# Supplementary material
Source: HighWire-hosted journal article supplement (https://jitc.bmj.com/content/8/2/e001053)
Supplement: inline-supplementary-material-1 [file inline-supplementary-material-1.pdf]

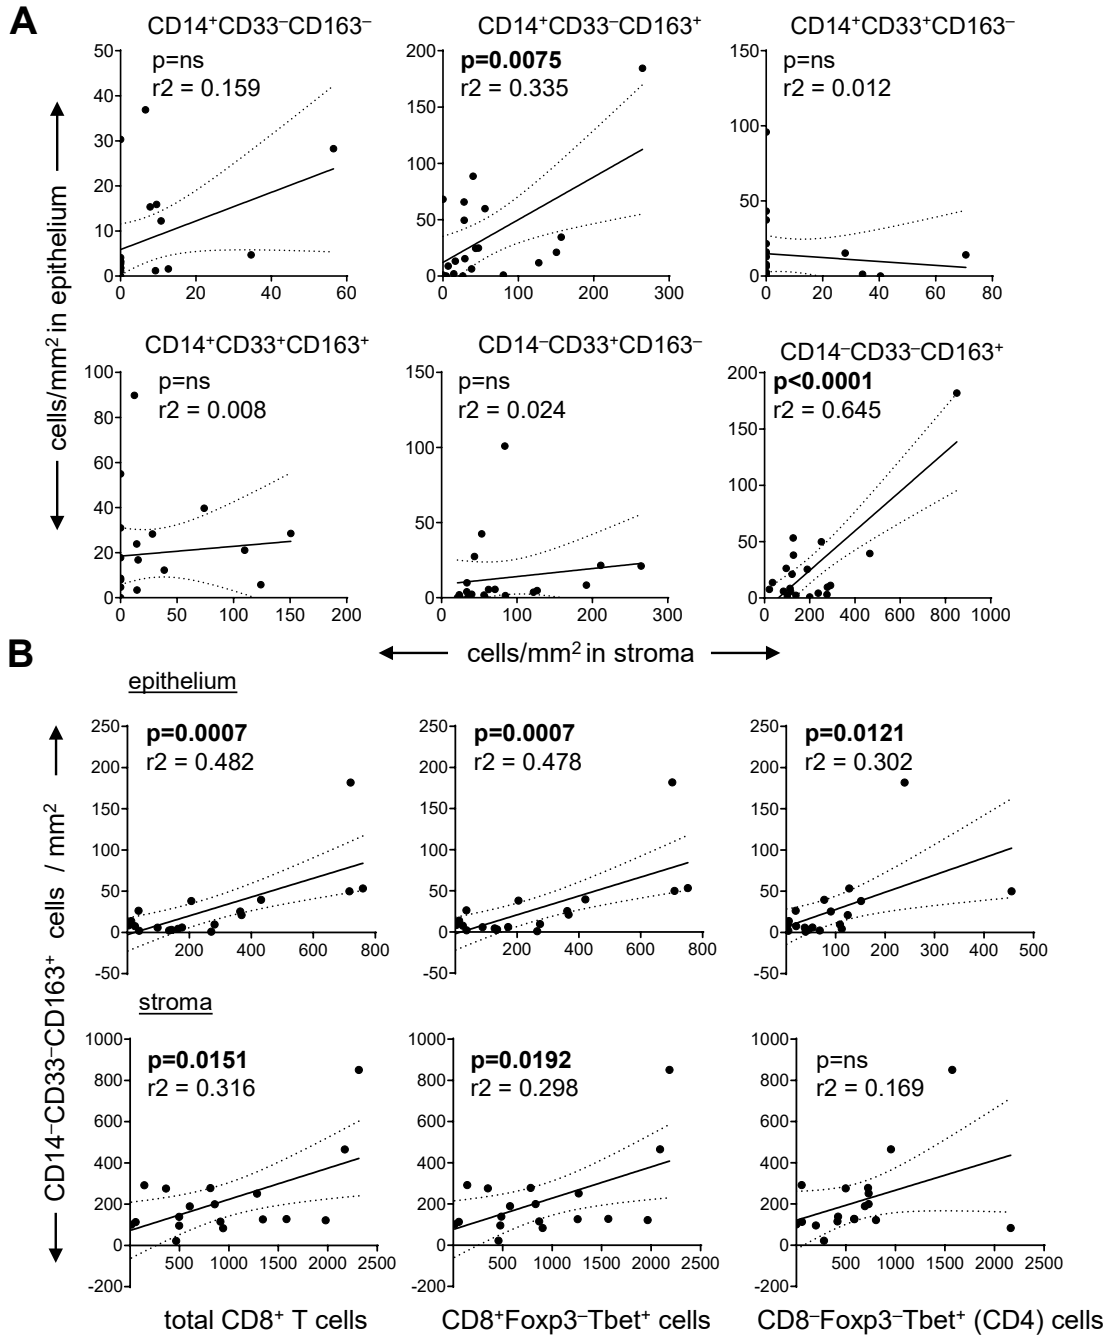

Supplementary figure S1 (continuous on next page)

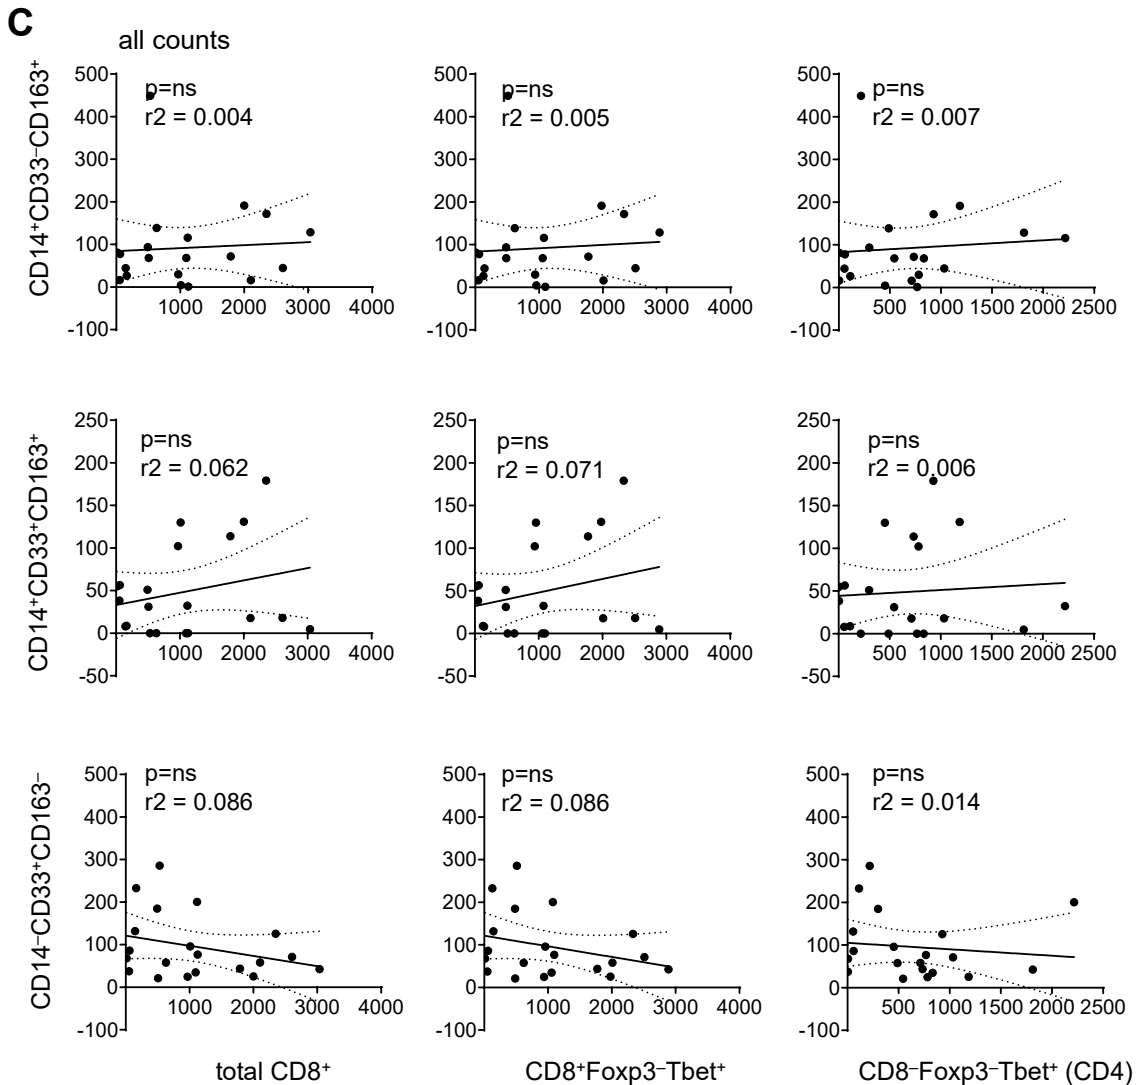

**Supplementary figure S1. The numbers of epithelial and stromal CD14-CD33-CD163<sup>+</sup> cells are highly correlated and both are significantly correlated with infiltration of T cells.** Scatter plots and correlation analysis between (A) the number of cells/mm<sup>2</sup> in epithelium (Y-axis) and stroma (X-axis) for indicated myeloid cells and (B) the number of CD14-CD33-CD163<sup>+</sup> cells/mm<sup>2</sup> (Y-axis) and indicated T cells at the horizontal axis for epithelial (top) and stromal infiltrates (bottom) and (C) the number of total CD14<sup>+</sup>CD33-CD163<sup>+</sup>, CD14<sup>+</sup>CD33<sup>+</sup>CD163<sup>+</sup> and CD14-CD33<sup>+</sup>CD163<sup>-</sup> cells/mm<sup>2</sup> (epithelium + stroma; Y-axis) and total CD8<sup>+</sup>, CD8<sup>+</sup>Foxp3-Tbet<sup>+</sup> and CD4-Foxp3-Tbet<sup>+</sup> (CD4) (from left to right; X-axis) cells/mm<sup>2</sup> (n=20). Pearson's correlation with the coefficient of determination ( $r^2$ ) and p-value is depicted for each correlation analysis. The dotted lines represent the 95% confidence interval. Data for total CD8<sup>+</sup>, CD8<sup>+</sup>Foxp3-Tbet<sup>+</sup> and CD8-Foxp3-Tbet<sup>+</sup> (CD4) have been described before [3].

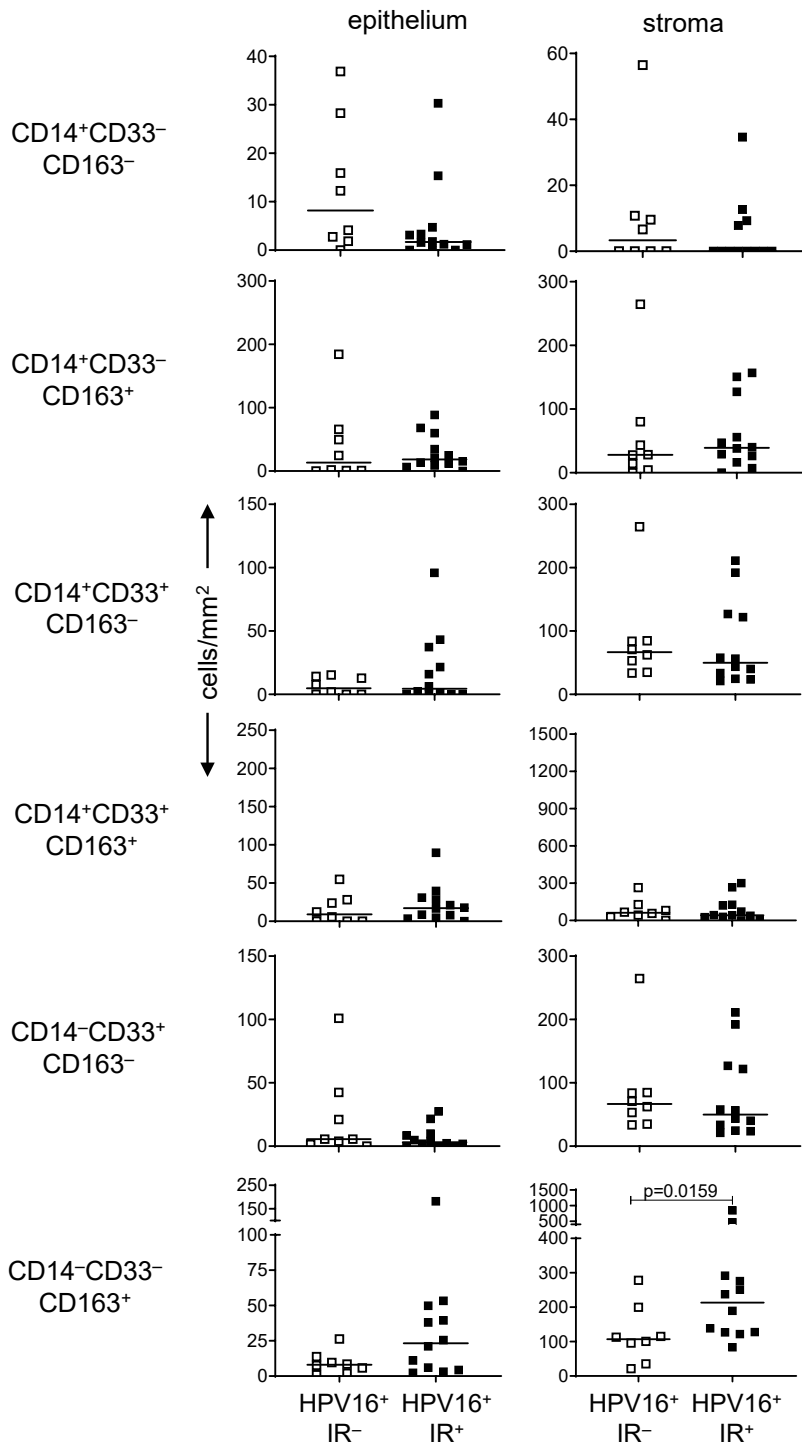

**Supplementary figure S2. The numbers of epithelial and stromal CD14-CD33-CD163<sup>+</sup> cells are higher in HPV16<sup>+</sup> and immune response (IR)<sup>+</sup> OPSCC.** Scatter plots depicting (from top to bottom) the indicated different types of myeloid cells as cells/mm<sup>2</sup> in the epithelium (left) and stroma (right) in eight HPV16<sup>+</sup>IR<sup>-</sup> (open squares) and 12 HPV16<sup>+</sup>IR<sup>+</sup> (closed squares) OPSCC patients.

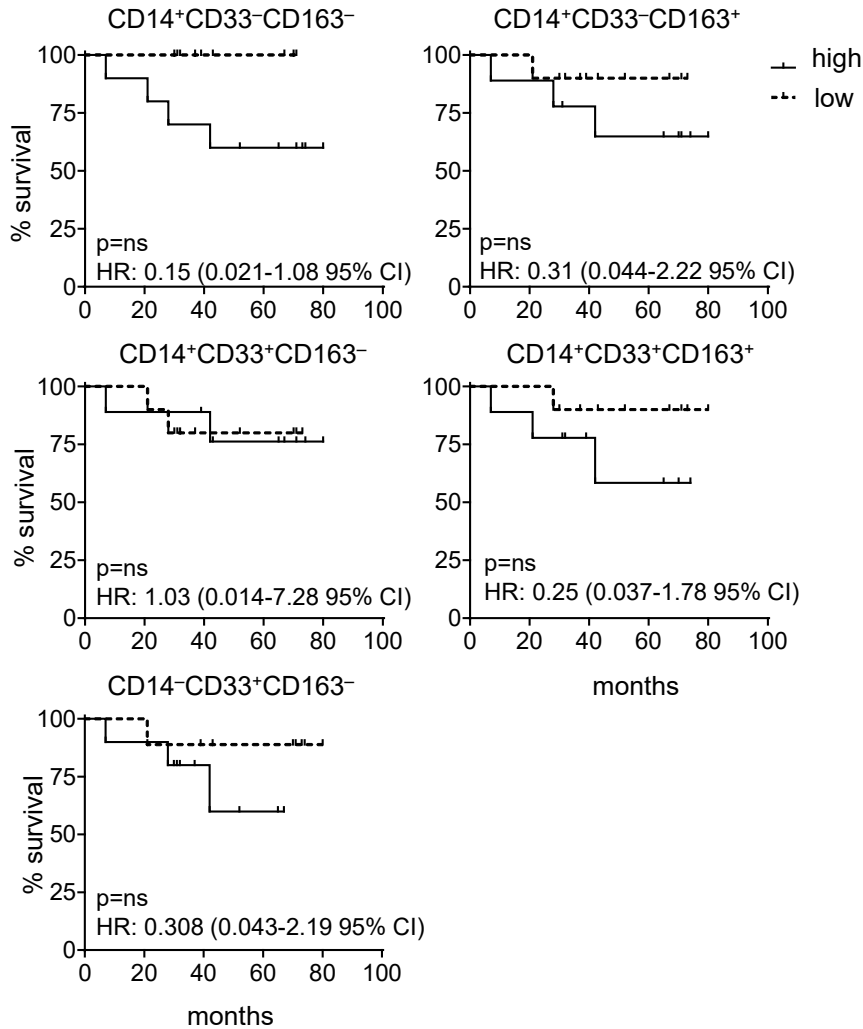

**Supplementary figure S3. Infiltration of CD14<sup>+</sup>CD33<sup>-</sup>CD163<sup>-</sup>, CD14<sup>+</sup>CD33<sup>-</sup>CD163<sup>+</sup>, CD14<sup>+</sup>CD33<sup>+</sup>CD163<sup>-</sup>, CD14<sup>+</sup>CD33<sup>+</sup>CD163<sup>+</sup> and CD14<sup>-</sup>CD33<sup>+</sup>CD163<sup>-</sup> cells is not correlated to survival.** Kaplan-Meier survival curves showing the survival outcome of 19 OPSCC patients with high (above the median) and low (below the median) numbers of indicated myeloid cells/mm<sup>2</sup>.

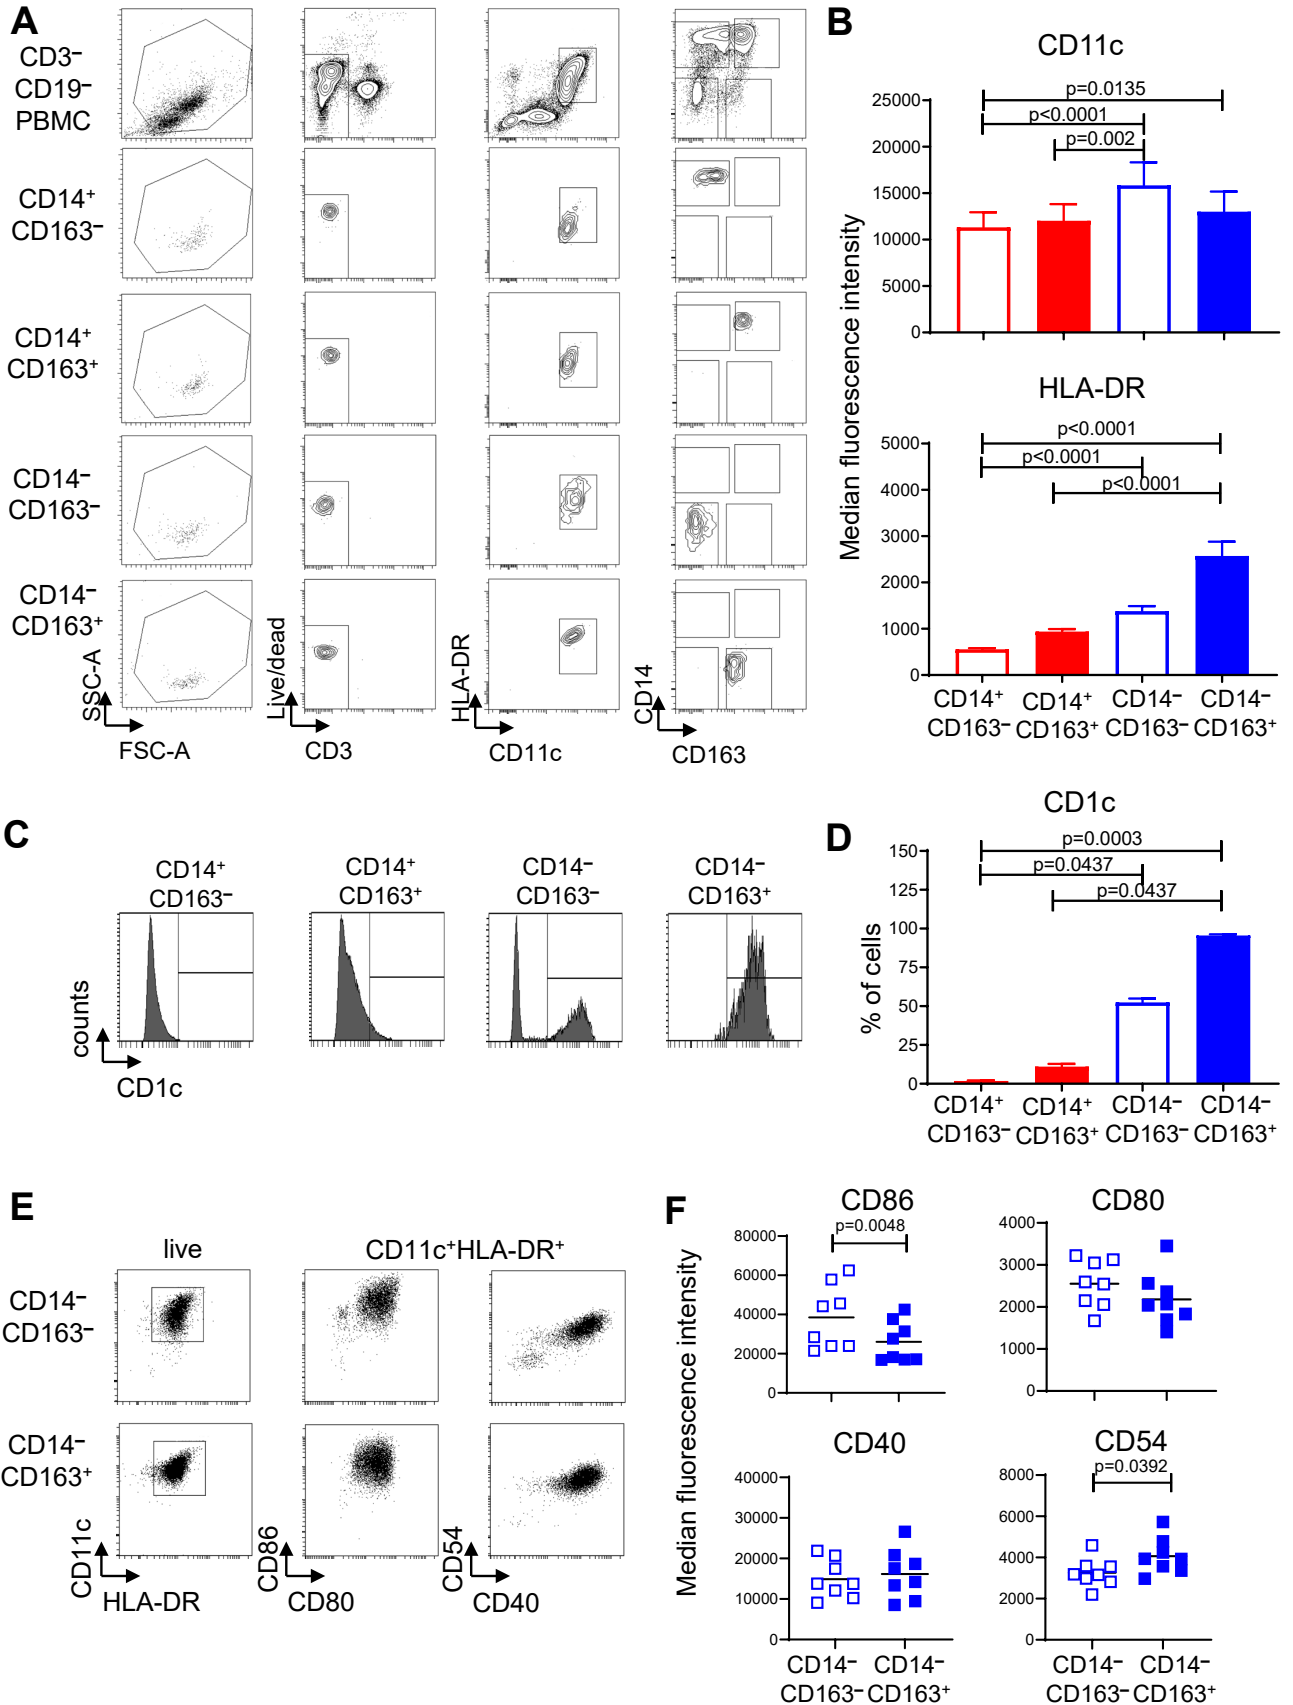

**Supplementary figure S4. Characterization of CD163<sup>+</sup> and CD163<sup>-</sup> DCs and macrophages from blood.** CD3<sup>-</sup> and CD19<sup>-</sup> depleted PBMC from buffy coats were stained with live/dead near IR dye and antibodies directed against CD11c, HLA-DR, CD14 and CD163, after which live CD11c<sup>+</sup>HLA-DR<sup>+</sup> and CD14<sup>+</sup>CD163<sup>-</sup>, CD14<sup>+</sup>CD163<sup>+</sup>, CD14<sup>-</sup>CD163<sup>-</sup> and CD14<sup>-</sup>CD163<sup>+</sup> myeloid cells were sorted by using a BD FACS Aria III. **(A)** Representative example of the FSC-A/SSC-A, live-dead/CD3, CD11c/HLA-DR and CD14/CD163 properties (from left to right) of CD3<sup>-</sup>CD19<sup>-</sup> PBMC, and sorted CD14<sup>+</sup>CD163<sup>-</sup>, CD14<sup>+</sup>CD163<sup>+</sup>, CD14<sup>-</sup>CD163<sup>-</sup> and CD14<sup>-</sup>CD163<sup>+</sup> (from top to bottom) populations. **(B)** Bar graph of the median fluorescence intensity of CD11c (top) and HLA-DR (bottom) of FACS-sorted CD14<sup>+</sup>CD163<sup>-</sup> (open red), CD14<sup>+</sup>CD163<sup>+</sup> (closed red), CD14<sup>-</sup>CD163<sup>-</sup> (open blue) and CD14<sup>-</sup>CD163<sup>+</sup> (closed blue) populations for 17 donors. **(C, D)** CD1c expression within the FACS-sorted CD163<sup>+</sup> and CD163<sup>-</sup> myeloid populations is depicted for a representative donor **(c)** and the six donors **(D)**. **(E, F)** CD80, CD86, CD54 and CD40 expression on CD14<sup>-</sup>CD163<sup>-</sup> and CD14<sup>-</sup>CD163<sup>+</sup> DC subsets that were stimulated overnight with 100 ng/ml LPS and 2,5 µg/ml R848 is depicted for a representative donor **(E)** and the eight donors **(F)**.

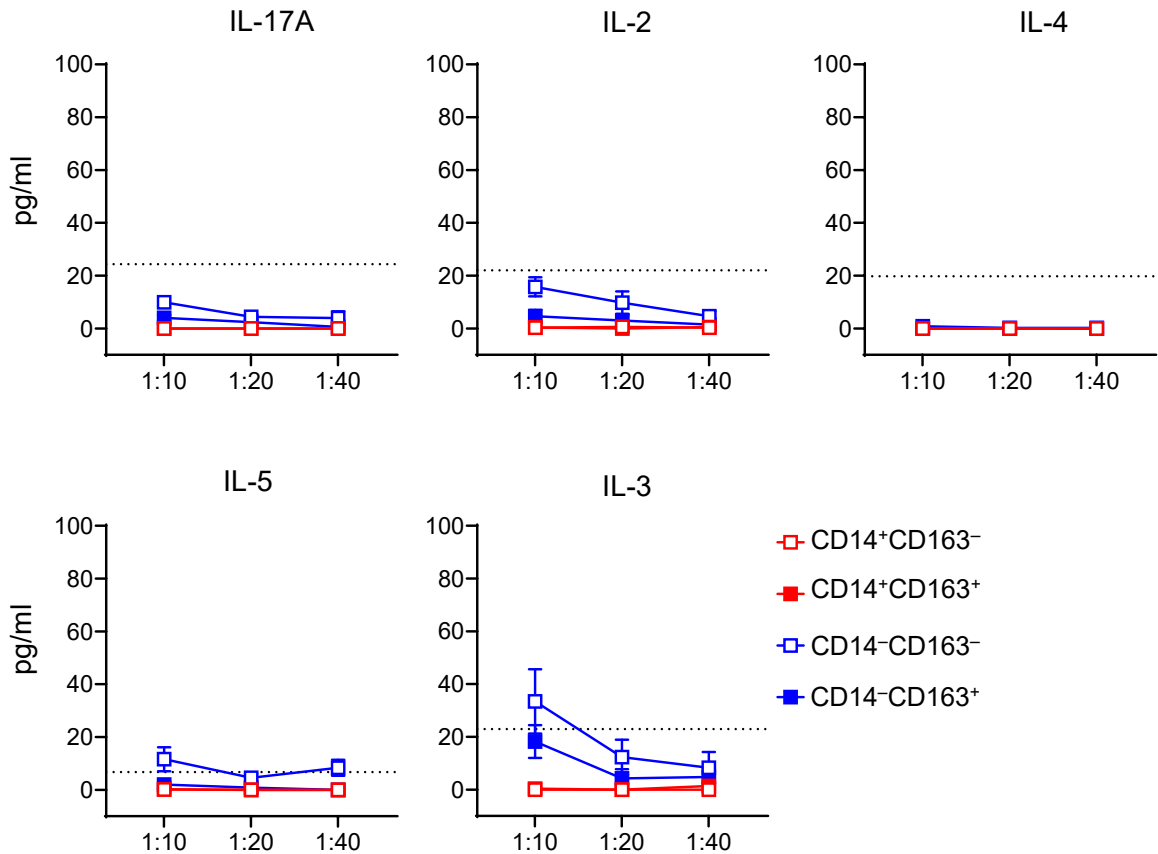

**Supplementary figure S5. Cytokine profile of CD163<sup>-</sup> and CD163<sup>+</sup> myeloid cell stimulated allogeneic T cells.** Graphs depict the IL-17A, IL-2, IL-4, IL-5 and IL-3 production in pg/ml (mean  $\pm$  SEM) of the total allogeneic PBMC when stimulated with CD163<sup>-</sup> or CD163<sup>+</sup> myeloid cells (n=8), as determined by multiplex T cell cytokine assay. The dotted line indicates the lower limit of detection of each of the cytokines.

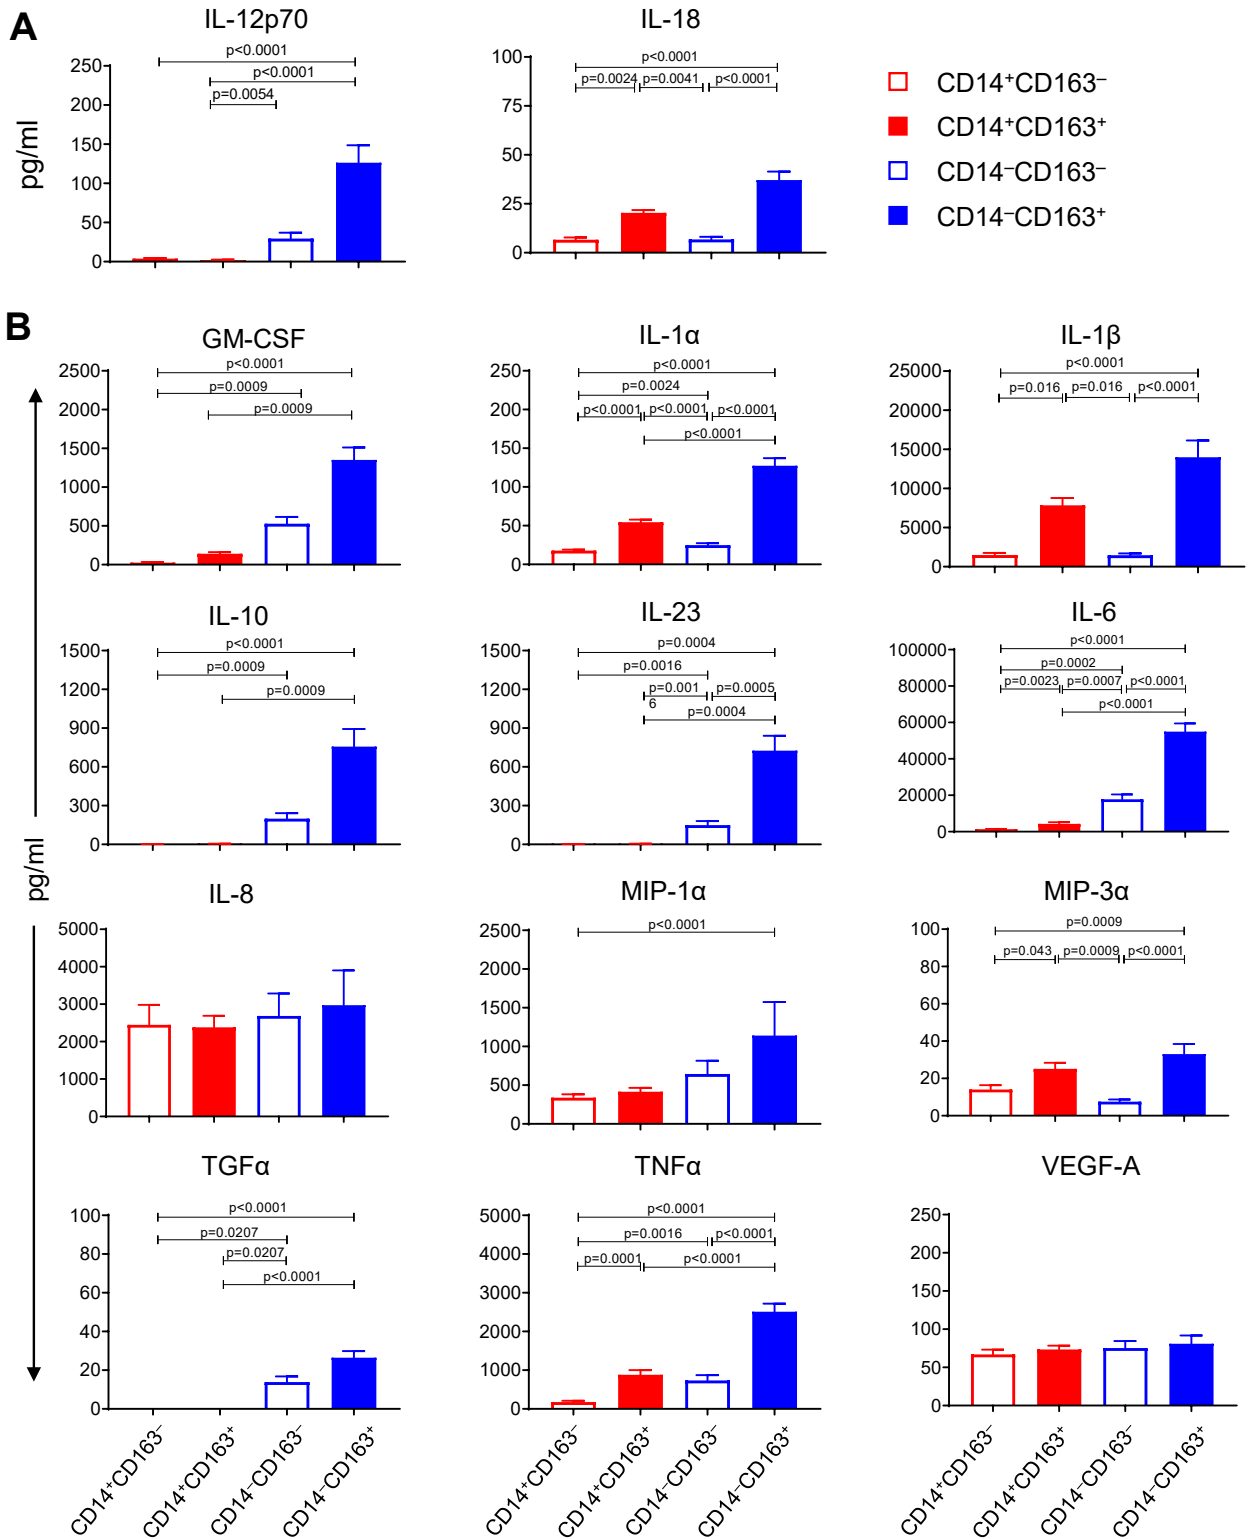

**Supplementary figure S6. Cytokine profile of CD163<sup>-</sup> and CD163<sup>+</sup> myeloid cells.** Graphs depict the production of indicated cytokines as mean  $\pm$  SEM in the supernatants of (A) for  $n=15$  and (B) for  $n=12$  TLR-agonist stimulated CD14<sup>+</sup>CD163<sup>-</sup>, CD14<sup>+</sup>CD163<sup>+</sup>, CD14<sup>-</sup>CD163<sup>-</sup> and CD14<sup>-</sup>CD163<sup>+</sup> myeloid cells cultures. Cytokines were determined by ELISA (A) and multiplex cytokine assay (B) and given in pg/ml.



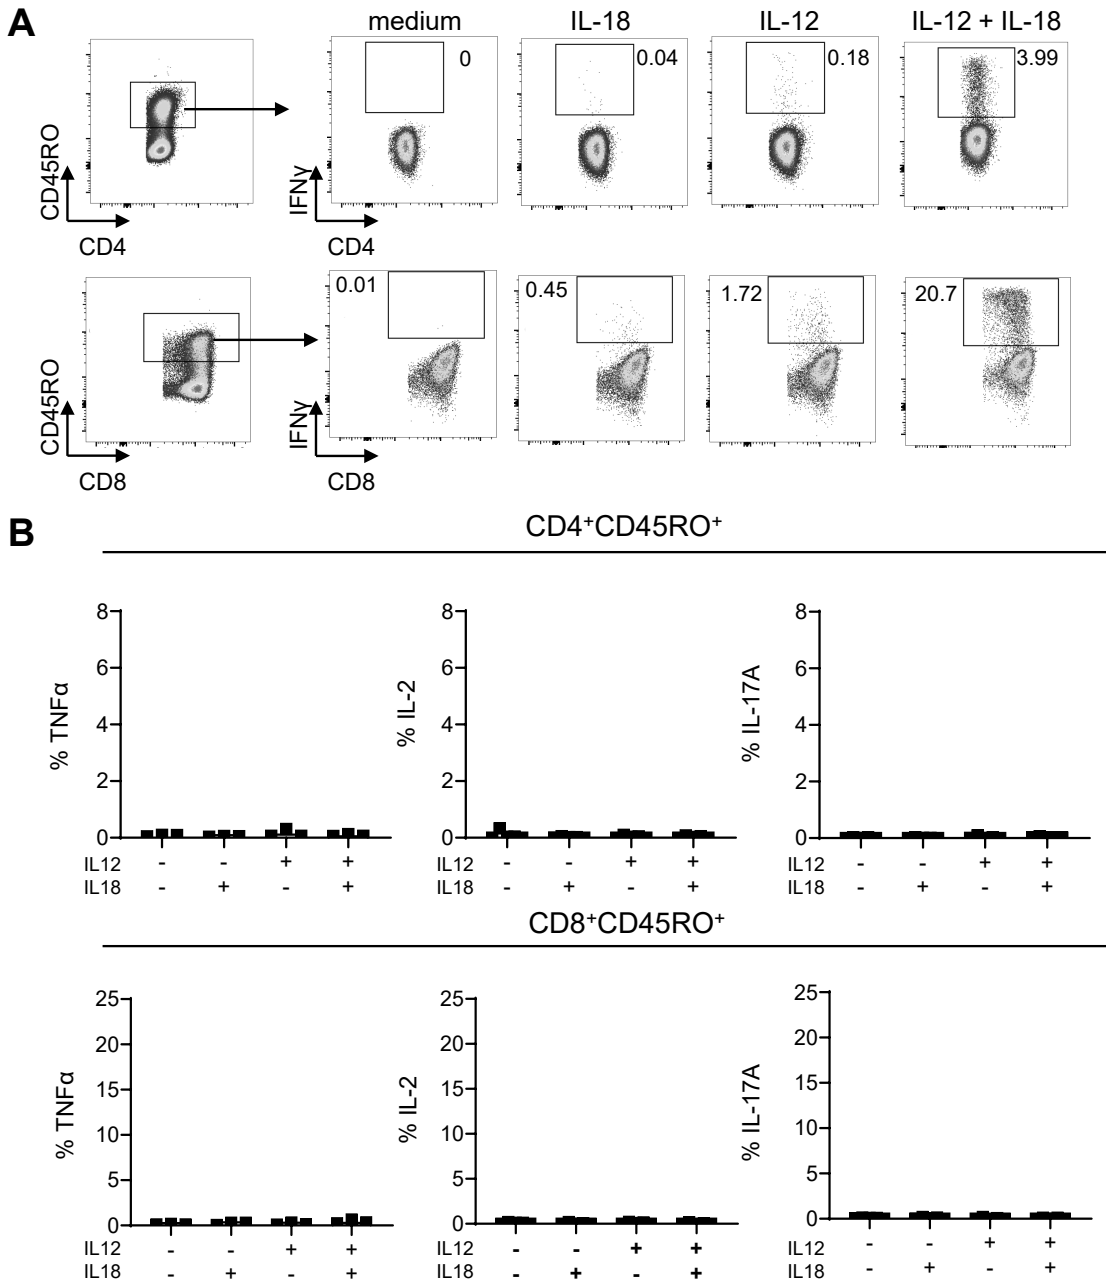

**Supplementary figure S7. Intracellular cytokine production within CD4<sup>+</sup>CD45RO<sup>+</sup> and CD8<sup>+</sup>CD45RO<sup>+</sup> T cells following IL-12/IL-18 exposure.** Healthy donor-derived PBMC were after cultured in the presence or absence of 50 ng/ml IL-12 and/or IL18 for 24 hours, after which the cells were analyzed by intracellular cytokine staining (ICS). **A**) Gating strategy depicted for a representative experiment. Singlets were gated on FSC-H/FSC-A followed by dead cell removal through gating on SSC-A/FSC-A and yellow amine reactive dye-negative cells. Next, CD3<sup>+</sup>CD4<sup>+</sup>CD45RO<sup>+</sup> or CD3<sup>+</sup>CD8<sup>+</sup>CD45RO<sup>+</sup> T cells were selected and subsequently analyzed for IFN $\gamma$ , TNF $\alpha$ , IL-2 and IL-17A production by ICS. **B**) Graphs depicting % TNF $\alpha$ , IL-2<sup>+</sup> and IL-17A<sup>+</sup> cells within CD4<sup>+</sup>CD45RO<sup>+</sup> (top) and CD8<sup>+</sup>CD45RO<sup>+</sup> (bottom) T cells.

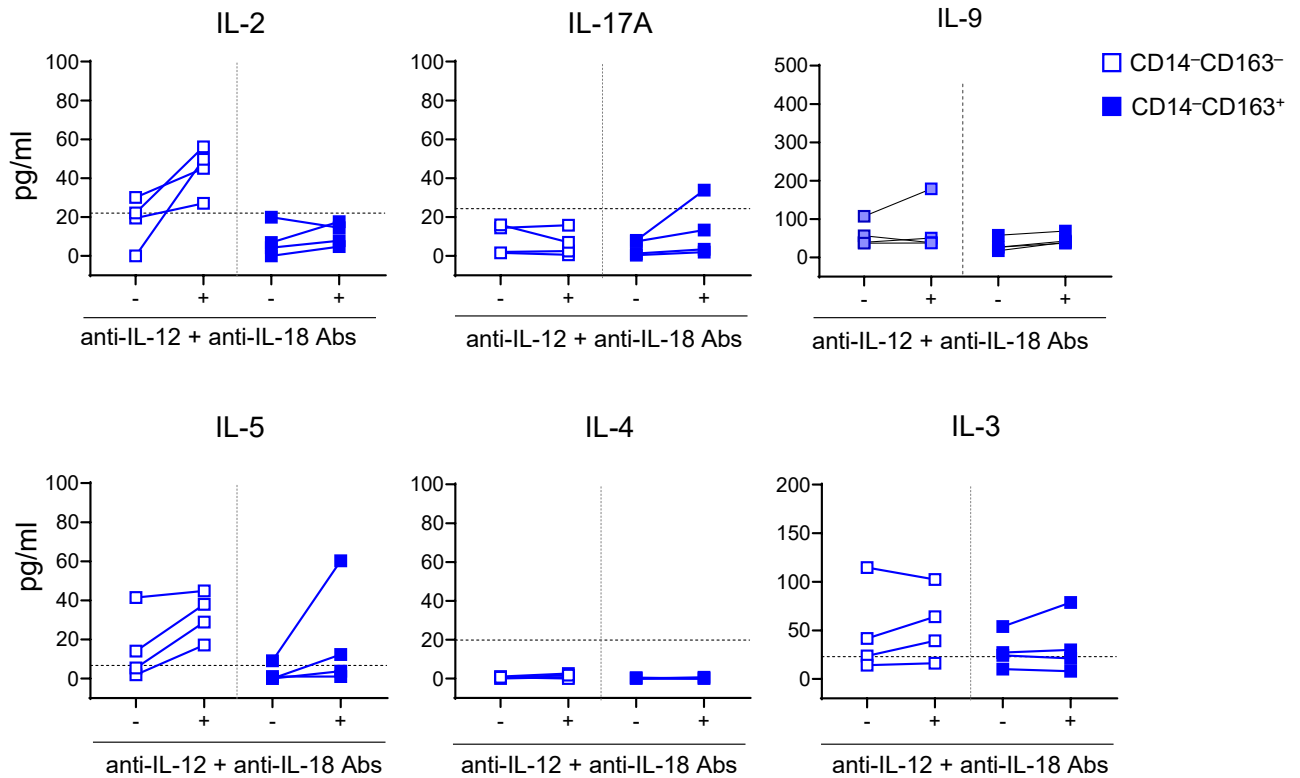

**Supplementary figure S8. Effect of IL12/IL18 blocking on the production of Th1/Th2/Th17 cytokines.** To test the effect of IL-12 and IL-18 blockade in the allogeneic stimulatory setting, cytokine production of total PBMC was assessed after stimulation for 4 days with CD14-CD163<sup>-</sup> DCs (open blue) and CD14-CD163<sup>+</sup> DCs (closed blue) in the presence or absence of 10 µg/ml anti-IL-12 and anti-IL-18 antibodies. Graphs depict IL-2, IL-17A, IL-9, IL-5, IL-4 and IL-3 (from left to right, top to bottom) in pg/ml by total PBMC.

**Supplementary table S1. Patient characteristics**

| ID*  | Sex | Age | Tumor location  | pTNM stage | HPV16 status | p16 status | Immune response status <sup>§</sup> |
|------|-----|-----|-----------------|------------|--------------|------------|-------------------------------------|
| H59  | F   | 64  | Tongue base     | T3-N2c-M0  | +            | +          | -                                   |
| H61  | F   | 65  | Tonsil          | T2-N1-M0   | +            | +          | +                                   |
| H62  | M   | 62  | Tongue base     | T4a-N2c-M0 | +            | -          | -                                   |
| H63  | F   | 61  | Tonsil          | T3-N2c-M0  | +            | -          | -                                   |
| H64  | M   | 60  | Tongue base     | T4a-N2b-M0 | +            | -          | -                                   |
| H66  | M   | 53  | Tongue base     | T1-N2a-M0  | +            | +          | +                                   |
| H67  | F   | 51  | Tonsil          | T2-N1-M0   | +            | +          | +                                   |
| H68  | F   | 65  | Tonsil          | T3-N2b-M0  | +            | +          | +                                   |
| H70  | M   | 65  | Tongue base     | T1-N1-M0   | +            | +          | +                                   |
| H71  | F   | 63  | Tongue base     | T2-N2c-M0  | +            | +          | +                                   |
| H80  | M   | 54  | Tonsil          | T3-N0-M0   | +            | +          | +                                   |
| H93  | M   | 57  | Tongue base     | T1-N2b-M0  | +            | +          | +                                   |
| H95  | M   | 59  | Tongue base     | T3-N1-M0   | +            | -          | -                                   |
| H96  | F   | 56  | Tongue base     | T3-N2c-M0  | +            | -          | -                                   |
| H133 | M   | 53  | Tonsillar Fossa | T2-N0-M0   | +            | +          | +                                   |
| H138 | M   | 75  | Tongue base     | T2-N0-M0   | +            | +          | +                                   |
| H139 | M   | 57  | Tongue base     | T2-N3-M0   | +            | +          | -                                   |
| H141 | M   | 68  | Tongue base     | T3-N2b-M0  | +            | +          | +                                   |
| H147 | M   | 57  | Tonsil          | T2-N3-M0   | +            | +          | -                                   |
| H148 | F   | 65  | Tonsil          | T2-N2b-M0  | +            | +          | +                                   |
| H149 | F   | 48  | Tonsil          | T2-N2a-M0  | +            | +          | -                                   |
| H176 | M   | 53  | Tongue base     | T3-N0-M0   | +            | +          | +                                   |
| H180 | M   | 59  | Tonsil          | T2-N2a-M0  | +            | +          | +                                   |
| H182 | M   | 66  | Tongue base     | T4-N3-M0   | +            | +          | -                                   |
| H191 | M   | 39  | Tonsil          | T2-N2b-M0  | +            | +          | -                                   |
| H202 | M   | 81  | Tongue base     | T3-N3-M0   | +            | +          | +                                   |
| H206 | M   | 58  | Tonsil          | T2-N2b-M0  | +            | +          | +                                   |

\*“H” indicate OPSCC patients included in the P07-112 head and neck cancer study.

<sup>§</sup> Immune response status of OPSCC tumors was determined by analyzing cultured tumor infiltrating lymphocyte (TIL) batches for the presence of HPV16-specific T cells using a 5-day [3H]-thymidine-based proliferation assay and antigen-specific cytokine production assay as described and previously reported for most of these patients

Abbreviations: F: female; M: male; pTNM: pathological Tumor, lymph Nodes, Metastasis;

**Supplementary table S2. Antibody panels for multiplex immunofluorescent staining**

|                                  | <b>Antibody</b> | <b>Antigen</b> | <b>Detection</b> | <b>Fluorochrome</b> | <b>Clone</b>             | <b>Supplier</b>           |
|----------------------------------|-----------------|----------------|------------------|---------------------|--------------------------|---------------------------|
| <b>Multiplex antibody panels</b> | Panel 1         |                |                  |                     |                          |                           |
|                                  | 1               | CD14           | Indirect         | Alexa 488           | C7                       | Novacastra                |
|                                  | 2               | CD33           | Indirect         | Alexa 546           | PWS44                    | Novacastra                |
|                                  | 3               | CD163          | Indirect         | Alexa 647           | 10D6                     | Novacastra                |
|                                  | 4               | DAPI           |                  |                     |                          |                           |
|                                  | Panel 2         |                |                  |                     |                          |                           |
|                                  | 1               | CD14/CD68      | Indirect         | CF680               | D7A2T/D4B9C              | Cell signaling Technology |
|                                  | 2               | CD11c          | Direct           | Alexa 546           | EP1347Y                  | Abcam                     |
|                                  | 3               | HLA-DR         | Direct           | Alexa 594           | TAL 1B5                  | Thermo Fisher scientific  |
| 4                                | CD163           | Indirect       | CF633            | 10D6                | Thermo Fisher scientific |                           |
| 5                                | DAPI            |                |                  |                     |                          |                           |

Supplementary table S3. Antibody panels for flow cytometry

|                                | Antibody                                     | Antigen         | Fluorochrome  | Clone                    | Supplier        |
|--------------------------------|----------------------------------------------|-----------------|---------------|--------------------------|-----------------|
| Flow cytometry antibody panels | Panel 1 (ex vivo DC analysis)                |                 |               |                          |                 |
|                                | 1                                            | CD3             | FITC          | SK7                      | BD Biosciences  |
|                                | 2                                            | CD19            | FITC          | 4G7                      | BD Biosciences  |
|                                | 3                                            | CD20            | FITC          | L27                      | BD Biosciences  |
|                                | 4                                            | CD56            | FITC          | NCAM16.2                 | BD Biosciences  |
|                                | 5                                            | CD163           | PerCPCy5.5    | GHI/61                   | BD Biosciences  |
|                                | 6                                            | CD11c           | BV650         | B-ly6                    | BD Biosciences  |
|                                | 7                                            | HLA-DR          | V500          | G46-6                    | BD Biosciences  |
|                                | 8                                            | CD14            | PE-Cy7        | M5E2                     | BD Biosciences  |
|                                | 9                                            | CLEC9A          | PE            | 8F9                      | Biologend       |
|                                | 10                                           | CD141           | APC           | Ad5-14H12                | Miltenyi Biotec |
|                                | 11                                           | CD1c            | BV421         | L161                     | Biologend       |
|                                | 12                                           | CD16            | PE-CF594      | 3G8                      | BD Biosciences  |
|                                | 13                                           | CD123           | BV605         | 9F5                      | BD Biosciences  |
|                                | 14                                           | CD36            | APC-Cy7       | 5-271                    | Biologend       |
|                                | 15                                           | CD32B           | AlexaFluor700 | 190723                   | R&D systems     |
| 16                             | Live/dead                                    | Fixable yellow  | -             | Thermo Fisher scientific |                 |
| Flow cytometry antibody panels | Panel 2 (DC sorting)                         |                 |               |                          |                 |
|                                | 1                                            | CD3             | V450          | UCHT1                    | BD Biosciences  |
|                                | 2                                            | CD11c           | PE            | B-ly6                    | BD Biosciences  |
|                                | 3                                            | HLA-DR          | V500          | G46-6                    | BD Biosciences  |
|                                | 4                                            | CD14            | PE-Cy7        | M5E2                     | BD Biosciences  |
|                                | 5                                            | CD163           | APC           | 215427                   | R&D systems     |
| 6                              | Live/dead                                    | Fixable near-IR | -             | Thermo Fisher scientific |                 |
| Flow cytometry antibody panels | Panel 3 (proliferation and IFN $\gamma$ ICS) |                 |               |                          |                 |
|                                | 1                                            | CD3             | APC           | SK7                      | BD Biosciences  |
|                                | 2                                            | CD4             | PE-CF594      | RPA-T4                   | BD Biosciences  |
|                                | 3                                            | CD8             | APC-Cy7       | SK1                      | BD Biosciences  |
|                                | 4                                            | CD45RO          | PE-Cy7        | UCHL1                    | BD Biosciences  |
|                                | 5                                            | IFN $\gamma$    | AlexaFluor700 | B27                      | BD Biosciences  |
|                                | 6                                            | TNF $\alpha$    | BV605         | Mab11                    | Biologend       |
| 7                              | CellTrace dye                                | Violet (V450)   | -             | Thermo Fisher scientific |                 |
| Flow cytometry antibody panels | Panel 4 (ICS PBMC)                           |                 |               |                          |                 |
|                                | 1                                            | CD3             | BV510         | UCHT1                    | Biologend       |
|                                | 2                                            | CD4             | PE-CF594      | RPA-T4                   | BD Biosciences  |
|                                | 3                                            | CD8             | FITC          | SK1                      | BD Biosciences  |
|                                | 4                                            | CD45RA          | PERCP-Cy5.5   | HI100                    | BD Biosciences  |
|                                | 5                                            | IFN $\gamma$    | AlexaFluor700 | B27                      | BD Biosciences  |
|                                | 6                                            | TNF $\alpha$    | BV421         | Mab11                    | Biologend       |
|                                | 7                                            | IL-17           | BV605         | BL168                    | Biologend       |
|                                | 8                                            | GM-CSF          | APC           | BVD2-21C11               | Biologend       |
|                                | 9                                            | IL-2            | PE-Cy7        | MQ1-17H12                | Biologend       |
| 10                             | Live/dead                                    | Fixable near-IR | -             | Thermo Fisher scientific |                 |
| Flow cytometry antibody panels | Panel 5 (ICS T cell clones)                  |                 |               |                          |                 |
|                                | 1                                            | CD3             | BV510         | UCHT1                    | Biologend       |
|                                | 2                                            | CD4             | FITC          | RPA-T4                   | BD Biosciences  |
|                                | 3                                            | CD8             | BB700         | HIT8a                    | BD Biosciences  |
|                                | 4                                            | CD137           | BV605         | 4B4-1                    | Biologend       |
|                                | 5                                            | CD154           | PE-CF594      | TRAP1                    | BD Biosciences  |
| 6                              | IFN $\gamma$                                 | AlexaFluor700   | B27           | BD Biosciences           |                 |

---

|    |              |                 |            |                          |
|----|--------------|-----------------|------------|--------------------------|
| 7  | TNF $\alpha$ | BV421           | Mab11      | Biologend                |
| 8  | GM-CSF       | APC             | BVD2-21C11 | Biologend                |
| 9  | IL-2         | PE-Cy7          | MQ1-17H12  | Biologend                |
| 10 | Live/dead    | Fixable near-IR | -          | Thermo Fisher scientific |

---

| Supplementary Table 4 |       |                |                         |                         |                 |          |
|-----------------------|-------|----------------|-------------------------|-------------------------|-----------------|----------|
| A                     | B     | C              | D                       | E                       | F               | G        |
| geneSymbol            | CD5+  | CD5-<br>CD163- | CD5-<br>CD163+<br>CD14- | CD5-<br>CD163+<br>CD14+ | ANOVA<br>pvalue | padj     |
| CALN1                 | 0,10  | 2,26           | 0,08                    | 0,17                    | 1,915E-49       | 4,26E-45 |
| S100A9                | 8,60  | 11,18          | 11,33                   | 13,01                   | 4,846E-47       | 5,38E-43 |
| S100A8                | 5,37  | 9,76           | 9,01                    | 11,39                   | 1,238E-39       | 9,17E-36 |
| CDH7                  | 0,05  | 2,34           | 0,04                    | 0,20                    | 1,559E-38       | 8,66E-35 |
| PTGIS                 | 0,32  | 0,94           | 0,32                    | 0,27                    | 4,837E-37       | 2,15E-33 |
| IGHA1                 | 1,64  | 6,48           | 2,54                    | 2,25                    | 1,01E-34        | 3,74E-31 |
| RP11-467L19.14        | 0,00  | 4,20           | 0,17                    | 0,07                    | 5,821E-26       | 1,85E-22 |
| HCST                  | 6,19  | 8,19           | 7,59                    | 8,72                    | 2,319E-25       | 6,44E-22 |
| CD74                  | 14,47 | 12,76          | 13,36                   | 12,30                   | 3,948E-25       | 9,75E-22 |
| VCAN                  | 4,83  | 7,29           | 7,15                    | 8,07                    | 1,748E-24       | 3,89E-21 |
| ABCB5                 | 0,05  | 3,96           | 0,08                    | 0,14                    | 4,352E-24       | 8,79E-21 |
| AC010468.1            | 0,70  | 1,45           | 0,61                    | 0,68                    | 8,901E-24       | 1,65E-20 |
| RP11-353H3.1          | 0,59  | 1,78           | 0,76                    | 1,31                    | 1,759E-23       | 3,01E-20 |
| OR2AT4                | 1,78  | 3,06           | 1,62                    | 1,37                    | 2,543E-23       | 4,04E-20 |
| FCN1                  | 6,92  | 7,78           | 8,68                    | 8,61                    | 7,047E-23       | 1,04E-19 |
| S100A12               | 3,26  | 7,17           | 5,69                    | 7,87                    | 1,123E-22       | 1,56E-19 |
| CASR                  | 0,45  | 1,44           | 0,47                    | 0,53                    | 2,574E-22       | 3,37E-19 |
| RP11-31L22.5          | 5,20  | 7,06           | 7,12                    | 7,46                    | 4,411E-22       | 5,45E-19 |
| CELF4                 | 0,26  | 0,60           | 0,45                    | 0,79                    | 1,011E-21       | 1,18E-18 |
| MAGI2                 | 1,04  | 6,87           | 1,38                    | 1,52                    | 2,882E-21       | 3,2E-18  |
| HRG                   | 0,03  | 4,34           | 0,08                    | 0,50                    | 3,134E-21       | 3,32E-18 |
| TNR                   | 0,08  | 0,09           | 0,13                    | 0,85                    | 5,449E-21       | 5,36E-18 |
| CTSD                  | 4,92  | 5,65           | 6,33                    | 7,48                    | 5,547E-21       | 5,36E-18 |
| BTG1                  | 5,50  | 6,35           | 6,53                    | 6,89                    | 1,129E-20       | 1,05E-17 |
| LANCL3                | 0,06  | 0,24           | 0,07                    | 0,06                    | 1,629E-20       | 1,45E-17 |
| FAXC                  | 0,05  | 1,16           | 0,11                    | 0,29                    | 5,052E-20       | 4,32E-17 |
| CH17-373J23.1         | 6,52  | 8,02           | 7,47                    | 8,51                    | 6,023E-20       | 4,96E-17 |
| SYT13                 | 0,00  | 0,26           | 0,03                    | 0,09                    | 3,49E-19        | 2,77E-16 |
| C1orf158              | 0,21  | 0,52           | 0,42                    | 1,02                    | 6,482E-19       | 4,97E-16 |
| HLA-DPA1              | 12,50 | 10,79          | 11,49                   | 10,16                   | 6,829E-19       | 5,06E-16 |
| DDX25                 | 0,10  | 0,12           | 0,22                    | 0,45                    | 1,626E-18       | 1,17E-15 |
| ENAH                  | 0,09  | 3,70           | 0,18                    | 0,95                    | 1,957E-18       | 1,36E-15 |
| SLC4A3                | 3,56  | 2,22           | 2,76                    | 0,11                    | 2,065E-18       | 1,39E-15 |
| CLIC2                 | 6,14  | 6,15           | 4,90                    | 2,43                    | 2,395E-18       | 1,57E-15 |
| RP11-255B23.3         | 1,61  | 5,43           | 2,33                    | 2,56                    | 6,114E-18       | 3,88E-15 |
| ABCA8                 | 0,15  | 1,59           | 0,34                    | 0,18                    | 7,096E-18       | 4,38E-15 |
| MIXL1                 | 0,56  | 0,89           | 0,82                    | 0,93                    | 8,996E-18       | 5,4E-15  |
| DPP6                  | 0,29  | 0,35           | 0,39                    | 0,37                    | 2,77E-17        | 1,61E-14 |
| SNORD3A               | 5,61  | 7,30           | 7,18                    | 7,77                    | 2,826E-17       | 1,61E-14 |
| KIAA1671              | 0,09  | 0,16           | 0,12                    | 0,19                    | 3,401E-17       | 1,89E-14 |
| COLCA1                | 0,26  | 0,53           | 0,24                    | 0,31                    | 3,65E-17        | 1,98E-14 |
| SLFNL1-AS1            | 0,24  | 0,33           | 0,24                    | 0,40                    | 6,22E-17        | 3,29E-14 |
| OR4F17                | 1,92  | 4,62           | 1,87                    | 2,63                    | 1,125E-16       | 5,82E-14 |
| ADAM28                | 7,43  | 4,61           | 6,23                    | 4,31                    | 1,427E-16       | 7,14E-14 |
| AGBL4                 | 0,03  | 0,13           | 0,04                    | 0,38                    | 1,445E-16       | 7,14E-14 |
| HLA-DRA               | 14,42 | 12,87          | 13,44                   | 12,07                   | 1,885E-16       | 9,11E-14 |
| SLAMF7                | 6,07  | 2,87           | 2,38                    | 1,11                    | 2,234E-16       | 1,04E-13 |
| GPM6A                 | 0,71  | 2,00           | 1,44                    | 2,07                    | 2,257E-16       | 1,04E-13 |
| S1PR3                 | 0,08  | 2,54           | 0,12                    | 0,44                    | 2,923E-16       | 1,33E-13 |
| RGS22                 | 0,31  | 3,80           | 0,32                    | 1,49                    | 3,864E-16       | 1,72E-13 |

Columns B to E display gene expression measured by RNA-seq in the sorted cell subsets as median over replicates of log<sub>2</sub> transformed TPM values (precisely, log<sub>2</sub>(TPM + 1.0), with a pseudocount of 1.0 added to avoid log-zero)

Columns F and G show nominal and multiple testing corrected p-values generated using DESeq2 in an ANOVA-like analysis to find genes that vary between the sorted cell subsets. The p-values are "NA" for very low expressed genes such as IL6, IL10, CSF2 where in many of the samples zero reads were observed

|               |       |       |       |       |           |          |
|---------------|-------|-------|-------|-------|-----------|----------|
| MLXIPL        | 0,36  | 2,88  | 0,26  | 0,44  | 4,553E-16 | 1,98E-13 |
| HSPB9         | 0,28  | 0,39  | 0,36  | 0,09  | 4,855E-16 | 2,08E-13 |
| SIGLEC11      | 0,26  | 0,28  | 0,24  | 1,83  | 5,025E-16 | 2,11E-13 |
| OR10K1        | 0,38  | 2,17  | 0,45  | 0,25  | 6,979E-16 | 2,87E-13 |
| SASH1         | 0,00  | 0,03  | 0,00  | 0,64  | 8,414E-16 | 3,4E-13  |
| CTD-2561B21.5 | 0,07  | 0,84  | 0,08  | 0,05  | 9,863E-16 | 3,91E-13 |
| BTLA          | 3,42  | 0,30  | 0,23  | 0,24  | 1,146E-15 | 4,47E-13 |
| MURC          | 0,00  | 0,22  | 0,02  | 0,00  | 3,081E-15 | 1,18E-12 |
| CHDH          | 0,16  | 0,53  | 0,11  | 0,19  | 3,487E-15 | 1,31E-12 |
| INTS2         | 1,60  | 2,33  | 1,65  | 1,07  | 3,595E-15 | 1,33E-12 |
| LMNA          | 4,05  | 6,10  | 6,32  | 5,55  | 3,939E-15 | 1,44E-12 |
| MIOX          | 0,16  | 0,40  | 0,35  | 0,65  | 4,138E-15 | 1,48E-12 |
| ZNF843        | 0,19  | 0,70  | 0,12  | 0,24  | 4,689E-15 | 1,65E-12 |
| RP11-66B24.2  | 0,23  | 2,86  | 0,83  | 0,74  | 6,494E-15 | 2,26E-12 |
| MAP3K9        | 0,04  | 0,06  | 0,07  | 0,04  | 9,368E-15 | 3,2E-12  |
| APO03068.18   | 0,42  | 1,22  | 0,71  | 1,02  | 1,243E-14 | 4,18E-12 |
| DMKN          | 0,46  | 1,63  | 0,98  | 1,39  | 1,581E-14 | 5,25E-12 |
| MT-ND1        | 11,12 | 11,95 | 11,96 | 12,87 | 1,668E-14 | 5,45E-12 |
| TSPO          | 8,87  | 9,24  | 9,61  | 9,74  | 1,841E-14 | 5,93E-12 |
| DAND5         | 0,46  | 3,17  | 0,53  | 0,45  | 1,913E-14 | 6E-12    |
| RP11-591N1.1  | 4,19  | 5,44  | 5,30  | 5,42  | 1,916E-14 | 6E-12    |
| SV2C          | 0,04  | 0,06  | 0,05  | 1,18  | 2,088E-14 | 6,45E-12 |
| CTD-2230D16.1 | 0,17  | 0,40  | 0,16  | 0,97  | 2,712E-14 | 8,26E-12 |
| ACTG1         | 10,92 | 9,95  | 10,16 | 9,22  | 3,081E-14 | 9,25E-12 |
| CD14          | 3,87  | 7,06  | 6,51  | 8,54  | 3,121E-14 | 9,25E-12 |
| TNFRSF1B      | 4,22  | 5,29  | 5,97  | 6,39  | 3,172E-14 | 9,28E-12 |
| ACSS3         | 0,00  | 0,24  | 0,06  | 0,53  | 3,523E-14 | 1,02E-11 |
| RP11-311P8.1  | 1,34  | 1,76  | 1,70  | 1,53  | 4,009E-14 | 1,14E-11 |
| PLEKHG5       | 0,03  | 0,26  | 0,14  | 0,29  | 4,346E-14 | 1,22E-11 |
| PTPRH         | 0,07  | 0,34  | 0,11  | 0,29  | 4,906E-14 | 1,35E-11 |
| JCHAIN        | 1,98  | 4,07  | 2,89  | 2,50  | 4,927E-14 | 1,35E-11 |
| RP11-46C20.1  | 0,13  | 0,14  | 0,12  | 0,52  | 5,243E-14 | 1,42E-11 |
| CHCHD10       | 1,40  | 3,60  | 3,87  | 5,71  | 5,384E-14 | 1,44E-11 |
| SYP           | 0,35  | 0,46  | 0,44  | 0,37  | 6,231E-14 | 1,65E-11 |
| RP11-217O12.1 | 9,41  | 10,89 | 10,43 | 11,27 | 6,612E-14 | 1,73E-11 |
| CEBPB         | 1,34  | 2,72  | 3,17  | 4,00  | 6,718E-14 | 1,74E-11 |
| RP11-189E14.4 | 0,03  | 0,40  | 0,27  | 0,17  | 6,885E-14 | 1,76E-11 |
| NFIB          | 0,20  | 0,36  | 0,22  | 0,54  | 8,679E-14 | 2,19E-11 |
| AC007392.3    | 0,00  | 1,50  | 0,00  | 0,62  | 9,476E-14 | 2,37E-11 |
| CNR2          | 0,31  | 1,24  | 0,43  | 1,04  | 1,026E-13 | 2,53E-11 |
| S100A6        | 9,32  | 10,12 | 10,16 | 10,65 | 1,085E-13 | 2,65E-11 |
| CACNA1G       | 0,28  | 3,02  | 0,56  | 0,45  | 1,129E-13 | 2,73E-11 |
| ELAVL3        | 0,00  | 2,66  | 0,03  | 0,02  | 1,152E-13 | 2,75E-11 |
| DZIP1         | 0,04  | 0,26  | 0,03  | 0,43  | 1,3E-13   | 3,07E-11 |
| C1orf162      | 10,37 | 9,27  | 9,33  | 8,22  | 1,575E-13 | 3,68E-11 |
| STAB1         | 1,65  | 5,89  | 4,89  | 7,16  | 2,043E-13 | 4,73E-11 |
| MT-ATP6       | 12,04 | 12,90 | 12,78 | 13,58 | 2,165E-13 | 4,94E-11 |
| BMPR1A        | 0,38  | 0,97  | 0,48  | 0,60  | 2,177E-13 | 4,94E-11 |
| CTC-260F20.3  | 0,12  | 0,32  | 0,21  | 0,59  | 5,39E-13  | 1,21E-10 |
| TYROBP        | 10,14 | 10,51 | 10,54 | 11,11 | 6,259E-13 | 1,39E-10 |
| ARHGAP28      | 1,19  | 1,25  | 1,55  | 2,31  | 6,483E-13 | 1,43E-10 |
| CSTA          | 5,86  | 6,51  | 6,52  | 6,77  | 8,02E-13  | 1,75E-10 |
| APLP2         | 6,82  | 6,72  | 7,46  | 7,84  | 8,307E-13 | 1,79E-10 |
| MT-CYB        | 13,46 | 14,52 | 14,28 | 14,84 | 8,632E-13 | 1,84E-10 |
| CEACAM19      | 0,50  | 1,87  | 0,57  | 0,90  | 9,249E-13 | 1,96E-10 |



|               |       |       |       |       |           |          |
|---------------|-------|-------|-------|-------|-----------|----------|
| LYL1          | 0,87  | 0,94  | 1,32  | 2,73  | 1,764E-12 | 3,7E-10  |
| IGSF1         | 0,07  | 0,02  | 0,05  | 0,20  | 1,836E-12 | 3,8E-10  |
| GLRA3         | 0,09  | 1,16  | 0,09  | 0,08  | 1,845E-12 | 3,8E-10  |
| CD63          | 7,27  | 7,97  | 8,19  | 8,64  | 2,239E-12 | 4,57E-10 |
| PGAM5         | 1,31  | 2,80  | 1,80  | 1,06  | 2,541E-12 | 5,13E-10 |
| PDLIM3        | 0,10  | 0,20  | 0,15  | 0,33  | 2,789E-12 | 5,57E-10 |
| LGSN          | 0,13  | 0,37  | 0,34  | 0,27  | 2,809E-12 | 5,57E-10 |
| DPF1          | 0,29  | 0,23  | 0,22  | 0,55  | 3,17E-12  | 6,24E-10 |
| MYL12A        | 10,92 | 9,75  | 10,04 | 9,27  | 3,213E-12 | 6,26E-10 |
| RP4-598P13.1  | 2,29  | 3,56  | 2,10  | 2,03  | 3,942E-12 | 7,62E-10 |
| MT-ND2        | 10,98 | 11,70 | 11,50 | 12,54 | 4,366E-12 | 8,31E-10 |
| EHBP1L1       | 1,84  | 5,49  | 4,19  | 5,94  | 4,376E-12 | 8,31E-10 |
| INMT          | 0,06  | 0,30  | 0,31  | 2,12  | 4,531E-12 | 8,53E-10 |
| MIPOL1        | 2,19  | 3,94  | 2,00  | 2,57  | 4,828E-12 | 9,02E-10 |
| HOMER3        | 0,06  | 1,92  | 0,25  | 0,83  | 5,464E-12 | 1,01E-09 |
| FHDC1         | 0,09  | 2,99  | 0,19  | 0,12  | 5,903E-12 | 1,08E-09 |
| RABAC1        | 6,61  | 7,50  | 7,29  | 7,33  | 6,464E-12 | 1,18E-09 |
| RP11-544D21.2 | 0,34  | 0,53  | 0,39  | 0,61  | 7,342E-12 | 1,33E-09 |
| RP5-857K21.10 | 8,96  | 9,61  | 9,78  | 10,62 | 7,833E-12 | 1,4E-09  |
| RP11-431K24.1 | 0,61  | 2,56  | 0,78  | 1,23  | 8,114E-12 | 1,44E-09 |
| PLXND1        | 2,01  | 5,24  | 4,21  | 5,45  | 8,252E-12 | 1,46E-09 |
| RP1-17K7.2    | 1,66  | 3,39  | 2,43  | 3,13  | 8,554E-12 | 1,5E-09  |
| RP11-230F18.5 | 0,04  | 0,50  | 0,08  | 0,08  | 8,872E-12 | 1,54E-09 |
| IGKV3-15      | 0,51  | 3,33  | 0,30  | 0,51  | 1,005E-11 | 1,72E-09 |
| COMMD3-BMI1   | 4,21  | 0,00  | 2,64  | 0,00  | 1,007E-11 | 1,72E-09 |
| KIF5C         | 0,03  | 0,35  | 0,02  | 0,46  | 1,07E-11  | 1,81E-09 |
| MT-TR         | 3,33  | 6,40  | 4,90  | 7,11  | 1,158E-11 | 1,95E-09 |
| GADD45GIP1    | 4,22  | 5,41  | 5,43  | 5,92  | 1,356E-11 | 2,27E-09 |
| NMNAT2        | 0,07  | 0,03  | 0,03  | 0,05  | 1,444E-11 | 2,4E-09  |
| ACVR2B        | 0,09  | 0,10  | 0,12  | 0,32  | 1,588E-11 | 2,6E-09  |
| C2CD3         | 2,95  | 4,04  | 2,53  | 3,00  | 1,597E-11 | 2,6E-09  |
| HRH1          | 0,03  | 0,09  | 0,04  | 0,10  | 1,602E-11 | 2,6E-09  |
| OR56A1        | 0,71  | 1,75  | 0,67  | 0,80  | 1,747E-11 | 2,81E-09 |
| CLEC7A        | 6,85  | 7,72  | 7,50  | 8,08  | 1,897E-11 | 3,03E-09 |
| OR6C4         | 0,05  | 0,21  | 0,05  | 0,20  | 1,93E-11  | 3,06E-09 |
| ATP5D         | 5,63  | 6,11  | 7,31  | 8,09  | 2,358E-11 | 3,72E-09 |
| GRID1         | 0,02  | 0,07  | 0,04  | 0,25  | 2,499E-11 | 3,91E-09 |
| MT-CO2        | 13,36 | 13,96 | 13,91 | 14,74 | 2,85E-11  | 4,43E-09 |
| PARVA         | 0,17  | 0,05  | 0,14  | 0,85  | 3,264E-11 | 5,04E-09 |
| DIO2          | 0,00  | 1,12  | 0,00  | 0,00  | 3,386E-11 | 5,19E-09 |
| RP11-284P20.2 | 0,33  | 2,14  | 0,45  | 0,92  | 3,426E-11 | 5,21E-09 |
| CLEC3A        | 0,53  | 0,63  | 1,48  | 0,84  | 3,477E-11 | 5,26E-09 |
| FAM129B       | 0,52  | 4,95  | 1,91  | 2,53  | 3,715E-11 | 5,58E-09 |
| MT-TL1        | 5,40  | 6,81  | 6,30  | 7,48  | 4,614E-11 | 6,88E-09 |
| APBB2         | 0,27  | 1,37  | 0,52  | 1,08  | 5,035E-11 | 7,43E-09 |
| RP11-578F5.1  | 0,47  | 1,00  | 0,58  | 0,00  | 5,045E-11 | 7,43E-09 |
| TMEM108       | 0,02  | 0,09  | 0,02  | 0,05  | 5,106E-11 | 7,47E-09 |
| GCNT4         | 0,04  | 0,05  | 0,05  | 0,13  | 5,374E-11 | 7,81E-09 |
| CD160         | 0,30  | 1,87  | 0,39  | 0,36  | 5,588E-11 | 8,06E-09 |
| ABCC8         | 0,00  | 1,37  | 0,06  | 0,11  | 5,952E-11 | 8,53E-09 |
| AC136007.2    | 5,19  | 5,88  | 6,66  | 6,24  | 6,126E-11 | 8,73E-09 |
| NAA38         | 5,49  | 6,45  | 6,23  | 6,81  | 6,366E-11 | 9,01E-09 |
| EFR3B         | 0,23  | 3,66  | 0,28  | 0,50  | 6,846E-11 | 9,63E-09 |
| RP5-857K21.8  | 3,77  | 4,10  | 4,26  | 5,23  | 7,069E-11 | 9,87E-09 |
| MAFB          | 0,43  | 1,25  | 3,09  | 4,32  | 7,106E-11 | 9,87E-09 |

|               |       |       |       |       |           |          |
|---------------|-------|-------|-------|-------|-----------|----------|
| SYT16         | 0,20  | 0,66  | 0,17  | 0,09  | 7,357E-11 | 1,02E-08 |
| CD300LD       | 0,84  | 1,80  | 0,93  | 0,89  | 8,091E-11 | 1,11E-08 |
| SYNPO2        | 0,05  | 0,07  | 0,09  | 1,72  | 8,105E-11 | 1,11E-08 |
| FGF13         | 0,89  | 2,74  | 0,94  | 1,09  | 9,192E-11 | 1,25E-08 |
| FREM2         | 0,00  | 0,01  | 0,00  | 0,01  | 1,042E-10 | 1,4E-08  |
| GPSM3         | 6,71  | 7,73  | 7,22  | 7,48  | 1,082E-10 | 1,45E-08 |
| WT1AS         | 0,13  | 0,47  | 0,21  | 0,20  | 1,087E-10 | 1,45E-08 |
| CDK17         | 4,94  | 3,48  | 3,32  | 2,03  | 1,105E-10 | 1,46E-08 |
| ERN2          | 0,36  | 0,45  | 0,33  | 0,96  | 1,119E-10 | 1,47E-08 |
| GDI2          | 8,24  | 7,25  | 7,59  | 6,69  | 1,129E-10 | 1,47E-08 |
| PON2          | 7,93  | 3,40  | 6,65  | 4,20  | 1,131E-10 | 1,47E-08 |
| KLF6          | 8,36  | 9,15  | 8,99  | 9,20  | 1,18E-10  | 1,52E-08 |
| FAUP1         | 0,88  | 3,06  | 1,25  | 1,37  | 1,211E-10 | 1,56E-08 |
| HLA-DPB1      | 12,14 | 10,77 | 11,34 | 9,65  | 1,223E-10 | 1,56E-08 |
| RP11-325F22.4 | 4,31  | 5,63  | 5,40  | 5,82  | 1,35E-10  | 1,71E-08 |
| TMEM45B       | 0,42  | 1,00  | 0,80  | 1,00  | 1,577E-10 | 1,99E-08 |
| POU2F3        | 0,08  | 0,37  | 0,12  | 0,09  | 1,608E-10 | 2,02E-08 |
| CAMK2B        | 1,37  | 2,47  | 1,72  | 2,38  | 1,706E-10 | 2,13E-08 |
| RP1-14N1.2    | 2,32  | 4,13  | 2,41  | 3,43  | 1,883E-10 | 2,34E-08 |
| CORO2A        | 0,19  | 0,50  | 0,34  | 0,86  | 2,18E-10  | 2,69E-08 |
| MT-CO3        | 12,77 | 13,11 | 13,39 | 14,09 | 2,243E-10 | 2,75E-08 |
| SNORD3B-2     | 3,39  | 1,74  | 4,88  | 5,41  | 2,304E-10 | 2,81E-08 |
| MT-ATP8       | 10,93 | 11,77 | 11,94 | 12,69 | 2,373E-10 | 2,88E-08 |
| CFL1          | 11,04 | 10,41 | 10,25 | 9,24  | 2,441E-10 | 2,95E-08 |
| SCN1A         | 0,37  | 0,20  | 0,36  | 1,18  | 2,645E-10 | 3,14E-08 |
| TUBA1B        | 10,14 | 8,90  | 9,04  | 6,78  | 2,658E-10 | 3,14E-08 |
| ADORA2A-AS1   | 0,37  | 0,60  | 0,59  | 0,72  | 2,659E-10 | 3,14E-08 |
| AXL           | 5,70  | 0,84  | 3,20  | 1,78  | 2,66E-10  | 3,14E-08 |
| LCP1          | 8,45  | 7,21  | 7,74  | 7,12  | 2,683E-10 | 3,16E-08 |
| HOXB13        | 0,16  | 2,95  | 0,16  | 1,04  | 2,753E-10 | 3,22E-08 |
| ARPC2         | 10,31 | 9,27  | 9,56  | 8,78  | 3,029E-10 | 3,52E-08 |
| CYP2B6        | 0,44  | 2,62  | 0,49  | 0,76  | 3,054E-10 | 3,53E-08 |
| PXN           | 3,81  | 5,78  | 4,51  | 4,70  | 3,118E-10 | 3,58E-08 |
| KLF2          | 2,86  | 5,32  | 4,58  | 5,19  | 3,126E-10 | 3,58E-08 |
| PFDN5         | 10,07 | 10,56 | 10,37 | 10,60 | 3,227E-10 | 3,66E-08 |
| PNPLA6        | 4,90  | 6,00  | 6,43  | 6,53  | 3,227E-10 | 3,66E-08 |
| DLG5          | 0,03  | 0,28  | 0,02  | 0,02  | 3,709E-10 | 4,18E-08 |
| TANC1         | 0,07  | 0,09  | 0,11  | 0,20  | 4,257E-10 | 4,78E-08 |
| A1CF          | 0,02  | 0,20  | 0,04  | 0,16  | 4,524E-10 | 5,05E-08 |
| MT-TV         | 4,07  | 5,05  | 4,89  | 6,97  | 4,574E-10 | 5,08E-08 |
| ANKRD30B      | 0,06  | 0,28  | 0,04  | 1,19  | 4,721E-10 | 5,22E-08 |
| CTA-243E7.4   | 0,31  | 0,83  | 0,59  | 0,98  | 4,775E-10 | 5,25E-08 |
| MT-ND4        | 12,68 | 13,71 | 13,28 | 14,31 | 4,851E-10 | 5,31E-08 |
| NRGN          | 1,06  | 1,47  | 2,46  | 3,62  | 5,039E-10 | 5,49E-08 |
| RP5-1171110.5 | 1,94  | 3,23  | 2,90  | 3,91  | 5,317E-10 | 5,76E-08 |
| MCTP2         | 0,11  | 1,46  | 0,14  | 1,08  | 5,411E-10 | 5,84E-08 |
| ADPRHL1       | 0,02  | 0,07  | 0,03  | 0,03  | 5,634E-10 | 6,05E-08 |
| RP11-215I23.4 | 0,85  | 2,23  | 1,06  | 1,23  | 5,961E-10 | 6,37E-08 |
| CKAP4         | 0,15  | 0,72  | 1,31  | 2,44  | 6,224E-10 | 6,62E-08 |
| CTD-2313F11.1 | 0,23  | 0,91  | 0,41  | 0,31  | 6,703E-10 | 7,09E-08 |
| FBXW12        | 0,12  | 1,06  | 0,48  | 0,98  | 6,827E-10 | 7,19E-08 |
| CTD-2547E10.6 | 0,52  | 0,96  | 0,51  | 1,11  | 7,068E-10 | 7,41E-08 |
| COL4A5        | 0,15  | 0,96  | 0,35  | 0,31  | 7,148E-10 | 7,45E-08 |
| SORBS2        | 0,07  | 1,20  | 0,18  | 0,35  | 7,172E-10 | 7,45E-08 |
| NTRK3         | 0,09  | 1,27  | 0,10  | 0,34  | 7,457E-10 | 7,71E-08 |

|               |       |       |       |       |           |          |
|---------------|-------|-------|-------|-------|-----------|----------|
| SOX5          | 0,29  | 1,36  | 0,45  | 0,38  | 8,116E-10 | 8,35E-08 |
| DISP2         | 0,13  | 0,27  | 0,15  | 0,34  | 9,388E-10 | 9,61E-08 |
| BR13          | 5,21  | 6,03  | 6,44  | 7,34  | 9,578E-10 | 9,76E-08 |
| ZNF286B       | 0,28  | 0,61  | 0,39  | 0,65  | 1,009E-09 | 1,02E-07 |
| NENF          | 1,49  | 2,47  | 3,87  | 3,82  | 1,13E-09  | 1,14E-07 |
| RP11-465B22.6 | 0,00  | 0,62  | 0,02  | 0,03  | 1,232E-09 | 1,23E-07 |
| NR5A2         | 0,59  | 0,91  | 0,65  | 2,09  | 1,233E-09 | 1,23E-07 |
| RP11-10J21.2  | 0,08  | 0,38  | 0,09  | 0,21  | 1,238E-09 | 1,23E-07 |
| RP11-182N22.9 | 0,13  | 0,50  | 0,27  | 1,55  | 1,325E-09 | 1,31E-07 |
| KLK7          | 0,08  | 1,30  | 0,11  | 0,08  | 1,374E-09 | 1,36E-07 |
| HLA-DOB       | 6,36  | 0,48  | 4,03  | 2,73  | 1,38E-09  | 1,36E-07 |
| KCNG1         | 0,06  | 0,15  | 0,09  | 0,32  | 1,418E-09 | 1,39E-07 |
| AIF1          | 9,48  | 9,28  | 9,82  | 10,18 | 1,457E-09 | 1,42E-07 |
| CROCC2        | 0,00  | 1,25  | 0,00  | 0,14  | 1,501E-09 | 1,46E-07 |
| RP1-228P16.4  | 0,06  | 0,27  | 0,04  | 0,61  | 1,76E-09  | 1,7E-07  |
| RP11-341A22.2 | 0,23  | 1,20  | 0,15  | 0,24  | 1,924E-09 | 1,85E-07 |
| ATP8B2        | 0,73  | 2,16  | 0,62  | 1,90  | 1,938E-09 | 1,86E-07 |
| RP4-749H3.1   | 0,23  | 1,20  | 0,12  | 0,05  | 2,106E-09 | 2,01E-07 |
| ATG3          | 8,08  | 7,02  | 7,11  | 6,12  | 2,156E-09 | 2,04E-07 |
| AC096655.2    | 5,97  | 6,88  | 6,60  | 6,65  | 2,164E-09 | 2,04E-07 |
| RP11-513G11.1 | 0,25  | 0,33  | 0,42  | 0,93  | 2,169E-09 | 2,04E-07 |
| PDE11A        | 0,10  | 0,27  | 0,28  | 0,61  | 2,229E-09 | 2,09E-07 |
| LGMN          | 5,80  | 3,57  | 5,18  | 1,74  | 2,346E-09 | 2,19E-07 |
| AC004053.1    | 0,10  | 0,36  | 0,18  | 0,07  | 2,411E-09 | 2,24E-07 |
| LITAF         | 7,73  | 7,68  | 6,55  | 5,20  | 2,562E-09 | 2,37E-07 |
| FAM213A       | 0,20  | 2,00  | 0,76  | 0,61  | 2,669E-09 | 2,46E-07 |
| CRB1          | 0,10  | 0,17  | 0,13  | 0,24  | 2,695E-09 | 2,47E-07 |
| CFD           | 4,33  | 5,56  | 5,19  | 7,81  | 2,746E-09 | 2,5E-07  |
| LAMC2         | 0,04  | 0,06  | 0,04  | 0,32  | 2,749E-09 | 2,5E-07  |
| FOSB          | 7,56  | 9,34  | 8,69  | 8,53  | 2,792E-09 | 2,53E-07 |
| RP11-629G13.1 | 0,17  | 0,47  | 0,17  | 0,25  | 2,947E-09 | 2,66E-07 |
| ZNF556        | 0,32  | 1,08  | 0,46  | 0,46  | 3,182E-09 | 2,86E-07 |
| SLC1A2        | 1,31  | 4,72  | 1,53  | 2,21  | 3,314E-09 | 2,97E-07 |
| RP4-530I15.9  | 0,00  | 0,90  | 0,01  | 0,03  | 3,423E-09 | 3,06E-07 |
| CEBPD         | 4,05  | 5,34  | 5,39  | 5,36  | 3,508E-09 | 3,12E-07 |
| SLC41A1       | 0,00  | 1,79  | 0,00  | 0,00  | 3,571E-09 | 3,16E-07 |
| RP11-88H9.2   | 0,17  | 0,58  | 0,63  | 1,08  | 3,579E-09 | 3,16E-07 |
| MT-ND5        | 10,24 | 11,30 | 10,97 | 11,57 | 3,605E-09 | 3,17E-07 |
| CD1C          | 10,31 | 9,31  | 9,34  | 7,24  | 3,833E-09 | 3,35E-07 |
| NEUROD2       | 0,48  | 1,29  | 0,88  | 1,35  | 4,279E-09 | 3,73E-07 |
| TYMP          | 5,82  | 6,00  | 7,40  | 8,62  | 4,387E-09 | 3,81E-07 |
| TRIM65        | 0,36  | 0,91  | 1,08  | 2,21  | 4,426E-09 | 3,83E-07 |
| RNF152        | 0,09  | 0,22  | 0,09  | 0,29  | 4,508E-09 | 3,88E-07 |
| RAB7A         | 7,52  | 6,24  | 6,65  | 5,66  | 4,539E-09 | 3,9E-07  |
| RAC1          | 6,85  | 7,84  | 8,05  | 7,83  | 4,746E-09 | 4,06E-07 |
| NCF1          | 5,21  | 5,80  | 5,30  | 7,00  | 4,791E-09 | 4,08E-07 |
| MT-TM         | 5,06  | 6,47  | 6,15  | 8,24  | 5,074E-09 | 4,3E-07  |
| FUT9          | 0,03  | 0,29  | 0,04  | 0,05  | 5,144E-09 | 4,35E-07 |
| ASGR1         | 3,34  | 3,55  | 4,87  | 5,99  | 5,294E-09 | 4,46E-07 |
| PRR5          | 0,26  | 3,75  | 0,14  | 0,37  | 5,397E-09 | 4,53E-07 |
| PCSK5         | 6,11  | 10,78 | 5,99  | 8,21  | 5,726E-09 | 4,78E-07 |
| HEPACAM       | 0,25  | 0,65  | 0,41  | 0,63  | 5,997E-09 | 4,99E-07 |
| MYD88         | 7,51  | 5,30  | 6,28  | 4,83  | 6,023E-09 | 5E-07    |
| ALDOA         | 9,63  | 9,72  | 9,87  | 10,13 | 6,078E-09 | 5,02E-07 |
| RPLP1         | 10,05 | 10,74 | 10,69 | 11,07 | 6,143E-09 | 5,06E-07 |

|                |       |       |       |       |           |          |
|----------------|-------|-------|-------|-------|-----------|----------|
| EMP3           | 7,04  | 7,74  | 8,02  | 8,44  | 6,549E-09 | 5,37E-07 |
| CHD7           | 1,40  | 1,32  | 1,91  | 3,05  | 7,124E-09 | 5,82E-07 |
| RP11-192P3.4   | 0,34  | 1,02  | 0,41  | 0,30  | 7,183E-09 | 5,83E-07 |
| VWA5B1         | 1,18  | 1,81  | 1,69  | 2,30  | 7,196E-09 | 5,83E-07 |
| C1orf210       | 0,00  | 0,84  | 0,00  | 0,18  | 7,212E-09 | 5,83E-07 |
| PRKCSH         | 3,06  | 3,83  | 3,34  | 3,25  | 7,29E-09  | 5,87E-07 |
| CAT            | 7,58  | 6,35  | 6,30  | 5,36  | 7,342E-09 | 5,89E-07 |
| RP11-71G12.1   | 0,02  | 0,39  | 0,05  | 0,07  | 7,615E-09 | 6,09E-07 |
| KCNH6          | 0,04  | 0,14  | 0,09  | 0,05  | 8,168E-09 | 6,51E-07 |
| ZNF688         | 2,69  | 5,51  | 3,66  | 4,16  | 8,889E-09 | 7,06E-07 |
| GRIN2A         | 0,01  | 0,03  | 0,02  | 0,03  | 9,622E-09 | 7,61E-07 |
| AC092669.3     | 2,98  | 4,50  | 3,80  | 3,51  | 9,976E-09 | 7,86E-07 |
| RPL28          | 7,72  | 8,49  | 8,35  | 8,84  | 1,001E-08 | 7,86E-07 |
| ADGRD2         | 0,25  | 1,09  | 0,43  | 0,35  | 1,038E-08 | 8,13E-07 |
| CRIP1          | 8,03  | 9,44  | 9,15  | 9,65  | 1,093E-08 | 8,52E-07 |
| CTD-2540F13.2  | 0,28  | 1,11  | 0,48  | 0,18  | 1,188E-08 | 9,23E-07 |
| MPLKIP         | 6,01  | 0,85  | 5,38  | 4,56  | 1,195E-08 | 9,23E-07 |
| WISP2          | 0,39  | 0,48  | 0,50  | 0,63  | 1,196E-08 | 9,23E-07 |
| INTU           | 2,10  | 2,70  | 2,05  | 3,62  | 1,216E-08 | 9,35E-07 |
| KIAA1210       | 0,06  | 0,05  | 0,03  | 0,01  | 1,292E-08 | 9,9E-07  |
| SLITRK5        | 0,07  | 0,14  | 0,07  | 0,11  | 1,302E-08 | 9,94E-07 |
| RP11-715J22.6  | 0,53  | 1,42  | 0,85  | 1,37  | 1,371E-08 | 1,04E-06 |
| BMP7           | 0,02  | 0,28  | 0,05  | 0,06  | 1,473E-08 | 1,12E-06 |
| MGAT4C         | 0,10  | 0,73  | 0,07  | 0,27  | 1,486E-08 | 1,12E-06 |
| RP11-145G20.1  | 0,62  | 2,18  | 0,75  | 1,14  | 1,487E-08 | 1,12E-06 |
| FCAR           | 0,58  | 1,10  | 0,58  | 2,19  | 1,522E-08 | 1,14E-06 |
| RP11-117L5.1   | 0,02  | 0,06  | 0,06  | 0,12  | 1,525E-08 | 1,14E-06 |
| HIF3A          | 0,50  | 0,62  | 0,98  | 1,08  | 1,544E-08 | 1,15E-06 |
| FRRS1L         | 0,99  | 2,77  | 1,26  | 1,45  | 1,571E-08 | 1,17E-06 |
| HNF1B          | 0,08  | 0,12  | 0,10  | 0,11  | 1,622E-08 | 1,2E-06  |
| C4orf48        | 4,23  | 5,47  | 6,07  | 7,16  | 1,637E-08 | 1,21E-06 |
| MYLK           | 2,20  | 1,44  | 1,14  | 1,04  | 1,842E-08 | 1,36E-06 |
| CTD-2540B15.11 | 4,18  | 5,29  | 5,40  | 6,17  | 1,894E-08 | 1,39E-06 |
| ACTB           | 13,16 | 12,04 | 12,70 | 12,17 | 1,919E-08 | 1,4E-06  |
| RP11-696N14.1  | 0,16  | 4,30  | 0,12  | 1,84  | 1,926E-08 | 1,4E-06  |
| CTNNA2         | 0,04  | 0,11  | 0,13  | 0,38  | 1,935E-08 | 1,41E-06 |
| LAMTOR4        | 8,93  | 9,63  | 9,56  | 9,96  | 1,953E-08 | 1,41E-06 |
| CTD-2349P21.11 | 1,14  | 1,89  | 0,76  | 1,76  | 2,003E-08 | 1,45E-06 |
| RPLP2          | 8,89  | 10,10 | 9,83  | 10,31 | 2,026E-08 | 1,46E-06 |
| PCDH7          | 0,01  | 0,05  | 0,00  | 0,02  | 2,055E-08 | 1,47E-06 |
| RP13-262C2.4   | 0,10  | 0,00  | 0,09  | 1,02  | 2,124E-08 | 1,52E-06 |
| GHET1          | 1,60  | 3,51  | 1,80  | 2,79  | 2,214E-08 | 1,58E-06 |
| CTD-2031P19.3  | 0,20  | 2,01  | 0,35  | 0,40  | 2,289E-08 | 1,63E-06 |
| CHRD           | 0,04  | 0,09  | 0,05  | 0,14  | 2,358E-08 | 1,67E-06 |
| HLA-DRB1       | 11,63 | 10,71 | 11,26 | 10,18 | 2,431E-08 | 1,71E-06 |
| AC004941.3     | 0,13  | 0,81  | 0,34  | 0,26  | 2,453E-08 | 1,73E-06 |
| QSOX1          | 3,28  | 4,31  | 4,82  | 5,51  | 2,477E-08 | 1,74E-06 |
| PPA1           | 8,28  | 6,81  | 7,56  | 6,28  | 2,523E-08 | 1,76E-06 |
| RP1-228P16.3   | 0,00  | 1,42  | 0,00  | 0,37  | 2,578E-08 | 1,8E-06  |
| RP11-559N14.5  | 0,11  | 0,28  | 0,17  | 0,23  | 2,671E-08 | 1,86E-06 |
| ZBTB7A         | 0,21  | 0,86  | 0,59  | 0,90  | 2,714E-08 | 1,88E-06 |
| RP11-597K23.2  | 0,14  | 0,60  | 0,28  | 0,68  | 2,918E-08 | 2,01E-06 |
| SCYL3          | 1,48  | 4,75  | 0,99  | 1,30  | 3,081E-08 | 2,11E-06 |
| NTNG1          | 0,14  | 0,28  | 0,17  | 0,81  | 3,085E-08 | 2,11E-06 |
| CES1           | 4,26  | 7,10  | 6,26  | 6,38  | 3,09E-08  | 2,11E-06 |

|               |       |       |       |       |           |          |
|---------------|-------|-------|-------|-------|-----------|----------|
| IFI27L2       | 4,81  | 5,32  | 5,25  | 6,66  | 3,118E-08 | 2,13E-06 |
| RP11-89M16.1  | 0,99  | 1,21  | 1,22  | 1,67  | 3,28E-08  | 2,23E-06 |
| AC005086.4    | 0,04  | 3,61  | 2,44  | 3,17  | 3,414E-08 | 2,31E-06 |
| RP11-679C8.2  | 0,90  | 1,88  | 1,40  | 2,35  | 3,496E-08 | 2,36E-06 |
| RP11-298J20.3 | 1,22  | 1,27  | 1,42  | 1,16  | 3,507E-08 | 2,36E-06 |
| HK3           | 2,76  | 5,12  | 3,87  | 6,08  | 3,563E-08 | 2,39E-06 |
| SH3BP2        | 3,87  | 4,70  | 4,39  | 5,28  | 3,564E-08 | 2,39E-06 |
| ZEB2          | 6,75  | 7,49  | 7,26  | 7,56  | 3,691E-08 | 2,46E-06 |
| FTL           | 12,41 | 12,56 | 12,74 | 13,20 | 3,762E-08 | 2,5E-06  |
| ADTRP         | 0,00  | 4,32  | 0,14  | 0,88  | 3,767E-08 | 2,5E-06  |
| RP11-358M11.2 | 0,39  | 5,71  | 1,77  | 2,21  | 3,913E-08 | 2,59E-06 |
| IL2RG         | 7,99  | 7,45  | 6,69  | 5,65  | 3,948E-08 | 2,6E-06  |
| POU2F2        | 3,89  | 4,87  | 4,98  | 6,11  | 3,988E-08 | 2,62E-06 |
| CAMK4         | 0,02  | 0,82  | 0,01  | 0,52  | 3,991E-08 | 2,62E-06 |
| RP11-87N24.3  | 4,34  | 5,99  | 5,44  | 6,65  | 4,205E-08 | 2,75E-06 |
| ATP1B4        | 0,03  | 0,07  | 0,07  | 0,27  | 4,372E-08 | 2,85E-06 |
| CCDC141       | 0,15  | 0,45  | 0,31  | 0,33  | 4,44E-08  | 2,89E-06 |
| GTF2IP18      | 0,11  | 1,28  | 0,37  | 1,04  | 4,5E-08   | 2,92E-06 |
| CADM1         | 0,09  | 0,16  | 0,40  | 0,68  | 4,592E-08 | 2,97E-06 |
| SPIN3         | 1,09  | 3,45  | 1,01  | 0,81  | 4,679E-08 | 3,01E-06 |
| POMT2         | 1,18  | 6,65  | 2,20  | 1,73  | 4,734E-08 | 3,04E-06 |
| MRPL9         | 6,93  | 6,17  | 5,47  | 3,58  | 4,805E-08 | 3,08E-06 |
| FLT3          | 6,09  | 3,38  | 5,15  | 3,62  | 4,999E-08 | 3,19E-06 |
| CFAP74        | 0,81  | 1,50  | 1,39  | 1,57  | 5,22E-08  | 3,32E-06 |
| H2AFJ         | 5,75  | 6,66  | 6,53  | 6,88  | 5,339E-08 | 3,39E-06 |
| ZNF704        | 0,01  | 0,25  | 0,03  | 0,06  | 5,407E-08 | 3,42E-06 |
| MT-ND4L       | 12,75 | 13,66 | 13,47 | 14,28 | 5,679E-08 | 3,59E-06 |
| HLA-DQA1      | 9,92  | 8,25  | 8,66  | 6,92  | 5,904E-08 | 3,72E-06 |
| CHRN4         | 0,41  | 3,41  | 0,39  | 0,48  | 6,125E-08 | 3,85E-06 |
| SF3A3         | 5,81  | 4,82  | 4,39  | 3,12  | 6,146E-08 | 3,85E-06 |
| TMA7          | 7,73  | 8,19  | 8,17  | 8,26  | 6,262E-08 | 3,91E-06 |
| RP11-169F17.1 | 0,48  | 0,82  | 0,54  | 1,08  | 6,338E-08 | 3,94E-06 |
| PAK1          | 7,67  | 6,27  | 6,64  | 5,83  | 6,358E-08 | 3,94E-06 |
| AC079630.2    | 0,24  | 0,90  | 0,11  | 1,10  | 6,364E-08 | 3,94E-06 |
| GPX1          | 9,29  | 9,80  | 9,91  | 10,18 | 6,607E-08 | 4,08E-06 |
| SPINT2        | 7,35  | 7,57  | 7,07  | 4,72  | 6,984E-08 | 4,3E-06  |
| RP4-562J12.2  | 0,05  | 0,60  | 0,17  | 0,28  | 7,049E-08 | 4,33E-06 |
| CLEC4E        | 1,06  | 3,06  | 3,13  | 5,86  | 7,275E-08 | 4,45E-06 |
| PIGT          | 6,65  | 7,68  | 6,44  | 6,90  | 7,3E-08   | 4,46E-06 |
| SPRYD4        | 0,75  | 0,56  | 0,31  | 1,06  | 7,319E-08 | 4,46E-06 |
| CD24          | 0,04  | 2,42  | 0,06  | 0,11  | 7,89E-08  | 4,79E-06 |
| DGKZ          | 2,24  | 4,64  | 4,13  | 3,23  | 8,202E-08 | 4,97E-06 |
| SDF4          | 1,08  | 0,60  | 2,91  | 3,24  | 8,229E-08 | 4,97E-06 |
| RP11-136K7.2  | 0,11  | 3,35  | 0,16  | 0,06  | 8,841E-08 | 5,33E-06 |
| RN7SL163P     | 0,00  | 1,59  | 2,22  | 4,37  | 9,063E-08 | 5,44E-06 |
| CDK5RAP3      | 6,64  | 7,66  | 7,37  | 7,43  | 9,225E-08 | 5,53E-06 |
| TXNL4B        | 3,87  | 0,40  | 2,23  | 0,59  | 9,298E-08 | 5,56E-06 |
| SCN9A         | 2,95  | 1,88  | 0,98  | 0,57  | 9,38E-08  | 5,59E-06 |
| EML2          | 0,78  | 5,39  | 0,48  | 0,65  | 9,498E-08 | 5,64E-06 |
| RP11-110L15.1 | 1,35  | 1,52  | 4,13  | 3,94  | 9,55E-08  | 5,66E-06 |
| FLG2          | 0,01  | 0,20  | 0,03  | 0,07  | 9,934E-08 | 5,87E-06 |
| HLA-DMB       | 10,27 | 9,29  | 9,46  | 8,36  | 1,024E-07 | 6,04E-06 |
| PDZD7         | 0,77  | 1,08  | 1,39  | 1,40  | 1,034E-07 | 6,08E-06 |
| ZNF483        | 0,68  | 1,66  | 1,06  | 1,75  | 1,04E-07  | 6,1E-06  |
| FGFR2         | 0,14  | 0,50  | 0,32  | 0,57  | 1,056E-07 | 6,18E-06 |

|                |       |       |       |       |           |          |
|----------------|-------|-------|-------|-------|-----------|----------|
| DAZAP2         | 9,34  | 8,18  | 8,06  | 7,32  | 1,081E-07 | 6,3E-06  |
| GYPA           | 0,90  | 0,16  | 1,13  | 2,23  | 1,094E-07 | 6,36E-06 |
| RGS16          | 0,19  | 0,52  | 0,37  | 0,75  | 1,104E-07 | 6,41E-06 |
| MRPL52         | 4,95  | 6,10  | 5,68  | 5,89  | 1,121E-07 | 6,49E-06 |
| CYBB           | 5,02  | 4,80  | 5,27  | 6,40  | 1,13E-07  | 6,53E-06 |
| AC020956.3     | 0,95  | 1,87  | 1,79  | 2,73  | 1,151E-07 | 6,61E-06 |
| CLEC4A         | 8,36  | 8,00  | 7,63  | 5,87  | 1,152E-07 | 6,61E-06 |
| SALRNA1        | 0,39  | 1,57  | 0,28  | 0,58  | 1,288E-07 | 7,38E-06 |
| KCNT1          | 0,03  | 1,58  | 0,03  | 0,03  | 1,305E-07 | 7,45E-06 |
| IGBP1          | 6,12  | 2,40  | 6,08  | 4,70  | 1,352E-07 | 7,71E-06 |
| CLMN           | 0,79  | 1,52  | 2,16  | 2,20  | 1,373E-07 | 7,8E-06  |
| TMEM258        | 6,49  | 7,35  | 6,75  | 7,38  | 1,387E-07 | 7,86E-06 |
| ARHGFE39       | 0,47  | 1,16  | 0,78  | 0,18  | 1,411E-07 | 7,98E-06 |
| RP3-410C9.1    | 2,11  | 6,02  | 3,76  | 4,78  | 1,42E-07  | 8,01E-06 |
| H3F3B          | 10,98 | 10,34 | 10,18 | 9,45  | 1,479E-07 | 8,32E-06 |
| FGF23          | 1,71  | 2,96  | 2,21  | 2,52  | 1,485E-07 | 8,33E-06 |
| ACADVL         | 6,54  | 8,16  | 7,11  | 7,65  | 1,545E-07 | 8,65E-06 |
| CD5            | 4,42  | 1,67  | 0,21  | 0,07  | 1,557E-07 | 8,7E-06  |
| AOC1           | 0,00  | 0,12  | 0,24  | 0,55  | 1,593E-07 | 8,87E-06 |
| AC147651.3     | 0,00  | 0,00  | 0,27  | 1,08  | 1,615E-07 | 8,97E-06 |
| TMPRSS12       | 0,03  | 0,62  | 0,12  | 0,40  | 1,63E-07  | 9,03E-06 |
| ABCA13         | 0,05  | 2,00  | 0,08  | 0,19  | 1,659E-07 | 9,17E-06 |
| SH2B3          | 6,09  | 4,88  | 5,17  | 3,64  | 1,676E-07 | 9,24E-06 |
| SEC14L4        | 0,11  | 1,44  | 0,21  | 0,22  | 1,684E-07 | 9,26E-06 |
| RP11-90C4.1    | 1,52  | 4,46  | 1,43  | 2,83  | 1,691E-07 | 9,28E-06 |
| RP11-512C24.2  | 0,00  | 2,13  | 0,46  | 0,20  | 1,703E-07 | 9,32E-06 |
| DNAAF1         | 1,07  | 1,75  | 1,91  | 3,69  | 1,737E-07 | 9,48E-06 |
| ELOVL5         | 6,63  | 4,93  | 5,36  | 4,44  | 1,817E-07 | 9,9E-06  |
| TDRD1          | 0,06  | 0,06  | 0,10  | 0,09  | 1,828E-07 | 9,93E-06 |
| RP11-96M12.1   | 0,10  | 0,58  | 0,21  | 0,30  | 1,831E-07 | 9,93E-06 |
| LAMP1          | 0,48  | 1,90  | 1,99  | 3,67  | 1,977E-07 | 1,07E-05 |
| CD163          | 4,96  | 6,59  | 6,61  | 6,38  | 2,027E-07 | 1,09E-05 |
| NOS2P1         | 0,05  | 0,32  | 0,07  | 0,29  | 2,029E-07 | 1,09E-05 |
| BCL11A         | 8,04  | 6,97  | 7,05  | 4,84  | 2,041E-07 | 1,1E-05  |
| TMEM205        | 6,38  | 7,19  | 7,20  | 7,50  | 2,094E-07 | 1,12E-05 |
| PTPRC          | 8,73  | 8,13  | 8,09  | 7,16  | 2,099E-07 | 1,12E-05 |
| EYS            | 0,86  | 1,38  | 0,83  | 0,46  | 2,155E-07 | 1,15E-05 |
| SNW1           | 5,70  | 2,63  | 5,20  | 3,37  | 2,184E-07 | 1,16E-05 |
| RP11-707G18.1  | 2,51  | 4,31  | 3,94  | 5,13  | 2,233E-07 | 1,18E-05 |
| PAK3           | 0,08  | 0,17  | 0,15  | 0,44  | 2,241E-07 | 1,19E-05 |
| HIGD1A         | 6,33  | 6,09  | 5,62  | 2,92  | 2,269E-07 | 1,2E-05  |
| RPL37A         | 9,35  | 10,10 | 10,07 | 10,60 | 2,306E-07 | 1,21E-05 |
| RPL36          | 8,68  | 9,43  | 9,32  | 9,62  | 2,321E-07 | 1,22E-05 |
| KIAA0664L3     | 0,18  | 1,39  | 0,26  | 1,14  | 2,371E-07 | 1,24E-05 |
| SLC47A1        | 0,65  | 1,07  | 1,17  | 1,32  | 2,399E-07 | 1,25E-05 |
| C6orf227       | 0,74  | 1,55  | 0,91  | 0,98  | 2,406E-07 | 1,26E-05 |
| CTA-414D7.1    | 0,19  | 0,40  | 0,73  | 0,36  | 2,446E-07 | 1,27E-05 |
| MT-RNR2        | 13,83 | 14,22 | 14,28 | 14,78 | 2,503E-07 | 1,3E-05  |
| CH507-154B10.1 | 0,07  | 0,11  | 0,07  | 0,11  | 2,528E-07 | 1,31E-05 |
| RP5-1014D13.2  | 0,79  | 0,83  | 0,97  | 1,19  | 2,534E-07 | 1,31E-05 |
| AFF3           | 5,50  | 4,54  | 4,37  | 2,63  | 2,55E-07  | 1,31E-05 |
| CTD-2319I12.1  | 6,28  | 0,87  | 2,69  | 0,90  | 2,583E-07 | 1,33E-05 |
| PRLR           | 0,00  | 0,08  | 0,00  | 0,17  | 2,669E-07 | 1,37E-05 |
| MCF2L2         | 0,66  | 2,02  | 0,86  | 0,53  | 2,71E-07  | 1,39E-05 |
| MACROD2        | 0,85  | 1,29  | 1,16  | 1,25  | 2,819E-07 | 1,44E-05 |

|               |      |      |      |       |           |          |
|---------------|------|------|------|-------|-----------|----------|
| RP4-644F6.3   | 0,76 | 1,61 | 1,53 | 2,03  | 2,869E-07 | 1,46E-05 |
| HNFI1A        | 0,00 | 0,28 | 0,00 | 0,00  | 2,934E-07 | 1,49E-05 |
| MFSD11        | 4,23 | 6,24 | 3,52 | 1,96  | 2,94E-07  | 1,49E-05 |
| HULC          | 2,68 | 4,48 | 2,34 | 3,56  | 3,089E-07 | 1,56E-05 |
| ZNF555        | 1,49 | 1,19 | 1,02 | 1,57  | 3,119E-07 | 1,58E-05 |
| H1FX          | 2,26 | 3,39 | 4,38 | 5,31  | 3,162E-07 | 1,59E-05 |
| RIC3          | 0,65 | 1,56 | 0,44 | 1,90  | 3,163E-07 | 1,59E-05 |
| GFOD2         | 0,76 | 1,79 | 1,20 | 1,95  | 3,19E-07  | 1,6E-05  |
| MBNL1         | 7,29 | 6,68 | 6,58 | 5,96  | 3,225E-07 | 1,61E-05 |
| RP11-42B7.1   | 0,62 | 1,03 | 2,11 | 2,35  | 3,472E-07 | 1,73E-05 |
| CXCL14        | 0,46 | 1,20 | 0,92 | 1,19  | 3,481E-07 | 1,73E-05 |
| PDIA3         | 7,71 | 6,64 | 6,94 | 6,12  | 3,515E-07 | 1,75E-05 |
| LETM1         | 3,31 | 3,78 | 3,41 | 3,02  | 3,522E-07 | 1,75E-05 |
| PID1          | 4,44 | 6,59 | 6,59 | 7,05  | 3,559E-07 | 1,76E-05 |
| TRIM7         | 0,02 | 0,15 | 0,09 | 0,72  | 3,662E-07 | 1,81E-05 |
| CHRM3         | 0,00 | 0,00 | 0,00 | 0,05  | 3,712E-07 | 1,83E-05 |
| VDAC2         | 7,77 | 7,25 | 6,96 | 5,81  | 3,75E-07  | 1,84E-05 |
| PLD5          | 0,20 | 0,20 | 0,09 | 0,24  | 3,809E-07 | 1,87E-05 |
| SLC11A1       | 1,16 | 1,77 | 2,84 | 4,73  | 3,953E-07 | 1,94E-05 |
| MIR1248       | 3,15 | 6,22 | 5,36 | 7,61  | 4,006E-07 | 1,96E-05 |
| IGHV3-21      | 0,00 | 2,20 | 0,00 | 0,00  | 4,018E-07 | 1,96E-05 |
| RP11-567L7.3  | 0,00 | 0,31 | 0,00 | 0,29  | 4,054E-07 | 1,97E-05 |
| CTA-747E2.11  | 0,31 | 1,52 | 0,34 | 0,43  | 4,068E-07 | 1,97E-05 |
| PATJ          | 1,73 | 1,91 | 2,17 | 2,10  | 4,089E-07 | 1,98E-05 |
| C21orf2       | 2,66 | 5,97 | 3,84 | 4,88  | 4,111E-07 | 1,99E-05 |
| STK4          | 7,41 | 5,95 | 6,52 | 5,20  | 4,152E-07 | 2E-05    |
| MPIG6B        | 0,09 | 0,26 | 0,16 | 2,20  | 4,175E-07 | 2,01E-05 |
| HMGNA4        | 6,09 | 3,64 | 4,87 | 2,42  | 4,268E-07 | 2,05E-05 |
| RP11-275D4.1  | 0,49 | 2,15 | 1,31 | 3,00  | 4,307E-07 | 2,06E-05 |
| RP11-48O20.4  | 0,23 | 0,30 | 0,75 | 1,79  | 4,351E-07 | 2,08E-05 |
| PPP1R14A      | 4,49 | 1,96 | 1,70 | 0,26  | 4,362E-07 | 2,08E-05 |
| KPNA2         | 5,67 | 3,91 | 5,11 | 1,60  | 4,377E-07 | 2,08E-05 |
| ABC89         | 1,15 | 1,28 | 1,30 | 2,03  | 4,557E-07 | 2,16E-05 |
| CAP1          | 8,30 | 7,00 | 7,46 | 6,87  | 4,56E-07  | 2,16E-05 |
| RP11-329L6.2  | 2,95 | 4,96 | 4,78 | 5,49  | 4,607E-07 | 2,18E-05 |
| RPS28         | 8,63 | 9,98 | 9,65 | 10,57 | 4,652E-07 | 2,2E-05  |
| SSBP4         | 3,59 | 6,00 | 4,97 | 5,49  | 4,805E-07 | 2,26E-05 |
| SLC13A5       | 0,17 | 0,29 | 0,41 | 0,46  | 4,834E-07 | 2,27E-05 |
| EMCN          | 0,07 | 0,07 | 0,43 | 0,88  | 4,871E-07 | 2,28E-05 |
| TCF25         | 6,29 | 7,84 | 7,14 | 7,57  | 4,905E-07 | 2,29E-05 |
| AGTRAP        | 6,72 | 7,08 | 7,22 | 8,32  | 4,921E-07 | 2,3E-05  |
| PPP6R1        | 3,05 | 2,47 | 4,03 | 5,27  | 4,972E-07 | 2,32E-05 |
| RP11-419117.1 | 2,45 | 3,63 | 2,80 | 3,09  | 4,988E-07 | 2,32E-05 |
| MT-ND3        | 8,25 | 9,87 | 9,29 | 10,58 | 5,003E-07 | 2,32E-05 |
| BLK           | 0,00 | 4,01 | 0,06 | 0,67  | 5,023E-07 | 2,33E-05 |
| CHMP4A        | 7,54 | 7,18 | 7,05 | 4,85  | 5,037E-07 | 2,33E-05 |
| TMEM233       | 0,00 | 0,52 | 0,00 | 0,00  | 5,163E-07 | 2,38E-05 |
| PLK1          | 0,07 | 0,00 | 0,06 | 0,20  | 5,212E-07 | 2,4E-05  |
| RP11-411H5.1  | 0,66 | 0,00 | 0,35 | 0,14  | 5,244E-07 | 2,41E-05 |
| SIM2          | 0,37 | 0,52 | 0,53 | 1,59  | 5,325E-07 | 2,44E-05 |
| CREG2         | 0,21 | 1,00 | 0,22 | 0,57  | 5,346E-07 | 2,44E-05 |
| NEUROD1       | 0,19 | 0,25 | 0,39 | 0,54  | 5,379E-07 | 2,45E-05 |
| MBD6          | 2,19 | 2,97 | 3,69 | 4,58  | 5,469E-07 | 2,49E-05 |
| NONO          | 7,21 | 6,63 | 6,64 | 5,50  | 5,485E-07 | 2,49E-05 |
| AC007292.4    | 0,72 | 3,14 | 0,00 | 1,05  | 5,672E-07 | 2,57E-05 |

|               |       |       |       |       |           |          |
|---------------|-------|-------|-------|-------|-----------|----------|
| SRL           | 0,01  | 0,11  | 0,00  | 0,07  | 5,769E-07 | 2,61E-05 |
| RP13-93L13.2  | 0,66  | 1,37  | 0,86  | 1,42  | 5,786E-07 | 2,61E-05 |
| RP3-499B10.3  | 0,97  | 1,41  | 1,41  | 2,06  | 5,843E-07 | 2,63E-05 |
| MAPK1IP1L     | 6,09  | 3,77  | 5,31  | 4,13  | 5,896E-07 | 2,65E-05 |
| RP11-177H13.2 | 0,32  | 0,77  | 0,59  | 0,45  | 5,932E-07 | 2,66E-05 |
| RP11-63G10.4  | 0,28  | 1,61  | 0,34  | 1,01  | 6,223E-07 | 2,79E-05 |
| RP11-731C17.2 | 0,14  | 0,41  | 0,18  | 2,37  | 6,287E-07 | 2,81E-05 |
| STX12         | 4,85  | 0,85  | 5,19  | 4,91  | 6,481E-07 | 2,89E-05 |
| RP11-374M1.2  | 0,18  | 1,16  | 0,20  | 0,18  | 6,503E-07 | 2,9E-05  |
| DOPEY1        | 3,17  | 2,12  | 3,80  | 0,85  | 6,547E-07 | 2,91E-05 |
| RP4-794H19.4  | 1,93  | 3,95  | 2,61  | 2,45  | 6,615E-07 | 2,93E-05 |
| SCARNA22      | 2,15  | 3,00  | 4,49  | 4,86  | 6,689E-07 | 2,96E-05 |
| IGHG2         | 0,27  | 1,14  | 0,44  | 1,16  | 6,704E-07 | 2,96E-05 |
| KLHDC10       | 3,49  | 6,17  | 2,99  | 3,10  | 6,942E-07 | 3,06E-05 |
| MEIS3         | 0,24  | 1,63  | 0,20  | 0,14  | 7,02E-07  | 3,09E-05 |
| RP11-90E5.1   | 0,14  | 0,79  | 0,16  | 0,17  | 7,086E-07 | 3,11E-05 |
| FCGBP         | 0,00  | 0,11  | 0,20  | 1,30  | 7,142E-07 | 3,13E-05 |
| NDUFS2        | 7,07  | 3,16  | 6,36  | 5,44  | 7,175E-07 | 3,14E-05 |
| CTA-992D9.10  | 0,19  | 0,34  | 0,31  | 0,33  | 7,189E-07 | 3,14E-05 |
| RNVU1-15      | 3,89  | 5,78  | 3,77  | 6,10  | 7,364E-07 | 3,21E-05 |
| HLA-DQB1      | 11,69 | 10,36 | 11,07 | 9,98  | 7,395E-07 | 3,21E-05 |
| SDC3          | 0,67  | 1,10  | 1,07  | 1,33  | 7,4E-07   | 3,21E-05 |
| CTC-436K13.6  | 0,22  | 1,53  | 0,00  | 0,00  | 7,514E-07 | 3,26E-05 |
| C12orf45      | 5,93  | 6,49  | 5,21  | 3,96  | 7,53E-07  | 3,26E-05 |
| ADCK4         | 2,91  | 4,89  | 1,09  | 4,59  | 7,575E-07 | 3,27E-05 |
| RASSF5        | 5,87  | 4,61  | 5,53  | 3,03  | 7,616E-07 | 3,28E-05 |
| UBXN11        | 4,59  | 5,25  | 5,33  | 5,73  | 7,623E-07 | 3,28E-05 |
| ANKRD13D      | 5,11  | 5,42  | 6,13  | 6,94  | 7,8E-07   | 3,34E-05 |
| LLNLR-246C6.1 | 0,76  | 1,38  | 1,02  | 1,56  | 7,808E-07 | 3,34E-05 |
| TMEM131       | 4,66  | 1,47  | 3,84  | 2,79  | 7,903E-07 | 3,38E-05 |
| RP11-700A24.1 | 0,49  | 1,03  | 0,79  | 1,02  | 7,937E-07 | 3,39E-05 |
| ACO16582.2    | 0,00  | 1,39  | 0,00  | 0,00  | 7,997E-07 | 3,4E-05  |
| RP11-659E9.6  | 1,09  | 2,29  | 1,43  | 2,41  | 8,085E-07 | 3,44E-05 |
| SARAF         | 8,63  | 7,34  | 7,83  | 6,96  | 8,129E-07 | 3,45E-05 |
| TNNT1         | 0,00  | 2,66  | 2,12  | 4,46  | 8,259E-07 | 3,5E-05  |
| HMGB1P39      | 0,89  | 1,46  | 0,99  | 0,57  | 8,315E-07 | 3,51E-05 |
| CXXC5         | 2,86  | 5,21  | 3,36  | 3,42  | 8,51E-07  | 3,58E-05 |
| SERPINA1      | 6,91  | 7,33  | 7,33  | 8,45  | 8,517E-07 | 3,58E-05 |
| RF00004       | 9,73  | 9,52  | 10,78 | 11,17 | 8,587E-07 | 3,6E-05  |
| RNF157        | 0,28  | 0,63  | 0,37  | 1,10  | 8,592E-07 | 3,6E-05  |
| STEAP4        | 0,51  | 0,71  | 0,28  | 2,62  | 8,745E-07 | 3,66E-05 |
| RP3-368B9.1   | 0,00  | 0,51  | 0,00  | 0,00  | 8,794E-07 | 3,67E-05 |
| CGN           | 0,12  | 2,37  | 0,00  | 0,00  | 8,837E-07 | 3,68E-05 |
| EGR1          | 3,31  | 5,59  | 5,33  | 5,36  | 8,88E-07  | 3,7E-05  |
| RP11-867G23.8 | 0,00  | 0,24  | 0,24  | 2,23  | 8,958E-07 | 3,72E-05 |
| RPS6KA4       | 1,36  | 2,30  | 2,61  | 3,55  | 9,006E-07 | 3,73E-05 |
| SMIM5         | 0,03  | 0,10  | 0,09  | 0,14  | 9,046E-07 | 3,74E-05 |
| AC005197.2    | 0,00  | 1,97  | 0,12  | 0,00  | 9,047E-07 | 3,74E-05 |
| AC109642.1    | 0,38  | 0,96  | 0,64  | 0,75  | 9,154E-07 | 3,77E-05 |
| DNAH9         | 0,00  | 0,23  | 0,05  | 0,01  | 9,197E-07 | 3,79E-05 |
| RP11-141M3.6  | 0,09  | 0,11  | 0,08  | 0,10  | 9,425E-07 | 3,87E-05 |
| PLVAP         | 0,00  | 3,21  | 0,00  | 0,00  | 9,47E-07  | 3,88E-05 |
| EPN1          | 0,74  | 3,09  | 1,29  | 1,00  | 9,604E-07 | 3,93E-05 |
| RP11-366L20.2 | 0,06  | 0,09  | 0,14  | 0,46  | 9,635E-07 | 3,94E-05 |
| CNBP          | 9,13  | 8,33  | 8,07  | 7,49  | 9,739E-07 | 3,97E-05 |



|                |       |       |       |       |           |          |
|----------------|-------|-------|-------|-------|-----------|----------|
| NCRNA00211     | 0,65  | 0,72  | 0,59  | 1,91  | 9,854E-07 | 4,01E-05 |
| IGLL5          | 0,52  | 1,41  | 0,25  | 0,62  | 9,869E-07 | 4,01E-05 |
| C12orf75       | 5,48  | 4,77  | 4,08  | 1,25  | 9,89E-07  | 4,01E-05 |
| SNX2           | 6,74  | 3,86  | 6,34  | 5,89  | 9,994E-07 | 4,05E-05 |
| PPP1R9A        | 0,00  | 0,00  | 0,01  | 0,28  | 1,009E-06 | 4,08E-05 |
| RP11-627K11.1  | 0,47  | 0,81  | 0,54  | 1,10  | 1,019E-06 | 4,11E-05 |
| SLC35F2        | 3,58  | 0,39  | 1,24  | 0,18  | 1,02E-06  | 4,11E-05 |
| NANOG          | 0,25  | 1,16  | 0,59  | 0,77  | 1,03E-06  | 4,14E-05 |
| ZBTB8A         | 0,42  | 0,77  | 0,78  | 0,52  | 1,037E-06 | 4,16E-05 |
| FOXP4          | 0,02  | 1,09  | 0,13  | 0,31  | 1,041E-06 | 4,17E-05 |
| RP3-455J7.4    | 0,25  | 0,52  | 0,39  | 1,37  | 1,065E-06 | 4,26E-05 |
| CD209          | 0,12  | 1,25  | 0,34  | 1,09  | 1,077E-06 | 4,3E-05  |
| LLNLF-187D8.1  | 0,07  | 0,14  | 0,09  | 0,16  | 1,102E-06 | 4,38E-05 |
| UQCR11         | 7,12  | 7,83  | 7,50  | 8,01  | 1,105E-06 | 4,38E-05 |
| RP11-304L19.11 | 0,87  | 2,38  | 1,74  | 1,31  | 1,105E-06 | 4,38E-05 |
| PYGL           | 2,61  | 4,03  | 4,52  | 3,83  | 1,106E-06 | 4,38E-05 |
| GAS7           | 3,37  | 5,19  | 4,29  | 4,00  | 1,121E-06 | 4,43E-05 |
| AC034110.1     | 0,67  | 0,84  | 1,04  | 1,61  | 1,165E-06 | 4,6E-05  |
| AC010970.2     | 14,28 | 15,34 | 14,99 | 15,78 | 1,167E-06 | 4,6E-05  |
| TFEB           | 3,14  | 3,03  | 4,68  | 5,37  | 1,193E-06 | 4,69E-05 |
| SSX7           | 0,34  | 0,00  | 0,29  | 0,28  | 1,22E-06  | 4,79E-05 |
| ALDH5A1        | 0,12  | 0,49  | 0,15  | 0,53  | 1,224E-06 | 4,8E-05  |
| KSR2           | 0,05  | 0,65  | 0,09  | 0,04  | 1,236E-06 | 4,84E-05 |
| RP11-69P2.1    | 1,03  | 1,59  | 1,58  | 2,65  | 1,247E-06 | 4,87E-05 |
| CTA-398F10.2   | 1,62  | 2,12  | 1,86  | 3,44  | 1,255E-06 | 4,89E-05 |
| RP11-214C8.2   | 0,43  | 0,50  | 0,98  | 1,06  | 1,263E-06 | 4,91E-05 |
| AKIP1          | 4,53  | 1,48  | 3,73  | 0,99  | 1,304E-06 | 5,06E-05 |
| FECH           | 3,36  | 0,59  | 3,06  | 0,14  | 1,304E-06 | 5,06E-05 |
| RNA5SP151      | 6,65  | 0,00  | 6,47  | 0,00  | 1,313E-06 | 5,08E-05 |
| OR52K1         | 1,06  | 1,26  | 1,55  | 1,66  | 1,317E-06 | 5,09E-05 |
| RP5-1024G6.7   | 1,41  | 3,99  | 1,98  | 3,41  | 1,351E-06 | 5,21E-05 |
| DDX5           | 9,95  | 9,25  | 9,09  | 8,52  | 1,384E-06 | 5,33E-05 |
| RP11-21M24.1   | 0,98  | 2,89  | 1,77  | 0,81  | 1,398E-06 | 5,37E-05 |
| OST4           | 7,56  | 7,71  | 7,67  | 8,14  | 1,426E-06 | 5,47E-05 |
| RP5-857K21.11  | 3,25  | 3,68  | 3,88  | 4,41  | 1,44E-06  | 5,52E-05 |
| RP11-16L21.8   | 0,54  | 0,97  | 0,41  | 0,99  | 1,444E-06 | 5,52E-05 |
| ARHGEF1        | 5,31  | 7,09  | 6,36  | 6,90  | 1,451E-06 | 5,54E-05 |
| ELOB           | 6,54  | 7,07  | 6,83  | 7,58  | 1,459E-06 | 5,56E-05 |
| PTP4A1         | 5,27  | 5,87  | 4,67  | 2,80  | 1,461E-06 | 5,56E-05 |
| CTD-2509G16.2  | 0,73  | 1,39  | 0,45  | 0,41  | 1,469E-06 | 5,58E-05 |
| ANKRD49        | 3,86  | 4,75  | 2,39  | 2,04  | 1,472E-06 | 5,58E-05 |
| RP11-193J6.1   | 0,03  | 0,12  | 0,04  | 0,10  | 1,486E-06 | 5,63E-05 |
| AC006509.7     | 4,91  | 5,92  | 5,59  | 6,07  | 1,521E-06 | 5,75E-05 |
| MKRN3          | 0,11  | 1,00  | 0,29  | 0,54  | 1,525E-06 | 5,75E-05 |
| TTYH1          | 0,28  | 0,21  | 0,47  | 1,02  | 1,539E-06 | 5,8E-05  |
| OTUD7B         | 0,25  | 0,70  | 0,25  | 0,64  | 1,542E-06 | 5,8E-05  |
| PNMA2          | 0,17  | 0,96  | 0,65  | 0,23  | 1,576E-06 | 5,92E-05 |
| MT-TQ          | 6,13  | 8,14  | 7,16  | 8,29  | 1,581E-06 | 5,92E-05 |
| CD27           | 0,24  | 0,30  | 0,14  | 1,16  | 1,593E-06 | 5,96E-05 |
| RP11-290L7.5   | 0,25  | 0,49  | 0,29  | 1,05  | 1,596E-06 | 5,96E-05 |
| RF00012        | 6,60  | 7,30  | 7,54  | 8,16  | 1,598E-06 | 5,96E-05 |
| RP3-522J7.7    | 0,58  | 1,33  | 0,75  | 0,94  | 1,603E-06 | 5,97E-05 |
| RP11-685M7.3   | 0,38  | 0,86  | 0,33  | 0,61  | 1,607E-06 | 5,97E-05 |
| CTB-92J24.3    | 0,00  | 2,24  | 0,13  | 0,93  | 1,61E-06  | 5,98E-05 |
| TMEM14C        | 7,62  | 5,63  | 6,88  | 5,91  | 1,621E-06 | 6E-05    |

|               |       |       |       |       |           |          |
|---------------|-------|-------|-------|-------|-----------|----------|
| NCMAP         | 0,20  | 0,95  | 0,32  | 0,63  | 1,624E-06 | 6,01E-05 |
| WASHC1        | 1,32  | 1,45  | 2,51  | 3,51  | 1,638E-06 | 6,05E-05 |
| EPPK1         | 0,00  | 0,05  | 0,00  | 0,01  | 1,695E-06 | 6,25E-05 |
| MRPS35        | 5,16  | 1,88  | 4,96  | 4,24  | 1,737E-06 | 6,39E-05 |
| RP11-295D4.3  | 0,23  | 0,08  | 0,82  | 0,79  | 1,739E-06 | 6,39E-05 |
| CST3          | 12,91 | 12,03 | 12,53 | 11,52 | 1,742E-06 | 6,39E-05 |
| COX19         | 3,53  | 4,19  | 4,28  | 4,86  | 1,748E-06 | 6,4E-05  |
| RP11-47J17.1  | 0,00  | 1,23  | 0,00  | 0,63  | 1,754E-06 | 6,41E-05 |
| SCAND1        | 6,71  | 7,38  | 7,45  | 7,81  | 1,756E-06 | 6,41E-05 |
| GIPR          | 4,43  | 1,80  | 2,66  | 0,69  | 1,78E-06  | 6,48E-05 |
| PRCP          | 7,72  | 6,49  | 6,95  | 5,54  | 1,794E-06 | 6,53E-05 |
| ZBTB33        | 2,87  | 0,71  | 2,29  | 0,16  | 1,798E-06 | 6,53E-05 |
| NUP35         | 3,65  | 5,29  | 0,57  | 0,66  | 1,81E-06  | 6,56E-05 |
| AC012668.1    | 0,49  | 2,42  | 0,54  | 0,35  | 1,813E-06 | 6,56E-05 |
| KCNE1         | 0,48  | 0,97  | 1,02  | 1,34  | 1,826E-06 | 6,6E-05  |
| HECW1         | 0,02  | 0,65  | 0,01  | 0,05  | 1,833E-06 | 6,61E-05 |
| SH3BP1        | 0,61  | 0,61  | 1,53  | 2,36  | 1,844E-06 | 6,64E-05 |
| CLSPN         | 0,08  | 0,10  | 0,21  | 0,39  | 1,865E-06 | 6,71E-05 |
| NDUFA11       | 7,36  | 7,69  | 7,83  | 8,18  | 1,876E-06 | 6,74E-05 |
| SNRNP40       | 6,00  | 6,53  | 4,90  | 2,96  | 1,895E-06 | 6,79E-05 |
| CTC-459F4.1   | 0,05  | 0,84  | 0,09  | 0,07  | 1,907E-06 | 6,82E-05 |
| RP11-429J17.8 | 0,18  | 1,30  | 0,56  | 0,77  | 1,909E-06 | 6,82E-05 |
| SPRY2         | 3,92  | 1,91  | 2,05  | 0,21  | 1,916E-06 | 6,83E-05 |
| WIPF3         | 0,10  | 0,53  | 0,18  | 0,41  | 1,947E-06 | 6,93E-05 |
| MECOM         | 1,97  | 3,14  | 2,87  | 3,55  | 1,966E-06 | 6,99E-05 |
| CACNA1D       | 0,55  | 1,79  | 0,38  | 1,18  | 1,995E-06 | 7,08E-05 |
| ZNF471        | 1,99  | 3,11  | 2,40  | 2,92  | 2,014E-06 | 7,14E-05 |
| ROR1          | 0,00  | 0,18  | 0,00  | 0,06  | 2,022E-06 | 7,15E-05 |
| RPS14         | 11,25 | 12,04 | 11,64 | 11,70 | 2,027E-06 | 7,16E-05 |
| RP11-1100L3.8 | 6,32  | 8,60  | 8,05  | 7,37  | 2,039E-06 | 7,19E-05 |
| KRTAP9-6      | 0,00  | 0,00  | 0,00  | 0,37  | 2,044E-06 | 7,2E-05  |
| ARHGDI1       | 10,88 | 9,70  | 9,93  | 9,38  | 2,074E-06 | 7,29E-05 |
| SHISA2        | 0,80  | 2,05  | 1,11  | 1,52  | 2,077E-06 | 7,29E-05 |
| SYTL2         | 0,24  | 1,69  | 0,40  | 1,60  | 2,114E-06 | 7,41E-05 |
| CLNK          | 0,98  | 1,04  | 0,38  | 0,72  | 2,138E-06 | 7,48E-05 |
| BDP1          | 4,40  | 5,19  | 4,32  | 4,74  | 2,145E-06 | 7,5E-05  |
| MT-TD         | 3,88  | 5,72  | 4,47  | 5,90  | 2,172E-06 | 7,58E-05 |
| DACT3         | 1,01  | 1,22  | 1,02  | 1,05  | 2,182E-06 | 7,6E-05  |
| RPS17         | 9,17  | 9,78  | 9,71  | 9,78  | 2,191E-06 | 7,61E-05 |
| PPP1R13B      | 1,01  | 1,10  | 1,15  | 2,10  | 2,192E-06 | 7,61E-05 |
| ADRBK1        | 4,49  | 5,57  | 5,91  | 6,35  | 2,22E-06  | 7,7E-05  |
| GINS1         | 0,49  | 0,53  | 0,46  | 0,53  | 2,253E-06 | 7,8E-05  |
| ZNF37B        | 1,58  | 2,97  | 1,31  | 1,91  | 2,29E-06  | 7,91E-05 |
| SCUBE1        | 0,13  | 1,01  | 0,48  | 1,14  | 2,387E-06 | 8,24E-05 |
| C19orf70      | 5,49  | 6,15  | 6,27  | 6,53  | 2,395E-06 | 8,25E-05 |
| ITM2C         | 3,70  | 2,01  | 2,67  | 0,65  | 2,447E-06 | 8,41E-05 |
| EMILIN2       | 5,09  | 5,59  | 5,82  | 6,14  | 2,448E-06 | 8,41E-05 |
| GMFG          | 8,58  | 8,93  | 8,55  | 8,92  | 2,47E-06  | 8,47E-05 |
| SLC7A7        | 4,98  | 3,26  | 5,53  | 6,66  | 2,489E-06 | 8,52E-05 |
| UBL5          | 7,58  | 8,27  | 7,99  | 8,54  | 2,514E-06 | 8,6E-05  |
| UNC93B1       | 2,83  | 3,86  | 4,09  | 5,31  | 2,556E-06 | 8,72E-05 |
| PITX1         | 0,29  | 0,48  | 0,47  | 0,68  | 2,558E-06 | 8,72E-05 |
| BTNL8         | 0,21  | 0,25  | 0,40  | 0,52  | 2,627E-06 | 8,94E-05 |
| RP11-42O15.3  | 0,49  | 0,00  | 1,36  | 1,99  | 2,634E-06 | 8,95E-05 |
| PTPN2         | 7,59  | 7,20  | 6,79  | 6,14  | 2,658E-06 | 9,01E-05 |

|                |       |       |       |       |           |          |
|----------------|-------|-------|-------|-------|-----------|----------|
| PPIAL4G        | 0,64  | 2,03  | 0,72  | 0,99  | 2,662E-06 | 9,01E-05 |
| TRERF1         | 2,81  | 2,36  | 1,84  | 1,32  | 2,665E-06 | 9,01E-05 |
| ZIM3           | 0,03  | 0,28  | 0,05  | 0,09  | 2,678E-06 | 9,04E-05 |
| RP11-1112C15.1 | 0,13  | 0,16  | 0,07  | 0,18  | 2,68E-06  | 9,04E-05 |
| NDUFA13        | 7,32  | 7,99  | 7,77  | 8,09  | 2,762E-06 | 9,3E-05  |
| SPNS1          | 4,93  | 6,28  | 6,01  | 6,47  | 2,857E-06 | 9,61E-05 |
| RNU2-1         | 6,37  | 6,22  | 7,44  | 7,79  | 2,875E-06 | 9,65E-05 |
| RP11-203J24.8  | 0,00  | 3,02  | 0,33  | 0,41  | 2,911E-06 | 9,76E-05 |
| UBE2N          | 6,46  | 6,39  | 5,77  | 3,53  | 2,915E-06 | 9,76E-05 |
| MARCKS         | 4,17  | 4,17  | 4,39  | 5,30  | 2,924E-06 | 9,77E-05 |
| SLC25A5        | 9,42  | 9,36  | 8,69  | 7,08  | 2,927E-06 | 9,77E-05 |
| TIGD5          | 0,08  | 0,05  | 0,25  | 0,22  | 2,931E-06 | 9,77E-05 |
| TBCD           | 4,92  | 4,52  | 5,64  | 7,06  | 2,945E-06 | 9,8E-05  |
| DOCK6          | 0,10  | 2,75  | 1,04  | 0,34  | 2,954E-06 | 9,8E-05  |
| TRIM56         | 2,22  | 1,48  | 2,63  | 3,38  | 2,955E-06 | 9,8E-05  |
| DMBX1          | 0,14  | 0,33  | 0,18  | 0,08  | 2,992E-06 | 9,91E-05 |
| ZNF787         | 0,24  | 1,73  | 0,83  | 0,61  | 3,013E-06 | 9,96E-05 |
| RP11-573M3.2   | 0,00  | 3,75  | 0,00  | 2,14  | 3,022E-06 | 9,98E-05 |
| AKNAD1         | 0,00  | 0,15  | 0,00  | 0,00  | 3,053E-06 | 0,000101 |
| WWC2           | 0,02  | 0,81  | 1,37  | 0,35  | 3,148E-06 | 0,000104 |
| RP11-1078H9.6  | 0,00  | 0,20  | 0,11  | 0,13  | 3,18E-06  | 0,000105 |
| RF00017        | 9,36  | 10,14 | 9,91  | 10,03 | 3,185E-06 | 0,000105 |
| DPP4           | 1,90  | 0,48  | 0,03  | 0,29  | 3,209E-06 | 0,000105 |
| PLOD3          | 3,76  | 3,91  | 4,86  | 4,79  | 3,222E-06 | 0,000105 |
| WDR60          | 2,40  | 4,31  | 3,19  | 4,34  | 3,278E-06 | 0,000107 |
| SPIB           | 4,36  | 2,49  | 3,05  | 1,16  | 3,287E-06 | 0,000107 |
| RP11-372E1.6   | 1,09  | 2,41  | 1,58  | 1,67  | 3,296E-06 | 0,000107 |
| RP11-515E23.1  | 0,88  | 1,33  | 1,00  | 1,15  | 3,297E-06 | 0,000107 |
| RP5-857K21.9   | 2,66  | 3,22  | 3,20  | 4,23  | 3,448E-06 | 0,000112 |
| ZNF557         | 1,89  | 2,50  | 2,67  | 3,48  | 3,48E-06  | 0,000113 |
| RP11-326A13.2  | 0,33  | 0,36  | 0,47  | 1,10  | 3,483E-06 | 0,000113 |
| LA16c-4G1.3    | 1,43  | 3,02  | 1,72  | 1,79  | 3,524E-06 | 0,000114 |
| C14orf132      | 0,02  | 0,04  | 0,02  | 0,03  | 3,538E-06 | 0,000114 |
| DMBT1P1        | 0,02  | 0,36  | 0,05  | 0,36  | 3,576E-06 | 0,000115 |
| HLA-B          | 9,59  | 10,22 | 10,18 | 10,56 | 3,58E-06  | 0,000115 |
| DEAF1          | 3,23  | 6,00  | 4,30  | 4,63  | 3,606E-06 | 0,000116 |
| MT-ND6         | 10,20 | 10,61 | 10,54 | 10,97 | 3,612E-06 | 0,000116 |
| RHD            | 0,37  | 0,49  | 0,49  | 1,68  | 3,637E-06 | 0,000117 |
| RP11-118G23.3  | 1,07  | 0,33  | 0,84  | 0,49  | 3,641E-06 | 0,000117 |
| SRRM2          | 4,86  | 6,59  | 5,97  | 6,63  | 3,647E-06 | 0,000117 |
| CNN2           | 7,24  | 6,46  | 6,35  | 4,66  | 3,669E-06 | 0,000117 |
| TRAC           | 1,25  | 5,65  | 0,62  | 0,93  | 3,795E-06 | 0,000121 |
| AC003665.1     | 0,17  | 0,31  | 0,20  | 1,33  | 3,853E-06 | 0,000123 |
| PRR16          | 0,00  | 0,08  | 0,00  | 0,10  | 3,861E-06 | 0,000123 |
| PTGDR          | 0,00  | 0,00  | 0,00  | 0,30  | 3,885E-06 | 0,000123 |
| RP11-552F3.12  | 0,14  | 0,00  | 0,45  | 0,19  | 3,895E-06 | 0,000123 |
| HLA-A          | 7,87  | 8,31  | 8,34  | 8,66  | 3,93E-06  | 0,000124 |
| RP1-217P22.2   | 0,19  | 0,30  | 0,20  | 0,88  | 4,03E-06  | 0,000127 |
| RPL36A         | 8,77  | 9,35  | 9,30  | 9,78  | 4,033E-06 | 0,000127 |
| RNU1-28P       | 4,01  | 5,06  | 5,16  | 5,99  | 4,124E-06 | 0,00013  |
| MAST2          | 1,56  | 3,55  | 1,81  | 2,25  | 4,134E-06 | 0,00013  |
| NEAT1          | 5,12  | 5,42  | 6,05  | 6,03  | 4,173E-06 | 0,00013  |
| RNU1-1         | 4,01  | 5,06  | 5,16  | 5,99  | 4,181E-06 | 0,00013  |
| RNU1-2         | 4,01  | 5,06  | 5,16  | 5,99  | 4,181E-06 | 0,00013  |
| RNU1-27P       | 4,01  | 5,06  | 5,16  | 5,99  | 4,181E-06 | 0,00013  |

|               |       |       |       |       |           |          |
|---------------|-------|-------|-------|-------|-----------|----------|
| RNU1-3        | 4,01  | 5,06  | 5,16  | 5,99  | 4,181E-06 | 0,00013  |
| RNU1-4        | 4,01  | 5,06  | 5,16  | 5,99  | 4,181E-06 | 0,00013  |
| RNVU1-18      | 4,01  | 5,06  | 5,16  | 5,99  | 4,181E-06 | 0,00013  |
| NOSTRIN       | 0,14  | 1,28  | 0,14  | 0,44  | 4,227E-06 | 0,000132 |
| CTD-2313J23.1 | 0,48  | 1,71  | 0,59  | 0,95  | 4,235E-06 | 0,000132 |
| KCNJ3         | 0,29  | 0,70  | 0,41  | 0,52  | 4,258E-06 | 0,000132 |
| SEC31A        | 6,27  | 4,43  | 5,31  | 5,90  | 4,266E-06 | 0,000132 |
| RP4-726N20.2  | 0,67  | 0,18  | 0,19  | 1,63  | 4,375E-06 | 0,000135 |
| CCL3          | 6,67  | 8,53  | 7,63  | 8,53  | 4,43E-06  | 0,000137 |
| PNPLA1        | 0,05  | 0,00  | 0,00  | 0,46  | 4,462E-06 | 0,000138 |
| CHST12        | 3,39  | 2,30  | 2,33  | 0,92  | 4,47E-06  | 0,000138 |
| MIR193BHG     | 0,61  | 2,01  | 0,86  | 1,17  | 4,535E-06 | 0,00014  |
| ARHGDI4       | 4,36  | 6,12  | 5,69  | 6,44  | 4,554E-06 | 0,00014  |
| MAPRE1        | 5,77  | 2,82  | 4,84  | 4,58  | 4,599E-06 | 0,000141 |
| PDP2          | 0,25  | 0,50  | 0,83  | 0,75  | 4,6E-06   | 0,000141 |
| RP5-1125A11.1 | 0,76  | 0,52  | 0,99  | 1,97  | 4,662E-06 | 0,000143 |
| IGLV2-14      | 0,71  | 4,27  | 0,00  | 0,00  | 4,704E-06 | 0,000144 |
| THEM4         | 4,41  | 3,26  | 2,55  | 1,55  | 4,718E-06 | 0,000144 |
| SERF2         | 9,23  | 9,67  | 9,67  | 10,05 | 4,73E-06  | 0,000144 |
| LLNLF-96A1.1  | 10,50 | 11,05 | 11,17 | 12,89 | 4,842E-06 | 0,000147 |
| ARHGAP44      | 0,11  | 1,32  | 0,12  | 0,13  | 4,902E-06 | 0,000149 |
| ANAPC11       | 6,84  | 7,62  | 7,40  | 7,97  | 4,955E-06 | 0,00015  |
| CD300E        | 3,73  | 3,31  | 4,52  | 5,37  | 4,989E-06 | 0,000151 |
| PRKACA        | 1,74  | 3,17  | 3,57  | 3,30  | 5,041E-06 | 0,000153 |
| MDGA1         | 0,00  | 0,37  | 0,00  | 0,01  | 5,057E-06 | 0,000153 |
| TMEM144       | 2,49  | 0,46  | 1,75  | 4,22  | 5,101E-06 | 0,000154 |
| TMEM120A      | 4,18  | 5,31  | 4,87  | 5,72  | 5,109E-06 | 0,000154 |
| RP1-283E3.8   | 0,46  | 0,51  | 1,11  | 1,39  | 5,112E-06 | 0,000154 |
| DAPP1         | 6,86  | 5,46  | 5,63  | 4,71  | 5,18E-06  | 0,000156 |
| EFHD2         | 4,81  | 4,98  | 5,49  | 5,43  | 5,252E-06 | 0,000158 |
| ELMO1         | 7,56  | 5,89  | 6,75  | 6,39  | 5,269E-06 | 0,000158 |
| RP11-362F19.2 | 0,07  | 0,14  | 0,11  | 1,57  | 5,275E-06 | 0,000158 |
| TSHR          | 1,55  | 3,81  | 1,55  | 2,33  | 5,28E-06  | 0,000158 |
| RAB3GAP2      | 3,84  | 3,05  | 2,65  | 3,12  | 5,29E-06  | 0,000158 |
| RPS8          | 8,86  | 9,37  | 9,33  | 9,39  | 5,299E-06 | 0,000158 |
| RP11-213H15.3 | 0,31  | 0,32  | 1,68  | 2,07  | 5,299E-06 | 0,000158 |
| ZDHHHC18      | 2,86  | 4,00  | 2,41  | 1,76  | 5,304E-06 | 0,000158 |
| RPL41         | 11,45 | 11,95 | 11,78 | 12,01 | 5,306E-06 | 0,000158 |
| GAK           | 5,04  | 6,45  | 6,14  | 6,60  | 5,329E-06 | 0,000158 |
| MYO6          | 0,10  | 0,29  | 0,10  | 0,11  | 5,406E-06 | 0,00016  |
| RNF113A       | 4,83  | 0,78  | 4,64  | 3,32  | 5,48E-06  | 0,000162 |
| SYNPO2L       | 0,31  | 0,47  | 0,32  | 0,46  | 5,575E-06 | 0,000164 |
| RP1-59D14.9   | 5,17  | 5,85  | 5,64  | 5,57  | 5,576E-06 | 0,000164 |
| RP11-118A1.2  | 5,17  | 5,85  | 5,64  | 5,57  | 5,576E-06 | 0,000164 |
| RP11-294N21.2 | 5,17  | 5,85  | 5,64  | 5,57  | 5,576E-06 | 0,000164 |
| AP000437.3    | 0,37  | 1,50  | 1,08  | 0,80  | 5,66E-06  | 0,000166 |
| LPIN3         | 0,30  | 0,86  | 0,57  | 1,08  | 5,665E-06 | 0,000166 |
| CCDC64        | 0,59  | 0,68  | 0,77  | 1,20  | 5,676E-06 | 0,000166 |
| CDK5R1        | 0,00  | 0,57  | 0,00  | 0,15  | 5,676E-06 | 0,000166 |
| KLRD1         | 1,21  | 1,93  | 1,05  | 1,82  | 5,684E-06 | 0,000166 |
| B3GAT2        | 0,17  | 0,44  | 0,13  | 0,41  | 5,706E-06 | 0,000167 |
| KCNQ1OT1      | 1,13  | 1,63  | 1,16  | 1,38  | 5,721E-06 | 0,000167 |
| ATP5E         | 4,71  | 5,18  | 5,06  | 5,66  | 5,764E-06 | 0,000168 |
| ADCY2         | 0,47  | 0,74  | 0,95  | 1,51  | 5,853E-06 | 0,00017  |
| RPUSD4        | 3,25  | 4,01  | 3,17  | 5,32  | 5,924E-06 | 0,000172 |

|               |       |       |       |      |           |          |
|---------------|-------|-------|-------|------|-----------|----------|
| CHST3         | 0,03  | 0,72  | 0,06  | 0,29 | 5,926E-06 | 0,000172 |
| TUBB3         | 0,00  | 1,54  | 0,28  | 1,11 | 5,933E-06 | 0,000172 |
| LMX1B         | 0,08  | 0,24  | 0,07  | 0,07 | 5,934E-06 | 0,000172 |
| GRIN2B        | 0,01  | 0,00  | 0,01  | 0,05 | 5,941E-06 | 0,000172 |
| USP7          | 4,57  | 5,54  | 4,69  | 4,12 | 6,006E-06 | 0,000173 |
| DAPK2         | 0,79  | 1,35  | 1,20  | 1,76 | 6,021E-06 | 0,000174 |
| RP11-375O18.2 | 0,37  | 0,53  | 0,69  | 0,79 | 6,069E-06 | 0,000175 |
| C5orf28       | 2,78  | 1,85  | 1,31  | 0,65 | 6,207E-06 | 0,000178 |
| TINCR         | 0,12  | 1,69  | 1,18  | 2,39 | 6,28E-06  | 0,00018  |
| OTOA          | 0,20  | 0,26  | 0,36  | 0,67 | 6,331E-06 | 0,000182 |
| NDST3         | 0,03  | 0,27  | 0,04  | 0,07 | 6,342E-06 | 0,000182 |
| FAM169B       | 0,11  | 0,27  | 0,85  | 0,21 | 6,371E-06 | 0,000182 |
| FBN1          | 0,01  | 0,30  | 0,05  | 0,01 | 6,509E-06 | 0,000186 |
| CDC42SE2      | 6,77  | 6,41  | 5,98  | 5,63 | 6,592E-06 | 0,000188 |
| CD1E          | 6,10  | 2,52  | 5,25  | 0,94 | 6,612E-06 | 0,000188 |
| RP1-78B3.1    | 0,38  | 0,49  | 0,43  | 0,66 | 6,697E-06 | 0,000191 |
| NLRP12        | 0,87  | 3,63  | 2,58  | 3,70 | 6,71E-06  | 0,000191 |
| CHCHD3        | 5,56  | 2,49  | 4,67  | 3,34 | 6,737E-06 | 0,000191 |
| GS1-122H1.2   | 0,16  | 1,47  | 0,22  | 0,30 | 6,743E-06 | 0,000191 |
| RP11-725C19.1 | 0,19  | 0,13  | 0,17  | 2,16 | 6,804E-06 | 0,000193 |
| AKT2          | 1,85  | 2,37  | 2,19  | 2,12 | 6,989E-06 | 0,000198 |
| IGHM          | 0,87  | 6,31  | 1,44  | 1,90 | 7,014E-06 | 0,000198 |
| NHLRC2        | 2,14  | 1,40  | 1,01  | 1,35 | 7,049E-06 | 0,000199 |
| RN7SL431P     | 0,00  | 2,28  | 0,00  | 0,72 | 7,073E-06 | 0,000199 |
| WDR70         | 4,78  | 3,99  | 4,74  | 5,09 | 7,139E-06 | 0,000201 |
| ESR2          | 0,17  | 0,85  | 0,20  | 0,33 | 7,159E-06 | 0,000201 |
| ARHGAP4       | 4,76  | 4,71  | 5,69  | 6,34 | 7,286E-06 | 0,000204 |
| TRIM58        | 0,27  | 2,31  | 0,26  | 0,51 | 7,308E-06 | 0,000205 |
| RP3-412A9.17  | 0,61  | 1,01  | 0,72  | 1,07 | 7,331E-06 | 0,000205 |
| CTB-50L17.10  | 0,76  | 2,63  | 0,81  | 1,94 | 7,337E-06 | 0,000205 |
| ATP2A3        | 2,56  | 4,30  | 1,75  | 2,03 | 7,388E-06 | 0,000206 |
| ADAM15        | 3,76  | 5,91  | 5,49  | 5,97 | 7,401E-06 | 0,000206 |
| RAB5A         | 5,64  | 1,38  | 4,21  | 2,43 | 7,403E-06 | 0,000206 |
| NOG           | 0,59  | 1,16  | 0,86  | 1,41 | 7,411E-06 | 0,000206 |
| PIPOX         | 1,57  | 0,63  | 0,88  | 0,12 | 7,516E-06 | 0,000209 |
| DUSP1         | 8,87  | 9,21  | 9,38  | 9,06 | 7,541E-06 | 0,000209 |
| RP11-392O17.1 | 1,30  | 1,58  | 2,03  | 2,50 | 7,562E-06 | 0,00021  |
| LAMB4         | 0,10  | 1,05  | 0,21  | 0,16 | 7,675E-06 | 0,000212 |
| PTPRG         | 0,03  | 0,68  | 0,10  | 0,12 | 7,698E-06 | 0,000213 |
| TMEM212       | 2,42  | 3,71  | 2,61  | 3,74 | 7,701E-06 | 0,000213 |
| SSPN          | 0,06  | 0,03  | 0,00  | 0,03 | 7,712E-06 | 0,000213 |
| CTC-242N15.1  | 2,39  | 3,48  | 2,91  | 3,09 | 7,722E-06 | 0,000213 |
| CTB-12A17.2   | 0,40  | 0,56  | 0,38  | 2,12 | 7,865E-06 | 0,000216 |
| HDHD2         | 4,04  | 1,00  | 2,90  | 0,31 | 7,881E-06 | 0,000217 |
| ARHGAP5       | 4,97  | 3,99  | 4,05  | 2,00 | 7,907E-06 | 0,000217 |
| FCER1A        | 11,32 | 10,47 | 10,81 | 8,79 | 7,988E-06 | 0,000219 |
| CTD-2246P4.1  | 0,44  | 0,67  | 0,50  | 1,74 | 8,007E-06 | 0,000219 |
| LSM7          | 6,72  | 7,59  | 7,26  | 7,50 | 8,161E-06 | 0,000223 |
| PLXNC1        | 5,66  | 5,47  | 4,73  | 3,95 | 8,207E-06 | 0,000224 |
| RPL35         | 8,95  | 9,59  | 9,52  | 9,89 | 8,264E-06 | 0,000225 |
| SLCO1A2       | 0,13  | 1,85  | 0,18  | 0,18 | 8,296E-06 | 0,000226 |
| RN7SL388P     | 0,00  | 0,76  | 1,86  | 2,50 | 8,336E-06 | 0,000227 |
| TRIM45        | 0,11  | 0,28  | 0,32  | 0,11 | 8,341E-06 | 0,000227 |
| NDUFB1        | 6,24  | 6,77  | 6,94  | 7,45 | 8,465E-06 | 0,00023  |
| SNX3          | 7,78  | 7,02  | 6,93  | 6,54 | 8,49E-06  | 0,00023  |

|               |       |      |      |       |           |          |
|---------------|-------|------|------|-------|-----------|----------|
| VENTX         | 2,36  | 2,32 | 3,18 | 4,12  | 8,568E-06 | 0,000232 |
| RP11-113I24.1 | 1,77  | 2,49 | 2,29 | 2,70  | 8,741E-06 | 0,000236 |
| LSP1          | 8,66  | 7,35 | 7,93 | 6,74  | 8,787E-06 | 0,000237 |
| RP11-189E14.3 | 0,00  | 0,34 | 0,00 | 0,39  | 8,851E-06 | 0,000239 |
| PRKCQ         | 0,00  | 0,73 | 0,00 | 1,27  | 8,905E-06 | 0,00024  |
| CYP8B1        | 0,02  | 0,17 | 0,04 | 0,07  | 9,001E-06 | 0,000242 |
| ACAP3         | 0,70  | 0,96 | 1,73 | 2,42  | 9,032E-06 | 0,000243 |
| ZNF486        | 0,65  | 2,42 | 0,57 | 0,82  | 9,111E-06 | 0,000245 |
| CYP2E1        | 3,44  | 0,19 | 0,35 | 0,25  | 9,205E-06 | 0,000247 |
| PIK3R1        | 4,66  | 4,12 | 4,54 | 4,72  | 9,226E-06 | 0,000247 |
| AC112229.4    | 0,00  | 0,00 | 0,00 | 0,18  | 9,342E-06 | 0,00025  |
| COX8A         | 8,27  | 8,76 | 8,74 | 9,01  | 9,348E-06 | 0,00025  |
| PXYLP1        | 1,08  | 1,04 | 1,36 | 1,54  | 9,379E-06 | 0,00025  |
| CAPN15        | 1,49  | 3,43 | 2,40 | 2,05  | 9,486E-06 | 0,000253 |
| APC2          | 0,00  | 0,67 | 0,06 | 0,06  | 9,493E-06 | 0,000253 |
| IER3          | 1,86  | 6,29 | 4,26 | 5,83  | 9,555E-06 | 0,000254 |
| RP11-429E11.3 | 0,08  | 1,26 | 0,10 | 0,15  | 9,56E-06  | 0,000254 |
| ZSWIM8-AS1    | 2,29  | 0,00 | 0,00 | 0,00  | 9,584E-06 | 0,000254 |
| SLC27A3       | 4,13  | 3,48 | 5,58 | 6,07  | 9,601E-06 | 0,000254 |
| DNASE2        | 0,37  | 1,07 | 0,66 | 2,67  | 9,751E-06 | 0,000258 |
| FFAR2         | 1,61  | 2,59 | 2,23 | 3,55  | 9,779E-06 | 0,000258 |
| B3GNT6        | 0,00  | 0,20 | 0,00 | 0,10  | 1,008E-05 | 0,000266 |
| SMYD5         | 0,58  | 1,78 | 0,71 | 2,51  | 1,02E-05  | 0,000269 |
| C14orf145     | 3,98  | 2,76 | 2,47 | 0,64  | 1,026E-05 | 0,00027  |
| PTK2B         | 4,04  | 5,38 | 4,33 | 3,93  | 1,055E-05 | 0,000278 |
| TTC16         | 0,27  | 0,38 | 0,32 | 0,58  | 1,061E-05 | 0,000278 |
| ABCC13        | 0,10  | 0,52 | 0,19 | 0,18  | 1,061E-05 | 0,000278 |
| MT-TK         | 4,41  | 5,69 | 4,69 | 6,76  | 1,063E-05 | 0,000278 |
| CYP3A5        | 1,67  | 2,51 | 1,92 | 2,46  | 1,069E-05 | 0,00028  |
| PTCH2         | 1,54  | 2,03 | 2,24 | 2,83  | 1,074E-05 | 0,000281 |
| A1BG          | 4,04  | 5,43 | 5,25 | 6,08  | 1,075E-05 | 0,000281 |
| ZER1          | 1,47  | 1,95 | 1,48 | 0,73  | 1,085E-05 | 0,000283 |
| RAVER2        | 3,00  | 0,30 | 1,29 | 0,13  | 1,092E-05 | 0,000284 |
| GPR137C       | 0,84  | 3,48 | 0,85 | 1,29  | 1,094E-05 | 0,000285 |
| OR2V1         | 0,02  | 1,66 | 0,45 | 0,38  | 1,098E-05 | 0,000286 |
| KALRN         | 0,62  | 0,03 | 0,69 | 0,86  | 1,108E-05 | 0,000288 |
| RP11-389C8.2  | 4,12  | 1,82 | 1,01 | 0,10  | 1,111E-05 | 0,000288 |
| PRAM1         | 4,51  | 4,67 | 5,57 | 5,85  | 1,115E-05 | 0,000289 |
| MRPL43        | 6,23  | 1,63 | 5,89 | 5,81  | 1,127E-05 | 0,000291 |
| ZFAND3        | 2,64  | 0,18 | 3,46 | 2,97  | 1,127E-05 | 0,000291 |
| MTMR1         | 3,56  | 2,97 | 2,42 | 2,70  | 1,133E-05 | 0,000292 |
| CCDC6         | 5,25  | 1,16 | 4,35 | 3,72  | 1,133E-05 | 0,000292 |
| RPS12         | 9,52  | 9,93 | 9,78 | 10,32 | 1,139E-05 | 0,000293 |
| ADNP          | 5,83  | 3,17 | 4,74 | 2,84  | 1,147E-05 | 0,000295 |
| MNT           | 1,64  | 2,27 | 2,89 | 2,20  | 1,153E-05 | 0,000296 |
| DMXL2         | 2,41  | 4,28 | 4,27 | 5,06  | 1,166E-05 | 0,000299 |
| JUND          | 3,74  | 5,15 | 5,12 | 5,95  | 1,197E-05 | 0,000307 |
| C14orf2       | 7,52  | 8,12 | 7,74 | 8,33  | 1,201E-05 | 0,000307 |
| TPI1          | 10,05 | 9,36 | 9,52 | 8,21  | 1,225E-05 | 0,000313 |
| CTD-2369P2.4  | 0,00  | 1,68 | 0,26 | 3,36  | 1,236E-05 | 0,000316 |
| CTB-127C13.1  | 1,72  | 0,85 | 1,45 | 1,85  | 1,262E-05 | 0,000322 |
| OR5AS1        | 1,76  | 2,97 | 2,03 | 2,44  | 1,281E-05 | 0,000326 |
| LGALS9        | 7,57  | 5,61 | 6,99 | 5,95  | 1,288E-05 | 0,000328 |
| OGFR          | 1,09  | 2,11 | 2,13 | 3,41  | 1,31E-05  | 0,000333 |
| CTD-2081K17.2 | 0,32  | 1,63 | 0,76 | 0,40  | 1,311E-05 | 0,000333 |

|               |       |       |       |       |           |          |
|---------------|-------|-------|-------|-------|-----------|----------|
| S100A4        | 11,44 | 11,82 | 11,96 | 12,03 | 1,327E-05 | 0,000337 |
| AL035610.2    | 1,88  | 2,89  | 2,36  | 3,12  | 1,336E-05 | 0,000339 |
| TNIP3         | 0,32  | 0,58  | 0,30  | 0,48  | 1,345E-05 | 0,00034  |
| HAVCR2        | 6,41  | 5,02  | 5,78  | 4,27  | 1,348E-05 | 0,000341 |
| FCGR1B        | 0,50  | 0,00  | 0,32  | 3,54  | 1,372E-05 | 0,000346 |
| IKZF1         | 5,92  | 6,03  | 5,35  | 4,90  | 1,391E-05 | 0,000351 |
| EIF3M         | 8,58  | 6,83  | 7,88  | 6,98  | 1,409E-05 | 0,000355 |
| RUSC2         | 0,00  | 0,07  | 0,00  | 1,31  | 1,422E-05 | 0,000358 |
| LINC01272     | 1,66  | 0,75  | 2,14  | 4,49  | 1,434E-05 | 0,00036  |
| TGM5          | 0,12  | 1,39  | 0,27  | 0,32  | 1,446E-05 | 0,000363 |
| FAM83F        | 0,22  | 0,39  | 0,47  | 0,68  | 1,448E-05 | 0,000363 |
| FAM228B       | 4,04  | 4,71  | 4,24  | 4,20  | 1,456E-05 | 0,000365 |
| BRK1          | 8,37  | 7,48  | 7,79  | 6,58  | 1,478E-05 | 0,00037  |
| PTCHD4        | 0,21  | 0,05  | 0,41  | 1,57  | 1,481E-05 | 0,00037  |
| RP11-7209.4   | 2,21  | 2,94  | 3,67  | 4,73  | 1,488E-05 | 0,000372 |
| NDUFA7        | 6,12  | 7,03  | 6,56  | 7,14  | 1,498E-05 | 0,000374 |
| YWHAZ         | 8,46  | 7,60  | 7,92  | 7,04  | 1,507E-05 | 0,000376 |
| YPEL3         | 5,30  | 6,74  | 6,23  | 7,04  | 1,53E-05  | 0,000381 |
| TRMT112       | 7,34  | 7,76  | 7,48  | 7,85  | 1,533E-05 | 0,000381 |
| TCIRG1        | 6,86  | 8,14  | 7,49  | 8,19  | 1,536E-05 | 0,000382 |
| FAM131A       | 0,32  | 3,47  | 0,80  | 0,68  | 1,538E-05 | 0,000382 |
| FTHL11        | 0,43  | 0,00  | 0,00  | 0,84  | 1,547E-05 | 0,000383 |
| LRP6          | 0,00  | 0,00  | 0,07  | 0,18  | 1,568E-05 | 0,000388 |
| PEA15         | 5,68  | 4,16  | 5,50  | 4,84  | 1,576E-05 | 0,00039  |
| PPIP5K2       | 5,71  | 3,71  | 5,16  | 3,81  | 1,578E-05 | 0,00039  |
| GPRC5A        | 0,38  | 0,52  | 0,55  | 0,87  | 1,587E-05 | 0,000392 |
| MORC4         | 2,17  | 3,74  | 2,64  | 2,54  | 1,59E-05  | 0,000392 |
| RP11-484D2.2  | 0,68  | 1,49  | 1,05  | 1,40  | 1,604E-05 | 0,000395 |
| ARF6          | 5,87  | 3,44  | 4,98  | 4,49  | 1,611E-05 | 0,000396 |
| RP11-360A9.2  | 0,21  | 0,62  | 0,45  | 0,10  | 1,612E-05 | 0,000396 |
| CISD3         | 3,70  | 5,46  | 4,43  | 5,28  | 1,623E-05 | 0,000398 |
| RP11-579O24.3 | 1,00  | 1,20  | 1,52  | 2,44  | 1,635E-05 | 0,000401 |
| EIF2B1        | 5,61  | 3,75  | 4,55  | 2,83  | 1,641E-05 | 0,000402 |
| AC073055.2    | 0,07  | 0,17  | 0,18  | 0,17  | 1,65E-05  | 0,000404 |
| CDK2AP2       | 6,76  | 6,63  | 6,21  | 5,00  | 1,655E-05 | 0,000404 |
| AC003102.3    | 0,57  | 1,98  | 0,64  | 0,66  | 1,658E-05 | 0,000405 |
| C17orf89      | 4,93  | 5,33  | 5,98  | 5,64  | 1,664E-05 | 0,000405 |
| TTN           | 0,67  | 2,63  | 0,50  | 2,41  | 1,666E-05 | 0,000405 |
| ATG16L2       | 5,92  | 6,07  | 6,55  | 7,45  | 1,674E-05 | 0,000407 |
| XPO1          | 5,77  | 4,09  | 5,20  | 5,57  | 1,676E-05 | 0,000407 |
| CCDC162P      | 0,61  | 0,62  | 0,32  | 2,41  | 1,686E-05 | 0,000409 |
| ALDH18A1      | 1,75  | 0,23  | 0,15  | 0,04  | 1,688E-05 | 0,000409 |
| MAPK10        | 3,24  | 4,50  | 3,31  | 3,56  | 1,694E-05 | 0,00041  |
| RP11-473M20.5 | 0,03  | 0,27  | 0,05  | 0,05  | 1,712E-05 | 0,000414 |
| PYGO1         | 0,04  | 0,26  | 0,03  | 0,12  | 1,732E-05 | 0,000418 |
| PABPC1        | 11,11 | 10,48 | 10,59 | 10,18 | 1,763E-05 | 0,000426 |
| SAFB2         | 4,41  | 5,81  | 4,96  | 5,25  | 1,794E-05 | 0,000432 |
| CARD19        | 5,52  | 4,46  | 6,79  | 6,58  | 1,809E-05 | 0,000435 |
| KIF6          | 0,64  | 1,46  | 1,22  | 2,16  | 1,811E-05 | 0,000435 |
| CTH           | 0,84  | 3,46  | 0,94  | 2,57  | 1,815E-05 | 0,000436 |
| LILRA6        | 2,13  | 0,90  | 2,92  | 3,64  | 1,822E-05 | 0,000437 |
| PMPCB         | 5,61  | 1,71  | 5,05  | 3,62  | 1,825E-05 | 0,000437 |
| C19orf24      | 4,64  | 6,23  | 5,81  | 6,21  | 1,84E-05  | 0,000441 |
| FAM57B        | 0,48  | 0,24  | 0,53  | 1,39  | 1,852E-05 | 0,000443 |
| RP11-366K18.3 | 0,63  | 2,51  | 0,97  | 1,83  | 1,858E-05 | 0,000444 |

|                 |       |       |       |       |           |          |
|-----------------|-------|-------|-------|-------|-----------|----------|
| LGALS1          | 10,18 | 10,76 | 10,72 | 10,73 | 1,859E-05 | 0,000444 |
| GJD2            | 0,18  | 0,39  | 0,32  | 0,51  | 1,861E-05 | 0,000444 |
| RHOC            | 7,21  | 5,04  | 6,52  | 6,07  | 1,862E-05 | 0,000444 |
| SGSM1           | 0,07  | 0,43  | 0,17  | 0,19  | 1,871E-05 | 0,000445 |
| TRAPPC5         | 7,34  | 7,98  | 7,77  | 7,68  | 1,878E-05 | 0,000446 |
| CCDC149         | 0,16  | 0,21  | 1,05  | 3,46  | 1,909E-05 | 0,000453 |
| RP11-458K10.3   | 0,00  | 0,76  | 0,00  | 0,23  | 1,919E-05 | 0,000455 |
| THUMPD1         | 5,50  | 5,61  | 4,54  | 3,47  | 1,924E-05 | 0,000456 |
| TMTC1           | 0,08  | 0,65  | 0,06  | 1,22  | 1,946E-05 | 0,000461 |
| RP11-315A17.1   | 0,00  | 1,77  | 0,35  | 0,00  | 1,954E-05 | 0,000462 |
| RP11-154D6.2    | 1,30  | 2,05  | 1,38  | 2,11  | 2,003E-05 | 0,000473 |
| AP1S2           | 8,48  | 7,23  | 7,55  | 7,26  | 2,021E-05 | 0,000477 |
| RP11-75C9.1     | 0,38  | 0,44  | 0,34  | 0,47  | 2,024E-05 | 0,000477 |
| KIFC3           | 3,33  | 4,07  | 3,60  | 5,06  | 2,03E-05  | 0,000478 |
| RP11-344B2.3    | 0,00  | 2,02  | 0,37  | 0,39  | 2,039E-05 | 0,00048  |
| FO XK1          | 1,03  | 1,12  | 1,29  | 2,84  | 2,061E-05 | 0,000484 |
| ZNF395          | 1,96  | 3,08  | 2,69  | 4,15  | 2,067E-05 | 0,000485 |
| AP003068.9      | 3,26  | 5,11  | 5,07  | 5,79  | 2,073E-05 | 0,000486 |
| PGGT1B          | 4,78  | 3,43  | 3,06  | 1,60  | 2,088E-05 | 0,000489 |
| ATP5F1          | 9,22  | 8,34  | 8,28  | 7,30  | 2,106E-05 | 0,000492 |
| XRCC3           | 0,00  | 2,77  | 0,12  | 0,27  | 2,108E-05 | 0,000492 |
| RP11-374N7.2    | 2,22  | 4,13  | 2,57  | 2,66  | 2,108E-05 | 0,000492 |
| LL22NC03-86G7.1 | 0,40  | 1,32  | 0,44  | 0,33  | 2,126E-05 | 0,000496 |
| RP11-1018N14.5  | 1,32  | 3,35  | 1,38  | 3,04  | 2,128E-05 | 0,000496 |
| VCL             | 5,39  | 4,47  | 4,42  | 3,62  | 2,13E-05  | 0,000496 |
| RP1-6209.3      | 0,45  | 0,74  | 0,92  | 1,02  | 2,135E-05 | 0,000496 |
| DENND3          | 4,61  | 3,16  | 5,38  | 4,99  | 2,14E-05  | 0,000496 |
| RP11-285A1.1    | 0,06  | 0,24  | 0,19  | 0,69  | 2,14E-05  | 0,000496 |
| RP11-153M7.3    | 0,39  | 1,35  | 0,59  | 1,26  | 2,158E-05 | 0,0005   |
| CAPZA1          | 8,31  | 6,75  | 7,53  | 7,32  | 2,16E-05  | 0,0005   |
| CD207           | 3,63  | 0,00  | 0,00  | 0,00  | 2,166E-05 | 0,000501 |
| RNASEK          | 9,36  | 9,32  | 9,86  | 9,41  | 2,205E-05 | 0,000509 |
| SOX2-OT         | 2,98  | 4,45  | 3,55  | 4,51  | 2,215E-05 | 0,000511 |
| NEIL1           | 0,90  | 2,01  | 1,56  | 4,19  | 2,278E-05 | 0,000525 |
| DHRS3           | 5,33  | 3,67  | 3,12  | 0,88  | 2,293E-05 | 0,000528 |
| RP11-523O18.5   | 1,27  | 1,84  | 1,66  | 2,13  | 2,305E-05 | 0,00053  |
| HHIP            | 0,07  | 0,73  | 0,12  | 0,09  | 2,325E-05 | 0,000534 |
| RP11-604N13.1   | 0,72  | 2,37  | 0,94  | 0,89  | 2,334E-05 | 0,000536 |
| MGST3           | 5,65  | 6,50  | 6,13  | 5,89  | 2,359E-05 | 0,000541 |
| FAM184B         | 0,06  | 0,18  | 0,09  | 0,27  | 2,371E-05 | 0,000543 |
| DUSP2           | 5,40  | 7,95  | 7,00  | 4,66  | 2,376E-05 | 0,000544 |
| MCOLN2          | 5,50  | 3,67  | 3,57  | 3,10  | 2,384E-05 | 0,000545 |
| RP11-499E14.1   | 0,40  | 0,00  | 0,12  | 0,30  | 2,392E-05 | 0,000546 |
| RGS1            | 8,74  | 8,09  | 7,71  | 5,45  | 2,422E-05 | 0,000553 |
| HELLPAR         | 1,08  | 2,06  | 1,12  | 1,38  | 2,434E-05 | 0,000555 |
| GOLGA1          | 1,94  | 0,06  | 2,25  | 4,27  | 2,442E-05 | 0,000556 |
| HMGA2           | 0,19  | 0,40  | 0,22  | 0,13  | 2,457E-05 | 0,000558 |
| KIRREL3         | 0,15  | 0,74  | 0,00  | 0,21  | 2,457E-05 | 0,000558 |
| TMRSS13         | 0,20  | 2,25  | 0,05  | 0,07  | 2,484E-05 | 0,000564 |
| SCOC            | 4,51  | 0,28  | 2,44  | 1,46  | 2,508E-05 | 0,000569 |
| RAB3D           | 0,96  | 1,20  | 2,17  | 2,72  | 2,523E-05 | 0,000572 |
| MT-TE           | 7,76  | 10,07 | 8,44  | 9,61  | 2,529E-05 | 0,000572 |
| KLF13           | 5,24  | 5,74  | 6,05  | 6,83  | 2,554E-05 | 0,000577 |
| NAP1L4          | 4,86  | 5,91  | 5,31  | 4,88  | 2,561E-05 | 0,000579 |
| PPP1R37         | 0,20  | 0,33  | 0,26  | 0,64  | 2,579E-05 | 0,000581 |



|               |       |       |       |       |           |          |
|---------------|-------|-------|-------|-------|-----------|----------|
| RP5-940J5.9   | 2,46  | 2,70  | 2,53  | 3,49  | 2,582E-05 | 0,000581 |
| MAPK14        | 4,71  | 2,90  | 4,57  | 4,99  | 2,585E-05 | 0,000581 |
| EPC1          | 6,25  | 6,96  | 5,92  | 4,25  | 2,586E-05 | 0,000581 |
| SLC38A7       | 1,10  | 1,80  | 2,32  | 2,68  | 2,587E-05 | 0,000581 |
| TMEM138       | 4,75  | 5,63  | 4,16  | 5,62  | 2,642E-05 | 0,000593 |
| PLAG1         | 0,21  | 0,27  | 0,29  | 0,64  | 2,695E-05 | 0,000604 |
| RYR2          | 0,00  | 2,25  | 0,00  | 0,02  | 2,728E-05 | 0,000611 |
| CRISPLD2      | 1,28  | 1,13  | 1,33  | 3,07  | 2,73E-05  | 0,000611 |
| TEPP          | 0,00  | 0,22  | 0,05  | 0,00  | 2,794E-05 | 0,000625 |
| RBPJ          | 7,76  | 7,08  | 7,14  | 6,28  | 2,797E-05 | 0,000625 |
| DDX11L9       | 0,00  | 2,27  | 0,00  | 0,31  | 2,838E-05 | 0,000633 |
| RGS18         | 6,26  | 2,93  | 4,73  | 5,30  | 2,871E-05 | 0,00064  |
| NPY1R         | 0,19  | 0,00  | 0,11  | 0,15  | 2,905E-05 | 0,000647 |
| GABRG2        | 1,26  | 2,43  | 1,29  | 1,27  | 2,911E-05 | 0,000648 |
| TPRXL         | 2,10  | 4,56  | 2,27  | 4,66  | 2,923E-05 | 0,00065  |
| AC022311.1    | 0,06  | 2,48  | 0,00  | 0,42  | 2,936E-05 | 0,000651 |
| CSF2RA        | 8,28  | 6,75  | 7,76  | 6,78  | 2,936E-05 | 0,000651 |
| AP000281.1    | 0,78  | 1,35  | 0,85  | 1,13  | 2,941E-05 | 0,000652 |
| PLEC          | 2,34  | 3,03  | 3,10  | 3,34  | 2,946E-05 | 0,000652 |
| TGIF1         | 6,97  | 6,76  | 6,13  | 5,26  | 2,988E-05 | 0,000661 |
| RP11-813C7.1  | 0,00  | 0,25  | 0,00  | 0,16  | 3,006E-05 | 0,000664 |
| RP11-325O24.5 | 0,42  | 0,78  | 0,53  | 1,22  | 3,042E-05 | 0,000671 |
| EDEM1         | 5,30  | 4,97  | 4,64  | 3,08  | 3,055E-05 | 0,000674 |
| SLC6A2        | 0,00  | 0,00  | 0,00  | 0,04  | 3,094E-05 | 0,000681 |
| SLC7A9        | 0,15  | 0,48  | 0,21  | 0,26  | 3,115E-05 | 0,000686 |
| C12orf65      | 3,40  | 4,83  | 3,49  | 4,95  | 3,131E-05 | 0,000688 |
| AC013400.2    | 0,32  | 3,06  | 0,56  | 0,62  | 3,142E-05 | 0,00069  |
| MIF4GD        | 6,58  | 2,79  | 6,02  | 0,94  | 3,174E-05 | 0,000696 |
| LINC00670     | 2,09  | 3,87  | 2,48  | 2,64  | 3,176E-05 | 0,000696 |
| RP11-176H8.1  | 2,23  | 4,90  | 1,16  | 1,08  | 3,178E-05 | 0,000696 |
| PCDH9         | 0,15  | 0,46  | 0,36  | 0,60  | 3,194E-05 | 0,000698 |
| AGPHD1        | 1,05  | 2,08  | 1,20  | 2,47  | 3,195E-05 | 0,000698 |
| C15orf41      | 1,39  | 1,24  | 0,76  | 1,34  | 3,215E-05 | 0,000701 |
| AP000432.3    | 3,81  | 5,60  | 4,21  | 5,29  | 3,216E-05 | 0,000701 |
| CTD-2196E14.8 | 1,32  | 1,52  | 1,08  | 2,18  | 3,235E-05 | 0,000705 |
| SRFBP1        | 3,38  | 0,90  | 2,31  | 2,93  | 3,24E-05  | 0,000705 |
| SEMA5A        | 0,12  | 0,38  | 0,11  | 0,06  | 3,242E-05 | 0,000705 |
| RP11-428G5.7  | 0,47  | 2,20  | 0,75  | 0,93  | 3,251E-05 | 0,000706 |
| CD48          | 9,15  | 7,62  | 8,16  | 7,60  | 3,261E-05 | 0,000708 |
| FRY           | 3,12  | 5,49  | 3,25  | 4,56  | 3,271E-05 | 0,000709 |
| RP11-416I2.1  | 0,07  | 0,49  | 0,08  | 0,12  | 3,277E-05 | 0,00071  |
| RABL6         | 1,43  | 2,60  | 2,84  | 3,77  | 3,279E-05 | 0,00071  |
| RETN          | 2,67  | 4,71  | 4,72  | 6,44  | 3,29E-05  | 0,000711 |
| PPP1CB        | 7,94  | 6,65  | 7,61  | 5,83  | 3,299E-05 | 0,000713 |
| PITHD1        | 5,33  | 1,66  | 4,47  | 2,65  | 3,312E-05 | 0,000715 |
| RGPD4         | 0,00  | 0,00  | 0,00  | 0,05  | 3,332E-05 | 0,000718 |
| CD109         | 1,58  | 0,52  | 1,79  | 0,25  | 3,333E-05 | 0,000718 |
| KDM5C         | 1,65  | 2,37  | 2,29  | 1,25  | 3,368E-05 | 0,000725 |
| ADAM32        | 2,41  | 3,22  | 2,45  | 3,64  | 3,381E-05 | 0,000727 |
| RPS15         | 10,66 | 11,23 | 10,92 | 11,18 | 3,39E-05  | 0,000728 |
| DEC1          | 1,92  | 3,69  | 2,21  | 1,72  | 3,396E-05 | 0,000729 |
| PLEKHG4B      | 0,05  | 0,11  | 0,07  | 0,19  | 3,416E-05 | 0,000731 |
| RP13-104F24.1 | 4,80  | 1,66  | 4,63  | 0,70  | 3,416E-05 | 0,000731 |
| CTD-2001J20.1 | 0,46  | 0,71  | 0,53  | 0,55  | 3,425E-05 | 0,000733 |
| FRAS1         | 0,00  | 0,04  | 0,00  | 0,53  | 3,433E-05 | 0,000734 |

|               |       |       |       |       |           |          |
|---------------|-------|-------|-------|-------|-----------|----------|
| BEAN1         | 0,08  | 0,91  | 0,39  | 0,29  | 3,442E-05 | 0,000735 |
| LPA           | 0,00  | 0,51  | 0,00  | 0,00  | 3,462E-05 | 0,000738 |
| AP004782.1    | 0,03  | 0,09  | 0,09  | 0,44  | 3,471E-05 | 0,00074  |
| MCM10         | 0,04  | 3,20  | 0,04  | 0,03  | 3,517E-05 | 0,000749 |
| DECR1         | 8,28  | 7,30  | 7,72  | 6,30  | 3,567E-05 | 0,000758 |
| CTC-510F12.6  | 3,33  | 2,71  | 4,75  | 5,43  | 3,569E-05 | 0,000758 |
| TRMU          | 3,59  | 5,74  | 3,83  | 4,64  | 3,577E-05 | 0,000759 |
| PATL2         | 3,20  | 4,34  | 2,53  | 6,57  | 3,585E-05 | 0,00076  |
| IL18          | 6,84  | 6,33  | 5,82  | 3,44  | 3,659E-05 | 0,000775 |
| SHC4          | 1,11  | 4,57  | 0,74  | 1,23  | 3,678E-05 | 0,000778 |
| WDR13         | 4,14  | 6,02  | 5,16  | 6,52  | 3,691E-05 | 0,000781 |
| P2RY11        | 0,12  | 0,71  | 1,52  | 2,07  | 3,697E-05 | 0,000781 |
| AC005281.1    | 0,15  | 0,10  | 0,13  | 0,25  | 3,698E-05 | 0,000781 |
| RP11-242D8.1  | 2,90  | 4,96  | 4,22  | 3,95  | 3,722E-05 | 0,000785 |
| TECPR1        | 1,84  | 3,44  | 2,65  | 2,22  | 3,765E-05 | 0,000793 |
| CHST9-AS1     | 0,03  | 0,13  | 0,04  | 0,25  | 3,798E-05 | 0,000799 |
| AP001057.1    | 0,27  | 0,47  | 1,11  | 0,73  | 3,8E-05   | 0,000799 |
| UGCG          | 4,55  | 3,20  | 3,99  | 2,13  | 3,822E-05 | 0,000803 |
| KCNA2         | 0,02  | 0,09  | 0,01  | 0,12  | 3,881E-05 | 0,000814 |
| MZT2B         | 3,45  | 6,06  | 5,07  | 5,11  | 3,893E-05 | 0,000816 |
| MYEOV2        | 5,47  | 6,29  | 6,16  | 6,94  | 3,908E-05 | 0,000818 |
| RPL34         | 10,25 | 10,84 | 10,54 | 11,15 | 3,909E-05 | 0,000818 |
| RP11-219E24.1 | 2,41  | 3,47  | 3,12  | 3,41  | 3,914E-05 | 0,000818 |
| SLC14A1       | 0,44  | 0,29  | 0,36  | 0,90  | 3,924E-05 | 0,00082  |
| CAST          | 6,27  | 6,36  | 6,71  | 6,62  | 3,95E-05  | 0,000824 |
| RP5-1044O17.1 | 2,52  | 4,90  | 3,12  | 3,92  | 3,978E-05 | 0,000829 |
| CENPB         | 1,11  | 1,80  | 1,27  | 2,28  | 3,999E-05 | 0,000833 |
| VAT1          | 0,41  | 0,00  | 2,57  | 2,06  | 4,01E-05  | 0,000834 |
| RDH16         | 0,92  | 1,91  | 1,39  | 1,14  | 4,021E-05 | 0,000836 |
| RAF1          | 5,44  | 2,93  | 5,13  | 3,76  | 4,023E-05 | 0,000836 |
| RP11-316M24.1 | 0,47  | 0,70  | 0,63  | 1,18  | 4,038E-05 | 0,000838 |
| SCARB2        | 3,90  | 3,93  | 4,54  | 5,04  | 4,052E-05 | 0,000839 |
| SDHD          | 7,65  | 6,95  | 6,87  | 5,57  | 4,052E-05 | 0,000839 |
| MYO9B         | 5,22  | 7,44  | 5,89  | 6,07  | 4,07E-05  | 0,000842 |
| PDE1C         | 0,08  | 0,08  | 0,02  | 0,52  | 4,085E-05 | 0,000845 |
| RP11-297C4.3  | 0,75  | 4,10  | 1,32  | 1,77  | 4,127E-05 | 0,000853 |
| RASA4B        | 2,60  | 3,42  | 3,65  | 3,84  | 4,154E-05 | 0,000857 |
| SHROOM1       | 0,03  | 0,04  | 0,04  | 0,46  | 4,184E-05 | 0,000863 |
| OR7C1         | 0,52  | 1,68  | 0,85  | 1,26  | 4,192E-05 | 0,000863 |
| KDM4B         | 1,73  | 3,08  | 2,42  | 1,53  | 4,23E-05  | 0,00087  |
| MTSS1         | 2,30  | 5,79  | 4,00  | 5,34  | 4,278E-05 | 0,000879 |
| GABRA1        | 0,00  | 1,04  | 0,16  | 0,52  | 4,282E-05 | 0,000879 |
| STK10         | 5,21  | 6,15  | 6,09  | 6,53  | 4,327E-05 | 0,000888 |
| GSDMA         | 0,20  | 0,29  | 0,40  | 0,64  | 4,351E-05 | 0,000892 |
| PSAP          | 8,76  | 8,17  | 9,03  | 9,43  | 4,365E-05 | 0,000894 |
| TUBGCP2       | 5,42  | 6,43  | 6,43  | 6,56  | 4,425E-05 | 0,000906 |
| RPPH1         | 4,54  | 5,86  | 5,48  | 5,53  | 4,432E-05 | 0,000906 |
| CTC-347C20.2  | 0,19  | 0,84  | 0,34  | 0,97  | 4,445E-05 | 0,000908 |
| TMEM156       | 4,00  | 0,82  | 2,54  | 1,17  | 4,498E-05 | 0,000918 |
| VSIG2         | 0,00  | 0,14  | 0,81  | 1,85  | 4,529E-05 | 0,000923 |
| RP11-650J17.1 | 0,00  | 3,41  | 0,00  | 0,15  | 4,54E-05  | 0,000925 |
| GABRA3        | 0,08  | 0,41  | 0,16  | 0,03  | 4,553E-05 | 0,000927 |
| NOL3          | 0,29  | 0,59  | 0,50  | 1,12  | 4,591E-05 | 0,000934 |
| FKBP1A        | 8,37  | 6,55  | 7,40  | 6,73  | 4,661E-05 | 0,000946 |
| PKNOX2        | 0,05  | 0,54  | 0,03  | 0,20  | 4,665E-05 | 0,000946 |

|               |       |      |      |      |           |          |
|---------------|-------|------|------|------|-----------|----------|
| VWFP1         | 0,00  | 2,06 | 0,00 | 0,00 | 4,665E-05 | 0,000946 |
| TXN2          | 7,36  | 7,21 | 7,06 | 5,68 | 4,687E-05 | 0,000949 |
| CNKSR2        | 1,19  | 2,47 | 1,16 | 1,96 | 4,688E-05 | 0,000949 |
| NOTCH3        | 0,40  | 2,71 | 0,70 | 0,66 | 4,69E-05  | 0,000949 |
| OR9K1P        | 0,10  | 0,32 | 0,39 | 0,42 | 4,701E-05 | 0,00095  |
| KIR3DX1       | 0,61  | 1,48 | 0,73 | 1,01 | 4,738E-05 | 0,000956 |
| USP1          | 4,81  | 4,42 | 3,49 | 2,31 | 4,74E-05  | 0,000956 |
| PAEP          | 0,00  | 0,35 | 0,00 | 0,85 | 4,754E-05 | 0,000958 |
| RP11-120E11.2 | 0,00  | 1,59 | 0,00 | 1,75 | 4,818E-05 | 0,00097  |
| GOLGA8Q       | 0,27  | 2,52 | 0,00 | 0,00 | 4,833E-05 | 0,000972 |
| C2            | 0,33  | 0,78 | 0,61 | 2,22 | 4,87E-05  | 0,000979 |
| KCTD19        | 1,05  | 0,20 | 1,28 | 2,18 | 4,914E-05 | 0,000986 |
| TCEA3         | 2,96  | 0,10 | 1,25 | 0,25 | 4,946E-05 | 0,000992 |
| RP11-60A8.1   | 0,76  | 0,00 | 0,19 | 0,79 | 4,954E-05 | 0,000993 |
| AL022476.2    | 0,03  | 0,14 | 0,21 | 0,35 | 4,961E-05 | 0,000993 |
| ZNF382        | 0,66  | 0,60 | 1,16 | 1,47 | 4,972E-05 | 0,000994 |
| ZNF716        | 0,09  | 0,24 | 0,11 | 0,17 | 4,977E-05 | 0,000994 |
| SOWAHC        | 0,12  | 0,86 | 0,16 | 0,15 | 4,978E-05 | 0,000994 |
| MET           | 0,01  | 0,04 | 0,04 | 0,07 | 4,986E-05 | 0,000995 |
| RP11-338N10.1 | 0,07  | 0,36 | 0,17 | 0,64 | 4,992E-05 | 0,000995 |
| AC073987.1    | 0,00  | 0,55 | 0,00 | 0,56 | 4,995E-05 | 0,000995 |
| GRN           | 9,01  | 9,12 | 9,44 | 9,52 | 5,009E-05 | 0,000997 |
| ADAM29        | 0,12  | 0,56 | 0,37 | 0,65 | 5,022E-05 | 0,000998 |
| CSF3R         | 6,30  | 6,81 | 6,87 | 7,16 | 5,032E-05 | 0,000999 |
| NPM1          | 9,27  | 7,50 | 8,64 | 7,86 | 5,067E-05 | 0,001005 |
| AGRN          | 0,24  | 0,55 | 0,52 | 0,48 | 5,102E-05 | 0,001011 |
| RPL35A        | 8,95  | 9,39 | 9,20 | 9,50 | 5,15E-05  | 0,00102  |
| EEF2          | 6,38  | 7,29 | 7,06 | 7,30 | 5,194E-05 | 0,001028 |
| RP11-315H15.3 | 0,00  | 0,19 | 0,00 | 0,00 | 5,204E-05 | 0,001028 |
| IKBKE         | 0,07  | 0,17 | 2,22 | 5,18 | 5,205E-05 | 0,001028 |
| TMEM50B       | 5,47  | 5,30 | 4,74 | 3,40 | 5,239E-05 | 0,001034 |
| SLC14A2       | 0,33  | 0,59 | 0,50 | 1,27 | 5,262E-05 | 0,001037 |
| RP11-47I22.3  | 2,19  | 3,34 | 2,58 | 3,09 | 5,263E-05 | 0,001037 |
| COPG2         | 0,87  | 3,85 | 0,08 | 0,36 | 5,27E-05  | 0,001037 |
| RP5-892K4.1   | 0,20  | 0,59 | 0,33 | 0,22 | 5,273E-05 | 0,001037 |
| ARAP1         | 4,67  | 5,88 | 5,66 | 5,73 | 5,302E-05 | 0,001042 |
| UBALD1        | 0,49  | 0,72 | 1,12 | 1,36 | 5,328E-05 | 0,001046 |
| MLKL          | 3,17  | 3,79 | 4,36 | 5,17 | 5,331E-05 | 0,001046 |
| CXADR         | 0,04  | 0,18 | 0,06 | 0,14 | 5,34E-05  | 0,001046 |
| MS4A4E        | 6,02  | 2,40 | 5,57 | 3,70 | 5,341E-05 | 0,001046 |
| UBB           | 10,45 | 9,40 | 9,92 | 9,32 | 5,348E-05 | 0,001046 |
| CTD-2311B13.7 | 1,32  | 3,64 | 1,05 | 1,49 | 5,353E-05 | 0,001046 |
| RP11-143A12.3 | 0,18  | 1,88 | 0,26 | 0,00 | 5,358E-05 | 0,001046 |
| EP400NL       | 2,60  | 1,04 | 1,82 | 3,70 | 5,369E-05 | 0,001048 |
| CDKN2B-AS1    | 0,63  | 1,63 | 0,76 | 0,94 | 5,387E-05 | 0,00105  |
| CYP2C19       | 0,00  | 0,24 | 0,07 | 0,05 | 5,416E-05 | 0,001055 |
| LA16c-390E6.5 | 1,51  | 0,00 | 3,75 | 5,39 | 5,487E-05 | 0,001068 |
| RN7SL698P     | 0,00  | 0,81 | 3,52 | 2,54 | 5,56E-05  | 0,001081 |
| LRP1          | 2,13  | 3,08 | 2,98 | 3,60 | 5,637E-05 | 0,001095 |
| RP11-418I22.2 | 0,00  | 5,29 | 0,00 | 0,00 | 5,642E-05 | 0,001095 |
| CTB-25B13.5   | 0,00  | 2,00 | 0,15 | 0,13 | 5,664E-05 | 0,001098 |
| RP11-20I23.10 | 0,33  | 1,62 | 1,02 | 0,99 | 5,705E-05 | 0,001105 |
| RP11-624A21.1 | 2,12  | 3,12 | 2,26 | 2,37 | 5,708E-05 | 0,001105 |
| SNHG5         | 7,93  | 9,05 | 8,52 | 8,14 | 5,719E-05 | 0,001106 |
| RP11-268J15.5 | 2,51  | 1,91 | 2,06 | 0,38 | 5,74E-05  | 0,001109 |

|                   |      |      |      |      |           |          |
|-------------------|------|------|------|------|-----------|----------|
| RP11-159F24.1     | 1,99 | 3,03 | 2,68 | 2,55 | 5,784E-05 | 0,001117 |
| ODF3B             | 5,50 | 5,61 | 6,37 | 6,73 | 5,787E-05 | 0,001117 |
| TRDC              | 0,00 | 0,24 | 0,17 | 2,09 | 5,894E-05 | 0,001136 |
| RP11-455O6.5      | 0,06 | 0,15 | 0,09 | 0,12 | 5,929E-05 | 0,001142 |
| GPR85             | 1,27 | 2,80 | 1,59 | 2,26 | 5,989E-05 | 0,001152 |
| DCDC2             | 0,00 | 0,33 | 0,03 | 0,07 | 6,024E-05 | 0,001158 |
| FCGR1A            | 2,16 | 3,97 | 4,08 | 5,72 | 6,028E-05 | 0,001158 |
| MKNK1             | 4,80 | 2,51 | 5,26 | 5,71 | 6,049E-05 | 0,001161 |
| SAE1              | 4,69 | 1,54 | 4,26 | 2,69 | 6,069E-05 | 0,001164 |
| PLEKHG2           | 3,87 | 5,71 | 5,44 | 4,19 | 6,138E-05 | 0,001176 |
| RP11-680E19.1     | 0,28 | 0,19 | 0,15 | 0,46 | 6,209E-05 | 0,001189 |
| RP11-429J17.7     | 0,30 | 1,19 | 0,28 | 0,46 | 6,251E-05 | 0,001196 |
| LINC01002         | 1,30 | 3,94 | 2,01 | 2,60 | 6,282E-05 | 0,0012   |
| CHMP7             | 3,31 | 4,57 | 3,26 | 2,34 | 6,299E-05 | 0,001203 |
| LILRB2            | 4,08 | 4,95 | 4,85 | 4,73 | 6,383E-05 | 0,001218 |
| RP4-539M6.14      | 0,50 | 0,95 | 1,40 | 1,80 | 6,417E-05 | 0,001223 |
| COMMD9            | 7,18 | 5,86 | 6,52 | 5,40 | 6,454E-05 | 0,001229 |
| RP11-280K24.4     | 0,28 | 1,40 | 0,39 | 1,11 | 6,492E-05 | 0,001235 |
| RP11-1152H15.1    | 2,04 | 3,49 | 2,55 | 3,75 | 6,505E-05 | 0,001237 |
| ECH1              | 7,63 | 7,72 | 6,86 | 6,35 | 6,547E-05 | 0,001244 |
| PIK3R3            | 0,14 | 2,04 | 0,36 | 0,35 | 6,611E-05 | 0,001254 |
| CSMD1             | 0,05 | 1,55 | 0,04 | 0,72 | 6,619E-05 | 0,001254 |
| UCP2              | 8,45 | 7,21 | 7,76 | 6,44 | 6,622E-05 | 0,001254 |
| RPL38             | 8,05 | 8,82 | 8,69 | 9,23 | 6,623E-05 | 0,001254 |
| LL22NC01-81G9.3   | 0,00 | 0,30 | 0,20 | 1,22 | 6,644E-05 | 0,001257 |
| RP11-476C8.1      | 0,00 | 0,16 | 0,00 | 0,18 | 6,652E-05 | 0,001257 |
| PNRC1             | 5,48 | 5,93 | 5,98 | 6,04 | 6,666E-05 | 0,001259 |
| RP11-43F13.3      | 0,85 | 3,08 | 0,97 | 1,48 | 6,713E-05 | 0,001266 |
| C1orf106          | 1,76 | 2,27 | 2,14 | 3,43 | 6,738E-05 | 0,00127  |
| RP11-508N22.2     | 0,64 | 2,71 | 0,32 | 0,19 | 6,804E-05 | 0,001281 |
| RSPH10B2          | 0,34 | 2,66 | 0,55 | 0,38 | 6,83E-05  | 0,001285 |
| GLYATL1           | 0,00 | 0,72 | 0,00 | 0,37 | 6,847E-05 | 0,001288 |
| XXbac-BPG181B23.4 | 0,36 | 1,63 | 0,35 | 0,45 | 6,857E-05 | 0,001288 |
| PLPP2             | 0,25 | 0,70 | 0,48 | 0,37 | 6,864E-05 | 0,001288 |
| RP11-723O4.2      | 0,25 | 1,52 | 0,33 | 0,54 | 6,885E-05 | 0,001291 |
| TMEM160           | 5,05 | 5,87 | 5,91 | 6,89 | 6,929E-05 | 0,001298 |
| MAN2B1            | 5,18 | 5,04 | 6,07 | 6,14 | 7,006E-05 | 0,001312 |
| CTC-232P5.3       | 0,00 | 2,21 | 1,24 | 2,06 | 7,053E-05 | 0,001319 |
| SLC5A12           | 0,73 | 1,02 | 0,29 | 2,06 | 7,058E-05 | 0,001319 |
| RPL22             | 6,67 | 6,85 | 6,94 | 6,80 | 7,226E-05 | 0,00135  |
| RP11-284E20.1     | 0,84 | 1,33 | 1,97 | 2,09 | 7,234E-05 | 0,00135  |
| RP4-568F9.6       | 1,30 | 1,85 | 2,12 | 2,42 | 7,253E-05 | 0,001352 |
| HLA-DPB2          | 4,70 | 0,87 | 2,87 | 0,53 | 7,257E-05 | 0,001352 |
| TOB1              | 7,51 | 5,92 | 6,50 | 5,29 | 7,271E-05 | 0,001353 |
| LRRC1             | 0,29 | 2,02 | 0,13 | 0,25 | 7,284E-05 | 0,001355 |
| GPR183            | 9,30 | 8,96 | 9,12 | 6,92 | 7,323E-05 | 0,001361 |
| SCML4             | 0,84 | 1,81 | 0,13 | 2,66 | 7,342E-05 | 0,001363 |
| C3orf65           | 1,00 | 2,40 | 1,48 | 1,39 | 7,416E-05 | 0,001376 |
| MCHR2             | 0,00 | 0,00 | 0,00 | 0,11 | 7,456E-05 | 0,001381 |
| RP11-693J15.5     | 0,06 | 0,26 | 0,10 | 0,19 | 7,46E-05  | 0,001381 |
| PHLDA1            | 0,09 | 0,42 | 0,86 | 0,32 | 7,464E-05 | 0,001381 |
| CTB-50E14.6       | 3,40 | 3,31 | 3,61 | 5,46 | 7,506E-05 | 0,001388 |
| RF00003           | 8,37 | 8,80 | 8,89 | 9,16 | 7,602E-05 | 0,001404 |
| RP11-104F15.9     | 0,00 | 0,37 | 0,04 | 0,73 | 7,605E-05 | 0,001404 |
| ARHGGEF28         | 0,74 | 4,70 | 0,72 | 1,01 | 7,619E-05 | 0,001405 |

|               |       |       |       |       |           |          |
|---------------|-------|-------|-------|-------|-----------|----------|
| EHHADH        | 0,38  | 0,65  | 0,39  | 0,40  | 7,649E-05 | 0,00141  |
| HNRNPH2       | 6,14  | 4,85  | 4,93  | 3,37  | 7,662E-05 | 0,00141  |
| MIRS48AJ2     | 0,00  | 7,36  | 2,40  | 6,53  | 7,663E-05 | 0,00141  |
| TAX1BP1       | 6,36  | 6,09  | 6,05  | 5,10  | 7,727E-05 | 0,00142  |
| LRRC36        | 0,20  | 0,24  | 0,47  | 0,68  | 7,731E-05 | 0,00142  |
| RP4-682C21.5  | 1,65  | 4,28  | 1,86  | 3,21  | 7,745E-05 | 0,001421 |
| PLXNA3        | 0,20  | 3,48  | 0,40  | 0,33  | 7,76E-05  | 0,001423 |
| ARPC4         | 7,34  | 7,44  | 7,60  | 7,68  | 7,851E-05 | 0,001439 |
| RP11-108B14.5 | 0,16  | 0,36  | 0,25  | 0,81  | 7,86E-05  | 0,001439 |
| SEMA3D        | 0,28  | 1,76  | 0,17  | 0,32  | 7,904E-05 | 0,001446 |
| CCDC85B       | 3,13  | 3,96  | 4,31  | 4,19  | 7,919E-05 | 0,001447 |
| SHKBP1        | 6,27  | 7,83  | 6,99  | 7,33  | 7,967E-05 | 0,001455 |
| PREP          | 2,68  | 5,59  | 2,08  | 1,18  | 7,982E-05 | 0,001456 |
| UBA52         | 9,80  | 10,16 | 10,15 | 10,42 | 7,985E-05 | 0,001456 |
| GRK5          | 0,07  | 0,46  | 0,81  | 0,13  | 7,995E-05 | 0,001456 |
| SLC15A3       | 6,34  | 7,61  | 6,98  | 6,93  | 8,012E-05 | 0,001458 |
| RP11-39K24.14 | 4,38  | 0,00  | 3,29  | 1,25  | 8,032E-05 | 0,00146  |
| MT-TG         | 2,52  | 5,26  | 2,60  | 5,44  | 8,036E-05 | 0,00146  |
| MRPL23        | 5,48  | 6,87  | 6,23  | 6,56  | 8,044E-05 | 0,001461 |
| MT-TF         | 5,54  | 5,99  | 6,28  | 7,49  | 8,071E-05 | 0,001464 |
| TPT1          | 10,27 | 10,74 | 10,56 | 10,37 | 8,09E-05  | 0,001467 |
| FUCA2         | 5,32  | 2,79  | 4,31  | 2,91  | 8,104E-05 | 0,001468 |
| SETD5         | 5,54  | 4,05  | 5,11  | 5,56  | 8,147E-05 | 0,001474 |
| VAMP5         | 5,93  | 6,70  | 5,95  | 7,29  | 8,184E-05 | 0,00148  |
| RP5-1021I20.5 | 0,74  | 1,86  | 1,38  | 1,14  | 8,271E-05 | 0,001494 |
| RPL21         | 9,84  | 10,39 | 10,00 | 10,12 | 8,279E-05 | 0,001495 |
| B2M           | 14,80 | 13,97 | 14,15 | 13,84 | 8,288E-05 | 0,001495 |
| RP11-23E10.4  | 0,30  | 0,66  | 0,31  | 1,11  | 8,365E-05 | NA       |
| RP4-794I6.4   | 0,60  | 1,20  | 0,73  | 0,89  | 8,37E-05  | 0,001509 |
| TREML1        | 0,00  | 0,00  | 0,00  | 0,32  | 8,402E-05 | 0,001513 |
| RP11-381N20.2 | 0,00  | 0,41  | 0,29  | 0,93  | 8,405E-05 | 0,001513 |
| TMEM104       | 3,00  | 3,90  | 3,31  | 2,17  | 8,412E-05 | 0,001513 |
| SLC5A5        | 0,09  | 0,26  | 0,22  | 0,31  | 8,465E-05 | 0,001521 |
| ARMC8         | 5,51  | 2,89  | 4,33  | 4,08  | 8,471E-05 | 0,001521 |
| VOPP1         | 5,75  | 2,90  | 5,32  | 4,26  | 8,551E-05 | 0,001534 |
| RFNG          | 1,09  | 4,23  | 2,32  | 3,81  | 8,587E-05 | 0,001539 |
| TACC2         | 1,13  | 2,13  | 1,33  | 1,70  | 8,628E-05 | 0,001545 |
| RPS18         | 11,21 | 11,92 | 11,56 | 11,63 | 8,65E-05  | 0,001547 |
| ACACB         | 4,40  | 5,01  | 5,21  | 4,95  | 8,654E-05 | 0,001547 |
| RP11-545A16.1 | 0,06  | 0,24  | 0,07  | 0,18  | 8,662E-05 | 0,001547 |
| RP11-574F21.3 | 2,95  | 1,12  | 3,54  | 2,47  | 8,675E-05 | 0,001547 |
| PLA2G2C       | 0,07  | 0,23  | 0,09  | 0,28  | 8,675E-05 | 0,001547 |
| ADGRG5        | 1,40  | 4,76  | 0,41  | 0,09  | 8,678E-05 | 0,001547 |
| AQP9          | 0,00  | 0,60  | 0,20  | 0,04  | 8,698E-05 | 0,001548 |
| PPP1R3G       | 0,00  | 0,00  | 0,01  | 0,16  | 8,699E-05 | 0,001548 |
| CYBA          | 7,70  | 7,92  | 8,34  | 8,63  | 8,724E-05 | 0,001551 |
| RP4-575N6.5   | 0,63  | 2,84  | 0,58  | 0,92  | 8,841E-05 | 0,001571 |
| C19orf79      | 5,25  | 4,93  | 5,74  | 6,62  | 8,855E-05 | 0,001572 |
| RP11-252C24.3 | 1,22  | 0,48  | 1,79  | 1,82  | 8,868E-05 | 0,001573 |
| RPL37         | 8,52  | 9,20  | 8,86  | 9,16  | 9,031E-05 | 0,001601 |
| MSL3          | 5,64  | 3,76  | 5,10  | 3,90  | 9,038E-05 | 0,001601 |
| RP11-328D5.4  | 0,01  | 0,31  | 0,00  | 0,00  | 9,052E-05 | 0,001602 |
| SNAP23        | 5,87  | 3,97  | 5,11  | 4,53  | 9,101E-05 | 0,001609 |
| SLC9A7        | 2,95  | 1,60  | 3,88  | 1,64  | 9,175E-05 | 0,001621 |
| RP11-275I4.1  | 0,13  | 0,39  | 1,09  | 0,61  | 9,242E-05 | 0,001632 |

|               |      |      |      |      |           |          |
|---------------|------|------|------|------|-----------|----------|
| SUPT5H        | 4,77 | 5,66 | 6,19 | 6,52 | 9,255E-05 | 0,001632 |
| PNPLA2        | 3,47 | 4,84 | 4,31 | 4,51 | 9,284E-05 | 0,001636 |
| EML1          | 1,29 | 3,43 | 1,82 | 1,77 | 9,334E-05 | 0,001644 |
| MATK          | 1,16 | 2,35 | 1,88 | 2,97 | 9,359E-05 | 0,001647 |
| RP11-620A17.2 | 0,00 | 0,21 | 0,00 | 0,00 | 9,368E-05 | 0,001647 |
| MARVELD3      | 0,38 | 1,55 | 0,50 | 1,03 | 9,442E-05 | 0,001657 |
| CTC-483L24.2  | 6,00 | 2,47 | 6,21 | 6,26 | 9,446E-05 | 0,001657 |
| TCAF2         | 0,80 | 2,77 | 0,90 | 1,93 | 9,448E-05 | 0,001657 |
| HKDC1         | 0,00 | 0,04 | 0,00 | 1,13 | 9,459E-05 | 0,001658 |
| FAAP20        | 3,89 | 4,59 | 4,60 | 5,07 | 9,58E-05  | 0,001678 |
| TXN           | 6,45 | 6,55 | 6,88 | 6,82 | 9,586E-05 | 0,001678 |
| ROCK1P1       | 2,64 | 5,19 | 1,40 | 1,68 | 9,609E-05 | 0,00168  |
| RF01518       | 0,00 | 3,89 | 0,00 | 2,26 | 9,698E-05 | 0,001694 |
| GABRB3        | 0,25 | 0,17 | 0,44 | 0,89 | 9,703E-05 | 0,001694 |
| NCRNA00107    | 1,93 | 3,93 | 3,86 | 4,24 | 9,781E-05 | 0,001706 |
| RF01241       | 2,42 | 4,63 | 2,74 | 0,15 | 9,793E-05 | 0,001707 |
| PHYHD1        | 1,09 | 0,97 | 0,39 | 0,24 | 9,823E-05 | 0,00171  |
| AC092159.2    | 0,21 | 3,08 | 0,65 | 0,48 | 9,824E-05 | 0,00171  |
| ABR           | 3,82 | 3,94 | 4,78 | 4,59 | 9,851E-05 | 0,001713 |
| RP11-326111.3 | 0,10 | 0,22 | 0,31 | 0,38 | 9,917E-05 | 0,001723 |
| CTD-2339F6.1  | 0,00 | 0,11 | 0,02 | 0,32 | 9,944E-05 | 0,001726 |
| CTD-2553L13.4 | 0,22 | 0,95 | 0,38 | 3,06 | 9,952E-05 | 0,001726 |
| PIGR          | 0,25 | 0,69 | 0,17 | 0,42 | 9,955E-05 | 0,001726 |
| RP11-421L10.1 | 0,71 | 0,52 | 0,72 | 1,38 | 0,0001002 | 0,001736 |
| AC104809.4    | 0,00 | 0,00 | 0,00 | 1,87 | 0,0001017 | 0,001761 |
| P2RY14        | 5,04 | 4,31 | 3,00 | 0,27 | 0,000102  | 0,001764 |
| IGKV3-20      | 0,47 | 2,84 | 0,62 | 0,95 | 0,0001025 | 0,001771 |
| AC004019.13   | 0,67 | 1,89 | 0,63 | 0,63 | 0,0001029 | 0,001775 |
| AC011288.2    | 2,64 | 4,57 | 2,21 | 0,99 | 0,0001029 | 0,001775 |
| AC000095.6    | 0,10 | 1,73 | 0,28 | 0,04 | 0,0001033 | 0,00178  |
| PLEKHG1       | 0,46 | 0,41 | 0,58 | 0,77 | 0,0001038 | 0,001788 |
| RPS20         | 9,22 | 9,98 | 9,49 | 9,70 | 0,0001039 | 0,001789 |
| IL23R         | 0,00 | 0,07 | 0,05 | 0,08 | 0,000104  | 0,001789 |
| IRAK2         | 0,21 | 0,61 | 0,45 | 0,46 | 0,0001041 | 0,00179  |
| RNASE1        | 0,00 | 0,00 | 3,98 | 4,92 | 0,0001043 | 0,001792 |
| RP11-452D2.2  | 0,98 | 1,40 | 1,08 | 1,11 | 0,0001054 | 0,00181  |
| RP11-769N22.1 | 0,41 | 1,47 | 0,29 | 0,15 | 0,0001057 | 0,001811 |
| SH3BGRL2      | 0,00 | 0,03 | 0,00 | 0,03 | 0,0001057 | 0,001811 |
| PABPN1        | 3,66 | 4,84 | 4,50 | 4,21 | 0,0001073 | 0,001837 |
| WDR88         | 0,00 | 4,33 | 0,00 | 0,00 | 0,0001075 | 0,001838 |
| AC068499.10   | 0,33 | 1,58 | 0,11 | 0,42 | 0,0001076 | 0,001839 |
| RP13-317D12.3 | 0,58 | 2,82 | 1,03 | 0,83 | 0,0001078 | 0,001842 |
| SMPDL3B       | 0,55 | 0,00 | 0,00 | 0,43 | 0,0001087 | 0,001855 |
| RP5-902P8.10  | 0,70 | 0,34 | 0,00 | 0,83 | 0,0001101 | 0,001876 |
| FAM49B        | 8,33 | 7,89 | 7,60 | 6,94 | 0,0001101 | 0,001876 |
| LAPTM4A       | 7,05 | 5,14 | 6,31 | 4,65 | 0,0001105 | 0,001882 |
| RP13-27G4.2   | 0,46 | 0,43 | 0,23 | 0,96 | 0,0001107 | 0,001885 |
| MYO1B         | 0,06 | 0,39 | 0,20 | 0,00 | 0,0001109 | 0,001885 |
| ELOC          | 5,27 | 3,24 | 4,77 | 6,22 | 0,0001111 | 0,001888 |
| LINC00511     | 2,43 | 3,58 | 2,83 | 3,78 | 0,0001118 | 0,001897 |
| SNORA73B      | 1,70 | 2,35 | 1,15 | 4,03 | 0,0001123 | 0,001905 |
| SSR1          | 7,35 | 6,58 | 6,54 | 5,38 | 0,0001124 | 0,001905 |
| HNRNPL        | 5,88 | 6,94 | 6,74 | 6,55 | 0,0001125 | 0,001906 |
| PYCARD        | 7,84 | 7,83 | 8,05 | 8,37 | 0,0001134 | 0,001918 |
| RP11-651E20.2 | 0,70 | 0,00 | 0,74 | 0,00 | 0,0001134 | 0,001918 |

|               |       |       |       |       |           |          |
|---------------|-------|-------|-------|-------|-----------|----------|
| PYGB          | 2,04  | 3,95  | 2,81  | 3,83  | 0,0001137 | 0,001921 |
| IRS2          | 0,59  | 0,45  | 1,91  | 2,44  | 0,0001147 | 0,001937 |
| MXD1          | 4,67  | 5,16  | 6,21  | 5,82  | 0,0001152 | 0,001943 |
| ARV1          | 3,74  | 0,50  | 3,09  | 0,90  | 0,0001152 | 0,001943 |
| LINC00668     | 0,56  | 3,10  | 1,14  | 1,86  | 0,0001162 | 0,001957 |
| AC144450.2    | 0,83  | 3,03  | 1,13  | 1,99  | 0,0001168 | 0,001967 |
| TMSB10        | 12,22 | 12,48 | 12,56 | 12,61 | 0,0001179 | 0,001984 |
| BASP1         | 5,15  | 3,78  | 4,46  | 2,86  | 0,000119  | 0,002    |
| ZNF37A        | 2,25  | 3,68  | 2,34  | 2,44  | 0,0001192 | 0,002002 |
| FLT3LG        | 1,93  | 3,63  | 2,29  | 2,65  | 0,0001199 | 0,002013 |
| STAT2         | 6,07  | 4,95  | 6,36  | 7,02  | 0,0001211 | 0,002029 |
| ROMO1         | 6,39  | 7,33  | 6,82  | 7,42  | 0,0001211 | 0,002029 |
| CTC-490E21.11 | 3,08  | 4,02  | 3,10  | 3,47  | 0,0001219 | 0,002042 |
| LILRB1        | 3,45  | 1,14  | 3,29  | 3,84  | 0,0001222 | 0,002045 |
| SARM1         | 0,43  | 0,15  | 0,30  | 0,64  | 0,0001228 | 0,002054 |
| RP11-115D19.4 | 0,15  | 0,39  | 0,41  | 0,72  | 0,0001233 | 0,002061 |
| RP11-382B18.1 | 3,03  | 4,33  | 3,18  | 3,49  | 0,0001237 | 0,002066 |
| EXTL3         | 1,90  | 3,22  | 2,88  | 2,44  | 0,0001239 | 0,002067 |
| NPLOC4        | 3,89  | 4,62  | 4,13  | 5,29  | 0,0001243 | 0,002073 |
| COTL1         | 9,39  | 9,76  | 9,82  | 9,51  | 0,0001262 | 0,002102 |
| CTA-113A6.1   | 0,42  | 1,85  | 1,80  | 1,86  | 0,0001275 | 0,002122 |
| RP11-123O10.3 | 0,97  | 3,27  | 1,15  | 3,25  | 0,0001276 | 0,002122 |
| BTA1F1        | 4,45  | 3,45  | 3,96  | 1,99  | 0,0001277 | 0,002123 |
| AC009196.1    | 3,95  | 0,00  | 1,38  | 0,00  | 0,0001281 | 0,002128 |
| AC011753.3    | 4,21  | 4,46  | 4,91  | 5,74  | 0,0001291 | 0,002143 |
| RP11-46H11.3  | 0,37  | 0,77  | 0,51  | 0,92  | 0,0001296 | 0,00215  |
| GUK1          | 7,74  | 7,71  | 8,02  | 8,25  | 0,0001298 | 0,00215  |
| IL18R1        | 4,60  | 1,58  | 3,47  | 0,93  | 0,0001298 | 0,00215  |
| MCAM          | 0,27  | 0,60  | 0,44  | 0,54  | 0,0001307 | 0,002161 |
| GLTSCR2       | 4,50  | 5,45  | 5,22  | 5,80  | 0,0001307 | 0,002161 |
| UTF1          | 0,00  | 0,00  | 0,16  | 0,23  | 0,0001311 | 0,002165 |
| TMC2          | 1,42  | 3,12  | 1,65  | 1,87  | 0,0001311 | 0,002165 |
| CTB-167G5.6   | 0,00  | 0,67  | 0,20  | 0,64  | 0,0001318 | 0,002173 |
| RP11-252B20.1 | 0,06  | 0,13  | 0,00  | 0,12  | 0,0001318 | 0,002173 |
| FAM89B        | 3,56  | 5,57  | 4,24  | 4,19  | 0,0001324 | 0,002181 |
| RP11-17M16.2  | 0,17  | 0,00  | 0,38  | 0,34  | 0,0001326 | 0,002183 |
| OR2M3         | 2,78  | 4,00  | 2,54  | 3,68  | 0,0001331 | 0,00219  |
| NACC2         | 1,42  | 1,84  | 1,88  | 2,66  | 0,0001338 | 0,0022   |
| RP11-57C13.3  | 0,26  | 0,64  | 0,70  | 0,87  | 0,0001342 | 0,002203 |
| POU2AF1       | 0,68  | 2,06  | 0,80  | 1,25  | 0,0001342 | 0,002203 |
| DUXAP10       | 0,31  | 5,98  | 0,82  | 1,21  | 0,0001345 | 0,002207 |
| KCNV1         | 0,73  | 2,10  | 0,63  | 1,04  | 0,0001355 | 0,002221 |
| HLA-DOA       | 5,73  | 5,29  | 5,07  | 2,89  | 0,0001356 | 0,002221 |
| MEX3B         | 0,04  | 0,11  | 0,34  | 0,00  | 0,0001357 | 0,002221 |
| RP5-916L7.1   | 0,64  | 2,00  | 0,96  | 1,86  | 0,0001365 | 0,002232 |
| SLC26A8       | 0,26  | 0,35  | 0,19  | 0,93  | 0,0001366 | 0,002233 |
| TLR4          | 2,04  | 2,80  | 3,41  | 3,99  | 0,0001368 | 0,002233 |
| POGLUT1       | 4,69  | 1,46  | 3,62  | 2,65  | 0,0001369 | 0,002233 |
| RP11-74M13.4  | 0,13  | 1,04  | 0,06  | 0,25  | 0,0001376 | 0,002244 |
| C5orf17       | 0,99  | 3,76  | 1,38  | 1,12  | 0,0001377 | 0,002244 |
| HELQ          | 3,63  | 0,34  | 3,11  | 1,09  | 0,000138  | 0,002247 |
| WBSCR22       | 7,32  | 6,19  | 6,70  | 5,00  | 0,0001381 | 0,002247 |
| TSPYL1        | 5,06  | 3,58  | 4,22  | 4,04  | 0,0001385 | 0,002251 |
| SLC44A2       | 3,00  | 6,10  | 1,70  | 3,61  | 0,0001405 | 0,002283 |
| EGFL8         | 0,09  | 1,27  | 0,08  | 0,19  | 0,0001407 | 0,002284 |

|                |      |      |      |      |           |          |
|----------------|------|------|------|------|-----------|----------|
| ARL4C          | 7,09 | 7,24 | 6,75 | 5,06 | 0,0001415 | 0,002296 |
| RP11-492E3.1   | 3,07 | 2,89 | 3,77 | 4,24 | 0,0001421 | 0,002304 |
| LDHA           | 8,52 | 8,00 | 7,60 | 6,68 | 0,0001433 | 0,002321 |
| RP11-433N2.1   | 0,05 | 0,98 | 0,05 | 0,00 | 0,0001434 | 0,002321 |
| KIF22          | 4,13 | 4,49 | 4,67 | 5,11 | 0,0001436 | 0,002323 |
| CSDE1          | 7,13 | 5,50 | 6,56 | 6,17 | 0,0001441 | 0,002329 |
| MREG           | 0,00 | 0,49 | 0,00 | 0,00 | 0,0001442 | 0,002329 |
| MOBP           | 0,12 | 0,42 | 0,26 | 0,53 | 0,0001454 | 0,002346 |
| USP54          | 0,69 | 0,90 | 0,89 | 1,97 | 0,0001455 | 0,002347 |
| RP11-140I9.2   | 0,07 | 0,22 | 0,40 | 0,81 | 0,0001459 | 0,002351 |
| GNAQ           | 5,04 | 3,07 | 4,70 | 3,82 | 0,000146  | 0,002351 |
| SYDE2          | 0,04 | 0,12 | 0,07 | 0,02 | 0,0001463 | 0,002353 |
| RPL13P12       | 1,29 | 4,25 | 2,32 | 2,13 | 0,0001464 | 0,002353 |
| ZBTB16         | 0,27 | 0,68 | 0,47 | 3,81 | 0,0001464 | 0,002353 |
| RP5-1011O1.3   | 1,16 | 0,94 | 0,89 | 0,38 | 0,0001472 | 0,002364 |
| BLVRB          | 7,69 | 8,31 | 7,91 | 8,38 | 0,0001501 | 0,002408 |
| SEMA4D         | 3,52 | 3,47 | 3,58 | 4,17 | 0,0001514 | 0,002427 |
| PLEK           | 7,52 | 5,37 | 6,85 | 5,90 | 0,0001522 | 0,002439 |
| RP11-73G16.1   | 0,32 | 0,76 | 0,38 | 0,51 | 0,0001537 | 0,00246  |
| RP11-28G8.1    | 0,11 | 0,35 | 0,29 | 0,28 | 0,0001538 | 0,00246  |
| PCBP2          | 8,02 | 7,14 | 7,54 | 6,73 | 0,000154  | 0,002463 |
| RP11-281P23.1  | 1,10 | 1,04 | 1,41 | 2,06 | 0,000155  | 0,002477 |
| TET2           | 5,75 | 3,85 | 5,52 | 3,71 | 0,0001556 | 0,002485 |
| RN7SL785P      | 3,61 | 4,53 | 4,60 | 5,44 | 0,0001559 | 0,002487 |
| RP11-138J23.1  | 0,00 | 0,00 | 0,00 | 1,18 | 0,0001564 | NA       |
| RP11-160E2.6   | 2,46 | 2,89 | 3,11 | 4,46 | 0,0001567 | 0,002497 |
| RBBP4          | 6,33 | 4,35 | 5,30 | 2,93 | 0,0001567 | 0,002497 |
| KYNU           | 6,11 | 6,33 | 5,74 | 3,36 | 0,0001576 | 0,002508 |
| ZACN           | 0,32 | 3,50 | 1,65 | 0,31 | 0,0001576 | 0,002508 |
| PTPN22         | 5,08 | 4,40 | 4,17 | 3,26 | 0,0001582 | 0,002514 |
| GNB2           | 6,23 | 6,47 | 7,03 | 6,09 | 0,0001585 | 0,002519 |
| RP11-242F24.1  | 0,57 | 1,77 | 0,64 | 0,43 | 0,000161  | 0,002555 |
| RP11-1028N23.4 | 0,79 | 2,05 | 0,72 | 2,85 | 0,0001613 | 0,002559 |
| C4orf26        | 0,51 | 0,42 | 1,24 | 2,30 | 0,0001626 | 0,002576 |
| PPP1R14B       | 1,78 | 4,67 | 2,99 | 3,38 | 0,0001626 | 0,002576 |
| KIT            | 0,97 | 0,07 | 0,21 | 0,00 | 0,0001629 | 0,002576 |
| CCDC57         | 4,40 | 5,08 | 5,20 | 5,78 | 0,0001629 | 0,002576 |
| PAF1           | 2,96 | 0,61 | 3,31 | 4,72 | 0,0001647 | 0,002603 |
| UMPS           | 4,45 | 1,23 | 1,39 | 2,36 | 0,000165  | 0,002607 |
| GATS           | 0,24 | 0,89 | 0,52 | 0,18 | 0,0001652 | 0,002608 |
| MRVI1          | 0,00 | 0,53 | 0,03 | 0,56 | 0,0001654 | 0,002609 |
| HMG1           | 7,77 | 6,30 | 7,08 | 6,03 | 0,0001663 | 0,002621 |
| FCRL1          | 0,78 | 1,47 | 0,87 | 1,02 | 0,0001667 | 0,002624 |
| WTIP           | 0,45 | 1,53 | 0,54 | 0,85 | 0,0001668 | 0,002624 |
| TTC33          | 1,38 | 1,36 | 0,43 | 0,37 | 0,0001669 | 0,002624 |
| AC092171.2     | 0,00 | 0,24 | 0,25 | 1,08 | 0,000167  | 0,002624 |
| RP11-214O1.3   | 0,46 | 1,48 | 0,74 | 0,33 | 0,000167  | 0,002624 |
| KLHL26         | 0,50 | 2,64 | 1,70 | 2,38 | 0,0001672 | 0,002624 |
| RP11-138I1.4   | 9,23 | 8,44 | 8,76 | 8,17 | 0,0001682 | 0,002638 |
| TCAIM          | 4,24 | 0,77 | 3,49 | 2,76 | 0,0001688 | 0,002645 |
| RP11-40H19.1   | 4,35 | 0,00 | 0,00 | 0,00 | 0,0001689 | 0,002645 |
| RN7SL1         | 4,94 | 6,35 | 6,00 | 6,85 | 0,0001694 | 0,002652 |
| CMAHP          | 6,97 | 2,64 | 6,35 | 4,85 | 0,0001704 | 0,002663 |
| CH507-528H12.1 | 1,36 | 4,07 | 1,70 | 3,38 | 0,0001704 | 0,002663 |
| LA16c-60D12.1  | 0,62 | 0,89 | 0,69 | 1,09 | 0,0001706 | 0,002665 |



|               |      |      |      |      |           |          |
|---------------|------|------|------|------|-----------|----------|
| AP003068.23   | 0,34 | 2,42 | 0,52 | 1,09 | 0,0001708 | 0,002666 |
| TEDDM1        | 0,00 | 0,17 | 0,04 | 0,00 | 0,0001711 | 0,002667 |
| GADL1         | 1,17 | 1,78 | 1,44 | 2,00 | 0,0001711 | 0,002667 |
| RNU4ATAC      | 6,17 | 5,40 | 6,49 | 7,45 | 0,0001713 | 0,002668 |
| RP11-267C16.1 | 1,67 | 2,35 | 2,14 | 2,83 | 0,0001716 | 0,002671 |
| CH507-513H4.1 | 1,36 | 4,07 | 1,70 | 3,38 | 0,0001718 | 0,002671 |
| LAMA1         | 0,09 | 0,18 | 0,12 | 0,03 | 0,0001721 | 0,002674 |
| C6orf141      | 2,94 | 2,69 | 3,94 | 3,37 | 0,0001732 | 0,002689 |
| ADRA1A        | 0,11 | 1,05 | 0,25 | 0,36 | 0,0001737 | 0,002696 |
| FAM171B       | 0,08 | 0,19 | 0,10 | 0,08 | 0,0001746 | 0,002708 |
| TACC3         | 4,10 | 1,65 | 4,53 | 4,78 | 0,0001748 | 0,002709 |
| COX5B         | 7,90 | 8,17 | 8,21 | 8,42 | 0,0001758 | 0,002723 |
| RN7SL492P     | 2,61 | 4,48 | 2,94 | 3,08 | 0,0001773 | 0,002744 |
| FCRL2         | 0,80 | 2,82 | 0,95 | 0,93 | 0,0001777 | 0,002746 |
| RP5-977L11.2  | 0,12 | 0,05 | 0,20 | 0,60 | 0,0001777 | 0,002746 |
| RP11-609N14.4 | 1,38 | 1,66 | 1,22 | 2,24 | 0,000179  | 0,002762 |
| CSAD          | 2,19 | 3,59 | 2,60 | 3,78 | 0,000179  | 0,002762 |
| RP11-96P7.1   | 0,00 | 0,00 | 0,00 | 0,06 | 0,0001796 | 0,00277  |
| FDXACB1       | 1,98 | 0,14 | 0,53 | 0,17 | 0,0001799 | 0,002772 |
| RP11-540A21.3 | 2,81 | 4,01 | 2,23 | 4,19 | 0,0001811 | 0,002789 |
| RNASE2        | 3,68 | 4,68 | 5,93 | 6,45 | 0,0001814 | 0,002791 |
| ITGA8         | 0,01 | 0,02 | 0,02 | 0,13 | 0,0001815 | 0,002791 |
| TARS2         | 2,94 | 6,00 | 3,54 | 3,37 | 0,0001816 | 0,002791 |
| PHEX          | 0,02 | 0,36 | 0,04 | 0,02 | 0,0001821 | 0,002796 |
| HTN1          | 1,17 | 1,32 | 1,45 | 1,91 | 0,0001826 | 0,002802 |
| STAG1         | 3,56 | 1,89 | 3,38 | 1,18 | 0,000183  | 0,002807 |
| SCRIB         | 0,83 | 4,53 | 2,70 | 3,99 | 0,0001837 | 0,002813 |
| GABRA2        | 0,09 | 0,49 | 0,06 | 0,19 | 0,0001838 | 0,002813 |
| MALL          | 0,14 | 1,44 | 0,38 | 0,17 | 0,0001838 | 0,002813 |
| RP11-131H24.5 | 0,20 | 1,41 | 0,21 | 0,36 | 0,000185  | 0,002829 |
| MEPCE         | 3,42 | 5,51 | 4,02 | 4,38 | 0,0001854 | 0,002833 |
| CCDC62        | 0,05 | 0,21 | 0,12 | 0,13 | 0,0001855 | 0,002833 |
| B3GAT1        | 0,28 | 0,27 | 0,14 | 1,14 | 0,0001857 | 0,002835 |
| UCKL1-AS1     | 0,26 | 0,65 | 0,50 | 0,50 | 0,0001869 | 0,002851 |
| UBL7          | 7,00 | 6,30 | 5,83 | 4,55 | 0,000187  | 0,002851 |
| DUT           | 6,54 | 6,80 | 6,07 | 4,58 | 0,0001873 | 0,002854 |
| PDGFRA        | 0,29 | 2,85 | 0,33 | 0,38 | 0,0001883 | 0,002867 |
| SELL          | 8,13 | 7,28 | 7,19 | 6,11 | 0,0001887 | 0,00287  |
| KBTBD12       | 0,06 | 0,27 | 0,08 | 0,06 | 0,0001891 | 0,002875 |
| JUNB          | 7,74 | 8,79 | 8,58 | 8,22 | 0,0001893 | 0,002876 |
| GOLGA8S       | 0,00 | 0,28 | 0,00 | 0,00 | 0,0001897 | 0,00288  |
| SLC27A1       | 1,43 | 2,34 | 2,95 | 2,37 | 0,0001902 | 0,002884 |
| IDH2          | 6,36 | 4,63 | 5,94 | 4,23 | 0,0001902 | 0,002884 |
| C11orf49      | 5,11 | 6,25 | 4,81 | 5,15 | 0,0001904 | 0,002885 |
| IGHA2         | 0,14 | 1,42 | 0,28 | 0,55 | 0,0001907 | 0,002887 |
| AL136419.6    | 1,90 | 0,49 | 2,51 | 3,08 | 0,0001911 | 0,002891 |
| ANKRD13B      | 0,00 | 2,63 | 0,00 | 0,00 | 0,0001913 | 0,002892 |
| RHBG          | 0,13 | 1,05 | 0,39 | 0,59 | 0,0001923 | 0,002906 |
| RP4-669H2.1   | 0,19 | 0,88 | 0,22 | 0,95 | 0,0001927 | 0,002909 |
| FPR2          | 0,00 | 0,55 | 0,06 | 1,61 | 0,0001941 | 0,002928 |
| MTRNR2L6      | 0,16 | 0,29 | 0,40 | 0,43 | 0,0001943 | 0,002928 |
| RD3           | 0,07 | 0,14 | 0,17 | 0,23 | 0,0001943 | 0,002928 |
| AC011747.4    | 0,35 | 0,69 | 0,36 | 0,98 | 0,0001947 | 0,002932 |
| ANXA5         | 9,16 | 8,05 | 8,41 | 7,78 | 0,0001949 | 0,002932 |
| DDRKG1        | 3,62 | 2,73 | 4,84 | 5,07 | 0,0001952 | 0,002933 |

|               |      |      |      |      |           |          |
|---------------|------|------|------|------|-----------|----------|
| CYP3A43       | 0,13 | 1,83 | 0,24 | 0,64 | 0,0001953 | 0,002933 |
| RP11-387D10.3 | 0,69 | 2,30 | 1,45 | 0,67 | 0,0001953 | 0,002933 |
| AC007246.3    | 4,05 | 6,27 | 4,69 | 4,01 | 0,0001957 | 0,002936 |
| PSTPIP1       | 5,79 | 6,01 | 6,48 | 7,12 | 0,0001968 | 0,002952 |
| RP11-143O10.1 | 0,00 | 0,23 | 0,07 | 0,45 | 0,0001984 | 0,002973 |
| NUMBL         | 0,24 | 0,23 | 0,59 | 0,24 | 0,0001985 | 0,002973 |
| FLCN          | 1,45 | 2,35 | 1,80 | 1,91 | 0,0001987 | 0,002973 |
| RP11-69I8.2   | 2,40 | 2,96 | 2,33 | 3,63 | 0,0001994 | 0,002983 |
| RP11-252A24.2 | 1,38 | 0,43 | 1,76 | 2,03 | 0,0001996 | 0,002983 |
| RNU5F-1       | 4,84 | 4,39 | 6,46 | 7,12 | 0,0001999 | 0,002985 |
| VAPA          | 7,34 | 7,82 | 6,82 | 5,05 | 0,0002005 | 0,002991 |
| PCDH11X       | 0,36 | 0,51 | 0,49 | 0,44 | 0,0002005 | 0,002991 |
| CARM1L        | 0,73 | 1,11 | 2,04 | 2,37 | 0,0002038 | 0,003036 |
| CSNK1G2-AS1   | 0,00 | 0,00 | 0,90 | 0,15 | 0,0002038 | 0,003036 |
| ZP3           | 2,28 | 1,97 | 3,26 | 4,08 | 0,000204  | 0,003036 |
| RP5-1187M17.7 | 0,00 | 0,00 | 0,18 | 0,00 | 0,0002051 | 0,003051 |
| RPS19BP1      | 5,97 | 6,89 | 6,29 | 6,58 | 0,0002054 | 0,003053 |
| SPATA6L       | 1,52 | 2,66 | 1,63 | 2,78 | 0,0002056 | 0,003054 |
| OR1D2         | 1,90 | 2,77 | 1,75 | 3,14 | 0,0002062 | 0,00306  |
| GPR1-AS       | 0,04 | 0,39 | 0,18 | 0,20 | 0,0002063 | 0,00306  |
| CCNJL         | 0,14 | 1,08 | 0,47 | 0,96 | 0,0002064 | 0,00306  |
| RYBP          | 3,48 | 1,50 | 3,02 | 2,42 | 0,0002067 | 0,003063 |
| SSR4          | 8,57 | 8,87 | 9,01 | 9,07 | 0,0002069 | 0,003064 |
| RP11-158H5.7  | 0,05 | 0,36 | 0,10 | 1,32 | 0,0002079 | 0,003076 |
| RP11-648L3.2  | 1,04 | 3,52 | 1,44 | 1,47 | 0,0002082 | 0,003078 |
| ZNF442        | 0,27 | 0,38 | 0,21 | 0,22 | 0,0002084 | 0,003079 |
| IL5RA         | 0,12 | 0,85 | 0,19 | 0,53 | 0,0002095 | 0,003092 |
| RP11-346D14.1 | 3,58 | 4,91 | 3,58 | 3,95 | 0,0002096 | 0,003092 |
| WWP2          | 4,51 | 4,23 | 4,52 | 4,79 | 0,0002096 | 0,003092 |
| RPL32         | 9,55 | 9,91 | 9,90 | 9,87 | 0,0002101 | 0,003097 |
| DST           | 5,57 | 5,31 | 5,17 | 3,77 | 0,000211  | 0,003107 |
| RP11-1B20.1   | 0,00 | 2,11 | 0,00 | 0,19 | 0,0002117 | 0,003116 |
| RP11-747H7.3  | 0,27 | 0,76 | 0,14 | 0,57 | 0,0002123 | 0,003123 |
| RP13-198D9.5  | 0,19 | 0,58 | 0,25 | 0,59 | 0,0002138 | 0,003143 |
| EIF3H         | 8,34 | 8,07 | 7,58 | 7,18 | 0,0002141 | 0,003145 |
| SRSF3         | 8,37 | 7,65 | 7,88 | 7,03 | 0,0002144 | 0,003147 |
| RP11-383I23.2 | 0,49 | 1,77 | 0,50 | 2,00 | 0,0002145 | 0,003147 |
| ST8SIA4       | 4,79 | 2,39 | 4,52 | 3,38 | 0,0002147 | 0,003147 |
| SLC23A3       | 0,12 | 0,14 | 0,48 | 0,07 | 0,0002154 | 0,003156 |
| RP11-465I4.2  | 0,51 | 0,76 | 1,60 | 1,67 | 0,0002159 | 0,003161 |
| CTD-2309M13.1 | 1,07 | 0,28 | 0,72 | 0,47 | 0,0002161 | 0,003161 |
| RP11-433M22.2 | 0,45 | 0,54 | 0,90 | 1,00 | 0,0002162 | 0,003162 |
| BEST1         | 4,95 | 5,39 | 5,36 | 5,17 | 0,0002166 | 0,003165 |
| GOLGA3        | 2,71 | 3,16 | 3,14 | 3,26 | 0,0002177 | 0,003178 |
| MIDN          | 1,46 | 2,18 | 2,81 | 2,83 | 0,0002183 | 0,003186 |
| IKBKG         | 2,56 | 5,30 | 3,57 | 3,74 | 0,0002197 | 0,003204 |
| TMEM39A       | 4,20 | 1,70 | 3,00 | 2,30 | 0,0002203 | 0,003211 |
| RP11-742N3.1  | 5,94 | 6,88 | 6,81 | 7,38 | 0,0002207 | 0,003214 |
| LRP12         | 0,25 | 0,33 | 0,48 | 0,46 | 0,0002226 | 0,003239 |
| ALDH2         | 6,95 | 6,07 | 6,17 | 4,00 | 0,0002246 | 0,003267 |
| MUL1          | 3,06 | 0,11 | 2,85 | 1,31 | 0,0002255 | 0,003278 |
| SEPN1         | 2,55 | 1,40 | 3,70 | 4,07 | 0,0002263 | 0,003288 |
| RP11-286N22.8 | 4,90 | 1,47 | 4,12 | 1,97 | 0,0002269 | 0,003294 |
| ITGAE         | 6,26 | 3,86 | 6,33 | 5,81 | 0,0002273 | 0,003298 |
| CTA-992D9.8   | 0,34 | 1,95 | 0,62 | 1,06 | 0,0002281 | 0,003307 |

|               |       |       |       |       |           |          |
|---------------|-------|-------|-------|-------|-----------|----------|
| RORA          | 0,44  | 4,40  | 0,28  | 3,07  | 0,0002282 | 0,003307 |
| MYO1G         | 3,13  | 4,67  | 4,48  | 4,69  | 0,0002288 | 0,003312 |
| RP11-167H9.3  | 0,00  | 0,00  | 0,00  | 0,27  | 0,0002289 | 0,003313 |
| BUB1B         | 0,03  | 0,24  | 0,00  | 0,77  | 0,0002306 | 0,003334 |
| TECR          | 6,67  | 6,14  | 5,65  | 4,97  | 0,0002314 | 0,003343 |
| NOP9          | 1,13  | 0,13  | 0,76  | 1,60  | 0,0002325 | 0,003354 |
| MEG3          | 0,23  | 1,11  | 0,25  | 0,32  | 0,0002325 | 0,003354 |
| MBD3          | 3,31  | 4,88  | 4,98  | 4,33  | 0,0002327 | 0,003354 |
| RP11-364L4.1  | 0,34  | 0,24  | 0,90  | 0,58  | 0,0002327 | 0,003354 |
| PLCG2         | 4,96  | 4,47  | 4,79  | 1,75  | 0,0002339 | 0,003368 |
| DHDDS         | 3,44  | 5,23  | 2,94  | 4,27  | 0,0002341 | 0,00337  |
| DIXDC1        | 0,17  | 0,74  | 0,29  | 0,30  | 0,0002355 | 0,003387 |
| CCDC64B       | 0,00  | 1,36  | 0,00  | 0,00  | 0,0002358 | 0,00339  |
| ADAMTS5       | 0,00  | 0,01  | 0,00  | 0,11  | 0,0002367 | 0,0034   |
| MPP7          | 4,46  | 1,92  | 3,41  | 3,72  | 0,0002393 | 0,003436 |
| GZMK          | 0,00  | 0,00  | 0,00  | 0,27  | 0,0002395 | 0,003437 |
| JAKMIP1       | 0,08  | 2,49  | 0,04  | 0,11  | 0,0002401 | 0,003443 |
| VWTR1         | 0,22  | 0,35  | 0,32  | 0,43  | 0,000241  | 0,003454 |
| BST1          | 1,40  | 3,27  | 3,49  | 5,77  | 0,0002425 | 0,003472 |
| RP11-371I20.2 | 0,29  | 1,64  | 0,61  | 0,49  | 0,0002427 | 0,003472 |
| ZNF326        | 3,49  | 1,91  | 3,11  | 1,82  | 0,0002428 | 0,003472 |
| AC012594.1    | 2,63  | 2,66  | 2,86  | 2,63  | 0,0002444 | 0,003494 |
| CTPS1         | 5,32  | 3,26  | 4,23  | 2,55  | 0,0002457 | 0,003509 |
| MT-TS2        | 5,01  | 7,26  | 5,19  | 6,88  | 0,0002458 | 0,003509 |
| RP11-90D4.2   | 3,04  | 4,98  | 3,33  | 6,32  | 0,0002463 | 0,003513 |
| PAPPA2        | 0,00  | 0,14  | 0,00  | 0,00  | 0,0002468 | 0,003518 |
| FRG1HP        | 3,87  | 3,39  | 4,64  | 5,59  | 0,0002469 | 0,003518 |
| CAV2          | 0,19  | 0,18  | 0,25  | 0,31  | 0,000248  | 0,003531 |
| RP11-245J9.5  | 2,02  | 2,30  | 1,82  | 3,77  | 0,0002482 | 0,003531 |
| C6orf62       | 7,30  | 5,47  | 5,94  | 4,96  | 0,0002485 | 0,003534 |
| RPL18A        | 11,53 | 11,87 | 11,69 | 11,81 | 0,0002491 | 0,00354  |
| UBE2W         | 4,61  | 2,85  | 3,95  | 2,84  | 0,0002505 | 0,003557 |
| GAREM2        | 0,14  | 0,05  | 0,22  | 0,23  | 0,0002513 | 0,003566 |
| BRAF          | 4,77  | 5,67  | 3,67  | 2,60  | 0,0002521 | 0,003575 |
| NDUFC1        | 5,07  | 5,60  | 5,59  | 6,23  | 0,0002526 | 0,00358  |
| AC009120.6    | 1,60  | 0,08  | 3,14  | 2,43  | 0,0002561 | 0,003627 |
| LPAR5         | 0,22  | 0,45  | 0,05  | 0,30  | 0,0002567 | 0,003633 |
| KCNE4         | 2,07  | 2,12  | 2,33  | 3,06  | 0,0002581 | 0,003651 |
| OR2M4         | 0,22  | 0,57  | 0,37  | 0,66  | 0,0002584 | 0,003653 |
| RP11-64C12.3  | 0,00  | 0,74  | 0,17  | 0,41  | 0,0002588 | 0,003656 |
| RP11-447J13.3 | 0,55  | 2,21  | 0,71  | 0,69  | 0,0002597 | 0,003666 |
| CPEB1         | 0,51  | 0,62  | 0,64  | 1,28  | 0,0002606 | 0,003675 |
| TMEM169       | 0,08  | 0,28  | 0,06  | 0,11  | 0,0002607 | 0,003675 |
| DNM1L         | 5,89  | 3,35  | 5,16  | 4,59  | 0,000261  | 0,003675 |
| PILRA         | 5,74  | 5,74  | 6,37  | 5,97  | 0,000261  | 0,003675 |
| MYL4          | 0,00  | 0,00  | 0,00  | 0,00  | 0,0002611 | 0,003675 |
| SLC24A2       | 0,18  | 0,36  | 0,30  | 0,34  | 0,0002617 | 0,003681 |
| BRWD3         | 3,50  | 0,76  | 2,76  | 2,43  | 0,000263  | 0,003697 |
| RP11-300M24.1 | 0,29  | 0,33  | 0,34  | 1,70  | 0,0002652 | 0,003726 |
| RBM3          | 8,50  | 7,60  | 7,66  | 6,71  | 0,0002657 | 0,00373  |
| EPG5          | 2,45  | 4,95  | 2,47  | 1,38  | 0,0002663 | 0,003734 |
| PAQR5         | 0,29  | 0,14  | 0,24  | 0,79  | 0,0002663 | 0,003734 |
| CTDSP1        | 4,01  | 4,22  | 4,73  | 5,24  | 0,0002668 | 0,003738 |
| PPP2R2C       | 0,12  | 0,49  | 0,23  | 0,19  | 0,0002671 | 0,003739 |
| SYMPK         | 2,42  | 3,67  | 3,37  | 4,56  | 0,0002671 | 0,003739 |

|                |       |       |       |       |           |          |
|----------------|-------|-------|-------|-------|-----------|----------|
| ACER3          | 5,97  | 4,60  | 5,37  | 3,77  | 0,0002683 | 0,003753 |
| MIF            | 7,00  | 7,96  | 7,48  | 7,58  | 0,0002706 | 0,003782 |
| PRKAG2         | 4,92  | 5,54  | 5,08  | 5,34  | 0,0002708 | 0,003783 |
| TMEM109        | 7,61  | 7,63  | 7,22  | 5,99  | 0,0002711 | 0,003784 |
| AC000123.2     | 1,49  | 0,05  | 0,39  | 0,03  | 0,0002728 | 0,003805 |
| CALHM1         | 0,08  | 0,18  | 0,05  | 0,54  | 0,0002732 | 0,003809 |
| GPX3           | 4,52  | 2,48  | 1,86  | 0,30  | 0,0002743 | 0,003822 |
| IKZF3          | 0,39  | 1,42  | 0,46  | 1,59  | 0,0002744 | 0,003822 |
| AJ239322.1     | 0,06  | 0,44  | 0,13  | 0,50  | 0,0002757 | 0,003836 |
| BAG6           | 6,48  | 7,35  | 6,86  | 7,05  | 0,0002766 | 0,003847 |
| RP11-1103G16.1 | 1,31  | 3,28  | 2,03  | 1,54  | 0,0002786 | 0,003873 |
| C3orf18        | 0,21  | 0,88  | 0,33  | 0,00  | 0,0002792 | 0,003878 |
| BEGAIN         | 0,00  | 0,16  | 0,02  | 0,04  | 0,0002796 | 0,003881 |
| DUSP4          | 0,68  | 0,84  | 0,22  | 0,02  | 0,0002799 | 0,003883 |
| PPP1CA         | 8,48  | 7,86  | 7,80  | 7,33  | 0,0002809 | 0,003894 |
| GTF3C4         | 1,37  | 2,45  | 1,57  | 0,60  | 0,0002811 | 0,003895 |
| FLNA           | 7,70  | 7,67  | 8,35  | 8,32  | 0,0002815 | 0,003898 |
| COMMD4         | 5,80  | 3,15  | 5,40  | 5,67  | 0,0002826 | 0,003908 |
| CITF22-92A6.2  | 0,07  | 0,19  | 0,09  | 0,26  | 0,0002827 | 0,003908 |
| NYAP2          | 0,08  | 0,44  | 0,12  | 0,29  | 0,0002827 | 0,003908 |
| GHc-857G6.7    | 0,00  | 0,00  | 0,00  | 0,13  | 0,0002829 | 0,003908 |
| PIP5K1         | 1,18  | 1,65  | 0,90  | 0,70  | 0,0002834 | 0,003912 |
| ARHGAP6        | 0,00  | 0,53  | 0,00  | 0,22  | 0,0002849 | 0,00393  |
| FILIP1         | 0,37  | 0,22  | 0,46  | 0,34  | 0,0002868 | 0,003954 |
| RPL23          | 9,74  | 10,37 | 10,15 | 10,29 | 0,000287  | 0,003954 |
| CTD-2291D10.1  | 0,03  | 0,32  | 0,03  | 0,20  | 0,0002871 | 0,003954 |
| RP11-114N19.3  | 1,36  | 2,65  | 1,59  | 2,35  | 0,000288  | 0,003964 |
| TSPEAR-AS2     | 0,23  | 0,16  | 0,11  | 0,06  | 0,0002891 | 0,003976 |
| GTF3C3         | 5,67  | 1,65  | 4,45  | 4,70  | 0,0002897 | 0,003981 |
| ADAMTS10       | 0,00  | 0,95  | 0,05  | 0,29  | 0,0002918 | 0,004008 |
| PTBP3          | 4,68  | 4,50  | 4,27  | 3,18  | 0,0002921 | 0,004011 |
| FBXL2          | 1,76  | 3,44  | 1,34  | 1,66  | 0,000293  | 0,004015 |
| SPIN1          | 3,98  | 0,99  | 2,90  | 2,34  | 0,000293  | 0,004015 |
| ATP7B          | 0,00  | 0,07  | 0,02  | 0,10  | 0,000293  | 0,004015 |
| C1S            | 1,32  | 1,42  | 2,54  | 2,45  | 0,0002933 | 0,004017 |
| AL928654.7     | 0,01  | 0,70  | 1,23  | 2,86  | 0,0002951 | 0,004038 |
| HIST1H4H       | 0,10  | 0,74  | 0,06  | 0,47  | 0,0002954 | 0,00404  |
| AP5Z1          | 3,09  | 5,16  | 4,19  | 4,85  | 0,0002959 | 0,004045 |
| STXBP2         | 5,70  | 6,77  | 6,36  | 6,17  | 0,0002968 | 0,004054 |
| RP11-10L12.5   | 0,00  | 0,00  | 0,10  | 0,00  | 0,0002984 | 0,004072 |
| RASGRP2        | 4,91  | 5,64  | 5,37  | 6,26  | 0,0002985 | 0,004072 |
| RP11-16C1.2    | 0,08  | 0,22  | 0,31  | 0,36  | 0,0002993 | 0,00408  |
| RPL18          | 10,53 | 10,85 | 10,83 | 10,80 | 0,0002997 | 0,004082 |
| MICAL2         | 4,11  | 4,79  | 5,28  | 4,58  | 0,0002998 | 0,004082 |
| OSTF1          | 7,26  | 5,51  | 6,12  | 5,66  | 0,0003008 | 0,004092 |
| RP11-362K2.2   | 0,28  | 1,70  | 0,43  | 0,20  | 0,0003008 | 0,004092 |
| YIPF6          | 3,68  | 5,02  | 2,87  | 1,69  | 0,0003011 | 0,004093 |
| RP1-23E21.2    | 0,00  | 0,09  | 0,24  | 0,29  | 0,0003013 | 0,004093 |
| MORF4L2        | 6,23  | 4,53  | 5,10  | 2,91  | 0,0003025 | 0,004107 |
| ABHD1          | 0,13  | 0,53  | 0,22  | 0,12  | 0,0003031 | 0,004112 |
| EIF3L          | 9,04  | 8,76  | 8,43  | 7,85  | 0,0003038 | 0,00412  |
| SCP2           | 7,34  | 5,60  | 6,57  | 5,46  | 0,0003042 | 0,004123 |
| RP11-749H20.6  | 0,29  | 0,50  | 0,33  | 0,53  | 0,0003056 | 0,004138 |
| ARFGEF3        | 0,02  | 0,03  | 0,03  | 0,06  | 0,0003061 | 0,004143 |
| PCA3           | 0,65  | 1,40  | 0,89  | 1,08  | 0,0003076 | 0,004161 |

|               |       |       |       |      |           |          |
|---------------|-------|-------|-------|------|-----------|----------|
| AJUBA         | 0,15  | 0,83  | 0,14  | 0,00 | 0,0003078 | 0,004161 |
| SRP9          | 7,77  | 6,38  | 6,94  | 6,57 | 0,0003088 | 0,004172 |
| RBM39         | 9,14  | 8,73  | 8,83  | 8,02 | 0,0003106 | 0,004194 |
| FERMT3        | 6,18  | 6,67  | 6,73  | 6,54 | 0,0003115 | 0,004204 |
| RP11-342C24.8 | 0,48  | 1,21  | 1,06  | 0,58 | 0,0003146 | 0,004242 |
| FAM159A       | 0,84  | 2,67  | 0,96  | 1,20 | 0,0003155 | 0,004252 |
| RPL27         | 9,31  | 9,73  | 9,64  | 9,82 | 0,0003161 | 0,004258 |
| CLCN7         | 0,70  | 3,15  | 3,07  | 2,09 | 0,0003168 | 0,004263 |
| RCAN1         | 3,47  | 3,43  | 1,94  | 2,65 | 0,0003168 | 0,004263 |
| HPSE          | 0,40  | 1,10  | 0,55  | 2,00 | 0,0003179 | 0,004274 |
| IL7R          | 2,04  | 4,40  | 1,20  | 3,34 | 0,0003204 | 0,004306 |
| BMPRI1B       | 0,04  | 0,24  | 0,05  | 0,11 | 0,0003223 | 0,004328 |
| HLA-DMA       | 10,77 | 10,25 | 10,51 | 9,57 | 0,0003228 | 0,004332 |
| SLBP          | 5,28  | 4,70  | 3,94  | 2,39 | 0,0003233 | 0,004337 |
| RASSF3        | 3,62  | 3,68  | 3,82  | 4,54 | 0,0003265 | 0,004376 |
| SPG7          | 4,77  | 5,72  | 5,71  | 5,76 | 0,0003267 | 0,004377 |
| COBLL1        | 0,22  | 1,70  | 0,23  | 0,74 | 0,0003271 | 0,004379 |
| CHCHD5        | 4,95  | 4,72  | 5,16  | 6,16 | 0,0003279 | 0,004387 |
| RP11-96O20.5  | 0,53  | 0,00  | 0,70  | 1,74 | 0,0003296 | 0,004403 |
| ZNF517        | 0,19  | 1,16  | 0,52  | 1,02 | 0,0003296 | 0,004403 |
| HYDIN         | 0,61  | 5,26  | 0,76  | 0,94 | 0,0003298 | 0,004403 |
| PLK5          | 0,26  | 0,77  | 0,47  | 0,91 | 0,0003299 | 0,004403 |
| TCF20         | 0,36  | 0,92  | 1,18  | 2,14 | 0,0003304 | 0,004408 |
| TRUB2         | 3,51  | 1,18  | 3,39  | 1,11 | 0,0003311 | 0,004413 |
| CTD-2083E4.4  | 0,57  | 1,30  | 0,61  | 0,45 | 0,0003312 | 0,004413 |
| AC007228.9    | 0,00  | 0,12  | 0,00  | 0,19 | 0,0003318 | 0,004419 |
| REL           | 5,46  | 3,34  | 5,30  | 3,55 | 0,0003342 | 0,004447 |
| AP000330.8    | 0,00  | 0,23  | 0,05  | 0,48 | 0,0003346 | 0,004449 |
| ZSCAN26       | 2,17  | 0,07  | 0,44  | 1,55 | 0,0003347 | 0,004449 |
| G2E3          | 5,28  | 3,07  | 4,22  | 4,20 | 0,0003359 | 0,004461 |
| RP11-383F6.1  | 6,02  | 4,68  | 0,96  | 0,35 | 0,0003361 | 0,004461 |
| RPS21         | 8,57  | 9,74  | 9,15  | 9,61 | 0,0003362 | 0,004461 |
| OAZ3          | 0,10  | 0,93  | 0,20  | 0,49 | 0,0003379 | 0,004481 |
| KB-1980E6.2   | 0,65  | 0,73  | 1,10  | 0,64 | 0,0003385 | 0,004486 |
| RP3-508I15.18 | 3,09  | 3,55  | 4,25  | 4,80 | 0,0003388 | 0,004487 |
| LINC01348     | 0,09  | 0,52  | 0,26  | 0,53 | 0,0003409 | 0,004512 |
| RP11-478H13.2 | 0,00  | 0,03  | 0,24  | 1,51 | 0,0003412 | 0,004513 |
| FBLIM1        | 0,30  | 0,65  | 0,50  | 1,22 | 0,0003418 | 0,004518 |
| RP11-57A19.2  | 0,36  | 0,60  | 0,65  | 0,67 | 0,0003428 | 0,004529 |
| AC008691.1    | 0,14  | 0,28  | 0,29  | 0,16 | 0,0003434 | 0,004534 |
| RP11-227H15.4 | 0,00  | 0,38  | 0,07  | 0,00 | 0,0003449 | 0,004552 |
| SEMA4B        | 1,42  | 1,30  | 2,27  | 1,74 | 0,0003456 | 0,004558 |
| ENPP6         | 0,23  | 0,77  | 0,45  | 0,53 | 0,0003479 | 0,004586 |
| RP11-181C3.4  | 0,00  | 0,41  | 0,17  | 1,95 | 0,0003483 | 0,004587 |
| PLXNA4        | 0,05  | 0,46  | 0,03  | 0,01 | 0,0003484 | 0,004587 |
| OAS3          | 4,93  | 1,07  | 4,13  | 3,22 | 0,0003495 | 0,004599 |
| RP11-587D21.5 | 0,21  | 0,52  | 0,20  | 0,79 | 0,0003505 | 0,004609 |
| APEX1         | 7,48  | 6,32  | 6,69  | 5,97 | 0,0003523 | 0,004629 |
| ZNF540        | 0,14  | 0,14  | 0,26  | 0,57 | 0,0003524 | 0,004629 |
| PBXIP1        | 1,55  | 3,07  | 1,98  | 2,24 | 0,0003526 | 0,004629 |
| RASGEF1A      | 1,58  | 0,06  | 0,64  | 0,34 | 0,000353  | 0,004631 |
| RP11-274H24.2 | 1,06  | 2,70  | 1,61  | 1,87 | 0,0003539 | 0,004638 |
| HAMP          | 0,63  | 1,08  | 0,73  | 1,50 | 0,000354  | 0,004638 |
| PDLIM5        | 5,18  | 2,63  | 4,39  | 5,04 | 0,0003551 | 0,004651 |
| PLCE1         | 0,53  | 1,94  | 0,85  | 0,54 | 0,0003577 | 0,004682 |

|                |       |       |       |       |           |          |
|----------------|-------|-------|-------|-------|-----------|----------|
| RP11-9G1.3     | 0,33  | 0,49  | 0,15  | 0,18  | 0,0003586 | 0,004691 |
| C5orf15        | 4,61  | 2,24  | 3,75  | 3,92  | 0,0003592 | 0,004696 |
| RP11-303E16.9  | 2,14  | 2,39  | 2,51  | 2,66  | 0,0003603 | 0,004708 |
| CD99           | 7,12  | 7,46  | 7,75  | 7,64  | 0,0003613 | 0,004717 |
| SNRPF          | 4,14  | 4,35  | 4,40  | 4,94  | 0,0003637 | 0,004746 |
| IDO1           | 4,33  | 0,99  | 0,64  | 0,51  | 0,0003644 | 0,004753 |
| OTULIN         | 4,40  | 0,97  | 3,56  | 2,68  | 0,0003647 | 0,004754 |
| RP11-245J9.8   | 1,19  | 3,01  | 1,45  | 2,06  | 0,000365  | 0,004755 |
| RP11-210M15.2  | 0,04  | 0,41  | 0,11  | 0,14  | 0,0003677 | 0,004787 |
| CH17-132F21.5  | 0,00  | 0,13  | 0,00  | 0,58  | 0,0003679 | 0,004787 |
| RP11-58O9.2    | 0,75  | 2,20  | 0,89  | 0,73  | 0,00037   | 0,004812 |
| PTMA           | 9,68  | 9,77  | 9,83  | 9,49  | 0,0003703 | 0,004812 |
| SKAP1          | 0,34  | 1,17  | 0,61  | 2,02  | 0,0003704 | 0,004812 |
| KIF14          | 0,05  | 0,03  | 0,14  | 0,21  | 0,0003709 | 0,004816 |
| PTP4A2         | 9,06  | 8,88  | 8,73  | 7,46  | 0,0003715 | 0,00482  |
| LPP-AS2        | 0,34  | 0,16  | 0,32  | 0,59  | 0,0003723 | 0,004827 |
| DGKD           | 3,39  | 5,36  | 4,60  | 3,93  | 0,0003725 | 0,004827 |
| ACBD7          | 0,30  | 2,83  | 0,39  | 1,13  | 0,0003728 | 0,004829 |
| PTPRJ          | 2,75  | 2,15  | 2,81  | 3,64  | 0,0003732 | 0,004831 |
| ZEB1           | 4,13  | 3,96  | 2,09  | 0,19  | 0,0003743 | 0,004842 |
| RP3-422G23.2   | 0,85  | 1,58  | 0,89  | 1,79  | 0,0003749 | 0,004844 |
| NKPD1          | 0,00  | 0,20  | 0,01  | 0,05  | 0,0003751 | 0,004844 |
| RP11-95I16.4   | 0,25  | 0,67  | 1,06  | 1,72  | 0,0003751 | 0,004844 |
| KIAA0513       | 1,39  | 0,94  | 1,46  | 2,73  | 0,000376  | 0,004853 |
| EEF1G          | 10,80 | 10,45 | 10,15 | 9,49  | 0,0003766 | 0,004858 |
| IL17RC         | 0,15  | 0,40  | 0,96  | 1,34  | 0,0003774 | 0,004866 |
| STX10          | 5,81  | 4,37  | 6,39  | 6,60  | 0,0003795 | 0,004889 |
| SSR3           | 7,10  | 5,67  | 7,08  | 7,08  | 0,0003796 | 0,004889 |
| CCT5           | 6,91  | 5,98  | 6,49  | 5,32  | 0,0003812 | 0,004903 |
| CTD-2058B24.2  | 0,00  | 1,00  | 0,00  | 1,51  | 0,0003812 | 0,004903 |
| RPL29          | 10,08 | 10,47 | 10,40 | 10,40 | 0,0003816 | 0,004905 |
| PTGS2          | 5,16  | 5,28  | 5,01  | 2,39  | 0,0003826 | 0,004915 |
| RP11-498C9.3   | 0,92  | 3,85  | 3,67  | 3,23  | 0,0003831 | 0,004919 |
| AASDHPPT       | 4,36  | 0,62  | 4,23  | 3,02  | 0,000385  | 0,00494  |
| IER3IP1        | 3,86  | 4,94  | 3,17  | 3,52  | 0,0003857 | 0,004947 |
| HSPB1          | 2,59  | 3,44  | 3,56  | 3,76  | 0,0003868 | 0,004957 |
| MCMD2          | 0,04  | 0,05  | 0,07  | 0,12  | 0,000387  | 0,004957 |
| EIF5AL1        | 0,33  | 0,62  | 0,54  | 1,03  | 0,0003889 | 0,004979 |
| RP11-148K14.2  | 2,37  | 4,20  | 2,50  | 3,46  | 0,0003899 | 0,004987 |
| ATP5I          | 6,99  | 7,98  | 7,76  | 8,27  | 0,00039   | 0,004987 |
| TXK            | 1,06  | 3,87  | 1,69  | 3,22  | 0,0003904 | 0,004989 |
| LL22NC03-2H8.5 | 2,94  | 4,72  | 3,93  | 4,13  | 0,0003908 | 0,004989 |
| AC008982.2     | 2,98  | 5,00  | 4,28  | 3,97  | 0,0003909 | 0,004989 |
| LYPD2          | 0,00  | 1,02  | 0,00  | 3,75  | 0,0003911 | 0,004989 |
| EEF1A1         | 12,61 | 12,27 | 12,14 | 11,29 | 0,0003925 | 0,005002 |
| PLEKHA2        | 3,59  | 5,35  | 3,37  | 3,16  | 0,0003925 | 0,005002 |
| RP11-426J5.3   | 0,00  | 0,40  | 0,03  | 0,00  | 0,000395  | 0,005029 |
| AC020743.2     | 0,95  | 1,18  | 1,10  | 1,47  | 0,0003951 | 0,005029 |
| FAM153B        | 0,33  | 1,54  | 0,20  | 0,45  | 0,0003961 | 0,005039 |
| RN7SL726P      | 0,69  | 2,00  | 1,49  | 1,57  | 0,0003963 | 0,005039 |
| LTB4R          | 3,44  | 5,07  | 4,26  | 3,55  | 0,000397  | 0,005045 |
| NET1           | 3,95  | 0,84  | 2,79  | 1,03  | 0,0004002 | 0,005083 |
| C2CD4A         | 0,08  | 0,57  | 0,12  | 0,17  | 0,0004019 | 0,0051   |
| OCIAD2         | 4,38  | 1,46  | 2,68  | 0,73  | 0,0004021 | 0,0051   |
| ATE1           | 4,54  | 5,01  | 3,79  | 1,92  | 0,0004031 | 0,005108 |

|               |      |       |       |       |           |          |
|---------------|------|-------|-------|-------|-----------|----------|
| RP11-345K9.2  | 0,74 | 1,31  | 0,88  | 1,68  | 0,0004031 | 0,005108 |
| HPGD          | 0,00 | 0,00  | 0,40  | 0,00  | 0,0004042 | 0,005117 |
| RP11-527L4.5  | 2,23 | 0,00  | 0,27  | 0,00  | 0,0004043 | 0,005117 |
| OR7E25P       | 0,54 | 0,98  | 0,77  | 0,52  | 0,0004058 | 0,005133 |
| RP5-1091N2.12 | 1,52 | 0,00  | 0,02  | 0,00  | 0,0004088 | 0,005168 |
| CLEC10A       | 7,98 | 8,41  | 8,80  | 7,02  | 0,0004096 | 0,005173 |
| SEPT7         | 7,93 | 7,78  | 7,19  | 6,19  | 0,0004097 | 0,005173 |
| NKG7          | 4,68 | 8,14  | 5,86  | 7,73  | 0,0004101 | 0,005176 |
| CCBE1         | 0,21 | 0,54  | 0,27  | 0,38  | 0,0004113 | 0,005188 |
| AHCYL1        | 4,61 | 2,62  | 3,89  | 4,56  | 0,0004118 | 0,005191 |
| MYO3B         | 0,18 | 0,23  | 0,29  | 0,23  | 0,0004126 | 0,005198 |
| RP11-436J20.2 | 3,64 | 0,00  | 2,48  | 0,00  | 0,000413  | 0,0052   |
| FAT3          | 0,09 | 0,16  | 0,05  | 0,07  | 0,0004132 | 0,0052   |
| LECT2         | 2,12 | 3,78  | 2,26  | 4,61  | 0,0004139 | 0,005206 |
| RP11-1143G9.5 | 0,42 | 1,61  | 0,59  | 1,13  | 0,0004143 | 0,005209 |
| ZNF770        | 3,26 | 0,10  | 1,45  | 0,56  | 0,0004157 | 0,005223 |
| LRR1          | 4,22 | 0,32  | 2,44  | 0,74  | 0,0004164 | 0,005229 |
| ZNF620        | 0,66 | 1,92  | 1,14  | 0,72  | 0,0004177 | 0,005241 |
| RP11-342C20.3 | 0,69 | 1,12  | 0,98  | 1,13  | 0,0004179 | 0,005242 |
| RP11-15H20.7  | 0,00 | 0,92  | 0,00  | 0,40  | 0,0004189 | 0,005251 |
| NRP1          | 0,81 | 2,39  | 1,09  | 2,20  | 0,0004195 | 0,005256 |
| COL19A1       | 0,62 | 0,90  | 0,61  | 0,44  | 0,0004204 | 0,005261 |
| RAPGEF4       | 0,11 | 0,07  | 0,13  | 0,25  | 0,0004204 | 0,005261 |
| SF3B4         | 3,93 | 3,71  | 3,17  | 1,50  | 0,000421  | 0,005263 |
| RPS16         | 9,88 | 10,12 | 10,21 | 10,21 | 0,000421  | 0,005263 |
| ACO16757.3    | 0,73 | 0,00  | 0,00  | 0,00  | 0,0004222 | 0,005274 |
| UFC1          | 7,70 | 6,87  | 7,21  | 5,89  | 0,0004228 | 0,005276 |
| GIMAP7        | 5,13 | 5,76  | 5,53  | 7,13  | 0,0004228 | 0,005276 |
| RP11-775C24.3 | 0,19 | 0,30  | 0,45  | 0,80  | 0,0004234 | 0,005281 |
| ZC3H12B       | 0,08 | 0,04  | 0,14  | 0,07  | 0,0004243 | 0,005289 |
| RPRD2         | 2,43 | 0,50  | 1,92  | 0,95  | 0,0004246 | 0,00529  |
| ACO16722.4    | 0,74 | 0,82  | 0,63  | 0,90  | 0,0004259 | 0,005303 |
| PARVG         | 7,45 | 6,60  | 7,11  | 6,07  | 0,0004265 | 0,005307 |
| RND2          | 0,09 | 0,17  | 0,14  | 0,18  | 0,0004288 | 0,005333 |
| NOTCH4        | 0,33 | 1,69  | 1,44  | 2,37  | 0,0004291 | 0,005334 |
| FAM50A        | 3,36 | 4,94  | 4,61  | 4,99  | 0,00043   | 0,005342 |
| ABCC6         | 0,33 | 0,70  | 0,85  | 2,76  | 0,0004317 | 0,00536  |
| MAPKAP1       | 4,48 | 4,05  | 4,98  | 5,13  | 0,0004337 | 0,005382 |
| LURAP1        | 0,09 | 0,38  | 0,42  | 0,42  | 0,0004349 | 0,005394 |
| TUBA1A        | 9,06 | 8,25  | 8,70  | 7,70  | 0,000436  | 0,005404 |
| RP11-670E13.6 | 3,51 | 6,65  | 5,38  | 6,10  | 0,0004363 | 0,005405 |
| MRC1          | 1,49 | 3,12  | 4,28  | 2,53  | 0,0004372 | 0,00541  |
| GTF2H4        | 0,36 | 0,00  | 1,62  | 0,32  | 0,0004372 | 0,00541  |
| CSNK2B        | 7,94 | 7,63  | 7,42  | 6,34  | 0,0004382 | 0,00542  |
| DSTN          | 5,28 | 5,41  | 4,14  | 3,84  | 0,0004399 | 0,005433 |
| RP11-83B20.3  | 0,00 | 0,30  | 0,13  | 0,21  | 0,00044   | 0,005433 |
| TRNT1         | 4,01 | 5,27  | 3,94  | 4,72  | 0,00044   | 0,005433 |
| CH17-12M21.1  | 0,00 | 0,29  | 0,00  | 0,00  | 0,0004436 | 0,005474 |
| SCTR          | 0,00 | 2,36  | 0,38  | 1,89  | 0,0004444 | 0,005481 |
| ZNF583        | 0,33 | 0,47  | 0,83  | 0,23  | 0,0004451 | 0,005487 |
| CCDC152       | 0,22 | 0,36  | 0,17  | 0,41  | 0,000446  | 0,005495 |
| SACS          | 2,69 | 1,83  | 2,15  | 0,25  | 0,0004475 | 0,00551  |
| RP11-556O5.3  | 1,08 | 3,32  | 1,59  | 0,93  | 0,0004478 | 0,00551  |
| SNORA12       | 1,30 | 2,30  | 2,80  | 3,72  | 0,0004481 | 0,00551  |
| KDM6B         | 3,40 | 2,26  | 3,92  | 4,80  | 0,0004483 | 0,00551  |

|              |      |      |      |      |           |          |
|--------------|------|------|------|------|-----------|----------|
| MYBBP1A      | 2,07 | 2,04 | 2,71 | 3,22 | 0,0004493 | 0,00552  |
| CMTM6        | 7,35 | 6,05 | 6,42 | 5,37 | 0,0004498 | 0,005524 |
| ADGRE5       | 5,68 | 7,07 | 7,18 | 7,35 | 0,0004509 | 0,005532 |
| RP11-767N6.7 | 0,00 | 1,55 | 0,00 | 0,00 | 0,0004511 | 0,005532 |
| SLC13A3      | 0,00 | 0,10 | 0,09 | 0,15 | 0,0004513 | 0,005532 |
| FXR2         | 2,05 | 6,02 | 2,15 | 3,61 | 0,0004518 | 0,005535 |
| PLD3         | 5,19 | 5,20 | 5,78 | 5,84 | 0,0004527 | 0,005542 |
| RP11-346L1.2 | 0,14 | 0,86 | 0,19 | 0,19 | 0,0004529 | 0,005542 |
| AC064853.3   | 0,55 | 1,29 | 0,36 | 0,64 | 0,0004533 | 0,005544 |
| RERG         | 0,98 | 0,00 | 1,53 | 2,85 | 0,0004542 | 0,005553 |
| PRDM9        | 0,66 | 0,62 | 0,21 | 0,19 | 0,0004548 | 0,005556 |
| TMEM52B      | 1,06 | 1,73 | 5,20 | 5,28 | 0,000455  | 0,005556 |
| KMT2E        | 7,45 | 6,37 | 6,52 | 5,89 | 0,0004586 | 0,005597 |
| HAND2-AS1    | 2,07 | 3,26 | 2,46 | 3,17 | 0,0004602 | 0,005614 |
| LRP1B        | 1,73 | 0,05 | 0,32 | 0,22 | 0,0004609 | 0,005619 |
| TMEM256      | 5,27 | 5,59 | 5,60 | 6,45 | 0,0004622 | 0,005631 |
| PSG7         | 0,00 | 0,00 | 0,00 | 0,46 | 0,000463  | 0,005639 |
| AC002429.5   | 0,07 | 0,00 | 0,18 | 0,23 | 0,0004641 | 0,005648 |
| LAMA4        | 1,22 | 1,42 | 1,13 | 2,09 | 0,0004643 | 0,005648 |
| LLGL2        | 0,61 | 3,18 | 1,60 | 2,89 | 0,0004657 | 0,005661 |
| ECI1         | 2,16 | 2,56 | 4,05 | 3,12 | 0,000466  | 0,005661 |
| PTEN         | 6,42 | 5,91 | 6,02 | 4,87 | 0,0004661 | 0,005661 |
| PTGES3L      | 0,58 | 1,14 | 1,20 | 1,56 | 0,0004666 | 0,005663 |
| HSPA4L       | 0,22 | 0,19 | 0,30 | 0,31 | 0,0004678 | 0,005675 |
| CREM         | 6,24 | 5,92 | 6,21 | 2,78 | 0,0004681 | 0,005675 |
| D2HGDH       | 0,57 | 3,30 | 0,82 | 0,77 | 0,0004683 | 0,005675 |
| RP11-21I4.1  | 0,00 | 0,32 | 0,23 | 0,32 | 0,0004688 | 0,005678 |
| CYP46A1      | 1,88 | 3,01 | 1,83 | 2,39 | 0,0004695 | 0,005679 |
| CTC-510F12.3 | 1,04 | 1,74 | 1,79 | 2,02 | 0,0004695 | 0,005679 |
| APPL2        | 4,06 | 3,29 | 2,85 | 4,62 | 0,0004697 | 0,005679 |
| SGTA         | 3,73 | 5,40 | 4,44 | 4,48 | 0,0004746 | 0,005735 |
| DDX39B       | 6,76 | 6,29 | 7,23 | 7,50 | 0,0004768 | 0,005758 |
| ENAM         | 0,00 | 1,92 | 1,05 | 1,26 | 0,000477  | 0,005758 |
| RP6-91H8.5   | 0,81 | 1,31 | 1,39 | 1,63 | 0,0004775 | 0,005759 |
| LINC00471    | 0,66 | 1,76 | 0,69 | 2,34 | 0,0004776 | 0,005759 |
| DNAH2        | 0,35 | 1,04 | 0,59 | 0,97 | 0,0004787 | 0,00577  |
| SLC25A39     | 6,13 | 5,98 | 6,10 | 4,35 | 0,0004821 | 0,005807 |
| RAC2         | 8,13 | 6,35 | 7,21 | 6,58 | 0,0004824 | 0,005808 |
| RP11-205M3.3 | 0,46 | 1,63 | 0,12 | 0,58 | 0,0004844 | 0,005829 |
| CTB-96E2.6   | 0,59 | 3,84 | 0,98 | 0,96 | 0,0004868 | 0,005854 |
| RPL34-AS1    | 0,50 | 1,68 | 0,43 | 1,07 | 0,0004875 | 0,005858 |
| KCNN1        | 0,06 | 0,11 | 0,10 | 0,13 | 0,0004876 | 0,005858 |
| IL1RAP       | 4,56 | 4,19 | 5,23 | 5,33 | 0,0004893 | 0,005873 |
| ZDBF2        | 0,00 | 0,30 | 0,02 | 0,03 | 0,0004896 | 0,005873 |
| MINK1        | 1,94 | 2,43 | 2,40 | 1,65 | 0,0004896 | 0,005873 |
| RP4-640H8.2  | 0,16 | 0,49 | 0,35 | 0,26 | 0,0004914 | 0,00589  |
| CTB-131B5.4  | 1,08 | 2,59 | 1,66 | 2,42 | 0,0004916 | 0,00589  |
| RP1-18D14.3  | 2,83 | 4,97 | 3,01 | 2,29 | 0,0004974 | 0,005956 |
| GREB1L       | 0,15 | 0,00 | 0,02 | 1,37 | 0,0004977 | 0,005957 |
| ZDHH17       | 4,78 | 3,68 | 4,45 | 2,25 | 0,000498  | 0,005957 |
| RP11-384K6.8 | 0,17 | 1,78 | 0,11 | 0,30 | 0,0004986 | 0,005961 |
| SLC25A25     | 0,69 | 0,09 | 1,05 | 0,91 | 0,0004994 | 0,005965 |
| CENPF        | 1,73 | 2,79 | 1,70 | 1,63 | 0,0004995 | 0,005965 |
| RP9          | 3,72 | 2,56 | 3,84 | 4,69 | 0,0005002 | 0,00597  |
| YPEL5        | 7,79 | 7,01 | 7,17 | 6,15 | 0,0005006 | 0,005972 |



|                |      |      |      |      |           |          |
|----------------|------|------|------|------|-----------|----------|
| C5orf64        | 0,31 | 0,54 | 0,46 | 1,53 | 0,0005009 | 0,005973 |
| C1orf228       | 1,08 | 2,21 | 3,68 | 5,41 | 0,0005025 | 0,005988 |
| C14orf142      | 4,47 | 3,20 | 2,28 | 0,85 | 0,0005045 | 0,006009 |
| RTBDN          | 0,00 | 0,07 | 0,00 | 0,17 | 0,0005054 | NA       |
| BBC3           | 0,00 | 0,00 | 0,91 | 0,42 | 0,0005062 | 0,006026 |
| DNAJC22        | 0,24 | 0,49 | 0,20 | 0,45 | 0,0005068 | 0,00603  |
| LRRC19         | 0,10 | 0,04 | 0,25 | 0,47 | 0,0005088 | 0,006049 |
| AC004490.1     | 0,00 | 0,11 | 0,00 | 0,00 | 0,0005089 | 0,006049 |
| RP11-83A24.2   | 2,48 | 3,85 | 2,57 | 3,66 | 0,0005094 | 0,006051 |
| RP11-1079K10.5 | 0,11 | 0,23 | 0,32 | 0,97 | 0,0005119 | 0,006078 |
| GNLY           | 1,14 | 7,45 | 1,75 | 6,67 | 0,0005127 | 0,006084 |
| SEPT4          | 0,67 | 3,63 | 1,74 | 2,83 | 0,0005133 | 0,006087 |
| RP11-553A21.3  | 0,00 | 0,29 | 0,15 | 0,30 | 0,0005162 | 0,006119 |
| TNFRSF14       | 5,32 | 6,23 | 6,17 | 6,62 | 0,0005165 | 0,006119 |
| FASTKD5        | 3,45 | 1,02 | 2,43 | 0,29 | 0,0005183 | 0,006137 |
| TTC19          | 5,27 | 3,58 | 4,84 | 2,80 | 0,0005186 | 0,006137 |
| SNORD63        | 6,02 | 6,95 | 7,86 | 5,08 | 0,0005214 | 0,006168 |
| PPT1           | 8,15 | 6,54 | 7,58 | 6,80 | 0,0005223 | 0,006174 |
| PDE3B          | 0,50 | 4,48 | 1,27 | 2,04 | 0,0005226 | 0,006174 |
| FRK            | 1,49 | 2,58 | 1,59 | 1,85 | 0,0005228 | 0,006174 |
| MFGE8          | 0,00 | 0,06 | 0,05 | 0,95 | 0,0005271 | 0,006221 |
| LARS2          | 1,66 | 4,50 | 0,64 | 0,72 | 0,0005276 | 0,006223 |
| RDH13          | 1,87 | 2,31 | 2,57 | 3,05 | 0,0005278 | 0,006223 |
| DPP7           | 5,33 | 6,15 | 6,26 | 6,71 | 0,0005286 | 0,006229 |
| HNFA4          | 0,05 | 0,26 | 0,11 | 0,18 | 0,0005316 | 0,006261 |
| RP11-291L22.9  | 0,10 | 0,14 | 0,17 | 0,49 | 0,0005336 | 0,006281 |
| RP11-323P17.2  | 1,99 | 4,19 | 2,55 | 3,43 | 0,0005342 | 0,006285 |
| YTHDC1         | 4,95 | 4,18 | 5,14 | 5,15 | 0,0005374 | 0,006319 |
| CTC-429P9.2    | 0,25 | 0,00 | 0,30 | 1,69 | 0,0005396 | 0,006342 |
| RP11-23D24.2   | 0,03 | 0,70 | 0,11 | 0,14 | 0,0005401 | 0,006343 |
| SP140          | 5,45 | 2,78 | 4,40 | 2,65 | 0,0005402 | 0,006343 |
| NEXMIF         | 0,00 | 0,02 | 0,01 | 0,32 | 0,0005413 | 0,00635  |
| PARVB          | 2,79 | 2,94 | 3,15 | 1,75 | 0,0005414 | 0,00635  |
| RP11-977G19.5  | 3,44 | 4,14 | 4,17 | 4,48 | 0,0005437 | 0,006374 |
| RP11-44M6.3    | 0,12 | 0,68 | 0,22 | 0,38 | 0,0005502 | 0,006446 |
| PRKAA2         | 0,02 | 0,01 | 0,01 | 0,04 | 0,0005523 | 0,006467 |
| DLG2           | 0,00 | 0,05 | 0,00 | 0,27 | 0,0005531 | 0,006472 |
| RPS15A         | 8,92 | 9,34 | 9,30 | 9,34 | 0,0005533 | 0,006472 |
| TPP1           | 6,81 | 5,79 | 6,48 | 5,56 | 0,0005544 | 0,006481 |
| ADCY9          | 0,42 | 5,25 | 0,84 | 1,45 | 0,0005598 | 0,006536 |
| PTPRD          | 0,00 | 2,10 | 0,00 | 1,56 | 0,0005598 | 0,006536 |
| CNTLN          | 2,72 | 1,45 | 2,70 | 1,38 | 0,00056   | 0,006536 |
| SIGLEC8        | 0,73 | 1,07 | 0,74 | 0,80 | 0,0005603 | 0,006536 |
| RELA           | 3,82 | 5,51 | 4,26 | 4,03 | 0,0005622 | 0,006555 |
| LINC00997      | 0,04 | 0,00 | 0,00 | 0,05 | 0,0005673 | 0,006612 |
| GPX4           | 8,23 | 8,91 | 8,35 | 8,44 | 0,0005713 | 0,006655 |
| TAB2           | 5,38 | 4,68 | 4,80 | 3,16 | 0,0005742 | 0,006682 |
| ABCC11         | 0,62 | 0,00 | 0,96 | 0,00 | 0,0005742 | 0,006682 |
| BNC2           | 0,19 | 0,20 | 0,11 | 0,23 | 0,0005748 | 0,006685 |
| RP11-566K8.2   | 0,00 | 0,00 | 0,00 | 0,00 | 0,0005774 | 0,006711 |
| BTG2           | 5,47 | 6,76 | 6,01 | 5,60 | 0,0005778 | 0,006713 |
| ZNF703         | 0,35 | 0,20 | 1,66 | 2,05 | 0,0005784 | 0,006716 |
| RP11-558N14.1  | 0,09 | 0,38 | 0,11 | 0,29 | 0,0005806 | 0,006734 |
| LDLR           | 2,77 | 3,70 | 4,61 | 3,93 | 0,0005808 | 0,006734 |
| SLC43A2        | 2,08 | 1,83 | 3,29 | 3,00 | 0,0005808 | 0,006734 |

|                |      |      |      |      |           |          |
|----------------|------|------|------|------|-----------|----------|
| RP11-538D16.2  | 2,54 | 3,97 | 2,64 | 3,36 | 0,0005816 | 0,006739 |
| RP11-239E10.3  | 0,73 | 1,11 | 1,47 | 0,42 | 0,0005825 | 0,006746 |
| MYH11          | 0,78 | 3,50 | 0,65 | 1,13 | 0,0005832 | 0,006751 |
| ATOX1          | 6,18 | 6,14 | 6,33 | 6,96 | 0,0005837 | 0,006753 |
| RP11-167J8.1   | 0,17 | 0,24 | 0,10 | 0,00 | 0,0005846 | 0,00676  |
| ADAM19         | 3,06 | 1,57 | 2,36 | 0,30 | 0,0005851 | 0,006762 |
| AC073257.1     | 2,33 | 5,20 | 2,61 | 3,73 | 0,0005865 | 0,006775 |
| MAP2K6         | 3,99 | 0,75 | 2,83 | 1,40 | 0,0005884 | 0,006794 |
| MARCH7         | 5,11 | 3,63 | 4,58 | 3,37 | 0,00059   | 0,006807 |
| RP11-575A19.2  | 3,14 | 0,00 | 1,53 | 3,36 | 0,0005903 | 0,006807 |
| CYTIP          | 7,05 | 5,96 | 6,38 | 5,70 | 0,0005908 | 0,006807 |
| CAPZB          | 7,90 | 6,13 | 7,51 | 6,15 | 0,0005908 | 0,006807 |
| RASSF8         | 0,39 | 2,90 | 0,42 | 0,90 | 0,0005914 | 0,00681  |
| PARP4          | 4,50 | 1,97 | 4,38 | 3,11 | 0,0005924 | 0,006818 |
| RP1L1          | 1,20 | 2,54 | 0,52 | 1,79 | 0,0005926 | 0,006818 |
| CLCN1          | 0,00 | 0,04 | 0,00 | 1,38 | 0,0005936 | 0,006825 |
| RP13-15E13.1   | 0,19 | 0,79 | 0,32 | 0,77 | 0,0005939 | 0,006825 |
| TMEM176B       | 0,00 | 0,35 | 0,20 | 5,27 | 0,0005955 | 0,00684  |
| AC009952.3     | 0,06 | 0,72 | 0,00 | 0,00 | 0,0005968 | NA       |
| RP11-691G17.1  | 3,40 | 4,33 | 3,46 | 4,04 | 0,0005973 | 0,006857 |
| RP1-56K13.3    | 0,25 | 0,00 | 3,15 | 4,44 | 0,0005978 | 0,006859 |
| KCNMB4         | 0,04 | 3,67 | 0,10 | 0,17 | 0,000599  | 0,006869 |
| SMAD9          | 0,14 | 0,11 | 0,09 | 1,07 | 0,0006003 | 0,006881 |
| HSF5           | 0,00 | 0,03 | 0,00 | 0,09 | 0,0006007 | 0,006882 |
| RP11-713P17.4  | 0,12 | 0,08 | 0,25 | 0,48 | 0,0006015 | 0,006882 |
| NUDT19         | 4,21 | 2,44 | 4,08 | 1,45 | 0,0006016 | 0,006882 |
| RP11-447D11.3  | 0,13 | 0,24 | 0,08 | 0,21 | 0,0006017 | 0,006882 |
| CLSTN2         | 0,05 | 0,00 | 0,03 | 0,08 | 0,000602  | 0,006882 |
| RP11-264L1.1   | 0,16 | 0,41 | 0,38 | 0,56 | 0,0006026 | 0,006886 |
| CTD-3193K9.7   | 0,69 | 0,85 | 0,85 | 0,94 | 0,0006061 | 0,006922 |
| GAB4           | 0,00 | 4,01 | 0,00 | 0,08 | 0,0006124 | 0,00699  |
| TNPO2          | 1,20 | 3,12 | 1,59 | 1,99 | 0,0006129 | 0,006993 |
| RFX5           | 4,50 | 1,27 | 3,45 | 2,17 | 0,0006132 | 0,006993 |
| SLC28A2        | 0,61 | 0,59 | 0,63 | 0,53 | 0,000618  | 0,007042 |
| CTF1           | 0,22 | 1,81 | 0,21 | 0,66 | 0,0006182 | 0,007042 |
| RNVU1-19       | 4,01 | 4,45 | 4,33 | 5,62 | 0,000619  | 0,007048 |
| CELP           | 0,09 | 0,11 | 0,18 | 0,15 | 0,0006197 | 0,007052 |
| CTD-2351A16.1  | 0,50 | 1,55 | 0,57 | 0,58 | 0,0006253 | 0,007112 |
| HHLA3          | 0,80 | 1,03 | 0,14 | 0,25 | 0,0006266 | 0,007123 |
| RP13-212L9.1   | 2,06 | 3,31 | 1,92 | 3,05 | 0,0006278 | 0,007132 |
| ADGRD1         | 0,48 | 0,73 | 0,98 | 1,89 | 0,000628  | 0,007132 |
| CSF1R          | 4,79 | 5,64 | 5,75 | 5,29 | 0,0006291 | 0,007141 |
| NOS2P3         | 0,12 | 0,30 | 0,11 | 0,86 | 0,0006338 | 0,007188 |
| RP11-1069G10.1 | 0,68 | 1,47 | 0,79 | 1,35 | 0,0006339 | 0,007188 |
| GINS4          | 1,12 | 0,77 | 1,18 | 2,46 | 0,0006349 | 0,007195 |
| AC005517.3     | 2,59 | 3,40 | 2,91 | 0,74 | 0,0006366 | 0,007208 |
| CTIF           | 0,01 | 0,00 | 1,46 | 0,15 | 0,0006367 | 0,007208 |
| RP11-730A19.6  | 0,42 | 1,05 | 0,93 | 0,82 | 0,0006381 | 0,007221 |
| EXTL3-AS1      | 0,22 | 0,95 | 1,46 | 0,16 | 0,0006391 | 0,007229 |
| ZNF148         | 3,52 | 0,88 | 3,54 | 3,67 | 0,0006419 | 0,007256 |
| CRNDE          | 0,57 | 0,37 | 0,78 | 3,05 | 0,0006431 | 0,007267 |
| EPHB2          | 0,03 | 0,07 | 0,14 | 0,35 | 0,0006438 | 0,007271 |
| MAP1LC3B2      | 1,30 | 5,22 | 2,86 | 2,06 | 0,0006449 | 0,007278 |
| PLSCR1         | 8,36 | 6,98 | 7,36 | 5,93 | 0,0006451 | 0,007278 |
| OR8B9P         | 0,30 | 0,43 | 0,50 | 0,80 | 0,0006462 | 0,007284 |

|               |       |       |       |       |           |          |
|---------------|-------|-------|-------|-------|-----------|----------|
| TKT           | 6,71  | 6,49  | 6,86  | 7,19  | 0,0006463 | 0,007284 |
| MRPL33        | 6,85  | 6,90  | 7,15  | 7,45  | 0,0006467 | 0,007285 |
| B4GALNT3      | 0,00  | 2,16  | 0,00  | 0,80  | 0,0006501 | 0,007313 |
| TMEM14B       | 7,35  | 6,51  | 6,73  | 6,02  | 0,0006504 | 0,007313 |
| Z97634.3      | 1,65  | 2,30  | 1,55  | 0,89  | 0,0006505 | 0,007313 |
| AC007743.1    | 1,71  | 3,00  | 1,67  | 1,41  | 0,0006505 | 0,007313 |
| NUP214        | 4,89  | 6,08  | 5,84  | 6,04  | 0,0006519 | 0,007325 |
| CTA-331P3.1   | 0,10  | 0,09  | 0,10  | 1,32  | 0,0006567 | 0,007375 |
| C7orf49       | 5,31  | 0,52  | 3,50  | 3,39  | 0,0006576 | 0,007381 |
| CYP27C1       | 0,39  | 0,71  | 0,46  | 0,82  | 0,000658  | 0,007382 |
| RPL13         | 11,61 | 12,05 | 11,84 | 11,73 | 0,0006604 | 0,007406 |
| RP11-487E13.1 | 5,37  | 4,88  | 6,42  | 5,57  | 0,0006617 | 0,007416 |
| UBE2L6        | 8,32  | 7,27  | 7,68  | 6,66  | 0,0006632 | 0,00743  |
| TLR3          | 0,73  | 0,07  | 0,23  | 0,11  | 0,0006662 | 0,007459 |
| NEXN          | 1,26  | 0,31  | 2,18  | 3,21  | 0,0006698 | 0,007495 |
| AL035610.1    | 2,82  | 4,05  | 3,27  | 4,61  | 0,0006713 | 0,007507 |
| TSIX          | 1,03  | 2,11  | 1,40  | 1,58  | 0,0006715 | 0,007507 |
| SAMD4A        | 1,05  | 1,31  | 2,17  | 2,53  | 0,0006741 | 0,007532 |
| MUC21         | 0,00  | 0,15  | 0,04  | 0,10  | 0,0006789 | 0,007582 |
| EIF35SP1      | 0,00  | 1,67  | 0,00  | 0,00  | 0,000681  | 0,007602 |
| S100PBP       | 3,42  | 3,06  | 3,00  | 3,96  | 0,0006828 | 0,007618 |
| IDO2          | 1,67  | 1,00  | 0,15  | 0,30  | 0,0006841 | 0,007629 |
| RP11-486O12.2 | 0,99  | 1,51  | 1,23  | 1,61  | 0,0006853 | 0,007639 |
| RP11-17M16.1  | 0,00  | 0,07  | 0,16  | 0,00  | 0,0006859 | 0,007642 |
| RP3-522J7.6   | 0,12  | 0,13  | 0,13  | 0,32  | 0,0006876 | 0,007654 |
| RP11-407G23.5 | 0,16  | 0,34  | 0,36  | 0,45  | 0,0006878 | 0,007654 |
| IFNL1         | 1,35  | 0,00  | 0,00  | 0,00  | 0,0006899 | 0,007675 |
| HEATR5B       | 5,16  | 3,56  | 4,16  | 2,84  | 0,0006931 | 0,007706 |
| RP4-813D12.3  | 0,11  | 0,26  | 0,06  | 0,21  | 0,0006953 | 0,007727 |
| AC083899.1    | 0,34  | 1,62  | 0,32  | 0,31  | 0,0007    | 0,007774 |
| DLX6-AS1      | 0,76  | 2,37  | 1,34  | 1,98  | 0,0007025 | 0,007798 |
| ITGA2         | 0,17  | 0,04  | 0,15  | 0,10  | 0,0007034 | 0,007805 |
| CXCR4         | 9,27  | 8,24  | 8,26  | 6,98  | 0,0007052 | 0,007821 |
| EEF1D         | 8,89  | 9,18  | 9,36  | 9,29  | 0,0007063 | 0,007829 |
| NXPE3         | 1,61  | 1,33  | 3,49  | 2,13  | 0,000707  | 0,007833 |
| FOS           | 11,33 | 10,55 | 10,73 | 10,06 | 0,0007081 | 0,007838 |
| RP11-55K13.1  | 0,12  | 0,18  | 0,27  | 0,68  | 0,0007082 | 0,007838 |
| MYL12B        | 9,20  | 7,79  | 8,46  | 8,22  | 0,0007105 | 0,007856 |
| LRRC59        | 3,24  | 0,41  | 3,34  | 3,43  | 0,0007105 | 0,007856 |
| EGR3          | 1,22  | 2,81  | 2,95  | 1,37  | 0,0007161 | 0,007915 |
| RP11-63B13.1  | 2,70  | 3,83  | 2,54  | 3,83  | 0,0007184 | 0,007935 |
| CLN6          | 2,85  | 1,97  | 3,11  | 4,16  | 0,0007201 | 0,007951 |
| C12orf77      | 0,54  | 1,25  | 0,78  | 0,97  | 0,0007205 | 0,007951 |
| KIAA1755      | 0,01  | 0,05  | 0,07  | 0,02  | 0,0007228 | 0,007972 |
| TMEM148       | 0,09  | 0,31  | 0,25  | 0,09  | 0,0007232 | 0,007973 |
| ILVBL         | 1,93  | 2,89  | 0,81  | 1,93  | 0,0007237 | 0,007974 |
| GTF2H1        | 4,26  | 3,25  | 2,93  | 3,22  | 0,0007267 | 0,008003 |
| ATP5A1        | 8,45  | 7,78  | 7,68  | 6,11  | 0,0007286 | 0,00802  |
| XRN1          | 5,22  | 3,37  | 5,29  | 4,30  | 0,0007305 | 0,008037 |
| CLEC18A       | 0,10  | 2,74  | 0,11  | 0,70  | 0,000732  | 0,00805  |
| GRINA         | 4,40  | 5,92  | 5,14  | 5,98  | 0,0007324 | 0,008051 |
| PRPF18        | 4,43  | 0,22  | 3,77  | 2,12  | 0,0007337 | 0,008061 |
| CORIN         | 0,67  | 0,70  | 0,94  | 1,42  | 0,0007357 | 0,008079 |
| RP11-478P10.1 | 0,34  | 1,75  | 0,91  | 1,91  | 0,0007368 | 0,008084 |
| MCM5          | 4,70  | 1,92  | 3,86  | 2,71  | 0,0007369 | 0,008084 |

|                |      |       |       |       |           |          |
|----------------|------|-------|-------|-------|-----------|----------|
| RP11-379B18.5  | 3,37 | 5,10  | 3,59  | 3,28  | 0,0007395 | 0,008108 |
| AACS           | 3,27 | 3,61  | 4,34  | 4,11  | 0,0007409 | 0,00812  |
| MTA1           | 0,66 | 1,03  | 1,64  | 0,52  | 0,0007424 | 0,008132 |
| RN7SL397P      | 0,00 | 0,85  | 2,67  | 4,05  | 0,0007444 | 0,00815  |
| RP3-508I15.10  | 0,69 | 1,34  | 0,62  | 0,30  | 0,0007475 | 0,008178 |
| RP11-56G10.2   | 3,48 | 4,01  | 4,72  | 4,01  | 0,0007477 | 0,008178 |
| CCDC122        | 2,98 | 4,34  | 3,10  | 3,66  | 0,0007491 | 0,008189 |
| RP11-259O2.3   | 3,59 | 4,23  | 3,43  | 3,40  | 0,0007496 | 0,008191 |
| HNRNP11        | 3,86 | 5,69  | 3,42  | 1,25  | 0,0007536 | 0,00823  |
| FLVCR1-AS1     | 0,98 | 5,24  | 0,72  | 2,59  | 0,0007547 | 0,008235 |
| IFI35          | 6,55 | 2,93  | 5,85  | 6,09  | 0,0007548 | 0,008235 |
| ENPP1          | 0,07 | 0,18  | 0,10  | 0,31  | 0,0007555 | 0,008239 |
| APMAP          | 5,70 | 4,02  | 5,24  | 3,26  | 0,0007567 | 0,008247 |
| RP11-120K18.2  | 0,32 | 1,15  | 0,52  | 0,62  | 0,000757  | 0,008247 |
| CAPN10         | 4,11 | 4,95  | 4,11  | 5,29  | 0,0007592 | 0,008267 |
| GNAS           | 8,23 | 7,50  | 8,03  | 7,09  | 0,0007603 | 0,008275 |
| ZNF410         | 5,11 | 2,71  | 4,53  | 2,74  | 0,0007625 | 0,008295 |
| ACADS          | 0,34 | 1,92  | 2,57  | 1,68  | 0,000763  | 0,008296 |
| RPL39          | 9,73 | 10,47 | 10,20 | 10,80 | 0,0007663 | 0,008328 |
| AAK1           | 3,43 | 4,76  | 3,49  | 4,34  | 0,0007676 | 0,008338 |
| ANKS4B         | 0,10 | 0,32  | 0,24  | 0,20  | 0,0007685 | 0,008343 |
| SLITRK2        | 0,09 | 0,19  | 0,23  | 0,20  | 0,0007703 | 0,008359 |
| RP11-20I23.8   | 0,14 | 0,90  | 0,61  | 0,93  | 0,0007725 | 0,008379 |
| TNS1           | 0,30 | 4,86  | 0,54  | 2,83  | 0,000773  | 0,00838  |
| CLDN4          | 0,49 | 0,76  | 0,99  | 2,37  | 0,0007734 | 0,00838  |
| RP11-481G8.2   | 0,24 | 0,36  | 0,65  | 1,28  | 0,0007758 | 0,008403 |
| GRK6           | 2,88 | 4,68  | 3,42  | 4,07  | 0,000778  | 0,008419 |
| TRABD2A        | 3,09 | 3,33  | 1,29  | 2,24  | 0,0007783 | 0,008419 |
| USF2           | 4,31 | 5,47  | 5,38  | 5,09  | 0,0007784 | 0,008419 |
| OR8B8          | 0,18 | 0,65  | 0,14  | 0,20  | 0,0007799 | 0,00843  |
| DTX3L          | 3,84 | 1,31  | 3,70  | 4,11  | 0,0007823 | 0,008452 |
| RP11-148B18.4  | 0,00 | 0,00  | 0,32  | 0,73  | 0,0007828 | 0,008453 |
| APOC1          | 1,51 | 1,22  | 0,33  | 0,00  | 0,0007831 | 0,008453 |
| PER1           | 4,51 | 5,17  | 5,45  | 5,71  | 0,0007835 | 0,008453 |
| RN7SL25P       | 0,75 | 3,07  | 2,02  | 1,44  | 0,0007867 | 0,008481 |
| RP11-793H13.10 | 0,88 | 0,41  | 1,25  | 3,15  | 0,0007869 | 0,008481 |
| RP11-543H23.1  | 0,06 | 0,40  | 0,10  | 0,28  | 0,0007879 | 0,008488 |
| MTHFD1L        | 2,87 | 1,17  | 1,89  | 0,45  | 0,0007882 | 0,008488 |
| SLC35F3        | 0,00 | 0,23  | 0,00  | 0,05  | 0,0007899 | 0,008501 |
| PPP2R2B        | 0,28 | 4,09  | 0,21  | 1,97  | 0,0007905 | 0,008501 |
| RP11-397E7.5   | 0,74 | 1,48  | 1,44  | 1,31  | 0,0007906 | 0,008501 |
| AP4B1          | 4,36 | 1,02  | 3,96  | 4,18  | 0,0007924 | 0,008516 |
| ZNF445         | 1,10 | 1,38  | 1,63  | 1,21  | 0,0007928 | 0,008516 |
| RP11-734K23.9  | 0,73 | 2,58  | 0,93  | 0,88  | 0,0007943 | 0,008528 |
| MROH6          | 2,78 | 1,06  | 3,73  | 4,83  | 0,000795  | 0,008532 |
| INO80          | 2,77 | 1,27  | 3,73  | 1,84  | 0,0008004 | 0,008583 |
| RP11-22N19.2   | 2,53 | 2,57  | 4,05  | 3,25  | 0,0008006 | 0,008583 |
| CTD-2626G11.2  | 0,16 | 1,44  | 0,47  | 0,14  | 0,000805  | 0,008617 |
| GTPBP1         | 2,19 | 3,39  | 3,50  | 2,42  | 0,0008053 | 0,008617 |
| SMARCC2        | 4,72 | 2,87  | 4,36  | 2,78  | 0,0008053 | 0,008617 |
| NRIP2          | 0,56 | 0,25  | 0,81  | 0,17  | 0,0008053 | 0,008617 |
| SIRPG          | 0,00 | 4,90  | 0,00  | 0,17  | 0,0008059 | 0,008619 |
| TMEM33         | 4,71 | 2,26  | 4,57  | 2,86  | 0,0008106 | 0,008666 |
| RP11-473P24.2  | 0,56 | 0,87  | 0,27  | 0,37  | 0,0008113 | 0,008669 |
| CYCS           | 7,23 | 6,98  | 6,20  | 5,64  | 0,0008127 | 0,00868  |

|                |      |      |      |      |           |          |
|----------------|------|------|------|------|-----------|----------|
| ABHD17A        | 1,57 | 2,64 | 2,72 | 3,44 | 0,0008147 | 0,008697 |
| RPS6KA3        | 5,56 | 5,56 | 5,34 | 4,63 | 0,0008156 | 0,008702 |
| LRCH4          | 4,87 | 5,68 | 5,56 | 6,13 | 0,000816  | 0,008702 |
| CTC-559E9.4    | 0,39 | 2,64 | 0,23 | 0,81 | 0,0008167 | 0,008706 |
| NGEF           | 0,00 | 0,00 | 0,00 | 0,29 | 0,0008173 | 0,008708 |
| SLC17A5        | 0,65 | 1,10 | 1,90 | 1,90 | 0,0008181 | 0,008713 |
| TSTD1          | 5,73 | 7,28 | 4,19 | 5,42 | 0,000819  | 0,008718 |
| RP5-1067M6.6   | 0,80 | 2,11 | 0,94 | 1,58 | 0,0008218 | 0,008743 |
| RP11-440I14.4  | 0,00 | 0,00 | 0,00 | 0,06 | 0,0008237 | 0,008759 |
| PPIP5K1        | 1,65 | 5,86 | 1,66 | 2,79 | 0,0008245 | 0,008764 |
| SMIM4          | 2,67 | 3,33 | 3,78 | 5,25 | 0,0008261 | 0,008774 |
| UNK            | 0,99 | 5,92 | 0,58 | 0,78 | 0,0008264 | 0,008774 |
| GYPC           | 5,15 | 2,79 | 4,28 | 2,01 | 0,0008266 | 0,008774 |
| RP5-908M14.10  | 0,00 | 0,17 | 0,17 | 0,13 | 0,0008298 | 0,008803 |
| CXCL16         | 5,95 | 4,47 | 5,51 | 2,83 | 0,0008304 | 0,008805 |
| C7orf13        | 0,00 | 0,28 | 0,00 | 0,00 | 0,000832  | 0,008818 |
| RP3-404F18.5   | 0,51 | 1,74 | 0,85 | 0,91 | 0,0008341 | 0,008831 |
| L1CAM          | 0,00 | 0,00 | 0,00 | 0,00 | 0,0008344 | 0,008831 |
| HK2            | 2,73 | 3,82 | 3,43 | 2,51 | 0,0008344 | 0,008831 |
| AC096669.3     | 0,24 | 0,35 | 0,37 | 1,28 | 0,0008365 | 0,008849 |
| CCP110         | 2,37 | 1,09 | 1,69 | 4,26 | 0,0008437 | 0,008918 |
| DTHD1          | 0,00 | 0,85 | 0,00 | 0,00 | 0,0008439 | 0,008918 |
| MOB1A          | 6,70 | 5,65 | 5,80 | 5,40 | 0,0008446 | 0,008921 |
| SFMBT1         | 0,63 | 0,60 | 0,42 | 0,73 | 0,0008449 | 0,008921 |
| RP6-1107.2     | 0,24 | 0,23 | 0,00 | 0,20 | 0,0008456 | 0,008923 |
| RBM14          | 4,30 | 4,55 | 5,17 | 5,28 | 0,0008467 | 0,008931 |
| CTD-2561J22.4  | 0,29 | 0,38 | 0,59 | 0,64 | 0,0008487 | 0,008948 |
| RP11-165E7.1   | 0,84 | 2,32 | 0,81 | 1,22 | 0,0008581 | 0,009042 |
| COL17A1        | 0,00 | 2,84 | 0,00 | 0,05 | 0,0008585 | 0,009042 |
| TMOD3          | 3,73 | 2,44 | 3,82 | 3,88 | 0,0008594 | 0,009047 |
| ZNF207         | 6,95 | 7,16 | 6,21 | 5,23 | 0,000861  | 0,009061 |
| PDHB           | 7,09 | 5,37 | 6,35 | 4,90 | 0,0008615 | 0,009061 |
| RP11-44F14.1   | 0,80 | 0,77 | 1,27 | 1,34 | 0,0008655 | 0,009099 |
| PRRG1          | 0,10 | 0,33 | 0,21 | 0,66 | 0,0008659 | 0,009099 |
| OR11G2         | 0,11 | 0,15 | 0,09 | 0,34 | 0,0008715 | 0,009154 |
| CTD-2619J13.14 | 0,56 | 0,87 | 0,62 | 1,19 | 0,0008741 | 0,009177 |
| PLCH2          | 0,00 | 0,08 | 0,00 | 0,00 | 0,0008749 | 0,009181 |
| SAMD12         | 0,05 | 0,40 | 0,07 | 0,06 | 0,0008822 | 0,009251 |
| ORC3           | 3,15 | 0,11 | 1,05 | 0,34 | 0,0008828 | 0,009251 |
| ERBB3          | 1,12 | 1,94 | 1,44 | 2,02 | 0,0008828 | 0,009251 |
| TSPAN4         | 3,33 | 5,37 | 4,05 | 4,75 | 0,0008842 | 0,009261 |
| RP11-470M1.2   | 1,40 | 3,35 | 1,43 | 2,73 | 0,0008863 | 0,009279 |
| PTPN14         | 0,40 | 1,32 | 0,57 | 0,67 | 0,0008889 | 0,009301 |
| RP11-797H7.3   | 0,00 | 3,45 | 0,00 | 0,00 | 0,0008931 | 0,009341 |
| UBTF           | 2,37 | 4,11 | 3,17 | 3,21 | 0,0008962 | 0,009369 |
| RN7SKP4        | 0,77 | 0,00 | 0,82 | 1,45 | 0,0008969 | 0,009372 |
| FAM46C         | 2,94 | 1,41 | 0,67 | 0,05 | 0,0008979 | 0,009378 |
| RP11-461G12.3  | 0,00 | 2,47 | 0,00 | 0,00 | 0,0009003 | 0,009399 |
| RP11-727A23.4  | 0,41 | 1,74 | 0,52 | 0,71 | 0,0009014 | 0,009405 |
| YBX3           | 5,88 | 6,68 | 7,06 | 7,31 | 0,0009058 | 0,009447 |
| SRCIN1         | 0,02 | 0,26 | 0,07 | 0,20 | 0,0009101 | 0,009487 |
| MAN1C1         | 0,50 | 4,02 | 1,01 | 0,81 | 0,0009127 | 0,009502 |
| PCSK2          | 0,05 | 0,10 | 0,05 | 0,24 | 0,0009128 | 0,009502 |
| ACTL6A         | 4,34 | 0,94 | 4,41 | 2,34 | 0,0009128 | 0,009502 |
| RP11-46B11.5   | 0,04 | 0,00 | 0,00 | 0,04 | 0,0009148 | 0,009519 |

|                |      |      |      |      |           |          |
|----------------|------|------|------|------|-----------|----------|
| RP11-34P13.13  | 1,42 | 2,51 | 1,73 | 1,69 | 0,0009204 | 0,009572 |
| RP11-421L21.2  | 0,00 | 0,00 | 0,00 | 0,65 | 0,0009212 | 0,009576 |
| NXT1           | 5,58 | 3,07 | 5,80 | 3,18 | 0,00093   | 0,009663 |
| RP11-439E19.10 | 0,48 | 0,58 | 0,31 | 0,96 | 0,0009324 | 0,009684 |
| RAD1           | 3,81 | 4,48 | 2,30 | 0,77 | 0,0009331 | 0,009686 |
| MUC6           | 0,00 | 0,95 | 0,00 | 0,11 | 0,0009361 | 0,009713 |
| RP11-63E5.8    | 0,07 | 0,10 | 0,04 | 0,32 | 0,0009375 | 0,009723 |
| NANOGP4        | 0,00 | 1,77 | 0,00 | 0,00 | 0,0009389 | 0,009729 |
| RP11-289F5.1   | 0,08 | 0,40 | 0,26 | 0,35 | 0,000939  | 0,009729 |
| RAB8B          | 3,91 | 2,80 | 4,01 | 4,79 | 0,0009407 | 0,009742 |
| RP5-1041C10.3  | 0,00 | 0,17 | 0,25 | 0,25 | 0,0009463 | 0,009796 |
| NLRC3          | 0,23 | 1,02 | 0,12 | 0,62 | 0,0009496 | 0,009825 |
| AK4            | 0,00 | 0,14 | 0,16 | 0,73 | 0,0009504 | 0,009829 |
| CTA-280A3.2    | 0,04 | 0,01 | 0,02 | 0,10 | 0,0009511 | 0,009832 |
| DVL1           | 0,17 | 2,22 | 0,95 | 2,18 | 0,0009536 | 0,009853 |
| FAM181B        | 0,00 | 0,03 | 0,15 | 0,07 | 0,0009558 | 0,009871 |
| RP11-109G23.3  | 1,21 | 0,27 | 1,27 | 0,87 | 0,000957  | 0,009879 |
| RP11-47I22.2   | 0,03 | 0,56 | 0,01 | 0,02 | 0,0009587 | 0,009892 |
| RP11-262H14.1  | 4,72 | 5,53 | 4,49 | 5,88 | 0,0009593 | 0,009893 |
| VPS26A         | 5,07 | 2,26 | 4,22 | 3,98 | 0,0009597 | 0,009893 |
| RBP1           | 0,08 | 0,14 | 0,15 | 0,17 | 0,0009607 | 0,009899 |
| FOLR2          | 0,00 | 0,59 | 0,27 | 5,36 | 0,000964  | 0,009929 |
| ZNF655         | 5,65 | 4,49 | 4,73 | 3,65 | 0,000965  | 0,009934 |
| RP11-100I7.1   | 0,44 | 1,37 | 0,54 | 1,14 | 0,0009675 | 0,009955 |
| RP11-73M11.3   | 0,00 | 1,17 | 0,83 | 0,91 | 0,0009743 | 0,01002  |
| MYO15B         | 6,31 | 6,52 | 7,12 | 7,37 | 0,0009763 | 0,010036 |
| DFFB           | 0,40 | 0,55 | 2,18 | 1,31 | 0,0009819 | 0,010089 |
| ZNF630         | 0,68 | 2,55 | 0,43 | 1,09 | 0,0009836 | 0,010102 |
| KB-1460A1.5    | 0,09 | 0,35 | 0,17 | 0,98 | 0,0009861 | 0,010123 |
| LYPD3          | 3,10 | 0,08 | 2,16 | 0,10 | 0,0009865 | 0,010123 |
| PGM5P2         | 0,50 | 0,51 | 0,60 | 1,33 | 0,0009902 | 0,010154 |
| RP11-573D15.2  | 0,18 | 0,49 | 0,24 | 0,41 | 0,0009907 | 0,010154 |
| SNX1           | 5,41 | 2,57 | 4,70 | 4,81 | 0,000991  | 0,010154 |
| RP11-527H14.2  | 0,14 | 0,28 | 0,16 | 0,21 | 0,0009932 | 0,010173 |
| AKAP2          | 3,69 | 2,70 | 3,14 | 1,31 | 0,0009952 | 0,010188 |
| MPC1           | 6,91 | 5,51 | 6,05 | 5,46 | 0,0009969 | 0,0102   |
| DLST           | 1,92 | 2,10 | 3,46 | 3,01 | 0,0009973 | 0,0102   |
| RP11-463O12.5  | 0,31 | 1,73 | 0,88 | 1,23 | 0,0009997 | 0,01022  |
| LRRC37B        | 3,45 | 4,45 | 2,76 | 4,64 | 0,0010003 | 0,010221 |
| RAX2           | 0,17 | 0,68 | 0,13 | 0,59 | 0,0010022 | 0,010236 |
| PPP1R11        | 5,17 | 4,98 | 3,95 | 1,47 | 0,0010059 | 0,010269 |
| KIAA1257       | 1,78 | 3,36 | 1,70 | 1,14 | 0,0010066 | 0,010271 |
| CYP4F12        | 0,00 | 4,22 | 0,00 | 0,27 | 0,0010076 | 0,010277 |
| LCK            | 0,68 | 3,45 | 0,43 | 3,17 | 0,0010082 | 0,010278 |
| CASP2          | 3,73 | 1,29 | 3,94 | 2,98 | 0,0010127 | 0,01031  |
| CCL4           | 3,39 | 8,54 | 3,06 | 5,90 | 0,001013  | 0,01031  |
| PTGES3         | 6,59 | 6,30 | 6,43 | 4,94 | 0,001013  | 0,01031  |
| ATCAY          | 0,20 | 1,77 | 0,34 | 0,31 | 0,0010131 | 0,01031  |
| PLCB1          | 2,58 | 5,72 | 2,84 | 3,93 | 0,0010147 | 0,010321 |
| RP11-631B21.1  | 2,06 | 3,33 | 2,64 | 3,38 | 0,0010166 | 0,010336 |
| DHRS7          | 7,08 | 5,82 | 5,83 | 5,39 | 0,0010184 | 0,010349 |
| RP11-618G20.1  | 0,00 | 0,00 | 0,53 | 0,00 | 0,0010201 | 0,010361 |
| AC015849.13    | 1,53 | 2,79 | 1,00 | 1,81 | 0,001021  | 0,010366 |
| AP000705.7     | 1,65 | 3,05 | 2,54 | 3,26 | 0,001029  | 0,010442 |
| CTC-448F2.7    | 1,51 | 2,68 | 2,15 | 2,85 | 0,0010323 | 0,010472 |

|               |      |      |      |      |           |          |
|---------------|------|------|------|------|-----------|----------|
| PNLIPRP1      | 0,79 | 2,67 | 1,09 | 2,51 | 0,001033  | 0,010473 |
| TMEM98        | 0,08 | 0,38 | 0,16 | 0,30 | 0,0010377 | 0,010516 |
| RP11-334C17.3 | 0,19 | 0,45 | 0,26 | 0,55 | 0,0010386 | 0,010521 |
| F3            | 0,06 | 0,15 | 0,13 | 0,13 | 0,0010408 | 0,010538 |
| RP11-108O10.2 | 0,70 | 1,56 | 1,61 | 1,27 | 0,001042  | 0,010545 |
| WI2-1959D15.3 | 0,00 | 0,09 | 0,16 | 0,34 | 0,0010427 | 0,010548 |
| RP11-500M8.4  | 2,26 | 1,79 | 3,34 | 3,97 | 0,0010433 | 0,010549 |
| TRIP13        | 0,10 | 0,15 | 0,10 | 0,10 | 0,0010474 | 0,010586 |
| MTRR          | 4,21 | 5,09 | 2,45 | 2,54 | 0,0010485 | 0,010592 |
| LEMD2         | 1,07 | 1,45 | 2,60 | 2,01 | 0,00105   | 0,010603 |
| NDUFB7        | 7,15 | 7,26 | 7,40 | 8,13 | 0,0010524 | 0,010622 |
| RP11-378I6.1  | 0,05 | 0,07 | 0,28 | 0,00 | 0,001058  | 0,010671 |
| TRAPPC2L      | 5,64 | 7,43 | 6,00 | 5,20 | 0,0010587 | 0,010671 |
| STMN1         | 5,05 | 2,30 | 3,96 | 1,80 | 0,0010587 | 0,010671 |
| CTC-339O9.1   | 0,21 | 0,23 | 0,40 | 0,80 | 0,0010614 | 0,010694 |
| RP11-723D22.3 | 0,81 | 2,15 | 1,80 | 1,13 | 0,0010635 | 0,01071  |
| RP11-146E13.4 | 1,78 | 3,49 | 2,12 | 2,89 | 0,0010646 | 0,010716 |
| PDZD11        | 4,97 | 0,82 | 4,68 | 1,68 | 0,0010676 | 0,010741 |
| RP11-423H2.3  | 1,77 | 3,19 | 2,43 | 1,92 | 0,0010692 | 0,010748 |
| AC004076.7    | 1,24 | 1,88 | 1,46 | 2,93 | 0,0010693 | 0,010748 |
| AGAP3         | 3,35 | 1,36 | 4,62 | 4,22 | 0,0010701 | 0,010752 |
| NAPA-AS1      | 0,15 | 0,77 | 0,32 | 3,08 | 0,0010709 | 0,010755 |
| LINC00466     | 1,09 | 0,58 | 1,43 | 1,90 | 0,0010718 | 0,010756 |
| RP11-294O2.1  | 0,85 | 1,28 | 1,51 | 1,73 | 0,0010719 | 0,010756 |
| STOML2        | 6,15 | 6,84 | 5,23 | 5,36 | 0,0010735 | 0,010766 |
| LIX1          | 0,09 | 0,45 | 0,29 | 0,18 | 0,0010784 | 0,010811 |
| RP11-106M3.2  | 0,03 | 0,62 | 0,10 | 0,10 | 0,0010789 | 0,010811 |
| ARFGEF2       | 2,97 | 1,44 | 2,87 | 2,35 | 0,0010808 | 0,010825 |
| SCARNA9       | 2,85 | 3,91 | 3,88 | 4,51 | 0,0010849 | 0,010861 |
| AF011889.2    | 2,73 | 0,00 | 3,00 | 0,00 | 0,001086  | 0,010867 |
| SLC31A1       | 2,90 | 2,33 | 3,57 | 3,47 | 0,0010866 | 0,010869 |
| FAAP100       | 1,89 | 4,66 | 3,50 | 4,03 | 0,0010881 | 0,010878 |
| NDUF55        | 7,11 | 7,39 | 7,39 | 7,96 | 0,0010891 | 0,010883 |
| CFL1P1        | 1,49 | 3,14 | 1,19 | 2,17 | 0,0010897 | 0,010885 |
| PSORS1C1      | 0,04 | 0,44 | 0,05 | 0,27 | 0,0010988 | 0,010971 |
| KDSR          | 4,33 | 3,32 | 4,43 | 1,38 | 0,0011037 | 0,011014 |
| PARP11        | 3,51 | 1,22 | 2,46 | 1,07 | 0,0011042 | 0,011014 |
| SPG11         | 6,58 | 4,12 | 6,29 | 6,33 | 0,0011046 | 0,011014 |
| ALDH6A1       | 1,29 | 0,87 | 2,00 | 2,07 | 0,0011073 | 0,011036 |
| EFHD1         | 0,00 | 0,46 | 0,60 | 0,31 | 0,0011085 | 0,011042 |
| RP11-697E22.2 | 0,00 | 0,39 | 0,00 | 0,34 | 0,0011141 | 0,011089 |
| GXYLT2        | 0,12 | 0,27 | 0,13 | 0,21 | 0,0011142 | 0,011089 |
| KB-1410C5.2   | 0,24 | 0,18 | 0,31 | 0,43 | 0,0011222 | 0,011162 |
| CIRBP-AS1     | 0,26 | 0,00 | 1,38 | 1,39 | 0,0011229 | 0,011162 |
| CTSC          | 7,31 | 5,35 | 6,35 | 5,52 | 0,0011235 | 0,011162 |
| RP3-324O17.5  | 0,68 | 4,92 | 1,15 | 1,41 | 0,0011238 | 0,011162 |
| RP11-792D21.2 | 0,11 | 1,19 | 0,28 | 0,06 | 0,0011241 | 0,011162 |
| CFTR          | 3,89 | 6,72 | 3,48 | 3,16 | 0,0011245 | 0,011162 |
| SCG3          | 0,03 | 0,68 | 0,00 | 0,07 | 0,0011272 | 0,011181 |
| CTDSPL        | 1,43 | 1,28 | 1,45 | 3,04 | 0,0011276 | 0,011181 |
| GHITM         | 7,71 | 6,40 | 6,53 | 5,71 | 0,0011279 | 0,011181 |
| ANKH          | 2,94 | 2,93 | 3,57 | 2,16 | 0,0011285 | 0,011182 |
| POTEC         | 0,88 | 1,48 | 0,90 | 1,73 | 0,0011294 | 0,011184 |
| SPIRE2        | 0,74 | 0,93 | 1,16 | 2,01 | 0,0011297 | 0,011184 |
| RP11-481J8.3  | 0,07 | 0,40 | 0,92 | 0,91 | 0,0011309 | 0,011191 |

|                  |       |       |       |       |           |          |
|------------------|-------|-------|-------|-------|-----------|----------|
| FAM83G           | 0,02  | 0,16  | 0,09  | 0,03  | 0,0011314 | 0,011191 |
| PIAS2            | 2,75  | 1,29  | 2,54  | 3,00  | 0,0011328 | 0,011195 |
| HIST4H4          | 1,92  | 1,80  | 1,94  | 4,61  | 0,001133  | 0,011195 |
| NRXN1            | 0,55  | 0,86  | 0,41  | 0,41  | 0,0011337 | 0,011195 |
| RP11-1109M24.5   | 1,04  | 2,54  | 1,02  | 2,17  | 0,0011339 | 0,011195 |
| RP11-91H12.1     | 0,00  | 0,00  | 0,00  | 1,85  | 0,00114   | 0,011251 |
| SFTPD-AS1        | 1,61  | 2,15  | 1,67  | 1,70  | 0,0011447 | 0,011292 |
| PFN1             | 11,29 | 10,83 | 10,87 | 10,11 | 0,0011488 | 0,011327 |
| CD151            | 1,33  | 2,89  | 2,36  | 2,95  | 0,0011498 | 0,011327 |
| CXorf36          | 0,16  | 0,36  | 0,44  | 1,35  | 0,0011502 | 0,011327 |
| TMEM53           | 0,30  | 0,66  | 1,41  | 0,51  | 0,0011504 | 0,011327 |
| FUS              | 4,92  | 4,23  | 5,52  | 5,40  | 0,0011508 | 0,011327 |
| PDE8B            | 0,13  | 0,00  | 0,05  | 0,00  | 0,0011537 | 0,011351 |
| CTD-3247F14.2    | 0,02  | 1,04  | 0,38  | 0,02  | 0,0011542 | 0,011351 |
| RP11-313F23.4    | 0,00  | 0,36  | 0,00  | 0,00  | 0,001156  | 0,011363 |
| IL2RA            | 0,19  | 0,45  | 0,26  | 0,09  | 0,001157  | 0,011368 |
| CTD-2194D22.4    | 0,08  | 0,29  | 0,06  | 0,15  | 0,0011636 | 0,011428 |
| AC073065.3       | 0,19  | 0,62  | 0,32  | 0,62  | 0,0011649 | 0,011435 |
| OR5A2            | 0,47  | 1,56  | 0,86  | 1,22  | 0,0011669 | 0,01145  |
| HRK              | 0,04  | 0,05  | 0,02  | 0,07  | 0,0011675 | 0,011451 |
| RP11-522B15.4    | 0,47  | 0,00  | 1,15  | 0,69  | 0,0011684 | 0,011455 |
| ACOT13           | 3,05  | 0,68  | 2,87  | 0,53  | 0,0011692 | 0,011457 |
| COX6B1           | 7,85  | 8,05  | 8,31  | 8,50  | 0,0011759 | 0,011518 |
| RP11-322L20.1    | 0,03  | 1,29  | 0,20  | 0,08  | 0,0011792 | 0,011545 |
| RP5-916O11.2     | 1,48  | 3,83  | 1,42  | 0,77  | 0,0011823 | 0,01157  |
| FAM103A1         | 5,00  | 1,76  | 3,93  | 2,34  | 0,0011829 | 0,011571 |
| KCNE3            | 2,32  | 3,43  | 2,98  | 3,62  | 0,0011904 | 0,01164  |
| RP11-556O5.7     | 0,22  | 2,21  | 0,31  | 0,87  | 0,0011926 | 0,011656 |
| PCED1A           | 3,88  | 5,39  | 4,96  | 5,97  | 0,0011977 | 0,0117   |
| NHLRC1           | 0,00  | 0,06  | 0,06  | 0,15  | 0,0012006 | 0,011724 |
| MT-TN            | 5,95  | 6,90  | 6,27  | 6,78  | 0,0012048 | 0,011758 |
| ATG2B            | 1,66  | 1,44  | 2,48  | 0,40  | 0,0012052 | 0,011758 |
| PSMD14           | 5,64  | 1,10  | 4,30  | 2,00  | 0,0012141 | 0,01184  |
| MBOAT4           | 0,49  | 0,00  | 0,24  | 0,00  | 0,0012156 | 0,011845 |
| ANKRD44          | 7,05  | 4,96  | 6,34  | 5,94  | 0,0012159 | 0,011845 |
| SRSF2            | 7,74  | 7,04  | 7,21  | 6,45  | 0,0012162 | 0,011845 |
| CTD-2047H16.3    | 0,84  | 1,84  | 1,28  | 1,24  | 0,0012187 | 0,011861 |
| VPS13D           | 3,66  | 2,88  | 3,26  | 2,24  | 0,0012193 | 0,011861 |
| TFEC             | 4,04  | 5,71  | 4,06  | 5,15  | 0,0012195 | 0,011861 |
| XXbac-B476C20.13 | 0,07  | 0,16  | 0,06  | 0,27  | 0,0012212 | 0,011873 |
| ANO1             | 0,00  | 0,85  | 0,00  | 0,00  | 0,0012218 | 0,011874 |
| CECR1            | 6,46  | 4,90  | 6,38  | 5,89  | 0,0012228 | 0,011877 |
| HLA-F            | 6,53  | 6,11  | 6,68  | 7,14  | 0,0012232 | 0,011877 |
| ZNF257           | 2,27  | 0,89  | 0,51  | 0,05  | 0,0012255 | 0,011894 |
| CD96             | 0,15  | 3,30  | 0,34  | 2,15  | 0,0012325 | 0,011956 |
| CH507-42P11.8    | 4,04  | 5,26  | 4,24  | 2,37  | 0,0012356 | 0,011981 |
| RP11-114H23.3    | 0,00  | 1,45  | 0,87  | 0,00  | 0,0012362 | 0,011982 |
| RP4-738P15.6     | 3,07  | 4,53  | 5,28  | 5,56  | 0,0012369 | 0,011984 |
| METTL21EP        | 0,13  | 0,28  | 0,16  | 0,41  | 0,00124   | 0,012008 |
| TNK2             | 2,47  | 4,88  | 3,75  | 4,17  | 0,0012434 | 0,012036 |
| UPRT             | 4,17  | 0,99  | 3,29  | 0,50  | 0,0012478 | 0,012074 |
| SPIRE1           | 0,00  | 0,00  | 0,05  | 0,03  | 0,0012503 | 0,012092 |
| PPM1N            | 1,72  | 2,40  | 2,40  | 2,95  | 0,0012569 | 0,01215  |
| PELP1            | 0,36  | 0,51  | 1,09  | 0,79  | 0,0012592 | 0,012168 |
| TSG101           | 6,36  | 5,30  | 5,25  | 3,21  | 0,0012599 | 0,01217  |



|                |       |       |       |       |           |          |
|----------------|-------|-------|-------|-------|-----------|----------|
| RP11-6N17.10   | 0,26  | 3,14  | 1,79  | 2,20  | 0,0012609 | 0,012174 |
| ABHD18         | 3,48  | 1,37  | 2,81  | 0,71  | 0,0012616 | 0,012175 |
| DBN1           | 0,16  | 0,78  | 0,27  | 0,24  | 0,0012737 | 0,012287 |
| ACO04156.3     | 0,58  | 1,78  | 0,88  | 1,18  | 0,0012753 | 0,012297 |
| RPL30          | 10,24 | 10,56 | 10,46 | 10,38 | 0,0012782 | 0,012319 |
| FADS3          | 0,56  | 3,71  | 0,80  | 1,16  | 0,0012822 | 0,012351 |
| RP11-356N1.2   | 1,64  | 0,99  | 1,62  | 3,77  | 0,0012826 | 0,012351 |
| GGPS1          | 5,09  | 0,66  | 2,77  | 3,30  | 0,0012838 | 0,012357 |
| AD000092.3     | 0,19  | 0,23  | 0,27  | 0,00  | 0,0012852 | 0,012365 |
| PGLS           | 7,06  | 7,97  | 7,38  | 6,57  | 0,001287  | 0,012377 |
| RP11-561B11.6  | 1,69  | 5,22  | 2,49  | 2,40  | 0,0012885 | 0,012386 |
| IGFBP7         | 4,26  | 6,40  | 4,45  | 4,54  | 0,0013004 | 0,012496 |
| FBRSL1         | 1,28  | 2,98  | 1,45  | 0,98  | 0,0013028 | 0,012513 |
| CCDC155        | 0,82  | 2,32  | 0,34  | 0,34  | 0,001307  | 0,012543 |
| RP11-58E21.1   | 0,32  | 1,97  | 1,34  | 0,78  | 0,0013072 | 0,012543 |
| UGT2B15        | 0,00  | 1,02  | 0,00  | 0,15  | 0,0013077 | 0,012543 |
| CSMD3          | 0,35  | 1,38  | 0,75  | 1,43  | 0,0013095 | 0,012556 |
| HEBP2          | 3,00  | 3,23  | 3,85  | 4,44  | 0,0013112 | 0,012566 |
| RPS27A         | 9,42  | 9,92  | 9,63  | 9,83  | 0,0013143 | 0,012588 |
| KIF1C          | 0,92  | 1,14  | 1,01  | 1,01  | 0,0013146 | 0,012588 |
| GNAS-AS1       | 0,18  | 1,09  | 0,20  | 0,31  | 0,0013159 | 0,012595 |
| CPD            | 2,94  | 3,04  | 3,27  | 4,99  | 0,0013175 | 0,012605 |
| VAV3           | 5,27  | 3,58  | 4,24  | 3,33  | 0,0013197 | 0,012621 |
| TMEM255B       | 0,00  | 0,04  | 0,07  | 0,68  | 0,0013238 | 0,012654 |
| RNF166         | 4,56  | 5,02  | 5,28  | 5,50  | 0,0013256 | 0,012666 |
| EEF1A1P30      | 0,21  | 0,11  | 0,00  | 0,11  | 0,0013282 | 0,012685 |
| ACO05754.8     | 0,20  | 0,42  | 0,46  | 0,56  | 0,0013321 | 0,012717 |
| RMND5A         | 3,04  | 2,87  | 3,43  | 1,77  | 0,0013328 | 0,012718 |
| KLC1           | 4,87  | 5,22  | 5,71  | 6,05  | 0,0013371 | 0,012754 |
| TBK1           | 4,47  | 1,99  | 4,42  | 3,95  | 0,0013435 | 0,012809 |
| RP11-573E11.2  | 0,93  | 4,63  | 2,13  | 2,35  | 0,001346  | 0,012828 |
| EDF1           | 7,86  | 8,33  | 8,13  | 8,04  | 0,0013502 | 0,012863 |
| RPS6KB1        | 4,19  | 3,90  | 3,22  | 4,88  | 0,0013514 | 0,012867 |
| C1orf27        | 3,27  | 2,13  | 3,69  | 1,12  | 0,0013518 | 0,012867 |
| MBNL2          | 2,60  | 0,85  | 2,20  | 2,75  | 0,0013537 | 0,012879 |
| RP11-1348G14.1 | 0,00  | 1,33  | 0,42  | 0,81  | 0,0013554 | 0,01289  |
| AJ003147.11    | 1,14  | 0,06  | 0,43  | 0,50  | 0,001359  | 0,012918 |
| RP11-461O14.1  | 0,00  | 0,34  | 0,00  | 0,29  | 0,0013608 | 0,012931 |
| CTD-3113P16.11 | 0,28  | 0,65  | 0,16  | 0,08  | 0,0013619 | 0,012936 |
| RAP2C          | 4,06  | 4,41  | 3,07  | 3,47  | 0,0013648 | 0,012957 |
| XYLB           | 1,65  | 0,60  | 1,01  | 1,26  | 0,0013664 | 0,012963 |
| HSPA8          | 9,11  | 7,59  | 8,22  | 7,83  | 0,0013666 | 0,012963 |
| AF011889.4     | 2,18  | 0,32  | 3,96  | 0,73  | 0,0013673 | 0,012964 |
| RAD17          | 3,89  | 0,81  | 2,60  | 2,70  | 0,0013688 | 0,012969 |
| CECR2          | 0,06  | 0,15  | 0,10  | 0,06  | 0,001369  | 0,012969 |
| POLR2L         | 5,24  | 6,05  | 5,66  | 6,07  | 0,0013706 | 0,012979 |
| KIF21A         | 0,23  | 2,25  | 0,64  | 2,06  | 0,0013723 | 0,01299  |
| TRAT1          | 0,00  | 0,26  | 0,00  | 0,00  | 0,0013818 | 0,013071 |
| ACO08074.3     | 0,00  | 0,00  | 0,03  | 1,28  | 0,0013821 | 0,013071 |
| GSTM2          | 5,26  | 5,89  | 4,00  | 1,98  | 0,0013834 | 0,013073 |
| RP11-498C9.17  | 0,70  | 0,93  | 0,83  | 1,07  | 0,0013835 | 0,013073 |
| NCOA6          | 3,69  | 5,05  | 3,35  | 4,24  | 0,0013875 | 0,013106 |
| CTD-2541M15.1  | 0,00  | 0,00  | 0,00  | 0,00  | 0,0013953 | 0,013173 |
| ACO17048.3     | 1,02  | 2,43  | 1,06  | 3,23  | 0,0013977 | 0,013191 |
| SLC44A4        | 1,06  | 0,84  | 0,49  | 3,90  | 0,0014045 | 0,013249 |

|                |      |      |      |      |           |          |
|----------------|------|------|------|------|-----------|----------|
| AC123023.1     | 0,00 | 0,97 | 0,74 | 0,35 | 0,001406  | 0,013254 |
| LILRB4         | 5,63 | 5,00 | 5,04 | 3,01 | 0,0014062 | 0,013254 |
| FAM186A        | 0,25 | 2,91 | 0,85 | 1,40 | 0,0014071 | 0,013257 |
| VAMP7          | 4,91 | 1,91 | 3,01 | 2,94 | 0,0014089 | 0,013268 |
| RP11-158L12.4  | 0,09 | 0,59 | 0,10 | 0,07 | 0,0014104 | 0,013276 |
| PRSS27         | 0,35 | 1,82 | 0,48 | 1,30 | 0,0014109 | 0,013276 |
| ZHX3           | 0,07 | 0,48 | 0,64 | 1,11 | 0,0014124 | 0,013284 |
| STK17B         | 8,41 | 6,96 | 7,90 | 7,51 | 0,0014139 | 0,013293 |
| SIMC1          | 3,22 | 5,61 | 3,32 | 3,38 | 0,0014206 | 0,01335  |
| RP11-661P17.1  | 0,26 | 1,49 | 0,59 | 0,20 | 0,0014215 | 0,013353 |
| CHST13         | 0,00 | 0,16 | 0,94 | 1,60 | 0,0014229 | 0,013355 |
| ANO6           | 3,32 | 3,63 | 2,99 | 3,55 | 0,0014229 | 0,013355 |
| SEPT3          | 0,16 | 0,06 | 0,06 | 0,07 | 0,0014249 | 0,013368 |
| AC009299.4     | 2,94 | 5,79 | 1,09 | 3,76 | 0,001427  | 0,013382 |
| NLRP1          | 4,35 | 5,99 | 5,00 | 4,84 | 0,0014317 | 0,013414 |
| ZNF518B        | 2,79 | 0,26 | 1,22 | 0,67 | 0,0014322 | 0,013414 |
| TMOD2          | 0,83 | 0,39 | 1,97 | 2,05 | 0,0014322 | 0,013414 |
| EFL1           | 2,12 | 5,05 | 1,86 | 3,36 | 0,0014371 | 0,013454 |
| FOXH1          | 1,68 | 3,58 | 2,71 | 2,17 | 0,0014386 | 0,013459 |
| MIR34AHG       | 0,20 | 0,31 | 0,16 | 0,49 | 0,0014388 | 0,013459 |
| RP11-760H22.2  | 1,63 | 1,43 | 2,31 | 0,49 | 0,0014405 | 0,013462 |
| RP11-2E17.1    | 0,01 | 0,07 | 0,04 | 0,04 | 0,0014407 | 0,013462 |
| RP11-95D17.1   | 0,50 | 0,87 | 1,21 | 0,47 | 0,001441  | 0,013462 |
| ATXN1L         | 2,78 | 0,91 | 1,64 | 2,16 | 0,0014466 | 0,013508 |
| AP001066.10    | 0,00 | 0,00 | 0,00 | 0,00 | 0,0014474 | 0,013511 |
| RF00100        | 2,99 | 4,05 | 3,97 | 5,48 | 0,0014521 | 0,013548 |
| NEK2           | 0,40 | 1,15 | 0,39 | 0,58 | 0,0014538 | 0,013559 |
| RP5-859M6.1    | 0,27 | 0,00 | 0,31 | 0,83 | 0,0014546 | 0,01356  |
| SLC4A5         | 1,12 | 0,56 | 0,46 | 2,67 | 0,0014552 | 0,01356  |
| MAST3          | 3,23 | 4,29 | 2,23 | 1,99 | 0,00146   | 0,013599 |
| HLA-C          | 7,56 | 8,14 | 8,01 | 7,88 | 0,0014616 | 0,013608 |
| CNGB1          | 0,19 | 0,23 | 0,35 | 0,58 | 0,0014667 | 0,01365  |
| ASGR2          | 5,14 | 5,75 | 5,50 | 6,32 | 0,0014674 | 0,013652 |
| RP11-288I21.1  | 0,39 | 0,91 | 0,52 | 1,28 | 0,0014696 | 0,013666 |
| PRDM14         | 0,08 | 1,03 | 0,08 | 1,15 | 0,0014703 | 0,013667 |
| VAMP8          | 8,75 | 8,71 | 8,83 | 9,12 | 0,0014738 | 0,013693 |
| CPEB2          | 2,92 | 1,56 | 2,75 | 1,12 | 0,001477  | 0,013717 |
| GRIP1          | 3,25 | 0,20 | 1,80 | 0,35 | 0,0014776 | 0,013717 |
| RP11-77C3.3    | 0,04 | 0,19 | 0,00 | 0,08 | 0,0014782 | 0,013717 |
| PPP1R18        | 5,72 | 3,66 | 5,95 | 5,25 | 0,0014815 | 0,013742 |
| RP11-982M15.8  | 0,47 | 1,47 | 0,74 | 0,62 | 0,0014865 | 0,013783 |
| PRELP          | 0,15 | 0,77 | 0,24 | 0,48 | 0,0014877 | 0,013789 |
| RP11-259K5.1   | 0,00 | 0,00 | 0,00 | 0,87 | 0,0014896 | 0,0138   |
| CLK3           | 5,97 | 7,35 | 5,50 | 4,35 | 0,0014906 | 0,013803 |
| AC015971.2     | 1,51 | 0,00 | 1,99 | 0,41 | 0,0014923 | 0,013812 |
| RP11-158H5.2   | 1,53 | 5,12 | 0,21 | 0,00 | 0,0014927 | 0,013812 |
| PRORY          | 0,00 | 0,00 | 0,00 | 1,01 | 0,0014953 | NA       |
| ZNF280D        | 4,23 | 3,66 | 2,73 | 3,61 | 0,0014954 | 0,01383  |
| RASEF          | 1,25 | 1,38 | 1,70 | 1,19 | 0,0014959 | 0,01383  |
| CTD-2527I21.11 | 0,14 | 1,42 | 0,20 | 0,00 | 0,0014966 | 0,01383  |
| RPLPOP2        | 0,36 | 0,32 | 0,42 | 0,30 | 0,0014971 | 0,01383  |
| SALRNA3        | 0,68 | 1,89 | 0,68 | 1,29 | 0,0014985 | 0,013836 |
| UBE2E2         | 6,43 | 2,71 | 5,14 | 4,25 | 0,0015021 | 0,013864 |
| ARF5           | 8,19 | 8,93 | 8,56 | 7,88 | 0,0015036 | 0,013872 |
| YPEL2          | 2,15 | 0,56 | 2,63 | 2,46 | 0,0015054 | 0,013883 |

|               |      |      |       |      |           |          |
|---------------|------|------|-------|------|-----------|----------|
| TTC24         | 0,00 | 3,86 | 0,00  | 0,00 | 0,0015063 | 0,013885 |
| PNPT1         | 3,99 | 4,34 | 3,39  | 1,46 | 0,0015086 | 0,013901 |
| KLHL6         | 3,18 | 3,19 | 2,15  | 2,18 | 0,0015159 | 0,013962 |
| MTFMT         | 4,12 | 1,66 | 3,39  | 1,74 | 0,0015205 | 0,013999 |
| CTC-591M7.1   | 0,45 | 1,85 | 0,49  | 1,15 | 0,0015242 | 0,014027 |
| HNMT          | 3,97 | 4,49 | 4,42  | 5,44 | 0,0015253 | 0,014032 |
| RN7SL32P      | 0,00 | 1,75 | 1,46  | 2,56 | 0,0015289 | 0,014058 |
| WDR1          | 5,95 | 5,96 | 5,55  | 4,55 | 0,0015341 | 0,014094 |
| NIPBL         | 5,76 | 5,30 | 5,34  | 4,15 | 0,0015345 | 0,014094 |
| RP11-212D3.4  | 1,01 | 2,58 | 1,24  | 2,31 | 0,0015354 | 0,014094 |
| JUN           | 3,91 | 4,83 | 4,77  | 4,88 | 0,0015356 | 0,014094 |
| RP11-166N6.2  | 0,28 | 0,00 | 0,00  | 0,00 | 0,0015364 | 0,014094 |
| BLOC1S1       | 7,27 | 7,04 | 7,52  | 7,52 | 0,0015365 | 0,014094 |
| RN7SL284P     | 2,33 | 0,00 | 2,88  | 2,00 | 0,0015384 | 0,014105 |
| ICAM2         | 7,15 | 6,81 | 6,54  | 7,69 | 0,0015413 | 0,014126 |
| CNPY4         | 0,61 | 4,40 | 0,47  | 0,57 | 0,0015428 | 0,014133 |
| TIAM2         | 1,96 | 2,74 | 1,45  | 4,24 | 0,0015505 | 0,014198 |
| ANKRD10       | 7,87 | 6,06 | 6,98  | 6,94 | 0,0015516 | 0,014203 |
| SPEG          | 0,02 | 0,05 | 0,10  | 1,17 | 0,0015533 | 0,014212 |
| RP3-406M12.1  | 2,34 | 1,97 | 1,80  | 3,33 | 0,0015558 | 0,014229 |
| PAFAH1B3      | 5,64 | 6,17 | 4,92  | 1,89 | 0,0015558 | 0,014244 |
| CYB561A3      | 5,08 | 5,43 | 4,47  | 2,21 | 0,0015595 | 0,014252 |
| FDFT1         | 6,53 | 4,34 | 5,53  | 5,42 | 0,0015614 | 0,014263 |
| RP11-513O17.2 | 0,28 | 3,64 | 0,50  | 0,57 | 0,0015635 | 0,014276 |
| PGM5          | 0,50 | 0,83 | 0,67  | 1,40 | 0,0015665 | 0,014298 |
| VKORC1L1      | 1,14 | 0,23 | 0,57  | 0,43 | 0,0015679 | 0,014305 |
| ATHL1         | 0,33 | 2,72 | 2,41  | 4,01 | 0,0015685 | 0,014305 |
| RP11-274B18.2 | 0,00 | 5,10 | 1,28  | 3,17 | 0,0015722 | 0,014333 |
| S100A10       | 9,96 | 9,50 | 10,42 | 9,80 | 0,0015757 | 0,014359 |
| CSE1L         | 4,66 | 1,91 | 3,30  | 1,70 | 0,0015784 | 0,014377 |
| AC124789.1    | 0,26 | 0,58 | 0,12  | 0,30 | 0,0015808 | 0,014393 |
| TDRD6         | 0,00 | 0,00 | 0,00  | 0,02 | 0,0015937 | 0,014504 |
| HS3ST1        | 0,23 | 0,35 | 0,24  | 0,64 | 0,0015947 | 0,014508 |
| GDF15         | 0,00 | 0,64 | 0,46  | 1,56 | 0,0015998 | 0,014548 |
| RP11-550E22.3 | 3,36 | 5,26 | 3,78  | 3,45 | 0,0016054 | 0,014593 |
| S100A13       | 2,99 | 0,00 | 3,15  | 5,74 | 0,0016086 | 0,014615 |
| OR11A1        | 0,56 | 2,14 | 0,42  | 0,47 | 0,0016092 | 0,014615 |
| DNAAF5        | 1,68 | 3,07 | 1,35  | 0,64 | 0,0016103 | 0,01462  |
| ABCA17P       | 0,00 | 0,00 | 0,03  | 0,48 | 0,0016115 | 0,014625 |
| RP11-114G22.1 | 0,97 | 4,56 | 1,32  | 0,68 | 0,0016127 | 0,014629 |
| ZNF462        | 0,09 | 0,34 | 0,12  | 0,14 | 0,0016163 | 0,014656 |
| RP11-284F21.8 | 0,15 | 0,25 | 0,29  | 0,16 | 0,0016192 | 0,014676 |
| PRMT9         | 2,12 | 2,54 | 1,52  | 1,36 | 0,0016199 | 0,014677 |
| SYNE4         | 0,04 | 0,24 | 0,20  | 0,10 | 0,0016235 | 0,014703 |
| CR1           | 0,69 | 3,55 | 1,10  | 1,67 | 0,0016263 | 0,014722 |
| EPS8          | 3,16 | 3,01 | 3,74  | 5,36 | 0,0016414 | 0,014854 |
| NR1H3         | 1,97 | 5,19 | 2,64  | 3,55 | 0,0016452 | 0,014882 |
| AC003973.6    | 0,44 | 1,62 | 0,87  | 0,83 | 0,0016478 | 0,014895 |
| SHMT2         | 4,40 | 1,94 | 4,58  | 3,79 | 0,001648  | 0,014895 |
| TXNRD2        | 3,28 | 2,61 | 4,56  | 5,17 | 0,001649  | 0,014898 |
| RNASEH1       | 4,14 | 2,94 | 3,54  | 1,29 | 0,0016547 | 0,014943 |
| CDHR1         | 0,00 | 0,76 | 0,00  | 0,47 | 0,0016562 | 0,014951 |
| DOHH          | 0,00 | 0,52 | 0,00  | 0,00 | 0,0016573 | 0,014955 |
| PLXNB2        | 5,18 | 5,95 | 5,92  | 6,23 | 0,001661  | 0,014982 |
| MTDH          | 5,84 | 6,59 | 6,18  | 5,58 | 0,001664  | 0,015003 |

|               |       |       |       |       |           |          |
|---------------|-------|-------|-------|-------|-----------|----------|
| RNU11         | 3,55  | 0,00  | 3,45  | 4,97  | 0,0016696 | 0,015047 |
| CHTOP         | 5,44  | 3,13  | 4,89  | 5,86  | 0,0016705 | 0,015049 |
| RP3-508115.9  | 1,08  | 1,46  | 1,46  | 1,12  | 0,001673  | 0,015061 |
| KATNAL1       | 0,61  | 0,53  | 0,38  | 0,39  | 0,0016731 | 0,015061 |
| STYXL1        | 6,08  | 6,18  | 4,88  | 4,41  | 0,0016749 | 0,015071 |
| AC072062.1    | 3,17  | 5,50  | 2,97  | 3,51  | 0,0016764 | 0,015078 |
| AC009120.11   | 0,96  | 0,62  | 1,34  | 1,60  | 0,0016842 | 0,015142 |
| FAU           | 9,79  | 10,22 | 10,06 | 10,13 | 0,0016882 | 0,015167 |
| CTB-175P5.4   | 0,15  | 1,82  | 0,46  | 0,43  | 0,0016883 | 0,015167 |
| MEF2C         | 7,37  | 6,23  | 6,85  | 5,98  | 0,0016902 | 0,015178 |
| IGFL2         | 0,99  | 2,10  | 1,12  | 1,48  | 0,0016918 | 0,015185 |
| SLC25A42      | 0,55  | 1,19  | 0,31  | 1,67  | 0,0016926 | 0,015187 |
| ZNF626        | 1,72  | 1,58  | 0,97  | 1,56  | 0,001695  | 0,015199 |
| KLHL12        | 4,05  | 0,12  | 3,00  | 2,47  | 0,0016953 | 0,015199 |
| RP11-31312.11 | 0,43  | 1,88  | 0,46  | 0,98  | 0,0016969 | 0,015203 |
| FANCA         | 1,41  | 6,27  | 1,46  | 2,58  | 0,0016971 | 0,015203 |
| MAN2C1        | 5,33  | 6,27  | 6,00  | 5,89  | 0,0016992 | 0,01521  |
| MGP           | 0,48  | 0,33  | 0,58  | 0,77  | 0,0016993 | 0,01521  |
| TK2           | 4,11  | 3,19  | 2,98  | 4,82  | 0,0017007 | 0,015217 |
| OLR1          | 1,28  | 2,53  | 2,62  | 1,97  | 0,0017047 | 0,015246 |
| HTN3          | 1,72  | 2,98  | 1,90  | 1,96  | 0,0017103 | 0,01529  |
| B3GALNT1      | 0,97  | 2,25  | 0,42  | 0,14  | 0,0017135 | 0,015312 |
| MEMO1         | 6,19  | 4,97  | 4,85  | 3,98  | 0,001721  | 0,01537  |
| AC005017.1    | 0,08  | 0,53  | 0,27  | 0,06  | 0,0017213 | 0,01537  |
| MT-RNR1       | 13,45 | 14,11 | 13,78 | 13,92 | 0,001725  | 0,015394 |
| HNRNPA1       | 9,65  | 8,86  | 9,16  | 8,20  | 0,0017253 | 0,015394 |
| GABRB1        | 0,00  | 0,07  | 0,00  | 0,00  | 0,0017279 | 0,01541  |
| PTGDS         | 2,15  | 1,03  | 1,07  | 1,67  | 0,001732  | 0,015441 |
| CTD-2001C12.1 | 0,06  | 1,63  | 0,09  | 1,34  | 0,0017424 | 0,015525 |
| DOCK2         | 5,97  | 3,80  | 5,84  | 5,39  | 0,0017428 | 0,015525 |
| SLC43A3       | 4,00  | 5,21  | 4,65  | 5,24  | 0,0017477 | 0,015562 |
| AP000997.1    | 0,00  | 2,50  | 0,00  | 0,00  | 0,0017486 | 0,015564 |
| RP11-166P13.4 | 0,23  | 0,24  | 0,21  | 0,50  | 0,0017508 | 0,015577 |
| MAP2K7        | 1,16  | 1,81  | 1,93  | 1,18  | 0,001759  | 0,015644 |
| CD300C        | 6,67  | 0,91  | 5,61  | 3,98  | 0,0017612 | 0,015651 |
| AC010148.1    | 1,61  | 4,16  | 0,93  | 0,54  | 0,0017612 | 0,015651 |
| CTC-281B15.1  | 1,01  | 0,94  | 1,29  | 2,74  | 0,0017645 | 0,015674 |
| RP4-798A10.2  | 0,42  | 1,43  | 0,44  | 1,14  | 0,0017657 | 0,015678 |
| LRRC37A2      | 4,04  | 1,06  | 4,13  | 2,08  | 0,0017678 | 0,015691 |
| COL27A1       | 0,16  | 0,25  | 0,23  | 0,22  | 0,0017715 | 0,015713 |
| AC004158.3    | 0,14  | 0,20  | 0,35  | 0,49  | 0,0017728 | 0,015713 |
| RP11-519G16.3 | 1,04  | 2,35  | 1,31  | 2,57  | 0,001773  | 0,015713 |
| CTD-2306M5.1  | 1,31  | 1,49  | 1,79  | 1,31  | 0,0017732 | 0,015713 |
| RP11-364P22.1 | 0,00  | 3,31  | 0,00  | 0,18  | 0,0017786 | 0,015753 |
| OSMR          | 0,93  | 0,85  | 0,29  | 0,33  | 0,0017791 | 0,015753 |
| ATP6VOA1      | 4,23  | 4,90  | 5,33  | 5,71  | 0,0017801 | 0,015756 |
| KIF13B        | 1,78  | 0,79  | 2,17  | 3,61  | 0,0017811 | 0,015759 |
| RP11-662G23.1 | 0,00  | 0,15  | 0,00  | 1,17  | 0,0017911 | NA       |
| RP4-758J18.13 | 1,11  | 1,39  | 1,24  | 1,22  | 0,0017925 | 0,015853 |
| RSRP1         | 7,24  | 8,01  | 7,02  | 6,96  | 0,0017963 | 0,015879 |
| CTD-2313N18.2 | 0,00  | 4,14  | 0,10  | 0,11  | 0,0017976 | 0,015879 |
| OR56B2P       | 0,00  | 1,92  | 0,00  | 0,00  | 0,0017976 | 0,015879 |
| OTUB1         | 7,54  | 7,13  | 6,93  | 6,14  | 0,0017983 | 0,015879 |
| RP11-17A4.2   | 1,06  | 2,81  | 1,25  | 1,39  | 0,0018002 | 0,015889 |
| FAM151B       | 2,44  | 3,98  | 3,81  | 2,96  | 0,001801  | 0,01589  |

|               |       |       |       |       |           |          |
|---------------|-------|-------|-------|-------|-----------|----------|
| HNRNPC        | 8,45  | 7,55  | 7,96  | 7,03  | 0,0018019 | 0,015891 |
| MAP3K11       | 4,22  | 5,39  | 5,02  | 5,06  | 0,0018044 | 0,015907 |
| AP003419.16   | 0,00  | 3,38  | 2,64  | 3,56  | 0,0018007 | 0,015924 |
| RPS27         | 11,38 | 12,24 | 11,56 | 12,17 | 0,0018088 | 0,01593  |
| ANKRD45       | 0,59  | 0,16  | 0,49  | 1,56  | 0,0018091 | 0,01593  |
| WDR66         | 1,51  | 2,71  | 1,80  | 2,16  | 0,0018116 | 0,015945 |
| TIGAR         | 4,92  | 4,36  | 3,87  | 0,50  | 0,0018122 | 0,015945 |
| DPYSL2        | 6,43  | 5,67  | 5,71  | 5,05  | 0,001813  | 0,015945 |
| CTD-2515A14.1 | 0,56  | 0,89  | 0,49  | 1,56  | 0,0018157 | 0,015963 |
| SRP54         | 5,13  | 3,52  | 4,85  | 4,74  | 0,0018195 | 0,01599  |
| RP11-25H12.1  | 0,00  | 0,00  | 0,00  | 0,05  | 0,0018242 | 0,016025 |
| GIMAP1        | 0,32  | 1,67  | 1,98  | 2,67  | 0,0018251 | 0,016026 |
| RP11-356J5.12 | 2,63  | 2,42  | 1,68  | 1,11  | 0,0018273 | 0,016039 |
| RP11-229D13.3 | 0,39  | 0,96  | 0,56  | 0,90  | 0,0018317 | 0,016072 |
| RP11-511P7.2  | 0,38  | 0,82  | 0,48  | 1,37  | 0,001833  | 0,016072 |
| ISPD          | 0,12  | 0,51  | 0,10  | 0,45  | 0,0018332 | 0,016072 |
| MPZL2         | 3,08  | 0,31  | 2,15  | 1,21  | 0,0018416 | 0,016139 |
| RP11-323N12.5 | 0,00  | 0,00  | 0,00  | 4,06  | 0,0018447 | 0,01616  |
| FAM213B       | 0,09  | 0,00  | 0,21  | 0,31  | 0,0018588 | 0,016278 |
| CORO7         | 3,76  | 3,93  | 4,82  | 5,07  | 0,0018674 | 0,016346 |
| GDE1          | 4,42  | 1,12  | 3,15  | 4,19  | 0,0018711 | 0,016369 |
| RP11-34P13.10 | 0,84  | 1,61  | 1,65  | 1,86  | 0,0018715 | 0,016369 |
| CPM           | 2,69  | 5,11  | 3,87  | 3,93  | 0,0018734 | 0,016379 |
| PRELID1       | 8,92  | 7,84  | 8,35  | 7,95  | 0,0018788 | 0,01642  |
| ZDHC22        | 0,06  | 0,00  | 0,03  | 0,29  | 0,0018819 | 0,016441 |
| TPH1          | 0,18  | 0,08  | 0,27  | 0,07  | 0,0018838 | 0,016448 |
| RP11-266K22.2 | 0,00  | 0,49  | 0,00  | 0,75  | 0,0018843 | 0,016448 |
| MR1           | 2,73  | 1,51  | 3,64  | 1,77  | 0,0018884 | 0,016478 |
| CTD-2270P14.1 | 1,82  | 1,01  | 2,23  | 2,70  | 0,0018932 | 0,016513 |
| AC073283.4    | 2,26  | 2,71  | 2,12  | 2,65  | 0,0018963 | 0,016534 |
| TMEM150B      | 0,00  | 0,00  | 0,07  | 0,73  | 0,0019067 | 0,016612 |
| PROX1         | 0,06  | 0,00  | 0,63  | 0,65  | 0,0019068 | 0,016612 |
| NUF2          | 0,00  | 0,08  | 0,00  | 0,20  | 0,001908  | 0,016617 |
| PSIP1         | 4,27  | 4,43  | 3,90  | 5,08  | 0,0019178 | 0,016692 |
| RP11-521B24.3 | 0,17  | 0,55  | 0,27  | 0,55  | 0,0019182 | 0,016692 |
| RP11-64C12.1  | 0,15  | 0,36  | 0,40  | 0,40  | 0,0019223 | 0,016721 |
| FGFRL1        | 0,72  | 0,32  | 0,19  | 0,53  | 0,0019253 | 0,016741 |
| RP11-1C1.7    | 0,84  | 1,00  | 1,26  | 2,26  | 0,0019266 | 0,016746 |
| GTPBP3        | 0,61  | 1,60  | 1,58  | 1,17  | 0,0019319 | 0,016785 |
| CTNS          | 2,91  | 0,48  | 2,05  | 4,35  | 0,0019407 | 0,016855 |
| SEC14L2       | 0,00  | 0,43  | 0,03  | 0,08  | 0,0019444 | 0,01688  |
| AC011816.4    | 0,42  | 1,12  | 0,70  | 1,16  | 0,0019451 | 0,01688  |
| FNBP4         | 6,02  | 4,08  | 5,49  | 5,10  | 0,0019465 | 0,016886 |
| RP11-115H13.1 | 0,18  | 1,46  | 0,34  | 0,34  | 0,0019543 | 0,016942 |
| MARC1         | 0,31  | 0,17  | 0,21  | 0,20  | 0,0019546 | 0,016942 |
| GAA           | 3,16  | 3,23  | 4,70  | 4,01  | 0,0019568 | 0,016955 |
| FUT3          | 0,00  | 0,98  | 0,15  | 0,28  | 0,0019643 | 0,01701  |
| GULP1         | 0,08  | 0,00  | 0,08  | 0,18  | 0,0019647 | 0,01701  |
| RP11-717H13.1 | 0,04  | 0,05  | 0,08  | 0,03  | 0,0019677 | 0,017024 |
| AKAP1         | 4,08  | 2,41  | 2,83  | 1,00  | 0,0019678 | 0,017024 |
| ZNF830        | 2,90  | 4,57  | 2,59  | 1,53  | 0,0019688 | 0,017026 |
| SLC39A7       | 0,00  | 0,54  | 0,24  | 0,66  | 0,0019707 | 0,017036 |
| MIER1         | 4,54  | 5,08  | 4,92  | 4,40  | 0,0019912 | 0,017201 |
| RP11-177N22.3 | 0,00  | 1,02  | 0,00  | 0,76  | 0,0019914 | 0,017201 |
| PRRG4         | 0,54  | 0,40  | 0,53  | 2,38  | 0,0019959 | 0,017233 |

|               |       |       |       |       |           |          |
|---------------|-------|-------|-------|-------|-----------|----------|
| CMKLR1        | 0,00  | 0,00  | 0,00  | 0,62  | 0,0019978 | 0,017243 |
| RP11-843P14.1 | 0,00  | 0,00  | 0,36  | 0,44  | 0,0020002 | 0,017257 |
| RP11-135N5.3  | 1,06  | 0,54  | 0,67  | 1,19  | 0,002006  | 0,0173   |
| GAB2          | 2,97  | 0,62  | 3,83  | 3,05  | 0,0020187 | 0,017404 |
| NOCT          | 1,44  | 2,23  | 2,22  | 2,66  | 0,002024  | 0,017443 |
| CBFA2T3       | 3,55  | 2,87  | 2,63  | 1,31  | 0,0020261 | 0,017454 |
| HNRNPF        | 6,46  | 5,47  | 5,67  | 4,25  | 0,0020305 | 0,017485 |
| IDUA          | 0,45  | 1,10  | 1,92  | 0,50  | 0,0020353 | 0,017519 |
| PI4KAP2       | 1,78  | 0,89  | 2,82  | 2,26  | 0,0020412 | 0,017563 |
| OR4P4         | 0,20  | 0,14  | 0,49  | 0,22  | 0,0020482 | 0,017616 |
| GTF2IRD1      | 0,19  | 2,54  | 0,33  | 0,11  | 0,0020489 | 0,017616 |
| RP11-22H5.2   | 0,03  | 0,24  | 0,07  | 0,18  | 0,002051  | 0,017626 |
| AZIN1         | 5,20  | 2,60  | 4,11  | 3,85  | 0,0020517 | 0,017626 |
| RAB29         | 5,46  | 4,63  | 4,32  | 3,78  | 0,0020562 | 0,017658 |
| RPS3A         | 12,01 | 12,21 | 11,67 | 11,02 | 0,0020571 | 0,017659 |
| RALGPS2       | 1,76  | 0,21  | 1,06  | 1,81  | 0,0020622 | 0,017696 |
| SLC22A9       | 0,09  | 0,21  | 0,19  | 0,23  | 0,0020637 | 0,017702 |
| CTD-2012K14.5 | 1,18  | 1,61  | 1,51  | 1,90  | 0,0020672 | 0,017725 |
| DDX60         | 3,62  | 0,41  | 2,84  | 3,59  | 0,0020693 | 0,017736 |
| CTD-3035K23.7 | 0,28  | 0,36  | 0,33  | 0,00  | 0,0020769 | 0,017795 |
| CECR7         | 0,34  | 2,01  | 0,58  | 0,69  | 0,0020802 | 0,017808 |
| LACC1         | 2,12  | 0,26  | 1,13  | 0,49  | 0,0020808 | 0,017808 |
| OR6C75        | 1,40  | 2,08  | 1,27  | 2,68  | 0,0020809 | 0,017808 |
| DFNB31        | 0,22  | 1,66  | 0,47  | 0,00  | 0,0020896 | 0,017876 |
| RP11-107E5.3  | 3,56  | 3,35  | 4,68  | 4,63  | 0,0020925 | 0,017894 |
| RP1-257A7.5   | 6,59  | 6,35  | 6,39  | 2,44  | 0,002094  | 0,0179   |
| RP11-282K24.3 | 0,11  | 1,15  | 0,16  | 0,34  | 0,0020957 | 0,017907 |
| MPHOSPH10     | 4,62  | 3,06  | 3,85  | 1,96  | 0,0020969 | 0,017911 |
| CTA-212A2.2   | 1,16  | 1,37  | 1,55  | 1,57  | 0,002106  | 0,017982 |
| ITSN2         | 6,24  | 5,12  | 5,57  | 4,88  | 0,0021086 | 0,017994 |
| OR10H5        | 0,50  | 1,17  | 0,81  | 0,71  | 0,0021091 | 0,017994 |
| RP11-262H14.3 | 0,00  | 3,10  | 0,00  | 0,28  | 0,0021152 | 0,018039 |
| RF00560       | 1,99  | 0,00  | 0,00  | 0,00  | 0,0021193 | 0,018059 |
| NKTR          | 6,54  | 5,70  | 6,51  | 5,13  | 0,00212   | 0,018059 |
| SLC7A1        | 1,04  | 0,65  | 0,67  | 0,03  | 0,0021204 | 0,018059 |
| DDHD1         | 6,00  | 4,48  | 5,17  | 3,41  | 0,0021208 | 0,018059 |
| ADGRF3        | 0,47  | 0,32  | 0,00  | 0,10  | 0,0021234 | 0,018074 |
| HECTD1        | 6,40  | 7,02  | 6,31  | 4,14  | 0,0021259 | 0,018089 |
| DEK           | 6,11  | 5,95  | 6,46  | 6,37  | 0,002127  | 0,018092 |
| CDH6          | 0,05  | 0,12  | 0,10  | 0,13  | 0,0021283 | 0,018096 |
| KDELRL2       | 5,70  | 4,85  | 5,03  | 5,21  | 0,0021293 | 0,018097 |
| E2F5          | 0,57  | 0,13  | 0,25  | 0,06  | 0,0021327 | 0,018119 |
| UBALD2        | 2,13  | 4,41  | 3,18  | 3,75  | 0,0021354 | 0,018135 |
| SUV39H2       | 2,93  | 0,78  | 0,78  | 0,75  | 0,0021371 | 0,018142 |
| RBM48         | 3,35  | 0,69  | 2,89  | 2,94  | 0,0021382 | 0,018145 |
| RP11-541F9.2  | 2,22  | 1,74  | 2,66  | 0,35  | 0,0021393 | 0,018147 |
| SEC14L5       | 0,05  | 0,27  | 0,09  | 0,12  | 0,0021434 | 0,018175 |
| FOCAD         | 2,60  | 5,19  | 3,14  | 2,17  | 0,0021452 | 0,018183 |
| PLLP          | 0,72  | 0,96  | 1,07  | 1,13  | 0,0021466 | 0,018188 |
| MYO1D         | 1,55  | 0,04  | 0,72  | 0,02  | 0,0021485 | 0,018198 |
| RP4-756H11.3  | 4,41  | 3,40  | 4,58  | 5,02  | 0,0021499 | 0,018203 |
| ULK4P1        | 4,58  | 0,00  | 3,74  | 0,89  | 0,0021512 | 0,018207 |
| ARRDC2        | 4,72  | 5,74  | 5,18  | 5,07  | 0,0021553 | 0,018234 |
| RP4-617C6.1   | 1,20  | 2,31  | 0,83  | 1,51  | 0,0021636 | 0,018298 |
| CCL5          | 3,19  | 5,57  | 3,32  | 5,96  | 0,0021653 | 0,018305 |

|               |      |      |      |      |           |          |
|---------------|------|------|------|------|-----------|----------|
| RP5-827C21.4  | 1,45 | 5,43 | 1,84 | 4,41 | 0,0021674 | 0,018316 |
| MCM3          | 2,52 | 4,84 | 2,55 | 0,72 | 0,0021709 | 0,018339 |
| RP11-410C4.5  | 1,91 | 2,58 | 1,72 | 3,02 | 0,0021719 | 0,01834  |
| NAPRT         | 5,61 | 5,96 | 6,18 | 6,87 | 0,0021799 | 0,0184   |
| VDAC1         | 6,77 | 6,53 | 6,32 | 4,91 | 0,0021812 | 0,018405 |
| THRAP3        | 5,47 | 5,31 | 5,14 | 3,95 | 0,0021847 | 0,018421 |
| FKBP3         | 5,67 | 6,55 | 5,20 | 4,44 | 0,0021848 | 0,018421 |
| LLNLR-304A6.1 | 0,61 | 1,94 | 1,32 | 1,20 | 0,002187  | 0,018427 |
| SMCR5         | 0,14 | 0,08 | 0,37 | 0,32 | 0,0021897 | 0,018427 |
| VTRNA1-3      | 0,00 | 0,00 | 1,99 | 5,08 | 0,0021897 | 0,018427 |
| DGAT1         | 4,25 | 4,81 | 4,80 | 5,08 | 0,00219   | 0,018427 |
| MUC3A         | 0,00 | 1,28 | 0,00 | 0,09 | 0,0021901 | 0,018427 |
| IGKC          | 3,97 | 6,87 | 4,35 | 4,40 | 0,0021906 | 0,018427 |
| RP5-1184F4.7  | 0,28 | 0,93 | 0,35 | 0,82 | 0,0021919 | 0,018431 |
| ACTR3         | 7,21 | 6,12 | 6,31 | 5,32 | 0,0021975 | 0,018472 |
| AGGF1         | 3,81 | 1,52 | 2,91 | 2,71 | 0,0022006 | 0,018485 |
| ETNK2         | 0,32 | 0,00 | 0,21 | 0,36 | 0,0022007 | 0,018485 |
| RP11-563J2.3  | 0,18 | 1,79 | 0,25 | 0,16 | 0,0022078 | 0,018536 |
| ZBTB26        | 0,22 | 0,00 | 0,06 | 0,08 | 0,0022085 | 0,018536 |
| ELK4          | 3,52 | 1,31 | 2,75 | 3,10 | 0,0022144 | 0,018569 |
| RP11-886P16.3 | 0,96 | 2,39 | 0,87 | 2,37 | 0,0022144 | 0,018569 |
| HARS          | 5,00 | 5,75 | 4,12 | 2,53 | 0,002215  | 0,018569 |
| VPS37B        | 0,30 | 0,26 | 2,15 | 3,12 | 0,0022159 | 0,01857  |
| FRMPD3        | 0,05 | 0,04 | 0,00 | 0,16 | 0,0022189 | 0,018588 |
| RP11-615I16.2 | 0,00 | 0,00 | 0,00 | 0,68 | 0,002224  | NA       |
| KIAA1328      | 3,14 | 4,60 | 3,59 | 3,46 | 0,0022259 | 0,018638 |
| FKBP9         | 0,87 | 1,72 | 2,01 | 2,92 | 0,0022265 | 0,018638 |
| PLA2G4D       | 0,40 | 0,47 | 0,42 | 0,64 | 0,0022279 | 0,018642 |
| ANGPT1        | 0,16 | 0,00 | 0,42 | 0,18 | 0,0022287 | 0,018642 |
| TRMT44        | 2,14 | 5,59 | 2,37 | 1,19 | 0,0022373 | 0,018707 |
| PPCS          | 6,93 | 6,51 | 5,85 | 5,44 | 0,0022384 | 0,01871  |
| TTC7A         | 3,74 | 2,49 | 4,30 | 4,28 | 0,002241  | 0,018724 |
| DYNLL2        | 0,34 | 1,54 | 0,56 | 0,61 | 0,0022441 | 0,018741 |
| PCDHB1        | 0,23 | 0,77 | 0,31 | 0,33 | 0,0022447 | 0,018741 |
| ZNF264        | 0,95 | 0,43 | 0,78 | 0,92 | 0,0022473 | 0,018756 |
| PLA2G2D       | 0,16 | 0,33 | 0,34 | 0,42 | 0,0022526 | 0,018793 |
| DCUN1D4       | 2,44 | 1,24 | 1,24 | 2,71 | 0,0022555 | 0,01881  |
| WDR75         | 4,54 | 2,71 | 3,53 | 1,93 | 0,0022608 | 0,018845 |
| AC006116.25   | 1,32 | 3,68 | 1,30 | 1,77 | 0,0022615 | 0,018845 |
| CMIP          | 1,67 | 2,08 | 2,88 | 3,57 | 0,0022661 | 0,018877 |
| TRIM36        | 1,82 | 0,35 | 1,40 | 0,06 | 0,0022705 | 0,018899 |
| CLP1          | 3,64 | 0,00 | 1,12 | 0,24 | 0,0022712 | 0,018899 |
| RP11-540B6.6  | 0,26 | 2,01 | 1,28 | 0,43 | 0,0022713 | 0,018899 |
| TRIML2        | 2,03 | 2,00 | 2,77 | 3,34 | 0,0022724 | 0,018901 |
| ZC3H11A       | 4,58 | 3,53 | 3,97 | 4,96 | 0,0022756 | 0,01892  |
| HIST3H2BB     | 0,53 | 0,72 | 1,14 | 1,03 | 0,0022789 | 0,018941 |
| CYC1          | 8,03 | 7,53 | 7,94 | 6,84 | 0,0022829 | 0,018964 |
| CALM3         | 5,19 | 6,70 | 5,87 | 6,94 | 0,0022834 | 0,018964 |
| SEP15         | 7,39 | 5,94 | 6,55 | 6,35 | 0,0022918 | 0,019021 |
| MOB2          | 1,25 | 1,28 | 2,34 | 1,37 | 0,0022919 | 0,019021 |
| PBX1          | 2,28 | 3,99 | 2,13 | 2,82 | 0,0023008 | 0,019087 |
| FARS2         | 5,00 | 0,78 | 3,56 | 0,93 | 0,0023016 | 0,019087 |
| GYG2P1        | 1,64 | 1,05 | 1,58 | 2,83 | 0,0023034 | 0,019091 |
| TMEM259       | 2,75 | 2,74 | 3,48 | 3,85 | 0,0023037 | 0,019091 |
| RP11-344E13.4 | 0,00 | 0,39 | 0,00 | 0,00 | 0,0023066 | 0,019107 |

|               |      |      |      |      |           |          |
|---------------|------|------|------|------|-----------|----------|
| NRAS          | 3,61 | 1,21 | 2,82 | 2,39 | 0,0023081 | 0,01911  |
| RP11-157B13.7 | 0,00 | 0,07 | 0,09 | 0,24 | 0,0023087 | 0,01911  |
| AC022182.1    | 0,00 | 2,09 | 0,84 | 1,01 | 0,0023167 | 0,019169 |
| RP11-762H8.2  | 2,72 | 3,83 | 3,85 | 4,13 | 0,0023184 | 0,019176 |
| PIEZO1        | 5,80 | 7,18 | 6,70 | 6,25 | 0,002323  | 0,019207 |
| APOBEC3C      | 4,80 | 6,43 | 4,80 | 4,01 | 0,0023246 | 0,019213 |
| MYO10         | 0,40 | 0,58 | 0,44 | 0,52 | 0,0023259 | 0,019217 |
| RP11-615I2.6  | 0,70 | 1,04 | 1,24 | 1,46 | 0,0023288 | 0,019234 |
| HAS3          | 0,00 | 0,57 | 0,00 | 0,00 | 0,0023382 | 0,019303 |
| PPP1R2        | 5,95 | 4,14 | 5,40 | 4,75 | 0,002339  | 0,019303 |
| C8orf86       | 0,07 | 0,29 | 0,23 | 0,10 | 0,0023535 | 0,019416 |
| OR6Y1         | 0,80 | 2,22 | 0,99 | 1,87 | 0,0023566 | 0,01943  |
| ARL5C         | 0,21 | 1,19 | 0,00 | 0,00 | 0,0023569 | 0,01943  |
| RP11-217E22.2 | 1,43 | 3,01 | 1,64 | 2,12 | 0,0023625 | 0,019468 |
| THBS1         | 0,22 | 4,14 | 2,31 | 0,49 | 0,0023685 | 0,019511 |
| RP11-295K3.1  | 0,00 | 0,25 | 0,00 | 0,16 | 0,002371  | 0,019517 |
| SLC1A6        | 1,04 | 2,03 | 1,15 | 1,23 | 0,002371  | 0,019517 |
| SUSD3         | 5,61 | 0,78 | 4,27 | 0,69 | 0,0023745 | 0,019538 |
| ZBTB25        | 2,47 | 2,46 | 2,09 | 1,08 | 0,0023788 | 0,01956  |
| BNIP1         | 0,14 | 0,52 | 0,52 | 0,21 | 0,0023789 | 0,01956  |
| C10orf128     | 7,29 | 6,29 | 6,00 | 5,43 | 0,0023837 | 0,019592 |
| AC079466.1    | 0,16 | 0,68 | 0,08 | 0,23 | 0,0023859 | 0,019603 |
| RP1-228P16.9  | 0,82 | 2,60 | 1,49 | 1,80 | 0,0023877 | 0,019611 |
| LA16c-60D12.2 | 0,72 | 1,56 | 0,89 | 1,18 | 0,0023887 | 0,019612 |
| SPTLC3        | 3,27 | 4,31 | 3,10 | 4,45 | 0,0024    | 0,019697 |
| CYP4F11       | 0,43 | 0,52 | 0,25 | 0,27 | 0,0024015 | 0,019703 |
| OR10J1        | 0,14 | 0,04 | 0,19 | 0,30 | 0,0024037 | 0,019713 |
| SMARCA4       | 3,15 | 0,24 | 2,56 | 2,42 | 0,002405  | 0,019714 |
| RP11-43N16.4  | 0,21 | 0,00 | 0,69 | 0,42 | 0,0024056 | 0,019714 |
| CTSH          | 9,45 | 8,23 | 8,67 | 8,20 | 0,0024137 | 0,019769 |
| CTD-2554C21.2 | 3,53 | 4,92 | 2,51 | 1,69 | 0,0024142 | 0,019769 |
| DNMBP         | 0,13 | 0,00 | 0,24 | 0,18 | 0,002415  | 0,019769 |
| MRPS15        | 6,69 | 5,56 | 6,51 | 5,23 | 0,0024162 | 0,019772 |
| TNKS2         | 3,76 | 2,47 | 3,49 | 2,55 | 0,0024171 | 0,019772 |
| RP11-65J3.1   | 1,33 | 2,66 | 1,20 | 4,02 | 0,0024235 | 0,019817 |
| NDUFA8        | 5,92 | 1,91 | 5,79 | 5,35 | 0,0024284 | 0,019848 |
| SCPEP1        | 4,96 | 6,16 | 5,72 | 5,42 | 0,0024291 | 0,019848 |
| RP11-96K19.4  | 3,10 | 4,12 | 2,49 | 3,68 | 0,0024315 | 0,019855 |
| P2RY1         | 1,26 | 0,14 | 0,48 | 0,49 | 0,0024317 | 0,019855 |
| CMAS          | 3,98 | 5,92 | 3,61 | 4,03 | 0,0024343 | 0,019868 |
| RP11-5N23.2   | 0,67 | 1,32 | 1,59 | 3,09 | 0,0024386 | 0,01989  |
| OPA1          | 4,77 | 2,07 | 4,86 | 4,45 | 0,0024386 | 0,01989  |
| H2AFZ         | 8,84 | 8,38 | 8,15 | 7,54 | 0,0024415 | 0,019905 |
| RP3-405J10.3  | 0,20 | 0,42 | 0,34 | 0,31 | 0,0024435 | 0,019915 |
| RP11-290F5.1  | 0,21 | 2,47 | 0,23 | 0,00 | 0,0024509 | 0,019968 |
| MTF2          | 6,36 | 5,84 | 5,54 | 4,86 | 0,0024606 | 0,020039 |
| PPM1L         | 1,40 | 1,70 | 1,20 | 1,69 | 0,0024686 | 0,020097 |
| INTS11        | 4,02 | 5,46 | 4,16 | 5,10 | 0,0024711 | 0,02011  |
| TRMT10A       | 1,92 | 0,08 | 1,12 | 0,21 | 0,0024737 | 0,020124 |
| MED9          | 0,69 | 3,66 | 2,01 | 0,29 | 0,0024756 | 0,020131 |
| CAMTA1        | 5,88 | 5,82 | 5,19 | 4,53 | 0,0024789 | 0,020147 |
| EPN2          | 2,41 | 4,09 | 2,48 | 1,91 | 0,0024793 | 0,020147 |
| RP11-252K23.2 | 2,61 | 0,30 | 3,12 | 2,56 | 0,0024809 | 0,020149 |
| FAM81A        | 1,63 | 0,04 | 1,67 | 0,04 | 0,0024813 | 0,020149 |
| NFKB2         | 2,21 | 3,55 | 3,04 | 3,16 | 0,0024875 | 0,020192 |



|               |      |      |      |      |           |          |
|---------------|------|------|------|------|-----------|----------|
| CTD-2651B20.3 | 0,30 | 0,78 | 1,14 | 0,46 | 0,0024941 | 0,020238 |
| RP5-881P19.7  | 0,05 | 0,61 | 0,36 | 0,26 | 0,0024962 | 0,020247 |
| CHD9          | 6,46 | 5,28 | 5,62 | 5,55 | 0,0024971 | 0,020247 |
| SPDYE1        | 0,47 | 0,21 | 0,22 | 0,19 | 0,0024985 | 0,020251 |
| DYNC1H1       | 5,61 | 5,91 | 6,11 | 6,08 | 0,0025008 | 0,020263 |
| RP11-265M18.2 | 4,37 | 1,70 | 4,66 | 3,76 | 0,002505  | 0,020289 |
| OR6J1         | 0,34 | 0,38 | 0,37 | 0,69 | 0,002514  | 0,020355 |
| RP11-328J2.1  | 0,06 | 0,35 | 0,01 | 0,56 | 0,002525  | 0,020436 |
| ZFP41         | 0,00 | 0,08 | 0,01 | 0,00 | 0,0025288 | 0,02046  |
| RP1-212G6.7   | 0,35 | 1,34 | 0,54 | 2,38 | 0,00254   | 0,020543 |
| KB-1572G7.1   | 2,69 | 5,52 | 2,94 | 2,68 | 0,0025417 | 0,020549 |
| CTC-510F12.2  | 0,00 | 0,62 | 0,31 | 0,42 | 0,002544  | 0,020555 |
| WSB1          | 7,47 | 5,23 | 7,11 | 6,60 | 0,0025443 | 0,020555 |
| TMEM68        | 3,02 | 2,17 | 2,33 | 4,01 | 0,0025515 | 0,020606 |
| PTPN18        | 5,31 | 5,86 | 5,89 | 5,24 | 0,0025685 | 0,020736 |
| RP11-93B14.9  | 0,00 | 0,00 | 0,00 | 0,28 | 0,0025695 | 0,020736 |
| DNAJC6        | 0,02 | 0,14 | 0,00 | 0,02 | 0,0025709 | 0,02074  |
| CDC42BPB      | 0,48 | 1,61 | 1,57 | 2,39 | 0,002577  | 0,020781 |
| CERK          | 4,01 | 4,60 | 4,38 | 3,09 | 0,0025806 | 0,020803 |
| RAB41         | 0,00 | 4,99 | 0,00 | 0,00 | 0,0025817 | 0,020804 |
| SESN3         | 2,73 | 2,07 | 1,56 | 1,34 | 0,0025882 | 0,020849 |
| MTHFD2        | 5,66 | 4,25 | 5,35 | 3,84 | 0,0026052 | 0,020977 |
| CCDC169       | 1,14 | 1,61 | 1,40 | 2,08 | 0,0026059 | 0,020977 |
| SRSF7         | 8,53 | 8,10 | 7,99 | 7,25 | 0,0026085 | 0,02099  |
| ZNF439        | 2,81 | 0,37 | 1,98 | 2,37 | 0,0026109 | 0,021002 |
| INPP5J        | 0,00 | 0,00 | 0,00 | 0,00 | 0,0026138 | 0,021017 |
| LINC00506     | 2,60 | 3,44 | 2,61 | 2,77 | 0,0026197 | 0,021057 |
| SULT1C4       | 0,18 | 1,21 | 0,19 | 0,77 | 0,0026252 | 0,021091 |
| INTS1         | 3,82 | 5,07 | 4,18 | 5,18 | 0,0026259 | 0,021091 |
| KIAA1324      | 0,15 | 0,31 | 0,25 | 0,48 | 0,0026268 | 0,021091 |
| FAM129C       | 1,02 | 1,86 | 1,27 | 1,33 | 0,0026286 | 0,021098 |
| AC137932.4    | 1,06 | 1,45 | 0,98 | 2,14 | 0,0026349 | 0,021141 |
| AC003029.4    | 0,00 | 0,14 | 0,15 | 0,07 | 0,0026384 | 0,021141 |
| YTHDF2        | 5,79 | 5,75 | 4,68 | 4,37 | 0,0026385 | 0,021141 |
| NAT10         | 3,73 | 1,13 | 3,80 | 3,38 | 0,0026385 | 0,021141 |
| PIGK          | 3,39 | 0,26 | 1,95 | 0,34 | 0,0026397 | 0,021141 |
| AC011139.1    | 0,67 | 0,99 | 1,13 | 1,05 | 0,0026403 | 0,021141 |
| NCAPG         | 1,31 | 0,00 | 0,43 | 0,12 | 0,0026406 | 0,021141 |
| RNU5D-1       | 6,15 | 4,40 | 6,40 | 7,53 | 0,002642  | 0,021145 |
| PLPPR2        | 1,24 | 2,41 | 2,93 | 4,19 | 0,0026445 | 0,021157 |
| RP11-7F17.5   | 0,11 | 0,35 | 0,19 | 0,17 | 0,0026467 | 0,021167 |
| NSFL1C        | 5,58 | 5,79 | 4,72 | 4,09 | 0,0026529 | 0,021209 |
| F13A1         | 1,55 | 5,80 | 4,95 | 5,19 | 0,0026563 | 0,021228 |
| AC000036.4    | 0,00 | 0,07 | 0,00 | 0,13 | 0,0026621 | 0,021265 |
| AC104820.2    | 0,44 | 1,24 | 0,88 | 1,57 | 0,0026629 | 0,021265 |
| ITGAM         | 3,05 | 2,10 | 4,20 | 4,96 | 0,0026644 | 0,021265 |
| C11orf72      | 0,94 | 3,19 | 0,89 | 1,19 | 0,002665  | 0,021265 |
| GLB1          | 7,31 | 5,93 | 6,45 | 5,98 | 0,0026658 | 0,021265 |
| TECRL         | 0,98 | 2,24 | 0,76 | 1,23 | 0,0026684 | 0,021265 |
| SPATS2        | 3,82 | 1,12 | 3,74 | 2,67 | 0,0026685 | 0,021265 |
| RP11-468E2.10 | 0,45 | 1,37 | 0,61 | 0,78 | 0,0026688 | 0,021265 |
| CCNT2         | 5,13 | 3,88 | 3,48 | 2,12 | 0,0026695 | 0,021265 |
| AC114730.2    | 0,00 | 0,00 | 0,40 | 0,00 | 0,0026771 | 0,021318 |
| PHF8          | 2,88 | 0,40 | 2,24 | 3,66 | 0,0026862 | 0,021382 |
| VSNL1         | 0,59 | 1,66 | 0,50 | 0,54 | 0,0026972 | 0,021463 |

|               |      |      |      |      |           |          |
|---------------|------|------|------|------|-----------|----------|
| DDX59         | 3,16 | 0,67 | 3,55 | 3,05 | 0,0027068 | 0,021525 |
| ATPIF1        | 7,40 | 7,39 | 7,70 | 7,54 | 0,0027085 | 0,021525 |
| RP11-170K4.2  | 0,06 | 0,31 | 0,10 | 0,17 | 0,0027088 | 0,021525 |
| RPAP2         | 3,04 | 2,99 | 2,47 | 3,06 | 0,0027106 | 0,021525 |
| FAM195A       | 3,89 | 6,43 | 4,21 | 4,58 | 0,0027107 | 0,021525 |
| SLC25A4       | 0,05 | 0,09 | 0,04 | 0,12 | 0,0027118 | 0,021525 |
| RP11-97O12.2  | 0,53 | 1,28 | 0,25 | 1,83 | 0,0027119 | 0,021525 |
| GAGE1         | 0,16 | 1,52 | 0,17 | 0,73 | 0,0027132 | 0,021529 |
| CTD-2143L24.1 | 1,17 | 3,92 | 1,23 | 3,40 | 0,002724  | 0,021599 |
| MLF2          | 6,75 | 5,59 | 6,04 | 5,23 | 0,0027241 | 0,021599 |
| CTD-3184A7.4  | 3,21 | 3,24 | 3,85 | 4,85 | 0,0027262 | 0,021609 |
| ATP5C1        | 8,47 | 7,75 | 8,06 | 7,11 | 0,0027346 | 0,021667 |
| ATF4          | 7,86 | 7,76 | 8,28 | 8,14 | 0,0027359 | 0,02167  |
| RP11-322E11.2 | 2,40 | 3,46 | 2,42 | 2,69 | 0,0027406 | 0,0217   |
| TADA1         | 4,09 | 0,24 | 2,60 | 1,96 | 0,0027449 | 0,021721 |
| EIF2S3        | 7,47 | 6,66 | 6,79 | 6,29 | 0,0027453 | 0,021721 |
| RN7SL301P     | 2,59 | 1,56 | 2,55 | 2,73 | 0,0027475 | 0,021731 |
| DDX19B        | 4,52 | 0,95 | 4,76 | 3,50 | 0,0027512 | 0,021752 |
| PHAX          | 4,97 | 5,90 | 4,28 | 1,82 | 0,0027562 | 0,021784 |
| AC139100.4    | 0,41 | 0,90 | 0,00 | 0,27 | 0,0027655 | 0,02185  |
| LARP4B        | 4,81 | 4,96 | 4,67 | 3,75 | 0,0027677 | 0,02185  |
| RP5-915N17.11 | 0,58 | 0,19 | 0,95 | 0,66 | 0,0027683 | 0,02185  |
| GZMB          | 1,64 | 5,87 | 1,69 | 5,41 | 0,0027685 | 0,02185  |
| NSD2          | 3,15 | 5,19 | 4,17 | 4,15 | 0,0027695 | 0,02185  |
| COPS4         | 5,44 | 1,48 | 4,18 | 5,11 | 0,0027719 | 0,021859 |
| TRIM66        | 1,98 | 0,30 | 1,66 | 1,26 | 0,0027726 | 0,021859 |
| GTF3C6        | 6,90 | 5,31 | 6,79 | 6,15 | 0,0027805 | 0,021913 |
| PLPP1         | 1,50 | 0,26 | 0,37 | 0,17 | 0,0027814 | 0,021913 |
| UROD          | 5,95 | 3,74 | 6,28 | 5,29 | 0,0027827 | 0,021916 |
| SACM1L        | 4,66 | 1,97 | 4,06 | 2,31 | 0,0027886 | 0,021942 |
| SAMMSON       | 1,66 | 2,82 | 1,22 | 1,26 | 0,0027893 | 0,021942 |
| ESYT2         | 4,79 | 2,76 | 4,62 | 3,55 | 0,0027894 | 0,021942 |
| CTD-2026K11.2 | 0,13 | 1,09 | 0,54 | 0,69 | 0,00279   | 0,021942 |
| OVCH1-AS1     | 0,07 | 0,05 | 0,13 | 0,46 | 0,0027917 | 0,021947 |
| HERC2P4       | 0,16 | 0,30 | 0,47 | 0,97 | 0,0027927 | 0,021948 |
| NEIL3         | 0,05 | 0,11 | 0,11 | 0,30 | 0,0027938 | 0,021948 |
| PLA2G12A      | 3,15 | 1,22 | 1,80 | 1,49 | 0,0027967 | 0,021963 |
| VSIG4         | 1,49 | 0,00 | 3,75 | 5,18 | 0,0027995 | 0,021978 |
| CACYBP        | 6,59 | 5,44 | 5,70 | 3,92 | 0,0028005 | 0,021978 |
| OR2A9P        | 0,14 | 2,48 | 0,33 | 0,44 | 0,0028073 | 0,022024 |
| GPS2          | 6,08 | 3,48 | 5,00 | 4,55 | 0,0028103 | 0,022034 |
| RP11-221J22.2 | 0,00 | 0,69 | 0,05 | 0,86 | 0,0028107 | 0,022034 |
| RP11-327P2.5  | 0,73 | 0,15 | 1,22 | 0,00 | 0,0028118 | 0,022035 |
| C1orf159      | 0,54 | 3,19 | 1,66 | 1,73 | 0,0028145 | 0,022047 |
| HERC2P5       | 1,25 | 2,24 | 0,93 | 2,11 | 0,0028153 | 0,022047 |
| EBF1          | 0,35 | 0,72 | 0,37 | 0,49 | 0,0028194 | 0,02207  |
| CIDECP        | 5,23 | 2,10 | 3,92 | 1,17 | 0,0028202 | 0,02207  |
| RAD54L2       | 2,25 | 0,93 | 1,83 | 1,35 | 0,0028283 | 0,022126 |
| NUGGC         | 0,38 | 0,38 | 0,56 | 0,84 | 0,0028293 | 0,022126 |
| RP5-832C2.5   | 1,28 | 0,26 | 1,74 | 2,16 | 0,0028339 | 0,022154 |
| ACYP2         | 4,93 | 2,14 | 4,56 | 2,91 | 0,002836  | 0,022162 |
| RP11-491F9.2  | 0,08 | 0,16 | 0,11 | 0,32 | 0,0028374 | 0,022166 |
| RARRES3       | 5,85 | 4,54 | 5,84 | 7,16 | 0,0028389 | 0,022169 |
| DUX4L34       | 0,00 | 0,14 | 0,00 | 0,12 | 0,0028398 | NA       |
| CDH8          | 0,35 | 1,75 | 0,65 | 1,25 | 0,0028404 | 0,022173 |

|               |      |      |      |      |           |          |
|---------------|------|------|------|------|-----------|----------|
| AC005786.7    | 1,26 | 2,21 | 3,32 | 3,63 | 0,0028428 | 0,022182 |
| TIMM23        | 5,42 | 2,09 | 4,57 | 1,95 | 0,0028435 | 0,022182 |
| NCKAP5        | 0,73 | 0,30 | 0,61 | 0,00 | 0,0028509 | 0,022232 |
| RP11-308K2.1  | 0,00 | 0,37 | 0,00 | 0,33 | 0,0028524 | NA       |
| RAB42         | 0,28 | 0,04 | 0,12 | 0,37 | 0,0028528 | 0,022239 |
| RP11-175B9.2  | 0,00 | 0,00 | 0,00 | 0,00 | 0,0028545 | 0,022244 |
| IMP4          | 6,99 | 1,49 | 6,13 | 6,36 | 0,0028664 | 0,022329 |
| PGK1          | 8,21 | 8,12 | 7,67 | 6,78 | 0,0028697 | 0,022347 |
| KCNJ14        | 0,26 | 0,38 | 0,48 | 0,31 | 0,0028734 | 0,022369 |
| E2F7          | 0,00 | 0,02 | 0,19 | 0,00 | 0,002877  | 0,022388 |
| RP11-26J3.3   | 3,10 | 5,06 | 3,84 | 4,13 | 0,0028826 | 0,022424 |
| PER3          | 0,39 | 0,00 | 0,03 | 0,97 | 0,0028894 | 0,022469 |
| TRAPPC1       | 6,60 | 5,74 | 6,17 | 5,58 | 0,0028939 | 0,022496 |
| DNAH3         | 0,12 | 1,59 | 0,23 | 1,17 | 0,0028961 | 0,022506 |
| ANKRD30BP2    | 0,04 | 0,05 | 0,11 | 0,20 | 0,0029004 | 0,022531 |
| NACAP1        | 0,18 | 0,33 | 0,43 | 0,51 | 0,0029016 | 0,022533 |
| TLR2          | 4,86 | 3,35 | 5,71 | 5,40 | 0,0029035 | 0,02254  |
| PDGFA         | 2,35 | 3,30 | 2,96 | 3,55 | 0,0029055 | 0,022547 |
| AC013402.2    | 0,86 | 0,97 | 1,37 | 1,66 | 0,0029114 | 0,022585 |
| SVOP          | 0,10 | 0,08 | 0,18 | 0,50 | 0,0029149 | 0,022604 |
| RP11-542P2.2  | 0,34 | 0,97 | 0,46 | 0,33 | 0,002916  | 0,022605 |
| FUCA1         | 2,34 | 0,37 | 2,30 | 0,40 | 0,0029171 | 0,022605 |
| NXF1          | 6,49 | 7,08 | 7,18 | 6,79 | 0,0029191 | 0,022613 |
| RP11-265O12.1 | 0,39 | 0,36 | 0,19 | 0,85 | 0,0029228 | 0,022625 |
| SEC61G        | 6,33 | 6,63 | 6,52 | 7,05 | 0,0029235 | 0,022625 |
| ITGA4         | 6,82 | 5,70 | 6,11 | 6,32 | 0,0029237 | 0,022625 |
| SAMD9         | 3,72 | 1,20 | 3,22 | 3,47 | 0,0029292 | 0,022659 |
| SUZ12P        | 3,93 | 3,96 | 3,71 | 2,44 | 0,0029348 | 0,022691 |
| RP11-558F24.4 | 0,22 | 1,61 | 0,72 | 0,38 | 0,0029352 | 0,022691 |
| RP11-489E7.1  | 0,95 | 1,87 | 0,81 | 2,08 | 0,0029383 | 0,022706 |
| RP11-315E17.1 | 0,09 | 0,25 | 0,00 | 0,00 | 0,0029397 | 0,022709 |
| RP11-18H21.1  | 0,13 | 0,09 | 0,00 | 0,24 | 0,0029424 | 0,022723 |
| BTBD9         | 1,94 | 1,13 | 2,03 | 0,90 | 0,0029444 | 0,02273  |
| ANXA13        | 0,49 | 0,64 | 0,67 | 1,38 | 0,0029508 | 0,022771 |
| C16orf70      | 3,40 | 2,45 | 3,94 | 4,00 | 0,0029524 | 0,022776 |
| RP11-1000B6.3 | 4,60 | 1,79 | 5,00 | 5,58 | 0,0029548 | 0,02278  |
| DNLZ          | 1,00 | 3,34 | 2,17 | 3,81 | 0,002955  | 0,02278  |
| CXCR3         | 0,69 | 0,17 | 0,10 | 0,24 | 0,0029586 | 0,0228   |
| RP11-344E13.3 | 1,10 | 0,98 | 0,48 | 1,02 | 0,0029675 | 0,022853 |
| CD37          | 8,19 | 6,64 | 7,57 | 6,98 | 0,0029676 | 0,022853 |
| CTB-12A17.3   | 0,00 | 0,00 | 0,40 | 2,07 | 0,0029728 | 0,022882 |
| RN7SL823P     | 0,00 | 3,06 | 0,00 | 0,00 | 0,0029734 | 0,022882 |
| ALPP          | 0,07 | 0,00 | 0,00 | 0,00 | 0,0029797 | 0,022923 |
| PAQR7         | 2,59 | 3,43 | 3,10 | 3,21 | 0,0029821 | 0,022927 |
| DPM3          | 4,21 | 4,90 | 4,70 | 5,42 | 0,0029823 | 0,022927 |
| RNU7-181P     | 0,00 | 5,10 | 4,37 | 2,31 | 0,0029888 | 0,022969 |
| PRF1          | 0,62 | 5,35 | 1,70 | 4,70 | 0,0029977 | 0,023026 |
| PKD1L2        | 0,43 | 0,75 | 0,45 | 0,62 | 0,0029986 | 0,023026 |
| MASP1         | 0,10 | 0,02 | 0,14 | 0,29 | 0,0029993 | 0,023026 |
| NECTIN2       | 0,12 | 0,00 | 1,54 | 1,50 | 0,0030026 | 0,023043 |
| DNAH5         | 0,24 | 0,02 | 0,27 | 0,22 | 0,0030052 | 0,023055 |
| KLHL30        | 0,02 | 0,04 | 0,04 | 0,10 | 0,0030066 | 0,023058 |
| PLEKHH3       | 0,20 | 0,37 | 0,18 | 0,20 | 0,0030093 | 0,02307  |
| NDUFB9        | 7,32 | 8,13 | 7,74 | 7,98 | 0,0030157 | 0,023111 |
| PPP1R16B      | 2,51 | 0,17 | 0,99 | 0,72 | 0,0030224 | 0,023148 |

|               |      |      |      |      |           |          |
|---------------|------|------|------|------|-----------|----------|
| RP11-425L10.1 | 0,00 | 0,00 | 0,59 | 0,00 | 0,0030225 | 0,023148 |
| RP11-9L18.3   | 1,86 | 3,48 | 2,48 | 3,61 | 0,0030258 | 0,023165 |
| HELB          | 3,42 | 1,64 | 2,14 | 1,01 | 0,0030287 | 0,023174 |
| KARS          | 6,37 | 6,61 | 5,80 | 4,71 | 0,003029  | 0,023174 |
| AC002303.5    | 0,32 | 0,22 | 0,08 | 0,06 | 0,0030305 | 0,023177 |
| ZNF441        | 0,64 | 2,14 | 0,69 | 1,14 | 0,0030329 | 0,023187 |
| LRRC56        | 0,10 | 0,42 | 0,15 | 0,16 | 0,0030339 | 0,023187 |
| ATAD3A        | 0,68 | 2,52 | 1,46 | 1,20 | 0,0030385 | 0,023214 |
| STK11         | 1,24 | 1,87 | 2,33 | 2,60 | 0,0030441 | 0,023249 |
| AC004951.6    | 0,30 | 2,98 | 1,04 | 0,95 | 0,0030486 | 0,023275 |
| SOX9-AS1      | 1,31 | 1,79 | 0,22 | 2,52 | 0,0030498 | 0,023277 |
| WBP2          | 4,47 | 4,91 | 4,89 | 5,23 | 0,0030546 | 0,023297 |
| VT11B         | 6,04 | 3,64 | 5,67 | 4,76 | 0,003056  | 0,023297 |
| MT2A          | 4,60 | 5,37 | 5,50 | 5,46 | 0,0030564 | 0,023297 |
| PYURF         | 7,65 | 7,14 | 6,65 | 5,96 | 0,0030566 | 0,023297 |
| GID8          | 3,78 | 2,71 | 4,08 | 3,98 | 0,0030603 | 0,023317 |
| CTBP1-AS1     | 0,50 | 1,48 | 1,01 | 0,55 | 0,003067  | 0,023336 |
| STAU1         | 4,02 | 4,75 | 4,02 | 4,76 | 0,0030701 | 0,023373 |
| RP11-140I24.1 | 2,84 | 3,93 | 3,26 | 3,22 | 0,0030708 | 0,023373 |
| PTOV1         | 3,44 | 4,64 | 4,37 | 4,84 | 0,0030722 | 0,023376 |
| PSMD12        | 4,94 | 0,92 | 4,71 | 3,06 | 0,0030824 | 0,023445 |
| TFG           | 5,51 | 3,21 | 4,54 | 5,57 | 0,0030856 | 0,023461 |
| TNFAIP3       | 4,96 | 6,18 | 5,54 | 4,89 | 0,003088  | 0,023472 |
| ZNF18         | 2,49 | 0,00 | 1,12 | 1,16 | 0,0030907 | 0,023484 |
| RP11-233H19.2 | 0,09 | 0,34 | 0,24 | 0,26 | 0,0030939 | 0,0235   |
| MCM2          | 1,10 | 2,63 | 0,09 | 0,07 | 0,0030971 | 0,023517 |
| CXorf65       | 1,09 | 0,00 | 1,13 | 0,00 | 0,0030991 | 0,023524 |
| MID1IP1       | 0,48 | 0,96 | 1,15 | 1,72 | 0,003107  | 0,023576 |
| SMIM12        | 5,30 | 5,89 | 5,65 | 1,63 | 0,003109  | 0,023582 |
| ATP6V0A2      | 2,77 | 2,80 | 2,81 | 4,25 | 0,0031099 | 0,023582 |
| RP11-708J19.1 | 0,11 | 2,36 | 0,29 | 0,41 | 0,0031181 | 0,02363  |
| ATP2B4        | 4,44 | 4,86 | 3,30 | 2,56 | 0,00312   | 0,02363  |
| FAM200B       | 2,97 | 3,52 | 4,16 | 4,66 | 0,0031203 | 0,02363  |
| RP11-462B18.1 | 0,00 | 0,00 | 0,00 | 1,50 | 0,0031225 | 0,02363  |
| SPRED1        | 0,07 | 0,40 | 1,04 | 0,57 | 0,0031225 | 0,02363  |
| RP4-673M15.1  | 1,85 | 0,66 | 1,75 | 2,77 | 0,0031227 | 0,02363  |
| RP11-1078H9.5 | 0,11 | 0,13 | 0,28 | 0,29 | 0,0031354 | 0,023718 |
| BABAM1        | 6,59 | 5,13 | 5,60 | 5,43 | 0,0031401 | 0,023746 |
| PRDX5         | 7,54 | 7,89 | 7,67 | 7,53 | 0,0031424 | 0,023755 |
| NAALADL2      | 0,43 | 0,28 | 0,46 | 0,89 | 0,003144  | 0,023759 |
| GPR171        | 4,22 | 1,21 | 0,19 | 0,31 | 0,0031464 | 0,023762 |
| IGHG3         | 0,00 | 0,33 | 0,00 | 0,11 | 0,0031465 | 0,023762 |
| ANKRD17       | 4,74 | 5,68 | 4,24 | 3,96 | 0,0031507 | 0,023786 |
| RIN1          | 0,10 | 0,28 | 0,69 | 1,00 | 0,0031521 | 0,023788 |
| SLC2A5        | 0,13 | 0,53 | 0,30 | 0,28 | 0,0031609 | 0,023847 |
| ALCAM         | 5,14 | 2,99 | 4,48 | 4,50 | 0,0031632 | 0,02385  |
| UBA7          | 4,98 | 5,44 | 5,43 | 5,64 | 0,0031636 | 0,02385  |
| MCOLN1        | 4,34 | 3,87 | 4,65 | 5,61 | 0,0031648 | 0,023852 |
| C14orf1       | 3,81 | 1,47 | 2,57 | 1,43 | 0,00317   | 0,023883 |
| HEMK1         | 3,39 | 0,34 | 4,25 | 4,29 | 0,0031721 | 0,02389  |
| RP3-395P12.2  | 1,01 | 2,84 | 0,44 | 1,78 | 0,0031745 | 0,0239   |
| CHMP2B        | 5,88 | 4,95 | 4,85 | 3,29 | 0,0031788 | 0,02392  |
| RP11-134G8.7  | 0,37 | 0,00 | 0,08 | 0,09 | 0,0031794 | 0,02392  |
| JAK1          | 6,22 | 5,41 | 5,47 | 4,86 | 0,0031804 | 0,02392  |
| SPOCK2        | 0,00 | 0,21 | 0,07 | 0,24 | 0,0031849 | 0,023946 |

|                 |      |      |      |      |           |          |
|-----------------|------|------|------|------|-----------|----------|
| JAK2            | 5,90 | 4,05 | 5,25 | 4,46 | 0,0031861 | 0,023947 |
| RP11-546B8.5    | 0,00 | 0,00 | 0,00 | 1,15 | 0,0031881 | NA       |
| DNAJC28         | 0,21 | 0,15 | 0,10 | 0,11 | 0,0031927 | 0,023988 |
| RP11-546D6.3    | 3,18 | 0,00 | 0,19 | 0,79 | 0,0031967 | 0,024011 |
| RP11-22C11.2    | 0,17 | 0,95 | 0,32 | 0,21 | 0,0031982 | 0,024014 |
| RP11-664I21.5   | 0,00 | 0,25 | 0,29 | 0,00 | 0,0032048 | 0,024055 |
| DIO3OS          | 0,00 | 2,08 | 0,00 | 0,00 | 0,0032067 | 0,024061 |
| RIF1            | 3,82 | 4,66 | 3,05 | 2,04 | 0,0032091 | 0,024069 |
| SH2D3A          | 0,88 | 0,58 | 1,01 | 1,08 | 0,00321   | 0,024069 |
| RP11-583M2.2    | 1,05 | 1,70 | 1,29 | 1,73 | 0,0032124 | 0,02408  |
| PROSER3         | 1,35 | 1,16 | 1,72 | 2,62 | 0,003215  | 0,02409  |
| BAIAP2L1        | 0,00 | 0,00 | 0,48 | 0,69 | 0,003216  | 0,02409  |
| XXyac-YM21GA2.7 | 0,06 | 1,08 | 0,06 | 0,06 | 0,0032236 | 0,024139 |
| TIE1            | 0,04 | 0,00 | 0,05 | 0,26 | 0,0032342 | 0,02421  |
| RINL            | 1,45 | 3,25 | 1,45 | 1,63 | 0,0032353 | 0,02421  |
| RP11-77K12.9    | 0,17 | 0,00 | 0,06 | 0,06 | 0,0032369 | 0,024214 |
| CLIP4           | 0,05 | 0,33 | 1,21 | 2,57 | 0,0032384 | 0,024217 |
| TBCA            | 6,35 | 6,42 | 6,17 | 4,95 | 0,0032417 | 0,02423  |
| TMEM236         | 0,46 | 0,87 | 0,57 | 0,81 | 0,0032422 | 0,02423  |
| LINC00173       | 3,54 | 0,18 | 4,14 | 1,94 | 0,0032477 | 0,024262 |
| PSMA2           | 8,24 | 6,76 | 7,72 | 6,81 | 0,0032543 | 0,024303 |
| RP11-81A22.4    | 1,00 | 1,16 | 1,45 | 1,00 | 0,0032593 | 0,024332 |
| FAM133B         | 5,35 | 4,83 | 5,68 | 6,13 | 0,0032672 | 0,024383 |
| CTA-286B10.7    | 0,00 | 2,08 | 0,44 | 1,35 | 0,0032712 | 0,024405 |
| CYFIP1          | 4,22 | 2,20 | 3,98 | 3,26 | 0,0032742 | 0,024419 |
| RP11-736K20.4   | 0,46 | 1,01 | 0,88 | 0,89 | 0,0032775 | 0,024435 |
| RP11-735B13.2   | 2,36 | 3,92 | 2,77 | 1,83 | 0,0032796 | 0,024443 |
| RP4-724E16.2    | 0,16 | 0,40 | 0,44 | 0,66 | 0,0032838 | 0,024466 |
| SLC38A2         | 6,17 | 5,57 | 5,28 | 4,64 | 0,0032855 | 0,024471 |
| GOLGA7          | 5,49 | 3,00 | 4,07 | 4,66 | 0,0032894 | 0,024492 |
| RP11-638I2.2    | 2,32 | 3,21 | 3,37 | 3,15 | 0,0032933 | 0,024507 |
| LDB3            | 0,17 | 0,75 | 0,24 | 0,22 | 0,0032947 | 0,024507 |
| CAPN5           | 0,15 | 1,04 | 0,19 | 0,13 | 0,0032954 | 0,024507 |
| CH17-195P21.2   | 1,06 | 1,30 | 1,84 | 2,87 | 0,0032962 | 0,024507 |
| USP6            | 0,46 | 1,06 | 0,29 | 0,28 | 0,003297  | 0,024507 |
| NIPAL2          | 3,69 | 0,76 | 2,71 | 2,32 | 0,0033004 | 0,024524 |
| SREBF2          | 2,98 | 1,64 | 3,34 | 3,33 | 0,0033048 | 0,024549 |
| LACTB2          | 4,59 | 0,53 | 3,09 | 1,84 | 0,0033086 | 0,024568 |
| RHOB            | 3,55 | 3,09 | 4,36 | 4,84 | 0,0033099 | 0,02457  |
| RP11-830F9.6    | 0,13 | 0,50 | 0,05 | 0,00 | 0,0033129 | 0,024584 |
| HERPUD1         | 8,74 | 8,06 | 7,97 | 7,03 | 0,0033148 | 0,024584 |
| C5orf60         | 0,27 | 0,39 | 0,30 | 0,33 | 0,0033151 | 0,024584 |
| TSPAN17         | 0,18 | 2,26 | 2,22 | 2,30 | 0,0033177 | 0,024595 |
| RP11-197K6.1    | 0,21 | 2,02 | 0,33 | 0,23 | 0,0033221 | 0,024619 |
| GNRHR2          | 2,81 | 3,78 | 3,01 | 4,41 | 0,0033232 | 0,024619 |
| RP11-196E1.3    | 0,34 | 0,27 | 0,76 | 0,25 | 0,003332  | 0,024676 |
| AP000580.1      | 0,00 | 0,00 | 0,00 | 3,86 | 0,0033351 | 0,024691 |
| WNT5A           | 0,00 | 0,00 | 0,00 | 0,00 | 0,0033468 | 0,024765 |
| NDUFA2          | 6,41 | 6,45 | 6,69 | 6,79 | 0,0033473 | 0,024765 |
| ME2             | 4,88 | 2,60 | 3,85 | 3,07 | 0,0033487 | 0,024767 |
| IFIH1           | 3,43 | 1,16 | 3,24 | 4,06 | 0,0033594 | 0,024835 |
| EXOSC6          | 2,76 | 3,03 | 2,92 | 3,34 | 0,0033601 | 0,024835 |
| RP11-266L9.2    | 0,05 | 0,72 | 0,19 | 1,49 | 0,0033625 | 0,024844 |
| LINC00294       | 0,26 | 0,54 | 1,28 | 1,64 | 0,0033664 | 0,024864 |
| SSTR2           | 0,64 | 0,80 | 0,82 | 0,80 | 0,0033679 | 0,024864 |

|               |      |      |      |      |           |          |
|---------------|------|------|------|------|-----------|----------|
| CTD-2095E4.3  | 0,96 | 1,83 | 0,88 | 2,31 | 0,0033688 | 0,024864 |
| ARL6IP6       | 4,60 | 0,44 | 3,50 | 2,17 | 0,0033696 | 0,024864 |
| ERVW-1        | 3,11 | 4,89 | 3,85 | 3,60 | 0,0033757 | 0,0249   |
| SCAF1         | 0,34 | 0,33 | 0,76 | 0,41 | 0,0033777 | 0,024907 |
| CTD-2008P7.1  | 0,59 | 1,64 | 0,75 | 1,39 | 0,0034095 | 0,025124 |
| RP11-752G15.3 | 0,12 | 0,28 | 0,14 | 0,37 | 0,0034095 | 0,025124 |
| SPARC         | 0,00 | 2,03 | 0,00 | 0,09 | 0,0034169 | 0,025171 |
| CTA-390C10.10 | 0,52 | 1,13 | 0,40 | 0,81 | 0,003418  | 0,025171 |
| PPIF          | 6,66 | 6,35 | 6,17 | 4,07 | 0,0034279 | 0,025235 |
| SRSF6         | 6,13 | 4,80 | 5,60 | 5,44 | 0,003432  | 0,025257 |
| SCIN          | 0,97 | 2,02 | 1,46 | 1,86 | 0,0034339 | 0,025263 |
| ANKRD6        | 2,32 | 3,72 | 3,80 | 0,63 | 0,0034384 | 0,025288 |
| ZNF385A       | 2,81 | 1,51 | 3,31 | 2,78 | 0,0034431 | 0,025314 |
| AC105339.1    | 0,00 | 0,06 | 0,05 | 0,23 | 0,0034514 | 0,025367 |
| NUDT6         | 2,00 | 1,29 | 1,37 | 0,44 | 0,0034536 | 0,025374 |
| CASA          | 0,50 | 1,62 | 0,91 | 1,00 | 0,0034768 | 0,025536 |
| LAMB2         | 0,00 | 0,54 | 1,42 | 0,00 | 0,0034883 | 0,025612 |
| UNC80         | 1,23 | 2,75 | 1,16 | 2,19 | 0,0034908 | 0,025622 |
| RP4-736L20.5  | 2,89 | 3,35 | 3,49 | 5,04 | 0,0034939 | 0,025636 |
| RP11-1136L8.1 | 0,00 | 0,26 | 0,28 | 0,25 | 0,0034979 | 0,025657 |
| NEBL          | 0,13 | 0,51 | 0,96 | 3,07 | 0,0035096 | 0,025734 |
| IGLV3-19      | 0,00 | 0,61 | 0,00 | 0,69 | 0,0035114 | 0,025739 |
| TRBV6-2       | 0,00 | 0,00 | 0,00 | 0,00 | 0,0035148 | 0,025752 |
| GPN3          | 4,02 | 2,16 | 4,41 | 1,46 | 0,0035154 | 0,025752 |
| CTD-3076M17.1 | 0,03 | 0,08 | 0,00 | 0,49 | 0,0035187 | 0,025767 |
| CD226         | 3,36 | 3,37 | 1,83 | 0,84 | 0,0035202 | 0,02577  |
| PIK3CA        | 3,08 | 4,93 | 2,14 | 2,67 | 0,003535  | 0,025869 |
| BAZ2A         | 3,86 | 4,77 | 4,70 | 4,93 | 0,0035362 | 0,02587  |
| TNFRSF10C     | 0,00 | 0,94 | 0,03 | 0,00 | 0,0035401 | 0,02589  |
| HNRNPA1L2     | 1,91 | 0,10 | 0,40 | 0,13 | 0,0035416 | 0,025892 |
| NIP2          | 5,49 | 2,41 | 4,84 | 3,21 | 0,0035453 | 0,025901 |
| AC006115.7    | 1,47 | 2,11 | 1,35 | 2,82 | 0,0035455 | 0,025901 |
| ZNF785        | 0,90 | 1,67 | 1,49 | 0,91 | 0,0035463 | 0,025901 |
| SELT          | 7,27 | 7,89 | 6,55 | 5,50 | 0,0035512 | 0,025928 |
| DMC1          | 0,28 | 0,43 | 0,26 | 0,50 | 0,0035712 | 0,026065 |
| B3GNTL1       | 5,00 | 1,98 | 4,48 | 3,69 | 0,0035743 | 0,02608  |
| CTD-2323K18.1 | 1,28 | 0,00 | 0,00 | 0,00 | 0,0035771 | 0,026089 |
| RP13-104F24.3 | 5,98 | 2,67 | 4,72 | 2,71 | 0,0035779 | 0,026089 |
| EXO5          | 1,82 | 0,45 | 0,28 | 0,19 | 0,0035798 | 0,026094 |
| SCN2A         | 1,05 | 1,80 | 1,15 | 1,52 | 0,0035818 | 0,026095 |
| SEM1          | 6,30 | 6,17 | 6,24 | 6,60 | 0,0035822 | 0,026095 |
| CTD-3014M21.4 | 2,59 | 3,30 | 3,40 | 2,86 | 0,0035874 | 0,026124 |
| RAB2B         | 3,61 | 5,49 | 2,45 | 1,81 | 0,0035895 | 0,026131 |
| MRE11A        | 4,13 | 2,16 | 3,08 | 2,71 | 0,0035975 | 0,02618  |
| SAT2          | 5,54 | 6,39 | 6,26 | 6,34 | 0,0036031 | 0,026206 |
| DDX11         | 2,86 | 4,63 | 2,73 | 2,99 | 0,0036034 | 0,026206 |
| FAM193B       | 4,44 | 5,53 | 5,33 | 5,91 | 0,0036079 | 0,026219 |
| GNG4          | 0,17 | 0,62 | 0,27 | 0,28 | 0,0036082 | 0,026219 |
| SEPT13        | 4,42 | 1,45 | 3,76 | 3,71 | 0,0036091 | 0,026219 |
| FYCO1         | 1,29 | 0,06 | 0,38 | 0,70 | 0,0036099 | 0,026219 |
| GALNT2        | 3,13 | 3,14 | 2,54 | 4,49 | 0,0036113 | 0,026221 |
| CTC-260E6.4   | 0,08 | 3,46 | 0,04 | 0,08 | 0,0036192 | 0,026265 |
| CTD-2233K9.1  | 0,66 | 1,57 | 0,73 | 0,55 | 0,0036197 | 0,026265 |
| OR111         | 1,11 | 1,92 | 1,10 | 1,30 | 0,0036269 | 0,026308 |
| RBMX2         | 2,74 | 3,40 | 2,18 | 3,17 | 0,0036289 | 0,026314 |

|                |       |       |       |       |           |          |
|----------------|-------|-------|-------|-------|-----------|----------|
| OR8G1          | 0,34  | 0,89  | 0,21  | 0,32  | 0,0036374 | 0,026364 |
| GPAT3          | 6,84  | 4,44  | 6,86  | 4,30  | 0,0036382 | 0,026364 |
| AC010733.4     | 0,00  | 0,44  | 0,10  | 0,57  | 0,0036421 | 0,026384 |
| PAX6           | 1,50  | 2,66  | 1,48  | 1,20  | 0,0036448 | 0,026395 |
| AC131056.5     | 0,00  | 1,08  | 0,00  | 0,00  | 0,0036483 | NA       |
| SLC36A1        | 1,66  | 0,04  | 2,33  | 3,31  | 0,0036508 | 0,026427 |
| CTC-439O9.1    | 0,12  | 0,08  | 0,28  | 0,42  | 0,0036516 | 0,026427 |
| PAPD4          | 6,21  | 4,77  | 5,24  | 4,71  | 0,003654  | 0,026435 |
| CTD-2192J16.22 | 5,64  | 6,56  | 6,36  | 6,11  | 0,0036587 | 0,02646  |
| UBE2V2         | 5,95  | 2,15  | 4,99  | 3,33  | 0,0036609 | 0,02646  |
| SELPLG         | 6,75  | 4,89  | 6,14  | 6,27  | 0,003661  | 0,02646  |
| CITED4         | 0,00  | 0,65  | 0,29  | 0,45  | 0,0036704 | 0,02652  |
| RP11-199O14.1  | 0,00  | 0,00  | 0,09  | 0,00  | 0,0036726 | 0,026527 |
| SMN1           | 5,02  | 3,52  | 4,25  | 2,96  | 0,0036759 | 0,026536 |
| RP11-727A23.5  | 0,77  | 5,20  | 2,38  | 1,77  | 0,0036763 | 0,026536 |
| FNIP2          | 4,23  | 1,91  | 3,69  | 2,14  | 0,0036799 | 0,026554 |
| RP11-541P9.3   | 0,31  | 2,49  | 0,85  | 1,41  | 0,0036885 | 0,0266   |
| HIF1AN         | 1,96  | 2,47  | 1,28  | 1,61  | 0,0036891 | 0,0266   |
| C17orf49       | 8,25  | 7,74  | 7,77  | 6,68  | 0,0036908 | 0,0266   |
| IMPAD1         | 2,67  | 0,79  | 2,87  | 1,01  | 0,0036911 | 0,0266   |
| ELOA           | 3,82  | 2,27  | 3,61  | 0,76  | 0,0036944 | 0,026615 |
| SYBU           | 0,03  | 0,05  | 0,00  | 0,00  | 0,0037002 | NA       |
| RP11-97E7.1    | 0,39  | 1,51  | 1,12  | 0,00  | 0,0037028 | 0,026667 |
| RP11-613F22.5  | 0,00  | 1,96  | 0,00  | 0,00  | 0,0037102 | 0,026711 |
| RP11-178C10.3  | 0,20  | 0,41  | 0,22  | 0,30  | 0,0037141 | 0,026725 |
| UBR4           | 5,34  | 3,49  | 5,61  | 6,04  | 0,0037144 | 0,026725 |
| RPL17          | 10,71 | 11,08 | 10,86 | 10,70 | 0,0037212 | 0,026765 |
| RP11-107N7.1   | 0,00  | 1,81  | 0,60  | 0,00  | 0,003724  | 0,026776 |
| JUP            | 2,84  | 1,17  | 3,19  | 4,42  | 0,0037331 | 0,026833 |
| RP11-134K1.2   | 0,00  | 0,00  | 0,00  | 0,00  | 0,0037368 | NA       |
| TANGO6         | 3,23  | 5,38  | 3,10  | 2,00  | 0,0037402 | 0,026875 |
| NABP2          | 3,15  | 0,96  | 2,92  | 3,75  | 0,0037502 | 0,026939 |
| RP11-83B20.1   | 0,26  | 1,13  | 0,52  | 1,03  | 0,0037552 | 0,026966 |
| PADI4          | 1,39  | 2,26  | 2,25  | 2,69  | 0,0037647 | 0,027021 |
| SPPL2A         | 5,96  | 2,62  | 4,91  | 3,54  | 0,0037654 | 0,027021 |
| FADS2          | 0,90  | 2,55  | 1,11  | 0,71  | 0,0037713 | 0,027056 |
| KIAA1024L      | 0,11  | 0,17  | 0,20  | 0,53  | 0,0037751 | 0,027073 |
| B3GALT5-AS1    | 0,65  | 1,86  | 0,85  | 0,96  | 0,003781  | 0,027107 |
| RP11-893F2.5   | 0,00  | 0,23  | 0,00  | 0,18  | 0,0037883 | 0,027151 |
| CTB-186H2.3    | 0,00  | 0,00  | 0,03  | 0,04  | 0,0037972 | 0,027206 |
| FAM168B        | 3,38  | 1,31  | 3,03  | 0,43  | 0,0037987 | 0,027208 |
| TSR3           | 2,54  | 3,93  | 4,24  | 3,95  | 0,0038042 | 0,027238 |
| ADAMTS20       | 0,00  | 0,14  | 0,00  | 0,00  | 0,0038069 | 0,027248 |
| RSRC2          | 6,20  | 5,07  | 6,41  | 5,88  | 0,003808  | 0,027248 |
| RP11-86H7.1    | 0,79  | 1,69  | 0,68  | 2,83  | 0,0038125 | 0,027263 |
| RP11-33B1.3    | 0,61  | 3,12  | 0,37  | 0,21  | 0,0038125 | 0,027263 |
| CERS6          | 1,91  | 0,39  | 2,14  | 2,75  | 0,0038154 | 0,027267 |
| ALDH16A1       | 2,17  | 3,36  | 3,88  | 3,01  | 0,0038156 | 0,027267 |
| RP11-18H7.1    | 2,77  | 3,23  | 3,55  | 3,98  | 0,0038183 | 0,027278 |
| ADA            | 5,03  | 1,77  | 2,92  | 2,86  | 0,003823  | 0,027303 |
| GTF3A          | 7,67  | 7,40  | 7,01  | 7,05  | 0,003825  | 0,027309 |
| AC097467.2     | 0,36  | 1,12  | 0,47  | 0,85  | 0,0038273 | 0,027316 |
| ARHGEF26       | 0,35  | 1,09  | 0,69  | 0,65  | 0,0038397 | 0,027395 |
| AC004237.1     | 2,15  | 1,90  | 2,29  | 2,47  | 0,0038409 | 0,027396 |
| HSPA6          | 2,43  | 0,73  | 3,48  | 3,61  | 0,0038517 | 0,027461 |

|                   |       |       |       |       |           |          |
|-------------------|-------|-------|-------|-------|-----------|----------|
| AC004862.6        | 0,00  | 0,00  | 0,46  | 0,00  | 0,0038525 | 0,027461 |
| PCLAF             | 3,29  | 1,45  | 2,30  | 1,18  | 0,0038543 | 0,027465 |
| ZBTB37            | 1,41  | 0,40  | 0,71  | 1,16  | 0,003857  | 0,027475 |
| CYSLTR2           | 1,16  | 0,17  | 1,85  | 1,60  | 0,0038605 | 0,027488 |
| ASCL2             | 0,17  | 2,19  | 1,02  | 0,69  | 0,0038613 | 0,027488 |
| CIR1              | 5,07  | 5,35  | 4,45  | 4,89  | 0,0038647 | 0,027496 |
| NOTCH2NL          | 7,59  | 6,84  | 6,53  | 6,35  | 0,003865  | 0,027496 |
| RP11-624L4.1      | 4,44  | 6,05  | 4,46  | 4,60  | 0,0038707 | 0,027528 |
| POT1              | 3,37  | 5,06  | 1,21  | 0,54  | 0,0038735 | 0,027532 |
| ACO06369.3        | 0,00  | 1,43  | 0,27  | 0,57  | 0,0038737 | 0,027532 |
| GPR89B            | 3,55  | 2,64  | 1,30  | 1,42  | 0,0038781 | 0,027555 |
| S100B             | 3,74  | 1,59  | 0,69  | 0,33  | 0,0038798 | 0,027558 |
| RP11-415F23.2     | 0,00  | 0,37  | 0,00  | 0,00  | 0,0038827 | 0,027566 |
| NFKBIA            | 9,76  | 9,76  | 10,31 | 9,59  | 0,0038835 | 0,027566 |
| YARS              | 4,89  | 3,16  | 4,89  | 4,81  | 0,0038891 | 0,027597 |
| RPS19             | 10,68 | 11,25 | 11,14 | 11,43 | 0,0039012 | 0,027675 |
| RP11-196G11.6     | 0,44  | 0,76  | 0,70  | 0,43  | 0,0039031 | 0,027676 |
| LLNLR-276H7.1     | 0,00  | 0,00  | 0,00  | 0,45  | 0,0039037 | NA       |
| KLF16             | 0,35  | 2,20  | 1,01  | 0,92  | 0,0039039 | 0,027676 |
| RP11-736N17.2     | 0,11  | 0,20  | 0,16  | 0,44  | 0,0039149 | 0,027735 |
| RP11-571I7.4      | 0,71  | 0,00  | 0,96  | 1,03  | 0,0039164 | 0,027735 |
| ACO07241.4        | 0,02  | 0,05  | 0,05  | 0,07  | 0,0039166 | 0,027735 |
| RPL31             | 10,40 | 10,79 | 10,59 | 10,74 | 0,0039172 | 0,027735 |
| RP11-568K15.1     | 1,50  | 1,73  | 2,05  | 1,71  | 0,003921  | 0,027753 |
| STK33             | 1,28  | 1,57  | 1,70  | 2,11  | 0,0039226 | 0,027753 |
| RP11-84A14.7      | 0,18  | 0,72  | 0,26  | 0,44  | 0,0039235 | 0,027753 |
| NDUFS6            | 5,21  | 4,73  | 5,91  | 6,17  | 0,0039261 | 0,027761 |
| DCTPP1            | 6,12  | 6,25  | 5,48  | 1,57  | 0,0039271 | 0,027761 |
| RP11-240O9.2      | 0,12  | 0,45  | 0,07  | 0,04  | 0,0039294 | 0,027768 |
| DLEU1             | 4,50  | 4,57  | 2,69  | 2,77  | 0,003931  | 0,027769 |
| MAP3K8            | 8,32  | 7,30  | 7,63  | 6,90  | 0,003932  | 0,027769 |
| OGFOD1            | 3,13  | 0,83  | 2,39  | 1,53  | 0,0039353 | 0,027783 |
| ERCC4             | 2,53  | 5,48  | 1,85  | 1,19  | 0,0039424 | 0,027825 |
| XXbac-BPG283O16.9 | 2,41  | 2,89  | 2,11  | 2,56  | 0,0039488 | 0,027861 |
| BLOC1S2           | 6,80  | 5,68  | 5,98  | 4,82  | 0,0039589 | 0,027923 |
| CTD-3049M7.1      | 0,90  | 1,89  | 0,76  | 1,57  | 0,0039645 | 0,027954 |
| CD3D              | 2,63  | 5,83  | 0,54  | 5,31  | 0,0039686 | 0,027974 |
| EPHB1             | 0,02  | 2,76  | 0,05  | 0,47  | 0,0039781 | 0,028021 |
| GALNT10           | 2,87  | 3,99  | 2,25  | 2,82  | 0,0039783 | 0,028021 |
| PTRF              | 0,30  | 0,47  | 0,38  | 0,30  | 0,003979  | 0,028021 |
| PRMT1             | 5,90  | 4,27  | 5,40  | 3,89  | 0,0039858 | 0,02806  |
| LINC00891         | 2,28  | 3,40  | 2,04  | 2,51  | 0,0040074 | 0,028203 |
| GIGYF1            | 1,20  | 2,39  | 1,77  | 1,76  | 0,0040104 | 0,028215 |
| CACNA2D3          | 6,14  | 4,30  | 5,39  | 3,91  | 0,004012  | 0,028217 |
| SEPT2             | 7,12  | 6,39  | 6,20  | 5,82  | 0,0040139 | 0,028222 |
| TSC2              | 4,44  | 5,48  | 4,38  | 5,38  | 0,0040247 | 0,028288 |
| NPEPL1            | 3,14  | 4,79  | 4,14  | 4,17  | 0,004028  | 0,028303 |
| RP11-448G4.1      | 3,45  | 0,00  | 2,29  | 0,25  | 0,0040339 | 0,028335 |
| TULP4             | 1,68  | 2,09  | 2,17  | 1,62  | 0,0040371 | 0,028349 |
| NRK               | 0,04  | 0,03  | 0,11  | 0,44  | 0,0040498 | 0,028429 |
| SOX13             | 0,35  | 0,46  | 0,59  | 0,53  | 0,0040511 | 0,028429 |
| FANCL             | 5,29  | 1,28  | 4,23  | 3,71  | 0,0040568 | 0,028458 |
| RP11-702F3.3      | 0,00  | 0,18  | 0,00  | 0,00  | 0,0040578 | 0,028458 |
| SLC16A12          | 0,08  | 0,00  | 0,03  | 0,09  | 0,0040602 | 0,028466 |
| SCO1              | 3,64  | 1,09  | 3,44  | 4,29  | 0,0040692 | 0,028512 |



|               |      |      |      |      |           |          |
|---------------|------|------|------|------|-----------|----------|
| TRPM7         | 3,75 | 2,53 | 3,13 | 3,84 | 0,0040692 | 0,028512 |
| WDR87         | 0,00 | 0,26 | 0,00 | 0,00 | 0,0040733 | 0,028523 |
| OR6K1P        | 0,00 | 0,24 | 0,46 | 0,15 | 0,0040735 | 0,028523 |
| MGMT          | 4,38 | 5,07 | 4,32 | 5,13 | 0,0040804 | 0,028563 |
| CTD-2256P15.4 | 0,07 | 0,00 | 0,00 | 0,00 | 0,004083  | 0,028565 |
| EIF4H         | 6,39 | 4,50 | 6,04 | 4,86 | 0,0040832 | 0,028565 |
| SLC25A6       | 8,12 | 7,80 | 7,93 | 6,69 | 0,0040866 | 0,028579 |
| AC008697.1    | 0,00 | 0,87 | 0,03 | 0,56 | 0,0040889 | 0,028587 |
| RP11-778D9.4  | 0,22 | 0,51 | 0,51 | 0,44 | 0,0040903 | 0,028587 |
| C11orf24      | 3,41 | 0,86 | 3,53 | 3,00 | 0,0040994 | 0,028642 |
| MCTP1         | 6,22 | 5,96 | 5,63 | 4,87 | 0,0041073 | 0,028688 |
| MKL1          | 5,52 | 4,72 | 4,61 | 4,05 | 0,00411   | 0,028694 |
| CTA-282F2.3   | 0,00 | 0,36 | 0,12 | 0,00 | 0,0041108 | 0,028694 |
| DDX56         | 5,41 | 5,24 | 5,01 | 5,95 | 0,0041219 | 0,028747 |
| AL161668.5    | 0,42 | 0,46 | 0,23 | 0,00 | 0,004122  | 0,028747 |
| LINC01452     | 0,10 | 0,37 | 0,07 | 0,08 | 0,0041222 | 0,028747 |
| MED23         | 4,12 | 3,14 | 3,39 | 1,68 | 0,0041254 | 0,028756 |
| SNORD3B-1     | 3,04 | 2,32 | 3,29 | 4,11 | 0,004127  | 0,028756 |
| ZNF451        | 5,03 | 6,49 | 4,07 | 3,97 | 0,0041277 | 0,028756 |
| TREM1         | 4,60 | 5,98 | 5,81 | 5,63 | 0,0041287 | 0,028756 |
| ZBTB1         | 5,07 | 4,92 | 3,78 | 3,55 | 0,0041486 | 0,028884 |
| SLC25A38      | 4,02 | 0,71 | 3,38 | 4,78 | 0,0041496 | 0,028884 |
| RP11-184I16.2 | 0,00 | 0,71 | 0,53 | 1,14 | 0,0041527 | 0,028896 |
| MYO16         | 0,05 | 0,04 | 0,04 | 0,48 | 0,0041672 | 0,028982 |
| RN7SL592P     | 1,37 | 1,16 | 2,31 | 2,08 | 0,0041682 | 0,028982 |
| PLA2G15       | 1,18 | 1,26 | 2,63 | 3,82 | 0,004169  | 0,028982 |
| PCSK1         | 0,00 | 0,00 | 0,00 | 0,16 | 0,004174  | 0,029008 |
| PMS2L3        | 1,19 | 0,28 | 1,59 | 0,00 | 0,0041775 | 0,029023 |
| RP11-574F11.3 | 0,16 | 0,00 | 0,25 | 1,05 | 0,0041834 | 0,029048 |
| GZMH          | 0,12 | 3,52 | 0,39 | 5,00 | 0,004184  | 0,029048 |
| PDE4A         | 1,92 | 2,95 | 3,12 | 3,76 | 0,004185  | 0,029048 |
| RP11-202K23.1 | 0,22 | 4,02 | 0,33 | 2,66 | 0,0041924 | 0,02909  |
| ANKHD1        | 6,66 | 5,90 | 6,19 | 4,80 | 0,0041977 | 0,029118 |
| RP11-128A6.2  | 0,08 | 0,72 | 0,01 | 0,00 | 0,0042059 | 0,029166 |
| BET1          | 4,02 | 3,46 | 3,10 | 3,30 | 0,0042119 | 0,029198 |
| SRM           | 4,51 | 5,12 | 5,03 | 5,72 | 0,0042193 | 0,02924  |
| NDUFB2        | 7,72 | 7,95 | 7,98 | 7,93 | 0,0042216 | 0,029247 |
| RP11-872I21.3 | 0,09 | 0,00 | 0,09 | 0,09 | 0,0042329 | 0,029317 |
| KRT15         | 0,30 | 0,54 | 0,36 | 0,68 | 0,0042466 | 0,029402 |
| SMG9          | 3,40 | 4,12 | 4,16 | 4,65 | 0,0042488 | 0,029408 |
| OR1L8         | 0,00 | 0,00 | 0,00 | 0,00 | 0,0042589 | NA       |
| EFCAB14       | 4,85 | 4,85 | 4,64 | 2,44 | 0,0042615 | 0,029487 |
| ZNF800        | 4,84 | 3,15 | 4,26 | 3,93 | 0,0042636 | 0,029489 |
| RP11-341I3.1  | 3,49 | 5,15 | 4,10 | 4,30 | 0,0042647 | 0,029489 |
| MAPK8IP2      | 0,09 | 0,17 | 0,14 | 0,28 | 0,0042657 | 0,029489 |
| COPE          | 7,92 | 7,45 | 7,27 | 6,84 | 0,0042689 | 0,029501 |
| LRRFIP1       | 7,63 | 7,30 | 7,64 | 6,68 | 0,0042782 | 0,029556 |
| SFSWAP        | 3,49 | 3,69 | 4,26 | 3,63 | 0,0042854 | 0,029597 |
| TP53RK        | 3,17 | 1,19 | 1,38 | 2,16 | 0,0042902 | 0,029621 |
| GALR1         | 0,28 | 0,96 | 0,25 | 0,49 | 0,0042967 | 0,029657 |
| ZNF74         | 0,30 | 0,46 | 0,34 | 0,51 | 0,0043017 | 0,029673 |
| CREB3L1       | 0,83 | 1,96 | 1,00 | 0,99 | 0,0043018 | 0,029673 |
| MIB2          | 0,75 | 2,60 | 2,44 | 3,65 | 0,0043038 | 0,029678 |
| FAM167A       | 0,06 | 2,08 | 0,06 | 0,05 | 0,0043064 | 0,029681 |
| RP11-272L14.3 | 0,05 | 0,04 | 0,11 | 0,10 | 0,0043069 | 0,029681 |

|               |      |      |      |      |           |          |
|---------------|------|------|------|------|-----------|----------|
| RP11-178H8.2  | 0,96 | 1,58 | 1,33 | 1,08 | 0,0043095 | 0,02969  |
| POTEI         | 0,57 | 1,75 | 0,47 | 0,59 | 0,0043164 | 0,029728 |
| CATSPERB      | 0,33 | 0,91 | 0,91 | 0,72 | 0,0043285 | 0,029802 |
| RP11-212P7.2  | 0,69 | 1,13 | 1,14 | 0,69 | 0,004332  | 0,02981  |
| RP11-439K3.3  | 0,37 | 1,60 | 1,07 | 1,18 | 0,0043323 | 0,02981  |
| ZNF507        | 0,05 | 0,29 | 0,11 | 0,35 | 0,0043343 | 0,029814 |
| ZBTB3         | 0,81 | 0,96 | 0,90 | 1,58 | 0,00435   | 0,029913 |
| EHD3          | 0,03 | 0,03 | 0,06 | 0,46 | 0,0043524 | 0,02992  |
| RP11-77H9.2   | 2,05 | 1,04 | 1,91 | 0,62 | 0,0043562 | 0,029937 |
| SEC61A1       | 4,28 | 3,08 | 4,95 | 5,16 | 0,004362  | 0,029968 |
| MPHOSPH8      | 3,55 | 3,74 | 3,96 | 4,11 | 0,0043693 | 0,029994 |
| PDCD6IP       | 6,00 | 4,94 | 4,96 | 4,79 | 0,0043694 | 0,029994 |
| LRRC3         | 0,15 | 0,21 | 0,23 | 0,18 | 0,00437   | 0,029994 |
| BTNL9         | 1,12 | 0,95 | 1,10 | 1,19 | 0,0043782 | 0,030042 |
| MVP           | 4,14 | 5,83 | 4,75 | 5,44 | 0,0043833 | 0,030067 |
| TBC1D3L       | 1,82 | 1,68 | 1,84 | 0,00 | 0,0043894 | 0,0301   |
| ANKRA2        | 4,47 | 1,51 | 3,31 | 0,93 | 0,0043965 | 0,030122 |
| PRRC2A        | 4,17 | 5,44 | 5,04 | 4,59 | 0,0043965 | 0,030122 |
| RP11-3B12.1   | 2,03 | 3,45 | 1,69 | 1,80 | 0,0043967 | 0,030122 |
| UBR1          | 4,02 | 2,21 | 3,80 | 2,26 | 0,0044011 | 0,030143 |
| SCN1B         | 0,36 | 0,98 | 0,94 | 1,15 | 0,0044074 | 0,030177 |
| ARPC5         | 8,60 | 7,80 | 7,93 | 7,98 | 0,004413  | 0,030206 |
| ZNF593        | 4,54 | 4,29 | 5,19 | 5,29 | 0,0044189 | 0,030237 |
| TIMM17A       | 6,06 | 5,54 | 5,94 | 3,42 | 0,0044204 | 0,030238 |
| CTC-250I14.3  | 0,00 | 1,11 | 0,37 | 1,34 | 0,004429  | NA       |
| JHDM1D-AS1    | 1,68 | 3,50 | 2,35 | 3,46 | 0,0044402 | 0,030364 |
| RP11-175P13.3 | 0,00 | 0,52 | 0,25 | 0,43 | 0,004442  | 0,030367 |
| RP11-804H8.6  | 2,58 | 0,13 | 0,97 | 0,54 | 0,0044512 | 0,030418 |
| SMEK1         | 6,04 | 3,54 | 5,82 | 4,49 | 0,0044521 | 0,030418 |
| KDM2A         | 5,32 | 3,98 | 6,07 | 4,75 | 0,004455  | 0,030428 |
| RP11-379K17.4 | 0,07 | 0,46 | 0,12 | 0,16 | 0,0044635 | 0,030462 |
| P2RX4         | 4,26 | 5,90 | 4,71 | 4,96 | 0,004464  | 0,030462 |
| RP11-396B14.2 | 0,00 | 0,17 | 0,00 | 0,00 | 0,0044641 | 0,030462 |
| KCNH5         | 0,10 | 0,07 | 0,27 | 0,01 | 0,004475  | 0,030527 |
| CYP1A2        | 0,74 | 1,12 | 0,89 | 1,47 | 0,004486  | 0,03059  |
| RP11-749H20.3 | 3,61 | 5,91 | 3,31 | 3,98 | 0,004487  | 0,03059  |
| C1orf127      | 0,30 | 0,17 | 0,28 | 2,28 | 0,0044978 | 0,030654 |
| VMA21         | 4,22 | 1,96 | 4,73 | 5,16 | 0,0044999 | 0,030659 |
| C17orf105     | 0,63 | 0,50 | 0,72 | 0,90 | 0,0045074 | 0,030701 |
| TOMM7         | 6,16 | 6,81 | 6,65 | 7,11 | 0,0045138 | 0,030735 |
| EEF1E1        | 7,24 | 5,53 | 6,22 | 5,09 | 0,0045165 | 0,030744 |
| KIF20B        | 2,81 | 0,36 | 1,55 | 0,89 | 0,0045195 | 0,030754 |
| RP11-166O4.6  | 1,07 | 1,92 | 1,77 | 2,08 | 0,0045208 | 0,030754 |
| TMBIM4        | 8,80 | 8,50 | 8,35 | 7,35 | 0,0045281 | 0,030794 |
| RP1-90L6.2    | 0,42 | 1,21 | 0,77 | 1,21 | 0,0045371 | 0,030846 |
| RP11-326N17.2 | 2,46 | 2,56 | 2,48 | 2,35 | 0,0045432 | 0,030879 |
| C5orf51       | 3,73 | 0,61 | 2,81 | 0,51 | 0,00455   | 0,030915 |
| PLEKHD1       | 0,67 | 1,65 | 0,54 | 1,35 | 0,0045522 | 0,03092  |
| CYB5R2        | 0,16 | 0,18 | 0,26 | 0,30 | 0,0045583 | 0,030953 |
| NR4A3         | 5,17 | 3,85 | 5,18 | 2,37 | 0,0045632 | 0,030968 |
| TMEM150C      | 0,18 | 1,32 | 0,12 | 0,04 | 0,0045633 | 0,030968 |
| RP11-982M15.7 | 0,00 | 1,86 | 0,89 | 1,23 | 0,0045675 | 0,030987 |
| RP11-583F2.1  | 1,24 | 6,21 | 2,13 | 2,59 | 0,0045739 | 0,031012 |
| ACADM         | 5,18 | 2,67 | 4,46 | 5,22 | 0,0045746 | 0,031012 |
| TMEM154       | 4,46 | 1,80 | 3,49 | 2,45 | 0,0045754 | 0,031012 |

|                |      |      |      |      |           |          |
|----------------|------|------|------|------|-----------|----------|
| CTD-2235C13.3  | 0,00 | 0,00 | 0,58 | 3,39 | 0,0045896 | 0,031099 |
| RP11-749I16.3  | 0,11 | 0,29 | 0,16 | 0,17 | 0,0045941 | 0,03112  |
| CFAP43         | 0,00 | 3,07 | 0,00 | 0,03 | 0,0045963 | 0,031125 |
| CLECL1         | 5,08 | 0,47 | 3,93 | 3,32 | 0,0046109 | 0,031215 |
| IIFT122        | 2,82 | 1,98 | 2,49 | 1,38 | 0,0046134 | 0,031222 |
| MRPL41         | 4,12 | 4,61 | 4,61 | 4,38 | 0,0046195 | 0,031254 |
| PCLO           | 0,00 | 0,01 | 0,00 | 0,06 | 0,0046214 | 0,031257 |
| RP11-651L5.3   | 0,54 | 0,55 | 0,74 | 1,47 | 0,0046256 | 0,031276 |
| RN7SL600P      | 3,57 | 0,00 | 4,21 | 2,78 | 0,0046287 | 0,03128  |
| RP11-39K24.8   | 1,30 | 0,00 | 0,11 | 0,00 | 0,004629  | 0,03128  |
| PNPLA8         | 4,96 | 2,46 | 5,03 | 5,42 | 0,0046313 | 0,03128  |
| RP11-631M6.2   | 2,84 | 3,87 | 4,00 | 5,02 | 0,0046333 | 0,03128  |
| MIR3153        | 0,00 | 0,00 | 1,07 | 0,00 | 0,0046333 | 0,03128  |
| CTD-2378E12.1  | 1,11 | 0,45 | 1,09 | 1,68 | 0,0046379 | 0,031302 |
| RP11-572C15.5  | 0,08 | 0,28 | 0,21 | 0,46 | 0,0046428 | 0,031325 |
| PRR11          | 2,25 | 1,94 | 2,88 | 1,97 | 0,0046477 | 0,031338 |
| GNAI3          | 3,24 | 2,53 | 2,35 | 1,46 | 0,0046483 | 0,031338 |
| ZNF549         | 1,57 | 2,19 | 0,42 | 0,34 | 0,0046489 | 0,031338 |
| RP11-747D18.1  | 0,05 | 0,22 | 0,07 | 0,16 | 0,0046553 | 0,031372 |
| RP11-406A20.4  | 0,00 | 0,00 | 0,03 | 0,00 | 0,0046591 | 0,031388 |
| AP000662.4     | 0,80 | 0,63 | 1,93 | 1,59 | 0,0046608 | 0,03139  |
| BACH2          | 1,26 | 0,83 | 1,94 | 0,56 | 0,0046704 | 0,03144  |
| AC074117.12    | 0,60 | 0,85 | 0,77 | 0,85 | 0,0046711 | 0,03144  |
| ZSCAN10        | 0,23 | 0,98 | 0,31 | 0,78 | 0,0046788 | 0,031483 |
| RP11-196G18.23 | 0,00 | 0,82 | 0,00 | 1,29 | 0,004682  | 0,031487 |
| AP001053.11    | 1,93 | 0,00 | 4,24 | 2,70 | 0,0046823 | 0,031487 |
| RP11-509E10.1  | 0,77 | 3,12 | 0,68 | 1,52 | 0,0046859 | 0,031502 |
| FAHD2A         | 4,84 | 4,03 | 2,40 | 0,39 | 0,0046906 | 0,031524 |
| RPL12P1        | 0,00 | 1,02 | 0,00 | 0,00 | 0,0046938 | NA       |
| PEX5           | 0,19 | 0,40 | 0,20 | 0,04 | 0,0046941 | 0,031537 |
| CTD-2185K10.1  | 0,10 | 0,27 | 0,26 | 0,70 | 0,0046978 | 0,031553 |
| NCF2           | 7,20 | 5,30 | 7,16 | 6,96 | 0,0047021 | 0,03157  |
| SLC52A1        | 0,17 | 0,26 | 0,34 | 0,42 | 0,0047032 | 0,03157  |
| KIAA0907       | 3,27 | 1,48 | 3,41 | 4,18 | 0,0047077 | 0,03159  |
| CGNL1          | 0,26 | 2,94 | 0,27 | 1,15 | 0,0047098 | 0,031595 |
| L3HYPDH        | 3,94 | 0,68 | 2,29 | 3,93 | 0,0047118 | 0,031599 |
| POU6F1         | 0,60 | 2,57 | 0,78 | 1,13 | 0,0047148 | 0,03161  |
| C19orf66       | 3,80 | 1,35 | 4,10 | 2,64 | 0,0047175 | 0,031618 |
| IGLV1-47       | 0,70 | 0,60 | 0,38 | 0,47 | 0,0047224 | 0,031641 |
| GPR81          | 0,34 | 0,80 | 0,44 | 0,50 | 0,0047269 | 0,031662 |
| ZNF624         | 1,55 | 2,06 | 1,21 | 2,20 | 0,0047303 | 0,031668 |
| ZMAT5          | 4,91 | 1,58 | 4,65 | 4,96 | 0,0047317 | 0,031668 |
| GSK3B          | 3,79 | 3,32 | 3,30 | 3,77 | 0,0047329 | 0,031668 |
| SORT1          | 3,34 | 5,19 | 3,37 | 3,36 | 0,0047335 | 0,031668 |
| MYNN           | 3,24 | 1,57 | 1,73 | 1,81 | 0,0047374 | 0,031685 |
| RP11-216L13.19 | 0,03 | 0,09 | 0,14 | 0,13 | 0,0047421 | 0,031706 |
| SMURF2P1       | 0,44 | 0,00 | 0,00 | 0,00 | 0,0047517 | 0,031745 |
| QSER1          | 2,73 | 4,42 | 2,06 | 1,44 | 0,0047521 | 0,031745 |
| RP1-101G11.3   | 0,12 | 0,53 | 0,18 | 0,41 | 0,0047531 | 0,031745 |
| CNTN4          | 0,01 | 0,05 | 0,03 | 0,14 | 0,0047535 | 0,031745 |
| TOM1           | 3,11 | 4,71 | 4,56 | 5,06 | 0,0047611 | 0,031786 |
| TLR5           | 2,76 | 1,74 | 3,65 | 4,09 | 0,0047633 | 0,031791 |
| CROCCP3        | 0,70 | 0,93 | 0,68 | 0,52 | 0,004772  | 0,031839 |
| RP11-848P1.4   | 4,66 | 4,95 | 4,97 | 5,52 | 0,0047765 | 0,03186  |
| JTB            | 6,75 | 6,74 | 7,37 | 7,21 | 0,0047819 | 0,031887 |

|               |       |       |       |       |           |          |
|---------------|-------|-------|-------|-------|-----------|----------|
| MAP3K7        | 4,20  | 0,81  | 2,41  | 1,88  | 0,0047851 | 0,031898 |
| CTC-548K16.2  | 0,62  | 0,00  | 0,37  | 2,31  | 0,0047886 | 0,031912 |
| DEGS1         | 6,28  | 3,76  | 4,86  | 3,89  | 0,004801  | 0,031979 |
| RP11-536K7.3  | 0,38  | 0,50  | 0,62  | 0,62  | 0,0048016 | 0,031979 |
| BCLAF1        | 7,06  | 7,12  | 6,56  | 6,35  | 0,0048032 | 0,03198  |
| ZNF724P       | 0,73  | 0,36  | 1,32  | 1,69  | 0,0048081 | 0,032    |
| RP11-266C7.3  | 0,30  | 1,83  | 0,13  | 0,19  | 0,0048089 | 0,032    |
| PDE4DIP       | 4,02  | 3,70  | 4,32  | 5,36  | 0,0048112 | 0,032005 |
| ZNF200        | 0,94  | 0,54  | 0,85  | 1,97  | 0,0048168 | 0,032033 |
| G6PD          | 2,90  | 3,52  | 1,84  | 0,85  | 0,0048267 | 0,032089 |
| CTD-3099C6.11 | 0,44  | 1,18  | 0,96  | 1,75  | 0,0048442 | 0,032196 |
| RPS10         | 9,41  | 9,64  | 9,77  | 9,70  | 0,0048463 | 0,0322   |
| RP11-462G12.4 | 0,00  | 2,04  | 1,11  | 1,11  | 0,0048519 | NA       |
| RPS24         | 9,89  | 10,30 | 10,04 | 10,05 | 0,0048755 | 0,032375 |
| RP5-828K20.2  | 0,71  | 1,23  | 0,68  | 0,90  | 0,0048756 | 0,032375 |
| UBQLN1        | 3,54  | 2,14  | 3,83  | 2,30  | 0,004878  | 0,032381 |
| ACY1          | 3,56  | 4,29  | 3,61  | 1,34  | 0,0048882 | 0,03244  |
| PRDM16        | 0,53  | 1,39  | 0,78  | 0,73  | 0,0048924 | 0,032458 |
| ZEB2-AS1      | 1,99  | 3,33  | 3,53  | 4,10  | 0,0048947 | 0,032463 |
| RP11-53B2.4   | 2,77  | 0,27  | 0,77  | 0,86  | 0,0048962 | 0,032463 |
| PIGH          | 4,69  | 2,46  | 3,25  | 3,42  | 0,0048976 | 0,032463 |
| BEX3          | 0,00  | 0,00  | 0,28  | 0,95  | 0,0048999 | 0,032469 |
| RFC2          | 4,51  | 4,21  | 3,84  | 0,80  | 0,0049157 | 0,032564 |
| PHLDB3        | 1,59  | 3,65  | 2,28  | 4,31  | 0,0049198 | 0,032581 |
| GAS2          | 0,00  | 0,00  | 0,00  | 0,00  | 0,0049303 | 0,032632 |
| RP11-69C17.1  | 0,05  | 0,07  | 0,11  | 0,17  | 0,0049305 | 0,032632 |
| TMEM14A       | 3,71  | 0,17  | 0,70  | 0,00  | 0,0049397 | 0,032684 |
| PIK3IP1       | 0,95  | 4,78  | 1,51  | 3,18  | 0,0049504 | 0,032745 |
| RP11-93G5.1   | 1,11  | 1,86  | 1,37  | 1,12  | 0,0049559 | 0,032772 |
| RPS11         | 11,06 | 11,47 | 11,25 | 11,43 | 0,0049591 | 0,032783 |
| RP11-503C24.4 | 0,19  | 0,80  | 0,23  | 0,35  | 0,0049611 | 0,032786 |
| RP11-20D14.6  | 1,62  | 2,50  | 2,21  | 4,62  | 0,0049737 | 0,03286  |
| RPL27A        | 10,17 | 11,00 | 10,70 | 10,31 | 0,0049766 | 0,032864 |
| TLL4          | 2,70  | 0,14  | 3,85  | 2,65  | 0,0049772 | 0,032864 |
| DHRS1         | 4,84  | 5,83  | 4,48  | 6,65  | 0,0049954 | 0,032956 |
| MBOAT2        | 2,74  | 0,70  | 1,60  | 2,64  | 0,0049956 | 0,032956 |
| GNE           | 1,07  | 3,63  | 1,07  | 2,26  | 0,0049957 | 0,032956 |
| C19orf47      | 0,34  | 2,56  | 1,08  | 1,76  | 0,0050057 | 0,033009 |
| NARFL         | 2,50  | 1,58  | 2,84  | 4,32  | 0,0050067 | 0,033009 |
| ITIH6         | 0,00  | 0,00  | 0,00  | 0,26  | 0,0050106 | 0,03302  |
| PPM1F         | 3,35  | 4,67  | 4,12  | 3,20  | 0,0050114 | 0,03302  |
| RP11-515O17.2 | 0,00  | 0,30  | 0,00  | 0,00  | 0,0050175 | NA       |
| TNFRSF13C     | 0,13  | 1,60  | 0,29  | 0,28  | 0,0050247 | 0,033089 |
| WBSCR17       | 0,03  | 0,48  | 0,00  | 0,83  | 0,0050248 | 0,033089 |
| TMX4          | 4,58  | 5,30  | 4,86  | 3,27  | 0,0050412 | 0,033179 |
| RP11-246E12.2 | 0,18  | 0,39  | 0,37  | 0,70  | 0,0050414 | 0,033179 |
| HIST2H2BE     | 3,19  | 0,29  | 2,98  | 1,33  | 0,0050439 | 0,033186 |
| DDX54         | 3,65  | 1,34  | 3,90  | 4,45  | 0,0050504 | 0,033219 |
| G6PC2         | 0,00  | 0,19  | 0,06  | 0,11  | 0,0050544 | 0,033221 |
| U95743.1      | 0,00  | 0,00  | 0,00  | 1,64  | 0,0050552 | 0,033221 |
| CTB-152G17.6  | 1,25  | 1,22  | 1,75  | 1,57  | 0,0050553 | 0,033221 |
| RP11-338N10.2 | 0,94  | 0,35  | 0,54  | 0,52  | 0,0050622 | 0,033257 |
| BLNK          | 5,09  | 3,12  | 2,83  | 3,45  | 0,0050651 | 0,033266 |
| SNX19         | 3,54  | 0,48  | 2,71  | 1,25  | 0,0050696 | 0,033276 |
| RN7SL279P     | 0,00  | 0,59  | 1,00  | 1,68  | 0,005071  | 0,033276 |

|                |       |       |      |      |           |          |
|----------------|-------|-------|------|------|-----------|----------|
| CTB-129P6.7    | 0,69  | 1,04  | 0,78 | 0,87 | 0,0050724 | 0,033276 |
| ANKRD9         | 0,09  | 0,30  | 0,21 | 0,20 | 0,005074  | 0,033276 |
| GRAMD1B        | 2,15  | 1,99  | 3,43 | 2,11 | 0,0050741 | 0,033276 |
| MIR100HG       | 1,57  | 3,52  | 2,01 | 2,97 | 0,005081  | 0,03331  |
| DLGAP5         | 0,00  | 0,00  | 0,00 | 0,04 | 0,0050828 | 0,03331  |
| STK24          | 4,79  | 4,68  | 5,11 | 4,00 | 0,0050838 | 0,03331  |
| CCZ1B          | 5,43  | 6,16  | 5,26 | 4,46 | 0,0050892 | 0,03333  |
| RP11-10E18.4   | 0,51  | 0,00  | 0,06 | 0,00 | 0,0050905 | 0,03333  |
| MAPK8          | 3,46  | 0,74  | 3,75 | 2,49 | 0,0050914 | 0,03333  |
| PSMB4          | 9,33  | 8,11  | 8,92 | 8,36 | 0,0050929 | 0,03333  |
| RP11-73O6.3    | 0,00  | 4,92  | 0,00 | 0,00 | 0,0050966 | 0,033345 |
| ESCO2          | 0,73  | 0,68  | 0,72 | 0,77 | 0,0051001 | 0,033357 |
| RP11-21F16.1   | 0,71  | 2,71  | 1,13 | 1,29 | 0,0051015 | 0,033357 |
| ACSM2A         | 2,62  | 2,31  | 2,26 | 3,27 | 0,0051068 | 0,033382 |
| PIF1           | 0,25  | 0,54  | 0,43 | 0,55 | 0,0051118 | 0,033397 |
| CATSPER1       | 0,05  | 0,46  | 3,10 | 3,23 | 0,0051121 | 0,033397 |
| WI2-85898F10.1 | 3,15  | 3,27  | 3,79 | 3,71 | 0,005124  | 0,033465 |
| RP11-436K8.1   | 0,55  | 1,96  | 0,97 | 2,00 | 0,005131  | 0,033501 |
| TRIM73         | 0,66  | 0,78  | 1,09 | 1,64 | 0,0051387 | 0,033535 |
| YTHDF3         | 5,84  | 2,87  | 5,22 | 4,51 | 0,0051393 | 0,033535 |
| AC141586.5     | 2,95  | 1,60  | 2,51 | 1,24 | 0,0051461 | 0,03357  |
| AOX2P          | 0,13  | 0,20  | 0,17 | 0,26 | 0,0051515 | 0,033595 |
| CFAP70         | 0,07  | 0,65  | 0,12 | 0,69 | 0,0051584 | 0,03363  |
| SMARCAL1       | 1,52  | 1,01  | 2,36 | 1,22 | 0,0051843 | 0,03378  |
| RP11-117B7.1   | 2,90  | 0,00  | 0,00 | 3,42 | 0,0051844 | 0,03378  |
| RP11-403P13.1  | 0,79  | 1,50  | 1,15 | 1,49 | 0,0051918 | 0,033817 |
| NDUFV2P1       | 2,39  | 1,41  | 2,00 | 0,64 | 0,0051932 | 0,033817 |
| CTD-2349P21.3  | 0,51  | 0,21  | 0,72 | 1,20 | 0,0051982 | 0,03384  |
| PIP4K2A        | 7,03  | 5,82  | 6,16 | 5,36 | 0,0052031 | 0,033854 |
| STRADB         | 3,77  | 1,21  | 1,12 | 0,70 | 0,0052034 | 0,033854 |
| DOK2           | 4,64  | 3,39  | 5,01 | 4,63 | 0,0052089 | 0,03388  |
| AC009237.8     | 0,00  | 0,34  | 0,00 | 0,04 | 0,0052232 | 0,033963 |
| NELL1          | 0,00  | 0,23  | 0,13 | 1,67 | 0,0052295 | 0,03399  |
| SNRPD2         | 7,87  | 8,62  | 8,18 | 8,45 | 0,0052305 | 0,03399  |
| CALM2          | 10,50 | 10,17 | 9,66 | 9,17 | 0,0052438 | 0,034065 |
| PCK2           | 3,14  | 6,00  | 2,83 | 3,47 | 0,005246  | 0,034065 |
| CPOX           | 1,09  | 0,05  | 1,38 | 1,71 | 0,0052472 | 0,034065 |
| EVA1C          | 1,59  | 3,24  | 0,85 | 4,50 | 0,0052481 | 0,034065 |
| GLULP5         | 1,93  | 0,00  | 2,07 | 2,34 | 0,0052572 | 0,034114 |
| EFCAB1         | 0,00  | 0,83  | 0,00 | 0,00 | 0,005262  | 0,034136 |
| RP11-448A19.1  | 0,32  | 0,53  | 0,68 | 0,98 | 0,0052744 | 0,034206 |
| RP11-227G15.10 | 2,87  | 4,76  | 3,43 | 2,18 | 0,0052798 | 0,034231 |
| MANBA          | 5,68  | 5,51  | 5,58 | 4,68 | 0,0052854 | 0,034257 |
| AP000688.15    | 0,71  | 1,52  | 2,70 | 2,88 | 0,0052869 | 0,034257 |
| U73166.2       | 0,60  | 1,63  | 0,64 | 0,66 | 0,0053    | 0,034332 |
| MT-TC          | 4,94  | 6,59  | 5,38 | 6,32 | 0,0053049 | 0,034354 |
| AC135048.13    | 2,79  | 4,36  | 1,52 | 0,89 | 0,0053084 | 0,034366 |
| CDCA3          | 0,74  | 0,55  | 0,44 | 0,68 | 0,0053316 | 0,034506 |
| HDDC3          | 4,75  | 6,25  | 4,52 | 1,49 | 0,005336  | 0,034525 |
| LILRB3         | 4,17  | 3,51  | 4,62 | 5,00 | 0,0053382 | 0,034525 |
| RP11-74C1.2    | 0,00  | 1,53  | 0,00 | 0,00 | 0,0053391 | 0,034525 |
| ARMC1          | 3,17  | 1,49  | 2,14 | 1,23 | 0,0053516 | 0,034595 |
| RUBCN          | 3,19  | 5,08  | 3,15 | 3,01 | 0,0053647 | 0,03467  |
| RP13-297E16.5  | 0,00  | 0,00  | 0,00 | 1,00 | 0,0053851 | 0,034792 |
| UBFD1          | 2,60  | 3,73  | 1,57 | 2,87 | 0,0053919 | 0,034825 |

|               |       |       |       |       |           |          |
|---------------|-------|-------|-------|-------|-----------|----------|
| AC096558.1    | 1,38  | 0,00  | 2,07  | 0,40  | 0,0053987 | 0,03486  |
| RPS2          | 10,62 | 11,07 | 10,95 | 10,69 | 0,0054054 | 0,034893 |
| C16orf89      | 0,09  | 0,15  | 0,20  | 0,32  | 0,0054171 | 0,034958 |
| GLMN          | 3,26  | 1,02  | 2,58  | 3,77  | 0,0054291 | 0,035025 |
| RP11-50I19.2  | 0,19  | 2,97  | 0,20  | 0,34  | 0,0054383 | 0,035074 |
| LY6G6E        | 0,55  | 0,00  | 0,76  | 0,69  | 0,0054416 | 0,035077 |
| AC017116.8    | 0,57  | 0,29  | 1,01  | 1,09  | 0,0054418 | 0,035077 |
| IL13RA1       | 5,90  | 4,50  | 6,08  | 4,92  | 0,0054552 | 0,035149 |
| PECAM1        | 5,13  | 4,23  | 5,10  | 5,77  | 0,0054574 | 0,035149 |
| ARHGAP19      | 2,74  | 0,35  | 0,80  | 0,65  | 0,0054577 | 0,035149 |
| CCDC88B       | 5,05  | 4,64  | 6,26  | 6,42  | 0,0054677 | 0,035198 |
| PPID          | 4,23  | 3,83  | 3,07  | 0,84  | 0,0054686 | 0,035198 |
| GF1B          | 0,33  | 1,21  | 0,66  | 0,44  | 0,0054724 | 0,035213 |
| RP11-225N10.1 | 0,07  | 0,50  | 0,14  | 0,68  | 0,0054847 | 0,035281 |
| METTL3        | 5,14  | 2,44  | 3,85  | 2,84  | 0,0054978 | 0,035356 |
| AIFM2         | 0,58  | 0,04  | 0,17  | 0,04  | 0,0055067 | 0,035392 |
| DNASE1L3      | 3,52  | 1,62  | 1,43  | 0,77  | 0,0055067 | 0,035392 |
| MLLT6         | 2,36  | 4,00  | 2,18  | 2,75  | 0,0055149 | 0,035435 |
| RNF170        | 4,29  | 0,61  | 2,32  | 4,43  | 0,0055208 | 0,035462 |
| IYD           | 0,26  | 0,94  | 0,35  | 0,40  | 0,0055296 | 0,035509 |
| CTD-2396E7.11 | 0,63  | 2,45  | 0,99  | 0,00  | 0,0055323 | 0,035513 |
| RSL24D1       | 6,33  | 5,66  | 5,48  | 5,60  | 0,0055335 | 0,035513 |
| RP11-474C8.8  | 1,05  | 3,02  | 1,64  | 2,74  | 0,0055433 | 0,035566 |
| CDR2          | 2,52  | 3,22  | 1,26  | 0,43  | 0,0055481 | 0,035587 |
| CACFD1        | 0,19  | 0,41  | 1,39  | 0,17  | 0,0055547 | 0,035618 |
| PM20D2        | 0,92  | 0,66  | 1,45  | 1,81  | 0,0055581 | 0,035625 |
| SFXN1         | 3,03  | 5,75  | 2,64  | 2,66  | 0,0055589 | 0,035625 |
| TKFC          | 3,87  | 0,75  | 2,53  | 0,83  | 0,0055637 | 0,035645 |
| THAP4         | 3,41  | 5,88  | 2,42  | 1,53  | 0,0055711 | 0,035682 |
| TRGV3         | 0,00  | 0,00  | 0,00  | 0,00  | 0,005582  | 0,035742 |
| ZNF324        | 0,69  | 3,91  | 0,68  | 0,61  | 0,0055874 | 0,035766 |
| LRRC74B       | 0,91  | 1,54  | 0,85  | 1,33  | 0,0055927 | 0,03579  |
| ITPK1         | 3,41  | 3,42  | 3,83  | 2,58  | 0,0056094 | 0,035886 |
| HCG23         | 2,46  | 3,65  | 2,55  | 2,88  | 0,0056111 | 0,035887 |
| CCDC9         | 1,57  | 3,16  | 2,61  | 3,00  | 0,0056252 | 0,035967 |
| TAP2          | 3,09  | 1,95  | 2,96  | 3,96  | 0,0056337 | 0,036011 |
| U47924.31     | 3,83  | 3,36  | 4,22  | 4,92  | 0,0056374 | 0,036024 |
| EIF4G2        | 7,38  | 6,29  | 7,13  | 6,59  | 0,0056458 | 0,036067 |
| DEXI          | 1,97  | 3,53  | 2,36  | 0,62  | 0,0056496 | 0,036072 |
| ZNF788        | 0,92  | 0,93  | 0,97  | 1,61  | 0,0056505 | 0,036072 |
| MIER2         | 1,85  | 1,31  | 2,37  | 3,19  | 0,0056514 | 0,036072 |
| RP1-122P22.2  | 0,00  | 0,00  | 0,00  | 0,53  | 0,0056613 | 0,036115 |
| CSRNP3        | 0,01  | 0,05  | 0,01  | 0,12  | 0,0056613 | 0,036115 |
| VPS33A        | 3,09  | 2,54  | 3,65  | 1,84  | 0,0056644 | 0,036124 |
| RP11-66B24.7  | 0,05  | 0,06  | 0,12  | 0,12  | 0,0056716 | 0,036159 |
| LSM14A        | 5,24  | 4,41  | 4,78  | 3,82  | 0,0056745 | 0,036166 |
| RAB28         | 3,91  | 1,48  | 2,16  | 1,84  | 0,0056789 | 0,036166 |
| STMND1        | 0,33  | 1,40  | 0,56  | 0,48  | 0,005679  | 0,036166 |
| F2RL3         | 0,36  | 0,69  | 0,69  | 0,89  | 0,0056792 | 0,036166 |
| IGF2BP1       | 0,76  | 2,56  | 1,60  | 0,96  | 0,0056832 | 0,036181 |
| RP11-411K7.4  | 0,20  | 1,79  | 0,75  | 1,44  | 0,005691  | 0,03622  |
| SUB1          | 8,63  | 8,16  | 8,46  | 7,81  | 0,0057168 | 0,036375 |
| RAD21-AS1     | 1,79  | 4,04  | 2,06  | 1,46  | 0,0057221 | 0,036393 |
| AC133965.1    | 0,00  | 3,02  | 0,00  | 1,83  | 0,005723  | 0,036393 |
| ACSM5         | 0,00  | 0,62  | 0,00  | 0,19  | 0,0057488 | 0,036547 |

|                  |       |       |       |      |           |          |
|------------------|-------|-------|-------|------|-----------|----------|
| RPL3             | 11,04 | 10,83 | 10,72 | 9,97 | 0,0057514 | 0,036553 |
| SNX10            | 5,26  | 4,52  | 5,65  | 5,69 | 0,0057554 | 0,036567 |
| TMTC3            | 1,66  | 0,21  | 0,97  | 1,41 | 0,0057652 | 0,036619 |
| COL4A3           | 0,00  | 3,79  | 0,00  | 0,00 | 0,0057748 | 0,03667  |
| AC005301.5       | 3,62  | 4,18  | 3,23  | 4,96 | 0,0057766 | 0,036671 |
| RP11-311C24.1    | 3,26  | 0,00  | 0,80  | 0,00 | 0,005779  | 0,036676 |
| AC111200.2       | 0,94  | 1,66  | 1,25  | 1,78 | 0,0057901 | 0,036736 |
| LY75             | 4,18  | 2,16  | 3,36  | 1,56 | 0,0058003 | 0,03679  |
| ABI3BP           | 2,25  | 3,91  | 1,79  | 2,20 | 0,0058021 | 0,036791 |
| CYB5A            | 5,01  | 3,70  | 4,82  | 2,34 | 0,0058083 | 0,036819 |
| PPAT             | 3,08  | 1,15  | 1,22  | 0,77 | 0,0058108 | 0,036825 |
| NANOGP1          | 0,16  | 0,51  | 0,39  | 0,42 | 0,0058153 | 0,036843 |
| RP11-374F3.4     | 2,58  | 4,47  | 2,57  | 2,14 | 0,0058177 | 0,036848 |
| RP11-41E15.1     | 0,09  | 0,58  | 0,03  | 0,14 | 0,0058232 | 0,036872 |
| CISD2            | 4,89  | 1,97  | 3,82  | 3,82 | 0,0058295 | 0,036884 |
| CDH1             | 2,22  | 1,68  | 1,20  | 1,19 | 0,0058302 | 0,036884 |
| ADM              | 0,00  | 0,34  | 0,30  | 0,17 | 0,0058314 | 0,036884 |
| CTSZ             | 3,80  | 4,21  | 3,44  | 5,30 | 0,0058327 | 0,036884 |
| RNU6-1024P       | 0,00  | 1,93  | 0,00  | 2,59 | 0,0058346 | 0,036884 |
| KIAA1468         | 4,50  | 2,78  | 3,91  | 5,60 | 0,0058351 | 0,036884 |
| RP13-631K18.3    | 0,62  | 0,43  | 1,08  | 1,95 | 0,0058405 | 0,036908 |
| RNY3P14          | 0,00  | 0,00  | 1,96  | 1,86 | 0,0058502 | NA       |
| ZDHH1            | 0,00  | 0,00  | 0,20  | 1,22 | 0,0058577 | 0,037006 |
| RP11-578F21.6    | 0,49  | 0,00  | 0,00  | 0,00 | 0,0058692 | 0,037068 |
| RP11-4B14.3      | 0,53  | 0,53  | 0,64  | 1,09 | 0,0058754 | 0,037097 |
| MLLT11           | 0,14  | 0,41  | 0,52  | 0,24 | 0,0058787 | 0,037101 |
| LL09NC01-251B2.3 | 1,08  | 1,85  | 1,91  | 1,89 | 0,0058795 | 0,037101 |
| FIZ1             | 0,52  | 0,03  | 1,16  | 1,08 | 0,0058913 | 0,037166 |
| MKKS             | 3,48  | 0,86  | 2,28  | 1,34 | 0,0058935 | 0,037169 |
| POLR3E           | 4,43  | 1,86  | 3,16  | 1,57 | 0,0058982 | 0,037188 |
| PYHIN1           | 0,24  | 0,59  | 0,36  | 0,89 | 0,005901  | 0,037195 |
| FMN1             | 2,43  | 2,11  | 2,94  | 5,36 | 0,0059141 | 0,037267 |
| NCF1C            | 4,30  | 4,04  | 4,29  | 5,72 | 0,0059184 | 0,037284 |
| RP13-554M15.7    | 0,09  | 0,06  | 0,17  | 0,14 | 0,0059222 | 0,037297 |
| IGKV3-11         | 0,00  | 2,75  | 0,55  | 0,55 | 0,0059274 | 0,037319 |
| RP11-66D17.3     | 0,27  | 0,69  | 0,35  | 0,62 | 0,0059308 | 0,03733  |
| ENG              | 2,75  | 3,00  | 2,77  | 4,28 | 0,0059335 | 0,037336 |
| AC079807.3       | 0,77  | 0,00  | 4,07  | 0,00 | 0,005944  | 0,037388 |
| MAEA             | 3,71  | 5,13  | 4,34  | 4,32 | 0,0059451 | 0,037388 |
| UPB1             | 0,24  | 1,00  | 0,33  | 0,58 | 0,0059483 | 0,037397 |
| STX7             | 5,43  | 5,52  | 4,85  | 3,97 | 0,0059514 | 0,037407 |
| RP11-1186N24.5   | 0,32  | 0,40  | 1,31  | 0,00 | 0,0059629 | 0,037468 |
| C15orf43         | 0,09  | 0,78  | 0,00  | 0,84 | 0,0059659 | 0,037471 |
| FAM217B          | 2,89  | 0,94  | 2,54  | 2,02 | 0,0059668 | 0,037471 |
| CTCFL            | 1,49  | 2,19  | 2,16  | 1,79 | 0,0059945 | 0,037635 |
| CCNY             | 4,39  | 4,69  | 4,90  | 4,53 | 0,0059998 | 0,037639 |
| RP11-6N17.1      | 0,56  | 0,38  | 0,28  | 1,34 | 0,0060009 | 0,037639 |
| RP11-111M22.2    | 0,66  | 1,45  | 0,60  | 1,11 | 0,0060009 | 0,037639 |
| DMXL1            | 4,53  | 2,21  | 4,44  | 4,02 | 0,006002  | 0,037639 |
| IVNS1ABP         | 6,00  | 4,51  | 6,12  | 5,99 | 0,0060075 | 0,037663 |
| TNFRSF1A         | 4,35  | 5,15  | 4,48  | 5,13 | 0,0060104 | 0,037671 |
| POLD3            | 3,84  | 4,32  | 1,96  | 3,08 | 0,0060126 | 0,037673 |
| RPP21            | 4,45  | 5,13  | 4,94  | 5,45 | 0,0060141 | 0,037673 |
| CATIP            | 1,42  | 1,71  | 1,20  | 2,00 | 0,0060254 | 0,037733 |
| SAMD11           | 0,00  | 0,10  | 0,00  | 0,00 | 0,0060298 | 0,03775  |

|               |      |       |       |       |           |          |
|---------------|------|-------|-------|-------|-----------|----------|
| DDX51         | 1,82 | 4,09  | 1,74  | 1,53  | 0,0060368 | 0,03778  |
| PCDHA4        | 0,96 | 1,48  | 1,14  | 1,06  | 0,0060379 | 0,03778  |
| LRRC16A       | 3,40 | 1,17  | 2,50  | 3,08  | 0,0060418 | 0,037793 |
| PPP4R3B       | 4,44 | 3,34  | 4,19  | 2,41  | 0,0060495 | 0,037831 |
| FAH           | 4,26 | 6,06  | 4,65  | 1,89  | 0,0060516 | 0,037831 |
| RP11-722M1.1  | 0,00 | 0,00  | 0,00  | 0,87  | 0,0060529 | 0,037831 |
| RAN           | 8,21 | 7,63  | 7,58  | 6,48  | 0,0060739 | 0,037951 |
| COX11         | 4,14 | 0,80  | 3,07  | 2,88  | 0,006081  | 0,037985 |
| ARL17A        | 3,41 | 4,22  | 3,39  | 3,48  | 0,006087  | 0,038009 |
| YLPM1         | 4,95 | 3,31  | 3,64  | 3,21  | 0,0060899 | 0,038009 |
| RP11-496D24.2 | 0,25 | 0,21  | 0,32  | 0,61  | 0,0060909 | 0,038009 |
| RP11-728F11.4 | 0,45 | 3,04  | 0,73  | 0,65  | 0,0060916 | 0,038009 |
| STARD4        | 2,12 | 1,19  | 2,46  | 1,73  | 0,0060959 | 0,038025 |
| ARID1A        | 5,45 | 4,56  | 4,72  | 3,50  | 0,0061039 | 0,038051 |
| IFT52         | 4,30 | 2,42  | 4,09  | 2,04  | 0,0061051 | 0,038051 |
| UFL1          | 3,99 | 2,71  | 3,25  | 3,11  | 0,0061053 | 0,038051 |
| KIAA1462      | 0,04 | 0,08  | 0,05  | 0,05  | 0,0061126 | 0,038081 |
| RP11-34P13.7  | 1,86 | 2,39  | 1,18  | 2,49  | 0,0061135 | 0,038081 |
| RP11-442N1.2  | 0,19 | 0,82  | 0,20  | 0,53  | 0,0061154 | 0,038082 |
| RP11-626H12.2 | 1,05 | 0,62  | 1,80  | 1,80  | 0,0061278 | 0,038149 |
| COPRS         | 1,37 | 3,27  | 2,39  | 4,44  | 0,0061313 | 0,03816  |
| ATP8B4        | 5,38 | 3,64  | 5,02  | 4,23  | 0,0061495 | 0,038262 |
| RPS29         | 9,74 | 10,57 | 10,32 | 10,84 | 0,0061511 | 0,038262 |
| RP11-705O1.8  | 0,36 | 3,23  | 0,50  | 1,34  | 0,006159  | 0,0383   |
| EREG          | 4,41 | 5,27  | 5,59  | 4,68  | 0,0061682 | 0,038346 |
| RNA5-8SN3     | 3,98 | 5,93  | 4,84  | 6,19  | 0,0061816 | 0,038419 |
| ANKRD12       | 6,02 | 4,81  | 5,62  | 4,61  | 0,0061867 | 0,03844  |
| RNU5E-4P      | 0,86 | 1,77  | 2,87  | 1,68  | 0,0061937 | 0,038473 |
| C11orf88      | 0,04 | 0,10  | 0,00  | 0,21  | 0,0061967 | 0,038481 |
| MAB21L3       | 0,23 | 0,25  | 0,26  | 0,23  | 0,0061989 | 0,038484 |
| ABTB1         | 2,98 | 3,57  | 3,76  | 4,15  | 0,006219  | 0,038586 |
| MRPL39        | 4,57 | 1,02  | 3,46  | 0,60  | 0,0062195 | 0,038586 |
| RP11-259F4.1  | 0,00 | 2,22  | 0,00  | 0,00  | 0,0062207 | 0,038586 |
| CPS1          | 0,05 | 0,29  | 0,12  | 0,26  | 0,0062245 | 0,038599 |
| OPHN1         | 3,55 | 3,26  | 2,74  | 2,05  | 0,006229  | 0,038616 |
| RP11-77P6.2   | 0,04 | 0,12  | 0,00  | 0,43  | 0,0062399 | 0,038666 |
| AC083864.3    | 0,00 | 0,77  | 0,39  | 1,20  | 0,0062405 | 0,038666 |
| RP11-58E21.3  | 3,58 | 3,88  | 3,58  | 3,04  | 0,0062467 | 0,038694 |
| RP11-597D13.9 | 0,34 | 0,00  | 0,34  | 0,25  | 0,0062519 | 0,038715 |
| RP11-262D11.2 | 0,00 | 0,37  | 0,14  | 0,64  | 0,0062799 | NA       |
| UBXN7         | 2,42 | 4,63  | 2,59  | 4,53  | 0,0063006 | 0,039006 |
| MGLL          | 2,50 | 0,25  | 0,85  | 0,32  | 0,0063083 | 0,039043 |
| MAGOH         | 4,95 | 3,12  | 4,95  | 3,75  | 0,006329  | 0,039155 |
| GJC1          | 0,43 | 0,79  | 0,63  | 0,68  | 0,0063299 | 0,039155 |
| LRCH3         | 3,38 | 5,81  | 3,23  | 2,56  | 0,0063457 | 0,039242 |
| DUSP22        | 6,10 | 4,07  | 5,56  | 5,94  | 0,0063581 | 0,039307 |
| RP11-168K9.1  | 0,29 | 1,74  | 0,20  | 0,55  | 0,0063708 | 0,039375 |
| HS3ST2        | 0,00 | 0,83  | 0,03  | 0,06  | 0,0063745 | 0,039387 |
| ST7           | 3,87 | 1,99  | 2,99  | 2,44  | 0,0063788 | 0,039394 |
| CARD9         | 3,93 | 4,06  | 4,80  | 4,58  | 0,0063793 | 0,039394 |
| FAM9B         | 0,16 | 0,63  | 0,46  | 0,63  | 0,0063821 | 0,039401 |
| PTCHD3        | 0,00 | 0,13  | 0,01  | 0,00  | 0,0063856 | 0,039411 |
| ZDHHC7        | 3,80 | 5,11  | 4,00  | 4,21  | 0,0063962 | 0,039466 |
| MOGAT1        | 0,00 | 0,15  | 0,00  | 0,00  | 0,006417  | 0,039583 |
| RAP1B         | 7,71 | 7,43  | 7,11  | 6,48  | 0,0064188 | 0,039583 |



|                |      |      |      |      |           |          |
|----------------|------|------|------|------|-----------|----------|
| NMD3           | 4,99 | 3,68 | 3,75 | 2,53 | 0,006426  | 0,039615 |
| CHD3           | 3,54 | 3,85 | 4,26 | 5,22 | 0,0064276 | 0,039615 |
| C1QBP          | 7,77 | 6,50 | 7,30 | 5,97 | 0,0064482 | 0,039723 |
| AC104534.2     | 0,53 | 1,49 | 1,10 | 1,26 | 0,0064487 | 0,039723 |
| CABP4          | 1,41 | 1,84 | 2,14 | 2,32 | 0,0064551 | 0,039752 |
| WNT10A         | 0,05 | 0,88 | 0,55 | 0,87 | 0,0064647 | 0,0398   |
| C11orf83       | 2,27 | 2,48 | 2,97 | 3,72 | 0,006482  | 0,039891 |
| ANKRD30A       | 0,00 | 3,88 | 0,00 | 1,84 | 0,0064838 | 0,039891 |
| RAD51C         | 5,12 | 5,34 | 3,82 | 3,28 | 0,0064888 | 0,039891 |
| RP11-17L5.4    | 0,00 | 0,00 | 0,00 | 0,48 | 0,0064891 | 0,039891 |
| LINS1          | 3,62 | 2,28 | 2,04 | 2,31 | 0,0064893 | 0,039891 |
| RP4-614O4.5    | 3,10 | 3,94 | 4,17 | 4,55 | 0,0064903 | 0,039891 |
| RNU6-645P      | 3,90 | 7,60 | 6,39 | 6,55 | 0,0065191 | 0,040057 |
| PPM1D          | 3,52 | 1,91 | 2,33 | 2,55 | 0,0065219 | 0,04006  |
| C2orf15        | 0,24 | 0,15 | 0,36 | 1,04 | 0,0065232 | 0,04006  |
| PITPNM3        | 0,05 | 0,07 | 0,05 | 0,07 | 0,0065296 | 0,040089 |
| ZNF697         | 0,00 | 0,03 | 0,09 | 0,02 | 0,006535  | 0,04011  |
| AC003958.2     | 0,06 | 0,19 | 0,06 | 0,27 | 0,0065427 | 0,040138 |
| LA16c-380H5.1  | 0,33 | 0,49 | 0,51 | 0,46 | 0,0065431 | 0,040138 |
| LINC00908      | 1,18 | 3,22 | 1,32 | 2,19 | 0,0065459 | 0,040141 |
| SERF1A         | 0,41 | 0,82 | 0,95 | 1,62 | 0,0065492 | 0,040141 |
| RP5-1070A16.1  | 1,89 | 2,72 | 1,71 | 2,71 | 0,0065506 | 0,040141 |
| NHEJ1          | 2,25 | 0,14 | 2,58 | 0,11 | 0,0065507 | 0,040141 |
| RPS25          | 8,98 | 9,27 | 9,13 | 9,25 | 0,0065574 | 0,040159 |
| ABHD14B        | 3,51 | 5,24 | 4,46 | 4,68 | 0,0065574 | 0,040159 |
| SCNN1A         | 1,00 | 1,92 | 1,33 | 1,91 | 0,0065688 | 0,040218 |
| DENND2A        | 0,28 | 0,52 | 0,43 | 0,46 | 0,0065747 | 0,040243 |
| NHLRC3         | 4,23 | 2,85 | 3,85 | 4,39 | 0,0065784 | 0,040254 |
| RP5-1169K15.1  | 0,27 | 1,15 | 0,42 | 0,95 | 0,0065984 | 0,040354 |
| OR4D1          | 0,12 | 0,10 | 0,14 | 0,26 | 0,0065989 | 0,040354 |
| CDC34          | 1,37 | 3,74 | 2,71 | 2,92 | 0,0066012 | 0,040354 |
| SETD6          | 3,46 | 4,21 | 2,28 | 2,47 | 0,0066019 | 0,040354 |
| DOK6           | 0,04 | 0,05 | 0,04 | 0,04 | 0,0066059 | 0,040368 |
| RN7SL624P      | 0,81 | 0,93 | 1,35 | 1,47 | 0,0066118 | 0,040384 |
| PCOLCE         | 2,01 | 1,52 | 1,99 | 0,07 | 0,0066123 | 0,040384 |
| HSPA9          | 6,34 | 6,08 | 6,65 | 5,20 | 0,0066166 | 0,0404   |
| SPACA3         | 0,00 | 0,00 | 0,00 | 0,93 | 0,0066217 | NA       |
| SCD5           | 2,52 | 3,37 | 2,48 | 3,12 | 0,006634  | 0,040494 |
| KIAA1614       | 0,00 | 0,04 | 0,00 | 0,00 | 0,0066448 | 0,040549 |
| SLC38A1        | 5,66 | 4,71 | 5,21 | 3,11 | 0,0066505 | 0,040573 |
| NANOGNB        | 0,00 | 0,86 | 0,24 | 0,29 | 0,0066619 | 0,040631 |
| FBLN1          | 0,96 | 3,56 | 1,63 | 1,55 | 0,0066655 | 0,040637 |
| IL32           | 2,48 | 5,58 | 1,22 | 5,37 | 0,0066679 | 0,040637 |
| ABHD12B        | 0,28 | 3,04 | 0,27 | 1,09 | 0,0066683 | 0,040637 |
| KCMF1          | 4,20 | 1,51 | 3,19 | 2,79 | 0,0066705 | 0,040639 |
| KIAA1147       | 1,36 | 0,02 | 1,71 | 2,00 | 0,0066787 | 0,040678 |
| SHTN1          | 4,66 | 3,42 | 4,28 | 3,73 | 0,0066807 | 0,040679 |
| RP11-508N22.12 | 0,04 | 0,04 | 0,03 | 0,19 | 0,0066904 | 0,040727 |
| RP11-255C15.3  | 0,29 | 0,10 | 0,71 | 0,45 | 0,0066993 | 0,04077  |
| BAIAP2         | 4,55 | 5,05 | 4,85 | 2,50 | 0,006715  | 0,040854 |
| CIITA          | 7,45 | 6,95 | 7,16 | 5,58 | 0,0067179 | 0,040861 |
| HIST1H2BG      | 2,53 | 0,29 | 0,26 | 0,17 | 0,0067218 | 0,040873 |
| GALR2          | 0,00 | 0,00 | 0,13 | 0,00 | 0,0067259 | 0,040887 |
| SLC41A2        | 5,15 | 4,32 | 3,27 | 0,72 | 0,0067328 | 0,040918 |
| XYLT2          | 1,53 | 1,78 | 2,78 | 1,38 | 0,0067353 | 0,040922 |

|               |       |       |       |       |           |          |
|---------------|-------|-------|-------|-------|-----------|----------|
| ZNF146        | 3,35  | 0,69  | 3,19  | 1,60  | 0,0067494 | 0,040996 |
| NUP54         | 4,89  | 4,11  | 4,52  | 2,81  | 0,0067557 | 0,041023 |
| ZXDA          | 0,00  | 0,00  | 0,00  | 0,00  | 0,0067877 | 0,041206 |
| RPL23A        | 10,68 | 11,25 | 10,78 | 10,78 | 0,0067907 | 0,041213 |
| RP11-22B23.3  | 0,00  | 0,00  | 0,00  | 0,00  | 0,0068025 | 0,041273 |
| ALG2          | 4,86  | 2,21  | 4,26  | 2,75  | 0,0068042 | 0,041273 |
| FAM161B       | 1,12  | 4,22  | 1,70  | 1,30  | 0,0068073 | 0,041277 |
| OTUD5         | 3,60  | 4,07  | 3,17  | 3,78  | 0,0068086 | 0,041277 |
| PSMC1         | 6,76  | 5,06  | 5,59  | 5,00  | 0,0068267 | 0,041376 |
| RP11-640M9.1  | 2,92  | 2,87  | 3,59  | 3,07  | 0,0068467 | 0,04148  |
| ST3GAL2       | 0,83  | 1,09  | 1,07  | 1,57  | 0,0068494 | 0,04148  |
| RP11-96C23.13 | 0,43  | 1,00  | 0,34  | 0,27  | 0,0068496 | 0,04148  |
| ZNF621        | 2,32  | 2,37  | 2,75  | 2,89  | 0,006858  | 0,041508 |
| OR10G3        | 1,51  | 2,36  | 1,66  | 2,22  | 0,0068585 | 0,041508 |
| NPTN-IT1      | 0,75  | 0,06  | 0,87  | 0,00  | 0,0068603 | 0,041508 |
| CCDC151       | 0,00  | 0,06  | 0,08  | 0,82  | 0,0068617 | 0,041508 |
| ZNF791        | 3,96  | 1,85  | 4,04  | 3,88  | 0,0068647 | 0,041515 |
| DYNC1I2       | 4,57  | 1,93  | 5,07  | 5,00  | 0,006869  | 0,041524 |
| RN7SL828P     | 0,00  | 0,00  | 0,88  | 1,97  | 0,0068717 | 0,041524 |
| SAPCD2        | 0,00  | 0,04  | 0,04  | 0,15  | 0,006875  | 0,041524 |
| LAP3          | 7,60  | 6,75  | 6,88  | 6,08  | 0,0068761 | 0,041524 |
| AC006273.4    | 0,33  | 1,19  | 1,16  | 0,48  | 0,0068772 | 0,041524 |
| LINC00476     | 3,48  | 5,15  | 2,83  | 4,53  | 0,0068774 | 0,041524 |
| CD3G          | 2,19  | 5,58  | 0,42  | 1,81  | 0,0068817 | 0,041539 |
| FCRL6         | 1,63  | 0,43  | 0,26  | 0,93  | 0,0068881 | 0,041559 |
| OSCAR         | 3,41  | 2,22  | 4,30  | 3,62  | 0,0068908 | 0,041559 |
| RB1           | 4,79  | 4,22  | 5,01  | 3,35  | 0,0068975 | 0,041559 |
| RP11-553K8.5  | 6,60  | 0,00  | 4,67  | 3,36  | 0,0068976 | 0,041559 |
| BAG2          | 0,41  | 2,10  | 0,21  | 0,05  | 0,0068977 | 0,041559 |
| EFR3A         | 3,52  | 0,65  | 3,91  | 3,22  | 0,0069001 | 0,041559 |
| SLC39A10      | 3,91  | 3,70  | 3,70  | 3,04  | 0,0069025 | 0,041559 |
| MIS12         | 2,90  | 0,26  | 2,37  | 0,69  | 0,0069027 | 0,041559 |
| ACY3          | 0,00  | 0,00  | 0,00  | 0,17  | 0,0069059 | 0,041559 |
| RP11-364P22.2 | 0,99  | 3,43  | 1,51  | 2,64  | 0,006906  | 0,041559 |
| TBC1D20       | 2,36  | 2,10  | 2,17  | 2,54  | 0,0069067 | 0,041559 |
| HDFG          | 3,95  | 4,16  | 4,38  | 4,63  | 0,0069075 | 0,041559 |
| OR4D9         | 0,75  | 1,34  | 0,96  | 1,00  | 0,0069117 | 0,041573 |
| KDM5B         | 2,09  | 0,76  | 2,93  | 2,60  | 0,0069203 | 0,041614 |
| ACSL4         | 4,05  | 2,15  | 4,08  | 2,47  | 0,0069232 | 0,04162  |
| UBE2L3        | 5,90  | 5,08  | 5,31  | 4,87  | 0,0069266 | 0,041629 |
| RRAS          | 0,39  | 2,70  | 1,95  | 4,19  | 0,0069317 | 0,041648 |
| DRAIC         | 0,63  | 1,41  | 0,83  | 0,80  | 0,0069374 | 0,041658 |
| RP13-923O23.7 | 1,17  | 1,71  | 1,46  | 1,88  | 0,0069401 | 0,041658 |
| DLC1          | 0,78  | 0,91  | 0,49  | 0,35  | 0,0069401 | 0,041658 |
| AC005332.1    | 3,26  | 0,97  | 2,78  | 3,86  | 0,0069408 | 0,041658 |
| RFC3          | 1,99  | 0,00  | 1,27  | 0,57  | 0,0069461 | 0,041675 |
| RP6-109B7.3   | 1,28  | 2,38  | 1,68  | 2,28  | 0,0069474 | 0,041675 |
| PRKD2         | 2,25  | 4,32  | 3,71  | 5,26  | 0,0069532 | 0,041698 |
| LAT           | 2,12  | 4,78  | 1,88  | 4,12  | 0,0069578 | 0,041715 |
| MYCL          | 3,89  | 2,96  | 3,76  | 0,85  | 0,0069649 | 0,041746 |
| ALDH3B1       | 3,17  | 1,50  | 3,25  | 3,29  | 0,0069724 | 0,041779 |
| RP11-351O2.1  | 0,00  | 0,00  | 1,03  | 0,00  | 0,0069741 | 0,041779 |
| FAM198B       | 0,38  | 2,29  | 2,23  | 3,44  | 0,0069774 | 0,041787 |
| MUSK          | 0,00  | 0,00  | 0,00  | 1,12  | 0,0069839 | 0,041815 |
| RP11-477J21.7 | 0,30  | 1,67  | 0,33  | 0,45  | 0,0069861 | 0,041817 |

|               |      |      |      |      |           |          |
|---------------|------|------|------|------|-----------|----------|
| LYPLA1        | 6,60 | 6,00 | 5,89 | 5,40 | 0,0069907 | 0,041833 |
| MRPS30        | 4,77 | 1,78 | 3,85 | 2,01 | 0,0069975 | 0,041862 |
| UGDH          | 1,78 | 1,80 | 1,39 | 1,08 | 0,0070104 | 0,041929 |
| RP11-240L7.5  | 0,73 | 1,18 | 0,96 | 1,49 | 0,0070333 | 0,042054 |
| CD1D          | 6,01 | 4,08 | 5,83 | 4,27 | 0,0070428 | 0,0421   |
| SLC35C1       | 1,59 | 4,79 | 1,15 | 0,62 | 0,0070504 | 0,042134 |
| RP1-278E11.3  | 0,40 | 0,00 | 0,00 | 0,95 | 0,0070554 | NA       |
| FKBP2         | 5,80 | 5,54 | 6,12 | 6,25 | 0,0070677 | 0,042226 |
| RNF175        | 1,89 | 0,09 | 2,63 | 3,45 | 0,0070756 | 0,042261 |
| C9orf72       | 6,51 | 5,73 | 5,80 | 5,13 | 0,0070774 | 0,042261 |
| RP11-168J19.2 | 0,00 | 0,34 | 0,19 | 0,00 | 0,0070974 | 0,042369 |
| RP11-626G11.1 | 0,54 | 2,21 | 0,77 | 2,35 | 0,0071001 | 0,042373 |
| BRCA1         | 1,20 | 2,97 | 1,45 | 3,40 | 0,0071068 | 0,042402 |
| MS4A1         | 0,00 | 1,11 | 0,07 | 3,09 | 0,0071133 | 0,042426 |
| WAS           | 3,65 | 2,24 | 3,69 | 3,97 | 0,0071146 | 0,042426 |
| CC2D2A        | 1,85 | 1,59 | 3,83 | 2,33 | 0,0071184 | 0,042437 |
| RP11-108H9.1  | 1,18 | 0,00 | 0,64 | 1,14 | 0,0071211 | 0,042442 |
| LZTS1         | 0,02 | 0,09 | 0,01 | 0,06 | 0,0071377 | 0,04253  |
| IL18BP        | 4,69 | 2,85 | 3,23 | 2,19 | 0,0071408 | 0,042537 |
| HECW2         | 1,07 | 0,84 | 0,73 | 3,53 | 0,007151  | 0,042586 |
| NSRP1         | 5,29 | 4,77 | 5,38 | 6,30 | 0,0071615 | 0,042637 |
| ZNF470        | 0,96 | 1,79 | 1,14 | 1,13 | 0,0071655 | 0,04265  |
| NUAK2         | 1,25 | 3,31 | 2,44 | 1,05 | 0,007174  | 0,042689 |
| RMDN2         | 0,38 | 0,34 | 1,29 | 0,55 | 0,0071891 | 0,042724 |
| RP11-293M10.5 | 1,66 | 2,34 | 2,63 | 3,84 | 0,0071891 | 0,042724 |
| ZNF143        | 4,83 | 5,30 | 4,46 | 5,59 | 0,0071895 | 0,042724 |
| LA16c-444G7.2 | 1,77 | 0,00 | 0,00 | 0,00 | 0,0071903 | 0,042724 |
| EPHX4         | 0,26 | 0,17 | 0,21 | 0,28 | 0,0071914 | 0,042724 |
| RP11-151E14.1 | 0,05 | 0,29 | 0,00 | 0,06 | 0,0071914 | 0,042724 |
| SWT1          | 0,48 | 0,00 | 1,23 | 0,10 | 0,0072012 | 0,04277  |
| GALNT6        | 1,66 | 1,80 | 2,84 | 3,13 | 0,0072033 | 0,042772 |
| ZBTB48        | 4,89 | 5,50 | 5,25 | 5,46 | 0,007213  | 0,042818 |
| RP11-388P9.2  | 0,00 | 0,00 | 0,00 | 0,00 | 0,0072206 | 0,042846 |
| HBA2          | 0,70 | 4,33 | 1,73 | 2,43 | 0,0072217 | 0,042846 |
| CTD-2206N4.4  | 0,63 | 2,03 | 0,64 | 0,91 | 0,0072267 | 0,04286  |
| RP11-490O6.2  | 0,20 | 0,38 | 0,64 | 1,64 | 0,007228  | 0,04286  |
| ZNF181        | 1,83 | 0,03 | 0,57 | 0,16 | 0,0072311 | 0,04286  |
| RP11-897M7.3  | 1,91 | 4,19 | 2,71 | 3,47 | 0,0072318 | 0,04286  |
| ADAMTS16      | 0,28 | 1,68 | 0,05 | 0,05 | 0,0072354 | 0,04287  |
| DSCR3         | 4,49 | 1,66 | 3,89 | 3,23 | 0,007245  | 0,042906 |
| AC002511.1    | 0,52 | 0,26 | 0,76 | 1,40 | 0,0072453 | 0,042906 |
| RP11-299H21.1 | 0,02 | 0,34 | 0,00 | 0,34 | 0,0072526 | 0,042938 |
| RP11-174N3.4  | 2,05 | 2,73 | 2,31 | 3,08 | 0,0072562 | 0,042944 |
| MKLN1         | 5,69 | 3,75 | 5,02 | 4,30 | 0,0072577 | 0,042944 |
| MTHFR         | 2,73 | 4,02 | 3,21 | 3,33 | 0,0072595 | 0,042944 |
| RP11-380P13.1 | 0,00 | 0,00 | 0,00 | 1,00 | 0,0072668 | 0,042976 |
| PTPMT1        | 6,14 | 5,55 | 6,17 | 2,24 | 0,00727   | 0,042983 |
| BCL6          | 6,10 | 5,66 | 5,32 | 4,17 | 0,0072754 | 0,043004 |
| OSBP          | 4,08 | 0,95 | 4,18 | 1,99 | 0,0072788 | 0,043013 |
| RILPL1        | 1,62 | 2,00 | 1,75 | 3,01 | 0,0072833 | 0,043025 |
| GRAMD1A       | 3,42 | 3,62 | 3,81 | 4,80 | 0,0072847 | 0,043025 |
| DDHD2         | 3,79 | 3,26 | 2,34 | 1,39 | 0,0072993 | 0,0431   |
| LA16c-358B7.3 | 0,30 | 0,40 | 0,42 | 0,73 | 0,007314  | 0,043175 |
| CCM2          | 4,40 | 5,23 | 5,19 | 4,58 | 0,0073444 | 0,043343 |
| SFT2D1        | 7,10 | 5,86 | 6,83 | 6,03 | 0,0073513 | 0,043372 |

|                |       |       |       |       |           |          |
|----------------|-------|-------|-------|-------|-----------|----------|
| C17orf99       | 0,05  | 0,18  | 0,14  | 0,53  | 0,0073593 | 0,043408 |
| ARPP21         | 0,00  | 0,67  | 0,00  | 0,00  | 0,0073817 | 0,043528 |
| AC093415.4     | 0,42  | 1,88  | 0,79  | 0,00  | 0,0073907 | 0,043565 |
| RP11-296110.6  | 2,55  | 3,17  | 3,60  | 3,43  | 0,0073918 | 0,043565 |
| ARPC3          | 10,27 | 9,31  | 9,72  | 9,14  | 0,0073962 | 0,043579 |
| RALBP1         | 3,15  | 3,11  | 3,59  | 4,11  | 0,0074034 | 0,04361  |
| CRBN           | 5,80  | 2,62  | 5,23  | 5,52  | 0,007413  | 0,043655 |
| RP4-799D16.1   | 0,00  | 2,73  | 0,00  | 0,00  | 0,0074226 | NA       |
| RITA1          | 2,55  | 0,45  | 2,33  | 0,14  | 0,0074374 | 0,043787 |
| MRPL20         | 6,91  | 6,29  | 7,13  | 7,40  | 0,0074516 | 0,043859 |
| EXOSC2         | 3,94  | 1,57  | 3,03  | 2,47  | 0,0074722 | 0,043969 |
| ARHGGEF6       | 4,96  | 4,04  | 4,36  | 3,99  | 0,0074806 | 0,044006 |
| TNFAIP2        | 8,80  | 8,02  | 8,95  | 9,00  | 0,0074988 | 0,044102 |
| MEGF8          | 0,30  | 2,27  | 0,66  | 0,22  | 0,0075014 | 0,044106 |
| TRIM34         | 4,14  | 0,21  | 3,96  | 4,73  | 0,0075047 | 0,044108 |
| CCDC68         | 0,00  | 0,10  | 0,00  | 0,00  | 0,0075058 | 0,044108 |
| CTA-212A2.3    | 1,12  | 1,71  | 1,16  | 1,40  | 0,0075099 | 0,044121 |
| SHANK1         | 0,36  | 2,04  | 0,21  | 1,14  | 0,0075172 | 0,044151 |
| RP11-64P12.3   | 0,36  | 0,70  | 0,44  | 1,47  | 0,0075277 | 0,044201 |
| BAD            | 4,65  | 1,91  | 5,39  | 5,88  | 0,0075379 | 0,04425  |
| DLEC1          | 0,52  | 1,13  | 0,81  | 0,59  | 0,0075451 | 0,04428  |
| ELMSAN1        | 5,20  | 3,67  | 4,37  | 3,94  | 0,0075518 | 0,044308 |
| SGO2           | 0,64  | 1,80  | 0,79  | 1,46  | 0,0075672 | 0,044376 |
| CRIP3          | 5,32  | 2,29  | 4,87  | 3,28  | 0,0075673 | 0,044376 |
| ATP10B         | 0,44  | 2,38  | 0,49  | 0,80  | 0,0075701 | 0,04438  |
| RBFox3         | 0,27  | 0,34  | 0,45  | 0,50  | 0,0075743 | 0,044393 |
| RP11-11N9.2    | 2,00  | 0,00  | 0,84  | 0,14  | 0,0075785 | 0,044406 |
| VIM            | 10,05 | 9,43  | 10,22 | 9,22  | 0,0075819 | 0,044415 |
| COMMD6         | 6,48  | 6,63  | 6,76  | 7,01  | 0,0075864 | 0,044424 |
| ZNF793         | 0,61  | 1,80  | 0,49  | 1,11  | 0,0075876 | 0,044424 |
| ONECUT3        | 0,13  | 0,18  | 0,24  | 0,31  | 0,0075949 | 0,044455 |
| RPS23          | 10,13 | 10,50 | 10,28 | 10,12 | 0,0075994 | 0,044463 |
| TMEM57         | 2,37  | 3,21  | 1,72  | 1,51  | 0,0076002 | 0,044463 |
| AC012593.1     | 0,40  | 1,75  | 0,73  | 1,59  | 0,007605  | 0,044479 |
| RN7SL824P      | 2,44  | 1,83  | 1,89  | 0,00  | 0,0076187 | 0,044543 |
| RPL31P11       | 0,00  | 0,09  | 0,00  | 0,00  | 0,00762   | 0,044543 |
| ARL6IP4        | 7,17  | 7,17  | 7,55  | 7,35  | 0,0076221 | 0,044544 |
| RP11-755E23.2  | 0,94  | 2,48  | 1,17  | 2,07  | 0,007631  | 0,044584 |
| TRAPPC6A       | 6,71  | 7,50  | 6,47  | 6,37  | 0,0076366 | 0,044605 |
| RP13-507123.1  | 0,54  | 0,51  | 0,85  | 1,52  | 0,0076498 | 0,044671 |
| PPTC7          | 3,45  | 3,54  | 3,12  | 1,83  | 0,0076587 | 0,044711 |
| TMEM38A        | 0,10  | 0,16  | 0,26  | 0,52  | 0,0076618 | 0,044717 |
| RP11-621L6.2   | 0,81  | 0,51  | 1,40  | 2,04  | 0,0076648 | 0,044723 |
| RP11-299G20.2  | 0,06  | 0,24  | 0,12  | 0,22  | 0,0076752 | 0,044763 |
| AC063980.3     | 0,45  | 1,59  | 0,51  | 0,93  | 0,0076767 | 0,044763 |
| CEP126         | 0,17  | 0,07  | 0,39  | 1,60  | 0,0076777 | 0,044763 |
| MIR1537        | 0,00  | 0,00  | 1,30  | 0,00  | 0,0076885 | 0,044814 |
| RP13-122B23.13 | 1,26  | 3,99  | 2,43  | 2,70  | 0,0076921 | 0,044814 |
| GABBR1         | 4,18  | 4,55  | 4,46  | 4,94  | 0,0076924 | 0,044814 |
| VWC2           | 0,01  | 0,09  | 0,03  | 0,01  | 0,0076967 | 0,044827 |
| CTD-2303H24.2  | 3,07  | 4,25  | 3,46  | 4,99  | 0,0077039 | 0,044857 |
| RP11-557H15.2  | 0,06  | 0,20  | 0,21  | 0,48  | 0,0077266 | 0,044978 |
| CTD-253611.1   | 0,17  | 0,18  | 0,16  | 0,29  | 0,0077289 | 0,044979 |
| CTB-189B5.3    | 0,00  | 0,24  | 0,19  | 0,32  | 0,0077332 | 0,044979 |
| RASAL1         | 0,05  | 0,30  | 0,09  | 0,24  | 0,0077335 | 0,044979 |

|                  |      |      |      |      |           |          |
|------------------|------|------|------|------|-----------|----------|
| KIAA0125         | 0,01 | 4,72 | 0,02 | 1,53 | 0,007735  | 0,044979 |
| AC074289.1       | 3,06 | 3,87 | 3,09 | 5,09 | 0,0077382 | 0,044982 |
| TIMM8B           | 5,05 | 5,04 | 5,02 | 5,59 | 0,0077395 | 0,044982 |
| TEX2             | 0,88 | 0,43 | 1,62 | 0,77 | 0,0077524 | 0,045045 |
| RP1-267L14.3     | 0,26 | 2,63 | 0,56 | 0,55 | 0,0077551 | 0,045049 |
| ITPR2            | 3,58 | 4,23 | 3,97 | 4,53 | 0,0077591 | 0,045055 |
| TRAPPC2B         | 3,80 | 1,28 | 3,41 | 0,44 | 0,0077608 | 0,045055 |
| XXbac-BPG55C20.7 | 1,12 | 3,31 | 1,89 | 1,26 | 0,0077622 | 0,045055 |
| RNA5-8S5         | 3,07 | 4,96 | 3,89 | 5,21 | 0,0077684 | 0,045079 |
| TRADD            | 4,50 | 1,83 | 3,87 | 0,93 | 0,0077846 | 0,04515  |
| BAG5             | 3,57 | 0,44 | 3,35 | 4,52 | 0,0077846 | 0,04515  |
| RP11-715J22.2    | 0,45 | 0,65 | 0,47 | 0,86 | 0,0077898 | 0,045168 |
| SGSH             | 3,48 | 4,77 | 4,70 | 5,72 | 0,007801  | 0,045221 |
| RP11-114H20.1    | 0,00 | 0,17 | 0,00 | 0,03 | 0,0078206 | 0,045308 |
| RP11-363G10.2    | 0,00 | 0,17 | 0,00 | 0,03 | 0,0078206 | 0,045308 |
| LLNLR-271C9.1    | 0,00 | 1,36 | 0,00 | 0,00 | 0,0078222 | 0,045308 |
| MDFIC            | 3,26 | 5,03 | 2,81 | 2,62 | 0,0078278 | 0,045325 |
| ASB13            | 2,85 | 3,04 | 3,84 | 4,45 | 0,0078307 | 0,045325 |
| ATP5L            | 8,44 | 8,65 | 8,65 | 8,60 | 0,0078312 | 0,045325 |
| DPYSL5           | 0,08 | 0,12 | 0,12 | 0,29 | 0,0078738 | 0,04556  |
| HIST1H2BJ        | 0,00 | 0,60 | 0,00 | 0,00 | 0,0078789 | 0,045578 |
| P2RY10           | 2,82 | 0,42 | 0,40 | 0,09 | 0,0078861 | 0,045607 |
| AP000254.8       | 2,06 | 0,39 | 2,00 | 0,33 | 0,007895  | 0,045647 |
| CD2BP2           | 3,80 | 0,45 | 3,48 | 2,27 | 0,007904  | 0,045687 |
| ACO11747.7       | 0,00 | 0,00 | 0,52 | 0,48 | 0,0079112 | 0,045717 |
| SPAG11A          | 0,00 | 0,00 | 0,00 | 0,00 | 0,0079154 | 0,045729 |
| ATXN2L           | 3,82 | 4,69 | 4,56 | 5,50 | 0,0079281 | 0,045791 |
| RNA5-8SN4        | 3,07 | 4,96 | 3,89 | 5,21 | 0,007932  | 0,045801 |
| IFT46            | 2,54 | 2,31 | 0,51 | 0,58 | 0,007938  | 0,045817 |
| PLEKHG3          | 0,02 | 3,73 | 0,80 | 1,32 | 0,0079389 | 0,045817 |
| TSHZ1            | 3,01 | 0,89 | 2,40 | 1,87 | 0,0079467 | 0,04585  |
| RASSF2           | 5,17 | 4,96 | 4,74 | 4,00 | 0,0079521 | 0,04587  |
| MMADHC           | 6,66 | 5,60 | 5,41 | 4,32 | 0,0079592 | 0,045898 |
| RP11-520E6.1     | 0,29 | 0,72 | 0,18 | 1,54 | 0,0079696 | 0,045946 |
| UNC45B           | 0,02 | 0,12 | 0,04 | 0,04 | 0,0079736 | 0,045958 |
| NDUFB11          | 6,06 | 6,47 | 6,42 | 6,55 | 0,0079836 | 0,046003 |
| RP11-941F15.1    | 1,82 | 0,84 | 1,68 | 2,03 | 0,0080025 | 0,046101 |
| SF3B2            | 5,78 | 6,17 | 6,33 | 5,96 | 0,008008  | 0,04612  |
| C3orf66          | 0,23 | 0,07 | 0,33 | 0,59 | 0,0080286 | 0,046204 |
| CTC-205M6.3      | 2,83 | 5,16 | 3,47 | 3,89 | 0,0080289 | 0,046204 |
| RP11-700J17.1    | 0,00 | 0,00 | 0,00 | 0,00 | 0,0080295 | 0,046204 |
| KRT8             | 1,72 | 2,20 | 1,73 | 2,89 | 0,0080309 | 0,046204 |
| ZNF541           | 0,00 | 2,69 | 0,00 | 0,00 | 0,0080421 | 0,046257 |
| GOLGA8B          | 4,61 | 3,14 | 3,34 | 3,01 | 0,0080459 | 0,046261 |
| PARK7            | 8,59 | 7,51 | 8,11 | 7,07 | 0,008047  | 0,046261 |
| SLC48A1          | 1,64 | 0,71 | 2,38 | 3,36 | 0,008057  | 0,046305 |
| MAPK3            | 1,94 | 3,93 | 2,48 | 4,10 | 0,0080608 | 0,046305 |
| ATP10A           | 1,03 | 0,33 | 2,02 | 1,62 | 0,0080609 | 0,046305 |
| POC1A            | 0,00 | 0,00 | 0,00 | 0,00 | 0,0080667 | 0,046326 |
| RP11-1348G14.5   | 0,77 | 2,96 | 1,01 | 1,57 | 0,0080717 | 0,046335 |
| DAAM2            | 0,00 | 0,19 | 0,09 | 0,11 | 0,0080729 | 0,046335 |
| RP11-405M12.2    | 0,43 | 1,39 | 0,65 | 0,52 | 0,0080745 | 0,046335 |
| PECR             | 0,91 | 1,78 | 1,29 | 1,52 | 0,0080941 | 0,046435 |
| RP11-138A9.2     | 4,28 | 3,28 | 3,98 | 2,74 | 0,0080967 | 0,046438 |
| KIAA1191         | 4,08 | 4,36 | 3,67 | 1,53 | 0,0081225 | 0,046574 |

|                   |      |      |      |      |           |          |
|-------------------|------|------|------|------|-----------|----------|
| TAF15             | 4,48 | 1,87 | 2,81 | 2,76 | 0,0081275 | 0,046591 |
| DYNAP             | 0,88 | 1,43 | 1,73 | 0,70 | 0,0081333 | 0,046611 |
| DONSON            | 2,23 | 0,27 | 1,43 | 0,36 | 0,0081351 | 0,046611 |
| CST7              | 6,74 | 6,14 | 5,44 | 4,90 | 0,008138  | 0,046615 |
| DLX6              | 0,09 | 0,18 | 0,15 | 0,15 | 0,0081585 | 0,046709 |
| COX7C             | 7,60 | 7,66 | 7,81 | 8,31 | 0,0081586 | 0,046709 |
| PKHD1             | 0,02 | 1,03 | 0,13 | 0,19 | 0,0081783 | 0,046782 |
| CTB-161M19.4      | 0,67 | 0,67 | 0,71 | 1,66 | 0,0081799 | 0,046782 |
| GBP5              | 3,51 | 3,02 | 0,81 | 4,01 | 0,0081801 | 0,046782 |
| XXbac-BPG116M5.14 | 0,00 | 0,30 | 0,06 | 0,19 | 0,0081818 | 0,046782 |
| XXbac-BPG116M5.16 | 0,00 | 0,30 | 0,06 | 0,19 | 0,0081818 | 0,046782 |
| C15orf52          | 0,12 | 0,06 | 0,40 | 0,20 | 0,0081919 | 0,046816 |
| RP11-701P16.2     | 2,50 | 3,07 | 5,19 | 5,27 | 0,008192  | 0,046816 |
| RP11-426C22.4     | 1,51 | 0,07 | 0,26 | 0,19 | 0,0082082 | 0,046891 |
| TRPM2             | 1,58 | 1,66 | 3,95 | 4,35 | 0,0082107 | 0,046891 |
| RP11-750H9.5      | 4,64 | 1,39 | 2,30 | 0,35 | 0,0082125 | 0,046891 |
| GUCY1B3           | 0,10 | 0,08 | 0,00 | 0,06 | 0,0082153 | 0,046891 |
| PSMA6             | 8,73 | 7,34 | 8,25 | 8,00 | 0,0082156 | 0,046891 |
| RP11-866E20.3     | 1,70 | 0,38 | 1,10 | 1,34 | 0,0082206 | 0,046907 |
| TMEM176A          | 0,24 | 1,42 | 0,27 | 5,25 | 0,0082277 | 0,046936 |
| ZNF641            | 3,46 | 1,54 | 2,61 | 1,85 | 0,008238  | 0,046982 |
| CTA-212A2.4       | 0,39 | 0,96 | 0,64 | 1,24 | 0,0082531 | 0,04704  |
| DNAJC3            | 4,85 | 2,89 | 4,35 | 4,02 | 0,0082545 | 0,04704  |
| USH2A             | 0,00 | 0,01 | 0,00 | 0,01 | 0,0082545 | 0,04704  |
| CTC-265F19.1      | 0,55 | 1,15 | 0,87 | 1,10 | 0,0082598 | 0,047058 |
| RN7SL575P         | 2,05 | 0,00 | 2,88 | 1,79 | 0,0082618 | 0,047058 |
| SEC11C            | 6,19 | 3,90 | 5,87 | 5,48 | 0,0082775 | 0,047123 |
| AVL9              | 3,35 | 3,26 | 3,77 | 2,60 | 0,0082776 | 0,047123 |
| NRP2              | 0,09 | 0,06 | 0,29 | 0,59 | 0,0082802 | 0,047126 |
| TMEM55A           | 5,81 | 1,87 | 4,54 | 1,36 | 0,0082847 | 0,047139 |
| SNORD100          | 7,15 | 0,00 | 1,11 | 0,00 | 0,0082881 | 0,047143 |
| HMG20B            | 4,37 | 5,46 | 4,15 | 5,10 | 0,0082895 | 0,047143 |
| CHMP4B            | 2,63 | 2,74 | 3,16 | 4,33 | 0,0083015 | 0,047199 |
| SLIT2             | 0,00 | 0,92 | 0,00 | 0,00 | 0,0083074 | 0,047214 |
| ADRB3             | 0,20 | 0,56 | 0,19 | 0,32 | 0,0083083 | 0,047214 |
| RP11-351D16.3     | 0,00 | 0,43 | 1,07 | 0,26 | 0,0083244 | 0,047293 |
| RP13-395E19.3     | 2,92 | 0,15 | 2,03 | 0,00 | 0,0083333 | 0,047331 |
| OR8H1             | 0,11 | 0,23 | 0,14 | 0,13 | 0,0083392 | 0,047353 |
| TRIM8             | 4,48 | 4,69 | 4,72 | 4,80 | 0,008347  | 0,047379 |
| SLC4A1            | 0,23 | 0,21 | 0,41 | 0,23 | 0,008348  | 0,047379 |
| CTD-2017F17.2     | 0,00 | 2,82 | 1,17 | 2,18 | 0,0083659 | 0,047468 |
| TRBC1             | 0,76 | 5,72 | 0,64 | 5,54 | 0,0083792 | 0,047509 |
| RP11-184E9.1      | 0,65 | 2,75 | 0,48 | 1,16 | 0,0083793 | 0,047509 |
| RNASE6            | 9,21 | 8,19 | 8,65 | 7,81 | 0,0083795 | 0,047509 |
| ZNF585B           | 1,31 | 1,88 | 0,30 | 0,52 | 0,008384  | 0,047522 |
| CD8A              | 0,05 | 3,04 | 0,11 | 1,85 | 0,0083898 | 0,047532 |
| TMUB1             | 0,85 | 1,79 | 2,15 | 2,97 | 0,00839   | 0,047532 |
| LINC01012         | 0,75 | 1,70 | 1,05 | 1,32 | 0,0083965 | 0,047557 |
| RNF7              | 6,80 | 7,17 | 6,25 | 5,62 | 0,0084197 | 0,047676 |
| SH3PXD2A-AS1      | 0,34 | 1,31 | 0,14 | 0,56 | 0,0084448 | 0,047806 |
| UBXN2B            | 3,18 | 0,64 | 3,23 | 1,41 | 0,0084574 | 0,047865 |
| WDR17             | 0,31 | 0,22 | 0,53 | 0,49 | 0,0084622 | 0,04788  |
| CCDC144A          | 3,02 | 2,14 | 2,64 | 3,90 | 0,0084668 | 0,047894 |
| LY96              | 5,72 | 5,27 | 5,69 | 6,20 | 0,0084769 | 0,047938 |
| CCR6              | 4,16 | 0,31 | 2,67 | 0,25 | 0,0084813 | 0,047951 |

|               |      |      |      |      |           |          |
|---------------|------|------|------|------|-----------|----------|
| OCIAD1        | 6,59 | 5,03 | 6,23 | 5,63 | 0,0084835 | 0,047951 |
| TPM3          | 9,16 | 8,49 | 8,64 | 8,43 | 0,0084962 | 0,048005 |
| PSMD2         | 6,62 | 5,98 | 6,07 | 4,89 | 0,0084973 | 0,048005 |
| RP11-106M3.3  | 0,12 | 0,14 | 1,12 | 0,00 | 0,0085249 | 0,048145 |
| RBM20         | 0,47 | 0,99 | 0,31 | 0,74 | 0,0085264 | 0,048145 |
| ST6GAL2       | 0,15 | 0,37 | 0,18 | 0,14 | 0,0085338 | 0,048175 |
| CTD-2196P11.1 | 0,21 | 0,90 | 0,16 | 0,56 | 0,008549  | 0,048248 |
| DSC3          | 0,00 | 0,00 | 0,05 | 0,03 | 0,0085598 | 0,048297 |
| RP11-102M11.2 | 0,06 | 0,39 | 0,16 | 0,72 | 0,0085636 | 0,048306 |
| AC010226.4    | 0,67 | 0,00 | 0,63 | 0,22 | 0,008598  | 0,048487 |
| RP11-497K21.1 | 0,23 | 0,30 | 0,38 | 0,00 | 0,0086016 | 0,048487 |
| RP11-643A5.3  | 0,00 | 2,49 | 0,00 | 0,00 | 0,0086023 | 0,048487 |
| GPX8          | 0,06 | 0,45 | 0,10 | 0,14 | 0,0086059 | 0,048496 |
| ZCCHC4        | 1,10 | 3,77 | 1,37 | 2,10 | 0,0086127 | 0,048522 |
| HIPK3         | 4,15 | 2,86 | 4,65 | 4,25 | 0,0086287 | 0,048599 |
| FAM84B        | 0,00 | 0,03 | 0,05 | 0,38 | 0,0086399 | 0,04865  |
| SATL1         | 0,59 | 1,20 | 0,57 | 0,35 | 0,0086471 | 0,048678 |
| AC073284.4    | 0,00 | 1,01 | 0,00 | 0,00 | 0,0086748 | 0,048822 |
| CNTNAP2       | 1,66 | 0,78 | 1,77 | 2,89 | 0,0086828 | 0,048844 |
| HS6ST1        | 0,90 | 0,58 | 0,50 | 1,84 | 0,0086832 | 0,048844 |
| FAM43A        | 0,58 | 1,30 | 1,29 | 2,28 | 0,0086898 | 0,048869 |
| AC034187.2    | 1,51 | 1,79 | 1,58 | 1,84 | 0,008703  | 0,048931 |
| LINC01127     | 0,03 | 0,04 | 0,05 | 0,07 | 0,0087231 | 0,049032 |
| CCNE2         | 0,53 | 0,00 | 0,00 | 0,00 | 0,0087267 | 0,04904  |
| WDR46         | 4,14 | 5,34 | 5,71 | 5,25 | 0,0087315 | 0,049054 |
| CTD-2026D20.3 | 3,13 | 4,36 | 2,23 | 1,46 | 0,0087743 | 0,049273 |
| UTP4          | 3,96 | 2,30 | 3,06 | 1,66 | 0,0087749 | 0,049273 |
| SMIM18        | 0,00 | 0,00 | 0,33 | 0,15 | 0,008778  | 0,049278 |
| PPP1R7        | 5,70 | 3,98 | 5,16 | 3,93 | 0,008797  | 0,04937  |
| GLRX3         | 6,82 | 5,55 | 6,10 | 5,84 | 0,0087988 | 0,04937  |
| LINC01597     | 0,00 | 1,58 | 0,00 | 0,03 | 0,0088018 | 0,049374 |
| STK40         | 2,82 | 1,37 | 3,45 | 3,42 | 0,0088056 | 0,049383 |
| TMEM260       | 3,68 | 1,70 | 2,84 | 3,03 | 0,0088354 | 0,049528 |
| RP11-531A24.5 | 0,23 | 1,39 | 0,65 | 0,31 | 0,0088359 | 0,049528 |
| TTC9          | 0,00 | 0,77 | 0,00 | 0,09 | 0,0088505 | 0,049597 |
| ARPC1B        | 9,63 | 9,93 | 9,59 | 9,06 | 0,0088548 | 0,049609 |
| RP11-680C21.1 | 0,12 | 0,00 | 0,19 | 0,34 | 0,0088715 | 0,04969  |
| ZNF551        | 2,20 | 0,47 | 1,63 | 0,39 | 0,0088809 | 0,049722 |
| DDIT4         | 6,66 | 5,67 | 5,48 | 4,18 | 0,0088831 | 0,049722 |
| MYO9A         | 3,79 | 1,47 | 3,40 | 4,37 | 0,0088839 | 0,049722 |
| HP1BP3        | 5,59 | 5,59 | 5,97 | 6,29 | 0,0088863 | 0,049723 |
| HLA-DQB2      | 7,42 | 6,24 | 6,59 | 4,12 | 0,0088944 | 0,049756 |
| AC016747.3    | 2,56 | 2,89 | 2,90 | 3,27 | 0,0089066 | 0,049811 |
| APOBEC3F      | 0,49 | 3,51 | 1,72 | 0,40 | 0,0089136 | 0,049837 |
| ANO7          | 0,05 | 0,07 | 0,00 | 0,06 | 0,0089347 | 0,049914 |
| ARRB1         | 4,20 | 4,07 | 3,45 | 4,33 | 0,0089353 | 0,049914 |
| SLC25A19      | 4,99 | 1,45 | 4,54 | 2,58 | 0,0089354 | 0,049914 |
| HMCN1         | 0,00 | 0,00 | 0,00 | 0,01 | 0,0089362 | 0,049914 |
| MMD           | 2,37 | 0,88 | 2,99 | 2,23 | 0,0089549 | 0,050006 |
| LRRC25        | 5,89 | 3,04 | 5,00 | 4,29 | 0,0089671 | 0,050061 |
| RNF2          | 4,55 | 0,89 | 3,54 | 3,29 | 0,0089816 | 0,05013  |
| RAET1E        | 0,13 | 0,76 | 0,16 | 0,29 | 0,0089864 | 0,050139 |
| RPL32P3       | 2,48 | 2,45 | 3,11 | 3,71 | 0,0089885 | 0,050139 |
| NDUFA1        | 6,96 | 7,13 | 7,15 | 7,81 | 0,00899   | 0,050139 |
| ACSM2B        | 1,51 | 3,51 | 1,47 | 2,18 | 0,0090142 | 0,050256 |

|               |       |      |      |      |           |          |
|---------------|-------|------|------|------|-----------|----------|
| RP11-205M20.3 | 2,20  | 3,13 | 2,72 | 3,41 | 0,0090161 | 0,050256 |
| ATL1          | 1,49  | 1,99 | 1,23 | 2,16 | 0,0090178 | 0,050256 |
| ENTPD7        | 1,37  | 0,00 | 0,54 | 0,25 | 0,0090332 | 0,050329 |
| CTD-2547G23.4 | 0,29  | 0,36 | 0,29 | 1,00 | 0,009037  | 0,050338 |
| CTD-2336O2.1  | 3,03  | 1,36 | 3,74 | 4,19 | 0,0090486 | 0,050389 |
| RP1-111C20.3  | 0,38  | 0,49 | 0,32 | 0,24 | 0,0090532 | 0,050403 |
| DAP           | 4,35  | 1,42 | 5,02 | 3,99 | 0,0090559 | 0,050405 |
| AC015818.3    | 0,36  | 0,75 | 0,76 | 0,19 | 0,0090662 | 0,05045  |
| RP4-669P10.18 | 2,27  | 3,08 | 3,61 | 3,03 | 0,0090973 | 0,0506   |
| GPR174        | 0,11  | 1,37 | 0,09 | 0,40 | 0,0090978 | 0,0506   |
| AC005863.1    | 0,17  | 0,95 | 0,21 | 0,08 | 0,009101  | 0,050605 |
| CTD-2647L4.4  | 3,56  | 0,00 | 1,94 | 0,00 | 0,0091055 | 0,050618 |
| AC124944.3    | 0,25  | 0,36 | 0,38 | 0,62 | 0,0091079 | 0,050619 |
| MSR1          | 2,77  | 2,72 | 3,52 | 3,47 | 0,0091258 | 0,050705 |
| MAP3K7CL      | 1,32  | 3,74 | 1,33 | 3,96 | 0,0091324 | 0,050729 |
| CTD-2245F17.3 | 0,74  | 3,55 | 0,71 | 1,08 | 0,009137  | 0,050735 |
| TAGLN2        | 9,26  | 8,48 | 9,09 | 8,24 | 0,0091441 | 0,050735 |
| RP11-989E6.10 | 0,29  | 2,15 | 1,63 | 1,27 | 0,0091444 | 0,050735 |
| RP11-20I23.7  | 2,80  | 4,57 | 2,90 | 3,95 | 0,0091448 | 0,050735 |
| SCAPER        | 4,04  | 2,53 | 3,58 | 3,56 | 0,0091467 | 0,050735 |
| LRFN1         | 0,15  | 0,08 | 0,14 | 0,29 | 0,0091471 | 0,050735 |
| TPMT          | 4,48  | 4,03 | 3,83 | 1,62 | 0,009152  | 0,050749 |
| CD1B          | 1,58  | 4,89 | 0,66 | 0,13 | 0,0091625 | 0,050795 |
| CTA-342B11.2  | 0,00  | 0,00 | 0,00 | 1,79 | 0,0091757 | 0,050843 |
| ARMT1         | 3,37  | 0,25 | 2,94 | 3,41 | 0,0091758 | 0,050843 |
| CYB5R4        | 4,65  | 3,33 | 4,29 | 2,45 | 0,0091932 | 0,050927 |
| RP11-331G2.6  | 0,44  | 1,02 | 0,73 | 0,70 | 0,0092019 | 0,050963 |
| ATF3          | 3,57  | 5,09 | 4,84 | 3,74 | 0,0092061 | 0,050965 |
| ATG7          | 5,18  | 6,39 | 5,34 | 5,95 | 0,009207  | 0,050965 |
| RASL10B       | 1,24  | 2,63 | 2,39 | 1,36 | 0,0092094 | 0,050966 |
| ANXA1         | 10,34 | 9,35 | 9,76 | 8,96 | 0,0092219 | 0,051023 |
| TMEM213       | 0,36  | 1,42 | 0,41 | 0,54 | 0,0092255 | 0,05103  |
| H2AFX         | 1,69  | 3,14 | 2,72 | 0,61 | 0,0092413 | 0,051099 |
| PRNCR1        | 0,52  | 0,80 | 0,56 | 0,76 | 0,0092427 | 0,051099 |
| MPV17L        | 1,93  | 1,71 | 2,32 | 2,24 | 0,0092477 | 0,051114 |
| KCNH3         | 0,00  | 0,00 | 0,00 | 0,06 | 0,0092666 | 0,051198 |
| CTB-36O1.5    | 0,46  | 1,20 | 0,91 | 1,76 | 0,0092675 | 0,051198 |
| OR2G6         | 0,69  | 1,49 | 0,58 | 0,42 | 0,009273  | 0,051209 |
| TDRD10        | 0,00  | 2,75 | 0,00 | 0,00 | 0,0092746 | 0,051209 |
| RP11-744K17.1 | 0,00  | 0,35 | 0,10 | 0,09 | 0,0092805 | 0,051209 |
| SHROOM4       | 0,02  | 0,39 | 0,19 | 1,07 | 0,0092808 | 0,051209 |
| OR5M2P        | 0,34  | 0,83 | 0,29 | 0,34 | 0,009281  | 0,051209 |
| RP11-383C5.3  | 0,45  | 0,77 | 0,79 | 1,42 | 0,009286  | 0,051224 |
| ERC2-IT1      | 0,10  | 0,19 | 0,26 | 0,51 | 0,0092887 | 0,051226 |
| CD6           | 2,24  | 1,21 | 2,58 | 3,20 | 0,0092937 | 0,051241 |
| C20orf194     | 2,04  | 2,13 | 3,11 | 2,96 | 0,0092994 | 0,05126  |
| RNU4-38P      | 5,07  | 0,00 | 0,75 | 0,00 | 0,009305  | 0,051278 |
| FXYD6         | 0,00  | 0,00 | 0,40 | 3,31 | 0,0093128 | 0,051308 |
| PSMC4         | 6,83  | 6,71 | 6,17 | 4,96 | 0,0093341 | 0,051413 |
| RP11-81A1.4   | 0,15  | 0,61 | 0,26 | 0,30 | 0,0093493 | 0,051484 |
| CTD-2135D7.4  | 0,00  | 0,19 | 0,00 | 1,00 | 0,0093674 | 0,051571 |
| RP1-168L15.5  | 0,53  | 0,50 | 1,59 | 0,96 | 0,0093731 | 0,051589 |
| PPAN          | 0,89  | 1,12 | 1,34 | 2,39 | 0,0093863 | 0,051647 |
| TYRO3         | 0,82  | 1,49 | 0,98 | 0,86 | 0,0093903 | 0,051647 |
| AKAP8L        | 3,43  | 0,39 | 3,78 | 2,59 | 0,0093929 | 0,051647 |



|               |      |      |      |      |           |          |
|---------------|------|------|------|------|-----------|----------|
| LRRC27        | 2,73 | 5,91 | 2,41 | 2,25 | 0,009393  | 0,051647 |
| DNASE1        | 1,21 | 1,92 | 1,41 | 1,79 | 0,0094122 | 0,05174  |
| RP11-356C4.4  | 0,83 | 1,07 | 1,14 | 1,59 | 0,0094148 | 0,051742 |
| SIRT7         | 3,46 | 3,44 | 3,85 | 4,65 | 0,0094205 | 0,05176  |
| ERAP2         | 5,04 | 5,08 | 3,73 | 4,59 | 0,0094258 | 0,051777 |
| SZT2          | 4,77 | 5,37 | 4,47 | 4,99 | 0,0094327 | 0,05179  |
| VSTM4         | 0,44 | 0,60 | 0,63 | 0,89 | 0,0094329 | 0,05179  |
| LARP1         | 3,99 | 1,78 | 3,53 | 3,18 | 0,0094409 | 0,051816 |
| NPC2          | 8,10 | 7,27 | 8,32 | 8,47 | 0,0094423 | 0,051816 |
| CA11          | 1,34 | 3,31 | 2,11 | 2,94 | 0,0094484 | 0,051837 |
| RP11-345J4.6  | 0,00 | 0,00 | 0,00 | 4,62 | 0,0094564 | 0,051868 |
| RP11-71L14.3  | 0,00 | 0,00 | 0,00 | 0,07 | 0,0094651 | 0,051903 |
| RP11-296E23.2 | 2,86 | 4,83 | 3,81 | 2,98 | 0,0094716 | 0,051926 |
| LILRA4        | 2,37 | 1,43 | 0,55 | 0,61 | 0,0094779 | 0,05194  |
| S100Z         | 3,60 | 0,69 | 3,59 | 4,52 | 0,0094789 | 0,05194  |
| SIGLEC6       | 3,04 | 0,00 | 0,00 | 0,00 | 0,0095086 | 0,05209  |
| RTFDC1        | 6,98 | 5,10 | 6,00 | 5,08 | 0,0095122 | 0,052097 |
| RP11-322E11.5 | 0,33 | 1,24 | 0,24 | 0,62 | 0,009516  | 0,052105 |
| CTC-246B18.10 | 0,00 | 4,39 | 2,75 | 1,42 | 0,0095234 | 0,052132 |
| RP11-493L12.2 | 5,76 | 5,99 | 5,79 | 5,28 | 0,0095374 | 0,052196 |
| AP001059.7    | 0,48 | 1,69 | 1,52 | 1,86 | 0,0095585 | 0,052299 |
| ANGEL1        | 2,24 | 0,25 | 0,65 | 0,20 | 0,0095661 | 0,052315 |
| RP5-828H9.3   | 0,00 | 0,58 | 0,16 | 0,30 | 0,0095662 | 0,052315 |
| ASAP1         | 6,77 | 4,43 | 5,64 | 4,99 | 0,0095827 | 0,052393 |
| CTD-2311M21.3 | 0,06 | 0,16 | 0,05 | 0,05 | 0,0095894 | 0,052409 |
| UHMK1         | 4,14 | 4,54 | 3,87 | 2,30 | 0,0095905 | 0,052409 |
| IVD           | 5,01 | 5,46 | 3,95 | 5,39 | 0,009597  | 0,052432 |
| AC005301.9    | 0,71 | 1,90 | 1,29 | 1,40 | 0,0096022 | 0,052448 |
| NUSAP1        | 1,78 | 3,42 | 1,77 | 1,25 | 0,0096123 | 0,052478 |
| SAYSD1        | 3,09 | 2,05 | 2,45 | 0,68 | 0,0096125 | 0,052478 |
| CXorf23       | 1,51 | 0,94 | 1,52 | 2,38 | 0,0096177 | 0,052493 |
| PLCD3         | 0,43 | 1,16 | 0,54 | 0,48 | 0,0096281 | 0,052537 |
| MAGEH1        | 3,24 | 0,10 | 0,38 | 4,83 | 0,0096435 | 0,052608 |
| RF02271       | 3,86 | 6,37 | 3,79 | 2,07 | 0,0096496 | 0,052626 |
| DYRK2         | 2,70 | 0,44 | 2,11 | 1,22 | 0,0096515 | 0,052626 |
| PERM1         | 0,00 | 1,44 | 0,00 | 0,00 | 0,0096661 | 0,052685 |
| PSG3          | 0,00 | 0,00 | 0,00 | 0,00 | 0,009667  | 0,052685 |
| ZNF487        | 3,77 | 1,30 | 4,26 | 2,05 | 0,0096769 | 0,052726 |
| C9orf153      | 0,52 | 0,00 | 0,80 | 0,00 | 0,0096807 | 0,052734 |
| UBE2M         | 3,06 | 1,98 | 3,23 | 3,66 | 0,009685  | 0,052744 |
| CASP6         | 4,46 | 0,67 | 1,87 | 1,64 | 0,0096973 | 0,052798 |
| PIAS1         | 5,28 | 3,52 | 4,66 | 5,49 | 0,0097092 | 0,052838 |
| EMC3          | 6,10 | 3,45 | 5,49 | 4,38 | 0,0097094 | 0,052838 |
| GEM           | 0,90 | 0,13 | 0,81 | 0,00 | 0,0097143 | 0,052852 |
| GANC          | 5,26 | 0,84 | 4,42 | 3,47 | 0,0097248 | 0,052896 |
| SFR1          | 2,38 | 0,00 | 2,00 | 2,95 | 0,0097359 | 0,052944 |
| OSTC          | 7,87 | 7,35 | 7,22 | 6,81 | 0,0097388 | 0,052946 |
| AP001350.4    | 0,23 | 0,28 | 0,50 | 0,00 | 0,0097479 | 0,052983 |
| MIR3159       | 0,04 | 2,34 | 3,59 | 2,61 | 0,0097509 | 0,052986 |
| RNF19A        | 4,83 | 1,77 | 3,78 | 4,88 | 0,0097688 | 0,053051 |
| RP11-261P13.5 | 0,03 | 0,09 | 0,00 | 0,21 | 0,0097713 | 0,053051 |
| CELSR1        | 0,00 | 0,00 | 0,00 | 0,03 | 0,0097715 | 0,053051 |
| ABLIM2        | 0,00 | 0,20 | 0,00 | 0,00 | 0,0097761 | 0,053051 |
| AC022431.3    | 0,56 | 1,71 | 1,07 | 1,38 | 0,0097761 | 0,053051 |
| CTB-51A17.1   | 0,13 | 0,11 | 0,10 | 0,30 | 0,0097772 | 0,053051 |

|                   |      |      |      |      |           |          |
|-------------------|------|------|------|------|-----------|----------|
| PCDHGA1           | 0,00 | 0,00 | 0,07 | 0,00 | 0,0097855 | NA       |
| COX10             | 4,12 | 0,35 | 1,68 | 2,17 | 0,0097874 | 0,053094 |
| RP11-330M2.6      | 0,00 | 0,00 | 0,00 | 0,00 | 0,0097933 | 0,053113 |
| XXbac-BPG254F23.5 | 6,39 | 7,03 | 5,63 | 1,32 | 0,0098002 | 0,053132 |
| RHBDD1            | 3,74 | 1,43 | 1,30 | 1,86 | 0,0098016 | 0,053132 |
| HMG2              | 9,05 | 8,01 | 8,44 | 8,00 | 0,0098093 | 0,053141 |
| RP11-109113.2     | 0,49 | 0,26 | 0,92 | 0,94 | 0,0098102 | 0,053141 |
| UBE4B             | 3,24 | 4,66 | 2,89 | 2,60 | 0,0098105 | 0,053141 |
| LINC00340         | 0,64 | 1,75 | 0,72 | 0,99 | 0,0098157 | 0,053157 |
| TBC1D23           | 4,47 | 2,22 | 3,27 | 2,75 | 0,0098279 | 0,053209 |
| RP4-548D19.5      | 2,25 | 0,68 | 0,00 | 0,00 | 0,0098401 | 0,053263 |
| AC005944.2        | 3,71 | 5,17 | 4,32 | 4,71 | 0,0098525 | 0,053317 |
| ARIH2             | 6,56 | 5,51 | 5,41 | 4,00 | 0,0098651 | 0,053372 |
| CTA-384D8.35      | 4,30 | 0,59 | 3,78 | 2,19 | 0,009871  | 0,053387 |
| FTSJ2             | 5,25 | 2,23 | 3,79 | 2,85 | 0,0098728 | 0,053387 |
| TBC1D24           | 1,81 | 0,73 | 0,52 | 0,72 | 0,0098793 | 0,053387 |
| GTSF1             | 3,56 | 0,25 | 1,87 | 2,30 | 0,0098799 | 0,053387 |
| BIN1              | 4,97 | 5,00 | 3,91 | 3,40 | 0,0098819 | 0,053387 |
| RP11-51J9.5       | 4,45 | 5,25 | 4,82 | 5,50 | 0,0098824 | 0,053387 |
| RP11-705C15.5     | 3,64 | 0,00 | 0,00 | 1,40 | 0,0098911 | 0,053422 |
| PAK6              | 0,63 | 1,70 | 1,14 | 1,21 | 0,0099208 | 0,053569 |
| MAEL              | 0,00 | 0,06 | 0,00 | 0,11 | 0,0099426 | 0,053674 |
| RP11-113D6.10     | 1,85 | 3,74 | 1,68 | 0,81 | 0,0099501 | 0,053701 |
| ATG16L1           | 3,69 | 4,82 | 2,30 | 1,71 | 0,0099613 | 0,053748 |
| KDELC2            | 0,69 | 1,05 | 1,03 | 0,36 | 0,0099653 | 0,053757 |
| SLC15A1           | 0,22 | 0,37 | 0,34 | 0,62 | 0,0099697 | 0,053761 |
| RP11-243A14.1     | 0,32 | 1,33 | 0,18 | 0,27 | 0,009971  | 0,053761 |
| RP11-480D4.3      | 0,21 | 0,00 | 0,24 | 0,90 | 0,0099844 | 0,053821 |
| RP11-551L14.4     | 2,81 | 4,25 | 3,30 | 3,50 | 0,0099996 | 0,05389  |
| RP5-914P20.5      | 0,00 | 0,00 | 1,05 | 0,00 | 0,0100116 | 0,053938 |
| NPL               | 1,01 | 0,56 | 1,09 | 2,10 | 0,0100135 | 0,053938 |
| CTD-2643I7.5      | 0,63 | 1,79 | 0,76 | 1,28 | 0,0100236 | 0,053971 |
| PDCD4             | 6,12 | 6,49 | 5,83 | 4,95 | 0,0100245 | 0,053971 |
| TFCP2L1           | 0,00 | 0,00 | 0,00 | 0,48 | 0,0100365 | 0,05401  |
| STEAP2            | 0,18 | 0,06 | 0,18 | 0,14 | 0,0100366 | 0,05401  |
| STK26             | 3,26 | 1,41 | 2,36 | 2,54 | 0,0100755 | 0,054207 |
| NFKBIZ            | 7,22 | 7,34 | 7,81 | 7,27 | 0,0100881 | 0,054261 |
| CTD-2373H9.3      | 0,14 | 0,28 | 0,30 | 0,50 | 0,010092  | 0,054264 |
| KCNMB2            | 0,00 | 0,23 | 0,00 | 0,00 | 0,0100935 | 0,054264 |
| TMC7              | 0,38 | 0,54 | 0,74 | 1,77 | 0,0100997 | 0,054276 |
| RSPH10B           | 0,34 | 1,28 | 0,55 | 0,38 | 0,0101006 | 0,054276 |
| RP11-346C20.5     | 1,06 | 0,68 | 1,53 | 1,64 | 0,0101034 | 0,054278 |
| RP11-615I2.2      | 0,00 | 0,09 | 0,09 | 0,00 | 0,0101067 | 0,054282 |
| ACLY              | 3,89 | 2,82 | 3,60 | 2,60 | 0,010119  | 0,054334 |
| C14orf156         | 6,28 | 6,37 | 6,75 | 6,60 | 0,0101211 | 0,054334 |
| IRF4              | 4,74 | 4,23 | 3,96 | 2,59 | 0,0101389 | 0,054416 |
| CTD-2537I9.13     | 0,00 | 0,34 | 0,37 | 0,25 | 0,0101531 | 0,054479 |
| AC107982.5        | 0,00 | 0,26 | 0,00 | 0,25 | 0,0101613 | 0,054487 |
| LYSMD2            | 3,81 | 5,69 | 4,85 | 3,82 | 0,0101618 | 0,054487 |
| TRIM61            | 0,07 | 0,09 | 0,17 | 0,00 | 0,0101619 | 0,054487 |
| LIN37             | 3,14 | 0,01 | 0,39 | 3,31 | 0,0101653 | 0,054492 |
| RP11-756H6.1      | 0,38 | 1,94 | 0,45 | 0,78 | 0,0101687 | 0,054497 |
| ZMIZ1             | 4,10 | 5,02 | 4,29 | 3,13 | 0,0101806 | 0,054548 |
| RHBDL2            | 0,20 | 0,64 | 0,43 | 0,55 | 0,0101831 | 0,054548 |
| RP11-405O10.2     | 0,14 | 0,09 | 0,18 | 0,00 | 0,0101855 | 0,054548 |

|               |      |      |      |      |           |          |
|---------------|------|------|------|------|-----------|----------|
| RP13-126P21.1 | 0,92 | 1,80 | 1,28 | 0,43 | 0,0101879 | 0,054548 |
| RAD9A         | 1,95 | 2,98 | 2,31 | 3,73 | 0,0101995 | 0,054597 |
| SCAMP4        | 2,47 | 2,29 | 2,23 | 3,92 | 0,0102067 | 0,054622 |
| HHEX          | 4,42 | 2,04 | 4,37 | 3,35 | 0,010234  | 0,054755 |
| UQCRQ         | 7,36 | 7,77 | 7,79 | 7,91 | 0,0102437 | 0,054793 |
| AFAP1L2       | 0,00 | 0,51 | 0,00 | 0,00 | 0,0102518 | 0,054824 |
| RP11-427P5.3  | 0,00 | 0,00 | 0,00 | 0,00 | 0,0102544 | 0,054824 |
| ECE1          | 0,29 | 0,54 | 0,26 | 0,16 | 0,0102707 | 0,054898 |
| RP11-10A14.5  | 0,51 | 0,00 | 1,39 | 0,93 | 0,0102794 | 0,054931 |
| RHBDF2        | 2,89 | 4,38 | 3,59 | 3,98 | 0,010289  | 0,054966 |
| NSMCE2        | 4,99 | 1,92 | 4,49 | 4,50 | 0,0102932 | 0,054966 |
| MFSD14A       | 3,86 | 4,05 | 3,35 | 1,46 | 0,0102934 | 0,054966 |
| RP11-489M13.4 | 0,24 | 0,96 | 0,53 | 0,20 | 0,0102976 | 0,054967 |
| AGPAT3        | 3,94 | 4,69 | 4,38 | 3,76 | 0,0102984 | 0,054967 |
| ZFP36L2       | 6,07 | 6,19 | 6,41 | 6,43 | 0,0103012 | 0,054969 |
| WNT2B         | 0,80 | 0,30 | 0,33 | 0,44 | 0,0103253 | 0,055073 |
| SAMHD1        | 8,96 | 9,08 | 8,80 | 8,48 | 0,0103258 | 0,055073 |
| DHX37         | 0,87 | 1,12 | 1,20 | 1,70 | 0,0103286 | 0,055075 |
| APBA2         | 0,00 | 0,37 | 0,03 | 0,23 | 0,0103367 | 0,055093 |
| ARIH2OS       | 2,51 | 0,53 | 1,00 | 4,00 | 0,0103369 | 0,055093 |
| ID1           | 4,89 | 5,84 | 5,90 | 6,35 | 0,0103537 | 0,055169 |
| PPA2          | 7,67 | 6,51 | 6,58 | 6,42 | 0,0103794 | 0,055293 |
| COMMD3        | 7,35 | 5,61 | 6,53 | 5,66 | 0,0103924 | 0,055348 |
| CD83          | 7,63 | 6,16 | 7,16 | 5,75 | 0,0103956 | 0,055348 |
| CKB           | 0,44 | 0,00 | 0,53 | 0,00 | 0,0103972 | 0,055348 |
| CTD-3092A11.3 | 0,00 | 0,14 | 0,00 | 0,11 | 0,0104098 | 0,055402 |
| AC007386.2    | 0,28 | 0,18 | 0,25 | 0,23 | 0,0104142 | 0,055412 |
| UPP1          | 5,10 | 6,68 | 6,32 | 6,23 | 0,0104356 | 0,055507 |
| ZNF175        | 1,63 | 0,02 | 0,27 | 2,74 | 0,010437  | 0,055507 |
| GPKOW         | 1,66 | 5,96 | 0,97 | 0,53 | 0,0104396 | 0,055507 |
| IGLON5        | 0,16 | 0,96 | 0,21 | 0,42 | 0,0104475 | 0,055536 |
| FLAD1         | 5,09 | 5,03 | 5,20 | 5,83 | 0,0104615 | 0,055597 |
| CTA-212D2.2   | 0,00 | 0,00 | 0,00 | 0,22 | 0,0104653 | 0,055604 |
| RP11-739B23.1 | 0,31 | 0,63 | 0,09 | 0,13 | 0,0104831 | 0,055685 |
| RP11-846F4.12 | 0,31 | 0,79 | 0,10 | 0,42 | 0,01049   | 0,055704 |
| FGFR1         | 0,99 | 1,43 | 1,33 | 1,85 | 0,0104925 | 0,055704 |
| C1orf43       | 6,97 | 6,42 | 6,12 | 5,58 | 0,0104946 | 0,055704 |
| SNORD104      | 4,09 | 3,51 | 5,09 | 5,95 | 0,0104967 | 0,055704 |
| STOML1        | 0,51 | 2,59 | 0,63 | 0,58 | 0,0105013 | 0,055715 |
| FIS1          | 6,93 | 7,26 | 7,16 | 7,21 | 0,0105045 | 0,055719 |
| RP11-16K12.1  | 0,06 | 0,00 | 0,13 | 0,14 | 0,0105149 | 0,055761 |
| NBR2          | 1,71 | 0,77 | 1,25 | 0,16 | 0,0105276 | 0,055815 |
| PRKCDBP       | 0,16 | 5,04 | 2,78 | 4,42 | 0,0105307 | 0,055818 |
| KCTD13        | 2,03 | 0,11 | 1,58 | 3,01 | 0,0105411 | 0,055856 |
| AC064860.2    | 0,64 | 1,09 | 0,92 | 1,13 | 0,0105443 | 0,055856 |
| CH17-172B3.1  | 1,17 | 0,79 | 1,25 | 2,76 | 0,0105455 | 0,055856 |
| LTB           | 5,23 | 5,83 | 4,62 | 6,48 | 0,0105504 | 0,055858 |
| CAMKMT        | 3,74 | 2,25 | 2,45 | 1,65 | 0,0105518 | 0,055858 |
| TLE3          | 3,89 | 4,22 | 4,56 | 4,61 | 0,0105557 | 0,055858 |
| TMEM91        | 0,70 | 3,14 | 1,95 | 2,21 | 0,0105574 | 0,055858 |
| EFCAB3        | 2,32 | 3,57 | 3,03 | 1,89 | 0,0105583 | 0,055858 |
| DAZAP1        | 2,78 | 3,88 | 3,62 | 3,12 | 0,0105702 | 0,055907 |
| SNAPIN        | 6,28 | 3,98 | 5,08 | 3,43 | 0,0105863 | 0,055979 |
| PPP1R27       | 0,00 | 0,80 | 0,00 | 0,00 | 0,0105929 | 0,056001 |
| RP11-813I20.3 | 0,00 | 0,00 | 0,29 | 1,16 | 0,010609  | 0,05607  |

|                |      |      |      |      |           |          |
|----------------|------|------|------|------|-----------|----------|
| RP11-403A3.2   | 2,55 | 4,09 | 1,29 | 0,00 | 0,010611  | 0,05607  |
| C16orf95       | 0,21 | 0,75 | 0,59 | 0,44 | 0,0106161 | 0,056083 |
| LAYN           | 2,18 | 0,60 | 2,77 | 0,51 | 0,0106274 | 0,056111 |
| KRCC1          | 4,90 | 1,99 | 3,63 | 1,87 | 0,0106282 | 0,056111 |
| AC004112.6     | 0,00 | 0,00 | 0,00 | 0,00 | 0,0106289 | 0,056111 |
| ZKSCAN7        | 0,33 | 0,24 | 0,09 | 0,48 | 0,0106332 | 0,05612  |
| AKAP13         | 7,84 | 7,65 | 7,62 | 6,67 | 0,0106486 | 0,056172 |
| RP11-554D20.2  | 0,17 | 1,28 | 0,22 | 0,00 | 0,0106499 | 0,056172 |
| RP11-77G23.5   | 2,39 | 2,84 | 3,27 | 3,32 | 0,0106507 | 0,056172 |
| CCDC13         | 0,71 | 4,20 | 1,52 | 0,55 | 0,0106634 | 0,056208 |
| TMEM45A        | 2,75 | 3,75 | 2,78 | 2,97 | 0,0106645 | 0,056208 |
| LY6G5B         | 1,38 | 3,17 | 2,37 | 3,25 | 0,0106649 | 0,056208 |
| IMMT           | 5,36 | 3,89 | 4,99 | 4,47 | 0,0106738 | 0,056241 |
| TMEM266        | 0,39 | 1,04 | 1,08 | 1,42 | 0,0106776 | 0,056248 |
| CLEC4D         | 0,00 | 0,00 | 0,57 | 1,63 | 0,0106839 | 0,056268 |
| PLS1           | 0,03 | 0,61 | 0,25 | 0,79 | 0,0106906 | 0,056284 |
| MAN1A2         | 3,93 | 1,82 | 4,13 | 4,16 | 0,010692  | 0,056284 |
| PRRT2          | 0,05 | 0,37 | 0,09 | 0,11 | 0,0107057 | 0,056342 |
| RP11-540O11.7  | 3,91 | 1,88 | 3,85 | 2,13 | 0,0107204 | 0,0564   |
| ZNF554         | 0,35 | 0,74 | 0,57 | 0,73 | 0,0107217 | 0,0564   |
| RP11-303E16.10 | 0,04 | 0,05 | 0,08 | 0,10 | 0,0107328 | 0,056445 |
| RP11-350G8.5   | 0,38 | 0,00 | 0,67 | 0,22 | 0,0107468 | 0,056505 |
| RP11-661A12.7  | 0,00 | 2,24 | 0,35 | 0,27 | 0,0107645 | NA       |
| SEC24A         | 1,93 | 0,14 | 2,08 | 2,21 | 0,0107886 | 0,056706 |
| METTL8         | 3,76 | 5,13 | 2,64 | 1,26 | 0,01079   | 0,056706 |
| ADGRG4         | 0,00 | 0,36 | 0,00 | 0,09 | 0,0108    | 0,056745 |
| PSS2           | 3,70 | 2,68 | 1,71 | 0,83 | 0,0108115 | 0,056792 |
| RP11-562A8.4   | 0,81 | 0,00 | 0,00 | 0,57 | 0,0108235 | 0,056841 |
| STXBP1         | 0,97 | 0,95 | 1,21 | 1,53 | 0,0108293 | 0,056847 |
| RP11-809N15.3  | 0,21 | 0,14 | 0,27 | 0,44 | 0,0108297 | 0,056847 |
| RP11-116D2.1   | 0,08 | 0,00 | 0,00 | 0,08 | 0,0108388 | 0,056881 |
| RP11-151A6.6   | 0,91 | 1,20 | 0,75 | 1,61 | 0,0108455 | 0,056903 |
| MT1F           | 0,00 | 0,00 | 0,00 | 2,31 | 0,0108519 | 0,056923 |
| EED            | 4,83 | 3,03 | 3,12 | 3,47 | 0,010894  | 0,05713  |
| KLHL22         | 2,96 | 3,34 | 2,79 | 0,53 | 0,0109054 | 0,057177 |
| CLCN2          | 0,27 | 0,51 | 0,54 | 0,37 | 0,0109157 | 0,057217 |
| SDAD1          | 4,91 | 4,33 | 4,73 | 2,64 | 0,0109264 | 0,057254 |
| TFR2           | 0,54 | 3,02 | 0,55 | 0,29 | 0,0109295 | 0,057254 |
| RP11-152H18.3  | 0,00 | 0,00 | 0,00 | 0,00 | 0,0109305 | 0,057254 |
| LINC00526      | 0,23 | 0,22 | 0,00 | 0,00 | 0,0109391 | 0,057286 |
| RPL9P32        | 0,00 | 0,00 | 0,00 | 0,35 | 0,0109416 | 0,057286 |
| B3GALT6        | 1,88 | 0,28 | 2,51 | 1,00 | 0,010961  | 0,057373 |
| ADH4           | 0,35 | 0,68 | 0,34 | 1,04 | 0,0109701 | 0,057408 |
| TMED2          | 6,08 | 5,50 | 5,69 | 4,53 | 0,0109758 | 0,057411 |
| STAT6          | 5,52 | 6,17 | 5,80 | 5,44 | 0,0109759 | 0,057411 |
| TRIM26         | 4,26 | 5,03 | 3,34 | 2,58 | 0,0109817 | 0,057425 |
| MARCH9         | 1,69 | 2,59 | 2,45 | 2,66 | 0,0109837 | 0,057425 |
| RP11-542K23.7  | 0,17 | 0,40 | 0,00 | 2,16 | 0,0109983 | 0,057488 |
| MAPK1          | 4,23 | 1,95 | 3,62 | 2,95 | 0,0110159 | 0,057566 |
| AC004448.5     | 0,98 | 2,62 | 0,82 | 0,70 | 0,0110284 | 0,057618 |
| C22orf27       | 1,02 | 0,98 | 0,99 | 1,87 | 0,0110344 | 0,057636 |
| MYCBPAP        | 1,30 | 3,86 | 2,77 | 2,87 | 0,0110423 | 0,057663 |
| UHRF2          | 4,31 | 4,72 | 3,23 | 3,47 | 0,0110508 | 0,057684 |
| ZNF888         | 2,08 | 2,65 | 1,05 | 1,16 | 0,0110515 | 0,057684 |
| KRT42P         | 0,00 | 0,42 | 0,00 | 0,16 | 0,0110548 | 0,057688 |

|                   |      |      |      |      |           |          |
|-------------------|------|------|------|------|-----------|----------|
| AP000609.5        | 0,48 | 1,26 | 0,77 | 2,35 | 0,0110645 | 0,057725 |
| CTC-518P12.6      | 0,00 | 3,37 | 0,43 | 2,75 | 0,011068  | 0,05773  |
| EBPL              | 3,07 | 2,51 | 4,28 | 3,75 | 0,0110945 | 0,057842 |
| RHOT2             | 4,63 | 4,43 | 5,46 | 5,35 | 0,0110947 | 0,057842 |
| CD72              | 5,23 | 1,91 | 3,30 | 1,08 | 0,0111156 | 0,05793  |
| RP11-641D5.1      | 0,00 | 0,00 | 0,00 | 1,87 | 0,0111168 | 0,05793  |
| AC079807.4        | 0,34 | 3,15 | 1,06 | 0,77 | 0,0111233 | 0,05795  |
| B4GALNT2          | 0,94 | 1,64 | 1,26 | 1,72 | 0,0111479 | 0,058064 |
| LRP2              | 0,01 | 0,01 | 0,03 | 0,10 | 0,0111505 | 0,058064 |
| RP11-274B21.14    | 1,72 | 1,48 | 4,08 | 3,50 | 0,0111604 | 0,058102 |
| RP11-465B22.3     | 3,33 | 0,96 | 2,79 | 1,01 | 0,0111696 | 0,058137 |
| C8orf82           | 0,10 | 0,07 | 0,34 | 1,50 | 0,0112057 | 0,05831  |
| DUSP6             | 3,10 | 3,94 | 4,75 | 6,19 | 0,0112082 | 0,05831  |
| RP11-163E9.2      | 0,66 | 0,00 | 0,22 | 1,69 | 0,0112113 | 0,058313 |
| RP11-544I20.2     | 1,14 | 1,45 | 1,62 | 1,18 | 0,0112221 | 0,058355 |
| XXbac-BPG171B11.8 | 0,03 | 0,33 | 0,02 | 0,21 | 0,0112388 | 0,058429 |
| ULK4P3            | 1,34 | 0,62 | 1,68 | 0,00 | 0,0112417 | 0,05843  |
| RN7SL405P         | 4,07 | 4,46 | 5,28 | 4,78 | 0,0112587 | 0,058505 |
| PRDM7             | 0,78 | 2,58 | 1,36 | 1,14 | 0,0112797 | 0,0586   |
| LINC00493         | 6,59 | 6,94 | 6,68 | 6,64 | 0,011283  | 0,058604 |
| NEDD4             | 6,14 | 6,57 | 5,76 | 6,63 | 0,0112862 | 0,058606 |
| RP11-41O4.1       | 0,00 | 3,56 | 0,58 | 1,73 | 0,0112921 | 0,058617 |
| THOP1             | 0,45 | 0,48 | 0,54 | 3,88 | 0,0112935 | 0,058617 |
| RNU2-2P           | 4,70 | 3,92 | 5,01 | 5,51 | 0,0112976 | 0,058625 |
| LA16c-431H6.7     | 0,09 | 0,12 | 0,07 | 0,00 | 0,0113005 | 0,058626 |
| DDB1              | 5,67 | 6,58 | 5,52 | 4,82 | 0,011306  | 0,058641 |
| AGBL1             | 0,02 | 0,04 | 0,03 | 0,05 | 0,0113492 | 0,058851 |
| SIRPD             | 0,00 | 0,00 | 0,49 | 0,20 | 0,0113634 | 0,058911 |
| RP5-882O7.5       | 0,35 | 0,46 | 0,47 | 1,00 | 0,0113727 | 0,058945 |
| RNF5              | 5,34 | 3,70 | 5,43 | 3,65 | 0,0113794 | 0,058966 |
| SIDT1             | 2,89 | 3,70 | 2,91 | 1,82 | 0,0113851 | 0,058982 |
| CYP2D7P1          | 0,00 | 0,00 | 1,18 | 0,69 | 0,0113889 | 0,058988 |
| BDH2              | 2,00 | 0,00 | 0,74 | 0,58 | 0,0114072 | 0,059069 |
| KCNJ5             | 0,33 | 0,36 | 0,37 | 0,57 | 0,0114105 | 0,059072 |
| KIAA0930          | 4,41 | 4,48 | 4,90 | 4,92 | 0,0114198 | 0,059107 |
| AC007038.7        | 1,06 | 1,77 | 0,64 | 1,41 | 0,0114319 | 0,059152 |
| ZNF700            | 3,97 | 0,44 | 2,28 | 1,86 | 0,0114338 | 0,059152 |
| SC5D              | 3,90 | 0,17 | 1,58 | 0,83 | 0,0114451 | 0,059197 |
| ZBTB38            | 3,63 | 4,70 | 4,06 | 2,68 | 0,0114501 | 0,059209 |
| IPO7              | 4,06 | 2,65 | 3,44 | 1,85 | 0,0114564 | 0,059228 |
| GABPB1            | 3,95 | 1,17 | 2,59 | 1,22 | 0,0114631 | 0,059236 |
| SIX3              | 0,19 | 0,37 | 0,23 | 0,52 | 0,0114635 | 0,059236 |
| RP11-53O19.1      | 3,54 | 3,54 | 3,28 | 4,66 | 0,0114711 | 0,059262 |
| ZNF767            | 2,13 | 4,60 | 2,48 | 2,24 | 0,0114745 | 0,059266 |
| KNTC1             | 3,20 | 2,36 | 2,51 | 4,69 | 0,0114932 | 0,059348 |
| ACE               | 0,30 | 0,25 | 0,46 | 0,79 | 0,0115095 | 0,059419 |
| HACD1             | 0,93 | 3,05 | 1,38 | 1,09 | 0,0115197 | 0,059458 |
| RP11-161D15.3     | 0,08 | 0,00 | 0,00 | 0,50 | 0,0115274 | 0,059484 |
| CTA-215D11.5      | 1,19 | 1,89 | 0,78 | 1,03 | 0,0115488 | 0,05958  |
| PNPLA7            | 0,00 | 0,56 | 0,07 | 0,05 | 0,0115818 | 0,059737 |
| SLAMF6            | 0,27 | 1,08 | 0,16 | 0,19 | 0,0115854 | 0,05974  |
| ELAVL4            | 0,06 | 0,00 | 0,00 | 0,00 | 0,0115895 | 0,05974  |
| TIMMS50           | 5,72 | 5,79 | 4,90 | 4,59 | 0,0115905 | 0,05974  |
| RP11-93P10.2      | 1,17 | 1,82 | 0,73 | 2,15 | 0,0115958 | 0,059754 |
| NEB               | 1,03 | 0,92 | 0,84 | 1,37 | 0,0116006 | 0,059764 |

|               |      |      |      |      |           |          |
|---------------|------|------|------|------|-----------|----------|
| CLEC4C        | 1,04 | 0,68 | 0,55 | 0,46 | 0,0116102 | 0,0598   |
| SPINK9        | 1,14 | 1,69 | 1,73 | 1,72 | 0,0116337 | 0,059902 |
| AC084219.4    | 0,00 | 0,00 | 0,00 | 0,00 | 0,0116363 | 0,059902 |
| RBBP8         | 4,36 | 2,26 | 3,18 | 2,32 | 0,0116381 | 0,059902 |
| DUS2          | 4,56 | 4,47 | 2,14 | 4,02 | 0,0116473 | 0,059936 |
| ZMYND10       | 0,00 | 3,47 | 0,05 | 0,05 | 0,0116766 | 0,060072 |
| NWD1          | 0,10 | 0,23 | 0,14 | 0,18 | 0,0116918 | 0,060137 |
| ARGLU1        | 6,25 | 6,04 | 6,24 | 6,43 | 0,0116961 | 0,060144 |
| RP4-620F22.3  | 0,36 | 1,12 | 0,39 | 1,40 | 0,0116987 | 0,060144 |
| CPNE1         | 7,83 | 6,53 | 7,60 | 6,74 | 0,0117074 | 0,060175 |
| DCUN1D2       | 2,27 | 3,93 | 2,46 | 2,76 | 0,0117284 | 0,060268 |
| CTD-2369P2.8  | 0,34 | 2,54 | 1,22 | 1,64 | 0,011731  | 0,060268 |
| IQCK          | 0,84 | 3,78 | 0,96 | 0,74 | 0,0117406 | 0,060304 |
| CHML          | 3,14 | 2,46 | 3,07 | 1,48 | 0,0117475 | 0,060317 |
| TMEM251       | 3,87 | 0,34 | 3,88 | 0,63 | 0,0117487 | 0,060317 |
| CYB5D2        | 3,05 | 0,44 | 0,86 | 0,57 | 0,0117584 | 0,060349 |
| SAP30         | 1,62 | 2,03 | 3,30 | 3,27 | 0,0117602 | 0,060349 |
| WFDC1         | 0,75 | 1,04 | 0,87 | 1,53 | 0,0117758 | 0,060404 |
| SORBS3        | 2,41 | 0,32 | 2,32 | 2,95 | 0,0117764 | 0,060404 |
| SORL1         | 3,72 | 4,43 | 4,36 | 4,58 | 0,0117866 | 0,060442 |
| RP11-258F22.1 | 1,07 | 2,25 | 1,46 | 1,09 | 0,0117945 | 0,060469 |
| ATP6VOC       | 5,21 | 4,80 | 5,27 | 5,35 | 0,0118078 | 0,060523 |
| ZFYVE26       | 2,13 | 1,16 | 1,87 | 2,05 | 0,0118141 | 0,060542 |
| LARS          | 5,56 | 6,41 | 5,47 | 5,50 | 0,0118177 | 0,060546 |
| GSDMD         | 5,62 | 4,44 | 5,86 | 6,21 | 0,0118244 | 0,060566 |
| ADD2          | 0,27 | 0,15 | 0,33 | 0,23 | 0,0118503 | 0,060685 |
| BZW2          | 5,80 | 3,53 | 5,49 | 5,60 | 0,0118533 | 0,060686 |
| AC008985.1    | 0,44 | 0,77 | 0,64 | 1,11 | 0,0118646 | 0,060715 |
| COX6C         | 8,00 | 8,35 | 8,01 | 8,17 | 0,0118658 | 0,060715 |
| MYADML        | 0,06 | 0,07 | 0,10 | 0,23 | 0,0118671 | 0,060715 |
| SCb-64M4.1    | 0,63 | 2,05 | 0,91 | 1,07 | 0,011883  | 0,060782 |
| ZNF425        | 0,35 | 2,25 | 0,57 | 1,60 | 0,011904  | 0,060876 |
| RQCD1         | 5,72 | 3,69 | 4,86 | 4,42 | 0,0119127 | 0,060906 |
| KMO           | 3,54 | 2,44 | 2,17 | 2,98 | 0,0119245 | 0,060953 |
| RP5-902P8.12  | 0,31 | 1,63 | 0,31 | 0,29 | 0,0119738 | 0,061188 |
| C2CD2         | 2,00 | 1,04 | 3,38 | 1,29 | 0,0119761 | 0,061188 |
| C1orf105      | 0,35 | 1,07 | 0,00 | 0,00 | 0,0119851 | 0,06122  |
| CCDC102A      | 0,00 | 0,00 | 0,00 | 0,00 | 0,0119976 | 0,06127  |
| RNU4-2        | 3,37 | 3,15 | 4,42 | 4,51 | 0,0120028 | 0,061282 |
| GPR89A        | 3,90 | 2,88 | 3,51 | 1,81 | 0,0120102 | 0,061306 |
| CAPN1         | 4,98 | 4,66 | 5,56 | 5,51 | 0,0120162 | 0,061323 |
| TNFRSF9       | 0,62 | 1,46 | 1,08 | 1,07 | 0,0120243 | 0,061327 |
| SERPINH1      | 0,39 | 0,39 | 0,46 | 0,93 | 0,0120244 | 0,061327 |
| LGI1          | 0,27 | 0,37 | 0,21 | 0,55 | 0,0120253 | 0,061327 |
| RP11-261C10.3 | 0,07 | 0,04 | 0,03 | 0,46 | 0,0120331 | 0,061352 |
| MPV17         | 7,31 | 5,45 | 6,90 | 5,07 | 0,0120453 | 0,061401 |
| CTD-2545M3.2  | 2,20 | 3,89 | 4,19 | 4,93 | 0,0120541 | 0,061426 |
| CACNB3        | 0,50 | 1,03 | 0,62 | 1,65 | 0,0120557 | 0,061426 |
| KLC4          | 1,59 | 2,03 | 2,83 | 3,17 | 0,0120595 | 0,06143  |
| MRPL48        | 6,09 | 7,34 | 5,16 | 2,31 | 0,012062  | 0,06143  |
| LRRC7         | 1,55 | 1,31 | 0,38 | 0,03 | 0,0120689 | 0,061438 |
| OSBPL11       | 3,75 | 2,39 | 3,18 | 3,14 | 0,0120692 | 0,061438 |
| AP002387.1    | 0,37 | 0,08 | 0,14 | 0,38 | 0,0120752 | 0,061454 |
| SGMS1         | 2,55 | 0,31 | 2,45 | 2,60 | 0,012097  | 0,061544 |
| CCNF          | 1,17 | 1,12 | 1,27 | 1,52 | 0,0120984 | 0,061544 |

|                |      |      |      |      |           |          |
|----------------|------|------|------|------|-----------|----------|
| CTLA4          | 1,02 | 2,12 | 0,21 | 0,00 | 0,0121054 | 0,061566 |
| CA2            | 4,19 | 1,68 | 2,13 | 0,68 | 0,0121157 | 0,0616   |
| RP11-374F3.5   | 0,26 | 0,00 | 0,02 | 0,05 | 0,0121176 | 0,0616   |
| RP1-182O16.1   | 0,00 | 1,11 | 0,58 | 1,44 | 0,0121263 | NA       |
| RP11-588G21.2  | 0,65 | 0,72 | 0,20 | 1,56 | 0,0121315 | 0,061656 |
| RP3-442L6.4    | 1,01 | 1,23 | 1,25 | 1,55 | 0,012147  | 0,061721 |
| DLGAP1         | 1,10 | 3,80 | 1,93 | 4,08 | 0,012151  | 0,061723 |
| KLF3           | 4,84 | 4,39 | 4,88 | 5,31 | 0,0121542 | 0,061723 |
| NPAP1          | 0,62 | 0,83 | 0,68 | 0,94 | 0,0121558 | 0,061723 |
| LSR            | 0,36 | 0,31 | 0,55 | 1,15 | 0,0121646 | 0,061751 |
| FAM225B        | 0,00 | 0,05 | 0,00 | 0,04 | 0,0121667 | 0,061751 |
| ORAI3          | 3,89 | 3,19 | 3,19 | 4,33 | 0,0121761 | 0,061784 |
| ETV3           | 4,94 | 2,58 | 4,34 | 1,96 | 0,0121843 | 0,061811 |
| PCID2          | 5,18 | 1,39 | 3,94 | 3,58 | 0,0121872 | 0,061812 |
| AC074141.3     | 0,18 | 0,26 | 0,20 | 0,24 | 0,0122006 | 0,061866 |
| AC114271.2     | 0,48 | 0,00 | 0,19 | 0,00 | 0,0122106 | 0,061903 |
| ORC6           | 3,11 | 4,05 | 3,54 | 3,54 | 0,0122226 | 0,061949 |
| SWAP70         | 3,49 | 3,90 | 4,06 | 2,91 | 0,0122383 | 0,062014 |
| CDPF1          | 1,99 | 0,00 | 0,31 | 0,18 | 0,0122471 | 0,062039 |
| RP11-566K19.12 | 0,08 | 0,00 | 0,11 | 0,70 | 0,0122488 | 0,062039 |
| CTC-436P18.4   | 1,43 | 3,15 | 1,77 | 2,72 | 0,0122643 | 0,062093 |
| ANKUB1         | 0,31 | 1,07 | 0,43 | 0,40 | 0,0122664 | 0,062093 |
| RP11-1086F11.1 | 0,12 | 2,76 | 0,46 | 0,58 | 0,0122691 | 0,062093 |
| PRKCZ          | 0,00 | 1,20 | 0,18 | 0,00 | 0,0122704 | 0,062093 |
| GPR65          | 4,67 | 4,56 | 3,69 | 3,88 | 0,0122851 | 0,062153 |
| PTTG1IP        | 6,14 | 6,12 | 5,98 | 5,08 | 0,0123141 | 0,062285 |
| PARP15         | 2,89 | 1,55 | 1,40 | 3,09 | 0,0123268 | 0,062311 |
| RP11-3B12.3    | 0,97 | 1,41 | 0,55 | 1,88 | 0,0123275 | 0,062311 |
| HIST2H3A       | 0,00 | 0,34 | 0,00 | 0,00 | 0,0123305 | 0,062311 |
| HIST2H3C       | 0,00 | 0,34 | 0,00 | 0,00 | 0,0123305 | 0,062311 |
| RP11-107E5.4   | 0,10 | 0,58 | 2,46 | 4,87 | 0,0123412 | 0,062351 |
| RP11-810P8.1   | 1,44 | 4,50 | 1,97 | 1,96 | 0,012348  | 0,062372 |
| EVC            | 0,00 | 0,00 | 0,00 | 0,00 | 0,0123556 | 0,062392 |
| THBD           | 2,72 | 2,59 | 0,96 | 0,28 | 0,0123626 | 0,062392 |
| NCEH1          | 0,61 | 0,57 | 1,93 | 1,97 | 0,0123626 | 0,062392 |
| RP11-167N24.3  | 0,00 | 1,20 | 0,00 | 2,38 | 0,0123648 | 0,062392 |
| CTC-304I17.6   | 0,93 | 2,49 | 1,38 | 2,05 | 0,0123662 | 0,062392 |
| TGM2           | 0,80 | 0,91 | 0,91 | 1,01 | 0,0123709 | 0,0624   |
| THSD7A         | 0,01 | 0,35 | 0,00 | 0,00 | 0,0123734 | 0,0624   |
| PPP1CC         | 5,96 | 4,09 | 5,19 | 5,06 | 0,0123886 | 0,062463 |
| RP11-1007O24.2 | 0,34 | 0,64 | 0,64 | 1,12 | 0,0124123 | 0,062568 |
| KSR1           | 1,15 | 0,74 | 1,75 | 2,90 | 0,0124194 | 0,06259  |
| ZCWPW1         | 2,07 | 2,64 | 2,77 | 3,99 | 0,0124286 | 0,062608 |
| SPATA17        | 1,19 | 1,71 | 1,39 | 1,85 | 0,0124287 | 0,062608 |
| AL133249.1     | 0,00 | 1,79 | 0,24 | 0,00 | 0,0124464 | 0,062683 |
| ERC2           | 0,00 | 0,18 | 0,00 | 0,24 | 0,0124492 | 0,062683 |
| RP3-465N24.7   | 0,50 | 1,29 | 0,70 | 0,75 | 0,0124568 | 0,062707 |
| RP11-88E10.4   | 0,36 | 1,72 | 0,39 | 0,40 | 0,0124801 | 0,06281  |
| ACOX3          | 2,01 | 4,39 | 1,14 | 2,39 | 0,0124875 | 0,062833 |
| IQCC           | 0,25 | 0,27 | 0,44 | 0,68 | 0,012494  | 0,062843 |
| RP11-511B23.2  | 0,00 | 0,00 | 0,00 | 0,00 | 0,012495  | 0,062843 |
| RP5-984P4.6    | 0,57 | 0,05 | 0,67 | 0,15 | 0,0125358 | 0,063015 |
| SLC25A37       | 4,30 | 2,62 | 5,27 | 4,56 | 0,0125358 | 0,063015 |
| CCDC12         | 6,67 | 7,39 | 6,74 | 7,15 | 0,012538  | 0,063015 |
| APOLD1         | 0,36 | 1,83 | 0,73 | 2,82 | 0,0125406 | 0,063015 |

|                |      |      |      |      |           |          |
|----------------|------|------|------|------|-----------|----------|
| RP11-724N1.1   | 1,18 | 1,51 | 1,11 | 1,75 | 0,0125499 | 0,063047 |
| AC007250.3     | 0,71 | 0,00 | 0,59 | 0,29 | 0,0125574 | 0,063066 |
| C2orf54        | 0,07 | 0,08 | 0,00 | 0,54 | 0,0125594 | 0,063066 |
| RP11-861A13.5  | 1,74 | 0,00 | 1,28 | 0,00 | 0,0125996 | 0,063254 |
| LINC01132      | 0,00 | 0,33 | 0,00 | 0,00 | 0,0126116 | 0,0633   |
| GNG2           | 5,86 | 5,47 | 5,01 | 4,96 | 0,0126186 | 0,063321 |
| ADARB2         | 0,01 | 0,05 | 0,02 | 0,26 | 0,0126529 | 0,063479 |
| HERC6          | 2,65 | 0,42 | 1,70 | 1,33 | 0,0126719 | 0,06356  |
| RP11-1096D5.1  | 0,21 | 0,96 | 0,26 | 1,01 | 0,0126786 | 0,063573 |
| RP11-499E18.1  | 0,00 | 0,38 | 0,58 | 1,30 | 0,0126803 | 0,063573 |
| NAP1L6         | 0,00 | 0,84 | 0,19 | 0,22 | 0,0126841 | 0,063578 |
| UBXN6          | 3,91 | 5,46 | 4,47 | 5,02 | 0,0126941 | 0,063614 |
| RP4-712E4.4    | 1,82 | 2,69 | 1,88 | 2,81 | 0,0127029 | 0,063644 |
| MRPL49         | 3,91 | 4,23 | 1,63 | 1,26 | 0,0127118 | 0,063674 |
| SDHC           | 4,68 | 1,79 | 4,46 | 3,09 | 0,0127181 | 0,063681 |
| CH507-338C24.1 | 0,12 | 0,03 | 0,27 | 0,06 | 0,012719  | 0,063681 |
| ITPR3          | 0,00 | 0,48 | 0,00 | 0,02 | 0,012726  | 0,063702 |
| SLC22A11       | 0,37 | 2,11 | 0,43 | 0,24 | 0,0127293 | 0,063704 |
| LYN            | 6,51 | 6,28 | 6,15 | 5,32 | 0,0127459 | 0,063773 |
| ANKRD20A2      | 0,58 | 0,00 | 0,02 | 0,00 | 0,0127618 | 0,063838 |
| RP11-3J10.4    | 0,00 | 0,25 | 0,26 | 0,00 | 0,0127697 | 0,063863 |
| AC012368.2     | 0,00 | 0,42 | 0,00 | 0,00 | 0,0127736 | 0,063868 |
| RP11-44N22.3   | 1,00 | 1,47 | 1,09 | 1,77 | 0,012788  | 0,063911 |
| NLRP3          | 5,27 | 5,01 | 6,10 | 4,78 | 0,012788  | 0,063911 |
| RP11-53B2.3    | 0,62 | 0,43 | 1,27 | 0,67 | 0,0127971 | 0,063942 |
| AP3B1          | 5,50 | 5,17 | 4,47 | 2,53 | 0,0128171 | 0,064028 |
| TCF23          | 0,18 | 0,56 | 0,18 | 0,58 | 0,0128234 | 0,064045 |
| CH17-174L20.1  | 0,00 | 0,00 | 0,00 | 0,92 | 0,0128286 | NA       |
| BTBD7          | 3,56 | 2,15 | 3,12 | 3,80 | 0,0128398 | 0,064113 |
| C6orf89        | 2,35 | 2,71 | 3,66 | 2,21 | 0,0128917 | 0,064357 |
| RP11-814P23.1  | 3,44 | 4,04 | 3,10 | 2,92 | 0,0128977 | 0,064373 |
| CTD-2537I9.18  | 0,00 | 0,57 | 0,13 | 0,83 | 0,0129036 | 0,064388 |
| AC011718.2     | 0,05 | 0,00 | 0,00 | 0,15 | 0,0129135 | 0,064403 |
| DTX4           | 1,91 | 0,68 | 2,05 | 0,40 | 0,0129152 | 0,064403 |
| KCNJ2          | 0,03 | 0,05 | 0,04 | 0,39 | 0,0129153 | 0,064403 |
| RP11-810P12.7  | 1,37 | 1,34 | 2,39 | 1,96 | 0,0129277 | 0,06445  |
| PIK3CB         | 4,15 | 5,25 | 4,58 | 3,56 | 0,0129363 | 0,064466 |
| RP4-621N11.2   | 0,00 | 0,00 | 0,00 | 0,19 | 0,0129384 | 0,064466 |
| EPS15          | 4,74 | 6,02 | 4,12 | 3,38 | 0,0129396 | 0,064466 |
| NDUFS1         | 4,51 | 2,57 | 3,72 | 2,98 | 0,0129425 | 0,064466 |
| RP11-345P4.9   | 1,25 | 0,50 | 1,53 | 0,55 | 0,0129544 | 0,064503 |
| USP19          | 2,26 | 4,73 | 2,57 | 3,49 | 0,0129557 | 0,064503 |
| TTC3           | 6,31 | 5,29 | 5,81 | 5,02 | 0,0129698 | 0,064558 |
| RP11-87C7.3    | 0,31 | 0,20 | 0,19 | 0,32 | 0,0129822 | 0,064606 |
| CHD4           | 5,51 | 5,62 | 6,02 | 5,77 | 0,012986  | 0,06461  |
| FAM13C         | 0,00 | 0,63 | 0,00 | 0,15 | 0,0130633 | 0,06498  |
| TSPAN3         | 6,04 | 3,44 | 5,76 | 4,21 | 0,0130664 | 0,064981 |
| CTD-2587H24.14 | 0,07 | 0,33 | 0,24 | 0,54 | 0,0130859 | 0,065063 |
| BCAS4          | 0,95 | 1,15 | 1,16 | 1,15 | 0,0130895 | 0,065067 |
| RP11-102N12.3  | 1,00 | 1,56 | 2,05 | 1,67 | 0,013106  | 0,065134 |
| MSANTD4        | 1,58 | 0,03 | 1,04 | 0,27 | 0,0131257 | 0,065218 |
| KCNK3          | 0,07 | 0,12 | 0,16 | 0,27 | 0,0131657 | 0,065388 |
| FCGR3A         | 0,04 | 0,13 | 0,07 | 2,75 | 0,0131659 | 0,065388 |
| GLIPR1         | 7,45 | 6,85 | 6,82 | 5,16 | 0,01318   | 0,065443 |
| FAHD2CP        | 0,25 | 0,00 | 2,00 | 0,10 | 0,0131887 | 0,065472 |



|               |      |      |      |      |           |          |
|---------------|------|------|------|------|-----------|----------|
| BLOC1S4       | 0,68 | 3,22 | 0,86 | 1,60 | 0,0132213 | 0,065619 |
| ZNF835        | 0,49 | 0,21 | 0,43 | 0,36 | 0,0132359 | 0,065665 |
| PLEKHA7       | 0,03 | 0,04 | 0,04 | 0,52 | 0,0132389 | 0,065665 |
| GLI4          | 0,95 | 0,40 | 2,12 | 1,58 | 0,0132394 | 0,065665 |
| ERCC8         | 3,07 | 0,75 | 2,48 | 0,93 | 0,0132492 | 0,065696 |
| RP11-124M17.1 | 0,00 | 0,42 | 0,00 | 0,99 | 0,0132534 | 0,065696 |
| CSNK1E        | 3,40 | 4,21 | 3,76 | 4,48 | 0,0132545 | 0,065696 |
| CCT2          | 6,58 | 6,35 | 6,48 | 5,52 | 0,013259  | 0,065704 |
| POLA1         | 1,23 | 4,84 | 1,22 | 1,08 | 0,0132643 | 0,065715 |
| FKBP8         | 1,57 | 2,97 | 2,41 | 2,73 | 0,0132781 | 0,065769 |
| RP11-981G7.1  | 0,14 | 1,02 | 0,55 | 0,30 | 0,0132931 | 0,065806 |
| CAPS          | 1,20 | 1,05 | 2,00 | 2,63 | 0,0132937 | 0,065806 |
| TCF7          | 0,18 | 1,81 | 0,32 | 1,28 | 0,0132967 | 0,065806 |
| FGFR1OP       | 3,93 | 1,19 | 3,42 | 1,78 | 0,0132974 | 0,065806 |
| RP11-197L7.3  | 1,23 | 1,51 | 0,69 | 0,51 | 0,0133176 | 0,065891 |
| SIM1          | 0,01 | 0,02 | 0,01 | 0,05 | 0,0133392 | 0,065983 |
| RP11-179F17.5 | 1,54 | 0,31 | 0,00 | 0,35 | 0,0133448 | 0,065988 |
| VPS13A        | 2,51 | 2,07 | 2,42 | 3,87 | 0,0133461 | 0,065988 |
| OR56A4        | 0,34 | 0,90 | 0,30 | 0,22 | 0,0133718 | 0,0661   |
| CYP2C9        | 1,60 | 0,00 | 1,14 | 1,62 | 0,0133776 | 0,0661   |
| MAP7          | 1,09 | 1,91 | 0,53 | 0,12 | 0,0133811 | 0,0661   |
| MX2           | 6,57 | 4,42 | 6,19 | 6,42 | 0,0133824 | 0,0661   |
| PWWP2A        | 4,00 | 1,33 | 4,20 | 3,86 | 0,0133856 | 0,0661   |
| OR5A1         | 0,71 | 1,41 | 0,59 | 1,01 | 0,0133906 | 0,0661   |
| ALOX12P2      | 0,23 | 2,46 | 0,33 | 0,38 | 0,0133906 | 0,0661   |
| SLC35B4       | 4,03 | 3,65 | 1,91 | 3,07 | 0,0133926 | 0,0661   |
| EWSR1         | 6,30 | 5,78 | 5,93 | 4,91 | 0,0134046 | 0,066145 |
| RP11-378I18.9 | 0,43 | 2,84 | 0,37 | 1,25 | 0,0134257 | 0,066234 |
| SAG           | 0,41 | 0,91 | 0,67 | 0,71 | 0,0134339 | 0,06626  |
| ARF4          | 6,89 | 6,99 | 6,50 | 4,54 | 0,0134486 | 0,066318 |
| FIBP          | 6,99 | 6,51 | 6,56 | 5,70 | 0,0134683 | 0,0664   |
| TET3          | 2,34 | 1,69 | 2,74 | 2,31 | 0,0134798 | 0,066443 |
| AC079753.4    | 0,35 | 0,24 | 0,26 | 0,17 | 0,0134956 | 0,066505 |
| CTNNA1        | 5,79 | 6,47 | 5,58 | 4,48 | 0,0135032 | 0,066519 |
| PKHD1L1       | 0,00 | 0,04 | 0,00 | 0,07 | 0,0135044 | 0,066519 |
| STC1          | 0,02 | 0,00 | 0,04 | 0,06 | 0,0135277 | NA       |
| ARHGAP26      | 6,13 | 5,51 | 6,73 | 6,47 | 0,0135335 | 0,066648 |
| TEP1          | 3,73 | 5,82 | 3,57 | 4,12 | 0,0135384 | 0,066657 |
| RP11-874J12.2 | 0,40 | 0,10 | 0,26 | 1,65 | 0,0135423 | 0,066658 |
| RWDD1         | 5,10 | 5,84 | 4,81 | 4,14 | 0,0135446 | 0,066658 |
| CD2           | 5,69 | 5,18 | 4,89 | 4,82 | 0,0135492 | 0,066666 |
| RP11-667K14.3 | 1,66 | 0,00 | 1,54 | 0,00 | 0,0135557 | 0,066683 |
| ZKSCAN3       | 0,62 | 0,67 | 0,33 | 0,61 | 0,0135924 | 0,066842 |
| LINC00550     | 0,93 | 1,97 | 0,53 | 1,83 | 0,0135939 | 0,066842 |
| FPGS          | 3,81 | 4,71 | 4,60 | 4,19 | 0,0136041 | 0,066877 |
| RP11-69E11.8  | 0,26 | 0,00 | 1,49 | 0,00 | 0,0136199 | 0,066926 |
| GGTA1P        | 3,69 | 2,40 | 3,88 | 0,78 | 0,01362   | 0,066926 |
| MC1R          | 0,00 | 0,65 | 0,00 | 0,00 | 0,0136288 | 0,066929 |
| KIDINS220     | 4,03 | 3,24 | 3,90 | 4,45 | 0,0136316 | 0,066929 |
| EOMES         | 0,00 | 1,64 | 0,00 | 2,26 | 0,0136322 | 0,066929 |
| NUP188        | 2,65 | 0,61 | 3,17 | 1,79 | 0,0136328 | 0,066929 |
| HOOK2         | 1,98 | 2,37 | 2,53 | 2,68 | 0,0136399 | 0,066944 |
| GALNT3        | 4,81 | 2,43 | 3,95 | 0,92 | 0,0136418 | 0,066944 |
| FAM173A       | 2,63 | 4,86 | 4,34 | 5,08 | 0,0136461 | 0,06695  |
| NELFCD        | 5,47 | 4,02 | 4,30 | 5,18 | 0,0136504 | 0,066956 |

|               |      |      |      |      |           |          |
|---------------|------|------|------|------|-----------|----------|
| SLCO4A1       | 0,00 | 0,00 | 0,00 | 0,00 | 0,013655  | 0,066959 |
| ZNF852        | 0,68 | 0,00 | 0,05 | 1,19 | 0,013657  | 0,066959 |
| SIN3B         | 2,57 | 3,14 | 2,82 | 1,73 | 0,0136639 | 0,066964 |
| DHX38         | 4,61 | 6,59 | 4,95 | 5,22 | 0,013664  | 0,066964 |
| UBE2S         | 1,96 | 1,92 | 2,83 | 4,16 | 0,0136911 | 0,067078 |
| EPDR1         | 0,00 | 0,00 | 0,00 | 0,00 | 0,0136933 | 0,067078 |
| RCN2          | 4,52 | 3,44 | 4,48 | 0,98 | 0,0137111 | 0,067139 |
| PCGF1         | 4,23 | 0,21 | 3,35 | 2,89 | 0,0137123 | 0,067139 |
| TAS2R64P      | 0,37 | 0,00 | 0,08 | 0,27 | 0,0137148 | 0,067139 |
| CCDC22        | 2,46 | 5,69 | 2,40 | 2,35 | 0,0137188 | 0,067144 |
| BPESC1        | 0,07 | 0,15 | 0,07 | 0,16 | 0,0137403 | 0,067234 |
| KCNJ6         | 0,26 | 0,39 | 0,36 | 0,32 | 0,013748  | 0,067257 |
| GPCPD1        | 5,71 | 4,82 | 5,65 | 5,04 | 0,0137658 | 0,067329 |
| RP11-24N18.1  | 2,84 | 3,42 | 3,83 | 4,08 | 0,0138026 | 0,06747  |
| ZRANB2        | 5,80 | 4,83 | 5,29 | 4,40 | 0,0138031 | 0,06747  |
| CTD-3252C9.4  | 2,42 | 4,86 | 3,91 | 4,67 | 0,0138036 | 0,06747  |
| PTGES2-AS1    | 0,08 | 0,44 | 0,31 | 0,07 | 0,0138099 | 0,067486 |
| ZBED5         | 5,32 | 2,41 | 4,05 | 3,98 | 0,0138296 | 0,067567 |
| KANSL3        | 3,33 | 2,89 | 3,55 | 2,86 | 0,0138485 | 0,067645 |
| CHD6          | 5,26 | 5,56 | 5,86 | 5,57 | 0,0138554 | 0,067658 |
| TTC34         | 0,37 | 0,74 | 0,47 | 0,81 | 0,0138573 | 0,067658 |
| AFF2          | 0,02 | 0,03 | 0,01 | 0,31 | 0,0138603 | 0,067658 |
| RP1-265C24.9  | 1,50 | 2,56 | 2,00 | 2,45 | 0,0138655 | 0,067668 |
| SNHG6         | 5,15 | 5,85 | 5,71 | 5,92 | 0,0138714 | 0,067669 |
| CTD-2651B20.6 | 0,00 | 2,48 | 0,33 | 1,43 | 0,0138732 | 0,067669 |
| CTB-184G21.3  | 1,12 | 1,81 | 1,13 | 1,98 | 0,0138749 | 0,067669 |
| TMEM229B      | 2,43 | 0,86 | 1,87 | 2,68 | 0,0138811 | 0,067679 |
| GALNT15       | 0,04 | 3,20 | 0,10 | 0,01 | 0,0138829 | 0,067679 |
| DNAI2         | 0,02 | 0,00 | 0,00 | 0,00 | 0,0138883 | 0,06769  |
| EPHA2         | 0,00 | 0,43 | 0,01 | 0,00 | 0,0138974 | 0,06772  |
| RP11-40217.2  | 0,00 | 2,02 | 0,00 | 0,00 | 0,0139012 | 0,067723 |
| SEL1L3        | 5,33 | 2,85 | 3,37 | 3,92 | 0,0139406 | 0,067901 |
| RP11-638L3.3  | 0,06 | 0,00 | 0,05 | 0,20 | 0,0139599 | 0,067979 |
| HDAC5         | 3,01 | 3,44 | 3,95 | 3,62 | 0,0139699 | 0,068014 |
| LNX2          | 0,24 | 0,03 | 0,51 | 0,89 | 0,0139832 | 0,068063 |
| GSG1          | 0,50 | 0,49 | 0,63 | 1,10 | 0,0139893 | 0,068064 |
| ZFP37         | 0,03 | 0,22 | 0,09 | 0,19 | 0,0139895 | 0,068064 |
| RP11-296A18.5 | 0,00 | 0,00 | 0,32 | 0,59 | 0,0140156 | 0,068172 |
| FKRP          | 1,70 | 1,77 | 2,77 | 2,76 | 0,0140177 | 0,068172 |
| CTB-114C7.4   | 0,00 | 0,12 | 0,03 | 0,05 | 0,0140259 | 0,068197 |
| SUPT20H       | 4,64 | 3,40 | 4,40 | 2,47 | 0,0140424 | 0,068262 |
| CSNK1G2       | 4,03 | 4,85 | 4,63 | 4,76 | 0,0140622 | 0,068325 |
| CTD-3064M3.7  | 0,00 | 1,77 | 0,00 | 0,00 | 0,0140638 | 0,068325 |
| RP11-426D19.1 | 1,39 | 2,10 | 1,83 | 1,36 | 0,0140646 | 0,068325 |
| APOC4         | 0,00 | 1,04 | 0,00 | 0,00 | 0,0140687 | 0,06833  |
| SMAD5         | 3,32 | 2,10 | 2,34 | 2,73 | 0,0140765 | 0,06835  |
| PDE3A         | 0,05 | 0,11 | 0,04 | 0,15 | 0,0140789 | 0,06835  |
| MED31         | 4,35 | 1,45 | 3,52 | 0,79 | 0,0141071 | 0,068467 |
| CD3EAP        | 0,68 | 0,49 | 0,61 | 1,02 | 0,014111  | 0,068467 |
| RP11-669C19.1 | 0,35 | 1,74 | 0,49 | 1,09 | 0,0141124 | 0,068467 |
| RP11-77P16.4  | 0,23 | 2,60 | 1,20 | 0,61 | 0,0141252 | 0,068501 |
| CCR7          | 0,28 | 1,10 | 0,13 | 0,55 | 0,0141256 | 0,068501 |
| C8orf74       | 0,00 | 0,00 | 0,00 | 0,39 | 0,0141306 | NA       |
| CLNS1A        | 7,67 | 8,14 | 7,32 | 6,23 | 0,0141713 | 0,068708 |
| RP11-296A18.3 | 2,23 | 2,28 | 2,34 | 1,60 | 0,0141744 | 0,068708 |

|               |       |      |      |      |           |          |
|---------------|-------|------|------|------|-----------|----------|
| DNAH17        | 0,86  | 2,28 | 1,36 | 2,24 | 0,0141859 | 0,068749 |
| EEF2K         | 2,00  | 0,31 | 1,36 | 0,85 | 0,0141952 | 0,068779 |
| LAMTOR3       | 6,01  | 4,22 | 4,80 | 3,57 | 0,0142134 | 0,06883  |
| RP11-791G15.1 | 0,07  | 0,57 | 0,33 | 0,09 | 0,0142141 | 0,06883  |
| SEPW1         | 6,86  | 7,42 | 6,85 | 7,30 | 0,0142151 | 0,06883  |
| RP11-141M1.4  | 4,07  | 0,42 | 3,35 | 1,39 | 0,01422   | 0,068839 |
| NOVA1         | 0,10  | 0,17 | 0,16 | 0,29 | 0,0142465 | 0,068952 |
| SMIM14        | 6,20  | 4,39 | 5,30 | 4,95 | 0,0142499 | 0,068953 |
| POLR2C        | 4,55  | 3,29 | 3,02 | 1,31 | 0,0142649 | 0,069011 |
| NPAT          | 3,68  | 5,40 | 3,38 | 4,16 | 0,0142778 | 0,069058 |
| SLC30A3       | 0,16  | 0,95 | 0,16 | 0,23 | 0,0142811 | 0,069059 |
| RP11-186N15.3 | 0,73  | 0,99 | 0,70 | 1,53 | 0,0142954 | 0,069107 |
| BCL11B        | 0,04  | 3,09 | 0,00 | 1,39 | 0,014299  | 0,069107 |
| TMCO1         | 6,29  | 5,73 | 5,92 | 5,13 | 0,0143003 | 0,069107 |
| RP11-5407.11  | 0,00  | 0,46 | 0,82 | 0,51 | 0,0143106 | 0,069142 |
| TRMT61B       | 2,93  | 1,51 | 3,01 | 0,41 | 0,0143184 | 0,069165 |
| RP11-514P8.12 | 3,65  | 4,80 | 3,44 | 2,82 | 0,0143232 | 0,069173 |
| ANKRD39       | 4,40  | 2,83 | 1,80 | 1,14 | 0,0143372 | 0,06922  |
| RALY          | 5,68  | 6,02 | 5,72 | 4,52 | 0,0143391 | 0,06922  |
| RP5-1057J7.8  | 0,36  | 1,42 | 0,41 | 0,34 | 0,0143528 | 0,069242 |
| HTR1D         | 0,10  | 0,31 | 0,24 | 0,24 | 0,0143539 | 0,069242 |
| ASB18         | 0,41  | 0,33 | 0,53 | 0,81 | 0,0143551 | 0,069242 |
| MBTPS1        | 4,26  | 4,41 | 4,98 | 5,40 | 0,0143562 | 0,069242 |
| RGS2          | 10,35 | 9,78 | 9,74 | 8,97 | 0,0143596 | 0,069243 |
| RP5-118517.1  | 0,47  | 3,02 | 0,44 | 0,41 | 0,0143714 | 0,069281 |
| RP11-46107.1  | 0,89  | 2,26 | 0,71 | 1,34 | 0,0143768 | 0,069281 |
| NUP88         | 4,54  | 2,82 | 5,12 | 4,61 | 0,0143772 | 0,069281 |
| TCF7L2        | 0,25  | 0,16 | 0,78 | 3,26 | 0,01438   | 0,069281 |
| CCNG1         | 5,94  | 5,86 | 5,00 | 2,14 | 0,0143937 | 0,069332 |
| HUNK          | 0,21  | 0,42 | 0,29 | 0,34 | 0,0144014 | 0,069354 |
| RP11-554D14.6 | 2,28  | 4,26 | 2,10 | 1,29 | 0,0144103 | 0,069382 |
| LINC00581     | 0,00  | 0,00 | 0,29 | 0,59 | 0,0144341 | 0,069482 |
| ZNF491        | 0,00  | 0,00 | 0,00 | 0,00 | 0,0144413 | 0,069494 |
| RP11-475J5.11 | 0,00  | 0,00 | 0,00 | 0,00 | 0,0144429 | 0,069494 |
| RP1-240K6.5   | 0,00  | 0,00 | 0,00 | 0,50 | 0,0144633 | 0,069564 |
| PAX3          | 0,00  | 1,55 | 0,05 | 0,15 | 0,0144647 | 0,069564 |
| HCAR2         | 0,08  | 2,58 | 1,66 | 4,04 | 0,0144695 | 0,069564 |
| PRICKLE2      | 0,52  | 0,87 | 0,80 | 0,95 | 0,0144699 | 0,069564 |
| LPP           | 4,46  | 2,30 | 5,20 | 2,90 | 0,0144794 | 0,069595 |
| RP11-154H23.3 | 1,16  | 0,11 | 0,38 | 0,61 | 0,0144855 | 0,069609 |
| UBL4A         | 2,48  | 0,17 | 1,13 | 0,24 | 0,0144946 | 0,069637 |
| TBC1D15       | 4,98  | 3,09 | 4,14 | 3,55 | 0,0145084 | 0,069649 |
| NME9          | 0,12  | 0,14 | 0,48 | 2,27 | 0,0145089 | 0,069649 |
| CYP4F22       | 0,00  | 0,00 | 0,00 | 0,15 | 0,0145093 | 0,069649 |
| SAC3D1        | 0,23  | 1,03 | 0,58 | 2,93 | 0,0145097 | 0,069649 |
| ARHGEF4       | 0,14  | 0,32 | 0,22 | 0,20 | 0,0145197 | 0,069683 |
| AUTS2         | 2,96  | 1,80 | 2,26 | 1,37 | 0,0145474 | 0,0698   |
| RP11-22011.1  | 3,91  | 1,14 | 3,31 | 2,03 | 0,0145606 | 0,069836 |
| AP000936.1    | 4,54  | 5,52 | 5,14 | 2,34 | 0,0145611 | 0,069836 |
| CTD-2510L9.1  | 0,42  | 3,22 | 0,54 | 1,51 | 0,0145671 | 0,06985  |
| RP11-3B7.6    | 0,00  | 0,00 | 0,00 | 0,98 | 0,0145756 | NA       |
| TSPAN5        | 0,07  | 0,26 | 0,06 | 0,49 | 0,014577  | 0,069882 |
| SPTLC1        | 5,38  | 2,34 | 4,52 | 5,12 | 0,0145968 | 0,069962 |
| GPR161        | 0,02  | 0,03 | 0,05 | 0,10 | 0,0146122 | 0,07002  |
| CYB5B         | 5,06  | 3,23 | 4,00 | 3,95 | 0,0146199 | 0,07004  |

|               |      |      |      |      |           |          |
|---------------|------|------|------|------|-----------|----------|
| DCP1A         | 4,42 | 3,45 | 3,50 | 2,22 | 0,0146232 | 0,07004  |
| PCDH15        | 0,15 | 0,78 | 0,12 | 0,10 | 0,0146257 | 0,07004  |
| FAM132B       | 0,19 | 0,24 | 0,32 | 0,62 | 0,0146466 | 0,070125 |
| RP11-2711.2   | 2,92 | 4,28 | 4,16 | 4,78 | 0,0146548 | 0,070149 |
| RP11-294J22.6 | 4,64 | 4,43 | 4,79 | 0,00 | 0,0146631 | 0,070174 |
| IL16          | 6,21 | 5,24 | 5,53 | 4,19 | 0,0146719 | 0,070188 |
| ZHX1          | 3,42 | 1,59 | 3,04 | 4,08 | 0,0146724 | 0,070188 |
| BCL2L2        | 1,53 | 3,51 | 0,91 | 0,21 | 0,0146811 | 0,070215 |
| TMEM210       | 0,19 | 1,00 | 0,38 | 0,81 | 0,0146923 | 0,070249 |
| KLF15         | 0,05 | 0,20 | 0,10 | 0,12 | 0,0146945 | 0,070249 |
| TSFM          | 4,63 | 4,04 | 2,57 | 0,52 | 0,0147204 | 0,070347 |
| OR51E2        | 0,35 | 0,35 | 0,19 | 0,62 | 0,0147217 | 0,070347 |
| RP1-69M21.2   | 0,37 | 1,47 | 0,27 | 0,52 | 0,0147254 | 0,070347 |
| TRIM69        | 3,97 | 1,72 | 3,38 | 1,78 | 0,0147277 | 0,070347 |
| RP11-473C18.6 | 0,00 | 0,00 | 0,00 | 0,51 | 0,0147471 | 0,070411 |
| TRMT13        | 3,97 | 0,71 | 2,53 | 3,60 | 0,0147507 | 0,070411 |
| ZNF224        | 3,65 | 3,29 | 2,79 | 4,18 | 0,0147524 | 0,070411 |
| INIP          | 4,51 | 5,02 | 3,40 | 4,16 | 0,0147539 | 0,070411 |
| MKNK2         | 4,11 | 4,41 | 4,95 | 4,28 | 0,0147648 | 0,070448 |
| RP11-927P21.2 | 0,60 | 0,35 | 1,35 | 1,85 | 0,0147883 | 0,070545 |
| RP11-190A12.7 | 0,02 | 0,07 | 0,02 | 0,01 | 0,0148054 | 0,070599 |
| SMURF2        | 4,07 | 3,24 | 3,32 | 1,69 | 0,0148059 | 0,070599 |
| RP11-592N21.1 | 0,34 | 1,30 | 0,73 | 0,39 | 0,0148103 | 0,070605 |
| CTD-2183H9.4  | 0,00 | 0,14 | 0,00 | 0,00 | 0,0148196 | NA       |
| MAP4K1        | 6,60 | 6,68 | 6,99 | 6,57 | 0,014823  | 0,07065  |
| KLHDC2        | 5,03 | 4,01 | 2,47 | 2,16 | 0,0148556 | 0,070771 |
| FAM206A       | 4,61 | 2,81 | 3,69 | 1,78 | 0,0148574 | 0,070771 |
| WDFY3-AS2     | 0,00 | 0,00 | 0,00 | 0,00 | 0,0148579 | 0,070771 |
| RNPC3         | 3,98 | 2,90 | 4,05 | 2,91 | 0,0148987 | 0,07095  |
| RP11-287F9.2  | 0,00 | 0,00 | 0,55 | 0,21 | 0,0149488 | 0,071173 |
| MKI67         | 1,67 | 0,16 | 0,49 | 0,03 | 0,0149608 | 0,071201 |
| NAPSB         | 9,86 | 9,63 | 9,58 | 8,94 | 0,014962  | 0,071201 |
| RP11-474B12.1 | 0,00 | 0,00 | 0,00 | 0,00 | 0,0149642 | 0,071201 |
| USP27X        | 0,09 | 0,11 | 0,15 | 0,36 | 0,014974  | 0,071232 |
| UBE2O         | 1,14 | 3,30 | 1,20 | 1,54 | 0,0149938 | 0,071311 |
| IMPG2         | 0,02 | 0,65 | 0,03 | 0,05 | 0,0150143 | 0,071393 |
| AC107081.5    | 1,18 | 1,37 | 1,55 | 0,93 | 0,0150297 | 0,071449 |
| RN7SL460P     | 0,41 | 2,87 | 1,20 | 3,14 | 0,0150325 | 0,071449 |
| RN7SL454P     | 0,00 | 0,00 | 0,00 | 1,11 | 0,0150865 | 0,071663 |
| LPXN          | 7,55 | 5,75 | 6,53 | 6,51 | 0,0150879 | 0,071663 |
| ABCF1         | 4,31 | 3,33 | 4,61 | 4,67 | 0,0150886 | 0,071663 |
| RP11-87G24.2  | 0,09 | 0,09 | 0,21 | 0,32 | 0,0150953 | 0,071663 |
| ACOT7         | 1,81 | 0,37 | 0,82 | 0,63 | 0,0150958 | 0,071663 |
| DHTKD1        | 2,54 | 1,19 | 2,43 | 1,11 | 0,0150967 | 0,071663 |
| SLC16A7       | 4,08 | 2,26 | 3,60 | 2,65 | 0,0151061 | 0,071692 |
| SPTSSA        | 2,67 | 1,25 | 1,29 | 1,71 | 0,0151237 | 0,07176  |
| TMEM8A        | 3,21 | 0,26 | 3,35 | 3,52 | 0,015133  | 0,071789 |
| RP13-371D18.2 | 0,67 | 0,00 | 1,19 | 0,35 | 0,015154  | 0,071873 |
| BCDIN3D       | 1,18 | 1,60 | 1,63 | 1,84 | 0,0151789 | 0,071975 |
| C11orf65      | 0,85 | 0,00 | 0,16 | 0,50 | 0,0151819 | 0,071975 |
| SS18L1        | 1,64 | 0,86 | 2,37 | 2,15 | 0,0151932 | 0,072013 |
| HIST1H2AG     | 0,50 | 0,13 | 0,30 | 0,21 | 0,0152039 | 0,072041 |
| IGHEP2        | 4,63 | 0,46 | 0,56 | 0,77 | 0,0152056 | 0,072041 |
| CD55          | 7,58 | 6,26 | 6,75 | 6,36 | 0,0152116 | 0,072046 |
| RN7SL474P     | 1,08 | 1,86 | 1,22 | 1,89 | 0,0152131 | 0,072046 |

|               |      |      |      |      |           |          |
|---------------|------|------|------|------|-----------|----------|
| RP11-4L24.4   | 0,11 | 0,46 | 0,11 | 2,22 | 0,0152205 | 0,072063 |
| ZNF599        | 0,45 | 0,45 | 0,31 | 0,44 | 0,0152232 | 0,072063 |
| PPP1R35       | 1,91 | 3,87 | 2,95 | 3,10 | 0,0152333 | 0,072095 |
| RGS19         | 6,84 | 5,39 | 6,33 | 5,63 | 0,0152391 | 0,072108 |
| AC006262.5    | 0,95 | 2,68 | 1,17 | 1,93 | 0,0152503 | 0,072145 |
| MCF2L         | 0,29 | 1,18 | 0,23 | 0,26 | 0,0152711 | 0,072228 |
| PDE4B         | 4,75 | 3,82 | 4,64 | 2,46 | 0,0152844 | 0,072276 |
| RIPPLY3       | 0,26 | 0,97 | 0,34 | 0,50 | 0,0153012 | 0,072339 |
| SESTD1        | 4,46 | 0,97 | 3,82 | 4,59 | 0,0153042 | 0,072339 |
| PPP1R42       | 0,00 | 0,51 | 0,00 | 0,48 | 0,0153192 | 0,072375 |
| SNHG3         | 4,91 | 5,22 | 4,12 | 3,81 | 0,0153222 | 0,072375 |
| KLHL29        | 0,34 | 0,00 | 0,10 | 0,00 | 0,0153234 | 0,072375 |
| AURKAPS1      | 0,00 | 0,00 | 0,00 | 0,00 | 0,0153272 | 0,072375 |
| PLBD1         | 6,69 | 4,12 | 6,43 | 5,28 | 0,0153283 | 0,072375 |
| AGK           | 3,57 | 4,47 | 2,18 | 3,67 | 0,0153332 | 0,072383 |
| ZSCAN32       | 0,63 | 3,17 | 0,38 | 2,16 | 0,0153395 | 0,072397 |
| FAM227A       | 0,22 | 0,74 | 0,42 | 0,33 | 0,0153451 | 0,072397 |
| CH17-84K15.2  | 4,71 | 2,88 | 4,86 | 4,84 | 0,0153491 | 0,072397 |
| VASP          | 5,21 | 5,45 | 5,62 | 6,00 | 0,0153492 | 0,072397 |
| RP11-196G11.2 | 1,37 | 2,71 | 2,02 | 1,70 | 0,015358  | 0,072417 |
| RP11-196G11.5 | 3,55 | 0,99 | 3,03 | 2,98 | 0,01536   | 0,072417 |
| VSX1          | 0,00 | 0,07 | 0,00 | 0,12 | 0,0153833 | NA       |
| MAL           | 0,00 | 1,05 | 0,00 | 1,64 | 0,0153873 | 0,072531 |
| RP11-661C3.2  | 0,00 | 0,81 | 1,56 | 0,00 | 0,0154009 | NA       |
| MORC1         | 0,00 | 1,49 | 0,00 | 0,00 | 0,0154493 | 0,072808 |
| BOC           | 0,04 | 0,02 | 0,07 | 0,11 | 0,0154583 | 0,072834 |
| RP11-110I1.6  | 0,36 | 3,33 | 1,56 | 2,18 | 0,0154686 | 0,072868 |
| BRD9          | 3,85 | 4,96 | 4,40 | 5,02 | 0,0154819 | 0,072915 |
| SREBF1        | 1,07 | 4,22 | 1,64 | 2,31 | 0,0155384 | 0,073166 |
| ACIN1         | 3,28 | 3,91 | 4,10 | 4,40 | 0,0155463 | 0,073187 |
| CD86          | 7,65 | 6,95 | 7,10 | 6,65 | 0,0155767 | 0,073315 |
| RP11-338I21.1 | 0,14 | 0,12 | 0,34 | 0,72 | 0,0156    | 0,073409 |
| CEACAM1       | 0,38 | 0,41 | 0,50 | 0,86 | 0,0156089 | 0,073435 |
| GPAM          | 0,50 | 0,04 | 0,60 | 0,22 | 0,015614  | 0,073444 |
| ABCC1         | 2,52 | 2,81 | 2,44 | 2,96 | 0,0156288 | 0,073488 |
| GNS           | 3,97 | 3,19 | 4,21 | 4,86 | 0,0156329 | 0,073488 |
| ELAVL1        | 3,17 | 4,51 | 3,65 | 3,55 | 0,0156396 | 0,073488 |
| TM9SF2        | 6,55 | 5,81 | 5,68 | 5,14 | 0,0156396 | 0,073488 |
| RPH3A         | 0,49 | 0,69 | 0,92 | 1,18 | 0,0156425 | 0,073488 |
| MAP7D1        | 4,53 | 5,30 | 4,96 | 4,93 | 0,0156473 | 0,073488 |
| ZFP1          | 0,04 | 0,81 | 0,10 | 0,10 | 0,015648  | 0,073488 |
| TRAPPC3L      | 2,13 | 2,99 | 1,90 | 3,10 | 0,0156511 | 0,073488 |
| BPIFB1        | 0,06 | 0,28 | 0,25 | 0,29 | 0,0156532 | 0,073488 |
| ANO10         | 3,02 | 0,14 | 2,50 | 1,13 | 0,0156602 | 0,073505 |
| ZNF605        | 2,14 | 0,51 | 1,00 | 0,96 | 0,0156665 | 0,073519 |
| CAMK2D        | 3,56 | 1,85 | 4,09 | 4,69 | 0,0156732 | 0,073534 |
| C15orf48      | 3,33 | 0,73 | 1,90 | 0,00 | 0,0156763 | 0,073534 |
| PIK3C2G       | 0,48 | 0,26 | 0,00 | 0,06 | 0,0156824 | 0,073535 |
| RP11-983P16.4 | 2,49 | 0,49 | 1,88 | 0,64 | 0,0156831 | 0,073535 |
| CH17-264B6.1  | 0,11 | 2,59 | 0,06 | 0,04 | 0,0156879 | 0,073542 |
| MERTK         | 0,00 | 0,00 | 0,00 | 1,12 | 0,0156957 | 0,073563 |
| AC087859.1    | 2,01 | 3,16 | 1,86 | 2,45 | 0,0157095 | 0,073612 |
| ZADH2         | 3,30 | 1,89 | 2,19 | 2,85 | 0,0157128 | 0,073612 |
| SLC10A7       | 2,85 | 0,50 | 1,43 | 0,51 | 0,0157169 | 0,073616 |
| AC017099.3    | 3,96 | 4,67 | 3,43 | 3,45 | 0,0157264 | 0,073645 |

|               |      |      |      |      |           |          |
|---------------|------|------|------|------|-----------|----------|
| GABARAPL2     | 8,04 | 6,78 | 7,35 | 6,81 | 0,0157323 | 0,073654 |
| SRP14         | 8,43 | 7,59 | 8,19 | 7,20 | 0,0157348 | 0,073654 |
| CDH23         | 2,78 | 2,53 | 2,48 | 3,60 | 0,0157679 | 0,073787 |
| NKRF          | 2,49 | 2,05 | 1,95 | 0,17 | 0,0157704 | 0,073787 |
| ZC3H12D       | 1,33 | 2,00 | 1,27 | 1,20 | 0,0157761 | 0,073787 |
| CTD-2647L4.5  | 0,00 | 2,12 | 1,79 | 1,34 | 0,0157819 | 0,073787 |
| ASB15         | 0,00 | 0,05 | 0,00 | 0,03 | 0,0157827 | 0,073787 |
| STT3A         | 4,72 | 1,97 | 4,14 | 4,48 | 0,0157832 | 0,073787 |
| CD302         | 5,27 | 4,61 | 4,91 | 3,93 | 0,0158003 | 0,073851 |
| RP11-33O4.2   | 0,00 | 0,00 | 0,00 | 0,06 | 0,0158063 | 0,073864 |
| RP11-139I14.2 | 0,20 | 0,17 | 0,13 | 0,33 | 0,0158215 | 0,073919 |
| RP3-337H4.8   | 0,43 | 1,43 | 0,54 | 0,85 | 0,0158252 | 0,073921 |
| RP11-30K9.6   | 1,02 | 2,03 | 1,08 | 1,55 | 0,015833  | 0,073942 |
| APOD          | 0,18 | 0,14 | 0,06 | 0,00 | 0,0158606 | 0,074055 |
| PEG13         | 0,00 | 3,94 | 0,00 | 0,00 | 0,0158788 | 0,074125 |
| RHOF          | 4,74 | 3,55 | 3,82 | 1,92 | 0,0158939 | 0,074176 |
| GRASP         | 4,15 | 5,37 | 5,19 | 4,06 | 0,0158965 | 0,074176 |
| MROH2A        | 0,00 | 1,26 | 0,00 | 0,00 | 0,0159027 | 0,074184 |
| RP3-347M6.1   | 0,69 | 0,48 | 1,21 | 0,80 | 0,0159049 | 0,074184 |
| C1QTNF2       | 0,04 | 0,00 | 0,10 | 0,19 | 0,0159086 | 0,074186 |
| CELF2         | 6,28 | 5,45 | 6,08 | 5,38 | 0,0159183 | 0,074215 |
| CLEC17A       | 2,37 | 0,39 | 1,40 | 0,42 | 0,0159246 | 0,074229 |
| RP11-110L15.2 | 0,00 | 0,41 | 0,00 | 0,43 | 0,0159282 | 0,07423  |
| RP11-269F21.1 | 0,84 | 5,23 | 0,92 | 1,74 | 0,0159373 | 0,074257 |
| AMMECR1       | 2,04 | 3,69 | 2,08 | 2,10 | 0,0159662 | 0,074376 |
| ZNF251        | 0,29 | 1,72 | 0,73 | 0,36 | 0,0159818 | 0,074433 |
| RN7SL567P     | 0,00 | 0,00 | 0,76 | 0,00 | 0,0159925 | 0,074467 |
| GLYR1         | 3,67 | 3,61 | 4,40 | 3,70 | 0,0160197 | 0,074579 |
| ITIH5         | 0,43 | 0,75 | 0,58 | 1,15 | 0,0160315 | 0,074606 |
| TSPYL5        | 0,57 | 0,03 | 0,17 | 0,05 | 0,0160323 | 0,074606 |
| MED15         | 4,53 | 4,92 | 5,03 | 5,07 | 0,0160365 | 0,07461  |
| FAM117B       | 3,60 | 0,78 | 2,67 | 1,67 | 0,0160544 | 0,074677 |
| EVI5L         | 0,43 | 0,32 | 0,28 | 0,66 | 0,016068  | 0,074725 |
| GSTO2         | 1,13 | 1,89 | 1,52 | 1,60 | 0,0160976 | 0,074847 |
| RP11-481I13.1 | 0,08 | 0,43 | 0,02 | 0,11 | 0,0161071 | NA       |
| CLN5          | 4,35 | 4,67 | 4,49 | 5,13 | 0,0161117 | 0,074922 |
| ARFGAP1       | 2,90 | 3,48 | 3,81 | 4,22 | 0,0161283 | 0,074958 |
| RP11-305I9.1  | 4,39 | 0,68 | 4,48 | 2,47 | 0,0161324 | 0,074962 |
| EHF           | 2,24 | 0,00 | 0,00 | 0,00 | 0,016146  | 0,075005 |
| CELA3B        | 1,12 | 0,60 | 0,96 | 0,75 | 0,0161483 | 0,075005 |
| GAN           | 1,20 | 0,61 | 0,77 | 0,32 | 0,0161597 | 0,075041 |
| RP11-110I1.11 | 0,64 | 1,18 | 1,15 | 1,46 | 0,016179  | 0,075116 |
| RP11-152D8.1  | 0,00 | 0,12 | 0,31 | 0,42 | 0,0161867 | 0,075136 |
| RP11-15H20.5  | 0,25 | 0,34 | 0,38 | 0,95 | 0,0161966 | 0,075166 |
| RP11-275I4.2  | 1,90 | 3,41 | 2,05 | 3,18 | 0,0162    | 0,075166 |
| HBEGF         | 5,01 | 5,70 | 6,06 | 5,41 | 0,0162045 | 0,075171 |
| RP5-882C2.2   | 2,96 | 2,12 | 1,86 | 2,07 | 0,0162196 | 0,075226 |
| RP11-73M11.2  | 0,28 | 1,23 | 0,53 | 2,59 | 0,0162292 | 0,075254 |
| ENOX1         | 0,08 | 0,14 | 0,07 | 0,13 | 0,0162386 | 0,075282 |
| SUMO2         | 7,72 | 7,17 | 7,46 | 6,98 | 0,0162425 | 0,075285 |
| RP11-417O18.1 | 1,73 | 2,01 | 2,09 | 2,50 | 0,0162533 | 0,075319 |
| RN7SL131P     | 1,60 | 3,08 | 1,76 | 3,14 | 0,0162639 | 0,075352 |
| NAV2          | 0,00 | 0,90 | 0,00 | 1,69 | 0,0162753 | 0,075389 |
| LTBP3         | 1,41 | 2,10 | 2,53 | 0,96 | 0,0162786 | 0,075389 |
| CCPG1         | 4,27 | 3,56 | 4,80 | 5,01 | 0,0162835 | 0,075395 |

|                |      |      |      |      |           |          |
|----------------|------|------|------|------|-----------|----------|
| LRIG2          | 1,55 | 0,97 | 1,99 | 1,77 | 0,0162898 | 0,075395 |
| RP11-133K1.7   | 0,05 | 0,15 | 0,04 | 0,07 | 0,01629   | 0,075395 |
| PCAT1          | 1,09 | 1,15 | 1,84 | 2,98 | 0,0163018 | 0,07542  |
| RP11-13J8.1    | 0,35 | 0,36 | 0,54 | 0,87 | 0,0163027 | 0,07542  |
| CTC-260E6.3    | 0,61 | 2,62 | 0,57 | 0,41 | 0,0163057 | 0,07542  |
| ARMCX5         | 1,96 | 0,24 | 0,52 | 0,80 | 0,0163136 | 0,075441 |
| CTD-2339L15.3  | 0,00 | 0,88 | 0,46 | 0,37 | 0,0163496 | 0,075592 |
| C5orf34        | 0,00 | 1,00 | 0,02 | 0,16 | 0,0163775 | 0,075679 |
| RP11-54G14.1   | 1,64 | 1,60 | 2,25 | 2,34 | 0,0163789 | 0,075679 |
| NXNL2          | 2,61 | 4,80 | 2,90 | 3,61 | 0,0163801 | 0,075679 |
| MTMR11         | 4,05 | 5,76 | 5,34 | 5,38 | 0,0163822 | 0,075679 |
| CNTNAP3B       | 0,22 | 1,60 | 0,23 | 0,95 | 0,0163856 | 0,07568  |
| RP11-621K7.1   | 1,57 | 1,67 | 1,69 | 2,43 | 0,0164036 | 0,075731 |
| CFAP69         | 1,62 | 1,77 | 2,04 | 2,07 | 0,0164036 | 0,075731 |
| NBEAL2         | 0,96 | 0,81 | 2,49 | 3,30 | 0,0164258 | 0,075787 |
| TRIT1          | 5,08 | 2,54 | 4,83 | 2,29 | 0,0164267 | 0,075787 |
| WASHC5         | 4,93 | 0,47 | 4,19 | 4,11 | 0,0164279 | 0,075787 |
| TRIM71         | 0,03 | 0,02 | 0,04 | 0,20 | 0,0164293 | 0,075787 |
| RP11-108M9.4   | 4,17 | 5,09 | 4,53 | 4,79 | 0,0164337 | 0,075791 |
| RP11-383M4.6   | 0,57 | 0,79 | 1,10 | 1,50 | 0,0164443 | 0,075824 |
| CCR4           | 0,33 | 0,37 | 0,29 | 0,55 | 0,01645   | 0,075829 |
| IREB2          | 4,88 | 5,61 | 4,27 | 4,16 | 0,0164521 | 0,075829 |
| FBXO18         | 4,33 | 3,11 | 4,97 | 4,88 | 0,0164565 | 0,075833 |
| ANGEL2         | 4,79 | 1,82 | 4,25 | 3,59 | 0,0164617 | 0,075842 |
| PEAK1          | 1,84 | 3,16 | 2,14 | 1,97 | 0,0164723 | 0,075875 |
| RP11-251G23.5  | 0,23 | 0,25 | 0,56 | 0,87 | 0,0164769 | 0,075881 |
| CTD-2050E21.1  | 0,61 | 1,18 | 0,69 | 1,33 | 0,0164806 | 0,075882 |
| LEKR1          | 6,04 | 3,95 | 5,96 | 6,12 | 0,0164968 | 0,075933 |
| RP11-420L9.4   | 1,05 | 2,46 | 1,45 | 1,83 | 0,0164986 | 0,075933 |
| RP11-705C15.3  | 1,85 | 0,87 | 0,65 | 0,53 | 0,0165147 | 0,075992 |
| OPRK1          | 0,00 | 0,00 | 0,06 | 0,05 | 0,0165216 | 0,076003 |
| KB-1608C10.2   | 0,07 | 1,45 | 0,60 | 0,88 | 0,0165241 | 0,076003 |
| KRTCAP2        | 6,83 | 6,77 | 7,07 | 7,02 | 0,0165509 | 0,076111 |
| MARK2          | 0,91 | 1,52 | 1,81 | 1,49 | 0,0165564 | 0,07612  |
| RP11-832A4.5   | 2,15 | 2,18 | 5,08 | 0,00 | 0,0165631 | 0,076122 |
| RP11-796I2.2   | 3,04 | 0,85 | 2,95 | 3,22 | 0,0165639 | 0,076122 |
| KLRK1          | 1,10 | 6,39 | 1,19 | 3,19 | 0,0165671 | 0,076122 |
| RP11-329B9.1   | 0,10 | 0,40 | 0,19 | 0,24 | 0,016577  | 0,076152 |
| RP5-951N9.1    | 0,00 | 0,00 | 0,00 | 1,20 | 0,0166291 | 0,076376 |
| RGS12          | 2,85 | 2,04 | 2,39 | 4,31 | 0,0166644 | 0,076522 |
| IDS            | 6,35 | 7,16 | 6,58 | 5,77 | 0,0166713 | 0,076538 |
| CTD-3222D19.12 | 0,23 | 0,68 | 0,45 | 0,33 | 0,0167178 | 0,076736 |
| PPFIBP2        | 2,05 | 4,73 | 3,56 | 3,22 | 0,0167378 | 0,076812 |
| TSPAN14        | 3,36 | 1,44 | 2,85 | 4,06 | 0,0167485 | 0,076845 |
| IKBIP          | 2,72 | 3,30 | 3,20 | 2,93 | 0,0167753 | 0,076941 |
| RP11-360L9.8   | 2,95 | 4,43 | 3,61 | 3,24 | 0,0167764 | 0,076941 |
| RP11-116G8.4   | 0,00 | 0,03 | 0,02 | 0,00 | 0,0167794 | NA       |
| PITRM1         | 4,97 | 2,80 | 4,78 | 4,86 | 0,0167827 | 0,076947 |
| VPS8           | 4,62 | 4,64 | 4,53 | 4,43 | 0,0167847 | 0,076947 |
| ENTPD1         | 5,74 | 4,27 | 5,63 | 4,26 | 0,0167989 | 0,076997 |
| RP11-147L13.15 | 1,44 | 0,39 | 1,99 | 1,94 | 0,0168689 | 0,0773   |
| CTC-548K16.6   | 0,41 | 1,45 | 0,95 | 1,07 | 0,0168722 | 0,0773   |
| MNDA           | 7,72 | 7,31 | 7,59 | 8,10 | 0,0168765 | 0,077304 |
| RNU5A-1        | 5,37 | 3,09 | 6,40 | 6,38 | 0,0168903 | 0,077351 |
| LILRA1         | 5,42 | 2,15 | 4,73 | 3,17 | 0,0169061 | 0,077408 |

|               |       |       |       |       |           |          |
|---------------|-------|-------|-------|-------|-----------|----------|
| TRAF3         | 1,99  | 2,60  | 2,96  | 4,19  | 0,0169468 | 0,077578 |
| RP11-3A3.1    | 0,88  | 2,98  | 1,20  | 1,55  | 0,0169565 | 0,077607 |
| RNASP282      | 0,00  | 0,00  | 2,93  | 0,00  | 0,0169678 | 0,077643 |
| RN7SL834P     | 3,15  | 1,79  | 2,03  | 0,00  | 0,0169956 | 0,077739 |
| RP11-681B3.4  | 0,19  | 0,37  | 0,13  | 0,25  | 0,0169967 | 0,077739 |
| ANKRD1        | 0,00  | 0,07  | 0,02  | 0,00  | 0,0170007 | NA       |
| POR           | 4,78  | 5,57  | 5,48  | 6,15  | 0,0170022 | 0,077739 |
| MUC4          | 0,00  | 0,04  | 0,00  | 0,01  | 0,0170029 | 0,077739 |
| CDON          | 0,07  | 0,07  | 0,12  | 0,61  | 0,0170106 | 0,077758 |
| RP11-44I10.3  | 1,65  | 0,00  | 3,06  | 0,00  | 0,017023  | 0,077799 |
| CTC-539A10.7  | 0,43  | 0,90  | 0,45  | 0,35  | 0,0170536 | 0,077923 |
| GRM8          | 0,00  | 4,07  | 0,00  | 0,00  | 0,0170615 | 0,077943 |
| RP11-354P11.3 | 0,00  | 1,16  | 0,39  | 0,45  | 0,0170691 | 0,077961 |
| BRAT1         | 2,75  | 3,53  | 3,51  | 3,55  | 0,0170811 | 0,078    |
| RIMS1         | 0,03  | 0,00  | 0,02  | 0,03  | 0,0170934 | 0,078037 |
| PRPSAP2       | 5,15  | 2,75  | 3,36  | 3,06  | 0,0170985 | 0,078037 |
| BCKDHA        | 5,56  | 6,01  | 5,75  | 6,30  | 0,0171038 | 0,078037 |
| VPS4A         | 3,33  | 4,50  | 3,92  | 3,16  | 0,0171038 | 0,078037 |
| HUS1          | 4,79  | 2,15  | 3,58  | 4,74  | 0,0171067 | 0,078037 |
| SERF1B        | 2,81  | 4,20  | 2,77  | 1,86  | 0,0171149 | 0,078058 |
| PRKRIP1       | 3,03  | 0,74  | 3,77  | 3,63  | 0,0171358 | 0,078135 |
| KIAA0586      | 3,61  | 4,32  | 2,78  | 2,15  | 0,0171388 | 0,078135 |
| PPP1R12A      | 6,25  | 6,52  | 5,53  | 5,82  | 0,0171525 | 0,078182 |
| RN7SL670P     | 0,81  | 2,14  | 2,37  | 1,97  | 0,0171602 | 0,078201 |
| N4BP2L1       | 5,91  | 5,58  | 5,09  | 3,50  | 0,0171913 | 0,078327 |
| GAPDHP72      | 0,06  | 1,35  | 0,23  | 0,15  | 0,0172049 | 0,078361 |
| RP11-423H2.1  | 4,07  | 0,83  | 2,98  | 2,16  | 0,017206  | 0,078361 |
| ERG           | 0,00  | 0,00  | 0,00  | 2,38  | 0,0172108 | 0,078367 |
| RP5-961K14.2  | 0,47  | 0,91  | 0,65  | 1,02  | 0,0172218 | 0,078401 |
| ATP1A2        | 0,02  | 0,34  | 0,01  | 0,03  | 0,0172418 | 0,078476 |
| BRD8          | 3,08  | 2,70  | 3,57  | 3,48  | 0,0172546 | 0,078518 |
| RP11-650L12.2 | 0,00  | 0,08  | 0,10  | 0,07  | 0,0172658 | 0,078553 |
| CTC-301O7.4   | 0,00  | 0,00  | 0,00  | 0,00  | 0,0173086 | 0,078732 |
| MALSU1        | 4,92  | 0,98  | 5,27  | 4,52  | 0,0173265 | 0,078782 |
| RP11-51J9.4   | 0,56  | 1,11  | 1,08  | 2,25  | 0,0173297 | 0,078782 |
| PSMD3         | 3,46  | 1,37  | 3,08  | 1,34  | 0,0173302 | 0,078782 |
| RP11-25K21.1  | 0,00  | 1,40  | 0,73  | 0,96  | 0,0173522 | 0,078866 |
| SRSF1         | 5,66  | 3,98  | 4,98  | 4,03  | 0,0173843 | 0,078995 |
| RP11-357C3.3  | 1,77  | 0,24  | 1,82  | 0,91  | 0,0173891 | 0,079001 |
| CTD-2621I17.6 | 1,39  | 0,45  | 0,99  | 0,00  | 0,0174001 | 0,079012 |
| DIS3L         | 4,13  | 2,44  | 2,76  | 2,00  | 0,0174019 | 0,079012 |
| HBS1L         | 4,57  | 2,50  | 4,00  | 1,92  | 0,0174023 | 0,079012 |
| TRIP12        | 4,97  | 3,44  | 5,11  | 6,04  | 0,0174189 | 0,07907  |
| PPP1R3E       | 2,08  | 0,35  | 2,18  | 2,73  | 0,017422  | 0,07907  |
| GBAS          | 6,29  | 5,19  | 5,56  | 4,90  | 0,0174306 | 0,079084 |
| TLCD1         | 0,31  | 0,00  | 1,01  | 1,21  | 0,0174323 | 0,079084 |
| AC138972.2    | 0,00  | 0,00  | 0,09  | 0,00  | 0,0174415 | 0,07911  |
| TSPAN32       | 6,24  | 4,32  | 6,23  | 6,19  | 0,0174598 | 0,079173 |
| ZYG11B        | 1,85  | 2,97  | 2,38  | 1,70  | 0,0174626 | 0,079173 |
| FOLH1         | 0,00  | 0,07  | 0,00  | 0,00  | 0,0174779 | 0,079226 |
| CCDC144NL     | 0,00  | 0,00  | 0,00  | 1,90  | 0,0174884 | 0,079258 |
| ALG11         | 3,06  | 2,19  | 2,81  | 1,77  | 0,0175071 | 0,079326 |
| PLEKHF1       | 0,00  | 0,00  | 0,00  | 0,13  | 0,0175208 | 0,079372 |
| RPL10         | 11,73 | 11,93 | 11,77 | 11,41 | 0,0175727 | 0,079579 |
| PARP16        | 1,01  | 0,00  | 1,47  | 0,36  | 0,0175737 | 0,079579 |



|               |      |      |      |      |           |          |
|---------------|------|------|------|------|-----------|----------|
| RP11-553P9.2  | 0,83 | 2,62 | 0,78 | 1,67 | 0,0175842 | 0,079611 |
| CNOT10        | 4,68 | 2,33 | 3,75 | 3,11 | 0,0176073 | 0,07969  |
| RP11-281A20.3 | 0,20 | 0,53 | 0,56 | 1,97 | 0,0176089 | 0,07969  |
| RP3-329A5.4   | 0,02 | 0,15 | 0,17 | 0,52 | 0,0176276 | 0,079758 |
| DCUN1D3       | 0,86 | 1,34 | 1,21 | 1,30 | 0,0176333 | 0,079768 |
| RP11-267A15.1 | 0,11 | 0,43 | 0,17 | 0,47 | 0,0176406 | 0,079773 |
| MIR3128       | 6,74 | 0,00 | 6,87 | 6,20 | 0,0176416 | 0,079773 |
| RP11-203J24.9 | 0,00 | 0,73 | 0,31 | 1,76 | 0,0176783 | 0,079909 |
| AP5M1         | 3,96 | 1,32 | 3,03 | 1,55 | 0,0176788 | 0,079909 |
| AASS          | 0,00 | 0,08 | 0,00 | 0,09 | 0,0176931 | 0,079957 |
| SCFD2         | 3,86 | 0,79 | 3,14 | 0,94 | 0,0177253 | 0,080086 |
| CACNA2D4      | 2,05 | 4,48 | 2,45 | 4,78 | 0,0177422 | 0,080136 |
| RP3-468O1.4   | 1,14 | 0,00 | 1,39 | 2,83 | 0,0177434 | 0,080136 |
| VTRNA1-1      | 0,00 | 4,02 | 1,87 | 3,20 | 0,0177566 | 0,080161 |
| SPAG5-AS1     | 1,93 | 3,28 | 2,95 | 0,65 | 0,0177571 | 0,080161 |
| SPCS1         | 7,55 | 6,19 | 7,29 | 7,02 | 0,0177598 | 0,080161 |
| APOL6         | 3,02 | 1,90 | 3,05 | 3,16 | 0,0177816 | 0,080228 |
| RP11-565F19.2 | 0,34 | 0,13 | 0,34 | 0,63 | 0,0177819 | 0,080228 |
| RP11-315I20.1 | 2,62 | 4,15 | 3,10 | 4,26 | 0,0178008 | 0,080297 |
| SCLT1         | 4,78 | 3,11 | 4,50 | 4,07 | 0,0178121 | 0,080332 |
| RP11-14J7.6   | 0,00 | 0,21 | 0,00 | 0,08 | 0,0178217 | 0,080359 |
| RP11-626G3.1  | 0,44 | 0,48 | 0,51 | 1,13 | 0,017838  | 0,080416 |
| JAG2          | 0,00 | 0,00 | 0,00 | 0,02 | 0,0178579 | 0,080489 |
| ARIH1         | 5,28 | 7,06 | 5,34 | 2,48 | 0,0178788 | 0,080567 |
| RP3-522P13.1  | 0,43 | 0,43 | 0,41 | 0,00 | 0,0179042 | 0,080665 |
| PKN2          | 4,80 | 3,00 | 4,73 | 3,52 | 0,0179189 | 0,080715 |
| RP11-916O13.1 | 0,00 | 0,10 | 0,00 | 0,00 | 0,0179367 | NA       |
| PLBD2         | 3,05 | 0,68 | 2,99 | 2,31 | 0,0179391 | 0,08079  |
| RP11-569G13.2 | 1,18 | 1,06 | 1,69 | 1,91 | 0,0179479 | 0,080799 |
| SETX          | 5,29 | 4,29 | 4,29 | 4,50 | 0,0179485 | 0,080799 |
| RP11-887P2.1  | 1,31 | 1,14 | 1,71 | 1,61 | 0,0179525 | 0,080801 |
| AP006621.5    | 0,00 | 1,03 | 1,96 | 1,25 | 0,0179617 | 0,080824 |
| RP11-58K22.4  | 0,00 | 0,00 | 0,00 | 0,36 | 0,017965  | 0,080824 |
| PSD3          | 0,26 | 0,62 | 0,40 | 0,85 | 0,017986  | 0,080903 |
| ANKRD19       | 0,44 | 0,53 | 1,02 | 0,72 | 0,01799   | 0,080904 |
| RP11-314D7.2  | 2,32 | 3,11 | 3,28 | 3,27 | 0,0179957 | 0,080913 |
| PHACTR1       | 6,49 | 5,48 | 6,34 | 5,07 | 0,0180085 | 0,080929 |
| TFAP4         | 0,79 | 0,92 | 1,02 | 1,27 | 0,0180098 | 0,080929 |
| MPEG1         | 6,34 | 6,39 | 6,67 | 6,35 | 0,0180143 | 0,080929 |
| RP11-251P6.1  | 0,27 | 0,31 | 0,28 | 0,24 | 0,0180167 | 0,080929 |
| FEM1C         | 2,75 | 0,77 | 1,82 | 1,91 | 0,0180175 | 0,080929 |
| SCCPDH        | 1,72 | 0,21 | 0,36 | 0,44 | 0,018069  | 0,081144 |
| RP11-791G16.2 | 0,00 | 0,16 | 0,00 | 0,16 | 0,0180738 | NA       |
| CTD-2301A4.3  | 3,01 | 1,08 | 2,02 | 1,53 | 0,0180813 | 0,081183 |
| CLUH          | 0,18 | 0,58 | 0,45 | 0,25 | 0,0181091 | 0,081275 |
| FGF11         | 0,26 | 0,50 | 0,85 | 0,36 | 0,0181133 | 0,081275 |
| HDAC1         | 5,46 | 4,56 | 4,49 | 4,44 | 0,0181145 | 0,081275 |
| TBC1D26       | 0,00 | 2,49 | 0,00 | 0,00 | 0,0181164 | 0,081275 |
| NEK7          | 4,17 | 3,72 | 3,78 | 1,54 | 0,0181341 | 0,081338 |
| RP11-397G17.1 | 0,00 | 0,00 | 0,00 | 0,19 | 0,0181457 | 0,081367 |
| RP11-159F24.2 | 1,02 | 2,82 | 1,18 | 2,88 | 0,0181496 | 0,081367 |
| ZNF23         | 0,26 | 0,55 | 0,76 | 0,89 | 0,018155  | 0,081367 |
| CALM1         | 9,47 | 8,71 | 9,21 | 8,35 | 0,0181552 | 0,081367 |
| IDH3G         | 7,05 | 6,24 | 6,18 | 5,83 | 0,0181775 | 0,081446 |
| CTD-2165H16.4 | 0,03 | 0,05 | 0,03 | 0,00 | 0,0181801 | 0,081446 |

|                |      |      |      |      |           |          |
|----------------|------|------|------|------|-----------|----------|
| EBAG9          | 4,74 | 1,29 | 2,89 | 3,08 | 0,0181915 | 0,08148  |
| SNRNP25        | 6,15 | 2,81 | 5,06 | 4,69 | 0,0182055 | 0,081527 |
| INVS           | 2,68 | 0,00 | 1,13 | 0,63 | 0,0182094 | 0,081528 |
| ATP8B1         | 2,46 | 1,20 | 1,74 | 1,53 | 0,0182396 | 0,081646 |
| FAM229B        | 0,36 | 0,06 | 0,37 | 0,16 | 0,0182605 | 0,081724 |
| DIAPH1         | 6,57 | 6,32 | 6,78 | 6,65 | 0,0182802 | 0,081796 |
| F2RL1          | 0,06 | 0,22 | 0,04 | 0,05 | 0,0182912 | 0,081828 |
| RIC1           | 2,89 | 1,50 | 2,99 | 2,18 | 0,0183097 | 0,081859 |
| C1QTNF1        | 0,02 | 0,26 | 0,31 | 0,50 | 0,0183131 | 0,081859 |
| DHX40          | 3,39 | 0,93 | 3,07 | 3,44 | 0,0183132 | 0,081859 |
| SMG7           | 4,48 | 2,33 | 4,16 | 2,81 | 0,0183162 | 0,081859 |
| RP11-1275H24.1 | 0,17 | 0,26 | 0,15 | 0,24 | 0,0183196 | 0,081859 |
| CTD-2507G9.1   | 0,41 | 1,23 | 0,87 | 1,42 | 0,0183201 | 0,081859 |
| CBLB           | 4,18 | 3,51 | 2,83 | 2,87 | 0,0183382 | 0,081923 |
| RP11-284G10.1  | 0,20 | 0,00 | 0,00 | 0,14 | 0,0183607 | 0,082007 |
| PTPRCAP        | 3,19 | 5,07 | 0,86 | 4,48 | 0,0183643 | 0,082007 |
| MAP1LC3B       | 6,48 | 5,15 | 6,00 | 5,54 | 0,0183772 | 0,082048 |
| RAD51AP1       | 0,14 | 0,34 | 0,15 | 0,00 | 0,0183877 | 0,082078 |
| CH17-76K2.6    | 0,75 | 1,54 | 1,19 | 1,06 | 0,0184168 | 0,082181 |
| SSX3           | 0,00 | 0,34 | 0,07 | 0,00 | 0,0184216 | 0,082181 |
| GZMA           | 0,27 | 6,41 | 0,39 | 5,16 | 0,0184254 | 0,082181 |
| RP11-317C20.9  | 0,31 | 0,10 | 0,26 | 0,76 | 0,0184289 | 0,082181 |
| PIK3R6         | 2,35 | 0,96 | 1,86 | 0,77 | 0,0184294 | 0,082181 |
| TSC22D1        | 3,31 | 4,07 | 2,09 | 0,34 | 0,0184367 | 0,082198 |
| ATP2B1         | 7,23 | 6,07 | 7,08 | 6,12 | 0,0184584 | 0,082278 |
| ZDHHC11B       | 0,00 | 2,52 | 0,00 | 0,00 | 0,018475  | 0,082335 |
| REXO1L6P       | 0,00 | 3,40 | 0,00 | 0,00 | 0,0184953 | 0,082405 |
| DCLRE1A        | 0,06 | 0,00 | 0,09 | 0,00 | 0,018498  | 0,082405 |
| FAM53C         | 3,68 | 1,66 | 2,94 | 3,10 | 0,0185059 | 0,082423 |
| PLCL1          | 0,00 | 0,21 | 0,05 | 0,03 | 0,0185271 | 0,082486 |
| PTPRZ1         | 1,84 | 2,30 | 1,40 | 1,65 | 0,0185273 | 0,082486 |
| TTC26          | 0,29 | 0,42 | 0,34 | 0,27 | 0,0185347 | 0,082502 |
| AP003900.6     | 0,00 | 4,67 | 0,00 | 0,00 | 0,0185666 | 0,082628 |
| DSP            | 0,00 | 0,00 | 0,00 | 0,27 | 0,0185729 | 0,082639 |
| BDKRB1         | 0,29 | 0,36 | 0,76 | 1,40 | 0,0185769 | 0,08264  |
| ACO10761.10    | 1,47 | 2,08 | 2,19 | 1,79 | 0,0185981 | 0,082718 |
| PDLIM1         | 6,28 | 5,13 | 4,75 | 1,53 | 0,0186194 | 0,082796 |
| RN7SL121P      | 0,00 | 1,05 | 1,60 | 2,01 | 0,0186328 | 0,082839 |
| ZSCAN30        | 2,09 | 4,56 | 2,42 | 2,21 | 0,0186409 | 0,082851 |
| ANXA11         | 6,00 | 6,73 | 6,25 | 6,14 | 0,0186428 | 0,082851 |
| MZT1           | 2,97 | 1,19 | 2,32 | 0,40 | 0,0186576 | 0,0829   |
| RXRA           | 2,95 | 2,60 | 3,34 | 3,82 | 0,0186711 | 0,082943 |
| MATN2          | 0,24 | 0,03 | 0,45 | 0,09 | 0,018675  | 0,082944 |
| ACO08072.1     | 1,40 | 3,01 | 1,63 | 0,72 | 0,0186854 | 0,08296  |
| CSTF3          | 4,50 | 4,19 | 3,33 | 3,45 | 0,018686  | 0,08296  |
| MSRA           | 4,33 | 3,60 | 4,59 | 4,82 | 0,0187133 | 0,083055 |
| PROM2          | 0,24 | 0,35 | 0,32 | 0,45 | 0,018715  | 0,083055 |
| GPBP1L1        | 6,25 | 4,81 | 4,84 | 4,58 | 0,0187399 | 0,083149 |
| ZNF780B        | 1,95 | 2,89 | 2,08 | 2,65 | 0,018771  | 0,08327  |
| ATAD3B         | 1,04 | 1,52 | 2,19 | 2,45 | 0,0187759 | 0,083276 |
| EEF1A2         | 0,04 | 0,10 | 0,15 | 0,11 | 0,0187838 | 0,083281 |
| RP11-7K24.3    | 0,20 | 0,20 | 0,38 | 0,80 | 0,0187847 | 0,083281 |
| MDGA2          | 0,02 | 0,04 | 0,03 | 0,07 | 0,0188094 | 0,083374 |
| RP1-29C18.9    | 1,24 | 0,94 | 1,73 | 1,42 | 0,0188131 | 0,083374 |
| PIK3R2         | 1,42 | 2,00 | 1,68 | 1,37 | 0,0188352 | 0,083455 |

|               |       |       |       |       |           |          |
|---------------|-------|-------|-------|-------|-----------|----------|
| PCYOX1        | 1,72  | 0,90  | 1,46  | 1,85  | 0,0188674 | 0,083571 |
| RP11-759A24.2 | 0,04  | 0,05  | 0,04  | 0,05  | 0,0188699 | 0,083571 |
| ESD           | 7,20  | 5,61  | 6,74  | 5,80  | 0,0188726 | 0,083571 |
| AC006262.4    | 0,00  | 0,31  | 0,00  | 0,48  | 0,018884  | 0,083605 |
| RP11-776H12.1 | 1,20  | 1,23  | 1,04  | 1,18  | 0,0189009 | 0,083663 |
| MTCH1         | 5,34  | 4,36  | 5,29  | 4,08  | 0,0189145 | 0,083707 |
| RP11-114F10.3 | 0,00  | 0,00  | 0,00  | 0,52  | 0,0189754 | NA       |
| ABCG8         | 0,85  | 1,19  | 1,04  | 1,57  | 0,0189767 | 0,083965 |
| RPS6          | 10,84 | 10,97 | 10,71 | 10,17 | 0,0189842 | 0,083982 |
| MCSR          | 0,00  | 0,00  | 0,12  | 0,00  | 0,0189919 | NA       |
| ZNF136        | 1,87  | 2,08  | 1,40  | 0,53  | 0,0190266 | 0,084152 |
| STK38         | 4,48  | 2,40  | 4,02  | 3,80  | 0,019037  | 0,084166 |
| OPRD1         | 0,37  | 0,77  | 0,39  | 0,53  | 0,0190372 | 0,084166 |
| GSG1L         | 0,09  | 0,03  | 0,10  | 0,00  | 0,0190444 | 0,084181 |
| HNF4G         | 0,64  | 0,92  | 0,95  | 2,27  | 0,019067  | 0,084264 |
| RP11-284E5.1  | 1,89  | 3,82  | 2,33  | 2,11  | 0,0190716 | 0,084268 |
| RP11-114M1.2  | 0,24  | 0,84  | 0,33  | 1,00  | 0,019086  | 0,084315 |
| AP001469.9    | 1,17  | 1,33  | 1,38  | 1,86  | 0,0190991 | 0,084342 |
| PAN3          | 4,48  | 3,98  | 3,79  | 3,43  | 0,0190998 | 0,084342 |
| ST3GAL3       | 2,24  | 3,71  | 2,22  | 2,74  | 0,0191369 | 0,084489 |
| MYOM2         | 1,97  | 0,00  | 2,05  | 0,00  | 0,0191438 | 0,0845   |
| RP11-457M11.5 | 0,22  | 0,00  | 0,35  | 1,15  | 0,0191469 | 0,0845   |
| CIAO1         | 5,48  | 6,79  | 5,29  | 4,31  | 0,0191526 | 0,084508 |
| NSMCE3        | 1,79  | 3,24  | 1,93  | 0,84  | 0,0191645 | 0,084544 |
| DVL2          | 0,51  | 1,44  | 1,25  | 0,91  | 0,0191771 | 0,084582 |
| C18orf32      | 6,71  | 6,08  | 5,68  | 5,22  | 0,0191873 | 0,084611 |
| CASP10        | 2,50  | 2,26  | 3,04  | 3,09  | 0,0192045 | 0,084658 |
| AIM1          | 5,32  | 4,34  | 4,60  | 3,30  | 0,0192057 | 0,084658 |
| NCKAP5L       | 0,70  | 0,98  | 1,83  | 1,63  | 0,0192121 | 0,08467  |
| ERV3-1        | 2,76  | 0,65  | 2,58  | 2,23  | 0,019217  | 0,084674 |
| CALR          | 6,97  | 7,30  | 7,60  | 8,10  | 0,0192625 | 0,084858 |
| SYT11         | 1,65  | 0,59  | 2,76  | 2,36  | 0,0192826 | 0,08493  |
| RP3-473L9.4   | 2,78  | 2,62  | 3,53  | 1,49  | 0,0192926 | 0,084947 |
| CTD-2553L13.9 | 0,10  | 0,54  | 0,12  | 0,08  | 0,0192942 | 0,084947 |
| RP11-867G23.4 | 0,00  | 3,05  | 3,44  | 5,11  | 0,0193149 | 0,085006 |
| BMI1          | 3,09  | 4,57  | 2,78  | 4,09  | 0,0193168 | 0,085006 |
| ATXN2         | 4,35  | 4,35  | 4,85  | 4,62  | 0,0193189 | 0,085006 |
| CASZ1         | 0,14  | 0,20  | 0,37  | 1,36  | 0,0193437 | 0,085098 |
| AC007193.8    | 0,00  | 0,00  | 0,60  | 2,67  | 0,019345  | NA       |
| RP11-93L9.1   | 0,65  | 0,67  | 0,69  | 0,71  | 0,019358  | 0,085115 |
| RBCK1         | 6,04  | 5,07  | 5,48  | 6,28  | 0,0193589 | 0,085115 |
| ABHD4         | 1,20  | 0,00  | 1,41  | 0,00  | 0,0193592 | 0,085115 |
| RP11-119F7.5  | 0,09  | 0,00  | 0,00  | 0,27  | 0,0193705 | 0,085123 |
| RP11-151D14.1 | 0,22  | 2,89  | 0,88  | 0,00  | 0,0193712 | 0,085123 |
| FAM96A        | 7,88  | 6,48  | 7,39  | 6,24  | 0,0193725 | 0,085123 |
| AC073130.1    | 3,42  | 3,80  | 2,89  | 5,33  | 0,0194028 | 0,08524  |
| CTD-2527I21.5 | 0,61  | 1,27  | 0,66  | 0,96  | 0,0194421 | 0,085395 |
| CERS5         | 5,74  | 4,93  | 5,43  | 6,25  | 0,0194519 | 0,085421 |
| AC016831.7    | 1,62  | 3,23  | 1,79  | 0,94  | 0,0194592 | 0,085437 |
| ZNF773        | 1,30  | 0,62  | 1,19  | 0,74  | 0,0194721 | 0,085477 |
| ACAT2         | 4,22  | 0,50  | 3,27  | 0,22  | 0,0194845 | 0,085514 |
| CCDC41        | 4,52  | 3,69  | 4,53  | 3,00  | 0,0194927 | 0,085533 |
| COX7A2        | 7,84  | 8,04  | 7,95  | 8,12  | 0,0195    | 0,085548 |
| MSMO1         | 2,55  | 0,87  | 1,02  | 2,78  | 0,0195117 | 0,085583 |
| GTPBP8        | 4,32  | 2,93  | 3,29  | 2,00  | 0,0195195 | 0,0856   |

|               |       |      |      |      |           |          |
|---------------|-------|------|------|------|-----------|----------|
| ZNF726        | 0,53  | 1,45 | 0,84 | 1,74 | 0,0195322 | 0,085639 |
| LCORL         | 3,42  | 2,99 | 2,79 | 1,64 | 0,0195722 | 0,085797 |
| RP11-162A12.4 | 0,00  | 0,00 | 0,00 | 0,00 | 0,0195787 | 0,085809 |
| UBC           | 10,06 | 9,96 | 9,76 | 9,14 | 0,0195831 | 0,085811 |
| CD68          | 5,23  | 5,20 | 5,80 | 6,40 | 0,0195877 | 0,085814 |
| GABRP         | 1,89  | 4,34 | 2,08 | 2,55 | 0,0196257 | 0,085964 |
| CDC25B        | 2,79  | 1,84 | 1,96 | 3,80 | 0,0196343 | 0,085985 |
| RP5-848E13.3  | 0,62  | 1,53 | 0,95 | 0,61 | 0,0196416 | 0,086    |
| RNF145        | 3,55  | 1,28 | 4,30 | 1,75 | 0,019654  | 0,08602  |
| SRD5A1        | 4,11  | 2,66 | 3,57 | 2,61 | 0,0196541 | 0,08602  |
| NIPAL3        | 4,02  | 4,10 | 2,96 | 1,56 | 0,0196707 | 0,086076 |
| C9orf3        | 2,60  | 2,15 | 2,05 | 3,16 | 0,0197044 | 0,086207 |
| EVI2B         | 7,44  | 6,53 | 6,97 | 6,49 | 0,0197157 | 0,086239 |
| RP11-158L12.6 | 0,27  | 0,51 | 0,35 | 0,35 | 0,0197266 | 0,08627  |
| AC069282.6    | 0,00  | 0,00 | 0,00 | 0,00 | 0,0197373 | 0,0863   |
| KB-1125A3.12  | 0,62  | 1,25 | 0,87 | 0,86 | 0,0197658 | 0,086407 |
| RP3-335N17.2  | 1,06  | 0,93 | 1,61 | 2,74 | 0,0197826 | 0,086464 |
| RP11-855A2.1  | 0,90  | 1,69 | 1,00 | 1,19 | 0,0197869 | 0,086466 |
| DDR1          | 0,00  | 0,19 | 0,00 | 0,00 | 0,0198005 | 0,086508 |
| RAB39B        | 2,03  | 0,07 | 0,40 | 0,10 | 0,0198082 | 0,086525 |
| MBLAC2        | 0,13  | 0,00 | 0,01 | 0,05 | 0,0198265 | 0,08658  |
| AC093642.4    | 0,00  | 4,38 | 0,00 | 0,00 | 0,0198286 | 0,08658  |
| RN7SL154P     | 0,91  | 2,67 | 0,00 | 0,83 | 0,0198295 | NA       |
| CTD-2309H9.3  | 0,10  | 0,41 | 0,14 | 0,14 | 0,0198462 | 0,08664  |
| KCNQ2         | 0,00  | 1,42 | 0,00 | 0,00 | 0,0198533 | 0,086653 |
| LMO3          | 0,14  | 0,32 | 0,18 | 0,54 | 0,0198656 | 0,08669  |
| TTLL7         | 0,19  | 0,73 | 0,27 | 0,34 | 0,019896  | 0,086804 |
| RP11-476B13.2 | 0,78  | 0,00 | 0,00 | 1,34 | 0,0198996 | 0,086804 |
| LAMTOR2       | 7,46  | 7,36 | 7,70 | 7,49 | 0,0199336 | 0,086934 |
| RP11-156L14.1 | 0,48  | 1,01 | 0,38 | 0,40 | 0,019937  | 0,086934 |
| RP1-102K2.6   | 0,00  | 0,60 | 0,18 | 0,00 | 0,0199518 | 0,086977 |
| TMX1          | 4,91  | 3,10 | 3,90 | 3,92 | 0,0199548 | 0,086977 |
| AC009299.3    | 0,00  | 0,00 | 0,00 | 0,00 | 0,0199832 | 0,087084 |
| AC008694.2    | 0,00  | 1,69 | 0,94 | 0,00 | 0,0199863 | NA       |
| RRM1          | 3,84  | 2,37 | 3,10 | 1,66 | 0,0200007 | 0,087143 |
| RP11-752L20.3 | 0,10  | 0,02 | 0,02 | 0,11 | 0,0200088 | 0,087161 |
| RANBP6        | 2,48  | 0,45 | 2,46 | 2,17 | 0,0200168 | 0,087179 |
| RP11-134N1.2  | 0,00  | 0,93 | 0,00 | 0,00 | 0,0200257 | 0,0872   |
| IL1A          | 0,00  | 1,27 | 0,00 | 0,00 | 0,020044  | 0,087263 |
| CYYR1         | 0,04  | 0,00 | 0,00 | 0,05 | 0,0200471 | NA       |
| AC092798.2    | 2,36  | 0,00 | 0,00 | 0,00 | 0,0200483 | 0,087265 |
| SEMA7A        | 0,14  | 1,48 | 0,08 | 0,00 | 0,0200568 | 0,087285 |
| RNU6-522P     | 3,89  | 7,54 | 4,06 | 0,00 | 0,0200898 | 0,087411 |
| RNU4-51P      | 6,56  | 1,61 | 5,70 | 0,00 | 0,0201314 | 0,087567 |
| NQO2          | 6,53  | 5,44 | 6,33 | 4,19 | 0,0201336 | 0,087567 |
| NACA          | 9,66  | 9,00 | 9,33 | 8,82 | 0,020149  | 0,087617 |
| MAP4K5        | 5,12  | 3,26 | 4,12 | 1,50 | 0,0201594 | 0,087645 |
| AC103965.1    | 0,00  | 0,51 | 0,05 | 0,00 | 0,0201777 | 0,087708 |
| AMY2A         | 0,00  | 1,30 | 0,00 | 0,00 | 0,020193  | 0,087757 |
| RN7SL338P     | 0,00  | 0,00 | 0,99 | 0,00 | 0,0201951 | NA       |
| ZSCAN29       | 1,29  | 0,47 | 0,98 | 1,58 | 0,0201969 | 0,087757 |
| TAF2          | 3,88  | 3,10 | 4,10 | 2,11 | 0,0202148 | 0,087817 |
| SUMO1         | 6,80  | 6,37 | 6,18 | 5,69 | 0,0202267 | 0,087852 |
| MT-TY         | 6,16  | 6,87 | 5,74 | 6,82 | 0,0202343 | 0,087868 |
| KCNN4         | 0,30  | 3,45 | 4,30 | 3,05 | 0,0202412 | 0,08788  |

|               |      |      |      |      |           |          |
|---------------|------|------|------|------|-----------|----------|
| NR2F6         | 0,51 | 0,11 | 0,75 | 0,06 | 0,0202752 | 0,088011 |
| SLC26A5       | 0,00 | 2,29 | 0,00 | 0,00 | 0,020305  | 0,088123 |
| RP5-855F14.1  | 0,00 | 0,00 | 0,00 | 0,00 | 0,0203078 | NA       |
| RP3-394A18.1  | 0,65 | 0,87 | 0,79 | 1,12 | 0,020316  | 0,088154 |
| NFKB1         | 6,06 | 5,21 | 5,69 | 4,61 | 0,0203202 | 0,088155 |
| RFX7          | 2,89 | 0,25 | 2,19 | 1,75 | 0,0203391 | 0,088194 |
| ARID3B        | 1,68 | 3,96 | 1,88 | 1,63 | 0,0203391 | 0,088194 |
| NLRC5         | 4,86 | 6,19 | 4,57 | 5,51 | 0,0203412 | 0,088194 |
| ZNF236        | 3,89 | 2,65 | 2,63 | 1,49 | 0,0203797 | 0,088344 |
| NOVA2         | 0,03 | 0,35 | 0,29 | 0,37 | 0,0203851 | 0,08835  |
| RP13-104F24.2 | 3,63 | 3,95 | 2,98 | 2,55 | 0,0203991 | 0,088394 |
| RP11-112L6.3  | 0,00 | 1,00 | 0,25 | 0,20 | 0,0204037 | 0,088396 |
| IL33          | 1,58 | 3,88 | 1,15 | 2,31 | 0,0204463 | 0,088556 |
| AC027317.2    | 0,47 | 0,82 | 0,82 | 1,73 | 0,0204486 | 0,088556 |
| NPIP4         | 5,72 | 6,40 | 6,34 | 6,10 | 0,0204864 | 0,088703 |
| CAPS2         | 1,80 | 4,01 | 2,40 | 2,62 | 0,0204932 | 0,088715 |
| CNNM4         | 2,00 | 0,03 | 0,54 | 0,03 | 0,0205062 | 0,088754 |
| TCF21         | 0,26 | 0,28 | 0,46 | 0,25 | 0,0205139 | 0,088755 |
| MMP14         | 0,00 | 0,31 | 0,00 | 0,00 | 0,0205145 | 0,088755 |
| AD000671.6    | 4,16 | 3,77 | 3,60 | 1,90 | 0,0205347 | 0,088825 |
| CYP4A11       | 0,26 | 0,22 | 0,29 | 0,00 | 0,0205403 | 0,088832 |
| RP11-120K19.3 | 0,00 | 0,00 | 0,05 | 1,22 | 0,020551  | 0,088861 |
| CROCCP2       | 3,58 | 5,52 | 3,71 | 4,01 | 0,0205771 | 0,088957 |
| TLL6          | 0,00 | 0,45 | 0,00 | 0,03 | 0,0205835 | NA       |
| FRYL          | 5,82 | 5,29 | 5,19 | 5,22 | 0,0205939 | 0,088984 |
| HERC2P8       | 1,25 | 1,48 | 1,05 | 1,34 | 0,0205948 | 0,088984 |
| RDH5          | 3,11 | 0,00 | 0,80 | 1,86 | 0,0205954 | 0,088984 |
| CDV3          | 6,27 | 5,97 | 5,90 | 5,42 | 0,020602  | 0,088995 |
| C12orf50      | 1,65 | 2,44 | 1,47 | 1,80 | 0,0206412 | 0,089147 |
| MIR155HG      | 0,18 | 0,75 | 0,05 | 0,00 | 0,0206643 | 0,089229 |
| YWHAE         | 8,39 | 7,53 | 7,93 | 7,48 | 0,0206775 | 0,089269 |
| IL1B          | 8,43 | 8,31 | 8,55 | 6,42 | 0,020686  | 0,089288 |
| GSS           | 5,31 | 4,25 | 5,11 | 4,08 | 0,0207072 | 0,089363 |
| NTM           | 0,00 | 0,00 | 0,00 | 1,70 | 0,0207606 | 0,089558 |
| AC010240.1    | 0,00 | 0,00 | 1,06 | 0,00 | 0,0207606 | 0,089558 |
| HYAL2         | 0,08 | 0,13 | 1,27 | 1,59 | 0,0207859 | 0,08965  |
| RNU5E-6P      | 2,07 | 3,35 | 2,00 | 4,07 | 0,0208098 | 0,089736 |
| PMCHL1        | 0,00 | 0,05 | 0,03 | 0,29 | 0,0208156 | 0,089743 |
| OR51M1        | 0,74 | 0,57 | 0,45 | 0,92 | 0,0208363 | 0,089815 |
| PNMAL1        | 0,15 | 0,53 | 0,23 | 0,14 | 0,0208506 | 0,089836 |
| RP11-883A18.3 | 1,43 | 1,46 | 1,43 | 1,62 | 0,0208514 | 0,089836 |
| PTPN12        | 4,44 | 5,43 | 4,92 | 3,63 | 0,0208532 | 0,089836 |
| MED11         | 4,77 | 1,02 | 5,54 | 4,70 | 0,0208939 | 0,089994 |
| TBRG1         | 6,01 | 6,51 | 5,38 | 5,45 | 0,0209318 | 0,090139 |
| DOC2A         | 0,78 | 1,78 | 1,43 | 1,45 | 0,0209417 | 0,090165 |
| GTF2IRD2B     | 3,30 | 1,69 | 2,98 | 2,63 | 0,0209563 | 0,09021  |
| KLF8          | 2,50 | 1,15 | 1,22 | 2,30 | 0,02099   | 0,090338 |
| GRIN2C        | 0,00 | 1,07 | 0,00 | 0,00 | 0,0210015 | 0,090369 |
| UTP18         | 5,08 | 5,67 | 4,94 | 2,73 | 0,0210159 | 0,090414 |
| POP1          | 1,40 | 0,08 | 2,24 | 0,50 | 0,0210232 | 0,090428 |
| C11orf76      | 0,57 | 1,10 | 0,84 | 1,06 | 0,0210347 | 0,09046  |
| RBMS1         | 4,88 | 5,34 | 5,15 | 5,83 | 0,0210579 | 0,090542 |
| ABCB8         | 1,44 | 2,17 | 3,18 | 3,41 | 0,021067  | 0,090564 |
| CDYL2         | 0,01 | 0,35 | 0,01 | 0,23 | 0,021086  | 0,090628 |
| XRCC4         | 2,90 | 0,70 | 2,57 | 3,37 | 0,0210958 | 0,090648 |

|                |      |      |      |      |           |          |
|----------------|------|------|------|------|-----------|----------|
| RIOK3          | 4,61 | 2,90 | 5,07 | 4,70 | 0,0210988 | 0,090648 |
| AC006004.1     | 0,50 | 0,92 | 0,39 | 0,53 | 0,0211174 | 0,09071  |
| RP11-158C6.4   | 0,56 | 1,57 | 0,90 | 1,14 | 0,0211414 | 0,090796 |
| POLR2B         | 5,17 | 3,24 | 5,02 | 4,92 | 0,0211477 | 0,090805 |
| C17orf97       | 0,00 | 0,08 | 0,00 | 0,20 | 0,0211956 | 0,090984 |
| POLR3A         | 1,73 | 0,70 | 2,22 | 0,91 | 0,0211974 | 0,090984 |
| PURG           | 0,00 | 0,00 | 0,00 | 0,00 | 0,021206  | 0,091003 |
| AL356017.3     | 2,73 | 4,16 | 2,69 | 2,41 | 0,0212506 | 0,091176 |
| SAP18          | 7,41 | 7,11 | 7,00 | 6,51 | 0,0212641 | 0,091208 |
| SPAST          | 3,45 | 4,07 | 3,29 | 2,70 | 0,0212661 | 0,091208 |
| CIZ1           | 3,56 | 3,55 | 4,06 | 4,18 | 0,0212795 | 0,091248 |
| MT1X           | 3,23 | 5,06 | 4,47 | 4,47 | 0,0212888 | 0,09127  |
| RPL26L1        | 5,14 | 5,24 | 5,18 | 3,75 | 0,0213038 | 0,091306 |
| GATAD2A        | 2,43 | 2,82 | 3,26 | 3,67 | 0,0213055 | 0,091306 |
| AC005562.1     | 3,83 | 1,62 | 2,80 | 0,14 | 0,0213412 | 0,091442 |
| RP11-244B22.10 | 0,18 | 0,71 | 0,11 | 0,34 | 0,0213474 | 0,091443 |
| RP11-5407.1    | 0,05 | 0,35 | 0,04 | 0,05 | 0,0213497 | 0,091443 |
| AC009303.2     | 0,36 | 0,43 | 0,61 | 0,32 | 0,0213651 | 0,091448 |
| ST6GALNAC1     | 0,00 | 0,06 | 0,00 | 1,10 | 0,0213707 | 0,091448 |
| RP4-598G3.1    | 0,00 | 0,07 | 0,03 | 0,06 | 0,0213715 | 0,091448 |
| RP11-44M6.7    | 0,55 | 0,23 | 1,34 | 1,37 | 0,0213759 | 0,091448 |
| MED4           | 5,34 | 2,81 | 5,18 | 3,39 | 0,0213778 | 0,091448 |
| DMRT1          | 0,00 | 0,31 | 0,12 | 0,14 | 0,0213786 | 0,091448 |
| MAD2L2         | 6,60 | 5,98 | 6,16 | 4,02 | 0,0213797 | 0,091448 |
| C11orf58       | 6,64 | 6,04 | 6,22 | 5,54 | 0,0213872 | 0,09145  |
| REXO1L1        | 0,21 | 3,59 | 0,12 | 0,43 | 0,0213891 | 0,09145  |
| MIR7845        | 0,00 | 0,00 | 0,00 | 2,85 | 0,0213925 | 0,09145  |
| TRMT10C        | 3,73 | 4,26 | 3,11 | 2,03 | 0,0214062 | 0,091491 |
| TCEAL3         | 0,80 | 0,16 | 1,63 | 0,28 | 0,0214186 | 0,091527 |
| SHCBP1         | 2,30 | 0,36 | 0,66 | 1,07 | 0,0214299 | 0,091532 |
| SYNGR1         | 4,55 | 4,94 | 4,91 | 5,27 | 0,0214366 | 0,091532 |
| TOR1B          | 2,93 | 0,10 | 3,21 | 1,02 | 0,0214375 | 0,091532 |
| C6orf132       | 1,07 | 2,25 | 0,73 | 0,77 | 0,0214385 | 0,091532 |
| STRN4          | 3,10 | 4,68 | 3,86 | 2,08 | 0,0214404 | 0,091532 |
| RNPS1          | 6,55 | 6,50 | 6,35 | 5,57 | 0,0215192 | 0,09185  |
| HELZ2          | 0,59 | 1,19 | 1,06 | 1,84 | 0,0215365 | 0,091906 |
| RP11-345I4.5   | 6,55 | 6,06 | 5,69 | 5,44 | 0,0215412 | 0,091909 |
| RP11-286E11.2  | 0,28 | 0,76 | 0,26 | 0,40 | 0,0215504 | 0,091914 |
| SGMS2          | 2,23 | 2,65 | 3,01 | 4,69 | 0,0215507 | 0,091914 |
| P4HA1          | 4,55 | 5,43 | 3,81 | 3,64 | 0,02156   | 0,091936 |
| HEATR5A        | 3,91 | 1,78 | 4,24 | 1,88 | 0,0215643 | 0,091937 |
| ASTN2          | 1,32 | 1,40 | 1,37 | 1,73 | 0,0215798 | 0,091985 |
| RP11-760N9.1   | 3,58 | 4,26 | 3,55 | 3,96 | 0,0215907 | 0,092014 |
| ZNF579         | 0,28 | 0,10 | 0,60 | 0,39 | 0,0215999 | 0,092033 |
| UZAF1L4        | 5,93 | 4,07 | 5,99 | 4,74 | 0,021609  | 0,092033 |
| MOCSS3         | 0,21 | 0,20 | 0,32 | 0,36 | 0,0216107 | 0,092033 |
| AC005235.1     | 1,18 | 1,40 | 1,01 | 1,60 | 0,0216116 | 0,092033 |
| HECTD3         | 1,55 | 3,95 | 3,07 | 1,13 | 0,0217357 | 0,092543 |
| CTC-455F18.1   | 0,41 | 1,03 | 0,60 | 0,62 | 0,0217472 | 0,092575 |
| RP11-722P11.8  | 0,16 | 0,12 | 0,12 | 0,63 | 0,0217663 | 0,092638 |
| RIMS2          | 0,44 | 0,76 | 0,76 | 1,64 | 0,0217738 | 0,092641 |
| RNF149         | 6,97 | 7,30 | 6,99 | 5,93 | 0,0217753 | 0,092641 |
| TRAPPC6B       | 3,48 | 1,53 | 2,97 | 1,70 | 0,0218013 | 0,092734 |
| FEM1A          | 0,36 | 1,19 | 0,66 | 0,65 | 0,0218092 | 0,092745 |
| RSL1D1         | 7,44 | 6,61 | 6,77 | 6,72 | 0,0218122 | 0,092745 |

|                |      |      |      |      |           |          |
|----------------|------|------|------|------|-----------|----------|
| RP11-9J18.1    | 0,31 | 0,24 | 0,39 | 1,10 | 0,0218167 | 0,092746 |
| RP11-335E6.2   | 1,47 | 1,53 | 1,51 | 1,26 | 0,0218237 | 0,092758 |
| ALKBH6         | 1,48 | 5,35 | 3,60 | 4,88 | 0,0218437 | 0,092809 |
| PRIM1          | 3,45 | 1,82 | 3,11 | 0,25 | 0,0218441 | 0,092809 |
| NEK6           | 1,00 | 0,05 | 2,22 | 1,93 | 0,0218977 | 0,093019 |
| RNF10          | 6,26 | 6,09 | 5,61 | 3,87 | 0,0219021 | 0,09302  |
| RP5-1022P6.3   | 1,15 | 0,00 | 0,45 | 0,00 | 0,0219266 | 0,093106 |
| DPY19L1        | 2,77 | 0,32 | 1,01 | 2,33 | 0,0219523 | 0,093198 |
| TESC           | 1,75 | 4,33 | 3,67 | 4,29 | 0,0219698 | 0,093254 |
| ZNF473         | 0,47 | 3,22 | 0,00 | 0,60 | 0,0220025 | 0,093375 |
| DLG1           | 4,39 | 3,02 | 3,52 | 2,19 | 0,0220184 | 0,093425 |
| SLAMF8         | 4,84 | 2,28 | 4,10 | 1,10 | 0,0220265 | 0,093435 |
| KBTBD4         | 0,65 | 0,00 | 0,00 | 0,00 | 0,0220293 | 0,093435 |
| CCDC8          | 0,17 | 1,63 | 0,26 | 0,41 | 0,0220376 | 0,093453 |
| DFNB59         | 0,00 | 0,52 | 0,48 | 0,00 | 0,0220478 | 0,093478 |
| ZNF271P        | 2,58 | 1,32 | 1,50 | 1,73 | 0,0220597 | 0,093511 |
| HRH2           | 2,89 | 2,02 | 3,82 | 3,72 | 0,0220844 | 0,093575 |
| BHMT           | 0,23 | 1,29 | 0,36 | 0,53 | 0,0220902 | 0,093575 |
| FAM227B        | 0,72 | 3,98 | 1,84 | 2,63 | 0,0220915 | 0,093575 |
| CTTNBP2        | 0,01 | 0,00 | 0,73 | 0,00 | 0,0220917 | 0,093575 |
| DGAT2          | 3,07 | 0,83 | 0,62 | 0,58 | 0,0220993 | 0,093577 |
| RP11-142O6.1   | 1,24 | 0,80 | 0,51 | 2,03 | 0,0221005 | 0,093577 |
| SMARCD3        | 1,07 | 0,46 | 3,33 | 4,62 | 0,0221146 | 0,093614 |
| FGF9           | 0,32 | 0,00 | 1,10 | 0,23 | 0,0221182 | 0,093614 |
| WBSCR16        | 2,22 | 0,30 | 2,34 | 3,27 | 0,0221219 | 0,093614 |
| RPL12          | 9,51 | 9,46 | 9,77 | 9,62 | 0,0221433 | 0,093686 |
| EFCAB6         | 0,13 | 0,10 | 0,16 | 0,19 | 0,0221491 | 0,09369  |
| NUP153         | 2,24 | 0,95 | 2,43 | 2,24 | 0,0221652 | 0,09369  |
| ZNF366         | 1,74 | 1,29 | 3,02 | 1,01 | 0,0221658 | 0,09369  |
| EFHB           | 0,24 | 0,22 | 0,20 | 0,50 | 0,0221676 | 0,09369  |
| C10orf53       | 0,14 | 1,06 | 0,16 | 0,45 | 0,0221749 | 0,09369  |
| SBDSP          | 4,14 | 0,32 | 3,26 | 1,94 | 0,0221756 | 0,09369  |
| KLF17          | 0,00 | 0,05 | 0,04 | 0,12 | 0,0221759 | 0,09369  |
| USP11          | 3,12 | 0,98 | 1,46 | 2,87 | 0,0221778 | 0,09369  |
| EIF2B5         | 4,30 | 2,79 | 4,16 | 4,44 | 0,022184  | 0,093698 |
| C1QA           | 0,00 | 0,00 | 1,29 | 4,06 | 0,0222018 | 0,093756 |
| RP11-506O24.2  | 0,00 | 0,19 | 0,00 | 0,10 | 0,0222165 | 0,0938   |
| MFSD14B        | 4,87 | 2,91 | 3,93 | 2,19 | 0,022225  | 0,093806 |
| PLXDC2         | 4,75 | 2,24 | 4,57 | 4,24 | 0,0222265 | 0,093806 |
| AC104024.1     | 0,07 | 0,41 | 0,15 | 0,45 | 0,0222425 | 0,093855 |
| SYNPO          | 0,08 | 0,08 | 0,11 | 0,03 | 0,0222475 | 0,093855 |
| AC009133.17    | 1,92 | 3,61 | 2,33 | 2,88 | 0,0222506 | 0,093855 |
| RP11-776B3.1   | 0,00 | 1,24 | 0,00 | 0,00 | 0,0222685 | 0,093912 |
| RBMS3          | 0,72 | 0,72 | 0,79 | 0,92 | 0,0222853 | 0,093965 |
| TOGARAM2       | 0,70 | 1,38 | 0,63 | 0,57 | 0,0223165 | 0,094079 |
| RP11-12A20.6   | 1,58 | 2,72 | 1,62 | 0,66 | 0,0223262 | 0,094102 |
| ADPRH          | 2,55 | 0,31 | 2,45 | 1,93 | 0,0223427 | 0,094154 |
| WRN            | 2,37 | 1,13 | 2,05 | 2,61 | 0,0223554 | 0,094189 |
| RP11-1102P22.1 | 0,54 | 0,31 | 1,48 | 0,32 | 0,0223619 | 0,094198 |
| LTC4S          | 4,27 | 3,08 | 4,04 | 0,74 | 0,022366  | 0,094198 |
| HLC5           | 1,17 | 0,55 | 0,96 | 0,55 | 0,0223891 | 0,094278 |
| PRDM1          | 2,34 | 2,81 | 2,96 | 2,02 | 0,0224054 | 0,094312 |
| ADI1           | 5,94 | 4,45 | 5,20 | 2,99 | 0,0224071 | 0,094312 |
| PLEKHM1P       | 3,71 | 2,21 | 3,07 | 3,58 | 0,02241   | 0,094312 |
| BID            | 7,86 | 7,88 | 7,44 | 6,67 | 0,0224456 | 0,094444 |

|               |      |      |      |      |           |          |
|---------------|------|------|------|------|-----------|----------|
| CUL2          | 3,66 | 1,63 | 3,52 | 1,15 | 0,0225068 | 0,094666 |
| RP11-712C19.2 | 0,56 | 1,25 | 0,84 | 1,16 | 0,022507  | 0,094666 |
| JKAMP         | 6,13 | 2,66 | 5,21 | 1,31 | 0,0225196 | 0,094702 |
| ATP6V1A       | 5,01 | 3,72 | 4,18 | 3,81 | 0,0225497 | 0,09481  |
| RP11-361D15.2 | 3,22 | 0,00 | 4,06 | 1,61 | 0,0225869 | 0,094949 |
| AC098617.1    | 0,00 | 0,00 | 0,00 | 0,00 | 0,0226005 | 0,094988 |
| AJ006998.2    | 1,50 | 2,83 | 0,92 | 0,52 | 0,022673  | 0,095275 |
| ACSF2         | 5,17 | 0,90 | 5,26 | 3,94 | 0,0226864 | 0,095313 |
| AC005757.6    | 0,00 | 1,15 | 0,64 | 1,20 | 0,0227026 | 0,095363 |
| RP11-23E10.3  | 0,48 | 0,91 | 0,69 | 0,75 | 0,0227414 | 0,095508 |
| RP11-5K23.5   | 0,00 | 0,00 | 0,00 | 0,80 | 0,0227458 | 0,095508 |
| PLCXD2        | 0,25 | 0,71 | 0,85 | 0,06 | 0,0227627 | 0,095547 |
| RN7SL644P     | 1,48 | 2,19 | 1,87 | 1,13 | 0,0227637 | 0,095547 |
| CTD-3037G24.4 | 0,00 | 0,38 | 0,31 | 0,00 | 0,0227694 | 0,095553 |
| CFAP44        | 0,11 | 1,12 | 0,45 | 2,07 | 0,0227921 | 0,095631 |
| SNX20         | 5,83 | 5,20 | 5,35 | 4,91 | 0,0227975 | 0,095635 |
| CARS2         | 5,87 | 6,67 | 6,06 | 5,38 | 0,0228039 | 0,095644 |
| METTL25       | 3,41 | 0,92 | 2,98 | 3,46 | 0,0228216 | 0,0957   |
| CDK19         | 3,17 | 3,69 | 2,77 | 1,58 | 0,0228672 | 0,095873 |
| ZKSCAN4       | 1,10 | 0,00 | 0,07 | 0,05 | 0,0228766 | 0,095885 |
| LLNLR-284B4.2 | 0,38 | 0,88 | 0,57 | 0,89 | 0,0228815 | 0,095885 |
| CTD-2319I12.2 | 3,69 | 4,50 | 2,02 | 3,03 | 0,022883  | 0,095885 |
| PSG5          | 0,13 | 0,82 | 0,29 | 0,75 | 0,0228922 | 0,095906 |
| OGDHL         | 0,00 | 0,08 | 0,00 | 0,00 | 0,0229025 | 0,09593  |
| RP11-12G12.7  | 1,27 | 1,72 | 1,56 | 0,97 | 0,0229066 | 0,09593  |
| EIF4EBP1      | 6,99 | 7,64 | 6,89 | 6,99 | 0,0229392 | 0,096039 |
| PCIF1         | 5,26 | 5,77 | 5,17 | 3,60 | 0,0229412 | 0,096039 |
| XPO5          | 3,20 | 3,80 | 3,21 | 3,40 | 0,0229661 | 0,096115 |
| WASHC4        | 5,24 | 3,63 | 4,97 | 5,10 | 0,0229682 | 0,096115 |
| MRO           | 0,08 | 0,03 | 0,11 | 0,66 | 0,0229779 | 0,096138 |
| RP11-164C12.2 | 1,22 | 1,83 | 0,51 | 1,22 | 0,0230125 | 0,096265 |
| RP11-296A18.6 | 0,49 | 0,72 | 0,76 | 1,95 | 0,0230196 | 0,096265 |
| AC023115.2    | 0,64 | 1,76 | 0,78 | 1,44 | 0,0230213 | 0,096265 |
| PDK3          | 3,10 | 0,27 | 2,47 | 2,50 | 0,0230273 | 0,096272 |
| AC012074.2    | 1,10 | 0,00 | 0,17 | 1,45 | 0,0230349 | 0,096286 |
| GOLGA8N       | 2,32 | 3,24 | 1,60 | 2,11 | 0,0230812 | 0,096461 |
| C2orf88       | 1,41 | 2,52 | 1,79 | 1,49 | 0,0231086 | 0,09655  |
| FAM120AOS     | 4,15 | 4,63 | 4,71 | 2,54 | 0,0231111 | 0,09655  |
| RP11-120D5.1  | 0,94 | 2,61 | 0,60 | 1,07 | 0,0231156 | 0,09655  |
| DCAF8         | 4,33 | 2,38 | 5,09 | 5,28 | 0,0231243 | 0,096569 |
| TMEM86A       | 0,14 | 0,00 | 0,13 | 0,27 | 0,023133  | 0,096587 |
| PDE7B         | 1,48 | 0,22 | 1,09 | 0,68 | 0,0231536 | 0,096655 |
| KB-1183D5.18  | 0,00 | 1,13 | 0,00 | 0,00 | 0,0231643 | 0,096667 |
| RP11-394B2.4  | 0,14 | 1,46 | 0,11 | 0,37 | 0,0231652 | 0,096667 |
| PGRMC1        | 3,65 | 1,57 | 4,10 | 4,18 | 0,0231838 | 0,096706 |
| SNORD42A      | 0,00 | 4,23 | 2,73 | 3,40 | 0,0231857 | NA       |
| RP11-58H15.1  | 0,34 | 0,55 | 0,63 | 0,47 | 0,0231907 | 0,096706 |
| CNOT8         | 6,13 | 5,32 | 5,78 | 4,65 | 0,0231981 | 0,096706 |
| AHNAK2        | 0,01 | 0,53 | 0,24 | 0,00 | 0,0231986 | 0,096706 |
| SLC16A4       | 0,24 | 0,53 | 0,62 | 0,73 | 0,0231989 | 0,096706 |
| PAPOLG        | 2,34 | 1,06 | 2,80 | 1,50 | 0,0232017 | 0,096706 |
| RP11-293P20.2 | 1,69 | 0,00 | 1,56 | 2,83 | 0,0232051 | 0,096706 |
| CCDC66        | 4,44 | 1,38 | 3,11 | 3,11 | 0,0232099 | 0,096708 |
| JAKMIP2       | 0,20 | 0,70 | 0,27 | 0,14 | 0,023228  | 0,096765 |
| CACNA1H       | 0,00 | 0,26 | 0,00 | 0,00 | 0,0232412 | 0,096802 |



|                |      |      |      |      |           |          |
|----------------|------|------|------|------|-----------|----------|
| CLEC6A         | 0,00 | 0,00 | 0,00 | 0,58 | 0,0232579 | 0,096854 |
| C1orf35        | 3,26 | 3,53 | 3,93 | 4,17 | 0,0232658 | 0,096866 |
| PDE4C          | 0,37 | 0,65 | 0,47 | 0,59 | 0,0232723 | 0,096866 |
| AC061992.2     | 0,00 | 0,23 | 0,00 | 2,19 | 0,0232739 | 0,096866 |
| NUP58          | 5,51 | 4,08 | 5,12 | 2,87 | 0,0232797 | 0,096871 |
| RP11-39H3.2    | 0,20 | 1,17 | 0,14 | 0,15 | 0,0232903 | 0,096897 |
| RP11-240G22.5  | 0,25 | 0,28 | 0,68 | 1,47 | 0,0232946 | 0,096897 |
| TMEM201        | 0,05 | 2,23 | 0,38 | 0,32 | 0,0233154 | 0,096966 |
| CENPM          | 1,83 | 1,24 | 1,48 | 2,47 | 0,0233402 | 0,097016 |
| C9orf69        | 1,69 | 3,28 | 2,26 | 3,23 | 0,0233404 | 0,097016 |
| RP4-639J15.3   | 0,26 | 0,64 | 0,56 | 0,16 | 0,0233405 | 0,097016 |
| AC009499.2     | 0,29 | 3,41 | 0,29 | 2,34 | 0,0233519 | 0,097045 |
| RP11-379K22.2  | 0,11 | 0,46 | 0,25 | 0,39 | 0,0233587 | 0,097055 |
| STK35          | 0,49 | 1,17 | 1,25 | 1,02 | 0,0233989 | 0,097204 |
| LSM12          | 5,80 | 5,81 | 5,86 | 4,94 | 0,0234134 | 0,097246 |
| RP11-473M20.14 | 3,70 | 2,30 | 2,02 | 1,86 | 0,0234196 | 0,097253 |
| AC093391.2     | 2,82 | 5,29 | 2,85 | 3,98 | 0,0234328 | 0,09729  |
| GPR35          | 3,93 | 0,33 | 3,07 | 2,31 | 0,0234675 | 0,097416 |
| DHX34          | 0,54 | 0,22 | 1,68 | 2,68 | 0,0234744 | 0,097426 |
| RP11-890B15.2  | 0,13 | 0,20 | 0,46 | 0,27 | 0,0235171 | 0,097586 |
| FAM135B        | 0,02 | 2,47 | 0,03 | 0,14 | 0,0235609 | 0,097749 |
| KIF25          | 0,67 | 0,51 | 0,28 | 0,57 | 0,0235794 | 0,097807 |
| PGAM1          | 7,21 | 4,96 | 6,77 | 6,15 | 0,0235936 | 0,097848 |
| RABGEF1        | 4,30 | 3,41 | 4,41 | 3,17 | 0,0236154 | 0,097907 |
| PRELID3B       | 5,14 | 5,14 | 4,41 | 3,85 | 0,0236165 | 0,097907 |
| AC092066.1     | 0,48 | 0,44 | 0,80 | 1,62 | 0,0236293 | 0,097941 |
| SLITRK3        | 0,00 | 0,22 | 0,04 | 0,03 | 0,0236358 | 0,097941 |
| AC135050.5     | 0,68 | 1,03 | 0,86 | 1,72 | 0,0236381 | 0,097941 |
| KDEL3          | 0,00 | 1,35 | 0,00 | 0,00 | 0,0236522 | 0,097981 |
| ZNF213         | 0,86 | 0,82 | 0,67 | 0,55 | 0,0236687 | 0,097998 |
| AF146191.4     | 2,98 | 1,34 | 0,10 | 0,20 | 0,0236688 | 0,097998 |
| OTOGL          | 0,00 | 0,03 | 0,00 | 0,08 | 0,0236694 | 0,097998 |
| TPGS1          | 0,29 | 0,21 | 0,43 | 1,16 | 0,0236787 | 0,098018 |
| SECISBP2L      | 4,04 | 3,51 | 3,45 | 2,63 | 0,0236866 | 0,098032 |
| AC009229.6     | 0,56 | 0,00 | 0,00 | 0,00 | 0,0237011 | 0,098074 |
| NCAM1          | 0,74 | 0,63 | 0,14 | 0,46 | 0,0237234 | 0,098148 |
| AC007275.1     | 0,00 | 0,59 | 0,23 | 0,25 | 0,0237414 | 0,09819  |
| TTC17          | 6,21 | 5,50 | 5,91 | 4,54 | 0,0237423 | 0,09819  |
| PSMC6          | 6,33 | 5,99 | 5,33 | 5,51 | 0,0237692 | 0,098283 |
| CTD-2270N23.1  | 0,15 | 0,00 | 0,20 | 0,70 | 0,0237768 | NA       |
| PCNX2          | 4,06 | 4,60 | 3,65 | 3,22 | 0,023786  | 0,098327 |
| SNU13          | 7,14 | 6,28 | 6,70 | 6,09 | 0,023793  | 0,098327 |
| CFAP97         | 4,07 | 2,04 | 3,93 | 1,47 | 0,0237931 | 0,098327 |
| TMEM209        | 3,27 | 3,09 | 2,08 | 1,34 | 0,0237981 | 0,098329 |
| ZNF304         | 0,03 | 0,00 | 0,09 | 0,03 | 0,0238189 | 0,098384 |
| GRM1           | 0,00 | 0,50 | 0,02 | 0,11 | 0,0238203 | 0,098384 |
| CDHR3          | 0,31 | 0,35 | 0,34 | 0,81 | 0,023836  | 0,098424 |
| ZNF250         | 1,71 | 1,11 | 2,01 | 0,32 | 0,0238388 | 0,098424 |
| TTC39B         | 1,43 | 0,52 | 1,92 | 0,54 | 0,0238455 | 0,098433 |
| TUBA8          | 0,00 | 0,00 | 0,00 | 0,00 | 0,0238645 | 0,098494 |
| FAM169A        | 0,00 | 0,62 | 0,00 | 0,00 | 0,023874  | 0,098515 |
| SMIM7          | 6,46 | 5,91 | 5,66 | 5,32 | 0,0238875 | 0,098552 |
| SPRYD3         | 1,72 | 3,56 | 2,48 | 1,27 | 0,0239386 | 0,098729 |
| CTC-499B15.5   | 1,14 | 1,80 | 1,22 | 2,06 | 0,023944  | 0,098729 |
| SRD5A3         | 3,31 | 0,17 | 2,05 | 1,92 | 0,0239445 | 0,098729 |

|               |      |      |      |      |           |          |
|---------------|------|------|------|------|-----------|----------|
| GPR160        | 4,18 | 2,90 | 3,11 | 3,07 | 0,0239481 | 0,098729 |
| RANBP2        | 5,92 | 4,45 | 5,61 | 3,15 | 0,0239785 | 0,098836 |
| RP11-308B5.2  | 0,36 | 1,78 | 0,68 | 0,72 | 0,023993  | 0,098877 |
| SLIT1         | 0,18 | 0,21 | 0,72 | 0,22 | 0,0240115 | 0,098935 |
| RP3-510L9.1   | 1,26 | 0,00 | 0,14 | 0,40 | 0,0240219 | 0,098943 |
| OR2J2         | 0,07 | 0,06 | 0,14 | 0,19 | 0,0240223 | 0,098943 |
| SCNM1         | 7,79 | 7,54 | 7,48 | 6,56 | 0,0240348 | 0,098976 |
| RP11-56L13.3  | 0,00 | 0,00 | 0,00 | 0,73 | 0,0240423 | 0,098988 |
| RP4-695O20.1  | 0,62 | 0,97 | 0,87 | 0,65 | 0,0240508 | 0,099005 |
| GPR162        | 0,27 | 0,31 | 3,60 | 2,52 | 0,0240621 | 0,099029 |
| CHMP1B        | 6,37 | 5,49 | 5,94 | 5,18 | 0,0240655 | 0,099029 |
| OGFRL1        | 4,28 | 4,16 | 4,63 | 4,14 | 0,0240714 | 0,099035 |
| ADAR          | 5,36 | 4,41 | 5,21 | 5,85 | 0,0240807 | 0,099051 |
| LRRC57        | 3,13 | 1,38 | 1,79 | 1,71 | 0,0240871 | 0,099051 |
| EXOC8         | 0,96 | 0,41 | 0,54 | 2,19 | 0,0240887 | 0,099051 |
| TJP2          | 1,84 | 1,64 | 2,67 | 2,86 | 0,0241146 | 0,099139 |
| H6PD          | 0,87 | 0,42 | 1,77 | 0,70 | 0,0241527 | 0,099262 |
| PXMP2         | 0,63 | 0,00 | 1,90 | 0,50 | 0,0241535 | 0,099262 |
| EPOR          | 0,06 | 0,19 | 0,96 | 1,02 | 0,0241647 | 0,09929  |
| TRIM3         | 0,20 | 0,00 | 0,34 | 1,67 | 0,0241801 | 0,099335 |
| PDIA6         | 6,35 | 4,63 | 5,60 | 4,90 | 0,0242042 | 0,099416 |
| RP11-640L9.1  | 0,00 | 0,48 | 1,84 | 0,00 | 0,0242202 | 0,099463 |
| POLR3B        | 0,91 | 0,03 | 0,79 | 0,41 | 0,0242389 | 0,099521 |
| SPATA7        | 1,82 | 3,92 | 0,84 | 1,77 | 0,0243029 | 0,099754 |
| RP11-941H19.3 | 0,25 | 0,00 | 0,47 | 0,81 | 0,0243044 | 0,099754 |
| DNAJC10       | 5,17 | 4,00 | 4,63 | 4,02 | 0,0243161 | 0,099783 |
| RP11-384C4.2  | 0,00 | 0,42 | 0,00 | 0,00 | 0,024327  | 0,099809 |
| RP11-316A16.1 | 0,12 | 0,25 | 0,27 | 0,46 | 0,024337  | 0,09983  |
| ZC3HAV1       | 6,62 | 5,52 | 5,69 | 4,73 | 0,024341  | 0,09983  |
| NHS           | 0,01 | 0,02 | 0,18 | 0,03 | 0,0243529 | 0,099861 |
| CTD-2197111.1 | 0,43 | 1,00 | 0,93 | 2,34 | 0,024366  | 0,099887 |
| ATRX          | 6,34 | 5,09 | 5,22 | 5,44 | 0,0243723 | 0,099887 |
| AC093627.9    | 0,18 | 1,94 | 0,00 | 2,41 | 0,0243729 | 0,099887 |
| GYG1          | 5,68 | 5,03 | 4,76 | 5,15 | 0,0243999 | 0,099979 |
| TAF10         | 4,40 | 4,82 | 5,47 | 5,75 | 0,0244206 | 0,100046 |
| RP4-545C24.1  | 0,64 | 0,91 | 0,39 | 0,65 | 0,0244277 | 0,10005  |
| SLC35E1       | 3,85 | 4,90 | 4,49 | 3,70 | 0,0244307 | 0,10005  |
| AC116366.4    | 4,19 | 2,30 | 3,92 | 5,29 | 0,0244421 | 0,100078 |
| CSNK1G1       | 2,54 | 3,95 | 3,08 | 2,94 | 0,0244522 | 0,100101 |
| RP11-12A16.3  | 1,48 | 0,95 | 2,39 | 2,59 | 0,0244608 | 0,100118 |
| CC2D1A        | 2,00 | 2,50 | 2,89 | 3,65 | 0,0244746 | 0,100156 |
| CTD-2270L9.3  | 0,35 | 0,56 | 0,39 | 0,39 | 0,0244894 | 0,100198 |
| PTDSS1        | 5,99 | 5,42 | 4,82 | 4,47 | 0,0245056 | 0,100246 |
| NR1D1         | 0,32 | 0,10 | 0,61 | 0,00 | 0,0245234 | 0,100293 |
| SNRPD3        | 5,88 | 5,16 | 5,94 | 5,05 | 0,0245291 | 0,100293 |
| BLM           | 0,20 | 0,37 | 0,87 | 0,10 | 0,0245307 | 0,100293 |
| PCDH11Y       | 0,07 | 0,43 | 0,08 | 0,18 | 0,0245405 | 0,100315 |
| FKBP6         | 0,00 | 0,10 | 0,00 | 0,07 | 0,0245534 | 0,100344 |
| MMRN1         | 0,02 | 0,04 | 0,00 | 0,13 | 0,0245567 | 0,100344 |
| FANCB         | 0,06 | 0,00 | 0,03 | 1,33 | 0,0245622 | 0,100348 |
| EEDP1         | 1,41 | 0,30 | 2,92 | 2,63 | 0,024591  | 0,100421 |
| RP11-112L6.5  | 1,40 | 2,18 | 1,69 | 1,17 | 0,0245915 | 0,100421 |
| RP11-473I1.6  | 1,33 | 2,35 | 0,75 | 1,29 | 0,0245975 | 0,100421 |
| RP1-209A6.1   | 1,08 | 0,00 | 1,23 | 0,22 | 0,024598  | 0,100421 |
| KB-1460A1.3   | 0,00 | 0,00 | 0,17 | 0,42 | 0,0245997 | NA       |

|                |      |      |      |      |           |          |
|----------------|------|------|------|------|-----------|----------|
| GPR109B        | 0,00 | 0,00 | 0,03 | 0,00 | 0,0246029 | 0,100422 |
| XRCC6          | 7,60 | 7,04 | 7,30 | 6,31 | 0,0246312 | 0,100519 |
| SCART1         | 0,47 | 1,57 | 0,54 | 0,85 | 0,0246373 | 0,100526 |
| KIAA0195       | 3,89 | 4,51 | 3,72 | 4,56 | 0,02465   | 0,100559 |
| RP4-541C22.5   | 0,00 | 1,33 | 0,00 | 0,00 | 0,0246563 | 0,100566 |
| SLC40A1        | 3,28 | 2,56 | 2,72 | 0,81 | 0,0247057 | 0,10074  |
| CTD-2326C4.1   | 2,02 | 1,95 | 2,45 | 2,07 | 0,024708  | 0,10074  |
| EBF4           | 0,00 | 0,00 | 0,00 | 0,00 | 0,0247224 | 0,100773 |
| SLC2A1         | 4,60 | 5,26 | 3,73 | 2,72 | 0,0247251 | 0,100773 |
| HGF            | 0,00 | 0,02 | 0,57 | 0,05 | 0,0247337 | 0,100789 |
| RABGGTB        | 6,69 | 5,73 | 6,24 | 5,48 | 0,0247588 | 0,100873 |
| ZNF480         | 3,57 | 4,98 | 3,59 | 3,18 | 0,0247658 | 0,100884 |
| ZNF277         | 4,92 | 2,73 | 3,98 | 3,12 | 0,0247816 | 0,100914 |
| SH3BGRL        | 7,73 | 6,36 | 7,09 | 7,14 | 0,0247964 | 0,100914 |
| CNOT11         | 4,18 | 3,55 | 4,04 | 2,14 | 0,024798  | 0,100914 |
| LINC01595      | 0,54 | 0,56 | 0,36 | 0,00 | 0,0247981 | 0,100914 |
| RP11-481C4.2   | 1,02 | 0,39 | 0,73 | 0,79 | 0,0247999 | 0,100914 |
| RP4-694B14.5   | 1,52 | 2,25 | 1,98 | 3,35 | 0,0248006 | 0,100914 |
| ZNF48          | 0,17 | 0,20 | 0,12 | 0,82 | 0,0248071 | 0,100915 |
| SOCS5          | 1,84 | 0,14 | 0,78 | 0,36 | 0,0248109 | 0,100915 |
| RASD1          | 0,10 | 0,17 | 1,28 | 0,26 | 0,0248145 | 0,100915 |
| FAM95B1        | 0,23 | 1,49 | 0,11 | 0,06 | 0,0248192 | 0,100916 |
| ZNF503         | 0,73 | 1,60 | 1,51 | 1,07 | 0,0248348 | 0,100961 |
| TP53I13        | 2,97 | 4,83 | 4,19 | 2,49 | 0,0248449 | 0,100984 |
| RGPD1          | 0,97 | 0,11 | 0,17 | 0,14 | 0,0248496 | 0,100984 |
| EIF3B          | 5,35 | 5,24 | 5,79 | 6,23 | 0,0248821 | 0,101097 |
| XAF1           | 6,73 | 4,92 | 5,46 | 6,13 | 0,0248864 | 0,101097 |
| TUSC2          | 3,73 | 1,17 | 3,80 | 4,69 | 0,0249118 | 0,101181 |
| ZBTB6          | 0,00 | 0,43 | 0,23 | 0,11 | 0,0249211 | 0,101201 |
| HOOK3          | 4,65 | 5,88 | 4,83 | 4,54 | 0,0249405 | 0,101261 |
| RP11-160A9.2   | 0,00 | 0,00 | 0,00 | 1,52 | 0,0249662 | 0,101347 |
| NDST2          | 2,63 | 0,50 | 3,47 | 4,47 | 0,0249707 | 0,101347 |
| GPATCH8        | 4,25 | 2,38 | 4,43 | 4,75 | 0,0250161 | 0,101512 |
| RP11-122K13.12 | 0,00 | 0,33 | 0,72 | 0,00 | 0,0250396 | 0,101563 |
| ZNF79          | 0,37 | 0,00 | 0,00 | 0,00 | 0,0250415 | 0,101563 |
| EMSY           | 3,55 | 3,22 | 3,56 | 2,90 | 0,0250422 | 0,101563 |
| TMEM219        | 7,86 | 8,02 | 8,24 | 8,20 | 0,0250499 | 0,101575 |
| RP4-794H19.2   | 0,00 | 0,00 | 0,00 | 0,16 | 0,0250555 | 0,101579 |
| RP11-112L7.1   | 0,13 | 0,18 | 0,15 | 0,21 | 0,0250822 | 0,101657 |
| AKT1           | 4,29 | 5,06 | 3,79 | 3,52 | 0,0250839 | 0,101657 |
| AC005077.12    | 0,70 | 1,33 | 0,91 | 0,92 | 0,0251035 | 0,101718 |
| RP11-461A8.5   | 0,57 | 0,61 | 0,00 | 0,00 | 0,0251388 | 0,101843 |
| DGKB           | 0,64 | 0,35 | 0,34 | 3,29 | 0,0251453 | 0,101851 |
| LRRC2          | 0,37 | 0,51 | 0,40 | 0,84 | 0,0251532 | 0,101864 |
| DDX42          | 4,63 | 3,44 | 4,50 | 4,85 | 0,025179  | 0,101937 |
| RP11-108M9.3   | 0,00 | 0,50 | 0,00 | 0,00 | 0,0251817 | 0,101937 |
| MRPL53         | 5,15 | 5,49 | 5,56 | 5,67 | 0,0251851 | 0,101937 |
| RP5-999L4.2    | 0,00 | 1,82 | 1,04 | 2,61 | 0,0252063 | 0,102005 |
| RP11-518D3.1   | 0,93 | 0,27 | 1,13 | 0,54 | 0,0252231 | 0,102054 |
| LIF            | 0,00 | 0,00 | 0,00 | 0,00 | 0,0252477 | 0,102125 |
| TPGS2          | 4,52 | 4,70 | 4,48 | 2,60 | 0,0252499 | 0,102125 |
| AR             | 0,14 | 0,38 | 0,20 | 0,25 | 0,0252684 | 0,102182 |
| USP33          | 5,48 | 5,20 | 5,11 | 6,02 | 0,0252873 | 0,102239 |
| RP11-409J23.1  | 0,00 | 0,03 | 0,03 | 0,04 | 0,0253192 | 0,102337 |
| SLC30A1        | 2,59 | 3,06 | 2,01 | 0,80 | 0,0253207 | 0,102337 |

|                |      |      |      |      |           |          |
|----------------|------|------|------|------|-----------|----------|
| AP2B1          | 2,95 | 4,00 | 4,02 | 3,45 | 0,0253372 | 0,102385 |
| ERP27          | 2,86 | 2,75 | 1,11 | 0,52 | 0,0253427 | 0,102389 |
| LPAR3          | 0,31 | 0,88 | 0,39 | 0,76 | 0,0253602 | 0,102441 |
| RP11-314B1.1   | 1,49 | 3,12 | 0,65 | 3,35 | 0,025379  | 0,102497 |
| PCGF5          | 5,79 | 3,49 | 5,20 | 2,80 | 0,0253833 | 0,102497 |
| CTC1           | 2,13 | 0,83 | 1,26 | 1,68 | 0,0254007 | 0,102528 |
| ANO7P1         | 0,00 | 0,00 | 0,00 | 0,00 | 0,0254062 | 0,102528 |
| ABHD17B        | 1,86 | 0,30 | 1,75 | 1,26 | 0,0254071 | 0,102528 |
| KBTBD7         | 0,13 | 0,00 | 0,18 | 0,12 | 0,0254093 | 0,102528 |
| MAP3K10        | 1,92 | 2,13 | 2,49 | 2,75 | 0,0254279 | 0,102582 |
| MINOS1         | 6,35 | 7,01 | 6,51 | 6,37 | 0,0254349 | 0,102582 |
| CFI            | 1,54 | 0,60 | 1,84 | 1,56 | 0,02544   | 0,102582 |
| AC009120.10    | 1,73 | 2,41 | 2,70 | 2,18 | 0,0254412 | 0,102582 |
| TRIP11         | 4,50 | 2,50 | 3,79 | 2,59 | 0,0254697 | 0,102678 |
| XIAP           | 3,18 | 2,88 | 3,35 | 1,28 | 0,0255008 | 0,102781 |
| BTF3           | 9,80 | 9,32 | 9,58 | 8,91 | 0,0255057 | 0,102781 |
| POLR2D         | 4,82 | 3,86 | 3,68 | 1,98 | 0,025509  | 0,102781 |
| COL9A1         | 0,01 | 0,30 | 0,16 | 0,17 | 0,0255164 | 0,102792 |
| RP11-206L10.17 | 0,00 | 0,43 | 0,23 | 0,55 | 0,025538  | 0,102855 |
| CCDC91         | 5,02 | 3,95 | 4,16 | 4,80 | 0,0255415 | 0,102855 |
| RP11-671J11.7  | 1,29 | 0,00 | 1,55 | 1,64 | 0,0255548 | 0,102873 |
| TRAK2          | 2,72 | 2,24 | 2,41 | 2,22 | 0,0255555 | 0,102873 |
| RP11-284F21.9  | 0,04 | 0,04 | 0,05 | 0,07 | 0,0255598 | 0,102873 |
| RNASEL         | 1,37 | 0,08 | 1,10 | 1,06 | 0,0255751 | 0,102916 |
| NEDD4L         | 0,27 | 2,46 | 0,66 | 0,56 | 0,0256024 | 0,102999 |
| RP1-58B11.2    | 1,55 | 3,36 | 1,36 | 0,41 | 0,025605  | 0,102999 |
| RN7SL2         | 4,52 | 4,71 | 4,19 | 6,57 | 0,0256185 | 0,103035 |
| RP11-359B12.2  | 0,46 | 0,13 | 1,06 | 0,08 | 0,0256256 | 0,103045 |
| AMBRA1         | 0,90 | 0,03 | 1,31 | 1,11 | 0,0256373 | 0,10306  |
| RP11-469N6.3   | 0,00 | 0,00 | 0,26 | 0,00 | 0,0256386 | 0,10306  |
| ZRSR2          | 3,94 | 3,84 | 4,81 | 4,45 | 0,0256773 | 0,103197 |
| RP11-120M18.2  | 0,86 | 1,79 | 0,62 | 0,72 | 0,0256931 | 0,103238 |
| MRPL42         | 5,27 | 6,27 | 4,23 | 4,30 | 0,0256992 | 0,103238 |
| ZBTB8B         | 0,24 | 0,34 | 0,35 | 0,44 | 0,0257015 | 0,103238 |
| RP11-33D13.2   | 0,00 | 0,00 | 0,34 | 0,68 | 0,0257269 | NA       |
| CTD-2530H13.2  | 3,60 | 3,31 | 4,83 | 2,32 | 0,0257445 | 0,103392 |
| SETBP1         | 0,68 | 0,03 | 0,07 | 0,05 | 0,0257536 | 0,103408 |
| TCTN1          | 2,02 | 1,68 | 2,20 | 2,17 | 0,0257579 | 0,103408 |
| LINC00923      | 1,12 | 0,34 | 1,16 | 1,16 | 0,0257725 | 0,103448 |
| CXCR2          | 1,03 | 0,19 | 0,17 | 0,04 | 0,0258362 | 0,103685 |
| AC004782.1     | 5,54 | 0,00 | 4,76 | 0,66 | 0,0258525 | 0,103731 |
| SEMA6B         | 1,23 | 0,07 | 1,88 | 1,17 | 0,0258572 | 0,103731 |
| TARDBP         | 5,51 | 4,91 | 5,82 | 6,20 | 0,0258615 | 0,103731 |
| HSPD1          | 6,17 | 6,08 | 6,10 | 5,20 | 0,0258767 | 0,103773 |
| RP5-1139I1.1   | 0,22 | 1,08 | 0,34 | 0,51 | 0,0258828 | 0,103778 |
| RP11-154H23.5  | 0,00 | 0,00 | 0,00 | 0,00 | 0,0258905 | 0,103778 |
| LMO7           | 2,66 | 0,76 | 2,78 | 2,44 | 0,0258963 | 0,103778 |
| GOSR1          | 5,25 | 2,07 | 5,14 | 4,17 | 0,0258966 | 0,103778 |
| RP11-169K16.9  | 1,99 | 1,84 | 2,30 | 2,39 | 0,0259298 | 0,103892 |
| HMOX2          | 5,88 | 3,56 | 5,07 | 4,59 | 0,0259695 | 0,104033 |
| FAM83C         | 0,03 | 0,00 | 0,02 | 0,04 | 0,0259905 | 0,104098 |
| L3MBTL2        | 2,51 | 4,42 | 2,66 | 1,90 | 0,0260038 | 0,104132 |
| RP3-466P17.3   | 1,02 | 2,04 | 0,94 | 1,76 | 0,0260268 | 0,104204 |
| RP11-582J16.5  | 0,01 | 0,17 | 0,06 | 0,06 | 0,0260311 | 0,104204 |
| ZNRF1          | 0,00 | 0,93 | 0,71 | 2,07 | 0,0260382 | 0,104214 |

|               |      |      |      |      |           |          |
|---------------|------|------|------|------|-----------|----------|
| NT5M          | 1,81 | 0,00 | 1,83 | 0,60 | 0,0260509 | 0,104226 |
| TIAF1         | 0,79 | 0,43 | 0,82 | 0,46 | 0,0260549 | 0,104226 |
| RP11-196D18.3 | 0,10 | 0,25 | 0,15 | 0,24 | 0,0260559 | 0,104226 |
| SPCS2         | 6,42 | 5,10 | 5,81 | 3,42 | 0,026062  | 0,104226 |
| ENTHD2        | 2,18 | 0,67 | 2,46 | 3,21 | 0,0260648 | 0,104226 |
| CASKIN2       | 0,00 | 0,00 | 0,30 | 0,00 | 0,026101  | 0,104344 |
| MAGED1        | 2,47 | 2,07 | 1,48 | 0,76 | 0,0261035 | 0,104344 |
| RP11-387H17.6 | 0,31 | 0,38 | 0,92 | 1,17 | 0,0261149 | 0,10437  |
| TPCN2         | 2,35 | 1,10 | 2,96 | 2,01 | 0,0261223 | 0,104381 |
| RP11-43D4.3   | 0,74 | 0,84 | 1,54 | 1,96 | 0,0261363 | 0,104419 |
| PLCB2         | 6,66 | 7,32 | 7,02 | 6,95 | 0,0261595 | 0,104492 |
| FAM98C        | 2,38 | 3,21 | 3,37 | 1,82 | 0,0261791 | 0,104552 |
| P3H4          | 0,60 | 1,04 | 0,76 | 1,79 | 0,0262065 | 0,104642 |
| RP4-534N18.4  | 0,47 | 0,59 | 0,61 | 1,01 | 0,026212  | 0,104646 |
| TLL12         | 0,55 | 2,78 | 1,62 | 1,15 | 0,0262268 | 0,104686 |
| YWHAQ         | 6,70 | 5,81 | 6,21 | 5,59 | 0,0262689 | 0,104823 |
| FZD3          | 0,34 | 0,19 | 0,42 | 0,17 | 0,0262705 | 0,104823 |
| ADCK2         | 3,33 | 0,27 | 3,24 | 4,83 | 0,0262904 | 0,104867 |
| ADPRHL2       | 4,54 | 1,06 | 4,34 | 0,65 | 0,0262925 | 0,104867 |
| RP11-5L12.1   | 1,20 | 1,23 | 1,15 | 0,62 | 0,0262958 | 0,104867 |
| CNTN2         | 0,28 | 0,31 | 0,32 | 0,45 | 0,0263042 | 0,104882 |
| RP11-246A10.1 | 1,01 | 0,73 | 1,76 | 1,12 | 0,026331  | 0,10497  |
| IL1R2         | 6,97 | 6,17 | 6,87 | 4,72 | 0,0263546 | 0,105045 |
| DDX52         | 3,30 | 4,39 | 3,17 | 3,01 | 0,0263602 | 0,105049 |
| RP5-857K21.14 | 0,00 | 0,00 | 1,28 | 2,37 | 0,0263644 | NA       |
| ELMOD3        | 3,40 | 1,51 | 3,82 | 4,31 | 0,0263736 | 0,105061 |
| DCAF6         | 4,26 | 3,86 | 4,13 | 2,87 | 0,0263784 | 0,105061 |
| AP001595.1    | 1,65 | 1,12 | 0,36 | 1,85 | 0,0263809 | 0,105061 |
| ZNF189        | 0,06 | 0,22 | 0,72 | 0,58 | 0,0263823 | 0,105061 |
| BBS2          | 3,25 | 0,29 | 3,12 | 1,18 | 0,0264141 | 0,105169 |
| ITGB7         | 5,83 | 6,11 | 6,17 | 5,06 | 0,0264197 | 0,105173 |
| RP11-545A16.4 | 0,00 | 0,00 | 0,42 | 0,53 | 0,0264318 | 0,105202 |
| BIRC3         | 3,89 | 3,45 | 3,85 | 3,09 | 0,0264409 | 0,105219 |
| MAPKAPK5      | 4,12 | 2,95 | 2,26 | 2,17 | 0,0264605 | 0,105278 |
| RYK           | 1,18 | 2,29 | 2,35 | 1,02 | 0,026506  | 0,105441 |
| CCDC80        | 0,95 | 0,90 | 1,06 | 1,52 | 0,0265241 | 0,105494 |
| HDAC3         | 6,65 | 5,57 | 6,85 | 6,59 | 0,0265493 | 0,105575 |
| BRPF1         | 2,16 | 2,15 | 3,25 | 2,30 | 0,0265656 | 0,105621 |
| RP5-857K21.7  | 0,37 | 0,54 | 0,60 | 1,01 | 0,0266311 | 0,105847 |
| FRAT1         | 1,15 | 2,25 | 1,98 | 1,61 | 0,026632  | 0,105847 |
| RP11-71N10.1  | 0,00 | 0,00 | 0,00 | 0,06 | 0,0266405 | 0,105856 |
| RPS3AP3       | 0,00 | 0,00 | 0,00 | 4,11 | 0,0266437 | 0,105856 |
| ALMS1         | 1,88 | 0,65 | 2,34 | 1,37 | 0,0266764 | 0,105967 |
| ZDHHC12       | 5,39 | 6,15 | 4,41 | 3,68 | 0,0266858 | 0,105985 |
| CEPT1         | 4,78 | 3,45 | 3,32 | 3,65 | 0,026693  | 0,105995 |
| AC016907.3    | 2,08 | 2,84 | 2,06 | 2,28 | 0,0267215 | 0,10608  |
| SLC9B1        | 0,83 | 1,05 | 1,75 | 1,20 | 0,0267239 | 0,10608  |
| SH2D1A        | 0,05 | 0,06 | 0,00 | 2,45 | 0,0267365 | 0,106096 |
| RP11-644F5.10 | 1,31 | 0,66 | 1,58 | 1,53 | 0,0267376 | 0,106096 |
| LGALS3BP      | 3,54 | 0,25 | 3,35 | 2,90 | 0,0267624 | 0,106175 |
| AC159540.1    | 4,71 | 5,58 | 4,33 | 5,23 | 0,0267694 | 0,106184 |
| CMTR2         | 2,46 | 0,33 | 1,92 | 2,39 | 0,0268069 | 0,106301 |
| AP001055.6    | 0,52 | 0,39 | 1,86 | 1,34 | 0,0268084 | 0,106301 |
| FLNB          | 2,84 | 1,92 | 0,46 | 1,55 | 0,0268513 | 0,106452 |
| UBE2D4        | 4,15 | 4,97 | 3,15 | 5,17 | 0,0268596 | 0,106456 |

|                |      |      |      |      |           |          |
|----------------|------|------|------|------|-----------|----------|
| HNRNPM         | 6,37 | 6,80 | 6,03 | 5,41 | 0,0268618 | 0,106456 |
| RP11-354K4.1   | 0,10 | 0,38 | 0,13 | 0,21 | 0,026887  | 0,10652  |
| HAVCR1         | 0,55 | 0,24 | 0,71 | 0,08 | 0,0268876 | 0,10652  |
| DENND6B        | 1,15 | 2,54 | 2,26 | 2,61 | 0,0269075 | 0,106561 |
| ECT2           | 1,31 | 4,32 | 1,83 | 2,83 | 0,0269088 | 0,106561 |
| CD69           | 5,81 | 5,46 | 5,55 | 3,44 | 0,0269144 | 0,106561 |
| SRPK3          | 0,05 | 0,06 | 0,06 | 0,10 | 0,0269173 | 0,106561 |
| WDR72          | 0,22 | 0,44 | 0,39 | 0,51 | 0,0269585 | 0,106706 |
| KIAA1217       | 0,00 | 0,08 | 0,00 | 0,00 | 0,0270026 | 0,106861 |
| ACO04878.2     | 0,50 | 0,58 | 0,43 | 0,89 | 0,0270191 | 0,1069   |
| ZNF681         | 0,57 | 0,11 | 0,16 | 0,14 | 0,0270219 | 0,1069   |
| SSX2B          | 0,00 | 0,12 | 0,00 | 0,00 | 0,0270496 | 0,10699  |
| PSME3          | 5,22 | 3,35 | 3,90 | 2,67 | 0,0270677 | 0,107039 |
| ORMDL2         | 5,53 | 4,70 | 5,68 | 5,95 | 0,0270715 | 0,107039 |
| AP000253.1     | 0,11 | 0,50 | 0,23 | 0,47 | 0,0270807 | 0,107041 |
| CASD1          | 2,56 | 2,44 | 1,56 | 0,77 | 0,0270818 | 0,107041 |
| TRPM1          | 0,04 | 0,60 | 0,05 | 0,07 | 0,0271063 | 0,107103 |
| RP3-522P13.2   | 0,00 | 0,00 | 0,07 | 0,00 | 0,027107  | 0,107103 |
| RP5-1024N4.2   | 1,70 | 3,26 | 2,68 | 3,06 | 0,0271124 | 0,107105 |
| TC2N           | 0,38 | 0,86 | 0,00 | 0,38 | 0,0271636 | 0,107232 |
| RP11-576D8.2   | 0,00 | 0,16 | 0,14 | 0,19 | 0,0271638 | 0,107232 |
| NCF1B          | 2,73 | 3,71 | 2,83 | 4,36 | 0,027164  | 0,107232 |
| TRPC6          | 0,79 | 0,00 | 0,07 | 0,00 | 0,0271684 | 0,107232 |
| FOXJ3          | 3,47 | 2,89 | 3,37 | 1,57 | 0,0271687 | 0,107232 |
| RP11-294J22.7  | 2,13 | 3,54 | 1,30 | 0,55 | 0,0271777 | 0,107249 |
| NUDCD2         | 4,37 | 3,72 | 3,71 | 1,96 | 0,027214  | 0,107373 |
| RPL36AL        | 7,36 | 7,58 | 7,58 | 7,84 | 0,027223  | 0,107389 |
| ATP5J2         | 7,65 | 7,61 | 7,80 | 8,06 | 0,0272417 | 0,107444 |
| PTGIR          | 1,16 | 1,56 | 1,55 | 2,59 | 0,0272577 | 0,107488 |
| SLC10A2        | 0,00 | 0,00 | 0,00 | 0,03 | 0,0272811 | 0,107525 |
| NADK2          | 2,56 | 2,66 | 2,30 | 3,14 | 0,0272823 | 0,107525 |
| CCDC47         | 5,80 | 6,11 | 5,23 | 3,31 | 0,0272863 | 0,107525 |
| AFAP1-AS1      | 0,02 | 0,13 | 0,06 | 0,10 | 0,0272863 | 0,107525 |
| FPR1           | 5,67 | 5,04 | 6,31 | 6,51 | 0,0272951 | 0,10754  |
| RP11-517I24.5  | 1,43 | 2,21 | 1,59 | 0,77 | 0,0273158 | 0,107603 |
| RP11-379B18.8  | 2,16 | 3,53 | 2,60 | 2,44 | 0,0273282 | 0,107632 |
| RP11-339B21.11 | 0,00 | 0,00 | 0,00 | 0,00 | 0,0273904 | 0,107858 |
| OMA1           | 4,47 | 3,70 | 3,23 | 5,78 | 0,0274028 | 0,107888 |
| MFN2           | 3,11 | 0,54 | 2,96 | 2,74 | 0,0274147 | 0,107915 |
| CTC-550B14.7   | 1,40 | 3,19 | 2,29 | 2,34 | 0,0274214 | 0,107923 |
| AC000099.1     | 0,00 | 0,00 | 0,00 | 0,13 | 0,0274328 | NA       |
| RP11-42A4.1    | 0,00 | 0,00 | 0,00 | 0,00 | 0,0274501 | 0,108017 |
| PASD1          | 0,00 | 0,04 | 0,00 | 0,00 | 0,027461  | 0,10804  |
| DDX39A         | 6,99 | 6,07 | 6,18 | 5,94 | 0,0274693 | 0,108054 |
| BLOC1S3        | 3,01 | 0,80 | 0,53 | 0,42 | 0,0274747 | 0,108054 |
| TIA1           | 4,60 | 2,31 | 4,16 | 4,26 | 0,0274791 | 0,108054 |
| GOLGA6L22      | 0,43 | 0,00 | 0,53 | 0,79 | 0,0275207 | 0,108177 |
| ZFAND6         | 6,88 | 6,35 | 5,97 | 5,93 | 0,0275213 | 0,108177 |
| RP11-358L22.2  | 1,04 | 1,13 | 0,87 | 1,02 | 0,0275248 | 0,108177 |
| RP11-225L12.2  | 3,06 | 2,17 | 3,80 | 4,01 | 0,0275364 | 0,108191 |
| HPSS           | 5,23 | 3,48 | 4,43 | 2,99 | 0,0275381 | 0,108191 |
| ZNF646         | 0,27 | 0,00 | 0,46 | 0,02 | 0,0275439 | 0,108194 |
| ALOX5AP        | 7,36 | 6,13 | 6,48 | 5,52 | 0,0275744 | 0,108294 |
| TMC3           | 0,53 | 1,27 | 0,10 | 0,02 | 0,027579  | 0,108294 |
| RP11-111F5.4   | 0,34 | 0,00 | 0,20 | 0,09 | 0,0275988 | 0,108345 |

|               |       |       |       |       |           |          |
|---------------|-------|-------|-------|-------|-----------|----------|
| CTD-2013N17.6 | 0,11  | 0,34  | 0,12  | 0,07  | 0,0276018 | 0,108345 |
| TTY8          | 0,17  | 0,00  | 0,00  | 0,17  | 0,0276042 | NA       |
| TTY8B         | 0,17  | 0,00  | 0,00  | 0,17  | 0,0276042 | NA       |
| VEGFA         | 1,61  | 2,61  | 3,17  | 1,77  | 0,027613  | 0,10837  |
| KMT5C         | 0,08  | 1,07  | 0,33  | 0,47  | 0,0276342 | 0,108422 |
| CAMKK1        | 0,51  | 1,83  | 0,86  | 0,25  | 0,027636  | 0,108422 |
| WHAMML1       | 2,25  | 1,58  | 1,63  | 1,53  | 0,0276414 | 0,108424 |
| DUS1L         | 4,23  | 5,47  | 5,27  | 4,98  | 0,0276495 | 0,108437 |
| PRR26         | 0,00  | 0,15  | 0,00  | 0,03  | 0,027683  | 0,108536 |
| TFB1M         | 4,36  | 1,66  | 3,37  | 1,80  | 0,0276846 | 0,108536 |
| TUBG1         | 2,04  | 1,23  | 0,73  | 0,43  | 0,0276984 | 0,108571 |
| CLEC11A       | 0,89  | 3,98  | 2,07  | 2,18  | 0,0277244 | 0,108654 |
| RP11-573M3.5  | 0,55  | 1,58  | 0,65  | 1,30  | 0,0277653 | 0,108795 |
| WTAP          | 6,83  | 5,70  | 6,33  | 5,93  | 0,0277925 | 0,108882 |
| PLEKHG4       | 0,30  | 0,61  | 0,68  | 0,51  | 0,0278061 | 0,108916 |
| VPS9D1        | 1,74  | 2,87  | 2,31  | 3,13  | 0,0278336 | 0,109005 |
| PDZD9         | 0,17  | 0,00  | 0,19  | 0,00  | 0,0278407 | 0,109013 |
| IGLC1         | 1,52  | 3,03  | 1,52  | 1,14  | 0,0278713 | 0,109108 |
| TP53I3        | 2,65  | 1,47  | 4,14  | 1,14  | 0,0278838 | 0,109108 |
| RP11-39K24.4  | 1,82  | 1,16  | 0,90  | 0,24  | 0,0278867 | 0,109108 |
| RP5-1142A6.9  | 0,02  | 0,18  | 0,10  | 0,95  | 0,0278893 | 0,109108 |
| RP11-666A8.7  | 1,48  | 2,61  | 2,13  | 2,76  | 0,0278936 | 0,109108 |
| RP11-53B2.2   | 0,99  | 0,41  | 1,45  | 0,21  | 0,0278944 | 0,109108 |
| CTD-2579N5.1  | 0,05  | 0,00  | 0,00  | 0,14  | 0,027902  | NA       |
| NAP1L5        | 0,00  | 0,21  | 0,03  | 0,07  | 0,02791   | 0,10915  |
| MEF2B         | 0,00  | 0,00  | 0,86  | 0,00  | 0,0279455 | 0,10927  |
| RN7SL73P      | 3,53  | 4,07  | 3,56  | 4,04  | 0,0279868 | 0,109412 |
| PSMG2         | 6,87  | 7,09  | 6,07  | 5,38  | 0,0280028 | 0,109451 |
| MFHAS1        | 1,25  | 0,23  | 1,28  | 2,89  | 0,0280066 | 0,109451 |
| CBR1          | 5,83  | 1,13  | 5,40  | 6,53  | 0,0280157 | 0,109467 |
| PCMT1         | 6,62  | 5,87  | 5,81  | 5,04  | 0,0280389 | 0,109538 |
| RP11-415K20.2 | 0,00  | 0,16  | 0,00  | 0,08  | 0,0280815 | 0,109676 |
| RN7SL494P     | 0,00  | 4,86  | 0,00  | 0,00  | 0,028084  | 0,109676 |
| C12orf57      | 4,73  | 5,86  | 4,92  | 3,95  | 0,0281024 | 0,109729 |
| CD38          | 2,98  | 0,76  | 2,91  | 2,35  | 0,0281122 | 0,109748 |
| RP11-10K16.1  | 0,38  | 0,35  | 0,46  | 0,28  | 0,0281479 | 0,109868 |
| TMEM41A       | 4,02  | 5,73  | 3,76  | 3,12  | 0,0281575 | 0,109877 |
| LINC00568     | 0,33  | 1,09  | 0,66  | 0,67  | 0,0281641 | 0,109877 |
| ARHGEF10L     | 0,88  | 3,46  | 2,98  | 3,44  | 0,028165  | 0,109877 |
| CWC15         | 5,94  | 6,00  | 5,60  | 6,06  | 0,0281729 | 0,109888 |
| RP11-589P10.5 | 1,09  | 1,60  | 0,81  | 0,00  | 0,0281795 | 0,109895 |
| PLAC8         | 7,28  | 6,35  | 6,87  | 7,29  | 0,0281883 | 0,109908 |
| PNPO          | 2,94  | 0,49  | 2,42  | 2,19  | 0,028197  | 0,109908 |
| CHIC2         | 4,11  | 2,30  | 4,42  | 1,48  | 0,0282    | 0,109908 |
| RP11-163M18.1 | 1,38  | 0,00  | 1,31  | 2,23  | 0,0282027 | 0,109908 |
| AP000654.4    | 0,12  | 3,16  | 0,59  | 0,17  | 0,0282168 | 0,109944 |
| EGLN2         | 5,34  | 5,91  | 5,61  | 5,21  | 0,0282324 | 0,109985 |
| MYL6          | 11,53 | 11,58 | 11,61 | 11,66 | 0,0282685 | 0,110099 |
| NRDE2         | 3,82  | 2,71  | 2,07  | 3,15  | 0,0282715 | 0,110099 |
| FSD1          | 0,00  | 0,19  | 0,09  | 0,26  | 0,028286  | 0,110136 |
| USP38         | 3,00  | 1,71  | 2,32  | 0,75  | 0,0282988 | 0,110146 |
| UBASH3B       | 2,92  | 1,83  | 2,01  | 0,92  | 0,028303  | 0,110146 |
| NME1-NME2     | 0,91  | 0,00  | 0,47  | 0,00  | 0,0283037 | 0,110146 |
| P4HB          | 5,69  | 6,61  | 6,26  | 5,94  | 0,0283095 | 0,110146 |
| AC073479.1    | 0,07  | 0,10  | 0,25  | 0,34  | 0,0283174 | 0,110146 |

|                |      |      |      |      |           |          |
|----------------|------|------|------|------|-----------|----------|
| TACO1          | 1,22 | 4,49 | 1,95 | 2,75 | 0,0283188 | 0,110146 |
| BCL7C          | 2,17 | 2,68 | 3,01 | 3,18 | 0,0283233 | 0,110146 |
| ATAD1          | 4,07 | 2,71 | 2,62 | 4,40 | 0,0283359 | 0,110176 |
| SLFN12L        | 2,33 | 2,74 | 2,25 | 1,91 | 0,0283417 | 0,110179 |
| RP11-188C12.2  | 0,09 | 1,77 | 0,55 | 0,00 | 0,0283778 | 0,110279 |
| RP11-800A18.3  | 0,79 | 1,14 | 0,36 | 0,29 | 0,0283806 | 0,110279 |
| SMIM11B        | 4,68 | 0,92 | 3,13 | 4,76 | 0,0283823 | 0,110279 |
| THEMIS2        | 7,35 | 6,85 | 7,06 | 6,54 | 0,0284074 | 0,110357 |
| GIMAP4         | 3,69 | 5,05 | 5,31 | 5,82 | 0,0284343 | 0,110442 |
| ATP6V1D        | 5,69 | 5,44 | 4,72 | 3,35 | 0,028443  | 0,110457 |
| GOLGA8R        | 0,07 | 0,13 | 0,30 | 0,33 | 0,0284521 | 0,110473 |
| PRDM6          | 0,10 | 0,00 | 0,03 | 0,23 | 0,028488  | 0,110593 |
| SREK1          | 5,86 | 6,20 | 5,91 | 5,78 | 0,0285168 | 0,110671 |
| OR52A1         | 0,13 | 0,31 | 0,18 | 0,13 | 0,028518  | 0,110671 |
| ADGRA3         | 1,09 | 4,45 | 0,82 | 0,48 | 0,0285275 | 0,110673 |
| SELENBP1       | 0,00 | 0,25 | 0,34 | 0,65 | 0,0285284 | 0,110673 |
| UXT            | 7,11 | 7,88 | 7,15 | 7,07 | 0,0285476 | 0,110717 |
| DEFB118        | 0,00 | 1,70 | 0,00 | 0,00 | 0,0285514 | 0,110717 |
| FNIP1          | 3,87 | 2,88 | 4,07 | 2,61 | 0,0285571 | 0,110717 |
| PCDHB16        | 0,13 | 0,06 | 0,20 | 0,19 | 0,0285598 | 0,110717 |
| RHOA           | 8,59 | 8,06 | 7,96 | 7,55 | 0,0285689 | 0,110733 |
| UCHL3          | 6,50 | 6,09 | 5,79 | 5,29 | 0,0286329 | 0,110962 |
| FBXO30         | 0,91 | 0,53 | 0,66 | 0,06 | 0,0286454 | 0,110991 |
| RN7SL524P      | 1,71 | 2,01 | 1,73 | 1,58 | 0,0287109 | 0,111225 |
| RP11-1042B17.3 | 4,13 | 5,17 | 3,99 | 4,87 | 0,0287205 | 0,111237 |
| MTL5           | 0,16 | 0,70 | 0,11 | 0,14 | 0,028724  | 0,111237 |
| PENT           | 4,14 | 0,65 | 4,79 | 5,03 | 0,028733  | 0,111253 |
| IL17RD         | 0,04 | 0,26 | 0,06 | 0,11 | 0,0287581 | 0,11133  |
| PLK2           | 4,51 | 2,59 | 4,22 | 2,73 | 0,0287659 | 0,111342 |
| TOGARAM1       | 3,35 | 1,66 | 2,24 | 1,33 | 0,0287737 | 0,111352 |
| MMP16          | 0,00 | 0,28 | 0,00 | 0,01 | 0,0287892 | 0,111393 |
| ORMDL3         | 0,19 | 0,07 | 1,61 | 1,59 | 0,0288078 | 0,111445 |
| RP11-2C24.9    | 0,76 | 0,08 | 1,00 | 0,71 | 0,028879  | 0,111701 |
| SPDYE3         | 0,90 | 0,86 | 0,34 | 0,19 | 0,0288874 | 0,111714 |
| CTD-2127H9.1   | 0,30 | 0,49 | 0,33 | 2,67 | 0,0289104 | 0,111769 |
| UNC119         | 6,67 | 6,14 | 6,18 | 5,30 | 0,0289115 | 0,111769 |
| E4F1           | 1,56 | 4,14 | 3,01 | 3,61 | 0,0289214 | 0,111787 |
| DDR2           | 0,00 | 0,01 | 0,00 | 0,23 | 0,0289591 | 0,111914 |
| CKS2           | 5,49 | 5,02 | 5,00 | 1,80 | 0,0289781 | 0,111968 |
| POPDC2         | 0,54 | 0,08 | 0,20 | 0,07 | 0,0289943 | 0,112011 |
| RP11-373E16.3  | 0,07 | 0,59 | 0,04 | 0,04 | 0,0290222 | 0,112092 |
| NMT2           | 0,25 | 0,64 | 0,59 | 0,34 | 0,0290254 | 0,112092 |
| RPRD1B         | 3,44 | 1,59 | 4,48 | 3,57 | 0,0290376 | 0,11212  |
| MTA2           | 1,65 | 2,21 | 2,40 | 2,43 | 0,0291084 | 0,112373 |
| RP11-932O9.9   | 3,70 | 3,92 | 4,44 | 4,06 | 0,0291229 | 0,11241  |
| RAB5C          | 6,02 | 5,38 | 5,57 | 4,11 | 0,0291343 | 0,112434 |
| AC012317.1     | 0,31 | 0,19 | 0,27 | 0,74 | 0,0291392 | 0,112434 |
| AC090804.1     | 0,33 | 0,00 | 0,00 | 0,48 | 0,0291436 | NA       |
| CLUAP1         | 1,61 | 1,36 | 1,31 | 0,41 | 0,0291554 | 0,112458 |
| SKAP2          | 5,69 | 5,11 | 5,25 | 4,96 | 0,0291557 | 0,112458 |
| AZU1           | 0,00 | 0,09 | 0,00 | 0,18 | 0,029198  | 0,112602 |
| C12orf36       | 0,88 | 0,00 | 0,47 | 0,00 | 0,029294  | 0,112949 |
| OR7E122P       | 0,45 | 1,95 | 0,35 | 1,10 | 0,029298  | 0,112949 |
| BNIP1          | 3,65 | 0,96 | 3,08 | 1,19 | 0,0293363 | 0,113077 |
| AF127577.13    | 1,92 | 0,00 | 1,00 | 0,78 | 0,0293417 | 0,113078 |



|               |      |      |      |      |           |          |
|---------------|------|------|------|------|-----------|----------|
| TMEM187       | 2,09 | 0,00 | 0,35 | 0,08 | 0,0293563 | 0,113097 |
| PIGN          | 4,08 | 4,44 | 3,53 | 4,38 | 0,029357  | 0,113097 |
| KLHDC4        | 3,20 | 5,27 | 3,15 | 3,01 | 0,0293738 | 0,113143 |
| CRIP2         | 0,00 | 1,07 | 0,81 | 1,48 | 0,0294141 | 0,113278 |
| CMPK1         | 4,83 | 5,70 | 4,50 | 4,93 | 0,0294504 | 0,113391 |
| C1GALT1C1     | 3,97 | 0,29 | 2,10 | 4,43 | 0,0294536 | 0,113391 |
| RP11-192H23.6 | 1,37 | 2,25 | 1,26 | 3,45 | 0,0294707 | 0,113437 |
| RP1-191J18.66 | 0,11 | 0,00 | 0,13 | 0,31 | 0,0295347 | 0,113664 |
| TLE4          | 4,85 | 4,18 | 5,27 | 5,08 | 0,0295406 | 0,113667 |
| LRRD1         | 0,17 | 0,57 | 0,18 | 0,35 | 0,0295509 | 0,113687 |
| RP11-34F20.7  | 0,00 | 0,00 | 0,05 | 0,00 | 0,029568  | 0,113733 |
| TUBB6         | 4,64 | 3,35 | 5,47 | 4,65 | 0,0295851 | 0,113763 |
| CATSPER2P1    | 2,09 | 1,31 | 2,50 | 3,36 | 0,029586  | 0,113763 |
| ZNF211        | 1,20 | 1,10 | 0,50 | 0,25 | 0,0296012 | 0,113788 |
| UTP23         | 4,44 | 4,89 | 3,52 | 4,16 | 0,0296028 | 0,113788 |
| ADSS          | 4,02 | 2,24 | 3,86 | 4,17 | 0,0296235 | 0,113834 |
| ST8SIA6       | 0,76 | 1,99 | 0,92 | 1,79 | 0,0296249 | 0,113834 |
| PLEKHF2       | 2,95 | 3,94 | 2,52 | 2,11 | 0,0296417 | 0,113878 |
| SPA17         | 0,16 | 0,11 | 0,10 | 1,99 | 0,0296468 | 0,113878 |
| ANKRD13A      | 5,06 | 4,46 | 4,57 | 3,61 | 0,0296551 | 0,11389  |
| PAXIP1        | 1,36 | 1,11 | 1,10 | 0,69 | 0,0296958 | 0,114027 |
| RNU5E-1       | 2,81 | 0,00 | 3,83 | 4,36 | 0,0297145 | 0,114079 |
| DCTN5         | 4,05 | 1,68 | 4,08 | 5,44 | 0,0297415 | 0,114159 |
| RAD23B        | 3,35 | 3,29 | 3,38 | 2,66 | 0,0297456 | 0,114159 |
| TEX35         | 4,15 | 4,82 | 2,82 | 3,77 | 0,0297612 | 0,114199 |
| RP1-506.4     | 0,00 | 0,37 | 0,00 | 0,00 | 0,0298001 | 0,114329 |
| RP11-772C9.1  | 1,46 | 2,16 | 2,20 | 2,14 | 0,0298357 | 0,11442  |
| FOXP3         | 5,55 | 5,15 | 5,93 | 5,88 | 0,0298363 | 0,11442  |
| RPL24         | 8,84 | 9,42 | 9,06 | 8,66 | 0,0298392 | 0,11442  |
| CYFIP2        | 5,48 | 5,43 | 4,50 | 5,02 | 0,029853  | 0,114453 |
| AP000487.4    | 0,16 | 2,28 | 1,46 | 0,00 | 0,0298598 | 0,114459 |
| RP11-165N12.2 | 1,17 | 2,18 | 1,34 | 2,38 | 0,0298847 | 0,114522 |
| RP11-19G24.3  | 0,00 | 1,23 | 0,00 | 0,00 | 0,0298986 | 0,114522 |
| DNAJC7        | 6,66 | 5,66 | 5,92 | 5,43 | 0,0298992 | 0,114522 |
| RNU2-59P      | 2,69 | 5,48 | 0,58 | 1,39 | 0,0299023 | 0,114522 |
| SDHB          | 7,70 | 7,39 | 7,10 | 7,19 | 0,0299058 | 0,114522 |
| YKT6          | 2,74 | 3,76 | 3,77 | 3,48 | 0,029907  | 0,114522 |
| PISD          | 4,69 | 2,54 | 3,65 | 3,85 | 0,0299326 | 0,11454  |
| SYT14         | 0,28 | 0,22 | 0,22 | 0,19 | 0,0299332 | 0,11454  |
| SLC39A5       | 0,27 | 1,60 | 0,50 | 0,21 | 0,0299345 | 0,11454  |
| PEX19         | 3,75 | 2,57 | 2,82 | 1,40 | 0,0299353 | 0,11454  |
| SVEP1         | 0,02 | 0,03 | 0,09 | 0,00 | 0,0299376 | 0,11454  |
| ACCS          | 4,05 | 4,15 | 3,73 | 1,43 | 0,0299972 | 0,114748 |
| RP11-575L7.8  | 3,23 | 3,85 | 2,75 | 0,00 | 0,030029  | 0,114841 |
| RP11-767N6.3  | 1,89 | 0,62 | 2,75 | 1,67 | 0,03004   | 0,114841 |
| RP4-723E3.1   | 0,26 | 1,14 | 0,42 | 1,26 | 0,0300401 | 0,114841 |
| FBXO7         | 6,45 | 5,16 | 5,99 | 5,17 | 0,0300421 | 0,114841 |
| NCOR2         | 2,14 | 2,90 | 2,89 | 2,84 | 0,0300562 | 0,114875 |
| RP1-12G14.9   | 1,61 | 0,24 | 2,56 | 0,00 | 0,0300749 | 0,114897 |
| AC069513.3    | 6,13 | 6,34 | 6,03 | 5,92 | 0,0300764 | 0,114897 |
| RP11-597D13.7 | 0,12 | 0,04 | 0,12 | 0,13 | 0,0300774 | 0,114897 |
| CCDC26        | 4,21 | 4,07 | 3,73 | 3,56 | 0,0300954 | 0,114942 |
| SLC25A29      | 1,75 | 3,01 | 3,49 | 0,27 | 0,0301027 | 0,114942 |
| CYB561D1      | 1,42 | 1,36 | 1,25 | 1,63 | 0,0301155 | 0,114942 |
| RP4-671O14.7  | 0,71 | 0,78 | 0,64 | 0,78 | 0,030118  | 0,114942 |

|               |      |      |      |      |           |          |
|---------------|------|------|------|------|-----------|----------|
| WDR33         | 4,58 | 2,20 | 3,56 | 2,92 | 0,0301192 | 0,114942 |
| RP13-192B19.2 | 0,00 | 0,00 | 0,00 | 0,02 | 0,0301217 | 0,114942 |
| CTD-3116E22.8 | 1,62 | 0,00 | 0,00 | 0,00 | 0,0301253 | 0,114942 |
| GTF3C2        | 4,90 | 5,78 | 4,56 | 4,12 | 0,0301416 | 0,114984 |
| CCDC50        | 5,14 | 4,97 | 4,72 | 3,08 | 0,0301719 | 0,115078 |
| RP11-369G6.3  | 0,40 | 0,90 | 0,62 | 0,44 | 0,0301767 | 0,115078 |
| RFXANK        | 5,54 | 3,58 | 5,37 | 6,25 | 0,0301874 | 0,115086 |
| TOX4          | 3,99 | 5,35 | 4,39 | 4,07 | 0,0301891 | 0,115086 |
| CDK11B        | 2,80 | 3,70 | 3,19 | 2,61 | 0,0301961 | 0,115093 |
| DYNC1LI2      | 3,83 | 2,20 | 4,79 | 4,82 | 0,03026   | 0,115317 |
| ARFIP2        | 4,24 | 0,91 | 3,19 | 2,79 | 0,0303005 | 0,115451 |
| CNOT2         | 6,84 | 5,57 | 6,48 | 5,14 | 0,0303096 | 0,115466 |
| CPPED1        | 6,02 | 3,63 | 5,63 | 4,43 | 0,0303422 | 0,115558 |
| WDR78         | 0,34 | 0,90 | 0,67 | 0,95 | 0,0303441 | 0,115558 |
| MDH1          | 7,41 | 6,76 | 6,44 | 5,82 | 0,03037   | 0,115606 |
| CTD-2095E4.5  | 0,36 | 0,00 | 0,00 | 0,00 | 0,0303702 | 0,115606 |
| RP11-10N23.6  | 0,00 | 0,72 | 0,00 | 0,00 | 0,0303724 | 0,115606 |
| RP11-16F15.2  | 0,00 | 0,79 | 0,39 | 0,43 | 0,0303796 | NA       |
| SLA           | 5,23 | 2,43 | 5,20 | 4,76 | 0,030404  | 0,115707 |
| CS            | 6,08 | 5,17 | 5,87 | 4,77 | 0,0304454 | 0,115845 |
| BCL2L14       | 0,45 | 0,46 | 0,63 | 0,82 | 0,0304762 | 0,11591  |
| DET1          | 1,42 | 0,89 | 1,07 | 1,77 | 0,0304787 | 0,11591  |
| CFDP1         | 4,95 | 5,73 | 4,91 | 5,17 | 0,0304812 | 0,11591  |
| SERPINF1      | 6,26 | 5,50 | 5,38 | 3,29 | 0,0304834 | 0,11591  |
| RP11-401O9.3  | 2,52 | 3,82 | 3,47 | 2,80 | 0,030492  | 0,115923 |
| RP11-398G24.2 | 0,23 | 2,62 | 0,98 | 0,83 | 0,0305562 | 0,116147 |
| ATF7          | 4,30 | 2,35 | 3,39 | 1,70 | 0,0305813 | 0,116222 |
| KANSL2        | 5,57 | 6,29 | 4,37 | 3,55 | 0,0306157 | 0,116333 |
| RP11-1O7.1    | 0,00 | 0,00 | 0,00 | 0,00 | 0,0306225 | 0,116339 |
| RP11-241F15.2 | 0,00 | 0,00 | 0,00 | 0,39 | 0,0306562 | 0,116447 |
| ZKSCAN1       | 3,44 | 1,86 | 2,98 | 2,85 | 0,0306675 | 0,11647  |
| COPS6         | 7,13 | 4,06 | 6,19 | 6,15 | 0,0306884 | 0,116505 |
| JADE2         | 1,16 | 0,49 | 1,28 | 2,20 | 0,0306946 | 0,116505 |
| CHRM2         | 0,00 | 0,02 | 0,02 | 0,04 | 0,0306955 | 0,116505 |
| TMEM164       | 2,75 | 1,50 | 2,82 | 3,36 | 0,0306977 | 0,116505 |
| RNASEH2C      | 4,84 | 4,92 | 4,88 | 5,40 | 0,0307286 | 0,116603 |
| RNF138        | 4,93 | 4,21 | 4,12 | 3,93 | 0,0308361 | 0,116991 |
| RP1-163M9.8   | 0,00 | 0,23 | 0,00 | 0,00 | 0,0308401 | NA       |
| AC008937.2    | 2,06 | 0,57 | 1,54 | 3,54 | 0,0308588 | 0,117057 |
| RPL9P3        | 0,32 | 0,61 | 0,36 | 0,39 | 0,0308665 | 0,117066 |
| GPR143        | 0,00 | 0,00 | 0,00 | 0,44 | 0,0308872 | 0,117125 |
| EHMT2         | 3,65 | 2,68 | 3,63 | 4,17 | 0,0308993 | 0,117151 |
| ACADSB        | 1,30 | 3,69 | 1,45 | 1,14 | 0,0309177 | 0,117189 |
| RP11-803D5.1  | 0,08 | 0,20 | 0,25 | 0,20 | 0,03092   | 0,117189 |
| RP11-680A11.5 | 1,56 | 1,90 | 2,68 | 3,15 | 0,0309626 | 0,11733  |
| SMC3          | 5,27 | 4,28 | 4,43 | 3,41 | 0,0309947 | 0,117432 |
| SUPT16H       | 4,87 | 5,34 | 4,81 | 3,03 | 0,0310583 | 0,117653 |
| PPP5D1        | 2,43 | 3,11 | 2,60 | 2,12 | 0,0310797 | 0,11771  |
| B4GALT6       | 0,23 | 0,03 | 0,42 | 0,24 | 0,0310855 | 0,11771  |
| IRF5          | 5,08 | 3,23 | 4,97 | 5,15 | 0,0310892 | 0,11771  |
| RP11-57H12.3  | 1,68 | 2,67 | 1,86 | 1,86 | 0,0311159 | 0,117791 |
| ZNF812P       | 0,00 | 0,00 | 0,00 | 0,86 | 0,0311253 | 0,117806 |
| RUNX1         | 4,48 | 4,52 | 4,52 | 3,01 | 0,0311318 | 0,117811 |
| WDR7          | 3,88 | 1,73 | 3,74 | 2,98 | 0,0311491 | 0,117855 |
| NUDT16P1      | 3,92 | 1,73 | 2,59 | 2,24 | 0,0311593 | 0,117855 |

|                |      |      |      |      |           |          |
|----------------|------|------|------|------|-----------|----------|
| QPRT           | 1,24 | 2,51 | 1,28 | 1,35 | 0,0311594 | 0,117855 |
| TRA2B          | 7,48 | 7,56 | 7,56 | 7,33 | 0,0311864 | 0,117925 |
| LINC00346      | 0,89 | 1,54 | 0,90 | 0,83 | 0,0311884 | 0,117925 |
| MAP3K3         | 3,91 | 2,72 | 4,55 | 3,90 | 0,0312176 | 0,118015 |
| Z95704.4       | 0,00 | 0,00 | 0,00 | 0,00 | 0,0312438 | 0,118094 |
| ZNF57          | 0,00 | 0,00 | 0,00 | 0,28 | 0,0312493 | 0,118095 |
| ITGA7          | 0,00 | 0,00 | 0,00 | 1,06 | 0,031284  | 0,118206 |
| RP11-83C7.3    | 0,54 | 2,35 | 1,22 | 0,18 | 0,0313325 | 0,118369 |
| RP11-134D3.1   | 0,06 | 0,16 | 0,09 | 0,31 | 0,0313509 | 0,118418 |
| CAMK1          | 4,24 | 5,18 | 4,84 | 4,33 | 0,0313643 | 0,118449 |
| FAM162A        | 6,20 | 4,46 | 5,86 | 4,49 | 0,031377  | 0,118477 |
| MICA           | 3,40 | 0,46 | 2,41 | 3,02 | 0,0313824 | 0,118477 |
| RP11-419K12.2  | 0,07 | 0,05 | 0,18 | 0,08 | 0,0314047 | 0,118534 |
| GIN1           | 0,69 | 1,42 | 1,13 | 0,83 | 0,0314081 | 0,118534 |
| CH17-385C13.2  | 0,45 | 0,97 | 1,59 | 3,33 | 0,0314384 | 0,118628 |
| AC016712.2     | 0,60 | 1,14 | 0,66 | 1,10 | 0,0314528 | 0,118653 |
| CTD-2233C11.3  | 0,00 | 3,18 | 0,00 | 0,00 | 0,0314611 | 0,118653 |
| PPP5C          | 3,76 | 1,92 | 2,68 | 1,36 | 0,0314634 | 0,118653 |
| PLK3           | 4,30 | 4,86 | 4,83 | 4,71 | 0,0314663 | 0,118653 |
| EGOT           | 0,09 | 0,00 | 0,02 | 0,00 | 0,0314742 | 0,118662 |
| LSINCT5        | 0,00 | 0,24 | 0,03 | 0,00 | 0,0314986 | 0,118734 |
| HAS2           | 0,00 | 0,00 | 0,03 | 0,03 | 0,0315299 | NA       |
| RRM2           | 0,74 | 0,28 | 0,99 | 0,27 | 0,0315315 | 0,118821 |
| DERA           | 5,46 | 3,43 | 4,60 | 1,90 | 0,0315328 | 0,118821 |
| RNVU1-6        | 6,10 | 4,84 | 6,54 | 3,30 | 0,0315383 | 0,118821 |
| STAM2          | 3,52 | 3,04 | 3,70 | 1,88 | 0,0315431 | 0,118821 |
| RP11-38L15.8   | 0,76 | 0,00 | 0,24 | 0,00 | 0,0315554 | 0,118825 |
| RP5-1057J7.7   | 1,99 | 3,15 | 2,35 | 2,69 | 0,0315563 | 0,118825 |
| DCAF16         | 1,94 | 1,64 | 1,69 | 3,30 | 0,0315635 | 0,118825 |
| CYHR1          | 4,11 | 6,04 | 4,58 | 4,36 | 0,0315656 | 0,118825 |
| CACTIN         | 1,27 | 0,24 | 1,44 | 1,76 | 0,031648  | 0,119115 |
| POF1B          | 0,24 | 0,16 | 0,22 | 0,75 | 0,0316988 | 0,119286 |
| SRSF9          | 5,49 | 4,80 | 5,92 | 4,98 | 0,0317063 | 0,119294 |
| RP11-1195F20.2 | 0,00 | 0,34 | 0,00 | 0,19 | 0,031735  | 0,119365 |
| AC025335.1     | 0,84 | 0,47 | 0,27 | 0,74 | 0,0317398 | 0,119365 |
| ATP1B1         | 5,31 | 3,79 | 4,71 | 3,48 | 0,0317419 | 0,119365 |
| CITED2         | 1,52 | 1,49 | 1,84 | 1,36 | 0,0317465 | 0,119365 |
| ZCCHC9         | 3,65 | 0,74 | 2,87 | 2,28 | 0,0317525 | 0,119367 |
| OXL1           | 4,28 | 3,55 | 4,44 | 5,90 | 0,0317676 | 0,119389 |
| LRSAM1         | 1,25 | 2,43 | 2,40 | 2,87 | 0,0317689 | 0,119389 |
| HSFY1          | 0,00 | 0,00 | 0,00 | 0,00 | 0,0317781 | 0,119394 |
| OR1A1          | 1,54 | 2,64 | 1,47 | 1,84 | 0,0317811 | 0,119394 |
| RP11-13G14.4   | 0,00 | 0,00 | 0,00 | 0,37 | 0,0317883 | 0,119401 |
| TTBK2          | 1,52 | 2,58 | 2,72 | 2,57 | 0,0318001 | 0,119425 |
| AC010733.7     | 0,78 | 1,06 | 0,79 | 0,79 | 0,0318192 | 0,119477 |
| AC005083.1     | 0,81 | 0,00 | 0,43 | 0,00 | 0,0318475 | 0,119534 |
| CBX4           | 2,35 | 2,93 | 3,04 | 2,05 | 0,0318507 | 0,119534 |
| RP1-257A7.4    | 3,76 | 3,60 | 3,99 | 1,80 | 0,0318558 | 0,119534 |
| FYB1           | 6,60 | 6,35 | 6,40 | 6,92 | 0,0318561 | 0,119534 |
| CTA-292E10.6   | 1,22 | 1,39 | 1,95 | 3,07 | 0,031867  | 0,119552 |
| EPB41L4B       | 0,00 | 0,00 | 0,00 | 0,10 | 0,0318715 | 0,119552 |
| LINC00310      | 0,98 | 2,55 | 0,89 | 2,40 | 0,031879  | 0,119557 |
| PCBP4          | 0,00 | 0,96 | 0,00 | 0,00 | 0,0318913 | 0,119557 |
| EIF2D          | 5,18 | 5,12 | 5,36 | 3,87 | 0,0318937 | 0,119557 |
| SLC6A16        | 0,50 | 0,00 | 0,23 | 1,25 | 0,0318992 | 0,119557 |

|                    |      |      |      |      |           |          |
|--------------------|------|------|------|------|-----------|----------|
| GS1-124K5.14       | 2,63 | 3,19 | 2,13 | 3,84 | 0,0318999 | 0,119557 |
| CNTNAP1            | 0,42 | 0,36 | 1,03 | 0,94 | 0,0319435 | 0,119701 |
| MAFK               | 0,45 | 0,08 | 1,06 | 0,76 | 0,0319668 | 0,119768 |
| AICDA              | 0,37 | 0,84 | 0,51 | 0,54 | 0,0319747 | 0,119777 |
| AC109828.1         | 1,31 | 1,31 | 1,39 | 1,70 | 0,0319944 | 0,119825 |
| RP11-227L6.1       | 1,56 | 3,14 | 1,79 | 2,10 | 0,0319982 | 0,119825 |
| RP13-143G15.4      | 0,80 | 1,05 | 1,74 | 4,38 | 0,0320242 | 0,119902 |
| RP11-426C22.10     | 3,01 | 0,20 | 2,24 | 1,65 | 0,0320761 | 0,120074 |
| IER2               | 7,12 | 7,60 | 7,20 | 6,71 | 0,0320809 | 0,120074 |
| RP3-476K8.4        | 0,00 | 0,73 | 0,38 | 0,00 | 0,032119  | 0,120182 |
| RP11-843B15.2      | 0,35 | 0,00 | 0,73 | 1,05 | 0,032122  | 0,120182 |
| RND1               | 0,61 | 0,08 | 0,62 | 0,18 | 0,0321278 | 0,120182 |
| ERICH1             | 3,78 | 6,03 | 4,49 | 4,29 | 0,0321315 | 0,120182 |
| AC002075.4         | 0,79 | 0,00 | 1,09 | 1,55 | 0,0321574 | NA       |
| TMEM70             | 5,02 | 2,47 | 3,12 | 2,83 | 0,0321672 | 0,120295 |
| RAB44              | 0,00 | 0,00 | 0,18 | 0,54 | 0,0321744 | 0,120302 |
| ZSWIM6             | 1,81 | 2,64 | 2,36 | 2,95 | 0,0322091 | 0,120412 |
| MAFG-AS1           | 0,00 | 0,00 | 0,00 | 0,53 | 0,0322315 | 0,120455 |
| NEDD8              | 8,16 | 8,09 | 8,13 | 8,40 | 0,0322315 | 0,120455 |
| PCDHA5             | 0,04 | 0,03 | 0,05 | 0,13 | 0,0322645 | 0,120521 |
| BTBD6              | 1,75 | 1,96 | 2,61 | 1,97 | 0,0322661 | 0,120521 |
| ELF5               | 0,06 | 0,12 | 0,09 | 0,16 | 0,0322693 | 0,120521 |
| RP11-186B7.4       | 2,95 | 3,54 | 3,70 | 3,60 | 0,032271  | 0,120521 |
| MAP3K6             | 2,98 | 2,61 | 2,79 | 4,52 | 0,0322927 | 0,120582 |
| METTL2B            | 2,90 | 1,59 | 2,00 | 1,42 | 0,0322983 | 0,120583 |
| RP11-624J12.1      | 0,00 | 0,87 | 0,00 | 0,32 | 0,0323335 | 0,120694 |
| SH2D6              | 1,97 | 2,54 | 2,69 | 3,14 | 0,0323664 | 0,120796 |
| TEX11              | 0,00 | 0,14 | 0,00 | 0,00 | 0,0324255 | 0,120997 |
| ID2                | 9,11 | 9,70 | 9,63 | 9,27 | 0,0324814 | 0,121169 |
| RP11-27G24.3       | 0,00 | 0,00 | 0,00 | 1,45 | 0,0324827 | 0,121169 |
| C16orf91           | 5,09 | 0,44 | 3,82 | 0,76 | 0,0325419 | 0,121364 |
| OR2T11             | 0,00 | 0,07 | 0,00 | 0,00 | 0,0325465 | NA       |
| GCA                | 6,59 | 5,56 | 5,68 | 4,91 | 0,0325482 | 0,121364 |
| RP11-556N4.1       | 0,77 | 0,49 | 1,08 | 0,82 | 0,0325552 | 0,121364 |
| CERS6-AS1          | 3,30 | 4,00 | 3,73 | 3,88 | 0,0325566 | 0,121364 |
| EIF2B3             | 5,50 | 3,73 | 4,87 | 3,03 | 0,0325702 | 0,121394 |
| NSUN5P1            | 2,61 | 4,46 | 3,03 | 2,69 | 0,0325943 | 0,121453 |
| MRPS12             | 6,13 | 6,66 | 6,56 | 6,27 | 0,0325969 | 0,121453 |
| FAM189B            | 2,35 | 0,56 | 2,05 | 1,14 | 0,03261   | 0,121463 |
| C1orf229           | 0,11 | 0,27 | 0,15 | 0,18 | 0,0326106 | 0,121463 |
| CLDND1             | 6,28 | 5,12 | 5,37 | 3,79 | 0,0326232 | 0,12149  |
| PDPR               | 3,31 | 3,60 | 3,20 | 3,49 | 0,0326382 | 0,121523 |
| PDIA5              | 0,56 | 0,07 | 0,66 | 0,78 | 0,032643  | 0,121523 |
| CYP2S1             | 4,83 | 4,03 | 3,83 | 2,67 | 0,032673  | 0,121606 |
| AL133493.2         | 1,21 | 2,08 | 1,19 | 1,32 | 0,0326763 | 0,121606 |
| C3orf14            | 1,87 | 0,04 | 0,31 | 0,31 | 0,032697  | 0,121614 |
| HCFC1              | 3,09 | 2,76 | 3,70 | 3,64 | 0,0326971 | 0,121614 |
| AC007969.5         | 1,12 | 2,00 | 1,45 | 1,45 | 0,0326986 | 0,121614 |
| XXbac-BPG296P20.14 | 0,00 | 0,00 | 0,41 | 1,41 | 0,0327003 | 0,121614 |
| NSUN3              | 3,64 | 4,66 | 2,42 | 2,24 | 0,0327082 | 0,121623 |
| CTD-2525I3.6       | 0,10 | 1,61 | 0,18 | 0,17 | 0,0327616 | 0,121801 |
| RP4-657D16.3       | 3,53 | 2,09 | 1,48 | 0,91 | 0,0327778 | 0,121841 |
| CCR3               | 0,00 | 0,00 | 0,00 | 0,00 | 0,0328117 | 0,121932 |
| RP11-818F20.5      | 0,00 | 1,47 | 0,00 | 0,00 | 0,0328133 | 0,121932 |
| AAMDC              | 4,70 | 4,56 | 4,44 | 5,07 | 0,0328407 | 0,122003 |

|                |       |       |       |       |           |          |
|----------------|-------|-------|-------|-------|-----------|----------|
| RP11-529K1.2   | 0,15  | 0,20  | 0,14  | 0,41  | 0,0328433 | 0,122003 |
| SLX4           | 0,11  | 0,49  | 0,34  | 0,33  | 0,0328654 | 0,12205  |
| RP4-564F22.5   | 0,51  | 2,35  | 0,39  | 0,91  | 0,032867  | 0,12205  |
| NARS           | 5,32  | 5,17  | 4,51  | 3,75  | 0,0329164 | 0,122185 |
| RP11-306O1.2   | 0,06  | 0,06  | 0,11  | 0,22  | 0,0329184 | 0,122185 |
| RP11-617D20.1  | 2,26  | 2,88  | 2,31  | 2,55  | 0,0329199 | 0,122185 |
| EMP2           | 1,43  | 1,70  | 1,26  | 1,69  | 0,032942  | 0,122247 |
| RPL7AP60       | 0,00  | 0,00  | 0,00  | 0,20  | 0,0329506 | 0,122258 |
| RIPK3          | 1,68  | 0,07  | 2,41  | 1,37  | 0,0329652 | 0,122292 |
| AP2A1          | 2,28  | 2,70  | 3,13  | 3,05  | 0,0329897 | 0,122363 |
| SDR42E2        | 0,18  | 0,25  | 0,20  | 0,26  | 0,0330011 | 0,122384 |
| HIST2H2AC      | 4,77  | 5,11  | 4,94  | 5,74  | 0,0330293 | 0,122469 |
| RP11-57G22.3   | 0,25  | 0,38  | 0,23  | 0,35  | 0,0330626 | 0,122572 |
| TIAL1          | 6,09  | 6,23  | 5,98  | 5,52  | 0,0330769 | 0,122587 |
| PSMD9          | 6,85  | 5,38  | 6,59  | 5,70  | 0,0330809 | 0,122587 |
| COX4I1         | 10,40 | 10,10 | 10,46 | 10,50 | 0,033084  | 0,122587 |
| RP11-966I7.1   | 0,27  | 0,41  | 0,38  | 1,98  | 0,0330888 | 0,122587 |
| CREG1          | 4,71  | 2,44  | 4,94  | 4,75  | 0,0331009 | 0,122611 |
| SLC25A12       | 3,95  | 1,96  | 2,05  | 2,05  | 0,0331375 | 0,122726 |
| RP11-649E7.7   | 0,30  | 1,83  | 0,00  | 0,19  | 0,0331709 | NA       |
| SRGN           | 10,77 | 10,29 | 10,33 | 9,75  | 0,0332322 | 0,123037 |
| MED12          | 2,31  | 2,35  | 1,30  | 0,97  | 0,0332325 | 0,123037 |
| IDH3A          | 6,25  | 4,18  | 5,86  | 5,00  | 0,0332977 | 0,123258 |
| APOBEC3A       | 1,59  | 2,77  | 3,05  | 6,32  | 0,0333464 | 0,123418 |
| RP11-46I1.1    | 0,63  | 0,91  | 0,00  | 0,00  | 0,0333762 | 0,123507 |
| RP11-18J9.3    | 0,28  | 1,91  | 0,54  | 0,07  | 0,0333949 | 0,123537 |
| IL2RB          | 0,52  | 2,44  | 0,61  | 2,14  | 0,0333952 | 0,123537 |
| CTD-2231E14.2  | 0,04  | 0,09  | 0,07  | 0,26  | 0,0334145 | 0,123587 |
| PRKY           | 0,89  | 0,83  | 0,31  | 0,92  | 0,0334468 | 0,123653 |
| RP11-110H10.2  | 2,21  | 3,40  | 1,95  | 2,86  | 0,033448  | 0,123653 |
| AP1M2          | 0,82  | 0,00  | 2,01  | 1,09  | 0,0334488 | 0,123653 |
| GTF2E1         | 2,58  | 0,24  | 0,47  | 1,85  | 0,0334598 | 0,123658 |
| GHRL           | 5,80  | 5,27  | 4,83  | 3,56  | 0,0334614 | 0,123658 |
| RP11-37O16.2   | 1,06  | 0,00  | 0,00  | 0,00  | 0,0334676 | 0,12366  |
| CTD-2336O2.3   | 0,00  | 1,96  | 0,00  | 0,16  | 0,0334787 | 0,123681 |
| RP11-287D1.1   | 0,13  | 0,21  | 0,18  | 0,47  | 0,033493  | 0,123681 |
| DENND2C        | 0,55  | 0,96  | 0,78  | 0,81  | 0,0334931 | 0,123681 |
| MX1            | 6,69  | 3,07  | 6,12  | 6,99  | 0,0334968 | 0,123681 |
| CLEC4M         | 0,04  | 0,11  | 0,08  | 0,20  | 0,0335085 | 0,123681 |
| RP11-266L9.4   | 0,00  | 0,00  | 0,00  | 0,00  | 0,0335129 | 0,123681 |
| RP11-521B24.5  | 0,97  | 1,76  | 1,73  | 1,70  | 0,0335132 | 0,123681 |
| CTB-22K14.1    | 0,70  | 0,50  | 0,80  | 0,51  | 0,0335178 | 0,123681 |
| MOB1B          | 3,98  | 2,54  | 3,46  | 2,25  | 0,0335263 | 0,123685 |
| TPT1-AS1       | 2,95  | 3,23  | 3,57  | 3,39  | 0,0335298 | 0,123685 |
| PPP4R2         | 3,37  | 3,73  | 4,29  | 3,10  | 0,0335473 | 0,123714 |
| KDM3B          | 4,75  | 3,72  | 4,52  | 3,36  | 0,0335526 | 0,123714 |
| RP11-498C9.15  | 0,91  | 0,91  | 0,73  | 0,36  | 0,0335546 | 0,123714 |
| TIFA           | 3,25  | 1,14  | 0,38  | 1,97  | 0,0335647 | 0,123731 |
| RRN3           | 3,21  | 1,78  | 2,38  | 1,39  | 0,0335889 | 0,123789 |
| TRA2A          | 6,87  | 5,81  | 6,53  | 6,11  | 0,0335915 | 0,123789 |
| AHRR           | 0,04  | 0,56  | 0,14  | 0,05  | 0,033614  | 0,123836 |
| PQLC1          | 3,15  | 3,42  | 4,09  | 3,39  | 0,0336153 | 0,123836 |
| ZMPSTE24       | 4,07  | 2,37  | 3,29  | 3,20  | 0,0336254 | 0,123852 |
| GUCY1A3        | 1,53  | 0,03  | 0,51  | 0,46  | 0,0336405 | 0,123888 |
| RP11-680F20.10 | 0,15  | 0,00  | 0,09  | 1,47  | 0,033654  | 0,123917 |

|                |      |      |      |      |           |          |
|----------------|------|------|------|------|-----------|----------|
| BUB3           | 5,54 | 2,67 | 5,45 | 6,07 | 0,033702  | 0,124073 |
| TSEN34         | 4,53 | 2,61 | 4,97 | 3,64 | 0,0337326 | 0,124165 |
| SDR39U1        | 5,98 | 5,28 | 5,32 | 2,78 | 0,0337411 | 0,124175 |
| LMBR1          | 3,58 | 1,58 | 3,75 | 0,88 | 0,0337581 | 0,124217 |
| RNU1-67P       | 0,00 | 0,00 | 0,00 | 0,00 | 0,0337687 | 0,124236 |
| RP11-1020A11.2 | 0,45 | 0,28 | 0,66 | 0,77 | 0,033778  | 0,12425  |
| CTC-490E21.10  | 0,00 | 1,63 | 0,00 | 0,00 | 0,0337892 | 0,12427  |
| CPSF3          | 5,12 | 4,97 | 4,50 | 2,87 | 0,0338034 | 0,124302 |
| CLEC2D         | 5,35 | 6,40 | 5,02 | 5,23 | 0,0338204 | 0,124344 |
| CTD-2329C7.2   | 0,50 | 0,42 | 0,92 | 0,71 | 0,0338467 | 0,12442  |
| SEPT8          | 0,21 | 0,00 | 0,70 | 1,66 | 0,0338709 | 0,124488 |
| AXIN1          | 1,13 | 0,76 | 2,36 | 1,41 | 0,0338935 | 0,124551 |
| SP1            | 2,80 | 0,90 | 2,62 | 2,83 | 0,0339172 | 0,124617 |
| SNN            | 3,59 | 1,86 | 3,64 | 1,83 | 0,0339337 | 0,124652 |
| CD9            | 0,00 | 0,88 | 3,02 | 0,77 | 0,0339415 | 0,124652 |
| SYCP1          | 3,27 | 3,98 | 2,45 | 3,53 | 0,0339436 | 0,124652 |
| CDA            | 0,00 | 0,00 | 0,00 | 5,66 | 0,0339593 | 0,124689 |
| MAF1           | 5,21 | 5,22 | 5,68 | 4,66 | 0,0339818 | 0,124752 |
| RIC8B          | 0,86 | 1,28 | 1,50 | 0,62 | 0,0340132 | 0,12483  |
| RAB38          | 0,08 | 0,10 | 0,04 | 0,09 | 0,0340144 | 0,12483  |
| FBXO21         | 3,58 | 1,69 | 2,78 | 2,52 | 0,0340266 | 0,124835 |
| PPARGC1B       | 1,97 | 1,46 | 2,26 | 2,42 | 0,034027  | 0,124835 |
| RP11-230G5.2   | 0,09 | 0,40 | 0,00 | 0,16 | 0,0340869 | 0,125033 |
| NXN            | 0,08 | 0,35 | 0,30 | 0,13 | 0,0340923 | 0,125033 |
| PRPF19         | 1,92 | 1,79 | 2,70 | 2,97 | 0,0341082 | 0,125063 |
| RP1-27K12.2    | 0,98 | 1,08 | 1,53 | 1,93 | 0,0341118 | 0,125063 |
| AC027125.2     | 0,52 | 2,46 | 2,04 | 2,09 | 0,0341211 | 0,125077 |
| KBTBD3         | 1,94 | 3,94 | 0,37 | 1,92 | 0,0341348 | 0,125107 |
| CTD-2135D7.3   | 0,26 | 1,62 | 0,00 | 0,72 | 0,0341509 | NA       |
| ABCC2          | 0,02 | 1,34 | 0,02 | 0,29 | 0,0341699 | 0,125201 |
| RP11-440L14.1  | 1,56 | 1,63 | 1,95 | 1,10 | 0,0341751 | 0,125201 |
| SERPING1       | 3,12 | 0,17 | 2,77 | 3,98 | 0,0341797 | 0,125201 |
| RP11-84A12.1   | 3,25 | 3,46 | 3,02 | 2,30 | 0,034183  | 0,125201 |
| RP6-99M1.2     | 0,15 | 0,32 | 0,80 | 1,15 | 0,0342099 | 0,125279 |
| SFXN2          | 1,28 | 0,75 | 1,69 | 2,37 | 0,0342867 | 0,125527 |
| IGHG1          | 0,49 | 1,89 | 0,89 | 0,36 | 0,0342891 | 0,125527 |
| PKIB           | 6,27 | 4,85 | 5,52 | 2,64 | 0,0343012 | 0,125535 |
| COPSS          | 6,47 | 4,50 | 5,87 | 5,43 | 0,0343025 | 0,125535 |
| PDZD8          | 3,08 | 0,61 | 2,83 | 0,62 | 0,03433   | 0,125615 |
| PWRN1          | 1,20 | 2,09 | 1,11 | 1,09 | 0,0343359 | 0,125616 |
| SMG1           | 6,85 | 5,76 | 6,51 | 5,58 | 0,0343626 | 0,125693 |
| PROCA1         | 1,55 | 0,94 | 1,02 | 1,96 | 0,0343896 | 0,12576  |
| RP11-624C23.1  | 2,89 | 0,32 | 1,42 | 0,53 | 0,0343924 | 0,12576  |
| ZNFX1          | 3,29 | 3,67 | 3,78 | 3,92 | 0,0344122 | 0,125812 |
| USP8           | 5,61 | 4,33 | 5,08 | 5,78 | 0,0344249 | 0,125838 |
| AC013470.8     | 0,44 | 0,46 | 0,11 | 0,77 | 0,0344581 | NA       |
| WDSUB1         | 3,23 | 1,29 | 1,75 | 0,47 | 0,0344655 | 0,125942 |
| RP11-848G14.5  | 3,24 | 1,11 | 3,09 | 3,09 | 0,0344673 | 0,125942 |
| POLR2A         | 4,16 | 3,11 | 3,53 | 3,97 | 0,0344704 | 0,125942 |
| RP11-568G11.3  | 0,15 | 0,00 | 0,00 | 0,00 | 0,0344761 | NA       |
| C4orf33        | 4,98 | 1,32 | 4,03 | 5,39 | 0,0344809 | 0,125959 |
| AC003991.3     | 3,82 | 4,79 | 3,86 | 4,55 | 0,0345086 | 0,126027 |
| AC005785.2     | 0,00 | 0,00 | 0,00 | 0,00 | 0,0345107 | 0,126027 |
| GHR            | 0,79 | 0,69 | 1,21 | 1,19 | 0,0345195 | 0,126027 |
| VIPR2          | 0,03 | 0,05 | 0,05 | 0,03 | 0,0345221 | 0,126027 |

|               |       |       |       |      |           |          |
|---------------|-------|-------|-------|------|-----------|----------|
| C9orf50       | 0,00  | 0,22  | 0,00  | 0,00 | 0,0345456 | 0,126079 |
| RP11-354E23.3 | 0,30  | 0,57  | 0,43  | 0,75 | 0,034551  | 0,126079 |
| MEAF6         | 5,77  | 5,71  | 5,11  | 3,55 | 0,0345571 | 0,126079 |
| PPP1R12C      | 3,51  | 3,77  | 3,91  | 4,53 | 0,0345591 | 0,126079 |
| NDUFV2        | 8,06  | 7,36  | 7,51  | 6,27 | 0,0345817 | 0,126141 |
| RP11-326I11.4 | 0,00  | 3,49  | 0,00  | 0,00 | 0,0345982 | 0,12617  |
| NFAM1         | 1,87  | 1,37  | 1,86  | 3,11 | 0,0346009 | 0,12617  |
| SRSF5         | 8,40  | 7,94  | 8,45  | 7,51 | 0,0346523 | 0,126337 |
| RP11-10022.1  | 2,03  | 1,27  | 2,16  | 1,72 | 0,0346892 | 0,126436 |
| MMP2          | 0,00  | 1,05  | 0,00  | 0,00 | 0,0346909 | 0,126436 |
| PRPF38A       | 4,79  | 3,27  | 4,06  | 3,59 | 0,0347044 | 0,12646  |
| RP5-890E16.2  | 0,10  | 0,26  | 0,23  | 0,12 | 0,0347091 | 0,12646  |
| OSR2          | 0,00  | 0,09  | 0,00  | 0,00 | 0,0347318 | 0,126484 |
| TMEM223       | 5,03  | 0,64  | 5,10  | 3,66 | 0,034733  | 0,126484 |
| TBXA2R        | 0,20  | 0,97  | 0,46  | 0,65 | 0,0347382 | 0,126484 |
| ETV4          | 0,14  | 0,39  | 0,37  | 0,00 | 0,0347384 | 0,126484 |
| CMTM3         | 5,31  | 3,92  | 5,87  | 4,67 | 0,0347539 | 0,1265   |
| ARL17B        | 5,03  | 5,80  | 4,27  | 3,00 | 0,0347542 | 0,1265   |
| ANKRD34C      | 0,00  | 1,27  | 0,00  | 0,00 | 0,0347763 | 0,126534 |
| RP5-1159O4.1  | 0,13  | 1,09  | 0,39  | 0,09 | 0,0347775 | 0,126534 |
| RP1-20B21.4   | 4,92  | 5,69  | 5,40  | 5,83 | 0,0347806 | 0,126534 |
| FAM110B       | 0,06  | 1,55  | 0,03  | 0,07 | 0,0347924 | 0,126557 |
| RP11-253M7.1  | 0,00  | 0,00  | 0,00  | 0,21 | 0,0348046 | 0,12658  |
| UGT1A1        | 0,40  | 0,60  | 0,67  | 0,76 | 0,0348369 | 0,126677 |
| STAR10        | 1,96  | 2,99  | 3,06  | 2,50 | 0,0348467 | 0,126692 |
| CCSER1        | 4,91  | 1,17  | 4,31  | 3,13 | 0,0348726 | 0,126765 |
| AP000477.3    | 0,18  | 0,00  | 0,38  | 2,24 | 0,0348843 | 0,126787 |
| MGME1         | 3,80  | 1,10  | 2,52  | 0,47 | 0,0348905 | 0,126789 |
| EEF1A1P5      | 3,58  | 3,40  | 3,34  | 2,43 | 0,0349232 | 0,126887 |
| RP11-416O18.1 | 1,18  | 1,38  | 1,71  | 0,93 | 0,0349347 | 0,126908 |
| ZFP36         | 7,87  | 8,52  | 8,33  | 7,53 | 0,034944  | 0,126921 |
| IGSF22        | 0,17  | 5,27  | 0,00  | 2,12 | 0,0349502 | 0,126923 |
| RN7SL657P     | 0,00  | 0,00  | 1,25  | 1,36 | 0,0349775 | NA       |
| CTD-3032J10.3 | 0,94  | 4,49  | 1,09  | 1,30 | 0,0349929 | 0,127042 |
| AP001340.2    | 0,29  | 0,33  | 0,00  | 0,37 | 0,0349932 | NA       |
| AP000337.3    | 0,00  | 1,47  | 0,00  | 0,00 | 0,0349944 | 0,127042 |
| RP11-61K9.2   | 0,62  | 1,37  | 1,48  | 1,70 | 0,0350213 | 0,127115 |
| ZNF606        | 0,63  | 0,49  | 1,13  | 1,20 | 0,0350258 | 0,127115 |
| FER1L6        | 0,00  | 0,31  | 0,00  | 0,00 | 0,0350533 | 0,127193 |
| C1orf167      | 0,00  | 2,86  | 0,00  | 0,00 | 0,0350627 | 0,127207 |
| RP11-1090M7.1 | 0,29  | 0,28  | 0,43  | 0,23 | 0,0350804 | 0,127242 |
| ARL8A         | 1,95  | 0,08  | 2,29  | 1,95 | 0,035084  | 0,127242 |
| TBC1D9B       | 5,32  | 3,77  | 4,86  | 3,59 | 0,0351042 | 0,127295 |
| CCNA2         | 0,05  | 0,00  | 0,00  | 0,00 | 0,0351212 | 0,127336 |
| AC107079.1    | 0,00  | 0,27  | 0,00  | 0,00 | 0,0351392 | 0,12738  |
| YWHAG         | 2,58  | 2,94  | 2,91  | 2,82 | 0,0351727 | 0,127481 |
| RP11-355O1.7  | 1,40  | 1,40  | 1,10  | 1,86 | 0,0351844 | 0,127503 |
| TMC4          | 0,00  | 1,86  | 0,00  | 1,98 | 0,0351962 | 0,127506 |
| IFITM2        | 9,88  | 8,20  | 9,34  | 9,13 | 0,0351983 | 0,127506 |
| MFAP5         | 0,21  | 0,64  | 0,51  | 0,12 | 0,0352109 | 0,127506 |
| FBXO15        | 3,70  | 4,49  | 3,99  | 4,53 | 0,0352152 | 0,127506 |
| RPL5          | 10,95 | 10,68 | 10,53 | 9,71 | 0,0352154 | 0,127506 |
| RP11-434H6.6  | 0,00  | 0,00  | 1,03  | 4,82 | 0,0352198 | 0,127506 |
| DDT           | 5,93  | 6,09  | 6,18  | 6,34 | 0,0352378 | 0,12755  |
| RP11-944L7.1  | 0,29  | 0,30  | 0,00  | 0,35 | 0,0352494 | 0,127572 |

|               |      |      |      |      |           |          |
|---------------|------|------|------|------|-----------|----------|
| SNF8          | 5,95 | 5,95 | 6,32 | 6,11 | 0,0352784 | 0,127656 |
| VWA8          | 2,41 | 0,40 | 1,35 | 0,30 | 0,0352906 | 0,127665 |
| RFWD2         | 4,74 | 4,18 | 4,97 | 5,52 | 0,0352925 | 0,127665 |
| SBDS          | 6,06 | 4,78 | 5,25 | 4,70 | 0,0353122 | 0,127716 |
| NAA40         | 2,56 | 0,96 | 2,25 | 0,66 | 0,0353191 | 0,12772  |
| DHX35         | 2,37 | 0,84 | 1,76 | 0,41 | 0,0353353 | 0,127746 |
| CTC-338M12.5  | 0,00 | 0,59 | 0,94 | 2,78 | 0,0353378 | 0,127746 |
| RP1-37N7.1    | 0,11 | 0,43 | 0,10 | 0,14 | 0,0353453 | 0,127751 |
| PEX1          | 2,92 | 1,08 | 2,44 | 1,99 | 0,0353507 | 0,127751 |
| FSCN1         | 0,44 | 0,40 | 1,36 | 0,26 | 0,0353594 | 0,127762 |
| USP4          | 5,62 | 4,91 | 6,06 | 5,33 | 0,0353673 | 0,127769 |
| RP11-17A19.1  | 0,22 | 0,17 | 0,33 | 0,45 | 0,0353793 | 0,127776 |
| ACO25171.1    | 2,66 | 3,96 | 3,62 | 3,35 | 0,0353807 | 0,127776 |
| RP13-216E22.5 | 0,93 | 1,23 | 0,75 | 2,67 | 0,0353911 | 0,127776 |
| C19orf43      | 5,22 | 5,19 | 5,84 | 5,80 | 0,0353922 | 0,127776 |
| RP11-333E1.1  | 4,71 | 6,42 | 4,52 | 3,12 | 0,0354002 | 0,127785 |
| RN7SL666P     | 1,50 | 3,20 | 1,51 | 0,00 | 0,0354156 | 0,127798 |
| AC138517.4    | 0,00 | 0,08 | 0,00 | 0,00 | 0,0354172 | 0,127798 |
| TOMM70        | 3,38 | 2,74 | 2,39 | 0,71 | 0,0354211 | 0,127798 |
| EAF2          | 6,72 | 7,21 | 5,62 | 4,17 | 0,0354505 | 0,127867 |
| BEND4         | 0,00 | 0,48 | 0,00 | 0,00 | 0,0354517 | 0,127867 |
| RP11-204E9.1  | 0,00 | 0,14 | 0,00 | 0,07 | 0,0354542 | NA       |
| MPP3          | 2,10 | 1,54 | 1,08 | 0,46 | 0,0355008 | 0,128023 |
| CTD-2647E9.3  | 3,78 | 2,27 | 2,19 | 1,56 | 0,0355537 | 0,128193 |
| DEDD2         | 3,94 | 1,45 | 3,21 | 2,47 | 0,0355713 | 0,128235 |
| RP1-32B1.4    | 1,89 | 2,14 | 1,50 | 1,50 | 0,0356044 | 0,128334 |
| AKR1C1        | 0,72 | 1,35 | 0,56 | 0,92 | 0,0356576 | 0,128464 |
| ARHGAP8       | 0,36 | 2,33 | 0,74 | 1,00 | 0,0356598 | 0,128464 |
| RP11-864I4.4  | 0,45 | 0,00 | 0,64 | 0,00 | 0,0356617 | 0,128464 |
| FAM114A2      | 3,28 | 0,00 | 3,47 | 0,99 | 0,0356636 | 0,128464 |
| ARAP3         | 0,00 | 0,80 | 0,03 | 0,88 | 0,0357014 | 0,128577 |
| NPTXR         | 0,10 | 0,48 | 0,12 | 0,40 | 0,0357064 | 0,128577 |
| C19orf44      | 0,71 | 0,00 | 1,40 | 1,49 | 0,0357165 | 0,128592 |
| AP001372.2    | 1,65 | 1,12 | 1,16 | 3,97 | 0,0357266 | 0,128602 |
| RP11-87M18.2  | 0,07 | 0,08 | 0,24 | 1,82 | 0,0357307 | 0,128602 |
| RP11-432N13.3 | 0,00 | 0,76 | 0,00 | 0,00 | 0,0357606 | 0,128689 |
| AP000688.29   | 0,92 | 1,83 | 1,35 | 1,50 | 0,0357736 | 0,128714 |
| CTD-2521M24.4 | 0,91 | 1,61 | 1,22 | 1,49 | 0,0357829 | 0,128727 |
| TEX9          | 3,50 | 3,84 | 2,65 | 1,61 | 0,0357902 | 0,128732 |
| KLHL2         | 3,93 | 3,81 | 3,71 | 1,90 | 0,0358183 | 0,128813 |
| ZFP42         | 0,55 | 1,66 | 0,77 | 0,90 | 0,0358408 | 0,128873 |
| RP11-632K20.6 | 0,00 | 0,69 | 0,00 | 0,00 | 0,0358501 | 0,128881 |
| RP11-21L1.1   | 0,13 | 0,17 | 0,14 | 0,00 | 0,0358548 | 0,128881 |
| CTC-543D15.1  | 0,12 | 0,74 | 0,12 | 0,33 | 0,0359174 | 0,129071 |
| EIF3F         | 8,35 | 8,13 | 8,09 | 7,42 | 0,0359192 | 0,129071 |
| RN7SL411P     | 0,00 | 2,12 | 0,00 | 0,79 | 0,0359296 | 0,129079 |
| SULT1B1       | 2,78 | 1,89 | 1,97 | 1,28 | 0,0359329 | 0,129079 |
| AC098973.2    | 0,00 | 1,54 | 0,00 | 0,00 | 0,0359422 | NA       |
| ORAI2         | 1,79 | 3,01 | 2,66 | 2,73 | 0,0359581 | 0,129148 |
| LRRC28        | 3,58 | 2,48 | 2,41 | 0,44 | 0,0359681 | 0,129163 |
| ALG13         | 6,01 | 5,41 | 5,20 | 4,55 | 0,0359923 | 0,129229 |
| TRIM5         | 2,86 | 2,58 | 3,92 | 2,38 | 0,0360276 | 0,129315 |
| RP11-410K21.2 | 0,64 | 0,00 | 0,20 | 0,00 | 0,0360296 | 0,129315 |
| C14orf105     | 0,54 | 0,00 | 0,54 | 1,09 | 0,0360336 | 0,129315 |
| RNY4          | 3,59 | 5,41 | 3,04 | 2,67 | 0,0360443 | 0,129332 |



|               |       |       |       |       |           |          |
|---------------|-------|-------|-------|-------|-----------|----------|
| RP4-800G7.2   | 1,99  | 2,00  | 0,89  | 0,91  | 0,0360537 | 0,129334 |
| MIEF1         | 3,01  | 0,86  | 2,53  | 1,34  | 0,0360565 | 0,129334 |
| THOC3         | 4,71  | 1,56  | 3,66  | 0,32  | 0,0360852 | 0,129416 |
| NEURL3        | 0,03  | 0,00  | 0,00  | 0,09  | 0,0361591 | 0,129666 |
| LINC00567     | 0,00  | 0,08  | 0,00  | 0,00  | 0,0361704 | 0,129688 |
| MIS18BP1      | 6,59  | 5,83  | 6,43  | 5,66  | 0,0361768 | 0,129682 |
| PEX13         | 2,70  | 0,30  | 1,11  | 0,53  | 0,0361955 | 0,129708 |
| RP11-44M6.1   | 1,38  | 2,68  | 1,62  | 1,79  | 0,0361956 | 0,129708 |
| SPOPL         | 4,09  | 1,84  | 3,70  | 2,79  | 0,0362068 | 0,129727 |
| RWDD4         | 3,69  | 0,61  | 2,78  | 2,00  | 0,0362297 | 0,129788 |
| SLC39A8       | 2,27  | 0,32  | 0,98  | 0,87  | 0,0362449 | 0,129822 |
| SLC24A4       | 2,77  | 0,89  | 0,74  | 0,94  | 0,0362553 | 0,129828 |
| SLC18A2       | 0,00  | 2,46  | 0,00  | 0,36  | 0,0362589 | 0,129828 |
| PNPLA4        | 3,87  | 1,80  | 2,09  | 1,57  | 0,0362642 | 0,129828 |
| DUOX2         | 0,02  | 0,20  | 0,07  | 0,09  | 0,0362775 | 0,129855 |
| MCFD2         | 4,35  | 4,42  | 4,21  | 4,90  | 0,036331  | 0,130025 |
| FAM212B       | 2,46  | 1,54  | 2,73  | 3,45  | 0,0363547 | 0,130077 |
| TRPM3         | 0,30  | 0,46  | 0,38  | 0,46  | 0,0363571 | 0,130077 |
| RP11-603124.5 | 0,00  | 0,00  | 0,16  | 0,00  | 0,0364086 | NA       |
| CTA-972D3.2   | 0,56  | 2,05  | 1,52  | 2,13  | 0,0364104 | 0,130246 |
| USO1          | 4,55  | 3,15  | 3,35  | 3,39  | 0,0364386 | 0,130326 |
| GLTSCR1L      | 1,21  | 2,69  | 1,90  | 1,45  | 0,0364578 | 0,130365 |
| TLCD2         | 0,44  | 0,62  | 0,56  | 0,35  | 0,0364654 | 0,130365 |
| DCAF12        | 2,71  | 1,60  | 3,00  | 0,39  | 0,0364671 | 0,130365 |
| PRTG          | 0,00  | 0,01  | 0,00  | 0,00  | 0,0364823 | 0,130384 |
| LINC00470     | 0,36  | 1,39  | 0,73  | 0,61  | 0,0364896 | 0,130384 |
| ZC2HC1A       | 2,58  | 0,00  | 1,52  | 0,45  | 0,0364898 | 0,130384 |
| CDH4          | 0,02  | 0,05  | 0,02  | 0,04  | 0,0364991 | 0,130396 |
| GASS          | 8,04  | 8,65  | 7,89  | 7,74  | 0,0365545 | 0,130565 |
| VRTN          | 0,01  | 0,07  | 0,08  | 0,05  | 0,0365583 | 0,130565 |
| RP11-803B1.8  | 0,80  | 0,68  | 0,87  | 0,89  | 0,0366513 | 0,130877 |
| MAP2K3        | 5,71  | 6,93  | 5,97  | 5,69  | 0,0366981 | 0,131022 |
| RP11-210M15.3 | 0,00  | 0,09  | 0,03  | 0,12  | 0,0367203 | 0,131065 |
| RP11-927P21.1 | 0,50  | 0,76  | 2,75  | 2,52  | 0,0367218 | 0,131065 |
| RP11-184I16.4 | 0,59  | 0,50  | 1,13  | 2,13  | 0,0367406 | 0,131111 |
| SRR           | 2,62  | 0,33  | 1,94  | 0,45  | 0,0367627 | 0,131156 |
| RP11-293M10.2 | 3,23  | 2,46  | 3,94  | 2,39  | 0,0367651 | 0,131156 |
| RP11-483E23.8 | 0,26  | 0,54  | 0,12  | 0,15  | 0,0368155 | 0,131315 |
| TAF5L         | 0,44  | 1,15  | 2,10  | 2,05  | 0,0368519 | 0,13142  |
| RPS5          | 10,72 | 11,05 | 10,61 | 10,16 | 0,0368566 | 0,13142  |
| GTF3C5        | 3,66  | 4,77  | 3,25  | 4,50  | 0,0368799 | 0,131481 |
| ACVRL1        | 0,16  | 3,06  | 1,22  | 2,08  | 0,0369288 | 0,131635 |
| RP11-88I18.2  | 1,04  | 0,83  | 0,56  | 0,40  | 0,0369435 | 0,131666 |
| BIN2          | 5,25  | 4,68  | 4,72  | 5,54  | 0,0369623 | 0,131712 |
| ETFA          | 7,05  | 5,68  | 6,83  | 5,25  | 0,0369757 | 0,131738 |
| SPATA5        | 0,90  | 0,54  | 0,52  | 0,63  | 0,0370041 | 0,131819 |
| MAS1          | 0,35  | 0,68  | 0,31  | 0,33  | 0,0370526 | 0,13197  |
| ACSM3         | 3,09  | 1,58  | 3,23  | 2,78  | 0,0370955 | 0,132068 |
| RP11-118B23.6 | 2,76  | 1,57  | 3,56  | 1,14  | 0,037098  | 0,132068 |
| PITPNB        | 4,91  | 4,48  | 4,15  | 3,31  | 0,0371036 | 0,132068 |
| KCNJ16        | 0,08  | 0,26  | 0,17  | 0,41  | 0,0371038 | 0,132068 |
| OLA1          | 5,98  | 4,13  | 5,40  | 4,20  | 0,0371154 | 0,132088 |
| SRP68         | 5,13  | 2,98  | 4,24  | 4,64  | 0,0371279 | 0,132111 |
| RN7SL483P     | 0,00  | 1,45  | 0,30  | 1,35  | 0,0371344 | 0,132113 |
| FAM3A         | 1,75  | 2,62  | 2,21  | 3,35  | 0,037152  | 0,132155 |

|               |      |      |      |      |           |          |
|---------------|------|------|------|------|-----------|----------|
| HGS           | 4,17 | 3,28 | 4,90 | 4,71 | 0,0371785 | 0,132228 |
| EXOSC8        | 5,20 | 5,61 | 4,15 | 3,39 | 0,0372191 | 0,132351 |
| CHCHD7        | 5,16 | 5,94 | 4,58 | 3,60 | 0,0372402 | 0,132405 |
| NR1I3         | 0,86 | 0,65 | 0,92 | 1,24 | 0,0372691 | 0,132487 |
| OR4K13        | 0,02 | 0,09 | 0,08 | 0,05 | 0,0372942 | 0,132555 |
| USP30         | 0,72 | 0,10 | 0,55 | 2,95 | 0,0373139 | 0,132603 |
| RGR           | 0,93 | 2,61 | 1,35 | 2,43 | 0,0373286 | 0,132634 |
| REV1          | 4,48 | 1,73 | 3,97 | 3,33 | 0,0373438 | 0,132667 |
| WBP4          | 2,41 | 1,25 | 2,15 | 1,60 | 0,0373664 | 0,132718 |
| RP11-613M5.2  | 2,45 | 2,96 | 2,40 | 2,64 | 0,0373699 | 0,132718 |
| HEATR1        | 2,60 | 4,08 | 2,73 | 0,83 | 0,0373932 | 0,132779 |
| MLXIP         | 3,31 | 3,93 | 3,79 | 3,48 | 0,0374114 | 0,132788 |
| NEK8          | 0,30 | 0,30 | 0,63 | 0,82 | 0,0374127 | 0,132788 |
| PAIP2         | 7,61 | 7,28 | 6,68 | 6,64 | 0,037418  | 0,132788 |
| SHISA9        | 0,78 | 1,48 | 0,70 | 0,96 | 0,0374251 | 0,132788 |
| AK3           | 3,46 | 4,62 | 1,88 | 2,43 | 0,0374255 | 0,132788 |
| CCL28         | 1,08 | 1,01 | 1,05 | 1,59 | 0,0374535 | 0,132866 |
| UBTD2         | 2,22 | 1,99 | 1,62 | 0,40 | 0,0374636 | 0,13288  |
| CDC42EP2      | 0,00 | 0,00 | 0,00 | 0,22 | 0,0374793 | NA       |
| MTHFD2L       | 3,97 | 1,38 | 3,46 | 3,29 | 0,0374931 | 0,132964 |
| MT-TH         | 2,83 | 4,71 | 2,76 | 4,75 | 0,0375373 | 0,133082 |
| RP1-298J18.1  | 0,87 | 1,26 | 0,92 | 1,57 | 0,0375384 | 0,133082 |
| INTS14        | 4,17 | 0,51 | 3,00 | 1,49 | 0,0375481 | 0,133095 |
| CTB-109A12.1  | 0,00 | 0,07 | 0,00 | 0,08 | 0,0375777 | NA       |
| RP11-799D4.4  | 0,71 | 1,82 | 0,99 | 2,32 | 0,037607  | 0,133283 |
| COX18         | 2,29 | 0,80 | 1,69 | 2,36 | 0,0376249 | 0,133325 |
| SLC25A48      | 0,19 | 0,18 | 0,19 | 0,49 | 0,0376422 | 0,133365 |
| EID3          | 0,08 | 0,10 | 0,76 | 0,18 | 0,0377126 | 0,13357  |
| RP11-761E20.1 | 1,41 | 2,66 | 0,59 | 0,13 | 0,0377158 | 0,13357  |
| RP13-270P17.1 | 0,93 | 0,65 | 0,64 | 0,28 | 0,037718  | 0,13357  |
| HTR7          | 2,34 | 0,13 | 1,14 | 0,64 | 0,0377433 | 0,133638 |
| MAPKAPK2      | 2,05 | 3,68 | 3,00 | 3,66 | 0,0377832 | 0,133758 |
| FGD3          | 4,17 | 4,96 | 4,42 | 4,77 | 0,0378279 | 0,133895 |
| PWP1          | 5,87 | 5,59 | 5,76 | 4,67 | 0,0378953 | 0,134112 |
| APOBEC3H      | 0,12 | 0,16 | 0,20 | 0,52 | 0,0379093 | 0,134132 |
| RP11-398J10.1 | 0,00 | 0,00 | 0,20 | 0,34 | 0,0379131 | 0,134132 |
| RP11-286B14.2 | 0,00 | 4,73 | 0,87 | 0,96 | 0,0379276 | 0,134162 |
| ELN           | 2,39 | 3,12 | 2,90 | 2,89 | 0,0379408 | 0,134187 |
| ADPRM         | 3,13 | 0,13 | 0,61 | 1,35 | 0,0379545 | 0,134215 |
| AC002472.15   | 0,56 | 0,28 | 0,36 | 0,08 | 0,0379639 | 0,134227 |
| RP1-74B13.2   | 1,35 | 1,32 | 1,65 | 1,62 | 0,0379841 | 0,134277 |
| TTC6          | 0,48 | 0,81 | 0,72 | 1,45 | 0,0380144 | 0,134362 |
| FHOD1         | 4,77 | 5,64 | 5,48 | 5,91 | 0,0380348 | 0,134413 |
| ADH6          | 0,00 | 0,60 | 0,34 | 0,35 | 0,0380854 | NA       |
| PUM1          | 5,34 | 5,58 | 5,09 | 4,00 | 0,0381422 | 0,134767 |
| RP11-324E6.6  | 0,42 | 1,20 | 1,20 | 2,03 | 0,0381511 | 0,134767 |
| RP11-543B16.3 | 1,21 | 4,47 | 1,49 | 0,79 | 0,0381561 | 0,134767 |
| RP11-995C19.3 | 2,12 | 0,78 | 2,44 | 2,21 | 0,0381592 | 0,134767 |
| VSTM1         | 0,00 | 0,00 | 0,00 | 0,00 | 0,0381722 | 0,134775 |
| RHPN1         | 0,13 | 2,17 | 0,09 | 0,07 | 0,0381735 | 0,134775 |
| SERPINB10     | 0,05 | 0,51 | 0,13 | 0,49 | 0,0382688 | 0,135085 |
| TRAPPC2       | 3,86 | 2,76 | 3,38 | 3,17 | 0,0382832 | 0,135085 |
| AC074117.10   | 0,49 | 1,14 | 0,75 | 0,51 | 0,0382833 | 0,135085 |
| FAM134A       | 3,71 | 3,81 | 3,65 | 3,63 | 0,0382857 | 0,135085 |
| CTD-2509G16.5 | 0,00 | 0,00 | 0,00 | 0,62 | 0,0383042 | NA       |

|               |       |      |      |      |           |          |
|---------------|-------|------|------|------|-----------|----------|
| WVVOX         | 4,17  | 4,43 | 4,37 | 5,22 | 0,038314  | 0,135163 |
| RP11-88E10.5  | 0,00  | 0,00 | 0,27 | 0,00 | 0,0384242 | 0,13553  |
| AMICA1        | 10,05 | 9,40 | 9,57 | 8,74 | 0,0384415 | 0,135555 |
| RAVER1        | 0,06  | 0,08 | 0,20 | 0,14 | 0,0384434 | 0,135555 |
| RP11-184M15.2 | 0,79  | 2,07 | 1,00 | 1,26 | 0,0384547 | 0,135564 |
| RP11-182J1.18 | 0,09  | 0,07 | 0,16 | 0,07 | 0,038464  | 0,135564 |
| FABP2         | 1,70  | 2,60 | 2,34 | 2,43 | 0,0384641 | 0,135564 |
| KCNQ3         | 0,00  | 0,03 | 0,00 | 0,06 | 0,0384727 | 0,135572 |
| TFRC          | 4,86  | 2,68 | 4,91 | 4,08 | 0,0384999 | 0,135647 |
| CD34          | 0,06  | 0,02 | 0,04 | 0,09 | 0,0385151 | 0,135679 |
| PDCD2         | 5,09  | 2,42 | 4,87 | 4,03 | 0,0385647 | 0,135832 |
| RP11-703H8.7  | 0,00  | 0,00 | 0,12 | 0,42 | 0,0385658 | NA       |
| IFT81         | 1,57  | 1,36 | 1,49 | 0,85 | 0,0385752 | 0,135848 |
| WDR83         | 2,79  | 4,87 | 1,80 | 1,63 | 0,0386048 | 0,13593  |
| ZNF846        | 4,59  | 1,54 | 3,14 | 2,36 | 0,038621  | 0,135966 |
| POMC          | 2,74  | 0,00 | 3,36 | 4,01 | 0,0386473 | 0,136031 |
| ZNF567        | 2,73  | 2,00 | 1,60 | 2,69 | 0,0386517 | 0,136031 |
| AC093732.1    | 0,00  | 0,00 | 0,00 | 0,62 | 0,0387191 | 0,136224 |
| TK1           | 1,48  | 0,55 | 0,23 | 0,10 | 0,0387203 | 0,136224 |
| LYPD4         | 0,11  | 0,07 | 0,08 | 0,27 | 0,0387251 | 0,136224 |
| PPP2R2A       | 4,98  | 3,43 | 4,54 | 3,69 | 0,0387483 | 0,136284 |
| RP11-140K17.3 | 2,24  | 1,51 | 1,98 | 0,00 | 0,0387721 | 0,136345 |
| CDHR4         | 0,00  | 0,94 | 0,00 | 0,17 | 0,0387777 | 0,136345 |
| HR            | 0,00  | 0,05 | 0,00 | 0,00 | 0,0388052 | 0,136415 |
| TRPT1         | 5,33  | 4,82 | 3,92 | 5,90 | 0,0388101 | 0,136415 |
| ACTR6         | 3,68  | 2,27 | 3,18 | 4,81 | 0,0388381 | 0,136492 |
| CTC-548K16.1  | 0,42  | 0,27 | 0,87 | 0,55 | 0,0388554 | 0,136531 |
| ZMYM6         | 4,83  | 3,21 | 4,21 | 3,85 | 0,0388675 | 0,136552 |
| RP11-567M16.1 | 0,03  | 0,40 | 0,01 | 0,05 | 0,0388762 | 0,136556 |
| SLIT3         | 0,11  | 0,42 | 0,21 | 0,47 | 0,0388808 | 0,136556 |
| NDUFAB1       | 7,46  | 6,77 | 7,54 | 6,52 | 0,0389055 | 0,136621 |
| RP11-147G7.3  | 0,05  | 4,16 | 0,28 | 0,67 | 0,0389224 | 0,136652 |
| GALNTL5       | 0,00  | 0,78 | 0,26 | 2,06 | 0,0389267 | 0,136652 |
| PDP1          | 3,72  | 3,34 | 3,61 | 1,41 | 0,0389435 | 0,13668  |
| SLC34A1       | 0,00  | 0,38 | 0,00 | 0,00 | 0,0389468 | 0,13668  |
| ATP11A        | 4,12  | 5,37 | 4,70 | 4,21 | 0,0389652 | 0,136723 |
| CTB-131K11.1  | 2,44  | 0,84 | 0,97 | 0,58 | 0,0390314 | 0,136914 |
| ZNF625        | 0,39  | 0,00 | 0,45 | 0,20 | 0,039033  | 0,136914 |
| AC092620.3    | 1,97  | 0,00 | 1,22 | 0,31 | 0,0390427 | 0,136914 |
| RP11-902B17.1 | 0,54  | 0,62 | 0,60 | 1,14 | 0,0390444 | 0,136914 |
| CSRP1         | 4,83  | 2,44 | 4,57 | 3,36 | 0,0391209 | 0,137109 |
| DECR2         | 2,88  | 2,10 | 1,82 | 0,18 | 0,0391258 | 0,137109 |
| AC092798.3    | 1,88  | 0,00 | 0,00 | 0,00 | 0,0391265 | 0,137109 |
| ZNF117        | 1,69  | 0,54 | 1,41 | 1,20 | 0,0391265 | 0,137109 |
| FKBP14        | 2,31  | 0,88 | 1,21 | 1,43 | 0,0391309 | 0,137109 |
| ACSL5         | 4,95  | 3,08 | 4,14 | 3,56 | 0,0391485 | 0,137149 |
| ADIRF-AS1     | 0,20  | 0,07 | 1,03 | 0,91 | 0,0391746 | 0,137219 |
| RP11-504G3.1  | 0,40  | 0,00 | 1,93 | 1,49 | 0,0392143 | 0,137298 |
| ZCCHC14       | 0,74  | 0,21 | 0,51 | 0,73 | 0,0392146 | 0,137298 |
| FRG1JP        | 0,06  | 0,00 | 0,11 | 0,58 | 0,0392186 | 0,137298 |
| RP11-1089B7.1 | 0,00  | 0,10 | 0,00 | 0,09 | 0,0392218 | 0,137298 |
| RPL10P3       | 0,00  | 0,00 | 0,21 | 0,50 | 0,0392244 | NA       |
| RP11-245J9.2  | 2,69  | 2,12 | 0,60 | 0,18 | 0,0392394 | 0,137323 |
| CTA-360L10.1  | 2,48  | 2,46 | 2,27 | 2,38 | 0,0392511 | 0,137323 |
| VMP1          | 6,66  | 4,99 | 6,29 | 6,51 | 0,0392515 | 0,137323 |

|               |      |      |      |      |           |          |
|---------------|------|------|------|------|-----------|----------|
| SMN2          | 5,30 | 3,81 | 4,93 | 4,49 | 0,0392537 | 0,137323 |
| GKAP1         | 0,11 | 1,54 | 0,30 | 0,88 | 0,0393012 | 0,137467 |
| ANKRD42       | 1,27 | 1,86 | 1,90 | 2,69 | 0,0393746 | 0,137703 |
| TOB2          | 1,97 | 1,43 | 2,79 | 2,94 | 0,0393941 | 0,137745 |
| CTC-260E6.6   | 1,82 | 4,26 | 1,89 | 2,34 | 0,039399  | 0,137745 |
| RP11-10A14.3  | 0,32 | 2,03 | 0,76 | 0,00 | 0,0394403 | 0,137867 |
| RP11-3P17.5   | 1,17 | 2,53 | 1,24 | 1,41 | 0,039447  | NA       |
| RP11-430C1.1  | 0,18 | 0,36 | 0,39 | 0,24 | 0,0394645 | 0,13793  |
| DBF4          | 4,10 | 1,45 | 3,36 | 2,22 | 0,0395305 | 0,138139 |
| TCEANC        | 0,90 | 0,35 | 0,46 | 0,78 | 0,0395545 | 0,138201 |
| SYNCRIP       | 5,52 | 4,55 | 4,99 | 4,48 | 0,0395692 | 0,138214 |
| LRTOMT        | 2,81 | 1,60 | 1,94 | 2,58 | 0,0395705 | 0,138214 |
| RNF180        | 1,54 | 1,58 | 2,52 | 2,88 | 0,0396084 | 0,138324 |
| EPM2AIP1      | 3,18 | 1,29 | 2,84 | 2,56 | 0,0396212 | 0,138347 |
| LINC00337     | 0,81 | 1,00 | 0,75 | 1,52 | 0,0396401 | 0,138392 |
| KLK2          | 1,35 | 0,77 | 1,15 | 2,50 | 0,0396776 | 0,138479 |
| OR2V2         | 0,24 | 0,43 | 0,37 | 0,28 | 0,0396782 | 0,138479 |
| TSC22D1-AS1   | 0,04 | 0,24 | 0,09 | 0,30 | 0,0396838 | 0,138479 |
| RP11-550P23.3 | 0,26 | 0,12 | 0,33 | 0,33 | 0,0397074 | 0,138539 |
| NUS1          | 3,45 | 1,00 | 2,98 | 2,31 | 0,0397883 | 0,1388   |
| SEC24D        | 3,62 | 4,28 | 4,09 | 2,06 | 0,0398076 | 0,138846 |
| SEZ6          | 0,20 | 0,09 | 0,17 | 0,28 | 0,0398157 | 0,138852 |
| AGAP6         | 1,46 | 1,34 | 3,45 | 2,16 | 0,0398425 | 0,138909 |
| C21orf59      | 4,85 | 2,87 | 4,51 | 4,32 | 0,0398552 | 0,138909 |
| KDM8          | 0,80 | 0,09 | 0,24 | 0,00 | 0,0398568 | 0,138909 |
| ZNF774        | 0,60 | 0,92 | 0,71 | 0,95 | 0,0398569 | 0,138909 |
| RP11-363P13.1 | 0,00 | 0,00 | 0,00 | 0,40 | 0,0398758 | 0,138953 |
| SLCO3A1       | 4,30 | 3,68 | 4,46 | 4,80 | 0,0399194 | 0,139069 |
| EME2          | 1,42 | 1,10 | 1,99 | 2,59 | 0,0399269 | 0,139069 |
| CRTAP         | 6,38 | 5,35 | 5,64 | 4,94 | 0,0399279 | 0,139069 |
| AP000347.2    | 1,73 | 1,42 | 1,94 | 3,25 | 0,0399426 | 0,139082 |
| GLIDR         | 0,81 | 0,11 | 0,94 | 0,28 | 0,0399442 | 0,139082 |
| RP11-796A5.4  | 0,27 | 0,45 | 0,20 | 1,55 | 0,0399649 | 0,139132 |
| KIAA2012      | 0,23 | 0,51 | 0,48 | 0,35 | 0,0399961 | 0,139219 |
| RP11-542M13.6 | 0,53 | 0,17 | 1,12 | 0,00 | 0,040016  | 0,139255 |
| C6orf226      | 4,51 | 3,38 | 4,14 | 5,15 | 0,0400188 | 0,139255 |
| RP11-395B7.4  | 2,92 | 5,00 | 3,32 | 0,61 | 0,0400325 | 0,13928  |
| KCNG4         | 0,10 | 0,18 | 0,19 | 0,20 | 0,0400926 | 0,139457 |
| SLC11A2       | 4,21 | 4,93 | 4,29 | 3,99 | 0,040096  | 0,139457 |
| ATPAF1        | 3,52 | 3,43 | 2,73 | 1,39 | 0,0401056 | 0,139469 |
| EXOC5         | 4,21 | 2,91 | 2,89 | 1,37 | 0,0401299 | 0,139532 |
| PPP2R5C       | 6,82 | 7,64 | 7,01 | 6,78 | 0,0401433 | 0,139543 |
| CHMP5         | 6,59 | 3,21 | 5,37 | 5,92 | 0,0401515 | 0,139543 |
| RP5-983L19.2  | 0,00 | 0,12 | 0,01 | 0,00 | 0,040152  | 0,139543 |
| MAGOHB        | 5,11 | 1,09 | 4,20 | 4,29 | 0,0401587 | 0,139545 |
| MON1B         | 2,62 | 2,73 | 3,12 | 3,49 | 0,0402107 | 0,139694 |
| RP11-365P13.5 | 2,13 | 2,94 | 2,32 | 2,54 | 0,0402142 | 0,139694 |
| SEC11A        | 6,76 | 6,76 | 6,96 | 6,04 | 0,0402287 | 0,139722 |
| MDS2          | 0,17 | 0,47 | 0,48 | 0,35 | 0,0402372 | 0,13973  |
| DNAL1         | 2,13 | 4,51 | 1,92 | 2,49 | 0,0402844 | 0,139872 |
| HOMER2        | 2,82 | 1,52 | 2,79 | 0,43 | 0,040291  | 0,139873 |
| CTC-360G5.9   | 0,59 | 1,11 | 0,45 | 0,64 | 0,0403171 | 0,139942 |
| IQGAP2        | 5,78 | 5,36 | 5,87 | 4,84 | 0,0403363 | 0,139987 |
| FGF5          | 0,04 | 0,08 | 0,10 | 0,06 | 0,0403551 | 0,14003  |
| RP11-807C20.2 | 0,56 | 0,00 | 2,03 | 2,66 | 0,0403732 | 0,140071 |

|               |      |      |      |      |           |          |
|---------------|------|------|------|------|-----------|----------|
| RNU6-595P     | 0,00 | 0,00 | 0,54 | 6,79 | 0,0404459 | 0,140301 |
| LDLRAD2       | 0,14 | 0,13 | 0,37 | 0,00 | 0,0404612 | 0,140332 |
| YTHDF1        | 3,64 | 3,86 | 3,44 | 2,21 | 0,0404681 | 0,140334 |
| ZNF548        | 1,85 | 1,44 | 1,08 | 2,39 | 0,040482  | 0,140352 |
| AC009403.2    | 1,85 | 2,35 | 2,89 | 1,59 | 0,0404868 | 0,140352 |
| RP11-231I16.1 | 0,04 | 0,03 | 0,09 | 0,39 | 0,0404921 | 0,140352 |
| PPM1J         | 1,45 | 0,21 | 0,40 | 0,13 | 0,040512  | 0,140399 |
| IMMP2L        | 4,31 | 2,14 | 3,72 | 0,51 | 0,0405502 | 0,140504 |
| RP11-526D8.3  | 0,00 | 0,00 | 0,00 | 0,81 | 0,0405557 | 0,140504 |
| RP11-720N19.2 | 0,70 | 0,00 | 0,23 | 3,97 | 0,0405628 | 0,140504 |
| ANAPC16       | 6,75 | 5,15 | 5,82 | 4,93 | 0,0405676 | 0,140504 |
| SLC35D1       | 1,56 | 0,84 | 1,40 | 0,50 | 0,0405907 | 0,140552 |
| INO80E        | 1,39 | 2,53 | 1,68 | 2,23 | 0,0405941 | 0,140552 |
| RP11-179G8.2  | 0,00 | 0,00 | 0,04 | 0,29 | 0,040604  | 0,140564 |
| PPP1R10       | 5,74 | 3,90 | 5,45 | 5,92 | 0,0406108 | 0,140566 |
| RP11-706O15.1 | 3,64 | 4,59 | 3,92 | 3,89 | 0,0406194 | 0,140574 |
| RP11-54H7.4   | 0,54 | 1,23 | 0,68 | 1,52 | 0,0406264 | 0,140576 |
| CTD-3105H18.7 | 0,25 | 3,58 | 0,00 | 0,00 | 0,0406366 | 0,14059  |
| NBPF26        | 4,69 | 3,41 | 4,62 | 5,37 | 0,0406593 | 0,140646 |
| FAM138A       | 2,16 | 0,00 | 1,29 | 2,87 | 0,0406713 | 0,140666 |
| MLX           | 5,55 | 4,61 | 4,46 | 4,49 | 0,0406967 | 0,140732 |
| RP11-494O16.4 | 0,38 | 0,82 | 0,76 | 0,75 | 0,0407103 | 0,140743 |
| TUBE1         | 2,83 | 2,88 | 2,20 | 2,20 | 0,0407126 | 0,140743 |
| TOM1L1        | 0,27 | 0,68 | 0,30 | 2,99 | 0,0407286 | 0,140749 |
| DRG1          | 5,88 | 5,11 | 4,98 | 4,24 | 0,0407292 | 0,140749 |
| ADRA2B        | 0,00 | 3,00 | 0,00 | 0,03 | 0,0407333 | 0,140749 |
| AC098823.3    | 0,32 | 0,37 | 0,32 | 0,14 | 0,0407696 | 0,140825 |
| ALG3          | 5,94 | 4,24 | 4,94 | 3,42 | 0,0407752 | 0,140825 |
| KIAA0100      | 4,54 | 5,25 | 5,28 | 4,72 | 0,0407828 | 0,140825 |
| RP11-646E18.4 | 0,00 | 0,13 | 0,11 | 0,00 | 0,0407864 | 0,140825 |
| RP11-139H14.5 | 0,00 | 0,00 | 0,00 | 0,03 | 0,04079   | 0,140825 |
| LINC-ROR      | 1,46 | 2,35 | 1,27 | 0,53 | 0,0407932 | 0,140825 |
| RAB4B-EGLN2   | 0,24 | 0,24 | 0,00 | 0,00 | 0,0408241 | 0,140889 |
| RP4-798A10.7  | 0,00 | 3,02 | 0,00 | 1,46 | 0,0408244 | 0,140889 |
| PRR27         | 0,00 | 0,33 | 0,05 | 0,12 | 0,0408752 | 0,141042 |
| CFL2          | 0,93 | 1,02 | 1,44 | 0,35 | 0,0408869 | 0,14106  |
| RP11-290F20.1 | 0,00 | 2,29 | 0,00 | 0,00 | 0,0409023 | 0,141078 |
| PGM3          | 2,35 | 2,18 | 0,85 | 1,18 | 0,0409048 | 0,141078 |
| GVINP1        | 0,39 | 0,08 | 0,38 | 1,07 | 0,0409319 | 0,141105 |
| C11orf71      | 3,38 | 0,28 | 2,42 | 3,71 | 0,0409449 | 0,141105 |
| DENND1B       | 4,86 | 3,43 | 3,94 | 2,07 | 0,0409454 | 0,141105 |
| NRM           | 4,34 | 1,90 | 4,77 | 3,19 | 0,0409465 | 0,141105 |
| RNU6-1        | 3,50 | 1,21 | 3,51 | 3,40 | 0,0409823 | 0,141105 |
| RNU6-2        | 3,50 | 1,21 | 3,51 | 3,40 | 0,0409823 | 0,141105 |
| RNU6-3P       | 3,50 | 1,21 | 3,51 | 3,40 | 0,0409823 | 0,141105 |
| RNU6-4P       | 3,50 | 1,22 | 3,51 | 3,40 | 0,0409823 | 0,141105 |
| RNU6-5P       | 3,50 | 1,22 | 3,51 | 3,40 | 0,0409823 | 0,141105 |
| RNU6-6P       | 3,50 | 1,21 | 3,51 | 3,40 | 0,0409823 | 0,141105 |
| RNU6-9        | 3,50 | 1,21 | 3,51 | 3,40 | 0,0409823 | 0,141105 |
| PIWIL2        | 0,00 | 0,00 | 0,00 | 0,00 | 0,041023  | NA       |
| RP11-74N20.1  | 0,15 | 0,18 | 0,89 | 0,89 | 0,0410544 | 0,141306 |
| RP11-382A20.3 | 1,17 | 0,57 | 1,57 | 2,42 | 0,0410567 | 0,141306 |
| CERCAM        | 0,12 | 1,34 | 0,28 | 1,15 | 0,0410598 | 0,141306 |
| TRIM72        | 0,44 | 0,78 | 0,61 | 0,66 | 0,0410803 | 0,141355 |
| RP11-172H24.4 | 0,30 | 0,59 | 0,41 | 0,34 | 0,0410954 | 0,141385 |

|               |      |      |      |      |           |          |
|---------------|------|------|------|------|-----------|----------|
| SGTB          | 0,48 | 0,68 | 1,02 | 1,98 | 0,0411185 | 0,141417 |
| PRMT3         | 3,12 | 3,86 | 1,34 | 1,01 | 0,0411187 | 0,141417 |
| RP11-325N19.3 | 0,29 | 2,04 | 0,39 | 0,47 | 0,0411238 | 0,141417 |
| FBXO10        | 0,00 | 0,00 | 0,00 | 0,00 | 0,0411658 | 0,14152  |
| CTD-2583A14.8 | 0,38 | 1,68 | 0,75 | 2,20 | 0,0411681 | 0,14152  |
| LRAT          | 0,22 | 0,21 | 0,18 | 0,24 | 0,041173  | 0,14152  |
| TCP1          | 6,65 | 5,13 | 5,81 | 5,08 | 0,0412001 | 0,141592 |
| DHX16         | 4,06 | 1,24 | 3,69 | 1,48 | 0,0412346 | 0,141688 |
| ANKRD13C      | 3,48 | 1,27 | 2,61 | 1,41 | 0,0412429 | 0,141695 |
| SPIN4         | 0,18 | 0,00 | 0,08 | 0,46 | 0,0412587 | 0,141727 |
| FAM108C1      | 0,15 | 0,00 | 0,33 | 0,00 | 0,0412682 | 0,141738 |
| C18orf25      | 3,35 | 2,43 | 1,83 | 1,26 | 0,0412757 | 0,141742 |
| ACO05606.14   | 0,00 | 3,71 | 0,00 | 0,00 | 0,0412847 | 0,141751 |
| CCNJ          | 2,03 | 0,29 | 1,11 | 0,84 | 0,0412961 | 0,141761 |
| KLHL18        | 4,31 | 4,84 | 4,40 | 4,54 | 0,0413003 | 0,141761 |
| C8orf41       | 2,37 | 1,10 | 2,23 | 2,17 | 0,0413318 | 0,141847 |
| GRPEL1        | 6,15 | 1,70 | 5,21 | 3,96 | 0,0413407 | 0,141855 |
| IFFO1         | 3,05 | 3,68 | 4,07 | 4,11 | 0,0413599 | 0,141899 |
| RP11-16N2.1   | 0,57 | 2,29 | 1,06 | 2,01 | 0,0413695 | 0,14191  |
| SLC9A3R2      | 0,00 | 0,34 | 0,13 | 0,12 | 0,0413831 | 0,141935 |
| MTFR1         | 3,04 | 3,67 | 1,99 | 0,54 | 0,0414676 | 0,142192 |
| RP11-14I17.2  | 2,15 | 1,97 | 1,67 | 3,08 | 0,0414708 | 0,142192 |
| C16orf46      | 0,00 | 0,48 | 0,00 | 0,00 | 0,0414959 | 0,142256 |
| AKT3          | 1,81 | 3,23 | 2,21 | 2,18 | 0,0415042 | 0,142263 |
| FAM126A       | 3,47 | 0,97 | 3,77 | 3,11 | 0,0415207 | 0,142295 |
| LA16c-390H2.4 | 0,53 | 0,61 | 0,52 | 0,79 | 0,0415272 | 0,142295 |
| ITPRIP        | 3,17 | 1,79 | 3,15 | 1,77 | 0,0415328 | 0,142295 |
| RP11-419I17.2 | 0,76 | 2,19 | 0,37 | 0,32 | 0,041554  | 0,142307 |
| RAPGEF2       | 3,64 | 4,00 | 2,79 | 4,58 | 0,0415544 | 0,142307 |
| IDH3B         | 7,19 | 6,14 | 6,20 | 6,10 | 0,0415555 | 0,142307 |
| ZNF658        | 0,27 | 1,40 | 0,08 | 0,35 | 0,0415716 | 0,14234  |
| VDAC3         | 7,43 | 6,85 | 6,63 | 5,57 | 0,0415854 | 0,142365 |
| RP13-685P2.5  | 0,54 | 1,19 | 0,41 | 0,98 | 0,0415952 | 0,142366 |
| CD40          | 4,05 | 0,85 | 3,59 | 0,94 | 0,0416038 | 0,142366 |
| TRAPPC8       | 5,12 | 4,06 | 4,58 | 4,84 | 0,0416049 | 0,142366 |
| RP11-102M11.1 | 0,19 | 1,32 | 0,58 | 1,74 | 0,0416173 | 0,142387 |
| PDIK1L        | 1,50 | 0,00 | 1,09 | 0,11 | 0,0416315 | 0,142399 |
| SPTBN5        | 0,00 | 0,45 | 0,00 | 0,01 | 0,0416336 | 0,142399 |
| TARBP1        | 5,45 | 2,43 | 5,01 | 5,28 | 0,0416661 | 0,142488 |
| RBM5-AS1      | 0,14 | 0,32 | 0,33 | 0,33 | 0,0417127 | 0,142625 |
| RP11-80B9.1   | 0,00 | 0,22 | 0,00 | 0,00 | 0,0417351 | 0,14268  |
| TSGA10        | 0,33 | 0,25 | 0,22 | 0,28 | 0,041772  | 0,142784 |
| RP11-258B16.1 | 0,05 | 0,30 | 0,05 | 0,19 | 0,0417834 | 0,142796 |
| RP11-739N10.1 | 2,07 | 3,97 | 1,07 | 3,40 | 0,0417882 | 0,142796 |
| STX16         | 4,90 | 4,13 | 4,47 | 5,06 | 0,0418117 | 0,142838 |
| HSDL1         | 0,03 | 0,05 | 1,86 | 0,21 | 0,0418134 | 0,142838 |
| AFF1          | 4,44 | 3,06 | 3,51 | 4,93 | 0,0418571 | 0,142965 |
| BBX           | 6,07 | 5,21 | 5,29 | 5,12 | 0,0418855 | 0,14304  |
| IP6K2         | 5,88 | 4,75 | 5,23 | 5,06 | 0,0419174 | 0,143127 |
| FANCD2OS      | 0,00 | 0,58 | 1,06 | 1,42 | 0,0419313 | 0,143152 |
| SIPA1L3       | 3,23 | 2,43 | 3,42 | 2,05 | 0,041948  | 0,143187 |
| FGFR3         | 0,02 | 0,05 | 0,03 | 0,03 | 0,0419682 | NA       |
| RN7SL477P     | 0,00 | 3,59 | 0,73 | 0,00 | 0,0419693 | 0,14322  |
| TUBB4A        | 0,00 | 2,12 | 0,00 | 0,05 | 0,0419703 | 0,14322  |
| LPAR4         | 0,81 | 1,41 | 0,98 | 1,27 | 0,0419844 | 0,143246 |

|                |      |      |      |      |           |          |
|----------------|------|------|------|------|-----------|----------|
| RP11-264B17.5  | 1,08 | 3,92 | 0,47 | 4,74 | 0,0420002 | 0,143278 |
| NCDN           | 0,39 | 0,00 | 0,50 | 0,17 | 0,0420151 | 0,143307 |
| FLVCR2         | 1,90 | 0,86 | 3,58 | 2,40 | 0,0420226 | 0,143308 |
| POLG2          | 4,35 | 4,98 | 3,52 | 3,69 | 0,0420283 | 0,143308 |
| RP3-330O12.5   | 0,23 | 0,25 | 0,28 | 0,42 | 0,0421    | 0,14353  |
| TRIM59         | 3,94 | 1,15 | 3,09 | 1,75 | 0,0421338 | 0,143612 |
| EEF1AKMT1      | 1,58 | 3,10 | 2,22 | 1,34 | 0,0421369 | 0,143612 |
| ZNF581         | 5,25 | 6,53 | 5,49 | 5,42 | 0,0421449 | 0,143617 |
| ARHGAP29       | 1,19 | 0,34 | 1,09 | 2,74 | 0,0421631 | 0,143652 |
| ACO17060.1     | 0,83 | 0,33 | 0,83 | 1,95 | 0,0421708 | 0,143652 |
| ANKAR          | 1,35 | 0,16 | 1,33 | 1,11 | 0,0421798 | 0,143652 |
| FFAR4          | 0,18 | 0,77 | 0,17 | 0,31 | 0,042181  | 0,143652 |
| TMEM9B-AS1     | 0,00 | 0,49 | 0,22 | 0,00 | 0,0421944 | 0,143672 |
| RP4-726F1.1    | 3,37 | 0,00 | 2,96 | 1,88 | 0,0421997 | 0,143672 |
| PRDX3          | 7,27 | 6,35 | 6,41 | 5,76 | 0,0422094 | 0,143682 |
| TBX4           | 0,15 | 0,00 | 0,20 | 0,08 | 0,0422287 | 0,143726 |
| ZNF225         | 1,65 | 2,81 | 2,77 | 2,50 | 0,0422537 | 0,143789 |
| RP11-949J7.7   | 0,52 | 1,39 | 1,02 | 0,34 | 0,0423064 | 0,143947 |
| KCNK10         | 0,43 | 0,90 | 0,40 | 0,53 | 0,0423394 | 0,144037 |
| CSPP1          | 2,83 | 4,97 | 2,87 | 3,78 | 0,0423506 | 0,144053 |
| ACO02310.7     | 0,16 | 0,00 | 0,32 | 0,37 | 0,0423649 | 0,144079 |
| SNRPG          | 6,59 | 7,24 | 6,87 | 7,17 | 0,0423747 | 0,144091 |
| PRR5L          | 1,22 | 1,05 | 0,87 | 3,52 | 0,0424121 | 0,144174 |
| RP11-170N11.1  | 0,00 | 0,10 | 0,39 | 0,12 | 0,0424121 | 0,144174 |
| AC109326.1     | 2,80 | 2,49 | 3,56 | 3,31 | 0,0424213 | 0,144182 |
| RP11-162A12.2  | 0,10 | 0,17 | 0,08 | 0,00 | 0,0424327 | 0,144182 |
| NIPAL1         | 0,19 | 0,60 | 0,29 | 0,27 | 0,0424365 | 0,144182 |
| SCMH1          | 1,89 | 2,50 | 1,15 | 0,12 | 0,0424404 | 0,144182 |
| BRAP           | 3,52 | 2,08 | 3,48 | 1,62 | 0,0424548 | 0,144202 |
| ACO07677.1     | 0,00 | 4,20 | 0,95 | 1,81 | 0,0424613 | 0,144202 |
| WDR36          | 3,87 | 1,59 | 2,97 | 2,31 | 0,0424657 | 0,144202 |
| ACO03075.4     | 2,03 | 0,37 | 2,05 | 5,01 | 0,0424742 | 0,144207 |
| ACOXL          | 0,44 | 0,49 | 0,50 | 0,61 | 0,0424803 | 0,144207 |
| NPY6R          | 0,00 | 0,00 | 0,05 | 0,00 | 0,0425048 | NA       |
| TREH           | 0,00 | 0,38 | 0,00 | 0,00 | 0,0425321 | 0,144361 |
| PHPT1          | 6,18 | 6,60 | 6,46 | 6,69 | 0,0425435 | 0,144374 |
| RP11-666A8.13  | 0,02 | 0,00 | 0,00 | 0,37 | 0,0425488 | 0,144374 |
| DENND4C        | 4,51 | 2,71 | 3,81 | 2,83 | 0,042594  | 0,144505 |
| DDOST          | 7,37 | 6,11 | 7,00 | 6,29 | 0,0426013 | 0,144508 |
| ALDH1L1        | 0,33 | 2,70 | 0,31 | 0,38 | 0,042619  | 0,144546 |
| DAXX           | 4,49 | 3,82 | 2,52 | 2,36 | 0,0426263 | 0,144548 |
| HARS2          | 3,71 | 0,50 | 3,81 | 2,36 | 0,0426394 | 0,144571 |
| ACO10761.6     | 0,96 | 1,83 | 1,07 | 2,17 | 0,0426474 | 0,144576 |
| RP11-751H17.1  | 0,33 | 1,54 | 0,43 | 0,62 | 0,0426744 | 0,144626 |
| KIAA0319       | 0,00 | 0,02 | 0,02 | 0,07 | 0,0426801 | 0,144626 |
| CYP3A4         | 0,00 | 0,00 | 0,00 | 0,00 | 0,0426817 | 0,144626 |
| SNORA75        | 0,00 | 0,00 | 0,00 | 1,48 | 0,0426937 | 0,14463  |
| GSN            | 6,71 | 7,31 | 7,02 | 6,34 | 0,0426958 | 0,14463  |
| NCRNA00114     | 0,53 | 0,61 | 0,93 | 0,76 | 0,042735  | 0,14474  |
| MRPL37         | 6,22 | 5,02 | 5,93 | 3,55 | 0,0427707 | 0,144839 |
| ZWILCH         | 1,18 | 0,15 | 0,80 | 0,24 | 0,042804  | 0,144911 |
| SOBP           | 0,00 | 0,00 | 0,00 | 0,00 | 0,0428049 | 0,144911 |
| SMIM20         | 4,86 | 5,45 | 4,11 | 2,60 | 0,0428203 | 0,144941 |
| C10orf10       | 0,00 | 0,00 | 0,22 | 0,00 | 0,0428617 | 0,145059 |
| RP11-1246C19.1 | 0,05 | 0,15 | 0,12 | 0,08 | 0,0428777 | 0,145091 |

|               |      |      |      |      |           |          |
|---------------|------|------|------|------|-----------|----------|
| ZNF575        | 0,08 | 0,00 | 0,14 | 0,00 | 0,0428928 | 0,14512  |
| RP11-538P18.1 | 0,00 | 0,00 | 0,61 | 0,00 | 0,0429273 | 0,145215 |
| TPCN1         | 3,10 | 3,13 | 3,97 | 3,68 | 0,0430041 | 0,145452 |
| UBE2V1        | 6,33 | 5,77 | 6,03 | 5,07 | 0,0430246 | 0,145499 |
| IGKV1-5       | 0,00 | 2,42 | 0,00 | 0,32 | 0,0430325 | 0,145504 |
| CTC-308K20.1  | 0,46 | 3,25 | 0,53 | 0,67 | 0,0430442 | 0,145521 |
| MRPL50        | 3,51 | 3,03 | 0,50 | 1,86 | 0,0430679 | 0,145554 |
| AC009961.3    | 1,95 | 2,73 | 1,27 | 1,72 | 0,0430727 | 0,145554 |
| PRKG2         | 0,00 | 0,00 | 0,04 | 0,17 | 0,0430734 | 0,145554 |
| ATXN1         | 2,81 | 1,16 | 3,01 | 2,88 | 0,0430964 | 0,145605 |
| SOCS3         | 2,29 | 3,17 | 3,50 | 2,37 | 0,0431017 | 0,145605 |
| MIR7851       | 0,00 | 2,15 | 1,72 | 2,09 | 0,043127  | 0,145668 |
| CTB-36H16.2   | 0,00 | 1,03 | 0,00 | 0,00 | 0,0431496 | 0,145723 |
| CCDC170       | 0,61 | 1,15 | 1,53 | 1,80 | 0,0431701 | 0,14577  |
| SNRPA1        | 7,00 | 6,74 | 6,59 | 5,51 | 0,0431829 | 0,145791 |
| WIZ           | 1,16 | 2,39 | 1,30 | 0,58 | 0,0431909 | 0,145795 |
| LRRC70        | 0,00 | 0,00 | 0,00 | 0,00 | 0,0432084 | 0,145833 |
| RP11-283I3.6  | 1,16 | 0,80 | 0,34 | 0,52 | 0,0432303 | 0,145864 |
| CDC23         | 3,43 | 2,90 | 1,74 | 2,67 | 0,0432308 | 0,145864 |
| RP11-383G6.3  | 1,92 | 2,53 | 1,92 | 0,84 | 0,0432763 | 0,145995 |
| AC091814.3    | 0,12 | 0,81 | 0,54 | 0,85 | 0,0432919 | 0,146015 |
| CPAMD8        | 0,68 | 1,43 | 0,86 | 0,70 | 0,0432954 | 0,146015 |
| BROX          | 4,91 | 3,86 | 4,45 | 4,79 | 0,0433073 | 0,146033 |
| RP1-86C11.7   | 0,00 | 1,26 | 0,00 | 0,32 | 0,0433217 | 0,146059 |
| RP4-669K10.8  | 1,02 | 1,90 | 1,27 | 1,67 | 0,0433331 | 0,146069 |
| ZSWIM8        | 4,59 | 5,24 | 5,39 | 4,71 | 0,0433552 | 0,146128 |
| PFAS          | 2,58 | 0,81 | 2,24 | 2,06 | 0,043386  | 0,14621  |
| SEMA6A        | 0,84 | 0,55 | 0,90 | 0,41 | 0,043406  | 0,146249 |
| TBXAS1        | 5,65 | 3,77 | 5,88 | 5,90 | 0,0434108 | 0,146249 |
| CEBPG         | 4,17 | 2,16 | 3,63 | 1,77 | 0,0434352 | 0,146309 |
| DHRS4L2       | 4,81 | 2,93 | 5,22 | 5,24 | 0,0434429 | 0,146313 |
| RP11-109N23.5 | 0,94 | 0,00 | 0,00 | 0,00 | 0,0434571 | 0,146338 |
| CHID1         | 5,15 | 5,87 | 5,21 | 4,32 | 0,0435077 | 0,146487 |
| ATP5H         | 7,91 | 8,40 | 7,72 | 7,97 | 0,043528  | 0,146533 |
| MBD4          | 4,87 | 2,90 | 4,18 | 3,50 | 0,0435523 | 0,146567 |
| RP11-480C16.1 | 0,67 | 1,00 | 0,73 | 1,03 | 0,0435537 | 0,146567 |
| PQBP1         | 6,68 | 5,68 | 6,55 | 5,98 | 0,043558  | 0,146567 |
| RP5-1126H10.2 | 0,00 | 0,07 | 0,00 | 0,04 | 0,0435804 | 0,146621 |
| RP11-90D4.5   | 0,00 | 0,00 | 0,17 | 1,99 | 0,0436017 | NA       |
| NRBF2         | 4,14 | 1,77 | 3,73 | 2,49 | 0,0436229 | 0,146741 |
| OSGIN2        | 3,17 | 4,04 | 1,74 | 1,23 | 0,0436383 | 0,146771 |
| BOP1          | 2,41 | 4,68 | 2,11 | 3,83 | 0,0436971 | 0,146918 |
| RP11-874I12.1 | 0,17 | 0,35 | 0,28 | 1,13 | 0,0436977 | 0,146918 |
| INPP5K        | 4,74 | 1,87 | 4,68 | 5,18 | 0,0437058 | 0,146918 |
| TMED3         | 5,67 | 4,23 | 5,83 | 5,18 | 0,0437086 | 0,146918 |
| NNMT          | 0,06 | 0,22 | 0,15 | 0,08 | 0,0437257 | 0,146953 |
| ZNF276        | 2,44 | 1,57 | 3,64 | 4,04 | 0,043733  | 0,146956 |
| NOC2L         | 3,21 | 4,16 | 3,50 | 3,37 | 0,0437638 | 0,147013 |
| ZNF235        | 0,60 | 0,04 | 0,57 | 0,44 | 0,043768  | 0,147013 |
| C12orf48      | 1,03 | 0,15 | 0,98 | 1,64 | 0,0437698 | 0,147013 |
| AC159540.2    | 3,69 | 0,00 | 0,00 | 2,43 | 0,0437888 | 0,147054 |
| RP11-350I20.5 | 1,85 | 2,57 | 2,10 | 2,58 | 0,0438018 | 0,147076 |
| HADHB         | 6,98 | 5,14 | 6,19 | 5,72 | 0,0438411 | 0,147159 |
| RP11-961A15.1 | 1,06 | 3,59 | 3,14 | 3,58 | 0,0438485 | 0,147159 |
| QARS          | 7,10 | 7,61 | 7,24 | 6,94 | 0,0438513 | 0,147159 |



|                |      |      |      |      |           |          |
|----------------|------|------|------|------|-----------|----------|
| TRMT12         | 2,08 | 2,66 | 0,46 | 3,03 | 0,0438607 | 0,147159 |
| CCDC73         | 0,16 | 0,00 | 0,06 | 0,04 | 0,0438703 | 0,147159 |
| MRPS22         | 5,28 | 4,40 | 4,84 | 2,97 | 0,043876  | 0,147159 |
| RAB33A         | 3,30 | 0,12 | 0,00 | 0,11 | 0,0438783 | 0,147159 |
| TRBC2          | 3,29 | 5,40 | 1,04 | 6,51 | 0,0438795 | 0,147159 |
| LINC00092      | 0,26 | 1,30 | 0,12 | 0,75 | 0,0439261 | 0,14727  |
| GFM2           | 3,97 | 1,69 | 3,18 | 4,70 | 0,0439322 | 0,14727  |
| CTD-2553L13.5  | 1,64 | 2,55 | 1,95 | 0,94 | 0,0439326 | 0,14727  |
| RP11-142A12.1  | 0,61 | 1,06 | 0,93 | 0,25 | 0,0439566 | 0,147328 |
| CPSF7          | 3,14 | 1,63 | 3,03 | 2,09 | 0,0439957 | 0,147437 |
| RBL1           | 2,17 | 0,30 | 1,35 | 2,28 | 0,0440138 | 0,147476 |
| RP11-693N9.2   | 0,65 | 3,65 | 0,52 | 1,97 | 0,0440217 | 0,14748  |
| ACOX2          | 0,00 | 3,85 | 0,00 | 0,69 | 0,0440361 | 0,147506 |
| MFS14C         | 3,73 | 4,96 | 4,11 | 4,10 | 0,0440928 | 0,147674 |
| ZNF134         | 1,14 | 0,46 | 0,82 | 0,32 | 0,0441162 | 0,14773  |
| NAP1L1         | 7,97 | 7,68 | 7,69 | 6,66 | 0,0441383 | 0,147781 |
| CGA            | 0,73 | 0,57 | 0,68 | 1,29 | 0,0441721 | 0,147872 |
| C2CD5          | 3,71 | 1,36 | 3,56 | 3,69 | 0,0441869 | 0,147885 |
| RP11-380B4.3   | 0,21 | 0,14 | 0,11 | 0,15 | 0,0441933 | 0,147885 |
| NEK10          | 0,61 | 2,46 | 0,87 | 0,33 | 0,0441959 | 0,147885 |
| ACO06000.5     | 2,33 | 0,21 | 1,93 | 3,26 | 0,0442454 | 0,148029 |
| NT5DC2         | 2,76 | 0,86 | 4,12 | 3,40 | 0,0442526 | 0,14803  |
| UBE2G1         | 4,91 | 2,99 | 3,84 | 2,12 | 0,044274  | 0,14808  |
| ATP7A          | 2,07 | 1,32 | 1,38 | 1,18 | 0,0443396 | 0,148277 |
| IFT57          | 5,06 | 5,72 | 5,05 | 3,24 | 0,0443554 | 0,148307 |
| CX3CL1         | 0,08 | 0,20 | 0,08 | 0,08 | 0,0443994 | 0,148432 |
| ELP4           | 3,45 | 4,85 | 2,30 | 3,09 | 0,0444263 | 0,1485   |
| RP11-1077A2.1  | 0,49 | 1,03 | 0,67 | 0,48 | 0,04447   | 0,148589 |
| SNHG9          | 4,56 | 5,25 | 5,45 | 5,69 | 0,0444726 | 0,148589 |
| CHCHD2         | 8,88 | 7,59 | 8,71 | 7,95 | 0,044473  | 0,148589 |
| RP11-568A7.4   | 1,22 | 0,88 | 2,41 | 2,18 | 0,0445026 | 0,148663 |
| CTD-2510F5.6   | 0,00 | 0,00 | 0,61 | 2,70 | 0,0445087 | 0,148663 |
| RP11-88I21.2   | 1,08 | 2,27 | 0,89 | 0,73 | 0,0445211 | 0,148683 |
| APO00230.1     | 0,48 | 1,40 | 1,11 | 1,70 | 0,0445439 | 0,148735 |
| RP11-445N18.7  | 0,05 | 0,50 | 0,11 | 0,16 | 0,0445598 | 0,148735 |
| MBTD1          | 3,57 | 2,83 | 2,07 | 2,73 | 0,0445611 | 0,148735 |
| RP13-314C10.5  | 0,72 | 1,47 | 0,40 | 0,68 | 0,0445637 | 0,148735 |
| RP11-351N5.1   | 1,18 | 4,12 | 1,35 | 1,61 | 0,0445909 | 0,148804 |
| RP11-473M20.11 | 0,00 | 1,83 | 0,00 | 0,00 | 0,0446134 | 0,148842 |
| CTD-2090I13.1  | 0,00 | 0,00 | 0,00 | 0,00 | 0,0446157 | 0,148842 |
| ZNF514         | 1,73 | 0,09 | 1,26 | 0,22 | 0,0446403 | 0,148869 |
| FAHD1          | 4,19 | 1,24 | 4,03 | 1,31 | 0,0446435 | 0,148869 |
| CELF1          | 5,34 | 3,57 | 5,13 | 4,04 | 0,044644  | 0,148869 |
| LBHD1          | 2,39 | 0,19 | 2,26 | 2,32 | 0,0446551 | 0,148884 |
| BBS7           | 0,98 | 0,05 | 0,09 | 0,72 | 0,0446743 | 0,148905 |
| KCTD14         | 0,00 | 2,36 | 0,00 | 0,00 | 0,0446807 | 0,148905 |
| GRWD1          | 1,97 | 0,41 | 1,19 | 0,77 | 0,0446816 | 0,148905 |
| RP5-898J17.1   | 0,00 | 0,66 | 0,03 | 0,17 | 0,0446941 | 0,148914 |
| C19orf53       | 6,28 | 6,85 | 6,25 | 6,66 | 0,0446977 | 0,148914 |
| PSMB9          | 9,29 | 8,33 | 8,80 | 8,18 | 0,0447212 | 0,14897  |
| PHC3           | 4,42 | 4,89 | 3,33 | 2,49 | 0,0447999 | 0,14921  |
| RASSF4         | 6,18 | 6,89 | 6,55 | 6,19 | 0,0448145 | 0,149218 |
| EVL            | 5,80 | 6,58 | 5,43 | 4,79 | 0,0448159 | 0,149218 |
| ATAD3C         | 0,17 | 0,63 | 0,35 | 0,41 | 0,0448377 | 0,149268 |
| ZFR            | 5,66 | 4,85 | 5,07 | 4,22 | 0,0448442 | 0,149268 |

|               |      |      |      |      |           |          |
|---------------|------|------|------|------|-----------|----------|
| HRH4          | 0,07 | 0,20 | 0,13 | 0,16 | 0,0448534 | 0,149276 |
| RP11-533E19.7 | 0,00 | 0,00 | 0,00 | 0,00 | 0,0448691 | 0,149306 |
| RP11-56N19.5  | 0,06 | 0,16 | 0,15 | 0,25 | 0,0448916 | 0,149359 |
| RP11-255M2.3  | 0,68 | 1,43 | 1,92 | 0,39 | 0,0449229 | 0,14944  |
| PEX7          | 1,12 | 0,68 | 1,31 | 0,24 | 0,0449599 | 0,149541 |
| NORAD         | 3,62 | 3,48 | 3,36 | 3,95 | 0,0449809 | 0,149588 |
| ATRN          | 1,42 | 2,17 | 1,09 | 0,48 | 0,0450128 | 0,149663 |
| STYK1         | 0,00 | 0,00 | 0,00 | 0,31 | 0,0450166 | 0,149663 |
| RP11-274G22.1 | 0,79 | 2,54 | 1,05 | 0,38 | 0,0450322 | 0,149682 |
| FLYWCH1       | 2,20 | 2,20 | 2,45 | 4,04 | 0,0450372 | 0,149682 |
| LIPH          | 0,08 | 0,11 | 0,06 | 0,16 | 0,0450477 | 0,149682 |
| MRPL1         | 4,43 | 4,45 | 3,82 | 3,46 | 0,0450494 | 0,149682 |
| SLX4IP        | 2,19 | 1,16 | 1,41 | 0,28 | 0,0451278 | 0,149894 |
| LMAN1         | 2,87 | 1,95 | 3,47 | 2,26 | 0,0451325 | 0,149894 |
| PEX2          | 4,67 | 3,97 | 3,04 | 5,25 | 0,0451333 | 0,149894 |
| RP11-70F11.8  | 0,00 | 0,35 | 0,36 | 0,54 | 0,0451519 | 0,149917 |
| RP11-106D4.2  | 0,16 | 0,20 | 0,15 | 0,09 | 0,0451538 | 0,149917 |
| RP11-116N8.2  | 0,44 | 1,14 | 0,75 | 0,69 | 0,0451754 | 0,149966 |
| TBC1D17       | 0,90 | 0,35 | 1,84 | 1,40 | 0,0451825 | 0,149967 |
| TIMM22        | 3,16 | 4,06 | 2,51 | 1,04 | 0,0451964 | 0,149991 |
| RP11-61L19.1  | 0,07 | 0,60 | 0,09 | 0,15 | 0,0452116 | 0,150019 |
| AC005624.2    | 0,00 | 0,00 | 0,00 | 1,10 | 0,0452351 | NA       |
| CTA-963H5.5   | 0,00 | 0,85 | 0,89 | 0,00 | 0,0452404 | 0,150092 |
| SF3B6         | 7,07 | 7,01 | 6,99 | 6,01 | 0,04527   | 0,15014  |
| ZNF528        | 1,35 | 0,75 | 1,45 | 2,23 | 0,0452721 | 0,15014  |
| RP11-420G6.4  | 2,65 | 3,35 | 2,59 | 3,95 | 0,0452793 | 0,15014  |
| SEC14L6       | 0,28 | 0,85 | 0,45 | 0,62 | 0,0452992 | 0,15014  |
| CASP8AP2      | 4,10 | 3,27 | 3,34 | 5,01 | 0,0453033 | 0,15014  |
| CTD-2062F14.2 | 1,49 | 1,75 | 1,92 | 2,56 | 0,0453061 | 0,15014  |
| AC008440.10   | 0,00 | 0,00 | 0,37 | 1,49 | 0,0453135 | 0,15014  |
| GNA12         | 4,20 | 5,93 | 4,21 | 2,26 | 0,0453137 | 0,15014  |
| HAUS5         | 2,23 | 4,53 | 1,99 | 0,15 | 0,0453156 | 0,15014  |
| PTPN9         | 3,53 | 2,84 | 2,92 | 1,60 | 0,0453484 | 0,150211 |
| RP13-131K19.1 | 0,00 | 0,00 | 0,00 | 1,77 | 0,0453505 | 0,150211 |
| RP11-12J10.3  | 0,00 | 0,00 | 0,00 | 0,00 | 0,0453637 | 0,150232 |
| RP11-758M4.1  | 0,61 | 1,08 | 0,98 | 1,84 | 0,0453824 | 0,150272 |
| CTD-2382E5.4  | 0,74 | 1,35 | 1,03 | 1,08 | 0,0454289 | 0,150403 |
| ZDHHC14       | 0,13 | 0,22 | 0,66 | 0,42 | 0,0454387 | 0,150404 |
| ABCD1         | 0,78 | 2,09 | 1,85 | 1,07 | 0,0454425 | 0,150404 |
| C4BPB         | 1,17 | 1,43 | 1,03 | 1,07 | 0,04548   | 0,150505 |
| ZSCAN4        | 0,05 | 0,00 | 0,09 | 0,16 | 0,0454954 | 0,150534 |
| SCGB3A2       | 1,30 | 4,94 | 2,10 | 2,36 | 0,0455038 | 0,150539 |
| EFCAB12       | 0,40 | 0,44 | 0,35 | 0,63 | 0,0455573 | 0,150694 |
| ZNF525        | 2,18 | 2,59 | 1,63 | 1,91 | 0,0456024 | 0,15082  |
| RP11-105N13.2 | 0,23 | 0,14 | 0,26 | 0,22 | 0,0456187 | 0,150852 |
| TELO2         | 0,09 | 0,41 | 1,83 | 2,14 | 0,0456452 | 0,150917 |
| GRAP          | 0,00 | 0,05 | 0,02 | 0,03 | 0,0456665 | 0,150965 |
| RP11-437B10.1 | 2,11 | 1,91 | 1,89 | 2,56 | 0,0456877 | 0,151013 |
| YIF1B         | 7,32 | 6,76 | 7,08 | 5,99 | 0,0457016 | 0,151036 |
| MMS19         | 5,08 | 5,72 | 4,79 | 5,19 | 0,0457087 | 0,151037 |
| CHRAC1        | 4,83 | 5,25 | 3,86 | 3,47 | 0,0457464 | 0,151139 |
| ZYX           | 6,20 | 6,32 | 6,74 | 6,53 | 0,0457645 | 0,151176 |
| BIRC2         | 4,50 | 3,20 | 4,66 | 4,52 | 0,0457764 | 0,151194 |
| MARCH6        | 5,98 | 3,44 | 5,63 | 4,00 | 0,0458005 | 0,151251 |
| CD82          | 1,56 | 4,83 | 1,69 | 1,80 | 0,045847  | 0,151382 |

|                |      |      |      |      |           |          |
|----------------|------|------|------|------|-----------|----------|
| AC007126.1     | 0,81 | 0,91 | 0,96 | 1,07 | 0,0458669 | 0,151425 |
| AGPAT1         | 4,60 | 4,37 | 4,20 | 1,72 | 0,0458793 | 0,151443 |
| GPX2           | 0,19 | 1,13 | 0,18 | 0,22 | 0,0459399 | 0,151562 |
| CCNL2          | 4,90 | 5,86 | 5,40 | 5,62 | 0,0459399 | 0,151562 |
| KLHL21         | 2,39 | 1,44 | 1,95 | 0,82 | 0,0459408 | 0,151562 |
| PCSK6          | 0,25 | 0,06 | 0,35 | 0,25 | 0,0459424 | 0,151562 |
| TCTN3          | 5,86 | 1,25 | 5,00 | 2,82 | 0,0459645 | 0,151612 |
| RP11-266L9.5   | 0,00 | 0,08 | 0,00 | 0,45 | 0,0459823 | 0,151633 |
| MCM3APAS       | 0,53 | 0,07 | 0,94 | 0,87 | 0,0459845 | 0,151633 |
| ZNF253         | 1,43 | 0,87 | 0,41 | 0,41 | 0,046006  | 0,151681 |
| BMS1P1         | 2,68 | 1,00 | 2,52 | 1,40 | 0,0460317 | 0,151743 |
| MYO3A          | 0,00 | 2,31 | 0,00 | 0,00 | 0,0460673 | 0,151834 |
| TLE2           | 0,00 | 0,63 | 0,33 | 0,05 | 0,0460729 | 0,151834 |
| ISLR2          | 0,10 | 0,37 | 0,18 | 0,15 | 0,046091  | 0,151871 |
| PGM2           | 4,00 | 5,10 | 3,35 | 1,09 | 0,0461313 | 0,151982 |
| NIPA1          | 0,35 | 0,67 | 0,46 | 1,94 | 0,0461795 | 0,152105 |
| PARP6          | 5,32 | 2,02 | 5,64 | 5,51 | 0,0461824 | 0,152105 |
| TPD52          | 2,90 | 4,34 | 1,60 | 0,98 | 0,046238  | 0,152255 |
| IGLJ2          | 0,00 | 2,08 | 0,00 | 0,00 | 0,0462416 | 0,152255 |
| ITPKC          | 0,34 | 0,00 | 0,26 | 0,04 | 0,0462614 | 0,152297 |
| RABL2A         | 0,71 | 1,64 | 1,22 | 0,38 | 0,0462717 | 0,152309 |
| FGD6           | 1,17 | 3,80 | 1,68 | 3,17 | 0,0462809 | 0,152314 |
| AC004980.7     | 1,37 | 1,17 | 1,89 | 2,81 | 0,046287  | 0,152314 |
| C5AR1          | 1,23 | 2,96 | 1,50 | 2,84 | 0,0463045 | 0,152339 |
| ANKRD11        | 5,49 | 5,72 | 5,54 | 5,41 | 0,0463085 | 0,152339 |
| MYO5C          | 1,42 | 0,91 | 0,27 | 0,23 | 0,0463154 | 0,152339 |
| RP11-257114.1  | 0,26 | 0,63 | 0,20 | 0,29 | 0,046322  | 0,152339 |
| GTF2F2         | 4,45 | 3,54 | 4,10 | 2,94 | 0,0463319 | 0,152349 |
| TOR1AIP2       | 3,35 | 2,62 | 3,95 | 4,12 | 0,0463478 | 0,152365 |
| RP11-540A21.2  | 0,00 | 0,25 | 0,00 | 0,06 | 0,0463505 | 0,152365 |
| CHPT1          | 4,33 | 3,84 | 4,24 | 2,17 | 0,0463646 | 0,152389 |
| CTA-398F10.1   | 4,65 | 5,36 | 4,69 | 5,02 | 0,0463908 | 0,152452 |
| RP11-326119.2  | 0,00 | 0,96 | 0,00 | 0,00 | 0,0464145 | 0,152506 |
| ZNF684         | 1,92 | 2,84 | 1,69 | 1,49 | 0,0464223 | 0,152506 |
| AOAH           | 7,38 | 7,61 | 7,81 | 7,53 | 0,0464341 | 0,152506 |
| PI4KB          | 4,86 | 3,94 | 4,33 | 3,21 | 0,0464413 | 0,152506 |
| RASSF9         | 0,10 | 0,17 | 0,16 | 0,27 | 0,046446  | 0,152506 |
| DDX21          | 5,59 | 4,61 | 5,16 | 4,69 | 0,0464541 | 0,152506 |
| UBE2D3         | 8,49 | 8,31 | 8,10 | 6,89 | 0,0464555 | 0,152506 |
| RIOK1          | 5,01 | 4,14 | 4,27 | 3,64 | 0,0464658 | 0,152506 |
| RP13-516M14.10 | 0,44 | 1,73 | 2,51 | 2,39 | 0,046473  | 0,152506 |
| IQGAP1         | 7,08 | 7,25 | 7,05 | 6,74 | 0,0464757 | 0,152506 |
| USPL1          | 3,92 | 1,77 | 2,78 | 1,16 | 0,0465432 | 0,152705 |
| TRIM22         | 7,09 | 6,42 | 6,40 | 6,53 | 0,0465524 | 0,152712 |
| TDP1           | 4,05 | 2,17 | 3,11 | 1,53 | 0,046596  | 0,152833 |
| AC093642.1     | 0,14 | 0,00 | 0,07 | 0,47 | 0,0466047 | 0,152839 |
| CUX1           | 5,19 | 5,37 | 5,10 | 3,91 | 0,0466148 | 0,15285  |
| ZNF274         | 3,10 | 0,64 | 2,30 | 1,97 | 0,0466521 | 0,152949 |
| NXT2           | 2,75 | 0,16 | 1,59 | 0,17 | 0,0466655 | 0,152971 |
| CTB-5506.10    | 0,00 | 0,00 | 0,00 | 1,49 | 0,0466912 | 0,153026 |
| ST3GAL6        | 5,97 | 6,57 | 5,07 | 4,77 | 0,0466962 | 0,153026 |
| HM13           | 6,12 | 5,42 | 6,40 | 5,92 | 0,0467485 | 0,153175 |
| FAM110A        | 3,42 | 1,79 | 3,87 | 3,06 | 0,0467557 | 0,153176 |
| SLC29A3        | 3,34 | 1,38 | 1,99 | 0,80 | 0,0467968 | 0,153276 |
| RRP1           | 3,00 | 2,86 | 3,75 | 3,71 | 0,0468052 | 0,153276 |

|               |      |      |      |      |           |          |
|---------------|------|------|------|------|-----------|----------|
| OFD1          | 4,74 | 4,01 | 3,52 | 3,20 | 0,046807  | 0,153276 |
| TRIM37        | 2,16 | 1,27 | 1,55 | 3,05 | 0,0468451 | 0,153375 |
| SWI5          | 4,15 | 1,33 | 2,04 | 0,60 | 0,046851  | 0,153375 |
| TMEM105       | 0,79 | 2,26 | 0,50 | 0,38 | 0,0468674 | 0,153406 |
| ATRAID        | 7,78 | 7,34 | 7,20 | 6,19 | 0,0468754 | 0,15341  |
| XPA           | 5,12 | 4,87 | 4,43 | 3,96 | 0,046905  | 0,153484 |
| MMP7          | 1,63 | 2,59 | 2,10 | 2,71 | 0,0469457 | 0,153594 |
| PTRHD1        | 6,25 | 6,42 | 5,93 | 5,22 | 0,046988  | 0,15371  |
| RP1-56K13.1   | 0,85 | 0,46 | 0,88 | 1,50 | 0,0469992 | 0,153724 |
| RP11-13P5.1   | 0,00 | 0,00 | 0,00 | 0,19 | 0,0470299 | 0,153802 |
| RP11-378E13.3 | 1,47 | 2,00 | 1,52 | 2,35 | 0,047044  | 0,153807 |
| HSBP1         | 5,57 | 5,43 | 5,81 | 5,90 | 0,0470452 | 0,153807 |
| EIF4E         | 5,53 | 5,79 | 4,97 | 3,99 | 0,0470725 | 0,153873 |
| UBE2A         | 6,19 | 4,93 | 5,24 | 4,04 | 0,047105  | 0,153921 |
| ALG10B        | 0,77 | 1,85 | 0,75 | 0,53 | 0,0471081 | 0,153921 |
| CD247         | 0,12 | 4,11 | 0,00 | 1,19 | 0,047117  | 0,153921 |
| MTHFS         | 5,01 | 0,34 | 4,21 | 4,91 | 0,0471255 | 0,153921 |
| PDE8A         | 3,53 | 0,79 | 4,01 | 3,28 | 0,0471286 | 0,153921 |
| PXDC1         | 0,48 | 0,00 | 0,17 | 0,15 | 0,0471286 | 0,153921 |
| NAMPT         | 8,44 | 7,66 | 8,36 | 7,70 | 0,0471623 | 0,154009 |
| AC079923.1    | 0,00 | 0,00 | 0,11 | 0,00 | 0,0472177 | 0,154167 |
| MTMR6         | 3,32 | 4,47 | 3,26 | 2,76 | 0,047237  | 0,154207 |
| STK3          | 4,10 | 5,24 | 3,72 | 3,99 | 0,0472463 | 0,15421  |
| RP1-225E12.2  | 4,43 | 2,09 | 3,56 | 3,88 | 0,0472518 | 0,15421  |
| SF3B1         | 7,95 | 6,87 | 7,00 | 7,40 | 0,0472688 | 0,154243 |
| RP11-15J22.8  | 0,00 | 0,00 | 0,67 | 0,00 | 0,0473223 | 0,154383 |
| RP11-130F10.1 | 0,83 | 0,00 | 0,22 | 0,82 | 0,0473285 | 0,154383 |
| PIR           | 1,63 | 1,77 | 1,70 | 2,08 | 0,0473338 | 0,154383 |
| RP11-116D17.4 | 1,16 | 1,02 | 1,08 | 2,06 | 0,0473395 | 0,154383 |
| GRHL1         | 0,07 | 0,22 | 0,14 | 0,27 | 0,0473489 | 0,154391 |
| NDUFC2        | 6,81 | 7,27 | 7,11 | 6,58 | 0,0473733 | 0,154448 |
| NRARP         | 0,14 | 0,15 | 0,41 | 0,00 | 0,0473833 | 0,154458 |
| AC006129.2    | 2,49 | 5,28 | 2,34 | 3,40 | 0,0474053 | 0,154496 |
| TRIM52        | 2,40 | 0,96 | 1,88 | 2,99 | 0,0474088 | 0,154496 |
| EZH1          | 4,18 | 2,92 | 4,17 | 4,82 | 0,0474407 | 0,154563 |
| RP11-14N9.2   | 4,07 | 4,67 | 3,72 | 4,53 | 0,0474466 | 0,154563 |
| AFTPH         | 5,59 | 3,67 | 4,96 | 4,67 | 0,0474505 | 0,154563 |
| TMED10        | 7,04 | 5,19 | 6,55 | 5,79 | 0,0474713 | 0,154609 |
| RN7SL285P     | 1,17 | 4,77 | 3,82 | 3,72 | 0,0475307 | 0,154779 |
| CCDC186       | 3,49 | 2,22 | 2,86 | 4,27 | 0,0475391 | 0,154784 |
| CCDC36        | 0,00 | 0,37 | 0,08 | 0,10 | 0,0475699 | 0,154862 |
| KIFC2         | 0,25 | 2,60 | 0,00 | 0,00 | 0,0476294 | 0,155029 |
| ZNF484        | 1,10 | 0,00 | 0,57 | 0,04 | 0,0476354 | 0,155029 |
| PALLD         | 0,93 | 1,09 | 1,01 | 2,02 | 0,0476815 | 0,155157 |
| ELF3          | 0,30 | 1,56 | 1,96 | 1,29 | 0,0477189 | 0,155256 |
| PPM1M         | 5,20 | 3,52 | 4,19 | 2,52 | 0,0477505 | 0,155327 |
| PCCA          | 3,30 | 4,55 | 4,00 | 3,04 | 0,0477548 | 0,155327 |
| RP11-29G8.3   | 1,31 | 0,77 | 0,55 | 0,84 | 0,0477725 | 0,155341 |
| MRPS16        | 5,23 | 4,04 | 5,25 | 5,23 | 0,047773  | 0,155341 |
| CHST9         | 0,01 | 0,00 | 0,02 | 0,02 | 0,0477875 | 0,155365 |
| ALPK1         | 3,88 | 4,31 | 3,67 | 3,46 | 0,0477989 | 0,15538  |
| WDR90         | 2,21 | 2,90 | 2,18 | 2,27 | 0,0478551 | 0,15554  |
| BRWD1-IT2     | 0,00 | 0,00 | 0,00 | 0,00 | 0,0478671 | 0,155556 |
| ZNF335        | 2,41 | 1,78 | 3,07 | 2,97 | 0,0479182 | 0,155699 |
| IER5L         | 0,11 | 0,15 | 0,10 | 0,05 | 0,0479425 | 0,155755 |

|               |      |      |      |      |           |          |
|---------------|------|------|------|------|-----------|----------|
| DNAJC5B       | 0,07 | 0,22 | 0,06 | 0,19 | 0,0480027 | 0,155928 |
| ACO98828.2    | 1,81 | 2,99 | 1,71 | 2,46 | 0,0480247 | 0,155977 |
| RP11-326C3.11 | 2,44 | 3,24 | 3,05 | 2,79 | 0,0480494 | 0,156021 |
| RP11-737O24.5 | 1,70 | 0,25 | 3,52 | 0,75 | 0,0480524 | 0,156021 |
| NSUN6         | 3,91 | 3,89 | 3,79 | 3,72 | 0,0480599 | 0,156023 |
| GPR63         | 0,27 | 0,05 | 0,28 | 0,74 | 0,0480937 | 0,156084 |
| HLA-H         | 3,09 | 4,04 | 2,96 | 2,45 | 0,0480968 | 0,156084 |
| ZNF492        | 0,06 | 0,19 | 0,07 | 0,03 | 0,0480999 | 0,156084 |
| NME2          | 8,15 | 8,26 | 8,17 | 7,60 | 0,0481074 | 0,156086 |
| ACO04257.1    | 0,00 | 0,96 | 0,00 | 0,87 | 0,0481143 | NA       |
| MRPL18        | 6,62 | 5,51 | 5,65 | 3,84 | 0,0481187 | 0,156087 |
| TGFB111       | 0,35 | 0,63 | 0,68 | 0,47 | 0,0481218 | 0,156087 |
| SLC9A9        | 3,97 | 0,65 | 3,01 | 3,77 | 0,0481322 | 0,156098 |
| ZNF829        | 0,42 | 0,97 | 0,69 | 0,49 | 0,0481731 | 0,156208 |
| RN7SL5P       | 0,00 | 0,00 | 0,00 | 1,61 | 0,048214  | NA       |
| RP11-437L7.1  | 0,08 | 0,00 | 0,20 | 0,00 | 0,048215  | 0,156321 |
| ZNF789        | 4,54 | 2,34 | 3,36 | 2,45 | 0,0482242 | 0,156322 |
| CYP4F2        | 0,00 | 1,89 | 0,00 | 0,00 | 0,0482296 | 0,156322 |
| ACO26150.8    | 2,13 | 2,52 | 1,56 | 0,00 | 0,0482537 | 0,156378 |
| WASH6P        | 3,27 | 2,99 | 4,38 | 4,30 | 0,0482665 | 0,156396 |
| ACSL3         | 4,83 | 5,20 | 4,02 | 3,46 | 0,0483405 | 0,156613 |
| RP5-1069C8.2  | 2,24 | 3,95 | 2,33 | 3,08 | 0,0483506 | 0,156614 |
| UNKL          | 0,35 | 0,51 | 1,54 | 3,59 | 0,0483612 | 0,156614 |
| TTL1          | 2,37 | 2,00 | 0,47 | 0,16 | 0,0483665 | 0,156614 |
| ENPP4         | 2,57 | 0,84 | 1,81 | 1,37 | 0,0483688 | 0,156614 |
| IGFL4         | 1,12 | 2,69 | 0,92 | 1,35 | 0,0483925 | 0,156668 |
| RP3-370M22.8  | 0,00 | 0,00 | 0,00 | 0,11 | 0,0484148 | 0,156717 |
| CYP4F8        | 0,83 | 1,44 | 1,02 | 0,76 | 0,048445  | 0,156792 |
| DUSP19        | 0,15 | 0,38 | 0,16 | 0,20 | 0,0484641 | 0,156831 |
| RBBP5         | 3,06 | 0,87 | 2,79 | 1,44 | 0,0484881 | 0,156886 |
| LAMC3         | 0,04 | 0,36 | 0,04 | 0,04 | 0,0484975 | 0,156893 |
| ZNF618        | 0,91 | 1,06 | 1,25 | 0,54 | 0,048514  | 0,156924 |
| ACO00123.3    | 0,00 | 0,00 | 0,00 | 0,45 | 0,0485513 | 0,157022 |
| UCK2          | 5,64 | 4,79 | 5,09 | 1,35 | 0,0485638 | 0,157039 |
| RP11-430C7.4  | 0,00 | 2,47 | 0,00 | 0,00 | 0,0485796 | 0,157067 |
| AC107070.1    | 0,00 | 1,72 | 0,00 | 0,00 | 0,0486578 | 0,157298 |
| DEGS2         | 0,00 | 0,00 | 0,00 | 0,06 | 0,048666  | 0,157299 |
| IFT22         | 1,37 | 1,29 | 1,30 | 1,73 | 0,0486724 | 0,157299 |
| RP11-703G6.1  | 4,22 | 4,45 | 4,11 | 3,92 | 0,0486976 | 0,157357 |
| RASA4         | 3,62 | 3,64 | 4,26 | 4,35 | 0,0487126 | 0,157383 |
| COQ6          | 3,82 | 1,92 | 2,14 | 2,00 | 0,048732  | 0,157423 |
| IL9R          | 0,00 | 0,85 | 0,00 | 0,00 | 0,0487663 | 0,157451 |
| SNORA28       | 7,09 | 7,23 | 7,00 | 3,92 | 0,0487667 | 0,157451 |
| RIMKLA        | 0,03 | 0,12 | 0,04 | 0,04 | 0,0487679 | 0,157451 |
| RP1-29C18.10  | 0,01 | 0,46 | 0,03 | 0,00 | 0,048769  | 0,157451 |
| SNORD13       | 3,82 | 5,61 | 4,23 | 4,97 | 0,0487788 | 0,15746  |
| CLASRP        | 2,14 | 3,54 | 3,78 | 5,29 | 0,0487874 | 0,157461 |
| SND1-IT1      | 2,45 | 2,73 | 3,32 | 1,96 | 0,0487933 | 0,157461 |
| RP1-224A6.4   | 4,20 | 1,17 | 3,84 | 2,98 | 0,0488076 | 0,157484 |
| RP11-1114A5.4 | 1,46 | 1,51 | 1,73 | 2,18 | 0,0488268 | 0,157523 |
| PRKCD         | 5,50 | 4,49 | 5,03 | 5,05 | 0,048835  | 0,157527 |
| RP11-39K24.15 | 0,00 | 0,00 | 0,00 | 0,12 | 0,0488587 | NA       |
| GLMP          | 2,46 | 2,09 | 4,20 | 4,74 | 0,0489177 | 0,15777  |
| RP11-170J3.2  | 1,51 | 0,45 | 1,32 | 1,19 | 0,0489309 | 0,15779  |
| ZNF589        | 2,30 | 1,20 | 2,94 | 2,73 | 0,0489432 | 0,157807 |

|               |       |       |       |      |           |          |
|---------------|-------|-------|-------|------|-----------|----------|
| FAM105A       | 6,83  | 5,56  | 6,19  | 4,24 | 0,0489633 | 0,157849 |
| CH17-449C21.2 | 1,87  | 2,08  | 2,78  | 1,73 | 0,0490063 | 0,157965 |
| RP11-99A14.1  | 1,08  | 0,39  | 0,37  | 0,65 | 0,049036  | 0,158037 |
| CHPF2         | 1,65  | 1,59  | 2,24  | 0,86 | 0,0490478 | 0,158047 |
| PHF12         | 3,85  | 1,73  | 3,58  | 2,02 | 0,0490643 | 0,158047 |
| GRB10         | 0,07  | 1,75  | 0,05  | 2,54 | 0,0490687 | 0,158047 |
| RN7SL846P     | 0,00  | 0,00  | 1,67  | 0,00 | 0,0490697 | 0,158047 |
| FAM20C        | 3,61  | 5,25  | 3,55  | 1,27 | 0,0490746 | 0,158047 |
| CTD-3094K11.1 | 1,22  | 3,59  | 0,00  | 2,82 | 0,0490895 | 0,158072 |
| RP11-20B24.6  | 0,66  | 0,00  | 0,37  | 0,82 | 0,0491503 | 0,158227 |
| RN7SL11P      | 0,00  | 0,00  | 0,00  | 0,53 | 0,0491522 | 0,158227 |
| RP11-20I23.13 | 1,41  | 0,79  | 2,28  | 0,60 | 0,0491588 | 0,158227 |
| FLT4          | 0,05  | 0,19  | 0,10  | 0,00 | 0,0491669 | 0,15823  |
| ERVFRD-1      | 0,17  | 1,43  | 0,62  | 0,07 | 0,0491952 | 0,158298 |
| GRAMD3        | 3,24  | 2,66  | 1,90  | 3,31 | 0,0492498 | 0,158451 |
| RP11-667K14.4 | 0,00  | 1,64  | 1,99  | 4,49 | 0,0492755 | 0,15851  |
| GDF7          | 0,00  | 0,04  | 0,00  | 0,01 | 0,0493113 | 0,158596 |
| ACTG2         | 1,77  | 1,66  | 0,74  | 0,33 | 0,0493164 | 0,158596 |
| PRSS55        | 0,00  | 0,06  | 0,02  | 0,05 | 0,0493177 | NA       |
| RP11-507K2.3  | 0,00  | 0,00  | 0,10  | 0,47 | 0,0493288 | NA       |
| CLCN6         | 2,32  | 2,92  | 3,32  | 2,83 | 0,0493316 | 0,158609 |
| RP11-104J23.1 | 0,00  | 0,00  | 0,00  | 0,00 | 0,0493347 | 0,158609 |
| FAM114A1      | 0,67  | 0,86  | 1,10  | 2,59 | 0,0493713 | 0,158704 |
| PPIL1         | 3,15  | 0,16  | 2,01  | 2,27 | 0,0494303 | 0,158849 |
| ZNF254        | 2,19  | 1,56  | 1,43  | 0,89 | 0,0494308 | 0,158849 |
| CDK4          | 5,54  | 3,45  | 4,46  | 3,50 | 0,0494552 | 0,158887 |
| EFHC1         | 5,09  | 6,30  | 5,10  | 5,49 | 0,049457  | 0,158887 |
| AP3M1         | 3,95  | 0,65  | 3,11  | 2,62 | 0,0494868 | 0,15896  |
| CERS2         | 5,58  | 4,80  | 5,69  | 2,38 | 0,0495101 | 0,159012 |
| RP11-16N11.2  | 0,00  | 0,00  | 0,00  | 0,00 | 0,0495246 | 0,159035 |
| TMEM141       | 4,61  | 5,94  | 4,42  | 4,59 | 0,0495494 | 0,159081 |
| MPZL3         | 3,63  | 3,00  | 2,19  | 2,02 | 0,0495532 | 0,159081 |
| PTPRN2        | 0,09  | 0,06  | 0,07  | 0,31 | 0,0495847 | 0,159159 |
| HNRNPK        | 7,01  | 6,34  | 6,41  | 6,37 | 0,0495982 | 0,15918  |
| ASB7          | 1,65  | 0,07  | 0,69  | 0,82 | 0,0496621 | 0,159362 |
| MYO7A         | 0,04  | 0,93  | 0,42  | 0,38 | 0,0496843 | 0,15941  |
| RP11-394B2.3  | 0,00  | 0,00  | 0,12  | 0,24 | 0,0497    | 0,159438 |
| RP11-140I24.2 | 0,54  | 1,19  | 0,78  | 1,45 | 0,0497199 | 0,159478 |
| COPS3         | 6,80  | 4,72  | 5,92  | 5,37 | 0,049729  | 0,159484 |
| RSBN1         | 3,24  | 1,62  | 2,62  | 2,62 | 0,0497619 | 0,159567 |
| RP11-864I4.3  | 1,39  | 1,60  | 1,72  | 3,29 | 0,0497982 | 0,15966  |
| RP11-39K24.9  | 0,89  | 0,00  | 0,13  | 0,00 | 0,0498523 | 0,159811 |
| RP4-681N20.1  | 1,59  | 1,37  | 1,98  | 2,05 | 0,049867  | 0,15982  |
| CAMKK2        | 3,37  | 3,60  | 2,75  | 2,55 | 0,0498696 | 0,15982  |
| DOCK10        | 6,48  | 5,02  | 5,80  | 4,68 | 0,0498811 | 0,159834 |
| RP11-659E9.2  | 1,20  | 2,63  | 1,00  | 1,62 | 0,049923  | 0,159943 |
| GS1-306C12.1  | 0,10  | 0,18  | 0,27  | 0,19 | 0,0499297 | 0,159943 |
| TARS          | 4,82  | 2,80  | 4,53  | 4,28 | 0,0499452 | 0,159955 |
| AC007099.1    | 0,68  | 0,68  | 0,62  | 1,24 | 0,0499495 | 0,159955 |
| SULT1C2P1     | 0,36  | 1,93  | 0,41  | 0,42 | 0,0499547 | 0,159955 |
| TBC1D8        | 3,76  | 4,80  | 3,91  | 2,85 | 0,0500137 | 0,160082 |
| SLC16A3       | 2,79  | 3,65  | 3,26  | 3,94 | 0,0500276 | 0,160082 |
| PRR29         | 0,16  | 0,20  | 0,43  | 1,32 | 0,0500288 | 0,160082 |
| NOS1          | 0,31  | 0,35  | 0,48  | 0,58 | 0,05003   | 0,160082 |
| RPL4          | 10,37 | 10,35 | 10,17 | 9,74 | 0,0500368 | 0,160082 |

|                |      |      |      |      |           |          |
|----------------|------|------|------|------|-----------|----------|
| RP11-110H1.4   | 0,67 | 0,58 | 0,24 | 1,56 | 0,0500379 | 0,160082 |
| RP11-10O22.2   | 0,80 | 2,30 | 0,65 | 1,30 | 0,0500893 | 0,160224 |
| EPHA1          | 0,68 | 2,79 | 1,15 | 1,08 | 0,0501042 | 0,160248 |
| PSMB2          | 5,87 | 5,34 | 5,25 | 4,04 | 0,0501475 | 0,160364 |
| PCDHGA6        | 0,17 | 0,38 | 0,25 | 0,39 | 0,0501822 | 0,16042  |
| RBM47          | 3,57 | 3,47 | 3,80 | 4,39 | 0,0501857 | 0,16042  |
| MPDZ           | 0,00 | 0,47 | 0,00 | 0,00 | 0,0501867 | 0,16042  |
| FYTTD1         | 4,11 | 2,66 | 3,36 | 3,07 | 0,050214  | 0,160484 |
| KLHL31         | 0,00 | 0,73 | 0,00 | 0,00 | 0,0502858 | 0,16069  |
| RP11-351I21.11 | 0,03 | 0,18 | 0,00 | 0,00 | 0,0503244 | 0,160791 |
| CEP68          | 2,52 | 1,34 | 1,86 | 2,30 | 0,0503365 | 0,160806 |
| DHRS7B         | 2,12 | 0,77 | 2,56 | 4,87 | 0,0503645 | 0,160855 |
| RP11-307A17.2  | 0,42 | 0,90 | 0,62 | 0,67 | 0,0503663 | 0,160855 |
| KIAA1456       | 0,51 | 1,06 | 0,47 | 0,35 | 0,0504027 | 0,160937 |
| TRAF3IP2       | 0,40 | 0,54 | 0,41 | 0,29 | 0,0504075 | 0,160937 |
| CHRD1          | 0,10 | 0,14 | 0,11 | 0,05 | 0,0504173 | 0,160937 |
| RP11-205A8.4   | 0,10 | 0,85 | 1,14 | 1,63 | 0,0504209 | 0,160937 |
| BOD1           | 2,81 | 5,09 | 2,65 | 1,98 | 0,0504466 | 0,160984 |
| EXTL2          | 2,16 | 3,74 | 2,48 | 0,14 | 0,05045   | 0,160984 |
| AC006129.3     | 1,15 | 0,25 | 0,23 | 0,00 | 0,0505201 | 0,161156 |
| AC012307.3     | 1,60 | 1,76 | 2,00 | 2,08 | 0,0505256 | 0,161156 |
| EGR2           | 3,27 | 5,81 | 4,57 | 5,34 | 0,0505259 | 0,161156 |
| PTPRM          | 2,88 | 4,29 | 3,10 | 2,56 | 0,0505614 | 0,161247 |
| RN7SL188P      | 0,00 | 0,90 | 0,00 | 0,00 | 0,0506205 | NA       |
| N4BP2          | 3,22 | 2,67 | 2,38 | 2,15 | 0,0506565 | 0,161526 |
| PMP22          | 0,54 | 0,57 | 2,02 | 0,47 | 0,0507001 | 0,161642 |
| ZSCAN12        | 0,63 | 0,16 | 0,22 | 0,32 | 0,0507162 | 0,161658 |
| DCBLD2         | 0,67 | 0,97 | 1,42 | 0,77 | 0,0507194 | 0,161658 |
| RP11-400N13.2  | 1,38 | 2,19 | 1,97 | 1,48 | 0,0507358 | 0,16168  |
| ECD            | 4,31 | 4,93 | 3,27 | 2,76 | 0,050741  | 0,16168  |
| ADAT1          | 4,59 | 1,58 | 4,03 | 3,12 | 0,0508    | 0,161845 |
| ADAM8          | 5,67 | 5,03 | 6,21 | 5,25 | 0,0508122 | 0,161845 |
| NUTF2          | 5,34 | 4,90 | 4,71 | 2,01 | 0,0508146 | 0,161845 |
| ARNTL2         | 0,14 | 0,21 | 0,17 | 0,33 | 0,0508248 | 0,161854 |
| ZNF790-AS1     | 0,73 | 1,06 | 0,18 | 1,67 | 0,0508654 | 0,161961 |
| CTB-131B5.5    | 0,36 | 0,55 | 0,21 | 0,31 | 0,0509082 | 0,162074 |
| RP11-15J10.8   | 0,00 | 0,00 | 0,47 | 0,00 | 0,050947  | 0,162174 |
| RP3-333H23.10  | 0,22 | 0,17 | 0,19 | 0,33 | 0,050989  | 0,162277 |
| FAM161A        | 0,69 | 0,49 | 0,90 | 0,86 | 0,0510009 | 0,162277 |
| RN7SL718P      | 2,15 | 4,45 | 3,36 | 3,44 | 0,0510013 | 0,162277 |
| STRAP          | 7,09 | 6,80 | 6,85 | 5,67 | 0,0510321 | 0,162352 |
| ADD1           | 6,67 | 6,77 | 6,59 | 6,83 | 0,0510663 | 0,162437 |
| CTB-102L5.7    | 0,40 | 0,74 | 0,73 | 0,45 | 0,0510873 | 0,162481 |
| ERO1A          | 4,57 | 3,43 | 3,87 | 3,59 | 0,0511103 | 0,162514 |
| RTN4           | 7,48 | 7,55 | 7,07 | 6,82 | 0,0511123 | 0,162514 |
| RP11-856B14.1  | 0,10 | 0,59 | 0,31 | 0,59 | 0,0511247 | 0,16253  |
| VWA5A          | 0,06 | 2,07 | 0,09 | 0,08 | 0,0511403 | 0,16254  |
| CTD-2568A17.3  | 3,78 | 2,88 | 4,33 | 2,27 | 0,0511426 | 0,16254  |
| ATG4A          | 1,44 | 0,00 | 2,48 | 2,08 | 0,0511555 | 0,162558 |
| P2RY13         | 5,43 | 1,40 | 4,62 | 3,37 | 0,0511854 | 0,16263  |
| UQCRC2         | 7,06 | 5,94 | 6,14 | 5,99 | 0,0512066 | 0,162654 |
| RP11-527N22.1  | 0,00 | 0,00 | 0,05 | 0,00 | 0,0512081 | 0,162654 |
| NADSYN1        | 5,06 | 5,30 | 5,28 | 5,56 | 0,0512149 | 0,162654 |
| NR6A1          | 0,94 | 2,90 | 1,48 | 0,28 | 0,0512407 | 0,162709 |
| TNFRSF25       | 0,49 | 4,63 | 0,38 | 0,25 | 0,0512505 | 0,162709 |

|                |      |       |      |      |           |          |
|----------------|------|-------|------|------|-----------|----------|
| OTUD4          | 3,02 | 1,40  | 2,91 | 3,09 | 0,0512542 | 0,162709 |
| PYROXD2        | 2,09 | 1,68  | 2,61 | 1,19 | 0,0512762 | 0,162742 |
| CTD-2545G14.7  | 0,00 | 0,00  | 0,72 | 0,00 | 0,0512893 | 0,162742 |
| STAC3          | 1,11 | 0,37  | 0,73 | 0,00 | 0,0512976 | 0,162742 |
| GTF2H2B        | 3,00 | 1,17  | 1,39 | 1,06 | 0,051301  | 0,162742 |
| RP5-1043L13.1  | 3,61 | 0,27  | 2,22 | 1,11 | 0,0513029 | 0,162742 |
| RP11-673E1.1   | 2,94 | 3,10  | 3,34 | 3,70 | 0,0513086 | 0,162742 |
| OVCH2          | 0,00 | 0,82  | 0,00 | 0,00 | 0,0513691 | 0,16291  |
| SYNJ2BP-COX16  | 2,79 | 0,00  | 1,26 | 0,39 | 0,0513762 | 0,16291  |
| RP11-1018N14.1 | 0,16 | 0,24  | 0,43 | 0,46 | 0,0514157 | 0,163012 |
| TCP11L1        | 2,48 | 5,23  | 1,61 | 2,01 | 0,0514735 | 0,163172 |
| CLHC1          | 1,75 | 0,35  | 2,05 | 3,26 | 0,0515062 | 0,163252 |
| PSMA4          | 9,10 | 7,94  | 8,76 | 7,50 | 0,051517  | 0,163263 |
| LINC00547      | 1,85 | 2,90  | 1,87 | 2,16 | 0,0515361 | 0,1633   |
| HMGXB3         | 2,53 | 1,23  | 2,39 | 3,14 | 0,0515566 | 0,163337 |
| CD59           | 4,77 | 4,00  | 3,77 | 2,01 | 0,0515623 | 0,163337 |
| RP11-360I20.2  | 0,00 | 1,94  | 0,00 | 0,00 | 0,051572  | 0,163345 |
| CTD-2531D15.5  | 0,00 | 0,00  | 1,47 | 0,00 | 0,0515902 | 0,163379 |
| PYM1           | 6,07 | 3,68  | 5,28 | 5,31 | 0,0516195 | 0,163448 |
| RP11-161H23.5  | 5,78 | 5,96  | 6,79 | 6,33 | 0,0516277 | 0,163451 |
| RPS7           | 9,82 | 10,19 | 9,71 | 9,35 | 0,0516556 | 0,163516 |
| NAGK           | 8,00 | 8,23  | 8,02 | 8,13 | 0,0516835 | 0,163581 |
| TAL1           | 0,04 | 0,11  | 0,04 | 0,09 | 0,0517353 | 0,163708 |
| CTD-2287O16.1  | 0,00 | 1,88  | 0,00 | 0,00 | 0,051739  | NA       |
| RFPL2          | 0,00 | 1,97  | 0,00 | 0,00 | 0,0517439 | 0,163708 |
| SMIM3          | 2,35 | 0,22  | 2,23 | 0,55 | 0,0517459 | 0,163708 |
| CPVL           | 9,11 | 8,39  | 9,17 | 7,93 | 0,0517632 | 0,16374  |
| BCAR3          | 1,32 | 1,89  | 0,40 | 0,22 | 0,051773  | 0,163748 |
| EIF2AK4        | 6,22 | 6,43  | 5,97 | 5,60 | 0,0518044 | 0,163824 |
| AC000367.1     | 1,41 | 1,22  | 1,31 | 2,68 | 0,05182   | 0,16385  |
| CDK5RAP1       | 4,75 | 6,06  | 5,35 | 5,79 | 0,0518697 | 0,163983 |
| SYNE2          | 1,48 | 2,89  | 1,34 | 2,57 | 0,0518931 | 0,164034 |
| RP11-264J9.1   | 0,15 | 0,31  | 0,85 | 0,54 | 0,0519461 | 0,164178 |
| AC073635.5     | 0,00 | 0,00  | 0,00 | 0,00 | 0,0519534 | 0,164178 |
| CHGB           | 0,10 | 0,21  | 0,14 | 0,54 | 0,0519713 | 0,164211 |
| RP11-1072C15.6 | 0,21 | 0,29  | 0,27 | 0,42 | 0,0519921 | 0,164246 |
| PDGFC          | 1,89 | 0,00  | 2,00 | 4,56 | 0,0519971 | 0,164246 |
| ZNF230         | 1,18 | 1,16  | 0,38 | 0,44 | 0,0520295 | 0,164325 |
| RP11-506M12.1  | 0,00 | 1,13  | 0,56 | 0,40 | 0,0520632 | 0,164408 |
| RP6-99M1.3     | 0,00 | 0,00  | 0,00 | 0,00 | 0,0520895 | 0,164466 |
| CHN1           | 0,00 | 0,00  | 0,00 | 0,00 | 0,0520964 | 0,164466 |
| PIP5K1B        | 0,03 | 0,27  | 0,24 | 0,12 | 0,0521312 | 0,164553 |
| HLX            | 0,86 | 3,05  | 3,24 | 2,95 | 0,0521605 | 0,164589 |
| SAMD15         | 0,00 | 0,00  | 0,08 | 0,11 | 0,0521652 | 0,164589 |
| RP11-216B9.9   | 1,90 | 1,85  | 2,41 | 1,73 | 0,0521706 | 0,164589 |
| IGF2R          | 0,95 | 0,80  | 1,08 | 1,84 | 0,0521793 | 0,164589 |
| C9orf152       | 0,02 | 0,20  | 0,04 | 0,05 | 0,0521803 | 0,164589 |
| FAM122A        | 2,05 | 0,06  | 0,93 | 1,69 | 0,052187  | 0,164589 |
| ZDHHC8P        | 0,05 | 0,26  | 0,12 | 0,07 | 0,0522458 | 0,164751 |
| CCBL2          | 4,93 | 3,15  | 3,27 | 2,05 | 0,0522776 | 0,164828 |
| RP11-341G5.1   | 0,00 | 0,06  | 0,06 | 0,11 | 0,0523275 | NA       |
| MCU            | 3,38 | 2,10  | 2,79 | 0,65 | 0,0523421 | 0,165007 |
| RP5-1021I20.4  | 0,56 | 3,33  | 0,82 | 0,33 | 0,0524704 | 0,165389 |
| SNORA53        | 0,00 | 1,59  | 0,00 | 1,06 | 0,0525512 | 0,16562  |
| AC136290.1     | 0,11 | 0,11  | 0,29 | 2,01 | 0,0525648 | 0,165639 |



|               |       |       |       |       |           |          |
|---------------|-------|-------|-------|-------|-----------|----------|
| NMNAT3        | 2,76  | 3,52  | 3,28  | 2,75  | 0,0525809 | 0,165662 |
| DMGDH         | 0,31  | 1,39  | 0,57  | 1,01  | 0,0525909 | 0,165662 |
| TRIM46        | 0,04  | 0,26  | 0,05  | 0,13  | 0,0525945 | 0,165662 |
| BAX           | 2,74  | 2,26  | 3,15  | 3,73  | 0,0526654 | 0,165862 |
| ABT1          | 4,31  | 2,23  | 3,09  | 1,92  | 0,0526981 | 0,165941 |
| MYL5          | 2,02  | 0,14  | 2,84  | 2,20  | 0,0527135 | 0,165967 |
| RP11-15E18.1  | 0,00  | 1,17  | 0,00  | 0,37  | 0,0527523 | 0,166021 |
| CDC37L1       | 2,48  | 0,26  | 1,76  | 2,21  | 0,0527545 | 0,166021 |
| PANK1         | 0,09  | 0,02  | 0,32  | 0,00  | 0,0527613 | 0,166021 |
| CASC5         | 0,32  | 0,06  | 0,26  | 0,36  | 0,0527719 | 0,166021 |
| CTC-484M2.1   | 0,42  | 0,59  | 0,34  | 0,82  | 0,052774  | 0,166021 |
| SLC39A6       | 3,67  | 3,28  | 2,99  | 1,37  | 0,0527757 | 0,166021 |
| NDRG2         | 6,32  | 5,83  | 5,72  | 4,21  | 0,0527968 | 0,166064 |
| IQCB1         | 4,28  | 4,44  | 3,88  | 1,77  | 0,0528084 | 0,166077 |
| SH2D5         | 0,00  | 0,64  | 0,00  | 0,00  | 0,0528524 | 0,166152 |
| SAV1          | 2,30  | 0,38  | 1,50  | 0,86  | 0,0528541 | 0,166152 |
| NLRP2         | 2,18  | 2,04  | 2,08  | 3,01  | 0,0528547 | 0,166152 |
| TMEM56        | 0,00  | 0,06  | 0,00  | 0,03  | 0,0528771 | NA       |
| LENG9         | 0,00  | 1,34  | 0,24  | 1,95  | 0,0528812 | 0,166212 |
| RPL7          | 11,65 | 11,64 | 11,43 | 10,88 | 0,0529171 | 0,166301 |
| RP11-8L2.1    | 0,08  | 0,50  | 0,08  | 0,24  | 0,0529502 | 0,166346 |
| RNU6-130P     | 0,00  | 0,00  | 0,00  | 0,00  | 0,052952  | 0,166346 |
| TAS2R18       | 0,00  | 0,00  | 0,00  | 0,00  | 0,0529539 | 0,166346 |
| ADAP1         | 3,14  | 4,03  | 4,23  | 3,76  | 0,0529779 | 0,166398 |
| RP11-493E3.3  | 1,91  | 1,92  | 2,37  | 2,33  | 0,0529915 | 0,166417 |
| IGFL3         | 0,00  | 0,28  | 0,00  | 0,66  | 0,0530035 | 0,166421 |
| MAN1A1        | 2,69  | 2,70  | 2,40  | 0,57  | 0,0530077 | 0,166421 |
| NLGN4Y        | 0,01  | 0,00  | 0,03  | 0,05  | 0,053021  | 0,16644  |
| NLGN2         | 0,00  | 0,14  | 0,00  | 0,00  | 0,0530627 | 0,166547 |
| CTD-3018O17.3 | 1,24  | 0,71  | 0,97  | 1,66  | 0,0530932 | 0,166619 |
| GK5           | 2,83  | 3,71  | 2,47  | 2,49  | 0,0531338 | 0,166723 |
| POLR2H        | 5,86  | 6,95  | 5,58  | 5,76  | 0,0531518 | 0,166756 |
| SNCA          | 4,50  | 0,85  | 3,24  | 2,58  | 0,0531903 | 0,166851 |
| RN75L368P     | 5,22  | 7,54  | 5,47  | 6,95  | 0,0531971 | 0,166851 |
| KRI1          | 3,27  | 3,60  | 3,64  | 4,05  | 0,0532459 | 0,166945 |
| LRRC6         | 0,00  | 3,15  | 0,07  | 0,54  | 0,0532494 | 0,166945 |
| DDX20         | 2,74  | 0,58  | 1,51  | 1,22  | 0,0532601 | 0,166945 |
| IGKV4-1       | 0,00  | 2,64  | 0,00  | 0,00  | 0,0532622 | 0,166945 |
| RP11-52A20.2  | 0,00  | 0,00  | 0,04  | 0,18  | 0,0532645 | 0,166945 |
| C14orf159     | 5,30  | 3,66  | 4,65  | 5,30  | 0,0533062 | 0,167036 |
| BTBD10        | 4,28  | 0,80  | 4,66  | 1,50  | 0,0533087 | 0,167036 |
| RP11-185O17.3 | 0,00  | 0,99  | 0,00  | 0,00  | 0,0533262 | NA       |
| ANAPC5        | 6,90  | 5,67  | 6,39  | 6,43  | 0,0533315 | 0,167083 |
| PRDX4         | 5,97  | 4,88  | 4,32  | 5,46  | 0,053341  | 0,167083 |
| TMEM269       | 1,10  | 1,78  | 1,52  | 1,77  | 0,0533463 | 0,167083 |
| AC008993.2    | 0,38  | 0,84  | 0,95  | 1,41  | 0,0533873 | 0,167188 |
| RP11-148K1.10 | 0,38  | 1,27  | 0,69  | 0,71  | 0,053458  | 0,167386 |
| C2orf81       | 0,10  | 0,20  | 0,20  | 0,19  | 0,0534748 | 0,167396 |
| CTD-2574D22.3 | 0,78  | 0,78  | 1,32  | 1,63  | 0,0534763 | 0,167396 |
| KLHL8         | 3,07  | 1,18  | 2,42  | 1,89  | 0,053513  | 0,167487 |
| LACTB         | 4,47  | 5,24  | 4,16  | 4,80  | 0,0535333 | 0,167498 |
| TSPYL3        | 0,51  | 0,59  | 0,62  | 0,59  | 0,0535337 | 0,167498 |
| INTS5         | 0,14  | 0,00  | 0,08  | 0,75  | 0,0535391 | 0,167498 |
| RP11-6J24.6   | 0,48  | 0,00  | 0,00  | 3,05  | 0,0535486 | 0,167504 |
| AC113167.1    | 1,00  | 2,38  | 1,99  | 0,72  | 0,0535561 | 0,167504 |

|                   |      |       |      |      |           |          |
|-------------------|------|-------|------|------|-----------|----------|
| COQ9              | 4,69 | 1,60  | 2,91 | 3,16 | 0,0535875 | 0,167579 |
| XXbac-BPG252P9.10 | 0,00 | 0,82  | 0,83 | 4,61 | 0,0536161 | 0,167644 |
| UNC5A             | 0,00 | 2,97  | 0,00 | 0,00 | 0,053634  | 0,16766  |
| PLA2G6            | 0,07 | 0,72  | 1,35 | 2,67 | 0,0536361 | 0,16766  |
| CLEC12A           | 6,11 | 6,67  | 6,35 | 7,29 | 0,0536475 | 0,167672 |
| RHNO1             | 4,25 | 1,59  | 2,84 | 1,68 | 0,0536814 | 0,167754 |
| RP11-572P18.1     | 9,98 | 10,23 | 9,88 | 9,52 | 0,0537224 | 0,167859 |
| DCTN2             | 5,46 | 6,40  | 5,53 | 5,50 | 0,05374   | 0,167885 |
| SIL1              | 4,56 | 5,74  | 5,13 | 4,92 | 0,0537459 | 0,167885 |
| RP11-4L24.3       | 0,13 | 2,36  | 0,36 | 1,18 | 0,0537656 | 0,167923 |
| RP11-244H3.5      | 0,15 | 0,17  | 0,26 | 0,55 | 0,0537955 | 0,167993 |
| RP5-1166F10.2     | 0,06 | 0,23  | 0,07 | 0,19 | 0,0538044 | 0,167997 |
| PTK2              | 4,69 | 3,74  | 3,94 | 4,90 | 0,0538169 | 0,168012 |
| ANKRD28           | 4,46 | 4,29  | 4,79 | 4,61 | 0,0538285 | 0,168025 |
| RP11-571O6.2      | 0,50 | 0,76  | 0,58 | 0,79 | 0,053853  | 0,168078 |
| LRP2BP            | 0,17 | 0,20  | 0,37 | 0,24 | 0,0538703 | 0,168106 |
| PSMD8             | 7,28 | 5,78  | 6,70 | 6,90 | 0,053881  | 0,168106 |
| RP11-263C24.1     | 4,14 | 1,72  | 3,12 | 1,77 | 0,0538847 | 0,168106 |
| ACO10524.2        | 0,19 | 0,64  | 0,25 | 0,26 | 0,0539025 | 0,168138 |
| JDP2              | 3,30 | 3,57  | 4,70 | 3,96 | 0,0539344 | 0,168196 |
| OAF               | 2,41 | 3,67  | 3,12 | 4,24 | 0,0539362 | 0,168196 |
| RP11-537H15.3     | 0,00 | 1,17  | 0,29 | 0,20 | 0,0539534 | 0,168226 |
| FAM214B           | 3,71 | 3,41  | 3,57 | 3,01 | 0,0539769 | 0,168276 |
| OPA3              | 1,64 | 1,24  | 2,38 | 1,88 | 0,0540099 | 0,168341 |
| RP11-932O9.7      | 0,00 | 0,00  | 0,00 | 0,00 | 0,0540129 | 0,168341 |
| WDR26             | 4,37 | 4,09  | 4,42 | 3,16 | 0,0540249 | 0,168354 |
| C19orf35          | 1,56 | 1,29  | 1,87 | 1,85 | 0,0540433 | 0,168369 |
| TMEM208           | 6,51 | 7,00  | 6,53 | 7,08 | 0,0540529 | 0,168369 |
| DCP2              | 6,48 | 7,25  | 5,51 | 4,88 | 0,0540595 | 0,168369 |
| RP11-748C4.1      | 0,29 | 0,00  | 2,34 | 3,18 | 0,0540679 | 0,168369 |
| FUT4              | 1,06 | 0,15  | 0,88 | 0,78 | 0,0540698 | 0,168369 |
| KMT2C             | 5,48 | 6,31  | 5,29 | 4,13 | 0,054075  | 0,168369 |
| PHB               | 6,97 | 5,64  | 6,10 | 4,07 | 0,0540832 | 0,168371 |
| PLA2G4B           | 2,43 | 2,89  | 3,15 | 3,17 | 0,0540977 | 0,168392 |
| LRRN1             | 0,00 | 0,00  | 0,00 | 0,17 | 0,0541119 | 0,168413 |
| SLC35F5           | 3,41 | 3,88  | 3,15 | 4,85 | 0,054123  | 0,168424 |
| C12orf73          | 1,37 | 0,00  | 0,70 | 0,10 | 0,0541462 | 0,168472 |
| RP11-608B3.1      | 1,69 | 2,51  | 1,61 | 1,16 | 0,0542159 | 0,168666 |
| EMX2OS            | 0,15 | 0,44  | 0,30 | 0,18 | 0,0542302 | 0,168676 |
| AC097468.5        | 0,83 | 1,29  | 0,61 | 1,87 | 0,0542458 | 0,168676 |
| SLC16A1           | 2,61 | 4,36  | 1,25 | 1,86 | 0,0542511 | 0,168676 |
| MDC1              | 0,33 | 0,33  | 1,05 | 0,02 | 0,0542548 | 0,168676 |
| WASH5P            | 2,24 | 1,50  | 2,59 | 1,25 | 0,0542571 | 0,168676 |
| TWF2              | 5,75 | 5,80  | 6,20 | 6,08 | 0,0542679 | 0,168686 |
| C3orf27           | 0,00 | 0,00  | 0,05 | 0,04 | 0,0542805 | 0,168701 |
| RP11-216F19.1     | 0,18 | 1,49  | 0,21 | 0,32 | 0,0542946 | 0,168714 |
| ADAMTSL5          | 0,05 | 0,05  | 0,09 | 0,16 | 0,0542998 | 0,168714 |
| ABL1              | 2,97 | 4,10  | 2,91 | 1,93 | 0,0543234 | 0,168764 |
| RP11-323J4.1      | 2,15 | 1,71  | 2,73 | 2,49 | 0,0543701 | 0,168885 |
| OR5H14            | 0,19 | 0,32  | 0,24 | 0,16 | 0,0544374 | 0,16907  |
| CCNDBP1           | 6,63 | 5,23  | 5,84 | 5,59 | 0,0544447 | 0,16907  |
| AP000265.1        | 0,10 | 0,13  | 0,20 | 0,09 | 0,0544537 | 0,169074 |
| AIDA              | 3,97 | 4,16  | 2,72 | 3,54 | 0,0544614 | 0,169074 |
| HEATR6            | 5,13 | 3,30  | 4,26 | 3,04 | 0,0544881 | 0,16912  |
| RP11-91I20.3      | 1,39 | 4,02  | 1,66 | 1,36 | 0,0544985 | 0,16912  |

|                |      |      |      |      |           |          |
|----------------|------|------|------|------|-----------|----------|
| SHARPIN        | 4,19 | 5,51 | 3,51 | 4,81 | 0,054505  | 0,16912  |
| RP11-234K19.2  | 0,00 | 0,30 | 0,08 | 0,00 | 0,0545176 | 0,16912  |
| HEXB           | 7,31 | 6,86 | 7,64 | 7,44 | 0,0545245 | 0,16912  |
| RP11-524F11.3  | 1,69 | 1,86 | 1,97 | 2,00 | 0,0545302 | 0,16912  |
| TMTC2          | 0,60 | 3,07 | 0,69 | 1,56 | 0,0545436 | 0,16912  |
| CD33           | 8,28 | 7,34 | 7,78 | 7,85 | 0,0545533 | 0,16912  |
| LAMP5          | 0,30 | 0,48 | 0,31 | 0,22 | 0,0545541 | 0,16912  |
| CCDC15         | 0,19 | 0,33 | 0,21 | 0,24 | 0,0545541 | 0,16912  |
| SULT1E1        | 0,06 | 0,75 | 0,00 | 0,00 | 0,0545634 | 0,16912  |
| TSSC4          | 4,23 | 4,63 | 3,94 | 4,58 | 0,0545674 | 0,16912  |
| RP13-923O23.6  | 0,00 | 0,00 | 0,00 | 0,45 | 0,0546182 | NA       |
| HIST2H2AA4     | 7,83 | 7,98 | 8,21 | 8,21 | 0,0546328 | 0,169299 |
| ZNF248         | 2,27 | 0,43 | 0,50 | 1,05 | 0,0546627 | 0,169368 |
| GCNT2          | 3,30 | 3,51 | 2,82 | 3,98 | 0,0546986 | 0,169456 |
| MTMR7          | 0,62 | 0,00 | 0,01 | 0,03 | 0,0547172 | 0,16949  |
| FAM188A        | 3,77 | 0,46 | 3,33 | 0,91 | 0,0547249 | 0,16949  |
| AVIL           | 0,91 | 2,51 | 0,49 | 1,40 | 0,0547362 | 0,169496 |
| NDUFA5         | 5,59 | 3,27 | 4,77 | 4,50 | 0,054742  | 0,169496 |
| EXOC1          | 4,40 | 3,48 | 4,08 | 4,04 | 0,0547829 | 0,169599 |
| RPL3L          | 0,57 | 0,71 | 0,62 | 0,98 | 0,0548003 | 0,169615 |
| AKT1S1         | 1,38 | 0,52 | 1,87 | 1,78 | 0,0548066 | 0,169615 |
| RP11-227G15.8  | 0,14 | 0,96 | 0,40 | 1,17 | 0,0548111 | 0,169615 |
| CTD-3105H18.18 | 1,50 | 2,43 | 1,39 | 0,38 | 0,0548388 | 0,169677 |
| VSIR           | 7,27 | 6,31 | 6,65 | 6,71 | 0,0548851 | 0,169791 |
| PLS3           | 0,00 | 1,03 | 0,26 | 0,31 | 0,0548907 | 0,169791 |
| RP11-613F22.8  | 1,44 | 0,71 | 1,94 | 1,38 | 0,0549123 | 0,16983  |
| C6orf120       | 0,87 | 2,76 | 2,60 | 2,46 | 0,0549287 | 0,16983  |
| PATE4          | 0,17 | 0,16 | 0,60 | 0,30 | 0,0549305 | 0,16983  |
| PGPEP1         | 1,34 | 1,55 | 2,16 | 4,30 | 0,054934  | 0,16983  |
| ZBTB4          | 0,90 | 0,37 | 1,79 | 1,70 | 0,0549644 | 0,1699   |
| CANT1          | 1,94 | 1,89 | 2,23 | 2,30 | 0,0549719 | 0,1699   |
| ARMCX6         | 5,56 | 0,44 | 3,86 | 0,48 | 0,0549828 | 0,16991  |
| RP11-632K20.7  | 3,64 | 4,16 | 4,37 | 4,40 | 0,0549964 | 0,169928 |
| RP11-296K13.4  | 0,47 | 3,45 | 0,63 | 0,57 | 0,0550084 | 0,169942 |
| MIR548W        | 3,61 | 5,78 | 0,00 | 6,55 | 0,0550187 | 0,16995  |
| AMY1C          | 0,00 | 0,13 | 0,00 | 0,00 | 0,0550656 | 0,170071 |
| SNX17          | 7,36 | 7,08 | 6,69 | 6,79 | 0,0550847 | 0,170107 |
| RP11-422P24.12 | 1,75 | 2,56 | 1,17 | 1,29 | 0,0551173 | 0,170181 |
| ZNF22          | 3,87 | 5,32 | 3,77 | 2,55 | 0,0551241 | 0,170181 |
| MPP6           | 0,72 | 2,54 | 0,74 | 0,69 | 0,055148  | 0,170231 |
| AREG           | 7,46 | 7,72 | 7,37 | 5,26 | 0,0551581 | 0,170239 |
| MAN2B2         | 2,29 | 2,69 | 1,79 | 2,03 | 0,0551683 | 0,170246 |
| CCNYL1         | 2,35 | 1,47 | 2,87 | 0,99 | 0,0552691 | 0,170534 |
| MOV10          | 4,92 | 2,25 | 5,27 | 5,09 | 0,0552798 | 0,170543 |
| WDR86          | 0,00 | 0,00 | 0,00 | 0,14 | 0,0552946 | 0,170565 |
| USP13          | 1,74 | 0,91 | 2,23 | 1,33 | 0,055304  | 0,17057  |
| TMEM78         | 0,61 | 0,70 | 0,63 | 1,12 | 0,055323  | 0,170606 |
| SULT2B1        | 0,17 | 0,83 | 0,29 | 0,11 | 0,0553373 | 0,170626 |
| CTD-2014B16.3  | 0,73 | 0,77 | 0,70 | 0,00 | 0,0553455 | 0,170628 |
| RP5-1142A6.10  | 0,00 | 0,00 | 0,08 | 0,92 | 0,0553589 | 0,170645 |
| RP4-594I10.3   | 0,00 | 0,65 | 0,00 | 0,00 | 0,0553754 | 0,170672 |
| RP11-231E4.2   | 1,08 | 2,75 | 0,75 | 0,61 | 0,055415  | 0,170764 |
| GCLM           | 0,24 | 0,43 | 0,64 | 0,78 | 0,0554262 | 0,170764 |
| LHFPL5         | 2,37 | 2,66 | 2,17 | 3,01 | 0,0554283 | 0,170764 |
| SPINK1         | 0,00 | 0,00 | 0,00 | 0,00 | 0,0554792 | 0,170897 |

|                   |       |       |       |       |           |          |
|-------------------|-------|-------|-------|-------|-----------|----------|
| ACO10761.8        | 1,08  | 0,55  | 2,07  | 0,94  | 0,0555008 | 0,17094  |
| RPLP0             | 10,92 | 10,73 | 10,50 | 10,10 | 0,0555234 | 0,170986 |
| SLC16A5           | 1,17  | 1,19  | 2,43  | 1,10  | 0,055541  | 0,171009 |
| SPON2             | 0,58  | 1,24  | 0,95  | 3,82  | 0,0555462 | 0,171009 |
| SLC35A2           | 2,79  | 4,79  | 3,50  | 1,53  | 0,055587  | 0,171111 |
| ZNF346            | 1,27  | 0,48  | 1,87  | 0,98  | 0,0556339 | 0,171211 |
| PACRG             | 1,39  | 1,52  | 1,91  | 2,66  | 0,0556404 | 0,171211 |
| NUDT15            | 2,80  | 2,87  | 1,51  | 0,56  | 0,0556494 | 0,171211 |
| DCN               | 1,58  | 1,39  | 1,44  | 2,09  | 0,0556504 | 0,171211 |
| PCAT7             | 0,16  | 0,38  | 0,33  | 0,61  | 0,0556751 | 0,171264 |
| SCARF1            | 1,68  | 0,46  | 0,33  | 1,02  | 0,055695  | 0,171287 |
| RP11-508M1.1      | 0,00  | 0,29  | 0,39  | 0,48  | 0,0556982 | 0,171287 |
| BANF1             | 7,00  | 7,64  | 7,11  | 6,37  | 0,05572   | 0,171331 |
| COQ5              | 4,83  | 6,00  | 4,92  | 2,73  | 0,0557389 | 0,171365 |
| RPL12L3           | 0,00  | 0,43  | 0,31  | 0,95  | 0,0557491 | NA       |
| ETFB              | 6,31  | 6,48  | 6,56  | 5,91  | 0,0557564 | 0,171395 |
| RP11-572M11.1     | 0,00  | 0,00  | 0,00  | 0,11  | 0,055773  | 0,171422 |
| RN7SL457P         | 0,00  | 2,11  | 0,00  | 0,90  | 0,0557888 | 0,171447 |
| RP4-781K5.2       | 5,68  | 6,85  | 6,67  | 5,20  | 0,0558083 | 0,171484 |
| GPATCH3           | 2,77  | 5,28  | 3,20  | 2,25  | 0,055832  | 0,171533 |
| RP11-304C12.5     | 0,00  | 5,56  | 0,00  | 0,00  | 0,0558555 | 0,171564 |
| XXbac-BPG294E21.9 | 0,00  | 0,47  | 0,00  | 0,43  | 0,0558577 | 0,171564 |
| C3AR1             | 0,29  | 0,14  | 2,79  | 3,21  | 0,0558716 | 0,171574 |
| RPL32P1           | 6,76  | 5,35  | 6,63  | 5,32  | 0,0558765 | 0,171574 |
| MBTPS2            | 2,16  | 0,12  | 0,65  | 0,35  | 0,0559017 | 0,171628 |
| RP11-211G23.1     | 0,00  | 0,00  | 0,06  | 0,34  | 0,0559368 | 0,171698 |
| TPH2              | 2,02  | 2,97  | 2,33  | 2,34  | 0,0559495 | 0,171698 |
| POLE4             | 5,75  | 5,74  | 6,10  | 6,16  | 0,0559537 | 0,171698 |
| ABCA6             | 0,43  | 0,14  | 0,38  | 1,66  | 0,0559553 | 0,171698 |
| STX4              | 4,75  | 5,40  | 4,89  | 6,20  | 0,0559898 | 0,171765 |
| RP11-220D10.1     | 0,00  | 0,00  | 0,00  | 0,00  | 0,0559926 | 0,171765 |
| ZNF777            | 0,00  | 0,16  | 0,00  | 0,04  | 0,0560106 | 0,171796 |
| SLC9A4            | 0,35  | 0,75  | 0,41  | 0,38  | 0,0560434 | 0,171873 |
| ACO16734.3        | 1,63  | 3,41  | 0,80  | 1,25  | 0,0560797 | 0,171957 |
| RN7SL48P          | 2,80  | 3,63  | 3,82  | 4,24  | 0,0560862 | 0,171957 |
| HCG18             | 4,38  | 5,15  | 4,13  | 4,77  | 0,0561234 | 0,172039 |
| TMEM130           | 0,26  | 0,23  | 0,77  | 0,99  | 0,0561286 | 0,172039 |
| SUFU              | 0,97  | 0,83  | 1,40  | 1,01  | 0,0561721 | 0,172149 |
| CHI3L1            | 0,06  | 0,00  | 0,08  | 0,14  | 0,0561969 | 0,172182 |
| DHX30             | 3,59  | 5,06  | 4,20  | 3,50  | 0,0561984 | 0,172182 |
| TMCO3             | 3,38  | 3,50  | 2,97  | 2,94  | 0,0562219 | 0,172191 |
| RP11-360N9.2      | 0,30  | 0,79  | 0,44  | 0,45  | 0,0562298 | 0,172191 |
| RP11-1038A11.2    | 0,30  | 1,56  | 0,49  | 0,46  | 0,0562312 | 0,172191 |
| SOCS7             | 0,81  | 0,06  | 0,48  | 0,66  | 0,0562323 | 0,172191 |
| RP11-861E21.2     | 1,74  | 2,22  | 1,71  | 2,17  | 0,0562847 | 0,172328 |
| MAP3K14           | 3,62  | 3,05  | 3,57  | 2,67  | 0,0562958 | 0,172329 |
| RP3-325F22.3      | 0,00  | 0,00  | 0,00  | 1,10  | 0,0563007 | 0,172329 |
| CACNB4            | 1,12  | 1,74  | 1,17  | 1,14  | 0,05632   | 0,172364 |
| RP11-23P13.4      | 0,00  | 0,14  | 0,96  | 0,00  | 0,0563584 | 0,172426 |
| ACO05618.6        | 0,04  | 0,04  | 0,07  | 0,05  | 0,0563715 | 0,172426 |
| ITGB8             | 0,13  | 0,50  | 0,29  | 0,14  | 0,0563747 | 0,172426 |
| AIG1              | 5,33  | 2,70  | 4,22  | 2,47  | 0,0563811 | 0,172426 |
| RP11-87H9.5       | 0,11  | 0,09  | 0,14  | 0,60  | 0,0563836 | 0,172426 |
| DENND5B           | 1,49  | 0,28  | 0,82  | 0,44  | 0,0563866 | 0,172426 |
| BAG1              | 5,32  | 5,36  | 5,79  | 5,00  | 0,056406  | 0,172457 |

|               |      |      |      |      |           |          |
|---------------|------|------|------|------|-----------|----------|
| ZFP14         | 2,01 | 0,55 | 1,95 | 1,48 | 0,0564123 | 0,172457 |
| ACO09502.4    | 0,87 | 2,08 | 0,90 | 1,13 | 0,0564253 | 0,172473 |
| INTS6L        | 4,19 | 3,76 | 2,61 | 2,12 | 0,0565183 | 0,172734 |
| EIF4B         | 7,01 | 6,90 | 6,63 | 5,50 | 0,056531  | 0,172749 |
| AP006222.1    | 1,38 | 1,74 | 1,07 | 1,93 | 0,0565565 | 0,172803 |
| KLF11         | 3,07 | 3,01 | 3,17 | 0,73 | 0,0566127 | 0,172951 |
| RP11-586L23.1 | 0,00 | 0,00 | 0,26 | 0,47 | 0,0566217 | 0,172954 |
| RP5-1166H10.2 | 0,21 | 0,67 | 0,33 | 0,06 | 0,0566386 | 0,172982 |
| RP11-399F4.2  | 1,12 | 0,03 | 0,10 | 0,06 | 0,0566523 | 0,173    |
| AF129408.17   | 2,39 | 0,00 | 0,00 | 0,00 | 0,056693  | 0,173101 |
| ACO27269.2    | 0,75 | 0,36 | 0,75 | 1,58 | 0,0567081 | 0,173123 |
| KDM7A         | 3,94 | 3,94 | 3,99 | 2,53 | 0,0567282 | 0,173161 |
| RP11-779O18.3 | 0,00 | 0,00 | 0,30 | 2,80 | 0,0567438 | 0,173185 |
| RPS6P20       | 0,05 | 0,16 | 0,09 | 0,25 | 0,0567698 | 0,17324  |
| RPL7P41       | 0,00 | 0,17 | 0,25 | 0,46 | 0,0567813 | NA       |
| CD47          | 7,45 | 6,46 | 6,50 | 5,62 | 0,0567814 | 0,173252 |
| RP11-401M16.7 | 0,23 | 0,44 | 0,19 | 0,36 | 0,056821  | 0,173349 |
| GTF2H3        | 3,38 | 1,44 | 2,80 | 1,15 | 0,0568568 | 0,173377 |
| CTD-2144E22.9 | 0,86 | 3,68 | 0,52 | 4,62 | 0,0568578 | 0,173377 |
| TMEM191C      | 0,77 | 0,68 | 0,97 | 1,62 | 0,056862  | 0,173377 |
| VAR5          | 4,32 | 0,79 | 4,19 | 2,65 | 0,0568669 | 0,173377 |
| CDC42BPG      | 0,00 | 0,00 | 0,00 | 0,00 | 0,056871  | 0,173377 |
| ACO90937.2    | 3,91 | 1,70 | 4,28 | 3,94 | 0,0568772 | 0,173377 |
| ATP6AP1       | 7,04 | 5,90 | 6,55 | 5,93 | 0,0568979 | 0,173417 |
| RP1-91J24.3   | 0,24 | 0,00 | 0,00 | 0,44 | 0,0569172 | 0,173452 |
| POLM          | 2,52 | 3,07 | 3,53 | 3,76 | 0,0569661 | 0,173577 |
| SKP1          | 9,09 | 8,49 | 8,56 | 7,80 | 0,056982  | 0,173602 |
| RP4-726F1.3   | 0,00 | 0,00 | 0,00 | 0,00 | 0,0569977 | 0,173626 |
| RP11-143J12.2 | 2,57 | 0,22 | 1,56 | 0,00 | 0,0570138 | 0,173651 |
| RP11-777B9.5  | 1,69 | 1,56 | 2,20 | 2,48 | 0,0570317 | 0,173658 |
| EEF1B2        | 9,83 | 9,75 | 9,58 | 8,99 | 0,0570402 | 0,173658 |
| PSMD6         | 6,58 | 5,70 | 5,65 | 3,80 | 0,0570431 | 0,173658 |
| CHST5         | 0,27 | 0,47 | 0,36 | 0,58 | 0,0570473 | 0,173658 |
| LFNG          | 3,37 | 1,31 | 3,64 | 3,37 | 0,0570729 | 0,173661 |
| WHAMMP2       | 1,78 | 3,00 | 1,57 | 0,78 | 0,0570777 | 0,173661 |
| SBK1          | 0,19 | 0,36 | 0,24 | 0,49 | 0,0570782 | 0,173661 |
| ZNF746        | 1,66 | 1,49 | 1,28 | 1,39 | 0,0570794 | 0,173661 |
| GXYLT1        | 2,11 | 1,25 | 1,75 | 0,50 | 0,0570949 | 0,173684 |
| RUFY3         | 5,83 | 4,20 | 5,47 | 5,26 | 0,0571104 | 0,173688 |
| ASZ1          | 0,08 | 0,19 | 0,22 | 0,36 | 0,0571132 | 0,173692 |
| MAP3K20-AS1   | 1,96 | 2,36 | 0,37 | 0,00 | 0,0571326 | 0,173727 |
| ZNF140        | 3,17 | 1,02 | 1,04 | 1,26 | 0,0571407 | 0,173728 |
| CTC-265F19.2  | 0,39 | 0,32 | 0,83 | 0,90 | 0,0572295 | 0,173966 |
| ZNF275        | 1,60 | 0,67 | 1,01 | 0,14 | 0,0572347 | 0,173966 |
| NRG1          | 0,00 | 0,72 | 0,71 | 3,86 | 0,0572587 | 0,174015 |
| RN7SL530P     | 0,00 | 0,00 | 0,39 | 0,00 | 0,0572736 | 0,174037 |
| REEP2         | 0,84 | 2,40 | 1,69 | 2,34 | 0,0572869 | 0,174044 |
| PVR           | 0,02 | 2,56 | 0,42 | 1,08 | 0,0572915 | 0,174044 |
| RP11-10B2.3   | 0,00 | 1,05 | 0,73 | 0,85 | 0,0572916 | NA       |
| RP11-521B24.4 | 0,63 | 1,09 | 0,68 | 0,74 | 0,0573492 | 0,174195 |
| RGAG4         | 0,14 | 0,17 | 0,29 | 1,15 | 0,057358  | 0,174198 |
| RBM15B        | 2,05 | 0,24 | 2,01 | 0,85 | 0,0573779 | 0,174235 |
| PPP2CA        | 6,38 | 5,41 | 5,94 | 4,51 | 0,057404  | 0,17429  |
| LCE6A         | 0,00 | 0,00 | 0,00 | 0,00 | 0,0574353 | 0,174361 |
| MED13L        | 4,02 | 2,43 | 3,78 | 3,84 | 0,0574544 | 0,174395 |

|                   |      |      |      |      |           |          |
|-------------------|------|------|------|------|-----------|----------|
| TNRC18            | 1,59 | 2,56 | 1,97 | 3,50 | 0,0574828 | 0,174458 |
| RNU6-681P         | 4,03 | 0,00 | 2,83 | 0,00 | 0,0575064 | 0,174491 |
| PCBP1             | 7,05 | 6,82 | 6,69 | 5,03 | 0,0575119 | 0,174491 |
| ALDH1B1           | 0,73 | 2,85 | 1,05 | 0,34 | 0,0575172 | 0,174491 |
| ATP5G3            | 8,64 | 8,18 | 8,51 | 7,84 | 0,0575581 | 0,174591 |
| ATF7IP2           | 5,79 | 6,07 | 4,75 | 4,44 | 0,0576009 | 0,174697 |
| MCM8              | 0,65 | 0,64 | 0,92 | 0,49 | 0,0576347 | 0,174776 |
| RTKN2             | 1,02 | 0,30 | 0,61 | 1,70 | 0,0576831 | 0,174899 |
| XXbac-BPG181M17.4 | 0,00 | 0,00 | 0,00 | 0,00 | 0,0577236 | 0,174998 |
| PAG1              | 2,73 | 2,66 | 3,65 | 3,04 | 0,0577333 | 0,175003 |
| NBPF15            | 1,80 | 1,43 | 1,79 | 2,21 | 0,0577492 | 0,175027 |
| PLCD4             | 0,16 | 0,13 | 0,25 | 0,33 | 0,0577738 | 0,175078 |
| RP11-163E9.1      | 0,00 | 0,00 | 0,73 | 0,00 | 0,0577874 | 0,175095 |
| RP11-1036E20.9    | 0,15 | 0,19 | 0,36 | 0,17 | 0,0578378 | 0,175224 |
| FOXO3             | 2,88 | 1,48 | 2,95 | 2,60 | 0,0578507 | 0,175232 |
| CNNM2             | 1,36 | 0,59 | 0,55 | 0,67 | 0,0578576 | 0,175232 |
| RP11-56B16.2      | 0,00 | 0,00 | 1,30 | 0,00 | 0,057868  | 0,175232 |
| ZNF667            | 0,88 | 2,13 | 0,76 | 1,14 | 0,057872  | 0,175232 |
| KPNA1             | 4,14 | 3,59 | 3,74 | 2,25 | 0,0579196 | 0,175353 |
| RP11-309H21.3     | 0,73 | 1,18 | 0,85 | 0,09 | 0,0579449 | 0,175405 |
| PTPN7             | 4,57 | 4,02 | 3,99 | 3,67 | 0,0579703 | 0,175452 |
| GS1-279B7.2       | 0,00 | 0,00 | 0,15 | 1,08 | 0,0579763 | 0,175452 |
| HSPA1A            | 3,12 | 4,77 | 3,43 | 3,47 | 0,0580471 | 0,175631 |
| NMI               | 6,47 | 5,46 | 5,58 | 5,01 | 0,0580578 | 0,175631 |
| TES               | 6,32 | 5,67 | 6,09 | 3,77 | 0,058059  | 0,175631 |
| KCNAB3            | 0,70 | 0,33 | 0,60 | 0,84 | 0,0580885 | 0,175693 |
| ZNF713            | 1,32 | 1,01 | 1,43 | 1,13 | 0,0580952 | 0,175693 |
| RP1-41C23.1       | 0,00 | 0,00 | 0,38 | 0,00 | 0,0581236 | NA       |
| MFSD13A           | 1,61 | 0,48 | 2,26 | 1,97 | 0,058129  | 0,175747 |
| RP11-529K1.3      | 0,64 | 0,00 | 0,03 | 0,00 | 0,0581336 | 0,175747 |
| RP11-10H3.1       | 0,00 | 0,00 | 0,00 | 1,19 | 0,0581369 | 0,175747 |
| TYW1              | 4,40 | 2,55 | 3,17 | 3,17 | 0,0582538 | 0,176077 |
| TBC1D3I           | 0,00 | 0,00 | 0,00 | 0,60 | 0,058262  | 0,176077 |
| RP3-402G11.25     | 2,99 | 0,33 | 1,67 | 1,53 | 0,0582801 | 0,176108 |
| AASDH             | 2,77 | 0,61 | 2,36 | 0,93 | 0,058309  | 0,176172 |
| RP11-736N17.4     | 0,00 | 0,21 | 0,00 | 0,00 | 0,0583323 | NA       |
| SAMD5             | 0,09 | 0,30 | 0,16 | 0,16 | 0,0583827 | 0,17637  |
| ASPSR1            | 3,67 | 5,85 | 4,59 | 4,32 | 0,0584045 | 0,176412 |
| SPG21             | 6,25 | 4,35 | 6,08 | 4,99 | 0,0584423 | 0,176502 |
| RP1-102H19.7      | 0,00 | 0,24 | 0,07 | 0,00 | 0,0584999 | 0,176638 |
| PARS2             | 0,00 | 0,00 | 0,00 | 0,06 | 0,0585032 | 0,176638 |
| RAP1GDS1          | 5,29 | 4,04 | 4,45 | 4,17 | 0,0585268 | 0,176686 |
| CHODL             | 0,00 | 2,15 | 0,00 | 0,00 | 0,0585632 | 0,176761 |
| DNAJB7            | 0,16 | 0,20 | 0,53 | 0,90 | 0,0585678 | 0,176761 |
| ESR1              | 0,00 | 0,02 | 0,12 | 0,23 | 0,0585846 | 0,176775 |
| TREML3P           | 0,00 | 2,38 | 0,00 | 0,00 | 0,0585884 | 0,176775 |
| CTD-2306A12.1     | 0,00 | 2,46 | 0,00 | 0,00 | 0,0586032 | 0,176796 |
| KIF5B             | 5,08 | 3,67 | 4,60 | 3,78 | 0,05863   | 0,17684  |
| ADGRE2            | 4,14 | 2,77 | 4,32 | 4,72 | 0,0586363 | 0,17684  |
| LATS1             | 2,99 | 1,15 | 2,42 | 1,82 | 0,0586416 | 0,17684  |
| CTB-47B11.3       | 3,15 | 2,76 | 3,65 | 3,20 | 0,0586642 | 0,176884 |
| BBS1              | 2,28 | 0,59 | 1,55 | 1,27 | 0,0586753 | 0,176894 |
| AP000679.2        | 0,09 | 0,19 | 0,08 | 0,26 | 0,0587008 | 0,176946 |
| ABL2              | 1,45 | 3,68 | 2,24 | 2,28 | 0,0587145 | 0,176964 |
| CTD-2587H19.3     | 1,62 | 0,73 | 2,27 | 1,61 | 0,0587286 | 0,176982 |

|                    |      |      |      |      |           |          |
|--------------------|------|------|------|------|-----------|----------|
| PEF1               | 5,75 | 3,22 | 4,87 | 4,37 | 0,0587364 | 0,176982 |
| RP11-462L8.1       | 0,00 | 0,15 | 0,00 | 0,00 | 0,0587421 | NA       |
| C11orf80           | 0,29 | 2,57 | 0,83 | 1,97 | 0,0587502 | 0,176999 |
| GUSBP3             | 2,73 | 1,81 | 3,50 | 2,88 | 0,0587731 | 0,177019 |
| SLC25A11           | 6,13 | 5,44 | 5,86 | 3,52 | 0,0587814 | 0,177019 |
| FAM135A            | 4,05 | 4,77 | 3,44 | 1,92 | 0,0587866 | 0,177019 |
| RNVU1-3            | 2,40 | 0,00 | 3,43 | 4,65 | 0,0587946 | 0,177019 |
| USP6NL             | 2,45 | 1,68 | 2,25 | 1,07 | 0,0587966 | 0,177019 |
| ZNF121             | 3,88 | 2,74 | 2,85 | 2,18 | 0,0588173 | 0,177054 |
| RP11-34F20.4       | 0,00 | 0,00 | 0,00 | 0,00 | 0,0588317 | 0,177054 |
| GABRE              | 0,26 | 0,00 | 0,51 | 1,01 | 0,058832  | 0,177054 |
| RP5-1043L3.1       | 0,35 | 0,85 | 0,42 | 0,89 | 0,0588435 | 0,177064 |
| MTOR               | 2,59 | 3,10 | 2,74 | 1,04 | 0,0589227 | 0,177279 |
| RUNX2              | 4,20 | 4,00 | 3,23 | 2,59 | 0,0589481 | 0,177331 |
| UNC45A             | 2,89 | 5,01 | 3,78 | 4,88 | 0,0589584 | 0,177338 |
| RP11-626K17.3      | 0,09 | 0,17 | 0,15 | 0,23 | 0,0589895 | 0,177394 |
| USP18              | 0,28 | 0,19 | 0,12 | 0,34 | 0,0589935 | 0,177394 |
| NMB                | 1,69 | 0,00 | 0,11 | 0,16 | 0,059001  | 0,177394 |
| ABC7-42389800N19.1 | 1,37 | 0,45 | 2,42 | 2,73 | 0,0590202 | 0,177428 |
| SAMD4B             | 3,63 | 4,63 | 3,71 | 3,87 | 0,059061  | 0,177522 |
| RP11-521D12.1      | 0,26 | 0,33 | 0,19 | 0,66 | 0,0590674 | 0,177522 |
| MIR1273G           | 0,00 | 3,28 | 1,53 | 2,02 | 0,0590984 | 0,177591 |
| ATXN7              | 4,53 | 0,93 | 3,21 | 2,11 | 0,0591408 | 0,177674 |
| NIPSNAP3B          | 3,03 | 0,99 | 2,22 | 0,76 | 0,0591421 | 0,177674 |
| C2orf47            | 4,43 | 0,22 | 3,86 | 4,39 | 0,0591553 | 0,17769  |
| MAGI1              | 0,00 | 0,00 | 0,01 | 0,59 | 0,0591959 | 0,177788 |
| SRSF12             | 0,18 | 0,65 | 0,25 | 1,26 | 0,0592075 | 0,177799 |
| ATP6V1F            | 7,96 | 7,60 | 8,27 | 7,72 | 0,0592359 | 0,17786  |
| RP4-728D4.2        | 2,99 | 0,00 | 0,57 | 3,05 | 0,0592573 | 0,177882 |
| ZNHIT1             | 6,42 | 6,67 | 6,33 | 6,41 | 0,0592641 | 0,177882 |
| RP11-124N14.4      | 4,28 | 4,18 | 4,63 | 4,63 | 0,0592674 | 0,177882 |
| SPRYD7             | 1,52 | 0,24 | 1,15 | 0,42 | 0,0592855 | 0,177913 |
| TMED7              | 4,76 | 2,77 | 3,66 | 2,70 | 0,0593086 | 0,177958 |
| C20orf197          | 1,88 | 0,05 | 0,75 | 0,26 | 0,0593203 | 0,177969 |
| TFAM               | 3,99 | 3,28 | 3,33 | 2,77 | 0,059332  | 0,17798  |
| CTA-373H7.7        | 0,13 | 0,19 | 0,21 | 0,36 | 0,0593458 | 0,177997 |
| C11orf57           | 3,11 | 1,38 | 2,54 | 0,77 | 0,0594346 | 0,17824  |
| SNRPN              | 4,91 | 6,35 | 4,26 | 2,58 | 0,059443  | 0,178241 |
| PAPSS1             | 4,55 | 3,38 | 3,85 | 4,95 | 0,0594981 | 0,178369 |
| RP11-717D12.1      | 0,09 | 0,10 | 0,15 | 0,00 | 0,0595022 | 0,178369 |
| C6orf136           | 2,85 | 0,99 | 3,43 | 0,85 | 0,0595099 | 0,178369 |
| ISG15              | 7,59 | 6,93 | 8,46 | 9,50 | 0,0595315 | 0,17841  |
| COL24A1            | 0,02 | 0,00 | 0,02 | 0,85 | 0,0595406 | 0,178413 |
| RP11-464F9.21      | 0,00 | 0,00 | 0,00 | 0,00 | 0,05957   | 0,178477 |
| BBIP1              | 4,41 | 3,19 | 4,02 | 4,00 | 0,0595912 | 0,178516 |
| TSTD3              | 0,00 | 3,82 | 0,10 | 0,31 | 0,0596189 | 0,178517 |
| AC133644.2         | 0,00 | 0,39 | 0,08 | 1,21 | 0,0596276 | 0,178517 |
| RP13-131K19.2      | 0,00 | 0,15 | 0,00 | 0,00 | 0,059634  | 0,178517 |
| RP11-457P14.4      | 0,00 | 0,59 | 0,30 | 0,88 | 0,0596347 | 0,178517 |
| NME1               | 6,54 | 7,08 | 6,61 | 5,57 | 0,059638  | 0,178517 |
| AP001187.9         | 0,74 | 1,25 | 1,08 | 0,52 | 0,0596428 | 0,178517 |
| RP11-848P1.9       | 3,23 | 1,20 | 2,96 | 4,57 | 0,0596476 | 0,178517 |
| DUX4L19            | 0,00 | 0,13 | 0,00 | 0,00 | 0,0597108 | 0,178667 |
| CCDC158            | 0,07 | 0,32 | 0,12 | 0,23 | 0,0597137 | 0,178667 |
| RP11-1217F2.23     | 0,00 | 0,00 | 0,00 | 0,46 | 0,0597343 | NA       |

|                |      |      |      |      |           |          |
|----------------|------|------|------|------|-----------|----------|
| RP3-446N13.1   | 0,25 | 0,90 | 0,34 | 0,48 | 0,0598064 | 0,17892  |
| NANOS1         | 0,06 | 0,13 | 0,10 | 0,10 | 0,0598144 | 0,17892  |
| ASB16          | 0,07 | 0,22 | 0,11 | 0,00 | 0,0598342 | 0,178955 |
| STARD5         | 1,74 | 3,06 | 1,42 | 1,81 | 0,0598776 | 0,179061 |
| NOSIP          | 6,82 | 6,79 | 6,35 | 6,69 | 0,0599092 | 0,179131 |
| PAK1IP1        | 4,88 | 2,65 | 4,33 | 4,08 | 0,0599352 | 0,179185 |
| SCD            | 2,23 | 0,05 | 1,41 | 0,65 | 0,0600089 | 0,179381 |
| AC004069.3     | 5,94 | 1,23 | 5,29 | 3,54 | 0,060028  | 0,179408 |
| TBCCD1         | 2,04 | 0,52 | 2,70 | 2,62 | 0,060034  | 0,179408 |
| RP11-977G19.11 | 2,17 | 2,22 | 1,52 | 0,95 | 0,0601554 | 0,179747 |
| MLPH           | 0,79 | 0,77 | 1,01 | 1,45 | 0,0602591 | 0,180032 |
| SLC30A6        | 2,33 | 0,85 | 0,72 | 0,66 | 0,0602677 | 0,180034 |
| NREP           | 5,58 | 4,53 | 5,01 | 3,51 | 0,0602769 | 0,180037 |
| AGMO           | 0,00 | 0,11 | 0,00 | 0,06 | 0,0602963 | NA       |
| B4GALT7        | 3,57 | 2,75 | 2,36 | 3,43 | 0,0603933 | 0,18036  |
| PLN            | 1,26 | 1,36 | 0,33 | 0,59 | 0,0604029 | 0,180365 |
| SLAIN1         | 0,00 | 0,07 | 0,10 | 0,57 | 0,0604135 | 0,18037  |
| RP11-575M22.1  | 0,00 | 0,00 | 0,00 | 0,00 | 0,0604268 | 0,18037  |
| COL3A1         | 0,00 | 0,00 | 0,00 | 0,00 | 0,060429  | 0,18037  |
| RP11-78J21.6   | 0,00 | 0,00 | 0,00 | 0,24 | 0,0604692 | 0,180446 |
| CTD-2296D1.5   | 1,20 | 1,40 | 1,77 | 1,61 | 0,0604708 | 0,180446 |
| OSBPL1A        | 2,98 | 2,51 | 3,36 | 3,47 | 0,0606136 | 0,180848 |
| CYP4B1         | 0,32 | 1,42 | 0,41 | 0,56 | 0,0606278 | 0,180866 |
| CTB-31O20.3    | 1,83 | 2,03 | 3,00 | 3,90 | 0,0606581 | 0,180931 |
| AHSA1          | 6,10 | 6,74 | 5,48 | 5,13 | 0,0606694 | 0,180931 |
| MYEF2          | 4,12 | 4,17 | 4,56 | 4,82 | 0,0606739 | 0,180931 |
| RNU7-41P       | 3,54 | 2,95 | 4,98 | 4,89 | 0,0606883 | 0,180949 |
| KIF19          | 0,15 | 1,16 | 0,04 | 0,22 | 0,0607073 | 0,180963 |
| SLC3A2         | 5,94 | 7,15 | 5,87 | 6,32 | 0,0607099 | 0,180963 |
| RP11-327J17.7  | 0,06 | 0,19 | 0,09 | 0,21 | 0,0607171 | 0,180963 |
| NDEL1          | 5,70 | 4,41 | 5,40 | 3,50 | 0,0607268 | 0,180967 |
| RP11-287F9.1   | 0,00 | 1,78 | 0,00 | 0,00 | 0,0607591 | 0,181012 |
| MRPL38         | 5,17 | 4,46 | 4,55 | 3,43 | 0,0607621 | 0,181012 |
| XRN2           | 5,87 | 4,81 | 5,29 | 5,03 | 0,060773  | 0,181012 |
| ZFP30          | 0,58 | 0,07 | 0,53 | 1,16 | 0,06078   | 0,181012 |
| CAPNS1         | 7,92 | 7,83 | 8,15 | 7,99 | 0,0607825 | 0,181012 |
| CDH3           | 0,62 | 0,05 | 0,55 | 0,03 | 0,0608297 | 0,181128 |
| RNVU1-4        | 5,49 | 1,45 | 6,29 | 6,75 | 0,0608473 | 0,181156 |
| RP11-382A20.5  | 3,80 | 4,67 | 2,68 | 3,05 | 0,0608745 | 0,181213 |
| KDM4C          | 5,53 | 3,04 | 4,42 | 3,37 | 0,0608877 | 0,181228 |
| CADM2          | 0,00 | 0,22 | 0,00 | 0,00 | 0,0609177 | 0,181293 |
| LTK            | 1,37 | 0,27 | 0,09 | 0,23 | 0,0609447 | 0,181349 |
| FAM160A2       | 3,03 | 2,71 | 3,91 | 4,02 | 0,0609559 | 0,181358 |
| RP11-146F11.5  | 0,50 | 0,45 | 1,01 | 1,61 | 0,0609714 | 0,181376 |
| LIPA           | 5,36 | 5,10 | 4,73 | 3,98 | 0,0609888 | 0,181376 |
| ILDR1          | 0,05 | 0,12 | 0,07 | 0,06 | 0,0609892 | 0,181376 |
| FOXP1          | 5,13 | 4,56 | 5,39 | 5,26 | 0,0609959 | 0,181376 |
| PRLHR          | 0,00 | 0,23 | 0,01 | 0,04 | 0,0610108 | 0,181376 |
| RP11-95C14.1   | 0,00 | 0,00 | 0,08 | 0,18 | 0,0610109 | 0,181376 |
| ZNF25          | 1,60 | 0,10 | 1,16 | 1,18 | 0,0610661 | 0,181516 |
| RP11-51F16.5   | 0,70 | 0,41 | 3,78 | 3,38 | 0,0610894 | 0,181557 |
| ENHO           | 5,68 | 6,31 | 5,86 | 3,82 | 0,0610963 | 0,181557 |
| TONSL          | 0,74 | 0,61 | 0,36 | 0,48 | 0,061123  | 0,181612 |
| RP11-12M9.4    | 0,14 | 0,30 | 0,09 | 0,00 | 0,0611343 | NA       |
| BRF2           | 0,12 | 0,01 | 0,75 | 0,11 | 0,0612365 | 0,181925 |



|                |       |       |       |      |           |          |
|----------------|-------|-------|-------|------|-----------|----------|
| RP11-28H5.2    | 0,63  | 0,00  | 0,73  | 0,44 | 0,0612576 | 0,181963 |
| TACSTD2        | 0,00  | 0,06  | 0,00  | 0,00 | 0,061272  | NA       |
| RAB11FIP1      | 4,72  | 4,47  | 4,92  | 4,54 | 0,0613321 | 0,18216  |
| CTD-2292M16.8  | 0,07  | 0,07  | 0,23  | 0,57 | 0,0613663 | 0,182231 |
| RAB27A         | 3,44  | 2,46  | 4,74  | 3,51 | 0,0613783 | 0,182231 |
| DUS4L          | 0,21  | 0,73  | 1,11  | 0,42 | 0,0613806 | 0,182231 |
| RP11-422115.1  | 0,00  | 1,52  | 0,05  | 0,00 | 0,0613974 | 0,182244 |
| LNPEP          | 3,60  | 4,56  | 2,98  | 2,95 | 0,0614012 | 0,182244 |
| HIST2H4A       | 2,78  | 0,83  | 0,41  | 0,24 | 0,0614098 | 0,182245 |
| C1orf61        | 0,12  | 0,42  | 0,20  | 0,58 | 0,0614435 | 0,182321 |
| RP5-1050D4.3   | 1,18  | 0,00  | 2,35  | 2,87 | 0,0614601 | 0,182346 |
| EIF1B-AS1      | 1,78  | 0,78  | 0,77  | 0,61 | 0,0615139 | 0,182481 |
| RP11-30K9.4    | 0,65  | 1,29  | 0,51  | 1,70 | 0,0615272 | 0,182493 |
| RP1-317E23.3   | 0,00  | 0,78  | 0,07  | 0,00 | 0,0615345 | 0,182493 |
| KB-1208A12.3   | 1,85  | 2,76  | 0,62  | 0,61 | 0,0615835 | 0,182614 |
| MIR1254-1      | 0,00  | 0,00  | 0,58  | 3,26 | 0,0616341 | 0,18274  |
| SLC12A5        | 0,00  | 2,43  | 0,00  | 0,05 | 0,0616898 | 0,18288  |
| PARP9          | 5,31  | 3,52  | 4,82  | 4,38 | 0,0617454 | 0,182978 |
| CDC27          | 5,82  | 3,38  | 5,11  | 5,52 | 0,0617517 | 0,182978 |
| HOOK1          | 0,09  | 0,06  | 0,10  | 0,69 | 0,061754  | 0,182978 |
| CTD-2583A14.11 | 1,62  | 0,20  | 0,35  | 1,36 | 0,0617556 | 0,182978 |
| PITPNC1        | 2,97  | 3,13  | 2,74  | 3,55 | 0,0617798 | 0,183025 |
| RP11-628K18.1  | 0,00  | 0,00  | 0,00  | 0,87 | 0,0617828 | NA       |
| CIB1           | 7,88  | 7,11  | 7,42  | 6,80 | 0,0618012 | 0,183064 |
| C2orf69        | 2,99  | 2,07  | 2,68  | 1,71 | 0,0618338 | 0,183137 |
| AC114776.3     | 0,43  | 0,22  | 0,55  | 0,72 | 0,0618935 | 0,183275 |
| IBA57          | 0,51  | 0,56  | 1,14  | 0,80 | 0,0619086 | 0,183275 |
| CTC-529L17.2   | 0,00  | 0,00  | 0,00  | 0,00 | 0,0619105 | 0,183275 |
| HTRA4          | 1,66  | 2,24  | 1,32  | 1,84 | 0,0619204 | 0,183275 |
| CTSB           | 7,72  | 6,61  | 7,05  | 7,45 | 0,0619235 | 0,183275 |
| ODF2           | 2,90  | 2,14  | 2,51  | 2,16 | 0,06193   | 0,183275 |
| NUBP1          | 6,35  | 5,40  | 5,55  | 3,58 | 0,0619387 | 0,183276 |
| KLLN           | 0,73  | 0,97  | 0,97  | 1,15 | 0,0619686 | 0,18334  |
| CHST11         | 3,06  | 2,88  | 2,35  | 1,95 | 0,0620352 | 0,183513 |
| CCDC83         | 0,18  | 0,00  | 0,00  | 0,00 | 0,0620575 | 0,183554 |
| RP11-476H20.1  | 1,97  | 3,17  | 1,63  | 2,17 | 0,0620685 | 0,183562 |
| ANXA2          | 10,91 | 10,43 | 10,60 | 9,89 | 0,0620837 | 0,183583 |
| RP11-666A8.1   | 0,00  | 0,00  | 0,00  | 0,00 | 0,0621456 | 0,183742 |
| AC096582.7     | 0,03  | 0,15  | 0,05  | 0,14 | 0,0621836 | 0,18383  |
| MTSS1L         | 0,00  | 0,06  | 0,00  | 0,00 | 0,0621898 | NA       |
| LILRB5         | 0,13  | 0,29  | 0,18  | 0,14 | 0,062211  | 0,183886 |
| SLC7A5         | 0,45  | 1,36  | 1,97  | 0,50 | 0,0622828 | 0,184074 |
| PPP2R3B        | 0,21  | 0,15  | 0,52  | 1,00 | 0,06238   | 0,184337 |
| ZNF252P        | 2,39  | 1,13  | 1,74  | 0,51 | 0,0624073 | 0,184393 |
| HDX            | 2,30  | 0,71  | 0,20  | 0,28 | 0,0624408 | 0,184467 |
| GPAA1          | 5,07  | 5,06  | 5,07  | 5,57 | 0,0624696 | 0,184528 |
| AC069292.6     | 0,72  | 1,39  | 0,58  | 0,65 | 0,0625031 | 0,184602 |
| WDFY4          | 5,39  | 5,08  | 5,02  | 4,17 | 0,06257   | 0,184771 |
| ZEB1-AS1       | 1,05  | 0,00  | 0,06  | 0,70 | 0,0625768 | 0,184771 |
| PVT1           | 1,23  | 4,13  | 3,13  | 2,14 | 0,062636  | 0,184921 |
| C19orf52       | 1,57  | 2,07  | 2,37  | 1,10 | 0,0626889 | 0,185053 |
| RP11-352D13.6  | 0,23  | 2,48  | 0,57  | 0,98 | 0,0627086 | 0,185086 |
| HIP1R          | 0,00  | 2,01  | 0,04  | 0,23 | 0,0627335 | 0,185099 |
| RN7SL246P      | 1,03  | 0,00  | 0,89  | 3,06 | 0,0627351 | 0,185099 |
| H2AFY          | 7,52  | 7,54  | 7,52  | 7,03 | 0,0627444 | 0,185099 |

|                |      |      |      |      |           |          |
|----------------|------|------|------|------|-----------|----------|
| ACOT9          | 5,83 | 4,85 | 5,87 | 5,14 | 0,0627464 | 0,185099 |
| PCBP2-OT1      | 0,00 | 0,00 | 0,59 | 1,76 | 0,062782  | 0,18518  |
| MYO19          | 3,92 | 1,67 | 2,36 | 2,09 | 0,0627968 | 0,185183 |
| UNC13D         | 2,90 | 2,03 | 3,09 | 3,57 | 0,0627996 | 0,185183 |
| TIGD2          | 0,06 | 0,00 | 0,25 | 0,07 | 0,062817  | 0,185195 |
| RN7SL526P      | 0,99 | 2,84 | 1,28 | 2,08 | 0,0628206 | 0,185195 |
| RP11-307P5.2   | 0,44 | 1,52 | 0,62 | 1,07 | 0,0628461 | 0,185246 |
| RP11-15H20.6   | 2,12 | 2,64 | 2,70 | 2,76 | 0,0628809 | 0,185324 |
| ADAMTS6        | 0,00 | 0,00 | 0,00 | 0,00 | 0,0628984 | 0,185351 |
| RP4-664K17.2   | 2,91 | 4,03 | 2,96 | 3,38 | 0,0629067 | 0,185351 |
| TIMM13         | 6,36 | 6,59 | 6,58 | 7,12 | 0,0629335 | 0,185405 |
| C21orf33       | 3,00 | 5,59 | 1,36 | 0,53 | 0,0630299 | 0,185606 |
| C17orf80       | 1,00 | 1,56 | 0,93 | 0,12 | 0,0630362 | 0,185606 |
| LCN12          | 0,61 | 0,91 | 1,12 | 1,28 | 0,0630475 | 0,185606 |
| RP11-154H23.4  | 0,19 | 0,23 | 0,35 | 0,19 | 0,063052  | 0,185606 |
| AL163953.3     | 1,39 | 3,38 | 1,86 | 1,87 | 0,0630561 | 0,185606 |
| GLG1           | 5,47 | 5,39 | 5,40 | 4,43 | 0,0630601 | 0,185606 |
| GEMIN5         | 0,60 | 0,38 | 0,92 | 0,09 | 0,0630631 | 0,185606 |
| ZSWIM4         | 0,17 | 0,20 | 0,36 | 0,68 | 0,0630684 | 0,185606 |
| ADGRG6         | 2,84 | 0,19 | 0,30 | 0,26 | 0,0630912 | 0,185641 |
| SEPT14         | 0,44 | 0,42 | 0,51 | 1,34 | 0,0630971 | 0,185641 |
| RN7SL66P       | 0,00 | 0,00 | 1,30 | 1,38 | 0,0631152 | 0,18567  |
| NR3C1          | 6,39 | 5,92 | 5,55 | 5,37 | 0,0631536 | 0,185758 |
| CCS            | 5,23 | 5,94 | 5,47 | 5,99 | 0,0632064 | 0,185889 |
| RAPGEF6        | 3,79 | 3,92 | 3,24 | 3,83 | 0,0632434 | 0,185973 |
| OXA1L          | 7,45 | 4,77 | 6,76 | 6,22 | 0,063267  | 0,186018 |
| MTCH2          | 6,87 | 5,19 | 6,36 | 5,33 | 0,0632926 | 0,186069 |
| FAM221B        | 0,52 | 0,83 | 0,96 | 0,23 | 0,0633022 | 0,186072 |
| RP11-848P1.2   | 0,55 | 0,97 | 1,07 | 1,49 | 0,0633108 | 0,186073 |
| FAM92A3        | 0,06 | 0,00 | 0,09 | 0,24 | 0,0633283 | 0,1861   |
| GGT7           | 0,21 | 0,10 | 0,06 | 0,00 | 0,0633539 | 0,18615  |
| IMPDH2         | 6,09 | 6,57 | 5,63 | 5,34 | 0,0634345 | 0,186362 |
| OR9H1P         | 0,28 | 0,42 | 0,19 | 0,43 | 0,0635191 | 0,186586 |
| RN7SL538P      | 0,00 | 1,74 | 0,36 | 1,40 | 0,0635519 | 0,186637 |
| RP4-590F24.2   | 0,09 | 0,00 | 0,36 | 0,17 | 0,0635531 | 0,186637 |
| CTD-2315E11.1  | 3,04 | 2,35 | 3,84 | 3,04 | 0,0635745 | 0,186675 |
| ZNF804A        | 0,04 | 0,00 | 0,39 | 0,04 | 0,0636427 | 0,186851 |
| ARPC1A         | 5,46 | 3,08 | 5,39 | 4,54 | 0,0636731 | 0,186884 |
| ZC2HC1C        | 0,03 | 0,03 | 0,26 | 0,10 | 0,0636754 | 0,186884 |
| EIF2B2         | 4,84 | 6,05 | 3,03 | 3,02 | 0,0636791 | 0,186884 |
| CACNA1A        | 2,89 | 2,88 | 3,09 | 2,97 | 0,0637009 | 0,186903 |
| DHX15          | 6,30 | 4,97 | 5,73 | 6,42 | 0,0637025 | 0,186903 |
| L2HGDH         | 0,32 | 0,62 | 0,41 | 0,38 | 0,0637743 | 0,187089 |
| RP11-525J21.1  | 0,00 | 0,28 | 0,24 | 0,78 | 0,0637944 | 0,187119 |
| MS4A7          | 6,28 | 4,39 | 5,99 | 6,23 | 0,0638013 | 0,187119 |
| NT5DC1         | 4,99 | 1,41 | 2,76 | 1,89 | 0,0638437 | 0,187218 |
| RNASE4         | 0,16 | 0,12 | 1,60 | 3,44 | 0,0638625 | 0,187234 |
| DTNA           | 4,87 | 5,68 | 4,28 | 3,78 | 0,063866  | 0,187234 |
| POLR2E         | 6,58 | 5,49 | 6,34 | 6,41 | 0,0638879 | 0,18726  |
| CCDC153        | 0,72 | 1,24 | 1,66 | 2,08 | 0,0638917 | 0,18726  |
| RP11-65L19.4   | 0,11 | 0,13 | 0,16 | 0,40 | 0,0639133 | 0,187299 |
| RP11-247I13.11 | 0,00 | 0,00 | 0,44 | 0,00 | 0,0639751 | 0,187455 |
| AC100830.3     | 0,51 | 0,61 | 0,67 | 1,75 | 0,0640011 | 0,187506 |
| STK32B         | 0,00 | 0,32 | 0,00 | 0,00 | 0,06407   | 0,187684 |
| ZNF629         | 0,03 | 0,02 | 0,07 | 0,53 | 0,0641155 | 0,187792 |

|               |      |      |      |      |           |          |
|---------------|------|------|------|------|-----------|----------|
| MORN4         | 0,26 | 0,22 | 0,32 | 0,35 | 0,0641417 | 0,187844 |
| RP11-423P10.2 | 2,66 | 3,21 | 2,44 | 2,86 | 0,0641618 | 0,187878 |
| SSC5D         | 0,05 | 0,18 | 0,12 | 0,12 | 0,0642039 | 0,187954 |
| RP11-6N17.4   | 2,77 | 2,65 | 2,52 | 4,10 | 0,0642046 | 0,187954 |
| ZNF772        | 0,37 | 0,44 | 0,16 | 0,41 | 0,0642204 | 0,187965 |
| C9orf78       | 6,29 | 5,69 | 5,63 | 4,87 | 0,0642254 | 0,187965 |
| RER1          | 7,16 | 6,14 | 6,71 | 5,75 | 0,0642443 | 0,187996 |
| SOS2          | 3,07 | 1,78 | 3,05 | 2,33 | 0,0642594 | 0,188015 |
| ZNF282        | 0,07 | 2,68 | 1,09 | 0,42 | 0,0642742 | 0,188034 |
| RAP2B         | 5,02 | 3,91 | 4,34 | 3,90 | 0,0643366 | 0,188192 |
| ABCE1         | 5,08 | 2,15 | 4,07 | 4,07 | 0,0643938 | 0,188334 |
| ACTN4         | 2,60 | 1,03 | 2,62 | 2,37 | 0,0644266 | 0,188405 |
| CAPN7         | 3,85 | 2,97 | 4,49 | 4,40 | 0,0644715 | 0,188512 |
| AF178030.2    | 0,00 | 0,00 | 2,18 | 0,92 | 0,0645035 | 0,188581 |
| MVD           | 2,50 | 4,17 | 3,44 | 4,03 | 0,0645185 | 0,1886   |
| TMC8          | 3,68 | 4,67 | 3,57 | 3,54 | 0,0645733 | 0,188718 |
| LPCAT4        | 3,10 | 3,44 | 2,04 | 0,85 | 0,0645759 | 0,188718 |
| DNM1          | 0,18 | 1,77 | 1,62 | 0,23 | 0,0645939 | 0,188721 |
| RN7SL339P     | 0,99 | 2,50 | 2,09 | 0,33 | 0,0646053 | 0,188721 |
| AC128677.1    | 0,00 | 0,00 | 0,00 | 0,00 | 0,0646061 | 0,188721 |
| CTC-788C1.1   | 0,53 | 0,00 | 0,88 | 1,11 | 0,0646118 | NA       |
| RP11-489E7.4  | 2,58 | 3,63 | 3,08 | 3,84 | 0,064629  | 0,188721 |
| BTN2A1        | 4,00 | 1,17 | 3,70 | 2,99 | 0,0646294 | 0,188721 |
| RAB13         | 2,93 | 3,52 | 4,08 | 1,40 | 0,064633  | 0,188721 |
| AC009303.1    | 1,64 | 0,80 | 2,27 | 3,48 | 0,064644  | 0,188721 |
| AC097500.1    | 0,00 | 0,00 | 0,00 | 0,00 | 0,0646449 | 0,188721 |
| RP6-191P20.4  | 0,58 | 1,43 | 0,85 | 1,19 | 0,0646915 | 0,188832 |
| CHRNA1        | 0,00 | 1,44 | 0,06 | 0,00 | 0,0647212 | 0,188894 |
| RP11-431H16.2 | 0,06 | 0,00 | 0,07 | 0,00 | 0,0647328 | 0,188894 |
| GUSBP4        | 0,00 | 0,00 | 0,69 | 0,83 | 0,0647382 | 0,188894 |
| C6orf208      | 0,00 | 0,07 | 0,05 | 0,00 | 0,0648071 | 0,18907  |
| RP11-560J1.1  | 2,68 | 3,40 | 0,89 | 0,00 | 0,0648325 | 0,18912  |
| APP           | 3,58 | 1,94 | 2,74 | 3,55 | 0,0648706 | 0,189206 |
| LA16c-306A4.2 | 0,14 | 0,11 | 0,07 | 0,20 | 0,0648887 | 0,189215 |
| STON2         | 2,95 | 2,23 | 1,85 | 1,15 | 0,0648908 | 0,189215 |
| LEO1          | 3,87 | 2,01 | 3,14 | 2,63 | 0,0649334 | 0,189315 |
| SNX14         | 6,08 | 5,48 | 6,25 | 4,60 | 0,0649656 | 0,189373 |
| SIPA1         | 5,64 | 6,77 | 6,63 | 6,85 | 0,0649961 | 0,189373 |
| AC002551.1    | 1,88 | 2,57 | 2,66 | 2,27 | 0,0649994 | 0,189373 |
| SRPRA         | 4,78 | 3,39 | 4,08 | 3,73 | 0,0650057 | 0,189373 |
| KLF12         | 2,56 | 2,56 | 2,16 | 3,54 | 0,0650061 | 0,189373 |
| DUX4L18       | 0,00 | 0,00 | 0,00 | 0,12 | 0,0650086 | 0,189373 |
| GREM1         | 0,40 | 0,79 | 0,53 | 0,51 | 0,0650131 | 0,189373 |
| SUV39H1       | 0,00 | 0,00 | 0,02 | 0,19 | 0,0650503 | 0,189434 |
| PREB          | 3,78 | 1,08 | 3,52 | 5,22 | 0,065051  | 0,189434 |
| TMEM50A       | 6,92 | 5,28 | 6,19 | 6,22 | 0,0650746 | 0,189478 |
| GSE1          | 3,94 | 3,28 | 3,52 | 2,40 | 0,0650972 | 0,189505 |
| PTX3          | 0,26 | 0,83 | 0,76 | 0,63 | 0,0651012 | 0,189505 |
| SERPINA3      | 0,00 | 0,94 | 0,00 | 0,00 | 0,0651252 | 0,189541 |
| ULK2          | 2,60 | 3,80 | 2,24 | 3,46 | 0,0651305 | 0,189541 |
| SLC22A15      | 0,00 | 0,00 | 0,70 | 0,65 | 0,0651586 | 0,189598 |
| AP000344.3    | 0,00 | 1,71 | 0,00 | 0,00 | 0,0652789 | 0,189923 |
| GNG7          | 2,77 | 3,03 | 2,41 | 1,03 | 0,0653359 | 0,190064 |
| WBP11         | 4,42 | 2,86 | 4,40 | 2,95 | 0,0654323 | 0,19032  |
| C2orf58       | 4,08 | 5,36 | 3,45 | 4,71 | 0,0654773 | 0,190421 |

|               |      |      |      |      |           |          |
|---------------|------|------|------|------|-----------|----------|
| DNAJC21       | 3,86 | 3,44 | 4,09 | 4,61 | 0,0654842 | 0,190421 |
| TMEM60        | 4,48 | 0,43 | 2,29 | 4,03 | 0,0654951 | 0,190428 |
| RN7SL655P     | 2,71 | 0,94 | 2,85 | 3,59 | 0,0655195 | 0,190451 |
| ZNF34         | 2,58 | 1,38 | 0,53 | 0,76 | 0,0655205 | 0,190451 |
| RECQL5        | 2,25 | 0,90 | 2,17 | 2,16 | 0,0655343 | 0,190467 |
| ZNF331        | 5,86 | 4,72 | 5,91 | 4,87 | 0,0655507 | 0,19049  |
| OR10H1        | 0,37 | 0,42 | 0,46 | 0,57 | 0,0655858 | 0,190567 |
| ARHGAP15      | 6,83 | 6,60 | 6,01 | 5,48 | 0,0656107 | 0,190614 |
| MAGEF1        | 3,17 | 0,82 | 3,28 | 1,40 | 0,0656301 | 0,190646 |
| RP11-406H21.2 | 1,22 | 0,00 | 0,90 | 0,00 | 0,0656508 | 0,190681 |
| IQSEC2        | 1,68 | 2,05 | 2,07 | 2,20 | 0,0656751 | 0,190726 |
| PRSS23        | 1,23 | 2,50 | 1,46 | 1,34 | 0,0656884 | 0,19074  |
| C19orf59      | 0,05 | 0,37 | 0,38 | 3,96 | 0,0656984 | 0,190744 |
| RP1-180E22.3  | 0,04 | 0,00 | 0,15 | 0,05 | 0,0657299 | 0,190765 |
| HAAO          | 4,08 | 1,41 | 2,85 | 3,64 | 0,0657301 | 0,190765 |
| ERCC3         | 4,39 | 2,73 | 3,76 | 2,80 | 0,0657314 | 0,190765 |
| RP1-34L19.1   | 0,09 | 0,37 | 0,12 | 0,09 | 0,0657535 | 0,190798 |
| RNF41         | 3,77 | 1,96 | 3,19 | 2,98 | 0,0657599 | 0,190798 |
| C11orf63      | 2,07 | 0,38 | 1,51 | 0,54 | 0,065784  | 0,190813 |
| FASTKD3       | 4,06 | 2,98 | 0,47 | 0,86 | 0,0657867 | 0,190813 |
| RP11-336A10.2 | 2,46 | 0,17 | 3,15 | 2,34 | 0,0657909 | 0,190813 |
| TRIM11        | 1,99 | 2,70 | 2,53 | 3,37 | 0,0658209 | 0,190846 |
| SDS           | 3,62 | 2,42 | 1,74 | 2,82 | 0,0658213 | 0,190846 |
| CTD-2611K5.6  | 0,00 | 0,00 | 0,00 | 0,03 | 0,065832  | NA       |
| RP5-906C1.1   | 0,00 | 2,23 | 0,69 | 0,00 | 0,0658325 | 0,190846 |
| RENBP         | 1,02 | 1,58 | 1,44 | 1,24 | 0,0658516 | 0,190846 |
| CCDC43        | 3,83 | 1,70 | 3,50 | 2,77 | 0,0658521 | 0,190846 |
| ZNF668        | 0,16 | 0,22 | 1,31 | 0,85 | 0,0658536 | 0,190846 |
| PTGR2         | 1,92 | 1,92 | 1,62 | 2,74 | 0,065875  | 0,190846 |
| LUC7L2        | 5,38 | 5,17 | 5,11 | 3,86 | 0,0658779 | 0,190846 |
| IGSF5         | 0,00 | 0,17 | 0,00 | 0,00 | 0,0658795 | 0,190846 |
| DCTN1         | 4,40 | 5,47 | 4,99 | 5,36 | 0,0658907 | 0,190854 |
| RN7SL105P     | 0,79 | 0,00 | 1,24 | 1,40 | 0,0659366 | 0,190962 |
| IFIT3         | 4,64 | 1,36 | 4,17 | 2,01 | 0,0659529 | 0,190983 |
| TMEM40        | 0,67 | 0,90 | 0,78 | 2,80 | 0,0659652 | 0,190983 |
| PDCD6         | 7,74 | 7,29 | 7,12 | 6,05 | 0,0659697 | 0,190983 |
| TRAF2         | 2,39 | 2,37 | 2,63 | 1,83 | 0,0659789 | 0,190985 |
| TCTN2         | 0,47 | 0,44 | 0,63 | 1,45 | 0,0659884 | 0,190987 |
| GART          | 4,57 | 1,63 | 3,81 | 4,35 | 0,0660087 | 0,191021 |
| NARS2         | 3,19 | 2,76 | 1,89 | 0,33 | 0,0660595 | 0,191143 |
| FTO           | 3,81 | 4,96 | 4,22 | 3,10 | 0,0661282 | 0,191317 |
| AF127936.7    | 1,37 | 0,00 | 0,73 | 1,52 | 0,0661474 | 0,191348 |
| RP11-159D12.5 | 0,41 | 0,00 | 1,10 | 2,82 | 0,0661626 | 0,191367 |
| MSX1          | 0,09 | 0,07 | 0,12 | 0,25 | 0,0661966 | 0,191426 |
| C6orf106      | 1,78 | 1,49 | 3,65 | 3,31 | 0,0662002 | 0,191426 |
| SMTN          | 0,02 | 0,03 | 0,34 | 0,62 | 0,0662108 | 0,191432 |
| RP11-464F9.1  | 0,10 | 0,00 | 0,00 | 0,00 | 0,0662212 | 0,191437 |
| RP11-181D10.2 | 0,00 | 0,85 | 0,15 | 0,00 | 0,0662566 | 0,1915   |
| CCDC27        | 0,09 | 0,28 | 0,12 | 0,25 | 0,0662602 | 0,1915   |
| CYP2T2P       | 0,00 | 0,42 | 0,19 | 0,00 | 0,066325  | 0,191641 |
| AC017076.5    | 3,52 | 0,00 | 0,82 | 0,46 | 0,0663275 | 0,191641 |
| TNFSF9        | 1,01 | 0,09 | 1,21 | 0,08 | 0,0663348 | 0,191641 |
| FCRL5         | 2,27 | 2,68 | 2,29 | 2,90 | 0,0663674 | 0,19171  |
| SLC12A7       | 4,07 | 4,26 | 3,80 | 3,02 | 0,0663904 | 0,191751 |
| AC008268.3    | 2,43 | 3,09 | 2,43 | 2,55 | 0,066403  | 0,191763 |

|                |      |       |      |      |           |          |
|----------------|------|-------|------|------|-----------|----------|
| RP11-524C21.2  | 0,00 | 0,09  | 0,00 | 0,00 | 0,0664173 | NA       |
| PAIP1          | 4,97 | 4,93  | 4,34 | 4,43 | 0,0664707 | 0,191934 |
| BTG3-AS1       | 0,00 | 0,00  | 0,00 | 0,07 | 0,0664986 | 0,191989 |
| CDKN3          | 0,28 | 0,34  | 0,30 | 0,00 | 0,0665156 | 0,192013 |
| RNU2-58P       | 1,07 | 1,82  | 0,00 | 2,05 | 0,0665779 | 0,192132 |
| CTD-2373J6.2   | 0,00 | 0,00  | 0,00 | 0,00 | 0,0665789 | 0,192132 |
| RFFL           | 3,31 | 2,64  | 1,97 | 1,07 | 0,0665827 | 0,192132 |
| UQCRB          | 5,99 | 6,55  | 6,31 | 6,38 | 0,0666032 | 0,19215  |
| ELF1           | 5,83 | 5,16  | 6,08 | 5,58 | 0,0666125 | 0,19215  |
| PAQR4          | 0,00 | 0,00  | 0,23 | 0,00 | 0,0666149 | 0,19215  |
| RRP36          | 3,90 | 4,11  | 3,87 | 5,27 | 0,0666341 | 0,192181 |
| SEC61A2        | 2,00 | 0,08  | 1,83 | 0,17 | 0,0666539 | 0,192213 |
| RP11-370I10.2  | 1,71 | 0,26  | 1,05 | 1,30 | 0,0667133 | 0,192359 |
| RP11-418J17.1  | 2,36 | 5,20  | 2,12 | 2,15 | 0,0667263 | 0,192372 |
| APOOL          | 2,35 | 1,42  | 2,43 | 1,77 | 0,0667615 | 0,19241  |
| RP11-783N5.1   | 0,61 | 0,18  | 0,00 | 0,00 | 0,0667636 | 0,19241  |
| TCFL5          | 1,19 | 0,00  | 1,23 | 0,54 | 0,0667656 | 0,19241  |
| RP11-501E14.1  | 0,78 | 1,62  | 0,95 | 0,00 | 0,0667932 | 0,192465 |
| RP11-517P14.2  | 1,85 | 0,83  | 2,07 | 1,26 | 0,0668213 | 0,19252  |
| FAM53B         | 1,13 | 0,73  | 2,20 | 2,01 | 0,0668304 | 0,192522 |
| MAD2L1         | 0,47 | 0,23  | 0,29 | 0,07 | 0,0668458 | 0,192541 |
| EMP1           | 4,52 | 3,94  | 5,15 | 5,00 | 0,0668736 | 0,192596 |
| CTA-243E7.1    | 0,48 | 0,76  | 0,51 | 0,54 | 0,0668874 | 0,192611 |
| FBXO3          | 3,09 | 1,37  | 2,31 | 2,97 | 0,0668977 | 0,192616 |
| RP11-91I20.4   | 1,86 | 0,48  | 2,52 | 1,41 | 0,0669169 | 0,192633 |
| TDP2           | 2,77 | 0,87  | 2,46 | 1,27 | 0,0669209 | 0,192633 |
| NOD2           | 3,95 | 3,26  | 4,63 | 2,19 | 0,0669331 | 0,192643 |
| PSME1          | 9,44 | 8,92  | 9,07 | 9,05 | 0,0669777 | 0,192746 |
| FRG1CP         | 3,95 | 0,42  | 3,19 | 3,06 | 0,0669931 | 0,192766 |
| PPP1R9B        | 2,44 | 1,70  | 2,67 | 2,13 | 0,0670223 | 0,192801 |
| STT3B          | 5,63 | 3,89  | 5,55 | 4,62 | 0,0670229 | 0,192801 |
| AC022154.7     | 2,36 | 0,56  | 2,30 | 2,74 | 0,0670613 | 0,192887 |
| RPL26          | 9,64 | 10,02 | 9,73 | 9,88 | 0,067103  | 0,192982 |
| STARD7         | 5,77 | 5,67  | 5,78 | 4,82 | 0,0671607 | 0,193071 |
| NFE2           | 2,51 | 1,86  | 3,37 | 5,00 | 0,0671648 | 0,193071 |
| CTD-2033A16.3  | 0,00 | 0,15  | 0,13 | 0,00 | 0,0671655 | 0,193071 |
| ACTG1P9        | 0,26 | 0,11  | 0,29 | 0,41 | 0,0671766 | 0,193071 |
| OTUD6A         | 0,10 | 0,00  | 0,35 | 0,25 | 0,0671815 | 0,193071 |
| RP11-753C18.12 | 0,62 | 1,11  | 0,62 | 1,43 | 0,0671929 | 0,193071 |
| MED27          | 4,19 | 0,42  | 4,08 | 2,87 | 0,0671946 | 0,193071 |
| ST6GALNAC3     | 0,00 | 0,00  | 0,00 | 0,00 | 0,06721   | 0,19309  |
| ST3GAL4        | 3,02 | 0,65  | 1,03 | 0,48 | 0,0672238 | 0,193096 |
| MBNL1-AS1      | 1,51 | 0,28  | 0,71 | 0,70 | 0,0672296 | 0,193096 |
| ZNF347         | 1,68 | 1,35  | 2,35 | 2,49 | 0,0672538 | 0,193108 |
| RP11-100F15.1  | 0,00 | 0,69  | 0,00 | 0,00 | 0,0672655 | 0,193108 |
| KCTD21         | 0,57 | 2,31  | 1,22 | 1,71 | 0,0672669 | 0,193108 |
| TMEM19         | 4,51 | 5,45  | 3,23 | 3,14 | 0,0672686 | 0,193108 |
| C6orf48        | 7,72 | 7,34  | 7,38 | 6,29 | 0,0672911 | 0,193148 |
| SH2B1          | 1,65 | 3,01  | 2,24 | 2,40 | 0,067319  | 0,193203 |
| CCND2          | 3,01 | 4,43  | 3,33 | 3,72 | 0,0673389 | 0,193233 |
| RP11-346I3.2   | 0,55 | 1,21  | 0,62 | 1,72 | 0,067352  | 0,193233 |
| RP11-175P19.3  | 0,00 | 0,21  | 0,00 | 0,00 | 0,067353  | NA       |
| HOTAIRM1       | 4,94 | 4,38  | 5,52 | 5,34 | 0,0673554 | 0,193233 |
| HMGA1          | 4,74 | 4,80  | 4,34 | 2,71 | 0,067379  | 0,193276 |
| FUNDC2         | 6,88 | 5,24  | 6,90 | 6,34 | 0,0674354 | 0,193381 |

|                |      |      |      |      |           |          |
|----------------|------|------|------|------|-----------|----------|
| RP11-946L20.4  | 3,48 | 5,15 | 2,91 | 2,52 | 0,0674364 | 0,193381 |
| SEC22A         | 3,74 | 0,36 | 1,44 | 0,71 | 0,0674418 | 0,193381 |
| CTSV           | 1,42 | 0,59 | 0,75 | 0,61 | 0,067467  | 0,193428 |
| PRDM2          | 4,41 | 4,92 | 4,02 | 5,18 | 0,0674814 | 0,193444 |
| RPL23AP2       | 1,33 | 2,09 | 1,22 | 1,40 | 0,067513  | 0,19351  |
| WASH4P         | 0,18 | 0,00 | 0,00 | 0,00 | 0,0675397 | 0,19354  |
| AF127936.9     | 1,60 | 0,00 | 0,02 | 0,02 | 0,0675474 | 0,19354  |
| RP11-500G22.5  | 0,25 | 0,30 | 0,38 | 0,31 | 0,0675529 | 0,19354  |
| TFB2M          | 3,83 | 1,72 | 2,39 | 0,95 | 0,0675614 | 0,19354  |
| RP11-414K1.3   | 0,11 | 0,34 | 0,12 | 0,26 | 0,0675758 | 0,19354  |
| FYN            | 7,28 | 5,81 | 7,44 | 7,26 | 0,067576  | 0,19354  |
| AC093838.7     | 0,64 | 1,59 | 0,64 | 0,92 | 0,0675843 | 0,19354  |
| RF00026        | 0,88 | 5,41 | 3,73 | 4,47 | 0,0677245 | 0,193909 |
| RP11-139E24.1  | 1,23 | 1,26 | 1,95 | 1,50 | 0,0677364 | 0,193909 |
| ABHD15         | 2,27 | 0,96 | 1,93 | 0,92 | 0,0677394 | 0,193909 |
| OR8J3          | 0,00 | 0,00 | 0,00 | 0,03 | 0,0677778 | NA       |
| UHRF1BP1L      | 4,71 | 4,91 | 4,09 | 4,05 | 0,0677814 | 0,194004 |
| OR14J1         | 1,26 | 1,86 | 1,12 | 1,21 | 0,0678273 | 0,19411  |
| KB-1836B5.1    | 0,28 | 0,62 | 0,48 | 0,00 | 0,0678567 | 0,19417  |
| COG5           | 4,59 | 2,32 | 3,88 | 3,68 | 0,0679008 | 0,194271 |
| CTTNBP2NL      | 4,47 | 2,02 | 4,70 | 3,54 | 0,0679411 | 0,194361 |
| PTBP1          | 5,02 | 4,09 | 5,47 | 5,48 | 0,0679809 | 0,19445  |
| ZNF17          | 0,14 | 0,06 | 0,30 | 0,40 | 0,0680234 | 0,194546 |
| ZNF672         | 3,48 | 4,76 | 3,32 | 2,92 | 0,0680324 | 0,194547 |
| TXNL4A         | 6,13 | 6,24 | 6,54 | 6,73 | 0,0680679 | 0,194609 |
| LAPTM4B        | 0,13 | 0,23 | 0,07 | 0,13 | 0,0680724 | 0,194609 |
| ALDH1A2        | 0,00 | 1,91 | 0,00 | 0,00 | 0,0680802 | 0,194609 |
| F11R           | 3,23 | 2,21 | 2,77 | 1,04 | 0,068092  | 0,194617 |
| TTPAL          | 2,29 | 1,10 | 1,65 | 1,35 | 0,0681231 | 0,194681 |
| RP11-867O8.5   | 0,90 | 2,17 | 1,15 | 1,28 | 0,0681369 | 0,194695 |
| NIP7           | 4,06 | 1,54 | 3,32 | 3,36 | 0,0682193 | 0,194906 |
| CTD-2300H10.2  | 0,00 | 0,63 | 0,00 | 0,00 | 0,06822   | NA       |
| RABEP1         | 4,19 | 2,32 | 4,02 | 4,06 | 0,068231  | 0,194914 |
| GPC2           | 0,23 | 1,20 | 0,27 | 0,75 | 0,0682465 | 0,194934 |
| NCR3           | 0,00 | 0,00 | 0,00 | 0,51 | 0,0682672 | 0,194934 |
| TSN            | 5,00 | 2,09 | 4,43 | 4,68 | 0,0682676 | 0,194934 |
| ATP10D         | 4,24 | 2,35 | 3,89 | 2,87 | 0,0682731 | 0,194934 |
| SGPL1          | 3,32 | 1,39 | 3,29 | 2,88 | 0,0682835 | 0,194939 |
| ERGIC3         | 7,41 | 6,84 | 7,15 | 6,18 | 0,0683403 | 0,195051 |
| PTGES3L-AARSD1 | 0,00 | 0,00 | 0,74 | 0,00 | 0,0683403 | 0,195051 |
| TMEM69         | 4,74 | 0,54 | 4,45 | 1,29 | 0,068394  | 0,195149 |
| PSMF1          | 5,97 | 4,27 | 5,14 | 4,87 | 0,0684081 | 0,195149 |
| PPP6R3         | 5,26 | 3,92 | 5,02 | 5,10 | 0,0684248 | 0,195149 |
| CCNB2          | 1,57 | 0,26 | 1,21 | 0,49 | 0,0684311 | 0,195149 |
| CTD-2576D5.1   | 0,82 | 0,10 | 0,22 | 0,20 | 0,0684316 | 0,195149 |
| DEPDC1         | 0,00 | 0,00 | 0,00 | 0,00 | 0,0684331 | 0,195149 |
| FNDC3B         | 3,81 | 4,74 | 4,09 | 4,83 | 0,0684362 | 0,195149 |
| ZC3H18         | 3,37 | 1,76 | 3,29 | 3,99 | 0,0684779 | 0,195243 |
| RP11-736I24.3  | 2,42 | 0,00 | 0,45 | 0,00 | 0,0685133 | 0,195318 |
| RBM18          | 4,46 | 2,43 | 4,09 | 1,36 | 0,0685218 | 0,195318 |
| RP11-1398P2.1  | 2,46 | 0,00 | 1,94 | 3,39 | 0,0685641 | 0,195414 |
| OMG            | 1,64 | 0,00 | 0,47 | 0,33 | 0,0687106 | 0,195744 |
| PAX5           | 0,18 | 0,24 | 0,16 | 0,18 | 0,0687107 | 0,195744 |
| C1GALT1        | 5,00 | 2,37 | 4,48 | 3,02 | 0,0687128 | 0,195744 |
| TRPM4          | 1,97 | 2,91 | 2,54 | 3,10 | 0,068715  | 0,195744 |

|               |      |      |      |      |           |          |
|---------------|------|------|------|------|-----------|----------|
| NFATC2        | 3,42 | 1,20 | 2,32 | 0,37 | 0,0687498 | 0,195817 |
| SLC35A5       | 3,90 | 3,64 | 3,42 | 1,76 | 0,0687708 | 0,195852 |
| RP3-333A15.2  | 0,43 | 3,91 | 0,47 | 3,47 | 0,0687951 | 0,195873 |
| PCYOX1L       | 2,95 | 2,31 | 2,61 | 2,54 | 0,0687957 | 0,195873 |
| RP11-718D19.2 | 0,35 | 0,35 | 0,50 | 0,38 | 0,0688721 | 0,196054 |
| LRIF1         | 2,56 | 2,81 | 2,34 | 0,34 | 0,0688769 | 0,196054 |
| TENM1         | 0,00 | 0,02 | 0,00 | 0,11 | 0,068916  | 0,19614  |
| SSSCA1        | 5,52 | 6,25 | 5,76 | 6,07 | 0,0689428 | 0,196191 |
| ZNF814        | 4,55 | 3,09 | 4,54 | 3,94 | 0,0689756 | 0,196238 |
| MANF          | 3,72 | 2,77 | 4,26 | 2,70 | 0,0689769 | 0,196238 |
| KCNAB1        | 0,38 | 0,70 | 0,23 | 0,04 | 0,0689968 | 0,19625  |
| LIMK2         | 1,02 | 0,77 | 0,54 | 0,96 | 0,0689988 | 0,19625  |
| KCNMB1        | 3,05 | 3,01 | 1,98 | 1,80 | 0,069017  | 0,196277 |
| RP11-531F16.3 | 1,11 | 0,05 | 0,81 | 1,26 | 0,0691003 | 0,196489 |
| FAM221A       | 2,14 | 1,35 | 1,32 | 0,75 | 0,0691702 | 0,196627 |
| MRPS7         | 6,74 | 6,14 | 6,29 | 5,77 | 0,0691836 | 0,196627 |
| PLGRKT        | 4,70 | 1,97 | 4,45 | 0,91 | 0,0691853 | 0,196627 |
| RTCA          | 3,48 | 3,03 | 2,06 | 2,93 | 0,0691998 | 0,196627 |
| SDSL          | 3,37 | 0,31 | 2,17 | 5,01 | 0,0692036 | 0,196627 |
| MAK           | 0,80 | 0,00 | 0,12 | 0,27 | 0,069208  | 0,196627 |
| TPTE          | 0,00 | 1,80 | 0,00 | 0,00 | 0,0692108 | 0,196627 |
| RP11-417N10.4 | 0,00 | 3,91 | 0,00 | 0,00 | 0,0692418 | 0,19669  |
| RP11-577H5.5  | 1,80 | 0,00 | 0,00 | 0,00 | 0,0692641 | 0,196725 |
| GIGYF2        | 4,89 | 6,05 | 5,37 | 3,90 | 0,0692719 | 0,196725 |
| RP13-1032I1.7 | 1,96 | 3,45 | 2,33 | 3,82 | 0,0693163 | 0,196826 |
| TMEM150A      | 3,60 | 1,41 | 2,96 | 1,15 | 0,0693354 | 0,196855 |
| NUDT1         | 6,19 | 6,40 | 6,22 | 5,28 | 0,0693675 | 0,196921 |
| RN7SKP94      | 0,00 | 0,00 | 0,00 | 0,00 | 0,0693974 | 0,196969 |
| BACH1         | 5,87 | 5,78 | 6,27 | 5,87 | 0,0694023 | 0,196969 |
| MAPK7         | 0,83 | 0,00 | 1,39 | 0,58 | 0,0694432 | 0,197039 |
| PRKCH         | 5,90 | 4,03 | 5,45 | 6,52 | 0,0694446 | 0,197039 |
| RP11-713P17.3 | 0,24 | 0,36 | 0,30 | 0,34 | 0,0694635 | 0,197067 |
| OPRM1         | 0,59 | 2,05 | 1,00 | 0,39 | 0,0695172 | 0,197195 |
| ST3GAL4-AS1   | 2,42 | 1,30 | 1,29 | 1,66 | 0,0695446 | 0,197225 |
| ABLIM1        | 0,73 | 2,23 | 0,18 | 2,15 | 0,0695475 | 0,197225 |
| RP11-642A1.2  | 0,00 | 0,00 | 0,34 | 0,00 | 0,0695545 | 0,197225 |
| CCDC84        | 3,98 | 3,08 | 4,62 | 4,07 | 0,0695724 | 0,197251 |
| AC140134.2    | 0,00 | 0,10 | 0,21 | 0,29 | 0,0695931 | 0,197259 |
| RP11-974F13.3 | 0,00 | 0,10 | 0,21 | 0,29 | 0,0695931 | 0,197259 |
| TRIP6         | 1,54 | 0,00 | 0,73 | 0,55 | 0,0696494 | 0,197393 |
| RP11-888D10.4 | 0,90 | 0,00 | 0,19 | 0,29 | 0,0696944 | 0,197495 |
| KCNK2         | 0,05 | 0,04 | 0,00 | 0,13 | 0,0697072 | 0,197507 |
| IGSF9         | 0,20 | 0,23 | 0,62 | 0,70 | 0,0697693 | 0,197657 |
| GPATCH4       | 3,58 | 5,36 | 4,14 | 3,97 | 0,0698078 | 0,197724 |
| SYPL1         | 4,49 | 4,83 | 4,41 | 2,75 | 0,0698105 | 0,197724 |
| AC099850.1    | 0,00 | 0,00 | 0,00 | 0,00 | 0,0698515 | 0,197815 |
| C8orf59       | 6,06 | 6,20 | 6,12 | 4,92 | 0,0699002 | 0,197927 |
| RP11-536C5.2  | 0,00 | 0,54 | 0,00 | 0,00 | 0,0699455 | 0,19803  |
| PRPF4         | 3,98 | 3,24 | 2,91 | 2,40 | 0,0699678 | 0,198068 |
| AC068286.1    | 0,88 | 1,95 | 1,61 | 1,15 | 0,0700259 | 0,198207 |
| KLC3          | 1,11 | 2,02 | 1,58 | 1,79 | 0,0700408 | 0,198224 |
| FAM47E        | 1,69 | 4,10 | 2,22 | 2,10 | 0,0700552 | 0,19824  |
| RP11-1100L3.7 | 4,14 | 4,53 | 4,99 | 4,52 | 0,0700868 | 0,198304 |
| RP11-106M3.4  | 0,00 | 0,46 | 0,17 | 0,78 | 0,0701215 | 0,198377 |
| ITGA6         | 0,00 | 0,37 | 0,01 | 3,23 | 0,0701503 | 0,198379 |

|               |      |      |      |      |           |          |
|---------------|------|------|------|------|-----------|----------|
| TOR3A         | 4,82 | 4,14 | 4,85 | 3,34 | 0,0701541 | 0,198379 |
| RP11-191112.1 | 0,05 | 0,16 | 0,13 | 0,07 | 0,0701545 | 0,198379 |
| HLA-DRB5      | 8,97 | 8,50 | 8,53 | 6,44 | 0,070166  | 0,198379 |
| EFNA4         | 1,27 | 0,00 | 0,28 | 0,37 | 0,070167  | 0,198379 |
| CTD-2197O4.1  | 0,11 | 0,00 | 0,02 | 0,00 | 0,0701756 | NA       |
| RP11-229P13.2 | 1,53 | 0,48 | 1,03 | 0,83 | 0,0702778 | 0,198667 |
| CCDC175       | 0,00 | 0,00 | 0,27 | 0,34 | 0,0703087 | 0,198715 |
| CTB-32O4.2    | 0,43 | 0,00 | 0,74 | 0,21 | 0,0703123 | 0,198715 |
| NBEAL1        | 4,13 | 2,91 | 2,64 | 2,68 | 0,0703579 | 0,198818 |
| CTC-281M20.1  | 0,11 | 1,31 | 0,07 | 0,00 | 0,0703732 | 0,198836 |
| CTD-2568A17.1 | 2,03 | 1,70 | 0,94 | 2,83 | 0,0704125 | 0,198902 |
| BBS10         | 0,31 | 0,00 | 0,17 | 0,14 | 0,0704145 | 0,198902 |
| RP1-130L23.1  | 2,11 | 0,00 | 1,54 | 0,00 | 0,0704441 | 0,19896  |
| AC005253.2    | 0,00 | 0,14 | 0,14 | 0,55 | 0,0704824 | 0,199034 |
| TMCO4         | 3,36 | 0,98 | 1,90 | 1,45 | 0,0704966 | 0,199034 |
| DOCK9         | 0,15 | 0,44 | 0,06 | 0,05 | 0,070497  | 0,199034 |
| OR2T33        | 0,10 | 0,07 | 0,18 | 0,37 | 0,070512  | 0,199051 |
| FBXO24        | 0,68 | 1,37 | 0,42 | 0,39 | 0,0705457 | 0,199121 |
| RP11-141O15.1 | 0,98 | 0,19 | 0,87 | 0,00 | 0,0705705 | 0,199166 |
| RP11-39K24.11 | 0,48 | 0,00 | 0,09 | 0,41 | 0,0705933 | 0,199173 |
| B4GALT1       | 5,46 | 5,28 | 5,89 | 6,16 | 0,0705959 | 0,199173 |
| XKR9          | 0,16 | 0,58 | 0,19 | 0,25 | 0,0705999 | 0,199173 |
| CUBN          | 0,24 | 0,06 | 0,32 | 0,50 | 0,0706719 | 0,199351 |
| UACA          | 0,60 | 0,72 | 1,36 | 2,57 | 0,0707184 | 0,199449 |
| TSR1          | 3,82 | 0,77 | 3,06 | 2,91 | 0,0707289 | 0,199449 |
| ATP5B         | 9,72 | 8,93 | 9,34 | 9,16 | 0,0707336 | 0,199449 |
| RP11-498D10.3 | 0,78 | 2,44 | 1,52 | 1,84 | 0,0707491 | 0,199467 |
| CLCA2         | 0,00 | 0,07 | 0,00 | 0,00 | 0,0707766 | 0,199519 |
| MCM3AP        | 3,96 | 3,96 | 4,67 | 3,80 | 0,0707974 | 0,199553 |
| PKN1          | 4,92 | 5,23 | 4,77 | 5,43 | 0,0708299 | 0,199564 |
| KRT10         | 3,58 | 5,10 | 4,48 | 3,75 | 0,07083   | 0,199564 |
| XPC           | 3,59 | 2,96 | 3,21 | 3,41 | 0,0708302 | 0,199564 |
| CRTAM         | 1,10 | 0,36 | 0,93 | 0,83 | 0,0708375 | 0,199564 |
| RUSC1-AS1     | 2,37 | 1,67 | 2,64 | 1,29 | 0,0708617 | 0,199607 |
| PSMA1         | 8,43 | 7,55 | 7,95 | 7,63 | 0,0709425 | 0,199804 |
| FAHD2B        | 0,35 | 1,99 | 1,14 | 0,00 | 0,0709604 | 0,199804 |
| RP11-363K21.1 | 0,24 | 0,15 | 0,90 | 0,75 | 0,0709687 | 0,199804 |
| BTBD1         | 4,74 | 4,87 | 4,52 | 4,80 | 0,0709726 | 0,199804 |
| PCDHGB6       | 0,09 | 0,09 | 0,12 | 0,06 | 0,0709763 | 0,199804 |
| TBC1D3B       | 0,00 | 0,86 | 0,00 | 0,00 | 0,0710104 | 0,199874 |
| RP3-382I10.7  | 0,62 | 0,00 | 0,08 | 0,00 | 0,0710914 | 0,20006  |
| NRG4          | 2,15 | 2,07 | 2,13 | 3,40 | 0,0710945 | 0,20006  |
| SSBP1         | 7,79 | 7,25 | 7,59 | 6,90 | 0,0711115 | 0,200083 |
| C9orf85       | 3,29 | 1,98 | 2,65 | 3,19 | 0,0711401 | 0,200126 |
| COX7B         | 5,13 | 5,69 | 5,14 | 4,90 | 0,0711449 | 0,200126 |
| BTN3A3        | 4,04 | 0,70 | 2,79 | 3,62 | 0,0711704 | 0,200172 |
| KCNJ13        | 1,94 | 0,00 | 0,66 | 0,05 | 0,0711919 | 0,200179 |
| IFITM3        | 8,22 | 6,42 | 8,40 | 8,64 | 0,0711929 | 0,200179 |
| ARHGDI3       | 0,00 | 2,46 | 0,39 | 0,00 | 0,0711997 | 0,200179 |
| RP11-149I23.3 | 0,00 | 0,19 | 0,00 | 0,00 | 0,0712544 | 0,200307 |
| CTD-2020K17.3 | 0,00 | 0,00 | 0,00 | 0,07 | 0,0712818 | NA       |
| IRF8          | 6,22 | 5,57 | 5,62 | 4,97 | 0,071282  | 0,200359 |
| SCHIP1        | 0,72 | 2,25 | 1,19 | 0,92 | 0,0713288 | 0,20045  |
| MYH16         | 0,00 | 1,19 | 0,00 | 0,00 | 0,0713322 | 0,20045  |
| TOMM34        | 4,80 | 1,95 | 4,11 | 2,46 | 0,0713416 | 0,200451 |



|                |      |      |      |      |           |          |
|----------------|------|------|------|------|-----------|----------|
| POLR3F         | 2,86 | 0,12 | 1,46 | 2,84 | 0,0713939 | 0,200573 |
| RN7SL234P      | 1,89 | 0,00 | 2,38 | 0,74 | 0,0714289 | 0,200646 |
| RP11-66A2.2    | 0,00 | 0,28 | 0,19 | 0,49 | 0,0714536 | 0,20069  |
| MOK            | 2,52 | 2,13 | 4,11 | 3,20 | 0,0714771 | 0,20073  |
| ZNF526         | 0,69 | 0,72 | 0,83 | 1,70 | 0,0715315 | 0,20083  |
| ETV5           | 1,50 | 3,74 | 1,01 | 0,48 | 0,0715331 | 0,20083  |
| LINC00689      | 0,00 | 0,04 | 0,06 | 0,04 | 0,0715398 | 0,20083  |
| GCN1           | 2,90 | 1,73 | 2,13 | 2,97 | 0,0715729 | 0,200898 |
| RP11-326F20.5  | 0,35 | 0,54 | 0,00 | 0,00 | 0,0716105 | 0,200947 |
| PSMA3          | 8,20 | 7,36 | 7,38 | 6,95 | 0,0716139 | 0,200947 |
| AF042090.2     | 0,27 | 0,97 | 0,14 | 0,16 | 0,0716175 | 0,200947 |
| YME1L1         | 4,46 | 4,90 | 4,80 | 4,63 | 0,0716795 | 0,201082 |
| XPNPEP3        | 3,12 | 1,30 | 1,95 | 1,76 | 0,0716839 | 0,201082 |
| EVA1B          | 0,24 | 0,52 | 1,67 | 3,62 | 0,0717075 | 0,201123 |
| ERCC1          | 6,31 | 4,90 | 6,08 | 4,92 | 0,0717292 | 0,201159 |
| NBPF19         | 6,87 | 6,48 | 6,73 | 6,95 | 0,071744  | 0,201159 |
| MIR326         | 0,00 | 0,00 | 0,00 | 4,12 | 0,0717626 | 0,201159 |
| MZT2A          | 3,48 | 4,35 | 4,33 | 2,36 | 0,071765  | 0,201159 |
| CTD-3187F8.14  | 0,00 | 0,00 | 0,00 | 1,83 | 0,0717655 | 0,201159 |
| RP11-96C21.2   | 0,00 | 0,04 | 0,00 | 0,04 | 0,0717886 | 0,201171 |
| HYAL4          | 0,27 | 0,41 | 0,21 | 0,62 | 0,0717964 | 0,201171 |
| RP11-116D17.3  | 0,46 | 0,27 | 0,57 | 0,51 | 0,071797  | 0,201171 |
| CLASP2         | 5,27 | 3,79 | 5,15 | 3,93 | 0,0718593 | 0,20132  |
| PTPRK          | 0,34 | 1,02 | 0,70 | 1,24 | 0,0718802 | 0,201353 |
| AP001422.3     | 0,54 | 0,00 | 0,00 | 0,00 | 0,0719856 | 0,201623 |
| FUOM           | 5,01 | 6,13 | 5,59 | 5,23 | 0,0719998 | 0,201637 |
| AC011625.1     | 0,00 | 0,93 | 0,00 | 0,00 | 0,0720106 | 0,201642 |
| DIS3L2         | 2,56 | 1,28 | 3,96 | 2,79 | 0,0720656 | 0,201771 |
| TSTD2          | 2,71 | 0,84 | 2,38 | 1,64 | 0,0720801 | 0,201775 |
| GTF3C1         | 3,12 | 3,00 | 3,21 | 5,01 | 0,0720852 | 0,201775 |
| RP11-758H9.2   | 0,71 | 0,00 | 0,92 | 0,93 | 0,0721064 | 0,201809 |
| SRP72          | 6,69 | 5,83 | 6,09 | 5,71 | 0,0721655 | 0,201949 |
| SLC27A5        | 1,92 | 1,82 | 2,10 | 2,15 | 0,0721897 | 0,201991 |
| RP11-856B14.10 | 2,48 | 0,00 | 3,14 | 1,97 | 0,0722211 | 0,202018 |
| DDA1           | 3,51 | 3,69 | 2,91 | 0,82 | 0,0722299 | 0,202018 |
| RGPD2          | 0,40 | 0,77 | 1,12 | 0,11 | 0,0722312 | 0,202018 |
| STK11IP        | 4,18 | 4,70 | 4,30 | 4,35 | 0,0722355 | 0,202018 |
| SNTB2          | 0,85 | 0,54 | 0,59 | 0,78 | 0,0722477 | 0,202026 |
| RGL2           | 4,56 | 3,37 | 4,65 | 3,82 | 0,0722657 | 0,202031 |
| TAF1           | 4,19 | 3,65 | 3,51 | 4,19 | 0,0722675 | 0,202031 |
| RP11-15A1.4    | 0,26 | 0,16 | 0,26 | 0,37 | 0,0723112 | 0,202128 |
| CRELD1         | 2,29 | 0,00 | 1,92 | 1,58 | 0,0723427 | 0,202146 |
| BRCA2          | 1,43 | 0,32 | 1,37 | 0,56 | 0,0723429 | 0,202146 |
| BCYRN1         | 3,49 | 3,86 | 3,55 | 4,56 | 0,0723502 | 0,202146 |
| ECT2L          | 0,21 | 2,00 | 0,16 | 0,63 | 0,0723547 | 0,202146 |
| FKBP9L         | 0,31 | 0,18 | 0,28 | 0,54 | 0,0723633 | 0,202146 |
| GARS           | 5,67 | 6,48 | 5,24 | 5,37 | 0,0723834 | 0,202177 |
| RP11-799A12.1  | 0,00 | 0,26 | 0,00 | 0,00 | 0,0724459 | NA       |
| SH3PXD2A       | 0,18 | 0,16 | 0,28 | 0,21 | 0,0724587 | 0,202362 |
| RN7SL435P      | 0,00 | 0,00 | 0,00 | 0,78 | 0,0725086 | 0,202476 |
| AC007326.10    | 0,05 | 0,18 | 0,00 | 0,02 | 0,0725337 | 0,20252  |
| CTD-2337A12.1  | 1,18 | 2,19 | 1,94 | 0,84 | 0,0726025 | 0,202687 |
| SNAI3          | 2,53 | 0,32 | 3,00 | 1,57 | 0,0726482 | 0,202789 |
| NCAPG2         | 0,67 | 0,13 | 0,18 | 0,35 | 0,0726875 | 0,202843 |
| GLYAT          | 2,47 | 0,66 | 1,64 | 2,43 | 0,0726927 | 0,202843 |

|               |      |      |      |      |           |          |
|---------------|------|------|------|------|-----------|----------|
| OLFML1        | 0,13 | 0,97 | 0,19 | 0,16 | 0,0726949 | 0,202843 |
| CSNK1D        | 5,05 | 5,89 | 5,84 | 5,43 | 0,0727042 | 0,202843 |
| RILP          | 1,29 | 0,31 | 3,14 | 2,03 | 0,0727242 | 0,202874 |
| ST6GALNAC4    | 2,48 | 0,45 | 2,43 | 1,44 | 0,0727935 | 0,203042 |
| KIAA1586      | 3,17 | 0,83 | 2,62 | 0,70 | 0,0728069 | 0,203054 |
| RP11-44F14.5  | 0,32 | 1,65 | 0,81 | 0,26 | 0,0728228 | 0,203072 |
| ITGA10        | 0,24 | 0,76 | 0,60 | 1,18 | 0,0728814 | 0,203185 |
| PHF23         | 2,35 | 0,60 | 2,05 | 3,85 | 0,0728815 | 0,203185 |
| VWCE          | 0,18 | 0,00 | 0,38 | 0,57 | 0,0728906 | 0,203185 |
| WDR31         | 0,20 | 0,34 | 0,30 | 0,45 | 0,0729378 | 0,203291 |
| CNNM3         | 0,26 | 0,10 | 0,36 | 0,77 | 0,0729634 | 0,203337 |
| TMX2          | 5,90 | 4,03 | 5,44 | 4,26 | 0,0730161 | 0,203443 |
| CYP17A1       | 0,07 | 0,34 | 0,13 | 0,21 | 0,0730278 | 0,203443 |
| DGCR8         | 1,47 | 2,84 | 1,93 | 1,33 | 0,0730289 | 0,203443 |
| KLF7          | 2,55 | 3,06 | 3,49 | 1,33 | 0,0730535 | 0,203479 |
| BRX1          | 4,59 | 3,97 | 2,49 | 4,45 | 0,0730603 | 0,203479 |
| RN7SL461P     | 2,35 | 3,75 | 2,63 | 1,03 | 0,0730982 | 0,203559 |
| TMEM127       | 3,07 | 4,40 | 3,21 | 3,14 | 0,0731083 | 0,203562 |
| RP11-170N16.3 | 0,28 | 0,24 | 0,18 | 0,54 | 0,0731283 | 0,203592 |
| SYNE3         | 2,03 | 2,29 | 2,34 | 2,02 | 0,0731591 | 0,203652 |
| CTD-2184D3.6  | 0,00 | 2,37 | 1,51 | 0,97 | 0,0732217 | 0,203782 |
| SLC26A11      | 0,54 | 0,24 | 0,88 | 1,45 | 0,0732239 | 0,203782 |
| AP000892.4    | 0,78 | 2,29 | 0,70 | 1,59 | 0,0732834 | 0,203922 |
| THEMIS        | 0,00 | 0,00 | 0,00 | 0,23 | 0,0732949 | 0,203928 |
| ARHGAP10      | 2,24 | 1,12 | 3,01 | 2,66 | 0,0733119 | 0,20393  |
| ANXA3         | 0,13 | 0,84 | 0,23 | 0,10 | 0,073314  | 0,20393  |
| RP11-731D1.4  | 0,55 | 0,83 | 0,00 | 0,00 | 0,0733577 | 0,204026 |
| RP11-260E18.1 | 0,07 | 0,00 | 0,02 | 0,00 | 0,0733635 | NA       |
| TRNAU1AP      | 4,91 | 6,45 | 4,79 | 4,38 | 0,0734211 | 0,204167 |
| INPPL1        | 2,07 | 1,41 | 3,23 | 2,58 | 0,0734267 | 0,204167 |
| OSBPL2        | 3,10 | 2,41 | 3,70 | 2,78 | 0,0734629 | 0,204242 |
| LGALS17A      | 0,00 | 0,09 | 0,00 | 0,00 | 0,0735015 | 0,204301 |
| RP13-616I3.1  | 0,24 | 0,17 | 0,17 | 0,14 | 0,0735026 | 0,204301 |
| GOLGA2B       | 1,35 | 3,19 | 1,19 | 1,09 | 0,0735891 | 0,204492 |
| RP11-769O8.3  | 0,15 | 0,31 | 0,44 | 0,20 | 0,0735896 | 0,204492 |
| SLC23A2       | 3,00 | 0,74 | 2,18 | 1,13 | 0,0736157 | 0,204539 |
| PDGFRB        | 0,00 | 0,00 | 0,00 | 0,03 | 0,0736478 | 0,204595 |
| FMN2          | 0,06 | 0,05 | 0,04 | 0,00 | 0,0736819 | 0,204595 |
| SNRNP27       | 4,99 | 3,14 | 4,41 | 4,90 | 0,0736825 | 0,204595 |
| DTX2          | 3,12 | 5,69 | 3,83 | 4,52 | 0,0736827 | 0,204595 |
| ARID2         | 3,76 | 2,55 | 3,10 | 2,25 | 0,0737    | 0,204595 |
| RP11-19P22.8  | 1,19 | 0,31 | 2,72 | 3,07 | 0,0737012 | 0,204595 |
| HMGNS         | 1,35 | 0,67 | 1,09 | 3,17 | 0,0737059 | 0,204595 |
| HTR2B         | 0,19 | 0,00 | 0,33 | 0,00 | 0,0737093 | 0,204595 |
| PPBP          | 0,23 | 5,00 | 0,26 | 5,89 | 0,0737358 | 0,204616 |
| NDUFA12       | 7,85 | 6,90 | 7,57 | 6,96 | 0,0737384 | 0,204616 |
| RP11-486I11.2 | 0,29 | 0,00 | 0,00 | 4,70 | 0,0737566 | 0,204616 |
| NLN           | 1,36 | 3,80 | 2,66 | 2,48 | 0,0737619 | 0,204616 |
| SERINC5       | 4,04 | 5,24 | 4,01 | 4,30 | 0,0737631 | 0,204616 |
| RP11-84A19.2  | 1,07 | 1,39 | 1,30 | 1,48 | 0,073774  | 0,204621 |
| CIDEB         | 5,99 | 4,86 | 4,81 | 4,54 | 0,0738063 | 0,204685 |
| CD8B          | 0,00 | 4,25 | 0,00 | 0,00 | 0,073919  | 0,204972 |
| PPP2R4        | 2,93 | 3,33 | 3,93 | 2,83 | 0,0739396 | 0,204974 |
| NT5C2         | 5,15 | 3,59 | 4,15 | 3,43 | 0,0739404 | 0,204974 |
| RP11-16P20.3  | 0,37 | 1,59 | 0,20 | 1,45 | 0,0739473 | 0,204974 |

|               |       |       |       |       |           |          |
|---------------|-------|-------|-------|-------|-----------|----------|
| RP11-104C4.6  | 0,00  | 0,00  | 0,00  | 1,01  | 0,0739715 | 0,205001 |
| RP11-355I22.3 | 0,00  | 0,00  | 0,00  | 0,12  | 0,0739755 | 0,205001 |
| AC006014.8    | 0,00  | 0,00  | 0,00  | 0,00  | 0,0739808 | NA       |
| RP11-315J22.1 | 0,17  | 0,38  | 0,09  | 0,11  | 0,073988  | NA       |
| RP11-339A11.2 | 0,79  | 0,38  | 0,90  | 0,42  | 0,0740219 | 0,205094 |
| RP11-458D21.5 | 1,22  | 1,77  | 0,97  | 1,93  | 0,0740275 | 0,205094 |
| SIK1          | 3,18  | 2,62  | 3,02  | 1,47  | 0,0740709 | 0,205167 |
| RP11-481C4.1  | 0,00  | 2,59  | 2,85  | 0,00  | 0,074074  | 0,205167 |
| RP11-475J5.6  | 0,00  | 0,11  | 0,00  | 0,12  | 0,0740799 | NA       |
| USP9X         | 4,67  | 3,74  | 4,36  | 3,32  | 0,0740874 | 0,205167 |
| CA6           | 0,43  | 0,52  | 0,61  | 0,93  | 0,074091  | 0,205167 |
| FSD1L         | 0,47  | 0,31  | 0,76  | 0,73  | 0,074158  | 0,205327 |
| RP11-407G23.4 | 1,85  | 3,13  | 2,26  | 3,18  | 0,0741814 | 0,205366 |
| RP11-563J2.2  | 0,10  | 0,61  | 0,18  | 0,22  | 0,0741961 | 0,205381 |
| C11orf73      | 5,51  | 6,68  | 5,65  | 5,44  | 0,0742456 | 0,205471 |
| FAM72A        | 2,47  | 0,19  | 2,92  | 1,08  | 0,0742548 | 0,205471 |
| RP4-548D19.4  | 0,00  | 2,65  | 0,00  | 2,57  | 0,074256  | 0,205471 |
| HIST2H2BF     | 1,53  | 0,60  | 1,31  | 1,05  | 0,0742823 | 0,205518 |
| AMZ2P1        | 3,95  | 0,66  | 4,15  | 3,42  | 0,0743046 | 0,205538 |
| RP11-93O17.2  | 0,07  | 0,25  | 0,14  | 0,19  | 0,0743082 | 0,205538 |
| RP11-166P13.3 | 0,20  | 0,46  | 0,34  | 0,24  | 0,074356  | 0,205645 |
| AC006369.2    | 0,57  | 1,26  | 1,09  | 1,52  | 0,0743674 | 0,205651 |
| SLC15A4       | 2,94  | 1,31  | 2,83  | 2,47  | 0,0743921 | 0,205693 |
| SSH2          | 4,94  | 3,34  | 4,95  | 4,79  | 0,0744279 | 0,205763 |
| CRHBP         | 0,00  | 0,26  | 0,09  | 0,62  | 0,0744359 | 0,205763 |
| LSM14B        | 0,42  | 0,11  | 0,41  | 0,78  | 0,0744557 | 0,205793 |
| CCDC171       | 1,75  | 2,32  | 1,41  | 2,18  | 0,0744666 | 0,205797 |
| EPS15L1       | 3,51  | 2,64  | 3,78  | 1,90  | 0,0745047 | 0,205851 |
| CCNH          | 7,09  | 6,61  | 6,88  | 5,41  | 0,0745076 | 0,205851 |
| RP5-943J3.2   | 0,00  | 0,00  | 0,00  | 0,25  | 0,0745105 | NA       |
| RNASEH2A      | 3,54  | 1,49  | 2,54  | 2,13  | 0,0745139 | 0,205851 |
| RF00272       | 2,36  | 1,89  | 1,83  | 0,00  | 0,0745359 | 0,205875 |
| DGKA          | 5,42  | 5,94  | 5,43  | 5,45  | 0,0745411 | 0,205875 |
| TRAF5         | 1,86  | 1,56  | 2,47  | 0,48  | 0,074556  | 0,205891 |
| METRN         | 0,00  | 0,09  | 0,00  | 0,04  | 0,0745787 | 0,205928 |
| ADAMTSL4      | 2,63  | 3,78  | 3,57  | 3,32  | 0,074604  | 0,205972 |
| FAM195B       | 5,40  | 4,39  | 5,76  | 5,94  | 0,0746155 | 0,205978 |
| RP11-415F23.4 | 0,00  | 0,00  | 0,00  | 0,00  | 0,0746297 | 0,205991 |
| KATNBL1       | 5,45  | 3,84  | 4,98  | 5,25  | 0,0746409 | 0,205991 |
| PRKAR1B       | 0,95  | 0,00  | 1,59  | 0,33  | 0,0746479 | 0,205991 |
| TMBIM1        | 4,08  | 3,92  | 4,69  | 4,46  | 0,0746609 | 0,206001 |
| PKM           | 6,85  | 6,63  | 6,96  | 6,66  | 0,0747566 | 0,206228 |
| RP11-735B13.1 | 0,01  | 0,00  | 0,00  | 0,03  | 0,0747616 | 0,206228 |
| KIF1B         | 2,59  | 1,63  | 2,99  | 2,72  | 0,0747911 | 0,206284 |
| DCAF7         | 4,74  | 5,39  | 4,74  | 5,23  | 0,0748298 | 0,206357 |
| PEX16         | 4,87  | 5,84  | 5,56  | 4,31  | 0,0748362 | 0,206357 |
| ALG14         | 2,89  | 0,99  | 2,67  | 1,29  | 0,0748772 | 0,206382 |
| RP11-425A23.1 | 0,55  | 0,00  | 1,23  | 0,86  | 0,0748913 | 0,206382 |
| LMO2          | 4,56  | 4,36  | 4,90  | 5,25  | 0,0749036 | 0,206382 |
| WNNT9B        | 0,14  | 0,42  | 0,26  | 0,09  | 0,0749053 | 0,206382 |
| FSTL3         | 0,00  | 2,08  | 0,06  | 0,00  | 0,0749093 | 0,206382 |
| RP11-960L18.1 | 0,86  | 0,00  | 0,82  | 1,05  | 0,0749185 | 0,206382 |
| ZNF586        | 2,94  | 0,80  | 3,05  | 0,82  | 0,0749237 | 0,206382 |
| RP4-625H18.2  | 0,00  | 0,59  | 0,00  | 0,08  | 0,0749259 | 0,206382 |
| RPL11         | 10,54 | 10,75 | 10,64 | 10,48 | 0,0749325 | 0,206382 |

|                |       |       |       |       |           |          |
|----------------|-------|-------|-------|-------|-----------|----------|
| SS18L2         | 6,35  | 2,77  | 5,91  | 5,30  | 0,0749384 | 0,206382 |
| TMEM44         | 0,19  | 0,23  | 0,22  | 1,37  | 0,0750269 | 0,206601 |
| S100A11        | 9,24  | 9,03  | 9,27  | 9,05  | 0,0750637 | 0,206676 |
| DMTF1          | 6,07  | 6,64  | 5,64  | 6,27  | 0,0750902 | 0,206716 |
| ABCA11         | 0,07  | 1,90  | 0,05  | 0,00  | 0,0750967 | 0,206716 |
| RPS9           | 10,38 | 10,85 | 10,77 | 10,55 | 0,0751155 | 0,206718 |
| RP11-370I10.12 | 0,68  | 0,11  | 0,34  | 1,14  | 0,0751173 | 0,206718 |
| SLC35E2        | 1,79  | 0,57  | 1,85  | 2,03  | 0,0751254 | 0,206718 |
| CTB-102L5.8    | 1,01  | 2,38  | 1,60  | 1,60  | 0,075157  | 0,206759 |
| IFI27          | 2,99  | 0,45  | 0,99  | 3,39  | 0,0751588 | 0,206759 |
| PKD1P6         | 0,40  | 0,62  | 0,80  | 1,03  | 0,0751881 | 0,206814 |
| RP11-91K8.1    | 0,00  | 0,00  | 0,35  | 0,84  | 0,0752401 | 0,206913 |
| CRKL           | 3,20  | 0,27  | 2,55  | 2,30  | 0,0752429 | 0,206913 |
| ANKLE1         | 1,76  | 2,81  | 2,03  | 1,85  | 0,0752798 | 0,206989 |
| BEND6          | 1,54  | 2,42  | 1,37  | 1,43  | 0,075328  | 0,207072 |
| C22orf29       | 0,29  | 1,91  | 0,41  | 0,11  | 0,0753285 | 0,207072 |
| TTC12          | 2,91  | 0,35  | 0,12  | 0,72  | 0,0754493 | 0,207378 |
| FBXO36         | 0,50  | 0,68  | 0,36  | 0,35  | 0,0754794 | 0,207435 |
| RP11-18I14.10  | 4,58  | 3,16  | 3,39  | 2,22  | 0,075647  | 0,20787  |
| FOXRED2        | 0,71  | 1,79  | 1,02  | 0,63  | 0,0756884 | 0,207958 |
| MAB21L2        | 0,00  | 0,00  | 0,00  | 0,04  | 0,0757026 | 0,207972 |
| EPB41L4A-AS1   | 5,16  | 4,90  | 5,71  | 5,09  | 0,0757388 | 0,208045 |
| IMPACT         | 3,42  | 4,02  | 3,97  | 2,87  | 0,0757779 | 0,208079 |
| RPS26          | 7,59  | 7,63  | 7,96  | 8,19  | 0,0757805 | 0,208079 |
| MGAT5          | 1,77  | 0,22  | 1,31  | 0,25  | 0,0757874 | 0,208079 |
| RP11-1072A3.2  | 0,16  | 0,00  | 0,00  | 0,51  | 0,0757886 | 0,208079 |
| CSAR2          | 1,35  | 1,27  | 1,40  | 1,38  | 0,0758079 | 0,208103 |
| TSPAN2         | 0,50  | 0,00  | 0,02  | 0,41  | 0,0758159 | 0,208103 |
| RP11-145D11.1  | 0,00  | 0,00  | 0,00  | 0,00  | 0,0758878 | 0,208274 |
| RP11-434D2.3   | 0,00  | 0,14  | 0,00  | 0,12  | 0,0759006 | 0,208284 |
| RP11-405F3.4   | 0,00  | 0,61  | 0,00  | 0,00  | 0,0759716 | 0,208453 |
| RP11-293P20.4  | 0,00  | 0,00  | 0,00  | 0,00  | 0,0760323 | 0,208594 |
| PTBP2          | 3,55  | 3,13  | 2,18  | 2,71  | 0,0760654 | 0,208659 |
| PSMB10         | 8,34  | 8,33  | 8,28  | 8,28  | 0,0760762 | 0,208663 |
| NCOA2          | 3,16  | 2,31  | 3,22  | 3,29  | 0,076094  | 0,208686 |
| SLC6A6         | 3,56  | 3,67  | 2,50  | 1,76  | 0,0761175 | 0,208713 |
| DCANP1         | 0,96  | 2,32  | 0,25  | 0,09  | 0,0761228 | 0,208713 |
| MT-TS1         | 9,06  | 9,62  | 9,04  | 9,07  | 0,0762311 | 0,208917 |
| LINC00692      | 0,00  | 0,66  | 0,00  | 0,00  | 0,0762333 | 0,208917 |
| AANAT          | 0,11  | 0,22  | 0,18  | 0,13  | 0,0762337 | 0,208917 |
| UBXN8          | 1,87  | 2,80  | 2,76  | 0,57  | 0,0762346 | 0,208917 |
| JRK            | 0,70  | 2,46  | 0,27  | 1,42  | 0,0762589 | 0,208958 |
| NCL            | 6,91  | 6,84  | 7,19  | 6,43  | 0,076314  | 0,209083 |
| ATG4B          | 4,93  | 4,16  | 5,53  | 4,85  | 0,0763671 | 0,209198 |
| LZIC           | 4,47  | 3,23  | 3,71  | 5,34  | 0,0763747 | 0,209198 |
| MFSD9          | 1,04  | 0,24  | 1,76  | 0,35  | 0,076404  | 0,209252 |
| HHIPL1         | 0,02  | 0,03  | 0,13  | 0,29  | 0,0764293 | 0,209295 |
| USP5           | 1,64  | 0,98  | 2,54  | 2,62  | 0,0764458 | 0,209315 |
| WASH2P         | 0,82  | 0,87  | 1,67  | 1,22  | 0,0764827 | 0,20939  |
| RP11-6N17.2    | 0,49  | 0,48  | 1,00  | 0,46  | 0,0765548 | 0,20956  |
| RP11-278C7.1   | 0,34  | 0,00  | 0,08  | 0,00  | 0,0765638 | 0,20956  |
| ST5            | 1,39  | 0,76  | 1,45  | 0,09  | 0,0766123 | 0,209667 |
| CLINT1         | 5,85  | 5,47  | 5,42  | 4,73  | 0,0766394 | 0,209716 |
| NCKIPSD        | 1,57  | 1,08  | 1,23  | 0,78  | 0,0766529 | 0,209727 |
| RPS3           | 11,70 | 11,95 | 11,73 | 11,48 | 0,0766819 | 0,20978  |

|               |      |      |      |      |           |          |
|---------------|------|------|------|------|-----------|----------|
| ZNF138        | 2,07 | 0,00 | 1,79 | 0,07 | 0,0767135 | 0,209841 |
| RNF135        | 4,62 | 5,14 | 4,91 | 4,79 | 0,0767438 | 0,209883 |
| POLK          | 4,68 | 3,15 | 4,55 | 3,00 | 0,0767476 | 0,209883 |
| LA16c-381G6.1 | 0,06 | 0,00 | 0,00 | 0,00 | 0,0767651 | 0,209905 |
| RHOXF1-AS1    | 1,37 | 0,30 | 0,07 | 0,07 | 0,0767901 | 0,209947 |
| PRPF39        | 3,88 | 1,38 | 2,83 | 1,63 | 0,0768071 | 0,209954 |
| PIGM          | 1,00 | 1,10 | 1,14 | 1,30 | 0,0768115 | 0,209954 |
| TPM4          | 6,60 | 5,77 | 6,18 | 5,59 | 0,0768385 | 0,209984 |
| PDIA4         | 3,45 | 4,55 | 3,23 | 2,82 | 0,0768415 | 0,209984 |
| RP11-114M11.2 | 0,00 | 0,18 | 0,00 | 0,00 | 0,0768776 | 0,210057 |
| SLC38A4       | 0,56 | 0,17 | 0,27 | 1,36 | 0,0769031 | 0,210101 |
| MOSPD1        | 1,74 | 0,74 | 2,13 | 1,82 | 0,0769277 | 0,210142 |
| ZNF720        | 2,97 | 1,16 | 2,81 | 0,59 | 0,0769683 | 0,210227 |
| CCL3L3        | 5,66 | 6,78 | 6,32 | 6,03 | 0,0769923 | 0,210267 |
| RP11-6B19.1   | 0,00 | 0,00 | 0,00 | 0,00 | 0,0770074 | 0,210282 |
| NFX1          | 4,48 | 4,68 | 3,65 | 3,05 | 0,077047  | 0,210365 |
| RP11-103C3.1  | 2,71 | 3,58 | 2,89 | 3,18 | 0,0770732 | 0,210411 |
| NECAP2        | 5,43 | 5,47 | 5,06 | 5,51 | 0,0770917 | 0,210433 |
| ANKRD22       | 1,06 | 0,33 | 1,42 | 0,93 | 0,077112  | 0,210433 |
| AC015987.1    | 0,64 | 0,00 | 0,21 | 0,18 | 0,0771236 | 0,210433 |
| RP11-298C2.1  | 1,68 | 1,21 | 2,42 | 3,81 | 0,0771248 | 0,210433 |
| CTD-3025N20.2 | 0,26 | 0,24 | 0,12 | 0,14 | 0,077129  | 0,210433 |
| HIF1A         | 7,24 | 6,65 | 6,55 | 6,18 | 0,0772428 | 0,210718 |
| DNAH6         | 0,42 | 0,72 | 0,38 | 0,32 | 0,0772591 | 0,210737 |
| TMEM185B      | 0,82 | 0,06 | 0,34 | 0,60 | 0,0772911 | 0,21079  |
| CD52          | 9,51 | 9,43 | 9,69 | 9,84 | 0,0772976 | 0,21079  |
| RP1-65J11.5   | 0,47 | 1,05 | 0,54 | 0,68 | 0,077356  | 0,210923 |
| RP11-234B24.2 | 0,15 | 0,00 | 0,13 | 0,00 | 0,0774158 | 0,211035 |
| TMEM147       | 7,67 | 7,21 | 7,23 | 6,67 | 0,077416  | 0,211035 |
| LIN7C         | 2,84 | 1,31 | 2,07 | 1,23 | 0,0774604 | 0,211131 |
| INPP4B        | 1,43 | 2,13 | 0,18 | 1,40 | 0,0774757 | 0,211146 |
| PLCXD3        | 0,02 | 0,10 | 0,01 | 0,05 | 0,0774993 | 0,211183 |
| NYNRIN        | 0,00 | 0,00 | 0,00 | 0,00 | 0,0775476 | 0,211183 |
| PNISR         | 7,02 | 6,14 | 6,63 | 6,53 | 0,077562  | 0,211183 |
| MBOAT1        | 0,70 | 0,08 | 0,62 | 0,14 | 0,0775638 | 0,211183 |
| PFKFB3        | 3,39 | 2,99 | 2,94 | 2,16 | 0,077567  | 0,211183 |
| CSRP2BP       | 2,14 | 0,32 | 1,07 | 2,47 | 0,077572  | 0,211183 |
| CDKL1         | 2,45 | 3,46 | 2,40 | 3,62 | 0,0775777 | 0,211183 |
| KB-1572G7.2   | 0,99 | 0,00 | 1,86 | 3,42 | 0,0775779 | 0,211183 |
| ELOVL1        | 5,70 | 4,24 | 5,41 | 3,96 | 0,0775892 | 0,211183 |
| BIRC6         | 5,58 | 3,80 | 5,09 | 5,72 | 0,0775939 | 0,211183 |
| CHST2         | 1,52 | 0,72 | 2,19 | 1,40 | 0,0776029 | 0,211183 |
| RNY3          | 0,00 | 3,08 | 2,22 | 1,12 | 0,0776032 | 0,211183 |
| PLXNA1        | 0,09 | 0,89 | 0,02 | 0,01 | 0,0776172 | 0,211195 |
| RP11-216B9.7  | 1,35 | 0,00 | 0,00 | 3,40 | 0,0776897 | 0,211366 |
| RN7SL716P     | 1,39 | 0,00 | 0,90 | 1,00 | 0,0777059 | 0,211385 |
| NCOA7         | 4,56 | 3,10 | 4,21 | 3,43 | 0,0777504 | 0,21148  |
| EXOC3L1       | 0,00 | 0,00 | 0,00 | 0,20 | 0,0777844 | 0,211511 |
| OLMALINC      | 4,23 | 5,09 | 3,96 | 4,69 | 0,077785  | 0,211511 |
| ZNF587        | 2,04 | 1,60 | 1,77 | 1,07 | 0,0777987 | 0,211511 |
| FSIP2         | 2,16 | 2,33 | 2,15 | 2,34 | 0,0778    | 0,211511 |
| MCCC2         | 4,62 | 2,59 | 4,10 | 2,60 | 0,0778178 | 0,211534 |
| KDR           | 0,00 | 0,06 | 0,00 | 0,06 | 0,0778504 | 0,211597 |
| MIR1291       | 0,00 | 0,00 | 0,00 | 0,00 | 0,0779079 | 0,211719 |
| MRPL3         | 6,22 | 3,82 | 5,65 | 4,32 | 0,0779146 | 0,211719 |

|               |      |      |      |      |           |          |
|---------------|------|------|------|------|-----------|----------|
| AC139712.4    | 1,49 | 0,33 | 1,44 | 0,00 | 0,0779541 | 0,211801 |
| RP11-247113.3 | 0,00 | 0,00 | 0,00 | 0,00 | 0,077979  | 0,211842 |
| SNRBP2        | 5,27 | 4,41 | 5,37 | 4,40 | 0,0780632 | 0,212045 |
| RP11-1072N2.3 | 0,00 | 0,62 | 0,00 | 0,93 | 0,0780785 | 0,212061 |
| HSP90AB2P     | 0,00 | 0,00 | 0,00 | 0,00 | 0,0781272 | 0,212167 |
| AC013472.3    | 0,19 | 0,21 | 0,15 | 0,30 | 0,0781448 | 0,212189 |
| ADAM12        | 0,00 | 0,33 | 0,03 | 0,09 | 0,0781566 | 0,212195 |
| METTL15       | 2,98 | 3,08 | 2,49 | 2,87 | 0,0781705 | 0,212207 |
| WDR49         | 2,07 | 0,85 | 2,72 | 2,91 | 0,0781949 | 0,212247 |
| CTC-241F20.4  | 2,91 | 1,52 | 0,00 | 0,00 | 0,0782186 | 0,212286 |
| FAM168A       | 3,08 | 2,00 | 3,37 | 3,11 | 0,0782543 | 0,212354 |
| RN7SKP266     | 3,57 | 0,00 | 4,88 | 0,00 | 0,0782627 | 0,212354 |
| PITPNM1       | 2,61 | 0,39 | 3,10 | 3,05 | 0,078274  | 0,212358 |
| MBD2          | 4,23 | 4,93 | 4,31 | 3,51 | 0,0782847 | 0,212361 |
| MIR1255B2     | 3,75 | 2,73 | 2,97 | 0,00 | 0,0783118 | 0,212409 |
| SDPR          | 2,33 | 0,58 | 0,59 | 0,14 | 0,0783757 | 0,212557 |
| UBA2          | 5,24 | 3,65 | 4,84 | 4,16 | 0,0783938 | 0,212566 |
| RF00156       | 0,00 | 7,15 | 0,00 | 0,00 | 0,078404  | 0,212566 |
| OR7G2         | 0,19 | 0,84 | 0,20 | 0,39 | 0,0784079 | 0,212566 |
| RP11-484L7.2  | 5,21 | 5,47 | 5,48 | 4,55 | 0,0784259 | 0,21258  |
| TF            | 1,49 | 1,44 | 0,93 | 1,07 | 0,0784442 | 0,21258  |
| MIR600HG      | 0,00 | 0,52 | 0,00 | 0,00 | 0,0784487 | 0,21258  |
| ABCB6         | 0,00 | 0,55 | 0,00 | 0,04 | 0,0784598 | 0,21258  |
| GPR68         | 0,00 | 0,00 | 0,00 | 0,00 | 0,0784608 | 0,21258  |
| ETS1          | 1,33 | 1,49 | 1,44 | 2,02 | 0,0784777 | 0,2126   |
| RP11-863P13.3 | 2,85 | 0,87 | 2,13 | 1,07 | 0,0785161 | 0,212678 |
| CH17-258A22.4 | 3,01 | 0,74 | 2,09 | 0,39 | 0,0785552 | 0,212738 |
| TMEM262       | 0,00 | 0,00 | 0,00 | 0,00 | 0,0785574 | 0,212738 |
| DUX4L37       | 0,22 | 1,90 | 0,00 | 0,00 | 0,0786185 | 0,212854 |
| RP5-1171110.4 | 3,35 | 1,43 | 3,01 | 1,75 | 0,0786197 | 0,212854 |
| ZNF280C       | 0,51 | 0,06 | 0,20 | 0,78 | 0,0786399 | 0,212862 |
| HIST3H2A      | 4,29 | 0,34 | 2,54 | 4,05 | 0,0786416 | 0,212862 |
| LINC00624     | 0,58 | 1,64 | 0,20 | 0,17 | 0,0786571 | 0,212878 |
| MLIP          | 0,00 | 0,05 | 0,00 | 0,08 | 0,0786947 | NA       |
| RP11-901H12.1 | 0,00 | 0,00 | 0,01 | 0,06 | 0,0787    | 0,212951 |
| DPAGT1        | 5,12 | 1,76 | 4,12 | 2,68 | 0,0787032 | 0,212951 |
| CTC-559E9.6   | 0,66 | 0,00 | 0,25 | 0,74 | 0,0787916 | 0,213164 |
| RP11-855A2.2  | 0,78 | 0,00 | 0,63 | 0,31 | 0,0788213 | 0,213219 |
| RP11-863H1.1  | 1,35 | 0,37 | 1,26 | 2,25 | 0,0788727 | 0,213316 |
| RP5-867C24.5  | 1,39 | 1,19 | 0,92 | 1,88 | 0,0788765 | 0,213316 |
| RP11-98F14.10 | 0,00 | 0,92 | 0,00 | 0,00 | 0,0789164 | 0,213398 |
| SAMD9L        | 5,62 | 4,68 | 5,08 | 5,03 | 0,0789852 | 0,213519 |
| FAM49A        | 5,59 | 4,93 | 5,27 | 4,23 | 0,0789881 | 0,213519 |
| YIPF7         | 0,00 | 3,16 | 0,00 | 0,00 | 0,0789899 | 0,213519 |
| PAICS         | 3,60 | 5,32 | 2,49 | 2,76 | 0,0790424 | 0,213591 |
| KIAA1841      | 2,82 | 1,77 | 3,14 | 2,33 | 0,0790434 | 0,213591 |
| RPRD1A        | 4,03 | 1,75 | 3,66 | 2,30 | 0,0790455 | 0,213591 |
| EIF4G3        | 5,55 | 2,07 | 4,63 | 4,13 | 0,0790823 | 0,213664 |
| BTN3A1        | 4,00 | 2,95 | 3,73 | 4,35 | 0,0791185 | 0,213712 |
| ZNF154        | 0,68 | 0,61 | 0,81 | 0,51 | 0,0791191 | 0,213712 |
| RP11-555I4.3  | 2,60 | 3,65 | 2,20 | 2,64 | 0,079137  | 0,21372  |
| DGCR14        | 1,76 | 4,63 | 1,29 | 1,03 | 0,0791412 | 0,21372  |
| OCEL1         | 4,25 | 1,28 | 3,83 | 5,13 | 0,0791697 | 0,213771 |
| RP11-398C13.8 | 0,53 | 0,09 | 0,67 | 0,78 | 0,0792056 | 0,213842 |
| ZNF736        | 3,61 | 2,32 | 1,84 | 1,39 | 0,0792456 | 0,213924 |

|               |      |      |      |      |           |          |
|---------------|------|------|------|------|-----------|----------|
| RP11-534P6.1  | 0,36 | 0,88 | 0,60 | 0,26 | 0,0792634 | 0,213933 |
| LUC7L3        | 7,39 | 6,88 | 7,22 | 7,70 | 0,0792708 | 0,213933 |
| SLX1A         | 5,54 | 5,67 | 5,84 | 6,07 | 0,0792778 | 0,213933 |
| TTC30A        | 0,00 | 0,00 | 0,00 | 0,08 | 0,0793286 | 0,21403  |
| CDH2          | 0,00 | 0,53 | 0,00 | 0,00 | 0,0793331 | 0,21403  |
| RP5-899B16.1  | 0,46 | 0,24 | 0,41 | 0,52 | 0,0793517 | 0,214054 |
| RP1-149C7.1   | 0,16 | 1,27 | 0,19 | 0,79 | 0,0793716 | 0,214082 |
| MYLK3         | 2,07 | 3,09 | 2,06 | 3,01 | 0,0793965 | 0,214123 |
| RP11-126K1.6  | 2,87 | 1,86 | 2,07 | 0,30 | 0,079426  | 0,214177 |
| REEP3         | 2,71 | 3,59 | 2,87 | 2,26 | 0,0794729 | 0,214277 |
| RP11-610P19.2 | 0,44 | 0,74 | 0,68 | 0,39 | 0,0795108 | 0,214337 |
| RP11-658F2.2  | 0,77 | 2,60 | 1,08 | 0,98 | 0,0795143 | 0,214337 |
| MTR           | 2,80 | 2,93 | 2,61 | 1,39 | 0,0795259 | 0,214342 |
| SMARCA2       | 6,91 | 5,79 | 6,26 | 5,87 | 0,0795756 | 0,21445  |
| RP11-278A16.1 | 0,00 | 0,00 | 0,17 | 0,27 | 0,0795824 | NA       |
| ACO02310.12   | 0,59 | 0,13 | 0,77 | 1,03 | 0,0796284 | 0,214566 |
| TMEM63A       | 2,90 | 3,41 | 3,40 | 2,59 | 0,0796539 | 0,214604 |
| EAPP          | 6,17 | 3,78 | 5,48 | 5,53 | 0,0796744 | 0,214604 |
| SRSF8         | 4,40 | 5,19 | 3,33 | 2,33 | 0,0796784 | 0,214604 |
| RP11-38O23.4  | 0,22 | 0,38 | 0,22 | 0,47 | 0,079681  | 0,214604 |
| RP11-467L13.7 | 0,67 | 0,65 | 0,87 | 0,40 | 0,0797086 | 0,214617 |
| C12orf76      | 3,42 | 3,91 | 3,82 | 3,61 | 0,0797108 | 0,214617 |
| GPRC5C        | 0,59 | 0,24 | 2,21 | 1,08 | 0,0797149 | 0,214617 |
| ATP8A1        | 2,99 | 2,26 | 2,01 | 0,92 | 0,0797565 | 0,214703 |
| PAX1          | 0,00 | 0,65 | 0,00 | 0,00 | 0,0798045 | 0,214806 |
| UGT1A7        | 0,23 | 0,63 | 0,19 | 0,05 | 0,0798254 | 0,214836 |
| HEXDC-IT1     | 1,63 | 2,22 | 1,67 | 2,16 | 0,0798361 | 0,214839 |
| CTBP1-AS      | 0,00 | 0,15 | 0,00 | 0,03 | 0,0798707 | 0,214906 |
| RP3-508I15.22 | 0,00 | 0,00 | 0,60 | 0,56 | 0,0798973 | 0,214919 |
| IK            | 6,25 | 6,03 | 5,97 | 5,00 | 0,0799066 | 0,214919 |
| RCCD1         | 0,44 | 0,48 | 0,52 | 1,50 | 0,079916  | 0,214919 |
| CPQ           | 5,92 | 5,33 | 5,27 | 4,19 | 0,0799291 | 0,214919 |
| SARS          | 6,12 | 5,11 | 5,03 | 3,59 | 0,0799354 | 0,214919 |
| SLC26A2       | 1,69 | 1,03 | 0,97 | 0,57 | 0,0799422 | 0,214919 |
| RP11-34P13.8  | 0,00 | 0,00 | 0,00 | 0,00 | 0,079943  | 0,214919 |
| PARM1         | 0,62 | 0,15 | 2,10 | 0,26 | 0,080007  | 0,215065 |
| AC079325.6    | 7,25 | 6,59 | 5,84 | 4,58 | 0,0800217 | 0,215078 |
| AC008888.7    | 0,04 | 0,30 | 0,07 | 0,38 | 0,0800383 | 0,215093 |
| PCDHGB8P      | 0,10 | 0,23 | 0,05 | 0,09 | 0,0800581 | 0,215093 |
| TMEM145       | 1,12 | 0,00 | 1,57 | 2,53 | 0,0800595 | 0,215093 |
| NUP210        | 4,58 | 4,65 | 4,43 | 3,99 | 0,0800661 | 0,215093 |
| CH507-254M2.4 | 0,00 | 0,99 | 0,00 | 0,00 | 0,0800876 | 0,215125 |
| LDLRAD1       | 0,06 | 0,00 | 0,07 | 0,25 | 0,0801345 | 0,215225 |
| TRMO          | 4,97 | 0,34 | 4,13 | 2,34 | 0,0801601 | 0,215268 |
| RP11-415J8.3  | 1,45 | 1,46 | 1,25 | 1,29 | 0,0802422 | 0,215462 |
| EXOSC3        | 3,88 | 2,13 | 3,89 | 3,67 | 0,080262  | 0,21549  |
| TICAM1        | 0,91 | 0,00 | 1,25 | 1,45 | 0,0803169 | 0,215583 |
| ASXL2         | 2,81 | 3,80 | 2,48 | 2,30 | 0,0803223 | 0,215583 |
| RP11-411K7.1  | 0,05 | 0,96 | 0,05 | 0,38 | 0,0803257 | 0,215583 |
| SLC35G1       | 1,17 | 3,51 | 1,28 | 0,81 | 0,080346  | 0,215611 |
| MARVELD1      | 2,73 | 2,69 | 3,16 | 3,38 | 0,0803904 | 0,215704 |
| ZBED9         | 0,08 | 0,33 | 0,03 | 0,21 | 0,0804037 | 0,215714 |
| HSF4          | 0,00 | 0,00 | 2,80 | 0,00 | 0,0804436 | 0,215795 |
| CTC-459M5.2   | 1,17 | 0,00 | 0,00 | 2,58 | 0,0804675 | 0,215833 |
| CTD-2369P2.10 | 0,65 | 0,40 | 0,76 | 0,87 | 0,0804858 | 0,215856 |

|                   |       |       |       |       |           |          |
|-------------------|-------|-------|-------|-------|-----------|----------|
| AC005086.3        | 0,00  | 0,00  | 0,00  | 0,00  | 0,0805136 | 0,215904 |
| PNPLA5            | 0,04  | 0,60  | 0,06  | 0,14  | 0,080567  | 0,216021 |
| UEVLD             | 1,97  | 1,41  | 2,25  | 1,34  | 0,0805874 | 0,21605  |
| CCR2              | 4,72  | 3,86  | 4,89  | 5,59  | 0,0806119 | 0,21609  |
| TSPAN19           | 1,08  | 0,53  | 1,33  | 1,24  | 0,0806339 | 0,216123 |
| AC064846.1        | 2,18  | 2,89  | 2,33  | 2,46  | 0,0806755 | 0,216162 |
| UQCRHL            | 0,31  | 0,75  | 0,38  | 0,46  | 0,0806758 | 0,216162 |
| ZNF587B           | 0,69  | 2,56  | 0,45  | 0,69  | 0,0806779 | 0,216162 |
| AC093381.2        | 0,00  | 0,57  | 0,00  | 0,00  | 0,0807251 | NA       |
| ALG10             | 0,00  | 0,00  | 0,02  | 0,00  | 0,0807276 | 0,216269 |
| MYBL1             | 0,10  | 1,86  | 0,01  | 2,26  | 0,0807777 | 0,216377 |
| OR2A42            | 0,00  | 0,00  | 0,00  | 0,03  | 0,0808    | 0,216408 |
| EIF3C             | 7,55  | 7,35  | 7,71  | 7,40  | 0,0808085 | 0,216408 |
| PAIP2B            | 0,61  | 0,06  | 0,43  | 0,62  | 0,0808985 | 0,216623 |
| GET4              | 3,99  | 3,63  | 4,83  | 4,19  | 0,080913  | 0,216635 |
| METTL23           | 5,86  | 6,58  | 4,96  | 5,31  | 0,0809286 | 0,216651 |
| HPS1              | 6,22  | 6,38  | 5,92  | 5,36  | 0,0809565 | 0,216666 |
| ABC14-118882207.1 | 0,00  | 1,18  | 0,04  | 0,32  | 0,0809636 | 0,216666 |
| ATP1A10S          | 0,19  | 0,00  | 0,23  | 0,00  | 0,080967  | 0,216666 |
| CTD-2510F5.4      | 0,60  | 1,33  | 0,28  | 1,24  | 0,0809731 | 0,216666 |
| C2-AS1            | 0,48  | 0,25  | 0,26  | 0,00  | 0,0809916 | 0,216689 |
| UBA5              | 3,89  | 0,63  | 3,17  | 1,80  | 0,081047  | 0,216811 |
| RP11-29A19.2      | 0,00  | 0,00  | 0,05  | 0,11  | 0,0810717 | NA       |
| APOBEC3B          | 0,00  | 0,13  | 0,14  | 0,11  | 0,0810984 | 0,216923 |
| SPATA4            | 0,44  | 1,27  | 0,69  | 0,97  | 0,0811602 | 0,217062 |
| AC022819.3        | 0,20  | 0,62  | 0,18  | 0,23  | 0,0812384 | 0,217236 |
| H2AFY2            | 0,20  | 0,00  | 0,88  | 0,48  | 0,0812447 | 0,217236 |
| DLD               | 5,00  | 3,20  | 4,72  | 4,02  | 0,0812768 | 0,217296 |
| PPM1E             | 0,00  | 1,12  | 0,00  | 0,00  | 0,0812897 | 0,217304 |
| KLHDC1            | 0,26  | 0,00  | 0,59  | 1,04  | 0,0813049 | 0,217318 |
| SNX12             | 3,05  | 0,67  | 3,81  | 2,72  | 0,0813145 | 0,217318 |
| RP11-744K17.9     | 0,00  | 0,20  | 0,00  | 0,00  | 0,0813327 | 0,21734  |
| AGO3              | 3,89  | 2,26  | 3,09  | 3,14  | 0,0813426 | 0,217341 |
| RPL13AP5          | 1,76  | 2,00  | 1,62  | 2,12  | 0,0813812 | 0,217418 |
| BLCAP             | 5,72  | 5,95  | 5,11  | 4,01  | 0,0813986 | 0,217438 |
| TMEM110           | 1,18  | 2,92  | 1,53  | 3,42  | 0,0814293 | 0,217494 |
| TSPAN10           | 0,91  | 1,20  | 1,11  | 1,49  | 0,0814793 | 0,217601 |
| DPYD              | 4,11  | 3,60  | 4,79  | 4,32  | 0,0814985 | 0,217614 |
| LIMCH1            | 2,23  | 0,04  | 1,02  | 0,37  | 0,0815038 | 0,217614 |
| FIP1L1            | 4,91  | 5,64  | 4,37  | 4,13  | 0,0815552 | 0,217725 |
| AC002398.5        | 0,00  | 0,16  | 0,00  | 0,00  | 0,0816032 | 0,217827 |
| PTPRN             | 0,00  | 0,03  | 0,03  | 0,03  | 0,0816563 | 0,217943 |
| AC004063.1        | 0,00  | 0,37  | 0,26  | 0,34  | 0,0816704 | NA       |
| RF00019           | 10,35 | 11,06 | 10,31 | 10,17 | 0,0816798 | 0,21798  |
| TRIM13            | 4,61  | 2,11  | 3,68  | 3,72  | 0,081698  | 0,217991 |
| RP11-100L22.3     | 0,00  | 0,55  | 0,55  | 1,01  | 0,0817126 | 0,217991 |
| DAW1              | 0,17  | 0,00  | 0,33  | 0,05  | 0,0817229 | 0,217991 |
| APIP              | 5,12  | 3,46  | 4,28  | 2,03  | 0,0817232 | 0,217991 |
| ZNF790            | 1,16  | 3,99  | 0,39  | 0,91  | 0,0817524 | 0,218042 |
| ABCA1             | 0,89  | 0,00  | 1,16  | 1,30  | 0,0818309 | 0,218226 |
| GCLC              | 4,52  | 4,88  | 3,50  | 2,51  | 0,081844  | 0,218234 |
| ARL9              | 0,26  | 0,23  | 0,28  | 0,15  | 0,0818724 | 0,218284 |
| C19orf76          | 0,00  | 0,00  | 0,31  | 0,00  | 0,0818937 | 0,218315 |
| PTK7              | 1,15  | 1,10  | 1,14  | 1,46  | 0,0819534 | 0,218447 |
| ANKS1B            | 1,54  | 2,07  | 2,36  | 2,59  | 0,0819867 | 0,21851  |



|               |       |       |       |       |           |          |
|---------------|-------|-------|-------|-------|-----------|----------|
| C20orf166     | 0,00  | 0,00  | 0,00  | 0,11  | 0,0819885 | NA       |
| RP11-628J14.1 | 0,41  | 0,63  | 0,55  | 0,50  | 0,0820076 | 0,218529 |
| SLC19A1       | 1,63  | 2,33  | 2,49  | 3,07  | 0,0820136 | 0,218529 |
| SRGAP3        | 2,94  | 1,98  | 3,30  | 2,04  | 0,0820541 | 0,218611 |
| FIGNL1        | 0,16  | 1,83  | 0,00  | 0,11  | 0,0820647 | 0,218613 |
| LINC00582     | 3,34  | 3,70  | 2,90  | 3,39  | 0,0820996 | 0,21868  |
| TLE1          | 0,07  | 4,65  | 0,25  | 0,49  | 0,0821429 | 0,218769 |
| SMARCD2       | 3,49  | 4,00  | 4,08  | 1,90  | 0,0821824 | 0,218848 |
| RP11-174G6.1  | 0,58  | 2,05  | 1,00  | 0,48  | 0,0822231 | 0,21893  |
| IGKV1-39      | 0,00  | 2,66  | 0,00  | 1,27  | 0,0822676 | 0,218989 |
| TPR           | 5,71  | 5,18  | 5,28  | 4,25  | 0,0822742 | 0,218989 |
| RAB40A        | 0,00  | 0,13  | 0,00  | 0,00  | 0,0822747 | 0,218989 |
| RP11-553K8.3  | 2,37  | 0,00  | 0,71  | 2,31  | 0,0823024 | 0,219036 |
| NPIP11        | 2,49  | 1,48  | 1,87  | 1,39  | 0,0823504 | 0,219116 |
| GLT25D1       | 5,63  | 6,29  | 5,88  | 5,96  | 0,082352  | 0,219116 |
| RP11-303E16.2 | 0,38  | 0,00  | 0,20  | 0,36  | 0,0823769 | 0,219156 |
| IFI44L        | 6,75  | 1,03  | 5,59  | 4,55  | 0,0823959 | 0,219175 |
| SNTG1         | 0,91  | 2,29  | 0,88  | 1,31  | 0,082404  | 0,219175 |
| RP11-461F11.2 | 0,27  | 0,41  | 0,26  | 0,44  | 0,0824531 | 0,219233 |
| E2F6          | 1,01  | 0,18  | 1,58  | 1,91  | 0,0824617 | 0,219233 |
| LONP2         | 4,43  | 4,62  | 3,98  | 2,34  | 0,0824649 | 0,219233 |
| PSEN1         | 5,24  | 5,77  | 4,85  | 4,53  | 0,082465  | 0,219233 |
| RP11-119F19.5 | 0,11  | 0,00  | 0,00  | 0,32  | 0,0824989 | 0,219297 |
| ZNF180        | 1,91  | 3,00  | 1,44  | 1,84  | 0,0825167 | 0,219318 |
| OR4N2         | 0,00  | 0,00  | 0,00  | 0,00  | 0,0825283 | 0,219322 |
| AC007326.11   | 4,06  | 4,71  | 4,24  | 3,28  | 0,0825847 | 0,219446 |
| GPHN          | 2,77  | 0,75  | 1,87  | 1,20  | 0,082602  | 0,219466 |
| SLFN5         | 1,45  | 0,93  | 1,66  | 2,13  | 0,0826317 | 0,219518 |
| CTB-46B19.2   | 1,28  | 3,15  | 2,63  | 3,57  | 0,0826544 | 0,219552 |
| PIGG          | 4,40  | 3,74  | 4,81  | 4,87  | 0,0826654 | 0,219555 |
| REPS1         | 4,82  | 1,60  | 4,39  | 2,80  | 0,0826937 | 0,219604 |
| RP5-887A10.1  | 0,00  | 0,45  | 0,00  | 0,00  | 0,0827088 | NA       |
| OLIG2         | 0,00  | 0,04  | 0,00  | 0,00  | 0,0827285 | NA       |
| RP11-658F2.8  | 5,07  | 4,61  | 4,36  | 4,06  | 0,0827334 | 0,219652 |
| TXNDC16       | 2,21  | 0,77  | 2,15  | 3,20  | 0,082735  | 0,219652 |
| TM7SF3        | 5,22  | 2,39  | 4,09  | 5,27  | 0,0827414 | 0,219652 |
| STAG3         | 2,43  | 0,18  | 1,18  | 0,64  | 0,0827788 | 0,219725 |
| BMP8B         | 0,36  | 0,85  | 0,39  | 0,82  | 0,0827953 | 0,219743 |
| RP11-99P18.1  | 0,00  | 0,00  | 0,00  | 0,00  | 0,0828181 | NA       |
| RPL9          | 10,15 | 10,58 | 10,19 | 10,49 | 0,0828672 | 0,219907 |
| HECA          | 3,67  | 4,49  | 3,38  | 3,36  | 0,0829387 | 0,220041 |
| FILIP1L       | 2,95  | 0,76  | 2,23  | 0,63  | 0,0829523 | 0,220041 |
| NEO1          | 0,00  | 0,03  | 0,00  | 0,81  | 0,0829624 | 0,220041 |
| C17orf101     | 3,60  | 1,17  | 4,08  | 3,67  | 0,0829714 | 0,220041 |
| TOR1AIP1      | 4,67  | 4,80  | 3,90  | 4,41  | 0,0829741 | 0,220041 |
| RP11-462G2.1  | 0,00  | 0,62  | 0,00  | 0,00  | 0,0829768 | NA       |
| RP11-131M11.4 | 0,94  | 1,00  | 0,94  | 1,28  | 0,0829817 | 0,220041 |
| CD40LG        | 0,06  | 0,00  | 0,10  | 0,31  | 0,0830042 | 0,220041 |
| RPL7AP64      | 0,00  | 0,30  | 0,00  | 1,15  | 0,0830046 | 0,220041 |
| RP11-626G11.3 | 3,96  | 3,89  | 3,65  | 1,06  | 0,0830109 | 0,220041 |
| LGALS2        | 8,16  | 8,70  | 8,70  | 8,36  | 0,0830168 | 0,220041 |
| RCOR3         | 4,49  | 2,94  | 4,90  | 3,21  | 0,0830888 | 0,220206 |
| C8orf34       | 1,36  | 0,22  | 1,18  | 0,40  | 0,0831132 | 0,220245 |
| RP11-408A13.4 | 0,00  | 0,13  | 0,00  | 0,00  | 0,0831606 | 0,220259 |
| KIAA1370      | 4,27  | 2,00  | 3,13  | 2,40  | 0,0831613 | 0,220259 |

|               |      |      |      |      |           |          |
|---------------|------|------|------|------|-----------|----------|
| CNTN3         | 0,00 | 0,00 | 0,00 | 0,00 | 0,0831617 | 0,220259 |
| THOC5         | 2,78 | 1,59 | 3,31 | 2,24 | 0,0831641 | 0,220259 |
| EXPH5         | 0,36 | 0,22 | 0,40 | 0,18 | 0,0831682 | 0,220259 |
| RP11-406O16.1 | 0,00 | 0,00 | 0,00 | 0,25 | 0,0832059 | NA       |
| CUTC          | 5,36 | 0,67 | 5,45 | 1,86 | 0,083261  | 0,220478 |
| RUNX3         | 4,06 | 3,41 | 4,15 | 3,11 | 0,0832855 | 0,220517 |
| C8orf77       | 0,06 | 0,12 | 0,14 | 0,08 | 0,0833201 | 0,220561 |
| RP1-261D10.1  | 0,83 | 3,95 | 0,71 | 0,00 | 0,0833256 | 0,220561 |
| RP11-322M19.1 | 5,36 | 4,00 | 4,74 | 2,70 | 0,0833344 | 0,220561 |
| AP001469.7    | 0,45 | 0,58 | 0,00 | 1,53 | 0,0833416 | 0,220561 |
| RP3-403L10.3  | 0,00 | 0,00 | 1,53 | 0,00 | 0,0833864 | 0,220653 |
| G0S2          | 3,47 | 5,41 | 4,75 | 0,47 | 0,0834072 | 0,220682 |
| RP11-156E8.1  | 1,19 | 0,59 | 1,36 | 0,97 | 0,0834417 | 0,220747 |
| CCDC112       | 3,65 | 2,31 | 3,91 | 2,13 | 0,0834991 | 0,220872 |
| RPS2P46       | 0,99 | 1,30 | 0,97 | 0,68 | 0,083515  | 0,220888 |
| AC116035.1    | 0,72 | 0,00 | 0,48 | 1,49 | 0,0835821 | 0,221039 |
| RP11-216B9.6  | 0,57 | 0,00 | 0,69 | 2,44 | 0,0836879 | 0,221292 |
| MRPS11        | 5,61 | 5,65 | 6,14 | 5,61 | 0,0836975 | 0,221292 |
| RP11-523O18.7 | 1,07 | 0,36 | 0,73 | 0,00 | 0,0837155 | 0,221313 |
| RP11-725D20.1 | 0,00 | 0,65 | 0,36 | 0,74 | 0,0837613 | 0,221408 |
| SETDB2        | 4,79 | 3,22 | 4,46 | 2,95 | 0,083797  | 0,221476 |
| CTC-444N24.6  | 0,00 | 1,89 | 0,00 | 0,00 | 0,0838311 | 0,221539 |
| AP001476.2    | 0,00 | 0,31 | 0,07 | 0,07 | 0,083905  | 0,221708 |
| RP11-510C10.4 | 0,11 | 0,18 | 0,00 | 0,80 | 0,0839208 | 0,221724 |
| KMT2D         | 1,30 | 2,25 | 3,23 | 4,14 | 0,0839646 | 0,221813 |
| CTC-204F22.1  | 0,60 | 0,12 | 0,59 | 0,38 | 0,083994  | 0,221853 |
| RP11-70F11.6  | 1,04 | 2,13 | 1,55 | 1,53 | 0,0839999 | 0,221853 |
| ZNF561        | 3,74 | 1,20 | 2,93 | 1,62 | 0,0840156 | 0,221869 |
| CISH          | 0,00 | 0,19 | 0,12 | 2,30 | 0,0840268 | 0,221872 |
| AKAP7         | 2,07 | 0,46 | 1,35 | 0,96 | 0,0840377 | 0,221874 |
| RP11-794P6.1  | 0,04 | 0,06 | 0,16 | 0,29 | 0,084083  | 0,221967 |
| FANK1         | 0,59 | 0,49 | 0,25 | 0,08 | 0,0841649 | 0,222157 |
| SLC12A4       | 0,86 | 2,69 | 0,61 | 2,48 | 0,0841991 | 0,222221 |
| CYLD          | 5,60 | 6,27 | 5,10 | 4,68 | 0,084212  | 0,222229 |
| MARCH5        | 4,04 | 3,07 | 3,23 | 2,36 | 0,0842603 | 0,22233  |
| HIST1H4E      | 2,93 | 0,10 | 0,64 | 0,85 | 0,0842992 | 0,222406 |
| MKL2          | 1,86 | 1,63 | 2,31 | 2,54 | 0,0843382 | 0,222483 |
| AGBL3         | 0,33 | 0,00 | 0,06 | 0,06 | 0,0843537 | 0,222497 |
| RN7SL491P     | 0,00 | 0,00 | 0,00 | 0,91 | 0,0843755 | 0,222528 |
| LARP4         | 3,92 | 3,53 | 3,53 | 2,78 | 0,08443   | 0,222645 |
| AC007952.5    | 0,05 | 0,57 | 0,08 | 0,20 | 0,0845633 | 0,222938 |
| HMGB3         | 2,60 | 0,69 | 2,22 | 1,36 | 0,0845673 | 0,222938 |
| RN7SL40P      | 0,91 | 1,25 | 1,06 | 1,24 | 0,0845771 | 0,222938 |
| COLEC12       | 0,89 | 2,69 | 1,53 | 2,03 | 0,0845809 | 0,222938 |
| SPATA5L1      | 3,90 | 1,16 | 3,66 | 1,83 | 0,084609  | 0,222985 |
| RNU6-60P      | 1,54 | 0,00 | 0,00 | 3,07 | 0,0846392 | 0,223039 |
| ZNF677        | 2,99 | 1,38 | 2,05 | 2,29 | 0,0846501 | 0,223041 |
| CHUK          | 3,57 | 1,93 | 2,43 | 1,38 | 0,0846934 | 0,223128 |
| GS1-57L11.1   | 0,00 | 2,68 | 0,00 | 0,00 | 0,0847333 | 0,223207 |
| FLII          | 7,53 | 7,85 | 7,58 | 7,53 | 0,0848804 | 0,223568 |
| RP11-314O13.1 | 0,00 | 0,99 | 0,00 | 0,00 | 0,0848914 | NA       |
| ZDHHHC23      | 0,00 | 0,00 | 0,01 | 0,00 | 0,0849508 | 0,223714 |
| ZNF792        | 0,03 | 0,00 | 0,00 | 0,00 | 0,0849559 | 0,223714 |
| KEL           | 0,29 | 0,94 | 0,31 | 0,27 | 0,0849771 | 0,223743 |
| RFX1          | 1,05 | 2,99 | 2,94 | 3,78 | 0,0850601 | 0,223935 |

|                 |      |      |      |      |           |          |
|-----------------|------|------|------|------|-----------|----------|
| NOTCH2          | 5,25 | 3,25 | 5,04 | 5,06 | 0,0850761 | 0,223951 |
| DPY30           | 6,24 | 5,21 | 5,73 | 4,70 | 0,0850966 | 0,22396  |
| LOXL1           | 0,00 | 0,00 | 0,00 | 0,00 | 0,0850998 | 0,22396  |
| CENPW           | 2,69 | 0,39 | 2,87 | 0,00 | 0,0851433 | 0,224048 |
| ZNF594          | 0,37 | 0,06 | 0,07 | 0,23 | 0,0851767 | 0,224075 |
| RP11-544A12.8   | 1,18 | 0,39 | 1,08 | 1,02 | 0,0851833 | 0,224075 |
| SDCBP           | 7,00 | 5,97 | 6,62 | 7,19 | 0,085184  | 0,224075 |
| MYOF            | 4,97 | 3,12 | 4,89 | 4,01 | 0,0852174 | 0,224137 |
| RP11-90L1.8     | 0,97 | 1,55 | 1,12 | 1,46 | 0,0852748 | 0,224237 |
| SNX15           | 2,10 | 1,36 | 1,90 | 0,67 | 0,0852836 | 0,224237 |
| SGK494          | 0,90 | 0,81 | 1,44 | 2,38 | 0,0852935 | 0,224237 |
| COA1            | 5,55 | 4,63 | 5,06 | 4,13 | 0,0853128 | 0,224237 |
| FAM26E          | 0,00 | 0,31 | 0,00 | 0,00 | 0,0853136 | 0,224237 |
| ZNF350          | 4,39 | 5,94 | 4,45 | 2,66 | 0,0853177 | 0,224237 |
| JOSD1           | 3,83 | 1,73 | 3,94 | 2,76 | 0,0853259 | 0,224237 |
| RP11-498P14.5   | 0,45 | 0,00 | 0,97 | 1,71 | 0,085344  | 0,224258 |
| RP11-1094M14.11 | 3,26 | 1,64 | 3,82 | 2,15 | 0,0853816 | 0,22433  |
| CMTM7           | 6,60 | 6,36 | 6,69 | 6,98 | 0,085399  | 0,224333 |
| CTD-2540B15.13  | 0,00 | 0,00 | 0,00 | 0,70 | 0,085403  | 0,224333 |
| SLC35B1         | 5,78 | 5,71 | 5,22 | 4,97 | 0,0854407 | 0,224405 |
| GLT1D1          | 0,00 | 0,10 | 0,02 | 1,14 | 0,0854872 | 0,224484 |
| TCEANC2         | 2,06 | 2,11 | 1,57 | 1,12 | 0,0854908 | 0,224484 |
| JSRP1           | 0,35 | 0,40 | 0,22 | 0,00 | 0,0855132 | 0,224516 |
| AC008280.2      | 0,00 | 0,00 | 0,00 | 0,44 | 0,0855136 | NA       |
| CELF5           | 0,83 | 1,02 | 1,15 | 0,42 | 0,0855334 | 0,224526 |
| RP11-930O11.2   | 0,00 | 0,40 | 0,00 | 3,97 | 0,0855372 | 0,224526 |
| OVCH1           | 0,00 | 0,38 | 0,00 | 0,03 | 0,0855639 | 0,22457  |
| RNU6-1188P      | 4,42 | 0,00 | 0,00 | 0,00 | 0,0856074 | 0,224657 |
| CTD-2369P2.12   | 2,92 | 3,69 | 3,15 | 3,21 | 0,0856238 | 0,224674 |
| CTC-463A16.1    | 0,20 | 0,16 | 0,10 | 0,14 | 0,0856407 | 0,224692 |
| AC074008.4      | 0,13 | 0,32 | 0,06 | 0,00 | 0,0856722 | 0,224748 |
| RP11-374P20.5   | 0,36 | 0,42 | 0,58 | 2,21 | 0,0857361 | 0,224889 |
| RP11-36C20.1    | 0,00 | 0,00 | 0,28 | 0,31 | 0,0857388 | NA       |
| SMIM22          | 0,14 | 1,73 | 0,58 | 1,95 | 0,0857522 | 0,224905 |
| RP5-1198O20.4   | 1,99 | 2,64 | 2,22 | 3,18 | 0,0857788 | 0,224947 |
| AP000688.14     | 0,05 | 0,14 | 0,03 | 0,00 | 0,0857886 | 0,224947 |
| ZNF699          | 0,81 | 0,00 | 0,10 | 0,68 | 0,0858116 | 0,224981 |
| RP11-97O12.5    | 1,97 | 0,03 | 2,74 | 3,15 | 0,0858363 | 0,225019 |
| NFIC            | 1,35 | 2,80 | 2,28 | 2,33 | 0,0858552 | 0,225042 |
| PMS2L4          | 2,63 | 1,74 | 0,64 | 0,84 | 0,0858827 | 0,225088 |
| RP11-442O1.4    | 0,52 | 1,09 | 0,72 | 0,12 | 0,0859257 | 0,225129 |
| RNU6-1016P      | 0,00 | 0,00 | 3,94 | 3,28 | 0,0859385 | 0,225129 |
| RP11-378A13.2   | 0,00 | 0,00 | 0,00 | 1,07 | 0,0859452 | NA       |
| RP11-974F13.5   | 1,74 | 0,82 | 2,27 | 0,80 | 0,0859483 | 0,225129 |
| RP11-597G23.1   | 0,20 | 0,27 | 0,36 | 0,67 | 0,0859536 | 0,225129 |
| IRF1            | 5,31 | 5,29 | 5,36 | 5,40 | 0,0859551 | 0,225129 |
| PPFIBP1         | 0,92 | 2,85 | 0,70 | 1,37 | 0,0859592 | 0,225129 |
| MRPL15          | 6,49 | 2,06 | 5,49 | 3,04 | 0,0860611 | 0,225369 |
| INSL4           | 0,18 | 0,22 | 0,07 | 1,61 | 0,0860807 | 0,225394 |
| FENDRR          | 0,12 | 0,44 | 0,02 | 0,06 | 0,0861362 | 0,225493 |
| RP11-359E3.4    | 0,07 | 0,10 | 0,11 | 0,18 | 0,0861387 | 0,225493 |
| RP11-254B13.3   | 4,19 | 0,49 | 0,49 | 0,00 | 0,0862199 | 0,225679 |
| RP11-332J15.4   | 0,00 | 0,00 | 0,54 | 0,00 | 0,086261  | 0,22576  |
| SPPL2B          | 1,56 | 3,04 | 2,34 | 1,44 | 0,0862989 | 0,225778 |
| RP11-307C12.12  | 0,00 | 2,50 | 0,90 | 0,87 | 0,0862997 | 0,225778 |

|               |       |       |       |       |           |          |
|---------------|-------|-------|-------|-------|-----------|----------|
| EMBP1         | 0,91  | 1,92  | 0,00  | 0,00  | 0,0863007 | 0,225778 |
| CD19          | 0,00  | 4,69  | 0,13  | 0,00  | 0,0863087 | 0,225778 |
| PCYT1B        | 0,03  | 0,02  | 0,05  | 0,05  | 0,0863191 | 0,225779 |
| RP11-1012A1.4 | 0,00  | 0,00  | 0,00  | 0,00  | 0,0863632 | 0,225845 |
| RP11-455F5.4  | 0,65  | 1,29  | 0,67  | 0,31  | 0,0863648 | 0,225845 |
| RP11-395114.2 | 1,81  | 1,35  | 0,97  | 1,27  | 0,0863848 | 0,225871 |
| MTMR12        | 3,35  | 4,19  | 3,20  | 4,51  | 0,0864005 | 0,225885 |
| SAMD1         | 1,02  | 0,67  | 2,11  | 2,03  | 0,0864257 | 0,225925 |
| ZC3HAV1L      | 0,26  | 0,12  | 0,41  | 0,32  | 0,0864542 | 0,225973 |
| MBOAT7        | 5,32  | 5,23  | 5,62  | 5,58  | 0,086472  | 0,225993 |
| AC098820.3    | 3,74  | 4,86  | 2,74  | 1,90  | 0,0864874 | 0,225993 |
| ZAP70         | 0,06  | 1,59  | 0,19  | 3,73  | 0,0864927 | 0,225993 |
| AC004744.3    | 0,74  | 0,80  | 0,00  | 0,00  | 0,0865026 | 0,225993 |
| RP11-662M24.1 | 0,10  | 0,00  | 0,09  | 0,09  | 0,0865327 | 0,226045 |
| RP11-509J21.1 | 0,96  | 2,30  | 0,70  | 3,71  | 0,0865503 | 0,226064 |
| RPL13A        | 11,31 | 11,38 | 11,22 | 11,03 | 0,0865951 | 0,226155 |
| RP11-212I21.4 | 0,59  | 0,22  | 0,41  | 1,71  | 0,086612  | 0,226172 |
| HNRNPDL       | 7,88  | 7,11  | 7,57  | 6,94  | 0,0866294 | 0,226191 |
| FHL1          | 0,06  | 0,47  | 0,07  | 0,93  | 0,0866632 | 0,226232 |
| HDAC7         | 1,86  | 2,65  | 2,94  | 3,17  | 0,0866662 | 0,226232 |
| OIP5-AS1      | 4,28  | 4,87  | 3,71  | 5,00  | 0,0866757 | 0,226232 |
| SUSD6         | 4,79  | 2,76  | 4,49  | 4,62  | 0,0867065 | 0,226265 |
| SERPINB8      | 4,37  | 1,43  | 4,27  | 4,58  | 0,0867086 | 0,226265 |
| POLRMT        | 3,07  | 2,55  | 3,32  | 3,78  | 0,0867481 | 0,226341 |
| KB-1732A1.1   | 0,11  | 1,49  | 0,27  | 0,00  | 0,0867622 | 0,226352 |
| RP11-666A20.4 | 1,92  | 1,10  | 1,22  | 2,16  | 0,0867918 | 0,226402 |
| REXO2         | 4,45  | 2,39  | 3,86  | 1,95  | 0,0868052 | 0,226411 |
| RNF103        | 2,42  | 0,93  | 2,81  | 0,45  | 0,0868602 | 0,226528 |
| KCNK12        | 0,00  | 0,29  | 0,00  | 0,00  | 0,0868785 | 0,226549 |
| TRAPPC4       | 6,09  | 5,18  | 4,91  | 4,37  | 0,0869327 | 0,226647 |
| AC113188.2    | 0,28  | 0,00  | 0,36  | 0,69  | 0,0869364 | 0,226647 |
| PGC           | 0,00  | 0,75  | 0,00  | 0,00  | 0,0870091 | 0,22681  |
| RP5-1073O3.7  | 1,93  | 1,67  | 3,16  | 2,77  | 0,0870345 | 0,226849 |
| RP5-991C6.4   | 0,57  | 0,00  | 0,00  | 1,32  | 0,0870497 | 0,226858 |
| C12orf10      | 5,97  | 6,92  | 5,70  | 6,08  | 0,0870702 | 0,226858 |
| AC000403.4    | 1,07  | 0,14  | 0,61  | 0,15  | 0,0870747 | 0,226858 |
| TSPAN6        | 0,25  | 0,12  | 0,21  | 0,19  | 0,0870788 | 0,226858 |
| DOC2B         | 0,11  | 0,25  | 0,13  | 0,30  | 0,0871626 | 0,22705  |
| DPPA4         | 1,01  | 1,49  | 1,01  | 0,98  | 0,087217  | 0,227165 |
| AC017006.2    | 0,94  | 0,00  | 1,00  | 0,00  | 0,0872458 | 0,227213 |
| HEATR3        | 2,44  | 0,91  | 2,88  | 3,81  | 0,087264  | 0,227234 |
| RNU6-1026P    | 0,00  | 0,00  | 0,00  | 0,00  | 0,0873054 | 0,227315 |
| C5orf45       | 3,58  | 5,17  | 4,27  | 3,47  | 0,0873213 | 0,22733  |
| RABGAP1L      | 6,00  | 4,86  | 5,72  | 6,06  | 0,0873511 | 0,227369 |
| RP11-848P1.3  | 0,93  | 1,76  | 1,98  | 0,59  | 0,0873668 | 0,227369 |
| AC097382.5    | 1,16  | 1,52  | 0,98  | 0,95  | 0,0873771 | 0,227369 |
| RP11-338K17.5 | 0,00  | 0,68  | 0,00  | 0,26  | 0,0873774 | 0,227369 |
| OR2I1P        | 0,03  | 0,22  | 0,00  | 0,00  | 0,0874006 | 0,227403 |
| BEX4          | 5,41  | 2,73  | 5,01  | 3,45  | 0,0874206 | 0,227429 |
| PPRC1         | 3,75  | 1,44  | 4,19  | 4,37  | 0,0874643 | 0,227513 |
| SURF1         | 5,64  | 5,59  | 5,88  | 6,34  | 0,0874736 | 0,227513 |
| RP11-231E6.1  | 0,74  | 1,13  | 1,38  | 1,05  | 0,0876624 | 0,227956 |
| DNAJC27       | 2,15  | 0,28  | 1,49  | 1,66  | 0,0876684 | 0,227956 |
| AC011526.1    | 0,13  | 0,08  | 0,33  | 0,57  | 0,0876744 | 0,227956 |
| HHLA1         | 0,33  | 1,05  | 0,30  | 0,76  | 0,0877682 | 0,228173 |

|               |      |      |      |      |           |          |
|---------------|------|------|------|------|-----------|----------|
| RP11-567M16.6 | 0,16 | 0,59 | 0,37 | 1,18 | 0,0878047 | 0,228241 |
| WDFY1         | 4,11 | 4,82 | 4,33 | 5,46 | 0,0878612 | 0,228361 |
| TMEM117       | 0,00 | 1,38 | 0,00 | 0,00 | 0,0878973 | 0,228428 |
| CECR5         | 4,28 | 5,39 | 4,66 | 3,96 | 0,0879704 | 0,228589 |
| CSRNP1        | 4,00 | 4,96 | 4,46 | 4,19 | 0,0879799 | 0,228589 |
| RP11-158K1.3  | 1,65 | 0,74 | 1,17 | 0,92 | 0,0880061 | 0,228617 |
| ATP6V0E1      | 8,46 | 7,35 | 7,92 | 7,61 | 0,088011  | 0,228617 |
| C14orf37      | 0,18 | 0,14 | 0,59 | 0,91 | 0,0880562 | 0,228684 |
| FBF1          | 0,14 | 0,00 | 0,26 | 0,00 | 0,0880587 | 0,228684 |
| RPL21P3       | 0,00 | 0,00 | 0,00 | 0,00 | 0,0880756 | 0,228684 |
| ZNF660        | 0,37 | 1,18 | 0,30 | 0,25 | 0,088079  | 0,228684 |
| CD300LB       | 4,40 | 4,55 | 4,40 | 2,87 | 0,0880885 | 0,228684 |
| DTX2P1        | 0,00 | 0,12 | 0,00 | 0,00 | 0,0880952 | NA       |
| MXRA7         | 0,46 | 0,43 | 0,66 | 0,94 | 0,0881644 | 0,228855 |
| RP11-6O2.2    | 0,40 | 0,58 | 0,24 | 0,28 | 0,088185  | 0,228862 |
| SEPHS1        | 3,31 | 0,86 | 2,44 | 1,35 | 0,0882037 | 0,228862 |
| PGBD2         | 2,12 | 3,72 | 1,93 | 1,58 | 0,088207  | 0,228862 |
| NDRG4         | 0,44 | 0,88 | 1,09 | 0,35 | 0,0882086 | 0,228862 |
| LGALS4        | 0,04 | 0,58 | 0,26 | 1,23 | 0,0882579 | 0,228964 |
| RP11-693M3.1  | 0,99 | 0,09 | 0,25 | 0,11 | 0,0883456 | 0,229142 |
| U52112.12     | 0,19 | 1,05 | 0,49 | 0,32 | 0,0883473 | 0,229142 |
| RP11-197N18.2 | 0,00 | 0,00 | 0,00 | 0,03 | 0,0883605 | 0,22915  |
| RWDD2A        | 0,04 | 0,04 | 0,00 | 0,13 | 0,0884022 | 0,229212 |
| SH3GL1        | 3,05 | 2,23 | 3,27 | 3,10 | 0,088405  | 0,229212 |
| TMEM254       | 3,89 | 2,95 | 2,36 | 0,23 | 0,0884332 | 0,229258 |
| RP11-415I12.2 | 0,00 | 0,00 | 0,00 | 0,00 | 0,0884454 | 0,229263 |
| AP003774.1    | 0,00 | 0,00 | 0,43 | 0,00 | 0,08847   | 0,229268 |
| RP11-114G11.3 | 0,00 | 0,47 | 0,00 | 0,16 | 0,0884758 | 0,229268 |
| DYNLT1        | 7,32 | 6,00 | 7,17 | 6,93 | 0,0884828 | 0,229268 |
| MEN1          | 0,68 | 0,24 | 1,34 | 1,01 | 0,0884888 | 0,229268 |
| RP11-98O2.1   | 0,21 | 0,00 | 0,09 | 0,61 | 0,088534  | 0,229359 |
| TEN1          | 5,81 | 2,93 | 5,40 | 5,90 | 0,0885462 | 0,229364 |
| RP11-359E19.2 | 0,00 | 0,44 | 0,00 | 0,00 | 0,0886649 | NA       |
| SLC35F6       | 4,14 | 1,82 | 3,37 | 1,64 | 0,088706  | 0,229751 |
| PLOD2         | 0,29 | 0,99 | 0,12 | 0,30 | 0,0887203 | 0,229761 |
| COG4          | 4,54 | 5,82 | 4,64 | 4,57 | 0,0887434 | 0,229791 |
| IFNAR1        | 4,51 | 4,25 | 4,12 | 3,58 | 0,0887525 | 0,229791 |
| RN7SL149P     | 0,74 | 1,42 | 1,11 | 0,00 | 0,0887842 | 0,229812 |
| TMEM173       | 4,88 | 3,66 | 5,09 | 4,45 | 0,0887867 | 0,229812 |
| RP11-365P13.4 | 2,85 | 1,37 | 3,79 | 2,92 | 0,0887994 | 0,229812 |
| SIGLEC1       | 3,23 | 0,30 | 4,35 | 4,79 | 0,0888022 | 0,229812 |
| MFSD3         | 0,78 | 0,10 | 1,57 | 0,17 | 0,0888202 | 0,229832 |
| MT-TI         | 3,31 | 5,05 | 0,81 | 3,65 | 0,0888333 | 0,229839 |
| MPZL1         | 3,94 | 4,16 | 3,58 | 2,00 | 0,088867  | 0,2299   |
| SORBS1        | 0,13 | 0,46 | 0,16 | 1,91 | 0,0889019 | 0,229963 |
| SDE2          | 2,28 | 3,55 | 2,49 | 0,90 | 0,0889204 | 0,22998  |
| RP13-516M14.8 | 0,29 | 1,21 | 1,39 | 0,86 | 0,0889291 | 0,22998  |
| SLC25A45      | 3,93 | 3,75 | 3,14 | 3,65 | 0,0889665 | 0,23005  |
| RP11-127I20.8 | 0,25 | 0,00 | 0,69 | 0,23 | 0,0889834 | 0,230067 |
| OR6M1         | 0,00 | 0,00 | 0,00 | 0,00 | 0,0889954 | 0,230071 |
| AKR1B15       | 1,55 | 1,91 | 0,99 | 0,67 | 0,0890437 | 0,230164 |
| RP11-472N19.3 | 0,00 | 0,00 | 0,00 | 0,00 | 0,0890519 | 0,230164 |
| RP11-289H16.1 | 1,43 | 0,00 | 0,69 | 0,04 | 0,0890903 | 0,230236 |
| CTSK          | 2,57 | 1,40 | 0,96 | 2,21 | 0,089119  | 0,230284 |
| RN7SL398P     | 2,23 | 1,00 | 3,49 | 3,16 | 0,0891337 | 0,230295 |

|                  |      |      |      |      |           |          |
|------------------|------|------|------|------|-----------|----------|
| YIPF5            | 4,01 | 1,12 | 3,36 | 3,19 | 0,0891467 | 0,230302 |
| RP11-386I14.4    | 7,27 | 7,17 | 7,51 | 7,37 | 0,0891594 | 0,230308 |
| ZNF644           | 4,70 | 3,20 | 4,86 | 3,59 | 0,0891962 | 0,230376 |
| SFPQ             | 8,08 | 7,96 | 7,87 | 8,09 | 0,0892068 | 0,230377 |
| RP3-355L5.4      | 0,00 | 0,38 | 0,25 | 0,77 | 0,0892316 | 0,230414 |
| PIK3CG           | 4,29 | 3,21 | 3,50 | 2,64 | 0,0892455 | 0,230423 |
| HIST2H3D         | 4,10 | 0,00 | 0,00 | 0,00 | 0,0892617 | 0,230438 |
| RP11-405M12.4    | 2,76 | 4,20 | 1,38 | 0,75 | 0,0893027 | 0,230517 |
| MECR             | 4,35 | 1,90 | 2,85 | 3,92 | 0,0893337 | 0,23057  |
| RABGAP1          | 3,37 | 5,06 | 3,48 | 4,15 | 0,0893706 | 0,230639 |
| RNU1-134P        | 0,00 | 4,33 | 1,39 | 2,26 | 0,0893939 | 0,230672 |
| XXbac-BPG55C20.5 | 2,61 | 0,54 | 0,55 | 0,82 | 0,0894114 | 0,23069  |
| MIR1273H         | 4,34 | 1,71 | 4,82 | 3,01 | 0,0894267 | 0,230703 |
| RP1-12G14.3      | 0,00 | 2,33 | 0,50 | 0,53 | 0,0894923 | 0,230846 |
| RP11-212P7.1     | 0,00 | 0,00 | 0,44 | 0,00 | 0,0895072 | NA       |
| RP11-1018J11.2   | 0,17 | 0,30 | 0,15 | 0,09 | 0,0895174 | 0,230884 |
| PHF10            | 4,78 | 3,28 | 4,54 | 5,66 | 0,0895325 | 0,230896 |
| TSEN54           | 4,99 | 6,34 | 4,15 | 2,99 | 0,0895672 | 0,230959 |
| OR6C6            | 0,00 | 0,10 | 0,08 | 0,09 | 0,0896742 | NA       |
| PFKL             | 4,93 | 3,83 | 5,45 | 5,43 | 0,0896849 | 0,231235 |
| P3H2             | 1,29 | 2,38 | 1,20 | 1,16 | 0,0896988 | 0,231244 |
| CTD-2124B8.2     | 0,00 | 0,00 | 0,00 | 0,32 | 0,0897181 | NA       |
| LYRM7            | 2,06 | 1,50 | 2,24 | 2,03 | 0,0897649 | 0,231388 |
| RFXAP            | 2,59 | 2,52 | 0,37 | 0,39 | 0,0897919 | 0,23143  |
| SLC2A4RG         | 0,20 | 0,72 | 1,74 | 1,87 | 0,0898333 | 0,231488 |
| RP11-293G6.1     | 0,46 | 0,31 | 0,71 | 0,31 | 0,0898349 | 0,231488 |
| RP11-126K1.8     | 1,56 | 2,64 | 2,99 | 4,45 | 0,0898764 | 0,231568 |
| SCN2B            | 0,06 | 0,27 | 0,11 | 0,13 | 0,0899011 | 0,231604 |
| RP11-271F18.4    | 0,00 | 0,37 | 0,27 | 0,16 | 0,0899149 | 0,231613 |
| SYT15            | 2,08 | 2,04 | 2,27 | 2,47 | 0,0899333 | 0,231634 |
| RP5-1056L3.3     | 1,13 | 0,00 | 3,06 | 0,00 | 0,0899684 | 0,231689 |
| SLC34A2          | 1,79 | 1,92 | 2,58 | 2,33 | 0,0899754 | 0,231689 |
| TAF6             | 2,62 | 0,61 | 1,89 | 2,53 | 0,0899881 | 0,231694 |
| GNPTAB           | 4,40 | 5,78 | 4,74 | 4,77 | 0,0899983 | 0,231694 |
| STON1            | 0,09 | 0,02 | 0,23 | 0,08 | 0,0900121 | 0,231702 |
| CYP2W1           | 0,00 | 0,07 | 0,00 | 0,00 | 0,0900294 | 0,231715 |
| RIN2             | 3,53 | 3,71 | 3,78 | 3,78 | 0,0900384 | 0,231715 |
| EHD2             | 0,06 | 0,33 | 0,06 | 0,16 | 0,0900525 | 0,231715 |
| RP1-274L7.4      | 0,38 | 0,94 | 0,43 | 0,53 | 0,0900587 | 0,231715 |
| C21orf62-AS1     | 0,15 | 0,07 | 0,34 | 0,62 | 0,090078  | 0,231736 |
| CBLL1            | 4,16 | 2,57 | 3,05 | 2,17 | 0,0900877 | 0,231736 |
| RP11-322M19.2    | 1,09 | 0,13 | 1,31 | 1,05 | 0,0901081 | 0,231759 |
| BAG4             | 3,83 | 3,70 | 2,90 | 2,38 | 0,0901176 | 0,231759 |
| ZNF844           | 0,66 | 0,99 | 0,89 | 1,18 | 0,0901561 | 0,231809 |
| SUMO4            | 2,55 | 0,00 | 0,50 | 0,13 | 0,0901797 | 0,231809 |
| EDEM2            | 5,34 | 0,81 | 4,02 | 2,92 | 0,0901827 | 0,231809 |
| SLC12A6          | 3,86 | 2,14 | 3,65 | 2,22 | 0,0901899 | 0,231809 |
| WASHC2A          | 3,66 | 4,15 | 3,75 | 4,18 | 0,0901925 | 0,231809 |
| RP11-98J23.1     | 0,39 | 0,04 | 0,24 | 0,03 | 0,0902024 | 0,231809 |
| RP11-361H10.5    | 0,66 | 1,93 | 0,99 | 0,43 | 0,0902101 | 0,231809 |
| SLC38A10         | 4,16 | 3,80 | 4,45 | 4,55 | 0,0902329 | 0,231841 |
| BRWD1            | 5,00 | 3,13 | 4,54 | 5,50 | 0,0902831 | 0,231943 |
| PPP2R5D          | 0,39 | 0,16 | 0,32 | 1,66 | 0,0902956 | 0,231949 |
| OR2A25           | 0,00 | 0,66 | 0,00 | 0,12 | 0,0903111 | 0,231962 |
| PPM1B            | 4,54 | 5,37 | 4,56 | 2,94 | 0,0903452 | 0,232023 |

|                |      |      |      |      |           |          |
|----------------|------|------|------|------|-----------|----------|
| FAM200A        | 0,72 | 0,06 | 0,10 | 0,85 | 0,0905305 | 0,232471 |
| INTS9          | 3,69 | 4,24 | 2,92 | 4,28 | 0,0905606 | 0,232498 |
| AC046143.7     | 1,10 | 0,71 | 0,73 | 1,28 | 0,0905617 | 0,232498 |
| SPECC1L        | 2,73 | 0,71 | 2,17 | 2,82 | 0,0905847 | 0,23253  |
| KCNK6          | 4,48 | 4,95 | 4,40 | 3,66 | 0,0906276 | 0,232613 |
| C7orf26        | 1,92 | 1,85 | 2,18 | 2,83 | 0,0907121 | 0,232803 |
| GANAB          | 1,88 | 1,24 | 2,09 | 2,79 | 0,0907356 | 0,232827 |
| AF131216.5     | 1,08 | 0,62 | 0,51 | 0,88 | 0,0907424 | 0,232827 |
| RF00409        | 4,85 | 1,61 | 3,34 | 4,28 | 0,0907691 | 0,232852 |
| RELB           | 3,62 | 5,15 | 4,08 | 3,81 | 0,0907807 | 0,232852 |
| LCN15          | 0,67 | 0,10 | 0,18 | 0,89 | 0,0907836 | 0,232852 |
| ARL4D          | 0,11 | 0,17 | 0,00 | 0,00 | 0,0908508 | 0,232998 |
| ACO10883.5     | 2,47 | 4,20 | 1,00 | 0,59 | 0,0908825 | 0,233052 |
| RP11-367G18.1  | 0,43 | 0,00 | 0,00 | 0,48 | 0,0908875 | NA       |
| FBXO42         | 3,00 | 1,95 | 2,39 | 2,28 | 0,0909166 | 0,233082 |
| RP11-1D12.1    | 0,00 | 0,00 | 0,10 | 0,00 | 0,0909247 | 0,233082 |
| RP11-34P13.15  | 1,21 | 2,78 | 2,38 | 2,11 | 0,0909254 | 0,233082 |
| NSDHL          | 3,73 | 0,31 | 1,43 | 2,40 | 0,0909972 | 0,233239 |
| RP11-446N19.1  | 3,40 | 0,00 | 1,54 | 0,55 | 0,0910116 | 0,233249 |
| SLC25A3        | 9,66 | 9,19 | 9,42 | 8,72 | 0,0910803 | 0,233398 |
| AC144530.1     | 1,50 | 1,29 | 1,05 | 1,03 | 0,0911275 | 0,233492 |
| C10orf110      | 0,24 | 0,00 | 0,29 | 0,17 | 0,0911194 | 0,233635 |
| COQ4           | 5,17 | 6,49 | 4,49 | 2,88 | 0,0912083 | 0,233645 |
| OR13K1P        | 0,12 | 1,30 | 0,00 | 0,13 | 0,0912711 | 0,233779 |
| FBXL5          | 5,70 | 5,41 | 5,18 | 5,36 | 0,0913115 | 0,233855 |
| RP13-516M14.2  | 0,06 | 0,39 | 0,09 | 0,28 | 0,091323  | 0,233858 |
| NGLY1          | 5,32 | 4,11 | 4,73 | 4,06 | 0,0913475 | 0,233878 |
| LINC00344      | 0,00 | 0,24 | 0,00 | 0,00 | 0,0913518 | 0,233878 |
| RFPL1-AS1      | 0,16 | 1,09 | 0,46 | 0,33 | 0,0914604 | 0,234077 |
| RP11-574K11.27 | 0,00 | 0,00 | 0,00 | 0,00 | 0,0914612 | 0,234077 |
| LST1           | 9,49 | 9,27 | 9,24 | 9,39 | 0,0914613 | 0,234077 |
| HCFC1R1        | 4,33 | 1,57 | 4,58 | 4,48 | 0,0914899 | 0,234099 |
| CTD-2571L23.8  | 0,76 | 1,23 | 0,33 | 0,68 | 0,0914907 | 0,234099 |
| KB-1507C5.2    | 1,72 | 1,07 | 2,79 | 0,93 | 0,0915392 | 0,234187 |
| CCDC115        | 5,20 | 2,20 | 3,66 | 3,34 | 0,0915462 | 0,234187 |
| USHBP1         | 0,26 | 0,84 | 0,28 | 0,33 | 0,091558  | 0,23419  |
| TBC1D32        | 3,96 | 2,95 | 3,26 | 2,83 | 0,0916279 | 0,234342 |
| RP11-166O4.3   | 4,27 | 1,52 | 3,02 | 0,83 | 0,0916664 | 0,234413 |
| DPP8           | 4,95 | 4,27 | 4,31 | 5,50 | 0,0916848 | 0,234427 |
| EIF3CL         | 3,33 | 3,58 | 2,43 | 0,00 | 0,0916928 | 0,234427 |
| RP11-484D2.4   | 3,37 | 4,87 | 4,06 | 2,52 | 0,0917493 | 0,234544 |
| RBP7           | 0,00 | 0,65 | 0,00 | 1,26 | 0,0918096 | 0,234672 |
| CLN3           | 5,93 | 6,27 | 6,12 | 5,83 | 0,0918299 | 0,234696 |
| RP11-571F15.3  | 0,00 | 0,00 | 0,00 | 0,24 | 0,0919372 | 0,234928 |
| RP4-565E6.1    | 1,08 | 2,10 | 1,37 | 1,68 | 0,0919416 | 0,234928 |
| RP11-392A14.8  | 0,00 | 0,09 | 0,00 | 0,00 | 0,0919778 | 0,234971 |
| GGNBP2         | 6,35 | 5,21 | 5,76 | 5,24 | 0,0919803 | 0,234971 |
| ZFYVE21        | 3,30 | 1,94 | 0,93 | 0,81 | 0,0919901 | 0,234971 |
| RP11-514P8.10  | 2,92 | 4,25 | 3,30 | 3,79 | 0,0920654 | 0,235097 |
| F8A3           | 0,00 | 2,93 | 0,00 | 0,00 | 0,0920772 | 0,235097 |
| CACUL1         | 6,27 | 6,18 | 6,33 | 4,39 | 0,0920863 | 0,235097 |
| RP11-70L8.5    | 2,34 | 2,23 | 3,07 | 3,49 | 0,0920876 | 0,235097 |
| EIF4A1         | 9,76 | 9,04 | 9,39 | 8,99 | 0,0920925 | 0,235097 |
| AQR            | 4,34 | 2,75 | 3,88 | 3,11 | 0,0921033 | 0,235098 |
| CHKB           | 6,42 | 6,28 | 6,68 | 6,86 | 0,0921555 | 0,235204 |

|               |      |      |      |      |           |          |
|---------------|------|------|------|------|-----------|----------|
| RP11-202G11.2 | 0,00 | 0,00 | 0,00 | 0,00 | 0,0921617 | NA       |
| SUPT4H1       | 6,62 | 5,18 | 6,32 | 5,79 | 0,0922123 | 0,235307 |
| ZNF524        | 2,91 | 5,42 | 4,32 | 3,90 | 0,0922252 | 0,235307 |
| RP11-318G8.4  | 0,00 | 0,00 | 0,19 | 0,28 | 0,0922277 | 0,235307 |
| OR6U2P        | 0,06 | 0,36 | 0,17 | 0,26 | 0,0922577 | 0,235357 |
| CTDSP2        | 4,02 | 2,88 | 4,25 | 5,31 | 0,0922701 | 0,235361 |
| PARP10        | 1,72 | 1,49 | 2,45 | 3,03 | 0,0922919 | 0,235383 |
| RP11-65F13.1  | 0,45 | 0,22 | 0,31 | 0,20 | 0,0922998 | 0,235383 |
| CCT6A         | 7,19 | 5,50 | 6,68 | 6,27 | 0,0923985 | 0,235608 |
| METTL9        | 5,32 | 3,95 | 5,81 | 5,93 | 0,0924638 | 0,235713 |
| MGEA5         | 6,86 | 6,50 | 6,13 | 6,02 | 0,0924711 | 0,235713 |
| RP11-293M10.6 | 0,08 | 0,59 | 0,11 | 0,07 | 0,0924717 | 0,235713 |
| CFAP61        | 0,00 | 3,21 | 0,00 | 0,00 | 0,0924969 | 0,235751 |
| CTNND1        | 5,65 | 3,94 | 4,67 | 5,19 | 0,0925507 | 0,235844 |
| RP4-773A18.8  | 1,09 | 0,61 | 0,99 | 0,77 | 0,0925549 | 0,235844 |
| RP11-426C22.1 | 2,30 | 0,24 | 2,49 | 0,87 | 0,0925668 | 0,235848 |
| RP11-258C19.5 | 2,46 | 3,01 | 2,20 | 2,94 | 0,0926542 | 0,236025 |
| CORO1A        | 7,45 | 8,08 | 7,89 | 7,17 | 0,0926577 | 0,236025 |
| F5            | 0,00 | 0,00 | 0,02 | 2,26 | 0,0926766 | 0,236046 |
| RP11-358B23.6 | 0,07 | 2,41 | 0,62 | 0,53 | 0,0926961 | 0,236069 |
| RP11-463I10.2 | 4,12 | 2,58 | 1,80 | 4,16 | 0,0927741 | 0,23624  |
| DPM1          | 5,69 | 2,07 | 5,37 | 3,72 | 0,092794  | 0,236253 |
| RP11-404E6.1  | 0,00 | 4,56 | 0,00 | 0,00 | 0,0928003 | 0,236253 |
| RIN3          | 5,64 | 4,46 | 5,05 | 5,00 | 0,0928571 | 0,23637  |
| NSUN5P2       | 2,62 | 3,09 | 2,99 | 3,51 | 0,0928832 | 0,23641  |
| TRIM25        | 4,26 | 4,26 | 4,36 | 5,00 | 0,0929096 | 0,236433 |
| RN7SL697P     | 0,00 | 0,00 | 1,19 | 1,97 | 0,0929137 | 0,236433 |
| EPS15L2       | 0,23 | 0,14 | 0,09 | 0,68 | 0,0929457 | 0,236437 |
| SLC22A4       | 0,00 | 0,53 | 1,16 | 2,62 | 0,0929564 | 0,236437 |
| RP11-44K6.3   | 0,00 | 1,30 | 0,93 | 1,06 | 0,0929592 | 0,236437 |
| FAM160B1      | 2,54 | 1,64 | 3,27 | 1,86 | 0,0929669 | 0,236437 |
| IRF2          | 4,94 | 4,15 | 4,35 | 4,53 | 0,0929831 | 0,236437 |
| HAUS2         | 3,55 | 3,70 | 3,54 | 1,70 | 0,0929864 | 0,236437 |
| ADAMTS17      | 0,06 | 1,09 | 0,04 | 0,09 | 0,0929996 | 0,236437 |
| SNORD12C      | 6,53 | 0,00 | 5,40 | 3,54 | 0,0930003 | 0,236437 |
| CFAP221       | 0,81 | 0,52 | 1,22 | 1,40 | 0,0930838 | 0,236622 |
| DUXAP9        | 0,33 | 3,26 | 0,16 | 0,00 | 0,0931243 | 0,236698 |
| RRAGD         | 0,27 | 0,00 | 0,73 | 0,33 | 0,093171  | 0,23679  |
| DNM1P51       | 0,04 | 0,13 | 0,03 | 0,10 | 0,0932031 | 0,236844 |
| CTD-2049O4.1  | 0,29 | 0,47 | 0,27 | 0,33 | 0,0932808 | 0,237014 |
| RP11-15B24.5  | 0,26 | 4,68 | 1,44 | 3,28 | 0,0933308 | 0,237114 |
| AC104794.5    | 0,93 | 0,68 | 0,86 | 0,87 | 0,093353  | 0,237144 |
| UBTFL6        | 0,00 | 0,00 | 0,00 | 2,32 | 0,0933813 | 0,237188 |
| CBWD1         | 5,71 | 3,69 | 5,30 | 3,92 | 0,0934055 | 0,237223 |
| IGSF10        | 0,00 | 0,13 | 0,01 | 0,02 | 0,0934994 | 0,237434 |
| IL12B         | 0,13 | 0,29 | 0,20 | 0,13 | 0,0935245 | 0,237443 |
| PAPLN         | 2,12 | 1,24 | 1,44 | 1,43 | 0,0935366 | 0,237443 |
| SLC25A35      | 2,21 | 1,15 | 1,32 | 2,34 | 0,0935384 | 0,237443 |
| HERC3         | 4,00 | 4,41 | 3,20 | 3,49 | 0,0935544 | 0,237443 |
| ZC3HC1        | 3,58 | 0,42 | 3,18 | 1,86 | 0,0935562 | 0,237443 |
| LDHD          | 0,00 | 1,59 | 0,00 | 0,00 | 0,0936608 | 0,237681 |
| ZSCAN16       | 0,92 | 0,00 | 0,18 | 1,11 | 0,0937123 | 0,237785 |
| NOP14         | 1,91 | 1,60 | 2,53 | 2,73 | 0,0937507 | 0,237855 |
| SPATA13       | 1,94 | 1,72 | 2,66 | 2,79 | 0,0938068 | 0,23797  |
| RP11-656D10.3 | 0,22 | 0,00 | 0,36 | 0,38 | 0,0938391 | 0,238025 |



|                |      |      |      |      |           |          |
|----------------|------|------|------|------|-----------|----------|
| RP3-449O17.1   | 4,36 | 3,47 | 3,23 | 3,81 | 0,093887  | 0,238119 |
| SRRD           | 3,47 | 0,58 | 2,68 | 1,88 | 0,093947  | 0,238244 |
| OR2L2          | 0,28 | 0,50 | 0,33 | 0,37 | 0,0940115 | 0,23838  |
| PRRG3          | 0,41 | 0,43 | 0,47 | 0,54 | 0,0940368 | 0,238413 |
| TIFAB          | 0,66 | 0,13 | 0,85 | 0,05 | 0,0940458 | 0,238413 |
| METAP1         | 4,50 | 1,72 | 4,25 | 3,34 | 0,0940611 | 0,238425 |
| RP11-484O2.1   | 4,13 | 4,13 | 4,15 | 4,44 | 0,0940732 | 0,238428 |
| RP11-656G9.3   | 1,45 | 2,15 | 1,28 | 2,44 | 0,094131  | 0,23852  |
| NCLN           | 2,46 | 3,00 | 3,67 | 3,94 | 0,0941374 | 0,23852  |
| GADD45A        | 3,25 | 3,57 | 2,40 | 1,63 | 0,0941414 | 0,23852  |
| RP11-158J3.2   | 0,00 | 0,00 | 0,00 | 3,97 | 0,0941799 | 0,23859  |
| HLA-G          | 0,20 | 0,38 | 0,28 | 0,24 | 0,0942057 | 0,238619 |
| RP11-411A19.5  | 0,92 | 0,98 | 1,26 | 0,99 | 0,0942128 | 0,238619 |
| SNORD70        | 0,00 | 2,19 | 0,00 | 0,00 | 0,0942463 | NA       |
| RP11-854K16.1  | 0,06 | 0,14 | 0,00 | 0,13 | 0,094331  | 0,238874 |
| GRIK5          | 0,00 | 0,00 | 0,00 | 0,00 | 0,094335  | 0,238874 |
| CDK11A         | 4,71 | 2,25 | 4,74 | 3,89 | 0,0943516 | 0,238889 |
| DHX57          | 3,47 | 4,93 | 3,87 | 3,18 | 0,0943685 | 0,238904 |
| RP11-603J24.17 | 1,54 | 3,00 | 1,35 | 1,64 | 0,0944133 | 0,238965 |
| CTD-2366F13.1  | 0,24 | 1,28 | 0,33 | 0,05 | 0,094414  | 0,238965 |
| FAM124B        | 0,55 | 0,39 | 0,30 | 0,49 | 0,0944569 | 0,239046 |
| WBP2NL         | 1,26 | 1,59 | 0,44 | 0,70 | 0,0944865 | 0,239094 |
| CEP250         | 1,49 | 2,67 | 1,23 | 1,96 | 0,0945142 | 0,23911  |
| TNFRSF8        | 0,00 | 0,06 | 0,30 | 0,06 | 0,0945145 | 0,23911  |
| RP11-378J18.8  | 0,94 | 0,10 | 0,68 | 0,41 | 0,094547  | 0,239165 |
| SLC12A9        | 1,69 | 3,18 | 3,01 | 3,03 | 0,0945601 | 0,239166 |
| RP11-256L6.3   | 0,00 | 0,00 | 0,00 | 0,00 | 0,0945689 | 0,239166 |
| FBXW9          | 0,26 | 0,11 | 0,35 | 2,69 | 0,0946352 | 0,239293 |
| FBXO22         | 3,84 | 2,37 | 1,69 | 1,83 | 0,0946403 | 0,239293 |
| ZFAND1         | 5,00 | 3,46 | 3,84 | 1,31 | 0,0946581 | 0,23931  |
| NUPL2          | 5,52 | 3,15 | 4,89 | 4,00 | 0,0947154 | 0,239428 |
| C6orf47        | 0,15 | 0,00 | 0,23 | 0,41 | 0,094732  | 0,239443 |
| RP11-349F21.5  | 0,81 | 1,63 | 0,64 | 0,62 | 0,0947602 | 0,239487 |
| RP11-730K11.1  | 0,04 | 0,05 | 0,07 | 0,08 | 0,0948296 | 0,239635 |
| TMEM222        | 4,12 | 4,10 | 2,28 | 4,80 | 0,0948623 | 0,239678 |
| H3F3A          | 8,95 | 8,55 | 9,00 | 8,72 | 0,0948681 | 0,239678 |
| LUZP1          | 4,07 | 4,13 | 4,45 | 3,13 | 0,0949514 | 0,239861 |
| TNIK           | 0,00 | 4,47 | 0,05 | 1,06 | 0,0949857 | 0,23992  |
| HIVEP2         | 2,50 | 1,14 | 1,58 | 0,88 | 0,0950521 | 0,240049 |
| CTB-113I20.2   | 0,00 | 0,00 | 0,59 | 0,00 | 0,0950583 | 0,240049 |
| ALO22393.9     | 0,00 | 0,00 | 0,00 | 0,00 | 0,0950822 | 0,240081 |
| CASP1          | 8,56 | 7,43 | 8,16 | 8,13 | 0,0950926 | 0,240081 |
| WDR5B          | 1,08 | 0,61 | 0,30 | 1,22 | 0,0951583 | 0,24022  |
| NRDC           | 6,51 | 5,46 | 6,31 | 6,06 | 0,095187  | 0,240265 |
| ZBTB17         | 3,89 | 2,44 | 4,25 | 4,29 | 0,0952185 | 0,240317 |
| BRD7           | 4,93 | 3,99 | 4,60 | 3,59 | 0,0952453 | 0,240346 |
| RP11-182I10.3  | 1,15 | 2,20 | 2,15 | 2,03 | 0,0952516 | 0,240346 |
| RP4-669P10.19  | 0,00 | 0,00 | 0,26 | 0,00 | 0,0952852 | 0,240403 |
| PMM2           | 4,37 | 3,27 | 2,96 | 2,70 | 0,0953213 | 0,240467 |
| GNG10          | 5,51 | 5,35 | 4,49 | 3,34 | 0,0953516 | 0,240516 |
| TM4SF18        | 0,00 | 0,30 | 0,00 | 0,26 | 0,0954108 | NA       |
| ZNF280B        | 0,23 | 0,20 | 0,24 | 0,28 | 0,0954189 | 0,240659 |
| NPR3           | 0,98 | 1,79 | 1,44 | 2,24 | 0,0954393 | 0,240683 |
| RP11-624L4.2   | 0,00 | 0,00 | 0,00 | 0,00 | 0,0954696 | 0,240732 |
| AC034193.5     | 1,62 | 0,56 | 0,87 | 1,32 | 0,0955002 | 0,240782 |

|               |      |      |      |      |           |          |
|---------------|------|------|------|------|-----------|----------|
| BRMS1         | 4,64 | 3,81 | 5,29 | 5,37 | 0,0955642 | 0,240916 |
| TXNDC12       | 5,48 | 4,27 | 4,96 | 4,24 | 0,0956058 | 0,240982 |
| CREBBP        | 5,43 | 4,98 | 5,21 | 5,18 | 0,0956175 | 0,240982 |
| RP11-379F4.6  | 1,04 | 2,75 | 1,19 | 1,21 | 0,0956228 | 0,240982 |
| NAXE          | 5,19 | 6,39 | 5,02 | 4,50 | 0,0956655 | 0,241053 |
| RP11-466A19.1 | 0,09 | 0,58 | 0,18 | 0,15 | 0,0956727 | 0,241053 |
| SNUPN         | 4,51 | 2,06 | 3,71 | 2,44 | 0,0956894 | 0,241067 |
| CCDC61        | 0,11 | 2,48 | 0,19 | 0,40 | 0,0957043 | 0,241078 |
| RP11-318K12.2 | 0,00 | 2,04 | 0,00 | 0,00 | 0,0957577 | 0,241115 |
| ZNF35         | 0,04 | 0,05 | 2,20 | 0,44 | 0,0957753 | 0,241115 |
| CARD8         | 4,98 | 4,68 | 4,81 | 5,37 | 0,0957803 | 0,241115 |
| LINC00327     | 0,00 | 0,19 | 0,00 | 0,06 | 0,0957849 | 0,241115 |
| RBM15         | 2,73 | 1,19 | 1,40 | 1,49 | 0,0957871 | 0,241115 |
| WDR82         | 3,19 | 3,42 | 3,32 | 3,82 | 0,0958112 | 0,241183 |
| GS1-179L18.1  | 0,04 | 0,00 | 0,14 | 0,13 | 0,0958341 | 0,241213 |
| RP11-867G23.3 | 0,64 | 1,89 | 0,97 | 1,24 | 0,0958662 | 0,241267 |
| RP11-631M6.3  | 3,23 | 1,57 | 4,81 | 4,22 | 0,0959084 | 0,241346 |
| RP11-36D19.9  | 0,04 | 0,11 | 0,10 | 0,16 | 0,0959338 | 0,241382 |
| TNS4          | 0,54 | 0,73 | 0,69 | 0,84 | 0,0959539 | 0,241387 |
| RP11-4O3.1    | 2,43 | 0,00 | 2,13 | 0,00 | 0,0959575 | 0,241387 |
| PFDN1         | 6,05 | 6,85 | 5,80 | 2,89 | 0,0959774 | 0,24139  |
| CHAMP1        | 2,53 | 4,49 | 2,63 | 3,01 | 0,0959802 | 0,24139  |
| PYGM          | 0,47 | 2,02 | 1,04 | 1,16 | 0,0960342 | 0,241498 |
| SLC12A8       | 1,03 | 1,13 | 0,67 | 2,22 | 0,0960625 | 0,241542 |
| PRDX2         | 7,04 | 6,24 | 6,24 | 5,02 | 0,0961051 | 0,241599 |
| SLFN12        | 3,17 | 1,32 | 3,94 | 4,40 | 0,0961068 | 0,241599 |
| KCTD18        | 2,95 | 1,62 | 2,12 | 3,28 | 0,0961275 | 0,241623 |
| RP11-384P7.7  | 0,08 | 0,00 | 0,10 | 0,44 | 0,0961975 | 0,241772 |
| CFAP54        | 1,37 | 2,30 | 0,98 | 1,99 | 0,0962202 | 0,241802 |
| RP11-310E22.5 | 0,00 | 0,00 | 0,00 | 0,52 | 0,096234  | NA       |
| ZNF574        | 0,51 | 0,22 | 0,89 | 0,94 | 0,0962427 | 0,241831 |
| RN7SL740P     | 0,87 | 0,00 | 1,53 | 1,18 | 0,0962794 | 0,241896 |
| ITGA5         | 4,47 | 2,87 | 4,71 | 3,48 | 0,0963014 | 0,241924 |
| LRCC1         | 2,22 | 0,20 | 2,00 | 1,19 | 0,0963123 | 0,241924 |
| DNAJC4        | 6,42 | 5,34 | 6,19 | 5,30 | 0,0963763 | 0,24205  |
| RICTOR        | 4,37 | 5,94 | 4,00 | 3,71 | 0,0963845 | 0,24205  |
| TCERG1L       | 0,00 | 0,03 | 0,00 | 0,05 | 0,0964718 | NA       |
| HSPA1B        | 0,69 | 0,59 | 2,00 | 1,66 | 0,0964993 | 0,242311 |
| ICE2          | 4,30 | 2,43 | 3,18 | 3,48 | 0,0965408 | 0,242326 |
| CTB-41I6.1    | 0,00 | 0,00 | 1,62 | 0,53 | 0,0965462 | 0,242326 |
| ADAMTS1       | 0,04 | 0,09 | 0,06 | 0,14 | 0,0965474 | 0,242326 |
| CHD8          | 4,70 | 4,80 | 4,88 | 4,25 | 0,0965489 | 0,242326 |
| RNU6ATAC39P   | 4,24 | 0,00 | 1,68 | 4,92 | 0,0965641 | 0,242337 |
| ADAMTS4       | 0,44 | 0,60 | 0,49 | 0,44 | 0,0965754 | 0,242338 |
| GALNT12       | 0,07 | 0,05 | 0,01 | 0,00 | 0,0966231 | 0,24243  |
| ABAT          | 1,48 | 1,37 | 2,17 | 1,86 | 0,0967659 | 0,242761 |
| CARHSP1       | 3,77 | 5,20 | 3,74 | 4,47 | 0,0967918 | 0,242799 |
| RP1-56J10.8   | 3,32 | 2,92 | 3,84 | 3,41 | 0,0968036 | 0,242801 |
| CTC-338M12.6  | 0,14 | 0,57 | 1,07 | 1,77 | 0,0968506 | 0,242891 |
| MRPS10        | 4,25 | 2,93 | 3,62 | 3,30 | 0,096916  | 0,243028 |
| TRMT2A        | 3,90 | 2,49 | 4,96 | 4,98 | 0,0970294 | 0,243285 |
| ETV6          | 5,07 | 4,28 | 4,84 | 4,19 | 0,0971662 | 0,243601 |
| TAF11         | 4,72 | 5,65 | 4,40 | 3,17 | 0,097185  | 0,24362  |
| NOX5          | 0,25 | 0,88 | 0,24 | 0,42 | 0,097264  | 0,243791 |
| MINPP1        | 1,31 | 0,29 | 0,21 | 0,11 | 0,0972793 | 0,243802 |

|                 |      |      |      |      |           |          |
|-----------------|------|------|------|------|-----------|----------|
| RPN2            | 7,13 | 6,79 | 6,59 | 6,38 | 0,097308  | 0,243846 |
| UTRN            | 6,70 | 5,97 | 5,71 | 6,66 | 0,0973598 | 0,243905 |
| LRRCS3          | 0,00 | 0,00 | 0,00 | 0,00 | 0,0973631 | 0,243905 |
| AC012363.12     | 0,00 | 0,00 | 0,00 | 0,00 | 0,0973643 | 0,243905 |
| RP11-1094M14.14 | 0,71 | 0,00 | 1,32 | 2,01 | 0,0974032 | 0,243974 |
| ZNF628          | 0,04 | 0,00 | 0,70 | 0,50 | 0,0974274 | 0,244008 |
| RBM12           | 3,22 | 2,86 | 2,49 | 2,08 | 0,097478  | 0,244087 |
| RP5-1142A6.8    | 0,16 | 0,10 | 0,32 | 0,15 | 0,0974811 | 0,244087 |
| GUCY2C          | 0,04 | 0,04 | 0,00 | 0,82 | 0,0974982 | 0,244102 |
| EPHB3           | 0,25 | 0,12 | 0,44 | 0,31 | 0,097566  | 0,244245 |
| NPIPA8          | 0,76 | 3,06 | 0,75 | 0,52 | 0,0976162 | 0,244317 |
| C12orf43        | 3,22 | 4,33 | 3,06 | 3,05 | 0,0976226 | 0,244317 |
| PLIN4           | 0,00 | 0,04 | 0,00 | 0,00 | 0,0976281 | 0,244317 |
| DERL2           | 5,67 | 4,51 | 5,48 | 2,66 | 0,097639  | 0,244317 |
| C7orf71         | 0,00 | 0,00 | 0,00 | 0,00 | 0,0976959 | 0,244432 |
| UPF1            | 2,87 | 4,81 | 3,29 | 2,80 | 0,0977628 | 0,244571 |
| UBASH3A         | 0,00 | 0,00 | 0,00 | 0,14 | 0,0977735 | 0,244571 |
| AP001605.4      | 0,00 | 0,00 | 0,00 | 0,00 | 0,0977911 | 0,244588 |
| RNU6-82P        | 5,13 | 1,91 | 4,93 | 1,93 | 0,0978772 | 0,244775 |
| TNIP1           | 4,29 | 4,07 | 4,68 | 4,91 | 0,097895  | 0,244793 |
| RP11-16E12.2    | 0,00 | 0,31 | 0,00 | 0,00 | 0,0979182 | 0,244823 |
| RP11-638I2.6    | 2,61 | 3,91 | 4,04 | 2,96 | 0,0979533 | 0,244879 |
| MLLT10          | 3,61 | 4,78 | 4,24 | 2,97 | 0,0979625 | 0,244879 |
| AMIGO2          | 0,25 | 1,72 | 0,00 | 0,13 | 0,0980811 | 0,245147 |
| RNASE10         | 0,00 | 0,16 | 0,00 | 0,00 | 0,0981409 | 0,245269 |
| RP11-144H23.1   | 1,99 | 0,00 | 1,59 | 0,90 | 0,0981895 | 0,245363 |
| AC068831.10     | 1,04 | 2,08 | 1,35 | 2,13 | 0,0983061 | 0,245627 |
| RP11-532N4.2    | 2,74 | 3,50 | 1,82 | 1,20 | 0,0984309 | 0,245911 |
| RNU6-107P       | 0,00 | 0,00 | 0,00 | 0,00 | 0,0984777 | 0,245975 |
| ARMCX2          | 0,00 | 0,00 | 0,00 | 0,09 | 0,0984785 | 0,245975 |
| AGO2            | 4,11 | 1,77 | 4,09 | 2,75 | 0,0985871 | 0,24621  |
| RP11-428C6.2    | 0,00 | 0,30 | 0,04 | 1,00 | 0,0986017 | 0,24621  |
| CD93            | 3,84 | 2,14 | 3,39 | 3,45 | 0,0986058 | 0,24621  |
| SLC27A4         | 0,53 | 3,12 | 1,96 | 2,93 | 0,0986393 | 0,246266 |
| RN7SL605P       | 1,28 | 0,00 | 0,87 | 2,49 | 0,0986744 | 0,246269 |
| ASB1            | 1,45 | 0,70 | 2,32 | 1,69 | 0,098676  | 0,246269 |
| RP11-295B17.6   | 0,00 | 0,00 | 0,00 | 0,00 | 0,0986796 | 0,246269 |
| NPHP4           | 0,44 | 1,46 | 0,23 | 0,45 | 0,0986861 | 0,246269 |
| RP11-471B22.3   | 0,31 | 0,32 | 0,28 | 0,63 | 0,0986959 | 0,246269 |
| FUT2            | 0,28 | 1,03 | 0,19 | 0,24 | 0,0987689 | 0,246393 |
| PHF7            | 1,74 | 1,53 | 2,60 | 1,83 | 0,0987702 | 0,246393 |
| RP11-106M7.1    | 0,52 | 0,53 | 0,74 | 0,86 | 0,0987789 | 0,246393 |
| AP3D1           | 4,12 | 4,50 | 4,63 | 3,99 | 0,0988218 | 0,246467 |
| ACTR2           | 7,44 | 6,14 | 6,85 | 6,48 | 0,0988311 | 0,246467 |
| MARCKSL1        | 4,03 | 3,09 | 3,75 | 2,42 | 0,0988419 | 0,246467 |
| EIF4G1          | 4,86 | 5,55 | 5,59 | 5,66 | 0,0989026 | 0,246591 |
| ZC3H14          | 4,72 | 2,61 | 4,12 | 2,75 | 0,0989834 | 0,246765 |
| AKTIP           | 1,32 | 2,42 | 0,57 | 0,80 | 0,099053  | 0,24691  |
| PSD             | 1,08 | 1,01 | 1,33 | 1,38 | 0,0990885 | 0,246971 |
| ABRACL          | 6,96 | 6,41 | 6,67 | 5,49 | 0,0991198 | 0,246983 |
| METAP2          | 5,80 | 3,28 | 5,24 | 5,47 | 0,0991245 | 0,246983 |
| CTD-2134A5.4    | 0,34 | 1,24 | 0,68 | 0,62 | 0,0991264 | 0,246983 |
| PTGDR2          | 1,82 | 0,10 | 0,01 | 0,00 | 0,0991571 | 0,247031 |
| CD7             | 0,00 | 0,81 | 0,32 | 0,57 | 0,099259  | 0,247258 |
| RCOR1           | 3,95 | 3,26 | 3,69 | 2,33 | 0,0992791 | 0,24728  |

|               |      |      |      |      |           |          |
|---------------|------|------|------|------|-----------|----------|
| RN7SL391P     | 0,00 | 0,00 | 0,00 | 1,75 | 0,0993113 | NA       |
| ROPN1         | 0,00 | 0,00 | 0,00 | 0,00 | 0,0993325 | 0,247385 |
| SMAGP         | 3,32 | 0,78 | 2,29 | 2,60 | 0,0993612 | 0,247429 |
| DNM3          | 0,19 | 2,67 | 0,02 | 0,39 | 0,0994123 | 0,247509 |
| FBN3          | 0,00 | 0,00 | 0,00 | 0,00 | 0,0994254 | 0,247509 |
| ROCK1         | 6,04 | 5,78 | 6,00 | 5,36 | 0,0994267 | 0,247509 |
| CIAPIN1       | 4,79 | 3,76 | 4,64 | 3,35 | 0,0994731 | 0,247597 |
| RP11-127L20.3 | 0,00 | 2,89 | 0,00 | 0,00 | 0,099513  | 0,247668 |
| TMEM106C      | 0,72 | 0,28 | 0,62 | 0,43 | 0,0995971 | 0,24785  |
| MIR99AHG      | 2,08 | 1,30 | 1,03 | 1,64 | 0,0996472 | 0,247947 |
| REC8          | 4,20 | 1,31 | 4,15 | 4,13 | 0,0996738 | 0,24796  |
| SETD1A        | 1,17 | 2,36 | 1,60 | 2,04 | 0,0996749 | 0,24796  |
| LANCL1        | 3,62 | 3,62 | 2,10 | 0,62 | 0,0996867 | 0,247962 |
| RPL36AP45     | 0,61 | 0,00 | 0,76 | 1,15 | 0,0996955 | NA       |
| ZC3H8         | 2,90 | 3,52 | 2,23 | 3,14 | 0,0997462 | 0,248082 |
| SORD          | 2,29 | 2,02 | 1,53 | 1,00 | 0,0997939 | 0,248173 |
| SLC25A22      | 0,38 | 0,05 | 0,43 | 0,24 | 0,0998569 | 0,24829  |
| NAPA          | 6,37 | 5,56 | 5,96 | 4,87 | 0,0998632 | 0,24829  |
| GCM1          | 0,09 | 0,05 | 0,09 | 0,27 | 0,099881  | 0,24829  |
| RP11-90L20.3  | 0,00 | 0,00 | 0,51 | 0,00 | 0,0998858 | 0,24829  |
| RP11-368I7.6  | 1,68 | 2,89 | 1,37 | 0,80 | 0,0999311 | 0,248349 |
| ITGB3BP       | 3,79 | 4,07 | 3,57 | 1,20 | 0,0999316 | 0,248349 |
| KMT5B         | 4,43 | 2,51 | 4,20 | 4,20 | 0,0999675 | 0,24841  |
| RP11-373L24.1 | 4,30 | 4,65 | 3,86 | 2,98 | 0,0999994 | 0,248458 |
| RP4-655J12.4  | 0,22 | 0,00 | 0,52 | 0,34 | 0,1000094 | 0,248458 |
| MTM1          | 3,93 | 0,53 | 2,97 | 1,41 | 0,1000598 | 0,248518 |
| TIMP2         | 4,15 | 4,09 | 4,59 | 4,18 | 0,1000629 | 0,248518 |
| ZNF674        | 0,93 | 2,71 | 1,66 | 1,51 | 0,1000668 | 0,248518 |
| C19orf45      | 0,52 | 0,49 | 0,29 | 1,31 | 0,1001406 | 0,248648 |
| CKLF          | 7,54 | 7,60 | 7,70 | 7,82 | 0,1001427 | 0,248648 |
| AC092675.3    | 0,00 | 0,00 | 0,00 | 1,10 | 0,100153  | 0,248648 |
| RBMS2         | 1,98 | 0,69 | 1,77 | 0,81 | 0,1002643 | 0,248858 |
| ACTR8         | 0,79 | 3,02 | 3,31 | 4,21 | 0,1002659 | 0,248858 |
| GS1-124K5.13  | 1,23 | 1,53 | 2,25 | 1,33 | 0,1002863 | 0,248858 |
| RP11-305O6.3  | 0,18 | 0,75 | 0,07 | 0,27 | 0,1002887 | 0,248858 |
| RP11-206L10.9 | 5,11 | 5,41 | 4,92 | 3,98 | 0,1003021 | 0,248858 |
| SNORA66       | 1,86 | 0,00 | 0,75 | 1,56 | 0,1003045 | 0,248858 |
| MT-TW         | 0,00 | 0,00 | 0,00 | 3,35 | 0,1003274 | NA       |
| PLD4          | 5,36 | 5,31 | 4,97 | 4,46 | 0,100367  | 0,248956 |
| FGGY          | 1,88 | 0,63 | 2,47 | 1,30 | 0,1003716 | 0,248956 |
| PCAT14        | 2,14 | 2,98 | 2,50 | 2,06 | 0,1003778 | 0,248956 |
| POU5F1P2      | 0,00 | 2,76 | 0,00 | 0,00 | 0,1004699 | 0,249157 |
| CRLF2         | 0,00 | 0,16 | 0,18 | 0,00 | 0,1005231 | 0,249261 |
| OR10A3        | 0,10 | 0,15 | 0,17 | 0,22 | 0,1005388 | 0,249272 |
| RP11-411D10.1 | 0,51 | 0,00 | 0,73 | 1,27 | 0,1005806 | 0,249321 |
| CTD-2595P9.2  | 1,32 | 2,85 | 1,96 | 2,18 | 0,1005961 | 0,249321 |
| RP11-313P13.4 | 2,02 | 0,00 | 0,88 | 0,00 | 0,1006078 | 0,249321 |
| PRMT6         | 1,48 | 0,88 | 0,38 | 0,15 | 0,1006196 | 0,249321 |
| RP11-805I24.1 | 0,04 | 0,09 | 0,11 | 0,11 | 0,1006254 | 0,249321 |
| TTYH3         | 1,80 | 1,05 | 1,96 | 1,70 | 0,1006258 | 0,249321 |
| SSH1          | 2,73 | 2,09 | 2,97 | 1,40 | 0,1006568 | 0,24937  |
| RP4-535B20.4  | 0,00 | 1,52 | 2,63 | 1,15 | 0,1007127 | 0,249481 |
| KIAA0141      | 5,46 | 5,21 | 4,97 | 4,81 | 0,1007622 | 0,249575 |
| NEDD9         | 5,22 | 2,99 | 4,71 | 3,16 | 0,1007954 | 0,249607 |
| ZFYVE16       | 3,81 | 3,11 | 4,38 | 3,67 | 0,1007989 | 0,249607 |

|                |      |      |      |      |           |          |
|----------------|------|------|------|------|-----------|----------|
| TMEM9B         | 6,16 | 5,99 | 5,26 | 4,65 | 0,100812  | 0,249607 |
| TMEM159        | 2,35 | 1,47 | 2,37 | 3,80 | 0,1008199 | 0,249607 |
| RIPOR2         | 6,38 | 6,45 | 5,97 | 6,51 | 0,1009268 | 0,249844 |
| RP11-36B6.1    | 0,30 | 1,46 | 0,57 | 0,81 | 0,1009925 | 0,249979 |
| VBP1           | 5,41 | 4,21 | 4,82 | 1,68 | 0,1010134 | 0,250002 |
| RP11-11518.1   | 0,17 | 0,00 | 0,00 | 0,00 | 0,1010226 | NA       |
| OR52E4         | 0,34 | 1,34 | 0,43 | 0,20 | 0,1010421 | 0,250046 |
| RP11-274A11.4  | 0,00 | 0,00 | 0,00 | 0,07 | 0,1011448 | 0,250272 |
| SAP25          | 1,58 | 2,98 | 2,59 | 3,48 | 0,1012148 | 0,250397 |
| RP11-456N14.4  | 0,15 | 0,41 | 0,21 | 0,36 | 0,1012179 | 0,250397 |
| RP11-316M1.12  | 0,00 | 0,00 | 0,00 | 4,48 | 0,101239  | 0,250421 |
| DOK3           | 0,00 | 0,08 | 0,56 | 2,86 | 0,1012749 | 0,250473 |
| ZNF19          | 1,78 | 2,83 | 1,27 | 1,04 | 0,1012822 | 0,250473 |
| ZNF302         | 2,76 | 3,15 | 3,32 | 3,73 | 0,1013059 | 0,2505   |
| SPDL1          | 2,03 | 0,00 | 0,19 | 0,19 | 0,1013157 | 0,2505   |
| ROCK2          | 2,72 | 2,08 | 3,13 | 1,40 | 0,1013375 | 0,250526 |
| RP11-663N22.1  | 0,00 | 1,31 | 0,39 | 0,85 | 0,1013566 | 0,250545 |
| CTD-2201E18.3  | 3,10 | 3,40 | 3,51 | 3,28 | 0,1013707 | 0,250552 |
| TBC1D8B        | 1,79 | 1,87 | 1,58 | 1,34 | 0,1013929 | 0,250579 |
| CECR6          | 0,00 | 0,00 | 0,00 | 0,21 | 0,101442  | 0,250672 |
| SIRT1          | 4,62 | 3,69 | 3,94 | 3,51 | 0,101453  | 0,250672 |
| RP11-630C16.2  | 0,42 | 0,00 | 0,56 | 1,79 | 0,1014679 | 0,250681 |
| SRGAP2C        | 3,58 | 2,86 | 3,37 | 2,59 | 0,101496  | 0,250722 |
| RP11-335K5.3   | 0,00 | 2,52 | 0,00 | 1,66 | 0,1014998 | NA       |
| RP11-38511.2   | 0,00 | 0,00 | 0,00 | 1,29 | 0,1015242 | 0,250764 |
| PLA1A          | 2,15 | 0,10 | 1,80 | 0,38 | 0,1016204 | 0,250932 |
| PABPC4         | 6,38 | 6,11 | 6,63 | 6,07 | 0,1016252 | 0,250932 |
| SAFB           | 4,38 | 3,45 | 4,79 | 4,31 | 0,1016369 | 0,250932 |
| LHFP           | 1,19 | 0,56 | 1,41 | 0,09 | 0,1016375 | 0,250932 |
| SP4            | 1,72 | 2,27 | 0,90 | 2,02 | 0,101675  | 0,250997 |
| BLMH           | 3,93 | 4,31 | 3,35 | 2,76 | 0,1016934 | 0,251015 |
| ENO4           | 0,00 | 0,10 | 0,00 | 0,00 | 0,1017156 | 0,251031 |
| RP11-58B17.1   | 6,17 | 5,67 | 5,75 | 6,31 | 0,101733  | 0,251031 |
| RP11-290C10.1  | 0,00 | 0,00 | 0,00 | 0,00 | 0,1017338 | 0,251031 |
| RP11-361D15.1  | 1,13 | 0,00 | 3,85 | 1,64 | 0,1017542 | 0,251053 |
| MTRNR2L3       | 0,09 | 0,18 | 0,00 | 0,11 | 0,101795  | 0,251126 |
| MIR210HG       | 0,29 | 0,08 | 0,21 | 0,36 | 0,1018651 | 0,251271 |
| ACO13403.9     | 0,00 | 1,25 | 0,00 | 0,00 | 0,1019153 | NA       |
| FHL3           | 3,36 | 2,15 | 3,80 | 4,43 | 0,1019249 | 0,251391 |
| MXD3           | 1,11 | 2,22 | 3,06 | 2,54 | 0,1019728 | 0,251444 |
| ACO18866.1     | 0,37 | 1,83 | 0,20 | 0,75 | 0,1019773 | 0,251444 |
| RPA2           | 5,89 | 5,26 | 5,05 | 3,72 | 0,1019826 | 0,251444 |
| RP11-502F1.1   | 0,78 | 0,77 | 0,47 | 0,72 | 0,101992  | 0,251444 |
| RSRC1          | 5,26 | 5,34 | 5,10 | 5,26 | 0,1020113 | 0,251464 |
| ACO09506.2     | 0,00 | 0,00 | 0,00 | 0,00 | 0,1020951 | 0,251634 |
| ADARB1         | 0,00 | 0,09 | 0,36 | 0,20 | 0,1021029 | 0,251634 |
| ACO13448.1     | 0,75 | 1,72 | 0,96 | 1,47 | 0,102152  | 0,251687 |
| RP11-757G1.6   | 0,13 | 1,82 | 0,33 | 1,05 | 0,1021532 | 0,251687 |
| CCDC159        | 4,49 | 3,06 | 4,43 | 4,63 | 0,1021581 | 0,251687 |
| SLU7           | 6,07 | 4,04 | 5,63 | 5,75 | 0,1022123 | 0,25176  |
| CTD-2314I6.1   | 0,00 | 0,00 | 0,00 | 0,00 | 0,1022138 | 0,25176  |
| RP11-358L22.3  | 1,93 | 1,63 | 1,28 | 1,15 | 0,1022223 | 0,25176  |
| CTD-2192J16.15 | 2,36 | 2,73 | 2,56 | 2,37 | 0,1022409 | 0,25176  |
| PDZK1          | 0,00 | 0,16 | 0,00 | 0,00 | 0,1022445 | 0,25176  |
| RP11-34C15.1   | 0,00 | 0,00 | 0,00 | 0,16 | 0,1022634 | 0,251779 |

|               |       |       |       |       |           |          |
|---------------|-------|-------|-------|-------|-----------|----------|
| TMEM192       | 4,01  | 1,44  | 2,86  | 2,58  | 0,1022975 | 0,251834 |
| PSMD1         | 5,53  | 5,25  | 5,16  | 5,71  | 0,1023297 | 0,251886 |
| ADK           | 5,04  | 3,05  | 5,37  | 4,30  | 0,1024291 | 0,25209  |
| CCDC160       | 0,12  | 0,00  | 0,38  | 0,55  | 0,1024354 | 0,25209  |
| RP11-391H12.6 | 0,00  | 0,00  | 0,00  | 0,23  | 0,1024527 | 0,252093 |
| RP11-449G16.1 | 0,00  | 0,00  | 0,00  | 0,00  | 0,1024591 | 0,252093 |
| HSP90B2P      | 0,04  | 0,00  | 0,00  | 0,00  | 0,1024988 | NA       |
| CH17-472G23.2 | 2,76  | 2,02  | 3,11  | 4,12  | 0,1025681 | 0,252305 |
| OR7A5         | 0,30  | 0,54  | 0,22  | 0,56  | 0,1025682 | 0,252305 |
| RPL19         | 11,10 | 11,24 | 11,13 | 10,81 | 0,1025815 | 0,25231  |
| CTB-36O1.7    | 0,22  | 0,44  | 0,29  | 0,36  | 0,102632  | 0,252399 |
| IL11RA        | 1,67  | 4,40  | 2,69  | 2,58  | 0,1026403 | 0,252399 |
| APO00689.8    | 3,28  | 2,87  | 3,55  | 3,31  | 0,1027047 | 0,252529 |
| RP11-357G3.2  | 1,01  | 0,00  | 0,00  | 0,00  | 0,1027309 | 0,252544 |
| RP4-550H1.5   | 1,86  | 1,23  | 1,58  | 0,53  | 0,1027333 | 0,252544 |
| TMC5          | 0,00  | 0,11  | 0,07  | 0,04  | 0,1027591 | 0,252572 |
| SS18          | 5,72  | 3,12  | 4,75  | 4,75  | 0,1027779 | 0,252572 |
| AC079448.1    | 0,00  | 0,00  | 0,00  | 0,00  | 0,1027789 | 0,252572 |
| CCDC88A       | 7,63  | 6,98  | 7,43  | 6,93  | 0,1027927 | 0,252578 |
| NPTN          | 4,53  | 3,10  | 5,04  | 3,94  | 0,1028591 | 0,252713 |
| RP11-65L3.4   | 0,00  | 0,00  | 0,00  | 0,00  | 0,1029409 | 0,252871 |
| GALM          | 3,84  | 0,77  | 2,30  | 2,32  | 0,1029514 | 0,252871 |
| INSIG1        | 5,87  | 6,05  | 5,74  | 4,60  | 0,1029576 | 0,252871 |
| FADD          | 0,07  | 0,08  | 0,44  | 0,00  | 0,1029821 | 0,252874 |
| RP11-274B21.3 | 2,63  | 1,91  | 2,71  | 0,57  | 0,1029835 | 0,252874 |
| RNF130        | 8,02  | 8,01  | 7,61  | 7,16  | 0,1029928 | 0,252874 |
| RP11-690D19.3 | 0,70  | 1,23  | 0,74  | 0,12  | 0,1030381 | 0,252932 |
| KIF3A         | 1,46  | 1,06  | 0,58  | 0,45  | 0,1030394 | 0,252932 |
| ATG4D         | 3,20  | 4,46  | 3,73  | 3,77  | 0,1031012 | 0,253056 |
| TCEAL4        | 3,73  | 1,48  | 3,67  | 3,32  | 0,1031306 | 0,2531   |
| TRGC2         | 0,00  | 4,15  | 0,00  | 0,21  | 0,1031447 | 0,253107 |
| RP11-566C13.2 | 0,11  | 0,11  | 0,11  | 0,00  | 0,1031583 | 0,253113 |
| RP11-883G14.4 | 1,59  | 2,94  | 1,64  | 3,29  | 0,103214  | 0,253221 |
| CTB-75G16.1   | 0,00  | 0,00  | 0,00  | 0,00  | 0,103259  | 0,253304 |
| RP11-268G12.1 | 0,07  | 0,25  | 0,11  | 0,15  | 0,1032772 | 0,25332  |
| MFSD5         | 3,99  | 0,23  | 3,59  | 2,30  | 0,1033194 | 0,253396 |
| APRT          | 8,44  | 9,28  | 8,51  | 8,08  | 0,1033727 | 0,253473 |
| STAT5B        | 3,61  | 1,61  | 3,39  | 3,97  | 0,1033735 | 0,253473 |
| ZNF542        | 0,99  | 1,08  | 1,20  | 1,15  | 0,103445  | 0,253568 |
| PLEKHO1       | 5,95  | 6,78  | 6,57  | 6,63  | 0,1034472 | 0,253568 |
| TVP23C        | 2,18  | 1,45  | 1,06  | 0,53  | 0,1034525 | 0,253568 |
| CTA-228A9.4   | 0,70  | 0,89  | 0,75  | 0,81  | 0,1034665 | 0,253568 |
| GSTM4         | 4,29  | 3,97  | 3,88  | 1,14  | 0,1034695 | 0,253568 |
| CDC27P3       | 0,00  | 0,08  | 0,00  | 0,00  | 0,1035354 | 0,253637 |
| TBCC          | 5,47  | 5,00  | 3,96  | 2,81  | 0,1035359 | 0,253637 |
| SLC25A23      | 0,21  | 0,63  | 0,03  | 0,23  | 0,1035381 | 0,253637 |
| AMACR         | 0,04  | 0,00  | 0,09  | 0,10  | 0,1035533 | 0,253637 |
| FBXW10        | 0,49  | 1,09  | 0,85  | 0,68  | 0,1035546 | 0,253637 |
| AC007163.3    | 0,00  | 0,00  | 0,30  | 0,58  | 0,1035956 | 0,253674 |
| RP11-231C14.7 | 0,49  | 0,36  | 1,01  | 0,73  | 0,1036297 | 0,253674 |
| MUM1          | 2,03  | 1,08  | 1,97  | 3,65  | 0,1036319 | 0,253674 |
| RP4-701O16.5  | 0,19  | 0,51  | 0,39  | 0,30  | 0,1036439 | 0,253674 |
| CTD-2528A14.5 | 0,93  | 0,42  | 0,36  | 0,73  | 0,1036452 | 0,253674 |
| CTA-14H9.7    | 0,40  | 0,35  | 0,64  | 0,78  | 0,1036459 | 0,253674 |
| ABI2          | 2,94  | 2,75  | 2,02  | 1,44  | 0,1036496 | 0,253674 |

|               |      |      |      |      |           |          |
|---------------|------|------|------|------|-----------|----------|
| PAM           | 0,93 | 0,61 | 0,79 | 1,49 | 0,1036748 | 0,253708 |
| NAPEPLD       | 1,44 | 2,17 | 0,42 | 0,60 | 0,1037272 | 0,253808 |
| NCKAP1L       | 5,57 | 4,24 | 5,51 | 4,71 | 0,1038685 | 0,254126 |
| LYGK          | 0,07 | 1,35 | 0,18 | 0,27 | 0,1039021 | 0,25418  |
| RP11-244N9.4  | 2,45 | 0,00 | 2,09 | 5,05 | 0,1039429 | 0,254235 |
| CSTF2T        | 1,37 | 0,45 | 0,74 | 1,14 | 0,1039474 | 0,254235 |
| ZFP36L1       | 5,58 | 4,71 | 5,29 | 4,75 | 0,1040282 | 0,254404 |
| RAD51         | 0,00 | 0,90 | 0,00 | 0,51 | 0,1040418 | 0,25441  |
| RP11-457M11.7 | 0,17 | 0,16 | 0,09 | 0,09 | 0,1040927 | 0,254506 |
| POLE3         | 5,25 | 5,29 | 4,61 | 5,24 | 0,1041388 | 0,254591 |
| RP11-305D15.2 | 0,17 | 0,00 | 0,00 | 0,00 | 0,1041551 | 0,254598 |
| RP11-138P22.1 | 0,00 | 0,00 | 0,00 | 0,14 | 0,1041582 | NA       |
| RP11-573I11.2 | 0,84 | 0,19 | 0,69 | 0,32 | 0,1041649 | 0,254598 |
| ADIPOR1       | 5,74 | 5,93 | 5,56 | 4,20 | 0,1041908 | 0,254634 |
| RP11-449P15.2 | 0,43 | 0,69 | 0,48 | 0,52 | 0,1042027 | 0,254635 |
| CTA-217C2.1   | 2,74 | 0,68 | 1,40 | 3,40 | 0,1042358 | 0,254688 |
| PIP4K2C       | 1,95 | 0,05 | 0,63 | 0,68 | 0,1042705 | 0,254745 |
| VPS29         | 8,40 | 7,94 | 7,82 | 7,03 | 0,104307  | 0,254806 |
| FAM178B       | 0,34 | 0,38 | 1,01 | 0,66 | 0,1043219 | 0,254814 |
| CYP2R1        | 3,88 | 4,63 | 3,47 | 3,11 | 0,1043608 | 0,254881 |
| RNU6-1069P    | 1,43 | 0,00 | 2,95 | 0,00 | 0,10446   | 0,255095 |
| ACO06116.17   | 0,79 | 1,22 | 1,44 | 0,82 | 0,1044901 | 0,255141 |
| SORCS1        | 0,00 | 0,93 | 0,00 | 0,02 | 0,1045119 | 0,255152 |
| BFSP1         | 0,06 | 0,07 | 0,06 | 1,11 | 0,1045175 | 0,255152 |
| ZNF169        | 2,31 | 0,69 | 1,26 | 0,90 | 0,1045624 | 0,255233 |
| CCDC129       | 0,26 | 1,08 | 0,13 | 0,00 | 0,1045821 | 0,255253 |
| DOLK          | 0,07 | 0,13 | 0,06 | 0,07 | 0,1045965 | 0,25526  |
| AP1S3         | 3,84 | 3,74 | 2,63 | 1,44 | 0,1046219 | 0,255294 |
| IGFBP5        | 0,04 | 0,00 | 0,01 | 0,00 | 0,1046606 | 0,255361 |
| MALT1         | 4,60 | 4,58 | 4,57 | 3,45 | 0,104681  | 0,255367 |
| EMC4          | 7,25 | 6,73 | 6,96 | 6,01 | 0,104686  | 0,255367 |
| HGSNAT        | 5,17 | 4,75 | 4,90 | 3,82 | 0,1047006 | 0,255374 |
| SRXN1         | 0,47 | 0,52 | 0,54 | 1,24 | 0,1047205 | 0,255395 |
| RP11-571M6.7  | 2,54 | 3,61 | 3,15 | 4,72 | 0,1047343 | 0,2554   |
| RP11-575L16.2 | 0,77 | 0,00 | 0,15 | 0,00 | 0,104805  | 0,255545 |
| RP11-328N19.1 | 0,12 | 0,26 | 0,00 | 0,05 | 0,1048994 | 0,255709 |
| CTD-2013M15.1 | 0,14 | 0,95 | 0,32 | 0,33 | 0,1049052 | 0,255709 |
| C9orf91       | 2,78 | 2,60 | 2,39 | 2,56 | 0,1049069 | 0,255709 |
| U91319.1      | 0,00 | 0,00 | 0,00 | 0,00 | 0,1049494 | 0,255785 |
| R3HCC1L       | 4,02 | 4,90 | 3,29 | 1,55 | 0,1049959 | 0,255844 |
| PREPL         | 2,64 | 3,51 | 2,46 | 2,22 | 0,1049969 | 0,255844 |
| NUPR1         | 0,82 | 1,11 | 1,27 | 1,54 | 0,1050971 | 0,256043 |
| SNTG2         | 0,05 | 0,08 | 0,06 | 0,00 | 0,1051014 | 0,256043 |
| RP11-135A24.4 | 1,10 | 0,00 | 0,00 | 0,00 | 0,1051264 | 0,256076 |
| TBC1D14       | 3,56 | 0,10 | 3,79 | 2,73 | 0,1051422 | 0,256086 |
| RP11-357N13.3 | 1,11 | 1,49 | 2,20 | 1,35 | 0,1051555 | 0,25609  |
| MAN1B1        | 4,26 | 3,50 | 4,81 | 4,28 | 0,1052    | 0,256171 |
| GDPD5         | 1,92 | 0,95 | 2,08 | 2,95 | 0,1052659 | 0,256285 |
| TYW5          | 2,35 | 1,70 | 1,37 | 0,83 | 0,10527   | 0,256285 |
| KIFAP3        | 3,07 | 0,51 | 2,34 | 1,71 | 0,1052983 | 0,256309 |
| ZNF358        | 0,51 | 2,62 | 0,79 | 1,50 | 0,105303  | 0,256309 |
| ENTPD5        | 1,75 | 0,55 | 0,47 | 3,53 | 0,1053341 | 0,256347 |
| RP11-304F15.4 | 0,09 | 0,37 | 0,38 | 0,32 | 0,1053451 | 0,256347 |
| AP4E1         | 1,74 | 0,26 | 2,02 | 1,16 | 0,105353  | 0,256347 |
| RP11-358D17.2 | 0,35 | 0,81 | 0,45 | 0,78 | 0,1053727 | 0,256367 |

|                |      |      |      |      |           |          |
|----------------|------|------|------|------|-----------|----------|
| RP11-227G15.12 | 0,54 | 0,91 | 0,71 | 1,16 | 0,1053984 | 0,256401 |
| RP11-452C13.1  | 0,00 | 0,00 | 0,00 | 0,00 | 0,1054206 | 0,256427 |
| MAP3K20        | 5,01 | 5,13 | 4,37 | 3,24 | 0,1055156 | 0,25662  |
| TMEM80         | 4,67 | 5,14 | 4,75 | 2,39 | 0,1055232 | 0,25662  |
| IGHG4          | 0,00 | 0,27 | 0,00 | 0,00 | 0,1055318 | NA       |
| RP11-337A23.6  | 0,00 | 0,00 | 0,00 | 0,00 | 0,1055472 | 0,256651 |
| ACO10976.2     | 3,81 | 0,26 | 2,92 | 3,04 | 0,1055934 | 0,256707 |
| VPS13B         | 4,81 | 3,11 | 5,00 | 3,97 | 0,105602  | 0,256707 |
| RP11-583F2.2   | 0,40 | 0,07 | 0,44 | 0,34 | 0,1056111 | 0,256707 |
| CDKN2AIP       | 2,79 | 0,15 | 0,92 | 0,45 | 0,1056224 | 0,256707 |
| RP3-403A15.5   | 0,00 | 0,00 | 0,01 | 0,01 | 0,1056391 | 0,256707 |
| BRD4           | 3,10 | 3,90 | 4,06 | 3,69 | 0,1056399 | 0,256707 |
| RP11-146D12.2  | 1,05 | 2,60 | 0,12 | 0,00 | 0,1056711 | 0,256732 |
| KATNA1         | 4,15 | 4,37 | 3,24 | 3,00 | 0,1056732 | 0,256732 |
| RP1-197B17.5   | 1,81 | 0,40 | 2,02 | 0,00 | 0,1057072 | 0,256787 |
| RRNAD1         | 3,50 | 3,04 | 3,42 | 5,21 | 0,1057218 | 0,256794 |
| RP11-361L15.4  | 0,00 | 0,00 | 0,47 | 1,44 | 0,1057361 | 0,256801 |
| METTL12        | 3,23 | 4,74 | 3,26 | 3,93 | 0,1057965 | 0,25692  |
| ASB4           | 1,30 | 2,00 | 1,01 | 1,82 | 0,1058558 | 0,257028 |
| ARSD           | 3,22 | 1,81 | 3,72 | 3,17 | 0,1058644 | 0,257028 |
| RNF123         | 3,65 | 5,35 | 3,69 | 1,75 | 0,1059515 | 0,257212 |
| CNGA1          | 0,00 | 0,06 | 0,00 | 0,00 | 0,105969  | NA       |
| IGKV1-33       | 0,63 | 3,36 | 1,52 | 1,87 | 0,1060157 | 0,257339 |
| AC093818.1     | 0,88 | 0,69 | 0,87 | 0,26 | 0,1060289 | 0,257343 |
| KPNA4          | 3,66 | 2,59 | 3,65 | 3,21 | 0,1060494 | 0,25736  |
| TRIM44         | 3,61 | 2,65 | 2,96 | 2,48 | 0,1060589 | 0,25736  |
| RP11-163F15.1  | 1,48 | 0,39 | 2,21 | 1,24 | 0,106079  | 0,25738  |
| EXOSC7         | 5,77 | 3,46 | 5,20 | 5,56 | 0,1061512 | 0,257528 |
| AC011753.5     | 0,69 | 0,00 | 0,62 | 0,62 | 0,1062038 | 0,257627 |
| RP11-600F24.7  | 0,04 | 0,27 | 0,04 | 0,00 | 0,106277  | 0,257754 |
| ERCC5          | 4,74 | 4,75 | 5,24 | 4,74 | 0,1062791 | 0,257754 |
| C17orf100      | 0,03 | 1,07 | 0,13 | 1,39 | 0,1063744 | 0,257956 |
| RP13-635I23.2  | 0,00 | 0,00 | 0,64 | 0,00 | 0,1063898 | 0,257966 |
| FANCM          | 2,90 | 0,07 | 0,16 | 1,00 | 0,106525  | 0,258265 |
| AUH            | 0,72 | 1,58 | 1,88 | 0,45 | 0,1065392 | 0,258272 |
| RP11-849N15.5  | 0,62 | 1,12 | 1,21 | 0,86 | 0,1065718 | 0,258323 |
| RP4-544H6.2    | 0,00 | 0,00 | 0,00 | 0,00 | 0,1066542 | 0,258494 |
| MEX3C          | 2,52 | 0,80 | 1,85 | 1,43 | 0,106692  | 0,258544 |
| AC006196.1     | 0,00 | 0,00 | 0,00 | 0,00 | 0,1066982 | 0,258544 |
| PHTF2          | 3,59 | 3,25 | 3,52 | 1,95 | 0,1067387 | 0,258614 |
| AC074366.3     | 2,09 | 3,94 | 2,22 | 1,46 | 0,106794  | 0,258711 |
| UQCC1          | 4,39 | 2,85 | 3,77 | 2,93 | 0,1068036 | 0,258711 |
| RP11-569A2.2   | 0,00 | 1,90 | 1,97 | 2,76 | 0,1068137 | 0,258711 |
| PTPDC1         | 0,47 | 0,06 | 0,03 | 0,25 | 0,1068285 | 0,258719 |
| RP11-171A24.3  | 0,24 | 0,00 | 0,12 | 0,00 | 0,1068496 | 0,258742 |
| LILRA5         | 5,51 | 5,36 | 5,64 | 6,32 | 0,106869  | 0,258761 |
| PCNA           | 4,91 | 1,99 | 4,23 | 1,28 | 0,1069036 | 0,258816 |
| CTD-2116F7.1   | 0,37 | 0,42 | 0,45 | 0,29 | 0,1070518 | 0,259099 |
| WDFY2          | 7,22 | 2,55 | 6,27 | 3,37 | 0,1070594 | 0,259099 |
| RP1-145M24.1   | 0,00 | 0,00 | 0,00 | 0,00 | 0,10707   | 0,259099 |
| RP11-403P17.4  | 0,41 | 0,59 | 0,23 | 0,88 | 0,1070751 | 0,259099 |
| IGDCC3         | 0,17 | 0,81 | 0,22 | 0,00 | 0,1070786 | 0,259099 |
| RP11-569O4.5   | 0,30 | 0,76 | 0,28 | 0,00 | 0,1070998 | 0,259122 |
| NCRNA00115     | 0,18 | 0,11 | 1,38 | 0,74 | 0,1071629 | 0,259246 |
| RP4-705D16.3   | 0,00 | 0,53 | 0,66 | 0,16 | 0,1072196 | 0,259355 |



|                |      |      |      |      |           |          |
|----------------|------|------|------|------|-----------|----------|
| AP000356.2     | 1,37 | 0,00 | 2,48 | 1,87 | 0,1072684 | 0,259445 |
| GGT1           | 1,76 | 4,28 | 2,91 | 4,12 | 0,1073108 | 0,259519 |
| STK16          | 0,00 | 0,34 | 0,23 | 3,27 | 0,1073459 | 0,259576 |
| RP11-342M1.3   | 0,00 | 0,41 | 1,05 | 0,86 | 0,1073985 | 0,259675 |
| RP11-456I15.2  | 0,00 | 0,00 | 0,00 | 2,71 | 0,1074352 | 0,259735 |
| CTD-2329K10.1  | 0,36 | 0,00 | 0,92 | 1,28 | 0,1074762 | 0,259803 |
| TTC39C         | 4,20 | 3,89 | 4,38 | 5,29 | 0,1074864 | 0,259803 |
| RP11-366M4.11  | 0,29 | 0,00 | 0,08 | 0,00 | 0,107513  | 0,259812 |
| RP11-466P24.6  | 0,00 | 0,00 | 0,00 | 0,00 | 0,1075136 | 0,259812 |
| ZNF184         | 1,54 | 0,05 | 0,14 | 0,37 | 0,1075277 | 0,259813 |
| RN7SL123P      | 1,11 | 2,68 | 1,25 | 2,30 | 0,1075429 | 0,259813 |
| RFTN1          | 5,60 | 2,35 | 4,82 | 2,55 | 0,1075493 | 0,259813 |
| TBC1D19        | 0,63 | 0,11 | 0,16 | 0,31 | 0,1075611 | 0,259814 |
| KCTD6          | 3,53 | 0,71 | 2,70 | 3,12 | 0,1076194 | 0,259926 |
| RP11-87L10.1   | 0,00 | 0,10 | 0,81 | 0,00 | 0,1076614 | 0,259999 |
| SLC30A8        | 0,11 | 0,58 | 0,09 | 0,30 | 0,1077473 | 0,260162 |
| UBXN4          | 6,57 | 5,67 | 6,19 | 5,49 | 0,1077522 | 0,260162 |
| TMEM14EP       | 1,63 | 0,11 | 1,67 | 0,23 | 0,1077849 | 0,260213 |
| IPO8           | 3,16 | 2,06 | 3,27 | 3,16 | 0,1078088 | 0,260231 |
| AC099057.8     | 0,76 | 0,54 | 0,45 | 1,07 | 0,1078176 | 0,260231 |
| TRAF1          | 0,78 | 0,86 | 0,65 | 0,12 | 0,1078275 | 0,260231 |
| ZNF32          | 5,31 | 5,40 | 3,89 | 2,51 | 0,1078655 | 0,260294 |
| SLC25A30       | 1,86 | 2,91 | 1,85 | 0,99 | 0,1079082 | 0,260343 |
| LILRA2         | 6,73 | 4,87 | 6,20 | 5,20 | 0,1079093 | 0,260343 |
| RP11-653B10.1  | 1,74 | 4,66 | 1,68 | 0,95 | 0,1079529 | 0,26042  |
| RTF1           | 3,33 | 2,68 | 3,43 | 3,55 | 0,1079864 | 0,26045  |
| ZNF93          | 1,70 | 1,71 | 1,96 | 0,78 | 0,1079888 | 0,26045  |
| SUPV3L1        | 3,38 | 2,03 | 3,83 | 2,82 | 0,1080178 | 0,260492 |
| RP11-124B7.1   | 1,42 | 1,79 | 1,71 | 1,86 | 0,1080595 | 0,260564 |
| DPY19L4        | 2,72 | 0,36 | 1,06 | 2,12 | 0,1080738 | 0,260571 |
| C10orf25       | 0,34 | 0,04 | 0,23 | 0,09 | 0,1081    | 0,260596 |
| RN7SL667P      | 1,96 | 3,79 | 2,24 | 2,32 | 0,1081077 | 0,260596 |
| RP13-511M20.1  | 2,82 | 2,61 | 2,32 | 1,63 | 0,108138  | 0,260635 |
| LLNLR-263F3.1  | 0,08 | 0,19 | 0,17 | 0,17 | 0,1081535 | 0,260635 |
| RP11-807H22.10 | 0,03 | 0,52 | 0,00 | 0,00 | 0,108159  | 0,260635 |
| RP11-139E19.1  | 1,71 | 0,00 | 2,01 | 1,13 | 0,1082024 | 0,260664 |
| DTD1           | 5,25 | 4,19 | 4,60 | 2,41 | 0,1082149 | 0,260664 |
| CTB-5E10.3     | 1,37 | 2,80 | 1,15 | 1,52 | 0,108222  | 0,260664 |
| FAM92B         | 0,19 | 0,30 | 0,10 | 0,67 | 0,1082265 | 0,260664 |
| SPAG17         | 0,00 | 4,08 | 0,01 | 0,37 | 0,1082297 | 0,260664 |
| GNB4           | 4,68 | 3,10 | 4,57 | 3,48 | 0,1082489 | 0,260682 |
| RP11-340B18.1  | 0,00 | 0,07 | 0,06 | 0,18 | 0,1082763 | 0,260712 |
| MAVS           | 1,25 | 1,39 | 1,86 | 1,40 | 0,1082865 | 0,260712 |
| MTRNR2L4       | 0,24 | 0,25 | 0,53 | 0,48 | 0,1082965 | 0,260712 |
| CHIT1          | 0,00 | 0,07 | 0,00 | 0,02 | 0,1082992 | NA       |
| AP001462.6     | 0,00 | 1,46 | 0,00 | 0,00 | 0,1083131 | 0,260723 |
| DDX55          | 4,02 | 2,78 | 3,40 | 2,19 | 0,1084699 | 0,261049 |
| CNP            | 4,88 | 3,04 | 4,48 | 3,99 | 0,1084719 | 0,261049 |
| RP11-129B22.1  | 0,02 | 0,04 | 0,00 | 0,02 | 0,1085698 | 0,261256 |
| RP11-666A8.8   | 0,33 | 0,38 | 0,41 | 1,75 | 0,1086079 | 0,26132  |
| TUBA4A         | 4,41 | 3,93 | 2,88 | 4,41 | 0,1086223 | 0,261326 |
| FRG1DP         | 0,96 | 0,22 | 0,37 | 0,22 | 0,1087281 | 0,26154  |
| PPP2R1A        | 6,13 | 5,76 | 5,70 | 5,42 | 0,1087414 | 0,26154  |
| HLA-K          | 0,71 | 0,00 | 0,24 | 0,17 | 0,1087465 | 0,26154  |
| CH507-236L23.1 | 0,00 | 0,00 | 0,00 | 0,76 | 0,1088234 | 0,261697 |

|                  |      |      |      |      |           |          |
|------------------|------|------|------|------|-----------|----------|
| FKBP1C           | 0,08 | 0,10 | 0,11 | 0,08 | 0,1088402 | 0,261709 |
| ELAC1            | 3,70 | 0,47 | 0,74 | 0,57 | 0,1089612 | 0,261949 |
| ARHGAP31         | 2,79 | 1,06 | 2,50 | 2,05 | 0,1089639 | 0,261949 |
| PTPN11           | 5,12 | 4,72 | 5,07 | 5,18 | 0,1090096 | 0,262006 |
| CSNK1A1          | 6,74 | 6,40 | 6,60 | 6,21 | 0,1090112 | 0,262006 |
| RP11-1379J22.2   | 0,00 | 0,07 | 0,05 | 0,00 | 0,1090543 | 0,262082 |
| NOXA1            | 0,73 | 3,86 | 2,71 | 2,30 | 0,1090918 | 0,262138 |
| LL22NC03-80A10.6 | 4,51 | 1,42 | 3,71 | 4,55 | 0,1091062 | 0,262138 |
| POLDIP2          | 5,05 | 4,89 | 3,72 | 3,41 | 0,1091308 | 0,262138 |
| RP11-274B21.9    | 0,00 | 0,33 | 0,05 | 0,62 | 0,1091364 | 0,262138 |
| CH17-472G23.4    | 0,92 | 0,06 | 1,24 | 0,42 | 0,1091366 | 0,262138 |
| RP11-136F16.1    | 0,80 | 1,94 | 1,96 | 0,00 | 0,1091538 | 0,262151 |
| RNU4-8P          | 0,00 | 0,00 | 0,00 | 0,00 | 0,1092557 | 0,262367 |
| RP4-605O3.4      | 1,81 | 2,26 | 2,06 | 2,48 | 0,1092718 | 0,262377 |
| CRIM1            | 1,49 | 1,64 | 1,50 | 0,77 | 0,1092863 | 0,262384 |
| RCE1             | 4,85 | 3,18 | 3,13 | 1,15 | 0,109405  | 0,262641 |
| MYO18A           | 3,30 | 2,86 | 3,21 | 1,51 | 0,1094299 | 0,262672 |
| SPATA2L          | 0,02 | 0,77 | 1,12 | 1,21 | 0,1094782 | 0,262759 |
| LRRC8A           | 2,04 | 0,03 | 2,11 | 1,32 | 0,1094911 | 0,262762 |
| PURA             | 1,11 | 1,31 | 1,06 | 0,75 | 0,1095214 | 0,262802 |
| STRADA           | 5,04 | 4,31 | 4,25 | 3,95 | 0,1095313 | 0,262802 |
| RHAG             | 0,28 | 0,00 | 1,03 | 0,73 | 0,1095916 | 0,262918 |
| PRDX6            | 7,12 | 6,82 | 6,51 | 7,08 | 0,1096482 | 0,263026 |
| NFE2L1           | 1,52 | 1,97 | 1,96 | 3,11 | 0,1097147 | 0,263144 |
| CTA-363E6.6      | 0,00 | 0,00 | 0,00 | 0,00 | 0,1097291 | 0,263144 |
| CTD-2095E4.4     | 1,75 | 2,84 | 2,09 | 2,47 | 0,1097333 | 0,263144 |
| RP11-242F24.2    | 0,38 | 0,52 | 0,55 | 0,51 | 0,1097662 | 0,263177 |
| KDM1B            | 2,39 | 2,04 | 2,85 | 2,08 | 0,1097707 | 0,263177 |
| MIR3180-2        | 0,14 | 0,00 | 0,03 | 0,86 | 0,1098122 | 0,26322  |
| MIR3180-3        | 0,14 | 0,00 | 0,03 | 0,86 | 0,1098122 | 0,26322  |
| TVP23A           | 2,57 | 0,97 | 1,66 | 1,40 | 0,1098303 | 0,263235 |
| AC000095.12      | 1,42 | 2,19 | 2,11 | 3,09 | 0,109847  | 0,263247 |
| RP13-631K18.2    | 0,50 | 0,27 | 0,78 | 0,78 | 0,1098701 | 0,263274 |
| TATDN1           | 4,98 | 6,28 | 4,76 | 3,00 | 0,1098922 | 0,263298 |
| ZNF70            | 0,23 | 0,63 | 0,31 | 0,30 | 0,1099317 | 0,263358 |
| PQLC3            | 6,35 | 4,32 | 5,64 | 6,11 | 0,1099592 | 0,263358 |
| HN1L             | 0,78 | 1,10 | 1,21 | 1,16 | 0,1099627 | 0,263358 |
| FAM184A          | 0,00 | 0,00 | 0,00 | 0,11 | 0,1099647 | 0,263358 |
| UBA3             | 6,35 | 4,94 | 5,29 | 5,70 | 0,1099885 | 0,263387 |
| PSMC2            | 6,21 | 3,69 | 5,83 | 4,05 | 0,1100166 | 0,263412 |
| C14orf166        | 7,35 | 6,48 | 6,84 | 5,59 | 0,1100225 | 0,263412 |
| BRICD5           | 0,22 | 0,39 | 1,12 | 1,89 | 0,1100731 | 0,26346  |
| RP11-466F5.6     | 0,00 | 0,13 | 0,00 | 0,14 | 0,1100783 | 0,26346  |
| TMPRSS3          | 0,00 | 0,00 | 0,06 | 0,18 | 0,110095  | 0,26346  |
| CTD-2587M2.1     | 0,66 | 0,30 | 0,52 | 0,41 | 0,110105  | 0,26346  |
| SIDT2            | 4,51 | 3,19 | 4,82 | 3,87 | 0,1101089 | 0,26346  |
| GSTO1            | 7,51 | 7,49 | 7,68 | 7,75 | 0,1101197 | 0,26346  |
| RP11-352M15.2    | 1,24 | 0,34 | 1,27 | 0,69 | 0,1101255 | 0,26346  |
| LLOXNC01-157D4.1 | 3,09 | 2,58 | 2,60 | 1,58 | 0,1101669 | 0,26353  |
| GSAP             | 6,00 | 4,88 | 5,09 | 4,76 | 0,1102166 | 0,263578 |
| NCRNA00167       | 0,04 | 0,21 | 0,14 | 0,60 | 0,1102339 | 0,263578 |
| SLC29A4          | 0,26 | 0,61 | 0,57 | 0,73 | 0,1102348 | 0,263578 |
| PDCD2L           | 1,19 | 0,20 | 1,03 | 0,00 | 0,110245  | 0,263578 |
| AC106782.18      | 0,42 | 0,43 | 0,66 | 0,82 | 0,1102464 | 0,263578 |
| LY86             | 8,80 | 8,31 | 8,30 | 7,77 | 0,1103139 | 0,263712 |

|               |      |      |      |      |           |          |
|---------------|------|------|------|------|-----------|----------|
| LIMK1         | 1,31 | 1,88 | 1,83 | 2,81 | 0,1103438 | 0,263723 |
| ARL6IP1       | 6,01 | 4,94 | 5,59 | 5,20 | 0,1103441 | 0,263723 |
| DR1           | 4,68 | 3,83 | 3,48 | 3,66 | 0,1103544 | 0,263723 |
| HMOX1         | 0,83 | 0,95 | 3,32 | 2,60 | 0,1103678 | 0,263727 |
| RP11-761N21.1 | 0,00 | 0,42 | 0,18 | 0,00 | 0,1104074 | NA       |
| ST3GAL5       | 3,80 | 3,83 | 4,55 | 4,59 | 0,1105299 | 0,264086 |
| RP11-522B15.3 | 0,06 | 0,03 | 0,07 | 0,11 | 0,1105457 | 0,264095 |
| NDUFB8        | 8,48 | 8,42 | 8,51 | 7,93 | 0,1105698 | 0,264099 |
| RP5-991O23.1  | 0,00 | 0,00 | 0,00 | 0,14 | 0,110571  | 0,264099 |
| ECHDC1        | 5,94 | 4,18 | 5,19 | 5,25 | 0,1106026 | 0,264141 |
| POLR2J        | 5,99 | 6,46 | 6,22 | 6,47 | 0,1106125 | 0,264141 |
| RP1-34B20.21  | 2,04 | 0,58 | 1,23 | 0,77 | 0,1106654 | 0,264239 |
| RP11-340I6.7  | 0,25 | 1,09 | 0,51 | 0,46 | 0,1108116 | 0,26456  |
| NSMCE4A       | 5,86 | 4,82 | 4,57 | 3,18 | 0,1108477 | 0,264618 |
| CABYR         | 0,47 | 0,65 | 0,69 | 0,59 | 0,1108604 | 0,264619 |
| RP11-114H24.6 | 0,01 | 0,35 | 2,16 | 4,13 | 0,1108834 | 0,264646 |
| SLC10A1       | 0,08 | 0,00 | 0,00 | 0,42 | 0,1109126 | 0,264683 |
| RP11-85M11.2  | 0,46 | 0,00 | 1,11 | 0,00 | 0,1109226 | 0,264683 |
| EXOSC1        | 6,31 | 6,85 | 6,09 | 5,05 | 0,1109462 | 0,264711 |
| RP11-214O1.1  | 0,22 | 0,21 | 0,21 | 0,35 | 0,1109879 | 0,26476  |
| CH507-9B2.9   | 2,42 | 2,20 | 2,25 | 1,81 | 0,111004  | 0,26476  |
| TTC31         | 2,00 | 4,13 | 2,90 | 1,46 | 0,1110137 | 0,26476  |
| TBC1D10B      | 2,25 | 2,42 | 3,08 | 3,39 | 0,1110147 | 0,26476  |
| RP11-264B17.3 | 0,00 | 0,00 | 0,04 | 0,00 | 0,1110432 | 0,2648   |
| GBP2          | 4,14 | 6,07 | 4,99 | 5,05 | 0,1110683 | 0,264831 |
| RP11-1O2.1    | 0,00 | 0,00 | 0,00 | 0,00 | 0,1110921 | NA       |
| RP11-436I9.2  | 0,00 | 0,00 | 0,09 | 0,11 | 0,1111188 | 0,264923 |
| RP4-756G23.5  | 0,07 | 0,05 | 0,06 | 0,06 | 0,1111747 | 0,265028 |
| SMG8          | 0,83 | 1,07 | 0,08 | 0,24 | 0,111207  | 0,265049 |
| TBC1D13       | 1,95 | 0,12 | 1,12 | 2,19 | 0,1112075 | 0,265049 |
| GRM6          | 0,15 | 0,13 | 0,25 | 0,33 | 0,1112246 | 0,265049 |
| CTD-2313F11.2 | 0,00 | 0,64 | 1,25 | 0,00 | 0,111243  | 0,265049 |
| TIAM1         | 2,59 | 4,10 | 3,27 | 3,61 | 0,1112433 | 0,265049 |
| ADCY6         | 0,02 | 0,10 | 0,03 | 0,53 | 0,111272  | 0,26509  |
| NUP43         | 2,11 | 2,90 | 1,71 | 0,94 | 0,1112989 | 0,265125 |
| RP11-165F24.3 | 3,84 | 5,63 | 3,54 | 2,31 | 0,1113327 | 0,265177 |
| FAM83E        | 0,03 | 0,18 | 0,13 | 0,21 | 0,1113603 | 0,265215 |
| PACS2         | 3,08 | 3,91 | 3,75 | 3,54 | 0,1113945 | 0,265268 |
| AP000475.2    | 0,17 | 0,43 | 0,40 | 0,39 | 0,1114518 | 0,265376 |
| UNGP1         | 0,11 | 0,77 | 0,17 | 0,20 | 0,1115512 | 0,265584 |
| SEMA4A        | 5,87 | 4,71 | 5,03 | 5,53 | 0,1115923 | 0,265602 |
| ARHGEF40      | 3,41 | 2,90 | 3,69 | 4,07 | 0,1115926 | 0,265602 |
| RP11-427L15.2 | 0,13 | 0,00 | 0,20 | 0,00 | 0,1115945 | 0,265602 |
| PTCD1         | 1,10 | 0,55 | 1,15 | 1,11 | 0,1116153 | 0,265621 |
| CTB-41I6.2    | 0,00 | 0,00 | 0,00 | 0,00 | 0,1116267 | 0,265621 |
| DNAJC14       | 1,16 | 1,02 | 2,04 | 2,68 | 0,1116433 | 0,265621 |
| AC006227.1    | 0,00 | 0,00 | 0,37 | 0,00 | 0,1116546 | 0,265621 |
| RN7SL70P      | 0,00 | 0,00 | 2,38 | 1,06 | 0,1116623 | 0,265621 |
| ITFG1         | 4,80 | 3,13 | 4,22 | 4,74 | 0,1116903 | 0,265642 |
| RP11-474I16.8 | 0,51 | 0,00 | 0,15 | 2,10 | 0,1116953 | 0,265642 |
| SH3BP5L       | 0,13 | 0,45 | 0,82 | 0,18 | 0,1117779 | 0,26581  |
| NBPF17P       | 0,00 | 0,13 | 0,00 | 0,00 | 0,1118267 | 0,265898 |
| ZNF385B       | 0,00 | 0,99 | 0,00 | 0,00 | 0,1118684 | 0,265969 |
| RP11-334E15.1 | 1,94 | 2,83 | 1,86 | 2,53 | 0,111903  | 0,266    |
| GSDMB         | 1,71 | 0,33 | 1,78 | 3,80 | 0,1119053 | 0,266    |

|                |       |       |       |      |           |          |
|----------------|-------|-------|-------|------|-----------|----------|
| DACH1          | 0,00  | 0,05  | 0,04  | 0,19 | 0,1119227 | 0,266012 |
| RP11-367B6.2   | 0,00  | 0,00  | 1,63  | 1,95 | 0,1119547 | 0,26606  |
| RN7SL377P      | 1,43  | 0,97  | 1,83  | 0,00 | 0,1119738 | 0,266077 |
| KB-1183D5.13   | 0,23  | 1,05  | 0,08  | 0,00 | 0,1120339 | 0,266191 |
| NSUN4          | 3,59  | 4,53  | 3,89  | 3,49 | 0,1120871 | 0,266276 |
| RP11-526D8.11  | 3,64  | 3,72  | 3,72  | 2,50 | 0,1120934 | 0,266276 |
| SNX18          | 3,24  | 1,35  | 2,77  | 1,16 | 0,1121413 | 0,266361 |
| PPIA           | 10,68 | 10,18 | 10,31 | 9,98 | 0,1121737 | 0,266391 |
| RP3-446N13.3   | 1,74  | 2,44  | 2,94  | 3,98 | 0,1121952 | 0,266391 |
| RBM22          | 5,04  | 5,19  | 4,90  | 3,71 | 0,1121985 | 0,266391 |
| LAX1           | 0,53  | 0,46  | 0,31  | 0,18 | 0,1122019 | 0,266391 |
| RP1-40E16.12   | 0,00  | 0,21  | 0,00  | 1,76 | 0,1122365 | 0,266445 |
| SAMD10         | 0,07  | 0,25  | 0,06  | 0,00 | 0,1123115 | 0,266582 |
| IL4R           | 2,98  | 3,91  | 4,16  | 3,53 | 0,1123184 | 0,266582 |
| TMEM206        | 4,72  | 4,19  | 3,68  | 3,09 | 0,1123696 | 0,266675 |
| SNRPD1         | 5,36  | 5,45  | 5,40  | 5,48 | 0,1125203 | 0,267005 |
| GMPR           | 0,25  | 0,58  | 0,71  | 0,21 | 0,1125561 | 0,267061 |
| MRPL30         | 2,28  | 2,48  | 2,77  | 1,78 | 0,1126693 | 0,267273 |
| ZBTB2          | 2,07  | 0,04  | 1,04  | 1,29 | 0,112675  | 0,267273 |
| RP3-468O1.6    | 0,00  | 0,00  | 0,00  | 0,88 | 0,1126816 | 0,267273 |
| SEN3-EIF4A1    | 0,25  | 0,00  | 0,07  | 0,00 | 0,1127463 | 0,267377 |
| RETSAT         | 0,29  | 0,00  | 0,36  | 0,25 | 0,1127495 | 0,267377 |
| RP1-127M18.1   | 0,00  | 0,00  | 0,00  | 0,71 | 0,1128042 | NA       |
| SMIM10L1       | 3,26  | 2,59  | 2,63  | 1,03 | 0,1128631 | 0,267592 |
| ACO79250.1     | 0,85  | 1,51  | 0,99  | 1,46 | 0,1128848 | 0,267592 |
| GMEB1          | 3,14  | 2,64  | 2,25  | 0,95 | 0,1128962 | 0,267592 |
| CWC25          | 3,96  | 3,26  | 4,18  | 3,83 | 0,1129056 | 0,267592 |
| RP11-1102P22.2 | 1,29  | 0,37  | 2,89  | 2,17 | 0,1129118 | 0,267592 |
| SCARA5         | 0,04  | 0,00  | 0,00  | 0,00 | 0,1129153 | NA       |
| SEMA4C         | 0,22  | 0,76  | 0,17  | 0,39 | 0,1129206 | 0,267592 |
| ZNF420         | 2,63  | 0,38  | 2,84  | 0,98 | 0,1129348 | 0,267592 |
| COX6B2         | 0,42  | 1,15  | 0,90  | 0,85 | 0,1129483 | 0,267592 |
| RAB21          | 3,92  | 3,10  | 3,78  | 2,71 | 0,1129625 | 0,267592 |
| NECTIN3        | 0,00  | 0,00  | 0,00  | 0,18 | 0,112964  | 0,267592 |
| EFEMP2         | 0,24  | 0,97  | 0,29  | 2,72 | 0,1129725 | 0,267592 |
| EFNB1          | 3,26  | 0,92  | 3,09  | 2,30 | 0,1130427 | 0,26773  |
| C4orf3         | 5,34  | 4,46  | 4,96  | 4,41 | 0,1131025 | 0,267843 |
| CCDC134        | 0,00  | 0,00  | 0,16  | 0,26 | 0,1131674 | 0,267957 |
| PLEKHM3        | 2,27  | 4,20  | 1,65  | 1,92 | 0,113175  | 0,267957 |
| RN7SL165P      | 0,89  | 1,70  | 0,00  | 0,00 | 0,1132026 | 0,267994 |
| PSG4           | 0,00  | 0,13  | 0,00  | 1,54 | 0,113245  | 0,268059 |
| PPM1A          | 5,07  | 4,91  | 4,89  | 3,96 | 0,1132571 | 0,268059 |
| RP11-411B10.7  | 2,33  | 3,82  | 2,83  | 3,13 | 0,1132662 | 0,268059 |
| DRAP1          | 6,12  | 5,64  | 6,14  | 5,62 | 0,1133013 | 0,268113 |
| GOLGA6A        | 0,00  | 0,00  | 0,00  | 0,94 | 0,1134091 | 0,268288 |
| SPDYE2         | 1,53  | 2,99  | 1,55  | 2,10 | 0,1134241 | 0,268288 |
| NOL4L          | 2,77  | 2,99  | 1,07  | 0,85 | 0,1134324 | 0,268288 |
| ZNF99          | 0,06  | 0,07  | 0,11  | 0,13 | 0,1134328 | 0,268288 |
| RP11-113K21.6  | 3,18  | 4,64  | 3,35  | 3,09 | 0,1134364 | 0,268288 |
| CTC-348L14.1   | 0,40  | 2,67  | 2,19  | 3,98 | 0,1134477 | 0,268288 |
| MVK            | 2,03  | 1,43  | 0,40  | 3,74 | 0,1135179 | 0,268426 |
| C10orf67       | 0,12  | 0,21  | 0,13  | 0,18 | 0,1135458 | 0,268463 |
| GRIA1          | 0,44  | 2,24  | 0,61  | 0,66 | 0,1135853 | 0,268516 |
| RP11-320G24.1  | 0,21  | 0,22  | 0,35  | 0,47 | 0,1135922 | 0,268516 |
| DESI2          | 3,41  | 1,75  | 2,95  | 3,57 | 0,1136622 | 0,268643 |

|                |      |      |      |      |           |          |
|----------------|------|------|------|------|-----------|----------|
| RP11-423C15.3  | 0,16 | 0,07 | 0,22 | 0,39 | 0,1136757 | 0,268643 |
| RN7SL541P      | 0,00 | 1,41 | 1,16 | 1,44 | 0,11369   | 0,268643 |
| LIMD2          | 7,05 | 6,45 | 6,55 | 6,19 | 0,1136945 | 0,268643 |
| RP11-396N11.1  | 1,42 | 2,92 | 1,18 | 0,00 | 0,1137119 | 0,268656 |
| ZNF510         | 2,06 | 1,25 | 0,27 | 0,00 | 0,1137458 | 0,268707 |
| ACADL          | 0,11 | 0,00 | 0,03 | 0,00 | 0,1137879 | 0,268779 |
| RP11-259K5.2   | 0,64 | 0,60 | 0,65 | 0,43 | 0,1138098 | 0,26879  |
| LA16c-380H5.2  | 0,00 | 0,97 | 0,00 | 0,29 | 0,1138112 | NA       |
| ZNF652         | 3,84 | 4,14 | 4,42 | 3,18 | 0,1138278 | 0,26879  |
| CTB-27N1.2     | 0,14 | 0,00 | 0,05 | 0,00 | 0,113829  | 0,26879  |
| RP11-336K24.12 | 0,07 | 0,19 | 0,19 | 0,16 | 0,1138533 | 0,268819 |
| AC008753.6     | 0,44 | 1,26 | 2,20 | 2,05 | 0,1138853 | 0,268861 |
| CTC-329H14.4   | 0,00 | 3,05 | 4,17 | 3,76 | 0,1139072 | 0,268861 |
| RP11-527B17.2  | 0,00 | 0,00 | 0,00 | 0,00 | 0,1139143 | 0,268861 |
| UBP1           | 4,39 | 1,85 | 3,98 | 3,28 | 0,1139198 | 0,268861 |
| ARID5A         | 2,94 | 2,89 | 3,92 | 3,52 | 0,113973  | 0,268958 |
| CNPY3          | 7,40 | 7,12 | 7,68 | 7,28 | 0,1139952 | 0,268982 |
| RP11-386G11.10 | 5,96 | 6,15 | 7,56 | 6,73 | 0,1140241 | 0,269022 |
| SLC6A4         | 0,03 | 0,26 | 0,08 | 0,10 | 0,1140758 | 0,2691   |
| SETD3          | 4,36 | 4,35 | 3,60 | 3,14 | 0,1140812 | 0,2691   |
| SH3GLB1        | 5,24 | 4,83 | 4,28 | 3,71 | 0,1141011 | 0,269118 |
| ASPG           | 0,00 | 0,00 | 0,00 | 0,00 | 0,1141988 | 0,26932  |
| RP11-73M18.2   | 0,00 | 0,00 | 0,43 | 0,00 | 0,1142472 | 0,269405 |
| P2RX5          | 2,48 | 2,07 | 0,41 | 1,23 | 0,11428   | 0,269454 |
| RING1          | 2,02 | 2,29 | 2,13 | 1,07 | 0,1142927 | 0,269455 |
| RP11-319G9.3   | 0,23 | 0,57 | 0,55 | 0,51 | 0,1143471 | 0,269515 |
| TUBGCP3        | 3,85 | 1,90 | 3,91 | 1,09 | 0,114352  | 0,269515 |
| SND1           | 4,40 | 5,16 | 5,01 | 4,53 | 0,1143553 | 0,269515 |
| VTI1A          | 4,54 | 3,82 | 3,92 | 3,90 | 0,1143666 | 0,269515 |
| RP11-24H1.1    | 0,00 | 0,00 | 0,00 | 0,38 | 0,1143753 | NA       |
| PWWP2B         | 1,59 | 0,59 | 2,36 | 0,98 | 0,1143805 | 0,269519 |
| EFCAB2         | 3,48 | 4,00 | 3,72 | 3,52 | 0,1143949 | 0,269525 |
| MYL6B          | 2,77 | 1,52 | 2,04 | 2,21 | 0,1144197 | 0,269555 |
| RP11-705C15.2  | 4,32 | 1,70 | 4,05 | 4,10 | 0,1144436 | 0,269582 |
| ZNF850         | 0,40 | 0,43 | 0,59 | 0,57 | 0,1144683 | 0,269612 |
| RP11-129B22.7  | 0,08 | 0,25 | 0,27 | 0,59 | 0,1144833 | 0,269619 |
| PDLIM2         | 4,81 | 5,32 | 4,46 | 5,16 | 0,1145224 | 0,269682 |
| RP11-43A14.1   | 0,00 | 0,00 | 0,00 | 0,00 | 0,1145534 | 0,269726 |
| FBXL22         | 0,00 | 0,00 | 0,00 | 0,08 | 0,1146346 | NA       |
| RP11-38L15.2   | 1,13 | 1,56 | 1,32 | 0,72 | 0,114637  | 0,269895 |
| AC097721.2     | 0,82 | 0,00 | 0,66 | 0,76 | 0,1146762 | 0,269958 |
| XRCC2          | 1,53 | 2,68 | 1,66 | 2,33 | 0,1147031 | 0,269993 |
| MFSD8          | 3,27 | 3,27 | 4,33 | 2,83 | 0,1147828 | 0,270127 |
| FAM129A        | 4,25 | 2,60 | 4,01 | 3,51 | 0,1147844 | 0,270127 |
| CFAP52         | 0,20 | 0,34 | 0,16 | 0,91 | 0,1148517 | 0,270255 |
| TMEM93         | 6,07 | 3,97 | 5,74 | 6,90 | 0,1148658 | 0,270255 |
| WDR77          | 5,51 | 3,18 | 4,85 | 3,33 | 0,1148751 | 0,270255 |
| CTD-2313J17.1  | 1,74 | 0,47 | 1,49 | 1,45 | 0,1149021 | 0,27029  |
| CAPG           | 8,94 | 8,64 | 8,67 | 7,96 | 0,1149723 | 0,270415 |
| CTD-2245O6.1   | 0,00 | 0,00 | 0,00 | 0,00 | 0,1149814 | 0,270415 |
| RN7SL465P      | 4,75 | 5,58 | 4,03 | 4,26 | 0,1149999 | 0,270415 |
| SGCE           | 1,22 | 2,15 | 1,27 | 0,92 | 0,1150039 | 0,270415 |
| BICD1          | 1,38 | 0,03 | 0,98 | 0,67 | 0,1150622 | 0,270523 |
| MFSD7          | 0,00 | 0,00 | 0,37 | 0,34 | 0,1150795 | 0,270535 |
| PPFIA2         | 0,00 | 0,00 | 0,00 | 0,00 | 0,11509   | NA       |

|               |      |      |      |      |           |          |
|---------------|------|------|------|------|-----------|----------|
| RP4-536B24.3  | 0,24 | 0,00 | 0,33 | 0,62 | 0,1151703 | 0,270695 |
| RP11-175K6.1  | 0,21 | 0,13 | 0,35 | 0,27 | 0,1151716 | 0,270695 |
| ZC3H6         | 1,50 | 0,60 | 1,99 | 1,45 | 0,1152097 | 0,270756 |
| EPT1          | 2,01 | 0,33 | 1,24 | 0,22 | 0,1152579 | 0,27084  |
| SCARNA10      | 0,00 | 1,96 | 0,00 | 1,57 | 0,1153837 | 0,271107 |
| CCDC24        | 0,52 | 1,13 | 0,48 | 1,01 | 0,1154562 | 0,271229 |
| RPS20P22      | 0,11 | 0,86 | 0,36 | 0,63 | 0,1154645 | 0,271229 |
| RP11-110I1.12 | 0,11 | 0,17 | 0,00 | 0,27 | 0,1154722 | 0,271229 |
| IFI6          | 7,58 | 5,54 | 6,67 | 7,80 | 0,1155959 | 0,271474 |
| UNC13A        | 0,01 | 0,01 | 0,01 | 0,03 | 0,1156009 | 0,271474 |
| CRCP          | 3,10 | 3,88 | 4,16 | 3,59 | 0,1156675 | 0,271565 |
| RP11-678G14.4 | 0,06 | 0,17 | 0,18 | 0,09 | 0,1156706 | 0,271565 |
| RP1-111B22.2  | 0,33 | 0,44 | 0,19 | 0,11 | 0,1156784 | 0,271565 |
| COX7CP1       | 0,00 | 0,00 | 0,00 | 0,00 | 0,1156885 | 0,271565 |
| RP11-61J19.5  | 0,05 | 0,15 | 0,89 | 1,28 | 0,1157127 | 0,271593 |
| EEF1A1L12     | 0,34 | 0,48 | 0,17 | 0,10 | 0,1157517 | 0,271656 |
| RP11-108M12.3 | 0,00 | 2,08 | 1,03 | 0,84 | 0,1157901 | 0,271717 |
| AKAP9         | 6,60 | 5,88 | 6,00 | 5,41 | 0,1158231 | 0,271766 |
| DAB2          | 3,90 | 1,72 | 3,53 | 3,01 | 0,1158491 | 0,271798 |
| RP11-158M2.2  | 0,35 | 0,00 | 1,23 | 0,00 | 0,1158953 | 0,271853 |
| ANAPC7        | 4,71 | 2,49 | 3,54 | 2,37 | 0,1158969 | 0,271853 |
| WDR61         | 6,65 | 5,15 | 5,99 | 5,50 | 0,1159864 | 0,27202  |
| PPWD1         | 5,11 | 2,82 | 3,58 | 4,05 | 0,1159926 | 0,27202  |
| SYNGAP1       | 0,00 | 0,02 | 0,02 | 0,02 | 0,1160164 | NA       |
| PCCB          | 4,29 | 2,02 | 4,44 | 4,59 | 0,1160386 | 0,272099 |
| CTD-2651B20.1 | 0,00 | 0,00 | 0,32 | 0,82 | 0,1160637 | 0,27213  |
| RP11-849H4.4  | 0,08 | 0,13 | 0,13 | 0,42 | 0,1160905 | 0,272153 |
| RP11-57A19.7  | 0,24 | 0,45 | 0,30 | 0,30 | 0,1160981 | 0,272153 |
| ZNF165        | 0,36 | 0,00 | 0,13 | 0,65 | 0,1161233 | 0,272176 |
| PRELID3A      | 1,54 | 1,45 | 1,64 | 0,42 | 0,1161325 | 0,272176 |
| RAB11B        | 2,73 | 1,54 | 2,55 | 1,73 | 0,1162461 | 0,272385 |
| RP11-231C14.9 | 3,47 | 0,27 | 3,07 | 2,07 | 0,1162604 | 0,272385 |
| ABHD14A-ACY1  | 0,99 | 0,00 | 0,18 | 0,20 | 0,1162626 | 0,272385 |
| C9orf84       | 0,32 | 0,07 | 0,00 | 0,03 | 0,1162789 | 0,272385 |
| CCDC17        | 0,00 | 0,08 | 0,19 | 0,00 | 0,1162828 | 0,272385 |
| ANKRD27       | 3,07 | 2,32 | 2,81 | 1,05 | 0,1163106 | 0,272398 |
| RP11-439A17.2 | 0,00 | 0,00 | 0,00 | 0,00 | 0,1163132 | 0,272398 |
| RP11-403N16.1 | 0,00 | 0,69 | 0,00 | 0,00 | 0,1163769 | 0,272492 |
| MICALL2       | 0,00 | 1,55 | 0,00 | 0,21 | 0,1163823 | 0,272492 |
| GALC          | 3,50 | 2,49 | 4,25 | 4,23 | 0,1163899 | 0,272492 |
| RP11-347J14.7 | 0,28 | 0,68 | 0,41 | 0,28 | 0,1164216 | 0,272535 |
| RP11-583F2.5  | 1,29 | 0,00 | 1,90 | 1,07 | 0,1164329 | 0,272535 |
| PLAGL2        | 1,02 | 1,10 | 1,08 | 1,07 | 0,1164557 | 0,27256  |
| RN7SKP95      | 0,00 | 0,87 | 0,32 | 1,55 | 0,1164724 | 0,27257  |
| INO80B        | 0,44 | 0,35 | 0,97 | 1,19 | 0,1165023 | 0,2726   |
| DEDD          | 4,69 | 3,53 | 4,95 | 3,59 | 0,1165097 | 0,2726   |
| ZNF573        | 2,29 | 2,26 | 2,42 | 1,28 | 0,1165708 | 0,272714 |
| IL31RA        | 0,00 | 0,06 | 0,00 | 0,49 | 0,1166272 | 0,272801 |
| RP11-353J17.5 | 0,00 | 0,00 | 0,00 | 0,00 | 0,1166326 | 0,272801 |
| TMEM107       | 4,40 | 4,12 | 5,38 | 5,26 | 0,1166546 | 0,272824 |
| RP11-207N4.2  | 0,51 | 3,28 | 0,70 | 2,11 | 0,1166776 | 0,272848 |
| GALNS         | 3,37 | 3,21 | 2,08 | 1,22 | 0,1166986 | 0,272848 |
| SYVN1         | 2,41 | 0,79 | 2,30 | 1,45 | 0,1167178 | 0,272848 |
| RP11-219B17.1 | 0,00 | 0,27 | 0,00 | 1,20 | 0,1167419 | 0,272848 |
| EIF4A2        | 7,78 | 7,19 | 7,35 | 6,76 | 0,1167471 | 0,272848 |

|               |      |      |      |      |           |          |
|---------------|------|------|------|------|-----------|----------|
| REST          | 3,70 | 2,48 | 3,41 | 3,40 | 0,1167493 | 0,272848 |
| TRPM6         | 0,09 | 0,41 | 0,28 | 0,20 | 0,1167509 | 0,272848 |
| RP11-69M1.6   | 0,15 | 0,16 | 0,16 | 0,13 | 0,1167636 | 0,27285  |
| HYAL1         | 0,18 | 0,27 | 0,09 | 1,09 | 0,1167855 | 0,272858 |
| ADRBK2        | 4,34 | 3,60 | 4,04 | 4,21 | 0,1167978 | 0,272858 |
| SGO1          | 0,42 | 0,95 | 0,43 | 0,21 | 0,1168039 | 0,272858 |
| RN7SL181P     | 2,00 | 0,00 | 1,46 | 0,88 | 0,116843  | 0,27292  |
| LIMD1-AS1     | 0,36 | 0,00 | 1,40 | 0,52 | 0,1168674 | 0,272948 |
| RP11-458B24.2 | 3,18 | 3,70 | 3,11 | 3,25 | 0,1169006 | 0,272997 |
| RP11-107F6.3  | 2,31 | 2,03 | 2,55 | 3,12 | 0,116922  | 0,273002 |
| EFHC2         | 0,04 | 0,11 | 0,14 | 0,06 | 0,1169272 | 0,273002 |
| TTC25         | 0,06 | 0,13 | 0,42 | 1,55 | 0,1169555 | 0,27304  |
| RBM6          | 6,17 | 5,29 | 6,17 | 6,01 | 0,1170406 | 0,273196 |
| KIF16B        | 3,20 | 4,60 | 2,71 | 1,85 | 0,1170471 | 0,273196 |
| ITGAX         | 6,39 | 5,48 | 6,35 | 5,66 | 0,1171118 | 0,273299 |
| RNA5SP450     | 1,57 | 0,00 | 5,13 | 0,00 | 0,1171157 | 0,273299 |
| ECSIT         | 4,80 | 5,68 | 5,35 | 5,61 | 0,1171963 | 0,273422 |
| DIEXF         | 1,08 | 0,42 | 0,56 | 0,30 | 0,1171983 | 0,273422 |
| DNM2          | 3,73 | 4,73 | 4,73 | 3,72 | 0,1172055 | 0,273422 |
| MYO7B         | 0,02 | 0,21 | 0,00 | 0,24 | 0,1172561 | 0,273479 |
| CEP164        | 3,67 | 2,38 | 3,58 | 3,11 | 0,1172652 | 0,273479 |
| RP11-217E22.5 | 0,00 | 0,00 | 0,00 | 0,00 | 0,1172668 | 0,273479 |
| NRF1          | 3,34 | 1,72 | 3,11 | 2,31 | 0,1172877 | 0,273499 |
| AC004041.2    | 0,71 | 3,32 | 0,00 | 0,00 | 0,1173259 | 0,273559 |
| HOXA9         | 2,12 | 1,03 | 0,83 | 0,22 | 0,1173607 | 0,273612 |
| INSR          | 3,24 | 2,87 | 3,26 | 2,66 | 0,1173782 | 0,273624 |
| OSBPL8        | 6,35 | 5,60 | 6,06 | 5,20 | 0,1174696 | 0,273808 |
| BMPER         | 0,93 | 3,14 | 1,35 | 1,69 | 0,1175934 | 0,274068 |
| CTD-2050N2.1  | 1,30 | 2,22 | 0,87 | 0,64 | 0,1176141 | 0,274088 |
| NPSR1-AS1     | 0,41 | 0,39 | 0,41 | 0,53 | 0,1176916 | 0,274239 |
| TYR           | 0,00 | 0,00 | 0,13 | 0,19 | 0,1176992 | NA       |
| SULT1A1       | 4,44 | 4,99 | 4,30 | 5,16 | 0,1177061 | 0,274245 |
| OR4K16P       | 0,54 | 0,45 | 0,10 | 0,48 | 0,1177565 | 0,27431  |
| AC017002.1    | 0,57 | 3,98 | 0,29 | 0,21 | 0,1177617 | 0,27431  |
| APBB3         | 2,94 | 1,07 | 2,81 | 3,53 | 0,1177712 | 0,27431  |
| RP11-177F15.1 | 0,00 | 0,50 | 0,00 | 0,12 | 0,1178263 | 0,27441  |
| USP37         | 1,77 | 0,98 | 2,20 | 0,71 | 0,11787   | 0,274482 |
| SLC35E3       | 2,46 | 2,93 | 3,27 | 2,81 | 0,1178929 | 0,274507 |
| MAP3K1        | 4,38 | 5,02 | 4,64 | 4,90 | 0,1179097 | 0,274517 |
| ARHGAP20      | 0,00 | 0,00 | 0,00 | 0,00 | 0,1179335 | 0,274544 |
| RP11-905F6.1  | 2,48 | 2,00 | 3,11 | 2,57 | 0,1180089 | 0,274691 |
| RN7SKP37      | 0,00 | 1,35 | 0,00 | 0,00 | 0,1180286 | 0,274708 |
| MIIP          | 4,08 | 3,34 | 4,24 | 4,99 | 0,1180566 | 0,274718 |
| CTB-88F18.5   | 0,62 | 1,17 | 0,76 | 0,45 | 0,1180661 | 0,274718 |
| TNNI1         | 0,02 | 0,03 | 0,00 | 0,03 | 0,1180792 | 0,274718 |
| AMDHD2        | 2,43 | 0,26 | 0,26 | 0,80 | 0,1180823 | 0,274718 |
| ZBTB49        | 0,16 | 0,90 | 0,16 | 1,85 | 0,1181255 | 0,274784 |
| PTOV1-AS1     | 0,68 | 0,98 | 0,28 | 0,00 | 0,1181355 | 0,274784 |
| RP6-159A1.4   | 4,46 | 2,12 | 3,95 | 4,24 | 0,1181741 | 0,274845 |
| GCHFR         | 4,93 | 3,89 | 4,25 | 5,66 | 0,1182007 | 0,274878 |
| ATP6V1B2      | 5,76 | 6,03 | 6,10 | 5,52 | 0,1182714 | 0,275014 |
| NR4A1         | 5,80 | 6,76 | 6,00 | 5,53 | 0,1183186 | 0,275095 |
| DSTYK         | 2,53 | 2,97 | 2,67 | 2,72 | 0,1183815 | 0,275212 |
| TUSC3         | 0,00 | 1,31 | 0,02 | 0,04 | 0,1184128 | 0,275232 |
| RP11-324I22.3 | 0,00 | 0,00 | 0,32 | 0,00 | 0,1184147 | 0,275232 |

|                |      |      |      |      |           |          |
|----------------|------|------|------|------|-----------|----------|
| YWHAB          | 8,22 | 7,68 | 8,05 | 7,51 | 0,1184601 | 0,275309 |
| RN7SL734P      | 0,00 | 0,00 | 0,00 | 0,92 | 0,1185051 | NA       |
| CASC4          | 4,20 | 4,40 | 4,46 | 3,46 | 0,1185106 | 0,27538  |
| F2R            | 0,12 | 0,54 | 0,09 | 0,09 | 0,1185156 | 0,27538  |
| ZBTB41         | 1,25 | 0,28 | 0,65 | 0,31 | 0,1185519 | 0,275414 |
| SOCS6          | 1,78 | 0,10 | 1,05 | 0,14 | 0,1185554 | 0,275414 |
| RNF121         | 2,56 | 5,07 | 1,68 | 2,44 | 0,1185675 | 0,275414 |
| AC007773.2     | 0,00 | 0,49 | 0,07 | 0,00 | 0,1185965 | 0,275453 |
| RP4-534N18.2   | 0,97 | 0,40 | 1,40 | 1,73 | 0,1186451 | 0,275537 |
| NNT            | 4,82 | 2,97 | 4,96 | 4,96 | 0,1186955 | 0,275625 |
| RN7SL330P      | 1,66 | 0,79 | 0,00 | 0,00 | 0,118823  | 0,275876 |
| XCL1           | 0,00 | 0,30 | 0,00 | 0,00 | 0,1188283 | 0,275876 |
| AC015978.3     | 0,01 | 0,03 | 0,03 | 0,04 | 0,11883   | NA       |
| ABCF2          | 3,68 | 2,94 | 3,01 | 3,80 | 0,1188704 | 0,275945 |
| LY9            | 3,33 | 4,81 | 1,66 | 2,15 | 0,1188922 | 0,275966 |
| RP11-362K14.5  | 0,69 | 0,46 | 0,72 | 0,26 | 0,1189354 | 0,276038 |
| IMMP1L         | 2,84 | 5,01 | 2,82 | 1,53 | 0,1189579 | 0,276061 |
| MORC3          | 3,59 | 3,70 | 3,01 | 2,53 | 0,1189828 | 0,27609  |
| AP1S1          | 3,12 | 0,44 | 1,36 | 2,19 | 0,1190017 | 0,276105 |
| PLXNB3         | 0,00 | 0,28 | 0,00 | 0,00 | 0,1190175 | 0,276113 |
| FERMT2         | 0,02 | 0,05 | 0,03 | 0,10 | 0,1191861 | 0,276475 |
| UBA6           | 4,03 | 2,80 | 3,84 | 3,85 | 0,119231  | 0,276551 |
| RAE1           | 4,63 | 4,74 | 4,13 | 2,87 | 0,119355  | 0,276809 |
| AC002386.1     | 0,00 | 0,00 | 0,00 | 0,00 | 0,119383  | 0,276845 |
| LRRK1          | 3,03 | 3,59 | 3,35 | 3,83 | 0,1194487 | 0,276947 |
| USP15          | 7,66 | 7,58 | 7,56 | 7,90 | 0,1194556 | 0,276947 |
| AP2A2          | 3,39 | 2,62 | 3,78 | 3,41 | 0,1194684 | 0,276947 |
| AC097724.3     | 1,01 | 0,50 | 1,06 | 0,96 | 0,1194827 | 0,276947 |
| SNED1          | 0,00 | 0,34 | 0,01 | 0,03 | 0,119489  | 0,276947 |
| PTPRF          | 0,00 | 0,23 | 0,05 | 0,14 | 0,119518  | 0,276985 |
| CD53           | 9,31 | 8,52 | 8,85 | 7,80 | 0,1195509 | 0,277033 |
| IPO5           | 4,27 | 2,63 | 3,50 | 2,99 | 0,1196096 | 0,27714  |
| CTB-133G6.2    | 0,00 | 1,28 | 0,75 | 1,95 | 0,1196402 | 0,277182 |
| MSS51          | 0,30 | 0,09 | 0,35 | 0,18 | 0,1196683 | 0,277198 |
| VAR52          | 1,51 | 1,18 | 1,29 | 0,74 | 0,119672  | 0,277198 |
| PPDPF          | 1,29 | 2,22 | 1,52 | 2,17 | 0,1197168 | 0,277272 |
| RP11-372K14.2  | 0,26 | 0,00 | 0,36 | 0,00 | 0,1197312 | 0,277277 |
| TRMT2B         | 2,40 | 1,81 | 1,53 | 0,45 | 0,1198296 | 0,277476 |
| RP11-1070N10.4 | 0,00 | 2,83 | 0,00 | 0,00 | 0,1198703 | 0,277541 |
| PLGLB1         | 2,77 | 0,00 | 2,17 | 0,49 | 0,1199374 | 0,277667 |
| RP11-347J14.4  | 0,00 | 0,14 | 0,00 | 0,02 | 0,1199979 | NA       |
| RP11-503L19.1  | 0,00 | 1,84 | 0,00 | 0,00 | 0,1200971 | 0,278008 |
| ING4           | 5,20 | 6,21 | 4,17 | 4,62 | 0,1201882 | 0,27819  |
| LIPT2          | 0,00 | 0,00 | 0,14 | 0,22 | 0,1202514 | 0,278307 |
| MESDC1         | 1,22 | 0,54 | 1,48 | 1,22 | 0,1202741 | 0,278331 |
| PUF60          | 6,37 | 6,37 | 5,69 | 4,82 | 0,1203209 | 0,278398 |
| HIST1H2AM      | 4,39 | 0,00 | 1,55 | 0,60 | 0,1203279 | 0,278398 |
| RF00592        | 2,45 | 0,00 | 0,00 | 0,00 | 0,1203613 | NA       |
| AC018816.3     | 0,64 | 1,78 | 0,00 | 0,00 | 0,1203979 | 0,27853  |
| RSAD1          | 3,33 | 1,97 | 3,08 | 0,86 | 0,1204103 | 0,27853  |
| TSPAN31        | 4,29 | 2,51 | 3,36 | 2,72 | 0,1204392 | 0,278568 |
| HDAC9          | 7,11 | 6,24 | 6,61 | 5,51 | 0,1205127 | 0,278705 |
| MICAL3         | 0,99 | 4,18 | 0,96 | 1,60 | 0,1205234 | 0,278705 |
| MAP2K4         | 3,69 | 1,29 | 3,27 | 3,05 | 0,1205834 | 0,278815 |
| RP11-24J19.1   | 0,00 | 1,57 | 2,35 | 0,69 | 0,1206189 | 0,278866 |



|                   |      |      |      |      |           |          |
|-------------------|------|------|------|------|-----------|----------|
| RP11-338E21.3     | 0,70 | 0,00 | 1,28 | 2,32 | 0,1206307 | 0,278866 |
| EPPIN             | 0,88 | 1,56 | 0,78 | 1,98 | 0,1206601 | 0,278905 |
| CRYBB2P1          | 4,30 | 4,54 | 3,17 | 4,38 | 0,1206943 | 0,278955 |
| OFCC1             | 0,00 | 2,07 | 0,00 | 0,00 | 0,1207361 | 0,279023 |
| OSBPL7            | 1,70 | 3,07 | 0,98 | 1,94 | 0,1207886 | 0,279115 |
| DTYMK             | 4,46 | 5,24 | 3,64 | 2,97 | 0,1208249 | 0,279166 |
| RP11-278C7.5      | 0,00 | 0,00 | 0,00 | 0,00 | 0,1208358 | 0,279166 |
| AMOTL1            | 0,06 | 0,05 | 0,08 | 0,00 | 0,1208648 | 0,279183 |
| MESDC2            | 3,72 | 2,52 | 3,27 | 2,66 | 0,1208684 | 0,279183 |
| RP4-601P9.2       | 0,00 | 0,66 | 0,05 | 0,42 | 0,1208844 | 0,279191 |
| C11orf1           | 2,73 | 2,55 | 2,60 | 1,21 | 0,1210346 | 0,279455 |
| VPS51             | 4,95 | 6,06 | 5,56 | 5,43 | 0,1210391 | 0,279455 |
| TSHZ2             | 0,02 | 0,18 | 0,05 | 0,08 | 0,1210439 | 0,279455 |
| ADAMTS2           | 0,40 | 0,54 | 0,44 | 1,39 | 0,1210491 | 0,279455 |
| MROH1             | 2,00 | 2,69 | 2,55 | 3,21 | 0,1210714 | 0,279478 |
| SLC24A1           | 2,52 | 1,93 | 2,13 | 2,41 | 0,1211869 | 0,279715 |
| FAXDC2            | 0,92 | 3,22 | 1,33 | 3,61 | 0,1212373 | 0,279803 |
| ATP5G2            | 9,63 | 9,48 | 9,72 | 9,34 | 0,1212598 | 0,279825 |
| RP11-552C15.1     | 0,00 | 0,00 | 0,00 | 2,63 | 0,1213055 | 0,279879 |
| AGO1              | 1,91 | 1,14 | 1,69 | 0,89 | 0,1213081 | 0,279879 |
| ANKRD16           | 0,17 | 0,18 | 0,13 | 0,09 | 0,1213686 | 0,279959 |
| CTB-102L5.4       | 0,87 | 0,48 | 0,60 | 0,00 | 0,1213725 | 0,279959 |
| CTDNEP1           | 5,57 | 5,17 | 5,72 | 4,66 | 0,1213808 | 0,279959 |
| C3orf70           | 0,14 | 0,30 | 0,16 | 0,32 | 0,121423  | 0,280028 |
| TCOF1             | 4,31 | 3,30 | 4,67 | 3,87 | 0,1214658 | 0,280097 |
| YOD1              | 1,46 | 3,51 | 1,29 | 1,34 | 0,12149   | 0,280124 |
| CTB-5506.12       | 2,91 | 2,87 | 2,69 | 4,33 | 0,1215077 | 0,280136 |
| SPNS3             | 4,70 | 4,45 | 5,36 | 3,20 | 0,1215288 | 0,280155 |
| MAP3K15           | 0,20 | 0,06 | 0,21 | 0,26 | 0,1215689 | 0,280219 |
| G3BP2             | 5,97 | 4,15 | 5,26 | 4,78 | 0,1216048 | 0,280265 |
| RP11-489P6.1      | 0,48 | 0,39 | 0,80 | 0,25 | 0,1216144 | 0,280265 |
| ZNF493            | 2,56 | 4,44 | 3,04 | 2,96 | 0,1216706 | 0,280366 |
| CCDC183           | 0,00 | 0,54 | 0,00 | 0,30 | 0,1216828 | NA       |
| WDR44             | 2,74 | 2,42 | 2,15 | 1,28 | 0,1216995 | 0,280403 |
| RTTN              | 3,47 | 3,91 | 3,38 | 3,21 | 0,121739  | 0,280451 |
| RP11-53I6.3       | 0,00 | 0,00 | 0,00 | 0,38 | 0,1217452 | 0,280451 |
| FTLP10            | 0,07 | 0,10 | 0,00 | 0,11 | 0,1217851 | NA       |
| GREM2             | 0,06 | 0,06 | 0,01 | 0,06 | 0,1218059 | 0,280561 |
| STX8              | 6,12 | 6,50 | 5,80 | 5,45 | 0,1218512 | 0,280626 |
| RP1-118J21.27     | 0,49 | 0,15 | 0,19 | 0,00 | 0,121871  | 0,280626 |
| RP11-732A19.9     | 0,87 | 0,00 | 0,00 | 0,00 | 0,1218717 | 0,280626 |
| APOPT1            | 4,75 | 4,58 | 4,58 | 2,72 | 0,1218943 | 0,280649 |
| C20orf196         | 1,57 | 1,48 | 3,17 | 3,22 | 0,121912  | 0,28066  |
| SLC25A51          | 0,80 | 0,18 | 1,00 | 1,24 | 0,1220478 | 0,280923 |
| HTATSF1           | 4,18 | 4,88 | 3,52 | 3,22 | 0,1220514 | 0,280923 |
| LMLN              | 0,53 | 0,21 | 0,87 | 0,64 | 0,1221316 | 0,281078 |
| IRF7              | 4,57 | 3,52 | 5,15 | 5,01 | 0,1221559 | 0,281105 |
| RN7SL296P         | 0,00 | 0,00 | 0,19 | 0,72 | 0,1221934 | NA       |
| SLX1A-SULT1A3     | 2,85 | 1,39 | 2,61 | 2,26 | 0,1221957 | 0,281168 |
| SULT1C2           | 0,19 | 0,04 | 0,26 | 0,14 | 0,1222199 | 0,281194 |
| RP11-148O21.2     | 0,00 | 0,00 | 0,00 | 0,00 | 0,1222456 | NA       |
| RP11-229O3.1      | 0,00 | 0,00 | 0,00 | 0,00 | 0,122289  | NA       |
| DCP1B             | 0,16 | 1,03 | 0,34 | 0,18 | 0,1223122 | 0,281378 |
| MFN1              | 3,73 | 1,05 | 2,79 | 2,88 | 0,122348  | 0,281431 |
| XXbac-BPG181B23.7 | 1,37 | 1,31 | 0,83 | 0,25 | 0,122392  | 0,281503 |

|               |      |      |      |      |           |          |
|---------------|------|------|------|------|-----------|----------|
| CPT1A         | 2,99 | 2,77 | 3,35 | 2,82 | 0,1224073 | 0,281509 |
| SMARCA4       | 4,83 | 5,65 | 4,87 | 5,01 | 0,1224419 | 0,28153  |
| PTPN4         | 3,18 | 4,72 | 2,23 | 2,88 | 0,1224445 | 0,28153  |
| DGCR2         | 0,89 | 1,74 | 0,66 | 2,33 | 0,1224544 | 0,28153  |
| CCNG2         | 2,16 | 0,51 | 1,77 | 1,42 | 0,1224689 | 0,281534 |
| CTC-471J1.8   | 0,68 | 0,00 | 0,01 | 1,02 | 0,1225322 | 0,281623 |
| SCML1         | 3,19 | 2,05 | 2,42 | 2,10 | 0,122533  | 0,281623 |
| ZNF316        | 0,02 | 0,57 | 0,09 | 0,49 | 0,122556  | 0,281647 |
| KLHL32        | 0,04 | 0,00 | 0,00 | 1,43 | 0,1225713 | 0,281653 |
| RCC1          | 0,35 | 0,05 | 0,29 | 0,58 | 0,1226067 | 0,281705 |
| CTB-13H5.1    | 1,56 | 1,95 | 1,56 | 1,19 | 0,1226197 | 0,281706 |
| C4orf19       | 1,46 | 3,80 | 2,98 | 3,03 | 0,1226661 | 0,281783 |
| RP11-888D10.3 | 0,00 | 0,00 | 0,00 | 1,56 | 0,1226963 | NA       |
| ANKRD18B      | 0,03 | 0,75 | 0,48 | 2,07 | 0,1227309 | 0,281903 |
| RP11-552M11.8 | 0,67 | 1,00 | 0,71 | 1,49 | 0,1227935 | 0,281994 |
| TMEM55B       | 4,77 | 6,23 | 4,90 | 4,32 | 0,1228048 | 0,281994 |
| RP11-45A17.4  | 0,59 | 1,99 | 1,29 | 0,94 | 0,1228085 | 0,281994 |
| AC010733.5    | 3,51 | 1,05 | 1,46 | 1,59 | 0,1228691 | 0,282082 |
| DCK           | 4,54 | 2,56 | 3,46 | 3,47 | 0,1228724 | 0,282082 |
| RP11-52B19.10 | 0,38 | 0,69 | 0,61 | 0,53 | 0,1229069 | 0,282115 |
| RP11-554E23.2 | 0,00 | 0,00 | 0,00 | 0,00 | 0,1229192 | 0,282115 |
| RP3-340H11.2  | 2,04 | 0,00 | 0,00 | 0,00 | 0,1229249 | 0,282115 |
| DYNC2LI1      | 1,48 | 0,48 | 1,13 | 0,72 | 0,1230039 | 0,282245 |
| AC093611.1    | 0,16 | 0,00 | 0,17 | 0,00 | 0,1230067 | 0,282245 |
| TBC1D9        | 4,12 | 3,59 | 4,17 | 3,46 | 0,1231138 | 0,282462 |
| H1FO          | 1,23 | 1,46 | 2,63 | 2,48 | 0,1231658 | 0,282552 |
| PACSIN2       | 4,04 | 4,51 | 4,97 | 4,57 | 0,1231917 | 0,282582 |
| EXOG          | 3,56 | 1,38 | 3,19 | 1,56 | 0,1232759 | 0,282746 |
| AJ006995.3    | 0,00 | 0,61 | 0,00 | 0,00 | 0,1233142 | NA       |
| GLTP          | 4,64 | 4,33 | 4,51 | 5,35 | 0,1233313 | 0,282844 |
| AEBP1         | 0,04 | 0,00 | 0,00 | 0,00 | 0,1233329 | NA       |
| RP11-354P11.4 | 0,62 | 1,07 | 1,37 | 1,61 | 0,1233504 | 0,282858 |
| RP11-438L7.1  | 3,26 | 4,17 | 3,73 | 3,25 | 0,1233679 | 0,282869 |
| RP4-758J18.2  | 0,52 | 0,00 | 0,27 | 0,21 | 0,1233841 | 0,282877 |
| RP11-295P9.3  | 3,78 | 1,15 | 4,68 | 2,96 | 0,1234282 | 0,282938 |
| RP5-1000K24.2 | 0,71 | 0,73 | 0,72 | 0,80 | 0,1234361 | 0,282938 |
| CTA-221G9.12  | 0,75 | 0,67 | 0,72 | 1,10 | 0,123502  | 0,28306  |
| APCDD1        | 0,00 | 0,00 | 0,00 | 0,04 | 0,12351   | NA       |
| RP1-140J1.4   | 0,00 | 0,36 | 0,00 | 0,16 | 0,1236351 | NA       |
| AC015849.16   | 2,46 | 3,97 | 2,90 | 3,02 | 0,1236953 | 0,283453 |
| AC011899.9    | 0,12 | 0,00 | 0,04 | 0,07 | 0,1236989 | 0,283453 |
| ARL5A         | 4,84 | 2,67 | 3,43 | 3,50 | 0,1237857 | 0,283619 |
| PLIN5         | 1,88 | 1,88 | 1,98 | 1,72 | 0,1237972 | 0,283619 |
| RP11-644F5.11 | 0,00 | 0,37 | 0,00 | 0,00 | 0,1239157 | 0,283838 |
| MAP1LC3A      | 0,00 | 0,00 | 0,00 | 0,00 | 0,123918  | 0,283838 |
| RP11-438D8.4  | 0,29 | 0,00 | 0,00 | 0,00 | 0,1239413 | 0,28385  |
| IRF2BP1       | 0,19 | 0,21 | 0,86 | 0,33 | 0,123949  | 0,28385  |
| TICAM2        | 2,44 | 0,21 | 1,60 | 2,65 | 0,1240067 | 0,283942 |
| RAB39A        | 0,82 | 0,00 | 0,29 | 0,33 | 0,1240248 | 0,283942 |
| ARHGEF5       | 0,00 | 0,93 | 0,00 | 0,00 | 0,1240273 | 0,283942 |
| RP11-65M17.3  | 0,00 | 0,00 | 0,00 | 0,00 | 0,1240763 | 0,284025 |
| SKIV2L        | 3,20 | 3,99 | 4,14 | 3,81 | 0,124233  | 0,284337 |
| RP11-570L15.1 | 3,15 | 0,00 | 1,71 | 0,29 | 0,1242385 | 0,284337 |
| TIMM21        | 3,18 | 1,02 | 3,08 | 2,40 | 0,1242811 | 0,284406 |
| SLC25A43      | 2,53 | 0,46 | 0,63 | 0,62 | 0,1243102 | 0,284443 |

|               |       |       |       |       |           |          |
|---------------|-------|-------|-------|-------|-----------|----------|
| GOLPH3L       | 2,48  | 2,43  | 0,64  | 0,99  | 0,1243283 | 0,284455 |
| RP4-583P15.11 | 1,59  | 3,56  | 1,19  | 1,63  | 0,1243558 | 0,284465 |
| ZBTB7B        | 0,47  | 0,68  | 0,61  | 0,90  | 0,1243584 | 0,284465 |
| GTF2H2C       | 4,45  | 4,80  | 2,85  | 2,59  | 0,1243778 | 0,28448  |
| RP11-57G10.8  | 0,23  | 0,00  | 0,25  | 0,41  | 0,1244039 | 0,284494 |
| RP5-826L7.1   | 0,40  | 0,00  | 1,05  | 0,00  | 0,1244274 | 0,284494 |
| CTD-2184C24.2 | 1,09  | 0,00  | 0,59  | 0,61  | 0,1244276 | 0,284494 |
| SLC29A1       | 0,05  | 3,75  | 0,07  | 0,55  | 0,1244349 | 0,284494 |
| HCG15         | 0,15  | 0,35  | 0,00  | 0,16  | 0,124488  | NA       |
| ZNF778        | 0,78  | 0,30  | 0,87  | 0,17  | 0,1245087 | 0,284633 |
| LY6E          | 6,92  | 4,79  | 6,66  | 7,02  | 0,1245469 | 0,284691 |
| TRGC1         | 0,00  | 0,00  | 0,00  | 0,44  | 0,1245687 | 0,284699 |
| RN7SL18P      | 0,00  | 0,00  | 1,65  | 3,18  | 0,124586  | 0,284699 |
| CALCOCO1      | 3,76  | 1,38  | 3,54  | 3,45  | 0,1245971 | 0,284699 |
| RP11-168O16.1 | 0,08  | 0,34  | 0,08  | 0,05  | 0,1246014 | 0,284699 |
| CTD-3216D2.5  | 0,36  | 0,35  | 0,90  | 0,93  | 0,1246574 | 0,284752 |
| EIF4EBP2      | 4,37  | 4,35  | 3,99  | 3,60  | 0,1246635 | 0,284752 |
| MEPE          | 0,00  | 0,00  | 0,00  | 0,00  | 0,1246788 | 0,284752 |
| RPS13         | 10,56 | 10,60 | 10,69 | 10,58 | 0,1246829 | 0,284752 |
| COQ7          | 3,00  | 2,70  | 3,69  | 4,31  | 0,1246987 | 0,284752 |
| RP11-364B6.2  | 0,00  | 0,00  | 0,00  | 0,00  | 0,1247059 | NA       |
| CTA-992D9.11  | 0,04  | 0,15  | 0,11  | 0,16  | 0,1247096 | 0,284752 |
| RNMTL1        | 4,00  | 3,53  | 2,79  | 1,43  | 0,1247141 | 0,284752 |
| RN7SL363P     | 1,35  | 0,00  | 1,66  | 0,00  | 0,1247345 | 0,284769 |
| ACO12360.6    | 0,21  | 0,43  | 0,22  | 0,89  | 0,1247673 | 0,284789 |
| FAM149B1      | 2,19  | 0,26  | 1,72  | 1,41  | 0,1247745 | 0,284789 |
| ANP32B        | 6,26  | 6,37  | 6,35  | 6,43  | 0,124782  | 0,284789 |
| RP13-20L14.1  | 1,03  | 1,75  | 2,49  | 1,82  | 0,1249179 | 0,28507  |
| PLIN3         | 4,65  | 2,40  | 4,97  | 2,44  | 0,1249358 | 0,285082 |
| NME3          | 5,27  | 4,88  | 5,76  | 6,11  | 0,1250131 | 0,285229 |
| ZNF33B        | 3,64  | 1,08  | 2,81  | 3,54  | 0,1250576 | 0,285301 |
| RP11-73M18.6  | 0,00  | 0,00  | 0,00  | 0,00  | 0,1250793 | 0,285322 |
| OR2AG2        | 0,10  | 0,13  | 0,13  | 0,10  | 0,1251247 | 0,285396 |
| MIR8086       | 1,90  | 2,95  | 3,33  | 3,30  | 0,1252403 | 0,285603 |
| TNFRSF6B      | 0,00  | 0,00  | 0,46  | 0,54  | 0,1252454 | 0,285603 |
| RP11-169L17.3 | 0,64  | 2,45  | 1,49  | 1,16  | 0,1252542 | 0,285603 |
| CH507-9B2.1   | 0,00  | 0,04  | 0,00  | 0,00  | 0,1253059 | 0,285692 |
| RP11-973H7.3  | 1,52  | 0,67  | 1,43  | 1,61  | 0,1254007 | 0,285878 |
| NPFF          | 0,00  | 0,36  | 0,00  | 2,54  | 0,1254545 | 0,285972 |
| AP001062.7    | 0,03  | 0,03  | 0,34  | 0,00  | 0,125505  | 0,286042 |
| ATF1          | 4,32  | 1,12  | 3,28  | 1,52  | 0,125511  | 0,286042 |
| PC            | 0,00  | 0,18  | 0,39  | 2,64  | 0,1255298 | 0,286056 |
| COL6A5        | 0,00  | 0,00  | 0,00  | 0,09  | 0,1255509 | 0,286071 |
| CH17-335B8.6  | 0,08  | 0,18  | 0,17  | 0,00  | 0,1255624 | 0,286071 |
| RP11-345I18.2 | 0,05  | 0,06  | 0,00  | 0,24  | 0,1255868 | 0,286097 |
| FAM9A         | 0,00  | 0,00  | 0,00  | 0,21  | 0,125688  | NA       |
| RN7SL519P     | 0,00  | 0,00  | 0,00  | 0,54  | 0,1257241 | 0,286365 |
| UBIAD1        | 2,95  | 1,49  | 1,86  | 2,00  | 0,1257414 | 0,286365 |
| CD46          | 5,56  | 4,95  | 5,54  | 5,24  | 0,1257427 | 0,286365 |
| LRRFIP2       | 4,44  | 4,87  | 4,60  | 4,80  | 0,1257802 | 0,286421 |
| RP11-730A19.5 | 0,21  | 0,95  | 0,35  | 1,15  | 0,1258066 | 0,286451 |
| C8orf33       | 3,82  | 4,76  | 3,59  | 3,89  | 0,1258403 | 0,286466 |
| CARD16        | 7,81  | 7,65  | 7,87  | 7,90  | 0,1258545 | 0,286466 |
| AC090044.1    | 0,01  | 0,04  | 0,01  | 0,00  | 0,1258594 | 0,286466 |
| RHEB          | 5,71  | 2,77  | 5,09  | 5,09  | 0,1258648 | 0,286466 |

|                |      |      |      |      |           |          |
|----------------|------|------|------|------|-----------|----------|
| CDIP1          | 2,15 | 0,68 | 2,81 | 2,51 | 0,1258799 | 0,286471 |
| ZNF761         | 2,64 | 0,92 | 1,71 | 2,20 | 0,1259797 | 0,286655 |
| RP11-258C19.3  | 0,12 | 0,15 | 0,00 | 0,00 | 0,1259865 | 0,286655 |
| RP11-313J2.1   | 0,24 | 0,08 | 0,28 | 0,28 | 0,1260147 | 0,28669  |
| GPR107         | 2,48 | 1,43 | 2,46 | 2,46 | 0,1261652 | 0,287003 |
| RNU6-254P      | 0,00 | 0,00 | 0,00 | 0,00 | 0,1261973 | 0,287047 |
| CDC42EP3       | 3,28 | 4,93 | 4,01 | 3,65 | 0,1262288 | 0,287089 |
| HNRPA1L-2      | 0,19 | 0,20 | 0,19 | 0,00 | 0,1262467 | 0,2871   |
| FMO3           | 0,19 | 1,71 | 0,05 | 0,46 | 0,1263552 | 0,287305 |
| RP11-549J18.1  | 0,65 | 0,73 | 0,31 | 0,77 | 0,1263623 | 0,287305 |
| RN7SL776P      | 0,00 | 1,89 | 0,91 | 0,98 | 0,1265132 | 0,287618 |
| MEST           | 0,19 | 0,81 | 0,07 | 1,18 | 0,1265422 | 0,287628 |
| RBM45          | 4,03 | 2,58 | 3,30 | 1,29 | 0,1265433 | 0,287628 |
| FAM107A        | 0,07 | 0,04 | 0,08 | 0,17 | 0,1265645 | 0,287647 |
| PAK2           | 4,95 | 3,94 | 5,13 | 4,44 | 0,1266344 | 0,287776 |
| ZNF362         | 2,20 | 0,26 | 1,51 | 1,07 | 0,1266707 | 0,287823 |
| HIST1H2BC      | 1,65 | 0,00 | 0,00 | 0,00 | 0,1266809 | 0,287823 |
| EIF4E2         | 6,70 | 4,90 | 6,00 | 5,56 | 0,1267593 | 0,287972 |
| UBE2Q2         | 4,36 | 1,96 | 4,17 | 3,34 | 0,1268081 | 0,288053 |
| MAGI3          | 0,00 | 0,00 | 0,14 | 0,12 | 0,1268245 | 0,288061 |
| RP11-609N14.1  | 0,78 | 1,28 | 1,25 | 1,95 | 0,1268518 | 0,28808  |
| TBX21          | 0,00 | 0,10 | 0,00 | 0,18 | 0,1268588 | 0,28808  |
| FGL2           | 7,31 | 6,43 | 7,03 | 6,41 | 0,1269009 | 0,28809  |
| DENND2D        | 3,98 | 5,19 | 1,68 | 1,74 | 0,1269095 | 0,28809  |
| RP1-315G1.4    | 0,00 | 0,75 | 0,54 | 0,00 | 0,1269123 | 0,28809  |
| MSH2           | 1,68 | 2,11 | 0,94 | 0,54 | 0,1269153 | 0,28809  |
| IFNG           | 0,00 | 0,00 | 0,00 | 0,13 | 0,1269944 | 0,28824  |
| MGA            | 3,14 | 3,90 | 3,02 | 2,68 | 0,1270359 | 0,288284 |
| SLAIN2         | 2,92 | 1,64 | 2,97 | 3,14 | 0,1270393 | 0,288284 |
| SLC17A7        | 0,27 | 0,70 | 0,38 | 0,07 | 0,1270661 | 0,288315 |
| RP11-464F9.22  | 0,00 | 0,00 | 0,15 | 0,00 | 0,1271022 | 0,288346 |
| WWC3           | 1,06 | 0,69 | 1,31 | 0,76 | 0,1271057 | 0,288346 |
| HEXDC          | 3,97 | 5,62 | 4,64 | 4,35 | 0,1271378 | 0,288389 |
| RP11-798L4.1   | 0,11 | 0,00 | 0,07 | 0,06 | 0,1271828 | 0,288462 |
| LINC-PINT      | 5,11 | 5,93 | 5,18 | 5,24 | 0,1272127 | 0,2885   |
| RP11-1149M10.1 | 0,00 | 0,00 | 0,00 | 1,00 | 0,1272139 | NA       |
| ANGPTL3        | 0,10 | 0,00 | 0,00 | 0,00 | 0,1272394 | 0,288531 |
| RP11-767N6.2   | 0,00 | 0,00 | 0,00 | 0,00 | 0,1272722 | 0,288576 |
| ELOVL6         | 0,15 | 0,14 | 0,26 | 0,26 | 0,1273182 | 0,288651 |
| AC009120.5     | 0,00 | 0,00 | 0,00 | 0,00 | 0,1274429 | 0,288904 |
| RP5-1100I6.2   | 0,00 | 0,00 | 0,02 | 0,00 | 0,1274532 | NA       |
| RP11-6D1.5     | 0,00 | 0,00 | 0,00 | 0,00 | 0,1274678 | NA       |
| AC140481.7     | 0,00 | 0,00 | 0,00 | 0,22 | 0,1275436 | NA       |
| FASTKD1        | 4,15 | 5,30 | 4,40 | 4,91 | 0,1275464 | 0,28911  |
| SPRED2         | 0,21 | 0,47 | 0,18 | 0,00 | 0,1275757 | 0,289146 |
| RP3-395M20.8   | 0,96 | 1,91 | 0,91 | 1,25 | 0,1275888 | 0,289147 |
| RP11-481H12.1  | 0,00 | 0,41 | 0,00 | 0,00 | 0,1276104 | 0,289166 |
| USP32P3        | 0,90 | 1,09 | 1,33 | 1,07 | 0,1276396 | 0,289203 |
| SUGP2          | 5,47 | 6,11 | 5,55 | 5,44 | 0,1276704 | 0,289238 |
| CBL            | 3,81 | 1,87 | 3,37 | 2,24 | 0,1276812 | 0,289238 |
| ACTR1A         | 4,91 | 3,12 | 4,83 | 4,87 | 0,1277059 | 0,289265 |
| RP11-792A8.3   | 0,82 | 0,00 | 0,52 | 6,29 | 0,1277627 | 0,289364 |
| MROH7          | 0,64 | 0,32 | 0,66 | 1,05 | 0,1277816 | 0,289377 |
| RP11-70L8.4    | 0,47 | 0,18 | 0,19 | 0,15 | 0,1278458 | 0,289458 |
| PTENP1-AS      | 0,46 | 0,21 | 0,08 | 0,00 | 0,127854  | 0,289458 |

|               |      |      |      |      |           |          |
|---------------|------|------|------|------|-----------|----------|
| LINC00649     | 2,33 | 4,49 | 2,39 | 3,30 | 0,1278566 | 0,289458 |
| GIMAP2        | 4,61 | 2,99 | 5,05 | 4,76 | 0,1278776 | 0,289476 |
| RP11-652L8.2  | 0,64 | 2,17 | 1,38 | 0,85 | 0,1279265 | 0,289558 |
| CEP170        | 5,84 | 5,84 | 5,88 | 5,02 | 0,1279566 | 0,289596 |
| ZNF432        | 1,62 | 0,59 | 1,19 | 1,04 | 0,1279786 | 0,289617 |
| C19orf60      | 6,58 | 6,46 | 7,03 | 6,12 | 0,1280186 | 0,289678 |
| RP11-916L7.1  | 0,75 | 2,07 | 0,85 | 1,38 | 0,1280499 | 0,289719 |
| METTL2A       | 2,63 | 2,37 | 2,06 | 1,48 | 0,1280791 | 0,289755 |
| CLEC2A        | 0,00 | 0,18 | 0,00 | 0,00 | 0,1281131 | 0,289783 |
| KCND2         | 0,00 | 0,05 | 0,00 | 0,00 | 0,1281671 | 0,289783 |
| CBWD6         | 3,95 | 2,90 | 4,48 | 5,64 | 0,1281856 | 0,289783 |
| RP11-379I19.3 | 1,75 | 0,00 | 0,36 | 0,67 | 0,1281865 | 0,289783 |
| RP11-838N2.4  | 3,68 | 2,23 | 4,38 | 4,82 | 0,1281869 | 0,289783 |
| DHODH         | 2,96 | 1,03 | 1,60 | 0,84 | 0,1281898 | 0,289783 |
| LMNB1         | 2,84 | 1,27 | 3,22 | 1,00 | 0,1282023 | 0,289783 |
| C16orf88      | 1,54 | 2,23 | 2,68 | 1,64 | 0,128214  | 0,289783 |
| ORA1          | 3,74 | 3,99 | 4,27 | 5,00 | 0,1282142 | 0,289783 |
| AF127577.11   | 2,11 | 0,81 | 2,97 | 0,37 | 0,1282215 | 0,289783 |
| LYRM9         | 0,20 | 0,27 | 0,35 | 3,35 | 0,1282953 | 0,28992  |
| FBXO34        | 3,64 | 1,72 | 2,90 | 1,70 | 0,1283222 | 0,289951 |
| RP11-204C16.4 | 0,22 | 0,00 | 0,00 | 0,00 | 0,1283659 | NA       |
| RIOX1         | 0,45 | 0,11 | 0,52 | 0,55 | 0,1284134 | 0,290119 |
| QTRT2         | 4,95 | 5,16 | 5,41 | 3,61 | 0,1284368 | 0,290119 |
| RN7SL274P     | 0,00 | 0,00 | 0,00 | 1,15 | 0,1284515 | 0,290119 |
| RP11-452L6.1  | 0,78 | 0,53 | 0,00 | 2,36 | 0,1284833 | 0,290119 |
| RP11-375H19.2 | 0,30 | 0,44 | 0,34 | 0,48 | 0,1284897 | NA       |
| DCLRE1C       | 4,75 | 3,23 | 3,87 | 3,17 | 0,1284944 | 0,290119 |
| CTD-2561B21.8 | 0,20 | 1,29 | 1,15 | 1,26 | 0,1284954 | 0,290119 |
| IGF2BP2       | 1,88 | 1,80 | 2,54 | 1,67 | 0,1285116 | 0,290119 |
| E2F2          | 0,62 | 0,21 | 0,24 | 0,69 | 0,1285117 | 0,290119 |
| AC092159.3    | 0,00 | 0,00 | 0,00 | 0,00 | 0,1285138 | 0,290119 |
| RP11-722A15.2 | 0,18 | 0,87 | 0,15 | 0,47 | 0,1285297 | 0,290125 |
| AC015922.6    | 0,00 | 0,00 | 0,08 | 0,20 | 0,1286194 | 0,290283 |
| RP11-75C10.9  | 0,00 | 0,00 | 0,00 | 0,00 | 0,1286257 | 0,290283 |
| CDH17         | 0,65 | 0,50 | 0,38 | 0,35 | 0,1286564 | 0,290323 |
| PACRGL        | 3,50 | 0,74 | 2,58 | 4,70 | 0,1286702 | 0,290324 |
| MEIS2         | 0,17 | 0,43 | 0,15 | 0,37 | 0,1287124 | 0,29039  |
| IFFO2         | 0,43 | 1,49 | 1,17 | 0,87 | 0,1287817 | 0,290517 |
| RP11-323F5.1  | 0,85 | 0,34 | 0,00 | 0,00 | 0,1288463 | 0,290579 |
| TTL9          | 0,19 | 0,13 | 0,33 | 0,14 | 0,1288614 | 0,290579 |
| RP11-395A13.2 | 2,20 | 0,45 | 2,82 | 2,53 | 0,1288688 | 0,290579 |
| MAML2         | 0,43 | 1,27 | 0,65 | 0,73 | 0,1288713 | 0,290579 |
| RP11-429G19.3 | 1,31 | 0,00 | 0,00 | 0,00 | 0,1288746 | 0,290579 |
| ABI1          | 5,45 | 3,18 | 4,67 | 4,20 | 0,1289035 | 0,290615 |
| GRPEL2        | 1,38 | 0,06 | 0,45 | 0,69 | 0,1290336 | 0,290878 |
| FMO1          | 0,00 | 0,00 | 0,00 | 0,13 | 0,1290535 | NA       |
| TTC1          | 4,98 | 5,97 | 5,05 | 4,28 | 0,1290646 | 0,290893 |
| ARL14EP       | 5,13 | 4,39 | 4,89 | 3,04 | 0,1290663 | 0,290893 |
| RP11-96D1.5   | 0,00 | 0,00 | 0,00 | 0,00 | 0,1290919 | 0,290922 |
| RNU6-455P     | 0,00 | 0,00 | 0,00 | 0,00 | 0,1291286 | 0,290946 |
| C9orf37       | 0,81 | 1,23 | 1,42 | 2,78 | 0,129132  | 0,290946 |
| CTC-484P3.1   | 0,20 | 0,24 | 0,32 | 4,00 | 0,1291418 | 0,290946 |
| RBKS          | 2,20 | 3,34 | 2,66 | 3,44 | 0,1292436 | 0,291116 |
| RP11-521L9.2  | 2,09 | 0,00 | 0,98 | 0,00 | 0,1292569 | 0,291116 |
| MN1           | 0,00 | 0,00 | 0,01 | 0,67 | 0,1292688 | 0,291116 |

|               |      |      |      |      |           |          |
|---------------|------|------|------|------|-----------|----------|
| SHISA5        | 5,71 | 4,97 | 5,87 | 5,59 | 0,1292716 | 0,291116 |
| MOSPD2        | 4,00 | 3,77 | 3,99 | 4,60 | 0,1292883 | 0,291116 |
| CHRNA5        | 0,05 | 0,23 | 0,10 | 0,23 | 0,129296  | 0,291116 |
| RP11-314N13.9 | 0,41 | 0,23 | 0,50 | 0,30 | 0,1293362 | 0,291177 |
| RP11-815J21.3 | 2,63 | 0,00 | 0,18 | 0,29 | 0,1294122 | 0,291318 |
| RP1-140K8.5   | 0,13 | 0,36 | 0,19 | 0,24 | 0,1294491 | 0,291372 |
| VAV1          | 4,59 | 4,05 | 4,57 | 5,16 | 0,1294877 | 0,291429 |
| KAZN          | 0,08 | 0,18 | 0,06 | 0,36 | 0,1295023 | 0,291433 |
| RFK           | 3,39 | 1,88 | 3,41 | 2,03 | 0,1295684 | 0,291552 |
| CDCP1         | 0,80 | 0,31 | 0,86 | 0,48 | 0,1296036 | 0,291602 |
| TGDS          | 3,60 | 3,34 | 1,77 | 1,30 | 0,1296864 | 0,291758 |
| GPR83         | 0,51 | 0,36 | 0,31 | 0,24 | 0,1296993 | 0,291758 |
| IFI44         | 7,11 | 4,68 | 6,90 | 6,16 | 0,1297416 | 0,291823 |
| CTC-523E23.11 | 0,00 | 0,00 | 0,00 | 0,57 | 0,1297622 | 0,29184  |
| NT5DC3        | 1,95 | 0,72 | 2,34 | 1,16 | 0,1298031 | 0,291903 |
| SH3GL1P1      | 0,27 | 0,30 | 1,58 | 0,00 | 0,1299532 | 0,292211 |
| AC004112.5    | 0,00 | 0,00 | 0,00 | 0,00 | 0,1300559 | 0,292403 |
| CDC14A        | 3,55 | 3,43 | 3,02 | 0,74 | 0,130065  | 0,292403 |
| PNCK          | 0,32 | 1,18 | 0,62 | 0,00 | 0,1301478 | 0,292559 |
| FBXO16        | 1,60 | 2,25 | 1,53 | 2,29 | 0,1301689 | 0,292577 |
| SERPINF2      | 1,32 | 0,24 | 0,72 | 0,20 | 0,1302205 | 0,292664 |
| MANSC1        | 0,48 | 0,70 | 0,45 | 0,50 | 0,1302528 | 0,292688 |
| RP1-156L9.1   | 0,00 | 0,00 | 0,00 | 0,00 | 0,1302577 | 0,292688 |
| RP11-391M1.3  | 1,59 | 2,15 | 2,22 | 3,23 | 0,1303094 | 0,292759 |
| USMG5         | 7,43 | 7,51 | 7,21 | 7,20 | 0,1303155 | 0,292759 |
| SIAH2         | 3,37 | 4,91 | 3,35 | 2,61 | 0,1303612 | 0,292832 |
| ZXDB          | 0,87 | 0,15 | 0,74 | 0,08 | 0,130425  | 0,292906 |
| ERBB2         | 0,59 | 1,11 | 0,70 | 0,96 | 0,1304535 | 0,292906 |
| RP11-826N14.7 | 0,00 | 0,00 | 0,01 | 0,00 | 0,1304565 | 0,292906 |
| POU5F1        | 0,39 | 0,87 | 0,33 | 0,37 | 0,1304569 | 0,292906 |
| RP11-36B15.1  | 0,00 | 0,00 | 0,00 | 0,00 | 0,1304601 | 0,292906 |
| CTD-2262B20.1 | 0,00 | 0,00 | 1,60 | 0,00 | 0,1304917 | 0,292942 |
| STARD3NL      | 4,36 | 5,65 | 4,31 | 3,02 | 0,130512  | 0,292942 |
| ZNF786        | 0,23 | 0,28 | 0,39 | 0,09 | 0,1305158 | 0,292942 |
| RP11-2E11.6   | 0,06 | 0,05 | 0,07 | 0,14 | 0,1305581 | 0,293004 |
| OSTM1         | 3,87 | 3,91 | 4,19 | 3,58 | 0,1305699 | 0,293004 |
| RP11-340F14.6 | 0,69 | 1,62 | 1,80 | 2,54 | 0,1306522 | 0,29315  |
| B3GNT8        | 0,00 | 0,00 | 0,00 | 2,99 | 0,1306612 | 0,29315  |
| RP11-517I3.2  | 0,24 | 0,07 | 0,48 | 0,50 | 0,1306757 | 0,293153 |
| KPNA5         | 2,85 | 2,33 | 2,14 | 1,79 | 0,1307198 | 0,293222 |
| RP11-539L10.3 | 1,79 | 1,11 | 1,13 | 0,91 | 0,1307829 | 0,293334 |
| IL34          | 0,00 | 0,30 | 0,00 | 0,00 | 0,1308471 | 0,293439 |
| ANXA8         | 0,35 | 0,39 | 0,05 | 0,00 | 0,1308562 | 0,293439 |
| WISP3         | 0,18 | 0,65 | 0,21 | 0,50 | 0,1309074 | 0,293525 |
| PI4K2B        | 1,62 | 0,11 | 0,83 | 1,84 | 0,1309436 | 0,293576 |
| AP002954.3    | 0,10 | 0,21 | 0,40 | 0,36 | 0,130999  | 0,293671 |
| HPD           | 0,00 | 0,00 | 0,00 | 0,00 | 0,1310603 | 0,293779 |
| RP11-260O18.1 | 0,00 | 0,00 | 0,03 | 0,65 | 0,1311029 | 0,293821 |
| ZDHHC2        | 2,57 | 0,91 | 2,18 | 1,94 | 0,1311085 | 0,293821 |
| FOLR1         | 0,00 | 0,00 | 0,00 | 0,00 | 0,131119  | 0,293821 |
| MTX2          | 5,00 | 4,47 | 2,68 | 1,26 | 0,131152  | 0,293858 |
| AC017076.4    | 0,80 | 2,08 | 1,31 | 1,35 | 0,1311618 | 0,293858 |
| SP140L        | 4,58 | 4,91 | 3,72 | 3,51 | 0,131253  | 0,29402  |
| RP11-98L5.2   | 0,12 | 0,92 | 0,32 | 0,44 | 0,1312608 | 0,29402  |
| MTMR10        | 3,97 | 3,36 | 2,75 | 2,69 | 0,131278  | 0,294029 |

|                    |       |       |       |       |           |          |
|--------------------|-------|-------|-------|-------|-----------|----------|
| HOXB-AS1           | 0,00  | 0,00  | 0,41  | 0,84  | 0,1313308 | 0,294118 |
| RP11-360N9.3       | 0,66  | 0,58  | 1,02  | 1,27  | 0,1313837 | 0,29418  |
| RP11-441O15.3      | 0,03  | 0,00  | 0,05  | 0,04  | 0,1313847 | 0,29418  |
| RP11-854K16.4      | 0,00  | 0,54  | 0,00  | 0,14  | 0,1314096 | 0,294206 |
| MYADM              | 5,36  | 5,49  | 5,48  | 4,95  | 0,1314564 | 0,294213 |
| HERC2P3            | 2,12  | 1,27  | 0,85  | 1,62  | 0,1314653 | 0,294213 |
| FGD4               | 4,43  | 3,85  | 4,91  | 4,75  | 0,1314707 | 0,294213 |
| ZNF384             | 2,40  | 0,53  | 0,36  | 0,13  | 0,131472  | 0,294213 |
| RP11-69L16.4       | 0,00  | 0,00  | 0,00  | 0,00  | 0,1314792 | 0,294213 |
| SLC7A6             | 3,93  | 4,08  | 3,64  | 1,43  | 0,1315106 | 0,294248 |
| RP11-356M20.1      | 4,77  | 1,93  | 4,00  | 2,44  | 0,131521  | 0,294248 |
| NAT16              | 0,09  | 0,42  | 0,20  | 0,18  | 0,1315572 | 0,294299 |
| ST6GAL1            | 3,77  | 3,57  | 4,15  | 2,75  | 0,1316501 | 0,294477 |
| C5orf24            | 2,84  | 1,95  | 2,19  | 1,76  | 0,1317877 | 0,294714 |
| ENPEP              | 0,00  | 0,00  | 0,00  | 0,00  | 0,131799  | 0,294714 |
| SSX5               | 0,49  | 0,00  | 0,34  | 0,00  | 0,1317991 | 0,294714 |
| TNNI2              | 5,01  | 1,76  | 4,51  | 4,49  | 0,1318089 | 0,294714 |
| RP11-20B24.4       | 0,27  | 2,04  | 0,67  | 0,00  | 0,1318397 | 0,294753 |
| FAM78A             | 1,73  | 0,68  | 2,30  | 0,54  | 0,1319745 | 0,295025 |
| GSDMC              | 0,00  | 0,05  | 0,03  | 0,05  | 0,1319802 | NA       |
| SNRNP70            | 1,00  | 2,18  | 2,10  | 2,43  | 0,1320729 | 0,295215 |
| FBXO5              | 2,11  | 0,39  | 0,40  | 0,31  | 0,1321411 | 0,295324 |
| HID1               | 0,13  | 0,69  | 0,00  | 0,68  | 0,1321624 | 0,295324 |
| PARP12             | 4,58  | 3,52  | 4,35  | 4,95  | 0,1321695 | 0,295324 |
| RP3-468B3.2        | 0,66  | 1,12  | 0,72  | 0,50  | 0,1321776 | 0,295324 |
| KCNQ1              | 2,59  | 1,33  | 2,91  | 2,86  | 0,1321883 | 0,295324 |
| PUM2               | 4,58  | 2,32  | 4,07  | 3,46  | 0,1322147 | 0,295353 |
| RP11-297C4.6       | 0,70  | 4,19  | 0,54  | 0,00  | 0,1323099 | 0,295507 |
| WDR83OS            | 7,79  | 7,58  | 7,85  | 7,78  | 0,1323115 | 0,295507 |
| ABC12-49244600F4.4 | 0,38  | 2,81  | 0,20  | 0,97  | 0,1323232 | 0,295507 |
| RPL6               | 10,63 | 10,44 | 10,50 | 10,06 | 0,1323581 | 0,295538 |
| SLC26A6            | 2,53  | 0,79  | 2,64  | 2,76  | 0,1323636 | 0,295538 |
| RP11-292F9.1       | 0,11  | 0,37  | 0,18  | 0,11  | 0,1324625 | 0,295729 |
| UROS               | 5,58  | 3,93  | 5,35  | 3,01  | 0,1325617 | 0,29592  |
| RP11-73M7.10       | 3,65  | 3,36  | 3,95  | 3,72  | 0,1325936 | 0,295962 |
| CTD-3064H18.6      | 0,00  | 1,17  | 0,59  | 0,00  | 0,1326327 | 0,296019 |
| RAPH1              | 0,33  | 0,00  | 0,61  | 0,26  | 0,132722  | 0,296189 |
| CTB-131B5.2        | 1,18  | 0,46  | 0,98  | 0,96  | 0,1327456 | 0,296212 |
| RP11-546O6.4       | 0,54  | 0,50  | 0,55  | 1,54  | 0,1327771 | 0,296251 |
| MCM7               | 4,63  | 2,44  | 4,08  | 4,94  | 0,132798  | 0,296251 |
| AC093726.4         | 0,02  | 0,24  | 0,07  | 0,06  | 0,132803  | 0,296251 |
| APEX2              | 1,80  | 1,93  | 2,08  | 1,05  | 0,1328345 | 0,296264 |
| RP11-306G20.1      | 0,72  | 0,25  | 0,69  | 0,65  | 0,1328356 | 0,296264 |
| IGLV3-10           | 0,00  | 3,36  | 0,00  | 0,00  | 0,1329044 | 0,296388 |
| RNU4-40P           | 1,57  | 0,00  | 3,78  | 1,44  | 0,1329198 | 0,296392 |
| OTUD1              | 4,56  | 5,47  | 4,89  | 4,47  | 0,1329348 | 0,296396 |
| MCL1               | 6,88  | 6,57  | 6,97  | 6,70  | 0,1330557 | 0,296636 |
| RP6-91H8.1         | 0,00  | 1,88  | 0,36  | 0,94  | 0,1330839 | 0,296669 |
| CARD11             | 0,26  | 2,07  | 0,04  | 1,88  | 0,1331679 | 0,296826 |
| TCF3               | 3,27  | 4,81  | 3,32  | 4,35  | 0,1331897 | 0,296827 |
| RN7SL317P          | 1,31  | 2,39  | 2,05  | 2,27  | 0,133195  | 0,296827 |
| ZNF461             | 1,30  | 0,42  | 0,97  | 2,47  | 0,1332899 | 0,297009 |
| NIT2               | 5,76  | 2,46  | 4,84  | 4,47  | 0,1333404 | 0,297066 |
| RP11-539L10.5      | 0,09  | 0,00  | 0,12  | 0,57  | 0,133342  | 0,297066 |
| CTD-3239E11.2      | 0,00  | 0,00  | 0,09  | 0,00  | 0,1333875 | NA       |

|               |      |      |      |      |           |          |
|---------------|------|------|------|------|-----------|----------|
| MYO15A        | 1,09 | 1,62 | 1,23 | 1,71 | 0,1333989 | 0,297163 |
| RP11-637N19.1 | 0,25 | 0,32 | 0,21 | 0,45 | 0,1334154 | 0,297169 |
| GALNT13       | 0,00 | 0,02 | 0,00 | 0,04 | 0,1334411 | 0,297172 |
| FAM83H        | 0,02 | 0,14 | 0,04 | 0,02 | 0,133459  | 0,297172 |
| GPR158        | 0,61 | 0,00 | 0,37 | 0,04 | 0,1334834 | 0,297172 |
| CTD-3092A11.2 | 2,24 | 0,98 | 1,33 | 1,28 | 0,1334855 | 0,297172 |
| COQ3          | 1,06 | 0,12 | 0,36 | 0,31 | 0,1334858 | 0,297172 |
| CCSAP         | 1,93 | 0,94 | 2,45 | 1,98 | 0,1334966 | 0,297172 |
| ERLIN1        | 3,11 | 3,83 | 2,18 | 3,91 | 0,1336032 | 0,297369 |
| FBXO48        | 0,68 | 0,73 | 0,69 | 1,14 | 0,1336248 | 0,297369 |
| PLA2G7        | 0,15 | 0,00 | 1,18 | 1,37 | 0,1336256 | 0,297369 |
| OR7E94P       | 1,26 | 2,91 | 1,64 | 1,62 | 0,1336695 | 0,297437 |
| NDUFA10       | 7,34 | 6,39 | 6,91 | 6,42 | 0,1336878 | 0,297447 |
| HAUS1         | 4,97 | 4,86 | 4,36 | 4,38 | 0,1337006 | 0,297447 |
| STX18         | 4,90 | 4,05 | 3,69 | 2,64 | 0,1337297 | 0,297482 |
| RP11-314A20.5 | 0,00 | 0,00 | 0,11 | 0,00 | 0,1337729 | 0,297548 |
| STRN3         | 3,86 | 5,12 | 3,85 | 3,49 | 0,1337948 | 0,297551 |
| INPP1         | 0,44 | 1,84 | 3,77 | 1,49 | 0,1338007 | 0,297551 |
| SNX6          | 5,85 | 4,71 | 5,01 | 5,22 | 0,1338213 | 0,297567 |
| RP11-448G15.3 | 0,14 | 0,00 | 0,16 | 0,60 | 0,1338418 | 0,297583 |
| RP11-713N11.4 | 0,78 | 0,42 | 0,00 | 1,06 | 0,1339281 | 0,297745 |
| RP3-329A5.8   | 0,14 | 0,06 | 0,13 | 0,03 | 0,1339924 | 0,297834 |
| ARSA          | 4,43 | 5,51 | 4,02 | 3,80 | 0,1339951 | 0,297834 |
| DAGLB         | 4,86 | 4,01 | 4,88 | 4,29 | 0,1340535 | 0,297934 |
| AC055764.1    | 0,00 | 0,00 | 0,00 | 0,00 | 0,1340788 | 0,297956 |
| RP11-791I24.4 | 0,36 | 0,00 | 0,68 | 0,00 | 0,1340903 | 0,297956 |
| RP11-175P19.1 | 0,00 | 0,00 | 0,18 | 0,00 | 0,1341132 | 0,297977 |
| TNFAIP8       | 6,29 | 5,01 | 5,30 | 4,26 | 0,1341426 | 0,298013 |
| RP11-27M15.1  | 0,22 | 0,47 | 0,15 | 0,28 | 0,134187  | 0,298056 |
| RP11-404O13.5 | 2,10 | 2,96 | 2,34 | 1,34 | 0,134189  | 0,298056 |
| NPIPB3        | 6,76 | 4,52 | 5,75 | 4,89 | 0,1342384 | 0,298136 |
| GIMAP6        | 0,25 | 0,21 | 1,03 | 1,85 | 0,1342887 | 0,298218 |
| DPEP3         | 0,00 | 0,00 | 0,00 | 0,08 | 0,1343121 | 0,29824  |
| RP11-163G10.3 | 1,39 | 2,41 | 1,66 | 0,00 | 0,1343585 | NA       |
| RP11-184D12.1 | 0,26 | 0,52 | 0,33 | 0,53 | 0,1344506 | 0,298518 |
| LEAP2         | 0,49 | 0,08 | 0,38 | 0,28 | 0,134489  | 0,298571 |
| GDAP2         | 4,26 | 1,15 | 3,44 | 3,12 | 0,1345015 | 0,298571 |
| XG            | 0,00 | 0,00 | 0,00 | 0,00 | 0,134555  | 0,29866  |
| RP11-115I23.1 | 1,42 | 0,57 | 1,29 | 1,39 | 0,1345683 | 0,29866  |
| RP11-77O11.5  | 2,52 | 0,00 | 2,28 | 0,00 | 0,1346151 | 0,298734 |
| PTGFRN        | 0,78 | 2,75 | 1,83 | 0,06 | 0,134658  | 0,298799 |
| AC006946.16   | 0,51 | 1,57 | 0,67 | 1,33 | 0,1346744 | 0,298806 |
| FKBP1B        | 0,00 | 1,58 | 0,24 | 0,00 | 0,1347793 | 0,299009 |
| TRAF3IP1      | 0,67 | 1,09 | 0,69 | 0,55 | 0,134812  | 0,299051 |
| CTC-444N24.8  | 0,17 | 0,00 | 0,42 | 1,74 | 0,1348636 | 0,299136 |
| SFXN3         | 2,33 | 2,94 | 3,17 | 2,63 | 0,1348771 | 0,299136 |
| FST           | 0,00 | 0,05 | 0,00 | 0,00 | 0,1349094 | NA       |
| RP11-124D2.7  | 0,16 | 0,22 | 0,53 | 0,27 | 0,1350007 | 0,29938  |
| RNASE3        | 0,00 | 0,24 | 0,00 | 0,45 | 0,1350244 | 0,299403 |
| RP11-729I10.2 | 0,00 | 0,00 | 0,00 | 0,37 | 0,1350379 | 0,299403 |
| KB-1471A8.1   | 0,50 | 0,83 | 0,64 | 0,69 | 0,1350564 | 0,299414 |
| MAT2A         | 7,10 | 5,55 | 6,82 | 6,31 | 0,1351025 | 0,299487 |
| SMAD6         | 0,00 | 0,00 | 0,00 | 0,08 | 0,1351399 | 0,299536 |
| CTD-2357A8.2  | 0,00 | 0,00 | 0,14 | 0,00 | 0,1351517 | 0,299536 |
| GNPAT         | 4,15 | 3,82 | 4,43 | 2,72 | 0,1351719 | 0,299551 |



|               |      |      |      |      |           |          |
|---------------|------|------|------|------|-----------|----------|
| DOC2GP        | 0,00 | 0,73 | 0,00 | 0,00 | 0,1352046 | 0,29957  |
| HMBS          | 5,15 | 6,28 | 4,44 | 4,64 | 0,1352109 | 0,29957  |
| RP11-380N8.4  | 0,03 | 0,00 | 0,09 | 0,74 | 0,1352209 | 0,29957  |
| TMEM97        | 3,92 | 2,51 | 3,16 | 0,31 | 0,1352678 | 0,299608 |
| RP11-762L8.6  | 0,00 | 0,00 | 0,00 | 0,00 | 0,1352727 | 0,299608 |
| CDK14         | 1,98 | 0,50 | 2,26 | 0,60 | 0,1352951 | 0,299608 |
| RP11-76I7.1   | 0,14 | 0,36 | 0,20 | 0,25 | 0,1353032 | 0,299608 |
| PANX2         | 0,00 | 0,12 | 0,00 | 0,00 | 0,1353057 | 0,299608 |
| HAUS8         | 0,88 | 3,73 | 3,10 | 3,73 | 0,1353438 | 0,299629 |
| RP11-697M17.1 | 0,64 | 0,48 | 0,49 | 0,38 | 0,1353503 | 0,299629 |
| RNFT2         | 0,65 | 0,53 | 0,81 | 0,79 | 0,1353556 | 0,299629 |
| SYCP2         | 0,54 | 2,41 | 0,07 | 0,06 | 0,1353818 | 0,299657 |
| FAM66E        | 0,00 | 0,00 | 0,00 | 0,24 | 0,1354147 | 0,2997   |
| RP11-536C10.3 | 0,00 | 3,85 | 0,00 | 0,00 | 0,1354635 | 0,299779 |
| PPIL4         | 4,27 | 3,27 | 4,08 | 3,16 | 0,1354803 | 0,299786 |
| AC079354.3    | 0,38 | 0,58 | 0,46 | 0,54 | 0,1355714 | 0,299958 |
| CHRNA2        | 2,53 | 0,39 | 1,53 | 0,38 | 0,1356276 | 0,300052 |
| AC009120.4    | 1,38 | 1,42 | 1,61 | 2,08 | 0,1356621 | 0,300098 |
| RNU6-890P     | 0,00 | 0,00 | 0,00 | 0,00 | 0,1356702 | NA       |
| CLMP          | 0,35 | 0,59 | 0,38 | 0,24 | 0,1356907 | 0,300132 |
| AC079630.4    | 0,07 | 0,00 | 0,63 | 0,00 | 0,1357065 | 0,300137 |
| RP11-638I2.10 | 3,04 | 0,00 | 1,87 | 0,00 | 0,1357695 | 0,30024  |
| SCAP          | 3,56 | 4,06 | 4,22 | 4,03 | 0,1357802 | 0,30024  |
| NT5C3B        | 3,35 | 1,22 | 4,12 | 4,05 | 0,135795  | 0,300243 |
| CA1           | 0,09 | 0,39 | 0,71 | 0,38 | 0,1358137 | 0,300255 |
| RP11-267M23.3 | 0,35 | 1,71 | 2,30 | 2,66 | 0,1359169 | 0,300415 |
| AAAS          | 4,48 | 2,59 | 2,95 | 2,65 | 0,1359214 | 0,300415 |
| MRM1          | 0,00 | 2,27 | 0,00 | 0,00 | 0,1359267 | 0,300415 |
| PPP1R15B      | 3,80 | 3,58 | 3,94 | 3,84 | 0,1360504 | 0,300658 |
| ACSF3         | 3,67 | 5,97 | 4,43 | 3,48 | 0,1361247 | 0,300754 |
| EIF4A3        | 7,46 | 6,53 | 6,75 | 6,35 | 0,1361429 | 0,300754 |
| ZNF324B       | 0,00 | 0,00 | 0,17 | 0,45 | 0,1361469 | 0,300754 |
| RN7SKP283     | 0,00 | 0,00 | 0,00 | 0,00 | 0,136148  | 0,300754 |
| SYN1          | 0,00 | 0,00 | 0,00 | 0,00 | 0,1361998 | 0,300793 |
| PRKAB2        | 2,50 | 0,34 | 1,46 | 1,72 | 0,1362051 | 0,300793 |
| PORCN         | 1,44 | 0,49 | 0,94 | 1,65 | 0,1362061 | 0,300793 |
| FAM126B       | 2,95 | 1,73 | 2,24 | 3,38 | 0,1362384 | 0,300834 |
| STX5          | 2,72 | 2,01 | 3,05 | 4,15 | 0,1362622 | 0,300857 |
| RP11-375F2.2  | 0,82 | 1,11 | 0,90 | 1,15 | 0,136288  | 0,300884 |
| RP11-39K24.7  | 0,00 | 0,00 | 0,00 | 0,00 | 0,1363896 | 0,301079 |
| CTD-2324F15.2 | 0,09 | 0,29 | 0,22 | 0,23 | 0,1364092 | 0,301092 |
| RP11-682B13.2 | 0,00 | 0,00 | 0,00 | 0,47 | 0,1364263 | NA       |
| SDK1          | 0,00 | 0,07 | 0,00 | 0,00 | 0,136457  | NA       |
| ABCC9         | 0,80 | 0,91 | 0,68 | 0,75 | 0,1364796 | 0,301217 |
| FGF8          | 0,47 | 0,00 | 0,60 | 0,53 | 0,1365015 | 0,301236 |
| HSPA5         | 6,40 | 6,07 | 5,70 | 5,17 | 0,1365456 | 0,301303 |
| MED26         | 1,24 | 0,10 | 0,75 | 0,06 | 0,1366029 | 0,3014   |
| CTD-2547H18.1 | 0,00 | 0,38 | 0,32 | 0,00 | 0,136618  | 0,301403 |
| TADA2B        | 2,69 | 2,38 | 1,57 | 3,22 | 0,1368009 | 0,301767 |
| NEK11         | 0,00 | 1,33 | 0,56 | 0,06 | 0,1368102 | 0,301767 |
| RP11-686D22.8 | 1,16 | 0,00 | 0,31 | 0,60 | 0,1368724 | 0,301875 |
| CTD-2033D15.3 | 0,00 | 0,00 | 0,00 | 0,40 | 0,1369009 | 0,301901 |
| COL8A2        | 1,66 | 0,36 | 0,32 | 0,63 | 0,1369115 | 0,301901 |
| RP11-340I6.13 | 1,06 | 0,30 | 1,40 | 1,16 | 0,1369276 | 0,301906 |
| C14orf119     | 6,57 | 4,33 | 5,50 | 5,00 | 0,1370951 | 0,302246 |

|                |      |       |      |      |           |          |
|----------------|------|-------|------|------|-----------|----------|
| CTD-2349P21.10 | 2,18 | 0,00  | 0,71 | 1,37 | 0,1371111 | 0,302251 |
| RP11-206L10.2  | 1,54 | 1,60  | 1,60 | 1,89 | 0,1371873 | 0,302389 |
| MT-TP          | 8,21 | 7,85  | 7,65 | 9,07 | 0,1372729 | 0,302511 |
| TM2D3          | 5,19 | 5,51  | 4,17 | 4,69 | 0,1372792 | 0,302511 |
| CTD-2653D5.1   | 0,74 | 0,33  | 1,10 | 0,82 | 0,1372837 | 0,302511 |
| FAM223A        | 1,27 | 2,07  | 0,43 | 0,53 | 0,1373254 | 0,302543 |
| ASF1A          | 4,28 | 2,98  | 3,55 | 1,57 | 0,137327  | 0,302543 |
| CASK           | 2,65 | 4,55  | 2,36 | 2,15 | 0,1373547 | 0,302543 |
| NPAS3          | 0,00 | 0,04  | 0,00 | 0,09 | 0,1373551 | 0,302543 |
| BRD2           | 6,04 | 5,85  | 5,93 | 5,95 | 0,1373659 | 0,302543 |
| RP11-284L19.1  | 0,00 | 0,00  | 0,00 | 0,00 | 0,1374241 | 0,302612 |
| RP11-568N6.1   | 0,32 | 3,07  | 0,29 | 0,32 | 0,1374247 | 0,302612 |
| ZNF407         | 2,37 | 1,10  | 2,38 | 2,75 | 0,1374891 | 0,302724 |
| RP11-946L20.2  | 0,00 | 0,00  | 0,00 | 0,00 | 0,1375241 | 0,302771 |
| RP11-417O11.5  | 0,43 | 0,00  | 0,37 | 0,00 | 0,1375275 | NA       |
| EXOC2          | 3,55 | 2,45  | 2,97 | 3,22 | 0,1375602 | 0,30282  |
| ELF4           | 3,22 | 1,44  | 3,30 | 2,21 | 0,1376074 | 0,302894 |
| MRPL51         | 6,79 | 7,12  | 6,59 | 7,05 | 0,1377053 | 0,303064 |
| RP11-529E15.1  | 3,17 | 3,08  | 3,69 | 3,33 | 0,1377116 | 0,303064 |
| TRIM2          | 0,56 | 0,94  | 0,72 | 0,35 | 0,1377428 | 0,303102 |
| ZNF821         | 1,77 | 4,82  | 1,07 | 2,75 | 0,1377626 | 0,303116 |
| RP11-297K7.2   | 0,00 | 0,00  | 0,00 | 4,57 | 0,1377858 | 0,303137 |
| NPEPPS         | 5,07 | 3,64  | 5,05 | 5,40 | 0,1378088 | 0,303158 |
| MSLN           | 1,15 | 0,15  | 0,00 | 0,00 | 0,1378304 | 0,303175 |
| RPSA           | 9,95 | 10,19 | 9,99 | 9,63 | 0,1378622 | 0,303215 |
| TDGF1P3        | 0,00 | 0,14  | 0,00 | 0,13 | 0,1378972 | 0,303262 |
| RP11-628M2.1   | 0,50 | 3,12  | 0,88 | 1,67 | 0,1379726 | 0,303388 |
| FDX1           | 2,90 | 4,03  | 3,26 | 1,73 | 0,137982  | 0,303388 |
| PTAFR          | 4,44 | 4,64  | 5,19 | 4,73 | 0,138004  | 0,3034   |
| TGIF2          | 2,71 | 3,69  | 3,06 | 2,29 | 0,1380238 | 0,3034   |
| HDAC10         | 0,71 | 1,56  | 0,86 | 0,62 | 0,1380284 | 0,3034   |
| RP11-796E2.4   | 2,08 | 2,09  | 2,23 | 3,44 | 0,1380866 | 0,303498 |
| SNRNP48        | 3,46 | 2,40  | 2,78 | 1,31 | 0,1382537 | 0,303836 |
| EP300          | 5,69 | 4,68  | 5,16 | 5,63 | 0,1383057 | 0,30392  |
| RP11-519M16.1  | 0,00 | 2,35  | 0,00 | 0,06 | 0,1383392 | 0,303963 |
| RHOXF2         | 0,14 | 0,10  | 0,14 | 0,14 | 0,1383901 | 0,304011 |
| CTD-3110H11.3  | 1,53 | 1,01  | 1,94 | 2,00 | 0,138391  | 0,304011 |
| OR5AN1         | 0,44 | 0,39  | 0,62 | 0,96 | 0,1384114 | 0,304011 |
| ILF3           | 5,51 | 6,43  | 5,66 | 5,06 | 0,1384218 | 0,304011 |
| HYDIN2         | 0,00 | 0,01  | 0,00 | 0,03 | 0,1384291 | 0,304011 |
| RN7SL353P      | 0,00 | 0,00  | 1,05 | 1,49 | 0,1384728 | NA       |
| MIR1290        | 0,00 | 0,00  | 0,00 | 3,27 | 0,1384747 | 0,304081 |
| AP3S2          | 3,22 | 1,01  | 3,97 | 1,99 | 0,1385089 | 0,304126 |
| OR2L3          | 0,50 | 0,38  | 0,43 | 1,79 | 0,1385579 | 0,304203 |
| RP11-260M2.1   | 4,75 | 2,06  | 2,15 | 1,03 | 0,1385932 | 0,304237 |
| RP11-127B20.3  | 0,40 | 0,00  | 1,00 | 3,66 | 0,1386009 | 0,304237 |
| CTD-2540B15.12 | 0,00 | 0,00  | 0,00 | 0,42 | 0,1386087 | NA       |
| RNF214         | 3,09 | 2,59  | 1,97 | 3,84 | 0,1386603 | 0,304324 |
| RP11-33B1.1    | 5,09 | 2,85  | 3,83 | 2,40 | 0,1386678 | 0,304324 |
| RN7SKP181      | 3,25 | 0,00  | 3,05 | 1,13 | 0,1387248 | 0,304392 |
| PLPP7          | 0,10 | 0,06  | 0,20 | 0,38 | 0,1387262 | 0,304392 |
| ZNF527         | 0,64 | 0,68  | 0,46 | 0,84 | 0,1387803 | 0,304408 |
| AC087590.3     | 2,39 | 2,37  | 2,44 | 1,07 | 0,1387921 | 0,304408 |
| IFNGR2         | 4,72 | 4,51  | 5,48 | 5,94 | 0,1387921 | 0,304408 |
| ZBTB40         | 1,99 | 0,45  | 1,30 | 1,67 | 0,1387977 | 0,304408 |

|               |      |      |      |      |           |          |
|---------------|------|------|------|------|-----------|----------|
| ZNF133        | 1,02 | 0,58 | 0,50 | 3,06 | 0,1388019 | 0,304408 |
| SQLE          | 3,86 | 0,77 | 2,84 | 1,52 | 0,1389277 | 0,304654 |
| RP11-84C10.2  | 0,00 | 0,77 | 0,67 | 2,13 | 0,1390202 | 0,304827 |
| RN7SKP78      | 0,00 | 0,00 | 0,00 | 0,00 | 0,1391769 | 0,305129 |
| CTD-2269F5.1  | 0,00 | 0,00 | 0,00 | 0,00 | 0,1391856 | 0,305129 |
| MRPL12        | 5,48 | 6,17 | 6,09 | 5,48 | 0,1392116 | 0,305156 |
| RP11-797A18.6 | 0,78 | 0,00 | 2,74 | 3,55 | 0,1392326 | 0,305167 |
| RP4-737E23.5  | 0,18 | 0,35 | 0,20 | 0,15 | 0,1392439 | 0,305167 |
| SCG2          | 0,00 | 0,63 | 0,00 | 0,00 | 0,1392647 | 0,305182 |
| HDAC6         | 4,03 | 3,26 | 4,86 | 3,97 | 0,1393265 | 0,305288 |
| RP11-474D1.1  | 0,86 | 0,72 | 1,82 | 1,43 | 0,1393435 | 0,305295 |
| HMCE5         | 3,80 | 0,10 | 3,27 | 0,86 | 0,1393788 | 0,305331 |
| WDR59         | 4,10 | 2,07 | 3,89 | 3,98 | 0,1393875 | 0,305331 |
| ADAM9         | 2,78 | 2,05 | 2,89 | 3,33 | 0,1394464 | 0,305423 |
| ATXN10        | 6,45 | 5,94 | 5,96 | 4,75 | 0,1394572 | 0,305423 |
| RP11-356I2.4  | 3,84 | 1,38 | 3,55 | 3,06 | 0,1394897 | 0,305437 |
| ORC5          | 1,37 | 1,52 | 2,10 | 0,87 | 0,1394907 | 0,305437 |
| NPIPB9        | 1,05 | 1,11 | 0,77 | 0,96 | 0,1395302 | 0,305493 |
| ZSCAN25       | 1,15 | 0,50 | 1,21 | 0,79 | 0,1395534 | 0,305514 |
| C12orf60      | 0,34 | 0,65 | 0,18 | 0,60 | 0,1395699 | 0,30552  |
| FBXO41        | 2,09 | 3,25 | 1,64 | 0,24 | 0,1396235 | 0,305607 |
| RP11-432D3.1  | 0,24 | 0,58 | 0,20 | 0,29 | 0,1396638 | 0,305658 |
| C1QTNF3       | 0,17 | 0,10 | 0,04 | 0,00 | 0,139688  | 0,305658 |
| RP11-379K17.7 | 0,90 | 1,18 | 1,80 | 1,64 | 0,1396926 | 0,305658 |
| CASP7         | 3,55 | 2,29 | 1,04 | 3,33 | 0,1397017 | 0,305658 |
| CEACAMP10     | 0,00 | 0,00 | 0,00 | 0,49 | 0,1397921 | 0,305825 |
| GHDC          | 1,24 | 1,06 | 1,62 | 1,81 | 0,1398746 | 0,305976 |
| RP11-705C15.1 | 0,00 | 0,12 | 0,00 | 0,00 | 0,1399053 | NA       |
| HPSE2         | 0,00 | 0,52 | 0,00 | 0,00 | 0,139942  | NA       |
| TYW1B         | 0,48 | 0,00 | 0,66 | 0,51 | 0,1399857 | 0,306159 |
| OR52I1        | 0,72 | 0,85 | 0,43 | 0,81 | 0,1399886 | 0,306159 |
| TUBGCP5       | 3,62 | 1,50 | 3,02 | 4,22 | 0,1399998 | 0,306159 |
| SCRN1         | 4,54 | 2,33 | 3,77 | 4,23 | 0,1400342 | 0,306174 |
| TMEM234       | 2,12 | 1,63 | 0,70 | 0,26 | 0,1400342 | 0,306174 |
| MIR17HG       | 0,36 | 0,00 | 0,11 | 0,00 | 0,1401165 | 0,306295 |
| ACO11322.4    | 0,00 | 0,40 | 0,42 | 0,67 | 0,1401169 | 0,306295 |
| ZBTB22        | 0,12 | 0,41 | 0,35 | 1,33 | 0,1401464 | 0,306329 |
| CTSW          | 4,75 | 3,30 | 3,83 | 4,33 | 0,1401714 | 0,306353 |
| MPG           | 5,60 | 4,17 | 5,48 | 4,72 | 0,140188  | 0,306355 |
| RP11-457I16.2 | 0,00 | 0,38 | 0,00 | 0,00 | 0,1401997 | 0,306355 |
| SPAG8         | 0,00 | 1,34 | 0,00 | 3,15 | 0,1402432 | 0,30642  |
| REEP5         | 7,13 | 5,75 | 6,54 | 5,83 | 0,1402873 | 0,306436 |
| RAB11FIP2     | 2,40 | 1,61 | 2,69 | 1,75 | 0,1402887 | 0,306436 |
| ZIC3          | 0,00 | 0,33 | 0,00 | 0,00 | 0,1402918 | 0,306436 |
| RRP12         | 4,15 | 5,32 | 4,33 | 3,83 | 0,1403818 | 0,306545 |
| AC009506.1    | 0,77 | 0,00 | 0,13 | 0,20 | 0,1403832 | 0,306545 |
| A2ML1         | 1,41 | 1,71 | 1,22 | 1,18 | 0,1403957 | 0,306545 |
| RP11-145P16.2 | 2,40 | 3,06 | 2,64 | 2,68 | 0,140397  | 0,306545 |
| HMHA1         | 6,52 | 7,32 | 6,92 | 6,76 | 0,140417  | 0,306559 |
| ARNT2         | 0,13 | 0,88 | 0,25 | 0,74 | 0,1404792 | 0,306664 |
| RP11-65J21.4  | 0,00 | 0,60 | 0,00 | 0,00 | 0,1405231 | 0,30673  |
| LETM2         | 2,68 | 4,18 | 3,32 | 3,01 | 0,1405556 | 0,306771 |
| POLR1C        | 4,83 | 3,03 | 4,15 | 2,21 | 0,1406186 | 0,306871 |
| ERCC6L        | 0,07 | 0,00 | 0,09 | 0,05 | 0,1406289 | 0,306871 |
| RP11-87N24.2  | 0,04 | 0,00 | 0,11 | 0,13 | 0,1407145 | 0,307027 |

|               |       |       |       |       |           |          |
|---------------|-------|-------|-------|-------|-----------|----------|
| GS1-251I9.4   | 3,57  | 2,33  | 2,20  | 2,75  | 0,1407483 | 0,307071 |
| POLH          | 0,47  | 0,13  | 0,43  | 1,04  | 0,1407786 | 0,3071   |
| FAM209B       | 0,00  | 0,73  | 0,00  | 1,15  | 0,1407994 | 0,3071   |
| MAP3K12       | 0,85  | 3,69  | 1,02  | 1,00  | 0,1408031 | 0,3071   |
| B4GALT3       | 4,42  | 5,38  | 4,21  | 3,14  | 0,1408554 | 0,307155 |
| NISCH         | 3,52  | 4,55  | 3,67  | 3,60  | 0,1408561 | 0,307155 |
| MYLK4         | 0,04  | 0,39  | 0,05  | 0,45  | 0,1408704 | 0,307156 |
| SYT8          | 0,04  | 0,21  | 0,05  | 0,03  | 0,1409015 | 0,307194 |
| FBXO31        | 1,41  | 0,24  | 0,12  | 0,11  | 0,1409324 | 0,307211 |
| RNU2-55P      | 1,09  | 0,00  | 1,75  | 0,00  | 0,1409519 | 0,307211 |
| RP11-531A24.3 | 0,54  | 0,38  | 0,44  | 1,17  | 0,1409558 | 0,307211 |
| RNU6-638P     | 0,00  | 0,00  | 0,00  | 0,00  | 0,1409646 | 0,307211 |
| RP11-706P11.2 | 0,00  | 0,00  | 0,00  | 0,00  | 0,1409844 | 0,307224 |
| TBKBP1        | 0,12  | 0,00  | 0,51  | 0,14  | 0,1410477 | 0,307332 |
| RNASSP371     | 0,00  | 0,00  | 0,00  | 0,00  | 0,1410791 | 0,30737  |
| SNORA33       | 6,95  | 0,00  | 4,40  | 0,00  | 0,1410952 | 0,307375 |
| RP11-326G21.1 | 0,00  | 0,00  | 0,63  | 0,40  | 0,1411375 | 0,307437 |
| PIGX          | 2,97  | 1,11  | 2,11  | 1,09  | 0,1412081 | 0,307532 |
| PRSS8         | 0,68  | 0,92  | 0,53  | 1,08  | 0,1412088 | 0,307532 |
| CTC-499B15.6  | 0,34  | 0,00  | 0,47  | 1,28  | 0,1412502 | 0,307592 |
| NUDT4         | 3,27  | 4,41  | 3,00  | 2,59  | 0,141295  | 0,30766  |
| APITD1-CORT   | 0,00  | 1,62  | 0,00  | 0,00  | 0,1413284 | 0,307689 |
| CAMSAP2       | 0,06  | 0,03  | 0,26  | 0,57  | 0,1413363 | 0,307689 |
| ARHGAP22      | 2,76  | 2,82  | 2,49  | 2,85  | 0,1413523 | 0,307694 |
| RP11-335E6.3  | 0,14  | 0,65  | 0,00  | 0,22  | 0,1414499 | 0,307876 |
| MIR3180-1     | 0,15  | 0,00  | 0,10  | 0,86  | 0,1415023 | 0,307936 |
| MOGAT3        | 1,13  | 1,64  | 1,15  | 1,22  | 0,1415052 | 0,307936 |
| RP11-4F22.3   | 0,00  | 0,49  | 0,08  | 0,53  | 0,1415643 | NA       |
| INPP4A        | 3,96  | 2,69  | 3,49  | 4,04  | 0,1415658 | 0,30803  |
| USE1          | 4,73  | 3,85  | 5,07  | 5,13  | 0,1415844 | 0,30803  |
| IFIT2         | 4,11  | 1,23  | 3,70  | 3,27  | 0,1415965 | 0,30803  |
| ATG12         | 5,50  | 3,50  | 5,03  | 4,25  | 0,1416269 | 0,30803  |
| CEP63         | 5,04  | 4,91  | 4,27  | 4,04  | 0,1416307 | 0,30803  |
| NEURL1        | 1,15  | 0,30  | 0,96  | 0,71  | 0,1416312 | 0,30803  |
| RP13-942N8.1  | 0,75  | 0,68  | 1,26  | 0,86  | 0,141692  | 0,308132 |
| OR4F15        | 0,08  | 0,23  | 0,06  | 0,40  | 0,1417059 | 0,308132 |
| RP11-5O24.1   | 0,41  | 0,45  | 0,68  | 0,56  | 0,1417738 | 0,30822  |
| TBC1D1        | 6,41  | 5,25  | 5,97  | 5,63  | 0,1417741 | 0,30822  |
| VPS28         | 7,75  | 8,25  | 7,64  | 7,25  | 0,1418137 | 0,308264 |
| SPHK1         | 0,15  | 2,35  | 0,71  | 1,39  | 0,1418382 | 0,308264 |
| RN7SL656P     | 1,69  | 1,16  | 2,79  | 1,06  | 0,1418461 | 0,308264 |
| TMSB4X        | 13,94 | 13,69 | 13,67 | 13,13 | 0,1418525 | 0,308264 |
| RP11-719K4.6  | 2,61  | 0,00  | 1,32  | 1,14  | 0,1418637 | 0,308264 |
| GDI1          | 2,50  | 1,81  | 2,69  | 2,82  | 0,141882  | 0,308273 |
| RP11-315A16.1 | 0,00  | 1,22  | 0,00  | 3,56  | 0,1419478 | 0,308386 |
| RP11-407N17.5 | 0,00  | 0,00  | 0,41  | 0,24  | 0,1420859 | 0,308656 |
| CHCHD8        | 5,90  | 5,49  | 5,91  | 4,77  | 0,1421407 | 0,30873  |
| EXOC6B        | 1,30  | 0,13  | 0,63  | 1,08  | 0,1421513 | 0,30873  |
| NR1H4         | 0,00  | 0,00  | 0,00  | 0,00  | 0,1421618 | 0,30873  |
| SLC22A16      | 2,00  | 0,15  | 1,94  | 2,17  | 0,1422833 | 0,308964 |
| RP11-82O18.2  | 2,61  | 0,00  | 1,32  | 1,14  | 0,1423159 | 0,308997 |
| RP11-810M2.2  | 4,09  | 5,22  | 5,17  | 3,95  | 0,1423293 | 0,308997 |
| RP11-347C12.1 | 3,00  | 2,32  | 2,56  | 2,29  | 0,1423404 | 0,308997 |
| TMEM241       | 0,66  | 1,38  | 1,30  | 0,90  | 0,1424523 | 0,30921  |
| AF277315.18   | 1,27  | 2,07  | 0,43  | 0,53  | 0,1424671 | 0,309212 |

|               |      |      |      |      |           |          |
|---------------|------|------|------|------|-----------|----------|
| GORAB         | 2,41 | 1,15 | 1,03 | 0,43 | 0,1424954 | 0,309231 |
| CTC-429P9.1   | 1,43 | 2,61 | 2,64 | 2,98 | 0,1425036 | 0,309231 |
| RP11-542C16.2 | 0,00 | 0,00 | 0,00 | 0,15 | 0,1425224 | NA       |
| BICD2         | 4,06 | 2,93 | 3,71 | 2,73 | 0,1426018 | 0,309414 |
| CBWD3         | 4,72 | 4,49 | 4,38 | 5,10 | 0,1426302 | 0,309445 |
| RP11-840I19.3 | 0,00 | 0,00 | 0,00 | 1,07 | 0,142662  | 0,309484 |
| PPP1R16A      | 4,73 | 3,51 | 3,83 | 1,83 | 0,1426947 | 0,3095   |
| ARL6IP5       | 7,23 | 7,38 | 6,76 | 6,67 | 0,1427314 | 0,3095   |
| PAIP1P1       | 0,00 | 0,00 | 0,00 | 0,00 | 0,1427315 | 0,3095   |
| ZNF721        | 3,54 | 4,29 | 3,70 | 2,21 | 0,1427601 | 0,3095   |
| RP11-718D19.1 | 2,86 | 3,02 | 2,73 | 1,48 | 0,1427615 | 0,3095   |
| ZMYND8        | 3,49 | 4,39 | 3,62 | 3,54 | 0,1427643 | 0,3095   |
| RP11-309N17.4 | 1,77 | 2,03 | 2,02 | 2,52 | 0,1427668 | 0,3095   |
| CTD-2260A17.1 | 0,15 | 1,52 | 0,79 | 0,68 | 0,1427837 | 0,309506 |
| RP11-880O3.1  | 0,00 | 0,24 | 0,24 | 0,25 | 0,1428555 | NA       |
| ANGPTL4       | 0,16 | 0,00 | 0,26 | 0,00 | 0,1428682 | 0,309659 |
| ZNRF2         | 2,70 | 2,54 | 2,12 | 0,68 | 0,14298   | 0,309871 |
| RP5-965G21.4  | 0,47 | 1,30 | 0,28 | 0,38 | 0,1430337 | 0,309958 |
| TPTE2P1       | 0,00 | 0,23 | 0,00 | 0,29 | 0,1430486 | 0,30996  |
| RP11-314N13.4 | 1,89 | 1,40 | 1,51 | 1,36 | 0,1431055 | 0,310053 |
| NEDD1         | 3,58 | 1,07 | 1,65 | 2,41 | 0,1431797 | 0,310183 |
| RP11-353N14.4 | 0,17 | 0,32 | 0,18 | 0,37 | 0,1432086 | 0,310191 |
| SIGLEC17P     | 2,25 | 0,11 | 0,17 | 0,00 | 0,1432112 | 0,310191 |
| SYNJ1         | 3,64 | 2,03 | 3,11 | 2,02 | 0,1433868 | 0,310541 |
| RP11-43N5.1   | 0,00 | 0,13 | 0,00 | 0,00 | 0,1434495 | 0,31064  |
| RNA5SP281     | 2,04 | 0,00 | 0,00 | 0,00 | 0,1434604 | 0,31064  |
| RAET1K        | 0,00 | 0,29 | 0,00 | 0,00 | 0,1435468 | NA       |
| RP11-313D6.4  | 1,87 | 2,53 | 1,87 | 2,09 | 0,1435532 | 0,310811 |
| AC009227.2    | 0,47 | 0,28 | 0,68 | 1,25 | 0,1436814 | 0,311031 |
| FADS6         | 0,34 | 0,31 | 1,33 | 1,52 | 0,1436848 | 0,311031 |
| CYP21A1P      | 0,07 | 0,21 | 0,12 | 0,08 | 0,1436972 | 0,311031 |
| COMMD8        | 5,72 | 5,60 | 5,16 | 4,39 | 0,1437384 | 0,311088 |
| RP11-507C10.5 | 2,55 | 0,00 | 1,63 | 0,00 | 0,1437513 | 0,311088 |
| GAB3          | 5,02 | 3,61 | 4,32 | 3,83 | 0,1437799 | 0,311119 |
| CARS          | 3,26 | 3,21 | 3,60 | 3,38 | 0,143913  | 0,311377 |
| POC5          | 3,56 | 2,00 | 1,59 | 1,64 | 0,1439962 | 0,311508 |
| CTD-2547L16.1 | 1,20 | 0,67 | 1,71 | 2,19 | 0,144007  | 0,311508 |
| PUSL1         | 3,61 | 4,35 | 3,07 | 0,32 | 0,1440154 | 0,311508 |
| OLFM1         | 0,00 | 2,43 | 1,96 | 2,79 | 0,1440645 | 0,311582 |
| KB-1507C5.4   | 0,59 | 0,36 | 0,93 | 0,00 | 0,1440779 | 0,311582 |
| CTC-244M17.1  | 0,52 | 0,33 | 0,39 | 1,32 | 0,1441075 | 0,311596 |
| RNF168        | 3,28 | 4,10 | 3,09 | 4,14 | 0,1441122 | 0,311596 |
| RNF212        | 0,22 | 1,75 | 0,20 | 0,92 | 0,1441641 | 0,311678 |
| PCDHB13       | 0,08 | 0,10 | 0,07 | 0,05 | 0,1441784 | 0,311678 |
| RCN3          | 4,16 | 4,44 | 4,36 | 4,70 | 0,1441964 | 0,311687 |
| ESCO1         | 3,40 | 3,34 | 2,65 | 3,42 | 0,1442282 | 0,311725 |
| RP4-564F22.2  | 5,43 | 2,00 | 5,98 | 6,36 | 0,1442967 | 0,311843 |
| ZNF92         | 2,12 | 1,00 | 2,40 | 2,91 | 0,1443597 | 0,311949 |
| SLC33A1       | 3,49 | 1,11 | 2,34 | 2,45 | 0,1443865 | 0,311977 |
| RP11-66N24.7  | 0,32 | 0,77 | 0,46 | 0,57 | 0,1444175 | 0,312013 |
| BECN1         | 5,87 | 5,76 | 5,42 | 4,04 | 0,1444414 | 0,312014 |
| RP11-271B5.1  | 0,61 | 1,42 | 0,47 | 0,70 | 0,1444728 | 0,312014 |
| ZNF880        | 4,33 | 3,54 | 3,09 | 3,26 | 0,1444894 | 0,312014 |
| HDAC2         | 6,51 | 3,82 | 5,87 | 4,80 | 0,1444927 | 0,312014 |
| RN7SL199P     | 1,69 | 1,16 | 2,79 | 1,06 | 0,1445081 | 0,312014 |

|                |       |       |       |      |           |          |
|----------------|-------|-------|-------|------|-----------|----------|
| OPTN           | 1,03  | 3,65  | 1,53  | 3,74 | 0,1445151 | 0,312014 |
| DCHS2          | 0,45  | 0,42  | 0,48  | 0,65 | 0,1445161 | 0,312014 |
| RP11-474N24.2  | 0,18  | 0,00  | 0,26  | 1,83 | 0,1446539 | 0,312223 |
| GJA1           | 0,05  | 0,09  | 0,07  | 0,12 | 0,1446617 | 0,312223 |
| JADRR          | 0,08  | 0,00  | 0,20  | 0,15 | 0,1446679 | 0,312223 |
| GATM-AS1       | 0,25  | 0,21  | 0,68  | 0,48 | 0,1446693 | 0,312223 |
| C16orf52       | 1,43  | 0,64  | 0,63  | 1,11 | 0,1447096 | 0,312272 |
| TMEM188        | 4,15  | 2,42  | 3,01  | 2,16 | 0,1447199 | 0,312272 |
| RN7SL517P      | 0,36  | 0,00  | 0,00  | 1,29 | 0,1447516 | 0,312277 |
| DIDO1          | 3,41  | 2,39  | 2,44  | 1,53 | 0,1447651 | 0,312277 |
| SLC22A23       | 0,04  | 0,00  | 0,00  | 0,09 | 0,1447833 | 0,312277 |
| RP11-789C7.1   | 0,00  | 0,30  | 0,39  | 1,45 | 0,1447844 | 0,312277 |
| KCNRG          | 0,07  | 0,09  | 0,11  | 0,65 | 0,1447927 | 0,312277 |
| RP11-112J3.16  | 0,00  | 0,00  | 0,00  | 0,00 | 0,1447965 | NA       |
| SYNRG          | 3,58  | 2,05  | 2,89  | 3,40 | 0,1448117 | 0,312288 |
| DNAJB6         | 6,46  | 6,25  | 6,02  | 5,12 | 0,144834  | 0,312306 |
| RP1-138B7.5    | 0,00  | 0,00  | 0,00  | 0,00 | 0,1449377 | 0,312499 |
| NKAP           | 2,49  | 2,21  | 3,17  | 2,91 | 0,1449969 | 0,312586 |
| FAM32B         | 0,00  | 0,00  | 0,00  | 0,00 | 0,1450059 | 0,312586 |
| RP11-846F4.6   | 0,00  | 0,00  | 0,00  | 0,00 | 0,145053  | NA       |
| MEX3A          | 0,00  | 0,26  | 0,00  | 0,00 | 0,1450873 | 0,312702 |
| MANBAL         | 4,36  | 2,34  | 3,51  | 2,67 | 0,145088  | 0,312702 |
| ATG101         | 4,71  | 2,88  | 4,47  | 5,12 | 0,145109  | 0,312717 |
| RP11-261C10.5  | 0,00  | 0,00  | 0,24  | 0,00 | 0,1451419 | 0,312757 |
| BGLAP          | 0,00  | 0,00  | 0,00  | 0,00 | 0,1451694 | 0,312768 |
| RP11-758M4.4   | 1,07  | 1,03  | 1,13  | 1,32 | 0,1451818 | 0,312768 |
| C1orf233       | 0,19  | 0,25  | 0,74  | 1,49 | 0,1451909 | 0,312768 |
| CD164          | 7,10  | 6,45  | 6,36  | 5,72 | 0,1452033 | 0,312768 |
| RP11-264B17.4  | 0,00  | 0,36  | 0,42  | 0,34 | 0,1452534 | 0,312846 |
| ZNF687         | 0,29  | 0,10  | 0,44  | 0,62 | 0,1453052 | 0,312927 |
| ACSL6          | 0,25  | 0,30  | 0,21  | 0,72 | 0,1453392 | 0,31297  |
| MIRS48T        | 0,00  | 2,46  | 0,00  | 0,00 | 0,1453604 | NA       |
| RP11-347H15.4  | 0,36  | 0,00  | 0,00  | 1,58 | 0,1453718 | 0,31301  |
| SLC16A6        | 1,47  | 3,74  | 1,84  | 2,70 | 0,1454056 | 0,313052 |
| VPS16          | 4,82  | 5,14  | 4,95  | 4,90 | 0,1454446 | 0,313106 |
| GPATCH2        | 2,95  | 1,18  | 2,70  | 2,37 | 0,1455537 | 0,313302 |
| CTD-2517M22.14 | 0,00  | 0,11  | 0,03  | 0,07 | 0,1455637 | 0,313302 |
| RP11-124K4.1   | 0,00  | 0,00  | 0,34  | 0,00 | 0,1456345 | NA       |
| RP11-517H2.6   | 0,04  | 0,00  | 0,05  | 0,00 | 0,1456759 | 0,313513 |
| BLOC1S5        | 4,51  | 3,18  | 3,33  | 2,86 | 0,1457644 | 0,313673 |
| IFNGR1         | 7,17  | 6,10  | 6,63  | 5,72 | 0,1458116 | 0,313744 |
| AC092171.4     | 0,22  | 0,38  | 0,38  | 0,55 | 0,145841  | 0,313777 |
| RP11-526A4.1   | 1,11  | 1,88  | 0,71  | 1,74 | 0,145866  | 0,3138   |
| HSPA14         | 4,03  | 2,18  | 3,92  | 2,88 | 0,1458942 | 0,313831 |
| RP11-394B2.5   | 0,00  | 0,00  | 0,00  | 0,29 | 0,1459495 | 0,313883 |
| RP11-218M11.1  | 0,00  | 0,10  | 0,00  | 0,00 | 0,1459528 | 0,313883 |
| DYNLL1         | 7,70  | 6,75  | 7,39  | 7,02 | 0,1459616 | 0,313883 |
| ATXN7L2        | 0,35  | 0,00  | 0,55  | 0,00 | 0,1459749 | 0,313883 |
| CD320          | 2,83  | 1,18  | 1,43  | 1,28 | 0,1460701 | 0,314017 |
| DUSP23         | 7,45  | 7,20  | 7,62  | 7,23 | 0,1460712 | 0,314017 |
| DPEP2          | 4,13  | 2,28  | 4,58  | 3,77 | 0,1460799 | 0,314017 |
| RP11-142I20.1  | 0,00  | 0,00  | 0,00  | 0,32 | 0,1461478 | 0,314133 |
| GOLGA6L4       | 0,22  | 2,09  | 0,10  | 0,38 | 0,1461761 | 0,314142 |
| SF3A1          | 3,64  | 2,89  | 3,43  | 1,50 | 0,1461971 | 0,314142 |
| RPL10A         | 10,30 | 10,29 | 10,18 | 9,48 | 0,1462077 | 0,314142 |

|                |       |      |      |      |           |          |
|----------------|-------|------|------|------|-----------|----------|
| RP11-619I22.1  | 1,17  | 0,00 | 1,57 | 3,35 | 0,1462189 | 0,314142 |
| RP11-161H23.8  | 0,00  | 0,00 | 0,00 | 2,82 | 0,146233  | 0,314142 |
| HCN3           | 0,00  | 0,07 | 0,00 | 0,00 | 0,1462441 | 0,314142 |
| NSUN7          | 0,00  | 1,26 | 0,00 | 0,00 | 0,1462509 | 0,314142 |
| RP11-304L19.13 | 0,49  | 0,42 | 1,48 | 0,95 | 0,1462668 | 0,314146 |
| FAR2           | 0,74  | 0,04 | 1,29 | 1,43 | 0,1462868 | 0,314149 |
| TRBV12-4       | 0,00  | 0,00 | 0,00 | 0,00 | 0,1463001 | 0,314149 |
| TGFBI          | 8,24  | 7,68 | 7,48 | 6,89 | 0,1463108 | 0,314149 |
| SAMSN1         | 5,76  | 7,08 | 6,51 | 6,00 | 0,1464352 | 0,314386 |
| RP11-996F15.2  | 0,13  | 0,23 | 0,07 | 0,13 | 0,146465  | 0,314419 |
| ARG2           | 0,49  | 0,00 | 0,45 | 0,00 | 0,1465063 | 0,314478 |
| RP1-67K17.4    | 2,83  | 3,61 | 3,10 | 4,56 | 0,146529  | 0,314496 |
| RP11-763B22.4  | 0,00  | 0,00 | 0,00 | 0,00 | 0,1465455 | NA       |
| RP11-367H5.5   | 0,00  | 0,00 | 0,22 | 0,00 | 0,1465921 | 0,314601 |
| KRIT1          | 4,72  | 4,28 | 3,88 | 4,19 | 0,1466308 | 0,314654 |
| BRIP1          | 1,36  | 0,46 | 1,29 | 1,79 | 0,1466763 | 0,314721 |
| JAZF1          | 2,78  | 2,24 | 2,38 | 4,30 | 0,1467921 | 0,314939 |
| CTA-305I2.1    | 0,00  | 1,64 | 0,97 | 0,84 | 0,1468082 | 0,314943 |
| RP11-722E23.2  | 0,00  | 0,00 | 0,00 | 0,00 | 0,1468998 | 0,315109 |
| CSTF2          | 2,86  | 0,24 | 1,83 | 0,86 | 0,1469342 | 0,315131 |
| SLC6A11        | 0,04  | 0,09 | 0,04 | 0,00 | 0,1469383 | 0,315131 |
| EEF2KMT        | 0,96  | 0,68 | 0,47 | 0,27 | 0,1471015 | 0,315451 |
| RN7SL507P      | 0,91  | 0,83 | 0,93 | 0,00 | 0,1471491 | 0,315522 |
| TMEM245        | 2,96  | 0,98 | 1,88 | 1,66 | 0,1471736 | 0,315544 |
| RNU6-936P      | 0,00  | 6,54 | 0,00 | 0,00 | 0,1472253 | 0,315604 |
| RP11-335O4.3   | 0,00  | 0,14 | 0,09 | 0,20 | 0,1472297 | 0,315604 |
| MED16          | 4,34  | 3,96 | 4,64 | 5,25 | 0,1472559 | 0,31563  |
| ADCY7          | 4,35  | 3,92 | 3,59 | 3,71 | 0,1472762 | 0,315637 |
| AURKAIP1       | 6,07  | 6,56 | 6,65 | 7,10 | 0,1473002 | 0,315637 |
| GCC2           | 5,75  | 4,46 | 5,14 | 3,64 | 0,1473022 | 0,315637 |
| FAM98B         | 2,50  | 1,40 | 2,16 | 1,42 | 0,1473926 | 0,315775 |
| SIGLEC10       | 3,49  | 3,02 | 2,72 | 1,71 | 0,1473949 | 0,315775 |
| TSPAN15        | 0,28  | 0,31 | 0,00 | 0,00 | 0,1474334 | 0,315827 |
| RNA5SP363      | 0,00  | 0,00 | 0,00 | 0,00 | 0,1475891 | 0,31613  |
| NDUFA3         | 6,43  | 6,16 | 6,67 | 6,71 | 0,1476568 | 0,316212 |
| RP11-195F19.9  | 0,00  | 0,00 | 0,48 | 0,00 | 0,1476663 | 0,316212 |
| THAP12         | 4,38  | 4,34 | 3,39 | 3,85 | 0,14767   | 0,316212 |
| SLC25A13       | 4,60  | 1,41 | 3,78 | 2,98 | 0,1477114 | 0,31627  |
| DOCK7          | 4,16  | 4,85 | 4,29 | 3,58 | 0,1477979 | 0,316425 |
| RP11-750H9.7   | 0,77  | 0,59 | 2,06 | 1,81 | 0,1478132 | 0,316427 |
| PSG6           | 0,00  | 0,17 | 0,00 | 0,00 | 0,1478857 | 0,316552 |
| SLC9A6         | 2,67  | 1,01 | 2,31 | 1,63 | 0,1479096 | 0,316573 |
| TIGD1L         | 1,73  | 2,54 | 1,70 | 1,19 | 0,147944  | 0,316616 |
| RP11-484D2.3   | 1,65  | 0,00 | 0,00 | 0,00 | 0,1479797 | 0,316662 |
| CTD-2335A18.1  | 0,00  | 0,00 | 0,00 | 0,11 | 0,1480238 | NA       |
| RPS4X          | 10,16 | 9,96 | 9,84 | 9,45 | 0,1480374 | 0,316755 |
| LONP1          | 3,58  | 2,94 | 3,72 | 3,71 | 0,1480726 | 0,316791 |
| SLC30A7        | 3,18  | 1,44 | 2,16 | 2,27 | 0,148083  | 0,316791 |
| SAR1A          | 6,01  | 5,39 | 5,58 | 5,45 | 0,1481075 | 0,316813 |
| RPL35AP32      | 3,80  | 0,00 | 2,27 | 1,20 | 0,1481537 | 0,316881 |
| RP11-168O22.1  | 0,00  | 0,52 | 0,00 | 0,46 | 0,1481578 | NA       |
| SMARCB1        | 4,87  | 3,73 | 4,22 | 3,63 | 0,1482506 | 0,317058 |
| AGPS           | 3,74  | 3,63 | 2,80 | 2,55 | 0,1483082 | 0,317121 |
| RP3-333H23.8   | 0,44  | 0,00 | 0,42 | 0,00 | 0,1483087 | 0,317121 |
| CARNMT1        | 2,34  | 2,31 | 1,47 | 1,96 | 0,1483475 | 0,317174 |

|               |      |      |      |      |           |          |
|---------------|------|------|------|------|-----------|----------|
| ZNF12         | 2,31 | 3,87 | 2,59 | 0,95 | 0,148446  | 0,317354 |
| INTS3         | 3,22 | 2,70 | 3,43 | 4,04 | 0,148526  | 0,317494 |
| RP11-305K5.1  | 0,00 | 0,00 | 0,00 | 0,34 | 0,1485533 | 0,317522 |
| RP11-384J4.2  | 1,30 | 2,92 | 1,26 | 0,95 | 0,1485674 | 0,317522 |
| ABCA10        | 0,00 | 1,01 | 0,00 | 0,02 | 0,1485861 | 0,317531 |
| ZNF841        | 2,05 | 2,12 | 0,35 | 1,09 | 0,1486028 | 0,317536 |
| RN7SL586P     | 0,00 | 0,00 | 0,59 | 0,00 | 0,1486301 | NA       |
| GTPBP6        | 3,54 | 1,93 | 3,97 | 3,22 | 0,148654  | 0,317615 |
| NME4          | 4,63 | 2,87 | 4,20 | 2,26 | 0,1486775 | 0,317635 |
| BLVRA         | 5,84 | 2,83 | 5,90 | 7,12 | 0,1487117 | 0,317678 |
| PANX3         | 0,00 | 0,00 | 0,00 | 0,00 | 0,1487373 | 0,317702 |
| TMEM25        | 0,26 | 1,67 | 0,25 | 0,63 | 0,1488025 | 0,317795 |
| AC138969.4    | 4,34 | 5,10 | 4,71 | 4,90 | 0,1488097 | 0,317795 |
| ZNF670-ZNF695 | 0,88 | 2,41 | 0,99 | 0,84 | 0,1488469 | 0,317844 |
| RP11-298H24.1 | 0,00 | 4,21 | 0,30 | 1,70 | 0,1488646 | 0,317851 |
| VPS54         | 3,52 | 3,29 | 3,39 | 1,37 | 0,1488896 | 0,317852 |
| PPM1H         | 0,08 | 0,23 | 0,14 | 1,20 | 0,1488933 | 0,317852 |
| FHAD1         | 0,04 | 0,06 | 0,22 | 0,23 | 0,1489208 | 0,31788  |
| RNF31         | 5,14 | 5,57 | 5,55 | 5,94 | 0,148944  | 0,317899 |
| NEK5          | 0,17 | 0,43 | 0,23 | 0,46 | 0,1489722 | 0,317929 |
| AMER2         | 0,07 | 0,41 | 0,02 | 0,20 | 0,149035  | 0,318032 |
| HCFG2         | 2,68 | 0,61 | 1,79 | 0,81 | 0,1491648 | 0,318278 |
| HCG4P11       | 0,00 | 0,00 | 0,00 | 0,00 | 0,1491768 | NA       |
| RN7SL225P     | 0,00 | 0,00 | 0,74 | 0,81 | 0,1491806 | 0,318281 |
| RP1-45P21.3   | 0,04 | 0,17 | 0,58 | 0,81 | 0,149211  | 0,318316 |
| SGK1          | 7,29 | 7,70 | 7,44 | 6,28 | 0,1492304 | 0,318327 |
| SH3PXD2B      | 0,00 | 0,00 | 0,01 | 1,27 | 0,14935   | 0,318542 |
| ATM           | 5,66 | 5,41 | 5,24 | 4,96 | 0,1493598 | 0,318542 |
| AP000266.7    | 0,00 | 0,00 | 0,00 | 0,00 | 0,1493764 | 0,318546 |
| CTD-3073N11.9 | 0,42 | 0,00 | 0,00 | 0,00 | 0,1493914 | NA       |
| RP11-864I4.1  | 0,38 | 0,60 | 0,16 | 0,21 | 0,1493984 | 0,318563 |
| JRKL          | 0,26 | 0,50 | 0,33 | 1,02 | 0,1494383 | 0,318595 |
| NAGPA         | 4,32 | 4,60 | 4,44 | 4,87 | 0,1494423 | 0,318595 |
| SEC14L3       | 0,00 | 0,28 | 0,05 | 0,05 | 0,1495003 | 0,318688 |
| PRSS16        | 0,83 | 0,04 | 0,08 | 0,04 | 0,149533  | 0,318727 |
| RP11-477N12.5 | 0,66 | 1,98 | 0,32 | 0,42 | 0,1495783 | 0,318785 |
| ATP6V1E1      | 6,36 | 6,00 | 5,87 | 5,63 | 0,1495886 | 0,318785 |
| ZZEF1         | 2,89 | 3,82 | 3,55 | 4,05 | 0,1496561 | 0,318898 |
| PHLDA2        | 4,07 | 4,05 | 5,50 | 5,24 | 0,1496901 | 0,318908 |
| IZUMO1        | 0,58 | 0,41 | 0,68 | 1,01 | 0,1496961 | 0,318908 |
| NAA20         | 6,84 | 6,03 | 6,13 | 5,85 | 0,1497038 | 0,318908 |
| ESF1          | 2,10 | 2,40 | 2,63 | 2,46 | 0,1497514 | 0,318979 |
| ADIPOR2       | 4,79 | 2,97 | 3,86 | 5,46 | 0,1497673 | 0,318982 |
| MAK16         | 2,86 | 0,98 | 2,03 | 0,44 | 0,1498048 | 0,319021 |
| CDS1          | 0,87 | 0,85 | 0,91 | 0,51 | 0,1498141 | 0,319021 |
| FAM124A       | 0,14 | 0,23 | 0,21 | 0,26 | 0,1498635 | 0,319089 |
| CLEC12B       | 1,87 | 0,00 | 2,06 | 0,64 | 0,149875  | 0,319089 |
| EIF6          | 8,07 | 8,24 | 7,72 | 7,19 | 0,1499884 | 0,319281 |
| EIF2A         | 6,22 | 5,78 | 5,65 | 6,14 | 0,1500082 | 0,319281 |
| TXNDC5        | 3,93 | 3,90 | 3,97 | 1,38 | 0,1500083 | 0,319281 |
| FAM84A        | 0,00 | 0,00 | 0,00 | 0,00 | 0,1500634 | 0,319368 |
| S100A7L2      | 0,00 | 0,00 | 0,00 | 0,00 | 0,1501125 | 0,319418 |
| NRROS         | 5,52 | 6,27 | 5,94 | 5,45 | 0,1501155 | 0,319418 |
| RP11-335K5.2  | 0,77 | 0,18 | 0,67 | 0,76 | 0,1501427 | 0,319445 |
| RP11-715F3.2  | 0,00 | 0,00 | 0,15 | 0,28 | 0,1501698 | 0,319472 |



|                 |      |      |      |      |           |          |
|-----------------|------|------|------|------|-----------|----------|
| TOPBP1          | 3,17 | 1,71 | 3,21 | 1,11 | 0,1502337 | 0,319577 |
| GTPBP10         | 2,77 | 1,14 | 1,97 | 2,63 | 0,150253  | 0,319588 |
| ALOX12          | 0,23 | 2,48 | 0,00 | 0,13 | 0,1502834 | 0,319622 |
| TCAF1           | 2,73 | 1,10 | 1,52 | 0,54 | 0,1503205 | 0,31967  |
| FAM193A         | 2,46 | 3,46 | 2,74 | 2,96 | 0,1503499 | 0,319693 |
| MARCH1          | 6,19 | 5,29 | 5,21 | 5,14 | 0,1503601 | 0,319693 |
| AC004386.4      | 0,37 | 0,81 | 0,29 | 0,70 | 0,150378  | 0,319701 |
| RP11-116D17.2   | 3,20 | 0,39 | 3,17 | 0,94 | 0,1504325 | 0,319781 |
| CNN3            | 0,11 | 0,08 | 0,12 | 0,00 | 0,1504445 | 0,319781 |
| AC005546.2      | 0,00 | 0,63 | 0,00 | 0,00 | 0,1504451 | NA       |
| DHRS11          | 0,78 | 1,18 | 0,61 | 0,34 | 0,150473  | 0,319811 |
| LINC01232       | 3,24 | 3,99 | 2,76 | 3,55 | 0,1504988 | 0,319835 |
| RTN1            | 5,62 | 4,87 | 5,80 | 4,22 | 0,1505301 | 0,319847 |
| PPP1R21         | 4,67 | 5,96 | 4,32 | 3,26 | 0,1505373 | 0,319847 |
| OR10AH1P        | 0,27 | 0,23 | 0,36 | 0,31 | 0,1505477 | 0,319847 |
| RP11-177F11.1   | 0,66 | 0,00 | 0,32 | 1,20 | 0,1506113 | NA       |
| P2RY2           | 0,08 | 0,13 | 0,03 | 0,05 | 0,1506432 | 0,32002  |
| TP53AIP1        | 0,00 | 0,23 | 0,00 | 0,40 | 0,1507362 | NA       |
| MEG8            | 0,36 | 2,24 | 0,51 | 1,46 | 0,1507449 | 0,320205 |
| AMFR            | 4,65 | 5,82 | 4,61 | 5,00 | 0,1508118 | 0,320314 |
| CTC-482H14.5    | 0,00 | 1,22 | 0,47 | 0,83 | 0,1508242 | NA       |
| AL844908.5      | 4,91 | 5,08 | 4,86 | 4,03 | 0,1508249 | 0,320314 |
| METTL7A         | 4,30 | 2,55 | 4,19 | 4,02 | 0,1508483 | 0,320331 |
| PRMT5           | 4,90 | 3,01 | 4,00 | 1,78 | 0,1508617 | 0,320331 |
| RP11-13K12.2    | 0,07 | 0,87 | 0,23 | 0,03 | 0,1509462 | 0,320479 |
| RP11-520F9.2    | 0,37 | 1,74 | 0,24 | 0,72 | 0,1509711 | 0,320495 |
| NPFFR1          | 0,44 | 0,55 | 0,43 | 0,23 | 0,1509825 | 0,320495 |
| ZMAT3           | 1,73 | 0,93 | 1,61 | 1,23 | 0,1510377 | 0,320582 |
| RP11-53B2.6     | 0,00 | 1,15 | 0,67 | 0,48 | 0,1510848 | 0,320651 |
| MOAP1           | 4,04 | 1,33 | 3,66 | 2,81 | 0,151114  | 0,320683 |
| RP11-133K1.6    | 0,11 | 0,20 | 0,14 | 0,17 | 0,1511545 | 0,320725 |
| SRP19           | 6,24 | 5,62 | 5,41 | 5,38 | 0,1511627 | 0,320725 |
| RNA5SP298       | 0,00 | 2,65 | 0,00 | 0,00 | 0,1511791 | NA       |
| RP11-77K12.3    | 0,00 | 0,19 | 0,00 | 0,23 | 0,1512611 | NA       |
| ATP6V1G2-DDX39B | 3,41 | 0,00 | 0,00 | 0,00 | 0,1512656 | 0,320865 |
| SGSM3           | 3,55 | 2,46 | 3,74 | 3,32 | 0,1512688 | 0,320865 |
| ZNF827          | 0,01 | 0,03 | 0,00 | 0,06 | 0,1512721 | 0,320865 |
| JMJD8           | 3,93 | 3,23 | 4,26 | 4,12 | 0,1512985 | 0,32089  |
| WDR92           | 2,42 | 0,68 | 0,52 | 0,71 | 0,1513317 | 0,32093  |
| RP11-269M20.3   | 0,00 | 0,00 | 0,84 | 0,52 | 0,1513546 | 0,320948 |
| CD274           | 0,00 | 0,00 | 0,00 | 0,00 | 0,1513834 | 0,320978 |
| ST13            | 6,06 | 5,26 | 5,27 | 5,14 | 0,151487  | 0,321167 |
| NOA1            | 2,78 | 3,65 | 2,55 | 3,11 | 0,15153   | 0,321228 |
| CMSS1           | 4,03 | 3,32 | 3,56 | 3,61 | 0,1515758 | 0,321295 |
| CREBRF          | 3,37 | 4,43 | 3,55 | 2,72 | 0,1515921 | 0,321298 |
| PFDN4           | 4,31 | 4,49 | 3,96 | 4,38 | 0,1516075 | 0,3213   |
| TMEM38B         | 2,60 | 2,75 | 2,55 | 1,25 | 0,1517565 | 0,321585 |
| VPS36           | 4,73 | 4,59 | 4,30 | 4,78 | 0,1517794 | 0,321603 |
| DCAKD           | 2,07 | 3,10 | 2,06 | 2,23 | 0,1518412 | 0,321704 |
| RP11-15J10.4    | 0,00 | 0,00 | 0,00 | 0,00 | 0,1518571 | 0,321707 |
| RP11-512H23.2   | 0,00 | 0,00 | 0,00 | 0,00 | 0,1518761 | 0,321716 |
| RP11-203P23.1   | 0,00 | 0,00 | 0,00 | 0,63 | 0,1519897 | 0,3219   |
| RP11-34E5.2     | 0,00 | 0,00 | 0,00 | 0,00 | 0,1519918 | 0,3219   |
| RP11-316M21.7   | 0,32 | 3,04 | 1,70 | 0,63 | 0,1520202 | 0,321929 |
| Z83851.1        | 0,00 | 0,00 | 0,00 | 0,00 | 0,1521746 | 0,322226 |

|                 |      |      |      |      |           |          |
|-----------------|------|------|------|------|-----------|----------|
| ZNF283          | 1,86 | 0,77 | 2,53 | 1,62 | 0,1522097 | 0,322228 |
| RP11-709D24.5   | 0,50 | 1,01 | 0,87 | 0,92 | 0,1522191 | 0,322228 |
| NSMAF           | 5,89 | 5,46 | 5,39 | 5,27 | 0,1522225 | 0,322228 |
| SLC25A53        | 1,58 | 0,74 | 1,65 | 2,13 | 0,1522337 | 0,322228 |
| SHOX            | 0,17 | 0,41 | 0,35 | 0,49 | 0,1522709 | 0,322269 |
| RP11-373E16.5   | 1,11 | 2,20 | 1,23 | 1,55 | 0,1522855 | 0,322269 |
| RP11-256L6.5    | 0,19 | 0,57 | 0,12 | 0,12 | 0,1522965 | 0,322269 |
| CTD-2545H1.2    | 0,00 | 0,00 | 0,15 | 0,42 | 0,1523238 | NA       |
| RP11-426C22.12  | 0,58 | 0,66 | 0,55 | 0,21 | 0,1523536 | 0,322359 |
| ADD3            | 5,48 | 5,63 | 5,20 | 4,22 | 0,1523838 | 0,322365 |
| RP11-573D15.8   | 2,91 | 3,84 | 3,03 | 2,37 | 0,1523853 | 0,322365 |
| GNGT2           | 5,17 | 2,75 | 4,22 | 4,57 | 0,1524012 | 0,322368 |
| RP11-67H24.3    | 0,00 | 0,84 | 0,06 | 0,83 | 0,1524673 | 0,322477 |
| HINT2           | 5,94 | 4,50 | 6,36 | 4,56 | 0,1525181 | 0,322552 |
| RP11-393I2.4    | 0,35 | 0,00 | 0,03 | 0,06 | 0,1525449 | 0,322552 |
| RP11-95M15.3    | 0,52 | 0,96 | 0,53 | 1,02 | 0,1525462 | 0,322552 |
| LSM11           | 0,15 | 0,04 | 0,41 | 0,14 | 0,1526055 | 0,322646 |
| RP5-971N18.3    | 3,22 | 3,96 | 3,52 | 1,24 | 0,1526717 | 0,322755 |
| AC125232.1      | 2,24 | 0,00 | 0,95 | 0,00 | 0,1527297 | 0,322847 |
| KCNA7           | 0,43 | 0,19 | 0,42 | 0,52 | 0,1527803 | 0,322924 |
| LRRC8E          | 0,80 | 0,70 | 0,97 | 1,20 | 0,1529061 | 0,323137 |
| MST1            | 0,02 | 1,66 | 0,00 | 0,00 | 0,1529105 | 0,323137 |
| RP11-178F10.1   | 0,00 | 0,00 | 0,00 | 0,90 | 0,1529538 | NA       |
| RNF26           | 1,69 | 0,35 | 1,02 | 1,90 | 0,1530318 | 0,323363 |
| RP11-215G15.3   | 0,00 | 1,25 | 0,00 | 0,00 | 0,1530477 | NA       |
| PLEKHA5         | 3,62 | 2,68 | 3,28 | 2,26 | 0,1530687 | 0,32341  |
| SNIP1           | 3,07 | 2,92 | 2,74 | 4,12 | 0,1531518 | 0,323555 |
| CTD-3088G3.6    | 0,17 | 0,19 | 0,17 | 0,30 | 0,1532126 | 0,323653 |
| QRICH2          | 0,00 | 0,09 | 0,00 | 0,00 | 0,1532628 | 0,323677 |
| PLCB3           | 0,50 | 1,03 | 1,17 | 0,61 | 0,1532657 | 0,323677 |
| RP1-228H13.2    | 0,00 | 0,00 | 1,23 | 0,51 | 0,1532687 | 0,323677 |
| RP11-271I.4     | 0,00 | 0,00 | 0,00 | 1,09 | 0,1532822 | 0,323677 |
| SPECC1L-ADORA2A | 0,00 | 0,00 | 0,00 | 0,08 | 0,1533222 | 0,323695 |
| RP11-110H1.8    | 0,07 | 0,20 | 0,08 | 0,11 | 0,1533235 | 0,323695 |
| TPD52L1         | 1,98 | 2,83 | 2,27 | 2,53 | 0,1533344 | 0,323695 |
| FIRRE           | 1,03 | 0,76 | 1,37 | 0,86 | 0,1533538 | 0,323705 |
| RP11-178F10.3   | 0,54 | 0,73 | 0,71 | 2,72 | 0,1533721 | 0,323713 |
| R3HDM4          | 3,83 | 5,28 | 4,08 | 4,52 | 0,1534249 | 0,323776 |
| SAMD8           | 2,76 | 3,81 | 2,81 | 1,94 | 0,1534314 | 0,323776 |
| POP7            | 4,77 | 1,27 | 3,76 | 3,34 | 0,1535177 | 0,323928 |
| OBFC1           | 4,67 | 0,87 | 5,00 | 3,31 | 0,1536457 | 0,324167 |
| NT5C3A          | 5,98 | 4,99 | 5,01 | 5,51 | 0,1536764 | 0,324201 |
| AC007326.13     | 0,36 | 0,20 | 0,00 | 0,00 | 0,153692  | 0,324203 |
| USP29           | 1,69 | 2,36 | 2,01 | 1,92 | 0,1537153 | 0,324222 |
| FAM104A         | 4,49 | 2,92 | 3,52 | 3,95 | 0,1537442 | 0,324239 |
| RP11-142E9.1    | 0,86 | 1,11 | 0,63 | 0,33 | 0,1537527 | 0,324239 |
| RP11-122C9.1    | 1,50 | 1,06 | 1,19 | 0,46 | 0,1537876 | 0,324272 |
| CDADC1          | 3,45 | 0,76 | 3,68 | 0,99 | 0,1537996 | 0,324272 |
| CTD-2019O4.1    | 0,00 | 0,00 | 0,00 | 2,12 | 0,1538126 | 0,324272 |
| ISOC1           | 2,90 | 0,34 | 1,27 | 0,90 | 0,1538528 | 0,324272 |
| NAB2            | 0,14 | 0,61 | 1,43 | 1,93 | 0,153854  | 0,324272 |
| EIF3E           | 8,57 | 8,15 | 8,18 | 7,48 | 0,1538558 | 0,324272 |
| HSPA13          | 1,77 | 0,52 | 0,79 | 1,38 | 0,1539482 | 0,324417 |
| MIR3188         | 0,00 | 0,00 | 1,07 | 2,14 | 0,1539622 | NA       |
| RP11-172F10.1   | 0,16 | 1,09 | 0,50 | 1,18 | 0,1539638 | 0,324417 |

|                |      |      |      |      |           |          |
|----------------|------|------|------|------|-----------|----------|
| ITGA1          | 0,59 | 0,96 | 0,57 | 0,33 | 0,1539686 | 0,324417 |
| UFM1           | 5,15 | 4,42 | 4,25 | 3,74 | 0,1539862 | 0,324424 |
| GLTPD2         | 0,00 | 0,17 | 0,00 | 0,00 | 0,1540731 | 0,324576 |
| COL6A2         | 0,00 | 0,04 | 0,00 | 0,20 | 0,1540972 | NA       |
| YJEFN3         | 0,00 | 2,75 | 0,02 | 0,64 | 0,1541615 | 0,32472  |
| RP11-248B24.1  | 0,23 | 0,46 | 0,13 | 0,24 | 0,1541706 | 0,32472  |
| IPO4           | 0,34 | 0,16 | 1,24 | 0,10 | 0,1542033 | 0,324726 |
| RP11-744N12.3  | 0,98 | 3,06 | 1,03 | 1,99 | 0,1542045 | 0,324726 |
| RP11-848D3.2   | 0,28 | 0,53 | 0,26 | 0,42 | 0,1542257 | 0,324726 |
| AMY2B          | 3,62 | 3,83 | 2,77 | 1,75 | 0,1542399 | 0,324726 |
| RP11-61L23.2   | 1,62 | 0,88 | 0,59 | 0,35 | 0,1542468 | 0,324726 |
| SLC12A3        | 0,03 | 0,03 | 0,07 | 0,05 | 0,1542667 | 0,324737 |
| TBC1D4         | 1,80 | 0,84 | 2,04 | 1,69 | 0,1543156 | 0,32481  |
| ADAMTSL4-AS1   | 1,37 | 0,68 | 1,79 | 1,81 | 0,1543359 | 0,324821 |
| RUNDC1         | 1,66 | 1,23 | 2,01 | 0,69 | 0,154353  | 0,324827 |
| AC091878.1     | 0,59 | 0,73 | 0,72 | 1,26 | 0,154398  | 0,32487  |
| WSCD1          | 0,00 | 0,29 | 0,00 | 0,00 | 0,1544025 | 0,32487  |
| DPCR1          | 0,00 | 0,00 | 0,00 | 0,00 | 0,1544229 | 0,324882 |
| IGLV2-23       | 0,00 | 0,80 | 0,00 | 0,00 | 0,1544337 | NA       |
| AF064858.11    | 2,40 | 0,97 | 3,77 | 0,81 | 0,1544604 | 0,32493  |
| FANCF          | 0,07 | 0,09 | 0,35 | 0,23 | 0,1545148 | 0,325013 |
| ASPM           | 0,01 | 0,04 | 0,10 | 0,01 | 0,1545408 | 0,325037 |
| NPM3           | 3,48 | 0,57 | 3,51 | 2,29 | 0,1545917 | 0,325114 |
| RP11-340P19.1  | 0,18 | 0,00 | 0,00 | 0,00 | 0,1546234 | 0,325149 |
| RP11-731I8.1   | 0,00 | 0,00 | 0,00 | 0,00 | 0,1547142 | 0,32531  |
| RP11-486O13.2  | 1,03 | 2,04 | 1,13 | 1,04 | 0,1547856 | 0,325393 |
| RP11-364C11.3  | 0,00 | 0,00 | 0,00 | 0,58 | 0,154797  | 0,325393 |
| ZC3H12C        | 0,12 | 0,07 | 0,12 | 0,05 | 0,1547977 | 0,325393 |
| ARHGAP11B      | 0,00 | 0,11 | 0,57 | 0,00 | 0,1548371 | 0,325445 |
| CTD-2003C8.1   | 3,61 | 0,28 | 2,62 | 0,97 | 0,1549466 | 0,325644 |
| POM121C        | 2,88 | 2,57 | 3,02 | 4,45 | 0,1549881 | 0,325701 |
| BAZ1A          | 5,21 | 5,24 | 5,08 | 5,65 | 0,1550244 | 0,325738 |
| RP11-1250I15.2 | 0,00 | 0,00 | 0,00 | 0,00 | 0,1550433 | 0,325738 |
| TBC1D31        | 0,77 | 0,54 | 0,90 | 1,34 | 0,1550497 | 0,325738 |
| CNTNAP5        | 0,12 | 0,30 | 0,10 | 0,03 | 0,1550776 | 0,325766 |
| L3MBTL1        | 0,54 | 0,48 | 1,26 | 0,85 | 0,1551408 | 0,325858 |
| ZNF502         | 0,00 | 1,68 | 0,07 | 1,11 | 0,1551642 | 0,325858 |
| RP11-18B3.2    | 0,00 | 0,06 | 0,00 | 0,00 | 0,1551711 | 0,325858 |
| TVP23B         | 3,44 | 3,14 | 2,22 | 2,30 | 0,1551801 | 0,325858 |
| RP11-760M1.3   | 2,07 | 2,11 | 2,08 | 2,75 | 0,1552458 | 0,325965 |
| NOP10          | 6,79 | 6,35 | 6,86 | 6,98 | 0,1553212 | 0,32608  |
| KAT5           | 3,68 | 3,58 | 4,68 | 5,92 | 0,1553515 | 0,32608  |
| RCHY1          | 3,98 | 1,79 | 2,90 | 1,26 | 0,1553567 | 0,32608  |
| HIC1           | 0,13 | 0,00 | 0,34 | 0,00 | 0,1553593 | 0,32608  |
| CCRL2          | 0,00 | 1,40 | 0,69 | 0,15 | 0,1554782 | 0,326299 |
| URGCP          | 2,76 | 3,22 | 2,90 | 3,45 | 0,155592  | 0,326507 |
| GPR155         | 2,28 | 1,20 | 2,28 | 1,48 | 0,1556815 | 0,326664 |
| RP11-167N4.4   | 0,00 | 0,00 | 0,00 | 0,11 | 0,1557419 | 0,32676  |
| RP11-805F19.3  | 0,39 | 0,75 | 0,51 | 0,19 | 0,1557819 | 0,326791 |
| TDRD12         | 0,16 | 0,15 | 0,20 | 0,48 | 0,1557881 | 0,326791 |
| RP1-244F24.1   | 0,00 | 0,00 | 0,00 | 0,00 | 0,1558104 | 0,326791 |
| HMGB1P8        | 0,39 | 0,90 | 0,53 | 0,65 | 0,1558155 | 0,326791 |
| RP11-304L19.2  | 0,00 | 0,56 | 0,00 | 0,00 | 0,155836  | NA       |
| SEC14L1        | 6,03 | 6,62 | 5,42 | 4,98 | 0,1559139 | 0,326966 |
| RP11-356D23.3  | 1,38 | 1,53 | 1,17 | 2,22 | 0,1559561 | 0,327024 |

|                |      |      |      |      |           |          |
|----------------|------|------|------|------|-----------|----------|
| RP11-495K9.9   | 0,00 | 4,65 | 0,00 | 0,00 | 0,1559726 | 0,327028 |
| NUP37          | 4,77 | 1,45 | 3,62 | 2,08 | 0,155989  | 0,327031 |
| DUOX1          | 1,86 | 0,00 | 1,01 | 1,51 | 0,1560073 | 0,327039 |
| ZCCHC2         | 3,86 | 2,02 | 3,06 | 2,55 | 0,1560354 | 0,327067 |
| AC005488.13    | 0,02 | 0,03 | 0,04 | 0,04 | 0,15608   | 0,327129 |
| RP11-415I12.3  | 1,20 | 0,96 | 1,07 | 0,00 | 0,1560966 | 0,327133 |
| GPR22          | 1,74 | 4,25 | 0,70 | 1,23 | 0,1561189 | 0,327138 |
| APBB1IP        | 4,99 | 2,64 | 4,71 | 4,73 | 0,1561323 | 0,327138 |
| RP11-96O20.2   | 0,65 | 2,61 | 1,18 | 0,50 | 0,1561431 | 0,327138 |
| RP11-352D13.5  | 0,00 | 0,00 | 0,00 | 0,00 | 0,1561682 | 0,32716  |
| UPK1B          | 0,00 | 0,00 | 0,06 | 0,36 | 0,1561959 | 0,327161 |
| CD200R1        | 4,39 | 4,41 | 2,72 | 2,23 | 0,1561981 | 0,327161 |
| RPL26P19       | 0,86 | 1,00 | 0,25 | 0,48 | 0,1562506 | NA       |
| SEMA3B         | 0,00 | 0,07 | 0,00 | 0,00 | 0,1564284 | NA       |
| CRYBG3         | 3,69 | 2,00 | 3,13 | 2,14 | 0,1564559 | 0,327667 |
| RP5-1093G23.1  | 0,00 | 0,00 | 0,00 | 0,75 | 0,1564692 | 0,327667 |
| PTMS           | 0,37 | 0,38 | 1,22 | 0,71 | 0,1565131 | 0,327728 |
| DXO            | 2,66 | 2,94 | 3,25 | 0,56 | 0,1565887 | 0,327855 |
| NPAS1          | 0,00 | 0,39 | 0,00 | 0,00 | 0,1566336 | 0,327918 |
| ATP8A2         | 0,02 | 0,01 | 0,01 | 0,03 | 0,1566619 | 0,327947 |
| IGKV1-9        | 0,00 | 0,94 | 0,00 | 0,57 | 0,1567142 | NA       |
| THRB           | 0,02 | 0,04 | 0,03 | 0,17 | 0,1567212 | 0,32804  |
| CTD-3149D2.3   | 1,12 | 1,51 | 1,84 | 1,23 | 0,1568289 | 0,328173 |
| AC009245.3     | 0,36 | 0,37 | 0,17 | 0,31 | 0,1568309 | 0,328173 |
| PRH1           | 5,48 | 2,40 | 4,86 | 2,02 | 0,1568329 | 0,328173 |
| AKAP5          | 0,08 | 0,17 | 0,17 | 0,19 | 0,156852  | 0,328173 |
| SUPT3H         | 3,04 | 1,09 | 2,44 | 2,74 | 0,1568999 | 0,328173 |
| RP11-804N13.1  | 0,00 | 3,03 | 0,00 | 0,00 | 0,1569104 | 0,328173 |
| GALNT11        | 3,66 | 4,59 | 3,11 | 2,30 | 0,1569108 | 0,328173 |
| MUC19          | 0,14 | 0,63 | 0,48 | 0,91 | 0,1569117 | 0,328173 |
| CASQ1          | 0,00 | 0,21 | 0,00 | 0,08 | 0,1569255 | 0,328173 |
| PHF11          | 6,17 | 5,43 | 5,58 | 5,88 | 0,1569322 | 0,328173 |
| CHMP1B2P       | 0,25 | 0,85 | 0,26 | 0,13 | 0,1570395 | 0,328284 |
| CH507-236L23.3 | 0,00 | 0,02 | 0,00 | 0,26 | 0,1570445 | 0,328284 |
| CH507-338C24.3 | 0,00 | 0,02 | 0,00 | 0,26 | 0,1570445 | 0,328284 |
| CH507-39O4.3   | 0,00 | 0,02 | 0,00 | 0,26 | 0,1570445 | 0,328284 |
| CITF22-49E9.3  | 0,00 | 0,00 | 0,00 | 0,00 | 0,1570855 | 0,328339 |
| CTB-151G24.2   | 0,00 | 0,00 | 0,00 | 0,00 | 0,1571037 | 0,328346 |
| CCT8           | 7,24 | 5,99 | 6,58 | 5,45 | 0,1572142 | 0,328517 |
| ACAP1          | 5,18 | 5,93 | 5,72 | 5,13 | 0,1572151 | 0,328517 |
| NOTCH1         | 0,69 | 0,66 | 1,34 | 0,75 | 0,1572467 | 0,328552 |
| TTL3           | 4,72 | 5,84 | 4,73 | 4,28 | 0,1572683 | 0,328566 |
| RP11-207C11.2  | 0,00 | 0,32 | 0,00 | 0,00 | 0,1574211 | NA       |
| CTA-125H2.2    | 0,00 | 0,21 | 0,00 | 0,00 | 0,1576763 | 0,329388 |
| EIF2S1         | 5,37 | 2,75 | 4,81 | 2,80 | 0,1577192 | 0,329446 |
| KMT2B          | 2,25 | 3,66 | 3,08 | 3,78 | 0,1577913 | 0,329566 |
| RP11-569O4.8   | 0,00 | 0,00 | 0,62 | 0,00 | 0,1578383 | 0,329633 |
| AC007000.7     | 0,54 | 0,14 | 0,37 | 0,65 | 0,15791   | 0,329698 |
| ZNF543         | 0,18 | 0,04 | 0,17 | 0,16 | 0,1579235 | 0,329698 |
| AC139666.1     | 0,00 | 0,43 | 0,00 | 0,00 | 0,1579264 | 0,329698 |
| RP11-506B4.3   | 0,28 | 5,78 | 0,09 | 0,36 | 0,1579399 | 0,329698 |
| BORCS7-ASMT    | 0,00 | 0,00 | 0,00 | 0,27 | 0,1579565 | 0,329698 |
| PPL3           | 6,04 | 5,65 | 4,98 | 4,18 | 0,1579584 | 0,329698 |
| RAB32          | 6,05 | 5,93 | 6,29 | 5,64 | 0,1580163 | 0,329788 |
| AC093673.5     | 4,73 | 4,09 | 5,31 | 5,49 | 0,1580354 | 0,329796 |

|               |      |      |      |      |           |          |
|---------------|------|------|------|------|-----------|----------|
| RP11-42F12.1  | 0,18 | 0,67 | 0,21 | 0,24 | 0,1580505 | 0,329796 |
| SLC4A11       | 0,00 | 0,09 | 0,00 | 0,00 | 0,1580646 | 0,329796 |
| CTD-2267D19.2 | 1,23 | 1,55 | 1,23 | 2,26 | 0,158136  | 0,329914 |
| RN7SL16P      | 0,00 | 0,70 | 0,00 | 1,74 | 0,1581755 | 0,329965 |
| AC016708.2    | 0,81 | 1,89 | 1,17 | 0,81 | 0,1582768 | NA       |
| FABP7         | 0,00 | 0,17 | 0,06 | 0,08 | 0,1582846 | NA       |
| RP11-522H2.3  | 0,00 | 0,00 | 0,00 | 0,00 | 0,158286  | NA       |
| CTD-2383I20.1 | 1,17 | 3,40 | 1,39 | 2,63 | 0,1583164 | 0,330212 |
| UBL3          | 3,42 | 1,59 | 3,35 | 2,10 | 0,1583288 | 0,330212 |
| NFKBIB        | 2,08 | 1,27 | 2,14 | 2,30 | 0,1583386 | 0,330212 |
| OLFML2A       | 0,04 | 0,05 | 0,13 | 0,15 | 0,1583775 | 0,330263 |
| ZBED6         | 0,00 | 0,00 | 0,43 | 0,16 | 0,1584863 | 0,33045  |
| ATXN7L1       | 1,84 | 1,85 | 2,73 | 0,86 | 0,1585222 | 0,33045  |
| AGAP5         | 1,68 | 0,16 | 1,95 | 1,36 | 0,1585373 | 0,33045  |
| JADE1         | 2,49 | 1,03 | 2,57 | 1,89 | 0,1585398 | 0,33045  |
| CYP20A1       | 4,27 | 4,87 | 3,44 | 2,59 | 0,1585556 | 0,33045  |
| IER5          | 4,45 | 4,58 | 4,38 | 4,17 | 0,1585661 | 0,33045  |
| CTD-2119F7.2  | 1,63 | 0,97 | 1,57 | 1,31 | 0,1585714 | 0,33045  |
| SRPRB         | 4,82 | 4,34 | 4,11 | 4,69 | 0,1587126 | 0,330713 |
| AVEN          | 1,58 | 0,18 | 0,39 | 0,09 | 0,1587275 | 0,330713 |
| RBM17         | 5,34 | 5,21 | 5,45 | 5,07 | 0,1588465 | 0,330928 |
| CTC-241N9.1   | 0,00 | 0,00 | 0,00 | 0,00 | 0,1588603 | 0,330928 |
| CTD-3099C6.7  | 0,00 | 0,00 | 0,00 | 0,00 | 0,158901  | 0,330982 |
| MAP3K2        | 3,83 | 3,96 | 4,07 | 4,20 | 0,1589359 | 0,331023 |
| MYH9          | 5,09 | 3,94 | 5,26 | 5,78 | 0,158969  | 0,331061 |
| MASP2         | 0,12 | 0,06 | 0,16 | 0,06 | 0,158999  | 0,331093 |
| BUD31         | 7,09 | 5,88 | 7,00 | 7,00 | 0,1590248 | 0,331116 |
| SP110         | 7,06 | 5,81 | 6,73 | 6,47 | 0,1590487 | 0,331134 |
| DMD           | 2,90 | 3,71 | 2,75 | 2,18 | 0,1591035 | 0,331199 |
| RP11-190C22.9 | 0,00 | 0,00 | 0,00 | 0,00 | 0,1591308 | 0,331199 |
| SFI1          | 3,56 | 4,38 | 4,02 | 4,08 | 0,1591309 | 0,331199 |
| RP11-728E14.3 | 0,06 | 0,17 | 0,06 | 0,07 | 0,1591453 | 0,331199 |
| ALKBH2        | 1,15 | 0,39 | 2,53 | 2,15 | 0,1591545 | 0,331199 |
| SP3           | 4,82 | 3,38 | 4,09 | 3,69 | 0,1591744 | 0,33121  |
| LGALS1        | 0,00 | 0,04 | 0,09 | 0,08 | 0,1592309 | 0,331283 |
| CH17-189H20.1 | 5,56 | 6,59 | 5,96 | 5,97 | 0,159241  | 0,331283 |
| DNAJB5-AS1    | 0,00 | 0,00 | 0,22 | 1,58 | 0,159266  | 0,331283 |
| VNN3          | 1,01 | 1,77 | 2,26 | 2,89 | 0,1592717 | 0,331283 |
| TMPRSS11BNL   | 0,27 | 0,37 | 0,28 | 1,12 | 0,1592842 | 0,331283 |
| SEMA3C        | 2,53 | 2,62 | 1,88 | 0,05 | 0,1593121 | 0,33131  |
| SF1           | 7,03 | 7,45 | 7,28 | 6,75 | 0,1593524 | 0,331337 |
| SMDT1         | 6,61 | 7,05 | 6,91 | 6,26 | 0,1593548 | 0,331337 |
| SNORA37       | 0,00 | 0,00 | 0,00 | 2,75 | 0,1593559 | NA       |
| ALS2CL        | 0,10 | 0,90 | 0,19 | 0,62 | 0,1594986 | 0,331605 |
| LCMT1         | 5,34 | 5,99 | 4,45 | 3,86 | 0,1596553 | 0,3319   |
| AZI2          | 4,50 | 1,07 | 4,20 | 3,45 | 0,1596783 | 0,331916 |
| AQP6          | 0,00 | 0,20 | 0,00 | 0,07 | 0,1596815 | NA       |
| RP11-368N21.2 | 0,30 | 3,22 | 0,00 | 0,00 | 0,1597733 | 0,332083 |
| FAM138E       | 0,76 | 0,00 | 0,50 | 1,83 | 0,1598472 | 0,332205 |
| CLOCK         | 2,24 | 0,87 | 1,66 | 0,64 | 0,1598723 | 0,332226 |
| CEBPZ         | 3,76 | 2,38 | 3,59 | 4,94 | 0,1598938 | 0,33224  |
| BLOC1S6       | 6,30 | 5,86 | 5,86 | 5,59 | 0,1599427 | 0,332311 |
| ZNF7          | 3,90 | 2,58 | 3,83 | 4,36 | 0,1599585 | 0,332312 |
| CTD-2284J15.1 | 0,25 | 1,00 | 0,23 | 0,00 | 0,1600135 | 0,332395 |
| TMEM216       | 4,37 | 0,32 | 1,56 | 1,84 | 0,1600395 | 0,33241  |

|               |       |       |       |       |           |          |
|---------------|-------|-------|-------|-------|-----------|----------|
| SPATS2L       | 4,63  | 4,14  | 4,04  | 2,89  | 0,1600505 | 0,33241  |
| CTD-2600H12.2 | 2,00  | 1,93  | 2,00  | 1,63  | 0,1601215 | 0,332504 |
| GPANK1        | 1,84  | 1,35  | 2,24  | 3,76  | 0,1601253 | 0,332504 |
| HCK           | 7,20  | 6,06  | 6,95  | 6,52  | 0,1601929 | 0,3326   |
| ASF1B         | 0,00  | 0,13  | 0,00  | 0,08  | 0,1602018 | 0,3326   |
| MAGEB10       | 0,27  | 0,08  | 0,33  | 0,00  | 0,1602277 | 0,332623 |
| YIPF3         | 6,12  | 5,22  | 5,52  | 5,39  | 0,1602785 | 0,332697 |
| ABCC4         | 2,16  | 0,71  | 2,35  | 1,04  | 0,1603511 | 0,332817 |
| ZNF578        | 0,06  | 0,14  | 0,11  | 0,17  | 0,1603751 | 0,332836 |
| RP11-1055B8.1 | 0,08  | 0,35  | 0,10  | 1,02  | 0,1604468 | 0,332939 |
| RP5-1052I5.1  | 1,39  | 1,31  | 1,40  | 0,14  | 0,1604557 | 0,332939 |
| KCNJ15        | 0,08  | 0,16  | 0,08  | 0,15  | 0,1604699 | 0,332939 |
| ZNF16         | 1,48  | 0,82  | 1,41  | 1,17  | 0,1605004 | 0,332971 |
| RP1-221C16.8  | 0,50  | 1,66  | 0,64  | 0,96  | 0,1605291 | 0,333    |
| RNU4-72P      | 1,38  | 2,67  | 1,77  | 0,00  | 0,1605615 | 0,333036 |
| RP11-53O19.3  | 0,15  | 0,26  | 0,10  | 0,00  | 0,160679  | 0,333249 |
| LINC00269     | 0,28  | 0,71  | 0,44  | 0,61  | 0,160799  | 0,333466 |
| CXXC4         | 0,00  | 0,00  | 0,00  | 0,00  | 0,1608394 | NA       |
| ZNF77         | 0,13  | 0,07  | 0,83  | 1,13  | 0,1608659 | 0,333574 |
| RP11-112L6.2  | 2,24  | 0,00  | 0,00  | 0,00  | 0,1609004 | 0,333592 |
| AC092338.5    | 0,00  | 0,00  | 0,14  | 0,13  | 0,1609044 | 0,333592 |
| CTC-774J1.2   | 0,22  | 0,73  | 0,34  | 0,21  | 0,1609295 | 0,333612 |
| TARID         | 0,39  | 0,90  | 0,21  | 0,09  | 0,1609756 | 0,333663 |
| GABARAP       | 10,76 | 10,56 | 10,78 | 10,31 | 0,1609842 | 0,333663 |
| MARVELD2      | 0,18  | 0,40  | 0,30  | 0,28  | 0,1610987 | 0,33387  |
| RP11-113K21.5 | 3,93  | 4,15  | 4,09  | 4,65  | 0,1611347 | 0,333911 |
| ZDHH11        | 0,00  | 1,07  | 0,00  | 0,00  | 0,1611485 | 0,333911 |
| RP5-1120P11.1 | 1,61  | 2,33  | 1,07  | 0,40  | 0,161183  | 0,333951 |
| SP100         | 7,54  | 6,59  | 7,04  | 6,90  | 0,161233  | 0,33402  |
| RP11-242C19.3 | 0,00  | 0,00  | 0,50  | 2,17  | 0,1612483 | 0,33402  |
| IMPA2         | 4,91  | 4,44  | 5,60  | 5,50  | 0,1612612 | 0,33402  |
| TOP1MT        | 5,13  | 6,00  | 4,65  | 3,80  | 0,1613041 | 0,334057 |
| RP11-659G9.3  | 0,00  | 0,53  | 0,44  | 0,00  | 0,1613186 | NA       |
| CCDC93        | 2,55  | 3,45  | 3,38  | 3,60  | 0,1613287 | 0,334057 |
| ZNF544        | 2,98  | 3,53  | 2,27  | 2,78  | 0,1613496 | 0,334057 |
| NADK          | 4,53  | 3,38  | 4,23  | 4,86  | 0,1613499 | 0,334057 |
| PCK1          | 0,05  | 0,09  | 0,08  | 0,10  | 0,1613545 | 0,334057 |
| RP11-510H23.1 | 0,13  | 0,41  | 0,14  | 0,48  | 0,1613695 | 0,334057 |
| MAPK12        | 0,20  | 0,86  | 0,27  | 0,39  | 0,1614132 | 0,334116 |
| RP11-96H17.1  | 0,00  | 0,06  | 0,00  | 0,00  | 0,1614289 | 0,334118 |
| ZNF106        | 5,70  | 5,64  | 5,52  | 6,00  | 0,1614438 | 0,334118 |
| ZNF627        | 1,72  | 2,31  | 2,28  | 1,70  | 0,1614949 | 0,334192 |
| RP11-274J7.2  | 0,47  | 2,87  | 0,53  | 1,35  | 0,1615362 | 0,334247 |
| COPS7A        | 5,11  | 3,92  | 4,37  | 3,98  | 0,1615833 | 0,334313 |
| ZRSR1         | 0,00  | 0,00  | 0,00  | 0,00  | 0,1616199 | 0,334357 |
| GABPB2        | 2,52  | 0,96  | 2,06  | 1,61  | 0,1617501 | 0,334547 |
| BSND          | 0,07  | 0,23  | 0,11  | 0,80  | 0,1617756 | 0,334547 |
| CTC-232P5.1   | 0,37  | 0,00  | 0,00  | 0,00  | 0,1617835 | 0,334547 |
| MICU2         | 4,96  | 5,09  | 4,67  | 3,84  | 0,1617913 | 0,334547 |
| TRDJ1         | 0,00  | 0,00  | 0,00  | 0,00  | 0,161824  | 0,334547 |
| ALKBH7        | 6,27  | 6,77  | 6,47  | 6,62  | 0,1618263 | 0,334547 |
| ACAA1         | 7,44  | 6,22  | 6,85  | 6,05  | 0,1618284 | 0,334547 |
| AC007228.5    | 1,17  | 1,63  | 1,28  | 2,23  | 0,1618521 | 0,334547 |
| VMAC          | 0,44  | 0,23  | 0,77  | 0,17  | 0,161855  | 0,334547 |
| CTA-407F11.8  | 0,00  | 0,00  | 0,26  | 0,00  | 0,161862  | 0,334547 |

|                |      |      |      |      |           |          |
|----------------|------|------|------|------|-----------|----------|
| RP11-681L8.1   | 0,31 | 0,87 | 0,20 | 0,00 | 0,1618819 | 0,334557 |
| OR1M1          | 0,52 | 0,53 | 0,63 | 0,81 | 0,1619173 | 0,334599 |
| WDR48          | 4,88 | 2,92 | 4,59 | 3,02 | 0,1619686 | 0,334674 |
| CGREF1         | 0,00 | 0,00 | 0,00 | 0,11 | 0,1619729 | NA       |
| AC079988.3     | 0,00 | 0,00 | 0,46 | 1,18 | 0,1620476 | 0,334792 |
| RN7SL275P      | 1,75 | 2,18 | 1,56 | 2,27 | 0,1620669 | 0,334792 |
| RP1-122K4.3    | 0,54 | 0,00 | 0,56 | 0,33 | 0,1620711 | 0,334792 |
| FEN1           | 1,23 | 0,44 | 0,08 | 0,19 | 0,1620996 | 0,334817 |
| TNPO3          | 3,19 | 3,54 | 1,99 | 2,67 | 0,1621265 | 0,334817 |
| UBE3D          | 0,90 | 0,52 | 0,47 | 2,17 | 0,1621282 | 0,334817 |
| CTA-150C2.16   | 0,34 | 0,00 | 1,52 | 1,07 | 0,1622517 | 0,335036 |
| MIR4312        | 0,00 | 0,00 | 0,00 | 0,00 | 0,1622644 | 0,335036 |
| RP11-736N17.10 | 0,00 | 0,25 | 0,00 | 0,00 | 0,1623546 | NA       |
| RCSO1          | 5,37 | 5,71 | 4,76 | 5,07 | 0,1624143 | 0,335314 |
| SULT2A1        | 0,24 | 0,32 | 0,33 | 0,38 | 0,1624753 | 0,335393 |
| STAU2          | 4,20 | 3,74 | 4,32 | 2,82 | 0,1625163 | 0,335393 |
| AL132780.10    | 0,37 | 1,27 | 1,26 | 0,20 | 0,1625485 | 0,335393 |
| DLGAP3         | 0,12 | 0,04 | 0,17 | 0,23 | 0,162549  | 0,335393 |
| RP11-44K6.4    | 0,26 | 1,01 | 0,68 | 1,36 | 0,162554  | 0,335393 |
| HIST1H2BD      | 5,60 | 2,35 | 4,56 | 0,39 | 0,1625568 | 0,335393 |
| SLC45A4        | 1,35 | 0,04 | 0,28 | 0,39 | 0,1625579 | 0,335393 |
| ARHGAP24       | 4,12 | 2,68 | 2,61 | 4,19 | 0,1626115 | 0,335455 |
| PTPRA          | 3,82 | 4,37 | 3,66 | 2,04 | 0,1626182 | 0,335455 |
| VLDLR          | 0,13 | 0,09 | 0,20 | 0,32 | 0,1626743 | 0,335539 |
| TP53BP1        | 1,73 | 2,33 | 2,17 | 1,31 | 0,1627554 | 0,335676 |
| FAM111B        | 0,98 | 0,73 | 1,42 | 1,22 | 0,1628537 | 0,335847 |
| RP11-534L6.5   | 0,00 | 1,87 | 0,00 | 0,00 | 0,1629605 | 0,336036 |
| MMRN2          | 0,43 | 0,03 | 0,46 | 0,26 | 0,162984  | 0,336053 |
| RP11-391L3.3   | 0,58 | 1,09 | 1,36 | 0,94 | 0,1630016 | 0,336058 |
| RP11-429G19.2  | 4,53 | 4,68 | 4,32 | 3,70 | 0,1630334 | 0,336093 |
| C4orf46        | 0,88 | 0,30 | 0,35 | 0,36 | 0,1630592 | 0,336115 |
| LIFR           | 0,00 | 0,69 | 0,00 | 0,05 | 0,1630902 | 0,336148 |
| DEPDC5         | 3,86 | 3,63 | 4,42 | 4,02 | 0,1631824 | 0,336306 |
| RP5-1189D6.2   | 0,23 | 0,00 | 0,05 | 0,00 | 0,1632246 | 0,336362 |
| VN1R5          | 0,00 | 0,00 | 0,00 | 0,42 | 0,163305  | 0,336497 |
| RP11-537I16.2  | 0,00 | 0,00 | 0,00 | 1,47 | 0,1633251 | 0,336507 |
| FAM172A        | 3,86 | 2,28 | 3,65 | 2,39 | 0,1633591 | 0,336539 |
| ARHGFE9        | 2,23 | 1,84 | 1,85 | 2,54 | 0,1633709 | 0,336539 |
| METTL14        | 3,43 | 3,33 | 2,55 | 2,54 | 0,1634139 | 0,336575 |
| RP11-396C23.4  | 0,00 | 0,00 | 0,00 | 0,00 | 0,1634185 | 0,336575 |
| ZNF701         | 3,18 | 1,48 | 2,87 | 3,56 | 0,1634905 | 0,336692 |
| ARHGAP11A      | 0,10 | 0,64 | 0,17 | 0,17 | 0,1635108 | 0,336702 |
| PDSS1          | 2,03 | 3,48 | 1,96 | 0,64 | 0,1635389 | 0,336729 |
| RP11-696L21.2  | 0,00 | 0,00 | 0,00 | 0,00 | 0,1635847 | 0,336792 |
| CLPB           | 3,57 | 1,43 | 3,80 | 2,58 | 0,1636029 | 0,336792 |
| C11orf31       | 7,85 | 8,00 | 7,98 | 7,99 | 0,1636309 | 0,336792 |
| HOPX           | 1,39 | 2,34 | 1,46 | 2,70 | 0,1636448 | 0,336792 |
| IFITM1         | 7,87 | 7,67 | 7,19 | 7,96 | 0,163651  | 0,336792 |
| FAM208A        | 5,35 | 4,93 | 4,61 | 4,16 | 0,1636602 | 0,336792 |
| RP11-142L16.2  | 4,45 | 0,00 | 2,08 | 0,00 | 0,1636777 | 0,336793 |
| ARID3A         | 1,89 | 1,10 | 2,05 | 1,61 | 0,1636913 | 0,336793 |
| RP11-519C12.1  | 0,00 | 0,00 | 0,00 | 0,00 | 0,163794  | 0,336973 |
| NOP56          | 5,42 | 5,89 | 5,23 | 5,40 | 0,1638148 | 0,336985 |
| RP1-310O13.7   | 0,07 | 0,15 | 0,07 | 0,14 | 0,1638426 | NA       |
| KLK10          | 0,06 | 0,44 | 0,17 | 0,20 | 0,1638646 | 0,337056 |

|                |      |      |      |      |           |          |
|----------------|------|------|------|------|-----------|----------|
| AK5            | 2,69 | 0,65 | 1,63 | 2,06 | 0,1638831 | 0,337063 |
| RP5-1042K10.14 | 0,06 | 0,00 | 0,01 | 0,00 | 0,1639598 | 0,337189 |
| MOCOS          | 0,14 | 0,04 | 0,16 | 0,30 | 0,1639866 | 0,337213 |
| LDAH           | 2,34 | 0,47 | 2,43 | 0,46 | 0,1640438 | 0,3373   |
| RAB11A         | 6,93 | 5,20 | 6,59 | 5,70 | 0,1641411 | 0,337464 |
| RN7SL113P      | 0,00 | 0,00 | 0,37 | 2,22 | 0,1641985 | 0,337464 |
| CRADD          | 3,35 | 0,22 | 0,49 | 0,48 | 0,1642174 | 0,337464 |
| RP11-6F2.6     | 0,20 | 0,00 | 0,37 | 0,93 | 0,1642279 | 0,337464 |
| KCTD17         | 0,10 | 1,22 | 0,46 | 1,94 | 0,1642326 | 0,337464 |
| CTD-2373H9.5   | 0,51 | 1,17 | 0,66 | 0,83 | 0,1642464 | 0,337464 |
| SLC41A3        | 3,88 | 4,80 | 3,29 | 2,77 | 0,1642469 | 0,337464 |
| ZNF3           | 2,18 | 1,27 | 2,57 | 1,60 | 0,1642519 | 0,337464 |
| SYNGR2         | 8,34 | 7,94 | 8,06 | 7,71 | 0,1642602 | 0,337464 |
| BOLL           | 0,17 | 0,05 | 0,12 | 0,08 | 0,1643381 | 0,337593 |
| GNG5           | 7,71 | 7,34 | 7,80 | 7,07 | 0,1643869 | 0,337662 |
| RHOBTB1        | 0,48 | 0,00 | 0,00 | 0,00 | 0,1644335 | 0,337726 |
| ZNF558         | 1,58 | 0,93 | 0,88 | 0,86 | 0,164452  | 0,337733 |
| AC124997.1     | 0,00 | 0,06 | 0,00 | 0,00 | 0,16446   | NA       |
| APOBEC3D       | 0,72 | 0,80 | 0,55 | 0,96 | 0,1645195 | 0,337814 |
| CCDC124        | 4,97 | 5,39 | 5,34 | 4,10 | 0,164522  | 0,337814 |
| CTC-316M18.1   | 0,00 | 0,00 | 0,00 | 0,00 | 0,1645686 | 0,337879 |
| LSM8           | 4,83 | 3,73 | 5,04 | 4,75 | 0,1646362 | 0,337974 |
| ZWINT          | 0,00 | 0,30 | 0,04 | 0,08 | 0,1646454 | 0,337974 |
| JMJD7          | 0,72 | 3,42 | 1,07 | 1,32 | 0,1646807 | 0,338015 |
| NAA35          | 3,32 | 3,10 | 3,29 | 1,91 | 0,1647026 | 0,338029 |
| RN7SL851P      | 0,00 | 0,00 | 0,00 | 0,00 | 0,1647147 | NA       |
| RP11-841O20.2  | 3,16 | 0,26 | 1,51 | 0,00 | 0,1647578 | 0,338111 |
| RN7SL91P       | 0,71 | 1,81 | 0,00 | 1,82 | 0,1647947 | 0,338155 |
| RP11-483K5.3   | 0,00 | 0,00 | 0,00 | 1,27 | 0,1648147 | 0,338165 |
| CTD-2008A1.2   | 0,24 | 0,00 | 0,56 | 0,09 | 0,1648297 | 0,338165 |
| CLRN1          | 0,05 | 0,27 | 0,00 | 0,00 | 0,1649443 | NA       |
| EVPL           | 0,02 | 0,04 | 0,00 | 0,37 | 0,1650329 | 0,33855  |
| KRT18P55       | 0,00 | 0,86 | 0,00 | 0,00 | 0,1650424 | NA       |
| RTEL1          | 1,28 | 0,64 | 2,67 | 3,37 | 0,1650483 | 0,338551 |
| GNPDA1         | 3,85 | 4,35 | 2,49 | 4,39 | 0,1650782 | 0,338557 |
| TM4SF20        | 0,06 | 0,07 | 0,20 | 0,06 | 0,165082  | 0,338557 |
| RN7SL304P      | 0,00 | 0,00 | 0,00 | 0,72 | 0,1651181 | NA       |
| GGA1           | 3,75 | 4,23 | 3,85 | 4,53 | 0,1651184 | 0,338601 |
| ATR            | 4,94 | 3,88 | 4,06 | 3,86 | 0,1651553 | 0,338618 |
| ENC1           | 0,49 | 0,29 | 1,85 | 1,19 | 0,1651701 | 0,338618 |
| ADRM1          | 5,31 | 5,13 | 4,78 | 4,01 | 0,1651919 | 0,338618 |
| RP11-171I2.2   | 0,00 | 0,40 | 0,00 | 0,00 | 0,1651946 | NA       |
| RP11-954J6.3   | 1,22 | 0,31 | 0,17 | 0,00 | 0,165202  | 0,338618 |
| MARK4          | 1,49 | 1,32 | 1,83 | 2,57 | 0,1652029 | 0,338618 |
| COL1A2         | 0,45 | 0,20 | 0,15 | 0,45 | 0,1652357 | 0,338643 |
| S100A7         | 0,00 | 0,00 | 0,00 | 0,00 | 0,1652458 | 0,338643 |
| RN7SL455P      | 0,00 | 0,99 | 0,98 | 0,00 | 0,1653376 | 0,3388   |
| RP11-567F11.1  | 0,00 | 0,00 | 0,00 | 0,00 | 0,1653592 | 0,338803 |
| RP11-345M22.2  | 0,07 | 0,00 | 0,03 | 0,44 | 0,1653732 | 0,338803 |
| YIPF4          | 4,32 | 1,97 | 3,77 | 2,30 | 0,1653846 | 0,338803 |
| NEU4           | 0,00 | 0,00 | 0,00 | 0,00 | 0,1654116 | 0,338827 |
| PPP4C          | 5,84 | 6,36 | 6,04 | 6,07 | 0,1654361 | 0,338846 |
| RP11-1197K16.2 | 0,62 | 0,00 | 0,00 | 0,00 | 0,1654608 | 0,338865 |
| AC005775.2     | 0,53 | 0,94 | 0,57 | 0,97 | 0,1655224 | 0,338954 |
| C14orf23       | 1,23 | 2,91 | 1,62 | 3,03 | 0,1655344 | 0,338954 |



|               |       |       |       |       |           |          |
|---------------|-------|-------|-------|-------|-----------|----------|
| B3GALT1       | 0,23  | 0,68  | 0,38  | 0,32  | 0,1656894 | 0,33924  |
| RP11-538I12.2 | 0,00  | 0,00  | 0,00  | 0,00  | 0,1657103 | 0,339251 |
| RNU2-65P      | 0,00  | 1,37  | 1,29  | 1,25  | 0,1657509 | 0,339271 |
| RP11-350E12.1 | 0,84  | 1,32  | 1,04  | 0,21  | 0,1657643 | 0,339271 |
| PF4           | 0,00  | 1,06  | 0,15  | 0,36  | 0,1657659 | 0,339271 |
| SCRN3         | 3,54  | 3,58  | 2,96  | 4,31  | 0,1658311 | 0,339331 |
| NAE1          | 4,66  | 2,60  | 3,82  | 5,03  | 0,1658389 | 0,339331 |
| AARSD1        | 5,46  | 5,11  | 5,43  | 2,97  | 0,165841  | 0,339331 |
| RP11-361I15.5 | 0,71  | 0,64  | 0,69  | 0,97  | 0,1658824 | 0,339367 |
| CTD-2012I19.3 | 0,00  | 0,00  | 0,04  | 0,00  | 0,1658889 | 0,339367 |
| CAMP          | 0,00  | 0,00  | 0,00  | 0,27  | 0,1659247 | 0,339409 |
| GBA2          | 4,37  | 2,80  | 3,91  | 3,85  | 0,1659814 | 0,339494 |
| ATL3          | 3,19  | 3,20  | 3,18  | 3,92  | 0,1660168 | 0,339528 |
| CDCA7         | 1,25  | 0,18  | 0,58  | 0,26  | 0,1660289 | 0,339528 |
| GAPDH         | 10,89 | 11,02 | 10,91 | 10,68 | 0,1660544 | 0,339549 |
| POLI          | 4,05  | 1,07  | 3,18  | 2,36  | 0,1661185 | 0,339649 |
| RBBP9         | 1,21  | 1,21  | 1,42  | 0,50  | 0,1661728 | 0,339729 |
| CAAP1         | 3,47  | 2,70  | 3,16  | 2,87  | 0,1662725 | 0,339901 |
| RP11-111H13.1 | 0,00  | 0,00  | 0,00  | 0,00  | 0,1663049 | 0,339936 |
| CH17-31A6.1   | 0,00  | 0,62  | 0,34  | 0,00  | 0,1663338 | 0,339964 |
| KIAA0319L     | 3,48  | 3,67  | 4,37  | 4,27  | 0,1663598 | 0,339986 |
| RP11-489G11.3 | 0,11  | 0,77  | 0,10  | 0,43  | 0,1665057 | 0,340253 |
| MAMSTR        | 0,00  | 0,09  | 0,00  | 0,00  | 0,1665305 | NA       |
| RPS6KL1       | 1,48  | 1,15  | 1,08  | 1,09  | 0,1665767 | 0,340367 |
| SYK           | 6,04  | 6,28  | 6,08  | 5,55  | 0,1666328 | 0,340439 |
| RP11-963H4.8  | 0,00  | 1,41  | 0,15  | 0,00  | 0,1666428 | 0,340439 |
| DAAM1         | 2,86  | 3,43  | 3,88  | 2,71  | 0,1667354 | 0,340592 |
| ELF2          | 4,66  | 4,02  | 4,94  | 5,14  | 0,1667483 | 0,340592 |
| OR2A12        | 0,00  | 0,06  | 0,00  | 0,03  | 0,1667693 | NA       |
| SEC24B        | 3,10  | 2,49  | 2,64  | 3,90  | 0,1668814 | 0,340833 |
| COL5A2        | 0,00  | 0,59  | 0,00  | 0,00  | 0,1669008 | 0,340834 |
| BIVM          | 2,49  | 1,08  | 1,24  | 1,74  | 0,1669261 | 0,340834 |
| TCAM1P        | 0,13  | 0,04  | 0,17  | 0,18  | 0,1669281 | 0,340834 |
| RN7SL638P     | 0,00  | 0,00  | 0,00  | 0,82  | 0,1669391 | NA       |
| SAA2          | 0,00  | 0,82  | 0,37  | 0,37  | 0,1669528 | 0,340844 |
| AC079111.1    | 1,22  | 0,62  | 0,44  | 0,35  | 0,1669637 | 0,340844 |
| ASAP2         | 0,09  | 0,00  | 0,18  | 0,00  | 0,1670059 | 0,340899 |
| RP11-51B13.2  | 5,90  | 5,25  | 6,74  | 5,62  | 0,1670225 | 0,340901 |
| BCCIP         | 5,96  | 6,26  | 5,14  | 5,02  | 0,167109  | 0,341047 |
| RP13-46G5.5   | 2,23  | 1,92  | 1,54  | 1,60  | 0,1671281 | 0,341054 |
| LYRM4         | 5,04  | 3,96  | 4,66  | 5,03  | 0,1671653 | 0,341083 |
| RP11-167P11.3 | 0,00  | 0,00  | 0,00  | 0,00  | 0,1671802 | 0,341083 |
| AC092214.10   | 0,29  | 4,38  | 0,35  | 0,59  | 0,1671881 | 0,341083 |
| RP11-432B6.3  | 0,70  | 0,00  | 0,00  | 0,00  | 0,1672629 | 0,341204 |
| RP11-720L3.1  | 1,76  | 0,00  | 2,57  | 4,48  | 0,1672895 | 0,341211 |
| PLIN2         | 5,22  | 6,58  | 4,73  | 3,36  | 0,1672987 | 0,341211 |
| FTHL23        | 2,98  | 2,87  | 3,10  | 2,88  | 0,1673125 | 0,341211 |
| FAM63B        | 1,72  | 0,74  | 1,76  | 0,89  | 0,1673306 | 0,341217 |
| RP11-759A9.1  | 0,00  | 2,04  | 0,00  | 0,00  | 0,1673926 | NA       |
| ADAM7         | 0,00  | 0,00  | 0,00  | 0,00  | 0,167402  | 0,34133  |
| TMEM59        | 7,89  | 7,12  | 7,19  | 6,92  | 0,1674167 | 0,34133  |
| RP11-419C5.1  | 2,94  | 0,43  | 2,69  | 0,74  | 0,1674737 | 0,341415 |
| RP11-326C3.12 | 1,64  | 3,74  | 2,25  | 3,26  | 0,1675555 | 0,34155  |
| ZNF521        | 0,00  | 0,00  | 0,00  | 0,00  | 0,1675822 | NA       |
| RP11-571F15.2 | 0,00  | 0,00  | 0,00  | 0,00  | 0,1676618 | 0,341735 |

|               |      |      |      |      |           |          |
|---------------|------|------|------|------|-----------|----------|
| RP13-130D24.1 | 0,11 | 0,14 | 0,12 | 0,12 | 0,1677161 | 0,341815 |
| COX16         | 5,51 | 4,92 | 5,53 | 5,56 | 0,1677993 | 0,341953 |
| RP11-806L2.2  | 1,02 | 1,57 | 0,86 | 0,22 | 0,1678451 | 0,342014 |
| PTPN6         | 8,40 | 8,51 | 8,41 | 8,28 | 0,1678665 | 0,342014 |
| RP11-212I21.2 | 0,94 | 1,19 | 1,91 | 3,24 | 0,1678755 | 0,342014 |
| SNORA11F      | 0,00 | 0,00 | 0,00 | 0,00 | 0,167895  | 0,342023 |
| AIMP2         | 5,83 | 1,60 | 5,09 | 2,35 | 0,168061  | 0,342329 |
| ATP2C1        | 4,30 | 1,18 | 4,21 | 2,04 | 0,1680763 | 0,342329 |
| CCDC144B      | 3,86 | 3,75 | 4,34 | 5,01 | 0,1681394 | 0,342363 |
| POLD2         | 4,74 | 3,76 | 4,55 | 3,95 | 0,1681544 | 0,342363 |
| KCTD3         | 1,56 | 0,72 | 2,00 | 1,67 | 0,1681592 | 0,342363 |
| ERCC2         | 1,60 | 1,86 | 2,61 | 1,27 | 0,1681698 | 0,342363 |
| SEMA3G        | 0,00 | 0,00 | 0,00 | 0,00 | 0,1681698 | 0,342363 |
| C16orf58      | 1,71 | 3,28 | 1,93 | 0,86 | 0,1682336 | 0,342461 |
| ATP9B         | 5,04 | 4,28 | 4,76 | 4,92 | 0,1682529 | 0,342469 |
| RP11-24J23.2  | 2,33 | 3,15 | 2,20 | 1,88 | 0,1682684 | 0,342469 |
| AC083899.3    | 0,81 | 0,00 | 0,02 | 0,00 | 0,168296  | 0,342494 |
| ZC3H15        | 6,36 | 7,08 | 6,07 | 6,10 | 0,1684667 | 0,342807 |
| PABPC4L       | 0,00 | 0,00 | 0,00 | 0,03 | 0,1684828 | 0,342807 |
| SPP2          | 2,51 | 2,76 | 2,80 | 2,00 | 0,1685099 | 0,342807 |
| CRYZ          | 2,66 | 0,57 | 0,44 | 0,16 | 0,1685117 | 0,342807 |
| RP11-552F3.9  | 0,00 | 0,13 | 0,04 | 0,04 | 0,1687525 | NA       |
| GPBAR1        | 4,35 | 3,78 | 4,53 | 5,73 | 0,1687931 | 0,343349 |
| RN7SL470P     | 0,96 | 1,48 | 0,76 | 2,77 | 0,1688366 | 0,343406 |
| ELL           | 2,26 | 2,03 | 2,62 | 1,40 | 0,168939  | 0,34352  |
| ANAPC13       | 6,13 | 6,60 | 5,61 | 2,77 | 0,1689531 | 0,34352  |
| SSBP3         | 3,66 | 4,49 | 3,71 | 3,69 | 0,1689612 | 0,34352  |
| ZFP3          | 0,37 | 0,10 | 0,28 | 0,28 | 0,1689628 | 0,34352  |
| RN7SL45P      | 0,00 | 1,59 | 1,10 | 2,39 | 0,1689702 | 0,34352  |
| ZNHIT3        | 6,20 | 6,05 | 5,23 | 5,23 | 0,1689857 | 0,34352  |
| ZNF44         | 4,09 | 4,84 | 3,62 | 4,02 | 0,169015  | 0,343533 |
| RP5-1091E12.1 | 0,21 | 0,00 | 0,73 | 0,05 | 0,1690226 | 0,343533 |
| SIGLEC16      | 0,00 | 0,00 | 0,11 | 2,40 | 0,1690968 | 0,343629 |
| RPP40         | 2,69 | 0,41 | 0,15 | 0,29 | 0,1691011 | 0,343629 |
| SH2D3C        | 3,53 | 2,55 | 3,33 | 1,76 | 0,1691357 | 0,343657 |
| VIPR1         | 3,12 | 4,92 | 2,85 | 2,33 | 0,1691459 | 0,343657 |
| RP11-6N17.6   | 4,28 | 1,27 | 3,06 | 3,27 | 0,1692716 | 0,343881 |
| STUB1         | 4,38 | 5,25 | 4,70 | 6,05 | 0,1693834 | 0,344056 |
| KIAA2013      | 3,50 | 3,87 | 4,01 | 2,47 | 0,1693888 | 0,344056 |
| RP11-3G20.2   | 0,00 | 0,70 | 0,75 | 0,00 | 0,1694275 | 0,344079 |
| FBLN2         | 2,97 | 1,27 | 1,83 | 0,37 | 0,1694309 | 0,344079 |
| RP11-817O13.2 | 0,16 | 0,18 | 0,05 | 0,17 | 0,1694983 | 0,344185 |
| INHBA         | 0,14 | 0,36 | 0,43 | 0,08 | 0,1695492 | 0,344256 |
| RP11-950C14.7 | 0,00 | 0,00 | 0,00 | 0,00 | 0,1696368 | 0,344403 |
| CDK18         | 0,43 | 0,54 | 0,99 | 0,44 | 0,1696821 | 0,344458 |
| SMIM16        | 0,10 | 0,00 | 0,13 | 0,19 | 0,169695  | 0,344458 |
| RPS3AP34      | 0,00 | 0,63 | 0,00 | 0,00 | 0,1697935 | 0,344627 |
| ST7L          | 3,70 | 3,25 | 3,13 | 1,94 | 0,1698401 | 0,34467  |
| RP4-742C19.13 | 0,06 | 0,36 | 0,08 | 0,13 | 0,1698611 | 0,34467  |
| RP4-647C14.2  | 0,03 | 0,26 | 0,06 | 0,09 | 0,169872  | 0,34467  |
| RN7SL648P     | 0,83 | 0,00 | 0,37 | 0,00 | 0,1698769 | 0,34467  |
| C7orf31       | 0,47 | 0,05 | 0,21 | 1,37 | 0,1700765 | 0,345043 |
| AC006552.1    | 0,78 | 2,22 | 0,59 | 0,32 | 0,1701043 | 0,345068 |
| RP11-579E24.1 | 0,06 | 0,18 | 0,25 | 0,20 | 0,1702751 | 0,345383 |
| RRAGB         | 3,46 | 1,08 | 1,55 | 2,22 | 0,1703831 | 0,345571 |

|                |      |      |      |      |           |          |
|----------------|------|------|------|------|-----------|----------|
| LPAR6          | 4,85 | 2,87 | 5,09 | 4,67 | 0,1704152 | 0,345583 |
| CTD-2370N5.3   | 0,00 | 0,00 | 0,00 | 0,00 | 0,1704246 | 0,345583 |
| COL6A3         | 0,12 | 0,08 | 0,09 | 0,24 | 0,1704423 | 0,345583 |
| FBXW2          | 3,41 | 1,19 | 3,44 | 2,26 | 0,1704511 | 0,345583 |
| RP11-819C21.1  | 1,05 | 0,65 | 1,30 | 0,19 | 0,1704696 | 0,345589 |
| FGFR1OP2       | 4,17 | 5,01 | 3,83 | 4,37 | 0,1704953 | 0,345609 |
| WDR34          | 0,00 | 0,00 | 0,00 | 0,00 | 0,1705183 | 0,345611 |
| PSMB8          | 8,69 | 7,69 | 8,35 | 8,07 | 0,1705273 | 0,345611 |
| FZD4           | 0,11 | 0,36 | 0,16 | 0,44 | 0,170547  | 0,345619 |
| EIF3I          | 7,37 | 7,23 | 6,61 | 6,19 | 0,1705748 | 0,345644 |
| THUMPD2        | 3,65 | 0,44 | 3,33 | 2,40 | 0,1705973 | 0,345658 |
| RP11-236F9.2   | 0,00 | 1,49 | 0,00 | 0,00 | 0,1706121 | NA       |
| UBAP1L         | 0,02 | 0,57 | 0,15 | 0,69 | 0,1706409 | 0,345715 |
| CBR4           | 3,79 | 4,28 | 3,16 | 2,88 | 0,1707177 | 0,345804 |
| ADIPOQ         | 0,04 | 0,10 | 0,10 | 0,04 | 0,1707276 | 0,345804 |
| CAB39          | 5,43 | 5,12 | 4,54 | 3,47 | 0,1707354 | 0,345804 |
| RP1-68D18.2    | 0,47 | 0,00 | 0,79 | 1,50 | 0,1707493 | 0,345804 |
| AC092594.1     | 0,00 | 0,00 | 0,22 | 0,40 | 0,1707628 | 0,345804 |
| RP11-1060J15.4 | 0,45 | 3,01 | 1,09 | 0,00 | 0,1707886 | 0,345813 |
| GOLGA6L9       | 0,21 | 0,34 | 0,07 | 0,07 | 0,1708064 | 0,345813 |
| PELI2          | 2,78 | 1,55 | 3,07 | 3,28 | 0,1708232 | 0,345813 |
| RP11-318G21.4  | 0,74 | 1,83 | 0,51 | 1,11 | 0,1708291 | 0,345813 |
| SLC35E2B       | 2,82 | 1,23 | 2,30 | 1,72 | 0,1708677 | 0,345859 |
| LENG8          | 3,94 | 4,71 | 4,70 | 3,37 | 0,1709532 | 0,346001 |
| PRPS2          | 4,99 | 4,27 | 3,41 | 3,56 | 0,170989  | 0,346007 |
| DACT3-AS1      | 0,09 | 0,00 | 0,17 | 0,00 | 0,1710034 | 0,346007 |
| RP11-417L19.2  | 1,46 | 0,48 | 1,97 | 1,42 | 0,1710056 | 0,346007 |
| LY6G5C         | 1,71 | 1,66 | 1,36 | 0,82 | 0,1710187 | 0,346007 |
| EOGT           | 2,31 | 0,58 | 1,64 | 0,37 | 0,1710354 | 0,34601  |
| AC011515.2     | 0,54 | 0,33 | 0,14 | 0,31 | 0,1710524 | 0,346013 |
| BCAT2          | 3,41 | 1,88 | 2,66 | 4,19 | 0,1710934 | 0,346064 |
| AC069277.2     | 0,53 | 0,43 | 1,01 | 2,29 | 0,1711168 | 0,34608  |
| NDUFA9         | 6,51 | 6,25 | 5,64 | 5,81 | 0,1711361 | 0,346082 |
| LZTFL1         | 2,04 | 0,33 | 1,12 | 0,48 | 0,1711488 | 0,346082 |
| HIST1H2BE      | 0,08 | 0,00 | 0,12 | 0,00 | 0,1714592 | 0,346675 |
| RP11-288C18.1  | 0,32 | 0,00 | 0,37 | 0,81 | 0,1714733 | 0,346675 |
| GOLGA6L5       | 0,00 | 0,80 | 0,05 | 0,00 | 0,1714894 | 0,346676 |
| RP11-799B12.1  | 4,77 | 0,66 | 4,88 | 4,52 | 0,1715181 | 0,346702 |
| GOLGA8J        | 0,00 | 0,30 | 0,00 | 0,13 | 0,1716387 | 0,346914 |
| AC007682.1     | 0,03 | 0,10 | 0,01 | 0,03 | 0,1719122 | 0,347436 |
| RP11-129M16.4  | 0,08 | 0,00 | 0,10 | 0,00 | 0,1720308 | 0,347644 |
| USP32P1        | 2,47 | 3,36 | 2,74 | 2,83 | 0,1720492 | 0,347649 |
| HAP1           | 0,13 | 0,15 | 0,19 | 0,37 | 0,1720885 | 0,347697 |
| TRIM39         | 2,91 | 4,95 | 3,76 | 2,76 | 0,1721202 | 0,347729 |
| RERE           | 4,08 | 2,32 | 3,41 | 2,62 | 0,1721618 | 0,347772 |
| ZBTB43         | 2,45 | 1,28 | 2,76 | 3,18 | 0,1721726 | 0,347772 |
| LRRIQ1         | 0,00 | 0,00 | 0,00 | 0,22 | 0,1722057 | 0,347807 |
| RP11-45A17.2   | 1,36 | 0,00 | 0,83 | 0,00 | 0,1723198 | 0,348006 |
| SERINC1        | 5,31 | 4,22 | 4,61 | 4,79 | 0,1723771 | 0,34809  |
| LZTS2          | 0,00 | 0,50 | 0,18 | 1,43 | 0,1724318 | 0,348169 |
| ARL1           | 3,89 | 3,22 | 4,11 | 2,66 | 0,1724839 | 0,348243 |
| CTD-2245F17.9  | 0,00 | 0,44 | 0,00 | 0,00 | 0,1725177 | NA       |
| RP11-195F19.5  | 0,00 | 1,67 | 0,23 | 0,56 | 0,1725271 | 0,348261 |
| RP11-231C14.4  | 7,02 | 6,59 | 6,74 | 6,20 | 0,1725344 | 0,348261 |
| RP11-849I19.2  | 2,53 | 0,17 | 2,42 | 3,05 | 0,1725401 | 0,348261 |

|               |       |       |       |       |           |          |
|---------------|-------|-------|-------|-------|-----------|----------|
| AP001172.2    | 0,00  | 0,00  | 0,00  | 0,00  | 0,172565  | 0,34828  |
| GRK4          | 0,28  | 0,14  | 0,57  | 1,45  | 0,1726104 | 0,348316 |
| XKRS          | 0,13  | 0,20  | 0,17  | 0,20  | 0,1726144 | 0,348316 |
| FLI1          | 4,85  | 4,79  | 4,35  | 3,63  | 0,1726964 | 0,348445 |
| ATF5          | 3,38  | 4,08  | 3,59  | 3,13  | 0,1727098 | 0,348445 |
| AC073043.1    | 1,27  | 3,16  | 1,08  | 2,50  | 0,172759  | 0,348513 |
| RAB11FIP3     | 0,60  | 0,50  | 0,58  | 0,37  | 0,1728021 | 0,348515 |
| RP11-387D10.2 | 1,43  | 0,36  | 0,75  | 0,50  | 0,1728053 | 0,348515 |
| AC003092.1    | 0,00  | 1,36  | 0,00  | 0,00  | 0,1728068 | 0,348515 |
| FAM134B       | 0,05  | 0,00  | 1,03  | 0,93  | 0,1729046 | 0,34868  |
| ZSCAN20       | 0,00  | 0,06  | 0,04  | 0,05  | 0,1730035 | 0,348848 |
| CTC-523E23.13 | 0,15  | 3,40  | 1,00  | 1,49  | 0,173035  | 0,34888  |
| C1orf53       | 0,00  | 0,00  | 0,00  | 0,00  | 0,173138  | 0,349056 |
| OLFML3        | 0,00  | 0,00  | 0,00  | 0,13  | 0,1731894 | NA       |
| PPIE          | 6,16  | 5,89  | 5,34  | 4,84  | 0,1731957 | 0,349112 |
| CTB-118N6.3   | 0,00  | 0,39  | 0,00  | 0,52  | 0,1731974 | 0,349112 |
| AMT           | 1,20  | 1,07  | 2,60  | 1,26  | 0,1732189 | 0,349124 |
| BCAM          | 0,56  | 0,70  | 0,91  | 1,11  | 0,1732974 | 0,349251 |
| TMEM239       | 0,00  | 0,20  | 0,00  | 0,03  | 0,173349  | 0,349316 |
| TOX           | 0,12  | 1,13  | 0,03  | 0,20  | 0,1733724 | 0,349316 |
| ZNF234        | 0,49  | 2,76  | 0,52  | 0,65  | 0,1733856 | 0,349316 |
| RSPH3         | 1,67  | 2,44  | 1,72  | 0,59  | 0,1734109 | 0,349316 |
| NCAPH2        | 2,56  | 3,20  | 2,23  | 1,63  | 0,1734262 | 0,349316 |
| RN7SL546P     | 2,08  | 2,89  | 3,16  | 3,14  | 0,1734316 | 0,349316 |
| HAL           | 0,00  | 0,51  | 0,17  | 0,75  | 0,1734402 | 0,349316 |
| KLHL42        | 2,23  | 2,60  | 1,35  | 0,27  | 0,1734975 | 0,3494   |
| CTC-471J1.11  | 0,00  | 0,00  | 0,00  | 0,00  | 0,173608  | 0,349577 |
| RP11-293F5.2  | 2,04  | 1,13  | 1,81  | 2,21  | 0,1736168 | 0,349577 |
| RP11-563N4.1  | 0,44  | 0,33  | 0,49  | 0,45  | 0,1737012 | 0,349693 |
| SLC12A2       | 2,09  | 2,18  | 2,12  | 2,84  | 0,1737056 | 0,349693 |
| GRSF1         | 5,88  | 4,45  | 5,45  | 5,27  | 0,1738082 | 0,349868 |
| GSPT1         | 4,87  | 4,11  | 3,81  | 4,10  | 0,173835  | 0,34989  |
| RP11-266I3.1  | 0,00  | 0,56  | 0,50  | 0,66  | 0,1738864 | 0,349961 |
| ICAM1         | 4,82  | 5,02  | 4,59  | 2,18  | 0,1739246 | 0,349994 |
| PTS           | 6,15  | 6,38  | 5,35  | 5,17  | 0,1739424 | 0,349994 |
| DNAJC30       | 1,54  | 0,54  | 1,69  | 0,39  | 0,1739499 | 0,349994 |
| DOT1L         | 1,21  | 2,76  | 1,89  | 2,76  | 0,1739739 | 0,350011 |
| CASP4         | 7,37  | 7,08  | 7,33  | 6,51  | 0,1740344 | 0,350078 |
| METTL21A      | 4,94  | 2,43  | 4,02  | 2,09  | 0,1740388 | 0,350078 |
| CCZ1          | 5,30  | 4,36  | 5,21  | 5,81  | 0,1741142 | 0,350165 |
| AC073254.1    | 1,88  | 0,49  | 1,51  | 1,05  | 0,1741294 | 0,350165 |
| RPL15         | 11,58 | 11,38 | 11,40 | 11,09 | 0,1741418 | 0,350165 |
| CDK12         | 3,65  | 2,11  | 3,10  | 2,50  | 0,1741498 | 0,350165 |
| RORC          | 0,37  | 0,10  | 0,34  | 0,28  | 0,174166  | 0,350165 |
| HMG3          | 7,92  | 7,08  | 7,65  | 6,61  | 0,1741832 | 0,350165 |
| RP11-365O16.3 | 3,63  | 2,10  | 3,81  | 2,07  | 0,1741922 | 0,350165 |
| POU2F1        | 2,59  | 1,57  | 1,88  | 1,39  | 0,1742316 | 0,3502   |
| RP11-492D6.1  | 0,00  | 0,00  | 0,00  | 0,51  | 0,1742414 | 0,3502   |
| RP11-385F7.1  | 0,00  | 0,00  | 0,00  | 0,00  | 0,1742634 | 0,350213 |
| TTC7B         | 2,76  | 2,08  | 2,84  | 3,50  | 0,1742939 | 0,350242 |
| LIN28B        | 0,00  | 0,20  | 0,08  | 0,00  | 0,1743614 | 0,350346 |
| SNHG4         | 0,55  | 1,19  | 0,73  | 1,75  | 0,1744114 | 0,350392 |
| ZBTB80S       | 5,08  | 2,96  | 4,90  | 6,01  | 0,1744157 | 0,350392 |
| VPS13C        | 5,08  | 4,23  | 5,09  | 4,36  | 0,1744353 | 0,3504   |
| OR13I1P       | 0,11  | 0,26  | 0,20  | 0,27  | 0,1744535 | 0,350405 |

|               |      |      |      |      |           |          |
|---------------|------|------|------|------|-----------|----------|
| CNPY2         | 6,54 | 6,70 | 6,66 | 6,18 | 0,1745172 | 0,350498 |
| B3GLCT        | 0,05 | 0,00 | 0,01 | 0,18 | 0,1745396 | 0,350498 |
| TYMS          | 0,30 | 0,12 | 0,17 | 0,35 | 0,1745573 | 0,350498 |
| RP1-39G22.7   | 1,08 | 0,00 | 0,00 | 0,11 | 0,1745629 | 0,350498 |
| CCNL1         | 8,50 | 7,75 | 8,26 | 7,82 | 0,1745894 | 0,350519 |
| GATM          | 2,31 | 1,48 | 1,66 | 1,33 | 0,1746553 | 0,350571 |
| RP1-177P22.1  | 0,00 | 0,00 | 0,28 | 1,52 | 0,1746694 | 0,350571 |
| AP000704.5    | 0,21 | 0,19 | 0,07 | 0,52 | 0,1746956 | 0,350571 |
| TCN2          | 0,07 | 3,79 | 2,73 | 3,20 | 0,1747022 | 0,350571 |
| RP4-778K6.3   | 0,00 | 0,00 | 0,00 | 0,00 | 0,174707  | 0,350571 |
| TMEM39B       | 4,42 | 2,93 | 4,34 | 2,54 | 0,1747097 | 0,350571 |
| FAM76A        | 3,91 | 3,82 | 3,69 | 4,35 | 0,1747506 | 0,350609 |
| ZNF43         | 4,03 | 3,21 | 3,91 | 1,23 | 0,17477   | 0,350609 |
| LINC01242     | 0,00 | 0,46 | 0,00 | 0,00 | 0,1747761 | 0,350609 |
| RP11-164P12.5 | 0,00 | 0,00 | 0,00 | 0,00 | 0,174792  | 0,350609 |
| RP11-478K7.2  | 0,00 | 0,28 | 0,00 | 0,13 | 0,1749495 | 0,350894 |
| HMG20A        | 5,40 | 2,46 | 4,47 | 1,23 | 0,1750139 | 0,350991 |
| ASPH          | 3,15 | 3,56 | 3,21 | 4,13 | 0,1751238 | 0,35118  |
| SLC5A1        | 0,02 | 0,11 | 0,05 | 0,00 | 0,1752737 | 0,351449 |
| TMEM79        | 0,11 | 0,07 | 0,14 | 0,00 | 0,1753146 | 0,351499 |
| BRMS1L        | 0,64 | 1,24 | 0,85 | 0,45 | 0,1753491 | 0,351537 |
| KRBA2         | 0,06 | 0,00 | 0,20 | 0,20 | 0,1754549 | 0,351683 |
| RP11-294O2.2  | 0,48 | 0,69 | 0,70 | 0,41 | 0,1754692 | 0,351683 |
| RNF167        | 4,83 | 5,09 | 4,86 | 3,72 | 0,1754696 | 0,351683 |
| OXER1         | 0,79 | 0,00 | 0,45 | 3,27 | 0,1755734 | 0,35183  |
| KIAA0040      | 3,04 | 3,43 | 3,05 | 2,97 | 0,1755779 | 0,35183  |
| TBX19         | 1,96 | 0,42 | 0,78 | 2,58 | 0,1755909 | 0,35183  |
| LA16c-431H6.6 | 0,12 | 0,16 | 0,21 | 0,40 | 0,1756062 | 0,35183  |
| RP11-306O13.1 | 2,94 | 3,94 | 3,24 | 3,33 | 0,1756418 | 0,351869 |
| THOC7         | 5,49 | 6,14 | 5,16 | 3,62 | 0,1757333 | 0,352009 |
| RP11-144G7.2  | 0,00 | 0,00 | 0,00 | 0,00 | 0,1757347 | NA       |
| FUZ           | 0,23 | 2,29 | 0,17 | 0,45 | 0,1757571 | 0,352009 |
| ACSS1         | 3,76 | 4,15 | 4,17 | 3,24 | 0,1757592 | 0,352009 |
| RP11-739P1.3  | 0,61 | 0,57 | 0,78 | 0,66 | 0,175806  | 0,352071 |
| SNHG12        | 4,34 | 5,65 | 4,19 | 4,57 | 0,1758505 | 0,352129 |
| RBMY2FP       | 0,00 | 0,00 | 0,06 | 0,07 | 0,1758799 | NA       |
| PLCG1         | 0,00 | 0,00 | 0,04 | 0,73 | 0,1759401 | 0,352277 |
| ENO1          | 9,44 | 8,83 | 9,10 | 8,34 | 0,1760791 | 0,352523 |
| INTS12        | 4,01 | 1,04 | 1,49 | 1,99 | 0,1761222 | 0,352542 |
| KAT8          | 4,56 | 2,63 | 5,12 | 4,97 | 0,1761245 | 0,352542 |
| RNU4-1        | 0,00 | 3,20 | 0,00 | 3,78 | 0,1761364 | 0,352542 |
| CXorf29       | 0,00 | 0,00 | 1,46 | 2,04 | 0,1761619 | 0,352562 |
| AC117947.1    | 0,00 | 1,01 | 0,00 | 0,00 | 0,1762073 | NA       |
| MAP3K13       | 4,00 | 2,58 | 3,94 | 2,83 | 0,1762248 | 0,352656 |
| RASA2         | 5,32 | 4,74 | 4,39 | 4,91 | 0,1762435 | 0,352662 |
| L3MBTL3       | 2,03 | 2,73 | 1,84 | 0,98 | 0,1762893 | 0,352721 |
| RP4-604K5.3   | 0,87 | 0,72 | 1,81 | 1,09 | 0,1763423 | 0,352796 |
| FLVCR1        | 3,31 | 1,32 | 2,78 | 2,18 | 0,1763782 | 0,352836 |
| IP6K1         | 2,03 | 3,06 | 2,60 | 2,48 | 0,1764238 | 0,352889 |
| ATIC          | 5,80 | 6,73 | 5,30 | 4,79 | 0,1764364 | 0,352889 |
| CTD-2135D7.5  | 0,00 | 0,00 | 0,19 | 0,00 | 0,1764862 | 0,352948 |
| AP003774.5    | 0,00 | 4,94 | 0,00 | 0,00 | 0,1764977 | 0,352948 |
| SPDYE16       | 1,19 | 0,77 | 0,63 | 0,75 | 0,1765627 | 0,353046 |
| UBR3          | 4,57 | 3,33 | 4,41 | 3,38 | 0,1765953 | 0,353079 |
| RP11-70O5.2   | 0,00 | 0,89 | 0,63 | 0,00 | 0,1766562 | 0,353131 |

|               |      |      |      |      |           |          |
|---------------|------|------|------|------|-----------|----------|
| RP11-327F22.1 | 1,99 | 0,83 | 1,81 | 1,54 | 0,1766746 | 0,353131 |
| AC004797.1    | 0,00 | 0,00 | 0,00 | 0,00 | 0,1766765 | 0,353131 |
| RN7SKP253     | 0,00 | 0,00 | 0,00 | 0,00 | 0,1766848 | 0,353131 |
| HEXIM2        | 0,42 | 0,00 | 0,36 | 0,37 | 0,1767346 | 0,353199 |
| RP11-76I14.1  | 0,10 | 0,36 | 0,25 | 0,12 | 0,1767531 | 0,353204 |
| B3GNT9        | 0,00 | 0,00 | 0,00 | 0,20 | 0,176807  | 0,353214 |
| LMTK2         | 0,79 | 0,21 | 0,19 | 0,06 | 0,1768177 | 0,353214 |
| SERP1         | 6,71 | 6,98 | 6,63 | 5,93 | 0,1768313 | 0,353214 |
| HADH          | 5,04 | 4,26 | 4,33 | 4,10 | 0,1768344 | 0,353214 |
| SETD4         | 2,51 | 0,87 | 2,11 | 1,71 | 0,1768375 | 0,353214 |
| OXSM          | 3,20 | 0,54 | 0,95 | 0,48 | 0,1769191 | 0,353345 |
| NMUR1         | 0,15 | 0,05 | 0,33 | 0,66 | 0,1769998 | 0,353475 |
| RP11-255N4.3  | 0,77 | 0,00 | 0,00 | 0,50 | 0,1770388 | NA       |
| RP11-298O21.3 | 0,00 | 0,00 | 0,00 | 0,00 | 0,1771297 | 0,353702 |
| UBBP4         | 0,51 | 0,10 | 0,39 | 0,26 | 0,17716   | 0,353731 |
| URAD          | 0,00 | 0,00 | 0,00 | 0,00 | 0,1771946 | 0,353768 |
| FBXO43        | 0,04 | 0,27 | 0,08 | 0,10 | 0,1772267 | 0,353783 |
| RP11-447M4.1  | 0,82 | 0,14 | 0,30 | 0,33 | 0,1772338 | 0,353783 |
| RP11-168P6.1  | 3,49 | 2,01 | 3,50 | 2,31 | 0,1773119 | 0,353907 |
| SLC22A25      | 0,44 | 0,98 | 0,96 | 0,78 | 0,1773615 | 0,353944 |
| RP11-136K14.2 | 0,00 | 0,00 | 0,00 | 2,73 | 0,1773621 | 0,353944 |
| CTC-444N24.7  | 1,03 | 0,49 | 0,29 | 0,55 | 0,1774276 | 0,354043 |
| AC004022.7    | 0,00 | 1,29 | 0,00 | 0,00 | 0,1774786 | NA       |
| LHX4          | 0,00 | 0,00 | 0,01 | 0,00 | 0,1775683 | 0,354292 |
| RP1-149A16.17 | 0,00 | 0,00 | 0,00 | 0,00 | 0,177677  | 0,354332 |
| CSRP2         | 0,76 | 0,76 | 0,74 | 1,61 | 0,1776776 | 0,354332 |
| RP11-474P2.6  | 0,00 | 0,00 | 0,00 | 0,00 | 0,177679  | 0,354332 |
| RP11-397E7.3  | 3,31 | 4,93 | 4,07 | 3,16 | 0,1776958 | 0,354332 |
| GPR32         | 0,00 | 0,00 | 0,00 | 0,00 | 0,1776988 | NA       |
| NFE2L2        | 6,94 | 6,17 | 6,36 | 4,82 | 0,1777075 | 0,354332 |
| RP11-59H7.4   | 1,91 | 0,66 | 1,14 | 0,77 | 0,1777247 | 0,354332 |
| SCN4A         | 0,00 | 0,48 | 0,00 | 0,00 | 0,177736  | 0,354332 |
| TIRAP         | 0,85 | 0,45 | 0,16 | 0,23 | 0,1777401 | 0,354332 |
| ABCB10        | 3,02 | 0,17 | 2,16 | 2,85 | 0,1777518 | 0,354332 |
| RP5-936J12.1  | 0,00 | 0,18 | 0,00 | 0,00 | 0,177765  | 0,354332 |
| ANKS3         | 2,28 | 0,95 | 1,86 | 1,76 | 0,1777761 | 0,354332 |
| ZNF496        | 1,05 | 0,65 | 1,16 | 0,74 | 0,1777897 | 0,354332 |
| OR5AU1        | 0,32 | 0,29 | 0,36 | 0,50 | 0,1777958 | 0,354332 |
| RP11-354E14.1 | 0,00 | 0,00 | 0,00 | 0,00 | 0,1777965 | NA       |
| CALCA         | 0,00 | 0,00 | 0,00 | 0,00 | 0,1778339 | 0,354376 |
| SOAT1         | 3,93 | 2,81 | 3,89 | 2,89 | 0,1779306 | 0,354456 |
| PSTPIP2       | 5,10 | 3,72 | 4,44 | 4,40 | 0,1779322 | 0,354456 |
| RPTOR         | 1,34 | 1,31 | 0,96 | 0,50 | 0,1779409 | 0,354456 |
| ICAM3         | 6,61 | 6,60 | 5,97 | 5,79 | 0,1779418 | 0,354456 |
| TTC8          | 2,13 | 0,61 | 1,39 | 1,21 | 0,1779534 | 0,354456 |
| OR52B5P       | 0,00 | 0,04 | 0,04 | 0,00 | 0,1779791 | NA       |
| FAM96B        | 7,18 | 7,70 | 7,03 | 6,54 | 0,1780169 | 0,354513 |
| ANAPC1        | 4,19 | 3,25 | 3,51 | 2,86 | 0,1780549 | 0,354513 |
| RP11-383J24.1 | 0,00 | 1,42 | 0,00 | 0,00 | 0,1780587 | 0,354513 |
| RNU6-722P     | 2,47 | 0,00 | 0,00 | 0,00 | 0,1780596 | 0,354513 |
| RN7SL621P     | 0,00 | 0,00 | 0,00 | 0,00 | 0,1780809 | NA       |
| EEF1DP3       | 0,00 | 0,00 | 0,00 | 3,72 | 0,1780864 | 0,354513 |
| RP11-318M2.2  | 0,80 | 1,40 | 1,51 | 1,59 | 0,1780919 | 0,354513 |
| MAPK9         | 3,09 | 1,59 | 2,34 | 2,68 | 0,178094  | 0,354513 |
| GRIA4         | 0,09 | 0,35 | 0,16 | 0,13 | 0,1781357 | 0,354564 |

|               |      |      |      |      |           |          |
|---------------|------|------|------|------|-----------|----------|
| RUFY4         | 1,07 | 0,00 | 1,28 | 0,13 | 0,1781833 | 0,354627 |
| OAT           | 4,95 | 2,74 | 3,68 | 3,44 | 0,1782369 | 0,354702 |
| ZBTB47        | 0,00 | 0,06 | 0,00 | 0,00 | 0,1782517 | NA       |
| AC011747.6    | 0,98 | 1,41 | 0,86 | 1,36 | 0,1783886 | 0,354972 |
| RF00554       | 2,36 | 4,56 | 2,77 | 2,60 | 0,1784848 | 0,355086 |
| CLEC9A        | 0,11 | 0,70 | 0,19 | 0,42 | 0,1784954 | 0,355086 |
| UBE2R2        | 4,11 | 3,95 | 4,44 | 4,23 | 0,1785042 | 0,355086 |
| CTD-2649C14.2 | 1,31 | 2,16 | 1,28 | 1,71 | 0,1785096 | 0,355086 |
| ABCA2         | 0,79 | 0,22 | 0,39 | 0,07 | 0,178583  | 0,3552   |
| GGCT          | 5,23 | 4,81 | 4,85 | 3,06 | 0,1786137 | 0,355229 |
| ZNF30         | 0,00 | 0,00 | 0,00 | 0,00 | 0,1786494 | 0,355245 |
| NLE1          | 1,15 | 0,19 | 1,02 | 0,94 | 0,178654  | 0,355245 |
| GLI1          | 0,00 | 0,00 | 0,00 | 0,00 | 0,1786696 | 0,355245 |
| RP3-427A4.2   | 1,64 | 0,00 | 1,31 | 0,47 | 0,1787237 | 0,355321 |
| PRG2          | 0,00 | 0,00 | 0,00 | 0,00 | 0,1787522 | 0,35533  |
| RP1-290I10.7  | 1,08 | 1,35 | 1,18 | 1,37 | 0,1787757 | 0,35533  |
| SRBD1         | 3,46 | 3,95 | 2,59 | 2,02 | 0,1787763 | 0,35533  |
| RP5-821D11.7  | 1,08 | 0,15 | 0,89 | 1,14 | 0,178842  | 0,355427 |
| AOC4          | 0,00 | 0,11 | 0,00 | 0,00 | 0,1788489 | NA       |
| CTD-2532N20.1 | 0,00 | 0,00 | 0,00 | 0,00 | 0,1788571 | 0,355427 |
| SSX1          | 0,00 | 0,00 | 0,00 | 0,00 | 0,1789319 | NA       |
| RP11-227G15.9 | 1,91 | 2,81 | 1,85 | 1,94 | 0,1789335 | 0,355547 |
| CBY1          | 2,02 | 0,00 | 1,40 | 0,48 | 0,1789932 | 0,355634 |
| RP11-39K24.13 | 0,00 | 0,00 | 0,09 | 0,22 | 0,1790278 | 0,355671 |
| CTC-421K24.1  | 0,38 | 0,00 | 0,00 | 0,00 | 0,1790652 | 0,355689 |
| BZW1          | 6,36 | 6,89 | 6,27 | 4,99 | 0,1790687 | 0,355689 |
| SLC25A46      | 3,97 | 2,68 | 2,83 | 2,84 | 0,1790995 | 0,355718 |
| SBN02         | 0,45 | 0,37 | 1,24 | 2,06 | 0,1791362 | 0,355743 |
| C1orf220      | 0,38 | 1,34 | 0,35 | 0,44 | 0,1791441 | 0,355743 |
| RNA5SP207     | 0,00 | 0,00 | 0,86 | 0,00 | 0,1791985 | 0,355819 |
| ACOT2         | 2,72 | 1,39 | 1,45 | 0,17 | 0,1792559 | 0,355867 |
| RP11-24M17.7  | 0,61 | 0,96 | 0,69 | 1,41 | 0,179269  | 0,355867 |
| CASP14        | 0,41 | 0,30 | 0,47 | 0,58 | 0,1792706 | 0,355867 |
| ST7-OT4       | 2,20 | 0,18 | 0,42 | 0,46 | 0,1794507 | 0,356193 |
| HDLBP         | 5,94 | 5,99 | 5,13 | 4,92 | 0,1795546 | 0,35633  |
| RP3-428A13.2  | 0,07 | 0,14 | 0,13 | 0,07 | 0,1795592 | 0,35633  |
| IL1RN         | 5,57 | 5,69 | 6,32 | 4,53 | 0,1795677 | 0,35633  |
| TRIO          | 5,47 | 4,52 | 5,20 | 5,52 | 0,1796289 | 0,356419 |
| RPLPOP1       | 0,00 | 0,70 | 0,00 | 0,00 | 0,179666  | NA       |
| CTD-2609K8.3  | 0,00 | 2,10 | 0,72 | 0,00 | 0,1796744 | 0,356451 |
| ALDH3A2       | 4,00 | 4,03 | 4,05 | 2,44 | 0,1796768 | 0,356451 |
| AC073128.10   | 0,00 | 0,00 | 0,00 | 0,41 | 0,1796988 | NA       |
| RP11-44F14.7  | 0,28 | 0,23 | 0,21 | 0,79 | 0,1797183 | 0,356501 |
| CRYAB         | 0,00 | 0,17 | 0,00 | 0,00 | 0,1797248 | NA       |
| CTD-2192D1.1  | 0,80 | 0,27 | 0,92 | 0,96 | 0,1797562 | 0,356544 |
| RP11-472N13.3 | 0,57 | 0,00 | 0,32 | 0,00 | 0,1797902 | 0,35658  |
| KLHL33        | 0,28 | 0,27 | 0,26 | 0,45 | 0,1798468 | 0,356661 |
| MIR3975       | 5,58 | 0,00 | 0,00 | 4,59 | 0,1799205 | 0,356775 |
| RPL22L1       | 5,52 | 5,10 | 5,58 | 6,17 | 0,1799384 | 0,356779 |
| CCDC142       | 0,93 | 0,37 | 0,50 | 1,95 | 0,179987  | 0,356843 |
| QPCTL         | 1,26 | 1,78 | 1,40 | 1,90 | 0,1800426 | 0,356871 |
| PEBP1         | 7,34 | 7,14 | 7,03 | 5,67 | 0,1800455 | 0,356871 |
| SLC25A15      | 2,12 | 0,00 | 0,00 | 1,00 | 0,1800491 | 0,356871 |
| SLC1A1        | 0,00 | 0,00 | 0,00 | 0,04 | 0,1801286 | NA       |
| RP11-138N21.1 | 1,67 | 0,00 | 0,72 | 1,08 | 0,1801618 | 0,357023 |

|               |      |      |      |      |           |          |
|---------------|------|------|------|------|-----------|----------|
| SNX25         | 0,00 | 0,56 | 0,00 | 0,00 | 0,180172  | 0,357023 |
| MTIF3         | 6,17 | 6,70 | 5,88 | 4,96 | 0,1801946 | 0,357023 |
| YBX1          | 7,73 | 7,66 | 7,85 | 7,53 | 0,1802045 | 0,357023 |
| CERKL         | 5,33 | 5,09 | 4,96 | 4,29 | 0,1802064 | 0,357023 |
| ACTR10        | 5,91 | 5,59 | 5,16 | 3,75 | 0,1802233 | 0,357025 |
| CBR3          | 0,36 | 4,61 | 0,00 | 0,00 | 0,1802718 | 0,357089 |
| RN7SL799P     | 0,00 | 0,00 | 0,00 | 0,87 | 0,1804657 | NA       |
| FSCN3         | 0,00 | 0,00 | 0,00 | 0,00 | 0,1805099 | 0,357529 |
| TCHP          | 3,65 | 4,47 | 3,13 | 2,71 | 0,1805582 | 0,357593 |
| WDR3          | 3,56 | 2,21 | 1,55 | 1,44 | 0,1805831 | 0,35761  |
| MLEC          | 4,46 | 5,73 | 5,09 | 4,22 | 0,1806337 | 0,357666 |
| TLN2          | 0,00 | 0,76 | 0,01 | 0,13 | 0,1806436 | 0,357666 |
| COMP          | 0,26 | 0,33 | 0,32 | 0,64 | 0,1807246 | 0,357795 |
| RNF222        | 0,07 | 0,21 | 0,10 | 0,37 | 0,1807916 | 0,357895 |
| HOTAIR        | 0,00 | 0,00 | 0,00 | 0,00 | 0,1808938 | NA       |
| RPF1          | 4,95 | 5,17 | 4,47 | 3,80 | 0,1809867 | 0,358205 |
| RP11-145M9.6  | 0,00 | 3,71 | 1,46 | 4,62 | 0,1810039 | 0,358205 |
| CDH12         | 0,05 | 0,06 | 0,16 | 0,43 | 0,1810241 | 0,358205 |
| LYRM2         | 5,84 | 4,05 | 4,68 | 4,57 | 0,1810324 | 0,358205 |
| ZNRD1         | 5,42 | 5,98 | 5,11 | 2,08 | 0,1810386 | 0,358205 |
| GOLM1         | 0,85 | 1,88 | 0,44 | 1,34 | 0,1810445 | 0,358205 |
| RP11-343N15.2 | 0,00 | 0,00 | 0,00 | 0,00 | 0,1810718 | 0,358227 |
| RP5-875O13.7  | 0,00 | 0,00 | 0,00 | 0,00 | 0,1810902 | 0,358231 |
| LA16c-361A3.3 | 0,00 | 5,85 | 0,00 | 0,00 | 0,1811243 | 0,35824  |
| RP11-549L6.2  | 0,00 | 0,50 | 0,00 | 0,77 | 0,1811303 | 0,35824  |
| KCP           | 0,34 | 0,13 | 1,04 | 0,61 | 0,1811431 | 0,35824  |
| ZRANB1        | 2,64 | 0,25 | 2,30 | 0,95 | 0,1811977 | 0,358275 |
| SON           | 6,80 | 6,86 | 6,72 | 6,70 | 0,1812034 | 0,358275 |
| KIF9          | 4,04 | 5,07 | 3,51 | 4,77 | 0,1812257 | 0,358275 |
| UGP2          | 5,02 | 5,28 | 4,78 | 3,78 | 0,1812266 | 0,358275 |
| MIR744        | 0,00 | 2,81 | 0,00 | 0,00 | 0,1812636 | 0,358275 |
| GPATCH2L      | 3,80 | 2,34 | 4,16 | 4,00 | 0,1812638 | 0,358275 |
| GLYATL2       | 0,00 | 0,00 | 0,00 | 0,71 | 0,1812737 | 0,358275 |
| C14orf64      | 1,35 | 1,34 | 1,42 | 1,46 | 0,1813076 | 0,358311 |
| TMEM170B      | 2,29 | 2,78 | 2,81 | 2,22 | 0,1813459 | 0,358342 |
| FBXO25        | 2,33 | 0,67 | 3,55 | 1,53 | 0,1813558 | 0,358342 |
| SNORA11B      | 0,00 | 0,00 | 0,00 | 0,00 | 0,1814274 | NA       |
| RP11-509E10.3 | 0,48 | 0,94 | 0,51 | 0,94 | 0,181454  | 0,358499 |
| AC073342.12   | 0,00 | 0,32 | 0,00 | 0,27 | 0,1814668 | NA       |
| FAIM          | 1,20 | 0,55 | 1,37 | 0,68 | 0,1814674 | 0,358499 |
| RP11-144A16.8 | 0,00 | 0,61 | 0,34 | 0,52 | 0,1815055 | NA       |
| RNA5SP494     | 5,57 | 0,00 | 4,54 | 0,00 | 0,1815194 | 0,358542 |
| LSAMP         | 0,29 | 0,79 | 0,16 | 1,10 | 0,1815213 | 0,358542 |
| RP11-162G9.1  | 0,30 | 0,30 | 0,65 | 1,03 | 0,1815769 | 0,358577 |
| RP11-566K11.6 | 1,90 | 1,43 | 0,50 | 1,38 | 0,1815849 | 0,358577 |
| AC026202.3    | 0,00 | 0,45 | 2,32 | 0,98 | 0,1816145 | 0,358577 |
| ESYT3         | 0,07 | 0,03 | 0,12 | 0,10 | 0,1816174 | 0,358577 |
| C8orf76       | 4,02 | 5,27 | 3,71 | 3,81 | 0,181628  | 0,358577 |
| TNFAIP8L3     | 0,28 | 0,85 | 0,40 | 0,23 | 0,1816361 | 0,358577 |
| CD244         | 4,12 | 5,12 | 3,95 | 3,41 | 0,1817337 | 0,358723 |
| ERBIN         | 5,05 | 3,93 | 4,85 | 4,40 | 0,1817423 | 0,358723 |
| DOCK11        | 6,16 | 5,18 | 5,71 | 4,70 | 0,1817596 | 0,358725 |
| TANK          | 6,14 | 6,13 | 6,67 | 6,26 | 0,1817823 | 0,358738 |
| PARP1         | 5,43 | 6,49 | 5,55 | 5,12 | 0,1818104 | 0,358762 |
| RP4-614C15.2  | 0,66 | 1,42 | 0,94 | 0,00 | 0,1819379 | 0,358982 |



|                |      |      |      |      |           |          |
|----------------|------|------|------|------|-----------|----------|
| RP11-159J3.4   | 0,00 | 0,44 | 0,00 | 0,00 | 0,1820221 | 0,359116 |
| HIST1H2AC      | 3,59 | 1,88 | 0,53 | 0,11 | 0,1820485 | 0,359136 |
| VPS4B          | 4,37 | 3,59 | 3,69 | 4,34 | 0,1820695 | 0,359146 |
| SGPP1          | 1,98 | 1,48 | 1,66 | 0,18 | 0,1820951 | 0,359164 |
| RP11-209D14.4  | 0,00 | 0,00 | 0,63 | 1,06 | 0,1821693 | 0,359274 |
| RP11-466F5.8   | 1,13 | 0,62 | 1,01 | 1,77 | 0,1821829 | 0,359274 |
| POP4           | 6,18 | 6,09 | 5,85 | 4,26 | 0,1822554 | 0,359385 |
| PAPD7          | 2,98 | 3,56 | 3,79 | 0,66 | 0,1823727 | 0,359573 |
| SNX29P2        | 3,73 | 2,27 | 3,59 | 1,28 | 0,1823831 | 0,359573 |
| IFNW1          | 0,00 | 0,00 | 0,00 | 0,00 | 0,1823995 | NA       |
| RP11-216M21.1  | 1,01 | 0,67 | 0,25 | 1,42 | 0,1824874 | 0,359686 |
| CTC-756D1.2    | 1,27 | 2,09 | 0,79 | 0,77 | 0,182503  | 0,359686 |
| PTCD2          | 1,59 | 2,49 | 1,16 | 0,33 | 0,1825044 | 0,359686 |
| MRPS23         | 4,44 | 0,81 | 4,41 | 2,21 | 0,1825051 | 0,359686 |
| HTRA2          | 3,14 | 0,12 | 2,27 | 0,58 | 0,1825493 | 0,35971  |
| LAMTOR1        | 7,97 | 7,03 | 7,73 | 7,39 | 0,1825497 | 0,35971  |
| RP11-481A20.11 | 0,26 | 0,72 | 0,24 | 1,55 | 0,1826344 | 0,359845 |
| MKS1           | 0,97 | 0,64 | 0,97 | 0,39 | 0,1826953 | 0,359924 |
| ETAA1          | 2,11 | 1,47 | 1,20 | 0,56 | 0,1827161 | 0,359924 |
| TMEM230        | 7,00 | 6,88 | 6,18 | 5,00 | 0,1827232 | 0,359924 |
| BCR            | 2,85 | 1,55 | 2,63 | 1,41 | 0,1827513 | 0,359948 |
| CMB9-55F22.2   | 0,55 | 0,86 | 0,41 | 0,56 | 0,1827818 | 0,359976 |
| RP11-307I14.2  | 0,00 | 0,57 | 0,00 | 0,00 | 0,1828788 | NA       |
| ZNF20          | 0,63 | 2,91 | 0,86 | 1,23 | 0,182885  | 0,360147 |
| XPO4           | 2,80 | 1,99 | 2,22 | 0,59 | 0,1829157 | 0,360151 |
| C1QTNF4        | 0,00 | 0,00 | 0,00 | 0,00 | 0,1829197 | 0,360151 |
| MRAS           | 1,83 | 0,35 | 2,00 | 2,68 | 0,1829498 | 0,360179 |
| GP5            | 0,00 | 0,04 | 0,02 | 0,00 | 0,1830545 | NA       |
| RP5-1153D9.5   | 0,45 | 0,18 | 0,14 | 0,22 | 0,183099  | 0,360441 |
| LIAS           | 2,89 | 4,22 | 2,87 | 3,41 | 0,1831423 | 0,360494 |
| RP11-53A1.3    | 0,00 | 0,12 | 0,09 | 0,41 | 0,1831968 | 0,360562 |
| SLC4A2         | 4,22 | 4,22 | 4,83 | 4,95 | 0,183239  | 0,360562 |
| RP11-307E17.8  | 0,77 | 0,31 | 0,31 | 0,12 | 0,1832457 | 0,360562 |
| LZTR1          | 1,85 | 3,98 | 3,15 | 1,47 | 0,1832569 | 0,360562 |
| RP11-295P9.2   | 0,00 | 0,00 | 0,00 | 0,00 | 0,1832578 | 0,360562 |
| RP11-86H7.6    | 0,00 | 0,00 | 0,00 | 0,19 | 0,1832645 | NA       |
| CTD-2313J17.5  | 0,64 | 1,51 | 0,74 | 1,11 | 0,1833101 | 0,360633 |
| OASL           | 3,25 | 1,33 | 3,72 | 3,12 | 0,1833341 | 0,360648 |
| RP4-545K15.3   | 2,71 | 0,73 | 3,23 | 3,64 | 0,1833825 | 0,360711 |
| CAPN3          | 5,06 | 4,14 | 4,43 | 1,83 | 0,183408  | 0,360729 |
| RP11-22P6.2    | 0,32 | 1,39 | 0,00 | 0,75 | 0,1834687 | 0,360792 |
| TMEM170A       | 4,75 | 5,58 | 3,19 | 2,02 | 0,1834723 | 0,360792 |
| DARS2          | 2,32 | 3,36 | 1,51 | 1,43 | 0,1835596 | 0,360932 |
| TMEM198B       | 1,99 | 3,09 | 2,62 | 2,83 | 0,183591  | 0,360938 |
| ATRNL1         | 0,00 | 0,24 | 0,00 | 0,20 | 0,1835967 | 0,360938 |
| VPS39          | 3,97 | 1,95 | 4,17 | 4,18 | 0,1836228 | 0,360938 |
| DDB2           | 5,05 | 3,05 | 5,29 | 4,73 | 0,1836277 | 0,360938 |
| CTD-2501B8.1   | 0,00 | 0,00 | 0,00 | 0,02 | 0,1836831 | NA       |
| PRKDC          | 4,52 | 3,61 | 4,48 | 3,61 | 0,1837515 | 0,361117 |
| BAIAP2L2       | 0,00 | 0,24 | 0,00 | 0,00 | 0,1837709 | 0,361117 |
| RACGAP1        | 0,04 | 1,70 | 0,05 | 0,04 | 0,1837987 | 0,361117 |
| GIMAP8         | 0,13 | 0,06 | 0,68 | 1,87 | 0,1838048 | 0,361117 |
| RALGDS         | 3,06 | 3,04 | 3,56 | 1,53 | 0,1838127 | 0,361117 |
| C6orf203       | 3,75 | 4,88 | 3,88 | 3,62 | 0,1838165 | 0,361117 |
| SNORA2C        | 2,71 | 0,00 | 0,00 | 0,00 | 0,1838338 | 0,361119 |

|                |      |      |      |      |           |          |
|----------------|------|------|------|------|-----------|----------|
| C19orf68       | 0,00 | 0,18 | 0,00 | 0,04 | 0,1838809 | 0,361156 |
| BCL9L          | 0,00 | 0,09 | 0,12 | 0,10 | 0,1838849 | 0,361156 |
| RBM34          | 5,11 | 6,27 | 5,04 | 4,36 | 0,1839241 | 0,36117  |
| LIN28A         | 0,13 | 0,32 | 0,13 | 0,24 | 0,183939  | 0,36117  |
| RP11-551M15.1  | 0,00 | 5,07 | 0,00 | 0,33 | 0,1839632 | 0,36117  |
| ATP6V1G1       | 7,91 | 7,25 | 7,54 | 6,81 | 0,1839778 | 0,36117  |
| LINC00482      | 0,41 | 1,02 | 0,55 | 0,78 | 0,1839854 | 0,36117  |
| PHACTR3        | 1,32 | 1,84 | 1,27 | 2,20 | 0,1839897 | 0,36117  |
| RP11-353N14.5  | 0,00 | 0,00 | 0,00 | 0,00 | 0,1840636 | 0,361283 |
| RP11-649A18.12 | 0,06 | 0,00 | 0,32 | 0,00 | 0,1841559 | 0,361433 |
| RP11-793H13.8  | 0,26 | 0,00 | 0,00 | 0,00 | 0,1842121 | 0,361511 |
| RP11-1033A18.1 | 0,06 | 0,06 | 0,06 | 0,14 | 0,1842889 | NA       |
| PCDHGC3        | 0,00 | 0,00 | 0,00 | 0,56 | 0,184303  | 0,361658 |
| AC002543.2     | 0,09 | 0,00 | 0,56 | 0,31 | 0,1843327 | 0,361684 |
| FAM50B         | 0,39 | 0,09 | 0,00 | 0,10 | 0,1843633 | 0,361703 |
| ESRG           | 0,37 | 1,97 | 0,41 | 0,90 | 0,1843751 | 0,361703 |
| RP3-467D16.3   | 0,48 | 3,27 | 1,22 | 1,31 | 0,1844305 | 0,36178  |
| STK31          | 0,50 | 0,64 | 0,54 | 0,91 | 0,1846679 | 0,362214 |
| STK36          | 0,61 | 2,86 | 0,99 | 0,16 | 0,1847198 | 0,362284 |
| RP11-121L10.3  | 0,11 | 0,00 | 0,09 | 0,00 | 0,1847849 | NA       |
| RP11-865A20.1  | 0,07 | 0,05 | 0,14 | 0,19 | 0,1847921 | 0,362371 |
| CTD-2085J24.3  | 0,39 | 0,50 | 0,00 | 0,52 | 0,1847968 | 0,362371 |
| PDHX           | 3,17 | 4,27 | 2,15 | 2,82 | 0,1848577 | 0,362442 |
| AARS2          | 0,66 | 0,23 | 1,13 | 0,37 | 0,1848681 | 0,362442 |
| ZNF341         | 0,17 | 0,25 | 0,67 | 1,39 | 0,1848939 | 0,362442 |
| RP11-615I2.1   | 0,00 | 0,00 | 0,00 | 0,00 | 0,1848985 | 0,362442 |
| TMEM265        | 2,91 | 4,57 | 4,07 | 4,73 | 0,184966  | 0,362543 |
| DGCR6L         | 5,43 | 6,15 | 5,14 | 5,88 | 0,1849849 | 0,362548 |
| EZR            | 6,75 | 6,44 | 6,75 | 6,17 | 0,185021  | 0,362586 |
| CLDN14         | 0,00 | 0,65 | 0,00 | 0,00 | 0,1850598 | 0,362616 |
| KRAS           | 4,10 | 4,71 | 4,12 | 3,40 | 0,1850686 | 0,362616 |
| PLG            | 2,92 | 0,27 | 0,97 | 0,21 | 0,1851355 | 0,362715 |
| MAGEA10        | 0,12 | 0,11 | 0,18 | 0,81 | 0,1851983 | 0,362806 |
| GBGT1          | 0,72 | 0,44 | 1,88 | 3,27 | 0,1853185 | 0,363009 |
| MRPL54         | 6,80 | 7,17 | 7,19 | 7,10 | 0,1854365 | 0,363154 |
| FCGR1C         | 0,00 | 0,00 | 0,00 | 0,00 | 0,1854424 | 0,363154 |
| PYROXD1        | 4,21 | 2,18 | 3,95 | 2,70 | 0,1854455 | 0,363154 |
| ASPA           | 2,05 | 2,00 | 1,90 | 1,28 | 0,1854579 | 0,363154 |
| MGRN1          | 3,26 | 3,88 | 3,69 | 4,13 | 0,1855063 | 0,363194 |
| REPS2          | 2,17 | 1,81 | 2,07 | 2,92 | 0,185511  | 0,363194 |
| RP11-434D9.2   | 0,53 | 1,33 | 1,07 | 0,60 | 0,1855801 | 0,363285 |
| KPNB1          | 5,75 | 4,40 | 5,15 | 5,28 | 0,1856053 | 0,363285 |
| PARD6G-AS1     | 0,00 | 0,15 | 0,20 | 0,00 | 0,1856063 | 0,363285 |
| ACPS           | 1,77 | 0,11 | 0,13 | 0,61 | 0,1856275 | 0,363294 |
| FAM174A        | 2,38 | 1,91 | 0,22 | 1,44 | 0,1856752 | 0,363356 |
| RP11-310N16.1  | 0,17 | 0,00 | 0,06 | 0,12 | 0,1858295 | 0,3636   |
| RP11-413H22.2  | 0,76 | 0,00 | 0,00 | 0,00 | 0,1858327 | 0,3636   |
| AC110926.4     | 0,04 | 0,35 | 0,12 | 0,21 | 0,1859687 | 0,363834 |
| SV2B           | 0,04 | 0,10 | 0,11 | 0,04 | 0,1860097 | 0,363882 |
| CENPC          | 3,75 | 3,77 | 3,17 | 3,11 | 0,1861029 | 0,364032 |
| NAIF1          | 0,64 | 3,86 | 1,04 | 0,69 | 0,1861719 | 0,364114 |
| POMZP3         | 0,77 | 0,42 | 1,83 | 1,81 | 0,1862002 | 0,364114 |
| RP4-601P9.1    | 0,52 | 0,55 | 0,77 | 0,00 | 0,1862068 | 0,364114 |
| AKIRIN1        | 5,27 | 4,72 | 5,00 | 4,59 | 0,1862099 | 0,364114 |
| RP11-267M23.4  | 0,08 | 0,00 | 0,08 | 0,17 | 0,1862989 | 0,364256 |

|                |      |      |      |      |           |          |
|----------------|------|------|------|------|-----------|----------|
| CTD-2270P14.3  | 0,19 | 0,00 | 0,28 | 0,37 | 0,1863243 | 0,364273 |
| SATB1          | 5,01 | 6,52 | 5,49 | 3,85 | 0,1863606 | 0,364312 |
| RP11-67B16.1   | 0,03 | 0,04 | 0,04 | 0,02 | 0,1863837 | 0,364325 |
| RP11-314N13.10 | 0,29 | 0,00 | 0,00 | 0,00 | 0,1864236 | NA       |
| RP11-318K15.2  | 3,20 | 4,86 | 2,61 | 4,03 | 0,1864759 | 0,364449 |
| GCFC2          | 3,86 | 1,73 | 2,99 | 2,64 | 0,1864883 | 0,364449 |
| PRR19          | 0,20 | 0,17 | 0,45 | 0,66 | 0,1864962 | 0,364449 |
| RP11-1338A7.1  | 0,00 | 0,00 | 0,00 | 0,00 | 0,1866191 | 0,364657 |
| C1orf131       | 4,05 | 1,80 | 3,39 | 2,93 | 0,1866679 | 0,364703 |
| CDC40          | 4,16 | 4,99 | 4,39 | 4,81 | 0,1866756 | 0,364703 |
| RP5-998N21.7   | 2,24 | 0,00 | 0,00 | 0,26 | 0,18676   | 0,364811 |
| RP11-286N22.14 | 0,13 | 0,58 | 0,00 | 0,00 | 0,1867702 | 0,364811 |
| NOL11          | 4,21 | 2,55 | 4,26 | 2,64 | 0,1867801 | 0,364811 |
| RP11-390P2.4   | 3,08 | 0,00 | 2,88 | 3,96 | 0,1869067 | 0,364986 |
| GAMT           | 2,75 | 0,41 | 1,16 | 1,35 | 0,1869155 | 0,364986 |
| CCDC125        | 3,13 | 4,06 | 2,82 | 2,46 | 0,1869186 | 0,364986 |
| RP11-196G11.3  | 0,50 | 0,26 | 0,23 | 0,47 | 0,1869561 | 0,364998 |
| RP11-338K17.8  | 0,46 | 2,00 | 0,93 | 1,31 | 0,1869576 | 0,364998 |
| AC124944.2     | 0,00 | 0,00 | 0,20 | 0,97 | 0,1869981 | 0,365029 |
| KIZ            | 2,65 | 0,25 | 3,51 | 1,06 | 0,1870064 | 0,365029 |
| PRRX1          | 0,00 | 0,04 | 0,00 | 0,00 | 0,187129  | NA       |
| RP13-20L14.4   | 0,48 | 0,80 | 0,87 | 0,53 | 0,1871541 | 0,365283 |
| NALCN          | 0,28 | 1,20 | 0,49 | 0,46 | 0,1871694 | 0,365283 |
| HAR1B          | 0,00 | 0,22 | 0,00 | 0,00 | 0,1871875 | NA       |
| TLR6           | 2,08 | 1,51 | 2,35 | 2,23 | 0,1872607 | 0,365422 |
| RP11-108M9.5   | 0,00 | 0,00 | 0,09 | 0,00 | 0,1872811 | 0,365422 |
| RP11-96B5.3    | 1,50 | 0,23 | 1,51 | 1,26 | 0,1873025 | 0,365422 |
| PRUNE          | 3,04 | 3,01 | 2,21 | 0,70 | 0,1873146 | 0,365422 |
| RGS10          | 7,59 | 6,61 | 7,26 | 6,28 | 0,1873246 | 0,365422 |
| CARD14         | 0,36 | 0,34 | 0,47 | 0,40 | 0,1873395 | 0,365422 |
| RP11-78J21.3   | 0,00 | 4,04 | 0,00 | 0,00 | 0,1874923 | 0,365653 |
| GPR12          | 0,02 | 0,13 | 0,02 | 0,05 | 0,1875068 | 0,365653 |
| TBC1D27        | 0,15 | 0,15 | 0,20 | 0,31 | 0,187507  | 0,365653 |
| SIKE1          | 4,71 | 1,12 | 3,42 | 2,06 | 0,1875699 | 0,365708 |
| RP11-756D7.2   | 0,24 | 0,30 | 0,17 | 0,93 | 0,1876024 | 0,365708 |
| CSTF1          | 3,39 | 0,50 | 2,18 | 1,42 | 0,1876138 | 0,365708 |
| GRHPR          | 6,54 | 5,32 | 5,76 | 5,40 | 0,1876189 | 0,365708 |
| CLTC           | 5,99 | 4,64 | 5,64 | 5,35 | 0,1876366 | 0,365708 |
| FBXO46         | 1,56 | 2,30 | 1,43 | 0,74 | 0,1876486 | 0,365708 |
| RP11-386I23.1  | 1,02 | 1,59 | 0,97 | 1,23 | 0,1876503 | 0,365708 |
| AC137499.2     | 0,00 | 0,00 | 0,00 | 0,00 | 0,1877279 | 0,365827 |
| ORAOV1         | 3,49 | 1,91 | 2,96 | 2,01 | 0,1878042 | 0,365943 |
| RP13-714J12.1  | 0,00 | 0,28 | 0,12 | 0,00 | 0,1878628 | 0,366025 |
| TACR2          | 0,59 | 1,53 | 0,66 | 2,84 | 0,1879113 | 0,366088 |
| CTD-2619J13.16 | 0,76 | 0,00 | 0,56 | 0,00 | 0,187937  | 0,366106 |
| RP11-454F8.2   | 0,47 | 1,63 | 1,17 | 0,70 | 0,1879718 | 0,366141 |
| SERTAD1        | 3,58 | 4,59 | 4,24 | 4,27 | 0,1880058 | 0,366176 |
| CLEC1B         | 2,52 | 1,60 | 2,02 | 3,77 | 0,1880463 | 0,366222 |
| SMAD7          | 0,05 | 0,78 | 0,05 | 0,11 | 0,1880896 | 0,366275 |
| RP11-676B18.1  | 0,00 | 0,04 | 0,08 | 0,06 | 0,1881269 | 0,366301 |
| HTR2A          | 0,07 | 0,61 | 0,07 | 0,03 | 0,1881466 | 0,366301 |
| SARNP          | 6,61 | 5,13 | 6,11 | 6,15 | 0,1881526 | 0,366301 |
| RP11-324C10.1  | 2,15 | 3,43 | 2,68 | 2,19 | 0,1882804 | 0,366518 |
| ZNF813         | 0,32 | 0,28 | 0,36 | 0,71 | 0,1883343 | 0,366522 |
| RP11-147L13.13 | 0,03 | 0,00 | 0,62 | 0,07 | 0,1883438 | 0,366522 |

|               |      |      |      |      |           |          |
|---------------|------|------|------|------|-----------|----------|
| MTMR9         | 3,49 | 2,09 | 3,52 | 1,72 | 0,1883484 | 0,366522 |
| KLHL17        | 0,62 | 2,08 | 1,22 | 0,11 | 0,1883686 | 0,366522 |
| KLRB1         | 0,08 | 2,87 | 0,11 | 1,16 | 0,1883831 | 0,366522 |
| RP3-425C14.6  | 0,00 | 0,00 | 0,00 | 0,00 | 0,18841   | 0,366522 |
| CTD-2313J17.6 | 0,00 | 0,00 | 0,76 | 1,13 | 0,1884192 | 0,366522 |
| MBD5          | 4,22 | 3,88 | 4,56 | 3,52 | 0,1884602 | 0,366522 |
| ZNF428        | 1,00 | 1,86 | 1,14 | 1,22 | 0,1884621 | 0,366522 |
| PET117        | 4,57 | 1,82 | 3,18 | 0,88 | 0,1884707 | 0,366522 |
| RP1-76C18.1   | 0,79 | 0,75 | 0,89 | 1,32 | 0,188483  | 0,366522 |
| GTF2A2        | 6,94 | 6,36 | 6,61 | 5,64 | 0,1884879 | 0,366522 |
| RN7SL488P     | 1,16 | 1,44 | 1,22 | 1,64 | 0,1884969 | 0,366522 |
| RP11-288L9.4  | 3,59 | 3,45 | 2,50 | 0,97 | 0,1887664 | 0,366971 |
| KCNK17        | 0,27 | 0,62 | 0,15 | 0,25 | 0,1887694 | 0,366971 |
| CHST14        | 0,19 | 1,56 | 0,73 | 0,15 | 0,1887776 | 0,366971 |
| NCBP3         | 3,53 | 4,22 | 3,11 | 3,35 | 0,188825  | 0,367017 |
| HOMEZ         | 0,94 | 0,03 | 0,18 | 0,25 | 0,1888343 | 0,367017 |
| IL10RA        | 6,02 | 6,26 | 6,16 | 5,56 | 0,1888519 | 0,367019 |
| RP11-344N17.8 | 0,00 | 1,14 | 0,00 | 1,52 | 0,1888975 | NA       |
| AD000684.2    | 0,39 | 0,32 | 0,54 | 0,29 | 0,1888977 | 0,367034 |
| WDR76         | 1,11 | 0,61 | 0,64 | 0,46 | 0,1889033 | 0,367034 |
| MAT2B         | 5,83 | 4,79 | 4,84 | 5,37 | 0,1889088 | 0,367034 |
| RP4-614C10.2  | 1,60 | 0,00 | 0,94 | 0,02 | 0,1889407 | 0,367064 |
| RP11-161M6.3  | 0,00 | 0,00 | 0,00 | 0,00 | 0,1891004 | 0,367342 |
| SUPT7L        | 4,49 | 0,99 | 3,62 | 2,73 | 0,1891238 | 0,367355 |
| GPR55         | 0,00 | 0,00 | 0,00 | 0,09 | 0,1891587 | 0,367391 |
| RP11-1113N2.2 | 0,00 | 0,00 | 0,00 | 0,00 | 0,1892288 | 0,367495 |
| GBA           | 3,41 | 4,62 | 3,95 | 4,24 | 0,189251  | 0,367506 |
| ATF6B         | 4,51 | 3,10 | 4,90 | 3,84 | 0,1892952 | 0,367559 |
| RGL4          | 0,71 | 0,05 | 0,02 | 0,05 | 0,1893496 | 0,367633 |
| QRSL1         | 2,97 | 1,69 | 2,72 | 2,02 | 0,1894703 | 0,367802 |
| BORA          | 1,62 | 0,09 | 0,16 | 0,54 | 0,1894739 | 0,367802 |
| EIF4E3        | 1,38 | 1,26 | 1,80 | 2,87 | 0,1894863 | 0,367802 |
| RN7SL665P     | 0,00 | 1,23 | 0,00 | 0,00 | 0,1895297 | 0,367854 |
| RP11-413N19.2 | 0,30 | 0,00 | 0,28 | 0,00 | 0,1896078 | NA       |
| ADNP2         | 1,89 | 2,50 | 1,83 | 0,36 | 0,1896203 | 0,367973 |
| RP11-553L6.5  | 0,00 | 0,00 | 0,00 | 0,00 | 0,189624  | 0,367973 |
| RP11-453A12.1 | 0,11 | 0,00 | 0,15 | 0,59 | 0,1896555 | 0,368002 |
| AC105253.1    | 0,19 | 0,22 | 0,07 | 0,06 | 0,1897069 | 0,36807  |
| CADPS2        | 0,00 | 0,42 | 0,00 | 0,00 | 0,1897306 | 0,368083 |
| RP11-671J11.5 | 4,14 | 5,37 | 4,87 | 5,23 | 0,1897706 | 0,368129 |
| RP11-378A12.1 | 0,00 | 0,16 | 0,08 | 0,08 | 0,1897902 | 0,368135 |
| MAPKAPK3      | 5,04 | 6,18 | 5,00 | 4,18 | 0,1899092 | 0,368333 |
| TMEM221       | 0,25 | 0,35 | 0,34 | 0,62 | 0,189929  | 0,36834  |
| ZNF232        | 0,00 | 0,00 | 0,00 | 0,24 | 0,1900036 | 0,368452 |
| RP3-425P12.1  | 2,15 | 0,00 | 0,67 | 4,27 | 0,1900263 | 0,368452 |
| NEK4          | 2,49 | 2,70 | 1,55 | 1,08 | 0,1900381 | 0,368452 |
| RN7SL98P      | 0,69 | 0,00 | 0,00 | 0,00 | 0,1900468 | NA       |
| BEND5         | 2,73 | 0,00 | 0,02 | 0,00 | 0,1900532 | 0,368452 |
| RP11-673C5.1  | 5,52 | 5,28 | 5,68 | 5,39 | 0,1901049 | 0,36852  |
| RP11-258F1.1  | 0,38 | 0,63 | 0,79 | 0,57 | 0,1901344 | 0,368545 |
| HIST1H2AL     | 1,91 | 0,00 | 1,03 | 0,00 | 0,1901971 | 0,368622 |
| GPR157        | 0,90 | 0,79 | 1,12 | 0,64 | 0,1902074 | 0,368622 |
| ZBED1         | 3,04 | 2,69 | 3,36 | 2,89 | 0,1902619 | 0,368672 |
| KB-1742H10.3  | 0,97 | 1,62 | 0,30 | 1,79 | 0,1902662 | 0,368672 |
| AC127904.2    | 0,65 | 0,88 | 1,52 | 2,29 | 0,1902834 | 0,368673 |

|                |      |      |      |      |           |          |
|----------------|------|------|------|------|-----------|----------|
| HLA-DRB6       | 5,55 | 6,94 | 6,47 | 3,93 | 0,1903237 | 0,368705 |
| VTA1           | 5,04 | 1,92 | 4,51 | 1,67 | 0,1903329 | 0,368705 |
| MS4A6A         | 9,48 | 9,45 | 9,80 | 9,42 | 0,1903702 | 0,368745 |
| C10orf88       | 1,72 | 1,64 | 2,11 | 0,90 | 0,1904069 | 0,368784 |
| CTD-2552B11.4  | 1,28 | 0,86 | 1,09 | 0,90 | 0,1904508 | 0,368837 |
| ANKMY1         | 1,67 | 1,15 | 1,98 | 3,61 | 0,1904789 | 0,368859 |
| SKA1           | 0,75 | 0,52 | 1,00 | 0,63 | 0,1906507 | 0,369159 |
| COPZ1          | 7,17 | 6,33 | 6,37 | 6,35 | 0,1906881 | 0,3692   |
| TMEM74B        | 0,16 | 0,20 | 0,00 | 0,00 | 0,1907944 | NA       |
| PCGF3          | 4,02 | 3,93 | 3,47 | 4,54 | 0,1908497 | 0,36948  |
| RP11-383J24.5  | 3,14 | 1,56 | 1,49 | 1,77 | 0,190996  | 0,369731 |
| SAMD7          | 0,00 | 0,06 | 0,00 | 0,00 | 0,1910232 | NA       |
| STIM2          | 5,02 | 4,13 | 4,08 | 4,83 | 0,1910371 | 0,369779 |
| STYX           | 3,71 | 3,37 | 2,92 | 1,61 | 0,1911356 | 0,369937 |
| ZMYM2          | 4,56 | 5,52 | 4,57 | 3,92 | 0,1912119 | 0,370053 |
| PLAU           | 0,83 | 0,23 | 0,76 | 0,07 | 0,1912668 | 0,370082 |
| AGAP9          | 2,70 | 2,51 | 2,71 | 1,61 | 0,1912727 | 0,370082 |
| RP11-366L5.1   | 0,07 | 0,07 | 0,04 | 0,11 | 0,1912769 | 0,370082 |
| CTD-2353F22.1  | 1,75 | 0,00 | 0,15 | 0,43 | 0,19131   | 0,370113 |
| RP11-722G7.1   | 0,35 | 0,46 | 0,37 | 0,67 | 0,1913282 | 0,370117 |
| RP11-523L20.2  | 0,13 | 1,00 | 0,25 | 0,37 | 0,1913491 | 0,370125 |
| SAMD14         | 0,00 | 1,03 | 0,00 | 0,07 | 0,1913996 | 0,37019  |
| SSFA2          | 4,34 | 4,59 | 4,51 | 3,71 | 0,1914528 | 0,370261 |
| TRMT11         | 2,81 | 3,10 | 2,46 | 2,93 | 0,1915103 | 0,37034  |
| FGD1           | 0,19 | 0,03 | 0,00 | 0,00 | 0,1915333 | 0,370352 |
| AP005530.1     | 0,00 | 0,34 | 0,00 | 0,21 | 0,1915951 | NA       |
| FKBP4          | 2,04 | 0,53 | 1,75 | 1,06 | 0,1916056 | 0,370429 |
| RP3-340B19.5   | 0,00 | 0,86 | 1,32 | 4,42 | 0,1916063 | 0,370429 |
| RPS6P21        | 0,00 | 0,00 | 0,00 | 0,00 | 0,1917682 | 0,37071  |
| RP11-17E2.2    | 0,48 | 1,13 | 0,50 | 0,36 | 0,1918623 | 0,370854 |
| ITGAL          | 4,45 | 5,35 | 4,11 | 4,14 | 0,1918763 | 0,370854 |
| RP11-439M11.1  | 1,96 | 1,59 | 1,76 | 2,38 | 0,1919193 | 0,370905 |
| CX3CR1         | 4,45 | 2,47 | 3,70 | 4,65 | 0,1919689 | 0,370955 |
| CNTN1          | 0,70 | 0,02 | 0,65 | 1,37 | 0,1919932 | 0,370955 |
| UBE4A          | 3,71 | 2,43 | 3,50 | 3,19 | 0,1920051 | 0,370955 |
| RP11-456D7.1   | 1,52 | 1,04 | 1,14 | 1,14 | 0,1920121 | 0,370955 |
| DLEU7          | 0,00 | 0,07 | 0,00 | 0,15 | 0,19203   | 0,370958 |
| TTF2           | 3,37 | 0,94 | 2,46 | 3,81 | 0,1920747 | 0,371012 |
| RGS3           | 0,41 | 1,61 | 1,26 | 2,80 | 0,1921138 | 0,371055 |
| AC010761.14    | 0,00 | 0,00 | 0,00 | 2,05 | 0,1921618 | 0,371096 |
| RP11-357H14.17 | 0,67 | 0,72 | 0,77 | 0,99 | 0,1921683 | 0,371096 |
| STRA13         | 5,22 | 5,76 | 5,57 | 1,21 | 0,1922293 | 0,371181 |
| SPRY4          | 0,02 | 0,05 | 0,03 | 0,00 | 0,1923009 | 0,371287 |
| ADAM17         | 3,85 | 1,82 | 3,45 | 2,69 | 0,1923459 | 0,371324 |
| CENPK          | 2,52 | 3,47 | 2,39 | 3,45 | 0,1923534 | 0,371324 |
| GLCC1          | 2,52 | 1,76 | 0,63 | 1,37 | 0,1923747 | 0,371332 |
| AC005616.2     | 0,55 | 1,96 | 1,02 | 1,15 | 0,192391  | 0,371332 |
| C1orf141       | 0,08 | 0,37 | 0,11 | 0,35 | 0,1924175 | 0,371351 |
| bP-21264C1.3   | 0,00 | 0,23 | 0,00 | 0,00 | 0,192427  | NA       |
| RP11-439A17.9  | 0,00 | 0,00 | 0,00 | 0,00 | 0,1924474 | 0,371377 |
| KRT17          | 0,00 | 0,31 | 0,00 | 0,00 | 0,1924699 | NA       |
| ACAT1          | 5,24 | 4,85 | 5,34 | 5,99 | 0,1924996 | 0,371445 |
| PPP2R2D        | 3,48 | 3,86 | 3,71 | 2,96 | 0,1925164 | 0,371445 |
| ALS2           | 2,48 | 2,17 | 1,16 | 2,28 | 0,1925446 | 0,371467 |
| RP11-498E2.9   | 0,00 | 0,00 | 0,00 | 4,23 | 0,1925797 | 0,371503 |

|                |      |      |      |      |           |          |
|----------------|------|------|------|------|-----------|----------|
| RP11-452L6.6   | 0,21 | 0,83 | 0,34 | 0,92 | 0,1925963 | 0,371503 |
| FAM26F         | 7,07 | 7,48 | 7,24 | 4,96 | 0,1926529 | 0,371579 |
| ZDHC24         | 3,04 | 1,02 | 2,63 | 1,49 | 0,1927014 | 0,371641 |
| RP11-472I20.4  | 0,06 | 0,13 | 0,19 | 0,07 | 0,1927296 | 0,371645 |
| RP4-665J23.4   | 0,79 | 0,93 | 1,37 | 1,09 | 0,1927373 | 0,371645 |
| KANK3          | 0,00 | 0,00 | 0,05 | 0,07 | 0,1927845 | NA       |
| XKR8           | 2,30 | 1,10 | 1,64 | 0,92 | 0,192956  | 0,372035 |
| KLRG1          | 1,32 | 3,41 | 1,89 | 1,83 | 0,1929728 | 0,372035 |
| RP1-148H17.1   | 0,00 | 0,00 | 0,00 | 0,00 | 0,1932259 | 0,372461 |
| WDR41          | 6,01 | 5,21 | 4,93 | 5,02 | 0,1932274 | 0,372461 |
| CLYBL          | 2,26 | 0,17 | 0,26 | 3,07 | 0,19335   | 0,372665 |
| POLR1A         | 1,28 | 0,58 | 1,38 | 0,69 | 0,193372  | 0,372675 |
| RP5-1174N9.2   | 1,88 | 2,96 | 2,06 | 2,44 | 0,1934063 | 0,372709 |
| RP11-382F24.6  | 0,00 | 0,00 | 0,00 | 0,00 | 0,1934245 | 0,372712 |
| LINC00895      | 0,00 | 0,60 | 0,04 | 0,09 | 0,1934686 | 0,372746 |
| RP11-517A5.5   | 0,33 | 1,64 | 2,83 | 1,68 | 0,1934829 | 0,372746 |
| RP3-510O8.4    | 0,00 | 0,51 | 0,00 | 0,00 | 0,1934865 | NA       |
| RP11-370I10.10 | 0,00 | 0,00 | 0,00 | 0,00 | 0,1934963 | 0,372746 |
| ELAC2          | 2,87 | 1,31 | 3,03 | 3,22 | 0,1935091 | 0,372746 |
| RP5-1086K13.1  | 0,00 | 0,70 | 0,36 | 1,56 | 0,193527  | 0,372748 |
| U2SURP         | 6,15 | 6,14 | 5,86 | 4,95 | 0,1935547 | 0,372769 |
| AHDC1          | 1,13 | 1,34 | 1,24 | 1,46 | 0,1935779 | 0,372781 |
| TALDO1         | 7,71 | 7,06 | 7,89 | 8,03 | 0,1935968 | 0,372785 |
| RP11-350A18.1  | 1,86 | 1,01 | 1,31 | 1,15 | 0,1936152 | 0,372789 |
| RP11-321N4.5   | 0,00 | 0,00 | 0,00 | 0,00 | 0,1937707 | 0,373044 |
| RP11-131M11.3  | 0,23 | 0,64 | 0,44 | 0,65 | 0,1937812 | 0,373044 |
| ADAM5          | 0,00 | 1,97 | 0,00 | 0,00 | 0,1938089 | 0,373065 |
| TCP11L2        | 3,39 | 2,07 | 3,58 | 1,85 | 0,1938525 | 0,373114 |
| CTC-429P9.5    | 0,00 | 0,42 | 0,42 | 0,44 | 0,1938682 | 0,373114 |
| TOP1           | 3,87 | 3,55 | 3,25 | 3,27 | 0,1939703 | 0,373278 |
| AC079776.3     | 0,24 | 0,48 | 0,41 | 0,32 | 0,1940523 | 0,373388 |
| RP11-114B7.6   | 0,59 | 0,00 | 0,48 | 1,61 | 0,194061  | 0,373388 |
| ZNF836         | 2,41 | 1,67 | 1,96 | 2,94 | 0,1941132 | 0,373456 |
| AC131056.3     | 0,00 | 0,00 | 0,00 | 0,17 | 0,1942082 | 0,373607 |
| ZNF268         | 2,91 | 1,15 | 1,37 | 1,23 | 0,1942373 | 0,37363  |
| RP11-1047D15.2 | 0,43 | 1,29 | 0,31 | 0,77 | 0,1942557 | 0,373632 |
| HIST1H2AD      | 3,44 | 0,00 | 0,00 | 0,00 | 0,1942718 | 0,373632 |
| UAP1           | 3,95 | 1,16 | 3,92 | 1,72 | 0,1943144 | 0,373682 |
| MRPL44         | 4,16 | 1,59 | 2,63 | 3,46 | 0,1943432 | 0,37369  |
| RP11-15A1.7    | 0,00 | 0,00 | 0,00 | 1,90 | 0,1943524 | 0,37369  |
| RP11-627G18.4  | 0,62 | 0,87 | 1,22 | 0,00 | 0,1943755 | 0,373702 |
| RP11-573D15.9  | 0,00 | 0,33 | 0,29 | 0,96 | 0,1944501 | 0,373813 |
| EFCAB5         | 1,96 | 2,50 | 2,14 | 3,23 | 0,194556  | 0,373984 |
| C11orf54       | 2,08 | 2,23 | 2,61 | 2,34 | 0,1945843 | 0,374006 |
| TMEM119        | 1,35 | 1,34 | 1,55 | 1,87 | 0,1946212 | 0,374045 |
| RP11-616K22.1  | 0,00 | 0,00 | 0,00 | 0,00 | 0,1947279 | 0,37416  |
| KIF26A         | 0,00 | 0,07 | 0,00 | 0,00 | 0,194748  | 0,37416  |
| RP11-761N21.2  | 3,41 | 4,17 | 3,51 | 3,71 | 0,1947481 | 0,37416  |
| CTC-436K13.1   | 0,00 | 0,00 | 0,00 | 0,50 | 0,1947482 | 0,37416  |
| TMEM168        | 3,42 | 1,33 | 2,39 | 0,96 | 0,1948105 | 0,374247 |
| RP11-144O23.22 | 0,00 | 0,00 | 0,00 | 0,00 | 0,1948629 | NA       |
| RP11-40A8.3    | 0,70 | 2,64 | 0,82 | 1,90 | 0,1950076 | 0,374593 |
| PEX11G         | 0,26 | 2,14 | 0,92 | 1,39 | 0,1950419 | 0,374618 |
| CLDND2         | 0,61 | 0,00 | 0,84 | 1,02 | 0,1950573 | 0,374618 |
| LEPR           | 0,75 | 0,53 | 0,61 | 1,89 | 0,1950814 | 0,374618 |

|               |      |      |      |      |           |          |
|---------------|------|------|------|------|-----------|----------|
| RP11-803D5.4  | 0,00 | 0,35 | 0,00 | 0,26 | 0,1950877 | 0,374618 |
| C9orf139      | 1,14 | 0,52 | 0,99 | 3,19 | 0,1951154 | 0,374638 |
| USP39         | 5,50 | 4,09 | 5,55 | 4,39 | 0,1951811 | 0,374722 |
| RP4-620E11.8  | 0,46 | 0,56 | 0,00 | 0,00 | 0,1951965 | 0,374722 |
| ZNF613        | 0,63 | 0,43 | 0,61 | 0,00 | 0,1952227 | 0,374722 |
| C22orf46      | 0,99 | 1,07 | 0,78 | 0,69 | 0,1952421 | 0,374722 |
| RP11-298I3.5  | 2,78 | 2,94 | 3,90 | 1,51 | 0,1952693 | 0,374722 |
| TMEM5         | 4,44 | 4,59 | 3,79 | 3,06 | 0,1952753 | 0,374722 |
| WDR25         | 1,45 | 0,09 | 1,68 | 2,65 | 0,195283  | 0,374722 |
| ZSWIM7        | 6,00 | 3,84 | 5,84 | 5,67 | 0,1952936 | 0,374722 |
| C16orf54      | 5,37 | 4,40 | 5,05 | 4,44 | 0,1953324 | 0,37474  |
| NFE4          | 0,00 | 0,18 | 0,89 | 0,36 | 0,1953371 | 0,37474  |
| CTC-459F4.2   | 2,13 | 2,75 | 2,44 | 1,13 | 0,1953752 | 0,374779 |
| RP11-254F7.3  | 3,44 | 4,23 | 4,19 | 4,56 | 0,1954191 | 0,374779 |
| IL6ST         | 3,93 | 3,15 | 4,73 | 3,17 | 0,1954242 | 0,374779 |
| PTGER4        | 6,43 | 5,23 | 5,88 | 4,14 | 0,1954249 | 0,374779 |
| RP11-44D15.3  | 0,25 | 0,00 | 0,27 | 0,00 | 0,1955035 | 0,374878 |
| DDX27         | 4,73 | 3,01 | 4,29 | 4,72 | 0,1955102 | 0,374878 |
| NUDT13        | 1,37 | 0,73 | 2,04 | 1,76 | 0,195612  | 0,375041 |
| MXI1          | 2,04 | 2,79 | 2,46 | 3,03 | 0,1956846 | 0,375148 |
| ARHGAP42      | 0,11 | 0,11 | 0,01 | 0,00 | 0,1957374 | 0,375186 |
| APOBEC3G      | 4,69 | 2,33 | 4,42 | 2,75 | 0,1957597 | 0,375186 |
| TNFAIP1       | 1,93 | 0,27 | 1,50 | 0,39 | 0,1957649 | 0,375186 |
| IRAK1         | 4,37 | 3,93 | 4,61 | 3,98 | 0,1957956 | 0,375186 |
| EFTUD2        | 5,83 | 4,81 | 5,50 | 5,88 | 0,1958044 | 0,375186 |
| ZMYM3         | 1,55 | 1,34 | 2,06 | 0,31 | 0,1958058 | 0,375186 |
| APLF          | 0,62 | 0,44 | 1,17 | 1,06 | 0,1958404 | 0,37522  |
| ZNF454        | 0,00 | 0,00 | 0,00 | 0,05 | 0,1958524 | NA       |
| IGHGP         | 0,00 | 0,00 | 0,00 | 0,12 | 0,1958885 | 0,37528  |
| RP11-814M22.1 | 0,00 | 0,00 | 0,00 | 0,00 | 0,1959564 | NA       |
| VAMP1         | 2,77 | 4,89 | 2,42 | 2,60 | 0,1960297 | 0,375518 |
| STS           | 0,10 | 1,58 | 0,18 | 0,28 | 0,1961381 | 0,375693 |
| RP11-80P20.3  | 1,01 | 1,98 | 1,47 | 1,56 | 0,1962862 | 0,375845 |
| RP11-96K19.5  | 0,10 | 0,00 | 0,00 | 0,00 | 0,1963042 | 0,375845 |
| RP11-817O13.8 | 0,00 | 0,00 | 0,00 | 0,00 | 0,196307  | 0,375845 |
| DOCK3         | 0,00 | 0,12 | 0,00 | 0,00 | 0,1963113 | 0,375845 |
| FRMD6-AS1     | 0,06 | 0,11 | 0,20 | 0,23 | 0,1963141 | 0,375845 |
| RP11-632K20.2 | 1,73 | 0,36 | 1,00 | 0,33 | 0,196347  | 0,375845 |
| IPPK          | 1,03 | 0,23 | 1,13 | 0,03 | 0,1963479 | 0,375845 |
| SLC5A2        | 0,00 | 1,22 | 0,83 | 1,58 | 0,1963621 | 0,375845 |
| GDF5OS        | 0,08 | 0,69 | 0,20 | 0,51 | 0,1963693 | 0,375845 |
| BCL9          | 0,00 | 0,00 | 0,00 | 0,00 | 0,1964071 | 0,375869 |
| UAP1L1        | 1,25 | 2,65 | 1,86 | 1,27 | 0,1964161 | 0,375869 |
| LUC7L         | 4,91 | 4,22 | 5,28 | 5,25 | 0,1964354 | 0,37587  |
| TESPA1        | 3,22 | 1,64 | 2,64 | 3,05 | 0,1964503 | 0,37587  |
| RP11-252K23.1 | 0,53 | 0,00 | 0,00 | 0,77 | 0,1965292 | NA       |
| CDKL5         | 2,14 | 2,99 | 2,10 | 2,61 | 0,1965332 | 0,375997 |
| ILK           | 6,82 | 3,65 | 6,27 | 6,32 | 0,1967818 | 0,37644  |
| PFDN6         | 2,50 | 1,66 | 1,41 | 1,46 | 0,1968592 | 0,376555 |
| RP11-511H23.1 | 0,00 | 0,33 | 0,00 | 0,40 | 0,196912  | NA       |
| WDR93         | 0,81 | 0,86 | 0,60 | 0,40 | 0,1970404 | 0,376869 |
| RP11-353N14.2 | 0,00 | 0,00 | 0,03 | 0,00 | 0,1970499 | NA       |
| RP11-445F6.2  | 0,00 | 0,20 | 0,00 | 0,17 | 0,1970592 | NA       |
| PMEPA1        | 0,07 | 0,00 | 0,03 | 0,06 | 0,1971436 | 0,377034 |
| SPRY1         | 0,00 | 0,00 | 0,00 | 0,00 | 0,1971856 | NA       |

|                |      |      |      |      |           |          |
|----------------|------|------|------|------|-----------|----------|
| ZFYVE27        | 3,71 | 0,41 | 3,54 | 2,64 | 0,1971863 | 0,377084 |
| AC096663.1     | 0,15 | 0,00 | 0,14 | 0,00 | 0,1972042 | NA       |
| AC009166.7     | 0,16 | 0,53 | 0,18 | 0,46 | 0,1972514 | 0,377176 |
| RP1-266L20.9   | 0,50 | 1,27 | 0,81 | 0,58 | 0,1974194 | 0,377464 |
| MDH1B          | 0,00 | 0,00 | 0,00 | 0,00 | 0,1974655 | NA       |
| TMEM220        | 2,98 | 1,10 | 2,00 | 2,01 | 0,1975242 | 0,377632 |
| KCTD2          | 0,27 | 0,34 | 1,65 | 2,03 | 0,1976471 | 0,377835 |
| KLHL36         | 2,20 | 1,70 | 2,78 | 2,43 | 0,1976752 | 0,377841 |
| RP4-773A18.10  | 0,13 | 0,07 | 0,26 | 0,46 | 0,1976919 | 0,377841 |
| RP11-799O21.1  | 0,05 | 0,17 | 0,04 | 0,19 | 0,1977013 | 0,377841 |
| HERC2P9        | 3,21 | 1,96 | 2,84 | 2,81 | 0,1977498 | 0,377901 |
| MB21D1         | 1,69 | 0,59 | 1,76 | 1,20 | 0,1979381 | 0,378228 |
| ARHGEF3        | 3,10 | 3,29 | 2,15 | 1,69 | 0,197966  | 0,378249 |
| PRPF40A        | 6,49 | 6,09 | 6,08 | 5,05 | 0,1979844 | 0,378252 |
| RP11-135F9.4   | 2,75 | 2,60 | 2,55 | 1,41 | 0,1981666 | 0,378567 |
| NDC1           | 2,61 | 0,12 | 1,15 | 1,37 | 0,1981998 | 0,378598 |
| EIF2AK2        | 4,91 | 2,97 | 4,65 | 4,02 | 0,1982449 | 0,37862  |
| MRPL27         | 6,04 | 6,42 | 6,35 | 5,54 | 0,1982451 | 0,37862  |
| CCDC92         | 2,71 | 0,85 | 2,25 | 3,21 | 0,198272  | 0,378639 |
| ARAP2          | 2,96 | 0,87 | 2,99 | 4,28 | 0,1983029 | 0,378665 |
| FUNDC1         | 4,59 | 3,91 | 1,46 | 1,11 | 0,1983624 | 0,378746 |
| CPNE9          | 0,00 | 0,00 | 0,00 | 0,00 | 0,1984156 | NA       |
| GCH1           | 3,66 | 2,36 | 3,72 | 3,32 | 0,1984181 | 0,37882  |
| RP11-328K4.1   | 0,00 | 0,49 | 0,00 | 0,00 | 0,1984411 | 0,378831 |
| SCARNA3        | 3,02 | 0,00 | 0,00 | 5,40 | 0,198473  | 0,37886  |
| RP11-157F20.1  | 0,00 | 0,00 | 0,08 | 0,00 | 0,1985092 | 0,378876 |
| RP11-10L12.2   | 0,00 | 0,00 | 0,00 | 0,00 | 0,1985325 | 0,378876 |
| PADI6          | 0,13 | 0,00 | 0,05 | 0,06 | 0,1985402 | 0,378876 |
| RBMX           | 6,67 | 6,66 | 5,98 | 5,40 | 0,1985498 | 0,378876 |
| DCAF11         | 4,24 | 5,44 | 4,42 | 5,02 | 0,19862   | 0,378977 |
| RP11-595B24.2  | 0,00 | 1,69 | 0,25 | 0,00 | 0,1986436 | 0,37899  |
| ZSWIM1         | 0,95 | 1,72 | 1,24 | 1,22 | 0,1987175 | 0,379073 |
| NRN1           | 0,14 | 0,09 | 0,14 | 0,85 | 0,198721  | 0,379073 |
| RPS6KC1        | 3,48 | 2,18 | 3,43 | 2,65 | 0,1987566 | 0,379108 |
| SNORD89        | 2,39 | 3,51 | 0,00 | 1,68 | 0,1987929 | 0,379145 |
| PARN           | 4,49 | 4,16 | 4,11 | 3,45 | 0,1988301 | 0,379183 |
| RP11-147L13.12 | 5,13 | 3,49 | 3,89 | 2,79 | 0,1988499 | 0,379188 |
| BHLHE40        | 6,46 | 5,66 | 6,34 | 5,45 | 0,1989334 | 0,379315 |
| RP11-277P12.9  | 0,00 | 1,65 | 0,00 | 0,00 | 0,1991002 | 0,379601 |
| PHF5A          | 5,41 | 1,35 | 3,91 | 2,03 | 0,1991177 | 0,379601 |
| CES4A          | 1,73 | 1,33 | 1,20 | 1,23 | 0,1991572 | 0,379637 |
| UBR5           | 5,26 | 5,55 | 4,58 | 5,11 | 0,1991708 | 0,379637 |
| GNPMB          | 0,02 | 0,09 | 0,05 | 0,00 | 0,199237  | NA       |
| HAUS3          | 3,10 | 2,49 | 2,09 | 2,10 | 0,1992523 | 0,379758 |
| EP400          | 3,33 | 3,09 | 3,08 | 3,67 | 0,1992683 | 0,379758 |
| RP11-473M20.7  | 0,71 | 1,85 | 0,78 | 1,46 | 0,1993357 | 0,379828 |
| KIAA0355       | 2,03 | 3,22 | 1,70 | 2,42 | 0,1993392 | 0,379828 |
| ATP6V0D1       | 7,79 | 7,51 | 7,32 | 7,10 | 0,1994672 | 0,380039 |
| RPL35AP3       | 0,00 | 0,00 | 0,00 | 1,45 | 0,1995024 | NA       |
| MAN1B1-AS1     | 0,60 | 0,45 | 1,46 | 0,87 | 0,1995364 | 0,38011  |
| CTD-3222D19.4  | 0,26 | 0,37 | 0,40 | 1,26 | 0,1995552 | 0,38011  |
| RP11-497H16.9  | 2,37 | 1,40 | 1,68 | 1,50 | 0,1995557 | 0,38011  |
| PATZ1          | 2,21 | 0,92 | 1,73 | 1,43 | 0,1996155 | 0,380191 |
| AC004696.2     | 1,99 | 3,88 | 2,39 | 1,71 | 0,1997512 | 0,380417 |
| VWA3B          | 0,05 | 0,30 | 0,07 | 0,09 | 0,1997922 | 0,380443 |



|                |      |      |      |      |           |          |
|----------------|------|------|------|------|-----------|----------|
| RP11-103G8.4   | 0,00 | 0,49 | 0,00 | 1,27 | 0,1998115 | 0,380443 |
| PRSS36         | 0,00 | 1,61 | 0,66 | 0,36 | 0,1998161 | 0,380443 |
| GALNT18        | 0,00 | 0,00 | 0,00 | 0,00 | 0,1998171 | NA       |
| PGA3           | 0,00 | 0,00 | 0,09 | 0,00 | 0,1998346 | NA       |
| NCBP1          | 4,70 | 3,59 | 3,43 | 3,62 | 0,1998476 | 0,380471 |
| RP11-727A23.10 | 2,01 | 3,09 | 1,64 | 2,49 | 0,1998718 | 0,380484 |
| SPECC1         | 6,19 | 5,81 | 5,93 | 5,43 | 0,2001134 | 0,38089  |
| RP11-798G7.5   | 0,00 | 0,00 | 0,00 | 0,00 | 0,2001191 | 0,38089  |
| CTA-722E9.1    | 0,14 | 0,32 | 1,11 | 0,61 | 0,2002019 | 0,380977 |
| GNAL           | 0,28 | 0,12 | 0,13 | 0,48 | 0,2002279 | 0,380977 |
| RP11-506B6.6   | 0,00 | 0,00 | 0,00 | 0,00 | 0,2002323 | 0,380977 |
| CCDC150        | 0,25 | 0,34 | 0,32 | 0,56 | 0,2002338 | 0,380977 |
| RP11-576C12.1  | 0,00 | 0,00 | 0,00 | 0,00 | 0,2003089 | 0,381088 |
| PKD1L1         | 0,00 | 0,03 | 0,00 | 0,00 | 0,2003551 | 0,381143 |
| PTDSS2         | 0,26 | 1,31 | 1,48 | 0,26 | 0,2004701 | 0,381309 |
| RP11-665G4.1   | 1,83 | 0,00 | 0,00 | 0,81 | 0,2004769 | 0,381309 |
| AC009133.12    | 0,00 | 0,45 | 0,13 | 0,68 | 0,2004951 | 0,381311 |
| PKP4           | 1,16 | 0,84 | 2,51 | 0,73 | 0,2005264 | 0,381324 |
| DUX4L26        | 0,00 | 0,91 | 0,00 | 0,00 | 0,2005363 | 0,381324 |
| PIH1D3         | 0,08 | 0,00 | 0,09 | 0,00 | 0,200553  | 0,381324 |
| KLF10          | 5,58 | 5,65 | 5,23 | 4,58 | 0,2006251 | 0,381427 |
| RN7SL395P      | 0,00 | 0,00 | 0,00 | 0,83 | 0,2006283 | NA       |
| NCOR1          | 7,13 | 6,53 | 6,80 | 6,31 | 0,2006482 | 0,381427 |
| HLA-DQA2       | 7,12 | 7,27 | 6,71 | 3,72 | 0,200659  | 0,381427 |
| AC096649.3     | 0,00 | 0,00 | 0,00 | 0,00 | 0,200693  | NA       |
| MSL2           | 2,75 | 4,78 | 2,86 | 3,20 | 0,2007005 | 0,381453 |
| LRPAP1         | 5,81 | 4,86 | 5,42 | 4,45 | 0,2007071 | 0,381453 |
| GS1-114I9.1    | 2,93 | 0,48 | 0,23 | 4,85 | 0,2007595 | 0,38152  |
| SWSAP1         | 2,95 | 4,10 | 3,09 | 3,02 | 0,2008421 | 0,381645 |
| RP11-37N22.1   | 0,63 | 0,93 | 0,85 | 0,72 | 0,2009197 | 0,381759 |
| CTC-308K20.4   | 0,00 | 0,00 | 0,00 | 1,44 | 0,2009384 | NA       |
| RP11-297D21.4  | 1,70 | 1,59 | 1,99 | 1,64 | 0,2009814 | 0,381816 |
| SKIDA1         | 0,29 | 0,24 | 0,17 | 0,17 | 0,2009839 | 0,381816 |
| RNU2-66P       | 0,00 | 0,00 | 0,00 | 0,00 | 0,2010014 | 0,381817 |
| UCHL1          | 0,00 | 0,27 | 0,00 | 0,22 | 0,201113  | NA       |
| MYT1           | 0,00 | 0,02 | 0,00 | 0,00 | 0,2012022 | 0,382166 |
| KATNAL2        | 1,71 | 1,67 | 1,84 | 1,03 | 0,2013239 | 0,382364 |
| CIRBP          | 6,56 | 6,39 | 6,54 | 6,56 | 0,2013819 | 0,382423 |
| ACTA1          | 0,56 | 0,38 | 0,33 | 0,30 | 0,2013891 | 0,382423 |
| PPHLN1         | 6,99 | 5,76 | 6,42 | 6,36 | 0,2014304 | 0,382468 |
| RP11-775H9.2   | 0,00 | 0,00 | 0,00 | 0,00 | 0,2015498 | 0,382662 |
| ZNF41          | 1,13 | 0,03 | 2,70 | 0,67 | 0,2016368 | 0,382795 |
| RN7SL376P      | 1,81 | 2,30 | 2,02 | 1,79 | 0,2017721 | 0,383019 |
| AC144521.1     | 0,70 | 0,83 | 0,62 | 0,29 | 0,2017909 | 0,383022 |
| RP11-424G14.1  | 0,00 | 0,19 | 0,00 | 0,09 | 0,2018306 | 0,383033 |
| CELA2B         | 0,00 | 0,00 | 0,00 | 0,00 | 0,2018311 | 0,383033 |
| CTC-228N24.3   | 2,17 | 3,63 | 1,62 | 1,21 | 0,201856  | 0,383047 |
| NAPG           | 4,20 | 3,45 | 3,85 | 3,08 | 0,2018791 | 0,383058 |
| OSGIN1         | 0,00 | 1,86 | 0,38 | 0,43 | 0,2019029 | 0,383071 |
| ATP13A2        | 0,80 | 0,31 | 1,95 | 1,43 | 0,2019867 | 0,383197 |
| SLC6A17        | 0,01 | 0,10 | 0,02 | 0,00 | 0,2020085 | 0,383206 |
| AGGF1P8        | 0,00 | 0,00 | 0,00 | 0,00 | 0,2020596 | 0,383259 |
| C17orf58       | 0,11 | 0,00 | 0,28 | 1,44 | 0,2020856 | 0,383259 |
| RP11-574M7.1   | 0,68 | 4,62 | 0,22 | 0,60 | 0,2020881 | 0,383259 |
| DOPEY2         | 2,17 | 1,57 | 2,45 | 2,58 | 0,2021149 | 0,383277 |

|               |      |      |      |      |           |          |
|---------------|------|------|------|------|-----------|----------|
| CTD-3138B18.5 | 0,06 | 0,48 | 0,41 | 0,04 | 0,202238  | 0,383453 |
| MRI1          | 0,90 | 0,52 | 1,29 | 0,93 | 0,2022526 | 0,383453 |
| MTERF1        | 2,77 | 1,84 | 2,02 | 0,70 | 0,2022741 | 0,383453 |
| SDCCAG3       | 3,79 | 3,02 | 3,33 | 4,13 | 0,2022768 | 0,383453 |
| KLHL13        | 0,00 | 0,00 | 0,00 | 0,02 | 0,2022952 | 0,383455 |
| RP11-320M2.1  | 0,50 | 0,32 | 0,81 | 1,12 | 0,2023802 | 0,383583 |
| RN7SL14P      | 2,06 | 0,00 | 1,50 | 0,73 | 0,2024456 | 0,383675 |
| CTD-2260A17.2 | 0,00 | 0,00 | 0,00 | 0,00 | 0,2025622 | 0,383814 |
| YES1          | 0,23 | 0,74 | 0,60 | 0,83 | 0,2025663 | 0,383814 |
| MIS18A        | 2,34 | 0,09 | 2,48 | 0,53 | 0,2025711 | 0,383814 |
| MEA1          | 6,20 | 4,19 | 5,83 | 5,22 | 0,2027114 | 0,384047 |
| AC020571.3    | 0,00 | 0,00 | 0,00 | 0,00 | 0,2027546 | NA       |
| ARHGEF11      | 0,09 | 0,18 | 1,17 | 0,88 | 0,2028553 | 0,384287 |
| CMB9-55A18.1  | 0,00 | 0,09 | 0,30 | 0,11 | 0,2028735 | 0,384289 |
| LMBR1L        | 3,13 | 4,19 | 4,38 | 3,15 | 0,2030356 | 0,384563 |
| RPS-995J12.2  | 0,28 | 0,38 | 0,28 | 0,27 | 0,2030786 | 0,384612 |
| TLDC1         | 0,80 | 1,94 | 0,84 | 0,72 | 0,2031209 | 0,384639 |
| RP11-51F16.1  | 0,95 | 1,01 | 1,83 | 1,53 | 0,2031275 | 0,384639 |
| RP11-325F22.3 | 2,96 | 2,19 | 3,95 | 3,41 | 0,2031541 | 0,384657 |
| AC009495.3    | 0,00 | 0,00 | 0,00 | 0,00 | 0,2031564 | NA       |
| MED10         | 5,83 | 5,82 | 5,55 | 4,29 | 0,2031765 | 0,384666 |
| FABP5L3       | 0,00 | 0,16 | 0,10 | 0,00 | 0,2032003 | NA       |
| RP11-129K20.2 | 0,00 | 0,00 | 0,00 | 0,00 | 0,2032051 | NA       |
| MRPL13        | 6,31 | 5,80 | 5,62 | 4,86 | 0,20325   | 0,384754 |
| MYCT1         | 0,00 | 0,00 | 0,00 | 0,28 | 0,2032577 | 0,384754 |
| RP11-355F16.1 | 0,10 | 0,00 | 0,00 | 0,15 | 0,2032775 | 0,384759 |
| FAM87B        | 0,00 | 0,00 | 0,00 | 0,10 | 0,2033041 | 0,384777 |
| RP11-751A18.1 | 0,00 | 0,69 | 0,00 | 0,00 | 0,2033257 | NA       |
| SHANK2        | 0,67 | 0,00 | 0,30 | 0,68 | 0,2033915 | 0,384909 |
| RP11-547C5.2  | 0,00 | 0,00 | 0,00 | 0,95 | 0,203448  | 0,384984 |
| SQRDL         | 6,19 | 5,16 | 5,95 | 5,47 | 0,2035092 | 0,38504  |
| DNAJB5        | 0,29 | 0,49 | 0,90 | 1,26 | 0,2035124 | 0,38504  |
| C2orf49       | 1,98 | 0,91 | 1,57 | 2,19 | 0,2035538 | 0,385041 |
| RP11-181C3.2  | 0,00 | 0,00 | 0,00 | 0,00 | 0,203557  | 0,385041 |
| CTA-339C12.1  | 0,00 | 0,00 | 1,54 | 0,00 | 0,2035648 | 0,385041 |
| RPS18P12      | 0,00 | 0,46 | 0,00 | 0,46 | 0,203601  | NA       |
| AC004510.3    | 0,42 | 1,84 | 0,15 | 2,44 | 0,2036685 | 0,385204 |
| RP11-80H18.3  | 3,03 | 0,10 | 3,35 | 0,58 | 0,2037481 | 0,385322 |
| ANKRD20A1     | 1,12 | 2,58 | 1,27 | 0,04 | 0,2038741 | 0,385512 |
| RP11-976B16.1 | 0,17 | 0,22 | 0,22 | 0,78 | 0,2038836 | 0,385512 |
| CCNI2         | 0,25 | 0,32 | 0,20 | 0,13 | 0,2039188 | 0,385546 |
| SH3D19        | 1,13 | 0,33 | 0,66 | 0,04 | 0,2039558 | 0,385583 |
| ZFPM2         | 0,19 | 1,59 | 0,57 | 0,28 | 0,2039818 | 0,3856   |
| RP11-588H7.1  | 0,30 | 0,18 | 0,39 | 0,23 | 0,2041102 | 0,38581  |
| RN7SL481P     | 0,81 | 1,43 | 2,00 | 0,79 | 0,2041438 | 0,38584  |
| ANKRD20A19P   | 0,92 | 1,49 | 0,75 | 0,66 | 0,2041813 | 0,385878 |
| FTSJ1         | 4,33 | 2,17 | 3,37 | 1,78 | 0,2042091 | 0,385898 |
| AC073264.6    | 0,00 | 3,71 | 0,00 | 3,82 | 0,2043185 | 0,38606  |
| MAPK8IP3      | 1,69 | 1,59 | 2,19 | 1,19 | 0,2043293 | 0,38606  |
| AC073046.4    | 0,00 | 0,32 | 0,00 | 0,00 | 0,2043796 | 0,386122 |
| CTD-2081C10.7 | 0,00 | 1,63 | 0,00 | 0,00 | 0,2044893 | 0,386276 |
| HYLS1         | 0,17 | 0,37 | 0,56 | 0,96 | 0,2045052 | 0,386276 |
| CHTF18        | 0,00 | 0,00 | 0,19 | 3,48 | 0,2045133 | 0,386276 |
| SMAP1         | 3,91 | 2,95 | 4,46 | 3,39 | 0,2045399 | 0,386288 |
| RP11-164H13.1 | 0,69 | 0,87 | 0,89 | 0,70 | 0,2045545 | 0,386288 |

|               |      |      |      |      |           |          |
|---------------|------|------|------|------|-----------|----------|
| RDH11         | 3,82 | 2,26 | 3,93 | 1,73 | 0,204583  | 0,386309 |
| AC024084.1    | 0,00 | 0,00 | 0,00 | 0,00 | 0,2046479 | 0,386399 |
| LA16c-360H6.1 | 0,00 | 0,00 | 0,00 | 0,00 | 0,2047087 | 0,386481 |
| RP11-421E14.2 | 0,51 | 0,68 | 0,49 | 1,51 | 0,2047711 | 0,386566 |
| STEAP3        | 0,07 | 0,86 | 0,16 | 0,31 | 0,2048353 | 0,386654 |
| RP11-589M4.1  | 0,14 | 0,00 | 0,00 | 1,83 | 0,2048773 | 0,3867   |
| RP11-474L11.5 | 0,00 | 0,00 | 0,00 | 0,00 | 0,2049686 | 0,38684  |
| RP11-798G7.6  | 2,87 | 2,00 | 3,21 | 2,63 | 0,205014  | 0,386893 |
| PRPF3         | 4,18 | 4,63 | 4,23 | 4,53 | 0,2050657 | 0,386957 |
| CTB-107G13.1  | 0,00 | 0,00 | 0,07 | 0,00 | 0,2051653 | 0,387113 |
| TTF1          | 3,04 | 1,07 | 2,13 | 3,79 | 0,2052559 | 0,387251 |
| CTD-2547E10.2 | 5,12 | 3,34 | 5,09 | 3,85 | 0,20528   | 0,387263 |
| KCNC2         | 0,70 | 1,19 | 0,47 | 0,52 | 0,2053577 | 0,387348 |
| LSM4          | 7,46 | 6,87 | 6,95 | 6,90 | 0,2053596 | 0,387348 |
| RP11-624G17.3 | 0,00 | 1,02 | 0,15 | 0,00 | 0,2053944 | 0,38735  |
| AAGAB         | 4,14 | 3,46 | 2,71 | 3,38 | 0,2053956 | 0,38735  |
| KIAA1551      | 5,16 | 4,51 | 4,73 | 5,31 | 0,2054263 | 0,387375 |
| RP5-1109J22.1 | 0,00 | 0,00 | 0,39 | 0,00 | 0,2055787 | 0,387629 |
| DROSHA        | 5,71 | 4,35 | 4,88 | 5,05 | 0,2056774 | 0,387782 |
| HCLS1         | 7,83 | 7,13 | 7,56 | 7,29 | 0,2057203 | 0,38783  |
| XPNPEP1       | 5,35 | 5,40 | 4,97 | 3,83 | 0,2057668 | 0,387885 |
| RP11-65G9.1   | 0,62 | 3,62 | 0,65 | 0,00 | 0,2058171 | 0,387947 |
| AC007191.4    | 0,33 | 0,35 | 0,31 | 0,27 | 0,2058518 | 0,38798  |
| STK39         | 2,21 | 2,04 | 1,28 | 0,50 | 0,2058835 | 0,388006 |
| RP11-357F12.1 | 0,46 | 1,14 | 0,70 | 0,22 | 0,205904  | 0,388012 |
| TGS1          | 2,19 | 1,69 | 2,08 | 1,14 | 0,2060101 | 0,388179 |
| AC011247.2    | 0,71 | 0,54 | 0,64 | 0,89 | 0,2060454 | 0,388213 |
| PTPN13        | 0,00 | 0,12 | 0,03 | 0,60 | 0,2061171 | 0,388284 |
| DGKE          | 2,98 | 4,06 | 1,80 | 1,20 | 0,2061181 | 0,388284 |
| RP3-402G11.26 | 0,00 | 0,00 | 0,00 | 0,00 | 0,2061333 | NA       |
| RP11-413N10.3 | 0,15 | 0,32 | 0,26 | 0,32 | 0,2061536 | 0,388318 |
| ICT1          | 5,86 | 5,74 | 5,43 | 4,41 | 0,2061929 | 0,388352 |
| SLC51A        | 1,49 | 2,23 | 1,36 | 2,58 | 0,2062144 | 0,388352 |
| MCEE          | 4,29 | 3,05 | 3,18 | 2,72 | 0,2062239 | 0,388352 |
| RN7SL366P     | 0,00 | 0,00 | 0,00 | 0,00 | 0,2062479 | 0,388364 |
| SLX1B-SULT1A4 | 2,48 | 1,39 | 1,79 | 0,94 | 0,2062791 | 0,38839  |
| KIAA1324L     | 0,28 | 0,18 | 0,02 | 0,00 | 0,2063623 | 0,388514 |
| HIP1          | 4,96 | 5,03 | 4,62 | 3,56 | 0,2064548 | 0,388655 |
| SGPP2         | 0,28 | 0,13 | 0,45 | 0,49 | 0,2064725 | 0,388655 |
| RP11-506H20.1 | 0,48 | 0,00 | 0,30 | 1,08 | 0,2065158 | 0,3887   |
| ZNF141        | 2,82 | 4,08 | 3,37 | 2,48 | 0,2065312 | 0,3887   |
| GALNT1        | 4,52 | 4,16 | 4,49 | 3,89 | 0,2065935 | 0,388784 |
| ANKIB1        | 4,25 | 4,70 | 4,38 | 3,81 | 0,2067482 | 0,389042 |
| RP11-566H8.2  | 0,00 | 0,00 | 0,00 | 0,00 | 0,2067853 | NA       |
| RP4-800J21.3  | 0,00 | 0,00 | 0,00 | 0,08 | 0,2068792 | NA       |
| RN7SL383P     | 0,00 | 0,00 | 0,00 | 0,00 | 0,2068949 | NA       |
| DNAJC2        | 4,99 | 4,27 | 5,15 | 4,16 | 0,2069328 | 0,389328 |
| AC079610.2    | 1,25 | 2,77 | 1,34 | 1,07 | 0,2069353 | 0,389328 |
| AC002306.1    | 0,32 | 0,21 | 0,43 | 0,45 | 0,206955  | 0,389333 |
| GOLGA8A       | 3,24 | 1,75 | 2,24 | 1,53 | 0,2070111 | 0,389405 |
| RP11-1A16.1   | 0,31 | 1,91 | 0,24 | 0,17 | 0,2070428 | 0,389432 |
| CTA-299D3.8   | 0,00 | 0,11 | 0,00 | 0,00 | 0,2071011 | NA       |
| AC007551.3    | 0,29 | 0,29 | 0,36 | 0,22 | 0,207138  | 0,389578 |
| RP11-371E8.4  | 0,00 | 0,00 | 0,00 | 0,00 | 0,2071815 | 0,389627 |
| RP11-107114.4 | 0,15 | 0,32 | 0,19 | 0,39 | 0,2073111 | 0,389812 |

|               |      |      |      |      |           |          |
|---------------|------|------|------|------|-----------|----------|
| MIRS690       | 0,00 | 0,00 | 2,68 | 6,79 | 0,2073219 | 0,389812 |
| WDR91         | 2,84 | 0,21 | 1,99 | 2,26 | 0,2073328 | 0,389812 |
| AC007389.3    | 0,26 | 0,64 | 0,37 | 0,73 | 0,2074097 | 0,389904 |
| NVL           | 4,08 | 3,98 | 4,29 | 4,25 | 0,2074327 | 0,389904 |
| CTB-5506.13   | 0,00 | 3,25 | 0,00 | 0,00 | 0,2074468 | 0,389904 |
| RP5-1112F19.2 | 0,05 | 0,00 | 0,06 | 0,15 | 0,207452  | 0,389904 |
| GOLGA6L10     | 0,13 | 0,17 | 0,04 | 0,00 | 0,2075117 | 0,389954 |
| RP11-426A6.7  | 0,06 | 0,05 | 0,02 | 0,37 | 0,2075238 | 0,389954 |
| AC011322.1    | 0,00 | 0,35 | 0,00 | 0,00 | 0,207548  | 0,389954 |
| COX7A2L       | 7,63 | 7,26 | 7,24 | 6,37 | 0,2075504 | 0,389954 |
| RP11-967K21.1 | 0,00 | 0,00 | 0,22 | 0,45 | 0,2075663 | 0,389954 |
| RP11-158I9.8  | 0,06 | 0,00 | 0,14 | 1,15 | 0,2076014 | 0,389987 |
| CTD-2210P24.1 | 0,00 | 0,45 | 0,00 | 0,12 | 0,2076166 | NA       |
| CTD-2280E9.1  | 0,00 | 0,00 | 0,00 | 0,00 | 0,2076262 | NA       |
| ZFYVE28       | 0,00 | 0,38 | 0,00 | 0,21 | 0,2076583 | 0,390017 |
| PKD2L2        | 1,62 | 1,66 | 2,07 | 1,98 | 0,207665  | 0,390017 |
| RP11-558O12.3 | 0,00 | 0,00 | 0,00 | 0,41 | 0,2076827 | 0,390017 |
| RP11-63M22.2  | 2,67 | 3,24 | 3,11 | 0,00 | 0,2076872 | 0,390017 |
| CAB39L        | 0,97 | 0,00 | 0,12 | 0,21 | 0,2077246 | 0,390054 |
| RP11-686D22.7 | 0,24 | 0,00 | 0,88 | 2,56 | 0,20777   | 0,390106 |
| RP11-48B3.3   | 0,45 | 0,58 | 0,52 | 0,63 | 0,2078439 | 0,390212 |
| ANKMY2        | 1,08 | 0,42 | 0,41 | 0,42 | 0,207958  | 0,390393 |
| RP11-862G15.1 | 0,10 | 1,96 | 0,27 | 0,06 | 0,2079839 | 0,390409 |
| RP11-890B15.3 | 0,29 | 0,03 | 0,22 | 0,03 | 0,2080531 | 0,390506 |
| RP11-59O6.3   | 3,07 | 0,00 | 0,55 | 0,47 | 0,2080769 | 0,390518 |
| ITIH4         | 3,62 | 4,18 | 4,20 | 4,25 | 0,208152  | 0,390625 |
| RN7SL364P     | 0,00 | 0,00 | 0,00 | 2,55 | 0,2082666 | 0,390808 |
| SCRG1         | 0,81 | 0,75 | 0,77 | 1,07 | 0,2083208 | 0,390876 |
| RP11-308B16.1 | 0,37 | 0,66 | 0,09 | 0,00 | 0,2083741 | 0,390926 |
| NOL6          | 1,36 | 0,65 | 1,29 | 2,25 | 0,2083912 | 0,390926 |
| RP11-473O4.3  | 0,00 | 0,37 | 0,00 | 0,00 | 0,2083999 | 0,390926 |
| OR5H1         | 0,08 | 0,19 | 0,05 | 0,19 | 0,2084747 | 0,391033 |
| RP11-153F10.2 | 0,00 | 0,00 | 0,00 | 0,00 | 0,2085864 | NA       |
| RP11-268P4.5  | 1,39 | 0,00 | 0,68 | 0,00 | 0,2086234 | 0,391247 |
| HINFP         | 3,85 | 3,04 | 3,51 | 3,69 | 0,208624  | 0,391247 |
| MICB          | 1,26 | 1,48 | 1,05 | 0,57 | 0,2086984 | 0,391353 |
| CTDP1         | 2,86 | 4,72 | 3,01 | 3,00 | 0,2087227 | 0,391366 |
| CTD-2020K17.1 | 3,00 | 3,85 | 3,61 | 3,42 | 0,208747  | 0,391379 |
| AF186192.6    | 0,00 | 0,00 | 0,00 | 0,00 | 0,2087852 | 0,391394 |
| TCF7L1        | 0,35 | 2,40 | 0,47 | 0,69 | 0,2088063 | 0,391394 |
| UQCRH         | 7,89 | 8,00 | 8,13 | 7,76 | 0,2088078 | 0,391394 |
| ALDH9A1       | 4,76 | 5,15 | 3,89 | 3,23 | 0,2088531 | 0,391441 |
| NKIRAS1       | 1,76 | 0,80 | 1,91 | 0,72 | 0,2088685 | 0,391441 |
| RP5-1065P14.3 | 0,00 | 0,28 | 0,00 | 0,00 | 0,2089591 | NA       |
| VCPKMT        | 3,07 | 4,08 | 3,23 | 1,91 | 0,2090357 | 0,391722 |
| RP11-481J2.2  | 0,28 | 0,00 | 0,13 | 0,09 | 0,2090691 | 0,391751 |
| C20orf27      | 6,34 | 5,30 | 6,09 | 4,98 | 0,2091724 | 0,391912 |
| CD36          | 6,58 | 6,11 | 6,77 | 6,81 | 0,2092292 | 0,391985 |
| BCL7B         | 4,39 | 3,06 | 4,70 | 3,94 | 0,2092573 | 0,392005 |
| TIGD3         | 0,00 | 2,27 | 0,00 | 0,00 | 0,2092862 | 0,392026 |
| RP11-259K15.2 | 0,16 | 0,00 | 0,11 | 0,78 | 0,2093697 | 0,392149 |
| RP11-690C23.2 | 0,00 | 0,00 | 0,00 | 0,00 | 0,2094045 | 0,392151 |
| USP32P2       | 1,40 | 0,95 | 1,60 | 1,06 | 0,209431  | 0,392151 |
| YARS2         | 3,27 | 1,64 | 2,62 | 3,75 | 0,2094354 | 0,392151 |
| WBP1          | 3,92 | 5,23 | 4,61 | 3,91 | 0,2094492 | 0,392151 |

|                  |       |       |       |       |           |          |
|------------------|-------|-------|-------|-------|-----------|----------|
| AC006987.4       | 0,00  | 0,38  | 0,00  | 0,00  | 0,2094591 | 0,392151 |
| MSL1             | 4,55  | 4,26  | 3,99  | 3,71  | 0,2094837 | 0,392164 |
| LIN54            | 0,93  | 0,44  | 0,46  | 0,32  | 0,2095397 | 0,392236 |
| ACAD8            | 3,22  | 0,82  | 1,61  | 2,17  | 0,209615  | 0,392336 |
| RP5-1112D6.7     | 0,20  | 0,00  | 0,12  | 0,00  | 0,2096285 | 0,392336 |
| SSRP1            | 5,18  | 4,55  | 5,12  | 5,25  | 0,2097167 | 0,392468 |
| IQCF3            | 3,63  | 3,49  | 3,60  | 2,98  | 0,2097446 | 0,392488 |
| TLL2             | 0,00  | 0,05  | 0,00  | 0,05  | 0,2097813 | NA       |
| RP11-463O9.8     | 0,32  | 0,00  | 0,07  | 0,13  | 0,2098127 | 0,392575 |
| TSPYL2           | 2,09  | 2,37  | 2,07  | 0,74  | 0,2098269 | 0,392575 |
| UBXN1            | 7,37  | 7,15  | 7,29  | 6,58  | 0,2098764 | 0,392635 |
| CTC-327F10.5     | 0,00  | 0,00  | 0,00  | 0,00  | 0,2099808 | 0,392797 |
| RN7SL269P        | 0,00  | 0,00  | 1,35  | 0,89  | 0,2100765 | 0,392943 |
| FAM107B          | 4,22  | 4,39  | 3,71  | 4,02  | 0,2101902 | 0,393095 |
| RN7SL130P        | 1,85  | 0,00  | 1,53  | 1,83  | 0,2101949 | 0,393095 |
| PHF24            | 0,00  | 0,00  | 0,00  | 0,00  | 0,2102108 | 0,393095 |
| INSL6            | 6,32  | 4,65  | 5,22  | 5,33  | 0,2102744 | 0,393181 |
| RP5-851M4.1      | 0,00  | 4,82  | 0,61  | 0,00  | 0,2103001 | 0,393196 |
| RP11-299H22.1    | 0,21  | 0,18  | 0,12  | 0,32  | 0,2103374 | 0,393233 |
| FAM58A           | 2,98  | 4,26  | 3,87  | 2,79  | 0,2103584 | 0,393239 |
| RPS27L           | 5,39  | 4,61  | 5,52  | 5,70  | 0,2103781 | 0,393243 |
| CTD-2240E14.4    | 0,00  | 0,00  | 0,00  | 0,00  | 0,2104258 | NA       |
| NDUFS4           | 7,24  | 6,73  | 6,86  | 5,87  | 0,2104558 | 0,393355 |
| SH3BGRL3         | 10,26 | 10,11 | 10,37 | 10,17 | 0,2106221 | 0,393632 |
| UQCR10           | 6,70  | 6,75  | 6,92  | 6,22  | 0,210657  | 0,393664 |
| RP11-737O24.2    | 0,00  | 0,00  | 0,49  | 0,00  | 0,2107111 | 0,393733 |
| ABCG1            | 0,93  | 0,26  | 1,01  | 2,18  | 0,2108501 | 0,393935 |
| RP11-780O17.1    | 0,33  | 0,93  | 1,49  | 1,68  | 0,210855  | 0,393935 |
| ERMAP            | 3,03  | 0,66  | 2,76  | 2,47  | 0,211099  | 0,394358 |
| TBX1             | 0,00  | 0,37  | 0,00  | 0,00  | 0,2111255 | NA       |
| RP11-809N15.2    | 0,00  | 0,00  | 0,45  | 1,54  | 0,2111562 | 0,394431 |
| MCPH1            | 2,87  | 3,11  | 2,20  | 2,35  | 0,2112879 | 0,394644 |
| G6PC             | 0,16  | 0,39  | 0,18  | 0,08  | 0,2113215 | 0,394674 |
| RAI14            | 0,22  | 0,28  | 0,61  | 0,90  | 0,2113436 | 0,394682 |
| FKBP7            | 1,66  | 0,05  | 0,46  | 0,48  | 0,2115161 | 0,394971 |
| PIP5K2B          | 2,51  | 0,62  | 1,84  | 2,11  | 0,2115898 | 0,395064 |
| XXyac-YR211F11.1 | 1,94  | 0,56  | 1,53  | 1,44  | 0,2116015 | 0,395064 |
| RIMBP3           | 0,00  | 0,00  | 0,00  | 0,00  | 0,2117006 | 0,395216 |
| PSRC1            | 0,00  | 0,00  | 1,44  | 0,17  | 0,2118815 | 0,39552  |
| PFKP             | 2,69  | 0,83  | 2,89  | 2,47  | 0,2119214 | 0,395562 |
| RP11-254F19.3    | 0,33  | 0,60  | 0,35  | 0,86  | 0,2119553 | 0,395592 |
| PUS7L            | 3,56  | 2,25  | 2,62  | 1,98  | 0,2121427 | 0,395857 |
| RP11-142A23.1    | 0,65  | 0,41  | 1,00  | 0,25  | 0,212162  | 0,395857 |
| ZNF771           | 0,16  | 0,38  | 0,16  | 0,14  | 0,2121641 | 0,395857 |
| COL28A1          | 0,81  | 1,09  | 0,68  | 0,88  | 0,2121735 | 0,395857 |
| OXTR             | 0,29  | 1,13  | 0,66  | 0,03  | 0,2121926 | 0,395857 |
| NIFK-AS1         | 2,67  | 0,37  | 0,97  | 0,37  | 0,2122045 | 0,395857 |
| RP11-611D20.2    | 0,00  | 0,00  | 0,00  | 1,20  | 0,2122706 | 0,395919 |
| RP11-815J21.1    | 0,46  | 0,27  | 0,34  | 0,20  | 0,2122909 | 0,395919 |
| ADAM10           | 4,18  | 4,69  | 4,19  | 3,70  | 0,2122909 | 0,395919 |
| ENPP2            | 0,46  | 0,27  | 0,12  | 0,09  | 0,2123676 | 0,396014 |
| FBXL18           | 0,74  | 1,43  | 1,16  | 0,83  | 0,2123929 | 0,396014 |
| USP28            | 2,86  | 2,33  | 2,66  | 1,12  | 0,2124095 | 0,396014 |
| CTC-325J23.2     | 0,54  | 1,16  | 0,43  | 0,00  | 0,2124132 | 0,396014 |
| FBXO6            | 5,73  | 5,05  | 5,12  | 3,97  | 0,212461  | 0,39607  |

|                |      |      |      |      |           |          |
|----------------|------|------|------|------|-----------|----------|
| RN7SL509P      | 0,00 | 1,35 | 0,00 | 1,22 | 0,2125162 | NA       |
| RP1-239B22.5   | 0,04 | 0,14 | 0,20 | 0,14 | 0,2125914 | 0,396264 |
| RGMB           | 0,00 | 0,11 | 0,00 | 0,00 | 0,2126009 | 0,396264 |
| SLC2A14        | 0,69 | 0,33 | 1,11 | 0,26 | 0,2126351 | 0,396295 |
| RP11-34P13.18  | 1,16 | 0,86 | 1,40 | 1,03 | 0,2127654 | 0,396504 |
| RP11-369J21.12 | 0,00 | 0,00 | 0,00 | 0,00 | 0,2127997 | 0,396535 |
| RAB5B          | 3,94 | 2,53 | 3,16 | 2,89 | 0,2128223 | 0,396544 |
| PSG1           | 0,00 | 0,00 | 0,15 | 0,00 | 0,2129356 | 0,396708 |
| RP11-425I13.3  | 0,93 | 0,07 | 0,05 | 0,08 | 0,2129458 | 0,396708 |
| SLC16A13       | 0,00 | 0,00 | 0,00 | 0,15 | 0,212981  | 0,39674  |
| SKP2           | 3,21 | 1,06 | 3,07 | 1,76 | 0,2131393 | 0,396981 |
| MTPAP          | 6,01 | 6,30 | 5,80 | 5,01 | 0,2131641 | 0,396981 |
| RP11-526D8.7   | 0,59 | 2,74 | 0,16 | 0,53 | 0,2131642 | 0,396981 |
| KLRF1          | 1,11 | 0,63 | 0,15 | 3,82 | 0,2132445 | 0,397063 |
| ITSN1          | 2,17 | 3,31 | 2,50 | 2,73 | 0,2132544 | 0,397063 |
| CACNB1         | 0,00 | 0,00 | 0,05 | 0,33 | 0,2132614 | 0,397063 |
| SEC22C         | 4,08 | 2,98 | 3,55 | 2,83 | 0,213321  | 0,397116 |
| RP11-127B16.1  | 0,00 | 1,32 | 0,71 | 0,30 | 0,2133257 | 0,397116 |
| RNU6-1010P     | 0,00 | 5,11 | 0,00 | 0,00 | 0,2134949 | 0,397397 |
| RP11-40F6.1    | 0,00 | 0,30 | 0,00 | 0,00 | 0,2135127 | NA       |
| ZNF585A        | 4,06 | 5,15 | 3,84 | 4,20 | 0,2136447 | 0,397643 |
| FER1L4         | 1,58 | 1,40 | 1,54 | 1,89 | 0,2137089 | 0,397729 |
| RP1-128O3.4    | 0,00 | 0,54 | 0,00 | 0,00 | 0,2138734 | NA       |
| AC092024.2     | 0,37 | 1,15 | 0,76 | 1,11 | 0,2138789 | 0,398012 |
| MISP           | 0,00 | 0,21 | 0,17 | 0,17 | 0,2138835 | NA       |
| EIF3K          | 9,15 | 8,39 | 8,83 | 8,37 | 0,2139329 | 0,39805  |
| PTPN23         | 1,01 | 1,90 | 1,71 | 1,32 | 0,2139502 | 0,39805  |
| SNX16          | 1,07 | 1,00 | 1,01 | 2,47 | 0,2139533 | 0,39805  |
| CCDC71         | 0,00 | 0,00 | 0,00 | 0,00 | 0,2140233 | 0,398148 |
| RP11-1C8.5     | 0,30 | 0,53 | 0,42 | 0,32 | 0,2140847 | 0,398228 |
| LEPROT         | 4,40 | 3,13 | 4,26 | 3,80 | 0,2142614 | 0,398524 |
| AC012457.2     | 0,00 | 0,19 | 0,00 | 0,00 | 0,2142635 | NA       |
| PPP1R14D       | 0,00 | 0,44 | 0,00 | 0,45 | 0,21434   | 0,398588 |
| NEMP2          | 1,30 | 0,28 | 0,86 | 1,68 | 0,2143426 | 0,398588 |
| DNAAF2         | 0,98 | 0,44 | 2,01 | 2,26 | 0,2143498 | 0,398588 |
| RP5-1007M22.2  | 2,31 | 0,19 | 2,27 | 1,05 | 0,2144943 | 0,398797 |
| RNF187         | 2,46 | 2,50 | 2,63 | 2,85 | 0,2144983 | 0,398797 |
| DLGAP4         | 3,57 | 3,71 | 2,75 | 3,01 | 0,2147003 | 0,399107 |
| BRI3BP         | 3,49 | 2,60 | 3,11 | 2,15 | 0,2147027 | 0,399107 |
| C7orf65        | 0,03 | 0,00 | 0,05 | 0,04 | 0,2147188 | 0,399107 |
| RP11-785H5.2   | 0,00 | 0,00 | 0,00 | 0,00 | 0,2147871 | 0,399185 |
| RP11-323P14.2  | 1,38 | 1,14 | 1,30 | 1,88 | 0,2147964 | 0,399185 |
| CAPZA2         | 7,47 | 5,69 | 6,96 | 6,44 | 0,2148182 | 0,399192 |
| RP11-247L20.4  | 0,00 | 0,00 | 0,00 | 0,00 | 0,2148221 | NA       |
| RP11-226B15.1  | 0,00 | 0,00 | 0,00 | 0,00 | 0,2148746 | 0,399263 |
| GABRD          | 0,30 | 0,95 | 0,62 | 0,34 | 0,2148972 | 0,399272 |
| IKZF2          | 0,01 | 0,41 | 0,02 | 0,07 | 0,2150317 | 0,399482 |
| XRCC5          | 6,93 | 6,20 | 6,25 | 6,53 | 0,215054  | 0,399482 |
| RN7SL147P      | 0,89 | 1,22 | 1,30 | 1,99 | 0,215064  | 0,399482 |
| RP11-490B18.5  | 0,00 | 0,00 | 0,51 | 0,00 | 0,2151389 | 0,399587 |
| FRAT2          | 3,41 | 4,99 | 4,14 | 2,46 | 0,2151783 | 0,399597 |
| AMZ2           | 6,18 | 4,79 | 5,72 | 3,65 | 0,2151979 | 0,399597 |
| TRGV9          | 0,00 | 0,00 | 0,00 | 0,00 | 0,215198  | 0,399597 |
| CCT6P3         | 1,65 | 2,18 | 1,96 | 1,74 | 0,2152735 | 0,399704 |
| KDELR1         | 4,65 | 4,55 | 4,89 | 4,85 | 0,2153578 | 0,399807 |

|               |      |      |      |      |           |          |
|---------------|------|------|------|------|-----------|----------|
| CCNT1         | 4,17 | 1,67 | 3,45 | 2,07 | 0,2153653 | 0,399807 |
| PSMB1         | 9,20 | 8,66 | 8,90 | 8,64 | 0,2154236 | 0,399882 |
| RNAS59        | 0,00 | 0,00 | 0,00 | 3,00 | 0,2154442 | NA       |
| VPS37C        | 1,08 | 0,09 | 1,83 | 2,63 | 0,2155623 | 0,400091 |
| CCDC189       | 2,19 | 1,81 | 2,19 | 4,45 | 0,2155757 | 0,400091 |
| RRBP1         | 3,70 | 2,95 | 4,08 | 3,37 | 0,2155901 | 0,400091 |
| RP11-801G16.2 | 0,60 | 0,00 | 0,00 | 0,00 | 0,2156225 | 0,400118 |
| CCDC25        | 4,42 | 0,24 | 4,54 | 4,80 | 0,2156464 | 0,400129 |
| TMED5         | 4,90 | 4,02 | 4,32 | 2,94 | 0,2158716 | 0,400513 |
| ACO17104.2    | 0,92 | 2,38 | 3,17 | 2,29 | 0,2159061 | 0,400528 |
| CTD-2165H16.3 | 0,11 | 0,00 | 0,16 | 0,00 | 0,2159223 | 0,400528 |
| ANAPC15       | 6,03 | 6,79 | 6,21 | 6,01 | 0,2159427 | 0,400528 |
| GPN1          | 5,27 | 5,00 | 3,71 | 4,13 | 0,2159665 | 0,400528 |
| PSD4          | 1,84 | 2,97 | 2,74 | 2,44 | 0,2159775 | 0,400528 |
| CTD-2528L19.6 | 0,00 | 0,00 | 0,06 | 0,00 | 0,2159876 | 0,400528 |
| MRPL35        | 3,38 | 2,32 | 4,05 | 2,45 | 0,216039  | 0,40059  |
| RP11-111M22.3 | 1,62 | 0,00 | 0,87 | 0,28 | 0,2160954 | 0,400661 |
| RP11-142G1.3  | 1,47 | 3,78 | 2,35 | 2,69 | 0,2161259 | 0,400684 |
| AC140076.1    | 2,85 | 0,00 | 0,61 | 0,00 | 0,2161481 | 0,400692 |
| BCAP29        | 4,17 | 3,44 | 4,24 | 4,92 | 0,2163717 | 0,401073 |
| RP11-324O2.3  | 2,17 | 1,69 | 2,11 | 2,05 | 0,216426  | 0,401133 |
| RP11-195C7.1  | 1,08 | 0,62 | 0,00 | 0,00 | 0,2164403 | 0,401133 |
| CTB-49A3.2    | 0,00 | 0,83 | 0,00 | 0,00 | 0,2164826 | 0,401178 |
| DGUOK         | 6,80 | 5,49 | 6,95 | 6,72 | 0,2165609 | 0,40129  |
| HARBI1        | 2,99 | 4,10 | 2,13 | 0,62 | 0,2166091 | 0,401345 |
| PIGV          | 2,06 | 0,33 | 0,08 | 0,77 | 0,2166268 | 0,401345 |
| OR6D1P        | 0,32 | 0,56 | 0,26 | 0,32 | 0,2167081 | 0,401462 |
| RP11-264I13.2 | 0,63 | 3,12 | 1,66 | 0,34 | 0,2167365 | 0,401481 |
| RP11-468E2.1  | 0,00 | 0,00 | 0,53 | 0,00 | 0,2167831 | 0,401534 |
| RN7SL448P     | 3,45 | 2,09 | 2,91 | 1,72 | 0,2168476 | 0,40162  |
| OBP2B         | 0,00 | 2,16 | 0,00 | 0,00 | 0,21686   | NA       |
| SYT6          | 0,00 | 0,00 | 0,00 | 0,00 | 0,216875  | NA       |
| SCAF4         | 4,09 | 5,09 | 3,67 | 3,61 | 0,2169129 | 0,401673 |
| MKRN2OS       | 0,45 | 0,66 | 0,69 | 1,35 | 0,2169264 | 0,401673 |
| SMURF1        | 2,60 | 1,13 | 2,26 | 1,27 | 0,2169482 | 0,401673 |
| U62631.5      | 0,48 | 1,80 | 0,55 | 1,15 | 0,2169607 | 0,401673 |
| BTN2A2        | 4,36 | 2,44 | 3,90 | 5,06 | 0,2169666 | 0,401673 |
| ARHGAP25      | 4,60 | 2,59 | 4,17 | 3,68 | 0,2170095 | 0,401719 |
| ZNF318        | 2,68 | 2,99 | 3,41 | 2,34 | 0,2170516 | 0,401763 |
| LRRC37A16P    | 0,22 | 0,04 | 0,20 | 0,22 | 0,2171116 | 0,401841 |
| RP3-332O11.2  | 1,16 | 1,29 | 0,84 | 2,90 | 0,2172213 | 0,40201  |
| RPS2L1        | 0,00 | 0,39 | 0,19 | 0,00 | 0,2172975 | NA       |
| CAMK1D        | 3,90 | 4,10 | 3,44 | 3,02 | 0,2173158 | 0,402152 |
| RP11-714L20.1 | 0,11 | 0,18 | 0,07 | 0,40 | 0,2173763 | 0,40223  |
| KLHL7         | 3,62 | 2,91 | 1,74 | 2,37 | 0,2174133 | 0,402265 |
| RP11-96D1.8   | 0,68 | 0,52 | 0,77 | 1,28 | 0,2174622 | 0,40229  |
| BOD1L1        | 3,96 | 3,15 | 3,71 | 3,33 | 0,217463  | 0,40229  |
| RP11-443F4.1  | 0,57 | 1,16 | 1,76 | 1,59 | 0,2175668 | 0,402392 |
| NCAPD2        | 2,95 | 0,44 | 1,99 | 1,05 | 0,2175989 | 0,402392 |
| COMMD7        | 6,43 | 6,00 | 5,74 | 5,16 | 0,2176001 | 0,402392 |
| CTR9          | 4,06 | 2,83 | 4,00 | 4,03 | 0,2176014 | 0,402392 |
| ZNF383        | 2,29 | 3,63 | 2,60 | 3,00 | 0,2176087 | 0,402392 |
| RP11-33O4.1   | 0,00 | 0,00 | 0,00 | 0,00 | 0,2176525 | 0,40244  |
| CTB-134H23.2  | 0,00 | 0,15 | 0,00 | 0,00 | 0,21767   | NA       |
| ARL13B        | 3,24 | 0,84 | 1,97 | 0,95 | 0,2177377 | 0,402564 |

|               |      |      |      |      |           |          |
|---------------|------|------|------|------|-----------|----------|
| TRAPPC11      | 4,58 | 3,43 | 4,13 | 4,64 | 0,2177636 | 0,402578 |
| PRDM4         | 3,18 | 0,84 | 2,34 | 2,26 | 0,2177893 | 0,402592 |
| WDR45B        | 4,44 | 5,37 | 4,64 | 3,73 | 0,2178384 | 0,402622 |
| TRIM14        | 3,98 | 2,32 | 3,46 | 2,76 | 0,2178414 | 0,402622 |
| RP11-161H23.9 | 0,00 | 0,00 | 0,00 | 0,00 | 0,2178685 | NA       |
| FBXO9         | 5,47 | 4,95 | 5,06 | 3,75 | 0,2179859 | 0,402855 |
| SUCNR1        | 0,00 | 0,00 | 0,00 | 0,00 | 0,2180141 | 0,402874 |
| CAPN13        | 0,00 | 0,00 | 0,00 | 0,00 | 0,2180231 | NA       |
| AP001962.3    | 0,25 | 0,36 | 0,08 | 0,00 | 0,2180575 | 0,402896 |
| LRBA          | 3,80 | 3,19 | 3,27 | 2,22 | 0,2180968 | 0,402896 |
| EXOC7         | 2,53 | 2,12 | 2,93 | 3,78 | 0,2181121 | 0,402896 |
| ENY2          | 7,03 | 6,38 | 7,10 | 7,03 | 0,2181224 | 0,402896 |
| B3GALT2       | 0,36 | 0,00 | 0,14 | 0,23 | 0,2181284 | 0,402896 |
| CTD-2562115.4 | 0,00 | 1,05 | 0,00 | 0,54 | 0,218135  | 0,402896 |
| RRAS2         | 0,00 | 0,51 | 0,00 | 0,15 | 0,2182439 | 0,40306  |
| MAOB          | 0,00 | 0,00 | 0,00 | 0,19 | 0,21827   | 0,40306  |
| ZNF783        | 1,91 | 2,90 | 1,41 | 2,36 | 0,218278  | 0,40306  |
| PGM1          | 4,36 | 2,51 | 2,63 | 1,93 | 0,2183097 | 0,403085 |
| AIRE          | 0,04 | 0,06 | 0,05 | 0,00 | 0,2183857 | 0,403156 |
| CCDC40        | 0,41 | 1,34 | 0,51 | 0,74 | 0,2184008 | 0,403156 |
| PAXBP1        | 4,28 | 2,91 | 3,96 | 4,28 | 0,2184028 | 0,403156 |
| CHM           | 2,67 | 1,42 | 2,62 | 2,79 | 0,2184576 | 0,403224 |
| CTD-2270P14.2 | 0,91 | 2,14 | 1,21 | 1,51 | 0,2184844 | 0,40324  |
| RP11-384M15.3 | 0,46 | 0,93 | 1,05 | 1,87 | 0,2185161 | 0,403265 |
| CSGALNACT2    | 4,27 | 2,72 | 4,23 | 3,47 | 0,2185467 | 0,403288 |
| CTD-252513.2  | 0,00 | 0,00 | 0,00 | 0,00 | 0,2185776 | 0,403312 |
| ZNF469        | 0,48 | 0,54 | 0,18 | 0,19 | 0,2185974 | 0,403314 |
| AC108488.4    | 0,00 | 0,58 | 0,00 | 0,00 | 0,218664  | 0,403404 |
| CTD-2165H16.1 | 0,71 | 0,70 | 0,51 | 0,35 | 0,2187817 | 0,403588 |
| RPS3AP5       | 1,75 | 1,91 | 1,62 | 1,30 | 0,2188286 | 0,403641 |
| JMJD4         | 2,29 | 2,36 | 1,43 | 0,49 | 0,2188864 | 0,403714 |
| DNAJC15       | 4,64 | 4,71 | 4,36 | 3,82 | 0,2190666 | 0,403982 |
| TNFSF10       | 6,07 | 4,21 | 5,77 | 6,55 | 0,219068  | 0,403982 |
| CFAP65        | 0,00 | 0,06 | 0,00 | 0,00 | 0,2191506 | NA       |
| TAF9          | 6,45 | 5,78 | 5,37 | 5,10 | 0,2191642 | 0,404125 |
| RN7SL709P     | 1,88 | 1,10 | 1,82 | 1,09 | 0,2192458 | 0,404214 |
| NAA25         | 4,31 | 3,42 | 4,11 | 3,39 | 0,2192564 | 0,404214 |
| PPP2R5B       | 0,83 | 3,70 | 1,06 | 0,83 | 0,2192666 | 0,404214 |
| AMD1          | 5,87 | 4,47 | 5,07 | 3,77 | 0,2193086 | 0,404227 |
| NOL9          | 3,08 | 2,78 | 1,85 | 1,73 | 0,219321  | 0,404227 |
| ZFP57         | 0,00 | 0,14 | 0,00 | 0,00 | 0,2193313 | 0,404227 |
| GGH           | 0,32 | 0,26 | 0,55 | 1,22 | 0,219362  | 0,404227 |
| PRAG1         | 0,18 | 0,67 | 0,18 | 0,44 | 0,2193745 | 0,404227 |
| RP11-33E15.1  | 0,00 | 0,00 | 0,00 | 0,00 | 0,2193777 | NA       |
| RP11-666F17.1 | 2,35 | 1,99 | 2,27 | 1,37 | 0,2193827 | 0,404227 |
| NAV3          | 3,03 | 2,67 | 3,37 | 3,42 | 0,2194403 | 0,404241 |
| NDC80         | 0,46 | 0,72 | 0,35 | 0,40 | 0,219445  | 0,404241 |
| RP11-666O2.2  | 2,46 | 3,09 | 1,81 | 0,00 | 0,219481  | 0,404241 |
| CTB-1121.1    | 0,00 | 0,38 | 0,17 | 0,34 | 0,219487  | NA       |
| AC002076.10   | 0,00 | 0,14 | 0,31 | 0,00 | 0,2195065 | 0,404241 |
| TBR1          | 0,03 | 0,04 | 0,02 | 0,04 | 0,219508  | 0,404241 |
| DYNC1L11      | 5,01 | 4,36 | 5,17 | 4,18 | 0,2195097 | 0,404241 |
| GNPNAT1       | 1,74 | 3,48 | 1,21 | 1,22 | 0,2195178 | 0,404241 |
| RN7SL403P     | 0,95 | 2,27 | 0,20 | 0,96 | 0,2195218 | NA       |
| RP11-403P17.6 | 2,24 | 0,00 | 2,81 | 1,21 | 0,2195654 | 0,404248 |



|                |      |      |      |      |           |          |
|----------------|------|------|------|------|-----------|----------|
| TBCE           | 4,09 | 1,57 | 3,50 | 2,39 | 0,2195755 | 0,404248 |
| MITF           | 1,46 | 3,47 | 1,79 | 3,95 | 0,219576  | 0,404248 |
| RP11-54515.3   | 5,77 | 6,30 | 5,52 | 5,55 | 0,219659  | 0,40433  |
| RF00322        | 2,37 | 5,97 | 2,25 | 4,02 | 0,2196615 | 0,40433  |
| RP11-399K21.12 | 2,44 | 2,96 | 2,82 | 1,87 | 0,2196819 | 0,40433  |
| RFX2           | 3,14 | 3,30 | 3,80 | 3,46 | 0,2196935 | 0,40433  |
| RN7SL786P      | 0,00 | 0,00 | 0,37 | 0,80 | 0,2197001 | NA       |
| LA16c-306E5.2  | 0,00 | 0,00 | 0,00 | 0,00 | 0,219712  | 0,40433  |
| CKS1B          | 5,36 | 1,37 | 4,00 | 4,73 | 0,2197326 | 0,404335 |
| RP11-274B21.10 | 0,23 | 0,00 | 0,13 | 0,00 | 0,219783  | 0,404394 |
| RP11-131P10.2  | 0,12 | 0,00 | 0,18 | 0,98 | 0,2198102 | 0,404411 |
| RNF141         | 4,57 | 4,13 | 3,46 | 2,76 | 0,2198832 | 0,404512 |
| APO01347.6     | 0,51 | 4,46 | 0,68 | 3,42 | 0,2199447 | 0,404558 |
| SPRED3         | 0,24 | 0,42 | 0,33 | 0,37 | 0,2199449 | 0,404558 |
| CTD-2013N17.7  | 1,54 | 1,79 | 1,91 | 2,14 | 0,2200672 | 0,404749 |
| DNALI1         | 0,00 | 0,00 | 0,00 | 0,00 | 0,2200965 | 0,40477  |
| DNAH7          | 1,60 | 0,52 | 1,27 | 0,57 | 0,2201268 | 0,404784 |
| ITIH2          | 0,00 | 0,00 | 0,00 | 0,04 | 0,2201405 | 0,404784 |
| RN7SL553P      | 0,00 | 0,00 | 0,46 | 0,00 | 0,2202226 | 0,404865 |
| SLC22A18AS     | 0,16 | 0,00 | 0,00 | 0,00 | 0,2202401 | 0,404865 |
| RP4-798C17.6   | 1,74 | 1,63 | 2,00 | 2,70 | 0,2202402 | 0,404865 |
| TAF13          | 3,96 | 3,34 | 4,32 | 3,77 | 0,2202577 | 0,404865 |
| FOSL2          | 4,81 | 4,59 | 4,60 | 3,57 | 0,2203526 | 0,405006 |
| RPS26P31       | 0,67 | 0,00 | 0,00 | 1,14 | 0,2203551 | NA       |
| MRPS24         | 7,45 | 7,49 | 7,24 | 6,54 | 0,2203814 | 0,405026 |
| CTC-327F10.1   | 0,00 | 0,15 | 0,00 | 0,00 | 0,2204006 | 0,405028 |
| SPATA1         | 1,62 | 0,00 | 1,73 | 1,07 | 0,2204661 | 0,405114 |
| RP11-422P24.10 | 0,00 | 0,94 | 0,00 | 0,52 | 0,2204799 | NA       |
| ATP8B5P        | 0,00 | 0,07 | 0,00 | 0,05 | 0,2205342 | NA       |
| RP4-680D5.2    | 0,16 | 0,00 | 0,14 | 0,27 | 0,220547  | 0,40523  |
| SSX2IP         | 2,97 | 2,99 | 1,36 | 0,22 | 0,2205738 | 0,405245 |
| LRRC8B         | 1,42 | 0,50 | 1,29 | 1,35 | 0,2206076 | 0,405274 |
| SRSF4          | 5,10 | 5,53 | 5,31 | 4,67 | 0,2206515 | 0,405321 |
| RP13-49I15.6   | 0,00 | 0,00 | 0,00 | 0,00 | 0,2206695 | 0,405321 |
| NCOA1          | 3,56 | 4,26 | 4,11 | 4,59 | 0,2206882 | 0,405321 |
| RP11-16E18.3   | 0,06 | 0,00 | 0,00 | 0,07 | 0,2207822 | 0,405411 |
| RPS6KB2        | 3,96 | 2,24 | 3,28 | 2,19 | 0,2207864 | 0,405411 |
| NUFIP2         | 3,63 | 2,15 | 3,78 | 3,46 | 0,2207926 | 0,405411 |
| DCAF4          | 1,75 | 2,26 | 1,87 | 0,59 | 0,2208101 | 0,405411 |
| APBA1          | 0,37 | 0,20 | 0,20 | 0,17 | 0,2208489 | 0,405435 |
| AC104654.2     | 0,00 | 1,71 | 0,00 | 0,00 | 0,2208593 | 0,405435 |
| TULP1          | 0,00 | 1,23 | 0,00 | 0,00 | 0,2209086 | 0,405492 |
| RP11-881M11.8  | 0,00 | 0,00 | 0,00 | 0,00 | 0,2209606 | 0,405548 |
| RP11-668G10.2  | 0,00 | 0,00 | 0,00 | 0,00 | 0,2209757 | 0,405548 |
| CCDC181        | 0,00 | 0,00 | 0,00 | 0,08 | 0,2211126 | 0,405725 |
| CTD-2373N4.5   | 0,00 | 0,00 | 0,00 | 0,57 | 0,2211191 | 0,405725 |
| AKAP6          | 0,37 | 0,56 | 0,30 | 0,07 | 0,2211296 | 0,405725 |
| PABPC1L        | 2,30 | 1,53 | 2,11 | 3,37 | 0,2211458 | 0,405725 |
| USP34          | 6,19 | 5,58 | 6,02 | 5,12 | 0,2211635 | 0,405725 |
| OR5T2          | 0,00 | 0,00 | 0,00 | 0,00 | 0,2212242 | 0,405802 |
| ID3            | 3,75 | 3,50 | 3,97 | 5,04 | 0,2212418 | 0,405802 |
| SIGLEC12       | 0,00 | 0,00 | 0,00 | 0,00 | 0,2212957 | 0,405867 |
| LINC00273      | 0,76 | 2,49 | 0,99 | 0,19 | 0,2213645 | 0,40596  |
| CTD-2540B15.10 | 0,00 | 1,40 | 0,00 | 0,67 | 0,2214093 | NA       |
| MTND2P12       | 0,27 | 0,00 | 0,29 | 0,10 | 0,2214129 | 0,406015 |

|               |      |      |      |      |           |          |
|---------------|------|------|------|------|-----------|----------|
| BFAR          | 4,52 | 3,58 | 4,59 | 3,15 | 0,2214578 | 0,406064 |
| RPAP3         | 4,22 | 4,57 | 3,79 | 3,05 | 0,2214944 | 0,406098 |
| AC005523.2    | 3,65 | 1,48 | 3,85 | 2,19 | 0,2215541 | 0,406153 |
| STRN          | 2,28 | 0,57 | 2,02 | 2,03 | 0,2215613 | 0,406153 |
| FAF2          | 3,20 | 2,62 | 3,64 | 3,77 | 0,2216072 | 0,406204 |
| MED8          | 5,14 | 4,89 | 4,98 | 1,36 | 0,2217478 | 0,406428 |
| TIGD1         | 4,56 | 4,97 | 4,85 | 4,35 | 0,2217779 | 0,40645  |
| TXNDC17       | 6,22 | 4,81 | 6,73 | 7,09 | 0,2217994 | 0,406455 |
| AC053503.12   | 0,22 | 0,27 | 0,23 | 0,39 | 0,2218222 | 0,406464 |
| RP13-991F5.2  | 0,74 | 0,76 | 0,99 | 0,51 | 0,221851  | 0,406481 |
| SEC16B        | 0,04 | 0,56 | 0,02 | 0,53 | 0,2218683 | 0,406481 |
| RP11-505K9.4  | 0,00 | 0,00 | 0,00 | 0,00 | 0,2219113 | NA       |
| RP11-227G15.2 | 0,48 | 0,00 | 0,12 | 0,00 | 0,2219283 | 0,406482 |
| ZBTB5         | 0,68 | 0,09 | 0,40 | 2,78 | 0,2219323 | 0,406482 |
| PRKCA         | 2,76 | 2,60 | 2,62 | 2,07 | 0,2219447 | 0,406482 |
| FRA10AC1      | 2,26 | 2,29 | 2,73 | 1,80 | 0,2219543 | 0,406482 |
| MCM4          | 2,35 | 1,24 | 1,96 | 1,60 | 0,221972  | 0,406482 |
| RNU7-75P      | 0,00 | 0,00 | 0,00 | 0,00 | 0,2219855 | 0,406482 |
| RP11-625I7.1  | 0,00 | 0,00 | 0,00 | 0,00 | 0,221997  | 0,406482 |
| MON1A         | 0,59 | 0,95 | 2,38 | 0,39 | 0,2220558 | 0,406556 |
| KB-431C1.4    | 2,58 | 3,18 | 2,78 | 3,01 | 0,2220888 | 0,406583 |
| DACT2         | 0,00 | 0,00 | 0,00 | 0,00 | 0,2221373 | NA       |
| RP4-666F24.3  | 0,00 | 1,79 | 1,13 | 0,00 | 0,2222755 | 0,406892 |
| RN7SL307P     | 0,00 | 0,00 | 0,00 | 0,82 | 0,2223878 | NA       |
| RP4-610L12.1  | 0,00 | 0,00 | 0,05 | 0,27 | 0,2224274 | 0,407136 |
| TMEM120B      | 2,18 | 3,54 | 1,76 | 2,34 | 0,2225209 | 0,407274 |
| RP11-412P11.1 | 0,31 | 0,12 | 0,22 | 0,26 | 0,2225621 | 0,407287 |
| AC069257.4    | 1,42 | 0,49 | 0,77 | 0,45 | 0,2225647 | 0,407287 |
| RP5-836N17.4  | 0,00 | 0,00 | 0,00 | 0,00 | 0,2225952 | 0,407309 |
| CNST          | 3,64 | 2,16 | 3,63 | 2,87 | 0,2226607 | 0,407396 |
| AC006019.3    | 0,00 | 0,21 | 0,00 | 0,00 | 0,2226987 | 0,407431 |
| SMYD3         | 4,07 | 5,16 | 2,80 | 4,02 | 0,2227471 | 0,407487 |
| RP11-77A13.1  | 0,00 | 0,00 | 0,98 | 0,00 | 0,2227672 | 0,40749  |
| GEMIN6        | 2,75 | 0,82 | 2,06 | 1,01 | 0,2228742 | 0,407652 |
| OGFOD2        | 0,95 | 0,88 | 3,39 | 1,96 | 0,2228925 | 0,407652 |
| MIOS          | 3,60 | 1,72 | 3,49 | 3,43 | 0,2229286 | 0,407684 |
| FCGR2B        | 6,72 | 6,94 | 7,19 | 5,28 | 0,2229651 | 0,407718 |
| BIK           | 3,32 | 0,17 | 1,14 | 0,00 | 0,223021  | 0,407786 |
| NSF           | 4,80 | 3,57 | 4,02 | 2,72 | 0,2230881 | 0,40787  |
| NPHP1         | 0,47 | 0,48 | 0,32 | 0,22 | 0,2231139 | 0,40787  |
| ARSE          | 1,24 | 1,04 | 1,50 | 0,99 | 0,2231297 | 0,40787  |
| HACD4         | 4,98 | 3,99 | 4,21 | 4,66 | 0,2231553 | 0,40787  |
| SLC46A2       | 0,10 | 0,00 | 0,18 | 0,87 | 0,2231584 | 0,40787  |
| RP11-807H22.7 | 0,70 | 0,89 | 0,75 | 0,58 | 0,2232665 | 0,407992 |
| CTC-507E2.2   | 0,00 | 0,00 | 0,00 | 3,84 | 0,2232771 | 0,407992 |
| ARSB          | 3,56 | 2,33 | 2,95 | 2,26 | 0,2232806 | 0,407992 |
| RP11-265N6.2  | 1,64 | 1,08 | 1,41 | 0,00 | 0,2233271 | 0,407997 |
| CLTCL1        | 0,00 | 0,00 | 0,00 | 0,27 | 0,2233404 | 0,407997 |
| RP11-20B24.2  | 0,23 | 0,92 | 0,35 | 1,17 | 0,2233541 | 0,407997 |
| RP11-462G12.1 | 0,00 | 0,13 | 0,00 | 0,00 | 0,2233567 | 0,407997 |
| RN7SL50P      | 0,00 | 0,00 | 0,00 | 0,98 | 0,2233786 | 0,408004 |
| TP53INP2      | 2,27 | 0,32 | 1,21 | 0,14 | 0,223524  | 0,408236 |
| AC010091.1    | 0,00 | 0,69 | 0,00 | 0,00 | 0,2235802 | 0,408305 |
| NKX6-2        | 0,00 | 0,00 | 0,38 | 1,77 | 0,2236462 | 0,408392 |
| ANKRD65       | 0,00 | 0,19 | 0,00 | 0,00 | 0,223688  | 0,408414 |

|               |      |      |      |      |           |          |
|---------------|------|------|------|------|-----------|----------|
| C10orf40      | 0,41 | 0,27 | 0,33 | 0,28 | 0,2236951 | 0,408414 |
| AC159540.14   | 0,26 | 1,71 | 0,89 | 0,38 | 0,2237424 | 0,408452 |
| TRMT1         | 3,62 | 2,37 | 3,64 | 4,36 | 0,2237525 | 0,408452 |
| ACO22816.2    | 0,00 | 0,44 | 0,00 | 0,00 | 0,2238098 | NA       |
| MYBL2         | 0,09 | 0,11 | 0,05 | 0,09 | 0,2240087 | 0,408877 |
| RP11-437J2.3  | 0,42 | 0,41 | 0,38 | 0,11 | 0,2240223 | 0,408877 |
| OR8H2         | 0,00 | 0,00 | 0,00 | 0,00 | 0,2240534 | NA       |
| UVSSA         | 2,78 | 0,97 | 2,29 | 2,38 | 0,2240842 | 0,408956 |
| VPS45         | 4,70 | 2,57 | 3,52 | 3,72 | 0,224117  | 0,408983 |
| AP000689.3    | 0,00 | 0,00 | 0,00 | 0,00 | 0,2241603 | NA       |
| CTB-133P21.1  | 0,21 | 0,00 | 0,00 | 0,00 | 0,224215  | 0,409128 |
| MELTF         | 0,00 | 0,10 | 0,03 | 0,00 | 0,2242468 | 0,409152 |
| PRODH         | 0,06 | 0,10 | 0,10 | 0,35 | 0,2243092 | 0,409153 |
| SNORD11B      | 0,00 | 0,00 | 0,00 | 0,00 | 0,2243138 | 0,409153 |
| RP11-351C21.2 | 0,00 | 0,00 | 0,22 | 0,00 | 0,2243246 | 0,409153 |
| CPNE3         | 6,13 | 3,69 | 5,44 | 3,88 | 0,2243344 | 0,409153 |
| RNF217        | 2,45 | 2,12 | 3,26 | 2,41 | 0,2243392 | 0,409153 |
| SCN8A         | 0,05 | 0,99 | 0,00 | 0,54 | 0,2243595 | 0,409157 |
| PSG2          | 0,23 | 0,00 | 0,26 | 0,49 | 0,2243996 | 0,409161 |
| RP11-712L6.5  | 0,67 | 0,00 | 0,00 | 0,00 | 0,2244276 | 0,409161 |
| MAPRE2        | 4,85 | 3,89 | 4,00 | 3,73 | 0,2244336 | 0,409161 |
| FAM35A        | 3,19 | 2,42 | 1,95 | 2,45 | 0,2244355 | 0,409161 |
| RP11-318C24.1 | 1,18 | 2,59 | 1,75 | 2,03 | 0,2246739 | 0,409541 |
| LONRF3        | 0,00 | 0,00 | 0,41 | 0,64 | 0,2246807 | 0,409541 |
| RBM28         | 3,75 | 4,18 | 3,33 | 4,91 | 0,2247111 | 0,409562 |
| RP11-67A1.4   | 0,00 | 0,00 | 0,00 | 0,00 | 0,2248172 | NA       |
| C21orf58      | 0,42 | 0,10 | 0,27 | 0,54 | 0,2248277 | 0,409725 |
| RP11-345P4.6  | 0,07 | 0,00 | 0,00 | 0,20 | 0,224858  | 0,409725 |
| NSMF          | 2,33 | 3,64 | 3,41 | 2,90 | 0,2248914 | 0,409725 |
| GLI3          | 0,00 | 0,00 | 0,00 | 0,00 | 0,2248916 | 0,409725 |
| MED21         | 2,88 | 1,42 | 2,93 | 3,86 | 0,2248952 | 0,409725 |
| RP11-216B9.8  | 1,40 | 2,22 | 1,45 | 2,56 | 0,2249108 | 0,409725 |
| RP11-74C1.4   | 0,00 | 0,00 | 0,00 | 0,00 | 0,2249537 | 0,409769 |
| ZBTB39        | 0,02 | 0,06 | 0,22 | 0,02 | 0,2249952 | 0,409811 |
| CH17-52D20.3  | 0,00 | 0,92 | 0,00 | 0,00 | 0,2250879 | NA       |
| RP11-720L2.4  | 0,00 | 2,14 | 0,09 | 0,00 | 0,2250939 | 0,409958 |
| RPL19P21      | 0,00 | 0,00 | 0,00 | 0,34 | 0,2251237 | NA       |
| RP11-347H15.3 | 1,61 | 0,00 | 0,00 | 0,00 | 0,2251984 | 0,410061 |
| SCN7A         | 0,57 | 0,22 | 0,37 | 0,36 | 0,2252041 | 0,410061 |
| ACO02398.9    | 0,42 | 0,39 | 0,00 | 0,00 | 0,2252058 | 0,410061 |
| TIPARP        | 5,12 | 5,93 | 4,20 | 3,95 | 0,2252688 | 0,410102 |
| RP11-513O17.3 | 0,00 | 0,09 | 0,03 | 0,19 | 0,2252825 | 0,410102 |
| FAM210B       | 2,04 | 2,49 | 1,75 | 2,61 | 0,2252837 | 0,410102 |
| CTB-96E2.7    | 0,00 | 1,66 | 0,45 | 2,58 | 0,2253329 | 0,410128 |
| RP11-378J18.3 | 0,00 | 2,16 | 0,00 | 0,00 | 0,2253353 | 0,410128 |
| TBX18         | 0,00 | 0,00 | 0,00 | 0,00 | 0,2253622 | NA       |
| SETD1B        | 1,72 | 1,60 | 2,49 | 1,69 | 0,2253775 | 0,410172 |
| RP11-115P16.3 | 0,00 | 1,48 | 0,00 | 2,51 | 0,2254319 | 0,410237 |
| RPS6KA6       | 0,55 | 0,47 | 0,53 | 0,76 | 0,2254871 | 0,410286 |
| RP11-178H8.7  | 0,00 | 0,05 | 0,00 | 0,00 | 0,2254934 | NA       |
| RP11-713N11.6 | 1,97 | 0,00 | 0,77 | 0,00 | 0,2254955 | 0,410286 |
| RP3-426I6.5   | 0,00 | 0,00 | 0,65 | 0,00 | 0,2255261 | 0,410308 |
| RN7SL751P     | 0,00 | 0,00 | 0,79 | 0,00 | 0,22559   | NA       |
| CAMSAP1       | 2,89 | 2,30 | 2,54 | 1,24 | 0,225648  | 0,410496 |
| PDE10A        | 0,39 | 0,71 | 0,19 | 1,50 | 0,2257005 | 0,410558 |

|               |      |      |      |      |           |          |
|---------------|------|------|------|------|-----------|----------|
| PRSS51        | 0,00 | 0,00 | 0,00 | 0,00 | 0,2257931 | 0,410693 |
| HRAS          | 1,53 | 3,34 | 3,53 | 3,71 | 0,2258587 | 0,410778 |
| RP11-488P3.1  | 0,11 | 0,00 | 0,00 | 0,08 | 0,2259555 | 0,410921 |
| AC116366.7    | 0,73 | 0,00 | 0,37 | 0,00 | 0,2260036 | 0,410953 |
| RP11-443A13.5 | 3,89 | 4,53 | 3,50 | 4,99 | 0,2260103 | 0,410953 |
| CTD-2636A23.2 | 1,54 | 1,87 | 2,06 | 1,90 | 0,2260547 | 0,411    |
| RN7SL482P     | 0,00 | 0,75 | 0,00 | 0,00 | 0,2261222 | 0,411082 |
| POLB          | 5,49 | 1,88 | 4,24 | 4,91 | 0,2261367 | 0,411082 |
| MYCBP2-AS1    | 5,30 | 2,40 | 4,39 | 4,93 | 0,2262254 | 0,411209 |
| TBC1D5        | 5,83 | 4,31 | 5,49 | 4,49 | 0,2262603 | 0,411226 |
| RP11-118F19.1 | 1,84 | 0,87 | 0,49 | 0,27 | 0,2262722 | 0,411226 |
| EPHA6         | 0,00 | 2,43 | 0,00 | 0,00 | 0,2262902 | 0,411226 |
| EIF1AD        | 4,57 | 5,58 | 4,23 | 1,92 | 0,2263273 | 0,411257 |
| RP11-982M15.2 | 5,15 | 6,30 | 5,18 | 5,12 | 0,2263437 | 0,411257 |
| STIM1         | 4,83 | 5,20 | 4,39 | 4,61 | 0,226386  | 0,4113   |
| RP11-143J12.3 | 2,28 | 2,49 | 2,39 | 2,27 | 0,2264073 | 0,411305 |
| TTC9C         | 4,53 | 5,67 | 3,46 | 4,09 | 0,2264367 | 0,41132  |
| CTB-134H23.3  | 0,23 | 0,19 | 0,26 | 0,27 | 0,2264525 | 0,41132  |
| RP11-732A19.1 | 0,00 | 0,00 | 0,00 | 0,00 | 0,2265735 | 0,411461 |
| RP11-493L12.4 | 0,00 | 3,32 | 0,00 | 0,87 | 0,2265747 | 0,411461 |
| PINLYP        | 0,55 | 0,75 | 0,45 | 0,71 | 0,226586  | 0,411461 |
| PATL1         | 2,43 | 1,20 | 2,00 | 1,27 | 0,2267151 | 0,411662 |
| TFAP2A-AS2    | 0,00 | 0,08 | 0,00 | 0,03 | 0,2268993 | NA       |
| CDKN1C        | 0,00 | 0,17 | 0,00 | 0,70 | 0,2269507 | 0,412056 |
| EPHB4         | 1,02 | 1,75 | 1,04 | 1,78 | 0,2270517 | 0,412182 |
| C1orf168      | 2,22 | 1,33 | 2,57 | 2,46 | 0,2270571 | 0,412182 |
| HUWE1         | 4,41 | 4,12 | 3,64 | 3,25 | 0,2271752 | 0,412354 |
| AC097500.2    | 0,49 | 2,56 | 0,26 | 0,00 | 0,2271889 | 0,412354 |
| RAD21         | 5,36 | 4,91 | 5,28 | 4,36 | 0,2273224 | 0,412555 |
| RP11-343B5.1  | 0,00 | 0,00 | 0,00 | 0,00 | 0,2273332 | NA       |
| FAM210A       | 2,69 | 2,84 | 3,25 | 3,29 | 0,227339  | 0,412555 |
| IFT20         | 6,41 | 5,42 | 5,84 | 4,51 | 0,2273554 | 0,412555 |
| MRRF          | 5,24 | 3,48 | 4,13 | 3,16 | 0,2274096 | 0,41256  |
| ARID4A        | 5,01 | 4,81 | 3,81 | 4,29 | 0,2274135 | 0,41256  |
| RP11-431M3.1  | 0,00 | 0,00 | 0,00 | 3,66 | 0,2274331 | 0,41256  |
| REEP6         | 0,00 | 0,00 | 0,00 | 0,00 | 0,2274501 | 0,41256  |
| DBET          | 0,04 | 0,17 | 0,02 | 0,08 | 0,227451  | 0,41256  |
| RAB11FIP5     | 0,00 | 0,00 | 0,00 | 0,00 | 0,2274619 | NA       |
| PIWIL1        | 0,00 | 0,00 | 0,00 | 0,00 | 0,2274878 | NA       |
| CTB-99A3.1    | 1,95 | 1,76 | 2,12 | 2,03 | 0,2275353 | 0,412679 |
| RBL2          | 4,49 | 4,19 | 3,68 | 3,97 | 0,2275669 | 0,412703 |
| XRRA1         | 3,54 | 3,45 | 2,61 | 3,05 | 0,2275959 | 0,412722 |
| PLEKHA1       | 2,63 | 1,35 | 2,67 | 3,23 | 0,2276545 | 0,412722 |
| RP3-508I15.21 | 2,59 | 0,00 | 2,54 | 0,36 | 0,2276625 | 0,412722 |
| RP11-63P12.6  | 2,47 | 1,36 | 2,72 | 1,51 | 0,227672  | 0,412722 |
| STIL          | 0,63 | 0,64 | 1,18 | 1,70 | 0,2276959 | 0,412722 |
| COX10-AS1     | 3,91 | 2,23 | 3,66 | 3,02 | 0,2277021 | 0,412722 |
| RP11-116B13.1 | 0,00 | 0,00 | 0,00 | 0,00 | 0,2277076 | NA       |
| TWF1          | 4,29 | 1,56 | 3,36 | 2,24 | 0,2277186 | 0,412722 |
| DGKI          | 0,00 | 0,07 | 0,00 | 1,33 | 0,227726  | 0,412722 |
| RN7SL754P     | 0,00 | 0,97 | 0,00 | 0,00 | 0,2278549 | NA       |
| TP73-AS1      | 0,67 | 0,27 | 1,25 | 0,78 | 0,227919  | 0,413028 |
| TMEM189       | 3,83 | 3,38 | 3,86 | 4,19 | 0,227933  | 0,413028 |
| RN7SL255P     | 1,04 | 0,79 | 1,03 | 0,00 | 0,227985  | 0,413028 |
| EXOC6         | 3,97 | 2,17 | 3,29 | 3,59 | 0,228015  | 0,413028 |

|               |      |      |      |      |           |          |
|---------------|------|------|------|------|-----------|----------|
| RP1-296G17.3  | 0,35 | 0,42 | 0,37 | 0,29 | 0,2280436 | 0,413028 |
| RAD18         | 2,08 | 1,66 | 1,21 | 0,44 | 0,2280501 | 0,413028 |
| SPDYA         | 2,92 | 1,85 | 3,23 | 1,43 | 0,2280505 | 0,413028 |
| TSEN2         | 3,62 | 3,61 | 2,06 | 2,35 | 0,2280906 | 0,413028 |
| SLC25A21      | 1,43 | 0,33 | 1,27 | 2,10 | 0,2280934 | 0,413028 |
| PMAIP1        | 6,87 | 6,03 | 6,13 | 6,27 | 0,2280953 | 0,413028 |
| ZDHHC15       | 2,88 | 3,34 | 2,87 | 3,53 | 0,2280995 | 0,413028 |
| MRPS18B       | 5,76 | 5,06 | 5,31 | 4,22 | 0,228135  | 0,413059 |
| RP11-383G6.4  | 0,00 | 0,00 | 0,03 | 0,05 | 0,2281524 | NA       |
| RP11-703M24.5 | 1,11 | 2,71 | 1,26 | 1,43 | 0,2281544 | 0,413061 |
| PTGER3        | 0,15 | 0,00 | 0,01 | 0,00 | 0,2283363 | 0,413356 |
| RP11-408E5.3  | 0,00 | 0,09 | 0,00 | 0,00 | 0,2283633 | NA       |
| RP11-126O1.4  | 5,42 | 3,68 | 4,22 | 0,64 | 0,2284018 | 0,413441 |
| FAM110C       | 0,03 | 0,21 | 0,05 | 0,08 | 0,2288543 | 0,414206 |
| KLHL28        | 4,47 | 2,35 | 2,97 | 1,38 | 0,2288619 | 0,414206 |
| RP11-564C4.5  | 0,00 | 0,00 | 0,00 | 0,00 | 0,2288904 | 0,414224 |
| BSG           | 5,70 | 5,44 | 5,69 | 5,34 | 0,2289796 | 0,414352 |
| FOPNL         | 3,99 | 4,36 | 3,52 | 3,66 | 0,2290434 | 0,414434 |
| FUBP3         | 2,93 | 1,52 | 2,63 | 2,45 | 0,2291174 | 0,414534 |
| HEATR4        | 0,78 | 0,04 | 1,34 | 0,08 | 0,2291639 | 0,414572 |
| NAALAD2       | 0,00 | 0,07 | 0,12 | 0,00 | 0,2291757 | 0,414572 |
| CLVS1         | 0,00 | 0,48 | 0,08 | 0,74 | 0,2292131 | 0,414572 |
| PLAGL1        | 3,76 | 2,97 | 3,48 | 4,19 | 0,229224  | 0,414572 |
| AC008079.10   | 0,62 | 1,13 | 0,61 | 0,78 | 0,2292413 | 0,414572 |
| FBXW4         | 3,60 | 0,69 | 4,21 | 2,40 | 0,2292723 | 0,414572 |
| ABCC3         | 1,01 | 2,24 | 2,00 | 3,41 | 0,2292828 | 0,414572 |
| TAS2R4        | 0,12 | 0,06 | 0,12 | 0,13 | 0,2293042 | 0,414572 |
| POLR2J3       | 3,90 | 4,91 | 3,55 | 3,61 | 0,2293066 | 0,414572 |
| CTA-215D11.6  | 0,59 | 0,23 | 0,41 | 0,60 | 0,2293461 | 0,414593 |
| PRDM15        | 1,81 | 1,39 | 1,62 | 0,33 | 0,2293559 | 0,414593 |
| C11orf96      | 0,00 | 0,11 | 0,00 | 0,00 | 0,2293737 | 0,414593 |
| DPP10         | 0,62 | 0,93 | 0,20 | 0,63 | 0,2295298 | 0,414841 |
| CUL9          | 4,26 | 5,00 | 4,19 | 5,09 | 0,2295631 | 0,414867 |
| RAB1A         | 6,44 | 6,53 | 6,54 | 6,02 | 0,2296167 | 0,414931 |
| GNG11         | 0,00 | 0,00 | 0,00 | 2,18 | 0,2296698 | 0,414993 |
| GATA4         | 0,00 | 0,10 | 0,00 | 0,00 | 0,229684  | NA       |
| RP11-361M10.5 | 0,60 | 1,66 | 0,36 | 0,16 | 0,2296927 | 0,414998 |
| AC009095.4    | 0,00 | 1,41 | 0,00 | 0,01 | 0,22971   | 0,414998 |
| GUSB          | 5,29 | 5,17 | 4,82 | 3,48 | 0,2297362 | 0,415012 |
| RP11-2B6.2    | 0,00 | 0,00 | 0,32 | 0,00 | 0,2297565 | 0,415014 |
| RP11-94C24.13 | 0,14 | 0,51 | 0,20 | 0,10 | 0,2299238 | 0,415281 |
| CDH20         | 0,00 | 0,00 | 0,00 | 0,00 | 0,2299801 | 0,415281 |
| FUK           | 2,03 | 3,15 | 2,24 | 1,76 | 0,2299858 | 0,415281 |
| STK38L        | 5,75 | 4,21 | 5,31 | 4,10 | 0,2300029 | 0,415281 |
| CCDC58        | 3,14 | 3,77 | 3,16 | 3,32 | 0,2300054 | 0,415281 |
| ZNF100        | 3,39 | 4,11 | 3,14 | 3,05 | 0,2300193 | 0,415281 |
| CERS4         | 0,93 | 1,75 | 0,74 | 3,77 | 0,2300349 | 0,415281 |
| RNU6-733P     | 0,00 | 0,00 | 0,00 | 0,00 | 0,2300782 | 0,415297 |
| KIAA1683      | 0,74 | 0,81 | 1,66 | 1,81 | 0,2300813 | 0,415297 |
| RP11-521O16.2 | 0,21 | 0,19 | 0,32 | 0,22 | 0,2301409 | 0,415344 |
| PABPC1L2A     | 0,02 | 0,00 | 0,00 | 0,00 | 0,2301443 | 0,415344 |
| GALNT5        | 0,46 | 0,32 | 0,43 | 0,25 | 0,2301818 | 0,415378 |
| RP1-59D14.8   | 0,00 | 0,00 | 0,00 | 4,64 | 0,2302334 | 0,415437 |
| CTC-241F20.3  | 1,36 | 1,04 | 1,60 | 2,09 | 0,2302565 | 0,415445 |
| PBRM1         | 5,30 | 4,99 | 4,41 | 3,23 | 0,2303369 | 0,415556 |

|                |      |      |      |      |           |          |
|----------------|------|------|------|------|-----------|----------|
| RP11-667M19.6  | 0,00 | 0,15 | 0,00 | 0,19 | 0,2304147 | NA       |
| AKAP10         | 4,51 | 5,36 | 3,87 | 4,51 | 0,2305177 | 0,415849 |
| SRF            | 2,52 | 2,88 | 3,29 | 2,51 | 0,2305513 | 0,415866 |
| GALK1          | 4,29 | 2,70 | 4,90 | 4,05 | 0,2305647 | 0,415866 |
| XXbac-B33L19.6 | 0,00 | 0,00 | 0,00 | 0,00 | 0,2306105 | 0,415905 |
| AC097461.4     | 0,00 | 0,00 | 0,43 | 0,00 | 0,2306237 | 0,415905 |
| SAR1B          | 5,34 | 4,38 | 4,95 | 4,27 | 0,2306494 | 0,415917 |
| RP11-17M15.2   | 0,00 | 0,06 | 0,00 | 0,00 | 0,2306645 | NA       |
| TRBV7-3        | 0,00 | 0,00 | 0,00 | 0,00 | 0,2306792 | 0,415938 |
| DCAF15         | 1,41 | 2,36 | 1,36 | 2,33 | 0,2308196 | 0,416141 |
| GNL3           | 5,79 | 4,65 | 5,49 | 4,50 | 0,2308295 | 0,416141 |
| RP11-39N8.2    | 4,30 | 0,38 | 3,21 | 3,88 | 0,2309355 | 0,416298 |
| RP11-467K18.3  | 0,51 | 0,20 | 0,46 | 0,09 | 0,2309586 | 0,416306 |
| RP11-267N12.3  | 0,00 | 0,00 | 0,00 | 0,00 | 0,2310437 | 0,416335 |
| MELK           | 0,29 | 0,46 | 0,47 | 0,55 | 0,2310538 | 0,416335 |
| RP11-245J9.9   | 1,91 | 0,77 | 1,54 | 1,26 | 0,2310545 | 0,416335 |
| PPIL2          | 3,85 | 1,59 | 3,79 | 2,88 | 0,2310783 | 0,416335 |
| BCORL1         | 0,10 | 0,00 | 0,28 | 0,61 | 0,2310957 | 0,416335 |
| AC013394.2     | 6,95 | 6,32 | 6,85 | 6,31 | 0,231114  | 0,416335 |
| RP11-284M14.1  | 0,00 | 3,04 | 0,00 | 0,00 | 0,231116  | 0,416335 |
| POMP           | 6,69 | 6,74 | 6,27 | 6,08 | 0,2311242 | 0,416335 |
| RP11-397A16.3  | 0,04 | 0,00 | 0,00 | 0,00 | 0,2313428 | 0,416695 |
| AC008592.8     | 0,00 | 0,71 | 0,60 | 0,85 | 0,2313873 | 0,41673  |
| RASIP1         | 0,00 | 0,00 | 0,00 | 0,00 | 0,2314003 | 0,41673  |
| SPDYE2B        | 0,00 | 0,00 | 0,18 | 0,13 | 0,2314452 | 0,416763 |
| PRX            | 0,00 | 0,49 | 0,00 | 0,00 | 0,2314559 | 0,416763 |
| ZNF570         | 1,09 | 0,59 | 1,56 | 0,17 | 0,2315414 | 0,416883 |
| RP5-1180D12.1  | 0,34 | 0,19 | 0,21 | 0,15 | 0,2315678 | 0,416897 |
| RP11-7I15.4    | 0,95 | 1,76 | 1,42 | 1,42 | 0,231649  | 0,416978 |
| NDUFB10        | 7,75 | 7,65 | 7,92 | 7,85 | 0,2316501 | 0,416978 |
| VN1R84P        | 0,00 | 0,00 | 0,00 | 0,00 | 0,2318015 | 0,417216 |
| RFX6           | 0,00 | 0,08 | 0,00 | 0,00 | 0,2318922 | 0,417346 |
| ASRGL1         | 3,33 | 3,75 | 3,37 | 4,38 | 0,2320028 | 0,417511 |
| MTFR2          | 0,87 | 0,00 | 0,12 | 0,08 | 0,2320476 | 0,417546 |
| Cxorf21        | 5,91 | 5,29 | 5,16 | 4,38 | 0,2320598 | 0,417546 |
| MRPS28         | 6,21 | 6,09 | 5,82 | 5,29 | 0,2322424 | 0,417841 |
| KLHL20         | 3,87 | 4,64 | 3,16 | 2,19 | 0,2323042 | 0,417876 |
| CRLF3          | 5,51 | 4,72 | 5,22 | 5,34 | 0,2323143 | 0,417876 |
| CTC-340A15.2   | 1,87 | 3,48 | 2,28 | 2,21 | 0,2323182 | 0,417876 |
| AC068282.3     | 0,42 | 1,06 | 0,80 | 0,22 | 0,232344  | 0,417888 |
| RP11-390F10.1  | 0,00 | 0,20 | 0,00 | 0,00 | 0,2324635 | NA       |
| PIK3C2B        | 0,63 | 0,17 | 0,53 | 0,64 | 0,232487  | 0,418112 |
| RBM44          | 1,12 | 0,07 | 0,52 | 2,04 | 0,232561  | 0,418199 |
| RP11-208N14.5  | 0,32 | 0,15 | 0,35 | 0,24 | 0,2325927 | 0,418199 |
| ECHDC3         | 0,00 | 0,55 | 0,33 | 0,90 | 0,232602  | 0,418199 |
| RP11-536I6.2   | 0,00 | 0,00 | 0,00 | 0,00 | 0,232619  | NA       |
| PIK3CD         | 4,03 | 4,49 | 3,91 | 3,72 | 0,2326272 | 0,418199 |
| SBNO1          | 3,68 | 3,78 | 3,25 | 3,86 | 0,2326296 | 0,418199 |
| RP11-742B18.1  | 0,00 | 0,00 | 0,00 | 0,00 | 0,2327262 | NA       |
| MEGF9          | 3,58 | 3,62 | 3,63 | 3,81 | 0,2327301 | 0,41832  |
| TRIM38         | 3,96 | 3,19 | 3,87 | 3,82 | 0,2327435 | 0,41832  |
| UBE2K          | 5,37 | 4,90 | 5,83 | 4,62 | 0,2327598 | 0,41832  |
| RFT1           | 3,50 | 1,41 | 2,58 | 1,41 | 0,2327723 | 0,41832  |
| RP4-714D9.5    | 1,03 | 0,51 | 1,08 | 1,07 | 0,2328077 | 0,41835  |
| C8orf17        | 0,20 | 0,00 | 0,11 | 0,13 | 0,23285   | 0,418376 |

|                |      |      |      |      |           |          |
|----------------|------|------|------|------|-----------|----------|
| MFSD1          | 7,25 | 6,35 | 6,99 | 6,55 | 0,2328598 | 0,418376 |
| RP11-356K23.2  | 0,00 | 0,06 | 1,05 | 0,46 | 0,2330187 | 0,418611 |
| ATP11B         | 4,48 | 4,95 | 4,05 | 3,68 | 0,2330281 | 0,418611 |
| VKORC1         | 6,32 | 6,32 | 6,49 | 5,03 | 0,2330911 | 0,41869  |
| WIPI1          | 3,46 | 3,58 | 3,89 | 4,18 | 0,2331339 | 0,418733 |
| PSPN           | 0,32 | 0,36 | 0,27 | 0,53 | 0,2331848 | 0,41879  |
| SPOCK1         | 0,00 | 0,00 | 0,01 | 0,00 | 0,2332074 | 0,418797 |
| AC007879.5     | 3,32 | 1,34 | 3,84 | 3,22 | 0,2333148 | 0,418956 |
| GLRX2          | 3,97 | 1,89 | 3,96 | 1,95 | 0,2334109 | 0,419095 |
| WFS1           | 0,00 | 0,00 | 0,00 | 0,00 | 0,2335146 | NA       |
| HIST1H3A       | 5,31 | 0,00 | 0,60 | 5,21 | 0,2335251 | 0,419213 |
| CORO7-PAM16    | 0,00 | 0,00 | 0,00 | 0,00 | 0,2335305 | 0,419213 |
| EXD2           | 0,99 | 3,17 | 2,21 | 2,49 | 0,2335332 | 0,419213 |
| RSPH14         | 0,00 | 0,00 | 0,00 | 0,42 | 0,2335554 | 0,419219 |
| RP11-512C24.3  | 0,00 | 2,33 | 0,00 | 0,05 | 0,2336333 | 0,4193   |
| CTD-3118D11.2  | 0,00 | 0,00 | 0,10 | 0,00 | 0,2336382 | 0,4193   |
| RP11-676J12.7  | 0,00 | 0,50 | 0,24 | 0,24 | 0,233663  | 0,419307 |
| TMEM203        | 3,51 | 1,43 | 3,63 | 3,42 | 0,2336801 | 0,419307 |
| RP11-52J3.3    | 0,00 | 0,00 | 0,00 | 0,00 | 0,2338179 | 0,419521 |
| RP3-466P17.1   | 0,00 | 0,00 | 0,00 | 0,00 | 0,2338444 | 0,419534 |
| RP11-331F4.5   | 0,10 | 0,20 | 0,07 | 0,14 | 0,233986  | 0,419755 |
| RP11-355O1.11  | 0,18 | 0,73 | 0,09 | 0,15 | 0,2340383 | 0,419795 |
| B3GALT4        | 0,14 | 0,08 | 1,24 | 1,23 | 0,2340464 | 0,419795 |
| FBXW5          | 5,16 | 4,75 | 5,42 | 5,78 | 0,2340888 | 0,419837 |
| AC091132.1     | 0,00 | 0,00 | 0,00 | 0,19 | 0,2342099 | 0,420021 |
| RNF146         | 3,49 | 0,25 | 1,80 | 1,38 | 0,2343537 | 0,420245 |
| TXNL1          | 5,75 | 5,42 | 4,86 | 2,31 | 0,234392  | 0,420279 |
| CTC-277H1.7    | 0,21 | 0,38 | 0,13 | 0,58 | 0,2344464 | 0,420315 |
| RP5-1085F17.4  | 0,00 | 0,00 | 0,00 | 0,00 | 0,2344498 | 0,420315 |
| CNTROB         | 1,39 | 1,37 | 3,13 | 1,38 | 0,2344862 | 0,420323 |
| HCP5           | 4,35 | 1,84 | 2,88 | 3,05 | 0,234492  | 0,420323 |
| PRKAB1         | 4,56 | 3,31 | 3,76 | 3,12 | 0,2345899 | 0,420465 |
| RNLS           | 1,67 | 0,30 | 1,37 | 0,60 | 0,2347186 | 0,420607 |
| CTD-2090I13.4  | 0,92 | 0,00 | 0,00 | 0,00 | 0,234735  | NA       |
| NAT9           | 4,88 | 3,83 | 4,63 | 3,46 | 0,2347395 | 0,420607 |
| RN7SL647P      | 0,00 | 0,00 | 0,00 | 0,00 | 0,2347502 | NA       |
| NIPSNAP1       | 3,40 | 1,73 | 2,74 | 2,78 | 0,2347655 | 0,420607 |
| ZFP62          | 1,27 | 5,29 | 2,59 | 4,20 | 0,2347717 | 0,420607 |
| RANBP1         | 6,27 | 6,95 | 6,33 | 5,38 | 0,2347919 | 0,420607 |
| RP11-73E17.2   | 0,31 | 0,14 | 0,42 | 0,22 | 0,2348125 | 0,420607 |
| GRIK1          | 1,13 | 0,64 | 1,08 | 0,00 | 0,2348197 | 0,420607 |
| ADAMTSL3       | 1,94 | 2,64 | 1,86 | 1,76 | 0,2348213 | 0,420607 |
| RN7SL76P       | 0,00 | 3,65 | 1,12 | 2,49 | 0,2348399 | 0,420607 |
| CTD-2354A18.1  | 0,00 | 1,03 | 0,00 | 0,23 | 0,2348951 | 0,420672 |
| CDC123         | 6,24 | 5,68 | 5,53 | 5,18 | 0,2349308 | 0,420702 |
| RP11-977G19.12 | 0,49 | 0,87 | 0,47 | 0,55 | 0,2349545 | 0,420711 |
| SPATA20        | 3,04 | 3,80 | 2,97 | 1,81 | 0,2350468 | 0,420842 |
| BTBD11         | 0,13 | 0,49 | 2,00 | 0,49 | 0,2351302 | 0,420958 |
| RP11-340L3.1   | 0,23 | 0,21 | 0,41 | 0,47 | 0,235197  | 0,421043 |
| RP11-135F9.3   | 2,93 | 1,50 | 3,07 | 0,88 | 0,2352967 | 0,421156 |
| ZC3H3          | 0,74 | 1,94 | 1,46 | 0,90 | 0,2353046 | 0,421156 |
| ANKRD40        | 3,34 | 3,24 | 3,33 | 2,81 | 0,2353166 | 0,421156 |
| OR8B5P         | 0,14 | 0,00 | 0,00 | 0,00 | 0,2353638 | NA       |
| SRSF11         | 7,49 | 6,67 | 7,19 | 7,00 | 0,2354402 | 0,421343 |
| RP11-727F15.14 | 0,00 | 0,00 | 1,44 | 1,94 | 0,2355174 | 0,421438 |

|               |       |       |       |      |           |          |
|---------------|-------|-------|-------|------|-----------|----------|
| RASAL3        | 2,79  | 1,43  | 2,75  | 2,21 | 0,2355425 | 0,421438 |
| AN08          | 0,07  | 0,07  | 0,19  | 0,03 | 0,2355504 | 0,421438 |
| RP11-33B1.2   | 0,57  | 0,87  | 0,69  | 1,14 | 0,2355908 | 0,421477 |
| C11orf44      | 0,00  | 0,04  | 0,00  | 0,00 | 0,2356111 | NA       |
| SEC22B        | 3,72  | 2,59  | 3,39  | 3,23 | 0,235695  | 0,421629 |
| DCAF17        | 0,83  | 0,26  | 1,38  | 1,33 | 0,235748  | 0,42169  |
| RP11-338C15.5 | 0,00  | 0,64  | 0,00  | 0,00 | 0,2358056 | 0,421759 |
| RSU1          | 5,82  | 5,26  | 5,33  | 5,37 | 0,2358287 | 0,421767 |
| SLC19A3       | 0,89  | 1,09  | 1,10  | 1,36 | 0,2358834 | 0,421806 |
| TNFAIP8L2     | 7,27  | 4,38  | 6,68  | 5,55 | 0,2358889 | 0,421806 |
| ARL5B         | 3,12  | 2,04  | 2,45  | 2,15 | 0,2359647 | 0,421908 |
| SNX33         | 0,04  | 1,19  | 0,47  | 0,22 | 0,2360043 | 0,421944 |
| SPDYE8P       | 0,43  | 1,31  | 0,13  | 0,00 | 0,236023  | 0,421944 |
| RP11-120K9.2  | 0,00  | 0,39  | 0,00  | 2,38 | 0,2360704 | 0,421995 |
| SIGLEC7       | 4,85  | 3,40  | 4,07  | 3,71 | 0,2360953 | 0,422006 |
| SNORA68B      | 0,00  | 0,00  | 0,00  | 2,23 | 0,2361818 | NA       |
| POSTN         | 0,00  | 0,00  | 0,00  | 0,00 | 0,2362758 | 0,422294 |
| ZNF596        | 0,64  | 0,26  | 0,50  | 0,43 | 0,2363672 | 0,422388 |
| PK2           | 1,75  | 0,83  | 1,78  | 1,65 | 0,2363825 | 0,422388 |
| SERAC1        | 1,02  | 1,00  | 1,64  | 1,22 | 0,236385  | 0,422388 |
| RP11-881M11.4 | 0,00  | 0,00  | 0,00  | 0,00 | 0,2364225 | NA       |
| NDUFB5        | 7,49  | 7,04  | 6,85  | 6,44 | 0,2364821 | 0,422505 |
| AC131180.3    | 0,00  | 0,00  | 0,17  | 0,19 | 0,2364918 | 0,422505 |
| SPAG7         | 6,89  | 7,30  | 6,86  | 6,23 | 0,236508  | 0,422505 |
| AC087886.1    | 0,44  | 0,05  | 0,36  | 0,13 | 0,2365805 | 0,422601 |
| RP11-127B20.2 | 0,22  | 0,30  | 0,00  | 0,00 | 0,2366718 | 0,42273  |
| RP4-788L20.5  | 0,00  | 0,00  | 0,00  | 0,00 | 0,2367557 | 0,422846 |
| TINF2         | 6,05  | 6,12  | 5,34  | 6,08 | 0,2368068 | 0,422903 |
| NAT14         | 0,00  | 0,00  | 0,00  | 2,02 | 0,236912  | 0,423029 |
| RABIF         | 3,30  | 2,96  | 2,69  | 2,56 | 0,2369151 | 0,423029 |
| RNF114        | 5,82  | 5,25  | 5,49  | 4,58 | 0,2370185 | 0,423179 |
| STRBP         | 1,80  | 2,87  | 0,92  | 3,39 | 0,2370805 | 0,423255 |
| XPO6          | 5,16  | 5,24  | 5,35  | 6,32 | 0,2370988 | 0,423255 |
| DENND1A       | 4,82  | 4,59  | 4,75  | 4,20 | 0,2372134 | 0,423425 |
| DNAJB9        | 4,51  | 2,35  | 3,93  | 3,27 | 0,2372571 | 0,423467 |
| C6orf1        | 5,57  | 5,52  | 5,65  | 4,99 | 0,2372752 | 0,423467 |
| FAM69C        | 0,00  | 0,04  | 0,00  | 0,09 | 0,237357  | 0,423571 |
| PPM1G         | 5,80  | 5,35  | 5,33  | 4,66 | 0,2373711 | 0,423571 |
| RP11-395P17.3 | 1,59  | 1,39  | 1,32  | 1,93 | 0,2374364 | 0,423653 |
| PSMD10        | 5,39  | 3,74  | 4,35  | 5,54 | 0,2374712 | 0,423681 |
| NTMT1         | 5,07  | 5,73  | 5,13  | 4,92 | 0,2375706 | 0,423825 |
| AC009948.5    | 3,92  | 2,63  | 4,10  | 2,02 | 0,2376197 | 0,423852 |
| PON3          | 0,00  | 1,79  | 0,00  | 0,00 | 0,2376363 | 0,423852 |
| LINC00632     | 0,04  | 0,45  | 0,11  | 0,17 | 0,237643  | 0,423852 |
| KIAA1161      | 0,90  | 1,78  | 0,96  | 1,38 | 0,2377103 | 0,423934 |
| ACBD5         | 3,63  | 1,65  | 2,36  | 2,66 | 0,2377272 | 0,423934 |
| TMEM126A      | 5,65  | 5,27  | 5,32  | 4,69 | 0,2378766 | 0,424134 |
| EIF1          | 10,29 | 10,14 | 10,19 | 9,43 | 0,2378776 | 0,424134 |
| AC024592.9    | 0,00  | 0,14  | 0,05  | 0,28 | 0,2378807 | NA       |
| RP1-100J12.1  | 0,00  | 0,00  | 0,38  | 0,00 | 0,2379967 | 0,424312 |
| LIG1          | 1,53  | 0,56  | 0,95  | 0,00 | 0,2380473 | 0,424337 |
| RN75L693P     | 0,00  | 1,05  | 0,88  | 1,55 | 0,2380487 | 0,424337 |
| COQ10B        | 5,01  | 1,31  | 4,29  | 3,71 | 0,2381497 | 0,424483 |
| RPL7AP11      | 0,17  | 0,00  | 0,10  | 0,22 | 0,2382774 | NA       |
| MPP5          | 1,71  | 0,59  | 1,96  | 2,32 | 0,2383063 | 0,424728 |



|               |       |       |       |       |           |          |
|---------------|-------|-------|-------|-------|-----------|----------|
| AL109763.2    | 0,45  | 2,49  | 0,00  | 2,40  | 0,238371  | 0,424771 |
| RP11-509E17.1 | 2,73  | 4,98  | 2,72  | 3,40  | 0,2383867 | 0,424771 |
| MT1E          | 0,00  | 0,00  | 0,24  | 2,26  | 0,2384032 | 0,424771 |
| CTC-268N12.3  | 0,00  | 0,00  | 0,62  | 2,28  | 0,2384071 | 0,424771 |
| RP11-273G15.2 | 1,59  | 0,50  | 1,30  | 2,99  | 0,2384414 | 0,424798 |
| RP11-380L11.4 | 0,23  | 0,63  | 0,28  | 0,28  | 0,2385111 | 0,424861 |
| TMEM177       | 0,00  | 0,20  | 0,00  | 0,14  | 0,2385147 | 0,424861 |
| RP11-567M21.3 | 0,33  | 1,30  | 0,40  | 0,48  | 0,2385574 | 0,424872 |
| AVPI1         | 4,37  | 0,73  | 2,87  | 1,07  | 0,2385761 | 0,424872 |
| RP11-566E18.3 | 0,00  | 0,09  | 0,10  | 0,00  | 0,2385785 | 0,424872 |
| MTRNR2L8      | 0,59  | 0,87  | 0,68  | 0,97  | 0,2386479 | 0,424932 |
| BNIP2         | 6,68  | 5,66  | 6,30  | 6,55  | 0,2386555 | 0,424932 |
| CCDC28A       | 5,37  | 4,01  | 4,86  | 5,10  | 0,2386767 | 0,424932 |
| RP11-678G14.2 | 2,19  | 3,82  | 2,91  | 1,40  | 0,2386886 | 0,424932 |
| AMMECR1L      | 1,25  | 0,45  | 1,34  | 0,73  | 0,2387345 | 0,424941 |
| HIST1H2BK     | 5,56  | 1,05  | 3,97  | 0,00  | 0,2387665 | 0,424941 |
| RP11-449H11.1 | 1,37  | 0,36  | 0,39  | 1,28  | 0,2387679 | 0,424941 |
| C9orf142      | 6,52  | 7,32  | 6,58  | 6,33  | 0,2387778 | 0,424941 |
| CTD-2506J14.1 | 0,00  | 0,00  | 0,24  | 0,00  | 0,2387889 | 0,424941 |
| RP11-582H21.2 | 0,00  | 0,00  | 0,00  | 0,00  | 0,2388454 | 0,424994 |
| MLLT4         | 1,00  | 0,88  | 1,39  | 1,41  | 0,238857  | 0,424994 |
| AC007292.3    | 0,42  | 0,50  | 0,39  | 0,37  | 0,2388852 | 0,424997 |
| RASGRP4       | 2,80  | 3,04  | 3,05  | 3,20  | 0,2388973 | 0,424997 |
| CTD-2012K14.6 | 0,00  | 0,00  | 0,00  | 0,00  | 0,2390585 | NA       |
| DUSP12        | 5,53  | 3,69  | 4,92  | 5,23  | 0,2391167 | 0,425354 |
| MALRD1        | 0,00  | 0,00  | 0,00  | 0,46  | 0,2391719 | 0,425408 |
| OSM           | 2,68  | 4,49  | 4,66  | 2,91  | 0,2391856 | 0,425408 |
| RP11-552M11.4 | 0,00  | 0,00  | 0,82  | 0,00  | 0,2392198 | 0,42541  |
| GLTSCR1       | 0,45  | 0,87  | 1,04  | 0,53  | 0,2392247 | 0,42541  |
| NUP98         | 5,02  | 3,88  | 4,81  | 3,49  | 0,2392586 | 0,425414 |
| NAPSA         | 0,35  | 0,36  | 0,27  | 0,23  | 0,2392704 | 0,425414 |
| RP11-386G11.5 | 2,69  | 1,06  | 2,77  | 1,78  | 0,2392847 | 0,425414 |
| HNRPA1P3      | 0,00  | 0,00  | 0,55  | 0,00  | 0,2393686 | NA       |
| PCBD1         | 4,78  | 2,25  | 4,46  | 3,64  | 0,239373  | 0,425533 |
| AC074183.3    | 0,16  | 0,00  | 0,29  | 0,58  | 0,2393899 | 0,425533 |
| RP11-321N4.4  | 0,97  | 1,07  | 1,22  | 1,93  | 0,2394771 | 0,425621 |
| ZNF638        | 6,08  | 6,44  | 6,07  | 5,53  | 0,2394778 | 0,425621 |
| RP11-321L2.2  | 1,95  | 1,32  | 1,59  | 1,07  | 0,239518  | 0,425659 |
| CTC-575I10.1  | 0,00  | 0,00  | 0,00  | 0,41  | 0,2395748 | NA       |
| CA5B          | 5,03  | 5,88  | 3,82  | 3,06  | 0,2395822 | 0,425722 |
| RP11-382A20.6 | 0,00  | 0,41  | 0,00  | 0,00  | 0,2395997 | NA       |
| COG6          | 1,78  | 0,83  | 1,75  | 1,39  | 0,2396068 | 0,425722 |
| MT-CO1        | 12,57 | 12,18 | 12,18 | 12,29 | 0,2396111 | 0,425722 |
| SYNPR         | 3,44  | 0,68  | 3,34  | 2,71  | 0,2397134 | 0,425824 |
| RP11-884K10.5 | 6,62  | 6,61  | 6,58  | 5,65  | 0,2397208 | 0,425824 |
| RP11-511H9.3  | 0,28  | 0,00  | 0,73  | 0,40  | 0,23978   | 0,425824 |
| GOLIM4        | 4,11  | 2,95  | 3,71  | 3,00  | 0,239785  | 0,425824 |
| ZNF584        | 1,52  | 1,51  | 1,15  | 2,88  | 0,2397887 | 0,425824 |
| TRIB2         | 4,27  | 2,20  | 3,06  | 3,56  | 0,2397917 | 0,425824 |
| ZNF296        | 1,04  | 2,06  | 0,98  | 1,20  | 0,2398028 | 0,425824 |
| MTRF1         | 3,26  | 0,71  | 2,11  | 1,63  | 0,2398615 | 0,425894 |
| bP-21264C1.2  | 2,01  | 4,20  | 2,50  | 2,70  | 0,2399134 | 0,425953 |
| RN7SL15P      | 0,00  | 1,81  | 0,00  | 0,00  | 0,2399485 | 0,425981 |
| PSMD7         | 6,79  | 5,13  | 6,35  | 6,39  | 0,2399723 | 0,425989 |
| AURKB         | 0,60  | 0,00  | 0,43  | 2,23  | 0,2400268 | 0,426018 |

|               |      |      |      |      |           |          |
|---------------|------|------|------|------|-----------|----------|
| SEPT6         | 5,79 | 5,18 | 5,19 | 5,56 | 0,2400268 | 0,426018 |
| RP11-379H18.1 | 1,10 | 1,82 | 1,07 | 1,52 | 0,2400565 | 0,426036 |
| GEMIN4        | 1,04 | 0,21 | 1,11 | 0,20 | 0,2401463 | 0,426151 |
| FBXW11        | 6,08 | 6,04 | 4,75 | 3,70 | 0,2401593 | 0,426151 |
| NLRX1         | 0,39 | 0,05 | 0,21 | 0,18 | 0,2402363 | 0,426208 |
| PDE6B         | 0,89 | 1,37 | 0,89 | 1,15 | 0,2402478 | 0,426208 |
| AUNIP         | 0,18 | 0,14 | 0,19 | 0,26 | 0,240249  | 0,426208 |
| AC144831.1    | 0,78 | 0,25 | 0,73 | 0,63 | 0,2403905 | 0,426425 |
| RP11-580I1.2  | 0,00 | 0,00 | 0,00 | 0,00 | 0,24041   | NA       |
| C12orf29      | 0,51 | 2,18 | 0,26 | 1,11 | 0,2404196 | 0,426443 |
| MIR548H4      | 0,00 | 2,26 | 0,41 | 0,00 | 0,2404643 | 0,426488 |
| RNY1P12       | 0,00 | 3,25 | 0,00 | 0,00 | 0,2405428 | NA       |
| RP11-342K2.1  | 0,45 | 0,30 | 0,54 | 0,34 | 0,2406613 | 0,426798 |
| ACP6          | 0,77 | 2,13 | 0,39 | 1,04 | 0,2406774 | 0,426798 |
| RP11-815J21.4 | 4,59 | 4,71 | 5,46 | 3,29 | 0,2407119 | 0,426825 |
| GUCY1B2       | 0,00 | 0,00 | 0,00 | 0,08 | 0,2407227 | NA       |
| CNIH1         | 6,68 | 5,21 | 6,09 | 3,56 | 0,2407647 | 0,426884 |
| N4BP2L2       | 7,17 | 6,90 | 6,68 | 6,52 | 0,2407934 | 0,426901 |
| SMOC1         | 0,00 | 0,62 | 0,00 | 0,38 | 0,2408241 | 0,426922 |
| HSH2D         | 5,27 | 4,79 | 4,77 | 5,14 | 0,2408696 | 0,426968 |
| ANKZF1        | 3,61 | 4,13 | 3,42 | 4,26 | 0,2409775 | 0,427103 |
| APOO          | 4,90 | 2,25 | 2,93 | 3,00 | 0,2409843 | 0,427103 |
| AXDND1        | 0,00 | 0,00 | 0,39 | 0,04 | 0,2410212 | 0,427135 |
| RP11-69C17.3  | 0,00 | 0,06 | 0,00 | 0,00 | 0,2410947 | NA       |
| DPH3          | 4,88 | 5,26 | 4,46 | 3,20 | 0,2411166 | 0,42727  |
| ZNHIT2        | 0,34 | 1,97 | 0,28 | 3,59 | 0,2411687 | 0,427301 |
| CMTM1         | 0,00 | 0,00 | 0,00 | 0,00 | 0,2411726 | 0,427301 |
| AC002066.1    | 0,00 | 0,39 | 0,00 | 0,00 | 0,2412424 | 0,42739  |
| RP11-134F2.8  | 3,01 | 4,45 | 2,77 | 2,82 | 0,2413686 | 0,42758  |
| COL20A1       | 0,00 | 0,03 | 0,00 | 0,11 | 0,241406  | 0,427586 |
| RP11-391L3.4  | 1,98 | 1,66 | 1,18 | 1,32 | 0,2414104 | 0,427586 |
| CTA-229A8.5   | 0,00 | 0,00 | 0,12 | 0,10 | 0,2414802 | 0,427649 |
| CEP57         | 4,33 | 4,12 | 3,88 | 2,95 | 0,2414847 | 0,427649 |
| ZNF45         | 1,56 | 1,58 | 1,09 | 0,33 | 0,2415104 | 0,427661 |
| TXLNG         | 1,79 | 0,87 | 1,81 | 0,40 | 0,2415309 | 0,427661 |
| MIR3908       | 0,00 | 0,00 | 1,55 | 0,00 | 0,2415414 | NA       |
| NUCB1         | 3,87 | 4,53 | 3,70 | 4,10 | 0,2415492 | 0,427661 |
| RP11-477I4.3  | 0,00 | 0,35 | 0,00 | 0,00 | 0,2416046 | 0,427725 |
| RP11-429B14.1 | 0,47 | 0,00 | 0,44 | 0,96 | 0,2416397 | 0,427753 |
| RP11-24B13.2  | 0,23 | 0,36 | 0,18 | 0,58 | 0,2416586 | 0,427753 |
| AC009312.1    | 0,00 | 0,15 | 0,40 | 0,66 | 0,2418196 | 0,427932 |
| TMX3          | 5,23 | 6,16 | 5,08 | 3,53 | 0,2418228 | 0,427932 |
| CINP          | 5,50 | 5,33 | 5,34 | 3,26 | 0,2418412 | 0,427932 |
| UTP20         | 1,27 | 1,12 | 1,33 | 1,16 | 0,2418503 | 0,427932 |
| RP11-413E1.4  | 0,00 | 0,00 | 0,00 | 0,52 | 0,2418941 | 0,427932 |
| RP11-79H23.3  | 0,07 | 0,61 | 0,09 | 0,00 | 0,2419015 | 0,427932 |
| GOLGA5        | 3,95 | 1,26 | 3,31 | 2,13 | 0,2419305 | 0,427932 |
| TATDN2        | 2,83 | 2,49 | 2,83 | 1,51 | 0,2419324 | 0,427932 |
| AC010980.2    | 1,66 | 4,46 | 2,45 | 1,19 | 0,2419332 | 0,427932 |
| TRIM60        | 0,07 | 0,00 | 0,34 | 0,70 | 0,2419841 | 0,427977 |
| MIR6891       | 2,10 | 0,00 | 1,88 | 0,00 | 0,2419972 | 0,427977 |
| CNGB3         | 0,00 | 0,00 | 0,00 | 0,03 | 0,2421237 | 0,428143 |
| CTA-223H9.9   | 0,00 | 0,49 | 0,00 | 1,87 | 0,2421298 | 0,428143 |
| RP11-432J24.2 | 0,00 | 0,00 | 0,00 | 0,00 | 0,2421734 | 0,428186 |
| NECAB1        | 0,04 | 0,36 | 0,04 | 0,09 | 0,2422008 | 0,428201 |

|               |       |       |       |      |           |          |
|---------------|-------|-------|-------|------|-----------|----------|
| MAML3         | 2,40  | 1,36  | 2,23  | 1,76 | 0,2423038 | 0,428349 |
| CCAR1         | 5,25  | 4,90  | 5,53  | 5,41 | 0,2423489 | 0,428394 |
| SLC9C1        | 0,00  | 0,05  | 0,00  | 0,86 | 0,2424244 | 0,428494 |
| PCBP3         | 0,45  | 1,20  | 0,37  | 0,65 | 0,2424803 | 0,428552 |
| FBXO45        | 2,19  | 0,11  | 1,81  | 2,45 | 0,2424959 | 0,428552 |
| ORM2          | 0,29  | 3,47  | 2,00  | 0,44 | 0,2425449 | 0,428605 |
| AC064874.2    | 2,21  | 2,88  | 2,32  | 3,03 | 0,2426012 | 0,42867  |
| DYRK1A        | 3,90  | 3,01  | 3,94  | 4,78 | 0,2427929 | 0,428952 |
| QPCT          | 2,65  | 2,78  | 4,08  | 3,82 | 0,2427994 | 0,428952 |
| LAPTM5        | 8,80  | 8,88  | 8,87  | 8,95 | 0,2429303 | 0,429149 |
| SMIM19        | 5,52  | 3,40  | 4,92  | 2,35 | 0,2430609 | 0,429341 |
| RP11-179A10.2 | 0,08  | 0,00  | 0,11  | 0,18 | 0,2430639 | NA       |
| AF131216.6    | 0,46  | 0,68  | 0,50  | 0,30 | 0,2430773 | 0,429341 |
| RP3-399J4.4   | 0,00  | 0,00  | 0,04  | 0,08 | 0,2431692 | 0,429469 |
| LCMT2         | 0,34  | 0,60  | 0,49  | 0,41 | 0,2433582 | 0,429769 |
| AC007283.4    | 0,98  | 0,00  | 0,00  | 0,00 | 0,2433969 | 0,429803 |
| RP11-182J23.1 | 1,63  | 1,55  | 1,99  | 1,86 | 0,2435325 | 0,430008 |
| NUDT16        | 3,00  | 3,46  | 3,37  | 2,76 | 0,243616  | 0,430121 |
| TMEM72        | 0,00  | 0,63  | 0,00  | 0,00 | 0,2436603 | 0,430127 |
| RP11-214N9.1  | 0,00  | 0,00  | 0,00  | 0,00 | 0,2436622 | 0,430127 |
| DYRK1B        | 0,12  | 0,00  | 0,45  | 1,08 | 0,2436895 | 0,430127 |
| C12orf61      | 0,22  | 0,07  | 0,40  | 0,18 | 0,2436968 | 0,430127 |
| RP11-421F16.3 | 0,58  | 0,74  | 1,31  | 0,85 | 0,2437842 | 0,430217 |
| DEF6          | 4,63  | 4,01  | 4,52  | 3,99 | 0,2437864 | 0,430217 |
| RP11-6B6.3    | 0,98  | 0,00  | 1,08  | 0,00 | 0,2438349 | 0,430268 |
| SLC1A3        | 0,03  | 0,04  | 0,21  | 0,00 | 0,2440193 | 0,430538 |
| EIF5AP2       | 0,11  | 0,63  | 0,00  | 0,00 | 0,2440276 | 0,430538 |
| RPS6KA5       | 2,84  | 3,40  | 2,89  | 1,61 | 0,2440459 | 0,430538 |
| TRUB1         | 2,20  | 0,76  | 0,76  | 1,69 | 0,2441627 | 0,43071  |
| RPL3P1        | 0,00  | 0,00  | 0,00  | 0,00 | 0,2441807 | NA       |
| RPIA          | 2,71  | 3,56  | 2,46  | 2,67 | 0,2442114 | 0,430762 |
| ZNF124        | 5,08  | 3,28  | 4,42  | 3,50 | 0,2442476 | 0,430791 |
| C22orf39      | 4,50  | 4,15  | 4,07  | 3,10 | 0,244288  | 0,430828 |
| RP11-309M7.1  | 0,00  | 0,29  | 0,00  | 0,13 | 0,2443583 | 0,430918 |
| AC006547.13   | 2,65  | 4,33  | 3,27  | 4,85 | 0,2443935 | 0,430946 |
| CHRM5         | 0,19  | 0,40  | 0,44  | 0,66 | 0,2445618 | 0,431209 |
| RP11-315D16.2 | 1,21  | 1,26  | 1,13  | 0,40 | 0,2446218 | 0,431232 |
| C9orf147      | 3,35  | 2,66  | 3,15  | 3,11 | 0,244631  | 0,431232 |
| CD22          | 3,07  | 3,72  | 2,24  | 1,42 | 0,2446332 | 0,431232 |
| RP11-181K12.1 | 0,46  | 0,87  | 0,55  | 0,45 | 0,2446883 | 0,431295 |
| RP11-586K12.1 | 0,63  | 2,21  | 0,30  | 3,44 | 0,2447715 | 0,431407 |
| DDAH2         | 5,28  | 3,58  | 5,51  | 4,43 | 0,2448379 | 0,43149  |
| RPL7A         | 10,25 | 10,25 | 10,26 | 9,85 | 0,2449362 | 0,431629 |
| AL022344.5    | 0,64  | 0,97  | 0,84  | 0,95 | 0,244956  | 0,43163  |
| MACROD1       | 0,00  | 0,00  | 0,00  | 0,00 | 0,244994  | 0,431663 |
| RNF223        | 0,09  | 0,26  | 0,11  | 0,00 | 0,2450717 | 0,431765 |
| BCL2L13       | 4,26  | 2,35  | 3,40  | 4,14 | 0,2451028 | 0,431786 |
| SSUH2         | 0,00  | 0,05  | 0,00  | 0,00 | 0,245168  | 0,431847 |
| AC092652.1    | 2,53  | 1,03  | 2,40  | 3,39 | 0,2451763 | 0,431847 |
| RP11-429D19.1 | 0,00  | 0,00  | 0,46  | 0,00 | 0,2451928 | NA       |
| RP11-422J8.1  | 0,08  | 0,00  | 0,15  | 0,47 | 0,24522   | 0,43189  |
| RP11-10N23.2  | 0,25  | 0,50  | 0,33  | 0,16 | 0,2452496 | 0,431908 |
| CTD-2026K11.6 | 0,04  | 0,15  | 0,10  | 0,11 | 0,2453393 | NA       |
| PARP2         | 3,56  | 1,69  | 3,10  | 2,87 | 0,2453769 | 0,432097 |
| ANKRD7        | 0,00  | 0,00  | 0,00  | 0,28 | 0,2454864 | 0,432246 |

|                |      |      |      |      |           |          |
|----------------|------|------|------|------|-----------|----------|
| TMEM161A       | 3,51 | 0,09 | 1,71 | 0,59 | 0,2455002 | 0,432246 |
| FTH1P7         | 0,00 | 0,00 | 0,58 | 0,00 | 0,2456812 | NA       |
| TMEM106B       | 1,27 | 1,60 | 2,04 | 2,76 | 0,2457258 | 0,432609 |
| FAM63A         | 2,36 | 0,91 | 2,85 | 0,86 | 0,24576   | 0,432635 |
| C9orf64        | 1,53 | 0,93 | 1,79 | 1,12 | 0,2458477 | 0,432724 |
| CTC-358I24.1   | 2,62 | 1,98 | 2,67 | 0,73 | 0,2458494 | 0,432724 |
| RP11-167P11.2  | 0,57 | 1,39 | 1,14 | 1,06 | 0,2458734 | 0,432732 |
| SOX4           | 2,40 | 0,87 | 1,53 | 1,73 | 0,2460082 | 0,432933 |
| CTD-2514C3.1   | 0,00 | 0,00 | 0,00 | 0,00 | 0,2460395 | 0,432933 |
| CTD-3211M3.1   | 0,00 | 0,00 | 0,00 | 0,00 | 0,246046  | 0,432933 |
| OR2C3          | 0,06 | 0,05 | 0,07 | 0,07 | 0,2461048 | 0,432982 |
| ABCA7          | 4,65 | 5,17 | 5,05 | 5,46 | 0,246113  | 0,432982 |
| CTC-523E23.5   | 0,13 | 0,34 | 0,18 | 0,14 | 0,2461845 | 0,43306  |
| RN7SL516P      | 0,00 | 0,00 | 0,00 | 0,80 | 0,2461963 | 0,43306  |
| RP11-401N16.2  | 0,00 | 0,00 | 0,00 | 0,59 | 0,2462172 | NA       |
| RP1-267D11.6   | 0,00 | 0,00 | 0,07 | 0,13 | 0,2463726 | 0,433336 |
| CDC7           | 2,41 | 0,28 | 0,05 | 0,25 | 0,2463978 | 0,433346 |
| RP11-503P21.4  | 0,69 | 1,00 | 1,12 | 0,96 | 0,2464521 | 0,433398 |
| RP11-544A12.4  | 3,17 | 3,22 | 2,89 | 2,64 | 0,2464663 | 0,433398 |
| C15orf59       | 0,13 | 0,21 | 0,19 | 0,13 | 0,2465336 | 0,433482 |
| FAM230A        | 0,02 | 0,46 | 0,00 | 0,28 | 0,2465639 | 0,433501 |
| RPL9P7         | 1,38 | 1,27 | 1,60 | 0,74 | 0,2465906 | 0,433513 |
| RP11-488C13.6  | 0,00 | 0,00 | 0,00 | 0,00 | 0,2466773 | 0,433631 |
| PSPH           | 3,82 | 3,80 | 3,24 | 1,11 | 0,2467067 | 0,433649 |
| ANAPC10        | 5,19 | 3,93 | 3,38 | 3,85 | 0,246805  | 0,433787 |
| ESPNL          | 0,00 | 0,44 | 0,00 | 0,00 | 0,2468341 | NA       |
| MIR143HG       | 0,54 | 0,65 | 0,65 | 0,91 | 0,2468704 | 0,433841 |
| CHEK2          | 4,04 | 3,10 | 3,61 | 2,67 | 0,2468747 | 0,433841 |
| POM121L7       | 1,34 | 2,48 | 1,76 | 0,59 | 0,2469474 | 0,433935 |
| FBXL19         | 0,00 | 0,00 | 0,00 | 0,10 | 0,2471294 | NA       |
| STAMBP         | 4,14 | 3,13 | 2,63 | 2,71 | 0,2471566 | 0,434239 |
| RP11-476H16.1  | 0,59 | 0,75 | 0,94 | 2,06 | 0,2471598 | 0,434239 |
| RP11-1136G11.6 | 0,12 | 0,00 | 0,11 | 0,00 | 0,2471881 | NA       |
| bP-2171C21.2   | 0,00 | 4,26 | 0,00 | 0,00 | 0,2472093 | 0,434241 |
| NSMCE1         | 6,78 | 6,93 | 6,56 | 6,47 | 0,2472125 | 0,434241 |
| RP11-74J13.8   | 1,69 | 3,20 | 1,81 | 1,85 | 0,2472206 | 0,434241 |
| RP11-552M14.1  | 0,35 | 0,71 | 0,00 | 0,00 | 0,2472391 | 0,434241 |
| PRKCB          | 5,33 | 4,89 | 5,66 | 5,90 | 0,2472671 | 0,434256 |
| ZBTB44         | 3,92 | 4,59 | 3,11 | 3,60 | 0,2473029 | 0,434285 |
| SEPT12         | 0,00 | 0,00 | 0,25 | 0,12 | 0,2473706 | NA       |
| RP11-67L14.1   | 0,08 | 0,94 | 0,29 | 0,58 | 0,2473775 | 0,434349 |
| VGLL3          | 2,55 | 3,28 | 2,60 | 3,15 | 0,2473789 | 0,434349 |
| CTC-429P9.3    | 3,29 | 5,25 | 3,36 | 2,33 | 0,2473982 | 0,434349 |
| RP11-288H12.3  | 0,06 | 0,06 | 0,76 | 0,38 | 0,2474247 | 0,434355 |
| CTBP1          | 4,11 | 4,52 | 4,46 | 4,35 | 0,2474446 | 0,434355 |
| AC006328.1     | 0,00 | 0,00 | 0,00 | 0,23 | 0,2474604 | 0,434355 |
| VPRBP          | 2,60 | 2,24 | 0,89 | 3,03 | 0,2475464 | 0,434472 |
| OBSL1          | 1,00 | 0,38 | 0,44 | 0,41 | 0,2475964 | 0,434486 |
| TAPT1          | 3,48 | 4,09 | 4,15 | 2,40 | 0,2476094 | 0,434486 |
| RP11-159H22.2  | 0,58 | 0,00 | 0,00 | 0,00 | 0,247613  | 0,434486 |
| PPIAP9         | 0,37 | 0,46 | 0,45 | 0,00 | 0,2476953 | NA       |
| C20orf144      | 0,06 | 0,47 | 0,21 | 0,20 | 0,2477021 | 0,434608 |
| COMMD1         | 5,71 | 5,46 | 5,82 | 5,65 | 0,2477629 | 0,43468  |
| RP11-278L15.2  | 0,20 | 0,67 | 0,00 | 0,18 | 0,2478532 | 0,434804 |
| COA7           | 1,70 | 0,66 | 1,56 | 1,01 | 0,2478967 | 0,434837 |

|                |       |       |       |       |           |          |
|----------------|-------|-------|-------|-------|-----------|----------|
| AC007403.3     | 0,34  | 0,00  | 0,32  | 0,00  | 0,2479107 | 0,434837 |
| RP11-347C12.2  | 4,85  | 3,94  | 4,96  | 3,84  | 0,247931  | 0,434838 |
| RP11-1124B17.1 | 0,00  | 0,00  | 0,00  | 0,00  | 0,248105  | NA       |
| DNAJA2         | 4,38  | 3,54  | 4,03  | 3,91  | 0,2481444 | 0,435177 |
| RP11-352G18.2  | 0,00  | 0,00  | 0,00  | 0,48  | 0,2481635 | 0,435177 |
| RP11-346C4.3   | 0,00  | 0,00  | 0,00  | 0,00  | 0,2481757 | NA       |
| RP11-357N13.6  | 0,00  | 0,00  | 0,00  | 0,07  | 0,2482177 | NA       |
| DARS           | 5,72  | 5,85  | 5,62  | 4,80  | 0,2485139 | 0,435757 |
| AC006014.6     | 0,42  | 0,00  | 1,38  | 1,64  | 0,2485332 | 0,435757 |
| OMD            | 0,00  | 0,00  | 0,00  | 0,00  | 0,2486125 | 0,435852 |
| RP11-50E11.3   | 0,25  | 0,37  | 0,32  | 0,46  | 0,2486268 | 0,435852 |
| CH507-513H4.5  | 8,50  | 8,72  | 8,80  | 8,62  | 0,2486717 | 0,435896 |
| RN7SL143P      | 0,00  | 0,00  | 0,00  | 0,00  | 0,2488376 | 0,436153 |
| P2RY6          | 5,15  | 2,76  | 3,45  | 3,15  | 0,2488764 | 0,436186 |
| C5orf22        | 3,23  | 3,79  | 2,10  | 3,91  | 0,2489653 | 0,436308 |
| RP3-370M22.6   | 3,54  | 2,81  | 2,88  | 2,90  | 0,2489946 | 0,436323 |
| RAB37          | 0,57  | 1,75  | 0,69  | 3,38  | 0,2490306 | 0,436323 |
| HMMR           | 0,00  | 0,00  | 0,00  | 0,00  | 0,2490328 | 0,436323 |
| DHCR24         | 0,09  | 0,03  | 0,65  | 0,32  | 0,2490901 | 0,436371 |
| ZCCHC6         | 4,44  | 3,68  | 3,90  | 4,15  | 0,2490997 | 0,436371 |
| RP11-1348G14.4 | 0,90  | 0,89  | 0,90  | 1,12  | 0,2491451 | 0,436416 |
| DNAH8          | 0,00  | 0,19  | 0,00  | 0,00  | 0,2492375 | 0,436524 |
| AC091801.1     | 1,18  | 1,28  | 2,05  | 2,16  | 0,2492457 | 0,436524 |
| BAHD1          | 0,81  | 0,12  | 0,61  | 0,32  | 0,2493671 | 0,436667 |
| CTD-3236F5.1   | 1,21  | 0,00  | 0,39  | 2,71  | 0,2493705 | 0,436667 |
| TMEM88         | 0,00  | 0,00  | 0,56  | 0,00  | 0,2493864 | 0,436667 |
| BRCC3          | 4,61  | 2,42  | 4,19  | 3,45  | 0,249418  | 0,436688 |
| ZPR1           | 4,18  | 2,67  | 4,08  | 2,92  | 0,2494561 | 0,43672  |
| AP1G1          | 5,08  | 2,90  | 4,35  | 3,57  | 0,2494888 | 0,436743 |
| USP25          | 5,17  | 3,44  | 4,77  | 4,49  | 0,2495245 | 0,436771 |
| HYPK           | 3,48  | 1,57  | 3,02  | 2,14  | 0,2497166 | 0,437073 |
| RPP30          | 5,23  | 2,67  | 4,78  | 1,90  | 0,2497761 | 0,437134 |
| CTD-2270L9.2   | 0,71  | 1,30  | 1,10  | 1,02  | 0,2497964 | 0,437134 |
| RPL8           | 10,72 | 10,94 | 10,76 | 10,54 | 0,2498105 | 0,437134 |
| A2M            | 1,98  | 4,92  | 2,41  | 3,71  | 0,2499147 | 0,437219 |
| GSK3A          | 1,32  | 1,54  | 1,50  | 1,50  | 0,2499154 | 0,437219 |
| C12orf49       | 1,49  | 2,44  | 1,84  | 1,62  | 0,2499179 | 0,437219 |
| TRABD          | 4,53  | 4,94  | 5,31  | 4,76  | 0,2499964 | 0,437321 |
| SLC16A9        | 0,00  | 0,00  | 0,00  | 0,00  | 0,2500509 | NA       |
| PACS1          | 2,82  | 2,83  | 3,25  | 4,25  | 0,2501592 | 0,437539 |
| NCRNA00161     | 1,47  | 0,90  | 2,06  | 0,30  | 0,2501603 | 0,437539 |
| CTD-2015H6.3   | 0,16  | 0,70  | 0,40  | 0,36  | 0,2502324 | 0,437631 |
| RP11-58H15.4   | 0,00  | 0,00  | 0,00  | 0,00  | 0,2502613 | 0,437647 |
| ATG2A          | 2,42  | 3,10  | 3,77  | 3,44  | 0,2503088 | 0,437696 |
| KLHL34         | 0,00  | 0,00  | 0,00  | 0,00  | 0,2504536 | NA       |
| RP11-10C24.3   | 0,16  | 0,00  | 0,35  | 0,13  | 0,2504926 | 0,437963 |
| CGGBP1         | 5,11  | 5,39  | 4,58  | 4,83  | 0,2505012 | 0,437963 |
| ERGIC1         | 1,80  | 4,06  | 3,29  | 1,48  | 0,250628  | 0,438151 |
| HIST1H4D       | 0,00  | 0,00  | 0,00  | 0,00  | 0,250717  | 0,43827  |
| UBE2Z          | 4,03  | 3,37  | 4,44  | 3,75  | 0,250777  | 0,43827  |
| CCDC86         | 3,11  | 1,08  | 2,05  | 1,19  | 0,2507851 | 0,43827  |
| ATP13A3        | 4,38  | 2,78  | 4,66  | 2,92  | 0,2507872 | 0,43827  |
| EARS2          | 2,56  | 3,12  | 1,95  | 2,14  | 0,2508004 | 0,43827  |
| NLRC4          | 3,39  | 0,50  | 2,10  | 3,77  | 0,2508451 | 0,43827  |
| WARS2          | 3,96  | 3,75  | 3,75  | 2,16  | 0,2508467 | 0,43827  |

|                |      |      |      |      |           |          |
|----------------|------|------|------|------|-----------|----------|
| LA16c-380H5.5  | 0,71 | 0,23 | 1,14 | 0,55 | 0,2508542 | 0,43827  |
| PMFBP1         | 0,00 | 0,00 | 0,13 | 0,00 | 0,2509819 | 0,438459 |
| TAF8           | 3,76 | 4,51 | 4,16 | 3,53 | 0,2510433 | 0,438532 |
| RP11-206L10.11 | 3,35 | 4,75 | 2,37 | 0,84 | 0,2511938 | 0,438713 |
| C3orf38        | 4,22 | 0,72 | 3,51 | 4,40 | 0,2511991 | 0,438713 |
| SFTA3          | 0,00 | 0,00 | 0,08 | 0,16 | 0,2512028 | NA       |
| RP11-256I9.2   | 0,10 | 1,01 | 0,08 | 0,48 | 0,2512123 | 0,438713 |
| RP11-973N13.4  | 0,00 | 0,00 | 0,00 | 0,00 | 0,2512259 | 0,438713 |
| SERTAD3        | 3,38 | 1,86 | 3,14 | 3,14 | 0,2512935 | 0,438763 |
| RP11-848G14.2  | 2,94 | 3,31 | 0,73 | 0,35 | 0,251294  | 0,438763 |
| CATSPER2       | 2,76 | 2,86 | 2,95 | 3,08 | 0,2513201 | 0,438774 |
| ULK1           | 1,04 | 1,55 | 1,95 | 1,24 | 0,2513744 | 0,438834 |
| RP11-666G4.1   | 0,13 | 0,25 | 0,08 | 0,21 | 0,2514558 | 0,438942 |
| FASTK          | 4,28 | 4,43 | 4,54 | 5,13 | 0,2515192 | 0,438981 |
| RP11-135J2.2   | 2,06 | 0,00 | 2,57 | 0,00 | 0,251531  | 0,438981 |
| DENND4A        | 5,36 | 6,14 | 4,78 | 5,08 | 0,2515378 | 0,438981 |
| AFM            | 0,00 | 0,13 | 0,00 | 0,00 | 0,2516929 | NA       |
| PGBD5          | 0,07 | 0,07 | 0,07 | 0,09 | 0,2517087 | 0,439169 |
| DNAJC25        | 2,47 | 1,43 | 2,12 | 1,07 | 0,2517237 | 0,439169 |
| KCTD5          | 3,25 | 2,72 | 2,89 | 1,93 | 0,2517457 | 0,439169 |
| RF00284        | 0,00 | 0,00 | 0,00 | 0,00 | 0,2517526 | 0,439169 |
| CNOT1          | 6,62 | 6,52 | 6,10 | 6,13 | 0,2517625 | 0,439169 |
| VDR            | 2,35 | 0,57 | 2,54 | 0,68 | 0,251764  | 0,439169 |
| RP11-330C7.1   | 0,00 | 0,00 | 0,00 | 0,00 | 0,2518032 | 0,439203 |
| RP11-582J16.4  | 0,56 | 0,29 | 0,84 | 0,29 | 0,2518492 | 0,43924  |
| RP11-243E13.1  | 0,31 | 0,22 | 0,24 | 0,33 | 0,2518641 | 0,43924  |
| TNKS           | 3,63 | 4,18 | 3,85 | 3,10 | 0,2519123 | 0,43926  |
| RIPK1          | 3,72 | 1,93 | 3,02 | 3,49 | 0,2519148 | 0,43926  |
| CLEC4G         | 0,00 | 0,00 | 0,18 | 0,10 | 0,2519563 | 0,439298 |
| RP11-21M24.2   | 0,41 | 0,43 | 0,30 | 0,54 | 0,2519817 | 0,439308 |
| SPIDR          | 5,11 | 5,68 | 5,26 | 5,24 | 0,252004  | 0,439312 |
| STAP1          | 0,92 | 0,28 | 0,17 | 1,16 | 0,2520706 | 0,439379 |
| RP11-792A8.4   | 2,96 | 2,69 | 2,84 | 3,60 | 0,2520819 | 0,439379 |
| DRAM2          | 6,65 | 6,91 | 6,21 | 5,75 | 0,2521424 | 0,43945  |
| CTA-228A9.3    | 0,82 | 1,88 | 1,02 | 2,07 | 0,2522193 | 0,439499 |
| RP11-360L9.7   | 0,21 | 0,00 | 0,00 | 0,00 | 0,2522247 | 0,439499 |
| SEC13          | 6,87 | 5,77 | 6,42 | 5,97 | 0,2522297 | 0,439499 |
| RP11-886P16.6  | 0,00 | 0,00 | 0,47 | 0,42 | 0,2524303 | NA       |
| ASH1L          | 4,59 | 2,84 | 4,73 | 4,97 | 0,252437  | 0,43982  |
| RN7SL440P      | 0,00 | 0,00 | 0,86 | 2,01 | 0,2524538 | 0,43982  |
| STARD3         | 4,43 | 4,97 | 4,69 | 4,50 | 0,2525135 | 0,439883 |
| CYB5R3         | 4,50 | 3,90 | 4,29 | 3,47 | 0,2525698 | 0,439883 |
| RP11-599B13.6  | 2,48 | 0,00 | 0,00 | 0,00 | 0,2525879 | 0,439883 |
| RP11-35J1.2    | 0,00 | 1,13 | 0,52 | 0,00 | 0,252588  | 0,439883 |
| RP11-90B9.3    | 0,00 | 0,00 | 0,29 | 0,00 | 0,2525886 | 0,439883 |
| LAMB1          | 0,18 | 0,00 | 1,19 | 0,80 | 0,2527065 | 0,440048 |
| ANXA7          | 6,14 | 5,41 | 5,53 | 4,91 | 0,2527233 | 0,440048 |
| PDS5B          | 4,52 | 4,71 | 4,59 | 3,85 | 0,2528402 | 0,440217 |
| SLC44A1        | 1,97 | 2,16 | 2,29 | 2,36 | 0,2529044 | 0,440289 |
| RP11-264B17.2  | 0,66 | 0,67 | 1,00 | 1,45 | 0,2529209 | 0,440289 |
| RPS20P33       | 0,00 | 0,00 | 0,00 | 0,00 | 0,2529849 | 0,440358 |
| RP11-548K23.11 | 0,00 | 0,00 | 0,00 | 0,00 | 0,2530189 | 0,440358 |
| ERI2           | 2,67 | 2,34 | 1,71 | 2,15 | 0,2530201 | 0,440358 |
| RF01210        | 4,75 | 2,77 | 4,46 | 5,23 | 0,2530579 | 0,440389 |
| CASC22         | 0,00 | 0,00 | 0,00 | 0,00 | 0,2530881 | NA       |

|                |      |      |      |      |           |          |
|----------------|------|------|------|------|-----------|----------|
| CDRT4          | 0,00 | 0,06 | 0,02 | 0,05 | 0,2531267 | 0,440475 |
| EPM2A          | 1,72 | 2,33 | 2,45 | 2,07 | 0,253147  | 0,440475 |
| HERC2          | 4,56 | 2,53 | 4,18 | 3,98 | 0,2531935 | 0,440522 |
| RP11-51M18.1   | 0,00 | 0,10 | 0,00 | 0,00 | 0,2532404 | NA       |
| ABHD3          | 4,01 | 4,36 | 3,25 | 1,59 | 0,2532649 | 0,440582 |
| ZNF444         | 0,55 | 0,43 | 1,00 | 1,31 | 0,2532678 | 0,440582 |
| LLGL1          | 0,03 | 0,03 | 0,05 | 0,14 | 0,2533522 | 0,440694 |
| HNRNPA3        | 5,64 | 5,14 | 5,85 | 5,44 | 0,2534133 | 0,440766 |
| RP11-497G19.7  | 0,45 | 0,37 | 0,71 | 0,23 | 0,2534628 | 0,440806 |
| PMS2L1         | 3,10 | 3,18 | 2,17 | 2,92 | 0,2534758 | 0,440806 |
| RP4-781K5.6    | 0,00 | 0,00 | 0,00 | 0,03 | 0,2535642 | NA       |
| XX-FW83563B9.5 | 1,28 | 0,48 | 1,00 | 2,10 | 0,2535704 | 0,440936 |
| RP4-591N18.2   | 1,05 | 1,27 | 1,80 | 1,34 | 0,2536526 | 0,441044 |
| RP11-276H1.1   | 0,00 | 1,74 | 0,00 | 0,43 | 0,2536885 | 0,441072 |
| GCNT1          | 2,17 | 0,88 | 1,58 | 0,79 | 0,2537148 | 0,441084 |
| NPC1L1         | 0,00 | 0,00 | 0,00 | 0,00 | 0,2538269 | 0,441244 |
| ADAM22         | 0,00 | 0,00 | 0,04 | 0,05 | 0,2538597 | 0,441266 |
| ZMYM1          | 1,45 | 2,27 | 0,67 | 1,95 | 0,2539125 | 0,441282 |
| RP11-391J2.3   | 1,62 | 2,74 | 1,72 | 1,77 | 0,2539235 | 0,441282 |
| C1orf216       | 1,75 | 2,40 | 2,04 | 2,71 | 0,2539281 | 0,441282 |
| PGD            | 5,59 | 5,73 | 5,43 | 5,76 | 0,2539817 | 0,441319 |
| HFE            | 0,37 | 1,15 | 0,79 | 0,75 | 0,2539895 | 0,441319 |
| HSD17B7        | 3,31 | 3,86 | 3,01 | 3,00 | 0,2540211 | 0,44134  |
| CA13           | 0,74 | 0,66 | 0,51 | 0,27 | 0,2540906 | 0,44141  |
| ERMN           | 3,73 | 1,51 | 3,13 | 0,65 | 0,2541088 | 0,44141  |
| RANGAP1        | 2,56 | 3,10 | 2,75 | 2,49 | 0,2541211 | 0,44141  |
| EV15           | 4,09 | 3,94 | 4,25 | 4,08 | 0,2542558 | 0,44161  |
| TOMM5          | 6,22 | 5,65 | 6,47 | 5,99 | 0,2543219 | 0,441664 |
| RP11-569D9.6   | 0,00 | 0,00 | 0,00 | 0,00 | 0,2543302 | 0,441664 |
| RP5-1139I1.2   | 0,29 | 0,30 | 0,49 | 0,55 | 0,2543468 | 0,441664 |
| RP13-228J13.6  | 0,86 | 1,67 | 0,21 | 0,00 | 0,2544266 | 0,441768 |
| CAPN12         | 0,79 | 2,60 | 1,30 | 1,69 | 0,2544616 | 0,441794 |
| SLC5A3         | 1,05 | 2,19 | 0,55 | 2,21 | 0,254596  | 0,441939 |
| RP11-10N16.2   | 0,00 | 0,08 | 0,23 | 0,07 | 0,2545984 | 0,441939 |
| RP11-1018N14.2 | 0,23 | 0,00 | 0,35 | 0,36 | 0,2546066 | 0,441939 |
| CTB-147C22.6   | 0,00 | 0,00 | 0,00 | 0,00 | 0,2546236 | NA       |
| RP11-231E19.1  | 0,08 | 0,05 | 0,56 | 0,76 | 0,2546402 | 0,441939 |
| RP11-392P7.3   | 0,39 | 0,13 | 1,14 | 0,29 | 0,2546445 | 0,441939 |
| HSPH1          | 4,57 | 4,73 | 4,07 | 3,10 | 0,2547227 | 0,442041 |
| AC002985.3     | 0,31 | 0,00 | 0,00 | 0,00 | 0,2547232 | NA       |
| HSD17B8        | 3,64 | 0,36 | 0,58 | 1,75 | 0,2547986 | 0,442137 |
| PSMD4          | 7,39 | 6,58 | 7,12 | 7,08 | 0,2548179 | 0,442137 |
| KIAA1429       | 4,05 | 4,70 | 3,68 | 3,58 | 0,2548431 | 0,442146 |
| CMP21-97G8.1   | 0,55 | 0,65 | 0,56 | 0,00 | 0,2548903 | 0,442162 |
| RP11-398C13.6  | 0,00 | 0,00 | 0,16 | 0,00 | 0,254892  | 0,442162 |
| GPR137B        | 2,83 | 1,70 | 1,96 | 1,21 | 0,2549686 | 0,44226  |
| AC026188.1     | 0,28 | 0,56 | 0,38 | 0,00 | 0,2550106 | 0,442271 |
| COX14          | 5,73 | 6,38 | 5,89 | 5,54 | 0,2550149 | 0,442271 |
| LIPE           | 0,78 | 0,93 | 0,56 | 0,41 | 0,2550776 | 0,442346 |
| UBE2E3         | 4,97 | 4,03 | 4,54 | 3,58 | 0,2550987 | 0,442347 |
| GFER           | 0,94 | 3,78 | 2,87 | 3,86 | 0,2551563 | 0,442399 |
| RP11-3P22.2    | 0,00 | 0,28 | 0,00 | 0,00 | 0,2551703 | 0,442399 |
| RP11-392A22.2  | 1,37 | 0,34 | 1,25 | 0,44 | 0,2551929 | 0,442399 |
| RP11-286O18.1  | 0,00 | 0,00 | 0,00 | 0,55 | 0,2552079 | 0,442399 |
| COX17          | 5,02 | 5,03 | 5,29 | 5,09 | 0,255233  | 0,442408 |

|                |      |      |      |      |           |          |
|----------------|------|------|------|------|-----------|----------|
| RP11-613C6.4   | 0,00 | 0,00 | 0,00 | 0,00 | 0,2552963 | 0,442466 |
| ZNF391         | 0,11 | 0,03 | 0,04 | 0,07 | 0,2553065 | 0,442466 |
| CEP95          | 4,88 | 3,74 | 4,78 | 3,54 | 0,2554006 | 0,442595 |
| RP11-776A13.1  | 1,82 | 2,13 | 1,86 | 2,69 | 0,2555826 | 0,442875 |
| ORMDL1         | 6,66 | 5,60 | 6,03 | 6,11 | 0,2556019 | 0,442875 |
| ACSBG1         | 0,97 | 0,21 | 0,54 | 0,55 | 0,2557016 | 0,443013 |
| MUC5AC         | 0,00 | 0,02 | 0,00 | 0,00 | 0,2557503 | 0,443033 |
| MTL1           | 0,00 | 0,00 | 0,00 | 2,99 | 0,2557533 | 0,443033 |
| RP11-166B2.1   | 2,48 | 1,23 | 2,10 | 1,27 | 0,2559223 | 0,443292 |
| PHRF1          | 0,94 | 1,02 | 1,67 | 1,54 | 0,2560428 | 0,443459 |
| RP1-178F15.5   | 1,03 | 0,00 | 0,67 | 0,00 | 0,2560648 | 0,443459 |
| HERC4          | 4,61 | 2,52 | 3,98 | 3,39 | 0,256079  | 0,443459 |
| CTC-461F20.1   | 0,00 | 0,00 | 0,00 | 0,00 | 0,2560895 | NA       |
| TFPI           | 1,77 | 3,35 | 2,25 | 2,59 | 0,2561202 | 0,443496 |
| RP11-473O4.4   | 2,85 | 2,10 | 1,87 | 1,44 | 0,2561783 | 0,443562 |
| LIPG           | 1,22 | 1,31 | 1,16 | 1,39 | 0,2562429 | 0,443639 |
| DCLRE1B        | 0,41 | 0,27 | 0,06 | 0,18 | 0,2562757 | 0,443662 |
| GCC2-AS1       | 1,00 | 0,00 | 1,04 | 0,35 | 0,2563142 | 0,443673 |
| AC129778.3     | 0,00 | 2,01 | 0,00 | 0,32 | 0,2563221 | 0,443673 |
| RFPL3S         | 0,00 | 0,26 | 0,00 | 0,63 | 0,2566874 | 0,44427  |
| CABP1          | 0,32 | 0,31 | 0,24 | 0,50 | 0,256726  | 0,444296 |
| OR4F5          | 0,00 | 1,53 | 0,00 | 0,04 | 0,2567421 | 0,444296 |
| XKR4           | 0,09 | 0,27 | 0,11 | 0,05 | 0,256795  | 0,444322 |
| C15orf38-AP3S2 | 3,93 | 4,33 | 1,51 | 1,35 | 0,2568158 | 0,444322 |
| NUP85          | 5,02 | 6,16 | 5,36 | 3,92 | 0,256817  | 0,444322 |
| MLLT3          | 2,07 | 3,68 | 2,35 | 3,09 | 0,2568625 | 0,444366 |
| AC006995.8     | 0,13 | 0,05 | 0,09 | 0,06 | 0,2570697 | 0,44469  |
| MRPL35P3       | 0,00 | 0,00 | 0,00 | 0,00 | 0,2572342 | 0,444909 |
| SVIL           | 2,71 | 3,56 | 2,87 | 3,52 | 0,2572365 | 0,444909 |
| ARL6           | 0,00 | 0,18 | 0,00 | 0,03 | 0,2572752 | 0,444941 |
| FBXO27         | 0,94 | 0,65 | 1,40 | 1,52 | 0,2573595 | 0,445052 |
| RP11-16E23.4   | 5,31 | 0,75 | 3,75 | 4,59 | 0,2573794 | 0,445052 |
| EXOC3L4        | 0,48 | 1,41 | 0,15 | 0,29 | 0,2574141 | 0,445078 |
| RP11-518K17.3  | 0,00 | 0,36 | 0,32 | 0,30 | 0,2574768 | NA       |
| PLOD1          | 3,43 | 3,33 | 3,91 | 3,55 | 0,2575704 | 0,445313 |
| CDC42SE1       | 6,17 | 5,96 | 5,75 | 5,31 | 0,2576257 | 0,445374 |
| RP11-414B7.1   | 0,00 | 1,93 | 0,00 | 0,21 | 0,2576499 | 0,445381 |
| RP11-752G15.7  | 0,06 | 0,18 | 0,07 | 0,09 | 0,257787  | 0,445584 |
| NIPSNAP3A      | 6,40 | 6,96 | 6,01 | 5,24 | 0,2578216 | 0,445609 |
| CTD-2270F17.1  | 0,06 | 0,00 | 0,00 | 0,00 | 0,2579363 | NA       |
| GBF1           | 1,82 | 2,75 | 2,02 | 1,46 | 0,2580273 | 0,44589  |
| TAS2R30        | 0,73 | 0,17 | 0,35 | 0,19 | 0,2580359 | 0,44589  |
| BOLA2          | 2,65 | 2,00 | 2,57 | 3,14 | 0,2580447 | 0,44589  |
| AP000997.3     | 0,08 | 0,06 | 0,30 | 0,59 | 0,2580936 | 0,44594  |
| ACPP           | 5,02 | 3,93 | 4,99 | 2,66 | 0,2581135 | 0,44594  |
| RP11-664D7.4   | 1,98 | 0,82 | 1,09 | 0,84 | 0,2581765 | 0,446014 |
| LY75-CD302     | 0,00 | 0,00 | 0,00 | 2,14 | 0,2582074 | 0,446033 |
| ERMP1          | 1,35 | 1,15 | 1,41 | 0,49 | 0,2582739 | 0,446082 |
| NCBP2          | 5,14 | 4,87 | 4,50 | 4,41 | 0,2582762 | 0,446082 |
| DDO            | 0,06 | 0,00 | 0,11 | 0,37 | 0,258302  | 0,446092 |
| SLC52A2        | 3,05 | 3,14 | 3,97 | 3,32 | 0,2583264 | 0,4461   |
| RP11-1376P16.1 | 2,65 | 3,07 | 3,21 | 1,58 | 0,2583618 | 0,446126 |
| RP11-138I1.2   | 0,08 | 0,58 | 0,00 | 0,37 | 0,2583942 | 0,446136 |
| ZNF76          | 3,23 | 0,80 | 1,79 | 2,11 | 0,2584075 | 0,446136 |
| MRPS25         | 4,65 | 5,13 | 4,95 | 3,44 | 0,2584467 | 0,446169 |



|                |      |      |      |      |           |          |
|----------------|------|------|------|------|-----------|----------|
| RP11-452K12.6  | 0,00 | 0,00 | 0,71 | 0,70 | 0,2585328 | 0,446234 |
| DYTN           | 0,00 | 0,00 | 0,00 | 0,00 | 0,2585549 | 0,446234 |
| EEF1A1L1       | 2,76 | 3,12 | 2,81 | 1,10 | 0,258563  | 0,446234 |
| RP11-264L1.2   | 0,29 | 0,98 | 0,79 | 0,58 | 0,2585648 | 0,446234 |
| OR8G2P         | 0,00 | 0,20 | 0,00 | 0,00 | 0,2585922 | NA       |
| LRMP           | 6,53 | 6,06 | 5,69 | 3,62 | 0,2587015 | 0,446409 |
| PANX1          | 0,06 | 0,05 | 0,33 | 0,19 | 0,2587065 | 0,446409 |
| DNAJB14        | 5,14 | 4,52 | 4,68 | 3,96 | 0,2587913 | 0,446521 |
| RP11-1334A24.6 | 0,00 | 0,00 | 0,00 | 0,00 | 0,2588441 | NA       |
| RP11-439A17.4  | 2,22 | 0,00 | 0,00 | 0,00 | 0,2589288 | 0,446677 |
| RP11-9307.5    | 1,56 | 1,66 | 1,25 | 1,26 | 0,2589291 | 0,446677 |
| FOXC2          | 0,00 | 0,11 | 0,00 | 0,00 | 0,2589972 | 0,446677 |
| SOX7           | 0,13 | 0,49 | 0,15 | 0,40 | 0,2590008 | 0,446677 |
| AP4M1          | 1,95 | 2,06 | 2,02 | 1,43 | 0,2590087 | 0,446677 |
| ZZZ3           | 4,90 | 4,85 | 4,01 | 3,32 | 0,2590157 | 0,446677 |
| CRTC1          | 1,00 | 1,38 | 1,14 | 0,32 | 0,2590336 | 0,446677 |
| RN7SL664P      | 0,00 | 0,00 | 0,00 | 0,00 | 0,2590903 | NA       |
| ZNF580         | 2,88 | 3,02 | 3,89 | 3,84 | 0,2590973 | 0,446677 |
| VNN2           | 1,35 | 0,38 | 1,02 | 2,92 | 0,2591144 | 0,446677 |
| PCED1B         | 2,11 | 0,28 | 0,77 | 1,28 | 0,2591499 | 0,446677 |
| RNF126         | 3,91 | 3,94 | 3,80 | 3,84 | 0,2591514 | 0,446677 |
| COL9A2         | 2,97 | 3,51 | 2,69 | 2,23 | 0,2591594 | 0,446677 |
| RP11-95P2.1    | 0,31 | 0,76 | 0,41 | 0,38 | 0,2591911 | 0,446677 |
| POLL           | 3,15 | 0,82 | 3,56 | 3,39 | 0,2592175 | 0,446677 |
| CHEK1          | 1,57 | 2,66 | 1,87 | 1,65 | 0,2592247 | 0,446677 |
| IGKV3D-20      | 0,00 | 1,53 | 0,00 | 0,00 | 0,2592266 | 0,446677 |
| COMTD1         | 3,33 | 3,32 | 3,38 | 2,93 | 0,2592618 | 0,446677 |
| RP11-218M22.1  | 0,33 | 0,00 | 0,13 | 0,35 | 0,2592743 | 0,446677 |
| TRHDE          | 0,01 | 0,68 | 0,04 | 0,09 | 0,2592818 | 0,446677 |
| SCN5A          | 0,00 | 0,00 | 0,00 | 0,00 | 0,2592834 | 0,446677 |
| NUDT14         | 4,26 | 3,02 | 5,10 | 3,90 | 0,2593577 | 0,446677 |
| NFU1           | 4,40 | 4,91 | 3,89 | 4,51 | 0,2593933 | 0,446797 |
| AC007192.6     | 3,98 | 3,79 | 3,74 | 4,76 | 0,2594264 | 0,446819 |
| TNFRSF12A      | 0,00 | 0,00 | 0,00 | 0,00 | 0,2595015 | 0,446914 |
| LINC00461      | 0,00 | 0,44 | 0,00 | 0,31 | 0,2595139 | NA       |
| DUX4L32        | 0,00 | 0,23 | 0,00 | 0,00 | 0,2596555 | NA       |
| TEX14          | 2,93 | 0,71 | 2,72 | 1,27 | 0,2596796 | 0,447186 |
| RP11-678G15.1  | 1,73 | 0,00 | 2,12 | 1,32 | 0,2598366 | 0,447421 |
| ETF1           | 5,87 | 4,74 | 5,40 | 3,67 | 0,2598966 | 0,447476 |
| MIR181A1HG     | 4,24 | 3,24 | 3,51 | 1,86 | 0,2599086 | 0,447476 |
| CTD-2224J9.2   | 1,68 | 2,08 | 1,20 | 0,82 | 0,2599321 | 0,447482 |
| RP11-128N14.4  | 0,00 | 0,00 | 0,00 | 0,00 | 0,2599774 | 0,447523 |
| C5orf30        | 0,03 | 0,05 | 0,19 | 0,16 | 0,2600007 | 0,447523 |
| SERPINB11      | 0,00 | 0,00 | 0,16 | 0,21 | 0,2600408 | NA       |
| HIST1H1E       | 5,00 | 2,39 | 5,59 | 4,84 | 0,260044  | 0,447523 |
| CTD-3220F14.2  | 0,00 | 0,00 | 0,00 | 0,69 | 0,2600792 | NA       |
| INSIG2         | 4,77 | 2,23 | 2,18 | 3,86 | 0,2600817 | 0,447523 |
| SRRT           | 5,16 | 6,59 | 5,83 | 6,18 | 0,2600892 | 0,447523 |
| MED20          | 1,11 | 0,42 | 0,76 | 1,74 | 0,2600949 | 0,447523 |
| RBBP7          | 5,45 | 3,92 | 5,74 | 5,34 | 0,2600967 | 0,447523 |
| HSD17B7P2      | 2,52 | 1,63 | 0,86 | 3,15 | 0,2601318 | 0,447545 |
| ZSCAN22        | 0,19 | 0,04 | 0,16 | 0,23 | 0,2601499 | 0,447545 |
| IGLV1-40       | 1,03 | 2,92 | 0,87 | 0,57 | 0,2601943 | 0,447587 |
| RP11-265F19.1  | 0,00 | 0,36 | 0,01 | 0,00 | 0,2602288 | 0,447611 |
| NOD1           | 2,92 | 1,01 | 1,42 | 2,08 | 0,2603205 | 0,447734 |

|                  |      |      |      |      |           |          |
|------------------|------|------|------|------|-----------|----------|
| ASB11            | 0,13 | 0,05 | 0,07 | 0,12 | 0,2603727 | 0,447789 |
| RP11-454E5.4     | 1,73 | 2,43 | 1,90 | 1,61 | 0,2604432 | 0,447857 |
| RP11-932O9.10    | 0,00 | 0,00 | 0,00 | 0,00 | 0,2604609 | 0,447857 |
| CFP              | 8,29 | 8,01 | 8,56 | 8,47 | 0,2604901 | 0,447857 |
| RP11-398H6.1     | 0,84 | 1,10 | 0,26 | 0,16 | 0,2604927 | 0,447857 |
| UBE2E1           | 4,18 | 4,92 | 4,52 | 4,48 | 0,2605171 | 0,447865 |
| RP11-492D6.3     | 0,18 | 0,18 | 0,27 | 0,31 | 0,2606131 | 0,447995 |
| ACP1             | 6,02 | 6,05 | 5,63 | 4,50 | 0,2606393 | 0,448005 |
| RP11-654A16.3    | 0,00 | 0,00 | 0,00 | 0,00 | 0,2607845 | 0,44822  |
| RP3-467K16.2     | 0,00 | 0,04 | 0,06 | 0,04 | 0,2608845 | NA       |
| ITPK1-AS1        | 0,27 | 0,11 | 0,32 | 0,34 | 0,2609428 | 0,448458 |
| ACO19185.4       | 0,00 | 1,22 | 0,00 | 0,38 | 0,2610538 | NA       |
| CFHR3            | 0,00 | 0,00 | 0,00 | 0,10 | 0,2610713 | 0,448629 |
| FNBP1            | 6,64 | 5,11 | 6,77 | 6,33 | 0,2611086 | 0,448629 |
| AARD             | 0,66 | 1,09 | 1,13 | 0,35 | 0,2611087 | 0,448629 |
| METTL10          | 4,30 | 4,05 | 3,18 | 0,93 | 0,261143  | 0,448629 |
| ACO90018.3       | 0,44 | 0,26 | 0,00 | 0,00 | 0,2611514 | 0,448629 |
| ARGFXP2          | 0,79 | 0,48 | 1,04 | 2,13 | 0,2612244 | 0,448629 |
| ACVR2A           | 0,79 | 1,22 | 1,81 | 1,00 | 0,2612254 | 0,448629 |
| RP11-417B4.4     | 0,00 | 0,00 | 0,00 | 0,00 | 0,2612415 | 0,448629 |
| RP11-195E11.2    | 0,27 | 1,44 | 0,43 | 0,42 | 0,2612597 | 0,448629 |
| CPEB3            | 0,54 | 1,11 | 1,10 | 1,31 | 0,2612643 | 0,448629 |
| NRAP             | 0,00 | 0,00 | 0,00 | 0,00 | 0,2612647 | 0,448629 |
| AP2S1            | 8,22 | 8,04 | 8,23 | 7,87 | 0,2613377 | 0,44872  |
| PRDM13           | 0,00 | 0,11 | 0,00 | 0,00 | 0,2613691 | 0,448739 |
| RP11-54C4.3      | 0,00 | 0,00 | 0,00 | 0,00 | 0,2613961 | 0,448751 |
| ARL16            | 5,32 | 2,98 | 5,19 | 5,93 | 0,2614548 | 0,448769 |
| LINC01080        | 0,00 | 0,00 | 0,00 | 0,00 | 0,2614586 | 0,448769 |
| RP11-483F11.7    | 0,00 | 0,00 | 0,00 | 0,00 | 0,2614591 | NA       |
| NFS1             | 3,58 | 1,68 | 2,28 | 2,08 | 0,2614824 | 0,448769 |
| ZNF529           | 2,88 | 2,19 | 2,65 | 2,47 | 0,2614961 | 0,448769 |
| FAM20B           | 2,15 | 1,04 | 1,80 | 1,26 | 0,2615077 | 0,448769 |
| RP11-415C15.2    | 0,07 | 0,84 | 0,12 | 0,12 | 0,2615347 | 0,448781 |
| TCERG1           | 6,21 | 6,46 | 6,03 | 5,57 | 0,2616464 | 0,448931 |
| MUC12            | 0,00 | 0,00 | 0,00 | 0,69 | 0,2616786 | 0,448931 |
| HSPA4            | 4,96 | 2,56 | 4,29 | 4,31 | 0,2616829 | 0,448931 |
| GLUDP3           | 1,13 | 1,76 | 1,59 | 0,39 | 0,2617381 | 0,448991 |
| ANTXR1           | 0,00 | 0,09 | 0,00 | 0,00 | 0,2617744 | NA       |
| DHX29            | 4,37 | 3,60 | 3,78 | 3,64 | 0,2617951 | 0,449021 |
| PPP2R3A          | 0,81 | 0,92 | 0,60 | 0,83 | 0,2617957 | 0,449021 |
| MTCP1            | 2,82 | 3,57 | 3,26 | 0,42 | 0,2618755 | 0,449098 |
| LLOXNC01-237H1.2 | 0,00 | 0,00 | 0,00 | 0,00 | 0,2618855 | 0,449098 |
| KTN1-AS1         | 0,06 | 0,37 | 0,16 | 0,87 | 0,2619062 | 0,449098 |
| PTCSC3           | 3,32 | 4,52 | 3,74 | 4,49 | 0,2619304 | 0,449098 |
| OSBP2            | 1,38 | 2,17 | 0,66 | 0,30 | 0,2619418 | 0,449098 |
| ZNF808           | 3,14 | 1,29 | 2,02 | 2,38 | 0,2619753 | 0,449116 |
| RP11-104G3.2     | 1,23 | 0,00 | 0,00 | 0,00 | 0,2619987 | 0,449116 |
| ZNF354B          | 1,77 | 0,75 | 1,78 | 1,97 | 0,2620128 | 0,449116 |
| PRPF6            | 3,59 | 3,49 | 3,67 | 3,68 | 0,2620525 | 0,449139 |
| TERF1            | 4,73 | 4,35 | 4,25 | 4,26 | 0,262067  | 0,449139 |
| RP11-49K24.8     | 0,00 | 0,00 | 0,00 | 0,00 | 0,2621096 | 0,449178 |
| PGBD4            | 0,66 | 0,95 | 1,15 | 1,37 | 0,2621448 | 0,449203 |
| EML3             | 3,02 | 4,18 | 3,19 | 3,06 | 0,2621657 | 0,449205 |
| BTG3             | 3,28 | 5,02 | 4,20 | 1,34 | 0,2621979 | 0,449225 |
| NUDT8            | 0,81 | 0,00 | 0,21 | 0,00 | 0,2622227 | 0,449233 |

|                |      |      |      |      |           |          |
|----------------|------|------|------|------|-----------|----------|
| RP11-330O11.2  | 0,00 | 0,00 | 0,00 | 0,55 | 0,2622625 | 0,449252 |
| AIP            | 7,41 | 6,31 | 7,01 | 5,97 | 0,2622742 | 0,449252 |
| ZNF219         | 0,03 | 0,09 | 0,18 | 0,00 | 0,2622952 | 0,449253 |
| INPP5F         | 3,59 | 2,95 | 2,95 | 2,78 | 0,2623462 | 0,449254 |
| RP5-1181K21.4  | 0,19 | 0,23 | 0,22 | 0,46 | 0,2623482 | 0,449254 |
| RP11-475A13.1  | 0,94 | 1,82 | 1,35 | 1,14 | 0,2623718 | 0,449254 |
| RP11-6O2.3     | 0,07 | 0,30 | 0,07 | 0,18 | 0,2623773 | 0,449254 |
| SUCLA2         | 5,08 | 5,07 | 4,47 | 3,71 | 0,2623966 | 0,449254 |
| CTD-2555A7.2   | 0,00 | 0,00 | 0,00 | 0,00 | 0,2624632 | NA       |
| CTA-268H5.14   | 0,00 | 0,11 | 0,00 | 0,00 | 0,2624869 | 0,449374 |
| RP11-875O11.1  | 0,45 | 1,01 | 1,29 | 1,67 | 0,2625175 | 0,449392 |
| LRP10          | 2,90 | 1,79 | 2,46 | 2,51 | 0,2626248 | 0,449541 |
| RBM27          | 3,53 | 2,56 | 2,61 | 2,48 | 0,2626543 | 0,449556 |
| AC009499.1     | 0,10 | 0,49 | 0,27 | 0,20 | 0,2626882 | 0,44958  |
| FOSL1          | 1,10 | 1,02 | 0,89 | 0,61 | 0,262787  | 0,449714 |
| TMSB4XP4       | 2,71 | 2,72 | 2,65 | 1,89 | 0,2628361 | 0,449764 |
| NAMPTL         | 1,53 | 0,48 | 1,07 | 0,58 | 0,2628837 | 0,449811 |
| AGL            | 1,74 | 1,88 | 1,27 | 0,66 | 0,2630599 | 0,450041 |
| CEP78          | 2,89 | 1,66 | 1,86 | 2,19 | 0,2630776 | 0,450041 |
| ELL3           | 0,00 | 0,00 | 0,11 | 0,78 | 0,2630793 | 0,450041 |
| AC002116.8     | 0,00 | 0,00 | 0,00 | 0,15 | 0,263199  | 0,450204 |
| SELO           | 4,43 | 2,27 | 5,08 | 4,40 | 0,263215  | 0,450204 |
| PPEF2          | 0,94 | 0,35 | 0,30 | 0,18 | 0,2632499 | 0,450229 |
| MRPL2          | 5,39 | 3,84 | 5,34 | 4,71 | 0,2633227 | 0,450266 |
| CMP21-T1230.1  | 0,32 | 0,18 | 0,19 | 0,12 | 0,2633312 | 0,450266 |
| WDR62          | 0,43 | 0,29 | 0,63 | 0,90 | 0,2633323 | 0,450266 |
| DCUN1D5        | 4,42 | 2,22 | 3,26 | 1,96 | 0,2633966 | 0,450321 |
| AC103563.2     | 0,00 | 0,00 | 0,00 | 0,00 | 0,2634177 | 0,450321 |
| RP11-169K16.4  | 0,00 | 0,00 | 0,00 | 0,00 | 0,2634249 | 0,450321 |
| FZR1           | 1,75 | 0,35 | 1,08 | 1,10 | 0,2635292 | 0,450464 |
| RP11-701P16.1  | 0,00 | 0,00 | 0,00 | 2,79 | 0,2635671 | 0,450491 |
| IFT172         | 1,54 | 0,09 | 1,45 | 0,96 | 0,2635855 | 0,450491 |
| CTD-2341M24.1  | 0,00 | 2,27 | 1,62 | 0,00 | 0,2636211 | 0,450517 |
| TOMM20         | 5,07 | 4,53 | 4,53 | 4,28 | 0,2637127 | 0,45062  |
| GP2            | 0,13 | 0,20 | 0,13 | 0,40 | 0,2637215 | 0,45062  |
| TRAF4          | 1,67 | 0,51 | 1,47 | 0,78 | 0,2637837 | 0,450691 |
| SLC22A2        | 0,05 | 0,45 | 0,02 | 0,03 | 0,2638283 | 0,450733 |
| RP11-671C19.1  | 0,00 | 0,12 | 0,00 | 0,00 | 0,2638489 | NA       |
| PPP1R8         | 2,70 | 2,59 | 3,31 | 2,96 | 0,2638817 | 0,450789 |
| SH3TC1         | 4,78 | 6,46 | 5,26 | 5,27 | 0,2639732 | 0,450911 |
| RP11-69E11.7   | 0,00 | 0,09 | 0,00 | 0,00 | 0,2640501 | 0,451008 |
| APPBP2         | 2,84 | 1,62 | 2,55 | 2,99 | 0,2641483 | 0,451121 |
| PSMG4          | 4,45 | 3,42 | 4,32 | 4,01 | 0,2641568 | 0,451121 |
| RP11-277P12.10 | 0,00 | 0,00 | 0,00 | 0,46 | 0,2643038 | 0,451337 |
| TAS2R10        | 0,00 | 0,00 | 0,00 | 0,00 | 0,264331  | 0,451349 |
| RP5-1112D6.4   | 1,89 | 0,96 | 0,84 | 3,36 | 0,2643941 | 0,451422 |
| RP11-55K22.5   | 0,19 | 0,00 | 0,11 | 0,11 | 0,2644627 | 0,451504 |
| RP11-483P21.2  | 1,66 | 1,60 | 1,02 | 0,59 | 0,2645329 | 0,451559 |
| RP11-403A21.2  | 0,00 | 0,56 | 0,00 | 0,00 | 0,2645351 | 0,451559 |
| RP11-532F12.5  | 1,59 | 0,00 | 0,30 | 0,31 | 0,2646112 | 0,451605 |
| RP11-178L8.9   | 0,00 | 1,15 | 0,00 | 0,66 | 0,2646133 | 0,451605 |
| PRPF38B        | 5,96 | 5,45 | 5,94 | 5,21 | 0,2646235 | 0,451605 |
| PGAP1          | 1,14 | 0,25 | 0,27 | 0,32 | 0,2646617 | 0,451636 |
| RP11-93O14.3   | 3,22 | 0,47 | 0,00 | 0,00 | 0,2647652 | 0,451778 |
| CPA3           | 0,00 | 0,00 | 0,00 | 0,00 | 0,2647854 | NA       |

|               |      |      |      |      |           |          |
|---------------|------|------|------|------|-----------|----------|
| RP11-438B23.2 | 0,02 | 0,00 | 0,03 | 0,05 | 0,2648432 | 0,451843 |
| CBS           | 0,18 | 1,08 | 0,72 | 0,79 | 0,2648443 | 0,451843 |
| ENDOG         | 0,72 | 0,27 | 1,44 | 2,94 | 0,264968  | 0,45202  |
| CEACAMP3      | 0,00 | 0,00 | 0,00 | 0,00 | 0,2649951 | NA       |
| CACNA1F       | 0,20 | 0,52 | 0,45 | 1,07 | 0,2650137 | 0,452063 |
| KCTD12        | 5,42 | 5,24 | 4,96 | 4,77 | 0,2650348 | 0,452064 |
| GSPT2         | 2,34 | 0,42 | 1,15 | 0,40 | 0,2650592 | 0,452071 |
| RP11-85I21.1  | 0,76 | 0,00 | 1,79 | 0,55 | 0,2650859 | 0,452082 |
| RF00561       | 2,57 | 1,76 | 0,00 | 1,65 | 0,2651486 | 0,452154 |
| ELP2          | 6,29 | 7,22 | 6,54 | 4,82 | 0,2652384 | 0,452273 |
| HIST1H3G      | 0,05 | 0,00 | 0,00 | 0,00 | 0,2652607 | 0,452276 |
| UBE2D2        | 6,58 | 5,92 | 6,60 | 5,45 | 0,2653128 | 0,45233  |
| AC007036.6    | 0,00 | 0,00 | 0,00 | 0,00 | 0,2653223 | NA       |
| C9orf9        | 0,39 | 0,48 | 0,42 | 0,34 | 0,2653511 | 0,452337 |
| SNAPC4        | 0,94 | 0,81 | 0,94 | 0,55 | 0,2653575 | 0,452337 |
| PAPOLA        | 6,37 | 6,49 | 6,22 | 6,28 | 0,265381  | 0,452342 |
| C1orf50       | 2,03 | 2,28 | 2,15 | 2,49 | 0,265429  | 0,45239  |
| RIPK2         | 6,28 | 5,50 | 5,89 | 4,24 | 0,265635  | 0,452672 |
| FAM201A       | 0,03 | 0,12 | 0,04 | 0,00 | 0,2656356 | 0,452672 |
| PIDD1         | 0,32 | 0,77 | 2,15 | 2,12 | 0,2656557 | 0,452672 |
| STAT4         | 2,72 | 4,29 | 2,00 | 2,99 | 0,2657729 | 0,452837 |
| IDI1          | 5,79 | 4,13 | 5,31 | 5,06 | 0,2658544 | 0,452941 |
| AC094020.1    | 0,00 | 0,00 | 0,00 | 0,00 | 0,2658893 | 0,452966 |
| ERO1B         | 3,31 | 2,91 | 2,28 | 1,80 | 0,2659183 | 0,45298  |
| TMEM165       | 5,91 | 6,58 | 6,18 | 5,87 | 0,2659654 | 0,453026 |
| MIRS48AD      | 0,00 | 0,00 | 0,00 | 0,00 | 0,2659972 | NA       |
| PLK4          | 0,10 | 0,60 | 0,00 | 1,68 | 0,2660446 | 0,453126 |
| ZBP1          | 4,33 | 3,02 | 3,22 | 4,49 | 0,2661145 | 0,45321  |
| FRG2          | 0,05 | 0,00 | 0,00 | 0,06 | 0,2661674 | NA       |
| GCGR          | 0,00 | 0,00 | 0,00 | 0,00 | 0,2661813 | NA       |
| RHOT1         | 4,97 | 3,18 | 4,51 | 3,51 | 0,2662686 | 0,453393 |
| PSMB6         | 8,45 | 8,51 | 8,44 | 7,62 | 0,2662769 | 0,453393 |
| CTA-315H11.2  | 0,44 | 0,80 | 0,76 | 0,91 | 0,2663024 | 0,453393 |
| CHMP1A        | 3,18 | 1,43 | 3,57 | 4,21 | 0,2663265 | 0,453393 |
| GRAMD2        | 0,37 | 0,87 | 1,10 | 0,97 | 0,266347  | 0,453393 |
| GBE1          | 3,01 | 4,28 | 2,92 | 1,48 | 0,2663559 | 0,453393 |
| RP11-342K6.2  | 0,96 | 0,92 | 0,18 | 1,25 | 0,2663819 | 0,453393 |
| RP11-69C13.1  | 0,24 | 0,46 | 0,27 | 0,34 | 0,2663852 | 0,453393 |
| RNF165        | 0,07 | 0,44 | 0,09 | 0,18 | 0,2664521 | 0,453473 |
| MTUS1         | 0,00 | 0,93 | 0,02 | 0,04 | 0,2664856 | 0,453495 |
| AC107982.4    | 0,35 | 0,00 | 0,00 | 0,00 | 0,2666188 | 0,453652 |
| PDCD5         | 5,86 | 6,39 | 5,53 | 5,87 | 0,2666188 | 0,453652 |
| CTD-2256P15.2 | 0,00 | 0,00 | 0,59 | 0,21 | 0,2666847 | 0,453711 |
| RP11-166B2.8  | 0,00 | 0,00 | 0,00 | 0,00 | 0,266723  | 0,453711 |
| ZDHHC5        | 2,40 | 0,97 | 3,19 | 2,79 | 0,266731  | 0,453711 |
| RP11-431K24.2 | 0,00 | 0,61 | 0,00 | 0,00 | 0,2667351 | 0,453711 |
| CTB-43P18.1   | 3,47 | 4,98 | 3,53 | 5,30 | 0,2667968 | 0,453781 |
| RP11-214O1.2  | 0,00 | 0,00 | 0,00 | 0,00 | 0,2668432 | 0,453825 |
| CTC-453G23.7  | 0,99 | 0,45 | 0,90 | 1,29 | 0,2668636 | 0,453825 |
| RNU6-1333P    | 4,75 | 0,00 | 2,73 | 0,00 | 0,2669443 | 0,453885 |
| ATP6AP1L      | 0,25 | 0,47 | 0,54 | 0,64 | 0,266951  | 0,453885 |
| RN7SL774P     | 2,07 | 2,88 | 1,97 | 1,23 | 0,26696   | 0,453885 |
| RNU4ATAC11P   | 0,00 | 0,00 | 0,00 | 2,79 | 0,2669813 | NA       |
| AGA           | 3,55 | 0,07 | 3,09 | 2,40 | 0,2670193 | 0,453951 |
| AC007250.4    | 0,64 | 2,82 | 0,23 | 1,25 | 0,2671004 | 0,454054 |

|                |      |      |      |      |           |          |
|----------------|------|------|------|------|-----------|----------|
| CTA-345G4.1    | 0,00 | 1,31 | 0,00 | 0,00 | 0,2671571 | 0,454113 |
| DHRS9          | 4,06 | 1,83 | 3,36 | 1,89 | 0,2671813 | 0,454113 |
| INPP5B         | 3,23 | 1,64 | 3,00 | 2,70 | 0,2671961 | 0,454113 |
| RP11-147L13.8  | 0,07 | 0,11 | 0,05 | 0,17 | 0,2672693 | 0,454202 |
| CH17-264B6.3   | 0,00 | 0,00 | 0,00 | 0,00 | 0,2673102 | 0,454237 |
| MED25          | 2,79 | 4,11 | 2,79 | 2,85 | 0,2673473 | 0,454266 |
| SDF2L1         | 5,61 | 2,38 | 6,10 | 4,80 | 0,2673808 | 0,454285 |
| ISCA1          | 3,45 | 4,30 | 3,40 | 3,12 | 0,2673998 | 0,454285 |
| RP11-7F17.8    | 0,69 | 0,79 | 0,95 | 0,64 | 0,2674888 | 0,454369 |
| RNA5SP498      | 1,46 | 3,06 | 2,41 | 2,93 | 0,2674899 | 0,454369 |
| ARSK           | 0,61 | 0,42 | 0,37 | 0,67 | 0,2675259 | 0,454395 |
| RP11-636O21.1  | 0,00 | 0,00 | 0,00 | 0,19 | 0,2675618 | 0,454422 |
| RNU1-33P       | 0,00 | 0,00 | 0,00 | 0,00 | 0,2675929 | NA       |
| P2RX7          | 3,82 | 4,29 | 4,25 | 3,58 | 0,2677059 | 0,454632 |
| ICA1           | 2,06 | 1,61 | 0,78 | 1,56 | 0,2677347 | 0,454646 |
| C4orf47        | 0,00 | 2,09 | 0,00 | 0,00 | 0,2677827 | 0,454693 |
| CA12           | 0,00 | 0,00 | 0,00 | 0,00 | 0,2678398 | 0,454755 |
| ODF4           | 0,00 | 0,00 | 0,00 | 0,00 | 0,2678953 | 0,4548   |
| CMC2           | 6,31 | 4,94 | 6,35 | 5,98 | 0,2679238 | 0,4548   |
| DCHS1          | 0,00 | 0,02 | 0,00 | 0,00 | 0,2679365 | 0,4548   |
| SART1          | 3,45 | 2,29 | 4,23 | 4,35 | 0,2679535 | 0,4548   |
| ATAD2B         | 5,94 | 5,62 | 5,68 | 4,33 | 0,267969  | 0,4548   |
| SLC13A4        | 0,06 | 0,27 | 0,17 | 0,11 | 0,2680069 | 0,45483  |
| AC005954.3     | 0,73 | 0,71 | 1,93 | 2,54 | 0,26817   | 0,455072 |
| AP000442.4     | 0,00 | 0,55 | 0,20 | 0,70 | 0,2682055 | 0,455092 |
| CYBRD1         | 3,11 | 1,98 | 3,54 | 3,11 | 0,2682393 | 0,455092 |
| CEP76          | 1,00 | 0,33 | 0,62 | 0,88 | 0,2682435 | 0,455092 |
| RP11-32K4.1    | 1,47 | 1,12 | 0,99 | 2,69 | 0,2682912 | 0,455139 |
| ALKBH4         | 1,41 | 3,30 | 1,95 | 0,84 | 0,2683868 | 0,455266 |
| MIR6077        | 0,00 | 0,00 | 0,00 | 0,00 | 0,2684357 | 0,455309 |
| BDH1           | 2,44 | 1,83 | 1,57 | 1,68 | 0,2684762 | 0,455309 |
| RP11-640N11.2  | 0,32 | 0,66 | 0,13 | 0,17 | 0,2684806 | 0,455309 |
| RPS2P5         | 5,95 | 5,67 | 5,33 | 4,83 | 0,2684966 | 0,455309 |
| PRPF40B        | 0,00 | 2,60 | 0,02 | 0,22 | 0,2685167 | 0,455309 |
| DLX2           | 0,00 | 0,00 | 0,00 | 0,12 | 0,2685657 | 0,455309 |
| TMEM237        | 0,61 | 0,00 | 0,62 | 0,12 | 0,2686003 | 0,455309 |
| RCL1           | 1,69 | 2,25 | 1,68 | 1,52 | 0,2686421 | 0,455309 |
| STAT1          | 6,06 | 3,70 | 5,37 | 5,74 | 0,2686551 | 0,455309 |
| RP4-635A23.6   | 1,74 | 0,82 | 2,50 | 1,89 | 0,268661  | 0,455309 |
| MMP25          | 0,20 | 0,04 | 0,36 | 0,00 | 0,2686749 | 0,455309 |
| C4orf32        | 1,97 | 2,03 | 1,96 | 2,00 | 0,2687001 | 0,455309 |
| ATP1B3         | 7,82 | 6,85 | 7,62 | 6,41 | 0,2687256 | 0,455309 |
| TIMM10         | 5,94 | 6,20 | 6,04 | 5,79 | 0,2687278 | 0,455309 |
| CTC-457E21.3   | 0,00 | 0,26 | 0,00 | 0,00 | 0,2687457 | 0,455309 |
| RP11-97C16.1   | 0,37 | 0,00 | 0,00 | 0,00 | 0,2687459 | 0,455309 |
| AWAT2          | 0,00 | 2,62 | 0,00 | 0,00 | 0,2687605 | 0,455309 |
| SERGEF         | 5,06 | 3,79 | 4,39 | 0,82 | 0,2688064 | 0,45533  |
| THTPA          | 0,30 | 0,00 | 0,00 | 0,00 | 0,2688136 | 0,45533  |
| CRY2           | 2,96 | 3,07 | 3,63 | 3,55 | 0,268872  | 0,455394 |
| MICU1          | 3,64 | 2,28 | 3,87 | 3,02 | 0,2689128 | 0,455419 |
| HECTD2         | 0,18 | 1,32 | 0,18 | 0,25 | 0,2689479 | 0,455419 |
| HNRNPAB        | 3,98 | 4,62 | 3,85 | 3,34 | 0,2689483 | 0,455419 |
| ADGRL4         | 0,00 | 0,00 | 0,00 | 0,00 | 0,2689706 | 0,45542  |
| RP11-122G18.11 | 0,00 | 0,67 | 0,00 | 1,49 | 0,26899   | 0,45542  |
| LRP8           | 1,71 | 0,69 | 1,59 | 0,92 | 0,2690236 | 0,455435 |

|               |      |      |      |      |           |          |
|---------------|------|------|------|------|-----------|----------|
| CTD-3025N20.3 | 0,00 | 0,00 | 0,00 | 0,00 | 0,2690399 | 0,455435 |
| TPK1          | 4,95 | 5,30 | 4,94 | 4,58 | 0,2690795 | 0,455468 |
| RP11-396K3.1  | 2,99 | 4,23 | 3,21 | 1,62 | 0,2691114 | 0,455487 |
| MPND          | 2,79 | 1,70 | 2,90 | 2,83 | 0,2691875 | 0,455581 |
| TNFRSF11A     | 0,06 | 0,11 | 0,04 | 0,42 | 0,2692975 | 0,455733 |
| LAT2          | 6,63 | 5,96 | 6,23 | 5,46 | 0,2695443 | 0,456074 |
| ZNF185        | 0,35 | 1,64 | 0,07 | 0,17 | 0,2695733 | 0,456074 |
| SH3BP4        | 3,33 | 2,34 | 2,55 | 2,33 | 0,2695734 | 0,456074 |
| RP11-356N1.1  | 0,00 | 0,00 | 0,00 | 0,00 | 0,2695812 | 0,456074 |
| NPDC1         | 0,00 | 0,65 | 0,00 | 0,00 | 0,2696331 | 0,456089 |
| UBTFL5        | 0,00 | 0,00 | 0,00 | 0,00 | 0,2696407 | 0,456089 |
| AC005355.2    | 0,32 | 0,39 | 0,51 | 0,13 | 0,2696519 | 0,456089 |
| RN7SL472P     | 0,00 | 0,00 | 0,43 | 0,00 | 0,2697275 | 0,456183 |
| DNER          | 0,00 | 0,00 | 0,00 | 0,00 | 0,2697899 | NA       |
| RP11-475C16.1 | 0,68 | 1,21 | 1,15 | 1,40 | 0,2698055 | 0,456214 |
| RP11-684B2.4  | 0,00 | 0,00 | 0,00 | 0,13 | 0,2698096 | NA       |
| RAB3IP        | 1,64 | 1,63 | 1,72 | 2,30 | 0,2698149 | 0,456214 |
| RRAGC         | 4,49 | 4,84 | 3,95 | 2,92 | 0,2698176 | 0,456214 |
| CCDC79        | 0,25 | 0,93 | 0,54 | 0,67 | 0,2698282 | 0,456214 |
| PLEKHH2       | 0,11 | 0,51 | 0,34 | 0,50 | 0,269904  | 0,456307 |
| MIR555        | 0,00 | 0,00 | 0,00 | 0,00 | 0,2699495 | NA       |
| HPS3          | 5,11 | 3,13 | 4,07 | 4,20 | 0,2703218 | 0,456979 |
| CTB-58E17.1   | 0,09 | 0,85 | 0,30 | 0,00 | 0,2704228 | 0,457091 |
| TGFBRAP1      | 2,15 | 0,20 | 1,92 | 2,74 | 0,2704346 | 0,457091 |
| AC013267.2    | 3,80 | 1,86 | 3,01 | 4,97 | 0,2704736 | 0,457091 |
| RAB27B        | 0,00 | 0,02 | 0,00 | 0,00 | 0,2704774 | 0,457091 |
| UNC119B       | 1,04 | 0,00 | 0,97 | 0,08 | 0,2704907 | 0,457091 |
| RP5-900K19.2  | 1,46 | 0,00 | 0,23 | 0,16 | 0,2705377 | 0,457135 |
| RP11-153I24.4 | 1,37 | 0,58 | 0,00 | 1,32 | 0,2706357 | 0,457266 |
| RP11-420A6.2  | 0,00 | 0,00 | 0,00 | 0,00 | 0,2707173 | 0,457268 |
| AC108142.1    | 0,10 | 0,32 | 0,12 | 0,22 | 0,2707485 | 0,457268 |
| RP11-70C1.3   | 0,00 | 0,00 | 0,00 | 0,00 | 0,2707546 | 0,457268 |
| RP11-749H20.1 | 0,00 | 0,00 | 0,00 | 0,00 | 0,2707612 | 0,457268 |
| AP001597.1    | 1,81 | 1,08 | 1,90 | 1,94 | 0,270769  | 0,457268 |
| PRDM10        | 0,13 | 0,07 | 0,44 | 0,70 | 0,2707792 | 0,457268 |
| FTHL10        | 1,68 | 1,56 | 1,83 | 1,24 | 0,2707806 | 0,457268 |
| UBAC1         | 4,82 | 5,51 | 4,59 | 2,33 | 0,2708078 | 0,457269 |
| TAF12         | 5,51 | 5,08 | 3,98 | 4,91 | 0,2708355 | 0,457269 |
| OR8A1         | 1,43 | 0,21 | 1,20 | 0,35 | 0,2708429 | 0,457269 |
| RP11-32B5.8   | 0,00 | 0,00 | 0,00 | 0,00 | 0,2709191 | NA       |
| BTK           | 5,97 | 3,98 | 5,07 | 5,08 | 0,2709655 | 0,457346 |
| FBXO38        | 5,14 | 3,30 | 3,56 | 4,00 | 0,2709667 | 0,457346 |
| RTCB          | 5,97 | 4,13 | 5,63 | 4,73 | 0,2709681 | 0,457346 |
| RP11-691H4.3  | 0,00 | 0,48 | 0,21 | 0,76 | 0,2709833 | 0,457346 |
| CH17-353B19.1 | 0,51 | 0,00 | 0,29 | 0,09 | 0,2709916 | 0,457346 |
| CCT6B         | 1,15 | 3,95 | 0,65 | 1,36 | 0,2710164 | 0,457353 |
| GPD1L         | 2,74 | 2,96 | 1,17 | 2,33 | 0,2710973 | 0,457455 |
| HACD3         | 4,08 | 2,85 | 2,97 | 2,12 | 0,2711288 | 0,457473 |
| FAM122C       | 2,34 | 1,44 | 2,60 | 1,80 | 0,2712015 | 0,457561 |
| RP11-317N12.1 | 2,15 | 1,83 | 2,52 | 2,08 | 0,2713037 | 0,457685 |
| SLC25A32      | 3,43 | 2,09 | 2,96 | 1,95 | 0,2713184 | 0,457685 |
| RPF2          | 5,02 | 2,19 | 4,01 | 4,51 | 0,2713364 | 0,457685 |
| RP11-406H23.2 | 1,14 | 2,33 | 0,00 | 0,00 | 0,271431  | 0,457809 |
| C4orf50       | 0,00 | 0,03 | 0,00 | 0,02 | 0,2715394 | 0,457957 |
| VPS35         | 5,82 | 5,58 | 5,35 | 5,29 | 0,2715877 | 0,458004 |

|                   |      |      |      |      |           |          |
|-------------------|------|------|------|------|-----------|----------|
| HEMGN             | 0,77 | 0,39 | 0,55 | 0,47 | 0,2716197 | 0,458023 |
| RGP1              | 0,89 | 0,20 | 0,41 | 0,98 | 0,2716446 | 0,458031 |
| RP11-861A13.4     | 1,00 | 0,15 | 0,87 | 0,25 | 0,271681  | 0,458057 |
| RP11-157E16.1     | 0,00 | 0,30 | 0,00 | 0,16 | 0,2718128 | NA       |
| AC144833.1        | 0,00 | 0,00 | 0,01 | 0,00 | 0,2718748 | NA       |
| RBPMS             | 0,43 | 0,05 | 0,15 | 0,36 | 0,2718863 | 0,458369 |
| OR9G1             | 0,00 | 0,00 | 0,00 | 0,04 | 0,2719387 | 0,4584   |
| C17orf102         | 0,00 | 0,00 | 0,00 | 0,07 | 0,2719589 | 0,4584   |
| RP11-732A19.10    | 0,00 | 0,00 | 0,00 | 0,00 | 0,2719636 | NA       |
| ACSL1             | 2,92 | 4,32 | 3,66 | 4,58 | 0,2719667 | 0,4584   |
| AP001626.2        | 0,07 | 0,05 | 0,11 | 0,07 | 0,2720437 | 0,458469 |
| DUX4              | 0,00 | 1,05 | 0,00 | 1,16 | 0,2720582 | 0,458469 |
| PLEKHA3           | 2,93 | 2,60 | 2,36 | 2,11 | 0,2720883 | 0,458469 |
| RP11-26J3.1       | 0,05 | 0,14 | 0,22 | 0,22 | 0,2720902 | 0,458469 |
| SH3BGR            | 0,00 | 0,33 | 0,00 | 0,28 | 0,2721148 | 0,458476 |
| AC009948.3        | 4,53 | 2,73 | 2,54 | 4,58 | 0,2721994 | 0,45855  |
| HPCAL1            | 3,78 | 4,18 | 4,79 | 3,43 | 0,2722004 | 0,45855  |
| AC004623.2        | 0,00 | 0,00 | 0,00 | 0,00 | 0,2722877 | NA       |
| CCDC82            | 4,32 | 1,78 | 4,08 | 4,21 | 0,2722988 | 0,458639 |
| ZNF763            | 1,85 | 1,20 | 1,18 | 0,45 | 0,2723063 | 0,458639 |
| AC009495.4        | 0,53 | 0,00 | 0,00 | 0,00 | 0,2723152 | 0,458639 |
| SALRNA2           | 0,00 | 0,07 | 0,00 | 0,00 | 0,272323  | NA       |
| PIGB              | 4,57 | 5,50 | 4,44 | 3,65 | 0,2723374 | 0,458642 |
| ZBED4             | 1,55 | 0,24 | 1,46 | 0,38 | 0,272366  | 0,458655 |
| XXbac-BPG254F23.7 | 0,00 | 0,00 | 0,00 | 0,25 | 0,2723769 | NA       |
| TTC23L            | 0,00 | 0,00 | 0,00 | 0,00 | 0,2724288 | NA       |
| VGLL4             | 3,45 | 4,37 | 4,04 | 4,06 | 0,2727033 | 0,459189 |
| CYB561            | 0,65 | 0,59 | 1,28 | 0,85 | 0,2727627 | 0,459254 |
| GCDH              | 2,52 | 4,02 | 3,79 | 2,31 | 0,2729618 | 0,459554 |
| TNS3              | 3,32 | 3,61 | 3,33 | 3,58 | 0,2730482 | 0,459665 |
| RP11-503E24.2     | 0,00 | 0,00 | 0,00 | 0,00 | 0,2731144 | 0,459742 |
| RP11-67L2.2       | 0,25 | 0,07 | 0,87 | 1,35 | 0,2731479 | 0,459763 |
| RP11-1057B6.1     | 0,00 | 3,59 | 0,21 | 0,00 | 0,2732768 | 0,459945 |
| FER1L5            | 0,31 | 0,41 | 0,27 | 0,26 | 0,2733146 | 0,459974 |
| FAM136A           | 5,02 | 4,45 | 3,96 | 3,33 | 0,273385  | 0,460058 |
| KCTD15            | 1,32 | 1,59 | 1,91 | 1,07 | 0,2734209 | 0,460083 |
| DCAF4L2           | 0,00 | 0,00 | 0,00 | 0,00 | 0,2734948 | 0,460109 |
| GTF2IRD2          | 1,86 | 2,21 | 2,83 | 2,52 | 0,273495  | 0,460109 |
| IRAK3             | 4,09 | 2,87 | 4,33 | 4,95 | 0,2735124 | 0,460109 |
| ACAD9             | 3,21 | 3,27 | 2,00 | 1,46 | 0,2735191 | 0,460109 |
| CCDC168           | 0,00 | 0,00 | 0,00 | 0,00 | 0,2735434 | 0,460112 |
| RP11-746M1.1      | 4,63 | 4,49 | 5,02 | 5,17 | 0,2735623 | 0,460112 |
| RP11-445O3.2      | 0,00 | 0,00 | 0,00 | 0,00 | 0,2735757 | NA       |
| CTD-3064C13.1     | 0,73 | 0,70 | 1,20 | 1,56 | 0,2735942 | 0,460131 |
| AC005154.7        | 0,00 | 0,21 | 0,00 | 0,56 | 0,2736222 | 0,460143 |
| HSF2              | 3,10 | 0,16 | 0,67 | 0,28 | 0,2736436 | 0,460144 |
| RP1-30M3.5        | 1,20 | 0,00 | 0,30 | 0,18 | 0,2736993 | 0,460203 |
| CACNB2            | 0,84 | 0,25 | 0,57 | 1,69 | 0,2737742 | 0,460251 |
| ACTA2             | 3,78 | 1,63 | 1,83 | 2,33 | 0,2738019 | 0,460251 |
| RP3-337D23.3      | 0,59 | 1,45 | 0,84 | 0,82 | 0,2738055 | 0,460251 |
| RP11-395G23.3     | 0,99 | 0,00 | 0,36 | 0,85 | 0,2738104 | 0,460251 |
| PRAMEF25          | 0,00 | 0,47 | 0,00 | 0,00 | 0,2738627 | NA       |
| TAS2R19           | 0,00 | 0,17 | 0,00 | 0,00 | 0,2738722 | 0,46032  |
| RP11-286N3.1      | 0,69 | 0,37 | 1,66 | 0,00 | 0,2739231 | 0,460371 |
| RP5-1180E21.5     | 3,12 | 1,54 | 3,36 | 4,32 | 0,2740508 | 0,460527 |

|                |      |      |      |      |           |          |
|----------------|------|------|------|------|-----------|----------|
| OR51B8P        | 0,00 | 0,00 | 0,00 | 0,00 | 0,2740515 | NA       |
| RP11-629E24.1  | 0,36 | 0,00 | 0,00 | 0,00 | 0,2740578 | 0,460527 |
| ZNF24          | 4,62 | 3,80 | 4,11 | 4,29 | 0,274098  | 0,46056  |
| GPI            | 5,75 | 5,02 | 4,75 | 4,62 | 0,2741599 | 0,460629 |
| SLAMF9         | 1,65 | 0,30 | 0,51 | 0,00 | 0,274195  | 0,460653 |
| RP11-323F24.5  | 2,47 | 2,90 | 2,23 | 2,96 | 0,27422   | 0,460661 |
| SPINK8         | 0,00 | 0,00 | 0,00 | 0,00 | 0,2742439 | 0,460666 |
| UZAF1          | 6,60 | 5,66 | 6,43 | 5,27 | 0,2742717 | 0,460678 |
| RN7SL544P      | 0,43 | 0,00 | 0,66 | 0,33 | 0,2743791 | NA       |
| RN7SL763P      | 0,43 | 0,00 | 0,66 | 0,33 | 0,2743791 | NA       |
| AC007318.5     | 0,57 | 0,32 | 0,30 | 0,00 | 0,2744925 | 0,460993 |
| RP11-1006G14.1 | 0,00 | 0,00 | 0,00 | 0,29 | 0,2745187 | 0,460993 |
| YEATS4         | 3,92 | 1,79 | 2,70 | 2,08 | 0,2745216 | 0,460993 |
| PPP1R32        | 2,58 | 0,51 | 1,91 | 4,61 | 0,274668  | 0,461153 |
| DUSP14         | 0,00 | 0,00 | 0,00 | 0,00 | 0,2747037 | 0,461153 |
| PLEKHJ1        | 5,55 | 5,68 | 5,96 | 6,16 | 0,2747053 | 0,461153 |
| CTD-3064H18.4  | 0,20 | 0,08 | 0,05 | 0,07 | 0,2747163 | 0,461153 |
| CTD-2235C13.1  | 0,00 | 0,00 | 0,00 | 0,00 | 0,2747204 | 0,461153 |
| RP11-30E17.3   | 0,08 | 0,35 | 0,16 | 0,07 | 0,2747965 | 0,461169 |
| RGPD5          | 6,10 | 6,30 | 6,82 | 5,90 | 0,2747988 | 0,461169 |
| AC000068.9     | 0,48 | 0,00 | 0,00 | 0,00 | 0,274847  | 0,461169 |
| RP11-269F21.3  | 0,24 | 0,46 | 0,14 | 1,65 | 0,2748505 | 0,461169 |
| SNORD17        | 0,00 | 0,00 | 0,00 | 1,73 | 0,2748549 | 0,461169 |
| FAM83A         | 0,05 | 0,07 | 0,01 | 0,04 | 0,2748716 | 0,461169 |
| RP11-276H1.2   | 0,00 | 0,00 | 0,00 | 0,00 | 0,2748757 | 0,461169 |
| TOLLIP         | 4,42 | 1,62 | 4,15 | 3,29 | 0,2750285 | 0,461391 |
| OR10AE1P       | 0,00 | 0,00 | 0,00 | 0,38 | 0,2750868 | 0,461428 |
| TUBG2          | 0,03 | 0,24 | 0,10 | 2,78 | 0,2750923 | 0,461428 |
| RP11-787D18.2  | 0,00 | 0,60 | 0,00 | 0,00 | 0,2751245 | 0,461448 |
| RP11-253E3.1   | 0,96 | 0,96 | 0,78 | 0,77 | 0,2751748 | 0,461497 |
| RP11-236P2.2   | 0,50 | 0,27 | 0,33 | 0,52 | 0,2752165 | 0,461505 |
| NCOA4          | 6,41 | 6,17 | 5,85 | 5,53 | 0,2752503 | 0,461505 |
| GAGE12F        | 0,00 | 2,93 | 0,00 | 0,00 | 0,2752728 | 0,461505 |
| THUMPD3        | 4,64 | 3,12 | 4,73 | 3,74 | 0,2753044 | 0,461505 |
| RP11-159H10.3  | 0,00 | 0,00 | 0,00 | 0,00 | 0,2753226 | 0,461505 |
| PDPK2P         | 0,66 | 1,37 | 0,86 | 1,75 | 0,2753318 | 0,461505 |
| HDDC2          | 4,54 | 2,89 | 3,25 | 4,83 | 0,2753415 | 0,461505 |
| LMOD3          | 0,05 | 0,23 | 0,07 | 0,13 | 0,2753453 | 0,461505 |
| DUSP18         | 3,45 | 1,90 | 3,47 | 1,68 | 0,2753974 | 0,461557 |
| RP11-151A6.5   | 0,00 | 0,00 | 0,00 | 0,00 | 0,2754357 | 0,461586 |
| TBCEL          | 2,24 | 0,75 | 1,96 | 1,28 | 0,275491  | 0,461644 |
| ABO            | 0,82 | 1,29 | 0,81 | 1,52 | 0,2755791 | 0,461686 |
| DIABLO         | 5,48 | 5,32 | 5,25 | 2,77 | 0,2755912 | 0,461686 |
| RARA           | 2,54 | 2,48 | 3,08 | 2,83 | 0,2756026 | 0,461686 |
| C1orf21        | 1,55 | 0,46 | 0,16 | 1,58 | 0,2756053 | 0,461686 |
| RP11-124N14.3  | 3,00 | 0,34 | 3,44 | 3,19 | 0,2756357 | 0,461686 |
| RP11-263K4.5   | 1,72 | 0,55 | 1,39 | 0,62 | 0,2756408 | 0,461686 |
| ABCB10P1       | 0,00 | 0,06 | 0,00 | 0,00 | 0,2759078 | NA       |
| RP11-844P9.5   | 0,04 | 0,08 | 0,12 | 0,13 | 0,2759192 | 0,462118 |
| PRMT7          | 4,01 | 3,11 | 3,10 | 4,34 | 0,2759458 | 0,462128 |
| RP11-179A16.2  | 0,00 | 0,00 | 0,00 | 0,00 | 0,275966  | NA       |
| RP11-618K13.2  | 0,00 | 0,00 | 0,00 | 1,38 | 0,2760784 | 0,462315 |
| NAGA           | 5,79 | 4,82 | 5,00 | 4,28 | 0,2761685 | 0,462431 |
| RP4-760C5.5    | 0,09 | 0,43 | 0,23 | 0,47 | 0,2762398 | 0,462515 |
| GDF6           | 0,00 | 0,07 | 0,00 | 0,00 | 0,276274  | NA       |



|                |      |      |      |      |           |          |
|----------------|------|------|------|------|-----------|----------|
| GABPB1-AS1     | 3,36 | 4,99 | 4,11 | 3,04 | 0,2762799 | 0,462547 |
| RP11-274H2.3   | 0,00 | 2,20 | 0,27 | 0,53 | 0,2763244 | 0,462547 |
| CTD-2142D14.1  | 0,00 | 0,76 | 0,00 | 0,00 | 0,2763423 | 0,462547 |
| MYO1F          | 6,38 | 6,35 | 6,37 | 6,75 | 0,2763532 | 0,462547 |
| CTD-2600O9.1   | 0,52 | 1,22 | 1,17 | 0,47 | 0,2763794 | 0,462547 |
| ZNF367         | 0,00 | 0,00 | 0,00 | 0,04 | 0,2763834 | 0,462547 |
| CTD-2313F11.3  | 0,00 | 0,00 | 0,00 | 0,49 | 0,2764144 | NA       |
| SMU1           | 4,16 | 3,43 | 3,44 | 3,09 | 0,2764796 | 0,462673 |
| SEMA3F         | 0,00 | 0,00 | 0,00 | 0,00 | 0,2767025 | NA       |
| SLC4A1AP       | 4,41 | 4,22 | 4,02 | 4,07 | 0,2767173 | 0,463036 |
| HTT            | 5,59 | 4,20 | 4,44 | 3,55 | 0,2768202 | 0,463173 |
| DYNLRB1        | 6,69 | 5,49 | 6,54 | 6,65 | 0,2768788 | 0,463236 |
| AP000550.1     | 0,17 | 0,20 | 0,22 | 0,00 | 0,2769158 | 0,463248 |
| PNMA1          | 0,00 | 0,63 | 0,05 | 0,26 | 0,2769275 | 0,463248 |
| FAM196A        | 0,03 | 0,00 | 0,00 | 0,03 | 0,2769512 | 0,463253 |
| CLDN15         | 1,09 | 2,70 | 1,89 | 1,07 | 0,2770627 | 0,463405 |
| RP11-397E7.6   | 0,60 | 0,72 | 0,63 | 0,55 | 0,2771346 | 0,463489 |
| RP11-347C12.10 | 0,00 | 0,00 | 0,00 | 0,00 | 0,2771735 | 0,463489 |
| C17orf107      | 0,12 | 2,78 | 1,19 | 0,63 | 0,2771757 | 0,463489 |
| AQP7           | 0,50 | 2,52 | 1,42 | 1,12 | 0,2772655 | 0,463604 |
| TTC27          | 3,57 | 2,26 | 0,94 | 0,70 | 0,2773143 | 0,463651 |
| XXbac-B33L19.4 | 0,00 | 0,00 | 0,00 | 0,00 | 0,277414  | 0,463742 |
| PLAA           | 4,00 | 1,77 | 3,36 | 2,89 | 0,2774144 | 0,463742 |
| RP11-44N21.3   | 0,84 | 1,76 | 1,00 | 1,74 | 0,2774314 | 0,463742 |
| CTD-2562J15.6  | 1,99 | 1,49 | 2,73 | 3,37 | 0,2775533 | 0,463911 |
| HNRNPH1        | 9,13 | 8,63 | 8,86 | 8,66 | 0,2775913 | 0,463939 |
| RP11-483E23.3  | 0,00 | 0,00 | 0,00 | 0,25 | 0,27768   | NA       |
| GOLGA2         | 2,47 | 4,08 | 3,14 | 3,06 | 0,2777039 | 0,464093 |
| AP001055.8     | 0,67 | 0,04 | 0,24 | 0,19 | 0,2777524 | 0,464139 |
| RP11-702L6.4   | 1,04 | 1,73 | 1,27 | 1,09 | 0,277831  | 0,464235 |
| DRG2           | 4,51 | 4,33 | 4,44 | 5,40 | 0,2779158 | 0,464342 |
| RNU2-45P       | 0,00 | 0,00 | 0,00 | 0,00 | 0,2780379 | NA       |
| AC007050.9     | 0,27 | 0,25 | 0,37 | 0,21 | 0,2780788 | 0,464501 |
| CTD-2117L12.1  | 0,78 | 2,38 | 1,39 | 1,14 | 0,2781288 | 0,464501 |
| SHQ1           | 3,82 | 1,40 | 3,70 | 3,00 | 0,2781306 | 0,464501 |
| EDRF1          | 3,19 | 2,60 | 3,52 | 1,90 | 0,2781395 | 0,464501 |
| ESYT1          | 6,29 | 5,13 | 6,06 | 5,00 | 0,2781424 | 0,464501 |
| GK             | 4,57 | 3,80 | 4,28 | 4,01 | 0,2781444 | 0,464501 |
| CAPRN1         | 5,81 | 3,93 | 5,14 | 4,38 | 0,2781732 | 0,464501 |
| RNF38          | 3,37 | 3,48 | 2,59 | 1,80 | 0,2781808 | 0,464501 |
| FGFR4          | 0,00 | 0,00 | 0,00 | 0,00 | 0,2781854 | NA       |
| CHRNB1         | 3,29 | 0,85 | 1,75 | 1,56 | 0,2781991 | 0,464501 |
| RP11-710F7.3   | 0,04 | 0,00 | 0,00 | 0,00 | 0,2783278 | 0,464639 |
| CRNKL1         | 3,58 | 2,20 | 2,73 | 1,62 | 0,2783655 | 0,464639 |
| AC007566.10    | 0,28 | 0,00 | 0,55 | 0,00 | 0,2784319 | 0,464639 |
| RP11-57P14.3   | 0,00 | 0,00 | 0,00 | 0,00 | 0,2784519 | 0,464639 |
| RN7SL487P      | 0,00 | 1,30 | 0,31 | 0,68 | 0,2784576 | 0,464639 |
| TMEM184A       | 1,82 | 3,48 | 2,28 | 2,29 | 0,2784653 | 0,464639 |
| RN7SL402P      | 0,00 | 0,00 | 0,00 | 0,00 | 0,2784674 | 0,464639 |
| FGF13-AS1      | 0,00 | 0,53 | 0,08 | 0,39 | 0,2784835 | 0,464639 |
| KB-1517D11.4   | 0,00 | 0,05 | 0,00 | 0,00 | 0,2784837 | 0,464639 |
| RP11-181E22.4  | 0,18 | 0,29 | 0,06 | 0,08 | 0,2784906 | 0,464639 |
| AC002127.4     | 0,15 | 3,89 | 0,00 | 0,00 | 0,2785977 | 0,464783 |
| RP11-153A23.6  | 1,00 | 1,70 | 1,25 | 1,89 | 0,2786515 | 0,464836 |
| EPC2           | 2,92 | 1,26 | 2,00 | 2,71 | 0,2786751 | 0,464836 |

|               |      |      |      |      |           |          |
|---------------|------|------|------|------|-----------|----------|
| NOMO3         | 3,37 | 2,85 | 3,01 | 4,13 | 0,2786927 | 0,464836 |
| IGF2          | 0,00 | 0,06 | 0,00 | 0,02 | 0,2787567 | NA       |
| DICER1        | 4,31 | 3,57 | 4,35 | 4,51 | 0,2790316 | 0,465367 |
| RP11-16L9.1   | 0,00 | 0,00 | 0,00 | 0,00 | 0,279076  | NA       |
| RN7SL503P     | 1,03 | 0,00 | 1,28 | 0,85 | 0,2791263 | 0,46549  |
| CTD-2017C7.2  | 2,22 | 0,00 | 0,51 | 1,51 | 0,2791555 | 0,465499 |
| ZCCHC17       | 4,64 | 0,95 | 4,60 | 4,30 | 0,2791963 | 0,465499 |
| RP11-358L16.4 | 0,00 | 0,00 | 0,00 | 0,00 | 0,2792133 | 0,465499 |
| MYCBP         | 5,23 | 4,38 | 4,57 | 2,84 | 0,2792158 | 0,465499 |
| RP11-505P4.6  | 0,00 | 0,00 | 0,00 | 0,00 | 0,2792717 | NA       |
| TRPC5         | 0,00 | 0,00 | 0,00 | 0,00 | 0,2793497 | 0,465672 |
| RP11-105D1.2  | 0,00 | 0,00 | 0,00 | 0,00 | 0,2793615 | 0,465672 |
| NAV1          | 3,27 | 2,10 | 3,16 | 2,82 | 0,2794044 | 0,465709 |
| AC007040.11   | 0,17 | 0,17 | 0,20 | 0,55 | 0,2795266 | 0,465861 |
| AC087430.1    | 0,04 | 0,10 | 0,25 | 0,07 | 0,2795543 | 0,465861 |
| RP11-268G13.1 | 0,07 | 0,11 | 0,09 | 0,07 | 0,2795585 | 0,465861 |
| SPDYE4        | 0,00 | 0,00 | 0,00 | 0,00 | 0,2795813 | NA       |
| RP11-50C13.1  | 0,35 | 0,00 | 0,00 | 0,38 | 0,2797052 | 0,466071 |
| RN7SL618P     | 1,19 | 3,71 | 0,79 | 0,63 | 0,2797271 | 0,466072 |
| RP11-611E13.2 | 3,44 | 0,63 | 3,70 | 4,43 | 0,2797968 | 0,46612  |
| ATP13A1       | 4,40 | 2,94 | 4,22 | 4,15 | 0,279811  | 0,46612  |
| PMVK          | 2,76 | 1,58 | 3,60 | 3,72 | 0,2798187 | 0,46612  |
| DUS3L         | 4,60 | 5,64 | 5,05 | 4,23 | 0,2799015 | 0,466223 |
| RP11-810P12.5 | 0,00 | 0,00 | 0,00 | 0,00 | 0,2800269 | 0,466363 |
| RP11-706C16.8 | 0,59 | 1,11 | 1,20 | 0,79 | 0,2800279 | 0,466363 |
| RP11-270B14.1 | 0,00 | 2,41 | 0,00 | 0,00 | 0,2800529 | NA       |
| MAP4          | 3,79 | 3,70 | 3,97 | 3,86 | 0,280128  | 0,466495 |
| C5orf58       | 2,12 | 0,00 | 3,18 | 1,21 | 0,280244  | 0,466653 |
| RP11-169D4.1  | 1,39 | 2,12 | 1,38 | 1,97 | 0,2803261 | 0,466708 |
| IL8RBP        | 0,05 | 0,06 | 0,36 | 0,28 | 0,2803441 | 0,466708 |
| RFC5          | 1,92 | 0,90 | 0,76 | 1,04 | 0,2803448 | 0,466708 |
| ZNF740        | 0,54 | 1,27 | 0,45 | 1,16 | 0,280361  | 0,466708 |
| FPR3          | 3,19 | 1,23 | 3,39 | 2,73 | 0,2803999 | 0,466738 |
| KDM6A         | 4,83 | 4,92 | 4,44 | 3,65 | 0,2804329 | 0,466758 |
| RP11-347C12.3 | 1,16 | 1,68 | 1,69 | 1,68 | 0,2804815 | 0,466804 |
| RP11-625H11.2 | 0,00 | 0,35 | 0,00 | 0,69 | 0,2806068 | 0,466937 |
| FXYD5         | 8,98 | 8,62 | 8,88 | 8,34 | 0,2806242 | 0,466937 |
| OR4E2         | 0,07 | 0,14 | 0,05 | 0,08 | 0,2806242 | 0,466937 |
| ZBTB18        | 2,04 | 2,42 | 2,74 | 2,45 | 0,2806726 | 0,466982 |
| TCF4          | 5,32 | 3,12 | 4,57 | 5,05 | 0,2807049 | 0,466982 |
| FEZ1          | 0,13 | 0,66 | 0,08 | 0,19 | 0,2807446 | 0,466982 |
| WASHC3        | 6,44 | 6,28 | 6,17 | 5,07 | 0,2807474 | 0,466982 |
| RN7SL300P     | 0,00 | 0,00 | 0,00 | 0,85 | 0,2807567 | 0,466982 |
| ELL2          | 0,24 | 0,22 | 0,67 | 2,49 | 0,2809026 | 0,46719  |
| AC005062.3    | 1,84 | 1,86 | 1,48 | 1,90 | 0,2809538 | 0,46724  |
| RNU6-957P     | 2,33 | 0,00 | 0,00 | 0,00 | 0,2810548 | 0,467373 |
| RP11-563N6.6  | 0,00 | 0,00 | 0,00 | 0,00 | 0,2811631 | 0,467518 |
| RP11-31I22.2  | 0,00 | 0,52 | 0,00 | 0,17 | 0,2812315 | NA       |
| LCLAT1        | 3,74 | 3,89 | 3,72 | 3,60 | 0,2812559 | 0,467595 |
| RP11-445O16.3 | 2,16 | 2,36 | 1,19 | 2,46 | 0,2812746 | 0,467595 |
| Z69666.2      | 0,43 | 0,42 | 0,39 | 0,41 | 0,2812854 | 0,467595 |
| NFATC2IP      | 4,47 | 2,92 | 4,24 | 3,78 | 0,2813065 | 0,467595 |
| RP11-297C4.2  | 0,00 | 0,00 | 0,00 | 0,62 | 0,2813143 | 0,467595 |
| KBTBD8        | 3,90 | 0,48 | 3,10 | 2,32 | 0,2813607 | 0,467637 |
| TPPP3         | 3,40 | 2,31 | 3,92 | 2,73 | 0,2814766 | 0,467795 |

|                |      |      |      |      |           |          |
|----------------|------|------|------|------|-----------|----------|
| USP40          | 4,18 | 2,40 | 4,20 | 3,93 | 0,2815283 | 0,467846 |
| GLRA1          | 0,15 | 0,00 | 0,18 | 0,21 | 0,2815527 | 0,467848 |
| SENP6          | 5,43 | 5,22 | 5,36 | 4,33 | 0,2815792 | 0,467848 |
| AC017116.11    | 0,22 | 0,00 | 0,00 | 0,00 | 0,2816232 | 0,467848 |
| IBTK           | 3,97 | 3,28 | 3,55 | 4,07 | 0,2816269 | 0,467848 |
| LENG1          | 2,75 | 3,24 | 2,78 | 4,16 | 0,2816398 | 0,467848 |
| SFT2D2         | 4,71 | 3,85 | 4,30 | 2,94 | 0,2816563 | 0,467848 |
| FAM65A         | 3,39 | 3,90 | 4,30 | 3,68 | 0,2816778 | 0,467849 |
| RIT2           | 0,00 | 2,62 | 0,00 | 0,00 | 0,2817251 | 0,467871 |
| RRP9           | 2,95 | 2,49 | 2,33 | 3,26 | 0,2817333 | 0,467871 |
| NAA30          | 1,58 | 2,13 | 1,75 | 0,38 | 0,2819033 | 0,468119 |
| TDRP           | 0,00 | 1,00 | 0,00 | 0,00 | 0,2820428 | 0,468236 |
| EFCAB13        | 1,57 | 0,92 | 1,36 | 2,40 | 0,2820809 | 0,468236 |
| RP3-354N19.3   | 0,00 | 0,00 | 0,00 | 0,00 | 0,2820828 | 0,468236 |
| B3GALNT2       | 3,18 | 2,88 | 2,76 | 1,53 | 0,2820975 | 0,468236 |
| NBPF8P         | 3,67 | 3,55 | 3,09 | 3,55 | 0,2821013 | 0,468236 |
| FANCD2         | 2,94 | 1,98 | 3,45 | 2,49 | 0,2821194 | 0,468236 |
| RP11-670P16.3  | 0,73 | 2,11 | 0,57 | 1,10 | 0,2821212 | 0,468236 |
| RAB33B         | 1,81 | 0,57 | 0,85 | 1,31 | 0,2821676 | 0,468278 |
| RNU6-878P      | 0,00 | 0,00 | 0,00 | 0,00 | 0,2823072 | 0,468474 |
| ACVR1C         | 0,00 | 0,00 | 0,00 | 0,00 | 0,2824142 | 0,46859  |
| BCL2L1         | 1,74 | 1,81 | 1,11 | 3,11 | 0,2824327 | 0,46859  |
| RP5-1074L1.1   | 0,04 | 0,00 | 0,17 | 0,16 | 0,2824657 | 0,46859  |
| RP4-671O14.5   | 0,57 | 0,20 | 0,48 | 0,45 | 0,2824661 | 0,46859  |
| SENP7          | 3,97 | 3,81 | 4,09 | 4,62 | 0,2824822 | 0,46859  |
| ANGPT4         | 0,09 | 0,23 | 0,22 | 0,08 | 0,2825172 | 0,468613 |
| CTD-2385L22.2  | 0,13 | 0,48 | 0,32 | 0,35 | 0,2825855 | 0,468642 |
| RP5-1086D14.5  | 0,00 | 0,00 | 0,00 | 0,00 | 0,282594  | 0,468642 |
| SPRNT          | 2,87 | 2,16 | 2,32 | 3,22 | 0,2825979 | 0,468642 |
| RP13-650J16.1  | 2,59 | 2,03 | 0,78 | 0,38 | 0,282655  | 0,468702 |
| GTF2I          | 5,26 | 3,81 | 4,92 | 5,44 | 0,282677  | 0,468703 |
| RP11-1017G21.6 | 0,48 | 0,42 | 0,36 | 0,91 | 0,2827536 | 0,468768 |
| HSPB11         | 4,33 | 3,70 | 3,73 | 2,83 | 0,2827703 | 0,468768 |
| HSD11B1L       | 0,92 | 2,06 | 1,18 | 1,22 | 0,2827886 | 0,468768 |
| AHCYL2         | 3,53 | 1,92 | 2,56 | 2,30 | 0,2828006 | 0,468768 |
| RP11-256P1.1   | 3,86 | 2,20 | 4,04 | 4,43 | 0,2828742 | 0,468855 |
| MRPL19         | 4,45 | 3,76 | 2,52 | 3,78 | 0,2829215 | 0,468899 |
| RIMS4          | 0,00 | 0,00 | 0,00 | 0,00 | 0,2829493 | NA       |
| CSTL1          | 0,00 | 0,00 | 0,03 | 0,76 | 0,2829672 | NA       |
| FBXL16         | 0,00 | 0,00 | 0,00 | 0,10 | 0,2829838 | NA       |
| SIGLEC15       | 0,33 | 1,50 | 0,42 | 0,31 | 0,2830219 | 0,46903  |
| AC007277.3     | 0,00 | 0,00 | 0,00 | 0,06 | 0,2830322 | NA       |
| TMEM143        | 1,00 | 1,38 | 0,64 | 1,22 | 0,2830951 | 0,469116 |
| RP5-857K21.6   | 1,55 | 1,39 | 1,66 | 1,82 | 0,2831322 | 0,469143 |
| ZNF83          | 3,63 | 3,04 | 3,03 | 2,52 | 0,2832339 | 0,469259 |
| ANKRD36BP1     | 0,00 | 0,00 | 0,00 | 0,00 | 0,2832445 | 0,469259 |
| CTC-366B18.2   | 0,17 | 2,22 | 0,00 | 1,60 | 0,2832969 | 0,46931  |
| R3HDM2         | 4,07 | 3,77 | 4,14 | 3,52 | 0,2833174 | 0,46931  |
| HLF            | 0,00 | 0,00 | 0,00 | 0,02 | 0,2833813 | NA       |
| TGOLN2         | 4,98 | 4,82 | 5,18 | 5,11 | 0,2833835 | 0,469384 |
| CXCR1          | 0,00 | 0,06 | 0,00 | 0,00 | 0,2834688 | NA       |
| RP11-497D6.4   | 0,13 | 0,34 | 0,22 | 1,01 | 0,283497  | 0,469537 |
| RP11-1H8.5     | 1,16 | 0,62 | 1,26 | 1,25 | 0,283559  | 0,469605 |
| AC092296.1     | 3,15 | 2,63 | 1,72 | 2,96 | 0,283761  | 0,469905 |
| CCDC146        | 3,07 | 2,61 | 2,31 | 3,76 | 0,2838318 | 0,469987 |

|               |      |      |      |      |           |          |
|---------------|------|------|------|------|-----------|----------|
| CTD-2630F21.1 | 0,00 | 0,31 | 0,00 | 0,15 | 0,2838565 | 0,469993 |
| RN7SL371P     | 0,98 | 1,22 | 1,05 | 2,29 | 0,2838953 | 0,470022 |
| MAPRE3        | 0,00 | 0,00 | 0,10 | 0,22 | 0,2840916 | 0,470312 |
| RP1-8B1.4     | 0,49 | 0,68 | 0,00 | 0,00 | 0,2840919 | NA       |
| ACD           | 3,33 | 1,85 | 2,64 | 1,56 | 0,2841574 | 0,470366 |
| RP11-507J18.5 | 1,44 | 0,87 | 1,44 | 1,79 | 0,284167  | 0,470366 |
| FES           | 5,66 | 5,76 | 5,84 | 5,78 | 0,2842375 | 0,470448 |
| RP11-409K20.6 | 0,41 | 0,00 | 0,00 | 0,00 | 0,2843275 | 0,470562 |
| BYSL          | 1,10 | 0,00 | 0,14 | 0,58 | 0,2843691 | 0,470596 |
| ENPP3         | 0,12 | 0,00 | 0,10 | 0,11 | 0,2844271 | 0,470649 |
| AC093323.3    | 0,37 | 2,77 | 0,57 | 0,35 | 0,2844435 | 0,470649 |
| RP11-536P6.3  | 0,00 | 0,00 | 0,01 | 0,38 | 0,2844578 | NA       |
| SLC37A2       | 1,67 | 0,88 | 1,41 | 2,83 | 0,284535  | 0,470756 |
| RP11-388C12.8 | 0,72 | 2,13 | 0,83 | 1,66 | 0,2845505 | 0,470756 |
| ERLEC1        | 4,54 | 4,06 | 3,90 | 3,61 | 0,2846608 | 0,470903 |
| RP11-837J7.3  | 0,00 | 0,08 | 0,00 | 0,00 | 0,2848083 | 0,471112 |
| SEMA6D        | 0,04 | 0,37 | 0,05 | 1,08 | 0,2848854 | 0,471175 |
| RP11-366H4.3  | 0,37 | 1,49 | 0,91 | 2,06 | 0,2848889 | 0,471175 |
| IRF2BPL       | 0,76 | 1,57 | 1,11 | 1,05 | 0,2849262 | 0,471202 |
| FAM86C2P      | 0,07 | 0,14 | 0,02 | 0,60 | 0,2849486 | 0,471204 |
| RP11-77I22.3  | 0,00 | 0,27 | 0,09 | 0,29 | 0,2850164 | 0,471281 |
| RP11-65D17.1  | 0,23 | 0,33 | 0,35 | 0,19 | 0,2850814 | 0,471354 |
| RP11-264E18.1 | 0,00 | 1,96 | 0,00 | 1,01 | 0,285117  | 0,471377 |
| RN7SL607P     | 0,00 | 0,82 | 0,00 | 0,00 | 0,2851177 | NA       |
| KPTN          | 1,57 | 0,46 | 2,16 | 0,90 | 0,2851837 | 0,471452 |
| DPM2          | 5,58 | 3,50 | 5,43 | 4,76 | 0,2852518 | 0,471529 |
| NOB1          | 4,75 | 2,73 | 4,19 | 2,98 | 0,2852725 | 0,471529 |
| RP11-867G2.5  | 0,00 | 0,00 | 0,00 | 0,00 | 0,2853533 | 0,471628 |
| AF038458.5    | 0,56 | 1,41 | 0,62 | 0,90 | 0,2854489 | 0,471751 |
| RPH3AL        | 1,26 | 0,11 | 0,61 | 0,22 | 0,2855198 | 0,471815 |
| BCO2          | 1,79 | 1,17 | 1,67 | 0,56 | 0,2855305 | 0,471815 |
| RP13-444H2.1  | 0,67 | 3,41 | 1,72 | 2,28 | 0,2855597 | 0,471829 |
| RP11-637O19.2 | 0,88 | 0,30 | 0,58 | 0,28 | 0,2856057 | 0,471832 |
| IFT140        | 0,09 | 1,46 | 0,05 | 0,05 | 0,2856342 | 0,471832 |
| PRDX1         | 7,50 | 7,35 | 7,46 | 8,10 | 0,2856426 | 0,471832 |
| IRAK4         | 4,31 | 3,23 | 4,23 | 3,74 | 0,2856591 | 0,471832 |
| CTD-2024I7.13 | 2,27 | 1,05 | 1,07 | 1,96 | 0,2856679 | 0,471832 |
| TOP2A         | 0,40 | 0,98 | 0,34 | 0,37 | 0,2857686 | 0,471963 |
| RP4-671O14.6  | 0,54 | 0,49 | 0,84 | 0,73 | 0,285859  | 0,472077 |
| RP11-708I19.2 | 0,00 | 0,38 | 0,00 | 0,00 | 0,28587   | NA       |
| RP1-111C20.4  | 3,40 | 3,93 | 3,93 | 3,54 | 0,285917  | 0,472138 |
| ATP23         | 3,69 | 1,26 | 1,20 | 1,27 | 0,2859604 | 0,472175 |
| CTD-2337I7.1  | 0,00 | 0,00 | 0,00 | 0,07 | 0,2860392 | 0,47227  |
| RN7SL683P     | 0,00 | 1,49 | 0,00 | 0,00 | 0,2860784 | 0,472276 |
| MIA2          | 4,46 | 5,13 | 4,66 | 4,57 | 0,2860854 | 0,472276 |
| CTSA          | 4,34 | 4,19 | 4,45 | 5,18 | 0,2862488 | 0,47251  |
| TEX30         | 4,12 | 0,49 | 3,40 | 0,00 | 0,2862708 | 0,472512 |
| HES7          | 0,00 | 0,26 | 0,00 | 0,00 | 0,2863016 | NA       |
| KIF13A        | 2,19 | 3,05 | 2,61 | 2,18 | 0,2863623 | 0,472628 |
| AKR1B1        | 6,10 | 5,52 | 5,70 | 4,68 | 0,2864071 | 0,472666 |
| NDUFA6        | 6,76 | 5,47 | 6,15 | 5,50 | 0,2866309 | 0,472999 |
| LMF1          | 1,17 | 0,59 | 0,69 | 1,48 | 0,2866818 | 0,472999 |
| SLK           | 2,91 | 3,22 | 3,33 | 2,49 | 0,2867048 | 0,472999 |
| RP11-146F11.1 | 0,00 | 0,00 | 0,00 | 0,00 | 0,2867245 | 0,472999 |
| C20orf96      | 2,25 | 0,60 | 1,55 | 2,16 | 0,2867303 | 0,472999 |

|                 |      |      |      |      |           |          |
|-----------------|------|------|------|------|-----------|----------|
| TRMT61A         | 0,00 | 3,17 | 1,41 | 0,49 | 0,286743  | 0,472999 |
| CD300A          | 6,79 | 4,45 | 6,36 | 5,77 | 0,2867575 | 0,472999 |
| ADORA2B         | 1,80 | 2,04 | 0,99 | 0,21 | 0,2867901 | 0,473017 |
| YAE1D1          | 0,00 | 0,20 | 0,07 | 0,00 | 0,2868773 | 0,473126 |
| RP11-57A19.5    | 0,00 | 0,68 | 0,00 | 0,54 | 0,2869008 | NA       |
| ANP32A          | 5,96 | 5,10 | 6,08 | 5,70 | 0,2869434 | 0,473177 |
| MAP1S           | 2,91 | 4,15 | 3,46 | 3,08 | 0,2869541 | 0,473177 |
| RP11-178A10.1   | 0,05 | 0,00 | 0,06 | 0,20 | 0,2869721 | 0,473177 |
| RP1-222E13.10   | 1,11 | 2,93 | 2,44 | 1,21 | 0,2871116 | 0,473372 |
| RP11-691H4.4    | 0,99 | 1,08 | 2,52 | 3,83 | 0,2871626 | 0,47342  |
| MICAL1          | 5,11 | 5,82 | 5,19 | 5,39 | 0,2871976 | 0,47342  |
| RP11-208G20.1   | 0,00 | 0,00 | 0,00 | 0,00 | 0,2872049 | 0,47342  |
| HORMAD1         | 0,00 | 0,00 | 0,25 | 0,20 | 0,2872687 | 0,473491 |
| RP11-395L14.11  | 0,63 | 0,07 | 0,00 | 0,00 | 0,2873214 | 0,473542 |
| ARGFXP1         | 0,00 | 0,57 | 0,14 | 0,00 | 0,2873683 | NA       |
| UIMC1           | 4,40 | 2,34 | 3,85 | 3,39 | 0,2873824 | 0,473573 |
| GPR141          | 4,04 | 1,23 | 2,87 | 5,08 | 0,2873826 | 0,473573 |
| OR10A2          | 0,02 | 0,19 | 0,08 | 0,06 | 0,287524  | 0,473771 |
| CH17-302M23.1   | 0,11 | 0,15 | 0,16 | 0,09 | 0,2875699 | 0,473811 |
| JMJD6           | 5,64 | 3,72 | 5,64 | 5,42 | 0,28764   | 0,473892 |
| ZNF622          | 5,02 | 3,06 | 4,47 | 4,27 | 0,2876679 | 0,473903 |
| RN75L810P       | 0,00 | 0,97 | 0,00 | 0,95 | 0,2876872 | NA       |
| KRT18           | 0,00 | 0,00 | 0,00 | 0,00 | 0,2877776 | 0,474015 |
| ADORA2A         | 0,00 | 1,02 | 0,00 | 0,04 | 0,2878162 | 0,474015 |
| CTD-2290C23.1   | 0,80 | 1,61 | 0,74 | 0,72 | 0,287818  | 0,474015 |
| ARHGAP12        | 1,89 | 0,63 | 1,67 | 1,48 | 0,2878238 | 0,474015 |
| RP11-927P21.5   | 0,00 | 0,00 | 0,00 | 0,00 | 0,2878426 | 0,474015 |
| RP11-276H1.3    | 0,29 | 0,37 | 0,40 | 0,42 | 0,2879519 | 0,47416  |
| USP50           | 0,00 | 1,11 | 0,00 | 0,00 | 0,2879807 | 0,474172 |
| PRRC2B          | 3,38 | 2,83 | 4,26 | 3,57 | 0,2880129 | 0,47419  |
| RP11-145E17.3   | 0,09 | 0,00 | 0,01 | 0,09 | 0,2881267 | 0,474307 |
| TMEM87B         | 3,06 | 1,15 | 2,27 | 2,69 | 0,2881269 | 0,474307 |
| LSM5            | 5,22 | 5,05 | 5,20 | 4,48 | 0,2882441 | 0,474465 |
| SYT5            | 1,32 | 1,06 | 0,81 | 1,04 | 0,2883065 | 0,474533 |
| SNHG15          | 7,29 | 7,30 | 6,96 | 6,70 | 0,288427  | 0,474696 |
| RP4-706G24.1    | 0,15 | 0,19 | 0,00 | 0,78 | 0,2884646 | 0,474722 |
| APOBEC2         | 0,61 | 0,00 | 0,28 | 0,58 | 0,2885352 | 0,474803 |
| EEA1            | 3,34 | 2,73 | 3,31 | 3,83 | 0,2886353 | 0,474933 |
| SUCO            | 3,68 | 2,88 | 3,54 | 2,69 | 0,2887874 | 0,475132 |
| ZNF623          | 1,54 | 1,80 | 1,20 | 0,83 | 0,2887991 | 0,475132 |
| RP11-59C5.3     | 0,00 | 0,02 | 0,00 | 0,02 | 0,2888373 | 0,47516  |
| CEP85           | 2,68 | 2,51 | 2,19 | 1,08 | 0,2888737 | 0,475185 |
| POLR3C          | 5,19 | 3,63 | 4,23 | 3,15 | 0,2890192 | 0,475389 |
| LIN7A           | 0,00 | 0,00 | 0,00 | 0,00 | 0,2890687 | NA       |
| RP3-521E19.2    | 0,00 | 0,00 | 0,00 | 0,00 | 0,2891027 | NA       |
| RP11-40H20.4    | 0,00 | 0,00 | 0,00 | 0,00 | 0,2891046 | NA       |
| AL133245.2      | 0,40 | 0,60 | 0,77 | 1,21 | 0,2891577 | 0,475581 |
| CTB-111F10.1    | 0,00 | 0,00 | 0,00 | 1,77 | 0,2892011 | 0,475608 |
| RP11-426J22.1   | 1,12 | 0,25 | 0,37 | 0,48 | 0,2892301 | 0,475608 |
| SYAP1           | 3,84 | 4,25 | 3,77 | 3,26 | 0,2892381 | 0,475608 |
| RP11-180M15.4   | 0,00 | 0,00 | 0,00 | 0,00 | 0,2893689 | 0,475788 |
| RNASEK-C17orf49 | 1,59 | 0,65 | 1,92 | 2,65 | 0,2894026 | 0,475808 |
| RP4-646B12.2    | 0,50 | 0,95 | 0,00 | 0,00 | 0,2894602 | NA       |
| KREMEN1         | 0,24 | 0,28 | 0,57 | 0,44 | 0,2894701 | 0,475884 |
| IGHV1-69-2      | 0,00 | 0,00 | 0,00 | 1,24 | 0,2895393 | NA       |

|                |      |      |      |      |           |          |
|----------------|------|------|------|------|-----------|----------|
| RP11-140L24.3  | 0,00 | 0,00 | 0,00 | 0,00 | 0,2895503 | NA       |
| FEM1B          | 3,20 | 2,02 | 3,67 | 1,79 | 0,2896034 | 0,476068 |
| RNU6-199P      | 0,00 | 0,00 | 0,00 | 0,00 | 0,28967   | 0,476127 |
| CDK5RAP2       | 4,09 | 3,84 | 4,11 | 4,91 | 0,2896823 | 0,476127 |
| RP11-690I21.2  | 0,00 | 0,05 | 0,00 | 0,00 | 0,2896984 | NA       |
| CEP112         | 1,89 | 3,58 | 1,61 | 0,84 | 0,2897521 | 0,476207 |
| PLAT           | 0,07 | 0,12 | 0,09 | 0,13 | 0,2898127 | 0,476271 |
| CEP44          | 1,92 | 1,52 | 2,62 | 1,29 | 0,2898376 | 0,476277 |
| SPTBN1         | 3,02 | 1,02 | 2,46 | 1,56 | 0,2899874 | 0,476487 |
| RP11-732M18.4  | 1,16 | 0,85 | 1,64 | 1,40 | 0,2900252 | 0,476512 |
| APOL1          | 1,84 | 0,44 | 1,32 | 1,82 | 0,2900453 | 0,476512 |
| RPS6KA2        | 1,52 | 0,47 | 0,88 | 1,37 | 0,2901918 | 0,476718 |
| HPS4           | 3,65 | 3,60 | 3,05 | 2,56 | 0,290239  | 0,47676  |
| AC104113.2     | 0,00 | 0,00 | 0,00 | 0,00 | 0,2902832 | 0,476768 |
| ARFRP1         | 4,03 | 1,75 | 3,60 | 4,85 | 0,2902925 | 0,476768 |
| ZNF446         | 1,41 | 0,00 | 0,71 | 0,22 | 0,2903084 | 0,476768 |
| ONECUT1        | 0,02 | 0,13 | 0,00 | 0,00 | 0,2903523 | 0,476796 |
| RP11-944C7.1   | 0,00 | 0,95 | 0,82 | 0,98 | 0,2903684 | 0,476796 |
| GPR4           | 0,04 | 0,13 | 0,05 | 0,15 | 0,2904507 | 0,476896 |
| G3BP1          | 4,93 | 5,46 | 4,48 | 4,94 | 0,2905342 | 0,476998 |
| RP11-841C19.6  | 0,14 | 0,20 | 0,19 | 0,10 | 0,2905779 | 0,477035 |
| GNA13          | 5,00 | 3,82 | 4,45 | 4,14 | 0,2906632 | 0,477088 |
| RP11-455O6.9   | 0,00 | 0,40 | 0,00 | 0,00 | 0,2906642 | 0,477088 |
| LLNLR-222A1.1  | 3,06 | 4,78 | 3,62 | 2,48 | 0,2906748 | 0,477088 |
| RP11-31F15.1   | 2,33 | 1,46 | 2,29 | 1,87 | 0,2907133 | 0,477116 |
| ACO10894.5     | 0,00 | 0,00 | 0,00 | 0,00 | 0,2908003 | 0,477223 |
| CH17-431G21.1  | 0,00 | 0,18 | 0,00 | 0,00 | 0,2909848 | 0,477467 |
| MATN1          | 0,08 | 0,07 | 0,03 | 0,32 | 0,2909916 | 0,477467 |
| LRRC45         | 0,10 | 0,62 | 0,59 | 0,24 | 0,2910904 | 0,47759  |
| ZGPAT          | 3,35 | 2,24 | 4,14 | 2,46 | 0,2911094 | 0,47759  |
| CYP2A7         | 0,00 | 0,00 | 0,00 | 0,00 | 0,2913286 | 0,477914 |
| MARCO          | 0,80 | 0,99 | 2,19 | 2,75 | 0,2913656 | 0,477939 |
| ZNF831         | 0,00 | 0,19 | 0,00 | 0,03 | 0,291389  | 0,477942 |
| RP11-79I23.2   | 0,00 | 0,00 | 0,00 | 0,00 | 0,2914262 | NA       |
| AC090421.1     | 1,81 | 0,72 | 0,35 | 2,52 | 0,2914493 | 0,478006 |
| RP11-498C9.16  | 0,08 | 1,33 | 0,00 | 0,00 | 0,2914774 | 0,478015 |
| CMC4           | 3,05 | 3,87 | 3,72 | 0,00 | 0,2914976 | 0,478015 |
| AGAP1          | 0,00 | 0,00 | 0,00 | 0,00 | 0,2915734 | NA       |
| TFCP2          | 3,87 | 3,25 | 3,07 | 2,98 | 0,2916348 | 0,478204 |
| ANTXR2         | 4,67 | 3,58 | 4,70 | 4,62 | 0,2916581 | 0,478204 |
| POLR2F         | 5,43 | 5,90 | 5,80 | 5,78 | 0,2916796 | 0,478204 |
| CD28           | 0,09 | 0,18 | 0,20 | 0,31 | 0,2916988 | 0,478204 |
| KMT2A          | 3,75 | 3,30 | 3,96 | 4,44 | 0,2917623 | 0,478272 |
| ATP5SL         | 4,65 | 4,02 | 4,30 | 3,14 | 0,2918175 | 0,478328 |
| MRPS17         | 3,32 | 3,66 | 3,00 | 2,20 | 0,2918576 | 0,478358 |
| PARG           | 3,02 | 2,22 | 2,90 | 2,11 | 0,2918931 | 0,478381 |
| DSEL           | 0,09 | 0,18 | 0,12 | 0,21 | 0,2919856 | 0,478497 |
| CHRNA10        | 0,00 | 0,00 | 0,00 | 0,00 | 0,2920934 | 0,478639 |
| RP11-1008C21.2 | 0,94 | 0,41 | 3,02 | 3,50 | 0,2921454 | 0,478689 |
| TTC21B         | 3,50 | 2,35 | 3,42 | 2,04 | 0,2921708 | 0,478695 |
| ST18           | 3,97 | 2,14 | 2,53 | 2,05 | 0,2922274 | 0,47872  |
| ZKSCAN5        | 0,36 | 2,34 | 1,08 | 1,49 | 0,2922387 | 0,47872  |
| RP11-468E2.11  | 2,92 | 3,54 | 2,96 | 3,55 | 0,2922613 | 0,47872  |
| GNPDA2         | 1,70 | 0,09 | 0,67 | 0,56 | 0,292272  | 0,47872  |
| RP11-354I13.2  | 0,00 | 0,00 | 0,00 | 0,00 | 0,2922968 | 0,478725 |

|               |      |      |      |      |           |          |
|---------------|------|------|------|------|-----------|----------|
| ANGPTL7       | 0,00 | 0,00 | 0,00 | 0,00 | 0,2923089 | NA       |
| PXMP4         | 2,38 | 2,22 | 1,05 | 0,51 | 0,2924262 | 0,478867 |
| RP11-879F14.1 | 0,59 | 0,36 | 0,92 | 0,00 | 0,2924265 | 0,478867 |
| POLR2K        | 5,74 | 4,44 | 4,69 | 4,84 | 0,2924782 | 0,478916 |
| EPB41         | 4,44 | 2,88 | 3,89 | 3,93 | 0,2925063 | 0,478927 |
| ACAA2         | 5,89 | 1,23 | 5,26 | 5,61 | 0,2926082 | 0,479058 |
| RAB9A         | 4,11 | 3,48 | 1,48 | 1,36 | 0,2927117 | 0,479192 |
| LRRC34        | 1,11 | 1,06 | 1,17 | 1,41 | 0,2927739 | 0,479229 |
| RP11-271C24.3 | 2,16 | 2,49 | 2,75 | 1,03 | 0,2927771 | 0,479229 |
| RP1-224A6.6   | 0,91 | 0,96 | 1,26 | 1,90 | 0,292849  | 0,479311 |
| RP11-16M8.2   | 0,00 | 0,36 | 0,00 | 1,30 | 0,2929227 | 0,479397 |
| RBM7          | 3,98 | 4,80 | 4,07 | 4,90 | 0,2929722 | 0,479442 |
| PINK1         | 1,93 | 2,02 | 1,89 | 2,08 | 0,2930033 | 0,479458 |
| OTUD7A        | 0,00 | 0,27 | 0,04 | 0,01 | 0,2930975 | 0,479536 |
| RP11-348A11.4 | 1,03 | 0,96 | 1,15 | 1,01 | 0,2931065 | 0,479536 |
| RP11-227P3.1  | 0,83 | 1,96 | 1,46 | 1,06 | 0,2931267 | 0,479536 |
| ZNF547        | 0,99 | 0,43 | 1,24 | 0,66 | 0,2931412 | 0,479536 |
| DDI2          | 2,38 | 1,35 | 2,17 | 1,61 | 0,2931587 | 0,479536 |
| RP3-431A14.4  | 0,00 | 0,17 | 0,00 | 0,00 | 0,2931941 | NA       |
| RP11-402K9.2  | 0,00 | 0,18 | 0,16 | 0,00 | 0,2932126 | NA       |
| WSB2          | 4,12 | 4,88 | 3,72 | 3,48 | 0,2932261 | 0,479577 |
| TMED8         | 2,08 | 1,48 | 2,00 | 2,34 | 0,2932268 | 0,479577 |
| RP11-96K19.2  | 0,38 | 0,11 | 0,26 | 0,26 | 0,2933137 | 0,479683 |
| PRICKLE3      | 0,96 | 0,49 | 0,59 | 0,47 | 0,2933619 | 0,479727 |
| SV2A          | 0,22 | 0,47 | 0,46 | 0,29 | 0,2934138 | 0,479777 |
| RP11-505F3.4  | 0,86 | 0,58 | 0,52 | 0,60 | 0,2934272 | NA       |
| CTC-444N24.11 | 2,24 | 3,50 | 2,25 | 2,41 | 0,2935422 | 0,4799   |
| RAB3GAP1      | 4,03 | 3,85 | 3,77 | 2,92 | 0,2935562 | 0,4799   |
| HIBADH        | 2,51 | 1,73 | 1,32 | 0,33 | 0,2935605 | 0,4799   |
| RP5-1121E10.2 | 0,24 | 0,75 | 0,36 | 0,00 | 0,2935757 | 0,4799   |
| ASB2          | 2,32 | 0,72 | 0,89 | 1,18 | 0,2936329 | 0,479927 |
| CDKAL1        | 1,43 | 1,72 | 2,15 | 2,03 | 0,2936355 | 0,479927 |
| IL11          | 0,05 | 0,09 | 0,20 | 0,21 | 0,2937064 | 0,480007 |
| CC2D1B        | 0,89 | 0,56 | 1,53 | 1,70 | 0,2937373 | 0,480007 |
| FRS2          | 3,19 | 1,27 | 3,20 | 1,28 | 0,293753  | 0,480007 |
| IGF1R         | 0,49 | 0,36 | 0,46 | 0,62 | 0,2937709 | 0,480007 |
| ARHGAP23      | 0,00 | 0,00 | 0,00 | 0,36 | 0,2938247 | NA       |
| RP3-368A4.3   | 0,00 | 0,00 | 0,00 | 0,00 | 0,2938886 | 0,480163 |
| CNTD1         | 0,05 | 0,00 | 0,07 | 0,00 | 0,2939092 | 0,480163 |
| CTD-2015G9.2  | 0,07 | 0,11 | 0,07 | 0,09 | 0,2939774 | 0,480233 |
| MCAT          | 1,33 | 0,39 | 3,41 | 1,64 | 0,2940044 | 0,480233 |
| SPDYE6        | 0,00 | 0,14 | 0,00 | 1,35 | 0,2940173 | 0,480233 |
| CTD-2177J2.2  | 0,30 | 0,00 | 0,00 | 0,35 | 0,2940406 | NA       |
| FAM86DP       | 0,40 | 0,41 | 0,30 | 0,65 | 0,2940671 | 0,480279 |
| JAGN1         | 4,12 | 3,96 | 4,22 | 1,82 | 0,2943056 | 0,480634 |
| MRPL4         | 4,60 | 2,10 | 4,10 | 2,75 | 0,2943484 | 0,480657 |
| ENTPD4        | 4,17 | 2,16 | 3,49 | 3,00 | 0,2943634 | 0,480657 |
| ASPHD2        | 3,93 | 2,49 | 3,16 | 1,04 | 0,2943963 | 0,480676 |
| SOX6          | 0,02 | 3,52 | 0,04 | 3,13 | 0,2944295 | 0,480695 |
| GORASP1       | 3,90 | 3,25 | 3,22 | 3,10 | 0,2945905 | 0,480922 |
| ZNF131        | 5,25 | 3,54 | 4,72 | 4,44 | 0,2946214 | 0,480937 |
| ZNF69         | 1,69 | 1,48 | 2,45 | 0,45 | 0,2946681 | 0,480978 |
| POLR3G        | 0,48 | 0,04 | 0,03 | 1,23 | 0,2947008 | 0,480996 |
| RN7SL357P     | 0,65 | 0,00 | 0,00 | 0,00 | 0,294798  | NA       |
| PBDC1         | 5,44 | 1,51 | 5,47 | 4,22 | 0,2948982 | 0,481275 |

|               |      |      |      |      |           |          |
|---------------|------|------|------|------|-----------|----------|
| COMMD10       | 5,40 | 5,99 | 4,79 | 3,94 | 0,2949146 | 0,481275 |
| YY1AP1        | 4,93 | 3,45 | 5,21 | 4,90 | 0,2949635 | 0,481319 |
| SCO2          | 6,34 | 5,68 | 7,07 | 7,84 | 0,2950124 | 0,481363 |
| SNORA59B      | 0,00 | 1,06 | 0,00 | 0,00 | 0,2950689 | NA       |
| CCT7          | 7,16 | 7,03 | 7,03 | 6,05 | 0,295141  | 0,481535 |
| RP11-316C12.2 | 2,82 | 0,57 | 2,14 | 1,01 | 0,2951609 | 0,481535 |
| FGF2          | 0,00 | 0,00 | 0,00 | 0,06 | 0,2952078 | NA       |
| AC064834.1    | 0,00 | 0,00 | 0,06 | 0,30 | 0,2952297 | NA       |
| AC100802.3    | 0,14 | 0,00 | 0,07 | 0,81 | 0,2952399 | 0,481577 |
| FAM204A       | 6,51 | 4,98 | 5,95 | 5,86 | 0,295257  | 0,481577 |
| RAD51D        | 1,39 | 2,50 | 2,33 | 1,93 | 0,2952641 | 0,481577 |
| RP11-122M14.1 | 0,40 | 0,75 | 0,45 | 0,07 | 0,2952742 | 0,481577 |
| DBP           | 1,53 | 3,41 | 2,72 | 2,04 | 0,295298  | 0,481577 |
| PRG4          | 0,00 | 0,03 | 0,05 | 0,90 | 0,2953164 | 0,481577 |
| RP11-649G15.2 | 0,00 | 5,73 | 0,00 | 1,50 | 0,2953556 | 0,481605 |
| NOMO2         | 5,04 | 2,34 | 3,98 | 4,29 | 0,2954709 | 0,481743 |
| NFKBID        | 4,52 | 4,66 | 4,83 | 3,88 | 0,2954835 | 0,481743 |
| STXBP5        | 2,67 | 2,83 | 2,30 | 2,55 | 0,2955394 | 0,481799 |
| CTD-3110H11.1 | 0,90 | 2,86 | 1,51 | 2,22 | 0,2955811 | 0,481831 |
| RNU6-494P     | 0,00 | 0,00 | 0,00 | 0,00 | 0,2956612 | 0,481927 |
| RP11-603K19.2 | 0,00 | 0,00 | 0,00 | 0,16 | 0,2956871 | 0,481933 |
| ATP5L2        | 0,18 | 1,92 | 0,99 | 0,71 | 0,295725  | 0,481939 |
| LYST          | 5,54 | 4,82 | 5,33 | 5,84 | 0,295734  | 0,481939 |
| RP11-309L24.4 | 0,00 | 0,00 | 0,00 | 0,00 | 0,2957373 | NA       |
| RP11-756A22.5 | 0,00 | 0,73 | 0,47 | 0,00 | 0,2957979 | NA       |
| NDUFAF2       | 3,85 | 4,23 | 4,02 | 5,05 | 0,2958323 | 0,481997 |
| NF1           | 4,21 | 3,14 | 4,27 | 3,20 | 0,2958403 | 0,481997 |
| TERF2IP       | 5,17 | 4,49 | 5,24 | 4,50 | 0,2958416 | 0,481997 |
| C6orf123      | 0,32 | 0,34 | 0,32 | 0,65 | 0,2958761 | 0,481997 |
| CTD-2036A2.1  | 1,01 | 1,87 | 1,04 | 1,57 | 0,295878  | 0,481997 |
| HIST1H3D      | 0,19 | 0,06 | 0,00 | 0,00 | 0,2959322 | 0,48205  |
| TIMM8A        | 2,05 | 1,94 | 1,05 | 0,60 | 0,2960855 | 0,482265 |
| MC2R          | 0,28 | 0,61 | 0,42 | 0,34 | 0,2961772 | 0,482379 |
| CAMK2G        | 4,69 | 3,87 | 4,53 | 2,24 | 0,2962365 | 0,482402 |
| ITGBL1        | 0,07 | 0,06 | 0,02 | 0,00 | 0,2962439 | 0,482402 |
| CTA-384D8.34  | 3,95 | 0,00 | 3,21 | 3,87 | 0,2962566 | 0,482402 |
| IRAK1BP1      | 3,70 | 3,73 | 3,52 | 3,40 | 0,296294  | 0,482405 |
| RGPD6         | 5,32 | 5,18 | 5,72 | 4,27 | 0,2963018 | 0,482405 |
| ATAD2         | 2,08 | 1,75 | 2,46 | 2,03 | 0,2963603 | 0,482437 |
| RP11-95G17.2  | 0,00 | 0,00 | 0,00 | 0,00 | 0,2963653 | 0,482437 |
| CLASP1        | 3,20 | 1,61 | 2,83 | 2,19 | 0,2964141 | 0,48246  |
| CPEB4         | 3,56 | 1,89 | 2,07 | 1,53 | 0,2964223 | 0,48246  |
| RP11-823P9.4  | 0,80 | 0,49 | 1,02 | 0,67 | 0,2964514 | 0,482472 |
| KB-1568E2.1   | 0,00 | 0,00 | 0,00 | 0,00 | 0,296553  | 0,482602 |
| IL17RE        | 0,25 | 0,00 | 0,31 | 0,42 | 0,2966591 | 0,482739 |
| RP11-114H24.3 | 0,00 | 0,00 | 0,00 | 0,47 | 0,2967974 | 0,482929 |
| RN7SL732P     | 0,69 | 0,00 | 0,37 | 1,20 | 0,296904  | NA       |
| RP11-138C24.1 | 0,00 | 0,10 | 0,02 | 0,00 | 0,2969048 | 0,483068 |
| CTC-527H23.2  | 0,00 | 0,00 | 0,00 | 0,00 | 0,2969474 | NA       |
| MRPS6         | 6,20 | 4,41 | 5,60 | 5,10 | 0,2969796 | 0,483154 |
| RP11-60I3.5   | 1,80 | 0,00 | 0,00 | 1,52 | 0,29716   | 0,483412 |
| AC002511.3    | 0,00 | 0,00 | 0,00 | 0,00 | 0,2971859 | NA       |
| AHR           | 6,23 | 4,76 | 5,77 | 3,80 | 0,2972243 | 0,483414 |
| MIR4434       | 0,00 | 0,00 | 0,00 | 0,00 | 0,297244  | 0,483414 |
| AC005593.2    | 0,00 | 0,00 | 0,62 | 0,41 | 0,2972461 | 0,483414 |



|                |      |      |      |      |           |          |
|----------------|------|------|------|------|-----------|----------|
| G6PC3          | 5,30 | 4,84 | 5,03 | 3,91 | 0,2972479 | 0,483414 |
| RP11-442J21.2  | 1,42 | 0,00 | 0,56 | 0,00 | 0,2972951 | 0,483455 |
| ATP6V0B        | 9,44 | 8,79 | 9,61 | 9,58 | 0,2973678 | 0,483538 |
| MRPL24         | 5,56 | 5,99 | 5,61 | 6,51 | 0,2973924 | 0,483543 |
| WRNIP1         | 4,54 | 2,70 | 3,62 | 3,27 | 0,2975519 | 0,483767 |
| NOTO           | 1,16 | 0,37 | 0,81 | 0,32 | 0,2976043 | 0,483816 |
| HOGA1          | 0,35 | 0,17 | 0,34 | 0,29 | 0,2977121 | 0,483956 |
| SGF29          | 5,25 | 1,11 | 4,37 | 4,77 | 0,2977531 | 0,483961 |
| NOL10          | 3,78 | 1,78 | 3,01 | 2,42 | 0,2977592 | 0,483961 |
| AP000295.7     | 2,15 | 0,91 | 3,03 | 1,68 | 0,2977925 | 0,483961 |
| RP11-285F7.2   | 1,99 | 4,64 | 2,97 | 2,18 | 0,2978021 | 0,483961 |
| CTB-129P6.11   | 0,00 | 1,17 | 0,00 | 0,34 | 0,2979202 | 0,484118 |
| CASP5          | 0,00 | 0,00 | 0,00 | 0,00 | 0,2979868 | 0,48419  |
| ABHD2          | 4,13 | 2,57 | 3,38 | 2,81 | 0,2980318 | 0,484211 |
| RP11-396O20.1  | 0,00 | 0,00 | 0,00 | 0,00 | 0,298043  | 0,484211 |
| CH17-260O16.1  | 0,00 | 0,00 | 0,00 | 0,00 | 0,2980984 | 0,484253 |
| AKR1D1         | 0,14 | 0,08 | 0,26 | 0,35 | 0,2981188 | 0,484253 |
| RP11-804F13.1  | 0,00 | 0,00 | 0,00 | 0,00 | 0,2981403 | NA       |
| RNF220         | 3,68 | 3,18 | 3,82 | 3,42 | 0,2981436 | 0,484253 |
| C15orf61       | 1,99 | 2,15 | 2,56 | 1,97 | 0,2981563 | 0,484253 |
| RP11-111F5.5   | 0,00 | 0,00 | 0,00 | 0,00 | 0,2981664 | NA       |
| U51244.2       | 0,59 | 0,00 | 0,31 | 0,00 | 0,2982654 | 0,484352 |
| PCMTD1         | 5,22 | 2,24 | 4,69 | 4,04 | 0,2982992 | 0,484352 |
| CHKB-CPT1B     | 0,79 | 0,65 | 0,17 | 0,07 | 0,2983018 | 0,484352 |
| IDE            | 3,45 | 4,08 | 3,13 | 3,40 | 0,298304  | 0,484352 |
| RP5-966M1.6    | 0,00 | 1,78 | 0,01 | 0,00 | 0,2984142 | 0,484495 |
| LRRC4C         | 0,00 | 0,00 | 0,00 | 0,42 | 0,2984791 | 0,484565 |
| RP11-504I13.3  | 2,83 | 1,05 | 2,54 | 3,59 | 0,2985409 | 0,48463  |
| HILPDA         | 0,61 | 0,40 | 0,70 | 2,27 | 0,2985704 | 0,484643 |
| AC108449.2     | 0,00 | 0,00 | 0,00 | 0,66 | 0,2985885 | NA       |
| LINC00539      | 0,15 | 0,18 | 0,00 | 0,30 | 0,2986519 | 0,484719 |
| ZNF174         | 0,54 | 0,06 | 0,06 | 0,24 | 0,2986608 | 0,484719 |
| RP11-138E24.1  | 0,14 | 0,22 | 0,25 | 0,59 | 0,2988025 | 0,484913 |
| TMEM178B       | 0,00 | 0,01 | 0,00 | 0,00 | 0,2988291 | NA       |
| PAFAH1B2       | 4,72 | 3,90 | 4,78 | 4,60 | 0,2988978 | 0,485032 |
| FM05           | 3,09 | 1,62 | 1,89 | 1,88 | 0,2989418 | 0,485068 |
| MIR4737        | 0,00 | 0,00 | 0,00 | 0,00 | 0,2989654 | 0,485071 |
| DHFRL1         | 1,91 | 1,33 | 1,32 | 0,95 | 0,2991153 | 0,485279 |
| EZH2           | 3,47 | 4,19 | 2,85 | 3,54 | 0,2991437 | 0,48529  |
| AP000459.4     | 0,40 | 1,38 | 0,37 | 0,12 | 0,299256  | 0,485436 |
| TRIM31         | 0,31 | 1,53 | 0,41 | 0,00 | 0,2992935 | 0,485462 |
| RP11-1277A3.2  | 0,00 | 0,00 | 0,14 | 0,00 | 0,2993458 | 0,485511 |
| TMEM194A       | 1,18 | 0,21 | 0,08 | 1,15 | 0,2994196 | 0,485596 |
| BFSP2          | 0,00 | 0,00 | 0,00 | 0,00 | 0,299522  | NA       |
| ZNF90          | 0,85 | 1,44 | 0,69 | 1,32 | 0,2996079 | 0,485865 |
| EGFLAM         | 0,00 | 0,00 | 0,00 | 0,00 | 0,2997049 | 0,485945 |
| EXOC4          | 4,80 | 6,25 | 4,55 | 3,84 | 0,2997081 | 0,485945 |
| RP11-400L8.2   | 0,00 | 0,00 | 0,00 | 2,74 | 0,299729  | 0,485945 |
| RP1-34B21.6    | 0,18 | 1,66 | 0,86 | 0,42 | 0,2997446 | 0,485945 |
| SLC7A6OS       | 4,08 | 0,71 | 3,20 | 2,54 | 0,2999676 | 0,486262 |
| SLC39A9        | 3,66 | 3,96 | 3,52 | 3,28 | 0,299984  | 0,486262 |
| RP11-867G23.12 | 0,00 | 0,00 | 0,00 | 0,39 | 0,2999927 | NA       |
| RP11-533E19.3  | 0,00 | 0,00 | 0,00 | 0,00 | 0,3000067 | 0,486264 |
| LSM10          | 7,15 | 7,51 | 6,75 | 6,99 | 0,3000488 | 0,486297 |
| RP11-390F4.3   | 1,33 | 1,46 | 1,56 | 1,49 | 0,3001784 | 0,486471 |

|                |      |      |      |      |           |          |
|----------------|------|------|------|------|-----------|----------|
| DHRS4-AS1      | 2,86 | 1,50 | 2,42 | 3,20 | 0,3002097 | 0,486486 |
| SATB2          | 0,10 | 0,36 | 0,17 | 0,44 | 0,300431  | 0,486723 |
| RP11-15G8.1    | 1,38 | 1,21 | 1,14 | 1,80 | 0,3004413 | 0,486723 |
| GRTP1          | 0,09 | 0,29 | 0,16 | 0,29 | 0,3004443 | 0,486723 |
| FUBP1          | 6,33 | 6,15 | 6,37 | 6,30 | 0,3004486 | 0,486723 |
| SIAH3          | 0,03 | 0,10 | 0,03 | 0,02 | 0,3004652 | 0,486723 |
| C11orf95       | 0,00 | 0,00 | 0,00 | 0,00 | 0,300505  | 0,486752 |
| RP11-324P9.1   | 0,00 | 0,00 | 0,00 | 0,19 | 0,3005215 | NA       |
| RP11-767I20.1  | 0,05 | 0,14 | 0,07 | 0,31 | 0,3005651 | 0,486814 |
| SIK3           | 3,93 | 5,07 | 4,68 | 5,03 | 0,3005948 | 0,486826 |
| USH1G          | 0,00 | 0,07 | 0,00 | 0,00 | 0,3006186 | NA       |
| PHGDH          | 1,23 | 2,28 | 1,44 | 1,22 | 0,3006396 | 0,486864 |
| RP11-313D6.3   | 0,00 | 1,31 | 0,00 | 0,00 | 0,3007905 | 0,48704  |
| PDPK1          | 3,78 | 3,46 | 3,72 | 3,80 | 0,3008124 | 0,48704  |
| AC006518.7     | 0,00 | 0,31 | 0,00 | 0,00 | 0,3008281 | 0,48704  |
| RP13-44L19.2   | 0,00 | 0,00 | 0,06 | 0,30 | 0,3008367 | 0,48704  |
| AOX3P          | 0,00 | 0,00 | 0,00 | 0,00 | 0,3008582 | 0,48704  |
| CTC-338M12.3   | 2,79 | 4,25 | 2,43 | 1,51 | 0,300901  | 0,487071 |
| RP11-166O4.5   | 1,35 | 0,47 | 1,92 | 2,67 | 0,3009214 | 0,487071 |
| APC            | 3,84 | 2,44 | 3,01 | 3,35 | 0,3010134 | 0,487185 |
| RN7SL55P       | 0,00 | 0,00 | 0,00 | 0,00 | 0,3010483 | 0,487206 |
| CTC-524C5.2    | 2,39 | 0,73 | 1,54 | 0,59 | 0,3011684 | 0,487365 |
| AC104532.4     | 0,47 | 0,00 | 0,68 | 0,00 | 0,3013064 | 0,487528 |
| RP11-295D4.4   | 0,51 | 1,38 | 1,02 | 0,53 | 0,3013206 | 0,487528 |
| RP11-61O11.1   | 0,32 | 0,75 | 0,51 | 0,68 | 0,3013348 | 0,487528 |
| RP2            | 3,46 | 2,33 | 2,88 | 1,93 | 0,3013933 | 0,487563 |
| XXcos-LUCA16.1 | 0,00 | 0,00 | 2,66 | 2,07 | 0,3014117 | 0,487563 |
| RAB3B          | 0,26 | 0,53 | 0,22 | 0,22 | 0,3014266 | 0,487563 |
| CTB-119C2.1    | 0,08 | 0,00 | 0,00 | 0,00 | 0,3014446 | 0,487563 |
| RP11-2J18.1    | 1,19 | 1,39 | 2,24 | 2,82 | 0,3015045 | 0,487625 |
| RP11-293B20.2  | 0,00 | 0,00 | 0,00 | 0,00 | 0,3015306 | NA       |
| RP11-20I23.5   | 0,13 | 1,16 | 0,91 | 0,18 | 0,3015432 | 0,487627 |
| DNMT3L         | 0,00 | 0,00 | 0,00 | 0,00 | 0,3015616 | 0,487627 |
| TBC1D22A       | 4,58 | 4,20 | 4,89 | 4,16 | 0,3015717 | 0,487627 |
| RP11-268P4.4   | 0,00 | 0,19 | 0,00 | 0,00 | 0,3015985 | NA       |
| ZNF285         | 0,20 | 0,07 | 0,14 | 0,17 | 0,3016183 | 0,487667 |
| FMNL3          | 0,31 | 1,08 | 0,95 | 0,30 | 0,3016728 | 0,487717 |
| RAB17          | 0,17 | 0,00 | 0,11 | 0,05 | 0,3016932 | 0,487717 |
| HNRNPA0        | 2,46 | 2,54 | 2,65 | 2,57 | 0,3017188 | 0,487723 |
| UBTD1          | 0,00 | 2,78 | 0,83 | 1,15 | 0,3017744 | 0,48777  |
| TMEM261        | 4,28 | 4,52 | 4,24 | 3,83 | 0,3018062 | 0,48777  |
| AC010150.1     | 0,00 | 0,00 | 0,00 | 0,00 | 0,3018141 | 0,48777  |
| PDE6G          | 4,26 | 0,41 | 2,62 | 4,17 | 0,3019984 | 0,488033 |
| RPL39P26       | 0,00 | 0,00 | 0,00 | 0,00 | 0,3020697 | 0,488112 |
| MAZ            | 4,34 | 4,56 | 4,98 | 4,80 | 0,3021931 | 0,488162 |
| PPP3R1         | 1,62 | 0,45 | 2,00 | 2,22 | 0,3022282 | 0,488162 |
| RP5-842K24.2   | 0,75 | 0,92 | 0,34 | 0,35 | 0,3022291 | 0,488162 |
| EBLN2          | 1,95 | 1,15 | 2,59 | 0,64 | 0,3022435 | 0,488162 |
| ABHD10         | 4,61 | 4,31 | 3,88 | 3,65 | 0,3022441 | 0,488162 |
| BRF1           | 2,13 | 2,40 | 2,59 | 1,91 | 0,3022671 | 0,488162 |
| ULK4           | 3,09 | 2,76 | 2,62 | 1,62 | 0,3022674 | 0,488162 |
| RP11-342D14.1  | 0,21 | 0,00 | 0,61 | 1,16 | 0,3022763 | 0,488162 |
| NINJ1          | 5,11 | 1,33 | 5,55 | 5,80 | 0,3023075 | 0,488177 |
| RN7SL361P      | 0,00 | 1,23 | 0,00 | 0,00 | 0,3024102 | NA       |
| COL15A1        | 0,22 | 0,45 | 0,26 | 1,03 | 0,3024707 | 0,488405 |

|                    |       |       |       |       |           |          |
|--------------------|-------|-------|-------|-------|-----------|----------|
| LMF2               | 2,71  | 1,54  | 2,20  | 2,51  | 0,3025009 | 0,488419 |
| SEC23IP            | 3,77  | 5,51  | 3,37  | 4,40  | 0,3026262 | 0,488586 |
| ABRA               | 0,09  | 0,00  | 0,37  | 0,31  | 0,3026548 | 0,488596 |
| ACO18462.2         | 0,41  | 0,45  | 0,55  | 0,27  | 0,3026987 | 0,48861  |
| RP3-431P23.5       | 0,00  | 0,21  | 0,00  | 0,00  | 0,3027073 | 0,48861  |
| ZNF519             | 2,07  | 1,45  | 1,25  | 0,93  | 0,3027827 | 0,488681 |
| XXbac-BPG296P20.15 | 1,03  | 0,49  | 1,69  | 0,61  | 0,30281   | 0,488681 |
| U47924.6           | 0,95  | 0,82  | 1,09  | 0,93  | 0,302824  | 0,488681 |
| TLL5               | 3,54  | 2,68  | 3,42  | 2,54  | 0,3028449 | 0,488681 |
| WDR5               | 2,08  | 0,98  | 2,36  | 1,44  | 0,3028613 | 0,488681 |
| CSF2RB             | 3,63  | 2,18  | 3,19  | 2,34  | 0,3028954 | 0,4887   |
| FZD8               | 0,00  | 0,00  | 0,00  | 0,00  | 0,3029032 | NA       |
| SHB                | 0,00  | 0,00  | 0,00  | 0,00  | 0,3029373 | 0,4887   |
| CH507-513H4.4      | 14,57 | 14,80 | 14,86 | 14,73 | 0,3029575 | 0,4887   |
| CH507-513H4.3      | 14,57 | 14,80 | 14,86 | 14,73 | 0,3029613 | 0,4887   |
| MPV17L2            | 4,25  | 0,76  | 2,94  | 1,66  | 0,3030353 | 0,488784 |
| SLC25A40           | 3,43  | 1,40  | 3,50  | 1,98  | 0,3031065 | 0,488864 |
| PLGLB2             | 0,00  | 0,00  | 0,00  | 0,00  | 0,3031966 | 0,488974 |
| CH507-513H4.6      | 14,57 | 14,80 | 14,86 | 14,73 | 0,3033689 | 0,489216 |
| PER2               | 2,53  | 2,62  | 2,17  | 1,26  | 0,3034287 | 0,489277 |
| TM9SF3             | 4,85  | 4,17  | 4,86  | 3,16  | 0,3034872 | 0,489336 |
| MYOG               | 0,00  | 0,19  | 0,05  | 0,19  | 0,3035175 | NA       |
| CTD-2290P7.1       | 0,00  | 0,00  | 0,00  | 0,00  | 0,3035447 | NA       |
| CTC-251D13.1       | 0,25  | 0,28  | 0,90  | 0,78  | 0,3036355 | 0,489539 |
| FMO4               | 0,00  | 0,00  | 0,00  | 1,09  | 0,3039287 | 0,489949 |
| RP11-353N4.5       | 0,08  | 0,00  | 0,18  | 0,16  | 0,3039334 | 0,489949 |
| PRKD1              | 0,00  | 0,54  | 0,00  | 0,38  | 0,3039642 | 0,489963 |
| RP11-118B23.7      | 0,89  | 2,21  | 0,26  | 0,48  | 0,3039907 | 0,48997  |
| RP11-196H14.4      | 0,00  | 0,00  | 0,00  | 0,00  | 0,3041156 | 0,490136 |
| RAB8A              | 5,44  | 4,00  | 5,07  | 4,30  | 0,3042787 | 0,490363 |
| RP11-2201.5        | 0,00  | 0,00  | 0,00  | 0,17  | 0,3043504 | NA       |
| ZSWIM3             | 0,00  | 0,00  | 0,00  | 0,00  | 0,3043659 | NA       |
| NBPF14             | 7,27  | 6,87  | 7,11  | 6,68  | 0,3043921 | 0,49051  |
| ACER1              | 0,23  | 0,00  | 0,05  | 0,19  | 0,3044875 | 0,490628 |
| ACACA              | 2,93  | 0,75  | 2,55  | 3,64  | 0,3045249 | 0,490653 |
| CTD-2538G9.5       | 0,00  | 0,00  | 0,00  | 0,00  | 0,3046791 | NA       |
| RP11-338L22.2      | 0,00  | 0,00  | 0,00  | 0,00  | 0,3047001 | NA       |
| FBXO40             | 0,19  | 0,00  | 0,14  | 0,18  | 0,3047728 | 0,491017 |
| IGKV1-17           | 0,00  | 1,47  | 0,00  | 0,00  | 0,3048144 | NA       |
| ALS2CR10           | 1,90  | 3,11  | 2,16  | 2,30  | 0,304867  | 0,491133 |
| PAFAH1B1           | 5,17  | 4,91  | 5,36  | 5,31  | 0,3049772 | 0,491247 |
| TMEM101            | 4,24  | 1,72  | 4,71  | 4,13  | 0,3049823 | 0,491247 |
| RP13-516M14.4      | 0,76  | 0,75  | 1,10  | 0,95  | 0,3050981 | 0,491396 |
| ANKRD23            | 0,84  | 0,00  | 0,39  | 0,51  | 0,3051318 | 0,491396 |
| SIGLEC9            | 4,40  | 4,96  | 4,47  | 3,61  | 0,3051412 | 0,491396 |
| ACO18470.3         | 0,16  | 0,00  | 0,00  | 0,17  | 0,3051549 | NA       |
| SSR2               | 8,20  | 7,44  | 7,97  | 7,50  | 0,3051694 | 0,491406 |
| ZMYND15            | 0,26  | 0,92  | 0,06  | 0,00  | 0,3052078 | 0,491418 |
| MMS22L             | 2,81  | 2,30  | 1,90  | 2,72  | 0,3052212 | 0,491418 |
| SBF2               | 3,65  | 3,61  | 3,91  | 2,95  | 0,3053181 | 0,491507 |
| TCEA2              | 1,21  | 1,66  | 2,24  | 3,81  | 0,3053304 | 0,491507 |
| FCRL3              | 0,00  | 1,99  | 0,57  | 1,27  | 0,3053424 | 0,491507 |
| CWF19L2            | 2,89  | 3,87  | 1,65  | 2,39  | 0,3053931 | 0,491553 |
| COASY              | 5,13  | 4,72  | 5,48  | 4,44  | 0,3055968 | 0,491821 |
| MGST2              | 6,91  | 5,91  | 6,64  | 5,89  | 0,3056037 | 0,491821 |

|                |      |      |      |      |           |          |
|----------------|------|------|------|------|-----------|----------|
| RP11-706O15.7  | 0,09 | 0,00 | 0,43 | 1,26 | 0,3056756 | 0,491901 |
| MGAT1          | 5,80 | 6,18 | 6,17 | 6,02 | 0,3058313 | 0,492116 |
| FOXM1          | 0,71 | 1,22 | 0,85 | 1,53 | 0,3059199 | 0,492165 |
| ANKRD18A       | 0,00 | 1,70 | 0,13 | 1,01 | 0,3059265 | 0,492165 |
| MIRLET7BHG     | 0,06 | 0,38 | 0,20 | 0,74 | 0,3059284 | 0,492165 |
| AC083900.1     | 0,00 | 2,22 | 0,00 | 0,00 | 0,3059731 | 0,492201 |
| AC112229.7     | 0,00 | 0,48 | 0,00 | 0,00 | 0,3059866 | NA       |
| GPR3           | 0,13 | 0,07 | 0,31 | 0,06 | 0,3060353 | 0,492257 |
| RN7SKP166      | 0,00 | 0,00 | 0,00 | 0,00 | 0,3060521 | 0,492257 |
| RP11-1415C14.4 | 0,77 | 0,00 | 0,00 | 0,00 | 0,3062729 | 0,492577 |
| LIMS1          | 6,16 | 6,40 | 5,56 | 5,38 | 0,3063326 | 0,492637 |
| KANK2          | 0,71 | 1,08 | 0,81 | 1,40 | 0,3063644 | 0,492652 |
| TSPAN13        | 0,17 | 0,38 | 0,16 | 0,29 | 0,3064391 | 0,492737 |
| PCNP           | 5,32 | 5,43 | 4,92 | 4,70 | 0,3064785 | 0,492765 |
| CTD-2547L24.3  | 0,36 | 1,46 | 0,44 | 0,53 | 0,3066238 | 0,492963 |
| FNTB           | 2,38 | 0,21 | 0,81 | 1,71 | 0,3067092 | 0,493042 |
| PSME4          | 5,11 | 4,22 | 4,63 | 3,47 | 0,3067178 | 0,493042 |
| RP11-402L5.1   | 0,00 | 0,00 | 0,00 | 0,00 | 0,3068195 | 0,493123 |
| SLC8A3         | 0,00 | 0,11 | 0,00 | 0,04 | 0,3068399 | NA       |
| ITM2A          | 0,37 | 1,83 | 0,19 | 1,10 | 0,3068438 | 0,493123 |
| AC006538.1     | 0,12 | 0,52 | 0,53 | 0,46 | 0,3068708 | 0,493123 |
| RP11-11N9.4    | 3,73 | 3,91 | 3,45 | 2,33 | 0,3068887 | 0,493123 |
| IFI16          | 7,17 | 5,54 | 6,74 | 6,32 | 0,3068998 | 0,493123 |
| HMGCR          | 4,40 | 6,42 | 4,92 | 4,91 | 0,3069012 | 0,493123 |
| TRPC2          | 0,00 | 3,54 | 0,53 | 0,71 | 0,3069289 | 0,493132 |
| AC092610.12    | 0,00 | 0,00 | 0,00 | 0,00 | 0,3070112 | NA       |
| RP11-196G18.22 | 0,14 | 0,03 | 0,23 | 0,39 | 0,3070196 | 0,493242 |
| RN7SL711P      | 1,37 | 0,89 | 1,03 | 2,30 | 0,3070565 | 0,493266 |
| RNU6-298P      | 0,00 | 0,00 | 0,00 | 0,00 | 0,3071491 | NA       |
| CNTNAP3        | 2,68 | 1,85 | 2,80 | 2,91 | 0,3071781 | 0,49342  |
| BRSK2          | 0,00 | 0,00 | 0,00 | 0,33 | 0,3071968 | 0,49342  |
| SUN2           | 2,86 | 2,93 | 4,09 | 2,75 | 0,3073168 | 0,493519 |
| KCNJ2-AS1      | 0,00 | 0,00 | 0,00 | 0,00 | 0,3073223 | 0,493519 |
| AF121898.3     | 0,54 | 0,25 | 0,83 | 1,60 | 0,3073253 | 0,493519 |
| CTD-2203K17.1  | 0,00 | 0,00 | 0,00 | 0,00 | 0,3073564 | 0,493533 |
| RBM5           | 6,01 | 6,20 | 6,38 | 5,75 | 0,3074912 | 0,493705 |
| NECTIN4        | 0,17 | 0,07 | 0,08 | 0,07 | 0,3075076 | 0,493705 |
| IGHV4-39       | 0,00 | 1,44 | 0,00 | 0,00 | 0,3075612 | NA       |
| RP11-1007O24.3 | 0,50 | 0,06 | 1,05 | 0,51 | 0,3076351 | 0,493851 |
| MFSD2A         | 0,29 | 2,07 | 2,11 | 1,94 | 0,3076428 | 0,493851 |
| NIN            | 5,29 | 4,50 | 4,94 | 4,93 | 0,3076666 | 0,493853 |
| PHF6           | 3,20 | 2,16 | 3,13 | 2,66 | 0,3077039 | 0,493877 |
| ALDOC          | 3,18 | 0,00 | 1,09 | 0,18 | 0,3077316 | 0,493886 |
| PDXDC2P        | 3,25 | 0,77 | 3,69 | 3,45 | 0,3078045 | 0,493967 |
| NAA10          | 6,21 | 6,31 | 5,98 | 5,85 | 0,3078358 | 0,493982 |
| SERPINB5       | 0,00 | 0,15 | 0,00 | 0,10 | 0,3079069 | NA       |
| AP5S1          | 0,96 | 0,98 | 0,76 | 1,07 | 0,3079555 | 0,494128 |
| AC004837.5     | 0,00 | 1,01 | 0,00 | 0,00 | 0,307971  | 0,494128 |
| RP11-345J4.4   | 0,02 | 0,00 | 1,36 | 0,28 | 0,3081122 | 0,494251 |
| RP11-347C12.4  | 0,02 | 0,00 | 1,36 | 0,28 | 0,3081122 | 0,494251 |
| CTD-2002J20.1  | 0,00 | 0,00 | 0,00 | 0,00 | 0,3081363 | 0,494251 |
| APBB1          | 0,00 | 1,66 | 0,00 | 0,11 | 0,308137  | 0,494251 |
| CCT4           | 6,54 | 6,83 | 6,20 | 5,43 | 0,3082749 | 0,494437 |
| EBF2           | 0,00 | 0,00 | 0,00 | 0,05 | 0,3082966 | NA       |
| NUDT7          | 1,77 | 0,88 | 0,34 | 0,30 | 0,3083061 | 0,494451 |

|               |      |      |      |      |           |          |
|---------------|------|------|------|------|-----------|----------|
| FOXP2         | 1,31 | 0,73 | 0,99 | 1,27 | 0,3083462 | 0,49448  |
| INCENP        | 0,00 | 0,00 | 0,02 | 0,23 | 0,3084281 | 0,494548 |
| RP3-340N1.2   | 0,24 | 1,66 | 0,82 | 0,68 | 0,3084336 | 0,494548 |
| JOSD2         | 4,72 | 5,43 | 4,96 | 5,44 | 0,3084777 | 0,494584 |
| RP11-677O4.2  | 0,00 | 0,07 | 0,00 | 0,00 | 0,3085524 | NA       |
| AC009120.3    | 0,00 | 0,00 | 0,00 | 0,00 | 0,3085759 | 0,494654 |
| AC005276.1    | 0,00 | 0,72 | 0,13 | 0,50 | 0,308588  | 0,494654 |
| ADAMTS13      | 0,00 | 0,13 | 0,00 | 0,00 | 0,3086019 | 0,494654 |
| NME7          | 3,68 | 3,44 | 3,62 | 2,16 | 0,3086104 | 0,494654 |
| ATP9A         | 0,03 | 0,42 | 0,03 | 0,08 | 0,3086808 | 0,494727 |
| WDR6          | 4,82 | 0,66 | 4,91 | 3,85 | 0,3087008 | 0,494727 |
| ZNF132        | 0,00 | 0,00 | 0,00 | 0,00 | 0,3087942 | 0,494841 |
| SPPL3         | 4,96 | 3,18 | 4,49 | 3,77 | 0,3088299 | 0,494863 |
| CTC-490E21.14 | 0,41 | 1,46 | 0,92 | 1,16 | 0,3088829 | 0,494912 |
| MYCBP2        | 6,10 | 5,21 | 5,89 | 5,04 | 0,3089842 | 0,495012 |
| FBXL4         | 1,24 | 0,86 | 1,25 | 0,94 | 0,3089896 | 0,495012 |
| RP11-356M20.3 | 0,65 | 0,80 | 0,84 | 1,46 | 0,3090812 | 0,495123 |
| LGR4          | 0,00 | 0,00 | 0,34 | 0,02 | 0,3091106 | 0,495134 |
| RAB36         | 0,06 | 0,07 | 0,07 | 0,13 | 0,309152  | 0,495165 |
| AGAP4         | 4,62 | 5,51 | 4,09 | 3,44 | 0,3092078 | 0,495216 |
| MUSTN1        | 0,00 | 4,93 | 1,77 | 0,39 | 0,3092289 | 0,495216 |
| ADAT3         | 0,00 | 0,00 | 0,10 | 0,00 | 0,3093496 | 0,495374 |
| RP11-70D24.1  | 0,21 | 0,46 | 0,39 | 0,36 | 0,3093806 | 0,495388 |
| MCOLN3        | 2,12 | 2,19 | 2,06 | 2,35 | 0,3094365 | 0,495442 |
| L1TD1         | 0,03 | 0,03 | 0,02 | 0,00 | 0,3095121 | 0,495465 |
| GMPPA         | 4,82 | 5,56 | 4,37 | 4,82 | 0,3095191 | 0,495465 |
| RP11-401F24.4 | 0,09 | 0,12 | 0,09 | 0,08 | 0,3095258 | 0,495465 |
| RDH10         | 1,02 | 0,07 | 0,11 | 0,07 | 0,30954   | 0,495465 |
| XAB2          | 1,70 | 2,10 | 2,02 | 2,26 | 0,3095665 | 0,495471 |
| AC007950.2    | 0,09 | 0,27 | 0,06 | 0,05 | 0,3095898 | 0,495473 |
| DSTNP2        | 0,77 | 1,53 | 0,80 | 0,42 | 0,3096368 | 0,495513 |
| RP11-6D1.3    | 0,00 | 0,00 | 0,00 | 0,00 | 0,3096533 | NA       |
| AMPH          | 0,83 | 2,15 | 0,71 | 1,33 | 0,309683  | 0,495551 |
| CLIP2         | 1,96 | 1,13 | 2,20 | 1,79 | 0,3097393 | 0,495605 |
| THAP5         | 3,67 | 2,50 | 2,97 | 1,93 | 0,3097941 | 0,495621 |
| TMIE          | 0,00 | 0,00 | 0,00 | 0,15 | 0,3098299 | 0,495621 |
| GMFB          | 4,60 | 2,59 | 3,79 | 4,27 | 0,3098358 | 0,495621 |
| RP3-339A18.6  | 2,37 | 0,53 | 1,91 | 1,02 | 0,3098387 | 0,495621 |
| AC010145.4    | 0,00 | 0,00 | 0,00 | 0,00 | 0,3098625 | NA       |
| RN7SL378P     | 0,00 | 0,85 | 0,00 | 1,00 | 0,3098685 | 0,495634 |
| DNAJB12       | 4,47 | 4,42 | 3,96 | 4,09 | 0,3100109 | 0,495826 |
| TXNIP         | 8,76 | 8,56 | 8,17 | 7,94 | 0,3101614 | 0,496031 |
| PIM2          | 4,14 | 3,82 | 3,86 | 3,39 | 0,3102889 | 0,496199 |
| GAPDHP42      | 0,00 | 1,90 | 0,19 | 0,00 | 0,3103409 | 0,496212 |
| RCC2          | 5,16 | 5,27 | 5,49 | 5,41 | 0,3103417 | 0,496212 |
| RNF151        | 0,00 | 0,00 | 0,00 | 0,00 | 0,3103791 | NA       |
| MIR27A        | 0,00 | 0,00 | 0,00 | 2,41 | 0,3104467 | NA       |
| ARL8B         | 5,49 | 6,04 | 5,85 | 5,02 | 0,3104527 | 0,496354 |
| ZMAT2         | 4,05 | 3,46 | 4,41 | 4,46 | 0,310555  | 0,496481 |
| CFHR1         | 0,00 | 1,05 | 0,00 | 0,96 | 0,3106099 | NA       |
| FAM109A       | 2,96 | 3,48 | 3,28 | 3,44 | 0,3106139 | 0,49654  |
| RP11-223110.1 | 0,21 | 0,37 | 0,37 | 0,00 | 0,3106562 | 0,496572 |
| RP11-820I16.4 | 0,00 | 0,00 | 0,00 | 0,03 | 0,310772  | NA       |
| FOXRED1       | 4,39 | 2,90 | 3,36 | 3,36 | 0,3107731 | 0,496688 |
| AC104777.1    | 0,00 | 3,49 | 0,00 | 0,00 | 0,3107736 | 0,496688 |

|               |      |      |      |      |           |          |
|---------------|------|------|------|------|-----------|----------|
| ABCG4         | 0,00 | 0,11 | 0,00 | 0,00 | 0,3107984 | NA       |
| C2CD2L        | 2,06 | 3,37 | 2,44 | 2,21 | 0,3108136 | 0,4967   |
| RP11-514012.4 | 0,00 | 0,00 | 0,00 | 1,48 | 0,3108256 | 0,4967   |
| TPM2          | 1,09 | 0,50 | 0,85 | 2,05 | 0,310849  | 0,496701 |
| ASAP1-IT2     | 1,64 | 2,01 | 1,24 | 0,65 | 0,3108766 | 0,49671  |
| RN7SL841P     | 0,00 | 0,89 | 0,00 | 0,80 | 0,3109595 | NA       |
| TYRO3P        | 0,00 | 0,00 | 0,00 | 0,00 | 0,3110959 | NA       |
| ACKR2         | 0,22 | 0,82 | 0,56 | 0,27 | 0,3111235 | 0,497069 |
| MEIOB         | 0,00 | 0,00 | 0,00 | 0,00 | 0,3112122 | 0,497105 |
| RP11-521C20.4 | 0,34 | 0,44 | 1,33 | 0,68 | 0,311221  | 0,497105 |
| CTC-207P7.1   | 0,00 | 0,00 | 0,22 | 0,82 | 0,3112311 | 0,497105 |
| CLPTM1L       | 4,76 | 6,05 | 4,87 | 4,95 | 0,3112483 | 0,497105 |
| ATP1A4        | 0,15 | 0,13 | 0,52 | 0,42 | 0,3112581 | 0,497105 |
| FAM153C       | 0,68 | 0,00 | 0,66 | 2,47 | 0,3113065 | 0,49714  |
| PNO1          | 4,50 | 5,34 | 3,90 | 2,90 | 0,3113247 | 0,49714  |
| TAT           | 0,11 | 0,13 | 0,03 | 0,10 | 0,3114217 | 0,497259 |
| ANOS1         | 0,00 | 0,00 | 0,00 | 0,00 | 0,3114236 | NA       |
| SHISA4        | 0,00 | 0,00 | 0,00 | 0,00 | 0,3115097 | 0,497328 |
| MFSD6         | 3,31 | 1,70 | 2,64 | 2,19 | 0,3115457 | 0,497328 |
| C15orf39      | 4,05 | 3,35 | 4,23 | 4,32 | 0,3115472 | 0,497328 |
| S1PR1         | 0,00 | 2,41 | 0,00 | 0,04 | 0,3115544 | 0,497328 |
| DDX18         | 4,76 | 3,92 | 3,88 | 3,76 | 0,3115784 | 0,497331 |
| C1orf112      | 0,07 | 0,04 | 0,04 | 0,59 | 0,3117611 | 0,497557 |
| AC007383.4    | 0,00 | 0,00 | 0,00 | 0,00 | 0,3117653 | 0,497557 |
| HINT1         | 8,43 | 8,43 | 8,28 | 7,78 | 0,3118364 | 0,497635 |
| RP11-907D1.3  | 0,00 | 0,00 | 0,00 | 0,00 | 0,3120285 | NA       |
| KIF3C         | 0,00 | 0,21 | 0,00 | 0,13 | 0,312048  | 0,497937 |
| ALDOB         | 0,00 | 0,06 | 0,00 | 0,00 | 0,3120975 | NA       |
| RBM38         | 2,08 | 3,72 | 1,22 | 2,25 | 0,3121135 | 0,498006 |
| RN7SL531P     | 0,85 | 2,41 | 1,04 | 1,55 | 0,3121522 | 0,498032 |
| GATAD1        | 3,62 | 3,11 | 4,02 | 3,19 | 0,3122219 | 0,498107 |
| C8orf49       | 0,78 | 0,65 | 1,08 | 0,67 | 0,3122965 | 0,49819  |
| HCG25         | 3,18 | 1,69 | 3,82 | 3,54 | 0,3123992 | 0,498319 |
| OR2T6         | 0,00 | 0,30 | 0,00 | 0,10 | 0,3124242 | 0,498323 |
| RP11-254N18.1 | 0,00 | 0,00 | 0,00 | 0,00 | 0,3124554 | 0,498337 |
| SLC39A4       | 4,42 | 3,56 | 4,65 | 4,40 | 0,3126766 | 0,498654 |
| FAM155A       | 0,02 | 0,00 | 0,03 | 0,06 | 0,3127798 | 0,498782 |
| CTC-458G6.2   | 0,00 | 0,26 | 0,08 | 0,00 | 0,3128125 | NA       |
| RP11-95O2.1   | 0,00 | 0,07 | 0,00 | 0,00 | 0,3128519 | 0,498862 |
| GTF2B         | 5,84 | 3,52 | 4,73 | 4,92 | 0,3130441 | 0,499132 |
| WDR19         | 2,81 | 1,29 | 2,64 | 2,86 | 0,3131109 | 0,499203 |
| RN7SL847P     | 0,00 | 0,99 | 0,77 | 1,04 | 0,3131488 | NA       |
| SOWAHD        | 0,00 | 1,06 | 0,00 | 0,00 | 0,3131821 | 0,499281 |
| TEKT4         | 0,00 | 0,10 | 0,00 | 0,00 | 0,3131857 | NA       |
| FAM208B       | 4,74 | 4,19 | 4,72 | 5,11 | 0,3132788 | 0,499399 |
| PIAS4         | 1,18 | 0,36 | 1,43 | 0,96 | 0,3133247 | 0,499436 |
| DUSP5         | 4,07 | 3,60 | 3,03 | 1,99 | 0,3133595 | 0,499456 |
| CREB1         | 5,56 | 4,86 | 4,79 | 5,80 | 0,3134013 | 0,499471 |
| AC113189.5    | 0,00 | 1,61 | 0,00 | 0,93 | 0,3134279 | 0,499471 |
| RP11-48112.4  | 0,31 | 0,00 | 0,33 | 0,06 | 0,3134365 | 0,499471 |
| RPL13P2       | 0,00 | 0,28 | 0,24 | 0,50 | 0,3134452 | NA       |
| NUMA1         | 5,10 | 5,70 | 5,12 | 5,34 | 0,3135303 | 0,499585 |
| ANKRD50       | 2,11 | 0,90 | 1,62 | 2,49 | 0,3136138 | 0,499662 |
| HDAC8         | 3,90 | 4,64 | 3,95 | 2,62 | 0,3136374 | 0,499662 |
| PELO          | 0,01 | 1,29 | 0,63 | 0,17 | 0,3136953 | 0,499662 |

|                |      |      |      |      |           |          |
|----------------|------|------|------|------|-----------|----------|
| TSEN15         | 5,07 | 4,64 | 4,89 | 4,57 | 0,3137098 | 0,499662 |
| DNAL4          | 0,68 | 0,36 | 0,95 | 0,21 | 0,3137224 | 0,499662 |
| CTC-525D6.1    | 0,70 | 0,38 | 1,15 | 1,69 | 0,313731  | 0,499662 |
| RP11-53B2.5    | 0,00 | 0,00 | 0,00 | 0,00 | 0,3137771 | 0,499662 |
| RP11-342K6.1   | 1,73 | 1,12 | 0,55 | 0,23 | 0,3137788 | 0,499662 |
| RP11-1319K7.1  | 0,94 | 0,00 | 0,00 | 0,00 | 0,3137808 | 0,499662 |
| RP11-673C5.2   | 0,00 | 0,64 | 0,00 | 0,00 | 0,313785  | NA       |
| RP11-932O9.8   | 0,00 | 0,41 | 0,00 | 0,00 | 0,3138078 | NA       |
| CCL22          | 0,25 | 1,22 | 0,42 | 0,31 | 0,3138128 | 0,499677 |
| CTD-3222D19.8  | 0,17 | 0,70 | 0,44 | 0,23 | 0,3138862 | 0,499758 |
| TMBIM6         | 8,34 | 7,88 | 7,71 | 7,48 | 0,3139719 | 0,499835 |
| PCDH24         | 0,00 | 0,00 | 0,00 | 0,00 | 0,3139794 | NA       |
| MND1           | 0,16 | 0,42 | 0,00 | 0,14 | 0,3139794 | 0,499835 |
| PIGW           | 0,26 | 0,49 | 0,60 | 0,27 | 0,3140527 | 0,499886 |
| TOR2A          | 6,01 | 5,77 | 5,49 | 2,74 | 0,3140563 | 0,499886 |
| ACL29778.2     | 2,78 | 1,09 | 3,23 | 0,13 | 0,3141407 | 0,49996  |
| AP4S1          | 1,63 | 2,40 | 1,93 | 1,47 | 0,3141482 | 0,49996  |
| E2F8           | 0,11 | 0,24 | 0,14 | 0,05 | 0,314217  | 0,500034 |
| RSPH1          | 0,00 | 0,00 | 0,04 | 0,00 | 0,3142289 | NA       |
| PHF19          | 3,47 | 3,71 | 4,04 | 2,80 | 0,3143655 | 0,500212 |
| FANCC          | 0,60 | 0,71 | 0,43 | 0,60 | 0,3143946 | 0,500212 |
| EID1           | 7,18 | 7,51 | 7,21 | 6,73 | 0,3143962 | 0,500212 |
| NR2F2          | 0,00 | 0,00 | 0,00 | 0,00 | 0,3144664 | NA       |
| NDUFAF7        | 3,75 | 3,69 | 3,15 | 4,04 | 0,3144763 | 0,500303 |
| AC068490.1     | 0,00 | 0,06 | 0,06 | 0,00 | 0,3145443 | 0,500376 |
| MS4A10         | 0,36 | 0,12 | 0,36 | 0,51 | 0,3146219 | 0,500454 |
| IL6R           | 5,16 | 5,52 | 5,24 | 4,56 | 0,3146387 | 0,500454 |
| PASK           | 0,32 | 0,44 | 0,08 | 0,41 | 0,3147078 | 0,500516 |
| NPHP3          | 3,33 | 2,51 | 3,34 | 3,73 | 0,314723  | 0,500516 |
| L29074.5       | 3,23 | 1,62 | 2,29 | 2,23 | 0,3147967 | 0,500598 |
| METTL1         | 4,11 | 2,61 | 3,13 | 0,31 | 0,3148456 | 0,50064  |
| IARS2          | 3,82 | 4,00 | 3,96 | 1,53 | 0,3150885 | 0,500973 |
| CDH12P2        | 2,85 | 0,00 | 0,00 | 4,84 | 0,3151001 | 0,500973 |
| TSNAX          | 5,02 | 3,87 | 4,32 | 3,81 | 0,3151265 | 0,500979 |
| RP1-149A16.3   | 0,00 | 0,00 | 0,00 | 0,00 | 0,3151535 | 0,500986 |
| RP11-147C23.1  | 0,00 | 0,00 | 0,00 | 0,00 | 0,3152216 | NA       |
| RHOJ           | 0,08 | 0,08 | 0,17 | 0,11 | 0,3152343 | 0,501079 |
| RP11-47A8.5    | 0,00 | 0,00 | 0,00 | 0,76 | 0,3153953 | 0,501299 |
| CRLS1          | 4,11 | 4,99 | 4,42 | 5,29 | 0,3155524 | 0,501509 |
| RP11-779O18.1  | 0,34 | 3,69 | 0,22 | 4,12 | 0,3155728 | 0,501509 |
| NKX3-1         | 0,14 | 0,24 | 0,24 | 0,36 | 0,3156051 | 0,501525 |
| FLOT1          | 5,62 | 5,12 | 5,66 | 5,26 | 0,3156907 | 0,501625 |
| DCT            | 0,00 | 0,73 | 0,00 | 0,00 | 0,3157904 | 0,501747 |
| ORC2           | 2,71 | 2,40 | 3,37 | 3,25 | 0,3158224 | 0,501762 |
| DSE            | 4,73 | 3,62 | 4,07 | 4,79 | 0,315866  | 0,501764 |
| TNFSF12        | 2,57 | 1,58 | 1,37 | 1,94 | 0,3158689 | 0,501764 |
| RP11-849H4.2   | 2,17 | 2,03 | 2,01 | 2,74 | 0,3159977 | 0,501933 |
| RP11-139K1.2   | 0,00 | 0,00 | 0,00 | 0,00 | 0,3161154 | 0,502083 |
| RP1-20N2.4     | 2,52 | 1,91 | 2,54 | 1,52 | 0,316137  | 0,502083 |
| RP11-382E15.1  | 0,00 | 0,00 | 0,25 | 0,35 | 0,3161445 | NA       |
| RN7SL7P        | 0,00 | 5,92 | 0,00 | 0,00 | 0,3162117 | 0,502165 |
| RP11-667M19.10 | 0,75 | 1,48 | 1,56 | 2,82 | 0,3164219 | 0,502451 |
| RP11-332H14.2  | 0,48 | 0,18 | 0,26 | 0,17 | 0,3164537 | 0,502451 |
| PAPSS2         | 2,80 | 0,88 | 3,64 | 4,58 | 0,3164672 | 0,502451 |
| ZDHHC6         | 4,71 | 5,60 | 4,47 | 4,07 | 0,3164822 | 0,502451 |

|                    |      |      |      |      |           |          |
|--------------------|------|------|------|------|-----------|----------|
| SASS6              | 0,35 | 1,06 | 0,34 | 0,08 | 0,3165078 | 0,502456 |
| MIR663A            | 0,00 | 3,45 | 0,00 | 0,00 | 0,3165553 | NA       |
| KLHL9              | 2,31 | 0,88 | 2,00 | 1,93 | 0,31659   | 0,502551 |
| MED1               | 2,85 | 1,39 | 2,94 | 2,25 | 0,3166668 | 0,502622 |
| MEIS1              | 1,73 | 0,15 | 0,67 | 0,37 | 0,316693  | 0,502622 |
| RP11-576D8.4       | 0,27 | 0,38 | 0,36 | 0,22 | 0,3167024 | 0,502622 |
| INTS6              | 3,63 | 4,05 | 3,61 | 3,38 | 0,3167409 | 0,502647 |
| RPL10P1            | 0,28 | 0,73 | 0,31 | 0,00 | 0,3167988 | NA       |
| AKR1A1             | 7,83 | 6,74 | 7,42 | 7,37 | 0,3169042 | 0,50287  |
| BNIP3L             | 6,46 | 4,80 | 6,01 | 6,06 | 0,3169798 | 0,502945 |
| SLC1A4             | 2,66 | 1,35 | 2,34 | 1,43 | 0,3169966 | 0,502945 |
| VPS52              | 3,80 | 0,55 | 3,68 | 1,59 | 0,3170443 | 0,502985 |
| ABC7-42404400C24.1 | 0,00 | 1,18 | 0,00 | 0,24 | 0,317102  | 0,503005 |
| TUBA4B             | 0,00 | 1,39 | 0,00 | 0,00 | 0,3171024 | 0,503005 |
| RNA5SP199          | 0,00 | 0,00 | 0,00 | 0,00 | 0,3171082 | NA       |
| IMPA1              | 3,33 | 2,53 | 2,43 | 1,65 | 0,3173542 | 0,503368 |
| RN7SL737P          | 0,00 | 0,00 | 0,00 | 0,00 | 0,3174292 | 0,503451 |
| SHF                | 0,06 | 0,11 | 0,52 | 0,31 | 0,3175263 | 0,503553 |
| ERVMER34-1         | 0,08 | 0,20 | 0,14 | 0,03 | 0,3175389 | 0,503553 |
| ALOX15B            | 0,08 | 0,47 | 0,22 | 0,62 | 0,317577  | 0,503578 |
| BTBD3              | 1,49 | 0,11 | 1,33 | 0,57 | 0,3176617 | 0,503607 |
| RP11-364F11.1      | 0,00 | 0,00 | 0,00 | 0,00 | 0,3176719 | 0,503607 |
| AC092684.1         | 0,20 | 1,74 | 0,00 | 0,96 | 0,3176732 | 0,503607 |
| FUT1               | 1,12 | 1,57 | 1,29 | 1,83 | 0,3176857 | 0,503607 |
| RP11-310J24.3      | 0,00 | 0,00 | 0,32 | 0,00 | 0,3177281 | 0,503621 |
| FAR5B              | 3,43 | 1,05 | 3,42 | 2,04 | 0,3177401 | 0,503621 |
| RAB20              | 3,54 | 0,49 | 2,63 | 1,12 | 0,3177858 | 0,503658 |
| CEP131             | 1,58 | 0,27 | 0,83 | 1,68 | 0,3178121 | 0,503663 |
| FASTKD2            | 3,80 | 2,42 | 3,57 | 2,24 | 0,3178542 | 0,503664 |
| RP11-485G7.5       | 1,40 | 0,49 | 1,12 | 0,67 | 0,3178581 | 0,503664 |
| RN7SL49P           | 0,00 | 0,00 | 0,67 | 0,00 | 0,3179439 | NA       |
| RP11-671J11.2      | 1,33 | 0,00 | 1,35 | 0,00 | 0,3179445 | 0,503696 |
| BOLA3              | 3,76 | 2,83 | 3,64 | 3,16 | 0,3179506 | 0,503696 |
| TOR1A              | 5,15 | 3,68 | 4,10 | 4,59 | 0,3179638 | 0,503696 |
| RP11-674E16.4      | 0,11 | 0,00 | 0,02 | 0,16 | 0,3179687 | 0,503696 |
| VWA2               | 0,00 | 0,09 | 0,00 | 0,00 | 0,3180404 | NA       |
| TMEM106A           | 2,84 | 1,83 | 3,32 | 3,80 | 0,3181146 | 0,503871 |
| METTL21B           | 0,29 | 0,26 | 0,75 | 0,84 | 0,3181245 | 0,503871 |
| ANP32E             | 5,48 | 5,36 | 4,67 | 4,64 | 0,3181508 | 0,503877 |
| HEG1               | 0,70 | 0,31 | 0,59 | 0,58 | 0,318185  | 0,503895 |
| AC104451.2         | 0,00 | 0,00 | 1,30 | 3,65 | 0,3182847 | 0,504017 |
| RP11-182B22.2      | 0,13 | 0,00 | 0,00 | 0,00 | 0,3183103 | 0,504022 |
| PKP2               | 1,01 | 0,78 | 1,62 | 0,73 | 0,3183637 | 0,504035 |
| RP5-940J5.6        | 0,05 | 0,00 | 0,20 | 0,73 | 0,3183641 | 0,504035 |
| RP11-112J1.2       | 0,00 | 0,00 | 0,00 | 0,00 | 0,3184508 | 0,504136 |
| SUMF2              | 5,00 | 4,35 | 4,78 | 4,35 | 0,318479  | 0,504145 |
| MYH14              | 0,09 | 0,39 | 0,09 | 0,14 | 0,3186694 | 0,50441  |
| CTD-2091N23.1      | 0,00 | 0,94 | 0,00 | 0,00 | 0,3186918 | NA       |
| RP11-6D1.6         | 1,09 | 1,78 | 1,13 | 1,38 | 0,3188592 | 0,504675 |
| METTL16            | 3,66 | 2,79 | 3,36 | 2,42 | 0,3188862 | 0,504682 |
| C9orf114           | 3,95 | 3,12 | 3,39 | 4,18 | 0,3189242 | 0,504706 |
| NUP155             | 2,62 | 0,78 | 2,56 | 1,45 | 0,3190313 | 0,504813 |
| RP1-134E15.3       | 0,00 | 0,00 | 0,00 | 0,54 | 0,3190373 | 0,504813 |
| RP11-269F19.2      | 0,00 | 0,00 | 0,00 | 0,00 | 0,3190656 | NA       |
| CNOT7              | 7,08 | 7,31 | 6,57 | 5,61 | 0,3190871 | 0,504845 |



|               |      |      |      |      |           |          |
|---------------|------|------|------|------|-----------|----------|
| TMEM102       | 0,07 | 0,00 | 0,08 | 0,90 | 0,3191043 | 0,504845 |
| ASMTL         | 3,16 | 3,67 | 4,11 | 1,80 | 0,3191351 | 0,504845 |
| RP11-195B3.1  | 0,00 | 0,00 | 0,00 | 0,00 | 0,3191481 | 0,504845 |
| LRGUK         | 0,00 | 0,70 | 0,00 | 0,00 | 0,3193085 | 0,505062 |
| LOXL2         | 1,04 | 1,41 | 1,53 | 1,25 | 0,3194404 | 0,505235 |
| RP11-527E14.1 | 0,00 | 0,00 | 0,00 | 0,00 | 0,3194915 | 0,505258 |
| ACO90505.4    | 1,06 | 1,10 | 0,98 | 0,73 | 0,3195206 | 0,505258 |
| RP11-408P14.1 | 2,67 | 2,27 | 2,34 | 2,01 | 0,3195234 | 0,505258 |
| RP11-567C20.5 | 0,54 | 0,33 | 0,41 | 0,48 | 0,3196499 | 0,505422 |
| RABEP2        | 3,36 | 2,47 | 2,57 | 2,72 | 0,3196962 | 0,50546  |
| AGPAT6        | 5,06 | 4,87 | 4,74 | 3,64 | 0,3197391 | 0,505469 |
| KRT8P12       | 1,37 | 0,00 | 0,32 | 0,23 | 0,3197475 | 0,505469 |
| GPR21         | 0,16 | 0,14 | 0,31 | 0,00 | 0,3198057 | 0,505525 |
| RN75L12P      | 0,00 | 0,85 | 0,00 | 0,00 | 0,3199054 | NA       |
| RP11-426C22.5 | 5,19 | 3,83 | 4,91 | 4,41 | 0,3199292 | 0,505657 |
| DNASE1L1      | 3,65 | 2,29 | 2,82 | 3,50 | 0,3199349 | 0,505657 |
| RNU2-28P      | 0,00 | 0,00 | 0,00 | 1,23 | 0,3200026 | 0,505728 |
| RNU6-225P     | 0,00 | 0,00 | 0,00 | 2,06 | 0,3200336 | NA       |
| FAM175A       | 3,23 | 1,62 | 3,23 | 2,47 | 0,3200465 | 0,505762 |
| PRKRA         | 5,40 | 4,47 | 4,22 | 4,71 | 0,3201261 | 0,505837 |
| AZIN2         | 0,00 | 0,00 | 0,00 | 0,00 | 0,3201394 | 0,505837 |
| CTD-2545M3.8  | 0,00 | 0,00 | 1,25 | 3,58 | 0,3202107 | 0,505899 |
| RP11-861E23.2 | 0,64 | 0,70 | 0,66 | 0,61 | 0,3202247 | 0,505899 |
| ABCA9         | 2,00 | 2,32 | 1,67 | 2,60 | 0,3203328 | 0,506034 |
| U52111.14     | 0,00 | 0,37 | 0,00 | 0,00 | 0,3203505 | NA       |
| PIANP         | 0,00 | 0,00 | 0,00 | 0,00 | 0,3203727 | NA       |
| RP11-661D19.3 | 0,33 | 0,00 | 0,00 | 0,70 | 0,3204474 | 0,50605  |
| ARMC10        | 3,28 | 2,52 | 3,44 | 2,03 | 0,3204906 | 0,50605  |
| CTSS          | 9,10 | 8,08 | 8,73 | 8,99 | 0,3204907 | 0,50605  |
| ZMYND11       | 1,74 | 3,37 | 2,44 | 1,63 | 0,3204935 | 0,50605  |
| RN75KP163     | 0,00 | 0,00 | 0,00 | 0,00 | 0,3205083 | 0,50605  |
| RWDD2B        | 3,61 | 3,39 | 3,32 | 2,49 | 0,3205151 | 0,50605  |
| HMGCS1        | 4,56 | 3,18 | 4,57 | 3,22 | 0,3205193 | 0,50605  |
| PCTP          | 2,30 | 3,22 | 3,76 | 1,62 | 0,3205247 | 0,50605  |
| ZNF497        | 0,59 | 0,41 | 0,48 | 0,24 | 0,3205837 | 0,506107 |
| CTD-3065J16.6 | 0,00 | 0,11 | 0,00 | 0,00 | 0,3206029 | NA       |
| RN75KP247     | 0,00 | 0,00 | 0,14 | 0,76 | 0,3206162 | NA       |
| MCUR1         | 3,03 | 2,18 | 2,91 | 2,29 | 0,3206432 | 0,506116 |
| SENP5         | 3,61 | 2,27 | 2,98 | 3,27 | 0,3206506 | 0,506116 |
| TOMM22        | 6,14 | 5,88 | 5,79 | 5,45 | 0,3206847 | 0,506116 |
| AC018642.1    | 0,25 | 0,22 | 0,49 | 0,22 | 0,3206887 | 0,506116 |
| MIR548C       | 5,98 | 6,92 | 5,54 | 5,26 | 0,3207258 | 0,506116 |
| MIR548Z       | 5,98 | 6,92 | 5,54 | 5,26 | 0,3207258 | 0,506116 |
| AKR1C4        | 0,00 | 0,36 | 0,00 | 0,00 | 0,3207616 | 0,506136 |
| MCM6          | 2,61 | 2,20 | 1,98 | 0,59 | 0,3207977 | 0,506157 |
| RP11-452H21.2 | 0,58 | 1,08 | 1,33 | 1,52 | 0,3209177 | 0,506311 |
| POC1B-GALNT4  | 0,00 | 1,60 | 0,01 | 0,00 | 0,3210026 | 0,506389 |
| NIF3L1        | 3,40 | 0,52 | 1,92 | 2,45 | 0,3210174 | 0,506389 |
| NOP58         | 6,75 | 6,10 | 6,32 | 5,29 | 0,321036  | 0,506389 |
| LOC440461     | 0,00 | 0,00 | 0,00 | 0,00 | 0,321067  | 0,506402 |
| GMCL1         | 3,06 | 3,37 | 3,06 | 3,23 | 0,3213085 | 0,506747 |
| TSKS          | 0,00 | 0,40 | 0,00 | 0,00 | 0,3213863 | NA       |
| VN1R2         | 0,04 | 0,12 | 0,13 | 0,22 | 0,3213946 | 0,506847 |
| RP11-489O18.1 | 2,23 | 0,36 | 2,23 | 1,20 | 0,321422  | 0,506854 |
| RP11-420K14.6 | 0,00 | 0,00 | 0,00 | 0,00 | 0,3214605 | 0,506879 |

|                 |      |      |      |      |           |          |
|-----------------|------|------|------|------|-----------|----------|
| CCDC28B         | 4,05 | 1,97 | 3,58 | 2,40 | 0,3214885 | 0,506887 |
| RP11-10J21.6    | 0,00 | 1,93 | 0,00 | 0,00 | 0,3215383 | 0,50693  |
| RILPL2          | 3,83 | 4,24 | 4,14 | 2,99 | 0,3215988 | 0,50697  |
| AP1B1           | 3,93 | 4,27 | 4,39 | 3,73 | 0,3216595 | 0,50697  |
| CLDN9           | 0,00 | 0,00 | 0,00 | 0,00 | 0,3216632 | 0,50697  |
| RGL1            | 1,03 | 1,15 | 2,31 | 1,70 | 0,321665  | 0,50697  |
| RNF185          | 1,07 | 0,16 | 1,34 | 2,69 | 0,3216779 | 0,50697  |
| ATP2C2          | 0,00 | 0,18 | 0,00 | 0,00 | 0,3217518 | 0,50705  |
| COL23A1         | 0,00 | 0,00 | 0,00 | 0,00 | 0,3217876 | 0,507071 |
| CCDC120         | 0,18 | 0,10 | 0,08 | 0,18 | 0,3218511 | 0,507135 |
| ST20            | 3,40 | 3,29 | 3,16 | 4,03 | 0,3218935 | 0,507139 |
| PEX10           | 0,00 | 1,54 | 0,49 | 0,00 | 0,3219103 | 0,507139 |
| DPH6            | 2,98 | 2,53 | 2,22 | 2,20 | 0,3219217 | 0,507139 |
| PLA2G4F         | 0,00 | 0,02 | 0,00 | 0,05 | 0,3220779 | 0,507349 |
| POTEH           | 0,13 | 0,16 | 0,09 | 0,07 | 0,3222096 | 0,50752  |
| PI4K2A          | 2,03 | 1,64 | 2,55 | 2,74 | 0,3222792 | 0,507575 |
| MVB12A          | 4,31 | 1,14 | 3,74 | 4,16 | 0,3222904 | 0,507575 |
| CRB2            | 0,00 | 0,00 | 0,00 | 0,00 | 0,3223444 | 0,507606 |
| BAZ1B           | 3,55 | 3,68 | 2,95 | 2,35 | 0,3223694 | 0,507606 |
| RP4-552O12.2    | 1,14 | 1,38 | 1,40 | 1,24 | 0,3223782 | 0,507606 |
| ARRB2           | 5,49 | 5,30 | 5,71 | 5,58 | 0,3224193 | 0,507634 |
| RP5-998N21.10   | 0,00 | 0,00 | 0,00 | 0,00 | 0,3224895 | NA       |
| AARS            | 2,80 | 1,60 | 2,65 | 2,03 | 0,3226631 | 0,507982 |
| RP11-369L4.1    | 0,00 | 0,00 | 0,00 | 0,74 | 0,3227152 | NA       |
| CTA-992D9.9     | 0,00 | 0,00 | 0,00 | 0,00 | 0,3227348 | 0,508031 |
| AC022007.5      | 0,93 | 1,81 | 1,41 | 1,95 | 0,3227399 | 0,508031 |
| RP11-464O2.2    | 0,08 | 0,00 | 0,02 | 0,32 | 0,3228546 | 0,508144 |
| GINS2           | 0,14 | 0,41 | 0,10 | 0,16 | 0,3229096 | 0,508144 |
| FGFBP2          | 0,00 | 0,14 | 0,34 | 3,82 | 0,3229193 | 0,508144 |
| XXyac-YRM2039.3 | 0,78 | 1,09 | 0,68 | 0,58 | 0,3229341 | 0,508144 |
| RP11-107O13.1   | 0,00 | 0,00 | 0,00 | 0,00 | 0,3229486 | NA       |
| ESRRA           | 1,36 | 3,49 | 1,71 | 1,30 | 0,3229495 | 0,508144 |
| CTC-564N23.2    | 0,00 | 0,00 | 0,00 | 0,00 | 0,3229695 | 0,508144 |
| TRMT1L          | 3,17 | 2,87 | 1,78 | 1,39 | 0,3229847 | 0,508144 |
| RHOU            | 2,68 | 0,60 | 1,85 | 0,80 | 0,3229952 | 0,508144 |
| GTDC1           | 0,44 | 0,57 | 0,75 | 0,61 | 0,3230171 | 0,508144 |
| AC020594.5      | 0,00 | 0,00 | 0,00 | 0,00 | 0,3230716 | 0,508149 |
| PFKFB4          | 0,31 | 0,00 | 1,05 | 2,15 | 0,3230885 | 0,508149 |
| SNORD59A        | 0,00 | 0,00 | 0,00 | 0,00 | 0,323089  | 0,508149 |
| VRK1            | 4,13 | 4,51 | 3,80 | 2,93 | 0,323115  | 0,508154 |
| SLC3A1          | 0,40 | 0,64 | 0,37 | 0,43 | 0,3233782 | 0,508532 |
| BMS1            | 3,07 | 2,77 | 2,81 | 1,28 | 0,3234795 | 0,508646 |
| RP11-795F19.1   | 0,56 | 0,40 | 0,61 | 0,24 | 0,3234967 | 0,508646 |
| RP11-255G21.1   | 0,09 | 0,00 | 0,00 | 0,06 | 0,3235408 | 0,50868  |
| SAMD3           | 2,45 | 3,79 | 0,98 | 2,67 | 0,3235996 | 0,508728 |
| TBL1X           | 4,13 | 2,11 | 3,68 | 4,17 | 0,3236175 | 0,508728 |
| CCDC90B         | 5,52 | 5,94 | 5,30 | 5,28 | 0,3237846 | 0,508955 |
| RP1-59D14.1     | 0,00 | 0,00 | 0,00 | 0,00 | 0,3238352 | 0,508972 |
| UBQLN2          | 3,16 | 1,95 | 2,04 | 1,95 | 0,3238414 | 0,508972 |
| RP11-307L3.2    | 0,00 | 0,45 | 0,00 | 0,00 | 0,3239368 | NA       |
| AC006145.4      | 3,57 | 4,02 | 4,14 | 2,99 | 0,3239565 | 0,509088 |
| AC003077.1      | 0,00 | 0,00 | 0,00 | 0,00 | 0,3239611 | 0,509088 |
| RP11-390F4.8    | 0,18 | 0,00 | 0,03 | 0,00 | 0,324003  | 0,509096 |
| RP3-496C20.1    | 0,12 | 0,00 | 0,53 | 0,34 | 0,3240118 | 0,509096 |
| DSCAM           | 0,00 | 0,12 | 0,00 | 0,03 | 0,3240827 | 0,509144 |

|               |      |      |      |      |           |          |
|---------------|------|------|------|------|-----------|----------|
| RPP25         | 0,04 | 0,28 | 0,05 | 0,04 | 0,3240883 | 0,509144 |
| RP11-538I12.3 | 0,00 | 0,00 | 0,00 | 0,00 | 0,324099  | NA       |
| AC009487.6    | 0,00 | 0,00 | 0,00 | 0,00 | 0,3241706 | NA       |
| GS1-324M7.6   | 0,00 | 0,00 | 0,00 | 0,00 | 0,3241979 | 0,50928  |
| SYCP2L        | 0,31 | 0,21 | 0,70 | 0,24 | 0,3242665 | 0,509335 |
| WDR37         | 2,46 | 2,50 | 3,09 | 2,91 | 0,3242788 | 0,509335 |
| HERPUD2       | 4,03 | 2,91 | 3,01 | 3,27 | 0,3243115 | 0,509351 |
| JAM2          | 0,39 | 1,52 | 0,19 | 0,34 | 0,3243459 | 0,509365 |
| RP11-504P24.3 | 2,68 | 1,53 | 3,00 | 3,07 | 0,3243667 | 0,509365 |
| PPIL6         | 0,27 | 0,31 | 0,33 | 0,40 | 0,3245544 | 0,509624 |
| RP11-501O2.5  | 0,00 | 0,00 | 0,00 | 0,00 | 0,3246394 | NA       |
| CTB-77H17.1   | 0,00 | 0,00 | 0,00 | 0,00 | 0,3246455 | NA       |
| MED24         | 4,20 | 1,49 | 4,53 | 4,45 | 0,3246976 | 0,509813 |
| RP11-611O2.3  | 0,52 | 0,00 | 0,35 | 0,00 | 0,3247855 | 0,509915 |
| ADAMTS7P1     | 0,00 | 0,00 | 0,00 | 0,00 | 0,3249089 | NA       |
| SUPT6H        | 3,20 | 4,18 | 3,94 | 3,48 | 0,3249749 | 0,510163 |
| GPM6B         | 0,11 | 0,10 | 0,21 | 0,20 | 0,3249896 | 0,510163 |
| ZNF114        | 0,55 | 2,00 | 0,80 | 1,65 | 0,3250497 | 0,510222 |
| ENDOV         | 4,99 | 5,05 | 4,39 | 4,95 | 0,3250746 | 0,510225 |
| SLC25A14      | 3,44 | 5,49 | 1,56 | 0,94 | 0,3251037 | 0,510234 |
| CREBL2        | 3,65 | 3,11 | 3,32 | 1,72 | 0,3251453 | 0,510264 |
| ACBD6         | 4,30 | 2,57 | 4,82 | 4,82 | 0,3251683 | 0,510264 |
| RP11-20I23.6  | 1,69 | 2,94 | 2,93 | 4,02 | 0,3253829 | 0,510542 |
| RP11-333I13.1 | 0,10 | 0,35 | 0,12 | 0,46 | 0,3253918 | 0,510542 |
| CTD-2234N14.1 | 0,00 | 0,00 | 0,00 | 0,00 | 0,3254231 | NA       |
| MARCH8        | 3,41 | 2,53 | 2,81 | 2,75 | 0,3254526 | 0,510602 |
| CYP4A22       | 0,00 | 0,01 | 0,00 | 0,00 | 0,3255158 | 0,510665 |
| RP11-171I9.1  | 0,88 | 0,00 | 0,00 | 0,00 | 0,325597  | NA       |
| CSNK1G3       | 3,26 | 3,29 | 3,23 | 3,95 | 0,3256053 | 0,510769 |
| UQCRFS1       | 6,28 | 5,93 | 5,84 | 5,52 | 0,3257764 | 0,510938 |
| TMEM185A      | 2,96 | 3,37 | 2,24 | 3,06 | 0,3257987 | 0,510938 |
| UPF2          | 3,54 | 3,26 | 3,29 | 3,70 | 0,325812  | 0,510938 |
| RP11-218M11.7 | 1,42 | 2,27 | 1,75 | 2,72 | 0,3258599 | 0,510938 |
| RP11-173A16.1 | 0,00 | 0,00 | 0,00 | 0,00 | 0,325869  | 0,510938 |
| LYRM1         | 3,64 | 1,64 | 2,32 | 3,38 | 0,3258718 | 0,510938 |
| RGS14         | 4,82 | 4,71 | 4,89 | 4,02 | 0,3258817 | 0,510938 |
| RP13-20L14.10 | 0,00 | 0,24 | 0,00 | 0,00 | 0,325898  | 0,510938 |
| TAF9B         | 3,29 | 1,61 | 2,51 | 3,49 | 0,3259557 | 0,510938 |
| RAB1B         | 4,56 | 5,05 | 4,35 | 3,86 | 0,3259699 | 0,510938 |
| AMER3         | 0,02 | 0,04 | 0,00 | 0,08 | 0,3259886 | 0,510938 |
| RP11-391A7.1  | 0,17 | 0,25 | 0,12 | 0,34 | 0,3259888 | 0,510938 |
| CTD-2017C7.1  | 1,12 | 0,84 | 0,86 | 0,86 | 0,3262217 | 0,511267 |
| CTD-2021H9.3  | 0,00 | 0,95 | 0,00 | 0,00 | 0,3262664 | NA       |
| ARL11         | 2,24 | 2,27 | 1,01 | 1,65 | 0,3262993 | 0,511134 |
| DCC           | 0,00 | 1,26 | 0,00 | 0,21 | 0,3263145 | 0,511134 |
| ZNF212        | 2,43 | 0,86 | 1,47 | 0,72 | 0,3263673 | 0,511387 |
| NID1          | 0,02 | 0,23 | 0,42 | 0,67 | 0,3263948 | 0,511394 |
| RP11-363E7.4  | 0,00 | 0,00 | 0,00 | 0,06 | 0,3263969 | NA       |
| ISYNA1        | 0,08 | 0,29 | 0,69 | 0,00 | 0,3264641 | 0,511448 |
| RN7SL230P     | 0,36 | 2,72 | 0,00 | 0,78 | 0,3264755 | 0,511448 |
| RUFY2         | 3,39 | 2,29 | 3,71 | 2,12 | 0,3265036 | 0,511456 |
| SLC30A10      | 0,03 | 0,04 | 0,03 | 0,14 | 0,3265975 | 0,511565 |
| FAM229A       | 0,24 | 0,64 | 1,79 | 0,62 | 0,3266483 | 0,511565 |
| CHAF1A        | 1,85 | 1,19 | 1,89 | 2,16 | 0,3266619 | 0,511565 |
| RP11-133F8.2  | 0,95 | 1,62 | 1,24 | 0,70 | 0,3266953 | 0,511565 |

|               |      |      |      |      |           |          |
|---------------|------|------|------|------|-----------|----------|
| RP11-532F6.3  | 0,00 | 0,00 | 0,00 | 0,00 | 0,3267017 | 0,511565 |
| ACOT1         | 0,21 | 0,00 | 0,00 | 0,00 | 0,3267112 | 0,511565 |
| NRIP1         | 4,47 | 1,96 | 5,12 | 3,88 | 0,3267893 | 0,511651 |
| PHLDA3        | 0,00 | 0,28 | 0,07 | 0,21 | 0,3268504 | 0,511691 |
| GPN2          | 3,17 | 1,21 | 1,85 | 0,83 | 0,3268605 | 0,511691 |
| RP11-734I18.1 | 0,00 | 0,00 | 0,00 | 0,26 | 0,3269716 | 0,511799 |
| RP11-380P13.2 | 0,45 | 0,46 | 0,19 | 0,00 | 0,3269756 | 0,511799 |
| RALGAPB       | 3,04 | 3,73 | 2,73 | 2,03 | 0,3271014 | 0,511932 |
| DNAJC17       | 4,45 | 2,97 | 4,97 | 4,26 | 0,3271064 | 0,511932 |
| HECTD4        | 3,78 | 3,81 | 3,86 | 3,41 | 0,3271326 | 0,511937 |
| PDF           | 0,00 | 0,00 | 0,22 | 0,00 | 0,3272113 | 0,512024 |
| ZW10          | 1,54 | 0,09 | 0,57 | 1,95 | 0,3272544 | 0,512034 |
| RP11-586D19.1 | 0,15 | 0,16 | 0,23 | 0,28 | 0,3272637 | 0,512034 |
| LDHAL6A       | 0,15 | 0,31 | 0,50 | 0,99 | 0,3273338 | 0,512107 |
| AP000235.2    | 0,00 | 0,00 | 0,00 | 0,00 | 0,3273667 | NA       |
| RP11-404O13.4 | 0,00 | 0,00 | 0,00 | 0,47 | 0,327434  | 0,512228 |
| BCL6B         | 0,00 | 0,00 | 0,00 | 0,00 | 0,3274796 | NA       |
| LIMS4         | 0,00 | 0,00 | 0,00 | 0,00 | 0,3275008 | NA       |
| RP11-82O19.2  | 0,00 | 0,00 | 0,00 | 0,00 | 0,3275428 | 0,512292 |
| CCDC191       | 1,59 | 0,33 | 1,31 | 3,02 | 0,3275552 | 0,512292 |
| AP5B1         | 0,23 | 0,48 | 0,38 | 1,11 | 0,3275823 | 0,512292 |
| RP11-580I16.2 | 0,00 | 0,00 | 0,00 | 0,00 | 0,3275835 | 0,512292 |
| HABP4         | 0,05 | 0,03 | 0,33 | 0,04 | 0,3275905 | 0,512292 |
| ZNF682        | 0,22 | 0,14 | 0,35 | 0,28 | 0,3276788 | 0,512394 |
| HNRNPD        | 6,59 | 6,63 | 6,28 | 6,14 | 0,3277597 | 0,512485 |
| BICC1         | 0,14 | 0,29 | 0,17 | 0,27 | 0,3278301 | 0,512559 |
| NOMO1         | 2,99 | 1,87 | 3,20 | 2,22 | 0,3278806 | 0,512602 |
| RP11-274B21.4 | 0,00 | 0,00 | 0,00 | 0,00 | 0,3279215 | 0,51263  |
| RP11-574F21.2 | 0,00 | 0,00 | 0,00 | 0,00 | 0,3279604 | 0,512654 |
| FOXK2         | 4,57 | 3,73 | 4,90 | 3,91 | 0,328017  | 0,5127   |
| PDCD10        | 5,94 | 3,67 | 5,07 | 5,38 | 0,3280559 | 0,5127   |
| WDR55         | 3,46 | 2,18 | 3,07 | 1,92 | 0,3280587 | 0,5127   |
| RP11-575L7.4  | 2,08 | 3,73 | 1,87 | 1,34 | 0,328138  | 0,512788 |
| CTD-2258A20.5 | 0,00 | 0,00 | 0,00 | 0,00 | 0,3281702 | NA       |
| RP11-196G11.4 | 0,00 | 1,13 | 0,00 | 2,17 | 0,3282109 | 0,512866 |
| AC002115.7    | 0,55 | 1,12 | 0,63 | 0,28 | 0,3282491 | 0,512889 |
| LLNLF-158E9.1 | 0,76 | 2,23 | 0,79 | 0,45 | 0,3286338 | 0,51342  |
| RP13-15M17.1  | 0,00 | 0,36 | 0,15 | 1,95 | 0,3286347 | 0,51342  |
| ANKRD46       | 2,46 | 3,60 | 0,90 | 0,05 | 0,3286747 | 0,513446 |
| AF196972.3    | 2,04 | 0,00 | 0,00 | 0,00 | 0,3287731 | 0,513564 |
| CD164L2       | 0,00 | 0,00 | 0,00 | 0,11 | 0,3288172 | 0,513593 |
| HTR3B         | 0,55 | 0,80 | 0,47 | 0,49 | 0,3288382 | 0,513593 |
| UBE3C         | 3,47 | 4,12 | 3,77 | 2,90 | 0,3288668 | 0,5136   |
| RP11-165J3.6  | 0,00 | 0,00 | 0,00 | 0,07 | 0,3288975 | 0,5136   |
| RPLP1P6       | 0,00 | 0,00 | 0,00 | 0,00 | 0,3289117 | 0,5136   |
| PRKXP1        | 0,00 | 0,15 | 0,00 | 0,00 | 0,3289559 | 0,513632 |
| E2F3          | 1,85 | 1,99 | 3,07 | 1,84 | 0,3289988 | 0,513656 |
| RP3-468B3.3   | 0,53 | 1,11 | 0,94 | 1,30 | 0,3290174 | 0,513656 |
| HP            | 0,15 | 1,88 | 0,24 | 0,80 | 0,3290518 | 0,513674 |
| AC007276.5    | 0,08 | 0,00 | 0,18 | 0,00 | 0,329077  | 0,513677 |
| GGNBP1        | 2,01 | 4,52 | 1,84 | 0,00 | 0,329115  | 0,5137   |
| TEX12         | 0,00 | 0,00 | 0,00 | 0,00 | 0,3291417 | 0,513706 |
| RPUSD1        | 2,37 | 0,31 | 2,32 | 0,48 | 0,3291785 | 0,513727 |
| AC140481.1    | 1,32 | 0,00 | 0,81 | 0,75 | 0,329234  | 0,513778 |
| RP11-440G9.1  | 0,47 | 0,00 | 0,00 | 0,74 | 0,3293398 | 0,513907 |

|               |      |      |      |      |           |          |
|---------------|------|------|------|------|-----------|----------|
| AC073869.1    | 0,00 | 0,05 | 0,00 | 0,00 | 0,3294207 | NA       |
| SCIMP         | 6,08 | 4,44 | 5,50 | 5,55 | 0,3294822 | 0,514091 |
| SSH3          | 1,42 | 3,15 | 2,16 | 3,45 | 0,329504  | 0,514091 |
| RN7SL414P     | 0,00 | 0,00 | 0,00 | 0,82 | 0,3295108 | NA       |
| RP11-252E2.2  | 0,00 | 0,00 | 0,00 | 0,00 | 0,329522  | NA       |
| MSRB3         | 0,35 | 0,46 | 0,99 | 0,49 | 0,329552  | 0,514111 |
| SLFN13        | 1,82 | 1,03 | 1,55 | 1,40 | 0,3295627 | 0,514111 |
| CTD-2184D3.5  | 0,00 | 0,00 | 0,00 | 0,00 | 0,3297469 | NA       |
| RP11-803F22.1 | 0,00 | 0,00 | 0,00 | 0,00 | 0,3297562 | NA       |
| SPTB          | 0,38 | 0,11 | 0,38 | 0,98 | 0,3298342 | 0,514498 |
| RP11-550A5.2  | 2,13 | 0,96 | 1,91 | 0,77 | 0,3300458 | 0,514788 |
| RP11-651P23.5 | 0,80 | 0,78 | 0,92 | 2,82 | 0,3300668 | 0,514788 |
| ALOX15        | 0,17 | 0,38 | 0,00 | 0,06 | 0,3301382 | 0,514864 |
| STAC2         | 0,31 | 0,07 | 0,24 | 0,44 | 0,3301676 | 0,514873 |
| RP11-656D10.6 | 0,00 | 0,00 | 0,00 | 0,92 | 0,3302037 | 0,514877 |
| KAT6A         | 2,94 | 3,99 | 2,50 | 2,67 | 0,3302265 | 0,514877 |
| SMPD2         | 3,50 | 1,89 | 2,46 | 1,43 | 0,3302393 | 0,514877 |
| MIR570        | 0,00 | 0,00 | 0,00 | 0,00 | 0,3302723 | 0,514892 |
| RP11-496D24.1 | 0,00 | 0,83 | 0,00 | 0,79 | 0,3303998 | NA       |
| PCSK7         | 3,78 | 4,32 | 3,77 | 3,15 | 0,3304333 | 0,515026 |
| ARGFX         | 0,00 | 0,03 | 0,00 | 0,15 | 0,3304339 | NA       |
| TMEM184B      | 2,09 | 1,35 | 1,83 | 1,75 | 0,3304355 | 0,515026 |
| RP11-504P24.2 | 0,76 | 0,99 | 1,54 | 1,23 | 0,3304413 | 0,515026 |
| C16orf86      | 0,04 | 0,12 | 0,22 | 1,25 | 0,330451  | 0,515026 |
| ING2          | 2,35 | 2,30 | 1,54 | 3,24 | 0,3305707 | 0,515167 |
| DSG3          | 0,05 | 0,21 | 0,04 | 0,00 | 0,3305959 | 0,515167 |
| VPS37A        | 4,49 | 0,35 | 3,55 | 2,63 | 0,3306241 | 0,515167 |
| FKBP11        | 3,42 | 3,66 | 3,17 | 2,07 | 0,330634  | 0,515167 |
| FARP2         | 4,55 | 4,03 | 3,90 | 1,37 | 0,3306761 | 0,515196 |
| C17orf63      | 2,39 | 0,87 | 1,67 | 2,65 | 0,3307219 | 0,515232 |
| TMEM65        | 2,03 | 0,37 | 1,58 | 1,16 | 0,3307545 | 0,515246 |
| RP11-387A1.6  | 0,06 | 0,00 | 0,08 | 0,06 | 0,3308158 | 0,515306 |
| MAFG          | 1,99 | 3,03 | 2,21 | 2,70 | 0,3308795 | 0,515369 |
| RP11-977B10.2 | 1,41 | 0,21 | 0,60 | 0,18 | 0,3309557 | 0,515451 |
| AC091969.1    | 0,00 | 0,00 | 0,00 | 0,00 | 0,3309678 | NA       |
| PAM16         | 4,62 | 5,95 | 4,71 | 4,82 | 0,3310138 | 0,515493 |
| RP11-386J22.3 | 2,20 | 1,22 | 2,41 | 1,80 | 0,3310402 | 0,515493 |
| AC064852.4    | 0,00 | 0,00 | 0,00 | 0,00 | 0,3310521 | 0,515493 |
| RP11-398E10.1 | 0,36 | 0,88 | 0,52 | 0,41 | 0,3313071 | 0,515854 |
| CTC-426B10.1  | 0,65 | 1,25 | 0,37 | 0,02 | 0,331357  | 0,515896 |
| AC027612.3    | 1,53 | 0,00 | 0,90 | 1,50 | 0,3315594 | 0,516175 |
| UGT2A1        | 0,00 | 0,09 | 0,00 | 0,00 | 0,3316047 | NA       |
| RP11-54B9.2   | 0,00 | 0,12 | 0,00 | 0,10 | 0,3316407 | NA       |
| RP1-20N2.8    | 1,88 | 0,23 | 0,62 | 0,60 | 0,3316674 | 0,516307 |
| RP11-446J8.1  | 0,38 | 0,87 | 0,00 | 0,00 | 0,3318538 | 0,516561 |
| AC002117.1    | 1,09 | 0,00 | 0,86 | 0,00 | 0,3318876 | 0,516577 |
| PRR12         | 0,00 | 0,00 | 0,25 | 0,10 | 0,3319642 | 0,516666 |
| ELFN2         | 0,00 | 0,03 | 0,00 | 0,00 | 0,3321294 | NA       |
| DENND4B       | 5,52 | 6,11 | 5,34 | 5,18 | 0,3321698 | 0,516936 |
| RP11-455F5.6  | 0,16 | 0,35 | 0,28 | 0,34 | 0,3321878 | 0,516936 |
| MPI           | 3,67 | 2,11 | 3,50 | 2,29 | 0,332249  | 0,516995 |
| SLC17A9       | 2,88 | 2,79 | 3,34 | 3,13 | 0,3323156 | 0,517062 |
| GBP6          | 1,57 | 1,27 | 1,85 | 1,29 | 0,3323533 | 0,517065 |
| POLE          | 2,31 | 1,88 | 2,65 | 3,84 | 0,332364  | 0,517065 |
| RNF212B       | 0,00 | 0,00 | 0,00 | 0,15 | 0,3323748 | NA       |

|               |      |      |      |      |           |          |
|---------------|------|------|------|------|-----------|----------|
| RP11-453E17.1 | 0,99 | 1,25 | 1,01 | 0,95 | 0,3324043 | 0,517091 |
| LEPROTL1      | 6,04 | 5,86 | 6,57 | 5,66 | 0,3324462 | 0,51712  |
| AC010761.13   | 1,00 | 5,45 | 0,36 | 1,89 | 0,3324968 | 0,517163 |
| FBXO28        | 3,68 | 1,81 | 2,12 | 2,16 | 0,3325404 | 0,517194 |
| RN7SL731P     | 2,52 | 4,31 | 1,15 | 2,77 | 0,3327092 | 0,517421 |
| TBC1D30       | 0,05 | 0,05 | 0,35 | 0,86 | 0,3327428 | 0,517437 |
| C15orf57      | 5,54 | 3,95 | 4,40 | 3,56 | 0,332849  | 0,517566 |
| N4BP2L2-IT2   | 0,62 | 0,03 | 0,05 | 0,05 | 0,3328857 | 0,517587 |
| RP1-97J1.2    | 0,00 | 1,46 | 0,00 | 0,00 | 0,3329913 | 0,517715 |
| NUDT21        | 5,20 | 5,40 | 4,70 | 4,51 | 0,3330554 | 0,517778 |
| OR9A2         | 0,00 | 0,15 | 0,00 | 0,00 | 0,3330821 | NA       |
| RP11-96D1.3   | 0,00 | 0,00 | 0,27 | 0,00 | 0,3331855 | NA       |
| TMEM191B      | 0,67 | 0,10 | 0,11 | 1,45 | 0,3332286 | 0,518011 |
| RP11-510M2.2  | 0,00 | 0,00 | 0,00 | 0,00 | 0,3333866 | 0,518163 |
| PML           | 3,44 | 2,91 | 3,94 | 3,21 | 0,33339   | 0,518163 |
| KIAA0922      | 4,31 | 3,28 | 4,08 | 3,87 | 0,3333966 | 0,518163 |
| KIAA1715      | 2,08 | 1,27 | 2,57 | 1,85 | 0,3334252 | 0,518163 |
| WDR54         | 5,70 | 2,70 | 4,50 | 3,84 | 0,3334426 | 0,518163 |
| CTC-480C2.1   | 0,07 | 0,23 | 0,00 | 0,00 | 0,3334715 | NA       |
| TPD52L2       | 4,64 | 4,71 | 5,40 | 4,95 | 0,3335188 | 0,518245 |
| DHPS          | 5,87 | 5,68 | 5,59 | 5,42 | 0,3335421 | 0,518245 |
| CTD-2195M18.1 | 0,03 | 0,05 | 0,05 | 0,00 | 0,3336806 | 0,518424 |
| EDDM13        | 1,09 | 0,00 | 1,12 | 0,00 | 0,3337717 | 0,518514 |
| RP4-739H11.4  | 0,07 | 0,00 | 0,19 | 0,08 | 0,3337851 | 0,518514 |
| IL1R1         | 2,24 | 2,60 | 1,00 | 2,18 | 0,3338478 | 0,518557 |
| AC004057.1    | 7,49 | 7,21 | 7,61 | 7,84 | 0,3338599 | 0,518557 |
| RPL10P15      | 0,00 | 1,64 | 0,95 | 0,68 | 0,3339676 | NA       |
| C5orf55       | 0,00 | 0,10 | 0,09 | 0,38 | 0,3340157 | 0,518721 |
| RNU7-133P     | 0,00 | 0,00 | 3,84 | 0,00 | 0,3340174 | 0,518721 |
| RP11-2C24.7   | 0,00 | 2,43 | 0,00 | 0,00 | 0,3340356 | 0,518721 |
| NR4A2         | 6,41 | 6,44 | 6,73 | 5,86 | 0,3340641 | 0,518729 |
| TMEM86B       | 1,94 | 0,00 | 2,20 | 2,20 | 0,3341505 | 0,518827 |
| NRG2          | 0,00 | 0,07 | 0,00 | 0,00 | 0,3341951 | 0,51886  |
| WFDC3         | 0,00 | 0,00 | 0,07 | 0,57 | 0,334245  | 0,518902 |
| RP3-430N8.11  | 0,00 | 1,89 | 0,00 | 0,00 | 0,3342621 | NA       |
| MLLT1         | 1,58 | 0,33 | 1,99 | 2,93 | 0,3342745 | 0,518911 |
| RP11-719K4.4  | 0,00 | 1,00 | 0,00 | 0,00 | 0,3343114 | NA       |
| ZBED3-AS1     | 2,31 | 2,73 | 2,31 | 1,90 | 0,3344389 | 0,51913  |
| SNX4          | 4,29 | 5,04 | 3,67 | 3,01 | 0,3344698 | 0,519142 |
| NUDCD1        | 3,01 | 2,89 | 2,00 | 1,64 | 0,3346821 | 0,519435 |
| RP11-159D12.8 | 0,89 | 1,84 | 0,71 | 1,06 | 0,3347073 | 0,519438 |
| CCDC157       | 0,60 | 1,87 | 1,00 | 0,46 | 0,3347663 | 0,519493 |
| RP11-546B15.1 | 1,36 | 0,00 | 0,00 | 0,00 | 0,3347941 | 0,5195   |
| RP11-124A7.2  | 0,00 | 0,83 | 0,00 | 1,32 | 0,3348134 | NA       |
| MIPEP         | 1,99 | 3,96 | 0,49 | 0,48 | 0,3348932 | 0,519618 |
| SLC35A4       | 4,68 | 2,98 | 4,40 | 3,87 | 0,3350408 | 0,5198   |
| POLA2         | 2,29 | 2,33 | 3,94 | 2,59 | 0,3350576 | 0,5198   |
| HLA-E         | 8,12 | 8,25 | 8,07 | 8,22 | 0,335146  | 0,519861 |
| TMEM191A      | 2,78 | 0,93 | 3,30 | 3,96 | 0,3351597 | 0,519861 |
| PCMTD2        | 4,84 | 3,37 | 3,78 | 3,94 | 0,335167  | 0,519861 |
| TST           | 5,00 | 3,28 | 4,57 | 5,31 | 0,3352067 | 0,519886 |
| CCL16         | 0,13 | 0,57 | 0,37 | 1,09 | 0,335237  | 0,519897 |
| FAM98A        | 1,38 | 0,15 | 1,70 | 2,22 | 0,3353218 | 0,519975 |
| SNAI1         | 1,22 | 0,24 | 1,74 | 0,00 | 0,3353339 | 0,519975 |
| ARHGAP33      | 0,00 | 0,09 | 0,00 | 0,00 | 0,3353791 | 0,520008 |

|               |      |      |      |      |           |          |
|---------------|------|------|------|------|-----------|----------|
| GPD2          | 2,65 | 2,15 | 2,66 | 2,10 | 0,335423  | 0,52004  |
| MIER3         | 2,42 | 2,17 | 1,23 | 0,52 | 0,3354913 | 0,52011  |
| LINC01374     | 0,00 | 0,00 | 0,00 | 0,00 | 0,3355622 | 0,520183 |
| SLC25A17      | 3,28 | 0,87 | 2,03 | 1,74 | 0,335599  | 0,520204 |
| RP11-500M8.7  | 4,29 | 3,77 | 1,98 | 0,91 | 0,3356308 | 0,520217 |
| AF228730.14   | 0,45 | 0,78 | 0,80 | 0,41 | 0,3356693 | 0,520222 |
| FAN1          | 1,44 | 0,00 | 0,55 | 0,05 | 0,3356805 | 0,520222 |
| RP5-928E24.4  | 0,00 | 0,00 | 0,00 | 0,08 | 0,3357581 | NA       |
| CTD-2384A14.1 | 0,00 | 0,00 | 0,00 | 0,28 | 0,3357984 | NA       |
| CEBPA-AS1     | 0,00 | 0,07 | 0,00 | 0,00 | 0,3358265 | 0,520391 |
| RP11-717F1.2  | 0,17 | 0,06 | 0,23 | 0,12 | 0,3358365 | 0,520391 |
| CTD-2653M23.1 | 0,00 | 0,00 | 0,00 | 0,00 | 0,3358848 | 0,520429 |
| KCNIP4-IT1    | 0,29 | 0,24 | 0,35 | 0,25 | 0,335953  | 0,520467 |
| RAB3A         | 0,54 | 0,00 | 1,38 | 0,26 | 0,3359664 | 0,520467 |
| RP11-447D11.2 | 0,27 | 1,16 | 0,56 | 0,58 | 0,3359792 | 0,520467 |
| RP11-259N19.1 | 0,83 | 1,97 | 0,37 | 0,42 | 0,3361192 | 0,520617 |
| GTSE1         | 1,31 | 1,76 | 1,19 | 0,93 | 0,3361229 | 0,520617 |
| AC131097.3    | 0,42 | 0,00 | 0,37 | 0,61 | 0,3361617 | 0,520641 |
| FTCD          | 0,00 | 0,00 | 0,00 | 0,00 | 0,3361677 | NA       |
| NEXN-AS1      | 0,05 | 0,19 | 0,08 | 0,17 | 0,3362074 | 0,520675 |
| CTC-513N18.6  | 0,00 | 0,21 | 0,23 | 0,40 | 0,3362601 | 0,52072  |
| RN7SL387P     | 0,78 | 0,92 | 1,01 | 2,01 | 0,3363994 | 0,5209   |
| RP11-181F12.1 | 0,00 | 0,13 | 0,00 | 0,00 | 0,3364507 | NA       |
| BCORP1        | 0,06 | 0,04 | 0,07 | 0,14 | 0,3365122 | 0,521038 |
| CPSF6         | 4,68 | 4,62 | 4,69 | 3,67 | 0,3366356 | 0,521164 |
| TFDP1         | 3,41 | 2,89 | 3,43 | 2,86 | 0,3366495 | 0,521164 |
| ZNF267        | 4,08 | 4,28 | 4,49 | 4,30 | 0,3366638 | 0,521164 |
| RP11-495P10.1 | 0,85 | 0,52 | 0,70 | 1,24 | 0,3367139 | 0,521205 |
| SMYD4         | 2,55 | 1,50 | 1,48 | 2,46 | 0,3367515 | 0,521214 |
| LA16c-OS12.2  | 0,00 | 0,00 | 0,17 | 1,42 | 0,3367661 | 0,521214 |
| SLC7A2        | 0,00 | 0,00 | 0,02 | 0,00 | 0,3368099 | NA       |
| RP11-428O18.6 | 1,94 | 2,10 | 2,26 | 2,41 | 0,3368137 | 0,521251 |
| MVB12B        | 1,33 | 0,22 | 2,51 | 0,17 | 0,3368551 | 0,521256 |
| HSD3B7        | 0,20 | 0,59 | 0,31 | 1,62 | 0,3368818 | 0,521256 |
| SLC4A10       | 0,00 | 3,59 | 0,00 | 0,00 | 0,3368995 | 0,521256 |
| RP11-837J7.4  | 0,48 | 0,00 | 0,00 | 2,24 | 0,336911  | 0,521256 |
| SFTPB         | 0,47 | 0,39 | 0,81 | 0,82 | 0,3369685 | 0,52127  |
| ZNF284        | 1,24 | 0,76 | 0,46 | 0,20 | 0,3369738 | 0,52127  |
| RN7SL38P      | 0,00 | 0,00 | 0,00 | 1,22 | 0,3369902 | NA       |
| CENPE         | 0,69 | 0,08 | 0,37 | 0,24 | 0,3369914 | 0,52127  |
| TASP1         | 3,66 | 2,14 | 3,24 | 0,84 | 0,3370268 | 0,52127  |
| MTMR2         | 2,02 | 0,69 | 1,14 | 0,19 | 0,3370373 | 0,52127  |
| RBM23         | 5,41 | 4,20 | 5,34 | 6,04 | 0,337061  | 0,521271 |
| MROH8         | 0,65 | 0,59 | 0,50 | 0,15 | 0,3371333 | 0,521346 |
| CTD-2339M3.1  | 0,00 | 0,00 | 0,00 | 0,00 | 0,337169  | 0,521365 |
| CTDSPL2       | 3,29 | 0,96 | 3,04 | 3,68 | 0,3372849 | 0,521481 |
| THAP1         | 2,72 | 0,74 | 2,73 | 0,53 | 0,3372911 | 0,521481 |
| USP35         | 0,00 | 0,00 | 0,00 | 0,91 | 0,3373265 | 0,521495 |
| SNORA7A       | 0,00 | 2,30 | 0,00 | 0,00 | 0,3373355 | NA       |
| PALD1         | 0,02 | 1,43 | 0,37 | 0,00 | 0,3373618 | 0,521495 |
| RP11-165M6.1  | 0,28 | 1,51 | 0,12 | 0,07 | 0,3373701 | 0,521495 |
| GNB1L         | 0,56 | 4,31 | 0,95 | 0,49 | 0,3375097 | 0,521674 |
| RN7SL822P     | 0,00 | 0,00 | 0,00 | 0,00 | 0,3376212 | NA       |
| AL121653.4    | 0,51 | 0,12 | 0,35 | 0,57 | 0,3376695 | 0,521855 |
| MYCNOS        | 0,63 | 1,16 | 0,67 | 1,71 | 0,337691  | 0,521855 |

|               |      |      |      |      |           |          |
|---------------|------|------|------|------|-----------|----------|
| SLC37A4       | 0,04 | 0,05 | 0,15 | 0,07 | 0,337697  | 0,521855 |
| CABLES1       | 0,00 | 0,35 | 0,00 | 0,00 | 0,3377574 | 0,521912 |
| E2F1          | 0,00 | 0,00 | 0,00 | 0,00 | 0,3377972 | 0,521934 |
| AC073052.1    | 0,21 | 0,00 | 0,11 | 0,00 | 0,3378353 | 0,521934 |
| RP11-82L7.4   | 0,00 | 0,00 | 0,00 | 1,51 | 0,3378636 | 0,521934 |
| AC006132.1    | 0,00 | 0,21 | 0,00 | 0,00 | 0,337866  | 0,521934 |
| FDXR          | 0,00 | 0,00 | 0,08 | 0,32 | 0,3379197 | 0,521981 |
| RNU6-1057P    | 0,00 | 0,00 | 0,00 | 0,00 | 0,3379228 | NA       |
| RP13-735L24.1 | 0,00 | 0,00 | 0,02 | 0,00 | 0,3379357 | NA       |
| RP11-540K16.1 | 0,00 | 2,86 | 0,00 | 2,78 | 0,3379658 | 0,522016 |
| CSPG4P10      | 0,00 | 0,00 | 0,00 | 0,00 | 0,3380086 | NA       |
| LARP1B        | 1,50 | 1,39 | 1,96 | 0,70 | 0,3380223 | 0,522067 |
| RP11-182I10.2 | 0,00 | 0,00 | 0,00 | 0,00 | 0,3381286 | 0,522195 |
| RNU1-46P      | 2,13 | 0,00 | 1,84 | 0,00 | 0,3381868 | 0,522249 |
| CTD-2218G20.1 | 0,00 | 1,50 | 0,00 | 0,00 | 0,3382907 | NA       |
| C8orf58       | 0,44 | 0,78 | 0,20 | 0,47 | 0,3383061 | 0,522383 |
| UTP15         | 2,78 | 0,98 | 1,13 | 1,40 | 0,3383208 | 0,522383 |
| RNF216P1      | 3,39 | 2,83 | 2,75 | 3,67 | 0,3384235 | 0,522505 |
| RP4-753D10.5  | 0,52 | 0,00 | 0,32 | 1,05 | 0,338471  | 0,522542 |
| RP1-158P9.2   | 0,10 | 0,54 | 0,10 | 0,27 | 0,3386314 | 0,522724 |
| KAT2A         | 3,76 | 3,70 | 4,06 | 3,61 | 0,3386356 | 0,522724 |
| CTC-277H1.6   | 0,23 | 0,76 | 0,33 | 0,69 | 0,3386608 | 0,522726 |
| UBN2          | 2,79 | 2,28 | 2,11 | 2,81 | 0,3387126 | 0,52277  |
| bP-21201H5.1  | 0,34 | 1,50 | 0,34 | 0,52 | 0,3387702 | 0,522823 |
| LRRC8C        | 3,65 | 4,36 | 3,01 | 3,89 | 0,3388325 | 0,522882 |
| PPP1R15A      | 6,12 | 6,17 | 6,43 | 6,02 | 0,3389993 | 0,523059 |
| AC093590.1    | 0,00 | 0,39 | 0,00 | 1,20 | 0,3390116 | 0,523059 |
| SYTL3         | 2,67 | 3,74 | 2,94 | 2,94 | 0,3390178 | 0,523059 |
| ZNF670        | 0,08 | 0,07 | 0,09 | 0,18 | 0,3390795 | 0,523118 |
| RP13-49I15.5  | 0,95 | 0,61 | 0,62 | 1,63 | 0,3391405 | 0,523176 |
| AC016735.1    | 0,00 | 2,90 | 0,00 | 0,00 | 0,3393326 | 0,523416 |
| NHSL2         | 2,04 | 2,89 | 1,67 | 2,23 | 0,3393636 | 0,523416 |
| RP11-297N6.4  | 0,73 | 0,90 | 0,91 | 1,25 | 0,3393669 | 0,523416 |
| RP11-697H9.3  | 1,06 | 1,29 | 1,43 | 0,52 | 0,3394128 | 0,523451 |
| RP11-33A14.1  | 0,21 | 0,00 | 0,03 | 0,12 | 0,3394458 | 0,523465 |
| MRPS34        | 6,14 | 5,61 | 6,08 | 6,12 | 0,3395407 | 0,523575 |
| RAP2A         | 3,42 | 1,16 | 3,01 | 2,56 | 0,3395909 | 0,523616 |
| FAM78B        | 0,03 | 0,00 | 0,00 | 0,05 | 0,339635  | NA       |
| PA2G4P4       | 0,00 | 0,00 | 0,24 | 0,00 | 0,3396695 | 0,52369  |
| RP5-1112D6.3  | 0,00 | 0,00 | 0,00 | 0,00 | 0,3397006 | 0,52369  |
| AC012513.6    | 0,72 | 0,57 | 0,90 | 0,79 | 0,3397093 | 0,52369  |
| PRPS1         | 3,40 | 2,71 | 2,62 | 3,87 | 0,3398276 | 0,523816 |
| CTD-2196E14.3 | 0,00 | 0,00 | 0,00 | 0,65 | 0,3398379 | 0,523816 |
| ALS2CR11      | 0,00 | 0,00 | 0,00 | 0,70 | 0,3399459 | 0,523925 |
| TMEM41B       | 3,07 | 0,94 | 2,75 | 2,23 | 0,3399561 | 0,523925 |
| RN7SL382P     | 0,00 | 0,00 | 2,42 | 2,89 | 0,340001  | 0,523958 |
| AC136289.1    | 0,53 | 0,66 | 0,70 | 1,11 | 0,3400381 | 0,523979 |
| AC005264.2    | 0,32 | 0,43 | 0,74 | 0,84 | 0,3401886 | 0,524174 |
| AC010127.5    | 1,14 | 0,00 | 0,00 | 0,06 | 0,3402332 | 0,524207 |
| PDXP          | 3,07 | 2,38 | 3,72 | 2,26 | 0,3403472 | 0,524346 |
| MAP4K3        | 4,29 | 3,47 | 3,30 | 3,62 | 0,3403942 | 0,524382 |
| CTA-286B10.8  | 0,00 | 0,00 | 0,18 | 0,00 | 0,3404735 | NA       |
| IZUMO2        | 0,54 | 0,98 | 0,32 | 0,50 | 0,3404907 | 0,524494 |
| IL18RAP       | 1,87 | 0,59 | 0,04 | 0,17 | 0,3405167 | 0,524498 |
| PCSK6-AS1     | 0,31 | 0,73 | 0,00 | 0,00 | 0,3405718 | NA       |



|                |      |      |      |      |           |          |
|----------------|------|------|------|------|-----------|----------|
| RP11-73B2.7    | 0,00 | 0,00 | 0,00 | 0,04 | 0,3406723 | 0,524701 |
| ZSCAN21        | 1,02 | 0,31 | 0,88 | 0,71 | 0,3407585 | 0,524798 |
| SF3B5          | 7,99 | 8,11 | 7,93 | 8,06 | 0,3408964 | 0,524974 |
| RP11-459O16.7  | 0,00 | 0,86 | 0,00 | 0,00 | 0,3410159 | NA       |
| TPST2          | 3,48 | 4,54 | 3,97 | 3,18 | 0,3410686 | 0,525203 |
| RP11-1060G2.2  | 0,04 | 0,19 | 0,32 | 0,09 | 0,3411814 | 0,52534  |
| ACO12314.20    | 0,00 | 0,00 | 0,49 | 0,00 | 0,3412412 | 0,52538  |
| SERPINB9       | 3,52 | 2,14 | 3,09 | 2,55 | 0,3412892 | 0,52538  |
| RP11-98D18.9   | 0,76 | 0,32 | 0,80 | 0,77 | 0,3412893 | 0,52538  |
| RP11-666I19.2  | 0,00 | 0,00 | 0,00 | 0,70 | 0,3413274 | NA       |
| CCBL1          | 1,62 | 0,35 | 1,06 | 0,75 | 0,34133   | 0,52538  |
| RP11-486M23.1  | 0,00 | 0,00 | 0,00 | 0,00 | 0,3413453 | 0,52538  |
| CTD-2006C1.13  | 0,56 | 0,73 | 0,74 | 1,76 | 0,3413492 | 0,52538  |
| RP11-168P8.2   | 0,00 | 0,00 | 0,00 | 0,00 | 0,3414098 | 0,525437 |
| MAPT           | 0,10 | 0,33 | 0,10 | 0,03 | 0,3417063 | 0,525826 |
| RP11-304M2.2   | 0,00 | 0,28 | 0,10 | 0,12 | 0,3417101 | 0,525826 |
| ACO10127.3     | 2,71 | 3,93 | 2,05 | 0,77 | 0,341769  | 0,525869 |
| FUT6           | 0,04 | 0,25 | 0,06 | 0,06 | 0,3418154 | 0,525869 |
| FBXO8          | 2,88 | 0,28 | 1,25 | 1,77 | 0,3418421 | 0,525869 |
| MFAP1          | 1,82 | 0,06 | 1,52 | 2,25 | 0,3418542 | 0,525869 |
| ACO68522.4     | 0,00 | 0,00 | 0,68 | 0,00 | 0,3418845 | 0,525869 |
| RP11-445N18.2  | 0,30 | 0,60 | 0,34 | 0,61 | 0,3419032 | 0,525869 |
| CYCSP40        | 0,00 | 0,00 | 0,00 | 0,00 | 0,3419051 | 0,525869 |
| RP11-576N17.5  | 0,00 | 0,00 | 0,00 | 0,00 | 0,3419156 | NA       |
| TFE3           | 2,50 | 2,38 | 2,27 | 3,33 | 0,3419423 | 0,525869 |
| CTC-479C5.10   | 0,08 | 0,07 | 0,02 | 1,14 | 0,3419508 | 0,525869 |
| RP11-180I4.2   | 0,00 | 0,00 | 0,00 | 0,00 | 0,3419846 | 0,525884 |
| YY2            | 0,08 | 0,00 | 0,08 | 0,06 | 0,3421555 | 0,526009 |
| OR6B1          | 0,13 | 0,22 | 0,13 | 0,41 | 0,3421628 | 0,526009 |
| NPIPA3         | 0,00 | 0,00 | 0,00 | 0,31 | 0,3421665 | 0,526009 |
| RP11-479O16.1  | 0,83 | 0,90 | 1,52 | 0,77 | 0,3421726 | 0,526009 |
| RP11-488I18.10 | 4,75 | 4,05 | 4,09 | 4,12 | 0,3422046 | 0,526009 |
| RP11-507B12.2  | 0,29 | 0,63 | 0,40 | 0,28 | 0,3422383 | 0,526009 |
| ZNF233         | 1,07 | 1,73 | 1,08 | 1,24 | 0,3422486 | 0,526009 |
| COG2           | 3,70 | 3,03 | 3,21 | 2,47 | 0,3422551 | 0,526009 |
| MTX3           | 1,06 | 0,28 | 0,55 | 0,21 | 0,342363  | 0,526139 |
| APOB           | 0,00 | 0,00 | 0,00 | 0,00 | 0,3424343 | NA       |
| ACO06296.3     | 0,72 | 0,25 | 1,50 | 2,20 | 0,3424684 | 0,526264 |
| RP11-291I15.2  | 0,00 | 0,00 | 0,00 | 0,00 | 0,3424799 | NA       |
| FAM72B         | 1,07 | 0,00 | 1,03 | 0,52 | 0,3425423 | 0,526279 |
| CTNBL1         | 5,81 | 2,70 | 5,70 | 5,28 | 0,3425741 | 0,526279 |
| TXNRD1         | 4,94 | 4,88 | 5,01 | 3,04 | 0,3425818 | 0,526279 |
| ARHGAP18       | 3,50 | 0,84 | 2,89 | 2,80 | 0,3425823 | 0,526279 |
| ZCCHC3         | 1,88 | 1,11 | 2,20 | 0,49 | 0,3425964 | 0,526279 |
| ACO92301.3     | 0,00 | 0,00 | 0,00 | 0,67 | 0,3426526 | NA       |
| RP11-416A17.6  | 1,17 | 1,27 | 3,78 | 2,60 | 0,342655  | 0,526322 |
| PAQR8          | 2,24 | 0,96 | 1,85 | 2,47 | 0,3426715 | 0,526322 |
| RP11-489P20.1  | 0,00 | 0,00 | 0,37 | 0,00 | 0,3426865 | NA       |
| INTS4          | 4,36 | 3,03 | 3,81 | 3,53 | 0,3427798 | 0,526429 |
| ACO12309.5     | 0,19 | 0,00 | 0,00 | 0,18 | 0,3427889 | 0,526429 |
| ACO12123.1     | 0,00 | 0,00 | 0,00 | 0,00 | 0,3428528 | NA       |
| SLC28A3        | 0,00 | 0,00 | 0,00 | 0,02 | 0,3428695 | NA       |
| RNPEPL1        | 4,30 | 4,12 | 5,08 | 3,94 | 0,3428961 | 0,526533 |
| RP1-256G22.1   | 0,00 | 0,00 | 0,00 | 0,15 | 0,342897  | NA       |
| GRM4           | 0,03 | 0,00 | 0,06 | 0,10 | 0,342904  | 0,526533 |

|                 |      |      |      |      |           |          |
|-----------------|------|------|------|------|-----------|----------|
| UBAP1           | 3,66 | 1,11 | 3,47 | 1,40 | 0,3429281 | 0,526534 |
| RP11-35J10.7    | 1,80 | 0,51 | 0,55 | 0,49 | 0,3429835 | 0,526571 |
| RP3-322G13.7    | 0,00 | 0,40 | 0,00 | 0,00 | 0,3429998 | 0,526571 |
| PDZD2           | 0,11 | 0,21 | 0,34 | 0,05 | 0,343042  | 0,526599 |
| MED14           | 3,88 | 3,90 | 4,16 | 1,99 | 0,3431111 | 0,526669 |
| GPC5-AS1        | 0,00 | 0,00 | 0,00 | 0,00 | 0,343156  | NA       |
| XXyac-YX155B6.5 | 1,44 | 1,12 | 1,43 | 1,17 | 0,3432647 | 0,526751 |
| CTU2            | 1,94 | 0,00 | 2,52 | 0,72 | 0,3432662 | 0,526751 |
| OR8D1           | 0,14 | 0,28 | 0,03 | 0,16 | 0,3432805 | 0,526751 |
| RP11-385E5.5    | 0,91 | 0,96 | 0,43 | 0,73 | 0,3432881 | 0,526751 |
| RP11-382J24.2   | 0,00 | 2,01 | 0,00 | 0,89 | 0,3432896 | 0,526751 |
| MRPL47          | 5,07 | 4,00 | 4,94 | 3,11 | 0,3433105 | 0,526751 |
| ZNF467          | 3,49 | 4,61 | 4,32 | 4,49 | 0,3433303 | 0,526751 |
| RP11-326C3.14   | 1,60 | 0,00 | 1,80 | 3,85 | 0,3434152 | 0,526845 |
| PRKACB          | 4,19 | 4,61 | 3,55 | 3,00 | 0,3435414 | 0,52697  |
| PTPRO           | 3,63 | 0,22 | 2,71 | 0,88 | 0,3435703 | 0,52697  |
| GPR135          | 0,57 | 0,08 | 0,19 | 0,23 | 0,3435982 | 0,52697  |
| CCND3           | 7,18 | 6,35 | 6,60 | 6,78 | 0,3436113 | 0,52697  |
| AC093415.2      | 3,13 | 2,12 | 3,41 | 2,71 | 0,3436155 | 0,52697  |
| ARID1B          | 4,72 | 5,32 | 4,76 | 3,78 | 0,3436677 | 0,527014 |
| SIGLEC18P       | 0,00 | 0,00 | 0,00 | 0,00 | 0,3437376 | 0,527085 |
| RP11-279N8.3    | 0,59 | 0,48 | 0,85 | 0,36 | 0,3437694 | 0,527097 |
| RP11-744N12.2   | 1,77 | 0,42 | 0,80 | 0,54 | 0,3439105 | 0,527277 |
| WNK4            | 0,14 | 0,18 | 0,14 | 0,27 | 0,3439515 | 0,527304 |
| RP1-102E24.10   | 0,00 | 0,59 | 0,28 | 2,66 | 0,3439974 | 0,527338 |
| RPL15P20        | 0,32 | 0,00 | 0,28 | 0,00 | 0,3440168 | NA       |
| RB1CC1          | 4,05 | 3,23 | 3,59 | 3,19 | 0,3440846 | 0,527435 |
| RP11-946P6.6    | 0,00 | 0,35 | 0,00 | 0,00 | 0,344112  | NA       |
| TMEM263         | 1,50 | 3,24 | 1,31 | 1,69 | 0,3441213 | 0,527455 |
| AC004549.6      | 0,00 | 0,00 | 0,00 | 0,00 | 0,3442529 | 0,52762  |
| SEC16A          | 4,02 | 4,37 | 3,67 | 2,58 | 0,3442949 | 0,527648 |
| RP11-1041F24.1  | 0,94 | 0,00 | 1,02 | 0,00 | 0,3443395 | 0,52768  |
| RP11-711C17.2   | 0,00 | 0,38 | 0,00 | 1,96 | 0,3444184 | 0,527765 |
| ACOT11          | 0,98 | 1,55 | 1,27 | 1,65 | 0,3444578 | 0,527789 |
| CYP27B1         | 0,00 | 0,00 | 0,00 | 0,00 | 0,3446873 | 0,528104 |
| NELL2           | 0,00 | 4,25 | 0,00 | 0,14 | 0,3447417 | 0,528151 |
| RP11-15B17.4    | 0,00 | 0,00 | 0,00 | 0,00 | 0,3447848 | NA       |
| ANKS6           | 1,15 | 0,14 | 1,88 | 1,62 | 0,344788  | 0,528185 |
| RP11-773D16.1   | 5,26 | 4,14 | 5,13 | 5,09 | 0,3448888 | 0,5283   |
| RP11-27J8.3     | 0,05 | 0,21 | 0,50 | 0,17 | 0,3449102 | 0,5283   |
| RP11-416N2.4    | 0,32 | 0,71 | 0,40 | 0,24 | 0,344943  | 0,528303 |
| RAB10           | 5,60 | 6,53 | 5,35 | 5,45 | 0,3449598 | 0,528303 |
| EEF1B4          | 1,18 | 1,81 | 1,33 | 0,94 | 0,3450307 | 0,528371 |
| CTA-113A6.2     | 0,00 | 0,63 | 3,06 | 1,60 | 0,3450521 | 0,528371 |
| ELK1            | 0,89 | 0,28 | 1,27 | 1,63 | 0,3451283 | 0,528452 |
| ZNF862          | 1,92 | 0,33 | 1,12 | 1,53 | 0,3452167 | 0,528519 |
| RP11-805J14.3   | 0,31 | 0,00 | 0,10 | 0,00 | 0,3452197 | 0,528519 |
| AC007880.1      | 0,00 | 0,00 | 0,00 | 0,00 | 0,3452522 | 0,528532 |
| CREB3L2         | 3,44 | 4,25 | 3,17 | 2,89 | 0,345336  | 0,528624 |
| RP11-288L9.1    | 0,00 | 0,00 | 0,00 | 0,00 | 0,3453657 | 0,528633 |
| CTC-344H19.4    | 0,99 | 1,61 | 1,65 | 0,57 | 0,3453915 | 0,528636 |
| RP11-894P9.1    | 1,13 | 1,50 | 1,50 | 1,03 | 0,3454845 | 0,528742 |
| RP5-1042K10.10  | 0,63 | 2,40 | 1,58 | 2,57 | 0,3455531 | 0,528811 |
| MAP10           | 0,06 | 0,07 | 0,05 | 0,00 | 0,3456133 | 0,528833 |
| RP11-557L19.1   | 2,10 | 0,94 | 0,28 | 0,61 | 0,3456151 | 0,528833 |

|                |      |      |      |      |           |          |
|----------------|------|------|------|------|-----------|----------|
| SNORD38A       | 0,00 | 0,00 | 2,35 | 2,46 | 0,3456885 | NA       |
| OR4F4          | 0,00 | 0,29 | 0,00 | 0,00 | 0,3458344 | NA       |
| ILKAP          | 5,33 | 4,60 | 5,16 | 5,61 | 0,3460465 | 0,529456 |
| PRR14L         | 3,73 | 3,56 | 3,49 | 3,13 | 0,3460832 | 0,529476 |
| OR6M2P         | 0,05 | 0,00 | 0,00 | 1,08 | 0,3461163 | 0,52949  |
| C20orf100      | 0,00 | 0,00 | 0,00 | 0,00 | 0,3461465 | 0,5295   |
| ZCCHC24        | 1,15 | 1,07 | 1,40 | 0,35 | 0,3462043 | 0,529539 |
| HNRNPUL2       | 2,19 | 0,81 | 1,74 | 1,24 | 0,3462195 | 0,529539 |
| NDUFS8         | 7,90 | 7,91 | 7,80 | 7,56 | 0,3463068 | 0,529603 |
| RP11-977G19.10 | 0,00 | 0,00 | 0,00 | 0,00 | 0,3463229 | 0,529603 |
| GAPT           | 6,52 | 5,25 | 6,15 | 5,55 | 0,3463333 | 0,529603 |
| AC012442.5     | 0,00 | 0,00 | 0,00 | 0,00 | 0,3464753 | NA       |
| RP11-316O14.1  | 0,00 | 0,00 | 0,00 | 0,00 | 0,3465044 | NA       |
| RPE            | 4,71 | 1,17 | 3,60 | 5,01 | 0,3465309 | 0,529808 |
| RAI1           | 0,82 | 0,32 | 0,57 | 1,58 | 0,3465336 | 0,529808 |
| RP11-193H5.1   | 0,00 | 0,00 | 0,00 | 0,00 | 0,3465394 | 0,529808 |
| LPAR1          | 0,00 | 0,00 | 0,08 | 0,00 | 0,3465626 | 0,529808 |
| BVES           | 0,28 | 0,21 | 0,23 | 0,30 | 0,3466155 | 0,529853 |
| TEK            | 0,00 | 0,00 | 0,00 | 0,00 | 0,3466401 | 0,529854 |
| GGA3           | 3,34 | 3,00 | 3,58 | 3,09 | 0,3467095 | 0,529915 |
| RP4-547N15.3   | 0,24 | 0,22 | 0,20 | 0,32 | 0,3467278 | 0,529915 |
| SLC2A6         | 2,42 | 3,51 | 3,93 | 2,89 | 0,3467689 | 0,529941 |
| AC090602.1     | 0,00 | 0,38 | 0,00 | 0,00 | 0,3468402 | NA       |
| RP11-501M7.2   | 0,00 | 0,00 | 0,00 | 0,00 | 0,3468695 | 0,530049 |
| TAGAP          | 5,72 | 4,28 | 5,31 | 4,95 | 0,3469108 | 0,530049 |
| AGPAT5         | 2,96 | 2,12 | 3,14 | 2,42 | 0,3469315 | 0,530049 |
| RP1-313I6.12   | 2,85 | 3,60 | 2,57 | 3,38 | 0,3469488 | 0,530049 |
| ADGRF1         | 0,92 | 1,47 | 1,13 | 1,23 | 0,3469607 | 0,530049 |
| IL19           | 0,09 | 0,00 | 0,09 | 0,10 | 0,346992  | 0,530049 |
| AF230666.2     | 0,34 | 0,43 | 0,04 | 0,23 | 0,3470063 | 0,530049 |
| SLC35A1        | 4,64 | 4,13 | 4,18 | 5,49 | 0,3470619 | 0,530098 |
| ADGB           | 0,47 | 0,04 | 0,24 | 0,52 | 0,3471656 | 0,530199 |
| LARP6          | 0,02 | 0,18 | 0,05 | 0,03 | 0,3471908 | 0,530199 |
| MYH7B          | 0,60 | 0,76 | 0,66 | 0,74 | 0,3472001 | 0,530199 |
| RP11-244F12.2  | 0,52 | 0,49 | 0,63 | 1,24 | 0,3472538 | 0,530211 |
| TMEM35         | 0,14 | 0,07 | 0,12 | 0,06 | 0,3472557 | 0,530211 |
| LGALS9C        | 0,00 | 0,23 | 0,00 | 0,00 | 0,3474204 | NA       |
| KTN1           | 5,51 | 5,65 | 5,39 | 4,85 | 0,3474316 | 0,530444 |
| EPHA4          | 2,43 | 1,92 | 2,46 | 3,41 | 0,3475306 | 0,530523 |
| AC009505.2     | 0,65 | 0,36 | 0,06 | 1,88 | 0,3475312 | 0,530523 |
| ICE1           | 2,56 | 1,59 | 2,70 | 2,46 | 0,3477105 | 0,530744 |
| FAM90A1        | 0,00 | 0,06 | 0,08 | 0,00 | 0,3477572 | 0,530744 |
| BGN            | 0,00 | 0,00 | 0,06 | 0,00 | 0,3477903 | 0,530744 |
| PA2G4          | 6,05 | 5,66 | 5,57 | 4,70 | 0,347795  | 0,530744 |
| ZNF582         | 0,00 | 0,00 | 0,01 | 0,00 | 0,3478209 | 0,530744 |
| PAAF1          | 3,83 | 1,81 | 3,42 | 2,93 | 0,3478809 | 0,530744 |
| TBRG4          | 4,45 | 5,42 | 4,16 | 5,08 | 0,3478847 | 0,530744 |
| RP11-577B7.1   | 3,23 | 3,26 | 3,23 | 3,96 | 0,3478921 | 0,530744 |
| HS2ST1         | 1,08 | 0,67 | 1,53 | 1,03 | 0,3479022 | 0,530744 |
| GLB1L          | 1,67 | 1,26 | 1,91 | 1,78 | 0,3479224 | 0,530744 |
| CLEC19A        | 1,28 | 1,96 | 1,35 | 1,26 | 0,3479389 | 0,530744 |
| RP11-450H6.3   | 0,00 | 0,00 | 0,00 | 0,00 | 0,347984  | 0,530774 |
| NOC4L          | 3,81 | 3,68 | 4,23 | 4,36 | 0,348006  | 0,530774 |
| MTMR9L         | 0,00 | 0,05 | 0,04 | 0,06 | 0,348139  | NA       |
| CRELD2         | 3,74 | 3,06 | 4,11 | 4,25 | 0,3481892 | 0,531017 |

|                |      |      |      |      |           |          |
|----------------|------|------|------|------|-----------|----------|
| SYS1           | 4,36 | 4,49 | 3,09 | 4,34 | 0,3482564 | 0,531083 |
| DGKQ           | 1,03 | 1,28 | 1,86 | 2,81 | 0,3482813 | 0,531084 |
| AC004166.5     | 0,00 | 0,00 | 0,00 | 0,00 | 0,3484135 | 0,531249 |
| DNAJC16        | 3,14 | 1,51 | 1,73 | 1,58 | 0,3484374 | 0,531249 |
| RP11-496N17.2  | 2,52 | 2,70 | 2,59 | 2,95 | 0,3484805 | 0,531279 |
| P2RX5-TAX1BP3  | 1,33 | 0,76 | 1,04 | 0,74 | 0,3485302 | 0,531284 |
| RP11-634B22.4  | 0,48 | 4,04 | 0,20 | 0,23 | 0,3485315 | 0,531284 |
| RP11-783K16.14 | 0,00 | 0,00 | 0,00 | 0,00 | 0,3486867 | 0,531363 |
| ORC1           | 0,00 | 0,10 | 0,08 | 0,37 | 0,3487236 | 0,531363 |
| RP1-224A6.8    | 0,35 | 0,00 | 0,43 | 0,00 | 0,3487471 | 0,531363 |
| STAM           | 3,60 | 0,98 | 2,49 | 2,56 | 0,348749  | 0,531363 |
| RABEPK         | 4,01 | 4,82 | 4,02 | 4,92 | 0,3487492 | 0,531363 |
| TMCO6          | 2,48 | 2,83 | 1,73 | 3,45 | 0,3487494 | 0,531363 |
| RP11-154D6.1   | 0,99 | 0,84 | 0,95 | 0,97 | 0,348751  | 0,531363 |
| PALM           | 0,37 | 0,67 | 0,36 | 0,83 | 0,3488928 | 0,531507 |
| DDX43          | 0,63 | 0,00 | 0,00 | 0,16 | 0,3489029 | 0,531507 |
| RP11-342M3.5   | 0,00 | 0,04 | 0,21 | 0,73 | 0,3489222 | 0,531507 |
| RN7SL582P      | 0,00 | 0,00 | 0,00 | 1,12 | 0,3489605 | 0,531507 |
| USP32          | 5,62 | 5,07 | 5,09 | 3,83 | 0,348972  | 0,531507 |
| DDX10          | 3,87 | 3,47 | 3,86 | 4,44 | 0,3489893 | 0,531507 |
| VENTXP4        | 0,71 | 1,09 | 0,94 | 0,42 | 0,349015  | 0,53151  |
| AF121898.1     | 0,10 | 0,08 | 0,10 | 0,11 | 0,3491179 | 0,531614 |
| PRC1           | 2,74 | 3,63 | 3,60 | 2,53 | 0,3491736 | 0,531614 |
| ADGRL3         | 0,00 | 0,00 | 0,00 | 0,03 | 0,3491845 | 0,531614 |
| RBMXL1         | 2,64 | 1,01 | 1,91 | 2,38 | 0,3491873 | 0,531614 |
| RP11-676J12.4  | 0,51 | 0,91 | 0,37 | 0,98 | 0,3492025 | 0,531614 |
| RHOQ           | 4,87 | 4,18 | 5,03 | 5,45 | 0,3492874 | 0,531706 |
| CTD-2333M24.1  | 0,33 | 0,00 | 0,44 | 0,38 | 0,3493781 | 0,531799 |
| VEZF1          | 4,42 | 3,95 | 4,11 | 3,28 | 0,3493971 | 0,531799 |
| ILF2           | 7,45 | 7,28 | 6,84 | 6,67 | 0,3494585 | 0,531799 |
| GS1-410F4.4    | 0,00 | 0,00 | 0,00 | 0,00 | 0,3494645 | 0,531799 |
| GOLGA8F        | 0,00 | 0,01 | 0,00 | 0,00 | 0,349483  | 0,531799 |
| INPP5D         | 5,87 | 6,32 | 5,91 | 5,17 | 0,349492  | 0,531799 |
| ITGB1BP1       | 6,36 | 6,32 | 6,29 | 5,63 | 0,3495313 | 0,531823 |
| UBE3B          | 3,18 | 1,02 | 2,67 | 2,33 | 0,349648  | 0,531964 |
| RP1-278C19.3   | 3,35 | 3,97 | 3,51 | 3,39 | 0,3496831 | 0,531978 |
| AP000350.5     | 0,00 | 0,00 | 0,03 | 0,00 | 0,3497054 | 0,531978 |
| FRMD4A         | 0,53 | 1,13 | 0,53 | 0,95 | 0,3497388 | 0,531993 |
| MIR320A        | 0,00 | 0,00 | 0,00 | 2,42 | 0,3498236 | NA       |
| AC008984.2     | 0,89 | 0,00 | 0,37 | 0,57 | 0,3498565 | 0,532135 |
| RP5-1056H1.2   | 0,22 | 0,24 | 0,29 | 0,28 | 0,350006  | 0,532326 |
| AP003774.6     | 3,81 | 0,95 | 2,43 | 2,72 | 0,350031  | 0,532328 |
| COG1           | 3,50 | 4,07 | 2,60 | 2,50 | 0,3500614 | 0,532338 |
| LARGE          | 0,30 | 1,06 | 0,19 | 0,37 | 0,3502478 | 0,532585 |
| RP11-823P9.1   | 3,20 | 2,55 | 1,26 | 2,51 | 0,3502774 | 0,532587 |
| RP11-426C22.7  | 0,00 | 0,00 | 0,00 | 0,00 | 0,3502974 | 0,532587 |
| MIR548H3       | 0,00 | 1,77 | 0,00 | 0,00 | 0,3503089 | NA       |
| TCEAL1         | 3,80 | 2,48 | 3,42 | 0,61 | 0,3504965 | 0,532805 |
| RP11-65F13.2   | 0,06 | 0,11 | 0,10 | 0,11 | 0,350504  | 0,532805 |
| P3H1           | 4,37 | 4,04 | 3,87 | 4,95 | 0,3505126 | 0,532805 |
| BZRAP1         | 3,34 | 4,12 | 3,77 | 1,60 | 0,3505597 | 0,53284  |
| RP11-686D22.4  | 0,55 | 2,19 | 0,61 | 3,43 | 0,3506433 | 0,532896 |
| AC090627.1     | 0,14 | 0,53 | 0,00 | 1,05 | 0,3506446 | 0,532896 |
| SLC35C2        | 4,30 | 3,40 | 3,93 | 2,65 | 0,3507001 | 0,532922 |
| KIF1BP         | 1,61 | 1,12 | 1,32 | 1,48 | 0,3507097 | 0,532922 |

|                |      |      |      |      |           |          |
|----------------|------|------|------|------|-----------|----------|
| CTC-351M12.1   | 0,34 | 0,99 | 0,64 | 0,61 | 0,3507629 | 0,532967 |
| PLA2R1         | 0,07 | 0,18 | 0,11 | 0,14 | 0,3508244 | 0,533024 |
| SNTB1          | 0,69 | 0,82 | 1,64 | 2,35 | 0,3508682 | 0,533054 |
| RP1-72A23.3    | 0,79 | 0,00 | 1,07 | 0,00 | 0,3508864 | NA       |
| RP11-1129I3.1  | 0,00 | 0,19 | 0,00 | 0,00 | 0,3509001 | 0,533066 |
| TWSG1          | 1,68 | 1,58 | 2,43 | 1,05 | 0,3509976 | 0,533161 |
| ZFP69          | 0,06 | 0,31 | 0,03 | 0,31 | 0,3510106 | 0,533161 |
| SUGT1          | 5,24 | 3,25 | 5,04 | 4,14 | 0,3511267 | 0,533301 |
| AQP3           | 0,00 | 0,15 | 0,00 | 0,00 | 0,3512006 | 0,533377 |
| RP11-215A21.2  | 0,35 | 0,67 | 0,45 | 0,77 | 0,3512149 | NA       |
| C6orf229       | 0,00 | 0,00 | 0,00 | 0,19 | 0,3512307 | 0,533386 |
| GOT1L1         | 0,00 | 0,00 | 0,00 | 0,00 | 0,351248  | NA       |
| SLC8A1         | 4,49 | 3,35 | 4,64 | 4,38 | 0,3513109 | 0,533445 |
| GEMIN2         | 3,01 | 2,82 | 2,68 | 2,69 | 0,3513178 | 0,533445 |
| RP11-536I6.1   | 0,59 | 1,10 | 0,52 | 1,24 | 0,3513573 | 0,533447 |
| RP11-319E12.2  | 0,17 | 0,00 | 0,18 | 0,25 | 0,3513667 | 0,533447 |
| EIF3J          | 4,31 | 3,85 | 4,26 | 4,30 | 0,3514064 | 0,53347  |
| UPK3BL         | 5,08 | 4,70 | 5,06 | 5,21 | 0,3514522 | 0,533504 |
| RP13-198D9.4   | 0,12 | 0,00 | 0,00 | 0,00 | 0,3514804 | NA       |
| RP11-154C3.2   | 0,05 | 0,08 | 0,01 | 0,08 | 0,3514988 | 0,533538 |
| TBC1D12        | 2,06 | 1,91 | 2,66 | 2,31 | 0,3515494 | 0,533578 |
| GS1-115G20.1   | 0,00 | 0,00 | 0,00 | 0,00 | 0,3515997 | 0,533618 |
| CTD-2162K18.4  | 0,10 | 1,12 | 0,22 | 0,19 | 0,3517089 | 0,533747 |
| RP11-973H7.5   | 0,00 | 2,32 | 0,00 | 0,00 | 0,3517497 | NA       |
| BCL2L11        | 4,00 | 3,47 | 3,85 | 2,82 | 0,3517787 | 0,533814 |
| NSD3           | 4,72 | 4,57 | 4,31 | 3,49 | 0,351801  | 0,533814 |
| RP11-543P15.3  | 0,00 | 0,00 | 0,00 | 0,17 | 0,3518562 | 0,533862 |
| RANBP3         | 4,06 | 3,56 | 4,22 | 4,56 | 0,3519378 | 0,533948 |
| GALNT7         | 4,02 | 2,48 | 3,25 | 3,25 | 0,3519613 | 0,533948 |
| ACP2           | 0,21 | 0,53 | 0,61 | 1,89 | 0,3520132 | 0,53399  |
| SETDB1         | 4,16 | 5,56 | 4,12 | 3,90 | 0,3520536 | 0,534015 |
| RP11-121E16.1  | 0,00 | 0,00 | 0,00 | 0,00 | 0,352086  | NA       |
| C1QB           | 0,39 | 0,00 | 0,78 | 0,00 | 0,3521553 | 0,534092 |
| PHC2           | 3,25 | 3,80 | 4,05 | 3,23 | 0,3521584 | 0,534092 |
| ZBTB20         | 5,10 | 4,27 | 5,26 | 5,58 | 0,3521766 | 0,534092 |
| RP11-331G2.7   | 0,00 | 0,00 | 0,00 | 0,00 | 0,3522448 | NA       |
| NPC1           | 4,30 | 5,99 | 4,46 | 2,37 | 0,3523285 | 0,534286 |
| EVI2A          | 6,61 | 5,56 | 6,15 | 5,86 | 0,3524451 | 0,53441  |
| RP11-834C11.3  | 0,45 | 0,78 | 0,13 | 0,06 | 0,3524581 | 0,53441  |
| RNU7-18P       | 0,00 | 0,00 | 0,00 | 0,00 | 0,3525039 | 0,534443 |
| RP11-185E15.1  | 0,00 | 0,00 | 0,00 | 0,00 | 0,3525382 | 0,534448 |
| RP11-389E17.1  | 0,00 | 0,00 | 0,00 | 0,30 | 0,3525553 | 0,534448 |
| ZNF430         | 3,56 | 3,12 | 3,81 | 3,59 | 0,3527217 | 0,534664 |
| NPTX1          | 0,00 | 0,42 | 0,01 | 0,02 | 0,3527632 | 0,534673 |
| RP11-100L22.1  | 0,00 | 0,00 | 0,00 | 0,00 | 0,3527899 | 0,534673 |
| CTD-2026K11.4  | 0,00 | 0,00 | 0,00 | 0,00 | 0,3528026 | 0,534673 |
| KLHL23         | 0,13 | 0,24 | 0,18 | 0,26 | 0,3528241 | 0,534673 |
| ZNF182         | 1,15 | 1,60 | 0,31 | 0,35 | 0,3529446 | 0,534819 |
| RP11-227G15.11 | 0,00 | 0,39 | 0,00 | 0,34 | 0,3530076 | NA       |
| GNRH1          | 0,00 | 0,00 | 0,45 | 0,78 | 0,3530203 | 0,534897 |
| SLC4A4         | 0,00 | 0,00 | 0,00 | 0,21 | 0,3530956 | 0,534975 |
| RP5-832C2.8    | 0,00 | 0,00 | 0,00 | 0,00 | 0,3531157 | NA       |
| RP11-687M24.3  | 0,03 | 0,12 | 0,05 | 0,04 | 0,3531838 | 0,535072 |
| RAB40C         | 0,05 | 1,39 | 0,62 | 2,90 | 0,3533078 | 0,535224 |
| SAPCD1         | 0,17 | 0,00 | 0,39 | 0,00 | 0,3536078 | 0,535642 |

|                |      |      |      |      |           |          |
|----------------|------|------|------|------|-----------|----------|
| IGHD           | 0,00 | 1,72 | 0,00 | 0,32 | 0,3536872 | 0,535725 |
| DAPK1          | 3,95 | 2,92 | 3,20 | 2,02 | 0,3537387 | 0,535767 |
| CTC-499B15.8   | 0,00 | 0,00 | 0,00 | 0,89 | 0,3537628 | NA       |
| RP3-470L22.1   | 0,00 | 0,00 | 0,00 | 0,00 | 0,3537732 | 0,535783 |
| RPS6KA1        | 5,61 | 5,00 | 5,26 | 4,53 | 0,3538644 | 0,535884 |
| SHPRH          | 3,42 | 1,64 | 2,87 | 3,94 | 0,3539301 | 0,535934 |
| TMEM199        | 3,83 | 3,02 | 3,00 | 3,54 | 0,3539456 | 0,535934 |
| SLC5A6         | 2,21 | 0,69 | 2,53 | 2,08 | 0,3540766 | 0,536076 |
| SLFN11         | 3,59 | 2,92 | 2,86 | 4,07 | 0,354102  | 0,536076 |
| GMPS           | 4,74 | 3,24 | 4,11 | 1,91 | 0,3541119 | 0,536076 |
| IGLV3-25       | 0,00 | 1,96 | 0,00 | 0,00 | 0,3541284 | NA       |
| RP11-465N4.4   | 0,00 | 0,00 | 0,00 | 0,00 | 0,3541383 | 0,53608  |
| RP11-1102P22.3 | 0,08 | 0,81 | 0,31 | 0,51 | 0,3542348 | 0,536189 |
| RP1-27O5.3     | 0,00 | 0,04 | 0,08 | 0,10 | 0,3543181 | 0,536252 |
| LTB4R2         | 0,00 | 0,00 | 0,03 | 0,00 | 0,3543242 | 0,536252 |
| AC009495.2     | 0,34 | 0,45 | 0,26 | 0,66 | 0,3544208 | 0,536361 |
| ZNF208         | 0,71 | 1,18 | 0,73 | 0,87 | 0,3544514 | 0,536371 |
| RP11-354E11.2  | 0,60 | 0,57 | 0,68 | 0,67 | 0,3545801 | 0,536502 |
| SCAMP2         | 6,08 | 4,97 | 5,82 | 4,95 | 0,354586  | 0,536502 |
| RP5-1125A11.4  | 1,22 | 2,92 | 0,33 | 1,66 | 0,354643  | 0,536551 |
| CREB3          | 4,54 | 5,54 | 3,48 | 3,20 | 0,3547577 | 0,536688 |
| OR10AC1P       | 0,03 | 0,18 | 0,00 | 0,12 | 0,3548232 | 0,536747 |
| RP11-704M14.1  | 0,00 | 0,00 | 0,00 | 0,00 | 0,3548577 | NA       |
| MOB3C          | 0,55 | 2,89 | 0,44 | 0,37 | 0,3548804 | 0,536747 |
| AC005532.5     | 1,09 | 0,00 | 1,22 | 1,55 | 0,3549024 | 0,536747 |
| GLI2           | 0,00 | 0,09 | 0,00 | 0,00 | 0,3549061 | 0,536747 |
| RP3-488M23.3   | 0,00 | 0,00 | 0,00 | 0,92 | 0,3549171 | 0,536747 |
| RP11-1149O23.3 | 1,03 | 0,59 | 0,34 | 0,28 | 0,3549787 | 0,536804 |
| PPP1R3B        | 0,58 | 0,38 | 0,37 | 0,68 | 0,3550157 | 0,536817 |
| MRPL28         | 5,88 | 5,78 | 5,74 | 6,01 | 0,3550359 | 0,536817 |
| GRHL3          | 0,00 | 0,76 | 0,00 | 0,00 | 0,3551158 | NA       |
| RP11-2N1.1     | 0,32 | 0,98 | 0,43 | 0,00 | 0,3551724 | 0,536927 |
| ARF1           | 7,78 | 7,84 | 7,70 | 7,23 | 0,3551957 | 0,536927 |
| AC007064.24    | 0,34 | 0,00 | 0,46 | 1,11 | 0,355197  | 0,536927 |
| CBFB           | 4,52 | 3,61 | 3,85 | 3,17 | 0,3552052 | 0,536927 |
| NR2E3          | 0,07 | 0,00 | 0,00 | 0,00 | 0,3552535 | 0,536963 |
| AC093627.10    | 0,50 | 0,74 | 1,60 | 0,36 | 0,3554099 | 0,537163 |
| ATF4P3         | 0,00 | 0,00 | 0,22 | 0,26 | 0,3554756 | 0,537226 |
| FAM76B         | 3,78 | 1,77 | 3,29 | 3,68 | 0,3555353 | 0,53728  |
| DKK2           | 0,00 | 0,00 | 0,00 | 0,00 | 0,3556178 | 0,537335 |
| RP11-138I1.3   | 1,24 | 1,39 | 2,23 | 1,66 | 0,3556201 | 0,537335 |
| RP11-10N23.5   | 0,00 | 0,40 | 0,00 | 0,00 | 0,3556982 | NA       |
| RP11-802O23.4  | 0,00 | 3,61 | 0,00 | 0,83 | 0,3557027 | 0,537417 |
| RP11-343C2.11  | 0,00 | 0,00 | 0,00 | 0,00 | 0,355743  | 0,537417 |
| CTB-89H12.4    | 3,74 | 3,24 | 3,58 | 2,79 | 0,355747  | 0,537417 |
| RP11-775G23.1  | 0,00 | 0,00 | 0,00 | 0,00 | 0,3557929 | NA       |
| RP5-905H16.2   | 3,46 | 1,25 | 3,86 | 2,79 | 0,3558194 | 0,537462 |
| PHTF1          | 4,51 | 3,70 | 4,67 | 2,85 | 0,3558255 | 0,537462 |
| APLP1          | 0,25 | 0,32 | 0,34 | 0,11 | 0,3558923 | 0,537497 |
| RP11-513I15.6  | 4,59 | 2,30 | 3,73 | 3,17 | 0,3558966 | 0,537497 |
| CAMLG          | 4,83 | 4,88 | 4,67 | 3,98 | 0,3559619 | 0,537559 |
| RP11-39E3.6    | 0,26 | 0,54 | 0,37 | 0,44 | 0,3560865 | 0,537664 |
| CTD-3014M21.1  | 5,59 | 5,46 | 5,18 | 6,30 | 0,3560942 | 0,537664 |
| RP11-511H23.2  | 0,00 | 0,00 | 0,00 | 0,00 | 0,3561038 | 0,537664 |
| CALD1          | 2,28 | 3,73 | 1,51 | 3,10 | 0,3561423 | 0,537685 |

|               |      |      |      |      |           |          |
|---------------|------|------|------|------|-----------|----------|
| RP11-363G2.5  | 1,31 | 0,13 | 0,49 | 0,84 | 0,3561686 | 0,537688 |
| RNY4P34       | 0,00 | 0,00 | 0,00 | 0,00 | 0,3562036 | NA       |
| ZNF385C       | 0,73 | 1,61 | 1,24 | 0,49 | 0,3562595 | 0,537789 |
| MDH2          | 6,82 | 6,75 | 6,93 | 6,29 | 0,3563516 | 0,537892 |
| C1D           | 5,26 | 4,60 | 4,66 | 4,13 | 0,3564202 | 0,537898 |
| BPTF          | 5,56 | 4,56 | 4,86 | 5,35 | 0,3564369 | 0,537898 |
| RP11-114G11.4 | 0,39 | 0,52 | 0,38 | 0,73 | 0,3564537 | 0,537898 |
| CTD-3032J10.2 | 0,00 | 2,59 | 0,63 | 0,00 | 0,356501  | 0,537898 |
| RP11-98D18.17 | 0,00 | 1,94 | 0,00 | 0,00 | 0,3565056 | 0,537898 |
| HAT1          | 4,73 | 3,29 | 3,82 | 2,89 | 0,3565303 | 0,537898 |
| FAM102B       | 3,78 | 2,53 | 3,17 | 2,63 | 0,356536  | 0,537898 |
| CRYGS         | 0,00 | 4,88 | 0,09 | 0,92 | 0,3565884 | 0,537898 |
| ALDH4A1       | 0,17 | 0,07 | 0,41 | 0,96 | 0,3565905 | 0,537898 |
| RP13-228J13.1 | 0,11 | 0,00 | 0,00 | 0,00 | 0,3565978 | 0,537898 |
| AP1G2         | 6,34 | 6,68 | 6,12 | 6,23 | 0,3566418 | 0,537928 |
| PUS1          | 2,78 | 0,65 | 2,76 | 2,24 | 0,3567283 | 0,538022 |
| CTD-2331D11.4 | 0,00 | 0,00 | 0,00 | 0,20 | 0,3567836 | NA       |
| AC040160.13   | 0,00 | 2,34 | 0,06 | 0,00 | 0,356787  | 0,538074 |
| RP5-1086K13.3 | 0,00 | 0,13 | 0,56 | 0,24 | 0,3568154 | 0,53808  |
| MIAT          | 0,10 | 0,42 | 0,03 | 0,05 | 0,3568726 | 0,538103 |
| RP1-99E18.2   | 0,28 | 0,00 | 0,00 | 0,00 | 0,3568792 | 0,538103 |
| SUSD1         | 4,39 | 4,86 | 4,27 | 2,53 | 0,3569673 | 0,538199 |
| SNORD15B      | 0,00 | 0,00 | 0,00 | 0,00 | 0,3571181 | 0,53839  |
| FAM134C       | 2,71 | 2,70 | 2,30 | 1,34 | 0,3571812 | 0,538449 |
| RP11-433M22.1 | 0,00 | 0,00 | 0,00 | 0,00 | 0,357197  | NA       |
| NFKBIE        | 3,77 | 4,73 | 4,77 | 4,92 | 0,3572651 | 0,538509 |
| RP11-346I3.4  | 0,01 | 0,23 | 0,02 | 0,03 | 0,3572783 | 0,538509 |
| PRKAR2B       | 2,30 | 2,04 | 2,97 | 3,37 | 0,3572935 | 0,538509 |
| RP3-424M6.4   | 0,37 | 1,76 | 0,64 | 0,78 | 0,3574365 | 0,538688 |
| RP11-856M7.4  | 0,00 | 0,00 | 0,00 | 0,00 | 0,3575649 | NA       |
| AC087069.1    | 0,00 | 0,00 | 0,00 | 0,00 | 0,3576348 | 0,538826 |
| HIBCH         | 4,75 | 4,16 | 3,90 | 4,52 | 0,3576535 | 0,538826 |
| AC093106.7    | 0,44 | 0,53 | 0,71 | 0,00 | 0,3576909 | 0,538826 |
| USP31         | 0,78 | 0,59 | 0,41 | 0,17 | 0,3577035 | 0,538826 |
| PADI2         | 3,07 | 3,16 | 2,47 | 2,09 | 0,3577042 | 0,538826 |
| RN7SL836P     | 0,00 | 0,00 | 0,00 | 1,32 | 0,3577061 | NA       |
| RP11-769O8.1  | 0,53 | 1,14 | 0,41 | 0,45 | 0,357712  | 0,538826 |
| SIVA1         | 6,80 | 7,57 | 6,95 | 7,13 | 0,3577298 | 0,538826 |
| RP11-438N5.3  | 0,00 | 0,00 | 0,00 | 0,00 | 0,3577306 | 0,538826 |
| CPA6          | 0,00 | 0,31 | 0,00 | 0,00 | 0,3577596 | 0,538826 |
| TNNT2         | 0,53 | 0,52 | 0,55 | 1,13 | 0,3577884 | 0,538826 |
| SDHAF4        | 1,10 | 0,80 | 0,96 | 1,36 | 0,3578019 | 0,538826 |
| CHORDC1       | 4,07 | 4,09 | 3,68 | 3,09 | 0,3578191 | 0,538826 |
| CASP9         | 3,99 | 3,01 | 3,28 | 2,07 | 0,3579408 | 0,538972 |
| CTD-2147F2.2  | 0,00 | 0,00 | 0,00 | 0,00 | 0,3579483 | NA       |
| FCRLB         | 0,00 | 0,00 | 0,00 | 0,00 | 0,3579699 | 0,53898  |
| STX17         | 4,71 | 3,15 | 3,67 | 4,95 | 0,3581935 | 0,539227 |
| FBLN7         | 0,05 | 0,09 | 0,06 | 0,06 | 0,3582008 | 0,539227 |
| RP11-382A20.4 | 0,76 | 0,68 | 0,91 | 1,90 | 0,3582068 | 0,539227 |
| B3GNT4        | 0,03 | 0,00 | 0,04 | 0,04 | 0,3582347 | 0,539232 |
| TPPP          | 0,00 | 0,12 | 0,00 | 0,00 | 0,3582753 | NA       |
| CTD-2514K5.4  | 4,79 | 3,86 | 4,81 | 5,38 | 0,3583004 | 0,539295 |
| EPB41L4A      | 0,31 | 1,61 | 0,37 | 0,28 | 0,3583246 | 0,539295 |
| ARID5B        | 2,72 | 4,10 | 2,65 | 3,78 | 0,3583994 | 0,539371 |
| MMGT1         | 3,57 | 1,52 | 3,43 | 1,46 | 0,3586036 | 0,539586 |

|               |      |      |      |      |           |          |
|---------------|------|------|------|------|-----------|----------|
| PAQR3         | 3,06 | 0,95 | 1,85 | 1,55 | 0,35861   | 0,539586 |
| AC068491.1    | 5,28 | 3,76 | 5,06 | 4,78 | 0,358615  | 0,539586 |
| ZNF615        | 2,85 | 0,46 | 2,46 | 1,96 | 0,3586597 | 0,539616 |
| THEG          | 0,00 | 0,00 | 0,00 | 0,00 | 0,3587039 | NA       |
| SFXN5         | 3,34 | 3,17 | 2,95 | 2,60 | 0,3587098 | 0,539633 |
| C12orf72      | 0,98 | 0,31 | 1,59 | 1,88 | 0,3587191 | 0,539633 |
| FAM65C        | 0,23 | 0,15 | 0,35 | 0,07 | 0,3588215 | 0,53975  |
| PIM3          | 3,76 | 3,32 | 4,17 | 2,64 | 0,3589588 | 0,53991  |
| CDC73         | 4,14 | 3,52 | 4,59 | 4,01 | 0,3589762 | 0,53991  |
| U47924.27     | 0,00 | 0,73 | 0,30 | 0,00 | 0,3590218 | NA       |
| RP11-806011.1 | 0,23 | 0,26 | 0,21 | 0,00 | 0,3590966 | 0,540032 |
| CD180         | 3,34 | 1,36 | 2,66 | 3,55 | 0,359106  | 0,540032 |
| RN7SL552P     | 0,00 | 0,00 | 0,00 | 0,00 | 0,3591959 | 0,540131 |
| PCDHA9        | 0,07 | 0,09 | 0,07 | 0,05 | 0,3593127 | 0,54027  |
| RP11-326C3.13 | 0,00 | 0,00 | 0,00 | 0,00 | 0,3593526 | NA       |
| RP11-399D6.2  | 1,37 | 1,29 | 1,56 | 1,02 | 0,3593704 | 0,54032  |
| MLLT4-AS1     | 0,00 | 0,07 | 0,00 | 0,00 | 0,359485  | NA       |
| RPS4XP22      | 0,53 | 0,88 | 0,40 | 0,21 | 0,3595339 | 0,540423 |
| CTD-2525I3.3  | 0,00 | 0,00 | 0,42 | 0,00 | 0,359534  | 0,540423 |
| IL3RA         | 3,46 | 1,92 | 3,61 | 3,38 | 0,359564  | 0,540423 |
| IARS          | 4,50 | 3,37 | 4,28 | 3,08 | 0,3595895 | 0,540423 |
| CIPC          | 1,98 | 0,90 | 1,39 | 0,42 | 0,3595943 | 0,540423 |
| SPATA31A7     | 1,30 | 0,87 | 1,51 | 1,33 | 0,3596251 | 0,540423 |
| RP11-19O2.2   | 0,00 | 0,10 | 0,00 | 0,00 | 0,3596388 | 0,540423 |
| AC005616.1    | 0,00 | 0,00 | 0,00 | 0,00 | 0,3596418 | 0,540423 |
| SCFD1         | 6,38 | 5,81 | 6,45 | 6,49 | 0,3596601 | 0,540423 |
| PARP8         | 4,92 | 5,71 | 4,40 | 5,24 | 0,3596962 | 0,540423 |
| MIR3140       | 1,93 | 0,00 | 0,00 | 0,00 | 0,3597062 | 0,540423 |
| RP11-29H23.4  | 0,00 | 0,00 | 0,00 | 0,00 | 0,3597624 | 0,54047  |
| RMDN1         | 6,24 | 5,90 | 5,21 | 3,91 | 0,3598031 | 0,540495 |
| MYSM1         | 3,54 | 2,88 | 3,26 | 2,28 | 0,3598423 | 0,540517 |
| NINJ2         | 4,92 | 3,21 | 4,00 | 5,09 | 0,3599553 | 0,540651 |
| MXD4          | 2,38 | 1,64 | 2,86 | 2,39 | 0,3600464 | 0,540751 |
| CCDC106       | 0,00 | 0,00 | 0,00 | 0,00 | 0,3602096 | 0,54092  |
| LINC01176     | 4,15 | 0,25 | 1,88 | 2,97 | 0,3602312 | 0,54092  |
| CXCL8         | 6,82 | 7,10 | 6,83 | 6,12 | 0,3602322 | 0,54092  |
| DAD1          | 7,75 | 7,69 | 7,48 | 7,37 | 0,3603424 | 0,541049 |
| RP11-161M6.4  | 0,55 | 0,25 | 0,56 | 0,46 | 0,360371  | 0,541056 |
| SLC2A10       | 0,02 | 0,04 | 0,01 | 0,05 | 0,360403  | 0,541067 |
| RP11-274H2.2  | 2,06 | 0,00 | 1,83 | 0,76 | 0,3605141 | 0,541197 |
| DNAJC5        | 3,18 | 3,77 | 3,33 | 2,18 | 0,3605859 | 0,541269 |
| SET           | 7,23 | 6,13 | 7,14 | 6,76 | 0,360635  | 0,541306 |
| RP11-689P11.3 | 0,26 | 0,51 | 0,53 | 0,93 | 0,3607149 | 0,541376 |
| AIMP1         | 5,11 | 4,52 | 4,69 | 3,81 | 0,3607656 | 0,541376 |
| ZMYND19       | 0,19 | 0,00 | 1,25 | 2,30 | 0,3607665 | 0,541376 |
| RP11-159D12.2 | 1,34 | 0,71 | 1,03 | 0,34 | 0,3607796 | 0,541376 |
| SOD2          | 6,27 | 6,06 | 6,01 | 6,37 | 0,3608502 | 0,541446 |
| MEGF6         | 0,00 | 0,00 | 0,00 | 0,03 | 0,3608917 | NA       |
| LIX1L         | 3,10 | 2,70 | 2,80 | 2,17 | 0,3609394 | 0,541543 |
| RP11-561B11.2 | 0,00 | 0,00 | 0,00 | 0,00 | 0,3609635 | 0,541543 |
| RP13-968A2.1  | 1,79 | 1,40 | 1,71 | 2,02 | 0,3610148 | 0,541583 |
| RP11-156P1.3  | 2,12 | 1,57 | 1,17 | 1,61 | 0,3610481 | 0,541597 |
| RP11-314P15.2 | 0,00 | 0,00 | 0,00 | 0,00 | 0,3611148 | NA       |
| RP11-357N13.2 | 0,00 | 0,00 | 0,00 | 0,00 | 0,3611174 | 0,541664 |
| GMIP          | 3,03 | 4,16 | 3,43 | 4,00 | 0,3611435 | 0,541667 |



|               |      |      |      |      |           |          |
|---------------|------|------|------|------|-----------|----------|
| UBE2T         | 0,00 | 0,00 | 0,00 | 0,00 | 0,3611723 | 0,541673 |
| RP11-80H5.9   | 1,15 | 0,80 | 1,65 | 1,48 | 0,3612219 | 0,541711 |
| RNF8          | 3,18 | 2,89 | 2,56 | 3,20 | 0,3612482 | 0,541714 |
| EIF5          | 8,76 | 8,08 | 8,46 | 7,72 | 0,3612765 | 0,541718 |
| AMDHD1        | 0,00 | 0,50 | 0,07 | 0,61 | 0,3612994 | 0,541718 |
| RASGRP1       | 1,46 | 2,90 | 1,53 | 0,41 | 0,3613365 | 0,541737 |
| C1QTNF12      | 0,00 | 0,00 | 0,00 | 2,09 | 0,3614119 | 0,541813 |
| RP1-149A16.16 | 0,00 | 0,00 | 0,00 | 0,00 | 0,3614697 | 0,541839 |
| RP11-651P23.4 | 0,00 | 0,00 | 0,00 | 0,00 | 0,3615051 | 0,541839 |
| U2AF2         | 1,14 | 0,72 | 1,12 | 1,18 | 0,3615359 | 0,541839 |
| POGZ          | 4,52 | 4,34 | 4,36 | 3,53 | 0,3615515 | 0,541839 |
| RP11-530C5.4  | 0,00 | 0,00 | 0,20 | 0,00 | 0,361571  | 0,541839 |
| GSTA1         | 0,00 | 0,00 | 0,00 | 0,00 | 0,3615733 | NA       |
| TRIB1         | 4,93 | 4,32 | 5,07 | 4,22 | 0,3615752 | 0,541839 |
| RP11-1055B8.4 | 0,00 | 0,00 | 0,68 | 0,94 | 0,3616407 | 0,541859 |
| ACO05921.2    | 0,34 | 0,87 | 0,46 | 1,05 | 0,3616535 | 0,541859 |
| CTSL          | 1,10 | 0,70 | 2,16 | 3,52 | 0,361662  | 0,541859 |
| NPPA-AS1      | 0,00 | 1,26 | 0,22 | 0,00 | 0,3616896 | 0,541864 |
| RP11-330H6.5  | 0,00 | 0,08 | 0,00 | 0,00 | 0,3617228 | 0,541877 |
| ZNF417        | 1,30 | 2,25 | 2,12 | 3,49 | 0,3617717 | 0,541906 |
| METTL17       | 5,85 | 6,57 | 4,91 | 5,27 | 0,361793  | 0,541906 |
| VN2R19P       | 0,00 | 0,00 | 0,00 | 0,00 | 0,3618255 | 0,541906 |
| RP4-635E18.8  | 4,95 | 3,33 | 4,81 | 1,55 | 0,3618399 | 0,541906 |
| RP11-94C24.6  | 0,00 | 0,00 | 0,00 | 0,00 | 0,3618785 | NA       |
| ARHGEF7       | 3,80 | 2,86 | 3,60 | 2,38 | 0,361914  | 0,541981 |
| AP001065.2    | 0,00 | 0,00 | 0,00 | 0,00 | 0,3621008 | NA       |
| AP000462.2    | 0,00 | 0,00 | 0,00 | 0,21 | 0,3621326 | NA       |
| RN7SKP110     | 0,00 | 0,00 | 0,00 | 0,00 | 0,3622182 | 0,5424   |
| PHF1          | 2,35 | 2,04 | 2,09 | 2,45 | 0,3622721 | 0,542444 |
| RP11-876N24.3 | 2,43 | 0,00 | 0,00 | 0,00 | 0,3623553 | 0,542532 |
| SCARNA20      | 0,00 | 0,00 | 0,00 | 0,00 | 0,3625081 | NA       |
| RP11-2N5.2    | 0,78 | 1,25 | 0,70 | 0,95 | 0,3625629 | 0,542806 |
| RP11-1C8.4    | 0,00 | 1,17 | 0,00 | 0,00 | 0,3625778 | NA       |
| ITGB1         | 5,16 | 3,62 | 5,09 | 4,98 | 0,3626223 | 0,542845 |
| ACO10240.2    | 0,11 | 0,14 | 0,19 | 0,41 | 0,3626373 | 0,542845 |
| RP11-274E7.2  | 0,32 | 0,27 | 0,30 | 0,21 | 0,3626532 | NA       |
| ZC3H10        | 0,69 | 0,25 | 0,92 | 0,72 | 0,3626717 | 0,542859 |
| KB-1254G8.1   | 0,00 | 0,00 | 0,00 | 0,57 | 0,362729  | NA       |
| PSKH1         | 1,09 | 0,29 | 0,77 | 0,93 | 0,3627343 | 0,542917 |
| PES1          | 2,53 | 1,54 | 3,14 | 2,64 | 0,3629583 | 0,54317  |
| RP11-669I1.1  | 0,10 | 0,92 | 0,15 | 0,17 | 0,3629737 | 0,54317  |
| LMO4          | 3,83 | 3,99 | 3,40 | 1,89 | 0,3629768 | 0,54317  |
| ARHGEF15      | 0,25 | 0,56 | 0,00 | 0,40 | 0,3630974 | NA       |
| BORCS8        | 4,20 | 1,54 | 3,94 | 4,30 | 0,3631558 | 0,543401 |
| RP11-87C12.5  | 0,10 | 0,00 | 0,00 | 0,00 | 0,3632124 | 0,543432 |
| ACO03973.4    | 0,00 | 0,11 | 0,00 | 0,10 | 0,3632254 | 0,543432 |
| RP11-127O4.3  | 0,00 | 0,24 | 0,00 | 0,00 | 0,3632637 | NA       |
| RP11-57H14.4  | 0,05 | 0,06 | 0,04 | 0,44 | 0,3632885 | 0,54349  |
| CTD-2130O13.1 | 0,00 | 0,00 | 0,00 | 0,00 | 0,3633002 | NA       |
| RP11-400K9.1  | 0,00 | 0,83 | 0,00 | 0,00 | 0,3633559 | NA       |
| MORC2         | 1,97 | 0,51 | 2,30 | 2,31 | 0,3635125 | 0,54377  |
| ACTN1         | 4,74 | 2,97 | 3,89 | 3,10 | 0,3635249 | 0,54377  |
| RP11-133M8.3  | 0,00 | 0,00 | 0,00 | 0,00 | 0,3635711 | 0,543803 |
| PLA2G4C       | 2,17 | 4,11 | 2,53 | 1,62 | 0,3636278 | 0,543831 |
| STX11         | 5,11 | 5,41 | 5,12 | 3,98 | 0,3636388 | 0,543831 |

|                 |      |      |      |      |           |          |
|-----------------|------|------|------|------|-----------|----------|
| RN7SL558P       | 0,00 | 0,00 | 0,39 | 0,00 | 0,3636665 | 0,543836 |
| RP11-660L16.2   | 0,39 | 0,00 | 0,00 | 0,00 | 0,3638231 | 0,544033 |
| RP4-710H13.2    | 0,00 | 0,00 | 0,00 | 0,00 | 0,3639445 | 0,544178 |
| ZNF438          | 0,18 | 0,04 | 0,67 | 0,69 | 0,3640036 | 0,54423  |
| MIR601          | 0,00 | 0,00 | 0,00 | 0,00 | 0,3640411 | 0,54425  |
| RP11-1023P17.2  | 0,00 | 0,00 | 0,00 | 0,00 | 0,3640802 | 0,544271 |
| RP11-80K21.3    | 0,03 | 0,00 | 0,00 | 0,13 | 0,364166  | NA       |
| C16orf87        | 3,90 | 1,05 | 2,81 | 1,72 | 0,3642158 | 0,54438  |
| FADS1           | 3,35 | 4,17 | 3,34 | 2,75 | 0,3642254 | 0,54438  |
| TCL6            | 1,23 | 1,74 | 1,23 | 1,36 | 0,3642265 | 0,54438  |
| RP3-476K8.3     | 0,00 | 0,00 | 0,16 | 0,00 | 0,3642817 | 0,544399 |
| SOCS4           | 2,26 | 2,25 | 1,98 | 1,24 | 0,3642994 | 0,544399 |
| CTC-342M10.2    | 0,00 | 0,44 | 0,08 | 0,00 | 0,3643125 | 0,544399 |
| MFF             | 6,18 | 3,01 | 6,01 | 4,56 | 0,3643649 | 0,544437 |
| CHRNA7          | 2,84 | 0,52 | 1,34 | 0,90 | 0,3644413 | 0,544437 |
| RP11-325F22.2   | 2,81 | 0,00 | 2,74 | 4,62 | 0,3644702 | 0,544437 |
| BRDT            | 0,00 | 0,67 | 0,36 | 0,78 | 0,364475  | 0,544437 |
| CGRRF1          | 3,43 | 1,43 | 1,43 | 1,06 | 0,364493  | 0,544437 |
| XXbac-B444P24.8 | 0,00 | 0,15 | 0,01 | 0,18 | 0,3644955 | 0,544437 |
| CTD-2227C6.2    | 0,00 | 0,00 | 0,00 | 0,00 | 0,3645147 | 0,544437 |
| APO00560.3      | 1,73 | 0,86 | 1,41 | 0,37 | 0,3645338 | 0,544437 |
| RP11-734K2.4    | 0,11 | 0,55 | 0,14 | 0,48 | 0,3646327 | 0,544548 |
| TGFBR3          | 0,16 | 0,55 | 0,06 | 2,61 | 0,3646891 | 0,544596 |
| ATP6V0A4        | 0,00 | 0,00 | 0,00 | 0,18 | 0,3647249 | NA       |
| PSMC5           | 6,39 | 5,28 | 6,15 | 5,67 | 0,3648152 | 0,544712 |
| AC073130.3      | 0,00 | 0,00 | 0,28 | 0,00 | 0,3648164 | 0,544712 |
| USP41           | 0,00 | 0,13 | 0,00 | 0,00 | 0,3649587 | 0,544862 |
| THRIL           | 0,00 | 0,00 | 0,98 | 0,00 | 0,3649655 | 0,544862 |
| MGAT2           | 1,55 | 0,32 | 0,00 | 0,00 | 0,3650158 | 0,5449   |
| AC016722.3      | 0,81 | 0,28 | 1,05 | 1,19 | 0,3650964 | 0,544984 |
| RPL24P2         | 0,46 | 0,85 | 0,11 | 0,44 | 0,3651288 | NA       |
| SUGT1P3         | 1,71 | 0,89 | 1,12 | 1,16 | 0,3651865 | 0,545048 |
| SUCLG2          | 4,07 | 3,69 | 3,06 | 2,11 | 0,3651938 | 0,545048 |
| AF131215.9      | 0,15 | 0,30 | 0,24 | 0,23 | 0,3652128 | 0,545048 |
| CTB-63M22.1     | 0,89 | 0,00 | 0,43 | 0,92 | 0,3652516 | NA       |
| CTD-3137H5.5    | 0,00 | 0,00 | 0,00 | 0,00 | 0,3654198 | 0,54532  |
| TBPL1           | 4,90 | 3,43 | 4,29 | 3,40 | 0,3655347 | 0,545428 |
| FAM83D          | 1,05 | 1,73 | 1,00 | 0,12 | 0,3655442 | 0,545428 |
| PRDM5           | 2,67 | 3,79 | 2,70 | 3,13 | 0,3655654 | 0,545428 |
| CREBZF          | 3,16 | 1,38 | 2,54 | 2,41 | 0,365602  | 0,545446 |
| C1orf74         | 0,23 | 0,07 | 0,03 | 0,13 | 0,3656373 | 0,54545  |
| CNPY1           | 0,00 | 0,00 | 0,00 | 0,21 | 0,3656543 | 0,54545  |
| DNMT1           | 5,91 | 5,78 | 5,90 | 5,95 | 0,3657307 | 0,545528 |
| TWISTNB         | 4,97 | 3,49 | 4,72 | 4,45 | 0,3658506 | 0,54567  |
| PARD3B          | 0,00 | 0,00 | 0,00 | 0,24 | 0,3658856 | 0,545686 |
| RP11-89M22.3    | 0,00 | 0,00 | 0,00 | 0,24 | 0,3659504 | NA       |
| KIAA1524        | 0,23 | 0,00 | 0,88 | 0,77 | 0,3659554 | 0,545709 |
| RP3-454G6.2     | 0,21 | 0,36 | 0,25 | 0,17 | 0,3659958 | 0,545709 |
| TGFBR1          | 5,46 | 5,90 | 4,80 | 2,18 | 0,3660096 | 0,545709 |
| KIF26B          | 0,00 | 0,00 | 0,00 | 0,00 | 0,3660168 | 0,545709 |
| RP11-14C22.6    | 0,00 | 0,00 | 0,00 | 0,00 | 0,366024  | 0,545709 |
| CTB-157D17.1    | 0,65 | 1,03 | 1,77 | 2,12 | 0,3661513 | 0,545862 |
| CNOT4           | 3,48 | 4,40 | 3,62 | 3,87 | 0,3661874 | 0,545879 |
| RPUSD3          | 4,90 | 3,85 | 4,77 | 4,09 | 0,3662195 | 0,545891 |
| RP11-554A11.6   | 0,00 | 0,00 | 0,00 | 0,00 | 0,3663057 | NA       |

|               |      |      |      |      |           |          |
|---------------|------|------|------|------|-----------|----------|
| RP11-434H6.7  | 1,44 | 0,00 | 2,54 | 0,62 | 0,366375  | 0,546086 |
| NDFIP1        | 4,81 | 4,92 | 4,47 | 3,91 | 0,3664254 | 0,546123 |
| RP11-164J13.1 | 1,17 | 0,04 | 0,00 | 0,31 | 0,3664545 | 0,546123 |
| RP11-483E23.2 | 0,00 | 0,00 | 0,00 | 0,00 | 0,3664861 | NA       |
| CSNK2A1       | 5,22 | 4,64 | 5,01 | 4,20 | 0,3664891 | 0,546123 |
| TIMMDC1       | 5,95 | 6,20 | 5,49 | 5,29 | 0,3664983 | 0,546123 |
| RP4-781K5.4   | 0,21 | 0,00 | 0,06 | 0,00 | 0,3665362 | 0,546143 |
| RP1-46F2.3    | 0,77 | 0,00 | 0,18 | 0,74 | 0,3666545 | 0,546252 |
| AC007041.2    | 0,00 | 0,00 | 0,00 | 0,00 | 0,3666736 | 0,546252 |
| MGC2752       | 0,00 | 0,61 | 1,08 | 3,95 | 0,3667023 | 0,546252 |
| CUTA          | 7,09 | 6,98 | 7,10 | 7,10 | 0,3667165 | 0,546252 |
| ZNF718        | 1,80 | 0,20 | 0,22 | 0,65 | 0,3667321 | 0,546252 |
| FOLR3         | 0,00 | 0,00 | 0,00 | 0,22 | 0,3668262 | 0,546332 |
| KCTD9         | 3,25 | 2,38 | 2,69 | 2,89 | 0,366872  | 0,546332 |
| ISG20L2       | 2,85 | 1,52 | 3,26 | 3,14 | 0,366877  | 0,546332 |
| RP11-417L19.6 | 0,00 | 0,00 | 0,00 | 0,00 | 0,3668847 | 0,546332 |
| RP11-622O11.2 | 0,04 | 0,64 | 0,08 | 1,67 | 0,3669466 | 0,546388 |
| TEAD3         | 0,00 | 0,00 | 0,00 | 0,05 | 0,3669519 | NA       |
| RP3-477O4.14  | 4,26 | 4,65 | 4,54 | 3,60 | 0,3670144 | 0,546452 |
| FLYWCH2       | 4,35 | 5,06 | 2,79 | 1,42 | 0,3671423 | 0,546606 |
| CTD-2050B12.1 | 0,00 | 0,00 | 0,00 | 0,00 | 0,3671913 | 0,546643 |
| RP11-573J24.1 | 0,00 | 0,00 | 0,00 | 0,22 | 0,3672223 | NA       |
| METTL7B       | 0,00 | 0,00 | 0,00 | 0,00 | 0,36724   | 0,546678 |
| ARHGAP32      | 2,08 | 0,22 | 2,15 | 0,22 | 0,3672919 | 0,546719 |
| RP11-109D9.3  | 0,00 | 0,35 | 0,00 | 0,00 | 0,3673798 | NA       |
| RSF1          | 5,60 | 4,20 | 5,69 | 6,15 | 0,3675529 | 0,547071 |
| COX6A1        | 8,08 | 7,61 | 8,16 | 8,12 | 0,3676058 | 0,547113 |
| RP11-513C4.1  | 0,00 | 0,00 | 0,00 | 0,00 | 0,3676599 | NA       |
| CROT          | 0,95 | 0,49 | 1,16 | 2,47 | 0,3676688 | 0,54717  |
| MED29         | 3,98 | 1,00 | 3,71 | 2,74 | 0,367704  | 0,547183 |
| RP5-1065O2.4  | 0,33 | 0,28 | 0,13 | 0,12 | 0,3677527 | 0,547183 |
| DDX19A        | 3,72 | 2,26 | 3,23 | 3,07 | 0,367769  | 0,547183 |
| TNFRSF10D     | 1,38 | 0,97 | 2,87 | 1,90 | 0,3677837 | 0,547183 |
| CTAGE1        | 0,00 | 0,03 | 0,00 | 0,00 | 0,3677849 | NA       |
| CLK4          | 5,00 | 5,18 | 4,03 | 4,67 | 0,36781   | 0,547183 |
| AC021068.1    | 1,35 | 0,99 | 1,50 | 0,18 | 0,367825  | 0,547183 |
| RIBC1         | 0,00 | 0,20 | 0,00 | 0,00 | 0,3678444 | NA       |
| FAM216A       | 2,46 | 2,39 | 1,16 | 2,48 | 0,3679571 | 0,547323 |
| SGK3          | 5,07 | 5,11 | 4,84 | 3,96 | 0,3679687 | 0,547323 |
| PAX8-AS1      | 3,35 | 1,31 | 2,34 | 1,67 | 0,3680323 | 0,547381 |
| VPS26B        | 2,69 | 0,99 | 3,24 | 3,14 | 0,3681776 | 0,547561 |
| ACBD3         | 2,75 | 3,71 | 2,36 | 2,31 | 0,3682393 | 0,547589 |
| LTV1          | 5,32 | 4,62 | 4,92 | 1,94 | 0,3682461 | 0,547589 |
| SDHAP1        | 3,27 | 2,30 | 3,96 | 3,00 | 0,3682766 | 0,547598 |
| PHACTR4       | 4,06 | 4,69 | 3,57 | 4,59 | 0,3683267 | 0,547636 |
| RN7SL47P      | 1,84 | 2,60 | 1,76 | 2,24 | 0,3684443 | 0,547774 |
| ARMC7         | 1,40 | 0,13 | 2,75 | 1,33 | 0,3685264 | 0,547859 |
| ANKLE2        | 3,82 | 4,02 | 4,03 | 4,34 | 0,3686069 | 0,547942 |
| MAST1         | 0,20 | 0,23 | 0,29 | 0,49 | 0,3687509 | 0,54812  |
| RP13-554M15.2 | 3,66 | 3,44 | 4,44 | 2,78 | 0,3689122 | 0,548317 |
| BCL7A         | 2,53 | 3,41 | 2,31 | 1,96 | 0,3689524 | 0,548317 |
| RP11-430H10.2 | 0,06 | 0,00 | 0,09 | 0,42 | 0,3689575 | 0,548317 |
| ZNF696        | 0,03 | 0,22 | 0,14 | 0,11 | 0,3690109 | 0,54836  |
| RP11-506N2.1  | 4,41 | 5,40 | 4,12 | 5,40 | 0,3690639 | 0,548402 |
| C7orf25       | 0,00 | 0,00 | 0,00 | 0,00 | 0,3691066 | 0,548405 |

|               |      |      |      |      |           |          |
|---------------|------|------|------|------|-----------|----------|
| HENMT1        | 3,33 | 1,22 | 3,03 | 1,81 | 0,3691474 | 0,548405 |
| GABRG3        | 0,03 | 0,06 | 0,02 | 0,06 | 0,3691552 | 0,548405 |
| ADORA3        | 0,47 | 0,00 | 0,10 | 0,12 | 0,3691646 | 0,548405 |
| RP11-556113.2 | 0,06 | 0,09 | 0,00 | 0,08 | 0,369179  | NA       |
| ZNF84         | 1,31 | 1,61 | 2,47 | 1,06 | 0,3692747 | 0,548532 |
| RP11-231P20.6 | 0,19 | 0,45 | 0,20 | 0,19 | 0,3693234 | 0,54854  |
| RP11-80O3.1   | 0,00 | 0,00 | 0,00 | 0,76 | 0,3693298 | 0,54854  |
| CYSTM1        | 5,72 | 3,40 | 5,36 | 4,74 | 0,3694437 | 0,548673 |
| ABHD13        | 3,04 | 1,44 | 2,64 | 2,32 | 0,3695572 | 0,548801 |
| RP11-726G1.2  | 2,46 | 3,24 | 1,80 | 0,73 | 0,3695797 | 0,548801 |
| RP11-269G24.3 | 0,00 | 0,00 | 0,00 | 0,00 | 0,3696073 | NA       |
| RP11-54O7.2   | 1,05 | 0,74 | 1,24 | 1,21 | 0,3697287 | 0,548986 |
| RP11-680F8.1  | 0,00 | 0,00 | 0,00 | 0,00 | 0,3698299 | NA       |
| RP11-390B4.5  | 0,18 | 0,10 | 0,30 | 0,52 | 0,3698683 | 0,549156 |
| LLPH          | 4,65 | 4,16 | 4,39 | 5,05 | 0,3699132 | 0,549186 |
| CNNM1         | 0,00 | 0,00 | 0,01 | 0,00 | 0,3699752 | NA       |
| RELT          | 4,06 | 4,37 | 4,44 | 3,87 | 0,3700639 | 0,549373 |
| RP11-44D19.1  | 3,50 | 3,18 | 2,88 | 3,62 | 0,3700957 | 0,549384 |
| MRPS18A       | 6,45 | 3,68 | 5,79 | 6,57 | 0,3702229 | 0,549531 |
| STAMBPL1      | 1,65 | 1,30 | 0,89 | 0,71 | 0,370244  | 0,549531 |
| CTB-50L17.16  | 0,00 | 0,00 | 0,75 | 0,00 | 0,3702995 | 0,549576 |
| CCNYL2        | 0,22 | 0,31 | 0,15 | 0,10 | 0,3703404 | 0,549589 |
| FGF7          | 0,00 | 1,27 | 0,00 | 0,08 | 0,3703572 | 0,549589 |
| CTD-2008L17.2 | 0,63 | 0,00 | 0,76 | 0,83 | 0,3703978 | 0,549612 |
| RP11-375D13.2 | 0,00 | 0,43 | 0,24 | 0,00 | 0,3705947 | NA       |
| TJAP1         | 1,95 | 2,24 | 3,05 | 3,58 | 0,3706249 | 0,549855 |
| CCDC88C       | 2,23 | 3,30 | 3,33 | 2,73 | 0,3706295 | 0,549855 |
| RUNDC3B       | 1,00 | 0,00 | 1,46 | 0,39 | 0,3706531 | 0,549855 |
| MFAP3L        | 0,00 | 0,00 | 0,00 | 0,35 | 0,3706602 | 0,549855 |
| SOS1          | 3,66 | 2,45 | 3,36 | 3,04 | 0,3707087 | 0,54986  |
| RP11-73M18.8  | 1,63 | 4,90 | 3,94 | 2,88 | 0,3707276 | 0,54986  |
| NGDN          | 6,33 | 5,87 | 5,96 | 5,45 | 0,3707379 | 0,54986  |
| LRFN3         | 0,00 | 0,37 | 0,02 | 0,12 | 0,3707766 | 0,549881 |
| RPL21P129     | 0,00 | 0,00 | 0,00 | 0,43 | 0,3708116 | NA       |
| GPR82         | 1,23 | 0,59 | 0,55 | 1,39 | 0,3708648 | 0,549975 |
| CDK5          | 4,86 | 2,91 | 4,58 | 3,35 | 0,3709164 | 0,550014 |
| RP4-657E11.10 | 0,00 | 0,00 | 0,00 | 0,00 | 0,3709449 | 0,55002  |
| BISPR         | 4,15 | 3,03 | 3,57 | 2,38 | 0,371119  | 0,550242 |
| ANKRD62       | 0,03 | 0,04 | 0,03 | 0,09 | 0,3711669 | 0,550261 |
| ADCY3         | 2,73 | 0,29 | 3,28 | 0,16 | 0,3711914 | 0,550261 |
| THADA         | 4,22 | 4,51 | 3,86 | 2,97 | 0,3712064 | 0,550261 |
| UPK1A         | 0,11 | 0,00 | 0,16 | 0,34 | 0,3714582 | 0,550561 |
| BCAT1         | 2,67 | 2,63 | 2,90 | 2,49 | 0,3714586 | 0,550561 |
| LINGO3        | 0,00 | 0,06 | 0,05 | 0,00 | 0,3715096 | NA       |
| RP11-968A15.8 | 0,35 | 0,00 | 0,00 | 0,41 | 0,3715648 | NA       |
| AC016995.3    | 0,00 | 0,00 | 0,11 | 0,54 | 0,3717014 | 0,550885 |
| FAM207A       | 1,91 | 3,96 | 2,78 | 3,49 | 0,3717828 | 0,550968 |
| RP11-379C1.1  | 0,00 | 0,00 | 0,00 | 0,00 | 0,3719001 | NA       |
| CDAN1         | 0,82 | 0,32 | 0,95 | 0,72 | 0,3719188 | 0,551105 |
| OR7D2         | 0,89 | 0,69 | 0,51 | 1,18 | 0,3719246 | 0,551105 |
| CUL7          | 0,79 | 1,06 | 0,71 | 1,28 | 0,3719683 | 0,551133 |
| RP11-555E18.2 | 0,00 | 0,00 | 0,00 | 0,00 | 0,3720517 | 0,551217 |
| CTC-559E9.8   | 0,00 | 0,00 | 0,00 | 0,00 | 0,3720828 | NA       |
| BIN3          | 2,76 | 1,75 | 4,05 | 2,79 | 0,3720959 | 0,551217 |
| MED18         | 1,09 | 0,83 | 0,84 | 0,93 | 0,3721128 | 0,551217 |

|               |      |      |      |      |           |          |
|---------------|------|------|------|------|-----------|----------|
| RP11-392B6.1  | 1,11 | 0,00 | 0,70 | 2,73 | 0,3721243 | 0,551217 |
| ARPC4-TLL3    | 2,33 | 1,54 | 1,98 | 0,95 | 0,3721856 | 0,551271 |
| C4orf22       | 0,12 | 1,03 | 0,18 | 0,48 | 0,3722713 | 0,551361 |
| PPP2R3C       | 5,96 | 5,35 | 5,58 | 5,58 | 0,3723177 | 0,551393 |
| RNF25         | 1,54 | 0,39 | 0,49 | 0,17 | 0,372436  | 0,551497 |
| PRNP          | 5,07 | 5,23 | 4,70 | 4,38 | 0,3724562 | 0,551497 |
| BBOF1         | 0,00 | 0,00 | 0,06 | 0,00 | 0,3724624 | 0,551497 |
| FOXD4L4       | 0,00 | 0,00 | 0,00 | 0,00 | 0,3725269 | NA       |
| INAFM1        | 1,89 | 0,80 | 2,27 | 2,72 | 0,3725843 | 0,551641 |
| ACTRT1        | 0,00 | 0,00 | 0,00 | 0,00 | 0,3726117 | 0,551645 |
| HDC           | 0,00 | 2,09 | 0,00 | 0,00 | 0,3726413 | 0,551652 |
| CTC-503J8.8   | 0,00 | 0,00 | 0,00 | 0,00 | 0,3726774 | NA       |
| AK6           | 5,19 | 5,05 | 3,84 | 1,74 | 0,3727201 | 0,551732 |
| AP1M1         | 5,17 | 2,67 | 4,50 | 3,67 | 0,3727671 | 0,551765 |
| ZNF263        | 2,89 | 1,80 | 3,25 | 2,42 | 0,3728282 | 0,551801 |
| HSBP1L1       | 1,23 | 3,39 | 2,01 | 2,52 | 0,3728468 | 0,551801 |
| PAH           | 0,00 | 0,00 | 0,00 | 0,00 | 0,3729012 | 0,551801 |
| SNAI2         | 0,07 | 0,00 | 0,00 | 0,06 | 0,3729058 | 0,551801 |
| SLC9A8        | 0,88 | 1,90 | 1,78 | 0,81 | 0,372916  | 0,551801 |
| HMBBOX1       | 5,08 | 5,60 | 5,20 | 2,78 | 0,3729908 | 0,551834 |
| RP11-342K6.4  | 0,28 | 0,00 | 0,10 | 0,00 | 0,3730107 | 0,551834 |
| GCSH          | 2,16 | 1,73 | 1,06 | 0,91 | 0,373025  | 0,551834 |
| RP11-432N13.5 | 0,00 | 0,00 | 0,00 | 0,00 | 0,3730395 | NA       |
| CTA-221G9.11  | 0,65 | 1,65 | 0,45 | 1,03 | 0,3730559 | 0,551834 |
| CEACAM22P     | 0,20 | 0,18 | 0,18 | 0,30 | 0,3730621 | 0,551834 |
| RP5-1049G16.4 | 0,00 | 0,00 | 0,00 | 0,00 | 0,3731313 | 0,5519   |
| RP11-643M14.1 | 0,00 | 0,00 | 0,00 | 0,00 | 0,3732327 | NA       |
| PLEKHN1       | 0,00 | 0,00 | 0,00 | 0,06 | 0,3732779 | NA       |
| RP6-109B7.2   | 0,00 | 1,01 | 0,00 | 0,11 | 0,3734442 | 0,552326 |
| RP4-612B18.1  | 0,51 | 1,21 | 0,60 | 0,71 | 0,3734923 | NA       |
| PKD1P1        | 0,00 | 0,04 | 0,00 | 0,00 | 0,3735217 | 0,552401 |
| SGIP1         | 0,00 | 0,38 | 0,23 | 0,38 | 0,373545  | 0,552401 |
| TRIAP1        | 5,51 | 6,10 | 4,53 | 3,84 | 0,3736426 | 0,552509 |
| SLC35A3       | 2,66 | 1,95 | 2,98 | 2,18 | 0,3736765 | 0,552522 |
| CHP2          | 1,10 | 0,53 | 1,14 | 0,30 | 0,3737614 | 0,552611 |
| LRRC75B       | 0,00 | 0,13 | 0,00 | 0,00 | 0,3738688 | 0,552733 |
| RP11-68I3.2   | 0,00 | 0,00 | 0,00 | 0,00 | 0,3739218 | NA       |
| OR5M1         | 0,00 | 0,00 | 0,00 | 0,00 | 0,3740001 | NA       |
| GPRIN3        | 2,91 | 2,82 | 2,56 | 1,44 | 0,374004  | 0,552896 |
| GRIK2         | 0,23 | 0,61 | 0,34 | 0,29 | 0,3740876 | 0,552983 |
| RP11-366M4.7  | 0,43 | 0,57 | 0,50 | 0,33 | 0,374147  | 0,553034 |
| CTD-2298J14.2 | 2,54 | 4,24 | 1,62 | 1,04 | 0,3741899 | 0,553061 |
| RP11-134P9.3  | 0,73 | 0,24 | 0,21 | 0,65 | 0,3742213 | 0,55307  |
| PLEKHA4       | 1,07 | 2,59 | 1,26 | 2,24 | 0,3742801 | 0,55312  |
| GLUDP7        | 0,00 | 0,47 | 0,00 | 0,00 | 0,3743925 | 0,553199 |
| RP4-761J14.10 | 1,27 | 1,37 | 0,62 | 0,92 | 0,3744136 | 0,553199 |
| PSENN         | 6,13 | 5,75 | 6,37 | 6,26 | 0,3744279 | 0,553199 |
| PLA2G16       | 2,64 | 3,11 | 3,20 | 1,77 | 0,3744332 | 0,553199 |
| GAPDHP44      | 0,00 | 0,16 | 0,00 | 0,00 | 0,3744534 | NA       |
| TIPIN         | 1,37 | 1,01 | 0,49 | 0,34 | 0,3745633 | 0,553355 |
| RP11-603J24.6 | 0,00 | 0,00 | 0,00 | 1,05 | 0,3745968 | NA       |
| CYP4V2        | 2,25 | 1,79 | 2,15 | 1,43 | 0,3746409 | 0,553384 |
| RP3-322G13.5  | 0,00 | 0,00 | 0,00 | 0,00 | 0,3746457 | 0,553384 |
| CENPL         | 0,34 | 0,36 | 0,82 | 0,57 | 0,374658  | 0,553384 |
| C1orf198      | 0,08 | 0,36 | 0,24 | 0,00 | 0,3747293 | 0,553434 |

|                |      |      |      |      |           |          |
|----------------|------|------|------|------|-----------|----------|
| CALB1          | 0,10 | 0,49 | 0,07 | 0,23 | 0,3747593 | 0,553434 |
| RP3-486I3.4    | 0,84 | 1,17 | 1,36 | 0,82 | 0,3747663 | 0,553434 |
| DNAJC5G        | 0,00 | 0,33 | 0,00 | 0,00 | 0,3749864 | NA       |
| GTPBP2         | 4,26 | 2,68 | 4,61 | 3,75 | 0,3750015 | 0,553671 |
| SRPK1          | 4,14 | 3,13 | 4,05 | 3,91 | 0,3750225 | 0,553671 |
| RP13-467E5.1   | 0,00 | 0,00 | 0,00 | 0,00 | 0,3750563 | 0,553671 |
| FAM192A        | 6,34 | 7,06 | 6,05 | 5,67 | 0,3750624 | 0,553671 |
| RP11-133K1.12  | 4,25 | 2,33 | 5,12 | 4,88 | 0,3750823 | 0,553671 |
| LRRC47         | 2,97 | 2,72 | 2,68 | 2,87 | 0,3750967 | 0,553671 |
| RP13-131K19.6  | 0,49 | 0,00 | 1,91 | 0,00 | 0,375101  | 0,553671 |
| RP3-364I1.3    | 0,31 | 0,00 | 0,41 | 0,40 | 0,3751019 | NA       |
| USF3           | 2,81 | 3,08 | 2,34 | 1,85 | 0,3751813 | 0,553752 |
| CTB-87J17.2    | 0,00 | 0,00 | 0,00 | 0,00 | 0,3752137 | NA       |
| RNU6-1135P     | 0,00 | 0,00 | 0,00 | 0,00 | 0,3752137 | NA       |
| RP11-466I24.1  | 0,00 | 0,00 | 0,00 | 0,00 | 0,3752137 | NA       |
| CNBD1          | 0,00 | 0,00 | 0,00 | 0,00 | 0,3752603 | 0,553807 |
| COA6           | 5,25 | 5,35 | 4,77 | 5,38 | 0,3752683 | 0,553807 |
| RP11-54F2.9    | 0,81 | 0,00 | 0,73 | 1,00 | 0,3752969 | 0,553813 |
| AC139099.3     | 0,00 | 0,00 | 0,00 | 0,07 | 0,3754572 | NA       |
| RP11-43F13.1   | 0,21 | 0,00 | 0,97 | 1,32 | 0,3754988 | 0,554074 |
| RC3H1          | 3,40 | 2,24 | 3,25 | 2,82 | 0,3755366 | 0,554093 |
| MOCS2          | 4,50 | 3,51 | 3,86 | 1,57 | 0,3755842 | 0,554124 |
| HGH1           | 1,60 | 0,88 | 0,17 | 0,87 | 0,3756077 | 0,554124 |
| PCDH12         | 0,04 | 0,00 | 0,13 | 0,00 | 0,3757033 | 0,554228 |
| AC068831.16    | 0,40 | 0,79 | 0,41 | 0,00 | 0,375704  | NA       |
| RP11-203M5.8   | 0,00 | 0,00 | 0,00 | 0,00 | 0,375872  | NA       |
| FAM120C        | 1,94 | 2,37 | 3,07 | 1,85 | 0,3758727 | 0,554442 |
| TRAF6          | 1,12 | 0,39 | 1,21 | 1,51 | 0,3759022 | 0,554448 |
| RP5-1136A10.1  | 0,00 | 0,00 | 0,00 | 0,00 | 0,3760628 | NA       |
| RINT1          | 2,63 | 3,17 | 2,70 | 1,69 | 0,3760769 | 0,554669 |
| ZIK1           | 0,09 | 0,10 | 0,14 | 0,14 | 0,3761293 | 0,55471  |
| RP11-521I2.3   | 0,18 | 0,00 | 0,00 | 0,00 | 0,3762261 | 0,554813 |
| CDK2           | 0,25 | 0,00 | 0,42 | 0,43 | 0,3762697 | 0,554813 |
| RP11-108M21.1  | 1,04 | 0,88 | 1,34 | 0,33 | 0,376276  | 0,554813 |
| SUMO3          | 5,89 | 5,26 | 5,44 | 5,35 | 0,3762991 | 0,554813 |
| CTC-499B15.7   | 0,05 | 0,89 | 0,31 | 0,39 | 0,3763956 | 0,554918 |
| AC108676.1     | 1,15 | 1,91 | 1,02 | 1,15 | 0,3764816 | 0,555008 |
| RP11-16N10.2   | 0,08 | 0,25 | 0,18 | 0,10 | 0,3765379 | 0,555054 |
| POGK           | 3,29 | 2,29 | 3,15 | 1,45 | 0,3766222 | 0,555142 |
| MST1L          | 0,00 | 0,17 | 0,00 | 0,00 | 0,3766589 | 0,555159 |
| RP1-190J20.2   | 0,00 | 0,00 | 0,00 | 0,00 | 0,3767306 | NA       |
| RP11-2010I0.1  | 0,00 | 0,00 | 0,00 | 0,00 | 0,3768237 | NA       |
| RAPGEF1        | 3,61 | 3,31 | 3,62 | 3,21 | 0,3769142 | 0,555463 |
| PCYT2          | 0,33 | 0,43 | 2,51 | 0,75 | 0,3769559 | 0,555463 |
| USP10          | 5,81 | 4,85 | 5,60 | 4,67 | 0,3769607 | 0,555463 |
| ITGB5          | 0,77 | 0,30 | 0,79 | 0,74 | 0,3769654 | 0,555463 |
| DBI            | 8,23 | 8,50 | 8,50 | 7,88 | 0,37699   | 0,555463 |
| THOC6          | 4,95 | 4,67 | 4,98 | 3,27 | 0,3770273 | 0,555481 |
| RP11-727A23.11 | 0,00 | 0,00 | 0,00 | 0,00 | 0,3770801 | 0,555522 |
| SEC61B         | 7,97 | 7,96 | 8,25 | 7,84 | 0,3771259 | 0,555553 |
| RBX1           | 6,21 | 5,88 | 5,98 | 6,05 | 0,3771986 | 0,55562  |
| RP11-16E23.3   | 4,10 | 4,92 | 5,24 | 3,81 | 0,3772214 | 0,55562  |
| PSMD5          | 3,75 | 4,55 | 3,18 | 1,15 | 0,3772559 | 0,555634 |
| RP11-275F13.1  | 0,00 | 1,03 | 0,23 | 0,00 | 0,3772934 | 0,555652 |
| RP13-36G14.2   | 0,00 | 0,00 | 0,00 | 0,00 | 0,377509  | NA       |

|                |       |       |       |       |           |          |
|----------------|-------|-------|-------|-------|-----------|----------|
| SAT1           | 11,29 | 10,42 | 11,01 | 10,93 | 0,3776018 | 0,556069 |
| NEMF           | 7,09  | 6,33  | 6,22  | 5,65  | 0,3776668 | 0,556128 |
| AC006987.7     | 0,00  | 0,00  | 0,00  | 0,00  | 0,3777387 | NA       |
| DPH2           | 3,01  | 0,09  | 1,45  | 0,31  | 0,3777623 | 0,556232 |
| SEC63          | 5,37  | 5,16  | 5,38  | 4,29  | 0,3777938 | 0,556242 |
| ABHD8          | 0,37  | 0,07  | 0,95  | 0,16  | 0,3778293 | 0,556257 |
| RP11-18A15.1   | 1,46  | 2,93  | 1,18  | 1,71  | 0,3781313 | 0,556643 |
| RP11-91P24.1   | 0,00  | 0,00  | 0,98  | 0,00  | 0,3781416 | 0,556643 |
| GDPD1          | 1,25  | 0,83  | 1,14  | 0,63  | 0,3782418 | 0,556754 |
| LMBRD1         | 5,20  | 2,42  | 4,60  | 5,26  | 0,3783072 | 0,556777 |
| C18orf8        | 5,14  | 5,44  | 3,24  | 3,73  | 0,3783076 | 0,556777 |
| ANAPC2         | 0,38  | 0,28  | 0,15  | 0,07  | 0,3783489 | 0,556801 |
| RN7SL213P      | 0,00  | 0,00  | 0,00  | 0,00  | 0,3783496 | NA       |
| SLC6A12        | 0,05  | 1,08  | 0,41  | 0,48  | 0,3784227 | 0,556872 |
| FRMD1          | 0,03  | 0,10  | 0,06  | 0,06  | 0,378476  | 0,556914 |
| AC008746.11    | 1,48  | 3,16  | 1,86  | 2,40  | 0,3785024 | 0,556916 |
| DNAJC1         | 3,43  | 4,76  | 3,74  | 3,78  | 0,3785495 | 0,556948 |
| RP11-461A8.1   | 0,00  | 1,26  | 0,00  | 0,00  | 0,3786285 | NA       |
| ZNF429         | 2,92  | 3,92  | 2,43  | 3,31  | 0,37876   | 0,557221 |
| KIAA0825       | 1,32  | 0,60  | 1,01  | 0,20  | 0,378836  | 0,557296 |
| TACC1          | 5,88  | 6,16  | 5,90  | 5,55  | 0,3788654 | 0,557303 |
| AC018462.3     | 0,00  | 0,00  | 0,00  | 0,00  | 0,3789602 | 0,557405 |
| ARF3           | 5,03  | 2,70  | 5,15  | 3,69  | 0,3790195 | 0,557455 |
| RP11-89K11.1   | 0,00  | 0,41  | 0,32  | 0,00  | 0,3790691 | 0,557484 |
| CTGF           | 0,00  | 0,11  | 0,00  | 0,00  | 0,379085  | NA       |
| GPSM1          | 0,00  | 0,00  | 0,00  | 0,06  | 0,3790893 | 0,557484 |
| C6orf54        | 0,19  | 0,20  | 0,31  | 0,33  | 0,3791614 | 0,557553 |
| RN7SL418P      | 0,69  | 1,88  | 1,29  | 0,00  | 0,3792322 | 0,557605 |
| AC010093.1     | 1,61  | 4,08  | 3,19  | 3,13  | 0,3792465 | 0,557605 |
| C9orf172       | 0,00  | 0,00  | 0,00  | 0,00  | 0,3793144 | 0,557668 |
| RP11-305D15.6  | 0,00  | 0,00  | 0,00  | 1,05  | 0,3793798 | 0,557705 |
| MLH1           | 4,71  | 5,06  | 4,24  | 2,75  | 0,3794112 | 0,557705 |
| RP11-338K17.10 | 0,00  | 0,00  | 0,45  | 0,00  | 0,3794153 | 0,557705 |
| SNORD91A       | 0,00  | 0,00  | 0,00  | 0,00  | 0,3794377 | NA       |
| RP11-713M15.1  | 0,00  | 0,00  | 0,03  | 0,31  | 0,3794968 | 0,557788 |
| COL18A1        | 0,24  | 0,00  | 0,21  | 0,04  | 0,3795557 | 0,557809 |
| AC091062.2     | 0,30  | 0,41  | 0,43  | 0,65  | 0,3795613 | 0,557809 |
| ZNF865         | 0,00  | 0,00  | 0,01  | 0,06  | 0,379618  | 0,557819 |
| ORC4           | 4,72  | 3,33  | 4,00  | 3,47  | 0,3796182 | 0,557819 |
| P2RX1          | 3,32  | 3,98  | 3,74  | 3,70  | 0,3796563 | 0,557838 |
| AC068044.1     | 0,00  | 0,00  | 0,00  | 0,12  | 0,37969   | NA       |
| RP11-25D3.1    | 0,29  | 0,00  | 0,47  | 0,35  | 0,3797636 | 0,557928 |
| MIR4482        | 0,00  | 0,00  | 2,54  | 0,00  | 0,3797678 | 0,557928 |
| RP11-253M7.4   | 0,00  | 1,02  | 0,06  | 0,72  | 0,3797718 | NA       |
| RP4-669L17.8   | 0,00  | 1,69  | 0,00  | 0,00  | 0,379848  | 0,558009 |
| DNM1P46        | 0,14  | 0,05  | 0,28  | 0,29  | 0,3798994 | 0,558048 |
| CYP27A1        | 0,00  | 0,00  | 0,00  | 2,15  | 0,379977  | 0,558125 |
| CEP170P1       | 0,21  | 0,00  | 0,05  | 0,22  | 0,380028  | 0,558163 |
| RP11-110G21.2  | 5,47  | 3,71  | 3,77  | 2,38  | 0,3800698 | 0,558188 |
| RP11-298E2.2   | 0,00  | 0,00  | 0,00  | 0,00  | 0,3801231 | 0,558213 |
| BORCS5         | 3,72  | 1,29  | 4,13  | 4,45  | 0,3801667 | 0,558213 |
| RP11-131L23.1  | 0,00  | 2,38  | 0,75  | 2,04  | 0,3801685 | 0,558213 |
| RP11-104E19.1  | 3,53  | 3,21  | 3,26  | 1,66  | 0,3801875 | 0,558213 |
| ZNF891         | 0,44  | 0,39  | 0,60  | 0,59  | 0,3802217 | 0,558226 |
| C9orf66        | 2,09  | 1,03  | 1,99  | 1,42  | 0,3803221 | 0,558337 |

|                |       |       |       |      |           |          |
|----------------|-------|-------|-------|------|-----------|----------|
| RN7SL658P      | 0,00  | 0,00  | 0,78  | 0,00 | 0,3803528 | NA       |
| ETNPPL         | 0,00  | 0,70  | 0,00  | 0,18 | 0,3804098 | NA       |
| C12orf40       | 0,00  | 0,00  | 0,00  | 0,00 | 0,3805334 | NA       |
| SLCO6A1        | 0,00  | 0,00  | 0,00  | 0,00 | 0,380589  | 0,558692 |
| EBNA1BP2       | 5,74  | 1,92  | 4,96  | 3,40 | 0,3806641 | 0,558765 |
| CA14           | 0,51  | 0,38  | 0,87  | 1,18 | 0,3806981 | 0,558778 |
| TMEM136        | 0,09  | 0,29  | 0,19  | 0,06 | 0,380811  | 0,558907 |
| CTD-2105E13.16 | 0,00  | 2,29  | 0,00  | 0,00 | 0,3808706 | 0,558919 |
| RCBTB2         | 3,81  | 5,21  | 3,90  | 4,27 | 0,380905  | 0,558919 |
| BANP           | 4,60  | 4,40  | 4,72  | 3,17 | 0,3809102 | 0,558919 |
| RPL9P9         | 11,01 | 10,84 | 11,02 | 9,97 | 0,3809198 | 0,558919 |
| RF00045        | 1,01  | 0,00  | 0,00  | 0,00 | 0,3810796 | 0,559108 |
| RAB4A          | 4,88  | 3,98  | 4,32  | 2,57 | 0,3810994 | 0,559108 |
| C12orf66       | 2,46  | 0,66  | 1,06  | 0,41 | 0,3811731 | 0,559161 |
| C18orf63       | 0,00  | 0,00  | 0,00  | 0,00 | 0,3811853 | 0,559161 |
| RP11-343J18.1  | 0,00  | 0,00  | 0,00  | 0,00 | 0,3813019 | 0,559268 |
| DDX28          | 2,91  | 1,46  | 0,89  | 0,33 | 0,381309  | 0,559268 |
| RP11-284A20.3  | 0,00  | 0,00  | 0,00  | 0,00 | 0,3813686 | NA       |
| bP-21201H5.2   | 0,00  | 0,00  | 0,00  | 0,00 | 0,3814403 | 0,55939  |
| CLPTM1         | 3,00  | 2,32  | 3,34  | 3,54 | 0,3814423 | 0,55939  |
| TTC39A         | 0,29  | 1,20  | 0,54  | 0,09 | 0,3814925 | 0,559427 |
| GLIPR2         | 7,12  | 7,01  | 6,81  | 6,66 | 0,3815566 | 0,559484 |
| MED30          | 5,87  | 3,57  | 5,09  | 5,69 | 0,3816507 | 0,559572 |
| FABP5          | 5,82  | 6,33  | 5,55  | 6,32 | 0,3816673 | 0,559572 |
| RP11-248C1.2   | 0,00  | 0,00  | 0,01  | 0,05 | 0,3817805 | 0,559701 |
| ACO16831.6     | 0,00  | 0,38  | 0,00  | 0,00 | 0,3818423 | NA       |
| MAP9           | 0,01  | 1,29  | 0,00  | 0,00 | 0,3818878 | 0,559822 |
| RP11-90M2.4    | 0,47  | 0,37  | 0,41  | 0,31 | 0,3821096 | 0,560019 |
| CTB-13F3.1     | 1,10  | 1,17  | 0,97  | 0,86 | 0,3821104 | 0,560019 |
| WDR12          | 5,06  | 2,33  | 4,50  | 5,52 | 0,3821369 | 0,560019 |
| BBS9           | 2,92  | 0,31  | 0,98  | 1,71 | 0,3821693 | 0,560019 |
| HNRNPH3        | 5,82  | 5,54  | 5,58  | 4,28 | 0,3821713 | 0,560019 |
| RP13-1056D16.2 | 0,00  | 0,00  | 2,42  | 0,00 | 0,3821736 | 0,560019 |
| DYDC1          | 0,00  | 0,00  | 0,00  | 0,07 | 0,3821831 | NA       |
| RP11-70I4.1    | 0,00  | 2,75  | 0,09  | 0,00 | 0,3822318 | 0,560039 |
| FBL            | 6,21  | 6,37  | 6,14  | 6,27 | 0,3822384 | 0,560039 |
| CTD-2011F17.2  | 1,89  | 2,27  | 2,80  | 3,72 | 0,3822884 | 0,560039 |
| PNKP           | 3,54  | 4,01  | 4,06  | 3,82 | 0,3822885 | 0,560039 |
| APAF1          | 4,88  | 4,54  | 4,52  | 4,43 | 0,3823131 | 0,560039 |
| RP11-547D24.1  | 0,26  | 0,14  | 0,41  | 0,41 | 0,3824109 | 0,560145 |
| TFAP2C         | 0,00  | 0,09  | 0,00  | 0,00 | 0,3824152 | NA       |
| AC007365.3     | 0,00  | 1,61  | 1,97  | 0,29 | 0,3824689 | 0,560193 |
| ATL2           | 3,94  | 2,80  | 3,85  | 2,07 | 0,3825512 | 0,560275 |
| DHX36          | 5,38  | 4,21  | 5,19  | 5,25 | 0,3825754 | 0,560275 |
| RP11-67H24.2   | 0,00  | 0,00  | 0,00  | 0,00 | 0,3826058 | 0,560283 |
| PLXNA2         | 0,00  | 0,00  | 0,06  | 1,11 | 0,3826457 | 0,560296 |
| MIR3175        | 0,00  | 0,00  | 0,00  | 0,00 | 0,3826788 | 0,560296 |
| DTWD2          | 0,23  | 0,75  | 0,73  | 0,49 | 0,38269   | 0,560296 |
| RP11-613D13.10 | 3,21  | 4,07  | 2,14  | 0,41 | 0,3827726 | 0,560375 |
| AC006042.7     | 1,43  | 0,00  | 0,16  | 0,00 | 0,3827945 | 0,560375 |
| RP11-492M23.1  | 0,75  | 1,17  | 1,38  | 0,78 | 0,3828463 | 0,560414 |
| FDPSL5         | 0,00  | 0,00  | 0,00  | 0,00 | 0,382914  | 0,560476 |
| HAGHL          | 0,04  | 2,93  | 0,54  | 0,74 | 0,3830143 | 0,560586 |
| BIRC6-AS2      | 2,68  | 1,01  | 1,24  | 1,53 | 0,3831589 | 0,56076  |
| GNL2           | 5,49  | 4,48  | 5,04  | 4,51 | 0,3831836 | 0,56076  |



|               |       |       |       |       |           |          |
|---------------|-------|-------|-------|-------|-----------|----------|
| SURF4         | 4,80  | 5,03  | 4,32  | 4,78  | 0,3833025 | 0,560897 |
| DGCR11        | 0,19  | 0,13  | 0,17  | 0,40  | 0,3833986 | 0,561    |
| OR10H4        | 0,00  | 0,00  | 0,00  | 0,00  | 0,3834209 | NA       |
| RP4-814D15.2  | 4,35  | 5,94  | 3,59  | 4,04  | 0,3834682 | 0,561065 |
| ARID4B        | 6,10  | 4,12  | 5,78  | 5,68  | 0,3835357 | 0,561105 |
| RP11-138H11.1 | 0,00  | 0,00  | 0,00  | 0,00  | 0,3835461 | 0,561105 |
| AC073283.7    | 0,18  | 0,00  | 2,09  | 1,02  | 0,3835867 | 0,561128 |
| RP11-382E9.1  | 0,10  | 0,35  | 0,16  | 0,06  | 0,383674  | 0,561219 |
| RUSC1         | 2,56  | 1,54  | 2,19  | 3,61  | 0,3837168 | 0,561244 |
| C2orf80       | 0,20  | 0,74  | 0,23  | 0,59  | 0,3837639 | 0,561263 |
| CLIC1         | 10,05 | 9,63  | 9,84  | 9,66  | 0,3837799 | 0,561263 |
| AC104135.3    | 0,00  | 0,04  | 0,18  | 0,93  | 0,3838698 | 0,561327 |
| CTC-539A10.4  | 3,33  | 4,42  | 3,89  | 3,86  | 0,3839036 | 0,561327 |
| ENTPD6        | 4,33  | 2,83  | 4,81  | 3,88  | 0,383922  | 0,561327 |
| TCTE1         | 0,08  | 0,21  | 0,17  | 0,08  | 0,3839323 | 0,561327 |
| TMEM220-AS1   | 0,00  | 0,71  | 0,00  | 0,00  | 0,38395   | 0,561327 |
| MTPN          | 6,63  | 6,27  | 6,61  | 6,26  | 0,3840007 | 0,561364 |
| MYPOP         | 1,51  | 0,00  | 1,27  | 0,46  | 0,3841988 | 0,561617 |
| RP11-78O7.2   | 0,23  | 0,44  | 0,00  | 1,99  | 0,3842363 | 0,561634 |
| MMP11         | 0,00  | 0,00  | 0,00  | 0,00  | 0,3843359 | NA       |
| EML6          | 0,37  | 0,20  | 0,54  | 0,41  | 0,3843711 | 0,561795 |
| HSD17B13      | 0,40  | 0,64  | 0,61  | 0,37  | 0,3844574 | 0,561853 |
| POLR3D        | 1,85  | 1,16  | 1,61  | 0,41  | 0,3844833 | 0,561853 |
| MCC           | 0,11  | 0,20  | 0,14  | 0,25  | 0,3845184 | 0,561853 |
| PPFIA4        | 1,00  | 0,70  | 0,79  | 0,65  | 0,3845424 | 0,561853 |
| RP11-648O15.1 | 0,08  | 0,00  | 0,00  | 0,28  | 0,3845455 | 0,561853 |
| FTH1          | 12,89 | 12,65 | 12,82 | 12,44 | 0,3845629 | 0,561853 |
| RP11-629O1.2  | 0,00  | 2,77  | 1,25  | 0,31  | 0,3846975 | 0,562013 |
| DTWD1         | 5,06  | 4,57  | 5,11  | 5,85  | 0,3847925 | 0,56211  |
| TMED7-TICAM2  | 0,57  | 0,00  | 1,30  | 0,93  | 0,3848147 | 0,56211  |
| RP11-26F2.1   | 0,00  | 0,00  | 0,00  | 0,00  | 0,3848636 | 0,562145 |
| RP11-304L19.3 | 1,00  | 1,42  | 0,69  | 1,13  | 0,3849566 | 0,562244 |
| FBXL19-AS1    | 0,32  | 0,45  | 0,33  | 0,44  | 0,3849903 | 0,562256 |
| PAX8          | 0,00  | 0,00  | 0,00  | 0,06  | 0,3851311 | 0,562424 |
| RP11-92A5.2   | 0,00  | 0,09  | 0,00  | 0,00  | 0,3851604 | 0,56243  |
| SF3B3         | 5,32  | 5,90  | 5,37  | 4,97  | 0,3854304 | 0,562755 |
| RNU6-354P     | 0,00  | 0,00  | 0,00  | 0,00  | 0,3854795 | 0,562755 |
| RNU6-610P     | 0,00  | 0,00  | 0,00  | 0,00  | 0,3854795 | 0,562755 |
| BPHL          | 3,07  | 1,41  | 2,10  | 1,92  | 0,3854838 | 0,562755 |
| RNU6-233P     | 0,00  | 0,00  | 0,00  | 0,00  | 0,3854875 | NA       |
| RP11-677M14.3 | 0,00  | 0,00  | 0,00  | 0,00  | 0,3855242 | 0,562777 |
| EFCAB11       | 2,58  | 2,52  | 1,74  | 1,85  | 0,3856031 | 0,562828 |
| AC090286.2    | 0,00  | 0,00  | 0,00  | 0,00  | 0,3856097 | 0,562828 |
| NUTM2G        | 0,00  | 0,00  | 0,00  | 0,00  | 0,3857148 | 0,562944 |
| RP11-24F11.2  | 3,51  | 1,57  | 1,75  | 0,33  | 0,3859352 | 0,563216 |
| RP11-752G15.8 | 0,10  | 0,00  | 0,26  | 0,16  | 0,3859593 | 0,563216 |
| SDCBP2        | 0,00  | 1,96  | 0,00  | 0,00  | 0,3859814 | 0,563216 |
| MORN1         | 0,73  | 1,16  | 0,37  | 0,76  | 0,3860027 | 0,563216 |
| RP11-395F4.1  | 0,00  | 0,00  | 0,00  | 0,63  | 0,3860892 | 0,563306 |
| MOSPD3        | 3,64  | 5,68  | 3,25  | 3,13  | 0,3861623 | 0,563329 |
| RP11-2E17.2   | 0,64  | 1,49  | 1,41  | 1,14  | 0,3861697 | 0,563329 |
| RP11-386B13.3 | 0,00  | 0,29  | 0,10  | 0,26  | 0,3861846 | 0,563329 |
| CTD-2224J9.9  | 0,00  | 0,00  | 0,00  | 0,00  | 0,3862159 | 0,563329 |
| GMEB2         | 1,56  | 2,97  | 1,38  | 1,00  | 0,3862522 | 0,563329 |
| ZNF781        | 1,62  | 0,56  | 1,31  | 1,91  | 0,3862577 | 0,563329 |

|                |      |      |      |      |           |          |
|----------------|------|------|------|------|-----------|----------|
| KIF12          | 0,00 | 0,00 | 0,00 | 0,00 | 0,3862597 | NA       |
| TNFRSF17       | 0,01 | 0,60 | 0,09 | 0,14 | 0,3862802 | NA       |
| FAM199X        | 2,06 | 1,01 | 1,33 | 0,79 | 0,3862856 | 0,563333 |
| RP11-130C19.3  | 0,32 | 1,33 | 0,37 | 1,03 | 0,3863366 | 0,563371 |
| PRR33          | 0,12 | 0,15 | 0,06 | 0,03 | 0,3864393 | 0,563451 |
| CTC-529I10.1   | 4,33 | 0,00 | 2,31 | 0,76 | 0,3864422 | 0,563451 |
| ACO16712.1     | 0,77 | 1,49 | 0,82 | 1,03 | 0,3865515 | 0,563536 |
| ANKRD36B       | 3,16 | 2,84 | 2,35 | 1,78 | 0,3865517 | 0,563536 |
| RP11-762L8.1   | 0,00 | 0,00 | 0,00 | 0,00 | 0,3866051 | 0,563563 |
| KHDC1          | 1,05 | 1,09 | 0,79 | 1,55 | 0,3866206 | 0,563563 |
| RP13-204A15.5  | 0,00 | 0,00 | 0,75 | 0,00 | 0,3867097 | 0,563606 |
| P2RY8          | 3,24 | 3,21 | 3,13 | 2,28 | 0,3867197 | 0,563606 |
| BCAS3          | 4,10 | 4,37 | 4,10 | 3,81 | 0,3867263 | 0,563606 |
| OSBPL6         | 0,81 | 1,17 | 1,09 | 2,04 | 0,3867883 | 0,563635 |
| RNU1-106P      | 0,00 | 0,00 | 0,00 | 2,04 | 0,3867967 | 0,563635 |
| CXCL2          | 1,12 | 2,63 | 4,35 | 2,66 | 0,3869341 | 0,563757 |
| RP11-203I2.2   | 0,00 | 0,84 | 0,05 | 0,13 | 0,3869408 | 0,563757 |
| CDCA4          | 1,44 | 1,33 | 2,47 | 0,30 | 0,3869995 | 0,563757 |
| FN3KRP         | 3,30 | 1,14 | 2,86 | 0,07 | 0,3870054 | 0,563757 |
| LINC00677      | 0,00 | 0,00 | 0,00 | 0,45 | 0,3870411 | 0,563757 |
| VAMP2          | 4,40 | 4,16 | 4,17 | 3,39 | 0,3870436 | 0,563757 |
| RP11-313P13.3  | 1,11 | 0,18 | 0,00 | 0,00 | 0,3870581 | 0,563757 |
| POMGNT1        | 3,06 | 1,81 | 2,67 | 3,97 | 0,3871654 | 0,563857 |
| RP13-270P17.2  | 2,35 | 0,15 | 0,57 | 0,00 | 0,3871774 | 0,563857 |
| RP11-319E16.2  | 0,00 | 0,00 | 0,00 | 0,00 | 0,3872459 | NA       |
| SCYL1          | 3,99 | 3,91 | 4,36 | 4,55 | 0,3874441 | 0,564208 |
| RP11-1105G2.3  | 2,67 | 0,41 | 1,47 | 3,38 | 0,387652  | 0,564474 |
| CDC42EP1       | 0,00 | 0,70 | 0,12 | 0,38 | 0,3877098 | 0,564511 |
| RN7SL577P      | 0,00 | 0,00 | 0,41 | 0,71 | 0,3877281 | 0,564511 |
| MAST4          | 0,25 | 1,18 | 0,55 | 0,34 | 0,3877734 | 0,56454  |
| BUD13          | 2,86 | 2,67 | 3,17 | 3,20 | 0,3879128 | 0,564706 |
| RP11-529E10.7  | 0,32 | 1,02 | 0,37 | 1,00 | 0,3879797 | 0,564766 |
| RN7SL498P      | 1,11 | 0,85 | 0,00 | 1,91 | 0,3880579 | 0,564818 |
| CH507-254M2.3  | 0,38 | 0,00 | 0,00 | 0,00 | 0,3880658 | 0,564818 |
| RP11-29H23.1   | 0,27 | 0,00 | 0,29 | 0,00 | 0,3880989 | 0,564829 |
| GPR18          | 3,80 | 3,43 | 3,14 | 1,40 | 0,3883164 | 0,565108 |
| RP11-1035H13.3 | 1,10 | 4,38 | 0,00 | 2,62 | 0,3883535 | 0,565125 |
| SMCO3          | 0,00 | 0,00 | 0,00 | 0,00 | 0,3885535 | NA       |
| KLRC3          | 0,00 | 0,00 | 0,00 | 0,22 | 0,3886061 | 0,565452 |
| RP11-483G21.3  | 0,77 | 0,33 | 0,18 | 0,77 | 0,388629  | 0,565452 |
| CCDC77         | 3,84 | 3,85 | 3,38 | 3,11 | 0,3886774 | 0,565485 |
| RP5-947P14.1   | 1,46 | 1,80 | 1,35 | 0,48 | 0,3887106 | 0,565497 |
| CPNE2          | 1,43 | 0,54 | 1,27 | 1,37 | 0,3888675 | 0,565615 |
| INO80D         | 2,24 | 2,84 | 2,79 | 3,10 | 0,3888681 | 0,565615 |
| NCCRP1         | 0,49 | 0,39 | 0,44 | 0,14 | 0,3888931 | 0,565615 |
| RP11-373I16.1  | 0,00 | 0,00 | 0,24 | 0,00 | 0,3888934 | 0,565615 |
| CD99L1         | 3,50 | 0,81 | 2,26 | 0,67 | 0,3889418 | 0,565634 |
| BCL3           | 2,67 | 2,49 | 3,32 | 2,25 | 0,3889711 | 0,565634 |
| OSGEPL1        | 1,58 | 1,07 | 0,97 | 2,50 | 0,388983  | 0,565634 |
| NDUFAF1        | 3,09 | 1,26 | 1,39 | 1,19 | 0,389055  | 0,565701 |
| DBT            | 0,65 | 0,47 | 0,88 | 1,24 | 0,389126  | 0,565768 |
| CTD-2017D11.2  | 0,51 | 1,38 | 1,06 | 0,76 | 0,3892128 | 0,565857 |
| RF00086        | 0,00 | 0,00 | 0,00 | 0,00 | 0,3894536 | 0,56614  |
| RP11-73M18.10  | 0,00 | 0,00 | 0,71 | 0,00 | 0,3894586 | 0,56614  |
| CHRFAM7A       | 1,83 | 0,00 | 1,36 | 0,29 | 0,38951   | 0,566178 |

|                |      |      |      |      |           |          |
|----------------|------|------|------|------|-----------|----------|
| ESPL1          | 0,15 | 0,07 | 0,15 | 0,08 | 0,3895739 | 0,566234 |
| RP11-1191J2.5  | 0,00 | 0,00 | 0,00 | 1,18 | 0,3896223 | 0,566267 |
| C22orf42       | 0,00 | 0,11 | 0,00 | 0,08 | 0,3896289 | NA       |
| RHBDL1         | 0,00 | 0,10 | 0,00 | 0,00 | 0,389833  | 0,566536 |
| RNU4-86P       | 2,55 | 1,17 | 2,75 | 3,58 | 0,3898973 | 0,566593 |
| RP11-231D20.1  | 0,00 | 0,00 | 0,00 | 0,00 | 0,3899358 | 0,566612 |
| CHST15         | 0,02 | 0,05 | 0,11 | 2,37 | 0,3899917 | 0,566656 |
| RP11-277B15.2  | 0,64 | 0,00 | 0,53 | 0,74 | 0,3900456 | 0,566697 |
| RP11-541N10.3  | 0,00 | 0,00 | 0,00 | 0,00 | 0,3900573 | NA       |
| ACO11293.1     | 0,00 | 0,00 | 0,00 | 0,00 | 0,3901243 | NA       |
| OR1J1          | 0,00 | 0,00 | 0,00 | 0,35 | 0,3901735 | NA       |
| RP4-569D19.5   | 0,11 | 0,13 | 0,15 | 0,08 | 0,3902086 | 0,566897 |
| RP11-17P16.1   | 0,65 | 0,30 | 0,54 | 0,51 | 0,3902515 | 0,566922 |
| RP11-764K9.1   | 0,33 | 0,09 | 0,43 | 0,45 | 0,3903103 | 0,56697  |
| ZNF107         | 1,46 | 0,39 | 0,39 | 1,95 | 0,390429  | 0,567106 |
| RP11-219A15.1  | 0,00 | 0,00 | 0,00 | 0,00 | 0,3904959 | 0,567166 |
| CBLC           | 0,00 | 0,00 | 0,00 | 0,00 | 0,3905121 | NA       |
| RP5-864K19.4   | 1,12 | 0,19 | 0,29 | 0,75 | 0,3905418 | 0,567195 |
| RP11-417E7.1   | 0,00 | 0,31 | 0,00 | 0,00 | 0,3905723 | NA       |
| RP11-645C24.3  | 2,36 | 3,30 | 3,18 | 2,55 | 0,3906127 | 0,567261 |
| MAPK8IP1       | 0,00 | 0,61 | 0,02 | 0,00 | 0,3906469 | 0,567274 |
| TXLNB          | 0,05 | 0,00 | 0,00 | 0,02 | 0,3907322 | 0,567332 |
| KB-1410C5.3    | 2,10 | 1,74 | 2,30 | 2,34 | 0,3907381 | 0,567332 |
| RP11-307C12.13 | 0,00 | 3,30 | 0,00 | 1,45 | 0,3907971 | 0,567363 |
| RMDN3          | 3,48 | 1,67 | 1,77 | 1,32 | 0,3908107 | 0,567363 |
| RP3-324O17.8   | 0,00 | 0,00 | 0,19 | 0,00 | 0,3908418 | 0,567372 |
| CTD-2377D24.6  | 0,00 | 0,30 | 0,57 | 0,31 | 0,3910239 | 0,567574 |
| RP11-537A6.9   | 0,00 | 0,00 | 0,00 | 0,00 | 0,3910262 | NA       |
| DNMT3B         | 0,00 | 0,03 | 0,00 | 0,07 | 0,3910324 | 0,567574 |
| AGBL5          | 0,32 | 0,06 | 0,52 | 0,58 | 0,391103  | 0,567592 |
| RP11-1072C15.4 | 0,00 | 0,00 | 0,00 | 0,00 | 0,3911445 | 0,567592 |
| CEP152         | 3,10 | 1,79 | 3,27 | 2,57 | 0,3911502 | 0,567592 |
| KCTD1          | 0,94 | 0,92 | 1,29 | 0,82 | 0,391155  | 0,567592 |
| GTF2H5         | 1,29 | 0,97 | 1,40 | 1,57 | 0,3911729 | 0,567592 |
| MFSD10         | 4,07 | 2,44 | 4,92 | 4,35 | 0,3911976 | 0,567592 |
| RP11-358H9.2   | 0,00 | 0,00 | 0,00 | 0,00 | 0,3912609 | NA       |
| NOXO1          | 0,00 | 0,00 | 0,00 | 0,23 | 0,3913107 | NA       |
| DDIAS          | 1,69 | 1,00 | 1,31 | 0,85 | 0,3913675 | 0,567801 |
| RP11-753H16.5  | 0,00 | 0,00 | 0,00 | 0,00 | 0,3914047 | 0,567818 |
| RP11-113J24.4  | 0,00 | 0,00 | 0,00 | 0,00 | 0,3914734 | 0,567881 |
| AGPAT2         | 3,46 | 2,67 | 3,99 | 4,64 | 0,3915021 | 0,567885 |
| SLC22A10       | 0,00 | 3,06 | 0,00 | 0,00 | 0,3915674 | 0,567943 |
| KB-1958F4.1    | 0,73 | 0,00 | 0,52 | 0,00 | 0,3916869 | 0,568042 |
| IGSF8          | 0,33 | 3,21 | 2,86 | 1,85 | 0,3916881 | 0,568042 |
| CFAP206        | 0,35 | 0,00 | 0,26 | 0,00 | 0,3917126 | 0,568042 |
| ACO93690.1     | 0,67 | 0,46 | 0,26 | 0,69 | 0,3917537 | 0,568065 |
| SMAD1          | 1,11 | 0,07 | 1,13 | 1,07 | 0,3918867 | 0,56819  |
| RP5-940J5.8    | 1,51 | 0,88 | 0,91 | 0,49 | 0,3918912 | 0,56819  |
| RP11-73B2.9    | 0,00 | 0,00 | 0,00 | 0,00 | 0,3919423 | NA       |
| CPE            | 0,00 | 0,00 | 0,00 | 0,06 | 0,3919428 | NA       |
| RP11-434C1.1   | 0,07 | 0,14 | 0,16 | 0,36 | 0,3920083 | 0,568314 |
| ELP5           | 5,76 | 2,17 | 4,79 | 5,89 | 0,3920281 | 0,568314 |
| RP11-94B19.3   | 0,00 | 0,19 | 0,00 | 0,00 | 0,3921119 | NA       |
| RP11-302M6.5   | 0,00 | 0,00 | 0,00 | 0,00 | 0,3922522 | 0,568602 |
| STAB2          | 0,00 | 0,13 | 0,00 | 0,00 | 0,3923152 | 0,568649 |

|               |      |      |      |      |           |          |
|---------------|------|------|------|------|-----------|----------|
| SIK2          | 1,05 | 0,62 | 0,59 | 0,52 | 0,39234   | 0,568649 |
| BET1L         | 3,25 | 3,36 | 2,98 | 3,65 | 0,3923611 | 0,568649 |
| RP11-57H14.3  | 0,00 | 0,80 | 0,00 | 0,00 | 0,3924478 | NA       |
| RP11-455J20.2 | 1,81 | 2,60 | 1,81 | 1,74 | 0,3925225 | 0,56883  |
| INSRR         | 0,00 | 0,05 | 0,00 | 0,00 | 0,3925275 | NA       |
| MOGS          | 1,74 | 0,58 | 1,81 | 2,24 | 0,3925786 | 0,56883  |
| HOXA-AS3      | 0,00 | 0,00 | 0,00 | 0,00 | 0,3925867 | 0,56883  |
| EPB41L3       | 5,46 | 5,15 | 5,79 | 4,61 | 0,3926106 | 0,56883  |
| LAGE3         | 3,64 | 3,04 | 3,59 | 4,18 | 0,3926332 | 0,56883  |
| KIF11         | 0,13 | 0,15 | 0,34 | 0,21 | 0,3926396 | 0,56883  |
| CD58          | 6,75 | 7,03 | 6,00 | 6,65 | 0,3927336 | 0,568929 |
| RP11-38L15.3  | 0,00 | 0,96 | 0,37 | 0,00 | 0,3928155 | 0,568989 |
| SMS           | 5,49 | 4,49 | 4,76 | 3,36 | 0,3928374 | 0,568989 |
| AC104135.4    | 0,00 | 0,00 | 0,00 | 0,12 | 0,3928518 | 0,568989 |
| NUDT12        | 0,00 | 0,00 | 0,00 | 0,58 | 0,3929023 | 0,569025 |
| RP11-90J7.3   | 0,00 | 0,00 | 0,00 | 0,57 | 0,3929326 | 0,569032 |
| SLC38A9       | 3,59 | 2,33 | 3,38 | 3,12 | 0,3931177 | 0,569263 |
| RP11-121L11.3 | 0,00 | 0,00 | 0,00 | 0,00 | 0,3932369 | NA       |
| DHRS4         | 4,70 | 5,06 | 5,02 | 4,18 | 0,393465  | 0,569728 |
| IL1RL2        | 0,00 | 0,00 | 0,00 | 0,41 | 0,3934989 | 0,56974  |
| RN7SL310P     | 0,00 | 2,23 | 0,00 | 0,00 | 0,3935489 | NA       |
| SPDYE5        | 0,99 | 0,91 | 0,36 | 1,06 | 0,3936085 | 0,569835 |
| APTX          | 4,73 | 5,39 | 4,42 | 3,71 | 0,3936156 | 0,569835 |
| RP11-525G12.1 | 0,00 | 0,00 | 0,00 | 0,00 | 0,3937471 | 0,569988 |
| ADAT2         | 3,39 | 3,23 | 3,59 | 3,09 | 0,3937863 | 0,570008 |
| RP11-196G4.2  | 0,00 | 0,00 | 0,01 | 0,03 | 0,3938047 | NA       |
| KCTD20        | 3,67 | 3,50 | 3,95 | 3,59 | 0,3939399 | 0,570193 |
| RP11-89K21.1  | 0,00 | 0,00 | 0,00 | 0,04 | 0,3939445 | NA       |
| LPCAT2        | 5,18 | 3,86 | 4,71 | 4,74 | 0,3940061 | 0,570226 |
| RP11-400F1.1  | 0,00 | 0,17 | 0,09 | 0,14 | 0,3940137 | 0,570226 |
| UBE2J1        | 4,00 | 4,75 | 3,71 | 3,41 | 0,3941038 | 0,570319 |
| AC009237.11   | 0,00 | 0,00 | 0,00 | 0,00 | 0,3942303 | 0,570465 |
| RN7SL122P     | 2,08 | 1,20 | 2,07 | 1,93 | 0,3942597 | 0,57047  |
| ZNF598        | 2,16 | 2,35 | 2,08 | 0,38 | 0,3944033 | 0,570603 |
| RP4-647J21.1  | 2,71 | 1,26 | 2,71 | 0,44 | 0,3944169 | 0,570603 |
| TIMM10B       | 4,35 | 3,73 | 3,05 | 2,93 | 0,394432  | 0,570603 |
| GATA6         | 0,00 | 0,00 | 0,00 | 0,00 | 0,3944459 | NA       |
| ANG           | 2,57 | 4,74 | 1,15 | 3,96 | 0,3944545 | 0,570603 |
| KRT18P18      | 0,00 | 0,13 | 0,00 | 0,00 | 0,3944652 | NA       |
| RP11-764D10.2 | 0,00 | 0,00 | 0,44 | 0,99 | 0,3945432 | 0,570695 |
| GOLGA8H       | 0,00 | 0,00 | 0,00 | 0,00 | 0,3945659 | NA       |
| RP11-226E21.2 | 0,00 | 0,00 | 0,00 | 0,00 | 0,3946173 | NA       |
| PRRC1         | 3,50 | 1,28 | 4,27 | 2,97 | 0,3946217 | 0,570771 |
| TXNDC15       | 4,21 | 4,62 | 3,87 | 3,29 | 0,3946483 | 0,570772 |
| CTD-2013N17.4 | 0,00 | 0,00 | 0,00 | 0,60 | 0,394666  | NA       |
| RP11-114N1.1  | 0,00 | 1,33 | 0,00 | 0,00 | 0,3947229 | NA       |
| RP11-173B14.5 | 0,00 | 0,80 | 0,00 | 1,03 | 0,3947393 | 0,570861 |
| AC007422.1    | 0,00 | 0,00 | 0,00 | 0,00 | 0,394758  | NA       |
| SYT10         | 0,00 | 0,00 | 0,00 | 0,00 | 0,3947835 | 0,570861 |
| TSNAX-DISC1   | 0,00 | 1,44 | 0,00 | 0,00 | 0,3947863 | 0,570861 |
| RNASE9        | 0,00 | 0,00 | 0,00 | 0,00 | 0,3948029 | NA       |
| DRC7          | 0,00 | 0,00 | 0,00 | 0,00 | 0,3948112 | NA       |
| RP11-151N17.1 | 0,00 | 0,00 | 0,15 | 1,28 | 0,3948818 | 0,570961 |
| ZNF202        | 0,40 | 0,56 | 0,12 | 0,21 | 0,3951485 | 0,57131  |
| DYNC1I1       | 0,45 | 0,41 | 0,27 | 0,28 | 0,3951856 | 0,571326 |

|                 |      |      |      |      |           |          |
|-----------------|------|------|------|------|-----------|----------|
| RN7SL297P       | 0,00 | 0,84 | 0,00 | 0,00 | 0,3951942 | NA       |
| CLCN5           | 2,73 | 1,61 | 2,26 | 1,76 | 0,3952589 | 0,571395 |
| CTD-2013N24.2   | 2,45 | 0,61 | 1,28 | 0,93 | 0,3953306 | 0,571458 |
| RSPH9           | 0,00 | 0,00 | 0,00 | 0,00 | 0,3953733 | 0,571458 |
| RP11-863P13.4   | 0,74 | 0,00 | 1,66 | 0,86 | 0,3953985 | 0,571458 |
| RP11-202D20.1   | 1,62 | 0,00 | 0,00 | 0,00 | 0,3954294 | 0,571458 |
| AC005300.5      | 0,00 | 0,00 | 0,00 | 0,00 | 0,3954514 | 0,571458 |
| BPNT1           | 2,40 | 0,74 | 2,21 | 1,03 | 0,3954564 | 0,571458 |
| GJAS            | 0,00 | 0,12 | 0,00 | 0,00 | 0,395464  | NA       |
| SCAI            | 1,87 | 2,23 | 1,43 | 2,17 | 0,3955017 | 0,571486 |
| RP13-188A5.1    | 0,34 | 1,40 | 0,46 | 0,53 | 0,3955577 | 0,57153  |
| TM2D2           | 4,03 | 1,37 | 3,49 | 2,67 | 0,3955947 | 0,571546 |
| RP11-160N1.10   | 0,00 | 0,00 | 0,00 | 0,00 | 0,395707  | NA       |
| RP11-266J6.2    | 0,00 | 0,00 | 0,00 | 0,00 | 0,3957307 | 0,571674 |
| FAM20A          | 0,17 | 1,23 | 0,15 | 0,34 | 0,3957347 | 0,571674 |
| TRGV4           | 0,24 | 0,86 | 0,00 | 0,00 | 0,3957914 | 0,571719 |
| RP11-93H24.3    | 0,00 | 0,00 | 0,00 | 0,00 | 0,3958162 | NA       |
| PNLIPRP2        | 0,00 | 0,00 | 0,00 | 0,00 | 0,3958453 | NA       |
| RBFOX1          | 0,13 | 0,18 | 0,39 | 0,00 | 0,3958465 | 0,571761 |
| RP11-348A11.5   | 0,00 | 0,00 | 0,00 | 1,49 | 0,3959238 | 0,571836 |
| TTPA            | 0,07 | 0,27 | 0,13 | 0,15 | 0,3960838 | 0,572029 |
| RP11-363G15.2   | 0,12 | 0,29 | 0,00 | 0,17 | 0,3961546 | NA       |
| ERMARD          | 4,90 | 1,34 | 4,20 | 3,63 | 0,3961831 | 0,572136 |
| CRX             | 0,27 | 0,24 | 0,42 | 0,35 | 0,3962567 | 0,572205 |
| RP11-596C23.2   | 3,36 | 1,06 | 3,28 | 1,42 | 0,3963262 | 0,572268 |
| RNU6-1284P      | 0,00 | 0,00 | 0,00 | 0,00 | 0,3963787 | 0,572307 |
| GPR132          | 0,98 | 0,60 | 1,67 | 1,21 | 0,3964123 | 0,572318 |
| RP11-665C16.4   | 0,00 | 0,00 | 0,00 | 0,00 | 0,3964444 | NA       |
| RP5-1154L15.1   | 0,00 | 0,00 | 0,00 | 0,00 | 0,3964871 | NA       |
| ZDHH4           | 5,14 | 5,11 | 4,78 | 5,64 | 0,3965606 | 0,572427 |
| CCDC56          | 6,82 | 6,67 | 6,56 | 7,32 | 0,396564  | 0,572427 |
| AJ011931.1      | 0,00 | 0,00 | 0,00 | 0,00 | 0,3965652 | 0,572427 |
| CTD-2066L21.3   | 0,28 | 0,00 | 0,28 | 0,38 | 0,3965996 | 0,57244  |
| COL4A3BP        | 4,91 | 5,05 | 5,42 | 5,37 | 0,3967666 | 0,572644 |
| EIF3LP2         | 0,17 | 0,00 | 0,18 | 0,22 | 0,3968662 | NA       |
| AC024619.2      | 0,00 | 0,00 | 0,00 | 0,00 | 0,3969065 | NA       |
| CTC-428G20.5    | 0,53 | 0,46 | 0,92 | 1,28 | 0,3969413 | 0,572859 |
| CELF6           | 1,00 | 1,39 | 0,54 | 0,64 | 0,3970018 | 0,572889 |
| FAM118B         | 4,36 | 1,41 | 3,77 | 2,43 | 0,3970142 | 0,572889 |
| RP1-7G5.6       | 0,40 | 0,51 | 0,28 | 0,63 | 0,3970984 | 0,572974 |
| RP11-74E22.8    | 0,00 | 0,12 | 0,05 | 0,04 | 0,3971457 | NA       |
| CTD-2334D19.1   | 0,00 | 0,00 | 0,00 | 0,00 | 0,3972357 | NA       |
| CDC42BPA        | 0,55 | 0,35 | 0,45 | 0,09 | 0,3972704 | 0,573163 |
| KLHL4           | 0,00 | 0,00 | 0,00 | 0,02 | 0,397282  | NA       |
| CTD-2173L22.4   | 0,00 | 0,32 | 0,00 | 0,00 | 0,3972825 | 0,573163 |
| METRNL          | 6,27 | 7,14 | 6,80 | 6,69 | 0,3973289 | 0,573163 |
| CP              | 0,61 | 0,16 | 0,20 | 0,10 | 0,3973329 | 0,573163 |
| LL22NC03-79E2.1 | 1,02 | 0,94 | 1,48 | 0,99 | 0,3973959 | 0,573217 |
| RP11-548M13.1   | 0,00 | 0,00 | 0,00 | 0,00 | 0,3974237 | NA       |
| RP11-370F5.4    | 0,00 | 0,57 | 0,31 | 1,74 | 0,3974928 | 0,573319 |
| STAG3L5P        | 3,24 | 2,36 | 2,99 | 3,46 | 0,3975483 | 0,573362 |
| RP11-798M19.3   | 0,00 | 0,00 | 0,00 | 0,00 | 0,397574  | 0,573362 |
| RP11-198D23.2   | 0,00 | 2,34 | 0,00 | 0,00 | 0,3975977 | NA       |
| NCAPD3          | 2,12 | 1,15 | 1,31 | 0,69 | 0,397656  | 0,573413 |
| MGAT5B          | 0,00 | 0,09 | 0,00 | 0,00 | 0,3976611 | 0,573413 |

|               |      |      |      |      |           |          |
|---------------|------|------|------|------|-----------|----------|
| RP11-78J21.2  | 0,42 | 0,60 | 0,42 | 0,19 | 0,3978305 | 0,573618 |
| TPM1          | 3,41 | 4,19 | 3,26 | 1,80 | 0,397901  | 0,573618 |
| MIR4637       | 0,00 | 0,00 | 0,00 | 0,00 | 0,3979163 | 0,573618 |
| PREX2         | 0,18 | 0,02 | 0,12 | 0,24 | 0,3979251 | 0,573618 |
| CFAP73        | 0,00 | 0,00 | 0,00 | 0,00 | 0,397932  | 0,573618 |
| LINC00304     | 0,33 | 0,84 | 0,30 | 0,38 | 0,3981071 | 0,573833 |
| LINC00266-1   | 0,00 | 0,00 | 0,00 | 0,00 | 0,3981416 | NA       |
| TSPAN16       | 0,00 | 0,00 | 0,00 | 0,52 | 0,3981495 | 0,573857 |
| ZNHIT6        | 2,96 | 1,98 | 2,28 | 2,27 | 0,3981999 | 0,573891 |
| AC062029.1    | 0,88 | 0,00 | 0,07 | 0,47 | 0,3982249 | 0,573891 |
| AC096921.2    | 0,00 | 0,00 | 0,00 | 0,00 | 0,3983385 | 0,574018 |
| PAOX          | 1,43 | 1,66 | 2,29 | 3,81 | 0,3984465 | 0,574063 |
| SPAG5         | 2,03 | 0,59 | 2,93 | 0,20 | 0,3984552 | 0,574063 |
| GGACT         | 0,16 | 0,00 | 0,00 | 0,15 | 0,3984582 | 0,574063 |
| FAM102A       | 0,03 | 3,31 | 0,06 | 0,63 | 0,3984736 | 0,574063 |
| RN7SL191P     | 0,76 | 0,00 | 0,79 | 1,36 | 0,3985952 | 0,574201 |
| FAM197Y3      | 0,00 | 0,00 | 0,03 | 0,00 | 0,3986108 | NA       |
| RP5-875O13.1  | 0,00 | 0,00 | 0,00 | 0,00 | 0,3988349 | NA       |
| DRC3          | 3,12 | 1,65 | 3,43 | 2,28 | 0,3989103 | 0,574618 |
| PKIG          | 3,38 | 1,45 | 1,31 | 1,06 | 0,3989797 | 0,574681 |
| RP5-1022I14.1 | 0,47 | 0,12 | 0,38 | 0,30 | 0,3990579 | 0,574725 |
| RP11-667K14.5 | 1,94 | 1,24 | 1,76 | 3,64 | 0,3990621 | 0,574725 |
| RN7SL535P     | 0,00 | 0,00 | 0,00 | 0,80 | 0,3990974 | 0,574733 |
| AC022201.4    | 0,27 | 0,85 | 0,14 | 0,00 | 0,3991196 | 0,574733 |
| MATR3         | 6,31 | 6,08 | 5,93 | 5,43 | 0,3991914 | 0,574799 |
| NAB1          | 3,17 | 2,72 | 2,98 | 3,54 | 0,3992551 | 0,574854 |
| LAMA2         | 0,00 | 0,66 | 0,00 | 0,00 | 0,3993446 | 0,574946 |
| VN1R81P       | 0,00 | 0,00 | 0,00 | 0,00 | 0,3993738 | 0,574947 |
| MRP63P3       | 0,00 | 0,00 | 0,00 | 0,00 | 0,3994217 | 0,574947 |
| SLC4A8        | 1,67 | 1,73 | 1,41 | 1,21 | 0,3994235 | 0,574947 |
| RP11-716O23.2 | 0,00 | 0,29 | 0,00 | 0,26 | 0,3994253 | NA       |
| GPER1         | 0,11 | 0,47 | 0,08 | 2,17 | 0,3996447 | 0,575229 |
| UBR7          | 3,15 | 1,12 | 2,41 | 1,63 | 0,3996959 | 0,575265 |
| NCAM2         | 0,00 | 0,00 | 0,00 | 0,00 | 0,3998187 | NA       |
| CTD-2515O10.6 | 3,54 | 2,74 | 2,64 | 3,34 | 0,399846  | 0,575423 |
| RMND5B        | 1,80 | 0,45 | 2,41 | 2,06 | 0,3998578 | 0,575423 |
| SLC22A5       | 1,13 | 2,23 | 1,29 | 1,00 | 0,3998888 | 0,575431 |
| NAGLU         | 0,98 | 0,54 | 3,11 | 2,66 | 0,4000768 | 0,575664 |
| RP11-775H9.3  | 0,00 | 0,37 | 0,00 | 0,00 | 0,4001243 | 0,575695 |
| RP11-330L19.2 | 0,38 | 1,11 | 0,00 | 0,41 | 0,4003351 | 0,575961 |
| SLC38A11      | 0,00 | 0,00 | 0,00 | 0,00 | 0,4004014 | 0,576019 |
| RP11-533K9.4  | 0,00 | 0,00 | 0,00 | 0,00 | 0,4004803 | 0,576095 |
| C12orf42      | 0,00 | 3,76 | 0,00 | 2,67 | 0,4005298 | 0,576121 |
| RP11-231P20.2 | 1,75 | 1,47 | 1,97 | 1,03 | 0,4005501 | 0,576121 |
| RP11-154D17.1 | 0,28 | 0,51 | 0,42 | 0,88 | 0,4006297 | 0,576198 |
| AP000609.2    | 0,31 | 0,00 | 0,33 | 0,30 | 0,4007073 | 0,576273 |
| FARP1         | 2,57 | 1,83 | 2,77 | 2,20 | 0,4009912 | 0,576604 |
| RP11-21L23.2  | 0,07 | 0,14 | 0,10 | 0,12 | 0,4010304 | 0,576604 |
| CENPH         | 0,77 | 0,35 | 1,20 | 1,35 | 0,4010495 | 0,576604 |
| CDK9          | 3,16 | 2,88 | 3,39 | 2,87 | 0,4010619 | 0,576604 |
| RP11-384E22.1 | 0,00 | 0,00 | 0,00 | 0,00 | 0,4010892 | 0,576604 |
| C21orf67      | 0,23 | 0,00 | 0,00 | 0,00 | 0,401093  | 0,576604 |
| MPP2          | 0,00 | 0,40 | 0,00 | 0,00 | 0,4011767 | NA       |
| RP11-316C10.1 | 0,00 | 0,00 | 0,00 | 0,00 | 0,4011833 | 0,576673 |
| UBAP2         | 3,51 | 3,27 | 2,81 | 2,06 | 0,4011929 | 0,576673 |

|                |      |      |      |      |           |          |
|----------------|------|------|------|------|-----------|----------|
| CDC20          | 0,00 | 0,00 | 0,00 | 0,00 | 0,401334  | 0,576838 |
| RP11-454P21.1  | 0,00 | 2,88 | 0,00 | 1,47 | 0,4013633 | 0,576843 |
| KCNE1B         | 0,00 | 0,00 | 0,00 | 0,25 | 0,4014539 | 0,576862 |
| AC012507.3     | 2,96 | 4,66 | 2,21 | 0,00 | 0,4014703 | 0,576862 |
| FN1            | 0,14 | 0,70 | 0,26 | 0,19 | 0,4014787 | 0,576862 |
| PKD1           | 0,58 | 0,92 | 0,64 | 0,58 | 0,4014803 | 0,576862 |
| ARHGEF10       | 0,53 | 0,32 | 0,96 | 0,88 | 0,4016101 | 0,576991 |
| CDCA7L         | 3,93 | 1,73 | 2,71 | 0,77 | 0,401622  | 0,576991 |
| PCNX1          | 4,54 | 2,95 | 4,38 | 4,06 | 0,4017676 | 0,577163 |
| KCNC4          | 0,23 | 0,32 | 0,27 | 0,89 | 0,4018286 | 0,577213 |
| TBC1D29        | 0,00 | 0,68 | 0,00 | 0,54 | 0,4018789 | 0,577248 |
| MIR5095        | 0,00 | 2,21 | 0,64 | 0,00 | 0,4018894 | NA       |
| MIR5708        | 0,00 | 0,00 | 0,00 | 0,00 | 0,4019889 | NA       |
| RP11-737O24.4  | 0,00 | 0,00 | 0,00 | 0,00 | 0,4020423 | 0,577445 |
| MAGEB3         | 0,00 | 0,23 | 0,00 | 0,00 | 0,4020969 | NA       |
| SLC39A1        | 3,42 | 2,77 | 2,90 | 2,19 | 0,4022182 | 0,577661 |
| MIR103A2       | 0,00 | 0,00 | 0,00 | 0,00 | 0,4022227 | NA       |
| IPO9           | 3,76 | 2,19 | 3,13 | 2,47 | 0,4023439 | 0,577804 |
| STARD8         | 3,22 | 3,64 | 3,34 | 2,75 | 0,402556  | 0,578034 |
| RP11-502I4.3   | 0,00 | 0,00 | 0,00 | 0,12 | 0,4025769 | 0,578034 |
| RP11-39K24.12  | 0,00 | 0,00 | 0,00 | 0,00 | 0,4026053 | 0,578034 |
| CTD-2331H12.7  | 0,00 | 0,00 | 0,00 | 0,00 | 0,4026081 | 0,578034 |
| TARBP2         | 3,58 | 1,53 | 3,19 | 3,83 | 0,4027784 | 0,578206 |
| RP11-309H8.3   | 0,00 | 0,00 | 0,00 | 0,00 | 0,4028036 | 0,578206 |
| AC068533.7     | 0,00 | 0,00 | 0,82 | 1,03 | 0,402824  | 0,578206 |
| CTC-454M9.1    | 0,82 | 0,36 | 0,37 | 1,20 | 0,4028318 | 0,578206 |
| RP1-37E16.13   | 0,00 | 0,00 | 0,00 | 0,00 | 0,4029079 | 0,578241 |
| RP11-1060J15.7 | 1,45 | 1,27 | 2,23 | 1,57 | 0,4029081 | 0,578241 |
| DZIP1L         | 0,03 | 0,00 | 0,10 | 0,06 | 0,4029596 | 0,578277 |
| RP11-798M19.6  | 0,75 | 0,87 | 1,02 | 0,40 | 0,4030163 | 0,578321 |
| AC093620.5     | 0,00 | 0,00 | 0,00 | 0,00 | 0,4030366 | NA       |
| RP11-277I20.2  | 1,96 | 0,00 | 0,87 | 0,68 | 0,4030457 | 0,578326 |
| RP11-454H13.5  | 0,42 | 0,67 | 1,11 | 0,45 | 0,4030845 | 0,578344 |
| RP4-706A16.3   | 0,00 | 0,40 | 0,17 | 0,47 | 0,403085  | NA       |
| CTD-2521M24.13 | 0,24 | 0,19 | 0,37 | 0,15 | 0,4031545 | 0,578384 |
| HAGH           | 4,96 | 5,23 | 4,71 | 4,68 | 0,403164  | 0,578384 |
| RP11-477B16.3  | 0,00 | 0,00 | 0,00 | 0,00 | 0,4032233 | NA       |
| RP11-123O10.1  | 1,00 | 0,00 | 1,56 | 1,93 | 0,403296  | 0,578536 |
| SCARNA23       | 0,00 | 0,00 | 0,00 | 0,00 | 0,4034876 | 0,578733 |
| RP11-108M9.6   | 0,00 | 0,00 | 0,26 | 2,52 | 0,4035065 | 0,578733 |
| RP11-1099M24.6 | 0,33 | 0,68 | 0,76 | 0,52 | 0,4035314 | 0,578733 |
| CASC10         | 0,08 | 0,07 | 0,08 | 0,06 | 0,4035663 | 0,578733 |
| SNX32          | 0,00 | 0,07 | 0,00 | 0,00 | 0,4035825 | 0,578733 |
| RP11-10E18.7   | 0,00 | 0,15 | 0,68 | 0,15 | 0,4035898 | 0,578733 |
| SETD9          | 4,13 | 2,43 | 1,28 | 0,53 | 0,4036576 | 0,57875  |
| RNU6-1152P     | 0,00 | 0,00 | 0,00 | 0,00 | 0,403673  | 0,57875  |
| ZNF614         | 1,72 | 1,70 | 1,59 | 1,16 | 0,4037194 | 0,57875  |
| KIF18B         | 0,13 | 0,20 | 0,19 | 0,09 | 0,4037452 | 0,57875  |
| LA16c-316G12.2 | 3,06 | 2,71 | 2,91 | 1,93 | 0,4037454 | 0,57875  |
| RP11-159F24.4  | 0,40 | 0,56 | 0,38 | 0,35 | 0,403758  | 0,57875  |
| RP11-326K13.5  | 0,00 | 1,31 | 0,00 | 0,00 | 0,4040678 | 0,579157 |
| RP11-862L9.3   | 0,00 | 0,00 | 0,00 | 0,29 | 0,4040944 | NA       |
| RP11-449K6.4   | 0,00 | 0,00 | 0,00 | 0,05 | 0,404118  | 0,57918  |
| ATG9A          | 2,60 | 1,95 | 2,71 | 3,74 | 0,4041472 | 0,57918  |
| CTD-2553L13.10 | 0,00 | 0,00 | 0,16 | 0,38 | 0,4041621 | 0,57918  |

|                |      |      |      |      |           |          |
|----------------|------|------|------|------|-----------|----------|
| PDRG1          | 3,11 | 1,12 | 1,83 | 0,92 | 0,4043902 | 0,579469 |
| AC011551.3     | 0,77 | 0,77 | 0,58 | 0,91 | 0,4044345 | 0,579496 |
| RP13-638C3.5   | 0,00 | 0,00 | 0,00 | 0,00 | 0,4046222 | NA       |
| HPRT1          | 6,06 | 6,05 | 4,93 | 2,40 | 0,4046379 | 0,579745 |
| TRIM55         | 0,00 | 0,00 | 0,00 | 0,00 | 0,4046491 | NA       |
| ZNF215         | 0,19 | 1,13 | 0,27 | 0,40 | 0,4046609 | 0,579745 |
| CYP39A1        | 0,00 | 0,00 | 0,00 | 0,00 | 0,4046744 | NA       |
| RP1-68D18.4    | 3,95 | 3,78 | 4,13 | 4,42 | 0,4047064 | 0,579769 |
| SLC35B2        | 3,14 | 3,98 | 3,11 | 1,96 | 0,4047297 | 0,579769 |
| CTA-243E7.3    | 0,39 | 0,49 | 0,54 | 0,64 | 0,4048256 | 0,579852 |
| RP6-65G23.1    | 0,15 | 0,59 | 0,30 | 0,31 | 0,4048511 | 0,579852 |
| RP11-480D4.2   | 0,00 | 0,00 | 0,00 | 0,00 | 0,4048792 | NA       |
| RP11-1H15.2    | 0,28 | 0,00 | 0,15 | 0,56 | 0,4049313 | 0,579852 |
| C1orf52        | 4,73 | 4,17 | 4,72 | 3,35 | 0,4049339 | 0,579852 |
| SENP1          | 3,29 | 0,54 | 2,20 | 3,05 | 0,404988  | 0,579852 |
| AC078937.4     | 1,54 | 2,07 | 1,48 | 0,91 | 0,4049906 | 0,579852 |
| RP11-334C17.5  | 0,83 | 1,18 | 1,27 | 2,08 | 0,4049945 | 0,579852 |
| MBNL3          | 4,14 | 2,82 | 3,08 | 2,05 | 0,4049963 | 0,579852 |
| RP11-286N22.6  | 2,08 | 1,96 | 2,68 | 2,90 | 0,4051778 | 0,580075 |
| SGSM2          | 3,81 | 3,54 | 4,06 | 2,86 | 0,4054418 | 0,580415 |
| RP11-159F24.3  | 0,00 | 0,00 | 0,46 | 0,42 | 0,4055137 | 0,580481 |
| FAM234B        | 1,45 | 0,50 | 0,66 | 0,17 | 0,4055527 | 0,580499 |
| EEF1A19        | 0,47 | 0,39 | 0,57 | 0,27 | 0,4056276 | 0,580569 |
| AC130469.2     | 0,00 | 0,00 | 0,00 | 0,00 | 0,4056316 | NA       |
| LINC00158      | 0,00 | 0,00 | 0,00 | 0,00 | 0,4057773 | NA       |
| SRPK2          | 5,27 | 4,61 | 5,07 | 5,34 | 0,405818  | 0,580804 |
| RPL7AP31       | 0,00 | 0,00 | 0,00 | 0,00 | 0,4058839 | 0,580861 |
| OR11N1P        | 0,00 | 0,00 | 0,00 | 0,00 | 0,4058936 | NA       |
| RP1-202O8.3    | 0,00 | 0,00 | 0,00 | 0,00 | 0,4059065 | NA       |
| RP11-512M8.12  | 0,00 | 0,00 | 0,00 | 0,00 | 0,4059348 | NA       |
| BTN3A2         | 4,05 | 4,53 | 3,97 | 4,28 | 0,4059735 | 0,580951 |
| RP11-422N19.3  | 0,00 | 0,54 | 0,00 | 0,00 | 0,4060195 | 0,580951 |
| RP11-544M22.13 | 2,38 | 3,20 | 1,93 | 0,51 | 0,4060603 | 0,580951 |
| USP20          | 1,97 | 2,61 | 2,11 | 3,11 | 0,4060736 | 0,580951 |
| RP11-946P6.4   | 0,00 | 0,00 | 0,00 | 0,73 | 0,4060777 | 0,580951 |
| DCDC1          | 0,08 | 0,19 | 0,09 | 0,31 | 0,4061472 | 0,581013 |
| SNX27          | 4,15 | 4,24 | 4,13 | 3,96 | 0,4061851 | 0,58103  |
| CTD-2267D19.3  | 0,00 | 0,00 | 0,00 | 0,00 | 0,4062249 | 0,58105  |
| TBC1D10C       | 4,49 | 5,63 | 3,96 | 4,04 | 0,4062541 | 0,581054 |
| RP11-221J22.1  | 0,00 | 0,00 | 0,00 | 0,00 | 0,4063111 | 0,581069 |
| SYCE2          | 0,00 | 0,00 | 0,00 | 0,00 | 0,4063416 | 0,581069 |
| ERCC6          | 3,96 | 2,36 | 2,85 | 1,03 | 0,406343  | 0,581069 |
| RPS12P26       | 0,00 | 0,00 | 0,00 | 0,00 | 0,4063579 | NA       |
| RP1-272E8.1    | 0,08 | 0,64 | 0,32 | 0,31 | 0,4063715 | 0,581072 |
| PDAP1          | 3,36 | 3,11 | 3,35 | 3,04 | 0,4064178 | 0,581101 |
| RP11-471M2.3   | 0,09 | 0,07 | 0,04 | 0,56 | 0,4066188 | 0,581351 |
| SPIN2B         | 0,82 | 0,26 | 0,37 | 0,28 | 0,4066642 | 0,581379 |
| TM6SF1         | 3,94 | 2,67 | 3,49 | 1,99 | 0,4067049 | 0,581399 |
| RP11-126O22.8  | 0,00 | 0,00 | 0,00 | 0,00 | 0,4067536 | 0,581432 |
| CTB-36O1.4     | 0,00 | 1,39 | 0,00 | 1,00 | 0,40676   | NA       |
| RP11-439C8.1   | 0,00 | 0,00 | 0,00 | 0,00 | 0,4068551 | NA       |
| RP11-834C11.7  | 0,00 | 0,00 | 0,00 | 0,17 | 0,4068833 | NA       |
| CHFR           | 4,97 | 4,35 | 4,77 | 3,99 | 0,4069424 | 0,581631 |
| MDM2           | 4,73 | 5,63 | 4,68 | 5,57 | 0,4069975 | 0,581631 |
| FCMR           | 2,33 | 0,68 | 0,67 | 0,00 | 0,4070106 | 0,581631 |



|                |      |      |      |      |           |          |
|----------------|------|------|------|------|-----------|----------|
| CTC-428H11.2   | 0,45 | 0,52 | 0,44 | 0,54 | 0,4070337 | 0,581631 |
| TAF5           | 0,19 | 0,04 | 0,08 | 0,22 | 0,407043  | 0,581631 |
| RP11-204J18.3  | 0,52 | 0,35 | 0,48 | 0,43 | 0,4070499 | 0,581631 |
| RP1-197B17.7   | 0,04 | 0,06 | 0,02 | 0,33 | 0,4071756 | 0,581773 |
| DIO1           | 0,00 | 0,00 | 0,00 | 0,00 | 0,4072762 | 0,581879 |
| FBXO4          | 3,99 | 3,08 | 2,01 | 0,34 | 0,4074492 | 0,582089 |
| C10orf76       | 3,40 | 3,92 | 3,42 | 3,05 | 0,4074929 | 0,582096 |
| ICK            | 0,68 | 1,56 | 0,74 | 0,96 | 0,4075063 | 0,582096 |
| AP005901.1     | 0,23 | 0,71 | 0,19 | 0,33 | 0,4076655 | 0,582286 |
| RNU6-939P      | 0,00 | 0,00 | 0,00 | 0,00 | 0,407666  | NA       |
| RP11-777J24.1  | 0,54 | 1,14 | 0,72 | 0,76 | 0,4076733 | NA       |
| KLF4           | 8,25 | 7,99 | 8,03 | 7,50 | 0,4077312 | 0,582312 |
| RP11-838N2.5   | 0,18 | 0,84 | 0,18 | 0,00 | 0,407736  | 0,582312 |
| ALS91893.1     | 1,84 | 1,47 | 1,34 | 1,69 | 0,4078422 | 0,58239  |
| CH17-268I9.2   | 3,08 | 0,92 | 3,06 | 2,89 | 0,4078551 | 0,58239  |
| RP1-308E4.1    | 0,00 | 0,00 | 0,00 | 0,49 | 0,4078699 | 0,58239  |
| RP11-561C5.3   | 0,28 | 0,31 | 0,32 | 0,66 | 0,4080657 | 0,582633 |
| LRRC31         | 0,00 | 0,00 | 0,00 | 0,00 | 0,4081045 | NA       |
| NCRNA00106     | 5,81 | 5,01 | 5,69 | 4,62 | 0,4081131 | 0,582663 |
| PUS10          | 2,49 | 1,95 | 1,58 | 1,29 | 0,4082612 | 0,582746 |
| AFG3L1P        | 4,45 | 3,90 | 4,70 | 4,19 | 0,4082704 | 0,582746 |
| MDM1           | 2,14 | 1,56 | 2,71 | 0,81 | 0,4082909 | 0,582746 |
| RP11-1008C21.1 | 0,00 | 0,00 | 0,00 | 2,04 | 0,4083075 | 0,582746 |
| TLR10          | 3,62 | 1,35 | 2,46 | 0,25 | 0,4083282 | 0,582746 |
| ACO13271.7     | 0,16 | 0,08 | 0,24 | 0,16 | 0,4083287 | 0,582746 |
| ACO06039.4     | 1,47 | 2,11 | 1,53 | 2,02 | 0,4084547 | 0,582889 |
| RN7SL375P      | 0,00 | 0,89 | 0,00 | 0,00 | 0,4085    | NA       |
| ASCC1          | 5,12 | 3,93 | 4,25 | 4,27 | 0,4086355 | 0,583109 |
| P3H3           | 0,00 | 0,00 | 0,00 | 0,00 | 0,4087072 | NA       |
| KIAA0430       | 3,64 | 3,70 | 3,73 | 3,13 | 0,4088003 | 0,583307 |
| RBM4B          | 3,56 | 2,26 | 2,06 | 3,00 | 0,4088901 | 0,583397 |
| RP11-567L7.6   | 0,00 | 0,00 | 0,00 | 0,00 | 0,4089206 | NA       |
| AIFM1          | 5,02 | 5,64 | 4,14 | 2,74 | 0,4089827 | 0,583492 |
| RP11-166N6.3   | 0,00 | 0,26 | 0,00 | 0,00 | 0,4090392 | NA       |
| TUBA1C         | 6,47 | 6,64 | 6,27 | 5,18 | 0,4090437 | 0,583531 |
| RP11-627K11.3  | 0,32 | 0,00 | 0,00 | 0,68 | 0,4090625 | 0,583531 |
| HIST2H3PS2     | 0,00 | 0,00 | 0,00 | 0,00 | 0,4090908 | NA       |
| PSMA5          | 7,01 | 6,54 | 6,41 | 6,30 | 0,4091118 | 0,583539 |
| SLF1           | 3,44 | 0,79 | 3,35 | 2,65 | 0,4091208 | 0,583539 |
| RP11-2H8.2     | 0,00 | 0,00 | 0,00 | 0,00 | 0,409164  | NA       |
| TMEM87A        | 6,20 | 6,12 | 5,48 | 5,82 | 0,4092177 | 0,583627 |
| OR51AB1P       | 0,00 | 0,00 | 0,00 | 0,00 | 0,4092557 | NA       |
| RP11-354P17.6  | 0,00 | 0,00 | 0,00 | 0,00 | 0,4092557 | NA       |
| RP11-350G24.1  | 0,48 | 1,05 | 0,00 | 0,35 | 0,4092703 | 0,583627 |
| RNU6-807P      | 0,00 | 2,70 | 0,00 | 0,00 | 0,4092978 | 0,583627 |
| ACO16735.2     | 0,24 | 0,05 | 0,16 | 0,20 | 0,4093082 | 0,583627 |
| THBS3          | 0,42 | 1,21 | 2,89 | 2,15 | 0,4093139 | 0,583627 |
| RP11-544M22.8  | 0,00 | 0,00 | 0,00 | 0,00 | 0,409391  | NA       |
| BHMG1          | 0,00 | 0,00 | 0,00 | 0,00 | 0,4093955 | NA       |
| RP1-29C18.8    | 0,80 | 0,43 | 0,41 | 0,25 | 0,4095194 | 0,583752 |
| RGCC           | 5,77 | 5,65 | 5,99 | 5,92 | 0,4095484 | 0,583752 |
| PMM1           | 5,48 | 4,43 | 5,09 | 3,39 | 0,4095561 | 0,583752 |
| CTD-2561B21.7  | 0,00 | 2,54 | 1,30 | 3,14 | 0,4095566 | 0,583752 |
| DRAM1          | 4,54 | 4,21 | 4,94 | 3,76 | 0,4095587 | 0,583752 |
| MTURN          | 0,57 | 0,13 | 1,72 | 2,26 | 0,4095828 | 0,583752 |

|                |      |      |      |      |           |          |
|----------------|------|------|------|------|-----------|----------|
| AFAP1          | 1,35 | 2,19 | 1,28 | 1,60 | 0,4095853 | 0,583752 |
| RP1-234P15.4   | 0,17 | 0,50 | 0,06 | 0,00 | 0,4097641 | 0,583967 |
| CTD-3137H5.1   | 0,00 | 0,00 | 0,00 | 0,00 | 0,409805  | 0,583967 |
| MYB            | 0,11 | 0,40 | 0,14 | 0,17 | 0,409831  | 0,583967 |
| STRC           | 0,31 | 0,41 | 0,56 | 0,28 | 0,4098413 | 0,583967 |
| WNT7B          | 0,00 | 0,04 | 0,00 | 0,00 | 0,4099551 | NA       |
| ZYG11A         | 0,23 | 0,11 | 0,31 | 0,40 | 0,4099752 | 0,584121 |
| FAM160B2       | 2,23 | 2,62 | 2,12 | 3,12 | 0,4100847 | 0,584236 |
| RP11-266L9.1   | 0,08 | 0,10 | 0,08 | 0,09 | 0,4101088 | 0,584236 |
| NDNF           | 0,00 | 0,00 | 0,00 | 0,15 | 0,4102128 | NA       |
| RP11-165J3.5   | 0,00 | 0,32 | 0,00 | 0,00 | 0,410325  | NA       |
| RP11-429B14.4  | 0,00 | 0,00 | 0,00 | 0,00 | 0,4103444 | NA       |
| ANKK1          | 0,00 | 0,11 | 0,13 | 0,17 | 0,4103798 | 0,584585 |
| ACO73236.2     | 0,00 | 0,00 | 0,00 | 0,00 | 0,4105388 | 0,584774 |
| MEFV           | 2,90 | 2,19 | 3,22 | 3,08 | 0,4105935 | 0,584814 |
| ERVK3-1        | 6,12 | 6,35 | 5,77 | 5,69 | 0,4106824 | 0,584855 |
| RP11-428J1.5   | 0,00 | 0,00 | 0,00 | 0,14 | 0,4107076 | 0,584855 |
| RP11-1035H13.2 | 3,13 | 2,30 | 1,39 | 0,56 | 0,4107246 | 0,584855 |
| MRPL45         | 4,98 | 3,96 | 4,14 | 2,64 | 0,410748  | 0,584855 |
| CR769776.3     | 0,00 | 0,00 | 0,00 | 0,00 | 0,4107594 | NA       |
| RP11-794M8.1   | 1,44 | 0,57 | 0,99 | 1,33 | 0,4107607 | 0,584855 |
| PPP2R5E        | 3,67 | 2,28 | 3,95 | 2,82 | 0,4107802 | 0,584855 |
| RNF34          | 4,91 | 3,63 | 4,66 | 3,46 | 0,4108233 | 0,584858 |
| FAM86B1        | 0,07 | 0,38 | 0,25 | 0,00 | 0,4108351 | 0,584858 |
| SPX            | 0,00 | 0,00 | 0,00 | 0,00 | 0,4109145 | 0,584934 |
| IGKJ5          | 0,00 | 4,27 | 0,00 | 0,00 | 0,4109221 | NA       |
| RP11-804A23.4  | 0,79 | 2,24 | 0,63 | 1,28 | 0,4109669 | 0,584971 |
| GFPT1          | 2,22 | 1,18 | 2,47 | 2,12 | 0,4110059 | 0,584989 |
| SCARNA2        | 0,00 | 0,00 | 0,00 | 0,45 | 0,4111113 | NA       |
| RP11-565J7.3   | 0,45 | 0,90 | 0,68 | 0,49 | 0,411163  | 0,585175 |
| HMGA1P2        | 0,00 | 0,00 | 0,00 | 0,00 | 0,41118   | NA       |
| CTA-85E5.10    | 0,00 | 0,00 | 0,00 | 0,84 | 0,4112068 | 0,5852   |
| RP11-120C12.3  | 0,00 | 0,00 | 0,00 | 0,00 | 0,4113307 | NA       |
| RASAL2         | 0,07 | 0,31 | 0,16 | 0,46 | 0,4113337 | 0,585343 |
| CTD-2054N24.2  | 1,00 | 0,41 | 1,31 | 0,97 | 0,4114949 | 0,585535 |
| MARCH4         | 0,00 | 0,34 | 0,00 | 0,00 | 0,4115376 | 0,585558 |
| RP13-46G5.4    | 0,00 | 0,00 | 0,00 | 0,41 | 0,4116249 | 0,585645 |
| MGAT4B         | 2,00 | 1,84 | 4,04 | 2,75 | 0,411668  | 0,585669 |
| SLITRK4        | 0,08 | 0,15 | 0,42 | 1,50 | 0,4117691 | 0,585775 |
| DYRK4          | 5,06 | 2,64 | 4,71 | 4,39 | 0,4118073 | 0,585792 |
| RP11-393I2.2   | 0,00 | 0,19 | 0,00 | 0,00 | 0,4118845 | NA       |
| RP11-400N9.1   | 0,56 | 0,96 | 0,45 | 0,59 | 0,4118894 | 0,585871 |
| ZNF436         | 0,00 | 0,00 | 0,00 | 0,00 | 0,4119302 | 0,585888 |
| PSMB5          | 5,93 | 2,69 | 5,57 | 5,95 | 0,4119536 | 0,585888 |
| RP11-317N8.5   | 0,04 | 0,15 | 0,05 | 0,10 | 0,4120462 | 0,585982 |
| PPP1R3D        | 0,15 | 0,15 | 0,26 | 0,24 | 0,4121103 | 0,586036 |
| CLN8           | 3,79 | 2,59 | 3,88 | 3,28 | 0,4121648 | 0,586076 |
| MIR4661        | 0,00 | 0,00 | 0,00 | 0,00 | 0,4122303 | NA       |
| P2RX6          | 0,00 | 0,27 | 0,00 | 0,00 | 0,4123974 | NA       |
| GNB1           | 5,95 | 5,77 | 5,81 | 4,93 | 0,4124117 | 0,586389 |
| PCNX4          | 3,55 | 2,24 | 3,30 | 2,37 | 0,4124698 | 0,586434 |
| GAS6-AS2       | 0,12 | 0,36 | 0,16 | 0,25 | 0,4125241 | 0,586474 |
| ZG16           | 0,00 | 0,14 | 0,05 | 0,04 | 0,4126112 | 0,58656  |
| RP11-298E9.5   | 0,00 | 0,00 | 0,00 | 0,00 | 0,4126129 | NA       |
| RP11-662B19.2  | 0,00 | 0,40 | 0,00 | 0,00 | 0,4127397 | NA       |

|                  |      |      |      |      |           |          |
|------------------|------|------|------|------|-----------|----------|
| CHMP3            | 6,07 | 5,89 | 5,44 | 6,21 | 0,4127431 | 0,58671  |
| AC079584.3       | 0,84 | 0,00 | 0,04 | 0,08 | 0,4127852 | 0,586733 |
| RP11-311F12.1    | 0,00 | 0,00 | 0,10 | 0,00 | 0,4128831 | 0,586796 |
| LAMC1            | 0,00 | 0,00 | 0,00 | 0,00 | 0,4128976 | 0,586796 |
| LL22NC03-23C6.13 | 0,00 | 0,22 | 0,00 | 0,00 | 0,4129201 | NA       |
| RP11-90K6.1      | 0,13 | 0,00 | 0,00 | 0,17 | 0,4129319 | 0,586796 |
| CHURC1           | 6,15 | 6,39 | 5,75 | 5,28 | 0,4129357 | 0,586796 |
| RP11-73M18.7     | 0,00 | 0,00 | 1,36 | 2,74 | 0,4130047 | 0,586857 |
| FAM154B          | 0,04 | 0,20 | 0,15 | 0,31 | 0,4130678 | 0,586909 |
| ALAS1            | 3,85 | 1,82 | 3,51 | 1,38 | 0,4131902 | 0,587046 |
| RP11-588L15.1    | 0,00 | 0,00 | 0,00 | 0,00 | 0,4132636 | 0,587112 |
| KLF9             | 3,86 | 3,89 | 3,39 | 2,54 | 0,4132939 | 0,587118 |
| LATS2            | 2,08 | 0,98 | 1,84 | 1,21 | 0,4134051 | 0,587238 |
| IFRD2            | 4,29 | 2,96 | 4,36 | 4,48 | 0,4134587 | 0,587277 |
| ZC3H12A          | 2,65 | 1,81 | 2,89 | 1,88 | 0,4135805 | 0,587412 |
| RP11-420K14.7    | 0,00 | 0,24 | 0,00 | 0,00 | 0,4136047 | NA       |
| RP11-456J20.1    | 0,00 | 0,06 | 0,00 | 0,00 | 0,4136097 | NA       |
| RP1-300G12.2     | 0,00 | 0,00 | 0,00 | 0,00 | 0,4136281 | 0,587442 |
| MIR3180-4        | 0,43 | 0,63 | 1,02 | 0,00 | 0,4138385 | 0,587703 |
| RP13-580B18.1    | 0,00 | 0,00 | 0,00 | 0,00 | 0,4138542 | NA       |
| PHOSPHO1         | 0,00 | 0,00 | 0,00 | 0,00 | 0,413884  | 0,587703 |
| LINC01138        | 2,25 | 2,00 | 2,55 | 3,22 | 0,413891  | 0,587703 |
| DDX58            | 2,82 | 1,58 | 2,66 | 2,57 | 0,4141095 | 0,587939 |
| RP11-197N18.8    | 0,25 | 0,58 | 0,38 | 0,91 | 0,4141101 | 0,587939 |
| CCNO             | 0,00 | 0,00 | 0,00 | 0,00 | 0,4141726 | NA       |
| BANCR            | 0,57 | 0,47 | 0,11 | 0,00 | 0,4141747 | 0,587993 |
| AC009236.1       | 0,05 | 0,00 | 0,00 | 0,00 | 0,4142597 | 0,588076 |
| TNPO1            | 4,56 | 2,18 | 4,11 | 4,11 | 0,4143559 | 0,588175 |
| DCD              | 0,25 | 0,29 | 0,35 | 0,49 | 0,414403  | NA       |
| CBWD5            | 5,98 | 6,25 | 6,09 | 6,31 | 0,4144336 | 0,588248 |
| TIMELESS         | 0,68 | 0,24 | 1,06 | 0,13 | 0,4145277 | 0,588274 |
| AC005037.7       | 0,00 | 0,00 | 0,00 | 0,00 | 0,4145292 | NA       |
| MAP1B            | 0,02 | 0,02 | 0,03 | 0,01 | 0,4145553 | 0,588274 |
| FAM163A          | 0,10 | 0,08 | 0,00 | 0,00 | 0,4145565 | 0,588274 |
| ANXA2P2          | 2,27 | 2,25 | 2,25 | 1,53 | 0,4145577 | 0,588274 |
| RN7SL148P        | 0,00 | 0,00 | 0,43 | 3,32 | 0,4147073 | 0,588449 |
| CD200            | 0,26 | 0,00 | 0,36 | 0,00 | 0,4148034 | 0,588547 |
| ELMOD2           | 2,11 | 0,03 | 2,31 | 1,23 | 0,4148622 | 0,588585 |
| RP11-662J14.2    | 0,80 | 0,31 | 0,84 | 0,00 | 0,4148832 | 0,588585 |
| ASAP3            | 2,06 | 3,95 | 2,38 | 2,83 | 0,4150203 | 0,588742 |
| PRDM11           | 0,03 | 0,68 | 0,07 | 0,09 | 0,4150595 | 0,588751 |
| LA16c-359F1.1    | 0,00 | 0,00 | 0,00 | 0,00 | 0,4150661 | NA       |
| TRBV9            | 0,00 | 0,00 | 0,00 | 0,00 | 0,4151034 | 0,588751 |
| CES3             | 0,00 | 0,16 | 0,04 | 0,00 | 0,4151349 | 0,588751 |
| AC019109.1       | 0,00 | 0,24 | 0,06 | 0,10 | 0,4151514 | 0,588751 |
| IAH1             | 6,05 | 3,80 | 6,03 | 5,00 | 0,415172  | 0,588751 |
| RP11-272L13.1    | 0,90 | 3,75 | 1,28 | 2,64 | 0,4151853 | 0,588751 |
| RNU1-103P        | 0,00 | 0,00 | 0,00 | 0,00 | 0,4154115 | NA       |
| WAPL             | 4,59 | 4,56 | 4,49 | 3,86 | 0,4154266 | 0,589056 |
| RP11-93G23.2     | 2,26 | 2,36 | 2,01 | 1,99 | 0,415463  | 0,58907  |
| ANKHD1-EIF4EBP3  | 1,89 | 0,18 | 2,40 | 2,98 | 0,4154962 | 0,589079 |
| RN7SL689P        | 1,32 | 0,00 | 1,79 | 0,80 | 0,4156896 | 0,589316 |
| ACRBP            | 2,52 | 0,21 | 3,21 | 3,23 | 0,4159449 | 0,58964  |
| RP11-144F15.1    | 0,00 | 0,00 | 0,00 | 0,00 | 0,4160182 | 0,589706 |
| RND3             | 0,00 | 0,00 | 0,00 | 0,11 | 0,4160674 | NA       |

|                |      |      |      |      |           |          |
|----------------|------|------|------|------|-----------|----------|
| TUBGCP4        | 2,49 | 1,46 | 2,73 | 1,44 | 0,4162392 | 0,589958 |
| RP11-426L16.8  | 0,27 | 0,39 | 0,44 | 0,90 | 0,4162726 | 0,589958 |
| C16orf72       | 3,79 | 3,21 | 3,65 | 3,65 | 0,4163009 | 0,589958 |
| AC018755.18    | 0,00 | 1,05 | 0,00 | 0,00 | 0,416323  | 0,589958 |
| CTD-3193O13.12 | 0,07 | 0,14 | 0,07 | 0,08 | 0,4163282 | 0,589958 |
| RFPL4A         | 0,00 | 0,00 | 0,00 | 0,17 | 0,4164446 | 0,590085 |
| RP11-199H2.2   | 0,00 | 0,00 | 0,00 | 0,00 | 0,4164561 | NA       |
| MMP24          | 0,02 | 0,04 | 0,19 | 0,12 | 0,4164865 | 0,590104 |
| EMX2           | 0,27 | 1,26 | 0,37 | 0,68 | 0,4165161 | 0,590104 |
| VILL           | 1,34 | 0,36 | 0,60 | 0,13 | 0,4165377 | 0,590104 |
| RP5-965G21.3   | 0,45 | 0,74 | 0,42 | 0,76 | 0,4168121 | 0,590455 |
| AC005041.9     | 0,33 | 0,13 | 0,09 | 0,56 | 0,4168616 | 0,590465 |
| RNF144A        | 0,09 | 0,20 | 0,07 | 0,07 | 0,4168719 | 0,590465 |
| FOXN1          | 0,00 | 0,00 | 0,00 | 0,00 | 0,4171016 | 0,590751 |
| TOE1           | 2,84 | 1,77 | 3,10 | 2,78 | 0,4171274 | 0,590751 |
| LEMD3          | 2,90 | 2,76 | 1,99 | 3,24 | 0,4171729 | 0,590778 |
| RPSAP57        | 0,00 | 0,00 | 0,00 | 0,00 | 0,4171816 | NA       |
| AC010149.2     | 2,72 | 1,86 | 3,57 | 1,64 | 0,417247  | 0,590799 |
| RP11-1082L8.3  | 0,00 | 0,10 | 0,00 | 0,00 | 0,4172734 | 0,590799 |
| RP11-555K2.3   | 0,00 | 0,33 | 0,00 | 0,00 | 0,417283  | 0,590799 |
| UNG            | 0,25 | 0,07 | 0,30 | 0,21 | 0,4172944 | 0,590799 |
| AC096767.2     | 0,00 | 0,00 | 0,00 | 0,00 | 0,4173272 | NA       |
| SMC1B          | 0,13 | 0,03 | 0,00 | 0,03 | 0,4173341 | 0,590818 |
| CTD-2651B20.7  | 0,30 | 0,41 | 0,00 | 0,00 | 0,4174063 | 0,590883 |
| AC010890.1     | 0,00 | 0,00 | 0,00 | 0,00 | 0,4175753 | 0,591074 |
| RP11-775C24.5  | 0,00 | 0,00 | 0,00 | 0,00 | 0,4175944 | 0,591074 |
| RP11-81A1.3    | 0,00 | 0,00 | 0,00 | 0,13 | 0,4176547 | NA       |
| PKD2           | 2,11 | 0,79 | 2,69 | 1,78 | 0,417664  | 0,591134 |
| TRMT10B        | 3,17 | 3,85 | 2,67 | 2,60 | 0,4180888 | 0,591698 |
| IL7            | 2,40 | 1,27 | 1,15 | 0,54 | 0,4182    | 0,591818 |
| ELK3           | 3,46 | 4,18 | 3,81 | 3,11 | 0,4183346 | 0,591946 |
| MIRLET7D       | 0,00 | 0,00 | 0,00 | 0,00 | 0,4183439 | 0,591946 |
| RP11-26E5.1    | 0,00 | 0,00 | 0,00 | 0,00 | 0,4183784 | 0,591957 |
| AC087294.2     | 0,00 | 0,13 | 0,00 | 0,00 | 0,418453  | 0,592025 |
| RN7SL744P      | 1,57 | 3,09 | 1,72 | 2,69 | 0,4186142 | 0,5922   |
| RASGRF2        | 0,00 | 0,07 | 0,00 | 0,09 | 0,4186358 | 0,5922   |
| FITM1          | 0,00 | 0,00 | 0,00 | 0,00 | 0,4186396 | NA       |
| AC073464.10    | 0,07 | 0,94 | 0,28 | 0,37 | 0,4186565 | 0,5922   |
| RP11-368I7.4   | 0,00 | 0,00 | 0,00 | 0,05 | 0,4187712 | NA       |
| CTD-3032J10.4  | 0,00 | 1,71 | 0,00 | 1,64 | 0,418783  | NA       |
| RP11-689D3.4   | 0,00 | 0,00 | 0,00 | 0,00 | 0,4188091 | 0,592378 |
| CWF19L1        | 3,85 | 4,85 | 3,35 | 3,20 | 0,4189    | 0,592469 |
| SFT2D3         | 0,75 | 0,52 | 0,00 | 0,86 | 0,418962  | 0,592519 |
| DHX33          | 1,23 | 2,55 | 1,10 | 0,84 | 0,4191108 | 0,592662 |
| UGGT1          | 2,78 | 2,51 | 3,19 | 1,86 | 0,4191169 | 0,592662 |
| RP3-417G15.1   | 0,00 | 0,00 | 0,25 | 0,00 | 0,4191835 | NA       |
| CTD-2036P10.5  | 0,00 | 0,00 | 0,00 | 0,00 | 0,4192203 | NA       |
| NCRNA00105     | 2,00 | 1,87 | 3,24 | 2,18 | 0,4194006 | 0,592996 |
| RPS3AP49       | 0,32 | 0,40 | 0,34 | 0,42 | 0,4194217 | 0,592996 |
| RP5-973N23.4   | 0,54 | 1,31 | 0,59 | 0,00 | 0,4194331 | 0,592996 |
| RP11-362F19.1  | 0,00 | 1,95 | 0,00 | 0,05 | 0,4194878 | 0,593007 |
| CARD17         | 0,00 | 0,00 | 0,00 | 0,00 | 0,4194943 | 0,593007 |
| RP11-248G5.8   | 0,00 | 0,00 | 0,00 | 0,00 | 0,4195382 | NA       |
| RP11-48B14.1   | 0,00 | 0,00 | 0,00 | 0,00 | 0,4195884 | NA       |
| AC005614.3     | 0,30 | 0,23 | 0,17 | 0,19 | 0,4196803 | 0,593232 |

|               |      |      |      |      |           |          |
|---------------|------|------|------|------|-----------|----------|
| RP11-324I22.4 | 2,33 | 3,38 | 2,32 | 2,65 | 0,4199557 | 0,593584 |
| SLC36A3       | 0,09 | 0,09 | 0,07 | 0,03 | 0,4200721 | 0,593711 |
| RP11-403B2.7  | 0,00 | 0,09 | 0,00 | 0,08 | 0,4201341 | NA       |
| RP5-1022P6.5  | 0,57 | 0,47 | 0,53 | 0,00 | 0,4202008 | 0,593855 |
| ZCCHC11       | 3,54 | 3,07 | 2,92 | 3,50 | 0,4203077 | 0,593956 |
| bP-2189O9.2   | 0,00 | 0,65 | 0,10 | 0,09 | 0,4203487 | 0,593956 |
| ERC1          | 4,10 | 3,42 | 4,27 | 3,05 | 0,4203525 | 0,593956 |
| NDOR1         | 0,00 | 0,86 | 0,64 | 0,52 | 0,4204027 | 0,593989 |
| ACTR3C        | 0,32 | 0,09 | 0,47 | 0,14 | 0,4205801 | 0,594202 |
| ACO15969.3    | 0,47 | 0,16 | 0,75 | 0,69 | 0,4206208 | 0,594222 |
| RP11-588L15.2 | 0,00 | 0,00 | 0,00 | 2,61 | 0,4206593 | 0,594238 |
| RP11-854K16.3 | 0,00 | 3,35 | 0,00 | 0,00 | 0,4207052 | 0,594265 |
| ACO73343.13   | 0,82 | 1,84 | 1,31 | 1,60 | 0,4207525 | 0,594295 |
| BEST3         | 0,59 | 2,01 | 0,14 | 0,87 | 0,4207815 | 0,594298 |
| ARHGFEF19     | 0,58 | 0,00 | 0,06 | 0,45 | 0,4208567 | 0,594353 |
| CSTB          | 6,10 | 6,10 | 6,16 | 5,30 | 0,4208906 | 0,594353 |
| NUP205        | 4,54 | 3,21 | 3,78 | 3,04 | 0,4209196 | 0,594353 |
| ZBTB7C        | 0,00 | 1,66 | 0,20 | 0,41 | 0,4209273 | 0,594353 |
| TAZ           | 4,31 | 0,88 | 4,96 | 5,04 | 0,4210083 | 0,594397 |
| CLRN1OS       | 0,05 | 0,13 | 0,08 | 0,21 | 0,4210124 | 0,594397 |
| RP11-37E23.3  | 0,00 | 0,00 | 0,00 | 0,00 | 0,4211032 | NA       |
| RP11-395B7.2  | 0,06 | 0,00 | 0,08 | 0,07 | 0,4211718 | 0,594562 |
| SH3GL1P3      | 0,00 | 0,00 | 0,00 | 0,00 | 0,4211825 | 0,594562 |
| OCRL          | 0,53 | 0,09 | 0,83 | 0,14 | 0,4212138 | 0,594568 |
| UROC1         | 0,00 | 0,00 | 0,00 | 0,00 | 0,4212512 | NA       |
| RP11-59D5_B.2 | 0,09 | 0,21 | 0,26 | 0,10 | 0,4212824 | 0,594627 |
| ACO09404.2    | 1,25 | 1,98 | 1,88 | 2,51 | 0,4213405 | 0,594668 |
| RP11-637O19.3 | 0,00 | 0,00 | 0,00 | 0,00 | 0,4214307 | 0,594668 |
| RP11-452F19.3 | 2,20 | 2,19 | 2,96 | 1,13 | 0,4214315 | 0,594668 |
| HLA-J         | 1,29 | 2,38 | 1,49 | 1,20 | 0,4214359 | 0,594668 |
| RP11-269G24.2 | 0,00 | 0,00 | 0,00 | 0,36 | 0,4214453 | 0,594668 |
| ZNF639        | 2,33 | 1,75 | 1,77 | 2,70 | 0,4215577 | 0,594737 |
| RBM25         | 5,77 | 5,00 | 5,83 | 5,60 | 0,4215733 | 0,594737 |
| RNF125        | 4,65 | 5,28 | 4,26 | 4,35 | 0,421574  | 0,594737 |
| RP5-1099E6.2  | 0,00 | 0,00 | 0,00 | 0,00 | 0,4216008 | NA       |
| PRPF4B        | 5,01 | 4,11 | 4,59 | 4,49 | 0,4216683 | 0,594808 |
| IFT27         | 4,31 | 4,47 | 4,33 | 2,17 | 0,4216778 | 0,594808 |
| RN7SL819P     | 1,45 | 1,49 | 1,25 | 2,09 | 0,4218794 | 0,595054 |
| LLNLR-259H9.1 | 0,00 | 0,00 | 0,00 | 0,00 | 0,421914  | NA       |
| NUP160        | 4,13 | 3,73 | 3,38 | 2,86 | 0,4219375 | 0,595068 |
| HIST1H2BN     | 3,47 | 0,50 | 2,26 | 0,59 | 0,4219426 | 0,595068 |
| CTD-3131K8.2  | 3,32 | 4,76 | 3,30 | 3,98 | 0,422031  | 0,595155 |
| CTC-276H5.1   | 0,13 | 0,35 | 0,00 | 0,70 | 0,4220649 | 0,595165 |
| WDR89         | 2,02 | 1,04 | 1,01 | 1,51 | 0,4221153 | 0,595198 |
| RP1-228P16.8  | 0,00 | 0,00 | 0,00 | 0,00 | 0,4222042 | 0,595232 |
| ARHGAP17      | 6,07 | 6,68 | 6,08 | 5,33 | 0,4222206 | 0,595232 |
| NDUFAF5       | 4,34 | 4,64 | 4,00 | 4,09 | 0,4222269 | 0,595232 |
| GMPPB         | 1,68 | 1,10 | 2,73 | 2,66 | 0,4222462 | 0,595232 |
| HDAC11        | 0,00 | 0,00 | 0,02 | 0,06 | 0,4223089 | 0,595279 |
| CTRC          | 0,19 | 2,12 | 0,22 | 0,48 | 0,4223336 | 0,595279 |
| RP11-26N15.2  | 0,00 | 0,00 | 0,00 | 0,00 | 0,4224394 | NA       |
| NAPB          | 1,07 | 0,24 | 1,09 | 0,46 | 0,4226703 | 0,595716 |
| H2AFV         | 6,52 | 5,83 | 6,55 | 5,75 | 0,4227078 | 0,595731 |
| C2orf50       | 0,10 | 0,46 | 0,10 | 0,21 | 0,4228203 | 0,595831 |
| RP11-66N24.4  | 1,82 | 1,38 | 2,25 | 1,95 | 0,422832  | 0,595831 |

|                |      |      |      |      |           |          |
|----------------|------|------|------|------|-----------|----------|
| DDX3X          | 7,16 | 6,48 | 6,92 | 6,51 | 0,4229076 | 0,595877 |
| RPL29P33       | 0,00 | 0,84 | 0,00 | 0,81 | 0,4229088 | NA       |
| MRTO4          | 3,69 | 2,18 | 3,23 | 1,37 | 0,4229187 | 0,595877 |
| RP11-613D13.5  | 0,16 | 0,25 | 0,03 | 0,00 | 0,4230885 | 0,59605  |
| CNDP2          | 6,83 | 5,93 | 6,63 | 6,03 | 0,4231025 | 0,59605  |
| TTC37          | 4,63 | 4,09 | 4,23 | 4,57 | 0,4231214 | 0,59605  |
| HOXC6          | 0,00 | 0,05 | 0,00 | 0,00 | 0,4231547 | NA       |
| RN7SL416P      | 0,00 | 0,00 | 0,00 | 0,00 | 0,4231595 | 0,596065 |
| TGFB3          | 0,05 | 0,25 | 0,02 | 0,06 | 0,4232617 | 0,596172 |
| ACO05534.8     | 0,00 | 0,00 | 0,00 | 0,00 | 0,423359  | 0,596271 |
| PMS1           | 3,93 | 2,52 | 2,92 | 2,56 | 0,4234464 | 0,596356 |
| MAN2A2         | 3,31 | 2,79 | 2,74 | 1,82 | 0,4235114 | 0,59641  |
| LIMA1          | 1,85 | 1,14 | 2,29 | 2,35 | 0,4235876 | 0,596479 |
| ZNF653         | 0,00 | 0,30 | 0,00 | 0,00 | 0,4237071 | 0,596578 |
| RP11-330L19.1  | 0,29 | 1,26 | 0,00 | 1,21 | 0,4237448 | NA       |
| RP11-14N7.2    | 1,01 | 1,80 | 0,75 | 2,19 | 0,4237638 | 0,596578 |
| CDK16          | 2,24 | 3,01 | 3,53 | 3,87 | 0,4237744 | 0,596578 |
| RP11-12A20.7   | 1,61 | 1,75 | 1,45 | 1,57 | 0,4237863 | 0,596578 |
| RP11-320N21.1  | 0,00 | 0,00 | 0,00 | 0,00 | 0,4238052 | 0,596578 |
| RP1-253P7.4    | 0,77 | 1,46 | 1,15 | 0,83 | 0,4238184 | 0,596578 |
| RP11-177H2.2   | 0,00 | 0,00 | 0,00 | 0,00 | 0,4239724 | 0,596757 |
| KLK11          | 0,39 | 0,20 | 0,32 | 0,46 | 0,4240167 | 0,596781 |
| RP4-736L20.4   | 1,17 | 2,17 | 1,76 | 1,71 | 0,424102  | 0,596863 |
| RP3-331H24.7   | 0,05 | 0,91 | 0,00 | 0,68 | 0,4241653 | 0,596904 |
| EMC8           | 3,90 | 3,41 | 3,39 | 3,04 | 0,4242061 | 0,596904 |
| CHL1           | 0,00 | 0,00 | 0,00 | 0,26 | 0,4242113 | 0,596904 |
| IGHV3-33       | 0,00 | 0,51 | 0,00 | 0,00 | 0,424251  | NA       |
| RP5-1073O3.5   | 0,56 | 0,24 | 0,79 | 0,17 | 0,4243245 | 0,597002 |
| RP11-1134I14.2 | 0,00 | 0,00 | 0,00 | 0,00 | 0,4243308 | NA       |
| RN7SL597P      | 2,01 | 0,83 | 1,12 | 1,27 | 0,4243415 | 0,597002 |
| RP11-333E13.4  | 0,29 | 0,35 | 0,39 | 0,26 | 0,4243619 | 0,597002 |
| RP11-711K1.8   | 0,00 | 0,00 | 0,00 | 0,48 | 0,4243986 | NA       |
| TDRD7          | 3,53 | 2,18 | 2,03 | 1,82 | 0,4244131 | 0,597002 |
| RP11-617F23.1  | 3,30 | 3,14 | 3,60 | 2,31 | 0,4244156 | 0,597002 |
| RP11-552M11.2  | 0,00 | 0,00 | 0,00 | 0,00 | 0,4244968 | 0,597079 |
| FAM182A        | 0,02 | 1,05 | 0,15 | 0,00 | 0,4246057 | 0,597194 |
| MIR1273E       | 0,00 | 0,00 | 0,13 | 0,00 | 0,42465   | NA       |
| NCAPH          | 0,00 | 0,00 | 0,07 | 0,00 | 0,4246762 | 0,597255 |
| MIR23A         | 0,00 | 0,00 | 0,00 | 0,00 | 0,4247183 | NA       |
| CEP85L         | 3,89 | 1,82 | 4,32 | 3,20 | 0,4248291 | 0,59741  |
| WASF3          | 0,00 | 0,00 | 0,00 | 0,09 | 0,424851  | 0,59741  |
| RNF40          | 4,05 | 4,56 | 4,82 | 4,60 | 0,424872  | 0,59741  |
| RP11-497H17.1  | 0,00 | 0,00 | 0,00 | 0,00 | 0,4248932 | 0,59741  |
| SNORD65B       | 0,00 | 0,00 | 0,00 | 0,00 | 0,4249645 | NA       |
| RP11-445P17.4  | 0,00 | 0,00 | 0,00 | 0,00 | 0,424986  | NA       |
| NFIL3          | 4,11 | 4,84 | 4,12 | 4,06 | 0,4251315 | 0,59767  |
| CTA-125H2.1    | 1,34 | 1,09 | 1,41 | 1,95 | 0,4251335 | 0,59767  |
| GABPA          | 3,01 | 1,23 | 2,50 | 1,85 | 0,425186  | 0,59767  |
| CYP4F3LP       | 0,00 | 0,00 | 0,00 | 0,61 | 0,4251942 | 0,59767  |
| RP11-212P7.3   | 0,00 | 0,00 | 0,00 | 0,00 | 0,4252132 | 0,59767  |
| RP11-180M15.6  | 1,59 | 0,58 | 2,15 | 1,58 | 0,4253086 | 0,597767 |
| RPL10P5        | 0,00 | 0,00 | 0,00 | 0,34 | 0,425501  | NA       |
| JAKMIP3        | 0,00 | 0,38 | 0,00 | 0,00 | 0,4256086 | 0,59815  |
| MS4A6E         | 2,39 | 0,00 | 0,44 | 1,61 | 0,4256572 | 0,598176 |
| RN7SL426P      | 0,00 | 0,00 | 0,00 | 0,00 | 0,4257011 | NA       |

|               |      |      |      |      |           |          |
|---------------|------|------|------|------|-----------|----------|
| RP11-344N10.5 | 0,42 | 0,94 | 0,78 | 1,14 | 0,4257099 | 0,598176 |
| ST20-MTHFS    | 0,03 | 0,00 | 0,00 | 0,00 | 0,425726  | 0,598176 |
| RP4-753P9.3   | 1,48 | 0,00 | 0,00 | 0,82 | 0,4257347 | 0,598176 |
| RP11-506B4.4  | 0,00 | 6,10 | 0,18 | 0,33 | 0,4258156 | 0,598252 |
| ZNF343        | 0,23 | 0,32 | 0,17 | 0,87 | 0,4259839 | 0,598451 |
| RP11-248M19.1 | 0,00 | 0,00 | 0,00 | 0,00 | 0,4260475 | NA       |
| GS1-166A23.2  | 0,25 | 0,00 | 0,00 | 0,00 | 0,426128  | 0,598567 |
| RP11-197O15.1 | 2,28 | 1,02 | 2,48 | 3,67 | 0,4261704 | 0,598567 |
| RP11-1148O4.2 | 0,61 | 0,00 | 0,00 | 0,00 | 0,4261721 | 0,598567 |
| DUSP16        | 3,13 | 1,43 | 1,58 | 2,17 | 0,426174  | 0,598567 |
| CEBPE         | 0,00 | 0,00 | 0,00 | 0,08 | 0,4263954 | 0,59884  |
| RP11-188D8.1  | 0,00 | 0,00 | 0,00 | 0,00 | 0,4264548 | NA       |
| RP11-305A4.3  | 0,12 | 0,43 | 0,23 | 0,54 | 0,4264893 | 0,598934 |
| ZC3H7A        | 5,10 | 5,55 | 4,85 | 4,90 | 0,4265227 | 0,598943 |
| RP11-413G22.2 | 0,00 | 0,89 | 0,00 | 1,85 | 0,4266008 | 0,599015 |
| RP11-245C17.2 | 0,62 | 1,12 | 0,74 | 2,05 | 0,4267515 | 0,599164 |
| TMEM242       | 2,96 | 1,32 | 2,28 | 2,37 | 0,4267612 | 0,599164 |
| ARNTL         | 4,51 | 3,16 | 4,40 | 3,06 | 0,4267942 | 0,599173 |
| MSH6          | 3,54 | 3,59 | 3,22 | 2,34 | 0,4269558 | 0,599359 |
| RP11-290D2.5  | 0,00 | 0,00 | 0,00 | 3,53 | 0,4269727 | NA       |
| RP11-44N11.1  | 3,19 | 0,73 | 2,69 | 2,07 | 0,4270221 | 0,599359 |
| RP11-46I8.3   | 0,00 | 0,00 | 0,00 | 0,00 | 0,4270232 | NA       |
| RP11-694I15.7 | 0,00 | 0,15 | 0,00 | 0,00 | 0,4270514 | 0,599359 |
| OXNAD1        | 3,80 | 2,69 | 3,61 | 4,19 | 0,42706   | 0,599359 |
| RP11-57P19.1  | 0,28 | 0,28 | 0,71 | 0,35 | 0,4270616 | 0,599359 |
| CBWD2         | 5,71 | 4,40 | 5,50 | 5,74 | 0,4271038 | 0,59938  |
| RRP7A         | 4,65 | 4,17 | 4,22 | 4,20 | 0,4271362 | 0,599388 |
| SNORD116-8    | 0,00 | 0,00 | 0,00 | 0,00 | 0,4271516 | NA       |
| RP11-76C10.5  | 0,00 | 0,00 | 0,00 | 0,00 | 0,427159  | NA       |
| RP11-271K21.7 | 0,00 | 0,00 | 0,00 | 0,00 | 0,4272035 | 0,599444 |
| KIAA0895L     | 2,92 | 0,69 | 1,96 | 1,67 | 0,4272584 | 0,599483 |
| BST2          | 7,86 | 7,25 | 7,99 | 7,97 | 0,4273387 | 0,599497 |
| RP11-981P6.1  | 2,49 | 1,09 | 2,74 | 2,07 | 0,4273598 | 0,599497 |
| PPP3CA        | 4,93 | 4,13 | 4,71 | 4,96 | 0,4273744 | 0,599497 |
| RP11-701H24.6 | 0,04 | 0,09 | 0,00 | 0,04 | 0,4273944 | 0,599497 |
| ZMAT4         | 2,95 | 0,86 | 0,35 | 0,00 | 0,4274033 | 0,599497 |
| RP11-763B22.6 | 0,00 | 0,00 | 0,00 | 0,00 | 0,427424  | NA       |
| LYSMD1        | 0,29 | 0,00 | 0,41 | 0,13 | 0,42746   | 0,599508 |
| IQCG          | 3,67 | 4,42 | 2,28 | 2,10 | 0,4274644 | 0,599508 |
| ZNF354C       | 0,00 | 0,00 | 0,02 | 0,15 | 0,4276001 | 0,59966  |
| ITPA          | 6,56 | 6,97 | 6,52 | 6,08 | 0,427694  | 0,599747 |
| MGST1         | 5,27 | 1,96 | 5,17 | 5,37 | 0,4277163 | 0,599747 |
| RP11-113C12.4 | 0,00 | 0,00 | 0,00 | 0,00 | 0,4277392 | NA       |
| RP11-241F15.3 | 0,00 | 0,00 | 0,00 | 2,52 | 0,4278387 | 0,599881 |
| RP11-83M16.5  | 0,00 | 0,00 | 0,00 | 0,00 | 0,4278394 | NA       |
| RPS18P1       | 0,00 | 0,00 | 0,00 | 0,00 | 0,4279536 | NA       |
| SULF2         | 7,00 | 6,48 | 6,85 | 6,24 | 0,4279595 | 0,600007 |
| AC105749.1    | 0,00 | 0,00 | 0,00 | 0,43 | 0,4279986 | NA       |
| RP5-1198O20.5 | 0,33 | 1,25 | 0,66 | 0,60 | 0,428005  | 0,600007 |
| APELA         | 1,03 | 1,11 | 0,98 | 1,75 | 0,4280093 | 0,600007 |
| PLEKHB2       | 5,78 | 5,15 | 5,73 | 5,10 | 0,4280845 | 0,600028 |
| CESSA         | 0,00 | 0,30 | 0,00 | 0,00 | 0,4281524 | 0,600028 |
| DPH1          | 3,27 | 4,12 | 2,30 | 1,09 | 0,4281696 | 0,600028 |
| RP3-391O22.3  | 0,00 | 0,00 | 0,00 | 0,00 | 0,4281732 | 0,600028 |
| NEU3          | 1,65 | 2,23 | 1,78 | 1,44 | 0,4281787 | 0,600028 |

|               |      |      |      |      |           |          |
|---------------|------|------|------|------|-----------|----------|
| AC011294.3    | 0,70 | 1,86 | 0,39 | 0,39 | 0,4281867 | 0,600028 |
| RAB24         | 7,15 | 6,02 | 6,83 | 6,93 | 0,4283962 | 0,600284 |
| RP3-354J5.2   | 0,40 | 0,00 | 0,76 | 0,57 | 0,4285389 | 0,600446 |
| RP11-596D21.1 | 0,32 | 0,17 | 0,00 | 0,00 | 0,4286032 | 0,600471 |
| GPATCH1       | 1,32 | 3,17 | 0,88 | 1,40 | 0,428633  | 0,600471 |
| AC004067.6    | 0,00 | 0,00 | 0,00 | 0,00 | 0,4286376 | 0,600471 |
| TLR1          | 3,47 | 3,55 | 4,88 | 3,68 | 0,4287678 | 0,600615 |
| RP11-197P3.5  | 1,37 | 1,72 | 1,15 | 0,54 | 0,4288552 | 0,6007   |
| JPX           | 5,02 | 1,17 | 4,73 | 3,20 | 0,4289924 | 0,600839 |
| CTD-2282P23.2 | 0,00 | 0,00 | 0,00 | 0,00 | 0,4290085 | 0,600839 |
| RP4-777O23.2  | 0,00 | 0,00 | 0,00 | 0,00 | 0,4290694 | NA       |
| GPLD1         | 1,04 | 0,73 | 1,08 | 0,97 | 0,4291659 | 0,601021 |
| SNORD14A      | 6,91 | 0,00 | 7,03 | 2,03 | 0,4292137 | 0,601021 |
| GDPD2         | 0,05 | 0,06 | 0,13 | 0,05 | 0,4292194 | 0,601021 |
| AP000473.6    | 0,00 | 0,00 | 0,00 | 0,53 | 0,4292316 | NA       |
| AC139103.1    | 0,00 | 0,15 | 0,00 | 0,00 | 0,4292658 | NA       |
| R3HDML        | 0,00 | 0,00 | 0,00 | 0,00 | 0,4292726 | NA       |
| AC068831.15   | 4,86 | 5,68 | 4,75 | 5,41 | 0,4292797 | 0,601067 |
| C16orf96      | 0,00 | 0,03 | 0,00 | 0,00 | 0,4293575 | 0,601101 |
| IL27RA        | 3,50 | 3,40 | 3,08 | 3,03 | 0,4293581 | 0,601101 |
| RP11-757G14.4 | 0,31 | 0,10 | 0,33 | 0,78 | 0,4294259 | 0,601158 |
| STK32C        | 3,73 | 4,83 | 3,42 | 3,35 | 0,4295041 | 0,601229 |
| RP11-843A23.1 | 0,00 | 0,00 | 0,10 | 0,00 | 0,4295307 | 0,601229 |
| AC021224.1    | 0,22 | 0,00 | 0,00 | 0,00 | 0,4295839 | NA       |
| RP11-14C22.4  | 0,08 | 0,05 | 0,00 | 0,07 | 0,42959   | 0,601275 |
| MARK3         | 6,22 | 5,64 | 5,66 | 5,72 | 0,4297126 | 0,601408 |
| RP11-401F2.3  | 0,00 | 0,00 | 0,00 | 0,55 | 0,4297263 | NA       |
| MRAP2         | 0,00 | 0,74 | 0,10 | 0,00 | 0,4298379 | 0,601534 |
| RP11-617D20.2 | 0,00 | 0,67 | 0,32 | 1,79 | 0,4298566 | 0,601534 |
| RP11-386G11.8 | 0,00 | 0,00 | 0,00 | 0,00 | 0,4298771 | NA       |
| KIAA1549      | 0,06 | 0,10 | 0,22 | 0,06 | 0,4299606 | 0,601554 |
| TMEM67        | 1,53 | 1,75 | 1,94 | 2,53 | 0,4299751 | 0,601554 |
| RP11-167P22.4 | 0,00 | 0,00 | 0,00 | 0,00 | 0,4300286 | NA       |
| ATXN7L3       | 1,96 | 1,82 | 2,26 | 2,88 | 0,4300372 | 0,601554 |
| RP1-199J3.5   | 0,00 | 0,00 | 0,00 | 0,00 | 0,4300465 | 0,601554 |
| DEPDC1B       | 0,00 | 0,76 | 0,02 | 0,65 | 0,4300651 | 0,601554 |
| AC002044.3    | 0,28 | 0,59 | 0,00 | 0,34 | 0,430067  | 0,601554 |
| PGAP2         | 3,54 | 2,45 | 2,04 | 0,66 | 0,4300705 | 0,601554 |
| RNU6-268P     | 2,97 | 4,16 | 2,98 | 1,80 | 0,4301119 | 0,601554 |
| KCNJ1         | 0,04 | 0,00 | 0,00 | 0,79 | 0,4301142 | 0,601554 |
| CTD-2368P22.1 | 0,83 | 1,35 | 1,35 | 1,61 | 0,4302161 | 0,601658 |
| RN7SL336P     | 0,00 | 0,00 | 0,74 | 0,00 | 0,4302465 | 0,601663 |
| MT-TA         | 5,88 | 5,58 | 5,87 | 6,46 | 0,4302856 | 0,60168  |
| PPP6R2        | 2,40 | 2,74 | 2,53 | 2,92 | 0,4304584 | 0,601883 |
| RP11-231P20.5 | 0,00 | 0,00 | 0,00 | 0,00 | 0,4304883 | NA       |
| CD27-AS1      | 3,32 | 2,67 | 3,31 | 2,08 | 0,4305557 | 0,601982 |
| RP11-359K18.4 | 0,70 | 1,02 | 1,41 | 0,00 | 0,4306214 | 0,602036 |
| OR52N1        | 0,06 | 0,06 | 0,08 | 0,05 | 0,4306625 | 0,602055 |
| RAB31         | 6,98 | 6,60 | 7,22 | 6,89 | 0,43069   | 0,602056 |
| AC093642.5    | 1,80 | 2,40 | 1,24 | 1,06 | 0,4307571 | 0,602096 |
| P4HA2         | 2,93 | 2,49 | 2,90 | 3,29 | 0,4308208 | 0,602096 |
| SNAPC3        | 1,40 | 1,83 | 2,27 | 1,30 | 0,4308418 | 0,602096 |
| CTC-369A16.2  | 0,29 | 1,26 | 0,56 | 1,02 | 0,4308485 | 0,602096 |
| AC007563.5    | 0,57 | 1,97 | 0,78 | 1,14 | 0,430854  | 0,602096 |
| KIR2DP1       | 0,00 | 0,22 | 0,00 | 0,00 | 0,4308949 | NA       |



|                |      |      |      |      |           |          |
|----------------|------|------|------|------|-----------|----------|
| RP11-500G10.1  | 2,69 | 0,81 | 1,19 | 0,98 | 0,430994  | 0,602222 |
| CCDC94         | 4,19 | 5,13 | 4,01 | 2,21 | 0,4309989 | 0,602222 |
| CCDC114        | 0,04 | 0,08 | 0,05 | 0,21 | 0,4310498 | 0,602256 |
| AC100830.5     | 0,00 | 0,00 | 0,00 | 0,00 | 0,4310821 | NA       |
| RP4-737A23.2   | 0,00 | 1,54 | 0,50 | 0,49 | 0,4311544 | 0,602363 |
| ROGDI          | 4,49 | 4,80 | 5,14 | 4,73 | 0,4311809 | 0,602363 |
| RNA5SP435      | 0,00 | 0,00 | 0,00 | 0,00 | 0,4312931 | 0,602482 |
| RP11-162G10.5  | 4,31 | 0,55 | 3,32 | 0,61 | 0,4314425 | 0,60263  |
| RP11-136H19.1  | 0,77 | 0,96 | 2,10 | 1,68 | 0,4314796 | 0,60263  |
| LRP11          | 0,00 | 0,00 | 0,00 | 0,08 | 0,431504  | 0,60263  |
| IKZF5          | 3,53 | 0,43 | 2,85 | 1,21 | 0,4315074 | 0,60263  |
| RP11-475D10.4  | 1,50 | 0,97 | 0,87 | 1,14 | 0,4316878 | 0,602788 |
| RP11-309N24.1  | 0,99 | 0,19 | 1,10 | 0,75 | 0,4317391 | 0,602788 |
| AC053503.6     | 0,00 | 0,00 | 0,14 | 2,18 | 0,4317416 | 0,602788 |
| ITPRIPL1       | 0,22 | 0,45 | 0,24 | 0,23 | 0,4317574 | 0,602788 |
| CABP2          | 0,00 | 0,00 | 0,00 | 0,00 | 0,4317739 | NA       |
| SLC18B1        | 4,48 | 3,05 | 3,80 | 1,82 | 0,4317785 | 0,602788 |
| RP11-968A15.2  | 0,00 | 0,00 | 0,00 | 0,00 | 0,4317867 | 0,602788 |
| RP11-228B15.4  | 0,37 | 0,21 | 0,43 | 0,51 | 0,4318103 | 0,602788 |
| KCNJ12         | 0,00 | 0,02 | 0,00 | 0,00 | 0,431867  | NA       |
| TMEM217        | 0,00 | 0,00 | 0,12 | 0,00 | 0,4319137 | 0,602877 |
| SLC18A1        | 0,18 | 0,47 | 0,08 | 0,21 | 0,4319349 | 0,602877 |
| AC105053.4     | 0,00 | 0,00 | 0,00 | 0,00 | 0,4319558 | 0,602877 |
| JARID2         | 3,58 | 3,81 | 3,74 | 3,22 | 0,4321463 | 0,603075 |
| TLK1           | 4,81 | 4,01 | 4,43 | 4,10 | 0,4321521 | 0,603075 |
| TCEAL9         | 0,00 | 0,00 | 0,00 | 0,25 | 0,4322034 | NA       |
| MAMDC4         | 0,00 | 0,82 | 0,21 | 0,06 | 0,4322233 | 0,603133 |
| RP5-858L17.1   | 0,00 | 0,00 | 0,12 | 0,00 | 0,4322479 | 0,603133 |
| RP11-434P11.2  | 0,00 | 0,00 | 0,00 | 0,00 | 0,4323526 | 0,603242 |
| RP11-105C19.1  | 0,00 | 0,00 | 0,21 | 0,11 | 0,4324347 | NA       |
| RP11-477I4.4   | 0,00 | 0,00 | 0,00 | 0,71 | 0,4324794 | NA       |
| RP11-145J3.3   | 0,00 | 0,00 | 0,00 | 0,00 | 0,4325619 | 0,603467 |
| RP11-818F20.1  | 0,56 | 0,56 | 0,74 | 1,29 | 0,4326151 | 0,603467 |
| TRAPPC10       | 3,20 | 3,96 | 3,65 | 2,98 | 0,4326595 | 0,603467 |
| GPBP1          | 6,28 | 5,01 | 5,81 | 5,62 | 0,4326638 | 0,603467 |
| GCNT7          | 0,05 | 0,14 | 0,08 | 0,06 | 0,4326985 | 0,603467 |
| SEPT7L         | 0,51 | 0,84 | 0,53 | 2,64 | 0,4327022 | 0,603467 |
| RP11-209M4.1   | 0,16 | 0,00 | 0,20 | 0,22 | 0,4327039 | 0,603467 |
| UGT2B7         | 0,00 | 0,00 | 0,00 | 0,11 | 0,4328036 | NA       |
| NFYC           | 5,65 | 4,90 | 5,12 | 4,57 | 0,4329347 | 0,603751 |
| RP11-131L12.3  | 0,00 | 0,00 | 0,00 | 0,00 | 0,4330101 | NA       |
| MTATP6P2       | 0,00 | 0,00 | 0,12 | 0,26 | 0,4330416 | NA       |
| ADPGK          | 6,23 | 6,26 | 5,98 | 5,54 | 0,4330965 | 0,603938 |
| RP11-465N4.5   | 0,00 | 0,00 | 0,00 | 0,00 | 0,4332015 | NA       |
| AC010096.1     | 0,00 | 0,00 | 0,07 | 0,17 | 0,4332385 | NA       |
| RP11-488C13.5  | 3,79 | 2,31 | 3,46 | 1,55 | 0,4332533 | 0,604119 |
| MIR4309        | 0,00 | 0,00 | 0,00 | 0,00 | 0,4333277 | NA       |
| TRAM1          | 6,16 | 5,27 | 5,68 | 5,40 | 0,4333961 | 0,604428 |
| TRIP4          | 4,39 | 5,11 | 4,00 | 2,84 | 0,4335702 | 0,604473 |
| RP11-6B19.3    | 0,00 | 0,00 | 0,00 | 0,00 | 0,4335704 | NA       |
| AC079742.4     | 0,00 | 0,00 | 0,00 | 0,00 | 0,4335859 | NA       |
| MBD1           | 2,86 | 1,37 | 3,12 | 1,92 | 0,4336263 | 0,604473 |
| RP11-48G14.2   | 0,27 | 1,35 | 0,00 | 0,00 | 0,4336318 | 0,604473 |
| DHRS2          | 0,21 | 0,17 | 0,21 | 0,66 | 0,4336428 | 0,604473 |
| RP11-1281K21.6 | 0,00 | 0,00 | 0,00 | 0,00 | 0,4336542 | NA       |

|                |      |      |      |      |           |          |
|----------------|------|------|------|------|-----------|----------|
| WNT9A          | 0,05 | 0,04 | 0,03 | 0,04 | 0,4336823 | 0,60449  |
| ASAH2          | 0,00 | 0,00 | 0,00 | 0,00 | 0,4337622 | NA       |
| RP11-666E17.1  | 0,00 | 0,00 | 0,00 | 0,00 | 0,4337689 | NA       |
| REXO1          | 0,10 | 0,72 | 1,00 | 0,76 | 0,4338455 | 0,604679 |
| RP11-1140I5.1  | 0,00 | 0,00 | 0,00 | 0,24 | 0,4338583 | NA       |
| RP3-487J7.2    | 1,96 | 1,42 | 1,53 | 2,47 | 0,4338981 | 0,604715 |
| RP11-574K11.29 | 0,13 | 0,00 | 0,00 | 0,20 | 0,4339889 | 0,604803 |
| AC010524.4     | 0,00 | 0,00 | 0,00 | 0,48 | 0,4340187 | NA       |
| CTD-2525I3.5   | 0,00 | 0,00 | 0,00 | 0,00 | 0,4340513 | 0,604852 |
| CTD-2535L24.2  | 0,00 | 0,00 | 0,00 | 0,00 | 0,4341565 | NA       |
| RP11-477G18.2  | 0,00 | 0,84 | 0,00 | 0,00 | 0,4341879 | NA       |
| MIR5194        | 0,00 | 0,00 | 0,00 | 0,00 | 0,4342009 | 0,605023 |
| AC092580.4     | 0,00 | 1,06 | 0,00 | 2,72 | 0,4343404 | 0,605179 |
| RALGPS1        | 0,76 | 0,80 | 0,87 | 1,18 | 0,4345299 | 0,605351 |
| AC092316.1     | 1,70 | 3,02 | 1,55 | 2,56 | 0,4345453 | 0,605351 |
| RP11-966I7.3   | 0,63 | 0,00 | 0,68 | 1,13 | 0,4345576 | 0,605351 |
| RNU6-866P      | 1,96 | 3,65 | 2,77 | 2,90 | 0,4345727 | 0,605351 |
| RP11-49I4.3    | 0,49 | 1,48 | 1,42 | 0,00 | 0,4347534 | 0,605565 |
| RPL7P47        | 0,48 | 0,00 | 0,37 | 0,00 | 0,4348409 | NA       |
| RASSF7         | 3,57 | 3,77 | 3,28 | 1,65 | 0,434846  | 0,605653 |
| PTK6           | 0,51 | 0,22 | 0,38 | 0,31 | 0,4348709 | 0,605653 |
| CITF22-49D8.1  | 0,00 | 0,00 | 0,00 | 0,03 | 0,434878  | NA       |
| ATP2A2         | 2,89 | 3,93 | 2,65 | 3,53 | 0,4349134 | 0,605674 |
| EMILIN3        | 0,00 | 0,07 | 0,00 | 0,00 | 0,4350068 | NA       |
| RP11-536O18.2  | 0,07 | 0,06 | 0,08 | 0,17 | 0,4352813 | 0,606148 |
| DCPS           | 5,13 | 5,42 | 5,00 | 3,60 | 0,4353493 | 0,606187 |
| MRPL37P1       | 3,45 | 3,17 | 3,80 | 2,74 | 0,4353638 | 0,606187 |
| IGKV3D-15      | 0,00 | 0,00 | 0,00 | 0,00 | 0,4353919 | NA       |
| SNX22          | 1,15 | 0,48 | 0,73 | 1,49 | 0,435463  | 0,606287 |
| RP11-885N19.7  | 0,00 | 0,00 | 0,00 | 1,12 | 0,4355891 | 0,606425 |
| VASN           | 0,04 | 0,05 | 0,07 | 0,16 | 0,4356512 | 0,606473 |
| RN75L291P      | 0,00 | 0,00 | 0,00 | 0,00 | 0,4357036 | 0,6065   |
| RP11-632K5.3   | 0,05 | 0,07 | 0,05 | 0,07 | 0,4357265 | 0,6065   |
| RPA4           | 0,00 | 0,00 | 0,22 | 0,11 | 0,4357523 | 0,6065   |
| AUP1           | 6,25 | 5,80 | 5,97 | 5,89 | 0,4358401 | 0,606572 |
| SARS2          | 4,21 | 4,43 | 3,83 | 3,15 | 0,4358811 | 0,606572 |
| GGA2           | 4,91 | 5,09 | 4,48 | 4,37 | 0,435886  | 0,606572 |
| RP11-88N11.1   | 0,75 | 0,67 | 1,79 | 0,53 | 0,4360947 | 0,606825 |
| ZC3H4          | 2,78 | 1,48 | 2,58 | 2,38 | 0,4361929 | 0,606923 |
| RP11-352B15.1  | 0,00 | 2,14 | 0,00 | 1,34 | 0,4362237 | 0,606928 |
| NFATC1         | 2,29 | 2,85 | 1,71 | 1,45 | 0,4362712 | 0,606956 |
| CTD-2251F13.1  | 2,32 | 3,53 | 3,36 | 2,66 | 0,4363013 | 0,60696  |
| RP11-544A12.5  | 0,00 | 0,44 | 0,00 | 0,00 | 0,4363144 | NA       |
| GLT8D1         | 3,81 | 2,73 | 3,43 | 2,03 | 0,436456  | 0,607112 |
| CCDC97         | 1,85 | 0,36 | 2,17 | 3,42 | 0,4364649 | 0,607112 |
| KCTD7          | 2,06 | 1,10 | 1,15 | 0,44 | 0,4365255 | 0,607134 |
| CBLN3          | 0,00 | 0,06 | 0,01 | 0,78 | 0,4365482 | 0,607134 |
| RP11-23J9.5    | 0,00 | 0,00 | 0,00 | 0,07 | 0,4365977 | 0,607134 |
| CCR1           | 3,18 | 1,32 | 3,97 | 2,08 | 0,4366285 | 0,607134 |
| RP11-958N24.1  | 0,00 | 0,21 | 0,00 | 0,00 | 0,4366364 | 0,607134 |
| DNAH12         | 0,09 | 1,24 | 0,20 | 0,60 | 0,4366749 | 0,607134 |
| SSBP2          | 5,32 | 3,69 | 5,40 | 4,16 | 0,4366963 | 0,607134 |
| VRK2           | 5,56 | 2,89 | 4,15 | 4,43 | 0,4366996 | 0,607134 |
| RP11-204M4.4   | 0,87 | 0,00 | 0,08 | 0,00 | 0,4367299 | 0,607138 |
| PIGZ           | 0,04 | 0,07 | 0,33 | 0,06 | 0,4368177 | 0,607223 |

|               |      |      |      |      |           |          |
|---------------|------|------|------|------|-----------|----------|
| AP000223.41   | 0,00 | 0,00 | 0,00 | 0,00 | 0,4368437 | NA       |
| BGLT3         | 0,00 | 0,00 | 0,00 | 0,00 | 0,4368437 | NA       |
| ZNF566        | 1,79 | 2,31 | 1,58 | 1,46 | 0,4369142 | 0,607319 |
| THNSL1        | 0,00 | 0,00 | 0,07 | 0,04 | 0,4369668 | 0,60732  |
| CASS4         | 3,92 | 3,07 | 2,59 | 2,35 | 0,4369697 | 0,60732  |
| FBXO17        | 0,22 | 0,24 | 0,22 | 0,06 | 0,4370126 | 0,607341 |
| RP1-179N16.6  | 1,84 | 2,46 | 2,12 | 2,69 | 0,4371455 | 0,607488 |
| RP11-318E3.4  | 0,00 | 0,00 | 0,00 | 0,00 | 0,4371799 | 0,607498 |
| MADD          | 4,01 | 2,82 | 3,74 | 3,37 | 0,4372396 | 0,607543 |
| PBLD          | 0,88 | 0,98 | 1,51 | 1,06 | 0,4372895 | 0,607574 |
| RP11-282I1.1  | 0,00 | 0,00 | 0,00 | 0,00 | 0,4373133 | NA       |
| CENPJ         | 1,00 | 0,21 | 0,22 | 0,11 | 0,4374331 | 0,607736 |
| CRYL1         | 4,71 | 3,20 | 5,15 | 2,06 | 0,4375175 | 0,607815 |
| RP11-126K1.2  | 0,00 | 0,00 | 0,34 | 0,00 | 0,4376056 | 0,607873 |
| GIT1          | 3,46 | 3,90 | 3,55 | 3,42 | 0,4376139 | 0,607873 |
| TP53I11       | 0,30 | 0,04 | 0,29 | 0,42 | 0,4378441 | 0,608155 |
| RP11-122L9.1  | 0,00 | 0,84 | 0,82 | 0,37 | 0,4378785 | 0,608165 |
| PFKFB2        | 1,72 | 2,07 | 0,98 | 1,04 | 0,4379475 | 0,608208 |
| PPIAP2        | 0,00 | 0,00 | 0,00 | 0,00 | 0,4379644 | 0,608208 |
| RNF215        | 0,13 | 0,40 | 0,18 | 0,80 | 0,4380174 | 0,608243 |
| AC003051.1    | 0,07 | 0,16 | 0,10 | 0,28 | 0,4380575 | 0,608247 |
| RNU6-94P      | 0,00 | 1,89 | 1,85 | 0,00 | 0,4380959 | 0,608247 |
| RN7SL812P     | 0,00 | 0,00 | 0,00 | 0,00 | 0,4381021 | 0,608247 |
| RN7SL510P     | 0,00 | 0,00 | 0,00 | 0,00 | 0,438157  | NA       |
| LGALS9B       | 0,00 | 0,00 | 0,00 | 0,75 | 0,4382242 | 0,608359 |
| FAM91A1       | 4,17 | 2,62 | 3,82 | 3,86 | 0,4382399 | 0,608359 |
| RP11-293K19.1 | 0,00 | 0,00 | 0,00 | 0,00 | 0,4382647 | 0,608359 |
| ABLIM3        | 0,00 | 0,00 | 0,00 | 0,00 | 0,4383766 | NA       |
| PRSS3         | 0,00 | 0,00 | 0,00 | 0,00 | 0,4384473 | NA       |
| ARF4-AS1      | 1,53 | 2,72 | 1,27 | 0,75 | 0,4384508 | 0,608536 |
| KCNMB3        | 0,31 | 0,18 | 0,30 | 1,30 | 0,4384666 | 0,608536 |
| HIST1H4I      | 2,35 | 1,69 | 1,68 | 0,25 | 0,4384745 | 0,608536 |
| DNTTIP1       | 5,92 | 2,67 | 5,42 | 4,58 | 0,4385615 | 0,608619 |
| HCG27         | 0,00 | 0,00 | 0,00 | 0,19 | 0,4386499 | 0,608703 |
| PDE6A         | 1,24 | 0,41 | 1,34 | 0,82 | 0,4386912 | 0,608723 |
| TANC2         | 1,62 | 2,45 | 1,64 | 1,97 | 0,438728  | 0,608736 |
| GAD2          | 0,00 | 0,00 | 0,00 | 0,00 | 0,4387972 | NA       |
| RP11-153M7.5  | 0,00 | 0,39 | 0,00 | 0,00 | 0,4388283 | NA       |
| PLA2G2F       | 0,00 | 0,00 | 0,00 | 0,00 | 0,4388842 | NA       |
| NAA50         | 4,54 | 5,39 | 4,05 | 3,90 | 0,4389162 | 0,60892  |
| RP11-665J16.1 | 0,00 | 0,00 | 0,00 | 0,00 | 0,4389491 | NA       |
| ENPP5         | 0,00 | 0,27 | 0,00 | 0,23 | 0,4389603 | 0,60892  |
| CNDP1         | 0,97 | 0,86 | 1,05 | 1,04 | 0,4389632 | 0,60892  |
| CD4           | 6,04 | 5,03 | 5,91 | 5,54 | 0,4389881 | 0,60892  |
| TLR7          | 2,24 | 0,95 | 2,85 | 2,82 | 0,438998  | 0,60892  |
| FASN          | 0,35 | 0,50 | 0,51 | 0,27 | 0,4390325 | 0,60893  |
| AC104134.2    | 0,00 | 0,00 | 0,00 | 0,00 | 0,4391377 | 0,609009 |
| RP5-865N13.1  | 0,00 | 0,04 | 0,01 | 0,06 | 0,4391444 | 0,609009 |
| GUSBP2        | 1,15 | 1,43 | 1,32 | 1,00 | 0,4391974 | 0,609045 |
| BMX           | 0,00 | 0,57 | 0,00 | 0,00 | 0,43924   | 0,609061 |
| BEND3         | 0,29 | 0,82 | 0,26 | 0,69 | 0,4392835 | 0,609061 |
| SAAL1         | 4,12 | 2,36 | 4,42 | 5,24 | 0,4392909 | 0,609061 |
| AGAP14P       | 0,00 | 0,00 | 0,00 | 0,00 | 0,4393176 | NA       |
| CTC-303L1.1   | 0,00 | 0,00 | 0,00 | 0,00 | 0,4393384 | 0,609088 |
| RP11-745L13.2 | 2,04 | 3,27 | 2,76 | 0,81 | 0,4393783 | 0,609106 |

|                  |      |      |      |      |           |          |
|------------------|------|------|------|------|-----------|----------|
| RP11-48B3.5      | 0,56 | 0,00 | 0,22 | 0,27 | 0,4394339 | 0,609145 |
| RP11-295M3.2     | 0,00 | 1,19 | 0,00 | 0,00 | 0,4394636 | NA       |
| RP11-171I2.5     | 0,00 | 0,00 | 0,00 | 0,23 | 0,4395263 | 0,609206 |
| RNY1P15          | 0,00 | 0,00 | 0,00 | 0,00 | 0,4395531 | 0,609206 |
| RP3-475N16.1     | 2,62 | 2,75 | 3,31 | 3,53 | 0,4395601 | 0,609206 |
| THNSL2           | 0,31 | 0,49 | 0,30 | 0,41 | 0,4396812 | 0,609336 |
| XXbac-BPG250I8.4 | 0,52 | 0,93 | 0,93 | 0,35 | 0,4397145 | 0,609344 |
| RP11-564A8.4     | 0,52 | 0,80 | 0,31 | 0,48 | 0,4397684 | 0,60938  |
| CSRNP2           | 0,04 | 0,23 | 0,29 | 0,83 | 0,439814  | 0,609406 |
| ZNF826P          | 1,29 | 1,83 | 1,09 | 0,66 | 0,4398799 | 0,609459 |
| HIC2             | 0,75 | 0,10 | 0,57 | 1,29 | 0,4399778 | 0,60954  |
| B4GALT4          | 3,38 | 1,77 | 3,54 | 1,19 | 0,439993  | 0,60954  |
| RP11-368J21.1    | 5,25 | 5,16 | 5,12 | 4,26 | 0,4400299 | 0,609553 |
| RP11-101P17.5    | 0,00 | 0,23 | 0,00 | 0,00 | 0,440039  | NA       |
| AC058791.1       | 3,73 | 2,19 | 3,14 | 1,35 | 0,4402691 | 0,609846 |
| ZNF365           | 0,03 | 0,34 | 0,10 | 0,14 | 0,4403092 | 0,609864 |
| AC004980.9       | 3,19 | 2,93 | 2,05 | 2,86 | 0,4403458 | 0,609876 |
| UBE2Q2P1         | 0,95 | 0,60 | 0,71 | 1,43 | 0,440419  | 0,60994  |
| RP5-1113E3.3     | 0,00 | 0,00 | 0,46 | 0,91 | 0,4404619 | 0,609953 |
| SUSD2            | 0,00 | 0,00 | 0,00 | 0,00 | 0,44047   | NA       |
| RDH14            | 1,49 | 1,65 | 1,47 | 0,37 | 0,4404835 | 0,609953 |
| CTC-425O23.5     | 0,49 | 0,70 | 0,64 | 0,63 | 0,4405742 | 0,610041 |
| RN7SL100P        | 1,10 | 1,41 | 1,35 | 1,33 | 0,4406248 | 0,610072 |
| SLC35D2          | 3,21 | 1,93 | 3,92 | 1,98 | 0,4406742 | 0,610072 |
| RP11-398K22.12   | 0,86 | 0,99 | 1,26 | 1,38 | 0,440706  | 0,610072 |
| TUBB             | 5,35 | 3,86 | 5,01 | 4,86 | 0,4407068 | 0,610072 |
| PODXL            | 0,00 | 0,15 | 0,06 | 0,08 | 0,440789  | 0,610141 |
| SAA1             | 0,00 | 0,00 | 0,00 | 0,00 | 0,4408073 | NA       |
| STAT5A           | 4,36 | 4,48 | 4,44 | 3,94 | 0,4408115 | 0,610141 |
| GDAP1            | 0,09 | 0,04 | 0,21 | 1,90 | 0,440895  | 0,610219 |
| RP11-1217F2.15   | 0,00 | 0,00 | 0,00 | 0,00 | 0,4409455 | NA       |
| AC021107.3       | 0,00 | 0,00 | 0,07 | 0,07 | 0,4411061 | NA       |
| CHIC1            | 0,08 | 0,05 | 0,02 | 0,03 | 0,4411707 | 0,610517 |
| CTC-559E9.1      | 0,75 | 1,68 | 0,62 | 0,32 | 0,4412118 | 0,610517 |
| AL163953.1       | 0,26 | 0,27 | 0,32 | 0,51 | 0,4412577 | 0,610517 |
| ACTR5            | 2,54 | 2,82 | 2,22 | 1,06 | 0,4412611 | 0,610517 |
| RP11-404F10.1    | 0,00 | 0,00 | 0,00 | 0,00 | 0,4412878 | 0,610517 |
| CGB2             | 0,00 | 2,33 | 0,00 | 0,00 | 0,4412923 | 0,610517 |
| TMC6             | 5,41 | 5,83 | 5,93 | 5,93 | 0,4413028 | 0,610517 |
| RP11-946L20.1    | 0,00 | 0,00 | 0,00 | 0,00 | 0,4413897 | NA       |
| ZNF737           | 1,08 | 1,28 | 0,97 | 0,57 | 0,4414024 | 0,61056  |
| MANEA            | 1,12 | 0,79 | 0,89 | 0,53 | 0,441451  | 0,61056  |
| PRKAR1A          | 6,22 | 6,36 | 5,89 | 5,75 | 0,4414551 | 0,61056  |
| LLNLR-470E3.1    | 6,33 | 4,63 | 6,05 | 6,23 | 0,4414799 | 0,61056  |
| RP11-688I9.5     | 1,43 | 2,56 | 1,20 | 1,10 | 0,4414847 | 0,61056  |
| RP11-305L7.7     | 0,81 | 0,46 | 0,51 | 0,88 | 0,4414986 | 0,61056  |
| ARL4A            | 6,11 | 4,80 | 5,91 | 5,16 | 0,4415525 | 0,610596 |
| CTD-2363C16.1    | 0,00 | 0,00 | 0,00 | 0,00 | 0,4415764 | NA       |
| CTC-451P13.1     | 0,86 | 0,98 | 0,84 | 0,65 | 0,4415872 | 0,610606 |
| EIF2B4           | 5,43 | 5,77 | 5,52 | 5,06 | 0,4416473 | 0,610631 |
| ZMYM5            | 4,33 | 0,36 | 3,47 | 2,81 | 0,4416719 | 0,610631 |
| RP11-1038A11.1   | 1,33 | 0,97 | 1,79 | 0,12 | 0,4416877 | 0,610631 |
| RP11-285G1.15    | 0,00 | 0,00 | 0,00 | 0,23 | 0,441855  | NA       |
| ISG20            | 6,59 | 6,98 | 5,67 | 5,75 | 0,4419382 | 0,61093  |
| PPP4R1           | 4,65 | 3,55 | 5,16 | 5,55 | 0,4419588 | 0,61093  |

|                |      |      |      |      |           |          |
|----------------|------|------|------|------|-----------|----------|
| LDOC1L         | 0,08 | 0,78 | 0,62 | 0,27 | 0,4420556 | 0,611012 |
| RHEBP1         | 0,00 | 0,00 | 0,00 | 0,00 | 0,4420728 | 0,611012 |
| RCVRN          | 0,00 | 1,05 | 0,52 | 0,39 | 0,4422735 | 0,611251 |
| CARNS1         | 0,00 | 0,00 | 0,22 | 0,05 | 0,4423289 | 0,611271 |
| PCDHGA10       | 0,15 | 0,09 | 0,14 | 0,30 | 0,4424166 | 0,611271 |
| RP11-231E4.4   | 3,06 | 4,23 | 2,39 | 3,98 | 0,4424249 | 0,611271 |
| ZNF765         | 0,96 | 0,59 | 1,08 | 0,64 | 0,4424434 | 0,611271 |
| DCTN6          | 5,43 | 4,31 | 4,98 | 4,53 | 0,4424626 | 0,611271 |
| ALKBH1         | 2,61 | 1,99 | 0,70 | 2,30 | 0,4424654 | 0,611271 |
| RP11-10017.2   | 1,82 | 2,19 | 0,44 | 2,46 | 0,4424803 | 0,611271 |
| TANGO2         | 4,47 | 3,34 | 4,23 | 3,37 | 0,442573  | 0,611361 |
| RMI1           | 2,50 | 0,62 | 1,01 | 0,30 | 0,4426092 | 0,611373 |
| TUBD1          | 1,56 | 2,07 | 1,51 | 2,28 | 0,4426508 | 0,611392 |
| CLK2           | 4,56 | 5,40 | 4,46 | 4,74 | 0,4428214 | 0,611576 |
| WDR43          | 6,40 | 6,40 | 5,30 | 5,07 | 0,442839  | 0,611576 |
| CTC-425F1.4    | 2,15 | 2,39 | 3,07 | 2,86 | 0,4428893 | 0,611608 |
| MRPL55         | 7,06 | 7,52 | 6,85 | 7,03 | 0,4429539 | 0,611659 |
| AC005758.1     | 0,00 | 0,00 | 0,00 | 0,00 | 0,4429621 | NA       |
| MAX            | 5,20 | 5,51 | 5,08 | 4,34 | 0,4430156 | 0,611706 |
| C3orf58        | 4,67 | 4,18 | 4,32 | 3,16 | 0,4431146 | 0,611775 |
| RP11-1046B16.3 | 3,31 | 0,38 | 3,00 | 4,15 | 0,4431203 | 0,611775 |
| RP11-659P15.1  | 1,45 | 0,87 | 1,60 | 2,27 | 0,4431677 | 0,611792 |
| RP11-252M21.4  | 1,65 | 1,81 | 1,57 | 1,19 | 0,4431882 | 0,611792 |
| ZCCHC8         | 4,12 | 1,82 | 4,01 | 2,84 | 0,4433151 | 0,611193 |
| CTD-2526A2.4   | 0,00 | 0,00 | 0,00 | 0,06 | 0,4434507 | NA       |
| RP11-401119.2  | 0,00 | 0,04 | 0,00 | 0,00 | 0,4435302 | NA       |
| AC006947.1     | 0,44 | 0,43 | 0,00 | 0,63 | 0,4435571 | 0,612165 |
| CH507-42P11.1  | 2,14 | 2,13 | 1,14 | 0,21 | 0,443568  | 0,612165 |
| H2BFS          | 2,14 | 2,13 | 1,14 | 0,21 | 0,443568  | 0,612165 |
| CTB-91J4.1     | 0,00 | 0,00 | 0,00 | 0,45 | 0,4436535 | NA       |
| RP11-111K18.1  | 0,41 | 0,00 | 0,00 | 0,15 | 0,4436695 | 0,612267 |
| CTD-2116N20.1  | 0,48 | 0,00 | 0,00 | 0,67 | 0,4437104 | 0,612285 |
| CTD-2325P2.3   | 0,00 | 0,00 | 0,00 | 0,00 | 0,4438428 | 0,612419 |
| IWS1           | 5,36 | 4,16 | 4,56 | 4,62 | 0,4438623 | 0,612419 |
| NPHP3-AS1      | 0,05 | 0,11 | 0,09 | 0,24 | 0,4439045 | 0,612439 |
| CTC-329D1.2    | 0,00 | 0,00 | 0,00 | 0,00 | 0,4440273 | 0,612524 |
| ZNF506         | 2,99 | 3,00 | 2,95 | 1,93 | 0,44403   | 0,612524 |
| MIR3690        | 0,00 | 0,00 | 0,00 | 0,00 | 0,4440602 | 0,612524 |
| WASH3P         | 2,87 | 3,31 | 3,91 | 3,52 | 0,4441011 | 0,612524 |
| MED13          | 5,07 | 4,03 | 4,54 | 4,53 | 0,4441041 | 0,612524 |
| RP1-321O10.2   | 0,05 | 0,00 | 0,00 | 0,00 | 0,4441109 | NA       |
| RP11-571E6.3   | 0,97 | 0,00 | 0,46 | 0,68 | 0,4441666 | 0,612572 |
| RN7SL329P      | 0,86 | 2,83 | 1,75 | 2,64 | 0,4442056 | 0,612588 |
| RP11-148G20.1  | 0,00 | 0,00 | 0,00 | 0,00 | 0,4442232 | NA       |
| AC016749.2     | 0,00 | 0,00 | 0,00 | 0,00 | 0,4442341 | 0,612589 |
| AC021016.6     | 0,00 | 0,00 | 0,00 | 1,41 | 0,4442652 | 0,612594 |
| CTD-3080P12.3  | 0,05 | 0,32 | 0,07 | 0,09 | 0,4443111 | 0,61262  |
| DNAJC24        | 2,84 | 2,64 | 1,89 | 2,73 | 0,4443804 | 0,612677 |
| RP11-573M3.4   | 0,00 | 0,00 | 0,00 | 0,00 | 0,444417  | NA       |
| AC009133.21    | 0,00 | 0,00 | 0,00 | 0,00 | 0,4444509 | 0,612736 |
| RP11-727F15.9  | 1,66 | 2,68 | 2,53 | 4,23 | 0,4445189 | 0,612766 |
| DGCR6          | 1,78 | 1,18 | 1,29 | 0,72 | 0,4445273 | 0,612766 |
| AC008132.14    | 0,00 | 0,00 | 0,00 | 0,00 | 0,4446055 | NA       |
| ZNF714         | 2,56 | 1,80 | 2,58 | 2,32 | 0,4447737 | 0,613067 |
| WAC            | 6,39 | 5,39 | 6,07 | 5,23 | 0,444928  | 0,6132   |

|               |      |      |      |      |           |          |
|---------------|------|------|------|------|-----------|----------|
| RP6-201G10.2  | 0,00 | 0,00 | 0,00 | 0,00 | 0,4449462 | 0,6132   |
| NR2C2         | 3,25 | 1,14 | 3,02 | 1,83 | 0,4449531 | 0,6132   |
| P2RX3         | 0,15 | 0,27 | 0,19 | 0,39 | 0,4451485 | 0,613432 |
| VEPH1         | 0,00 | 0,00 | 0,00 | 0,00 | 0,4451712 | NA       |
| CD81          | 4,65 | 5,07 | 4,80 | 4,57 | 0,4453451 | 0,613665 |
| TNS2          | 0,08 | 0,28 | 0,15 | 0,24 | 0,4454048 | 0,613709 |
| RP11-343H5.4  | 0,80 | 0,50 | 0,84 | 1,05 | 0,4455613 | 0,613853 |
| UFD1L         | 5,81 | 2,79 | 5,73 | 4,94 | 0,4455647 | 0,613853 |
| RP11-415J8.7  | 0,00 | 0,00 | 0,00 | 0,00 | 0,4457297 | NA       |
| HSP90B1       | 7,68 | 6,66 | 7,21 | 6,56 | 0,4459032 | 0,614281 |
| AC097495.3    | 0,00 | 0,00 | 0,00 | 0,00 | 0,4460666 | 0,614457 |
| C1orf174      | 4,09 | 3,60 | 3,00 | 3,36 | 0,4460892 | 0,614457 |
| SERPINB2      | 0,00 | 0,50 | 0,00 | 0,00 | 0,4461391 | 0,614457 |
| DEPTOR        | 3,26 | 1,00 | 3,42 | 0,37 | 0,4461416 | 0,614457 |
| RP11-714M23.2 | 0,00 | 0,00 | 0,02 | 0,03 | 0,4461539 | NA       |
| RP11-65N13.6  | 0,00 | 0,00 | 0,00 | 0,00 | 0,4461732 | NA       |
| RP1-71L16.2   | 1,56 | 1,91 | 1,51 | 2,38 | 0,4464359 | 0,614778 |
| RP11-318E3.9  | 0,83 | 0,00 | 0,00 | 0,00 | 0,4464424 | 0,614778 |
| SCEL          | 0,00 | 0,00 | 0,00 | 0,00 | 0,4464692 | 0,614778 |
| RP11-438N16.1 | 3,21 | 2,91 | 3,18 | 2,75 | 0,4464854 | 0,614778 |
| GTF2F1        | 3,42 | 3,22 | 3,49 | 3,24 | 0,4466059 | 0,614906 |
| TTC32         | 5,33 | 4,88 | 4,24 | 3,78 | 0,4468711 | 0,615233 |
| AC004066.1    | 0,39 | 0,66 | 0,40 | 0,37 | 0,4469088 | 0,615247 |
| RDX           | 4,50 | 4,16 | 3,90 | 4,91 | 0,446972  | 0,615296 |
| RPL6P27       | 1,09 | 1,13 | 0,86 | 0,80 | 0,4470058 | 0,615304 |
| RP11-252E2.1  | 0,00 | 0,00 | 0,00 | 0,00 | 0,4471698 | 0,615492 |
| NPPC          | 0,00 | 0,15 | 0,00 | 0,00 | 0,4471828 | NA       |
| HIST1H4C      | 7,12 | 7,22 | 7,06 | 6,94 | 0,4471975 | 0,615492 |
| RP11-305N23.1 | 0,05 | 0,08 | 0,12 | 0,46 | 0,4473497 | 0,615663 |
| RNU7-30P      | 0,00 | 0,00 | 0,00 | 0,00 | 0,4473644 | NA       |
| SNX11         | 3,10 | 2,56 | 3,16 | 3,90 | 0,4474868 | 0,615777 |
| AC008592.3    | 0,00 | 0,00 | 0,00 | 0,00 | 0,4474931 | 0,615777 |
| CSK           | 6,19 | 5,07 | 6,39 | 5,79 | 0,4475151 | 0,615777 |
| HSD17B12      | 4,92 | 4,72 | 4,32 | 3,42 | 0,4476958 | 0,615987 |
| CTB-50E14.5   | 0,00 | 0,00 | 0,00 | 0,00 | 0,4477361 | NA       |
| RP11-125B21.2 | 0,05 | 0,20 | 0,10 | 0,24 | 0,4477534 | 0,616028 |
| KIAA0226L     | 0,38 | 1,08 | 0,21 | 0,77 | 0,4478105 | 0,616069 |
| ICAM4         | 2,15 | 0,00 | 0,96 | 0,59 | 0,4478389 | 0,61607  |
| PHOSPHO2      | 0,75 | 0,18 | 1,65 | 0,00 | 0,4478862 | 0,616097 |
| SIRT5         | 2,78 | 2,00 | 2,03 | 2,88 | 0,4479287 | 0,616117 |
| KIAA1958      | 1,36 | 0,16 | 1,42 | 0,68 | 0,4480064 | 0,616186 |
| RP11-690G19.4 | 0,24 | 0,36 | 0,62 | 0,30 | 0,4483407 | 0,616607 |
| RP11-550P17.1 | 0,00 | 0,00 | 0,00 | 0,00 | 0,4485291 | NA       |
| AC012075.2    | 0,00 | 0,00 | 0,00 | 0,00 | 0,4485856 | NA       |
| FCGRT         | 8,60 | 8,52 | 8,55 | 8,33 | 0,4486333 | 0,616971 |
| RPGRIP1       | 0,44 | 1,96 | 0,75 | 2,28 | 0,4487033 | 0,61703  |
| CTD-2026K11.3 | 0,64 | 0,00 | 0,00 | 0,25 | 0,448747  | 0,617051 |
| RP5-1069P2.4  | 0,16 | 0,07 | 0,22 | 0,19 | 0,4488148 | 0,617107 |
| RP11-983G14.4 | 0,00 | 0,00 | 0,00 | 0,00 | 0,448889  | NA       |
| RP11-434D11.1 | 0,60 | 1,94 | 1,14 | 1,49 | 0,4488894 | 0,617146 |
| CTA-407F11.6  | 0,93 | 0,30 | 1,75 | 0,76 | 0,4488989 | 0,617146 |
| KNG1          | 0,00 | 0,04 | 0,00 | 0,00 | 0,4489496 | 0,617159 |
| RP1-197J16.3  | 0,00 | 0,00 | 0,00 | 0,00 | 0,448956  | NA       |
| IDSP1         | 0,51 | 0,09 | 0,71 | 0,71 | 0,4489641 | 0,617159 |
| SPAG9         | 5,59 | 4,96 | 5,17 | 4,52 | 0,4490564 | 0,617248 |

|               |      |      |      |      |           |          |
|---------------|------|------|------|------|-----------|----------|
| CTA-392E5.1   | 0,00 | 0,00 | 0,00 | 0,00 | 0,4491422 | NA       |
| RP11-484L7.1  | 0,69 | 1,11 | 0,68 | 1,17 | 0,4492152 | 0,617428 |
| RP11-480I12.3 | 0,00 | 0,00 | 0,00 | 0,00 | 0,4493201 | 0,617534 |
| PHIP          | 4,48 | 4,30 | 4,15 | 3,94 | 0,4493925 | 0,617571 |
| CHP1          | 6,74 | 6,01 | 6,48 | 6,01 | 0,4494031 | 0,617571 |
| CTD-2125J1.1  | 0,00 | 0,00 | 0,00 | 0,00 | 0,4494302 | NA       |
| LRRC38        | 0,00 | 0,00 | 0,00 | 0,00 | 0,4494727 | NA       |
| APPL1         | 4,90 | 4,37 | 5,06 | 3,52 | 0,4494732 | 0,617582 |
| AC084117.3    | 0,00 | 0,00 | 0,00 | 0,00 | 0,4494908 | 0,617582 |
| RP11-471B22.2 | 0,00 | 0,00 | 0,00 | 0,00 | 0,4494943 | 0,617582 |
| DCTD          | 5,10 | 1,04 | 3,93 | 2,92 | 0,4495554 | 0,617628 |
| OR3A3         | 0,09 | 0,10 | 0,11 | 0,23 | 0,4496219 | 0,617681 |
| CTD-2227I18.1 | 0,00 | 0,00 | 0,00 | 0,33 | 0,4496558 | NA       |
| RP11-707O23.1 | 0,00 | 0,00 | 0,00 | 0,40 | 0,4498011 | 0,617889 |
| RP11-329N22.1 | 0,00 | 0,00 | 0,00 | 0,00 | 0,4499896 | NA       |
| RN7SL294P     | 0,00 | 0,00 | 0,00 | 0,81 | 0,4501762 | NA       |
| ZNF664        | 2,31 | 2,86 | 1,77 | 1,34 | 0,4501928 | 0,618389 |
| ZCRB1         | 5,60 | 4,38 | 5,10 | 4,32 | 0,4503414 | 0,618555 |
| AC000370.2    | 0,00 | 0,00 | 0,00 | 0,00 | 0,4503452 | NA       |
| RNU2-63P      | 6,84 | 5,71 | 6,86 | 6,24 | 0,4504828 | 0,618689 |
| RP11-434H14.1 | 5,02 | 4,75 | 4,71 | 4,87 | 0,4504948 | 0,618689 |
| RP11-544M22.1 | 0,81 | 0,73 | 1,01 | 1,52 | 0,450616  | 0,618817 |
| GDNF          | 0,05 | 0,07 | 0,07 | 0,10 | 0,4507459 | 0,618958 |
| AGFG2         | 0,14 | 0,36 | 0,29 | 0,50 | 0,4507967 | 0,618989 |
| RP5-1085F17.3 | 3,03 | 0,89 | 1,70 | 0,31 | 0,4509278 | 0,619131 |
| RP11-218F10.3 | 0,71 | 0,34 | 1,44 | 1,14 | 0,4510347 | 0,619197 |
| ACKR3         | 0,05 | 0,00 | 0,05 | 0,00 | 0,4510455 | 0,619197 |
| TTL           | 2,66 | 1,86 | 2,22 | 1,76 | 0,4510594 | 0,619197 |
| OAZ2          | 5,90 | 5,18 | 5,41 | 4,76 | 0,4511247 | 0,619248 |
| CTD-2073O6.1  | 0,00 | 0,00 | 0,00 | 0,20 | 0,4511513 | NA       |
| RP11-50D16.4  | 1,34 | 0,39 | 0,73 | 0,30 | 0,4511813 | 0,619288 |
| RP11-403F21.1 | 0,00 | 0,00 | 0,00 | 0,00 | 0,4512061 | NA       |
| CTD-3076O17.2 | 0,76 | 0,96 | 0,95 | 0,64 | 0,4512889 | 0,619392 |
| RP5-1057J7.6  | 0,04 | 0,05 | 0,02 | 0,02 | 0,4513237 | 0,619392 |
| RP11-15A1.3   | 0,40 | 0,00 | 0,18 | 0,11 | 0,4513411 | 0,619392 |
| RP11-18H21.2  | 0,00 | 0,00 | 0,00 | 0,00 | 0,4513888 | NA       |
| RP4-667H12.3  | 0,10 | 0,00 | 0,00 | 0,00 | 0,4514699 | NA       |
| CTA-481E9.4   | 3,13 | 3,78 | 2,01 | 3,53 | 0,45154   | 0,619627 |
| UFSP1         | 0,00 | 0,00 | 0,00 | 0,00 | 0,4515937 | NA       |
| SLC25A1       | 3,95 | 2,53 | 4,58 | 3,51 | 0,4516297 | 0,619712 |
| TRIM54        | 0,00 | 0,00 | 0,00 | 0,00 | 0,4517817 | NA       |
| KB-1205A7.2   | 0,00 | 0,88 | 0,00 | 0,00 | 0,4517917 | 0,619896 |
| KRTCAP3       | 0,00 | 0,00 | 0,00 | 0,97 | 0,4519485 | 0,620073 |
| TBX6          | 0,13 | 0,22 | 0,17 | 0,48 | 0,4520046 | 0,620111 |
| CPT1B         | 3,30 | 1,51 | 3,11 | 2,33 | 0,4520676 | 0,620159 |
| AC008132.15   | 0,00 | 0,68 | 0,00 | 0,00 | 0,4521521 | NA       |
| RP11-709A23.2 | 0,00 | 0,00 | 0,00 | 0,00 | 0,4522153 | NA       |
| AC010492.2    | 0,00 | 0,00 | 0,00 | 0,00 | 0,4522807 | NA       |
| RHBDD2        | 5,36 | 4,05 | 5,09 | 6,14 | 0,452342  | 0,620439 |
| SIGLEC2P      | 0,00 | 0,00 | 0,00 | 0,00 | 0,4523521 | 0,620439 |
| RP11-582H21.1 | 0,00 | 0,10 | 0,00 | 0,00 | 0,4523596 | 0,620439 |
| RP11-43D4.2   | 5,11 | 3,78 | 6,10 | 5,19 | 0,4523831 | 0,620439 |
| PROX2         | 0,00 | 0,00 | 0,62 | 0,00 | 0,4524747 | 0,620516 |
| AC011737.2    | 0,56 | 0,04 | 0,51 | 0,00 | 0,4524947 | 0,620516 |
| FANCG         | 0,00 | 1,06 | 1,03 | 1,78 | 0,4525299 | 0,620526 |

|                |      |      |      |      |           |          |
|----------------|------|------|------|------|-----------|----------|
| RP11-84E24.3   | 0,00 | 0,04 | 0,04 | 0,00 | 0,4525576 | NA       |
| CTD-2616J11.16 | 0,00 | 0,00 | 0,00 | 0,00 | 0,4526958 | NA       |
| INHBE          | 0,05 | 0,17 | 0,06 | 0,05 | 0,4527632 | 0,620807 |
| RP5-1039K5.16  | 0,50 | 1,04 | 0,80 | 1,29 | 0,4528368 | 0,62087  |
| MNAT1          | 3,96 | 2,70 | 3,36 | 1,51 | 0,4529594 | 0,621    |
| FAM118A        | 6,01 | 6,11 | 5,89 | 6,52 | 0,4530058 | 0,621025 |
| DND1           | 0,00 | 0,00 | 0,00 | 0,00 | 0,4530343 | NA       |
| RP11-706J10.3  | 0,00 | 0,00 | 0,00 | 0,00 | 0,4530628 | NA       |
| RP1-138B7.6    | 0,00 | 0,00 | 0,00 | 0,00 | 0,4531022 | NA       |
| POLR2I         | 5,07 | 5,59 | 5,15 | 4,79 | 0,4531326 | 0,62116  |
| RP11-83J16.1   | 0,00 | 0,00 | 0,00 | 0,00 | 0,4531538 | NA       |
| ALG5           | 5,79 | 4,97 | 4,72 | 2,79 | 0,4531839 | 0,621192 |
| PRND           | 0,09 | 0,03 | 0,10 | 0,09 | 0,4532285 | 0,621215 |
| SNX29          | 4,50 | 3,98 | 4,59 | 3,30 | 0,4532839 | 0,621253 |
| CTC-525D6.3    | 0,00 | 0,07 | 0,19 | 0,08 | 0,453372  | 0,621335 |
| RNU6-1003P     | 2,72 | 3,26 | 0,00 | 0,00 | 0,453455  | 0,621411 |
| RP11-141M1.1   | 0,00 | 0,00 | 0,00 | 0,00 | 0,4535359 | NA       |
| FOXO4          | 0,00 | 0,08 | 0,03 | 0,04 | 0,4535684 | 0,621528 |
| SKIL           | 3,94 | 1,96 | 3,44 | 4,12 | 0,4536515 | 0,621603 |
| ZNF823         | 0,04 | 0,00 | 0,07 | 0,00 | 0,4536981 | 0,62161  |
| RIMS3          | 0,01 | 0,10 | 0,02 | 0,00 | 0,4537127 | 0,62161  |
| RP11-241F15.10 | 0,00 | 0,00 | 0,00 | 0,00 | 0,4537404 | NA       |
| ETV7           | 1,16 | 0,11 | 0,11 | 0,74 | 0,4537669 | 0,621646 |
| RP11-40H20.2   | 0,00 | 0,00 | 0,00 | 0,18 | 0,4537822 | NA       |
| RPN1           | 6,38 | 6,10 | 6,05 | 5,84 | 0,4538249 | 0,621688 |
| RP11-61A14.4   | 0,37 | 0,76 | 0,54 | 0,54 | 0,4538824 | 0,621714 |
| SYNE1          | 4,02 | 3,87 | 3,08 | 4,34 | 0,4539355 | 0,621714 |
| MAP3K5         | 3,52 | 2,64 | 3,35 | 3,04 | 0,4539363 | 0,621714 |
| RN7SL351P      | 5,14 | 5,42 | 4,60 | 5,12 | 0,4539563 | 0,621714 |
| RP4-563E14.1   | 0,00 | 0,00 | 0,14 | 0,00 | 0,4540249 | 0,62177  |
| UBA1           | 5,70 | 5,16 | 5,63 | 5,10 | 0,4541076 | 0,621845 |
| MYO1C          | 0,91 | 0,25 | 1,47 | 1,65 | 0,4541777 | 0,621903 |
| SFXN4          | 4,53 | 4,83 | 4,10 | 4,11 | 0,4542144 | 0,621914 |
| YIPF1          | 4,84 | 4,11 | 4,47 | 4,51 | 0,4543468 | 0,622007 |
| GSR            | 3,03 | 2,37 | 3,25 | 3,30 | 0,454362  | 0,622007 |
| RBP2           | 0,00 | 1,57 | 0,00 | 0,00 | 0,4543656 | 0,622007 |
| ACO12314.19    | 0,00 | 0,00 | 1,86 | 0,82 | 0,4544242 | 0,622044 |
| RP1-1J6.2      | 0,09 | 0,11 | 0,49 | 0,00 | 0,454449  | 0,622044 |
| LINC00654      | 0,07 | 0,02 | 0,09 | 0,21 | 0,4545868 | 0,622194 |
| RP4-742C19.12  | 0,00 | 0,00 | 0,00 | 0,00 | 0,4545901 | NA       |
| RN7SL401P      | 0,00 | 0,00 | 0,00 | 0,00 | 0,4546351 | NA       |
| RPS10-NUDT3    | 2,83 | 4,67 | 1,54 | 2,93 | 0,4547374 | 0,622335 |
| PHLDB2         | 0,11 | 1,64 | 0,08 | 0,09 | 0,454748  | 0,622335 |
| SEH1L          | 4,59 | 5,13 | 4,10 | 3,86 | 0,4547738 | 0,622335 |
| FPGT           | 2,00 | 0,20 | 0,84 | 1,76 | 0,4548178 | 0,622357 |
| MTERF4         | 4,71 | 1,62 | 4,02 | 3,32 | 0,4549542 | 0,622505 |
| N6AMT1         | 0,47 | 0,52 | 0,41 | 0,37 | 0,4549819 | 0,622505 |
| BMS1P2         | 0,70 | 2,32 | 1,76 | 1,03 | 0,4551019 | 0,622617 |
| SOHLH2         | 0,00 | 0,00 | 0,00 | 0,34 | 0,4551196 | 0,622617 |
| RP11-958J22.1  | 1,98 | 1,37 | 2,06 | 2,16 | 0,4551491 | 0,622619 |
| PROCR          | 2,29 | 2,42 | 2,67 | 0,78 | 0,4551822 | 0,622626 |
| RNA5SP465      | 0,00 | 0,00 | 0,00 | 0,00 | 0,4552455 | 0,622654 |
| SMIM15         | 3,67 | 3,00 | 2,83 | 4,09 | 0,455275  | 0,622654 |
| CH17-118O6.2   | 1,18 | 1,28 | 2,12 | 0,86 | 0,4552871 | 0,622654 |
| IGHV3-15       | 0,00 | 0,94 | 0,00 | 0,00 | 0,455347  | NA       |



|               |      |      |      |      |           |          |
|---------------|------|------|------|------|-----------|----------|
| GFOD1         | 0,52 | 0,67 | 0,72 | 0,87 | 0,4553893 | 0,622756 |
| OR6C66P       | 0,01 | 0,03 | 0,00 | 0,03 | 0,4554489 | 0,622799 |
| GAS6-AS1      | 0,11 | 1,34 | 0,32 | 0,71 | 0,4555881 | 0,622904 |
| CYP2B7P1      | 0,16 | 0,23 | 0,25 | 0,35 | 0,4556045 | 0,622904 |
| ANO5          | 0,01 | 0,04 | 0,05 | 0,04 | 0,4556097 | 0,622904 |
| ANKRD29       | 0,00 | 0,04 | 0,02 | 0,00 | 0,4556712 | NA       |
| AC144652.1    | 1,84 | 0,00 | 1,76 | 0,17 | 0,4557564 | 0,623066 |
| MED15P1       | 0,00 | 0,18 | 0,00 | 0,00 | 0,4558335 | NA       |
| RP11-69H7.3   | 0,00 | 0,29 | 0,00 | 0,00 | 0,4559571 | NA       |
| RP11-560A15.3 | 0,00 | 0,96 | 0,36 | 0,00 | 0,4559648 | 0,623313 |
| HDAC4         | 2,95 | 3,58 | 3,01 | 3,86 | 0,4561224 | 0,62349  |
| MMACHC        | 0,77 | 0,60 | 0,85 | 0,69 | 0,4562633 | 0,623644 |
| SMCHD1        | 7,09 | 6,70 | 6,62 | 6,47 | 0,4563204 | 0,623658 |
| CDK6          | 2,41 | 2,17 | 2,19 | 0,97 | 0,4563295 | 0,623658 |
| MYO1H         | 0,00 | 0,00 | 0,00 | 0,00 | 0,4565034 | NA       |
| SLC10A5       | 0,00 | 0,00 | 0,00 | 0,00 | 0,4565196 | NA       |
| RP11-622O11.1 | 0,00 | 0,00 | 0,00 | 0,00 | 0,4565271 | NA       |
| NFYB          | 3,25 | 0,40 | 2,85 | 2,61 | 0,4567416 | 0,624098 |
| AC005162.4    | 2,63 | 0,00 | 1,53 | 2,16 | 0,4567521 | 0,624098 |
| RP13-858C7.1  | 0,00 | 0,55 | 0,76 | 0,24 | 0,4567735 | 0,624098 |
| SMC6          | 3,71 | 2,92 | 3,55 | 2,61 | 0,456786  | 0,624098 |
| RP11-91P17.1  | 0,64 | 2,19 | 0,67 | 0,00 | 0,4567922 | 0,624098 |
| RP11-329N15.3 | 1,47 | 2,47 | 0,91 | 0,43 | 0,4568273 | 0,624099 |
| HMGXB4        | 4,45 | 1,69 | 4,00 | 3,15 | 0,4568486 | 0,624099 |
| IGLV2-11      | 0,00 | 1,13 | 0,00 | 0,00 | 0,4568624 | NA       |
| RP11-555K12.1 | 0,00 | 0,00 | 0,00 | 0,00 | 0,4569047 | 0,624137 |
| GAS2L3        | 2,36 | 3,22 | 2,22 | 1,16 | 0,4569502 | 0,624137 |
| RP11-286E11.1 | 0,04 | 0,00 | 0,07 | 1,49 | 0,4569608 | 0,624137 |
| GAPVD1        | 4,48 | 2,87 | 3,85 | 3,27 | 0,4569955 | 0,624142 |
| IKZF4         | 0,88 | 0,40 | 0,90 | 0,55 | 0,4570211 | 0,624142 |
| RP11-248E9.6  | 0,00 | 0,42 | 0,00 | 0,00 | 0,4570249 | NA       |
| RNU6-416P     | 0,00 | 0,00 | 0,00 | 0,00 | 0,4571132 | NA       |
| RP11-865I6.2  | 0,76 | 0,75 | 0,98 | 0,00 | 0,4571633 | 0,62427  |
| DNAJC11       | 3,79 | 3,01 | 2,59 | 1,62 | 0,4571755 | 0,62427  |
| GDPD3         | 0,63 | 0,12 | 0,91 | 2,47 | 0,4571985 | 0,62427  |
| PRKCE         | 5,09 | 2,20 | 4,71 | 4,01 | 0,4573268 | 0,624406 |
| ARMCS         | 0,65 | 0,49 | 0,23 | 1,26 | 0,4574548 | 0,624543 |
| CTD-2562G15.2 | 0,00 | 0,00 | 0,00 | 0,00 | 0,4574971 | 0,624552 |
| ZNF490        | 2,63 | 2,79 | 3,35 | 2,45 | 0,4575177 | 0,624552 |
| RP11-266K4.14 | 0,03 | 0,12 | 0,06 | 0,00 | 0,4576285 | 0,624633 |
| RN7SL619P     | 2,37 | 0,00 | 1,85 | 4,19 | 0,4576404 | 0,624633 |
| RP11-181D18.2 | 0,14 | 0,18 | 0,12 | 0,30 | 0,4576612 | 0,624633 |
| AC068831.18   | 1,98 | 0,97 | 1,56 | 0,59 | 0,4577018 | 0,62465  |
| RNU7-151P     | 0,00 | 0,00 | 0,00 | 0,00 | 0,4577725 | NA       |
| SUN3          | 0,00 | 0,00 | 0,00 | 0,00 | 0,457796  | NA       |
| ZDHHC20       | 3,62 | 2,86 | 4,15 | 3,60 | 0,4579333 | 0,624843 |
| AC004016.2    | 0,00 | 0,00 | 0,00 | 0,00 | 0,457937  | 0,624843 |
| INO80C        | 5,03 | 5,39 | 4,71 | 5,27 | 0,4579437 | 0,624843 |
| LA16c-3G11.5  | 0,00 | 0,20 | 0,00 | 0,17 | 0,4579561 | 0,624843 |
| RP11-758P17.2 | 0,00 | 1,07 | 0,00 | 0,00 | 0,4579872 | NA       |
| KPNA3         | 3,70 | 2,36 | 3,41 | 2,87 | 0,457988  | 0,624849 |
| AC126118.1    | 0,00 | 0,00 | 0,00 | 0,00 | 0,4580819 | 0,624924 |
| ACO2          | 4,97 | 2,96 | 4,75 | 3,51 | 0,4580998 | 0,624924 |
| CCDC60        | 0,00 | 0,48 | 0,49 | 0,00 | 0,4581496 | 0,624954 |
| ADHFE1        | 3,41 | 1,35 | 2,60 | 1,80 | 0,4582152 | 0,625005 |

|               |      |      |      |      |           |          |
|---------------|------|------|------|------|-----------|----------|
| AC100802.2    | 0,00 | 0,00 | 0,00 | 0,00 | 0,458236  | NA       |
| RP11-670E13.3 | 1,23 | 0,00 | 1,89 | 0,00 | 0,4583087 | 0,625094 |
| WDHD1         | 0,03 | 0,59 | 0,00 | 0,07 | 0,4583426 | 0,625102 |
| RP11-132G19.3 | 0,00 | 0,00 | 0,00 | 0,00 | 0,4583702 | NA       |
| RNA5SP128     | 0,00 | 0,00 | 0,00 | 0,00 | 0,4584344 | NA       |
| GP1BA         | 0,00 | 0,00 | 0,00 | 0,00 | 0,4585027 | NA       |
| RP11-34F13.2  | 0,00 | 0,00 | 0,00 | 0,00 | 0,4585883 | NA       |
| CEP97         | 0,56 | 2,09 | 0,93 | 1,22 | 0,4585898 | 0,625364 |
| FRMD8         | 3,13 | 3,66 | 2,94 | 2,53 | 0,4586045 | 0,625364 |
| TAS2R31       | 0,00 | 0,00 | 0,00 | 0,00 | 0,4586192 | 0,625364 |
| TEKT3         | 0,00 | 0,00 | 0,00 | 0,00 | 0,4587165 | NA       |
| RPL31P61      | 0,00 | 0,00 | 0,00 | 0,00 | 0,4587921 | NA       |
| IL411         | 0,07 | 0,36 | 1,93 | 2,84 | 0,4589011 | 0,625686 |
| EMC2          | 3,97 | 0,63 | 3,83 | 2,95 | 0,4589117 | 0,625686 |
| AF127577.8    | 0,00 | 0,00 | 0,07 | 0,41 | 0,4589981 | 0,625766 |
| AC010746.2    | 3,96 | 2,81 | 4,22 | 3,12 | 0,4590392 | 0,625783 |
| PANK3         | 2,64 | 1,74 | 2,69 | 1,04 | 0,4590872 | 0,62581  |
| KANSL1        | 5,39 | 5,07 | 5,69 | 4,62 | 0,4591204 | 0,625817 |
| AC078941.1    | 0,00 | 0,00 | 0,00 | 0,00 | 0,4591627 | NA       |
| CENPT         | 3,16 | 1,59 | 2,64 | 2,95 | 0,45923   | 0,625924 |
| RP11-27H1.1   | 0,00 | 0,00 | 0,00 | 0,00 | 0,4592552 | 0,625924 |
| MRPL17        | 3,11 | 2,66 | 3,15 | 0,47 | 0,4592983 | 0,625945 |
| RF00410       | 0,00 | 2,39 | 0,00 | 1,73 | 0,4593768 | NA       |
| RP11-805J14.5 | 0,00 | 0,00 | 0,00 | 0,28 | 0,4594929 | 0,626111 |
| AC083884.8    | 3,27 | 3,55 | 2,51 | 4,16 | 0,4594966 | 0,626111 |
| CTC-510F12.4  | 0,00 | 3,87 | 0,49 | 1,22 | 0,459505  | 0,626111 |
| HIPK1         | 3,84 | 3,06 | 4,10 | 3,79 | 0,459745  | 0,626353 |
| FBXL15        | 4,77 | 4,41 | 4,81 | 5,54 | 0,4597857 | 0,626353 |
| POLR3GL       | 5,10 | 3,26 | 4,84 | 4,04 | 0,4598722 | 0,626353 |
| LINC00836     | 0,42 | 0,68 | 0,20 | 0,29 | 0,4598748 | 0,626353 |
| CTD-2643K12.1 | 0,33 | 0,00 | 0,38 | 0,00 | 0,4598792 | NA       |
| TMEM123       | 6,86 | 5,79 | 6,27 | 5,99 | 0,4598873 | 0,626353 |
| RP11-398A8.5  | 0,00 | 0,00 | 0,00 | 0,00 | 0,4598956 | NA       |
| PLXDC1        | 0,36 | 0,48 | 0,75 | 0,95 | 0,4599563 | 0,626353 |
| CTD-2270P14.5 | 0,05 | 0,05 | 0,05 | 0,09 | 0,4599601 | 0,626353 |
| RP1-267L14.6  | 0,00 | 0,00 | 0,00 | 0,00 | 0,4599631 | 0,626353 |
| TMEM126B      | 5,32 | 4,25 | 5,36 | 4,74 | 0,4599871 | 0,626353 |
| AATF          | 5,10 | 4,44 | 4,82 | 4,09 | 0,459992  | 0,626353 |
| MIR548AA1     | 3,06 | 3,03 | 2,88 | 2,04 | 0,4600266 | 0,626353 |
| MIR548D1      | 3,06 | 3,03 | 2,88 | 2,04 | 0,4600266 | 0,626353 |
| RP11-110J1.5  | 0,00 | 1,38 | 0,00 | 0,00 | 0,4600491 | 0,626353 |
| SNHG16        | 4,89 | 3,89 | 4,72 | 3,29 | 0,4601361 | 0,626404 |
| ZGRF1         | 1,56 | 0,17 | 2,50 | 1,18 | 0,4601424 | 0,626404 |
| CMTM4         | 0,03 | 1,35 | 0,26 | 0,52 | 0,4601813 | 0,626418 |
| RP1-241P17.3  | 0,00 | 0,12 | 0,00 | 0,00 | 0,4602423 | NA       |
| AC096574.4    | 0,00 | 0,00 | 0,00 | 0,00 | 0,4602888 | 0,626526 |
| TRIM33        | 5,37 | 4,51 | 4,56 | 4,21 | 0,4607398 | 0,627035 |
| RP11-182J1.3  | 0,00 | 0,00 | 0,17 | 0,11 | 0,4607424 | 0,627035 |
| CTD-2371O3.2  | 0,10 | 0,00 | 0,45 | 0,46 | 0,4607473 | 0,627035 |
| AC007464.1    | 0,87 | 0,35 | 1,27 | 0,00 | 0,4608406 | 0,627113 |
| AS3MT         | 0,40 | 0,48 | 0,57 | 0,00 | 0,4608609 | 0,627113 |
| FMO6P         | 0,00 | 0,38 | 0,00 | 0,06 | 0,4608838 | NA       |
| RP11-81H14.2  | 2,80 | 3,52 | 2,22 | 1,96 | 0,4609277 | 0,627165 |
| MOB3B         | 2,72 | 1,38 | 3,23 | 2,30 | 0,46096   | 0,627171 |
| MIA-RAB4B     | 1,47 | 0,45 | 1,52 | 1,35 | 0,460994  | 0,627179 |

|                |       |       |       |       |           |          |
|----------------|-------|-------|-------|-------|-----------|----------|
| RP11-649A16.1  | 0,00  | 0,34  | 0,00  | 0,00  | 0,4611194 | NA       |
| CUEDC1         | 1,47  | 0,14  | 0,76  | 0,68  | 0,4612017 | 0,627423 |
| MCMBP          | 4,56  | 3,85  | 4,18  | 4,11  | 0,4613036 | 0,627523 |
| RN7SL596P      | 0,94  | 0,01  | 0,83  | 1,00  | 0,4613605 | 0,627562 |
| BAHCC1         | 0,10  | 0,02  | 0,11  | 0,01  | 0,4614797 | 0,627686 |
| ARHGAP21       | 4,04  | 3,97  | 3,96  | 2,51  | 0,4615345 | 0,627694 |
| C1orf109       | 1,78  | 1,87  | 1,97  | 2,28  | 0,4615644 | 0,627694 |
| SRSF10         | 6,18  | 5,26  | 5,86  | 5,77  | 0,4615706 | 0,627694 |
| RP11-175G14.2  | 0,00  | 0,00  | 0,00  | 0,00  | 0,4616037 | 0,627701 |
| MED22          | 2,02  | 0,30  | 2,58  | 3,64  | 0,4617393 | 0,627847 |
| RGS20          | 0,00  | 0,00  | 0,00  | 0,00  | 0,4617818 | NA       |
| RN7SL728P      | 0,00  | 0,00  | 0,00  | 0,00  | 0,4617869 | NA       |
| GPR75          | 0,00  | 0,00  | 0,00  | 0,07  | 0,4618074 | NA       |
| MSTO1          | 2,93  | 0,75  | 2,49  | 0,70  | 0,4618589 | 0,627971 |
| RP11-21K12.2   | 0,49  | 0,28  | 0,68  | 0,88  | 0,4619872 | 0,628107 |
| RP11-1080G15.1 | 0,00  | 0,71  | 0,00  | 0,00  | 0,4619919 | NA       |
| RRAD           | 0,00  | 0,00  | 0,00  | 0,90  | 0,4620185 | 0,628111 |
| HIST1H1PS1     | 0,66  | 0,00  | 0,16  | 0,00  | 0,4620818 | 0,628124 |
| RP11-392E22.6  | 0,28  | 0,30  | 0,19  | 1,06  | 0,4620843 | 0,628124 |
| RPS4XP17       | 0,00  | 0,25  | 0,00  | 0,00  | 0,4621825 | NA       |
| RP11-354M20.3  | 0,00  | 0,00  | 0,00  | 0,00  | 0,4622344 | 0,628289 |
| ITCH           | 4,09  | 5,00  | 4,62  | 4,32  | 0,4623215 | 0,628369 |
| MPPE1          | 5,33  | 5,61  | 5,10  | 4,54  | 0,4623849 | 0,628417 |
| PYCR1          | 0,00  | 0,00  | 0,00  | 0,08  | 0,4624218 | 0,628429 |
| AC068491.4     | 0,83  | 0,94  | 1,64  | 1,67  | 0,4625378 | 0,628548 |
| CTC-559E9.12   | 0,00  | 0,00  | 0,00  | 0,00  | 0,4626096 | NA       |
| ROR2           | 0,00  | 0,24  | 0,00  | 0,00  | 0,4626825 | NA       |
| CANX           | 6,42  | 6,18  | 6,08  | 5,65  | 0,4627466 | 0,628761 |
| TMEM135        | 1,57  | 1,43  | 1,27  | 1,91  | 0,4627512 | 0,628761 |
| CTA-256D12.11  | 0,00  | 0,00  | 0,00  | 0,00  | 0,4628135 | NA       |
| ANKDD1A        | 1,13  | 0,39  | 1,02  | 1,35  | 0,4628446 | 0,62885  |
| MIR4306        | 0,00  | 0,00  | 0,00  | 0,00  | 0,4628466 | NA       |
| RHOBTB3        | 0,06  | 0,74  | 0,86  | 0,43  | 0,4628954 | 0,628879 |
| C21orf91       | 2,94  | 4,27  | 2,46  | 1,68  | 0,4629227 | 0,628879 |
| PCBD2          | 2,46  | 0,85  | 2,88  | 2,20  | 0,4629778 | 0,628915 |
| CTD-2192J16.26 | 0,00  | 0,00  | 0,24  | 0,00  | 0,4630382 | NA       |
| ANLN           | 0,02  | 0,00  | 0,30  | 0,28  | 0,4631158 | 0,629064 |
| RP11-286H14.4  | 0,00  | 0,00  | 0,00  | 0,00  | 0,4632144 | NA       |
| RP11-44D5.1    | 0,37  | 0,75  | 0,78  | 0,00  | 0,4632822 | 0,629252 |
| CARF           | 1,41  | 0,90  | 0,91  | 1,03  | 0,4633377 | 0,629289 |
| MMAA           | 0,57  | 0,50  | 0,51  | 0,54  | 0,4634594 | 0,629378 |
| RP5-1092A3.4   | 1,84  | 2,31  | 1,56  | 1,38  | 0,4634598 | 0,629378 |
| RP11-332M2.1   | 1,99  | 0,00  | 2,55  | 0,73  | 0,4635101 | 0,629408 |
| MIR635         | 0,00  | 0,00  | 0,00  | 0,00  | 0,4635236 | NA       |
| KCNJ10         | 0,14  | 0,29  | 0,12  | 0,05  | 0,4636182 | 0,629516 |
| RP11-85K15.2   | 0,00  | 0,00  | 0,00  | 0,00  | 0,46369   | 0,629575 |
| RP11-453N18.1  | 2,22  | 1,57  | 1,94  | 2,13  | 0,4637429 | 0,629608 |
| GTF2IRD2P      | 0,00  | 0,00  | 0,00  | 0,14  | 0,4638237 | 0,629612 |
| LYZ            | 12,45 | 11,67 | 12,33 | 11,94 | 0,4638372 | 0,629612 |
| TBL1XR1        | 5,86  | 4,92  | 5,83  | 5,14  | 0,4638474 | 0,629612 |
| RP11-662I13.3  | 0,48  | 1,22  | 0,58  | 0,80  | 0,4638593 | 0,629612 |
| TULP3          | 0,03  | 0,00  | 0,25  | 0,08  | 0,4639625 | 0,629714 |
| RP11-18E13.1   | 0,19  | 0,00  | 0,09  | 0,00  | 0,4639726 | NA       |
| RN7SL623P      | 1,67  | 0,00  | 1,15  | 0,69  | 0,463992  | 0,629716 |
| FAM183B        | 0,00  | 0,00  | 0,00  | 0,00  | 0,4640966 | 0,629819 |

|                |      |      |      |      |           |          |
|----------------|------|------|------|------|-----------|----------|
| SCRN2          | 1,33 | 1,29 | 2,21 | 1,30 | 0,4641555 | 0,629861 |
| MAP2K5         | 4,00 | 4,99 | 4,27 | 3,97 | 0,4642253 | 0,629917 |
| NAT6           | 1,94 | 2,62 | 1,85 | 2,82 | 0,4642925 | 0,629947 |
| STK25          | 5,18 | 3,79 | 5,60 | 5,20 | 0,4643039 | 0,629947 |
| DISP3          | 0,00 | 0,00 | 0,00 | 0,00 | 0,4643957 | NA       |
| AK9            | 2,77 | 2,11 | 1,89 | 1,94 | 0,4644595 | 0,630085 |
| GSTM3          | 0,41 | 0,40 | 0,39 | 0,44 | 0,4644628 | 0,630085 |
| GS1-519E5.1    | 0,12 | 0,09 | 0,24 | 0,16 | 0,46452   | 0,630103 |
| NPIP8          | 0,00 | 0,00 | 0,00 | 0,00 | 0,4645207 | NA       |
| NR2C2AP        | 2,79 | 1,55 | 0,06 | 2,52 | 0,4645324 | 0,630103 |
| ZNF394         | 5,43 | 5,98 | 5,48 | 5,36 | 0,4645841 | 0,630134 |
| AC007347.2     | 0,00 | 2,06 | 1,53 | 1,27 | 0,4647478 | NA       |
| CKAP2          | 3,36 | 3,87 | 2,68 | 3,63 | 0,4648229 | 0,63042  |
| RNF39          | 0,00 | 0,00 | 0,00 | 0,00 | 0,4648542 | NA       |
| RP11-275F13.3  | 0,00 | 0,00 | 0,00 | 0,00 | 0,4648944 | NA       |
| RP11-214F16.2  | 0,63 | 0,22 | 0,21 | 0,74 | 0,4649497 | 0,630491 |
| RP11-42L13.1   | 0,00 | 0,64 | 0,18 | 0,66 | 0,4649567 | 0,630491 |
| RP11-244H3.1   | 0,00 | 0,00 | 0,00 | 0,00 | 0,4649603 | 0,630491 |
| EIF2AK3        | 2,45 | 1,14 | 1,43 | 1,86 | 0,4651023 | 0,630645 |
| RP11-1391J7.1  | 0,30 | 0,41 | 0,33 | 0,28 | 0,465187  | 0,630721 |
| MAGT1          | 4,00 | 1,92 | 3,66 | 3,97 | 0,4652414 | 0,630741 |
| CTD-2521M24.6  | 0,67 | 0,27 | 0,75 | 0,56 | 0,4652586 | 0,630741 |
| TIMM23B        | 4,10 | 2,61 | 3,12 | 2,13 | 0,4653501 | 0,630827 |
| RPL7L1         | 4,93 | 4,17 | 4,10 | 4,67 | 0,4654395 | 0,630883 |
| RP11-354E23.4  | 0,00 | 0,00 | 0,14 | 1,78 | 0,4654669 | 0,630883 |
| DUSP10         | 2,15 | 2,56 | 2,18 | 1,63 | 0,4654767 | 0,630883 |
| GOPC           | 2,31 | 0,58 | 2,66 | 2,13 | 0,465514  | 0,63089  |
| RP3-415N12.1   | 0,00 | 0,00 | 0,00 | 0,00 | 0,4655501 | 0,63089  |
| COPB1          | 5,55 | 5,54 | 5,34 | 5,03 | 0,465567  | 0,63089  |
| PLD1           | 0,97 | 0,61 | 1,90 | 1,30 | 0,4656775 | 0,631001 |
| TTYH2          | 2,73 | 3,17 | 2,07 | 1,89 | 0,465742  | 0,631034 |
| IQCH           | 0,00 | 0,00 | 0,00 | 0,00 | 0,4657583 | 0,631034 |
| IL17RA         | 3,74 | 3,67 | 3,95 | 4,20 | 0,4658876 | 0,63117  |
| AC008062.1     | 0,00 | 0,00 | 0,12 | 2,05 | 0,4659428 | 0,631207 |
| SMIM8          | 2,91 | 2,81 | 1,15 | 2,30 | 0,4660483 | 0,631277 |
| GJB7           | 0,00 | 0,07 | 0,02 | 0,07 | 0,4660517 | 0,631277 |
| RNU6-190P      | 0,00 | 0,00 | 0,00 | 0,00 | 0,4661157 | 0,631326 |
| CTD-2118P12.1  | 1,62 | 1,37 | 1,60 | 1,09 | 0,4661661 | 0,631355 |
| FAM13A         | 3,68 | 3,73 | 3,60 | 4,59 | 0,4661942 | 0,631355 |
| RP11-774O3.2   | 0,00 | 1,00 | 0,00 | 0,00 | 0,4661969 | NA       |
| TMTC4          | 2,98 | 3,67 | 1,61 | 2,03 | 0,4663546 | 0,631518 |
| OR8Q1P         | 0,00 | 0,00 | 0,00 | 0,00 | 0,4663666 | NA       |
| MED7           | 3,44 | 2,56 | 2,05 | 2,12 | 0,4663957 | 0,631518 |
| RP11-731K22.1  | 0,17 | 0,35 | 0,26 | 0,37 | 0,4663996 | 0,631518 |
| ZNF610         | 0,52 | 2,54 | 0,81 | 0,59 | 0,4664819 | 0,631591 |
| LA16c-349E10.1 | 0,47 | 0,29 | 0,46 | 0,88 | 0,4666208 | 0,63174  |
| FCGR2C         | 5,46 | 3,86 | 5,58 | 5,12 | 0,4667812 | 0,631919 |
| RP11-94B19.7   | 0,00 | 0,00 | 0,00 | 0,00 | 0,4668154 | NA       |
| RN7SL778P      | 0,24 | 0,00 | 0,21 | 1,14 | 0,4668627 | 0,63199  |
| RN7SL622P      | 1,00 | 0,00 | 0,25 | 0,93 | 0,4668634 | NA       |
| RNU6ATAC27P    | 0,00 | 0,00 | 0,00 | 2,67 | 0,4668907 | NA       |
| SIRPA          | 4,31 | 4,41 | 4,44 | 3,82 | 0,4668942 | 0,63199  |
| HAX1           | 6,44 | 4,59 | 5,32 | 5,10 | 0,4669273 | 0,63199  |
| FAM177B        | 0,00 | 0,00 | 0,00 | 0,00 | 0,4669472 | 0,63199  |
| RP11-329B9.4   | 0,00 | 0,00 | 0,00 | 0,00 | 0,4671828 | 0,632248 |

|                   |      |      |      |      |           |          |
|-------------------|------|------|------|------|-----------|----------|
| RP1-134M13.2      | 0,00 | 0,00 | 0,00 | 0,00 | 0,467194  | NA       |
| ZNF619            | 0,34 | 0,26 | 0,35 | 1,05 | 0,4671947 | 0,632248 |
| MORF4L1           | 7,18 | 6,29 | 6,67 | 6,59 | 0,4672392 | 0,632269 |
| GATAD2B           | 3,13 | 2,51 | 3,22 | 2,88 | 0,4672676 | 0,632269 |
| AP3S1             | 6,51 | 5,87 | 6,23 | 5,71 | 0,467383  | 0,632352 |
| AC007790.4        | 0,00 | 0,00 | 0,00 | 0,20 | 0,4673988 | 0,632352 |
| MTFP1             | 3,55 | 3,93 | 3,93 | 4,40 | 0,4674142 | 0,632352 |
| RP11-730B22.1     | 0,00 | 3,50 | 0,00 | 0,00 | 0,4674886 | NA       |
| AC097635.2        | 0,00 | 0,00 | 0,00 | 0,00 | 0,4675348 | NA       |
| CASBP             | 5,15 | 5,32 | 5,16 | 5,33 | 0,4675455 | 0,632488 |
| UGT8              | 0,06 | 0,12 | 0,00 | 0,15 | 0,4675713 | 0,632488 |
| RP11-206M11.7     | 0,00 | 0,00 | 0,00 | 0,41 | 0,4675837 | NA       |
| RP11-687F6.4      | 0,76 | 0,83 | 0,54 | 0,33 | 0,4676184 | 0,632513 |
| ZDHHC3            | 4,84 | 5,24 | 4,08 | 4,05 | 0,4676886 | 0,632569 |
| ANKRD20A4         | 0,45 | 0,12 | 0,44 | 0,00 | 0,4677205 | 0,632574 |
| RP3-404F18.2      | 0,00 | 0,00 | 0,00 | 0,04 | 0,4677919 | 0,632632 |
| XXbac-B562F10.11  | 0,00 | 0,00 | 0,00 | 0,00 | 0,4679714 | NA       |
| UTP14A            | 2,70 | 0,72 | 2,60 | 1,87 | 0,467989  | 0,63286  |
| ARHGAP35          | 0,17 | 2,33 | 1,26 | 1,16 | 0,4680418 | 0,632893 |
| AC008073.7        | 0,00 | 0,00 | 0,05 | 0,36 | 0,4680626 | NA       |
| RP11-20E24.1      | 0,51 | 2,01 | 0,00 | 0,00 | 0,4681376 | 0,632984 |
| RP11-99H20.1      | 0,00 | 0,00 | 0,00 | 0,00 | 0,4684553 | NA       |
| CH17-437K3.1      | 0,03 | 0,11 | 0,00 | 0,12 | 0,4684761 | 0,633277 |
| AF127577.10       | 0,00 | 0,79 | 1,24 | 0,00 | 0,4684782 | 0,633277 |
| PFDN2             | 5,86 | 5,38 | 6,09 | 5,80 | 0,4684785 | 0,633277 |
| RP11-627D16.1     | 0,00 | 0,66 | 0,00 | 0,69 | 0,4684965 | 0,633277 |
| RP1-33E13.1       | 0,00 | 0,00 | 0,00 | 0,00 | 0,468497  | 0,633277 |
| RP11-128A6.1      | 0,00 | 0,00 | 0,00 | 0,00 | 0,4685697 | NA       |
| XXbac-BPG249D20.9 | 0,00 | 0,37 | 0,00 | 0,00 | 0,4686205 | 0,633373 |
| RP11-407B7.1      | 0,10 | 0,00 | 0,00 | 0,00 | 0,4686398 | 0,633373 |
| AC072062.3        | 0,00 | 0,87 | 0,29 | 0,00 | 0,4686533 | 0,633373 |
| RP11-92F20.1      | 0,00 | 0,00 | 0,00 | 0,00 | 0,4689706 | 0,633763 |
| AC018464.3        | 1,37 | 1,93 | 0,10 | 0,00 | 0,4690305 | 0,633806 |
| RP11-22B23.1      | 0,00 | 0,00 | 0,00 | 0,09 | 0,4690697 | 0,63382  |
| KB-1410C5.5       | 0,00 | 0,00 | 0,00 | 0,00 | 0,4691646 | 0,63391  |
| MIR760            | 0,00 | 0,00 | 0,00 | 0,00 | 0,4691657 | NA       |
| RP11-1029F8.1     | 0,00 | 0,00 | 0,00 | 0,00 | 0,4692514 | NA       |
| NPB               | 0,00 | 0,00 | 0,00 | 0,00 | 0,4692931 | 0,634045 |
| ZNF101            | 3,67 | 3,95 | 2,89 | 2,19 | 0,469422  | 0,634181 |
| NPIP5             | 7,56 | 6,87 | 7,52 | 7,32 | 0,4697236 | 0,634549 |
| CTD-2021H9.2      | 0,00 | 0,00 | 0,00 | 0,00 | 0,4697432 | NA       |
| PARK2             | 0,18 | 0,46 | 0,18 | 0,26 | 0,4697828 | 0,634591 |
| GAS6              | 3,67 | 3,89 | 4,08 | 3,97 | 0,4698331 | 0,63462  |
| TMEM43            | 4,86 | 2,99 | 4,50 | 4,43 | 0,4698715 | 0,634633 |
| C2orf74           | 4,14 | 4,40 | 3,78 | 2,14 | 0,4699241 | 0,634666 |
| RP11-115H15.2     | 2,85 | 1,59 | 3,14 | 2,42 | 0,4701139 | 0,634884 |
| GYG2              | 0,00 | 0,11 | 0,00 | 0,00 | 0,4701327 | NA       |
| RN7SL380P         | 0,00 | 0,85 | 0,80 | 0,00 | 0,4701867 | NA       |
| GPR34             | 0,05 | 0,56 | 0,14 | 0,13 | 0,4702186 | 0,634952 |
| RP11-437L7.2      | 0,89 | 0,25 | 0,98 | 0,99 | 0,4702215 | 0,634952 |
| RP11-350N15.5     | 3,39 | 2,48 | 3,07 | 1,12 | 0,4702963 | 0,63499  |
| CDK8              | 2,24 | 1,01 | 1,63 | 2,73 | 0,4703072 | 0,63499  |
| RP11-13N12.2      | 0,00 | 0,00 | 0,00 | 0,00 | 0,4703506 | NA       |
| VRK3              | 5,41 | 2,99 | 4,46 | 4,63 | 0,4704131 | 0,635095 |
| AC092839.4        | 0,00 | 0,00 | 0,00 | 0,00 | 0,4704184 | NA       |

|                |      |      |      |      |           |          |
|----------------|------|------|------|------|-----------|----------|
| ZNF26          | 2,61 | 2,19 | 1,82 | 1,72 | 0,4705468 | 0,635237 |
| PTPRS          | 0,33 | 0,24 | 0,27 | 0,17 | 0,4706882 | 0,635381 |
| CH507-145C22.1 | 0,00 | 0,00 | 0,00 | 0,00 | 0,4707111 | 0,635381 |
| RP11-255A11.2  | 0,00 | 0,00 | 0,00 | 0,00 | 0,4707779 | NA       |
| IGHV3-7        | 0,00 | 0,96 | 0,00 | 0,00 | 0,4709368 | NA       |
| CTA-384D8.28   | 6,10 | 7,97 | 6,86 | 6,62 | 0,4709843 | 0,635699 |
| TSPYL4         | 2,37 | 1,52 | 1,70 | 1,58 | 0,4710242 | 0,635699 |
| DUSP28         | 3,08 | 1,36 | 3,60 | 2,48 | 0,4710492 | 0,635699 |
| GIPC1          | 0,62 | 0,17 | 0,79 | 2,11 | 0,4710605 | 0,635699 |
| RP11-574K11.28 | 0,12 | 0,07 | 0,42 | 0,34 | 0,4711789 | 0,63582  |
| CYP4F43P       | 0,00 | 0,00 | 0,06 | 0,07 | 0,4715109 | NA       |
| CTD-2340D6.1   | 1,01 | 0,62 | 1,20 | 0,97 | 0,4715273 | 0,636236 |
| ACTR3B         | 1,06 | 0,41 | 0,35 | 1,40 | 0,4715913 | 0,636236 |
| RF00096        | 1,48 | 5,09 | 0,00 | 3,32 | 0,4716027 | 0,636236 |
| MRPS18C        | 4,69 | 4,73 | 4,97 | 4,55 | 0,4716079 | 0,636236 |
| RP11-262N9.3   | 0,21 | 1,06 | 0,70 | 0,37 | 0,4716306 | 0,636236 |
| C6orf59        | 0,00 | 0,00 | 0,07 | 0,21 | 0,4716971 | 0,636287 |
| TNIP2          | 3,41 | 4,01 | 3,40 | 1,15 | 0,4718598 | 0,636407 |
| CCDC137        | 1,23 | 1,92 | 1,95 | 3,37 | 0,4718827 | 0,636407 |
| PMS2CL         | 1,98 | 0,85 | 1,76 | 1,53 | 0,4718959 | 0,636407 |
| TRRAP          | 2,88 | 1,88 | 2,52 | 2,20 | 0,4719213 | 0,636407 |
| ACO06129.1     | 6,89 | 7,00 | 7,13 | 5,91 | 0,471929  | 0,636407 |
| TMEM249        | 0,00 | 0,08 | 0,00 | 0,00 | 0,4719801 | 0,636437 |
| IL27           | 0,00 | 0,00 | 0,86 | 0,71 | 0,4721362 | 0,636609 |
| CH507-24F1.2   | 0,00 | 0,00 | 0,00 | 0,00 | 0,4722034 | 0,636661 |
| NOX3           | 0,00 | 0,19 | 0,00 | 0,00 | 0,4722179 | NA       |
| CDH24          | 0,00 | 0,00 | 0,00 | 0,00 | 0,472304  | NA       |
| RP11-276H19.2  | 0,00 | 0,00 | 0,00 | 0,07 | 0,472409  | 0,6369   |
| RNU6-1020P     | 0,00 | 0,00 | 0,00 | 0,00 | 0,4724799 | NA       |
| RP11-613D13.2  | 0,00 | 0,00 | 0,05 | 0,00 | 0,4725338 | 0,637029 |
| RP11-66N11.8   | 0,71 | 2,66 | 0,43 | 1,33 | 0,4725845 | 0,637035 |
| NHP2           | 7,18 | 7,19 | 7,11 | 6,86 | 0,4725955 | 0,637035 |
| POU6F2         | 0,02 | 0,43 | 0,00 | 0,00 | 0,4726529 | 0,637074 |
| AGPAT4         | 1,30 | 1,27 | 0,79 | 1,43 | 0,4726949 | 0,637092 |
| LSM3           | 3,34 | 2,83 | 3,26 | 3,17 | 0,472731  | 0,637102 |
| HERC2P2        | 2,64 | 3,59 | 2,62 | 1,56 | 0,4727878 | 0,63714  |
| ZNF2           | 0,38 | 0,21 | 0,18 | 0,22 | 0,472847  | 0,637181 |
| NAF1           | 4,21 | 3,10 | 3,93 | 4,61 | 0,4728905 | 0,637201 |
| SCAF8          | 3,47 | 3,92 | 3,28 | 2,80 | 0,4729483 | 0,637228 |
| AEN            | 2,72 | 1,88 | 3,05 | 2,69 | 0,4729789 | 0,637228 |
| GRM2           | 0,00 | 0,04 | 0,00 | 0,00 | 0,4729967 | 0,637228 |
| RP11-629E24.2  | 0,25 | 0,00 | 0,00 | 0,00 | 0,4730478 | 0,637251 |
| CTD-2175M1.1   | 0,00 | 3,44 | 0,00 | 0,00 | 0,4730707 | 0,637251 |
| RP1-86D1.5     | 0,33 | 0,72 | 0,36 | 0,00 | 0,4731067 | 0,63726  |
| NPRL3          | 2,49 | 3,65 | 2,64 | 1,87 | 0,4731805 | 0,637293 |
| FAM71F2        | 2,12 | 2,29 | 2,18 | 2,49 | 0,4731881 | 0,637293 |
| RP11-290O12.1  | 0,00 | 0,00 | 0,00 | 0,52 | 0,4732645 | NA       |
| HYI            | 2,92 | 1,50 | 1,33 | 1,11 | 0,4732992 | 0,637395 |
| SLC10A3        | 0,57 | 0,66 | 0,58 | 0,52 | 0,473321  | 0,637395 |
| RAB22A         | 2,80 | 1,46 | 2,55 | 2,29 | 0,4733573 | 0,637405 |
| KLRC1          | 1,22 | 1,18 | 0,94 | 1,12 | 0,4734275 | 0,63743  |
| FHIT           | 2,22 | 0,42 | 2,27 | 2,97 | 0,4734331 | 0,63743  |
| SLC19A2        | 1,09 | 0,24 | 0,85 | 2,26 | 0,4734932 | 0,637472 |
| ANKDD1B        | 0,00 | 0,00 | 0,00 | 0,14 | 0,4735976 | 0,637574 |
| RN7SL591P      | 0,00 | 0,84 | 0,00 | 0,00 | 0,4735997 | NA       |

|                   |      |      |      |      |           |          |
|-------------------|------|------|------|------|-----------|----------|
| CYTH4             | 5,05 | 4,20 | 4,89 | 4,63 | 0,4736472 | 0,637602 |
| RN7SL265P         | 0,00 | 0,00 | 0,00 | 0,00 | 0,473727  | NA       |
| SMYD2             | 3,18 | 1,83 | 3,48 | 4,03 | 0,4737617 | 0,637692 |
| MED6              | 5,30 | 3,88 | 4,87 | 4,93 | 0,4737909 | 0,637692 |
| RP11-514P8.11     | 0,64 | 0,00 | 0,00 | 0,00 | 0,4738158 | 0,637692 |
| RP11-1070N10.6    | 0,00 | 0,00 | 0,00 | 0,00 | 0,4738435 | 0,637692 |
| SDF2              | 5,61 | 5,97 | 5,17 | 4,58 | 0,4739085 | 0,637692 |
| LRRC23            | 0,61 | 0,46 | 2,50 | 0,68 | 0,4739191 | 0,637692 |
| TMEM121           | 0,00 | 0,00 | 0,00 | 0,00 | 0,4739421 | 0,637692 |
| SNX24             | 0,08 | 0,10 | 0,00 | 0,00 | 0,4739436 | 0,637692 |
| FAM127A           | 4,34 | 3,24 | 4,43 | 4,22 | 0,4740092 | 0,637742 |
| RN7SL156P         | 2,10 | 2,25 | 2,61 | 1,96 | 0,4740981 | 0,637802 |
| RNA5SP37          | 0,00 | 0,00 | 0,00 | 0,00 | 0,4741112 | 0,637802 |
| HCG4B             | 0,00 | 0,00 | 0,00 | 0,00 | 0,4741314 | NA       |
| RP11-235D19.4     | 0,00 | 0,00 | 0,00 | 0,00 | 0,4741325 | NA       |
| CTC-359M8.1       | 0,00 | 0,65 | 0,00 | 0,00 | 0,4741925 | 0,63782  |
| EGLN1             | 3,05 | 2,34 | 2,58 | 2,54 | 0,4741999 | 0,63782  |
| RP11-91P24.7      | 0,31 | 0,38 | 0,00 | 0,00 | 0,4742113 | 0,63782  |
| RP11-3K24.1       | 0,00 | 0,00 | 0,00 | 2,55 | 0,4742916 | 0,637834 |
| NR1D2             | 2,90 | 1,63 | 2,42 | 0,79 | 0,4743045 | 0,637834 |
| PPOX              | 4,33 | 3,94 | 3,65 | 3,10 | 0,4743071 | 0,637834 |
| ECI2              | 4,82 | 4,04 | 4,39 | 1,86 | 0,4745862 | 0,638151 |
| RNU4-78P          | 0,00 | 0,00 | 0,00 | 0,00 | 0,4746079 | 0,638151 |
| TTC13             | 3,58 | 2,79 | 3,42 | 2,61 | 0,4746295 | 0,638151 |
| KHSRP             | 2,09 | 0,99 | 2,43 | 1,64 | 0,4747695 | 0,638301 |
| LAIR1             | 3,46 | 2,86 | 2,88 | 4,15 | 0,4749143 | 0,638457 |
| RP11-173C20.1     | 0,00 | 0,00 | 0,00 | 0,00 | 0,4750018 | 0,638536 |
| TBX5              | 0,00 | 0,15 | 0,00 | 0,00 | 0,4750696 | NA       |
| RP11-49O14.2      | 0,00 | 0,00 | 0,00 | 0,00 | 0,4750738 | NA       |
| CTD-2135J3.2      | 2,73 | 0,85 | 1,32 | 0,56 | 0,47509   | 0,638616 |
| RP11-332L18.4     | 0,10 | 0,00 | 0,06 | 0,00 | 0,4751461 | NA       |
| RP11-35O15.2      | 0,00 | 0,00 | 0,00 | 0,00 | 0,4751713 | 0,638687 |
| RN7SL502P         | 0,00 | 0,00 | 0,00 | 0,00 | 0,4751896 | NA       |
| OR7E108P          | 0,00 | 0,00 | 0,00 | 0,00 | 0,4752014 | NA       |
| CUL4B             | 3,36 | 2,48 | 3,37 | 1,95 | 0,475265  | 0,638774 |
| GS1-114I9.3       | 0,00 | 0,00 | 0,00 | 0,00 | 0,4753011 | 0,638784 |
| HIPK4             | 0,00 | 0,00 | 0,00 | 0,00 | 0,4754417 | NA       |
| CTD-2062A1.2      | 0,00 | 0,00 | 0,00 | 0,00 | 0,4754593 | NA       |
| SNORD63B          | 0,00 | 0,00 | 0,00 | 0,00 | 0,4755418 | 0,63904  |
| MRPS27            | 4,81 | 4,41 | 3,73 | 2,17 | 0,4755494 | 0,63904  |
| TNFRSF19          | 0,00 | 2,24 | 0,00 | 0,28 | 0,4756403 | 0,639097 |
| RP11-761I4.4      | 0,00 | 0,00 | 0,00 | 0,00 | 0,4756593 | 0,639097 |
| LAS1L             | 3,60 | 0,82 | 2,45 | 2,48 | 0,4756984 | 0,639097 |
| PDE7A             | 5,01 | 3,73 | 4,15 | 3,50 | 0,4757065 | 0,639097 |
| XXbac-BPG181M17.5 | 0,00 | 0,00 | 0,00 | 0,00 | 0,4757391 | NA       |
| ZBTB46            | 1,07 | 1,33 | 1,03 | 0,60 | 0,475908  | 0,639329 |
| RP1-179P9.3       | 0,00 | 0,00 | 0,00 | 0,00 | 0,4759804 | NA       |
| RP11-311P8.2      | 0,00 | 0,00 | 0,00 | 0,00 | 0,476012  | 0,639418 |
| LYPD5             | 0,67 | 0,88 | 0,59 | 0,58 | 0,4760317 | 0,639418 |
| RP11-382H24.2     | 0,00 | 0,00 | 0,00 | 0,00 | 0,476034  | NA       |
| FAM72C            | 0,00 | 0,00 | 0,00 | 0,22 | 0,4760707 | 0,639431 |
| MKRN9P            | 0,18 | 0,00 | 0,12 | 0,00 | 0,4762399 | 0,63962  |
| SLC25A34          | 0,27 | 0,33 | 0,25 | 0,22 | 0,4763241 | 0,639662 |
| PMF1-BGLAP        | 2,37 | 1,70 | 1,55 | 0,67 | 0,4763291 | 0,639662 |
| PPP1R36           | 0,00 | 0,00 | 0,00 | 0,00 | 0,4763443 | NA       |

|                |      |      |      |      |           |          |
|----------------|------|------|------|------|-----------|----------|
| HCN1           | 0,07 | 0,15 | 0,11 | 0,12 | 0,4763707 | 0,63968  |
| SNORD36C       | 0,00 | 0,00 | 0,00 | 0,00 | 0,4763981 | NA       |
| CLPP           | 5,35 | 4,08 | 5,28 | 4,80 | 0,4764401 | 0,639702 |
| SEC23A         | 3,37 | 4,01 | 2,75 | 2,13 | 0,4764447 | 0,639702 |
| RP11-685B13.2  | 0,00 | 0,00 | 0,00 | 0,00 | 0,4764873 | NA       |
| CTB-61M7.2     | 1,05 | 1,09 | 1,40 | 2,00 | 0,4765321 | 0,639752 |
| AQP11          | 0,10 | 0,00 | 0,13 | 0,00 | 0,4765397 | 0,639752 |
| ME3            | 0,44 | 1,85 | 2,36 | 0,96 | 0,4766884 | 0,6399   |
| RP4-537K23.4   | 0,00 | 0,00 | 0,00 | 0,00 | 0,4767023 | NA       |
| CTB-92J24.2    | 0,08 | 0,10 | 0,15 | 0,31 | 0,4767074 | 0,6399   |
| LINC00200      | 0,00 | 0,00 | 0,00 | 0,00 | 0,4767856 | NA       |
| FKTN           | 2,10 | 0,57 | 1,01 | 1,89 | 0,4767864 | 0,63996  |
| RP11-846C15.2  | 0,00 | 0,00 | 0,00 | 0,00 | 0,4768248 | NA       |
| C1RL           | 2,81 | 0,55 | 3,76 | 2,54 | 0,4768259 | 0,63996  |
| TSTA3          | 4,24 | 5,47 | 4,22 | 3,95 | 0,4768513 | 0,63996  |
| NIFK           | 5,28 | 4,78 | 4,60 | 4,83 | 0,4768675 | 0,63996  |
| RP11-408H1.3   | 1,90 | 2,00 | 1,83 | 1,50 | 0,4768964 | 0,63996  |
| RP11-507M3.1   | 0,22 | 0,07 | 0,32 | 0,30 | 0,4769795 | 0,640004 |
| COL5A3         | 0,00 | 0,04 | 0,00 | 0,00 | 0,4769807 | NA       |
| RP11-96D1.11   | 0,35 | 0,00 | 1,19 | 1,01 | 0,4769864 | 0,640004 |
| RP11-335I12.2  | 0,00 | 0,00 | 0,00 | 0,00 | 0,4771503 | 0,640185 |
| RP11-343N15.1  | 0,65 | 0,93 | 0,84 | 0,65 | 0,4772457 | 0,640273 |
| SSB            | 6,46 | 5,95 | 6,16 | 5,53 | 0,4772731 | 0,640273 |
| MYBPC3         | 0,20 | 1,24 | 0,41 | 0,27 | 0,4773381 | 0,640321 |
| CTD-2022H16.3  | 0,00 | 0,00 | 0,00 | 0,00 | 0,4774032 | NA       |
| PPIEL          | 2,90 | 4,24 | 2,79 | 2,15 | 0,4774511 | 0,640434 |
| XX-FW81066F1.2 | 0,00 | 0,00 | 0,00 | 0,00 | 0,4774938 | NA       |
| HSPA12A        | 0,83 | 1,71 | 1,08 | 0,73 | 0,477575  | 0,640535 |
| KCNIP3         | 0,00 | 0,07 | 0,00 | 0,07 | 0,477584  | 0,640535 |
| ZNF397         | 2,31 | 1,52 | 1,84 | 1,62 | 0,4776204 | 0,640545 |
| USP44          | 0,04 | 0,03 | 0,00 | 0,00 | 0,4777416 | 0,640669 |
| RP11-1151B14.3 | 0,43 | 0,33 | 0,18 | 0,65 | 0,4778199 | 0,640685 |
| KAT2B          | 4,37 | 3,21 | 3,97 | 3,57 | 0,4778235 | 0,640685 |
| ACAD10         | 2,85 | 3,13 | 2,43 | 3,27 | 0,4778401 | 0,640685 |
| CRTC2          | 4,06 | 4,75 | 4,08 | 4,22 | 0,4779631 | 0,640811 |
| ARHGAP39       | 0,00 | 0,00 | 0,00 | 0,00 | 0,4780068 | NA       |
| LIPM           | 0,00 | 0,00 | 0,00 | 0,00 | 0,47816   | NA       |
| FGD5P1         | 0,03 | 0,09 | 0,04 | 0,05 | 0,4781848 | 0,64107  |
| RP11-480I12.4  | 0,09 | 0,09 | 0,13 | 0,57 | 0,4782238 | 0,641083 |
| IGFBP2         | 0,05 | 0,28 | 0,04 | 0,11 | 0,4782628 | 0,641094 |
| LPO            | 1,06 | 0,71 | 0,97 | 0,77 | 0,4782893 | 0,641094 |
| IFNK           | 0,00 | 0,00 | 0,00 | 0,00 | 0,4783696 | 0,641163 |
| SLC5A4P1       | 0,00 | 0,00 | 0,00 | 0,00 | 0,4785879 | NA       |
| SHOC2          | 5,21 | 4,58 | 4,91 | 5,49 | 0,4786196 | 0,641456 |
| APOF           | 0,16 | 0,09 | 0,34 | 0,46 | 0,4786457 | 0,641456 |
| DNASE1L2       | 0,00 | 0,00 | 0,00 | 0,00 | 0,4786851 | NA       |
| TRIM9          | 0,00 | 0,35 | 0,00 | 0,00 | 0,478694  | NA       |
| SLC30A5        | 4,08 | 3,35 | 4,01 | 3,40 | 0,4786968 | 0,641485 |
| AC006960.7     | 0,92 | 0,94 | 0,87 | 0,67 | 0,4787414 | 0,641507 |
| RP11-443B20.1  | 0,00 | 0,00 | 0,00 | 0,00 | 0,4788539 | NA       |
| TRIQK          | 2,24 | 1,60 | 2,35 | 1,83 | 0,4788733 | 0,641645 |
| RF00139        | 0,00 | 0,00 | 0,00 | 0,00 | 0,4789394 | 0,641695 |
| AC012363.13    | 0,00 | 0,00 | 0,00 | 0,00 | 0,4789807 | NA       |
| RN7SKP26       | 0,00 | 0,00 | 0,00 | 0,00 | 0,4789848 | 0,641695 |
| RNU6-944P      | 0,00 | 0,00 | 0,00 | 0,00 | 0,478999  | NA       |



|               |      |      |      |      |           |          |
|---------------|------|------|------|------|-----------|----------|
| RBM43         | 1,08 | 1,06 | 1,13 | 0,98 | 0,4790733 | 0,641695 |
| ATP5J2LP      | 0,00 | 0,00 | 0,00 | 0,00 | 0,4790757 | NA       |
| AP000688.8    | 0,00 | 0,00 | 0,00 | 0,00 | 0,4790822 | NA       |
| DERL3         | 0,24 | 0,40 | 0,24 | 0,14 | 0,4790938 | 0,641695 |
| RP5-849H19.3  | 0,06 | 0,16 | 0,13 | 0,09 | 0,4790999 | 0,641695 |
| UBE2G2        | 5,58 | 5,58 | 5,60 | 5,06 | 0,4791008 | 0,641695 |
| IFT88         | 3,04 | 0,64 | 2,57 | 3,74 | 0,4791129 | 0,641695 |
| TRAPPC12      | 5,64 | 5,88 | 5,77 | 6,08 | 0,479231  | 0,641814 |
| AC013409.3    | 0,00 | 0,00 | 0,00 | 0,00 | 0,4792573 | NA       |
| RP11-115J16.1 | 0,26 | 0,39 | 0,26 | 1,97 | 0,4794551 | 0,642076 |
| AC006994.2    | 0,00 | 0,00 | 0,00 | 0,00 | 0,479479  | NA       |
| ADAMTS18      | 0,00 | 0,02 | 0,02 | 0,00 | 0,4795265 | 0,642122 |
| FAR1          | 6,07 | 5,71 | 5,56 | 4,86 | 0,4795747 | 0,642122 |
| MS4A14        | 2,61 | 1,89 | 2,97 | 1,89 | 0,4795949 | 0,642122 |
| CTD-307407.5  | 1,16 | 0,00 | 0,94 | 0,43 | 0,4796053 | 0,642122 |
| FRS3          | 0,84 | 0,79 | 0,85 | 1,14 | 0,4796613 | 0,642158 |
| QDPR          | 5,31 | 1,39 | 4,29 | 4,18 | 0,4798138 | 0,642292 |
| C3orf33       | 0,73 | 1,42 | 0,48 | 0,37 | 0,4798305 | 0,642292 |
| ZNF592        | 2,66 | 2,96 | 2,22 | 1,67 | 0,4798475 | 0,642292 |
| RP11-397P13.7 | 0,00 | 0,00 | 0,00 | 0,71 | 0,4798821 | NA       |
| SLC2A7        | 0,00 | 0,00 | 0,00 | 0,00 | 0,4799428 | NA       |
| PTGS1         | 4,33 | 2,95 | 3,63 | 3,49 | 0,4799939 | 0,642449 |
| RP11-280K24.1 | 0,00 | 0,00 | 0,00 | 0,00 | 0,4800213 | NA       |
| CTC-551A13.1  | 0,00 | 0,00 | 0,00 | 0,00 | 0,4800417 | NA       |
| MRFAP1L1      | 5,05 | 4,08 | 4,17 | 4,81 | 0,4802129 | 0,642703 |
| RP1-257I20.14 | 0,00 | 0,00 | 0,00 | 0,00 | 0,4803006 | 0,642778 |
| PDHA1         | 6,28 | 5,77 | 5,68 | 5,54 | 0,4803263 | 0,642778 |
| PARP4P2       | 0,00 | 0,00 | 0,00 | 0,00 | 0,4803888 | NA       |
| THBS4         | 0,27 | 0,00 | 0,40 | 0,99 | 0,4804079 | 0,642802 |
| NTAN1         | 3,93 | 1,47 | 3,73 | 3,24 | 0,4804508 | 0,642802 |
| NR2F1         | 0,00 | 0,07 | 0,03 | 0,00 | 0,480464  | 0,642802 |
| HIGD2B        | 0,00 | 0,00 | 0,00 | 0,00 | 0,4804762 | NA       |
| RN7SL842P     | 0,70 | 0,00 | 1,37 | 1,69 | 0,4804843 | 0,642802 |
| CTC-497E21.4  | 0,84 | 0,78 | 1,13 | 0,58 | 0,4804891 | 0,642802 |
| RNU6-652P     | 0,00 | 0,00 | 0,00 | 0,00 | 0,4805546 | 0,642851 |
| AC008565.1    | 0,07 | 0,00 | 0,09 | 0,35 | 0,4805886 | NA       |
| MT1JP         | 0,00 | 0,00 | 0,00 | 0,00 | 0,4806122 | 0,642889 |
| PHF13         | 0,00 | 0,00 | 0,00 | 0,65 | 0,4806651 | 0,642921 |
| RP11-258C19.6 | 0,27 | 0,26 | 0,17 | 0,80 | 0,4807252 | 0,642963 |
| RP11-64I5.1   | 0,76 | 0,00 | 0,34 | 0,24 | 0,4808144 | 0,643044 |
| RP11-8P13.1   | 0,00 | 0,00 | 0,00 | 0,00 | 0,4808946 | NA       |
| RP11-147L13.2 | 2,99 | 2,46 | 3,13 | 2,00 | 0,4808952 | 0,643113 |
| CREB5         | 4,92 | 4,42 | 4,32 | 3,42 | 0,4809717 | 0,643177 |
| LG14          | 0,00 | 0,00 | 0,00 | 0,00 | 0,4810503 | 0,643243 |
| UTP11         | 5,05 | 1,40 | 4,40 | 3,53 | 0,4811303 | 0,643299 |
| RPL5P29       | 0,00 | 0,34 | 0,00 | 0,00 | 0,4811641 | NA       |
| NSUN5         | 3,07 | 2,82 | 3,01 | 3,65 | 0,4811655 | 0,643299 |
| PBX3          | 4,35 | 1,74 | 3,51 | 2,85 | 0,4811786 | 0,643299 |
| RP4-635E18.7  | 0,00 | 0,00 | 0,00 | 0,00 | 0,4812085 | NA       |
| RAB26         | 0,00 | 0,00 | 0,20 | 0,22 | 0,4812387 | 0,64334  |
| RP4-543J19.8  | 0,60 | 0,98 | 0,54 | 1,05 | 0,4813245 | 0,64341  |
| SEPSECS       | 2,69 | 1,32 | 1,98 | 2,04 | 0,4813556 | 0,64341  |
| RP11-713M6.2  | 0,00 | 0,00 | 0,00 | 0,00 | 0,4813774 | 0,64341  |
| RN7SL202P     | 0,00 | 0,00 | 0,00 | 0,00 | 0,4814096 | NA       |
| UNC5D         | 0,00 | 0,01 | 0,00 | 0,00 | 0,4814584 | NA       |

|                |      |      |      |      |           |          |
|----------------|------|------|------|------|-----------|----------|
| CLU1           | 0,12 | 0,06 | 0,13 | 0,12 | 0,4814702 | 0,643495 |
| RP11-230B22.1  | 0,00 | 0,00 | 0,00 | 0,00 | 0,4815236 | NA       |
| RP11-257O5.2   | 0,00 | 0,00 | 0,00 | 0,00 | 0,4815277 | 0,643533 |
| C13orf45       | 0,00 | 0,00 | 0,00 | 0,00 | 0,4816067 | NA       |
| RNF216         | 4,05 | 2,67 | 3,98 | 3,81 | 0,4816188 | 0,64358  |
| SYCP3          | 0,51 | 0,31 | 0,86 | 0,33 | 0,4816206 | 0,64358  |
| RN7SKP19       | 0,00 | 0,00 | 0,00 | 0,00 | 0,4816268 | NA       |
| RP11-116B19.2  | 0,00 | 0,00 | 0,00 | 0,00 | 0,4816307 | NA       |
| RNU5F-6P       | 0,00 | 0,00 | 0,00 | 1,66 | 0,4816683 | 0,643581 |
| RP11-543E8.1   | 3,53 | 0,61 | 2,45 | 0,48 | 0,4816797 | 0,643581 |
| RP11-90P5.2    | 0,00 | 2,42 | 0,00 | 0,00 | 0,4817718 | 0,643666 |
| GADD45B        | 7,09 | 7,10 | 7,22 | 7,12 | 0,4818321 | 0,643708 |
| RP11-307E17.11 | 0,00 | 0,00 | 0,00 | 0,81 | 0,4818754 | NA       |
| AAR2           | 4,26 | 4,14 | 3,38 | 1,93 | 0,4818761 | 0,643728 |
| ALMS1P         | 0,00 | 0,00 | 0,00 | 0,00 | 0,4819334 | NA       |
| CTC-205M6.2    | 0,81 | 1,23 | 0,64 | 0,49 | 0,4820139 | 0,643844 |
| NBR1           | 3,43 | 1,65 | 3,53 | 3,72 | 0,482042  | 0,643844 |
| CTB-43P18.3    | 0,00 | 2,95 | 0,02 | 0,00 | 0,4820504 | 0,643844 |
| RP11-158D2.2   | 1,61 | 2,07 | 1,76 | 1,93 | 0,482166  | 0,64396  |
| RP11-745L13.1  | 0,00 | 0,00 | 0,00 | 0,00 | 0,4823608 | NA       |
| DISC1          | 3,40 | 2,39 | 3,48 | 2,80 | 0,4824034 | 0,644238 |
| RP11-572M11.4  | 1,36 | 0,25 | 2,11 | 1,76 | 0,4825362 | 0,644341 |
| RP11-863K10.4  | 0,00 | 0,00 | 0,00 | 0,57 | 0,4825495 | 0,644341 |
| OR4K17         | 0,54 | 0,96 | 0,38 | 0,16 | 0,4825669 | 0,644341 |
| AC093826.2     | 0,00 | 0,00 | 0,99 | 0,00 | 0,4826476 | 0,644408 |
| SNHG7          | 2,47 | 4,26 | 3,06 | 3,17 | 0,4826792 | 0,644408 |
| NKAPP1         | 2,47 | 2,63 | 1,45 | 1,17 | 0,482704  | 0,644408 |
| RP11-454L9.2   | 0,00 | 0,00 | 0,00 | 1,49 | 0,4827629 | NA       |
| RP11-255G12.5  | 0,00 | 1,22 | 0,00 | 0,00 | 0,4827963 | 0,644492 |
| RN7SKP224      | 2,43 | 1,61 | 2,40 | 2,39 | 0,4828368 | 0,644507 |
| TRIOBP         | 3,18 | 2,22 | 2,00 | 2,94 | 0,4828762 | 0,644521 |
| RP11-360F5.1   | 0,45 | 0,00 | 0,44 | 0,18 | 0,4829329 | 0,644558 |
| AP000959.2     | 0,00 | 0,18 | 0,00 | 0,00 | 0,4829625 | 0,644559 |
| RP11-474G23.1  | 0,00 | 0,00 | 0,00 | 0,00 | 0,4830466 | 0,644633 |
| RP11-443G13.3  | 0,00 | 0,00 | 0,00 | 0,00 | 0,4830478 | NA       |
| RP11-316P21.1  | 0,36 | 0,27 | 0,27 | 0,26 | 0,4831405 | 0,644719 |
| COG8           | 1,49 | 2,39 | 1,19 | 1,08 | 0,4832504 | 0,644811 |
| RNF181         | 7,22 | 7,32 | 7,46 | 7,27 | 0,483282  | 0,644811 |
| SCARNA5        | 1,33 | 3,33 | 1,08 | 3,94 | 0,4832967 | 0,644811 |
| GLUL           | 5,08 | 4,99 | 4,73 | 3,99 | 0,4833324 | 0,64482  |
| RP11-530C5.2   | 2,26 | 2,78 | 2,91 | 3,36 | 0,483376  | 0,64484  |
| RP5-1182A14.8  | 0,00 | 0,00 | 0,00 | 1,11 | 0,4835055 | NA       |
| C2orf76        | 4,01 | 3,55 | 3,19 | 3,24 | 0,4836323 | 0,64511  |
| SPCS3          | 5,24 | 4,60 | 5,10 | 4,62 | 0,4836366 | 0,64511  |
| ALS89743.2     | 0,92 | 0,00 | 0,71 | 0,75 | 0,4836768 | 0,645125 |
| AC083843.1     | 0,15 | 0,08 | 0,02 | 0,06 | 0,4838031 | 0,645255 |
| TDG            | 3,86 | 3,06 | 3,57 | 3,17 | 0,4839618 | 0,645428 |
| ZNF550         | 0,26 | 0,50 | 0,20 | 0,36 | 0,48405   | 0,645507 |
| RP11-112L6.4   | 0,00 | 0,00 | 0,00 | 0,28 | 0,4840734 | NA       |
| MYLPF          | 2,52 | 2,88 | 2,47 | 2,39 | 0,4841086 | 0,645546 |
| SNHG14         | 2,98 | 2,11 | 2,29 | 2,47 | 0,4842825 | 0,645739 |
| BAIAP3         | 0,00 | 0,00 | 0,00 | 0,00 | 0,4843088 | NA       |
| RP11-4K3__A.5  | 0,00 | 0,00 | 0,00 | 0,00 | 0,4843494 | NA       |
| MPO            | 0,00 | 0,00 | 0,00 | 0,18 | 0,4844103 | 0,645871 |
| MTERF3         | 3,94 | 1,33 | 2,68 | 1,27 | 0,4844849 | 0,645905 |

|                |      |      |      |      |           |          |
|----------------|------|------|------|------|-----------|----------|
| RNU2-68P       | 0,00 | 0,00 | 0,00 | 0,00 | 0,4844939 | 0,645905 |
| PTPN3          | 2,97 | 3,37 | 2,70 | 2,78 | 0,4845483 | 0,645938 |
| TLR8           | 3,24 | 0,36 | 2,72 | 3,24 | 0,4846224 | 0,645999 |
| RP1-43E13.2    | 0,00 | 0,40 | 0,00 | 0,00 | 0,4846734 | 0,646028 |
| RPL17-C18orf32 | 0,00 | 0,00 | 0,00 | 0,00 | 0,4848109 | 0,646103 |
| PDE6D          | 5,09 | 5,76 | 4,49 | 2,39 | 0,4848405 | 0,646103 |
| RN7SL145P      | 3,24 | 3,64 | 3,15 | 2,87 | 0,4849161 | 0,646103 |
| AP000640.2     | 2,95 | 3,91 | 2,52 | 2,33 | 0,4849405 | 0,646103 |
| SIGLEC5        | 2,53 | 2,72 | 1,88 | 1,90 | 0,4849426 | 0,646103 |
| RN7SL127P      | 2,05 | 1,42 | 2,61 | 3,43 | 0,4849478 | 0,646103 |
| AF129408.14    | 0,00 | 2,32 | 0,00 | 2,65 | 0,4849489 | 0,646103 |
| CNIH4          | 4,75 | 4,33 | 5,17 | 4,04 | 0,4849627 | 0,646103 |
| RPL23AP53      | 2,21 | 2,41 | 2,86 | 2,97 | 0,4850188 | 0,646139 |
| CTD-2561J22.2  | 0,00 | 0,00 | 0,00 | 0,00 | 0,4852179 | NA       |
| CTC-436K13.3   | 1,11 | 0,66 | 1,03 | 0,74 | 0,4852484 | 0,646406 |
| UBE2SP2        | 0,00 | 0,00 | 0,00 | 0,00 | 0,4852949 | NA       |
| LLNLF-173C4.2  | 0,00 | 0,59 | 0,00 | 0,00 | 0,4853296 | 0,64645  |
| TAF4           | 1,00 | 0,86 | 1,19 | 0,63 | 0,4853389 | 0,64645  |
| C10orf95       | 0,00 | 0,00 | 0,00 | 0,00 | 0,4853863 | NA       |
| GOLGA80        | 0,34 | 0,00 | 0,00 | 0,00 | 0,4854129 | 0,646476 |
| AC123886.2     | 3,84 | 4,44 | 3,50 | 2,42 | 0,485417  | 0,646476 |
| DKC1           | 4,31 | 6,00 | 5,15 | 4,65 | 0,4855048 | 0,646554 |
| RP11-345J4.3   | 0,74 | 1,62 | 0,58 | 0,90 | 0,4856147 | 0,646662 |
| CDK3           | 1,12 | 3,66 | 2,49 | 3,10 | 0,4857008 | 0,646713 |
| NCRNA00277     | 0,00 | 0,00 | 0,00 | 0,00 | 0,485703  | NA       |
| RP11-299J3.8   | 4,46 | 3,16 | 3,87 | 3,45 | 0,4857116 | 0,646713 |
| RP11-171I2.4   | 0,00 | 0,36 | 0,00 | 0,00 | 0,485732  | NA       |
| RP11-31E22.1   | 0,08 | 0,09 | 0,09 | 0,09 | 0,485753  | 0,64673  |
| AC096775.2     | 0,00 | 0,00 | 0,00 | 0,00 | 0,4858034 | NA       |
| AC095067.1     | 0,09 | 0,10 | 0,07 | 0,00 | 0,4859127 | 0,646904 |
| RP11-12C17.3   | 1,47 | 2,21 | 1,87 | 1,33 | 0,4859862 | 0,646963 |
| DTNB           | 2,48 | 0,18 | 0,74 | 0,00 | 0,4860246 | 0,646975 |
| ZNF839         | 2,14 | 1,07 | 2,81 | 1,59 | 0,4861571 | 0,647113 |
| RP11-13B9.5    | 0,00 | 0,00 | 0,00 | 0,00 | 0,4862075 | NA       |
| AP000476.1     | 2,30 | 1,45 | 1,99 | 2,01 | 0,4863021 | 0,647143 |
| CTC-499J9.1    | 0,00 | 0,00 | 0,00 | 0,48 | 0,4863103 | 0,647143 |
| RP11-390M11.1  | 0,08 | 0,35 | 0,07 | 0,18 | 0,4863294 | 0,647143 |
| PWP2           | 0,23 | 0,59 | 0,25 | 0,36 | 0,4863501 | 0,647143 |
| TXNDC11        | 4,74 | 2,56 | 5,06 | 3,19 | 0,4863555 | 0,647143 |
| AC005027.4     | 0,62 | 0,59 | 1,04 | 0,71 | 0,4863731 | 0,647143 |
| NCALD          | 3,16 | 2,80 | 2,08 | 1,65 | 0,4863833 | 0,647143 |
| OR6T1          | 0,00 | 0,00 | 0,00 | 0,00 | 0,4863987 | NA       |
| RP11-345J4.8   | 2,39 | 2,03 | 1,67 | 0,80 | 0,4865357 | 0,647307 |
| TBX15          | 0,00 | 0,05 | 0,00 | 0,00 | 0,4865734 | NA       |
| CTC-441N14.2   | 1,18 | 1,17 | 1,81 | 1,90 | 0,4866125 | 0,64734  |
| ADAM33         | 0,05 | 0,17 | 0,13 | 0,27 | 0,4866255 | 0,64734  |
| RP11-793H13.11 | 0,00 | 3,08 | 0,23 | 1,63 | 0,486679  | 0,64734  |
| RP11-1415C14.3 | 1,87 | 0,00 | 0,24 | 0,89 | 0,4866969 | 0,64734  |
| RP11-142C4.6   | 0,00 | 0,27 | 0,00 | 0,48 | 0,4867284 | 0,64734  |
| GSTCD          | 0,62 | 0,74 | 0,81 | 0,78 | 0,4867447 | 0,64734  |
| ARL2BP         | 4,88 | 5,40 | 4,86 | 4,82 | 0,4867923 | 0,64734  |
| SNHG8          | 7,22 | 7,75 | 7,31 | 7,13 | 0,4867936 | 0,64734  |
| ANGPT2         | 1,14 | 0,49 | 0,86 | 0,94 | 0,4868672 | 0,647399 |
| RP1-102G20.4   | 0,00 | 0,00 | 0,00 | 0,00 | 0,4869488 | 0,647469 |
| CTA-929C8.6    | 0,00 | 0,00 | 0,00 | 0,00 | 0,4869625 | NA       |

|                    |      |      |      |      |           |          |
|--------------------|------|------|------|------|-----------|----------|
| MIR22HG            | 3,88 | 1,82 | 3,82 | 3,34 | 0,4870172 | 0,64748  |
| OGT                | 5,66 | 4,59 | 5,37 | 4,86 | 0,4870343 | 0,64748  |
| SIRPB1             | 4,14 | 2,17 | 3,70 | 4,09 | 0,487045  | 0,64748  |
| RP3-455J7.1        | 0,00 | 0,00 | 0,00 | 0,00 | 0,4870661 | NA       |
| PABPC3             | 0,09 | 0,08 | 0,04 | 0,04 | 0,4870935 | 0,647496 |
| KRT222             | 0,00 | 0,77 | 0,00 | 0,00 | 0,4871151 | 0,647496 |
| RP11-37111.1       | 0,00 | 0,00 | 0,00 | 0,00 | 0,4871788 | NA       |
| GLYATL1P1          | 0,00 | 0,00 | 0,00 | 0,00 | 0,4872669 | NA       |
| ASL                | 4,54 | 4,16 | 4,85 | 5,26 | 0,487351  | 0,647771 |
| RP11-605P22.1      | 0,00 | 0,00 | 0,00 | 0,00 | 0,4873848 | NA       |
| RP11-1376P16.2     | 0,00 | 0,00 | 0,00 | 0,00 | 0,4875897 | NA       |
| RP11-1334A24.4     | 0,00 | 0,00 | 0,00 | 0,00 | 0,4876157 | NA       |
| RP11-1023L17.1     | 3,96 | 4,09 | 3,46 | 2,87 | 0,4876689 | 0,648155 |
| WASHC2C            | 3,95 | 3,35 | 4,64 | 4,20 | 0,4877177 | 0,648181 |
| RP11-395N6.2       | 0,00 | 0,00 | 0,00 | 0,00 | 0,4878477 | NA       |
| PIK3C3             | 5,13 | 2,37 | 4,73 | 4,89 | 0,4878586 | 0,648327 |
| RP11-298O21.5      | 0,00 | 0,00 | 0,00 | 0,96 | 0,4878863 | 0,648327 |
| AC073346.2         | 5,34 | 3,22 | 5,11 | 3,43 | 0,4881337 | 0,648589 |
| MITD1              | 5,59 | 5,59 | 4,81 | 4,94 | 0,4881413 | 0,648589 |
| RP11-468B6.3       | 0,00 | 0,00 | 0,00 | 0,00 | 0,4882507 | 0,648695 |
| KIRREL2            | 0,00 | 0,05 | 0,00 | 0,00 | 0,4882859 | NA       |
| AP000350.6         | 0,00 | 0,00 | 0,00 | 0,00 | 0,4882891 | NA       |
| MTA3               | 1,56 | 1,19 | 0,92 | 0,88 | 0,4884324 | 0,648898 |
| RP11-686F15.2      | 0,00 | 0,00 | 0,00 | 0,00 | 0,4885213 | NA       |
| RP11-30L3.2        | 0,00 | 0,00 | 0,80 | 0,00 | 0,4885557 | 0,648977 |
| TADA3              | 4,47 | 4,76 | 4,18 | 3,83 | 0,488562  | 0,648977 |
| EAF1               | 3,44 | 3,54 | 3,46 | 3,47 | 0,4885799 | 0,648977 |
| RP11-151N17.2      | 3,17 | 0,67 | 2,91 | 2,42 | 0,4886422 | 0,649021 |
| LOC100421166       | 0,00 | 0,00 | 0,00 | 0,00 | 0,488662  | NA       |
| RNU6-402P          | 0,00 | 0,00 | 0,00 | 0,00 | 0,4888009 | 0,649193 |
| AC012314.8         | 0,57 | 0,15 | 0,50 | 0,35 | 0,4889433 | 0,649344 |
| RP4-717I23.3       | 5,64 | 5,27 | 5,13 | 4,53 | 0,489068  | 0,649446 |
| PPP1R1A            | 0,00 | 0,00 | 0,00 | 0,00 | 0,4890792 | 0,649446 |
| SNCAIP             | 0,40 | 0,36 | 0,51 | 0,51 | 0,4891823 | 0,649545 |
| TAS1R1             | 0,00 | 0,00 | 0,00 | 0,00 | 0,4893165 | NA       |
| RP11-281A20.2      | 0,10 | 1,08 | 0,15 | 0,05 | 0,4893622 | 0,649721 |
| COMMD2             | 5,21 | 5,37 | 4,53 | 2,84 | 0,4893738 | 0,649721 |
| RP11-863K10.7      | 0,54 | 0,39 | 0,81 | 0,90 | 0,4895272 | 0,649875 |
| PLEKHH1            | 0,40 | 0,41 | 0,39 | 0,18 | 0,4895485 | 0,649875 |
| PIGL               | 4,23 | 3,04 | 3,23 | 3,95 | 0,4895875 | 0,649888 |
| FRG1               | 5,57 | 3,72 | 5,44 | 5,62 | 0,489638  | 0,649917 |
| AC005786.6         | 0,82 | 1,28 | 1,33 | 1,09 | 0,4897037 | 0,649934 |
| SPP1               | 0,00 | 0,00 | 0,00 | 0,00 | 0,4897201 | 0,649934 |
| RN7SL790P          | 0,00 | 0,00 | 0,77 | 0,00 | 0,4897258 | NA       |
| PGBD1              | 0,03 | 0,04 | 0,04 | 0,00 | 0,4897536 | 0,649934 |
| RP11-347I19.7      | 0,79 | 0,00 | 0,00 | 0,08 | 0,4897677 | 0,649934 |
| RP11-737O24.3      | 0,00 | 0,00 | 0,00 | 0,00 | 0,4898083 | NA       |
| ABC12-49244600F4.3 | 2,03 | 2,21 | 2,26 | 2,92 | 0,4899023 | 0,65002  |
| POLR1D             | 7,09 | 6,92 | 7,14 | 7,15 | 0,4899074 | 0,65002  |
| MLF1               | 1,13 | 0,00 | 0,28 | 0,76 | 0,4899209 | 0,65002  |
| CTD-3051L14.15     | 0,16 | 0,48 | 0,10 | 0,11 | 0,4899683 | 0,650024 |
| AC006011.4         | 3,54 | 0,00 | 3,30 | 0,45 | 0,4899825 | 0,650024 |
| AC139712.2         | 0,00 | 0,00 | 0,00 | 0,00 | 0,4900716 | NA       |
| GLUD2              | 0,00 | 0,11 | 0,00 | 0,00 | 0,4900917 | NA       |
| RP11-627K11.6      | 1,25 | 3,96 | 2,84 | 2,87 | 0,4901807 | 0,650249 |

|                |      |      |      |      |           |          |
|----------------|------|------|------|------|-----------|----------|
| RP11-430C7.5   | 0,26 | 0,75 | 0,12 | 0,25 | 0,4902434 | 0,650269 |
| AP000688.11    | 0,00 | 0,00 | 0,00 | 0,00 | 0,4902546 | 0,650269 |
| HIST1H2APS3    | 0,00 | 0,00 | 0,00 | 0,00 | 0,4903403 | NA       |
| AC083875.2     | 0,00 | 0,00 | 0,00 | 0,00 | 0,4903709 | NA       |
| RNU6-1099P     | 0,00 | 0,00 | 0,00 | 0,00 | 0,4904952 | NA       |
| RPGR           | 2,86 | 1,85 | 2,55 | 2,01 | 0,4905693 | 0,650648 |
| RIBC2          | 0,00 | 0,00 | 0,00 | 0,09 | 0,4906202 | 0,650653 |
| RP11-624J6.2   | 0,25 | 0,60 | 0,39 | 0,64 | 0,490651  | 0,650653 |
| DOCK1          | 0,18 | 0,47 | 0,18 | 2,35 | 0,4906608 | 0,650653 |
| RP4-549L20.3   | 0,00 | 0,00 | 0,00 | 0,00 | 0,4907134 | NA       |
| RP11-2K6.1     | 0,00 | 1,10 | 0,00 | 0,00 | 0,4907663 | NA       |
| EMC10          | 2,26 | 2,40 | 2,43 | 2,61 | 0,4909727 | 0,651008 |
| MAD1L1         | 6,32 | 6,22 | 5,89 | 5,99 | 0,4909874 | 0,651008 |
| ARHGAP30       | 5,41 | 4,15 | 5,39 | 5,30 | 0,4911519 | 0,651187 |
| CMPK2          | 4,65 | 4,87 | 2,75 | 2,84 | 0,4913212 | 0,651351 |
| GNL1           | 1,45 | 2,59 | 1,52 | 1,85 | 0,4913344 | 0,651351 |
| THEM6          | 0,00 | 0,00 | 0,03 | 0,35 | 0,4915994 | 0,651664 |
| RP11-707F2.1   | 0,00 | 0,41 | 0,00 | 0,00 | 0,492023  | NA       |
| CTD-2037K23.2  | 1,35 | 0,84 | 2,24 | 1,43 | 0,4920683 | 0,652209 |
| RP11-37B2.1    | 3,11 | 2,42 | 2,19 | 2,97 | 0,4920695 | 0,652209 |
| AC110619.2     | 0,00 | 0,00 | 0,00 | 0,00 | 0,492071  | NA       |
| CCNK           | 3,71 | 3,92 | 4,02 | 4,65 | 0,4921347 | 0,652257 |
| IKBKAP         | 3,34 | 1,60 | 2,64 | 0,82 | 0,492167  | 0,652261 |
| ZNF426         | 2,34 | 2,05 | 2,32 | 1,87 | 0,4922884 | 0,652383 |
| RP13-516M14.1  | 1,73 | 1,21 | 1,80 | 1,45 | 0,4924625 | 0,652575 |
| RP11-122G18.12 | 2,16 | 1,51 | 1,87 | 2,16 | 0,4925038 | 0,65259  |
| C1orf146       | 0,37 | 0,20 | 0,44 | 0,35 | 0,4925671 | 0,652635 |
| RP11-956E11.1  | 0,00 | 0,00 | 0,00 | 0,00 | 0,4925947 | NA       |
| FOXL1          | 0,00 | 0,00 | 0,00 | 0,00 | 0,4926606 | NA       |
| RP4-680D5.9    | 0,00 | 0,00 | 0,00 | 0,00 | 0,4926736 | NA       |
| CTD-3022G6.1   | 0,00 | 1,13 | 0,00 | 0,00 | 0,4927024 | 0,652776 |
| SPATA21        | 0,28 | 0,00 | 0,55 | 1,13 | 0,4927672 | 0,652823 |
| RP5-1112D6.5   | 2,34 | 0,60 | 2,29 | 1,14 | 0,4928135 | 0,652845 |
| CITF22-92A6.1  | 0,00 | 0,00 | 0,00 | 0,00 | 0,4928977 | 0,652894 |
| AF003626.1     | 0,00 | 0,00 | 0,00 | 0,00 | 0,4929095 | 0,652894 |
| LYRM5          | 3,53 | 3,06 | 3,67 | 4,17 | 0,4930053 | 0,652982 |
| AC114788.2     | 0,00 | 0,04 | 0,04 | 0,00 | 0,4930111 | NA       |
| CTD-2619J13.8  | 0,04 | 0,04 | 0,03 | 0,18 | 0,4931836 | 0,653162 |
| CTD-2036P10.3  | 1,61 | 3,05 | 1,99 | 2,99 | 0,4931999 | 0,653162 |
| RP11-75C10.6   | 0,05 | 0,30 | 0,09 | 0,11 | 0,4932839 | 0,653213 |
| KDM5A          | 5,67 | 5,99 | 5,40 | 5,34 | 0,4932971 | 0,653213 |
| FAM117A        | 1,11 | 1,46 | 1,39 | 1,90 | 0,4933545 | 0,65325  |
| ADAM3A         | 0,22 | 0,15 | 0,25 | 1,03 | 0,4933943 | 0,653264 |
| PIBF1          | 3,99 | 2,28 | 2,97 | 2,34 | 0,4934852 | 0,653339 |
| SNORA23        | 0,00 | 0,00 | 0,00 | 0,00 | 0,4935054 | NA       |
| SESN1          | 3,41 | 4,29 | 1,57 | 2,44 | 0,4935098 | 0,653339 |
| NOC3L          | 3,26 | 3,09 | 2,24 | 2,43 | 0,4935504 | 0,653354 |
| RP11-213H15.1  | 0,00 | 0,00 | 0,00 | 0,00 | 0,4936942 | 0,653477 |
| COMMD5         | 4,92 | 1,42 | 5,08 | 2,48 | 0,4937019 | 0,653477 |
| MRFAP1         | 6,98 | 6,18 | 6,50 | 6,05 | 0,4937513 | 0,653488 |
| RP11-218M22.2  | 0,37 | 1,47 | 0,43 | 0,77 | 0,4937924 | 0,653488 |
| RP11-629N8.4   | 0,00 | 0,16 | 0,07 | 0,27 | 0,4937989 | 0,653488 |
| FSD2           | 0,05 | 0,19 | 0,08 | 0,04 | 0,4938548 | 0,653523 |
| AL928742.9     | 0,00 | 0,00 | 0,00 | 0,00 | 0,4939077 | 0,653554 |
| SMCO4          | 6,25 | 5,66 | 5,81 | 6,09 | 0,4940107 | 0,653639 |

|               |      |      |      |      |           |          |
|---------------|------|------|------|------|-----------|----------|
| CTNNB1        | 5,74 | 5,39 | 5,58 | 5,03 | 0,4940519 | 0,653639 |
| PROSER1       | 4,12 | 4,97 | 3,94 | 4,01 | 0,4940601 | 0,653639 |
| QSOX2         | 0,63 | 1,19 | 0,58 | 0,22 | 0,4941181 | 0,653677 |
| CLIC4         | 2,57 | 0,36 | 2,28 | 1,74 | 0,4942332 | 0,65379  |
| RP11-486M23.3 | 0,07 | 0,10 | 0,00 | 0,00 | 0,494392  | 0,653962 |
| AC007050.18   | 0,00 | 0,00 | 0,00 | 0,00 | 0,4944469 | NA       |
| NEK9          | 4,29 | 4,32 | 4,54 | 3,06 | 0,4944649 | 0,653996 |
| RP11-324H6.6  | 0,00 | 0,00 | 0,01 | 0,43 | 0,4944772 | 0,653996 |
| CIDEC         | 0,00 | 0,19 | 0,00 | 0,00 | 0,4945716 | NA       |
| RN7SL172P     | 2,70 | 0,87 | 2,93 | 3,18 | 0,494608  | 0,65413  |
| SLC51B        | 0,00 | 0,19 | 0,00 | 0,00 | 0,4946179 | NA       |
| ZNF577        | 2,43 | 1,43 | 2,26 | 1,48 | 0,4946527 | 0,654151 |
| ZNF518A       | 5,64 | 5,48 | 5,15 | 5,10 | 0,4947016 | 0,654176 |
| RP11-723O4.3  | 0,00 | 0,00 | 0,00 | 0,00 | 0,4947451 | NA       |
| CTD-3046C4.1  | 0,00 | 0,00 | 0,00 | 0,00 | 0,4947638 | NA       |
| HMGB1L10      | 0,00 | 0,38 | 0,00 | 0,00 | 0,4949171 | NA       |
| RP1-40E16.2   | 1,67 | 0,00 | 1,44 | 2,05 | 0,4949181 | 0,654408 |
| CTC-428G20.4  | 0,00 | 0,00 | 0,00 | 0,00 | 0,4949304 | NA       |
| RERGL         | 0,00 | 0,00 | 0,00 | 0,00 | 0,4949782 | 0,654408 |
| RP1-168L15.6  | 0,08 | 0,08 | 0,07 | 0,33 | 0,4950162 | 0,654408 |
| RP11-1072A3.3 | 0,04 | 0,04 | 0,04 | 0,03 | 0,4950196 | 0,654408 |
| FBXW4P1       | 0,64 | 0,24 | 0,11 | 0,08 | 0,4950236 | 0,654408 |
| GLDC          | 0,39 | 0,79 | 0,47 | 0,64 | 0,4950943 | 0,654462 |
| RRM2B         | 4,65 | 2,69 | 4,58 | 4,48 | 0,4952055 | 0,65457  |
| RP5-1033H22.2 | 0,00 | 0,00 | 0,00 | 0,44 | 0,4953018 | 0,654645 |
| ZCWPW2        | 1,07 | 0,85 | 1,15 | 1,55 | 0,495336  | 0,654645 |
| CTC-378H22.1  | 0,71 | 0,61 | 0,54 | 0,22 | 0,4953508 | 0,654645 |
| RP11-434D2.10 | 0,00 | 0,71 | 0,00 | 0,57 | 0,4955141 | NA       |
| CEACAM6       | 0,00 | 0,00 | 0,00 | 0,00 | 0,4956128 | NA       |
| RP11-245J9.4  | 0,00 | 0,00 | 0,68 | 0,00 | 0,4957158 | 0,655044 |
| PKMYT1        | 0,56 | 0,00 | 0,89 | 0,25 | 0,4957243 | 0,655044 |
| GSTZ1         | 3,89 | 0,73 | 4,06 | 3,03 | 0,4957406 | 0,655044 |
| RP11-15F12.3  | 0,00 | 0,00 | 0,00 | 0,00 | 0,4958442 | NA       |
| AC004593.3    | 0,15 | 2,67 | 0,98 | 0,00 | 0,4958651 | 0,655169 |
| SENP8         | 0,15 | 0,03 | 0,15 | 0,04 | 0,4959413 | 0,655197 |
| RP11-723P16.2 | 0,00 | 0,38 | 0,00 | 0,00 | 0,4959453 | 0,655197 |
| SPC24         | 1,27 | 0,67 | 1,49 | 1,75 | 0,4959899 | 0,655217 |
| RP11-674J14.3 | 0,00 | 0,00 | 0,00 | 0,00 | 0,4959901 | NA       |
| TRANK1        | 1,39 | 1,49 | 1,01 | 1,60 | 0,4961462 | 0,655329 |
| TAB3          | 2,29 | 2,65 | 2,31 | 1,03 | 0,4961552 | 0,655329 |
| M6PR          | 7,51 | 7,28 | 7,06 | 6,93 | 0,4961639 | 0,655329 |
| OR5BA1P       | 0,07 | 0,24 | 0,06 | 0,23 | 0,4961928 | 0,655329 |
| FURIN         | 2,57 | 1,06 | 2,94 | 2,02 | 0,4962652 | 0,655386 |
| WASF2         | 5,50 | 5,79 | 5,84 | 5,17 | 0,4963322 | 0,655436 |
| RP13-452N2.1  | 1,51 | 0,77 | 1,49 | 2,67 | 0,4963894 | 0,655472 |
| CTC-546K23.1  | 0,00 | 0,00 | 0,00 | 0,00 | 0,4963901 | NA       |
| PDGFRL        | 0,00 | 0,00 | 0,00 | 0,00 | 0,4964151 | NA       |
| AIPL1         | 0,00 | 0,07 | 0,10 | 0,22 | 0,4964539 | 0,655519 |
| LRRC61        | 0,07 | 2,05 | 0,17 | 0,00 | 0,4964851 | 0,655519 |
| ASB6          | 2,10 | 1,01 | 1,70 | 1,38 | 0,4965129 | 0,655519 |
| RP11-196P2.1  | 0,00 | 0,00 | 0,00 | 0,00 | 0,4965549 | 0,655524 |
| PAWR          | 0,45 | 1,74 | 0,95 | 0,11 | 0,4965756 | 0,655524 |
| RP11-126O22.9 | 0,00 | 0,00 | 0,00 | 0,00 | 0,4966496 | NA       |
| RP11-568J23.2 | 0,13 | 0,06 | 0,12 | 0,09 | 0,496712  | 0,655623 |
| TMEM132B      | 0,05 | 0,33 | 0,12 | 0,04 | 0,4967218 | 0,655623 |

|                |      |      |      |      |           |          |
|----------------|------|------|------|------|-----------|----------|
| RP11-21M7.2    | 0,00 | 0,00 | 0,00 | 0,00 | 0,496729  | NA       |
| VCP            | 5,88 | 5,09 | 5,96 | 5,72 | 0,4967542 | 0,655623 |
| AC007161.5     | 0,00 | 0,00 | 0,00 | 0,00 | 0,4967692 | 0,655623 |
| FBXL3          | 3,19 | 4,08 | 2,88 | 2,17 | 0,496802  | 0,655628 |
| ZBTB11         | 3,99 | 3,69 | 3,83 | 3,38 | 0,4969166 | 0,65574  |
| FAM156A        | 4,29 | 5,25 | 4,50 | 4,58 | 0,496971  | 0,655773 |
| RP11-219F1.2   | 0,00 | 0,00 | 0,00 | 0,00 | 0,4970099 | NA       |
| TMEM140        | 2,29 | 1,67 | 2,76 | 1,94 | 0,4970352 | 0,655787 |
| CTD-2619J13.19 | 0,64 | 0,57 | 0,69 | 0,48 | 0,4970578 | 0,655787 |
| RNU6-805P      | 0,00 | 0,00 | 0,00 | 0,00 | 0,4971228 | 0,655787 |
| CTB-37A13.1    | 0,91 | 0,87 | 0,45 | 1,55 | 0,4971443 | 0,655787 |
| TMEM232        | 0,02 | 0,62 | 0,96 | 1,09 | 0,4971779 | 0,655787 |
| WASH7P         | 0,26 | 0,13 | 0,00 | 0,00 | 0,4972037 | 0,655787 |
| RP11-434P11.1  | 1,12 | 2,77 | 1,92 | 2,39 | 0,497217  | 0,655787 |
| THYN1          | 6,00 | 6,01 | 5,47 | 6,04 | 0,497245  | 0,655787 |
| SCARNA21       | 0,00 | 2,37 | 0,00 | 0,00 | 0,4972497 | NA       |
| RP5-1039K5.17  | 0,37 | 1,59 | 0,60 | 0,39 | 0,4972601 | 0,655787 |
| RP11-93I21.3   | 0,00 | 0,08 | 0,00 | 0,07 | 0,4972769 | NA       |
| ITK            | 1,13 | 3,97 | 1,75 | 1,66 | 0,497287  | 0,655787 |
| RP11-649E7.5   | 2,50 | 0,00 | 1,10 | 2,52 | 0,4973165 | 0,655787 |
| RP11-168F9.2   | 0,00 | 0,00 | 0,00 | 0,00 | 0,4973799 | 0,655787 |
| PIKFYVE        | 3,90 | 2,63 | 3,47 | 3,13 | 0,4973907 | 0,655787 |
| ADCY4          | 1,66 | 3,67 | 1,18 | 2,68 | 0,4974415 | 0,655787 |
| RP4-761J14.8   | 4,00 | 3,67 | 3,80 | 1,43 | 0,4974821 | 0,655787 |
| AC138430.4     | 0,11 | 0,17 | 0,14 | 0,07 | 0,4974835 | 0,655787 |
| C1QL3          | 0,00 | 0,00 | 0,00 | 0,00 | 0,4974924 | 0,655787 |
| GPR180         | 0,71 | 0,31 | 0,36 | 0,02 | 0,4975132 | 0,655787 |
| SLC35G6        | 0,00 | 0,00 | 0,00 | 0,00 | 0,4976313 | NA       |
| CTD-2035E11.5  | 1,25 | 0,29 | 0,97 | 1,09 | 0,497707  | 0,656004 |
| PPP3CC         | 3,98 | 3,88 | 3,67 | 1,30 | 0,4978707 | 0,656158 |
| RP11-630A13.4  | 0,71 | 0,69 | 0,83 | 0,65 | 0,4978977 | 0,656158 |
| ITM2B          | 8,47 | 8,23 | 8,10 | 7,55 | 0,4979128 | 0,656158 |
| RP5-1102E8.2   | 0,19 | 0,00 | 0,00 | 0,00 | 0,4979474 | NA       |
| RP11-193E15.4  | 0,00 | 0,00 | 0,00 | 0,85 | 0,49797   | NA       |
| RP11-15I11.2   | 0,00 | 0,00 | 0,00 | 0,48 | 0,4980101 | NA       |
| AC027612.6     | 0,87 | 0,78 | 2,00 | 0,24 | 0,4980231 | 0,656265 |
| U91328.19      | 0,50 | 1,68 | 0,64 | 1,56 | 0,4980869 | 0,656284 |
| MBD3L4         | 0,00 | 0,00 | 0,00 | 0,00 | 0,4981432 | NA       |
| CDH19          | 0,32 | 0,33 | 0,30 | 0,49 | 0,49816   | 0,656284 |
| CTB-50L17.14   | 0,38 | 0,41 | 0,54 | 0,41 | 0,4981626 | 0,656284 |
| DSG2           | 0,02 | 0,13 | 0,05 | 0,02 | 0,4981698 | 0,656284 |
| RP11-420K14.8  | 0,00 | 0,00 | 0,00 | 0,00 | 0,4981774 | NA       |
| ZNF85          | 1,22 | 2,09 | 1,48 | 1,46 | 0,4982148 | 0,656284 |
| GAREM1         | 2,89 | 3,69 | 0,94 | 3,42 | 0,4982554 | 0,656284 |
| NFIX           | 0,09 | 0,19 | 0,24 | 0,69 | 0,4982757 | 0,656284 |
| BARD1          | 2,72 | 0,77 | 3,25 | 2,73 | 0,4982826 | 0,656284 |
| RP1-187B23.1   | 0,28 | 0,24 | 0,25 | 0,31 | 0,4983037 | 0,656284 |
| RP5-1057B20.3  | 0,24 | 0,18 | 0,25 | 0,42 | 0,4983399 | 0,656293 |
| RNF4           | 5,06 | 3,79 | 4,19 | 4,07 | 0,4983726 | 0,656297 |
| RP11-758N13.3  | 1,96 | 1,24 | 2,97 | 1,97 | 0,4985017 | 0,656386 |
| SYT2           | 0,06 | 0,07 | 0,07 | 0,04 | 0,4985122 | 0,656386 |
| GTF2A1L        | 0,00 | 0,00 | 0,00 | 0,00 | 0,4985242 | NA       |
| ARHGEF18       | 1,84 | 1,50 | 1,69 | 2,75 | 0,4985285 | 0,656386 |
| APEH           | 5,16 | 5,64 | 5,26 | 5,62 | 0,4986419 | 0,656482 |
| MBD3L3         | 0,00 | 0,00 | 0,00 | 0,00 | 0,4986478 | NA       |

|                |      |      |      |      |           |          |
|----------------|------|------|------|------|-----------|----------|
| RP13-297E16.4  | 1,11 | 3,24 | 1,81 | 1,35 | 0,4986603 | 0,656482 |
| PSEN2          | 1,66 | 0,21 | 0,85 | 0,73 | 0,4987139 | 0,656486 |
| ALDH1A3        | 0,00 | 0,00 | 0,00 | 0,00 | 0,4987192 | NA       |
| RF00493        | 0,00 | 2,60 | 0,00 | 2,49 | 0,4987225 | 0,656486 |
| RP11-50E11.2   | 0,00 | 0,00 | 0,00 | 0,00 | 0,4987264 | NA       |
| HIST2H2BD      | 0,00 | 0,33 | 0,00 | 0,00 | 0,4987394 | NA       |
| MIRLET7DHG     | 0,00 | 0,15 | 0,00 | 0,15 | 0,4988278 | 0,656586 |
| MUC1           | 0,00 | 2,17 | 0,23 | 0,00 | 0,4989497 | 0,656707 |
| KIAA1967       | 3,22 | 3,14 | 3,37 | 3,03 | 0,4990053 | 0,656714 |
| PITPNA         | 4,89 | 2,83 | 4,95 | 5,46 | 0,4990142 | 0,656714 |
| AC083843.2     | 0,00 | 0,00 | 0,45 | 0,00 | 0,4990457 | 0,656717 |
| GNAI2          | 7,20 | 7,33 | 7,46 | 7,21 | 0,4991494 | 0,656814 |
| ZNF530         | 0,78 | 0,22 | 0,41 | 1,27 | 0,4991843 | 0,656821 |
| CLEC4GP1       | 0,00 | 0,00 | 0,00 | 0,00 | 0,4994085 | NA       |
| FDX1L          | 0,84 | 0,80 | 1,93 | 1,30 | 0,4994354 | 0,657113 |
| RP11-357H14.11 | 0,00 | 0,00 | 0,00 | 0,00 | 0,4995054 | NA       |
| CTD-2169H9.1   | 0,00 | 0,00 | 0,00 | 0,00 | 0,4995407 | NA       |
| RP11-673D15.7  | 3,72 | 2,08 | 0,00 | 4,67 | 0,4995498 | 0,657225 |
| THAP10         | 0,00 | 0,00 | 0,00 | 0,00 | 0,4996137 | NA       |
| RP11-774D14.1  | 0,00 | 0,79 | 0,00 | 0,00 | 0,4997542 | 0,657442 |
| CNOT3          | 2,30 | 2,42 | 2,04 | 1,87 | 0,4997978 | 0,657442 |
| RP11-67K19.3   | 0,77 | 0,34 | 0,58 | 1,02 | 0,4998041 | 0,657442 |
| RNU6-469P      | 0,00 | 0,00 | 2,01 | 0,00 | 0,499838  | 0,657448 |
| SCLY           | 2,19 | 1,46 | 2,57 | 3,08 | 0,4999545 | 0,657562 |
| POLR2G         | 7,89 | 6,96 | 7,98 | 7,32 | 0,4999871 | 0,657566 |
| IGKV3D-11      | 0,00 | 0,94 | 0,00 | 0,00 | 0,5000065 | NA       |
| PLET1          | 0,00 | 0,00 | 0,00 | 0,00 | 0,5000575 | NA       |
| RP11-738E22.3  | 0,00 | 0,00 | 0,00 | 0,00 | 0,5001287 | NA       |
| RP11-575C20.1  | 0,00 | 0,00 | 0,00 | 0,00 | 0,5001978 | NA       |
| AC022173.2     | 0,00 | 0,00 | 0,00 | 0,00 | 0,5002547 | NA       |
| OS9            | 6,08 | 5,56 | 5,98 | 5,14 | 0,5003375 | 0,657988 |
| RP11-350J20.12 | 0,00 | 0,00 | 0,00 | 0,00 | 0,5004122 | NA       |
| AC016747.2     | 4,99 | 1,75 | 4,11 | 3,90 | 0,500462  | 0,658113 |
| HSPA12B        | 0,00 | 0,00 | 0,00 | 0,00 | 0,5005073 | 0,658133 |
| RP11-574K11.5  | 0,00 | 0,00 | 1,29 | 0,00 | 0,5005367 | 0,658133 |
| NUMB           | 5,60 | 4,68 | 5,45 | 5,66 | 0,500604  | 0,65818  |
| ZNF329         | 0,78 | 0,57 | 0,93 | 1,05 | 0,5006317 | 0,65818  |
| ZBTB21         | 4,50 | 4,99 | 4,99 | 5,50 | 0,5006695 | 0,658191 |
| RP11-128M1.1   | 0,00 | 0,00 | 0,00 | 0,00 | 0,500808  | 0,658334 |
| SIT1           | 0,21 | 0,36 | 0,14 | 0,13 | 0,5008724 | 0,658342 |
| WFDC11         | 2,72 | 1,09 | 2,36 | 1,40 | 0,5008733 | 0,658342 |
| AC006262.6     | 0,50 | 1,16 | 0,68 | 0,55 | 0,5009987 | 0,658448 |
| PCDHB11        | 0,39 | 0,41 | 0,36 | 0,48 | 0,5010132 | 0,658448 |
| RP11-1110F20.1 | 0,00 | 0,00 | 0,00 | 0,16 | 0,5011283 | NA       |
| DCBLD1         | 1,87 | 2,68 | 1,95 | 0,95 | 0,5011747 | 0,658581 |
| BAP1           | 4,85 | 4,70 | 5,01 | 4,94 | 0,501193  | 0,658581 |
| RP11-613D13.7  | 0,00 | 0,00 | 0,00 | 0,00 | 0,5012031 | 0,658581 |
| SMCR2          | 0,00 | 0,00 | 0,00 | 0,00 | 0,5014243 | NA       |
| PCDHAC1        | 0,00 | 0,00 | 0,00 | 0,00 | 0,501479  | NA       |
| AC046143.5     | 3,93 | 0,39 | 1,72 | 2,78 | 0,5015439 | 0,658963 |
| WDR24          | 0,12 | 0,60 | 0,33 | 1,02 | 0,5015533 | 0,658963 |
| CTB-139P11.2   | 0,72 | 1,85 | 0,82 | 1,40 | 0,5016334 | 0,658997 |
| RP11-169E6.4   | 0,38 | 1,67 | 0,37 | 0,70 | 0,5016382 | 0,658997 |
| RGS13          | 0,30 | 0,22 | 0,23 | 0,22 | 0,501686  | 0,65902  |
| AC005062.2     | 2,85 | 2,62 | 2,76 | 2,38 | 0,5017148 | 0,65902  |



|               |      |      |      |      |           |          |
|---------------|------|------|------|------|-----------|----------|
| RP11-429P3.5  | 0,00 | 0,00 | 0,00 | 0,00 | 0,5019062 | 0,659232 |
| LIMD1         | 2,63 | 2,10 | 3,14 | 3,28 | 0,5019907 | 0,659304 |
| C1orf122      | 2,89 | 3,26 | 2,91 | 3,76 | 0,5020608 | 0,659357 |
| NBPF3         | 0,96 | 1,58 | 1,52 | 2,41 | 0,5020971 | 0,659366 |
| TRIM4         | 3,18 | 2,93 | 3,24 | 3,21 | 0,5023323 | 0,659612 |
| RP11-629B11.5 | 0,00 | 1,13 | 0,00 | 0,00 | 0,502344  | 0,659612 |
| RELL1         | 3,42 | 2,42 | 3,12 | 1,77 | 0,5024737 | 0,659733 |
| RN7SL30P      | 0,00 | 0,00 | 0,00 | 0,00 | 0,5025231 | 0,659733 |
| RP5-968D22.3  | 2,87 | 3,02 | 0,67 | 0,95 | 0,5025635 | 0,659733 |
| MRPL57        | 4,18 | 4,46 | 4,10 | 3,67 | 0,502568  | 0,659733 |
| ZNF14         | 1,03 | 0,05 | 0,34 | 0,37 | 0,5025948 | 0,659733 |
| CTB-175E5.4   | 2,54 | 1,82 | 2,09 | 1,39 | 0,5026138 | 0,659733 |
| ACO23590.1    | 0,80 | 0,64 | 0,57 | 1,15 | 0,5027359 | 0,659751 |
| RP11-333E13.1 | 0,24 | 0,00 | 0,00 | 0,00 | 0,5027504 | 0,659751 |
| DUX4L9        | 0,00 | 0,30 | 0,00 | 0,00 | 0,5027631 | 0,659751 |
| SNRNP35       | 4,91 | 5,05 | 4,62 | 5,14 | 0,5027684 | 0,659751 |
| SDC4          | 0,18 | 0,16 | 0,40 | 0,37 | 0,502776  | 0,659751 |
| KIF23         | 0,89 | 1,41 | 0,62 | 0,58 | 0,5029823 | 0,659982 |
| RP11-341D18.5 | 0,00 | 0,00 | 0,00 | 0,00 | 0,5030318 | NA       |
| ZNF260        | 0,36 | 0,47 | 0,76 | 0,08 | 0,5030937 | 0,660054 |
| PPFIA1        | 4,83 | 2,60 | 4,35 | 5,35 | 0,5030961 | 0,660054 |
| RP11-401.2    | 1,68 | 3,02 | 1,58 | 2,19 | 0,5031585 | 0,660097 |
| SLMAP         | 3,43 | 1,87 | 3,46 | 3,09 | 0,5031905 | 0,6601   |
| RP11-627K11.7 | 0,09 | 0,00 | 0,40 | 0,17 | 0,5033347 | 0,66025  |
| CEP295        | 2,12 | 0,48 | 1,74 | 2,10 | 0,5034137 | 0,660315 |
| RP11-225B17.2 | 0,81 | 0,45 | 0,83 | 0,88 | 0,5035529 | 0,660455 |
| RP11-16E18.4  | 0,00 | 0,25 | 0,71 | 0,91 | 0,5036095 | 0,660455 |
| RP11-567M16.5 | 0,00 | 0,00 | 0,00 | 0,00 | 0,5036098 | 0,660455 |
| RP11-108E14.1 | 0,34 | 0,00 | 0,00 | 0,41 | 0,5036511 | 0,66047  |
| OSBPL10       | 1,41 | 1,31 | 1,33 | 0,90 | 0,5036849 | 0,660475 |
| PRR14         | 3,92 | 4,52 | 4,16 | 4,02 | 0,5037236 | 0,660484 |
| RP11-328G15.2 | 0,73 | 0,98 | 0,82 | 0,78 | 0,5037508 | 0,660484 |
| RP11-426L16.3 | 0,00 | 0,00 | 0,00 | 0,00 | 0,5037857 | NA       |
| RP11-58D2.1   | 0,91 | 1,13 | 1,54 | 2,59 | 0,5039264 | 0,660644 |
| RP11-463O9.9  | 0,00 | 0,00 | 0,00 | 0,00 | 0,5039271 | NA       |
| AKAP17A       | 3,29 | 4,24 | 3,61 | 3,00 | 0,5039325 | 0,660644 |
| ACO02451.3    | 0,68 | 3,22 | 0,37 | 0,98 | 0,5041664 | 0,660912 |
| RP5-981L23.7  | 0,00 | 0,04 | 0,00 | 0,00 | 0,5042109 | NA       |
| RP11-1085N6.3 | 0,33 | 0,42 | 0,74 | 0,39 | 0,5042123 | 0,660933 |
| CEP192        | 4,02 | 3,09 | 3,57 | 3,95 | 0,5042962 | 0,660974 |
| RP11-634H22.1 | 2,38 | 0,37 | 1,40 | 0,35 | 0,5043028 | 0,660974 |
| ACO06539.3    | 0,00 | 0,00 | 0,00 | 0,00 | 0,5043308 | NA       |
| RP11-389J22.1 | 0,00 | 0,00 | 0,00 | 0,00 | 0,5043308 | NA       |
| RP11-672L10.2 | 0,01 | 0,00 | 0,00 | 0,00 | 0,5043339 | NA       |
| RNU6-672P     | 0,00 | 0,00 | 0,00 | 0,00 | 0,5043379 | 0,660981 |
| CSN1S2AP      | 0,00 | 0,00 | 0,00 | 0,00 | 0,5043804 | NA       |
| RP11-627C21.1 | 0,00 | 0,00 | 0,00 | 0,00 | 0,5043804 | NA       |
| RP11-713C5.1  | 0,00 | 0,00 | 0,00 | 0,00 | 0,5043804 | NA       |
| ALKBH3        | 5,67 | 3,02 | 4,86 | 4,02 | 0,5044527 | 0,661092 |
| RP11-517H2.7  | 0,00 | 0,00 | 0,00 | 0,00 | 0,5044744 | NA       |
| RP11-359N11.2 | 0,03 | 0,25 | 0,02 | 0,19 | 0,5045483 | 0,661148 |
| DPP3          | 2,68 | 1,27 | 2,51 | 3,12 | 0,5045751 | 0,661148 |
| PKIA          | 0,00 | 0,09 | 0,00 | 0,00 | 0,5046289 | NA       |
| ZCCHC7        | 4,69 | 3,59 | 3,85 | 3,72 | 0,5046326 | 0,661148 |
| RP11-717F1.1  | 0,00 | 2,21 | 0,00 | 0,00 | 0,5046378 | 0,661148 |

|                 |      |      |      |      |           |          |
|-----------------|------|------|------|------|-----------|----------|
| COLEC10         | 0,00 | 0,00 | 0,00 | 0,85 | 0,5046438 | 0,661148 |
| RP11-841C19.1   | 0,00 | 0,00 | 0,00 | 0,00 | 0,5047242 | NA       |
| COPS8           | 5,43 | 4,13 | 4,73 | 3,24 | 0,5048019 | 0,661307 |
| HOMER1          | 0,03 | 0,15 | 0,16 | 0,04 | 0,5048252 | 0,661307 |
| MDM4            | 6,60 | 6,69 | 6,70 | 5,71 | 0,5048872 | 0,661319 |
| ACVR1B          | 0,06 | 0,11 | 0,86 | 1,89 | 0,5048938 | 0,661319 |
| RP11-551G24.3   | 0,00 | 0,00 | 0,00 | 0,00 | 0,504945  | NA       |
| HSP90AA1        | 8,10 | 7,93 | 8,14 | 8,03 | 0,5049949 | 0,661413 |
| FCGR2A          | 6,09 | 6,05 | 6,33 | 5,91 | 0,5051273 | 0,661511 |
| RP11-567J20.2   | 0,00 | 1,90 | 0,10 | 0,58 | 0,5051292 | 0,661511 |
| RP11-14I17.3    | 0,00 | 0,00 | 0,00 | 0,61 | 0,5052015 | 0,661566 |
| RP11-511I2.2    | 0,00 | 0,00 | 0,00 | 0,00 | 0,5052536 | NA       |
| ZFC3H1          | 5,36 | 4,17 | 4,73 | 4,19 | 0,5053035 | 0,661661 |
| CHST10          | 0,00 | 0,73 | 0,09 | 0,37 | 0,5053399 | 0,66167  |
| RP11-30L15.6    | 0,00 | 0,00 | 0,00 | 0,00 | 0,5053798 | NA       |
| AC103828.1      | 0,00 | 0,84 | 0,00 | 0,00 | 0,5054109 | 0,661723 |
| FAM225A         | 0,00 | 0,00 | 0,02 | 0,17 | 0,5056204 | 0,661932 |
| SERPINB1        | 6,21 | 5,65 | 6,01 | 6,47 | 0,5056299 | 0,661932 |
| CTA-29F11.1     | 5,77 | 6,21 | 6,23 | 6,07 | 0,505716  | 0,662006 |
| RP11-678L1.1    | 0,63 | 0,28 | 0,36 | 0,28 | 0,5058207 | 0,662104 |
| RNU6-226P       | 0,00 | 0,00 | 0,00 | 0,00 | 0,5060566 | 0,662374 |
| PROSER2         | 0,00 | 0,00 | 0,00 | 0,00 | 0,5061424 | 0,662447 |
| FITM2           | 0,19 | 0,19 | 0,33 | 0,34 | 0,5062682 | 0,662573 |
| CTD-3075F15.1   | 0,95 | 0,00 | 0,19 | 1,00 | 0,5065879 | 0,662952 |
| AC066692.3      | 0,00 | 0,00 | 0,00 | 0,00 | 0,5068094 | 0,663203 |
| RP11-716O23.1   | 0,00 | 0,00 | 0,00 | 0,00 | 0,5072325 | NA       |
| RP11-150O12.4   | 0,00 | 0,00 | 0,00 | 0,40 | 0,5072646 | NA       |
| XXyac-YR38GF2.1 | 0,06 | 0,00 | 0,01 | 0,05 | 0,5072906 | 0,663764 |
| SMCR8           | 0,88 | 0,73 | 1,19 | 0,69 | 0,5072975 | 0,663764 |
| RP11-384G23.1   | 0,15 | 1,60 | 0,16 | 0,47 | 0,5073465 | 0,663781 |
| RP4-547C10.1    | 0,32 | 0,11 | 0,20 | 0,21 | 0,5074069 | 0,663781 |
| FAM149A         | 0,24 | 0,37 | 0,44 | 0,36 | 0,5074291 | 0,663781 |
| LUZP6           | 4,31 | 3,81 | 2,94 | 0,00 | 0,5074305 | 0,663781 |
| AC079325.8      | 0,49 | 0,21 | 0,50 | 0,43 | 0,5076381 | 0,664014 |
| MCM9            | 3,76 | 1,91 | 2,97 | 2,50 | 0,5076906 | 0,664041 |
| KIAA0391        | 3,28 | 1,99 | 2,78 | 3,24 | 0,5077184 | 0,664041 |
| RP11-553L6.2    | 0,06 | 0,09 | 0,05 | 0,60 | 0,5077769 | 0,664078 |
| MIR205HG        | 2,47 | 3,12 | 2,81 | 2,54 | 0,5078366 | 0,664117 |
| CTA-941F9.10    | 0,47 | 0,48 | 0,51 | 0,65 | 0,5078976 | 0,664151 |
| IMPDH1          | 4,82 | 5,24 | 5,06 | 4,88 | 0,507986  | 0,664151 |
| AC074391.1      | 0,00 | 0,86 | 0,00 | 0,00 | 0,5079989 | 0,664151 |
| RP11-927P21.12  | 0,00 | 0,00 | 0,00 | 0,00 | 0,5080189 | 0,664151 |
| RP11-83A24.1    | 0,00 | 0,00 | 0,00 | 0,00 | 0,5080292 | 0,664151 |
| VPS50           | 3,08 | 2,62 | 2,84 | 4,09 | 0,508042  | 0,664151 |
| TREML2          | 0,06 | 0,12 | 0,15 | 0,70 | 0,5081502 | 0,664254 |
| AP003068.22     | 0,00 | 0,40 | 0,10 | 0,08 | 0,5083131 | 0,664427 |
| RP11-474P2.2    | 0,00 | 0,00 | 0,00 | 0,00 | 0,5083863 | 0,664484 |
| MRPL36          | 5,40 | 0,61 | 5,02 | 4,52 | 0,508492  | 0,664583 |
| AC005776.1      | 0,00 | 0,00 | 0,00 | 0,00 | 0,5085117 | NA       |
| RP11-250H24.5   | 0,00 | 0,00 | 0,00 | 0,00 | 0,5085672 | NA       |
| RP11-598F7.1    | 0,00 | 0,46 | 0,00 | 0,00 | 0,5088287 | 0,664961 |
| RP11-122C21.1   | 0,00 | 0,00 | 0,00 | 0,00 | 0,5088305 | NA       |
| CTC-523E23.3    | 0,78 | 0,00 | 0,25 | 0,11 | 0,5088408 | 0,664961 |
| DNAH100S        | 0,24 | 0,13 | 0,27 | 0,13 | 0,5089309 | 0,664967 |
| RPS2P45         | 0,65 | 0,56 | 0,47 | 0,53 | 0,5089333 | 0,664967 |

|                 |      |      |      |      |           |          |
|-----------------|------|------|------|------|-----------|----------|
| PTPRE           | 6,31 | 5,53 | 6,18 | 5,78 | 0,5089356 | 0,664967 |
| RNU6-1294P      | 0,00 | 0,00 | 0,00 | 0,00 | 0,5089515 | NA       |
| RP11-34514.1    | 0,00 | 0,00 | 0,00 | 0,00 | 0,5089548 | NA       |
| RP11-190A12.9   | 0,00 | 0,00 | 0,80 | 0,00 | 0,5091454 | 0,665202 |
| RP11-823E8.3    | 0,00 | 0,00 | 0,00 | 0,00 | 0,5092083 | NA       |
| AC002519.8      | 1,55 | 0,66 | 1,32 | 1,20 | 0,5092435 | 0,665291 |
| PMS2P6          | 0,00 | 0,00 | 0,00 | 0,00 | 0,5092992 | NA       |
| TRBV14          | 0,00 | 0,55 | 0,00 | 0,00 | 0,5093834 | NA       |
| S100A7A         | 0,00 | 0,00 | 0,00 | 0,00 | 0,5094332 | NA       |
| DCDC2C          | 0,00 | 0,00 | 0,00 | 0,00 | 0,5095671 | NA       |
| PSMD11          | 5,27 | 5,31 | 5,28 | 5,62 | 0,5095734 | 0,665683 |
| RP11-552E20.4   | 0,00 | 0,55 | 0,00 | 0,00 | 0,5096883 | NA       |
| ALG1            | 4,33 | 4,43 | 3,07 | 0,99 | 0,5096884 | 0,665794 |
| VNN1            | 2,57 | 1,44 | 0,67 | 1,55 | 0,5097733 | 0,665858 |
| CXorf31         | 0,00 | 0,00 | 0,00 | 0,00 | 0,5097746 | NA       |
| ADGRF5          | 0,00 | 0,00 | 0,00 | 0,00 | 0,5097969 | 0,665858 |
| AP000240.4      | 0,16 | 0,20 | 0,28 | 0,33 | 0,5098609 | 0,665902 |
| ALAD            | 2,84 | 1,60 | 1,90 | 2,29 | 0,5099068 | 0,665923 |
| LZTS3           | 0,00 | 0,00 | 0,00 | 0,00 | 0,5099436 | NA       |
| WLS             | 0,00 | 0,00 | 0,00 | 0,00 | 0,509981  | NA       |
| NPHP3-ACAD11    | 0,00 | 0,00 | 0,00 | 0,00 | 0,5100063 | 0,666014 |
| RP11-1157N2_B.2 | 0,17 | 0,00 | 0,00 | 0,00 | 0,5100951 | NA       |
| RP11-271K11.5   | 0,33 | 0,00 | 0,00 | 0,00 | 0,5101058 | 0,666103 |
| MEGF10          | 0,00 | 0,06 | 0,00 | 0,00 | 0,510114  | NA       |
| PRRG2           | 0,00 | 0,00 | 0,00 | 0,00 | 0,5101347 | 0,666103 |
| RP11-4C20.3     | 0,00 | 0,00 | 0,00 | 0,42 | 0,5102389 | 0,666171 |
| AL773604.8      | 0,00 | 0,17 | 0,40 | 0,14 | 0,5102603 | 0,666171 |
| RP11-390D11.1   | 0,00 | 0,00 | 0,00 | 0,00 | 0,5102763 | 0,666171 |
| C19orf73        | 0,00 | 0,00 | 0,00 | 0,00 | 0,5103526 | 0,666231 |
| CTD-3137H5.4    | 0,00 | 0,00 | 0,00 | 0,00 | 0,510492  | NA       |
| RP13-890H12.2   | 0,00 | 0,00 | 0,00 | 0,00 | 0,5104998 | 0,666384 |
| SIGLEC14        | 4,41 | 3,38 | 3,91 | 2,80 | 0,5105469 | 0,666407 |
| GATSL2          | 0,00 | 0,00 | 0,00 | 0,00 | 0,5105837 | NA       |
| GUCY2D          | 0,03 | 0,20 | 0,07 | 0,03 | 0,5106615 | 0,666517 |
| CTC-250I14.6    | 0,00 | 0,00 | 0,00 | 0,00 | 0,5106979 | NA       |
| POLR2M          | 4,01 | 4,47 | 3,23 | 1,09 | 0,5107107 | 0,666542 |
| OGDH            | 3,66 | 3,45 | 3,68 | 3,05 | 0,5108352 | 0,666665 |
| DNHD1           | 1,99 | 2,29 | 2,03 | 0,95 | 0,510872  | 0,666674 |
| RP4-599G15.5    | 0,00 | 0,00 | 0,00 | 0,00 | 0,5108833 | NA       |
| MIR3662         | 0,00 | 0,00 | 0,00 | 0,00 | 0,510915  | NA       |
| PTPN5           | 0,00 | 0,00 | 0,00 | 0,13 | 0,5109723 | 0,666689 |
| RP5-1039K5.12   | 0,23 | 0,66 | 0,46 | 0,23 | 0,5109875 | 0,666689 |
| RN7SL663P       | 0,00 | 0,00 | 0,00 | 0,00 | 0,5110147 | NA       |
| RBM8A           | 7,86 | 7,38 | 7,57 | 7,34 | 0,5110561 | 0,666689 |
| UBE2I           | 5,28 | 4,54 | 5,08 | 4,29 | 0,5110568 | 0,666689 |
| PGP             | 1,82 | 1,68 | 1,95 | 1,42 | 0,5110583 | 0,666689 |
| CTD-3083F21.1   | 0,00 | 0,00 | 0,00 | 0,00 | 0,5110872 | 0,666689 |
| ARHGAP19-SLIT1  | 0,00 | 0,00 | 0,08 | 2,58 | 0,5110933 | 0,666689 |
| DUX4L50         | 0,23 | 0,96 | 0,00 | 0,53 | 0,5111622 | 0,666674 |
| RP11-256L11.1   | 0,22 | 0,00 | 0,30 | 0,00 | 0,5111745 | NA       |
| TADA2A          | 3,86 | 2,68 | 3,41 | 3,34 | 0,5112164 | 0,666771 |
| SLC9A2          | 0,00 | 0,00 | 0,00 | 0,00 | 0,5112476 | NA       |
| SULT1A4         | 4,44 | 4,64 | 3,58 | 5,10 | 0,511333  | 0,666884 |
| RP11-170L3.7    | 0,00 | 0,00 | 0,00 | 0,00 | 0,5115352 | NA       |
| RP4-773N10.4    | 0,00 | 0,00 | 0,00 | 0,07 | 0,5115452 | 0,667122 |

|                |      |      |      |      |           |          |
|----------------|------|------|------|------|-----------|----------|
| IPO11          | 2,69 | 0,91 | 1,60 | 0,79 | 0,5116544 | 0,667225 |
| PDCL3          | 5,72 | 4,73 | 5,15 | 4,54 | 0,5117262 | 0,66728  |
| PRH1-PRR4      | 2,69 | 0,00 | 0,83 | 1,62 | 0,5118927 | 0,667458 |
| RP11-789C2.1   | 0,00 | 0,66 | 0,32 | 0,34 | 0,5120321 | 0,6676   |
| PCDHB2         | 0,00 | 0,00 | 0,00 | 0,05 | 0,5121233 | NA       |
| RF00443        | 0,00 | 0,00 | 0,00 | 0,00 | 0,5121326 | NA       |
| CCDC117        | 2,09 | 1,58 | 2,48 | 1,72 | 0,5122693 | 0,66787  |
| RP4-568C11.4   | 0,00 | 0,00 | 0,00 | 0,00 | 0,512397  | NA       |
| ICOSLG         | 1,65 | 1,48 | 2,10 | 1,85 | 0,5124145 | 0,668007 |
| RP11-996F15.6  | 0,00 | 0,00 | 0,00 | 0,00 | 0,5124553 | 0,668007 |
| FGD2           | 6,24 | 5,69 | 6,24 | 5,93 | 0,512464  | 0,668007 |
| RN7SL242P      | 0,00 | 2,97 | 0,00 | 0,00 | 0,5125106 | 0,668028 |
| IDNK           | 3,15 | 0,93 | 3,75 | 2,03 | 0,5126761 | 0,66815  |
| TNFSF13B       | 7,71 | 7,11 | 7,67 | 7,70 | 0,5126899 | 0,66815  |
| RP11-798K3.3   | 0,18 | 0,00 | 0,00 | 0,24 | 0,5126945 | 0,66815  |
| RP13-726E6.1   | 0,00 | 0,00 | 0,00 | 0,00 | 0,5127988 | NA       |
| MRLN           | 2,14 | 2,08 | 1,42 | 0,87 | 0,5128253 | 0,668206 |
| RP6-109B7.4    | 0,07 | 0,00 | 0,24 | 0,00 | 0,5128449 | 0,668206 |
| RP11-173A16.2  | 0,00 | 0,09 | 0,00 | 0,00 | 0,5128827 | 0,668206 |
| CTA-363E6.3    | 0,26 | 0,36 | 0,38 | 0,64 | 0,5128874 | 0,668206 |
| AC084018.1     | 2,22 | 1,34 | 1,80 | 1,33 | 0,5128877 | 0,668206 |
| CDHR5          | 0,00 | 0,12 | 0,00 | 0,00 | 0,5129292 | NA       |
| LA16c-3G11.7   | 0,11 | 0,00 | 0,00 | 0,00 | 0,5129884 | NA       |
| RP11-432J24.5  | 0,00 | 0,00 | 0,00 | 0,00 | 0,5131207 | NA       |
| RNF213         | 6,66 | 5,76 | 6,70 | 6,70 | 0,5131248 | 0,668441 |
| RP11-345P4.10  | 0,00 | 0,00 | 0,00 | 0,00 | 0,5132082 | 0,668441 |
| RP11-473J6.1   | 0,80 | 0,00 | 0,48 | 1,05 | 0,5132278 | 0,668441 |
| PLPP3          | 0,05 | 0,13 | 0,09 | 0,19 | 0,5132532 | 0,668441 |
| AP003419.11    | 0,79 | 3,74 | 3,96 | 4,85 | 0,5132742 | 0,668441 |
| RP11-460N1.1   | 0,00 | 0,00 | 0,00 | 0,00 | 0,513278  | NA       |
| RP11-72M14.1   | 5,02 | 2,48 | 5,84 | 6,37 | 0,5132816 | 0,668441 |
| TIMP1          | 9,01 | 9,23 | 9,27 | 9,13 | 0,5132857 | 0,668441 |
| ANKFY1         | 2,89 | 3,08 | 3,62 | 3,67 | 0,5133085 | 0,668441 |
| RAB6A          | 4,75 | 3,89 | 4,26 | 4,31 | 0,5134784 | 0,668601 |
| RP11-373D23.3  | 0,00 | 0,00 | 0,00 | 0,19 | 0,5134919 | 0,668601 |
| PHF14          | 3,91 | 3,48 | 3,74 | 4,38 | 0,5137606 | 0,668892 |
| RAP1A          | 6,38 | 5,77 | 5,95 | 5,96 | 0,5137753 | 0,668892 |
| RP11-213P13.1  | 0,00 | 0,00 | 0,00 | 0,00 | 0,513875  | NA       |
| MSN            | 6,68 | 5,56 | 6,36 | 5,93 | 0,5138906 | 0,669003 |
| DNTTIP2        | 6,32 | 5,57 | 5,89 | 5,38 | 0,5139637 | 0,669059 |
| AC010900.1     | 0,00 | 0,10 | 0,00 | 0,00 | 0,5140142 | NA       |
| RN7SL806P      | 1,65 | 0,00 | 2,14 | 2,09 | 0,514127  | 0,669232 |
| RP11-45A17.3   | 0,04 | 0,16 | 0,02 | 0,10 | 0,5141871 | 0,669271 |
| CHD2           | 6,45 | 5,76 | 6,53 | 6,53 | 0,5142267 | 0,669284 |
| PEX6           | 2,12 | 2,26 | 2,01 | 0,91 | 0,5143142 | 0,669322 |
| DZIP3          | 2,17 | 0,32 | 0,88 | 1,12 | 0,5143312 | 0,669322 |
| RP11-35G9.3    | 3,97 | 1,12 | 2,88 | 3,10 | 0,5143465 | 0,669322 |
| MIR7848        | 0,00 | 0,00 | 0,00 | 0,00 | 0,5143583 | NA       |
| RP4-647C14.3   | 3,06 | 1,65 | 2,45 | 1,15 | 0,5144182 | 0,669356 |
| DNAJB4         | 3,48 | 2,25 | 1,30 | 1,88 | 0,514433  | 0,669356 |
| DPCD           | 3,78 | 0,38 | 4,40 | 1,42 | 0,5145071 | 0,669413 |
| RPL36A-HNRNPH2 | 0,00 | 0,57 | 0,00 | 0,00 | 0,5146036 | NA       |
| DPH5           | 4,35 | 3,09 | 3,82 | 2,67 | 0,5146366 | 0,669543 |
| RP11-624L12.1  | 0,30 | 0,36 | 0,42 | 0,33 | 0,5146835 | NA       |
| APH1B          | 2,91 | 3,64 | 2,62 | 1,13 | 0,5147545 | 0,669652 |

|                  |      |      |      |      |           |          |
|------------------|------|------|------|------|-----------|----------|
| ODF3             | 0,00 | 0,05 | 0,00 | 0,00 | 0,5147733 | NA       |
| RP11-680F8.3     | 0,17 | 0,13 | 0,31 | 0,40 | 0,5147807 | 0,669652 |
| RP11-16C1.3      | 0,00 | 0,00 | 0,00 | 0,00 | 0,5147896 | NA       |
| ETV1             | 0,00 | 1,30 | 0,10 | 0,00 | 0,5148389 | 0,669675 |
| CEP350           | 4,43 | 4,34 | 5,00 | 4,47 | 0,5148587 | 0,669675 |
| RP11-562L8.1     | 0,00 | 0,00 | 0,00 | 0,32 | 0,51488   | NA       |
| RP11-115P16.4    | 0,83 | 0,47 | 0,62 | 0,98 | 0,514919  | 0,669709 |
| RP11-552M6.1     | 0,00 | 0,00 | 0,05 | 0,00 | 0,5149482 | 0,669709 |
| RP11-505C13.1    | 0,00 | 0,00 | 0,00 | 0,00 | 0,514975  | 0,669709 |
| HNRNPR           | 6,16 | 6,57 | 5,91 | 5,47 | 0,515016  | 0,669723 |
| RP11-275B7.1     | 0,00 | 0,00 | 0,00 | 0,00 | 0,5151513 | NA       |
| AC004957.5       | 0,00 | 0,00 | 0,00 | 0,00 | 0,5151915 | NA       |
| RN7SL346P        | 0,00 | 0,00 | 0,00 | 0,00 | 0,5151928 | NA       |
| GLB1L3           | 2,27 | 1,48 | 2,33 | 1,82 | 0,515199  | 0,669894 |
| CDKN1A           | 5,55 | 6,32 | 6,29 | 5,26 | 0,5152778 | 0,669894 |
| MFSD12           | 3,56 | 2,88 | 4,21 | 2,97 | 0,5152958 | 0,669894 |
| RP11-110I1.13    | 1,33 | 0,00 | 0,00 | 2,92 | 0,5152962 | 0,669894 |
| LRRC20           | 0,00 | 0,27 | 0,00 | 0,04 | 0,5152981 | 0,669894 |
| VIMP             | 5,25 | 5,42 | 5,43 | 4,64 | 0,5153774 | 0,669957 |
| RP11-278H7.1     | 0,00 | 0,00 | 0,00 | 0,00 | 0,5154415 | 0,670002 |
| RP11-18M11.2     | 0,07 | 0,00 | 0,00 | 0,04 | 0,5155384 | 0,670088 |
| IPCEF1           | 3,48 | 2,89 | 3,57 | 3,31 | 0,5156471 | 0,67019  |
| PP2D1            | 0,00 | 0,00 | 0,00 | 0,00 | 0,5156802 | 0,670194 |
| RP11-701B16.2    | 0,00 | 0,00 | 0,00 | 0,00 | 0,515712  | NA       |
| LRRC69           | 2,47 | 1,34 | 1,60 | 1,11 | 0,5157551 | 0,670252 |
| RN7SL236P        | 0,00 | 0,84 | 0,00 | 0,00 | 0,5157822 | NA       |
| YPEL1            | 0,29 | 0,43 | 0,48 | 0,53 | 0,5158806 | 0,670376 |
| ULBP2            | 0,00 | 0,00 | 0,00 | 0,00 | 0,515921  | 0,67039  |
| T                | 0,00 | 0,00 | 0,00 | 0,00 | 0,5159494 | NA       |
| RNY1P11          | 0,00 | 0,00 | 0,00 | 1,86 | 0,5159624 | NA       |
| AK8              | 0,00 | 0,00 | 0,00 | 0,07 | 0,5160219 | NA       |
| RP11-182L21.6    | 2,00 | 2,20 | 1,89 | 0,63 | 0,5161249 | 0,670582 |
| THAP2            | 2,44 | 0,53 | 2,93 | 2,53 | 0,5161291 | 0,670582 |
| NCF4             | 5,39 | 4,47 | 5,80 | 5,41 | 0,5161785 | 0,670603 |
| XXbac-BPG308K3.5 | 0,43 | 0,00 | 0,24 | 0,42 | 0,5162555 | 0,670603 |
| MIR1273A         | 2,33 | 2,85 | 2,48 | 3,36 | 0,5162622 | 0,670603 |
| DEF8             | 5,13 | 3,69 | 5,15 | 4,56 | 0,5162661 | 0,670603 |
| RF00264          | 0,00 | 2,40 | 0,00 | 0,00 | 0,516308  | NA       |
| ARNT             | 4,13 | 2,51 | 3,74 | 3,99 | 0,5163699 | 0,670641 |
| RP11-10L12.6     | 0,00 | 0,00 | 0,00 | 0,00 | 0,5163789 | 0,670641 |
| NEURL1B          | 0,00 | 0,00 | 0,00 | 0,00 | 0,5163862 | 0,670641 |
| KIFC1            | 0,35 | 0,00 | 0,24 | 0,70 | 0,516459  | 0,670674 |
| TIGD7            | 0,00 | 0,00 | 0,00 | 0,03 | 0,5164873 | 0,670674 |
| MRPS9            | 5,39 | 5,62 | 4,28 | 3,88 | 0,5165017 | 0,670674 |
| RHOXF2B          | 0,33 | 0,22 | 0,33 | 0,30 | 0,5165427 | 0,670688 |
| IGHV1-18         | 0,00 | 0,96 | 0,00 | 0,00 | 0,5166009 | NA       |
| IRF9             | 6,54 | 5,93 | 6,56 | 6,79 | 0,5166143 | 0,670742 |
| RP5-886K2.3      | 0,46 | 0,00 | 0,08 | 2,49 | 0,5168154 | 0,670963 |
| RP11-303E16.8    | 0,31 | 0,16 | 0,25 | 0,00 | 0,5168927 | 0,671013 |
| UST              | 1,52 | 0,43 | 0,74 | 0,21 | 0,5169143 | 0,671013 |
| RP11-255C15.1    | 0,29 | 2,37 | 0,40 | 1,02 | 0,5169703 | 0,671047 |
| TULP2            | 1,36 | 0,00 | 0,92 | 1,43 | 0,5172533 | 0,671375 |
| RP4-747G18.8     | 0,00 | 0,00 | 0,00 | 0,00 | 0,5172865 | NA       |
| RP11-12A1.1      | 0,00 | 0,00 | 0,00 | 0,00 | 0,5172938 | NA       |
| MRPS14           | 4,77 | 4,73 | 4,55 | 4,29 | 0,517302  | 0,671399 |

|                |      |      |      |      |           |          |
|----------------|------|------|------|------|-----------|----------|
| RP1-34L19.2    | 0,00 | 0,00 | 0,00 | 0,00 | 0,5173492 | NA       |
| RP11-546K22.3  | 0,00 | 0,00 | 0,00 | 0,00 | 0,5173539 | 0,671427 |
| RP11-298I23.10 | 1,57 | 0,00 | 0,57 | 0,62 | 0,5173972 | 0,671436 |
| RP11-14C10.6   | 0,05 | 0,00 | 0,07 | 0,07 | 0,517423  | 0,671436 |
| BRD1           | 2,59 | 2,78 | 2,14 | 2,70 | 0,5174511 | 0,671436 |
| CTC-554D6.1    | 0,00 | 0,00 | 0,00 | 0,00 | 0,5175155 | NA       |
| SH3BP5         | 3,69 | 3,43 | 3,80 | 3,39 | 0,5175524 | 0,671487 |
| RP11-337N6.2   | 3,06 | 2,17 | 2,72 | 3,90 | 0,5175873 | 0,671487 |
| AP001505.10    | 1,46 | 1,55 | 1,37 | 1,53 | 0,5176002 | 0,671487 |
| NOM1           | 2,25 | 4,04 | 2,00 | 2,67 | 0,5176115 | 0,671487 |
| KLF18          | 0,00 | 0,00 | 0,00 | 0,00 | 0,517646  | NA       |
| SEPT9          | 4,29 | 3,58 | 4,62 | 3,96 | 0,5177085 | 0,671571 |
| RP11-638F5.1   | 0,00 | 0,00 | 0,00 | 0,00 | 0,5177499 | 0,671571 |
| RP1-37N7.3     | 0,00 | 0,00 | 0,00 | 0,00 | 0,5177934 | 0,671571 |
| TINAGL1        | 0,86 | 1,07 | 0,56 | 0,75 | 0,5177971 | 0,671571 |
| GINS3          | 2,33 | 2,77 | 2,31 | 1,99 | 0,5178872 | 0,671619 |
| PPP1R26        | 0,00 | 0,12 | 0,53 | 0,25 | 0,5178948 | 0,671619 |
| RP11-44F14.8   | 0,00 | 0,00 | 0,00 | 0,00 | 0,5179359 | NA       |
| POLDIP3        | 4,67 | 4,34 | 4,19 | 4,35 | 0,5179376 | 0,671636 |
| FTX            | 3,58 | 3,96 | 3,61 | 3,20 | 0,5180031 | 0,671681 |
| RF02124        | 1,76 | 0,00 | 0,69 | 1,30 | 0,5180302 | NA       |
| RP5-855D21.3   | 0,24 | 0,00 | 0,74 | 0,00 | 0,5180455 | 0,671697 |
| TRBV27         | 0,00 | 0,00 | 0,00 | 0,00 | 0,5180822 | NA       |
| CTB-12O2.1     | 0,11 | 0,11 | 0,09 | 0,93 | 0,5181975 | 0,671855 |
| RP11-586E1.1   | 0,00 | 0,00 | 0,00 | 0,00 | 0,5182197 | NA       |
| RN7SL134P      | 0,00 | 0,00 | 0,00 | 0,75 | 0,518243  | NA       |
| RN7SL342P      | 0,00 | 0,66 | 0,00 | 1,40 | 0,5182598 | 0,671897 |
| IPP            | 0,40 | 0,49 | 0,30 | 1,15 | 0,518367  | 0,671996 |
| USP17L15       | 0,00 | 0,00 | 0,00 | 0,00 | 0,518399  | NA       |
| ANKRD20A7P     | 0,00 | 0,00 | 0,00 | 0,00 | 0,5184322 | NA       |
| NCRNA00051     | 0,00 | 0,00 | 0,00 | 0,13 | 0,5184512 | NA       |
| FAP            | 0,00 | 0,00 | 0,00 | 0,00 | 0,5184558 | NA       |
| RP11-753G20.1  | 1,26 | 0,73 | 1,12 | 1,25 | 0,5184806 | 0,672072 |
| RP11-153I24.5  | 0,37 | 0,73 | 0,55 | 0,44 | 0,5185098 | 0,672072 |
| RP11-82L2.1    | 1,00 | 1,01 | 0,90 | 1,80 | 0,5185157 | 0,672072 |
| RP11-700H6.2   | 0,17 | 0,41 | 0,27 | 0,44 | 0,518575  | 0,672109 |
| RP11-11N9.1    | 0,00 | 0,00 | 0,00 | 0,00 | 0,518586  | NA       |
| CEMP1          | 3,19 | 0,00 | 1,72 | 4,34 | 0,5186446 | 0,672155 |
| RP11-147I3.1   | 2,98 | 2,94 | 2,12 | 2,63 | 0,5186709 | 0,672155 |
| BNC1           | 0,00 | 0,00 | 0,00 | 0,00 | 0,5187467 | NA       |
| CDK7           | 4,32 | 4,34 | 3,79 | 2,17 | 0,5187688 | 0,672243 |
| RP11-281O15.8  | 0,30 | 0,00 | 0,00 | 0,47 | 0,5187938 | NA       |
| UTS2B          | 2,66 | 2,89 | 1,68 | 2,06 | 0,518954  | 0,672377 |
| RP11-142G7.1   | 0,32 | 0,81 | 0,38 | 0,33 | 0,5189585 | 0,672377 |
| RP11-392O17.2  | 0,25 | 0,47 | 0,38 | 0,34 | 0,5189967 | 0,672377 |
| ZNF500         | 1,39 | 2,39 | 1,11 | 1,29 | 0,5190072 | 0,672377 |
| RSPH4A         | 0,00 | 0,00 | 0,00 | 0,00 | 0,5190251 | 0,672377 |
| ZNF195         | 4,32 | 2,76 | 2,69 | 3,84 | 0,5190539 | 0,672377 |
| AC007240.1     | 0,05 | 0,00 | 0,08 | 0,14 | 0,5192783 | 0,672628 |
| ETNK1          | 5,52 | 4,99 | 4,73 | 4,90 | 0,5193215 | 0,672645 |
| RP11-351A11.1  | 0,00 | 0,00 | 0,00 | 0,00 | 0,5193433 | NA       |
| RP11-266O8.1   | 1,35 | 1,74 | 0,40 | 0,37 | 0,5193875 | 0,672692 |
| RN7SL604P      | 0,00 | 1,83 | 0,00 | 0,81 | 0,5194696 | 0,672759 |
| TESK1          | 2,93 | 4,12 | 3,12 | 1,33 | 0,5195065 | 0,672767 |
| CITF22-62D4.1  | 0,00 | 0,00 | 0,00 | 0,00 | 0,5195578 | NA       |

|               |      |      |      |      |           |          |
|---------------|------|------|------|------|-----------|----------|
| GOLT1B        | 4,83 | 4,24 | 4,56 | 3,84 | 0,5196344 | 0,672894 |
| TMCC1         | 2,74 | 2,65 | 2,96 | 2,98 | 0,5197317 | 0,67298  |
| RP11-589M4.2  | 0,00 | 0,00 | 0,00 | 0,00 | 0,5197401 | NA       |
| HPS6          | 0,10 | 0,00 | 0,08 | 0,31 | 0,5197679 | 0,672988 |
| RP11-102N12.2 | 0,00 | 0,00 | 0,00 | 0,00 | 0,5198441 | NA       |
| RP11-94H18.1  | 0,00 | 0,00 | 0,00 | 0,00 | 0,5199199 | NA       |
| NDRG3         | 3,43 | 2,37 | 2,94 | 1,70 | 0,5199684 | 0,673192 |
| TRIM21        | 3,86 | 2,62 | 2,59 | 2,13 | 0,5199857 | 0,673192 |
| AC104695.3    | 0,06 | 0,12 | 0,09 | 0,09 | 0,5200471 | 0,673215 |
| UBE2F         | 6,47 | 5,32 | 6,14 | 5,92 | 0,5200644 | 0,673215 |
| RN7SKP190     | 0,00 | 0,00 | 0,00 | 0,00 | 0,5200942 | NA       |
| GLIPR1L2      | 0,46 | 0,47 | 0,52 | 1,20 | 0,5201707 | 0,673268 |
| TMEM214       | 2,43 | 0,63 | 2,38 | 2,70 | 0,520193  | 0,673268 |
| RP11-274B21.1 | 1,07 | 0,23 | 0,50 | 0,90 | 0,520218  | 0,673268 |
| FHL2          | 0,63 | 0,70 | 0,68 | 0,53 | 0,5202505 | 0,673268 |
| XCR1          | 0,05 | 0,12 | 0,05 | 0,69 | 0,5202569 | 0,673268 |
| RP11-778D9.8  | 0,41 | 1,39 | 0,73 | 0,61 | 0,520347  | 0,673341 |
| SNORD13E      | 5,31 | 4,20 | 4,98 | 4,42 | 0,5203738 | 0,673341 |
| RP11-389G6.4  | 0,00 | 0,00 | 0,00 | 0,37 | 0,520468  | NA       |
| PEX14         | 0,91 | 2,29 | 0,38 | 0,47 | 0,5205813 | 0,673541 |
| RP11-96D1.10  | 0,26 | 0,39 | 0,54 | 1,87 | 0,5205886 | 0,673541 |
| RP11-762H8.1  | 0,00 | 0,00 | 0,00 | 0,00 | 0,5207567 | 0,673719 |
| MMEL1         | 0,00 | 0,60 | 0,00 | 0,00 | 0,5208406 | 0,673788 |
| CTD-3203P2.2  | 0,81 | 1,12 | 0,80 | 0,87 | 0,5208718 | 0,673789 |
| FMNL1         | 5,94 | 6,28 | 6,10 | 5,85 | 0,5209258 | 0,67382  |
| PPP2R1B       | 2,17 | 2,49 | 1,76 | 1,84 | 0,5211206 | 0,67403  |
| CTC-338M12.4  | 1,65 | 0,51 | 0,49 | 0,00 | 0,521149  | 0,67403  |
| EHD4          | 2,57 | 1,35 | 2,32 | 1,64 | 0,5212012 | 0,674059 |
| AC006378.2    | 0,00 | 0,00 | 0,36 | 0,00 | 0,5212346 | NA       |
| PDE1A         | 0,09 | 0,00 | 0,09 | 0,06 | 0,5212612 | 0,674097 |
| SGCZ          | 0,00 | 0,19 | 0,00 | 0,00 | 0,5214945 | 0,674359 |
| DNMT3A        | 1,80 | 1,66 | 1,33 | 1,79 | 0,5215656 | 0,674412 |
| CELA1         | 0,00 | 0,00 | 0,00 | 0,00 | 0,5215676 | NA       |
| MID1          | 0,03 | 0,02 | 0,01 | 0,21 | 0,5216182 | 0,674441 |
| NIT1          | 4,57 | 3,10 | 3,32 | 3,03 | 0,5217727 | 0,674562 |
| AC007272.2    | 0,06 | 0,00 | 0,00 | 0,00 | 0,5217799 | NA       |
| AC145124.2    | 0,00 | 0,22 | 0,00 | 0,12 | 0,5217853 | 0,674562 |
| DIRAS2        | 0,57 | 0,38 | 0,00 | 0,61 | 0,5218223 | 0,674562 |
| RP11-500C11.3 | 0,00 | 0,00 | 0,00 | 0,00 | 0,5218889 | 0,674562 |
| CRTC3         | 2,65 | 1,79 | 2,88 | 2,39 | 0,5218937 | 0,674562 |
| SNRPE         | 6,81 | 6,40 | 6,97 | 7,15 | 0,5218942 | 0,674562 |
| RP11-234A1.1  | 0,97 | 1,17 | 0,88 | 1,33 | 0,5219244 | 0,674562 |
| RP11-356J5.5  | 0,00 | 0,00 | 0,00 | 0,00 | 0,5219387 | NA       |
| RN7SL801P     | 0,63 | 0,00 | 0,00 | 2,08 | 0,5219625 | 0,674572 |
| RP11-218L14.4 | 3,62 | 4,80 | 4,67 | 3,38 | 0,5220072 | 0,674591 |
| RP11-474D1.3  | 0,06 | 0,12 | 0,05 | 0,10 | 0,522064  | 0,674625 |
| ALPL          | 0,00 | 0,00 | 0,00 | 0,00 | 0,5220662 | NA       |
| U82670.9      | 0,00 | 0,00 | 0,00 | 0,00 | 0,5220888 | NA       |
| RP11-659O3.1  | 0,00 | 0,00 | 0,00 | 0,00 | 0,5220996 | NA       |
| RP11-850A17.1 | 0,55 | 1,42 | 0,40 | 1,03 | 0,5221439 | 0,674656 |
| C3orf62       | 2,16 | 2,37 | 2,53 | 2,90 | 0,5221491 | 0,674656 |
| RP11-509J21.2 | 0,00 | 0,00 | 0,00 | 0,00 | 0,5222168 | NA       |
| RP11-123O1.1  | 0,00 | 1,21 | 0,00 | 0,00 | 0,5222483 | NA       |
| RP11-609D21.3 | 0,00 | 3,67 | 1,65 | 3,38 | 0,5222824 | 0,674789 |
| MRAP          | 0,00 | 0,50 | 0,00 | 0,00 | 0,5223769 | NA       |

|                |      |      |      |      |           |          |
|----------------|------|------|------|------|-----------|----------|
| AC104653.1     | 0,00 | 0,00 | 0,00 | 0,00 | 0,5224299 | NA       |
| RP11-291C6.1   | 0,00 | 0,00 | 0,00 | 0,00 | 0,52244   | NA       |
| RP11-343L5.2   | 0,00 | 0,09 | 0,00 | 0,00 | 0,5224589 | 0,674978 |
| RP11-757G14.1  | 1,65 | 0,78 | 1,74 | 0,00 | 0,5225059 | 0,67498  |
| AC093388.3     | 0,00 | 0,00 | 0,00 | 0,00 | 0,5225154 | NA       |
| GRIA3          | 0,04 | 0,05 | 0,00 | 0,10 | 0,5225411 | 0,67498  |
| BSDC1          | 3,63 | 3,73 | 4,15 | 3,97 | 0,5225518 | 0,67498  |
| RP11-667K14.13 | 0,00 | 0,00 | 0,00 | 0,00 | 0,5227769 | 0,675232 |
| AC007875.2     | 0,00 | 0,00 | 0,00 | 0,00 | 0,5228243 | NA       |
| RNU2-36P       | 0,00 | 1,27 | 0,00 | 0,00 | 0,5228413 | NA       |
| TNRC6B         | 4,95 | 5,25 | 4,67 | 5,10 | 0,5229457 | 0,675366 |
| RP11-363N22.3  | 0,26 | 0,83 | 0,21 | 0,45 | 0,5229601 | 0,675366 |
| BACE1-AS       | 0,10 | 0,23 | 0,00 | 0,26 | 0,5229815 | 0,675366 |
| RP11-1017G21.3 | 0,00 | 0,00 | 0,00 | 0,00 | 0,523002  | 0,675366 |
| RP11-166B2.3   | 0,82 | 0,89 | 1,02 | 1,09 | 0,5230499 | 0,675388 |
| SNX30          | 4,30 | 3,34 | 3,95 | 4,62 | 0,5231738 | 0,675475 |
| RP11-528D24.3  | 0,00 | 0,39 | 0,34 | 0,35 | 0,5231777 | 0,675475 |
| RP11-518I13.1  | 0,00 | 0,00 | 0,00 | 0,00 | 0,5232999 | NA       |
| CTD-2310F14.1  | 0,41 | 0,38 | 0,32 | 0,35 | 0,5233876 | 0,675707 |
| CDT1           | 0,36 | 0,26 | 0,17 | 0,51 | 0,5234185 | 0,675707 |
| GNA11          | 0,49 | 0,15 | 1,00 | 1,49 | 0,5235036 | 0,675778 |
| CTB-83J4.2     | 0,00 | 0,52 | 0,00 | 0,00 | 0,5237732 | 0,676087 |
| RP11-361L15.3  | 0,00 | 0,00 | 0,00 | 0,90 | 0,5239465 | 0,676271 |
| TFIP11         | 3,86 | 4,88 | 4,24 | 3,97 | 0,524013  | 0,676318 |
| RP11-680F20.4  | 0,26 | 0,00 | 0,32 | 0,88 | 0,524137  | 0,676384 |
| RP11-210M15.1  | 0,00 | 0,00 | 0,00 | 0,15 | 0,5241537 | 0,676384 |
| CD44           | 8,17 | 7,60 | 7,85 | 7,36 | 0,5241558 | 0,676384 |
| ZFAND2A        | 6,29 | 5,56 | 5,91 | 5,45 | 0,5241894 | 0,676388 |
| DLAT           | 2,49 | 2,85 | 1,67 | 2,33 | 0,5242422 | 0,676417 |
| RN7SKP287      | 0,00 | 0,00 | 0,00 | 0,00 | 0,524278  | 0,676424 |
| GPT2           | 0,41 | 0,38 | 0,60 | 1,00 | 0,524331  | 0,676429 |
| TRIM17         | 0,00 | 0,00 | 0,00 | 0,00 | 0,5243554 | NA       |
| HELLS          | 1,35 | 2,23 | 1,26 | 0,84 | 0,5243591 | 0,676429 |
| FRRS1          | 0,83 | 0,62 | 0,74 | 1,20 | 0,5244269 | 0,676429 |
| MIR644A        | 5,76 | 0,00 | 0,98 | 0,00 | 0,5244357 | 0,676429 |
| NAALADL1       | 0,00 | 3,37 | 0,73 | 0,25 | 0,5244656 | 0,676429 |
| HDHD3          | 2,08 | 2,18 | 0,30 | 1,05 | 0,5245241 | 0,676429 |
| COL21A1        | 0,00 | 3,70 | 0,00 | 0,00 | 0,524535  | 0,676429 |
| GEMIN7         | 6,17 | 6,51 | 5,64 | 4,81 | 0,5245513 | 0,676429 |
| LMAN2L         | 0,84 | 0,82 | 0,29 | 0,13 | 0,5245794 | 0,676429 |
| AC074338.4     | 0,00 | 0,00 | 0,00 | 0,00 | 0,5245859 | 0,676429 |
| RP11-278J6.1   | 0,00 | 0,00 | 0,00 | 0,00 | 0,524597  | NA       |
| RP11-182N22.7  | 0,00 | 0,00 | 0,00 | 0,00 | 0,5246859 | NA       |
| RNU6-1190P     | 0,00 | 4,60 | 0,00 | 0,00 | 0,5247814 | 0,676607 |
| RP11-254A24.2  | 0,00 | 0,07 | 0,03 | 0,22 | 0,5247857 | 0,676607 |
| TNFRSF4        | 0,00 | 0,00 | 0,00 | 0,00 | 0,5248132 | NA       |
| RP5-951N9.2    | 0,31 | 0,00 | 0,00 | 0,35 | 0,5248155 | 0,676607 |
| HSPB2          | 0,00 | 0,00 | 0,00 | 0,00 | 0,524822  | NA       |
| RP5-1063M23.3  | 0,42 | 1,20 | 0,44 | 0,45 | 0,5249158 | 0,676697 |
| PKP1           | 0,00 | 0,00 | 0,00 | 0,00 | 0,5249202 | NA       |
| RPLP1P11       | 0,00 | 0,00 | 0,00 | 0,00 | 0,5249725 | NA       |
| RP11-113C3.1   | 0,00 | 0,00 | 0,00 | 0,00 | 0,525003  | NA       |
| ERH            | 4,96 | 3,79 | 4,69 | 4,58 | 0,5250223 | 0,676795 |
| ZNF321P        | 0,75 | 0,36 | 0,93 | 0,98 | 0,5251152 | 0,676872 |
| CFAP20         | 5,60 | 4,30 | 3,92 | 2,67 | 0,525146  | 0,676872 |



|               |      |      |      |      |           |          |
|---------------|------|------|------|------|-----------|----------|
| RP11-517B11.7 | 0,00 | 0,00 | 0,00 | 0,00 | 0,525195  | 0,676872 |
| SMPD1         | 2,91 | 2,70 | 2,98 | 4,57 | 0,5252036 | 0,676872 |
| RP11-434D12.1 | 0,00 | 0,00 | 0,00 | 0,23 | 0,5253517 | 0,676988 |
| AC016722.1    | 0,53 | 0,26 | 0,71 | 0,62 | 0,5253552 | 0,676988 |
| RPA3          | 4,53 | 4,40 | 4,27 | 3,81 | 0,5254535 | 0,677076 |
| MIR5096       | 0,00 | 1,14 | 0,00 | 3,31 | 0,5255389 | NA       |
| RP11-463I20.4 | 0,54 | 1,49 | 0,62 | 1,03 | 0,5256049 | 0,677207 |
| RP11-326A19.5 | 0,00 | 0,00 | 0,00 | 0,00 | 0,5256359 | 0,677207 |
| CRLF1         | 0,00 | 0,00 | 0,00 | 0,15 | 0,525708  | 0,677207 |
| GS1-484O17.5  | 1,53 | 0,57 | 1,83 | 1,03 | 0,5257205 | 0,677207 |
| RP11-325K4.3  | 0,89 | 0,00 | 0,78 | 0,00 | 0,5257326 | 0,677207 |
| RP11-597A11.5 | 0,00 | 0,00 | 0,04 | 0,07 | 0,5257399 | NA       |
| NBN           | 4,58 | 2,52 | 4,38 | 3,67 | 0,525751  | 0,677207 |
| RP11-144A16.3 | 0,07 | 0,00 | 0,07 | 0,16 | 0,5257688 | 0,677207 |
| EIF4EBP3      | 4,51 | 4,55 | 5,10 | 4,54 | 0,5258184 | 0,677227 |
| DLEU2         | 3,50 | 0,83 | 2,12 | 2,03 | 0,5258448 | 0,677227 |
| DEFB122       | 0,00 | 0,00 | 0,00 | 0,00 | 0,5259315 | NA       |
| UBE2F-SCLY    | 0,00 | 0,00 | 0,00 | 0,04 | 0,525938  | 0,677307 |
| LRRN4         | 0,00 | 0,00 | 0,00 | 0,00 | 0,5259656 | NA       |
| AF131216.8    | 0,20 | 0,00 | 0,20 | 1,01 | 0,5260475 | 0,677369 |
| ARL2          | 5,81 | 5,19 | 5,53 | 5,27 | 0,5260495 | 0,677369 |
| KMT5A         | 3,32 | 3,66 | 3,61 | 3,48 | 0,5260772 | 0,677369 |
| RP11-1000B6.5 | 0,00 | 0,51 | 0,00 | 0,22 | 0,5261442 | 0,677416 |
| DPF2          | 4,23 | 4,13 | 3,62 | 3,70 | 0,5262007 | 0,677434 |
| AP000459.7    | 1,88 | 0,40 | 2,02 | 1,25 | 0,5262194 | 0,677434 |
| TAF3          | 1,88 | 1,37 | 1,95 | 2,29 | 0,5262524 | 0,677438 |
| TAF1C         | 2,47 | 2,02 | 2,94 | 2,35 | 0,5263438 | 0,677505 |
| RP11-844P9.6  | 0,00 | 0,91 | 0,00 | 0,00 | 0,5263713 | NA       |
| GDF9          | 0,00 | 0,00 | 0,00 | 0,00 | 0,5263912 | 0,677505 |
| C4orf17       | 0,82 | 0,00 | 0,90 | 1,37 | 0,5263961 | 0,677505 |
| ZNF738        | 2,78 | 2,23 | 2,69 | 1,39 | 0,5264851 | 0,677535 |
| REEP1         | 0,00 | 0,00 | 0,00 | 0,03 | 0,5264855 | NA       |
| CALML4        | 3,09 | 0,00 | 2,42 | 2,42 | 0,5264995 | 0,677535 |
| RN7SL617P     | 0,00 | 0,00 | 0,00 | 0,00 | 0,5265029 | NA       |
| KCNQ5         | 0,00 | 0,00 | 0,00 | 0,00 | 0,5265109 | 0,677535 |
| RP11-101E3.5  | 0,00 | 0,00 | 0,00 | 0,00 | 0,5265281 | NA       |
| AC006116.22   | 0,00 | 0,00 | 0,00 | 0,00 | 0,5265844 | NA       |
| ARFGAP3       | 4,35 | 2,36 | 4,40 | 4,16 | 0,5267636 | 0,6778   |
| REXO1L2P      | 0,00 | 0,00 | 0,00 | 0,00 | 0,5267749 | NA       |
| C10orf11      | 5,83 | 5,95 | 6,20 | 5,39 | 0,5267779 | 0,6778   |
| RP11-645C24.5 | 0,00 | 0,00 | 0,00 | 0,00 | 0,5268847 | 0,677881 |
| RP11-34P13.9  | 1,05 | 0,82 | 1,75 | 2,25 | 0,526902  | 0,677881 |
| AC005324.6    | 0,00 | 0,00 | 0,00 | 0,00 | 0,5270064 | NA       |
| DSCC1         | 0,00 | 1,50 | 0,00 | 0,00 | 0,5272092 | 0,678215 |
| CTNNBIP1      | 2,85 | 3,58 | 2,72 | 3,58 | 0,5272232 | 0,678215 |
| AC008277.1    | 0,68 | 0,55 | 0,00 | 0,00 | 0,5272528 | 0,678215 |
| RP11-14D22.5  | 0,00 | 0,23 | 0,00 | 0,00 | 0,5272571 | NA       |
| OXCT2         | 0,00 | 0,00 | 0,00 | 0,00 | 0,527346  | 0,678295 |
| RPS27AP1      | 0,00 | 0,45 | 0,00 | 0,38 | 0,5274226 | NA       |
| RP11-182E7.1  | 1,84 | 3,35 | 1,60 | 1,90 | 0,5274261 | 0,678359 |
| AC079779.4    | 1,12 | 1,01 | 1,04 | 1,69 | 0,5274729 | 0,67838  |
| RP11-661O13.1 | 0,00 | 0,00 | 0,00 | 0,00 | 0,527588  | 0,678489 |
| RN7SL162P     | 0,00 | 0,00 | 0,00 | 0,00 | 0,5276879 | NA       |
| TROAP         | 0,77 | 0,66 | 0,77 | 0,76 | 0,5277153 | 0,678613 |
| RP11-823P9.3  | 0,00 | 0,00 | 0,00 | 0,00 | 0,5277617 | NA       |

|               |      |      |      |      |           |          |
|---------------|------|------|------|------|-----------|----------|
| KDM4D         | 0,00 | 0,00 | 0,00 | 0,00 | 0,5277919 | NA       |
| HSD17B1       | 0,20 | 0,12 | 0,23 | 0,37 | 0,5278078 | 0,678682 |
| PSORS1C3      | 0,00 | 0,00 | 0,00 | 0,00 | 0,5278087 | NA       |
| ARHGEF38      | 0,99 | 2,96 | 0,43 | 2,05 | 0,5278297 | 0,678682 |
| SLC22A18      | 4,07 | 4,87 | 4,55 | 4,67 | 0,5278771 | 0,678704 |
| OTUD3         | 1,03 | 0,04 | 1,34 | 0,74 | 0,5279398 | 0,678731 |
| DYDC2         | 0,67 | 0,08 | 0,45 | 0,34 | 0,5279597 | 0,678731 |
| RP11-483F11.5 | 0,00 | 0,00 | 0,00 | 0,36 | 0,5280689 | NA       |
| TSSK4         | 0,00 | 0,00 | 0,68 | 0,00 | 0,528076  | 0,678841 |
| RNU6-12P      | 0,00 | 0,00 | 0,00 | 0,00 | 0,5280983 | NA       |
| RNU6-13P      | 0,00 | 0,00 | 0,00 | 0,00 | 0,5280983 | NA       |
| RNU6-32P      | 0,00 | 0,00 | 0,00 | 0,00 | 0,5280983 | NA       |
| COPS2         | 4,65 | 3,71 | 4,47 | 3,88 | 0,5281077 | 0,678843 |
| C21orf128     | 0,00 | 0,06 | 0,00 | 0,00 | 0,5282092 | NA       |
| DACH2         | 0,00 | 0,14 | 0,03 | 0,00 | 0,5282504 | NA       |
| RP11-15G16.1  | 0,00 | 0,96 | 0,37 | 0,36 | 0,5282758 | 0,678988 |
| ACTR1B        | 4,02 | 4,55 | 4,21 | 4,29 | 0,5282821 | 0,678988 |
| CTB-113P19.5  | 0,34 | 0,39 | 1,00 | 0,00 | 0,5283338 | 0,679016 |
| RP5-888M10.2  | 0,00 | 0,00 | 0,00 | 0,00 | 0,5284133 | 0,679064 |
| RP11-513I15.5 | 1,06 | 0,70 | 1,07 | 1,33 | 0,5284492 | 0,679064 |
| SPDEF         | 0,00 | 0,00 | 0,00 | 0,00 | 0,5284798 | NA       |
| HES2          | 0,39 | 0,00 | 0,41 | 0,66 | 0,5284831 | 0,679064 |
| OR7A17        | 0,14 | 0,33 | 0,15 | 0,36 | 0,5284939 | 0,679064 |
| XPR1          | 2,26 | 2,09 | 2,05 | 1,67 | 0,5285819 | 0,679134 |
| C9orf135      | 0,00 | 0,00 | 0,00 | 0,00 | 0,5285827 | NA       |
| RP11-598F7.3  | 0,33 | 0,33 | 0,16 | 0,00 | 0,5286266 | 0,679134 |
| PARP14        | 5,08 | 4,84 | 4,98 | 5,55 | 0,5286399 | 0,679134 |
| USP3          | 7,10 | 6,39 | 6,45 | 6,28 | 0,5287491 | 0,679235 |
| RP11-297B17.3 | 0,00 | 0,00 | 0,00 | 0,25 | 0,5287789 | NA       |
| RP11-403N16.4 | 0,26 | 0,48 | 0,00 | 0,06 | 0,5288842 | 0,679354 |
| RP11-191L17.1 | 2,92 | 1,41 | 2,70 | 3,58 | 0,5289029 | 0,679354 |
| PART1         | 0,31 | 0,40 | 0,30 | 0,37 | 0,5289809 | 0,679415 |
| AC123788.3    | 0,36 | 0,73 | 0,60 | 1,10 | 0,5290466 | 0,679437 |
| ING3          | 5,98 | 4,53 | 4,88 | 4,73 | 0,5290736 | 0,679437 |
| DYM           | 4,94 | 5,36 | 4,48 | 4,42 | 0,5290898 | 0,679437 |
| RP4-621B10.2  | 0,00 | 0,00 | 0,00 | 0,00 | 0,529125  | NA       |
| AC008533.1    | 0,00 | 0,00 | 0,11 | 0,79 | 0,529157  | 0,679484 |
| RP11-474D14.2 | 0,00 | 0,00 | 0,00 | 0,00 | 0,5291751 | NA       |
| RP11-276M12.1 | 0,00 | 0,00 | 0,00 | 0,40 | 0,5292482 | NA       |
| EID2          | 0,45 | 0,68 | 0,50 | 0,17 | 0,5292623 | 0,67958  |
| RPS3P2        | 0,00 | 0,00 | 0,00 | 0,00 | 0,5292761 | NA       |
| GCNA          | 0,13 | 0,31 | 0,07 | 0,07 | 0,5292969 | 0,679585 |
| AP001189.4    | 0,00 | 0,00 | 0,00 | 0,00 | 0,5293866 | 0,679661 |
| CTD-3128G10.7 | 0,00 | 0,00 | 0,00 | 0,00 | 0,5295422 | NA       |
| IGHMBP2       | 2,71 | 2,44 | 2,46 | 1,80 | 0,5295868 | 0,679777 |
| SLC25A26      | 4,71 | 3,21 | 5,15 | 3,73 | 0,5295926 | 0,679777 |
| KIF4B         | 0,00 | 0,00 | 0,00 | 0,00 | 0,5296386 | NA       |
| SPAM1         | 0,00 | 0,00 | 0,00 | 0,00 | 0,5296416 | NA       |
| RNA5SP295     | 0,00 | 0,00 | 0,00 | 0,00 | 0,5296525 | 0,679777 |
| LYAR          | 4,21 | 3,54 | 3,98 | 3,54 | 0,529664  | 0,679777 |
| GPATCH11      | 2,63 | 1,52 | 2,86 | 2,37 | 0,5296643 | 0,679777 |
| RP11-444I9.2  | 0,00 | 0,20 | 0,00 | 1,08 | 0,5297069 | 0,679777 |
| ZFPL1         | 4,20 | 2,77 | 3,81 | 3,96 | 0,5297131 | 0,679777 |
| INGX          | 0,08 | 0,29 | 0,49 | 0,84 | 0,529721  | 0,679777 |
| RP1-301L19.1  | 0,00 | 0,00 | 0,00 | 0,00 | 0,5297681 | NA       |

|                |      |      |      |      |           |          |
|----------------|------|------|------|------|-----------|----------|
| RRS1           | 0,36 | 0,68 | 1,04 | 0,93 | 0,5298483 | 0,679901 |
| RN7SKP165      | 0,00 | 0,00 | 0,00 | 0,00 | 0,5298522 | NA       |
| CTC-325J23.3   | 0,00 | 0,00 | 0,00 | 0,00 | 0,5298988 | NA       |
| AC007919.19    | 0,00 | 0,00 | 0,00 | 0,00 | 0,5299421 | NA       |
| MFAP3          | 0,68 | 0,64 | 0,74 | 1,29 | 0,5299587 | 0,679965 |
| MSANTD3        | 0,96 | 0,60 | 0,61 | 0,50 | 0,5299595 | 0,679965 |
| RP11-44F21.3   | 0,00 | 0,00 | 0,00 | 0,00 | 0,5300689 | NA       |
| BLZF1          | 3,75 | 2,76 | 2,94 | 1,36 | 0,5302534 | 0,6803   |
| ZC3H13         | 4,53 | 4,15 | 3,94 | 3,80 | 0,5302816 | 0,6803   |
| RP1-71L16.1    | 0,00 | 0,00 | 0,00 | 0,00 | 0,5304014 | 0,680414 |
| AC004538.3     | 0,82 | 0,62 | 0,75 | 1,69 | 0,5304864 | 0,680456 |
| OVCA2          | 5,94 | 0,00 | 5,46 | 5,78 | 0,5304955 | 0,680456 |
| RNU6-1011P     | 0,00 | 0,00 | 0,00 | 0,00 | 0,530538  | NA       |
| HSP90AB1       | 7,88 | 7,99 | 7,79 | 7,63 | 0,5305921 | 0,680541 |
| FTSJ3          | 2,51 | 1,71 | 2,32 | 1,68 | 0,5306316 | 0,680552 |
| CDKN2D         | 4,70 | 3,77 | 4,52 | 4,06 | 0,5307321 | 0,680592 |
| RPUSD2         | 0,16 | 1,25 | 0,53 | 0,42 | 0,5307383 | 0,680592 |
| C1orf56        | 5,40 | 5,32 | 5,58 | 5,55 | 0,5307547 | 0,680592 |
| CCDC102B       | 0,42 | 0,13 | 0,02 | 0,50 | 0,5307962 | 0,680606 |
| LRCH1          | 2,28 | 0,65 | 1,26 | 1,77 | 0,5308701 | 0,680662 |
| ERICH6         | 0,00 | 0,00 | 0,00 | 0,00 | 0,530899  | NA       |
| ENGASE         | 2,18 | 2,84 | 2,50 | 2,01 | 0,5309131 | 0,680677 |
| SULT1A3        | 6,01 | 5,64 | 6,02 | 6,22 | 0,5309615 | 0,6807   |
| RP11-554E23.4  | 0,00 | 0,00 | 0,00 | 0,00 | 0,5310206 | NA       |
| BMP5           | 0,00 | 0,00 | 0,00 | 0,00 | 0,5310919 | 0,680828 |
| BTRC           | 2,23 | 1,90 | 2,04 | 2,35 | 0,5311984 | 0,680925 |
| MIR602         | 0,00 | 0,00 | 0,00 | 0,00 | 0,5312032 | NA       |
| PAK4           | 1,04 | 0,60 | 0,77 | 0,75 | 0,5313366 | 0,681018 |
| CTC-273B12.5   | 0,00 | 0,00 | 0,00 | 0,00 | 0,5313656 | NA       |
| RP13-122B23.9  | 0,00 | 0,00 | 0,00 | 0,00 | 0,5313709 | NA       |
| ATG10          | 4,11 | 3,20 | 3,72 | 2,72 | 0,531374  | 0,681018 |
| RP11-38J22.1   | 0,00 | 0,00 | 0,00 | 0,00 | 0,5313786 | NA       |
| RP11-395L14.18 | 0,06 | 0,32 | 0,00 | 0,00 | 0,5313849 | 0,681018 |
| ADGRG7         | 0,00 | 0,00 | 0,00 | 0,00 | 0,5314602 | 0,681018 |
| AC067945.4     | 0,00 | 3,06 | 0,00 | 0,57 | 0,5314705 | 0,681018 |
| CTD-2140G10.2  | 0,00 | 1,76 | 0,00 | 0,00 | 0,5315379 | 0,681018 |
| RP11-568G20.1  | 1,44 | 0,95 | 1,01 | 0,72 | 0,5315543 | 0,681018 |
| NFATC3         | 3,20 | 3,60 | 3,25 | 3,13 | 0,5315698 | 0,681018 |
| ABCD4          | 3,53 | 3,58 | 3,24 | 4,25 | 0,5315716 | 0,681018 |
| RP5-882O7.1    | 0,00 | 1,47 | 0,00 | 4,27 | 0,5315773 | 0,681018 |
| LAMP3          | 0,11 | 0,12 | 0,23 | 0,33 | 0,5316631 | 0,681048 |
| CTD-2201G3.1   | 0,00 | 0,08 | 0,00 | 0,35 | 0,5316809 | 0,681048 |
| RP11-25K21.4   | 3,46 | 0,15 | 3,29 | 2,17 | 0,5316922 | 0,681048 |
| MIR606         | 0,00 | 0,00 | 0,00 | 0,00 | 0,5317817 | NA       |
| STXBP4         | 0,58 | 0,50 | 0,34 | 1,74 | 0,5317982 | 0,681144 |
| RP11-111D3.2   | 0,00 | 0,00 | 0,00 | 0,00 | 0,5318158 | NA       |
| MPZ            | 0,00 | 0,00 | 0,00 | 0,00 | 0,5318274 | NA       |
| RNU7-79P       | 0,00 | 0,00 | 0,00 | 0,00 | 0,5321038 | 0,681496 |
| RP11-438H8.8   | 0,00 | 0,00 | 0,00 | 0,00 | 0,5322062 | NA       |
| RP4-799P18.4   | 0,00 | 0,00 | 0,00 | 0,00 | 0,5322241 | 0,681611 |
| RNA5SP39       | 0,00 | 0,00 | 0,00 | 1,68 | 0,5323227 | 0,681626 |
| RP11-532F12.7  | 0,05 | 0,39 | 0,45 | 0,49 | 0,5323246 | 0,681626 |
| ABCF3          | 3,60 | 3,55 | 4,32 | 5,08 | 0,5323276 | 0,681626 |
| RP11-354K1.3   | 0,00 | 0,00 | 0,00 | 0,00 | 0,5323834 | NA       |
| RP11-1275H24.3 | 0,00 | 0,10 | 0,00 | 0,00 | 0,5324446 | NA       |

|                |      |      |      |      |           |          |
|----------------|------|------|------|------|-----------|----------|
| CTD-2021A8.3   | 0,00 | 1,10 | 0,00 | 0,00 | 0,5324787 | 0,681719 |
| TPRG1L         | 3,23 | 3,98 | 3,27 | 3,42 | 0,532514  | 0,681719 |
| RP11-479H16.1  | 0,00 | 0,53 | 0,05 | 0,87 | 0,532583  | 0,681719 |
| MYH3           | 0,30 | 1,64 | 0,08 | 0,02 | 0,5325956 | 0,681719 |
| TXNDC9         | 4,26 | 3,24 | 4,13 | 3,69 | 0,5325969 | 0,681719 |
| PPT2-EGFL8     | 0,08 | 0,03 | 0,04 | 0,09 | 0,5326102 | 0,681719 |
| TLN1           | 5,09 | 4,48 | 4,75 | 4,88 | 0,5326314 | 0,681719 |
| BMP1           | 0,32 | 0,38 | 0,93 | 0,57 | 0,5326453 | 0,681719 |
| RPL21P122      | 0,00 | 0,00 | 0,00 | 0,96 | 0,532708  | NA       |
| TTBK1          | 0,02 | 0,19 | 0,01 | 0,00 | 0,5327439 | 0,681718 |
| EFCAB7         | 0,21 | 0,00 | 0,07 | 0,32 | 0,532755  | 0,681718 |
| AC023347.1     | 0,00 | 0,74 | 0,24 | 0,54 | 0,5329104 | NA       |
| RP11-314A20.1  | 0,54 | 0,97 | 0,61 | 0,56 | 0,5329461 | NA       |
| MPST           | 5,02 | 5,66 | 5,18 | 4,43 | 0,532964  | 0,682009 |
| CCDC154        | 0,37 | 0,00 | 0,86 | 3,33 | 0,5330038 | 0,68202  |
| CPHL1          | 0,00 | 0,33 | 0,00 | 0,00 | 0,5330382 | NA       |
| IZUMO4         | 0,00 | 0,00 | 0,00 | 0,00 | 0,5330551 | NA       |
| RP11-460G11.2  | 0,00 | 0,00 | 0,00 | 0,00 | 0,5330552 | NA       |
| RP3-368A4.6    | 0,50 | 0,66 | 0,46 | 0,49 | 0,5330987 | 0,682074 |
| RASGEF1B       | 5,28 | 4,34 | 5,33 | 5,04 | 0,5331069 | 0,682074 |
| RTN2           | 0,25 | 0,08 | 0,55 | 0,00 | 0,5331413 | 0,682078 |
| RP11-177C12.3  | 0,00 | 0,00 | 0,00 | 0,00 | 0,5331592 | NA       |
| XXyac-R12DG2.3 | 0,00 | 0,00 | 0,00 | 0,00 | 0,5331924 | NA       |
| RP11-317B17.4  | 0,00 | 0,00 | 0,00 | 0,00 | 0,5335247 | NA       |
| RP11-5G9.5     | 0,00 | 0,00 | 0,00 | 0,94 | 0,5335665 | 0,682565 |
| THAP3          | 3,64 | 3,51 | 4,57 | 3,17 | 0,5336015 | 0,682565 |
| RP11-722C17.1  | 0,64 | 0,93 | 0,86 | 0,65 | 0,5336137 | 0,682565 |
| S100P          | 0,00 | 0,00 | 0,00 | 0,00 | 0,5336276 | NA       |
| TMEM161B       | 2,85 | 2,09 | 2,58 | 1,90 | 0,5337067 | 0,682645 |
| CPXM2          | 0,00 | 0,00 | 0,00 | 0,05 | 0,5337118 | NA       |
| RPS15AP16      | 0,00 | 0,00 | 0,00 | 0,00 | 0,5337186 | NA       |
| CTA-276F8.1    | 1,00 | 0,26 | 0,87 | 0,11 | 0,5337453 | 0,682645 |
| HIST1H2AE      | 1,93 | 0,00 | 0,34 | 1,86 | 0,5337688 | 0,682645 |
| PANK4          | 1,49 | 2,00 | 0,70 | 2,50 | 0,5338056 | 0,682653 |
| RIIAD1         | 0,00 | 0,00 | 0,00 | 0,00 | 0,5339012 | NA       |
| MIP            | 0,00 | 0,00 | 0,00 | 0,05 | 0,5339133 | NA       |
| UCHL5          | 5,33 | 1,57 | 4,73 | 4,69 | 0,5339803 | 0,682815 |
| AL133243.4     | 1,20 | 0,43 | 1,15 | 1,73 | 0,5339977 | 0,682815 |
| SLC44A3        | 0,00 | 0,67 | 0,00 | 0,00 | 0,534071  | 0,682815 |
| USP22          | 4,74 | 4,16 | 4,56 | 4,18 | 0,5340844 | 0,682815 |
| GRM3           | 0,02 | 0,10 | 0,05 | 0,03 | 0,5340854 | 0,682815 |
| AC009478.1     | 0,00 | 0,00 | 0,00 | 0,00 | 0,5340872 | NA       |
| LCA5L          | 0,73 | 0,47 | 0,43 | 0,29 | 0,534151  | 0,682821 |
| HOXA-AS2       | 0,00 | 0,16 | 0,00 | 0,00 | 0,5341753 | 0,682821 |
| RP11-334J6.7   | 2,79 | 2,66 | 3,48 | 3,56 | 0,5341826 | 0,682821 |
| PHC1           | 0,55 | 0,36 | 0,16 | 0,09 | 0,5342455 | 0,682862 |
| CLTB           | 4,86 | 5,63 | 5,16 | 5,13 | 0,5343128 | 0,682884 |
| RP11-57J16.1   | 0,00 | 0,36 | 0,37 | 0,99 | 0,5343242 | 0,682884 |
| RNU6-315P      | 0,00 | 0,00 | 0,00 | 0,00 | 0,5343266 | NA       |
| ELP3           | 4,05 | 3,03 | 3,14 | 2,16 | 0,534433  | 0,682974 |
| RP5-1096D14.3  | 0,00 | 0,00 | 0,00 | 0,00 | 0,5344567 | NA       |
| RP11-295D4.1   | 0,09 | 0,35 | 0,28 | 0,53 | 0,5344819 | 0,682974 |
| PIK3C2A        | 2,99 | 2,18 | 3,33 | 2,62 | 0,5344891 | 0,682974 |
| CETN2          | 3,98 | 1,02 | 2,45 | 2,77 | 0,5345178 | 0,682974 |
| RP11-119B16.2  | 1,89 | 2,10 | 0,90 | 1,06 | 0,5346667 | 0,683125 |

|                |      |       |       |       |           |          |
|----------------|------|-------|-------|-------|-----------|----------|
| MNS1           | 0,00 | 0,00  | 0,00  | 0,70  | 0,5347766 | 0,683214 |
| RP11-260M19.1  | 0,00 | 0,00  | 0,00  | 0,00  | 0,5348025 | NA       |
| DGKH           | 1,20 | 1,24  | 1,74  | 2,20  | 0,5348287 | 0,683214 |
| GPR39          | 0,00 | 0,00  | 0,00  | 0,00  | 0,5348417 | 0,683214 |
| RP4-583P15.10  | 0,00 | 0,00  | 0,00  | 0,00  | 0,5348587 | 0,683214 |
| DIS3           | 3,22 | 2,66  | 3,20  | 3,26  | 0,5351275 | 0,683386 |
| AC003989.3     | 0,00 | 0,00  | 0,00  | 0,00  | 0,5351399 | 0,683386 |
| OR7E38P        | 0,98 | 2,29  | 1,54  | 3,04  | 0,5351462 | 0,683386 |
| RP11-640L9.2   | 0,18 | 0,27  | 0,13  | 0,38  | 0,5351859 | 0,683386 |
| TMEM30A        | 4,24 | 2,45  | 3,99  | 2,88  | 0,5351978 | 0,683386 |
| RFPL4AL1       | 0,00 | 0,00  | 0,00  | 0,29  | 0,5352039 | 0,683386 |
| RP11-215N21.1  | 1,13 | 2,17  | 1,26  | 1,30  | 0,535209  | 0,683386 |
| BDNF           | 0,00 | 0,03  | 0,00  | 0,00  | 0,5352219 | NA       |
| CASC3          | 4,21 | 4,39  | 4,23  | 3,35  | 0,5352397 | 0,683386 |
| RP11-478J18.1  | 1,84 | 2,04  | 2,16  | 2,31  | 0,5352985 | 0,683422 |
| RP11-806J6.1   | 0,00 | 1,78  | 0,57  | 0,00  | 0,5355043 | 0,683645 |
| RNU6-942P      | 0,00 | 0,00  | 0,00  | 0,00  | 0,5355309 | NA       |
| CEBPA          | 2,41 | 2,39  | 2,69  | 2,36  | 0,5356366 | 0,683374 |
| MUC17          | 0,00 | 0,01  | 0,00  | 0,35  | 0,5356691 | 0,683374 |
| RP13-52K8.1    | 0,00 | 0,00  | 0,00  | 0,00  | 0,53568   | NA       |
| RP11-701H24.9  | 0,00 | 0,00  | 0,00  | 0,00  | 0,5357125 | 0,683374 |
| TIMM9          | 5,09 | 3,98  | 4,69  | 4,07  | 0,5357294 | 0,683374 |
| RP11-1143G9.4  | 5,28 | 10,68 | 10,66 | 11,50 | 0,535732  | 0,683374 |
| AF003529.2     | 0,00 | 0,00  | 0,00  | 0,00  | 0,5357948 | NA       |
| HNRNPU         | 6,98 | 6,80  | 6,95  | 6,84  | 0,5358428 | 0,683842 |
| SUCLG1         | 6,60 | 6,50  | 6,11  | 6,44  | 0,5359066 | 0,683884 |
| RF00416        | 0,00 | 2,82  | 0,00  | 0,00  | 0,5359229 | NA       |
| RP11-85B7.2    | 0,00 | 0,00  | 0,00  | 0,00  | 0,5359831 | NA       |
| SPICE1         | 0,48 | 0,18  | 0,47  | 0,23  | 0,5360095 | 0,683976 |
| RP11-365N19.2  | 0,00 | 0,22  | 0,00  | 0,32  | 0,5360292 | NA       |
| RP4-732G19.2   | 0,00 | 0,00  | 0,00  | 0,00  | 0,5361445 | NA       |
| MRGBP          | 1,87 | 0,18  | 1,39  | 0,10  | 0,5361639 | 0,684134 |
| RP11-356B19.11 | 0,00 | 0,00  | 0,00  | 0,00  | 0,5362024 | NA       |
| UBE3A          | 5,32 | 2,78  | 5,30  | 5,10  | 0,5363175 | 0,684224 |
| RP11-538C21.2  | 0,18 | 0,05  | 0,09  | 0,18  | 0,5363598 | 0,684224 |
| PSMC3IP        | 0,00 | 0,00  | 0,00  | 0,00  | 0,5363675 | 0,684224 |
| YDJC           | 3,64 | 2,88  | 4,02  | 3,46  | 0,5363828 | 0,684224 |
| SNX21          | 0,22 | 1,25  | 0,70  | 0,82  | 0,536397  | 0,684224 |
| GS1-590J6.3    | 0,00 | 0,18  | 0,00  | 0,00  | 0,5364413 | NA       |
| TSC22D3        | 8,37 | 7,70  | 8,33  | 8,30  | 0,5364436 | 0,684224 |
| RP11-711K1.7   | 0,00 | 0,00  | 0,00  | 0,79  | 0,53645   | 0,684224 |
| RP11-363E6.1   | 0,00 | 0,00  | 0,00  | 0,00  | 0,5364844 | NA       |
| SNX5           | 6,58 | 6,12  | 6,02  | 5,18  | 0,5365487 | 0,684296 |
| ZNF710         | 3,89 | 3,68  | 3,85  | 3,69  | 0,5365684 | 0,684296 |
| POTEE          | 0,00 | 0,00  | 0,00  | 0,00  | 0,5365885 | NA       |
| TYK2           | 7,72 | 7,62  | 7,84  | 7,19  | 0,5366632 | 0,684378 |
| RP11-548K12.4  | 0,00 | 0,00  | 0,00  | 0,00  | 0,5368004 | NA       |
| RP11-346J10.2  | 0,00 | 0,24  | 0,00  | 0,00  | 0,5368636 | NA       |
| CHN2           | 5,79 | 5,10  | 6,07  | 5,57  | 0,5369613 | 0,684719 |
| MB21D2         | 0,64 | 0,00  | 0,21  | 0,77  | 0,5370457 | 0,684787 |
| NDN            | 0,00 | 1,62  | 0,08  | 0,00  | 0,5371504 | 0,68488  |
| AC092431.2     | 0,00 | 0,00  | 0,08  | 0,15  | 0,5371799 | 0,68488  |
| MYOM3          | 0,46 | 0,98  | 0,71  | 0,34  | 0,5372667 | 0,68492  |
| UCA1           | 1,83 | 0,90  | 1,99  | 3,02  | 0,5372733 | 0,68492  |
| RAPSN          | 0,00 | 1,53  | 0,05  | 0,47  | 0,5374052 | 0,685049 |

|                |      |      |      |      |           |          |
|----------------|------|------|------|------|-----------|----------|
| MKRN2          | 3,64 | 1,20 | 1,48 | 0,20 | 0,5375193 | 0,685155 |
| RP11-567C20.2  | 0,00 | 0,00 | 0,00 | 0,00 | 0,5377176 | NA       |
| CCT6P1         | 1,83 | 1,53 | 1,35 | 0,00 | 0,5377265 | 0,68538  |
| TDRKH          | 0,04 | 1,55 | 0,00 | 0,55 | 0,5377674 | 0,685393 |
| RP11-271K21.12 | 0,72 | 0,82 | 0,72 | 0,58 | 0,5378008 | 0,685396 |
| TIMM44         | 3,33 | 3,37 | 4,22 | 3,96 | 0,5378533 | 0,685424 |
| LINC00271      | 3,50 | 3,46 | 3,20 | 4,07 | 0,5379073 | 0,685453 |
| RP11-242P2.2   | 2,15 | 1,31 | 2,60 | 1,65 | 0,5379992 | 0,685531 |
| AC000123.4     | 0,00 | 0,00 | 0,00 | 0,00 | 0,5380357 | 0,685538 |
| RP11-46A10.2   | 0,00 | 0,00 | 0,00 | 0,00 | 0,5381321 | NA       |
| RP11-253I19.3  | 0,00 | 0,00 | 0,00 | 0,00 | 0,5381407 | 0,685622 |
| FICD           | 0,25 | 0,26 | 0,22 | 0,08 | 0,5381631 | 0,685622 |
| SPN            | 3,23 | 2,83 | 3,28 | 3,03 | 0,5381976 | 0,685627 |
| RP1-38C16.2    | 0,00 | 0,00 | 0,00 | 0,00 | 0,5382088 | NA       |
| CTD-322D19.5   | 0,00 | 0,14 | 0,00 | 0,00 | 0,5384252 | NA       |
| MIR137HG       | 0,32 | 0,36 | 0,58 | 0,37 | 0,5384726 | 0,685938 |
| RP11-3N2.5     | 0,00 | 0,00 | 0,00 | 0,00 | 0,5385459 | NA       |
| AC087501.1     | 0,00 | 0,00 | 0,23 | 0,00 | 0,5386158 | 0,686081 |
| RP11-602M11.4  | 0,00 | 0,00 | 0,00 | 0,00 | 0,5387035 | NA       |
| SDR16C6P       | 0,68 | 1,11 | 1,23 | 1,20 | 0,5387114 | 0,686137 |
| C1orf180       | 0,16 | 0,27 | 0,15 | 0,08 | 0,5387219 | 0,686137 |
| RP11-308B16.2  | 0,00 | 0,00 | 0,00 | 0,00 | 0,5390061 | NA       |
| CAD            | 1,82 | 1,49 | 2,25 | 2,11 | 0,5390129 | 0,686469 |
| SLC6A6P        | 0,00 | 0,00 | 0,00 | 0,00 | 0,5390254 | NA       |
| NOS2           | 0,00 | 0,00 | 0,00 | 0,00 | 0,539122  | NA       |
| RP4-593M8.1    | 0,00 | 0,00 | 0,00 | 0,00 | 0,5391786 | 0,686638 |
| RP11-82O19.1   | 0,32 | 0,43 | 0,33 | 0,32 | 0,5392079 | 0,686638 |
| YAF2           | 4,16 | 3,61 | 4,39 | 4,04 | 0,5393946 | 0,686837 |
| ELMO2          | 3,52 | 2,77 | 3,78 | 2,08 | 0,5394559 | 0,686875 |
| CC2D2B         | 2,37 | 2,30 | 2,72 | 2,62 | 0,5395468 | 0,686952 |
| WDR27          | 3,45 | 3,24 | 3,48 | 4,25 | 0,5396736 | 0,687074 |
| RP11-514P8.7   | 0,00 | 0,00 | 0,00 | 0,00 | 0,5399072 | NA       |
| RP11-218M11.6  | 0,00 | 0,61 | 0,00 | 0,00 | 0,5400105 | NA       |
| RP11-298A10.3  | 0,00 | 0,00 | 0,00 | 0,08 | 0,5400272 | 0,687485 |
| RP5-844F9.1    | 0,00 | 1,04 | 0,00 | 0,00 | 0,5401914 | 0,687654 |
| GFAP           | 1,70 | 2,68 | 2,51 | 1,57 | 0,5404498 | 0,687944 |
| RN7SL743P      | 0,85 | 0,85 | 0,21 | 1,71 | 0,5406061 | 0,688103 |
| PHLDB1         | 0,90 | 1,18 | 1,33 | 1,69 | 0,5406616 | 0,688135 |
| AC087163.2     | 0,00 | 0,00 | 0,00 | 0,00 | 0,5408443 | NA       |
| NAA60          | 4,42 | 4,00 | 4,69 | 3,54 | 0,540859  | 0,688346 |
| RP11-165D7.5   | 0,00 | 0,00 | 0,00 | 0,00 | 0,5409762 | 0,688379 |
| LYSMD3         | 2,27 | 0,47 | 2,00 | 1,51 | 0,5409793 | 0,688379 |
| ANK3           | 1,14 | 1,33 | 0,68 | 0,74 | 0,5409963 | 0,688379 |
| RP11-584P21.2  | 0,38 | 0,00 | 0,35 | 0,34 | 0,5410084 | 0,688379 |
| SNORD27        | 0,00 | 0,00 | 0,00 | 3,15 | 0,5410141 | NA       |
| PITX2          | 0,00 | 0,00 | 0,00 | 0,04 | 0,5410434 | NA       |
| PCYT1A         | 4,84 | 4,51 | 4,25 | 4,05 | 0,5410706 | 0,688386 |
| ADCK3          | 3,54 | 2,20 | 3,77 | 2,56 | 0,5410884 | 0,688386 |
| CHTF8          | 4,25 | 3,87 | 2,68 | 3,07 | 0,5411074 | 0,688386 |
| APOL2          | 3,35 | 4,06 | 3,03 | 3,79 | 0,5411545 | 0,688407 |
| SPOCD1         | 0,13 | 0,43 | 0,23 | 0,18 | 0,5412684 | 0,688513 |
| ATAT1          | 0,26 | 1,58 | 1,20 | 0,93 | 0,5413437 | 0,688569 |
| RP3-508I15.20  | 0,00 | 0,00 | 0,00 | 0,00 | 0,5414081 | NA       |
| RP3-425C14.5   | 0,47 | 0,23 | 0,29 | 0,68 | 0,5414702 | 0,688662 |
| RP4-781K5.5    | 0,29 | 3,82 | 0,00 | 0,00 | 0,5415424 | 0,688662 |

|               |      |      |      |      |           |          |
|---------------|------|------|------|------|-----------|----------|
| SYTL4         | 0,26 | 0,29 | 0,46 | 0,24 | 0,5415649 | 0,688662 |
| ZNF883        | 0,21 | 0,25 | 0,48 | 0,55 | 0,541567  | 0,688662 |
| ISOC2         | 4,72 | 3,14 | 4,72 | 5,39 | 0,5415719 | 0,688662 |
| GAL3ST2       | 0,00 | 0,00 | 0,00 | 0,00 | 0,54161   | NA       |
| PODNL1        | 1,11 | 1,62 | 1,95 | 1,46 | 0,5416287 | 0,688695 |
| AC021188.4    | 0,00 | 0,00 | 0,00 | 0,00 | 0,5416973 | NA       |
| NFRKB         | 3,82 | 4,13 | 2,72 | 2,63 | 0,541751  | 0,688811 |
| GOLGA6L6      | 0,00 | 0,17 | 0,00 | 0,00 | 0,5418218 | NA       |
| SDK2          | 1,64 | 1,01 | 0,07 | 1,03 | 0,5418772 | 0,688907 |
| CTC-518B2.12  | 0,00 | 0,00 | 0,00 | 0,00 | 0,5418889 | 0,688907 |
| GLA           | 5,76 | 4,44 | 5,11 | 4,75 | 0,5420505 | 0,689073 |
| ABCC6P1       | 0,00 | 0,00 | 0,00 | 0,00 | 0,5420981 | NA       |
| RP11-157L3.11 | 3,48 | 3,11 | 2,37 | 2,80 | 0,5421062 | 0,689105 |
| NFAT5         | 2,74 | 3,22 | 2,64 | 2,51 | 0,5422709 | 0,689275 |
| AIF1L         | 0,00 | 0,00 | 0,00 | 0,00 | 0,5422892 | NA       |
| OR6B3         | 0,00 | 0,00 | 0,00 | 0,00 | 0,5423293 | NA       |
| DQX1          | 0,00 | 0,00 | 0,00 | 0,00 | 0,5423511 | NA       |
| RP11-118B18.2 | 0,00 | 0,36 | 0,45 | 0,00 | 0,5423679 | 0,689359 |
| SCN4B         | 0,00 | 0,00 | 0,00 | 0,00 | 0,5424862 | 0,689463 |
| SLC39A11      | 5,61 | 5,08 | 5,02 | 4,69 | 0,5425117 | 0,689463 |
| RP11-5G9.6    | 0,00 | 0,00 | 0,00 | 0,28 | 0,5425125 | NA       |
| GTF2E2        | 4,30 | 2,56 | 3,97 | 4,31 | 0,5425598 | 0,689484 |
| RP1-138B7.4   | 0,00 | 0,00 | 0,00 | 0,00 | 0,5425937 | 0,689488 |
| RP11-496B10.7 | 0,00 | 0,09 | 0,00 | 0,35 | 0,5426333 | 0,689496 |
| RN7SL561P     | 0,00 | 0,00 | 1,48 | 1,68 | 0,5426913 | 0,689496 |
| ZNF8          | 0,60 | 1,02 | 0,91 | 0,95 | 0,5426933 | 0,689496 |
| SLC25A16      | 2,65 | 2,49 | 1,94 | 1,93 | 0,5427628 | 0,689545 |
| AC007386.4    | 1,21 | 1,90 | 0,62 | 0,77 | 0,5427952 | 0,689547 |
| C10orf71      | 0,00 | 0,00 | 0,00 | 0,00 | 0,5428186 | NA       |
| RP11-356K23.1 | 3,82 | 2,38 | 3,21 | 4,25 | 0,5428279 | 0,689549 |
| RNU6-198P     | 0,00 | 0,00 | 0,00 | 0,00 | 0,5428615 | NA       |
| RP11-380M21.4 | 0,00 | 0,94 | 2,26 | 0,85 | 0,5429179 | 0,689624 |
| RP11-345I18.5 | 0,00 | 0,00 | 0,00 | 0,00 | 0,5430088 | NA       |
| LYNX1         | 0,00 | 0,00 | 0,00 | 0,00 | 0,5430176 | NA       |
| RNU6-903P     | 0,00 | 0,00 | 0,00 | 0,00 | 0,5430188 | NA       |
| UHRF1BP1      | 1,42 | 0,23 | 1,41 | 0,64 | 0,5430294 | 0,689674 |
| RP11-403P17.3 | 2,59 | 0,73 | 2,47 | 1,70 | 0,5430497 | 0,689674 |
| RP11-73B2.4   | 0,27 | 0,00 | 0,07 | 0,44 | 0,5430538 | NA       |
| RP5-905H7.8   | 0,27 | 0,00 | 0,07 | 0,44 | 0,5430538 | NA       |
| RP11-87M1.1   | 0,11 | 0,32 | 0,10 | 0,00 | 0,5430826 | NA       |
| U47924.32     | 0,00 | 0,00 | 0,00 | 0,39 | 0,5430988 | 0,689674 |
| MPC2          | 6,30 | 5,78 | 5,70 | 4,09 | 0,5431097 | 0,689674 |
| RP11-90D11.1  | 0,15 | 0,00 | 0,10 | 0,16 | 0,5431126 | 0,689674 |
| RNU6-196P     | 0,00 | 0,00 | 0,00 | 0,00 | 0,5431727 | NA       |
| IGHV1-68      | 0,00 | 0,00 | 0,00 | 0,00 | 0,5432719 | NA       |
| RP3-468O1.2   | 0,00 | 0,00 | 0,00 | 0,00 | 0,5432719 | NA       |
| CDC6          | 0,06 | 0,00 | 0,08 | 0,05 | 0,5433675 | 0,689948 |
| VSIG10        | 1,38 | 2,94 | 2,22 | 1,39 | 0,5433907 | 0,689948 |
| CTD-2012I17.1 | 0,00 | 0,00 | 0,00 | 0,00 | 0,5434278 | NA       |
| RP4-613A2.1   | 0,00 | 0,00 | 0,00 | 0,00 | 0,543463  | NA       |
| ABHD14A       | 4,76 | 2,95 | 4,49 | 3,42 | 0,5435174 | 0,69007  |
| LPAR2         | 4,24 | 4,70 | 4,38 | 4,61 | 0,5435973 | 0,690116 |
| RP11-54D18.1  | 0,24 | 0,30 | 0,10 | 0,00 | 0,5435995 | NA       |
| RP11-84A14.4  | 0,87 | 2,11 | 1,11 | 1,89 | 0,5436351 | 0,690116 |
| RP1-142L7.5   | 0,00 | 0,00 | 0,00 | 0,24 | 0,5436428 | NA       |

|                |      |      |      |      |           |          |
|----------------|------|------|------|------|-----------|----------|
| CLDN18         | 0,05 | 0,18 | 0,00 | 0,07 | 0,5436468 | 0,690116 |
| CLDN23         | 0,00 | 0,00 | 0,00 | 0,00 | 0,5436776 | NA       |
| FBLN5          | 0,00 | 0,00 | 0,00 | 0,00 | 0,5437092 | NA       |
| RP11-846F4.5   | 0,00 | 0,00 | 0,00 | 0,00 | 0,5437285 | NA       |
| CTD-2023N9.1   | 0,00 | 0,00 | 0,00 | 0,00 | 0,543844  | NA       |
| RNPEP          | 5,20 | 5,19 | 5,30 | 5,36 | 0,543925  | 0,69043  |
| H1FOO          | 0,00 | 0,00 | 0,00 | 0,00 | 0,5439355 | NA       |
| RP11-511P7.6   | 0,00 | 0,00 | 0,00 | 0,00 | 0,5439435 | NA       |
| NAP1L2         | 0,00 | 0,00 | 0,00 | 0,00 | 0,5440085 | NA       |
| DDX11L8        | 0,00 | 0,00 | 0,00 | 0,00 | 0,5440549 | NA       |
| CRY1           | 1,11 | 1,47 | 0,50 | 0,81 | 0,5440645 | 0,690559 |
| USP17L11       | 0,00 | 0,00 | 0,00 | 0,00 | 0,5440831 | NA       |
| SMIM11A        | 0,64 | 0,09 | 0,50 | 0,67 | 0,5441294 | 0,690559 |
| LXN            | 1,99 | 0,24 | 0,81 | 0,63 | 0,544144  | 0,690559 |
| CLDN11         | 0,52 | 0,64 | 0,67 | 1,06 | 0,5441621 | 0,690559 |
| ZNF568         | 1,72 | 1,32 | 1,68 | 1,61 | 0,5441819 | 0,690559 |
| RP11-12G12.6   | 0,00 | 0,00 | 0,00 | 0,00 | 0,5441842 | NA       |
| ST14           | 4,33 | 3,78 | 3,75 | 3,17 | 0,5442232 | 0,690572 |
| MIR7843        | 0,00 | 0,00 | 0,00 | 0,00 | 0,5443175 | NA       |
| HERC1          | 5,73 | 4,52 | 5,69 | 5,38 | 0,5443561 | 0,690674 |
| RP11-280F2.2   | 0,30 | 0,72 | 0,32 | 0,72 | 0,544366  | 0,690674 |
| LPIN1          | 3,73 | 4,17 | 4,07 | 3,64 | 0,5444233 | 0,690707 |
| RAPGEFL1       | 0,21 | 0,09 | 0,30 | 0,32 | 0,5444554 | 0,690708 |
| RN7SL678P      | 0,00 | 0,00 | 0,00 | 0,00 | 0,5445049 | NA       |
| ACO10884.1     | 0,00 | 0,00 | 0,00 | 0,00 | 0,544806  | NA       |
| GS1-124K5.12   | 4,12 | 4,51 | 4,01 | 4,57 | 0,544919  | 0,691257 |
| THSD4          | 0,63 | 1,51 | 0,35 | 0,48 | 0,5450575 | 0,691393 |
| RN7SKP149      | 0,00 | 0,00 | 0,00 | 0,68 | 0,5451265 | 0,691441 |
| RP1-155D22.2   | 0,00 | 0,00 | 0,00 | 0,00 | 0,5454244 | NA       |
| KEAP1          | 3,77 | 3,52 | 3,82 | 3,16 | 0,545476  | 0,691845 |
| FGR            | 7,29 | 6,29 | 7,08 | 7,14 | 0,5455235 | 0,691852 |
| CTD-2583P5.1   | 0,21 | 0,22 | 0,00 | 0,56 | 0,5455436 | 0,691852 |
| CEP89          | 3,11 | 2,74 | 3,32 | 2,85 | 0,5456078 | 0,691894 |
| SMC5           | 4,03 | 4,11 | 3,58 | 3,54 | 0,5457229 | 0,692    |
| VWA3A          | 0,00 | 0,00 | 0,00 | 0,06 | 0,5457819 | NA       |
| RP11-529F4.1   | 0,00 | 0,00 | 0,00 | 0,00 | 0,5457868 | NA       |
| RP11-398F12.1  | 0,25 | 0,27 | 0,17 | 0,58 | 0,5457976 | 0,692056 |
| FAM19A2        | 5,24 | 2,64 | 5,09 | 4,54 | 0,5459439 | 0,692166 |
| ZDHH8          | 1,19 | 1,88 | 1,39 | 1,31 | 0,5459469 | 0,692166 |
| RP11-174G17.3  | 0,00 | 0,02 | 0,00 | 0,00 | 0,5460434 | NA       |
| ARRDC5         | 0,93 | 3,10 | 1,02 | 0,92 | 0,546054  | 0,692209 |
| SH3RF2         | 0,00 | 0,00 | 0,00 | 0,00 | 0,5460552 | 0,692209 |
| ARRDC4         | 2,80 | 0,50 | 2,30 | 1,93 | 0,5460739 | 0,692209 |
| RP11-291L19.1  | 0,00 | 0,00 | 0,00 | 0,00 | 0,5460903 | NA       |
| RP4-740C4.7    | 1,53 | 0,00 | 0,50 | 1,87 | 0,5461882 | 0,692314 |
| SOCS1          | 0,00 | 0,00 | 0,00 | 0,10 | 0,5462543 | 0,692358 |
| CD84           | 2,45 | 2,91 | 2,34 | 1,93 | 0,5462885 | 0,692362 |
| SNAP47         | 3,92 | 2,16 | 2,42 | 0,92 | 0,5463522 | 0,692403 |
| CHCHD6         | 0,28 | 3,73 | 0,26 | 2,19 | 0,5464028 | 0,692403 |
| CTD-2616J11.10 | 0,00 | 0,49 | 0,00 | 0,00 | 0,5464295 | NA       |
| WI2-89031B12.1 | 0,00 | 0,00 | 0,00 | 0,00 | 0,5464397 | NA       |
| ACO17006.3     | 0,90 | 0,00 | 1,01 | 1,06 | 0,5464806 | 0,692403 |
| RP11-773H22.4  | 0,00 | 0,00 | 0,00 | 0,00 | 0,5464837 | 0,692403 |
| PIN1           | 5,85 | 4,85 | 5,32 | 6,16 | 0,5465544 | 0,692403 |
| WDFY3          | 3,51 | 2,33 | 3,28 | 3,60 | 0,5465897 | 0,692403 |



|                |      |      |      |      |           |          |
|----------------|------|------|------|------|-----------|----------|
| TSNARE1        | 0,07 | 0,08 | 0,04 | 1,76 | 0,5466142 | 0,692403 |
| SLC38A6        | 3,41 | 3,24 | 2,97 | 4,55 | 0,5466155 | 0,692403 |
| CTD-2081C10.5  | 0,00 | 0,00 | 0,00 | 0,00 | 0,5466202 | 0,692403 |
| RP11-798G7.8   | 2,03 | 1,11 | 0,96 | 1,49 | 0,5466321 | 0,692403 |
| PDCL           | 2,88 | 1,45 | 1,02 | 1,90 | 0,5466886 | 0,692435 |
| ERAL1          | 5,42 | 5,31 | 4,60 | 3,90 | 0,5468388 | 0,692586 |
| RPS2P4         | 0,00 | 0,42 | 0,00 | 0,00 | 0,5470214 | NA       |
| AGXT2          | 0,00 | 0,33 | 0,00 | 0,00 | 0,5470492 | 0,692813 |
| ZAN            | 0,00 | 0,00 | 0,00 | 0,00 | 0,5471683 | NA       |
| USP53          | 3,00 | 2,92 | 3,55 | 3,45 | 0,5472115 | 0,692951 |
| AC068134.10    | 0,00 | 0,00 | 0,00 | 0,00 | 0,5472207 | 0,692951 |
| RP11-1079K10.2 | 0,00 | 0,00 | 0,00 | 0,00 | 0,5473109 | NA       |
| RAD9B          | 0,42 | 1,27 | 1,47 | 0,13 | 0,5473389 | 0,693061 |
| SNORA50A       | 0,00 | 0,00 | 0,00 | 0,00 | 0,5473903 | NA       |
| CTD-2116N24.1  | 0,00 | 0,00 | 0,00 | 0,00 | 0,5474103 | NA       |
| ALG9           | 2,62 | 2,75 | 3,14 | 3,55 | 0,5474787 | 0,693142 |
| PNRC2          | 5,91 | 4,69 | 5,75 | 4,61 | 0,5475002 | 0,693142 |
| AP000318.2     | 0,00 | 0,23 | 0,20 | 0,49 | 0,5475101 | 0,693142 |
| RP11-145E5.3   | 0,00 | 0,00 | 0,00 | 0,00 | 0,5475598 | NA       |
| CHURC1-FNTB    | 2,47 | 2,05 | 2,08 | 2,87 | 0,5475682 | 0,693142 |
| CYB5D1         | 0,28 | 0,56 | 0,88 | 0,00 | 0,5475775 | 0,693142 |
| RP11-196G18.24 | 0,00 | 0,00 | 0,00 | 0,00 | 0,5475902 | 0,693142 |
| NCOA3          | 4,82 | 4,56 | 4,48 | 4,05 | 0,5476684 | 0,693202 |
| ZHX2           | 0,16 | 0,19 | 0,18 | 0,78 | 0,5478245 | 0,693336 |
| CTD-2561J22.6  | 0,00 | 0,00 | 0,00 | 0,00 | 0,5478412 | NA       |
| RP11-295D4.5   | 0,28 | 0,00 | 0,00 | 0,54 | 0,5479194 | 0,693441 |
| WIPF2          | 3,18 | 0,72 | 2,68 | 2,43 | 0,5480312 | 0,693542 |
| CHMP4C         | 0,11 | 0,15 | 0,13 | 0,07 | 0,5480799 | 0,693547 |
| CTB-89H12.1    | 0,00 | 4,14 | 1,74 | 3,30 | 0,5480969 | 0,693547 |
| SNX7           | 0,00 | 0,18 | 0,00 | 0,00 | 0,5481602 | 0,693587 |
| RP11-12K11.2   | 0,18 | 0,78 | 0,00 | 0,00 | 0,5482963 | 0,69372  |
| UMODL1         | 0,00 | 0,10 | 0,00 | 0,00 | 0,5483465 | NA       |
| RP11-10G12.1   | 0,00 | 0,00 | 0,00 | 0,00 | 0,5484748 | NA       |
| RP1-313L4.3    | 0,23 | 0,00 | 0,00 | 0,25 | 0,5484818 | 0,693915 |
| SH3TC2         | 0,10 | 0,14 | 0,16 | 0,25 | 0,5486811 | 0,694128 |
| PSAT1          | 0,00 | 0,11 | 0,00 | 0,37 | 0,5487264 | 0,694146 |
| RP11-542M13.3  | 0,27 | 0,29 | 0,00 | 0,00 | 0,5487647 | 0,694155 |
| RP11-388M20.6  | 0,45 | 2,84 | 0,00 | 1,94 | 0,5488453 | 0,694206 |
| TAB1           | 1,26 | 1,64 | 1,73 | 2,46 | 0,5488677 | 0,694206 |
| ART3           | 0,23 | 0,29 | 0,28 | 0,29 | 0,5490849 | 0,694441 |
| GPR33          | 0,00 | 0,00 | 0,00 | 0,00 | 0,549123  | 0,69445  |
| TRBV7-2        | 0,00 | 0,00 | 0,00 | 0,00 | 0,5492206 | NA       |
| USP49          | 0,96 | 0,82 | 0,98 | 0,75 | 0,5492579 | 0,694581 |
| RNU6-977P      | 0,00 | 0,00 | 0,00 | 0,00 | 0,5493038 | 0,694599 |
| DYNLT3         | 3,47 | 1,99 | 2,39 | 1,86 | 0,5493511 | 0,69462  |
| RP11-1105G2.4  | 0,00 | 0,00 | 0,00 | 0,00 | 0,5493529 | NA       |
| RP4-559A3.5    | 0,00 | 2,42 | 0,00 | 0,00 | 0,5493983 | NA       |
| NR2C1          | 4,46 | 4,88 | 4,79 | 5,01 | 0,549578  | 0,694867 |
| SURF2          | 4,16 | 4,59 | 4,32 | 3,91 | 0,5496288 | 0,694892 |
| LTBP1          | 0,00 | 0,44 | 0,00 | 0,03 | 0,5496689 | 0,694895 |
| AC003002.6     | 0,00 | 0,00 | 0,00 | 0,00 | 0,5496718 | NA       |
| SH3YL1         | 3,65 | 3,68 | 3,61 | 2,68 | 0,5496939 | 0,694895 |
| OR6P1          | 0,00 | 0,00 | 0,00 | 0,00 | 0,5498006 | NA       |
| DTNBP1         | 3,90 | 3,92 | 3,53 | 3,47 | 0,5499583 | 0,695148 |
| OR9M1P         | 0,55 | 0,39 | 0,07 | 0,04 | 0,549983  | 0,695148 |

|               |      |      |      |      |           |          |
|---------------|------|------|------|------|-----------|----------|
| ALG6          | 3,99 | 2,57 | 3,03 | 2,28 | 0,5500276 | 0,695148 |
| SLC39A3       | 4,72 | 3,22 | 3,78 | 4,89 | 0,5500278 | 0,695148 |
| VAPB          | 2,86 | 1,55 | 2,23 | 2,31 | 0,5500504 | 0,695148 |
| AC005682.6    | 0,00 | 0,10 | 0,00 | 0,00 | 0,5500597 | NA       |
| DEPDC7        | 0,00 | 0,00 | 0,07 | 0,37 | 0,5500925 | 0,695155 |
| RP13-158L7.1  | 0,15 | 0,70 | 0,21 | 0,23 | 0,5501393 | 0,695155 |
| NPIPA5        | 1,74 | 0,23 | 1,30 | 0,64 | 0,55015   | 0,695155 |
| RP11-188P20.3 | 0,00 | 0,00 | 0,00 | 0,28 | 0,5502336 | 0,695221 |
| RP11-575I8.1  | 0,00 | 0,07 | 0,00 | 0,00 | 0,5503433 | NA       |
| PSPC1         | 5,16 | 4,18 | 4,88 | 4,64 | 0,5504039 | 0,695397 |
| TBL2          | 1,73 | 2,28 | 1,70 | 1,38 | 0,5504571 | 0,695425 |
| CDRT15P1      | 0,00 | 0,00 | 0,00 | 0,00 | 0,5505397 | NA       |
| RP11-438E5.1  | 0,52 | 1,29 | 0,50 | 0,50 | 0,550583  | 0,695544 |
| RP11-104C4.2  | 0,00 | 0,00 | 0,00 | 0,00 | 0,5506242 | NA       |
| AP001464.4    | 0,00 | 0,00 | 0,00 | 0,00 | 0,550648  | NA       |
| NFIA          | 0,52 | 0,28 | 0,40 | 1,09 | 0,550657  | 0,695598 |
| BRD3          | 3,40 | 3,94 | 3,82 | 3,65 | 0,5507168 | 0,695634 |
| ABCB4         | 2,98 | 0,47 | 1,85 | 0,12 | 0,5508054 | 0,695668 |
| ATXN8OS       | 0,41 | 0,26 | 0,21 | 0,67 | 0,5508066 | 0,695668 |
| CDKN2A        | 0,00 | 0,00 | 0,00 | 0,69 | 0,5509419 | 0,6958   |
| RELL2         | 1,21 | 0,12 | 1,06 | 0,45 | 0,5509813 | 0,69581  |
| AC007948.1    | 0,00 | 0,00 | 0,00 | 0,00 | 0,551038  | NA       |
| MIR339        | 0,00 | 0,00 | 0,00 | 0,00 | 0,5510495 | NA       |
| RP11-203B9.4  | 3,88 | 3,14 | 3,42 | 2,37 | 0,5510839 | 0,6959   |
| RP11-126O22.4 | 0,00 | 0,00 | 0,00 | 0,00 | 0,5511562 | NA       |
| S100A3        | 0,00 | 0,00 | 0,00 | 0,00 | 0,5512847 | NA       |
| LSM1          | 5,56 | 2,86 | 5,16 | 5,52 | 0,5512876 | 0,696118 |
| RP3-428L16.2  | 0,00 | 0,00 | 0,00 | 0,00 | 0,5514325 | 0,696253 |
| TCHH          | 0,00 | 0,00 | 0,00 | 0,00 | 0,5514574 | 0,696253 |
| RP11-109G10.2 | 0,00 | 0,00 | 0,00 | 0,00 | 0,5514576 | NA       |
| LINC00338     | 1,62 | 2,36 | 1,64 | 1,68 | 0,5516081 | 0,696367 |
| ZNF227        | 2,65 | 2,54 | 0,75 | 0,62 | 0,5516101 | 0,696367 |
| RPL23AP77     | 0,00 | 0,00 | 0,00 | 0,00 | 0,5517607 | NA       |
| RP11-803P9.1  | 0,00 | 0,00 | 0,00 | 0,00 | 0,5517991 | 0,696527 |
| LINC00205     | 0,29 | 0,66 | 0,64 | 1,01 | 0,5518405 | 0,696527 |
| CPA4          | 0,08 | 0,29 | 0,07 | 0,09 | 0,5518614 | 0,696527 |
| LRG1          | 0,70 | 1,37 | 0,85 | 0,54 | 0,5518626 | 0,696527 |
| RP4-791K14.2  | 0,00 | 0,00 | 0,00 | 0,08 | 0,5519378 | 0,69657  |
| PPME1         | 3,08 | 1,74 | 3,22 | 3,55 | 0,5519589 | 0,69657  |
| RP11-259K5.3  | 0,43 | 0,26 | 0,95 | 0,94 | 0,5520308 | 0,696621 |
| RNU4ATAC17P   | 0,00 | 0,00 | 0,00 | 0,00 | 0,5520681 | NA       |
| FOXD2         | 0,00 | 0,03 | 0,00 | 0,00 | 0,5520785 | NA       |
| RPL23AP1      | 0,05 | 0,00 | 0,00 | 0,00 | 0,5521416 | 0,696652 |
| RP11-317F20.3 | 0,10 | 0,09 | 0,12 | 0,34 | 0,5521484 | 0,696652 |
| RF00402       | 7,33 | 5,31 | 7,26 | 6,40 | 0,5521666 | 0,696652 |
| RP11-121A14.2 | 0,00 | 0,00 | 0,00 | 3,26 | 0,5521812 | 0,696652 |
| RF00591       | 0,00 | 0,00 | 0,00 | 0,00 | 0,5522124 | NA       |
| RP11-124N3.2  | 0,00 | 0,00 | 0,00 | 0,00 | 0,5522196 | NA       |
| AC016737.1    | 0,00 | 0,00 | 0,00 | 0,00 | 0,552389  | NA       |
| RP11-447H19.1 | 0,00 | 0,00 | 0,00 | 0,00 | 0,55245   | NA       |
| RP11-111M22.5 | 0,00 | 0,00 | 0,00 | 0,00 | 0,5525156 | NA       |
| NELFE         | 5,81 | 3,17 | 5,20 | 5,44 | 0,5525985 | 0,697139 |
| RP11-540O11.6 | 0,00 | 0,00 | 0,00 | 0,00 | 0,5526067 | NA       |
| NME5          | 0,00 | 1,59 | 0,00 | 0,00 | 0,5526587 | 0,697147 |
| TGFB2         | 0,00 | 0,00 | 0,00 | 0,00 | 0,5526672 | 0,697147 |

|                  |      |      |      |      |           |          |
|------------------|------|------|------|------|-----------|----------|
| RP1-178F10.1     | 0,00 | 0,00 | 0,00 | 0,00 | 0,5528773 | NA       |
| RP11-1028N23.2   | 0,00 | 0,37 | 0,00 | 0,52 | 0,552894  | 0,697392 |
| RP3-453C12.15    | 0,08 | 0,00 | 0,14 | 0,22 | 0,5529241 | 0,697392 |
| RP11-117F22.1    | 0,00 | 0,00 | 0,00 | 0,00 | 0,5529417 | NA       |
| RP11-345M22.3    | 0,00 | 0,00 | 0,00 | 0,00 | 0,5530019 | NA       |
| AC079586.1       | 0,00 | 0,00 | 0,00 | 0,00 | 0,5531279 | NA       |
| RP11-85P9.3      | 0,00 | 0,97 | 0,80 | 1,23 | 0,5531963 | 0,697695 |
| PLP2             | 7,60 | 6,57 | 7,43 | 6,71 | 0,5534628 | 0,697992 |
| RP11-4N23.1      | 0,00 | 0,00 | 0,00 | 0,00 | 0,5534764 | NA       |
| AC006547.8       | 0,00 | 1,82 | 0,00 | 0,00 | 0,5536029 | 0,698129 |
| AC000095.8       | 0,00 | 0,00 | 0,00 | 0,00 | 0,5536803 | NA       |
| RP11-101C21.1    | 0,70 | 1,69 | 1,46 | 2,19 | 0,5536861 | 0,698194 |
| SMAD2            | 5,23 | 3,71 | 4,05 | 5,46 | 0,5537775 | 0,69827  |
| ZNF680           | 2,31 | 2,81 | 1,34 | 1,69 | 0,554011  | 0,698525 |
| ZNF595           | 2,44 | 1,73 | 0,38 | 1,22 | 0,5540768 | 0,698567 |
| HOXA7            | 0,00 | 0,00 | 0,00 | 0,00 | 0,5541104 | 0,698567 |
| SNORD43          | 0,00 | 0,00 | 0,00 | 0,00 | 0,554139  | 0,698567 |
| TKTL1            | 0,00 | 0,05 | 0,00 | 0,00 | 0,5541886 | NA       |
| AC055740.2       | 1,16 | 0,80 | 0,54 | 1,99 | 0,554253  | 0,69864  |
| XXbac-BPG32J3.22 | 1,56 | 2,00 | 2,43 | 0,36 | 0,5542598 | 0,69864  |
| RP11-247I13.6    | 0,00 | 0,00 | 0,00 | 0,00 | 0,5543897 | NA       |
| CTC-512J12.7     | 0,00 | 0,00 | 0,00 | 0,00 | 0,5544049 | NA       |
| HOXC4            | 0,00 | 0,00 | 0,00 | 0,00 | 0,5544128 | 0,698793 |
| RP11-298A10.1    | 0,00 | 0,00 | 0,00 | 0,00 | 0,554525  | NA       |
| RP11-56B16.1     | 0,00 | 0,00 | 0,00 | 0,00 | 0,5545759 | NA       |
| RMRP             | 0,00 | 0,95 | 1,03 | 2,51 | 0,5546305 | 0,699028 |
| ZNF479           | 0,00 | 0,00 | 0,00 | 0,00 | 0,554784  | NA       |
| DNAI1            | 0,00 | 0,19 | 0,00 | 0,00 | 0,5548278 | 0,699237 |
| AC010906.1       | 0,00 | 1,11 | 0,00 | 0,00 | 0,554845  | NA       |
| OR52K2           | 0,00 | 0,00 | 0,00 | 0,00 | 0,5548522 | NA       |
| RP11-1058B10.1   | 0,00 | 0,34 | 0,11 | 0,26 | 0,5548673 | 0,699247 |
| LHFPL2           | 0,28 | 1,65 | 0,39 | 0,50 | 0,5549206 | 0,699275 |
| AC005943.6       | 0,00 | 0,00 | 0,00 | 0,00 | 0,5549867 | NA       |
| RP11-397P13.6    | 0,00 | 0,00 | 0,00 | 0,00 | 0,5550333 | NA       |
| POM121L4P        | 0,00 | 0,00 | 0,00 | 0,00 | 0,555049  | NA       |
| RP11-344B5.2     | 0,00 | 0,00 | 0,00 | 0,00 | 0,5551622 | NA       |
| KCTD16           | 0,00 | 0,00 | 0,00 | 0,01 | 0,5551999 | NA       |
| CTA-246H3.12     | 0,00 | 0,00 | 0,00 | 0,00 | 0,5552111 | NA       |
| RP11-440K22.1    | 0,00 | 0,00 | 0,00 | 0,00 | 0,5552712 | NA       |
| PRKAR2A          | 3,95 | 3,94 | 3,51 | 4,01 | 0,5553322 | 0,699754 |
| XBP1             | 5,54 | 5,73 | 5,91 | 4,97 | 0,5554055 | 0,699779 |
| IGSF11           | 0,09 | 0,00 | 0,00 | 0,93 | 0,5554153 | 0,699779 |
| AC079834.1       | 0,00 | 0,00 | 0,00 | 0,00 | 0,5554364 | NA       |
| LASP1            | 4,04 | 3,57 | 3,89 | 3,22 | 0,5554509 | 0,69978  |
| TAF1A            | 0,20 | 0,25 | 0,29 | 0,38 | 0,5554786 | 0,69978  |
| RNU5B-2P         | 0,00 | 0,00 | 0,00 | 0,00 | 0,5555323 | 0,699808 |
| RP11-72I8.1      | 4,32 | 4,29 | 4,27 | 2,82 | 0,5556415 | 0,699905 |
| EIF1AX           | 6,04 | 4,83 | 5,76 | 5,61 | 0,5557047 | 0,699945 |
| RP11-468E2.5     | 0,77 | 0,63 | 0,28 | 0,00 | 0,5558122 | 0,700006 |
| ACVR1            | 2,45 | 1,69 | 1,08 | 0,26 | 0,5558276 | 0,700006 |
| MYOM1            | 2,86 | 1,25 | 2,14 | 2,95 | 0,5558473 | 0,700006 |
| CTB-187L3.1      | 0,00 | 0,00 | 0,00 | 0,00 | 0,5558544 | NA       |
| TAC4             | 3,73 | 2,97 | 4,07 | 2,93 | 0,5559397 | 0,700065 |
| SZRD1            | 4,24 | 3,58 | 4,23 | 3,47 | 0,5559568 | 0,700065 |
| RN7SL797P        | 0,00 | 3,18 | 0,75 | 1,58 | 0,5560788 | 0,700166 |

|               |      |      |      |      |           |          |
|---------------|------|------|------|------|-----------|----------|
| RP5-1092A3.5  | 0,00 | 0,00 | 0,00 | 0,44 | 0,5561005 | 0,700166 |
| RF02217       | 0,00 | 0,00 | 0,00 | 0,00 | 0,5561211 | NA       |
| RN7SL602P     | 1,90 | 0,87 | 0,97 | 2,03 | 0,5561622 | 0,700189 |
| CTD-2562J17.6 | 4,27 | 4,33 | 4,44 | 3,77 | 0,5561818 | 0,700189 |
| RP11-247A12.2 | 0,60 | 1,25 | 0,49 | 0,68 | 0,5563243 | 0,700323 |
| RP4-737E23.2  | 0,00 | 0,00 | 0,00 | 0,00 | 0,5563757 | 0,700323 |
| CUEDC2        | 6,30 | 6,62 | 6,25 | 5,87 | 0,5563914 | 0,700323 |
| AC005752.10   | 0,16 | 0,12 | 0,19 | 0,11 | 0,5564141 | 0,700323 |
| HCG9          | 0,01 | 0,00 | 0,00 | 0,00 | 0,5565468 | 0,700427 |
| RP1-69B10.3   | 0,00 | 0,16 | 0,00 | 0,00 | 0,5565526 | NA       |
| AF254983.5    | 0,24 | 1,24 | 0,09 | 0,37 | 0,5565644 | 0,700427 |
| OR7E128P      | 0,00 | 0,00 | 0,00 | 0,00 | 0,5566013 | 0,700427 |
| RP11-665C16.1 | 4,02 | 3,94 | 3,36 | 0,00 | 0,5566227 | 0,700427 |
| CTC-448F2.5   | 0,00 | 0,00 | 0,00 | 0,00 | 0,5566344 | NA       |
| ZSWIM2        | 0,00 | 0,00 | 0,00 | 0,00 | 0,5572589 | NA       |
| AC062028.1    | 0,00 | 0,37 | 0,10 | 0,20 | 0,5572716 | 0,701204 |
| H3F3C         | 0,25 | 0,44 | 0,25 | 0,13 | 0,5574741 | 0,701419 |
| DFFA          | 2,66 | 2,12 | 2,46 | 1,56 | 0,5575173 | 0,701434 |
| RP11-225N10.3 | 0,00 | 0,00 | 0,00 | 0,00 | 0,5575878 | NA       |
| ZNF569        | 2,42 | 0,90 | 1,45 | 0,67 | 0,557593  | 0,701489 |
| RN7SL141P     | 0,00 | 0,00 | 0,00 | 1,76 | 0,557635  | 0,701502 |
| AC002398.13   | 0,00 | 0,00 | 0,00 | 0,00 | 0,5577414 | NA       |
| RP11-637C24.2 | 0,00 | 0,00 | 0,00 | 0,02 | 0,5577916 | NA       |
| CTD-2325M2.1  | 2,76 | 1,58 | 2,18 | 2,67 | 0,5578638 | 0,701746 |
| C21orf131     | 0,00 | 0,68 | 0,00 | 0,00 | 0,5578918 | 0,701746 |
| TMEM99        | 0,00 | 0,53 | 0,00 | 1,08 | 0,5579611 | 0,701793 |
| GON4L         | 5,27 | 4,93 | 4,92 | 3,92 | 0,5580998 | 0,701888 |
| CTD-2510L9.2  | 0,32 | 0,31 | 0,16 | 1,06 | 0,5581288 | 0,701888 |
| RP11-674E16.5 | 0,09 | 0,00 | 0,06 | 0,00 | 0,5581311 | 0,701888 |
| URB1          | 0,42 | 0,26 | 0,53 | 0,19 | 0,558176  | 0,701905 |
| RP11-843B15.4 | 0,00 | 0,00 | 0,00 | 0,00 | 0,5581767 | NA       |
| LSM6          | 5,65 | 5,88 | 5,41 | 5,03 | 0,5582105 | 0,701908 |
| RNU4-80P      | 0,00 | 0,00 | 0,00 | 1,69 | 0,5582638 | NA       |
| YWHAH         | 5,44 | 4,98 | 5,54 | 3,04 | 0,5583505 | 0,701974 |
| RP11-85G21.1  | 0,00 | 0,00 | 0,00 | 0,00 | 0,5583694 | 0,701974 |
| RP11-474P2.5  | 2,22 | 1,15 | 1,47 | 0,96 | 0,5583756 | 0,701974 |
| AC011893.3    | 0,00 | 0,00 | 0,00 | 0,08 | 0,5584018 | NA       |
| PDE4D         | 2,26 | 2,44 | 2,12 | 3,72 | 0,5584169 | 0,701974 |
| LRRC58        | 2,95 | 3,09 | 2,70 | 3,26 | 0,5584211 | 0,701974 |
| ST8SIA5       | 0,19 | 0,42 | 0,17 | 0,35 | 0,558454  | 0,701976 |
| AC068831.6    | 0,71 | 1,21 | 0,79 | 0,94 | 0,5585231 | 0,702023 |
| BACE1         | 0,12 | 2,01 | 0,38 | 0,17 | 0,558691  | 0,702195 |
| EDARADD       | 0,00 | 0,00 | 0,04 | 0,04 | 0,5586989 | NA       |
| RP11-131H24.4 | 0,00 | 0,00 | 0,00 | 0,00 | 0,5588144 | NA       |
| C11orf84      | 0,05 | 0,00 | 0,18 | 0,12 | 0,5588944 | 0,702382 |
| RP1-102G20.2  | 0,00 | 0,00 | 0,61 | 0,00 | 0,5589034 | 0,702382 |
| RP11-7N10.1   | 0,00 | 0,12 | 0,00 | 0,00 | 0,5589402 | NA       |
| RN7SL322P     | 1,01 | 2,07 | 0,53 | 1,47 | 0,5589412 | 0,70239  |
| AKNA          | 4,98 | 5,13 | 5,29 | 4,64 | 0,55904   | 0,702454 |
| RP11-452J13.1 | 0,00 | 0,00 | 0,00 | 0,00 | 0,5590947 | NA       |
| MS4A4A        | 4,82 | 5,02 | 4,88 | 5,06 | 0,5591088 | 0,702454 |
| CSGALNACT1    | 1,51 | 2,10 | 2,02 | 2,38 | 0,5591096 | 0,702454 |
| TMEM71        | 5,16 | 2,54 | 5,77 | 5,19 | 0,559119  | 0,702454 |
| ZNF799        | 0,37 | 0,72 | 0,23 | 0,60 | 0,5593152 | 0,702661 |
| EGR4          | 0,00 | 0,00 | 0,00 | 0,00 | 0,559386  | NA       |

|               |      |      |      |      |           |          |
|---------------|------|------|------|------|-----------|----------|
| PUS7          | 0,77 | 0,91 | 0,78 | 0,07 | 0,5594174 | 0,70272  |
| CMTR1         | 1,50 | 1,03 | 1,36 | 2,47 | 0,5594249 | 0,70272  |
| RP11-600F24.2 | 0,00 | 0,00 | 0,00 | 0,24 | 0,559471  | NA       |
| RP5-1042I8.7  | 3,43 | 3,14 | 2,72 | 2,99 | 0,5595333 | 0,702816 |
| RP11-375N15.1 | 0,00 | 0,00 | 0,00 | 0,00 | 0,5595436 | NA       |
| RP3-473L9.3   | 0,00 | 0,08 | 0,00 | 0,07 | 0,5595882 | 0,702845 |
| RP11-923I11.3 | 0,00 | 0,00 | 0,00 | 0,00 | 0,5595985 | NA       |
| VPS72         | 4,87 | 2,40 | 4,12 | 1,51 | 0,5597446 | 0,703002 |
| RP11-486M3.2  | 0,00 | 0,00 | 0,00 | 0,00 | 0,5597979 | NA       |
| FBXO11        | 5,27 | 4,63 | 4,84 | 3,71 | 0,5598602 | 0,703108 |
| RP11-14I2.2   | 0,00 | 0,06 | 0,00 | 0,00 | 0,5599847 | NA       |
| RP11-443B7.1  | 0,84 | 2,64 | 1,57 | 0,00 | 0,5600729 | 0,703335 |
| APO01092.4    | 0,00 | 0,00 | 0,00 | 0,00 | 0,5600787 | NA       |
| RP4-583P15.15 | 0,00 | 0,00 | 0,00 | 0,00 | 0,5601665 | 0,703413 |
| RP11-163N6.2  | 0,71 | 0,80 | 1,22 | 1,27 | 0,5603464 | 0,703599 |
| C19orf38      | 5,95 | 5,35 | 5,51 | 5,51 | 0,5605455 | 0,703788 |
| RP11-136I14.5 | 0,00 | 0,00 | 0,00 | 0,00 | 0,5605605 | 0,703788 |
| C11orf74      | 0,89 | 2,26 | 3,66 | 0,34 | 0,5606058 | 0,703793 |
| ZFP92         | 0,14 | 0,02 | 0,12 | 0,22 | 0,5606538 | 0,703793 |
| MYC           | 0,00 | 0,19 | 0,32 | 0,37 | 0,5606615 | 0,703793 |
| LA16c-312E8.4 | 0,00 | 0,00 | 0,00 | 0,00 | 0,5606959 | NA       |
| RP11-718B12.5 | 0,00 | 0,00 | 0,00 | 0,00 | 0,5606983 | 0,703793 |
| CD79B         | 4,27 | 2,52 | 3,05 | 4,71 | 0,5607225 | 0,703793 |
| PEX3          | 0,88 | 1,84 | 0,34 | 0,97 | 0,5608004 | 0,703851 |
| RP11-160E2.11 | 0,00 | 0,00 | 0,00 | 0,00 | 0,5608457 | NA       |
| CTB-52I2.4    | 0,00 | 0,00 | 0,00 | 0,00 | 0,5608679 | NA       |
| GYPE          | 0,07 | 0,09 | 0,12 | 0,00 | 0,5609459 | 0,70396  |
| SMCO2         | 0,00 | 0,00 | 0,00 | 0,00 | 0,5609504 | 0,70396  |
| BAALC         | 0,00 | 0,25 | 0,00 | 0,00 | 0,5609908 | NA       |
| RP9P          | 0,83 | 0,62 | 0,86 | 0,69 | 0,5610727 | 0,704056 |
| DLX4          | 0,00 | 0,00 | 0,00 | 0,00 | 0,5610904 | 0,704056 |
| SMKR1         | 0,00 | 0,00 | 0,00 | 0,00 | 0,5612177 | NA       |
| AC007970.1    | 0,19 | 0,21 | 0,00 | 0,00 | 0,5612708 | 0,704195 |
| AC093038.1    | 0,31 | 0,00 | 0,18 | 0,00 | 0,5612895 | 0,704195 |
| BMS1P4        | 2,09 | 0,43 | 0,42 | 1,37 | 0,5612967 | 0,704195 |
| TOP3A         | 5,10 | 3,40 | 4,46 | 2,37 | 0,5613298 | 0,704197 |
| RP11-143C19.1 | 0,00 | 0,00 | 0,00 | 0,00 | 0,5613683 | NA       |
| CTD-3065B20.2 | 0,00 | 0,00 | 0,00 | 0,00 | 0,5615673 | 0,704413 |
| DNAH11        | 2,67 | 3,35 | 2,40 | 2,45 | 0,5615732 | 0,704413 |
| RP11-792A8.5  | 0,00 | 0,00 | 0,00 | 0,00 | 0,5616192 | 0,704413 |
| RP11-900F13.3 | 0,00 | 0,00 | 0,00 | 0,00 | 0,5616468 | 0,704413 |
| BATF2         | 0,00 | 0,00 | 0,00 | 0,00 | 0,5616609 | NA       |
| SDHAF1        | 4,18 | 1,57 | 4,94 | 4,11 | 0,5616656 | 0,704413 |
| ZBTB10        | 2,11 | 2,02 | 2,03 | 0,94 | 0,5616921 | 0,704413 |
| PIP5K1C       | 1,22 | 0,90 | 1,64 | 0,72 | 0,5617472 | 0,704442 |
| MYOT          | 0,00 | 0,00 | 0,00 | 0,00 | 0,5617602 | NA       |
| RP11-447M12.2 | 0,00 | 0,00 | 0,00 | 0,00 | 0,5617923 | NA       |
| LINC00216     | 2,08 | 2,34 | 1,72 | 1,19 | 0,5618142 | 0,704487 |
| PRIMPOL       | 3,92 | 4,31 | 3,27 | 1,70 | 0,5619406 | 0,704605 |
| RP11-835E18.2 | 4,05 | 1,98 | 3,42 | 1,39 | 0,5622125 | 0,704828 |
| TMEM30B       | 0,00 | 0,03 | 0,00 | 0,03 | 0,5622241 | 0,704828 |
| ACSM6         | 0,56 | 0,22 | 0,22 | 0,32 | 0,5622289 | 0,704828 |
| PI4KAP1       | 3,03 | 2,74 | 2,97 | 0,67 | 0,5622467 | 0,704828 |
| SCUBE2        | 0,74 | 0,98 | 0,81 | 0,66 | 0,5623113 | 0,704828 |
| RP11-881M11.2 | 0,00 | 0,00 | 0,00 | 0,00 | 0,5623376 | 0,704828 |

|               |      |      |      |      |           |          |
|---------------|------|------|------|------|-----------|----------|
| AC066692.4    | 0,00 | 0,26 | 0,00 | 1,97 | 0,5623398 | 0,704828 |
| OSER1         | 6,02 | 6,16 | 5,69 | 5,39 | 0,562372  | 0,704828 |
| MFSD4A        | 0,25 | 0,04 | 0,15 | 0,49 | 0,5624386 | 0,704872 |
| SLC37A1       | 2,16 | 2,41 | 2,12 | 0,94 | 0,562514  | 0,704897 |
| PKLR          | 0,00 | 0,00 | 0,00 | 0,00 | 0,5625245 | NA       |
| AC097374.2    | 1,59 | 0,19 | 0,71 | 0,96 | 0,5625351 | 0,704897 |
| EIF2AK1       | 4,70 | 4,62 | 4,68 | 4,06 | 0,5625538 | 0,704897 |
| AC022182.3    | 1,36 | 2,10 | 1,04 | 1,75 | 0,5626146 | 0,704933 |
| AC002480.6    | 2,12 | 1,85 | 1,82 | 1,09 | 0,5626803 | 0,704976 |
| TTI1          | 2,17 | 1,33 | 0,83 | 0,97 | 0,5627699 | 0,705049 |
| NFXL1         | 2,96 | 0,68 | 1,51 | 0,24 | 0,5629265 | 0,705205 |
| EIF3G         | 7,40 | 7,43 | 7,32 | 6,85 | 0,5630258 | 0,705231 |
| WDR35         | 0,47 | 0,11 | 0,07 | 0,02 | 0,5630442 | 0,705231 |
| AC092431.3    | 1,23 | 2,54 | 0,41 | 3,15 | 0,5630508 | 0,705231 |
| CNTN5         | 0,00 | 0,00 | 0,00 | 0,00 | 0,5630558 | NA       |
| PRKAG1        | 5,70 | 4,01 | 5,37 | 5,26 | 0,5630738 | 0,705231 |
| TGIF2P1       | 0,00 | 0,00 | 0,00 | 0,00 | 0,5631346 | NA       |
| PHYH          | 1,59 | 3,87 | 1,61 | 1,15 | 0,5631372 | 0,70527  |
| CTC-527H23.3  | 0,00 | 0,00 | 0,09 | 0,00 | 0,5631915 | 0,705298 |
| RP11-193H5.8  | 0,00 | 0,00 | 0,00 | 0,00 | 0,5632185 | NA       |
| QKI           | 6,87 | 6,94 | 6,95 | 6,75 | 0,5632482 | 0,70533  |
| NDRG1         | 4,63 | 3,84 | 4,67 | 4,24 | 0,5633927 | 0,705395 |
| ALG8          | 5,46 | 3,28 | 4,75 | 5,33 | 0,5633982 | 0,705395 |
| DOLPP1        | 1,52 | 0,14 | 0,17 | 1,74 | 0,5634155 | 0,705395 |
| RP11-54611.1  | 1,31 | 2,66 | 0,68 | 0,18 | 0,5634269 | 0,705395 |
| AC008067.2    | 0,00 | 0,67 | 0,00 | 0,00 | 0,5634302 | NA       |
| TUFM          | 7,07 | 6,34 | 6,98 | 6,44 | 0,5635166 | 0,705467 |
| AL022344.2    | 0,00 | 0,00 | 0,00 | 0,00 | 0,5635882 | NA       |
| CTD-2576D5.2  | 0,00 | 0,00 | 0,00 | 0,00 | 0,5636438 | NA       |
| CFB           | 0,00 | 0,00 | 0,00 | 0,51 | 0,5637652 | NA       |
| SNORA20       | 0,00 | 0,00 | 0,75 | 1,76 | 0,5637814 | NA       |
| AC019118.2    | 0,00 | 0,00 | 0,10 | 0,00 | 0,5637876 | 0,705767 |
| RNU2-17P      | 0,00 | 0,00 | 0,00 | 0,00 | 0,5637907 | NA       |
| RP11-300I18.3 | 0,00 | 0,54 | 0,00 | 0,91 | 0,5638565 | 0,705813 |
| RP1-131F15.3  | 0,00 | 0,00 | 0,00 | 0,00 | 0,5639182 | NA       |
| AAED1         | 4,01 | 3,39 | 3,64 | 2,39 | 0,5639614 | 0,705884 |
| TMEM218       | 5,22 | 1,56 | 4,24 | 5,44 | 0,563977  | 0,705884 |
| CTA-415G2.2   | 0,00 | 0,00 | 0,00 | 0,00 | 0,5641085 | NA       |
| RP11-403E24.1 | 0,00 | 0,00 | 0,00 | 0,00 | 0,5642334 | NA       |
| RP13-582O9.5  | 1,46 | 0,00 | 3,00 | 4,25 | 0,5642966 | 0,706225 |
| ADH1A         | 0,00 | 0,00 | 0,00 | 0,00 | 0,5643823 | NA       |
| RP11-267M23.1 | 0,17 | 0,00 | 0,13 | 0,00 | 0,5643833 | 0,706225 |
| CCDC187       | 0,00 | 0,00 | 0,00 | 0,00 | 0,5644145 | 0,706225 |
| SMARCE1       | 5,75 | 4,21 | 5,37 | 5,19 | 0,5644512 | 0,706225 |
| MRPL22        | 6,07 | 4,53 | 5,38 | 5,23 | 0,5644889 | 0,706225 |
| DBR1          | 1,90 | 1,23 | 1,65 | 0,71 | 0,5645025 | 0,706225 |
| PJA2          | 5,17 | 4,82 | 5,58 | 4,50 | 0,5645072 | 0,706225 |
| ETV2          | 0,00 | 0,91 | 0,00 | 0,17 | 0,5645574 | 0,706225 |
| FER           | 4,30 | 4,21 | 4,64 | 4,16 | 0,5645658 | 0,706225 |
| AC007040.5    | 0,52 | 0,31 | 0,42 | 0,62 | 0,5645671 | 0,706225 |
| RP11-478C19.2 | 0,00 | 0,00 | 0,00 | 0,00 | 0,5646306 | NA       |
| RP11-157D23.1 | 0,00 | 0,00 | 0,00 | 0,00 | 0,5647072 | NA       |
| CEP290        | 2,06 | 1,87 | 2,03 | 2,85 | 0,5648118 | 0,706392 |
| PARD6G        | 0,06 | 0,09 | 0,09 | 0,06 | 0,5648202 | 0,706392 |
| RP11-513M16.7 | 0,00 | 0,00 | 0,00 | 0,00 | 0,5648412 | NA       |

|               |      |      |      |      |           |          |
|---------------|------|------|------|------|-----------|----------|
| EDC4          | 3,25 | 3,31 | 3,74 | 3,25 | 0,5648487 | 0,706392 |
| RP11-373M8.2  | 0,14 | 0,35 | 0,00 | 0,00 | 0,5648678 | 0,706392 |
| RNAS5P68      | 0,00 | 1,76 | 0,00 | 0,00 | 0,564887  | 0,706392 |
| CTD-2342N23.3 | 0,00 | 0,00 | 0,00 | 0,00 | 0,5648912 | 0,706392 |
| RAB12         | 1,42 | 2,55 | 1,68 | 2,15 | 0,5649381 | 0,706411 |
| RBM4          | 6,61 | 6,70 | 6,59 | 6,71 | 0,5652838 | 0,706804 |
| AC097495.2    | 0,00 | 0,00 | 0,00 | 0,00 | 0,5654942 | 0,707027 |
| PRRC2C        | 6,45 | 5,88 | 6,23 | 6,22 | 0,5657362 | 0,70729  |
| CTD-2033A16.1 | 0,43 | 0,38 | 0,26 | 0,00 | 0,5657477 | NA       |
| RNF14         | 3,55 | 3,14 | 2,31 | 3,01 | 0,5658211 | 0,707356 |
| RAD51L3-RFFL  | 0,00 | 0,00 | 0,00 | 0,00 | 0,5658387 | NA       |
| RP11-278A23.4 | 0,00 | 0,00 | 0,00 | 0,00 | 0,5658895 | NA       |
| RP11-514P8.6  | 0,00 | 0,00 | 0,00 | 0,00 | 0,56603   | NA       |
| RP11-463J7.2  | 0,05 | 0,06 | 0,00 | 0,18 | 0,5660508 | 0,707564 |
| RP11-4B16.1   | 0,55 | 0,06 | 0,65 | 0,26 | 0,566062  | 0,707564 |
| ZNF784        | 0,17 | 0,32 | 0,52 | 1,22 | 0,5660921 | 0,707564 |
| SNRK          | 3,86 | 2,60 | 3,61 | 2,11 | 0,5661255 | 0,707564 |
| FBXO33        | 3,40 | 1,84 | 2,82 | 3,83 | 0,5661483 | 0,707564 |
| NPAP1P2       | 0,00 | 0,44 | 0,00 | 0,00 | 0,566174  | NA       |
| RP11-680G24.6 | 0,00 | 0,00 | 0,00 | 0,00 | 0,5661786 | 0,707564 |
| RN7SL251P     | 0,00 | 0,00 | 0,00 | 0,00 | 0,5662041 | NA       |
| RP11-245G13.2 | 0,00 | 0,00 | 0,00 | 1,31 | 0,5663411 | 0,707727 |
| RP3-499B10.4  | 0,00 | 0,00 | 0,00 | 0,00 | 0,5663942 | 0,707754 |
| CTB-31O20.6   | 0,00 | 0,00 | 0,00 | 0,00 | 0,5663982 | NA       |
| RP11-54O15.3  | 0,00 | 0,00 | 0,00 | 0,00 | 0,566416  | NA       |
| RP11-9E17.1   | 0,00 | 0,05 | 0,00 | 0,00 | 0,5664703 | 0,707809 |
| AC074286.1    | 3,46 | 3,68 | 3,41 | 4,65 | 0,5665314 | 0,70781  |
| RNF13         | 6,45 | 7,09 | 6,55 | 6,58 | 0,5665349 | 0,70781  |
| LINC00443     | 0,00 | 0,00 | 0,00 | 0,00 | 0,5667665 | NA       |
| CDK20         | 0,00 | 0,00 | 0,00 | 0,00 | 0,5667845 | 0,708082 |
| RP11-406D1.2  | 0,00 | 0,21 | 0,00 | 0,00 | 0,5668226 | NA       |
| WASF1         | 0,00 | 0,00 | 0,00 | 0,00 | 0,5668545 | NA       |
| RP11-638I8.1  | 0,00 | 0,00 | 0,00 | 0,00 | 0,5668655 | NA       |
| TGFB1         | 2,17 | 1,03 | 2,13 | 2,14 | 0,5668794 | 0,708161 |
| RP11-556O5.4  | 0,19 | 0,00 | 0,00 | 0,00 | 0,5668961 | NA       |
| RP11-446E24.3 | 0,00 | 0,00 | 0,00 | 0,00 | 0,5669064 | NA       |
| RP11-251G23.2 | 0,00 | 0,00 | 0,00 | 0,00 | 0,5669268 | NA       |
| RP4-693M11.3  | 0,00 | 0,00 | 0,00 | 0,00 | 0,5669505 | NA       |
| CXCR5         | 0,29 | 0,17 | 0,16 | 0,33 | 0,5669947 | 0,708237 |
| RP11-323P17.1 | 0,23 | 1,17 | 1,15 | 1,30 | 0,5670106 | 0,708237 |
| SPG20         | 4,26 | 3,65 | 3,71 | 4,36 | 0,5670655 | 0,708237 |
| AC051649.16   | 2,47 | 0,88 | 1,27 | 1,01 | 0,5670677 | 0,708237 |
| RP11-710E1.2  | 0,00 | 0,00 | 0,00 | 0,00 | 0,5671303 | NA       |
| RP11-484D2.5  | 0,00 | 0,53 | 0,00 | 0,00 | 0,5671609 | 0,708314 |
| RP11-267A15.3 | 0,00 | 0,00 | 0,00 | 0,00 | 0,5672948 | NA       |
| NLRP11        | 0,17 | 0,00 | 0,18 | 0,40 | 0,5673799 | 0,708547 |
| RP1-292B18.3  | 0,00 | 0,00 | 0,00 | 0,00 | 0,5673852 | NA       |
| QTRT1         | 3,86 | 1,96 | 3,67 | 4,25 | 0,5674236 | 0,708562 |
| TRIM64B       | 0,00 | 0,00 | 0,00 | 0,00 | 0,5674758 | NA       |
| RN7SL521P     | 0,00 | 0,00 | 0,00 | 0,00 | 0,5675187 | NA       |
| GINM1         | 4,50 | 2,93 | 3,82 | 3,70 | 0,5675324 | 0,708606 |
| PHF3          | 4,45 | 2,99 | 4,16 | 4,43 | 0,5675419 | 0,708606 |
| RN7SL125P     | 0,00 | 2,25 | 0,96 | 1,00 | 0,5675542 | 0,708606 |
| GOT2          | 4,07 | 2,58 | 3,96 | 1,96 | 0,5676455 | 0,708628 |
| MTG1          | 5,02 | 5,40 | 5,04 | 5,32 | 0,5676642 | 0,708628 |

|                   |      |      |      |      |           |          |
|-------------------|------|------|------|------|-----------|----------|
| RP11-595B24.1     | 0,00 | 0,00 | 0,60 | 1,79 | 0,5676855 | 0,708628 |
| RP11-337C18.10    | 0,15 | 0,00 | 0,00 | 0,00 | 0,5676992 | 0,708628 |
| RP11-403C10.2     | 0,00 | 0,00 | 0,00 | 0,00 | 0,567761  | NA       |
| COL14A1           | 0,06 | 0,00 | 0,04 | 0,00 | 0,5677756 | 0,708683 |
| MS4A8             | 0,00 | 0,00 | 0,00 | 0,00 | 0,567778  | NA       |
| MPP4              | 0,70 | 0,50 | 0,97 | 0,32 | 0,5679226 | 0,708803 |
| OR7D4             | 0,19 | 0,47 | 0,21 | 0,34 | 0,5679352 | 0,708803 |
| RP11-400F19.6     | 1,07 | 0,00 | 0,08 | 0,00 | 0,5681617 | 0,708979 |
| BAIAP2-AS1        | 1,51 | 1,72 | 1,77 | 1,62 | 0,5681742 | 0,708979 |
| RP1-102E24.8      | 0,07 | 0,08 | 0,00 | 0,07 | 0,5681881 | 0,708979 |
| PCNX3             | 1,85 | 2,92 | 2,31 | 1,27 | 0,5682043 | 0,708979 |
| RP5-834N19.1      | 0,00 | 0,00 | 0,00 | 0,00 | 0,5682313 | NA       |
| GPR137            | 1,18 | 0,87 | 1,77 | 2,22 | 0,5682499 | 0,708997 |
| RP3-509I19.11     | 0,00 | 0,35 | 0,00 | 0,42 | 0,5682568 | NA       |
| RPS3AP39          | 0,15 | 0,24 | 0,00 | 0,22 | 0,5683331 | NA       |
| LINC00921         | 0,62 | 0,73 | 0,62 | 0,32 | 0,568404  | 0,709149 |
| PKN3              | 0,00 | 0,00 | 0,00 | 0,00 | 0,5684193 | NA       |
| RP11-981G7.6      | 0,08 | 0,00 | 0,00 | 0,12 | 0,5685029 | 0,709207 |
| FAM90A24P         | 0,00 | 0,00 | 0,00 | 0,06 | 0,5685227 | NA       |
| RP11-243M5.3      | 0,42 | 0,84 | 0,49 | 0,33 | 0,5685328 | 0,709207 |
| RP11-93K22.13     | 0,00 | 0,00 | 0,00 | 0,00 | 0,5685391 | NA       |
| SOST              | 0,00 | 0,00 | 0,00 | 0,25 | 0,5685509 | 0,709207 |
| ABCA3             | 0,00 | 0,00 | 0,00 | 0,68 | 0,5685785 | 0,709207 |
| C19orf40          | 2,16 | 2,18 | 1,78 | 2,46 | 0,5686267 | 0,709228 |
| RP4-803J11.2      | 0,00 | 0,00 | 0,00 | 0,00 | 0,5687261 | NA       |
| RP11-214K3.24     | 0,06 | 0,52 | 0,28 | 0,23 | 0,568743  | 0,709333 |
| IGFBP3            | 0,00 | 0,00 | 0,00 | 0,00 | 0,5688104 | NA       |
| SMARCD1           | 2,94 | 2,83 | 2,17 | 1,05 | 0,5689356 | 0,709486 |
| ALKBH8            | 1,09 | 0,68 | 1,48 | 0,82 | 0,5689469 | 0,709486 |
| DHFR              | 0,82 | 1,76 | 0,67 | 0,72 | 0,5689796 | 0,709486 |
| RP11-187O7.3      | 0,00 | 0,00 | 0,00 | 0,00 | 0,5690171 | 0,709486 |
| NOP16             | 5,47 | 4,47 | 5,31 | 5,92 | 0,569038  | 0,709486 |
| TBCK              | 3,80 | 2,54 | 4,23 | 2,10 | 0,5690574 | 0,709486 |
| SH3RF1            | 2,83 | 0,62 | 2,58 | 1,10 | 0,569094  | 0,709492 |
| AP002856.5        | 0,00 | 0,00 | 0,00 | 0,00 | 0,5691694 | NA       |
| CTA-21C21.1       | 0,00 | 0,00 | 0,00 | 0,00 | 0,5691694 | NA       |
| RP11-137L10.6     | 1,89 | 3,94 | 2,67 | 1,69 | 0,56926   | 0,709659 |
| RN7SLS7P          | 0,00 | 0,00 | 0,00 | 0,00 | 0,5693691 | 0,709755 |
| LL22NC03-N95F10.1 | 0,00 | 0,35 | 0,00 | 0,00 | 0,5694525 | NA       |
| AC016909.1        | 0,00 | 0,00 | 0,00 | 0,00 | 0,5694931 | 0,709849 |
| AC006042.6        | 0,00 | 0,00 | 0,00 | 0,00 | 0,5694987 | NA       |
| CEACAM3           | 0,23 | 0,00 | 0,00 | 0,00 | 0,5695084 | 0,709849 |
| RP11-231G3.1      | 0,00 | 0,00 | 0,00 | 0,28 | 0,5695406 | NA       |
| CCT8P1            | 0,07 | 0,00 | 0,00 | 0,00 | 0,5695778 | 0,709896 |
| IRGQ              | 2,59 | 1,78 | 2,85 | 1,84 | 0,5696303 | 0,709918 |
| RP11-380O24.1     | 1,32 | 0,79 | 0,15 | 1,15 | 0,5696898 | 0,709918 |
| EME1              | 0,00 | 0,00 | 0,00 | 0,00 | 0,5696987 | 0,709918 |
| DDX47             | 5,33 | 4,14 | 4,25 | 3,49 | 0,5697229 | 0,709918 |
| GPR1              | 0,34 | 0,09 | 0,19 | 0,45 | 0,5698067 | 0,709982 |
| HIGD1C            | 0,00 | 0,00 | 0,00 | 0,00 | 0,5698794 | NA       |
| BEST2             | 0,37 | 1,09 | 0,41 | 0,55 | 0,5699267 | 0,710085 |
| C1orf101          | 0,00 | 0,00 | 0,04 | 0,00 | 0,5699534 | 0,710085 |
| CTC-281F24.3      | 1,00 | 1,45 | 1,11 | 1,18 | 0,5699969 | 0,7101   |
| ZNF764            | 0,89 | 0,11 | 1,14 | 0,56 | 0,5701223 | 0,710216 |
| LL22NC03-2H8.4    | 0,00 | 0,00 | 0,00 | 0,00 | 0,5701271 | NA       |



|               |      |      |      |      |           |          |
|---------------|------|------|------|------|-----------|----------|
| RP11-699C17.1 | 0,00 | 0,00 | 0,00 | 0,00 | 0,5703161 | NA       |
| MAP2K1        | 5,67 | 4,00 | 5,50 | 4,72 | 0,5704661 | 0,710605 |
| RP3-508115.14 | 0,00 | 0,00 | 0,00 | 0,00 | 0,5705157 | 0,710627 |
| BMPR2         | 2,11 | 1,49 | 2,63 | 2,01 | 0,5706414 | 0,710731 |
| RP11-40C6.3   | 0,95 | 0,59 | 0,76 | 0,31 | 0,570663  | 0,710731 |
| RP11-324H7.1  | 0,00 | 0,00 | 0,09 | 0,10 | 0,5706993 | NA       |
| AC006129.4    | 0,78 | 0,88 | 1,16 | 0,00 | 0,5707099 | 0,710745 |
| TEX15         | 0,00 | 0,47 | 0,00 | 0,00 | 0,5707385 | 0,710745 |
| ROBO3         | 3,38 | 4,19 | 2,54 | 2,93 | 0,5708087 | 0,710792 |
| TRDN          | 0,00 | 0,03 | 0,00 | 0,08 | 0,5708331 | NA       |
| RN7SKP3       | 0,00 | 0,00 | 0,00 | 0,00 | 0,5708505 | NA       |
| AC002472.11   | 1,71 | 0,64 | 1,05 | 2,59 | 0,5708713 | 0,710831 |
| ADTB1L1       | 0,00 | 0,00 | 0,00 | 0,00 | 0,5709932 | NA       |
| CASP16P       | 0,20 | 0,14 | 0,37 | 0,28 | 0,5710069 | 0,71096  |
| SNORD53B      | 0,00 | 0,00 | 0,00 | 0,00 | 0,5710189 | NA       |
| HMGB1P14      | 0,00 | 0,00 | 0,00 | 0,00 | 0,5710321 | NA       |
| RP11-632K5.5  | 0,40 | 0,00 | 0,28 | 0,70 | 0,5710548 | 0,710976 |
| ERI1          | 2,13 | 1,68 | 2,09 | 1,83 | 0,5711157 | 0,710976 |
| ZNF559        | 3,61 | 1,21 | 1,14 | 0,54 | 0,571116  | 0,710976 |
| SLC35G2       | 0,13 | 0,05 | 0,17 | 0,11 | 0,5711856 | 0,711    |
| CMC1          | 5,28 | 4,59 | 4,76 | 5,11 | 0,5711994 | 0,711    |
| HSD17B14      | 0,00 | 0,00 | 0,00 | 0,00 | 0,5712939 | NA       |
| MLN           | 0,00 | 0,00 | 0,00 | 0,00 | 0,5713685 | NA       |
| YRDC          | 3,14 | 1,10 | 3,41 | 1,25 | 0,5713883 | 0,711195 |
| HNRPCP        | 0,00 | 0,00 | 0,00 | 0,00 | 0,5714114 | NA       |
| RP11-25619.3  | 0,00 | 0,39 | 0,00 | 0,00 | 0,5714212 | NA       |
| CTC-526N19.1  | 0,22 | 0,21 | 0,10 | 0,06 | 0,5716946 | 0,711537 |
| SLC25A31      | 0,00 | 0,00 | 0,00 | 0,00 | 0,5717309 | NA       |
| CTC-378H22.2  | 0,21 | 0,22 | 0,08 | 0,30 | 0,5717373 | 0,71155  |
| IL15          | 3,14 | 3,59 | 3,70 | 2,78 | 0,5718969 | 0,711709 |
| SLC6A1        | 1,54 | 1,48 | 1,36 | 0,62 | 0,5719332 | 0,711714 |
| CTD-2313110.1 | 0,31 | 0,77 | 0,51 | 0,46 | 0,5720137 | 0,711775 |
| SNORD14E      | 1,92 | 0,00 | 3,35 | 0,00 | 0,5720682 | 0,711798 |
| CFAP45        | 0,00 | 0,62 | 0,00 | 0,00 | 0,5720965 | 0,711798 |
| ALS2CR12      | 0,47 | 0,20 | 1,04 | 2,16 | 0,5722036 | 0,711891 |
| STRIP1        | 4,04 | 4,96 | 3,65 | 3,78 | 0,5722542 | 0,711914 |
| IFT80         | 2,89 | 3,65 | 2,31 | 3,22 | 0,5722965 | 0,711927 |
| RP11-545N8.3  | 0,00 | 0,00 | 0,00 | 0,00 | 0,5723445 | NA       |
| RP11-290D2.6  | 0,00 | 0,00 | 0,30 | 0,00 | 0,5723937 | 0,712008 |
| AC098817.1    | 0,00 | 0,00 | 0,00 | 0,00 | 0,5724036 | NA       |
| RP11-301L8.2  | 0,00 | 0,00 | 0,00 | 0,00 | 0,5724101 | NA       |
| MIR616        | 4,79 | 5,03 | 3,95 | 0,00 | 0,5725102 | 0,712113 |
| RP11-91G21.1  | 0,00 | 0,00 | 0,00 | 0,40 | 0,5725943 | 0,712178 |
| DNAJB2        | 1,18 | 2,73 | 1,22 | 2,81 | 0,5726759 | 0,71224  |
| GOLGA7B       | 0,00 | 0,00 | 0,00 | 0,00 | 0,5727259 | 0,712241 |
| FTH1P15       | 3,46 | 2,72 | 3,65 | 3,34 | 0,5727415 | 0,712241 |
| RN7SKP292     | 0,00 | 0,00 | 0,00 | 0,00 | 0,5728059 | NA       |
| RP11-176N18.2 | 0,00 | 0,39 | 0,00 | 0,00 | 0,5728147 | NA       |
| MUS81         | 3,16 | 3,14 | 2,66 | 2,47 | 0,5728246 | 0,712305 |
| RP11-612B6.2  | 0,00 | 0,00 | 0,00 | 0,00 | 0,5729845 | NA       |
| RP5-836N10.1  | 3,30 | 4,32 | 3,43 | 2,89 | 0,5729895 | 0,71247  |
| AC015849.15   | 0,04 | 0,12 | 0,05 | 0,05 | 0,5730526 | 0,712507 |
| LTA4H         | 6,56 | 4,57 | 5,95 | 5,86 | 0,5730835 | 0,712507 |
| AC013400.1    | 0,00 | 0,00 | 0,00 | 0,00 | 0,573146  | NA       |
| YEATS2        | 2,99 | 2,55 | 3,02 | 1,10 | 0,5731828 | 0,712591 |

|                 |      |      |      |      |           |          |
|-----------------|------|------|------|------|-----------|----------|
| RP11-250B2.3    | 0,00 | 0,00 | 0,00 | 0,00 | 0,5732006 | NA       |
| CRHR2           | 0,00 | 0,17 | 0,00 | 0,00 | 0,5732264 | 0,712605 |
| RP11-108P2.1    | 0,00 | 0,00 | 0,00 | 0,00 | 0,5735022 | NA       |
| CTD-3020H12.4   | 0,61 | 0,00 | 0,84 | 0,69 | 0,5735071 | 0,712914 |
| ACAD11          | 2,91 | 1,38 | 1,41 | 2,07 | 0,5736564 | 0,713047 |
| RP11-746M1.8    | 0,00 | 0,00 | 0,00 | 0,00 | 0,5736837 | NA       |
| RP11-697N18.4   | 0,23 | 0,00 | 0,00 | 1,18 | 0,5737001 | 0,713047 |
| RP11-486B10.4   | 0,00 | 0,00 | 0,00 | 0,00 | 0,5737057 | NA       |
| TBC1D25         | 0,94 | 0,72 | 1,65 | 0,27 | 0,5737102 | 0,713047 |
| CADM4           | 0,00 | 0,00 | 0,00 | 0,00 | 0,5737927 | NA       |
| USP46           | 1,78 | 1,42 | 2,53 | 1,57 | 0,5738325 | 0,713159 |
| CTD-2060L22.1   | 0,00 | 0,00 | 0,00 | 0,00 | 0,5739182 | NA       |
| RNA5SP82        | 0,00 | 0,00 | 0,00 | 0,00 | 0,5739259 | NA       |
| AP000892.6      | 1,29 | 0,11 | 1,31 | 1,34 | 0,5739416 | 0,713222 |
| RP1-56L9.7      | 0,54 | 0,07 | 0,67 | 0,37 | 0,5739471 | 0,713222 |
| NAXD            | 1,98 | 1,97 | 1,92 | 1,81 | 0,574077  | 0,713343 |
| RP1-240K6.3     | 0,00 | 0,00 | 0,00 | 0,00 | 0,5741633 | NA       |
| MOB4            | 4,81 | 1,40 | 4,69 | 4,11 | 0,5742207 | 0,713339 |
| PLD2            | 2,66 | 1,40 | 3,34 | 2,91 | 0,5742749 | 0,713339 |
| WDR81           | 2,59 | 3,07 | 3,45 | 2,93 | 0,5743154 | 0,713339 |
| CTB-193M12.3    | 1,29 | 0,41 | 0,91 | 0,69 | 0,574319  | 0,713339 |
| OR10V3P         | 0,36 | 0,51 | 0,26 | 0,81 | 0,5743597 | 0,713339 |
| PRDM12          | 0,00 | 0,00 | 0,00 | 0,05 | 0,574368  | 0,713339 |
| MAU2            | 2,81 | 2,21 | 3,26 | 2,70 | 0,5743899 | 0,713339 |
| ENOSF1          | 2,75 | 2,60 | 1,92 | 1,64 | 0,5744013 | 0,713339 |
| GIMAP5          | 0,07 | 0,00 | 0,09 | 1,63 | 0,5744035 | 0,713339 |
| RNU5F-2P        | 0,00 | 0,00 | 0,00 | 0,00 | 0,5744169 | NA       |
| USP17L20        | 0,00 | 0,01 | 0,00 | 0,00 | 0,5744434 | NA       |
| STX2            | 2,01 | 2,61 | 2,30 | 2,66 | 0,5744773 | 0,713442 |
| ADAMTS8         | 0,00 | 0,00 | 0,00 | 0,06 | 0,5745454 | NA       |
| RPP14           | 2,70 | 2,58 | 2,29 | 3,22 | 0,5745514 | 0,713494 |
| F8A1            | 3,08 | 3,02 | 3,23 | 3,37 | 0,5746329 | 0,713556 |
| RP11-1020A11.1  | 0,00 | 0,39 | 0,00 | 0,00 | 0,5746636 | NA       |
| DNPH1           | 6,16 | 6,24 | 6,28 | 5,74 | 0,5748884 | 0,713799 |
| ENDOD1          | 1,52 | 0,18 | 1,14 | 0,67 | 0,5748931 | 0,713799 |
| SNX13           | 4,19 | 3,93 | 3,87 | 3,10 | 0,5749658 | 0,713849 |
| GUCD1           | 4,35 | 4,29 | 3,81 | 4,34 | 0,5750563 | 0,713909 |
| RP4-675C20.4    | 0,00 | 0,00 | 0,00 | 0,09 | 0,575078  | 0,713909 |
| RP11-459F6.3    | 0,00 | 0,00 | 0,00 | 0,00 | 0,5751442 | NA       |
| RP11-91A18.5    | 0,00 | 0,00 | 0,00 | 0,00 | 0,5751943 | NA       |
| C9orf16         | 5,96 | 5,98 | 6,00 | 6,03 | 0,5752003 | 0,714021 |
| XXbac-B135H6.15 | 1,67 | 1,92 | 0,52 | 0,30 | 0,5752387 | 0,714029 |
| GAL3ST1         | 0,00 | 0,37 | 0,08 | 0,00 | 0,5752886 | NA       |
| AE000662.92     | 0,00 | 0,00 | 0,00 | 0,00 | 0,5753273 | NA       |
| CH17-340M24.3   | 2,80 | 4,25 | 2,44 | 2,17 | 0,5753351 | 0,714088 |
| CTD-2162K18.3   | 0,07 | 0,24 | 0,00 | 0,00 | 0,5753512 | 0,714088 |
| TEX37           | 0,00 | 0,00 | 0,00 | 0,00 | 0,5753621 | NA       |
| SRRM4           | 0,10 | 0,16 | 0,09 | 0,11 | 0,5754274 | 0,714141 |
| STEAP1          | 0,00 | 0,00 | 0,00 | 0,00 | 0,5754395 | NA       |
| HSD17B11        | 6,23 | 4,69 | 5,53 | 5,50 | 0,575458  | 0,714141 |
| OR2J4P          | 0,00 | 0,00 | 0,00 | 0,00 | 0,5754643 | NA       |
| RP11-121L10.2   | 0,00 | 0,00 | 0,00 | 0,00 | 0,5754702 | NA       |
| AC114812.8      | 0,34 | 0,30 | 0,43 | 0,88 | 0,575595  | 0,714271 |
| RP11-484L8.1    | 0,00 | 0,00 | 0,00 | 0,00 | 0,5756492 | NA       |
| CHI3L2          | 1,21 | 2,57 | 2,02 | 1,46 | 0,5757245 | 0,714384 |

|                |      |      |      |      |           |          |
|----------------|------|------|------|------|-----------|----------|
| CTD-3030D20.2  | 0,00 | 0,00 | 0,00 | 0,00 | 0,5757418 | NA       |
| RP11-160H22.1  | 0,91 | 0,97 | 1,78 | 1,61 | 0,575758  | 0,714384 |
| MRPL10         | 4,97 | 4,18 | 3,88 | 3,76 | 0,5757824 | 0,714384 |
| SHMT1          | 1,08 | 1,62 | 1,00 | 0,44 | 0,5759535 | 0,714557 |
| CBX3           | 5,99 | 6,00 | 5,41 | 5,40 | 0,5760647 | 0,714655 |
| RP11-718O11.1  | 0,67 | 1,12 | 1,04 | 1,55 | 0,576158  | 0,71473  |
| RP11-155D18.13 | 0,41 | 0,80 | 0,44 | 0,39 | 0,5762872 | 0,714851 |
| TYW3           | 4,11 | 4,14 | 4,46 | 4,53 | 0,5763881 | 0,714936 |
| RP11-345M4.1   | 0,00 | 0,00 | 0,00 | 0,00 | 0,5764044 | NA       |
| YIPF2          | 1,99 | 0,35 | 3,27 | 2,87 | 0,5764738 | 0,715003 |
| DNAJC13        | 4,10 | 3,32 | 3,84 | 3,27 | 0,576565  | 0,715076 |
| OR4N3P         | 0,00 | 0,00 | 0,00 | 0,00 | 0,5765816 | NA       |
| CTC-336P14.1   | 0,00 | 0,00 | 0,00 | 0,00 | 0,5766199 | NA       |
| RP11-753N8.1   | 0,00 | 0,00 | 0,00 | 0,00 | 0,5766247 | NA       |
| C15orf58       | 1,40 | 0,73 | 1,63 | 1,74 | 0,5766293 | 0,715116 |
| RP11-242C19.2  | 0,00 | 0,00 | 1,14 | 0,33 | 0,5766695 | 0,715125 |
| RNU6-510P      | 0,00 | 0,00 | 0,00 | 0,00 | 0,5766716 | NA       |
| C11orf70       | 0,19 | 0,37 | 0,40 | 0,12 | 0,5767081 | 0,715134 |
| RP11-115K3.2   | 0,00 | 0,11 | 0,00 | 0,00 | 0,5769094 | NA       |
| RP4-777D9.2    | 0,56 | 0,90 | 0,52 | 0,41 | 0,5769417 | 0,715383 |
| NOP2           | 3,34 | 3,22 | 3,17 | 2,92 | 0,5769918 | 0,715406 |
| CD2AP          | 3,83 | 2,95 | 3,28 | 2,47 | 0,5770662 | 0,715458 |
| SMG5           | 2,41 | 2,87 | 2,52 | 3,00 | 0,5771581 | 0,715532 |
| RNU4ATAC18P    | 0,00 | 0,00 | 0,00 | 0,00 | 0,5772345 | NA       |
| RGPD8          | 1,07 | 0,49 | 0,98 | 1,08 | 0,5772901 | 0,715656 |
| RP3-448I9.1    | 0,00 | 0,00 | 0,00 | 0,00 | 0,5772914 | NA       |
| RP11-1148L6.9  | 0,00 | 0,00 | 0,00 | 0,36 | 0,5774892 | 0,715862 |
| FAM120A        | 4,87 | 4,44 | 4,93 | 4,98 | 0,5775241 | 0,715866 |
| SLC32A1        | 0,00 | 0,00 | 0,00 | 0,00 | 0,5775724 | NA       |
| RP4-568F9.7    | 0,00 | 0,00 | 0,00 | 0,00 | 0,5776118 | NA       |
| RP11-315A16.3  | 0,00 | 0,00 | 0,00 | 1,44 | 0,5777281 | 0,716049 |
| CTB-118N6.2    | 0,00 | 0,00 | 0,00 | 0,39 | 0,577736  | 0,716049 |
| RN7SL578P      | 0,00 | 0,00 | 0,00 | 0,00 | 0,5777743 | NA       |
| RP1-80N2.3     | 0,07 | 0,11 | 0,13 | 0,09 | 0,5777754 | 0,716057 |
| RP3-407E4.4    | 0,00 | 0,00 | 0,00 | 0,00 | 0,5778047 | NA       |
| RP11-401L13.2  | 0,00 | 0,00 | 0,00 | 0,00 | 0,5778379 | NA       |
| RP11-458J1.1   | 0,13 | 0,46 | 0,26 | 0,30 | 0,577861  | 0,716124 |
| RP11-459I19.1  | 0,00 | 0,00 | 0,00 | 0,00 | 0,5780355 | NA       |
| RP11-520M5.5   | 0,58 | 0,28 | 0,62 | 1,19 | 0,5780723 | 0,716346 |
| EYA3           | 4,13 | 3,54 | 3,98 | 2,26 | 0,5781376 | 0,716387 |
| CTB-167B5.1    | 0,00 | 0,00 | 0,00 | 0,00 | 0,5781544 | NA       |
| RP1-172N19.2   | 0,00 | 2,65 | 0,00 | 0,00 | 0,5782189 | 0,716421 |
| CTD-2653B5.1   | 0,00 | 0,00 | 0,00 | 0,00 | 0,5782881 | NA       |
| RP11-702L15.4  | 0,61 | 0,63 | 0,66 | 0,00 | 0,5783245 | 0,716421 |
| CTD-3092A11.1  | 2,96 | 2,07 | 2,65 | 2,88 | 0,5783329 | 0,716421 |
| RP11-350G13.1  | 0,24 | 0,36 | 0,29 | 0,34 | 0,5783419 | 0,716421 |
| ZNF780A        | 3,89 | 4,52 | 3,55 | 4,25 | 0,5783515 | 0,716421 |
| CTD-2651B20.5  | 0,21 | 0,65 | 0,56 | 0,48 | 0,5783634 | 0,716421 |
| SC22CB-1E7.1   | 0,00 | 0,00 | 0,00 | 0,00 | 0,578432  | 0,716421 |
| AC073333.8     | 0,00 | 0,00 | 0,00 | 0,00 | 0,5784372 | 0,716421 |
| CTD-2081C10.1  | 0,00 | 0,00 | 0,00 | 0,00 | 0,5784389 | NA       |
| RP11-802O23.3  | 1,88 | 0,00 | 0,38 | 0,30 | 0,5784773 | 0,716421 |
| KB-1995A5.5    | 0,24 | 0,35 | 0,29 | 0,38 | 0,5784874 | 0,716421 |
| RNU6-593P      | 0,00 | 0,00 | 0,00 | 0,00 | 0,5785328 | NA       |
| AC096579.14    | 1,07 | 1,57 | 1,03 | 1,05 | 0,5787612 | 0,716691 |

|               |      |      |      |      |           |          |
|---------------|------|------|------|------|-----------|----------|
| NDUFAF3       | 5,80 | 6,65 | 5,77 | 5,98 | 0,5787862 | 0,716691 |
| RP4-549L20.2  | 0,00 | 0,00 | 0,00 | 0,52 | 0,5788023 | 0,716691 |
| RAD23A        | 5,75 | 4,72 | 5,59 | 5,18 | 0,5789779 | 0,716868 |
| RP11-532F6.2  | 0,00 | 0,00 | 0,00 | 0,00 | 0,5790561 | NA       |
| MESTIT1       | 0,11 | 0,13 | 0,10 | 0,09 | 0,5791713 | 0,717068 |
| TNNC2         | 0,00 | 0,00 | 0,00 | 0,00 | 0,579306  | NA       |
| SLC50A1       | 5,67 | 4,81 | 5,01 | 5,25 | 0,5793692 | 0,717273 |
| DMAP1         | 4,90 | 4,22 | 4,90 | 4,55 | 0,5794048 | 0,717277 |
| ZNF81         | 1,51 | 0,02 | 1,85 | 1,57 | 0,5794669 | 0,7173   |
| AC139887.4    | 0,00 | 0,00 | 0,00 | 0,00 | 0,5794692 | NA       |
| ARSF          | 0,05 | 0,00 | 0,07 | 0,07 | 0,5794873 | NA       |
| AC138517.6    | 0,05 | 0,00 | 0,13 | 0,14 | 0,5794877 | 0,7173   |
| RNU5F-8P      | 0,00 | 0,00 | 0,00 | 0,00 | 0,5796589 | NA       |
| RP11-433J8.1  | 0,07 | 0,35 | 0,08 | 0,13 | 0,5797639 | 0,717602 |
| CTRB1         | 0,00 | 0,00 | 0,00 | 0,11 | 0,5797866 | NA       |
| EML5          | 0,00 | 0,00 | 0,00 | 0,00 | 0,5798411 | 0,717657 |
| RP13-136L2.1  | 0,14 | 0,00 | 0,00 | 0,00 | 0,5798736 | NA       |
| RNU6-319P     | 0,00 | 0,00 | 0,00 | 0,00 | 0,5799128 | 0,717706 |
| SYTL1         | 5,53 | 4,49 | 5,75 | 5,64 | 0,5800017 | 0,717741 |
| RP11-343C2.12 | 0,93 | 0,37 | 0,60 | 2,19 | 0,5800182 | 0,717741 |
| C21orf81      | 0,00 | 0,04 | 0,08 | 0,00 | 0,5800377 | 0,717741 |
| RP11-727M10.1 | 0,00 | 0,00 | 0,00 | 0,00 | 0,5800987 | NA       |
| UBAP2L        | 5,28 | 4,97 | 5,25 | 5,07 | 0,5801269 | 0,717811 |
| TECPR2        | 1,12 | 0,89 | 0,92 | 0,98 | 0,5801722 | 0,717827 |
| RP11-700F16.3 | 0,00 | 0,00 | 0,00 | 0,00 | 0,5803102 | NA       |
| ROM1          | 0,00 | 1,01 | 0,00 | 0,00 | 0,5803204 | 0,717933 |
| SPEN          | 4,62 | 3,79 | 3,98 | 3,82 | 0,5803916 | 0,717933 |
| RP1-85F18.6   | 0,00 | 0,00 | 0,00 | 0,00 | 0,5804005 | 0,717933 |
| TRAIP         | 0,00 | 0,00 | 0,00 | 0,00 | 0,5804074 | 0,717933 |
| XPOT          | 2,69 | 3,10 | 2,26 | 1,99 | 0,5804197 | 0,717933 |
| AC111200.10   | 0,00 | 0,00 | 0,00 | 0,00 | 0,5804492 | NA       |
| RP11-705O24.4 | 0,00 | 0,00 | 0,00 | 0,00 | 0,5805223 | NA       |
| CPT2          | 2,67 | 2,39 | 2,36 | 2,24 | 0,5805462 | 0,71805  |
| KRTAP5-8      | 0,00 | 0,00 | 0,00 | 0,00 | 0,5805506 | NA       |
| RP11-294N21.3 | 0,00 | 0,00 | 0,00 | 0,00 | 0,580573  | NA       |
| AC084193.1    | 0,00 | 0,00 | 0,00 | 0,00 | 0,5805787 | NA       |
| AC104537.2    | 0,00 | 0,00 | 0,00 | 0,00 | 0,5806023 | NA       |
| TYSND1        | 2,97 | 2,62 | 2,09 | 2,37 | 0,5806473 | 0,718135 |
| RP11-304L19.5 | 2,38 | 2,28 | 2,16 | 3,36 | 0,5807056 | 0,718167 |
| RP3-402G11.27 | 0,00 | 0,00 | 0,00 | 0,00 | 0,5807104 | NA       |
| SNORA77       | 0,00 | 2,49 | 0,00 | 0,00 | 0,5808085 | NA       |
| AOC2          | 0,00 | 0,00 | 0,00 | 0,00 | 0,580965  | NA       |
| RP11-144L1.2  | 0,00 | 0,00 | 0,00 | 0,00 | 0,5809739 | NA       |
| RADIL         | 0,08 | 0,19 | 0,05 | 0,10 | 0,5810509 | 0,718549 |
| AC079305.10   | 2,58 | 2,15 | 2,95 | 2,64 | 0,5810791 | 0,718549 |
| MIR6724-1     | 0,00 | 1,42 | 0,00 | 0,00 | 0,5811405 | NA       |
| MIR6724-2     | 0,00 | 1,42 | 0,00 | 0,00 | 0,5811405 | NA       |
| MIR6724-3     | 0,00 | 1,42 | 0,00 | 0,00 | 0,5811405 | NA       |
| MIR6724-4     | 0,00 | 1,42 | 0,00 | 0,00 | 0,5811405 | NA       |
| ARL10         | 0,50 | 0,40 | 0,39 | 0,71 | 0,5811772 | 0,71863  |
| MIR4425       | 0,00 | 2,24 | 0,00 | 0,00 | 0,5812982 | NA       |
| MASTL         | 2,33 | 1,33 | 1,23 | 0,84 | 0,5813064 | 0,71875  |
| ARCN1         | 5,09 | 5,32 | 5,18 | 4,31 | 0,5813637 | 0,718762 |
| RP11-585F1.6  | 0,00 | 0,00 | 0,00 | 0,00 | 0,5814032 | 0,718762 |
| ITGAV         | 1,61 | 2,25 | 1,20 | 1,71 | 0,5814128 | 0,718762 |

|                |      |      |      |      |           |          |
|----------------|------|------|------|------|-----------|----------|
| CCDC180        | 0,55 | 1,31 | 0,65 | 0,41 | 0,5814834 | 0,718809 |
| RP11-1055B8.9  | 0,00 | 0,00 | 0,00 | 0,00 | 0,5816383 | NA       |
| RP5-855D21.1   | 0,00 | 0,00 | 0,00 | 0,00 | 0,5816786 | 0,71901  |
| POMGNT2        | 0,05 | 0,05 | 0,08 | 0,09 | 0,5817415 | 0,719048 |
| TMEM183A       | 4,81 | 4,86 | 4,24 | 4,62 | 0,5818219 | 0,719107 |
| RP11-735G4.1   | 0,00 | 0,13 | 0,00 | 0,00 | 0,5818597 | NA       |
| RP11-454P7.1   | 0,00 | 0,00 | 0,00 | 0,00 | 0,5818716 | NA       |
| GATB           | 4,17 | 2,75 | 3,53 | 4,04 | 0,5819641 | 0,719243 |
| RP11-616L12.1  | 1,14 | 0,36 | 1,03 | 0,34 | 0,5820262 | 0,71928  |
| RP1-206D15.6   | 0,00 | 0,00 | 0,00 | 0,00 | 0,5820714 | 0,719296 |
| ZNF157         | 0,30 | 0,21 | 0,13 | 0,14 | 0,5822063 | 0,719423 |
| RP1-283E3.4    | 0,00 | 0,00 | 0,00 | 0,03 | 0,5823051 | 0,719505 |
| CTB-193M12.1   | 0,00 | 0,00 | 0,00 | 0,00 | 0,58231   | NA       |
| Z95114.8       | 0,00 | 0,00 | 0,08 | 0,00 | 0,5824775 | 0,719678 |
| RP11-316M21.8  | 0,34 | 0,45 | 0,35 | 0,59 | 0,5825612 | 0,719741 |
| SLC4A7         | 4,09 | 2,22 | 3,85 | 4,02 | 0,5826237 | 0,719771 |
| RP11-134E15.2  | 0,00 | 0,00 | 0,00 | 0,00 | 0,5826752 | NA       |
| APOM           | 2,46 | 0,00 | 0,77 | 0,29 | 0,5827196 | 0,719771 |
| RP4-756H11.5   | 1,90 | 1,48 | 1,59 | 1,85 | 0,5827247 | 0,719771 |
| FAM120B        | 3,34 | 3,51 | 2,94 | 3,06 | 0,582735  | 0,719771 |
| RP11-378A13.1  | 0,39 | 0,67 | 0,82 | 0,76 | 0,5827476 | 0,719771 |
| OR14L1P        | 0,29 | 0,64 | 0,31 | 0,00 | 0,582812  | 0,719796 |
| TGFBR2         | 4,30 | 5,03 | 3,99 | 3,53 | 0,5828746 | 0,719796 |
| PLA2G4A        | 2,28 | 0,85 | 1,16 | 0,38 | 0,5828804 | 0,719796 |
| PLEKHO2        | 2,71 | 2,35 | 3,17 | 3,44 | 0,582897  | 0,719796 |
| FTCDNL1        | 2,43 | 0,00 | 2,19 | 0,97 | 0,5829359 | 0,719804 |
| RP11-404E16.1  | 0,00 | 0,00 | 0,00 | 0,00 | 0,5829498 | NA       |
| CTD-2083E4.6   | 0,00 | 0,00 | 0,00 | 0,82 | 0,5830577 | 0,719914 |
| LINC00896      | 0,00 | 0,00 | 0,00 | 0,00 | 0,5830711 | NA       |
| ZNF433         | 3,36 | 3,29 | 2,74 | 1,87 | 0,58309   | 0,719914 |
| RP13-685P2.7   | 0,00 | 0,00 | 0,00 | 0,00 | 0,5832528 | NA       |
| VHL            | 2,73 | 3,48 | 3,03 | 2,94 | 0,5832723 | 0,720072 |
| DNAJC9-AS1     | 0,00 | 2,73 | 0,25 | 0,06 | 0,5832858 | 0,720072 |
| AC099535.3     | 0,00 | 0,00 | 0,00 | 0,00 | 0,5832963 | NA       |
| HIST2H2BC      | 1,81 | 0,00 | 0,00 | 0,35 | 0,5833153 | 0,720072 |
| FAM217A        | 0,00 | 0,00 | 0,00 | 0,00 | 0,5833613 | NA       |
| RP11-770J1.4   | 0,39 | 0,56 | 0,41 | 0,31 | 0,5833617 | 0,72009  |
| SRPX           | 0,00 | 0,00 | 0,00 | 0,00 | 0,5836403 | 0,720393 |
| CTD-2061E19.6  | 0,00 | 0,00 | 0,00 | 0,47 | 0,5836544 | NA       |
| RF00015        | 0,00 | 0,00 | 1,11 | 0,00 | 0,5837361 | 0,720472 |
| RP4-657D16.6   | 1,10 | 3,16 | 2,21 | 2,47 | 0,5837761 | 0,720473 |
| OGG1           | 1,96 | 2,90 | 2,67 | 0,74 | 0,5838016 | 0,720473 |
| RP4-809F18.1   | 0,06 | 0,18 | 0,00 | 0,00 | 0,5838695 | 0,720492 |
| RP11-617F23.2  | 2,85 | 1,83 | 2,09 | 1,76 | 0,5838863 | 0,720492 |
| RP11-473O4.1   | 0,00 | 0,00 | 0,00 | 0,00 | 0,5839533 | 0,720492 |
| ITGB2          | 7,78 | 7,95 | 8,00 | 7,88 | 0,583956  | 0,720492 |
| RBM33          | 5,22 | 5,98 | 5,08 | 4,44 | 0,5839793 | 0,720492 |
| PADI1          | 0,00 | 0,00 | 0,00 | 0,00 | 0,5839825 | NA       |
| RP11-316M21.6  | 0,00 | 0,00 | 0,00 | 0,21 | 0,5840027 | NA       |
| SNORA32        | 0,00 | 0,00 | 0,00 | 1,78 | 0,5840161 | NA       |
| RP11-59H1.4    | 0,00 | 0,00 | 0,00 | 0,00 | 0,5840454 | NA       |
| RP11-496H1.1   | 0,00 | 0,00 | 0,00 | 0,00 | 0,5841061 | NA       |
| RP11-597D13.10 | 0,00 | 0,00 | 0,00 | 0,00 | 0,5841375 | NA       |
| LRRC37A3       | 3,08 | 1,36 | 3,10 | 2,23 | 0,5841539 | 0,720667 |
| CTD-2235C13.2  | 0,00 | 0,00 | 0,00 | 0,00 | 0,5842004 | 0,720672 |

|               |      |      |      |      |           |          |
|---------------|------|------|------|------|-----------|----------|
| ADAM11        | 0,00 | 0,00 | 0,00 | 0,14 | 0,5842225 | 0,720672 |
| MIR337        | 0,00 | 0,00 | 0,00 | 0,00 | 0,584319  | NA       |
| RP11-881L2.1  | 1,54 | 2,67 | 1,27 | 0,64 | 0,5843213 | 0,720714 |
| MTERFD3       | 0,35 | 0,09 | 0,26 | 0,21 | 0,5843214 | 0,720714 |
| SCAMP5        | 0,06 | 0,04 | 0,16 | 0,39 | 0,5843922 | 0,720761 |
| CTD-2195B23.3 | 0,00 | 0,00 | 0,00 | 0,00 | 0,5844269 | NA       |
| CCT3          | 6,49 | 6,34 | 6,32 | 5,07 | 0,5845189 | 0,720877 |
| RIMBP3C       | 0,00 | 0,00 | 0,00 | 0,00 | 0,5845544 | 0,720881 |
| NOXRED1       | 0,00 | 0,00 | 0,00 | 0,00 | 0,5846028 | NA       |
| NAAA          | 6,37 | 4,52 | 5,90 | 5,08 | 0,5846236 | 0,720915 |
| RN7SL587P     | 4,05 | 0,00 | 4,81 | 2,47 | 0,5846466 | 0,720915 |
| RP11-214K3.25 | 0,00 | 0,00 | 0,00 | 0,00 | 0,5848326 | NA       |
| RP1-85F18.5   | 0,00 | 0,00 | 0,00 | 0,00 | 0,5848769 | NA       |
| LINC00299     | 2,03 | 0,12 | 0,12 | 2,14 | 0,5849336 | 0,721191 |
| C18orf21      | 3,92 | 3,00 | 4,06 | 2,92 | 0,5849371 | 0,721191 |
| USP24         | 5,44 | 3,60 | 5,38 | 3,48 | 0,5849676 | 0,721191 |
| PGLYRP4       | 0,00 | 0,00 | 0,00 | 0,00 | 0,5849837 | NA       |
| ZNF317        | 4,02 | 4,13 | 3,97 | 3,83 | 0,5850754 | 0,72125  |
| RP11-692N5.2  | 0,00 | 0,00 | 0,00 | 0,00 | 0,5850805 | 0,72125  |
| MAPKBP1       | 1,35 | 1,62 | 1,18 | 0,90 | 0,5851709 | 0,721321 |
| RP11-508O18.1 | 0,00 | 0,00 | 0,00 | 0,00 | 0,5851736 | NA       |
| CTD-2540L5.4  | 0,00 | 0,00 | 0,00 | 0,00 | 0,585198  | NA       |
| NDUFA4        | 6,59 | 6,51 | 6,52 | 5,88 | 0,5852442 | 0,721372 |
| C11orf68      | 1,33 | 0,74 | 1,13 | 1,09 | 0,5853012 | 0,721402 |
| HIST1H1B      | 1,52 | 0,00 | 0,37 | 0,77 | 0,5853876 | 0,721468 |
| PUS3          | 2,64 | 3,82 | 1,39 | 2,01 | 0,5856082 | 0,7217   |
| TAPBPL        | 5,21 | 5,98 | 5,17 | 4,15 | 0,5856971 | 0,72177  |
| ITIH3         | 0,00 | 0,00 | 0,00 | 0,00 | 0,585702  | NA       |
| CCDC71L       | 0,36 | 0,20 | 0,91 | 0,29 | 0,5857302 | 0,721771 |
| ZMAT1         | 2,54 | 0,92 | 3,03 | 3,08 | 0,585842  | 0,721868 |
| RP11-301O19.1 | 0,00 | 0,00 | 0,00 | 0,00 | 0,585881  | 0,721876 |
| RP11-774O3.3  | 0,03 | 0,00 | 0,00 | 0,00 | 0,5859376 | 0,721906 |
| AC087431.1    | 0,00 | 0,00 | 0,00 | 0,00 | 0,5860153 | NA       |
| CTC-281F24.1  | 0,00 | 0,00 | 0,00 | 0,00 | 0,5860381 | NA       |
| NR5A1         | 0,00 | 0,00 | 0,00 | 0,00 | 0,5860698 | NA       |
| MIR5009       | 0,00 | 0,00 | 0,00 | 0,00 | 0,5860778 | NA       |
| ADSSL1        | 0,88 | 0,15 | 0,56 | 0,75 | 0,5861269 | 0,722099 |
| RP11-181K12.2 | 0,00 | 0,00 | 0,00 | 0,00 | 0,5861345 | NA       |
| RP11-452L6.5  | 0,19 | 0,00 | 0,29 | 0,80 | 0,5861866 | 0,722101 |
| RP11-687F6.5  | 0,00 | 0,10 | 0,05 | 0,18 | 0,5862485 | 0,722101 |
| RP4-816N1.6   | 0,00 | 0,00 | 0,00 | 0,00 | 0,586283  | 0,722101 |
| KCNMB3L       | 0,00 | 0,00 | 0,00 | 0,00 | 0,5863124 | 0,722101 |
| PRR4          | 0,81 | 1,62 | 0,00 | 0,00 | 0,5863273 | 0,722101 |
| CTB-25B13.12  | 0,52 | 0,20 | 0,91 | 0,68 | 0,5863379 | 0,722101 |
| SPTAN1        | 5,27 | 4,31 | 5,22 | 5,15 | 0,5863555 | 0,722101 |
| RP3-337H4.9   | 0,00 | 0,67 | 0,00 | 0,00 | 0,5863839 | NA       |
| FOXI3         | 0,05 | 0,00 | 0,00 | 0,05 | 0,5864259 | NA       |
| RP11-149F8.6  | 0,00 | 0,00 | 0,00 | 0,00 | 0,5865478 | NA       |
| RP5-966M1.2   | 0,00 | 0,00 | 0,00 | 0,00 | 0,5866229 | NA       |
| RP11-546M21.6 | 0,65 | 1,15 | 1,27 | 2,04 | 0,5866374 | 0,722375 |
| F2RL2         | 1,36 | 1,26 | 1,93 | 1,59 | 0,5866429 | 0,722375 |
| RP11-394O4.3  | 0,00 | 0,33 | 0,00 | 0,00 | 0,5866542 | NA       |
| AC026150.6    | 0,00 | 0,00 | 0,00 | 0,40 | 0,5867293 | 0,722441 |
| SULF1         | 0,00 | 0,14 | 0,00 | 0,64 | 0,5868205 | 0,722513 |
| PYDC1         | 0,00 | 1,26 | 0,00 | 0,00 | 0,5868239 | NA       |

|                 |      |      |      |      |           |          |
|-----------------|------|------|------|------|-----------|----------|
| MDK             | 0,00 | 0,00 | 0,00 | 0,11 | 0,5868634 | 0,722526 |
| CTC-467M3.1     | 0,00 | 0,00 | 0,00 | 2,16 | 0,5869353 | 0,722574 |
| CTD-2014B16.4   | 0,00 | 0,00 | 0,00 | 0,17 | 0,5869482 | NA       |
| SLC43A1         | 0,00 | 0,33 | 0,36 | 0,66 | 0,5870615 | 0,72269  |
| RP11-849F2.5    | 2,14 | 2,46 | 1,04 | 0,80 | 0,5871287 | 0,722733 |
| RP11-347E10.1   | 0,00 | 0,00 | 0,00 | 0,00 | 0,5871398 | NA       |
| RP11-959F10.6   | 0,00 | 0,00 | 0,00 | 0,00 | 0,5871493 | NA       |
| MCCD1           | 0,00 | 0,00 | 0,00 | 0,00 | 0,5871642 | NA       |
| HIST1H1C        | 5,23 | 3,76 | 5,42 | 4,36 | 0,5871747 | 0,722749 |
| RP11-554D13.1   | 0,00 | 0,00 | 0,00 | 1,12 | 0,5871755 | NA       |
| PCM1            | 6,34 | 6,11 | 6,35 | 6,42 | 0,5872348 | 0,722783 |
| AC096669.1      | 0,00 | 0,00 | 0,06 | 0,33 | 0,5872705 | 0,722787 |
| FRZB            | 0,00 | 0,00 | 0,00 | 0,00 | 0,5873746 | NA       |
| MIR5186         | 0,00 | 0,00 | 0,00 | 0,00 | 0,5873813 | NA       |
| CTC-445B21.1    | 0,02 | 0,04 | 0,00 | 0,02 | 0,5874314 | NA       |
| SEPSECS-AS1     | 3,35 | 4,32 | 3,15 | 3,38 | 0,5874484 | 0,722966 |
| RP11-440L14.4   | 0,21 | 0,00 | 0,00 | 0,82 | 0,58752   | 0,723014 |
| RP11-432M8.18   | 0,00 | 0,00 | 0,00 | 0,00 | 0,5875803 | NA       |
| COX5A           | 8,59 | 7,69 | 8,30 | 8,20 | 0,5877061 | 0,723188 |
| LONRF1          | 3,58 | 2,78 | 2,73 | 2,60 | 0,5877266 | 0,723188 |
| NCRNA00111      | 0,00 | 0,00 | 0,00 | 0,00 | 0,5877407 | NA       |
| RAMP1           | 0,00 | 0,00 | 0,00 | 0,00 | 0,5877708 | NA       |
| CTC-459F4.6     | 0,00 | 0,00 | 0,00 | 0,00 | 0,5877711 | NA       |
| ARMCX4          | 2,13 | 2,63 | 2,14 | 2,11 | 0,5878397 | 0,723287 |
| ZFHX3           | 2,12 | 2,78 | 2,35 | 3,35 | 0,5880228 | 0,723473 |
| SIRT4           | 0,00 | 0,00 | 0,00 | 0,00 | 0,5880469 | NA       |
| RP11-1157N2_A.2 | 0,00 | 0,00 | 0,00 | 0,00 | 0,5881385 | NA       |
| CTD-2524L6.3    | 0,00 | 0,24 | 0,00 | 0,00 | 0,5881603 | NA       |
| RP11-799D4.2    | 0,00 | 0,26 | 0,00 | 0,00 | 0,5881878 | NA       |
| RFC4            | 1,28 | 0,37 | 0,99 | 0,88 | 0,5881923 | 0,723641 |
| LA16c-358B7.4   | 0,11 | 0,11 | 0,16 | 0,26 | 0,5882581 | 0,723682 |
| AC002456.2      | 0,00 | 0,00 | 0,00 | 0,00 | 0,5883499 | 0,723747 |
| RP4-545K15.5    | 0,00 | 0,29 | 0,00 | 0,00 | 0,5883568 | NA       |
| PRR3            | 2,69 | 5,12 | 2,49 | 1,75 | 0,5883762 | 0,723747 |
| AP001412.1      | 0,00 | 0,00 | 0,00 | 0,00 | 0,5884355 | 0,72378  |
| RP11-174O3.3    | 0,00 | 0,00 | 0,00 | 0,00 | 0,5885012 | NA       |
| VWA5B2          | 0,00 | 0,04 | 0,00 | 0,00 | 0,5885021 | NA       |
| CTC-265N9.1     | 0,00 | 0,00 | 0,00 | 0,00 | 0,5885147 | NA       |
| GLCE            | 2,79 | 3,48 | 1,95 | 1,34 | 0,5885375 | 0,723859 |
| LIN52           | 2,59 | 2,73 | 2,02 | 2,83 | 0,5885879 | 0,723859 |
| CLCN3           | 3,61 | 3,03 | 3,24 | 2,79 | 0,5885972 | 0,723859 |
| RP11-521C10.1   | 0,00 | 0,00 | 0,00 | 0,00 | 0,5886506 | NA       |
| RP11-16B13.1    | 0,00 | 0,00 | 0,00 | 0,00 | 0,5886767 | 0,723916 |
| RP5-945F2.3     | 0,00 | 0,00 | 0,00 | 0,00 | 0,5887736 | NA       |
| XX-C2158C12.2   | 0,00 | 0,25 | 0,00 | 0,00 | 0,588876  | NA       |
| TAF6L           | 0,09 | 0,58 | 0,25 | 0,21 | 0,5889954 | 0,724268 |
| RP11-702N8.2    | 0,00 | 0,00 | 0,00 | 0,00 | 0,5890209 | NA       |
| NEUROG2         | 0,00 | 0,00 | 0,00 | 0,00 | 0,5891086 | NA       |
| RP11-320M16.2   | 0,00 | 0,00 | 0,00 | 0,00 | 0,5891282 | NA       |
| CYP51A1         | 3,99 | 2,85 | 3,78 | 3,18 | 0,5891783 | 0,724453 |
| RP11-570L15.2   | 1,39 | 0,46 | 0,71 | 0,98 | 0,5893143 | 0,72457  |
| LPCAT3          | 3,61 | 3,25 | 3,37 | 4,54 | 0,5893387 | 0,72457  |
| MAP4K4          | 3,98 | 2,70 | 3,86 | 4,39 | 0,5893843 | 0,724586 |
| OR5B12          | 0,00 | 0,00 | 0,00 | 0,00 | 0,5893868 | NA       |
| RP11-159M11.2   | 0,00 | 0,00 | 0,00 | 0,00 | 0,5894004 | NA       |

|                   |       |       |       |       |           |          |
|-------------------|-------|-------|-------|-------|-----------|----------|
| XXbac-BPGBPG55C20 | 0,33  | 0,00  | 0,00  | 0,00  | 0,5894418 | 0,724617 |
| TMEM179B          | 7,63  | 6,80  | 7,54  | 6,60  | 0,5894986 | 0,724646 |
| MIR3137           | 0,00  | 0,00  | 0,00  | 0,00  | 0,5895042 | NA       |
| BMF               | 3,24  | 3,66  | 3,59  | 3,45  | 0,5895908 | 0,72472  |
| RP5-1050D4.4      | 0,00  | 0,00  | 0,00  | 0,00  | 0,5897388 | NA       |
| RACK1             | 10,45 | 10,38 | 10,30 | 10,25 | 0,5897949 | 0,72493  |
| PHB2              | 6,61  | 5,80  | 6,59  | 6,10  | 0,58985   | 0,724944 |
| RNF111            | 3,92  | 1,68  | 3,22  | 3,68  | 0,5899121 | 0,724944 |
| RP11-293M10.4     | 0,00  | 0,00  | 0,00  | 0,00  | 0,5899289 | 0,724944 |
| MSANTD1           | 0,24  | 0,27  | 0,28  | 0,45  | 0,5899363 | 0,724944 |
| RP11-136C24.1     | 0,00  | 0,00  | 0,00  | 0,00  | 0,5900547 | NA       |
| RP11-565F19.3     | 0,00  | 0,00  | 0,00  | 0,00  | 0,590075  | NA       |
| RP11-420A23.1     | 0,00  | 0,00  | 0,00  | 0,22  | 0,5901666 | 0,725187 |
| NBL1              | 0,00  | 0,00  | 0,00  | 0,00  | 0,5902128 | NA       |
| RNU6-920P         | 0,00  | 0,00  | 0,00  | 2,83  | 0,5902672 | 0,72527  |
| AGTPBP1           | 4,84  | 5,24  | 4,53  | 4,41  | 0,5903522 | 0,725318 |
| OCLN              | 0,91  | 0,44  | 0,76  | 0,39  | 0,5903864 | 0,725318 |
| PFN1P4            | 0,00  | 0,63  | 1,05  | 0,00  | 0,5904041 | 0,725318 |
| RP11-468E2.9      | 0,00  | 0,00  | 0,00  | 0,00  | 0,5904599 | NA       |
| HLA-DPA2          | 3,36  | 3,38  | 2,94  | 1,04  | 0,590467  | 0,725347 |
| RP11-820I16.3     | 2,65  | 3,57  | 2,76  | 3,03  | 0,590493  | 0,725347 |
| CTD-2516F10.2     | 2,41  | 3,72  | 2,58  | 2,55  | 0,5906464 | 0,725496 |
| KRT7              | 0,00  | 0,00  | 0,00  | 0,00  | 0,5906811 | NA       |
| RNU6-38P          | 0,00  | 0,00  | 0,00  | 0,00  | 0,5907041 | NA       |
| RP11-215P8.2      | 0,00  | 0,53  | 0,00  | 0,00  | 0,5907457 | 0,725564 |
| RP1-102G20.5      | 0,00  | 1,88  | 0,00  | 0,00  | 0,5907672 | 0,725564 |
| CHMP6             | 3,67  | 2,45  | 3,84  | 3,75  | 0,5909538 | 0,725719 |
| AC093726.6        | 1,39  | 1,49  | 1,93  | 1,25  | 0,5909587 | 0,725719 |
| RP11-110G21.1     | 1,29  | 1,60  | 1,37  | 0,88  | 0,5910078 | 0,725739 |
| CA3               | 0,00  | 0,00  | 0,00  | 0,00  | 0,5910585 | 0,725745 |
| RP11-78J21.7      | 0,57  | 0,00  | 0,00  | 0,00  | 0,5910783 | 0,725745 |
| HIVEP3            | 0,71  | 0,82  | 0,95  | 1,20  | 0,5911851 | 0,725836 |
| CTD-2547L16.3     | 0,00  | 0,39  | 0,26  | 0,33  | 0,5912244 | 0,725844 |
| CH507-210P18.4    | 0,00  | 0,00  | 0,00  | 0,00  | 0,5913084 | NA       |
| RP11-140L24.4     | 0,00  | 0,00  | 0,00  | 0,00  | 0,5913344 | 0,725939 |
| XPOTP1            | 0,00  | 0,00  | 0,00  | 0,00  | 0,5913604 | NA       |
| RP11-480I12.5     | 0,24  | 0,33  | 0,18  | 0,17  | 0,5914605 | NA       |
| SLC35B3           | 1,61  | 3,04  | 1,83  | 0,52  | 0,5915126 | 0,726118 |
| RP11-165F24.2     | 0,00  | 0,00  | 0,00  | 0,00  | 0,5915569 | NA       |
| GABRQ             | 0,00  | 0,00  | 0,00  | 0,00  | 0,5916131 | NA       |
| FASLG             | 0,19  | 0,29  | 0,25  | 0,07  | 0,5916496 | 0,726246 |
| AC002044.4        | 0,00  | 0,00  | 0,00  | 1,52  | 0,5917037 | NA       |
| ZNF730            | 0,00  | 0,00  | 0,00  | 0,00  | 0,5917095 | NA       |
| RP5-908M14.9      | 0,00  | 0,00  | 0,00  | 0,00  | 0,5917304 | 0,726305 |
| RP11-146I2.1      | 0,33  | 0,70  | 0,56  | 0,83  | 0,5917628 | 0,726305 |
| MRC2              | 0,00  | 0,00  | 0,00  | 0,00  | 0,5917652 | NA       |
| CHCHD4            | 3,29  | 1,17  | 2,23  | 1,61  | 0,5918708 | 0,726377 |
| HNRNPA1P7         | 0,00  | 0,00  | 0,00  | 0,00  | 0,5918732 | NA       |
| RP1-229K20.5      | 0,00  | 0,00  | 0,00  | 0,00  | 0,5918871 | 0,726377 |
| CTD-2340E1.2      | 0,00  | 0,00  | 0,00  | 0,66  | 0,5919687 | NA       |
| MICALL1           | 1,41  | 0,59  | 1,93  | 1,36  | 0,5919991 | 0,726475 |
| TRAP1             | 5,31  | 5,56  | 5,11  | 4,93  | 0,59211   | 0,72657  |
| LPGAT1            | 3,86  | 3,76  | 3,79  | 2,55  | 0,5921447 | 0,726573 |
| RP11-507J18.2     | 0,00  | 0,00  | 0,00  | 0,00  | 0,5921754 | NA       |
| SDHAF2            | 5,44  | 4,72  | 5,14  | 5,41  | 0,5922802 | 0,726666 |



|                |      |      |      |      |           |          |
|----------------|------|------|------|------|-----------|----------|
| ARPC5L         | 4,57 | 4,27 | 4,07 | 3,82 | 0,5922857 | 0,726666 |
| AC114763.1     | 0,22 | 1,67 | 0,79 | 0,41 | 0,5924166 | 0,726762 |
| AC104024.2     | 0,00 | 0,00 | 0,00 | 0,00 | 0,5924315 | NA       |
| SLC30A9        | 4,54 | 3,69 | 4,44 | 4,16 | 0,5924479 | 0,726762 |
| RP11-12M9.3    | 0,00 | 0,00 | 0,00 | 0,28 | 0,5924558 | NA       |
| RELN           | 0,00 | 0,24 | 0,00 | 0,01 | 0,5924623 | 0,726762 |
| NFKBIL1        | 0,35 | 0,00 | 0,36 | 0,39 | 0,5925441 | 0,726822 |
| RP11-771K4.3   | 0,00 | 0,00 | 0,00 | 0,00 | 0,5927806 | NA       |
| CRYBA1         | 0,00 | 0,00 | 0,00 | 0,34 | 0,5927823 | 0,727074 |
| RP11-589O3.1   | 0,17 | 0,00 | 0,00 | 0,00 | 0,5927959 | NA       |
| AC026166.1     | 0,00 | 0,00 | 0,00 | 0,00 | 0,5928007 | NA       |
| POU5F1B        | 0,07 | 0,19 | 0,10 | 0,10 | 0,5928892 | 0,727165 |
| CTB-55B8.1     | 0,00 | 0,00 | 0,00 | 0,00 | 0,5929209 | NA       |
| DEFB103A       | 0,00 | 0,00 | 0,00 | 0,00 | 0,5929746 | NA       |
| DEFB103B       | 0,00 | 0,00 | 0,00 | 0,00 | 0,5929746 | NA       |
| RP11-524O1.4   | 0,00 | 0,00 | 0,00 | 0,00 | 0,5930329 | NA       |
| RP1-111D6.5    | 0,19 | 0,42 | 0,32 | 0,35 | 0,5931462 | 0,72744  |
| CMB9-94B1.2    | 0,00 | 0,00 | 0,00 | 0,00 | 0,5931762 | NA       |
| SIGIRR         | 6,00 | 6,02 | 5,81 | 6,19 | 0,5931791 | 0,727441 |
| CTU1           | 0,00 | 0,00 | 0,00 | 0,06 | 0,5932174 | NA       |
| MYH10          | 3,20 | 1,02 | 1,53 | 1,40 | 0,5932525 | 0,72749  |
| GNMT           | 0,64 | 0,43 | 0,58 | 0,32 | 0,5933389 | 0,727529 |
| FXN            | 5,07 | 3,81 | 4,82 | 3,61 | 0,5933717 | 0,727529 |
| SNAP29         | 4,12 | 2,24 | 4,24 | 2,50 | 0,593382  | 0,727529 |
| ACP7           | 0,18 | 0,23 | 0,19 | 0,22 | 0,5934722 | 0,727532 |
| LTBR           | 4,62 | 4,05 | 4,97 | 4,53 | 0,593477  | 0,727532 |
| PIGBOS1        | 4,16 | 3,83 | 4,18 | 2,67 | 0,5934827 | 0,727532 |
| COX20          | 3,98 | 2,06 | 3,66 | 3,15 | 0,5936239 | 0,727629 |
| CD3E           | 1,17 | 1,19 | 0,13 | 0,21 | 0,5936412 | 0,727629 |
| SEC62          | 5,40 | 5,89 | 5,26 | 5,03 | 0,5936601 | 0,727629 |
| RP11-1334A24.5 | 0,11 | 0,41 | 0,12 | 0,27 | 0,5937869 | 0,727744 |
| PTGES          | 0,32 | 0,34 | 0,49 | 0,65 | 0,5938469 | 0,727769 |
| SUN1           | 3,51 | 3,77 | 3,93 | 3,18 | 0,593873  | 0,727769 |
| RNU6ATAC14P    | 0,00 | 0,00 | 0,00 | 0,00 | 0,5938907 | NA       |
| AC017048.4     | 0,00 | 0,00 | 0,00 | 0,00 | 0,5938939 | NA       |
| RP11-452G18.2  | 0,00 | 0,00 | 0,00 | 0,00 | 0,5939162 | NA       |
| NMRK1          | 3,25 | 4,58 | 2,88 | 2,61 | 0,5939237 | 0,727791 |
| RP1-202O8.2    | 0,00 | 1,21 | 0,00 | 0,00 | 0,5940015 | NA       |
| C5orf66        | 1,94 | 1,17 | 2,05 | 2,60 | 0,5940726 | 0,727845 |
| NSG1           | 2,04 | 3,94 | 2,40 | 2,22 | 0,5940936 | 0,727845 |
| RP5-1017O19.1  | 2,08 | 0,00 | 0,00 | 0,00 | 0,5941009 | 0,727845 |
| RP6-91H8.3     | 3,14 | 1,47 | 3,14 | 1,70 | 0,5941032 | 0,727845 |
| RP11-245M24.1  | 0,26 | 0,41 | 0,39 | 0,29 | 0,5941314 | 0,727845 |
| AC083884.7     | 0,00 | 0,00 | 0,00 | 0,00 | 0,5941402 | NA       |
| ADAP2          | 4,44 | 5,17 | 4,28 | 4,55 | 0,5941827 | 0,72786  |
| SESN2          | 2,08 | 1,21 | 1,97 | 0,98 | 0,5942086 | 0,72786  |
| SMIM6          | 0,00 | 0,00 | 0,00 | 0,00 | 0,5944034 | NA       |
| FAM32A         | 6,92 | 4,93 | 6,16 | 6,38 | 0,5944318 | 0,728093 |
| ITGB4          | 0,00 | 0,09 | 0,00 | 0,00 | 0,5944559 | NA       |
| RP11-826N14.2  | 0,00 | 0,00 | 0,00 | 0,00 | 0,5944954 | NA       |
| RP11-265D19.6  | 0,00 | 0,00 | 0,00 | 0,00 | 0,5945501 | NA       |
| IGHV5-51       | 0,00 | 1,34 | 0,00 | 0,47 | 0,5948317 | 0,728517 |
| CTA-363E6.7    | 0,00 | 0,71 | 0,01 | 0,00 | 0,5948593 | 0,728517 |
| RNU6-960P      | 0,00 | 0,00 | 0,00 | 0,00 | 0,594882  | NA       |
| RP11-121C6.5   | 0,00 | 2,36 | 0,15 | 0,81 | 0,5948968 | 0,728517 |

|               |      |      |      |      |           |          |
|---------------|------|------|------|------|-----------|----------|
| CRYZL1        | 5,25 | 6,14 | 5,05 | 4,77 | 0,5949094 | 0,728517 |
| FAM167A-AS1   | 0,00 | 0,12 | 0,00 | 0,00 | 0,5949108 | NA       |
| PPP1R1C       | 0,14 | 0,36 | 0,54 | 0,19 | 0,594945  | 0,728521 |
| RP11-87E22.2  | 0,48 | 0,55 | 0,49 | 0,42 | 0,5949954 | 0,728542 |
| RN7SL132P     | 1,39 | 2,08 | 1,48 | 0,82 | 0,5950419 | 0,728559 |
| IDH1          | 4,16 | 2,12 | 3,89 | 2,48 | 0,5951917 | 0,728666 |
| RP11-572C21.1 | 0,12 | 0,41 | 0,26 | 0,24 | 0,595195  | 0,728666 |
| CBFA2T2       | 2,18 | 1,38 | 2,48 | 1,35 | 0,5952625 | 0,728709 |
| RP11-566H8.3  | 0,00 | 0,00 | 0,00 | 0,00 | 0,5952645 | NA       |
| CTD-2542C24.5 | 0,37 | 0,15 | 0,37 | 0,52 | 0,5953105 | 0,728727 |
| RAB30         | 1,10 | 1,14 | 0,45 | 0,45 | 0,59539   | 0,728785 |
| AC012087.2    | 0,00 | 0,19 | 0,00 | 0,00 | 0,5953956 | NA       |
| RP11-169E6.1  | 0,00 | 0,00 | 0,00 | 0,00 | 0,5954404 | 0,728792 |
| CTD-2175A23.1 | 0,36 | 0,39 | 0,00 | 0,00 | 0,5954619 | 0,728792 |
| RP11-716H6.1  | 0,28 | 0,00 | 0,31 | 0,00 | 0,5955185 | 0,728822 |
| COPS7B        | 3,98 | 2,72 | 3,47 | 2,19 | 0,5956021 | 0,728836 |
| CTB-159G17.3  | 0,85 | 1,07 | 0,00 | 1,12 | 0,5956094 | 0,728836 |
| ZNF266        | 4,21 | 4,28 | 3,69 | 3,90 | 0,5956283 | 0,728836 |
| RP11-303E16.3 | 0,00 | 0,52 | 0,00 | 0,54 | 0,5958087 | 0,728991 |
| CTD-2547E10.4 | 1,12 | 0,62 | 1,16 | 0,75 | 0,5958211 | 0,728991 |
| RP11-77P19.1  | 0,00 | 0,00 | 0,00 | 0,00 | 0,5958228 | NA       |
| AC004069.2    | 2,34 | 2,73 | 3,04 | 3,45 | 0,5959571 | 0,729117 |
| ALX3          | 0,00 | 0,00 | 0,00 | 0,00 | 0,5960608 | NA       |
| AF131216.7    | 0,00 | 0,00 | 0,00 | 0,00 | 0,5960903 | 0,729216 |
| GAP43         | 0,00 | 0,00 | 0,00 | 0,00 | 0,5960911 | NA       |
| RP11-462P6.1  | 0,00 | 0,00 | 0,00 | 0,59 | 0,5961037 | 0,729216 |
| DHX58         | 4,33 | 0,22 | 4,41 | 4,33 | 0,5961749 | 0,72924  |
| ATN1          | 0,55 | 0,60 | 1,34 | 1,14 | 0,5961885 | 0,72924  |
| RP11-169D4.2  | 0,00 | 0,00 | 0,00 | 0,00 | 0,5963379 | 0,729382 |
| TRPC4AP       | 4,25 | 4,25 | 4,53 | 3,48 | 0,5965037 | 0,729545 |
| RP11-649A18.4 | 0,00 | 0,00 | 0,00 | 0,00 | 0,5966062 | NA       |
| ZGLP1         | 2,83 | 0,30 | 3,07 | 1,86 | 0,5966118 | 0,729637 |
| GFM1          | 4,65 | 3,85 | 4,02 | 3,87 | 0,5967181 | 0,729686 |
| VAMP4         | 2,84 | 2,69 | 2,24 | 0,92 | 0,5967202 | 0,729686 |
| RP11-455J20.3 | 0,00 | 2,84 | 0,00 | 0,00 | 0,5968037 | 0,729686 |
| TM6SF2        | 0,00 | 0,00 | 0,00 | 0,00 | 0,5968076 | NA       |
| RNU1-13P      | 1,14 | 0,00 | 0,00 | 1,37 | 0,5968087 | 0,729686 |
| AC073072.5    | 0,00 | 0,00 | 0,00 | 0,00 | 0,5968276 | NA       |
| RP11-269F19.9 | 0,00 | 0,00 | 0,00 | 0,00 | 0,5968351 | 0,729686 |
| HMGB2         | 6,83 | 6,57 | 6,82 | 7,11 | 0,5968488 | 0,729686 |
| IGKJ4         | 0,00 | 0,00 | 0,00 | 0,00 | 0,5969989 | NA       |
| RP11-16P20.4  | 0,00 | 0,00 | 0,01 | 0,05 | 0,5970428 | NA       |
| CTD-2003C8.2  | 0,00 | 0,00 | 0,00 | 0,00 | 0,5971003 | NA       |
| ZNF440        | 1,84 | 2,80 | 2,02 | 1,47 | 0,5971065 | 0,729927 |
| CTB-1144G6.6  | 0,70 | 0,38 | 0,78 | 0,87 | 0,5971354 | 0,729927 |
| RP11-17A4.1   | 0,00 | 0,00 | 0,00 | 0,00 | 0,5971445 | 0,729927 |
| RBP5          | 0,00 | 0,00 | 0,00 | 0,00 | 0,5972163 | 0,729975 |
| RP3-406P24.3  | 0,00 | 0,00 | 0,00 | 0,00 | 0,597485  | NA       |
| RP11-133M8.1  | 0,00 | 0,00 | 0,00 | 0,00 | 0,597534  | NA       |
| CTD-2033C11.1 | 0,00 | 0,00 | 0,00 | 0,00 | 0,5976333 | NA       |
| RP11-167N5.5  | 0,82 | 1,32 | 1,06 | 1,29 | 0,5978746 | 0,730739 |
| RP11-367G6.2  | 0,00 | 0,00 | 0,00 | 0,00 | 0,5979085 | NA       |
| RP11-531F16.4 | 1,74 | 1,59 | 0,41 | 0,85 | 0,5979516 | 0,730793 |
| RP11-458B24.1 | 0,00 | 0,00 | 0,00 | 0,00 | 0,5979668 | NA       |
| HOXB6         | 0,00 | 0,00 | 0,00 | 0,00 | 0,598039  | NA       |

|                  |      |      |      |      |           |          |
|------------------|------|------|------|------|-----------|----------|
| RNU1-77P         | 0,00 | 1,47 | 0,00 | 0,00 | 0,5980514 | NA       |
| WASL             | 1,76 | 1,30 | 1,57 | 1,32 | 0,5981261 | 0,730966 |
| RPP38            | 4,29 | 1,25 | 2,96 | 2,67 | 0,5981868 | 0,731    |
| RP11-532L16.1    | 0,00 | 0,00 | 0,00 | 0,00 | 0,5982052 | NA       |
| SLC23A1          | 0,00 | 0,00 | 0,00 | 0,00 | 0,598288  | 0,73106  |
| COX15            | 4,64 | 4,80 | 3,98 | 3,07 | 0,5983017 | 0,73106  |
| RNU5A-8P         | 0,00 | 0,00 | 0,00 | 0,00 | 0,598317  | NA       |
| RP4-633I8.2      | 0,39 | 0,26 | 0,24 | 0,46 | 0,5983856 | 0,731067 |
| PTGR1            | 1,45 | 2,27 | 1,54 | 0,76 | 0,5984059 | 0,731067 |
| RN7SL180P        | 0,72 | 2,85 | 1,07 | 1,48 | 0,5984063 | 0,731067 |
| GABARAPL1        | 4,54 | 4,39 | 4,49 | 4,74 | 0,5984723 | 0,731094 |
| MAGIX            | 0,26 | 0,39 | 0,61 | 0,22 | 0,5984936 | 0,731094 |
| RP1-84D21.1      | 0,00 | 0,00 | 0,00 | 0,00 | 0,5985224 | NA       |
| POLR2J4          | 1,56 | 0,15 | 0,80 | 1,09 | 0,5986148 | 0,731202 |
| NTNG2            | 0,52 | 0,28 | 0,15 | 0,15 | 0,5987629 | 0,731342 |
| CTD-2256P15.1    | 0,00 | 0,00 | 0,00 | 0,00 | 0,5988866 | NA       |
| FRMD4B           | 5,17 | 5,34 | 5,05 | 4,72 | 0,5989864 | 0,731575 |
| MT-TL2           | 3,06 | 2,54 | 2,32 | 2,46 | 0,5990824 | NA       |
| MUC15            | 0,00 | 0,07 | 0,01 | 0,30 | 0,5991068 | 0,731682 |
| RN7SL19P         | 0,00 | 0,00 | 0,00 | 0,00 | 0,5991231 | NA       |
| RP11-302F12.10   | 0,00 | 0,48 | 0,00 | 0,45 | 0,5991384 | NA       |
| RP1-167O22.1     | 0,00 | 0,00 | 0,00 | 0,00 | 0,5991943 | NA       |
| CTD-3126B10.2    | 0,15 | 0,22 | 0,38 | 0,33 | 0,5992018 | 0,731728 |
| ZNF512B          | 0,02 | 0,00 | 0,07 | 0,07 | 0,5992537 | 0,731728 |
| EXOC3L2          | 0,12 | 0,14 | 0,09 | 0,17 | 0,5992856 | 0,731728 |
| RP11-305E6.4     | 0,51 | 1,34 | 0,68 | 0,70 | 0,5993055 | 0,731728 |
| TCTEX1D2         | 3,43 | 1,04 | 2,57 | 0,46 | 0,5993308 | 0,731728 |
| RP11-451G4.2     | 0,17 | 0,37 | 0,09 | 0,44 | 0,5993419 | 0,731728 |
| RP11-254F7.2     | 3,39 | 2,16 | 1,77 | 1,56 | 0,5994202 | 0,731783 |
| RPA1             | 4,06 | 3,92 | 3,72 | 3,07 | 0,5995029 | 0,731844 |
| METAP1D          | 0,74 | 0,00 | 0,00 | 1,02 | 0,5995797 | 0,731897 |
| WDR45            | 5,58 | 5,10 | 5,54 | 5,13 | 0,5996397 | 0,731931 |
| RP11-759A24.1    | 0,00 | 0,00 | 0,03 | 0,03 | 0,5997036 | NA       |
| RP11-266K4.8     | 0,00 | 0,00 | 0,00 | 0,00 | 0,599814  | 0,732077 |
| ZNF292           | 5,67 | 5,25 | 5,72 | 4,94 | 0,5998255 | 0,732077 |
| RP4-616B8.5      | 0,75 | 1,41 | 0,75 | 1,15 | 0,599908  | 0,732137 |
| DCAF5            | 3,72 | 3,23 | 3,33 | 3,17 | 0,5999602 | 0,732161 |
| RP11-85G21.3     | 0,00 | 0,00 | 0,00 | 0,00 | 0,6000578 | NA       |
| FAM72D           | 0,00 | 0,00 | 0,00 | 0,00 | 0,6002098 | 0,732425 |
| RPL13AP3         | 0,00 | 0,31 | 0,00 | 0,30 | 0,6002465 | NA       |
| LLOXNC01-116E7.2 | 0,00 | 0,00 | 0,00 | 0,11 | 0,6003627 | NA       |
| CTD-2035E11.3    | 4,58 | 1,75 | 4,58 | 3,48 | 0,6003855 | 0,7326   |
| RP11-54O7.17     | 0,00 | 0,00 | 0,00 | 0,00 | 0,6003888 | NA       |
| RP11-561B11.1    | 0,06 | 0,00 | 0,00 | 0,00 | 0,6004138 | NA       |
| MSH3             | 2,75 | 3,50 | 3,06 | 3,28 | 0,600536  | 0,732676 |
| SLC7A14          | 3,33 | 2,81 | 3,31 | 3,79 | 0,6005591 | 0,732676 |
| RF00001          | 0,00 | 0,00 | 0,00 | 0,00 | 0,6005644 | NA       |
| RP11-222A11.1    | 2,76 | 1,47 | 2,94 | 1,94 | 0,6005744 | 0,732676 |
| RP11-144I2.1     | 0,39 | 0,16 | 0,33 | 0,46 | 0,6005798 | 0,732676 |
| RP11-872D17.4    | 0,00 | 0,00 | 0,00 | 0,00 | 0,6006576 | NA       |
| RP11-356C4.3     | 1,13 | 2,03 | 1,60 | 1,73 | 0,6007483 | 0,732841 |
| RP11-886H22.1    | 0,00 | 0,00 | 0,00 | 0,00 | 0,6007722 | NA       |
| EIF5A            | 6,91 | 6,32 | 6,98 | 6,61 | 0,6007902 | 0,732852 |
| RP11-50D9.1      | 0,51 | 0,97 | 0,78 | 0,78 | 0,6008307 | 0,732861 |
| CTC-490G23.2     | 0,00 | 0,00 | 0,00 | 0,00 | 0,6008579 | NA       |

|                |      |      |      |      |           |          |
|----------------|------|------|------|------|-----------|----------|
| RP11-542G1.3   | 0,00 | 0,00 | 0,00 | 0,00 | 0,6009433 | 0,73292  |
| RP11-43P5.1    | 0,60 | 0,93 | 0,58 | 0,56 | 0,6009447 | 0,73292  |
| SKA3           | 0,00 | 0,00 | 0,00 | 0,00 | 0,6012261 | 0,733209 |
| CTD-2555K7.2   | 0,57 | 1,86 | 0,18 | 0,73 | 0,6012478 | 0,733209 |
| RP11-356I2.1   | 0,00 | 0,00 | 0,00 | 0,00 | 0,6012934 | 0,733224 |
| RP11-395N21.2  | 0,00 | 0,00 | 0,09 | 0,00 | 0,6013778 | 0,733253 |
| ZNF562         | 3,21 | 1,51 | 1,70 | 1,58 | 0,6013829 | 0,733253 |
| RP11-173M11.6  | 0,00 | 0,00 | 0,00 | 0,00 | 0,6013834 | NA       |
| RP11-363N22.2  | 0,00 | 0,00 | 0,00 | 0,00 | 0,6014183 | NA       |
| CEACAM20       | 0,00 | 0,00 | 0,00 | 0,00 | 0,6015359 | NA       |
| RP11-783K16.5  | 0,00 | 0,00 | 0,00 | 0,00 | 0,6015466 | NA       |
| CPNE7          | 0,00 | 0,00 | 0,00 | 0,00 | 0,6017982 | NA       |
| AC195454.1     | 0,00 | 0,00 | 0,00 | 0,64 | 0,6018022 | 0,733724 |
| RP11-129B9.2   | 0,00 | 0,00 | 0,00 | 0,00 | 0,6018634 | NA       |
| RP3-497J21.1   | 0,00 | 0,00 | 0,00 | 0,00 | 0,6018797 | NA       |
| RP11-1260E13.4 | 0,00 | 0,00 | 0,00 | 0,00 | 0,6019079 | NA       |
| AC004049.2     | 0,00 | 0,00 | 0,00 | 0,00 | 0,6019682 | NA       |
| RP1-45C12.1    | 0,00 | 0,00 | 0,00 | 0,60 | 0,6019796 | 0,7339   |
| IGLV3-9        | 0,00 | 1,32 | 0,00 | 0,00 | 0,6019871 | NA       |
| FAM219B        | 4,14 | 4,51 | 4,20 | 4,35 | 0,6022153 | 0,734147 |
| RP11-190D6.1   | 0,00 | 0,00 | 0,00 | 0,07 | 0,6022299 | NA       |
| AC011558.5     | 6,34 | 6,73 | 6,53 | 6,41 | 0,6023591 | 0,734282 |
| SNORA80E       | 0,00 | 0,00 | 0,00 | 0,00 | 0,6026354 | 0,734567 |
| RP11-255L13.1  | 0,55 | 1,06 | 0,59 | 0,50 | 0,6026464 | NA       |
| C14orf178      | 1,46 | 0,53 | 1,38 | 1,35 | 0,6026589 | 0,734567 |
| RP11-395I14.3  | 0,00 | 0,00 | 0,00 | 0,00 | 0,6026604 | NA       |
| RP11-259P1.1   | 0,00 | 0,00 | 0,00 | 0,00 | 0,6027769 | 0,73467  |
| AC009404.5     | 0,00 | 0,13 | 0,00 | 0,00 | 0,6028095 | 0,73467  |
| RP1-125I3.2    | 1,03 | 1,09 | 0,92 | 0,38 | 0,6028641 | 0,734676 |
| PTTG2          | 0,00 | 0,00 | 0,00 | 0,00 | 0,6028651 | NA       |
| RP1-71H24.1    | 1,15 | 1,96 | 1,07 | 1,02 | 0,602904  | 0,734676 |
| NCRNA00102     | 0,00 | 0,00 | 0,07 | 0,00 | 0,6029147 | 0,734676 |
| PJA1           | 0,05 | 0,00 | 0,03 | 1,83 | 0,6029465 | 0,734676 |
| CD300LF        | 5,23 | 4,93 | 4,89 | 5,19 | 0,6031169 | 0,734843 |
| HIGD2A         | 8,54 | 8,52 | 8,45 | 8,48 | 0,6031548 | 0,734849 |
| CTC-512J14.5   | 0,00 | 0,00 | 0,00 | 0,00 | 0,6032889 | NA       |
| C20orf24       | 6,46 | 7,05 | 7,04 | 7,17 | 0,6033084 | 0,734979 |
| RP11-166O4.1   | 2,50 | 2,66 | 1,67 | 2,18 | 0,6033277 | 0,734979 |
| RP11-439L12.1  | 0,00 | 0,00 | 0,00 | 0,00 | 0,6033461 | NA       |
| GRK7           | 0,03 | 0,13 | 0,09 | 0,10 | 0,6034015 | 0,735029 |
| CTC-512J14.4   | 0,21 | 0,18 | 0,07 | 0,00 | 0,6034363 | NA       |
| CTD-2586B10.1  | 0,00 | 0,00 | 0,00 | 0,00 | 0,6035098 | NA       |
| MTX1           | 5,56 | 5,45 | 6,13 | 5,43 | 0,6035409 | 0,735123 |
| SGCG           | 0,00 | 0,00 | 0,00 | 0,00 | 0,6035489 | NA       |
| IL12RB1        | 1,97 | 1,89 | 2,61 | 1,77 | 0,6035813 | 0,735123 |
| HOXA-AS4       | 0,25 | 0,00 | 0,03 | 0,00 | 0,6035885 | 0,735123 |
| ELFN1          | 0,00 | 0,04 | 0,00 | 0,03 | 0,6036384 | 0,735123 |
| HCCS           | 5,45 | 4,21 | 4,64 | 4,32 | 0,6036445 | 0,735123 |
| RP11-415C15.1  | 0,00 | 0,00 | 0,00 | 0,00 | 0,6036461 | NA       |
| RP11-240M16.1  | 0,00 | 0,00 | 0,00 | 0,00 | 0,6037261 | NA       |
| OPRPN          | 0,00 | 0,00 | 0,00 | 0,00 | 0,6038085 | NA       |
| RP11-473M20.16 | 0,60 | 1,07 | 0,90 | 1,14 | 0,603819  | 0,735295 |
| NDST1          | 2,52 | 3,76 | 2,18 | 1,91 | 0,6038587 | 0,735303 |
| RDH12          | 0,00 | 0,00 | 0,09 | 0,00 | 0,6039058 | 0,735321 |
| RP11-547D13.1  | 0,06 | 0,17 | 0,09 | 0,11 | 0,6039684 | 0,735356 |

|                |      |      |      |      |           |          |
|----------------|------|------|------|------|-----------|----------|
| AC015922.5     | 0,00 | 0,00 | 0,00 | 0,00 | 0,6039872 | NA       |
| RP11-133L14.2  | 0,00 | 0,00 | 0,00 | 0,00 | 0,6040049 | NA       |
| FCHO2          | 2,32 | 1,74 | 2,13 | 1,76 | 0,6040907 | 0,735435 |
| INPP5A         | 0,37 | 0,99 | 1,14 | 0,52 | 0,6040988 | 0,735435 |
| RP11-422P24.11 | 0,00 | 0,00 | 0,00 | 0,00 | 0,6041178 | NA       |
| SEPT11         | 3,50 | 4,64 | 3,88 | 3,69 | 0,6041932 | 0,735483 |
| AL355093.2     | 0,00 | 0,00 | 0,00 | 0,00 | 0,6042134 | 0,735483 |
| GYPB           | 0,00 | 0,00 | 0,00 | 0,00 | 0,6042614 | 0,735483 |
| RP11-738E22.1  | 0,00 | 0,00 | 0,00 | 0,00 | 0,6042729 | NA       |
| RP11-51O6.1    | 0,71 | 0,66 | 0,48 | 0,85 | 0,6042829 | NA       |
| PRR22          | 0,00 | 0,00 | 0,00 | 0,00 | 0,6042939 | NA       |
| RP11-338E21.2  | 0,74 | 1,88 | 1,22 | 2,29 | 0,6043096 | 0,735483 |
| C4orf36        | 0,00 | 0,38 | 0,04 | 0,00 | 0,6043444 | 0,735483 |
| KIF18A         | 0,76 | 0,58 | 0,75 | 0,54 | 0,604378  | 0,735483 |
| KLHDC7B        | 0,25 | 0,05 | 0,20 | 0,24 | 0,6043878 | 0,735483 |
| RP11-36B6.2    | 1,71 | 2,89 | 2,10 | 2,25 | 0,6044035 | 0,735483 |
| SPATA31A6      | 0,00 | 0,00 | 0,00 | 0,00 | 0,6044046 | NA       |
| RP3-333A15.1   | 0,49 | 0,26 | 0,37 | 0,40 | 0,6045203 | 0,735585 |
| RP11-521D12.5  | 0,00 | 0,00 | 0,00 | 0,00 | 0,6046079 | NA       |
| CYB561D2       | 5,93 | 4,73 | 5,41 | 5,06 | 0,6046179 | 0,735663 |
| CDH9           | 0,00 | 0,08 | 0,00 | 0,35 | 0,6046507 | 0,735663 |
| SNORA74C-1     | 0,00 | 2,40 | 0,00 | 0,00 | 0,6047232 | 0,735711 |
| MEF2A          | 5,74 | 5,05 | 5,62 | 5,65 | 0,6047856 | 0,735742 |
| MYL9           | 0,00 | 0,58 | 0,00 | 0,00 | 0,6048169 | 0,735742 |
| AC066593.1     | 0,00 | 0,00 | 0,00 | 0,00 | 0,6048459 | NA       |
| MIB1           | 1,73 | 0,82 | 1,33 | 1,53 | 0,6048476 | 0,735742 |
| BCAS2          | 5,88 | 5,37 | 4,90 | 5,37 | 0,6048849 | 0,735747 |
| BCL2L12        | 2,31 | 0,54 | 1,30 | 0,96 | 0,6049226 | 0,735752 |
| RP11-83A16.1   | 0,00 | 0,00 | 0,00 | 0,00 | 0,6049348 | NA       |
| RP11-384C4.7   | 0,00 | 0,00 | 0,00 | 0,00 | 0,6050636 | NA       |
| RP11-472K22.2  | 3,01 | 2,87 | 3,16 | 2,50 | 0,6051327 | 0,735968 |
| CETP           | 0,00 | 0,00 | 0,00 | 0,00 | 0,6051928 | 0,735992 |
| RP11-456P18.2  | 0,00 | 0,00 | 0,00 | 0,00 | 0,6051943 | NA       |
| RP11-555K12.3  | 0,00 | 1,10 | 0,00 | 0,05 | 0,6052185 | 0,735992 |
| CTB-31O20.2    | 4,26 | 5,48 | 3,79 | 2,15 | 0,6052657 | 0,736009 |
| RP11-227J5.3   | 0,00 | 0,21 | 0,00 | 0,00 | 0,6054343 | NA       |
| RP11-204M4.1   | 0,00 | 0,00 | 0,00 | 0,00 | 0,6054602 | NA       |
| MIR7-3HG       | 1,35 | 0,35 | 0,98 | 1,79 | 0,6054669 | 0,736213 |
| VENTXP1        | 0,00 | 0,00 | 0,00 | 0,00 | 0,605545  | NA       |
| COPB2          | 5,24 | 4,93 | 5,39 | 4,23 | 0,6055838 | 0,736299 |
| RFTN2          | 0,10 | 0,14 | 0,16 | 0,14 | 0,6056037 | 0,736299 |
| CTD-2340D6.2   | 0,00 | 0,00 | 0,00 | 0,00 | 0,6056456 | NA       |
| WDR47          | 2,63 | 2,20 | 2,50 | 1,71 | 0,6056925 | 0,736366 |
| CTC-543D15.8   | 0,00 | 0,23 | 0,00 | 0,00 | 0,6056988 | NA       |
| HIST1H2AH      | 0,00 | 0,00 | 0,00 | 0,00 | 0,6057831 | NA       |
| NLGN4X         | 0,00 | 0,02 | 0,00 | 0,00 | 0,6058721 | NA       |
| RNU6-422P      | 0,00 | 0,00 | 0,00 | 1,16 | 0,6059065 | NA       |
| RP1-178F15.4   | 0,00 | 0,00 | 0,00 | 0,50 | 0,6059841 | NA       |
| RP11-4B16.3    | 0,00 | 0,00 | 0,00 | 0,00 | 0,6060148 | NA       |
| ROBO1          | 0,27 | 0,16 | 0,30 | 0,31 | 0,6060897 | 0,736809 |
| RP11-378J18.6  | 0,00 | 0,00 | 0,00 | 0,00 | 0,6061139 | NA       |
| CTD-2015H6.2   | 0,00 | 0,00 | 0,00 | 0,00 | 0,6063777 | NA       |
| CD101          | 5,78 | 6,01 | 5,71 | 4,07 | 0,6063934 | 0,737138 |
| OSBPL9         | 4,85 | 4,65 | 4,48 | 3,02 | 0,6066151 | 0,737342 |
| OR10A6         | 0,12 | 1,20 | 0,33 | 0,54 | 0,606651  | 0,737342 |

|                |       |       |       |       |           |          |
|----------------|-------|-------|-------|-------|-----------|----------|
| CTSO           | 3,76  | 2,44  | 3,12  | 2,46  | 0,6067176 | 0,737342 |
| RP11-488C13.7  | 0,00  | 0,99  | 0,00  | 0,00  | 0,6067438 | 0,737342 |
| RP1-118J21.28  | 0,00  | 0,00  | 0,00  | 0,00  | 0,6067526 | 0,737342 |
| DPP9           | 2,95  | 3,96  | 3,32  | 3,12  | 0,6067696 | 0,737342 |
| AP2M1          | 6,77  | 6,85  | 6,45  | 6,21  | 0,6067937 | 0,737342 |
| TP63           | 0,00  | 0,06  | 0,25  | 0,23  | 0,606881  | 0,737408 |
| POTEB2         | 0,00  | 0,00  | 0,00  | 0,00  | 0,6069622 | NA       |
| CTD-2132H18.1  | 0,00  | 0,00  | 0,00  | 0,00  | 0,6069979 | NA       |
| PLEKHM1        | 4,28  | 4,08  | 3,76  | 3,58  | 0,607139  | 0,737635 |
| RP11-1217F2.10 | 0,00  | 0,00  | 0,00  | 0,00  | 0,607183  | NA       |
| GLOD4          | 5,05  | 4,85  | 4,62  | 4,02  | 0,6072113 | 0,737635 |
| AC137932.5     | 0,00  | 0,00  | 0,00  | 0,00  | 0,6072279 | 0,737635 |
| WDTC1          | 1,48  | 1,54  | 1,43  | 1,33  | 0,6072328 | 0,737635 |
| ANKRD36        | 3,36  | 4,43  | 3,17  | 3,06  | 0,607234  | 0,737635 |
| WDR73          | 3,75  | 2,06  | 2,82  | 1,75  | 0,6072869 | 0,737654 |
| APO00708.1     | 1,49  | 1,07  | 1,52  | 1,39  | 0,6073305 | 0,737654 |
| NUDC           | 5,75  | 5,60  | 5,51  | 4,20  | 0,6073569 | 0,737654 |
| RNU6-946P      | 6,01  | 0,00  | 6,01  | 4,66  | 0,6073823 | 0,737654 |
| GSTP1          | 10,94 | 10,88 | 10,79 | 10,44 | 0,6076052 | 0,737885 |
| RNA551         | 0,00  | 1,67  | 0,20  | 1,34  | 0,6076424 | NA       |
| RNA5510        | 0,00  | 1,67  | 0,20  | 1,34  | 0,6076424 | NA       |
| RNA5511        | 0,00  | 1,67  | 0,20  | 1,34  | 0,6076424 | NA       |
| RNA5512        | 0,00  | 1,67  | 0,20  | 1,34  | 0,6076424 | NA       |
| RNA5513        | 0,00  | 1,67  | 0,20  | 1,34  | 0,6076424 | NA       |
| RNA5514        | 0,00  | 1,67  | 0,20  | 1,34  | 0,6076424 | NA       |
| RNA5515        | 0,00  | 1,67  | 0,20  | 1,34  | 0,6076424 | NA       |
| RNA5516        | 0,00  | 1,67  | 0,20  | 1,34  | 0,6076424 | NA       |
| RNA5517        | 0,00  | 1,67  | 0,20  | 1,34  | 0,6076424 | NA       |
| RNA552         | 0,00  | 1,67  | 0,20  | 1,34  | 0,6076424 | NA       |
| RNA553         | 0,00  | 1,67  | 0,20  | 1,34  | 0,6076424 | NA       |
| RNA554         | 0,00  | 1,67  | 0,20  | 1,34  | 0,6076424 | NA       |
| RNA555         | 0,00  | 1,67  | 0,20  | 1,34  | 0,6076424 | NA       |
| RNA556         | 0,00  | 1,67  | 0,20  | 1,34  | 0,6076424 | NA       |
| RNA557         | 0,00  | 1,67  | 0,20  | 1,34  | 0,6076424 | NA       |
| RNA558         | 0,00  | 1,67  | 0,20  | 1,34  | 0,6076424 | NA       |
| VASH1          | 2,41  | 1,81  | 2,62  | 1,28  | 0,6077963 | 0,738075 |
| RPS15AP18      | 0,00  | 0,00  | 0,00  | 0,00  | 0,6078052 | NA       |
| RP11-517O13.1  | 0,00  | 0,00  | 0,24  | 0,52  | 0,6078201 | NA       |
| RP11-85A1.3    | 0,00  | 0,20  | 0,46  | 0,00  | 0,607845  | 0,738075 |
| CCDC78         | 0,00  | 0,04  | 0,00  | 0,00  | 0,6078457 | NA       |
| RP11-148B6.1   | 2,75  | 0,92  | 2,32  | 2,84  | 0,6078855 | 0,738075 |
| AC063976.7     | 0,12  | 0,46  | 0,17  | 0,35  | 0,607895  | 0,738075 |
| DKK1           | 0,00  | 0,00  | 0,00  | 0,00  | 0,6079637 | NA       |
| PRPSAP1        | 4,31  | 3,02  | 4,13  | 2,15  | 0,6079862 | 0,738113 |
| CTD-2278I10.4  | 0,00  | 0,89  | 0,09  | 1,18  | 0,6079923 | 0,738113 |
| ZNF695         | 0,28  | 0,52  | 0,37  | 0,27  | 0,6080283 | 0,738116 |
| RP11-932O9.4   | 0,00  | 0,00  | 0,00  | 0,00  | 0,6081031 | NA       |
| CRYM           | 0,00  | 0,64  | 0,00  | 0,00  | 0,6081594 | 0,738235 |
| RP11-138I18.2  | 0,26  | 1,33  | 0,20  | 0,43  | 0,608261  | 0,738318 |
| RP11-100G15.2  | 0,00  | 0,00  | 0,00  | 0,00  | 0,608277  | NA       |
| CTD-2331H12.8  | 0,00  | 0,00  | 0,00  | 0,00  | 0,6082982 | NA       |
| FXR1           | 4,93  | 5,09  | 4,56  | 3,61  | 0,6083364 | 0,738369 |
| RP11-101C21.4  | 0,00  | 0,00  | 0,00  | 0,00  | 0,6083802 | NA       |
| RN7SL280P      | 0,00  | 0,00  | 0,00  | 0,00  | 0,6086624 | NA       |
| TRAFD1         | 3,98  | 4,49  | 2,86  | 4,26  | 0,6086929 | 0,738747 |

|                    |      |      |      |      |           |          |
|--------------------|------|------|------|------|-----------|----------|
| NUP62              | 4,49 | 4,01 | 4,38 | 4,58 | 0,6087144 | 0,738747 |
| TARSL2             | 1,42 | 1,62 | 1,43 | 1,69 | 0,6088046 | 0,738766 |
| PCNT               | 3,32 | 1,34 | 2,75 | 1,99 | 0,608807  | 0,738766 |
| UBLCP1             | 4,60 | 2,64 | 3,73 | 2,30 | 0,6088299 | 0,738766 |
| RP11-333A23.4      | 0,84 | 0,22 | 0,85 | 0,80 | 0,6090532 | 0,738995 |
| CPSF4              | 3,49 | 0,92 | 3,14 | 3,19 | 0,6090849 | 0,738995 |
| SLC24A3            | 0,00 | 0,00 | 0,00 | 0,04 | 0,6091383 | NA       |
| IGHJ4              | 0,00 | 3,65 | 0,00 | 3,59 | 0,6091713 | NA       |
| RP11-516C1.2       | 0,00 | 0,00 | 0,00 | 0,00 | 0,6093442 | 0,739269 |
| AL353662.3         | 1,61 | 1,42 | 1,61 | 1,71 | 0,6096114 | 0,739553 |
| RP11-600P18.4      | 0,00 | 0,00 | 0,00 | 0,00 | 0,6097889 | NA       |
| AF241726.4         | 0,05 | 0,14 | 0,06 | 0,06 | 0,6099328 | 0,739894 |
| CTC-248O19.1       | 1,52 | 0,00 | 0,00 | 0,00 | 0,609974  | 0,739894 |
| RP11-108P20.3      | 0,00 | 0,00 | 0,00 | 0,00 | 0,6099857 | NA       |
| RP11-329J18.5      | 0,00 | 0,45 | 0,00 | 0,00 | 0,6099923 | 0,739894 |
| ROBO4              | 0,06 | 0,00 | 0,07 | 0,00 | 0,6100837 | 0,739964 |
| RP4-682C21.2       | 0,00 | 0,00 | 0,00 | 0,00 | 0,6102428 | NA       |
| RP11-762I7.5       | 0,00 | 0,00 | 0,00 | 1,38 | 0,6102621 | 0,740141 |
| AC007679.1         | 0,39 | 0,52 | 0,11 | 0,00 | 0,6102641 | NA       |
| AB019441.29        | 0,24 | 0,30 | 0,00 | 0,29 | 0,6102745 | NA       |
| AC004453.8         | 0,00 | 0,00 | 0,49 | 0,00 | 0,6102876 | NA       |
| RP11-487E1.1       | 0,00 | 5,68 | 0,29 | 0,00 | 0,6103578 | 0,740216 |
| RNU6-613P          | 0,00 | 0,00 | 0,00 | 0,00 | 0,610469  | 0,740311 |
| USP21              | 3,40 | 2,15 | 2,81 | 2,31 | 0,6105326 | 0,740347 |
| RP11-480G7.2       | 0,00 | 0,00 | 0,00 | 0,00 | 0,6106029 | NA       |
| RP11-333J10.3      | 1,02 | 0,00 | 0,58 | 1,22 | 0,6106104 | 0,740362 |
| ZFP91              | 3,47 | 3,17 | 3,51 | 3,31 | 0,6106109 | 0,740362 |
| STAG3L5P-PVRIG2P-P | 2,27 | 2,07 | 1,64 | 0,37 | 0,610715  | 0,740447 |
| HAUS4              | 5,83 | 6,12 | 5,22 | 4,19 | 0,6108094 | 0,740521 |
| LBX2               | 0,00 | 0,00 | 0,00 | 0,00 | 0,6108837 | NA       |
| AC025477.1         | 0,00 | 0,00 | 0,00 | 0,00 | 0,6109534 | 0,740626 |
| LINC00314          | 0,59 | 0,35 | 0,96 | 1,37 | 0,6109711 | 0,740626 |
| SLC25A10           | 0,00 | 0,00 | 0,00 | 0,00 | 0,6109956 | 0,740626 |
| RNU6-1181P         | 0,00 | 0,00 | 0,00 | 0,00 | 0,611061  | NA       |
| CTD-2514K5.2       | 0,28 | 0,00 | 0,00 | 0,00 | 0,6111472 | 0,740769 |
| DDX46              | 4,38 | 4,36 | 4,35 | 4,13 | 0,611217  | 0,740814 |
| SERPINI1           | 0,00 | 0,00 | 0,00 | 0,00 | 0,611265  | 0,740831 |
| RN7SL556P          | 0,00 | 0,00 | 0,00 | 0,80 | 0,6112874 | NA       |
| RP11-79E3.2        | 0,00 | 0,00 | 0,00 | 0,00 | 0,61144   | NA       |
| FRG1EP             | 0,00 | 0,00 | 0,00 | 0,00 | 0,6114547 | NA       |
| RP11-576I22.2      | 0,00 | 0,00 | 0,00 | 0,65 | 0,611494  | 0,741068 |
| CLEC5A             | 0,00 | 0,69 | 0,00 | 0,00 | 0,6115602 | 0,74109  |
| UBE2H              | 3,60 | 3,45 | 3,12 | 2,65 | 0,611599  | 0,74109  |
| ARRDC3             | 4,64 | 3,27 | 4,68 | 4,45 | 0,6116332 | 0,74109  |
| RP11-539G18.3      | 1,21 | 2,74 | 1,90 | 1,65 | 0,6116606 | 0,74109  |
| GABRG1             | 0,00 | 0,00 | 0,00 | 0,00 | 0,6116763 | NA       |
| RP11-573G6.10      | 0,00 | 0,00 | 0,00 | 0,00 | 0,6116787 | 0,74109  |
| RP11-30L15.4       | 0,00 | 0,00 | 0,00 | 0,00 | 0,6117477 | NA       |
| B3GNT2             | 2,62 | 1,22 | 2,29 | 0,40 | 0,6117478 | 0,741125 |
| CTD-2561J22.5      | 1,22 | 1,67 | 1,37 | 1,49 | 0,6117741 | 0,741125 |
| RP1-223H12.5       | 1,87 | 2,49 | 1,59 | 0,00 | 0,6118464 | 0,741166 |
| ING1               | 3,12 | 2,54 | 2,98 | 2,27 | 0,6118749 | 0,741166 |
| NHSL1              | 1,69 | 0,74 | 0,97 | 0,71 | 0,6119763 | 0,741249 |
| IGLV6-57           | 0,00 | 0,00 | 0,00 | 0,00 | 0,6120171 | NA       |
| CTC-359M8.3        | 0,00 | 0,00 | 0,00 | 0,00 | 0,6120705 | NA       |

|                  |      |      |      |      |           |          |
|------------------|------|------|------|------|-----------|----------|
| SGCA             | 1,62 | 0,42 | 0,32 | 0,00 | 0,6121054 | 0,741334 |
| NHLH1            | 0,00 | 0,00 | 0,00 | 0,00 | 0,6121496 | 0,741334 |
| ODC1             | 4,12 | 4,11 | 4,21 | 4,06 | 0,6121647 | 0,741334 |
| RP11-677M14.7    | 1,66 | 2,23 | 1,53 | 1,43 | 0,6121805 | 0,741334 |
| AC144836.1       | 0,00 | 0,00 | 0,00 | 0,00 | 0,6122084 | NA       |
| RP13-635I23.4    | 0,00 | 2,80 | 0,00 | 0,71 | 0,6124579 | 0,74163  |
| ANK1             | 0,00 | 0,16 | 0,00 | 0,00 | 0,6126695 | 0,741815 |
| GS1-124K5.4      | 2,48 | 0,00 | 2,24 | 3,60 | 0,6126784 | 0,741815 |
| GPSM2            | 3,75 | 2,49 | 3,90 | 4,54 | 0,6127111 | 0,741815 |
| CTD-2619I13.17   | 0,46 | 0,23 | 0,42 | 0,21 | 0,612812  | 0,741897 |
| MYL2             | 0,00 | 0,00 | 0,00 | 0,00 | 0,6129989 | NA       |
| RP11-473C18.7    | 0,00 | 0,00 | 0,00 | 0,00 | 0,6130137 | 0,742031 |
| AMPD2            | 6,40 | 7,08 | 6,48 | 5,91 | 0,6130138 | 0,742031 |
| NCRNA00093       | 0,61 | 1,51 | 0,66 | 0,36 | 0,6130229 | 0,742031 |
| PANK2            | 4,28 | 4,16 | 4,79 | 4,70 | 0,6131727 | 0,742158 |
| KIAA0753         | 1,63 | 1,64 | 1,67 | 0,38 | 0,6131947 | 0,742158 |
| RP3-417L20.4     | 0,00 | 0,00 | 0,00 | 0,00 | 0,6132779 | NA       |
| ATG4C            | 4,84 | 4,82 | 4,04 | 3,97 | 0,6133002 | 0,742232 |
| RP11-573D15.3    | 0,00 | 0,74 | 0,00 | 0,00 | 0,6133689 | NA       |
| RP11-454F8.4     | 0,10 | 0,54 | 0,29 | 0,25 | 0,613414  | 0,742232 |
| RP5-1028K7.2     | 0,00 | 0,00 | 0,00 | 0,00 | 0,6134508 | NA       |
| RP11-20G6.2      | 1,03 | 1,33 | 0,86 | 0,77 | 0,61347   | 0,742232 |
| RCN1             | 4,25 | 3,55 | 3,75 | 3,43 | 0,6135129 | 0,742232 |
| RP11-689C9.1     | 0,00 | 0,31 | 0,00 | 0,00 | 0,6135337 | 0,742232 |
| XXbac-BPG252P9.9 | 0,00 | 0,00 | 0,00 | 0,00 | 0,6135477 | NA       |
| RNU6-8           | 0,00 | 2,49 | 0,00 | 0,00 | 0,6135645 | 0,742232 |
| RNU6-7           | 0,00 | 2,49 | 0,00 | 0,00 | 0,6135645 | 0,742232 |
| C19orf10         | 7,10 | 6,41 | 6,91 | 6,94 | 0,6135781 | 0,742232 |
| RP4-569M23.4     | 0,00 | 0,00 | 0,00 | 0,00 | 0,6135841 | 0,742232 |
| TUG1             | 5,03 | 4,49 | 4,80 | 3,92 | 0,6135894 | 0,742232 |
| SERINC3          | 5,76 | 5,24 | 5,26 | 4,34 | 0,6136374 | 0,742249 |
| PTGER2           | 2,29 | 3,19 | 1,61 | 2,53 | 0,6136782 | 0,742258 |
| RP11-205K6.3     | 0,00 | 0,00 | 0,00 | 0,00 | 0,6137086 | NA       |
| ADO              | 2,57 | 1,93 | 2,78 | 2,47 | 0,6138235 | 0,74232  |
| LARP7            | 5,30 | 5,00 | 5,34 | 5,23 | 0,6138518 | 0,74232  |
| RP13-941N14.1    | 0,00 | 0,00 | 0,00 | 0,00 | 0,6138662 | NA       |
| RP11-108O10.8    | 0,00 | 0,00 | 0,00 | 0,00 | 0,6138721 | 0,74232  |
| NSUN2            | 4,69 | 3,40 | 4,13 | 3,02 | 0,613884  | 0,74232  |
| NUCB2            | 4,69 | 4,49 | 3,84 | 2,97 | 0,613896  | 0,74232  |
| RP11-478C6.4     | 0,00 | 0,00 | 0,00 | 1,63 | 0,613899  | NA       |
| LCAT             | 1,36 | 0,93 | 2,25 | 2,92 | 0,6139886 | 0,742391 |
| KRT123P          | 0,00 | 0,00 | 0,00 | 0,00 | 0,6140767 | NA       |
| DRP2             | 0,00 | 0,00 | 0,00 | 0,00 | 0,6140903 | NA       |
| GBAP1            | 0,00 | 0,34 | 0,03 | 1,53 | 0,6140952 | 0,74248  |
| RP11-399C16.3    | 0,59 | 0,34 | 0,43 | 0,00 | 0,6141379 | 0,742491 |
| RP11-302M6.3     | 0,00 | 0,00 | 0,00 | 0,00 | 0,6142084 | NA       |
| RP11-1109M24.16  | 0,00 | 2,65 | 0,00 | 0,80 | 0,6143354 | 0,742621 |
| B3GALT5          | 0,06 | 0,10 | 0,06 | 0,02 | 0,6143637 | 0,742621 |
| RP11-392P7.6     | 0,00 | 0,27 | 0,00 | 0,47 | 0,614373  | 0,742621 |
| RTN3             | 5,35 | 5,13 | 5,60 | 5,07 | 0,6143786 | 0,742621 |
| RP11-667K14.8    | 0,00 | 0,00 | 0,00 | 0,00 | 0,6144631 | NA       |
| RP11-124N19.3    | 0,00 | 0,33 | 0,00 | 0,32 | 0,6144747 | NA       |
| RN7SL423P        | 0,00 | 0,00 | 0,00 | 0,67 | 0,614516  | NA       |
| ZBTB24           | 2,12 | 1,09 | 1,56 | 2,16 | 0,614584  | 0,742828 |
| OR7A19P          | 0,00 | 0,00 | 0,00 | 0,00 | 0,6146352 | NA       |



|                 |      |      |      |      |           |          |
|-----------------|------|------|------|------|-----------|----------|
| ATG5            | 4,48 | 2,62 | 4,46 | 3,42 | 0,6146486 | 0,742866 |
| RP11-173A6.3    | 0,00 | 0,00 | 0,00 | 0,00 | 0,6147675 | NA       |
| C1orf54         | 4,25 | 5,56 | 4,39 | 4,35 | 0,6148543 | 0,743068 |
| MS4A2           | 0,33 | 0,43 | 0,32 | 0,47 | 0,6148821 | 0,743068 |
| RP11-707F2.2    | 0,00 | 0,00 | 0,00 | 0,00 | 0,6150434 | NA       |
| RP11-76C10.3    | 0,69 | 0,75 | 0,52 | 0,32 | 0,6150878 | 0,743276 |
| HTATSF1P2       | 0,00 | 0,00 | 0,00 | 0,00 | 0,615141  | 0,743294 |
| RP11-567F11.2   | 0,00 | 0,00 | 0,00 | 0,00 | 0,6151701 | 0,743294 |
| USP48           | 5,14 | 4,68 | 5,46 | 4,59 | 0,6152388 | 0,743337 |
| RP13-580F15.2   | 0,63 | 0,29 | 0,29 | 0,33 | 0,6152862 | 0,743354 |
| Z69720.3        | 0,00 | 0,95 | 0,00 | 0,00 | 0,615463  | NA       |
| PYCR2           | 3,29 | 3,12 | 2,78 | 2,28 | 0,6154644 | 0,743529 |
| RP11-144G16.1   | 0,00 | 0,00 | 0,00 | 0,00 | 0,6155065 | NA       |
| SMAD3           | 3,29 | 3,89 | 2,81 | 2,55 | 0,6155258 | 0,743555 |
| RP11-474G23.2   | 0,00 | 0,00 | 0,88 | 0,30 | 0,6155695 | 0,743555 |
| TMEM9           | 5,04 | 0,78 | 4,30 | 2,43 | 0,6155862 | 0,743555 |
| RP3-433F14.3    | 1,73 | 0,85 | 1,80 | 1,39 | 0,6156489 | 0,74359  |
| RN7SKP151       | 0,00 | 0,00 | 0,00 | 0,00 | 0,6157406 | NA       |
| RP11-61L14.6    | 0,00 | 0,00 | 0,00 | 0,00 | 0,6157553 | NA       |
| RP11-554J4.1    | 2,34 | 4,42 | 1,32 | 3,64 | 0,6157691 | 0,743695 |
| RP11-263K4.1    | 0,00 | 0,00 | 0,00 | 0,00 | 0,6158285 | NA       |
| TFAP2E          | 0,00 | 0,00 | 0,00 | 0,00 | 0,6159585 | 0,743883 |
| RP11-390E23.6   | 0,08 | 0,30 | 1,56 | 2,34 | 0,6160355 | 0,743935 |
| MUT             | 2,27 | 0,76 | 1,26 | 0,33 | 0,6160732 | 0,743941 |
| SPATA31D1       | 0,00 | 0,00 | 0,00 | 0,00 | 0,6160757 | NA       |
| NTRK1           | 0,00 | 0,00 | 0,00 | 0,00 | 0,6161968 | NA       |
| RP11-474G23.3   | 0,69 | 0,90 | 1,46 | 1,01 | 0,6162169 | 0,744074 |
| RP11-497G19.2   | 0,00 | 0,00 | 0,00 | 0,00 | 0,6162391 | NA       |
| RP11-482G13.1   | 0,95 | 0,79 | 0,34 | 0,00 | 0,6163414 | 0,744184 |
| RP11-451N19.1   | 0,00 | 0,00 | 0,00 | 0,00 | 0,6164134 | NA       |
| RP11-211N8.2    | 0,00 | 0,00 | 0,00 | 0,00 | 0,6165026 | NA       |
| RN7SL441P       | 0,00 | 0,00 | 0,00 | 0,00 | 0,6165187 | 0,744336 |
| RRAGA           | 4,26 | 2,52 | 4,13 | 2,98 | 0,6165343 | 0,744336 |
| RP11-211G3.3    | 0,00 | 0,00 | 0,00 | 0,00 | 0,6166264 | 0,744406 |
| RP11-329B9.3    | 0,00 | 0,00 | 0,00 | 0,00 | 0,6166506 | NA       |
| CCDC190         | 0,00 | 0,10 | 0,00 | 0,00 | 0,6166985 | NA       |
| ZNF322          | 1,57 | 0,00 | 1,32 | 1,16 | 0,6168098 | 0,744587 |
| BAAT            | 0,00 | 0,00 | 0,00 | 0,00 | 0,6168396 | NA       |
| TTC41P          | 0,11 | 0,00 | 0,02 | 0,00 | 0,6168471 | 0,744592 |
| SPACA4          | 0,00 | 0,00 | 0,00 | 0,00 | 0,6168535 | NA       |
| RP11-505K9.1    | 0,00 | 0,00 | 0,00 | 0,00 | 0,6169879 | 0,744721 |
| AC005307.5      | 0,00 | 0,04 | 0,00 | 0,04 | 0,6170377 | NA       |
| GDNF-AS1        | 0,02 | 0,00 | 0,01 | 0,00 | 0,6170666 | NA       |
| XXbac-B476C20.9 | 0,00 | 0,16 | 0,09 | 0,09 | 0,6171084 | 0,744826 |
| USP17L22        | 0,00 | 0,00 | 0,00 | 0,00 | 0,617194  | NA       |
| GYS1            | 3,61 | 3,21 | 3,74 | 3,28 | 0,6172249 | 0,744927 |
| OR2N1P          | 0,00 | 0,00 | 0,00 | 0,00 | 0,6173384 | NA       |
| CTA-407F11.7    | 0,59 | 3,49 | 1,22 | 2,89 | 0,6173732 | 0,745065 |
| MRPS5           | 4,99 | 5,32 | 5,12 | 4,56 | 0,6174687 | 0,74514  |
| WDPCP           | 2,40 | 3,24 | 3,23 | 2,99 | 0,6175043 | 0,745142 |
| CD79A           | 0,00 | 0,21 | 0,11 | 0,11 | 0,6175929 | 0,745209 |
| RN7SL504P       | 0,00 | 0,00 | 0,00 | 0,00 | 0,6176154 | NA       |
| GHRLOS          | 0,44 | 0,65 | 0,64 | 0,00 | 0,6176642 | 0,745254 |
| AC018442.1      | 0,00 | 0,00 | 0,00 | 0,00 | 0,6177157 | NA       |
| RP11-524F11.2   | 1,00 | 0,00 | 1,24 | 1,52 | 0,6177217 | 0,745283 |

|               |      |      |      |      |           |          |
|---------------|------|------|------|------|-----------|----------|
| AC109631.1    | 0,00 | 0,00 | 0,00 | 0,00 | 0,6177468 | NA       |
| RP11-63G10.2  | 0,00 | 0,00 | 0,00 | 0,00 | 0,617756  | NA       |
| CT45A2        | 0,00 | 0,00 | 0,00 | 0,00 | 0,6177756 | NA       |
| RP11-498P14.3 | 0,00 | 0,00 | 0,00 | 0,66 | 0,6179116 | NA       |
| RP11-90P13.1  | 0,00 | 0,39 | 0,00 | 0,00 | 0,6179239 | 0,745487 |
| RP11-734J24.1 | 0,00 | 0,50 | 0,00 | 0,00 | 0,6179785 | NA       |
| OVOS          | 0,03 | 0,03 | 0,05 | 0,08 | 0,6179919 | 0,745528 |
| VANGL2        | 0,00 | 0,03 | 0,00 | 0,00 | 0,618095  | NA       |
| RP11-560F18.1 | 0,00 | 0,00 | 0,00 | 0,00 | 0,6181053 | NA       |
| RP11-324L3.1  | 0,00 | 0,00 | 0,00 | 0,00 | 0,6181126 | NA       |
| RP11-187O7.1  | 0,00 | 0,00 | 0,00 | 0,00 | 0,6181564 | NA       |
| RP11-348N5.9  | 0,00 | 0,00 | 0,00 | 0,00 | 0,6181791 | 0,745714 |
| CTD-209O113.2 | 0,00 | 0,00 | 0,00 | 0,00 | 0,6182276 | NA       |
| SPATA33       | 0,96 | 0,51 | 0,85 | 1,04 | 0,6183486 | 0,745838 |
| SIRPB2        | 2,68 | 5,04 | 4,06 | 3,77 | 0,6183496 | 0,745838 |
| RP11-317B3.2  | 0,00 | 0,00 | 0,00 | 0,00 | 0,6183873 | NA       |
| MIR548AL      | 2,00 | 0,00 | 0,00 | 0,00 | 0,6184121 | 0,745873 |
| CTB-79E8.2    | 0,00 | 0,00 | 0,00 | 0,00 | 0,6184247 | NA       |
| CKMT1B        | 0,00 | 0,00 | 0,00 | 0,00 | 0,6184271 | NA       |
| UCP1          | 0,00 | 0,37 | 0,00 | 0,00 | 0,6184903 | NA       |
| C4A           | 0,00 | 2,37 | 0,03 | 0,00 | 0,6184903 | 0,745927 |
| NBPF25P       | 0,91 | 0,47 | 0,75 | 0,89 | 0,6185306 | 0,745935 |
| NKAPL         | 0,00 | 0,17 | 0,00 | 0,00 | 0,6185497 | NA       |
| CTD-254O15.3  | 0,00 | 0,00 | 0,00 | 0,00 | 0,6185611 | NA       |
| RP11-372E1.4  | 0,51 | 0,57 | 0,63 | 0,42 | 0,6185991 | 0,745942 |
| RP1-153G14.4  | 2,26 | 2,28 | 2,44 | 2,17 | 0,6186028 | 0,745942 |
| HSD17B4       | 6,07 | 5,28 | 5,75 | 5,89 | 0,6186716 | 0,745971 |
| TMEM18        | 4,49 | 3,51 | 3,68 | 3,63 | 0,6186947 | 0,745971 |
| RP5-1107A17.2 | 0,00 | 0,54 | 0,00 | 0,00 | 0,6187908 | NA       |
| RP11-295P9.12 | 0,00 | 0,00 | 0,15 | 0,72 | 0,6187985 | NA       |
| FAM60A        | 5,35 | 5,02 | 4,97 | 3,18 | 0,6188697 | 0,746138 |
| CTGLF10P      | 0,32 | 0,51 | 0,16 | 0,12 | 0,6189003 | 0,746138 |
| SCARNA7       | 0,00 | 0,00 | 0,00 | 0,00 | 0,61902   | NA       |
| CTC-529I10.2  | 1,35 | 1,08 | 1,33 | 0,92 | 0,6191167 | 0,746237 |
| ANKRD33B      | 0,00 | 0,03 | 0,00 | 0,00 | 0,6191431 | 0,746237 |
| RECK          | 1,03 | 0,58 | 0,88 | 1,36 | 0,6191694 | 0,746237 |
| PHKB          | 5,50 | 5,54 | 5,37 | 4,71 | 0,6191742 | 0,746237 |
| RP11-402J6.1  | 0,00 | 0,00 | 0,00 | 0,00 | 0,6191777 | NA       |
| IRF2BP2       | 5,40 | 4,94 | 5,17 | 4,78 | 0,6191967 | 0,746237 |
| RP11-128N14.5 | 4,43 | 0,00 | 2,02 | 2,94 | 0,619216  | 0,746237 |
| RP11-299H22.5 | 0,90 | 1,11 | 0,92 | 0,47 | 0,619245  | 0,746237 |
| KB-226F1.2    | 0,00 | 0,00 | 0,00 | 0,00 | 0,6192511 | 0,746237 |
| RP11-820K3.3  | 0,56 | 0,26 | 0,20 | 1,10 | 0,6193131 | 0,746272 |
| SULT6B1       | 0,00 | 0,00 | 0,00 | 0,00 | 0,6193567 | NA       |
| AC016734.2    | 0,50 | 0,30 | 0,61 | 0,28 | 0,6193839 | 0,746303 |
| RPL10AP6      | 0,00 | 0,28 | 0,25 | 0,00 | 0,6193862 | NA       |
| TRMT6         | 4,77 | 4,49 | 4,58 | 3,64 | 0,6194064 | 0,746303 |
| C4B           | 0,00 | 2,37 | 0,05 | 0,00 | 0,6194692 | 0,746309 |
| SLC35G5       | 0,11 | 0,17 | 0,12 | 0,00 | 0,6194788 | 0,746309 |
| ALDH8A1       | 0,07 | 0,60 | 0,43 | 0,78 | 0,6195791 | 0,74639  |
| RP11-1055B8.2 | 0,20 | 0,87 | 0,00 | 0,00 | 0,6197294 | 0,746492 |
| RP11-474N24.6 | 2,09 | 0,73 | 0,72 | 0,44 | 0,619731  | 0,746492 |
| SEPT1         | 1,67 | 1,23 | 0,94 | 1,73 | 0,6198442 | 0,746575 |
| SERPINA10     | 2,02 | 1,17 | 2,18 | 0,83 | 0,6198674 | 0,746575 |
| MIR597        | 0,00 | 0,00 | 0,00 | 0,00 | 0,6199433 | NA       |

|                |      |      |      |      |           |          |
|----------------|------|------|------|------|-----------|----------|
| RP11-142J21.2  | 0,00 | 0,00 | 0,00 | 0,00 | 0,6199435 | NA       |
| RP11-1250I15.1 | 2,04 | 0,00 | 1,17 | 0,00 | 0,6199644 | 0,746652 |
| ANPEP          | 3,09 | 3,19 | 3,87 | 3,27 | 0,6200414 | 0,746704 |
| RP1-137K2.2    | 0,00 | 0,00 | 0,00 | 0,00 | 0,620155  | NA       |
| KB-1836B5.4    | 0,00 | 0,00 | 0,00 | 0,00 | 0,6201748 | NA       |
| TBC1D21        | 0,00 | 0,00 | 0,00 | 0,00 | 0,6201992 | NA       |
| FAM156B        | 2,72 | 2,65 | 2,95 | 1,04 | 0,6202423 | 0,746868 |
| RP11-493K19.3  | 2,52 | 0,55 | 2,66 | 1,47 | 0,6202452 | 0,746868 |
| RP11-63A11.2   | 0,00 | 0,06 | 0,06 | 0,17 | 0,6204805 | 0,747094 |
| RP11-792A8.1   | 0,00 | 0,00 | 0,00 | 0,00 | 0,6204845 | NA       |
| ABCB7          | 4,95 | 4,15 | 4,27 | 3,43 | 0,6204994 | 0,747094 |
| RP11-16C1.1    | 0,00 | 0,00 | 0,00 | 0,00 | 0,6206001 | NA       |
| MME            | 0,15 | 0,22 | 0,19 | 0,97 | 0,6206936 | 0,747287 |
| TRIML1         | 0,00 | 0,00 | 0,00 | 0,00 | 0,620719  | NA       |
| GGTLC2         | 0,00 | 0,20 | 0,00 | 0,00 | 0,6207371 | NA       |
| RP3-406P24.4   | 0,00 | 0,00 | 0,00 | 0,00 | 0,6209036 | NA       |
| HCG24          | 0,24 | 0,77 | 0,30 | 0,00 | 0,6209266 | 0,747527 |
| RPL39P38       | 0,00 | 0,00 | 0,00 | 0,00 | 0,62098   | NA       |
| RN7SL508P      | 0,00 | 0,00 | 0,00 | 0,00 | 0,6209805 | NA       |
| LDHAL6B        | 0,00 | 0,00 | 0,00 | 0,00 | 0,6210258 | NA       |
| RP1-59B16.1    | 0,00 | 0,00 | 0,00 | 0,00 | 0,6210269 | NA       |
| RAD50          | 4,43 | 3,14 | 3,77 | 2,78 | 0,6210403 | 0,747597 |
| NUDT9          | 3,25 | 2,44 | 3,01 | 3,76 | 0,6210521 | 0,747597 |
| RP11-62J1.3    | 0,00 | 0,00 | 0,00 | 0,00 | 0,6211245 | NA       |
| IGLV3-21       | 0,00 | 0,32 | 0,00 | 0,00 | 0,6211399 | 0,747662 |
| RNU6-413P      | 0,00 | 0,00 | 0,00 | 0,00 | 0,6212345 | NA       |
| RP11-16B9.1    | 4,50 | 2,53 | 2,22 | 1,54 | 0,6212844 | 0,74778  |
| AC074389.9     | 0,00 | 1,59 | 0,00 | 0,00 | 0,6213047 | 0,74778  |
| MIR933         | 0,00 | 0,00 | 0,00 | 0,00 | 0,62132   | NA       |
| RP11-450H5.1   | 0,00 | 0,00 | 0,00 | 0,00 | 0,621422  | NA       |
| RN7SL34P       | 0,00 | 0,00 | 0,00 | 0,00 | 0,6214306 | NA       |
| UNC13B         | 0,00 | 0,00 | 0,01 | 0,10 | 0,6214707 | 0,747939 |
| ANKS1A         | 1,50 | 1,35 | 1,07 | 1,99 | 0,6215328 | 0,74794  |
| CXorf56        | 2,37 | 1,60 | 2,51 | 1,89 | 0,6215623 | 0,74794  |
| RP11-535A19.1  | 0,00 | 1,57 | 0,00 | 0,00 | 0,621573  | 0,74794  |
| AC010907.3     | 3,48 | 3,83 | 3,08 | 2,72 | 0,6217588 | 0,748123 |
| AFF4           | 5,06 | 4,11 | 4,53 | 3,81 | 0,6218829 | 0,748232 |
| BOLA2B         | 4,14 | 3,96 | 4,37 | 4,57 | 0,6219948 | 0,748326 |
| RP11-241F15.1  | 0,00 | 0,00 | 0,00 | 0,00 | 0,6220681 | 0,748374 |
| RP11-24P14.1   | 0,00 | 0,00 | 0,00 | 0,00 | 0,6221103 | NA       |
| LA16c-306E5.1  | 0,00 | 0,00 | 0,00 | 0,00 | 0,6221654 | NA       |
| TMEM189-UBE2V1 | 0,14 | 0,15 | 0,00 | 0,00 | 0,6222219 | 0,748512 |
| RN7SL385P      | 0,00 | 0,00 | 0,00 | 0,00 | 0,6222546 | NA       |
| ZNF28          | 2,95 | 2,69 | 2,72 | 2,37 | 0,6222926 | 0,748512 |
| AMIGO3         | 0,00 | 0,00 | 0,00 | 0,16 | 0,6222951 | 0,748512 |
| TET1           | 0,04 | 0,01 | 0,01 | 0,02 | 0,622329  | 0,748512 |
| TMED4          | 5,68 | 5,53 | 5,25 | 4,98 | 0,6223509 | 0,748512 |
| AC147651.4     | 3,50 | 5,00 | 2,66 | 3,56 | 0,6223928 | 0,748522 |
| FUT8-AS1       | 0,00 | 0,00 | 0,00 | 0,00 | 0,6224181 | NA       |
| STIP1          | 4,73 | 4,13 | 4,08 | 4,85 | 0,622509  | 0,748606 |
| TP53TG1        | 4,35 | 4,17 | 4,29 | 1,78 | 0,6225301 | 0,748606 |
| CTC-425O23.2   | 0,00 | 0,00 | 0,00 | 0,09 | 0,6225347 | NA       |
| MGAT4D         | 0,00 | 0,00 | 0,00 | 0,00 | 0,6225741 | NA       |
| RP11-552F3.4   | 0,00 | 0,20 | 0,00 | 0,00 | 0,6226206 | NA       |
| CTD-3162L10.1  | 0,18 | 0,59 | 0,01 | 0,64 | 0,6227039 | 0,748756 |

|               |       |       |       |       |           |          |
|---------------|-------|-------|-------|-------|-----------|----------|
| TRBJ1-2       | 0,00  | 0,00  | 0,00  | 0,00  | 0,6227072 | NA       |
| RP11-192H23.5 | 0,00  | 0,00  | 0,41  | 0,00  | 0,6227205 | NA       |
| NDUFS3        | 7,43  | 7,30  | 7,11  | 6,73  | 0,6227395 | 0,748756 |
| RP11-77K12.1  | 0,00  | 0,00  | 0,00  | 0,00  | 0,6227562 | 0,748756 |
| AL121652.3    | 0,00  | 0,00  | 0,00  | 0,00  | 0,6227563 | NA       |
| RNU7-152P     | 0,00  | 0,00  | 0,00  | 0,00  | 0,6227902 | NA       |
| CHAC2         | 0,09  | 0,00  | 0,00  | 0,00  | 0,6228178 | 0,748779 |
| RP11-454H13.6 | 0,00  | 0,48  | 0,00  | 0,00  | 0,6228426 | 0,748779 |
| TAPBP         | 6,32  | 6,03  | 6,40  | 5,92  | 0,6230414 | 0,748977 |
| RP11-310A13.1 | 0,00  | 0,00  | 0,00  | 0,00  | 0,6230616 | NA       |
| PCDH10        | 0,06  | 0,03  | 0,05  | 0,03  | 0,6230999 | 0,749001 |
| TAF4B         | 0,87  | 0,00  | 0,78  | 0,87  | 0,6231283 | 0,749001 |
| RP3-522P13.4  | 0,00  | 0,00  | 0,00  | 0,00  | 0,6231879 | 0,74903  |
| OR2AG1        | 0,24  | 0,23  | 0,29  | 0,12  | 0,6232197 | 0,74903  |
| RNASP452      | 0,00  | 3,40  | 0,00  | 0,00  | 0,6232559 | NA       |
| RP11-4B16.4   | 2,32  | 2,37  | 1,51  | 0,69  | 0,623267  | 0,749046 |
| CTB-181H17.1  | 0,28  | 0,43  | 0,46  | 0,82  | 0,6233273 | 0,749075 |
| HNFB1A-AS1    | 1,99  | 1,95  | 1,97  | 1,35  | 0,6233593 | 0,749075 |
| ZNF689        | 1,78  | 1,06  | 0,40  | 1,25  | 0,6233978 | 0,749075 |
| API5          | 5,24  | 4,68  | 4,02  | 4,40  | 0,6234256 | 0,749075 |
| RP4-791M13.3  | 0,15  | 0,39  | 0,04  | 0,22  | 0,6235905 | 0,749232 |
| RNU6-1157P    | 0,00  | 0,00  | 0,00  | 0,00  | 0,6236028 | NA       |
| NUBP2         | 5,24  | 5,99  | 4,99  | 3,03  | 0,6237023 | 0,74928  |
| RP11-473M20.9 | 2,75  | 3,73  | 3,80  | 4,11  | 0,6237092 | 0,74928  |
| RP11-69L16.5  | 1,08  | 1,20  | 1,16  | 1,05  | 0,6237458 | 0,74928  |
| RN7SL615P     | 1,40  | 0,00  | 1,23  | 0,88  | 0,6237951 | 0,74928  |
| RP11-156P1.2  | 0,68  | 0,00  | 0,58  | 0,90  | 0,623799  | 0,74928  |
| PDK1          | 2,81  | 2,72  | 2,44  | 0,82  | 0,6239604 | 0,749434 |
| AC132008.1    | 0,00  | 0,00  | 0,00  | 0,00  | 0,6239787 | NA       |
| ACO12506.4    | 0,00  | 0,00  | 0,00  | 0,28  | 0,6240169 | NA       |
| RP11-72H11.1  | 0,00  | 0,00  | 0,00  | 0,00  | 0,6240253 | NA       |
| ACO34228.4    | 0,00  | 0,00  | 0,00  | 0,00  | 0,6241164 | NA       |
| RN7SL850P     | 0,00  | 0,00  | 0,00  | 1,08  | 0,6241935 | NA       |
| CTD-2542L18.1 | 0,58  | 0,61  | 0,45  | 0,41  | 0,6244266 | 0,749933 |
| RP11-328P23.4 | 0,00  | 0,00  | 0,00  | 0,00  | 0,6244279 | NA       |
| AF129075.5    | 0,00  | 0,00  | 0,00  | 0,00  | 0,624515  | 0,749933 |
| POLR3K        | 4,61  | 3,85  | 4,18  | 3,61  | 0,6245242 | 0,749933 |
| GALE          | 3,80  | 2,38  | 4,13  | 1,12  | 0,6245324 | 0,749933 |
| RP1-140C12.2  | 0,09  | 0,17  | 0,10  | 0,09  | 0,6245446 | 0,749933 |
| RPL31P52      | 0,00  | 0,00  | 0,00  | 0,00  | 0,6246531 | 0,750022 |
| RAB23         | 0,00  | 0,00  | 0,00  | 0,00  | 0,6247539 | 0,750103 |
| RP11-493G17.4 | 0,00  | 0,00  | 0,00  | 0,00  | 0,6247745 | NA       |
| RP11-460B17.1 | 0,00  | 0,00  | 0,00  | 0,00  | 0,6249256 | NA       |
| RP5-1101C3.1  | 0,00  | 0,00  | 0,00  | 0,51  | 0,6249296 | 0,750273 |
| RP11-24C3.2   | 0,35  | 0,94  | 0,42  | 0,36  | 0,6250015 | 0,750319 |
| RP11-557H15.3 | 0,00  | 0,00  | 0,00  | 0,00  | 0,6250029 | NA       |
| RP11-631M6.1  | 0,00  | 0,00  | 0,05  | 0,00  | 0,6250331 | NA       |
| MALAT1        | 12,69 | 12,27 | 12,48 | 12,42 | 0,6250622 | 0,750322 |
| EMC1          | 3,73  | 2,53  | 3,24  | 2,85  | 0,6251    | 0,750322 |
| RNU5B-1       | 2,32  | 3,78  | 2,49  | 4,09  | 0,6251051 | 0,750322 |
| CTD-2231E14.8 | 4,72  | 4,91  | 4,00  | 3,80  | 0,6251916 | 0,750375 |
| OR55B1P       | 0,42  | 0,53  | 0,17  | 0,05  | 0,625241  | 0,750375 |
| RP11-213G2.3  | 0,29  | 0,00  | 0,17  | 0,20  | 0,625251  | 0,750375 |
| RP11-1078H9.1 | 0,00  | 0,00  | 0,00  | 0,00  | 0,6252569 | NA       |
| RP11-419P8.1  | 0,10  | 0,00  | 0,12  | 0,00  | 0,6253114 | 0,750386 |

|               |      |      |      |      |           |          |
|---------------|------|------|------|------|-----------|----------|
| NOV           | 0,00 | 0,29 | 0,00 | 0,00 | 0,625327  | 0,750386 |
| RP11-141I13.3 | 0,00 | 0,00 | 0,00 | 0,00 | 0,6254695 | NA       |
| IGSF6         | 7,20 | 6,99 | 7,05 | 6,83 | 0,6254752 | 0,750523 |
| CTD-3193K9.4  | 0,00 | 0,00 | 0,00 | 0,00 | 0,6254762 | NA       |
| CTD-2194F12.1 | 0,52 | 0,54 | 0,44 | 0,49 | 0,6255476 | 0,750569 |
| TTC5          | 3,58 | 1,89 | 3,30 | 2,57 | 0,625582  | 0,75057  |
| ZFR2          | 0,09 | 0,94 | 0,23 | 0,43 | 0,6257039 | 0,750676 |
| PLEKHA6       | 0,05 | 0,36 | 0,10 | 0,15 | 0,625777  | 0,750723 |
| RP11-889L3.1  | 0,33 | 0,59 | 0,34 | 0,56 | 0,6258098 | NA       |
| CTA-747E2.10  | 0,00 | 0,00 | 0,00 | 0,00 | 0,6258691 | NA       |
| DUXAP7        | 0,47 | 1,03 | 0,56 | 0,26 | 0,6259436 | 0,750861 |
| RP11-419L4.1  | 0,00 | 0,00 | 0,00 | 0,00 | 0,6259624 | 0,750861 |
| CCSER2        | 4,32 | 4,04 | 3,63 | 3,78 | 0,6259936 | 0,750861 |
| PDCD11        | 2,71 | 2,56 | 2,31 | 2,83 | 0,6260683 | 0,75091  |
| RP11-322D14.2 | 0,00 | 0,00 | 0,00 | 0,23 | 0,6260995 | NA       |
| RP11-467C18.1 | 0,00 | 0,00 | 0,00 | 0,00 | 0,6261294 | NA       |
| RP11-669M16.2 | 0,00 | 0,00 | 0,00 | 0,00 | 0,6261791 | NA       |
| C15orf40      | 4,55 | 5,36 | 4,59 | 5,03 | 0,6262654 | 0,751106 |
| AC083949.1    | 0,00 | 0,52 | 0,00 | 0,26 | 0,6264747 | 0,751278 |
| SMG6          | 2,21 | 2,95 | 2,67 | 3,68 | 0,6264763 | 0,751278 |
| IL6           | 0,00 | 0,00 | 0,00 | 0,00 | 0,6264869 | NA       |
| RP11-315J22.3 | 0,00 | 0,00 | 0,00 | 0,00 | 0,6265816 | NA       |
| KIF2C         | 0,00 | 0,00 | 0,00 | 0,00 | 0,6266884 | NA       |
| RP11-231E4.5  | 0,00 | 0,00 | 0,00 | 0,00 | 0,6267917 | 0,751568 |
| AC018816.4    | 1,26 | 1,37 | 1,29 | 1,45 | 0,6268091 | 0,751568 |
| RP11-493P1.2  | 0,00 | 0,00 | 0,00 | 0,00 | 0,6268196 | 0,751568 |
| PMS2          | 2,04 | 2,25 | 1,60 | 0,30 | 0,6269081 | 0,751578 |
| ERP29         | 6,42 | 6,56 | 6,42 | 5,33 | 0,6269231 | 0,751578 |
| AP001271.2    | 1,48 | 0,20 | 0,96 | 0,81 | 0,6269292 | 0,751578 |
| RP11-118B22.2 | 0,23 | 0,06 | 0,13 | 0,10 | 0,6270977 | 0,751739 |
| CH17-80A12.1  | 0,11 | 0,24 | 0,20 | 0,29 | 0,6271926 | 0,751812 |
| RP3-355L5.5   | 0,00 | 0,00 | 0,00 | 0,00 | 0,6272259 | NA       |
| RP5-965G21.5  | 0,00 | 0,00 | 0,00 | 0,00 | 0,6272506 | NA       |
| VPS25         | 6,39 | 5,73 | 6,17 | 5,56 | 0,6272694 | 0,751864 |
| RP11-79E3.3   | 0,00 | 0,06 | 0,00 | 0,00 | 0,6272855 | NA       |
| CTC-534A2.2   | 1,17 | 4,04 | 0,27 | 0,71 | 0,6273382 | 0,751906 |
| TRIP10        | 2,21 | 0,74 | 1,70 | 1,91 | 0,6274301 | 0,751976 |
| RP11-873E20.1 | 0,00 | 0,00 | 0,00 | 0,00 | 0,6274517 | NA       |
| RP11-176F3.9  | 0,00 | 0,00 | 0,00 | 0,00 | 0,6275306 | NA       |
| MIR941-1      | 0,00 | 0,00 | 0,00 | 0,00 | 0,6276162 | NA       |
| RP11-163O17.1 | 5,44 | 4,74 | 5,12 | 4,61 | 0,6277077 | 0,752268 |
| RP13-614K11.1 | 0,05 | 0,04 | 0,07 | 0,08 | 0,6278501 | 0,752285 |
| RCBTB1        | 2,61 | 2,73 | 2,81 | 1,04 | 0,6278744 | 0,752285 |
| OTUB2         | 0,00 | 0,00 | 0,00 | 0,00 | 0,6278805 | 0,752285 |
| RP11-777B9.4  | 1,26 | 0,00 | 1,33 | 0,80 | 0,6278864 | 0,752285 |
| LAMTOR5       | 7,63 | 6,92 | 7,10 | 7,30 | 0,6278912 | 0,752285 |
| RP11-152K4.2  | 0,00 | 0,00 | 0,00 | 0,00 | 0,6279249 | NA       |
| CTD-2231E14.5 | 0,00 | 0,00 | 0,34 | 0,87 | 0,6281525 | 0,752557 |
| RPL29P19      | 0,43 | 0,46 | 0,55 | 0,00 | 0,6282891 | NA       |
| RP11-626G11.5 | 0,00 | 0,92 | 0,00 | 0,00 | 0,6283134 | NA       |
| AKAP11        | 2,64 | 0,84 | 2,12 | 1,93 | 0,6284557 | 0,75288  |
| TAOK1         | 3,80 | 4,07 | 3,63 | 3,02 | 0,6285313 | 0,75293  |
| RP11-92G12.3  | 1,14 | 1,66 | 0,89 | 0,81 | 0,6286529 | 0,753035 |
| RP11-629N8.3  | 0,00 | 0,62 | 0,00 | 0,00 | 0,6287265 | NA       |
| RP11-337C18.8 | 0,49 | 0,12 | 0,57 | 0,28 | 0,6287334 | 0,753072 |

|                  |      |      |      |      |           |          |
|------------------|------|------|------|------|-----------|----------|
| RP11-498P14.2    | 0,00 | 0,00 | 0,00 | 0,00 | 0,6287412 | NA       |
| AC004985.13      | 0,52 | 0,45 | 0,78 | 0,79 | 0,6287558 | 0,753072 |
| RP11-800A3.3     | 0,00 | 0,30 | 0,00 | 0,00 | 0,6288157 | 0,753072 |
| SUSD5            | 0,08 | 0,18 | 0,03 | 0,05 | 0,6288193 | 0,753072 |
| BLACE            | 0,12 | 0,00 | 0,21 | 0,21 | 0,6288661 | 0,753087 |
| DIP2A            | 3,76 | 4,06 | 3,45 | 3,22 | 0,6289145 | 0,753105 |
| RP6-24A23.7      | 0,03 | 0,05 | 0,02 | 0,05 | 0,6289722 | 0,753133 |
| AC000095.10      | 0,00 | 0,00 | 0,00 | 0,00 | 0,6290214 | NA       |
| RP11-8L8.2       | 3,84 | 3,24 | 4,11 | 0,72 | 0,6290339 | 0,753167 |
| RP4-617A9.4      | 0,00 | 0,33 | 0,00 | 0,73 | 0,6291123 | 0,75322  |
| RNU4-20P         | 0,00 | 0,00 | 0,00 | 0,00 | 0,6291234 | NA       |
| RP1-261D10.2     | 0,00 | 0,00 | 0,00 | 0,00 | 0,6291652 | 0,753243 |
| RP3-326I13.1     | 0,00 | 0,06 | 0,00 | 0,00 | 0,6292072 | NA       |
| XXyac-YR21IF11.3 | 0,65 | 0,94 | 0,63 | 0,65 | 0,6292276 | 0,753243 |
| RP11-706D8.2     | 0,05 | 0,14 | 0,08 | 0,13 | 0,6292331 | 0,753243 |
| RP11-479O17.12   | 0,18 | 0,15 | 0,10 | 0,24 | 0,6292718 | 0,753249 |
| AWAT1            | 0,00 | 0,00 | 0,00 | 0,00 | 0,6292797 | NA       |
| AP000469.2       | 0,00 | 0,00 | 0,00 | 0,00 | 0,6293491 | NA       |
| CTBP2            | 4,78 | 3,84 | 4,96 | 4,07 | 0,6294789 | 0,753456 |
| AC003005.2       | 0,57 | 1,00 | 0,37 | 0,51 | 0,6295619 | 0,753515 |
| OAS2             | 4,66 | 2,88 | 4,43 | 4,31 | 0,6297482 | 0,753678 |
| RP11-277A4.4     | 0,97 | 1,45 | 0,72 | 1,44 | 0,6297664 | 0,753678 |
| IL10RB           | 5,83 | 5,45 | 5,38 | 5,72 | 0,6298308 | 0,753715 |
| RP11-409I10.2    | 0,00 | 0,00 | 0,00 | 0,00 | 0,6298974 | NA       |
| RP11-276H19.1    | 0,00 | 0,09 | 0,00 | 0,04 | 0,6299351 | 0,753799 |
| HIST1H2BH        | 0,00 | 0,00 | 0,00 | 0,00 | 0,6299819 | 0,753814 |
| OR4K8P           | 0,00 | 0,00 | 0,00 | 0,00 | 0,6300137 | NA       |
| SLC7A11          | 0,17 | 0,10 | 0,10 | 0,20 | 0,6300309 | 0,753832 |
| AC005785.5       | 1,36 | 0,41 | 0,50 | 1,26 | 0,6302408 | 0,754043 |
| TCP10            | 0,00 | 0,24 | 0,00 | 0,00 | 0,6303185 | NA       |
| SLC38A3          | 0,00 | 0,00 | 0,31 | 0,00 | 0,6303461 | NA       |
| RP11-284N8.3     | 0,11 | 0,26 | 0,08 | 0,22 | 0,6303736 | 0,754161 |
| RN7SL190P        | 1,02 | 1,01 | 1,15 | 1,60 | 0,6304351 | 0,754193 |
| ZNF766           | 2,83 | 1,84 | 2,94 | 2,76 | 0,6304677 | 0,754193 |
| RP11-458I7.1     | 0,00 | 0,21 | 0,00 | 0,00 | 0,6304723 | NA       |
| TMEM175          | 4,09 | 3,37 | 3,80 | 3,07 | 0,6305392 | 0,754238 |
| RP11-182I1.13    | 0,00 | 0,13 | 0,00 | 0,00 | 0,6307406 | NA       |
| RP11-292E2.2     | 0,00 | 0,00 | 0,00 | 0,00 | 0,630867  | NA       |
| ACO1             | 0,27 | 0,47 | 0,74 | 0,39 | 0,6308713 | 0,754552 |
| RP11-876K22.2    | 0,00 | 0,00 | 0,00 | 0,00 | 0,6308739 | 0,754552 |
| RP11-348P10.1    | 0,00 | 0,00 | 0,00 | 0,00 | 0,6308951 | NA       |
| FAM104B          | 3,56 | 0,94 | 3,01 | 2,63 | 0,6309038 | 0,754552 |
| RN7SKP248        | 0,00 | 0,00 | 0,00 | 0,00 | 0,6309417 | NA       |
| C17orf67         | 0,24 | 0,26 | 0,23 | 0,08 | 0,6310353 | 0,754669 |
| SDHA             | 5,51 | 5,60 | 5,28 | 4,44 | 0,6311152 | 0,754723 |
| AC016745.3       | 0,00 | 0,00 | 0,00 | 0,00 | 0,6311678 | NA       |
| RP11-290F5.2     | 0,12 | 0,00 | 0,09 | 0,12 | 0,6312135 | 0,754769 |
| METTL5           | 5,28 | 5,99 | 5,34 | 3,46 | 0,6312214 | 0,754769 |
| THG1L            | 3,80 | 2,22 | 3,32 | 1,41 | 0,6312957 | 0,754817 |
| RNU6-539P        | 0,00 | 0,00 | 0,00 | 0,00 | 0,6313371 | NA       |
| RN7SL840P        | 0,89 | 0,93 | 1,14 | 1,33 | 0,6314068 | 0,75491  |
| CNBD2            | 3,93 | 5,23 | 3,93 | 1,13 | 0,6315946 | 0,755038 |
| LTBP4            | 2,96 | 4,29 | 3,62 | 1,62 | 0,6316003 | 0,755038 |
| RCAN3            | 2,66 | 2,05 | 1,85 | 1,61 | 0,6316158 | 0,755038 |
| FIGNL2           | 0,00 | 0,00 | 0,00 | 0,00 | 0,6316281 | NA       |

|                |      |      |      |      |           |          |
|----------------|------|------|------|------|-----------|----------|
| AC079922.3     | 0,00 | 0,07 | 0,00 | 0,00 | 0,6316767 | 0,75507  |
| RP11-11N6.1    | 0,00 | 0,00 | 0,00 | 0,00 | 0,6317516 | NA       |
| CR1L           | 0,00 | 0,28 | 0,00 | 0,00 | 0,6317794 | NA       |
| LGALS3         | 7,56 | 7,51 | 7,62 | 7,37 | 0,6317827 | 0,755156 |
| RP11-501J20.2  | 0,00 | 0,22 | 0,06 | 0,00 | 0,6319322 | 0,755294 |
| RP11-505D17.1  | 0,00 | 0,00 | 0,00 | 0,00 | 0,6319536 | NA       |
| AC016629.8     | 1,18 | 1,25 | 1,94 | 1,78 | 0,6319705 | 0,755299 |
| AC131180.4     | 0,00 | 0,76 | 0,00 | 0,00 | 0,6320305 | NA       |
| ZNF75A         | 4,34 | 5,04 | 4,90 | 4,33 | 0,6321782 | 0,755506 |
| CSMD2          | 0,13 | 0,54 | 0,07 | 0,11 | 0,6322111 | 0,755506 |
| AC007131.1     | 0,05 | 0,00 | 0,00 | 0,06 | 0,6322716 | NA       |
| RNY3P13        | 0,00 | 0,00 | 0,00 | 0,00 | 0,632309  | NA       |
| HINT3          | 2,73 | 2,49 | 2,87 | 2,66 | 0,632372  | 0,755634 |
| SCN3B          | 0,77 | 0,44 | 0,51 | 0,82 | 0,6323882 | 0,755634 |
| RP11-479O17.9  | 0,00 | 0,00 | 0,00 | 0,00 | 0,6324184 | NA       |
| PXK            | 4,42 | 2,94 | 3,94 | 3,79 | 0,6324206 | 0,755634 |
| AC068718.1     | 0,00 | 0,00 | 0,00 | 0,00 | 0,6324965 | NA       |
| SRCAP          | 1,59 | 1,87 | 1,39 | 0,83 | 0,6325618 | 0,755762 |
| RP11-42I10.1   | 0,00 | 0,28 | 0,16 | 0,27 | 0,6325711 | NA       |
| B3GNT7         | 2,80 | 0,31 | 2,42 | 0,32 | 0,632661  | 0,75584  |
| RP11-347C12.11 | 0,00 | 0,00 | 0,00 | 0,00 | 0,6327638 | NA       |
| CTD-2021K4.1   | 5,37 | 3,15 | 4,97 | 4,78 | 0,6329682 | 0,756146 |
| AP000692.9     | 2,66 | 0,84 | 3,41 | 3,42 | 0,6329851 | 0,756146 |
| AP006621.8     | 0,00 | 0,00 | 0,00 | 0,00 | 0,6329919 | NA       |
| RP11-402B2.1   | 0,00 | 0,00 | 0,00 | 0,00 | 0,633186  | NA       |
| GSKIP          | 3,07 | 1,18 | 1,27 | 0,33 | 0,633231  | 0,756364 |
| AC098824.5     | 0,00 | 0,00 | 0,00 | 0,00 | 0,6332585 | NA       |
| RP11-705O3.1   | 0,61 | 1,52 | 0,95 | 1,23 | 0,6332637 | 0,756364 |
| TBL3           | 3,61 | 2,71 | 3,58 | 3,24 | 0,6332901 | 0,756364 |
| ADCK1          | 2,12 | 2,78 | 1,98 | 1,34 | 0,6333035 | 0,756364 |
| RP11-96H19.1   | 1,73 | 0,00 | 0,88 | 0,09 | 0,6333712 | 0,756396 |
| KCNK13         | 0,00 | 0,10 | 0,06 | 0,00 | 0,633399  | 0,756396 |
| ARFGAP2        | 5,61 | 4,88 | 5,01 | 4,25 | 0,6335104 | 0,756489 |
| FAM222A        | 0,00 | 0,00 | 0,00 | 0,00 | 0,6335767 | NA       |
| AC009961.5     | 0,00 | 0,00 | 0,00 | 0,00 | 0,6336109 | 0,756568 |
| RP11-467L19.6  | 0,00 | 0,00 | 0,00 | 0,00 | 0,633659  | NA       |
| SLC46A3        | 3,60 | 2,22 | 3,40 | 3,13 | 0,633703  | 0,756637 |
| AC008440.5     | 0,00 | 0,64 | 0,00 | 0,00 | 0,6337404 | NA       |
| RNU6-748P      | 0,00 | 0,00 | 0,00 | 0,00 | 0,6337468 | NA       |
| RP11-297A16.4  | 0,00 | 0,16 | 0,00 | 0,59 | 0,6340039 | 0,756949 |
| SKINT1L        | 0,00 | 0,56 | 0,24 | 0,00 | 0,6340319 | 0,756949 |
| IFT74          | 3,35 | 1,93 | 3,78 | 3,49 | 0,6341176 | 0,75701  |
| RP5-1031D4.3   | 0,00 | 0,00 | 0,00 | 0,00 | 0,6341845 | NA       |
| RP11-268P4.6   | 1,53 | 0,96 | 1,32 | 0,91 | 0,6341849 | 0,75705  |
| PUDP           | 3,67 | 5,18 | 3,48 | 2,24 | 0,6342426 | 0,757078 |
| ATOH8          | 0,00 | 0,00 | 0,00 | 0,00 | 0,6344385 | 0,757272 |
| CT45A8         | 0,00 | 0,00 | 0,00 | 0,00 | 0,6344974 | NA       |
| RP4-635E18.9   | 0,34 | 2,00 | 0,18 | 0,00 | 0,6345716 | 0,757349 |
| RP11-609L23.1  | 0,10 | 0,00 | 0,20 | 0,55 | 0,6345882 | 0,757349 |
| COG3           | 3,36 | 4,30 | 4,06 | 3,07 | 0,6346059 | 0,757349 |
| RP11-657O9.1   | 0,00 | 0,00 | 0,00 | 0,00 | 0,6346881 | NA       |
| RP11-408H20.3  | 0,00 | 0,16 | 0,00 | 0,00 | 0,6347262 | NA       |
| ERP44          | 4,56 | 4,15 | 4,26 | 3,75 | 0,6347293 | 0,757456 |
| RP11-15E18.5   | 0,00 | 3,20 | 0,00 | 0,00 | 0,6348126 | 0,757515 |
| RN7SL523P      | 0,00 | 0,00 | 0,37 | 0,00 | 0,6348547 | NA       |

|                |      |      |      |      |           |          |
|----------------|------|------|------|------|-----------|----------|
| CTD-2547L24.4  | 0,00 | 0,00 | 0,00 | 0,46 | 0,6348717 | NA       |
| CXXC1          | 4,55 | 4,66 | 5,11 | 3,62 | 0,6348913 | 0,757568 |
| RAB35          | 1,86 | 1,11 | 1,34 | 1,05 | 0,6349455 | 0,757581 |
| ACO04878.8     | 0,00 | 0,00 | 0,00 | 1,56 | 0,6350225 | NA       |
| RP11-81H14.1   | 0,13 | 0,11 | 0,17 | 0,13 | 0,6350255 | 0,757581 |
| SENP2          | 3,86 | 3,80 | 2,98 | 3,74 | 0,6350336 | 0,757581 |
| LSS            | 0,41 | 0,62 | 0,81 | 0,58 | 0,6350611 | 0,757581 |
| CTB-113D17.1   | 1,82 | 1,47 | 2,24 | 1,25 | 0,6350724 | 0,757581 |
| MT1G           | 0,00 | 0,00 | 0,00 | 0,00 | 0,6350959 | NA       |
| ACO13474.4     | 0,27 | 0,39 | 0,31 | 0,32 | 0,6351409 | 0,757622 |
| AFG3L2         | 4,20 | 4,67 | 3,84 | 2,59 | 0,6351918 | 0,757639 |
| RP11-337N19.1  | 0,00 | 0,00 | 0,00 | 0,00 | 0,6352669 | 0,757639 |
| RP11-317M11.1  | 0,00 | 0,09 | 0,00 | 0,00 | 0,6352846 | NA       |
| RP11-380N8.7   | 0,00 | 0,00 | 0,00 | 0,00 | 0,6353099 | 0,757639 |
| CTD-2020K17.4  | 0,00 | 0,00 | 0,00 | 0,15 | 0,635319  | 0,757639 |
| RNU6-430P      | 1,57 | 4,55 | 4,69 | 5,07 | 0,6353256 | 0,757639 |
| RP11-34C15.2   | 1,03 | 0,00 | 0,55 | 0,49 | 0,6353877 | 0,757672 |
| RP11-344A16.2  | 0,00 | 0,00 | 0,00 | 0,00 | 0,6354083 | NA       |
| ACO06978.6     | 5,45 | 5,98 | 5,81 | 4,98 | 0,6354683 | 0,757717 |
| RP11-77K12.5   | 0,00 | 0,00 | 0,00 | 0,00 | 0,6354938 | 0,757717 |
| DDX50          | 4,62 | 3,47 | 4,13 | 3,51 | 0,6356468 | 0,757859 |
| RP11-298P6.1   | 0,00 | 0,09 | 0,00 | 0,00 | 0,6357376 | NA       |
| URM1           | 3,57 | 2,99 | 3,26 | 2,73 | 0,6357381 | 0,757927 |
| ZNF221         | 0,00 | 0,06 | 0,06 | 0,00 | 0,6357428 | NA       |
| MT-TT          | 4,38 | 5,07 | 4,17 | 4,69 | 0,6358799 | 0,758033 |
| RN7SL381P      | 0,00 | 1,34 | 0,00 | 0,00 | 0,6358952 | 0,758033 |
| RP11-977G19.14 | 0,00 | 0,00 | 0,00 | 0,00 | 0,63595   | NA       |
| RP11-165M1.1   | 0,13 | 0,09 | 0,72 | 0,50 | 0,636028  | 0,758151 |
| RP4-654C18.1   | 0,00 | 0,00 | 0,00 | 0,00 | 0,6360287 | NA       |
| MED28          | 4,88 | 4,07 | 4,47 | 3,57 | 0,6360875 | 0,758181 |
| PRCD           | 0,00 | 0,04 | 0,00 | 0,00 | 0,6361046 | NA       |
| RP11-115D19.2  | 0,00 | 0,00 | 0,00 | 0,00 | 0,6361297 | NA       |
| RP11-38C17.1   | 0,00 | 0,00 | 0,00 | 0,00 | 0,6361348 | NA       |
| RP1-89D4.1     | 0,00 | 0,00 | 0,00 | 0,55 | 0,6361788 | NA       |
| KDM4A          | 1,68 | 0,46 | 1,62 | 2,63 | 0,636208  | 0,758284 |
| RP11-429P3.3   | 0,00 | 0,00 | 0,00 | 0,00 | 0,6362417 | NA       |
| ACO09005.2     | 2,21 | 0,00 | 1,63 | 0,00 | 0,6362756 | 0,758324 |
| FAM215A        | 0,00 | 0,00 | 0,00 | 0,00 | 0,6363423 | 0,758363 |
| RP11-263K19.4  | 0,00 | 0,60 | 0,00 | 0,00 | 0,6364738 | NA       |
| RP5-901A4.1    | 0,00 | 0,00 | 0,00 | 0,00 | 0,6365679 | 0,758552 |
| C3             | 1,73 | 1,90 | 2,03 | 1,73 | 0,636569  | 0,758552 |
| RP11-598F7.4   | 0,06 | 0,00 | 0,05 | 0,00 | 0,6366146 | 0,758565 |
| RP11-443N24.2  | 0,00 | 0,00 | 0,00 | 0,21 | 0,6367102 | NA       |
| ACO02044.1     | 0,31 | 1,10 | 0,88 | 2,10 | 0,6367113 | 0,75864  |
| ACO03029.1     | 5,04 | 5,99 | 5,11 | 5,01 | 0,6368062 | 0,758712 |
| RP11-51A2.1    | 0,00 | 0,00 | 0,00 | 0,00 | 0,6368128 | NA       |
| MST1P2         | 0,00 | 0,00 | 0,00 | 0,00 | 0,6368326 | NA       |
| C3orf49        | 0,21 | 0,24 | 0,31 | 0,28 | 0,636859  | 0,758727 |
| ACO06486.10    | 0,10 | 0,25 | 0,24 | 0,58 | 0,6368872 | 0,758727 |
| CTD-2293H3.2   | 0,00 | 0,00 | 0,00 | 0,00 | 0,6369813 | NA       |
| RP11-43N22.1   | 0,00 | 0,00 | 0,00 | 0,00 | 0,6370186 | NA       |
| UPF3B          | 3,58 | 2,20 | 3,58 | 2,95 | 0,637028  | 0,758835 |
| RP11-661A12.12 | 0,87 | 1,07 | 1,07 | 1,30 | 0,637098  | 0,758835 |
| TMF1           | 4,08 | 3,41 | 3,75 | 4,08 | 0,6370989 | 0,758835 |
| DZANK1         | 1,10 | 0,70 | 0,87 | 0,78 | 0,6371145 | 0,758835 |



|                |      |      |      |      |           |          |
|----------------|------|------|------|------|-----------|----------|
| C11orf21       | 3,86 | 3,04 | 3,79 | 4,30 | 0,6371759 | 0,758868 |
| RP11-173P15.10 | 0,00 | 0,00 | 0,00 | 0,00 | 0,6371808 | NA       |
| RP13-753N3.3   | 0,00 | 0,00 | 0,00 | 0,00 | 0,637398  | 0,759073 |
| SEC31B         | 3,82 | 3,50 | 4,08 | 3,27 | 0,6374304 | 0,759073 |
| RP11-165H20.1  | 0,00 | 0,00 | 0,00 | 0,24 | 0,6374504 | 0,759073 |
| RP11-479G22.8  | 0,06 | 0,00 | 0,00 | 0,00 | 0,6375268 | 0,759103 |
| KTI12          | 3,20 | 1,13 | 2,13 | 0,51 | 0,6375438 | 0,759103 |
| RTP1           | 0,00 | 0,06 | 0,00 | 0,00 | 0,637574  | NA       |
| SCAANT1        | 0,00 | 0,00 | 0,00 | 0,95 | 0,637638  | 0,759162 |
| AMPD3          | 2,01 | 3,24 | 1,90 | 2,61 | 0,6376623 | 0,759162 |
| RNU6-50P       | 0,00 | 0,00 | 0,00 | 0,00 | 0,6377728 | NA       |
| RN7SL471P      | 0,00 | 0,82 | 0,00 | 0,00 | 0,6377731 | NA       |
| MYBPC2         | 0,00 | 0,04 | 0,00 | 0,03 | 0,6378761 | 0,759376 |
| RP5-1010E17.2  | 0,05 | 0,23 | 0,10 | 0,12 | 0,6379889 | 0,75947  |
| RANBP17        | 2,91 | 3,01 | 2,95 | 3,17 | 0,6380953 | 0,759556 |
| SPOP           | 6,59 | 4,93 | 6,35 | 5,99 | 0,6381646 | 0,759588 |
| WNK3           | 0,02 | 0,01 | 0,02 | 0,02 | 0,6381908 | 0,759588 |
| AP000925.2     | 0,00 | 0,00 | 0,00 | 0,00 | 0,6381912 | NA       |
| XX-CR54.1      | 0,00 | 1,45 | 0,96 | 0,23 | 0,6382584 | 0,759628 |
| RP11-348J12.2  | 0,00 | 0,00 | 0,00 | 0,00 | 0,6384292 | NA       |
| ARRDC1         | 5,61 | 5,13 | 5,74 | 4,88 | 0,6384588 | 0,759793 |
| GIT2           | 5,58 | 4,31 | 5,49 | 4,88 | 0,6384657 | 0,759793 |
| RP11-474P2.4   | 0,00 | 0,35 | 0,00 | 0,00 | 0,6385367 | NA       |
| PSTK           | 2,56 | 0,53 | 1,02 | 0,20 | 0,6385749 | 0,759829 |
| MAP7D2         | 0,00 | 0,00 | 0,00 | 0,00 | 0,638594  | 0,759829 |
| RHOH           | 1,71 | 1,94 | 1,95 | 2,31 | 0,6385983 | 0,759829 |
| RABL2B         | 3,10 | 1,19 | 2,95 | 2,21 | 0,6386451 | 0,759842 |
| RNU6-101P      | 0,00 | 0,00 | 0,00 | 0,00 | 0,6386776 | 0,759842 |
| MS4A5          | 0,00 | 0,00 | 0,00 | 0,00 | 0,6387184 | NA       |
| RN7SKP192      | 0,00 | 0,00 | 0,00 | 0,00 | 0,6387221 | NA       |
| NQO1           | 0,06 | 0,00 | 0,06 | 0,41 | 0,6388077 | 0,759956 |
| SCARNA12       | 0,00 | 0,00 | 0,00 | 0,00 | 0,6388299 | NA       |
| RP11-578O24.2  | 0,00 | 0,00 | 0,00 | 0,00 | 0,6389988 | NA       |
| RNU6-628P      | 0,00 | 0,00 | 0,00 | 0,00 | 0,6390531 | NA       |
| KIAA0232       | 2,38 | 3,65 | 2,52 | 1,12 | 0,6390753 | 0,760204 |
| RP1-261G23.7   | 0,00 | 0,00 | 0,00 | 0,00 | 0,6390955 | NA       |
| CPSF1          | 5,61 | 3,43 | 5,19 | 4,76 | 0,6391521 | 0,760204 |
| CTC-563A5.2    | 0,83 | 0,00 | 0,00 | 0,61 | 0,6391655 | 0,760204 |
| APOBR          | 3,78 | 1,29 | 3,63 | 3,70 | 0,6391772 | 0,760204 |
| CTD-2196E14.9  | 3,96 | 3,55 | 3,45 | 3,99 | 0,6391869 | 0,760204 |
| PGM5P4-AS1     | 0,96 | 2,12 | 1,35 | 1,64 | 0,6392801 | 0,760274 |
| MIR1268A       | 0,00 | 0,00 | 0,00 | 0,00 | 0,6393589 | NA       |
| RP11-85K15.3   | 0,56 | 0,78 | 1,12 | 0,55 | 0,6394123 | 0,760354 |
| CTD-2284O10.1  | 0,34 | 0,44 | 0,23 | 0,20 | 0,6394491 | 0,760354 |
| AD001527.7     | 2,88 | 0,00 | 1,96 | 2,21 | 0,6394504 | 0,760354 |
| RP11-125M16.1  | 0,00 | 0,00 | 0,00 | 0,00 | 0,6394666 | NA       |
| CTC-559E9.5    | 0,00 | 0,00 | 0,00 | 0,00 | 0,6395238 | 0,760401 |
| FGF18          | 0,00 | 0,00 | 0,00 | 0,00 | 0,6395829 | NA       |
| RP1-256G22.2   | 0,00 | 0,00 | 0,00 | 0,00 | 0,6395949 | NA       |
| HKR1           | 3,35 | 3,37 | 3,46 | 2,35 | 0,6397014 | 0,760566 |
| CUL5           | 5,42 | 4,17 | 5,34 | 5,42 | 0,6397309 | 0,760566 |
| C22orf15       | 0,00 | 0,00 | 0,00 | 0,00 | 0,6397634 | NA       |
| RNVU1-7        | 0,00 | 0,00 | 0,00 | 1,66 | 0,6398751 | 0,76066  |
| ZNF717         | 1,06 | 0,23 | 1,75 | 2,66 | 0,6398785 | 0,76066  |
| CTD-2537I9.16  | 0,00 | 0,00 | 0,00 | 0,00 | 0,640091  | NA       |

|                |      |      |      |      |           |          |
|----------------|------|------|------|------|-----------|----------|
| C17orf51       | 0,40 | 0,44 | 0,45 | 0,35 | 0,6401073 | 0,760802 |
| RP11-26L16.1   | 0,49 | 0,00 | 1,47 | 1,16 | 0,6401191 | 0,760802 |
| CCDC14         | 3,48 | 2,17 | 2,85 | 2,92 | 0,6401428 | 0,760802 |
| RP11-91K9.1    | 0,00 | 0,60 | 0,35 | 0,38 | 0,640155  | 0,760802 |
| RP11-1299A16.3 | 0,02 | 0,00 | 0,00 | 0,05 | 0,6401693 | 0,760802 |
| FZD5           | 0,02 | 0,06 | 0,03 | 0,02 | 0,6402409 | 0,760847 |
| DHRS12         | 2,82 | 1,47 | 2,14 | 2,92 | 0,6404027 | 0,760998 |
| RP11-361D14.2  | 0,00 | 0,00 | 0,00 | 0,00 | 0,6404253 | NA       |
| RP11-408I18.9  | 0,00 | 0,00 | 0,00 | 0,00 | 0,6405104 | NA       |
| AC000111.6     | 0,00 | 0,00 | 0,00 | 0,00 | 0,6405144 | NA       |
| RAB18          | 5,78 | 4,68 | 5,02 | 5,17 | 0,640577  | 0,761115 |
| ZNF468         | 2,01 | 1,28 | 2,24 | 0,68 | 0,6405985 | 0,761115 |
| ARHGEF35       | 0,00 | 0,00 | 0,00 | 0,00 | 0,6406715 | 0,761195 |
| JPH4           | 0,00 | 0,00 | 0,00 | 0,13 | 0,6407057 | 0,761195 |
| PTRH2          | 4,12 | 1,99 | 3,43 | 3,30 | 0,6408869 | 0,761336 |
| RP11-758M2.1   | 1,19 | 1,80 | 0,76 | 1,12 | 0,6408924 | 0,761336 |
| AC009963.3     | 0,00 | 0,00 | 0,00 | 0,00 | 0,6410073 | NA       |
| PRMT2          | 6,70 | 6,55 | 6,58 | 6,58 | 0,6410906 | 0,761493 |
| C11orf45       | 0,00 | 0,00 | 0,00 | 0,00 | 0,6410935 | 0,761493 |
| AL121656.4     | 0,00 | 0,00 | 0,00 | 0,00 | 0,6411232 | NA       |
| TDGF1          | 0,14 | 0,26 | 0,22 | 0,25 | 0,6411318 | 0,761498 |
| RP11-204C23.1  | 0,00 | 0,00 | 0,00 | 0,69 | 0,6411592 | NA       |
| RP1-273N12.4   | 0,00 | 0,00 | 0,00 | 0,00 | 0,6412971 | NA       |
| RP11-332H14.1  | 0,00 | 0,00 | 0,00 | 0,00 | 0,6414305 | NA       |
| RP11-259G18.3  | 0,00 | 0,00 | 0,00 | 0,00 | 0,6414319 | NA       |
| RP11-68I3.4    | 0,00 | 0,00 | 0,00 | 0,00 | 0,6414467 | NA       |
| DHRS13         | 0,00 | 0,00 | 0,00 | 0,00 | 0,6414531 | 0,761839 |
| THOC1          | 4,75 | 3,86 | 4,42 | 5,16 | 0,6414947 | 0,761848 |
| C17orf53       | 0,00 | 0,00 | 0,00 | 0,00 | 0,6417345 | NA       |
| CTD-2650P22.2  | 0,00 | 1,03 | 0,00 | 0,00 | 0,64175   | NA       |
| PCGEM1         | 0,00 | 0,00 | 0,00 | 0,00 | 0,6418731 | NA       |
| RN7SL282P      | 0,70 | 0,85 | 0,76 | 0,00 | 0,6419772 | 0,76238  |
| ZNF532         | 3,26 | 3,59 | 3,03 | 2,46 | 0,6420541 | 0,762395 |
| RNF122         | 0,31 | 0,92 | 0,43 | 0,90 | 0,6420584 | 0,762395 |
| CTC-523E23.14  | 0,00 | 0,00 | 0,00 | 0,00 | 0,6420995 | NA       |
| IGHV5-78       | 0,00 | 0,00 | 0,00 | 0,00 | 0,6421447 | NA       |
| RN7SL788P      | 0,00 | 0,00 | 0,00 | 0,00 | 0,6422471 | NA       |
| ZNF155         | 0,00 | 0,00 | 0,00 | 0,00 | 0,6422523 | 0,762585 |
| RN7SKP195      | 0,00 | 0,00 | 0,00 | 0,00 | 0,6423122 | NA       |
| RP11-398I13.1  | 0,29 | 0,10 | 0,36 | 1,25 | 0,6424405 | 0,762767 |
| RP1-297M16.2   | 0,00 | 0,00 | 0,00 | 0,00 | 0,6425095 | NA       |
| RN7SL608P      | 0,39 | 1,88 | 1,16 | 2,09 | 0,6426234 | 0,762944 |
| RN7SL690P      | 1,61 | 1,55 | 0,85 | 2,08 | 0,6426586 | 0,762945 |
| CASC2          | 0,00 | 0,00 | 0,00 | 0,00 | 0,6426751 | NA       |
| AC133785.1     | 0,00 | 0,00 | 0,00 | 0,00 | 0,6427131 | NA       |
| EPRS           | 4,65 | 4,80 | 4,20 | 3,75 | 0,642776  | 0,763043 |
| RP11-307C12.11 | 0,00 | 0,00 | 0,00 | 0,00 | 0,642792  | NA       |
| MTMR14         | 6,30 | 6,64 | 5,74 | 5,28 | 0,642838  | 0,76305  |
| CDKL3          | 1,69 | 2,10 | 0,96 | 1,10 | 0,6428774 | 0,76305  |
| ADH1B          | 0,02 | 0,19 | 0,07 | 0,16 | 0,6429043 | 0,76305  |
| RP11-503N18.5  | 0,93 | 2,47 | 1,31 | 1,03 | 0,6429366 | 0,76305  |
| RP4-569M23.5   | 0,06 | 0,07 | 0,14 | 0,11 | 0,6429732 | 0,76305  |
| PRKCG          | 0,00 | 0,00 | 0,00 | 0,00 | 0,6430572 | 0,76305  |
| HES1           | 0,00 | 0,00 | 0,00 | 0,09 | 0,6430614 | 0,76305  |
| CDC45          | 0,00 | 0,00 | 0,00 | 0,00 | 0,6430803 | 0,76305  |

|                |      |      |      |      |           |          |
|----------------|------|------|------|------|-----------|----------|
| SMUG1          | 4,38 | 0,86 | 4,79 | 3,67 | 0,643091  | 0,76305  |
| RN7SL636P      | 0,00 | 0,00 | 0,00 | 0,00 | 0,6431708 | NA       |
| RP11-278C7.4   | 1,20 | 2,11 | 0,00 | 1,00 | 0,6431879 | 0,763125 |
| RP11-218E20.3  | 0,38 | 0,71 | 0,53 | 0,87 | 0,6432405 | 0,763146 |
| RP11-439L18.3  | 0,00 | 0,06 | 0,00 | 0,05 | 0,643341  | NA       |
| AC073842.19    | 0,00 | 0,00 | 0,00 | 0,00 | 0,6433499 | NA       |
| CTD-2201E18.5  | 1,10 | 1,02 | 0,73 | 1,07 | 0,6433547 | 0,763241 |
| RP11-466A19.3  | 0,00 | 0,00 | 0,00 | 0,00 | 0,6435372 | NA       |
| RP11-736K20.1  | 0,00 | 0,00 | 0,00 | 0,00 | 0,6436119 | NA       |
| NEIL2          | 1,51 | 0,47 | 0,68 | 0,68 | 0,6436878 | 0,763596 |
| RP11-315O6.1   | 0,00 | 0,00 | 0,00 | 0,00 | 0,643781  | NA       |
| SNORD94        | 0,00 | 0,00 | 0,00 | 0,00 | 0,643808  | NA       |
| NRN1L          | 0,00 | 0,00 | 0,00 | 0,25 | 0,6439282 | 0,763764 |
| RP11-35G9.5    | 2,62 | 3,97 | 2,88 | 2,55 | 0,6439368 | 0,763764 |
| RPAIN          | 5,44 | 5,27 | 5,01 | 4,50 | 0,6439659 | 0,763764 |
| EDEM3          | 3,66 | 2,25 | 3,32 | 2,78 | 0,6439676 | 0,763764 |
| RP11-553P9.3   | 0,00 | 0,00 | 0,00 | 0,26 | 0,6441026 | NA       |
| RP11-17H4.2    | 0,00 | 0,00 | 0,00 | 0,00 | 0,6441295 | NA       |
| CCDC51         | 0,71 | 0,44 | 1,61 | 2,48 | 0,6443318 | 0,764138 |
| RN7SL733P      | 0,50 | 0,73 | 0,11 | 0,00 | 0,6443514 | 0,764138 |
| LIME1          | 0,85 | 1,14 | 1,25 | 0,97 | 0,6443898 | 0,764143 |
| TBC1D3D        | 0,00 | 0,09 | 0,00 | 0,00 | 0,6444756 | NA       |
| RP11-1228E12.2 | 0,00 | 0,00 | 0,00 | 0,00 | 0,6445853 | NA       |
| RP11-466I1.1   | 0,00 | 0,00 | 0,00 | 0,00 | 0,6446344 | NA       |
| CH507-9B2.4    | 0,00 | 0,00 | 0,00 | 0,00 | 0,644668  | NA       |
| RP11-77H9.8    | 0,00 | 0,00 | 0,00 | 0,00 | 0,644681  | NA       |
| TRGV10         | 0,00 | 0,40 | 0,00 | 0,00 | 0,6446969 | NA       |
| RP11-716D16.1  | 0,00 | 0,00 | 0,00 | 0,00 | 0,6446973 | NA       |
| AC007796.1     | 0,00 | 0,00 | 0,00 | 0,00 | 0,6447734 | NA       |
| RBM14-RBM4     | 2,82 | 0,10 | 3,47 | 2,65 | 0,6448583 | 0,764568 |
| LINC00960      | 1,22 | 0,85 | 1,15 | 1,57 | 0,6448623 | 0,764568 |
| SLC36A4        | 2,50 | 2,67 | 2,08 | 3,03 | 0,6448959 | 0,764568 |
| C12orf4        | 3,66 | 3,68 | 3,59 | 2,31 | 0,6449146 | 0,764568 |
| RP11-123C21.2  | 3,76 | 2,58 | 3,09 | 1,04 | 0,6449203 | 0,764568 |
| MIR4530        | 0,00 | 0,00 | 0,00 | 0,00 | 0,6449557 | NA       |
| CTC-471F3.5    | 0,00 | 0,00 | 0,00 | 0,00 | 0,644958  | NA       |
| ZNF597         | 0,11 | 0,02 | 0,04 | 0,03 | 0,6450475 | 0,764678 |
| RNU6-606P      | 0,00 | 0,00 | 0,00 | 0,00 | 0,6451766 | NA       |
| RP11-594N15.2  | 0,00 | 0,68 | 0,00 | 0,00 | 0,6452583 | 0,764848 |
| DRAXIN         | 0,19 | 0,32 | 0,28 | 0,35 | 0,6452598 | 0,764848 |
| SNORD56B       | 0,00 | 0,00 | 0,00 | 0,00 | 0,6453457 | 0,764876 |
| VCP1P1         | 2,79 | 0,88 | 2,37 | 2,05 | 0,6453886 | 0,764876 |
| PLAUR          | 7,70 | 7,49 | 8,03 | 7,60 | 0,6454133 | 0,764876 |
| RP11-10N23.4   | 0,00 | 0,00 | 0,00 | 0,00 | 0,6454213 | 0,764876 |
| RN7SL220P      | 0,00 | 0,00 | 0,00 | 0,00 | 0,6454282 | NA       |
| RP11-322E11.3  | 0,00 | 0,00 | 0,00 | 0,00 | 0,64553   | NA       |
| C12orf54       | 0,00 | 0,00 | 0,00 | 0,00 | 0,6455905 | NA       |
| CTC-360P9.4    | 0,00 | 1,48 | 0,16 | 0,08 | 0,6455958 | 0,765012 |
| CDC26          | 6,26 | 5,24 | 5,73 | 5,39 | 0,6456049 | 0,765012 |
| RNU6-987P      | 0,00 | 0,00 | 0,00 | 0,00 | 0,6456077 | NA       |
| RP11-295G24.5  | 0,00 | 0,00 | 0,00 | 0,00 | 0,6456254 | NA       |
| RP11-512F24.1  | 0,00 | 0,00 | 0,00 | 0,00 | 0,6456394 | NA       |
| AC105396.3     | 0,00 | 0,00 | 0,00 | 0,00 | 0,6456523 | NA       |
| CTC-250P20.2   | 0,00 | 0,00 | 0,00 | 0,00 | 0,6456528 | NA       |
| ATP5O          | 8,59 | 8,35 | 8,52 | 7,85 | 0,6457073 | 0,765093 |

|               |      |      |      |      |           |          |
|---------------|------|------|------|------|-----------|----------|
| RP11-470H9.1  | 0,00 | 0,00 | 0,00 | 0,00 | 0,6457777 | NA       |
| PTPN1         | 4,07 | 4,30 | 3,91 | 3,34 | 0,6458264 | 0,765193 |
| PEPD          | 4,92 | 5,76 | 5,18 | 4,83 | 0,6459257 | 0,76527  |
| RP11-71L14.4  | 0,42 | 0,49 | 0,64 | 0,54 | 0,645998  | 0,765315 |
| C5orf27       | 0,00 | 0,00 | 0,00 | 0,00 | 0,6460007 | NA       |
| RP11-380D23.2 | 0,00 | 0,00 | 0,00 | 0,00 | 0,646019  | NA       |
| RP11-16O9.2   | 0,00 | 0,00 | 0,00 | 0,00 | 0,6460265 | NA       |
| RP11-392M9.2  | 0,00 | 0,00 | 0,00 | 0,00 | 0,6461795 | NA       |
| FAM64A        | 0,35 | 0,79 | 0,84 | 0,97 | 0,6461912 | 0,765484 |
| TMEM51        | 0,00 | 0,00 | 0,27 | 1,46 | 0,6462093 | 0,765484 |
| GNB5          | 3,28 | 1,44 | 2,41 | 1,85 | 0,6462635 | 0,765507 |
| RP11-405A12.2 | 0,00 | 0,27 | 0,00 | 0,00 | 0,6462928 | NA       |
| NOLC1         | 4,59 | 4,30 | 4,27 | 4,26 | 0,6463272 | 0,765537 |
| OSCP1         | 0,00 | 0,00 | 0,00 | 0,00 | 0,646358  | 0,765537 |
| RFLNB         | 2,11 | 1,21 | 1,49 | 1,64 | 0,6464351 | 0,765588 |
| C14orf28      | 0,10 | 0,05 | 0,11 | 0,14 | 0,6465051 | 0,76563  |
| TMA16         | 4,33 | 4,81 | 4,12 | 4,36 | 0,6466836 | 0,765801 |
| RNU7-28P      | 0,00 | 0,00 | 0,00 | 0,00 | 0,6467212 | NA       |
| CTD-2538G9.6  | 1,25 | 2,36 | 0,95 | 1,87 | 0,646883  | 0,765996 |
| RP11-667F14.1 | 0,12 | 0,79 | 0,44 | 0,12 | 0,647     | 0,766003 |
| RP11-755B10.3 | 0,11 | 0,71 | 0,32 | 0,29 | 0,6470042 | 0,766003 |
| SYNDIG1L      | 0,00 | 0,00 | 0,00 | 0,00 | 0,6470433 | NA       |
| RLIM          | 3,86 | 2,51 | 2,88 | 2,93 | 0,6470439 | 0,766003 |
| STAP2         | 1,12 | 0,69 | 1,11 | 0,49 | 0,6470806 | 0,766003 |
| HAPLN4        | 0,00 | 0,00 | 0,00 | 0,00 | 0,6471099 | NA       |
| RP5-1112D6.8  | 0,90 | 0,68 | 0,64 | 0,58 | 0,6471457 | 0,766003 |
| RP11-3D4.3    | 0,96 | 0,32 | 0,52 | 0,71 | 0,6471477 | 0,766003 |
| AC093495.4    | 2,21 | 2,17 | 2,37 | 3,52 | 0,6471552 | 0,766003 |
| U82695.5      | 0,00 | 0,05 | 0,00 | 0,00 | 0,6471574 | NA       |
| OR2A3P        | 0,00 | 0,00 | 0,14 | 0,08 | 0,6471719 | 0,766003 |
| FUT7          | 0,00 | 0,00 | 0,00 | 0,00 | 0,6471996 | 0,766003 |
| CXorf40A      | 4,80 | 3,85 | 5,26 | 4,10 | 0,6472514 | 0,766024 |
| C14orf80      | 0,21 | 0,98 | 1,32 | 1,50 | 0,6474224 | 0,766183 |
| PCF11         | 5,06 | 4,16 | 4,42 | 4,74 | 0,6474937 | 0,766183 |
| NCK2          | 2,24 | 2,36 | 1,35 | 1,80 | 0,6475757 | 0,766183 |
| NR3C2         | 0,00 | 0,05 | 0,00 | 0,07 | 0,6475806 | 0,766183 |
| EFNA3         | 0,00 | 0,00 | 0,00 | 0,00 | 0,6476036 | NA       |
| RP4-669L17.4  | 3,15 | 4,23 | 3,78 | 3,89 | 0,6476234 | 0,766183 |
| RP1-101D8.1   | 0,15 | 0,48 | 0,25 | 0,32 | 0,6476256 | 0,766183 |
| NOS3          | 0,76 | 0,94 | 0,41 | 0,56 | 0,6476272 | 0,766183 |
| AC027601.1    | 0,00 | 0,03 | 0,00 | 0,00 | 0,647672  | NA       |
| AC074367.1    | 0,00 | 0,00 | 0,00 | 0,00 | 0,6477266 | NA       |
| CTC-232P5.4   | 0,00 | 0,00 | 0,00 | 0,00 | 0,6477465 | NA       |
| RP5-1091N2.9  | 4,92 | 2,61 | 3,95 | 2,47 | 0,6478343 | 0,766387 |
| RC3H2         | 4,45 | 4,24 | 3,77 | 3,92 | 0,6478734 | 0,766393 |
| SUMF1         | 4,87 | 3,86 | 4,20 | 4,11 | 0,6480178 | 0,76647  |
| PCDHB19P      | 0,00 | 0,05 | 0,00 | 0,00 | 0,6480226 | NA       |
| RP4-621B10.8  | 0,00 | 0,23 | 0,10 | 0,10 | 0,6480381 | 0,76647  |
| KCNA3         | 0,04 | 0,15 | 0,05 | 0,00 | 0,648042  | 0,76647  |
| LEFTY1        | 0,00 | 0,00 | 0,00 | 0,00 | 0,6481058 | NA       |
| TMCC3         | 1,17 | 0,15 | 1,62 | 1,33 | 0,6482466 | 0,766654 |
| RP11-676I15.1 | 0,00 | 0,00 | 0,00 | 0,00 | 0,648267  | 0,766654 |
| DMRTC1B       | 0,07 | 0,00 | 0,05 | 0,06 | 0,648403  | NA       |
| RP11-428B4.2  | 0,00 | 0,00 | 0,00 | 0,00 | 0,6484354 | NA       |
| MECP2         | 3,78 | 4,45 | 4,29 | 4,59 | 0,6485544 | 0,766953 |

|               |      |      |      |      |           |          |
|---------------|------|------|------|------|-----------|----------|
| RPS3AP47      | 0,56 | 0,73 | 0,41 | 0,56 | 0,6486057 | 0,766973 |
| RNU6-512P     | 0,00 | 0,00 | 0,00 | 0,00 | 0,648613  | NA       |
| RN7SL173P     | 2,79 | 3,35 | 2,83 | 3,66 | 0,6487253 | 0,767044 |
| GJD4          | 0,00 | 0,11 | 0,12 | 0,20 | 0,6487394 | 0,767044 |
| LRRC43        | 0,00 | 0,40 | 0,00 | 0,00 | 0,6487805 | NA       |
| ARHGEF12      | 1,76 | 2,61 | 1,63 | 1,46 | 0,6487862 | 0,767044 |
| PHKG1         | 0,72 | 1,05 | 1,05 | 2,00 | 0,6488035 | 0,767044 |
| RP11-525K10.3 | 0,00 | 0,00 | 0,00 | 0,00 | 0,648845  | NA       |
| FAF1          | 4,36 | 2,91 | 4,42 | 4,02 | 0,6488635 | 0,767074 |
| MIR4481       | 0,00 | 0,00 | 0,00 | 0,00 | 0,6489333 | NA       |
| C10orf82      | 0,33 | 0,38 | 0,20 | 0,39 | 0,6489995 | 0,767194 |
| ZNF705C       | 0,00 | 0,00 | 0,00 | 0,00 | 0,649115  | NA       |
| PXT1          | 0,00 | 0,00 | 0,00 | 0,06 | 0,6491566 | 0,767335 |
| RP11-268I9.2  | 0,00 | 1,53 | 0,59 | 0,09 | 0,6492116 | 0,767335 |
| RP3-461F17.3  | 3,99 | 4,18 | 3,11 | 3,29 | 0,6492222 | 0,767335 |
| CTD-2036P10.6 | 0,00 | 0,00 | 0,00 | 0,00 | 0,6492971 | NA       |
| OR52U1P       | 0,00 | 0,00 | 0,00 | 0,00 | 0,6493291 | NA       |
| SNORD3E       | 0,00 | 0,00 | 0,00 | 0,00 | 0,6493304 | NA       |
| MIR6877       | 0,00 | 0,00 | 0,00 | 0,00 | 0,6493536 | NA       |
| RN7SL468P     | 0,00 | 0,00 | 0,00 | 0,00 | 0,6494255 | NA       |
| ADAM1A        | 0,00 | 0,00 | 0,00 | 0,00 | 0,6494814 | 0,7676   |
| CTD-2007L18.5 | 0,00 | 0,00 | 0,00 | 0,00 | 0,6495117 | NA       |
| MIR4802       | 0,00 | 0,00 | 0,00 | 0,00 | 0,6497751 | NA       |
| RP1-20N2.2    | 0,00 | 0,00 | 0,00 | 0,00 | 0,6497907 | NA       |
| RP11-274H24.1 | 0,00 | 0,00 | 0,01 | 0,06 | 0,6498092 | NA       |
| RP11-537P22.2 | 0,00 | 0,00 | 0,00 | 0,00 | 0,6498144 | NA       |
| NME6          | 5,15 | 3,84 | 4,70 | 3,09 | 0,6498307 | 0,767972 |
| RP11-397E7.4  | 0,00 | 0,14 | 0,00 | 0,00 | 0,6499199 | 0,768012 |
| FSIP1         | 0,00 | 0,00 | 0,00 | 0,00 | 0,649952  | 0,768012 |
| TREX1         | 7,23 | 6,08 | 6,98 | 6,66 | 0,6499855 | 0,768012 |
| RP4-734G22.3  | 0,00 | 0,00 | 0,00 | 0,03 | 0,6500028 | 0,768012 |
| RNA5SP302     | 0,00 | 0,00 | 0,00 | 0,00 | 0,6501291 | NA       |
| MIF-AS1       | 0,10 | 0,13 | 0,10 | 0,00 | 0,6501614 | 0,768159 |
| MTQ1          | 3,47 | 2,44 | 3,33 | 2,35 | 0,6503578 | 0,76835  |
| RP11-533E19.2 | 0,00 | 0,53 | 0,00 | 0,00 | 0,6503742 | NA       |
| LOXL3         | 0,18 | 0,67 | 0,92 | 0,95 | 0,650413  | 0,768374 |
| RP11-191G24.1 | 0,00 | 0,00 | 0,00 | 0,00 | 0,6504254 | NA       |
| CTD-2583A14.9 | 0,00 | 0,00 | 0,00 | 0,00 | 0,6504754 | NA       |
| RBM26         | 3,94 | 3,61 | 3,52 | 2,64 | 0,650567  | 0,768516 |
| ITPRIPL2      | 1,70 | 1,05 | 1,75 | 0,92 | 0,6506247 | 0,768543 |
| RP11-321E8.5  | 0,00 | 0,00 | 0,00 | 0,00 | 0,6506938 | NA       |
| KLK15         | 0,00 | 0,00 | 0,00 | 0,00 | 0,6508548 | NA       |
| ABCA4         | 0,00 | 0,00 | 0,00 | 0,00 | 0,650876  | NA       |
| OR1AB1P       | 0,00 | 0,45 | 0,00 | 0,00 | 0,6508804 | NA       |
| PHF20         | 6,86 | 6,30 | 6,66 | 6,01 | 0,6508844 | 0,768801 |
| RP11-543N17.2 | 0,00 | 0,00 | 0,00 | 0,00 | 0,6508942 | NA       |
| RP11-154J22.1 | 0,48 | 0,49 | 0,44 | 0,83 | 0,6509177 | 0,768801 |
| LRRTM4        | 0,78 | 0,66 | 0,59 | 1,61 | 0,6509472 | 0,768801 |
| CTD-3195I5.4  | 0,00 | 0,96 | 0,00 | 0,00 | 0,6509986 | NA       |
| ZUFSP         | 3,72 | 2,10 | 3,05 | 2,48 | 0,6511012 | 0,768942 |
| LRRC41        | 3,74 | 4,01 | 3,22 | 2,90 | 0,6511477 | 0,768956 |
| SLC6A14       | 0,00 | 0,03 | 0,00 | 0,03 | 0,6512619 | 0,76905  |
| RP3-439I14.1  | 0,07 | 0,16 | 0,26 | 0,23 | 0,6515263 | 0,769322 |
| RP11-798G7.4  | 0,00 | 0,00 | 0,00 | 0,00 | 0,6515748 | NA       |
| RP11-995C19.2 | 0,00 | 0,00 | 0,00 | 0,00 | 0,6515748 | NA       |

|                |      |      |      |      |           |          |
|----------------|------|------|------|------|-----------|----------|
| RP11-169K17.4  | 0,00 | 0,00 | 0,00 | 0,00 | 0,6516682 | NA       |
| RP13-137A17.4  | 0,00 | 0,00 | 0,00 | 0,00 | 0,6516708 | NA       |
| PPARD          | 1,31 | 1,75 | 1,18 | 1,23 | 0,6517341 | 0,769526 |
| RNF115         | 2,62 | 2,05 | 2,48 | 2,28 | 0,6517872 | 0,769536 |
| UBE2Q2P2       | 2,80 | 2,32 | 1,00 | 1,64 | 0,6518116 | 0,769536 |
| CEACAM5        | 0,00 | 0,05 | 0,00 | 0,05 | 0,6518212 | NA       |
| RP11-467L24.1  | 0,00 | 0,00 | 0,00 | 0,00 | 0,6518652 | NA       |
| CTD-2104P17.2  | 0,00 | 0,00 | 0,00 | 0,00 | 0,6518935 | NA       |
| RP11-181C21.5  | 0,00 | 0,00 | 0,00 | 0,52 | 0,6519046 | 0,769605 |
| RP11-513G11.3  | 0,00 | 0,13 | 0,00 | 0,00 | 0,651936  | NA       |
| OR6N1          | 0,00 | 0,00 | 0,00 | 0,00 | 0,6519403 | NA       |
| USH1C          | 0,00 | 0,00 | 0,00 | 0,00 | 0,6519423 | NA       |
| RNA5SP455      | 0,00 | 0,00 | 0,00 | 0,00 | 0,651963  | 0,769633 |
| RP11-203M5.2   | 0,00 | 0,00 | 0,00 | 0,68 | 0,6519873 | NA       |
| AF064858.10    | 0,00 | 0,00 | 0,00 | 0,00 | 0,6520036 | NA       |
| RP11-386I8.5   | 3,03 | 3,23 | 3,50 | 3,31 | 0,6520766 | 0,769641 |
| RNU6ATAC24P    | 0,00 | 0,00 | 0,00 | 0,00 | 0,6520807 | 0,769641 |
| NCSTN          | 5,83 | 5,86 | 5,36 | 4,93 | 0,6520999 | 0,769641 |
| KLHL24         | 4,99 | 5,33 | 4,89 | 4,42 | 0,6521086 | 0,769641 |
| CTD-2369P2.5   | 0,00 | 0,00 | 0,00 | 0,00 | 0,6521303 | NA       |
| KCNH8          | 0,00 | 0,00 | 0,00 | 0,00 | 0,6522223 | NA       |
| ZHX1-C8orf76   | 0,00 | 1,11 | 0,36 | 2,70 | 0,652238  | 0,769753 |
| GZMM           | 0,00 | 0,00 | 0,00 | 0,00 | 0,6522534 | NA       |
| RP11-463D19.1  | 0,00 | 0,00 | 0,00 | 0,00 | 0,6523103 | NA       |
| RN7SL96P       | 1,32 | 1,66 | 1,25 | 0,78 | 0,6523633 | 0,769763 |
| RP11-417F21.1  | 1,58 | 0,10 | 1,59 | 0,08 | 0,6523868 | 0,769763 |
| AC000068.5     | 0,14 | 0,93 | 0,25 | 1,20 | 0,6523899 | 0,769763 |
| TMPRSS11B      | 1,01 | 0,13 | 1,17 | 0,42 | 0,6524017 | 0,769763 |
| MLH3           | 3,38 | 1,45 | 2,95 | 2,23 | 0,6524194 | 0,769763 |
| BTBD8          | 0,00 | 0,69 | 0,08 | 0,24 | 0,6524548 | 0,769764 |
| MCRS1          | 5,34 | 5,47 | 5,11 | 5,37 | 0,6525235 | 0,769804 |
| RP11-805F19.5  | 0,00 | 0,00 | 0,00 | 0,00 | 0,6525934 | NA       |
| RP1-229K20.9   | 0,00 | 0,00 | 0,00 | 0,00 | 0,6526838 | NA       |
| AC112198.1     | 0,00 | 0,00 | 0,00 | 0,00 | 0,6527151 | NA       |
| RNU4-34P       | 1,43 | 1,74 | 1,78 | 1,63 | 0,6527235 | 0,769999 |
| RP11-707A18.1  | 0,00 | 0,00 | 0,00 | 0,00 | 0,6527341 | NA       |
| CEP70          | 0,07 | 0,31 | 0,03 | 0,19 | 0,6527665 | 0,770009 |
| TPTE2P6        | 0,63 | 0,24 | 0,39 | 0,04 | 0,6528116 | 0,770021 |
| PPIAL4E        | 1,61 | 0,27 | 2,51 | 1,88 | 0,6529942 | 0,770196 |
| PDZD4          | 0,00 | 0,00 | 0,00 | 0,08 | 0,6530018 | NA       |
| RN7SL868P      | 0,00 | 0,00 | 0,00 | 0,00 | 0,6530135 | NA       |
| RP5-1037N22.2  | 0,78 | 1,34 | 0,27 | 0,00 | 0,6531374 | 0,770324 |
| RP11-611O2.1   | 0,00 | 0,00 | 0,55 | 0,60 | 0,6532818 | 0,770453 |
| RP11-19E18.2   | 0,00 | 0,00 | 0,00 | 0,00 | 0,6533403 | 0,770481 |
| SLC45A3        | 0,00 | 0,00 | 0,00 | 0,00 | 0,6533497 | NA       |
| ZFP69B         | 0,00 | 0,00 | 0,00 | 0,00 | 0,6533667 | NA       |
| RP11-893F2.18  | 0,00 | 0,00 | 0,00 | 0,00 | 0,6534034 | NA       |
| C7orf60        | 1,22 | 0,31 | 1,63 | 2,12 | 0,6536882 | 0,770814 |
| RP11-143E21.7  | 0,04 | 0,09 | 0,06 | 0,06 | 0,6536943 | 0,770814 |
| CMP21-97G8.2   | 0,03 | 0,00 | 0,53 | 0,00 | 0,6537398 | 0,770814 |
| RP11-556H2.1   | 0,34 | 0,76 | 0,65 | 0,65 | 0,6537615 | 0,770814 |
| CYP2F1         | 0,00 | 0,00 | 0,00 | 0,10 | 0,6537886 | NA       |
| RTEL1-TNFRSF6B | 0,00 | 0,00 | 0,00 | 0,00 | 0,6538033 | NA       |
| RN7SL769P      | 0,00 | 0,00 | 0,00 | 0,00 | 0,6538848 | NA       |
| RP11-252C15.1  | 0,00 | 0,00 | 0,00 | 1,18 | 0,6539088 | 0,770879 |

|                 |      |      |      |      |           |          |
|-----------------|------|------|------|------|-----------|----------|
| UFSP2           | 4,01 | 3,71 | 2,36 | 2,33 | 0,6539183 | 0,770879 |
| RP11-449P15.1   | 0,08 | 0,26 | 0,28 | 0,00 | 0,6539201 | 0,770879 |
| RP11-134G8.6    | 1,27 | 2,66 | 0,93 | 1,05 | 0,6539975 | 0,770929 |
| HSP90AB4P       | 0,61 | 0,00 | 0,53 | 0,95 | 0,6540482 | 0,770948 |
| RNA5SP280       | 0,00 | 0,00 | 0,00 | 0,00 | 0,6542395 | NA       |
| ZCCHC10         | 4,81 | 4,20 | 3,94 | 4,27 | 0,6542981 | 0,771201 |
| SYCE1L          | 0,00 | 0,00 | 0,00 | 0,00 | 0,654438  | NA       |
| RP11-159L20.1   | 0,00 | 0,00 | 0,00 | 0,00 | 0,6546309 | NA       |
| ANKRD26P1       | 0,00 | 0,00 | 0,00 | 0,00 | 0,654666  | NA       |
| RP4-601K24.1    | 0,90 | 0,30 | 0,26 | 0,38 | 0,654703  | 0,771638 |
| CDKL4           | 0,00 | 0,00 | 0,00 | 0,00 | 0,6547367 | NA       |
| RP5-867C24.4    | 1,45 | 1,57 | 3,00 | 4,07 | 0,654852  | 0,771736 |
| RN7SL791P       | 2,66 | 0,00 | 2,26 | 0,97 | 0,6548895 | 0,771736 |
| CTA-797E19.1    | 0,00 | 0,98 | 0,00 | 0,50 | 0,6548901 | 0,771736 |
| RP11-143M1.8    | 0,00 | 0,00 | 0,00 | 0,00 | 0,6549208 | NA       |
| RF02102         | 0,00 | 0,00 | 0,00 | 0,00 | 0,6549888 | NA       |
| EIF4ENIF1       | 3,61 | 2,88 | 3,17 | 3,54 | 0,6549976 | 0,771821 |
| RP11-475I24.9   | 0,00 | 0,00 | 0,00 | 0,00 | 0,6549984 | NA       |
| GS1-279B7.1     | 0,00 | 0,97 | 0,00 | 0,88 | 0,6551161 | 0,771863 |
| SCARB1          | 3,66 | 1,56 | 2,67 | 2,53 | 0,6551628 | 0,771863 |
| AMOT            | 0,04 | 0,05 | 0,00 | 0,00 | 0,6551824 | 0,771863 |
| AC005519.4      | 0,14 | 0,00 | 0,10 | 0,21 | 0,6551938 | 0,771863 |
| RP11-578F21.12  | 0,99 | 1,87 | 1,12 | 0,60 | 0,6552066 | 0,771863 |
| ASIC4           | 0,27 | 0,12 | 0,30 | 0,22 | 0,6552704 | 0,771897 |
| RP11-863P13.1   | 0,00 | 0,34 | 0,00 | 0,73 | 0,6553574 | 0,771959 |
| SLC6A19         | 0,00 | 0,00 | 0,00 | 0,00 | 0,6553958 | NA       |
| AC000032.2      | 0,00 | 1,15 | 0,00 | 0,00 | 0,6554234 | NA       |
| AC009264.1      | 2,16 | 1,37 | 2,20 | 1,40 | 0,6554725 | 0,772053 |
| RP11-522L3.4    | 0,00 | 0,00 | 0,00 | 0,00 | 0,655606  | NA       |
| DNAJB11         | 5,20 | 4,19 | 4,88 | 3,48 | 0,6556658 | 0,772229 |
| RP11-112J1.1    | 0,00 | 0,00 | 0,00 | 0,60 | 0,6557104 | NA       |
| ZFYVE1          | 1,33 | 0,74 | 0,99 | 1,17 | 0,6557601 | 0,772229 |
| RP4-765A10.2    | 1,88 | 0,00 | 0,00 | 0,00 | 0,6557613 | 0,772229 |
| VPS41           | 5,89 | 6,15 | 5,94 | 5,40 | 0,6557903 | 0,772229 |
| RP11-331F9.3    | 0,10 | 2,21 | 0,00 | 0,00 | 0,6558017 | 0,772229 |
| IRF3            | 5,15 | 5,06 | 5,46 | 4,88 | 0,6558302 | 0,772229 |
| AC012358.7      | 0,90 | 0,78 | 1,18 | 0,48 | 0,6558679 | 0,772233 |
| RN7SL499P       | 0,00 | 0,00 | 0,00 | 0,00 | 0,6558815 | NA       |
| AC006030.1      | 0,00 | 0,00 | 0,00 | 0,00 | 0,655925  | NA       |
| RP11-802E16.3   | 4,37 | 3,98 | 4,94 | 4,89 | 0,6560234 | 0,772346 |
| SNORD118        | 2,11 | 0,00 | 1,18 | 2,22 | 0,6560603 | 0,772346 |
| LL22NC03-63E9.3 | 0,13 | 0,37 | 0,34 | 0,40 | 0,6560681 | 0,772346 |
| RP11-677O4.6    | 0,00 | 0,00 | 0,00 | 0,00 | 0,6560876 | NA       |
| RNF169          | 1,14 | 0,26 | 1,14 | 0,23 | 0,6563034 | 0,772582 |
| AC007787.2      | 0,00 | 0,00 | 0,00 | 0,00 | 0,6563158 | NA       |
| RTKN            | 0,00 | 0,00 | 0,00 | 0,00 | 0,6563748 | NA       |
| RP11-81H3.2     | 1,60 | 1,63 | 1,10 | 1,12 | 0,6564434 | 0,772667 |
| C4orf45         | 0,00 | 0,00 | 0,00 | 0,78 | 0,6564457 | 0,772667 |
| MIR3134         | 0,00 | 0,00 | 0,00 | 0,00 | 0,6564853 | NA       |
| RP11-752G15.6   | 2,37 | 4,41 | 1,74 | 0,00 | 0,6565156 | 0,772709 |
| RP11-240E2.2    | 0,00 | 0,60 | 0,00 | 0,00 | 0,6566205 | NA       |
| RP11-434D2.2    | 0,00 | 0,84 | 0,00 | 0,00 | 0,656678  | NA       |
| AL157902.3      | 0,00 | 0,00 | 0,00 | 0,00 | 0,6567549 | NA       |
| ABCC12          | 0,00 | 0,00 | 0,00 | 0,00 | 0,6568902 | NA       |
| AC019201.1      | 2,91 | 3,46 | 3,77 | 2,56 | 0,6569479 | 0,773169 |

|               |      |      |      |      |           |          |
|---------------|------|------|------|------|-----------|----------|
| ZNF678        | 2,42 | 2,39 | 1,31 | 1,41 | 0,6569759 | 0,773169 |
| AP3B2         | 2,39 | 2,33 | 2,46 | 2,22 | 0,6570148 | 0,773174 |
| RNU6-150P     | 0,00 | 0,00 | 0,00 | 0,00 | 0,6570834 | NA       |
| AC074092.1    | 0,00 | 0,00 | 0,00 | 0,00 | 0,6570986 | NA       |
| POLD1         | 2,29 | 2,57 | 1,69 | 2,03 | 0,6572262 | 0,773381 |
| NUP107        | 4,35 | 2,28 | 3,57 | 2,31 | 0,65734   | 0,773465 |
| RP11-55L3.1   | 0,73 | 0,55 | 0,88 | 0,56 | 0,657367  | 0,773465 |
| AC011516.2    | 0,00 | 0,00 | 0,00 | 0,00 | 0,6573679 | NA       |
| CCDC59        | 5,46 | 5,38 | 5,65 | 4,84 | 0,6574448 | 0,773501 |
| RP11-269F20.1 | 0,00 | 0,00 | 0,00 | 0,00 | 0,657467  | 0,773501 |
| RP11-192H23.4 | 0,45 | 0,89 | 0,60 | 0,86 | 0,6575611 | 0,773571 |
| RN7SL58P      | 0,00 | 1,09 | 0,00 | 0,00 | 0,6576118 | NA       |
| PREX1         | 4,70 | 4,05 | 4,92 | 4,58 | 0,6576714 | 0,773659 |
| RN7SL306P     | 0,00 | 0,00 | 0,00 | 0,00 | 0,6578406 | NA       |
| SPRN          | 0,00 | 0,00 | 0,00 | 0,00 | 0,6578678 | 0,77385  |
| RNA5SP131     | 0,00 | 0,00 | 0,00 | 0,00 | 0,6579088 | NA       |
| PCDHGB1       | 0,00 | 0,00 | 0,00 | 0,00 | 0,6579382 | NA       |
| TRAV6         | 0,00 | 0,00 | 0,00 | 0,00 | 0,6579735 | NA       |
| PRR5-ARHGAP8  | 0,00 | 0,00 | 0,00 | 0,18 | 0,6579835 | NA       |
| NUDT5         | 5,97 | 4,12 | 5,77 | 5,79 | 0,6580383 | 0,773968 |
| CNRIP1        | 0,00 | 0,00 | 0,00 | 0,00 | 0,6580461 | NA       |
| CALCOCO2      | 5,75 | 4,69 | 5,93 | 5,57 | 0,6580603 | 0,773968 |
| VP53          | 3,66 | 3,32 | 3,17 | 2,50 | 0,6580727 | 0,773968 |
| RP11-127L20.6 | 0,00 | 0,00 | 0,00 | 0,00 | 0,6582582 | 0,774145 |
| LSMEM1        | 0,06 | 0,00 | 0,00 | 0,04 | 0,6584043 | 0,774276 |
| NP1PA1        | 3,96 | 3,92 | 4,37 | 3,87 | 0,6584536 | 0,774292 |
| LCP2          | 6,39 | 6,40 | 5,74 | 5,81 | 0,6584879 | 0,774292 |
| RP11-357N13.1 | 0,00 | 0,00 | 0,00 | 0,00 | 0,6585124 | NA       |
| CTD-2232E5.2  | 0,00 | 0,00 | 0,00 | 0,00 | 0,6585813 | NA       |
| ETS2          | 4,74 | 4,92 | 4,78 | 4,74 | 0,6586482 | 0,774413 |
| UHRF1         | 0,50 | 0,43 | 0,48 | 0,21 | 0,6586972 | 0,774413 |
| CYTH2         | 3,63 | 2,45 | 3,10 | 1,87 | 0,6587662 | 0,774413 |
| CENPO         | 0,63 | 0,48 | 1,28 | 0,62 | 0,6587752 | 0,774413 |
| IFNA10        | 0,00 | 0,00 | 0,00 | 0,00 | 0,658786  | NA       |
| ALG12         | 0,06 | 0,80 | 0,22 | 0,27 | 0,6588212 | 0,774413 |
| CETN3         | 2,36 | 1,64 | 1,48 | 0,90 | 0,6588294 | 0,774413 |
| GID4          | 1,35 | 1,45 | 1,38 | 1,04 | 0,658835  | 0,774413 |
| PAK7          | 0,00 | 0,03 | 0,00 | 0,03 | 0,6588517 | NA       |
| HAS1          | 0,00 | 0,00 | 0,00 | 0,00 | 0,6588649 | NA       |
| IST1          | 6,96 | 6,41 | 6,46 | 6,05 | 0,6589667 | 0,774527 |
| SLC37A3       | 1,16 | 3,20 | 1,70 | 1,72 | 0,6590314 | 0,774562 |
| RN7SL865P     | 0,37 | 0,00 | 0,00 | 0,95 | 0,659088  | NA       |
| SLC35F4       | 0,59 | 0,05 | 0,04 | 0,38 | 0,659096  | 0,774597 |
| RP11-100M12.2 | 0,00 | 0,00 | 0,00 | 1,31 | 0,6592819 | 0,774667 |
| C5            | 1,32 | 0,54 | 1,33 | 2,25 | 0,6592891 | 0,774667 |
| RP11-416H1.2  | 0,34 | 0,34 | 0,39 | 0,45 | 0,6592976 | 0,774667 |
| BSCL2         | 5,28 | 6,29 | 5,41 | 5,21 | 0,6593016 | 0,774667 |
| RP11-211N11.5 | 0,00 | 0,00 | 0,00 | 0,00 | 0,6593294 | NA       |
| HIST1H2BB     | 0,00 | 0,00 | 0,00 | 0,00 | 0,659353  | 0,774667 |
| RP11-192H23.8 | 3,03 | 1,16 | 3,39 | 1,11 | 0,6593647 | 0,774667 |
| PDILT         | 0,00 | 0,35 | 0,00 | 0,00 | 0,6593991 | NA       |
| FCRLA         | 0,14 | 0,00 | 0,00 | 0,00 | 0,6596019 | 0,774878 |
| CRYBG2        | 0,00 | 0,27 | 0,00 | 0,68 | 0,6596137 | 0,774878 |
| NUFIP1        | 1,19 | 0,87 | 0,94 | 0,35 | 0,6597015 | 0,77494  |
| RP11-126O1.6  | 0,00 | 0,00 | 0,00 | 0,00 | 0,6597252 | NA       |



|                |      |      |      |      |           |          |
|----------------|------|------|------|------|-----------|----------|
| TMEM134        | 5,50 | 5,57 | 6,04 | 5,52 | 0,6597529 | 0,77496  |
| BX470102.3     | 0,00 | 0,00 | 0,00 | 0,00 | 0,6598652 | 0,775015 |
| SNX8           | 5,39 | 5,15 | 5,11 | 3,72 | 0,6598701 | 0,775015 |
| MIR4263        | 0,00 | 0,00 | 0,00 | 0,00 | 0,6599534 | NA       |
| RNA5SP217      | 0,00 | 0,00 | 0,00 | 0,00 | 0,6600424 | NA       |
| RP11-98J23.2   | 0,00 | 0,00 | 0,00 | 0,00 | 0,6602098 | 0,775373 |
| GLS            | 5,67 | 5,54 | 5,73 | 5,82 | 0,6602687 | 0,775401 |
| POLD4          | 6,90 | 6,42 | 6,51 | 6,57 | 0,6603513 | 0,775457 |
| RN7SL478P      | 0,00 | 0,00 | 0,00 | 0,00 | 0,660452  | NA       |
| ZNF727         | 0,00 | 0,00 | 0,00 | 0,00 | 0,6604973 | NA       |
| SPSB3          | 4,79 | 5,40 | 4,84 | 5,03 | 0,6605173 | 0,775611 |
| RP11-488L18.4  | 4,18 | 4,41 | 4,36 | 3,71 | 0,6606051 | 0,775659 |
| AC093642.3     | 4,56 | 3,41 | 4,25 | 4,94 | 0,6606301 | 0,775659 |
| SLC25A20       | 4,55 | 4,10 | 3,78 | 4,01 | 0,6606756 | 0,775659 |
| PBX2           | 2,02 | 1,86 | 2,17 | 1,44 | 0,6606978 | 0,775659 |
| RP11-373E16.4  | 0,76 | 1,52 | 1,28 | 1,00 | 0,6608477 | 0,775789 |
| RP11-235E17.3  | 0,35 | 0,35 | 0,00 | 0,42 | 0,6608782 | 0,775789 |
| CTD-3065B20.1  | 0,00 | 0,00 | 0,00 | 0,81 | 0,6609848 | 0,775873 |
| RN7SL205P      | 0,79 | 0,93 | 1,04 | 1,37 | 0,6610898 | 0,775956 |
| DENND5A        | 5,42 | 4,63 | 4,87 | 4,69 | 0,6611281 | 0,77596  |
| MUC16          | 0,00 | 0,01 | 0,00 | 0,02 | 0,6613002 | 0,776121 |
| ZNF32OS2       | 0,00 | 0,00 | 0,00 | 0,00 | 0,6613462 | NA       |
| RNU6-20P       | 0,00 | 0,00 | 0,00 | 0,00 | 0,6613849 | NA       |
| RP11-642A1.1   | 0,59 | 1,49 | 1,43 | 1,28 | 0,6613876 | 0,776126 |
| FAAH           | 2,87 | 2,39 | 1,99 | 2,64 | 0,6614092 | 0,776126 |
| CCDC69         | 4,69 | 4,93 | 4,54 | 4,48 | 0,6614138 | 0,776126 |
| SCARNA21B      | 0,00 | 0,00 | 0,00 | 0,00 | 0,6614183 | NA       |
| ANKRD20A3      | 1,10 | 2,11 | 1,37 | 1,60 | 0,6614443 | 0,776126 |
| RP11-381K20.2  | 0,00 | 0,27 | 0,00 | 0,00 | 0,6614866 | 0,776135 |
| CTD-2283N19.1  | 1,66 | 1,30 | 1,51 | 0,55 | 0,6615834 | 0,776207 |
| RP11-157H10.4  | 0,00 | 0,00 | 0,00 | 0,09 | 0,6615966 | NA       |
| RP11-107F6.4   | 0,00 | 0,00 | 0,00 | 0,00 | 0,6616514 | NA       |
| ESPN           | 0,00 | 0,50 | 0,00 | 0,00 | 0,6617501 | NA       |
| DTD2           | 3,23 | 3,06 | 1,89 | 1,35 | 0,6617754 | 0,776391 |
| OR6R2P         | 0,00 | 0,00 | 0,00 | 0,91 | 0,6618777 | NA       |
| AC093724.1     | 0,00 | 0,47 | 0,00 | 0,00 | 0,6618872 | 0,776482 |
| GLRX5          | 2,77 | 2,28 | 2,95 | 3,04 | 0,6619527 | 0,77649  |
| RAB34          | 6,18 | 6,89 | 6,17 | 6,26 | 0,6619645 | 0,77649  |
| MESP2          | 0,00 | 0,25 | 0,00 | 0,00 | 0,6619987 | NA       |
| AC004988.1     | 0,07 | 0,10 | 0,10 | 0,00 | 0,6622755 | NA       |
| C4orf27        | 4,25 | 1,68 | 4,36 | 3,99 | 0,6622865 | 0,776803 |
| RNF19B         | 3,53 | 3,36 | 3,54 | 3,34 | 0,6623332 | 0,776803 |
| MPDU1          | 5,58 | 4,82 | 5,07 | 3,52 | 0,6623363 | 0,776803 |
| RP11-111L24.3  | 0,00 | 0,00 | 0,00 | 0,00 | 0,6625117 | NA       |
| PDCD7          | 1,62 | 1,14 | 1,82 | 2,34 | 0,6626104 | 0,777041 |
| WNK1           | 5,37 | 5,57 | 5,55 | 4,90 | 0,6626432 | 0,777041 |
| ADGRG2         | 0,24 | 0,47 | 0,33 | 0,19 | 0,6626436 | 0,777041 |
| EXOSC9         | 5,64 | 5,01 | 5,34 | 3,22 | 0,6627021 | 0,777068 |
| TLK2P1         | 0,00 | 0,00 | 0,00 | 0,00 | 0,6627072 | NA       |
| RP5-1021120.2  | 1,40 | 0,82 | 1,26 | 0,82 | 0,6628003 | 0,777142 |
| SCARNA16       | 0,00 | 0,00 | 0,00 | 0,00 | 0,6628211 | NA       |
| CTD-2023J5.1   | 0,00 | 0,00 | 0,00 | 0,00 | 0,6628288 | NA       |
| NOL8           | 4,44 | 3,36 | 4,50 | 4,38 | 0,6628782 | 0,777193 |
| RP11-1094M14.8 | 0,00 | 0,00 | 0,00 | 0,00 | 0,662912  | NA       |
| OR5P1P         | 0,00 | 0,00 | 0,00 | 0,00 | 0,6630103 | NA       |

|               |      |      |      |      |           |          |
|---------------|------|------|------|------|-----------|----------|
| IQGAP3        | 0,02 | 0,08 | 0,02 | 0,00 | 0,6630288 | 0,777294 |
| ZBTB34        | 1,82 | 0,14 | 0,76 | 0,73 | 0,663034  | 0,777294 |
| RP11-268G12.3 | 0,00 | 0,00 | 0,00 | 0,00 | 0,6631006 | NA       |
| AC121253.1    | 4,17 | 4,12 | 4,21 | 3,95 | 0,6631307 | 0,777366 |
| RP11-55L4.1   | 0,00 | 0,00 | 0,00 | 0,00 | 0,6632359 | NA       |
| GOSR2         | 4,43 | 3,03 | 4,08 | 3,49 | 0,663269  | 0,777486 |
| CTD-2349P21.7 | 0,00 | 0,00 | 0,00 | 1,88 | 0,6633033 | 0,777486 |
| RP11-672A2.6  | 0,00 | 0,00 | 0,00 | 0,00 | 0,6634887 | NA       |
| RP11-18B3.3   | 0,00 | 0,00 | 0,00 | 0,00 | 0,6634973 | 0,777673 |
| HSD17B2       | 1,44 | 1,33 | 1,34 | 1,20 | 0,6636826 | 0,777813 |
| DESI1         | 3,18 | 2,79 | 3,52 | 3,56 | 0,6636869 | 0,777813 |
| RP11-638L3.1  | 0,00 | 0,00 | 0,00 | 0,00 | 0,6637905 | NA       |
| OR10J2P       | 0,00 | 0,00 | 0,00 | 0,00 | 0,6638041 | 0,777909 |
| CDH13         | 0,92 | 0,95 | 1,30 | 1,11 | 0,6638956 | 0,777946 |
| RP11-91P24.6  | 0,00 | 0,00 | 0,00 | 0,00 | 0,6639054 | 0,777946 |
| RNA5SP190     | 0,00 | 0,00 | 0,00 | 0,00 | 0,663914  | NA       |
| RNU6-85P      | 0,00 | 0,00 | 0,00 | 0,00 | 0,6639711 | NA       |
| RP5-977B1.7   | 0,31 | 0,78 | 0,12 | 0,52 | 0,6640152 | 0,778033 |
| AC064834.3    | 0,00 | 0,00 | 0,00 | 0,00 | 0,6640664 | NA       |
| RP11-557N21.1 | 0,00 | 0,00 | 0,00 | 0,00 | 0,6641097 | NA       |
| RP13-585F24.1 | 0,00 | 0,00 | 0,19 | 0,41 | 0,6642417 | NA       |
| MIR3671       | 0,00 | 0,00 | 0,00 | 0,00 | 0,6642642 | NA       |
| BTBD2         | 3,26 | 3,92 | 3,14 | 2,06 | 0,6643875 | 0,778429 |
| AC018634.9    | 0,00 | 0,00 | 0,00 | 1,00 | 0,664482  | 0,778476 |
| RP11-654D12.3 | 0,00 | 1,57 | 0,00 | 0,55 | 0,6644977 | 0,778476 |
| RP11-565N2.2  | 0,00 | 0,00 | 0,00 | 0,00 | 0,6645753 | NA       |
| NT5CP1        | 0,00 | 0,00 | 0,00 | 0,00 | 0,6645799 | NA       |
| MIR5585       | 0,00 | 0,00 | 0,00 | 0,00 | 0,6646563 | NA       |
| CTA-211A9.5   | 4,53 | 0,67 | 3,89 | 2,41 | 0,6646753 | 0,778643 |
| RBAKDN        | 0,00 | 0,00 | 0,00 | 0,00 | 0,6647325 | NA       |
| AC007000.9    | 0,00 | 0,00 | 0,00 | 0,00 | 0,6647341 | NA       |
| OR51I1        | 0,00 | 0,00 | 0,00 | 0,00 | 0,6647355 | NA       |
| ZNF32OS1      | 0,00 | 0,00 | 0,00 | 0,00 | 0,6647878 | 0,778733 |
| RNA5SP283     | 0,00 | 0,00 | 0,00 | 0,00 | 0,6649242 | NA       |
| AC093484.4    | 0,00 | 0,00 | 0,00 | 0,00 | 0,6649312 | NA       |
| RP4-612B15.2  | 0,00 | 0,36 | 0,00 | 0,00 | 0,6650295 | NA       |
| TFPT          | 4,38 | 4,49 | 4,25 | 4,30 | 0,665053  | 0,779003 |
| GRIP2         | 0,00 | 0,03 | 0,00 | 0,00 | 0,6651269 | NA       |
| AC104600.1    | 0,00 | 0,00 | 0,05 | 0,19 | 0,6651781 | 0,779108 |
| BATF          | 3,90 | 1,36 | 3,78 | 2,79 | 0,6653186 | 0,77921  |
| AC005363.9    | 0,00 | 0,00 | 0,58 | 0,00 | 0,6653353 | 0,77921  |
| MUCL1         | 0,00 | 0,00 | 0,00 | 0,00 | 0,6653968 | NA       |
| SLC17A8       | 0,00 | 0,00 | 0,00 | 0,00 | 0,665457  | NA       |
| SAMD13        | 0,00 | 0,00 | 0,00 | 0,00 | 0,665523  | 0,779389 |
| AAMP          | 5,96 | 5,54 | 5,68 | 5,67 | 0,6656619 | 0,779511 |
| RP11-226E21.4 | 2,99 | 1,06 | 1,39 | 2,06 | 0,6659631 | 0,779822 |
| RP11-625B21.1 | 0,00 | 0,00 | 0,00 | 0,00 | 0,6660246 | NA       |
| AC002553.4    | 0,00 | 0,00 | 0,00 | 0,00 | 0,666031  | NA       |
| RHBDL3        | 0,00 | 0,06 | 0,00 | 0,00 | 0,6660358 | 0,779866 |
| LDLRAD4       | 5,36 | 2,77 | 5,13 | 3,65 | 0,6662013 | 0,779996 |
| TSKU          | 0,39 | 0,85 | 0,34 | 0,74 | 0,6662166 | 0,779996 |
| RP11-572M11.3 | 0,00 | 0,00 | 0,00 | 0,00 | 0,6663033 | NA       |
| AC001226.2    | 0,42 | 0,44 | 0,51 | 0,24 | 0,6663255 | 0,780038 |
| AC137934.1    | 1,67 | 1,55 | 1,27 | 2,25 | 0,66634   | 0,780038 |
| MRPS26        | 5,12 | 6,35 | 5,07 | 3,04 | 0,6663917 | 0,780038 |

|                    |      |      |      |      |           |          |
|--------------------|------|------|------|------|-----------|----------|
| RP11-864N7.4       | 0,14 | 0,66 | 0,32 | 0,49 | 0,666393  | 0,780038 |
| AC007381.2         | 0,00 | 0,00 | 0,00 | 0,00 | 0,6664373 | NA       |
| TRIM27             | 4,45 | 4,95 | 4,47 | 4,69 | 0,6664803 | 0,780099 |
| HIVEP1             | 3,19 | 2,37 | 3,19 | 2,53 | 0,6665517 | 0,780142 |
| FGA                | 0,00 | 0,00 | 0,00 | 0,00 | 0,6666651 | NA       |
| CTD-2147F2.1       | 0,61 | 0,00 | 0,40 | 1,15 | 0,6666824 | 0,7802   |
| RP11-341D18.3      | 0,71 | 0,00 | 0,34 | 0,33 | 0,6666853 | 0,7802   |
| TROVE2             | 5,37 | 5,77 | 5,12 | 5,20 | 0,6667066 | 0,7802   |
| DYSF               | 0,00 | 0,36 | 0,00 | 0,19 | 0,6667605 | 0,780222 |
| ASS1P5             | 0,00 | 0,00 | 0,00 | 0,00 | 0,6667664 | NA       |
| RP4-614O4.11       | 0,00 | 0,00 | 0,00 | 0,00 | 0,6668341 | NA       |
| RP11-259P20.1      | 0,00 | 0,31 | 0,00 | 0,00 | 0,6668882 | NA       |
| RN7SL408P          | 0,00 | 0,00 | 0,00 | 0,00 | 0,6669187 | NA       |
| PARL               | 6,57 | 6,11 | 6,13 | 6,45 | 0,6670257 | 0,780489 |
| S1PR4              | 4,02 | 3,61 | 4,20 | 4,18 | 0,6670588 | 0,780489 |
| AC005251.3         | 0,00 | 0,00 | 0,00 | 0,44 | 0,667111  | NA       |
| ADRB2              | 2,94 | 0,93 | 2,80 | 2,93 | 0,6671859 | 0,780596 |
| RP11-295P22.1      | 0,00 | 0,00 | 0,00 | 0,00 | 0,667272  | NA       |
| RP11-55J15.1       | 0,00 | 0,00 | 0,00 | 0,00 | 0,6673332 | 0,780716 |
| RP11-3J10.5        | 0,00 | 0,00 | 0,00 | 0,00 | 0,6673583 | 0,780716 |
| RP11-449H15.3      | 0,00 | 0,03 | 0,00 | 0,00 | 0,6673749 | NA       |
| AC073133.1         | 0,00 | 0,05 | 0,05 | 0,00 | 0,6674164 | NA       |
| XXbac-BPG300A18.13 | 0,00 | 0,00 | 0,00 | 1,02 | 0,6674495 | 0,780757 |
| CTD-2574D22.2      | 0,23 | 0,25 | 0,24 | 0,23 | 0,6674641 | 0,780757 |
| RP11-198P15.1      | 0,00 | 0,00 | 0,00 | 0,00 | 0,6674965 | NA       |
| RP11-350J20.13     | 0,00 | 0,00 | 0,00 | 0,00 | 0,667627  | 0,780907 |
| LRIG3              | 0,00 | 0,00 | 0,00 | 0,00 | 0,667651  | NA       |
| SPARCL1            | 0,06 | 0,00 | 0,05 | 0,00 | 0,6676783 | 0,780926 |
| RP11-266L9.8       | 0,00 | 0,00 | 0,00 | 0,00 | 0,6677342 | 0,78095  |
| CTD-2659N19.10     | 0,00 | 0,99 | 0,00 | 0,00 | 0,6677469 | NA       |
| HESX1              | 0,55 | 0,23 | 0,15 | 0,41 | 0,6678736 | 0,781062 |
| EQTN               | 0,00 | 0,00 | 0,00 | 0,00 | 0,6678792 | NA       |
| XXbac-BPG248L24.12 | 1,30 | 1,43 | 1,81 | 0,73 | 0,6679064 | 0,781062 |
| UCKL1              | 4,63 | 2,96 | 4,26 | 3,07 | 0,6679353 | 0,781062 |
| XXyac-YX60D10.1    | 0,00 | 0,00 | 0,00 | 0,18 | 0,6679512 | NA       |
| RP3-460G2.2        | 0,91 | 0,74 | 0,87 | 0,49 | 0,6680123 | 0,781111 |
| AC010729.2         | 0,00 | 0,00 | 0,00 | 0,00 | 0,6680433 | NA       |
| AC003006.7         | 0,00 | 0,00 | 0,00 | 0,06 | 0,6680963 | NA       |
| RNU7-169P          | 0,00 | 0,00 | 0,00 | 0,00 | 0,6681939 | 0,781282 |
| AHNAK              | 5,68 | 6,19 | 5,59 | 5,76 | 0,6682528 | 0,78131  |
| LIG4               | 1,20 | 0,43 | 0,83 | 0,59 | 0,6682951 | 0,781318 |
| RP11-399K21.10     | 0,00 | 0,00 | 0,00 | 0,00 | 0,668306  | NA       |
| OR4K14             | 0,00 | 0,00 | 0,00 | 0,00 | 0,6683235 | NA       |
| PSMC3              | 5,92 | 5,54 | 5,72 | 5,77 | 0,6684441 | 0,781372 |
| SCHLAP1            | 0,69 | 1,42 | 0,63 | 0,50 | 0,6684723 | 0,781372 |
| CAPN2              | 6,85 | 6,35 | 6,63 | 6,33 | 0,6684746 | 0,781372 |
| C19orf25           | 3,46 | 2,73 | 2,59 | 3,99 | 0,6684819 | 0,781372 |
| CLDN1              | 0,00 | 0,00 | 0,00 | 0,00 | 0,6684921 | NA       |
| RP11-378E13.4      | 0,00 | 0,00 | 0,00 | 0,82 | 0,6686458 | NA       |
| MIR3682            | 0,00 | 0,00 | 0,00 | 0,00 | 0,6686521 | 0,781493 |
| TNFRSF13B          | 0,16 | 0,11 | 0,33 | 0,00 | 0,6686558 | 0,781493 |
| RP11-403I13.5      | 0,00 | 1,00 | 0,07 | 0,04 | 0,6686931 | 0,781496 |
| KAT6B              | 2,85 | 3,09 | 2,72 | 2,73 | 0,6687306 | 0,781498 |
| FAM86HP            | 0,00 | 0,00 | 0,00 | 0,00 | 0,6687653 | NA       |
| WNT10B             | 0,00 | 0,00 | 0,00 | 0,00 | 0,668898  | 0,781653 |

|                |      |      |      |      |           |          |
|----------------|------|------|------|------|-----------|----------|
| AC010096.2     | 0,00 | 0,09 | 0,00 | 0,00 | 0,6689123 | NA       |
| ANXA9          | 0,12 | 0,08 | 0,04 | 1,09 | 0,6689715 | 0,781698 |
| RP5-105215.2   | 0,00 | 0,00 | 0,00 | 0,00 | 0,6690637 | NA       |
| RAC3           | 0,00 | 0,00 | 0,00 | 0,00 | 0,6690844 | NA       |
| SH3KBP1        | 5,74 | 5,54 | 5,44 | 4,82 | 0,6691777 | 0,781898 |
| CCDC174        | 3,30 | 2,44 | 3,70 | 2,83 | 0,6694039 | 0,782121 |
| RN7SL248P      | 0,13 | 0,00 | 0,00 | 0,00 | 0,6695193 | NA       |
| RN7SL453P      | 0,13 | 0,00 | 0,00 | 0,00 | 0,6695193 | NA       |
| FAM197Y2       | 0,00 | 0,00 | 0,00 | 0,00 | 0,6696028 | NA       |
| RP11-520H14.7  | 0,00 | 0,00 | 0,00 | 0,05 | 0,6696031 | NA       |
| FNTA           | 5,74 | 5,54 | 5,58 | 5,27 | 0,6696049 | 0,782288 |
| RP11-81K13.1   | 0,00 | 1,40 | 0,00 | 0,00 | 0,6696065 | NA       |
| SRGAP2B        | 3,58 | 4,03 | 3,44 | 3,33 | 0,6696177 | 0,782288 |
| LYPLA2         | 4,25 | 3,81 | 4,19 | 3,48 | 0,6697134 | 0,782353 |
| LRP5L          | 1,35 | 2,25 | 1,25 | 0,50 | 0,6697437 | 0,782353 |
| SH3RF3         | 0,00 | 0,00 | 0,00 | 0,00 | 0,6697796 | NA       |
| TRPV3          | 0,35 | 0,33 | 0,37 | 0,59 | 0,6698132 | 0,782393 |
| RP11-946L16.1  | 0,00 | 0,00 | 0,00 | 0,00 | 0,6698594 | 0,782397 |
| CCNC           | 5,11 | 3,17 | 4,24 | 3,37 | 0,6698869 | 0,782397 |
| MGAM           | 0,00 | 0,06 | 0,00 | 0,00 | 0,6699774 | 0,782462 |
| HSD17B6        | 0,00 | 0,00 | 0,00 | 0,00 | 0,6700335 | NA       |
| RP11-804M7.1   | 0,45 | 0,47 | 0,51 | 0,47 | 0,6702192 | 0,782703 |
| RNU7-49P       | 0,00 | 0,00 | 0,00 | 0,00 | 0,6702324 | NA       |
| RP11-739N20.3  | 1,10 | 0,00 | 1,12 | 3,27 | 0,6703324 | 0,782794 |
| SLC9B2         | 1,93 | 0,44 | 0,64 | 0,47 | 0,6703694 | 0,782796 |
| AC005077.7     | 0,00 | 0,00 | 0,00 | 0,00 | 0,6705823 | NA       |
| ZNF75D         | 1,99 | 3,18 | 1,82 | 0,33 | 0,6705983 | 0,782978 |
| CYP2A6         | 0,00 | 0,00 | 0,00 | 0,00 | 0,6706329 | NA       |
| PIWIL4         | 0,06 | 0,16 | 0,02 | 0,12 | 0,6706651 | 0,782978 |
| HIST2H2AB      | 0,00 | 0,00 | 0,00 | 0,00 | 0,6706823 | 0,782978 |
| RP4-560B9.2    | 0,96 | 0,97 | 0,99 | 0,52 | 0,6707005 | 0,782978 |
| IGLV1-51       | 0,94 | 1,35 | 0,63 | 1,04 | 0,6707016 | 0,782978 |
| AC064847.3     | 0,00 | 0,00 | 0,00 | 0,00 | 0,6707756 | NA       |
| RP11-622L21.1  | 0,00 | 0,00 | 0,00 | 0,00 | 0,6707874 | NA       |
| RP11-333J10.2  | 0,00 | 0,00 | 0,00 | 0,00 | 0,6708122 | NA       |
| RP3-425C14.4   | 1,87 | 2,81 | 1,70 | 2,43 | 0,6708474 | 0,783107 |
| RP11-180P8.3   | 0,00 | 0,00 | 0,00 | 0,00 | 0,6711204 | NA       |
| RP11-571M6.17  | 0,00 | 0,00 | 0,00 | 0,00 | 0,6711226 | 0,783349 |
| TSC1           | 3,36 | 1,59 | 3,19 | 3,04 | 0,6711246 | 0,783349 |
| ECHS1          | 6,81 | 5,71 | 6,00 | 6,22 | 0,6712083 | 0,783405 |
| RP11-174G6.5   | 1,23 | 1,76 | 0,92 | 1,37 | 0,6713764 | 0,78356  |
| RP11-768G7.2   | 0,00 | 0,00 | 0,00 | 0,00 | 0,6715193 | NA       |
| RP11-1250I15.3 | 0,70 | 1,86 | 1,56 | 2,08 | 0,6715844 | 0,783762 |
| C17orf64       | 0,00 | 0,00 | 0,00 | 0,00 | 0,6716288 | 0,783773 |
| RP11-314N14.1  | 0,00 | 0,00 | 0,00 | 0,45 | 0,6718195 | 0,783954 |
| HEXA           | 6,63 | 6,15 | 6,61 | 6,27 | 0,6718794 | 0,783983 |
| RN7SKP176      | 0,00 | 0,00 | 0,00 | 0,00 | 0,6718823 | NA       |
| RP11-556I14.1  | 0,00 | 0,00 | 0,00 | 0,00 | 0,6718844 | NA       |
| BTD            | 2,67 | 1,98 | 2,95 | 2,43 | 0,6719215 | 0,783991 |
| CTA-481E9.3    | 0,00 | 0,00 | 0,00 | 0,00 | 0,6719278 | NA       |
| RP11-302I18.1  | 0,00 | 0,00 | 0,00 | 0,00 | 0,6719825 | NA       |
| RP4-630C24.3   | 0,00 | 0,00 | 0,00 | 0,08 | 0,6720362 | NA       |
| RP11-224O19.2  | 0,00 | 0,00 | 0,00 | 0,00 | 0,6720941 | NA       |
| RP11-34P1.1    | 0,22 | 0,49 | 0,11 | 0,00 | 0,6721608 | NA       |
| RP11-678K21.3  | 0,00 | 0,00 | 0,00 | 0,44 | 0,6722893 | NA       |

|                  |      |      |      |      |           |          |
|------------------|------|------|------|------|-----------|----------|
| MIR320B2         | 0,00 | 0,00 | 0,00 | 0,00 | 0,6723127 | NA       |
| AC004854.4       | 2,26 | 1,92 | 2,40 | 2,67 | 0,6723379 | 0,784435 |
| AC007362.3       | 0,00 | 0,00 | 0,00 | 0,00 | 0,6723988 | NA       |
| RP11-745A24.1    | 0,00 | 0,00 | 0,00 | 0,00 | 0,672401  | 0,784468 |
| RIOX2            | 4,04 | 1,96 | 2,35 | 3,86 | 0,6724671 | 0,784504 |
| ARHGAP9          | 7,53 | 7,34 | 7,23 | 7,42 | 0,6726082 | 0,784627 |
| CTD-2006K23.2    | 0,00 | 0,00 | 0,00 | 0,00 | 0,6726294 | NA       |
| FAM66D           | 0,00 | 0,00 | 0,00 | 0,00 | 0,6726302 | NA       |
| AC012358.4       | 0,00 | 0,00 | 0,00 | 0,00 | 0,6726778 | 0,784667 |
| RP11-40020.4     | 0,00 | 0,00 | 0,00 | 0,00 | 0,6728185 | 0,784691 |
| RP11-857B24.1    | 0,00 | 0,00 | 0,00 | 0,00 | 0,6728267 | 0,784691 |
| RP11-298J23.8    | 0,00 | 0,00 | 0,00 | 0,00 | 0,6728306 | 0,784691 |
| RP11-452H21.1    | 0,00 | 0,00 | 0,00 | 0,00 | 0,6728391 | 0,784691 |
| RP11-26J3.4      | 0,00 | 0,00 | 0,00 | 0,00 | 0,6728659 | NA       |
| RP11-144G6.12    | 3,30 | 1,82 | 1,99 | 2,04 | 0,6729552 | 0,784785 |
| AC007349.7       | 0,00 | 0,00 | 0,00 | 0,00 | 0,673083  | NA       |
| XXbac-B444P24.13 | 0,00 | 0,00 | 0,00 | 0,00 | 0,6731096 | NA       |
| ZNF229           | 0,00 | 0,29 | 0,00 | 0,00 | 0,6731429 | 0,784928 |
| SVBP             | 5,02 | 5,06 | 5,46 | 4,95 | 0,6731488 | 0,784928 |
| RP11-527J8.1     | 0,00 | 0,00 | 0,00 | 0,00 | 0,6731873 | 0,784932 |
| SLC22A1          | 0,00 | 0,00 | 0,00 | 0,00 | 0,6735126 | NA       |
| KCTD9P1          | 0,00 | 0,00 | 0,22 | 0,00 | 0,6735636 | 0,78533  |
| CTB-40H15.4      | 0,00 | 0,00 | 0,00 | 0,00 | 0,673582  | NA       |
| RP11-20I23.2     | 0,62 | 0,00 | 0,19 | 0,31 | 0,6736537 | 0,785376 |
| OR1C1            | 0,24 | 0,12 | 0,17 | 0,25 | 0,6736744 | 0,785376 |
| TUBB2A           | 0,53 | 0,09 | 0,00 | 0,67 | 0,6737522 | 0,78539  |
| CCDC126          | 2,70 | 2,28 | 2,01 | 1,40 | 0,673757  | 0,78539  |
| AC108868.4       | 0,00 | 0,03 | 0,03 | 0,00 | 0,6738227 | 0,785398 |
| GRHL2            | 0,30 | 0,14 | 0,00 | 0,11 | 0,6738342 | 0,785398 |
| GPRASP1          | 0,00 | 0,00 | 0,00 | 0,02 | 0,6739195 | 0,785427 |
| XYLT1            | 2,40 | 2,80 | 2,65 | 1,12 | 0,67393   | 0,785427 |
| RNA5SP216        | 0,00 | 0,00 | 0,69 | 0,00 | 0,6740004 | NA       |
| AC137932.6       | 0,00 | 0,29 | 0,00 | 0,00 | 0,6740293 | 0,785502 |
| RP11-589N15.2    | 0,00 | 0,00 | 0,00 | 0,00 | 0,6740414 | NA       |
| RP11-18F14.4     | 0,00 | 0,00 | 0,00 | 0,00 | 0,6742014 | NA       |
| SNORA25          | 0,00 | 0,00 | 0,00 | 1,04 | 0,674282  | NA       |
| APOC2            | 0,00 | 0,00 | 0,00 | 0,00 | 0,6743582 | NA       |
| ATF2             | 3,75 | 4,76 | 4,12 | 3,11 | 0,6743651 | 0,785852 |
| IGKV1D-39        | 0,00 | 0,00 | 0,00 | 0,00 | 0,6744212 | NA       |
| RP11-159F24.6    | 0,00 | 2,19 | 0,00 | 0,00 | 0,6744477 | 0,78587  |
| OPRL1            | 0,18 | 0,00 | 0,69 | 0,51 | 0,6744519 | 0,78587  |
| AC007950.1       | 0,00 | 0,00 | 0,00 | 0,00 | 0,6744645 | NA       |
| RP11-646E18.2    | 0,00 | 0,00 | 0,00 | 0,27 | 0,6745745 | NA       |
| CTD-2568A17.8    | 0,00 | 0,00 | 0,00 | 0,00 | 0,6746159 | NA       |
| CTC-329D1.3      | 0,00 | 0,00 | 0,00 | 0,00 | 0,6746937 | NA       |
| DDX41            | 5,00 | 5,68 | 4,60 | 3,93 | 0,6747618 | 0,78619  |
| RPL24P4          | 0,00 | 0,55 | 0,47 | 0,00 | 0,6747765 | NA       |
| PAGR1            | 3,51 | 3,09 | 4,09 | 3,77 | 0,6748389 | 0,786239 |
| FOXL2NB          | 0,69 | 0,92 | 0,68 | 0,72 | 0,6749533 | 0,786274 |
| RP11-321G12.1    | 0,00 | 0,00 | 0,00 | 0,00 | 0,674999  | 0,786274 |
| MMAB             | 3,61 | 1,03 | 1,83 | 1,73 | 0,6750211 | 0,786274 |
| CYTOR            | 6,90 | 6,46 | 6,92 | 6,47 | 0,6750338 | 0,786274 |
| MIR4766          | 0,00 | 0,00 | 0,00 | 0,00 | 0,6750613 | NA       |
| CNFN             | 0,91 | 0,00 | 0,64 | 0,00 | 0,6750693 | 0,786274 |
| TRPC1            | 0,00 | 0,03 | 0,00 | 0,00 | 0,6750746 | NA       |

|                |      |      |      |      |           |          |
|----------------|------|------|------|------|-----------|----------|
| RUFY1          | 4,38 | 0,93 | 3,78 | 3,07 | 0,6751017 | 0,786274 |
| RP11-576E20.1  | 0,00 | 0,00 | 0,00 | 0,45 | 0,6751164 | 0,786274 |
| RP11-81K2.1    | 0,00 | 0,00 | 0,00 | 0,00 | 0,6751375 | NA       |
| EXOSC4         | 5,02 | 2,89 | 4,99 | 3,44 | 0,6751861 | 0,786283 |
| CTB-50L17.9    | 0,00 | 0,00 | 0,00 | 0,84 | 0,6751951 | 0,786283 |
| RF01992        | 0,00 | 0,00 | 0,00 | 0,00 | 0,6752615 | NA       |
| RP11-849F2.7   | 0,00 | 0,00 | 0,00 | 0,00 | 0,6753708 | NA       |
| RP11-74E22.3   | 0,00 | 0,00 | 0,00 | 0,00 | 0,6754641 | 0,786533 |
| HIST2H4B       | 3,88 | 2,73 | 3,93 | 4,46 | 0,6754805 | 0,786533 |
| RP5-1068H6.6   | 0,00 | 0,00 | 0,00 | 0,00 | 0,675565  | NA       |
| POU5F1P3       | 0,00 | 0,00 | 0,00 | 0,00 | 0,6756245 | NA       |
| RP11-483I13.3  | 0,00 | 0,00 | 0,00 | 0,00 | 0,675642  | NA       |
| RP11-89K21.2   | 0,00 | 0,00 | 0,00 | 0,00 | 0,6756488 | NA       |
| RP11-356C4.5   | 0,00 | 0,00 | 0,00 | 0,18 | 0,6756623 | 0,786703 |
| RXFP4          | 0,00 | 0,00 | 0,00 | 0,00 | 0,6756777 | NA       |
| ACPT           | 0,00 | 0,00 | 0,00 | 0,00 | 0,6757412 | NA       |
| RP11-561N12.7  | 0,00 | 0,00 | 0,00 | 0,00 | 0,6757597 | NA       |
| TIPRL          | 4,95 | 4,54 | 4,28 | 2,81 | 0,6758592 | 0,786891 |
| RP11-89C3.4    | 0,00 | 0,00 | 0,00 | 0,00 | 0,6760089 | NA       |
| GTF2IP1        | 4,42 | 3,56 | 4,28 | 3,40 | 0,6760539 | 0,787056 |
| RP11-103G8.2   | 2,61 | 3,24 | 2,61 | 2,73 | 0,6760715 | 0,787056 |
| RP5-1114G22.2  | 0,00 | 0,00 | 0,00 | 0,00 | 0,6761165 | NA       |
| POLR1B         | 2,87 | 2,65 | 2,03 | 2,46 | 0,6761708 | 0,787119 |
| AC007308.7     | 0,00 | 0,00 | 0,00 | 1,07 | 0,6761847 | NA       |
| CAMTA2         | 3,18 | 2,55 | 3,81 | 3,81 | 0,6761967 | 0,787119 |
| RP11-109I2.3   | 0,00 | 0,00 | 0,00 | 0,00 | 0,6762643 | NA       |
| AP000936.4     | 0,00 | 0,00 | 0,00 | 0,00 | 0,676278  | NA       |
| RPL31P49       | 0,00 | 0,00 | 0,00 | 0,00 | 0,6763306 | NA       |
| SERPINE1       | 0,43 | 0,35 | 0,28 | 0,53 | 0,6763332 | 0,787237 |
| SLC35F1        | 0,00 | 0,00 | 0,00 | 0,05 | 0,6764408 | NA       |
| RP5-1129I21.3  | 0,89 | 0,08 | 0,51 | 0,30 | 0,6765715 | 0,787473 |
| RN7SL399P      | 0,00 | 0,97 | 0,00 | 0,00 | 0,676641  | NA       |
| RP11-642N14.1  | 0,00 | 0,60 | 0,00 | 0,00 | 0,676693  | 0,787554 |
| PTTG1          | 4,78 | 0,52 | 4,05 | 0,60 | 0,6767464 | 0,787554 |
| TSC22D4        | 2,93 | 3,42 | 3,21 | 3,04 | 0,6767475 | 0,787554 |
| WT1            | 0,00 | 0,08 | 0,00 | 0,00 | 0,6768642 | NA       |
| RP11-108K14.12 | 0,00 | 0,00 | 0,00 | 0,00 | 0,6769331 | 0,787729 |
| KHDRBS1        | 5,53 | 5,31 | 5,36 | 5,21 | 0,6769779 | 0,78774  |
| OR2A14         | 0,00 | 0,00 | 0,00 | 0,00 | 0,6770434 | NA       |
| RP13-178D16.2  | 0,00 | 0,14 | 0,00 | 0,00 | 0,6770794 | NA       |
| PCDHGB5        | 0,00 | 0,00 | 0,00 | 0,00 | 0,6771821 | NA       |
| RP11-179B15.2  | 0,00 | 0,81 | 0,00 | 0,00 | 0,6772047 | 0,787927 |
| CYB5RL         | 1,86 | 1,39 | 1,48 | 1,96 | 0,6772097 | 0,787927 |
| AC002539.1     | 0,00 | 0,00 | 0,00 | 0,00 | 0,677237  | NA       |
| RP11-390P2.2   | 0,00 | 0,00 | 0,00 | 0,00 | 0,6772831 | NA       |
| CDK13          | 5,44 | 5,21 | 5,15 | 4,57 | 0,677297  | 0,787988 |
| RIPK4          | 0,00 | 0,00 | 0,00 | 0,00 | 0,6773283 | NA       |
| ULK4P2         | 2,83 | 0,00 | 1,79 | 0,00 | 0,6773935 | 0,788059 |
| RP11-315H15.1  | 0,00 | 0,00 | 0,00 | 0,00 | 0,6775086 | NA       |
| ADAM18         | 0,00 | 0,27 | 0,00 | 0,00 | 0,6775518 | NA       |
| PPP3CB         | 4,01 | 2,06 | 3,23 | 2,72 | 0,6775564 | 0,788207 |
| CBARP          | 0,00 | 0,00 | 0,00 | 0,00 | 0,6775578 | NA       |
| RP11-474B16.1  | 0,00 | 0,37 | 0,10 | 0,00 | 0,677608  | 0,788226 |
| SNORA22        | 0,00 | 0,00 | 0,00 | 0,00 | 0,6776282 | NA       |
| PQLC2          | 2,88 | 3,64 | 3,54 | 0,98 | 0,6776843 | 0,788257 |

|                |      |      |      |      |           |          |
|----------------|------|------|------|------|-----------|----------|
| AC006372.4     | 0,00 | 0,00 | 0,00 | 0,00 | 0,6776856 | NA       |
| PHACTR2        | 4,47 | 3,67 | 4,09 | 3,49 | 0,6777177 | 0,788257 |
| ANKEF1         | 1,24 | 1,85 | 1,26 | 1,24 | 0,677741  | 0,788257 |
| A1BG-AS1       | 0,20 | 0,24 | 1,59 | 0,58 | 0,6778535 | 0,788346 |
| RP11-791G16.6  | 0,00 | 0,00 | 0,00 | 0,36 | 0,6779058 | 0,788366 |
| ERLIN2         | 3,33 | 3,49 | 3,34 | 3,41 | 0,6779567 | 0,788372 |
| NIM1K          | 1,83 | 1,83 | 2,02 | 1,99 | 0,6779818 | 0,788372 |
| MIR4677        | 0,00 | 0,00 | 0,00 | 0,00 | 0,6780557 | NA       |
| RP11-463I20.3  | 0,00 | 1,45 | 0,00 | 0,00 | 0,6780606 | 0,788422 |
| CLEC2B         | 5,65 | 5,58 | 5,74 | 5,26 | 0,6781263 | 0,788457 |
| RP11-708B6.2   | 0,00 | 0,00 | 0,00 | 0,00 | 0,6781298 | NA       |
| NLRP10         | 0,00 | 0,00 | 0,00 | 0,00 | 0,6781389 | NA       |
| EHD1           | 2,75 | 3,14 | 1,80 | 2,12 | 0,6782418 | 0,78855  |
| CTC-457L16.1   | 0,00 | 0,03 | 0,00 | 0,03 | 0,6782567 | NA       |
| GPR27          | 0,00 | 0,00 | 0,00 | 0,00 | 0,6783028 | 0,78858  |
| RP11-549B18.2  | 0,00 | 0,06 | 0,00 | 0,05 | 0,6783417 | NA       |
| CTD-2320J21.1  | 0,00 | 0,00 | 0,00 | 0,00 | 0,678389  | 0,788639 |
| FBXW7          | 5,24 | 5,57 | 5,25 | 5,48 | 0,6784484 | 0,788648 |
| TOP2B          | 5,67 | 5,14 | 5,30 | 5,10 | 0,678468  | 0,788648 |
| RP11-212D19.4  | 0,00 | 0,00 | 0,00 | 0,00 | 0,6785798 | NA       |
| TMEM255A       | 0,00 | 0,00 | 0,00 | 0,19 | 0,6786583 | 0,788797 |
| FAM219A        | 0,88 | 0,18 | 0,58 | 0,69 | 0,6786804 | 0,788797 |
| FAM181A-AS1    | 0,00 | 2,34 | 0,43 | 0,00 | 0,6787024 | 0,788797 |
| OR10G4         | 0,21 | 0,28 | 0,31 | 0,15 | 0,6787524 | 0,788814 |
| GDAP1L1        | 0,00 | 0,00 | 0,00 | 0,05 | 0,6787647 | NA       |
| SAP30L         | 3,67 | 3,77 | 2,73 | 4,21 | 0,6788405 | 0,788875 |
| BEND2          | 0,10 | 0,10 | 0,08 | 0,07 | 0,6788828 | 0,788883 |
| CTD-2192J16.20 | 0,00 | 0,00 | 0,00 | 0,07 | 0,6789449 | 0,788899 |
| VAC14          | 4,67 | 4,24 | 5,46 | 4,09 | 0,6789681 | 0,788899 |
| RBM42          | 2,90 | 0,59 | 3,05 | 2,38 | 0,6790351 | 0,788936 |
| SLC45A2        | 0,00 | 0,00 | 0,00 | 0,00 | 0,6790605 | NA       |
| RP11-357H14.16 | 0,04 | 0,00 | 0,00 | 0,05 | 0,6791273 | NA       |
| ZMYM4          | 3,79 | 3,58 | 3,35 | 2,52 | 0,6791458 | 0,78899  |
| RP11-753H16.3  | 0,00 | 1,77 | 0,00 | 0,00 | 0,679153  | 0,78899  |
| CTD-2062O1.3   | 0,00 | 0,00 | 0,00 | 0,00 | 0,6791531 | NA       |
| RP4-663N10.1   | 0,00 | 0,00 | 0,00 | 0,00 | 0,6791667 | NA       |
| MIR4705        | 0,00 | 0,00 | 0,00 | 0,00 | 0,6791679 | NA       |
| RP13-614K11.2  | 0,00 | 0,00 | 0,00 | 0,00 | 0,6792752 | NA       |
| PIGQ           | 2,59 | 0,81 | 3,34 | 2,49 | 0,6793262 | 0,78908  |
| RP11-692C24.2  | 0,82 | 0,97 | 0,71 | 0,83 | 0,6793315 | 0,78908  |
| NBPF10         | 3,82 | 3,26 | 3,67 | 3,50 | 0,6793368 | 0,78908  |
| RP11-24M17.5   | 0,00 | 0,00 | 0,00 | 0,00 | 0,6794767 | NA       |
| APBA3          | 0,83 | 1,59 | 1,22 | 2,13 | 0,6795061 | 0,789211 |
| C3orf17        | 4,70 | 4,99 | 4,82 | 4,88 | 0,6795201 | 0,789211 |
| RPS9P1         | 0,00 | 0,37 | 0,28 | 0,00 | 0,6795492 | NA       |
| AC024168.2     | 0,00 | 0,00 | 0,00 | 0,00 | 0,6795762 | NA       |
| RP11-543P15.1  | 0,00 | 0,00 | 0,00 | 0,00 | 0,6796363 | NA       |
| RN7SL386P      | 0,00 | 0,00 | 0,24 | 0,00 | 0,6796583 | NA       |
| CTA-363E6.1    | 0,00 | 0,00 | 0,00 | 0,00 | 0,6796868 | NA       |
| ANKRD26        | 2,89 | 2,14 | 2,69 | 1,85 | 0,6797094 | 0,789372 |
| CDK2AP1        | 5,75 | 4,62 | 5,47 | 4,78 | 0,679747  | 0,789372 |
| TTC4           | 2,72 | 2,29 | 2,89 | 1,09 | 0,6797653 | 0,789372 |
| FAM187A        | 0,00 | 0,00 | 0,00 | 0,00 | 0,6798073 | NA       |
| RP11-47I22.4   | 0,00 | 0,00 | 0,00 | 0,00 | 0,6798299 | NA       |
| RP11-2P5.4     | 2,68 | 2,92 | 1,57 | 3,07 | 0,6798883 | 0,789473 |

|                |      |      |      |      |           |          |
|----------------|------|------|------|------|-----------|----------|
| CTB-180A7.6    | 0,00 | 0,00 | 0,00 | 0,00 | 0,6799082 | NA       |
| AC108463.2     | 0,00 | 0,00 | 0,00 | 0,00 | 0,6799783 | 0,789536 |
| AC129929.5     | 0,00 | 0,00 | 0,00 | 0,00 | 0,6800164 | NA       |
| RP11-168J18.6  | 0,00 | 0,00 | 0,00 | 0,00 | 0,6801162 | NA       |
| RP11-445P17.8  | 0,00 | 0,00 | 0,00 | 0,00 | 0,6801251 | NA       |
| RP5-890O3.9    | 0,00 | 0,00 | 0,00 | 0,51 | 0,6801724 | NA       |
| RN7SL186P      | 0,00 | 0,00 | 0,24 | 0,00 | 0,6802256 | NA       |
| RP11-474D1.2   | 0,74 | 1,10 | 0,58 | 0,55 | 0,6802514 | 0,789812 |
| RP11-52J3.2    | 3,90 | 3,87 | 3,32 | 0,64 | 0,6803138 | 0,789843 |
| CDC5L          | 3,42 | 2,61 | 3,37 | 3,76 | 0,6803806 | 0,78988  |
| RP11-342I1.2   | 0,18 | 0,22 | 0,00 | 0,32 | 0,6805587 | 0,790045 |
| OR2AH1P        | 0,00 | 0,00 | 0,00 | 0,00 | 0,6805813 | NA       |
| RP11-139H15.5  | 0,00 | 0,00 | 0,00 | 0,00 | 0,6805833 | NA       |
| RP11-318C24.2  | 1,14 | 1,53 | 1,71 | 1,35 | 0,6806087 | 0,790062 |
| CTC-518B2.10   | 0,00 | 0,50 | 0,00 | 0,00 | 0,6806165 | NA       |
| RP11-20L24.1   | 0,00 | 0,00 | 0,00 | 0,00 | 0,6807596 | NA       |
| TRIM74         | 0,00 | 0,00 | 0,00 | 0,00 | 0,6808061 | NA       |
| VEZT           | 4,71 | 4,66 | 4,08 | 2,57 | 0,6808183 | 0,790264 |
| RP11-244H3.4   | 0,64 | 0,77 | 0,27 | 0,56 | 0,6808769 | 0,790291 |
| CTD-3185P2.1   | 0,06 | 0,00 | 0,06 | 0,06 | 0,6809815 | 0,790351 |
| DDX60L         | 4,72 | 3,76 | 4,95 | 5,31 | 0,6809999 | 0,790351 |
| C12orf56       | 0,00 | 0,00 | 0,00 | 0,00 | 0,6810867 | 0,790411 |
| RP11-380I10.1  | 0,00 | 0,19 | 0,00 | 0,17 | 0,6812008 | NA       |
| C18orf54       | 0,00 | 0,03 | 0,00 | 0,21 | 0,6814025 | 0,790736 |
| TAS1R3         | 0,00 | 0,00 | 0,00 | 0,00 | 0,6814245 | NA       |
| RHOBTB2        | 0,00 | 0,00 | 0,20 | 0,32 | 0,6814379 | 0,790736 |
| RP11-350D17.3  | 0,00 | 0,00 | 0,00 | 0,00 | 0,6814484 | NA       |
| PDXK           | 3,39 | 4,54 | 3,40 | 4,62 | 0,6814863 | 0,79075  |
| RP4-735C1.4    | 0,00 | 0,00 | 0,00 | 0,00 | 0,6816555 | NA       |
| RP11-826N14.6  | 0,29 | 0,15 | 0,26 | 0,21 | 0,6817106 | 0,790969 |
| C15orf62       | 0,00 | 0,00 | 0,00 | 0,00 | 0,6817994 | NA       |
| TCEAL8         | 4,86 | 5,30 | 4,78 | 4,38 | 0,6818718 | 0,791115 |
| RP1-93H18.7    | 0,00 | 0,00 | 0,00 | 0,00 | 0,6818778 | NA       |
| CTD-2619J13.23 | 0,00 | 0,00 | 0,00 | 0,00 | 0,6819606 | NA       |
| LBH            | 1,03 | 1,13 | 0,60 | 1,15 | 0,681962  | 0,791178 |
| RP11-208G20.3  | 0,00 | 0,00 | 0,00 | 0,00 | 0,6820087 | NA       |
| IPMK           | 1,90 | 1,60 | 2,02 | 1,78 | 0,6820898 | 0,791285 |
| RP11-392P7.2   | 0,96 | 1,06 | 0,85 | 1,18 | 0,6821827 | 0,791325 |
| SETD2          | 4,87 | 5,10 | 4,78 | 4,52 | 0,682195  | 0,791325 |
| RP11-102L12.2  | 0,15 | 0,45 | 0,40 | 0,22 | 0,6822464 | 0,791343 |
| RNU6-1280P     | 0,00 | 0,00 | 0,00 | 0,00 | 0,6822968 | NA       |
| NPRL2          | 4,69 | 4,24 | 4,39 | 4,53 | 0,6823068 | 0,79135  |
| OR9Q2          | 0,00 | 0,00 | 0,00 | 0,00 | 0,6823239 | 0,79135  |
| MIR548E        | 0,00 | 0,00 | 0,00 | 0,00 | 0,6823581 | NA       |
| AC112255.1     | 0,00 | 0,00 | 0,00 | 0,00 | 0,6824617 | NA       |
| SPACA5         | 0,00 | 0,00 | 0,00 | 0,00 | 0,6824905 | NA       |
| AC008063.5     | 0,22 | 0,44 | 0,16 | 0,42 | 0,6825078 | 0,791518 |
| AC002055.4     | 2,71 | 2,81 | 2,22 | 1,80 | 0,6825907 | 0,791518 |
| SNORA80B       | 4,07 | 1,61 | 5,82 | 6,04 | 0,6826027 | 0,791518 |
| A4GALT         | 1,82 | 2,17 | 1,88 | 1,18 | 0,6826107 | 0,791518 |
| RNU6-919P      | 0,00 | 0,00 | 0,00 | 0,00 | 0,6826809 | NA       |
| RP4-737E23.6   | 0,00 | 0,00 | 0,00 | 0,00 | 0,6827203 | NA       |
| RP1-197B17.3   | 0,00 | 0,00 | 0,00 | 0,00 | 0,6828324 | 0,791734 |
| TMEM163        | 0,00 | 0,00 | 0,00 | 0,00 | 0,6828493 | NA       |
| RP11-521L9.1   | 0,00 | 0,00 | 0,00 | 0,00 | 0,6828707 | NA       |



|                |      |      |      |      |           |          |
|----------------|------|------|------|------|-----------|----------|
| AC092835.2     | 0,00 | 0,00 | 0,00 | 0,00 | 0,6829018 | NA       |
| NBPF1          | 3,13 | 3,33 | 3,07 | 2,95 | 0,682921  | 0,791771 |
| AC005954.4     | 0,40 | 0,38 | 0,59 | 0,55 | 0,6829355 | 0,791771 |
| AES            | 5,47 | 4,67 | 5,51 | 5,09 | 0,6830955 | 0,791915 |
| RNU6-272P      | 0,00 | 0,00 | 0,00 | 0,00 | 0,6831835 | NA       |
| EFCAB8         | 0,00 | 0,00 | 0,00 | 0,00 | 0,6831985 | NA       |
| RP13-507123.2  | 0,00 | 0,08 | 0,00 | 0,00 | 0,683221  | NA       |
| ZNF408         | 0,41 | 0,11 | 0,06 | 0,31 | 0,6832244 | 0,791986 |
| MIR548Q        | 0,00 | 0,00 | 0,00 | 0,00 | 0,6832284 | 0,791986 |
| CFAP36         | 3,16 | 1,75 | 2,98 | 1,67 | 0,683266  | 0,791989 |
| ASIP           | 0,00 | 0,00 | 0,00 | 0,00 | 0,6832916 | NA       |
| CTD-2517M22.16 | 0,00 | 0,00 | 0,00 | 0,00 | 0,6834122 | NA       |
| DLK2           | 0,00 | 0,14 | 0,00 | 0,06 | 0,683422  | 0,792128 |
| RP13-131K19.8  | 0,00 | 0,00 | 0,00 | 0,00 | 0,6834484 | NA       |
| OR4M2          | 0,00 | 0,00 | 0,00 | 0,00 | 0,6834625 | NA       |
| RP11-218M11.3  | 0,00 | 0,00 | 0,00 | 0,00 | 0,6835353 | NA       |
| RP11-158I13.2  | 0,00 | 0,00 | 0,00 | 0,00 | 0,6835698 | 0,792258 |
| C8orf44        | 2,79 | 2,11 | 2,59 | 1,17 | 0,6836456 | 0,792281 |
| AL109767.1     | 0,00 | 0,00 | 0,00 | 0,00 | 0,6836591 | NA       |
| FGFBP3         | 0,00 | 0,00 | 0,00 | 0,05 | 0,6836613 | 0,792281 |
| RP11-746B8.1   | 0,00 | 0,00 | 0,00 | 0,00 | 0,6837055 | NA       |
| NEK3           | 5,21 | 4,26 | 5,16 | 4,98 | 0,6837111 | 0,792298 |
| RP11-480I12.2  | 0,00 | 0,00 | 0,00 | 1,43 | 0,683751  | 0,792303 |
| RP11-172E10.1  | 0,00 | 0,00 | 0,00 | 0,38 | 0,6838149 | 0,792335 |
| CYSLTR1        | 4,27 | 3,35 | 4,20 | 3,95 | 0,683884  | 0,792374 |
| TBC1D2         | 0,88 | 0,07 | 1,81 | 2,39 | 0,6839468 | 0,792387 |
| PLRG1          | 4,54 | 3,26 | 4,54 | 2,92 | 0,6839667 | 0,792387 |
| MIR548L        | 0,00 | 0,00 | 0,00 | 0,00 | 0,6839859 | NA       |
| HAS2AS         | 0,00 | 0,35 | 0,00 | 0,00 | 0,6841193 | NA       |
| TLL2           | 0,17 | 0,23 | 0,16 | 0,12 | 0,6845312 | 0,792964 |
| SPAG11B        | 0,00 | 0,00 | 0,00 | 0,00 | 0,684536  | 0,792964 |
| RN7SL250P      | 0,00 | 0,00 | 0,00 | 0,00 | 0,6846645 | NA       |
| INPP5E         | 0,85 | 0,29 | 0,53 | 0,15 | 0,6846989 | 0,793112 |
| CTD-2384B9.1   | 0,00 | 0,00 | 0,00 | 0,00 | 0,6847186 | NA       |
| RP11-492E3.2   | 0,00 | 0,12 | 0,08 | 0,44 | 0,6847396 | 0,793118 |
| RP11-530C5.1   | 0,00 | 0,00 | 0,00 | 0,00 | 0,6847656 | NA       |
| RN7SKP127      | 0,00 | 0,00 | 0,00 | 0,70 | 0,6848232 | 0,793136 |
| ENKD1          | 0,00 | 0,00 | 0,05 | 0,00 | 0,684827  | 0,793136 |
| OR1N2          | 0,00 | 0,00 | 0,00 | 0,00 | 0,684855  | NA       |
| MIR630         | 0,00 | 0,00 | 0,00 | 0,00 | 0,6848787 | NA       |
| APOL3          | 3,81 | 2,95 | 3,55 | 4,50 | 0,684894  | 0,793172 |
| RP11-727F15.11 | 0,00 | 0,00 | 0,00 | 0,00 | 0,6850403 | 0,793209 |
| TAS2R14        | 0,25 | 0,17 | 0,16 | 0,00 | 0,6850591 | 0,793209 |
| PIH1D1         | 6,00 | 6,00 | 5,57 | 6,29 | 0,6850619 | 0,793209 |
| FBR5           | 2,33 | 2,53 | 2,72 | 2,22 | 0,68511   | 0,793209 |
| CTC-340D7.1    | 0,00 | 0,42 | 0,00 | 0,00 | 0,6851204 | NA       |
| GPR108         | 6,12 | 5,56 | 5,84 | 6,12 | 0,6851385 | 0,793209 |
| TMOD1          | 0,79 | 0,16 | 0,12 | 0,00 | 0,6851402 | 0,793209 |
| RPL15P3        | 2,50 | 1,58 | 2,28 | 1,63 | 0,6852164 | 0,793256 |
| RP11-392A14.2  | 0,00 | 0,00 | 0,00 | 0,00 | 0,685251  | NA       |
| RN7SL606P      | 0,00 | 0,00 | 0,25 | 0,00 | 0,6852834 | NA       |
| SALL4          | 0,25 | 0,13 | 0,24 | 0,33 | 0,6855092 | 0,793554 |
| CTD-2192J16.17 | 0,21 | 0,36 | 0,08 | 0,06 | 0,6855926 | 0,793609 |
| RP5-1024G6.2   | 0,70 | 1,17 | 2,30 | 3,05 | 0,6856911 | 0,793682 |
| OR51B5         | 0,19 | 0,70 | 0,42 | 0,29 | 0,68576   | 0,793718 |

|               |      |      |      |      |           |          |
|---------------|------|------|------|------|-----------|----------|
| SLC9A1        | 1,92 | 2,30 | 0,80 | 0,81 | 0,6857936 | 0,793718 |
| KIF27         | 1,80 | 2,14 | 0,87 | 0,70 | 0,6858318 | 0,793721 |
| AB015752.3    | 0,00 | 0,00 | 0,00 | 0,00 | 0,6858515 | NA       |
| RP13-216E22.4 | 1,37 | 0,89 | 1,78 | 2,28 | 0,6858714 | 0,793725 |
| LHPP          | 3,49 | 2,74 | 3,20 | 2,45 | 0,6859861 | 0,793817 |
| RP4-740C4.5   | 0,00 | 0,00 | 0,00 | 0,00 | 0,6860407 | NA       |
| POU5F2        | 0,89 | 1,27 | 1,29 | 0,85 | 0,6860861 | 0,793891 |
| IGLJ6         | 0,00 | 0,00 | 0,00 | 0,00 | 0,6861921 | NA       |
| RP11-411B10.4 | 0,00 | 0,00 | 0,00 | 0,00 | 0,6862258 | NA       |
| RP11-265N6.1  | 0,89 | 0,26 | 2,41 | 1,93 | 0,6862659 | 0,794051 |
| TAC3          | 0,00 | 0,00 | 0,00 | 0,00 | 0,6862962 | 0,794051 |
| RP11-21N7.6   | 0,00 | 0,53 | 0,00 | 0,00 | 0,6863198 | NA       |
| C7orf55       | 3,53 | 3,09 | 3,80 | 3,84 | 0,68638   | 0,794107 |
| HOXA6         | 0,00 | 0,00 | 0,00 | 0,00 | 0,686383  | NA       |
| RP11-433J20.1 | 0,10 | 0,06 | 0,35 | 0,16 | 0,68644   | 0,794135 |
| PIK3R4        | 3,55 | 1,36 | 3,56 | 1,93 | 0,6866054 | 0,794285 |
| RP11-63A11.1  | 0,03 | 0,58 | 0,31 | 0,76 | 0,6867601 | 0,794393 |
| RP5-1074L1.4  | 0,00 | 0,00 | 0,00 | 0,00 | 0,6867615 | NA       |
| RP11-638F5.2  | 0,54 | 0,21 | 0,69 | 0,21 | 0,6867765 | 0,794393 |
| CD1A          | 1,42 | 0,07 | 0,53 | 0,81 | 0,6868061 | 0,794393 |
| RP11-532M24.1 | 0,00 | 0,00 | 0,00 | 0,00 | 0,6868227 | NA       |
| RP5-1103G7.10 | 0,08 | 0,35 | 0,29 | 0,33 | 0,6868813 | 0,794439 |
| C1QTNF6       | 1,36 | 1,04 | 0,54 | 1,30 | 0,6870682 | 0,794595 |
| CTD-2006C1.2  | 4,30 | 3,68 | 4,06 | 3,38 | 0,6871059 | 0,794595 |
| DPY19L2P2     | 0,59 | 1,01 | 0,63 | 0,56 | 0,6871603 | 0,794595 |
| EMD           | 2,82 | 1,96 | 2,43 | 1,66 | 0,687168  | 0,794595 |
| CCDC107       | 5,46 | 5,46 | 4,98 | 4,49 | 0,6872041 | 0,794595 |
| ZDHC21        | 0,55 | 0,46 | 0,74 | 0,67 | 0,6872557 | 0,794595 |
| CTD-2154I11.2 | 1,79 | 1,97 | 1,75 | 0,70 | 0,6872664 | 0,794595 |
| RP11-797D24.4 | 0,00 | 0,00 | 0,00 | 0,00 | 0,6872934 | NA       |
| SVIP          | 1,87 | 1,63 | 1,50 | 1,24 | 0,6873297 | 0,794627 |
| RN7SL278P     | 0,71 | 0,83 | 1,22 | 1,75 | 0,6874038 | 0,794671 |
| RNA5SP20      | 0,00 | 0,00 | 0,00 | 0,00 | 0,6874451 | NA       |
| CENPA         | 0,00 | 0,00 | 0,00 | 0,00 | 0,6875088 | NA       |
| RAP1GAP2      | 2,49 | 2,85 | 2,31 | 2,04 | 0,6875229 | 0,794767 |
| LINC00934     | 0,02 | 0,07 | 0,06 | 0,11 | 0,6876388 | 0,794835 |
| DUSP7         | 3,20 | 2,91 | 3,02 | 2,90 | 0,6876528 | 0,794835 |
| TNFRSF10B     | 4,26 | 2,11 | 4,34 | 3,47 | 0,6877027 | 0,794851 |
| RP11-371E8.2  | 0,00 | 0,00 | 0,00 | 0,00 | 0,6877196 | NA       |
| OR1X1P        | 0,00 | 0,00 | 0,00 | 0,00 | 0,6877368 | NA       |
| ACBD4         | 0,17 | 0,59 | 0,95 | 1,14 | 0,687836  | 0,794964 |
| AC005822.1    | 0,00 | 0,00 | 0,00 | 0,00 | 0,6878658 | NA       |
| ANXA2R        | 3,32 | 2,49 | 3,44 | 4,45 | 0,6879506 | 0,795055 |
| OR10G6        | 0,00 | 0,00 | 0,00 | 0,00 | 0,6879756 | NA       |
| RP11-111J6.2  | 0,00 | 0,00 | 0,00 | 0,00 | 0,6879936 | NA       |
| UBE2D1        | 4,70 | 3,71 | 4,42 | 4,04 | 0,6880744 | 0,795149 |
| TEN1-CDK3     | 0,67 | 0,47 | 0,46 | 0,45 | 0,6881089 | 0,795149 |
| RP13-638C3.4  | 0,00 | 0,00 | 0,00 | 0,00 | 0,688139  | 0,795149 |
| TRIM29        | 0,00 | 0,53 | 0,00 | 0,00 | 0,6881991 | NA       |
| AC104135.2    | 0,32 | 0,65 | 0,44 | 0,00 | 0,6882848 | 0,795274 |
| RP11-338C15.3 | 0,00 | 0,00 | 0,00 | 0,00 | 0,6883198 | 0,795274 |
| RP11-380I14.1 | 0,00 | 0,00 | 0,00 | 0,00 | 0,6883318 | NA       |
| GNA15         | 3,32 | 4,24 | 2,96 | 2,43 | 0,6883544 | 0,795274 |
| RP11-164N3.3  | 0,00 | 0,00 | 0,00 | 0,00 | 0,6883831 | NA       |
| CTD-2267D19.1 | 0,00 | 0,11 | 0,00 | 0,00 | 0,6883915 | 0,795275 |

|                  |      |      |      |      |           |          |
|------------------|------|------|------|------|-----------|----------|
| MIRLET7I         | 0,00 | 0,00 | 0,00 | 0,00 | 0,6884786 | NA       |
| RP11-468D11.1    | 0,00 | 0,00 | 0,00 | 0,00 | 0,6884928 | NA       |
| AC007001.4       | 0,00 | 0,00 | 0,00 | 0,00 | 0,6885028 | NA       |
| CTD-3105H18.4    | 0,00 | 0,00 | 0,00 | 0,00 | 0,6885046 | NA       |
| PRELID2          | 0,70 | 0,61 | 1,07 | 1,57 | 0,688512  | 0,795373 |
| RP11-354M1.2     | 0,00 | 0,00 | 0,00 | 0,00 | 0,68852   | NA       |
| RP11-385H1.1     | 0,08 | 0,11 | 0,15 | 0,04 | 0,6885702 | 0,795399 |
| MIR511           | 0,00 | 0,00 | 0,00 | 0,00 | 0,6885786 | NA       |
| AC131097.4       | 0,00 | 0,00 | 0,00 | 0,00 | 0,6886048 | NA       |
| AP001258.4       | 0,50 | 0,53 | 1,05 | 1,01 | 0,6886675 | 0,79547  |
| RP5-1139B12.2    | 0,00 | 0,00 | 0,00 | 0,00 | 0,688722  | NA       |
| RP11-598P20.3    | 0,00 | 0,00 | 0,00 | 0,00 | 0,6888523 | NA       |
| RNU6-517P        | 0,00 | 0,00 | 0,00 | 0,00 | 0,6889091 | NA       |
| CTA-268H5.12     | 0,00 | 0,00 | 0,00 | 0,00 | 0,6890724 | NA       |
| CTC-384G19.1     | 1,30 | 1,51 | 1,56 | 2,02 | 0,6891084 | 0,795898 |
| SFMBT2           | 3,94 | 4,34 | 3,82 | 1,40 | 0,6891096 | 0,795898 |
| RP11-80I3.1      | 0,00 | 0,00 | 0,00 | 0,00 | 0,6892322 | NA       |
| RP11-565F19.4    | 1,91 | 1,41 | 1,07 | 1,14 | 0,6892537 | 0,796023 |
| LIPJ             | 0,00 | 0,00 | 0,00 | 0,00 | 0,6892676 | NA       |
| C9orf116         | 0,00 | 0,00 | 0,00 | 0,00 | 0,689285  | NA       |
| RP11-246E14.1    | 0,00 | 0,00 | 0,00 | 0,00 | 0,6893452 | NA       |
| RP11-728G15.1    | 0,12 | 0,43 | 0,16 | 0,00 | 0,6893806 | 0,796128 |
| RP11-418H16.1    | 0,00 | 0,00 | 0,00 | 0,00 | 0,6895054 | NA       |
| THSD7B           | 0,00 | 0,00 | 0,00 | 0,00 | 0,6895173 | 0,796244 |
| RP11-285G1.14    | 0,00 | 0,00 | 0,00 | 0,00 | 0,689542  | NA       |
| RP1-151F17.1     | 0,00 | 0,00 | 0,00 | 0,00 | 0,6896325 | 0,796336 |
| CTD-2561B21.11   | 0,00 | 0,00 | 0,00 | 0,00 | 0,6897316 | NA       |
| RP11-2I17.1      | 0,72 | 0,93 | 1,19 | 0,53 | 0,689757  | 0,796439 |
| L3MBTL4          | 0,05 | 0,36 | 0,19 | 0,13 | 0,6897934 | 0,796439 |
| CTA-276O3.4      | 0,00 | 0,00 | 0,00 | 0,00 | 0,6897941 | NA       |
| AP000766.2       | 0,00 | 0,00 | 0,00 | 0,00 | 0,6898654 | NA       |
| RP11-429K17.1    | 0,00 | 0,00 | 0,00 | 0,00 | 0,689887  | NA       |
| RP5-968P14.2     | 0,00 | 0,00 | 0,00 | 0,00 | 0,6898981 | NA       |
| RP11-707M3.3     | 0,00 | 0,50 | 0,27 | 0,48 | 0,6899549 | 0,796549 |
| JMJD1C           | 7,05 | 6,49 | 6,94 | 6,38 | 0,6899604 | 0,796549 |
| RP11-293B20.1    | 0,00 | 0,00 | 0,26 | 0,00 | 0,6900547 | 0,796617 |
| APOA2            | 1,25 | 0,58 | 1,34 | 0,89 | 0,6901921 | 0,796725 |
| TRAF3IP3         | 6,61 | 5,46 | 6,12 | 5,79 | 0,6902299 | 0,796725 |
| TEX40            | 0,00 | 0,00 | 0,00 | 0,00 | 0,6902817 | 0,796725 |
| RN7SL784P        | 1,57 | 2,99 | 1,44 | 1,62 | 0,690292  | 0,796725 |
| TPRKB            | 5,72 | 4,21 | 5,00 | 4,42 | 0,6903811 | 0,796787 |
| KRT18P1          | 0,00 | 0,00 | 0,00 | 0,00 | 0,6903948 | NA       |
| RNU6-380P        | 0,00 | 0,00 | 0,00 | 0,00 | 0,6904673 | NA       |
| RP11-632C17__A.1 | 0,00 | 0,00 | 0,00 | 0,00 | 0,6905143 | NA       |
| KRBA1            | 0,00 | 0,15 | 0,00 | 0,28 | 0,6905281 | 0,796915 |
| RP11-335I12.4    | 0,00 | 0,37 | 0,00 | 0,76 | 0,6907785 | 0,797162 |
| RP5-842K16.2     | 0,00 | 0,00 | 0,00 | 0,00 | 0,6908345 | NA       |
| RP11-331G2.8     | 0,30 | 0,41 | 0,42 | 0,60 | 0,6909392 | 0,797225 |
| RP11-175P8.1     | 1,60 | 2,80 | 1,24 | 1,16 | 0,6909441 | 0,797225 |
| RP5-1068E13.3    | 1,79 | 0,96 | 1,64 | 1,35 | 0,6909551 | 0,797225 |
| PRR13            | 8,55 | 8,10 | 8,45 | 8,09 | 0,6909761 | 0,797225 |
| CTA-363E6.2      | 0,00 | 0,00 | 0,00 | 0,00 | 0,6910662 | NA       |
| C8orf51          | 0,23 | 0,85 | 0,59 | 0,35 | 0,691125  | 0,797287 |
| RNU1-11P         | 0,00 | 0,00 | 0,00 | 0,00 | 0,6911299 | NA       |
| RP11-737O24.1    | 0,00 | 0,00 | 0,00 | 0,00 | 0,6911329 | 0,797287 |

|                   |      |      |      |      |           |          |
|-------------------|------|------|------|------|-----------|----------|
| RNU6-375P         | 0,00 | 0,00 | 0,00 | 0,00 | 0,6912095 | 0,797287 |
| SNORA70G          | 6,52 | 6,49 | 4,94 | 5,08 | 0,6912235 | 0,797287 |
| XXbac-BPGBPG55C20 | 1,27 | 0,12 | 0,60 | 0,77 | 0,6912267 | 0,797287 |
| ASB14             | 1,19 | 1,22 | 1,01 | 0,88 | 0,6912454 | 0,797287 |
| AC105935.1        | 0,00 | 0,00 | 0,04 | 0,00 | 0,6912859 | NA       |
| USB1              | 4,42 | 5,38 | 4,10 | 4,48 | 0,6913725 | 0,797393 |
| RP11-535C21.3     | 0,00 | 0,98 | 0,00 | 0,00 | 0,691383  | NA       |
| HEXIM1            | 3,03 | 3,57 | 3,07 | 3,08 | 0,6916282 | 0,79763  |
| AC000120.7        | 0,79 | 0,11 | 1,23 | 1,70 | 0,6916548 | 0,79763  |
| TRO               | 0,00 | 0,00 | 0,00 | 0,00 | 0,6916629 | NA       |
| AP000240.9        | 0,40 | 0,00 | 1,34 | 0,47 | 0,6916862 | 0,79763  |
| RP13-554M15.5     | 0,00 | 0,00 | 0,00 | 0,00 | 0,6917637 | NA       |
| C16orf13          | 6,66 | 6,33 | 6,68 | 6,53 | 0,6918423 | 0,797738 |
| RP11-454H19.2     | 0,00 | 0,02 | 0,00 | 0,00 | 0,691854  | NA       |
| NARF              | 6,39 | 6,16 | 6,62 | 6,50 | 0,6918591 | 0,797738 |
| RP5-965G21.6      | 0,00 | 0,00 | 0,00 | 0,00 | 0,6918963 | 0,797738 |
| RP5-1053E7.1      | 0,00 | 0,00 | 0,00 | 0,00 | 0,6919109 | NA       |
| USP45             | 2,73 | 1,38 | 2,64 | 1,41 | 0,6919237 | 0,797738 |
| RP11-1360M22.11   | 0,00 | 0,00 | 0,00 | 0,00 | 0,6921752 | NA       |
| CYTH1             | 5,77 | 5,02 | 6,08 | 5,85 | 0,6921906 | 0,797991 |
| OR6K3             | 0,66 | 0,10 | 0,51 | 0,58 | 0,6922218 | 0,797991 |
| TRAV19            | 0,00 | 0,00 | 0,00 | 0,00 | 0,6922241 | NA       |
| RP11-411B6.6      | 3,10 | 2,55 | 3,01 | 2,41 | 0,6922918 | 0,797991 |
| RP11-308D13.2     | 0,64 | 0,00 | 0,72 | 0,97 | 0,69232   | 0,797991 |
| RP11-333E1.2      | 0,00 | 1,02 | 0,00 | 0,00 | 0,692322  | 0,797991 |
| AC007317.1        | 0,00 | 0,00 | 0,00 | 0,00 | 0,6923262 | NA       |
| DCAF13            | 4,51 | 3,40 | 3,99 | 4,86 | 0,6923667 | 0,798001 |
| RP11-334E6.10     | 0,00 | 0,55 | 0,05 | 0,82 | 0,692375  | NA       |
| IGLV2-8           | 0,00 | 0,74 | 0,00 | 0,00 | 0,6923802 | NA       |
| NPIP15            | 2,10 | 1,83 | 2,51 | 0,56 | 0,6924454 | 0,79805  |
| RP4-677H15.4      | 0,00 | 3,05 | 0,00 | 0,00 | 0,6925057 | 0,798078 |
| RP11-154C3.1      | 0,00 | 0,00 | 0,00 | 0,00 | 0,6925599 | NA       |
| RP11-631N16.4     | 0,00 | 0,43 | 0,45 | 0,00 | 0,6925989 | 0,798108 |
| CTD-2047H16.4     | 0,80 | 0,18 | 0,59 | 0,14 | 0,6926032 | 0,798108 |
| RP11-23F23.1      | 0,00 | 0,00 | 0,00 | 0,00 | 0,6926851 | NA       |
| NBAS              | 4,04 | 4,32 | 4,24 | 3,71 | 0,6929447 | 0,79846  |
| SRGAP1            | 0,69 | 1,71 | 0,50 | 1,71 | 0,6929935 | 0,798475 |
| RP13-210D15.8     | 0,00 | 0,00 | 0,00 | 0,00 | 0,6930826 | NA       |
| RP11-927P21.4     | 0,00 | 0,00 | 0,00 | 0,00 | 0,6931772 | NA       |
| RP11-478K15.6     | 0,00 | 0,00 | 0,00 | 0,00 | 0,693206  | NA       |
| BANK1             | 3,85 | 3,73 | 2,96 | 1,93 | 0,693484  | 0,798998 |
| RN7SL566P         | 0,00 | 0,83 | 0,40 | 1,09 | 0,6935721 | NA       |
| C1orf95           | 0,00 | 0,02 | 0,00 | 0,00 | 0,6936104 | NA       |
| RP4-561L24.3      | 0,00 | 0,00 | 0,00 | 0,00 | 0,6936238 | NA       |
| HADHA             | 6,71 | 5,82 | 6,42 | 6,42 | 0,6938255 | 0,799317 |
| GBP4              | 3,83 | 3,67 | 3,29 | 3,16 | 0,6938324 | 0,799317 |
| RN7SL3            | 0,00 | 0,00 | 0,00 | 0,00 | 0,6938559 | NA       |
| RP11-493E12.2     | 0,75 | 2,53 | 1,06 | 0,71 | 0,6939334 | 0,799392 |
| RP11-157G21.2     | 0,00 | 0,00 | 0,00 | 0,00 | 0,6939411 | NA       |
| RP11-350G24.2     | 0,09 | 0,00 | 0,00 | 0,00 | 0,6940545 | NA       |
| AC011380.9        | 0,00 | 0,00 | 0,00 | 0,00 | 0,6940707 | NA       |
| AC092535.3        | 0,04 | 0,24 | 0,03 | 0,00 | 0,6941783 | 0,799633 |
| LL22NC03-24A12.8  | 0,00 | 0,00 | 0,00 | 0,00 | 0,6942523 | NA       |
| RP11-54A4.2       | 0,00 | 0,00 | 0,00 | 0,00 | 0,6943314 | 0,799768 |
| CTD-3057O21.1     | 0,00 | 0,00 | 0,00 | 0,00 | 0,6943519 | NA       |

|                |      |      |      |      |           |          |
|----------------|------|------|------|------|-----------|----------|
| RP1-155D22.1   | 0,00 | 0,00 | 0,00 | 0,00 | 0,6944475 | NA       |
| RP11-586K12.11 | 0,00 | 1,13 | 0,73 | 1,50 | 0,6944641 | 0,799879 |
| SNORA74C-2     | 0,00 | 0,00 | 0,00 | 0,00 | 0,6944805 | NA       |
| DMRTC1         | 0,07 | 0,00 | 0,03 | 0,06 | 0,6944955 | NA       |
| SMNDC1         | 3,73 | 3,79 | 3,17 | 2,60 | 0,6945468 | 0,799933 |
| FAM174B        | 0,73 | 0,40 | 1,92 | 4,02 | 0,6946819 | 0,800047 |
| HIST1H4J       | 5,44 | 4,18 | 4,79 | 4,42 | 0,6948813 | 0,800235 |
| PHF20L1        | 5,15 | 4,29 | 4,95 | 5,11 | 0,6949572 | 0,800281 |
| RP11-597D13.2  | 0,00 | 0,00 | 0,00 | 0,00 | 0,6950641 | NA       |
| RP11-794A8.1   | 0,00 | 0,00 | 0,00 | 0,00 | 0,6951601 | NA       |
| CCDC136        | 0,00 | 1,20 | 0,00 | 0,00 | 0,6951705 | 0,800485 |
| LINC00596      | 0,17 | 0,48 | 0,17 | 1,01 | 0,6954118 | 0,800722 |
| RP11-269G24.4  | 0,00 | 0,00 | 0,00 | 0,00 | 0,6954477 | NA       |
| SNRPA          | 5,62 | 4,14 | 5,18 | 4,76 | 0,6955992 | 0,800869 |
| RN7SL333P      | 0,00 | 0,00 | 0,00 | 0,00 | 0,6956118 | 0,800869 |
| WBSCR27        | 0,00 | 0,00 | 0,00 | 0,33 | 0,6956527 | NA       |
| AC010525.4     | 0,00 | 0,00 | 0,36 | 0,89 | 0,6957204 | NA       |
| RASA3          | 0,24 | 0,20 | 0,94 | 0,73 | 0,6957428 | 0,800917 |
| CENPP          | 0,50 | 0,00 | 0,09 | 0,16 | 0,6957551 | 0,800917 |
| USP2           | 0,00 | 0,00 | 0,00 | 0,00 | 0,6957555 | NA       |
| OARD1          | 4,70 | 5,67 | 4,00 | 4,51 | 0,695762  | 0,800917 |
| RN7SL798P      | 0,00 | 0,00 | 0,94 | 3,48 | 0,695863  | 0,800981 |
| TP53TG5        | 0,00 | 0,00 | 0,00 | 0,00 | 0,6958898 | 0,800981 |
| RP11-125H8.1   | 0,00 | 0,00 | 0,00 | 0,00 | 0,695916  | NA       |
| RP11-665C16.6  | 0,00 | 0,00 | 0,00 | 0,42 | 0,6959877 | 0,801053 |
| GIPC2          | 0,00 | 0,00 | 0,00 | 0,00 | 0,6959999 | NA       |
| MIRS4802       | 0,00 | 0,00 | 0,00 | 0,00 | 0,6961114 | NA       |
| RP11-757F18.5  | 0,00 | 0,00 | 0,00 | 0,00 | 0,6961447 | NA       |
| MSI2           | 3,59 | 4,48 | 3,11 | 2,08 | 0,6962549 | 0,801319 |
| AC009303.3     | 0,00 | 0,00 | 0,00 | 0,00 | 0,6963994 | NA       |
| RP11-304L19.8  | 0,00 | 0,00 | 0,00 | 0,00 | 0,6964    | 0,801415 |
| PRAMEF4        | 0,00 | 0,00 | 0,00 | 0,00 | 0,6964073 | NA       |
| NFE2L3         | 3,27 | 0,92 | 3,47 | 2,54 | 0,6964456 | 0,801415 |
| SPAG6          | 0,00 | 0,00 | 0,00 | 0,00 | 0,696447  | 0,801415 |
| RP11-561I11.3  | 0,00 | 0,00 | 0,00 | 0,00 | 0,696489  | NA       |
| SCGB3A1        | 2,31 | 3,26 | 2,93 | 0,00 | 0,6965657 | 0,80151  |
| LIMS1-AS1      | 0,00 | 0,00 | 0,00 | 0,00 | 0,6966033 | NA       |
| LMAN2          | 6,69 | 6,02 | 6,18 | 5,89 | 0,696617  | 0,801528 |
| ABCG5          | 0,04 | 0,31 | 0,02 | 0,05 | 0,696676  | 0,801554 |
| RP11-383H13.1  | 0,64 | 0,72 | 0,32 | 0,31 | 0,6967759 | 0,801589 |
| BRE            | 5,50 | 5,84 | 5,20 | 5,04 | 0,6968277 | 0,801589 |
| RP11-62E14.2   | 0,00 | 0,00 | 0,00 | 0,00 | 0,6968929 | NA       |
| RN7SL370P      | 0,00 | 0,90 | 0,00 | 0,00 | 0,696897  | NA       |
| ZNF609         | 3,31 | 3,77 | 3,07 | 3,45 | 0,6969031 | 0,801589 |
| CTD-2538C1.3   | 0,81 | 0,72 | 0,20 | 1,30 | 0,6969243 | 0,801589 |
| POMT1          | 2,37 | 2,86 | 2,63 | 2,91 | 0,6969278 | 0,801589 |
| TOMM40         | 2,37 | 2,57 | 2,74 | 2,42 | 0,6969424 | 0,801589 |
| RP11-292D4.3   | 0,00 | 0,00 | 0,00 | 0,00 | 0,6969515 | NA       |
| RP11-4K3_A.3   | 0,00 | 0,88 | 0,00 | 0,00 | 0,696964  | 0,801589 |
| MTRF1L         | 2,94 | 1,03 | 2,25 | 2,68 | 0,6970057 | 0,801589 |
| RP5-898I4.1    | 0,12 | 0,31 | 0,32 | 0,38 | 0,6970308 | 0,801589 |
| AL162151.1     | 0,00 | 0,00 | 0,76 | 0,00 | 0,6970726 | 0,801596 |
| CTD-3193O13.14 | 0,00 | 0,00 | 0,00 | 0,00 | 0,6971282 | NA       |
| TEX13C         | 0,00 | 0,00 | 0,00 | 0,00 | 0,6971857 | NA       |
| CTD-2002H8.2   | 0,57 | 0,50 | 0,78 | 1,19 | 0,6972137 | 0,801716 |

|                 |      |      |      |      |           |          |
|-----------------|------|------|------|------|-----------|----------|
| RF01233         | 0,00 | 2,96 | 0,00 | 0,00 | 0,6972319 | NA       |
| C1orf64         | 0,34 | 0,52 | 0,11 | 0,32 | 0,6972985 | 0,801772 |
| RP11-47G4.2     | 0,44 | 1,53 | 0,00 | 1,96 | 0,6973903 | 0,801837 |
| MRPL40          | 4,74 | 4,74 | 5,30 | 4,76 | 0,697441  | 0,801853 |
| RP11-260G13.1   | 0,00 | 0,00 | 0,00 | 0,00 | 0,6974854 | NA       |
| MAP1A           | 0,01 | 0,02 | 0,00 | 0,01 | 0,697545  | NA       |
| NCLP1           | 0,00 | 0,00 | 0,00 | 0,00 | 0,697563  | NA       |
| GS1-21A4.2      | 0,00 | 0,00 | 0,00 | 0,00 | 0,6976276 | NA       |
| RN7SL692P       | 0,00 | 0,00 | 0,00 | 0,00 | 0,6977379 | NA       |
| PPM1K           | 4,23 | 4,26 | 3,62 | 2,69 | 0,6978022 | 0,802201 |
| LRFN4           | 0,00 | 0,50 | 0,16 | 0,46 | 0,6978153 | 0,802201 |
| PFN2            | 1,66 | 0,00 | 0,35 | 1,52 | 0,6978905 | 0,802246 |
| RP11-3J1.1      | 0,29 | 0,00 | 0,00 | 0,30 | 0,6980908 | NA       |
| ACO16831.5      | 0,00 | 0,00 | 0,00 | 0,00 | 0,6981076 | NA       |
| RP11-59K5.1     | 0,00 | 0,00 | 0,00 | 0,00 | 0,6981317 | NA       |
| TMEM128         | 4,70 | 2,13 | 4,76 | 0,95 | 0,698181  | 0,802538 |
| RNU6-234P       | 0,00 | 0,00 | 0,00 | 0,00 | 0,6981958 | NA       |
| RNU6-10P        | 0,00 | 0,00 | 0,00 | 0,00 | 0,6983589 | NA       |
| TRAJ16          | 0,00 | 0,00 | 0,00 | 0,00 | 0,6984955 | NA       |
| RP4-796I17.5    | 0,00 | 0,00 | 0,00 | 0,00 | 0,6985428 | NA       |
| RP11-593P24.2   | 0,00 | 0,00 | 0,00 | 0,00 | 0,6985983 | NA       |
| RP11-231G15.2   | 0,00 | 0,00 | 0,00 | 0,80 | 0,6986136 | 0,802994 |
| RP4-779E11.3    | 0,00 | 0,00 | 0,00 | 0,00 | 0,6986559 | 0,802998 |
| RP11-177B4.1    | 0,42 | 0,92 | 1,10 | 1,30 | 0,6986895 | 0,802998 |
| RP11-1114I9.1   | 0,00 | 0,00 | 0,00 | 0,00 | 0,6987202 | NA       |
| OR7E162P        | 0,00 | 0,00 | 0,00 | 0,00 | 0,6987378 | NA       |
| RP11-814E24.3   | 0,00 | 0,00 | 0,00 | 0,00 | 0,6987846 | NA       |
| CTB-113P19.1    | 0,00 | 0,00 | 0,00 | 0,00 | 0,6988103 | NA       |
| AC097532.1      | 0,00 | 0,95 | 0,00 | 0,00 | 0,6989113 | 0,803125 |
| SLC20A1         | 5,84 | 4,16 | 5,98 | 5,02 | 0,6989279 | 0,803125 |
| UPK2            | 0,00 | 0,00 | 0,00 | 0,00 | 0,6989326 | NA       |
| RASSF1-AS1      | 0,90 | 2,96 | 2,19 | 0,00 | 0,6989334 | 0,803125 |
| RP11-23P13.6    | 0,00 | 0,00 | 0,00 | 0,00 | 0,6989448 | 0,803125 |
| AC097468.7      | 0,00 | 0,00 | 0,00 | 0,00 | 0,6989513 | NA       |
| RP11-135J2.3    | 0,00 | 0,00 | 0,00 | 0,00 | 0,6990079 | 0,803154 |
| IGKV1OR2-6      | 0,00 | 0,00 | 0,00 | 0,00 | 0,6990081 | NA       |
| ADCY5           | 0,00 | 0,00 | 0,00 | 0,00 | 0,699042  | 0,803154 |
| RNU6-431P       | 0,00 | 0,00 | 0,00 | 0,00 | 0,6991653 | NA       |
| RP11-629O1.4    | 0,00 | 0,00 | 0,00 | 0,00 | 0,6992038 | NA       |
| RP11-45L9.1     | 0,00 | 0,00 | 0,00 | 0,00 | 0,6992999 | NA       |
| RP11-285E9.5    | 0,00 | 0,00 | 0,00 | 0,71 | 0,6993408 | 0,803456 |
| AZGP1           | 0,21 | 0,24 | 0,20 | 0,58 | 0,6994158 | 0,8035   |
| CTB-36O1.2      | 0,00 | 0,00 | 0,00 | 0,00 | 0,6996049 | NA       |
| ADGRE3          | 2,95 | 0,78 | 0,37 | 0,07 | 0,699621  | 0,803694 |
| TEX21P          | 0,27 | 0,00 | 0,22 | 0,12 | 0,6997831 | 0,803839 |
| RP11-631N16.2   | 0,34 | 0,05 | 0,12 | 0,65 | 0,6998927 | 0,803924 |
| RP11-265B8.5    | 0,00 | 0,00 | 0,00 | 0,00 | 0,6999387 | NA       |
| RN7SL326P       | 0,00 | 1,39 | 0,00 | 0,87 | 0,6999608 | NA       |
| CYP3A7-CYP3A51P | 0,00 | 0,00 | 0,00 | 0,00 | 0,7001913 | NA       |
| RP11-798K23.5   | 0,00 | 0,00 | 0,00 | 0,00 | 0,7002342 | NA       |
| RP11-385F5.2    | 0,00 | 0,00 | 0,00 | 0,00 | 0,700257  | NA       |
| TNXB            | 0,00 | 0,00 | 0,00 | 0,00 | 0,7002982 | NA       |
| DVL3            | 2,52 | 1,60 | 2,36 | 2,25 | 0,7004851 | 0,804562 |
| NECTIN1         | 0,00 | 0,07 | 0,04 | 0,00 | 0,7005748 | 0,804624 |
| RP11-346A3.2    | 0,00 | 0,20 | 0,00 | 0,00 | 0,7006535 | NA       |

|                    |      |      |      |      |           |          |
|--------------------|------|------|------|------|-----------|----------|
| RP11-439M15.1      | 0,00 | 0,00 | 0,00 | 0,00 | 0,7007121 | NA       |
| AC016894.1         | 0,00 | 0,00 | 0,00 | 0,00 | 0,7007305 | 0,804761 |
| RP11-461L13.5      | 0,00 | 0,00 | 0,00 | 0,00 | 0,7007649 | NA       |
| RP11-119H12.2      | 0,20 | 0,41 | 0,38 | 0,21 | 0,7007651 | NA       |
| MSANTD3-TMEFF1     | 0,00 | 0,00 | 0,00 | 0,00 | 0,7007902 | NA       |
| PAPD5              | 3,52 | 4,10 | 3,55 | 4,43 | 0,7008632 | 0,804856 |
| TNFSF13            | 6,59 | 3,84 | 6,33 | 5,68 | 0,7008854 | 0,804856 |
| RP4-673D20.6       | 0,00 | 0,00 | 0,00 | 0,06 | 0,7009225 | NA       |
| RP5-855D21.2       | 0,00 | 0,00 | 0,00 | 0,00 | 0,7010265 | NA       |
| CT45A6             | 0,00 | 0,00 | 0,00 | 0,00 | 0,7011574 | NA       |
| CTD-3051D23.4      | 0,31 | 1,05 | 0,56 | 0,47 | 0,7012282 | 0,805208 |
| RP11-32P22.1       | 0,00 | 0,00 | 0,00 | 0,00 | 0,7012556 | NA       |
| RP11-213G21.1      | 0,00 | 0,00 | 0,00 | 0,21 | 0,7012736 | NA       |
| RPL9P33            | 0,00 | 0,00 | 0,00 | 0,00 | 0,7012874 | 0,805225 |
| GPR151             | 0,00 | 0,00 | 0,00 | 0,00 | 0,7013028 | NA       |
| RP13-158L7.3       | 0,32 | 0,19 | 0,23 | 0,00 | 0,7013159 | 0,805225 |
| CENPN              | 3,55 | 0,79 | 3,23 | 2,25 | 0,7014109 | 0,805293 |
| RP11-142C4.5       | 0,00 | 0,00 | 0,00 | 0,00 | 0,7014321 | NA       |
| RP11-67C2.2        | 0,00 | 0,00 | 0,00 | 0,00 | 0,7014392 | NA       |
| SEC24C             | 2,50 | 0,14 | 2,00 | 2,29 | 0,7014495 | 0,805295 |
| RP11-930P14.2      | 0,37 | 0,60 | 0,69 | 0,80 | 0,7015006 | 0,805313 |
| LYG2               | 0,00 | 0,00 | 0,00 | 0,00 | 0,7016015 | 0,805357 |
| XXbac-BPG170G13.33 | 1,26 | 1,87 | 0,83 | 0,49 | 0,7016149 | 0,805357 |
| AC104777.2         | 0,00 | 0,00 | 0,00 | 0,00 | 0,7016422 | NA       |
| RASL10A            | 0,25 | 1,51 | 0,42 | 1,95 | 0,7016481 | 0,805357 |
| PSME2              | 9,18 | 8,72 | 8,86 | 8,88 | 0,7016849 | 0,805358 |
| PDE5A              | 3,12 | 2,06 | 2,52 | 0,61 | 0,7017545 | 0,805396 |
| SUZ12              | 3,75 | 3,37 | 3,15 | 3,20 | 0,7018079 | 0,805416 |
| SRSF10P1           | 0,00 | 0,23 | 0,00 | 0,00 | 0,7018259 | NA       |
| MRPS2              | 3,85 | 2,08 | 4,34 | 3,35 | 0,7020163 | 0,80558  |
| MYO1A              | 0,00 | 2,11 | 0,02 | 0,04 | 0,7020235 | 0,80558  |
| RP11-669M16.1      | 0,00 | 0,00 | 0,00 | 0,00 | 0,7020499 | NA       |
| RP11-650L12.1      | 0,00 | 0,00 | 0,00 | 0,00 | 0,7020903 | NA       |
| ISCU               | 6,58 | 6,63 | 6,11 | 5,75 | 0,7021633 | 0,805658 |
| TCEA1P             | 0,00 | 0,22 | 0,00 | 0,85 | 0,7021642 | 0,805658 |
| AC012358.8         | 4,45 | 4,19 | 4,71 | 4,28 | 0,702231  | 0,805666 |
| AB019438.55        | 1,92 | 1,95 | 1,81 | 1,78 | 0,7022433 | 0,805666 |
| SRP68P3            | 0,00 | 0,00 | 0,00 | 0,00 | 0,7022681 | NA       |
| C2orf91            | 0,87 | 0,93 | 0,67 | 0,79 | 0,7022845 | 0,805672 |
| RP11-134P9.1       | 0,12 | 0,21 | 0,52 | 0,70 | 0,7024057 | 0,805705 |
| PEG3               | 0,00 | 0,00 | 0,00 | 0,00 | 0,7024173 | 0,805705 |
| CELSR2             | 0,00 | 0,05 | 0,00 | 0,72 | 0,7024221 | 0,805705 |
| RN7SL444P          | 0,00 | 0,82 | 0,77 | 2,22 | 0,7025055 | 0,805759 |
| RP11-527F15.1      | 0,00 | 0,00 | 0,00 | 0,00 | 0,7025136 | NA       |
| GS1-256O22.5       | 0,00 | 0,00 | 0,00 | 0,00 | 0,7025639 | NA       |
| CTD-2544N14.3      | 0,00 | 0,00 | 0,00 | 0,00 | 0,7025669 | 0,805784 |
| CTD-2049J23.2      | 0,69 | 0,71 | 0,90 | 0,62 | 0,7026004 | 0,805784 |
| TMEM238            | 0,00 | 0,00 | 0,00 | 0,00 | 0,7027025 | NA       |
| RN7SL419P          | 0,00 | 0,00 | 0,00 | 0,00 | 0,7027427 | NA       |
| ZPLD1              | 0,00 | 0,00 | 0,00 | 0,00 | 0,7028132 | NA       |
| RP11-385D13.3      | 4,09 | 3,17 | 3,80 | 4,25 | 0,7029284 | 0,806104 |
| RP11-539L10.4      | 1,22 | 0,67 | 0,89 | 1,11 | 0,7029518 | 0,806104 |
| AP001625.4         | 0,00 | 0,00 | 0,00 | 0,00 | 0,7030573 | NA       |
| RP11-20G6.1        | 0,00 | 0,00 | 0,00 | 0,00 | 0,7030748 | NA       |
| RP3-466I7.1        | 0,00 | 0,00 | 0,00 | 0,00 | 0,7031391 | NA       |

|                |      |      |      |      |           |          |
|----------------|------|------|------|------|-----------|----------|
| AC115115.3     | 0,00 | 0,00 | 0,00 | 0,00 | 0,7031664 | NA       |
| CTC-457L16.2   | 0,00 | 0,03 | 0,00 | 0,03 | 0,703215  | NA       |
| RP11-1166P10.1 | 0,00 | 0,00 | 0,00 | 0,00 | 0,7033123 | NA       |
| TMC1           | 0,44 | 1,41 | 0,46 | 0,79 | 0,7033193 | 0,806484 |
| CH17-262A2.1   | 0,00 | 0,00 | 0,00 | 0,00 | 0,7033844 | 0,806517 |
| CTC-506B8.1    | 0,00 | 0,00 | 0,00 | 0,00 | 0,703547  | NA       |
| AC092192.1     | 0,00 | 0,00 | 0,00 | 0,16 | 0,7035765 | NA       |
| RP11-382J12.1  | 1,30 | 1,91 | 1,50 | 1,19 | 0,7035905 | 0,806712 |
| RNU6-204P      | 0,00 | 0,00 | 0,00 | 0,00 | 0,7037743 | 0,806881 |
| RP11-495K9.2   | 0,00 | 0,00 | 0,00 | 0,00 | 0,703789  | NA       |
| MDP1           | 5,43 | 4,71 | 5,27 | 5,00 | 0,7038132 | 0,806884 |
| RP11-739P6.1   | 0,00 | 1,07 | 0,00 | 0,29 | 0,7038729 | NA       |
| C8orf88        | 0,00 | 0,00 | 0,00 | 0,00 | 0,7039577 | NA       |
| RP11-219B4.3   | 0,00 | 0,00 | 0,00 | 0,00 | 0,7040355 | 0,807097 |
| AC013399.3     | 0,00 | 0,00 | 0,00 | 0,00 | 0,7040498 | NA       |
| LRFN5          | 0,00 | 0,00 | 0,00 | 0,00 | 0,7040806 | NA       |
| FBXO44         | 1,82 | 1,19 | 1,91 | 2,99 | 0,7041503 | 0,807187 |
| CTC-575C13.3   | 0,00 | 0,00 | 0,00 | 0,00 | 0,7044561 | NA       |
| RP11-568J23.4  | 0,35 | 0,00 | 0,00 | 0,00 | 0,7044659 | NA       |
| CYP2U1         | 1,72 | 0,09 | 0,51 | 1,08 | 0,7045335 | 0,807585 |
| KB-67B5.17     | 0,00 | 0,00 | 0,00 | 0,00 | 0,7045918 | NA       |
| GOLGA6C        | 0,00 | 0,00 | 0,00 | 0,06 | 0,7047511 | NA       |
| RP11-803D5.5   | 0,13 | 0,00 | 0,09 | 0,12 | 0,7048085 | 0,807858 |
| TPRA1          | 4,06 | 4,23 | 4,22 | 3,64 | 0,7048674 | 0,807865 |
| AF001548.5     | 1,61 | 0,54 | 0,21 | 0,17 | 0,7049021 | 0,807865 |
| RNU6-574P      | 0,00 | 0,00 | 0,00 | 0,00 | 0,70491   | NA       |
| FLNC           | 0,00 | 0,01 | 0,00 | 0,01 | 0,7049421 | NA       |
| RP11-830F9.7   | 0,00 | 0,00 | 0,00 | 0,00 | 0,7049723 | 0,807865 |
| RP5-937E21.8   | 0,00 | 0,00 | 0,00 | 0,00 | 0,7049811 | 0,807865 |
| RP11-458D21.1  | 0,23 | 1,44 | 0,18 | 0,24 | 0,7050542 | 0,807865 |
| RP11-449L23.2  | 0,15 | 0,23 | 0,15 | 0,28 | 0,7050929 | 0,807865 |
| CXorf40B       | 5,47 | 2,33 | 4,58 | 4,35 | 0,7051011 | 0,807865 |
| CDC16          | 4,57 | 4,35 | 4,35 | 2,86 | 0,7051056 | 0,807865 |
| AP000487.6     | 0,00 | 0,38 | 0,69 | 0,00 | 0,7051695 | 0,807897 |
| ATP13A5        | 0,00 | 0,03 | 0,00 | 0,00 | 0,7051755 | NA       |
| MROH7-TTC4     | 0,00 | 0,00 | 0,00 | 0,00 | 0,7053945 | 0,808074 |
| RP11-319G6.1   | 1,95 | 2,37 | 0,86 | 0,91 | 0,7054039 | 0,808074 |
| RF00334        | 0,00 | 0,00 | 0,00 | 0,00 | 0,7054323 | NA       |
| NELFA          | 2,35 | 3,35 | 2,88 | 3,35 | 0,7054408 | 0,808074 |
| MCTS1          | 5,99 | 5,71 | 5,55 | 5,60 | 0,7054693 | 0,808074 |
| AC005592.3     | 0,00 | 0,00 | 0,00 | 0,00 | 0,705578  | NA       |
| AC079896.1     | 0,00 | 0,00 | 0,00 | 0,00 | 0,7055937 | NA       |
| AC009950.2     | 3,35 | 4,35 | 3,13 | 3,09 | 0,70565   | 0,808239 |
| PPARG          | 0,21 | 0,21 | 0,15 | 0,23 | 0,7057165 | 0,808274 |
| RP11-540O11.1  | 0,00 | 0,00 | 0,00 | 0,00 | 0,705717  | NA       |
| RABGGTA        | 5,37 | 5,68 | 5,16 | 4,97 | 0,7057598 | 0,808282 |
| SYNJ2          | 0,92 | 2,21 | 1,24 | 1,42 | 0,7058025 | 0,808289 |
| RN7SL811P      | 0,00 | 0,00 | 0,00 | 0,00 | 0,7059947 | NA       |
| THAP11         | 3,50 | 0,43 | 2,97 | 1,87 | 0,7060543 | 0,808535 |
| RP1-290F12.3   | 0,00 | 0,00 | 0,00 | 0,00 | 0,7061131 | NA       |
| RN7SL60P       | 1,26 | 1,79 | 1,09 | 1,87 | 0,7061409 | 0,808575 |
| AC106873.2     | 0,00 | 0,00 | 0,00 | 0,00 | 0,7061452 | NA       |
| ASAH2B         | 0,24 | 0,44 | 0,08 | 0,29 | 0,7061619 | 0,808575 |
| RP11-402L1.1   | 0,00 | 0,00 | 0,00 | 0,00 | 0,7061699 | NA       |
| RNU6-911P      | 0,00 | 0,00 | 0,00 | 0,00 | 0,7062298 | NA       |



|                |      |      |      |      |           |          |
|----------------|------|------|------|------|-----------|----------|
| GPR179         | 0,00 | 0,00 | 0,00 | 0,00 | 0,7064019 | NA       |
| MINOS1-NBL1    | 0,00 | 0,00 | 0,00 | 0,00 | 0,7064212 | NA       |
| STX3           | 4,51 | 4,76 | 3,81 | 3,42 | 0,7065834 | 0,809016 |
| RP1-28O10.1    | 0,00 | 0,00 | 0,00 | 0,00 | 0,7066236 | NA       |
| RP11-133O22.6  | 0,00 | 0,00 | 0,00 | 0,00 | 0,7066443 | 0,809018 |
| CLCN4          | 0,02 | 0,70 | 0,02 | 0,34 | 0,7066578 | 0,809018 |
| RNY4P25        | 0,00 | 0,00 | 0,00 | 0,00 | 0,7067805 | NA       |
| RP11-618G20.2  | 2,44 | 0,37 | 1,61 | 2,83 | 0,7068224 | 0,809165 |
| RNU6-212P      | 0,00 | 0,00 | 0,00 | 0,00 | 0,7068609 | NA       |
| RP11-279N8.1   | 1,42 | 0,00 | 0,52 | 0,57 | 0,7068882 | 0,809199 |
| USP16          | 5,07 | 4,30 | 4,85 | 4,18 | 0,7070456 | 0,809337 |
| RNA5SP383      | 0,00 | 1,79 | 1,72 | 0,00 | 0,7071174 | 0,809378 |
| SMIM13         | 0,79 | 0,54 | 1,22 | 2,40 | 0,7072685 | 0,809509 |
| NME8           | 3,79 | 3,32 | 4,58 | 4,65 | 0,7073554 | 0,809567 |
| RP11-334G22.1  | 0,00 | 0,00 | 0,00 | 0,00 | 0,707361  | NA       |
| RF00598        | 0,00 | 0,00 | 0,00 | 0,00 | 0,7074018 | 0,809578 |
| CTD-3065B20.3  | 0,00 | 0,00 | 0,00 | 0,00 | 0,7074843 | 0,809631 |
| RP11-183G22.1  | 0,15 | 0,49 | 0,13 | 0,00 | 0,7074994 | NA       |
| KIF7           | 0,00 | 0,00 | 0,00 | 0,00 | 0,7075056 | NA       |
| MIR4477A       | 0,00 | 0,00 | 0,00 | 0,00 | 0,7075145 | NA       |
| TRIB3          | 0,13 | 0,38 | 0,16 | 1,35 | 0,7077496 | 0,809856 |
| LAMA3          | 0,00 | 0,05 | 0,00 | 0,07 | 0,7077537 | 0,809856 |
| RP11-392P7.1   | 0,00 | 0,00 | 0,00 | 0,00 | 0,7077811 | NA       |
| MIR4727        | 0,00 | 0,00 | 0,00 | 0,00 | 0,70781   | NA       |
| PIAS3          | 1,85 | 0,07 | 1,80 | 1,44 | 0,7079039 | 0,809986 |
| PPIAP11        | 0,00 | 0,43 | 0,00 | 0,44 | 0,7079768 | NA       |
| ATP6VOE2       | 3,15 | 2,93 | 1,62 | 1,33 | 0,7079801 | 0,810031 |
| MIR4774        | 0,00 | 0,00 | 0,00 | 0,00 | 0,7082024 | 0,810244 |
| RP11-589C21.6  | 0,00 | 0,00 | 0,00 | 0,00 | 0,7082797 | NA       |
| RP11-115E19.1  | 0,00 | 0,00 | 0,00 | 0,00 | 0,7083017 | NA       |
| RP11-475N22.4  | 0,00 | 0,00 | 0,00 | 0,00 | 0,7083359 | NA       |
| RP11-756J15.1  | 1,06 | 0,54 | 0,83 | 0,73 | 0,7084227 | 0,810454 |
| LTN1           | 3,32 | 4,09 | 3,63 | 2,89 | 0,708512  | 0,810515 |
| CTD-2611K5.5   | 0,00 | 0,00 | 0,00 | 0,00 | 0,7085767 | NA       |
| GNL3L          | 1,28 | 1,48 | 2,59 | 0,95 | 0,7086891 | 0,810668 |
| RP11-636O21.2  | 0,37 | 0,90 | 0,49 | 0,40 | 0,7087191 | 0,810668 |
| TMEM8B         | 3,88 | 3,89 | 3,37 | 3,57 | 0,7087798 | 0,810696 |
| RP11-277P12.20 | 0,09 | 0,11 | 0,32 | 0,19 | 0,7088306 | 0,810712 |
| MEX3D          | 0,00 | 0,07 | 0,00 | 0,00 | 0,7088557 | NA       |
| RF01293        | 0,00 | 0,00 | 0,00 | 0,00 | 0,7088668 | NA       |
| RP11-428O18.3  | 0,00 | 0,00 | 0,00 | 0,00 | 0,7089414 | NA       |
| RP11-160H22.3  | 4,35 | 0,00 | 3,61 | 4,85 | 0,7089799 | 0,810841 |
| RP11-104L21.3  | 0,00 | 1,36 | 0,00 | 0,79 | 0,7090093 | NA       |
| RNA5SP483      | 0,00 | 0,00 | 0,00 | 0,00 | 0,7090298 | NA       |
| RP5-968D22.2   | 0,00 | 0,00 | 0,00 | 0,00 | 0,7090519 | NA       |
| RP3-388N13.3   | 0,00 | 0,42 | 0,00 | 0,00 | 0,7090771 | 0,810841 |
| TAF1D          | 6,03 | 6,07 | 6,05 | 5,84 | 0,709095  | 0,810841 |
| RP11-138H8.2   | 0,27 | 0,47 | 0,48 | 0,20 | 0,7091074 | 0,810841 |
| MKRN1          | 5,96 | 5,29 | 5,53 | 5,06 | 0,7091257 | 0,810841 |
| CTA-384D8.36   | 3,38 | 4,51 | 3,61 | 3,53 | 0,7092518 | 0,810928 |
| CTD-2228K2.5   | 1,09 | 2,04 | 2,70 | 2,17 | 0,7092745 | 0,810928 |
| RN75L138P      | 0,85 | 0,00 | 2,19 | 3,23 | 0,7093744 | 0,811    |
| ZNF728         | 0,00 | 0,00 | 0,00 | 0,00 | 0,7093853 | NA       |
| HVCN1          | 4,74 | 4,51 | 4,50 | 4,04 | 0,7094144 | 0,811004 |
| RP11-159C21.4  | 0,00 | 0,00 | 0,00 | 0,00 | 0,7094454 | NA       |

|                |      |      |      |      |           |          |
|----------------|------|------|------|------|-----------|----------|
| CTD-2382E5.1   | 0,05 | 0,00 | 0,08 | 0,07 | 0,7094944 | 0,811025 |
| RP1-111D6.3    | 0,08 | 0,55 | 0,11 | 0,31 | 0,7095053 | 0,811025 |
| NAA16          | 3,23 | 4,09 | 2,82 | 1,36 | 0,7095973 | 0,811064 |
| RP11-434D9.1   | 0,00 | 0,00 | 0,00 | 0,00 | 0,7096254 | NA       |
| RP3-414A15.12  | 0,37 | 0,33 | 0,69 | 0,31 | 0,7096427 | 0,811064 |
| SPI1           | 3,12 | 2,28 | 3,37 | 3,10 | 0,7096493 | 0,811064 |
| MIR7705        | 0,00 | 0,00 | 0,00 | 0,00 | 0,7096755 | NA       |
| RNU6-341P      | 0,00 | 0,00 | 0,00 | 0,00 | 0,7098034 | NA       |
| RP11-321G3.1   | 0,75 | 0,46 | 3,04 | 1,16 | 0,7099581 | 0,811375 |
| ACSM1          | 0,00 | 0,00 | 0,00 | 0,00 | 0,709961  | NA       |
| RPS10P16       | 0,00 | 0,00 | 0,00 | 0,00 | 0,7101107 | 0,811508 |
| ALG1L2         | 0,00 | 1,17 | 0,00 | 0,55 | 0,710149  | 0,81151  |
| RP11-507K12.1  | 0,00 | 0,00 | 0,00 | 0,00 | 0,7102024 | 0,811529 |
| MAGEA8         | 0,00 | 0,00 | 0,00 | 0,00 | 0,7102462 | NA       |
| RN7SL33P       | 0,00 | 1,52 | 0,70 | 0,00 | 0,710252  | 0,811544 |
| RP11-493E3.1   | 0,00 | 0,00 | 0,00 | 0,00 | 0,7104004 | NA       |
| RP11-814E24.2  | 0,00 | 0,00 | 0,00 | 0,00 | 0,7104155 | NA       |
| HELZ           | 4,48 | 3,80 | 4,69 | 4,97 | 0,7104251 | 0,811672 |
| RP5-991G20.1   | 0,00 | 0,00 | 0,00 | 0,00 | 0,710444  | 0,811672 |
| RP11-1094H24.3 | 0,00 | 0,36 | 0,15 | 0,31 | 0,7104728 | 0,811672 |
| GAS2L1         | 1,90 | 0,75 | 2,52 | 1,70 | 0,7105535 | 0,811722 |
| RP11-697E2.12  | 0,00 | 0,00 | 0,00 | 0,00 | 0,7105699 | NA       |
| KIAA0408       | 0,02 | 0,04 | 0,01 | 0,04 | 0,7106336 | NA       |
| STOM           | 4,52 | 4,59 | 4,59 | 4,28 | 0,710669  | 0,811775 |
| RP11-431N15.2  | 0,58 | 0,82 | 0,58 | 0,76 | 0,7106728 | 0,811775 |
| MKNK1-AS1      | 0,00 | 0,00 | 0,00 | 0,00 | 0,7108612 | NA       |
| TVP23C-CDRT4   | 0,00 | 0,00 | 0,00 | 0,00 | 0,7109713 | NA       |
| RPL9P30        | 0,00 | 0,00 | 0,00 | 0,00 | 0,7109842 | NA       |
| RP11-569A11.1  | 0,00 | 0,00 | 0,00 | 0,00 | 0,7110081 | NA       |
| BOLA1          | 3,78 | 0,23 | 2,11 | 1,12 | 0,7110757 | 0,81216  |
| C9orf131       | 0,39 | 1,00 | 0,00 | 0,00 | 0,7110829 | 0,81216  |
| RP11-248J18.2  | 0,00 | 0,00 | 0,00 | 0,00 | 0,7110951 | NA       |
| RP11-328C8.2   | 0,00 | 0,00 | 0,00 | 0,00 | 0,7111785 | NA       |
| AP001442.2     | 1,00 | 1,04 | 1,07 | 1,64 | 0,7112001 | 0,812252 |
| CCDC74A        | 0,05 | 0,32 | 0,08 | 0,00 | 0,7113349 | 0,812333 |
| RP11-1094M14.4 | 0,00 | 0,00 | 0,00 | 0,00 | 0,7113591 | NA       |
| RP11-349A22.5  | 6,41 | 5,98 | 6,07 | 6,27 | 0,7113726 | 0,812333 |
| RANBP10        | 1,20 | 0,64 | 0,57 | 0,82 | 0,7113807 | 0,812333 |
| RP11-263K4.3   | 0,00 | 0,04 | 0,05 | 0,05 | 0,7114577 | 0,812379 |
| HEPH           | 0,00 | 0,00 | 0,00 | 0,00 | 0,7114867 | NA       |
| RP11-556N21.1  | 0,00 | 0,00 | 0,00 | 0,00 | 0,7115939 | 0,812493 |
| DNAJC25-GNG10  | 3,85 | 0,44 | 2,84 | 0,00 | 0,7117235 | 0,812599 |
| RP11-96D1.9    | 0,00 | 0,00 | 0,00 | 0,00 | 0,7117723 | NA       |
| ST3GAL1        | 3,19 | 2,55 | 3,01 | 3,21 | 0,7118013 | 0,812611 |
| AC024560.3     | 3,10 | 2,93 | 2,31 | 3,32 | 0,7118069 | 0,812611 |
| RP11-235C23.5  | 0,00 | 0,95 | 0,00 | 0,00 | 0,7118125 | NA       |
| DGCR12         | 0,00 | 0,00 | 0,00 | 0,00 | 0,7118386 | NA       |
| RP11-407P18.1  | 0,00 | 0,00 | 0,00 | 0,00 | 0,7118431 | NA       |
| KDM2B          | 4,46 | 4,52 | 4,11 | 2,94 | 0,711865  | 0,812616 |
| ABALON         | 0,00 | 0,00 | 0,00 | 0,00 | 0,7118711 | NA       |
| RP11-298E9.6   | 0,00 | 1,07 | 0,60 | 0,98 | 0,7118864 | 0,812616 |
| TGFB2-OT1      | 0,00 | 0,00 | 0,00 | 0,00 | 0,7118939 | NA       |
| POM121B        | 0,00 | 0,00 | 0,00 | 0,00 | 0,7119015 | NA       |
| RP11-513M16.8  | 0,00 | 0,37 | 0,00 | 0,00 | 0,7119428 | 0,812616 |
| RP11-68I3.5    | 0,00 | 0,00 | 0,00 | 0,00 | 0,7119826 | 0,812616 |

|                |      |      |      |      |           |          |
|----------------|------|------|------|------|-----------|----------|
| RSBN1L         | 2,86 | 1,74 | 2,53 | 2,67 | 0,7119938 | 0,812616 |
| RP11-553A10.1  | 0,00 | 0,00 | 0,00 | 0,00 | 0,7120433 | NA       |
| RN7SL369P      | 0,00 | 0,00 | 0,00 | 0,00 | 0,7120915 | NA       |
| AP001469.5     | 0,26 | 0,52 | 0,00 | 0,00 | 0,7122664 | NA       |
| RP11-8J9.4     | 0,00 | 0,00 | 0,00 | 0,00 | 0,7123161 | 0,812942 |
| RP11-103B5.4   | 0,00 | 0,00 | 0,00 | 0,00 | 0,71239   | NA       |
| FSCN2          | 0,00 | 0,00 | 0,00 | 0,00 | 0,7124379 | NA       |
| MIR1200        | 0,00 | 0,00 | 0,00 | 0,00 | 0,7124568 | 0,81306  |
| RP11-368P15.3  | 4,16 | 4,63 | 4,49 | 4,94 | 0,7125873 | 0,813124 |
| CTD-3222D19.11 | 0,00 | 0,00 | 0,00 | 0,66 | 0,7126027 | NA       |
| TMEM35B        | 5,78 | 5,91 | 4,82 | 5,63 | 0,7126073 | 0,813124 |
| ZRANB3         | 2,03 | 0,19 | 1,16 | 1,37 | 0,7126226 | 0,813124 |
| RHOG           | 8,06 | 7,29 | 7,87 | 7,41 | 0,7128975 | 0,813388 |
| EDC3           | 2,59 | 3,66 | 2,37 | 2,17 | 0,7129269 | 0,813388 |
| AC083843.3     | 0,00 | 0,00 | 0,00 | 0,00 | 0,7129392 | NA       |
| SLC2A8         | 3,59 | 2,50 | 3,04 | 2,73 | 0,7130503 | 0,813487 |
| RP11-6I2.3     | 0,00 | 0,00 | 0,10 | 0,00 | 0,7132313 | 0,813577 |
| CEBPZOS        | 3,97 | 3,75 | 4,34 | 3,60 | 0,7132341 | 0,813577 |
| SMIM1          | 0,00 | 0,00 | 0,00 | 0,00 | 0,7132541 | NA       |
| ARAF           | 5,40 | 4,92 | 5,24 | 4,60 | 0,713289  | 0,813577 |
| ARMCX3         | 2,86 | 2,93 | 2,89 | 2,06 | 0,7133116 | 0,813577 |
| RP11-408O19.5  | 0,00 | 0,31 | 0,34 | 0,58 | 0,7133118 | 0,813577 |
| GRIPAP1        | 4,37 | 4,05 | 4,31 | 4,04 | 0,7133881 | 0,813622 |
| SLC2A9         | 3,55 | 2,63 | 2,78 | 4,30 | 0,7134515 | 0,813652 |
| RN7SL155P      | 0,00 | 0,00 | 0,00 | 1,00 | 0,7135743 | NA       |
| MIR7976        | 0,00 | 0,00 | 0,00 | 0,00 | 0,7136421 | NA       |
| C1orf194       | 0,00 | 0,00 | 0,00 | 0,00 | 0,7136725 | NA       |
| KLHL15         | 2,41 | 0,68 | 2,50 | 1,16 | 0,7136875 | 0,81388  |
| RARRES2P4      | 0,00 | 0,00 | 0,00 | 0,00 | 0,713713  | NA       |
| ING5           | 4,69 | 4,75 | 4,17 | 4,00 | 0,7138172 | 0,813986 |
| RP11-363E6.3   | 0,00 | 0,31 | 0,00 | 0,00 | 0,713861  | NA       |
| COL5A1         | 0,00 | 0,09 | 0,00 | 0,03 | 0,7138645 | 0,813998 |
| PPP1R14BP3     | 0,00 | 0,00 | 0,00 | 0,00 | 0,7138858 | NA       |
| RP11-29O13.1   | 0,00 | 0,75 | 0,00 | 0,00 | 0,7138957 | NA       |
| RP11-326K13.3  | 0,20 | 0,13 | 0,32 | 0,13 | 0,7139228 | 0,814023 |
| C7orf43        | 2,62 | 0,69 | 2,86 | 2,45 | 0,7139693 | 0,814034 |
| RP11-26311.1   | 0,00 | 0,00 | 0,00 | 0,00 | 0,71407   | NA       |
| AC096670.3     | 0,00 | 0,00 | 0,00 | 0,00 | 0,7140944 | NA       |
| RP11-80F22.4   | 0,00 | 0,00 | 0,00 | 0,00 | 0,7141335 | NA       |
| C1orf123       | 5,51 | 5,51 | 5,74 | 3,07 | 0,7142907 | 0,814273 |
| EHMT1          | 5,13 | 5,85 | 5,51 | 5,29 | 0,7142909 | 0,814273 |
| RN7SL118P      | 1,28 | 0,84 | 0,21 | 3,50 | 0,7143208 | 0,814273 |
| RNU6-827P      | 0,00 | 0,00 | 0,00 | 0,00 | 0,7143294 | NA       |
| RP11-758P17.3  | 2,40 | 0,83 | 0,94 | 0,00 | 0,7143494 | 0,814273 |
| CLEC16A        | 2,47 | 3,52 | 2,30 | 1,49 | 0,7143623 | 0,814273 |
| RP11-141C7.3   | 0,00 | 0,00 | 0,00 | 0,00 | 0,7143863 | NA       |
| RNU2-10P       | 0,00 | 0,00 | 0,00 | 0,00 | 0,714392  | NA       |
| RP11-168J18.4  | 0,00 | 0,00 | 0,00 | 0,00 | 0,7144114 | NA       |
| RP1-111D6.4    | 0,00 | 0,00 | 0,00 | 0,00 | 0,7144354 | NA       |
| NUP50          | 3,85 | 3,45 | 3,68 | 3,46 | 0,7144582 | 0,814331 |
| CLEC1A         | 1,28 | 1,62 | 1,98 | 2,78 | 0,7144859 | 0,814331 |
| OCM            | 0,00 | 0,00 | 0,00 | 0,00 | 0,7145288 | NA       |
| ICA1L          | 3,44 | 1,85 | 2,88 | 3,71 | 0,7145359 | 0,814346 |
| AC011747.5     | 0,00 | 0,00 | 0,00 | 0,00 | 0,7145579 | NA       |
| SP2            | 1,98 | 0,91 | 2,54 | 2,09 | 0,714668  | 0,814413 |

|                 |      |      |      |      |           |          |
|-----------------|------|------|------|------|-----------|----------|
| AC145110.1      | 0,80 | 1,43 | 0,79 | 0,81 | 0,7146942 | 0,814413 |
| RP11-2A4.1      | 0,00 | 0,00 | 0,00 | 0,00 | 0,7146989 | NA       |
| AP002884.2      | 0,00 | 0,00 | 0,00 | 0,00 | 0,7147046 | 0,814413 |
| RP11-337A23.3   | 0,00 | 0,00 | 0,00 | 0,00 | 0,7147909 | NA       |
| RP11-875O11.2   | 0,00 | 0,00 | 0,00 | 0,00 | 0,714797  | NA       |
| RECQL4          | 0,00 | 0,03 | 0,00 | 0,00 | 0,7148253 | 0,81442  |
| SLC2A3          | 6,96 | 6,28 | 6,52 | 6,51 | 0,714828  | 0,81442  |
| RP11-568A7.3    | 0,00 | 0,00 | 0,00 | 0,00 | 0,7148983 | NA       |
| RP11-141B14.1   | 0,29 | 0,09 | 0,17 | 0,24 | 0,7149044 | 0,81442  |
| RP11-326L2.1    | 0,33 | 0,24 | 0,57 | 1,10 | 0,7149614 | 0,81442  |
| CRAT            | 2,54 | 0,79 | 1,69 | 3,49 | 0,7149786 | 0,81442  |
| RP11-481E4.2    | 0,37 | 0,36 | 0,36 | 0,36 | 0,7149855 | 0,81442  |
| PDE12           | 1,56 | 1,24 | 1,46 | 1,56 | 0,7149898 | 0,81442  |
| RNU6-151P       | 0,00 | 0,00 | 0,00 | 0,00 | 0,7150417 | 0,81442  |
| IVL             | 0,00 | 0,00 | 0,00 | 0,00 | 0,7150487 | NA       |
| STAG3L3         | 4,49 | 4,42 | 4,20 | 4,01 | 0,7150517 | 0,81442  |
| RP11-395G17.1   | 0,00 | 0,00 | 0,00 | 0,00 | 0,7150763 | NA       |
| RNU6-531P       | 0,00 | 0,00 | 0,00 | 0,00 | 0,7150771 | 0,81442  |
| RNU6-1310P      | 0,00 | 0,00 | 0,00 | 0,00 | 0,7150909 | NA       |
| NEK1            | 3,45 | 3,19 | 2,95 | 3,02 | 0,7152313 | 0,81452  |
| KIF15           | 0,00 | 0,48 | 0,00 | 0,17 | 0,7152382 | 0,81452  |
| PENK            | 0,00 | 0,00 | 0,00 | 0,00 | 0,7152878 | NA       |
| AC023797.1      | 0,00 | 0,00 | 0,00 | 0,00 | 0,7153782 | NA       |
| RP3-399L15.3    | 1,04 | 1,55 | 2,38 | 1,27 | 0,7154866 | 0,814761 |
| RP11-675P14.2   | 0,60 | 0,63 | 0,73 | 0,00 | 0,7155791 | 0,814825 |
| RNU6ATAC9P      | 0,00 | 0,00 | 0,00 | 0,00 | 0,7155914 | NA       |
| MIR6087         | 0,00 | 0,00 | 0,00 | 3,32 | 0,7156377 | NA       |
| ANKRD34B        | 0,00 | 0,00 | 0,00 | 0,00 | 0,7156396 | NA       |
| RP11-660M5.1    | 0,00 | 4,18 | 0,74 | 0,00 | 0,7157086 | 0,814904 |
| RP11-460N20.5   | 0,00 | 0,00 | 0,00 | 0,00 | 0,7157201 | NA       |
| TOM1L2          | 1,75 | 1,35 | 1,84 | 2,06 | 0,715735  | 0,814904 |
| RNU6-534P       | 0,00 | 0,00 | 0,00 | 0,00 | 0,7157464 | NA       |
| OR2T10          | 0,00 | 0,00 | 0,00 | 0,07 | 0,715759  | 0,814904 |
| RP11-252A4.2    | 0,00 | 0,00 | 0,00 | 0,00 | 0,7157729 | NA       |
| PCDHGC5         | 0,00 | 0,05 | 0,00 | 0,00 | 0,7158116 | NA       |
| ADGRL1          | 0,03 | 0,03 | 0,11 | 0,43 | 0,7158733 | 0,814964 |
| RP11-863P13.6   | 0,00 | 0,00 | 0,00 | 0,00 | 0,7158808 | NA       |
| TNFSF12-TNFSF13 | 0,00 | 3,79 | 1,57 | 4,48 | 0,7158848 | 0,814964 |
| RP11-815J4.6    | 0,00 | 0,00 | 0,00 | 0,00 | 0,7161101 | NA       |
| AC012513.4      | 0,00 | 0,00 | 0,00 | 0,00 | 0,716225  | NA       |
| RP11-874G11.1   | 0,00 | 0,00 | 0,00 | 0,79 | 0,7162289 | 0,815276 |
| OR2A5           | 1,43 | 1,49 | 1,30 | 1,26 | 0,7162424 | 0,815276 |
| CTD-2207A17.1   | 0,00 | 0,06 | 0,00 | 0,05 | 0,7162693 | 0,815276 |
| RP11-113C12.2   | 0,00 | 0,00 | 0,00 | 0,00 | 0,7163188 | NA       |
| RP11-362I1.1    | 0,00 | 0,30 | 0,00 | 0,00 | 0,7163422 | NA       |
| NPIP6           | 0,41 | 0,91 | 0,60 | 0,00 | 0,7163503 | 0,815327 |
| RP1-292L20.3    | 0,00 | 0,00 | 0,00 | 0,00 | 0,7164264 | NA       |
| ARHGAP36        | 0,00 | 0,00 | 0,00 | 0,00 | 0,7164737 | NA       |
| RP11-326A13.3   | 0,00 | 0,00 | 0,00 | 0,00 | 0,7165303 | NA       |
| AGR3            | 0,00 | 0,00 | 0,00 | 0,00 | 0,7165861 | NA       |
| RP11-152N13.16  | 0,00 | 0,00 | 0,00 | 0,00 | 0,7165925 | 0,815459 |
| EXOSC10         | 4,46 | 4,33 | 4,50 | 4,19 | 0,7166643 | 0,815459 |
| RP11-559M23.1   | 0,00 | 0,00 | 0,00 | 0,00 | 0,7167073 | 0,815459 |
| CCHCR1          | 2,22 | 1,31 | 2,59 | 2,55 | 0,7167076 | 0,815459 |
| RNGTT           | 3,67 | 1,91 | 3,06 | 1,04 | 0,7167123 | 0,815459 |

|                |      |      |      |      |           |          |
|----------------|------|------|------|------|-----------|----------|
| TJP1           | 1,83 | 0,70 | 1,67 | 0,45 | 0,7167417 | 0,815459 |
| ELMOD1         | 0,06 | 0,16 | 0,09 | 0,11 | 0,7167548 | 0,815459 |
| BCL2L15        | 0,24 | 0,03 | 0,15 | 0,26 | 0,7167602 | 0,815459 |
| RP11-238O13.1  | 0,00 | 0,00 | 0,00 | 0,00 | 0,7168826 | NA       |
| RNU6-701P      | 0,00 | 0,00 | 0,00 | 0,00 | 0,7169252 | NA       |
| RP1-76B20.11   | 0,00 | 0,00 | 0,00 | 0,00 | 0,7169382 | NA       |
| TPP2           | 4,53 | 4,17 | 4,89 | 4,08 | 0,7170051 | 0,815696 |
| RP11-161I2.1   | 0,00 | 0,00 | 0,00 | 0,00 | 0,717148  | NA       |
| ZNF707         | 1,25 | 0,60 | 0,89 | 1,18 | 0,7171709 | 0,815825 |
| MIR3174        | 0,00 | 0,00 | 0,00 | 0,00 | 0,7171825 | NA       |
| RP11-1280N14.3 | 0,00 | 0,00 | 0,00 | 0,00 | 0,7171922 | 0,815825 |
| KLRC4-KLRK1    | 0,00 | 0,13 | 0,00 | 0,37 | 0,7172324 | 0,815829 |
| LILRP1         | 0,00 | 0,00 | 0,00 | 0,00 | 0,7173212 | NA       |
| GPR173         | 0,03 | 0,13 | 0,01 | 0,03 | 0,7173365 | 0,815906 |
| RNASP442       | 0,00 | 0,00 | 0,00 | 0,00 | 0,7174652 | NA       |
| RP11-707P20.1  | 0,00 | 0,00 | 0,00 | 0,00 | 0,7176078 | NA       |
| FAM47E-STBD1   | 0,09 | 0,11 | 0,06 | 0,13 | 0,717611  | 0,816176 |
| LUM            | 0,00 | 0,00 | 0,00 | 0,00 | 0,7176769 | NA       |
| HOXA5          | 0,42 | 0,75 | 0,35 | 0,58 | 0,7177336 | 0,816274 |
| RP11-277E18.2  | 0,00 | 0,00 | 0,00 | 0,00 | 0,7177922 | NA       |
| RP11-320N21.2  | 0,90 | 0,24 | 0,41 | 0,62 | 0,7178164 | 0,816327 |
| RP11-467L19.7  | 0,00 | 0,00 | 0,00 | 0,00 | 0,7178696 | NA       |
| HPN            | 0,27 | 0,59 | 0,43 | 0,07 | 0,7178832 | 0,816357 |
| RNF24          | 4,50 | 2,07 | 3,82 | 2,82 | 0,7179296 | 0,816357 |
| IQSEC1         | 3,83 | 3,47 | 3,82 | 3,66 | 0,7179536 | 0,816357 |
| RP11-373D23.2  | 6,88 | 6,45 | 6,83 | 5,70 | 0,7180126 | 0,816382 |
| RNU6-126P      | 0,00 | 0,00 | 0,00 | 0,00 | 0,7180327 | NA       |
| RET            | 0,00 | 0,03 | 0,00 | 0,00 | 0,7180947 | NA       |
| ZNF616         | 0,34 | 0,97 | 0,57 | 1,39 | 0,7180956 | 0,816382 |
| ALDH7A1        | 2,45 | 2,35 | 1,90 | 2,88 | 0,7181096 | 0,816382 |
| RP11-710M11.1  | 0,00 | 0,00 | 0,00 | 0,00 | 0,718115  | NA       |
| CEP120         | 2,27 | 0,68 | 1,09 | 2,28 | 0,7182008 | 0,816382 |
| AFMID          | 4,27 | 2,74 | 4,61 | 3,78 | 0,7182079 | 0,816382 |
| ACO06116.12    | 0,00 | 0,52 | 0,41 | 0,00 | 0,7182215 | 0,816382 |
| CTD-2007H13.3  | 0,00 | 0,00 | 0,38 | 0,46 | 0,7182698 | 0,816382 |
| UCK1           | 1,30 | 4,31 | 3,28 | 0,92 | 0,7182789 | 0,816382 |
| CDKN2B         | 0,00 | 0,00 | 0,00 | 0,00 | 0,7183389 | 0,816382 |
| SPINT1         | 4,80 | 4,54 | 4,62 | 3,52 | 0,7183423 | 0,816382 |
| RP11-542G1.1   | 0,46 | 0,46 | 0,00 | 0,41 | 0,7184258 | 0,816416 |
| RP11-791J7.2   | 1,37 | 0,91 | 1,84 | 1,80 | 0,7184464 | 0,816416 |
| RNU7-84P       | 0,00 | 0,00 | 0,00 | 0,00 | 0,7186082 | 0,816558 |
| CTD-3116E22.7  | 0,37 | 0,32 | 0,49 | 0,01 | 0,7186858 | 0,816605 |
| RP11-701H24.5  | 0,00 | 0,00 | 0,00 | 0,69 | 0,7187915 | 0,816653 |
| SUDS3          | 2,71 | 2,98 | 2,45 | 1,86 | 0,7188015 | 0,816653 |
| AP000692.10    | 0,00 | 0,21 | 0,00 | 0,00 | 0,7188104 | NA       |
| RP1-59D14.5    | 0,00 | 0,00 | 0,00 | 0,00 | 0,7188237 | NA       |
| RP11-534G20.3  | 2,13 | 2,60 | 3,44 | 3,08 | 0,7188745 | 0,816694 |
| PRADC1         | 3,30 | 0,79 | 2,22 | 3,50 | 0,7189643 | 0,816754 |
| ZBP2           | 0,44 | 0,67 | 0,32 | 0,00 | 0,7190601 | 0,816821 |
| AC104534.3     | 0,00 | 0,00 | 0,00 | 0,00 | 0,7191054 | 0,816826 |
| NGRN           | 3,66 | 0,53 | 2,86 | 2,15 | 0,7191824 | 0,816826 |
| RP11-755F10.1  | 0,00 | 0,00 | 0,00 | 0,00 | 0,7191959 | 0,816826 |
| MTFR1L         | 5,20 | 3,14 | 4,94 | 2,62 | 0,7192116 | 0,816826 |
| FAM25G         | 0,00 | 0,00 | 0,00 | 0,00 | 0,719219  | NA       |
| RP11-543F8.2   | 0,00 | 0,00 | 0,08 | 0,99 | 0,7193373 | 0,816928 |

|                  |      |      |      |      |           |          |
|------------------|------|------|------|------|-----------|----------|
| AC112217.2       | 0,57 | 0,71 | 0,68 | 0,53 | 0,7194292 | 0,81699  |
| RP11-64C12.2     | 0,00 | 0,00 | 0,00 | 0,00 | 0,7196478 | NA       |
| MIR491           | 0,00 | 0,00 | 0,00 | 0,00 | 0,7196704 | NA       |
| SMOX             | 3,05 | 3,12 | 3,21 | 1,34 | 0,7197128 | 0,81727  |
| LIPC             | 1,12 | 0,52 | 0,89 | 0,55 | 0,7198111 | 0,817339 |
| SNORD38C         | 0,00 | 0,00 | 0,00 | 0,00 | 0,7198362 | NA       |
| RP11-727F15.12   | 0,00 | 0,00 | 0,00 | 0,21 | 0,7198471 | 0,817339 |
| RP11-613D13.8    | 0,00 | 0,20 | 0,00 | 0,00 | 0,7198512 | NA       |
| HIST1H2BPS2      | 0,00 | 0,00 | 0,00 | 0,00 | 0,7199612 | NA       |
| RP11-179A16.1    | 0,31 | 0,35 | 0,38 | 0,32 | 0,7199675 | 0,817434 |
| CTD-2228K2.1     | 0,00 | 0,00 | 0,00 | 0,00 | 0,7200859 | NA       |
| RP11-398K22.9    | 0,00 | 0,00 | 0,00 | 0,00 | 0,7201143 | NA       |
| RP1-101A2.1      | 0,00 | 0,00 | 0,00 | 0,00 | 0,7201563 | 0,817561 |
| GRXCR2           | 0,00 | 0,00 | 0,00 | 0,00 | 0,7201626 | NA       |
| FRG1B            | 1,32 | 0,00 | 0,47 | 0,27 | 0,7201844 | 0,817561 |
| CAHM             | 2,08 | 0,63 | 1,25 | 1,90 | 0,7201892 | 0,817561 |
| RP11-305O6.4     | 0,72 | 0,00 | 2,33 | 0,23 | 0,7202321 | 0,817568 |
| SNORD101         | 0,00 | 0,00 | 0,00 | 0,00 | 0,7203292 | NA       |
| AC078843.2       | 0,00 | 0,00 | 0,00 | 0,00 | 0,7203953 | NA       |
| RP11-800A3.4     | 0,00 | 0,08 | 0,00 | 0,00 | 0,7204334 | 0,817754 |
| CTD-2311M21.2    | 1,99 | 2,31 | 1,78 | 2,09 | 0,7204784 | 0,817764 |
| MTAP             | 4,16 | 4,21 | 3,83 | 3,50 | 0,7205536 | 0,817791 |
| RP11-732A21.2    | 0,24 | 0,46 | 0,17 | 0,27 | 0,7205761 | 0,817791 |
| RNU2-6P          | 0,00 | 0,00 | 0,00 | 0,00 | 0,7206348 | NA       |
| RP11-436D23.1    | 0,72 | 0,73 | 0,42 | 0,84 | 0,7208003 | 0,818004 |
| RP11-809O17.1    | 3,85 | 4,14 | 3,63 | 2,93 | 0,7208667 | 0,818035 |
| RN7SL341P        | 0,00 | 0,00 | 0,00 | 0,00 | 0,7208793 | NA       |
| CTD-2574D22.4    | 0,07 | 0,30 | 0,10 | 0,14 | 0,7209012 | 0,818035 |
| LLOXNC01-237H1.3 | 0,00 | 0,00 | 0,00 | 0,00 | 0,7209067 | NA       |
| RP11-497H16.5    | 0,00 | 0,00 | 0,00 | 0,00 | 0,7210508 | NA       |
| SLC22A7          | 0,00 | 0,00 | 0,00 | 0,00 | 0,7210607 | NA       |
| RP11-862P13.1    | 0,00 | 0,00 | 0,00 | 0,39 | 0,7211067 | 0,818226 |
| AC005154.6       | 5,99 | 5,76 | 5,80 | 6,03 | 0,721187  | 0,818276 |
| CTD-2302E22.4    | 0,00 | 0,00 | 0,00 | 0,00 | 0,7212    | NA       |
| KIF21B           | 0,45 | 0,37 | 0,33 | 0,12 | 0,721296  | 0,818357 |
| CNOT6L           | 3,77 | 3,11 | 3,42 | 2,82 | 0,721419  | 0,818455 |
| RP11-209D20.2    | 0,00 | 0,00 | 0,00 | 0,00 | 0,7214707 | NA       |
| RP4-683L5.1      | 0,00 | 0,00 | 0,00 | 0,00 | 0,7214782 | NA       |
| CTC-527H23.1     | 0,00 | 0,00 | 0,00 | 0,00 | 0,721524  | NA       |
| OR8D4            | 0,12 | 0,09 | 0,10 | 0,12 | 0,7216078 | 0,818611 |
| IGHV1OR15-1      | 0,00 | 0,00 | 0,00 | 0,00 | 0,7216086 | NA       |
| RP11-294C11.4    | 0,00 | 0,00 | 0,00 | 0,00 | 0,7216086 | NA       |
| RP11-251A15.4    | 0,00 | 0,00 | 0,00 | 0,00 | 0,7216333 | NA       |
| ACOT8            | 4,81 | 2,27 | 3,85 | 3,74 | 0,7216539 | 0,818611 |
| ZNF334           | 0,00 | 0,00 | 0,05 | 0,10 | 0,7216666 | 0,818611 |
| ZNF10            | 3,69 | 5,22 | 3,04 | 0,67 | 0,7217393 | 0,818612 |
| INAFM2           | 3,67 | 4,02 | 3,19 | 2,91 | 0,7217413 | 0,818612 |
| SHCBP1L          | 0,00 | 0,00 | 0,00 | 0,00 | 0,721827  | NA       |
| RP4-583P15.14    | 1,02 | 0,99 | 0,99 | 0,77 | 0,7219558 | 0,818813 |
| RP11-365D9.1     | 0,00 | 0,00 | 0,00 | 0,00 | 0,722021  | NA       |
| RP11-733C7.2     | 1,93 | 2,30 | 2,45 | 2,59 | 0,7220723 | 0,818855 |
| RP11-197K3.1     | 0,17 | 0,34 | 0,00 | 0,00 | 0,7220988 | 0,818855 |
| RP11-481J2.1     | 1,28 | 1,91 | 0,74 | 1,43 | 0,7221113 | 0,818855 |
| RBBP6            | 5,23 | 4,75 | 5,63 | 5,06 | 0,7221609 | 0,818855 |
| RP11-13N13.5     | 2,87 | 3,26 | 3,01 | 2,62 | 0,7221781 | 0,818855 |

|                  |      |      |      |      |           |          |
|------------------|------|------|------|------|-----------|----------|
| RP11-661A12.5    | 0,00 | 0,00 | 0,00 | 0,00 | 0,7222132 | 0,818855 |
| RP11-213G2.1     | 0,00 | 0,00 | 0,00 | 0,00 | 0,7222757 | NA       |
| RPS12P21         | 0,00 | 0,00 | 0,00 | 0,00 | 0,7222787 | NA       |
| TAP1             | 6,36 | 5,80 | 6,18 | 6,20 | 0,722303  | 0,818915 |
| ZNF33A           | 4,68 | 4,80 | 4,23 | 3,95 | 0,7223582 | 0,818935 |
| DENND1C          | 3,49 | 2,58 | 2,92 | 2,65 | 0,7224261 | 0,818971 |
| BSPRY            | 0,08 | 0,18 | 0,43 | 0,11 | 0,7225101 | 0,81899  |
| C15orf54         | 0,00 | 0,00 | 0,00 | 0,00 | 0,7225137 | NA       |
| RNU6-428P        | 0,00 | 0,00 | 0,00 | 0,00 | 0,7225159 | NA       |
| RP11-399K21.11   | 1,06 | 0,66 | 0,00 | 0,00 | 0,7225233 | 0,81899  |
| ADSL             | 6,08 | 5,97 | 5,68 | 4,37 | 0,7225591 | 0,81899  |
| PAFAH2           | 2,09 | 0,58 | 1,64 | 1,61 | 0,7225905 | 0,81899  |
| RP11-893F2.14    | 0,00 | 0,00 | 0,00 | 0,00 | 0,7227908 | NA       |
| RP4-604G5.1      | 0,00 | 0,00 | 0,00 | 0,00 | 0,7228723 | NA       |
| IL15RA           | 0,52 | 1,37 | 0,35 | 0,20 | 0,7229223 | 0,819324 |
| GLE1             | 3,31 | 3,34 | 2,66 | 2,68 | 0,7229617 | 0,819327 |
| RP11-39C10.1     | 0,00 | 0,00 | 0,00 | 0,06 | 0,7229914 | NA       |
| C12orf79         | 3,92 | 4,17 | 3,85 | 4,76 | 0,7230988 | 0,819359 |
| RNF139           | 5,13 | 4,94 | 4,80 | 3,90 | 0,7231448 | 0,819359 |
| GCKR             | 1,11 | 1,80 | 1,32 | 1,48 | 0,723151  | 0,819359 |
| LIG3             | 2,48 | 1,93 | 2,35 | 2,07 | 0,7231788 | 0,819359 |
| RP11-277P12.6    | 0,00 | 0,00 | 0,00 | 0,00 | 0,7232153 | 0,819359 |
| RP5-884C9.4      | 0,00 | 0,09 | 0,00 | 0,00 | 0,7232641 | NA       |
| CTD-3051D23.1    | 0,03 | 0,04 | 0,00 | 0,07 | 0,7232668 | 0,819359 |
| ACO12370.3       | 0,70 | 0,74 | 0,91 | 1,15 | 0,7232713 | 0,819359 |
| PPCDC            | 3,79 | 0,39 | 4,31 | 3,95 | 0,7232891 | 0,819359 |
| ADAL             | 2,08 | 1,50 | 1,56 | 3,39 | 0,7233217 | 0,819359 |
| CLDN16           | 0,00 | 0,04 | 0,02 | 0,04 | 0,723389  | NA       |
| RP11-454K7.1     | 0,00 | 0,00 | 0,00 | 0,00 | 0,7234025 | NA       |
| LIN9             | 0,00 | 0,00 | 0,00 | 0,04 | 0,7234808 | 0,819497 |
| RP11-253A20.1    | 0,00 | 0,00 | 0,00 | 0,28 | 0,7236112 | 0,819603 |
| TRIM32           | 0,00 | 0,00 | 0,00 | 0,00 | 0,7236304 | NA       |
| LL22NC03-N64E9.1 | 0,00 | 0,00 | 0,00 | 0,00 | 0,7237636 | NA       |
| MIR497HG         | 0,26 | 0,19 | 0,27 | 0,29 | 0,7237789 | 0,819752 |
| STX19            | 0,00 | 0,00 | 0,00 | 0,00 | 0,7238057 | NA       |
| RP11-450K4.1     | 0,00 | 0,00 | 0,00 | 0,00 | 0,7238374 | 0,819776 |
| AC007319.1       | 0,00 | 0,00 | 0,00 | 0,00 | 0,7238383 | NA       |
| DUX4L17          | 0,00 | 0,00 | 0,00 | 0,13 | 0,723899  | NA       |
| NPW              | 0,00 | 0,00 | 0,00 | 0,00 | 0,7239229 | 0,819831 |
| LVRN             | 0,00 | 0,00 | 0,00 | 0,00 | 0,7239815 | NA       |
| RF00191          | 0,00 | 0,00 | 0,00 | 0,00 | 0,7241278 | NA       |
| CDRT1            | 0,00 | 0,10 | 0,00 | 0,00 | 0,7241808 | NA       |
| LYG1             | 0,00 | 0,00 | 0,00 | 0,88 | 0,7241836 | 0,820062 |
| OSGEP            | 5,87 | 5,44 | 5,96 | 5,42 | 0,7242005 | 0,820062 |
| RP11-475I24.8    | 0,00 | 0,00 | 0,00 | 0,00 | 0,7242518 | NA       |
| RP11-303E16.7    | 0,10 | 0,29 | 0,17 | 0,71 | 0,7243262 | 0,820147 |
| CBX7             | 0,10 | 0,36 | 0,34 | 0,66 | 0,7243492 | 0,820147 |
| RP11-605F22.2    | 0,00 | 0,44 | 0,00 | 0,00 | 0,7243889 | NA       |
| AP001465.5       | 0,00 | 3,29 | 0,00 | 0,00 | 0,7244888 | 0,820197 |
| KIF17            | 1,46 | 3,86 | 0,99 | 0,07 | 0,7245157 | 0,820197 |
| COIL             | 2,46 | 1,45 | 2,54 | 2,13 | 0,7245171 | 0,820197 |
| RP11-165D6.1     | 0,00 | 0,00 | 0,00 | 0,00 | 0,7246163 | NA       |
| DMWD             | 1,39 | 1,88 | 1,59 | 2,01 | 0,7246235 | 0,820197 |
| RP11-726G23.12   | 0,00 | 0,00 | 0,00 | 0,00 | 0,7246332 | 0,820197 |
| RN7SL685P        | 0,00 | 0,00 | 0,00 | 0,00 | 0,7246411 | NA       |

|               |      |      |      |      |           |          |
|---------------|------|------|------|------|-----------|----------|
| BCAR1         | 0,00 | 0,00 | 0,00 | 0,00 | 0,7246521 | 0,820197 |
| ACMSD         | 0,00 | 0,00 | 0,00 | 0,00 | 0,7246618 | NA       |
| RP4-715N11.2  | 0,00 | 0,00 | 0,57 | 0,00 | 0,724731  | 0,820197 |
| RP11-744K17.8 | 0,00 | 0,00 | 0,00 | 0,00 | 0,7247327 | NA       |
| KIAA2026      | 3,69 | 2,22 | 3,70 | 3,70 | 0,7247499 | 0,820197 |
| SLC13A1       | 0,00 | 0,00 | 0,00 | 0,00 | 0,724751  | NA       |
| CTD-2655K5.1  | 0,00 | 0,00 | 0,00 | 0,00 | 0,7247764 | NA       |
| RP11-187A9.3  | 1,32 | 0,64 | 1,55 | 0,72 | 0,7247927 | 0,820197 |
| BCAP31        | 6,95 | 6,60 | 6,76 | 6,13 | 0,7247967 | 0,820197 |
| RP11-304M2.3  | 0,00 | 0,00 | 0,00 | 0,18 | 0,7247998 | 0,820197 |
| RP11-178C10.4 | 0,00 | 0,00 | 0,00 | 0,00 | 0,7249477 | NA       |
| DEPDC4        | 0,22 | 0,50 | 0,21 | 0,43 | 0,7250531 | 0,820442 |
| KLHDC3        | 4,44 | 4,61 | 4,80 | 4,09 | 0,7250922 | 0,820445 |
| RP11-430C7.2  | 0,00 | 0,00 | 0,00 | 0,00 | 0,7251627 | NA       |
| RP11-204M4.2  | 0,00 | 0,24 | 0,00 | 0,95 | 0,7251977 | 0,8205   |
| TAOK3         | 6,88 | 5,99 | 6,51 | 5,68 | 0,7252152 | 0,8205   |
| RP11-73K9.3   | 0,00 | 0,00 | 0,00 | 0,00 | 0,7253217 | NA       |
| ATF7IP        | 5,17 | 3,57 | 5,03 | 4,16 | 0,7253681 | 0,820631 |
| RP11-160H22.5 | 0,96 | 0,96 | 1,33 | 1,14 | 0,7254393 | 0,82067  |
| TMEM186       | 1,11 | 2,17 | 1,22 | 0,72 | 0,7255385 | 0,820741 |
| NUDT17        | 0,61 | 0,52 | 0,77 | 0,44 | 0,7256222 | 0,820794 |
| RN7SL4P       | 0,00 | 0,00 | 0,00 | 0,00 | 0,7257675 | 0,820888 |
| RP11-690J15.1 | 0,00 | 0,00 | 0,00 | 0,00 | 0,7257797 | 0,820888 |
| PSMG1         | 4,46 | 2,27 | 4,68 | 4,71 | 0,7258213 | 0,820894 |
| AC004870.3    | 0,00 | 0,00 | 0,00 | 0,00 | 0,7259031 | NA       |
| RP11-244M2.1  | 0,00 | 0,00 | 0,00 | 0,00 | 0,7259297 | NA       |
| ADAMTS14      | 0,00 | 0,00 | 0,00 | 0,02 | 0,726032  | NA       |
| CRYGB         | 0,00 | 0,00 | 0,00 | 0,00 | 0,7261022 | NA       |
| RP11-19P22.3  | 0,00 | 0,00 | 0,00 | 0,00 | 0,7261022 | NA       |
| RP11-550I24.2 | 1,64 | 0,90 | 1,60 | 2,56 | 0,7261963 | 0,821276 |
| RP11-134L10.1 | 0,00 | 0,00 | 0,00 | 0,00 | 0,726235  | NA       |
| RP11-395I6.3  | 0,19 | 1,28 | 0,00 | 0,26 | 0,7262387 | 0,821282 |
| RP11-287D1.3  | 0,00 | 0,00 | 0,00 | 0,00 | 0,7262971 | NA       |
| RP11-1277A3.1 | 0,29 | 0,00 | 0,29 | 0,08 | 0,7263066 | 0,821317 |
| RP11-214L19.1 | 0,00 | 0,00 | 0,00 | 0,00 | 0,7263481 | NA       |
| SBF1          | 2,33 | 3,54 | 2,97 | 2,02 | 0,726531  | 0,821529 |
| RP11-15I11.3  | 0,00 | 0,00 | 0,00 | 0,00 | 0,7266233 | NA       |
| MAF           | 0,05 | 0,27 | 0,25 | 0,57 | 0,726641  | 0,821612 |
| LRRC42        | 1,31 | 0,00 | 1,07 | 0,36 | 0,7267306 | 0,821671 |
| DAPK3         | 0,00 | 0,00 | 0,00 | 0,00 | 0,7268708 | 0,821788 |
| MIR548AC      | 0,00 | 0,00 | 1,63 | 0,00 | 0,7269805 | 0,82187  |
| MBP           | 5,48 | 5,27 | 5,48 | 4,96 | 0,7270533 | 0,82191  |
| CTD-2380F24.1 | 0,00 | 0,00 | 0,00 | 0,00 | 0,7270963 | NA       |
| RNU2-7P       | 0,00 | 0,00 | 0,00 | 0,00 | 0,7271672 | NA       |
| HCG14         | 0,00 | 0,00 | 0,00 | 0,56 | 0,7272238 | 0,822061 |
| RN7SL585P     | 0,00 | 0,08 | 0,00 | 0,00 | 0,7272555 | NA       |
| AIRN          | 0,00 | 0,00 | 0,00 | 0,00 | 0,727301  | NA       |
| RP5-1189D6.1  | 0,00 | 0,00 | 0,00 | 0,00 | 0,7273379 | 0,822149 |
| ATP5EP2       | 0,00 | 0,00 | 0,00 | 0,00 | 0,7274301 | NA       |
| AC097713.4    | 0,00 | 0,00 | 0,00 | 0,00 | 0,7274322 | NA       |
| RP1-92O14.6   | 0,00 | 0,00 | 0,00 | 0,00 | 0,727456  | NA       |
| RP11-613M10.9 | 0,00 | 0,00 | 0,00 | 0,00 | 0,7274637 | 0,822249 |
| GOLGA8K       | 0,09 | 0,03 | 0,00 | 0,07 | 0,7275806 | 0,822332 |
| CRK           | 4,23 | 4,36 | 4,26 | 3,74 | 0,7276112 | 0,822332 |
| RP11-17L5.2   | 0,00 | 0,00 | 0,00 | 0,00 | 0,7276222 | NA       |



|                  |      |      |      |      |           |          |
|------------------|------|------|------|------|-----------|----------|
| AC098817.2       | 0,00 | 0,00 | 0,00 | 0,00 | 0,7276814 | NA       |
| UBXN2A           | 2,94 | 1,78 | 2,54 | 2,36 | 0,7276955 | 0,822385 |
| NOX1             | 0,00 | 0,00 | 0,00 | 0,00 | 0,7277799 | NA       |
| Xxbac-B476C20.18 | 0,00 | 0,00 | 0,00 | 0,00 | 0,7279389 | NA       |
| TAS2R15          | 0,00 | 0,00 | 0,00 | 0,00 | 0,727944  | NA       |
| LRRN2            | 0,05 | 0,08 | 0,07 | 0,03 | 0,7279833 | 0,822642 |
| TRIM41           | 2,29 | 1,32 | 1,71 | 1,97 | 0,7279967 | 0,822642 |
| STXBP3           | 4,94 | 5,02 | 4,87 | 4,71 | 0,728058  | 0,82267  |
| RP3-471M13.2     | 0,00 | 0,00 | 0,00 | 0,00 | 0,7281095 | NA       |
| AC093110.3       | 0,00 | 0,00 | 0,00 | 0,00 | 0,7282213 | NA       |
| RP11-768B22.2    | 0,07 | 0,22 | 0,02 | 0,06 | 0,7282957 | 0,82286  |
| CDKN1B           | 3,88 | 3,92 | 3,75 | 3,23 | 0,7283288 | 0,82286  |
| RP11-243M5.2     | 0,00 | 0,00 | 0,06 | 0,15 | 0,7283389 | 0,82286  |
| RP11-436I9.6     | 0,00 | 0,00 | 0,00 | 0,00 | 0,7283414 | NA       |
| RP11-558O12.1    | 0,00 | 0,00 | 0,00 | 0,00 | 0,7283434 | NA       |
| MTHFSD           | 1,04 | 3,93 | 1,05 | 0,96 | 0,7283743 | 0,82286  |
| AC116366.5       | 0,00 | 0,00 | 0,00 | 0,00 | 0,7283922 | NA       |
| MIR429           | 0,00 | 0,00 | 0,00 | 0,00 | 0,728449  | NA       |
| AC087163.3       | 0,00 | 0,00 | 0,00 | 0,00 | 0,7284924 | NA       |
| RP11-374M1.4     | 0,00 | 0,00 | 0,00 | 0,00 | 0,7284939 | NA       |
| NBPF11           | 2,81 | 2,68 | 1,53 | 1,19 | 0,728507  | 0,822968 |
| PEX11A           | 0,34 | 0,63 | 0,31 | 0,46 | 0,7286704 | 0,823111 |
| RN7SL290P        | 0,00 | 0,00 | 0,00 | 0,00 | 0,7288255 | NA       |
| RP11-589M4.3     | 0,40 | 0,00 | 0,00 | 0,00 | 0,728857  | 0,823279 |
| PXDN             | 0,00 | 0,85 | 0,00 | 0,00 | 0,728996  | NA       |
| RP11-25I15.2     | 0,28 | 0,76 | 0,39 | 0,77 | 0,7290218 | 0,823424 |
| RP11-651P23.2    | 0,00 | 0,00 | 0,00 | 0,00 | 0,7290235 | NA       |
| RN7SL505P        | 0,00 | 0,00 | 0,00 | 0,95 | 0,7290776 | NA       |
| RP11-354H21.2    | 0,00 | 0,00 | 0,00 | 0,00 | 0,729186  | NA       |
| ADGRV1           | 2,37 | 3,24 | 1,84 | 2,48 | 0,7291901 | 0,823572 |
| RP11-99J16_A.2   | 0,00 | 0,00 | 0,00 | 0,00 | 0,7293622 | NA       |
| KB-1592A4.15     | 0,00 | 0,23 | 0,00 | 0,03 | 0,7293697 | 0,823601 |
| ARFIP1           | 4,00 | 3,53 | 3,83 | 3,12 | 0,7293739 | 0,823601 |
| MIR4298          | 0,00 | 0,00 | 0,00 | 0,00 | 0,7293837 | NA       |
| PPP2CB           | 4,22 | 3,21 | 4,04 | 3,49 | 0,7294136 | 0,823601 |
| DOK1             | 2,02 | 1,78 | 2,29 | 3,46 | 0,7294391 | 0,823601 |
| RP11-297C4.1     | 0,00 | 0,41 | 0,44 | 0,31 | 0,7294428 | 0,823601 |
| AC005017.2       | 0,00 | 0,00 | 0,00 | 0,00 | 0,7294737 | NA       |
| RSAD2            | 2,78 | 0,90 | 3,52 | 3,02 | 0,7295315 | 0,823601 |
| DDTL             | 0,09 | 0,00 | 0,11 | 0,09 | 0,7295394 | 0,823601 |
| NTHL1            | 3,79 | 2,70 | 2,88 | 3,57 | 0,7295476 | 0,823601 |
| INTS4P1          | 0,52 | 0,04 | 0,13 | 0,39 | 0,7295492 | 0,823601 |
| WDR74            | 6,07 | 5,66 | 5,91 | 5,82 | 0,7296026 | 0,823619 |
| RP11-486I19.2    | 0,61 | 0,39 | 0,64 | 0,69 | 0,7296923 | 0,823679 |
| RP11-689B22.2    | 0,00 | 0,32 | 0,00 | 0,00 | 0,7297284 | NA       |
| RP11-571I18.5    | 0,00 | 0,00 | 0,04 | 0,10 | 0,7298156 | 0,823776 |
| GOLGA6B          | 0,00 | 0,00 | 0,00 | 0,00 | 0,7298965 | NA       |
| TCEA1            | 5,49 | 3,32 | 5,18 | 4,92 | 0,7299012 | 0,823831 |
| RP11-70P17.1     | 0,00 | 0,00 | 0,00 | 0,00 | 0,7299689 | NA       |
| AC012065.6       | 0,00 | 0,00 | 0,00 | 0,00 | 0,7300041 | NA       |
| RP11-544L8_B.4   | 0,00 | 0,00 | 0,00 | 0,00 | 0,7300536 | NA       |
| DCAF10           | 3,50 | 1,95 | 3,20 | 2,35 | 0,730071  | 0,82397  |
| RP11-298A18.1    | 0,00 | 0,00 | 0,00 | 0,00 | 0,7300985 | 0,82397  |
| CHD1L            | 5,47 | 4,83 | 5,41 | 4,04 | 0,730245  | 0,824093 |
| RP11-496N12.9    | 0,00 | 0,00 | 0,00 | 0,00 | 0,7302474 | NA       |

|               |      |      |      |      |           |          |
|---------------|------|------|------|------|-----------|----------|
| RN7SL570P     | 0,00 | 0,00 | 0,00 | 0,00 | 0,730301  | NA       |
| MYO1E         | 5,69 | 4,42 | 5,12 | 5,12 | 0,7303698 | 0,824192 |
| RP11-21M24.3  | 0,00 | 0,57 | 0,00 | 0,00 | 0,73038   | NA       |
| RP11-274J7.3  | 0,00 | 0,00 | 0,00 | 0,00 | 0,7303843 | NA       |
| RP11-809N8.4  | 2,10 | 1,89 | 2,43 | 1,75 | 0,7304795 | 0,824274 |
| KARSP3        | 0,00 | 0,00 | 0,00 | 0,00 | 0,7305277 | NA       |
| GPS1          | 5,98 | 6,17 | 5,91 | 5,92 | 0,7305458 | 0,824307 |
| TRBV25-1      | 0,00 | 0,00 | 0,00 | 0,00 | 0,7305901 | NA       |
| HIST1H1D      | 4,27 | 3,81 | 3,83 | 3,67 | 0,7306202 | 0,824349 |
| FOXO1         | 2,54 | 2,12 | 2,71 | 2,66 | 0,7306587 | 0,824351 |
| OXCT1         | 2,64 | 2,85 | 2,04 | 2,04 | 0,7306997 | 0,824355 |
| RP11-268F1.3  | 0,00 | 0,00 | 0,00 | 0,00 | 0,7307291 | NA       |
| ACO34220.3    | 1,62 | 1,03 | 1,93 | 1,31 | 0,73088   | 0,824517 |
| RP5-1077I2.3  | 0,00 | 0,00 | 0,00 | 0,00 | 0,7309281 | NA       |
| PTMAP1        | 0,00 | 0,00 | 0,00 | 0,00 | 0,7309282 | NA       |
| IGHV3-43      | 0,00 | 0,55 | 0,00 | 0,00 | 0,7310437 | NA       |
| E2F4          | 5,18 | 4,83 | 4,70 | 4,34 | 0,7311095 | 0,824734 |
| STOX2         | 0,00 | 0,01 | 0,00 | 0,00 | 0,7311505 | NA       |
| IGLJCOR18     | 0,00 | 0,00 | 0,00 | 0,00 | 0,7312039 | NA       |
| IGLV5-37      | 0,00 | 0,00 | 0,00 | 0,00 | 0,7312054 | NA       |
| RP11-983P16.2 | 0,82 | 1,33 | 0,96 | 1,58 | 0,7313412 | 0,824923 |
| CTA-254O6.1   | 0,00 | 0,00 | 0,14 | 0,07 | 0,7313515 | 0,824923 |
| NUB1          | 4,92 | 3,46 | 4,70 | 4,04 | 0,7314006 | 0,824937 |
| STMN1P1       | 0,00 | 0,00 | 0,00 | 0,00 | 0,7314298 | NA       |
| SNORD116-21   | 0,00 | 0,00 | 0,00 | 0,00 | 0,731449  | NA       |
| RN7SL65P      | 0,00 | 0,00 | 0,00 | 0,00 | 0,7314531 | NA       |
| ASCC3         | 4,38 | 4,44 | 3,82 | 2,83 | 0,7315172 | 0,825026 |
| SNORA27       | 0,00 | 0,00 | 0,00 | 0,00 | 0,7315567 | NA       |
| FOXF1         | 0,00 | 0,00 | 0,00 | 0,00 | 0,7315979 | NA       |
| U2AF1L5       | 6,09 | 5,76 | 6,15 | 5,95 | 0,731599  | 0,825077 |
| IQUB          | 0,00 | 0,00 | 0,00 | 0,00 | 0,7316589 | NA       |
| RF00212       | 0,00 | 0,00 | 0,00 | 0,00 | 0,7316964 | NA       |
| RP11-484H12.6 | 0,00 | 0,00 | 0,00 | 0,00 | 0,7317345 | 0,825188 |
| RP11-327L3.4  | 0,00 | 0,00 | 0,00 | 0,00 | 0,7317569 | NA       |
| AP000347.4    | 0,00 | 0,00 | 0,00 | 0,00 | 0,7317638 | NA       |
| CTNNA3        | 0,00 | 0,00 | 0,00 | 0,00 | 0,7317767 | NA       |
| RP11-843B15.1 | 0,00 | 0,00 | 0,00 | 0,00 | 0,7317783 | NA       |
| ZFAND5        | 7,22 | 6,70 | 7,50 | 7,02 | 0,731788  | 0,825206 |
| SCAMP1        | 3,57 | 1,96 | 3,18 | 2,13 | 0,7318467 | 0,825231 |
| CMBL          | 0,38 | 0,44 | 0,43 | 0,20 | 0,7318985 | 0,825247 |
| AC007182.6    | 0,00 | 0,00 | 0,00 | 0,00 | 0,7319768 | NA       |
| MIR576        | 0,00 | 0,00 | 0,00 | 0,00 | 0,7319829 | 0,8253   |
| LRTM1         | 0,67 | 0,95 | 0,81 | 1,28 | 0,7320434 | 0,825327 |
| SPAG16        | 1,51 | 0,88 | 0,92 | 1,17 | 0,7321973 | 0,82545  |
| WDR18         | 5,14 | 2,86 | 5,63 | 5,76 | 0,7322352 | 0,82545  |
| ZNF337        | 2,53 | 0,63 | 1,24 | 0,95 | 0,732264  | 0,82545  |
| RN7SL231P     | 0,00 | 0,00 | 0,00 | 0,00 | 0,7323256 | NA       |
| ATP6V1E2      | 0,25 | 0,28 | 0,27 | 2,22 | 0,732383  | 0,825486 |
| ARHGFE2       | 3,99 | 3,54 | 3,99 | 3,62 | 0,7323955 | 0,825486 |
| TMEM42        | 5,10 | 5,70 | 4,67 | 1,79 | 0,732408  | 0,825486 |
| RP11-113K21.4 | 0,00 | 0,00 | 0,00 | 0,00 | 0,732459  | NA       |
| PPIG          | 6,40 | 5,98 | 6,14 | 6,06 | 0,7325432 | 0,825597 |
| SLC2A13       | 0,01 | 0,75 | 0,30 | 0,34 | 0,7326471 | 0,825639 |
| RNU7-45P      | 0,00 | 0,00 | 0,00 | 0,00 | 0,732655  | 0,825639 |
| RP11-799P8.1  | 0,00 | 0,00 | 0,00 | 0,00 | 0,7327259 | NA       |

|               |      |      |      |      |           |          |
|---------------|------|------|------|------|-----------|----------|
| NUDCD3        | 3,86 | 4,55 | 3,89 | 3,02 | 0,7327676 | 0,825724 |
| AC011330.13   | 0,00 | 0,32 | 0,00 | 0,29 | 0,7329056 | 0,825838 |
| HNRNPUL1      | 4,90 | 4,87 | 5,08 | 4,72 | 0,732982  | 0,825882 |
| OR2H4P        | 0,00 | 0,00 | 0,00 | 0,00 | 0,7330261 | NA       |
| ADGRA2        | 0,00 | 0,04 | 0,00 | 0,00 | 0,7330771 | NA       |
| ETHE1         | 7,21 | 6,85 | 7,15 | 5,80 | 0,7330841 | 0,825932 |
| RFX8          | 0,00 | 0,00 | 0,00 | 0,00 | 0,7331101 | NA       |
| RP5-849H19.2  | 0,00 | 0,00 | 0,00 | 0,00 | 0,733123  | NA       |
| CD70          | 0,00 | 0,34 | 0,00 | 0,00 | 0,7331372 | 0,825932 |
| TAF1L         | 0,00 | 0,04 | 0,00 | 0,02 | 0,7331378 | 0,825932 |
| C22orf34      | 2,85 | 0,95 | 1,03 | 0,81 | 0,7332111 | 0,825973 |
| TRAM2         | 0,69 | 0,97 | 0,47 | 0,24 | 0,7333116 | 0,826028 |
| SECISBP2      | 5,25 | 5,22 | 4,93 | 3,94 | 0,7333612 | 0,826028 |
| RGS9          | 0,89 | 2,43 | 0,93 | 0,70 | 0,7333718 | 0,826028 |
| RYKP1         | 0,00 | 0,00 | 0,00 | 0,00 | 0,7334105 | NA       |
| AC073264.10   | 0,00 | 0,53 | 0,00 | 0,00 | 0,7334595 | NA       |
| PIGC          | 4,42 | 0,58 | 3,80 | 3,82 | 0,7336049 | 0,826249 |
| RP11-452D12.1 | 0,00 | 0,00 | 0,00 | 0,00 | 0,7336081 | NA       |
| RN7SL445P     | 0,00 | 0,00 | 0,00 | 0,55 | 0,7336756 | NA       |
| IGKV1OR10-1   | 0,00 | 0,00 | 0,00 | 0,00 | 0,7336781 | NA       |
| RP11-54O7.18  | 0,00 | 0,00 | 0,00 | 0,00 | 0,7337345 | NA       |
| RP11-117J13.1 | 0,00 | 0,00 | 0,00 | 0,00 | 0,7337683 | NA       |
| RP11-501E24.3 | 0,00 | 0,00 | 0,00 | 0,00 | 0,7337752 | NA       |
| CEACAM4       | 4,59 | 2,69 | 4,65 | 2,80 | 0,7338479 | 0,826481 |
| CTD-2544L4.1  | 0,00 | 0,00 | 0,00 | 0,00 | 0,7338939 | NA       |
| RP11-347C12.8 | 0,00 | 0,00 | 0,00 | 0,00 | 0,7339247 | NA       |
| RP11-148B18.1 | 0,20 | 0,00 | 0,25 | 0,53 | 0,7339374 | 0,82654  |
| GRXCR1        | 0,00 | 0,00 | 0,00 | 0,00 | 0,7339675 | NA       |
| RPSAP58       | 0,55 | 1,29 | 0,85 | 0,84 | 0,7340404 | 0,826572 |
| WWP1          | 3,68 | 2,23 | 3,09 | 3,28 | 0,7340406 | 0,826572 |
| RP11-307O13.1 | 0,00 | 0,00 | 0,00 | 0,00 | 0,7340434 | NA       |
| RP11-21K12.3  | 0,00 | 0,00 | 0,00 | 0,00 | 0,7340815 | NA       |
| OR56A3        | 0,00 | 0,00 | 0,00 | 0,00 | 0,7341442 | NA       |
| MRPL16        | 6,90 | 6,14 | 6,32 | 6,78 | 0,734182  | 0,826675 |
| RP11-537H15.5 | 0,00 | 0,00 | 0,00 | 0,00 | 0,7342115 | NA       |
| LDLRAP1       | 1,26 | 1,35 | 0,52 | 1,37 | 0,734225  | 0,826675 |
| RP1-303A1.2   | 0,00 | 0,00 | 0,00 | 0,00 | 0,734233  | NA       |
| POLN          | 0,51 | 0,57 | 0,42 | 0,75 | 0,7342443 | 0,826675 |
| PGS1          | 4,32 | 2,18 | 3,96 | 3,77 | 0,7342806 | 0,826675 |
| RP11-745O10.4 | 0,00 | 0,00 | 0,00 | 0,00 | 0,7342917 | NA       |
| RP11-490N5.2  | 0,00 | 0,07 | 0,00 | 0,00 | 0,7342917 | NA       |
| RP11-883G14.1 | 0,00 | 0,00 | 0,00 | 0,00 | 0,7344002 | NA       |
| NLRP7         | 0,00 | 0,00 | 0,00 | 0,05 | 0,7344163 | NA       |
| IGLV2-5       | 0,00 | 1,49 | 0,00 | 0,00 | 0,7344798 | NA       |
| AC007040.8    | 0,00 | 0,00 | 0,00 | 0,00 | 0,7345045 | NA       |
| DSG1          | 0,00 | 0,00 | 0,00 | 0,00 | 0,7345131 | NA       |
| TSPAN18       | 0,00 | 1,14 | 0,00 | 0,12 | 0,7345762 | 0,82695  |
| NPM1P14       | 0,00 | 0,00 | 0,00 | 0,16 | 0,7346143 | NA       |
| FBXL6         | 2,33 | 0,52 | 2,89 | 2,22 | 0,734636  | 0,82695  |
| RP11-383C5.4  | 0,00 | 1,54 | 0,00 | 0,00 | 0,7346364 | 0,82695  |
| FCHO1         | 3,50 | 3,99 | 3,90 | 3,19 | 0,734686  | 0,826964 |
| MTRNR2L11     | 0,00 | 0,00 | 0,00 | 0,09 | 0,7347615 | NA       |
| CH507-39O4.2  | 0,00 | 0,00 | 0,00 | 0,00 | 0,7347681 | NA       |
| MIR24-2       | 0,00 | 0,00 | 0,00 | 0,00 | 0,7348345 | NA       |
| RPL7AP10      | 0,00 | 0,00 | 0,00 | 0,00 | 0,7348397 | NA       |

|                |      |      |      |      |           |          |
|----------------|------|------|------|------|-----------|----------|
| AC092162.1     | 0,00 | 0,00 | 0,00 | 0,03 | 0,7348437 | 0,827099 |
| SF3A2          | 0,48 | 0,69 | 0,41 | 0,89 | 0,7349202 | 0,82711  |
| ARPIN          | 2,18 | 2,82 | 1,79 | 2,16 | 0,7349279 | 0,82711  |
| CDC42          | 8,14 | 8,27 | 8,09 | 7,52 | 0,7349918 | 0,82714  |
| C20orf191      | 0,00 | 0,00 | 0,00 | 0,00 | 0,7350412 | NA       |
| CTD-2318B16.3  | 0,00 | 0,00 | 0,00 | 0,00 | 0,7350491 | NA       |
| RP4-591C20.9   | 0,00 | 0,16 | 0,02 | 0,63 | 0,7351146 | 0,827237 |
| RP11-348N5.7   | 0,00 | 0,00 | 0,00 | 0,00 | 0,7352225 | NA       |
| RP11-488L18.3  | 0,00 | 0,00 | 0,00 | 0,00 | 0,7352263 | NA       |
| RP11-579D7.2   | 0,00 | 0,00 | 0,00 | 0,00 | 0,7352308 | NA       |
| IFNLR1         | 0,00 | 0,06 | 0,00 | 0,00 | 0,7352622 | NA       |
| RP11-1084A12.1 | 0,00 | 0,00 | 0,00 | 0,00 | 0,7352671 | 0,827322 |
| RP11-809N8.2   | 3,43 | 1,41 | 3,42 | 2,40 | 0,7352698 | 0,827322 |
| TERF2          | 2,93 | 2,97 | 2,93 | 2,13 | 0,7353018 | 0,827322 |
| RP11-453E17.3  | 0,00 | 0,00 | 0,00 | 0,00 | 0,7355476 | NA       |
| RP11-473M10.3  | 0,00 | 0,00 | 0,00 | 0,00 | 0,7356637 | NA       |
| RP11-258F1.2   | 0,00 | 0,15 | 0,00 | 0,00 | 0,7356941 | NA       |
| RP11-114F3.4   | 0,00 | 0,00 | 0,00 | 0,12 | 0,7357207 | NA       |
| RP11-686D22.10 | 0,00 | 0,00 | 0,00 | 0,00 | 0,7357342 | NA       |
| TMLHE          | 3,73 | 2,91 | 3,50 | 2,83 | 0,735878  | 0,827928 |
| DPY19L2P1      | 0,03 | 0,05 | 0,11 | 0,15 | 0,735938  | 0,827954 |
| RP11-257K9.2   | 0,00 | 0,00 | 0,00 | 0,00 | 0,7359536 | NA       |
| IGHV3-69-1     | 0,00 | 0,72 | 0,00 | 0,00 | 0,7360188 | NA       |
| ERGIC2         | 4,97 | 5,64 | 4,53 | 3,98 | 0,7360505 | 0,828038 |
| RP11-887P2.6   | 0,00 | 0,00 | 0,00 | 0,00 | 0,7362443 | NA       |
| KB-1042C11.5   | 0,06 | 0,22 | 0,00 | 0,16 | 0,7362529 | 0,828224 |
| DGKG           | 2,10 | 2,22 | 1,39 | 1,35 | 0,7363175 | 0,828238 |
| SLX1B          | 5,10 | 4,22 | 4,40 | 5,21 | 0,7363728 | 0,828238 |
| KDM1A          | 4,34 | 4,59 | 3,90 | 2,83 | 0,7363771 | 0,828238 |
| RP11-490D19.8  | 0,00 | 1,11 | 0,00 | 0,00 | 0,7364016 | NA       |
| RP11-384C4.3   | 0,00 | 0,00 | 0,00 | 0,00 | 0,7364871 | 0,82832  |
| LINC00595      | 0,07 | 0,40 | 0,24 | 0,04 | 0,7365388 | 0,828323 |
| KLHL5          | 4,49 | 4,71 | 3,93 | 4,15 | 0,7365642 | 0,828323 |
| FKBP10         | 0,00 | 0,00 | 0,00 | 0,00 | 0,7365721 | NA       |
| TRAV12-3       | 0,00 | 0,00 | 0,00 | 0,00 | 0,736581  | NA       |
| DDX23          | 4,16 | 2,58 | 4,18 | 2,43 | 0,7366905 | 0,828403 |
| RP11-115C21.2  | 0,80 | 0,64 | 0,77 | 1,07 | 0,7367107 | 0,828403 |
| AC093802.1     | 0,64 | 1,30 | 0,45 | 0,60 | 0,7368266 | 0,828481 |
| DIAPH3         | 0,04 | 0,05 | 0,10 | 0,21 | 0,7368544 | 0,828481 |
| RNU7-10P       | 0,00 | 0,00 | 0,00 | 0,00 | 0,7369479 | NA       |
| FAM189A2       | 0,00 | 0,00 | 0,00 | 0,03 | 0,7369558 | 0,828498 |
| TMEM132A       | 0,25 | 0,45 | 0,69 | 0,56 | 0,7369672 | 0,828498 |
| RP11-249M12.2  | 0,00 | 0,35 | 0,29 | 0,27 | 0,7369812 | 0,828498 |
| RP11-350G8.7   | 0,00 | 0,00 | 0,00 | 0,00 | 0,7369978 | NA       |
| CTC-296K1.3    | 0,00 | 0,00 | 0,00 | 0,00 | 0,7370193 | NA       |
| RP11-295K2.3   | 0,00 | 0,00 | 0,00 | 0,00 | 0,7370336 | 0,828515 |
| RP11-144G6.13  | 0,00 | 0,00 | 0,00 | 0,00 | 0,7370492 | NA       |
| RF00432        | 3,14 | 3,72 | 2,29 | 2,62 | 0,7372345 | 0,828699 |
| RP11-1280N14.4 | 0,00 | 0,00 | 0,00 | 0,00 | 0,7372993 | 0,82873  |
| LY6G6C         | 0,00 | 0,00 | 0,00 | 0,00 | 0,737364  | NA       |
| LRRC37A        | 1,48 | 1,09 | 1,49 | 0,60 | 0,7373927 | 0,828771 |
| CTB-151G24.1   | 1,93 | 1,60 | 2,24 | 0,00 | 0,7374179 | 0,828771 |
| RP11-515B12.1  | 0,00 | 0,00 | 0,00 | 0,00 | 0,7374449 | NA       |
| LRRN4CL        | 0,09 | 0,11 | 0,05 | 0,14 | 0,7374477 | 0,828771 |
| RP11-177C12.1  | 0,00 | 0,00 | 0,00 | 0,00 | 0,7374491 | NA       |

|                 |      |      |      |      |           |          |
|-----------------|------|------|------|------|-----------|----------|
| MAP7D3          | 2,40 | 2,48 | 1,52 | 2,61 | 0,7374861 | 0,828772 |
| AC010894.3      | 0,00 | 0,00 | 0,00 | 0,00 | 0,7375184 | NA       |
| AC073610.5      | 0,00 | 0,00 | 0,00 | 0,13 | 0,7375279 | NA       |
| FCHSD2          | 4,19 | 3,64 | 3,92 | 3,74 | 0,7376497 | 0,828914 |
| AC093838.4      | 1,70 | 0,68 | 1,22 | 0,96 | 0,7377392 | 0,828973 |
| TNK1            | 0,00 | 0,00 | 0,00 | 0,00 | 0,7377963 | NA       |
| CRTAC1          | 0,00 | 0,00 | 0,00 | 0,00 | 0,7379    | NA       |
| AL449209.1      | 2,44 | 0,36 | 2,01 | 1,01 | 0,737909  | 0,829055 |
| RP11-442N24_B.1 | 0,35 | 0,78 | 0,00 | 0,00 | 0,7379222 | 0,829055 |
| CFAP157         | 0,00 | 0,00 | 0,01 | 0,10 | 0,7379533 | 0,829055 |
| NF2             | 3,42 | 3,15 | 3,22 | 2,55 | 0,7379615 | 0,829055 |
| ANKRD34A        | 0,00 | 0,07 | 0,00 | 0,00 | 0,7380291 | 0,82907  |
| GJC3            | 0,00 | 0,14 | 0,00 | 0,25 | 0,7380494 | 0,82907  |
| RP11-686D16.2   | 0,00 | 0,00 | 0,00 | 0,00 | 0,7380599 | NA       |
| RP11-560I1.2    | 0,00 | 0,00 | 0,00 | 0,00 | 0,7383374 | NA       |
| RP11-311B18.1   | 0,00 | 0,00 | 0,00 | 0,00 | 0,7383414 | 0,829341 |
| ZNF354A         | 2,85 | 2,62 | 3,12 | 2,12 | 0,7383796 | 0,829341 |
| RP11-486A14.1   | 0,00 | 0,82 | 0,07 | 0,15 | 0,7384046 | 0,829341 |
| RP11-114F10.2   | 0,00 | 1,09 | 0,31 | 0,00 | 0,7384668 | 0,829341 |
| MPP1            | 5,16 | 3,86 | 5,19 | 4,84 | 0,7385132 | 0,829341 |
| RP11-493E12.1   | 0,00 | 0,00 | 0,00 | 0,00 | 0,7385144 | 0,829341 |
| CTC-444N24.9    | 0,00 | 0,00 | 0,00 | 0,00 | 0,7386067 | NA       |
| PEX11B          | 4,44 | 3,53 | 2,76 | 3,44 | 0,7386707 | 0,829435 |
| MTMR3           | 2,63 | 2,81 | 3,11 | 3,02 | 0,7386732 | 0,829435 |
| RP11-160E2.21   | 0,00 | 0,00 | 0,00 | 0,00 | 0,7386929 | NA       |
| RP11-460E7.8    | 0,00 | 1,76 | 0,00 | 0,00 | 0,7387234 | 0,829444 |
| AC005307.1      | 0,06 | 0,10 | 0,04 | 0,08 | 0,7387557 | 0,829444 |
| RP11-130L8.1    | 0,00 | 0,00 | 0,00 | 0,00 | 0,7389697 | NA       |
| RP11-141B14.2   | 0,26 | 2,02 | 0,80 | 0,50 | 0,7389993 | 0,829676 |
| PHLPP1          | 2,19 | 2,05 | 1,83 | 1,64 | 0,7390687 | 0,829712 |
| RP11-608O21.1   | 0,00 | 0,00 | 0,00 | 0,00 | 0,7390919 | NA       |
| LLNLR-285B5.1   | 0,00 | 0,00 | 0,00 | 0,00 | 0,7391355 | NA       |
| VPS18           | 1,99 | 2,47 | 1,78 | 1,19 | 0,7392593 | 0,829852 |
| HSD17B10        | 7,63 | 7,14 | 7,38 | 7,66 | 0,7392681 | 0,829852 |
| RP11-159G9.4    | 0,00 | 0,00 | 0,00 | 0,00 | 0,7392902 | NA       |
| ACAP2           | 6,73 | 6,98 | 6,55 | 5,84 | 0,7394333 | 0,829932 |
| DYRK3           | 0,00 | 0,00 | 0,00 | 0,07 | 0,7394948 | 0,829932 |
| RP11-923I11.4   | 0,15 | 0,12 | 0,00 | 0,00 | 0,7394949 | 0,829932 |
| TDRD9           | 0,83 | 0,31 | 0,61 | 1,44 | 0,7395    | 0,829932 |
| BCL2A1          | 5,94 | 5,81 | 5,63 | 4,33 | 0,7395262 | 0,829932 |
| RP11-78A19.3    | 7,01 | 5,53 | 6,77 | 6,17 | 0,7395709 | 0,82994  |
| RNU6-308P       | 0,00 | 0,00 | 0,00 | 0,00 | 0,7396166 | NA       |
| RP11-115H15.1   | 0,00 | 0,00 | 0,00 | 0,00 | 0,7396322 | NA       |
| RP11-149J18.1   | 0,00 | 0,00 | 0,00 | 0,00 | 0,7396516 | NA       |
| AC125238.3      | 0,00 | 0,00 | 0,00 | 0,00 | 0,7397065 | NA       |
| THAP6           | 2,12 | 2,98 | 2,71 | 2,84 | 0,7397112 | 0,830056 |
| RP11-341D18.8   | 0,00 | 0,00 | 0,00 | 0,00 | 0,7397138 | NA       |
| PSMB3           | 9,27 | 9,05 | 9,14 | 9,01 | 0,739833  | 0,83015  |
| KCNH1           | 0,70 | 1,22 | 0,97 | 0,95 | 0,7398739 | 0,830154 |
| RP11-394O2.3    | 0,00 | 0,00 | 0,00 | 0,00 | 0,7399442 | 0,830191 |
| RP11-282O18.3   | 1,59 | 2,39 | 1,43 | 2,12 | 0,7400753 | 0,830296 |
| RNU1-94P        | 0,00 | 0,00 | 0,00 | 0,00 | 0,7400998 | NA       |
| CETN4P          | 0,08 | 0,15 | 0,14 | 0,22 | 0,7401335 | 0,83032  |
| CWC27           | 4,90 | 3,83 | 4,27 | 3,70 | 0,7401711 | 0,83032  |
| RP11-552D8.1    | 0,00 | 0,00 | 0,00 | 0,00 | 0,7402119 | NA       |

|                |      |      |      |      |           |          |
|----------------|------|------|------|------|-----------|----------|
| RPL10P14       | 0,00 | 0,00 | 0,00 | 0,00 | 0,7402521 | NA       |
| FSTL4          | 0,00 | 0,00 | 0,00 | 0,00 | 0,7402864 | NA       |
| DHRX           | 4,98 | 5,34 | 4,81 | 3,56 | 0,7404731 | 0,830617 |
| FAS            | 3,87 | 2,77 | 3,03 | 2,51 | 0,7405101 | 0,830617 |
| RP1-41C23.2    | 0,00 | 0,00 | 0,00 | 0,00 | 0,7405284 | NA       |
| RP11-351J23.1  | 0,00 | 0,00 | 0,00 | 0,00 | 0,7405677 | NA       |
| SNHG1          | 6,46 | 5,55 | 6,02 | 5,71 | 0,7406705 | 0,830755 |
| AC007792.1     | 0,00 | 0,00 | 0,00 | 0,00 | 0,7407207 | NA       |
| RP11-46H11.12  | 0,00 | 0,00 | 0,00 | 0,00 | 0,7407228 | NA       |
| C17orf62       | 6,57 | 6,17 | 6,16 | 5,65 | 0,7408784 | 0,830946 |
| AC004980.8     | 0,00 | 0,00 | 0,00 | 0,00 | 0,7409322 | NA       |
| RALB           | 4,55 | 4,81 | 4,40 | 3,90 | 0,7409697 | 0,831006 |
| AC069213.4     | 0,00 | 0,00 | 0,00 | 0,00 | 0,7410332 | NA       |
| AC005037.4     | 0,00 | 0,00 | 0,00 | 0,00 | 0,7410644 | 0,831071 |
| RP11-573G6.4   | 0,00 | 0,00 | 0,00 | 0,00 | 0,7411419 | NA       |
| PRIMA1         | 0,00 | 0,00 | 0,00 | 0,00 | 0,7411614 | NA       |
| RP11-196G18.3  | 0,00 | 0,00 | 0,00 | 0,00 | 0,7411793 | NA       |
| RP11-95M15.2   | 0,00 | 0,00 | 0,00 | 0,00 | 0,7412301 | NA       |
| FEM1AP2        | 0,00 | 0,00 | 0,00 | 0,00 | 0,7412564 | NA       |
| RP11-38O23.5   | 0,00 | 0,12 | 0,00 | 0,00 | 0,7412586 | 0,831122 |
| RP11-1006G14.4 | 1,95 | 0,00 | 1,06 | 1,58 | 0,7412725 | 0,831122 |
| RP1-138A5.1    | 0,00 | 0,00 | 0,00 | 0,19 | 0,7413126 | NA       |
| RP5-905H7.11   | 0,00 | 0,00 | 0,00 | 0,01 | 0,7413582 | NA       |
| PFN1P8         | 2,72 | 1,85 | 1,30 | 2,08 | 0,7414248 | 0,831309 |
| MAP2K2         | 5,18 | 5,42 | 5,36 | 5,69 | 0,7414331 | 0,831309 |
| RP11-210K20.5  | 0,00 | 0,00 | 0,00 | 0,00 | 0,7414718 | 0,831309 |
| ADGRG1         | 2,45 | 1,53 | 1,69 | 1,78 | 0,7415091 | 0,831309 |
| RP11-65J3.2    | 0,00 | 0,00 | 0,00 | 0,00 | 0,7415391 | 0,831309 |
| CTB-31N19.3    | 2,24 | 3,04 | 3,95 | 2,85 | 0,7416149 | 0,831352 |
| GORASP2        | 4,57 | 3,80 | 3,85 | 4,06 | 0,7417069 | 0,831396 |
| GALNT4         | 1,36 | 0,17 | 1,17 | 1,30 | 0,741729  | 0,831396 |
| RP11-520D19.1  | 0,00 | 0,00 | 0,00 | 0,00 | 0,741766  | NA       |
| CH507-254M2.1  | 0,00 | 0,00 | 0,00 | 0,00 | 0,7417693 | NA       |
| PHKG2          | 5,74 | 5,81 | 5,78 | 5,55 | 0,7418327 | 0,831465 |
| TOP3B          | 1,31 | 2,11 | 2,54 | 2,46 | 0,7418651 | 0,831465 |
| RP11-20B24.7   | 0,00 | 0,00 | 0,00 | 0,00 | 0,741966  | NA       |
| CTC-339D2.1    | 0,00 | 0,00 | 0,00 | 0,00 | 0,7420606 | NA       |
| WDR4           | 2,38 | 0,83 | 1,52 | 0,46 | 0,7421874 | 0,831784 |
| ARL14          | 0,00 | 0,00 | 0,00 | 0,00 | 0,742207  | NA       |
| ZNF776         | 2,37 | 2,56 | 2,36 | 2,53 | 0,7422883 | 0,831855 |
| B3GAT3         | 3,42 | 3,69 | 3,74 | 4,35 | 0,7424583 | 0,831996 |
| KCNK1          | 0,00 | 0,00 | 0,00 | 0,00 | 0,7425151 | 0,831996 |
| ITPKB          | 2,42 | 1,30 | 1,89 | 1,55 | 0,7425575 | 0,831996 |
| GZF1           | 3,10 | 3,79 | 3,21 | 3,26 | 0,7425853 | 0,831996 |
| ZAR1L          | 0,00 | 0,00 | 0,00 | 0,00 | 0,7426012 | 0,831996 |
| RP11-72M17.1   | 1,62 | 0,00 | 1,37 | 0,13 | 0,7426771 | 0,832007 |
| CH507-24F1.1   | 0,00 | 0,00 | 0,00 | 0,00 | 0,7426872 | NA       |
| RF00573        | 0,00 | 0,00 | 0,00 | 0,00 | 0,7427118 | NA       |
| AP001628.6     | 0,00 | 0,00 | 0,00 | 0,00 | 0,7427189 | 0,832007 |
| EPHA10         | 0,06 | 0,02 | 0,06 | 0,00 | 0,7427234 | 0,832007 |
| FUT8           | 3,36 | 3,89 | 1,91 | 2,47 | 0,7427929 | 0,832043 |
| RP11-452N17.1  | 0,00 | 0,00 | 0,00 | 0,00 | 0,7429989 | NA       |
| PDS5A          | 4,85 | 4,51 | 4,38 | 4,14 | 0,7430503 | 0,832252 |
| ARL3           | 1,60 | 2,38 | 1,92 | 0,84 | 0,7430542 | 0,832252 |
| DCUN1D1        | 4,05 | 3,52 | 3,12 | 2,68 | 0,7431282 | 0,832293 |

|               |      |      |      |      |           |          |
|---------------|------|------|------|------|-----------|----------|
| RN7SL497P     | 0,00 | 0,00 | 0,00 | 0,00 | 0,7431339 | NA       |
| RP11-154H17.1 | 1,00 | 1,11 | 0,90 | 0,86 | 0,7431871 | 0,832317 |
| RP11-404F10.6 | 0,00 | 0,00 | 0,00 | 0,00 | 0,7432453 | NA       |
| RARG          | 0,94 | 0,80 | 1,79 | 1,39 | 0,7432797 | 0,832379 |
| HMGB1L1       | 0,21 | 0,00 | 0,00 | 0,27 | 0,7433668 | NA       |
| RN7SL677P     | 0,00 | 1,05 | 0,00 | 0,00 | 0,7435332 | NA       |
| SCARA3        | 0,00 | 0,00 | 0,00 | 0,00 | 0,7435665 | NA       |
| AC073310.3    | 0,00 | 0,00 | 0,00 | 0,00 | 0,7435852 | NA       |
| DEFB108P1     | 0,00 | 0,00 | 0,00 | 0,00 | 0,7435852 | NA       |
| RN7SKP140     | 0,00 | 0,00 | 0,00 | 0,00 | 0,7435852 | NA       |
| RP11-468J21.2 | 0,00 | 0,00 | 0,00 | 0,00 | 0,7435852 | NA       |
| RP11-15J10.1  | 0,00 | 0,00 | 0,00 | 2,90 | 0,743604  | 0,8327   |
| RNU12         | 5,53 | 5,58 | 5,44 | 5,32 | 0,7436464 | 0,832706 |
| PAR3          | 0,00 | 0,06 | 0,00 | 0,00 | 0,7436983 | 0,832722 |
| SDHAP3        | 0,00 | 0,00 | 0,00 | 0,00 | 0,7437428 | NA       |
| CTD-2207O23.3 | 0,00 | 1,01 | 0,00 | 1,15 | 0,7438192 | 0,832766 |
| CCDC144C      | 2,02 | 2,29 | 2,11 | 1,66 | 0,7438489 | 0,832766 |
| AF064858.6    | 0,07 | 0,00 | 0,00 | 0,02 | 0,7438501 | 0,832766 |
| RP11-582E3.6  | 1,38 | 2,51 | 2,22 | 0,66 | 0,7438888 | 0,832767 |
| SNORA1B       | 0,00 | 0,00 | 0,00 | 0,00 | 0,7439509 | NA       |
| XAGE1A        | 0,00 | 0,00 | 0,00 | 0,00 | 0,7439589 | NA       |
| CLCC1         | 3,85 | 3,43 | 2,76 | 3,32 | 0,7440115 | 0,832863 |
| RP11-10J18.3  | 0,00 | 0,00 | 0,00 | 0,00 | 0,7440153 | NA       |
| AC135966.1    | 0,00 | 0,00 | 0,00 | 0,00 | 0,7440744 | NA       |
| RP11-56P9.5   | 0,00 | 0,00 | 0,00 | 0,00 | 0,7442254 | NA       |
| ZNF414        | 0,85 | 1,20 | 1,14 | 1,60 | 0,7442949 | 0,833138 |
| AP002381.2    | 0,00 | 0,00 | 0,00 | 0,00 | 0,7444122 | 0,833227 |
| RP11-124N3.3  | 0,00 | 0,28 | 0,00 | 0,00 | 0,744432  | NA       |
| RRP8          | 3,96 | 1,69 | 3,41 | 1,71 | 0,7444738 | 0,833254 |
| FIGLA         | 0,00 | 0,00 | 0,00 | 0,00 | 0,7444761 | NA       |
| VIL1          | 0,07 | 0,11 | 0,11 | 0,73 | 0,7446052 | 0,833359 |
| KRT26         | 0,00 | 0,00 | 0,00 | 0,00 | 0,7447139 | NA       |
| RP11-523H20.5 | 0,97 | 1,25 | 0,81 | 0,70 | 0,7449088 | 0,833628 |
| RP4-784A16.5  | 0,00 | 0,00 | 0,00 | 2,32 | 0,7449391 | 0,833628 |
| USP8P         | 0,00 | 0,00 | 0,00 | 0,00 | 0,7449427 | NA       |
| RNU6-1127P    | 0,00 | 0,00 | 0,00 | 0,00 | 0,7450049 | 0,833628 |
| CYTH3         | 0,16 | 0,36 | 0,61 | 0,45 | 0,7450164 | 0,833628 |
| AC005229.5    | 0,00 | 0,00 | 0,00 | 0,00 | 0,7450201 | NA       |
| COLQ          | 0,00 | 0,09 | 0,00 | 0,05 | 0,7450331 | 0,833628 |
| CTD-2587M23.1 | 0,00 | 0,00 | 0,00 | 0,00 | 0,7450932 | NA       |
| SYF2          | 5,84 | 4,78 | 5,36 | 5,56 | 0,7451525 | 0,83372  |
| RP11-77P3.1   | 0,00 | 0,00 | 0,00 | 0,00 | 0,7451885 | NA       |
| RP5-870F10.1  | 0,00 | 0,00 | 0,00 | 0,00 | 0,7451933 | NA       |
| ZFAND4        | 0,48 | 1,25 | 1,10 | 1,29 | 0,7452051 | 0,833737 |
| RPS11P5       | 0,35 | 0,00 | 0,42 | 0,41 | 0,7453696 | 0,833787 |
| NMT1          | 3,96 | 4,30 | 3,84 | 4,13 | 0,7454403 | 0,833787 |
| TOMM6         | 8,11 | 8,05 | 8,02 | 7,56 | 0,7454557 | 0,833787 |
| CMTM2         | 0,00 | 0,00 | 0,00 | 0,00 | 0,7454646 | 0,833787 |
| RECQL         | 3,79 | 3,19 | 3,22 | 3,18 | 0,7454673 | 0,833787 |
| RP11-410A13.1 | 0,00 | 0,00 | 0,00 | 0,00 | 0,7454747 | 0,833787 |
| RP11-162O12.2 | 0,00 | 0,00 | 0,00 | 0,00 | 0,7455182 | NA       |
| NBDY          | 5,84 | 4,64 | 5,42 | 5,46 | 0,7456105 | 0,833884 |
| LINC00324     | 3,72 | 2,53 | 2,91 | 2,14 | 0,7456365 | 0,833884 |
| AP000356.8    | 0,00 | 0,10 | 0,00 | 0,00 | 0,7457681 | NA       |
| ARHGEF17      | 0,06 | 0,00 | 0,01 | 0,00 | 0,7457898 | 0,83401  |

|                  |      |      |      |      |           |          |
|------------------|------|------|------|------|-----------|----------|
| RNU4-9P          | 0,00 | 0,00 | 0,00 | 0,00 | 0,7457913 | NA       |
| RPGRIP1L         | 0,70 | 0,95 | 1,18 | 1,61 | 0,7458249 | 0,83401  |
| CTD-2033D24.2    | 0,00 | 0,00 | 0,00 | 0,00 | 0,7460578 | NA       |
| RP11-39516.2     | 0,00 | 2,33 | 0,18 | 0,00 | 0,7462499 | 0,83442  |
| GABRA5           | 0,00 | 0,00 | 0,00 | 0,00 | 0,74627   | NA       |
| ABHD11           | 3,95 | 0,93 | 2,73 | 2,07 | 0,7463099 | 0,83442  |
| NUBPL            | 5,04 | 4,53 | 4,72 | 3,55 | 0,7463206 | 0,83442  |
| SNORD60          | 0,00 | 0,00 | 0,00 | 0,00 | 0,7463213 | NA       |
| RP11-229P13.22   | 1,22 | 0,84 | 1,36 | 2,46 | 0,7463416 | 0,83442  |
| RP11-339A7.1     | 0,38 | 0,77 | 0,45 | 0,00 | 0,746376  | NA       |
| RP11-152O14.1    | 0,00 | 0,00 | 0,00 | 0,00 | 0,7463918 | NA       |
| KB-176G8.1       | 0,16 | 0,00 | 0,12 | 0,16 | 0,7464046 | 0,834436 |
| CTD-2561F5.1     | 0,00 | 0,00 | 0,00 | 0,00 | 0,7464137 | NA       |
| XXbac-B562F10.10 | 0,00 | 0,12 | 0,00 | 0,51 | 0,7464309 | 0,834436 |
| RP11-49K4.1      | 0,00 | 0,00 | 0,00 | 0,85 | 0,7464386 | NA       |
| RP4-662A9.2      | 0,00 | 0,23 | 0,00 | 0,00 | 0,7465053 | NA       |
| RP11-548H18.2    | 0,11 | 0,19 | 0,11 | 0,25 | 0,746543  | 0,834497 |
| RBM41            | 3,24 | 1,80 | 2,42 | 2,55 | 0,7465606 | 0,834497 |
| RP11-243118.3    | 0,00 | 0,00 | 0,00 | 0,00 | 0,7465864 | NA       |
| RP11-74E22.5     | 0,00 | 0,00 | 0,00 | 0,00 | 0,7466175 | NA       |
| CTD-2587H24.10   | 0,00 | 0,00 | 0,00 | 0,00 | 0,7466211 | NA       |
| VAV2             | 0,75 | 0,42 | 0,89 | 0,86 | 0,7466321 | 0,834535 |
| RP11-358B23.1    | 0,00 | 0,52 | 0,00 | 0,00 | 0,7467031 | NA       |
| PTMAP5           | 0,09 | 0,14 | 0,00 | 0,12 | 0,7467394 | NA       |
| KIRREL3-AS2      | 0,00 | 0,00 | 0,00 | 0,00 | 0,7468092 | NA       |
| RP11-120A1.1     | 0,00 | 0,00 | 0,00 | 0,00 | 0,7468556 | NA       |
| PBX4             | 0,00 | 0,00 | 0,00 | 0,00 | 0,7468678 | 0,834703 |
| CCNB1IP1         | 5,02 | 4,15 | 4,66 | 3,39 | 0,7468688 | 0,834703 |
| RP11-76E17.3     | 0,77 | 0,55 | 0,00 | 0,44 | 0,7469207 | 0,834703 |
| CTB-43E15.4      | 1,95 | 2,45 | 1,86 | 1,58 | 0,7469543 | 0,834703 |
| CMTM8            | 0,00 | 0,00 | 0,11 | 0,00 | 0,74697   | 0,834703 |
| NLGN3            | 0,06 | 0,13 | 0,12 | 0,11 | 0,7470359 | 0,834735 |
| RP11-229A12.4    | 0,00 | 0,00 | 0,00 | 0,00 | 0,7470473 | NA       |
| PIWIL3           | 0,00 | 0,13 | 0,00 | 0,05 | 0,7470552 | NA       |
| RP4-800G7.1      | 0,00 | 0,00 | 0,00 | 0,00 | 0,747082  | NA       |
| RN7SL783P        | 0,00 | 0,00 | 0,00 | 0,00 | 0,7471545 | NA       |
| RP11-65B7.1      | 0,00 | 0,00 | 0,00 | 0,00 | 0,7472705 | NA       |
| RP11-199F11.1    | 0,00 | 0,53 | 0,00 | 0,00 | 0,7472812 | NA       |
| RP11-602N24.3    | 0,00 | 0,00 | 0,00 | 0,00 | 0,747311  | NA       |
| OR13G1           | 0,00 | 0,00 | 0,00 | 0,00 | 0,747402  | NA       |
| RP11-203H2.1     | 1,97 | 2,15 | 0,57 | 0,90 | 0,747424  | 0,835126 |
| PERP             | 0,00 | 0,03 | 0,00 | 0,03 | 0,7474995 | 0,835169 |
| LCN2             | 0,00 | 0,00 | 0,00 | 0,00 | 0,7475143 | NA       |
| ZNF319           | 0,03 | 0,06 | 0,09 | 0,36 | 0,7475783 | 0,835202 |
| ZNF330           | 4,79 | 3,13 | 5,08 | 3,87 | 0,747604  | 0,835202 |
| RP11-477B16.4    | 0,00 | 0,00 | 0,00 | 0,00 | 0,7476501 | NA       |
| CTD-3128G10.6    | 0,38 | 0,01 | 0,04 | 0,79 | 0,7476717 | 0,835235 |
| RNU6-742P        | 0,00 | 0,00 | 0,00 | 0,00 | 0,747722  | NA       |
| CBX2             | 0,00 | 0,00 | 0,00 | 0,00 | 0,7477582 | NA       |
| RP11-244J10.1    | 0,00 | 0,00 | 0,00 | 0,00 | 0,747853  | NA       |
| TNFRSF21         | 2,91 | 2,31 | 2,47 | 1,00 | 0,7479758 | 0,835533 |
| XAGE1B           | 0,00 | 0,00 | 0,00 | 0,00 | 0,7480468 | NA       |
| LA16c-17H1.3     | 0,00 | 0,00 | 0,00 | 0,00 | 0,7480998 | NA       |
| RN7SL863P        | 0,00 | 0,86 | 0,00 | 0,00 | 0,7481107 | 0,835642 |
| OR7E126P         | 0,00 | 0,00 | 0,00 | 0,00 | 0,7481656 | NA       |



|                |      |      |      |      |           |          |
|----------------|------|------|------|------|-----------|----------|
| RP11-536C10.6  | 0,00 | 0,10 | 0,04 | 0,00 | 0,7481799 | 0,835644 |
| LINC00467      | 1,99 | 1,56 | 1,03 | 1,92 | 0,748188  | 0,835644 |
| RP11-262A12.1  | 0,00 | 0,00 | 0,00 | 0,00 | 0,7481916 | NA       |
| RP11-435I10.5  | 0,00 | 0,00 | 0,00 | 0,00 | 0,7482586 | NA       |
| RP11-814P5.1   | 0,10 | 0,10 | 0,13 | 0,04 | 0,7482607 | 0,835646 |
| CTSF           | 0,00 | 0,00 | 0,00 | 0,09 | 0,7482824 | 0,835646 |
| RP11-574K11.24 | 3,61 | 2,66 | 3,86 | 2,78 | 0,7483023 | 0,835646 |
| RP1-155G6.4    | 0,75 | 0,74 | 0,77 | 1,28 | 0,7484034 | 0,835648 |
| GP6            | 0,35 | 0,36 | 0,56 | 0,52 | 0,748405  | 0,835648 |
| GALP           | 0,00 | 0,00 | 0,00 | 0,00 | 0,7484056 | NA       |
| OR52K3P        | 0,00 | 0,00 | 0,00 | 0,78 | 0,7484173 | 0,835648 |
| RP11-863P13.5  | 0,00 | 0,00 | 0,00 | 0,00 | 0,7484197 | NA       |
| TAOK2          | 0,28 | 1,07 | 0,53 | 1,44 | 0,7485412 | 0,835672 |
| ZNF142         | 0,29 | 0,26 | 0,55 | 0,45 | 0,7486317 | 0,835672 |
| RP11-181C3.1   | 0,12 | 0,09 | 0,19 | 0,36 | 0,7486399 | 0,835672 |
| RP11-646I6.3   | 0,67 | 0,66 | 1,06 | 1,03 | 0,7486423 | 0,835672 |
| RP11-85B7.4    | 0,00 | 0,00 | 0,00 | 0,00 | 0,7486544 | 0,835672 |
| FAM27C         | 0,00 | 0,00 | 0,00 | 0,00 | 0,7486921 | 0,835672 |
| RP11-15E1.5    | 0,00 | 0,06 | 0,00 | 0,05 | 0,748702  | 0,835672 |
| RP11-263G22.1  | 0,00 | 0,00 | 0,00 | 0,00 | 0,7487248 | NA       |
| CTC-575N7.1    | 0,00 | 0,00 | 0,00 | 0,00 | 0,748734  | NA       |
| RP11-673E1.3   | 0,00 | 0,00 | 0,00 | 0,00 | 0,7487863 | 0,835715 |
| RP11-319G5.1   | 0,00 | 0,34 | 0,00 | 0,10 | 0,7488042 | NA       |
| BORCS7         | 4,99 | 3,61 | 4,71 | 5,29 | 0,7488174 | 0,835715 |
| AP000648.5     | 0,36 | 0,33 | 0,62 | 0,47 | 0,7488537 | 0,835715 |
| RP11-568G11.4  | 0,00 | 0,00 | 0,00 | 0,00 | 0,7489064 | NA       |
| RP11-85O21.5   | 0,00 | 0,00 | 0,00 | 0,00 | 0,7489245 | NA       |
| RP5-967N21.11  | 1,67 | 2,44 | 1,42 | 1,96 | 0,7489997 | 0,83576  |
| ZNF816         | 0,43 | 0,44 | 0,44 | 0,46 | 0,7490056 | 0,83576  |
| ZNF273         | 1,13 | 1,42 | 1,35 | 1,57 | 0,7490683 | 0,83576  |
| RP11-241I12.3  | 0,00 | 0,00 | 0,00 | 0,00 | 0,7491036 | NA       |
| UQCRC1         | 8,08 | 7,50 | 7,76 | 7,90 | 0,7491067 | 0,83576  |
| DOCK4          | 0,06 | 0,56 | 0,15 | 0,57 | 0,7491089 | 0,83576  |
| RP11-254B13.4  | 3,76 | 1,30 | 2,71 | 1,07 | 0,7491193 | 0,83576  |
| MIR548AA2      | 2,90 | 3,16 | 2,88 | 0,00 | 0,749393  | 0,835982 |
| MIR548D2       | 2,90 | 3,16 | 2,88 | 0,00 | 0,749393  | 0,835982 |
| FOX51          | 0,00 | 0,00 | 0,00 | 0,00 | 0,7495051 | NA       |
| IGKV2D-36      | 0,00 | 0,00 | 0,00 | 0,00 | 0,7495051 | NA       |
| RP11-138C9.1   | 2,27 | 1,99 | 2,55 | 3,05 | 0,7495869 | 0,836156 |
| CELA2A         | 0,51 | 0,72 | 0,50 | 1,17 | 0,7496523 | 0,836187 |
| SELV           | 0,00 | 0,00 | 0,00 | 0,00 | 0,7496871 | NA       |
| RN7SL835P      | 1,50 | 0,97 | 1,05 | 1,41 | 0,749749  | 0,836247 |
| DBNDD2         | 3,75 | 0,88 | 1,37 | 1,14 | 0,7497815 | 0,836247 |
| RP5-930J4.2    | 0,00 | 0,00 | 0,00 | 0,00 | 0,7498253 | NA       |
| RAB2A          | 6,30 | 6,27 | 6,29 | 5,27 | 0,7499903 | 0,836422 |
| LMNB2          | 1,54 | 0,29 | 1,10 | 1,45 | 0,7500139 | 0,836422 |
| MIA3           | 5,04 | 3,46 | 4,90 | 4,74 | 0,7503136 | 0,836715 |
| RP1-117O3.2    | 0,00 | 0,00 | 0,00 | 0,00 | 0,7503373 | NA       |
| TMUB2          | 4,88 | 3,50 | 5,14 | 4,68 | 0,7503643 | 0,836729 |
| RP11-746L20.1  | 0,00 | 0,00 | 0,00 | 0,00 | 0,7504448 | NA       |
| MIR548X2       | 0,00 | 0,00 | 0,00 | 0,00 | 0,7505275 | 0,836779 |
| SETMAR         | 2,77 | 2,53 | 2,47 | 3,11 | 0,7505445 | 0,836779 |
| RP11-205M5.3   | 4,66 | 3,36 | 3,18 | 1,00 | 0,750559  | 0,836779 |
| CRIP1          | 2,46 | 3,52 | 1,76 | 1,60 | 0,7505596 | 0,836779 |
| CTC-265F19.3   | 0,00 | 0,00 | 0,00 | 0,00 | 0,750573  | NA       |

|                |      |      |      |      |           |          |
|----------------|------|------|------|------|-----------|----------|
| RIMBP2         | 0,00 | 0,23 | 0,00 | 0,00 | 0,7506918 | NA       |
| CTC-429L19.3   | 0,00 | 0,00 | 0,16 | 0,00 | 0,7508228 | NA       |
| MIR4437        | 0,00 | 0,00 | 0,00 | 0,00 | 0,7508778 | NA       |
| RP11-429B11.1  | 0,00 | 0,00 | 0,00 | 0,00 | 0,7508816 | NA       |
| RP11-100G15.6  | 0,00 | 0,00 | 0,00 | 0,00 | 0,7508975 | NA       |
| RP4-539M6.20   | 0,00 | 0,00 | 0,00 | 0,00 | 0,7510699 | NA       |
| LSM2           | 5,60 | 5,22 | 5,46 | 5,16 | 0,751128  | 0,837371 |
| CENPV          | 1,35 | 1,79 | 1,52 | 0,36 | 0,7512523 | 0,837371 |
| EPST1          | 5,72 | 4,12 | 5,45 | 4,99 | 0,7512993 | 0,837371 |
| RP11-5316.2    | 5,37 | 0,00 | 4,38 | 0,00 | 0,7513035 | 0,837371 |
| HYAL3          | 1,42 | 0,80 | 0,07 | 1,14 | 0,7513124 | 0,837371 |
| CTD-3105H18.14 | 0,00 | 0,05 | 0,00 | 0,00 | 0,7513169 | 0,837371 |
| AC005351.1     | 0,00 | 0,00 | 0,00 | 0,00 | 0,7513447 | NA       |
| PICALM         | 6,76 | 6,35 | 6,34 | 6,06 | 0,751429  | 0,837454 |
| RP11-301G19.2  | 0,00 | 0,00 | 0,00 | 0,00 | 0,7514802 | NA       |
| CTC-450M9.1    | 0,00 | 0,00 | 0,00 | 0,00 | 0,7515083 | NA       |
| RP4-675G8.3    | 0,00 | 0,14 | 0,00 | 0,14 | 0,7516295 | NA       |
| TRBV20-1       | 0,00 | 0,00 | 0,00 | 0,00 | 0,7517094 | NA       |
| GUCA1C         | 0,00 | 0,00 | 0,00 | 0,00 | 0,7517377 | NA       |
| AC006538.8     | 0,00 | 0,00 | 0,00 | 0,00 | 0,751786  | NA       |
| STARD9         | 1,37 | 1,44 | 1,34 | 2,20 | 0,7518457 | 0,837838 |
| RP11-464D20.2  | 0,00 | 0,00 | 0,00 | 0,00 | 0,7518501 | NA       |
| PTPN20         | 0,03 | 0,00 | 0,00 | 0,53 | 0,7518736 | 0,837838 |
| RP11-184F3.1   | 0,38 | 0,82 | 0,41 | 0,00 | 0,7518766 | NA       |
| RP11-120I21.2  | 0,95 | 1,67 | 1,64 | 1,44 | 0,7518865 | 0,837838 |
| RP11-498C9.4   | 0,00 | 0,00 | 0,00 | 0,00 | 0,7519057 | NA       |
| RP5-1092A11.5  | 0,00 | 0,00 | 0,00 | 0,00 | 0,7519398 | NA       |
| RNA5SP195      | 0,00 | 0,00 | 0,00 | 0,00 | 0,7519886 | NA       |
| HTR1DP1        | 0,00 | 0,00 | 0,00 | 0,00 | 0,7519961 | 0,837918 |
| RN7SKP89       | 0,00 | 0,00 | 0,00 | 0,00 | 0,752032  | NA       |
| TNFAIP8L1      | 0,73 | 1,38 | 1,27 | 1,20 | 0,7520502 | 0,837936 |
| ZNF675         | 3,31 | 3,87 | 2,98 | 2,72 | 0,7521001 | 0,83795  |
| RP11-369E15.1  | 0,00 | 0,00 | 0,00 | 0,00 | 0,7521316 | NA       |
| AC005682.5     | 0,00 | 0,00 | 0,00 | 0,00 | 0,7521767 | NA       |
| RP11-360L9.4   | 0,00 | 0,00 | 0,00 | 0,00 | 0,7522005 | 0,838013 |
| RORB           | 0,03 | 0,08 | 0,04 | 0,04 | 0,7522325 | 0,838013 |
| RP11-438P9.2   | 0,00 | 0,00 | 0,00 | 0,00 | 0,7522749 | NA       |
| AC003104.1     | 0,00 | 0,00 | 0,00 | 0,00 | 0,7523173 | 0,838066 |
| CTC-459F4.9    | 0,00 | 0,00 | 0,00 | 0,00 | 0,7523805 | NA       |
| SNORA58        | 0,00 | 0,00 | 0,00 | 0,00 | 0,752433  | NA       |
| TTC28-AS1      | 3,33 | 1,47 | 3,25 | 3,33 | 0,7524765 | 0,838201 |
| RP11-369C8.1   | 0,00 | 0,00 | 0,00 | 0,00 | 0,7527071 | 0,838416 |
| CDH11          | 0,00 | 0,73 | 0,00 | 0,00 | 0,752784  | 0,83846  |
| FAM197Y9       | 0,00 | 0,00 | 0,00 | 0,00 | 0,7528015 | NA       |
| RP11-274J7.1   | 0,00 | 0,00 | 0,00 | 0,00 | 0,7528191 | NA       |
| RP11-10L12.1   | 1,62 | 1,04 | 0,00 | 0,00 | 0,7528672 | 0,838481 |
| ZNF649         | 2,03 | 2,02 | 1,97 | 1,12 | 0,7528783 | 0,838481 |
| C1QC           | 0,00 | 0,00 | 0,00 | 0,00 | 0,7530178 | NA       |
| AC073046.25    | 0,00 | 2,44 | 0,00 | 0,00 | 0,7530315 | 0,838579 |
| PHF2           | 1,71 | 0,42 | 1,72 | 0,59 | 0,753042  | 0,838579 |
| PIM1           | 1,84 | 3,41 | 2,24 | 2,54 | 0,7530817 | 0,838581 |
| RP11-281J9.2   | 0,00 | 0,00 | 0,00 | 0,00 | 0,7530824 | NA       |
| FXYD4          | 0,00 | 0,00 | 0,00 | 0,00 | 0,75313   | NA       |
| GHRHR          | 0,00 | 0,58 | 0,00 | 0,00 | 0,7531544 | 0,83862  |
| RN7SL254P      | 0,00 | 2,69 | 0,00 | 0,84 | 0,7531962 | 0,838625 |

|                |      |      |      |      |           |          |
|----------------|------|------|------|------|-----------|----------|
| RP11-38M8.1    | 0,00 | 0,00 | 0,81 | 0,00 | 0,7532436 | 0,838635 |
| RP11-282K24.1  | 0,50 | 0,80 | 0,43 | 0,28 | 0,7532856 | 0,83864  |
| OSTCL          | 0,00 | 0,00 | 0,00 | 0,00 | 0,7532975 | NA       |
| PNN            | 5,65 | 4,65 | 5,76 | 5,69 | 0,7534282 | 0,838757 |
| KCNC3          | 0,00 | 0,04 | 0,04 | 0,00 | 0,7535097 | 0,838806 |
| RP11-461C13.1  | 0,00 | 0,00 | 0,00 | 0,43 | 0,7535673 | 0,838828 |
| KIR2DL3        | 0,00 | 0,00 | 0,00 | 0,00 | 0,7535836 | NA       |
| RP11-485G7.4   | 0,16 | 0,00 | 0,00 | 0,00 | 0,7535874 | NA       |
| ETFDH          | 4,52 | 5,32 | 4,22 | 1,68 | 0,7537061 | 0,838893 |
| KRT73          | 0,00 | 0,00 | 0,00 | 0,00 | 0,7537902 | NA       |
| DCLK2          | 0,03 | 0,06 | 0,09 | 0,00 | 0,7537978 | 0,838893 |
| ZNF281         | 1,97 | 1,52 | 2,29 | 2,97 | 0,7538254 | 0,838893 |
| CCL4L2         | 3,56 | 3,78 | 4,49 | 6,30 | 0,7538307 | 0,838893 |
| BNIP3          | 1,24 | 1,52 | 0,86 | 1,09 | 0,7538423 | 0,838893 |
| RP11-49K24.6   | 0,93 | 0,00 | 2,49 | 0,00 | 0,7538528 | 0,838893 |
| DNAJA3         | 3,71 | 2,76 | 3,26 | 3,56 | 0,7538919 | 0,838895 |
| RNA5SP479      | 0,00 | 0,00 | 0,00 | 0,00 | 0,7539643 | NA       |
| KNDC1          | 0,00 | 0,02 | 0,00 | 0,00 | 0,7539764 | NA       |
| RP11-406A9.2   | 0,00 | 0,00 | 0,00 | 0,00 | 0,7540093 | 0,838983 |
| AC129492.6     | 0,00 | 0,00 | 0,00 | 0,00 | 0,7540494 | NA       |
| HPYR1          | 0,00 | 0,00 | 0,00 | 0,00 | 0,7540541 | NA       |
| IGHV3-16       | 0,00 | 0,00 | 0,00 | 0,00 | 0,7541735 | NA       |
| CASC1          | 0,00 | 0,08 | 0,00 | 0,00 | 0,7542294 | 0,839186 |
| LINC00479      | 0,00 | 0,00 | 0,00 | 0,00 | 0,7542328 | NA       |
| RPL10AP2       | 0,24 | 0,31 | 0,00 | 0,00 | 0,7542913 | NA       |
| CTD-2302E22.6  | 0,00 | 0,00 | 0,00 | 1,25 | 0,7542954 | 0,839218 |
| RP11-1149O23.1 | 0,00 | 0,00 | 0,00 | 0,50 | 0,7543441 | NA       |
| RP11-142L1.1   | 0,00 | 0,00 | 0,00 | 0,00 | 0,7544797 | 0,839342 |
| RP11-262H14.4  | 1,23 | 1,01 | 1,20 | 0,07 | 0,7544827 | 0,839342 |
| AL355480.3     | 0,00 | 2,03 | 0,00 | 0,00 | 0,7545074 | NA       |
| RP11-389O22.5  | 0,00 | 0,00 | 0,00 | 0,00 | 0,7545379 | NA       |
| RPL26P30       | 0,00 | 0,00 | 0,00 | 0,00 | 0,7545744 | NA       |
| RN7SL713P      | 0,00 | 0,00 | 0,00 | 0,00 | 0,754593  | NA       |
| GLO1           | 5,37 | 4,52 | 4,89 | 3,89 | 0,7547228 | 0,839567 |
| RP11-93B10.3   | 0,00 | 0,00 | 0,00 | 0,00 | 0,754822  | NA       |
| AC115522.3     | 0,25 | 0,00 | 0,00 | 0,33 | 0,7548605 | 0,839678 |
| RP11-231C14.6  | 0,00 | 0,00 | 0,00 | 0,00 | 0,7548861 | NA       |
| PKD1L3         | 0,00 | 0,00 | 0,00 | 0,00 | 0,7549329 | NA       |
| AP000884.4     | 0,00 | 0,00 | 0,00 | 0,00 | 0,7549636 | NA       |
| CCNB1          | 0,00 | 0,06 | 0,16 | 0,22 | 0,7551513 | 0,83996  |
| RP11-407G23.7  | 0,00 | 0,00 | 0,00 | 0,00 | 0,7551573 | NA       |
| CITF22-24E5.1  | 0,00 | 0,00 | 0,00 | 0,00 | 0,7552007 | NA       |
| RP11-17A1.3    | 1,72 | 1,46 | 1,79 | 0,72 | 0,7553686 | 0,84016  |
| RP11-126H7.3   | 0,38 | 0,33 | 0,35 | 0,31 | 0,7554104 | 0,840164 |
| HSFX1          | 0,00 | 0,00 | 0,00 | 0,00 | 0,7554209 | NA       |
| RP11-367G18.2  | 0,80 | 0,72 | 0,00 | 0,82 | 0,7554433 | NA       |
| TMPRSS9        | 0,00 | 0,00 | 0,00 | 0,00 | 0,7554552 | NA       |
| TMED11P        | 0,00 | 0,00 | 0,00 | 0,00 | 0,7555609 | NA       |
| SGK2           | 0,00 | 0,00 | 0,00 | 0,00 | 0,755666  | 0,840406 |
| RP11-963H4.3   | 0,00 | 0,00 | 0,00 | 0,00 | 0,7556735 | NA       |
| RP11-278A23.1  | 0,00 | 0,00 | 0,00 | 0,00 | 0,755757  | NA       |
| RP11-643G5.6   | 0,00 | 0,00 | 0,00 | 0,00 | 0,7557634 | NA       |
| RP11-414H23.2  | 0,00 | 0,36 | 0,00 | 0,34 | 0,7557976 | NA       |
| OR2F1          | 1,36 | 1,03 | 1,14 | 1,05 | 0,7558464 | 0,840565 |
| RP11-554D15.3  | 0,00 | 0,00 | 0,00 | 0,00 | 0,7560332 | NA       |

|                  |      |      |      |      |           |          |
|------------------|------|------|------|------|-----------|----------|
| UTP6             | 5,31 | 1,95 | 4,74 | 5,23 | 0,756124  | 0,840831 |
| FAM110D          | 0,59 | 0,24 | 0,59 | 0,33 | 0,7562319 | 0,840909 |
| RP11-333H9.6     | 0,00 | 0,00 | 0,00 | 0,00 | 0,756234  | NA       |
| AC073641.2       | 0,00 | 0,00 | 0,00 | 0,00 | 0,7562537 | NA       |
| RP11-512M8.3     | 0,00 | 0,00 | 0,00 | 0,00 | 0,7562728 | 0,840913 |
| NAP1L3           | 0,00 | 0,00 | 0,00 | 0,00 | 0,7563184 | NA       |
| RP11-383G10.3    | 0,61 | 0,64 | 0,57 | 0,73 | 0,756641  | 0,84128  |
| PCDHB15          | 0,00 | 0,00 | 0,00 | 0,00 | 0,7566676 | NA       |
| RP11-300D11.2    | 0,00 | 0,00 | 0,00 | 0,00 | 0,7566998 | NA       |
| PMS2P10          | 0,00 | 0,00 | 0,00 | 0,00 | 0,7567269 | NA       |
| LL09NC01-139C3.1 | 0,00 | 0,00 | 0,00 | 0,00 | 0,7567343 | NA       |
| ADRB1            | 0,12 | 0,18 | 0,14 | 0,10 | 0,7568366 | 0,841455 |
| RNU6-374P        | 0,00 | 0,00 | 0,00 | 0,00 | 0,7569058 | NA       |
| RP11-466F5.10    | 0,28 | 0,00 | 0,47 | 0,00 | 0,7569435 | 0,841532 |
| RP11-462D18.2    | 0,00 | 0,00 | 0,00 | 0,00 | 0,7570113 | NA       |
| AL109761.5       | 0,00 | 0,00 | 0,00 | 0,00 | 0,7570256 | NA       |
| RP11-118H17.1    | 0,00 | 0,00 | 0,00 | 0,00 | 0,7570691 | NA       |
| DDX24            | 5,57 | 5,58 | 5,63 | 5,14 | 0,7571274 | 0,841648 |
| RP11-770G2.2     | 0,00 | 0,00 | 0,00 | 0,00 | 0,7571397 | 0,841648 |
| RP11-435I10.4    | 1,55 | 1,05 | 1,31 | 1,15 | 0,7571616 | 0,841648 |
| RP11-599B13.10   | 0,00 | 0,00 | 0,00 | 0,00 | 0,757223  | NA       |
| METTL4           | 1,24 | 0,40 | 0,86 | 2,27 | 0,7572353 | 0,841688 |
| VN1R12P          | 0,00 | 0,00 | 0,00 | 0,00 | 0,7573413 | NA       |
| TMPO             | 3,81 | 2,83 | 3,26 | 2,90 | 0,7573414 | 0,84176  |
| SNORD6           | 0,00 | 0,00 | 0,00 | 0,00 | 0,7573545 | NA       |
| GPALPP1          | 3,97 | 3,73 | 3,35 | 2,76 | 0,7573755 | 0,84176  |
| PYGO2            | 1,07 | 1,55 | 1,32 | 1,21 | 0,7575427 | 0,841896 |
| SART3            | 4,34 | 3,74 | 3,49 | 4,42 | 0,7575774 | 0,841896 |
| RP11-430B1.1     | 0,00 | 0,60 | 0,00 | 0,68 | 0,757592  | NA       |
| DIP2B            | 3,56 | 1,68 | 3,37 | 2,78 | 0,7576117 | 0,841896 |
| CTC-471J1.9      | 0,00 | 1,95 | 0,00 | 0,56 | 0,7576826 | NA       |
| RP11-223E19.1    | 0,00 | 0,10 | 0,00 | 0,09 | 0,7577051 | NA       |
| TAF1B            | 4,05 | 2,60 | 3,91 | 2,68 | 0,7579405 | 0,842161 |
| RP11-527D7.1     | 0,00 | 0,00 | 0,00 | 0,00 | 0,7579406 | NA       |
| CDH12P1          | 2,46 | 0,33 | 0,17 | 3,04 | 0,7579642 | 0,842161 |
| CDH12P3          | 2,46 | 0,33 | 0,17 | 3,04 | 0,7579642 | 0,842161 |
| RALGAPA1         | 4,19 | 3,49 | 3,62 | 4,12 | 0,7580464 | 0,842211 |
| RP11-357K6.3     | 0,00 | 0,00 | 0,00 | 0,00 | 0,758085  | NA       |
| PTCD3            | 5,20 | 3,95 | 4,06 | 3,72 | 0,7581417 | 0,842248 |
| CPSF2            | 3,87 | 3,83 | 3,72 | 2,83 | 0,7581704 | 0,842248 |
| TXLNA            | 2,82 | 2,39 | 2,58 | 2,54 | 0,7582113 | 0,842248 |
| RP11-574K11.32   | 2,77 | 3,74 | 2,63 | 2,07 | 0,7582314 | 0,842248 |
| CARM1            | 2,84 | 2,08 | 2,12 | 0,96 | 0,7582955 | 0,842277 |
| CILP             | 0,00 | 0,09 | 0,00 | 0,00 | 0,758303  | NA       |
| RP11-50D9.4      | 0,00 | 0,00 | 0,00 | 0,00 | 0,7584429 | NA       |
| AC009542.2       | 0,00 | 0,00 | 0,00 | 0,29 | 0,7586956 | 0,842674 |
| CAMK2N1          | 0,20 | 0,06 | 0,11 | 0,20 | 0,7587286 | 0,842674 |
| LA16c-321D4.2    | 0,00 | 0,00 | 0,00 | 0,00 | 0,758751  | NA       |
| RP11-20J15.3     | 0,00 | 0,00 | 0,00 | 0,00 | 0,7587796 | NA       |
| ARSG             | 3,48 | 3,12 | 3,26 | 2,93 | 0,7588306 | 0,842745 |
| RP1-138O17.1     | 1,28 | 0,72 | 1,22 | 1,32 | 0,7588843 | 0,842762 |
| KB-1552D7.2      | 0,28 | 0,00 | 0,41 | 0,12 | 0,7589233 | 0,842764 |
| RP11-309M23.1    | 0,00 | 0,00 | 0,00 | 0,00 | 0,7589335 | NA       |
| RP11-375I20.6    | 0,00 | 0,00 | 0,00 | 0,00 | 0,7590295 | NA       |
| RP4-633I8.3      | 0,00 | 0,00 | 0,00 | 0,00 | 0,759113  | NA       |

|                |      |      |      |      |           |          |
|----------------|------|------|------|------|-----------|----------|
| CTD-2575K13.6  | 0,00 | 0,00 | 0,00 | 0,00 | 0,7591406 | NA       |
| AC019055.1     | 0,00 | 0,00 | 0,00 | 0,00 | 0,7592292 | NA       |
| RP11-44503.3   | 0,65 | 0,33 | 0,91 | 0,99 | 0,759243  | 0,843034 |
| WNT1           | 0,00 | 0,00 | 0,00 | 0,00 | 0,7592743 | NA       |
| CTC-431G16.2   | 0,00 | 0,00 | 0,00 | 0,00 | 0,7593182 | NA       |
| LRRC75A-AS1    | 9,41 | 8,81 | 9,34 | 8,94 | 0,7593381 | 0,843034 |
| DIMT1          | 4,82 | 3,03 | 4,02 | 4,18 | 0,7593416 | 0,843034 |
| RP11-513G19.1  | 1,86 | 0,42 | 1,84 | 0,94 | 0,7593666 | 0,843034 |
| RHBDD3         | 0,63 | 1,44 | 0,83 | 1,80 | 0,7593706 | 0,843034 |
| HYOU1          | 2,99 | 2,84 | 3,52 | 2,22 | 0,7594213 | 0,843034 |
| RP11-63P12.7   | 0,67 | 2,77 | 1,52 | 1,14 | 0,7594325 | 0,843034 |
| MFSD4B         | 0,46 | 0,30 | 0,40 | 0,25 | 0,7595325 | 0,843103 |
| WI2-80269A6.1  | 0,00 | 0,00 | 0,00 | 0,00 | 0,7596126 | NA       |
| RNU1-130P      | 2,98 | 3,01 | 3,72 | 2,47 | 0,7596325 | 0,843172 |
| RP11-21J18.1   | 0,00 | 0,00 | 0,00 | 0,00 | 0,7596603 | NA       |
| MIR4477B       | 0,00 | 0,00 | 0,00 | 0,00 | 0,759669  | NA       |
| RP11-58C22.2   | 1,27 | 1,90 | 1,08 | 1,33 | 0,7596808 | 0,843183 |
| NUP133         | 4,54 | 3,70 | 4,06 | 3,02 | 0,7598224 | 0,843299 |
| RP1-62D2.3     | 0,00 | 0,00 | 0,00 | 0,00 | 0,7598353 | NA       |
| RP11-393N4.2   | 0,00 | 0,23 | 0,00 | 0,00 | 0,7598913 | NA       |
| RP11-344P13.1  | 0,00 | 0,00 | 0,00 | 0,00 | 0,7599062 | 0,843349 |
| SNORA30B       | 0,00 | 0,00 | 0,00 | 0,00 | 0,7599126 | NA       |
| RP11-2H8.4     | 1,82 | 3,43 | 2,76 | 2,12 | 0,7600931 | 0,843488 |
| CTD-2006K23.1  | 5,63 | 3,23 | 4,17 | 2,70 | 0,760107  | 0,843488 |
| RP11-434C1.3   | 0,00 | 0,00 | 0,00 | 0,00 | 0,7601476 | NA       |
| RP11-429H9.4   | 0,00 | 0,00 | 0,00 | 0,00 | 0,7602058 | NA       |
| AP001046.5     | 0,00 | 0,00 | 0,00 | 0,00 | 0,760239  | NA       |
| RP5-1056L3.1   | 0,00 | 0,00 | 0,00 | 0,00 | 0,7604099 | 0,843782 |
| RP4-777O23.1   | 0,00 | 0,00 | 0,00 | 0,00 | 0,7604287 | NA       |
| RP11-848P1.5   | 0,41 | 0,00 | 0,00 | 0,00 | 0,7604663 | 0,843791 |
| APOE           | 0,21 | 0,49 | 0,60 | 0,55 | 0,7604943 | 0,843791 |
| RP11-449H3.3   | 2,08 | 1,42 | 1,71 | 0,73 | 0,7606367 | 0,843869 |
| ATG14          | 1,91 | 1,73 | 1,54 | 1,47 | 0,7606483 | 0,843869 |
| CTD-2050B12.2  | 0,00 | 0,00 | 0,00 | 0,00 | 0,7606698 | NA       |
| SLF2           | 3,67 | 2,51 | 3,03 | 2,30 | 0,760721  | 0,843869 |
| RNF11          | 3,55 | 2,51 | 3,18 | 2,73 | 0,7607476 | 0,843869 |
| RP11-1070N10.3 | 0,00 | 0,00 | 0,00 | 0,00 | 0,7607525 | NA       |
| RP11-3P9.1     | 0,00 | 0,00 | 0,00 | 0,00 | 0,7607544 | 0,843869 |
| RP11-522L3.1   | 0,00 | 0,00 | 0,00 | 0,15 | 0,7608065 | NA       |
| SRI            | 7,02 | 6,75 | 6,43 | 6,71 | 0,7608464 | 0,843922 |
| ZNF749         | 3,71 | 2,10 | 2,02 | 1,00 | 0,7609027 | 0,843922 |
| CH17-264L24.1  | 0,36 | 1,15 | 0,36 | 0,42 | 0,7609202 | 0,843922 |
| RP11-586K12.13 | 0,00 | 0,00 | 0,00 | 0,00 | 0,7609236 | NA       |
| LCTL           | 0,10 | 0,09 | 0,12 | 0,23 | 0,760954  | 0,843922 |
| AC016700.5     | 0,00 | 0,00 | 0,00 | 0,00 | 0,7609562 | NA       |
| WI2-89927D4.1  | 0,41 | 2,81 | 1,82 | 0,00 | 0,7610175 | 0,843951 |
| RP11-75L1.2    | 0,00 | 0,00 | 1,00 | 3,77 | 0,7610623 | 0,843958 |
| CTB-50L17.8    | 0,79 | 1,68 | 1,25 | 1,63 | 0,7612033 | 0,844014 |
| RN7SL283P      | 0,00 | 0,00 | 0,00 | 0,78 | 0,7612495 | NA       |
| CTD-2349P21.9  | 0,00 | 0,00 | 0,00 | 0,00 | 0,7612598 | 0,844014 |
| URI1           | 5,47 | 4,71 | 4,80 | 4,96 | 0,7612606 | 0,844014 |
| RP11-15F12.1   | 0,00 | 0,00 | 0,00 | 0,00 | 0,761265  | 0,844014 |
| CCR9           | 0,00 | 0,39 | 0,00 | 0,00 | 0,7613735 | 0,844062 |
| RPL13AP6       | 0,31 | 0,00 | 0,00 | 0,30 | 0,7613839 | 0,844062 |
| RP11-552F3.13  | 0,00 | 0,00 | 0,00 | 0,00 | 0,7614325 | NA       |

|               |      |      |      |      |           |          |
|---------------|------|------|------|------|-----------|----------|
| RP11-90L20.2  | 0,00 | 0,00 | 0,00 | 0,00 | 0,7614513 | NA       |
| DMTN          | 0,00 | 0,00 | 0,00 | 0,00 | 0,7615253 | NA       |
| MEF2D         | 1,38 | 2,28 | 2,74 | 1,87 | 0,7615297 | 0,844182 |
| RNU4-10P      | 0,00 | 0,00 | 0,00 | 0,00 | 0,7615348 | NA       |
| MS4A3         | 0,00 | 0,00 | 0,00 | 0,00 | 0,7615449 | NA       |
| CXCL3         | 0,00 | 2,30 | 0,19 | 0,00 | 0,7616829 | 0,844246 |
| RP11-219B4.5  | 0,21 | 0,00 | 0,39 | 0,50 | 0,7616948 | 0,844246 |
| NES           | 0,00 | 0,00 | 0,00 | 0,00 | 0,7617239 | NA       |
| RP11-554F20.1 | 0,00 | 0,09 | 0,00 | 0,08 | 0,7617665 | 0,844246 |
| CTD-2503I6.1  | 0,00 | 0,00 | 0,00 | 0,00 | 0,7617775 | 0,844246 |
| RP11-678K21.2 | 0,17 | 0,10 | 0,11 | 0,31 | 0,7617775 | 0,844246 |
| RP11-75A9.3   | 0,00 | 0,00 | 0,00 | 0,00 | 0,7618101 | NA       |
| RP11-118E18.1 | 0,00 | 0,00 | 0,00 | 0,00 | 0,761814  | NA       |
| CORO1B        | 3,85 | 2,63 | 4,06 | 2,93 | 0,7618626 | 0,844298 |
| RP11-288E14.2 | 0,00 | 0,68 | 0,00 | 0,65 | 0,7619143 | NA       |
| CTB-96E2.3    | 0,00 | 0,00 | 0,00 | 0,00 | 0,7619344 | NA       |
| OR5D3P        | 0,00 | 0,00 | 0,00 | 0,00 | 0,7619845 | NA       |
| RP4-816N1.7   | 0,00 | 0,00 | 0,00 | 0,00 | 0,7620469 | NA       |
| CREB3L4       | 1,00 | 1,06 | 0,58 | 0,89 | 0,7620485 | 0,844453 |
| CTB-176F20.3  | 0,06 | 0,10 | 0,04 | 0,03 | 0,7620782 | 0,844453 |
| AC104306.1    | 0,00 | 0,00 | 0,00 | 0,00 | 0,7620986 | NA       |
| CTC-492K19.4  | 0,00 | 0,00 | 0,00 | 0,00 | 0,7623    | NA       |
| CCKBR         | 0,00 | 0,16 | 0,00 | 0,00 | 0,7624143 | NA       |
| YY1           | 5,31 | 5,39 | 4,96 | 4,44 | 0,7624152 | 0,844784 |
| RP11-471M2.2  | 0,00 | 0,00 | 0,00 | 0,00 | 0,762495  | NA       |
| ALX4          | 0,00 | 0,00 | 0,00 | 0,00 | 0,7624993 | NA       |
| RP11-491H9.3  | 0,00 | 0,00 | 0,00 | 0,00 | 0,7625311 | NA       |
| GJB1          | 0,00 | 0,00 | 0,00 | 0,00 | 0,762594  | NA       |
| C5orf42       | 2,64 | 1,78 | 2,01 | 1,85 | 0,7627965 | 0,845139 |
| DNAJC9        | 3,15 | 1,31 | 3,07 | 1,72 | 0,7628116 | 0,845139 |
| NLGN1         | 0,00 | 0,00 | 0,00 | 0,00 | 0,7629387 | NA       |
| RP4-612B15.3  | 0,00 | 0,00 | 0,00 | 0,17 | 0,763     | NA       |
| RNF6          | 3,84 | 3,00 | 3,36 | 2,26 | 0,7630858 | 0,845401 |
| SSX4          | 0,00 | 0,00 | 0,00 | 0,00 | 0,7631393 | NA       |
| CTD-3035D6.2  | 0,00 | 0,00 | 0,00 | 0,00 | 0,7631841 | NA       |
| CTC-523E23.4  | 0,00 | 0,00 | 0,00 | 0,06 | 0,7632048 | NA       |
| TMX2-CTNND1   | 0,00 | 0,00 | 0,00 | 0,00 | 0,7632493 | NA       |
| ATP6V1C1      | 4,00 | 2,90 | 3,22 | 4,05 | 0,7632625 | 0,845554 |
| EIF3A         | 5,83 | 5,05 | 5,79 | 5,23 | 0,7634014 | 0,845666 |
| ST6GALNAC6    | 1,20 | 2,08 | 0,75 | 1,57 | 0,7635505 | 0,845789 |
| RP11-151A6.3  | 0,00 | 0,00 | 0,00 | 0,00 | 0,7636229 | NA       |
| CTD-3118D7.1  | 0,00 | 0,00 | 0,00 | 0,00 | 0,7636312 | 0,845836 |
| SNAPC2        | 2,49 | 2,98 | 2,15 | 1,65 | 0,7636755 | 0,845843 |
| AC018766.5    | 0,00 | 0,00 | 0,00 | 0,00 | 0,7638349 | 0,845978 |
| RP5-1029F21.4 | 1,31 | 2,54 | 1,92 | 1,13 | 0,7639152 | 0,846024 |
| C3orf80       | 0,00 | 0,00 | 0,00 | 0,00 | 0,7639501 | NA       |
| NBPF20        | 2,33 | 1,95 | 2,51 | 2,08 | 0,764016  | 0,846094 |
| RP11-463D19.2 | 0,00 | 0,00 | 0,00 | 0,00 | 0,7640699 | 0,846111 |
| RP11-10J21.4  | 0,00 | 0,00 | 0,00 | 0,00 | 0,7641257 | NA       |
| RP11-159F24.5 | 0,00 | 0,00 | 0,00 | 0,00 | 0,764207  | NA       |
| GGT6          | 0,34 | 0,47 | 0,47 | 0,64 | 0,7643939 | 0,846428 |
| RP5-1059L7.1  | 0,00 | 0,00 | 0,00 | 0,00 | 0,7645069 | NA       |
| AC106900.6    | 0,00 | 0,00 | 0,00 | 0,00 | 0,7645072 | NA       |
| RP11-474I11.7 | 0,00 | 0,00 | 0,00 | 0,00 | 0,7645551 | NA       |
| RP5-967N21.12 | 0,00 | 0,00 | 0,00 | 0,00 | 0,7645583 | 0,846531 |

|               |      |      |      |      |           |          |
|---------------|------|------|------|------|-----------|----------|
| RP11-278C7.3  | 0,35 | 0,26 | 0,22 | 0,48 | 0,7645636 | 0,846531 |
| AC091633.3    | 0,00 | 0,00 | 0,00 | 0,00 | 0,7646511 | 0,846586 |
| RP11-848P1.7  | 0,00 | 0,00 | 0,00 | 0,00 | 0,7646773 | NA       |
| RP11-117N2.2  | 0,00 | 0,00 | 0,00 | 0,00 | 0,7647107 | NA       |
| MSH5          | 2,87 | 1,57 | 2,16 | 1,84 | 0,7647672 | 0,846673 |
| RP11-380M21.2 | 0,63 | 1,01 | 0,80 | 1,22 | 0,76479   | NA       |
| OR3A1         | 0,00 | 0,00 | 0,00 | 0,00 | 0,7648362 | NA       |
| RN7SL837P     | 0,00 | 0,00 | 0,00 | 0,00 | 0,7648374 | NA       |
| ST7OT1        | 0,00 | 0,00 | 0,00 | 0,00 | 0,7648451 | NA       |
| UNC5CL        | 0,00 | 0,00 | 0,00 | 0,00 | 0,7648913 | 0,846768 |
| RP4-737E23.4  | 0,00 | 0,00 | 0,00 | 0,00 | 0,7649034 | NA       |
| RP11-431M7.3  | 0,84 | 1,09 | 0,41 | 0,61 | 0,7650129 | 0,84686  |
| RN7SL183P     | 0,00 | 0,00 | 0,00 | 0,00 | 0,7650385 | NA       |
| PRSS57        | 0,00 | 0,00 | 0,00 | 0,00 | 0,7651121 | NA       |
| VTN           | 0,00 | 0,00 | 0,00 | 0,00 | 0,7651732 | 0,846986 |
| GOLGA4        | 4,95 | 5,08 | 4,45 | 4,64 | 0,7652027 | 0,846986 |
| TAAR2         | 0,00 | 0,00 | 0,00 | 0,00 | 0,7653588 | NA       |
| BSN           | 0,00 | 0,03 | 0,00 | 0,00 | 0,7654634 | NA       |
| EIF5AP3       | 0,00 | 0,00 | 0,00 | 0,00 | 0,7654788 | NA       |
| PRAP1         | 0,00 | 0,00 | 0,00 | 0,00 | 0,7655431 | NA       |
| RWDD3         | 4,13 | 3,99 | 4,08 | 4,75 | 0,7656399 | 0,847421 |
| KB-7G2.9      | 0,00 | 0,00 | 0,00 | 0,00 | 0,7656536 | NA       |
| TJP3          | 0,00 | 0,00 | 0,00 | 0,00 | 0,7656663 | NA       |
| PALB2         | 2,41 | 0,21 | 1,41 | 0,73 | 0,7656723 | 0,847421 |
| ZNF600        | 2,00 | 0,10 | 1,94 | 1,35 | 0,7657159 | 0,847427 |
| CTD-2323K18.2 | 0,00 | 0,00 | 0,00 | 0,00 | 0,7657833 | NA       |
| RP11-204M4.3  | 0,14 | 0,11 | 0,13 | 0,37 | 0,7657999 | 0,847478 |
| WNT6          | 0,00 | 0,00 | 0,00 | 0,00 | 0,7658413 | NA       |
| RNA5SP378     | 0,00 | 0,00 | 0,00 | 0,00 | 0,765936  | NA       |
| RP11-123K19.1 | 2,50 | 1,99 | 1,49 | 1,11 | 0,7660231 | 0,847644 |
| RN7SL107P     | 0,00 | 0,00 | 0,45 | 0,00 | 0,7660379 | 0,847644 |
| RP11-63E9.1   | 0,60 | 1,07 | 0,16 | 0,00 | 0,766064  | 0,847644 |
| ZSCAN12P1     | 0,00 | 0,00 | 0,00 | 0,00 | 0,7661054 | NA       |
| RP11-173B14.4 | 0,00 | 0,00 | 0,00 | 0,00 | 0,7661883 | NA       |
| GTPBP4        | 4,31 | 3,91 | 4,43 | 3,70 | 0,7662022 | 0,847681 |
| RP11-126O1.5  | 0,00 | 0,45 | 0,05 | 0,00 | 0,7662104 | 0,847681 |
| RP11-2C24.3   | 0,89 | 0,94 | 1,51 | 0,56 | 0,7662119 | 0,847681 |
| FOXA1         | 0,00 | 0,00 | 0,00 | 0,00 | 0,7662421 | NA       |
| RP1-298J18.3  | 0,00 | 1,79 | 1,50 | 1,22 | 0,7662841 | 0,847686 |
| NANS          | 6,78 | 5,41 | 6,40 | 6,03 | 0,766293  | 0,847686 |
| RNU6-454P     | 0,00 | 0,00 | 0,00 | 0,00 | 0,7663423 | NA       |
| CTD-2055G21.1 | 0,00 | 0,00 | 0,00 | 0,00 | 0,7664061 | NA       |
| RP11-723J4.3  | 0,39 | 0,25 | 0,29 | 0,48 | 0,7664445 | 0,847811 |
| KIR3DP1       | 0,00 | 0,00 | 0,00 | 0,00 | 0,7664648 | NA       |
| RP11-120J4.1  | 0,00 | 0,83 | 0,00 | 0,00 | 0,7665869 | NA       |
| ZNF223        | 0,00 | 0,11 | 0,06 | 0,00 | 0,7666024 | 0,84791  |
| FBXW8         | 0,33 | 0,11 | 0,49 | 0,59 | 0,7666096 | 0,84791  |
| AC007256.5    | 0,00 | 0,00 | 0,00 | 0,00 | 0,7666514 | NA       |
| CHAF1B        | 0,82 | 1,10 | 0,85 | 0,81 | 0,766676  | 0,847941 |
| RF02159       | 0,00 | 0,00 | 0,00 | 0,00 | 0,7667037 | NA       |
| AKR1B10       | 0,00 | 0,00 | 0,18 | 0,22 | 0,7668377 | NA       |
| WDR64         | 0,00 | 0,28 | 0,00 | 0,00 | 0,7668434 | NA       |
| MARS          | 6,22 | 6,31 | 6,14 | 5,61 | 0,7668621 | 0,848105 |
| AF011889.5    | 2,30 | 1,39 | 0,79 | 1,50 | 0,7669786 | 0,848191 |
| RP5-967N21.7  | 0,00 | 0,00 | 0,00 | 0,00 | 0,7670523 | 0,848227 |

|                 |      |      |      |      |           |          |
|-----------------|------|------|------|------|-----------|----------|
| MMP17           | 0,30 | 0,60 | 0,79 | 1,73 | 0,7670961 | 0,848227 |
| C1orf195        | 0,00 | 0,00 | 0,00 | 0,00 | 0,7671063 | NA       |
| RP11-100L22.2   | 0,04 | 0,04 | 0,04 | 0,17 | 0,7671252 | 0,848227 |
| ZNF750          | 0,00 | 0,00 | 0,00 | 0,00 | 0,7671371 | NA       |
| RP4-697K14.15   | 0,00 | 0,00 | 0,00 | 0,00 | 0,7671717 | NA       |
| RP11-1286E23.1  | 0,00 | 0,00 | 0,00 | 0,00 | 0,7671755 | NA       |
| KNSTRN          | 1,56 | 1,47 | 1,71 | 0,63 | 0,7672383 | 0,84831  |
| RP1-122P22.4    | 0,00 | 0,00 | 0,00 | 0,00 | 0,7673219 | NA       |
| USP43           | 0,00 | 0,15 | 0,00 | 0,00 | 0,7674413 | 0,848492 |
| RN7SL28P        | 0,00 | 0,00 | 0,00 | 0,00 | 0,7675459 | NA       |
| EPHB6           | 2,66 | 3,10 | 2,41 | 3,38 | 0,7675773 | 0,8486   |
| PRIM2           | 2,49 | 2,68 | 2,35 | 0,68 | 0,7676936 | 0,848674 |
| RP11-894P9.2    | 0,00 | 0,00 | 0,00 | 0,32 | 0,7676939 | NA       |
| RP11-429B14.3   | 0,71 | 0,51 | 1,25 | 0,96 | 0,7677207 | 0,848674 |
| RNVU1-2         | 0,00 | 0,00 | 0,00 | 0,00 | 0,7678858 | NA       |
| XXbac-B135H6.18 | 0,00 | 0,00 | 0,00 | 0,00 | 0,7680163 | 0,848959 |
| AC017083.2      | 0,00 | 0,00 | 0,00 | 0,00 | 0,7681426 | NA       |
| HNRNPA1P6       | 0,00 | 0,00 | 0,00 | 0,00 | 0,7681745 | NA       |
| WBP1L           | 3,65 | 1,53 | 3,70 | 3,21 | 0,7681926 | 0,849111 |
| TRAV2           | 0,00 | 0,00 | 0,00 | 0,00 | 0,7682238 | NA       |
| RP11-61E2.1     | 0,00 | 0,00 | 0,00 | 0,00 | 0,7682472 | NA       |
| SNRPGP4         | 0,00 | 0,00 | 0,00 | 0,00 | 0,7682481 | NA       |
| RP11-575H3.1    | 0,00 | 0,00 | 0,00 | 0,00 | 0,7682778 | NA       |
| SCARNA17        | 0,49 | 2,96 | 0,61 | 0,55 | 0,7684283 | 0,849291 |
| ITPR1           | 4,45 | 4,68 | 4,67 | 2,98 | 0,7684489 | 0,849291 |
| RP13-20L14.6    | 0,00 | 1,19 | 0,69 | 3,84 | 0,7684694 | 0,849291 |
| RP11-571L19.8   | 0,00 | 0,19 | 0,00 | 0,00 | 0,7684917 | NA       |
| RP11-63M22.1    | 1,21 | 1,55 | 1,65 | 0,84 | 0,7685271 | 0,849312 |
| NWD2            | 0,00 | 0,00 | 0,00 | 0,00 | 0,7685825 | NA       |
| STMN4           | 0,17 | 0,00 | 0,29 | 0,61 | 0,7685865 | 0,849335 |
| POLR2J2         | 1,66 | 1,84 | 1,82 | 1,52 | 0,7687643 | 0,84949  |
| CTD-3126B10.5   | 0,00 | 0,00 | 0,02 | 0,00 | 0,7688219 | 0,849511 |
| CCIN            | 0,00 | 0,00 | 0,00 | 0,00 | 0,7688547 | NA       |
| INSL3           | 0,16 | 0,00 | 0,00 | 0,22 | 0,768981  | 0,849645 |
| SLC30A2         | 1,05 | 0,67 | 1,16 | 0,97 | 0,7691148 | 0,849731 |
| RP11-820K3.2    | 0,00 | 0,09 | 0,00 | 0,79 | 0,769156  | 0,849731 |
| RP11-712B9.5    | 0,00 | 0,00 | 0,00 | 0,00 | 0,7691606 | NA       |
| RP11-459O1.1    | 0,00 | 0,00 | 0,00 | 0,00 | 0,7691638 | NA       |
| MPHOSPH6        | 5,01 | 4,99 | 5,16 | 4,60 | 0,7691861 | 0,849731 |
| OR4E1           | 0,05 | 0,07 | 0,05 | 0,07 | 0,7692121 | 0,849731 |
| CTD-2057J6.1    | 0,00 | 0,00 | 0,00 | 0,00 | 0,7692303 | NA       |
| RP11-416N2.3    | 0,00 | 0,00 | 0,00 | 0,00 | 0,7692624 | NA       |
| RP11-395E19.6   | 0,00 | 0,00 | 0,00 | 0,00 | 0,769294  | NA       |
| TMPRSS11GP      | 0,00 | 0,00 | 0,00 | 0,00 | 0,7693185 | NA       |
| GRIN2D          | 0,00 | 0,00 | 0,00 | 0,00 | 0,7693311 | NA       |
| RP3-355L5.3     | 0,00 | 0,00 | 0,00 | 0,00 | 0,7693618 | NA       |
| SURF6           | 1,45 | 1,39 | 1,73 | 1,29 | 0,7693895 | 0,849827 |
| ZNF552          | 1,48 | 0,29 | 1,81 | 2,62 | 0,7694059 | 0,849827 |
| RP11-502I4.1    | 0,62 | 0,64 | 0,73 | 0,58 | 0,7694136 | 0,849827 |
| COL26A1         | 0,00 | 0,00 | 0,00 | 0,00 | 0,7695869 | NA       |
| ZNF160          | 3,73 | 4,13 | 3,53 | 3,84 | 0,7696015 | 0,849992 |
| RP4-676L2.1     | 0,00 | 0,00 | 0,00 | 0,00 | 0,769818  | NA       |
| AC092415.1      | 1,46 | 2,64 | 0,70 | 2,03 | 0,7698351 | 0,850208 |
| HOXA10          | 0,10 | 0,07 | 0,13 | 0,11 | 0,7699069 | 0,850245 |
| NANP            | 0,55 | 0,58 | 0,54 | 0,31 | 0,7701452 | 0,850466 |



|                |      |      |      |      |           |          |
|----------------|------|------|------|------|-----------|----------|
| GPRC5D         | 0,00 | 0,48 | 0,00 | 0,00 | 0,7701617 | NA       |
| RP1-13D10.3    | 0,00 | 0,00 | 0,00 | 0,00 | 0,7702519 | NA       |
| RP5-1116H23.5  | 0,00 | 0,00 | 0,00 | 0,00 | 0,7703015 | NA       |
| FAM188B        | 0,18 | 0,08 | 0,24 | 0,17 | 0,7703337 | 0,850632 |
| RP1-77H15.1    | 0,00 | 0,00 | 0,00 | 0,00 | 0,7703584 | NA       |
| AC068492.3     | 0,00 | 0,11 | 0,00 | 0,00 | 0,7703706 | NA       |
| RP11-90J19.1   | 5,39 | 4,33 | 5,02 | 5,17 | 0,7703734 | 0,850633 |
| PDXDC1         | 4,26 | 3,98 | 4,59 | 4,38 | 0,7704806 | 0,850709 |
| AC009967.3     | 0,47 | 0,29 | 0,75 | 0,24 | 0,7705478 | 0,850741 |
| CLIC5          | 0,00 | 0,00 | 0,00 | 0,00 | 0,7705674 | NA       |
| RP11-705O24.1  | 0,00 | 0,00 | 0,00 | 0,00 | 0,7705977 | NA       |
| AC010138.3     | 0,00 | 0,00 | 0,00 | 0,00 | 0,7707967 | NA       |
| NUTM2A         | 0,00 | 0,00 | 0,00 | 0,00 | 0,7708331 | NA       |
| RNY4P7         | 0,00 | 0,00 | 0,00 | 0,00 | 0,7708503 | 0,851033 |
| SHC3           | 0,00 | 0,00 | 0,00 | 0,00 | 0,7708555 | NA       |
| CMTM5          | 0,00 | 0,00 | 0,00 | 0,00 | 0,7710053 | NA       |
| ERCC6L2        | 4,05 | 2,56 | 4,11 | 1,05 | 0,7710082 | 0,851165 |
| NCOA5          | 2,14 | 2,05 | 1,82 | 1,64 | 0,7711568 | 0,851287 |
| RNY4P24        | 0,00 | 0,00 | 0,00 | 0,00 | 0,7711688 | NA       |
| SLC22A3        | 0,00 | 0,00 | 0,00 | 0,00 | 0,7712344 | NA       |
| CENPI          | 1,17 | 1,42 | 1,02 | 1,10 | 0,7712357 | 0,851294 |
| RUVBL1         | 3,80 | 1,52 | 2,21 | 1,81 | 0,7712854 | 0,851294 |
| CASP8          | 4,82 | 4,00 | 4,67 | 4,80 | 0,7713054 | 0,851294 |
| FAT2           | 0,00 | 0,00 | 0,00 | 0,00 | 0,7713316 | NA       |
| ATP6V1H        | 5,74 | 5,10 | 5,18 | 5,19 | 0,7713865 | 0,851294 |
| CTD-3116E22.4  | 0,21 | 1,73 | 0,83 | 0,74 | 0,7713888 | 0,851294 |
| SREK1IP1       | 2,94 | 3,15 | 3,00 | 3,27 | 0,7713934 | 0,851294 |
| RP11-18H21.3   | 0,00 | 0,00 | 0,00 | 0,00 | 0,771518  | NA       |
| CTD-3131K8.3   | 0,00 | 0,00 | 0,00 | 0,46 | 0,7716494 | NA       |
| RP11-568J23.8  | 0,00 | 0,00 | 0,00 | 0,37 | 0,7718709 | 0,851779 |
| RP11-88H10.1   | 0,00 | 0,00 | 0,00 | 0,00 | 0,7718809 | NA       |
| RP11-439L18.1  | 0,00 | 0,39 | 0,00 | 0,00 | 0,7718956 | NA       |
| CEACAM21       | 0,45 | 0,47 | 0,00 | 0,24 | 0,7719447 | 0,851818 |
| SNORA14A       | 0,00 | 0,00 | 0,00 | 0,00 | 0,7720072 | NA       |
| ZFP91-CNTF     | 0,00 | 0,00 | 0,00 | 0,00 | 0,7720455 | 0,851845 |
| KHK            | 0,13 | 3,27 | 0,14 | 0,00 | 0,7720459 | 0,851845 |
| ZC3H7B         | 0,73 | 0,65 | 0,65 | 0,37 | 0,7721351 | 0,851901 |
| RP11-680B3.2   | 0,44 | 0,84 | 0,43 | 0,60 | 0,7721732 | 0,851901 |
| RP11-610P16.1  | 0,00 | 0,00 | 0,00 | 0,00 | 0,7723072 | NA       |
| RP11-241K18.3  | 0,00 | 0,11 | 0,00 | 0,00 | 0,772322  | NA       |
| ZNF511         | 5,08 | 5,31 | 5,19 | 3,80 | 0,7723575 | 0,852062 |
| RP11-1033H12.1 | 0,00 | 0,00 | 0,00 | 0,00 | 0,7723977 | NA       |
| RP11-630D6.5   | 0,42 | 0,74 | 0,43 | 0,32 | 0,7724219 | 0,852091 |
| NCRNA00113     | 2,35 | 0,41 | 1,38 | 0,34 | 0,7725528 | 0,852193 |
| AP000240.5     | 0,82 | 1,45 | 1,29 | 1,23 | 0,7726924 | 0,852305 |
| RP3-477M7.4    | 0,00 | 0,00 | 0,00 | 0,23 | 0,772708  | NA       |
| RP11-219D15.3  | 0,00 | 0,00 | 0,00 | 0,00 | 0,772765  | NA       |
| TM9SF1         | 4,42 | 1,44 | 3,47 | 4,42 | 0,7728973 | 0,852486 |
| ARMC2          | 0,00 | 0,00 | 0,38 | 0,40 | 0,7729332 | 0,852486 |
| GS1-124K5.10   | 0,00 | 0,00 | 0,00 | 0,00 | 0,7729801 | NA       |
| RNU2-16P       | 2,38 | 3,20 | 1,52 | 0,00 | 0,7729954 | 0,852499 |
| RP11-613E4.1   | 0,00 | 0,00 | 0,00 | 0,00 | 0,7729985 | NA       |
| RP11-805L22.3  | 0,34 | 0,61 | 0,00 | 0,00 | 0,7730216 | 0,852499 |
| ZFP90          | 1,79 | 2,66 | 2,16 | 1,81 | 0,7730701 | 0,85251  |
| RP4-608O15.4   | 0,00 | 0,00 | 0,00 | 0,00 | 0,7731674 | NA       |

|                |      |      |      |      |           |          |
|----------------|------|------|------|------|-----------|----------|
| RP11-90L9.4    | 0,50 | 0,36 | 0,58 | 0,07 | 0,7731884 | 0,852524 |
| FBP1           | 6,18 | 5,31 | 6,24 | 5,35 | 0,7731887 | 0,852524 |
| DAG1           | 0,80 | 0,36 | 1,35 | 1,58 | 0,7731981 | 0,852524 |
| RP11-68L18.1   | 0,00 | 0,00 | 0,00 | 0,00 | 0,7731984 | NA       |
| NUDT18         | 0,16 | 0,19 | 1,33 | 1,24 | 0,7732958 | 0,852569 |
| ICMT           | 2,40 | 0,60 | 2,01 | 1,33 | 0,7733153 | 0,852569 |
| MIR6781        | 0,00 | 0,00 | 0,00 | 0,00 | 0,773344  | NA       |
| RP11-326I11.5  | 0,00 | 0,00 | 0,00 | 0,00 | 0,7733912 | NA       |
| CTD-2247C11.4  | 0,00 | 0,00 | 0,00 | 0,00 | 0,7735271 | NA       |
| RP1-265C24.8   | 0,00 | 0,05 | 0,02 | 0,09 | 0,7735873 | 0,852826 |
| RAB40B         | 0,15 | 0,58 | 0,41 | 0,95 | 0,7736587 | 0,852862 |
| RFX3           | 3,61 | 2,72 | 2,51 | 3,94 | 0,7737238 | 0,852862 |
| FAM45A         | 4,98 | 5,30 | 4,77 | 4,46 | 0,773735  | 0,852862 |
| CCL15          | 0,00 | 0,00 | 0,00 | 0,00 | 0,7737491 | NA       |
| TRDMT1         | 4,77 | 2,79 | 4,68 | 3,00 | 0,7738157 | 0,852909 |
| CTHRC1         | 0,00 | 0,00 | 0,00 | 0,00 | 0,7738953 | NA       |
| SNORA47        | 0,00 | 0,00 | 0,00 | 0,00 | 0,7739108 | NA       |
| RP11-133K1.9   | 0,91 | 1,45 | 1,32 | 0,53 | 0,7740119 | 0,853076 |
| CTC-303L1.2    | 0,00 | 0,00 | 0,00 | 0,00 | 0,7740259 | NA       |
| RP11-831F12.2  | 0,43 | 0,00 | 0,00 | 0,61 | 0,7740445 | 0,853076 |
| RP11-288K12.1  | 0,00 | 0,00 | 0,00 | 0,00 | 0,7740606 | NA       |
| RP1-209B5.2    | 0,00 | 0,00 | 0,00 | 0,00 | 0,7741025 | NA       |
| RP11-50D9.3    | 0,03 | 0,10 | 0,06 | 0,00 | 0,7741883 | 0,853169 |
| CTC-304I17.5   | 0,00 | 0,04 | 0,00 | 0,41 | 0,7742049 | 0,853169 |
| RPL13P4        | 0,00 | 0,00 | 0,00 | 0,00 | 0,7742923 | NA       |
| NUTM2B         | 0,00 | 0,00 | 0,00 | 0,06 | 0,774312  | NA       |
| HEBP1          | 4,14 | 2,63 | 3,87 | 2,45 | 0,7744586 | 0,853355 |
| SIRT6          | 2,83 | 2,06 | 2,23 | 2,01 | 0,7744773 | 0,853355 |
| AC079807.2     | 0,00 | 0,00 | 0,00 | 0,00 | 0,7745036 | 0,853355 |
| AC005330.2     | 0,00 | 0,12 | 0,00 | 0,00 | 0,7745273 | 0,853355 |
| CTD-2135D7.2   | 0,02 | 0,00 | 0,07 | 0,00 | 0,774655  | 0,853425 |
| PSMA7          | 9,10 | 8,75 | 8,88 | 8,53 | 0,7746684 | 0,853425 |
| RP11-106M3.1   | 0,00 | 0,00 | 0,00 | 0,40 | 0,7747083 | NA       |
| RP11-322M19.4  | 0,00 | 0,00 | 0,00 | 0,66 | 0,7747094 | 0,853428 |
| RP11-384E5.2   | 0,00 | 0,00 | 0,00 | 0,00 | 0,7747805 | NA       |
| RN7SL316P      | 0,00 | 0,00 | 0,00 | 0,00 | 0,774798  | NA       |
| WFDC8          | 0,00 | 0,00 | 0,00 | 0,13 | 0,7748624 | NA       |
| RP11-256I9.1   | 0,00 | 0,12 | 0,00 | 0,00 | 0,7748656 | NA       |
| AC004957.6     | 0,00 | 0,17 | 0,00 | 0,00 | 0,7751941 | NA       |
| HAR1A          | 0,00 | 0,00 | 0,00 | 0,00 | 0,7752371 | NA       |
| GGCX           | 4,21 | 3,84 | 3,83 | 4,07 | 0,7752847 | 0,85402  |
| CTD-3028N15.3  | 0,00 | 0,00 | 0,00 | 0,00 | 0,7753946 | NA       |
| RP3-348I23.2   | 0,00 | 0,00 | 0,00 | 0,00 | 0,7754295 | NA       |
| UBN1           | 2,89 | 2,87 | 2,91 | 3,17 | 0,775439  | 0,854122 |
| MSH5-SAPCD1    | 0,66 | 0,00 | 0,00 | 0,00 | 0,7754776 | 0,854122 |
| FZD2           | 2,83 | 3,26 | 2,63 | 4,10 | 0,7754932 | 0,854122 |
| MIR3661        | 0,00 | 0,00 | 0,00 | 0,00 | 0,7755295 | NA       |
| AC008984.7     | 0,00 | 0,00 | 0,00 | 0,00 | 0,7756906 | NA       |
| RP4-665J23.3   | 0,00 | 0,00 | 0,00 | 0,00 | 0,7757448 | NA       |
| RP11-379C10.1  | 0,00 | 1,39 | 0,61 | 1,33 | 0,7757918 | 0,854409 |
| RP11-1024P17.1 | 0,05 | 0,00 | 0,09 | 0,85 | 0,7758358 | 0,854415 |
| RP11-47I17.2   | 0,00 | 0,00 | 0,00 | 0,34 | 0,7759386 | NA       |
| BCOR           | 3,13 | 1,98 | 2,80 | 1,41 | 0,7759717 | 0,854522 |
| RP11-697M17.2  | 0,00 | 0,00 | 0,00 | 0,00 | 0,776041  | NA       |
| SERPINB7       | 0,00 | 0,00 | 0,00 | 0,00 | 0,7761086 | NA       |

|                |      |      |      |      |           |          |
|----------------|------|------|------|------|-----------|----------|
| RP11-390P24.1  | 0,28 | 0,00 | 0,30 | 0,30 | 0,7761232 | 0,854647 |
| RPL39L         | 1,39 | 1,37 | 0,73 | 1,10 | 0,7761908 | 0,854675 |
| RP11-477L16.2  | 0,00 | 0,00 | 0,00 | 0,00 | 0,776207  | NA       |
| RBM12B         | 1,17 | 0,04 | 1,23 | 0,48 | 0,776237  | 0,854675 |
| RP11-128P17.1  | 0,00 | 0,00 | 0,00 | 0,00 | 0,7762579 | NA       |
| CBX1           | 2,68 | 3,45 | 2,58 | 2,18 | 0,7762642 | 0,854675 |
| EEFSEC         | 2,92 | 3,87 | 2,22 | 2,63 | 0,7764455 | 0,854832 |
| KLB            | 0,12 | 0,33 | 0,25 | 0,17 | 0,7765679 | 0,854925 |
| AP006216.12    | 0,00 | 0,00 | 0,00 | 0,00 | 0,77663   | NA       |
| RP11-16E23.5   | 0,00 | 0,00 | 0,00 | 0,00 | 0,7766335 | NA       |
| RP5-998N21.4   | 0,00 | 0,00 | 0,00 | 0,00 | 0,7766338 | NA       |
| RP11-467D6.1   | 0,51 | 0,12 | 0,79 | 0,51 | 0,7766372 | 0,854959 |
| RP11-816B4.1   | 0,00 | 0,00 | 0,00 | 0,00 | 0,7766683 | NA       |
| RP11-131L12.4  | 3,28 | 2,99 | 2,59 | 2,43 | 0,7767483 | 0,855039 |
| KRT78          | 0,00 | 0,00 | 0,00 | 0,00 | 0,776848  | NA       |
| CTD-2017D11.1  | 1,28 | 2,48 | 1,95 | 2,46 | 0,776857  | 0,855095 |
| RP4-580N22.2   | 0,00 | 2,79 | 0,00 | 0,00 | 0,7768766 | 0,855095 |
| RP11-290O12.2  | 0,00 | 0,00 | 0,00 | 0,00 | 0,776908  | NA       |
| CTA-293F17.1   | 0,00 | 0,00 | 0,00 | 0,00 | 0,7769357 | NA       |
| RN7SL124P      | 0,00 | 0,00 | 0,00 | 0,00 | 0,776976  | NA       |
| SPATA2         | 0,52 | 0,71 | 0,44 | 1,53 | 0,7769794 | 0,855166 |
| AC106862.1     | 0,00 | 0,00 | 0,00 | 0,00 | 0,7770402 | NA       |
| RP11-85B7.5    | 0,00 | 0,00 | 0,00 | 0,00 | 0,7771466 | NA       |
| AC011524.2     | 0,00 | 0,00 | 0,00 | 0,00 | 0,7771736 | NA       |
| RP11-707G14.3  | 0,00 | 0,00 | 0,00 | 0,00 | 0,7771815 | NA       |
| TBC1D3         | 0,00 | 0,00 | 0,00 | 0,00 | 0,7771911 | NA       |
| FBXL17         | 1,97 | 2,53 | 2,37 | 3,49 | 0,7772667 | 0,85544  |
| RP11-620I15.3  | 3,35 | 1,04 | 2,64 | 1,02 | 0,7773594 | 0,855441 |
| SSX4B          | 0,00 | 0,00 | 0,00 | 0,00 | 0,7773667 | NA       |
| SAP30BP        | 5,88 | 6,63 | 5,82 | 5,68 | 0,7773911 | 0,855441 |
| CHMP2A         | 7,73 | 7,78 | 7,55 | 7,49 | 0,7773973 | 0,855441 |
| RP11-363L24.3  | 0,00 | 1,45 | 0,00 | 0,00 | 0,7774219 | 0,855441 |
| RP11-1217F2.14 | 0,00 | 0,00 | 0,00 | 0,00 | 0,7774496 | NA       |
| RP11-567P17.4  | 0,00 | 0,00 | 0,00 | 0,00 | 0,7774843 | NA       |
| FFAR1          | 0,05 | 0,17 | 0,05 | 0,00 | 0,7774867 | 0,85547  |
| TRIM6-TRIM34   | 0,00 | 0,00 | 0,00 | 0,00 | 0,7775004 | NA       |
| RP11-381P6.1   | 0,00 | 0,31 | 0,00 | 0,36 | 0,7775497 | NA       |
| RP11-725G5.3   | 0,00 | 0,00 | 0,00 | 0,00 | 0,7776244 | NA       |
| ARSI           | 0,00 | 0,04 | 0,00 | 0,00 | 0,777657  | NA       |
| RNU6-218P      | 0,00 | 0,00 | 0,00 | 0,00 | 0,7776676 | NA       |
| OXR1           | 4,78 | 4,24 | 4,88 | 4,18 | 0,7776707 | 0,85563  |
| RP5-981O7.2    | 0,00 | 0,00 | 0,00 | 0,00 | 0,7776762 | NA       |
| RP11-791G16.1  | 0,00 | 0,00 | 0,00 | 0,00 | 0,7777481 | NA       |
| CUZD1          | 0,00 | 0,00 | 0,00 | 0,00 | 0,7777856 | 0,855714 |
| L29074.1       | 1,46 | 1,54 | 1,53 | 1,08 | 0,777871  | 0,855766 |
| AP001062.8     | 0,00 | 0,00 | 0,00 | 0,00 | 0,7781285 | 0,856007 |
| PPT2           | 0,00 | 0,00 | 0,00 | 0,00 | 0,7782525 | NA       |
| OR1S2          | 0,00 | 0,00 | 0,00 | 0,00 | 0,7783322 | NA       |
| PHKA2          | 3,57 | 4,05 | 3,51 | 3,28 | 0,7783896 | 0,856252 |
| RP11-484D18.4  | 0,00 | 0,00 | 0,00 | 0,00 | 0,7784681 | NA       |
| FRG1GP         | 0,00 | 0,00 | 0,00 | 0,00 | 0,7785263 | NA       |
| LA16c-360H6.3  | 0,00 | 0,00 | 0,00 | 0,00 | 0,7785732 | NA       |
| SHANK3         | 0,00 | 0,00 | 0,00 | 0,00 | 0,7785894 | NA       |
| HEATR9         | 0,00 | 0,05 | 0,00 | 0,00 | 0,7786055 | NA       |
| MDN1           | 3,82 | 4,08 | 3,19 | 2,69 | 0,7786124 | 0,856454 |

|               |      |      |      |      |           |          |
|---------------|------|------|------|------|-----------|----------|
| RPAP1         | 2,73 | 3,72 | 2,63 | 1,58 | 0,7787217 | 0,856506 |
| PRKAA1        | 4,42 | 3,84 | 4,40 | 4,62 | 0,7787377 | 0,856506 |
| RP11-11I2.3   | 0,00 | 0,37 | 0,00 | 0,00 | 0,778779  | 0,856506 |
| AC005176.2    | 0,00 | 0,10 | 0,00 | 0,06 | 0,7788092 | NA       |
| RP11-343J3.2  | 0,00 | 0,00 | 0,00 | 0,40 | 0,7788772 | 0,856506 |
| WNT4          | 0,06 | 0,03 | 0,05 | 0,03 | 0,7788958 | 0,856506 |
| PLSCR3        | 3,44 | 2,56 | 3,60 | 2,60 | 0,7789251 | 0,856506 |
| RP1-102K2.9   | 0,13 | 0,17 | 0,30 | 0,03 | 0,7789291 | 0,856506 |
| RP11-66H6.4   | 0,00 | 0,00 | 0,00 | 0,00 | 0,7789323 | NA       |
| RP3-401D24.1  | 0,00 | 0,00 | 0,00 | 0,00 | 0,7789871 | NA       |
| RP11-631M21.7 | 0,00 | 0,00 | 0,00 | 0,00 | 0,7790177 | NA       |
| CPN2          | 0,54 | 0,98 | 0,53 | 0,46 | 0,7791664 | 0,856724 |
| FAM3C         | 2,90 | 3,38 | 2,73 | 1,47 | 0,7792047 | 0,856724 |
| RP11-230L22.4 | 0,00 | 0,00 | 0,00 | 0,00 | 0,7792341 | NA       |
| RP1-80B9.2    | 4,32 | 3,38 | 4,36 | 4,58 | 0,7792924 | 0,856773 |
| RP11-420L9.5  | 0,10 | 0,10 | 0,04 | 0,00 | 0,7793262 | 0,856773 |
| RP11-685N10.1 | 0,00 | 0,00 | 0,00 | 0,00 | 0,7794436 | NA       |
| GTF2H2        | 2,74 | 3,28 | 2,10 | 0,96 | 0,7794633 | 0,856881 |
| PFN1P6        | 0,00 | 0,00 | 0,00 | 0,00 | 0,7794931 | NA       |
| KCNG2         | 0,00 | 0,00 | 0,00 | 0,00 | 0,7795214 | NA       |
| RP11-219E7.2  | 0,00 | 0,00 | 0,00 | 0,00 | 0,7796938 | NA       |
| ZNF706        | 7,33 | 6,82 | 6,72 | 7,01 | 0,7797479 | 0,857152 |
| AREL1         | 3,76 | 3,46 | 3,70 | 2,94 | 0,779898  | 0,857274 |
| ACTR3BP3      | 0,00 | 0,00 | 0,00 | 0,00 | 0,7799691 | NA       |
| RPL9P2        | 0,00 | 0,00 | 0,00 | 0,00 | 0,7799831 | NA       |
| RP1-102E24.6  | 0,00 | 0,00 | 0,00 | 0,00 | 0,7799999 | NA       |
| SERBP1        | 6,54 | 5,86 | 6,49 | 5,95 | 0,7800072 | 0,857352 |
| CTC-736O2.1   | 0,00 | 0,00 | 0,00 | 0,00 | 0,7800926 | 0,857404 |
| MIR4502       | 0,00 | 0,00 | 0,00 | 0,00 | 0,780097  | NA       |
| RP11-550E22.4 | 0,00 | 0,00 | 0,00 | 0,21 | 0,7801199 | NA       |
| AC013791.10   | 0,00 | 0,00 | 0,00 | 0,00 | 0,7802774 | NA       |
| RP11-473O4.5  | 0,00 | 0,00 | 0,00 | 0,00 | 0,7802793 | NA       |
| RP11-381O6.1  | 0,00 | 0,00 | 0,00 | 0,00 | 0,7803213 | NA       |
| RP11-656E20.5 | 0,00 | 0,00 | 0,00 | 0,00 | 0,780335  | NA       |
| NECAP1        | 4,89 | 2,36 | 4,78 | 4,17 | 0,7803786 | 0,857675 |
| RP11-179F17.6 | 0,00 | 0,00 | 0,00 | 0,00 | 0,7804162 | NA       |
| RP11-373D17.1 | 0,00 | 0,00 | 0,00 | 0,02 | 0,7804594 | NA       |
| FOXE1         | 0,00 | 0,00 | 0,00 | 0,00 | 0,7804724 | NA       |
| CNOT6         | 2,79 | 2,99 | 2,77 | 2,41 | 0,7805032 | 0,85777  |
| RP11-49O14.3  | 0,00 | 0,00 | 0,00 | 0,00 | 0,7805683 | NA       |
| CTD-2311B13.9 | 0,80 | 1,32 | 0,84 | 0,77 | 0,7806731 | 0,857914 |
| RP11-31I22.3  | 0,00 | 0,00 | 0,00 | 0,00 | 0,7806959 | NA       |
| RP11-422P15.3 | 0,00 | 0,00 | 0,08 | 0,00 | 0,780771  | 0,857969 |
| SMAD4         | 3,43 | 0,77 | 3,43 | 3,79 | 0,7807999 | 0,857969 |
| KB-68A7.2     | 0,00 | 0,00 | 0,00 | 0,00 | 0,7808245 | NA       |
| RP11-844P9.1  | 0,00 | 0,00 | 0,00 | 0,00 | 0,7808428 | NA       |
| MYO22         | 0,00 | 0,00 | 0,00 | 0,00 | 0,7809008 | NA       |
| RP4-702J19.1  | 0,00 | 0,00 | 0,00 | 0,00 | 0,7809042 | NA       |
| BATF3         | 5,42 | 5,68 | 5,45 | 5,43 | 0,780942  | 0,858049 |
| RP11-54K22.1  | 0,00 | 0,00 | 0,00 | 0,00 | 0,78096   | NA       |
| RP11-365P13.3 | 0,78 | 0,87 | 0,76 | 0,00 | 0,7809951 | 0,858049 |
| LA16c-385E7.1 | 2,17 | 0,69 | 1,58 | 2,18 | 0,7810393 | 0,858049 |
| SNORD11       | 6,14 | 2,29 | 4,44 | 2,38 | 0,78107   | 0,858049 |
| LRRC37BP1     | 3,17 | 1,90 | 2,44 | 2,01 | 0,7810892 | 0,858049 |
| AP000962.1    | 0,76 | 0,41 | 0,57 | 0,33 | 0,7811267 | 0,858049 |

|               |      |      |      |      |           |          |
|---------------|------|------|------|------|-----------|----------|
| MRPS21        | 5,60 | 5,86 | 5,43 | 5,36 | 0,7811781 | 0,858049 |
| AC105760.2    | 0,89 | 0,98 | 0,53 | 0,54 | 0,7811818 | 0,858049 |
| AC091178.1    | 0,00 | 0,00 | 0,00 | 0,03 | 0,7812672 | NA       |
| RP11-4501.4   | 0,00 | 0,00 | 0,00 | 0,00 | 0,7813086 | NA       |
| AC011933.2    | 2,67 | 4,19 | 3,82 | 3,52 | 0,7813613 | 0,858204 |
| RP11-131L23.2 | 0,00 | 0,00 | 0,00 | 0,00 | 0,7813662 | NA       |
| PIPSL         | 0,05 | 0,04 | 0,05 | 0,07 | 0,7814311 | 0,858238 |
| RNU4-47P      | 0,00 | 0,00 | 0,00 | 0,00 | 0,781477  | NA       |
| RN7SL574P     | 0,00 | 0,00 | 0,00 | 0,00 | 0,7815094 | NA       |
| RP11-293F5.4  | 0,00 | 0,00 | 0,00 | 0,00 | 0,7815613 | NA       |
| PDE6C         | 0,00 | 0,00 | 0,08 | 0,00 | 0,7816399 | 0,858425 |
| MIR4639       | 0,00 | 0,00 | 0,00 | 0,00 | 0,7816904 | NA       |
| RP1-130H16.18 | 0,00 | 0,00 | 0,00 | 0,00 | 0,781788  | NA       |
| AC018755.16   | 0,00 | 0,19 | 0,00 | 0,00 | 0,7817989 | NA       |
| PTER          | 2,47 | 1,37 | 2,14 | 1,81 | 0,7818032 | 0,858562 |
| RP11-152L7.2  | 1,01 | 1,29 | 0,90 | 1,15 | 0,7819279 | 0,858656 |
| AC021218.2    | 0,00 | 0,00 | 0,00 | 0,00 | 0,7822394 | NA       |
| RP5-890E16.4  | 0,00 | 0,00 | 0,00 | 0,00 | 0,7822516 | NA       |
| RF00411       | 0,00 | 0,00 | 0,00 | 0,00 | 0,7823117 | NA       |
| FAM111A       | 4,86 | 2,45 | 4,27 | 5,08 | 0,7823269 | 0,859052 |
| TMEM11        | 4,98 | 6,16 | 4,75 | 4,15 | 0,7823704 | 0,859057 |
| RP11-166B2.5  | 0,00 | 0,00 | 0,00 | 0,10 | 0,7824055 | NA       |
| DBNL          | 6,37 | 6,94 | 6,15 | 5,63 | 0,7824852 | 0,859141 |
| RP11-212I21.5 | 0,00 | 0,00 | 0,00 | 0,00 | 0,7825259 | NA       |
| OR51L1        | 0,49 | 0,63 | 0,07 | 0,07 | 0,7826221 | 0,859249 |
| CORT          | 0,00 | 0,00 | 0,00 | 0,00 | 0,7826671 | NA       |
| ZSCAN9        | 2,92 | 1,91 | 3,31 | 1,39 | 0,7827284 | 0,859323 |
| RP11-424M24.5 | 0,00 | 0,00 | 0,00 | 0,00 | 0,7827347 | NA       |
| ADAMTS3       | 0,00 | 0,04 | 0,00 | 0,00 | 0,7827908 | NA       |
| TSSK3         | 0,00 | 0,00 | 0,00 | 0,00 | 0,7828126 | NA       |
| RP11-421L21.3 | 0,95 | 0,22 | 0,45 | 1,28 | 0,7828376 | 0,859369 |
| TCF12         | 5,07 | 3,69 | 4,71 | 3,07 | 0,7828474 | 0,859369 |
| RP11-534C12.1 | 0,00 | 0,00 | 0,00 | 0,00 | 0,7829708 | NA       |
| RP11-479I16.2 | 0,00 | 0,00 | 0,00 | 0,00 | 0,7829815 | NA       |
| ARHGAP1       | 4,98 | 4,15 | 4,92 | 4,60 | 0,7830049 | 0,859481 |
| RP5-1103G7.4  | 0,00 | 0,26 | 0,00 | 0,00 | 0,783045  | 0,859481 |
| RP11-812E19.4 | 0,00 | 0,00 | 0,00 | 0,00 | 0,7830486 | NA       |
| AC013439.4    | 0,00 | 0,00 | 0,00 | 0,00 | 0,7830817 | NA       |
| GOLPH3        | 4,25 | 3,03 | 4,13 | 4,02 | 0,7830963 | 0,859481 |
| AC018755.24   | 0,93 | 0,66 | 0,66 | 0,53 | 0,7831046 | 0,859481 |
| RPL23AP64     | 0,00 | 0,00 | 0,00 | 0,00 | 0,7832332 | NA       |
| MRPS33        | 5,34 | 5,06 | 5,06 | 4,90 | 0,7833091 | 0,859663 |
| RP11-432J24.3 | 0,00 | 0,00 | 0,00 | 0,00 | 0,7833251 | NA       |
| RP11-351M8.1  | 0,00 | 0,00 | 0,00 | 0,00 | 0,7833409 | NA       |
| RP11-88H12.2  | 0,00 | 0,00 | 0,00 | 0,00 | 0,7833611 | NA       |
| GALK2         | 3,68 | 2,59 | 3,58 | 3,20 | 0,7834079 | 0,859691 |
| SLC35E4       | 0,70 | 0,74 | 1,27 | 0,90 | 0,7834114 | 0,859691 |
| RP11-78F17.1  | 1,27 | 1,96 | 1,28 | 1,34 | 0,7835176 | 0,859765 |
| RP11-426C22.8 | 3,29 | 0,00 | 1,72 | 3,11 | 0,7835745 | 0,859785 |
| RP11-79D8.2   | 2,77 | 0,00 | 1,99 | 0,00 | 0,7836274 | 0,8598   |
| LINC00528     | 2,31 | 3,21 | 1,87 | 0,80 | 0,7837125 | 0,859851 |
| RP11-9M16.2   | 0,00 | 0,00 | 0,00 | 0,00 | 0,7837266 | NA       |
| SNORD99       | 7,45 | 5,60 | 6,20 | 7,37 | 0,7838146 | 0,859921 |
| LINC00235     | 0,00 | 0,00 | 0,00 | 0,00 | 0,7840181 | NA       |
| RF00090       | 0,00 | 0,00 | 0,00 | 1,22 | 0,7840546 | NA       |

|                |      |      |      |      |           |          |
|----------------|------|------|------|------|-----------|----------|
| SNORA14B       | 0,00 | 0,00 | 0,00 | 0,00 | 0,784284  | NA       |
| RP4-635A23.2   | 0,32 | 0,20 | 0,34 | 0,16 | 0,7843119 | 0,860424 |
| BLACAT1        | 0,00 | 0,00 | 0,00 | 0,00 | 0,7843686 | NA       |
| EPB41L2        | 4,84 | 4,54 | 4,61 | 4,99 | 0,7844348 | 0,860511 |
| RP5-1157M23.2  | 0,00 | 0,00 | 0,00 | 0,00 | 0,7844655 | NA       |
| RP5-997D16.2   | 0,00 | 0,00 | 0,00 | 0,00 | 0,7844683 | 0,860511 |
| RP11-333E13.2  | 1,75 | 0,79 | 0,36 | 1,35 | 0,7845691 | 0,860528 |
| GTF2A1         | 3,43 | 0,98 | 2,97 | 2,41 | 0,784589  | 0,860528 |
| RGN            | 0,00 | 0,08 | 0,00 | 0,00 | 0,7845933 | NA       |
| AC062017.1     | 0,00 | 0,00 | 0,00 | 0,89 | 0,7845999 | 0,860528 |
| NCRNA00168     | 0,00 | 0,00 | 0,00 | 0,00 | 0,7846827 | NA       |
| MIR93          | 0,00 | 0,00 | 0,00 | 0,00 | 0,7847834 | NA       |
| ZNF565         | 0,00 | 0,00 | 0,14 | 0,00 | 0,7848525 | NA       |
| COG7           | 3,64 | 2,17 | 2,64 | 2,53 | 0,7849716 | 0,860893 |
| USP47          | 5,22 | 4,31 | 4,89 | 4,06 | 0,7850705 | 0,860904 |
| RNU6-1208P     | 0,00 | 0,00 | 0,00 | 0,00 | 0,7850768 | NA       |
| KCNS1          | 0,00 | 0,00 | 0,00 | 0,00 | 0,7850947 | NA       |
| PDIA3P1        | 0,10 | 0,00 | 0,00 | 0,10 | 0,7850972 | 0,860904 |
| NXNL1          | 0,00 | 0,00 | 0,09 | 0,57 | 0,7851504 | 0,860904 |
| RP11-365K22.1  | 0,32 | 0,89 | 0,30 | 0,31 | 0,7851901 | NA       |
| SASH3          | 5,55 | 5,30 | 5,15 | 4,60 | 0,7852002 | 0,860904 |
| RP11-562A8.5   | 0,00 | 0,00 | 0,00 | 0,00 | 0,7852083 | 0,860904 |
| IQCJ-SCHIP1    | 0,84 | 0,67 | 0,66 | 0,68 | 0,7852138 | 0,860904 |
| AC016723.4     | 0,00 | 0,00 | 0,00 | 0,00 | 0,7853025 | NA       |
| CTD-2651B20.4  | 0,05 | 0,12 | 0,02 | 0,06 | 0,7853087 | 0,860965 |
| RP11-440D17.3  | 0,00 | 0,00 | 0,00 | 0,00 | 0,7853171 | NA       |
| RP11-444E17.6  | 0,36 | 0,04 | 0,03 | 0,12 | 0,7853513 | 0,860969 |
| RP4-756H11.2   | 0,59 | 0,02 | 0,16 | 0,00 | 0,7854488 | NA       |
| RP11-526F14.1  | 2,35 | 1,04 | 2,88 | 1,68 | 0,7854921 | 0,861081 |
| CLDN10         | 0,00 | 0,16 | 0,00 | 0,00 | 0,7855569 | 0,861106 |
| ZFP28          | 0,17 | 0,07 | 0,04 | 0,06 | 0,7855923 | 0,861106 |
| MIR548AZ       | 0,00 | 0,00 | 0,00 | 0,00 | 0,7856325 | 0,861108 |
| MAP3K4         | 4,18 | 3,71 | 4,04 | 3,55 | 0,7857212 | 0,861163 |
| RP11-350N15.3  | 0,00 | 0,00 | 0,00 | 0,00 | 0,7858024 | NA       |
| TNPO1P1        | 0,00 | 3,18 | 0,00 | 0,11 | 0,785848  | 0,861259 |
| SLFN14         | 0,00 | 0,00 | 0,00 | 0,00 | 0,7859229 | NA       |
| SNORA16A       | 0,00 | 1,64 | 0,00 | 0,00 | 0,7860204 | NA       |
| C16orf90       | 0,00 | 0,00 | 0,00 | 0,00 | 0,7860466 | NA       |
| GUCY2F         | 0,00 | 0,00 | 0,00 | 0,00 | 0,7860682 | NA       |
| RP11-485M7.1   | 0,00 | 0,00 | 0,00 | 0,00 | 0,7861539 | NA       |
| ERN1           | 3,18 | 2,17 | 2,77 | 2,42 | 0,7862557 | 0,861647 |
| RP11-505E24.3  | 0,00 | 0,00 | 0,00 | 0,00 | 0,7862698 | NA       |
| HSF1           | 3,42 | 1,69 | 3,64 | 2,71 | 0,7862796 | 0,861647 |
| FAM138B        | 0,00 | 0,00 | 0,00 | 0,00 | 0,7863648 | NA       |
| RP11-818C3.1   | 0,00 | 0,00 | 0,00 | 0,00 | 0,786474  | NA       |
| RN7SL350P      | 0,00 | 0,00 | 0,00 | 0,79 | 0,7864843 | NA       |
| RP5-1065J22.8  | 0,37 | 1,08 | 0,37 | 0,41 | 0,7864965 | 0,861842 |
| CTD-2341D24.1  | 0,00 | 0,00 | 0,00 | 0,00 | 0,7865096 | NA       |
| RP5-945F2.2    | 0,00 | 0,00 | 0,00 | 0,00 | 0,7866534 | 0,861972 |
| RP11-370B11.4  | 0,00 | 0,15 | 0,00 | 0,18 | 0,7866751 | NA       |
| RP11-216M21.4  | 0,00 | 0,00 | 0,00 | 0,00 | 0,7866831 | NA       |
| RP11-262H14.13 | 0,00 | 0,00 | 0,00 | 0,00 | 0,7868    | NA       |
| RP11-556O9.2   | 0,00 | 0,00 | 0,00 | 0,00 | 0,7868708 | NA       |
| RP11-106D4.3   | 0,00 | 0,00 | 0,00 | 0,00 | 0,7868785 | NA       |
| RP11-356J5.4   | 0,00 | 0,00 | 0,00 | 0,00 | 0,7869058 | 0,862192 |

|                |      |      |      |      |           |          |
|----------------|------|------|------|------|-----------|----------|
| PMF1           | 5,94 | 6,05 | 6,10 | 5,05 | 0,7869319 | 0,862192 |
| FAM3B          | 0,38 | 0,37 | 0,20 | 0,51 | 0,7871057 | 0,86234  |
| MANEAL         | 0,00 | 0,00 | 0,00 | 0,00 | 0,7871723 | NA       |
| ZNF285B        | 0,00 | 0,00 | 0,00 | 0,00 | 0,7871921 | NA       |
| RPL5P3         | 0,00 | 0,20 | 0,00 | 0,16 | 0,7872372 | NA       |
| RNA5SP94       | 0,00 | 0,00 | 0,00 | 0,00 | 0,7872995 | NA       |
| CTD-2531D15.4  | 0,00 | 0,00 | 0,00 | 0,00 | 0,7873797 | 0,862557 |
| RREB1          | 2,77 | 1,47 | 2,91 | 2,50 | 0,7873942 | 0,862557 |
| SSC4D          | 0,00 | 0,00 | 0,00 | 0,00 | 0,7873956 | NA       |
| AC018814.1     | 0,00 | 0,00 | 0,00 | 0,00 | 0,7874252 | NA       |
| IKBKB          | 5,41 | 3,98 | 5,26 | 4,60 | 0,7874543 | 0,862557 |
| RP11-91P24.5   | 1,42 | 0,99 | 1,21 | 1,42 | 0,7874589 | 0,862557 |
| FAM220A        | 3,06 | 0,43 | 0,57 | 0,97 | 0,7875019 | 0,862561 |
| BAK1           | 3,17 | 2,75 | 3,06 | 1,83 | 0,7875408 | 0,862561 |
| MIR3198-1      | 3,06 | 0,00 | 2,59 | 0,00 | 0,7876438 | 0,862632 |
| RP3-443C4.2    | 0,00 | 0,00 | 0,00 | 0,00 | 0,7876678 | NA       |
| AC005488.12    | 0,00 | 0,00 | 0,00 | 0,00 | 0,7876952 | NA       |
| LHCGR          | 0,00 | 0,00 | 0,00 | 0,00 | 0,7876997 | NA       |
| CTD-2313N18.5  | 0,31 | 1,29 | 0,53 | 0,51 | 0,7878008 | 0,862761 |
| CTD-2410N18.3  | 0,00 | 0,10 | 0,00 | 0,00 | 0,787822  | NA       |
| RP11-259G18.2  | 0,00 | 0,00 | 0,00 | 0,00 | 0,7878367 | NA       |
| TMEM116        | 1,71 | 1,92 | 1,79 | 2,72 | 0,7879814 | 0,862916 |
| RP4-593C16.2   | 0,00 | 0,00 | 0,00 | 0,00 | 0,7879983 | NA       |
| FAM234A        | 3,09 | 2,85 | 3,02 | 2,48 | 0,7880422 | 0,86294  |
| C8orf46        | 0,00 | 1,53 | 0,00 | 0,04 | 0,7880926 | 0,862953 |
| LA16c-329F2.2  | 0,00 | 0,00 | 0,00 | 0,00 | 0,7881232 | NA       |
| RP11-414H17.5  | 0,00 | 0,00 | 0,00 | 0,00 | 0,78814   | NA       |
| PNP            | 6,23 | 6,00 | 5,93 | 5,24 | 0,7881589 | 0,862983 |
| GATC           | 1,62 | 1,05 | 1,84 | 1,56 | 0,7882554 | 0,863046 |
| RP4-796I8.1    | 0,00 | 0,00 | 0,00 | 0,00 | 0,7882893 | NA       |
| RP11-371A22.1  | 1,70 | 1,86 | 1,45 | 1,56 | 0,788298  | 0,86305  |
| NCRNA00208     | 0,00 | 0,00 | 0,00 | 0,00 | 0,7883203 | NA       |
| GPRASP2        | 0,00 | 0,00 | 0,00 | 0,00 | 0,78834   | NA       |
| SCGB1C1        | 0,00 | 0,00 | 0,00 | 0,00 | 0,7883452 | NA       |
| RP11-574K11.31 | 0,00 | 0,08 | 0,02 | 0,07 | 0,7883499 | 0,863065 |
| MIR181A2HG     | 0,00 | 0,00 | 0,00 | 0,00 | 0,7884009 | NA       |
| RP11-587P21.3  | 0,00 | 0,00 | 0,00 | 0,00 | 0,7884155 | NA       |
| FUT11          | 2,91 | 3,53 | 2,80 | 2,20 | 0,7884174 | 0,863096 |
| AC000059.1     | 2,83 | 0,00 | 2,79 | 0,63 | 0,7884816 | 0,863123 |
| FAM180B        | 0,18 | 0,00 | 0,10 | 0,10 | 0,7885197 | 0,863123 |
| AL672183.2     | 0,00 | 0,00 | 0,00 | 0,00 | 0,7885461 | NA       |
| RNY1           | 0,00 | 0,00 | 0,00 | 2,51 | 0,7885836 | NA       |
| RP11-1223D19.1 | 0,00 | 0,00 | 0,00 | 0,00 | 0,7886515 | NA       |
| DMPK           | 1,44 | 0,54 | 1,97 | 1,92 | 0,7886906 | 0,863226 |
| XPO7           | 3,71 | 2,59 | 3,00 | 2,85 | 0,7886918 | 0,863226 |
| RP5-1125N11.2  | 0,00 | 0,00 | 0,00 | 0,00 | 0,7887142 | NA       |
| B3GNT5         | 2,90 | 2,06 | 3,21 | 1,33 | 0,7887404 | 0,863237 |
| GNRH2          | 0,00 | 0,69 | 0,00 | 0,00 | 0,7887694 | NA       |
| CAMK1G         | 0,00 | 0,00 | 0,00 | 0,00 | 0,7888688 | NA       |
| RP11-732A19.8  | 0,00 | 0,00 | 0,00 | 0,00 | 0,7888791 | NA       |
| MAATS1         | 0,00 | 0,00 | 0,04 | 0,00 | 0,7888943 | 0,863363 |
| RP11-317N8.3   | 0,00 | 0,00 | 0,00 | 0,00 | 0,7890248 | NA       |
| RP11-490K7.4   | 3,51 | 1,40 | 3,67 | 3,12 | 0,7890251 | 0,863429 |
| C10orf31       | 3,00 | 1,37 | 2,74 | 1,35 | 0,7890323 | 0,863429 |
| RP11-210N13.1  | 0,00 | 0,00 | 0,00 | 0,00 | 0,7891831 | NA       |

|                |      |      |      |      |           |          |
|----------------|------|------|------|------|-----------|----------|
| AC002550.6     | 0,00 | 0,00 | 0,00 | 0,00 | 0,7893286 | NA       |
| RNU6-786P      | 0,00 | 0,00 | 0,00 | 1,98 | 0,7893714 | 0,863747 |
| RP4-771M4.3    | 0,72 | 1,69 | 0,52 | 1,61 | 0,7894004 | 0,863747 |
| RP1-92C8.2     | 0,00 | 0,00 | 0,00 | 0,00 | 0,7894428 | NA       |
| PSMD13         | 7,51 | 6,84 | 7,10 | 6,98 | 0,7894899 | 0,863802 |
| RNY4P3         | 0,00 | 0,00 | 0,00 | 0,00 | 0,7895321 | NA       |
| AC068313.1     | 0,00 | 0,00 | 0,00 | 0,00 | 0,789547  | NA       |
| CTD-2527I21.7  | 1,18 | 1,26 | 1,00 | 0,41 | 0,7895982 | 0,863878 |
| CNTD2          | 0,00 | 0,13 | 0,00 | 0,00 | 0,7896242 | NA       |
| RP13-16H11.6   | 0,00 | 0,00 | 0,00 | 0,00 | 0,7896966 | NA       |
| RIT1           | 4,73 | 4,44 | 4,60 | 3,91 | 0,789699  | 0,863937 |
| SERTAD2        | 4,38 | 3,66 | 4,38 | 4,20 | 0,7897296 | 0,863937 |
| COL10A1        | 0,00 | 0,00 | 0,00 | 0,00 | 0,7899575 | 0,864144 |
| CAPRIN2        | 2,50 | 1,53 | 1,38 | 1,43 | 0,7900454 | 0,864197 |
| RP11-64K7.1    | 0,00 | 0,00 | 0,00 | 0,00 | 0,7900559 | NA       |
| RP11-674I16.2  | 0,00 | 0,00 | 0,00 | 0,00 | 0,7901006 | NA       |
| TRIM26P        | 0,00 | 0,00 | 0,00 | 0,00 | 0,7902453 | NA       |
| APOC1P1        | 0,63 | 0,66 | 0,49 | 1,06 | 0,7902568 | 0,864386 |
| RP11-477E3.2   | 0,00 | 0,00 | 0,00 | 0,00 | 0,7902864 | NA       |
| RP11-87C12.2   | 0,00 | 0,00 | 0,00 | 0,00 | 0,7902989 | NA       |
| ACYP1          | 2,57 | 1,23 | 2,27 | 2,77 | 0,7904041 | 0,864466 |
| ASNA1          | 4,48 | 3,61 | 3,98 | 3,14 | 0,790408  | 0,864466 |
| IGKV1OR1-1     | 0,00 | 0,00 | 0,00 | 0,00 | 0,7904837 | NA       |
| RN7SL795P      | 0,00 | 0,00 | 0,00 | 0,00 | 0,7905129 | NA       |
| SMC1A          | 4,23 | 4,68 | 3,82 | 3,44 | 0,7905782 | 0,864601 |
| DDX49          | 5,24 | 4,88 | 5,19 | 5,50 | 0,7906092 | 0,864601 |
| MBLAC1         | 0,00 | 0,00 | 0,00 | 0,10 | 0,7906324 | NA       |
| ALK            | 0,00 | 0,00 | 0,00 | 0,00 | 0,7906455 | NA       |
| RN7SKP185      | 0,00 | 0,00 | 0,00 | 0,00 | 0,7906708 | NA       |
| B9D2           | 4,13 | 3,26 | 4,96 | 3,18 | 0,7907189 | 0,864679 |
| CTD-3105H18.11 | 0,00 | 0,00 | 0,00 | 0,00 | 0,790758  | NA       |
| TBC1D3H        | 0,00 | 0,00 | 0,00 | 0,00 | 0,7908306 | 0,864755 |
| RP5-899E9.1    | 0,00 | 0,00 | 0,00 | 0,00 | 0,7908907 | NA       |
| PURB           | 2,42 | 2,04 | 2,34 | 1,39 | 0,7909211 | 0,864755 |
| RPL9P28        | 0,00 | 0,34 | 0,00 | 0,00 | 0,7909269 | NA       |
| SAGE1          | 0,00 | 0,00 | 0,00 | 0,00 | 0,7909296 | 0,864755 |
| AC079305.9     | 0,00 | 4,32 | 0,00 | 0,74 | 0,7909633 | 0,864755 |
| AC104782.3     | 0,20 | 0,31 | 0,18 | 0,17 | 0,7909987 | 0,864755 |
| RP11-330H6.6   | 0,12 | 0,51 | 0,23 | 0,54 | 0,7910224 | 0,864755 |
| ABHD16A        | 4,86 | 5,65 | 5,07 | 4,04 | 0,7910669 | 0,864759 |
| WNK2           | 0,09 | 0,00 | 0,05 | 0,05 | 0,7911034 | 0,864759 |
| RP11-477N3.1   | 0,00 | 0,00 | 0,00 | 0,00 | 0,7911424 | 0,864759 |
| RN7SL140P      | 0,00 | 0,00 | 0,00 | 0,00 | 0,7912356 | NA       |
| GPR61          | 0,00 | 0,00 | 0,00 | 0,00 | 0,7913127 | NA       |
| PROSC          | 4,77 | 3,70 | 4,51 | 3,23 | 0,791467  | 0,865071 |
| MAFF           | 2,45 | 2,70 | 2,65 | 2,32 | 0,7915065 | 0,865072 |
| RPL21P5        | 0,00 | 0,00 | 0,00 | 0,00 | 0,7915829 | NA       |
| RP11-621L6.3   | 0,00 | 0,00 | 0,00 | 0,00 | 0,7915875 | NA       |
| RP5-921G16.1   | 0,00 | 0,00 | 0,00 | 0,00 | 0,79159   | NA       |
| RP11-126O22.5  | 0,00 | 0,00 | 0,00 | 0,00 | 0,7918105 | NA       |
| CRABP2         | 0,00 | 0,00 | 0,00 | 0,00 | 0,7918363 | NA       |
| FAM71E1        | 0,00 | 0,00 | 0,00 | 0,00 | 0,7919138 | NA       |
| ANKRD36C       | 4,62 | 3,95 | 3,71 | 3,54 | 0,7919584 | 0,865523 |
| EXT1           | 0,22 | 0,11 | 0,56 | 0,37 | 0,7920093 | 0,865524 |
| AC006077.3     | 0,95 | 0,82 | 0,46 | 0,53 | 0,7920375 | 0,865524 |



|                 |      |      |      |      |           |          |
|-----------------|------|------|------|------|-----------|----------|
| RP11-62C3.5     | 0,00 | 0,00 | 0,00 | 0,00 | 0,7921048 | NA       |
| CACNG3          | 0,00 | 0,00 | 0,00 | 0,00 | 0,7921582 | NA       |
| MIR3146         | 0,00 | 0,00 | 0,00 | 0,00 | 0,7921729 | NA       |
| RNU6-90P        | 0,00 | 0,00 | 0,00 | 0,00 | 0,7921757 | NA       |
| PTAR1           | 3,86 | 2,87 | 3,37 | 3,26 | 0,7921961 | 0,865655 |
| NAT8L           | 0,00 | 0,00 | 0,00 | 0,00 | 0,7922097 | NA       |
| PCDHGA11        | 0,00 | 0,00 | 0,00 | 0,00 | 0,7922958 | NA       |
| TMEM243         | 5,92 | 5,24 | 6,16 | 5,78 | 0,7923333 | 0,865762 |
| SPTY2D1         | 2,58 | 0,94 | 2,88 | 2,69 | 0,7923727 | 0,865763 |
| RSL24D1P11      | 0,00 | 0,00 | 0,00 | 0,00 | 0,7924083 | NA       |
| ZSCAN5A         | 2,34 | 1,75 | 1,88 | 0,82 | 0,7924783 | 0,865833 |
| RP11-190A12.10  | 0,00 | 0,00 | 0,00 | 0,00 | 0,7924868 | NA       |
| GSTA4           | 0,20 | 0,24 | 0,26 | 0,61 | 0,7925149 | 0,865833 |
| AC013267.4      | 0,00 | 0,00 | 0,00 | 0,00 | 0,7925319 | NA       |
| MIR4308         | 0,00 | 0,00 | 0,00 | 0,00 | 0,7926848 | NA       |
| RP11-61G19.1    | 0,00 | 0,00 | 0,00 | 0,00 | 0,7926854 | NA       |
| AC022153.1      | 0,00 | 0,28 | 0,00 | 0,00 | 0,7927046 | NA       |
| AC132479.4      | 0,00 | 0,00 | 0,00 | 0,00 | 0,7927524 | NA       |
| SOX2            | 0,00 | 0,00 | 0,00 | 0,10 | 0,7927603 | 0,866016 |
| RP11-308D16.2   | 0,28 | 1,06 | 0,60 | 0,53 | 0,7927603 | 0,866016 |
| RNA5SP408       | 0,00 | 0,00 | 0,00 | 0,00 | 0,7928108 | NA       |
| RP11-112L18.1   | 0,00 | 0,00 | 0,00 | 0,00 | 0,7928108 | NA       |
| AC073387.2      | 0,00 | 0,00 | 0,00 | 0,00 | 0,7928143 | NA       |
| AC005537.2      | 2,80 | 1,02 | 2,17 | 4,06 | 0,7928306 | 0,86605  |
| AC096559.1      | 0,00 | 0,00 | 0,00 | 0,00 | 0,7928789 | NA       |
| AC005326.2      | 0,00 | 0,00 | 0,00 | 0,00 | 0,7928868 | NA       |
| RP5-901O8.3     | 0,00 | 0,00 | 0,00 | 0,00 | 0,7929053 | 0,866089 |
| TEX261          | 3,26 | 2,87 | 2,77 | 2,87 | 0,7930181 | 0,86613  |
| TBC1D10A        | 3,45 | 3,26 | 2,55 | 2,62 | 0,7930208 | 0,86613  |
| STPG1           | 1,35 | 1,31 | 1,65 | 1,19 | 0,793097  | 0,866137 |
| SEC23B          | 4,98 | 5,12 | 4,71 | 4,33 | 0,7931047 | 0,866137 |
| LINC01451       | 0,00 | 0,00 | 0,00 | 0,00 | 0,7931384 | NA       |
| SNORD83A        | 0,00 | 0,00 | 0,00 | 0,00 | 0,7931953 | NA       |
| POTEA           | 0,00 | 0,00 | 0,00 | 0,00 | 0,7932041 | NA       |
| CACNG4          | 0,00 | 0,00 | 0,00 | 0,00 | 0,7932096 | NA       |
| OR7E104P        | 0,00 | 0,00 | 0,00 | 0,00 | 0,7932349 | NA       |
| GBP3            | 4,32 | 3,60 | 4,29 | 3,87 | 0,7933013 | 0,866309 |
| RP11-360P21.2   | 0,00 | 0,00 | 0,00 | 0,00 | 0,7933029 | NA       |
| RP11-104G3.7    | 0,00 | 0,00 | 0,00 | 0,00 | 0,7933109 | NA       |
| TBC1D7          | 5,59 | 5,32 | 5,66 | 4,14 | 0,7933538 | 0,866315 |
| RP11-226F19.4   | 0,00 | 1,52 | 0,53 | 0,00 | 0,7933853 | 0,866315 |
| RP11-122K13.8   | 0,00 | 0,00 | 0,00 | 0,00 | 0,7934386 | 0,866315 |
| RP11-370A5.1    | 0,00 | 0,00 | 0,00 | 0,00 | 0,7934631 | 0,866315 |
| RP11-112J3.15   | 0,00 | 0,00 | 0,00 | 0,00 | 0,7934699 | NA       |
| TM2D1           | 5,40 | 5,65 | 5,07 | 5,68 | 0,7935107 | 0,866325 |
| RP11-143K11.7   | 0,00 | 0,00 | 0,00 | 0,00 | 0,7935162 | NA       |
| RP11-108L7.14   | 0,00 | 0,00 | 0,00 | 0,00 | 0,7935259 | NA       |
| RP13-923O23.5   | 0,00 | 0,00 | 0,00 | 0,00 | 0,7935277 | NA       |
| CTD-2023M8.1    | 0,00 | 0,00 | 0,00 | 0,00 | 0,7936417 | NA       |
| RP11-430M15.1   | 0,00 | 0,00 | 0,00 | 0,00 | 0,7936488 | NA       |
| RP11-33N16.3    | 0,00 | 0,00 | 0,00 | 0,00 | 0,7937111 | NA       |
| RP11-244N20.7   | 0,00 | 0,00 | 0,00 | 0,00 | 0,7937607 | NA       |
| AC104113.3      | 0,00 | 0,00 | 0,00 | 0,00 | 0,7937805 | NA       |
| CTB-105N12.2    | 0,00 | 0,00 | 0,00 | 0,00 | 0,7938029 | NA       |
| XXbac-BPG27H4.8 | 0,00 | 1,01 | 0,00 | 0,00 | 0,7938097 | 0,866609 |

|               |      |      |      |      |           |          |
|---------------|------|------|------|------|-----------|----------|
| RF00599       | 0,00 | 0,00 | 0,00 | 0,00 | 0,7940082 | NA       |
| RP5-884M6.1   | 2,43 | 1,18 | 1,90 | 3,88 | 0,7940473 | 0,866762 |
| RIOK2         | 3,66 | 1,41 | 3,83 | 2,06 | 0,7940675 | 0,866762 |
| ARMCX1        | 2,13 | 0,20 | 0,45 | 1,14 | 0,7940693 | 0,866762 |
| IFNAR2        | 5,40 | 5,86 | 4,94 | 5,15 | 0,7941059 | 0,866762 |
| RP11-348P10.2 | 0,00 | 0,00 | 0,00 | 0,00 | 0,7941502 | 0,866768 |
| PHOX2B        | 0,00 | 0,00 | 0,00 | 0,00 | 0,7941943 | NA       |
| CTB-20D2.1    | 0,00 | 0,00 | 0,00 | 0,00 | 0,7944272 | NA       |
| MEI1          | 1,81 | 2,35 | 3,82 | 2,85 | 0,7944887 | 0,867094 |
| RP11-12D24.3  | 0,00 | 0,00 | 0,00 | 0,00 | 0,7945237 | NA       |
| NLK           | 1,68 | 0,78 | 1,85 | 0,55 | 0,7945488 | 0,867117 |
| AC015849.19   | 1,54 | 1,36 | 1,66 | 1,25 | 0,7946862 | 0,867192 |
| LRRC73        | 0,00 | 0,00 | 0,00 | 0,00 | 0,7946907 | NA       |
| PLA2G4C-AS1   | 0,00 | 0,00 | 0,00 | 0,32 | 0,7947027 | 0,867192 |
| RP11-264B14.2 | 3,51 | 3,16 | 3,67 | 3,71 | 0,7947342 | 0,867192 |
| MED17         | 3,73 | 4,48 | 3,70 | 3,67 | 0,7948038 | 0,867225 |
| RP11-192C21.3 | 0,00 | 0,00 | 0,00 | 0,00 | 0,7949826 | NA       |
| RASSF1        | 5,84 | 5,81 | 6,13 | 5,51 | 0,7951196 | 0,867515 |
| DPPA3         | 0,00 | 0,26 | 0,00 | 0,00 | 0,7951715 | 0,867515 |
| NDE1          | 2,54 | 3,03 | 3,21 | 3,45 | 0,7951867 | 0,867515 |
| RP11-327F22.4 | 0,00 | 0,00 | 0,00 | 0,00 | 0,7953317 | NA       |
| WDR53         | 1,00 | 0,00 | 0,74 | 0,50 | 0,7954341 | 0,867699 |
| RP11-702F3.1  | 1,50 | 1,92 | 1,88 | 1,77 | 0,7954402 | 0,867699 |
| RNU6-142P     | 0,00 | 0,00 | 0,00 | 0,00 | 0,7954675 | NA       |
| ABCA5         | 3,43 | 3,01 | 2,98 | 2,89 | 0,7955043 | 0,867699 |
| RP11-48B3.4   | 0,00 | 0,00 | 0,00 | 0,00 | 0,7955111 | 0,867699 |
| APOA1         | 0,00 | 0,00 | 0,00 | 0,00 | 0,7955638 | NA       |
| ZP1           | 0,00 | 0,41 | 0,00 | 0,00 | 0,7955672 | 0,867718 |
| RP11-458I4.2  | 0,00 | 0,00 | 0,00 | 0,00 | 0,795785  | NA       |
| JAKMIP2-AS1   | 0,00 | 0,00 | 0,00 | 0,00 | 0,7958337 | NA       |
| AC007193.6    | 1,25 | 0,00 | 0,00 | 0,00 | 0,7958415 | 0,867974 |
| AC010982.1    | 0,00 | 0,00 | 0,00 | 0,00 | 0,7959099 | NA       |
| NSFP1         | 0,00 | 0,00 | 0,00 | 0,00 | 0,7959223 | 0,86802  |
| CLSTN1        | 3,37 | 3,14 | 3,05 | 2,46 | 0,7960546 | 0,868099 |
| MUC20         | 3,49 | 2,92 | 3,02 | 3,96 | 0,7961039 | 0,868099 |
| TNNI3K        | 0,00 | 0,00 | 0,00 | 0,00 | 0,7961592 | NA       |
| RNU6-415P     | 0,00 | 0,00 | 0,00 | 0,00 | 0,7961604 | 0,868099 |
| RP1-43O17.2   | 0,00 | 0,00 | 0,00 | 0,00 | 0,7961711 | NA       |
| AC139143.2    | 0,00 | 0,13 | 0,00 | 0,00 | 0,7961823 | NA       |
| RP11-281O15.7 | 0,00 | 0,00 | 0,00 | 0,00 | 0,7961872 | 0,868099 |
| USP9Y         | 0,07 | 0,17 | 0,21 | 0,35 | 0,7962027 | 0,868099 |
| CTA-331F8.1   | 0,00 | 0,00 | 0,00 | 0,00 | 0,7962219 | NA       |
| RRP15         | 2,56 | 0,78 | 2,43 | 0,79 | 0,7962293 | 0,868099 |
| AC097713.3    | 0,00 | 0,00 | 0,00 | 0,00 | 0,7962361 | NA       |
| INTS13        | 3,47 | 2,57 | 1,96 | 2,84 | 0,7963729 | 0,868211 |
| AC005306.3    | 2,09 | 3,11 | 2,08 | 2,14 | 0,7964173 | 0,868211 |
| RP11-508P1.2  | 0,26 | 0,00 | 0,00 | 0,00 | 0,7964492 | 0,868211 |
| CTC-359D24.3  | 1,43 | 0,00 | 0,11 | 0,00 | 0,7965714 | 0,868291 |
| TMEM64        | 1,65 | 2,22 | 1,68 | 0,31 | 0,7966127 | 0,868291 |
| RP11-320P7.1  | 0,00 | 0,00 | 0,00 | 0,71 | 0,7966469 | 0,868291 |
| DALRD3        | 3,64 | 2,53 | 3,23 | 4,20 | 0,7966794 | 0,868291 |
| RP4-790G17.7  | 0,92 | 0,26 | 1,03 | 0,88 | 0,7968224 | 0,868405 |
| LYSMD4        | 0,00 | 2,62 | 0,74 | 0,36 | 0,7968635 | 0,868407 |
| RP5-1160K1.6  | 0,00 | 0,00 | 0,00 | 0,00 | 0,7969198 | NA       |
| RP11-325E5.3  | 0,00 | 0,00 | 0,00 | 0,00 | 0,7969768 | NA       |

|                |      |      |      |      |           |          |
|----------------|------|------|------|------|-----------|----------|
| ALOX5          | 5,32 | 5,84 | 5,35 | 5,25 | 0,7969823 | 0,868494 |
| RP5-994D16.12  | 1,60 | 0,00 | 0,87 | 2,08 | 0,7970935 | 0,868572 |
| AC007349.5     | 0,00 | 0,00 | 0,00 | 0,00 | 0,7972508 | 0,868667 |
| RPL29P25       | 0,31 | 0,24 | 0,46 | 0,67 | 0,7972583 | 0,868667 |
| SCN10A         | 0,00 | 0,02 | 0,00 | 0,00 | 0,7973072 | NA       |
| RNU2-41P       | 0,00 | 0,00 | 0,00 | 0,00 | 0,7974588 | 0,868843 |
| RN7SL72P       | 0,00 | 0,93 | 0,00 | 0,00 | 0,797665  | NA       |
| TBC1D3G        | 0,00 | 0,00 | 0,00 | 0,00 | 0,7976965 | 0,869005 |
| WHAMM          | 2,58 | 3,06 | 2,80 | 2,54 | 0,7977092 | 0,869005 |
| MAGED2         | 3,38 | 1,55 | 3,13 | 4,19 | 0,7977253 | 0,869005 |
| RP11-429P3.8   | 0,76 | 0,59 | 0,97 | 0,89 | 0,7977877 | 0,869026 |
| RNU1-59P       | 0,00 | 0,00 | 0,00 | 0,00 | 0,7978016 | NA       |
| UBOX5          | 1,68 | 0,73 | 1,48 | 1,50 | 0,7978222 | 0,869026 |
| RP3-398D13.3   | 1,21 | 1,69 | 1,23 | 2,47 | 0,7979412 | 0,869113 |
| DPYSL4         | 0,00 | 0,00 | 0,00 | 0,00 | 0,7979646 | NA       |
| AP001630.5     | 0,00 | 0,00 | 0,00 | 0,00 | 0,7980038 | 0,869138 |
| ARVCF          | 0,00 | 0,00 | 0,00 | 0,00 | 0,7980991 | 0,869168 |
| RP11-118N24.3  | 0,00 | 0,00 | 0,00 | 0,00 | 0,7981248 | NA       |
| ASH2L          | 4,19 | 2,87 | 3,71 | 3,16 | 0,7981452 | 0,869168 |
| RP11-131K5.2   | 1,67 | 2,26 | 2,05 | 1,33 | 0,7981928 | 0,869168 |
| IGHV3OR16-15   | 0,00 | 0,00 | 0,00 | 0,00 | 0,7981929 | NA       |
| CTD-2349P21.12 | 0,88 | 0,54 | 0,00 | 0,49 | 0,7982231 | 0,869168 |
| KPNA6          | 3,95 | 2,98 | 3,31 | 2,54 | 0,7982264 | 0,869168 |
| UBE2J2         | 5,42 | 4,55 | 5,26 | 5,21 | 0,7983098 | 0,869216 |
| SLC28A1        | 0,00 | 0,00 | 0,00 | 0,00 | 0,7983362 | NA       |
| AC002467.7     | 0,34 | 0,39 | 0,06 | 1,85 | 0,7983633 | 0,869232 |
| RN7SL198P      | 0,95 | 1,00 | 0,00 | 0,00 | 0,79841   | 0,86924  |
| WDR11          | 4,80 | 4,49 | 4,36 | 4,90 | 0,7984639 | 0,869256 |
| RP11-58O15.1   | 0,00 | 0,36 | 0,00 | 0,00 | 0,7985696 | NA       |
| POLG           | 5,05 | 4,64 | 4,89 | 4,53 | 0,7986024 | 0,869348 |
| RP11-471L13.3  | 0,00 | 0,00 | 0,00 | 0,00 | 0,7986264 | 0,869348 |
| NBPF5P         | 0,00 | 0,00 | 0,00 | 0,00 | 0,7986395 | NA       |
| RP11-527H14.6  | 0,00 | 1,99 | 0,00 | 0,00 | 0,798707  | 0,869354 |
| SPRY3          | 0,01 | 0,00 | 0,07 | 0,10 | 0,798714  | 0,869354 |
| RP11-94I2.4    | 0,00 | 0,00 | 0,00 | 0,00 | 0,7987495 | 0,869354 |
| RP11-574K11.8  | 0,00 | 0,00 | 0,00 | 0,00 | 0,798902  | 0,869474 |
| RP11-230F18.6  | 0,00 | 0,00 | 0,00 | 0,00 | 0,7989577 | NA       |
| RP11-66B24.3   | 0,00 | 0,00 | 0,00 | 0,00 | 0,7989996 | NA       |
| TLK2           | 4,81 | 4,34 | 4,39 | 3,39 | 0,7990043 | 0,869474 |
| RNA5P424       | 0,00 | 0,00 | 0,00 | 0,00 | 0,7990191 | NA       |
| GSTK1          | 7,91 | 7,59 | 7,56 | 7,36 | 0,7990298 | 0,869474 |
| RP11-734E19.1  | 0,00 | 0,00 | 0,00 | 0,00 | 0,7990335 | NA       |
| SLC6A9         | 0,00 | 0,00 | 0,00 | 0,00 | 0,7991383 | NA       |
| RP11-687M24.7  | 0,00 | 0,00 | 0,00 | 0,00 | 0,7991463 | NA       |
| CPLX4          | 0,00 | 0,00 | 0,03 | 0,15 | 0,799166  | 0,869474 |
| PDE1B          | 1,11 | 1,99 | 1,24 | 1,84 | 0,7991829 | 0,869474 |
| CPED1          | 3,96 | 3,15 | 3,53 | 3,31 | 0,7991879 | 0,869474 |
| PSMG3          | 5,84 | 5,63 | 5,73 | 5,14 | 0,7991924 | 0,869474 |
| STMN3          | 0,06 | 0,12 | 0,29 | 0,05 | 0,7991943 | 0,869474 |
| RP11-228M15.3  | 0,00 | 0,48 | 0,07 | 0,13 | 0,7992117 | 0,869474 |
| CTD-2538G10.1  | 0,00 | 0,00 | 0,00 | 0,00 | 0,7992888 | NA       |
| LPCAT1         | 2,96 | 2,51 | 2,92 | 3,35 | 0,7993029 | 0,869494 |
| NEGR1          | 2,69 | 1,98 | 1,43 | 0,59 | 0,7993083 | 0,869494 |
| TRPC3          | 0,00 | 0,00 | 0,00 | 0,00 | 0,7993538 | NA       |
| RP11-386G11.3  | 0,00 | 0,00 | 0,00 | 0,00 | 0,7993567 | NA       |

|               |       |       |       |       |           |          |
|---------------|-------|-------|-------|-------|-----------|----------|
| CTB-45I8.1    | 0,00  | 0,00  | 0,00  | 0,00  | 0,7994665 | NA       |
| RP11-499F3.2  | 0,00  | 0,00  | 0,00  | 0,55  | 0,7994901 | 0,869649 |
| RP11-266K4.12 | 0,00  | 0,00  | 0,00  | 0,00  | 0,799561  | NA       |
| RN7SL237P     | 0,00  | 0,00  | 0,00  | 0,00  | 0,7995691 | NA       |
| MMP8          | 0,00  | 0,00  | 0,00  | 0,00  | 0,7995827 | NA       |
| RP11-68D16.2  | 0,00  | 0,00  | 0,00  | 0,00  | 0,7995905 | NA       |
| AC006033.22   | 0,00  | 0,00  | 0,00  | 0,00  | 0,7996931 | NA       |
| SIGLECL1      | 0,00  | 0,00  | 0,00  | 0,00  | 0,7997863 | NA       |
| PROS1         | 0,08  | 0,29  | 0,19  | 0,10  | 0,7998255 | 0,869907 |
| MPHOSPH9      | 4,34  | 3,37  | 4,13  | 3,92  | 0,7998274 | 0,869907 |
| CNPPD1        | 4,90  | 3,94  | 4,87  | 4,28  | 0,7998448 | 0,869907 |
| AC083822.1    | 0,00  | 0,00  | 0,00  | 0,00  | 0,7999367 | NA       |
| RP11-64D22.2  | 0,00  | 0,00  | 0,00  | 0,00  | 0,8001565 | NA       |
| RNA5SP532     | 0,00  | 0,00  | 0,00  | 0,00  | 0,8001913 | NA       |
| RP11-574E24.3 | 0,00  | 0,16  | 0,00  | 0,00  | 0,8003193 | 0,870322 |
| USP12         | 3,77  | 3,89  | 3,46  | 3,55  | 0,800337  | 0,870322 |
| FAM27E3       | 0,42  | 1,34  | 0,00  | 0,09  | 0,8003808 | 0,870322 |
| RP11-420A21.1 | 0,00  | 0,00  | 0,00  | 0,00  | 0,8004202 | 0,870322 |
| RP5-994D16.9  | 0,00  | 0,00  | 0,00  | 0,00  | 0,8004223 | 0,870322 |
| HCG4P5        | 0,00  | 0,00  | 0,00  | 0,00  | 0,8004233 | NA       |
| RP5-1042I8.2  | 0,00  | 0,00  | 0,00  | 0,00  | 0,8004845 | NA       |
| ERRFI1        | 0,00  | 0,00  | 0,00  | 0,00  | 0,8005079 | NA       |
| CCDC138       | 1,29  | 1,04  | 0,81  | 0,65  | 0,8005787 | 0,87045  |
| IFI30         | 10,84 | 10,23 | 10,78 | 10,53 | 0,8006861 | 0,870473 |
| HN1           | 6,04  | 5,76  | 6,04  | 5,75  | 0,8006891 | 0,870473 |
| RP11-20O24.4  | 0,67  | 0,79  | 0,00  | 0,40  | 0,8007179 | 0,870473 |
| ACTBP6        | 0,00  | 0,00  | 0,00  | 0,00  | 0,8007469 | NA       |
| RP11-17G12.2  | 0,24  | 0,00  | 0,00  | 0,36  | 0,8007889 | 0,870508 |
| FCN3          | 0,00  | 0,00  | 0,00  | 0,00  | 0,800904  | NA       |
| RP11-600F24.1 | 0,00  | 0,00  | 0,00  | 0,00  | 0,8009208 | NA       |
| RP11-22N19.1  | 0,00  | 0,00  | 0,00  | 0,00  | 0,8009581 | NA       |
| UTP3          | 2,81  | 1,50  | 2,39  | 2,30  | 0,801018  | 0,870714 |
| MT1B          | 0,00  | 0,00  | 0,00  | 0,00  | 0,8011234 | NA       |
| RP11-337N6.1  | 0,00  | 0,67  | 0,00  | 0,72  | 0,8011377 | 0,870782 |
| RNU6-917P     | 0,00  | 0,00  | 0,00  | 2,05  | 0,8011726 | NA       |
| RP11-494G9.1  | 1,62  | 2,61  | 1,16  | 1,46  | 0,8011859 | 0,870782 |
| NOL7          | 6,01  | 6,12  | 5,85  | 5,62  | 0,8012261 | 0,870782 |
| RP11-96O20.1  | 0,35  | 0,29  | 0,67  | 1,01  | 0,8012372 | 0,870782 |
| CFAP161       | 0,00  | 0,00  | 0,00  | 0,00  | 0,80132   | NA       |
| RP11-756P10.3 | 0,00  | 0,00  | 0,00  | 0,00  | 0,8013302 | NA       |
| AC005077.8    | 0,00  | 0,00  | 0,00  | 0,00  | 0,8013804 | 0,870895 |
| RP11-665C16.5 | 0,00  | 0,00  | 0,00  | 0,00  | 0,8014639 | 0,870902 |
| RN7SL288P     | 2,39  | 3,84  | 3,17  | 4,04  | 0,8014649 | 0,870902 |
| SHC1          | 3,54  | 3,42  | 3,60  | 3,22  | 0,8015272 | 0,870927 |
| POU3F3        | 0,00  | 0,00  | 0,00  | 0,00  | 0,8015384 | NA       |
| RNU2-31P      | 0,00  | 0,00  | 0,00  | 0,00  | 0,8016087 | NA       |
| CARD10        | 0,00  | 0,00  | 0,00  | 0,21  | 0,801642  | NA       |
| DDX4          | 0,00  | 0,00  | 0,00  | 0,08  | 0,8016789 | 0,871049 |
| RP11-122G18.9 | 0,00  | 0,00  | 0,00  | 0,00  | 0,80174   | NA       |
| RP11-350J20.4 | 0,00  | 0,00  | 0,00  | 0,00  | 0,8018125 | NA       |
| GLB1L2        | 0,03  | 0,12  | 0,02  | 0,04  | 0,801847  | 0,871189 |
| AC068610.3    | 0,00  | 0,00  | 0,00  | 0,00  | 0,8019637 | 0,871274 |
| UTP14C        | 2,13  | 1,12  | 1,11  | 1,52  | 0,8020583 | 0,871283 |
| DHX32         | 1,11  | 2,33  | 1,40  | 2,07  | 0,802063  | 0,871283 |
| MIR142        | 0,00  | 2,06  | 0,00  | 0,00  | 0,8020661 | NA       |

|               |      |      |      |      |           |          |
|---------------|------|------|------|------|-----------|----------|
| GS1-600G8.3   | 0,00 | 0,00 | 0,00 | 0,00 | 0,8020931 | NA       |
| RP11-702H23.6 | 1,88 | 0,00 | 1,37 | 3,29 | 0,8021215 | 0,871283 |
| AC010886.2    | 0,03 | 0,05 | 0,05 | 0,00 | 0,8021953 | 0,871283 |
| SECTM1        | 0,74 | 1,97 | 1,56 | 2,09 | 0,8022024 | 0,871283 |
| PKNOX1        | 3,09 | 3,33 | 2,53 | 2,55 | 0,8022078 | 0,871283 |
| RP11-169K16.8 | 0,00 | 0,00 | 0,22 | 0,52 | 0,8022369 | NA       |
| DHFRP1        | 0,00 | 0,00 | 0,00 | 0,00 | 0,8022579 | NA       |
| CH507-9B2.8   | 0,00 | 0,00 | 0,00 | 0,00 | 0,8022857 | NA       |
| AC006160.5    | 0,00 | 0,00 | 0,00 | 0,00 | 0,8022958 | NA       |
| RF00413       | 4,15 | 0,00 | 3,09 | 3,17 | 0,802348  | 0,871393 |
| MIR1273D      | 2,18 | 0,00 | 0,00 | 2,85 | 0,8024659 | 0,871456 |
| PFN1P3        | 0,00 | 0,00 | 0,00 | 0,00 | 0,802501  | NA       |
| CTD-319515.3  | 0,00 | 0,00 | 1,18 | 1,79 | 0,8025055 | 0,871456 |
| RN75L809P     | 0,00 | 0,89 | 0,00 | 0,00 | 0,8025236 | 0,871456 |
| POLRMTP1      | 0,00 | 0,00 | 0,00 | 0,00 | 0,8025361 | NA       |
| RP1-139D8.6   | 0,00 | 0,00 | 0,00 | 0,00 | 0,8025406 | NA       |
| MIR6862-1     | 0,00 | 0,00 | 0,00 | 0,00 | 0,8026709 | NA       |
| MIR6862-2     | 0,00 | 0,00 | 0,00 | 0,00 | 0,8026709 | NA       |
| DDX1          | 4,26 | 1,45 | 4,12 | 4,02 | 0,8027655 | 0,871553 |
| C21orf37      | 1,84 | 2,53 | 0,00 | 2,05 | 0,8027667 | 0,871553 |
| SCARNA13      | 0,00 | 0,00 | 0,00 | 0,00 | 0,80278   | 0,871553 |
| CFAP47        | 0,00 | 0,00 | 0,00 | 0,00 | 0,8027983 | 0,871553 |
| BBS4          | 2,83 | 1,38 | 1,08 | 1,52 | 0,802848  | 0,871553 |
| CTD-2311B13.1 | 0,00 | 0,00 | 0,00 | 0,00 | 0,8028644 | 0,871553 |
| AC007383.3    | 0,38 | 0,88 | 0,66 | 1,29 | 0,8028918 | 0,871553 |
| PRTFDC1       | 0,00 | 0,00 | 0,00 | 0,00 | 0,8028968 | NA       |
| AP001816.1    | 0,00 | 0,00 | 0,09 | 0,93 | 0,8029348 | 0,871553 |
| LIMS3         | 0,86 | 0,00 | 1,02 | 1,04 | 0,8029865 | 0,871553 |
| RP5-1096D14.2 | 0,00 | 0,06 | 0,00 | 0,00 | 0,8030026 | NA       |
| RP5-837O21.5  | 0,02 | 0,32 | 0,25 | 0,99 | 0,8030049 | 0,871553 |
| ECM2          | 0,00 | 0,00 | 0,00 | 0,00 | 0,8030691 | 0,871554 |
| FAM86C1       | 0,00 | 0,11 | 0,00 | 0,11 | 0,8030922 | 0,871554 |
| PATE2         | 0,16 | 0,43 | 0,21 | 0,17 | 0,8031548 | 0,871554 |
| RP11-458F8.2  | 0,00 | 0,00 | 0,00 | 0,00 | 0,8031604 | NA       |
| TTC21A        | 2,55 | 3,88 | 3,03 | 3,52 | 0,8031783 | 0,871554 |
| OXSR1         | 4,31 | 4,28 | 4,40 | 2,52 | 0,8032069 | 0,871554 |
| AF064858.8    | 0,20 | 0,11 | 0,37 | 0,00 | 0,8032415 | 0,871554 |
| ATP11C        | 2,66 | 1,00 | 2,64 | 1,15 | 0,8032908 | 0,871565 |
| RP11-89F3.2   | 0,00 | 0,62 | 0,00 | 0,00 | 0,8032936 | NA       |
| RP11-31K23.2  | 0,00 | 0,17 | 0,00 | 0,00 | 0,8033367 | NA       |
| AGER          | 4,84 | 3,98 | 4,94 | 4,76 | 0,8033562 | 0,871593 |
| CTD-2203A3.1  | 0,00 | 0,00 | 0,00 | 0,00 | 0,8034667 | NA       |
| RP11-7M10.2   | 0,00 | 0,00 | 0,00 | 0,00 | 0,8034894 | NA       |
| PDPN          | 0,42 | 0,48 | 0,40 | 0,36 | 0,8035181 | 0,871696 |
| RP1-56K13.2   | 0,94 | 1,36 | 1,56 | 1,81 | 0,8035291 | 0,871696 |
| RN75L356P     | 0,00 | 1,28 | 0,00 | 0,00 | 0,8035381 | NA       |
| RP4-769N13.7  | 0,00 | 0,00 | 0,00 | 0,00 | 0,8035868 | NA       |
| RP1-130G2.1   | 0,00 | 0,00 | 0,00 | 0,00 | 0,8035903 | NA       |
| RNU6-1239P    | 0,00 | 0,00 | 0,00 | 0,00 | 0,8035958 | NA       |
| RNU6-1268P    | 0,00 | 0,00 | 0,00 | 0,00 | 0,8035958 | NA       |
| RNU6-816P     | 0,00 | 0,00 | 0,00 | 0,00 | 0,8035958 | NA       |
| SP7           | 0,00 | 0,00 | 0,00 | 0,00 | 0,8038523 | NA       |
| RP11-396K3.2  | 0,00 | 0,00 | 0,00 | 0,00 | 0,8039184 | NA       |
| RSG1          | 0,00 | 0,00 | 0,00 | 0,00 | 0,8039668 | NA       |
| RP11-299J3.6  | 0,00 | 0,00 | 0,00 | 0,00 | 0,8040147 | NA       |

|                  |      |      |      |      |           |          |
|------------------|------|------|------|------|-----------|----------|
| AC007383.5       | 0,00 | 0,00 | 0,00 | 0,00 | 0,8040227 | NA       |
| PACRG-AS1        | 0,00 | 0,00 | 0,00 | 0,00 | 0,8040248 | NA       |
| RP5-1055C14.7    | 0,00 | 0,07 | 0,00 | 0,22 | 0,804034  | 0,872174 |
| AC098971.2       | 0,16 | 0,20 | 0,31 | 0,12 | 0,8040892 | 0,872174 |
| TUBB4B           | 6,41 | 4,45 | 6,35 | 5,83 | 0,8041056 | 0,872174 |
| RN7SL222P        | 0,00 | 0,00 | 0,00 | 0,91 | 0,8041168 | NA       |
| RP11-29A1.2      | 0,00 | 0,00 | 0,00 | 0,00 | 0,8041461 | NA       |
| PLCXD1           | 1,33 | 1,70 | 1,75 | 1,32 | 0,8041582 | 0,872174 |
| RP11-637A17.2    | 0,00 | 0,00 | 0,00 | 0,59 | 0,8041937 | 0,872174 |
| RP11-203B7.2     | 0,00 | 0,00 | 0,00 | 0,00 | 0,8042103 | NA       |
| RP11-516C1.1     | 0,00 | 0,00 | 0,00 | 0,00 | 0,8042159 | NA       |
| CWC22            | 3,47 | 2,40 | 3,59 | 2,54 | 0,8042429 | 0,872174 |
| ANKRD37          | 3,10 | 2,51 | 3,00 | 1,24 | 0,8042449 | 0,872174 |
| LL22NC03-104C7.1 | 0,00 | 0,00 | 0,00 | 0,00 | 0,8042739 | NA       |
| CXCL9            | 0,00 | 0,00 | 0,00 | 0,00 | 0,8043348 | NA       |
| PLCD1            | 3,43 | 0,00 | 2,08 | 1,12 | 0,8043982 | 0,872298 |
| RP11-292O17.1    | 0,00 | 0,00 | 0,00 | 0,00 | 0,8044313 | NA       |
| PTH2R            | 0,00 | 0,00 | 0,00 | 0,00 | 0,804532  | NA       |
| RN7SL332P        | 0,00 | 1,05 | 0,00 | 0,00 | 0,8046535 | NA       |
| RP11-109E12.1    | 0,00 | 0,00 | 0,00 | 0,00 | 0,8046992 | NA       |
| CAGE1            | 0,29 | 0,63 | 0,47 | 0,09 | 0,8047362 | 0,872622 |
| JMY              | 1,43 | 0,61 | 1,57 | 1,24 | 0,8047867 | 0,872634 |
| RP11-231D20.2    | 0,65 | 2,29 | 0,80 | 0,67 | 0,8048482 | 0,872658 |
| CTD-2308B18.3    | 0,00 | 0,00 | 0,00 | 0,00 | 0,8049641 | NA       |
| CTC-439O9.3      | 0,00 | 0,00 | 0,00 | 0,00 | 0,8050055 | NA       |
| OR2T7            | 0,03 | 0,15 | 0,20 | 0,00 | 0,8051149 | 0,87283  |
| SCGB1C2          | 0,00 | 0,00 | 0,00 | 0,00 | 0,8051176 | NA       |
| RP11-152P17.2    | 0,32 | 0,99 | 0,27 | 0,55 | 0,8051223 | 0,87283  |
| RP11-420L9.2     | 0,00 | 0,00 | 0,00 | 0,00 | 0,8051337 | NA       |
| RP1-240K6.4      | 0,28 | 0,48 | 0,00 | 0,00 | 0,8051469 | 0,87283  |
| RP11-10L7.1      | 0,00 | 0,00 | 0,00 | 0,00 | 0,8051721 | 0,87283  |
| RP3-467K16.4     | 0,36 | 0,36 | 0,22 | 0,27 | 0,805203  | 0,87283  |
| CTD-2086L14.1    | 0,00 | 0,00 | 0,00 | 0,29 | 0,8052075 | NA       |
| PATE1            | 0,00 | 0,00 | 0,00 | 0,00 | 0,8052716 | NA       |
| NRBP2            | 0,00 | 0,05 | 0,05 | 0,44 | 0,8052717 | 0,872862 |
| CTD-2339L15.1    | 1,49 | 2,34 | 1,37 | 2,03 | 0,8053372 | 0,87289  |
| MEOX2            | 0,00 | 0,00 | 0,00 | 0,00 | 0,8053839 | NA       |
| RP11-754I20.3    | 0,00 | 0,00 | 0,00 | 0,00 | 0,8054452 | NA       |
| RNU2-60P         | 0,00 | 0,00 | 0,00 | 0,00 | 0,8055058 | NA       |
| C9orf70          | 0,00 | 0,00 | 0,00 | 0,00 | 0,8055319 | NA       |
| FMR1             | 4,50 | 4,86 | 4,14 | 2,95 | 0,8056163 | 0,873086 |
| CEACAM8          | 0,04 | 0,21 | 0,12 | 0,16 | 0,80562   | 0,873086 |
| DHX8             | 3,87 | 3,02 | 3,78 | 3,60 | 0,8056357 | 0,873086 |
| RP11-861A13.3    | 0,00 | 0,00 | 0,00 | 0,00 | 0,8057454 | 0,873159 |
| AL121578.7       | 0,00 | 0,00 | 0,00 | 0,00 | 0,8057758 | NA       |
| CTA-212A2.1      | 0,00 | 0,07 | 0,00 | 0,00 | 0,8057815 | 0,873159 |
| TGFBR3L          | 0,00 | 0,00 | 0,00 | 0,00 | 0,8059202 | NA       |
| SLC20A2          | 3,92 | 4,28 | 4,23 | 5,01 | 0,8059441 | 0,873293 |
| RP11-830F9.5     | 0,00 | 0,00 | 0,00 | 0,00 | 0,8059491 | NA       |
| DSN1             | 3,17 | 2,58 | 1,93 | 2,27 | 0,8060586 | 0,873374 |
| STELLAR          | 0,00 | 0,55 | 0,00 | 0,00 | 0,8061246 | NA       |
| POLE2            | 0,38 | 1,68 | 0,00 | 0,93 | 0,8061422 | 0,873422 |
| ZFYVE19          | 3,81 | 2,01 | 4,13 | 3,65 | 0,806228  | 0,873459 |
| RP11-494M8.4     | 0,42 | 0,57 | 0,30 | 0,32 | 0,8062545 | 0,873459 |
| RP11-350A1.2     | 0,00 | 0,00 | 0,00 | 0,00 | 0,8062934 | NA       |

|               |      |      |      |      |           |          |
|---------------|------|------|------|------|-----------|----------|
| RP11-360A9.3  | 0,00 | 0,00 | 0,00 | 0,00 | 0,8062962 | NA       |
| RP11-367F23.1 | 0,00 | 0,00 | 0,00 | 0,00 | 0,8063295 | NA       |
| LRRC14        | 2,40 | 0,53 | 2,57 | 2,63 | 0,8063636 | 0,873528 |
| RP11-403I13.4 | 0,00 | 0,00 | 0,00 | 0,00 | 0,8063652 | NA       |
| RNU4-62P      | 2,44 | 4,81 | 2,96 | 4,25 | 0,806397  | 0,873528 |
| RP11-177A2.5  | 0,00 | 0,00 | 0,00 | 0,00 | 0,8064227 | NA       |
| RP11-75I2.3   | 0,00 | 0,00 | 0,00 | 0,00 | 0,8064371 | NA       |
| RP1-288H2.2   | 0,00 | 0,00 | 0,00 | 0,00 | 0,8064592 | NA       |
| UVRAG         | 6,45 | 6,26 | 6,23 | 6,41 | 0,8065324 | 0,873595 |
| FBXL20        | 3,04 | 2,22 | 2,35 | 2,72 | 0,8065404 | 0,873595 |
| BAZ2B         | 6,14 | 5,92 | 6,19 | 6,05 | 0,8065768 | 0,873595 |
| RP11-475J5.5  | 0,00 | 0,00 | 0,00 | 0,00 | 0,8066202 | NA       |
| FAM13B        | 4,30 | 4,16 | 3,86 | 3,80 | 0,8066206 | 0,8736   |
| PELI1         | 3,04 | 3,62 | 3,48 | 3,63 | 0,8066712 | 0,873612 |
| FDPS4         | 0,00 | 0,00 | 0,00 | 0,00 | 0,8067353 | NA       |
| CHRNE         | 0,06 | 0,00 | 0,03 | 0,53 | 0,8067738 | 0,873619 |
| RP11-371B4.2  | 0,23 | 0,47 | 0,22 | 0,07 | 0,8067747 | 0,873619 |
| CTB-85P21.1   | 0,00 | 0,00 | 0,00 | 0,00 | 0,8067947 | NA       |
| RP11-91H12.3  | 0,00 | 0,91 | 0,00 | 0,00 | 0,806795  | 0,873619 |
| ODF3L1        | 0,00 | 0,00 | 0,00 | 0,14 | 0,8068437 | NA       |
| NLRP4         | 0,00 | 0,00 | 0,00 | 0,00 | 0,8068998 | NA       |
| RP1-60O19.2   | 0,00 | 0,00 | 0,00 | 0,00 | 0,8069131 | NA       |
| NDUFB3        | 6,67 | 6,09 | 6,24 | 6,04 | 0,8069224 | 0,873714 |
| AP000593.6    | 0,00 | 0,00 | 0,00 | 0,00 | 0,8069407 | NA       |
| AC108051.2    | 0,00 | 0,00 | 0,00 | 0,00 | 0,8070717 | NA       |
| BB55          | 0,09 | 0,15 | 0,05 | 0,32 | 0,8071673 | 0,873907 |
| DDX6          | 4,87 | 5,45 | 4,95 | 4,76 | 0,807179  | 0,873907 |
| RP11-165N19.2 | 0,00 | 0,00 | 0,00 | 0,00 | 0,8072182 | NA       |
| TRAJ54        | 0,00 | 0,00 | 0,00 | 0,00 | 0,8072274 | NA       |
| RNU6-550P     | 0,00 | 0,00 | 0,00 | 0,00 | 0,8072697 | NA       |
| RP11-981G7.2  | 0,00 | 0,00 | 0,00 | 0,00 | 0,8074209 | NA       |
| COL1A2-AS1    | 0,00 | 0,00 | 0,00 | 0,00 | 0,8074549 | NA       |
| RP1-152L7.6   | 0,00 | 0,00 | 0,00 | 0,00 | 0,8076849 | NA       |
| SNORD93       | 0,00 | 0,00 | 0,00 | 0,00 | 0,8076849 | NA       |
| PBK           | 0,00 | 0,00 | 0,00 | 0,00 | 0,8077234 | NA       |
| RP11-487I9.2  | 2,44 | 2,77 | 2,98 | 1,39 | 0,807826  | 0,874564 |
| RP4-734P14.4  | 0,00 | 0,00 | 0,00 | 0,00 | 0,8078357 | NA       |
| FAM198A       | 0,00 | 0,00 | 0,00 | 0,00 | 0,8078477 | NA       |
| HIST1H4F      | 0,00 | 0,00 | 0,00 | 0,00 | 0,8078656 | NA       |
| AC116609.1    | 0,00 | 0,00 | 0,00 | 0,00 | 0,8079468 | NA       |
| ASTL          | 0,00 | 0,00 | 0,47 | 0,19 | 0,8080184 | 0,87473  |
| ZDHC13        | 3,32 | 0,91 | 2,84 | 0,84 | 0,8081403 | 0,874811 |
| RUVBL2        | 5,37 | 4,38 | 4,81 | 5,15 | 0,8081717 | 0,874811 |
| RP1-91J24.1   | 0,00 | 0,00 | 0,00 | 0,00 | 0,8082052 | NA       |
| MSANTD2       | 2,06 | 0,00 | 1,57 | 0,89 | 0,8083058 | 0,87485  |
| TRIM16L       | 1,17 | 1,17 | 0,95 | 1,01 | 0,8083179 | 0,87485  |
| TRPV2         | 5,50 | 5,12 | 5,65 | 5,75 | 0,808326  | 0,87485  |
| ZP4           | 0,00 | 0,00 | 0,00 | 0,00 | 0,8084338 | NA       |
| RNU6-237P     | 0,00 | 0,00 | 0,00 | 0,00 | 0,8084667 | NA       |
| MGC14436      | 0,00 | 0,00 | 0,00 | 0,18 | 0,8084973 | NA       |
| OR1XSP        | 0,00 | 0,00 | 0,00 | 0,00 | 0,8085117 | NA       |
| NUDT2         | 4,42 | 4,61 | 4,60 | 4,97 | 0,8085399 | 0,875039 |
| FRG2C         | 0,00 | 0,00 | 0,00 | 0,00 | 0,8085866 | NA       |
| MIR3155A      | 0,00 | 5,47 | 0,00 | 0,00 | 0,8086354 | 0,8751   |
| TAS2R60       | 0,00 | 0,00 | 0,00 | 0,00 | 0,8087213 | NA       |

|                |      |      |      |      |           |          |
|----------------|------|------|------|------|-----------|----------|
| SPAG4          | 0,25 | 0,73 | 0,25 | 0,42 | 0,8087698 | 0,875152 |
| GS1-174L6.4    | 0,87 | 1,37 | 0,82 | 0,65 | 0,8087922 | 0,875152 |
| PAN2           | 3,91 | 4,08 | 1,71 | 4,14 | 0,8088015 | 0,875152 |
| SNORA48        | 0,00 | 0,00 | 0,00 | 0,00 | 0,8088089 | NA       |
| RP11-214J9.1   | 0,00 | 0,00 | 0,00 | 0,00 | 0,8088488 | NA       |
| RP11-89K10.2   | 0,00 | 0,00 | 0,00 | 0,00 | 0,8088558 | 0,875168 |
| PIGU           | 3,25 | 1,28 | 3,15 | 2,46 | 0,8089347 | 0,87519  |
| CHERP          | 2,48 | 1,07 | 2,27 | 1,83 | 0,8089548 | 0,87519  |
| RP11-188C12.3  | 2,49 | 1,38 | 2,32 | 1,70 | 0,8091217 | 0,875318 |
| OXGR1          | 0,00 | 0,00 | 0,00 | 0,00 | 0,8091893 | 0,875318 |
| RP11-894J14.5  | 0,00 | 0,49 | 0,00 | 0,00 | 0,809192  | 0,875318 |
| POMK           | 0,91 | 0,15 | 0,70 | 1,47 | 0,8092762 | 0,875367 |
| RP11-572B2.1   | 0,00 | 0,17 | 0,00 | 0,00 | 0,8092773 | NA       |
| RP11-91J3.3    | 0,00 | 0,00 | 0,00 | 0,00 | 0,8093684 | NA       |
| RP11-433C9.2   | 0,50 | 0,43 | 0,41 | 0,36 | 0,8093715 | 0,875427 |
| RSPRY1         | 4,26 | 3,05 | 4,04 | 3,94 | 0,8095144 | 0,875539 |
| PARGP1         | 1,81 | 1,00 | 1,48 | 1,52 | 0,8095551 | 0,875541 |
| RP11-978I15.10 | 0,00 | 0,00 | 0,00 | 0,00 | 0,8095838 | NA       |
| RP11-107P7.4   | 0,00 | 0,00 | 0,00 | 0,00 | 0,8095899 | NA       |
| RP11-15K19.2   | 0,00 | 0,00 | 0,00 | 0,00 | 0,8096128 | 0,875561 |
| RP11-328C8.4   | 0,00 | 0,00 | 0,00 | 0,00 | 0,8096478 | NA       |
| RP4-773A18.2   | 0,00 | 0,00 | 0,00 | 0,00 | 0,8096575 | NA       |
| LRP4           | 0,00 | 0,00 | 0,00 | 0,00 | 0,8096743 | NA       |
| CTD-2317K6.1   | 0,00 | 0,00 | 0,00 | 0,00 | 0,8097193 | NA       |
| RN7SL44P       | 0,00 | 0,00 | 0,00 | 0,00 | 0,8097715 | NA       |
| AC024592.12    | 1,99 | 0,61 | 1,98 | 1,12 | 0,8098651 | 0,875791 |
| VN1R8P         | 0,00 | 0,00 | 0,00 | 0,00 | 0,8099198 | NA       |
| RPS27P23       | 0,00 | 0,00 | 0,00 | 0,00 | 0,8099713 | NA       |
| FARSA          | 3,79 | 3,54 | 3,58 | 3,58 | 0,8100078 | 0,875902 |
| CTD-2562G15.3  | 0,00 | 0,00 | 0,00 | 0,00 | 0,810041  | NA       |
| RP11-34E5.4    | 0,00 | 0,00 | 0,00 | 0,00 | 0,8101167 | NA       |
| CHKA           | 4,82 | 4,15 | 4,55 | 4,01 | 0,8101694 | 0,876035 |
| TRAV12-2       | 0,00 | 0,00 | 0,00 | 0,00 | 0,8101753 | NA       |
| RP11-91I20.1   | 0,90 | 0,93 | 0,88 | 0,88 | 0,8102935 | 0,876126 |
| KCTD10         | 2,30 | 2,75 | 1,83 | 1,05 | 0,8103443 | 0,876138 |
| AC104667.3     | 0,00 | 0,00 | 0,00 | 0,00 | 0,8103837 | NA       |
| RP11-1057B8.2  | 0,00 | 0,00 | 0,00 | 0,00 | 0,8105132 | NA       |
| RP11-553E24.2  | 0,00 | 0,00 | 0,00 | 0,00 | 0,8106528 | NA       |
| GADD45G        | 0,00 | 0,00 | 0,00 | 0,00 | 0,810677  | NA       |
| RP11-156K23.3  | 0,00 | 0,70 | 0,00 | 0,00 | 0,810707  | 0,876447 |
| RP11-1212A22.4 | 4,90 | 5,29 | 4,27 | 4,02 | 0,8107082 | 0,876447 |
| RP11-615J4.3   | 0,00 | 0,56 | 0,00 | 0,00 | 0,8108071 | 0,876511 |
| RP11-455P21.3  | 0,00 | 0,00 | 0,00 | 0,29 | 0,8109369 | NA       |
| AC009480.3     | 0,00 | 0,00 | 0,00 | 0,00 | 0,8109542 | NA       |
| RP11-756H20.1  | 0,19 | 0,31 | 0,22 | 0,38 | 0,8110293 | 0,876708 |
| MIR6719        | 0,00 | 0,00 | 0,00 | 0,00 | 0,8110646 | NA       |
| RP11-85F14.5   | 0,66 | 0,00 | 0,27 | 1,07 | 0,8111665 | 0,876787 |
| RP11-762H8.4   | 0,00 | 1,14 | 0,00 | 2,14 | 0,8112051 | 0,876787 |
| RP1-71H19.2    | 0,00 | 0,00 | 0,00 | 0,00 | 0,81122   | 0,876787 |
| OR4F13P        | 0,00 | 0,08 | 0,00 | 0,00 | 0,8112375 | NA       |
| ARHGEF37       | 1,74 | 2,94 | 0,21 | 1,37 | 0,8112595 | 0,876787 |
| AP000304.12    | 0,00 | 0,00 | 0,00 | 0,00 | 0,8112616 | NA       |
| CTD-2010I16.1  | 0,00 | 0,00 | 0,00 | 0,00 | 0,8113102 | NA       |
| RP11-320G10.1  | 0,00 | 0,00 | 0,00 | 0,00 | 0,8113266 | NA       |
| RP11-50B3.4    | 0,00 | 0,00 | 0,00 | 0,00 | 0,8113481 | NA       |



|               |      |      |      |      |           |          |
|---------------|------|------|------|------|-----------|----------|
| RN7SKP80      | 0,00 | 0,00 | 0,00 | 0,00 | 0,8113722 | NA       |
| AC106873.4    | 0,00 | 0,00 | 0,00 | 0,00 | 0,8113992 | NA       |
| ZNF404        | 0,00 | 1,18 | 0,09 | 0,29 | 0,8114188 | 0,876873 |
| ADAMTS9       | 2,30 | 1,08 | 1,45 | 1,74 | 0,8114469 | 0,876873 |
| RP11-156K13.3 | 0,00 | 0,00 | 0,00 | 0,00 | 0,8114573 | 0,876873 |
| CTD-203414.2  | 0,00 | 0,00 | 0,00 | 0,00 | 0,8114968 | NA       |
| RP11-49111.4  | 0,00 | 0,00 | 0,00 | 0,00 | 0,8115327 | NA       |
| CPTP          | 0,00 | 0,00 | 0,08 | 0,49 | 0,81157   | 0,87695  |
| APH1A         | 4,63 | 4,29 | 4,78 | 3,47 | 0,8116078 | 0,87695  |
| RP3-323K23.3  | 0,00 | 0,00 | 0,00 | 0,00 | 0,8116369 | NA       |
| RP11-425M5.7  | 0,00 | 0,00 | 0,00 | 0,00 | 0,8116867 | NA       |
| AC005740.5    | 0,00 | 0,00 | 0,00 | 0,00 | 0,8117595 | NA       |
| RP11-373N22.3 | 0,34 | 0,33 | 0,09 | 0,30 | 0,8117783 | 0,877091 |
| MIR1250       | 0,00 | 0,00 | 0,00 | 0,00 | 0,8118004 | NA       |
| C8orf31       | 0,57 | 1,57 | 0,93 | 0,94 | 0,8118465 | 0,877123 |
| RP11-92C4.3   | 0,00 | 0,35 | 0,00 | 0,00 | 0,812035  | NA       |
| RP1-140A9.1   | 0,00 | 0,00 | 0,00 | 0,00 | 0,8120897 | NA       |
| C2orf68       | 4,33 | 4,58 | 4,46 | 4,20 | 0,8121554 | 0,877414 |
| RP6-7406.6    | 0,00 | 0,00 | 0,00 | 0,00 | 0,8122097 | NA       |
| HLA-DRB9      | 2,69 | 0,00 | 1,21 | 0,00 | 0,812262  | 0,877457 |
| KCNH7         | 0,00 | 0,00 | 0,00 | 0,00 | 0,812289  | 0,877457 |
| RP11-430B1.2  | 0,00 | 0,00 | 0,00 | 0,00 | 0,812314  | 0,877457 |
| AC108066.1    | 0,00 | 0,00 | 0,00 | 0,00 | 0,812425  | NA       |
| RP11-35J6.1   | 0,00 | 1,37 | 0,00 | 2,40 | 0,8124276 | NA       |
| AC005022.1    | 0,00 | 0,00 | 0,00 | 0,27 | 0,8124351 | 0,877478 |
| AC007969.3    | 0,00 | 0,00 | 0,00 | 0,00 | 0,8124415 | NA       |
| RP11-35G22.1  | 0,49 | 2,31 | 1,58 | 1,53 | 0,8124656 | 0,877478 |
| RP11-196H14.3 | 0,00 | 0,00 | 0,00 | 0,00 | 0,8124776 | NA       |
| SH2B2         | 0,00 | 0,00 | 0,00 | 0,00 | 0,8124802 | NA       |
| MLLT10P1      | 0,00 | 0,00 | 0,00 | 0,00 | 0,8124885 | 0,877478 |
| RLF           | 2,72 | 1,78 | 2,56 | 2,74 | 0,8124911 | 0,877478 |
| RP11-622O11.4 | 0,00 | 0,00 | 0,00 | 0,00 | 0,812564  | 0,877496 |
| LOC390483     | 0,00 | 0,00 | 0,00 | 0,00 | 0,8126118 | NA       |
| CKLF-CMTM1    | 1,65 | 2,16 | 1,83 | 0,30 | 0,8126159 | 0,877496 |
| TMEM248       | 4,35 | 2,46 | 4,04 | 4,05 | 0,8126264 | 0,877496 |
| RP11-138I18.1 | 0,00 | 0,00 | 0,00 | 0,00 | 0,812742  | NA       |
| CCDC148       | 0,34 | 0,10 | 0,19 | 0,20 | 0,8128061 | 0,877621 |
| EMC7          | 5,36 | 2,98 | 5,15 | 4,42 | 0,8128213 | 0,877621 |
| RP13-235E23.1 | 0,00 | 0,00 | 0,00 | 0,00 | 0,8128352 | NA       |
| CTB-79E8.3    | 0,00 | 0,00 | 0,00 | 1,21 | 0,8128594 | NA       |
| CTC-239J10.1  | 0,00 | 0,00 | 0,00 | 0,00 | 0,8129417 | NA       |
| TTL11-IT1     | 0,00 | 0,00 | 0,00 | 0,00 | 0,8130062 | NA       |
| RP11-95I19.1  | 0,00 | 0,00 | 0,00 | 0,00 | 0,8130673 | NA       |
| PIGA          | 2,14 | 2,45 | 1,48 | 0,72 | 0,8130755 | 0,877853 |
| TMEM253       | 0,00 | 0,00 | 0,00 | 0,00 | 0,8131401 | NA       |
| AC018633.4    | 0,56 | 0,22 | 0,64 | 0,47 | 0,8131722 | 0,8779   |
| LMBRD2        | 1,43 | 1,30 | 1,55 | 0,95 | 0,8132296 | 0,8779   |
| RP11-27K13.3  | 0,00 | 0,00 | 0,00 | 0,00 | 0,8132379 | 0,8779   |
| RP3-445O10.1  | 0,00 | 0,23 | 0,00 | 0,00 | 0,8132692 | NA       |
| AC093616.4    | 0,00 | 0,00 | 0,00 | 0,00 | 0,8132752 | NA       |
| RP11-364B14.2 | 0,00 | 0,00 | 0,00 | 0,00 | 0,8132852 | NA       |
| HCP5B         | 0,00 | 0,00 | 0,00 | 0,00 | 0,8133357 | NA       |
| C19orf33      | 3,04 | 2,83 | 3,11 | 0,00 | 0,813345  | 0,877965 |
| RP11-556O15.1 | 0,05 | 0,00 | 0,00 | 0,00 | 0,8134128 | NA       |
| AF213884.2    | 0,00 | 1,75 | 1,15 | 0,50 | 0,8134138 | 0,877965 |

|               |      |      |      |      |           |          |
|---------------|------|------|------|------|-----------|----------|
| DCXR          | 7,25 | 7,31 | 7,10 | 6,88 | 0,8134166 | 0,877965 |
| CCND1         | 0,01 | 0,00 | 0,00 | 0,00 | 0,8134673 | NA       |
| AC110781.3    | 0,00 | 0,00 | 0,00 | 0,00 | 0,8135042 | NA       |
| FAT1          | 0,66 | 0,19 | 0,88 | 0,74 | 0,8135268 | 0,878035 |
| ASCC2         | 5,56 | 5,26 | 5,30 | 5,46 | 0,8135604 | 0,878035 |
| CTD-2557P19.4 | 0,00 | 0,00 | 0,00 | 0,00 | 0,8135859 | NA       |
| RP4-758J24.6  | 1,38 | 1,66 | 1,33 | 1,11 | 0,8136826 | 0,878124 |
| RP11-661A12.8 | 0,24 | 0,50 | 0,11 | 0,10 | 0,8137945 | 0,878203 |
| KIAA1024      | 0,00 | 0,00 | 0,00 | 0,00 | 0,8138775 | NA       |
| RASL11B       | 0,00 | 0,00 | 0,00 | 0,00 | 0,8139764 | NA       |
| AC011525.4    | 0,00 | 0,00 | 0,00 | 0,00 | 0,8140219 | NA       |
| RN7SL862P     | 0,00 | 0,00 | 0,00 | 0,00 | 0,8140448 | NA       |
| CHADL         | 0,00 | 0,00 | 0,00 | 0,00 | 0,8140924 | NA       |
| ZNF709        | 0,00 | 0,23 | 0,00 | 0,21 | 0,8141109 | 0,878501 |
| RN7SKP246     | 0,00 | 0,00 | 0,00 | 0,00 | 0,8142438 | NA       |
| RF02126       | 0,00 | 0,00 | 0,00 | 0,00 | 0,8142953 | NA       |
| SYDE1         | 0,00 | 0,00 | 0,00 | 0,00 | 0,8143302 | NA       |
| RPS10L        | 0,00 | 0,00 | 0,00 | 0,00 | 0,8143743 | NA       |
| RP11-312B8.1  | 0,00 | 0,00 | 0,00 | 0,00 | 0,814378  | NA       |
| RN7SL266P     | 0,00 | 0,00 | 0,00 | 0,00 | 0,8144152 | NA       |
| RP4-697P8.3   | 0,00 | 0,00 | 0,00 | 0,00 | 0,8145071 | NA       |
| ZFAS1         | 7,19 | 7,27 | 7,16 | 7,28 | 0,8145274 | 0,878872 |
| RP11-468N14.7 | 0,00 | 0,00 | 0,00 | 0,00 | 0,8145338 | NA       |
| TBC1D3P2      | 0,00 | 0,00 | 0,00 | 0,00 | 0,8145373 | NA       |
| RP11-808N1.1  | 0,00 | 0,04 | 0,00 | 0,00 | 0,814547  | 0,878872 |
| RN7SL543P     | 2,98 | 0,74 | 1,31 | 1,94 | 0,8146383 | 0,878872 |
| RP11-12A2.1   | 0,00 | 1,93 | 0,00 | 0,00 | 0,8146639 | 0,878872 |
| RP11-497H16.7 | 4,77 | 4,61 | 4,02 | 3,23 | 0,8146814 | 0,878872 |
| RP11-355N15.1 | 0,17 | 0,24 | 0,16 | 0,13 | 0,8147978 | 0,878872 |
| SLC5A4        | 0,00 | 0,00 | 0,00 | 0,00 | 0,8147991 | 0,878872 |
| COPG1         | 5,00 | 3,94 | 4,15 | 3,34 | 0,8148014 | 0,878872 |
| RP11-784B15.1 | 0,19 | 0,62 | 0,00 | 0,24 | 0,8148231 | 0,878872 |
| RP5-1090P18.1 | 0,37 | 0,41 | 0,39 | 0,40 | 0,8148496 | 0,878872 |
| RP11-64C1.1   | 0,00 | 0,00 | 0,00 | 0,09 | 0,8149016 | NA       |
| RP11-179B2.2  | 0,08 | 0,18 | 0,04 | 0,09 | 0,8149122 | 0,878897 |
| RP11-410D17.2 | 0,28 | 0,00 | 0,00 | 0,94 | 0,8149641 | 0,87891  |
| RP11-312P12.3 | 0,00 | 0,00 | 0,00 | 0,00 | 0,8150213 | NA       |
| RBSN          | 3,58 | 2,01 | 2,97 | 3,08 | 0,8150876 | 0,879001 |
| AC004837.4    | 0,00 | 0,00 | 0,00 | 0,00 | 0,8151258 | NA       |
| BCL2          | 2,18 | 1,98 | 2,07 | 1,79 | 0,8151394 | 0,879014 |
| AC007652.1    | 0,00 | 0,00 | 0,00 | 0,00 | 0,815146  | NA       |
| RP11-791N19.1 | 0,00 | 0,00 | 0,00 | 0,00 | 0,8151629 | NA       |
| RP11-501O2.3  | 0,00 | 0,00 | 0,00 | 0,00 | 0,8151821 | 0,879017 |
| AC007292.6    | 0,42 | 0,54 | 0,58 | 0,48 | 0,8152605 | 0,879059 |
| RP11-470E16.1 | 0,00 | 0,00 | 0,00 | 0,00 | 0,8153923 | NA       |
| HFE2          | 0,00 | 0,00 | 0,00 | 0,00 | 0,8155144 | NA       |
| RP11-452I5.2  | 0,00 | 0,00 | 0,00 | 0,00 | 0,8156352 | NA       |
| RP11-310I9.1  | 0,00 | 0,00 | 0,00 | 0,00 | 0,8157472 | NA       |
| CIC           | 0,90 | 1,89 | 1,33 | 1,25 | 0,8157634 | 0,879559 |
| GNGT1         | 0,00 | 0,00 | 0,00 | 0,00 | 0,8157879 | NA       |
| RP11-506H21.5 | 0,00 | 0,29 | 0,00 | 0,00 | 0,8157904 | NA       |
| ZMIZ2         | 3,49 | 3,64 | 3,42 | 3,03 | 0,81581   | 0,879566 |
| CTD-3035D6.1  | 1,76 | 1,87 | 1,92 | 2,19 | 0,8158496 | 0,879566 |
| RP11-148B6.2  | 0,00 | 0,00 | 0,00 | 0,00 | 0,8159136 | NA       |
| CTD-2010I16.2 | 0,00 | 0,00 | 0,00 | 0,00 | 0,8159689 | NA       |

|               |      |      |      |      |           |          |
|---------------|------|------|------|------|-----------|----------|
| RN7SL766P     | 0,00 | 0,00 | 0,00 | 0,00 | 0,8159724 | NA       |
| RP5-1107A17.3 | 0,00 | 0,41 | 0,39 | 0,57 | 0,8159789 | NA       |
| RP11-655G22.1 | 0,27 | 1,04 | 0,36 | 0,62 | 0,8160371 | 0,879726 |
| RNA5SP527     | 0,00 | 0,00 | 0,00 | 0,00 | 0,8160833 | NA       |
| RP11-372B4.3  | 0,60 | 1,10 | 0,79 | 0,79 | 0,8160841 | 0,879734 |
| RSPO2         | 0,00 | 0,00 | 0,00 | 0,00 | 0,8160975 | NA       |
| RP11-139E19.3 | 0,00 | 0,00 | 0,00 | 0,00 | 0,8161031 | NA       |
| RP11-46D6.1   | 0,00 | 0,00 | 0,00 | 0,00 | 0,816152  | NA       |
| DIP2C         | 0,00 | 0,31 | 0,00 | 1,24 | 0,8161928 | 0,879808 |
| IGHV3-30      | 0,00 | 0,00 | 0,00 | 0,00 | 0,8162111 | NA       |
| RP11-122K13.7 | 0,00 | 0,00 | 0,00 | 0,00 | 0,8162428 | NA       |
| S100A2        | 0,00 | 0,00 | 0,00 | 0,00 | 0,8163156 | NA       |
| RNU1-91P      | 0,00 | 0,00 | 0,00 | 0,00 | 0,8163466 | NA       |
| AC005009.2    | 0,00 | 0,00 | 0,00 | 0,00 | 0,8163562 | NA       |
| CYB5R1        | 4,39 | 4,32 | 4,29 | 3,79 | 0,8163775 | 0,879965 |
| RP11-393B14.1 | 0,88 | 0,75 | 0,70 | 0,46 | 0,8164953 | 0,879993 |
| RP11-368N21.5 | 0,49 | 0,46 | 0,20 | 0,44 | 0,8165543 | 0,879993 |
| METTL6        | 3,07 | 2,95 | 2,84 | 1,98 | 0,8165693 | 0,879993 |
| SLC15A2       | 2,13 | 1,51 | 2,04 | 1,93 | 0,8165745 | 0,879993 |
| IQCE          | 2,06 | 2,13 | 1,52 | 1,92 | 0,816602  | 0,879993 |
| RP11-393K10.1 | 0,00 | 0,00 | 0,00 | 0,00 | 0,8166241 | NA       |
| RP11-124O11.1 | 0,00 | 0,00 | 0,00 | 0,00 | 0,8166567 | NA       |
| RP11-430G17.4 | 0,00 | 0,00 | 0,00 | 0,00 | 0,816706  | NA       |
| RNA5SP449     | 0,00 | 0,00 | 0,00 | 0,00 | 0,8167186 | NA       |
| RP11-341D18.2 | 0,00 | 0,00 | 0,00 | 0,00 | 0,8168001 | NA       |
| ZNF837        | 0,00 | 0,00 | 0,00 | 0,00 | 0,8168095 | NA       |
| RP11-381O7.3  | 0,15 | 0,42 | 0,19 | 0,18 | 0,8168383 | 0,880164 |
| NSL1          | 4,20 | 3,18 | 3,19 | 3,90 | 0,8168396 | 0,880164 |
| RP11-439C15.4 | 0,00 | 0,00 | 0,00 | 0,00 | 0,8169522 | NA       |
| ECHDC2        | 4,83 | 4,29 | 4,55 | 4,74 | 0,8169882 | 0,880281 |
| BRPF3         | 0,00 | 0,74 | 0,38 | 0,31 | 0,8170305 | 0,880284 |
| CTC-550B14.6  | 0,00 | 0,00 | 0,00 | 0,00 | 0,8170651 | NA       |
| RP5-1012F16.1 | 0,00 | 0,26 | 0,24 | 0,24 | 0,8170959 | NA       |
| SH2D2A        | 0,00 | 0,00 | 0,00 | 0,26 | 0,817112  | 0,880329 |
| CENPS         | 0,00 | 0,26 | 0,00 | 0,00 | 0,81726   | 0,880446 |
| RP11-219G17.4 | 0,06 | 0,17 | 0,09 | 0,13 | 0,8173096 | 0,880457 |
| MIA           | 0,00 | 0,87 | 0,00 | 0,00 | 0,8174251 | 0,880539 |
| RP11-11H9.1   | 0,00 | 0,00 | 0,00 | 0,00 | 0,8175399 | NA       |
| ZNF563        | 0,35 | 1,01 | 0,55 | 0,69 | 0,8175646 | 0,880616 |
| CFH           | 0,00 | 0,04 | 0,00 | 0,02 | 0,8175766 | 0,880616 |
| AC007879.3    | 0,00 | 0,00 | 0,00 | 0,00 | 0,8176234 | NA       |
| RP11-392A23.4 | 0,00 | 0,00 | 0,00 | 0,00 | 0,8176544 | NA       |
| CDC42EP4      | 0,76 | 0,43 | 0,57 | 0,82 | 0,8176644 | 0,880668 |
| HBM           | 0,00 | 0,00 | 0,00 | 0,00 | 0,817705  | NA       |
| RNU4-59P      | 0,00 | 0,00 | 0,00 | 0,00 | 0,8177294 | NA       |
| ENSA          | 5,11 | 5,65 | 4,82 | 5,23 | 0,8177438 | 0,880711 |
| AC093616.3    | 0,00 | 0,00 | 0,00 | 1,18 | 0,8177701 | NA       |
| KIAA1143      | 3,28 | 3,36 | 3,14 | 2,16 | 0,8178608 | 0,880788 |
| CTD-2342J14.6 | 0,75 | 0,27 | 1,11 | 1,49 | 0,8179062 | 0,880788 |
| RP1-45N11.1   | 0,10 | 0,12 | 0,00 | 0,11 | 0,8179338 | 0,880788 |
| DNA2          | 0,58 | 0,00 | 1,05 | 1,09 | 0,8180486 | 0,880869 |
| AC012456.3    | 0,00 | 0,00 | 0,00 | 0,00 | 0,8180758 | NA       |
| USP17L6P      | 0,00 | 0,00 | 0,00 | 0,00 | 0,8180977 | NA       |
| AC010907.2    | 0,00 | 0,00 | 0,00 | 0,56 | 0,8181232 | 0,880877 |
| CTPS2         | 2,08 | 1,31 | 1,38 | 1,88 | 0,8181595 | 0,880877 |

|                |      |      |      |      |           |          |
|----------------|------|------|------|------|-----------|----------|
| RN7SL750P      | 0,79 | 0,00 | 0,00 | 0,95 | 0,8181985 | 0,880877 |
| ABI3           | 6,07 | 5,38 | 5,68 | 5,26 | 0,8182149 | 0,880877 |
| PADI3          | 0,00 | 0,08 | 0,00 | 0,00 | 0,8182247 | NA       |
| ARL15          | 2,26 | 0,66 | 1,83 | 0,33 | 0,8183121 | 0,880897 |
| CSNK2A2        | 3,66 | 3,52 | 3,59 | 3,53 | 0,8183129 | 0,880897 |
| RP11-1079K10.3 | 0,00 | 0,00 | 0,00 | 0,00 | 0,818356  | NA       |
| STK19          | 5,11 | 4,98 | 4,55 | 4,94 | 0,8184133 | 0,880963 |
| RN7SL337P      | 0,00 | 0,00 | 0,00 | 0,00 | 0,8184222 | NA       |
| RP11-51F16.9   | 0,00 | 0,00 | 0,00 | 0,00 | 0,8184665 | NA       |
| RP4-676J13.2   | 0,00 | 0,00 | 0,00 | 0,00 | 0,8185398 | NA       |
| RP11-468E2.2   | 0,00 | 0,00 | 0,00 | 0,00 | 0,8185802 | NA       |
| AC013791.2     | 0,00 | 0,00 | 0,00 | 0,00 | 0,8186092 | NA       |
| CTC-349J22.1   | 0,00 | 0,00 | 0,00 | 0,00 | 0,8186113 | NA       |
| AP001626.1     | 0,69 | 1,63 | 0,68 | 0,26 | 0,8186165 | 0,881105 |
| RP11-182I1.9   | 0,05 | 0,20 | 0,09 | 0,14 | 0,8186482 | 0,881105 |
| RNU6-789P      | 0,00 | 0,00 | 0,00 | 0,00 | 0,818652  | NA       |
| MTG2           | 3,14 | 2,88 | 2,90 | 1,99 | 0,8186646 | 0,881105 |
| RP11-787I22.3  | 0,00 | 0,00 | 0,00 | 0,00 | 0,8187084 | NA       |
| RP11-436A7.1   | 0,00 | 0,00 | 0,00 | 0,00 | 0,8187173 | NA       |
| AC115617.2     | 0,00 | 0,00 | 0,00 | 0,00 | 0,818787  | NA       |
| SLC2A4         | 0,15 | 0,22 | 0,19 | 0,28 | 0,8187935 | 0,881187 |
| HLA-V          | 0,52 | 0,53 | 0,39 | 0,48 | 0,8188196 | 0,881187 |
| LA16c-13E4.3   | 0,00 | 0,00 | 0,00 | 0,00 | 0,818891  | NA       |
| GDPD4          | 0,00 | 0,00 | 0,00 | 0,00 | 0,8189027 | NA       |
| PSAPL1         | 0,00 | 0,00 | 0,00 | 0,00 | 0,8189116 | NA       |
| RP11-24F11.5   | 0,00 | 0,14 | 0,00 | 0,00 | 0,8189744 | 0,881311 |
| LCN10          | 0,00 | 0,00 | 0,00 | 0,00 | 0,8190927 | NA       |
| IGKV1OR2-1     | 0,00 | 0,00 | 0,00 | 0,00 | 0,8191036 | NA       |
| AP005530.2     | 0,00 | 0,00 | 0,00 | 0,00 | 0,8191206 | NA       |
| SNORA2B        | 0,00 | 0,00 | 0,00 | 1,48 | 0,8191286 | NA       |
| ZNF516         | 4,24 | 3,60 | 4,64 | 3,69 | 0,8191298 | 0,881435 |
| RP4-668G5.1    | 1,20 | 1,06 | 1,04 | 0,00 | 0,8192404 | 0,881511 |
| STK17A         | 3,11 | 0,58 | 3,21 | 2,22 | 0,8193215 | 0,881556 |
| RP11-181E10.3  | 1,05 | 1,88 | 1,44 | 1,06 | 0,8194253 | 0,881625 |
| CTC-504A5.1    | 0,00 | 0,00 | 0,00 | 0,00 | 0,8194809 | NA       |
| POLR3H         | 3,25 | 3,87 | 3,83 | 2,96 | 0,8195017 | 0,881665 |
| RNA5SP290      | 0,00 | 0,00 | 0,00 | 0,00 | 0,819604  | NA       |
| COX6CP1        | 0,00 | 0,00 | 0,00 | 0,00 | 0,8196068 | NA       |
| ASTN1          | 0,00 | 0,00 | 0,00 | 0,00 | 0,8196136 | 0,881718 |
| GATSL3         | 0,83 | 3,10 | 2,16 | 2,57 | 0,8196305 | 0,881718 |
| RP11-353N4.6   | 0,00 | 0,00 | 0,00 | 0,00 | 0,8196412 | NA       |
| RP11-327O17.2  | 0,00 | 0,00 | 0,00 | 0,00 | 0,8198101 | NA       |
| RP11-538P18.2  | 0,00 | 0,00 | 0,00 | 0,00 | 0,8198343 | NA       |
| AC114730.7     | 0,00 | 0,00 | 0,00 | 0,00 | 0,8199259 | NA       |
| SLC30A4        | 1,16 | 1,34 | 1,11 | 0,95 | 0,819931  | 0,881988 |
| PRMT8          | 0,00 | 0,00 | 0,00 | 0,00 | 0,8199559 | NA       |
| MIR5188        | 0,00 | 0,00 | 0,00 | 0,00 | 0,8199668 | NA       |
| RP11-678B3.2   | 0,00 | 0,00 | 0,00 | 0,00 | 0,8199859 | NA       |
| RNU6-182P      | 0,00 | 0,00 | 0,00 | 0,00 | 0,8200226 | NA       |
| SLC9A3R1       | 4,62 | 4,76 | 4,36 | 5,48 | 0,8200279 | 0,881988 |
| UPF3A          | 4,46 | 3,87 | 4,43 | 4,37 | 0,8200449 | 0,881988 |
| C4BPA          | 0,00 | 0,00 | 0,00 | 0,00 | 0,8200557 | NA       |
| WIPI2          | 4,72 | 3,81 | 4,67 | 4,58 | 0,820075  | 0,881988 |
| TRAV14/DV4     | 0,00 | 0,00 | 0,00 | 0,00 | 0,8200758 | NA       |
| IGHV1-2        | 0,00 | 0,58 | 0,00 | 0,00 | 0,8200813 | NA       |

|                    |      |      |      |      |           |          |
|--------------------|------|------|------|------|-----------|----------|
| BCL10              | 3,84 | 3,51 | 3,83 | 3,61 | 0,8201124 | 0,881988 |
| LRPPRC             | 5,40 | 5,20 | 4,77 | 5,31 | 0,8201202 | 0,881988 |
| CTC-293G12.1       | 0,00 | 0,00 | 0,00 | 0,00 | 0,8202201 | NA       |
| PPP6C              | 4,10 | 3,96 | 3,81 | 3,15 | 0,8202312 | 0,882025 |
| TWNK               | 0,07 | 0,40 | 0,06 | 1,49 | 0,8202332 | 0,882025 |
| RP11-109E10.1      | 0,00 | 0,00 | 0,00 | 0,41 | 0,8202445 | NA       |
| RP11-401O9.4       | 0,00 | 0,00 | 0,00 | 0,00 | 0,8202782 | NA       |
| AD000090.2         | 1,17 | 1,73 | 1,42 | 1,11 | 0,8202859 | 0,882039 |
| RP11-589N15.1      | 0,00 | 0,00 | 0,00 | 0,00 | 0,8202954 | NA       |
| RP11-550F7.1       | 0,00 | 0,00 | 0,00 | 0,00 | 0,8203464 | NA       |
| RP1-222H5.1        | 0,00 | 0,00 | 0,00 | 0,00 | 0,8204427 | NA       |
| BPIFB5P            | 0,00 | 0,00 | 0,00 | 0,00 | 0,8205564 | NA       |
| CTD-2008P7.9       | 0,00 | 0,05 | 0,00 | 0,11 | 0,8205976 | 0,882262 |
| CPT1C              | 1,00 | 1,91 | 1,17 | 1,45 | 0,8206127 | 0,882262 |
| RP11-282A11.3      | 0,00 | 0,00 | 0,00 | 0,00 | 0,8206129 | 0,882262 |
| DOCK5              | 5,28 | 5,43 | 5,27 | 5,10 | 0,8207044 | 0,882295 |
| RP11-1101K5.1      | 0,00 | 0,00 | 0,00 | 0,00 | 0,8207086 | NA       |
| RGS11              | 0,00 | 0,00 | 0,00 | 0,00 | 0,8207138 | NA       |
| RP11-472B18.1      | 0,00 | 0,59 | 0,00 | 0,00 | 0,8207574 | 0,882295 |
| AP000640.9         | 3,48 | 1,21 | 2,27 | 0,00 | 0,8208197 | 0,882295 |
| ABC14-1080714F14.1 | 0,00 | 0,00 | 0,00 | 0,00 | 0,8208467 | 0,882295 |
| GAB1               | 1,58 | 1,25 | 1,56 | 1,08 | 0,8208723 | 0,882295 |
| RNF32              | 0,12 | 0,00 | 0,00 | 0,06 | 0,8209173 | 0,882295 |
| RPL12P8            | 0,34 | 0,60 | 0,41 | 0,60 | 0,8209216 | 0,882295 |
| RP11-500C12.1      | 2,49 | 1,77 | 1,23 | 0,80 | 0,820964  | 0,882298 |
| RP11-557C18.3      | 0,00 | 0,00 | 0,00 | 0,00 | 0,8209694 | NA       |
| AC114730.5         | 0,61 | 0,86 | 0,24 | 0,24 | 0,8210465 | 0,882327 |
| RP11-370I10.11     | 0,39 | 0,84 | 1,06 | 0,00 | 0,8210699 | 0,882327 |
| RP11-775D22.2      | 0,00 | 0,00 | 0,00 | 0,00 | 0,8211283 | NA       |
| RPL12P37           | 0,00 | 0,00 | 0,00 | 0,00 | 0,8211431 | NA       |
| RP11-25C19.3       | 4,27 | 3,48 | 3,42 | 0,00 | 0,8211979 | 0,882421 |
| RNA5SP146          | 0,00 | 0,00 | 0,00 | 0,00 | 0,8213105 | NA       |
| RP11-21N3.1        | 6,46 | 7,06 | 6,67 | 6,49 | 0,8213123 | 0,882502 |
| RNA5SP263          | 0,00 | 0,00 | 0,00 | 0,00 | 0,8214067 | NA       |
| CBX8               | 0,00 | 0,00 | 0,00 | 0,00 | 0,8215757 | 0,882649 |
| RP11-206L10.8      | 0,38 | 0,19 | 1,19 | 0,09 | 0,8215958 | 0,882649 |
| RP11-792A8.2       | 0,77 | 0,66 | 0,68 | 1,17 | 0,8216125 | 0,882649 |
| LRRC49             | 2,42 | 1,92 | 1,84 | 2,08 | 0,8216545 | 0,882649 |
| AADA3L3            | 0,00 | 0,00 | 0,00 | 0,00 | 0,8216754 | NA       |
| YBEY               | 2,30 | 3,45 | 3,54 | 3,64 | 0,8216776 | 0,882649 |
| FAM160A1           | 1,73 | 2,08 | 0,86 | 1,85 | 0,8217007 | 0,882649 |
| OR2H2              | 0,66 | 0,19 | 0,27 | 0,25 | 0,82173   | 0,882649 |
| CTD-2270L9.4       | 1,21 | 0,91 | 1,61 | 1,13 | 0,8217667 | 0,882649 |
| RN7SL775P          | 2,01 | 2,49 | 1,28 | 1,81 | 0,8218487 | 0,882659 |
| PLEKHG6            | 0,09 | 0,00 | 0,06 | 0,12 | 0,8218562 | 0,882659 |
| RP11-407G23.2      | 0,00 | 0,00 | 0,00 | 0,00 | 0,8218605 | NA       |
| RP5-1115A15.2      | 0,00 | 0,00 | 0,00 | 0,00 | 0,8219234 | NA       |
| RP4-681N20.5       | 0,00 | 0,00 | 0,00 | 0,00 | 0,8219528 | NA       |
| GLP2R              | 0,00 | 0,00 | 0,00 | 0,04 | 0,8219598 | NA       |
| RPS2P1             | 0,00 | 0,00 | 0,00 | 0,00 | 0,8219715 | NA       |
| RRH                | 0,00 | 0,00 | 0,00 | 0,00 | 0,8219936 | NA       |
| OPN3               | 3,95 | 5,03 | 3,91 | 0,99 | 0,8220187 | 0,882791 |
| RP11-213H15.4      | 0,00 | 0,31 | 0,00 | 0,00 | 0,8220314 | NA       |
| RP11-817O13.9      | 0,00 | 0,00 | 0,00 | 0,00 | 0,8220522 | NA       |
| CAMSAP3            | 0,00 | 0,00 | 0,00 | 0,00 | 0,8220978 | NA       |

|                 |      |      |      |      |           |          |
|-----------------|------|------|------|------|-----------|----------|
| RP11-267N12.1   | 0,00 | 0,00 | 0,00 | 0,00 | 0,8222786 | NA       |
| RP11-108O10.4   | 0,00 | 0,00 | 0,00 | 0,25 | 0,8222859 | NA       |
| AC007228.8      | 0,00 | 0,00 | 0,00 | 0,00 | 0,8222986 | NA       |
| TRBV4-1         | 0,00 | 0,00 | 0,00 | 0,00 | 0,8225443 | NA       |
| RP11-545D19.1   | 0,00 | 0,00 | 0,00 | 0,00 | 0,822639  | NA       |
| RP11-124N2.1    | 0,00 | 0,00 | 0,00 | 0,00 | 0,822699  | NA       |
| POTEB           | 0,00 | 0,00 | 0,00 | 0,00 | 0,8227133 | NA       |
| TRIM62          | 0,07 | 0,00 | 0,11 | 1,07 | 0,8227446 | 0,883522 |
| ANKRD24         | 0,00 | 0,00 | 0,00 | 0,00 | 0,8227783 | 0,883522 |
| RP11-515C16.1   | 0,00 | 0,00 | 0,00 | 0,00 | 0,8228137 | NA       |
| RP11-686O6.2    | 0,00 | 0,00 | 0,00 | 0,00 | 0,8229188 | NA       |
| RP11-546M4.3    | 0,00 | 0,00 | 0,00 | 0,00 | 0,8229322 | NA       |
| RP11-540B6.3    | 0,00 | 0,00 | 0,00 | 0,00 | 0,8229365 | NA       |
| SLC5A8          | 0,00 | 0,00 | 0,00 | 0,00 | 0,822939  | 0,883608 |
| XXyac-YM21GA2.3 | 0,00 | 0,00 | 0,00 | 0,00 | 0,8229408 | NA       |
| AC144449.1      | 0,00 | 0,00 | 0,00 | 0,00 | 0,8229521 | NA       |
| AHCTF1          | 3,13 | 3,54 | 2,61 | 1,93 | 0,822974  | 0,883608 |
| PLEKHG7         | 0,00 | 0,00 | 0,00 | 0,04 | 0,8229776 | 0,883608 |
| EIF2S2P3        | 0,00 | 0,00 | 0,00 | 0,00 | 0,8230298 | NA       |
| WBP11P1         | 0,00 | 0,00 | 0,00 | 0,00 | 0,823097  | NA       |
| RP11-1198D22.1  | 0,00 | 0,00 | 0,00 | 0,00 | 0,823255  | NA       |
| RP11-397A16.1   | 0,26 | 0,79 | 0,00 | 0,88 | 0,8232704 | 0,883879 |
| MT1DP           | 0,00 | 0,00 | 0,00 | 0,00 | 0,8233161 | NA       |
| RPL23AP84       | 0,00 | 0,00 | 0,00 | 0,00 | 0,8233876 | NA       |
| Z83001.1        | 0,00 | 1,31 | 1,96 | 0,83 | 0,823431  | 0,884009 |
| RAB43P1         | 0,00 | 0,00 | 0,00 | 0,00 | 0,8234407 | NA       |
| RN7SL197P       | 0,00 | 0,00 | 0,00 | 0,00 | 0,823467  | NA       |
| GALT            | 3,97 | 3,33 | 4,24 | 2,74 | 0,823539  | 0,884082 |
| RP11-57H12.5    | 0,00 | 0,00 | 0,00 | 0,00 | 0,8236082 | NA       |
| AC007965.4      | 0,00 | 0,00 | 0,00 | 0,00 | 0,8237054 | NA       |
| RNU6-1034P      | 0,00 | 0,00 | 0,00 | 0,00 | 0,8237075 | NA       |
| AC016738.3      | 0,00 | 0,00 | 0,00 | 0,00 | 0,8237087 | NA       |
| LONRF2          | 0,04 | 0,11 | 0,07 | 0,06 | 0,8237691 | 0,884272 |
| CTD-2303B20.1   | 0,00 | 0,00 | 0,00 | 0,69 | 0,8237971 | 0,884272 |
| C21orf93        | 0,00 | 0,00 | 0,00 | 0,00 | 0,8238297 | NA       |
| ZNF702P         | 0,90 | 1,98 | 0,83 | 0,83 | 0,8238353 | 0,884272 |
| FRMPD2L2        | 0,00 | 0,00 | 0,00 | 0,00 | 0,823853  | NA       |
| RP11-554O1.1    | 0,00 | 0,00 | 0,00 | 0,00 | 0,8239016 | NA       |
| EIF3D           | 7,68 | 7,57 | 7,42 | 7,13 | 0,8239427 | 0,884302 |
| RP11-84G21.1    | 0,00 | 0,00 | 0,00 | 0,00 | 0,8239615 | NA       |
| ECM1            | 0,00 | 0,08 | 0,00 | 0,00 | 0,8239755 | 0,884302 |
| RP11-118B18.1   | 1,84 | 2,66 | 1,17 | 1,55 | 0,8239826 | 0,884302 |
| RP11-578F21.3   | 0,00 | 0,00 | 0,00 | 0,00 | 0,8240331 | NA       |
| AC105402.3      | 0,00 | 0,00 | 0,00 | 0,00 | 0,8240367 | NA       |
| RP3-393P12.1    | 0,00 | 0,00 | 0,00 | 0,00 | 0,8242054 | NA       |
| RN7SL565P       | 0,65 | 0,00 | 0,66 | 0,33 | 0,8246314 | NA       |
| RN7SL722P       | 0,65 | 0,00 | 0,66 | 0,33 | 0,8246314 | NA       |
| CH507-396I9.3   | 0,00 | 0,00 | 0,00 | 0,00 | 0,8246771 | NA       |
| CTD-2542C24.14  | 0,00 | 0,00 | 0,00 | 0,00 | 0,8247251 | NA       |
| HIST1H3B        | 0,00 | 0,00 | 0,00 | 0,00 | 0,8247486 | NA       |
| SPSB2           | 0,94 | 0,34 | 0,88 | 0,53 | 0,8247587 | 0,885092 |
| RP11-436D10.3   | 0,00 | 0,00 | 0,00 | 0,00 | 0,824818  | NA       |
| SIPA1L1         | 5,00 | 3,87 | 5,09 | 3,80 | 0,8248325 | 0,885116 |
| CTD-2012K14.8   | 0,00 | 0,00 | 0,00 | 0,00 | 0,824855  | NA       |
| RN7SL703P       | 1,14 | 0,00 | 0,98 | 1,55 | 0,8248606 | 0,885116 |

|                |      |      |      |      |           |          |
|----------------|------|------|------|------|-----------|----------|
| KRT80          | 0,00 | 0,03 | 0,00 | 0,03 | 0,8249383 | 0,885133 |
| TEX10          | 3,26 | 2,96 | 3,04 | 2,97 | 0,8249558 | 0,885133 |
| RP11-284P20.4  | 0,00 | 0,00 | 0,00 | 0,00 | 0,8249907 | NA       |
| CTD-2325A15.5  | 0,00 | 0,00 | 0,00 | 0,00 | 0,8251345 | NA       |
| RP11-379K17.12 | 2,16 | 1,08 | 1,03 | 0,00 | 0,8251653 | 0,885315 |
| RP11-19C24.1   | 0,00 | 0,00 | 0,00 | 0,00 | 0,8252458 | NA       |
| RP11-561O23.8  | 0,00 | 0,00 | 0,00 | 0,00 | 0,8252598 | NA       |
| PRPH2          | 0,00 | 0,00 | 0,00 | 0,00 | 0,8252805 | 0,885396 |
| AC007016.3     | 0,00 | 0,00 | 0,00 | 0,00 | 0,825407  | NA       |
| RP5-858B6.3    | 0,00 | 0,00 | 0,00 | 0,00 | 0,8254386 | NA       |
| CDH18          | 0,46 | 0,19 | 0,41 | 0,41 | 0,8254855 | 0,885568 |
| ALKBH5         | 4,71 | 3,27 | 4,52 | 4,33 | 0,8255604 | 0,885568 |
| EXD3           | 2,56 | 2,21 | 2,51 | 2,15 | 0,8255978 | 0,885568 |
| KLHL35         | 0,22 | 0,39 | 0,38 | 0,31 | 0,8256007 | 0,885568 |
| RP5-872K7.7    | 0,00 | 0,00 | 0,00 | 0,00 | 0,8256604 | NA       |
| CTD-3099C6.9   | 0,64 | 1,15 | 0,51 | 0,69 | 0,8257129 | 0,885646 |
| RP11-218C14.5  | 0,00 | 0,00 | 0,00 | 0,00 | 0,8257193 | NA       |
| CTC-471J1.2    | 0,00 | 1,01 | 0,03 | 0,59 | 0,8257748 | 0,88567  |
| RP11-463M16.4  | 0,00 | 0,00 | 0,00 | 0,00 | 0,8259013 | NA       |
| PRH2           | 0,00 | 0,00 | 0,00 | 0,00 | 0,825955  | NA       |
| SUSD4          | 0,00 | 0,00 | 0,00 | 0,00 | 0,8259651 | NA       |
| RPL21P123      | 0,00 | 0,00 | 0,59 | 1,30 | 0,8261022 | 0,885958 |
| RNY3P11        | 0,00 | 0,00 | 0,00 | 0,00 | 0,8261096 | NA       |
| RP4-576H24.2   | 0,00 | 0,00 | 0,00 | 0,07 | 0,8261232 | 0,885958 |
| RP11-467I20.6  | 0,00 | 0,00 | 0,00 | 0,26 | 0,8261981 | 0,885995 |
| RP11-309L24.10 | 0,00 | 0,22 | 0,00 | 0,00 | 0,8262554 | NA       |
| SRGAP2         | 5,65 | 5,76 | 5,48 | 5,15 | 0,8262575 | 0,886003 |
| RN75L610P      | 2,26 | 1,46 | 1,08 | 1,55 | 0,8262854 | 0,886003 |
| RP11-422P24.9  | 0,00 | 0,00 | 0,00 | 0,00 | 0,8262905 | NA       |
| RP11-439E19.9  | 0,07 | 0,00 | 0,04 | 0,05 | 0,826346  | 0,886004 |
| SNRNP200       | 5,69 | 4,87 | 5,27 | 5,00 | 0,8263657 | 0,886004 |
| CTD-2035E11.4  | 0,00 | 0,00 | 0,00 | 0,00 | 0,8264265 | 0,886026 |
| RNMT           | 5,28 | 4,15 | 4,72 | 5,17 | 0,8264669 | 0,886027 |
| KIRREL3-AS3    | 0,00 | 0,00 | 0,00 | 0,00 | 0,826477  | NA       |
| FNDC7          | 0,00 | 0,00 | 0,00 | 0,00 | 0,8265114 | NA       |
| MAGI1-IT1      | 0,49 | 0,52 | 0,23 | 0,36 | 0,8265838 | 0,886101 |
| RP11-390B4.3   | 0,00 | 0,00 | 0,00 | 1,38 | 0,8266503 | 0,886101 |
| RP4-765A10.1   | 0,00 | 0,00 | 0,00 | 0,17 | 0,8266559 | 0,886101 |
| RP11-163O19.16 | 0,00 | 0,00 | 0,00 | 0,00 | 0,8266915 | NA       |
| RNU6-1053P     | 0,00 | 0,00 | 0,00 | 0,00 | 0,8267569 | 0,886103 |
| ADGRE1         | 1,35 | 0,85 | 1,08 | 2,27 | 0,8267622 | 0,886103 |
| AC025750.5     | 0,00 | 0,00 | 0,00 | 0,00 | 0,8268128 | NA       |
| OR10AE3P       | 0,00 | 0,00 | 0,00 | 0,00 | 0,8268132 | NA       |
| MIR645         | 0,00 | 0,00 | 0,00 | 0,00 | 0,8268234 | 0,886103 |
| SH3D21         | 0,00 | 0,00 | 0,00 | 0,00 | 0,8268534 | 0,886103 |
| RP11-504I13.2  | 0,00 | 0,03 | 0,29 | 0,17 | 0,8268567 | 0,886103 |
| TGM7           | 0,00 | 0,00 | 0,00 | 0,00 | 0,8269674 | NA       |
| AC013472.4     | 0,00 | 0,00 | 0,00 | 0,00 | 0,8269734 | NA       |
| RP11-415F23.3  | 0,00 | 0,00 | 0,00 | 0,00 | 0,8269858 | NA       |
| RP1-228P16.7   | 0,00 | 0,00 | 0,00 | 0,00 | 0,8271791 | NA       |
| WDR20          | 4,16 | 2,33 | 3,85 | 3,45 | 0,8272774 | 0,886511 |
| AC097639.8     | 0,00 | 0,00 | 0,00 | 0,00 | 0,8273038 | NA       |
| RP11-480I12.9  | 0,06 | 0,00 | 0,07 | 0,13 | 0,8274365 | 0,886639 |
| DTX1           | 0,00 | 0,00 | 0,00 | 0,00 | 0,8274516 | NA       |
| MRPL11         | 6,12 | 6,31 | 6,00 | 5,82 | 0,8275304 | 0,886697 |

|                 |      |      |      |      |           |          |
|-----------------|------|------|------|------|-----------|----------|
| RNY4P10         | 0,00 | 0,00 | 0,00 | 0,00 | 0,8275757 | NA       |
| RP11-132M7.3    | 0,09 | 0,00 | 0,00 | 0,22 | 0,8276481 | 0,88677  |
| ADH5            | 5,19 | 3,70 | 4,50 | 4,21 | 0,8276789 | 0,88677  |
| CTA-796E4.4     | 0,00 | 0,00 | 0,00 | 0,00 | 0,8277375 | NA       |
| AC126544.4      | 2,79 | 2,11 | 2,18 | 2,35 | 0,827739  | 0,886792 |
| TRBJ2-3         | 0,00 | 0,00 | 0,00 | 3,39 | 0,8277563 | NA       |
| RN7SL303P       | 0,00 | 1,53 | 0,00 | 0,00 | 0,8277741 | NA       |
| RP4-620E11.4    | 0,00 | 0,00 | 0,00 | 0,00 | 0,8278001 | NA       |
| RP11-655H13.2   | 0,00 | 0,00 | 0,00 | 0,00 | 0,8278138 | 0,886829 |
| FTHL20          | 0,28 | 0,00 | 0,35 | 0,31 | 0,8278578 | NA       |
| RNU6-562P       | 0,00 | 0,00 | 0,00 | 0,00 | 0,8279096 | NA       |
| RP11-101E5.1    | 0,00 | 0,00 | 0,00 | 0,00 | 0,8279819 | NA       |
| RP11-103H7.1    | 0,00 | 0,00 | 0,00 | 0,00 | 0,8280349 | NA       |
| CTD-2531D15.1   | 0,00 | 0,09 | 0,00 | 0,00 | 0,8280421 | NA       |
| XXbac-B461K10.4 | 0,08 | 0,01 | 0,02 | 0,52 | 0,8281434 | 0,88714  |
| RP11-215H22.1   | 0,00 | 0,00 | 0,00 | 0,00 | 0,8281803 | NA       |
| DRD1            | 0,00 | 0,00 | 0,00 | 0,00 | 0,8281897 | NA       |
| RP11-318A15.2   | 0,00 | 0,00 | 0,00 | 0,00 | 0,8282005 | NA       |
| SSU72           | 6,30 | 6,44 | 6,34 | 5,88 | 0,8283035 | 0,887268 |
| POM121L10P      | 0,00 | 0,00 | 0,00 | 0,00 | 0,828452  | NA       |
| RP11-719J20.1   | 0,00 | 0,00 | 0,00 | 0,00 | 0,8284739 | NA       |
| TRBJ2-2P        | 0,00 | 0,00 | 0,00 | 0,00 | 0,8284786 | NA       |
| LINGO2          | 0,00 | 0,00 | 0,00 | 0,00 | 0,8285758 | NA       |
| FAM151A         | 0,00 | 0,00 | 0,00 | 0,00 | 0,8286006 | NA       |
| RNU2-32P        | 0,00 | 0,00 | 0,00 | 0,00 | 0,8286746 | NA       |
| RP5-1024N4.6    | 0,03 | 0,00 | 0,04 | 0,10 | 0,828924  | 0,88789  |
| KRR1            | 4,71 | 2,60 | 3,69 | 3,21 | 0,8289821 | 0,88791  |
| RP11-435F13.2   | 0,00 | 0,71 | 0,00 | 0,00 | 0,8290971 | NA       |
| RP11-463C8.5    | 0,00 | 0,00 | 0,00 | 0,00 | 0,829112  | NA       |
| RP11-723O4.9    | 0,00 | 0,00 | 0,00 | 0,00 | 0,8291514 | NA       |
| RP11-736I24.4   | 0,00 | 0,00 | 0,00 | 0,00 | 0,8292446 | NA       |
| SNHG11          | 3,88 | 4,55 | 4,04 | 2,00 | 0,829264  | 0,888169 |
| EEF1A1P7        | 0,23 | 0,00 | 0,14 | 0,10 | 0,8293014 | NA       |
| CACNG1          | 0,00 | 0,00 | 0,00 | 0,00 | 0,8293069 | NA       |
| PRAMEF1         | 0,00 | 0,00 | 0,00 | 0,00 | 0,8293209 | NA       |
| RP11-12J10.4    | 0,00 | 0,00 | 0,00 | 0,00 | 0,8293225 | NA       |
| TAGLN2P1        | 0,00 | 0,00 | 0,00 | 0,00 | 0,829348  | NA       |
| NNAT            | 0,00 | 0,00 | 0,00 | 0,13 | 0,829399  | NA       |
| RP11-56D16.8    | 0,00 | 0,00 | 0,00 | 0,00 | 0,8294692 | NA       |
| RP13-991F5.4    | 0,00 | 0,00 | 0,00 | 0,00 | 0,8295531 | NA       |
| RP4-616B8.6     | 0,00 | 0,00 | 0,00 | 0,00 | 0,8296378 | NA       |
| PRORS1P         | 0,11 | 0,33 | 0,20 | 0,38 | 0,829699  | 0,888592 |
| GIP             | 0,00 | 0,00 | 0,00 | 0,00 | 0,8297468 | NA       |
| FAM180A         | 0,00 | 0,16 | 0,00 | 0,12 | 0,829873  | NA       |
| RP11-466L22.1   | 0,00 | 0,00 | 0,00 | 0,00 | 0,8299022 | NA       |
| RP11-266K4.13   | 0,00 | 0,00 | 0,00 | 0,00 | 0,8299534 | NA       |
| ASNSP1          | 0,00 | 0,00 | 0,00 | 0,00 | 0,8299779 | NA       |
| RP11-715N9.2    | 0,00 | 0,00 | 0,00 | 0,00 | 0,8300069 | 0,888879 |
| RNU7-110P       | 0,00 | 0,00 | 0,00 | 0,00 | 0,8301109 | NA       |
| KRT16P4         | 0,00 | 0,00 | 0,00 | 0,00 | 0,830157  | NA       |
| DUSP11          | 4,71 | 2,98 | 3,97 | 4,80 | 0,8303399 | 0,889151 |
| MIRS48A1        | 0,00 | 2,02 | 0,00 | 0,00 | 0,83035   | 0,889151 |
| REEP4           | 4,41 | 4,36 | 4,67 | 4,43 | 0,8303812 | 0,889151 |
| RN7SL110P       | 0,00 | 0,00 | 0,00 | 0,00 | 0,8303911 | NA       |
| RP11-37O16.3    | 0,00 | 0,00 | 0,00 | 0,00 | 0,8303991 | NA       |



|                |      |      |      |      |           |          |
|----------------|------|------|------|------|-----------|----------|
| RNU6-79P       | 0,00 | 0,00 | 0,00 | 0,00 | 0,8304133 | NA       |
| RP11-259G18.1  | 0,00 | 0,00 | 0,00 | 0,00 | 0,8304667 | NA       |
| RP11-531A24.7  | 0,00 | 0,00 | 0,00 | 0,00 | 0,8304864 | NA       |
| RP5-881L22.4   | 0,00 | 0,00 | 0,00 | 0,00 | 0,8305956 | NA       |
| RP11-96B2.1    | 0,00 | 0,41 | 0,00 | 0,00 | 0,8306005 | NA       |
| RP1-79C4.1     | 1,31 | 0,62 | 0,69 | 1,22 | 0,8306898 | 0,889439 |
| RN7SL74P       | 0,00 | 0,00 | 0,00 | 0,00 | 0,8308237 | NA       |
| RP11-654K19.6  | 0,00 | 0,00 | 0,00 | 0,00 | 0,8308282 | NA       |
| RP11-805F19.1  | 0,00 | 0,00 | 0,00 | 0,00 | 0,8309336 | NA       |
| ACO10642.1     | 0,00 | 0,00 | 0,00 | 0,00 | 0,8309361 | NA       |
| APOL4          | 1,58 | 0,97 | 1,19 | 0,92 | 0,8309519 | 0,889653 |
| RP11-5K16.2    | 0,00 | 0,00 | 0,00 | 0,00 | 0,8309647 | NA       |
| GOT1           | 3,47 | 0,54 | 2,76 | 0,08 | 0,83097   | 0,889653 |
| RP11-498M5.2   | 0,00 | 0,00 | 0,00 | 0,00 | 0,8309705 | NA       |
| MIR4462        | 0,00 | 0,00 | 0,00 | 0,00 | 0,831029  | NA       |
| DYNC1I2P1      | 0,00 | 0,00 | 0,00 | 0,00 | 0,8310692 | NA       |
| BCS1L          | 5,12 | 4,93 | 4,80 | 3,35 | 0,8310952 | 0,889744 |
| RP11-640A1.3   | 0,00 | 0,00 | 0,00 | 0,00 | 0,8311409 | NA       |
| KLC2           | 0,65 | 0,49 | 0,12 | 0,00 | 0,8311509 | 0,88975  |
| NKAIN3         | 0,00 | 0,00 | 0,00 | 0,00 | 0,8311776 | NA       |
| RN7SL827P      | 1,14 | 1,42 | 1,09 | 1,76 | 0,8311807 | 0,88975  |
| RNU6-1225P     | 0,00 | 0,00 | 0,00 | 0,00 | 0,8311931 | NA       |
| CH17-112A12.2  | 0,00 | 0,00 | 0,00 | 0,00 | 0,8311995 | NA       |
| RP11-135A24.2  | 0,00 | 0,00 | 0,00 | 0,00 | 0,8313553 | 0,889886 |
| IGFLR1         | 7,92 | 7,71 | 7,87 | 7,44 | 0,8313976 | 0,889886 |
| SEPHS2         | 3,72 | 4,11 | 3,46 | 3,07 | 0,8314278 | 0,889886 |
| RP11-28B23.1   | 0,00 | 0,00 | 0,00 | 0,00 | 0,8314834 | NA       |
| RP11-596C23.6  | 0,00 | 0,00 | 0,00 | 0,00 | 0,8316356 | NA       |
| RP11-1217F2.22 | 0,00 | 0,00 | 0,00 | 0,00 | 0,8316516 | NA       |
| FRMD5          | 0,00 | 0,00 | 0,00 | 0,00 | 0,8317028 | NA       |
| ISY1           | 5,43 | 4,80 | 5,33 | 4,28 | 0,8317239 | 0,890116 |
| AL133243.1     | 3,06 | 3,88 | 2,60 | 0,52 | 0,8317696 | 0,890116 |
| RP11-346C20.4  | 0,00 | 0,07 | 0,00 | 0,00 | 0,8317778 | 0,890116 |
| TNFSF14        | 0,13 | 0,92 | 0,21 | 0,87 | 0,8318029 | 0,890116 |
| ATP5G1         | 7,40 | 7,24 | 7,45 | 6,56 | 0,8318864 | 0,890163 |
| RP11-648C16.1  | 0,00 | 0,00 | 0,00 | 0,00 | 0,8319163 | NA       |
| CALCRL         | 3,62 | 1,01 | 3,36 | 2,76 | 0,8319583 | 0,890172 |
| CD99L2         | 1,76 | 2,52 | 1,02 | 1,27 | 0,8319749 | 0,890172 |
| CTD-3105H18.8  | 0,00 | 0,00 | 0,00 | 0,00 | 0,8319928 | NA       |
| SLC6A13        | 0,00 | 0,00 | 0,00 | 0,00 | 0,8319969 | NA       |
| BCKDHB         | 3,01 | 2,67 | 3,34 | 1,49 | 0,8320432 | 0,890202 |
| RP11-10A14.4   | 0,00 | 0,00 | 0,00 | 0,00 | 0,8320578 | NA       |
| SNORA15B-1     | 0,00 | 0,00 | 0,00 | 0,00 | 0,8321693 | NA       |
| SNORA15B-2     | 0,00 | 0,00 | 0,00 | 0,00 | 0,8321693 | NA       |
| AMZ1           | 1,49 | 1,39 | 1,44 | 0,59 | 0,8322868 | 0,890419 |
| RP11-151G14.2  | 0,00 | 0,00 | 0,00 | 0,00 | 0,8322874 | NA       |
| MIR548AQ       | 0,00 | 0,00 | 0,00 | 0,00 | 0,8323014 | NA       |
| GUF1           | 3,73 | 2,53 | 2,32 | 3,24 | 0,832347  | 0,890441 |
| RP11-190C22.8  | 0,00 | 0,00 | 0,00 | 0,00 | 0,8323686 | NA       |
| MIR548AJ1      | 0,00 | 0,00 | 0,00 | 0,00 | 0,8325975 | NA       |
| NIPAL4         | 0,00 | 0,00 | 0,00 | 0,00 | 0,8326427 | 0,8907   |
| HHAT           | 0,13 | 0,23 | 0,05 | 0,05 | 0,8326997 | 0,8907   |
| RP11-693J15.4  | 0,12 | 1,65 | 0,04 | 0,00 | 0,8327114 | 0,8907   |
| RP11-109A6.2   | 0,00 | 0,00 | 0,00 | 0,00 | 0,8327146 | NA       |
| RP11-452J21.2  | 0,00 | 0,00 | 0,00 | 0,00 | 0,8327961 | NA       |

|               |      |      |      |      |           |          |
|---------------|------|------|------|------|-----------|----------|
| RP4-594A5.1   | 0,00 | 0,00 | 0,00 | 0,00 | 0,8328106 | NA       |
| RNU6-118P     | 5,95 | 0,00 | 5,82 | 2,08 | 0,8328179 | 0,8907   |
| RP11-305E17.6 | 0,00 | 0,00 | 0,00 | 0,00 | 0,832828  | 0,8907   |
| RP5-894A10.2  | 0,41 | 0,00 | 0,45 | 0,41 | 0,8328291 | 0,8907   |
| RP11-585K6.1  | 0,00 | 0,00 | 0,00 | 0,00 | 0,8328924 | NA       |
| CYLC2         | 0,06 | 0,00 | 0,00 | 0,00 | 0,8329062 | 0,890739 |
| RP11-763F8.1  | 0,00 | 0,00 | 0,00 | 0,00 | 0,8330151 | NA       |
| AC005329.7    | 0,00 | 0,00 | 0,00 | 0,00 | 0,8331102 | NA       |
| AADAT         | 0,00 | 0,09 | 0,20 | 0,13 | 0,8331386 | 0,890945 |
| CES2          | 2,78 | 1,49 | 2,79 | 2,31 | 0,8332467 | 0,890995 |
| RP11-196N14.1 | 2,57 | 2,35 | 1,96 | 1,23 | 0,8332659 | 0,890995 |
| AC008753.2    | 0,00 | 0,00 | 0,00 | 0,00 | 0,8333941 | NA       |
| CTD-314810.15 | 0,00 | 0,00 | 0,00 | 0,00 | 0,83353   | NA       |
| RP11-162D16.2 | 2,24 | 3,00 | 2,44 | 2,83 | 0,8336028 | 0,891293 |
| PCGF6         | 1,27 | 0,95 | 1,39 | 0,49 | 0,8336712 | 0,891293 |
| RP11-278J6.5  | 0,00 | 0,00 | 0,00 | 0,00 | 0,8336733 | 0,891293 |
| DENND6A       | 3,54 | 3,49 | 2,54 | 3,23 | 0,8337045 | 0,891293 |
| RP11-598P12.1 | 0,00 | 0,00 | 0,00 | 0,00 | 0,8337216 | NA       |
| RP11-328L11.1 | 0,00 | 0,00 | 0,00 | 0,00 | 0,8337229 | NA       |
| CLDN20        | 0,00 | 0,00 | 0,00 | 0,00 | 0,8337646 | NA       |
| ENO3          | 1,84 | 1,64 | 1,96 | 2,87 | 0,8337829 | 0,891334 |
| AC010129.1    | 0,00 | 0,12 | 0,00 | 0,00 | 0,8337879 | NA       |
| DDX18P5       | 0,00 | 0,00 | 0,00 | 0,00 | 0,8338053 | NA       |
| AC008746.12   | 0,00 | 0,00 | 0,00 | 0,00 | 0,8338946 | NA       |
| STRA6         | 0,10 | 0,07 | 0,15 | 0,17 | 0,8340323 | 0,891446 |
| PF4V1         | 0,00 | 0,00 | 0,00 | 0,00 | 0,8340393 | NA       |
| MIR5480       | 0,00 | 0,00 | 0,00 | 0,00 | 0,8340425 | 0,891446 |
| CTC-435M10.3  | 1,58 | 2,37 | 3,30 | 3,55 | 0,834048  | 0,891446 |
| RNU6-74P      | 0,00 | 0,00 | 0,00 | 0,00 | 0,8340513 | NA       |
| ADGRE4P       | 0,08 | 0,00 | 0,02 | 0,27 | 0,8340691 | 0,891446 |
| RP11-640N20.4 | 1,00 | 2,08 | 0,96 | 0,82 | 0,8340886 | 0,891446 |
| MIR4469       | 0,00 | 0,00 | 0,00 | 0,00 | 0,8341268 | NA       |
| JAK3          | 4,79 | 4,16 | 4,73 | 4,71 | 0,8341501 | 0,891469 |
| AC097523.2    | 0,00 | 0,00 | 0,00 | 0,00 | 0,8343264 | NA       |
| FAM46A        | 4,21 | 3,31 | 4,25 | 3,70 | 0,8343338 | 0,891622 |
| PCDHA10       | 0,12 | 0,01 | 0,14 | 0,09 | 0,8346717 | 0,891921 |
| BARX2         | 0,14 | 0,14 | 0,17 | 0,14 | 0,8346934 | 0,891921 |
| KLHL14        | 0,00 | 0,00 | 0,00 | 0,00 | 0,8346981 | NA       |
| BANF2         | 0,00 | 0,00 | 0,00 | 0,00 | 0,834748  | NA       |
| RP5-1050D4.5  | 0,00 | 0,00 | 0,00 | 0,00 | 0,8347817 | 0,891972 |
| RP11-354M1.1  | 0,00 | 0,00 | 0,00 | 0,00 | 0,8348214 | NA       |
| AP000997.2    | 0,01 | 0,05 | 0,00 | 0,00 | 0,8348321 | 0,891983 |
| RP11-230C9.3  | 0,00 | 0,00 | 0,00 | 0,00 | 0,8348665 | NA       |
| RP11-19N8.4   | 0,00 | 0,20 | 0,00 | 0,00 | 0,8349357 | NA       |
| RP11-45P15.4  | 0,00 | 0,00 | 0,00 | 0,00 | 0,8349646 | 0,892082 |
| MED12L        | 1,40 | 1,10 | 1,04 | 1,71 | 0,8350142 | 0,892092 |
| RP11-126Q22.7 | 0,00 | 0,00 | 0,00 | 0,00 | 0,835061  | NA       |
| ANP32BP1      | 0,00 | 0,12 | 0,00 | 0,00 | 0,8351728 | NA       |
| RP11-157H4.1  | 0,00 | 0,00 | 0,00 | 0,00 | 0,8352195 | NA       |
| AURKC         | 0,00 | 0,00 | 0,00 | 0,00 | 0,835279  | NA       |
| RP11-404H14.1 | 0,80 | 1,26 | 0,59 | 1,68 | 0,835312  | 0,892367 |
| RP3-323M4.2   | 0,00 | 0,00 | 0,00 | 0,00 | 0,8353485 | NA       |
| RP13-152O15.2 | 0,00 | 0,00 | 0,00 | 0,00 | 0,8353659 | NA       |
| DPY19L3       | 1,96 | 2,05 | 1,40 | 1,48 | 0,8354253 | 0,892445 |
| OR2L5         | 0,00 | 0,00 | 0,00 | 0,00 | 0,8354668 | NA       |

|               |      |      |      |      |           |          |
|---------------|------|------|------|------|-----------|----------|
| RP11-173C20.2 | 0,00 | 0,00 | 0,00 | 0,00 | 0,835504  | NA       |
| PPIH          | 5,13 | 3,88 | 5,07 | 4,87 | 0,8355484 | 0,892534 |
| FOXP3         | 0,00 | 0,00 | 0,00 | 0,00 | 0,8357059 | NA       |
| NID2          | 0,00 | 0,00 | 0,00 | 0,21 | 0,8357801 | 0,892711 |
| CARD6         | 1,75 | 1,49 | 1,39 | 1,93 | 0,8357944 | 0,892711 |
| RP5-1021I20.6 | 0,00 | 0,00 | 0,00 | 0,00 | 0,8358817 | NA       |
| CCDC167       | 4,85 | 3,04 | 4,82 | 5,15 | 0,8358942 | 0,892775 |
| RP11-718B12.2 | 0,00 | 0,00 | 0,00 | 0,00 | 0,8359848 | NA       |
| RP3-412A9.11  | 0,41 | 1,42 | 0,48 | 1,95 | 0,8360201 | 0,892866 |
| AC019181.3    | 0,00 | 0,00 | 0,00 | 0,00 | 0,8361334 | NA       |
| CDH22         | 0,00 | 0,00 | 0,00 | 0,00 | 0,8361991 | NA       |
| NAT1          | 2,51 | 0,08 | 0,85 | 0,00 | 0,836269  | 0,893089 |
| SMC2          | 2,51 | 2,54 | 2,31 | 1,26 | 0,8363302 | 0,893112 |
| AC092620.2    | 4,39 | 1,36 | 3,97 | 2,49 | 0,8364777 | 0,893226 |
| RP11-358B23.5 | 0,00 | 0,00 | 0,00 | 0,00 | 0,8364899 | NA       |
| RP11-386M24.8 | 0,00 | 0,00 | 0,00 | 0,00 | 0,8365004 | NA       |
| MIR4459       | 0,00 | 0,00 | 0,00 | 0,00 | 0,8365361 | NA       |
| AC012065.5    | 0,00 | 0,00 | 0,00 | 0,00 | 0,8365667 | NA       |
| UNC50         | 5,46 | 4,10 | 4,90 | 4,64 | 0,8365809 | 0,893262 |
| RP11-75C9.2   | 0,00 | 0,00 | 0,00 | 0,00 | 0,8365826 | NA       |
| FAM175B       | 2,72 | 3,51 | 2,18 | 2,50 | 0,8365913 | 0,893262 |
| RP11-326C3.15 | 0,00 | 0,00 | 0,00 | 0,00 | 0,8366805 | NA       |
| RP11-203M5.7  | 0,00 | 0,49 | 0,00 | 1,21 | 0,8367673 | 0,893407 |
| AF131215.3    | 0,00 | 0,00 | 0,00 | 0,00 | 0,8367811 | NA       |
| RP11-210K20.2 | 0,00 | 1,29 | 0,17 | 0,76 | 0,8368042 | NA       |
| RP11-767L7.2  | 0,00 | 0,00 | 0,00 | 0,00 | 0,8368546 | NA       |
| SNRPC         | 7,69 | 7,24 | 7,81 | 6,76 | 0,8368841 | 0,89348  |
| P2RX6P        | 0,00 | 0,00 | 0,00 | 0,00 | 0,8368962 | NA       |
| RP11-281P23.2 | 0,00 | 0,00 | 0,00 | 0,00 | 0,8369165 | 0,89348  |
| AC006026.11   | 0,00 | 0,00 | 0,00 | 0,00 | 0,8369167 | NA       |
| MIR5195       | 0,00 | 0,00 | 0,00 | 0,00 | 0,8369548 | NA       |
| RP11-325E5.1  | 0,00 | 0,00 | 0,00 | 0,00 | 0,8369629 | NA       |
| RP1-20C7.6    | 0,00 | 0,40 | 0,00 | 0,00 | 0,8370128 | NA       |
| KCNK7         | 0,00 | 0,00 | 0,00 | 0,00 | 0,8371735 | NA       |
| AC016292.1    | 0,00 | 0,00 | 0,00 | 0,00 | 0,8373052 | 0,893852 |
| TTC38         | 1,89 | 2,16 | 1,82 | 2,56 | 0,8373569 | 0,893864 |
| RP11-61F12.1  | 0,00 | 0,00 | 0,00 | 0,00 | 0,837479  | NA       |
| OR2T2         | 0,00 | 0,00 | 0,00 | 0,00 | 0,8375658 | NA       |
| ACOD1         | 0,00 | 0,00 | 0,00 | 0,00 | 0,8375873 | NA       |
| C9orf40       | 0,00 | 0,00 | 0,00 | 0,00 | 0,8376417 | NA       |
| RP11-468E2.4  | 1,55 | 2,95 | 2,32 | 2,07 | 0,837648  | 0,894132 |
| RP11-484M3.4  | 0,00 | 0,00 | 0,00 | 0,00 | 0,8377239 | NA       |
| MIR8078       | 0,00 | 1,85 | 0,00 | 0,00 | 0,8377909 | NA       |
| RP11-463I20.1 | 0,00 | 1,21 | 1,78 | 1,33 | 0,837836  | 0,89429  |
| RP11-321A17.3 | 0,00 | 0,00 | 0,00 | 0,00 | 0,8378399 | NA       |
| C6orf52       | 0,00 | 0,00 | 0,00 | 0,00 | 0,8378453 | NA       |
| RN75L201P     | 0,00 | 0,00 | 0,00 | 0,00 | 0,8378861 | NA       |
| RP11-344G13.1 | 0,13 | 0,15 | 0,04 | 0,03 | 0,8378874 | 0,894302 |
| KCNA1         | 0,00 | 0,00 | 0,00 | 0,00 | 0,8379802 | NA       |
| CCT8L1        | 0,00 | 0,00 | 0,00 | 0,00 | 0,8380024 | NA       |
| AF130342.1    | 0,00 | 0,00 | 0,00 | 0,00 | 0,8380664 | NA       |
| AC006509.8    | 0,00 | 0,00 | 0,00 | 0,00 | 0,8380731 | NA       |
| RP1-85F18.4   | 0,00 | 0,00 | 0,00 | 0,00 | 0,8380754 | NA       |
| ASMT          | 0,00 | 0,00 | 0,00 | 0,00 | 0,8381342 | NA       |
| CTC-458I2.2   | 0,00 | 1,12 | 0,00 | 0,00 | 0,8381496 | 0,894539 |

|                |      |      |      |      |           |          |
|----------------|------|------|------|------|-----------|----------|
| OR7E84P        | 0,00 | 0,00 | 0,00 | 0,00 | 0,8381601 | NA       |
| RP11-686D22.5  | 0,00 | 0,00 | 0,00 | 0,00 | 0,8382796 | 0,894635 |
| RP11-84C13.2   | 0,00 | 0,00 | 0,00 | 0,00 | 0,8383115 | NA       |
| TOMM20L        | 0,00 | 0,00 | 0,00 | 0,00 | 0,8383609 | NA       |
| CTB-60E11.9    | 0,00 | 0,00 | 0,00 | 0,00 | 0,8384215 | NA       |
| TMEM167A       | 6,47 | 6,32 | 6,36 | 6,07 | 0,8384445 | 0,894768 |
| RPL32P29       | 4,62 | 3,84 | 4,21 | 4,53 | 0,8385452 | 0,894801 |
| AC092299.6     | 0,00 | 0,00 | 0,00 | 0,60 | 0,8385564 | 0,894801 |
| SFTA2          | 0,00 | 0,00 | 0,00 | 0,00 | 0,838567  | NA       |
| CTD-2319I12.10 | 0,45 | 0,00 | 0,00 | 0,00 | 0,8385754 | NA       |
| RP11-834C11.15 | 0,00 | 0,08 | 0,00 | 0,00 | 0,8386263 | NA       |
| MRPL34         | 6,52 | 5,82 | 6,60 | 5,92 | 0,8387187 | 0,894931 |
| MIR5692C2      | 0,00 | 0,00 | 0,00 | 0,00 | 0,8387573 | NA       |
| TRIM53         | 0,00 | 0,00 | 0,00 | 0,00 | 0,8388194 | NA       |
| SLC25A44       | 3,17 | 2,47 | 2,69 | 1,86 | 0,8388408 | 0,895019 |
| CTD-2048F20.1  | 0,00 | 0,00 | 0,00 | 0,00 | 0,8389355 | NA       |
| RP11-102C24.1  | 0,00 | 0,00 | 0,00 | 0,00 | 0,8389676 | NA       |
| RP11-175D17.3  | 0,00 | 0,00 | 0,00 | 0,00 | 0,83923   | NA       |
| ASPN           | 0,05 | 0,50 | 0,09 | 0,14 | 0,8392399 | 0,895401 |
| HOXB2          | 0,97 | 1,73 | 0,85 | 0,17 | 0,8392975 | 0,895405 |
| CTRL           | 1,79 | 3,22 | 1,63 | 1,11 | 0,8393235 | 0,895405 |
| RP11-303E16.5  | 0,00 | 0,00 | 0,00 | 0,00 | 0,8393278 | NA       |
| LRRC16B        | 0,00 | 0,16 | 0,00 | 0,00 | 0,8394122 | 0,895439 |
| AF196972.9     | 0,00 | 0,00 | 0,00 | 0,00 | 0,839526  | NA       |
| RP11-813F20.2  | 0,00 | 0,00 | 0,00 | 0,00 | 0,8395271 | NA       |
| RP11-59E19.4   | 0,00 | 0,67 | 0,00 | 0,18 | 0,839541  | 0,895439 |
| MCCC1          | 4,23 | 3,67 | 4,02 | 4,93 | 0,8395515 | 0,895439 |
| RP11-1096D5.2  | 0,00 | 0,00 | 0,00 | 0,00 | 0,8395644 | NA       |
| PRKCI          | 3,24 | 2,33 | 3,23 | 2,07 | 0,8395778 | 0,895439 |
| RN7SL166P      | 0,93 | 0,95 | 0,99 | 0,00 | 0,8395826 | 0,895439 |
| RP11-44F14.6   | 0,10 | 0,00 | 0,12 | 0,13 | 0,8395975 | 0,895439 |
| AC064834.2     | 0,00 | 0,00 | 0,00 | 0,00 | 0,8396498 | NA       |
| RP11-45A16.5   | 0,00 | 0,00 | 0,00 | 0,00 | 0,8397012 | NA       |
| EEF1AKMT4      | 3,42 | 0,29 | 1,24 | 0,36 | 0,8397453 | 0,895554 |
| C1orf157       | 0,00 | 0,00 | 0,00 | 0,00 | 0,8397724 | NA       |
| RP1-127D3.4    | 0,00 | 0,00 | 0,00 | 0,00 | 0,8398018 | NA       |
| KLHL11         | 0,00 | 0,00 | 0,00 | 0,00 | 0,8398651 | 0,895589 |
| ELP6           | 5,12 | 2,79 | 4,62 | 2,74 | 0,839886  | 0,895589 |
| MAP2           | 0,00 | 0,00 | 0,00 | 0,35 | 0,8399172 | 0,895589 |
| CTD-3253I12.1  | 0,00 | 0,00 | 0,00 | 0,00 | 0,8399535 | NA       |
| RP5-905H7.3    | 0,00 | 0,00 | 0,00 | 0,00 | 0,8399535 | NA       |
| EHBP1          | 3,73 | 2,76 | 3,15 | 3,60 | 0,8399765 | 0,895589 |
| CHSY1          | 2,63 | 2,07 | 2,50 | 2,83 | 0,8399797 | 0,895589 |
| AC004166.7     | 2,31 | 1,78 | 1,75 | 2,19 | 0,8400247 | 0,895594 |
| RP11-298I3.1   | 0,00 | 0,00 | 0,00 | 0,00 | 0,8400552 | NA       |
| RP5-1024G6.5   | 0,00 | 0,00 | 0,00 | 0,00 | 0,840087  | NA       |
| FLOT2          | 6,34 | 5,96 | 6,16 | 5,73 | 0,8400957 | 0,895627 |
| RN7SL321P      | 0,00 | 0,00 | 0,00 | 0,00 | 0,8401562 | NA       |
| RNA5SP123      | 0,00 | 0,00 | 0,00 | 0,00 | 0,840293  | NA       |
| RP11-533E19.5  | 0,54 | 1,00 | 0,49 | 0,70 | 0,8403605 | 0,895866 |
| AC005150.1     | 0,00 | 0,00 | 0,00 | 0,00 | 0,8404114 | NA       |
| TRBV10-1       | 0,00 | 0,00 | 0,00 | 0,00 | 0,8404165 | NA       |
| CTC-573N18.1   | 0,84 | 2,13 | 0,73 | 0,00 | 0,8404257 | 0,895892 |
| RP11-195B17.1  | 0,00 | 0,00 | 0,00 | 0,00 | 0,8404578 | NA       |
| RP11-739L10.1  | 2,21 | 1,88 | 1,68 | 0,00 | 0,840479  | 0,895906 |

|                 |      |      |      |      |           |          |
|-----------------|------|------|------|------|-----------|----------|
| CTD-2345M20.1   | 0,00 | 0,00 | 0,00 | 0,00 | 0,8404871 | NA       |
| AC108488.3      | 0,18 | 0,80 | 0,40 | 0,32 | 0,8405669 | 0,895957 |
| RP11-430C17.1   | 0,00 | 0,00 | 0,00 | 0,00 | 0,8406581 | NA       |
| SCAF11          | 6,23 | 5,30 | 6,27 | 6,07 | 0,8407769 | 0,896138 |
| RP11-649A18.5   | 0,00 | 0,64 | 0,76 | 0,00 | 0,8408242 | 0,896145 |
| RP13-16H11.5    | 0,00 | 0,00 | 0,00 | 0,00 | 0,8408547 | NA       |
| RP11-346E8.1    | 0,00 | 0,00 | 0,00 | 0,00 | 0,8409447 | NA       |
| RMI2            | 0,00 | 0,00 | 0,00 | 0,00 | 0,8409792 | NA       |
| ZFAT            | 1,64 | 1,79 | 0,69 | 1,32 | 0,8410446 | 0,8963   |
| FAM228A         | 0,00 | 0,00 | 0,00 | 0,00 | 0,8410449 | NA       |
| RP11-473I1.9    | 2,17 | 1,82 | 0,01 | 3,21 | 0,8410617 | 0,8963   |
| TMEM182         | 2,86 | 2,76 | 2,53 | 2,63 | 0,8410901 | 0,8963   |
| RP11-140H17.2   | 0,00 | 0,00 | 0,00 | 0,00 | 0,8412223 | 0,896398 |
| GOLGA8M         | 0,00 | 0,00 | 0,00 | 0,00 | 0,8413054 | NA       |
| RNU4-87P        | 0,00 | 0,00 | 0,00 | 0,00 | 0,8413346 | NA       |
| RP11-661A12.4   | 0,00 | 0,00 | 0,00 | 0,00 | 0,8413857 | NA       |
| RNU6-177P       | 0,00 | 0,00 | 0,00 | 0,00 | 0,8413948 | NA       |
| AC018816.2      | 0,00 | 0,00 | 0,00 | 0,00 | 0,8414074 | NA       |
| RP4-803A2.1     | 0,00 | 0,00 | 0,00 | 0,00 | 0,8414887 | NA       |
| RP5-1165K10.2   | 0,00 | 0,00 | 0,00 | 0,00 | 0,841494  | NA       |
| CCER2           | 0,00 | 0,00 | 0,00 | 0,00 | 0,8415418 | 0,896652 |
| ZNF546          | 1,06 | 1,96 | 1,63 | 1,84 | 0,8415612 | 0,896652 |
| EMG1            | 5,18 | 4,19 | 4,83 | 4,26 | 0,8415821 | 0,896652 |
| IFIT1           | 3,72 | 1,42 | 2,63 | 3,10 | 0,8416237 | 0,896653 |
| RP1-111C20.5    | 0,00 | 0,00 | 0,00 | 0,00 | 0,8416813 | NA       |
| SHOX2           | 0,00 | 0,00 | 0,00 | 0,00 | 0,8416936 | NA       |
| RNU1-122P       | 0,00 | 0,00 | 0,75 | 1,40 | 0,8417807 | NA       |
| PCSK4           | 0,00 | 0,00 | 0,00 | 0,00 | 0,841841  | NA       |
| RP11-443F16.1   | 0,00 | 0,00 | 0,00 | 0,00 | 0,8418555 | NA       |
| TTC14           | 4,42 | 2,84 | 4,30 | 3,57 | 0,8419306 | 0,896913 |
| KDELC1          | 0,00 | 0,00 | 0,00 | 0,00 | 0,8419482 | 0,896913 |
| ABC7-481722F1.2 | 0,00 | 0,00 | 0,00 | 0,00 | 0,8419683 | NA       |
| RP11-617B3.2    | 0,00 | 0,00 | 0,00 | 0,00 | 0,8420675 | NA       |
| ATG13           | 5,20 | 5,04 | 5,06 | 4,97 | 0,8420865 | 0,897018 |
| RP11-317G6.1    | 0,00 | 0,00 | 0,00 | 0,00 | 0,8421343 | NA       |
| CTD-3032H12.2   | 0,00 | 0,00 | 0,00 | 0,00 | 0,8421392 | NA       |
| RP4-703E10.1    | 0,12 | 0,00 | 0,00 | 0,61 | 0,8421898 | 0,897085 |
| RP5-920G3.3     | 0,00 | 0,00 | 0,00 | 0,00 | 0,8422385 | NA       |
| ZNF197          | 2,41 | 0,66 | 1,79 | 1,09 | 0,8423201 | 0,89718  |
| ADM2            | 0,05 | 0,13 | 0,03 | 0,04 | 0,8424714 | 0,897298 |
| AC007349.4      | 0,00 | 0,00 | 0,00 | 0,00 | 0,8425318 | NA       |
| CH17-118O6.6    | 0,00 | 0,00 | 0,00 | 0,00 | 0,842551  | NA       |
| STBD1           | 0,00 | 0,00 | 0,00 | 0,00 | 0,8427065 | NA       |
| IGHV3-49        | 0,00 | 0,00 | 0,00 | 0,00 | 0,8428681 | NA       |
| RP11-290L1.4    | 0,00 | 0,00 | 0,00 | 0,00 | 0,8430853 | NA       |
| CTB-113P19.3    | 0,00 | 0,00 | 0,00 | 0,00 | 0,8430892 | NA       |
| WARS            | 7,50 | 7,22 | 7,30 | 7,30 | 0,8431024 | 0,897835 |
| RP11-64P12.2    | 1,61 | 0,11 | 0,67 | 0,45 | 0,8431041 | 0,897835 |
| AC006988.3      | 0,00 | 0,10 | 0,00 | 0,00 | 0,8431157 | NA       |
| SFN             | 0,00 | 0,18 | 0,00 | 0,00 | 0,8431174 | 0,897835 |
| DCAF4L1         | 0,00 | 0,05 | 0,00 | 0,03 | 0,8431368 | 0,897835 |
| AC012354.6      | 0,00 | 0,00 | 0,00 | 0,05 | 0,8432251 | NA       |
| U82695.9        | 0,00 | 0,00 | 0,00 | 0,00 | 0,8432336 | NA       |
| RP11-261N11.14  | 0,00 | 0,00 | 0,00 | 0,00 | 0,8432499 | NA       |
| CCDC39          | 0,62 | 0,37 | 0,00 | 1,14 | 0,8432561 | 0,897911 |

|                    |      |      |      |      |           |          |
|--------------------|------|------|------|------|-----------|----------|
| DCTN4              | 4,69 | 3,58 | 4,48 | 3,84 | 0,8432937 | 0,897911 |
| RP11-556G22.2      | 0,00 | 0,00 | 0,00 | 0,00 | 0,8433037 | NA       |
| MIR3136            | 0,00 | 0,00 | 0,00 | 0,00 | 0,8433151 | NA       |
| C19orf12           | 2,49 | 0,43 | 1,73 | 2,38 | 0,8433292 | 0,897911 |
| RP11-456H18.2      | 0,00 | 0,00 | 0,00 | 0,00 | 0,8433298 | NA       |
| ENOPH1             | 4,22 | 2,19 | 3,60 | 1,20 | 0,8434495 | 0,897996 |
| RP11-157P1.4       | 0,00 | 0,00 | 0,00 | 0,00 | 0,8434972 | NA       |
| RP11-324J13.2      | 0,00 | 0,00 | 0,00 | 0,00 | 0,843538  | NA       |
| RP11-156P1.1       | 0,05 | 0,22 | 0,12 | 0,00 | 0,8435443 | 0,898054 |
| ACO08850.3         | 0,00 | 0,00 | 0,00 | 0,56 | 0,843589  | NA       |
| AMPD1              | 0,00 | 0,00 | 0,00 | 0,00 | 0,8436031 | NA       |
| RNU6-597P          | 0,00 | 0,00 | 0,00 | 0,00 | 0,8436597 | NA       |
| AP000240.6         | 0,00 | 0,00 | 0,16 | 0,37 | 0,8437427 | 0,898164 |
| AP000962.2         | 0,00 | 0,00 | 0,15 | 0,26 | 0,8437502 | 0,898164 |
| C3orf52            | 0,00 | 0,00 | 0,00 | 0,00 | 0,8437615 | NA       |
| RP3-333H23.9       | 0,00 | 1,73 | 0,07 | 0,79 | 0,8437686 | 0,898164 |
| RPL26P35           | 0,00 | 0,00 | 0,00 | 0,00 | 0,8438068 | NA       |
| RP11-522L3.9       | 0,00 | 0,00 | 0,00 | 0,00 | 0,8438709 | NA       |
| MIR5695            | 0,00 | 0,00 | 0,00 | 0,00 | 0,8438867 | NA       |
| RP5-1160K1.1       | 0,00 | 0,00 | 0,00 | 0,20 | 0,8439796 | NA       |
| RP11-638I2.8       | 0,00 | 0,00 | 0,00 | 0,00 | 0,8440024 | NA       |
| RP11-730A19.4      | 0,00 | 0,00 | 0,00 | 0,00 | 0,844014  | NA       |
| ZNF747             | 0,76 | 0,60 | 1,96 | 0,39 | 0,8440375 | 0,898407 |
| RP11-415I12.6      | 0,12 | 0,15 | 0,09 | 0,07 | 0,84405   | NA       |
| RP11-51J9.6        | 0,00 | 0,00 | 0,00 | 0,00 | 0,8440815 | NA       |
| PIN4               | 3,45 | 3,38 | 3,47 | 3,06 | 0,8441775 | 0,898513 |
| ACO05086.2         | 0,00 | 0,00 | 0,00 | 1,06 | 0,8442667 | NA       |
| AKR7A2             | 6,23 | 5,29 | 5,73 | 5,46 | 0,8442776 | 0,898576 |
| RP3-400N23.6       | 0,00 | 0,00 | 0,00 | 0,00 | 0,8443341 | NA       |
| RP11-325I22.3      | 0,00 | 0,00 | 0,00 | 0,00 | 0,8443945 | NA       |
| MTBP               | 1,39 | 1,65 | 1,11 | 1,58 | 0,8444208 | 0,89865  |
| GBA3               | 0,00 | 0,07 | 0,00 | 0,00 | 0,8444231 | NA       |
| SLC16A14           | 0,00 | 0,00 | 0,00 | 0,00 | 0,8444406 | 0,89865  |
| CTD-2026D20.2      | 0,00 | 0,00 | 0,00 | 0,00 | 0,8444619 | NA       |
| RP11-77K12.4       | 0,50 | 0,80 | 0,83 | 1,18 | 0,8444682 | 0,89865  |
| RP11-506F3.1       | 0,00 | 0,00 | 0,00 | 0,00 | 0,8445093 | NA       |
| RP11-297L17.4      | 0,00 | 0,00 | 0,00 | 0,00 | 0,8445545 | NA       |
| IPO13              | 2,75 | 1,56 | 2,68 | 2,73 | 0,8446102 | 0,898749 |
| DBF4B              | 1,28 | 1,66 | 1,83 | 1,41 | 0,8446425 | 0,898749 |
| PIK3AP1            | 4,55 | 5,05 | 4,16 | 3,97 | 0,8447071 | 0,898775 |
| RNA5SP344          | 0,00 | 0,00 | 0,00 | 0,00 | 0,8447868 | NA       |
| LCOR               | 4,13 | 3,52 | 3,66 | 3,39 | 0,8447885 | 0,89879  |
| RP11-561O23.9      | 1,52 | 1,89 | 1,85 | 1,58 | 0,8448021 | 0,89879  |
| KB-1440D3.16       | 0,00 | 0,00 | 0,00 | 0,00 | 0,8448422 | NA       |
| RP4-785G19.5       | 0,00 | 0,00 | 0,00 | 0,00 | 0,8448643 | NA       |
| CLPX               | 4,32 | 4,04 | 4,14 | 3,52 | 0,8449085 | 0,89886  |
| RP11-272G22.1      | 0,00 | 0,00 | 0,00 | 0,00 | 0,8449116 | NA       |
| RP11-361A21.3      | 0,00 | 0,00 | 0,00 | 0,00 | 0,8449467 | NA       |
| PRAMEF6            | 0,00 | 0,00 | 0,00 | 0,00 | 0,8449649 | NA       |
| XXbac-BPG170G13.32 | 0,00 | 0,00 | 0,00 | 0,00 | 0,8450026 | NA       |
| ITFG2              | 4,24 | 4,77 | 3,34 | 4,07 | 0,8450238 | 0,898898 |
| CDK1               | 0,00 | 0,00 | 0,04 | 0,00 | 0,8450252 | 0,898898 |
| RP11-689J19.2      | 0,00 | 0,00 | 0,00 | 0,00 | 0,8450592 | NA       |
| RP11-672L10.4      | 0,00 | 0,00 | 0,00 | 0,00 | 0,8450615 | NA       |
| LGR6               | 0,00 | 0,00 | 0,00 | 0,00 | 0,8450798 | NA       |

|                |      |      |      |      |           |          |
|----------------|------|------|------|------|-----------|----------|
| KALP           | 0,00 | 0,51 | 0,00 | 0,00 | 0,8451861 | NA       |
| AC112211.3     | 0,00 | 0,00 | 0,00 | 0,00 | 0,8452255 | NA       |
| R3HDM1         | 4,97 | 4,29 | 4,48 | 4,57 | 0,8452261 | 0,899046 |
| PI4KA          | 4,80 | 3,03 | 4,93 | 4,49 | 0,8452447 | 0,899046 |
| ANKRD30BP      | 0,00 | 0,00 | 0,00 | 0,00 | 0,8452867 | NA       |
| TCP10L         | 0,00 | 0,00 | 0,00 | 0,00 | 0,8453413 | NA       |
| SLC9A3         | 0,00 | 0,34 | 0,00 | 0,00 | 0,8454643 | 0,899222 |
| CTB-54D4.1     | 0,40 | 0,24 | 0,27 | 0,40 | 0,8454911 | 0,899222 |
| RPL7AP34       | 0,00 | 0,00 | 0,00 | 0,00 | 0,8455693 | NA       |
| RP11-300D11.3  | 0,00 | 0,00 | 0,00 | 0,00 | 0,845621  | NA       |
| RNU6-275P      | 0,00 | 0,00 | 0,00 | 1,80 | 0,8456468 | NA       |
| RN7SL760P      | 0,00 | 0,00 | 0,00 | 0,00 | 0,8457104 | NA       |
| RP11-575L7.2   | 0,00 | 0,00 | 0,00 | 0,00 | 0,8457239 | NA       |
| AC025918.2     | 0,00 | 0,00 | 0,00 | 0,00 | 0,8457598 | NA       |
| C3orf67        | 0,05 | 0,30 | 0,11 | 0,28 | 0,8457759 | 0,89943  |
| SLFN1          | 0,00 | 0,00 | 0,00 | 0,00 | 0,8457946 | NA       |
| IGHE           | 0,08 | 0,10 | 0,00 | 0,20 | 0,8458193 | 0,89943  |
| NBPF12         | 3,58 | 3,13 | 3,08 | 2,87 | 0,8458287 | 0,89943  |
| RF00153        | 0,00 | 1,15 | 0,00 | 0,00 | 0,8458308 | NA       |
| AC097662.2     | 0,00 | 0,10 | 0,03 | 0,06 | 0,8458333 | NA       |
| RP11-549K20.1  | 0,88 | 1,63 | 1,23 | 0,32 | 0,8458483 | 0,89943  |
| BBS12          | 0,00 | 0,00 | 0,00 | 0,00 | 0,8459259 | NA       |
| RP11-578F21.9  | 0,00 | 0,00 | 0,00 | 0,00 | 0,8459383 | NA       |
| RP3-388N13.5   | 0,00 | 0,00 | 0,00 | 0,00 | 0,8460323 | NA       |
| RP11-817I4.1   | 0,00 | 0,00 | 0,00 | 0,00 | 0,8460415 | NA       |
| RP11-26M5.2    | 0,00 | 0,00 | 0,00 | 0,00 | 0,8460971 | NA       |
| RP11-513D5.5   | 0,00 | 0,00 | 0,00 | 0,00 | 0,8461083 | NA       |
| RP11-332O19.2  | 0,00 | 0,00 | 0,00 | 0,00 | 0,8461136 | NA       |
| RP11-479O9.4   | 1,15 | 1,34 | 0,18 | 0,07 | 0,8462177 | 0,899779 |
| RP11-331F4.4   | 0,00 | 0,00 | 0,00 | 0,00 | 0,8463051 | NA       |
| RP11-3P17.3    | 0,00 | 0,00 | 0,00 | 0,00 | 0,8463255 | NA       |
| PCDHGA8        | 0,52 | 0,49 | 0,51 | 0,52 | 0,8463304 | 0,899856 |
| DDX18P1        | 0,00 | 0,00 | 0,00 | 0,00 | 0,8465523 | NA       |
| AC073551.1     | 0,00 | 0,00 | 0,00 | 0,00 | 0,8465555 | NA       |
| PDLIM4         | 0,00 | 0,00 | 0,00 | 0,00 | 0,8465982 | NA       |
| RP11-1399P15.1 | 0,00 | 0,00 | 0,00 | 0,00 | 0,8465996 | 0,900099 |
| RP11-667K14.9  | 0,00 | 0,00 | 0,00 | 0,00 | 0,846681  | 0,900143 |
| PNOC           | 0,00 | 0,00 | 0,00 | 0,00 | 0,8467222 | NA       |
| LAMB3          | 0,00 | 0,00 | 0,00 | 0,03 | 0,8467252 | 0,900147 |
| RP11-809N8.6   | 0,00 | 0,00 | 0,00 | 0,00 | 0,8467936 | NA       |
| RP11-211N8.8   | 0,00 | 0,00 | 0,00 | 0,00 | 0,8469367 | NA       |
| MIR4796        | 0,00 | 0,00 | 0,00 | 0,00 | 0,8469711 | NA       |
| RP5-1125M8.5   | 0,00 | 0,00 | 0,00 | 0,00 | 0,8469711 | NA       |
| RNU6-487P      | 0,00 | 0,00 | 0,00 | 0,00 | 0,8470421 | NA       |
| BIRC5          | 0,29 | 0,54 | 0,72 | 0,71 | 0,8470603 | 0,90046  |
| MIR6797        | 0,00 | 0,00 | 0,00 | 0,00 | 0,8470901 | NA       |
| HERC5          | 1,94 | 2,07 | 3,06 | 2,50 | 0,847131  | 0,900492 |
| RP11-196G11.1  | 0,00 | 0,12 | 0,00 | 0,00 | 0,8471422 | NA       |
| EMILIN1        | 0,00 | 0,00 | 0,00 | 0,00 | 0,8471542 | NA       |
| SSNA1          | 6,00 | 5,51 | 5,72 | 5,84 | 0,8472575 | 0,900583 |
| RP11-460E7.5   | 0,00 | 0,00 | 0,00 | 0,00 | 0,8472735 | NA       |
| SSX6           | 0,00 | 0,21 | 0,00 | 0,00 | 0,8473705 | NA       |
| RP11-115D7.3   | 0,00 | 0,00 | 0,00 | 0,00 | 0,8473967 | NA       |
| RP11-1057N3.2  | 0,00 | 0,00 | 0,00 | 0,00 | 0,8474517 | NA       |
| RP4-580N22.1   | 1,06 | 0,34 | 1,25 | 2,09 | 0,8475482 | 0,900849 |

|               |      |      |      |      |           |          |
|---------------|------|------|------|------|-----------|----------|
| DNM1P38       | 0,00 | 0,00 | 0,00 | 0,00 | 0,8476272 | NA       |
| ENOX2         | 2,30 | 1,15 | 1,90 | 1,89 | 0,8476554 | 0,900888 |
| RP3-323N1.2   | 5,66 | 5,17 | 4,55 | 3,44 | 0,847666  | 0,900888 |
| OR2W3         | 0,00 | 0,00 | 0,00 | 0,00 | 0,8476878 | NA       |
| AL078471.5    | 0,00 | 0,00 | 0,00 | 0,00 | 0,847722  | NA       |
| RP11-235G24.3 | 0,00 | 0,00 | 0,00 | 0,00 | 0,8477399 | NA       |
| RP11-860B13.3 | 0,00 | 0,00 | 0,00 | 0,00 | 0,8477607 | NA       |
| GOLGA8DP      | 0,00 | 0,00 | 0,00 | 0,00 | 0,8477811 | NA       |
| RNAS5P127     | 0,00 | 0,00 | 0,00 | 0,00 | 0,8477907 | NA       |
| RP11-386M24.4 | 0,00 | 0,00 | 0,00 | 0,00 | 0,8478515 | NA       |
| DSC1          | 0,00 | 0,00 | 0,00 | 0,00 | 0,8478574 | NA       |
| ANP32AP1      | 0,00 | 0,00 | 0,05 | 0,00 | 0,8479563 | 0,901146 |
| RP11-466C23.5 | 0,00 | 0,00 | 0,00 | 0,00 | 0,8479864 | NA       |
| RNH1          | 7,74 | 6,78 | 7,43 | 6,94 | 0,8479898 | 0,901146 |
| RP11-680F20.6 | 0,00 | 0,00 | 0,00 | 0,00 | 0,8480145 | NA       |
| CTB-129P6.4   | 0,00 | 0,00 | 0,00 | 0,00 | 0,8480454 | NA       |
| BCRP3         | 0,00 | 0,00 | 0,00 | 0,00 | 0,8481076 | NA       |
| KB-1980E6.3   | 0,19 | 0,24 | 0,00 | 0,20 | 0,8481649 | NA       |
| BTF3L4        | 5,21 | 4,54 | 4,80 | 4,92 | 0,8482433 | 0,901371 |
| RP11-401E9.3  | 0,00 | 0,00 | 0,00 | 0,00 | 0,8482779 | NA       |
| SLTM          | 6,68 | 6,14 | 6,46 | 6,42 | 0,8482821 | 0,901371 |
| L34079.4      | 0,00 | 0,00 | 0,00 | 0,00 | 0,8482904 | NA       |
| RP11-363H12.1 | 0,00 | 0,35 | 0,00 | 0,00 | 0,8483481 | NA       |
| SLC46A1       | 0,81 | 1,62 | 1,51 | 0,48 | 0,8483875 | 0,90144  |
| AC005154.8    | 0,00 | 0,00 | 0,00 | 0,00 | 0,8484124 | NA       |
| RP11-542C10.1 | 0,00 | 0,53 | 0,00 | 0,69 | 0,8484604 | NA       |
| DKK3          | 0,00 | 0,00 | 0,00 | 0,00 | 0,8485493 | NA       |
| PNLIP         | 0,00 | 0,00 | 0,00 | 0,00 | 0,8487486 | NA       |
| RP11-697K23.3 | 0,16 | 0,28 | 0,25 | 0,46 | 0,8487506 | 0,901782 |
| RP11-73B2.6   | 0,00 | 0,00 | 0,00 | 0,00 | 0,848773  | NA       |
| RP11-27M24.1  | 0,00 | 0,00 | 0,00 | 0,00 | 0,8487875 | NA       |
| RP11-473D24.1 | 0,00 | 0,00 | 0,00 | 0,32 | 0,8488253 | 0,901804 |
| KDM3A         | 4,14 | 1,80 | 3,61 | 3,17 | 0,8488671 | 0,901804 |
| MIR708        | 0,00 | 0,00 | 0,00 | 0,00 | 0,8488929 | 0,901804 |
| RP11-313A24.1 | 0,00 | 0,00 | 0,00 | 0,00 | 0,8489859 | NA       |
| ZNF611        | 3,54 | 3,71 | 3,69 | 2,96 | 0,8490133 | 0,901889 |
| RP11-46O21.2  | 3,81 | 3,69 | 3,46 | 3,16 | 0,8490763 | 0,901913 |
| ZNF460        | 2,22 | 2,27 | 1,10 | 0,54 | 0,8491224 | 0,901919 |
| ZNF80         | 0,00 | 0,00 | 0,00 | 0,00 | 0,8492071 | NA       |
| RP11-10C24.1  | 0,00 | 0,00 | 0,00 | 0,00 | 0,8493327 | NA       |
| TDRD3         | 3,35 | 2,20 | 3,32 | 2,04 | 0,8493994 | 0,90217  |
| NPIPA2        | 0,00 | 0,00 | 0,00 | 0,16 | 0,8495543 | 0,902291 |
| RP11-683L23.1 | 0,00 | 0,00 | 0,00 | 0,00 | 0,849649  | NA       |
| RP11-215P8.3  | 0,00 | 0,00 | 0,34 | 0,00 | 0,8496865 | NA       |
| RFESD         | 0,00 | 0,10 | 0,00 | 0,00 | 0,8497333 | NA       |
| PTPRU         | 0,00 | 0,00 | 0,00 | 0,00 | 0,8499362 | NA       |
| PMS2L2        | 2,41 | 0,94 | 2,17 | 1,55 | 0,8499744 | 0,902694 |
| RP11-8P13.5   | 0,00 | 0,00 | 0,00 | 0,00 | 0,8499865 | NA       |
| RP11-707M1.1  | 0,00 | 0,00 | 0,00 | 0,00 | 0,850123  | NA       |
| RP11-405M12.3 | 0,00 | 0,00 | 0,00 | 0,00 | 0,8501765 | NA       |
| RP11-933H2.4  | 0,05 | 0,32 | 0,71 | 0,73 | 0,8502315 | 0,902924 |
| OSR1          | 0,00 | 0,00 | 0,00 | 0,00 | 0,8503317 | NA       |
| MON2          | 4,00 | 3,43 | 3,83 | 3,57 | 0,8503463 | 0,903003 |
| WNT3A         | 0,00 | 0,00 | 0,00 | 0,00 | 0,850381  | NA       |
| HGD           | 0,00 | 0,00 | 0,00 | 0,00 | 0,8504181 | NA       |



|                    |      |      |      |      |           |          |
|--------------------|------|------|------|------|-----------|----------|
| RP11-10017.3       | 0,00 | 0,00 | 0,00 | 0,00 | 0,8504375 | NA       |
| ANKRD54            | 3,29 | 1,60 | 3,22 | 3,41 | 0,8504818 | 0,903104 |
| GM2A               | 3,00 | 3,46 | 3,55 | 3,56 | 0,8505446 | 0,903127 |
| SMIM10             | 0,00 | 0,00 | 0,00 | 0,00 | 0,8505736 | NA       |
| LEP                | 0,04 | 0,08 | 0,03 | 0,08 | 0,8506241 | 0,903149 |
| ADCY10             | 0,00 | 0,00 | 0,00 | 0,00 | 0,8506486 | NA       |
| EIF1B              | 5,86 | 5,33 | 5,61 | 5,22 | 0,8507017 | 0,903149 |
| SEZ6L              | 2,71 | 1,28 | 2,44 | 1,04 | 0,8507541 | 0,903149 |
| REPIN1             | 3,81 | 3,76 | 3,60 | 3,02 | 0,8507678 | 0,903149 |
| NT5C               | 5,33 | 3,66 | 4,70 | 5,09 | 0,8507679 | 0,903149 |
| MLYCD              | 0,22 | 0,26 | 0,39 | 1,07 | 0,8508224 | 0,903163 |
| GS1-393G12.12      | 0,00 | 0,00 | 0,00 | 0,00 | 0,8508691 | NA       |
| AH11               | 3,54 | 3,91 | 2,99 | 2,49 | 0,8509523 | 0,903257 |
| TMED6              | 0,00 | 0,00 | 0,00 | 0,00 | 0,8509922 | 0,903257 |
| TLDC2              | 0,48 | 0,13 | 1,00 | 0,87 | 0,8510462 | 0,903271 |
| RS1                | 0,00 | 0,00 | 0,00 | 0,00 | 0,8510498 | NA       |
| RP11-542H15.1      | 1,04 | 0,80 | 0,63 | 0,19 | 0,8511134 | 0,90332  |
| RP11-159D12.10     | 0,27 | 0,11 | 0,13 | 0,29 | 0,8511732 | 0,90332  |
| RNU1-93P           | 0,00 | 0,00 | 0,00 | 0,00 | 0,8512011 | NA       |
| RP11-423G4.8       | 0,00 | 0,08 | 0,00 | 0,61 | 0,8512226 | NA       |
| AC018648.5         | 0,00 | 0,00 | 0,00 | 0,00 | 0,8512904 | NA       |
| RNU1-16P           | 0,00 | 2,94 | 0,00 | 0,00 | 0,8513521 | 0,903467 |
| RP11-568J23.6      | 0,00 | 0,00 | 0,00 | 0,00 | 0,8514214 | NA       |
| RP11-867G23.2      | 0,00 | 0,00 | 0,00 | 0,00 | 0,8514363 | NA       |
| DNAJC19            | 4,60 | 4,89 | 4,56 | 3,99 | 0,8514435 | 0,90352  |
| MIR505             | 0,00 | 0,00 | 0,00 | 0,00 | 0,8514599 | NA       |
| RNU6-1111P         | 0,00 | 0,00 | 0,00 | 0,00 | 0,851484  | NA       |
| RP11-543A18.1      | 0,00 | 0,00 | 0,00 | 0,00 | 0,851507  | NA       |
| UBE2C              | 0,00 | 0,00 | 0,00 | 0,00 | 0,8515168 | 0,903555 |
| BCLAF1P2           | 0,00 | 0,00 | 0,00 | 0,00 | 0,8515652 | NA       |
| RNU6-399P          | 0,00 | 0,00 | 0,00 | 0,00 | 0,8515748 | NA       |
| ZNF217             | 3,33 | 3,57 | 3,25 | 3,25 | 0,8516079 | 0,903609 |
| RP11-273F15.1      | 0,00 | 0,00 | 0,00 | 0,00 | 0,8516821 | NA       |
| RP11-90J7.4        | 0,00 | 0,00 | 0,00 | 0,00 | 0,8517679 | NA       |
| RN7SL833P          | 0,00 | 0,00 | 0,00 | 0,00 | 0,8519509 | NA       |
| RP4-734C18.1       | 0,00 | 0,00 | 0,00 | 0,00 | 0,8519632 | NA       |
| PLCL2              | 3,65 | 2,99 | 2,86 | 3,21 | 0,8520104 | 0,903993 |
| RP11-157P23.2      | 0,00 | 0,00 | 0,00 | 0,00 | 0,8521302 | NA       |
| RNU6-302P          | 0,00 | 0,00 | 0,00 | 0,00 | 0,8521557 | NA       |
| TMEM110-MUSTN1     | 0,56 | 0,33 | 0,94 | 0,61 | 0,852162  | 0,90411  |
| XXbac-BPG258E24.10 | 0,00 | 0,00 | 0,00 | 0,00 | 0,8522496 | NA       |
| NDUFAF6            | 3,61 | 3,65 | 3,27 | 2,86 | 0,8522741 | 0,904186 |
| AC007036.4         | 0,00 | 0,00 | 0,00 | 0,00 | 0,852377  | NA       |
| TIMD4              | 0,00 | 0,00 | 0,00 | 0,00 | 0,8524058 | NA       |
| KCNB1              | 2,20 | 0,86 | 1,67 | 2,10 | 0,852419  | 0,904296 |
| RP11-307C18.1      | 0,00 | 0,00 | 0,00 | 0,00 | 0,8524298 | NA       |
| PCDHGA5            | 0,06 | 0,17 | 0,15 | 0,15 | 0,8525106 | 0,904315 |
| FOXN2              | 6,26 | 6,39 | 6,19 | 5,57 | 0,8525351 | 0,904315 |
| CTD-2576D5.4       | 0,00 | 0,00 | 0,00 | 0,00 | 0,8525392 | NA       |
| LRRC40             | 2,36 | 2,10 | 1,70 | 1,52 | 0,8525583 | 0,904315 |
| ANXA10             | 0,00 | 0,00 | 0,00 | 0,00 | 0,8525657 | NA       |
| CUL4A              | 4,53 | 4,56 | 4,27 | 4,58 | 0,8526293 | 0,904347 |
| RP11-474L23.3      | 0,00 | 0,00 | 0,00 | 0,00 | 0,8526564 | NA       |
| ZNF669             | 1,42 | 0,55 | 1,75 | 3,37 | 0,8527014 | 0,90438  |
| RP11-763B22.7      | 0,00 | 0,00 | 0,00 | 0,00 | 0,8527052 | NA       |

|                |      |      |      |      |           |          |
|----------------|------|------|------|------|-----------|----------|
| CTD-3187F8.15  | 0,00 | 0,00 | 0,00 | 0,00 | 0,8527539 | NA       |
| VN1R1          | 0,00 | 0,00 | 0,00 | 0,05 | 0,8527571 | 0,904396 |
| RP11-287D1.2   | 0,05 | 0,30 | 0,00 | 0,13 | 0,8528058 | 0,904405 |
| TMPRSS15       | 0,00 | 0,00 | 0,00 | 0,03 | 0,8530751 | NA       |
| RP11-75L1.1    | 0,00 | 0,00 | 0,00 | 0,00 | 0,8531645 | NA       |
| RNU6-307P      | 0,00 | 0,00 | 0,00 | 0,00 | 0,8532255 | NA       |
| UOX            | 0,00 | 0,00 | 0,00 | 0,00 | 0,8532573 | NA       |
| AC090044.2     | 0,00 | 0,00 | 0,00 | 0,00 | 0,8534218 | NA       |
| MIR3680-1      | 0,00 | 0,00 | 1,51 | 0,00 | 0,8534253 | 0,905018 |
| OPN1MW         | 0,00 | 0,00 | 0,00 | 0,00 | 0,8534282 | NA       |
| RF00108        | 0,00 | 0,00 | 0,00 | 0,00 | 0,8535369 | NA       |
| COA5           | 4,77 | 1,30 | 5,11 | 4,54 | 0,8535783 | 0,905138 |
| RP11-20I23.3   | 0,00 | 0,00 | 0,00 | 0,00 | 0,8536395 | NA       |
| HLA-W          | 0,00 | 0,00 | 0,00 | 0,00 | 0,8536439 | NA       |
| RP13-157F18.2  | 0,00 | 0,00 | 0,00 | 0,00 | 0,8536509 | NA       |
| RP11-756K15.2  | 0,00 | 0,00 | 0,00 | 0,00 | 0,8536616 | NA       |
| RN7SL144P      | 0,00 | 0,00 | 0,00 | 0,00 | 0,8536758 | NA       |
| RP5-1009E24.8  | 0,00 | 0,37 | 0,00 | 0,00 | 0,8537343 | 0,90526  |
| OR1S1          | 0,00 | 0,00 | 0,00 | 0,00 | 0,853758  | NA       |
| C6orf58        | 0,00 | 0,00 | 0,00 | 0,00 | 0,8537722 | NA       |
| GASS-AS1       | 0,00 | 0,00 | 0,00 | 0,00 | 0,8537765 | NA       |
| RP11-489P6.2   | 0,00 | 0,00 | 0,00 | 0,00 | 0,8537948 | NA       |
| AC145676.2     | 0,00 | 0,00 | 0,00 | 0,00 | 0,8538048 | NA       |
| NDUFB6         | 5,33 | 4,06 | 5,13 | 5,20 | 0,8538426 | 0,905325 |
| NUDT16L1       | 5,08 | 2,37 | 4,18 | 3,96 | 0,8538923 | 0,905325 |
| AGFG1          | 4,34 | 3,45 | 3,17 | 3,55 | 0,8539218 | 0,905325 |
| RP11-196H14.2  | 0,00 | 0,00 | 0,00 | 0,00 | 0,8539443 | NA       |
| TFF2           | 0,24 | 0,91 | 0,27 | 0,00 | 0,85398   | 0,905325 |
| SKA2           | 3,96 | 3,22 | 3,90 | 3,68 | 0,8539996 | 0,905325 |
| DNAH1          | 2,10 | 1,26 | 1,55 | 1,92 | 0,8540588 | 0,905345 |
| LINC00473      | 0,00 | 0,00 | 0,00 | 0,00 | 0,8540782 | NA       |
| RP1-92O14.3    | 0,00 | 0,00 | 0,00 | 0,00 | 0,8541401 | NA       |
| RP11-54A9.1    | 0,00 | 0,00 | 0,00 | 0,00 | 0,8541986 | NA       |
| RP11-23J9.4    | 0,00 | 0,15 | 0,00 | 0,00 | 0,8542263 | 0,905439 |
| RP1-179N16.3   | 4,72 | 0,73 | 3,46 | 2,06 | 0,8542294 | 0,905439 |
| RP11-351O1.3   | 0,00 | 0,00 | 0,00 | 0,00 | 0,8542589 | NA       |
| ZNF91          | 3,53 | 2,57 | 2,99 | 2,93 | 0,8542731 | 0,905442 |
| AC008753.4     | 0,00 | 0,00 | 0,00 | 0,00 | 0,8543456 | NA       |
| MIR6861        | 0,00 | 0,00 | 0,00 | 0,00 | 0,8544606 | NA       |
| RP11-79P5.10   | 0,00 | 0,00 | 0,00 | 0,00 | 0,8544861 | NA       |
| RP11-353N14.7  | 0,00 | 0,00 | 0,00 | 0,00 | 0,8544951 | NA       |
| RHOD           | 0,00 | 0,00 | 0,00 | 0,00 | 0,8545156 | NA       |
| LINC00244      | 0,00 | 0,00 | 0,00 | 0,00 | 0,8546389 | NA       |
| CLEC4F         | 1,84 | 1,86 | 0,00 | 1,88 | 0,8547451 | 0,905899 |
| U91328.21      | 2,42 | 1,14 | 2,05 | 0,00 | 0,8547894 | 0,905903 |
| MIR28          | 0,00 | 0,00 | 0,00 | 0,00 | 0,8547943 | NA       |
| TERC           | 0,00 | 0,00 | 0,00 | 0,00 | 0,8548415 | NA       |
| OR2M2          | 0,00 | 0,00 | 0,00 | 0,00 | 0,8549042 | NA       |
| RP11-763E3.1   | 0,00 | 0,00 | 0,00 | 0,00 | 0,8549602 | NA       |
| AC073218.2     | 0,18 | 1,26 | 0,37 | 0,36 | 0,8549676 | 0,906049 |
| RP11-332H18.7  | 0,00 | 0,00 | 0,00 | 0,00 | 0,855032  | NA       |
| TRIM43B        | 0,00 | 0,00 | 0,00 | 0,00 | 0,8550446 | NA       |
| CTD-2623N2.3   | 0,58 | 0,65 | 0,83 | 0,27 | 0,8550635 | 0,906066 |
| AC073263.4     | 0,00 | 0,00 | 0,00 | 0,00 | 0,8550982 | 0,906066 |
| RP11-1149O23.4 | 0,44 | 0,00 | 0,33 | 0,13 | 0,8551066 | 0,906066 |

|                |      |      |      |      |           |          |
|----------------|------|------|------|------|-----------|----------|
| RP11-693L9.2   | 0,00 | 0,00 | 0,00 | 0,00 | 0,855128  | NA       |
| RP11-540O11.4  | 0,00 | 0,00 | 0,00 | 0,00 | 0,8551385 | NA       |
| FEZ2           | 5,04 | 4,38 | 4,62 | 4,81 | 0,8551731 | 0,906094 |
| RP11-298D21.1  | 0,00 | 0,00 | 0,00 | 0,00 | 0,8551995 | NA       |
| THAP7-AS1      | 0,00 | 0,36 | 0,16 | 0,01 | 0,8552301 | 0,906111 |
| RP11-66N24.3   | 0,25 | 0,10 | 0,10 | 0,44 | 0,8553829 | 0,906195 |
| RP11-296O14.3  | 1,71 | 0,15 | 0,29 | 0,00 | 0,8554214 | 0,906195 |
| RP11-1281K21.8 | 0,00 | 0,08 | 0,00 | 0,00 | 0,8554317 | 0,906195 |
| PALM2-AKAP2    | 0,00 | 0,00 | 0,00 | 0,00 | 0,8554841 | NA       |
| ZNF66          | 1,52 | 1,90 | 1,71 | 1,62 | 0,855497  | 0,906221 |
| CTC-573M9.1    | 0,43 | 0,46 | 0,44 | 0,50 | 0,8556154 | 0,906275 |
| PDLIM7         | 3,22 | 1,05 | 2,35 | 2,68 | 0,8556476 | 0,906275 |
| NSA2           | 5,03 | 4,28 | 4,75 | 5,17 | 0,8556708 | 0,906275 |
| RP11-16F15.1   | 0,00 | 0,46 | 0,00 | 0,00 | 0,8557923 | NA       |
| NASP           | 5,35 | 4,62 | 5,48 | 5,35 | 0,8558488 | 0,906367 |
| RP11-173M1.4   | 0,93 | 1,20 | 1,05 | 1,49 | 0,855859  | 0,906367 |
| PHLPP2         | 1,07 | 1,24 | 1,19 | 0,84 | 0,8558792 | 0,906367 |
| RP11-668G8.1   | 0,00 | 0,00 | 0,00 | 0,00 | 0,856029  | NA       |
| PSMB7          | 8,03 | 7,73 | 7,70 | 7,35 | 0,8560353 | 0,906489 |
| RP11-111F16.2  | 0,00 | 0,97 | 0,00 | 0,00 | 0,8560789 | NA       |
| RP11-77M5.1    | 0,68 | 0,60 | 0,73 | 0,47 | 0,8560915 | 0,906505 |
| FABP4          | 0,00 | 0,00 | 0,00 | 0,00 | 0,8561519 | NA       |
| RP11-468N14.1  | 0,00 | 0,00 | 0,00 | 0,00 | 0,8561985 | NA       |
| RNA5SP395      | 0,00 | 0,00 | 0,00 | 0,00 | 0,8563518 | NA       |
| AC004383.4     | 0,00 | 0,00 | 0,00 | 0,00 | 0,8564875 | 0,906881 |
| RN7SL111P      | 0,00 | 0,93 | 0,00 | 0,77 | 0,8565056 | NA       |
| RP3-348I23.3   | 0,00 | 0,00 | 0,00 | 0,00 | 0,8565105 | NA       |
| RP11-603J24.7  | 0,00 | 0,00 | 0,00 | 0,00 | 0,8566134 | NA       |
| CTD-2666L21.1  | 0,00 | 0,00 | 0,00 | 0,00 | 0,8566156 | NA       |
| AC007879.2     | 0,00 | 0,00 | 0,00 | 0,00 | 0,8566158 | 0,906974 |
| RASA1          | 3,55 | 3,44 | 3,28 | 3,01 | 0,8566898 | 0,907009 |
| ZBTB45         | 0,44 | 1,52 | 1,07 | 2,50 | 0,8567322 | 0,907011 |
| ZNF396         | 0,81 | 0,34 | 1,03 | 0,68 | 0,8567843 | 0,907014 |
| RP11-717K11.2  | 0,00 | 0,00 | 0,00 | 0,00 | 0,8568174 | 0,907014 |
| OR52N4         | 0,00 | 0,00 | 0,00 | 0,00 | 0,8568235 | NA       |
| RP11-505E24.2  | 0,24 | 0,50 | 0,28 | 0,00 | 0,8568827 | 0,90704  |
| RNU7-103P      | 0,00 | 0,00 | 0,00 | 0,00 | 0,8569825 | NA       |
| SDCCAG8        | 6,32 | 6,05 | 5,80 | 5,77 | 0,8570032 | 0,907125 |
| RP11-597A11.2  | 0,00 | 0,00 | 0,00 | 0,00 | 0,8570655 | NA       |
| AK2            | 6,06 | 5,43 | 5,88 | 5,76 | 0,8570694 | 0,907152 |
| AC113617.1     | 1,96 | 3,07 | 1,92 | 2,62 | 0,8571183 | 0,90716  |
| ITGB1P1        | 2,08 | 0,00 | 1,38 | 0,00 | 0,8572107 | 0,907215 |
| MIR1267        | 0,00 | 3,22 | 0,00 | 0,00 | 0,857365  | 0,907335 |
| RP11-340I6.9   | 0,00 | 0,00 | 0,00 | 0,00 | 0,8574077 | NA       |
| EIF4BP5p       | 0,00 | 0,00 | 0,00 | 0,00 | 0,8574187 | NA       |
| RNU6-481P      | 0,00 | 0,00 | 0,00 | 0,00 | 0,8575186 | NA       |
| RP11-157K17.5  | 1,28 | 0,69 | 0,85 | 0,46 | 0,8575535 | 0,907491 |
| RP11-1H8.2     | 0,00 | 0,00 | 0,00 | 0,00 | 0,8576053 | NA       |
| MIR191         | 0,00 | 0,00 | 0,00 | 0,00 | 0,8576096 | NA       |
| PLSCR4         | 0,00 | 0,00 | 0,00 | 0,00 | 0,8576449 | NA       |
| RP11-29H23.7   | 0,00 | 0,00 | 0,00 | 0,00 | 0,857742  | NA       |
| RP11-856F16.2  | 0,00 | 0,33 | 0,00 | 0,00 | 0,8578135 | NA       |
| HRC            | 0,00 | 0,00 | 0,00 | 0,00 | 0,8579447 | NA       |
| RP13-494C23.1  | 0,00 | 0,00 | 0,00 | 0,00 | 0,8579449 | NA       |
| AC073869.17    | 0,00 | 0,00 | 0,00 | 0,00 | 0,8579588 | NA       |

|                |      |      |      |      |           |          |
|----------------|------|------|------|------|-----------|----------|
| OR5B17         | 0,00 | 0,00 | 0,00 | 0,00 | 0,8579856 | NA       |
| SNORD42B       | 0,00 | 0,00 | 0,00 | 0,00 | 0,8579868 | NA       |
| AC122136.1     | 0,00 | 0,12 | 0,00 | 0,00 | 0,8579893 | 0,907909 |
| RP1-50O24.6    | 0,00 | 0,00 | 0,00 | 0,00 | 0,8580479 | NA       |
| RNU6-466P      | 0,00 | 0,00 | 0,00 | 0,00 | 0,858084  | NA       |
| ABCG2          | 0,00 | 0,03 | 0,00 | 0,03 | 0,8580869 | NA       |
| NLRP8          | 0,02 | 0,04 | 0,03 | 0,04 | 0,8580883 | NA       |
| FOXJ2          | 2,54 | 2,57 | 2,52 | 1,93 | 0,8581055 | 0,907989 |
| HES4           | 0,00 | 0,00 | 0,00 | 0,00 | 0,8581568 | NA       |
| GPT            | 0,00 | 0,00 | 0,00 | 0,00 | 0,8582166 | NA       |
| RP4-613B23.1   | 0,34 | 0,83 | 0,70 | 0,00 | 0,8582275 | 0,908075 |
| RP4-555N2.3    | 0,00 | 0,00 | 0,00 | 0,00 | 0,8583132 | NA       |
| RP11-261A1.1   | 0,00 | 0,00 | 0,00 | 0,00 | 0,8583952 | NA       |
| N4BP1          | 4,09 | 2,09 | 4,24 | 2,94 | 0,858405  | 0,908219 |
| GEMIN8         | 3,77 | 0,34 | 4,07 | 1,92 | 0,8584918 | 0,908268 |
| KIAA0368       | 4,12 | 3,68 | 3,75 | 3,49 | 0,8585449 | 0,908281 |
| RP11-76I23.7   | 0,00 | 0,00 | 0,00 | 0,00 | 0,8586413 | NA       |
| RIC8A          | 3,52 | 1,24 | 3,47 | 1,32 | 0,8587177 | 0,90842  |
| CHAT           | 0,13 | 0,00 | 0,00 | 0,19 | 0,8587663 | 0,908428 |
| RN7SL708P      | 0,00 | 0,00 | 0,00 | 0,00 | 0,85877   | NA       |
| RNU4-71P       | 0,00 | 0,00 | 0,00 | 0,00 | 0,8587828 | NA       |
| AC005082.12    | 0,00 | 0,00 | 0,00 | 0,00 | 0,858792  | NA       |
| PZP            | 0,00 | 1,49 | 0,10 | 0,30 | 0,8588572 | 0,908481 |
| RP11-63A1.1    | 0,00 | 0,00 | 0,00 | 0,00 | 0,8589539 | NA       |
| ACCSL          | 0,00 | 0,00 | 0,00 | 0,00 | 0,8589553 | NA       |
| PPIAL4C        | 0,00 | 0,14 | 0,00 | 0,00 | 0,858956  | NA       |
| GBP1           | 5,13 | 4,95 | 5,33 | 5,10 | 0,858975  | 0,908484 |
| RP11-475A13.2  | 0,42 | 0,93 | 0,39 | 0,19 | 0,8589856 | 0,908484 |
| RP11-31L22.3   | 0,00 | 0,00 | 0,00 | 0,00 | 0,8590062 | NA       |
| ZXDC           | 3,34 | 2,16 | 2,88 | 3,54 | 0,859019  | 0,908484 |
| CEP162         | 1,76 | 1,16 | 1,59 | 3,00 | 0,8590234 | 0,908484 |
| AC007620.3     | 0,00 | 0,00 | 0,00 | 0,00 | 0,8590371 | NA       |
| AC006116.27    | 0,00 | 0,00 | 0,00 | 0,00 | 0,8590504 | NA       |
| AC079781.9     | 0,00 | 0,00 | 0,00 | 0,00 | 0,8590588 | NA       |
| S1PR2          | 1,46 | 0,80 | 0,60 | 0,85 | 0,8591208 | 0,908513 |
| TDO2           | 0,00 | 0,00 | 0,00 | 0,00 | 0,8591236 | NA       |
| SERPINE2       | 0,17 | 0,40 | 0,08 | 0,64 | 0,8591328 | 0,908513 |
| RN7SL700P      | 0,00 | 0,00 | 0,00 | 0,00 | 0,8591499 | NA       |
| RP11-216P6.2   | 0,00 | 0,00 | 0,00 | 0,00 | 0,8592598 | NA       |
| RIMKLB         | 1,49 | 1,52 | 2,08 | 0,98 | 0,8592858 | 0,908632 |
| AP000322.53    | 0,00 | 0,00 | 0,00 | 0,00 | 0,8593832 | NA       |
| PSG9           | 0,00 | 0,08 | 0,00 | 0,00 | 0,8594604 | NA       |
| MED14OS        | 2,23 | 0,85 | 1,17 | 1,52 | 0,8595408 | 0,908858 |
| CEACAM7        | 0,00 | 0,00 | 0,00 | 0,00 | 0,8596208 | NA       |
| RP11-818O24.2  | 0,00 | 0,00 | 0,00 | 0,00 | 0,8596672 | NA       |
| LRRC10         | 0,09 | 0,11 | 0,11 | 0,07 | 0,8597036 | 0,908987 |
| RP11-1137G4.3  | 0,00 | 0,00 | 0,00 | 0,00 | 0,8597119 | NA       |
| RP4-678D15.1   | 0,00 | 0,00 | 0,00 | 0,00 | 0,8597471 | NA       |
| TNFRSF10A      | 1,07 | 2,23 | 2,03 | 1,38 | 0,8597609 | 0,908997 |
| TM7SF2         | 0,75 | 0,50 | 0,43 | 1,34 | 0,859797  | 0,908997 |
| RP11-529G21.2  | 0,65 | 0,74 | 0,00 | 0,78 | 0,8598356 | 0,908997 |
| RP11-284F21.10 | 0,04 | 0,19 | 0,00 | 0,00 | 0,8599481 | 0,909053 |
| SLC22A13       | 0,00 | 0,00 | 0,00 | 0,00 | 0,8599485 | NA       |
| MIR3680-2      | 0,00 | 0,00 | 1,51 | 0,00 | 0,8599705 | 0,909053 |
| RP11-357P24.2  | 0,00 | 0,00 | 0,00 | 0,00 | 0,8600161 | NA       |

|                |      |      |      |      |           |          |
|----------------|------|------|------|------|-----------|----------|
| AGRP           | 0,00 | 0,00 | 0,00 | 0,00 | 0,8601598 | NA       |
| RP11-274B21.12 | 0,00 | 0,00 | 0,00 | 0,00 | 0,8602329 | NA       |
| RP11-586K2.1   | 0,08 | 0,56 | 0,21 | 0,16 | 0,8602429 | 0,909298 |
| RP4-646N3.1    | 0,00 | 0,00 | 0,00 | 0,00 | 0,8602884 | NA       |
| GFRA2          | 1,47 | 0,13 | 1,32 | 0,34 | 0,8602982 | 0,909313 |
| RP11-153K16.1  | 0,00 | 0,00 | 0,00 | 0,00 | 0,8603655 | NA       |
| UGGT2          | 3,06 | 2,45 | 2,99 | 2,90 | 0,8604325 | 0,909412 |
| RP11-453E17.2  | 0,00 | 0,00 | 0,00 | 0,00 | 0,8605279 | NA       |
| AC004112.4     | 0,00 | 0,00 | 0,00 | 0,00 | 0,8605494 | NA       |
| RN7SL168P      | 0,00 | 0,00 | 0,00 | 0,00 | 0,8606242 | NA       |
| RP5-905H7.1    | 0,00 | 0,00 | 0,00 | 0,00 | 0,8606904 | NA       |
| AC142528.1     | 0,00 | 0,00 | 0,00 | 0,00 | 0,860741  | NA       |
| LMOD2          | 0,00 | 0,00 | 0,00 | 0,00 | 0,8607498 | NA       |
| RP11-798G7.7   | 0,00 | 0,00 | 0,00 | 0,00 | 0,8607778 | NA       |
| RP11-2B6.3     | 0,00 | 0,00 | 0,00 | 0,00 | 0,8608044 | NA       |
| AL035209.2     | 0,66 | 0,43 | 0,70 | 0,85 | 0,8610238 | 0,909994 |
| CRISP1         | 0,00 | 0,00 | 0,00 | 0,00 | 0,8611433 | NA       |
| RNASET2        | 8,76 | 8,46 | 8,52 | 7,98 | 0,8612028 | 0,910139 |
| RP11-482M8.1   | 0,00 | 0,00 | 0,00 | 0,00 | 0,8612051 | NA       |
| RP11-214O14.1  | 0,00 | 0,32 | 0,00 | 0,00 | 0,8612803 | NA       |
| RN7SL525P      | 0,00 | 0,00 | 0,00 | 0,00 | 0,8613552 | NA       |
| SRC            | 1,00 | 0,07 | 1,22 | 0,37 | 0,8614802 | 0,910365 |
| FAM127B        | 3,72 | 3,63 | 3,21 | 3,56 | 0,8614982 | 0,910365 |
| ANKRD20A5P     | 2,19 | 0,23 | 2,11 | 1,55 | 0,8615726 | 0,9104   |
| RP11-23E19.2   | 0,00 | 0,00 | 0,00 | 0,00 | 0,8615905 | NA       |
| AC009196.2     | 0,00 | 0,00 | 0,00 | 0,00 | 0,8616245 | NA       |
| RP4-718J7.4    | 0,00 | 0,00 | 0,00 | 0,00 | 0,8616389 | NA       |
| OR2A1          | 0,04 | 0,03 | 0,07 | 0,00 | 0,8616694 | 0,910459 |
| STARD6         | 0,00 | 0,00 | 0,00 | 0,00 | 0,8617601 | NA       |
| RBM19          | 3,33 | 3,01 | 3,47 | 4,44 | 0,8619074 | 0,910627 |
| RP11-401P9.7   | 0,35 | 0,69 | 0,24 | 0,89 | 0,8619545 | 0,910627 |
| LTBP2          | 0,00 | 0,00 | 0,00 | 0,06 | 0,8619597 | 0,910627 |
| KIAA0556       | 2,20 | 1,58 | 1,77 | 1,26 | 0,8619923 | 0,910627 |
| RP11-455F5.5   | 0,00 | 0,00 | 0,00 | 0,00 | 0,8620819 | NA       |
| MOCS1          | 0,00 | 0,00 | 0,00 | 0,00 | 0,8621082 | NA       |
| AF196970.3     | 0,00 | 0,00 | 0,00 | 0,00 | 0,8621363 | NA       |
| PNMA6A         | 0,00 | 0,00 | 0,00 | 0,00 | 0,8621618 | NA       |
| RP4-680D5.3    | 0,00 | 0,00 | 0,00 | 0,00 | 0,8621883 | NA       |
| RP11-756I15.3  | 2,32 | 1,77 | 2,17 | 1,29 | 0,8622174 | 0,910822 |
| RP1-172I22.1   | 0,00 | 0,00 | 0,00 | 0,00 | 0,8622198 | NA       |
| MIR4762        | 0,00 | 0,00 | 0,00 | 0,00 | 0,8622215 | NA       |
| RP11-395L14.3  | 0,00 | 0,00 | 0,00 | 0,00 | 0,8623473 | NA       |
| C2orf42        | 0,31 | 0,06 | 0,14 | 1,64 | 0,8624194 | 0,910992 |
| RP11-255N4.2   | 0,10 | 0,32 | 0,17 | 0,35 | 0,862476  | 0,911008 |
| RP4-714D9.2    | 0,00 | 0,00 | 0,00 | 0,00 | 0,8625477 | NA       |
| R3HCC1         | 3,68 | 3,98 | 2,98 | 3,13 | 0,8625598 | 0,911054 |
| RP11-331F9.4   | 0,00 | 0,00 | 0,00 | 0,00 | 0,8626147 | 0,911068 |
| RP11-290L1.3   | 0,00 | 0,00 | 0,00 | 0,00 | 0,8626543 | NA       |
| RP11-354K1.2   | 0,00 | 0,00 | 0,00 | 0,34 | 0,8626676 | NA       |
| RP11-181L23.10 | 0,00 | 0,00 | 0,00 | 0,00 | 0,8626942 | NA       |
| FH             | 4,99 | 1,01 | 4,45 | 3,79 | 0,8627454 | 0,91109  |
| RP11-507K2.6   | 0,07 | 0,42 | 0,11 | 0,18 | 0,862746  | 0,91109  |
| RPL21P120      | 0,00 | 0,00 | 0,00 | 0,00 | 0,8627569 | NA       |
| LDHB           | 7,97 | 7,66 | 7,71 | 7,64 | 0,8627578 | 0,91109  |
| RP11-33E24.1   | 0,00 | 0,00 | 0,00 | 0,00 | 0,862872  | NA       |

|                |      |      |      |      |           |          |
|----------------|------|------|------|------|-----------|----------|
| AP000344.4     | 0,00 | 0,00 | 0,00 | 0,00 | 0,8628988 | NA       |
| RNU6-59P       | 0,00 | 0,00 | 0,00 | 0,00 | 0,8629412 | NA       |
| RP11-313P13.5  | 0,00 | 0,00 | 0,00 | 0,00 | 0,8629438 | NA       |
| RN7SKP221      | 0,00 | 0,00 | 0,00 | 0,00 | 0,8629608 | NA       |
| AC010967.2     | 0,00 | 0,00 | 0,00 | 0,00 | 0,8630524 | NA       |
| RP5-1097F14.3  | 0,00 | 0,00 | 0,00 | 0,00 | 0,8630655 | NA       |
| RPS11P6        | 0,10 | 1,27 | 0,23 | 0,54 | 0,8631778 | 0,91149  |
| CTD-2528L19.4  | 0,00 | 0,00 | 0,00 | 0,00 | 0,8631911 | NA       |
| C7orf50        | 6,42 | 6,43 | 6,16 | 5,94 | 0,8632252 | 0,911497 |
| RP11-733O18.1  | 0,00 | 0,00 | 0,00 | 0,00 | 0,8633748 | NA       |
| RP11-681N23.1  | 0,00 | 0,00 | 0,00 | 0,00 | 0,8633819 | NA       |
| RP11-245P10.8  | 0,00 | 0,00 | 0,00 | 0,00 | 0,8634106 | NA       |
| RP11-867G2.8   | 0,00 | 0,00 | 0,00 | 0,00 | 0,8634228 | NA       |
| HOXB3          | 0,24 | 0,18 | 0,12 | 0,27 | 0,8634322 | 0,911672 |
| C7orf61        | 0,00 | 0,00 | 0,00 | 0,00 | 0,8635816 | NA       |
| ART4           | 0,03 | 0,03 | 0,00 | 0,00 | 0,8635926 | 0,911798 |
| RP11-343J24.1  | 0,04 | 0,18 | 0,05 | 0,06 | 0,8636834 | 0,911821 |
| JMJD1C-AS1     | 0,00 | 0,00 | 0,00 | 0,00 | 0,8636889 | NA       |
| PPP1R3F        | 0,04 | 0,52 | 0,12 | 0,06 | 0,8636961 | 0,911821 |
| TRIM39-RPP21   | 0,00 | 0,00 | 0,00 | 0,00 | 0,8637199 | NA       |
| RN7SL464P      | 0,00 | 0,00 | 0,00 | 0,00 | 0,863771  | NA       |
| NPIPP1         | 2,54 | 2,60 | 2,67 | 1,61 | 0,8637729 | 0,911858 |
| CTC-425F1.2    | 0,00 | 0,00 | 0,00 | 0,00 | 0,8638178 | 0,911862 |
| GCSAML-AS1     | 0,00 | 0,00 | 0,00 | 0,00 | 0,863932  | NA       |
| RP11-691H4.1   | 0,06 | 0,12 | 0,57 | 0,00 | 0,8640136 | 0,91199  |
| NUDT22         | 5,90 | 5,82 | 5,70 | 5,62 | 0,8640561 | 0,91199  |
| RP11-437J2.4   | 0,00 | 1,58 | 0,00 | 0,42 | 0,8640938 | 0,91199  |
| RP11-570L14.1  | 0,51 | 0,65 | 0,62 | 0,20 | 0,8641029 | 0,91199  |
| ARFGEF1        | 4,56 | 4,50 | 3,98 | 3,65 | 0,8642016 | 0,912051 |
| RP11-589P10.7  | 0,00 | 0,00 | 0,00 | 0,00 | 0,864347  | NA       |
| KRT18P4        | 0,00 | 0,00 | 0,00 | 0,00 | 0,8643487 | NA       |
| KLK1           | 0,00 | 0,00 | 0,00 | 0,00 | 0,8643824 | NA       |
| RP13-507P19.2  | 0,00 | 0,00 | 0,00 | 0,00 | 0,8644015 | NA       |
| RP11-109J4.1   | 0,00 | 0,00 | 0,00 | 0,00 | 0,8644443 | NA       |
| GABBR2         | 0,06 | 0,19 | 0,12 | 0,24 | 0,8645004 | 0,912323 |
| VPREB3         | 0,00 | 0,00 | 0,00 | 0,00 | 0,8645153 | NA       |
| ATP5J2P6       | 0,00 | 0,00 | 0,00 | 0,00 | 0,8645229 | NA       |
| MSC            | 0,00 | 0,00 | 0,00 | 0,00 | 0,8645449 | NA       |
| RNU6-181P      | 0,00 | 0,00 | 0,00 | 0,00 | 0,8645959 | NA       |
| SRRM5          | 0,00 | 0,00 | 0,00 | 0,00 | 0,864616  | NA       |
| CH507-145C22.4 | 0,00 | 0,00 | 0,00 | 0,00 | 0,8646788 | NA       |
| C1orf186       | 0,11 | 0,09 | 0,14 | 0,32 | 0,8646819 | 0,912471 |
| EMC9           | 3,63 | 0,84 | 2,54 | 1,25 | 0,8647399 | 0,912489 |
| RP11-380M21.1  | 0,00 | 0,00 | 0,00 | 0,00 | 0,8647545 | NA       |
| SNRPB          | 7,91 | 7,27 | 7,64 | 7,61 | 0,864819  | 0,912529 |
| AC098820.4     | 0,00 | 0,00 | 0,00 | 0,00 | 0,8648402 | NA       |
| RP11-384B12.3  | 0,00 | 0,00 | 0,00 | 0,00 | 0,8648687 | NA       |
| RPL23AP79      | 2,81 | 2,44 | 3,47 | 3,09 | 0,8649231 | 0,912584 |
| MSRB2          | 1,96 | 2,81 | 2,36 | 3,19 | 0,8649858 | 0,912584 |
| TMSB15B        | 1,21 | 1,43 | 1,09 | 1,03 | 0,864994  | 0,912584 |
| GSG2           | 0,00 | 0,00 | 0,00 | 0,00 | 0,8651419 | NA       |
| RP11-428J1.4   | 0,00 | 0,08 | 0,02 | 0,00 | 0,8651705 | 0,912727 |
| OLIG1          | 0,00 | 0,00 | 0,00 | 0,00 | 0,8651858 | NA       |
| RP5-1121H13.3  | 0,00 | 0,00 | 0,00 | 0,00 | 0,8651967 | NA       |
| HS3ST5         | 0,00 | 0,00 | 0,00 | 0,00 | 0,8652499 | NA       |

|               |      |      |      |      |           |          |
|---------------|------|------|------|------|-----------|----------|
| RP11-452C8.1  | 3,16 | 2,45 | 2,92 | 2,82 | 0,8653178 | 0,91282  |
| RN7SL551P     | 0,00 | 0,00 | 0,00 | 0,00 | 0,865379  | NA       |
| RP11-75C10.7  | 0,00 | 0,00 | 0,00 | 0,00 | 0,8653869 | NA       |
| BCL2L2-PABPN1 | 0,76 | 0,00 | 0,53 | 2,38 | 0,8653972 | 0,91282  |
| PARP3         | 0,48 | 0,26 | 0,66 | 0,30 | 0,8654206 | 0,91282  |
| MPRIP         | 5,04 | 5,23 | 4,67 | 4,46 | 0,8654234 | 0,91282  |
| LIN7B         | 3,45 | 1,00 | 1,39 | 2,99 | 0,8654648 | 0,912821 |
| RP11-359G22.2 | 0,00 | 0,00 | 0,00 | 0,00 | 0,8655165 | NA       |
| RNU7-172P     | 0,00 | 0,00 | 0,00 | 0,00 | 0,8655556 | NA       |
| RF00492       | 0,00 | 0,00 | 0,00 | 0,00 | 0,86558   | NA       |
| CDRT15        | 0,00 | 0,00 | 0,00 | 0,00 | 0,86562   | NA       |
| RP3-388N13.2  | 0,00 | 0,00 | 0,00 | 0,00 | 0,865677  | NA       |
| TEFM          | 2,54 | 2,59 | 2,48 | 2,82 | 0,865704  | 0,913029 |
| PVRIG         | 1,22 | 1,05 | 0,42 | 1,01 | 0,8658054 | 0,913093 |
| RP11-195O1.1  | 0,00 | 0,00 | 0,00 | 0,00 | 0,8658076 | NA       |
| RP11-102G14.1 | 0,81 | 0,44 | 0,82 | 0,38 | 0,8658608 | 0,913108 |
| AJ271736.8    | 0,00 | 0,00 | 0,00 | 0,00 | 0,8658894 | NA       |
| RP11-12I24.2  | 0,00 | 0,00 | 0,00 | 0,00 | 0,866025  | NA       |
| RP11-449J21.5 | 0,00 | 0,00 | 0,00 | 0,00 | 0,8660404 | NA       |
| LGALS8        | 4,81 | 4,75 | 4,55 | 3,88 | 0,8660842 | 0,913274 |
| LRRK2         | 4,17 | 4,03 | 3,87 | 4,03 | 0,8661003 | 0,913274 |
| ENO2          | 0,00 | 0,00 | 0,00 | 0,06 | 0,8662197 | 0,913357 |
| RP11-212F11.1 | 0,00 | 0,00 | 0,00 | 0,00 | 0,8663117 | NA       |
| LRRC3B        | 0,00 | 0,00 | 0,00 | 0,00 | 0,866312  | NA       |
| RP1-161N10.1  | 0,00 | 0,00 | 0,00 | 0,00 | 0,8663386 | NA       |
| RP11-734K21.5 | 0,04 | 0,04 | 0,07 | 0,07 | 0,8663535 | 0,91344  |
| ZNF423        | 0,00 | 0,00 | 0,00 | 0,00 | 0,8663561 | NA       |
| MYRIP         | 0,00 | 0,00 | 0,00 | 0,00 | 0,8663793 | NA       |
| MSI1          | 0,04 | 0,04 | 0,07 | 0,08 | 0,8663807 | 0,91344  |
| RP11-231C14.3 | 0,33 | 0,12 | 0,08 | 0,09 | 0,8664636 | 0,913482 |
| PCDHGA9       | 0,05 | 0,05 | 0,05 | 0,05 | 0,8665026 | 0,913482 |
| RP11-117F22.2 | 0,00 | 0,00 | 0,00 | 0,00 | 0,8665601 | NA       |
| CLIC3         | 2,68 | 2,02 | 0,62 | 0,56 | 0,8665755 | 0,91351  |
| OR2B11        | 0,38 | 0,53 | 0,73 | 1,04 | 0,8666116 | 0,91351  |
| RNU11-2P      | 0,00 | 0,00 | 0,00 | 0,00 | 0,8666122 | NA       |
| NT5C1B        | 0,00 | 0,00 | 0,00 | 0,00 | 0,8666386 | NA       |
| NPIP7         | 0,00 | 0,00 | 0,00 | 0,00 | 0,8666768 | NA       |
| ZNF287        | 0,00 | 0,51 | 0,00 | 0,00 | 0,8667285 | 0,91359  |
| ST8SIA3       | 0,00 | 0,02 | 0,00 | 0,00 | 0,8667889 | NA       |
| CLDN19        | 0,00 | 0,10 | 0,04 | 0,04 | 0,8668333 | NA       |
| P2RX2         | 0,00 | 0,00 | 0,00 | 0,00 | 0,8668405 | NA       |
| RP11-342A23.2 | 0,00 | 0,00 | 0,00 | 0,00 | 0,8669172 | NA       |
| LRRC55        | 0,24 | 0,14 | 0,07 | 0,08 | 0,8669816 | 0,913787 |
| CALU          | 4,30 | 3,89 | 3,58 | 3,17 | 0,8670219 | 0,913787 |
| RP11-99H8.1   | 1,44 | 1,64 | 2,00 | 1,40 | 0,8670393 | 0,913787 |
| AC007192.4    | 0,00 | 0,00 | 0,00 | 0,00 | 0,8671709 | NA       |
| POLQ          | 0,42 | 1,33 | 0,54 | 0,53 | 0,8671887 | 0,913863 |
| RP11-864J10.4 | 0,13 | 0,09 | 0,02 | 0,08 | 0,8671929 | 0,913863 |
| RNU6-892P     | 0,00 | 0,00 | 0,00 | 0,00 | 0,867205  | NA       |
| CYP24A1       | 0,00 | 0,00 | 0,00 | 0,00 | 0,8673236 | NA       |
| RP11-301G19.1 | 0,00 | 0,00 | 0,00 | 0,00 | 0,8673247 | NA       |
| FAM153A       | 0,82 | 1,28 | 0,47 | 1,64 | 0,8674781 | 0,914099 |
| RP11-264L1.4  | 0,00 | 0,00 | 0,00 | 0,00 | 0,8674997 | 0,914099 |
| RN7SL126P     | 0,00 | 1,01 | 0,83 | 0,81 | 0,8675528 | NA       |
| AC022210.2    | 0,56 | 0,59 | 0,42 | 0,25 | 0,8678496 | 0,914425 |

|               |      |      |      |      |           |          |
|---------------|------|------|------|------|-----------|----------|
| MIR6133       | 0,00 | 0,00 | 0,00 | 0,00 | 0,8678703 | NA       |
| RN75L826P     | 0,00 | 0,92 | 0,39 | 0,76 | 0,8678999 | NA       |
| HHIPL2        | 0,00 | 0,00 | 0,00 | 0,00 | 0,8679689 | NA       |
| FCRL4         | 0,00 | 0,00 | 0,00 | 0,00 | 0,867985  | NA       |
| RYR1          | 0,11 | 0,53 | 0,16 | 0,13 | 0,8680718 | 0,914565 |
| RP11-410L14.2 | 1,83 | 2,16 | 2,03 | 2,30 | 0,8680788 | 0,914565 |
| CCR5          | 1,67 | 0,55 | 1,40 | 1,93 | 0,8681177 | 0,914565 |
| MIR5192       | 0,00 | 0,00 | 0,00 | 0,00 | 0,8681417 | NA       |
| PIGF          | 4,90 | 1,33 | 4,59 | 4,46 | 0,8681473 | 0,914565 |
| MIR128-1      | 0,00 | 0,00 | 0,00 | 0,00 | 0,8682048 | NA       |
| NDUFAF4       | 4,58 | 3,95 | 4,47 | 3,64 | 0,8682434 | 0,91462  |
| PPP2R5A       | 4,28 | 3,07 | 3,90 | 2,96 | 0,8682817 | 0,91462  |
| IFIT5         | 1,71 | 1,77 | 0,98 | 1,85 | 0,868325  | 0,914622 |
| AC145343.2    | 0,42 | 0,00 | 0,46 | 0,00 | 0,8684401 | 0,9147   |
| FKBP5         | 4,53 | 4,83 | 4,72 | 4,83 | 0,8685398 | 0,914761 |
| XPNPEP2       | 0,00 | 0,00 | 0,00 | 0,00 | 0,8685429 | NA       |
| RXFP2         | 0,00 | 0,00 | 0,00 | 0,00 | 0,8685717 | NA       |
| PLA2G2A       | 0,00 | 0,00 | 0,00 | 0,00 | 0,8685739 | NA       |
| MIR1285-1     | 0,00 | 0,00 | 0,00 | 0,00 | 0,8685809 | NA       |
| RP11-810D13.1 | 0,00 | 0,00 | 0,00 | 0,38 | 0,8685841 | NA       |
| BCAN          | 0,00 | 0,00 | 0,00 | 0,00 | 0,8686259 | NA       |
| SALL3         | 0,00 | 0,00 | 0,00 | 0,00 | 0,8686748 | NA       |
| CTD-3214H19.6 | 0,00 | 0,00 | 0,00 | 0,00 | 0,8687426 | NA       |
| RP11-546B15.2 | 0,00 | 0,00 | 0,00 | 0,00 | 0,8687972 | NA       |
| ODZ4          | 2,96 | 1,59 | 1,56 | 2,28 | 0,8688668 | 0,91503  |
| DNAJC8        | 6,48 | 5,82 | 6,15 | 5,57 | 0,8688802 | 0,91503  |
| RP11-800A3.2  | 0,00 | 0,99 | 0,00 | 0,00 | 0,8689074 | NA       |
| HACE1         | 1,97 | 2,46 | 1,81 | 1,81 | 0,8689185 | 0,91503  |
| MIR4722       | 0,00 | 0,00 | 0,00 | 0,00 | 0,8689883 | NA       |
| RP11-635I10.1 | 0,00 | 0,00 | 0,00 | 0,00 | 0,8690131 | NA       |
| KRASP1        | 0,00 | 0,00 | 0,00 | 0,00 | 0,8690639 | NA       |
| RP11-442A13.1 | 0,00 | 0,00 | 0,00 | 0,00 | 0,8690749 | NA       |
| RP11-15L13.4  | 0,00 | 0,00 | 0,00 | 0,00 | 0,8690796 | NA       |
| AC105053.3    | 1,19 | 0,69 | 1,05 | 0,80 | 0,8690993 | 0,915147 |
| RP11-436I24.1 | 0,29 | 0,00 | 0,10 | 0,09 | 0,8691119 | 0,915147 |
| AC008993.3    | 0,00 | 0,00 | 0,00 | 0,00 | 0,8691238 | NA       |
| CTD-2533K21.3 | 0,00 | 0,00 | 0,00 | 0,00 | 0,8691832 | NA       |
| RP11-134G8.2  | 0,00 | 0,00 | 0,00 | 0,00 | 0,8691832 | NA       |
| RN7SKP290     | 0,00 | 0,00 | 0,00 | 0,00 | 0,8692165 | NA       |
| CTC-492K19.7  | 0,00 | 0,00 | 0,00 | 0,00 | 0,8692192 | NA       |
| OR51B4        | 0,00 | 0,00 | 0,00 | 0,00 | 0,8692192 | NA       |
| MAMLD1        | 0,00 | 0,00 | 0,00 | 0,00 | 0,8692965 | NA       |
| RP3-486I3.5   | 0,00 | 0,00 | 0,00 | 0,00 | 0,8693182 | NA       |
| PCDHB9        | 0,06 | 0,00 | 0,05 | 0,03 | 0,8694206 | 0,915378 |
| EI24          | 4,98 | 3,94 | 4,50 | 4,00 | 0,8694761 | 0,915378 |
| ARRDC3-AS1    | 0,97 | 1,87 | 1,31 | 1,54 | 0,8694962 | 0,915378 |
| AL353898.2    | 2,48 | 1,93 | 3,64 | 3,93 | 0,8695282 | 0,915378 |
| ZBTB14        | 2,69 | 2,73 | 1,88 | 1,42 | 0,8695367 | 0,915378 |
| CTC-428G20.1  | 0,00 | 0,00 | 0,00 | 0,00 | 0,869641  | NA       |
| PGF           | 0,06 | 0,05 | 0,09 | 0,08 | 0,8696594 | 0,915455 |
| AC012370.2    | 0,00 | 0,00 | 0,00 | 0,00 | 0,869693  | 0,915455 |
| RP11-473M14.2 | 0,00 | 0,00 | 0,00 | 0,00 | 0,8697169 | NA       |
| HMG2P5        | 0,00 | 0,00 | 0,00 | 0,00 | 0,8697565 | NA       |
| RP11-672A2.5  | 0,00 | 0,00 | 0,00 | 0,00 | 0,8698115 | 0,915529 |
| RP11-522D2.1  | 0,00 | 0,00 | 0,00 | 0,00 | 0,8698186 | NA       |



|               |      |      |      |      |           |          |
|---------------|------|------|------|------|-----------|----------|
| TRAF7         | 2,85 | 2,75 | 2,37 | 2,58 | 0,8698453 | 0,915529 |
| RP11-487I5.1  | 0,00 | 0,00 | 0,00 | 0,00 | 0,8698597 | NA       |
| RP11-305L7.1  | 0,00 | 0,00 | 0,00 | 0,00 | 0,869885  | NA       |
| CTD-3222D19.9 | 0,00 | 0,00 | 0,00 | 0,00 | 0,8699126 | NA       |
| RP11-182L21.5 | 2,13 | 0,67 | 2,97 | 0,29 | 0,8699211 | 0,915566 |
| RP11-700P18.1 | 0,00 | 0,00 | 0,00 | 0,00 | 0,8699621 | NA       |
| RP11-38M15.10 | 0,00 | 0,00 | 0,00 | 0,00 | 0,8699684 | NA       |
| MIGA1         | 1,66 | 1,62 | 1,43 | 1,33 | 0,8699991 | 0,915604 |
| AC073326.3    | 0,00 | 0,00 | 0,00 | 0,00 | 0,8701437 | NA       |
| LRRC8D        | 3,71 | 2,93 | 3,60 | 2,09 | 0,8701635 | 0,915692 |
| RP11-251B9.1  | 0,06 | 0,05 | 0,07 | 0,11 | 0,8701721 | 0,915692 |
| RP11-108K1.2  | 0,00 | 0,00 | 0,00 | 0,00 | 0,8701821 | NA       |
| MTRNR2L10     | 0,00 | 0,22 | 0,00 | 0,09 | 0,8701931 | NA       |
| HIRIP3        | 1,59 | 1,22 | 0,40 | 0,92 | 0,8702058 | 0,915692 |
| RP11-199F11.2 | 0,00 | 0,24 | 0,14 | 0,13 | 0,8702972 | NA       |
| VENTXP5       | 0,00 | 0,00 | 0,00 | 0,00 | 0,870335  | NA       |
| AC092066.6    | 0,00 | 0,82 | 0,00 | 0,00 | 0,8704552 | NA       |
| RP11-229N15.1 | 0,00 | 0,00 | 0,00 | 0,00 | 0,8704672 | NA       |
| C16orf74      | 4,84 | 4,46 | 4,73 | 4,70 | 0,8704845 | 0,915942 |
| P4HTM         | 3,40 | 4,21 | 2,88 | 3,32 | 0,8705802 | 0,915999 |
| OPN1MW2       | 0,00 | 0,00 | 0,00 | 0,00 | 0,8706113 | NA       |
| RP11-570F6.1  | 0,00 | 0,00 | 0,00 | 0,18 | 0,8706343 | NA       |
| AGO4          | 3,33 | 3,46 | 3,47 | 3,64 | 0,8706373 | 0,916016 |
| RP11-701P16.4 | 0,00 | 0,00 | 0,00 | 0,00 | 0,870661  | NA       |
| RF01979       | 0,72 | 0,00 | 0,00 | 0,00 | 0,8706836 | NA       |
| RP4-778K6.2   | 0,00 | 0,00 | 0,00 | 0,00 | 0,8706968 | NA       |
| CTA-797E19.2  | 0,00 | 0,00 | 0,00 | 0,00 | 0,8707386 | NA       |
| AC018799.1    | 0,00 | 0,00 | 0,00 | 0,00 | 0,8708845 | NA       |
| RP11-479J7.1  | 0,00 | 0,00 | 0,00 | 0,24 | 0,870893  | NA       |
| CTA-126B4.7   | 0,00 | 0,00 | 0,00 | 0,00 | 0,8709081 | NA       |
| SLCO5A1       | 0,02 | 0,01 | 0,03 | 0,03 | 0,8709552 | 0,916253 |
| SPATA12       | 0,00 | 0,06 | 0,00 | 0,00 | 0,870965  | NA       |
| TM4SF4        | 0,00 | 0,00 | 0,00 | 0,00 | 0,8709805 | NA       |
| RP11-407N17.6 | 0,00 | 0,00 | 0,00 | 0,00 | 0,8710141 | NA       |
| CTD-2293H3.1  | 0,25 | 0,87 | 0,19 | 0,13 | 0,8710228 | 0,916253 |
| FN3K          | 0,58 | 1,13 | 0,90 | 0,72 | 0,8710279 | 0,916253 |
| HMGB1         | 8,60 | 8,53 | 8,64 | 8,36 | 0,8710279 | 0,916253 |
| RP11-1H15.1   | 0,00 | 0,00 | 0,00 | 0,00 | 0,8710473 | NA       |
| FAM69B        | 0,00 | 0,00 | 0,00 | 0,00 | 0,8710474 | NA       |
| RP11-844P9.3  | 0,00 | 0,00 | 0,00 | 0,00 | 0,871132  | NA       |
| ARSJ          | 0,27 | 1,12 | 0,50 | 1,00 | 0,8711879 | 0,916378 |
| AC090602.2    | 0,00 | 0,00 | 0,00 | 0,00 | 0,871215  | NA       |
| AC010969.1    | 0,00 | 0,00 | 0,00 | 0,00 | 0,8712879 | NA       |
| MIR6514       | 0,00 | 0,00 | 0,00 | 0,00 | 0,8713273 | 0,916481 |
| OR7E33P       | 0,00 | 0,00 | 0,00 | 0,00 | 0,8713308 | NA       |
| AC009299.2    | 0,00 | 0,00 | 0,00 | 0,00 | 0,8714355 | 0,916552 |
| RP11-815M8.1  | 0,00 | 0,00 | 0,00 | 0,00 | 0,8714822 | NA       |
| ATP5S         | 4,38 | 3,13 | 4,50 | 4,79 | 0,8714869 | 0,916562 |
| RP11-717A5.2  | 0,00 | 0,00 | 0,00 | 0,00 | 0,8714873 | NA       |
| IDI2          | 0,00 | 0,00 | 0,00 | 0,00 | 0,8715296 | NA       |
| RAG1          | 0,00 | 0,00 | 0,00 | 0,00 | 0,8716218 | NA       |
| RP11-128B16.5 | 0,00 | 0,00 | 0,00 | 0,00 | 0,8716341 | NA       |
| ABHD6         | 3,38 | 2,47 | 3,48 | 3,19 | 0,8716576 | 0,916698 |
| RP11-64D24.2  | 0,00 | 0,00 | 0,00 | 0,00 | 0,8717057 | NA       |
| MAGEC1        | 0,00 | 0,00 | 0,00 | 0,00 | 0,8717394 | NA       |

|                |      |      |      |      |           |          |
|----------------|------|------|------|------|-----------|----------|
| RP13-753N3.1   | 0,39 | 0,89 | 0,39 | 1,52 | 0,8717934 | 0,916798 |
| RP11-666O2.5   | 0,00 | 0,00 | 0,00 | 0,00 | 0,8718378 | NA       |
| CTC-463N11.3   | 0,00 | 0,00 | 0,00 | 0,00 | 0,8718636 | NA       |
| CTC-458G6.4    | 0,00 | 0,00 | 0,00 | 0,00 | 0,8718861 | NA       |
| RN7SL560P      | 0,00 | 1,74 | 0,00 | 1,06 | 0,8719465 | NA       |
| RAB4B          | 6,33 | 6,02 | 5,71 | 5,71 | 0,8720028 | 0,916963 |
| RNA5SP319      | 0,00 | 0,00 | 0,00 | 0,00 | 0,8720265 | NA       |
| NDUFV3         | 4,73 | 3,39 | 4,23 | 4,37 | 0,8720397 | 0,916963 |
| RP11-250B2.6   | 0,00 | 0,00 | 0,00 | 0,00 | 0,8720479 | NA       |
| HES6           | 0,00 | 0,00 | 0,00 | 0,00 | 0,8720745 | 0,916963 |
| ABCB11         | 0,00 | 0,00 | 0,00 | 0,00 | 0,8720913 | NA       |
| RP11-375B1.1   | 0,00 | 0,00 | 0,00 | 0,00 | 0,8720988 | NA       |
| PRR7           | 0,39 | 2,12 | 0,00 | 0,18 | 0,8721207 | 0,916969 |
| RN7SL688P      | 0,00 | 0,00 | 0,00 | 0,00 | 0,8721932 | NA       |
| CH507-145C22.3 | 0,00 | 0,00 | 0,00 | 0,00 | 0,8721955 | NA       |
| BCKDK          | 5,36 | 5,56 | 5,06 | 5,27 | 0,8722056 | 0,917014 |
| RP5-965K10.1   | 0,00 | 0,00 | 0,00 | 0,00 | 0,8722844 | NA       |
| MOV10L1        | 0,00 | 0,07 | 0,05 | 0,00 | 0,8723663 | NA       |
| TAX1BP3        | 4,81 | 4,87 | 4,42 | 2,23 | 0,872429  | 0,917134 |
| MGAT4A         | 3,89 | 4,87 | 4,37 | 4,15 | 0,8724304 | 0,917134 |
| RP11-375N15.2  | 0,00 | 0,00 | 0,00 | 0,00 | 0,8724406 | NA       |
| RP5-1051H14.1  | 0,08 | 0,21 | 0,06 | 0,00 | 0,8724435 | 0,917134 |
| H1FNT          | 0,00 | 0,00 | 0,00 | 0,00 | 0,8725238 | NA       |
| RP11-468N14.10 | 0,00 | 0,00 | 0,00 | 0,00 | 0,8725547 | NA       |
| RALGAPA2       | 3,33 | 2,21 | 2,92 | 2,95 | 0,8726419 | 0,9173   |
| TRAJ37         | 0,00 | 0,00 | 0,00 | 0,00 | 0,8726422 | NA       |
| TIMM17B        | 6,48 | 5,87 | 6,34 | 6,42 | 0,8726898 | 0,917307 |
| TIMP3          | 0,00 | 0,00 | 0,00 | 0,00 | 0,8727767 | NA       |
| CLCA3P         | 0,00 | 0,00 | 0,00 | 0,00 | 0,8728004 | NA       |
| GRB2           | 7,22 | 7,03 | 7,18 | 6,93 | 0,8728247 | 0,917405 |
| RP11-6L6.4     | 0,00 | 0,00 | 0,00 | 0,00 | 0,8728489 | NA       |
| RP11-674C21.9  | 0,00 | 0,00 | 0,00 | 0,00 | 0,8728635 | NA       |
| RP11-60H5.1    | 0,00 | 0,00 | 0,00 | 0,00 | 0,8729888 | NA       |
| RP11-312A15.1  | 0,00 | 0,00 | 0,00 | 0,00 | 0,8730087 | NA       |
| ATP6V0D2       | 0,63 | 0,34 | 0,51 | 0,47 | 0,8730293 | 0,917577 |
| RP11-347H15.5  | 0,00 | 0,00 | 0,00 | 0,00 | 0,8730935 | NA       |
| MIR219A1       | 0,00 | 0,00 | 0,00 | 0,00 | 0,8731136 | 0,917622 |
| LOXL4          | 0,00 | 0,00 | 0,00 | 0,06 | 0,8731917 | 0,917661 |
| CTB-175E5.7    | 0,00 | 0,00 | 0,00 | 0,00 | 0,8732349 | NA       |
| RNU1-87P       | 0,00 | 0,00 | 0,00 | 0,00 | 0,8732696 | NA       |
| CTB-186G2.1    | 0,00 | 0,00 | 0,00 | 0,00 | 0,873313  | NA       |
| AC017035.1     | 0,00 | 0,00 | 0,00 | 0,00 | 0,873365  | NA       |
| RP11-297L17.6  | 0,00 | 0,00 | 0,00 | 0,00 | 0,8733814 | NA       |
| PPIAL          | 0,96 | 0,99 | 0,70 | 0,69 | 0,8733895 | 0,91778  |
| RP11-121A8.1   | 0,00 | 0,00 | 0,07 | 0,60 | 0,873424  | 0,91778  |
| AC010733.8     | 0,00 | 0,00 | 0,00 | 0,00 | 0,8734291 | 0,91778  |
| RP11-227D13.4  | 0,00 | 0,00 | 0,00 | 0,00 | 0,8734585 | NA       |
| CDH15          | 0,10 | 0,18 | 0,05 | 0,00 | 0,8734905 | 0,917801 |
| RP11-495K9.3   | 0,00 | 0,00 | 0,00 | 0,00 | 0,8735938 | NA       |
| TMEM100        | 0,00 | 0,00 | 0,00 | 0,00 | 0,8736017 | NA       |
| bP-2189O9.1    | 0,00 | 0,00 | 0,00 | 0,00 | 0,8737236 | NA       |
| RP11-460H18.1  | 0,00 | 0,52 | 0,00 | 0,00 | 0,873758  | NA       |
| RP11-219E7.1   | 0,00 | 0,86 | 0,67 | 2,38 | 0,8738355 | 0,91806  |
| HMGCL          | 4,68 | 4,30 | 4,78 | 3,21 | 0,8738424 | 0,91806  |
| RP11-265D17.2  | 0,40 | 1,82 | 0,00 | 0,00 | 0,8738605 | 0,91806  |

|               |      |      |      |      |           |          |
|---------------|------|------|------|------|-----------|----------|
| AGMAT         | 0,28 | 0,23 | 0,32 | 0,39 | 0,8739394 | 0,918064 |
| GMDS          | 3,90 | 3,51 | 3,75 | 3,65 | 0,8739627 | 0,918064 |
| KCNAB2        | 4,41 | 4,12 | 4,28 | 3,99 | 0,874062  | 0,918064 |
| RN7SL815P     | 0,00 | 0,00 | 0,00 | 1,12 | 0,8740666 | 0,918064 |
| RP11-396C23.2 | 0,00 | 0,57 | 0,00 | 0,00 | 0,8740704 | NA       |
| MAP4K2        | 2,48 | 2,33 | 2,27 | 1,27 | 0,8740711 | 0,918064 |
| RP3-477O4.5   | 0,00 | 0,00 | 0,00 | 0,00 | 0,8741523 | NA       |
| RN7SL817P     | 1,07 | 2,79 | 1,80 | 1,74 | 0,8741624 | 0,918116 |
| RP11-261P13.3 | 0,00 | 0,00 | 0,00 | 0,00 | 0,8742873 | NA       |
| HCRTR1        | 0,00 | 0,00 | 0,00 | 0,00 | 0,874321  | NA       |
| CTC-498J12.1  | 0,00 | 0,00 | 0,00 | 0,00 | 0,8745485 | NA       |
| CTD-2308N23.5 | 0,39 | 0,87 | 0,60 | 0,00 | 0,8745545 | 0,918485 |
| MIR573        | 0,00 | 0,00 | 0,00 | 0,00 | 0,8745761 | NA       |
| ZFP82         | 0,35 | 0,84 | 0,75 | 0,76 | 0,8746404 | 0,918532 |
| RP11-456O19.2 | 0,00 | 0,00 | 0,00 | 0,94 | 0,874718  | 0,918558 |
| DNAJA4        | 2,68 | 0,15 | 2,34 | 1,62 | 0,8747485 | 0,918558 |
| RP11-949J7.8  | 0,00 | 0,00 | 0,00 | 0,00 | 0,874794  | NA       |
| RP11-606E8.2  | 0,00 | 0,00 | 0,00 | 0,00 | 0,8748218 | NA       |
| AP000343.1    | 0,00 | 0,00 | 0,00 | 0,00 | 0,8748249 | NA       |
| RP11-165N19.4 | 0,00 | 0,00 | 0,00 | 0,00 | 0,8748518 | NA       |
| CGB1          | 0,00 | 0,00 | 0,00 | 0,00 | 0,8748795 | NA       |
| AP000302.58   | 0,00 | 0,00 | 0,00 | 0,00 | 0,8750746 | NA       |
| RP11-106E15.1 | 0,00 | 0,00 | 0,00 | 0,00 | 0,8751389 | NA       |
| ANAPC4        | 3,91 | 3,71 | 3,98 | 3,54 | 0,875229  | 0,919004 |
| TMEM225B      | 0,00 | 0,45 | 0,00 | 0,66 | 0,8752553 | 0,919004 |
| DERL1         | 4,88 | 3,98 | 5,07 | 5,00 | 0,8753585 | 0,919068 |
| VN1R82P       | 0,00 | 0,00 | 0,00 | 0,00 | 0,8754789 | NA       |
| OR5P2         | 0,00 | 0,00 | 0,00 | 0,00 | 0,8756227 | NA       |
| AC092933.4    | 0,00 | 0,00 | 0,00 | 0,30 | 0,8756406 | NA       |
| KCNS3         | 0,00 | 0,00 | 0,00 | 0,00 | 0,8756558 | NA       |
| AHSP          | 0,00 | 0,00 | 0,00 | 0,00 | 0,8757078 | NA       |
| LRRTM2        | 0,13 | 0,14 | 0,27 | 0,36 | 0,8757239 | 0,919409 |
| TMEM204       | 0,00 | 0,00 | 0,00 | 0,21 | 0,8757945 | 0,919439 |
| KLK4          | 0,00 | 0,00 | 0,00 | 0,00 | 0,8759287 | NA       |
| AC084031.1    | 0,00 | 0,00 | 0,00 | 0,00 | 0,8759304 | NA       |
| MAMDC2        | 0,00 | 0,00 | 0,00 | 0,00 | 0,8759557 | NA       |
| CTB-133G6.1   | 0,07 | 0,34 | 0,05 | 0,20 | 0,8759979 | 0,91961  |
| FOXD2-AS1     | 0,00 | 0,00 | 0,00 | 0,00 | 0,8760751 | NA       |
| PRAF2         | 3,06 | 2,47 | 2,18 | 2,15 | 0,8760762 | 0,919634 |
| KCNE5         | 0,00 | 0,00 | 0,00 | 0,10 | 0,8761039 | 0,919634 |
| KRT82         | 0,00 | 0,05 | 0,00 | 0,00 | 0,8761219 | NA       |
| USP36         | 4,82 | 4,79 | 4,88 | 5,34 | 0,8761785 | 0,919638 |
| RP11-697H9.2  | 0,00 | 0,00 | 0,00 | 0,00 | 0,8761822 | NA       |
| RFO2104       | 0,00 | 0,00 | 0,00 | 0,00 | 0,8761854 | NA       |
| MAD2L1BP      | 4,21 | 0,62 | 2,78 | 3,35 | 0,8761909 | 0,919638 |
| RP11-435O11.5 | 0,00 | 0,00 | 0,00 | 0,00 | 0,876227  | NA       |
| ZP2           | 0,00 | 0,13 | 0,00 | 0,00 | 0,87623   | NA       |
| RP11-267J23.4 | 0,00 | 0,00 | 0,00 | 0,68 | 0,8762429 | NA       |
| RNU7-59P      | 0,00 | 0,00 | 0,00 | 0,00 | 0,8762904 | NA       |
| RP13-487P22.1 | 0,00 | 0,00 | 0,00 | 0,00 | 0,8763141 | NA       |
| OPCML         | 0,00 | 0,00 | 0,00 | 0,00 | 0,8763982 | NA       |
| TAS2R46       | 0,00 | 0,00 | 0,00 | 0,00 | 0,8764164 | NA       |
| RNFT1         | 4,36 | 2,36 | 4,17 | 3,78 | 0,8764198 | 0,919767 |
| EMB           | 5,31 | 4,98 | 5,04 | 4,06 | 0,8764324 | 0,919767 |
| RP11-660M18.2 | 0,89 | 0,68 | 0,86 | 0,58 | 0,8764421 | 0,919767 |

|                |      |      |      |      |           |          |
|----------------|------|------|------|------|-----------|----------|
| HIRA           | 1,81 | 1,93 | 2,20 | 0,11 | 0,876479  | 0,919767 |
| AC013248.2     | 0,00 | 0,00 | 0,00 | 0,00 | 0,8764865 | NA       |
| MIRS48Y        | 0,00 | 1,89 | 0,00 | 0,00 | 0,8765002 | NA       |
| KRTAP5-4       | 0,00 | 0,00 | 0,00 | 0,00 | 0,8765198 | NA       |
| EFCAB9         | 0,00 | 0,00 | 0,00 | 0,00 | 0,876549  | NA       |
| CTB-164N12.1   | 0,00 | 0,00 | 0,00 | 0,00 | 0,876591  | NA       |
| RP11-324E6.4   | 0,00 | 0,00 | 0,00 | 0,00 | 0,8765911 | NA       |
| RP11-350N15.4  | 0,00 | 0,00 | 0,00 | 0,00 | 0,8765911 | NA       |
| RP11-387D10.4  | 0,00 | 0,00 | 0,00 | 0,00 | 0,8766456 | NA       |
| CFLAR          | 6,29 | 5,89 | 6,42 | 6,20 | 0,8766717 | 0,919926 |
| CTCF           | 4,10 | 2,63 | 3,75 | 3,62 | 0,8767779 | 0,919994 |
| DUX4L4         | 0,00 | 0,00 | 0,00 | 0,00 | 0,8768807 | NA       |
| RP11-349F21.2  | 1,35 | 1,61 | 1,02 | 1,32 | 0,8768891 | 0,920054 |
| RNY1P16        | 2,38 | 2,67 | 2,55 | 3,33 | 0,8769183 | 0,920054 |
| CTD-2128A3.1   | 0,00 | 0,00 | 0,00 | 0,00 | 0,8769931 | NA       |
| RP11-505P4.7   | 0,21 | 0,65 | 0,52 | 0,72 | 0,8771113 | 0,920213 |
| LINC00637      | 0,00 | 0,00 | 0,00 | 0,00 | 0,8771214 | NA       |
| GLIPR1L1       | 0,00 | 0,00 | 0,00 | 0,00 | 0,8771264 | NA       |
| CCL17          | 0,00 | 0,00 | 0,00 | 0,00 | 0,8771544 | NA       |
| RP11-454P7.3   | 0,00 | 0,00 | 0,00 | 0,00 | 0,8773001 | NA       |
| RP11-118H4.1   | 0,53 | 0,63 | 0,42 | 0,38 | 0,8773382 | 0,920408 |
| PSG11          | 0,00 | 0,08 | 0,00 | 0,00 | 0,8773661 | NA       |
| RP3-395M20.9   | 0,00 | 0,00 | 0,00 | 0,00 | 0,8774542 | 0,920416 |
| CTD-2145A24.5  | 0,00 | 0,16 | 0,00 | 0,00 | 0,8774613 | 0,920416 |
| RP11-214K3.19  | 0,00 | 1,19 | 0,00 | 0,57 | 0,8774697 | 0,920416 |
| RP11-725K16.4  | 0,00 | 0,00 | 0,00 | 0,00 | 0,8776552 | NA       |
| RP11-451L19.1  | 0,00 | 0,00 | 0,00 | 0,00 | 0,8776578 | NA       |
| AP000487.5     | 0,84 | 0,65 | 1,05 | 0,74 | 0,8776865 | 0,920558 |
| SLC25A36       | 5,60 | 5,87 | 5,18 | 4,92 | 0,8776883 | 0,920558 |
| RN7SL761P      | 0,00 | 0,00 | 0,00 | 0,00 | 0,8777235 | NA       |
| AC007364.1     | 0,00 | 0,08 | 0,00 | 0,00 | 0,8778011 | NA       |
| RP13-582O9.7   | 0,00 | 0,00 | 0,00 | 0,00 | 0,8780049 | NA       |
| ZNF564         | 1,67 | 2,06 | 2,19 | 2,11 | 0,8780187 | 0,920861 |
| RP11-81A1.6    | 2,38 | 0,61 | 1,87 | 1,72 | 0,8781081 | 0,920911 |
| RP11-118M12.2  | 0,00 | 0,00 | 0,00 | 0,00 | 0,8781121 | NA       |
| RP5-981L23.2   | 0,00 | 0,00 | 0,00 | 0,00 | 0,8781279 | NA       |
| B4GALT2        | 0,00 | 0,00 | 0,00 | 0,00 | 0,8782838 | 0,921052 |
| RPTN           | 0,00 | 0,04 | 0,00 | 0,00 | 0,8783324 | NA       |
| RP11-1006G14.2 | 0,00 | 0,00 | 0,00 | 0,00 | 0,8783387 | NA       |
| SSX9           | 0,00 | 0,00 | 0,00 | 0,00 | 0,878341  | NA       |
| HAPLN1         | 0,00 | 0,00 | 0,00 | 0,00 | 0,8783989 | NA       |
| AMH            | 0,00 | 0,00 | 0,00 | 0,00 | 0,8784023 | NA       |
| TNFSF11        | 0,00 | 0,10 | 0,00 | 0,00 | 0,8784223 | NA       |
| FAM230B        | 0,00 | 0,00 | 0,00 | 0,06 | 0,8784365 | 0,921169 |
| RP11-378I13.1  | 0,00 | 0,00 | 0,00 | 0,00 | 0,8784466 | NA       |
| PNLIPRP3       | 0,00 | 0,00 | 0,00 | 0,00 | 0,878497  | NA       |
| RP11-566K19.8  | 0,00 | 0,00 | 0,00 | 0,00 | 0,8785014 | NA       |
| RP5-973M2.2    | 0,00 | 0,00 | 0,00 | 0,00 | 0,8785202 | NA       |
| RP11-90P5.5    | 2,39 | 3,02 | 3,06 | 3,11 | 0,8785332 | 0,921226 |
| SNORA9B        | 0,00 | 0,00 | 0,00 | 0,00 | 0,8785454 | NA       |
| RNU6-97P       | 0,00 | 0,00 | 0,00 | 0,00 | 0,8785744 | 0,921226 |
| NEU1           | 4,29 | 4,09 | 4,22 | 3,40 | 0,8786266 | 0,921238 |
| RP11-767C1.2   | 0,00 | 0,00 | 0,00 | 0,00 | 0,8786657 | NA       |
| FKBPL          | 0,00 | 0,00 | 0,00 | 0,00 | 0,8787816 | NA       |
| RP5-943J3.1    | 0,00 | 0,00 | 0,00 | 0,00 | 0,8788208 | NA       |

|               |      |      |      |      |           |          |
|---------------|------|------|------|------|-----------|----------|
| RP11-5407.3   | 0,00 | 0,06 | 0,00 | 0,00 | 0,8788587 | NA       |
| FAM90A17      | 0,00 | 0,00 | 0,00 | 0,00 | 0,8788634 | NA       |
| YIF1A         | 6,21 | 5,04 | 5,95 | 5,51 | 0,8788988 | 0,92148  |
| RP13-487K5.1  | 0,00 | 0,00 | 0,00 | 0,00 | 0,8789119 | NA       |
| CTB-66B24.1   | 0,00 | 0,00 | 0,00 | 0,00 | 0,8789311 | NA       |
| RP11-697E22.3 | 0,00 | 0,00 | 0,00 | 0,00 | 0,8789386 | NA       |
| RP11-7F17.1   | 0,00 | 0,00 | 0,00 | 0,00 | 0,8790612 | NA       |
| RP1-228H13.5  | 0,00 | 0,52 | 0,03 | 0,29 | 0,8790619 | 0,921605 |
| RP11-90D4.3   | 0,00 | 0,33 | 0,46 | 0,45 | 0,8791012 | 0,921605 |
| HBD           | 0,00 | 0,00 | 0,00 | 0,00 | 0,8791376 | NA       |
| RPS12P31      | 0,00 | 0,00 | 0,00 | 0,00 | 0,8791721 | 0,921636 |
| MRPL32        | 5,49 | 5,22 | 5,26 | 5,39 | 0,8792404 | 0,921664 |
| RP11-9D8.1    | 0,00 | 0,00 | 0,00 | 0,00 | 0,879308  | NA       |
| RP4-646N3.3   | 0,00 | 0,00 | 0,00 | 0,00 | 0,8794439 | NA       |
| LRP3          | 0,00 | 0,00 | 0,00 | 0,00 | 0,8794702 | NA       |
| OR5AC4P       | 0,00 | 0,00 | 0,00 | 0,00 | 0,8795153 | NA       |
| RP11-252I13.2 | 0,00 | 0,00 | 0,00 | 0,00 | 0,8795431 | NA       |
| MIR1539       | 0,00 | 0,00 | 0,00 | 0,00 | 0,8795871 | NA       |
| RP4-713B5.2   | 0,00 | 0,00 | 0,00 | 0,00 | 0,8796754 | NA       |
| RP11-430C1.2  | 0,00 | 0,00 | 0,00 | 0,00 | 0,8796777 | NA       |
| RP1-257C22.2  | 0,00 | 0,00 | 0,00 | 0,00 | 0,8797052 | 0,922108 |
| PDCC1LG2      | 0,00 | 0,00 | 0,00 | 0,00 | 0,8797172 | NA       |
| RP1-5O6.5     | 0,00 | 0,00 | 0,00 | 0,00 | 0,8798003 | NA       |
| RP11-480A16.2 | 0,27 | 0,21 | 0,39 | 0,35 | 0,8798517 | 0,922212 |
| DPEP1         | 0,00 | 0,00 | 0,00 | 0,00 | 0,879859  | NA       |
| RP11-301N24.3 | 0,00 | 0,00 | 0,00 | 0,00 | 0,8798666 | NA       |
| RP13-200J3.2  | 0,00 | 0,00 | 0,00 | 0,00 | 0,8798678 | NA       |
| RP11-248I18.3 | 2,39 | 1,22 | 1,55 | 0,00 | 0,8798877 | 0,922212 |
| RP11-13K12.5  | 0,00 | 0,00 | 0,00 | 0,00 | 0,8799158 | NA       |
| RP11-829H16.5 | 0,00 | 0,00 | 0,00 | 0,00 | 0,8799171 | NA       |
| SCNN1G        | 0,24 | 0,08 | 0,21 | 0,08 | 0,879929  | 0,922212 |
| RF00604       | 0,00 | 0,00 | 0,00 | 0,00 | 0,879939  | NA       |
| USP17L2       | 0,00 | 0,00 | 0,00 | 0,00 | 0,8799499 | NA       |
| SERPINB13     | 0,00 | 0,09 | 0,00 | 0,00 | 0,8799687 | NA       |
| AP005019.4    | 0,00 | 0,21 | 0,00 | 0,00 | 0,8799801 | NA       |
| BMP2K         | 3,85 | 5,04 | 4,16 | 3,86 | 0,8800208 | 0,922264 |
| RNU6-223P     | 0,00 | 0,00 | 0,00 | 0,00 | 0,88004   | NA       |
| RP11-173P15.5 | 0,00 | 0,00 | 0,00 | 0,00 | 0,8800568 | NA       |
| RP11-34P13.14 | 0,00 | 0,00 | 0,00 | 0,00 | 0,8801023 | NA       |
| CTD-2521M24.8 | 0,00 | 0,00 | 0,00 | 0,00 | 0,8801485 | NA       |
| VAX1          | 0,00 | 0,00 | 0,00 | 0,00 | 0,8801621 | NA       |
| RP11-196I2.1  | 0,00 | 0,43 | 0,00 | 1,73 | 0,8801771 | 0,922385 |
| RP11-351M16.1 | 0,00 | 0,00 | 0,00 | 0,00 | 0,8802386 | NA       |
| CTA-313A17.2  | 0,00 | 0,00 | 0,00 | 0,00 | 0,8803183 | 0,922447 |
| RN7SL344P     | 0,00 | 0,00 | 0,00 | 0,99 | 0,8803388 | NA       |
| AC002059.10   | 0,00 | 0,00 | 0,00 | 0,00 | 0,880356  | 0,922447 |
| RP11-403P17.5 | 0,00 | 0,00 | 0,00 | 0,00 | 0,8803818 | NA       |
| AC106705.2    | 0,00 | 0,00 | 0,00 | 0,00 | 0,8803932 | NA       |
| AF038458.4    | 0,00 | 0,00 | 0,00 | 0,00 | 0,8803932 | NA       |
| RP1-191J18.65 | 0,00 | 0,00 | 0,00 | 0,00 | 0,8803932 | NA       |
| RP11-586D19.2 | 0,07 | 0,13 | 0,15 | 0,11 | 0,8803933 | 0,922447 |
| AC116366.6    | 0,89 | 1,15 | 1,19 | 1,05 | 0,8804023 | 0,922447 |
| RP11-945F5.1  | 0,00 | 0,00 | 0,00 | 0,00 | 0,8804647 | NA       |
| RP11-53O19.2  | 0,00 | 0,00 | 0,00 | 0,00 | 0,8805441 | NA       |
| RP11-295I5.3  | 0,00 | 0,00 | 0,00 | 0,33 | 0,8805729 | 0,922582 |

|                 |      |      |      |      |           |          |
|-----------------|------|------|------|------|-----------|----------|
| RP11-498J9.1    | 0,00 | 0,00 | 0,00 | 0,00 | 0,8806383 | NA       |
| RP11-18C24.6    | 0,00 | 0,00 | 0,00 | 0,00 | 0,8806541 | 0,922587 |
| ZFX             | 4,88 | 4,04 | 4,60 | 3,98 | 0,8806609 | 0,922587 |
| WISP1           | 0,00 | 0,00 | 0,00 | 0,00 | 0,8807234 | NA       |
| RNU2-14P        | 0,00 | 0,00 | 0,00 | 0,00 | 0,8807691 | NA       |
| RP11-73M7.9     | 0,00 | 0,00 | 0,42 | 0,52 | 0,8808075 | 0,922697 |
| AC002486.2      | 0,00 | 0,00 | 0,00 | 0,00 | 0,8808861 | NA       |
| PRCC            | 3,57 | 3,68 | 3,70 | 3,09 | 0,8809152 | 0,922767 |
| RP11-20O24.1    | 0,00 | 0,00 | 0,00 | 0,00 | 0,8809399 | NA       |
| RP11-84N19.1    | 0,00 | 0,00 | 0,00 | 0,00 | 0,8809475 | NA       |
| KIR2DS4         | 0,00 | 0,00 | 0,00 | 0,00 | 0,8809644 | NA       |
| GLUD1           | 5,23 | 5,07 | 5,27 | 5,34 | 0,8809722 | 0,922783 |
| RP11-358M11.1   | 0,00 | 0,00 | 0,00 | 0,00 | 0,8809889 | NA       |
| TUBGCP6         | 2,77 | 3,49 | 3,06 | 2,88 | 0,8810225 | 0,922792 |
| RP11-449K6.5    | 0,00 | 0,00 | 0,00 | 0,00 | 0,8811118 | NA       |
| CECR4           | 0,00 | 0,00 | 0,00 | 0,00 | 0,8812909 | NA       |
| RP11-392O1.4    | 0,00 | 0,00 | 0,00 | 0,00 | 0,8813401 | NA       |
| CTD-2286N8.1    | 0,09 | 0,13 | 0,01 | 0,00 | 0,8813517 | 0,923093 |
| MIR27B          | 0,00 | 0,00 | 0,00 | 0,00 | 0,8813679 | NA       |
| OR2T12          | 0,41 | 0,50 | 0,31 | 0,41 | 0,8815297 | 0,923236 |
| RNU6-42P        | 0,00 | 0,00 | 0,00 | 0,00 | 0,8815941 | NA       |
| RN7SL660P       | 0,00 | 2,07 | 0,85 | 0,79 | 0,8816026 | 0,923269 |
| RP11-245P10.4   | 0,00 | 0,00 | 0,00 | 0,00 | 0,881737  | NA       |
| SLC39A13        | 1,12 | 1,54 | 1,88 | 2,72 | 0,8817517 | 0,923374 |
| TMEM62          | 4,28 | 4,61 | 3,99 | 3,81 | 0,8817855 | 0,923374 |
| CTD-2026C7.1    | 0,00 | 0,00 | 0,00 | 0,00 | 0,8817959 | NA       |
| CLEC3B          | 0,00 | 1,90 | 0,00 | 0,00 | 0,8818774 | 0,923426 |
| RP11-396F22.1   | 0,00 | 0,00 | 0,00 | 0,00 | 0,881878  | NA       |
| MIR1299         | 0,00 | 2,26 | 0,00 | 0,00 | 0,8819173 | NA       |
| RP11-325L7.2    | 0,00 | 0,00 | 0,00 | 0,19 | 0,8819193 | NA       |
| RP11-798K3.4    | 0,00 | 0,00 | 0,00 | 0,00 | 0,8819277 | NA       |
| RP11-732A19.5   | 0,00 | 0,34 | 0,00 | 0,00 | 0,8819317 | NA       |
| RP11-403I13.9   | 0,00 | 0,00 | 0,00 | 0,00 | 0,8819747 | NA       |
| TSPAN33         | 5,49 | 4,51 | 5,20 | 3,55 | 0,8819893 | 0,9235   |
| CTB-120L21.1    | 0,00 | 0,00 | 0,00 | 0,00 | 0,8820214 | NA       |
| CTD-2349P21.1   | 0,00 | 0,00 | 0,00 | 0,00 | 0,8820806 | NA       |
| SNORA38         | 0,00 | 0,00 | 0,00 | 0,00 | 0,882237  | NA       |
| XXyac-YX155B6.7 | 0,00 | 0,00 | 0,00 | 0,00 | 0,8822795 | NA       |
| RP11-14O22.1    | 0,00 | 0,00 | 0,00 | 0,00 | 0,8823772 | NA       |
| HIST1H2BO       | 0,00 | 0,00 | 0,00 | 0,00 | 0,8824655 | NA       |
| CDYL            | 3,56 | 3,05 | 3,28 | 2,49 | 0,8825668 | 0,924061 |
| RN7SL813P       | 0,00 | 0,00 | 0,00 | 0,00 | 0,8825747 | NA       |
| RP11-390K5.6    | 0,00 | 0,00 | 0,00 | 0,00 | 0,8826481 | NA       |
| KBTBD6          | 0,19 | 0,22 | 0,35 | 0,32 | 0,8828663 | 0,924307 |
| MYPN            | 0,10 | 0,90 | 0,09 | 0,08 | 0,8828849 | 0,924307 |
| RP11-230C9.4    | 0,00 | 0,00 | 0,00 | 0,00 | 0,8829294 | NA       |
| RP11-185C18.4   | 0,96 | 0,00 | 0,00 | 2,14 | 0,8829336 | 0,924315 |
| RPS26P8         | 0,00 | 0,00 | 0,00 | 0,00 | 0,8829405 | NA       |
| SYNC            | 0,00 | 0,00 | 0,00 | 0,35 | 0,8830064 | 0,924347 |
| AC098831.4      | 0,00 | 0,00 | 0,00 | 0,00 | 0,88306   | NA       |
| RP5-837J1.4     | 0,00 | 0,00 | 0,00 | 0,00 | 0,8830867 | NA       |
| ATP6AP2         | 6,73 | 6,41 | 6,68 | 5,85 | 0,883088  | 0,924389 |
| RN7SL420P       | 0,00 | 0,31 | 0,00 | 0,00 | 0,8831288 | NA       |
| IGHV1-24        | 0,00 | 0,00 | 0,00 | 0,00 | 0,8833724 | NA       |
| RP11-359J14.2   | 0,00 | 0,00 | 0,00 | 0,00 | 0,8833836 | NA       |

|                |      |      |      |      |           |          |
|----------------|------|------|------|------|-----------|----------|
| AKAP8          | 4,22 | 4,36 | 4,29 | 4,01 | 0,8833857 | 0,924657 |
| RP11-872D17.8  | 0,00 | 0,00 | 0,00 | 0,00 | 0,8833866 | NA       |
| AC006116.24    | 0,00 | 0,00 | 0,00 | 0,00 | 0,8833973 | NA       |
| RP11-316M21.5  | 0,00 | 0,00 | 0,00 | 0,00 | 0,8834297 | NA       |
| FAM8A1         | 1,87 | 2,33 | 1,40 | 0,37 | 0,8834646 | 0,924672 |
| MUTYH          | 2,50 | 3,94 | 2,48 | 2,82 | 0,8834828 | 0,924672 |
| AL138479.3     | 1,00 | 1,32 | 1,46 | 0,67 | 0,8835446 | 0,924693 |
| MIR568         | 0,00 | 0,00 | 0,00 | 0,00 | 0,8835917 | NA       |
| BRD7P1         | 0,00 | 0,00 | 0,00 | 0,00 | 0,8836554 | NA       |
| RP11-479F13.1  | 0,00 | 0,00 | 0,00 | 0,00 | 0,8836685 | 0,924779 |
| AC004543.2     | 0,00 | 0,00 | 0,00 | 0,00 | 0,883806  | NA       |
| MARCH2         | 3,38 | 3,25 | 3,37 | 3,66 | 0,8838358 | 0,924891 |
| AC007319.2     | 0,00 | 0,00 | 0,00 | 0,00 | 0,8838368 | NA       |
| RBP3           | 0,00 | 0,03 | 0,00 | 0,00 | 0,8838454 | NA       |
| RP11-314M24.1  | 0,00 | 0,76 | 0,00 | 0,32 | 0,8838733 | 0,924891 |
| THOC2          | 6,27 | 5,81 | 6,19 | 5,30 | 0,8839001 | 0,924891 |
| LPIN2          | 3,11 | 2,34 | 2,86 | 2,61 | 0,8839568 | 0,924907 |
| HPVC1          | 0,00 | 0,00 | 0,00 | 0,00 | 0,8840625 | NA       |
| RP11-12016.1   | 0,00 | 0,00 | 0,23 | 0,00 | 0,8841035 | 0,925016 |
| HOXA3          | 0,00 | 0,00 | 0,00 | 0,00 | 0,8841148 | NA       |
| NPSR1          | 0,00 | 0,00 | 0,00 | 0,00 | 0,884117  | NA       |
| HTR5A          | 0,00 | 0,00 | 0,00 | 0,04 | 0,8841544 | NA       |
| STOX1          | 0,00 | 0,00 | 0,00 | 0,00 | 0,8842417 | NA       |
| RP11-452D21.1  | 0,00 | 0,00 | 0,00 | 0,00 | 0,8842691 | NA       |
| RP11-220H4.2   | 0,00 | 0,00 | 0,00 | 0,00 | 0,8842927 | NA       |
| NRSN2          | 0,00 | 0,00 | 0,00 | 0,00 | 0,8843311 | 0,925211 |
| ERICD          | 0,00 | 0,00 | 0,00 | 0,00 | 0,8843418 | NA       |
| RP11-365H8.3   | 0,00 | 0,00 | 0,00 | 0,00 | 0,8843691 | NA       |
| RP11-2K15.2    | 0,00 | 0,00 | 0,00 | 0,00 | 0,8844012 | NA       |
| SPATA31A3      | 0,00 | 0,00 | 0,00 | 0,00 | 0,884505  | NA       |
| ALPI           | 0,00 | 0,00 | 0,00 | 0,00 | 0,884517  | NA       |
| RN7SL413P      | 0,00 | 0,00 | 0,00 | 0,00 | 0,8846388 | NA       |
| AC125634.1     | 0,00 | 0,00 | 0,00 | 0,00 | 0,8847023 | NA       |
| ADAMTS19       | 0,00 | 0,00 | 0,00 | 0,00 | 0,884728  | NA       |
| CTB-27N1.1     | 0,00 | 0,00 | 0,00 | 0,00 | 0,8847724 | NA       |
| GCC1           | 1,73 | 1,07 | 1,29 | 0,06 | 0,8847959 | 0,92563  |
| RP11-43215.1   | 0,00 | 0,00 | 0,00 | 0,00 | 0,8848066 | NA       |
| RP11-425D10.10 | 2,31 | 4,18 | 2,59 | 3,87 | 0,8848148 | 0,92563  |
| DTX3           | 0,00 | 0,00 | 0,00 | 0,00 | 0,884848  | NA       |
| RP11-9M16.3    | 0,00 | 0,00 | 0,00 | 0,00 | 0,8849496 | NA       |
| TRAPPC3        | 5,44 | 2,96 | 4,96 | 4,60 | 0,8850007 | 0,925781 |
| RP11-1166P10.6 | 0,00 | 0,00 | 0,00 | 0,00 | 0,8850512 | NA       |
| RP11-398A8.2   | 0,00 | 0,00 | 0,00 | 0,00 | 0,885147  | NA       |
| CLCNKA         | 0,00 | 0,00 | 0,00 | 0,00 | 0,885426  | NA       |
| CTB-161M19.3   | 0,00 | 0,81 | 0,91 | 1,29 | 0,8854347 | NA       |
| RP11-278H7.5   | 0,00 | 0,00 | 0,00 | 0,00 | 0,8854501 | NA       |
| GUCY1A2        | 0,00 | 0,00 | 0,00 | 0,00 | 0,8854503 | NA       |
| AC005037.8     | 0,00 | 0,00 | 0,00 | 0,00 | 0,8855204 | NA       |
| CTB-158D10.3   | 0,00 | 0,00 | 0,00 | 0,00 | 0,8856371 | NA       |
| RP11-193F5.2   | 0,00 | 0,00 | 0,00 | 0,00 | 0,8857188 | NA       |
| RP11-7F17.3    | 0,07 | 0,16 | 0,12 | 0,07 | 0,8857679 | 0,92654  |
| MIEN1          | 6,55 | 6,18 | 6,47 | 5,94 | 0,885829  | 0,926555 |
| RP11-467I20.5  | 0,00 | 0,00 | 0,00 | 0,00 | 0,8858423 | NA       |
| CTD-2540B15.9  | 0,00 | 0,57 | 0,00 | 0,00 | 0,8858696 | 0,926555 |
| PXDNL          | 0,00 | 0,00 | 0,00 | 0,00 | 0,8858809 | NA       |

|               |      |      |      |      |           |          |
|---------------|------|------|------|------|-----------|----------|
| DDX11L2       | 0,00 | 0,00 | 0,00 | 0,00 | 0,8859077 | 0,926555 |
| HSDL2         | 3,46 | 2,46 | 3,93 | 3,47 | 0,8860209 | 0,92663  |
| KCTD11        | 0,00 | 0,00 | 0,00 | 0,00 | 0,8861039 | NA       |
| TPD52L3       | 0,00 | 0,12 | 0,00 | 0,00 | 0,8861047 | NA       |
| RPS7P1        | 0,35 | 0,36 | 0,42 | 0,30 | 0,8861451 | NA       |
| ZC2HC1B       | 0,00 | 0,00 | 0,00 | 0,00 | 0,886267  | NA       |
| RP11-87H9.4   | 1,37 | 1,18 | 1,02 | 0,73 | 0,8862828 | 0,92686  |
| RF02266       | 0,00 | 0,00 | 0,00 | 0,00 | 0,8863256 | NA       |
| PLA2G10       | 0,33 | 0,54 | 0,31 | 0,72 | 0,8863862 | 0,926901 |
| GDF11         | 0,06 | 0,27 | 0,10 | 0,10 | 0,8864436 | 0,926901 |
| RP11-25L19.1  | 3,64 | 3,66 | 3,64 | 3,70 | 0,886482  | 0,926901 |
| RPL14         | 8,84 | 8,65 | 8,71 | 8,35 | 0,8864885 | 0,926901 |
| RP4-789D17.5  | 0,00 | 0,00 | 0,00 | 0,00 | 0,8865592 | NA       |
| RP11-280G19.2 | 0,00 | 0,00 | 0,00 | 0,00 | 0,8865601 | NA       |
| RNF219        | 2,15 | 0,15 | 1,08 | 1,41 | 0,8866184 | 0,926916 |
| RP1-184J9.2   | 0,00 | 0,00 | 0,00 | 0,00 | 0,8866192 | NA       |
| UXS1          | 3,17 | 1,73 | 2,88 | 2,09 | 0,8866219 | 0,926916 |
| ASIC3         | 0,00 | 0,00 | 0,00 | 0,00 | 0,8866276 | 0,926916 |
| RP11-410N8.3  | 0,00 | 0,00 | 0,00 | 0,00 | 0,8867838 | NA       |
| RP11-58A11.2  | 0,00 | 0,00 | 0,00 | 0,00 | 0,8867843 | NA       |
| RP11-53B2.1   | 0,00 | 0,00 | 0,00 | 0,00 | 0,8868491 | NA       |
| NTPCR         | 4,49 | 4,35 | 4,17 | 3,71 | 0,886888  | 0,927144 |
| RNU7-50P      | 0,00 | 0,00 | 0,00 | 0,00 | 0,8868881 | NA       |
| AF001548.3    | 0,38 | 0,61 | 0,57 | 0,40 | 0,8869845 | 0,927193 |
| RN7SL653P     | 0,00 | 0,84 | 0,00 | 0,00 | 0,8869859 | NA       |
| TDRD5         | 0,00 | 0,00 | 0,00 | 0,00 | 0,8870109 | NA       |
| DDIT3         | 5,57 | 4,99 | 5,24 | 5,83 | 0,8870182 | 0,927193 |
| RP11-355F22.1 | 0,00 | 0,00 | 0,00 | 0,00 | 0,8871546 | NA       |
| RP11-553N16.1 | 0,18 | 0,19 | 0,00 | 0,16 | 0,8871748 | NA       |
| RNU4-49P      | 0,00 | 0,00 | 0,00 | 0,00 | 0,8871941 | NA       |
| OTUD6B        | 2,90 | 2,34 | 2,28 | 1,62 | 0,8872089 | 0,927329 |
| RP11-393H10.4 | 0,00 | 0,00 | 0,00 | 0,00 | 0,887215  | NA       |
| PFKM          | 1,36 | 1,89 | 2,05 | 1,91 | 0,8872316 | 0,927329 |
| RP11-93B14.6  | 0,00 | 0,00 | 0,00 | 0,00 | 0,8872419 | NA       |
| AC079804.8    | 0,00 | 0,00 | 0,00 | 0,00 | 0,8872951 | NA       |
| RP11-5N19.3   | 0,00 | 0,00 | 0,00 | 0,00 | 0,8873229 | NA       |
| RP4-751H13.5  | 0,00 | 0,00 | 0,00 | 0,00 | 0,8873657 | NA       |
| AC002984.2    | 0,00 | 0,00 | 0,00 | 0,00 | 0,8873762 | NA       |
| NECAB3        | 0,66 | 0,00 | 0,17 | 0,35 | 0,8874147 | 0,927477 |
| RN7SL748P     | 0,00 | 0,00 | 0,00 | 0,00 | 0,8874782 | NA       |
| MRPL46        | 3,79 | 2,84 | 2,88 | 4,47 | 0,88761   | 0,927637 |
| RP11-572O6.1  | 0,00 | 0,00 | 0,00 | 0,00 | 0,8876128 | NA       |
| AC009965.2    | 0,00 | 0,35 | 0,15 | 0,34 | 0,887652  | 0,927637 |
| AC004987.7    | 0,53 | 0,09 | 0,84 | 0,21 | 0,8877742 | 0,927722 |
| RP11-77H9.5   | 0,00 | 0,00 | 0,00 | 0,00 | 0,8878343 | NA       |
| RP11-350G8.3  | 0,00 | 0,26 | 0,00 | 0,00 | 0,8878609 | NA       |
| RP11-804A23.2 | 0,00 | 0,00 | 0,00 | 0,00 | 0,887899  | NA       |
| CMB9-22P13.1  | 0,67 | 0,88 | 0,95 | 2,06 | 0,8880156 | 0,92793  |
| AP000949.1    | 0,00 | 0,00 | 0,00 | 0,00 | 0,8880351 | NA       |
| GS1-393A7.1   | 0,00 | 0,00 | 0,00 | 0,00 | 0,888181  | NA       |
| PHF21A        | 4,04 | 2,91 | 3,52 | 3,80 | 0,8882539 | 0,928114 |
| MIR548AP      | 0,00 | 0,00 | 0,00 | 0,00 | 0,8882663 | NA       |
| IFNA17        | 0,00 | 0,00 | 0,00 | 0,00 | 0,888303  | NA       |
| SETD7         | 3,89 | 2,01 | 2,92 | 2,43 | 0,8883142 | 0,928114 |
| SNAPC1        | 2,08 | 1,38 | 1,94 | 1,79 | 0,8883172 | 0,928114 |



|                |      |      |      |      |           |          |
|----------------|------|------|------|------|-----------|----------|
| LRRC26         | 0,00 | 0,12 | 0,00 | 0,00 | 0,8883538 | NA       |
| TRAPPC9        | 2,74 | 1,50 | 2,97 | 2,76 | 0,8883593 | 0,928115 |
| AC002519.6     | 0,00 | 0,00 | 0,00 | 0,00 | 0,8884253 | NA       |
| ARHGAP27       | 4,69 | 4,49 | 4,51 | 3,37 | 0,8885227 | 0,928236 |
| HBG2           | 0,00 | 0,00 | 0,00 | 0,00 | 0,8885738 | 0,928236 |
| ATP8B3         | 1,23 | 0,46 | 1,03 | 1,64 | 0,888606  | 0,928236 |
| RP11-219I21.2  | 0,98 | 1,45 | 1,22 | 1,76 | 0,8886422 | 0,928236 |
| RP11-126L15.4  | 0,00 | 0,00 | 0,00 | 0,00 | 0,888674  | NA       |
| RP11-481A20.10 | 0,00 | 0,00 | 0,00 | 0,00 | 0,8886769 | NA       |
| CCNI           | 8,54 | 8,68 | 8,55 | 8,20 | 0,8887365 | 0,928291 |
| AC004906.3     | 0,00 | 0,00 | 0,00 | 0,00 | 0,8887398 | NA       |
| AC006272.2     | 0,00 | 0,00 | 0,00 | 0,00 | 0,8889943 | NA       |
| RP11-76N22.2   | 0,45 | 0,52 | 0,41 | 0,29 | 0,8890353 | 0,928559 |
| RP11-386D6.2   | 0,00 | 0,00 | 0,00 | 0,00 | 0,8890943 | NA       |
| COL6A4P2       | 0,00 | 0,00 | 0,00 | 0,00 | 0,8890968 | 0,92858  |
| CTD-2014D20.1  | 0,00 | 0,00 | 0,00 | 0,00 | 0,8891696 | NA       |
| MIR3135B       | 0,00 | 0,00 | 0,00 | 0,00 | 0,8891854 | NA       |
| RP11-1148L6.8  | 0,00 | 0,00 | 0,00 | 0,51 | 0,8891979 | 0,928611 |
| RP11-380G5.3   | 5,45 | 3,52 | 4,60 | 4,99 | 0,8892101 | 0,928611 |
| RP11-456K23.1  | 1,12 | 0,14 | 0,71 | 0,00 | 0,8892963 | 0,928657 |
| RF02189        | 0,00 | 0,00 | 0,00 | 0,00 | 0,8893076 | NA       |
| RP11-399O19.9  | 0,00 | 0,00 | 0,00 | 0,00 | 0,8893602 | NA       |
| RP3-331H24.6   | 0,05 | 0,07 | 0,06 | 0,04 | 0,889404  | 0,928695 |
| SOX30          | 0,00 | 0,00 | 0,00 | 0,00 | 0,889416  | 0,928695 |
| RP11-169K17.2  | 0,00 | 0,00 | 0,00 | 0,00 | 0,8894955 | NA       |
| LINC01596      | 0,00 | 0,00 | 0,00 | 0,00 | 0,8895701 | 0,928812 |
| SF3A3P1        | 0,00 | 0,00 | 0,00 | 0,00 | 0,8896804 | NA       |
| PROC           | 0,00 | 0,30 | 0,05 | 0,21 | 0,8897301 | 0,928936 |
| SNORA70B       | 0,00 | 0,00 | 0,00 | 0,00 | 0,889836  | NA       |
| CSF2           | 0,00 | 0,00 | 0,00 | 0,00 | 0,8899367 | NA       |
| MIR548AU       | 0,00 | 0,00 | 0,00 | 0,00 | 0,8899618 | NA       |
| RP11-321E2.3   | 0,00 | 0,00 | 0,00 | 0,00 | 0,8899705 | NA       |
| PIP5K1A        | 3,62 | 3,49 | 4,15 | 3,34 | 0,889974  | 0,929147 |
| CHRN3          | 0,00 | 0,00 | 0,00 | 0,00 | 0,8900502 | NA       |
| ZNF648         | 0,00 | 0,04 | 0,00 | 0,00 | 0,8901019 | NA       |
| ALYREF         | 2,62 | 3,72 | 3,82 | 2,85 | 0,8901053 | 0,92924  |
| LINC01471      | 0,00 | 0,04 | 0,00 | 0,00 | 0,8901587 | NA       |
| RP11-689P11.2  | 0,00 | 0,04 | 0,00 | 0,05 | 0,8901874 | NA       |
| HBQ1           | 0,00 | 0,00 | 0,00 | 0,00 | 0,8902723 | NA       |
| CXorf38        | 4,12 | 3,58 | 3,81 | 3,67 | 0,890293  | 0,929392 |
| CTA-392C11.2   | 0,00 | 0,00 | 0,00 | 0,00 | 0,8903099 | NA       |
| HIST1H2AB      | 0,00 | 0,00 | 0,00 | 0,00 | 0,8903128 | NA       |
| RP11-265G8.3   | 0,00 | 0,00 | 0,00 | 0,00 | 0,8903399 | NA       |
| RNU6-998P      | 0,00 | 0,00 | 0,00 | 0,00 | 0,8903629 | NA       |
| RP11-20D14.8   | 0,00 | 0,00 | 0,00 | 0,00 | 0,8903642 | NA       |
| CTD-2292P10.4  | 0,00 | 0,04 | 0,00 | 0,00 | 0,8903748 | NA       |
| TSSC1          | 4,40 | 3,65 | 4,66 | 2,40 | 0,8903804 | 0,92944  |
| AC079776.1     | 0,00 | 0,00 | 0,00 | 0,00 | 0,8903952 | NA       |
| INO80B-WBP1    | 0,00 | 0,00 | 0,00 | 0,00 | 0,8904128 | NA       |
| RBFA           | 3,04 | 3,17 | 3,64 | 3,02 | 0,8904396 | 0,929458 |
| FGG            | 0,00 | 0,00 | 0,00 | 0,00 | 0,8905245 | NA       |
| CTD-2192D1.2   | 0,00 | 0,00 | 0,00 | 0,00 | 0,8905822 | NA       |
| AC009474.2     | 0,00 | 0,00 | 0,00 | 0,00 | 0,8906401 | NA       |
| TM9SF4         | 3,84 | 3,19 | 3,50 | 2,08 | 0,8906409 | 0,929624 |
| RP3-465N24.8   | 0,00 | 0,00 | 0,00 | 0,00 | 0,8906746 | NA       |

|                |      |      |      |      |           |          |
|----------------|------|------|------|------|-----------|----------|
| GOLGA6L1       | 0,00 | 0,00 | 0,00 | 0,00 | 0,8906765 | NA       |
| RN7SL146P      | 0,00 | 0,00 | 0,00 | 0,00 | 0,8907335 | 0,929625 |
| TMEM115        | 2,18 | 2,98 | 1,92 | 2,52 | 0,8907369 | 0,929625 |
| RP11-212D3.2   | 0,00 | 0,00 | 0,00 | 0,00 | 0,8907468 | NA       |
| CTA-292E10.8   | 0,00 | 0,00 | 0,00 | 0,00 | 0,8907655 | NA       |
| KIF2A          | 3,64 | 3,62 | 3,69 | 2,35 | 0,8907949 | 0,929625 |
| RP11-95M15.1   | 0,00 | 0,19 | 0,34 | 0,31 | 0,890809  | 0,929625 |
| ATPAF2         | 6,29 | 6,03 | 5,89 | 5,72 | 0,8909134 | 0,929675 |
| CTD-2130013.2  | 0,00 | 0,00 | 0,00 | 0,00 | 0,8909619 | NA       |
| TEKT4P2        | 0,92 | 1,61 | 0,64 | 0,09 | 0,8909888 | 0,929675 |
| CCDC127        | 0,66 | 0,51 | 0,24 | 0,81 | 0,8910089 | 0,929675 |
| TNFSF15        | 0,46 | 0,48 | 0,25 | 0,26 | 0,8910241 | 0,929675 |
| SNTA1          | 0,00 | 0,00 | 0,00 | 0,00 | 0,8911172 | 0,929717 |
| RP11-351M8.2   | 0,00 | 0,00 | 0,00 | 0,00 | 0,8911233 | NA       |
| RP11-702A23.1  | 0,00 | 0,00 | 0,00 | 0,00 | 0,8911326 | NA       |
| CNTRL          | 4,98 | 5,11 | 4,77 | 4,51 | 0,8911475 | 0,929717 |
| IGKJ1          | 0,00 | 4,28 | 0,00 | 0,00 | 0,891163  | NA       |
| AC104058.1     | 0,00 | 0,00 | 0,00 | 0,00 | 0,8911672 | NA       |
| RP11-178L8.7   | 0,00 | 0,00 | 0,00 | 0,00 | 0,8911927 | NA       |
| RP11-165M1.2   | 0,00 | 0,00 | 0,00 | 0,00 | 0,8911997 | NA       |
| CTD-2620I22.3  | 0,08 | 0,07 | 0,09 | 0,09 | 0,8912053 | 0,929733 |
| CTC-305D20.1   | 0,00 | 0,00 | 0,00 | 0,00 | 0,8913445 | NA       |
| RP11-417B4.3   | 0,00 | 0,00 | 0,00 | 0,00 | 0,8914195 | NA       |
| RP11-711D18.2  | 0,00 | 0,00 | 0,00 | 0,00 | 0,8914367 | NA       |
| CLIP1          | 4,42 | 3,93 | 4,25 | 3,58 | 0,8914744 | 0,92997  |
| NCK1           | 5,03 | 5,49 | 4,50 | 4,64 | 0,8915371 | 0,929992 |
| RP11-886P16.10 | 0,00 | 0,00 | 0,00 | 0,00 | 0,8915655 | NA       |
| CTD-2555O16.2  | 0,00 | 0,00 | 0,00 | 0,00 | 0,8915758 | NA       |
| RP11-191A15.2  | 0,00 | 0,00 | 0,00 | 0,00 | 0,891623  | NA       |
| RP11-73G16.2   | 0,00 | 0,44 | 0,00 | 0,00 | 0,891625  | NA       |
| SOGA3          | 0,00 | 0,00 | 0,00 | 0,00 | 0,8916812 | NA       |
| RP11-210L7.3   | 0,00 | 0,00 | 0,00 | 0,00 | 0,8917068 | NA       |
| MIRS561        | 0,00 | 0,00 | 0,00 | 0,00 | 0,8917271 | NA       |
| RP11-548K12.1  | 0,00 | 0,00 | 0,00 | 0,72 | 0,8917444 | NA       |
| TRGV5P         | 0,00 | 0,00 | 0,00 | 0,00 | 0,8917989 | NA       |
| RP11-63C8.1    | 0,00 | 0,00 | 0,00 | 0,00 | 0,8918563 | NA       |
| RP3-466P17.2   | 0,00 | 0,00 | 0,00 | 0,00 | 0,8918627 | NA       |
| MMP15          | 0,00 | 0,00 | 0,00 | 0,00 | 0,8918721 | NA       |
| UGT3A1         | 0,00 | 0,08 | 0,00 | 0,00 | 0,8919059 | NA       |
| RP11-143G3.1   | 0,00 | 0,00 | 0,00 | 0,00 | 0,8919512 | NA       |
| RN7SL89P       | 0,00 | 0,00 | 0,00 | 0,00 | 0,891961  | NA       |
| IRX5           | 0,00 | 0,00 | 0,00 | 0,00 | 0,8919628 | NA       |
| AC013463.2     | 0,12 | 0,38 | 0,08 | 0,39 | 0,892007  | 0,930432 |
| CTB-35F21.1    | 0,00 | 0,00 | 0,00 | 0,00 | 0,8920189 | NA       |
| CTD-2194L12.2  | 0,00 | 0,00 | 0,09 | 0,35 | 0,8920373 | NA       |
| RNASEH2B       | 6,14 | 5,67 | 5,88 | 5,65 | 0,8920422 | 0,930432 |
| IRX2           | 0,00 | 0,00 | 0,00 | 0,00 | 0,892066  | NA       |
| CTD-3023L14.1  | 0,00 | 0,00 | 0,00 | 0,00 | 0,8920733 | NA       |
| IFITM10        | 0,00 | 0,26 | 0,00 | 0,00 | 0,8921436 | 0,930494 |
| GPR26          | 0,00 | 0,00 | 0,00 | 0,00 | 0,8921478 | NA       |
| RP11-475I24.3  | 0,00 | 0,00 | 0,00 | 0,00 | 0,8922436 | NA       |
| RNY4P6         | 0,00 | 0,00 | 0,00 | 0,00 | 0,8922842 | NA       |
| AKIRIN2        | 6,24 | 5,98 | 6,36 | 6,15 | 0,8923038 | 0,930617 |
| YBX2           | 0,00 | 0,00 | 0,00 | 0,00 | 0,8923487 | NA       |
| TAF7L          | 0,00 | 0,00 | 0,00 | 0,00 | 0,8924325 | NA       |

|                |      |      |      |      |           |          |
|----------------|------|------|------|------|-----------|----------|
| DLG4           | 0,00 | 0,15 | 0,14 | 0,23 | 0,8924427 | 0,930718 |
| AC006116.21    | 0,00 | 0,64 | 0,00 | 0,00 | 0,8924635 | NA       |
| RP11-177G23.2  | 0,37 | 0,00 | 0,20 | 0,82 | 0,8924859 | 0,93072  |
| RP11-435F17.1  | 0,35 | 0,00 | 0,38 | 0,00 | 0,8925158 | NA       |
| CSF1           | 0,00 | 0,00 | 0,00 | 0,00 | 0,8925495 | NA       |
| RP11-361M10.3  | 0,00 | 0,00 | 0,00 | 0,00 | 0,8925499 | NA       |
| AC106874.1     | 0,00 | 0,00 | 0,00 | 0,00 | 0,8925627 | NA       |
| ADAMTS12       | 0,00 | 0,00 | 0,00 | 0,00 | 0,8925911 | NA       |
| ZNF226         | 4,50 | 3,56 | 4,22 | 3,85 | 0,8926167 | 0,930759 |
| CTD-3193O13.1  | 0,00 | 0,00 | 0,00 | 0,00 | 0,8926305 | NA       |
| HSPE1          | 5,89 | 5,97 | 5,91 | 5,75 | 0,8926465 | 0,930759 |
| SOD1           | 7,40 | 7,26 | 7,25 | 7,07 | 0,8926487 | 0,930759 |
| SNORD50B       | 0,00 | 0,00 | 0,00 | 2,41 | 0,8927141 | NA       |
| RP11-1026G19.1 | 0,00 | 0,00 | 0,00 | 0,00 | 0,8928035 | NA       |
| SMTNL1         | 0,00 | 0,00 | 0,00 | 0,00 | 0,8928038 | NA       |
| AL133243.3     | 0,00 | 0,00 | 0,00 | 0,00 | 0,8928202 | NA       |
| RP11-296O14.2  | 0,00 | 0,00 | 0,00 | 0,00 | 0,8928323 | NA       |
| AC012360.4     | 0,00 | 0,00 | 0,00 | 0,00 | 0,8929136 | NA       |
| RNU6-540P      | 0,00 | 0,00 | 0,00 | 0,00 | 0,8929158 | NA       |
| AL022341.3     | 0,00 | 0,00 | 0,00 | 0,00 | 0,8929626 | NA       |
| RP11-1127D7.1  | 0,00 | 0,00 | 0,00 | 0,00 | 0,8929953 | NA       |
| LACE1          | 1,50 | 0,99 | 1,43 | 1,04 | 0,8930051 | 0,931086 |
| RP11-566K11.4  | 0,00 | 0,00 | 0,00 | 0,00 | 0,8930429 | NA       |
| PLEKHA8        | 1,68 | 0,17 | 0,92 | 0,54 | 0,8931777 | 0,931214 |
| PUM3           | 5,13 | 5,28 | 4,82 | 4,81 | 0,8932109 | 0,931214 |
| SNORA36A       | 0,00 | 0,00 | 0,00 | 1,13 | 0,8933659 | NA       |
| ADAMTSL2       | 0,00 | 0,00 | 0,00 | 0,03 | 0,893555  | NA       |
| RP1-40E16.11   | 0,00 | 0,00 | 0,00 | 0,00 | 0,8936158 | NA       |
| RP11-695J4.2   | 0,00 | 0,00 | 0,00 | 0,00 | 0,8937157 | NA       |
| DRGX           | 0,00 | 0,00 | 0,00 | 0,00 | 0,8937158 | NA       |
| IMPG1          | 0,00 | 0,00 | 0,00 | 0,00 | 0,8937559 | NA       |
| RP11-70C1.1    | 0,45 | 0,21 | 0,59 | 1,16 | 0,8938393 | 0,931825 |
| RP11-299H22.7  | 0,00 | 0,35 | 0,00 | 0,00 | 0,8938605 | NA       |
| RNU6-762P      | 0,00 | 0,00 | 0,00 | 0,00 | 0,8938858 | NA       |
| AC007285.6     | 0,00 | 0,00 | 0,00 | 0,00 | 0,8938964 | NA       |
| RNU7-56P       | 0,00 | 0,00 | 0,00 | 0,00 | 0,8939527 | NA       |
| CTD-2022B6.1   | 0,00 | 0,00 | 0,00 | 0,09 | 0,8939969 | 0,93191  |
| SPHK2          | 1,54 | 2,21 | 1,20 | 1,00 | 0,8940043 | 0,93191  |
| RP11-367C11.2  | 0,00 | 0,00 | 0,00 | 0,00 | 0,8940698 | NA       |
| RP11-368M16.9  | 0,00 | 0,00 | 0,00 | 0,00 | 0,8940852 | NA       |
| ARMC4          | 0,00 | 0,00 | 0,00 | 0,00 | 0,8940876 | 0,931953 |
| CTD-2023N9.2   | 0,00 | 0,00 | 0,00 | 0,00 | 0,8941059 | NA       |
| RP11-583F2.3   | 0,00 | 0,00 | 0,00 | 0,00 | 0,8941613 | NA       |
| SDHAP2         | 0,00 | 0,00 | 0,00 | 0,00 | 0,8942066 | NA       |
| CCDC184        | 0,00 | 0,00 | 0,00 | 0,00 | 0,8942091 | NA       |
| RP11-61K9.3    | 0,11 | 1,53 | 0,50 | 0,25 | 0,8942355 | 0,932063 |
| RP11-515O17.3  | 0,00 | 0,00 | 0,00 | 0,00 | 0,8942766 | NA       |
| NAA15          | 4,37 | 3,40 | 4,02 | 3,73 | 0,8942876 | 0,932074 |
| AC007359.6     | 0,00 | 0,00 | 0,00 | 0,00 | 0,8943093 | NA       |
| AC008175.1     | 0,00 | 0,00 | 0,00 | 0,00 | 0,8943093 | NA       |
| RP11-106J23.1  | 0,00 | 0,00 | 0,00 | 0,00 | 0,8943207 | NA       |
| RP11-124B13.1  | 0,00 | 0,00 | 0,00 | 0,00 | 0,894343  | NA       |
| ERAP1          | 3,70 | 3,54 | 3,87 | 4,04 | 0,8943866 | 0,932133 |
| CTD-3105H18.16 | 0,00 | 0,00 | 0,00 | 0,00 | 0,8944193 | NA       |
| RP11-582E3.4   | 0,00 | 0,00 | 0,00 | 0,00 | 0,8944715 | NA       |

|               |      |      |      |      |           |          |
|---------------|------|------|------|------|-----------|----------|
| RP11-541M12.5 | 0,00 | 0,00 | 0,00 | 0,00 | 0,894474  | NA       |
| CEACAM16      | 0,00 | 0,00 | 0,00 | 0,00 | 0,8944947 | NA       |
| PLB1          | 4,55 | 4,67 | 4,54 | 4,24 | 0,8945475 | 0,932199 |
| HNRNPA1P4     | 0,00 | 0,00 | 0,00 | 0,00 | 0,8945533 | NA       |
| TTY15         | 0,50 | 3,15 | 0,45 | 1,28 | 0,8945553 | 0,932199 |
| RP5-838N20.6  | 0,00 | 0,00 | 0,00 | 0,00 | 0,894571  | NA       |
| RP11-795H16.3 | 0,00 | 0,00 | 0,00 | 0,00 | 0,8945875 | NA       |
| RPS3AP26      | 1,58 | 1,40 | 1,60 | 1,19 | 0,8945928 | 0,932199 |
| RP11-492I2.1  | 0,00 | 0,68 | 0,00 | 0,00 | 0,8945938 | NA       |
| ABHD5         | 4,30 | 3,50 | 3,98 | 4,72 | 0,8946172 | 0,932199 |
| INE1          | 0,45 | 0,84 | 0,62 | 0,73 | 0,8946853 | 0,932226 |
| HTATIP2       | 4,94 | 2,52 | 4,89 | 1,72 | 0,8948662 | 0,932364 |
| RFO2114       | 0,00 | 0,00 | 0,00 | 0,00 | 0,8948677 | NA       |
| FAM92A1       | 1,18 | 2,19 | 0,94 | 1,14 | 0,894918  | 0,932364 |
| PGM2L1        | 0,30 | 0,32 | 0,39 | 0,35 | 0,8949435 | 0,932364 |
| PPIAP20       | 0,00 | 0,00 | 0,00 | 0,00 | 0,8950941 | NA       |
| AC024168.1    | 0,00 | 0,00 | 0,00 | 0,00 | 0,8951061 | NA       |
| MIR425        | 0,00 | 0,00 | 0,00 | 0,00 | 0,8951256 | NA       |
| RP11-529A4.14 | 0,00 | 0,00 | 0,00 | 0,00 | 0,8951287 | NA       |
| RP5-1175C6.1  | 0,08 | 0,09 | 0,04 | 0,05 | 0,895319  | 0,932711 |
| RP11-492M23.2 | 0,00 | 0,00 | 0,00 | 0,41 | 0,8953824 | NA       |
| RN7SL262P     | 0,00 | 0,00 | 0,00 | 0,00 | 0,8954598 | NA       |
| C2orf19       | 0,00 | 0,38 | 0,06 | 0,04 | 0,8954787 | 0,932834 |
| RNU6-14P      | 0,00 | 0,00 | 0,00 | 0,00 | 0,8954923 | NA       |
| RP11-467J12.4 | 1,32 | 1,32 | 1,61 | 2,31 | 0,895618  | 0,932935 |
| RP11-844G16.1 | 0,00 | 0,00 | 0,00 | 0,00 | 0,8956581 | NA       |
| NR1H2         | 5,38 | 5,16 | 5,45 | 5,28 | 0,8956803 | 0,93295  |
| RP11-632K21.7 | 0,00 | 0,00 | 0,00 | 0,00 | 0,8957173 | NA       |
| RP11-335G20.7 | 0,00 | 0,00 | 0,00 | 0,00 | 0,8957331 | NA       |
| MEGF11        | 0,00 | 0,00 | 0,00 | 0,00 | 0,8957536 | 0,93295  |
| AP000266.5    | 0,00 | 0,00 | 0,00 | 0,00 | 0,8957553 | NA       |
| RP11-379K17.9 | 0,00 | 0,00 | 0,00 | 0,00 | 0,8957791 | NA       |
| PHYKPL        | 5,93 | 5,90 | 5,95 | 5,55 | 0,8957912 | 0,93295  |
| SRRM1         | 6,40 | 5,88 | 6,23 | 5,99 | 0,8957996 | 0,93295  |
| AL133168.2    | 0,00 | 0,00 | 0,00 | 0,00 | 0,8958263 | NA       |
| RP11-312P21.2 | 0,00 | 0,00 | 0,00 | 0,00 | 0,8958541 | NA       |
| RP11-203F10.6 | 0,56 | 0,44 | 0,55 | 0,46 | 0,895908  | NA       |
| AC012368.1    | 0,00 | 0,00 | 0,00 | 0,00 | 0,8959962 | NA       |
| RP11-219E7.3  | 0,00 | 0,00 | 0,00 | 0,00 | 0,8960165 | NA       |
| RP11-150O12.1 | 0,00 | 0,00 | 0,00 | 0,00 | 0,8962018 | NA       |
| RP11-184I16.3 | 0,00 | 0,00 | 0,00 | 0,00 | 0,8962753 | NA       |
| RBM10         | 3,65 | 3,67 | 3,45 | 3,31 | 0,8963348 | 0,933463 |
| QRICH1        | 4,26 | 3,71 | 3,90 | 3,25 | 0,8964045 | 0,933492 |
| GOLGA8T       | 0,00 | 0,10 | 0,00 | 0,00 | 0,896473  | NA       |
| RP11-398A8.4  | 0,00 | 0,00 | 0,00 | 0,00 | 0,8965917 | NA       |
| RP11-182I1.5  | 0,00 | 0,00 | 0,00 | 0,00 | 0,8965929 | NA       |
| RP11-147K21.1 | 0,00 | 0,00 | 0,00 | 0,00 | 0,8967856 | NA       |
| PRICKLE1      | 0,67 | 0,55 | 0,41 | 1,06 | 0,89682   | 0,933846 |
| RP11-756A22.7 | 3,76 | 3,89 | 3,26 | 3,07 | 0,8968406 | 0,933846 |
| RP11-182I10.1 | 0,00 | 0,00 | 0,00 | 0,00 | 0,8968753 | NA       |
| DAP3          | 6,54 | 5,86 | 6,21 | 6,32 | 0,8968808 | 0,933846 |
| AC122129.3    | 0,00 | 0,00 | 0,00 | 0,00 | 0,8968862 | NA       |
| RP11-807G9.2  | 1,08 | 1,01 | 0,67 | 0,54 | 0,8969583 | 0,933846 |
| EYA4          | 0,00 | 0,00 | 0,00 | 0,00 | 0,8969621 | NA       |
| RP11-31F15.2  | 0,66 | 0,61 | 0,86 | 0,61 | 0,8969703 | 0,933846 |

|                |      |      |      |      |           |          |
|----------------|------|------|------|------|-----------|----------|
| RGS17          | 1,27 | 1,05 | 1,21 | 0,40 | 0,8970105 | 0,933846 |
| PGAP3          | 0,00 | 0,36 | 0,48 | 0,95 | 0,8970675 | 0,933846 |
| CTD-2527I21.14 | 0,90 | 1,29 | 1,22 | 1,68 | 0,89708   | 0,933846 |
| CTA-397H3.1    | 0,00 | 0,00 | 0,00 | 0,00 | 0,897141  | NA       |
| RP11-168G16.1  | 0,69 | 0,60 | 0,12 | 0,52 | 0,8971549 | 0,93388  |
| AHCY           | 4,62 | 3,25 | 4,47 | 4,52 | 0,8972142 | 0,933898 |
| HEYL           | 0,00 | 0,00 | 0,00 | 0,00 | 0,8972343 | NA       |
| RP11-283G6.4   | 0,00 | 0,00 | 0,00 | 0,00 | 0,8973211 | NA       |
| KRTDAP         | 0,00 | 0,00 | 0,00 | 0,00 | 0,897339  | NA       |
| KIN            | 3,71 | 2,48 | 3,07 | 3,27 | 0,8974162 | 0,934041 |
| CRAMP1         | 0,41 | 0,95 | 0,52 | 1,06 | 0,8974355 | 0,934041 |
| SYPL2          | 0,00 | 0,00 | 0,00 | 0,00 | 0,8975159 | NA       |
| RPS5L          | 0,00 | 0,00 | 0,00 | 0,00 | 0,8975789 | NA       |
| RP11-799B12.2  | 0,00 | 0,00 | 0,00 | 0,00 | 0,8975885 | NA       |
| RP11-167N24.2  | 0,00 | 0,00 | 0,00 | 0,00 | 0,8977514 | NA       |
| RP11-26L20.3   | 0,00 | 0,00 | 0,00 | 0,00 | 0,8978059 | NA       |
| RP1-93I3.1     | 1,80 | 0,90 | 2,06 | 0,93 | 0,897923  | 0,934504 |
| AC062020.2     | 0,00 | 0,00 | 0,00 | 0,00 | 0,8979733 | 0,934513 |
| RP11-404F10.2  | 2,10 | 2,01 | 1,86 | 1,62 | 0,8980818 | 0,934582 |
| RP11-410E4.1   | 0,00 | 0,00 | 0,00 | 0,00 | 0,8981378 | NA       |
| ASS1           | 0,00 | 0,36 | 0,00 | 0,00 | 0,8981443 | 0,934603 |
| HSCB           | 4,59 | 2,76 | 4,25 | 4,32 | 0,8981965 | 0,934605 |
| TTC9B          | 0,00 | 0,00 | 0,00 | 0,00 | 0,8982298 | 0,934605 |
| RN7SL771P      | 0,00 | 0,00 | 0,00 | 0,00 | 0,8982335 | NA       |
| CTD-2151L9.2   | 0,00 | 0,00 | 0,00 | 0,00 | 0,8982423 | NA       |
| RP11-290F24.3  | 0,00 | 0,21 | 0,00 | 0,00 | 0,898244  | NA       |
| ACSS2          | 4,69 | 4,41 | 4,26 | 4,00 | 0,898274  | 0,934607 |
| TCL1B          | 0,00 | 0,00 | 0,00 | 0,00 | 0,898292  | NA       |
| RP11-96O20.4   | 0,00 | 0,00 | 0,00 | 0,00 | 0,8983429 | NA       |
| MIR4256        | 0,00 | 0,00 | 0,00 | 0,00 | 0,8983473 | NA       |
| ZNF71          | 0,51 | 0,94 | 0,48 | 0,34 | 0,8983474 | 0,93464  |
| RPL17P20       | 0,00 | 0,00 | 0,00 | 0,00 | 0,8983538 | NA       |
| USP17L7        | 0,00 | 0,00 | 0,00 | 0,00 | 0,8984519 | NA       |
| RP1-101K10.6   | 2,78 | 2,21 | 1,36 | 1,01 | 0,8985065 | 0,934761 |
| RNA5SP515      | 0,00 | 0,00 | 0,00 | 0,00 | 0,8985329 | NA       |
| RP11-845C23.2  | 1,19 | 1,23 | 1,09 | 1,21 | 0,8985671 | 0,934781 |
| RN7SL649P      | 0,00 | 0,00 | 0,00 | 0,00 | 0,8986952 | NA       |
| C10orf55       | 0,93 | 0,72 | 0,79 | 0,30 | 0,8986983 | 0,934873 |
| RP11-195B21.3  | 0,00 | 0,00 | 0,00 | 0,00 | 0,8987813 | NA       |
| RP11-1080G15.2 | 0,00 | 0,00 | 0,00 | 0,00 | 0,8988903 | NA       |
| NSD1           | 4,73 | 4,12 | 4,64 | 4,44 | 0,8990087 | 0,935125 |
| ASTE1          | 3,86 | 3,32 | 3,47 | 3,35 | 0,8990241 | 0,935125 |
| RP1-163M9.7    | 0,00 | 0,55 | 0,00 | 0,00 | 0,8990689 | NA       |
| RBAK           | 1,64 | 0,64 | 2,06 | 1,56 | 0,8990949 | 0,935155 |
| AL133245.1     | 0,00 | 0,00 | 0,00 | 0,00 | 0,8992113 | NA       |
| CTC-558O19.1   | 0,00 | 0,00 | 0,00 | 0,00 | 0,8992271 | NA       |
| RP11-12A16.2   | 0,00 | 0,00 | 0,00 | 0,00 | 0,8992722 | NA       |
| SPTLC2         | 6,15 | 6,43 | 5,75 | 5,83 | 0,8993241 | 0,93533  |
| OR7E100P       | 0,00 | 0,00 | 0,00 | 0,00 | 0,8993367 | NA       |
| FNDC3A         | 3,54 | 2,71 | 3,14 | 2,47 | 0,8993479 | 0,93533  |
| CYP4F3         | 0,65 | 0,67 | 0,42 | 0,56 | 0,899412  | 0,935353 |
| RP11-374A4.1   | 0,00 | 0,00 | 0,00 | 0,00 | 0,8995412 | NA       |
| TRAV13-2       | 0,00 | 0,00 | 0,00 | 0,00 | 0,8996198 | NA       |
| NUCKS1         | 3,19 | 3,33 | 3,33 | 2,77 | 0,8996259 | 0,935532 |
| RP11-493E12.3  | 0,00 | 0,25 | 0,00 | 0,00 | 0,8996982 | NA       |

|                |      |      |      |      |           |          |
|----------------|------|------|------|------|-----------|----------|
| RNU6-1019P     | 0,00 | 0,00 | 0,00 | 0,00 | 0,8998023 | NA       |
| SUGP1          | 2,82 | 2,40 | 3,20 | 2,28 | 0,8998347 | 0,935705 |
| RP11-486O13.4  | 0,00 | 0,00 | 0,00 | 0,00 | 0,8999546 | NA       |
| RP1-65P5.3     | 0,00 | 0,00 | 0,00 | 0,00 | 0,9000128 | NA       |
| RP11-855A2.3   | 0,60 | 0,75 | 0,72 | 0,50 | 0,900038  | 0,935873 |
| RP11-727A23.2  | 0,00 | 0,00 | 0,00 | 0,00 | 0,9000445 | NA       |
| RP13-122B23.12 | 0,00 | 0,00 | 0,00 | 0,00 | 0,9000502 | NA       |
| VTRNA2-1       | 0,00 | 0,00 | 0,00 | 0,00 | 0,9000923 | NA       |
| IGHV1-3        | 0,00 | 0,00 | 0,00 | 0,00 | 0,9001169 | NA       |
| TBP            | 3,98 | 0,35 | 3,81 | 3,94 | 0,9001748 | 0,935971 |
| EBP            | 7,11 | 6,56 | 6,86 | 6,66 | 0,9003178 | 0,936035 |
| RP11-100N21.1  | 0,50 | 0,57 | 0,53 | 0,55 | 0,9003208 | 0,936035 |
| RN7SL203P      | 0,00 | 0,00 | 0,00 | 0,00 | 0,9003288 | NA       |
| TOR4A          | 0,61 | 0,51 | 0,81 | 1,09 | 0,9003937 | 0,93604  |
| CTD-2201118.1  | 0,00 | 0,00 | 0,03 | 0,00 | 0,9004243 | 0,93604  |
| GPC1           | 0,00 | 0,00 | 0,00 | 0,00 | 0,9004384 | NA       |
| RP11-788M5.4   | 0,53 | 1,27 | 0,60 | 1,47 | 0,9004512 | 0,93604  |
| RP11-930O11.1  | 0,00 | 0,00 | 0,00 | 0,00 | 0,9004752 | NA       |
| RP11-244E17.1  | 0,00 | 0,00 | 0,00 | 0,00 | 0,9005131 | NA       |
| RP11-681O4.1   | 0,00 | 0,42 | 0,00 | 0,00 | 0,9005755 | NA       |
| PRKAG3         | 0,00 | 0,00 | 0,00 | 0,00 | 0,9005922 | NA       |
| RP13-16H11.8   | 0,15 | 0,40 | 0,35 | 0,41 | 0,9006273 | 0,936179 |
| AF015720.3     | 0,00 | 0,00 | 0,00 | 0,00 | 0,9006667 | NA       |
| RP11-99E15.2   | 0,00 | 0,00 | 0,00 | 0,00 | 0,9007129 | NA       |
| SPANXN4        | 0,00 | 0,00 | 0,00 | 0,00 | 0,9007776 | NA       |
| CTD-2215E18.1  | 0,00 | 0,00 | 0,00 | 0,00 | 0,9008305 | NA       |
| RP11-563K23.1  | 0,00 | 0,00 | 0,00 | 0,00 | 0,9008719 | NA       |
| ATXN3          | 5,62 | 5,24 | 5,49 | 4,82 | 0,9009735 | 0,936495 |
| RPL21P121      | 0,00 | 0,00 | 0,00 | 0,00 | 0,9009906 | NA       |
| MIR5000        | 0,00 | 0,00 | 0,00 | 0,00 | 0,9010321 | NA       |
| AC010744.1     | 0,00 | 0,00 | 0,00 | 0,00 | 0,9010968 | NA       |
| AC010504.2     | 0,00 | 0,00 | 0,00 | 0,12 | 0,9011226 | NA       |
| RN7SL78P       | 0,00 | 0,00 | 0,00 | 0,00 | 0,9011633 | NA       |
| POFUT1         | 1,13 | 0,92 | 1,34 | 1,07 | 0,9011797 | 0,936666 |
| GEN1           | 1,42 | 1,30 | 1,89 | 1,06 | 0,9013053 | 0,936752 |
| RNU6-253P      | 0,00 | 0,00 | 0,00 | 0,00 | 0,9013497 | NA       |
| CTC-429C10.4   | 0,65 | 1,23 | 0,00 | 0,35 | 0,9013522 | 0,936757 |
| RP11-587D21.1  | 0,00 | 0,00 | 0,00 | 0,00 | 0,9014157 | NA       |
| CTB-1048E9.7   | 0,00 | 0,21 | 0,00 | 0,00 | 0,9014404 | NA       |
| AP1AR          | 3,18 | 1,04 | 2,77 | 2,82 | 0,9014488 | 0,936814 |
| RP11-361I14.1  | 0,00 | 0,00 | 0,00 | 0,00 | 0,9015836 | NA       |
| RP11-44N12.2   | 0,15 | 0,00 | 0,00 | 0,00 | 0,9015852 | NA       |
| GPR52          | 0,00 | 0,00 | 0,00 | 0,00 | 0,901697  | NA       |
| RP11-398K22.14 | 0,00 | 0,00 | 0,00 | 0,00 | 0,9017514 | NA       |
| RP3-340N1.5    | 0,00 | 0,00 | 0,00 | 0,00 | 0,9017704 | NA       |
| MTF1           | 2,47 | 3,24 | 1,92 | 2,03 | 0,9017726 | 0,937076 |
| C21orf74       | 1,07 | 0,00 | 0,69 | 0,28 | 0,90179   | 0,937076 |
| RP11-467L13.4  | 0,00 | 0,00 | 0,00 | 0,00 | 0,9017969 | NA       |
| SEN3           | 0,34 | 0,85 | 0,49 | 1,54 | 0,9018276 | 0,937076 |
| RP1-81D8.3     | 0,00 | 0,00 | 0,00 | 0,00 | 0,9018479 | NA       |
| RN7SL724P      | 0,00 | 0,00 | 0,00 | 0,00 | 0,9018617 | NA       |
| RP11-113C12.1  | 0,00 | 0,00 | 0,00 | 0,00 | 0,9019488 | NA       |
| RP11-368M16.6  | 0,00 | 0,00 | 0,00 | 0,91 | 0,9019576 | NA       |
| CTD-2047H16.5  | 0,00 | 0,00 | 0,00 | 0,00 | 0,901972  | NA       |
| RP4-669P10.20  | 0,00 | 0,00 | 0,00 | 0,46 | 0,9020003 | 0,937113 |

|               |      |      |      |      |           |          |
|---------------|------|------|------|------|-----------|----------|
| ATAD5         | 1,27 | 2,24 | 0,98 | 1,06 | 0,9020256 | 0,937113 |
| TRIM28        | 6,16 | 6,21 | 6,16 | 5,97 | 0,9020917 | 0,937113 |
| RP11-179K3.2  | 0,10 | 0,11 | 0,11 | 0,11 | 0,9020929 | 0,937113 |
| RP11-196O2.1  | 0,00 | 0,08 | 0,00 | 0,00 | 0,9020968 | NA       |
| RP11-148E17.1 | 0,44 | 0,50 | 0,23 | 0,00 | 0,9021369 | 0,937113 |
| AC100793.2    | 0,54 | 0,08 | 0,32 | 0,99 | 0,9021447 | 0,937113 |
| PRAMEF18      | 0,00 | 0,00 | 0,00 | 0,00 | 0,9021685 | NA       |
| CEP104        | 3,39 | 3,79 | 3,22 | 2,63 | 0,9021821 | 0,937113 |
| GRIK4         | 0,00 | 0,00 | 0,00 | 0,00 | 0,9022001 | 0,937113 |
| RP11-456N14.2 | 0,00 | 0,00 | 0,00 | 0,00 | 0,9022333 | NA       |
| TRAJ3         | 0,00 | 0,00 | 0,00 | 0,00 | 0,9022545 | NA       |
| ZKSCAN8       | 1,48 | 1,84 | 1,10 | 1,24 | 0,9023194 | 0,937153 |
| RP11-617J18.1 | 0,43 | 0,19 | 0,41 | 0,19 | 0,9023238 | 0,937153 |
| NRL           | 0,00 | 0,00 | 0,00 | 0,00 | 0,902359  | NA       |
| RP11-587H10.1 | 0,00 | 0,00 | 0,00 | 0,00 | 0,9023785 | NA       |
| SNX19P3       | 0,00 | 0,00 | 0,00 | 0,00 | 0,9023861 | NA       |
| RNU6-548P     | 0,00 | 0,00 | 0,00 | 0,00 | 0,9024244 | NA       |
| CUL1          | 5,10 | 4,64 | 4,98 | 5,06 | 0,9024547 | 0,937246 |
| RP11-138H10.2 | 0,00 | 0,00 | 0,00 | 0,00 | 0,902575  | NA       |
| AC007040.6    | 0,00 | 0,00 | 0,00 | 0,00 | 0,9027479 | NA       |
| MRPL14        | 6,37 | 6,15 | 6,28 | 6,55 | 0,9028358 | 0,937598 |
| RP11-488L18.8 | 0,00 | 0,00 | 0,00 | 0,00 | 0,9028445 | NA       |
| AC005363.11   | 0,00 | 0,00 | 0,00 | 0,00 | 0,9028628 | NA       |
| RP11-5P18.1   | 0,00 | 0,00 | 0,00 | 0,00 | 0,9028963 | NA       |
| KB-1683C8.1   | 0,00 | 0,00 | 0,00 | 0,00 | 0,9029402 | NA       |
| FIGN          | 0,00 | 0,00 | 0,00 | 0,01 | 0,9029432 | 0,937665 |
| PABPC5        | 0,00 | 0,00 | 0,00 | 0,00 | 0,9030293 | NA       |
| RP11-332J15.3 | 0,00 | 0,37 | 0,00 | 0,33 | 0,9030575 | 0,93774  |
| C19orf81      | 0,00 | 0,00 | 0,00 | 0,00 | 0,9031564 | NA       |
| GLRX          | 7,47 | 7,09 | 7,49 | 6,90 | 0,9031599 | 0,937803 |
| RP11-930P14.1 | 0,35 | 0,14 | 0,48 | 0,12 | 0,9032723 | 0,937876 |
| RP11-286O1.1  | 0,00 | 0,00 | 0,00 | 0,00 | 0,9033041 | NA       |
| RP11-463O12.3 | 0,00 | 0,00 | 0,00 | 0,00 | 0,903307  | NA       |
| ISCA2         | 5,29 | 5,73 | 5,49 | 5,16 | 0,9033268 | 0,937888 |
| RP11-2E11.5   | 0,00 | 0,00 | 0,00 | 0,00 | 0,9033864 | NA       |
| TBC1D16       | 0,16 | 0,13 | 0,10 | 0,13 | 0,90342   | 0,937926 |
| CD80          | 0,00 | 0,00 | 0,00 | 0,00 | 0,9034471 | NA       |
| IFRD1         | 6,58 | 6,62 | 6,47 | 6,62 | 0,9034472 | 0,937926 |
| RP5-831K15.1  | 0,00 | 0,00 | 0,00 | 0,00 | 0,9034552 | NA       |
| RP11-20D14.3  | 0,00 | 0,00 | 0,00 | 0,00 | 0,903459  | NA       |
| RP11-74M11.2  | 0,00 | 0,00 | 0,00 | 0,00 | 0,9035549 | NA       |
| HLTF          | 3,05 | 1,08 | 2,52 | 2,76 | 0,9035656 | 0,938005 |
| SLCO4C1       | 0,51 | 0,66 | 0,90 | 0,86 | 0,9036743 | 0,938074 |
| RP13-152O15.5 | 0,00 | 0,00 | 0,00 | 0,00 | 0,9037707 | NA       |
| AC007899.3    | 0,00 | 0,00 | 0,00 | 0,12 | 0,9038026 | NA       |
| TCP11         | 0,00 | 0,00 | 0,00 | 0,00 | 0,9038154 | NA       |
| NUDT3         | 2,50 | 2,46 | 2,51 | 2,29 | 0,9038305 | 0,938192 |
| CRYBA4        | 0,00 | 0,00 | 0,00 | 0,00 | 0,903863  | NA       |
| GLP1R         | 0,00 | 0,00 | 0,00 | 0,00 | 0,9038834 | NA       |
| RP11-709D24.8 | 0,00 | 0,00 | 0,00 | 0,00 | 0,9038865 | NA       |
| REV3L         | 5,05 | 2,60 | 4,30 | 4,46 | 0,9039203 | 0,938242 |
| TECTA         | 0,00 | 0,00 | 0,00 | 0,00 | 0,9039401 | NA       |
| RN7SL320P     | 0,00 | 0,00 | 0,00 | 0,00 | 0,9040789 | NA       |
| RP11-94P11.4  | 0,00 | 0,00 | 0,00 | 0,00 | 0,904118  | NA       |
| AC074121.4    | 0,00 | 0,00 | 0,00 | 0,00 | 0,9041561 | NA       |

|                |       |       |       |       |           |          |
|----------------|-------|-------|-------|-------|-----------|----------|
| REXO4          | 1,92  | 1,74  | 1,69  | 1,12  | 0,9042368 | 0,938526 |
| RP1-56L9.3     | 0,00  | 0,00  | 0,00  | 0,00  | 0,9043506 | NA       |
| GLIS2          | 0,00  | 0,00  | 0,00  | 0,00  | 0,9043745 | NA       |
| DSCR9          | 0,00  | 0,00  | 0,00  | 0,00  | 0,9044178 | NA       |
| AC004019.10    | 0,00  | 0,00  | 0,00  | 0,00  | 0,9044442 | NA       |
| AC079789.1     | 0,00  | 0,00  | 0,00  | 0,00  | 0,9045156 | NA       |
| CXorf25        | 0,00  | 0,00  | 0,00  | 0,00  | 0,9045214 | NA       |
| RP5-931K24.3   | 2,99  | 3,35  | 3,22  | 3,00  | 0,9045509 | 0,938808 |
| RP11-265P11.2  | 0,00  | 0,00  | 0,00  | 0,00  | 0,9046108 | 0,938826 |
| AC004066.2     | 0,00  | 0,00  | 0,00  | 0,00  | 0,904622  | NA       |
| AC091729.9     | 0,00  | 0,00  | 0,00  | 0,00  | 0,904666  | 0,938826 |
| RP11-426L16.10 | 0,00  | 0,08  | 0,00  | 0,17  | 0,9046831 | NA       |
| RP11-403113.8  | 2,53  | 3,44  | 2,14  | 2,85  | 0,9046948 | 0,938826 |
| RP11-129H15.3  | 0,00  | 0,00  | 0,00  | 0,00  | 0,9046951 | NA       |
| ACSM4          | 0,00  | 0,00  | 0,00  | 0,00  | 0,9047083 | NA       |
| MUC22          | 0,00  | 0,00  | 0,00  | 0,00  | 0,904817  | NA       |
| CH507-39O4.1   | 0,00  | 0,00  | 0,00  | 0,00  | 0,9049098 | NA       |
| IFI27L1        | 2,31  | 1,51  | 1,83  | 0,19  | 0,9049143 | 0,93901  |
| RP11-330C7.3   | 0,00  | 0,00  | 0,77  | 0,00  | 0,9049866 | 0,939041 |
| RF01225        | 0,00  | 0,00  | 0,00  | 0,00  | 0,9050669 | NA       |
| RP4-717I23.2   | 0,00  | 0,00  | 0,00  | 0,00  | 0,905132  | NA       |
| COQ2           | 3,30  | 2,19  | 2,81  | 2,52  | 0,9052181 | 0,939238 |
| GBP7           | 0,00  | 0,00  | 0,00  | 0,00  | 0,9052235 | NA       |
| ETF1P1         | 0,00  | 0,00  | 0,00  | 0,00  | 0,9052662 | NA       |
| RP11-542M13.1  | 0,00  | 0,00  | 0,00  | 0,00  | 0,9054442 | NA       |
| MIR302C        | 0,00  | 0,00  | 0,00  | 0,00  | 0,9054486 | NA       |
| SLC44A5        | 0,14  | 0,24  | 0,06  | 0,12  | 0,9054524 | 0,939387 |
| CTD-2353F22.2  | 0,00  | 0,00  | 0,00  | 0,00  | 0,9054527 | NA       |
| DNPEP          | 5,39  | 2,03  | 5,78  | 5,87  | 0,9054852 | 0,939387 |
| AC018809.6     | 0,00  | 0,34  | 0,59  | 0,30  | 0,9054888 | 0,939387 |
| SYNM           | 0,00  | 0,00  | 0,00  | 0,00  | 0,9055123 | NA       |
| LA16c-380H5.6  | 0,86  | 1,51  | 1,29  | 1,99  | 0,9056072 | 0,939466 |
| PCOLCE2        | 0,00  | 0,24  | 0,00  | 0,00  | 0,9056753 | NA       |
| RAB11FIP4      | 2,70  | 1,99  | 2,10  | 0,99  | 0,905702  | 0,93952  |
| AC005498.3     | 0,00  | 0,00  | 0,00  | 0,00  | 0,9057524 | NA       |
| RN7SL753P      | 0,00  | 0,00  | 0,00  | 0,00  | 0,9058527 | NA       |
| PCGF2          | 0,00  | 0,00  | 0,00  | 0,00  | 0,9058817 | NA       |
| RP11-295I5.4   | 0,00  | 0,00  | 0,00  | 0,00  | 0,9059226 | NA       |
| OOEP           | 0,00  | 0,00  | 0,00  | 0,00  | 0,9059577 | NA       |
| CDKN2C         | 2,23  | 0,58  | 0,12  | 0,14  | 0,9060146 | 0,939801 |
| CYP11A1        | 0,00  | 0,00  | 0,00  | 0,00  | 0,9060275 | NA       |
| HTR3A          | 0,00  | 0,00  | 0,00  | 0,00  | 0,9061763 | NA       |
| ACOT6          | 0,00  | 0,00  | 0,00  | 0,00  | 0,9062388 | NA       |
| AC067945.2     | 0,00  | 0,00  | 0,00  | 0,25  | 0,9062779 | NA       |
| HIST1H2AK      | 0,00  | 0,00  | 0,00  | 0,00  | 0,9062889 | NA       |
| OR5M6P         | 0,00  | 0,00  | 0,00  | 0,00  | 0,9062942 | NA       |
| CTD-2034I4.1   | 0,00  | 0,00  | 0,00  | 0,00  | 0,906356  | NA       |
| SCARF2         | 0,00  | 0,16  | 0,04  | 0,00  | 0,9064064 | 0,940163 |
| RP11-135I2.4   | 0,00  | 0,00  | 0,00  | 0,00  | 0,9064101 | NA       |
| RP1-224A6.9    | 0,00  | 0,00  | 0,00  | 0,00  | 0,906437  | NA       |
| CTD-3116E22.6  | 0,00  | 0,00  | 0,00  | 0,00  | 0,9064555 | NA       |
| RP11-400K9.4   | 0,00  | 0,00  | 0,00  | 0,00  | 0,9065119 | NA       |
| RP11-170L3.4   | 0,00  | 0,00  | 0,00  | 0,00  | 0,9065175 | NA       |
| OAZ1           | 11,49 | 11,23 | 11,35 | 11,42 | 0,9065573 | 0,940276 |
| FTLP5          | 0,00  | 0,00  | 0,00  | 0,00  | 0,9066029 | NA       |



|                  |      |      |      |      |           |          |
|------------------|------|------|------|------|-----------|----------|
| RP11-407N17.4    | 0,00 | 0,39 | 0,00 | 0,00 | 0,9066052 | 0,940282 |
| SLC2A11          | 2,00 | 2,07 | 1,71 | 1,24 | 0,9066567 | 0,940291 |
| TMEM132C         | 0,00 | 0,00 | 0,00 | 0,00 | 0,9066648 | NA       |
| CTD-2291D10.4    | 0,00 | 0,00 | 0,00 | 0,00 | 0,9067342 | NA       |
| WRAP53           | 2,07 | 0,69 | 0,55 | 1,79 | 0,9067492 | 0,940343 |
| EML4             | 4,26 | 4,09 | 4,11 | 3,88 | 0,9067925 | 0,940344 |
| RP5-823G15.5     | 0,00 | 0,00 | 0,00 | 0,00 | 0,9068117 | NA       |
| AC007556.3       | 0,00 | 0,00 | 0,00 | 0,00 | 0,9068847 | NA       |
| CWH43            | 0,00 | 0,00 | 0,00 | 0,00 | 0,906965  | NA       |
| RNU6-1153P       | 0,00 | 0,00 | 0,00 | 0,00 | 0,9069865 | 0,940456 |
| MAGEA4           | 0,00 | 0,00 | 0,00 | 0,00 | 0,9069949 | NA       |
| RP5-1065J22.2    | 0,00 | 0,00 | 0,00 | 0,00 | 0,9070094 | NA       |
| RP11-795A2.3     | 0,00 | 0,00 | 0,00 | 0,00 | 0,9070161 | NA       |
| IRGM             | 0,14 | 0,29 | 0,18 | 0,20 | 0,9070188 | 0,940456 |
| RN7SL204P        | 3,09 | 3,47 | 3,27 | 2,59 | 0,9070332 | 0,940456 |
| RP11-790G19.3    | 0,00 | 0,00 | 0,00 | 0,00 | 0,9070595 | NA       |
| RN7SL559P        | 1,19 | 0,89 | 0,79 | 0,87 | 0,9070695 | 0,940456 |
| RNU6-387P        | 0,00 | 0,00 | 0,00 | 0,00 | 0,9071022 | NA       |
| XXyac-YX65C7_A.3 | 0,00 | 0,00 | 0,00 | 0,00 | 0,9071412 | NA       |
| IGLV2-18         | 0,00 | 0,65 | 0,00 | 0,00 | 0,9071653 | NA       |
| RP11-139H15.6    | 0,00 | 0,00 | 0,00 | 0,00 | 0,9072064 | NA       |
| CTC-564N23.5     | 0,00 | 0,32 | 0,00 | 0,00 | 0,9072454 | NA       |
| RP11-760D2.5     | 0,27 | 0,10 | 0,10 | 0,34 | 0,9073442 | 0,940697 |
| RP11-111F16.1    | 0,00 | 0,00 | 0,00 | 0,00 | 0,9073896 | NA       |
| RP11-55J15.2     | 0,00 | 0,00 | 0,00 | 0,00 | 0,9074251 | NA       |
| CTB-11I22.2      | 0,00 | 0,00 | 0,00 | 0,00 | 0,9074414 | NA       |
| RP1-45I4.2       | 0,00 | 0,00 | 0,00 | 0,00 | 0,9075328 | NA       |
| PCOLCE-AS1       | 0,00 | 0,00 | 0,00 | 0,00 | 0,9075958 | NA       |
| CTD-2528A14.1    | 0,00 | 0,00 | 0,00 | 0,00 | 0,9076385 | 0,940958 |
| LOX              | 0,00 | 0,00 | 0,00 | 0,00 | 0,9076417 | NA       |
| RNU6-235P        | 0,00 | 0,00 | 0,00 | 0,00 | 0,9076703 | NA       |
| RP1-67M12.2      | 0,00 | 0,00 | 0,00 | 0,00 | 0,907702  | NA       |
| RNF128           | 0,00 | 0,00 | 0,00 | 0,00 | 0,9077784 | NA       |
| AL133243.2       | 3,36 | 3,19 | 2,31 | 2,88 | 0,9077823 | 0,941064 |
| RP11-101O21.1    | 0,00 | 0,34 | 0,00 | 0,00 | 0,9078029 | NA       |
| RN7SL259P        | 0,00 | 0,00 | 0,00 | 0,00 | 0,9078241 | NA       |
| TGM1             | 0,00 | 0,23 | 0,00 | 0,00 | 0,9078638 | 0,941104 |
| HIST1H1A         | 0,00 | 0,00 | 0,00 | 0,00 | 0,9078674 | NA       |
| ERICH6B          | 0,00 | 0,00 | 0,00 | 0,00 | 0,9079551 | NA       |
| FCF1             | 2,13 | 0,89 | 1,84 | 2,01 | 0,9079819 | 0,941183 |
| RP1-313I6.1      | 0,00 | 0,00 | 0,00 | 0,00 | 0,9080136 | NA       |
| AC016736.2       | 0,00 | 0,00 | 0,05 | 0,04 | 0,908049  | 0,941208 |
| RP11-421N8.1     | 0,00 | 0,54 | 0,00 | 0,00 | 0,9080956 | NA       |
| RP11-168E14.1    | 0,00 | 0,00 | 0,00 | 0,00 | 0,9081094 | NA       |
| RP11-477B16.5    | 0,00 | 0,00 | 0,00 | 0,00 | 0,9081232 | NA       |
| RP11-64K12.9     | 0,00 | 0,00 | 0,00 | 0,28 | 0,9082708 | NA       |
| CTD-2616J11.11   | 0,00 | 0,00 | 0,00 | 0,00 | 0,9082908 | NA       |
| ATP1A1           | 5,78 | 5,74 | 5,90 | 5,51 | 0,9083151 | 0,94142  |
| RP11-347P5.1     | 3,84 | 2,79 | 3,97 | 3,73 | 0,9083381 | 0,94142  |
| RP11-429P3.2     | 0,00 | 0,04 | 0,00 | 0,00 | 0,9083387 | NA       |
| RP11-275N1.1     | 0,00 | 0,00 | 0,00 | 0,00 | 0,9083956 | NA       |
| IRF6             | 0,00 | 0,00 | 0,00 | 0,00 | 0,9084805 | NA       |
| RN7SL20P         | 0,00 | 0,83 | 0,00 | 0,00 | 0,9085191 | NA       |
| NEUROG3          | 0,00 | 0,00 | 0,00 | 0,00 | 0,9085976 | NA       |
| RP11-235E17.2    | 0,04 | 0,11 | 0,03 | 0,01 | 0,908718  | 0,941722 |

|               |      |      |      |      |           |          |
|---------------|------|------|------|------|-----------|----------|
| TRPV1         | 0,12 | 0,22 | 0,15 | 0,19 | 0,9087346 | 0,941722 |
| ZNF333        | 3,77 | 4,45 | 4,11 | 4,42 | 0,9088109 | 0,941722 |
| UBR2          | 3,66 | 2,64 | 3,25 | 2,54 | 0,9088446 | 0,941722 |
| PMPCA         | 4,63 | 4,23 | 4,16 | 3,88 | 0,9088872 | 0,941722 |
| RP5-965K10.3  | 0,00 | 0,00 | 0,00 | 0,00 | 0,9089023 | NA       |
| OXT           | 0,00 | 0,00 | 0,00 | 0,00 | 0,9089107 | NA       |
| WRB           | 3,62 | 2,03 | 2,38 | 2,48 | 0,9089143 | 0,941722 |
| ATMIN         | 3,54 | 2,15 | 2,40 | 2,11 | 0,9089255 | 0,941722 |
| RP11-62C7.2   | 0,00 | 0,00 | 0,00 | 0,00 | 0,908933  | NA       |
| STK19P        | 0,00 | 0,00 | 0,00 | 0,00 | 0,9089649 | NA       |
| CHRN2         | 0,00 | 0,00 | 0,00 | 0,00 | 0,9090121 | NA       |
| RP11-154H23.1 | 1,30 | 0,25 | 0,78 | 0,27 | 0,9092298 | 0,941993 |
| CTD-2545G14.2 | 0,00 | 0,00 | 0,00 | 0,00 | 0,9092923 | NA       |
| RP5-1185H19.2 | 0,00 | 0,00 | 0,00 | 0,00 | 0,9093155 | NA       |
| ANXA6         | 5,26 | 5,16 | 5,07 | 4,48 | 0,9094692 | 0,942173 |
| PCDH17        | 0,01 | 0,02 | 0,03 | 0,00 | 0,9095116 | NA       |
| MZF1          | 2,52 | 1,70 | 1,85 | 2,27 | 0,9095271 | 0,942173 |
| HS1BP3        | 1,93 | 0,66 | 2,33 | 1,53 | 0,9095305 | 0,942173 |
| RP11-186O14.4 | 0,00 | 0,00 | 0,00 | 0,00 | 0,9095587 | NA       |
| SPINT3        | 0,00 | 0,00 | 0,00 | 0,00 | 0,909594  | NA       |
| RP11-241I20.3 | 0,00 | 0,00 | 0,00 | 0,00 | 0,9096068 | NA       |
| RP11-53B5.1   | 0,00 | 0,00 | 0,00 | 0,00 | 0,909634  | NA       |
| TOMM40L       | 3,36 | 2,80 | 2,57 | 2,26 | 0,9096698 | 0,942273 |
| AC016751.3    | 0,00 | 0,00 | 0,00 | 0,00 | 0,9096803 | NA       |
| RAD51B        | 3,74 | 3,24 | 2,84 | 2,24 | 0,9097144 | 0,942275 |
| NABP1         | 5,23 | 4,79 | 5,14 | 3,80 | 0,9097626 | 0,942281 |
| CLGN          | 0,00 | 0,00 | 0,00 | 0,00 | 0,9097627 | NA       |
| RP11-297H3.3  | 0,00 | 0,00 | 0,00 | 0,00 | 0,9097675 | NA       |
| CDK10         | 4,43 | 4,81 | 4,50 | 4,44 | 0,9098397 | 0,942317 |
| AC012146.7    | 2,50 | 2,44 | 2,19 | 1,78 | 0,9098906 | 0,942326 |
| BDKRB2        | 0,00 | 0,00 | 0,00 | 0,00 | 0,909894  | NA       |
| ATP4B         | 0,00 | 0,00 | 0,00 | 0,00 | 0,9101438 | NA       |
| C9orf170      | 0,00 | 0,00 | 0,00 | 0,00 | 0,9102614 | NA       |
| RP1-90G24.5   | 0,00 | 0,00 | 0,00 | 0,00 | 0,9103593 | NA       |
| RP11-514P8.2  | 0,00 | 0,00 | 0,00 | 0,00 | 0,910418  | NA       |
| CTB-33G10.6   | 0,00 | 0,44 | 0,00 | 0,00 | 0,9104854 | NA       |
| RP11-321F6.1  | 0,00 | 0,00 | 0,00 | 0,00 | 0,9105773 | NA       |
| CTB-31O20.8   | 0,00 | 0,00 | 0,00 | 0,00 | 0,9105984 | NA       |
| TOPORS        | 3,62 | 3,29 | 3,53 | 3,24 | 0,9107913 | 0,943178 |
| AC114730.3    | 0,26 | 0,86 | 0,68 | 0,00 | 0,9108333 | 0,943178 |
| NKIRAS2       | 4,93 | 3,54 | 4,73 | 4,72 | 0,9108403 | 0,943178 |
| CEND1         | 0,00 | 0,00 | 0,00 | 0,00 | 0,9108464 | NA       |
| SUMO2P        | 0,00 | 0,00 | 0,00 | 0,00 | 0,9108851 | NA       |
| C7orf73       | 5,58 | 5,18 | 5,34 | 4,82 | 0,9109375 | 0,943234 |
| RP11-718N2.1  | 0,00 | 0,00 | 0,00 | 0,00 | 0,9109625 | NA       |
| DGKK          | 0,00 | 0,00 | 0,00 | 0,00 | 0,9110044 | NA       |
| AC002398.11   | 0,00 | 0,00 | 0,00 | 0,00 | 0,9111281 | NA       |
| PAQR6         | 0,00 | 0,35 | 0,00 | 0,00 | 0,9111393 | NA       |
| RP11-439A17.5 | 0,00 | 0,00 | 0,00 | 0,00 | 0,9111853 | NA       |
| MGAT3         | 0,00 | 0,00 | 0,00 | 0,00 | 0,9112328 | NA       |
| SMARCC1       | 4,03 | 3,88 | 4,01 | 4,32 | 0,9113605 | 0,943629 |
| GABRR2        | 0,00 | 0,00 | 0,00 | 0,00 | 0,9113781 | NA       |
| RP11-905K4.1  | 0,00 | 0,00 | 0,00 | 0,00 | 0,9114277 | NA       |
| MIR3173       | 0,00 | 0,00 | 0,00 | 0,00 | 0,9114477 | NA       |
| RP5-1166F10.1 | 0,00 | 0,00 | 0,00 | 0,00 | 0,911504  | NA       |

|                |      |      |      |      |           |          |
|----------------|------|------|------|------|-----------|----------|
| RP1-55C23.7    | 0,00 | 0,00 | 0,00 | 0,00 | 0,9115191 | NA       |
| AL109761.3     | 0,00 | 0,00 | 0,00 | 0,00 | 0,9115373 | NA       |
| LINC01230      | 0,00 | 0,00 | 0,00 | 0,00 | 0,9116471 | NA       |
| CPA1           | 0,00 | 0,00 | 0,00 | 0,00 | 0,9117375 | NA       |
| RP11-1060J15.3 | 0,00 | 0,00 | 0,00 | 0,00 | 0,9119876 | NA       |
| TNN            | 0,00 | 0,00 | 0,00 | 0,00 | 0,9120221 | NA       |
| RP11-73K9.2    | 0,00 | 0,00 | 0,00 | 0,00 | 0,9121928 | NA       |
| CDC25A         | 0,00 | 0,00 | 0,00 | 0,00 | 0,9121929 | 0,944446 |
| RP11-875H7.4   | 0,00 | 0,00 | 0,00 | 0,00 | 0,9121984 | NA       |
| CTD-2631K10.1  | 0,00 | 0,00 | 0,00 | 0,00 | 0,9122392 | NA       |
| CTD-2021A8.2   | 0,00 | 0,00 | 0,00 | 0,00 | 0,9122409 | NA       |
| PALM2          | 0,00 | 0,00 | 0,00 | 0,00 | 0,9122798 | NA       |
| CXCL5          | 0,00 | 0,00 | 0,00 | 0,00 | 0,9122941 | NA       |
| RP11-408E5.7   | 0,00 | 0,00 | 0,00 | 0,00 | 0,912322  | NA       |
| RP11-65E22.2   | 0,00 | 0,00 | 0,00 | 0,00 | 0,9123259 | NA       |
| PICK1          | 1,64 | 2,14 | 2,25 | 2,55 | 0,9124358 | 0,944654 |
| RBAK-RBAKDN    | 0,00 | 0,00 | 0,00 | 0,00 | 0,9125012 | NA       |
| RP11-301H24.3  | 0,00 | 0,00 | 0,00 | 0,00 | 0,9125195 | NA       |
| RP11-10A14.7   | 0,00 | 0,00 | 0,00 | 0,00 | 0,9125795 | NA       |
| TPRN           | 0,47 | 0,59 | 0,80 | 0,00 | 0,9126375 | 0,944819 |
| CLUL1          | 0,00 | 0,00 | 0,03 | 0,00 | 0,9127044 | NA       |
| MIR4734        | 0,00 | 0,00 | 0,00 | 0,00 | 0,9127073 | NA       |
| RP11-754B17.1  | 0,00 | 0,00 | 0,01 | 0,00 | 0,9127585 | 0,944888 |
| CTD-3214H19.12 | 0,00 | 0,00 | 0,00 | 0,00 | 0,9127628 | NA       |
| IFLTD1         | 0,43 | 0,79 | 0,33 | 0,54 | 0,9127892 | 0,944888 |
| RP11-166O4.4   | 0,00 | 0,00 | 0,00 | 0,00 | 0,9128333 | NA       |
| RNU6-1276P     | 0,00 | 0,00 | 0,00 | 0,00 | 0,9128482 | NA       |
| RP11-90B9.2    | 0,00 | 0,00 | 0,00 | 0,00 | 0,9128574 | NA       |
| AC008132.10    | 0,00 | 0,00 | 0,00 | 0,00 | 0,9129182 | NA       |
| TSPYL6         | 0,00 | 0,00 | 0,00 | 0,00 | 0,9129985 | NA       |
| RP11-443N24.3  | 0,91 | 0,62 | 0,89 | 0,70 | 0,9130947 | 0,94516  |
| RP11-123J14.2  | 0,00 | 0,00 | 0,00 | 0,00 | 0,913205  | NA       |
| CSRP3          | 0,00 | 0,11 | 0,00 | 0,00 | 0,9133029 | NA       |
| CYP2D6         | 0,00 | 0,00 | 0,00 | 0,00 | 0,9133397 | 0,945327 |
| CTD-2410N18.4  | 2,02 | 2,39 | 1,83 | 1,78 | 0,9133511 | 0,945327 |
| RP1-168P16.3   | 4,02 | 0,62 | 4,40 | 3,64 | 0,9134175 | 0,945327 |
| NPY5R          | 0,00 | 0,00 | 0,00 | 0,00 | 0,9134244 | NA       |
| LRRC18         | 0,00 | 0,68 | 0,02 | 0,10 | 0,9134415 | 0,945327 |
| SNORA3B        | 5,98 | 6,28 | 5,55 | 4,86 | 0,9134871 | 0,945327 |
| CADM3          | 0,00 | 0,00 | 0,00 | 0,00 | 0,9134924 | NA       |
| C1orf100       | 0,00 | 0,00 | 0,00 | 0,00 | 0,9134949 | NA       |
| RP11-152L20.3  | 0,00 | 0,03 | 0,00 | 0,00 | 0,9135111 | 0,945327 |
| WFDC12         | 0,56 | 0,70 | 0,00 | 0,00 | 0,9136043 | 0,945379 |
| RP11-626K17.5  | 0,00 | 0,00 | 0,00 | 0,00 | 0,9136198 | NA       |
| RP11-256I23.3  | 0,00 | 0,00 | 0,00 | 0,00 | 0,9136339 | NA       |
| RP1-232P20.1   | 0,00 | 0,00 | 0,00 | 0,00 | 0,9137687 | 0,945505 |
| RP5-848E13.5   | 0,00 | 0,00 | 0,00 | 0,00 | 0,9139101 | NA       |
| CHCHD1         | 4,19 | 4,56 | 4,50 | 4,43 | 0,913942  | 0,945641 |
| RN7SL764P      | 0,00 | 0,00 | 0,00 | 0,00 | 0,9139904 | NA       |
| RP11-879F14.3  | 0,00 | 0,00 | 0,00 | 0,00 | 0,9140162 | NA       |
| KRT28          | 0,00 | 0,00 | 0,00 | 0,00 | 0,9140495 | NA       |
| RP1-315G1.3    | 0,00 | 0,00 | 0,00 | 0,00 | 0,914079  | NA       |
| XXYLT1         | 2,90 | 3,17 | 1,86 | 2,99 | 0,9140866 | 0,945735 |
| SCML2          | 0,05 | 0,43 | 0,04 | 0,48 | 0,9141181 | 0,945735 |
| HLA-DPA3       | 0,00 | 0,00 | 0,00 | 0,00 | 0,9141242 | NA       |

|               |       |       |       |       |           |          |
|---------------|-------|-------|-------|-------|-----------|----------|
| RP11-804F13.2 | 0,00  | 0,00  | 0,00  | 0,00  | 0,9141454 | NA       |
| RMND1         | 3,10  | 1,12  | 2,67  | 2,45  | 0,9142004 | 0,945776 |
| NAP1L1P1      | 0,00  | 0,00  | 0,00  | 0,00  | 0,9142407 | NA       |
| ACO09365.3    | 0,00  | 0,00  | 0,00  | 0,00  | 0,9142568 | NA       |
| RP11-518D3.3  | 0,00  | 0,00  | 0,00  | 0,00  | 0,9142768 | NA       |
| MSRB1         | 6,26  | 5,59  | 6,26  | 6,20  | 0,914381  | 0,945919 |
| FAM186B       | 0,00  | 0,00  | 0,00  | 0,00  | 0,9143891 | NA       |
| RNU7-115P     | 0,00  | 3,12  | 0,00  | 0,00  | 0,9144204 | NA       |
| RP11-388M20.1 | 0,36  | 0,58  | 0,53  | 0,76  | 0,9144818 | 0,945979 |
| CTD-2213F21.3 | 0,00  | 0,00  | 0,00  | 0,00  | 0,9145113 | NA       |
| RNU6-1248P    | 0,00  | 0,00  | 0,00  | 0,00  | 0,9145118 | NA       |
| RP11-31L22.4  | 0,00  | 0,00  | 0,00  | 0,00  | 0,914524  | NA       |
| RP11-648M2.2  | 0,00  | 0,00  | 0,00  | 0,00  | 0,9145288 | NA       |
| ABCD3         | 3,46  | 4,35  | 3,53  | 3,43  | 0,9146497 | 0,946109 |
| AL132640.3    | 0,00  | 1,47  | 0,00  | 0,00  | 0,9146555 | NA       |
| RN7SL52P      | 0,65  | 0,00  | 0,40  | 0,33  | 0,9147275 | NA       |
| RP11-242A24.1 | 0,00  | 0,00  | 0,00  | 0,00  | 0,9148053 | NA       |
| RBMS2P1       | 0,00  | 0,00  | 0,00  | 0,00  | 0,9148556 | NA       |
| RNU6-877P     | 0,00  | 0,00  | 0,00  | 0,00  | 0,9148813 | NA       |
| ACO51649.7    | 0,00  | 0,00  | 0,00  | 0,00  | 0,9149417 | NA       |
| PRR30         | 0,00  | 0,00  | 0,00  | 0,00  | 0,914974  | NA       |
| GPR19         | 0,00  | 0,00  | 0,00  | 0,07  | 0,9151349 | 0,946566 |
| RP11-575F12.2 | 0,00  | 0,00  | 0,00  | 0,00  | 0,9151399 | NA       |
| AE000658.31   | 0,84  | 0,87  | 0,63  | 1,00  | 0,915215  | 0,946594 |
| CTD-2501M5.1  | 0,00  | 0,00  | 0,00  | 0,71  | 0,9152564 | 0,946594 |
| FCER1G        | 10,74 | 10,49 | 10,78 | 10,43 | 0,9152889 | 0,946594 |
| SCAMP3        | 6,07  | 6,00  | 6,17  | 5,98  | 0,9153893 | 0,946647 |
| CTC-457E21.2  | 0,00  | 0,00  | 0,00  | 0,00  | 0,9153936 | NA       |
| TRBJ2-7       | 0,00  | 0,00  | 0,00  | 0,00  | 0,9154096 | NA       |
| MTIF2         | 3,88  | 4,70  | 4,07  | 4,01  | 0,9154262 | 0,946647 |
| SNORA19       | 2,33  | 3,63  | 1,51  | 2,34  | 0,9155033 | 0,946683 |
| RP11-302B13.5 | 0,00  | 0,00  | 0,00  | 0,00  | 0,9155583 | NA       |
| RP11-666A20.1 | 0,00  | 0,00  | 0,00  | 0,00  | 0,9155995 | NA       |
| RP11-573D15.6 | 0,00  | 0,00  | 0,00  | 0,00  | 0,9156268 | NA       |
| RP11-383B4.4  | 0,00  | 0,00  | 0,00  | 0,00  | 0,9156372 | NA       |
| RPL37P23      | 0,00  | 0,00  | 0,00  | 0,00  | 0,9156436 | NA       |
| DPH3B         | 0,00  | 0,00  | 0,00  | 0,00  | 0,9156436 | NA       |
| SMYD1         | 0,00  | 0,00  | 0,00  | 0,00  | 0,9156723 | NA       |
| RP11-5C23.3   | 1,47  | 0,89  | 0,87  | 1,01  | 0,9156731 | 0,946794 |
| CTD-2236F14.1 | 0,00  | 0,00  | 0,00  | 0,00  | 0,9157006 | NA       |
| TP53BP2       | 3,32  | 3,79  | 4,23  | 3,28  | 0,9157228 | 0,946794 |
| RNA5SP493     | 0,00  | 0,00  | 0,00  | 0,00  | 0,9157278 | NA       |
| PRKG1         | 0,09  | 0,54  | 0,24  | 0,10  | 0,9157386 | 0,946794 |
| CTD-2189E23.1 | 0,00  | 0,00  | 0,00  | 0,00  | 0,9157539 | NA       |
| RP11-4L24.1   | 0,00  | 0,00  | 0,00  | 0,00  | 0,9157595 | NA       |
| RP11-360K13.1 | 0,00  | 0,00  | 0,00  | 0,00  | 0,9157951 | NA       |
| AQP10         | 0,00  | 0,00  | 0,00  | 0,00  | 0,9158007 | NA       |
| HACL1         | 4,34  | 0,60  | 3,00  | 4,37  | 0,9158008 | 0,946815 |
| LA16c-390E6.4 | 0,00  | 0,00  | 0,00  | 0,00  | 0,9159332 | NA       |
| RP3-330M21.5  | 0,00  | 0,00  | 0,00  | 0,00  | 0,9159602 | NA       |
| RP11-379I19.1 | 0,00  | 0,00  | 0,00  | 0,00  | 0,9159705 | NA       |
| CH17-478G19.2 | 0,00  | 0,00  | 0,00  | 0,00  | 0,9159927 | NA       |
| MYF5          | 0,00  | 0,00  | 0,00  | 0,00  | 0,916007  | NA       |
| RP1-32B1.3    | 0,00  | 0,00  | 0,00  | 0,00  | 0,9161001 | NA       |
| RN7SL174P     | 0,00  | 0,00  | 0,00  | 0,00  | 0,9161846 | NA       |

|                  |      |      |      |      |           |          |
|------------------|------|------|------|------|-----------|----------|
| AC011406.2       | 0,00 | 0,00 | 0,00 | 0,00 | 0,9161984 | NA       |
| PIK3R5           | 4,15 | 3,45 | 3,78 | 3,56 | 0,9162727 | 0,947258 |
| RNU1-32P         | 0,00 | 0,00 | 0,00 | 0,00 | 0,9163169 | NA       |
| ZNF320           | 2,16 | 2,25 | 2,17 | 1,83 | 0,9163647 | 0,947309 |
| RP11-541F9.1     | 0,00 | 0,00 | 0,00 | 0,00 | 0,9163733 | NA       |
| SPESP1           | 0,00 | 0,00 | 0,00 | 0,00 | 0,9164171 | 0,947319 |
| MRPS36           | 3,86 | 3,54 | 3,40 | 3,14 | 0,9164801 | 0,947341 |
| RP11-323F5.2     | 0,08 | 0,28 | 0,65 | 0,76 | 0,9165606 | 0,94738  |
| DIRC3            | 0,00 | 0,00 | 0,00 | 0,00 | 0,9165704 | NA       |
| RP11-632K21.6    | 0,00 | 0,00 | 0,00 | 0,00 | 0,9165764 | NA       |
| RP3-342P20.2     | 0,00 | 0,00 | 0,00 | 0,00 | 0,9166122 | NA       |
| RP11-60E8.3      | 0,00 | 0,00 | 0,00 | 0,00 | 0,9167354 | NA       |
| RP11-426C22.3    | 0,00 | 0,00 | 0,00 | 0,00 | 0,9167378 | 0,947459 |
| TMEM47           | 0,00 | 0,00 | 0,00 | 0,00 | 0,916743  | NA       |
| RP4-673D20.3     | 0,00 | 0,00 | 0,00 | 0,32 | 0,9167497 | 0,947459 |
| SNORA51          | 0,00 | 0,00 | 0,00 | 1,52 | 0,9167708 | NA       |
| AC026150.5       | 0,79 | 0,97 | 0,81 | 0,44 | 0,9168214 | 0,947459 |
| TNF              | 3,00 | 3,15 | 2,93 | 2,62 | 0,9168496 | 0,947459 |
| SYT1             | 0,00 | 0,24 | 0,00 | 0,00 | 0,9168714 | 0,947459 |
| RP11-180M15.7    | 3,78 | 2,26 | 3,65 | 1,37 | 0,9169053 | 0,947459 |
| FAM109B          | 0,07 | 0,94 | 0,41 | 0,12 | 0,916936  | 0,947459 |
| C11orf52         | 0,00 | 0,00 | 0,00 | 0,00 | 0,916958  | NA       |
| RP5-1099C19.2    | 0,00 | 0,00 | 0,00 | 0,00 | 0,9169874 | NA       |
| RP11-398A8.3     | 3,84 | 4,01 | 3,69 | 3,50 | 0,9170877 | 0,947534 |
| INTS10           | 5,31 | 5,50 | 5,50 | 4,35 | 0,9170932 | 0,947534 |
| RP11-1029J19.2   | 0,00 | 0,00 | 0,00 | 0,00 | 0,9171185 | NA       |
| Xxyac-YX65C7_A.2 | 0,00 | 0,00 | 0,00 | 0,00 | 0,9171865 | NA       |
| RP11-63L4.1      | 0,00 | 0,00 | 0,00 | 0,00 | 0,917227  | NA       |
| RP11-889L3.3     | 0,00 | 0,02 | 0,00 | 0,00 | 0,9172282 | NA       |
| CEP55            | 0,00 | 0,00 | 0,00 | 0,00 | 0,9173752 | NA       |
| CROCC            | 1,36 | 0,96 | 1,40 | 0,99 | 0,9174084 | 0,947733 |
| RP11-178L8.3     | 2,97 | 3,24 | 2,64 | 2,92 | 0,9174134 | 0,947733 |
| RP3-474I12.6     | 0,00 | 0,00 | 0,00 | 0,00 | 0,9174139 | 0,947733 |
| RP11-390F4.10    | 0,00 | 0,00 | 0,00 | 0,00 | 0,9174827 | NA       |
| AC019188.1       | 0,00 | 0,00 | 0,00 | 0,00 | 0,9175147 | NA       |
| RN7SKP230        | 1,78 | 2,57 | 2,08 | 2,80 | 0,9175611 | 0,947841 |
| CLK1             | 8,64 | 8,25 | 8,57 | 8,15 | 0,9176494 | 0,947888 |
| RP4-751H13.6     | 0,00 | 0,00 | 0,00 | 0,00 | 0,9177429 | NA       |
| PILRB            | 4,24 | 3,68 | 4,28 | 3,97 | 0,9177886 | 0,947988 |
| TRAJ22           | 0,00 | 0,00 | 0,00 | 0,00 | 0,9178532 | NA       |
| LETMD1           | 4,71 | 1,58 | 4,72 | 3,34 | 0,9178537 | 0,948011 |
| MAPK4            | 0,00 | 0,00 | 0,00 | 0,00 | 0,9179985 | NA       |
| NUTM2E           | 0,00 | 0,00 | 0,00 | 0,00 | 0,9180178 | NA       |
| GHC-210E9.2      | 0,00 | 0,00 | 0,00 | 0,00 | 0,9180269 | NA       |
| C14orf93         | 1,62 | 1,62 | 1,37 | 2,41 | 0,918126  | 0,948217 |
| USF1             | 4,42 | 4,20 | 4,59 | 4,28 | 0,9181562 | 0,948217 |
| RP11-298J20.4    | 0,00 | 0,00 | 0,00 | 0,00 | 0,9181809 | 0,948217 |
| AF124730.4       | 0,00 | 0,00 | 0,00 | 0,00 | 0,9182327 | NA       |
| RXRB             | 3,88 | 3,98 | 3,54 | 3,71 | 0,9182446 | 0,948238 |
| RP11-250H24.2    | 0,00 | 0,00 | 0,00 | 0,00 | 0,9183396 | NA       |
| AC084125.4       | 0,00 | 0,00 | 0,00 | 0,00 | 0,9183972 | NA       |
| OIT3             | 0,00 | 0,00 | 0,00 | 0,00 | 0,9184105 | NA       |
| RP11-756P10.6    | 0,38 | 1,74 | 0,00 | 0,65 | 0,9184795 | 0,948386 |
| CASQ2            | 0,04 | 2,02 | 0,00 | 0,06 | 0,9185133 | 0,948386 |
| RP11-34P1.2      | 0,00 | 0,76 | 0,00 | 0,00 | 0,9185449 | NA       |

|                   |      |      |      |      |           |          |
|-------------------|------|------|------|------|-----------|----------|
| RP11-206L10.4     | 0,00 | 0,96 | 1,16 | 2,02 | 0,918548  | 0,948386 |
| RP11-159J3.1      | 0,21 | 0,67 | 0,08 | 0,00 | 0,9185586 | 0,948386 |
| KB-1125A3.10      | 0,00 | 0,00 | 0,00 | 0,00 | 0,9186999 | NA       |
| RP11-418I22.3     | 0,00 | 0,00 | 0,00 | 0,00 | 0,9187065 | NA       |
| XXbac-BPG181M17.6 | 0,00 | 0,00 | 0,00 | 0,00 | 0,918817  | NA       |
| VPS35P1           | 0,00 | 0,00 | 0,00 | 0,00 | 0,918883  | NA       |
| RP11-651P23.6     | 0,00 | 0,00 | 0,00 | 0,00 | 0,9188851 | NA       |
| AC000078.5        | 0,00 | 0,00 | 0,00 | 0,00 | 0,9188856 | NA       |
| ALO22345.7        | 0,00 | 0,00 | 0,00 | 0,00 | 0,9189378 | NA       |
| ASB9              | 0,00 | 0,61 | 0,00 | 0,34 | 0,9189795 | 0,948777 |
| RPL7P2            | 0,00 | 0,93 | 0,00 | 0,00 | 0,9190831 | NA       |
| CTC-222D7.1       | 0,00 | 0,00 | 0,00 | 0,00 | 0,9191018 | NA       |
| RP13-820C6.2      | 0,00 | 0,86 | 0,00 | 0,00 | 0,9191163 | NA       |
| MLST8             | 4,43 | 3,13 | 4,14 | 4,20 | 0,9191293 | 0,948887 |
| RP11-326A13.1     | 0,00 | 0,00 | 0,00 | 0,00 | 0,9191811 | NA       |
| CCDC192           | 0,00 | 0,00 | 0,00 | 0,32 | 0,9192274 | NA       |
| SPATA32           | 0,00 | 0,00 | 0,00 | 0,00 | 0,9192488 | NA       |
| FAM185A           | 1,83 | 0,23 | 0,96 | 2,16 | 0,9192873 | 0,94895  |
| RP11-345I18.4     | 0,00 | 0,00 | 0,00 | 0,00 | 0,9193107 | NA       |
| RP11-88G17.6      | 0,09 | 0,34 | 0,14 | 0,08 | 0,9193205 | 0,94895  |
| GABRA4            | 0,01 | 0,01 | 0,00 | 0,02 | 0,9193446 | 0,94895  |
| GS1-124K5.2       | 0,86 | 0,38 | 0,47 | 0,35 | 0,9193645 | 0,94895  |
| NUP93             | 5,85 | 6,06 | 5,53 | 4,34 | 0,9194033 | 0,94895  |
| MIR4461           | 0,00 | 0,00 | 0,00 | 0,00 | 0,9194039 | NA       |
| RP11-295G20.2     | 2,22 | 2,45 | 2,36 | 1,26 | 0,9194637 | 0,948953 |
| SIRT3             | 2,50 | 0,05 | 2,80 | 2,03 | 0,9194916 | 0,948953 |
| RP11-205M3.1      | 0,00 | 0,00 | 0,00 | 0,00 | 0,9194956 | NA       |
| RP11-470P21.2     | 0,00 | 0,00 | 0,00 | 0,00 | 0,9195403 | NA       |
| RP4-754E20_A.5    | 0,00 | 0,18 | 0,00 | 0,00 | 0,9195472 | NA       |
| RP1-142L7.9       | 0,00 | 0,00 | 0,00 | 0,00 | 0,9196375 | NA       |
| RP11-701H24.7     | 0,00 | 0,00 | 0,00 | 0,00 | 0,919644  | NA       |
| RP1-273G13.3      | 0,00 | 0,00 | 0,00 | 0,90 | 0,9196502 | 0,949073 |
| LTF               | 0,00 | 0,00 | 0,00 | 0,00 | 0,91967   | NA       |
| UGT2B4            | 0,00 | 0,21 | 0,00 | 0,58 | 0,9197489 | NA       |
| RP11-448G4.2      | 0,00 | 0,00 | 0,00 | 0,00 | 0,9197752 | NA       |
| RP11-443B7.2      | 0,00 | 0,00 | 0,00 | 0,00 | 0,9197916 | NA       |
| ALO22344.4        | 0,00 | 0,00 | 0,00 | 0,00 | 0,9198009 | NA       |
| SNAPC5            | 4,94 | 4,20 | 5,03 | 2,04 | 0,9198116 | 0,949179 |
| ATP4A             | 0,00 | 0,00 | 0,00 | 0,00 | 0,9198444 | NA       |
| AC092597.3        | 0,00 | 0,00 | 0,00 | 0,27 | 0,9198465 | 0,949179 |
| BMP6              | 0,00 | 0,00 | 0,00 | 0,00 | 0,9198487 | NA       |
| RP11-973F15.1     | 0,00 | 0,00 | 0,00 | 0,00 | 0,9198922 | NA       |
| ASB3              | 3,50 | 2,89 | 3,79 | 3,19 | 0,919901  | 0,949179 |
| RP11-424N24.2     | 0,00 | 0,00 | 0,00 | 0,00 | 0,919927  | NA       |
| HBP1              | 5,37 | 4,82 | 5,25 | 5,14 | 0,9199695 | 0,949179 |
| CH507-9B2.3       | 5,60 | 4,80 | 5,57 | 5,31 | 0,9199746 | 0,949179 |
| AC009945.3        | 0,00 | 0,00 | 0,00 | 0,00 | 0,9199764 | NA       |
| RP11-429A20.3     | 0,59 | 0,47 | 0,38 | 0,60 | 0,9200233 | 0,949179 |
| GAR1              | 2,68 | 0,79 | 2,09 | 0,95 | 0,9200524 | 0,949179 |
| RP11-10L12.4      | 0,00 | 0,00 | 0,00 | 0,00 | 0,9200639 | NA       |
| RP11-379B18.6     | 0,00 | 0,00 | 0,00 | 0,00 | 0,9200708 | NA       |
| RP11-194N12.2     | 0,47 | 0,70 | 0,56 | 1,17 | 0,9201047 | 0,949189 |
| EXOC3             | 4,19 | 4,35 | 4,03 | 3,79 | 0,9201658 | 0,949208 |
| RP5-827C21.6      | 0,00 | 0,00 | 0,00 | 0,00 | 0,9201978 | NA       |
| RP11-196D18.2     | 0,00 | 0,00 | 0,00 | 0,00 | 0,9202564 | NA       |

|                |      |      |      |      |           |          |
|----------------|------|------|------|------|-----------|----------|
| CTD-2542C24.2  | 0,00 | 0,00 | 0,00 | 0,05 | 0,9202682 | NA       |
| AC005606.15    | 1,72 | 1,94 | 1,87 | 2,47 | 0,920321  | 0,949319 |
| DRD3           | 0,00 | 0,00 | 0,00 | 0,00 | 0,9203323 | NA       |
| ANKRD18DP      | 0,00 | 0,00 | 0,00 | 0,00 | 0,9203588 | 0,949319 |
| CDKN2AIPNL     | 3,64 | 3,46 | 3,47 | 3,47 | 0,9204501 | 0,949369 |
| PRB3           | 0,00 | 0,00 | 0,00 | 0,00 | 0,9204797 | NA       |
| RP11-44F14.2   | 3,48 | 3,19 | 3,75 | 2,42 | 0,9205105 | 0,949387 |
| TRIM24         | 2,79 | 2,78 | 2,54 | 2,13 | 0,9205651 | 0,949399 |
| SNORA80D       | 0,00 | 0,00 | 0,00 | 0,00 | 0,9206042 | NA       |
| RP11-400F19.12 | 0,00 | 0,00 | 0,00 | 0,37 | 0,9206587 | 0,949452 |
| AC001226.7     | 0,00 | 0,00 | 0,00 | 0,00 | 0,9206959 | NA       |
| GS1-184P14.1   | 0,00 | 0,00 | 0,00 | 0,00 | 0,9207071 | NA       |
| RP11-334L9.1   | 0,00 | 0,00 | 0,00 | 0,06 | 0,9207284 | NA       |
| AC060834.2     | 0,00 | 0,00 | 0,00 | 0,00 | 0,920754  | NA       |
| RP11-446H18.3  | 0,00 | 0,00 | 0,00 | 0,00 | 0,9207972 | NA       |
| RP11-39K24.2   | 0,00 | 0,00 | 0,00 | 0,00 | 0,9208366 | NA       |
| RNU4-89P       | 0,00 | 0,00 | 0,00 | 0,00 | 0,9208691 | NA       |
| CNKSR1         | 0,00 | 0,06 | 0,00 | 0,30 | 0,9208914 | 0,949565 |
| TMED1          | 4,84 | 0,37 | 4,33 | 3,73 | 0,9208992 | 0,949565 |
| SAMM50         | 5,81 | 5,21 | 5,18 | 5,67 | 0,9209028 | 0,949565 |
| RPS16P9        | 0,00 | 0,51 | 0,00 | 0,00 | 0,920986  | NA       |
| NUDT4P2        | 0,00 | 0,00 | 0,00 | 0,00 | 0,9209864 | NA       |
| CCDC173        | 0,83 | 1,25 | 0,00 | 0,00 | 0,9209899 | 0,949565 |
| RP11-649A18.3  | 0,50 | 0,85 | 0,55 | 0,31 | 0,9210069 | 0,949565 |
| RP11-630I5.1   | 0,00 | 0,00 | 0,00 | 0,00 | 0,9210166 | NA       |
| RP11-299H22.6  | 0,49 | 0,61 | 0,70 | 0,31 | 0,9210247 | 0,949565 |
| RP11-339B21.9  | 0,00 | 0,00 | 0,00 | 0,00 | 0,9210452 | NA       |
| AC018804.6     | 0,00 | 0,00 | 0,00 | 0,00 | 0,9210573 | NA       |
| AC091153.4     | 0,00 | 0,00 | 0,00 | 0,00 | 0,9210664 | NA       |
| LOC283404      | 0,00 | 0,00 | 0,00 | 0,00 | 0,9211268 | NA       |
| RP11-337A23.5  | 0,00 | 0,00 | 0,00 | 0,00 | 0,9212396 | NA       |
| RP1-193H18.3   | 0,00 | 0,00 | 0,00 | 0,00 | 0,9212533 | NA       |
| RP11-417N10.3  | 0,00 | 0,00 | 0,00 | 0,00 | 0,9212587 | NA       |
| RP11-109G10.1  | 0,78 | 1,77 | 1,01 | 0,99 | 0,9213012 | 0,949764 |
| RP11-234K19.1  | 0,00 | 0,00 | 0,00 | 0,00 | 0,9213028 | NA       |
| RP1-102G20.3   | 3,13 | 3,51 | 3,39 | 2,89 | 0,9213028 | 0,949764 |
| AC108463.1     | 0,00 | 0,00 | 0,00 | 0,00 | 0,9213235 | NA       |
| TRIM53B        | 0,00 | 0,00 | 0,00 | 0,00 | 0,9213549 | NA       |
| TRAJ35         | 0,00 | 0,00 | 0,00 | 0,00 | 0,9214124 | NA       |
| RP11-308N19.4  | 0,00 | 0,51 | 0,00 | 0,00 | 0,9214381 | NA       |
| RP11-809F4.4   | 0,00 | 0,00 | 0,00 | 0,00 | 0,9214491 | NA       |
| POC1B          | 3,78 | 1,73 | 3,28 | 2,25 | 0,9215462 | 0,949971 |
| RNU6-1201P     | 0,00 | 0,00 | 0,00 | 0,00 | 0,9215579 | NA       |
| RP11-775B15.2  | 0,00 | 0,00 | 0,00 | 0,00 | 0,9216115 | NA       |
| HAUS7          | 4,92 | 5,47 | 4,61 | 4,27 | 0,9216364 | 0,950019 |
| TMEM181        | 2,35 | 1,11 | 2,34 | 1,70 | 0,9217129 | 0,950054 |
| RP11-411K7.5   | 0,00 | 0,00 | 0,00 | 0,00 | 0,9217467 | NA       |
| RP11-320M16.1  | 0,18 | 0,25 | 0,24 | 0,24 | 0,9217932 | NA       |
| HSFX2          | 0,00 | 0,00 | 0,00 | 0,00 | 0,9218131 | NA       |
| RP11-380G5.2   | 2,50 | 0,75 | 1,10 | 2,27 | 0,9218951 | 0,950176 |
| C16orf62       | 4,02 | 2,80 | 3,66 | 2,98 | 0,9219165 | 0,950176 |
| HNRNPA2B1      | 7,93 | 7,38 | 7,84 | 7,11 | 0,9220387 | 0,950258 |
| RP11-664I21.6  | 0,00 | 0,00 | 0,00 | 0,00 | 0,9221456 | NA       |
| VPS33B         | 3,14 | 3,49 | 3,97 | 2,11 | 0,9222178 | 0,950398 |
| ZNF572         | 0,00 | 0,00 | 0,00 | 0,00 | 0,9222193 | NA       |

|                |      |      |      |      |           |          |
|----------------|------|------|------|------|-----------|----------|
| IL10           | 0,00 | 0,00 | 0,00 | 0,00 | 0,9223952 | NA       |
| DPYSL3         | 0,00 | 0,10 | 0,00 | 0,00 | 0,9224294 | NA       |
| ARMC6          | 3,84 | 0,39 | 3,96 | 4,15 | 0,9224681 | 0,950542 |
| MIR302A        | 0,00 | 0,00 | 0,00 | 0,00 | 0,9224706 | NA       |
| DHCR7          | 0,03 | 0,78 | 0,19 | 0,00 | 0,9224725 | 0,950542 |
| AP000280.66    | 0,00 | 0,00 | 0,00 | 0,00 | 0,9224847 | NA       |
| CPNE8          | 4,17 | 4,51 | 3,90 | 3,95 | 0,9225128 | 0,950542 |
| CLTA           | 7,22 | 6,11 | 7,30 | 6,92 | 0,92256   | 0,950542 |
| RPL17P33       | 0,58 | 0,64 | 0,61 | 0,37 | 0,9225731 | 0,950542 |
| KIAA1522       | 0,84 | 0,00 | 0,82 | 0,55 | 0,922614  | 0,950542 |
| RP11-314A20.2  | 0,00 | 0,00 | 0,00 | 0,00 | 0,9226747 | NA       |
| RP11-767L7.1   | 0,00 | 0,00 | 0,00 | 0,00 | 0,9226944 | NA       |
| CTB-193M12.5   | 3,27 | 2,87 | 3,49 | 2,54 | 0,9227467 | 0,950635 |
| RP11-131M11.2  | 0,00 | 0,00 | 0,00 | 0,00 | 0,9228405 | NA       |
| RP11-357K6.1   | 0,00 | 0,00 | 0,00 | 0,00 | 0,9228874 | 0,950736 |
| RP5-1042K10.13 | 0,00 | 0,00 | 0,00 | 0,00 | 0,9229058 | NA       |
| RP11-113E21.1  | 0,00 | 0,00 | 0,00 | 0,00 | 0,9229816 | NA       |
| RP11-331O9.7   | 0,00 | 0,00 | 0,00 | 0,00 | 0,9231765 | NA       |
| AC004951.5     | 0,00 | 0,00 | 0,00 | 0,00 | 0,9232839 | NA       |
| ADD3-AS1       | 0,57 | 0,55 | 0,49 | 0,72 | 0,9232927 | 0,951109 |
| PGAM4          | 0,00 | 0,00 | 0,00 | 0,00 | 0,9233548 | NA       |
| RP11-316I3.1   | 0,00 | 0,00 | 0,00 | 0,00 | 0,9233612 | NA       |
| RP4-550H1.7    | 0,00 | 0,00 | 0,00 | 0,00 | 0,9233823 | NA       |
| AC018693.6     | 0,00 | 0,37 | 0,00 | 0,00 | 0,9234692 | NA       |
| RTN4IP1        | 3,81 | 0,47 | 2,52 | 1,57 | 0,9235057 | 0,951285 |
| PMCHL2         | 0,00 | 0,08 | 0,00 | 0,00 | 0,9235115 | NA       |
| RP4-669K10.3   | 0,00 | 0,00 | 0,00 | 0,00 | 0,9235197 | NA       |
| AC093716.1     | 0,00 | 0,00 | 0,00 | 0,00 | 0,9235422 | NA       |
| RP11-536C10.7  | 0,00 | 0,00 | 0,00 | 0,00 | 0,923557  | NA       |
| DSG4           | 0,00 | 0,00 | 0,00 | 0,00 | 0,9235995 | NA       |
| PIEZO2         | 2,04 | 1,98 | 1,81 | 0,99 | 0,9236589 | 0,951398 |
| RP11-416A14.1  | 0,00 | 0,00 | 0,00 | 0,00 | 0,9236962 | NA       |
| FGF22          | 0,00 | 0,00 | 0,02 | 0,07 | 0,9237416 | NA       |
| RP11-201M22.1  | 0,00 | 0,00 | 0,00 | 0,00 | 0,9239262 | 0,951629 |
| RP11-341G5.3   | 0,00 | 0,00 | 0,00 | 0,00 | 0,9239711 | NA       |
| CTD-2154B17.4  | 0,00 | 0,00 | 0,00 | 0,00 | 0,9239832 | NA       |
| ZNF815P        | 0,21 | 1,12 | 0,13 | 0,36 | 0,9240194 | 0,951681 |
| GACAT1         | 0,00 | 0,00 | 0,00 | 0,00 | 0,9240556 | NA       |
| MIR7854        | 0,00 | 0,00 | 0,00 | 0,00 | 0,92428   | NA       |
| PCP2           | 0,00 | 0,00 | 0,00 | 0,00 | 0,9242901 | NA       |
| RP11-750B16.1  | 0,30 | 0,00 | 0,29 | 0,35 | 0,9242975 | NA       |
| RP13-204A15.3  | 0,00 | 0,00 | 0,00 | 0,00 | 0,9243325 | NA       |
| MIR7111        | 0,00 | 0,00 | 0,00 | 0,00 | 0,9244327 | NA       |
| RP4-765C7.2    | 0,00 | 0,65 | 0,64 | 0,00 | 0,9244408 | 0,95206  |
| RP11-116N8.4   | 0,00 | 0,00 | 0,00 | 0,00 | 0,9244509 | NA       |
| SLC26A1        | 0,00 | 0,00 | 0,00 | 0,00 | 0,9244665 | NA       |
| CASP3          | 3,36 | 4,04 | 2,96 | 3,02 | 0,9244723 | 0,95206  |
| LRRC9          | 0,00 | 0,00 | 0,00 | 0,00 | 0,9245077 | NA       |
| SPINK4         | 0,00 | 0,00 | 0,00 | 0,00 | 0,9245184 | NA       |
| RLBP1          | 0,00 | 0,00 | 0,00 | 0,00 | 0,9245214 | NA       |
| RP11-442G21.2  | 0,00 | 0,00 | 0,00 | 0,00 | 0,9245586 | NA       |
| KCNIP2         | 0,00 | 0,00 | 0,00 | 0,00 | 0,924601  | NA       |
| RP11-553P9.1   | 0,00 | 0,11 | 0,00 | 0,00 | 0,924624  | NA       |
| AC073934.6     | 0,00 | 0,00 | 0,00 | 0,00 | 0,9247218 | NA       |
| RP11-1029M24.1 | 0,00 | 0,00 | 0,00 | 0,00 | 0,9247578 | NA       |



|               |      |      |      |      |           |          |
|---------------|------|------|------|------|-----------|----------|
| RP11-40F6.2   | 0,00 | 0,00 | 0,00 | 0,00 | 0,9247834 | NA       |
| GNPTG         | 5,48 | 5,53 | 5,20 | 5,15 | 0,9248219 | 0,952375 |
| RF00091       | 0,00 | 0,00 | 0,00 | 0,00 | 0,9248375 | NA       |
| MIR4472-2     | 0,00 | 0,00 | 0,00 | 0,00 | 0,9248637 | NA       |
| RP11-667M19.1 | 0,00 | 0,00 | 0,00 | 0,00 | 0,9249063 | NA       |
| RN7SKP69      | 0,00 | 0,00 | 0,00 | 0,00 | 0,9249343 | NA       |
| CCDC130       | 4,43 | 3,79 | 4,58 | 4,48 | 0,9250183 | 0,952534 |
| RP11-242D8.3  | 0,00 | 1,89 | 0,00 | 0,00 | 0,9250513 | NA       |
| RP11-23E19.1  | 0,00 | 0,00 | 0,00 | 0,00 | 0,9250693 | NA       |
| RN7SL684P     | 0,00 | 0,00 | 0,00 | 0,00 | 0,9250717 | NA       |
| MIR4666B      | 0,00 | 0,00 | 0,00 | 0,00 | 0,9250986 | NA       |
| CCDC18        | 3,51 | 3,64 | 3,11 | 3,75 | 0,925305  | 0,952785 |
| EIF5B         | 3,85 | 3,64 | 3,25 | 2,95 | 0,9253632 | 0,952787 |
| RN7SKP16      | 0,00 | 0,00 | 0,00 | 0,00 | 0,9253716 | NA       |
| EIF2S3L       | 0,00 | 0,00 | 0,00 | 0,08 | 0,9253905 | NA       |
| PLAC4         | 0,32 | 0,40 | 0,07 | 0,29 | 0,9253926 | 0,952787 |
| TPSB2         | 0,00 | 0,13 | 0,00 | 0,00 | 0,925417  | NA       |
| RP11-171N4.2  | 0,00 | 0,00 | 0,00 | 0,00 | 0,9254248 | NA       |
| RP11-296E7.1  | 0,00 | 0,00 | 0,00 | 0,00 | 0,9254294 | NA       |
| CAPN11        | 0,00 | 0,10 | 0,00 | 0,00 | 0,9254583 | NA       |
| RP11-98I9.4   | 0,00 | 0,00 | 0,04 | 0,40 | 0,9255175 | 0,95286  |
| PRYP3         | 0,00 | 0,00 | 0,00 | 0,00 | 0,9255411 | NA       |
| PRYP4         | 0,00 | 0,00 | 0,00 | 0,00 | 0,9255411 | NA       |
| LLNLR-245B6.1 | 1,99 | 1,94 | 1,96 | 1,83 | 0,9255493 | 0,95286  |
| RP11-320C15.1 | 0,00 | 0,00 | 0,00 | 0,00 | 0,9256947 | NA       |
| PRPF31        | 4,23 | 2,13 | 4,38 | 4,15 | 0,9256999 | 0,95293  |
| CORO1C        | 5,69 | 4,53 | 5,52 | 4,89 | 0,925703  | 0,95293  |
| RPL12P18      | 0,00 | 0,00 | 0,00 | 0,00 | 0,9258302 | NA       |
| RP11-681H18.2 | 4,75 | 5,03 | 3,56 | 4,25 | 0,9259306 | 0,95307  |
| DNAJB1        | 4,59 | 3,93 | 4,36 | 4,21 | 0,9259331 | 0,95307  |
| RARS          | 5,64 | 5,36 | 5,48 | 5,02 | 0,9260008 | 0,95307  |
| CTD-2076M15.1 | 0,44 | 0,16 | 0,35 | 0,41 | 0,9260112 | 0,95307  |
| RP13-476E20.1 | 0,00 | 0,00 | 0,00 | 0,00 | 0,9260409 | NA       |
| AC079612.1    | 0,00 | 0,00 | 0,00 | 0,00 | 0,9260796 | NA       |
| ZNF878        | 0,00 | 0,00 | 0,00 | 0,00 | 0,9261233 | NA       |
| NBPF9         | 4,77 | 4,75 | 4,69 | 4,39 | 0,9261697 | 0,953177 |
| RP4-738P15.1  | 0,00 | 0,04 | 0,00 | 0,00 | 0,9262677 | NA       |
| RP11-31L22.2  | 0,00 | 0,00 | 0,00 | 0,00 | 0,9262705 | NA       |
| LGALS16       | 0,00 | 0,00 | 0,00 | 0,00 | 0,9263103 | NA       |
| IGHV3-32      | 0,00 | 0,00 | 0,00 | 0,00 | 0,9263658 | NA       |
| MRPL21        | 6,06 | 5,69 | 5,75 | 5,62 | 0,926366  | 0,953177 |
| RAB14         | 4,59 | 4,22 | 4,35 | 3,88 | 0,9263893 | 0,953177 |
| AC106801.1    | 0,07 | 0,17 | 0,17 | 0,07 | 0,9263901 | 0,953177 |
| FMR1-AS1      | 0,00 | 0,67 | 0,16 | 0,14 | 0,9264083 | 0,953177 |
| Z99756.1      | 0,11 | 0,23 | 0,07 | 0,13 | 0,9264212 | 0,953177 |
| DCLK1         | 0,66 | 1,41 | 0,83 | 0,46 | 0,9264454 | 0,953177 |
| RP11-477D19.2 | 0,30 | 0,38 | 0,33 | 0,64 | 0,9264578 | 0,953177 |
| RP11-272L13.2 | 0,00 | 0,00 | 0,00 | 0,00 | 0,92648   | NA       |
| OR11H2        | 0,00 | 0,00 | 0,00 | 0,00 | 0,9264902 | NA       |
| AC009413.2    | 0,00 | 0,00 | 0,00 | 0,00 | 0,9265216 | NA       |
| RP11-419C5.2  | 0,57 | 0,00 | 0,19 | 0,51 | 0,9265559 | 0,953234 |
| MIR4496       | 0,00 | 0,00 | 0,00 | 0,00 | 0,9265955 | NA       |
| CTD-2311B13.5 | 0,00 | 0,00 | 0,00 | 0,00 | 0,9266525 | NA       |
| CTD-2288F12.1 | 0,46 | 0,56 | 0,00 | 0,00 | 0,9267733 | NA       |
| SOX11         | 0,07 | 0,12 | 0,08 | 0,06 | 0,9269106 | 0,953542 |

|                    |      |      |      |      |           |          |
|--------------------|------|------|------|------|-----------|----------|
| RP11-153K16.2      | 0,00 | 0,00 | 0,00 | 0,10 | 0,92694   | NA       |
| PIGP               | 3,96 | 4,66 | 3,99 | 4,44 | 0,9269417 | 0,953542 |
| AC064871.3         | 0,00 | 0,00 | 0,00 | 0,00 | 0,9269951 | NA       |
| AC007405.8         | 0,00 | 0,00 | 0,00 | 0,00 | 0,9270377 | NA       |
| PTRH1              | 3,70 | 4,57 | 3,05 | 2,10 | 0,9270476 | 0,953557 |
| KRT17P2            | 0,00 | 0,00 | 0,00 | 0,00 | 0,9271757 | NA       |
| AC108025.2         | 0,00 | 0,16 | 0,00 | 0,00 | 0,9272112 | NA       |
| XXbac-BPG299F13.17 | 0,77 | 0,94 | 0,98 | 0,72 | 0,9272164 | 0,953557 |
| RP11-158M2.3       | 0,00 | 0,20 | 0,00 | 0,00 | 0,927231  | NA       |
| MORN2              | 0,00 | 0,28 | 0,52 | 0,00 | 0,9272359 | 0,953557 |
| ASAH1              | 6,98 | 6,47 | 6,89 | 6,73 | 0,9272475 | 0,953557 |
| LYPLAL1            | 4,28 | 1,81 | 4,52 | 3,57 | 0,9272669 | 0,953557 |
| ASNSD1             | 4,18 | 2,07 | 4,04 | 2,71 | 0,92729   | 0,953557 |
| CTC-436P18.3       | 2,15 | 1,53 | 1,69 | 1,65 | 0,9273231 | 0,953557 |
| RNU6-310P          | 0,00 | 0,00 | 0,00 | 0,00 | 0,9273247 | NA       |
| RP11-417F21.2      | 0,57 | 0,58 | 0,52 | 0,00 | 0,9273416 | 0,953557 |
| POLR1E             | 2,36 | 0,15 | 1,75 | 0,56 | 0,9273424 | 0,953557 |
| C8orf37            | 0,06 | 0,16 | 0,11 | 0,15 | 0,927446  | 0,95358  |
| RP1-5O6.7          | 0,39 | 0,00 | 0,00 | 0,00 | 0,9274503 | 0,95358  |
| RP6-105D16.1       | 0,00 | 0,00 | 0,00 | 0,00 | 0,9274623 | NA       |
| RP11-439H8.4       | 0,00 | 0,00 | 0,00 | 0,00 | 0,927484  | NA       |
| TNNI3              | 0,00 | 0,00 | 0,00 | 0,00 | 0,9275932 | NA       |
| OSBPL3             | 4,79 | 1,84 | 4,79 | 4,82 | 0,9276237 | 0,953714 |
| RP11-484D5.2       | 0,00 | 0,00 | 0,00 | 0,00 | 0,9276652 | NA       |
| POU5F1P5           | 0,00 | 0,00 | 0,00 | 0,00 | 0,9277212 | NA       |
| C16orf71           | 0,00 | 0,00 | 0,00 | 0,00 | 0,9278032 | NA       |
| ITGB3              | 0,00 | 0,17 | 0,00 | 0,07 | 0,9278389 | 0,953891 |
| RP3-468K18.5       | 0,00 | 0,00 | 0,00 | 0,00 | 0,9278422 | NA       |
| OR2R1P             | 0,00 | 0,00 | 0,00 | 0,00 | 0,9278436 | NA       |
| RN7SL762P          | 0,00 | 0,00 | 0,00 | 0,00 | 0,9278658 | NA       |
| RFO2188            | 0,00 | 0,00 | 0,00 | 0,00 | 0,9280699 | NA       |
| JMJD7-PLA2G4B      | 0,08 | 0,35 | 0,17 | 0,05 | 0,9280867 | 0,954102 |
| LLNLR-284B4.1      | 0,00 | 0,00 | 0,00 | 0,00 | 0,9280916 | NA       |
| RP11-203E14.1      | 0,00 | 0,00 | 0,00 | 0,00 | 0,9281144 | NA       |
| RAPGEF5            | 0,00 | 0,00 | 0,00 | 0,00 | 0,928149  | NA       |
| CTB-129O4.1        | 0,00 | 0,00 | 0,00 | 0,00 | 0,9281636 | NA       |
| RP11-163G10.2      | 0,00 | 0,00 | 0,00 | 0,00 | 0,9281895 | NA       |
| BLOC1S5-TXNDC5     | 0,02 | 0,00 | 0,00 | 0,00 | 0,9282069 | 0,954138 |
| IGHV3-48           | 0,00 | 0,00 | 0,00 | 0,00 | 0,9282225 | NA       |
| AC027763.2         | 3,79 | 2,45 | 3,50 | 2,63 | 0,9282457 | 0,954138 |
| CTD-2192J16.21     | 1,89 | 1,11 | 1,79 | 1,99 | 0,9282703 | 0,954138 |
| CTD-2562J17.7      | 1,28 | 1,32 | 1,63 | 1,58 | 0,9282935 | 0,954138 |
| CTC-250I14.1       | 0,00 | 0,00 | 0,00 | 0,00 | 0,9283027 | NA       |
| RP11-277I20.3      | 0,00 | 0,00 | 0,00 | 0,57 | 0,9283702 | 0,954173 |
| RN7SKP206          | 0,00 | 0,00 | 0,00 | 0,00 | 0,9283814 | NA       |
| FAAH2              | 0,00 | 0,00 | 0,00 | 0,00 | 0,9284579 | NA       |
| CYP2T3P            | 0,00 | 0,00 | 0,00 | 0,00 | 0,9284825 | NA       |
| RFWD3              | 2,31 | 2,34 | 1,98 | 2,84 | 0,9285275 | 0,95429  |
| DIRAS1             | 0,00 | 0,00 | 0,00 | 0,00 | 0,9285829 | NA       |
| ORM1               | 0,00 | 0,00 | 0,00 | 0,00 | 0,9286712 | NA       |
| RN7SL680P          | 0,00 | 0,88 | 0,00 | 0,00 | 0,9286801 | NA       |
| ZBTB9              | 0,00 | 0,00 | 0,00 | 0,00 | 0,9287105 | 0,954394 |
| AD000091.2         | 0,00 | 0,32 | 0,33 | 0,33 | 0,9287237 | 0,954394 |
| RP11-595O22.1      | 0,04 | 0,17 | 0,13 | 0,12 | 0,9288276 | 0,954394 |
| GMNN               | 2,61 | 3,70 | 2,62 | 0,84 | 0,9288301 | 0,954394 |

|                |      |      |      |      |           |          |
|----------------|------|------|------|------|-----------|----------|
| DCTN3          | 7,04 | 6,82 | 6,95 | 7,10 | 0,9288429 | 0,954394 |
| FREM1          | 0,00 | 0,00 | 0,00 | 0,00 | 0,9288491 | NA       |
| RP11-1379J22.5 | 0,00 | 0,00 | 0,00 | 0,00 | 0,9288586 | NA       |
| MIR4730        | 0,00 | 0,00 | 0,00 | 0,00 | 0,9289079 | NA       |
| FUT10          | 1,49 | 1,68 | 0,71 | 1,98 | 0,9289813 | 0,954492 |
| RNU6-618P      | 0,00 | 0,00 | 0,00 | 0,00 | 0,9289911 | NA       |
| RP1-247F3.1    | 0,00 | 0,00 | 0,00 | 0,00 | 0,9290659 | NA       |
| PON1           | 0,00 | 0,10 | 0,00 | 0,00 | 0,9290714 | NA       |
| LIPN           | 0,00 | 0,00 | 0,00 | 0,00 | 0,9290896 | 0,954559 |
| RP11-781P6.1   | 0,00 | 0,00 | 0,00 | 0,00 | 0,9290918 | NA       |
| AC100830.4     | 0,00 | 0,00 | 0,00 | 0,00 | 0,9291312 | NA       |
| RP11-245J9.6   | 0,00 | 0,00 | 0,00 | 0,00 | 0,9291404 | 0,954567 |
| SLC38A5        | 0,27 | 1,75 | 0,04 | 0,06 | 0,9292163 | 0,954601 |
| CTD-2047H16.2  | 0,00 | 0,57 | 0,00 | 0,00 | 0,9293002 | 0,95463  |
| CHD1           | 6,92 | 7,04 | 6,71 | 6,50 | 0,9293308 | 0,95463  |
| RP11-141M3.1   | 0,00 | 0,00 | 0,00 | 0,00 | 0,9293321 | NA       |
| DAPL1          | 0,00 | 0,00 | 0,00 | 0,00 | 0,9294458 | NA       |
| RP11-58O9.1    | 0,00 | 0,00 | 0,00 | 0,00 | 0,9295109 | NA       |
| RP11-84A1.3    | 0,00 | 0,00 | 0,00 | 0,00 | 0,9295117 | NA       |
| RP11-1396O13.2 | 0,00 | 0,00 | 0,00 | 0,00 | 0,9295373 | NA       |
| RNU1-85P       | 0,00 | 0,00 | 0,00 | 0,00 | 0,9295511 | NA       |
| RN7SL434P      | 0,00 | 0,00 | 0,00 | 0,00 | 0,9295658 | NA       |
| RP11-730N24.1  | 0,00 | 0,00 | 0,00 | 0,00 | 0,9295706 | NA       |
| SHISA7         | 0,00 | 0,00 | 0,00 | 0,00 | 0,9295892 | NA       |
| DDX31          | 1,08 | 2,58 | 1,20 | 2,30 | 0,9297102 | 0,954976 |
| AC108059.2     | 0,00 | 0,00 | 0,00 | 0,00 | 0,929754  | NA       |
| RP11-149B7.5   | 0,00 | 0,00 | 0,00 | 0,00 | 0,9297942 | NA       |
| SNORD62A       | 0,00 | 1,15 | 0,00 | 0,00 | 0,9298278 | NA       |
| SNORD62B       | 0,00 | 1,15 | 0,00 | 0,00 | 0,9298278 | NA       |
| GSTM1          | 3,64 | 1,75 | 1,75 | 3,77 | 0,9298606 | 0,955086 |
| TMCO2          | 0,00 | 0,00 | 0,00 | 0,00 | 0,9299299 | NA       |
| PGRMC2         | 2,71 | 1,65 | 2,21 | 1,05 | 0,9299612 | 0,955145 |
| CH17-264B6.4   | 0,00 | 0,00 | 0,00 | 0,00 | 0,9299913 | NA       |
| RP11-259O18.5  | 0,00 | 0,00 | 0,00 | 0,00 | 0,9300142 | NA       |
| RP11-30M20.2   | 0,00 | 0,00 | 0,00 | 0,00 | 0,9300453 | NA       |
| VEGFB          | 3,74 | 4,22 | 3,01 | 3,67 | 0,9300721 | 0,955215 |
| RNU6-322P      | 0,00 | 0,00 | 0,00 | 0,00 | 0,9300722 | NA       |
| FAM167B        | 0,00 | 0,00 | 0,00 | 0,00 | 0,9301807 | NA       |
| SPATC1L        | 0,69 | 2,11 | 1,75 | 3,03 | 0,9301847 | 0,955273 |
| RP3-402G11.28  | 0,00 | 0,00 | 0,00 | 0,00 | 0,9302217 | NA       |
| RP11-96O20.3   | 0,00 | 0,00 | 0,00 | 0,00 | 0,9302422 | NA       |
| RP11-885B4.4   | 0,11 | 0,80 | 0,00 | 0,00 | 0,9302567 | 0,955273 |
| STX6           | 3,53 | 3,33 | 2,43 | 2,73 | 0,9303019 | 0,955273 |
| RALYL          | 0,27 | 0,32 | 0,22 | 0,19 | 0,930343  | 0,955273 |
| ODF2L          | 3,08 | 3,91 | 3,33 | 3,31 | 0,9303431 | 0,955273 |
| ASPRV1         | 0,00 | 0,00 | 0,00 | 0,00 | 0,9303539 | NA       |
| RP11-263K19.9  | 0,00 | 0,00 | 0,00 | 0,00 | 0,9303687 | NA       |
| PRB2           | 0,00 | 0,00 | 0,00 | 0,00 | 0,9303894 | NA       |
| RN7SL325P      | 0,00 | 0,00 | 0,00 | 0,00 | 0,9304077 | NA       |
| MIR135A1       | 0,00 | 0,00 | 0,00 | 0,00 | 0,9304758 | NA       |
| RP11-340I6.6   | 0,00 | 0,00 | 0,00 | 0,00 | 0,9304892 | NA       |
| KLKP1          | 0,00 | 0,00 | 0,00 | 0,00 | 0,9305074 | NA       |
| AC004967.7     | 0,19 | 0,48 | 0,52 | 0,99 | 0,9305254 | 0,955416 |
| AC005592.2     | 0,00 | 0,00 | 0,00 | 0,00 | 0,9305437 | NA       |
| RASSF6         | 0,53 | 1,20 | 0,69 | 0,91 | 0,9306573 | 0,955507 |

|                |      |      |      |      |           |          |
|----------------|------|------|------|------|-----------|----------|
| RP5-884C9.2    | 0,00 | 0,00 | 0,00 | 0,00 | 0,9306783 | NA       |
| SNORD71        | 0,00 | 0,00 | 0,00 | 0,00 | 0,9306834 | NA       |
| RP11-45K10.2   | 0,00 | 0,00 | 0,00 | 0,00 | 0,930724  | NA       |
| RP11-734B5.2   | 0,00 | 0,00 | 0,00 | 0,00 | 0,9307246 | NA       |
| RP11-170L3.1   | 0,00 | 0,00 | 0,00 | 0,00 | 0,9307252 | NA       |
| STX16-NPEPL1   | 0,00 | 0,00 | 0,00 | 0,11 | 0,9307603 | 0,955563 |
| DNASE2B        | 0,00 | 0,00 | 0,00 | 0,00 | 0,9307671 | NA       |
| RP11-884K10.7  | 0,30 | 0,11 | 0,30 | 0,05 | 0,9307981 | 0,955563 |
| UBA52P8        | 0,00 | 0,00 | 0,00 | 0,00 | 0,930838  | NA       |
| RP11-49I11.1   | 0,00 | 0,00 | 0,00 | 0,00 | 0,9308588 | NA       |
| UBQLNL         | 0,00 | 0,00 | 0,00 | 0,00 | 0,9309534 | NA       |
| RP11-299G20.5  | 0,22 | 0,51 | 0,14 | 0,26 | 0,9309644 | 0,95569  |
| RNU6-11P       | 0,00 | 0,00 | 0,00 | 0,00 | 0,9310417 | NA       |
| RNU6-37P       | 0,00 | 0,00 | 0,00 | 0,00 | 0,9310417 | NA       |
| RP6-109B7.5    | 0,00 | 0,00 | 0,00 | 0,00 | 0,9311009 | NA       |
| GRAMD4         | 2,19 | 1,49 | 2,35 | 2,32 | 0,9311073 | 0,955749 |
| AC091814.2     | 0,00 | 0,00 | 0,00 | 0,00 | 0,9311084 | 0,955749 |
| CDC20B         | 0,33 | 0,31 | 0,34 | 0,33 | 0,9311786 | 0,955777 |
| RP6-218J18.2   | 0,00 | 0,00 | 0,00 | 0,00 | 0,9312163 | NA       |
| RP11-323H21.3  | 0,30 | 0,55 | 0,33 | 0,57 | 0,9312527 | 0,955809 |
| RP3-406A7.7    | 0,00 | 0,00 | 0,00 | 0,00 | 0,931286  | NA       |
| KIF4A          | 0,00 | 0,00 | 0,00 | 0,00 | 0,9313023 | NA       |
| RP11-400F19.18 | 0,07 | 0,35 | 0,30 | 0,38 | 0,9313084 | 0,955813 |
| RP11-104D21.3  | 0,00 | 0,24 | 0,00 | 0,00 | 0,9313156 | NA       |
| RNF44          | 2,78 | 2,48 | 2,62 | 2,63 | 0,9313422 | 0,955813 |
| CTD-2224J9.8   | 0,00 | 0,00 | 0,00 | 0,17 | 0,9314369 | NA       |
| RP4-641G12.3   | 0,00 | 0,00 | 0,00 | 0,00 | 0,9314537 | NA       |
| RP11-783K16.13 | 0,00 | 0,00 | 0,00 | 0,00 | 0,9314599 | NA       |
| DYX1C1         | 0,19 | 0,38 | 0,41 | 0,34 | 0,9315233 | 0,955954 |
| RP11-380M21.3  | 0,00 | 0,00 | 0,00 | 0,00 | 0,9315283 | NA       |
| C22orf23       | 0,00 | 0,00 | 0,00 | 0,00 | 0,9315949 | NA       |
| RN7SL277P      | 0,00 | 0,00 | 0,00 | 0,00 | 0,9316485 | NA       |
| RP11-547D23.1  | 0,00 | 0,00 | 0,00 | 0,00 | 0,9316728 | NA       |
| RP11-7D5.2     | 0,18 | 0,23 | 0,00 | 0,00 | 0,9317638 | NA       |
| C10orf35       | 0,00 | 0,00 | 0,00 | 0,00 | 0,9318015 | NA       |
| RP11-21K20.1   | 0,00 | 0,00 | 0,00 | 0,18 | 0,931841  | NA       |
| RP11-82O2.1    | 0,00 | 0,00 | 0,00 | 0,00 | 0,9318868 | NA       |
| OBSCN          | 0,24 | 0,44 | 0,03 | 0,17 | 0,9319364 | 0,956334 |
| CTD-3126B10.4  | 0,00 | 0,00 | 0,00 | 0,04 | 0,9319558 | NA       |
| RP11-20I23.11  | 0,00 | 0,00 | 0,00 | 0,04 | 0,9319558 | NA       |
| CTD-2501B8.5   | 0,00 | 0,00 | 0,00 | 0,00 | 0,9320367 | NA       |
| ZFPM1          | 0,53 | 0,34 | 0,44 | 0,64 | 0,9321039 | 0,956427 |
| RP11-138H8.6   | 0,22 | 0,61 | 0,29 | 0,45 | 0,9321125 | 0,956427 |
| RNU2-3P        | 0,00 | 0,00 | 0,00 | 0,00 | 0,9322241 | NA       |
| PODXL2         | 0,00 | 0,06 | 0,00 | 0,00 | 0,9322326 | NA       |
| CUL3           | 6,72 | 6,38 | 6,34 | 6,24 | 0,9322445 | 0,956482 |
| C20orf200      | 0,00 | 0,00 | 0,05 | 0,00 | 0,9322523 | 0,956482 |
| RP11-136K14.3  | 0,00 | 0,00 | 0,00 | 0,00 | 0,9322607 | NA       |
| CENPU          | 1,48 | 0,50 | 0,79 | 0,30 | 0,9323024 | 0,956489 |
| AC121251.1     | 0,00 | 0,00 | 0,00 | 0,00 | 0,9323211 | NA       |
| VTCN1          | 0,00 | 0,06 | 0,00 | 0,00 | 0,9323488 | NA       |
| AC017035.2     | 0,00 | 0,00 | 0,25 | 0,00 | 0,9323958 | 0,956505 |
| RP11-459J23.1  | 0,00 | 0,21 | 0,00 | 0,00 | 0,9324054 | NA       |
| SPC25          | 0,55 | 0,32 | 0,19 | 0,40 | 0,9324228 | 0,956505 |
| C1QTNF3-AMACR  | 0,00 | 0,00 | 0,00 | 0,00 | 0,9324401 | NA       |

|                  |      |      |      |      |           |          |
|------------------|------|------|------|------|-----------|----------|
| HACD2            | 3,90 | 3,81 | 3,81 | 2,27 | 0,9324469 | 0,956505 |
| DACT1            | 0,00 | 0,00 | 0,00 | 0,00 | 0,9324915 | NA       |
| RP11-367F23.2    | 0,00 | 0,00 | 0,00 | 0,00 | 0,9325534 | NA       |
| RP11-145D11.2    | 0,00 | 0,00 | 0,00 | 0,00 | 0,9325568 | NA       |
| TRAJ43           | 0,00 | 0,00 | 0,00 | 0,00 | 0,932597  | NA       |
| RN7SL520P        | 0,00 | 0,00 | 0,00 | 0,00 | 0,9326003 | NA       |
| LA16c-366D3.1    | 0,00 | 0,00 | 0,00 | 0,00 | 0,9326308 | NA       |
| RNU6V            | 0,00 | 0,00 | 0,00 | 0,00 | 0,9326319 | NA       |
| XXbac-BPG308K3.6 | 0,27 | 0,06 | 0,52 | 0,00 | 0,9327012 | 0,956658 |
| CCDC34           | 0,00 | 0,13 | 0,04 | 0,22 | 0,9327052 | 0,956658 |
| KIAA1109         | 4,48 | 4,73 | 4,20 | 3,17 | 0,9327257 | 0,956658 |
| RPL12P11         | 0,00 | 0,00 | 0,00 | 0,00 | 0,9327263 | NA       |
| CTA-246H3.11     | 0,00 | 0,00 | 0,00 | 0,00 | 0,9327474 | NA       |
| RP11-640I15.1    | 0,00 | 0,00 | 0,00 | 0,00 | 0,932769  | NA       |
| ABTB2            | 0,00 | 0,05 | 0,00 | 0,03 | 0,9328154 | 0,956706 |
| RP11-344N10.2    | 0,00 | 0,00 | 0,00 | 0,00 | 0,9328823 | NA       |
| BMP8A            | 0,00 | 0,00 | 0,00 | 0,00 | 0,9328829 | NA       |
| ELDR             | 0,00 | 0,00 | 0,00 | 0,00 | 0,932885  | NA       |
| DND1P1           | 0,00 | 0,00 | 0,00 | 0,00 | 0,932901  | NA       |
| HMGA1P3          | 0,00 | 0,00 | 0,00 | 0,00 | 0,9329886 | NA       |
| RP11-185P18.2    | 0,00 | 0,00 | 0,00 | 0,00 | 0,9330049 | NA       |
| KIAA0114         | 5,31 | 5,68 | 4,99 | 4,42 | 0,9330056 | 0,956857 |
| AC092641.2       | 0,00 | 0,00 | 0,00 | 0,00 | 0,933129  | NA       |
| C17orf75         | 2,61 | 3,29 | 1,77 | 1,83 | 0,9331893 | 0,957001 |
| GRAPL            | 0,00 | 0,00 | 0,00 | 0,00 | 0,9331933 | NA       |
| RP11-161H23.10   | 0,00 | 0,00 | 0,00 | 0,00 | 0,933213  | NA       |
| RP11-768F21.1    | 0,00 | 0,00 | 0,00 | 0,00 | 0,9332347 | NA       |
| AC004159.1       | 0,00 | 0,00 | 0,00 | 0,00 | 0,9332613 | NA       |
| AP3M2            | 2,31 | 0,71 | 1,23 | 2,32 | 0,933271  | 0,957041 |
| CTD-2588J6.2     | 0,00 | 0,00 | 0,00 | 0,00 | 0,9333002 | NA       |
| TMED9            | 5,44 | 4,98 | 5,08 | 5,16 | 0,9333276 | 0,957055 |
| NPIPA7           | 1,12 | 0,13 | 0,00 | 0,00 | 0,9334179 | 0,957103 |
| AC099048.1       | 0,00 | 0,00 | 0,00 | 0,00 | 0,9336182 | NA       |
| NPNT             | 0,00 | 0,00 | 0,00 | 0,00 | 0,9336228 | NA       |
| CTC-260E6.8      | 0,00 | 0,00 | 0,00 | 0,00 | 0,9336511 | NA       |
| DOCK8            | 6,54 | 5,97 | 6,26 | 6,10 | 0,9336999 | 0,95733  |
| RPS26P3          | 0,00 | 0,00 | 0,00 | 0,00 | 0,9337248 | NA       |
| SIAH1            | 3,88 | 3,15 | 2,78 | 2,88 | 0,9337252 | 0,95733  |
| TRGVB            | 0,00 | 0,00 | 0,00 | 0,00 | 0,9337669 | NA       |
| PSG8             | 0,00 | 0,00 | 0,00 | 0,00 | 0,9338185 | NA       |
| FNDC9            | 0,00 | 0,00 | 0,00 | 0,00 | 0,9338575 | 0,957421 |
| AC026191.1       | 0,00 | 0,00 | 0,00 | 0,00 | 0,9339275 | NA       |
| KRBOX4           | 3,08 | 1,87 | 2,82 | 2,63 | 0,9339497 | 0,957472 |
| OR51I2           | 0,00 | 0,00 | 0,00 | 0,00 | 0,933988  | NA       |
| RP11-167B3.3     | 0,00 | 0,00 | 0,00 | 0,00 | 0,933999  | NA       |
| C19orf18         | 0,00 | 0,00 | 0,00 | 0,00 | 0,9340005 | NA       |
| RP11-155G14.5    | 0,00 | 0,00 | 0,00 | 0,00 | 0,9341119 | NA       |
| RP11-77K12.10    | 0,00 | 0,00 | 0,00 | 0,00 | 0,9341427 | NA       |
| TMEM184C         | 3,66 | 3,76 | 3,17 | 2,57 | 0,934228  | 0,957671 |
| EXT2             | 3,62 | 2,98 | 3,10 | 2,54 | 0,9342465 | 0,957671 |
| RP1-245G19.2     | 0,00 | 0,00 | 0,00 | 0,00 | 0,9342591 | NA       |
| RP11-413E1.2     | 0,00 | 0,00 | 0,00 | 0,00 | 0,934267  | NA       |
| RP11-114H21.2    | 0,00 | 1,00 | 0,58 | 0,00 | 0,9342737 | 0,957671 |
| RP1-40G4P.1      | 0,29 | 0,37 | 0,33 | 0,00 | 0,934366  | NA       |
| RP11-126O22.1    | 0,00 | 0,00 | 0,00 | 0,00 | 0,9343878 | NA       |

|               |      |      |      |      |           |          |
|---------------|------|------|------|------|-----------|----------|
| COQ10A        | 2,16 | 1,75 | 1,79 | 1,97 | 0,9344455 | 0,957789 |
| HIST1H3E      | 0,07 | 0,06 | 0,02 | 0,00 | 0,9344747 | 0,957789 |
| CTD-2561B21.4 | 0,00 | 0,00 | 0,00 | 0,00 | 0,9344898 | NA       |
| RP11-495P10.5 | 0,00 | 0,00 | 0,00 | 0,00 | 0,9344939 | NA       |
| AC002116.7    | 0,00 | 0,00 | 0,00 | 0,00 | 0,9344982 | NA       |
| RNU7-73P      | 0,00 | 0,00 | 0,00 | 0,00 | 0,9344983 | NA       |
| CTD-2545G14.6 | 0,00 | 0,00 | 0,00 | 0,00 | 0,934501  | NA       |
| RP4-655C5.1   | 0,00 | 0,00 | 0,00 | 0,00 | 0,9345973 | NA       |
| RP11-775J23.1 | 0,00 | 0,00 | 0,00 | 0,00 | 0,9346056 | NA       |
| POM121        | 2,28 | 1,72 | 2,17 | 1,95 | 0,9346174 | 0,957851 |
| NMRAL1        | 5,12 | 3,08 | 5,19 | 3,23 | 0,9346214 | 0,957851 |
| NT5C1A        | 0,00 | 0,00 | 0,00 | 0,00 | 0,934647  | NA       |
| AC008872.1    | 0,00 | 0,00 | 0,00 | 0,00 | 0,93467   | NA       |
| NELFB         | 0,82 | 1,97 | 0,98 | 0,84 | 0,9347567 | 0,957946 |
| CTD-2619J13.3 | 0,00 | 0,00 | 0,00 | 0,00 | 0,9348023 | NA       |
| AC004862.5    | 0,00 | 0,00 | 0,00 | 0,00 | 0,9348833 | NA       |
| RP11-192P3.3  | 0,00 | 0,00 | 0,00 | 0,00 | 0,9349125 | NA       |
| FZD1          | 1,52 | 1,92 | 1,57 | 0,24 | 0,9349754 | 0,958126 |
| RNA5SP201     | 0,00 | 0,00 | 0,00 | 0,00 | 0,9350124 | NA       |
| FZD10         | 0,00 | 0,00 | 0,00 | 0,00 | 0,9350218 | NA       |
| RPL23P2       | 0,00 | 0,00 | 0,00 | 0,00 | 0,9350295 | NA       |
| SNORD67       | 0,00 | 0,00 | 0,00 | 0,00 | 0,9351877 | NA       |
| TAGLN         | 3,61 | 0,49 | 2,35 | 2,93 | 0,9352031 | 0,958277 |
| LIPT1         | 1,16 | 0,00 | 1,78 | 1,54 | 0,9352091 | 0,958277 |
| RP11-54D18.2  | 0,00 | 0,00 | 0,00 | 0,00 | 0,9352452 | NA       |
| RP11-496I2.5  | 0,00 | 0,00 | 0,00 | 0,00 | 0,9352797 | NA       |
| SNORD12B      | 0,00 | 0,00 | 0,00 | 0,00 | 0,9353007 | NA       |
| RP11-620J15.1 | 0,00 | 0,00 | 0,00 | 0,00 | 0,935414  | NA       |
| UBAC2         | 5,31 | 5,14 | 5,17 | 4,33 | 0,9354278 | 0,958457 |
| RP11-172H24.3 | 0,00 | 0,00 | 0,00 | 0,00 | 0,9354614 | NA       |
| RP11-319G9.1  | 0,00 | 0,00 | 0,00 | 0,00 | 0,935549  | 0,958537 |
| Z84723.1      | 0,00 | 0,00 | 0,00 | 0,00 | 0,9355913 | NA       |
| RP13-444K19.1 | 0,00 | 0,00 | 0,00 | 0,00 | 0,9355923 | NA       |
| AIFM3         | 2,85 | 1,76 | 2,18 | 2,63 | 0,935599  | 0,958544 |
| RP1-180M12.1  | 0,00 | 0,00 | 0,00 | 0,00 | 0,935634  | NA       |
| PLPP5         | 4,77 | 3,69 | 4,58 | 4,86 | 0,9356554 | 0,958557 |
| POU4F2        | 0,00 | 0,04 | 0,00 | 0,00 | 0,9356848 | NA       |
| PRR23C        | 0,06 | 0,15 | 0,09 | 0,19 | 0,9357037 | 0,958563 |
| CTD-2639E6.4  | 0,00 | 0,00 | 0,00 | 0,00 | 0,9357529 | 0,958569 |
| REG4          | 0,00 | 0,00 | 0,00 | 0,00 | 0,9357547 | NA       |
| CDS2          | 4,29 | 3,02 | 3,92 | 3,98 | 0,9358064 | 0,958576 |
| SIPA1L2       | 1,36 | 0,87 | 1,42 | 1,83 | 0,9358457 | 0,958576 |
| IGKJ2         | 0,00 | 0,00 | 0,00 | 0,00 | 0,9359252 | NA       |
| RP1-249H1.4   | 0,68 | 0,90 | 1,07 | 0,54 | 0,9359347 | 0,958622 |
| SNRPEP4       | 0,00 | 0,00 | 0,00 | 0,00 | 0,9359445 | NA       |
| RP11-348H3.8  | 0,00 | 0,61 | 0,00 | 0,00 | 0,9359452 | NA       |
| RP3-369A17.4  | 0,00 | 0,00 | 0,00 | 0,00 | 0,9359663 | NA       |
| FAT4          | 0,00 | 0,00 | 0,00 | 0,00 | 0,9359776 | NA       |
| KHNYN         | 2,40 | 0,71 | 2,13 | 2,18 | 0,9360105 | 0,958656 |
| RP11-558M24.1 | 0,00 | 0,00 | 0,00 | 0,00 | 0,9360515 | NA       |
| AC005104.3    | 0,00 | 0,00 | 0,00 | 0,00 | 0,9360602 | NA       |
| F2            | 0,00 | 0,00 | 0,00 | 0,00 | 0,9361482 | NA       |
| TLL11         | 0,00 | 0,00 | 0,00 | 0,49 | 0,9361872 | 0,958756 |
| GPR37L1       | 0,18 | 0,21 | 0,15 | 0,25 | 0,9361948 | 0,958756 |
| RP11-68E19.2  | 0,82 | 0,76 | 0,37 | 0,22 | 0,9362477 | 0,958766 |

|                   |      |      |      |      |           |          |
|-------------------|------|------|------|------|-----------|----------|
| IGLC7             | 0,00 | 0,51 | 0,00 | 0,00 | 0,9362542 | NA       |
| XDH               | 0,19 | 0,34 | 0,29 | 0,59 | 0,9363258 | 0,958785 |
| RP3-414A15.2      | 0,00 | 0,40 | 0,00 | 0,41 | 0,9363998 | 0,958785 |
| TMEM200B          | 0,00 | 0,00 | 0,00 | 0,00 | 0,936434  | 0,958785 |
| RP11-138E2.1      | 0,54 | 0,64 | 0,00 | 0,75 | 0,9364387 | 0,958785 |
| RP11-619L19.1     | 0,00 | 0,00 | 0,00 | 0,00 | 0,9365187 | NA       |
| CYP3A7            | 0,00 | 0,00 | 0,00 | 0,00 | 0,9365311 | NA       |
| CKAP5             | 3,35 | 3,56 | 3,63 | 2,61 | 0,936613  | 0,958919 |
| INTS7             | 3,49 | 4,02 | 3,02 | 2,26 | 0,9367061 | 0,958971 |
| XXbac-BPG246D15.8 | 6,98 | 5,95 | 6,67 | 6,85 | 0,9367537 | 0,958975 |
| RP11-134O21.1     | 0,00 | 0,00 | 0,00 | 0,00 | 0,9368107 | NA       |
| CCR10             | 0,00 | 0,00 | 0,00 | 0,00 | 0,9368348 | NA       |
| RP11-806H10.4     | 0,00 | 0,45 | 0,00 | 0,19 | 0,9368821 | NA       |
| RPL3P2            | 0,09 | 0,00 | 0,13 | 0,00 | 0,9369952 | NA       |
| CYP2A13           | 0,00 | 0,00 | 0,00 | 0,00 | 0,9370135 | NA       |
| RP11-342D11.3     | 0,00 | 0,00 | 0,00 | 0,00 | 0,9370342 | NA       |
| AL138479.2        | 0,00 | 0,00 | 0,00 | 0,15 | 0,9371047 | NA       |
| TBCB              | 7,73 | 7,10 | 7,59 | 7,22 | 0,9371331 | 0,959311 |
| MRPS31            | 4,61 | 4,68 | 4,32 | 4,57 | 0,9371685 | 0,959311 |
| RP11-642L11.1     | 0,35 | 0,00 | 0,09 | 0,42 | 0,9372229 | 0,959323 |
| RP1-281H8.3       | 0,00 | 0,00 | 0,00 | 0,21 | 0,9372311 | NA       |
| LL22NC03-N14H11.1 | 0,00 | 0,00 | 0,00 | 0,00 | 0,9372929 | NA       |
| RN7SL271P         | 0,00 | 0,00 | 0,00 | 0,00 | 0,937371  | 0,959428 |
| RP5-862P8.2       | 1,64 | 2,07 | 1,54 | 0,66 | 0,9374117 | 0,959428 |
| RP11-506M13.3     | 1,07 | 1,10 | 0,75 | 0,49 | 0,937501  | 0,959448 |
| PLEKHM2           | 3,58 | 4,23 | 3,92 | 3,71 | 0,9375179 | 0,959448 |
| RP11-422P22.1     | 0,00 | 0,00 | 0,00 | 0,00 | 0,937602  | NA       |
| TATDN3            | 4,28 | 4,48 | 3,87 | 3,88 | 0,9376117 | 0,959482 |
| PRSS21            | 0,00 | 0,00 | 0,00 | 0,00 | 0,9376467 | NA       |
| ULBP1             | 0,13 | 0,72 | 0,04 | 0,04 | 0,9376533 | 0,959482 |
| RPL17P41          | 0,00 | 0,00 | 0,00 | 0,00 | 0,9376669 | NA       |
| RP11-452H21.4     | 0,93 | 1,13 | 0,71 | 1,71 | 0,9377133 | 0,959482 |
| SIN3A             | 4,33 | 3,17 | 4,16 | 2,38 | 0,9377236 | 0,959482 |
| RP11-687E1.2      | 0,00 | 0,00 | 0,00 | 0,00 | 0,9377443 | NA       |
| OR10K2            | 0,00 | 0,00 | 0,00 | 0,00 | 0,9377976 | NA       |
| AC010971.1        | 0,16 | 0,42 | 0,05 | 0,00 | 0,937822  | 0,959494 |
| RP11-122G18.10    | 0,00 | 0,00 | 0,00 | 0,00 | 0,93786   | 0,959494 |
| RP11-367G6.1      | 0,00 | 0,00 | 0,00 | 0,00 | 0,9378651 | NA       |
| RP11-359C24.1     | 1,72 | 1,49 | 1,56 | 2,96 | 0,9378651 | 0,959494 |
| AC144450.1        | 0,00 | 0,00 | 0,00 | 0,00 | 0,9378703 | NA       |
| RP11-56B16.4      | 0,00 | 0,00 | 0,00 | 0,00 | 0,9380254 | NA       |
| RP11-692N5.1      | 0,00 | 0,00 | 0,00 | 0,00 | 0,9381022 | NA       |
| RP4-533D7.4       | 0,00 | 0,00 | 0,00 | 0,00 | 0,9383984 | NA       |
| AC078899.1        | 0,00 | 0,00 | 0,00 | 0,00 | 0,9384111 | NA       |
| RP11-834C11.8     | 0,00 | 0,00 | 0,00 | 0,00 | 0,9384692 | NA       |
| SMAD5OS           | 0,00 | 0,00 | 0,00 | 0,00 | 0,9384746 | NA       |
| RP1-90G24.6       | 0,00 | 0,00 | 0,00 | 0,00 | 0,9385461 | NA       |
| CCL23             | 0,00 | 0,00 | 0,00 | 0,00 | 0,9385712 | NA       |
| LL22NC03-27C5.1   | 0,02 | 0,02 | 0,03 | 0,00 | 0,9386043 | 0,960206 |
| TMEM155           | 0,00 | 0,00 | 0,00 | 0,00 | 0,9386415 | NA       |
| RP11-1064E11.1    | 0,00 | 0,00 | 0,00 | 0,00 | 0,9386636 | NA       |
| RP11-159H20.1     | 0,00 | 0,00 | 0,00 | 0,00 | 0,9387132 | NA       |
| RP1-130E4.3       | 0,00 | 0,00 | 0,00 | 0,00 | 0,9387535 | NA       |
| WI2-87327B8.2     | 0,00 | 0,00 | 0,00 | 0,00 | 0,9387757 | NA       |
| RP11-25I15.3      | 0,59 | 1,27 | 0,47 | 0,15 | 0,9388071 | 0,96037  |

|                 |      |      |      |      |           |          |
|-----------------|------|------|------|------|-----------|----------|
| RP11-297B17.2   | 0,00 | 0,00 | 0,00 | 0,00 | 0,9388353 | NA       |
| OR52J3          | 0,00 | 0,00 | 0,00 | 0,00 | 0,9388461 | NA       |
| EXD1            | 0,10 | 0,11 | 0,07 | 0,13 | 0,9388512 | 0,96037  |
| TRIM51BP        | 0,00 | 0,00 | 0,00 | 0,00 | 0,9389178 | NA       |
| SPG20OS         | 0,00 | 0,00 | 0,00 | 0,00 | 0,9389773 | NA       |
| USP14           | 3,93 | 3,39 | 3,77 | 2,88 | 0,9390023 | 0,960481 |
| CTB-33O18.3     | 0,00 | 0,00 | 0,00 | 0,00 | 0,9390079 | NA       |
| STON1-GTF2A1L   | 0,00 | 0,00 | 0,00 | 0,00 | 0,9390776 | NA       |
| MIR4420         | 0,00 | 0,00 | 0,00 | 0,00 | 0,9391342 | NA       |
| PSMA8           | 0,00 | 0,00 | 0,00 | 0,00 | 0,9391382 | NA       |
| RP11-236F9.4    | 0,00 | 0,00 | 0,00 | 0,00 | 0,9391849 | NA       |
| RP11-134F2.7    | 0,00 | 0,00 | 0,00 | 0,00 | 0,9392406 | NA       |
| RP11-122L4.2    | 0,00 | 0,00 | 0,00 | 0,00 | 0,9392443 | NA       |
| ZNF654          | 2,63 | 0,95 | 2,73 | 2,73 | 0,9392482 | 0,960688 |
| RP11-63K6.1     | 0,00 | 0,00 | 0,00 | 0,00 | 0,9392639 | NA       |
| RN7SL68P        | 0,00 | 0,00 | 0,39 | 0,00 | 0,9392811 | NA       |
| RP11-712P20.2   | 0,00 | 0,00 | 0,00 | 0,07 | 0,9393021 | 0,960699 |
| RP11-130L8.2    | 0,00 | 0,00 | 0,00 | 0,00 | 0,9393549 | NA       |
| ACO10677.5      | 0,00 | 0,00 | 0,00 | 0,46 | 0,9393761 | NA       |
| RP11-398A8.1    | 0,00 | 0,00 | 0,00 | 0,00 | 0,9393863 | NA       |
| RGS6            | 0,00 | 0,33 | 0,00 | 0,16 | 0,9394206 | 0,96073  |
| RP11-85I17.2    | 0,73 | 0,55 | 0,90 | 0,72 | 0,9394361 | 0,96073  |
| FMNL2           | 1,87 | 1,99 | 0,92 | 1,19 | 0,9394617 | 0,96073  |
| RNU6-527P       | 0,00 | 0,00 | 0,00 | 0,00 | 0,9394895 | NA       |
| POTEF           | 0,00 | 0,00 | 0,00 | 0,00 | 0,9394949 | NA       |
| RP11-511P7.5    | 0,05 | 1,14 | 0,13 | 0,90 | 0,9396777 | 0,960824 |
| RP11-75A9.2     | 0,11 | 0,00 | 0,14 | 0,13 | 0,939701  | NA       |
| ANXA4           | 5,50 | 3,77 | 4,81 | 4,97 | 0,9397043 | 0,960824 |
| LANCL2          | 4,04 | 2,51 | 3,85 | 1,94 | 0,9397128 | 0,960824 |
| NMNAT1          | 2,97 | 1,94 | 2,73 | 2,31 | 0,9397299 | 0,960824 |
| TMEM167B        | 4,39 | 3,31 | 4,10 | 3,64 | 0,93977   | 0,960824 |
| RP3-336K20_B.2  | 0,00 | 0,00 | 0,00 | 0,00 | 0,939773  | NA       |
| RP11-111F5.6    | 0,00 | 0,00 | 0,00 | 0,00 | 0,9398106 | NA       |
| ACO04054.1      | 0,00 | 0,00 | 0,00 | 0,00 | 0,93984   | NA       |
| RP11-356M20.2   | 0,00 | 0,00 | 0,00 | 0,00 | 0,9398613 | NA       |
| CITF22-1A6.3    | 0,79 | 0,28 | 1,06 | 0,69 | 0,939915  | 0,96089  |
| RP11-731I8.2    | 0,03 | 0,07 | 0,05 | 0,10 | 0,9399216 | 0,96089  |
| C1orf213        | 0,00 | 0,10 | 0,00 | 0,00 | 0,9399386 | NA       |
| RP11-418B12.1   | 0,00 | 0,00 | 0,00 | 0,00 | 0,9399844 | NA       |
| RP3-414A15.10   | 0,00 | 0,00 | 0,00 | 0,00 | 0,9400398 | NA       |
| RP3-393E18.1    | 0,00 | 0,00 | 0,00 | 0,00 | 0,9400416 | NA       |
| TTC30B          | 0,00 | 0,00 | 0,04 | 0,00 | 0,9400525 | 0,96098  |
| RP11-1109M24.13 | 0,00 | 0,00 | 0,72 | 0,40 | 0,940173  | 0,961059 |
| KRTAP4-6        | 0,00 | 0,00 | 0,00 | 0,00 | 0,940241  | NA       |
| GLUDP8          | 0,00 | 0,00 | 0,00 | 0,00 | 0,9402432 | NA       |
| GRID2IP         | 0,00 | 0,00 | 0,00 | 0,00 | 0,9402437 | NA       |
| CEP72           | 0,00 | 0,00 | 0,00 | 0,00 | 0,9402706 | NA       |
| RP11-270C12.3   | 0,00 | 1,08 | 0,59 | 0,00 | 0,9402834 | NA       |
| MIR4754         | 0,00 | 0,00 | 0,00 | 0,00 | 0,9403152 | NA       |
| RP3-340I3.1     | 0,08 | 0,06 | 0,11 | 0,06 | 0,9403505 | 0,961196 |
| RP11-762I7.4    | 0,00 | 0,00 | 0,00 | 0,00 | 0,9404094 | NA       |
| RP11-321F6.2    | 0,00 | 0,00 | 0,00 | 0,00 | 0,9406447 | NA       |
| RP11-270M14.1   | 0,52 | 0,71 | 0,35 | 0,70 | 0,9406538 | 0,961462 |
| MOB3A           | 5,13 | 4,92 | 5,00 | 4,64 | 0,9407133 | 0,961479 |
| OR7A3P          | 0,00 | 0,00 | 0,00 | 0,00 | 0,9408159 | NA       |



|                |      |      |      |      |           |          |
|----------------|------|------|------|------|-----------|----------|
| AC010547.9     | 0,00 | 0,00 | 0,00 | 0,00 | 0,9408561 | NA       |
| RN7SL170P      | 0,00 | 0,00 | 0,00 | 0,00 | 0,9408837 | NA       |
| RP11-1152H14.1 | 0,00 | 0,00 | 0,00 | 0,00 | 0,940908  | NA       |
| RP11-134G8.10  | 0,00 | 0,00 | 0,00 | 0,00 | 0,9410281 | NA       |
| AC004158.2     | 3,14 | 2,81 | 2,65 | 2,36 | 0,9410518 | 0,961701 |
| RP5-933K21.3   | 0,00 | 0,00 | 0,00 | 0,00 | 0,9410838 | NA       |
| AC133109.1     | 0,07 | 0,26 | 0,00 | 0,10 | 0,941112  | 0,961701 |
| ZNF782         | 1,34 | 0,75 | 1,16 | 1,24 | 0,9411239 | 0,961701 |
| CTD-3220F14.3  | 1,15 | 0,66 | 1,39 | 2,18 | 0,9411276 | 0,961701 |
| CAND1          | 5,03 | 4,75 | 5,04 | 3,16 | 0,9411699 | 0,961701 |
| RP11-507D14.4  | 0,00 | 0,00 | 0,00 | 0,00 | 0,9411722 | NA       |
| RNU6-611P      | 2,07 | 1,95 | 0,00 | 1,79 | 0,9411901 | 0,961701 |
| FBXL12         | 3,79 | 3,42 | 2,48 | 3,19 | 0,9413205 | 0,96179  |
| PRPF8          | 6,39 | 6,26 | 6,34 | 6,10 | 0,941369  | 0,961795 |
| RP11-643G16.3  | 0,00 | 0,00 | 0,00 | 0,00 | 0,9413914 | NA       |
| RP1-170D19.3   | 0,00 | 0,00 | 0,00 | 0,00 | 0,9414324 | NA       |
| AC006277.2     | 0,00 | 0,00 | 0,00 | 0,00 | 0,9414658 | 0,961847 |
| RP11-44N11.3   | 0,00 | 0,00 | 0,00 | 0,00 | 0,9414731 | NA       |
| CTD-3193K9.1   | 0,00 | 0,00 | 0,00 | 0,00 | 0,9414733 | NA       |
| RP4-597N16.4   | 0,00 | 0,00 | 0,00 | 0,00 | 0,9415292 | NA       |
| IGSF3          | 0,00 | 0,00 | 0,00 | 0,03 | 0,9415347 | 0,961847 |
| RP11-347C12.12 | 0,00 | 0,00 | 0,00 | 0,00 | 0,9415423 | NA       |
| COL6A4P1       | 0,00 | 0,00 | 0,00 | 0,00 | 0,9415458 | NA       |
| BPGM           | 3,50 | 0,47 | 2,34 | 0,45 | 0,941574  | 0,961847 |
| CTA-204B4.2    | 0,53 | 0,48 | 0,88 | 0,80 | 0,9415981 | 0,961847 |
| RP11-829H16.4  | 0,00 | 0,00 | 0,00 | 0,00 | 0,9416044 | NA       |
| RP13-270P17.3  | 3,56 | 3,68 | 2,44 | 1,12 | 0,9416359 | 0,961847 |
| MIR3939        | 0,00 | 0,00 | 0,00 | 0,00 | 0,9416555 | NA       |
| CTD-2591A6.2   | 0,00 | 0,00 | 0,00 | 0,00 | 0,941656  | NA       |
| PCSK1N         | 0,00 | 0,00 | 0,00 | 0,00 | 0,9416789 | NA       |
| TSPAN11        | 0,00 | 0,00 | 0,00 | 0,00 | 0,9416902 | NA       |
| RP5-952N6.1    | 0,00 | 0,00 | 0,00 | 0,00 | 0,9416998 | NA       |
| CTA-989H11.1   | 0,00 | 0,00 | 0,00 | 0,00 | 0,9417111 | NA       |
| AC009228.1     | 0,00 | 0,00 | 0,00 | 0,00 | 0,9417194 | NA       |
| CTD-2017F17.1  | 0,00 | 0,00 | 0,00 | 0,00 | 0,9417714 | 0,961869 |
| EXOSC5         | 5,91 | 5,47 | 5,57 | 5,22 | 0,9417806 | 0,961869 |
| RP3-325F22.5   | 0,44 | 0,69 | 0,68 | 0,71 | 0,9417875 | 0,961869 |
| RN7SL211P      | 0,00 | 0,00 | 0,00 | 0,00 | 0,9417961 | NA       |
| CORO6          | 0,00 | 0,00 | 0,00 | 0,00 | 0,9418238 | NA       |
| ZSCAN18        | 1,32 | 1,59 | 1,41 | 1,16 | 0,9419041 | 0,961944 |
| CTC-459F4.3    | 2,71 | 0,47 | 1,61 | 0,95 | 0,9419917 | 0,961989 |
| RP4-752I6.1    | 0,00 | 1,42 | 0,57 | 0,96 | 0,942144  | 0,9621   |
| INF2           | 4,13 | 2,99 | 4,13 | 3,55 | 0,9422218 | 0,962136 |
| CHAD           | 0,00 | 0,00 | 0,00 | 0,00 | 0,9422532 | NA       |
| AMN1           | 2,80 | 2,95 | 2,37 | 3,17 | 0,9423832 | 0,96222  |
| RP11-248C1.3   | 0,00 | 0,00 | 0,00 | 0,00 | 0,9424291 | NA       |
| RP11-455G16.1  | 0,30 | 0,11 | 0,53 | 0,83 | 0,9424601 | 0,96222  |
| TSGA10IP       | 0,00 | 0,00 | 0,00 | 0,00 | 0,9424803 | NA       |
| UPK3A          | 5,50 | 5,17 | 5,33 | 4,67 | 0,9425053 | 0,96222  |
| RP4-599G15.2   | 0,00 | 0,00 | 0,00 | 0,00 | 0,9425309 | NA       |
| RANBP9         | 4,30 | 3,19 | 4,44 | 1,59 | 0,9425332 | 0,96222  |
| RALA           | 4,84 | 4,81 | 4,86 | 4,94 | 0,942545  | 0,96222  |
| FAM122B        | 3,32 | 2,34 | 3,07 | 3,02 | 0,9425903 | 0,96222  |
| RP1-56K13.5    | 0,00 | 0,40 | 0,00 | 0,00 | 0,9425997 | NA       |
| CALHM2         | 5,18 | 5,49 | 5,09 | 2,92 | 0,9426076 | 0,96222  |

|                 |      |      |      |      |           |          |
|-----------------|------|------|------|------|-----------|----------|
| VPS37D          | 0,00 | 0,00 | 0,00 | 0,00 | 0,9426364 | NA       |
| RP11-98G7.1     | 0,00 | 0,00 | 0,00 | 0,00 | 0,9426693 | 0,962239 |
| MIR3942         | 0,00 | 0,00 | 0,00 | 0,00 | 0,9427176 | NA       |
| NDUFV1          | 7,09 | 7,03 | 6,95 | 6,75 | 0,9427456 | 0,962256 |
| FCHSD1          | 2,18 | 1,66 | 2,38 | 1,97 | 0,9427729 | 0,962256 |
| RP11-362K14.7   | 0,00 | 0,00 | 0,00 | 0,00 | 0,9427783 | NA       |
| RP11-498C9.2    | 0,00 | 0,00 | 0,00 | 0,00 | 0,942785  | NA       |
| CCDC38          | 0,50 | 0,59 | 0,73 | 0,63 | 0,9429043 | 0,962346 |
| RF00279         | 0,00 | 0,00 | 0,00 | 0,00 | 0,9429077 | NA       |
| RP1-121G13.3    | 0,00 | 0,00 | 0,00 | 0,00 | 0,9430045 | NA       |
| RP11-294C11.1   | 0,00 | 0,00 | 0,00 | 0,00 | 0,9430155 | NA       |
| RP11-143M1.2    | 0,96 | 2,12 | 1,42 | 1,64 | 0,9430277 | 0,962428 |
| RP4-669P10.16   | 0,00 | 0,00 | 0,00 | 0,00 | 0,9430829 | NA       |
| QRFP            | 0,00 | 0,00 | 0,00 | 0,00 | 0,9431856 | NA       |
| AMBP            | 0,00 | 0,00 | 0,00 | 0,00 | 0,9432414 | NA       |
| RP11-809H16.5   | 0,16 | 0,32 | 0,30 | 0,42 | 0,943331  | 0,962677 |
| RP11-266L9.6    | 0,00 | 0,00 | 0,00 | 0,00 | 0,9433435 | NA       |
| ASXL1           | 2,77 | 3,55 | 3,47 | 3,73 | 0,9433583 | 0,962677 |
| SLC31A2         | 6,01 | 6,53 | 6,30 | 5,94 | 0,9434418 | 0,962679 |
| SEPT14P21       | 0,00 | 0,00 | 0,00 | 0,00 | 0,9434471 | NA       |
| SYN3            | 2,46 | 2,00 | 1,32 | 0,97 | 0,9434475 | 0,962679 |
| RPL3P9          | 0,00 | 0,00 | 0,00 | 0,00 | 0,9434642 | NA       |
| RN7SL800P       | 0,00 | 0,00 | 0,00 | 0,00 | 0,9434654 | NA       |
| AC079767.4      | 0,00 | 0,00 | 0,00 | 0,00 | 0,9434692 | NA       |
| RP11-736I10.9   | 0,00 | 0,00 | 0,00 | 0,00 | 0,9435053 | NA       |
| RP11-191A15.4   | 0,00 | 0,00 | 0,00 | 0,00 | 0,9435083 | NA       |
| RNU6-812P       | 0,00 | 0,00 | 0,00 | 0,00 | 0,9435135 | NA       |
| SLC26A9         | 0,00 | 0,00 | 0,00 | 0,00 | 0,9436051 | NA       |
| RP11-499P20.2   | 1,86 | 1,61 | 1,14 | 0,83 | 0,9436108 | 0,962774 |
| THRA            | 0,00 | 0,44 | 0,09 | 0,09 | 0,943627  | 0,962774 |
| RP11-269C4.2    | 0,00 | 0,20 | 0,00 | 0,00 | 0,943629  | NA       |
| RP11-202G11.1   | 0,00 | 0,00 | 0,00 | 0,00 | 0,9437166 | NA       |
| RP11-806L2.3    | 0,00 | 0,00 | 0,00 | 0,00 | 0,9438324 | NA       |
| RP11-239A17.1   | 0,00 | 0,00 | 0,00 | 0,00 | 0,9438793 | NA       |
| RN7SL547P       | 0,00 | 0,00 | 0,00 | 0,00 | 0,9439294 | NA       |
| CTD-2515C13.2   | 0,00 | 0,00 | 0,00 | 0,00 | 0,9439336 | 0,963043 |
| RP5-966M1.7     | 0,00 | 0,00 | 0,00 | 0,00 | 0,9439367 | NA       |
| TUBB8P7         | 0,00 | 0,00 | 0,00 | 0,00 | 0,9440727 | NA       |
| RNU4-61P        | 0,00 | 0,00 | 0,00 | 0,00 | 0,9441583 | NA       |
| RP11-228M15.1   | 0,77 | 1,43 | 0,42 | 0,19 | 0,9441608 | 0,96323  |
| AC018359.1      | 0,00 | 0,00 | 0,00 | 0,00 | 0,9443198 | NA       |
| TYRP1           | 0,00 | 0,00 | 0,00 | 0,00 | 0,9444571 | NA       |
| RP11-638L3.4    | 0,00 | 0,00 | 0,00 | 0,00 | 0,9445642 | NA       |
| RP1-60N8.1      | 0,00 | 0,00 | 0,00 | 0,00 | 0,9445646 | NA       |
| RN7SL620P       | 0,00 | 0,00 | 0,00 | 0,00 | 0,9445706 | NA       |
| RP3-368A4.2     | 0,00 | 0,00 | 0,00 | 0,00 | 0,9446952 | NA       |
| ABCC5           | 2,58 | 2,11 | 2,33 | 1,86 | 0,9447262 | 0,963763 |
| RP11-32B5.1     | 0,00 | 0,00 | 0,00 | 0,00 | 0,9447574 | NA       |
| SPACA6          | 1,19 | 1,12 | 1,61 | 1,64 | 0,9449208 | 0,963899 |
| RP1-12G14.7     | 0,00 | 0,92 | 0,00 | 0,73 | 0,9449728 | 0,963899 |
| RN7SL752P       | 0,74 | 0,00 | 2,00 | 1,38 | 0,9449892 | 0,963899 |
| RP11-438P9.1    | 0,00 | 0,00 | 0,00 | 0,00 | 0,9450485 | NA       |
| LL21NC02-1C16.2 | 3,88 | 0,29 | 3,79 | 3,90 | 0,9450895 | 0,963915 |
| ACE2            | 0,00 | 0,00 | 0,00 | 0,00 | 0,945091  | NA       |
| ABCC10          | 3,37 | 3,11 | 3,12 | 3,40 | 0,9450967 | 0,963915 |

|               |      |      |      |      |           |          |
|---------------|------|------|------|------|-----------|----------|
| RP11-312H15.2 | 0,00 | 0,00 | 0,00 | 0,00 | 0,9451326 | NA       |
| SERPINE3      | 0,00 | 0,00 | 0,00 | 0,00 | 0,9451439 | NA       |
| RP11-6F2.4    | 0,25 | 0,31 | 0,65 | 1,08 | 0,9451538 | 0,963915 |
| NFYA          | 3,13 | 2,12 | 2,37 | 2,90 | 0,9451786 | 0,963915 |
| RP11-639E23.1 | 0,00 | 0,00 | 0,00 | 0,00 | 0,9452075 | NA       |
| RN7SL542P     | 0,00 | 0,00 | 0,00 | 0,00 | 0,9452336 | NA       |
| AC037445.1    | 0,00 | 0,00 | 0,00 | 0,00 | 0,9452571 | NA       |
| AC010746.4    | 0,00 | 0,00 | 0,00 | 0,00 | 0,9452572 | NA       |
| RP11-344P13.6 | 0,00 | 0,00 | 0,00 | 0,00 | 0,9453398 | NA       |
| CTD-2533K21.2 | 0,00 | 0,00 | 0,00 | 0,00 | 0,9453698 | NA       |
| IAPP          | 0,00 | 0,09 | 0,00 | 0,00 | 0,9454016 | NA       |
| RP11-473C18.3 | 0,00 | 0,00 | 0,00 | 0,00 | 0,9454107 | NA       |
| DPRXP3        | 0,00 | 0,00 | 0,00 | 0,00 | 0,9454362 | NA       |
| BEX5          | 0,00 | 0,00 | 0,00 | 0,00 | 0,9455129 | NA       |
| RP11-128B16.4 | 1,15 | 0,00 | 0,85 | 0,65 | 0,9455602 | 0,96426  |
| RP4-742C19.11 | 0,00 | 0,00 | 0,00 | 0,00 | 0,9455657 | NA       |
| SMIM2-AS1     | 0,13 | 0,40 | 0,23 | 0,18 | 0,9457014 | 0,964359 |
| RP11-322F10.3 | 0,00 | 0,00 | 0,00 | 0,00 | 0,9457153 | NA       |
| FAIM2         | 0,00 | 0,00 | 0,00 | 0,00 | 0,9457208 | NA       |
| MIR8485       | 3,12 | 2,86 | 3,09 | 2,70 | 0,9457488 | 0,964363 |
| MIR5087       | 0,00 | 0,00 | 0,00 | 0,00 | 0,9457524 | NA       |
| CTD-2619J13.1 | 0,00 | 0,00 | 0,00 | 0,00 | 0,9457882 | NA       |
| ZNF398        | 1,31 | 0,72 | 0,42 | 0,24 | 0,9458976 | 0,964471 |
| SNX9          | 2,48 | 1,90 | 2,17 | 2,38 | 0,9460344 | 0,964566 |
| NOLA2P1       | 0,00 | 0,00 | 0,00 | 0,00 | 0,9460683 | NA       |
| RP11-411G7.2  | 0,00 | 0,00 | 0,00 | 0,00 | 0,9461009 | NA       |
| AC018890.1    | 7,76 | 7,87 | 7,76 | 7,60 | 0,9461663 | 0,964656 |
| RP11-67M24.3  | 0,00 | 0,00 | 0,00 | 0,00 | 0,9462074 | NA       |
| RP13-479F17.2 | 0,00 | 0,00 | 0,00 | 0,00 | 0,9462197 | NA       |
| AC002310.14   | 0,00 | 0,00 | 0,00 | 0,00 | 0,9462728 | NA       |
| RP11-204E4.4  | 0,00 | 0,00 | 0,00 | 0,00 | 0,94632   | NA       |
| RP11-697E22.1 | 0,29 | 2,37 | 0,28 | 0,00 | 0,9463404 | 0,96479  |
| PPP1R2P1      | 0,00 | 0,00 | 0,00 | 0,00 | 0,9463624 | NA       |
| RP11-285E18.1 | 0,00 | 0,00 | 0,00 | 0,00 | 0,9463678 | NA       |
| TBX2          | 0,00 | 0,00 | 0,00 | 0,00 | 0,9464322 | NA       |
| RNA5SP288     | 0,00 | 0,00 | 0,00 | 0,00 | 0,9464868 | NA       |
| KANSL1L       | 1,96 | 3,59 | 2,55 | 2,93 | 0,946492  | 0,96486  |
| ZNF708        | 2,00 | 2,04 | 1,51 | 2,03 | 0,9464965 | 0,96486  |
| EIF4A1P12     | 0,00 | 0,00 | 0,00 | 0,00 | 0,9465023 | NA       |
| RP11-476C8.2  | 0,00 | 0,00 | 0,00 | 0,00 | 0,9465908 | NA       |
| RP11-121G22.3 | 1,40 | 2,26 | 1,21 | 1,60 | 0,9466377 | 0,964928 |
| RP11-1E4.1    | 0,07 | 0,11 | 0,08 | 0,09 | 0,9466986 | 0,964928 |
| RP4-655J12.5  | 0,00 | 0,00 | 0,00 | 0,00 | 0,9467038 | NA       |
| DENR          | 4,95 | 4,73 | 4,34 | 4,52 | 0,9467057 | 0,964928 |
| MILR1         | 5,33 | 5,28 | 5,24 | 4,04 | 0,946737  | 0,964928 |
| MIR361        | 0,00 | 0,00 | 0,00 | 0,00 | 0,9467419 | NA       |
| RP11-327J17.9 | 0,00 | 0,00 | 0,00 | 0,00 | 0,9467488 | NA       |
| RP11-417E7.2  | 0,00 | 0,00 | 0,00 | 0,00 | 0,946852  | NA       |
| PPAN-P2RY11   | 0,00 | 0,00 | 0,00 | 0,00 | 0,9469448 | NA       |
| MIR4804       | 0,00 | 0,00 | 0,00 | 0,00 | 0,9469498 | NA       |
| MIR4511       | 0,00 | 0,00 | 0,00 | 0,00 | 0,9469503 | NA       |
| CTC-420A11.2  | 0,23 | 0,26 | 0,26 | 0,31 | 0,9469654 | 0,965117 |
| RP11-393K19.1 | 0,00 | 0,00 | 0,00 | 0,00 | 0,9469777 | NA       |
| RNU6-729P     | 0,00 | 0,00 | 0,00 | 0,00 | 0,9469795 | NA       |
| RP11-497D6.2  | 0,00 | 0,00 | 0,00 | 0,00 | 0,9470743 | NA       |

|                |      |      |      |      |           |          |
|----------------|------|------|------|------|-----------|----------|
| ANKRD55        | 0,00 | 0,19 | 0,00 | 0,19 | 0,9471491 | 0,96526  |
| CTD-2522E6.4   | 0,00 | 0,00 | 0,00 | 0,00 | 0,9472055 | NA       |
| RP11-727F15.13 | 0,00 | 0,00 | 0,00 | 0,00 | 0,9473388 | NA       |
| CTD-2154I11.3  | 0,00 | 0,00 | 0,00 | 0,00 | 0,9473998 | NA       |
| RP3-410B11.1   | 0,00 | 0,00 | 0,00 | 0,00 | 0,9475898 | NA       |
| SIRT2          | 5,23 | 4,26 | 4,92 | 4,10 | 0,9476092 | 0,965628 |
| RPL34P34       | 0,00 | 0,66 | 0,00 | 0,00 | 0,9476105 | NA       |
| CTD-2265O21.8  | 0,30 | 0,00 | 0,00 | 0,40 | 0,9476288 | 0,965628 |
| RP11-25I15.1   | 0,00 | 0,00 | 0,00 | 0,00 | 0,9476412 | NA       |
| POFUT2         | 1,04 | 1,59 | 1,24 | 2,49 | 0,9476524 | 0,965628 |
| EGFL7          | 0,00 | 0,00 | 0,00 | 0,00 | 0,9476843 | NA       |
| SMPD4          | 3,38 | 0,91 | 3,20 | 1,64 | 0,9476844 | 0,965628 |
| RNA5SP394      | 0,00 | 0,00 | 0,00 | 0,00 | 0,9476961 | NA       |
| LRRC2-AS1      | 0,00 | 0,00 | 0,00 | 0,00 | 0,947712  | NA       |
| RP11-540B6.2   | 0,00 | 0,00 | 0,00 | 0,00 | 0,9477258 | NA       |
| RP11-134K1.3   | 0,00 | 0,00 | 0,00 | 0,00 | 0,947856  | NA       |
| RP11-439C15.6  | 0,00 | 0,00 | 0,00 | 0,00 | 0,9478616 | NA       |
| RNA5SP172      | 0,00 | 0,00 | 0,00 | 0,00 | 0,9479699 | NA       |
| RN7SL392P      | 0,79 | 0,00 | 0,00 | 1,21 | 0,9480233 | 0,965849 |
| RP11-23J18.1   | 0,22 | 1,03 | 0,58 | 1,31 | 0,9480281 | 0,965849 |
| CH507-9B2.5    | 0,75 | 0,50 | 1,25 | 0,62 | 0,9480316 | 0,965849 |
| RP11-10C8.2    | 0,00 | 0,00 | 0,00 | 0,00 | 0,9480553 | NA       |
| RP11-702L15.1  | 0,00 | 0,00 | 0,00 | 0,00 | 0,9481179 | NA       |
| RP11-60E8.4    | 0,00 | 0,00 | 0,00 | 0,00 | 0,9481538 | NA       |
| RP3-468O1.5    | 0,00 | 1,22 | 0,00 | 0,00 | 0,948249  | 0,966026 |
| OR4N5          | 0,00 | 0,00 | 0,00 | 0,00 | 0,9483099 | NA       |
| EDN1           | 0,00 | 0,00 | 0,00 | 0,00 | 0,9483138 | NA       |
| RP11-391I3.1   | 0,00 | 0,00 | 0,00 | 0,00 | 0,9483814 | NA       |
| ABHD12         | 4,16 | 3,33 | 3,99 | 3,18 | 0,9483894 | 0,966125 |
| RP11-442P12.1  | 0,00 | 0,00 | 0,00 | 0,00 | 0,9484079 | NA       |
| RP5-1099D15.1  | 0,00 | 0,00 | 0,00 | 0,00 | 0,9484372 | NA       |
| RIDA           | 4,31 | 2,48 | 4,01 | 1,25 | 0,9484694 | 0,966162 |
| RP11-39E3.3    | 0,00 | 0,00 | 0,00 | 0,00 | 0,9484974 | NA       |
| AP000472.3     | 0,00 | 0,00 | 0,00 | 0,37 | 0,948641  | NA       |
| FAM73B         | 2,23 | 1,25 | 1,35 | 0,96 | 0,9486475 | 0,9663   |
| RP11-474O21.5  | 0,00 | 0,00 | 0,00 | 0,00 | 0,9487231 | NA       |
| RN7SL793P      | 0,00 | 0,00 | 0,00 | 0,00 | 0,9487721 | NA       |
| FTLL2          | 0,00 | 0,00 | 0,00 | 0,00 | 0,9488932 | NA       |
| AC016629.7     | 0,00 | 0,00 | 0,00 | 0,00 | 0,9488975 | NA       |
| MTTP           | 0,00 | 0,00 | 0,00 | 0,09 | 0,9489148 | NA       |
| RP11-226M10.3  | 0,00 | 0,27 | 0,03 | 0,08 | 0,9490966 | 0,96664  |
| RP11-68I3.11   | 0,25 | 0,40 | 0,30 | 0,54 | 0,9491398 | 0,96664  |
| CHRNA4         | 0,00 | 0,00 | 0,00 | 0,00 | 0,9491512 | 0,96664  |
| CTD-3096M3.2   | 0,00 | 0,00 | 0,00 | 0,00 | 0,9491561 | 0,96664  |
| RP11-167P22.2  | 0,00 | 0,00 | 0,00 | 0,00 | 0,9491588 | NA       |
| FHOD3          | 0,00 | 0,03 | 0,00 | 0,00 | 0,9491618 | NA       |
| RP11-519G16.2  | 0,00 | 0,00 | 0,00 | 0,80 | 0,9493787 | NA       |
| RP11-166N17.3  | 0,00 | 0,45 | 0,00 | 0,69 | 0,9494893 | 0,966935 |
| RP11-457D2.3   | 0,00 | 0,00 | 0,00 | 0,00 | 0,9495009 | NA       |
| RP11-95J11.1   | 0,00 | 0,00 | 0,00 | 0,00 | 0,9495554 | NA       |
| ELOA3C         | 0,00 | 0,00 | 0,00 | 0,00 | 0,9495809 | NA       |
| RP11-141I13.5  | 0,00 | 0,13 | 0,00 | 0,11 | 0,9496798 | NA       |
| RP11-556H2.2   | 0,00 | 0,00 | 0,00 | 0,00 | 0,9496834 | NA       |
| RP11-152F13.8  | 0,00 | 0,00 | 0,00 | 0,00 | 0,9497004 | NA       |
| BPIFA3         | 0,00 | 0,00 | 0,00 | 0,00 | 0,94971   | NA       |

|               |      |      |      |      |           |          |
|---------------|------|------|------|------|-----------|----------|
| RP11-83B20.7  | 0,00 | 0,00 | 0,00 | 0,00 | 0,949713  | NA       |
| RP5-1057I20.2 | 0,00 | 0,00 | 0,00 | 0,00 | 0,9497448 | NA       |
| RP11-3L21.2   | 0,00 | 0,00 | 0,00 | 0,00 | 0,9497624 | NA       |
| MAGEA13P      | 0,00 | 0,00 | 0,00 | 0,00 | 0,9497878 | NA       |
| UBE3AP2       | 0,00 | 0,00 | 0,00 | 0,00 | 0,9498095 | NA       |
| XX-BC751M15.1 | 0,00 | 0,00 | 0,00 | 0,00 | 0,9498369 | NA       |
| MLLT10P2      | 0,00 | 0,00 | 0,00 | 0,00 | 0,9498566 | NA       |
| SKIV2L2       | 4,34 | 4,54 | 3,85 | 3,03 | 0,9498631 | 0,967272 |
| AC002310.17   | 0,00 | 0,00 | 0,00 | 0,00 | 0,9498734 | NA       |
| KCNQ4         | 0,00 | 0,00 | 0,00 | 0,00 | 0,949874  | NA       |
| RP11-577H5.2  | 0,00 | 0,00 | 0,00 | 0,00 | 0,9499221 | NA       |
| AC084149.2    | 0,00 | 0,00 | 0,00 | 0,20 | 0,9499358 | NA       |
| RP11-676F20.4 | 0,00 | 0,48 | 0,22 | 0,00 | 0,950059  | 0,967427 |
| RP11-167P22.3 | 0,00 | 0,00 | 0,00 | 0,00 | 0,9500742 | NA       |
| HK1           | 4,46 | 3,65 | 4,27 | 3,91 | 0,9501217 | 0,967446 |
| H3F3AP1       | 0,00 | 0,00 | 0,00 | 0,00 | 0,9501813 | NA       |
| SLC25A28      | 6,31 | 5,90 | 6,00 | 6,10 | 0,9502833 | 0,967567 |
| RNU6-125P     | 0,00 | 0,00 | 0,00 | 0,00 | 0,9503346 | 0,967575 |
| NPHS1         | 0,00 | 0,04 | 0,00 | 0,00 | 0,9504341 | 0,967588 |
| RNF20         | 3,34 | 4,34 | 2,91 | 3,43 | 0,9504346 | 0,967588 |
| RP11-93K22.9  | 0,00 | 0,00 | 0,00 | 0,00 | 0,9504912 | NA       |
| ATXN7L3B      | 3,51 | 3,04 | 3,34 | 2,83 | 0,9505279 | 0,967592 |
| DIAPH2        | 3,46 | 2,52 | 3,25 | 2,83 | 0,9505525 | 0,967592 |
| TCTA          | 3,23 | 1,80 | 2,65 | 1,49 | 0,9505695 | 0,967592 |
| RP11-220H4.3  | 0,00 | 0,00 | 0,00 | 0,00 | 0,9506088 | NA       |
| VIPAS39       | 3,13 | 0,97 | 2,39 | 2,02 | 0,9506735 | 0,967654 |
| CCL2          | 0,00 | 0,00 | 0,00 | 0,00 | 0,9506846 | NA       |
| AC093159.1    | 0,00 | 0,00 | 0,00 | 0,00 | 0,9507421 | NA       |
| RF01699       | 0,00 | 0,00 | 0,00 | 0,00 | 0,9507431 | NA       |
| RNU5E-3P      | 0,00 | 0,00 | 0,00 | 0,00 | 0,9507618 | NA       |
| TNFSF8        | 4,26 | 3,77 | 2,77 | 1,73 | 0,9508314 | 0,967747 |
| P4HA3         | 0,13 | 0,20 | 0,07 | 0,11 | 0,95089   | 0,967747 |
| PCDHB14       | 0,02 | 0,03 | 0,03 | 0,02 | 0,9508961 | 0,967747 |
| AC104655.2    | 0,00 | 0,00 | 0,00 | 0,00 | 0,9509517 | NA       |
| ZNF876P       | 0,23 | 0,34 | 0,27 | 0,12 | 0,9509672 | 0,967775 |
| RNA5SP389     | 0,00 | 0,00 | 0,00 | 0,00 | 0,9509976 | NA       |
| AP000279.69   | 0,91 | 1,02 | 0,86 | 0,74 | 0,9510144 | 0,967779 |
| RPL30P13      | 0,00 | 0,00 | 0,00 | 0,00 | 0,9511177 | NA       |
| RP11-425A6.5  | 0,05 | 0,11 | 0,13 | 0,00 | 0,9511362 | 0,967859 |
| RP11-140B16.2 | 0,00 | 0,00 | 0,00 | 0,00 | 0,9512394 | NA       |
| RP11-270M14.4 | 0,00 | 0,00 | 0,00 | 0,00 | 0,9512899 | NA       |
| CTB-118N6.1   | 0,00 | 0,00 | 0,00 | 0,00 | 0,9513393 | NA       |
| RP5-1057I20.5 | 0,00 | 0,00 | 0,00 | 0,00 | 0,9513544 | NA       |
| RP11-351I24.3 | 0,00 | 0,00 | 0,00 | 0,00 | 0,9514016 | NA       |
| CTD-3148I10.9 | 0,00 | 0,00 | 0,00 | 0,00 | 0,9514065 | NA       |
| NHLRC4        | 0,00 | 0,00 | 0,00 | 0,00 | 0,951431  | NA       |
| RP11-641C17.1 | 0,00 | 0,00 | 0,00 | 0,00 | 0,9515177 | NA       |
| TBC1D22B      | 0,84 | 0,08 | 0,85 | 0,63 | 0,9515744 | 0,96826  |
| RP11-539L10.6 | 0,00 | 0,00 | 0,00 | 0,00 | 0,951575  | NA       |
| AC011525.2    | 0,00 | 0,00 | 0,00 | 0,00 | 0,9516077 | NA       |
| KLHL3         | 0,56 | 1,04 | 0,48 | 0,27 | 0,9516236 | 0,968266 |
| RP11-438L19.1 | 0,00 | 0,00 | 0,00 | 0,00 | 0,9517612 | NA       |
| ESPNP         | 0,00 | 0,14 | 0,00 | 0,00 | 0,9520668 | NA       |
| HSPE1-MOB4    | 3,99 | 0,00 | 2,11 | 0,00 | 0,9520884 | 0,968695 |
| DHX9          | 5,79 | 5,58 | 5,41 | 4,99 | 0,9521924 | 0,968756 |

|               |      |      |      |      |           |          |
|---------------|------|------|------|------|-----------|----------|
| C14orf179     | 4,49 | 4,43 | 3,67 | 4,76 | 0,9522624 | 0,968783 |
| VANGL1        | 0,15 | 1,13 | 0,54 | 0,27 | 0,9523187 | 0,968796 |
| IL17A         | 0,00 | 0,00 | 0,00 | 0,00 | 0,9524465 | NA       |
| RNU2-12P      | 0,00 | 0,00 | 0,00 | 0,00 | 0,9524566 | NA       |
| RP11-319G9.4  | 0,00 | 0,00 | 0,00 | 0,00 | 0,9524635 | NA       |
| RNU6-912P     | 0,00 | 0,00 | 0,00 | 0,00 | 0,9524862 | NA       |
| RP3-477M7.3   | 0,00 | 0,00 | 0,00 | 0,00 | 0,9525055 | NA       |
| FXVD7         | 0,00 | 0,00 | 0,00 | 0,00 | 0,9525171 | NA       |
| RN7SL43P      | 0,00 | 1,42 | 0,00 | 0,00 | 0,9525575 | NA       |
| WIF1          | 0,00 | 0,00 | 0,00 | 0,00 | 0,9525969 | NA       |
| RP11-219C24.6 | 0,00 | 0,00 | 0,00 | 0,00 | 0,9526723 | NA       |
| EIF2S2        | 4,94 | 4,21 | 4,72 | 4,10 | 0,9527135 | 0,969107 |
| TRAPPC13      | 4,33 | 4,34 | 3,98 | 4,08 | 0,9527235 | 0,969107 |
| CRB3          | 0,03 | 0,00 | 0,00 | 0,00 | 0,9527486 | NA       |
| AP000479.1    | 0,00 | 0,00 | 0,00 | 0,00 | 0,9527528 | NA       |
| HSPBAP1       | 4,32 | 4,27 | 3,94 | 3,44 | 0,9527554 | 0,969107 |
| RP11-775H9.1  | 0,00 | 0,00 | 0,00 | 0,00 | 0,952832  | NA       |
| FBXL8         | 1,58 | 1,81 | 1,75 | 2,71 | 0,9528654 | 0,969175 |
| AP000271.1    | 0,00 | 0,00 | 0,00 | 0,00 | 0,9528673 | NA       |
| RP11-503G7.1  | 0,00 | 0,00 | 0,00 | 0,00 | 0,9528862 | NA       |
| HCRT          | 0,00 | 0,00 | 0,00 | 0,00 | 0,9529165 | NA       |
| CTD-2196E14.6 | 0,74 | 0,93 | 0,73 | 0,67 | 0,9529303 | 0,969196 |
| MIR581        | 0,00 | 0,00 | 0,00 | 0,00 | 0,952951  | NA       |
| MROH9         | 0,00 | 0,00 | 0,00 | 0,00 | 0,9529727 | NA       |
| RP11-101E5.6  | 0,00 | 0,04 | 0,00 | 0,02 | 0,9530684 | NA       |
| RP11-144A16.5 | 0,00 | 0,04 | 0,00 | 0,02 | 0,9530739 | NA       |
| RFC1          | 4,62 | 4,69 | 4,76 | 4,81 | 0,9530766 | 0,969272 |
| RN7SKP193     | 1,55 | 2,05 | 1,88 | 2,18 | 0,9530921 | 0,969272 |
| RP11-61K12.2  | 0,00 | 0,00 | 0,00 | 0,04 | 0,9531678 | NA       |
| SQSTM1        | 5,73 | 5,41 | 5,72 | 5,19 | 0,953176  | 0,969278 |
| CEP57L1       | 2,54 | 1,88 | 1,89 | 2,06 | 0,9531847 | 0,969278 |
| AC024067.1    | 0,00 | 0,00 | 0,00 | 0,00 | 0,9532032 | NA       |
| TP53INP1      | 1,58 | 1,23 | 1,56 | 1,96 | 0,9532972 | 0,969348 |
| ZSCAN1        | 0,00 | 0,00 | 0,00 | 0,00 | 0,9533234 | NA       |
| C10orf91      | 0,00 | 0,00 | 0,00 | 0,00 | 0,9533636 | 0,969371 |
| RP11-330C7.4  | 0,00 | 0,00 | 0,00 | 0,00 | 0,9533784 | NA       |
| H2AFB1        | 0,00 | 0,00 | 0,00 | 0,00 | 0,9534031 | NA       |
| RP11-950C14.3 | 0,00 | 0,00 | 0,00 | 0,00 | 0,9534227 | NA       |
| AC142119.1    | 0,39 | 0,26 | 0,64 | 0,86 | 0,9535629 | 0,969529 |
| RP11-193I22.2 | 0,00 | 0,00 | 0,00 | 0,00 | 0,9536143 | NA       |
| OR51B2        | 0,00 | 0,00 | 0,00 | 0,00 | 0,9536182 | NA       |
| SLC25A33      | 2,33 | 1,20 | 2,49 | 2,25 | 0,9536847 | 0,969609 |
| RP11-141O11.2 | 0,00 | 0,00 | 0,00 | 0,00 | 0,9536891 | NA       |
| CTD-2089O24.1 | 0,00 | 0,00 | 0,00 | 0,00 | 0,9536905 | NA       |
| RN7SKP285     | 0,00 | 0,00 | 0,00 | 0,00 | 0,9537116 | NA       |
| PIGO          | 3,17 | 1,22 | 2,94 | 2,92 | 0,9537419 | 0,969622 |
| RP11-214K3.20 | 0,00 | 0,00 | 0,00 | 0,00 | 0,9538302 | NA       |
| KRT23         | 0,00 | 0,00 | 0,00 | 0,00 | 0,9538426 | NA       |
| IGHV3-74      | 0,00 | 0,00 | 0,00 | 0,00 | 0,9538666 | NA       |
| RP1-182O16.2  | 0,00 | 0,00 | 0,00 | 0,00 | 0,9538951 | NA       |
| TM4SF1        | 0,00 | 0,00 | 0,00 | 0,00 | 0,9539419 | NA       |
| CHRNA3        | 0,00 | 0,00 | 0,00 | 0,00 | 0,953958  | 0,969774 |
| BORCS6        | 0,62 | 0,59 | 1,24 | 1,33 | 0,9539782 | 0,969774 |
| MIR6761       | 0,00 | 0,00 | 0,00 | 0,00 | 0,9540506 | NA       |
| RPL39P36      | 0,00 | 0,00 | 0,00 | 0,00 | 0,9540629 | NA       |

|                |      |      |      |      |           |          |
|----------------|------|------|------|------|-----------|----------|
| PIH1D2         | 0,00 | 0,00 | 0,00 | 0,00 | 0,9540696 | NA       |
| RP11-13K12.1   | 0,00 | 0,00 | 0,00 | 0,00 | 0,954143  | NA       |
| RP11-359K18.3  | 0,00 | 0,00 | 0,00 | 0,00 | 0,954147  | NA       |
| DRICH1         | 0,00 | 0,00 | 0,00 | 0,00 | 0,9541773 | NA       |
| ARR3           | 0,00 | 0,00 | 0,00 | 0,00 | 0,9544062 | NA       |
| DBX1           | 0,00 | 0,00 | 0,00 | 0,00 | 0,9544176 | NA       |
| RP11-752G15.9  | 0,21 | 0,41 | 0,18 | 0,09 | 0,9544322 | 0,97016  |
| VAMP3          | 5,55 | 5,28 | 4,86 | 4,98 | 0,9544458 | 0,97016  |
| AC008063.2     | 0,00 | 0,00 | 0,00 | 0,00 | 0,954461  | NA       |
| RP11-570G20.1  | 0,00 | 0,00 | 0,00 | 0,00 | 0,9545384 | NA       |
| LA16c-306E5.3  | 0,00 | 0,00 | 0,00 | 0,00 | 0,9545728 | NA       |
| RP11-1212A22.1 | 0,00 | 0,00 | 0,00 | 0,00 | 0,9545954 | 0,970268 |
| RP4-753D5.4    | 1,01 | 0,68 | 0,93 | 0,94 | 0,9546928 | 0,970323 |
| CAP2           | 0,00 | 0,00 | 0,00 | 0,00 | 0,9547258 | NA       |
| RP11-254F19.2  | 0,00 | 0,00 | 0,00 | 0,00 | 0,9547879 | NA       |
| C10orf111      | 0,33 | 0,71 | 0,52 | 0,72 | 0,9548179 | 0,970406 |
| RNA5SP387      | 0,00 | 0,00 | 0,00 | 0,00 | 0,9548201 | NA       |
| AC007254.3     | 6,72 | 6,43 | 6,16 | 5,98 | 0,9548643 | 0,970408 |
| RP11-662B19.1  | 0,00 | 0,00 | 0,00 | 0,00 | 0,9549691 | NA       |
| OR56B1         | 0,00 | 0,00 | 0,00 | 0,00 | 0,9550138 | NA       |
| RP11-5C23.2    | 0,00 | 0,00 | 0,00 | 0,00 | 0,9551458 | NA       |
| SNORA72        | 0,00 | 0,00 | 0,00 | 0,00 | 0,9551982 | NA       |
| RN7SL473P      | 4,55 | 2,98 | 5,50 | 3,74 | 0,9552422 | 0,970748 |
| ADIRF          | 0,00 | 0,00 | 0,00 | 0,00 | 0,9552607 | NA       |
| RP3-485C17.1   | 0,00 | 0,00 | 0,00 | 0,00 | 0,9553173 | NA       |
| RP11-348M17.1  | 0,00 | 0,00 | 0,00 | 0,00 | 0,9553743 | NA       |
| RP11-215P8.4   | 0,00 | 0,00 | 0,44 | 1,20 | 0,9554753 | 0,97094  |
| RP11-484D18.2  | 0,00 | 0,00 | 0,00 | 0,00 | 0,9555426 | NA       |
| CTB-32H22.1    | 0,00 | 0,00 | 0,00 | 0,00 | 0,9555657 | NA       |
| AC079248.1     | 0,00 | 0,00 | 0,00 | 0,00 | 0,9555703 | NA       |
| SUOX           | 2,34 | 1,69 | 1,65 | 2,31 | 0,955685  | 0,971086 |
| IGHV4-61       | 0,00 | 0,00 | 0,00 | 0,00 | 0,9556922 | NA       |
| SERPINB6       | 6,78 | 5,93 | 6,81 | 6,42 | 0,9557428 | 0,971086 |
| NOL12          | 6,16 | 5,76 | 5,85 | 5,45 | 0,9557501 | 0,971086 |
| RP11-771F20.1  | 0,00 | 0,00 | 0,00 | 0,00 | 0,9558289 | NA       |
| MXRA8          | 0,00 | 0,11 | 0,00 | 0,00 | 0,9558475 | NA       |
| SLC25A41       | 0,00 | 0,00 | 0,00 | 0,00 | 0,9559726 | NA       |
| RP11-729L2.2   | 0,00 | 0,00 | 0,00 | 0,13 | 0,9560242 | NA       |
| PDZRN4         | 0,00 | 0,00 | 0,00 | 0,00 | 0,956035  | NA       |
| PIGS           | 4,97 | 5,19 | 4,94 | 4,33 | 0,9561558 | 0,971454 |
| RP11-313P22.1  | 0,00 | 0,00 | 0,00 | 0,00 | 0,9561769 | NA       |
| RP11-550P17.5  | 0,00 | 0,00 | 0,00 | 0,00 | 0,9561815 | NA       |
| RNU6-1209P     | 0,00 | 0,00 | 0,00 | 0,00 | 0,9563558 | NA       |
| RP11-950K24.2  | 0,00 | 0,00 | 0,00 | 0,00 | 0,9563662 | NA       |
| NCBP2L         | 0,00 | 0,00 | 0,00 | 0,00 | 0,9563668 | NA       |
| AC007278.3     | 0,00 | 0,00 | 0,00 | 0,00 | 0,9564156 | NA       |
| RP11-669N7.2   | 0,00 | 0,00 | 0,00 | 0,00 | 0,9564699 | NA       |
| SLC6A7         | 0,00 | 0,00 | 0,00 | 0,00 | 0,9565494 | NA       |
| RP11-677M14.2  | 0,00 | 0,00 | 0,00 | 0,00 | 0,956565  | NA       |
| SMC4           | 5,11 | 4,47 | 4,81 | 5,11 | 0,9565902 | 0,971851 |
| EPX            | 0,00 | 0,00 | 0,00 | 0,00 | 0,9566748 | NA       |
| RP11-462G8.3   | 0,00 | 0,00 | 0,00 | 0,00 | 0,9566919 | NA       |
| CTD-2588E21.1  | 0,00 | 0,00 | 0,00 | 0,00 | 0,956697  | NA       |
| PLTP           | 0,00 | 0,00 | 0,00 | 0,00 | 0,9567504 | NA       |
| SLC25A24       | 2,90 | 2,69 | 2,73 | 2,89 | 0,9567511 | 0,97197  |

|                |      |      |      |      |           |          |
|----------------|------|------|------|------|-----------|----------|
| RP4-545C24.5   | 0,00 | 0,00 | 0,00 | 0,00 | 0,9567839 | NA       |
| TSR2           | 4,10 | 2,52 | 2,95 | 2,04 | 0,9568084 | 0,971984 |
| CTC-498J12.3   | 0,00 | 0,00 | 0,00 | 0,00 | 0,9568933 | NA       |
| RP11-204K16.2  | 0,00 | 0,00 | 0,00 | 0,00 | 0,9568967 | NA       |
| RP11-61I13.3   | 0,00 | 0,00 | 0,00 | 0,00 | 0,9570888 | NA       |
| TRGJ1          | 0,00 | 0,00 | 0,00 | 0,00 | 0,9571698 | NA       |
| TRGJ2          | 0,00 | 0,00 | 0,00 | 0,00 | 0,9571698 | NA       |
| SPATA31A5      | 0,00 | 0,00 | 0,00 | 0,00 | 0,9571986 | NA       |
| CRISP3         | 0,00 | 0,00 | 0,00 | 0,00 | 0,9572729 | NA       |
| ACO07050.17    | 0,00 | 0,00 | 0,00 | 0,28 | 0,9572904 | 0,972398 |
| CEP19          | 1,61 | 1,25 | 0,91 | 0,88 | 0,9573036 | 0,972398 |
| FAM173B        | 3,02 | 2,11 | 2,10 | 0,53 | 0,957444  | 0,972496 |
| RP11-445O3.1   | 0,00 | 0,00 | 0,00 | 0,00 | 0,9574851 | NA       |
| RP11-727A23.1  | 0,00 | 0,00 | 0,00 | 0,00 | 0,9575377 | NA       |
| ZNF576         | 1,12 | 0,57 | 0,99 | 0,65 | 0,95761   | 0,972585 |
| TEKT2          | 0,28 | 0,18 | 0,21 | 0,29 | 0,9576183 | 0,972585 |
| RP11-867G2.6   | 0,00 | 0,00 | 0,00 | 0,00 | 0,9576279 | NA       |
| RP11-76N11.2   | 0,00 | 0,00 | 0,00 | 0,00 | 0,9576357 | NA       |
| RN7SL217P      | 0,00 | 0,00 | 0,00 | 0,00 | 0,9576493 | NA       |
| RP11-402K9.1   | 0,21 | 0,29 | 0,47 | 0,13 | 0,9577432 | 0,972667 |
| RP11-492A12.2  | 0,00 | 0,00 | 0,00 | 0,00 | 0,9577788 | NA       |
| RP11-791G15.2  | 0,00 | 0,00 | 0,00 | 0,00 | 0,9577994 | NA       |
| ACO19066.3     | 0,00 | 0,00 | 0,00 | 0,00 | 0,9578153 | NA       |
| CT47A12        | 0,00 | 0,00 | 0,00 | 0,00 | 0,9578467 | NA       |
| RP11-175P13.2  | 0,00 | 0,00 | 0,00 | 0,00 | 0,9578718 | NA       |
| RP11-11C20.3   | 0,00 | 0,00 | 0,00 | 0,00 | 0,9579011 | NA       |
| RP11-326N17.1  | 0,00 | 0,00 | 0,00 | 0,00 | 0,9579661 | NA       |
| RP11-103J8.1   | 0,00 | 0,00 | 0,00 | 0,00 | 0,958071  | NA       |
| MAFA           | 0,00 | 0,00 | 0,00 | 0,00 | 0,9581475 | NA       |
| TPTE2          | 0,00 | 0,00 | 0,00 | 0,00 | 0,9581521 | NA       |
| RP5-874C20.8   | 0,00 | 0,00 | 0,00 | 0,00 | 0,9581752 | NA       |
| RP3-428A13.1   | 0,00 | 0,00 | 0,00 | 0,00 | 0,9582533 | NA       |
| CTB-36O1.6     | 0,00 | 0,15 | 0,06 | 0,00 | 0,9582814 | NA       |
| BMP3           | 0,00 | 0,00 | 0,00 | 0,02 | 0,9583601 | NA       |
| CCDC109B       | 5,52 | 4,99 | 5,14 | 5,24 | 0,9584253 | 0,973309 |
| RP11-267I18.1  | 0,00 | 0,00 | 0,00 | 0,00 | 0,958429  | NA       |
| RNU4-25P       | 0,00 | 0,00 | 0,00 | 0,00 | 0,9584534 | NA       |
| USP42          | 2,79 | 1,57 | 2,18 | 1,63 | 0,9584631 | 0,973309 |
| RP11-272L13.4  | 0,00 | 0,00 | 0,00 | 0,00 | 0,9584642 | NA       |
| HIPK2          | 1,91 | 2,18 | 2,04 | 1,48 | 0,9585537 | 0,973357 |
| RNU1-83P       | 0,00 | 0,00 | 0,00 | 0,00 | 0,9585653 | NA       |
| MIR6728        | 0,00 | 0,00 | 0,00 | 0,00 | 0,9585956 | NA       |
| ACHE           | 0,00 | 0,00 | 0,00 | 0,00 | 0,9586645 | NA       |
| ACOX1          | 3,58 | 4,00 | 3,86 | 3,53 | 0,958757  | 0,973519 |
| PTGES2         | 3,38 | 0,99 | 3,50 | 3,33 | 0,9588321 | 0,97355  |
| RP11-217B7.2   | 0,00 | 0,00 | 0,00 | 0,00 | 0,9588435 | NA       |
| RP11-534L20.4  | 0,00 | 0,00 | 0,00 | 0,00 | 0,9588657 | NA       |
| ACO11742.4     | 0,00 | 0,00 | 0,00 | 0,00 | 0,9588798 | NA       |
| MIR632         | 0,00 | 0,00 | 0,00 | 0,00 | 0,9589273 | NA       |
| ATF6           | 2,97 | 2,88 | 2,70 | 3,02 | 0,9589431 | 0,973619 |
| RP11-343P16.1  | 0,00 | 0,00 | 0,00 | 0,00 | 0,9589704 | NA       |
| RP11-173P15.9  | 0,00 | 0,00 | 0,00 | 0,00 | 0,9589946 | NA       |
| ZNF513         | 2,03 | 0,08 | 1,83 | 1,17 | 0,9589967 | 0,973629 |
| PDE6H          | 0,00 | 0,00 | 0,00 | 0,00 | 0,9590277 | NA       |
| RP11-147L13.11 | 3,38 | 1,50 | 2,74 | 1,55 | 0,9590739 | 0,973662 |



|                  |      |      |      |      |           |          |
|------------------|------|------|------|------|-----------|----------|
| NOS1AP           | 0,00 | 0,00 | 0,00 | 0,00 | 0,9591408 | NA       |
| SLC9B1P3         | 0,00 | 0,00 | 0,00 | 0,00 | 0,9591413 | NA       |
| TEC              | 3,22 | 1,54 | 2,87 | 1,27 | 0,9591609 | 0,973706 |
| FBXL21           | 0,00 | 0,00 | 0,00 | 0,00 | 0,9592047 | NA       |
| RP11-295B17.5    | 0,00 | 0,00 | 0,00 | 0,00 | 0,9592932 | NA       |
| AC013437.6       | 0,00 | 0,00 | 0,00 | 0,00 | 0,9593099 | NA       |
| CTC-510F12.7     | 0,00 | 0,00 | 0,00 | 0,00 | 0,9593143 | NA       |
| OR6C7P           | 0,00 | 0,00 | 0,00 | 0,00 | 0,9593149 | NA       |
| TRIM15           | 0,00 | 0,00 | 0,00 | 0,00 | 0,9593412 | NA       |
| RP11-697E2.7     | 0,00 | 0,00 | 0,00 | 0,00 | 0,9594169 | NA       |
| SLC22A8          | 0,00 | 0,00 | 0,00 | 0,00 | 0,959419  | NA       |
| ELOF1            | 6,28 | 5,80 | 5,83 | 5,89 | 0,9594385 | 0,973904 |
| RP11-795F19.5    | 0,00 | 0,00 | 0,00 | 0,00 | 0,9594419 | NA       |
| FAM41C           | 0,53 | 0,00 | 0,00 | 0,15 | 0,9594436 | 0,973904 |
| SMIM10L2A        | 0,00 | 0,00 | 0,00 | 0,00 | 0,9594726 | NA       |
| RP11-1109M24.14  | 0,00 | 0,74 | 0,00 | 0,00 | 0,9594909 | NA       |
| AEBP2            | 3,64 | 2,60 | 3,43 | 2,90 | 0,9595417 | 0,973931 |
| MTND5P26         | 0,00 | 0,00 | 0,00 | 0,00 | 0,9595496 | NA       |
| MB               | 0,00 | 0,00 | 0,00 | 0,00 | 0,959551  | NA       |
| LDB1             | 1,74 | 2,61 | 2,49 | 2,24 | 0,9595574 | 0,973931 |
| CTB-138E5.1      | 0,00 | 0,00 | 0,00 | 0,00 | 0,9595836 | NA       |
| RNY3P2           | 0,00 | 0,00 | 0,00 | 0,00 | 0,9596229 | NA       |
| XXbac-BPG32J3.18 | 0,00 | 0,00 | 0,00 | 0,00 | 0,9596483 | NA       |
| RP11-864N7.2     | 0,00 | 0,00 | 0,00 | 0,00 | 0,9596674 | NA       |
| RP11-1000B6.7    | 3,51 | 2,71 | 0,61 | 2,96 | 0,95967   | 0,974001 |
| SPR              | 0,00 | 0,10 | 0,06 | 0,57 | 0,9598501 | 0,974085 |
| RP11-81A1.2      | 0,47 | 1,20 | 0,53 | 0,22 | 0,9598643 | 0,974085 |
| AC067940.1       | 0,00 | 0,00 | 0,00 | 0,00 | 0,9598654 | NA       |
| NDUFB4           | 6,43 | 5,96 | 6,24 | 6,08 | 0,959885  | 0,974085 |
| RP3-355L5.2      | 0,00 | 0,00 | 0,00 | 0,00 | 0,9598865 | NA       |
| RNU6-1214P       | 0,00 | 0,00 | 0,00 | 0,00 | 0,9600222 | NA       |
| EPB41L1          | 0,00 | 0,00 | 0,00 | 0,00 | 0,9600964 | 0,974219 |
| SIAE             | 1,76 | 2,00 | 1,51 | 1,94 | 0,9601168 | 0,974219 |
| RP11-428G5.5     | 0,00 | 0,00 | 0,00 | 0,00 | 0,9601267 | NA       |
| RP11-696D21.2    | 0,00 | 0,19 | 0,00 | 0,00 | 0,9601284 | NA       |
| ZNF805           | 1,11 | 0,07 | 0,42 | 0,10 | 0,960178  | 0,974219 |
| ATP5J            | 7,14 | 6,88 | 7,06 | 6,61 | 0,9601922 | 0,974219 |
| RP11-540O11.8    | 0,00 | 0,00 | 0,00 | 0,00 | 0,9602048 | NA       |
| RP11-111F5.3     | 0,00 | 0,00 | 0,00 | 0,00 | 0,960226  | NA       |
| RP11-85L21.4     | 0,00 | 0,00 | 0,00 | 0,00 | 0,9602385 | NA       |
| SUMO1P4          | 0,00 | 0,00 | 0,00 | 0,00 | 0,9602834 | NA       |
| TUBA3D           | 0,00 | 0,00 | 0,00 | 0,00 | 0,9603503 | NA       |
| NDUFS7           | 8,02 | 7,82 | 7,80 | 7,78 | 0,9603892 | 0,974352 |
| RP11-325K19.1    | 0,00 | 0,00 | 0,00 | 0,00 | 0,9603944 | NA       |
| DPRXP4           | 0,00 | 0,00 | 0,00 | 0,34 | 0,9604105 | 0,974352 |
| RP13-279N23.2    | 0,00 | 0,00 | 0,00 | 0,00 | 0,9604221 | NA       |
| SNORA16B         | 0,00 | 0,00 | 0,00 | 0,00 | 0,9604247 | NA       |
| RP11-162D9.3     | 0,00 | 0,00 | 0,00 | 0,00 | 0,9604396 | NA       |
| RP11-189B4.6     | 0,00 | 0,00 | 0,00 | 0,00 | 0,9605664 | NA       |
| RP11-89H19.1     | 0,00 | 0,12 | 0,00 | 0,00 | 0,9606536 | NA       |
| RNU6-632P        | 0,00 | 0,00 | 0,00 | 0,00 | 0,9606703 | NA       |
| RP11-645C24.2    | 5,60 | 5,82 | 6,04 | 5,09 | 0,9607139 | 0,974574 |
| RP11-527H14.4    | 0,00 | 0,00 | 0,00 | 0,00 | 0,9607177 | 0,974574 |
| RP11-759F5.1     | 0,00 | 0,00 | 0,00 | 0,00 | 0,9607576 | NA       |
| SYNGR4           | 0,00 | 0,00 | 0,00 | 0,00 | 0,9607778 | NA       |

|                |      |      |      |      |           |          |
|----------------|------|------|------|------|-----------|----------|
| TRBV8-2        | 0,00 | 0,00 | 0,00 | 0,00 | 0,9609216 | NA       |
| RP11-340I6.1   | 0,00 | 0,00 | 0,00 | 0,00 | 0,9610112 | NA       |
| CFAP46         | 0,00 | 0,39 | 0,00 | 0,00 | 0,9610836 | 0,974901 |
| SNORD69        | 0,00 | 0,00 | 0,00 | 0,00 | 0,9611195 | NA       |
| FRMPD1         | 0,32 | 0,29 | 0,00 | 0,42 | 0,9612008 | 0,974975 |
| CTC-543D15.3   | 0,00 | 0,00 | 0,00 | 0,00 | 0,9612023 | NA       |
| RP11-295H24.3  | 0,00 | 0,00 | 0,00 | 0,00 | 0,9612092 | NA       |
| MIR3929        | 0,00 | 0,00 | 0,00 | 0,00 | 0,9612839 | NA       |
| CTA-150C2.22   | 0,00 | 0,00 | 0,00 | 0,00 | 0,9613403 | NA       |
| RP11-492I21.1  | 0,00 | 0,55 | 0,00 | 0,00 | 0,9614153 | 0,975113 |
| RP11-392A22.1  | 0,00 | 0,00 | 0,00 | 0,00 | 0,9614236 | NA       |
| TRMT5          | 0,55 | 1,23 | 0,81 | 0,26 | 0,9614832 | 0,975113 |
| RNY1P9         | 0,00 | 0,00 | 0,00 | 0,00 | 0,9614848 | NA       |
| CEP135         | 3,27 | 3,17 | 2,59 | 2,16 | 0,9615091 | 0,975113 |
| ARPP19         | 4,44 | 5,17 | 4,03 | 4,28 | 0,9615118 | 0,975113 |
| RNU6-288P      | 0,00 | 0,00 | 0,00 | 0,00 | 0,9615193 | NA       |
| RP11-260N14.1  | 0,00 | 0,00 | 0,00 | 0,00 | 0,9615301 | NA       |
| RNA5SP229      | 0,00 | 0,00 | 0,00 | 0,00 | 0,9615617 | NA       |
| HNFB4GP1       | 0,00 | 0,00 | 0,00 | 0,00 | 0,9616383 | NA       |
| RN7SL415P      | 0,00 | 0,00 | 0,00 | 0,00 | 0,9616459 | NA       |
| RP5-1051H14.2  | 0,00 | 0,00 | 0,00 | 0,00 | 0,9616856 | NA       |
| OR9G4          | 0,00 | 0,00 | 0,00 | 0,00 | 0,961749  | NA       |
| RP11-907D1.1   | 0,00 | 0,00 | 0,00 | 0,00 | 0,9617594 | NA       |
| RP11-22P4.2    | 0,00 | 0,00 | 0,00 | 0,00 | 0,9618241 | NA       |
| CTD-2540C19.1  | 0,00 | 0,09 | 0,00 | 0,00 | 0,9619428 | NA       |
| RP11-327E2.5   | 0,30 | 0,14 | 0,64 | 0,47 | 0,962014  | 0,975578 |
| RP11-386I8.6   | 0,15 | 0,25 | 0,00 | 0,10 | 0,9620963 | 0,975617 |
| IGKV1D-33      | 0,00 | 0,00 | 0,00 | 0,00 | 0,9621111 | NA       |
| CTD-2210P15.1  | 0,00 | 0,00 | 0,00 | 0,00 | 0,9621426 | NA       |
| RP11-247C2.2   | 0,31 | 0,38 | 0,23 | 0,22 | 0,9622209 | 0,975688 |
| MUC5B          | 0,00 | 0,01 | 0,00 | 0,00 | 0,9622328 | NA       |
| TRBV5-1        | 0,00 | 0,00 | 0,00 | 0,00 | 0,9622713 | 0,975688 |
| URB2           | 0,10 | 0,00 | 0,03 | 0,12 | 0,962298  | 0,975688 |
| POU3F2         | 0,00 | 0,00 | 0,00 | 0,00 | 0,9623216 | NA       |
| RP11-483I13.2  | 0,05 | 0,08 | 0,05 | 0,03 | 0,9623516 | 0,975697 |
| RP11-571M6.15  | 0,00 | 0,00 | 0,00 | 0,00 | 0,9623768 | NA       |
| RP11-442H21.2  | 0,00 | 0,06 | 0,00 | 0,00 | 0,9624111 | NA       |
| MFNG           | 5,78 | 5,10 | 4,61 | 5,04 | 0,96242   | 0,975722 |
| CITED1         | 0,00 | 0,00 | 0,00 | 0,00 | 0,9624212 | NA       |
| RP11-634B7.4   | 0,28 | 0,75 | 0,41 | 0,77 | 0,9624687 | 0,975727 |
| RP11-96F8.1    | 0,00 | 0,00 | 0,00 | 0,00 | 0,9624785 | NA       |
| RP11-122G18.7  | 0,00 | 0,00 | 0,00 | 0,00 | 0,9625447 | NA       |
| RP11-244K5.6   | 0,00 | 0,00 | 0,00 | 0,00 | 0,9625467 | NA       |
| VWDE           | 0,00 | 0,00 | 0,00 | 0,00 | 0,96262   | NA       |
| RN7SL493P      | 0,00 | 0,00 | 0,00 | 0,00 | 0,962666  | NA       |
| ZNF286A        | 1,42 | 0,70 | 2,10 | 2,07 | 0,9626911 | 0,975908 |
| RP11-448G4.4   | 0,00 | 0,00 | 0,00 | 0,00 | 0,9627119 | NA       |
| RF00622        | 0,00 | 0,00 | 0,00 | 0,00 | 0,9629149 | NA       |
| NAA11          | 0,00 | 0,00 | 0,00 | 0,00 | 0,962942  | NA       |
| RP11-262H14.12 | 0,00 | 0,00 | 0,00 | 0,00 | 0,9630009 | NA       |
| RNU6-680P      | 0,00 | 0,00 | 0,00 | 0,00 | 0,9630292 | NA       |
| MIR302D        | 0,00 | 0,00 | 0,00 | 0,00 | 0,9630443 | NA       |
| AC016722.2     | 0,00 | 0,00 | 0,00 | 0,00 | 0,9630553 | NA       |
| SOX12          | 0,05 | 0,36 | 0,13 | 0,41 | 0,9630612 | 0,976239 |
| RNA5SP85       | 0,00 | 0,00 | 0,00 | 0,00 | 0,9631801 | NA       |

|                |      |      |      |      |           |          |
|----------------|------|------|------|------|-----------|----------|
| AC010879.1     | 0,00 | 0,00 | 0,00 | 0,00 | 0,9632572 | NA       |
| TAMM41         | 3,60 | 2,40 | 3,82 | 2,55 | 0,9632638 | 0,976387 |
| ELMO3          | 0,00 | 0,12 | 0,03 | 0,19 | 0,9633056 | 0,976387 |
| AC096591.1     | 0,17 | 0,00 | 0,00 | 0,00 | 0,9633371 | NA       |
| UBQLN4         | 1,94 | 0,67 | 2,23 | 1,02 | 0,9633389 | 0,976387 |
| RP11-138H8.8   | 0,00 | 0,00 | 0,00 | 0,00 | 0,9633689 | NA       |
| RP11-798G7.3   | 2,55 | 2,03 | 2,28 | 2,18 | 0,9634086 | 0,976403 |
| AC079305.11    | 0,00 | 0,67 | 0,00 | 0,00 | 0,9634433 | 0,976403 |
| RNU6-928P      | 0,00 | 0,00 | 0,00 | 0,00 | 0,9635056 | NA       |
| RP11-1365D11.1 | 0,00 | 0,00 | 0,00 | 0,00 | 0,9635267 | NA       |
| RPS3P6         | 0,00 | 0,00 | 0,00 | 0,00 | 0,9635754 | NA       |
| IL22           | 0,00 | 0,00 | 0,00 | 0,00 | 0,9635893 | NA       |
| RP11-117D22.2  | 4,03 | 3,86 | 2,36 | 2,78 | 0,96359   | 0,976508 |
| RP11-45F15.1   | 0,00 | 0,00 | 0,00 | 0,00 | 0,9635935 | NA       |
| RP11-401E5.2   | 0,00 | 0,00 | 0,00 | 0,00 | 0,9636283 | NA       |
| RP11-56H16.1   | 0,00 | 0,00 | 0,00 | 0,00 | 0,9636331 | NA       |
| RP11-148K1.12  | 0,00 | 0,00 | 0,00 | 0,00 | 0,9636592 | NA       |
| OR7E110P       | 0,00 | 0,00 | 0,00 | 0,00 | 0,9637402 | NA       |
| RP1-190I16.2   | 0,00 | 0,00 | 0,00 | 0,00 | 0,9637843 | NA       |
| RNA5SP278      | 0,00 | 0,00 | 0,00 | 0,00 | 0,9637976 | NA       |
| RP11-85E16.1   | 0,00 | 0,00 | 0,00 | 0,00 | 0,9638029 | NA       |
| FAM3C2         | 0,00 | 0,00 | 0,00 | 0,00 | 0,9638062 | 0,976612 |
| TAF7           | 5,59 | 5,69 | 5,44 | 4,95 | 0,9638107 | 0,976612 |
| RP11-588H23.3  | 1,13 | 1,44 | 0,94 | 0,78 | 0,9638247 | 0,976612 |
| RF00190        | 0,00 | 0,00 | 0,00 | 0,00 | 0,9638835 | NA       |
| SNORD46        | 0,00 | 0,00 | 0,00 | 1,85 | 0,9640372 | NA       |
| AC011247.3     | 0,00 | 0,00 | 0,00 | 0,00 | 0,9640548 | NA       |
| RP11-468E2.12  | 0,00 | 0,00 | 0,00 | 0,00 | 0,9642015 | NA       |
| RP11-219A15.4  | 0,00 | 0,00 | 0,00 | 0,00 | 0,9642643 | NA       |
| OR7E23P        | 0,00 | 0,00 | 0,00 | 0,00 | 0,9642804 | NA       |
| RP11-383C6.2   | 0,00 | 0,00 | 0,00 | 0,00 | 0,9643334 | NA       |
| RP11-164A7.1   | 4,10 | 3,98 | 3,67 | 3,40 | 0,9643738 | 0,977097 |
| RNA5SP294      | 0,00 | 0,00 | 0,00 | 0,00 | 0,9643779 | NA       |
| RP11-885L14.1  | 0,00 | 0,00 | 0,00 | 0,00 | 0,9643928 | NA       |
| B4GALT5        | 1,71 | 2,11 | 1,92 | 0,64 | 0,9643998 | 0,977097 |
| RP5-1103B4.3   | 0,00 | 0,00 | 0,00 | 0,00 | 0,9644383 | NA       |
| MST1R          | 0,00 | 0,00 | 0,00 | 0,00 | 0,9644487 | NA       |
| FIG4           | 3,99 | 1,57 | 3,61 | 3,97 | 0,9644807 | 0,977097 |
| CDIPT          | 4,40 | 4,27 | 3,59 | 4,35 | 0,9645574 | 0,977097 |
| LLNLF-176F2.1  | 0,00 | 0,00 | 0,00 | 0,00 | 0,9645815 | NA       |
| RP11-46H11.11  | 1,27 | 0,20 | 1,63 | 0,65 | 0,9646144 | 0,977097 |
| PPP1R12B       | 3,11 | 2,43 | 3,25 | 1,67 | 0,964627  | 0,977097 |
| SPAG1          | 1,63 | 0,10 | 1,40 | 0,60 | 0,9646403 | 0,977097 |
| CBX6           | 3,75 | 3,70 | 3,64 | 3,69 | 0,9647095 | 0,977097 |
| RN7SKP222      | 1,64 | 0,00 | 0,00 | 0,00 | 0,9647311 | 0,977097 |
| AP002856.7     | 0,00 | 0,00 | 0,00 | 0,00 | 0,9647631 | NA       |
| RP11-464C19.3  | 0,77 | 0,97 | 0,32 | 0,70 | 0,9647668 | 0,977097 |
| SPATA6         | 2,58 | 0,37 | 1,66 | 1,92 | 0,964823  | 0,977097 |
| ZNRF2P3        | 0,00 | 0,00 | 0,00 | 0,00 | 0,9648238 | NA       |
| PDK4           | 1,42 | 1,13 | 0,88 | 1,21 | 0,964835  | 0,977097 |
| RP13-43E11.1   | 0,00 | 0,28 | 0,00 | 0,27 | 0,9648753 | 0,977097 |
| RNU6-1285P     | 0,00 | 0,00 | 0,00 | 0,00 | 0,9650038 | 0,977157 |
| ADCK5          | 3,01 | 2,95 | 2,06 | 1,79 | 0,9650222 | 0,977157 |
| RP11-252I14.1  | 0,00 | 0,00 | 0,00 | 0,25 | 0,9650411 | NA       |
| AP000282.2     | 0,00 | 0,00 | 0,00 | 0,00 | 0,9652325 | NA       |

|                |      |      |      |      |           |          |
|----------------|------|------|------|------|-----------|----------|
| RP11-340I6.8   | 0,00 | 0,00 | 0,00 | 0,00 | 0,9653604 | NA       |
| RP11-475E11.9  | 0,00 | 0,00 | 0,00 | 0,00 | 0,9653681 | NA       |
| RP5-920G3.1    | 0,00 | 0,00 | 0,00 | 0,00 | 0,9653853 | NA       |
| RNU6-1005P     | 0,00 | 0,00 | 0,00 | 0,00 | 0,9653916 | NA       |
| AF238380.5     | 0,00 | 0,00 | 0,00 | 0,00 | 0,9653962 | NA       |
| RP11-554A11.10 | 0,00 | 0,00 | 0,00 | 0,00 | 0,9654007 | NA       |
| RP11-65L3.3    | 0,15 | 0,49 | 0,40 | 0,93 | 0,9654174 | 0,977479 |
| MFSD2B         | 0,04 | 0,14 | 0,04 | 0,14 | 0,9654279 | 0,977479 |
| AC010731.3     | 0,00 | 0,00 | 0,00 | 0,00 | 0,965463  | NA       |
| AC127391.2     | 0,00 | 0,00 | 0,00 | 0,00 | 0,9654696 | NA       |
| AC008592.4     | 0,00 | 0,00 | 0,00 | 0,00 | 0,9655288 | NA       |
| TRPS1          | 3,44 | 1,10 | 3,42 | 2,78 | 0,9655412 | 0,977508 |
| RP5-1057I20.4  | 0,00 | 0,00 | 0,00 | 0,00 | 0,9655426 | NA       |
| MYOZ3          | 0,06 | 0,04 | 0,05 | 0,22 | 0,9655638 | 0,977508 |
| RP11-181D18.4  | 0,00 | 0,00 | 0,00 | 0,00 | 0,9655698 | NA       |
| UTS2           | 0,00 | 0,00 | 0,00 | 0,00 | 0,9655892 | NA       |
| CISD1          | 4,95 | 4,36 | 4,54 | 4,72 | 0,9656024 | 0,977508 |
| COPA           | 6,26 | 6,12 | 6,06 | 5,31 | 0,9656328 | 0,977508 |
| RNU6-993P      | 0,00 | 0,00 | 0,00 | 0,00 | 0,9656487 | NA       |
| OR11H5P        | 0,00 | 0,00 | 0,00 | 0,00 | 0,9656629 | NA       |
| AC004471.10    | 0,00 | 0,00 | 0,00 | 0,00 | 0,9657123 | NA       |
| PDGFB          | 0,00 | 0,00 | 0,00 | 0,00 | 0,9657234 | NA       |
| SMAP2          | 6,85 | 6,60 | 6,54 | 6,70 | 0,9657724 | 0,977605 |
| MIR5094        | 0,00 | 0,00 | 0,00 | 0,00 | 0,9657876 | NA       |
| RP11-351M16.4  | 0,00 | 0,00 | 0,00 | 0,17 | 0,9658607 | 0,97765  |
| GPAT2          | 0,00 | 0,35 | 0,00 | 0,00 | 0,9659104 | 0,977655 |
| BZW1L1         | 0,00 | 0,00 | 0,87 | 0,00 | 0,9660348 | 0,977706 |
| RP11-119D9.1   | 0,96 | 0,41 | 1,76 | 2,23 | 0,9660742 | 0,977706 |
| RP11-436H11.1  | 0,00 | 0,00 | 0,00 | 0,00 | 0,9660797 | NA       |
| FXYD3          | 1,01 | 1,32 | 1,38 | 0,24 | 0,966092  | 0,977706 |
| LOC124685      | 0,00 | 0,00 | 0,00 | 0,00 | 0,9661581 | NA       |
| RP11-585F1.8   | 0,00 | 1,55 | 0,00 | 0,00 | 0,9662013 | NA       |
| RP11-21M7.1    | 0,24 | 0,29 | 0,16 | 0,13 | 0,9662536 | 0,977799 |
| RP11-517H2.8   | 0,00 | 0,00 | 0,00 | 0,00 | 0,9662546 | NA       |
| AC102948.2     | 0,00 | 0,00 | 0,00 | 0,00 | 0,9662734 | NA       |
| RP1-32I10.10   | 0,00 | 2,68 | 0,00 | 0,00 | 0,9662745 | 0,977799 |
| RP11-648K4.2   | 0,00 | 0,00 | 0,00 | 0,00 | 0,9663323 | NA       |
| RP11-467L13.5  | 0,00 | 0,00 | 0,00 | 0,00 | 0,96634   | NA       |
| KXD1           | 6,08 | 6,23 | 5,85 | 5,27 | 0,9663657 | 0,977799 |
| CTD-2124B20.2  | 0,00 | 0,00 | 0,00 | 0,00 | 0,9663715 | NA       |
| CEP41          | 2,18 | 2,82 | 1,30 | 1,48 | 0,9663857 | 0,977799 |
| KCNC1          | 0,64 | 0,60 | 0,44 | 0,52 | 0,9664044 | 0,977799 |
| RP11-789C17.1  | 0,00 | 0,00 | 0,00 | 0,00 | 0,9664178 | NA       |
| AB019437.56    | 0,00 | 0,00 | 0,00 | 0,00 | 0,966433  | NA       |
| AC016629.3     | 0,00 | 0,00 | 0,00 | 0,00 | 0,9664495 | NA       |
| RP11-64D24.4   | 0,34 | 0,32 | 0,18 | 0,28 | 0,9664673 | 0,977818 |
| TEX264         | 5,79 | 4,55 | 5,70 | 5,49 | 0,9665183 | 0,977825 |
| RN7SL334P      | 0,00 | 0,00 | 0,00 | 0,00 | 0,9665649 | NA       |
| SNORA40B       | 0,00 | 0,00 | 0,00 | 0,00 | 0,9666714 | NA       |
| RP5-907C10.3   | 0,00 | 0,00 | 0,00 | 0,00 | 0,9667284 | NA       |
| RP11-188P20.2  | 0,00 | 0,00 | 0,00 | 0,00 | 0,9667926 | NA       |
| VPS11          | 4,96 | 4,87 | 4,88 | 5,28 | 0,9668125 | 0,97803  |
| MIR3198-2      | 0,00 | 1,92 | 0,00 | 0,00 | 0,9668249 | NA       |
| TCP11X1        | 0,00 | 0,00 | 0,00 | 0,00 | 0,9668571 | NA       |
| FDPS           | 6,74 | 6,33 | 6,25 | 5,64 | 0,9668854 | 0,97803  |

|               |      |      |      |      |           |          |
|---------------|------|------|------|------|-----------|----------|
| RAD52         | 2,53 | 1,68 | 2,57 | 2,45 | 0,9669279 | 0,97803  |
| RP11-131I3.1  | 0,05 | 0,08 | 0,05 | 0,03 | 0,9669313 | 0,97803  |
| LSG1          | 3,69 | 4,04 | 3,09 | 2,60 | 0,9669572 | 0,97803  |
| CDC37         | 5,43 | 4,53 | 5,20 | 5,10 | 0,966985  | 0,97803  |
| ZBTB32        | 0,00 | 0,00 | 0,00 | 0,00 | 0,9669887 | NA       |
| RP11-369K17.1 | 0,00 | 0,00 | 0,00 | 0,00 | 0,9670417 | NA       |
| AC006486.9    | 0,00 | 0,00 | 0,00 | 0,00 | 0,9671324 | NA       |
| ADAM20        | 0,00 | 0,00 | 0,00 | 0,00 | 0,967291  | NA       |
| KIAA0895      | 0,00 | 0,10 | 0,00 | 0,13 | 0,9673119 | 0,978317 |
| RP11-336N8.3  | 0,00 | 0,00 | 0,00 | 0,00 | 0,9673473 | NA       |
| PNMA5         | 0,00 | 0,00 | 0,00 | 0,00 | 0,9674115 | NA       |
| RP11-62I21.1  | 0,00 | 0,00 | 0,00 | 0,00 | 0,967471  | NA       |
| POTEKP        | 0,00 | 0,00 | 0,00 | 0,00 | 0,9675103 | NA       |
| STAG2         | 5,27 | 4,96 | 5,41 | 5,47 | 0,9675145 | 0,978477 |
| RN7SL210P     | 0,00 | 0,00 | 0,00 | 0,00 | 0,9675302 | NA       |
| RP11-325K4.2  | 2,27 | 1,53 | 0,22 | 0,92 | 0,9675892 | 0,978488 |
| VN1R83P       | 0,00 | 0,00 | 0,00 | 0,00 | 0,9676077 | NA       |
| TMEM2         | 3,51 | 4,44 | 3,69 | 4,34 | 0,9676137 | 0,978488 |
| AC073063.10   | 0,00 | 0,00 | 0,00 | 0,00 | 0,9676525 | NA       |
| AC109333.10   | 0,00 | 0,00 | 0,00 | 0,00 | 0,967795  | NA       |
| ZNF512        | 3,44 | 0,78 | 2,26 | 2,78 | 0,9677989 | 0,978631 |
| SNORD3H       | 0,00 | 0,00 | 0,00 | 0,00 | 0,9678724 | NA       |
| WRAP73        | 4,03 | 4,63 | 4,01 | 1,70 | 0,9679714 | 0,978715 |
| RF02187       | 0,00 | 0,00 | 0,00 | 0,00 | 0,9679744 | NA       |
| FAM209A       | 0,00 | 0,00 | 0,00 | 1,53 | 0,9679971 | 0,978715 |
| NCR1          | 0,07 | 0,09 | 0,05 | 0,18 | 0,9680144 | 0,978715 |
| MIR548AE2     | 0,00 | 0,00 | 0,00 | 0,00 | 0,968041  | NA       |
| SNORD92       | 0,00 | 0,00 | 0,00 | 0,00 | 0,9680809 | NA       |
| RN7SL714P     | 0,87 | 1,38 | 0,94 | 1,40 | 0,9680862 | 0,978743 |
| AC006335.11   | 0,00 | 0,00 | 0,00 | 0,00 | 0,9681    | NA       |
| AC013275.2    | 0,00 | 0,00 | 0,00 | 0,00 | 0,9681393 | NA       |
| RP11-368I23.2 | 0,00 | 0,00 | 0,00 | 0,00 | 0,9681593 | NA       |
| RP11-360F5.3  | 0,00 | 0,00 | 0,00 | 0,00 | 0,9681684 | NA       |
| RP3-414A15.11 | 0,00 | 0,00 | 0,00 | 0,00 | 0,9681793 | NA       |
| ATG9B         | 0,11 | 1,06 | 0,18 | 0,04 | 0,9681936 | 0,978807 |
| RNU6-925P     | 0,00 | 0,00 | 0,00 | 0,00 | 0,9682484 | NA       |
| RP11-11M20.2  | 0,00 | 0,00 | 0,00 | 0,00 | 0,9682536 | NA       |
| MIR1972-1     | 0,00 | 0,00 | 0,00 | 0,00 | 0,9682967 | NA       |
| MIR1972-2     | 0,00 | 0,00 | 0,00 | 0,00 | 0,9682967 | NA       |
| MIR342        | 0,00 | 0,00 | 0,00 | 0,00 | 0,9683154 | NA       |
| FGF1          | 0,00 | 0,00 | 0,00 | 0,27 | 0,9684022 | 0,978958 |
| KBTBD11       | 0,49 | 0,08 | 0,83 | 0,53 | 0,9684302 | 0,978958 |
| RNU2-70P      | 0,00 | 0,00 | 0,00 | 0,00 | 0,9684491 | NA       |
| RP3-412A9.16  | 0,00 | 0,00 | 0,00 | 0,00 | 0,9684935 | NA       |
| RNU2-27P      | 0,00 | 0,00 | 0,00 | 0,00 | 0,9685121 | NA       |
| LDHAP7        | 0,00 | 0,00 | 0,00 | 0,00 | 0,9685403 | NA       |
| RP11-271K11.1 | 0,00 | 0,00 | 0,00 | 0,00 | 0,9685598 | NA       |
| RP3-508I15.16 | 0,00 | 0,00 | 0,00 | 0,00 | 0,9685882 | NA       |
| RP11-778P17.2 | 0,00 | 0,00 | 0,00 | 0,00 | 0,9685956 | NA       |
| RP11-257P3.3  | 0,00 | 0,00 | 0,00 | 0,00 | 0,9685979 | NA       |
| RP11-494H4.3  | 0,00 | 0,00 | 0,00 | 0,00 | 0,9687034 | NA       |
| RP1-214M20.2  | 0,00 | 0,39 | 0,00 | 0,00 | 0,9687976 | NA       |
| RN7SKP177     | 2,31 | 2,65 | 2,21 | 2,07 | 0,9688276 | 0,979297 |
| RP11-254I22.3 | 0,00 | 0,00 | 0,00 | 0,00 | 0,9688404 | NA       |
| CALCB         | 0,00 | 0,00 | 0,00 | 0,06 | 0,9688536 | 0,979297 |

|                |      |      |      |      |           |          |
|----------------|------|------|------|------|-----------|----------|
| RP5-899B16.2   | 0,00 | 0,00 | 0,00 | 0,00 | 0,9688865 | NA       |
| RP11-83N9.5    | 0,00 | 0,00 | 0,00 | 0,00 | 0,968926  | NA       |
| RF01978        | 0,00 | 0,00 | 0,00 | 0,30 | 0,9689405 | NA       |
| HLA-U          | 0,00 | 0,00 | 0,00 | 0,00 | 0,9689957 | NA       |
| HSPBP1         | 3,55 | 3,59 | 2,70 | 1,95 | 0,969011  | 0,979411 |
| TFDP2          | 4,04 | 2,96 | 3,57 | 4,32 | 0,9691343 | 0,979425 |
| RP11-611O2.5   | 2,41 | 1,49 | 2,69 | 3,06 | 0,9691384 | 0,979425 |
| RP11-244O19.1  | 0,00 | 0,07 | 0,00 | 0,00 | 0,9691887 | 0,979425 |
| ZDHHC16        | 2,96 | 0,40 | 2,80 | 1,07 | 0,9692012 | 0,979425 |
| RNU6-711P      | 0,00 | 0,00 | 0,00 | 0,00 | 0,96931   | NA       |
| RN7SL308P      | 0,35 | 2,03 | 0,39 | 0,00 | 0,9693728 | 0,979554 |
| FRMD6          | 0,00 | 0,00 | 0,00 | 0,00 | 0,9694481 | NA       |
| ACO99552.3     | 0,00 | 0,00 | 0,00 | 0,00 | 0,9695111 | NA       |
| HEY1           | 0,00 | 0,00 | 0,00 | 0,00 | 0,9695262 | NA       |
| RP3-420J14.1   | 0,91 | 1,03 | 0,97 | 0,90 | 0,9695263 | 0,979665 |
| ACO06116.15    | 0,00 | 0,14 | 0,00 | 0,26 | 0,9695306 | NA       |
| RP11-81A22.5   | 0,00 | 0,00 | 0,00 | 0,00 | 0,9695583 | NA       |
| RP11-126D17.1  | 0,00 | 0,00 | 0,00 | 0,00 | 0,9695775 | NA       |
| HCG11          | 1,52 | 1,31 | 1,03 | 1,52 | 0,9695864 | 0,979681 |
| RPL41P2        | 0,00 | 0,58 | 0,00 | 0,55 | 0,9695976 | NA       |
| TPBG           | 0,00 | 0,00 | 0,00 | 0,00 | 0,9695989 | NA       |
| RAP1GAP        | 0,00 | 0,00 | 0,00 | 0,00 | 0,9696023 | NA       |
| OR7E91P        | 0,00 | 0,00 | 0,00 | 0,00 | 0,969616  | NA       |
| RP11-15B24.1   | 0,00 | 0,00 | 0,00 | 0,00 | 0,9696275 | NA       |
| RP11-521J5.1   | 0,00 | 0,25 | 0,00 | 0,00 | 0,9696436 | NA       |
| RP11-85F14.1   | 0,00 | 0,00 | 0,00 | 0,00 | 0,9696813 | NA       |
| RP5-894A10.6   | 0,00 | 0,00 | 0,00 | 0,00 | 0,969721  | 0,979737 |
| VASH2          | 1,01 | 1,27 | 0,82 | 0,57 | 0,96973   | 0,979737 |
| RP11-271C24.2  | 0,00 | 0,00 | 0,00 | 0,00 | 0,969754  | NA       |
| RP11-244B22.11 | 0,00 | 0,00 | 0,00 | 0,00 | 0,9697673 | NA       |
| GOLGA6L17P     | 0,00 | 0,00 | 0,00 | 0,00 | 0,9698342 | NA       |
| AE000661.37    | 0,00 | 0,00 | 0,00 | 0,00 | 0,9698411 | NA       |
| LRIT3          | 0,00 | 0,00 | 0,00 | 0,00 | 0,9698665 | NA       |
| NACAD          | 0,00 | 0,00 | 0,00 | 0,00 | 0,9698732 | NA       |
| RP11-793J2.1   | 0,00 | 0,00 | 0,00 | 0,00 | 0,9698776 | NA       |
| UBD            | 0,00 | 0,00 | 0,00 | 0,00 | 0,9698847 | NA       |
| OCM2           | 0,00 | 0,00 | 0,00 | 0,00 | 0,9699178 | NA       |
| RNU6-282P      | 0,00 | 0,00 | 0,00 | 0,00 | 0,9700212 | NA       |
| AL049757.3     | 0,13 | 0,00 | 0,04 | 0,16 | 0,9700507 | NA       |
| TSSK6          | 0,00 | 0,00 | 0,00 | 0,00 | 0,97007   | NA       |
| PRAMEF14       | 0,00 | 0,00 | 0,00 | 0,00 | 0,9700851 | NA       |
| RP11-574M7.2   | 0,00 | 0,00 | 0,00 | 0,00 | 0,9700888 | NA       |
| RP11-380D23.1  | 0,00 | 0,00 | 0,00 | 0,00 | 0,9701429 | NA       |
| CCL27          | 0,00 | 0,00 | 0,00 | 0,00 | 0,9701623 | NA       |
| FAM46B         | 0,00 | 0,00 | 0,00 | 0,00 | 0,9701704 | NA       |
| CABIN1         | 2,78 | 3,39 | 3,57 | 3,70 | 0,9701957 | 0,980094 |
| RP11-253E3.3   | 0,03 | 0,08 | 0,05 | 0,07 | 0,9702106 | 0,980094 |
| ZNF501         | 0,11 | 0,17 | 0,15 | 0,19 | 0,970216  | 0,980094 |
| RP11-829H16.3  | 0,00 | 0,00 | 0,00 | 0,00 | 0,9702199 | NA       |
| RP11-517O13.3  | 0,00 | 0,00 | 0,00 | 0,00 | 0,9702814 | NA       |
| RP11-407P2.1   | 0,00 | 0,00 | 0,00 | 0,00 | 0,9702862 | NA       |
| RP11-106E7.1   | 0,00 | 0,00 | 0,00 | 0,00 | 0,9703102 | NA       |
| RP3-512E2.2    | 0,00 | 0,00 | 0,00 | 0,00 | 0,9703602 | NA       |
| CTC-366B18.4   | 0,40 | 0,13 | 0,24 | 0,29 | 0,9703872 | 0,9802   |
| TRAK1          | 3,81 | 3,69 | 3,66 | 1,53 | 0,970414  | 0,9802   |

|                    |      |      |      |      |           |          |
|--------------------|------|------|------|------|-----------|----------|
| RP11-703H8.6       | 0,00 | 0,00 | 0,00 | 0,00 | 0,9704184 | NA       |
| CTA-229A8.6        | 0,00 | 0,00 | 0,00 | 0,00 | 0,9704653 | NA       |
| RP11-462G2.2       | 0,00 | 0,00 | 0,00 | 0,00 | 0,970475  | NA       |
| RN7SL674P          | 0,00 | 0,98 | 0,00 | 0,84 | 0,9704823 | 0,9802   |
| TRG-AS1            | 2,85 | 3,46 | 2,28 | 3,29 | 0,9705543 | 0,9802   |
| UBE2B              | 7,81 | 6,59 | 7,52 | 7,64 | 0,9705744 | 0,9802   |
| CTD-2555O16.4      | 0,21 | 0,42 | 0,27 | 0,56 | 0,9705857 | 0,9802   |
| RP11-455B3.1       | 0,00 | 0,00 | 0,00 | 0,00 | 0,9705898 | NA       |
| LLNLR-275H8.1      | 0,00 | 0,00 | 0,00 | 0,00 | 0,9706141 | NA       |
| MACF1              | 5,79 | 5,45 | 5,72 | 5,02 | 0,9707933 | 0,980365 |
| GPX6               | 0,00 | 0,00 | 0,00 | 0,00 | 0,9708366 | NA       |
| CACNA2D1           | 0,00 | 0,00 | 0,00 | 0,00 | 0,9708712 | NA       |
| AC092484.1         | 0,00 | 0,00 | 0,00 | 0,00 | 0,9709618 | NA       |
| EFCAB4B            | 1,81 | 0,67 | 2,07 | 0,45 | 0,9709723 | 0,980502 |
| NEDD8-MDP1         | 0,00 | 0,00 | 0,00 | 0,00 | 0,9709727 | NA       |
| SMIM9              | 0,00 | 0,00 | 0,00 | 0,00 | 0,9710051 | NA       |
| AC004893.10        | 0,00 | 0,00 | 0,00 | 0,00 | 0,9710687 | NA       |
| RP11-1360M22.2     | 0,00 | 0,00 | 0,00 | 0,00 | 0,9711025 | NA       |
| GJA10              | 0,00 | 0,00 | 0,00 | 0,00 | 0,9711588 | NA       |
| RP11-707M1.4       | 0,00 | 0,00 | 0,00 | 0,00 | 0,9712072 | NA       |
| RP1-50A13.2        | 0,00 | 0,00 | 0,00 | 0,00 | 0,9712239 | NA       |
| CTC-512J14.7       | 0,11 | 0,14 | 0,07 | 0,00 | 0,9712613 | NA       |
| RP11-109D20.2      | 0,00 | 0,00 | 0,00 | 0,00 | 0,9713226 | NA       |
| PYY2               | 0,00 | 0,00 | 0,00 | 0,00 | 0,9713908 | NA       |
| RNU5E-10P          | 0,00 | 0,00 | 0,00 | 0,00 | 0,9714051 | NA       |
| TTC36              | 0,00 | 0,00 | 0,00 | 0,00 | 0,9714091 | NA       |
| RP11-822E23.8      | 0,00 | 0,15 | 0,00 | 0,05 | 0,9714096 | 0,980899 |
| RP11-339N8.1       | 0,00 | 0,00 | 0,00 | 0,00 | 0,9715014 | NA       |
| HIST1H4B           | 0,00 | 0,00 | 0,00 | 0,00 | 0,9715416 | NA       |
| CTA-253N17.1       | 0,00 | 0,00 | 0,00 | 0,00 | 0,9715659 | NA       |
| SNHG10             | 3,16 | 2,26 | 1,83 | 3,16 | 0,9715896 | 0,981036 |
| CH17-55D9.1        | 1,32 | 1,37 | 1,62 | 1,05 | 0,9716688 | 0,981071 |
| WDYHV1             | 3,56 | 2,18 | 2,60 | 2,48 | 0,9717369 | 0,981095 |
| RP11-173A8.2       | 0,00 | 0,00 | 0,00 | 0,00 | 0,9717412 | NA       |
| RP13-126C7.1       | 0,00 | 0,00 | 0,00 | 0,00 | 0,9717678 | NA       |
| RNU6-516P          | 0,00 | 0,00 | 0,00 | 0,00 | 0,9718265 | NA       |
| THAP9              | 1,86 | 1,73 | 1,36 | 0,93 | 0,9718811 | 0,981196 |
| AC007349.6         | 0,00 | 0,00 | 0,00 | 0,00 | 0,9719125 | NA       |
| NETO1              | 0,00 | 0,00 | 0,00 | 0,00 | 0,9720482 | NA       |
| ULK3               | 3,09 | 2,81 | 2,31 | 2,24 | 0,9720706 | 0,981343 |
| INTS8              | 4,92 | 3,85 | 3,35 | 4,98 | 0,9721641 | 0,981393 |
| RP11-94M14.3       | 0,00 | 0,00 | 0,00 | 0,00 | 0,972261  | NA       |
| AP000275.65        | 0,00 | 0,00 | 0,00 | 0,00 | 0,9723135 | 0,981499 |
| SIGLEC20P          | 0,00 | 0,00 | 0,00 | 0,00 | 0,9723489 | NA       |
| RP11-165M1.3       | 0,00 | 0,00 | 0,00 | 0,00 | 0,9723923 | NA       |
| STAT3              | 5,19 | 4,77 | 5,31 | 4,64 | 0,9724803 | 0,981623 |
| RP11-431K24.4      | 0,00 | 0,00 | 0,00 | 0,00 | 0,9724918 | NA       |
| SNORA74D           | 0,00 | 0,00 | 0,00 | 0,00 | 0,9727215 | NA       |
| AC011518.1         | 0,00 | 0,00 | 0,00 | 0,00 | 0,9727236 | NA       |
| INE2               | 0,00 | 0,00 | 0,00 | 0,00 | 0,9727472 | NA       |
| RNU2-18P           | 0,00 | 0,00 | 0,00 | 0,00 | 0,9728171 | NA       |
| XXbac-BPG300A18.15 | 0,00 | 0,00 | 0,00 | 0,00 | 0,9728202 | NA       |
| RP11-135D11.2      | 0,00 | 0,38 | 0,05 | 0,35 | 0,9728614 | 0,981963 |
| LHX1               | 0,00 | 0,04 | 0,00 | 0,00 | 0,9728853 | NA       |
| INSM1              | 0,00 | 0,00 | 0,00 | 0,00 | 0,9728881 | NA       |

|                |      |      |      |      |           |          |
|----------------|------|------|------|------|-----------|----------|
| IGSF9B         | 0,00 | 0,00 | 0,00 | 0,22 | 0,9729109 | NA       |
| TRIM35         | 1,35 | 0,85 | 0,54 | 0,66 | 0,9729496 | 0,982008 |
| RP11-516J2.1   | 0,00 | 0,00 | 0,00 | 0,00 | 0,9729623 | NA       |
| CTD-2135J3.3   | 0,00 | 0,00 | 0,00 | 0,00 | 0,9730755 | NA       |
| ZFP64          | 2,20 | 1,39 | 1,63 | 1,34 | 0,9730948 | 0,982093 |
| CTSE           | 0,00 | 0,07 | 0,03 | 0,01 | 0,9731231 | 0,982093 |
| NUDT11         | 0,00 | 0,00 | 0,00 | 0,00 | 0,9731383 | NA       |
| RP13-228J13.10 | 0,00 | 0,00 | 0,00 | 0,00 | 0,9731411 | NA       |
| GLRA2          | 0,00 | 0,00 | 0,00 | 0,00 | 0,9731489 | NA       |
| RP1-63M2.7     | 0,00 | 0,00 | 0,00 | 0,00 | 0,9731537 | NA       |
| AC002400.1     | 0,00 | 0,00 | 0,00 | 0,00 | 0,9731652 | NA       |
| RP11-404L6.2   | 0,00 | 0,00 | 0,00 | 0,00 | 0,9731654 | NA       |
| FAM177A1       | 5,12 | 4,62 | 4,98 | 4,71 | 0,9732145 | 0,982141 |
| RP11-290D2.3   | 0,00 | 0,00 | 0,00 | 0,00 | 0,9733621 | NA       |
| RP11-543G18.1  | 0,00 | 0,00 | 0,00 | 0,00 | 0,973367  | NA       |
| RP11-30J20.1   | 0,00 | 0,76 | 0,00 | 0,00 | 0,9733959 | NA       |
| AATK           | 0,00 | 0,45 | 0,00 | 0,07 | 0,97341   | 0,982288 |
| RP11-657K20.1  | 0,00 | 0,00 | 0,00 | 0,00 | 0,9734852 | NA       |
| RP11-45F23.1   | 0,00 | 0,00 | 0,00 | 0,00 | 0,9735018 | NA       |
| CLDN8          | 0,00 | 0,00 | 0,00 | 0,00 | 0,9735037 | NA       |
| SDHAF3         | 3,31 | 0,83 | 3,47 | 1,62 | 0,9735224 | 0,982288 |
| PPIB           | 8,82 | 8,42 | 8,78 | 8,95 | 0,9735303 | 0,982288 |
| CCNE1          | 0,00 | 0,22 | 0,00 | 0,97 | 0,9735369 | 0,982288 |
| TLL8           | 0,00 | 0,00 | 0,00 | 0,00 | 0,9735432 | NA       |
| PMCH           | 0,00 | 0,00 | 0,00 | 0,00 | 0,9735756 | NA       |
| RP11-805L22.2  | 0,00 | 0,09 | 0,10 | 0,09 | 0,9736397 | 0,982347 |
| RNA5SP448      | 0,00 | 0,00 | 0,00 | 0,00 | 0,9736597 | NA       |
| RP4-800G7.3    | 0,00 | 0,00 | 0,00 | 0,00 | 0,9736953 | NA       |
| AF131215.4     | 0,00 | 0,00 | 0,00 | 0,00 | 0,9737445 | NA       |
| RP11-757O6.2   | 0,00 | 0,00 | 0,00 | 0,00 | 0,9737691 | NA       |
| TAS1R2         | 0,00 | 0,00 | 0,00 | 0,00 | 0,9737752 | NA       |
| RP11-355B11.2  | 2,95 | 3,29 | 2,47 | 2,61 | 0,9737778 | 0,982442 |
| BMS1P7         | 0,00 | 0,00 | 0,00 | 0,00 | 0,9738766 | NA       |
| CTC-435M10.10  | 0,00 | 0,37 | 0,00 | 0,00 | 0,9739301 | NA       |
| RP11-545E17.3  | 2,94 | 2,15 | 2,80 | 3,14 | 0,9739596 | 0,982581 |
| RP1-37M3.8     | 0,00 | 0,00 | 0,00 | 0,00 | 0,9740439 | NA       |
| CTD-2666L21.2  | 0,00 | 0,00 | 0,00 | 0,00 | 0,974058  | NA       |
| RP11-439E19.7  | 0,00 | 0,00 | 0,00 | 0,00 | 0,974064  | NA       |
| RP11-818O24.3  | 0,00 | 0,00 | 0,00 | 0,00 | 0,9741505 | NA       |
| RP5-854E16.2   | 0,00 | 0,00 | 0,00 | 0,00 | 0,9742027 | NA       |
| TMCO5B         | 0,00 | 0,00 | 0,00 | 0,08 | 0,9742727 | NA       |
| C16orf59       | 0,00 | 0,00 | 0,00 | 0,00 | 0,974337  | NA       |
| OR5B2          | 0,00 | 0,06 | 0,00 | 0,00 | 0,9743483 | 0,982928 |
| CTD-2384B11.2  | 0,00 | 0,00 | 0,00 | 0,00 | 0,9744351 | NA       |
| ZMYND12        | 0,00 | 0,00 | 0,00 | 0,00 | 0,9744437 | NA       |
| COMT           | 7,63 | 7,60 | 7,64 | 6,91 | 0,9744875 | 0,983024 |
| RNU6-603P      | 0,00 | 0,00 | 0,00 | 0,00 | 0,974517  | NA       |
| RP5-991G20.2   | 0,00 | 0,00 | 0,00 | 0,00 | 0,9745318 | NA       |
| XIST           | 5,79 | 6,13 | 6,02 | 5,83 | 0,9745384 | 0,983031 |
| SPANXN1        | 0,00 | 0,00 | 0,00 | 0,00 | 0,9745991 | NA       |
| CT55           | 0,00 | 0,00 | 0,00 | 0,00 | 0,9746095 | NA       |
| AC097523.3     | 0,00 | 0,00 | 0,00 | 0,00 | 0,9746102 | NA       |
| AC105760.3     | 0,00 | 0,00 | 0,00 | 0,00 | 0,9746256 | NA       |
| RP5-1173I20.1  | 0,00 | 0,01 | 0,00 | 0,00 | 0,974631  | NA       |
| RP11-327F22.6  | 0,00 | 0,00 | 0,00 | 0,00 | 0,9746411 | NA       |



|                 |      |      |      |      |           |          |
|-----------------|------|------|------|------|-----------|----------|
| RP11-276E17.2   | 0,00 | 0,00 | 0,00 | 0,00 | 0,9746487 | NA       |
| RP11-480N24.6   | 0,00 | 0,00 | 0,00 | 0,00 | 0,9746716 | NA       |
| RP5-896L10.1    | 0,00 | 0,00 | 0,00 | 0,00 | 0,9746779 | NA       |
| CTC-513N18.7    | 0,00 | 0,00 | 0,00 | 0,00 | 0,9747009 | NA       |
| NEURL4          | 0,18 | 0,90 | 0,26 | 0,56 | 0,9747479 | 0,983158 |
| CTC-209H22.3    | 0,00 | 0,00 | 0,00 | 0,00 | 0,9747486 | NA       |
| PRKX            | 4,12 | 3,56 | 3,91 | 3,97 | 0,9747528 | 0,983158 |
| ABC7-481722F1.1 | 0,00 | 0,00 | 0,00 | 0,00 | 0,9747564 | NA       |
| RP5-981O7.3     | 0,00 | 0,00 | 0,00 | 0,00 | 0,9747813 | NA       |
| RP11-445H22.3   | 0,00 | 0,00 | 0,00 | 0,00 | 0,9747955 | NA       |
| RPL23AP24       | 0,00 | 0,00 | 0,00 | 0,00 | 0,9747991 | NA       |
| RP11-1136J12.1  | 0,00 | 0,00 | 0,00 | 0,00 | 0,9748626 | NA       |
| RP11-305O4.3    | 0,00 | 0,00 | 0,00 | 0,00 | 0,9748717 | NA       |
| Z84812.4        | 0,00 | 0,00 | 0,00 | 0,00 | 0,9749231 | NA       |
| CTC-268N12.2    | 0,00 | 0,00 | 0,00 | 0,00 | 0,9749253 | NA       |
| RP11-177C12.4   | 0,00 | 0,00 | 0,00 | 0,00 | 0,9749271 | NA       |
| OR4K2           | 0,07 | 0,02 | 0,04 | 0,07 | 0,9749749 | 0,983337 |
| AC108056.1      | 0,00 | 0,00 | 0,00 | 0,00 | 0,9749893 | NA       |
| CTAGE3P         | 0,00 | 0,00 | 0,00 | 0,00 | 0,9750115 | NA       |
| RP11-240A16.1   | 0,00 | 0,00 | 0,00 | 0,00 | 0,9750247 | NA       |
| ATRIP           | 0,83 | 1,22 | 0,55 | 0,67 | 0,9750451 | 0,983363 |
| ITGAD           | 0,00 | 0,00 | 0,00 | 0,20 | 0,9750848 | NA       |
| TRAJ55          | 0,00 | 0,00 | 0,00 | 0,00 | 0,9751586 | NA       |
| RP1-30G7.1      | 0,00 | 0,00 | 0,00 | 0,00 | 0,975194  | NA       |
| RP11-173P15.3   | 0,00 | 0,00 | 0,00 | 0,00 | 0,9752283 | NA       |
| RP11-93K22.6    | 0,00 | 0,00 | 0,00 | 0,00 | 0,9752491 | NA       |
| RP11-394I13.2   | 0,00 | 0,00 | 0,00 | 0,00 | 0,9752502 | NA       |
| MIR3161         | 0,00 | 0,00 | 0,00 | 0,00 | 0,975276  | NA       |
| AC016644.1      | 0,00 | 0,00 | 0,00 | 0,00 | 0,9752889 | NA       |
| RN7SKP187       | 0,00 | 0,00 | 0,00 | 0,00 | 0,9753165 | NA       |
| OR1L3           | 0,00 | 0,00 | 0,00 | 0,00 | 0,9753308 | NA       |
| RP4-791M13.5    | 0,00 | 0,00 | 0,00 | 0,00 | 0,9753967 | NA       |
| CTD-2509G16.4   | 0,36 | 0,43 | 0,33 | 0,00 | 0,9754644 | NA       |
| OR7E7P          | 0,00 | 0,00 | 0,00 | 0,00 | 0,9754712 | NA       |
| RP11-42D20.2    | 0,00 | 0,00 | 0,00 | 0,00 | 0,9754816 | NA       |
| MATN3           | 0,00 | 0,00 | 0,00 | 0,00 | 0,9754837 | NA       |
| AC013267.1      | 0,00 | 0,00 | 0,00 | 0,00 | 0,9754957 | NA       |
| RP11-56H2.2     | 0,00 | 0,00 | 0,00 | 0,00 | 0,9754973 | NA       |
| HNRNPUL2-BSC12  | 0,00 | 0,32 | 0,00 | 0,00 | 0,9755018 | 0,983779 |
| RP11-92B11.3    | 0,00 | 0,00 | 0,00 | 0,00 | 0,9756396 | NA       |
| AC007009.1      | 0,00 | 0,00 | 0,00 | 0,00 | 0,9756612 | NA       |
| RP11-998D10.1   | 0,00 | 0,00 | 0,00 | 0,00 | 0,9757243 | 0,983919 |
| ZNF431          | 3,46 | 3,09 | 3,40 | 3,00 | 0,9757393 | 0,983919 |
| RP11-901L6.1    | 0,00 | 0,00 | 0,53 | 0,85 | 0,9757523 | NA       |
| RP11-229E13.4   | 0,00 | 0,00 | 0,00 | 0,00 | 0,9757732 | NA       |
| ERF             | 0,00 | 0,00 | 0,02 | 0,05 | 0,9758095 | 0,983919 |
| DNAJB13         | 0,42 | 0,44 | 0,34 | 0,53 | 0,975817  | 0,983919 |
| AC092651.1      | 0,00 | 0,00 | 0,00 | 0,00 | 0,9758215 | NA       |
| CTD-2265O21.7   | 0,00 | 0,00 | 0,00 | 0,00 | 0,9759215 | NA       |
| RNU6-720P       | 0,00 | 0,00 | 0,00 | 0,00 | 0,9759322 | NA       |
| RP11-553D4.2    | 0,00 | 0,00 | 0,00 | 0,00 | 0,9759642 | NA       |
| RNU6-245P       | 0,00 | 0,00 | 0,00 | 0,00 | 0,9761342 | NA       |
| RP11-389G6.3    | 0,00 | 0,00 | 0,00 | 0,00 | 0,976162  | NA       |
| AC005550.3      | 0,00 | 0,00 | 0,00 | 0,00 | 0,9762638 | NA       |
| AC092573.2      | 0,00 | 0,00 | 0,00 | 0,00 | 0,9762932 | NA       |

|               |      |      |      |      |           |          |
|---------------|------|------|------|------|-----------|----------|
| RPL34P21      | 0,00 | 0,00 | 0,00 | 0,00 | 0,9762968 | NA       |
| C11orf98      | 6,11 | 5,68 | 6,08 | 5,92 | 0,9763307 | 0,984364 |
| FAM69A        | 1,90 | 2,00 | 0,79 | 0,72 | 0,9763472 | 0,984364 |
| MED19         | 3,79 | 3,19 | 3,48 | 3,07 | 0,9764269 | 0,98437  |
| AC093375.1    | 0,17 | 0,00 | 0,10 | 0,14 | 0,9764417 | 0,98437  |
| RP11-38C18.2  | 0,00 | 0,00 | 0,00 | 0,00 | 0,9764475 | NA       |
| RP4-798P15.3  | 0,00 | 0,00 | 0,00 | 0,00 | 0,9764648 | NA       |
| RP4-686C3.7   | 0,00 | 0,00 | 0,00 | 0,19 | 0,976469  | NA       |
| CYP2AB1P      | 0,00 | 0,00 | 0,00 | 0,00 | 0,9765142 | NA       |
| OLFML2B       | 0,00 | 0,00 | 0,00 | 0,00 | 0,9765667 | NA       |
| RDH8          | 0,43 | 0,53 | 0,44 | 0,00 | 0,9766161 | NA       |
| CTD-2179L22.1 | 1,13 | 1,62 | 0,69 | 0,41 | 0,9766421 | 0,984527 |
| RPS3AP32      | 0,00 | 0,00 | 0,00 | 0,00 | 0,9766445 | NA       |
| CTC-260E6.2   | 0,00 | 0,00 | 0,00 | 0,00 | 0,9766655 | NA       |
| RP11-33N16.2  | 0,00 | 0,00 | 0,00 | 0,00 | 0,9766754 | NA       |
| RP11-22P6.3   | 0,00 | 0,00 | 0,00 | 0,00 | 0,9768079 | NA       |
| RP11-701H24.3 | 0,00 | 0,00 | 0,00 | 0,00 | 0,9768808 | NA       |
| RNU6-360P     | 0,00 | 0,00 | 0,00 | 0,00 | 0,9769296 | NA       |
| RP11-98F14.12 | 0,00 | 0,00 | 0,00 | 0,00 | 0,9769682 | NA       |
| RP11-507K13.6 | 0,00 | 0,00 | 0,00 | 0,00 | 0,9769703 | NA       |
| RP11-520H14.6 | 0,00 | 0,18 | 0,00 | 0,00 | 0,9769714 | NA       |
| RP5-958B11.1  | 0,00 | 0,00 | 0,00 | 0,00 | 0,9770557 | NA       |
| RNA5SP187     | 0,00 | 0,00 | 0,00 | 0,00 | 0,9770667 | NA       |
| AC005795.2    | 0,00 | 0,00 | 0,00 | 0,00 | 0,9770843 | NA       |
| RP11-548O1.3  | 0,00 | 0,00 | 0,00 | 0,00 | 0,9771386 | NA       |
| MBIP          | 3,27 | 3,91 | 3,13 | 1,24 | 0,977151  | 0,984995 |
| CH507-42P11.7 | 0,00 | 0,00 | 0,00 | 0,00 | 0,9771968 | NA       |
| DDN           | 0,00 | 0,00 | 0,00 | 0,00 | 0,9772213 | NA       |
| RP11-214K3.23 | 0,00 | 0,00 | 0,00 | 0,00 | 0,977251  | NA       |
| RP11-111A22.1 | 0,60 | 0,00 | 0,59 | 1,04 | 0,9772562 | 0,985047 |
| AC009960.8    | 0,95 | 0,73 | 0,62 | 0,80 | 0,9773246 | 0,985047 |
| HYMAI         | 0,00 | 0,08 | 0,00 | 0,11 | 0,9773347 | 0,985047 |
| RP11-817J15.2 | 0,00 | 0,00 | 0,00 | 0,00 | 0,9773452 | NA       |
| AC002310.13   | 0,00 | 0,00 | 0,00 | 0,00 | 0,9773473 | NA       |
| RP11-261C10.4 | 0,00 | 0,00 | 0,00 | 0,00 | 0,9773507 | NA       |
| RNU6-879P     | 0,00 | 0,00 | 0,00 | 0,00 | 0,9773602 | NA       |
| RP11-85L21.5  | 0,00 | 0,00 | 0,00 | 0,00 | 0,9774487 | NA       |
| MIR186        | 0,00 | 0,00 | 0,00 | 2,05 | 0,9775154 | NA       |
| RP11-638I2.4  | 0,00 | 0,00 | 0,00 | 0,00 | 0,9776013 | NA       |
| RP11-183M13.1 | 1,83 | 1,55 | 1,47 | 1,05 | 0,9776161 | 0,985286 |
| RP11-55K22.2  | 0,00 | 0,00 | 0,00 | 0,00 | 0,9776563 | NA       |
| RP11-203M5.6  | 0,00 | 0,20 | 0,00 | 0,00 | 0,9776661 | NA       |
| RP11-101C11.1 | 0,00 | 0,00 | 0,00 | 0,00 | 0,9777987 | NA       |
| RP11-805F19.2 | 0,00 | 0,00 | 0,00 | 0,00 | 0,9778372 | NA       |
| AC139452.2    | 0,00 | 0,00 | 0,00 | 0,00 | 0,977999  | NA       |
| GRK1          | 0,00 | 0,00 | 0,00 | 0,00 | 0,9780182 | NA       |
| RP11-345I18.3 | 0,00 | 0,00 | 0,00 | 1,02 | 0,9780223 | NA       |
| TMEFF2        | 0,00 | 0,00 | 0,00 | 0,00 | 0,9780305 | NA       |
| RP11-849F2.4  | 0,00 | 0,00 | 0,00 | 0,00 | 0,9780764 | NA       |
| RP11-77H9.1   | 0,35 | 0,55 | 0,37 | 0,37 | 0,978088  | 0,985717 |
| PODN          | 0,00 | 0,00 | 0,00 | 0,00 | 0,9781384 | NA       |
| EPHX3         | 0,00 | 0,08 | 0,00 | 0,00 | 0,9781941 | NA       |
| RP11-490H24.5 | 0,00 | 0,00 | 0,00 | 0,00 | 0,9782324 | NA       |
| RF01877       | 0,00 | 0,00 | 0,00 | 0,00 | 0,9782893 | NA       |
| RP11-190C22.1 | 0,00 | 0,30 | 0,00 | 0,00 | 0,978303  | NA       |

|               |      |      |      |      |           |          |
|---------------|------|------|------|------|-----------|----------|
| ELAVL2        | 0,31 | 0,26 | 0,33 | 0,58 | 0,9783105 | 0,985873 |
| C21orf119     | 4,10 | 2,97 | 3,00 | 0,43 | 0,9783324 | 0,985873 |
| RP11-184M15.1 | 0,00 | 0,00 | 0,00 | 0,00 | 0,9784072 | NA       |
| RP11-597D13.8 | 0,00 | 0,00 | 0,00 | 0,00 | 0,9784145 | NA       |
| ENKUR         | 0,00 | 0,00 | 0,00 | 0,00 | 0,9784384 | NA       |
| PDZK1P1       | 0,00 | 0,16 | 0,00 | 0,03 | 0,9785271 | 0,986025 |
| RP11-249M12.1 | 0,00 | 0,55 | 0,00 | 0,00 | 0,9785727 | NA       |
| RARS2         | 4,55 | 4,46 | 4,13 | 3,58 | 0,9786236 | 0,98605  |
| SCYL2         | 3,77 | 3,55 | 3,26 | 3,48 | 0,9786411 | 0,98605  |
| TAS2R63P      | 0,00 | 0,00 | 0,00 | 0,00 | 0,978763  | NA       |
| SRA1          | 6,42 | 6,28 | 6,35 | 6,29 | 0,97877   | 0,986136 |
| IGLJ3         | 0,00 | 0,00 | 0,00 | 0,00 | 0,9787705 | NA       |
| ZSWIM5P1      | 0,00 | 0,00 | 0,00 | 0,00 | 0,9788709 | NA       |
| AP001258.5    | 0,00 | 0,00 | 0,00 | 0,00 | 0,9788913 | NA       |
| DNAJA1        | 7,06 | 7,08 | 6,87 | 6,88 | 0,9789489 | 0,986271 |
| TAS2R43       | 0,00 | 0,00 | 0,00 | 0,00 | 0,9789758 | NA       |
| RP4-730K3.3   | 0,00 | 0,00 | 0,00 | 0,00 | 0,978991  | NA       |
| TBC1D2B       | 3,25 | 3,99 | 3,12 | 3,65 | 0,9790411 | 0,986319 |
| RP5-968J1.1   | 0,00 | 0,00 | 0,00 | 0,00 | 0,9790547 | NA       |
| RP11-669M2.1  | 0,00 | 0,00 | 0,00 | 0,00 | 0,9790719 | NA       |
| SERHL         | 0,00 | 0,34 | 0,00 | 0,00 | 0,9791083 | 0,986342 |
| RP11-109N23.4 | 0,00 | 0,00 | 0,00 | 0,00 | 0,9791538 | NA       |
| RNU6-195P     | 0,00 | 0,00 | 0,00 | 0,00 | 0,9792168 | NA       |
| HSD3B2        | 0,00 | 0,00 | 0,00 | 0,00 | 0,9793189 | NA       |
| RP11-580P21.1 | 0,00 | 0,00 | 0,00 | 0,00 | 0,9793673 | NA       |
| CTC-429P9.4   | 0,00 | 0,00 | 0,00 | 0,00 | 0,9793824 | NA       |
| RP11-239H6.2  | 0,00 | 0,00 | 0,00 | 0,00 | 0,9793974 | NA       |
| RP11-64K12.1  | 0,00 | 0,00 | 0,00 | 0,00 | 0,9794357 | NA       |
| RP11-43P8.2   | 0,00 | 0,00 | 0,00 | 0,00 | 0,9794556 | NA       |
| RPL21P119     | 0,68 | 0,86 | 0,00 | 0,00 | 0,9794612 | NA       |
| RP5-862P8.3   | 0,00 | 0,00 | 0,00 | 0,00 | 0,9794653 | NA       |
| RP11-10E18.2  | 0,00 | 0,00 | 0,00 | 0,00 | 0,9794934 | 0,986685 |
| RP11-516A11.1 | 0,00 | 0,00 | 0,00 | 0,00 | 0,9795276 | NA       |
| EID2B         | 2,11 | 0,16 | 1,94 | 1,12 | 0,9795575 | 0,986705 |
| OR4C45        | 0,00 | 0,00 | 0,00 | 0,00 | 0,9795906 | NA       |
| RP11-562A8.3  | 0,00 | 0,00 | 0,00 | 0,00 | 0,9796088 | NA       |
| AC011816.3    | 0,00 | 0,00 | 0,00 | 0,00 | 0,9797014 | NA       |
| CATSPERG      | 0,90 | 0,92 | 1,17 | 1,03 | 0,9797075 | 0,986812 |
| AGGF1P2       | 0,00 | 0,00 | 0,00 | 0,00 | 0,9797118 | NA       |
| IGLV4-60      | 0,00 | 0,00 | 0,00 | 0,00 | 0,9797203 | NA       |
| RP5-1090P18.2 | 0,00 | 0,00 | 0,00 | 0,00 | 0,9797247 | NA       |
| RP11-119F19.6 | 0,00 | 0,00 | 0,00 | 0,00 | 0,9797378 | NA       |
| JPH3          | 0,00 | 0,00 | 0,00 | 0,00 | 0,9797388 | NA       |
| ZNF112        | 0,00 | 0,00 | 0,00 | 0,00 | 0,9797506 | NA       |
| RNU2-5P       | 0,00 | 0,00 | 0,00 | 0,00 | 0,9797584 | NA       |
| IMP3          | 6,25 | 6,03 | 6,03 | 5,88 | 0,9797922 | 0,986852 |
| TUBB2B        | 0,00 | 0,00 | 0,00 | 0,00 | 0,9798122 | NA       |
| RP11-307I14.3 | 0,00 | 0,00 | 0,00 | 0,00 | 0,9798324 | NA       |
| AC005614.5    | 0,00 | 0,00 | 0,00 | 0,00 | 0,979852  | NA       |
| RP11-632K20.8 | 0,00 | 0,00 | 0,00 | 0,00 | 0,97987   | NA       |
| MAN2A1        | 4,55 | 3,54 | 4,42 | 3,08 | 0,9799012 | 0,986913 |
| RP11-689I19.1 | 0,00 | 0,00 | 0,00 | 0,00 | 0,9799252 | NA       |
| RP11-267J23.1 | 0,72 | 0,73 | 0,71 | 0,42 | 0,9799413 | 0,986913 |
| RP11-626G11.4 | 0,00 | 0,00 | 0,00 | 0,00 | 0,9799417 | NA       |
| RP11-597A11.4 | 0,00 | 0,00 | 0,00 | 0,00 | 0,979971  | NA       |

|                |      |      |      |      |           |          |
|----------------|------|------|------|------|-----------|----------|
| WI2-85898F10.2 | 0,00 | 0,00 | 0,00 | 0,00 | 0,979979  | NA       |
| KBTBD2         | 4,67 | 4,67 | 3,98 | 4,35 | 0,9800331 | 0,986961 |
| RP11-154H12.3  | 0,00 | 0,00 | 0,00 | 0,00 | 0,9800427 | NA       |
| SPEF2          | 0,61 | 0,47 | 0,92 | 0,76 | 0,9800877 | 0,986971 |
| CTC-503K11.2   | 0,00 | 0,00 | 0,00 | 0,00 | 0,9801081 | NA       |
| AMN            | 0,00 | 0,00 | 0,00 | 0,00 | 0,9801498 | NA       |
| RP1-7G5.5      | 0,00 | 0,00 | 0,00 | 0,00 | 0,9801653 | NA       |
| MIR320D1       | 0,00 | 0,00 | 0,00 | 0,00 | 0,9802239 | NA       |
| AC004166.6     | 0,00 | 0,00 | 0,00 | 0,00 | 0,9802351 | NA       |
| RP11-366M4.4   | 0,00 | 0,00 | 0,00 | 0,00 | 0,9802426 | NA       |
| RP11-293M10.1  | 0,00 | 0,00 | 0,00 | 0,00 | 0,9802533 | NA       |
| RP11-1236K1.5  | 0,00 | 0,00 | 0,00 | 0,00 | 0,9802938 | NA       |
| AC106870.2     | 0,00 | 1,08 | 0,00 | 1,18 | 0,9802969 | 0,987137 |
| RP11-441F2.5   | 0,00 | 0,00 | 0,00 | 0,00 | 0,980318  | NA       |
| RP11-614F17.2  | 0,00 | 0,00 | 0,00 | 0,00 | 0,9803522 | NA       |
| RTP4           | 0,09 | 0,09 | 0,06 | 0,35 | 0,9803926 | 0,987151 |
| SYNJ2BP        | 2,87 | 2,39 | 2,36 | 2,52 | 0,9804001 | 0,987151 |
| RP11-686D22.3  | 0,00 | 0,00 | 0,00 | 0,00 | 0,9804428 | NA       |
| RNU6-862P      | 0,00 | 0,00 | 0,00 | 0,00 | 0,9804946 | NA       |
| RP11-16E12.1   | 2,46 | 2,30 | 2,21 | 2,18 | 0,9804947 | 0,987191 |
| RP11-734K2.3   | 0,00 | 0,00 | 0,00 | 0,00 | 0,9805306 | NA       |
| MRS2           | 4,17 | 3,63 | 3,60 | 3,01 | 0,9805394 | 0,987191 |
| METTL22        | 4,25 | 4,75 | 4,82 | 4,39 | 0,9805725 | 0,987191 |
| RP11-25I15.4   | 0,00 | 0,00 | 0,00 | 0,00 | 0,9805827 | NA       |
| TRIM51         | 0,00 | 0,00 | 0,00 | 0,00 | 0,9805835 | NA       |
| MIR664A        | 0,00 | 0,00 | 0,00 | 0,00 | 0,9805871 | NA       |
| RP11-307L14.1  | 0,00 | 0,00 | 0,00 | 0,00 | 0,98059   | NA       |
| SDR42E1        | 0,01 | 0,19 | 0,03 | 0,06 | 0,9806561 | 0,987202 |
| RP11-75A9.1    | 0,00 | 0,00 | 0,00 | 0,00 | 0,9806666 | NA       |
| CCDC30         | 2,27 | 1,78 | 1,57 | 1,27 | 0,9806738 | 0,987202 |
| SIGMAR1        | 4,35 | 4,48 | 3,58 | 2,88 | 0,9807169 | 0,987202 |
| RP11-180C16.1  | 0,00 | 0,31 | 0,00 | 0,65 | 0,9808122 | 0,987253 |
| RP11-813P10.1  | 0,00 | 0,00 | 0,00 | 0,00 | 0,9808517 | NA       |
| MAPK6          | 3,20 | 2,52 | 2,24 | 2,56 | 0,9808579 | 0,987255 |
| RP11-530N7.2   | 0,00 | 0,00 | 0,00 | 0,00 | 0,9809418 | NA       |
| TBPL2          | 0,00 | 0,00 | 0,00 | 0,00 | 0,9809462 | NA       |
| C19orf54       | 2,81 | 1,02 | 2,04 | 1,91 | 0,9809667 | 0,987308 |
| RGL3           | 0,49 | 0,54 | 0,37 | 0,84 | 0,9809995 | 0,987308 |
| RP11-342F21.1  | 0,00 | 0,00 | 0,00 | 0,00 | 0,9810119 | NA       |
| NUTM1          | 0,00 | 0,00 | 0,00 | 0,00 | 0,9810468 | NA       |
| AC138972.1     | 0,00 | 0,00 | 0,00 | 0,00 | 0,9810699 | NA       |
| RP11-235E17.4  | 0,00 | 0,00 | 0,00 | 0,00 | 0,9813284 | NA       |
| RNU6-157P      | 0,00 | 0,00 | 0,00 | 0,00 | 0,9813817 | NA       |
| RP11-157L3.4   | 0,00 | 0,00 | 0,00 | 0,00 | 0,9814074 | NA       |
| LINC01246      | 0,00 | 0,29 | 0,00 | 0,00 | 0,9814359 | NA       |
| MIR4489        | 0,00 | 0,00 | 0,00 | 0,00 | 0,9815353 | NA       |
| OR10AF1P       | 0,00 | 0,00 | 0,00 | 0,00 | 0,9816494 | NA       |
| XRCC1          | 2,40 | 1,38 | 2,82 | 1,64 | 0,9816743 | 0,987877 |
| RP11-522I20.3  | 0,84 | 0,00 | 0,18 | 0,00 | 0,9816982 | 0,987877 |
| FKBP15         | 4,26 | 4,07 | 3,76 | 3,54 | 0,9816982 | 0,987877 |
| LYVE1          | 0,00 | 0,04 | 0,00 | 0,00 | 0,9817017 | NA       |
| RXFP1          | 0,00 | 0,00 | 0,00 | 0,00 | 0,9817494 | NA       |
| SSX2           | 0,00 | 0,00 | 0,00 | 0,00 | 0,9817923 | NA       |
| AC024937.6     | 0,00 | 0,00 | 0,00 | 0,00 | 0,9818054 | NA       |
| CTA-351J1.1    | 0,00 | 0,00 | 0,00 | 0,00 | 0,9818647 | NA       |

|               |      |      |      |      |           |          |
|---------------|------|------|------|------|-----------|----------|
| CTD-2647L4.1  | 0,00 | 0,00 | 0,00 | 0,00 | 0,9819152 | NA       |
| RP11-178C3.2  | 1,15 | 1,99 | 1,58 | 1,66 | 0,9819885 | 0,988124 |
| RF00586       | 0,00 | 0,00 | 0,00 | 0,00 | 0,9820269 | NA       |
| MTMR4         | 2,66 | 1,71 | 1,84 | 2,13 | 0,9820457 | 0,988129 |
| ELOA2         | 0,00 | 0,00 | 0,00 | 0,00 | 0,9820652 | NA       |
| TP53          | 4,39 | 4,35 | 4,47 | 3,74 | 0,982082  | 0,988129 |
| CTD-2382E5.6  | 0,00 | 0,00 | 0,00 | 0,00 | 0,9822282 | NA       |
| MIR6807       | 0,00 | 0,00 | 0,00 | 0,00 | 0,9822662 | NA       |
| CH17-13I23.1  | 0,00 | 0,00 | 0,00 | 0,00 | 0,9822763 | NA       |
| SLC26A3       | 0,00 | 0,00 | 0,00 | 0,00 | 0,9822909 | NA       |
| AF129408.15   | 0,00 | 0,00 | 0,00 | 0,00 | 0,9823021 | NA       |
| RP11-534L20.5 | 0,00 | 0,00 | 0,00 | 0,00 | 0,982343  | NA       |
| RNU4-39P      | 0,00 | 0,00 | 0,00 | 0,00 | 0,9823498 | NA       |
| GPR87         | 0,00 | 0,00 | 0,00 | 0,00 | 0,9823562 | NA       |
| AC015688.3    | 0,00 | 0,00 | 0,00 | 0,00 | 0,9823908 | NA       |
| RP4-536B24.2  | 0,00 | 0,00 | 0,00 | 0,00 | 0,9823956 | NA       |
| FRG1FP        | 0,00 | 0,00 | 0,00 | 0,00 | 0,9824402 | NA       |
| CTD-2562J17.2 | 0,00 | 0,00 | 0,00 | 0,00 | 0,9824656 | NA       |
| RP11-137O10.1 | 0,00 | 0,00 | 0,51 | 0,00 | 0,98247   | NA       |
| RP11-138A9.1  | 3,18 | 3,44 | 3,36 | 3,30 | 0,9824855 | 0,98849  |
| CTC-215O4.4   | 0,00 | 0,00 | 0,00 | 0,00 | 0,9825625 | NA       |
| RF00024       | 0,00 | 0,00 | 0,00 | 0,00 | 0,9825654 | NA       |
| AC005067.4    | 0,00 | 0,00 | 0,00 | 0,00 | 0,9826159 | NA       |
| AC007283.5    | 0,00 | 0,00 | 0,00 | 0,00 | 0,9826575 | NA       |
| CTD-2012K14.7 | 0,00 | 0,00 | 0,00 | 0,00 | 0,9827128 | NA       |
| RPS19P1       | 0,00 | 0,00 | 0,00 | 0,00 | 0,9827165 | NA       |
| RRP1B         | 1,89 | 1,35 | 1,96 | 1,37 | 0,9827428 | 0,988704 |
| RP11-296L22.4 | 0,00 | 0,00 | 0,00 | 0,00 | 0,9827681 | NA       |
| TRBJ2-1       | 0,00 | 0,00 | 0,00 | 0,00 | 0,9827728 | NA       |
| CTD-2132N18.3 | 0,00 | 0,00 | 0,00 | 0,00 | 0,982904  | NA       |
| NRBP1         | 5,38 | 4,36 | 5,12 | 4,67 | 0,9829041 | 0,988727 |
| ISY1-RAB43    | 0,00 | 0,00 | 0,05 | 0,10 | 0,9829363 | 0,988727 |
| RP11-156E6.1  | 0,64 | 1,19 | 0,50 | 0,41 | 0,9829663 | 0,988727 |
| RP11-863P13.2 | 0,00 | 2,29 | 0,96 | 1,34 | 0,9829752 | 0,988727 |
| PNKD          | 5,17 | 5,86 | 5,54 | 5,40 | 0,9829882 | 0,988727 |
| RP11-29H23.2  | 0,00 | 0,00 | 0,00 | 0,00 | 0,98302   | NA       |
| RP11-125K10.2 | 0,00 | 0,00 | 0,00 | 0,00 | 0,9830564 | NA       |
| HCG9P5        | 0,00 | 0,00 | 0,00 | 0,00 | 0,9831065 | NA       |
| RN75L650P     | 0,00 | 0,00 | 0,00 | 0,00 | 0,9831665 | 0,988862 |
| AC097532.3    | 0,00 | 0,00 | 0,00 | 0,00 | 0,9831713 | NA       |
| PCDHGA4       | 0,00 | 0,00 | 0,00 | 0,00 | 0,983226  | NA       |
| RP11-495P10.6 | 0,00 | 0,00 | 0,00 | 0,00 | 0,9832698 | NA       |
| RP11-382A20.1 | 0,00 | 0,00 | 0,00 | 0,00 | 0,9832752 | NA       |
| SMIM10L2B     | 0,00 | 0,00 | 0,00 | 0,00 | 0,9833195 | NA       |
| AC004941.4    | 0,00 | 0,00 | 0,00 | 0,00 | 0,983345  | NA       |
| OCLM          | 0,00 | 0,00 | 0,00 | 0,00 | 0,9834145 | NA       |
| MTHFD1        | 4,88 | 1,58 | 4,47 | 3,72 | 0,9834373 | 0,989089 |
| AC016689.1    | 0,40 | 0,60 | 0,50 | 0,83 | 0,9834995 | 0,989107 |
| FRG2B         | 0,00 | 0,00 | 0,00 | 0,00 | 0,983505  | NA       |
| NANOGP5       | 0,00 | 0,00 | 0,00 | 0,00 | 0,9835655 | NA       |
| AC005339.2    | 1,61 | 1,33 | 1,01 | 2,37 | 0,9835884 | 0,989116 |
| RP11-217B1.2  | 0,00 | 0,00 | 0,00 | 0,00 | 0,9835976 | NA       |
| RP11-286H15.1 | 0,64 | 0,70 | 0,39 | 0,51 | 0,9835979 | 0,989116 |
| AL050303.10   | 0,00 | 0,00 | 0,00 | 0,00 | 0,983624  | NA       |
| C1QTNF9B      | 0,00 | 0,00 | 0,00 | 0,00 | 0,9836266 | NA       |

|                |      |      |      |      |           |          |
|----------------|------|------|------|------|-----------|----------|
| RP11-1055B8.10 | 0,00 | 0,00 | 0,00 | 0,00 | 0,983638  | NA       |
| RP11-472M19.2  | 0,00 | 0,00 | 0,00 | 0,00 | 0,983643  | NA       |
| RP11-370I10.6  | 0,26 | 0,35 | 0,00 | 0,37 | 0,9836767 | 0,989151 |
| AC010149.4     | 0,00 | 0,00 | 0,00 | 0,00 | 0,9837566 | NA       |
| RP11-329E24.6  | 0,00 | 0,00 | 0,00 | 0,00 | 0,9838195 | NA       |
| RP13-16H11.1   | 0,12 | 0,00 | 0,00 | 0,00 | 0,9838291 | 0,989259 |
| MIR619         | 0,00 | 0,00 | 0,00 | 0,00 | 0,9839551 | NA       |
| RP11-506B6.7   | 0,00 | 0,00 | 0,00 | 0,00 | 0,9840207 | NA       |
| RP11-65D24.1   | 0,00 | 0,00 | 0,00 | 0,00 | 0,984026  | NA       |
| A4GNT          | 0,00 | 0,00 | 0,00 | 0,00 | 0,9840378 | NA       |
| DDX17          | 6,40 | 5,38 | 6,14 | 6,07 | 0,9840797 | 0,989467 |
| AC019330.1     | 0,00 | 0,00 | 0,00 | 0,00 | 0,9841745 | NA       |
| HPGDS          | 0,00 | 0,00 | 0,00 | 0,00 | 0,9841995 | NA       |
| RPL21P2        | 0,00 | 0,00 | 0,00 | 0,00 | 0,984215  | NA       |
| RP11-305I9.3   | 0,00 | 0,30 | 0,00 | 0,00 | 0,9842523 | 0,989493 |
| IGSF23         | 0,00 | 0,00 | 0,00 | 0,00 | 0,9842531 | NA       |
| CTC-360J11.4   | 0,00 | 0,00 | 0,00 | 0,00 | 0,9842647 | NA       |
| RPP25L         | 4,52 | 5,28 | 5,09 | 5,02 | 0,9842923 | 0,989493 |
| RNU7-77P       | 0,00 | 0,00 | 0,00 | 0,00 | 0,9842924 | 0,989493 |
| RN7SKP30       | 0,00 | 0,00 | 0,00 | 1,89 | 0,9842954 | 0,989493 |
| CTC-209H22.2   | 0,00 | 0,00 | 0,00 | 0,00 | 0,9843028 | NA       |
| RP11-480I12.10 | 0,00 | 0,00 | 0,00 | 0,00 | 0,9843084 | NA       |
| AGT            | 0,00 | 0,06 | 0,00 | 0,00 | 0,9843122 | NA       |
| RP11-809H16.2  | 0,00 | 0,00 | 0,00 | 0,00 | 0,9843127 | NA       |
| HAUS6          | 1,60 | 1,00 | 1,08 | 1,15 | 0,9843286 | 0,989493 |
| SMARCA5        | 3,92 | 3,40 | 3,85 | 3,69 | 0,9843846 | 0,989505 |
| RP11-114I13.1  | 0,00 | 0,00 | 0,00 | 0,00 | 0,9843991 | NA       |
| RP13-188P24.2  | 0,00 | 0,00 | 0,00 | 0,00 | 0,9844081 | NA       |
| MIR4526        | 0,00 | 0,00 | 0,00 | 0,00 | 0,9844712 | NA       |
| AMOTL2         | 0,00 | 0,00 | 0,00 | 0,00 | 0,9844757 | NA       |
| RP11-18M17.2   | 1,93 | 2,86 | 2,33 | 2,77 | 0,9844871 | 0,989563 |
| CNIH3          | 1,87 | 2,15 | 2,03 | 2,73 | 0,9845638 | 0,989595 |
| RNU2-46P       | 0,00 | 0,00 | 0,00 | 0,00 | 0,9846411 | NA       |
| RP11-178C10.2  | 0,00 | 0,00 | 0,43 | 0,41 | 0,9846915 | 0,989679 |
| RP11-494O16.3  | 0,00 | 0,00 | 0,00 | 0,00 | 0,9847003 | NA       |
| RP4-545L17.11  | 0,00 | 0,00 | 0,00 | 0,00 | 0,9847211 | NA       |
| LAMP2          | 5,43 | 4,60 | 5,39 | 4,91 | 0,9847395 | 0,989682 |
| AC104809.2     | 0,00 | 0,06 | 0,00 | 0,00 | 0,9847554 | NA       |
| RP11-680G24.4  | 0,00 | 0,00 | 0,00 | 0,00 | 0,9848089 | NA       |
| RP11-745O10.2  | 0,00 | 0,00 | 0,00 | 0,00 | 0,9848346 | NA       |
| RNU6-705P      | 0,00 | 0,00 | 0,00 | 0,00 | 0,9848392 | NA       |
| AC016710.1     | 0,00 | 0,00 | 0,00 | 0,00 | 0,9848689 | NA       |
| RP1-167A14.2   | 0,00 | 0,00 | 0,00 | 0,00 | 0,9849347 | 0,989834 |
| RP11-255I3.2   | 0,00 | 0,00 | 0,00 | 0,00 | 0,9849396 | NA       |
| CTD-2139B15.2  | 0,00 | 0,00 | 0,00 | 0,00 | 0,9850091 | NA       |
| AC010877.1     | 0,00 | 0,00 | 0,00 | 0,00 | 0,9850319 | NA       |
| RP11-395E19.2  | 0,00 | 0,04 | 0,00 | 0,00 | 0,9850772 | NA       |
| LA16c-325D7.1  | 0,00 | 0,00 | 0,00 | 0,00 | 0,9850842 | NA       |
| RNA5SP477      | 0,00 | 0,00 | 0,00 | 0,00 | 0,9851287 | NA       |
| RP11-2E11.9    | 0,00 | 0,00 | 0,00 | 0,00 | 0,985152  | NA       |
| CTD-2530N21.4  | 0,00 | 0,00 | 0,00 | 0,00 | 0,9852253 | NA       |
| AC010082.2     | 0,65 | 1,55 | 1,70 | 2,03 | 0,9852389 | 0,990095 |
| RNU6ATAC40P    | 0,00 | 0,00 | 0,00 | 0,00 | 0,9852442 | NA       |
| RP11-63L7.5    | 0,00 | 0,00 | 0,00 | 0,00 | 0,9853064 | NA       |
| RN7SL794P      | 0,00 | 0,00 | 0,00 | 0,00 | 0,9854269 | NA       |

|                   |      |      |      |      |           |          |
|-------------------|------|------|------|------|-----------|----------|
| RP11-109A6.5      | 0,00 | 0,00 | 0,00 | 0,00 | 0,9854765 | NA       |
| AC012454.4        | 0,11 | 0,01 | 0,25 | 0,20 | 0,9854785 | NA       |
| RF01169           | 0,00 | 0,00 | 0,00 | 0,00 | 0,9855034 | NA       |
| ASNS              | 3,47 | 1,78 | 2,34 | 2,79 | 0,9855263 | 0,990295 |
| GNAI1             | 1,61 | 2,58 | 2,02 | 2,16 | 0,9855278 | 0,990295 |
| RP11-152P23.2     | 0,00 | 0,00 | 0,00 | 0,00 | 0,9856718 | NA       |
| ID4               | 0,00 | 0,00 | 0,00 | 0,00 | 0,9856846 | 0,990408 |
| RP11-191G24.2     | 0,00 | 0,00 | 0,00 | 0,00 | 0,9857228 | NA       |
| RP4-566L20.1      | 0,00 | 0,00 | 0,00 | 0,00 | 0,9857476 | NA       |
| DIRC2             | 1,92 | 2,72 | 1,76 | 1,48 | 0,9857784 | 0,990431 |
| MYLIP             | 4,91 | 5,24 | 4,96 | 4,90 | 0,9857962 | 0,990431 |
| RP11-114M5.1      | 0,00 | 0,00 | 0,00 | 0,00 | 0,9858234 | NA       |
| RP13-228I13.5     | 2,32 | 2,89 | 1,88 | 2,36 | 0,9858476 | 0,990438 |
| GAPDHP38          | 0,00 | 0,00 | 0,00 | 0,00 | 0,9858754 | NA       |
| RP11-554D14.4     | 0,00 | 0,00 | 0,00 | 0,00 | 0,9859628 | NA       |
| RP4-733M16.2      | 0,00 | 0,00 | 0,00 | 0,00 | 0,9859654 | NA       |
| CAPN8             | 0,00 | 0,00 | 0,00 | 1,54 | 0,9860271 | 0,990546 |
| RP11-457M11.6     | 0,00 | 0,00 | 0,00 | 0,00 | 0,9860332 | NA       |
| WEE1              | 0,65 | 0,72 | 1,06 | 1,09 | 0,986045  | 0,990546 |
| PCDHB18           | 0,00 | 0,00 | 0,00 | 0,00 | 0,9861021 | NA       |
| RNA5SP307         | 0,00 | 0,00 | 0,00 | 0,00 | 0,9861058 | NA       |
| GAPDHP68          | 0,00 | 0,00 | 0,00 | 0,00 | 0,9861178 | NA       |
| COX6A1P2          | 0,00 | 0,00 | 0,00 | 0,00 | 0,9861707 | NA       |
| FAM216B           | 0,00 | 0,00 | 0,00 | 0,00 | 0,9861753 | 0,990633 |
| RP11-708L7.6      | 0,00 | 0,00 | 0,00 | 0,00 | 0,9861795 | NA       |
| RNU6-135P         | 0,00 | 0,00 | 0,00 | 0,00 | 0,9861916 | NA       |
| RP5-1120P11.4     | 0,00 | 0,00 | 0,00 | 0,00 | 0,9861962 | NA       |
| RP11-452K20.1     | 0,00 | 0,00 | 0,00 | 0,00 | 0,9862073 | NA       |
| RPEL1             | 0,00 | 0,00 | 0,00 | 0,00 | 0,9862568 | NA       |
| MARK1             | 0,00 | 0,00 | 0,00 | 0,00 | 0,9862658 | NA       |
| RP11-362K14.6     | 0,00 | 0,00 | 0,00 | 0,00 | 0,986376  | NA       |
| AC009948.7        | 0,00 | 0,00 | 0,00 | 0,00 | 0,986429  | NA       |
| Xxbac-BPGBPG55C20 | 0,00 | 0,00 | 0,00 | 0,00 | 0,9864598 | NA       |
| RP11-327L3.5      | 0,11 | 0,00 | 0,00 | 0,00 | 0,9865173 | NA       |
| CTD-3194G12.2     | 0,00 | 0,00 | 0,00 | 0,00 | 0,9865245 | NA       |
| OR4G1P            | 0,00 | 0,00 | 0,00 | 0,00 | 0,9865471 | NA       |
| IL12A             | 0,00 | 0,00 | 0,00 | 0,00 | 0,9865535 | NA       |
| AC074093.1        | 2,52 | 3,28 | 2,47 | 2,65 | 0,9865852 | 0,991    |
| CTD-2659N19.2     | 0,00 | 0,00 | 0,00 | 0,00 | 0,9866014 | NA       |
| RP11-664H17.1     | 0,00 | 0,00 | 0,00 | 0,00 | 0,9866105 | NA       |
| RP11-166A12.1     | 0,00 | 0,00 | 0,00 | 0,00 | 0,9866677 | NA       |
| RP11-90P5.1       | 0,00 | 0,00 | 0,00 | 0,00 | 0,9866778 | NA       |
| RP1-290I10.8      | 0,00 | 0,00 | 0,00 | 0,00 | 0,9867317 | NA       |
| FAM89A            | 0,00 | 0,00 | 0,00 | 0,00 | 0,9867522 | 0,991106 |
| RPL18P13          | 0,00 | 0,00 | 0,00 | 0,00 | 0,9867643 | NA       |
| LRRC46            | 0,00 | 0,00 | 0,00 | 0,00 | 0,9867808 | 0,991106 |
| CCDC7             | 2,80 | 1,46 | 1,80 | 1,75 | 0,9868375 | 0,991119 |
| RP11-676M6.1      | 0,00 | 0,00 | 0,00 | 0,00 | 0,9870124 | NA       |
| RP11-793H13.3     | 0,00 | 0,00 | 0,00 | 0,00 | 0,9870799 | NA       |
| AC016697.3        | 0,00 | 0,89 | 0,24 | 0,55 | 0,9871094 | 0,991314 |
| RP11-41O4.2       | 0,10 | 0,26 | 0,25 | 0,49 | 0,9871211 | 0,991314 |
| RP4-612J11.1      | 0,00 | 0,00 | 0,00 | 0,00 | 0,9871432 | NA       |
| RP11-956I14.3     | 0,00 | 0,00 | 0,00 | 0,00 | 0,9871708 | NA       |
| RP11-74E24.2      | 0,00 | 0,00 | 0,00 | 0,00 | 0,987202  | NA       |
| COLEC11           | 0,89 | 0,89 | 0,43 | 0,39 | 0,9872236 | 0,991372 |

|                 |      |      |      |      |           |          |
|-----------------|------|------|------|------|-----------|----------|
| CTD-2015H6.1    | 0,00 | 0,00 | 0,00 | 0,00 | 0,9872679 | NA       |
| AD000864.6      | 1,75 | 1,51 | 1,43 | 1,48 | 0,9873389 | 0,991443 |
| RP11-1036E20.7  | 0,00 | 0,00 | 0,00 | 0,00 | 0,9873561 | NA       |
| RP11-159D12.6   | 0,00 | 0,00 | 0,00 | 0,00 | 0,9873728 | NA       |
| RP11-567M16.3   | 0,00 | 0,00 | 0,00 | 0,00 | 0,9874049 | NA       |
| TRBJ1-3         | 0,00 | 0,00 | 0,00 | 0,00 | 0,9874344 | NA       |
| AC020550.7      | 0,00 | 0,00 | 0,00 | 0,00 | 0,987444  | NA       |
| HLA-L           | 1,73 | 2,38 | 1,81 | 1,97 | 0,9874909 | 0,99151  |
| RP5-867C24.1    | 0,20 | 0,23 | 0,34 | 0,63 | 0,9874951 | 0,99151  |
| PDHA1P1         | 0,00 | 0,00 | 0,00 | 0,00 | 0,9875183 | NA       |
| RP11-84P7.1     | 0,00 | 0,00 | 0,00 | 0,00 | 0,987537  | NA       |
| KB-1507C5.3     | 0,00 | 0,00 | 0,00 | 0,00 | 0,9875655 | NA       |
| NT5DC4          | 0,00 | 0,00 | 0,00 | 0,00 | 0,9875793 | NA       |
| CTC-454I21.3    | 0,00 | 0,31 | 0,17 | 0,00 | 0,9875984 | NA       |
| DMRTC2          | 0,00 | 0,00 | 0,00 | 0,00 | 0,9876678 | NA       |
| ACO09970.1      | 0,00 | 0,00 | 0,00 | 0,00 | 0,9876746 | NA       |
| RN7SL518P       | 0,00 | 0,00 | 0,00 | 0,00 | 0,9878362 | NA       |
| RNU6-969P       | 0,00 | 0,00 | 0,00 | 0,00 | 0,987869  | NA       |
| C15orf65        | 0,00 | 0,00 | 0,00 | 0,00 | 0,9878955 | NA       |
| RP11-285C1.2    | 0,00 | 0,00 | 0,00 | 0,00 | 0,9879422 | NA       |
| RP11-306I1.2    | 0,00 | 0,00 | 0,00 | 0,00 | 0,987999  | NA       |
| THSD1           | 0,00 | 0,00 | 0,00 | 0,00 | 0,9880011 | NA       |
| RP11-736G13.2   | 0,00 | 0,00 | 0,00 | 0,00 | 0,9880448 | NA       |
| AP000240.7      | 0,00 | 0,57 | 0,00 | 0,00 | 0,9880687 | NA       |
| RP11-57H14.5    | 0,00 | 0,00 | 0,00 | 0,00 | 0,9880979 | NA       |
| AP001258.1      | 0,00 | 0,00 | 0,00 | 0,00 | 0,9881323 | NA       |
| HIGD1B          | 0,00 | 0,00 | 0,00 | 0,00 | 0,9881521 | NA       |
| RP11-522L3.2    | 0,00 | 0,00 | 0,00 | 0,00 | 0,9881628 | NA       |
| SLC8B1          | 3,09 | 3,02 | 3,52 | 2,66 | 0,988178  | 0,992151 |
| RP11-558A11.1   | 0,00 | 0,00 | 0,00 | 0,00 | 0,9881801 | NA       |
| RP11-304L19.1   | 0,00 | 0,00 | 0,00 | 0,00 | 0,9881895 | NA       |
| RP11-495K9.5    | 0,00 | 0,00 | 0,00 | 0,00 | 0,9881973 | NA       |
| KATNB1          | 1,67 | 1,25 | 1,49 | 0,60 | 0,9882521 | 0,992181 |
| RP11-731I19.1   | 0,00 | 0,00 | 0,00 | 0,00 | 0,9882582 | NA       |
| TENM3           | 0,00 | 0,04 | 0,00 | 0,00 | 0,9882597 | NA       |
| RP11-519G16.5   | 0,00 | 0,29 | 0,00 | 0,40 | 0,9884443 | NA       |
| AP004290.1      | 0,00 | 0,00 | 0,00 | 0,00 | 0,9884503 | NA       |
| PAQR9           | 0,00 | 0,00 | 0,00 | 0,00 | 0,9884762 | NA       |
| RNA5SP153       | 0,00 | 0,00 | 0,00 | 0,00 | 0,9884968 | NA       |
| TAS2R5          | 0,00 | 0,00 | 0,00 | 0,00 | 0,9885353 | NA       |
| RP3-442M11.1    | 0,00 | 0,00 | 0,00 | 0,00 | 0,988545  | NA       |
| RP11-274B21.2   | 0,00 | 0,00 | 0,00 | 0,00 | 0,9885952 | NA       |
| RNA5SP78        | 0,00 | 0,00 | 0,00 | 0,00 | 0,988627  | NA       |
| RP11-43P5.3     | 0,00 | 0,00 | 0,00 | 0,00 | 0,9886333 | NA       |
| CTC-236F12.4    | 0,00 | 0,71 | 0,00 | 0,00 | 0,9886362 | 0,992521 |
| RP11-367G12.1   | 0,00 | 0,00 | 0,00 | 0,00 | 0,9886599 | NA       |
| RP11-54D18.4    | 0,00 | 0,00 | 0,00 | 0,00 | 0,9887775 | NA       |
| UBE2V1P1        | 0,00 | 0,00 | 0,00 | 0,00 | 0,9887888 | 0,992586 |
| ASB8            | 4,73 | 2,68 | 4,41 | 4,06 | 0,98879   | 0,992586 |
| RP11-445L13_B.1 | 0,00 | 0,00 | 0,00 | 0,00 | 0,9888473 | NA       |
| RP4-633I8.4     | 0,00 | 0,00 | 0,00 | 0,00 | 0,9888515 | NA       |
| DOK5            | 0,00 | 0,00 | 0,00 | 0,00 | 0,9888525 | NA       |
| RP11-1084I9.3   | 0,00 | 0,39 | 0,00 | 0,00 | 0,988866  | NA       |
| CTC-297N7.1     | 0,00 | 0,00 | 0,00 | 0,00 | 0,9888724 | NA       |
| RNA5SP312       | 0,00 | 0,00 | 0,00 | 0,00 | 0,9888852 | NA       |



|               |      |      |      |      |           |          |
|---------------|------|------|------|------|-----------|----------|
| RNA5SP315     | 0,00 | 0,00 | 0,00 | 0,00 | 0,9888852 | NA       |
| KCNV2         | 0,00 | 0,00 | 0,00 | 0,00 | 0,9889291 | NA       |
| RP11-115H18.1 | 0,00 | 0,00 | 0,00 | 0,00 | 0,9889294 | NA       |
| OTOF          | 0,00 | 0,03 | 0,00 | 0,41 | 0,9889984 | 0,992751 |
| RP11-793B23.1 | 0,00 | 0,00 | 0,00 | 0,00 | 0,9890017 | NA       |
| AC010904.1    | 0,00 | 0,00 | 0,00 | 0,00 | 0,9890219 | NA       |
| RP4-706L14.2  | 0,00 | 0,00 | 0,00 | 0,00 | 0,9890243 | NA       |
| BPIFB9P       | 0,00 | 0,00 | 0,00 | 0,00 | 0,9890246 | NA       |
| TLL13         | 0,00 | 0,00 | 0,00 | 0,00 | 0,9890628 | NA       |
| GRM5          | 0,00 | 0,00 | 0,00 | 0,00 | 0,9890883 | NA       |
| RP11-736I10.1 | 0,00 | 0,00 | 0,00 | 0,00 | 0,9891259 | NA       |
| EPAS1         | 0,00 | 0,00 | 0,00 | 0,00 | 0,9892679 | NA       |
| RP1-166H4.2   | 0,00 | 0,00 | 0,11 | 0,19 | 0,9892751 | 0,992901 |
| RP11-464D20.6 | 0,43 | 0,67 | 0,34 | 0,59 | 0,989294  | 0,992901 |
| RNUSA-3P      | 0,00 | 0,00 | 0,00 | 0,00 | 0,9893092 | NA       |
| RPS10P28      | 0,00 | 0,00 | 0,00 | 0,00 | 0,9893121 | NA       |
| ZFAND2B       | 5,66 | 5,83 | 5,35 | 5,44 | 0,9893244 | 0,992901 |
| HJURP         | 0,27 | 0,48 | 0,43 | 0,08 | 0,9893387 | 0,992901 |
| RP11-542M13.2 | 0,44 | 0,94 | 0,59 | 1,15 | 0,9893717 | 0,992901 |
| LGR5          | 0,00 | 0,00 | 0,00 | 0,00 | 0,9893722 | NA       |
| LTA           | 0,00 | 0,00 | 0,00 | 0,00 | 0,9893828 | NA       |
| LNP1          | 0,00 | 0,00 | 0,00 | 0,00 | 0,9894204 | NA       |
| RP11-432I13.6 | 0,00 | 0,00 | 0,00 | 0,00 | 0,9894328 | NA       |
| CTAGE9        | 0,00 | 0,00 | 0,00 | 0,00 | 0,9894365 | NA       |
| ER13          | 4,55 | 4,75 | 4,44 | 4,72 | 0,9894468 | 0,992932 |
| SLC1A5        | 5,10 | 4,17 | 4,92 | 4,62 | 0,9895252 | 0,992965 |
| EFNB3         | 0,00 | 0,00 | 0,00 | 0,00 | 0,9895503 | NA       |
| SLC16A2       | 0,00 | 0,00 | 0,00 | 0,00 | 0,9897311 | NA       |
| RP11-371F15.3 | 0,00 | 0,00 | 0,00 | 0,00 | 0,9897774 | NA       |
| MED15P9       | 0,00 | 0,15 | 0,04 | 0,08 | 0,9897981 | 0,993194 |
| RP11-23J9.3   | 0,00 | 0,00 | 0,00 | 0,00 | 0,989863  | NA       |
| DUSP3         | 5,15 | 4,74 | 5,14 | 4,48 | 0,9898738 | 0,993226 |
| RP11-365F18.3 | 0,07 | 0,29 | 0,14 | 0,35 | 0,9899503 | 0,993257 |
| TUBBP1        | 0,00 | 0,00 | 0,00 | 0,00 | 0,9899537 | NA       |
| RP11-59H7.3   | 0,00 | 0,30 | 0,00 | 0,00 | 0,9899898 | NA       |
| SHD           | 0,00 | 0,00 | 0,00 | 0,00 | 0,9900485 | NA       |
| RABL3         | 3,31 | 3,29 | 2,16 | 2,63 | 0,9900887 | 0,993351 |
| RP11-332B14.2 | 0,00 | 0,00 | 0,00 | 0,00 | 0,9901148 | NA       |
| RP11-797A18.3 | 0,00 | 0,00 | 0,00 | 0,00 | 0,9901674 | NA       |
| CTB-94B10.2   | 0,00 | 0,00 | 0,00 | 0,18 | 0,9901917 | 0,99341  |
| RP11-20G13.2  | 0,00 | 0,00 | 0,00 | 0,00 | 0,990193  | NA       |
| CYP21A2       | 0,00 | 0,00 | 0,00 | 0,00 | 0,9902596 | NA       |
| AC094019.4    | 0,00 | 0,00 | 0,00 | 0,00 | 0,9902766 | NA       |
| RP11-132I14.1 | 0,00 | 0,00 | 0,00 | 0,00 | 0,9902853 | NA       |
| RP11-524O24.2 | 0,00 | 0,00 | 0,00 | 0,00 | 0,9903021 | NA       |
| RP11-829H16.2 | 0,00 | 0,00 | 0,00 | 0,00 | 0,9903077 | NA       |
| RP11-224O19.4 | 0,00 | 0,00 | 0,00 | 0,00 | 0,9903584 | NA       |
| DYX1C1-CCPG1  | 0,00 | 0,00 | 0,00 | 0,00 | 0,9903619 | NA       |
| RP11-40C6.2   | 0,00 | 0,00 | 0,00 | 0,00 | 0,9903748 | NA       |
| RP11-379F4.4  | 0,00 | 0,00 | 0,00 | 0,00 | 0,9903899 | NA       |
| TMSB4Y        | 0,00 | 0,00 | 0,00 | 0,00 | 0,9903918 | NA       |
| KRT6C         | 0,00 | 0,00 | 0,00 | 0,00 | 0,9904061 | NA       |
| OAS1          | 5,69 | 6,27 | 5,73 | 5,61 | 0,9904287 | 0,993603 |
| RP11-10E18.5  | 1,18 | 0,00 | 1,00 | 0,80 | 0,990509  | 0,993639 |
| RP11-294H11.4 | 0,00 | 0,00 | 0,00 | 0,00 | 0,9905463 | NA       |

|                |      |      |      |      |           |          |
|----------------|------|------|------|------|-----------|----------|
| RPL7AP3        | 0,00 | 0,00 | 0,00 | 0,00 | 0,9905756 | NA       |
| CTD-2340E1.3   | 0,00 | 0,40 | 0,00 | 0,00 | 0,9906062 | NA       |
| RNU2-24P       | 0,00 | 1,64 | 0,00 | 0,00 | 0,990738  | NA       |
| RASD2          | 0,00 | 0,00 | 0,00 | 0,00 | 0,9907812 | NA       |
| RP11-234B24.6  | 0,00 | 0,00 | 0,00 | 0,00 | 0,9908088 | NA       |
| RP11-523H24.3  | 0,00 | 0,00 | 0,00 | 0,00 | 0,9908164 | NA       |
| RPL9P25        | 0,00 | 0,00 | 0,00 | 0,00 | 0,990841  | NA       |
| UBE2Q1         | 3,96 | 3,58 | 3,78 | 2,94 | 0,9908661 | 0,993952 |
| CTC-325H20.4   | 0,90 | 1,69 | 2,08 | 2,06 | 0,9909702 | 0,994003 |
| PDGFD          | 0,00 | 0,00 | 0,00 | 0,03 | 0,9910068 | 0,994003 |
| TRGV2          | 0,00 | 0,00 | 0,00 | 0,00 | 0,9910279 | NA       |
| HMG2P28        | 0,00 | 0,00 | 0,00 | 0,00 | 0,9910404 | NA       |
| RP11-466P24.3  | 0,00 | 0,00 | 0,00 | 0,00 | 0,9910416 | NA       |
| RP1-30M3.6     | 0,00 | 0,00 | 0,00 | 0,00 | 0,9910767 | NA       |
| MIR3135A       | 0,00 | 0,00 | 0,00 | 0,00 | 0,9910844 | NA       |
| METTL13        | 3,00 | 2,71 | 2,20 | 3,30 | 0,9911225 | 0,994075 |
| RP1-69E11.3    | 0,00 | 0,00 | 0,00 | 0,00 | 0,9911232 | NA       |
| CTC-529L17.1   | 0,56 | 0,90 | 0,07 | 0,00 | 0,9912225 | 0,99413  |
| RP11-557J10.4  | 0,00 | 0,00 | 0,00 | 0,00 | 0,9912588 | NA       |
| C2orf16        | 0,00 | 0,00 | 0,00 | 0,00 | 0,9913588 | NA       |
| HPDL           | 0,00 | 0,00 | 0,00 | 0,00 | 0,9913955 | NA       |
| RNY1P13        | 0,00 | 0,00 | 0,00 | 0,00 | 0,9914035 | NA       |
| RP11-354K4.2   | 0,00 | 0,22 | 0,00 | 0,00 | 0,9914806 | NA       |
| AC066606.1     | 0,00 | 0,00 | 0,00 | 0,00 | 0,9915206 | NA       |
| THAP7          | 3,36 | 3,07 | 2,49 | 3,09 | 0,9915441 | 0,994384 |
| RN7SL424P      | 0,00 | 0,00 | 0,00 | 0,00 | 0,9915588 | NA       |
| MYO5A          | 4,77 | 4,20 | 4,70 | 3,94 | 0,9915657 | 0,994384 |
| MIR367         | 0,00 | 0,00 | 0,00 | 0,00 | 0,991631  | NA       |
| PAGE4          | 0,00 | 0,00 | 0,00 | 0,00 | 0,9916532 | NA       |
| RP11-368P15.2  | 0,00 | 0,00 | 0,00 | 0,00 | 0,9916941 | NA       |
| SNORA31        | 6,27 | 1,69 | 5,88 | 5,83 | 0,9918671 | 0,994642 |
| KB-1205A7.1    | 0,00 | 0,00 | 0,00 | 0,00 | 0,9918693 | NA       |
| NTSR1          | 0,00 | 0,00 | 0,00 | 0,00 | 0,9918812 | NA       |
| KAT7           | 4,42 | 3,27 | 3,61 | 3,14 | 0,9919402 | 0,994653 |
| SAP130         | 1,73 | 1,01 | 1,25 | 0,80 | 0,991968  | 0,994653 |
| OR5BB1P        | 0,00 | 0,00 | 0,00 | 0,00 | 0,9920046 | NA       |
| RP11-329A14.1  | 0,00 | 0,00 | 0,00 | 0,00 | 0,9920175 | NA       |
| RP4-599G15.1   | 0,00 | 0,00 | 0,00 | 0,00 | 0,992027  | NA       |
| RN7SL672P      | 0,00 | 0,00 | 0,00 | 0,00 | 0,9920556 | NA       |
| RP11-439A17.10 | 0,00 | 0,00 | 0,00 | 0,00 | 0,9920617 | NA       |
| CTA-215D11.4   | 0,00 | 0,00 | 0,00 | 0,00 | 0,9921177 | NA       |
| RP11-565A3.1   | 0,00 | 0,00 | 0,00 | 0,00 | 0,9921307 | NA       |
| CTD-2506P8.5   | 0,00 | 0,00 | 0,00 | 0,00 | 0,9921343 | NA       |
| ACTL7A         | 0,00 | 0,00 | 0,00 | 0,00 | 0,9921653 | NA       |
| AC092155.1     | 0,00 | 0,00 | 0,00 | 0,00 | 0,9922913 | NA       |
| RPL7AP33       | 0,00 | 0,00 | 0,00 | 0,00 | 0,9923153 | NA       |
| RP11-266A24.1  | 0,00 | 0,00 | 0,00 | 0,00 | 0,9923362 | NA       |
| COL4A1         | 0,00 | 0,00 | 0,00 | 0,00 | 0,9923439 | NA       |
| RP11-527F13.1  | 0,00 | 0,00 | 0,00 | 0,00 | 0,9923495 | NA       |
| CTC-270D5.1    | 0,00 | 0,00 | 0,00 | 0,00 | 0,9923734 | NA       |
| RP11-404P21.8  | 0,00 | 0,00 | 0,00 | 0,00 | 0,9924075 | NA       |
| AC096664.1     | 0,00 | 0,00 | 0,00 | 0,00 | 0,9924077 | NA       |
| FTHL1          | 0,00 | 0,00 | 0,00 | 0,00 | 0,9924096 | NA       |
| AC107218.2     | 0,00 | 0,00 | 0,00 | 0,00 | 0,9924163 | NA       |
| EPN3           | 0,00 | 0,00 | 0,00 | 0,00 | 0,992423  | NA       |

|                |      |      |      |      |           |          |
|----------------|------|------|------|------|-----------|----------|
| RP11-15E18.4   | 0,00 | 0,00 | 0,00 | 0,00 | 0,9924242 | NA       |
| RP11-392A14.3  | 0,00 | 0,00 | 0,00 | 0,00 | 0,9924599 | NA       |
| AL773572.8     | 0,00 | 0,00 | 0,00 | 0,00 | 0,9924787 | NA       |
| RP11-38G5.4    | 0,00 | 0,00 | 0,00 | 0,00 | 0,9925061 | NA       |
| ZNF559-ZNF177  | 0,13 | 0,00 | 0,30 | 0,00 | 0,9925428 | 0,995139 |
| RF00425        | 0,00 | 0,00 | 0,00 | 0,00 | 0,9925577 | 0,995139 |
| PAX4           | 0,00 | 0,07 | 0,00 | 0,00 | 0,9925866 | 0,995139 |
| NCS1           | 0,00 | 0,00 | 0,00 | 0,00 | 0,9926245 | NA       |
| RF00494        | 0,00 | 0,00 | 0,00 | 0,00 | 0,9926323 | NA       |
| RNF144B        | 6,09 | 3,91 | 5,23 | 5,09 | 0,9926472 | 0,995155 |
| AP000281.2     | 0,00 | 0,00 | 0,00 | 0,00 | 0,9926913 | NA       |
| AC097711.1     | 0,00 | 0,00 | 0,00 | 0,00 | 0,992723  | NA       |
| AC000089.3     | 0,00 | 0,00 | 0,00 | 0,00 | 0,9927409 | NA       |
| OR7E140P       | 0,00 | 0,00 | 0,00 | 0,00 | 0,9927424 | NA       |
| AKR7L          | 1,95 | 1,92 | 2,02 | 1,86 | 0,9927719 | 0,995235 |
| RP11-29H23.5   | 0,00 | 0,00 | 0,00 | 0,00 | 0,9928064 | NA       |
| RPL23AP49      | 0,00 | 0,00 | 0,00 | 0,00 | 0,9928071 | NA       |
| RP11-627H22.8  | 0,00 | 0,00 | 0,00 | 0,00 | 0,992829  | NA       |
| CTB-159G17.4   | 0,00 | 1,35 | 0,53 | 0,00 | 0,9928928 | NA       |
| LINC01144      | 0,00 | 0,00 | 0,00 | 0,00 | 0,9929404 | NA       |
| RP4-735C1.6    | 0,00 | 0,00 | 0,00 | 0,00 | 0,9929511 | NA       |
| RP11-10B2.2    | 0,00 | 0,00 | 0,00 | 0,00 | 0,9929859 | NA       |
| RP13-25N22.1   | 0,00 | 0,06 | 0,00 | 0,10 | 0,9930843 | 0,995503 |
| UMAD1          | 2,23 | 2,99 | 1,63 | 0,38 | 0,9932044 | 0,99556  |
| CLDN12         | 1,68 | 0,76 | 1,37 | 1,59 | 0,993238  | 0,99556  |
| LLNLR-268E12.1 | 0,00 | 0,00 | 0,00 | 0,00 | 0,9932526 | NA       |
| CTD-3179P9.2   | 0,00 | 0,00 | 0,00 | 0,00 | 0,9932735 | NA       |
| RAB43          | 0,00 | 0,09 | 0,00 | 0,00 | 0,9932758 | 0,99556  |
| RP11-433P17.2  | 0,00 | 0,17 | 0,00 | 0,00 | 0,993294  | NA       |
| AC069368.3     | 0,00 | 0,00 | 0,00 | 0,00 | 0,9933283 | NA       |
| RP11-109P14.10 | 3,04 | 3,16 | 2,81 | 1,96 | 0,9933827 | 0,995623 |
| CERS3          | 0,00 | 0,00 | 0,00 | 0,00 | 0,9935724 | NA       |
| RP3-395M20.7   | 0,00 | 0,00 | 0,00 | 0,00 | 0,9937415 | NA       |
| RP11-98D18.15  | 0,00 | 0,00 | 0,00 | 0,00 | 0,9938303 | NA       |
| NAIP           | 5,95 | 6,02 | 5,98 | 5,74 | 0,9938707 | 0,996067 |
| NPPB           | 0,00 | 0,00 | 0,00 | 0,00 | 0,993906  | NA       |
| SPIN2A         | 0,00 | 0,00 | 0,00 | 0,00 | 0,9939273 | NA       |
| RP4-775C13.1   | 0,00 | 0,00 | 0,00 | 0,00 | 0,9940448 | NA       |
| RP3-467N11.2   | 0,00 | 0,00 | 0,00 | 0,00 | 0,9940633 | NA       |
| OR4A6P         | 0,00 | 0,00 | 0,00 | 0,00 | 0,9941009 | NA       |
| RNU6-541P      | 0,00 | 0,00 | 0,00 | 0,00 | 0,9941433 | NA       |
| RP11-723D22.2  | 0,69 | 0,00 | 1,49 | 0,00 | 0,9941539 | 0,996306 |
| COCH           | 0,00 | 0,00 | 0,00 | 0,00 | 0,9941944 | NA       |
| RP11-115L11.1  | 0,00 | 0,00 | 0,00 | 0,00 | 0,9942022 | NA       |
| RP11-407P15.1  | 0,00 | 0,00 | 0,00 | 0,00 | 0,9942839 | NA       |
| RP11-777B9.1   | 0,00 | 0,00 | 0,00 | 0,00 | 0,9943059 | NA       |
| POP5           | 6,14 | 6,09 | 5,90 | 4,95 | 0,9943167 | 0,996424 |
| NLRP5          | 0,00 | 0,00 | 0,00 | 0,00 | 0,9943251 | NA       |
| AC002480.3     | 0,00 | 0,00 | 0,00 | 0,00 | 0,9943321 | NA       |
| RANP1          | 0,00 | 0,00 | 0,00 | 0,00 | 0,9943788 | NA       |
| SNORD98        | 0,00 | 0,00 | 0,00 | 0,00 | 0,9944243 | NA       |
| C15orf60       | 0,00 | 0,00 | 0,00 | 0,00 | 0,9944454 | NA       |
| RNA5SP154      | 0,00 | 0,00 | 0,00 | 0,00 | 0,9944671 | NA       |
| CTC-398G3.1    | 0,00 | 0,00 | 0,00 | 0,00 | 0,9945557 | NA       |
| RP4-553F4.6    | 0,00 | 0,00 | 0,00 | 0,00 | 0,9945619 | NA       |

|               |      |      |      |      |           |          |
|---------------|------|------|------|------|-----------|----------|
| RP11-613E4.3  | 0,00 | 3,18 | 0,00 | 2,22 | 0,9946834 | 0,996706 |
| LINC00189     | 0,00 | 0,25 | 0,14 | 0,28 | 0,9946876 | 0,996706 |
| RP11-557B23.3 | 0,00 | 0,00 | 0,00 | 0,00 | 0,9946964 | NA       |
| SEL1L         | 4,19 | 2,57 | 4,15 | 3,87 | 0,9948039 | 0,996777 |
| PRKD3         | 4,71 | 3,71 | 4,36 | 3,79 | 0,9949179 | 0,99684  |
| RP11-79L9.2   | 0,00 | 0,79 | 0,00 | 0,47 | 0,9949737 | 0,99684  |
| GMPR2         | 5,45 | 4,03 | 5,11 | 4,78 | 0,9950009 | 0,99684  |
| RP11-490K7.1  | 0,00 | 0,00 | 0,00 | 0,00 | 0,9950389 | NA       |
| CTD-2252P21.1 | 0,00 | 0,00 | 0,00 | 0,00 | 0,9950501 | NA       |
| AC105461.1    | 0,00 | 0,00 | 0,00 | 0,00 | 0,9951412 | NA       |
| LGALS7B       | 0,00 | 0,00 | 0,00 | 0,00 | 0,9951726 | NA       |
| RP11-461F16.3 | 0,00 | 0,00 | 0,00 | 0,00 | 0,9951743 | NA       |
| CTBS          | 4,42 | 4,30 | 3,94 | 3,68 | 0,9951834 | 0,996978 |
| RNA5SP161     | 0,00 | 0,00 | 0,00 | 0,00 | 0,9951864 | NA       |
| MIR548F2      | 0,00 | 0,00 | 0,00 | 0,00 | 0,9951904 | NA       |
| ZFATAS        | 0,00 | 0,00 | 0,00 | 0,00 | 0,9952296 | NA       |
| AC012322.1    | 0,00 | 0,00 | 0,00 | 0,00 | 0,995242  | NA       |
| VIP           | 0,00 | 0,00 | 0,00 | 0,00 | 0,9952647 | NA       |
| RN7SL88P      | 0,00 | 0,00 | 0,00 | 0,00 | 0,9952726 | NA       |
| RP11-141M1.3  | 0,00 | 0,00 | 0,00 | 0,00 | 0,9952787 | NA       |
| RP1-315G1.1   | 0,00 | 0,00 | 0,00 | 0,00 | 0,9953296 | NA       |
| ZNF692        | 3,26 | 0,44 | 2,37 | 2,77 | 0,9953812 | 0,997131 |
| RP11-318L16.4 | 0,00 | 0,00 | 0,00 | 0,00 | 0,9953984 | NA       |
| MFAP2         | 0,00 | 0,00 | 0,00 | 0,00 | 0,9954073 | NA       |
| RP11-419M24.3 | 0,00 | 0,00 | 0,00 | 0,00 | 0,9954105 | NA       |
| RP11-299P2.1  | 0,00 | 0,00 | 0,00 | 0,00 | 0,9954173 | NA       |
| RANGRF        | 4,99 | 4,11 | 4,70 | 4,43 | 0,9954565 | 0,997161 |
| RP11-766N7.4  | 0,00 | 0,00 | 0,00 | 0,00 | 0,9954708 | NA       |
| RNU6-343P     | 0,00 | 0,00 | 0,00 | 0,00 | 0,9954882 | NA       |
| ZSCAN2        | 1,72 | 2,62 | 1,69 | 0,68 | 0,9956141 | 0,997243 |
| RP11-536C12.1 | 0,00 | 0,00 | 0,00 | 0,00 | 0,9956251 | NA       |
| RP11-93O14.2  | 2,92 | 0,81 | 2,00 | 2,37 | 0,995628  | 0,997243 |
| FERMT1        | 0,00 | 0,00 | 0,00 | 0,00 | 0,9956533 | NA       |
| CD200R1L      | 0,00 | 0,00 | 0,00 | 0,00 | 0,99575   | NA       |
| NDUFC2-KCTD14 | 4,53 | 3,95 | 4,52 | 4,66 | 0,9957858 | 0,997356 |
| RP1-37C10.3   | 0,00 | 0,00 | 0,00 | 0,00 | 0,9958227 | NA       |
| CLDN5         | 0,00 | 0,00 | 0,00 | 0,00 | 0,9958388 | NA       |
| RP11-460N20.4 | 0,00 | 0,00 | 0,00 | 0,00 | 0,9958769 | NA       |
| RP11-1E22.1   | 0,00 | 0,00 | 0,00 | 0,00 | 0,9958795 | NA       |
| NTN5          | 0,00 | 0,00 | 0,05 | 0,07 | 0,9959111 | NA       |
| RP11-295P22.2 | 0,00 | 0,00 | 0,00 | 0,00 | 0,9959118 | NA       |
| RNU6-1169P    | 0,00 | 0,00 | 0,00 | 0,00 | 0,9959758 | NA       |
| KLHDC9        | 0,00 | 0,00 | 0,00 | 0,00 | 0,9959774 | NA       |
| TNRC6A        | 3,16 | 3,77 | 3,54 | 3,60 | 0,9961371 | 0,997663 |
| RP11-383I24.2 | 0,00 | 0,00 | 0,00 | 0,00 | 0,9961739 | NA       |
| NKD1          | 0,13 | 0,22 | 0,07 | 0,20 | 0,9961898 | 0,997671 |
| RP11-275E10.1 | 0,00 | 0,00 | 0,00 | 0,00 | 0,9962763 | NA       |
| RP11-475O23.3 | 0,00 | 0,00 | 0,00 | 0,00 | 0,9962924 | NA       |
| FAM24B        | 0,64 | 0,00 | 0,70 | 2,15 | 0,9963068 | 0,997743 |
| RP11-354E23.5 | 0,00 | 0,00 | 0,00 | 0,00 | 0,996352  | NA       |
| RP11-1148L6.6 | 0,00 | 0,00 | 0,00 | 0,00 | 0,9963706 | NA       |
| CTD-2611O12.6 | 0,00 | 0,00 | 0,00 | 0,00 | 0,9964017 | NA       |
| RN7SL861P     | 0,00 | 0,00 | 0,00 | 0,00 | 0,9964296 | NA       |
| RP11-266K4.9  | 0,16 | 1,62 | 0,66 | 0,45 | 0,996443  | 0,997833 |
| RP13-870H17.3 | 0,00 | 0,00 | 0,00 | 0,00 | 0,9964519 | NA       |

|                  |      |      |      |      |           |          |
|------------------|------|------|------|------|-----------|----------|
| PABPN1L          | 0,00 | 0,00 | 0,00 | 0,00 | 0,9964711 | NA       |
| SMPD3            | 1,27 | 1,44 | 1,47 | 1,60 | 0,9964864 | 0,997833 |
| GYS2             | 0,00 | 0,00 | 0,00 | 0,00 | 0,9965224 | NA       |
| RP11-472I20.6    | 0,00 | 0,00 | 0,00 | 0,00 | 0,9965267 | NA       |
| RP11-478K7.1     | 0,00 | 0,00 | 0,00 | 0,00 | 0,9965615 | NA       |
| RP11-579C11.2    | 0,00 | 0,00 | 0,00 | 0,00 | 0,9965666 | NA       |
| FLRT3            | 0,00 | 0,00 | 0,00 | 0,00 | 0,996576  | NA       |
| RPL31P47         | 0,00 | 0,00 | 0,00 | 0,00 | 0,9965794 | NA       |
| PAUPAR           | 1,19 | 1,15 | 0,59 | 0,09 | 0,9965888 | 0,997891 |
| RN7SL270P        | 0,00 | 0,00 | 0,00 | 0,00 | 0,9965995 | NA       |
| ACTL10           | 0,00 | 0,00 | 0,00 | 0,00 | 0,9966682 | NA       |
| CTD-2308N23.2    | 0,08 | 0,00 | 0,10 | 0,22 | 0,996728  | NA       |
| RP11-474P2.7     | 0,00 | 0,10 | 0,00 | 0,00 | 0,9968114 | 0,998069 |
| LA16c-23H5.4     | 0,00 | 0,00 | 0,00 | 0,00 | 0,9968127 | NA       |
| UQCC2            | 4,49 | 4,61 | 4,75 | 4,30 | 0,9968572 | 0,99807  |
| RP11-278A23.2    | 0,00 | 0,00 | 0,00 | 0,00 | 0,9969143 | NA       |
| AC007566.11      | 0,00 | 0,00 | 0,00 | 0,00 | 0,9969279 | NA       |
| AC002511.2       | 0,61 | 0,00 | 0,52 | 0,98 | 0,9969646 | 0,998132 |
| RP11-280O1.2     | 0,00 | 0,00 | 0,00 | 0,00 | 0,9969802 | NA       |
| RNU6-216P        | 0,00 | 0,00 | 0,00 | 0,00 | 0,9970538 | NA       |
| CPO              | 0,00 | 0,00 | 0,00 | 0,00 | 0,9970796 | NA       |
| AC010522.1       | 0,00 | 0,00 | 0,00 | 0,00 | 0,997092  | NA       |
| KRT75            | 0,00 | 0,00 | 0,00 | 0,00 | 0,9971    | NA       |
| CAV1             | 0,00 | 0,00 | 0,00 | 0,00 | 0,9971092 | NA       |
| RNA5SP428        | 0,00 | 0,00 | 0,00 | 0,00 | 0,997194  | NA       |
| RP11-329J18.3    | 1,95 | 0,42 | 1,31 | 0,36 | 0,9972185 | 0,998342 |
| AP001625.6       | 0,00 | 0,00 | 0,00 | 0,00 | 0,9972619 | NA       |
| RP11-797A18.5    | 0,26 | 0,60 | 0,35 | 0,43 | 0,9973221 | 0,998394 |
| FAM159B          | 0,00 | 0,00 | 0,00 | 0,00 | 0,9973494 | NA       |
| KIF3B            | 2,23 | 0,37 | 1,86 | 0,65 | 0,9973671 | 0,998394 |
| SNORD10          | 0,00 | 0,00 | 0,00 | 0,00 | 0,9973978 | NA       |
| RASGRP3          | 1,98 | 3,30 | 1,70 | 2,19 | 0,9974055 | 0,998394 |
| POU5F1P6         | 0,00 | 0,00 | 0,00 | 0,00 | 0,9974799 | NA       |
| RN7SL302P        | 0,00 | 0,00 | 0,00 | 0,00 | 0,9974858 | NA       |
| CTD-2537I9.12    | 0,00 | 0,00 | 0,00 | 0,00 | 0,9975008 | NA       |
| RPL7AP8          | 0,00 | 0,00 | 0,00 | 0,00 | 0,9975517 | NA       |
| RP11-390D11.2    | 0,00 | 0,00 | 0,00 | 0,00 | 0,997597  | NA       |
| XXbac-B476C20.10 | 0,00 | 0,00 | 0,00 | 0,00 | 0,9976108 | NA       |
| CTGLF8P          | 0,00 | 0,00 | 0,00 | 0,00 | 0,997612  | NA       |
| ALG1L6P          | 0,00 | 0,00 | 0,00 | 0,00 | 0,9976252 | NA       |
| RP11-114O18.1    | 0,00 | 0,00 | 0,00 | 0,00 | 0,9976568 | NA       |
| CTC-479C5.12     | 0,76 | 0,94 | 1,11 | 1,09 | 0,9976701 | 0,998614 |
| MIR4668          | 0,00 | 0,00 | 0,00 | 0,00 | 0,9976936 | NA       |
| SLITRK1          | 0,00 | 0,00 | 0,00 | 0,00 | 0,9977045 | NA       |
| MYH13            | 0,00 | 0,00 | 0,00 | 0,00 | 0,9977515 | NA       |
| WIPF1            | 5,17 | 5,05 | 5,24 | 5,18 | 0,9977598 | 0,998648 |
| RP11-502N13.2    | 0,00 | 0,00 | 0,00 | 0,00 | 0,9977683 | NA       |
| TUT1             | 0,60 | 1,70 | 1,49 | 0,26 | 0,9977943 | 0,998648 |
| FOXC1            | 0,00 | 0,00 | 0,00 | 0,00 | 0,9978224 | NA       |
| GALNT9           | 0,00 | 0,00 | 0,05 | 0,05 | 0,9978415 | NA       |
| RP11-181G12.2    | 0,00 | 0,00 | 0,00 | 0,00 | 0,9978524 | NA       |
| RP3-393P12.2     | 0,00 | 0,00 | 0,00 | 0,00 | 0,9978897 | NA       |
| RP4-560B9.1      | 0,00 | 0,00 | 0,00 | 0,00 | 0,9979263 | NA       |
| HIST1H2BF        | 0,00 | 0,00 | 0,00 | 0,00 | 0,9979346 | NA       |
| RNU7-63P         | 0,00 | 0,00 | 0,00 | 0,00 | 0,9979491 | NA       |

|                |      |      |      |      |           |          |
|----------------|------|------|------|------|-----------|----------|
| AL355480.4     | 0,00 | 0,00 | 0,00 | 0,00 | 0,9979662 | NA       |
| RP11-397J20.1  | 0,00 | 0,00 | 0,00 | 0,00 | 0,9979921 | NA       |
| ADCYAP1        | 0,00 | 0,00 | 0,00 | 0,00 | 0,9980241 | NA       |
| PPIAL3         | 0,00 | 0,00 | 0,00 | 0,00 | 0,9980632 | NA       |
| RP11-283G6.6   | 0,00 | 0,00 | 0,00 | 0,00 | 0,9981053 | NA       |
| SLC25A18       | 0,00 | 0,00 | 0,00 | 0,00 | 0,9981427 | NA       |
| RNU6-48P       | 0,00 | 0,00 | 0,00 | 0,00 | 0,9981519 | NA       |
| AC018804.3     | 0,00 | 0,00 | 0,00 | 0,00 | 0,9981606 | NA       |
| MT1H           | 0,00 | 0,00 | 0,00 | 0,00 | 0,9981708 | NA       |
| RP3-419C19.3   | 0,00 | 0,00 | 0,00 | 0,00 | 0,9981725 | NA       |
| C9orf47        | 0,00 | 0,00 | 0,00 | 0,00 | 0,9981751 | NA       |
| GPC3           | 0,00 | 0,00 | 0,00 | 0,00 | 0,9981789 | NA       |
| RP11-13E5.2    | 0,24 | 0,00 | 0,00 | 0,43 | 0,9981819 | 0,998949 |
| GOLGB1         | 5,45 | 5,54 | 5,37 | 4,72 | 0,998185  | 0,998949 |
| RP11-18F14.1   | 0,00 | 0,00 | 0,00 | 0,00 | 0,9982059 | NA       |
| RP11-316M21.10 | 0,00 | 0,00 | 0,00 | 0,00 | 0,9982082 | NA       |
| CTC-287O8.1    | 0,00 | 0,00 | 0,00 | 0,00 | 0,9982226 | NA       |
| CTAGE4         | 0,00 | 0,00 | 0,00 | 0,00 | 0,9982488 | NA       |
| C17orf98       | 0,00 | 0,00 | 0,00 | 0,00 | 0,9982567 | NA       |
| SLCO2A1        | 0,00 | 0,00 | 0,00 | 0,00 | 0,9982622 | NA       |
| RP11-2C23.1    | 0,00 | 0,00 | 0,00 | 0,00 | 0,9982829 | NA       |
| RP11-244F12.3  | 0,00 | 0,00 | 0,00 | 0,00 | 0,9983118 | NA       |
| RP11-247L20.3  | 0,00 | 0,00 | 0,00 | 0,00 | 0,9983241 | NA       |
| RP11-344N10.3  | 1,21 | 0,65 | 0,98 | 0,56 | 0,9983775 | 0,999041 |
| RP11-401E14.2  | 0,00 | 0,00 | 0,00 | 0,00 | 0,9983803 | NA       |
| RNU6-36P       | 0,00 | 0,00 | 0,00 | 0,00 | 0,9983839 | NA       |
| RP11-351K16.4  | 0,43 | 0,22 | 0,17 | 0,00 | 0,998385  | 0,999041 |
| RP11-178L8.5   | 0,00 | 0,00 | 0,00 | 0,00 | 0,9983862 | NA       |
| RP11-379D21.3  | 0,00 | 0,00 | 0,00 | 0,00 | 0,998389  | NA       |
| RP11-297K8.2   | 0,00 | 0,00 | 0,00 | 0,00 | 0,9984065 | NA       |
| LBR            | 5,44 | 4,58 | 5,02 | 5,06 | 0,9984119 | 0,999041 |
| RP11-635O16.2  | 0,00 | 0,00 | 0,00 | 0,00 | 0,998452  | NA       |
| RP11-373I16.2  | 0,00 | 0,00 | 0,00 | 0,00 | 0,9984563 | NA       |
| RP11-397A16.2  | 0,00 | 0,00 | 0,00 | 0,00 | 0,9984679 | NA       |
| RP11-73M7.6    | 0,25 | 0,33 | 0,24 | 0,35 | 0,9985027 | 0,999051 |
| RN7SL189P      | 0,00 | 0,00 | 0,00 | 0,00 | 0,9985238 | NA       |
| RP11-712L6.7   | 0,00 | 0,00 | 0,00 | 0,00 | 0,9985403 | NA       |
| RP3-406P24.5   | 0,78 | 1,38 | 1,22 | 0,56 | 0,9985492 | 0,999051 |
| YTHDC2         | 3,99 | 3,40 | 3,90 | 3,78 | 0,9985695 | 0,999051 |
| TESK2          | 0,74 | 0,48 | 0,87 | 1,63 | 0,9986015 | 0,999051 |
| NPM1P5         | 0,00 | 0,00 | 0,00 | 0,00 | 0,998641  | NA       |
| RP11-425I13.1  | 0,00 | 0,00 | 0,00 | 0,00 | 0,9986498 | NA       |
| RN7SL150P      | 0,00 | 0,00 | 0,00 | 0,00 | 0,9986913 | NA       |
| RNU6-208P      | 0,00 | 0,00 | 0,00 | 0,00 | 0,9986998 | NA       |
| MROH2B         | 0,00 | 0,00 | 0,00 | 0,00 | 0,9987339 | NA       |
| RP11-64D22.1   | 0,05 | 0,35 | 0,00 | 0,00 | 0,9987493 | 0,999154 |
| RN7SL735P      | 0,00 | 0,00 | 0,00 | 0,00 | 0,9987889 | NA       |
| AP001619.2     | 0,00 | 0,00 | 0,00 | 0,00 | 0,9988195 | NA       |
| HS6ST3         | 0,00 | 0,00 | 0,00 | 0,00 | 0,9988472 | NA       |
| CTC-529P8.1    | 0,00 | 0,00 | 0,00 | 0,00 | 0,9988639 | NA       |
| DPH7           | 3,09 | 2,78 | 3,99 | 2,17 | 0,9988763 | 0,999189 |
| TSC22D2        | 4,80 | 5,01 | 4,63 | 4,08 | 0,9988788 | 0,999189 |
| RP11-457D13.3  | 0,00 | 0,00 | 0,00 | 0,00 | 0,9988861 | NA       |
| RP11-195F19.30 | 0,00 | 0,00 | 0,00 | 0,00 | 0,9989078 | NA       |
| RP11-484P15.1  | 0,00 | 0,00 | 0,00 | 0,00 | 0,9989179 | NA       |

|                |      |      |      |      |           |          |
|----------------|------|------|------|------|-----------|----------|
| BORCS8-MEF2B   | 0,00 | 0,00 | 0,29 | 1,37 | 0,9989196 | 0,999189 |
| RN7SL668P      | 0,00 | 0,00 | 0,00 | 0,00 | 0,9989562 | NA       |
| MIR938         | 0,00 | 0,00 | 0,00 | 0,00 | 0,9989713 | NA       |
| RNA5SP25       | 0,00 | 0,00 | 0,00 | 0,00 | 0,9989852 | NA       |
| RP11-144J4.3   | 0,00 | 0,00 | 0,00 | 0,00 | 0,9990309 | NA       |
| RP11-146N23.4  | 0,00 | 0,60 | 0,00 | 0,00 | 0,999045  | NA       |
| RP3-359N14.1   | 0,00 | 0,00 | 0,00 | 0,00 | 0,9990566 | NA       |
| SNORD117       | 0,00 | 0,00 | 0,00 | 0,00 | 0,9990833 | NA       |
| TMCC2          | 0,00 | 0,00 | 0,00 | 0,00 | 0,9991008 | NA       |
| GS1-124K5.5    | 0,00 | 0,00 | 0,00 | 0,00 | 0,9991491 | NA       |
| RP11-64B16.3   | 0,00 | 0,00 | 0,00 | 0,00 | 0,9991545 | NA       |
| RP11-867G2.4   | 0,00 | 0,00 | 0,00 | 0,00 | 0,9991641 | NA       |
| ACO22007.4     | 0,00 | 0,00 | 0,00 | 0,00 | 0,99917   | NA       |
| RP11-159N11.4  | 0,00 | 0,30 | 0,00 | 0,00 | 0,9991972 | NA       |
| RP11-492D6.2   | 0,00 | 0,00 | 0,00 | 0,00 | 0,9992076 | NA       |
| NETO2          | 0,17 | 0,32 | 0,17 | 0,56 | 0,9992461 | 0,999471 |
| SLC6A5         | 0,00 | 0,00 | 0,00 | 0,00 | 0,9992571 | NA       |
| AC093509.2     | 0,00 | 0,00 | 0,00 | 0,00 | 0,9992703 | NA       |
| RP11-61J19.3   | 0,00 | 0,00 | 0,00 | 0,00 | 0,9992899 | NA       |
| RP11-555F9.2   | 0,00 | 0,00 | 0,00 | 0,00 | 0,9993145 | NA       |
| RP11-76E17.4   | 0,00 | 0,00 | 0,00 | 0,00 | 0,9993544 | NA       |
| RNA5SP311      | 0,00 | 0,00 | 0,00 | 0,00 | 0,9993671 | NA       |
| RNA5SP317      | 0,00 | 0,00 | 0,00 | 0,00 | 0,9993671 | NA       |
| RP5-1010E17.1  | 0,00 | 0,11 | 0,00 | 0,11 | 0,9994106 | NA       |
| EPHA8          | 0,00 | 0,00 | 0,00 | 0,00 | 0,9994482 | NA       |
| ELSPBP1        | 0,00 | 0,00 | 0,00 | 0,00 | 0,9994511 | NA       |
| RP11-22L13.1   | 0,00 | 0,00 | 0,00 | 0,00 | 0,9994633 | NA       |
| RP11-542B15.1  | 0,11 | 0,09 | 0,17 | 0,15 | 0,9995104 | 0,99969  |
| IL9RP4         | 0,00 | 0,00 | 0,00 | 0,00 | 0,999542  | NA       |
| CTD-2544M6.2   | 0,00 | 0,00 | 0,00 | 0,00 | 0,9995455 | NA       |
| SCARNA18       | 0,00 | 0,00 | 0,00 | 0,00 | 0,9995714 | NA       |
| AC108868.5     | 0,00 | 0,00 | 0,00 | 0,00 | 0,9995885 | NA       |
| KRTAP1-5       | 0,00 | 0,14 | 0,00 | 0,00 | 0,9996004 | NA       |
| RP11-170M17.2  | 0,00 | 0,00 | 0,00 | 0,01 | 0,9996269 | NA       |
| RP11-302B13.1  | 0,00 | 0,00 | 0,00 | 0,00 | 0,9996315 | NA       |
| RP11-476B1.1   | 0,00 | 0,30 | 0,00 | 0,00 | 0,9996728 | NA       |
| AC007292.1     | 0,00 | 0,00 | 0,00 | 0,00 | 0,9997253 | NA       |
| AC008065.1     | 0,00 | 0,00 | 0,00 | 0,00 | 0,9997677 | NA       |
| CTD-2562J17.9  | 0,00 | 0,00 | 0,00 | 0,00 | 0,9997841 | NA       |
| MIR6822        | 0,00 | 0,00 | 0,00 | 0,00 | 0,9997937 | NA       |
| RNU6-780P      | 0,00 | 0,00 | 0,00 | 0,00 | 0,9997979 | NA       |
| RP1-65P5.5     | 0,00 | 0,29 | 0,00 | 0,00 | 0,9998425 | NA       |
| OR5F1          | 0,00 | 0,00 | 0,00 | 0,00 | 0,9998987 | NA       |
| RP11-57C13.5   | 0,00 | 0,00 | 0,00 | 0,00 | 0,9999043 | NA       |
| RNU6-141P      | 0,00 | 0,00 | 0,00 | 0,00 | 0,9999091 | NA       |
| RP3-395M20.2   | 0,00 | 0,00 | 0,00 | 0,00 | 0,999921  | NA       |
| RF02107        | 0,00 | 0,00 | 0,00 | 0,00 | 0,9999281 | NA       |
| RP11-645C24.4  | 0,00 | 0,00 | 0,00 | 0,00 | 0,9999299 | NA       |
| RP13-210D15.10 | 0,00 | 0,00 | 0,00 | 0,00 | 0,9999357 | NA       |
| AP000343.2     | 0,00 | 0,00 | 0,00 | 0,00 | 0,999947  | NA       |
| RP11-571M6.1   | 0,00 | 0,00 | 0,00 | 0,00 | 0,999953  | NA       |
| RP11-528A10.2  | 0,00 | 0,00 | 0,00 | 0,00 | 0,9999617 | NA       |
| CTD-3138B18.6  | 0,00 | 0,00 | 0,00 | 0,00 | 0,9999712 | NA       |
| SERPINA13      | 0,00 | 0,00 | 0,00 | 0,00 | 0,9999723 | NA       |
| CTB-178M22.1   | 0,00 | 0,00 | 0,00 | 0,00 | 0,9999798 | NA       |

|                |      |      |      |      |           |    |
|----------------|------|------|------|------|-----------|----|
| RP11-968O1.5   | 0,00 | 0,00 | 0,00 | 0,00 | 0,9999833 | NA |
| RHCG           | 0,00 | 0,16 | 0,00 | 0,00 | 0,9999844 | NA |
| RP11-1109M24.7 | 0,00 | 0,00 | 0,00 | 0,00 | 0,9999981 | NA |
| AADACL2        | 0,00 | 0,00 | 0,00 | 0,00 | 1         | NA |
| ABHD16B        | 0,00 | 0,00 | 0,00 | 0,00 | 1         | NA |
| AC000041.8     | 0,00 | 0,00 | 0,00 | 0,00 | 1         | NA |
| AC000068.10    | 0,00 | 0,00 | 0,00 | 0,00 | 1         | NA |
| AC002075.3     | 0,00 | 0,00 | 0,00 | 0,00 | 1         | NA |
| AC002383.2     | 0,00 | 0,00 | 0,00 | 0,00 | 1         | NA |
| AC002472.14    | 0,00 | 0,00 | 0,00 | 0,00 | 1         | NA |
| AC002480.2     | 0,00 | 0,00 | 0,00 | 0,00 | 1         | NA |
| AC002523.1     | 0,00 | 0,00 | 0,00 | 0,00 | 1         | NA |
| AC002542.2     | 0,00 | 0,00 | 0,00 | 0,00 | 1         | NA |
| AC003005.4     | 0,00 | 0,00 | 0,00 | 0,00 | 1         | NA |
| AC003984.1     | 0,00 | 0,00 | 0,00 | 0,00 | 1         | NA |
| AC004009.2     | 0,00 | 0,00 | 0,00 | 0,00 | 1         | NA |
| AC004014.3     | 0,00 | 0,00 | 0,00 | 0,00 | 1         | NA |
| AC004076.9     | 0,00 | 0,00 | 0,00 | 0,00 | 1         | NA |
| AC004455.1     | 0,00 | 0,00 | 0,00 | 0,00 | 1         | NA |
| AC004471.9     | 0,00 | 0,00 | 0,00 | 0,00 | 1         | NA |
| AC004538.2     | 0,00 | 0,00 | 0,00 | 0,00 | 1         | NA |
| AC004540.4     | 0,00 | 0,00 | 0,00 | 0,00 | 1         | NA |
| AC004562.1     | 0,00 | 0,00 | 0,00 | 0,00 | 1         | NA |
| AC004637.1     | 0,00 | 0,00 | 0,00 | 0,00 | 1         | NA |
| AC004837.3     | 0,00 | 0,00 | 0,00 | 0,00 | 1         | NA |
| AC004840.8     | 0,00 | 0,00 | 0,00 | 0,00 | 1         | NA |
| AC004954.2     | 0,00 | 0,00 | 0,00 | 0,00 | 1         | NA |
| AC005033.6     | 0,00 | 0,00 | 0,00 | 0,00 | 1         | NA |
| AC005034.3     | 0,00 | 0,00 | 0,00 | 0,00 | 1         | NA |
| AC005039.3     | 0,00 | 0,00 | 0,00 | 0,00 | 1         | NA |
| AC005042.2     | 0,00 | 0,00 | 0,00 | 0,00 | 1         | NA |
| AC005162.5     | 0,00 | 0,00 | 0,00 | 0,00 | 1         | NA |
| AC005178.1     | 0,00 | 0,00 | 0,00 | 0,00 | 1         | NA |
| AC005307.4     | 0,00 | 0,00 | 0,00 | 0,00 | 1         | NA |
| AC005358.3     | 0,00 | 0,00 | 0,00 | 0,00 | 1         | NA |
| AC005510.2     | 0,00 | 0,00 | 0,00 | 0,00 | 1         | NA |
| AC005522.6     | 0,00 | 0,00 | 0,00 | 0,00 | 1         | NA |
| AC005682.7     | 0,00 | 0,00 | 0,00 | 0,00 | 1         | NA |
| AC005754.7     | 0,00 | 0,00 | 0,00 | 0,00 | 1         | NA |
| AC005780.1     | 0,00 | 0,00 | 0,00 | 0,00 | 1         | NA |
| AC005786.5     | 0,00 | 0,00 | 0,00 | 0,00 | 1         | NA |
| AC005794.1     | 0,00 | 0,00 | 0,00 | 0,00 | 1         | NA |
| AC005820.3     | 0,00 | 0,00 | 0,00 | 0,00 | 1         | NA |
| AC006026.12    | 0,00 | 0,00 | 0,00 | 0,00 | 1         | NA |
| AC006028.11    | 0,00 | 0,00 | 0,00 | 0,00 | 1         | NA |
| AC006039.5     | 0,00 | 0,00 | 0,00 | 0,00 | 1         | NA |
| AC006153.3     | 0,00 | 0,00 | 0,00 | 0,00 | 1         | NA |
| AC006159.3     | 0,00 | 0,00 | 0,00 | 0,00 | 1         | NA |
| AC006326.3     | 0,00 | 0,00 | 0,00 | 0,00 | 1         | NA |
| AC006335.14    | 0,00 | 0,00 | 0,00 | 0,00 | 1         | NA |
| AC006499.8     | 0,00 | 0,00 | 0,00 | 0,00 | 1         | NA |
| AC006548.19    | 0,00 | 0,00 | 0,00 | 0,00 | 1         | NA |
| AC006946.15    | 0,00 | 0,00 | 0,00 | 0,00 | 1         | NA |
| AC006994.1     | 0,00 | 0,00 | 0,00 | 0,00 | 1         | NA |
| AC007000.8     | 0,00 | 0,00 | 0,00 | 0,00 | 1         | NA |



|             |      |      |      |      |   |    |
|-------------|------|------|------|------|---|----|
| AC007091.1  | 0,00 | 0,00 | 0,00 | 0,00 | 1 | NA |
| AC007279.2  | 0,00 | 0,00 | 0,00 | 0,00 | 1 | NA |
| AC007285.7  | 0,00 | 0,00 | 0,00 | 0,00 | 1 | NA |
| AC007391.2  | 0,00 | 0,00 | 0,00 | 0,00 | 1 | NA |
| AC007568.1  | 0,00 | 0,00 | 0,00 | 0,00 | 1 | NA |
| AC007618.3  | 0,00 | 0,00 | 0,00 | 0,00 | 1 | NA |
| AC007879.4  | 0,00 | 0,00 | 0,00 | 0,00 | 1 | NA |
| AC007879.6  | 0,00 | 0,00 | 0,00 | 0,00 | 1 | NA |
| AC007879.7  | 0,00 | 0,00 | 0,00 | 0,00 | 1 | NA |
| AC008174.3  | 0,00 | 0,00 | 0,00 | 0,00 | 1 | NA |
| AC008265.2  | 0,00 | 0,00 | 0,00 | 0,00 | 1 | NA |
| AC008268.2  | 0,00 | 0,00 | 0,00 | 0,00 | 1 | NA |
| AC008427.2  | 0,00 | 0,28 | 0,00 | 0,00 | 1 | NA |
| AC008746.10 | 0,00 | 0,00 | 0,00 | 0,00 | 1 | NA |
| AC008940.1  | 0,00 | 0,00 | 0,00 | 0,00 | 1 | NA |
| AC009133.15 | 0,00 | 0,00 | 0,00 | 0,00 | 1 | NA |
| AC009227.3  | 0,00 | 0,00 | 0,00 | 0,00 | 1 | NA |
| AC009232.2  | 0,00 | 0,00 | 0,00 | 0,00 | 1 | NA |
| AC009235.4  | 0,00 | 0,00 | 0,00 | 0,00 | 1 | NA |
| AC009237.10 | 0,00 | 0,00 | 0,00 | 0,00 | 1 | NA |
| AC009294.1  | 0,00 | 0,00 | 0,00 | 0,00 | 1 | NA |
| AC009313.1  | 0,00 | 0,00 | 0,00 | 0,00 | 1 | NA |
| AC009411.1  | 0,00 | 0,00 | 0,00 | 0,00 | 1 | NA |
| AC009477.7  | 0,00 | 0,00 | 0,00 | 0,00 | 1 | NA |
| AC010090.1  | 0,00 | 0,00 | 0,00 | 0,00 | 1 | NA |
| AC010093.2  | 0,00 | 0,00 | 0,00 | 0,00 | 1 | NA |
| AC010468.2  | 0,00 | 0,00 | 0,00 | 0,00 | 1 | NA |
| AC010642.2  | 0,00 | 0,00 | 0,00 | 0,00 | 1 | NA |
| AC010649.1  | 0,00 | 0,00 | 0,00 | 0,00 | 1 | NA |
| AC010878.3  | 0,00 | 0,00 | 0,00 | 0,00 | 1 | NA |
| AC010880.1  | 0,00 | 0,00 | 0,00 | 0,00 | 1 | NA |
| AC010886.1  | 0,00 | 0,00 | 0,00 | 0,00 | 1 | NA |
| AC010891.2  | 0,00 | 0,00 | 0,00 | 0,00 | 1 | NA |
| AC010975.2  | 0,00 | 0,00 | 0,00 | 0,00 | 1 | NA |
| AC011718.4  | 0,00 | 0,00 | 0,00 | 0,00 | 1 | NA |
| AC011742.3  | 0,00 | 0,00 | 0,00 | 0,00 | 1 | NA |
| AC011752.1  | 0,00 | 0,00 | 0,00 | 0,00 | 1 | NA |
| AC011897.2  | 0,00 | 0,00 | 0,00 | 0,00 | 1 | NA |
| AC011899.10 | 0,00 | 0,00 | 0,00 | 0,00 | 1 | NA |
| AC011998.1  | 0,00 | 0,00 | 0,00 | 0,00 | 1 | NA |
| AC012262.1  | 0,00 | 0,00 | 0,00 | 0,00 | 1 | NA |
| AC012363.8  | 0,00 | 0,00 | 0,00 | 0,00 | 1 | NA |
| AC012494.1  | 0,00 | 0,00 | 0,00 | 0,00 | 1 | NA |
| AC012497.2  | 0,00 | 0,00 | 0,00 | 0,00 | 1 | NA |
| AC013401.4  | 0,00 | 0,00 | 0,00 | 0,00 | 1 | NA |
| AC013404.1  | 0,00 | 0,00 | 0,00 | 0,00 | 1 | NA |
| AC013429.5  | 0,00 | 0,00 | 0,00 | 0,00 | 1 | NA |
| AC013437.4  | 0,00 | 0,00 | 0,00 | 0,00 | 1 | NA |
| AC013437.9  | 0,00 | 0,00 | 0,00 | 0,00 | 1 | NA |
| AC013444.1  | 0,00 | 0,00 | 0,00 | 0,00 | 1 | NA |
| AC015849.12 | 0,00 | 0,00 | 0,00 | 0,00 | 1 | NA |
| AC015923.1  | 0,00 | 0,00 | 0,00 | 0,00 | 1 | NA |
| AC016691.2  | 0,00 | 0,00 | 0,00 | 0,00 | 1 | NA |
| AC016697.2  | 0,00 | 0,00 | 0,00 | 0,00 | 1 | NA |
| AC016752.7  | 0,00 | 0,00 | 0,00 | 0,00 | 1 | NA |

|             |      |      |      |      |   |    |
|-------------|------|------|------|------|---|----|
| AC016831.3  | 0,00 | 0,00 | 0,00 | 0,00 | 1 | NA |
| AC016909.2  | 0,00 | 0,00 | 0,00 | 0,00 | 1 | NA |
| AC016910.1  | 0,00 | 0,00 | 0,00 | 0,00 | 1 | NA |
| AC017048.2  | 0,00 | 0,00 | 0,00 | 0,00 | 1 | NA |
| AC017104.6  | 0,00 | 0,00 | 0,00 | 0,00 | 1 | NA |
| AC018359.3  | 0,00 | 0,00 | 0,00 | 0,00 | 1 | NA |
| AC018643.4  | 0,00 | 0,00 | 0,00 | 0,00 | 1 | NA |
| AC018693.5  | 0,00 | 0,00 | 0,00 | 0,00 | 1 | NA |
| AC018730.1  | 0,00 | 0,31 | 0,00 | 0,00 | 1 | NA |
| AC018865.7  | 0,00 | 0,00 | 0,00 | 0,00 | 1 | NA |
| AC019070.1  | 0,00 | 0,00 | 0,00 | 0,00 | 1 | NA |
| AC019080.1  | 0,00 | 0,00 | 0,00 | 0,00 | 1 | NA |
| AC019178.1  | 0,00 | 0,00 | 0,00 | 0,00 | 1 | NA |
| AC019349.4  | 0,00 | 0,00 | 0,00 | 0,00 | 1 | NA |
| AC020626.1  | 0,00 | 0,00 | 0,00 | 0,00 | 1 | NA |
| AC020743.4  | 0,00 | 0,00 | 0,00 | 0,00 | 1 | NA |
| AC020983.6  | 0,00 | 0,00 | 0,00 | 0,00 | 1 | NA |
| AC022819.2  | 0,00 | 0,00 | 0,00 | 0,00 | 1 | NA |
| AC023115.4  | 0,00 | 0,00 | 0,00 | 0,00 | 1 | NA |
| AC023271.1  | 0,00 | 0,00 | 0,00 | 0,00 | 1 | NA |
| AC023356.3  | 0,00 | 0,00 | 0,00 | 0,00 | 1 | NA |
| AC023669.2  | 0,00 | 0,00 | 0,00 | 0,00 | 1 | NA |
| AC026954.6  | 0,00 | 0,00 | 0,00 | 0,00 | 1 | NA |
| AC034228.2  | 0,00 | 0,00 | 0,00 | 0,00 | 1 | NA |
| AC037193.1  | 0,00 | 0,00 | 0,00 | 0,00 | 1 | NA |
| AC044860.1  | 0,00 | 0,00 | 0,00 | 0,00 | 1 | NA |
| AC063976.4  | 0,00 | 0,00 | 0,00 | 0,00 | 1 | NA |
| AC064865.2  | 0,00 | 0,00 | 0,00 | 0,00 | 1 | NA |
| AC064875.2  | 0,00 | 0,00 | 0,00 | 0,00 | 1 | NA |
| AC067721.2  | 0,00 | 0,00 | 0,00 | 0,00 | 1 | NA |
| AC067950.1  | 0,00 | 0,00 | 0,00 | 0,00 | 1 | NA |
| AC067959.1  | 0,00 | 0,00 | 0,00 | 0,00 | 1 | NA |
| AC068057.2  | 0,00 | 0,00 | 0,00 | 0,00 | 1 | NA |
| AC068137.13 | 0,00 | 0,00 | 0,00 | 0,00 | 1 | NA |
| AC068274.1  | 0,00 | 0,00 | 0,00 | 0,00 | 1 | NA |
| AC068489.1  | 0,00 | 0,00 | 0,00 | 0,00 | 1 | NA |
| AC068491.3  | 0,00 | 0,00 | 0,00 | 0,00 | 1 | NA |
| AC068535.1  | 0,00 | 0,00 | 0,00 | 0,00 | 1 | NA |
| AC068538.4  | 0,00 | 0,00 | 0,00 | 0,00 | 1 | NA |
| AC068610.5  | 0,00 | 0,00 | 0,00 | 0,00 | 1 | NA |
| AC069277.1  | 0,00 | 0,00 | 0,00 | 0,00 | 1 | NA |
| AC073091.1  | 0,00 | 0,00 | 0,00 | 0,00 | 1 | NA |
| AC073150.6  | 0,00 | 0,00 | 0,00 | 0,00 | 1 | NA |
| AC073257.2  | 0,00 | 0,00 | 0,00 | 0,00 | 1 | NA |
| AC073842.18 | 0,00 | 0,00 | 0,00 | 0,00 | 1 | NA |
| AC073846.5  | 0,00 | 0,00 | 0,00 | 0,00 | 1 | NA |
| AC073869.14 | 0,00 | 0,00 | 0,00 | 0,00 | 1 | NA |
| AC073869.3  | 0,00 | 0,00 | 0,00 | 0,00 | 1 | NA |
| AC074182.1  | 0,00 | 0,00 | 0,00 | 0,00 | 1 | NA |
| AC074389.5  | 0,00 | 0,00 | 0,00 | 0,00 | 1 | NA |
| AC078842.4  | 0,00 | 0,00 | 0,00 | 0,00 | 1 | NA |
| AC078937.3  | 0,00 | 0,00 | 0,00 | 0,00 | 1 | NA |
| AC079145.4  | 0,00 | 0,00 | 0,00 | 0,00 | 1 | NA |
| AC079325.5  | 0,00 | 0,00 | 0,00 | 0,00 | 1 | NA |
| AC079809.2  | 0,00 | 0,00 | 0,00 | 0,00 | 1 | NA |

|             |      |      |      |      |   |    |
|-------------|------|------|------|------|---|----|
| AC079834.2  | 0,00 | 0,00 | 0,00 | 0,00 | 1 | NA |
| AC079987.2  | 0,00 | 0,00 | 0,00 | 0,00 | 1 | NA |
| AC080080.5  | 0,00 | 0,00 | 0,00 | 0,00 | 1 | NA |
| AC083855.4  | 0,00 | 0,00 | 0,00 | 0,00 | 1 | NA |
| AC083864.4  | 0,00 | 0,00 | 0,00 | 0,00 | 1 | NA |
| AC083867.4  | 0,00 | 0,00 | 0,00 | 0,00 | 1 | NA |
| AC084219.2  | 0,00 | 0,00 | 0,00 | 0,00 | 1 | NA |
| AC087499.10 | 0,00 | 0,00 | 0,00 | 0,00 | 1 | NA |
| AC087499.5  | 0,00 | 0,00 | 0,00 | 0,00 | 1 | NA |
| AC090516.1  | 0,00 | 0,00 | 0,00 | 0,00 | 1 | NA |
| AC090952.5  | 0,00 | 0,00 | 0,00 | 0,00 | 1 | NA |
| AC090960.1  | 0,00 | 0,00 | 0,00 | 0,00 | 1 | NA |
| AC091177.1  | 0,00 | 0,00 | 0,00 | 0,00 | 1 | NA |
| AC091493.2  | 0,00 | 0,00 | 0,00 | 0,00 | 1 | NA |
| AC091729.7  | 0,00 | 0,00 | 0,00 | 0,00 | 1 | NA |
| AC091962.3  | 0,00 | 0,00 | 0,00 | 0,00 | 1 | NA |
| AC092054.1  | 0,00 | 0,00 | 0,00 | 0,00 | 1 | NA |
| AC092156.2  | 0,00 | 0,00 | 0,00 | 0,00 | 1 | NA |
| AC092570.3  | 0,00 | 0,00 | 0,00 | 0,00 | 1 | NA |
| AC092578.1  | 0,00 | 0,00 | 0,00 | 0,00 | 1 | NA |
| AC092638.1  | 0,00 | 0,00 | 0,00 | 0,00 | 1 | NA |
| AC093162.5  | 0,00 | 0,00 | 0,00 | 0,00 | 1 | NA |
| AC093326.1  | 0,00 | 0,00 | 0,00 | 0,00 | 1 | NA |
| AC093326.2  | 0,00 | 0,00 | 0,00 | 0,00 | 1 | NA |
| AC093326.3  | 0,00 | 0,00 | 0,00 | 0,00 | 1 | NA |
| AC093393.2  | 0,00 | 0,00 | 0,00 | 0,00 | 1 | NA |
| AC093609.1  | 0,00 | 0,00 | 0,00 | 0,00 | 1 | NA |
| AC093627.7  | 0,00 | 0,00 | 0,00 | 0,00 | 1 | NA |
| AC093627.8  | 0,00 | 0,00 | 0,00 | 0,00 | 1 | NA |
| AC093639.1  | 0,00 | 0,00 | 0,00 | 0,00 | 1 | NA |
| AC093662.6  | 0,00 | 0,00 | 0,00 | 0,00 | 1 | NA |
| AC096669.2  | 0,00 | 0,00 | 0,00 | 0,00 | 1 | NA |
| AC097458.2  | 0,00 | 0,00 | 0,00 | 0,00 | 1 | NA |
| AC097532.4  | 0,00 | 0,00 | 0,00 | 0,00 | 1 | NA |
| AC098614.1  | 0,00 | 0,00 | 0,00 | 0,00 | 1 | NA |
| AC098828.3  | 0,00 | 0,00 | 0,00 | 0,00 | 1 | NA |
| AC099535.4  | 0,00 | 0,00 | 0,00 | 0,00 | 1 | NA |
| AC103563.6  | 0,00 | 0,00 | 0,00 | 0,00 | 1 | NA |
| AC103564.6  | 0,00 | 0,00 | 0,00 | 0,00 | 1 | NA |
| AC104297.2  | 0,00 | 0,00 | 0,00 | 0,00 | 1 | NA |
| AC104532.3  | 0,00 | 0,00 | 0,00 | 0,00 | 1 | NA |
| AC104695.4  | 0,00 | 0,00 | 0,00 | 0,00 | 1 | NA |
| AC104700.3  | 0,00 | 0,00 | 0,00 | 0,00 | 1 | NA |
| AC105344.2  | 0,00 | 0,00 | 0,00 | 0,00 | 1 | NA |
| AC105402.4  | 0,00 | 0,00 | 0,00 | 0,00 | 1 | NA |
| AC105765.1  | 0,00 | 0,00 | 0,00 | 0,00 | 1 | NA |
| AC105921.2  | 0,00 | 0,00 | 0,00 | 0,00 | 1 | NA |
| AC105921.5  | 0,00 | 0,00 | 0,00 | 0,00 | 1 | NA |
| AC108868.3  | 0,00 | 0,00 | 0,00 | 0,00 | 1 | NA |
| AC109589.1  | 0,00 | 0,00 | 0,00 | 0,00 | 1 | NA |
| AC109815.2  | 0,00 | 0,00 | 0,00 | 0,00 | 1 | NA |
| AC110769.3  | 0,00 | 0,00 | 0,00 | 0,00 | 1 | NA |
| AC112217.1  | 0,00 | 0,00 | 0,00 | 0,00 | 1 | NA |
| AC112721.2  | 0,00 | 0,00 | 0,00 | 0,00 | 1 | NA |
| AC113167.2  | 0,00 | 0,00 | 0,00 | 0,00 | 1 | NA |

|             |      |      |      |      |   |    |
|-------------|------|------|------|------|---|----|
| AC113608.1  | 0,00 | 0,00 | 0,00 | 0,00 | 1 | NA |
| AC114273.3  | 0,00 | 0,00 | 0,00 | 0,00 | 1 | NA |
| AC114752.1  | 0,00 | 0,00 | 0,00 | 0,00 | 1 | NA |
| AC114765.2  | 0,00 | 0,00 | 0,00 | 0,00 | 1 | NA |
| AC114812.10 | 0,00 | 0,00 | 0,00 | 0,00 | 1 | NA |
| AC116050.1  | 0,00 | 0,00 | 0,00 | 0,00 | 1 | NA |
| AC124944.4  | 0,00 | 0,00 | 0,00 | 0,00 | 1 | NA |
| AC124944.5  | 0,00 | 0,00 | 0,00 | 0,00 | 1 | NA |
| AC125238.4  | 0,00 | 0,00 | 0,00 | 0,00 | 1 | NA |
| AC130360.8  | 0,00 | 0,00 | 0,00 | 0,00 | 1 | NA |
| AC133633.2  | 0,00 | 0,00 | 0,00 | 0,00 | 1 | NA |
| AC133919.6  | 0,00 | 0,00 | 0,00 | 0,00 | 1 | NA |
| AC135178.7  | 0,00 | 0,00 | 0,00 | 0,00 | 1 | NA |
| AC135893.2  | 0,00 | 0,00 | 0,00 | 0,00 | 1 | NA |
| AC135999.2  | 0,00 | 0,00 | 0,00 | 0,00 | 1 | NA |
| AC140725.7  | 0,00 | 0,00 | 0,00 | 0,00 | 1 | NA |
| AC142391.3  | 0,00 | 0,00 | 0,00 | 0,00 | 1 | NA |
| AC144838.2  | 0,00 | 0,00 | 0,00 | 0,00 | 1 | NA |
| AC226118.1  | 0,00 | 0,00 | 0,00 | 0,00 | 1 | NA |
| ACOT12      | 0,00 | 0,00 | 0,00 | 0,00 | 1 | NA |
| ACRV1       | 0,00 | 0,00 | 0,00 | 0,00 | 1 | NA |
| ACSM5P1     | 0,00 | 0,00 | 0,00 | 0,00 | 1 | NA |
| ACTL7B      | 0,00 | 0,00 | 0,00 | 0,00 | 1 | NA |
| ACTN2       | 0,00 | 0,00 | 0,00 | 0,00 | 1 | NA |
| ACTRT3      | 0,00 | 0,00 | 0,00 | 0,00 | 1 | NA |
| ADAMDEC1    | 0,00 | 0,00 | 0,00 | 0,00 | 1 | NA |
| ADCY8       | 0,00 | 0,00 | 0,00 | 0,00 | 1 | NA |
| ADH5P3      | 0,00 | 0,00 | 0,00 | 0,00 | 1 | NA |
| ADH7        | 0,00 | 0,00 | 0,00 | 0,00 | 1 | NA |
| AE000658.25 | 0,00 | 0,00 | 0,00 | 0,00 | 1 | NA |
| AF001550.9  | 0,00 | 0,00 | 0,00 | 0,00 | 1 | NA |
| AF038458.3  | 0,00 | 0,00 | 0,00 | 0,00 | 1 | NA |
| AF064858.7  | 0,00 | 0,00 | 0,00 | 0,00 | 1 | NA |
| AF127936.5  | 0,00 | 0,00 | 0,00 | 0,00 | 1 | NA |
| AF129408.16 | 0,00 | 0,45 | 0,00 | 0,00 | 1 | NA |
| AF131215.1  | 0,00 | 0,00 | 0,00 | 0,00 | 1 | NA |
| AF131217.1  | 0,00 | 0,00 | 0,00 | 0,00 | 1 | NA |
| AF186192.1  | 0,00 | 0,00 | 0,00 | 0,00 | 1 | NA |
| AF212831.2  | 0,00 | 0,00 | 0,00 | 0,00 | 1 | NA |
| AF227510.7  | 0,00 | 0,00 | 0,00 | 0,00 | 1 | NA |
| AF238378.6  | 0,00 | 0,00 | 0,00 | 0,00 | 1 | NA |
| AF240627.2  | 0,00 | 0,00 | 0,00 | 0,00 | 1 | NA |
| AGGF1P1     | 0,00 | 0,00 | 0,00 | 0,00 | 1 | NA |
| AJ271735.3  | 0,00 | 0,00 | 0,00 | 0,00 | 1 | NA |
| AL022393.3  | 0,00 | 0,00 | 0,00 | 0,00 | 1 | NA |
| AL096869.5  | 0,00 | 0,00 | 0,00 | 0,00 | 1 | NA |
| AL121578.2  | 0,00 | 0,00 | 0,00 | 0,00 | 1 | NA |
| AL133247.3  | 0,00 | 0,00 | 0,00 | 0,00 | 1 | NA |
| AL590762.11 | 0,00 | 0,00 | 0,00 | 0,00 | 1 | NA |
| ALB         | 0,00 | 0,00 | 0,00 | 0,00 | 1 | NA |
| ALDH3B2     | 0,00 | 0,00 | 0,00 | 0,00 | 1 | NA |
| ALX1        | 0,00 | 0,00 | 0,00 | 0,00 | 1 | NA |
| AMHR2       | 0,00 | 0,00 | 0,00 | 0,00 | 1 | NA |
| ANGPTL5     | 0,00 | 0,00 | 0,00 | 0,00 | 1 | NA |
| ANGPTL6     | 0,00 | 0,00 | 0,00 | 0,00 | 1 | NA |

|             |      |      |      |      |   |    |
|-------------|------|------|------|------|---|----|
| ANHx        | 0,00 | 0,00 | 0,00 | 0,00 | 1 | NA |
| ANKRD31     | 0,00 | 0,00 | 0,00 | 0,00 | 1 | NA |
| ANKRD61     | 0,00 | 0,00 | 0,00 | 0,00 | 1 | NA |
| ANKRD62P1   | 0,00 | 0,00 | 0,00 | 0,00 | 1 | NA |
| ANO2        | 0,00 | 0,14 | 0,00 | 0,00 | 1 | 1  |
| ANO4        | 0,00 | 0,00 | 0,00 | 0,00 | 1 | NA |
| ANXA8L1     | 0,00 | 0,00 | 0,00 | 0,00 | 1 | NA |
| AOC3        | 0,00 | 0,00 | 0,00 | 0,00 | 1 | NA |
| AP000223.42 | 0,00 | 0,00 | 0,00 | 0,00 | 1 | NA |
| AP000244.11 | 0,00 | 0,00 | 0,00 | 0,00 | 1 | NA |
| AP000289.6  | 0,00 | 0,00 | 0,00 | 0,00 | 1 | NA |
| AP000351.13 | 0,00 | 0,00 | 0,00 | 0,00 | 1 | NA |
| AP000351.3  | 0,00 | 0,00 | 0,00 | 0,00 | 1 | NA |
| AP000355.2  | 0,00 | 0,00 | 0,00 | 0,00 | 1 | NA |
| AP000442.1  | 0,00 | 0,00 | 0,00 | 0,00 | 1 | NA |
| AP000462.1  | 0,00 | 0,00 | 0,00 | 0,00 | 1 | NA |
| AP000470.2  | 0,00 | 0,00 | 0,00 | 0,00 | 1 | NA |
| AP000563.2  | 0,00 | 0,00 | 0,00 | 0,00 | 1 | NA |
| AP000577.2  | 0,00 | 0,00 | 0,00 | 0,00 | 1 | NA |
| AP000593.7  | 0,00 | 0,00 | 0,00 | 0,00 | 1 | NA |
| AP000857.1  | 0,00 | 0,00 | 0,00 | 0,00 | 1 | NA |
| AP000857.3  | 0,00 | 0,00 | 0,00 | 0,00 | 1 | NA |
| AP000946.2  | 0,00 | 0,00 | 0,00 | 0,00 | 1 | NA |
| AP001059.5  | 0,00 | 0,00 | 0,00 | 0,00 | 1 | NA |
| AP001065.6  | 0,00 | 0,00 | 0,00 | 0,00 | 1 | NA |
| AP001136.2  | 0,00 | 0,00 | 0,00 | 0,00 | 1 | NA |
| AP001425.14 | 0,00 | 0,00 | 0,00 | 0,00 | 1 | NA |
| AP001429.1  | 0,00 | 0,00 | 0,00 | 0,00 | 1 | NA |
| AP001439.2  | 0,00 | 0,00 | 0,00 | 0,00 | 1 | NA |
| AP001468.58 | 0,00 | 0,00 | 0,00 | 0,00 | 1 | NA |
| AP001472.1  | 0,00 | 0,00 | 0,00 | 0,00 | 1 | NA |
| AP001793.1  | 0,00 | 0,00 | 0,00 | 0,00 | 1 | NA |
| AP002856.4  | 0,00 | 0,00 | 0,00 | 0,00 | 1 | NA |
| AP003039.3  | 0,00 | 0,00 | 0,00 | 0,00 | 1 | NA |
| AP004243.1  | 0,00 | 0,00 | 0,00 | 0,00 | 1 | NA |
| AP004289.1  | 0,00 | 0,00 | 0,00 | 0,00 | 1 | NA |
| AP006216.10 | 0,00 | 0,00 | 0,00 | 0,00 | 1 | NA |
| APLNR       | 0,00 | 0,00 | 0,00 | 0,00 | 1 | NA |
| APOA4       | 0,00 | 0,00 | 0,00 | 0,00 | 1 | NA |
| APOBEC1     | 0,00 | 0,00 | 0,00 | 0,00 | 1 | NA |
| AQP12B      | 0,00 | 0,00 | 0,00 | 0,00 | 1 | NA |
| ARC         | 0,00 | 0,00 | 0,00 | 0,00 | 1 | NA |
| ARL13A      | 0,00 | 0,00 | 0,00 | 0,00 | 1 | NA |
| ASB10       | 0,00 | 0,00 | 0,00 | 0,00 | 1 | NA |
| ASPHD1      | 0,00 | 0,00 | 0,00 | 0,00 | 1 | NA |
| ATP5A1P1    | 0,00 | 0,00 | 0,00 | 0,00 | 1 | NA |
| ATP5LP2     | 0,00 | 0,00 | 0,00 | 0,00 | 1 | NA |
| ATP6V1B1    | 0,00 | 0,00 | 0,00 | 0,00 | 1 | NA |
| ATP6V1G2    | 0,00 | 0,00 | 0,00 | 0,00 | 1 | NA |
| ATXN2-AS    | 0,00 | 0,00 | 0,00 | 0,00 | 1 | NA |
| AXIN2       | 0,00 | 0,00 | 0,00 | 0,00 | 1 | NA |
| AY269186.2  | 0,00 | 0,00 | 0,00 | 0,00 | 1 | NA |
| AZGP1P1     | 0,00 | 0,00 | 0,00 | 0,00 | 1 | NA |
| BEST4       | 0,00 | 0,00 | 0,00 | 0,00 | 1 | NA |
| BHLHE41     | 0,00 | 0,03 | 0,00 | 0,03 | 1 | 1  |

|             |      |      |      |      |   |    |
|-------------|------|------|------|------|---|----|
| BIVM-ERCC5  | 0,00 | 0,00 | 0,00 | 0,00 | 1 | NA |
| BMP2        | 0,00 | 0,00 | 0,00 | 0,00 | 1 | NA |
| BMS1P11     | 0,00 | 0,00 | 0,00 | 0,00 | 1 | NA |
| bP-2168N6.2 | 0,00 | 0,00 | 0,00 | 0,00 | 1 | NA |
| BPIFA4P     | 0,00 | 0,00 | 0,00 | 0,00 | 1 | NA |
| BPIFB2      | 0,00 | 0,00 | 0,00 | 0,00 | 1 | NA |
| BPIFC       | 0,00 | 0,00 | 0,00 | 0,00 | 1 | NA |
| BRINP2      | 0,00 | 0,00 | 0,00 | 0,00 | 1 | NA |
| BRSK1       | 0,00 | 0,00 | 0,00 | 0,06 | 1 | NA |
| BTBD16      | 0,00 | 0,00 | 0,00 | 0,00 | 1 | NA |
| BX682235.1  | 0,00 | 0,00 | 0,00 | 0,00 | 1 | NA |
| C10orf113   | 0,00 | 0,00 | 0,00 | 0,00 | 1 | NA |
| C11orf53    | 0,00 | 0,00 | 0,00 | 0,00 | 1 | NA |
| C14orf180   | 0,00 | 0,00 | 0,00 | 0,00 | 1 | NA |
| C15orf56    | 0,00 | 0,00 | 0,00 | 0,00 | 1 | NA |
| C16orf78    | 0,00 | 0,00 | 0,00 | 0,00 | 1 | NA |
| C16orf97    | 0,00 | 0,00 | 0,00 | 0,00 | 1 | NA |
| C17orf47    | 0,00 | 0,00 | 0,00 | 0,00 | 1 | NA |
| C19orf71    | 0,00 | 0,00 | 0,00 | 0,00 | 1 | NA |
| C19orf84    | 0,00 | 0,00 | 0,00 | 0,00 | 1 | NA |
| C1orf137    | 0,00 | 0,00 | 0,00 | 0,00 | 1 | NA |
| C1orf147    | 0,00 | 0,00 | 0,00 | 0,00 | 1 | NA |
| C1QBPP      | 0,00 | 0,00 | 0,00 | 0,00 | 1 | NA |
| C1QTNF8     | 0,00 | 0,00 | 0,00 | 0,00 | 1 | NA |
| C20orf173   | 0,00 | 0,00 | 0,00 | 0,00 | 1 | NA |
| C2orf69P2   | 0,00 | 0,00 | 0,00 | 0,00 | 1 | NA |
| C2orf72     | 0,00 | 0,00 | 0,00 | 0,00 | 1 | NA |
| C5orf52     | 0,00 | 0,00 | 0,00 | 0,00 | 1 | NA |
| C6orf201    | 0,00 | 0,00 | 0,00 | 0,00 | 1 | NA |
| C7orf77     | 0,00 | 0,00 | 0,00 | 0,00 | 1 | NA |
| C8A         | 0,00 | 0,00 | 0,00 | 0,00 | 1 | NA |
| C8orf71     | 0,00 | 0,00 | 0,00 | 0,00 | 1 | NA |
| C9          | 0,00 | 0,00 | 0,00 | 0,00 | 1 | NA |
| C9orf57     | 0,00 | 0,00 | 0,00 | 0,00 | 1 | NA |
| C9orf62     | 0,00 | 0,00 | 0,00 | 0,00 | 1 | NA |
| CABP5       | 0,00 | 0,00 | 0,00 | 0,00 | 1 | NA |
| CALM2P1     | 0,00 | 0,00 | 0,00 | 0,00 | 1 | NA |
| CAPN14      | 0,00 | 0,00 | 0,00 | 0,00 | 1 | NA |
| CAPN6       | 0,00 | 0,00 | 0,00 | 0,00 | 1 | NA |
| CAPSL       | 0,00 | 0,00 | 0,00 | 0,00 | 1 | NA |
| CARD18      | 0,00 | 0,00 | 0,00 | 0,00 | 1 | NA |
| CBLN1       | 0,00 | 0,00 | 0,00 | 0,00 | 1 | NA |
| CCDC110     | 0,00 | 0,00 | 0,00 | 0,00 | 1 | NA |
| CCDC42      | 0,00 | 0,00 | 0,00 | 0,00 | 1 | NA |
| CCDC58P1    | 0,00 | 0,00 | 0,00 | 0,00 | 1 | NA |
| CCDC74B     | 0,00 | 0,00 | 0,00 | 0,00 | 1 | NA |
| CCDC85A     | 0,00 | 0,00 | 0,00 | 0,00 | 1 | NA |
| CCL19       | 0,00 | 0,00 | 0,00 | 0,00 | 1 | NA |
| CCL8        | 0,00 | 0,00 | 0,00 | 0,00 | 1 | NA |
| CCT5P1      | 0,00 | 0,00 | 0,00 | 0,00 | 1 | NA |
| CCT8L2      | 0,00 | 0,00 | 0,00 | 0,00 | 1 | NA |
| CDR2L       | 0,00 | 0,00 | 0,00 | 0,00 | 1 | NA |
| CEACAM18    | 0,00 | 0,00 | 0,00 | 0,00 | 1 | NA |
| CECR3       | 0,00 | 0,00 | 0,00 | 0,00 | 1 | NA |
| CERS1       | 0,00 | 0,00 | 0,00 | 0,00 | 1 | NA |

|               |      |      |      |      |   |    |
|---------------|------|------|------|------|---|----|
| CFAP126       | 0,00 | 0,00 | 0,00 | 0,00 | 1 | NA |
| CGB3          | 0,00 | 0,00 | 0,00 | 0,00 | 1 | NA |
| CH17-118O6.3  | 0,00 | 0,00 | 0,00 | 0,00 | 1 | NA |
| CH17-125A10.1 | 0,00 | 0,00 | 0,00 | 0,00 | 1 | NA |
| CH17-164J11.1 | 0,00 | 0,00 | 0,00 | 0,00 | 1 | NA |
| CH17-195C8.1  | 0,00 | 0,00 | 0,00 | 0,00 | 1 | NA |
| CH17-262O2.1  | 0,00 | 0,00 | 0,00 | 0,00 | 1 | NA |
| CHRDL2        | 0,00 | 0,00 | 0,00 | 0,00 | 1 | NA |
| CHRNA6        | 0,00 | 0,00 | 0,00 | 0,00 | 1 | NA |
| CIB4          | 0,00 | 0,00 | 0,00 | 0,00 | 1 | NA |
| CIDEA         | 0,00 | 0,00 | 0,00 | 0,00 | 1 | NA |
| CISTR         | 0,00 | 0,00 | 0,00 | 0,00 | 1 | NA |
| CKMT1A        | 0,00 | 0,00 | 0,00 | 0,00 | 1 | NA |
| CLCA1         | 0,00 | 0,00 | 0,00 | 0,00 | 1 | NA |
| CLDN2         | 0,00 | 0,00 | 0,00 | 0,00 | 1 | NA |
| CMA1          | 0,00 | 0,00 | 0,00 | 0,00 | 1 | NA |
| CMB9-14B22.1  | 0,00 | 0,00 | 0,00 | 0,00 | 1 | NA |
| CMB9-22P13.2  | 0,00 | 0,00 | 0,00 | 0,00 | 1 | NA |
| CMB9-52H4.1   | 0,00 | 0,00 | 0,00 | 0,00 | 1 | NA |
| CMB9-75A1.1   | 0,00 | 0,00 | 0,00 | 0,00 | 1 | NA |
| CNGA3         | 0,00 | 0,00 | 0,00 | 0,00 | 1 | NA |
| CNGA4         | 0,00 | 0,00 | 0,00 | 0,00 | 1 | NA |
| CNMD          | 0,00 | 0,00 | 0,00 | 0,00 | 1 | NA |
| CORO2B        | 0,00 | 0,00 | 0,00 | 0,00 | 1 | NA |
| COX6BP3       | 0,00 | 0,00 | 0,00 | 0,00 | 1 | NA |
| CPLX2         | 0,00 | 0,00 | 0,00 | 0,00 | 1 | NA |
| CPLX3         | 0,00 | 0,00 | 0,00 | 0,00 | 1 | NA |
| CPXM1         | 0,00 | 0,00 | 0,00 | 0,00 | 1 | NA |
| CRABP1        | 0,00 | 0,00 | 0,00 | 0,00 | 1 | NA |
| CRHR1         | 0,00 | 0,00 | 0,00 | 0,00 | 1 | NA |
| CRYBB3        | 0,00 | 0,00 | 0,00 | 0,00 | 1 | NA |
| CRYGC         | 0,00 | 0,00 | 0,00 | 0,00 | 1 | NA |
| CSAG3         | 0,00 | 0,00 | 0,00 | 0,00 | 1 | NA |
| CSN3          | 0,00 | 0,00 | 0,00 | 0,00 | 1 | NA |
| CST1          | 0,00 | 0,00 | 0,00 | 0,00 | 1 | NA |
| CST11         | 0,00 | 0,00 | 0,00 | 0,00 | 1 | NA |
| CTA-134P22.2  | 0,00 | 0,00 | 0,00 | 0,00 | 1 | NA |
| CTA-249B10.1  | 0,00 | 0,00 | 0,00 | 0,00 | 1 | NA |
| CTA-256D12.12 | 0,00 | 0,00 | 0,00 | 0,00 | 1 | NA |
| CTA-31J9.2    | 0,00 | 0,00 | 0,00 | 0,00 | 1 | NA |
| CTA-440B3.1   | 0,00 | 0,00 | 0,00 | 0,00 | 1 | NA |
| CTA-796E4.3   | 0,00 | 0,00 | 0,00 | 0,00 | 1 | NA |
| CTA-85E5.8    | 0,00 | 0,00 | 0,00 | 0,00 | 1 | NA |
| CTAGE6        | 0,00 | 0,00 | 0,00 | 0,00 | 1 | NA |
| CTB-113I20.1  | 0,00 | 0,00 | 0,00 | 0,00 | 1 | NA |
| CTB-140J7.2   | 0,00 | 0,00 | 0,00 | 0,00 | 1 | NA |
| CTB-158E9.1   | 0,00 | 0,00 | 0,00 | 0,00 | 1 | NA |
| CTB-161M19.2  | 0,00 | 0,00 | 0,00 | 0,00 | 1 | NA |
| CTB-174O21.2  | 0,00 | 0,00 | 0,00 | 0,00 | 1 | NA |
| CTB-186H2.2   | 0,00 | 0,00 | 0,00 | 0,00 | 1 | NA |
| CTB-35F21.3   | 0,00 | 0,00 | 0,00 | 0,00 | 1 | NA |
| CTB-46E9.1    | 0,00 | 0,00 | 0,00 | 0,00 | 1 | NA |
| CTB-50L17.5   | 0,00 | 0,00 | 0,00 | 0,00 | 1 | NA |
| CTB-51E13.1   | 0,00 | 0,00 | 0,00 | 0,00 | 1 | NA |
| CTB-75G16.3   | 0,00 | 0,00 | 0,00 | 0,00 | 1 | NA |

|               |      |      |      |      |   |    |
|---------------|------|------|------|------|---|----|
| CTB-76P12.1   | 0,00 | 0,00 | 0,00 | 0,00 | 1 | NA |
| CTC-137K3.1   | 0,00 | 0,00 | 0,00 | 0,00 | 1 | NA |
| CTC-203F4.2   | 0,00 | 0,00 | 0,00 | 0,00 | 1 | NA |
| CTC-260E6.10  | 0,00 | 0,00 | 0,00 | 0,00 | 1 | NA |
| CTC-261N6.1   | 0,00 | 0,00 | 0,00 | 0,00 | 1 | NA |
| CTC-281F24.5  | 0,00 | 0,00 | 0,00 | 0,00 | 1 | NA |
| CTC-297N7.11  | 0,00 | 0,00 | 0,00 | 0,00 | 1 | NA |
| CTC-297N7.7   | 0,00 | 0,00 | 0,00 | 0,00 | 1 | NA |
| CTC-308K20.2  | 0,00 | 0,00 | 0,00 | 0,00 | 1 | NA |
| CTC-325H20.8  | 0,00 | 0,00 | 0,00 | 0,00 | 1 | NA |
| CTC-332L22.1  | 0,00 | 0,00 | 0,00 | 0,00 | 1 | NA |
| CTC-338M12.9  | 0,00 | 0,00 | 0,00 | 0,00 | 1 | NA |
| CTC-367F4.1   | 0,00 | 0,00 | 0,00 | 0,00 | 1 | NA |
| CTC-379B2.4   | 0,00 | 0,00 | 0,00 | 0,00 | 1 | NA |
| CTC-394G3.1   | 0,00 | 0,00 | 0,00 | 0,00 | 1 | NA |
| CTC-394G3.2   | 0,00 | 0,00 | 0,00 | 0,00 | 1 | NA |
| CTC-431G16.3  | 0,00 | 0,00 | 0,00 | 0,00 | 1 | NA |
| CTC-435M10.12 | 0,00 | 0,00 | 0,00 | 0,00 | 1 | NA |
| CTC-436K13.5  | 0,00 | 0,00 | 0,00 | 0,00 | 1 | NA |
| CTC-436P18.5  | 0,00 | 0,00 | 0,00 | 0,00 | 1 | NA |
| CTC-448D22.1  | 0,00 | 0,00 | 0,00 | 0,00 | 1 | NA |
| CTC-448F2.4   | 0,00 | 0,00 | 0,00 | 0,00 | 1 | NA |
| CTC-453G23.4  | 0,00 | 0,00 | 0,00 | 0,00 | 1 | NA |
| CTC-459I6.1   | 0,00 | 0,00 | 0,00 | 0,00 | 1 | NA |
| CTC-470E21.2  | 0,00 | 0,00 | 0,00 | 0,00 | 1 | NA |
| CTC-478M6.1   | 0,00 | 0,00 | 0,00 | 0,00 | 1 | NA |
| CTC-503J8.4   | 0,00 | 0,00 | 0,00 | 0,00 | 1 | NA |
| CTC-512J14.6  | 0,00 | 0,00 | 0,00 | 0,00 | 1 | NA |
| CTC-559E9.13  | 0,00 | 0,00 | 0,00 | 0,00 | 1 | NA |
| CTC-559E9.9   | 0,00 | 0,00 | 0,00 | 0,00 | 1 | NA |
| CTD-2001E22.1 | 0,00 | 0,00 | 0,00 | 0,00 | 1 | NA |
| CTD-2006C1.10 | 0,00 | 0,00 | 0,00 | 0,00 | 1 | NA |
| CTD-2007F2.1  | 0,00 | 0,00 | 0,00 | 0,00 | 1 | NA |
| CTD-2007H18.1 | 0,00 | 0,00 | 0,00 | 0,00 | 1 | NA |
| CTD-2008E3.1  | 0,00 | 0,00 | 0,00 | 0,00 | 1 | NA |
| CTD-2008L17.1 | 0,00 | 0,00 | 0,00 | 0,00 | 1 | NA |
| CTD-2013N17.1 | 0,00 | 0,00 | 0,00 | 0,00 | 1 | NA |
| CTD-2014E2.2  | 0,00 | 0,00 | 0,00 | 0,00 | 1 | NA |
| CTD-2015A6.1  | 0,00 | 0,00 | 0,00 | 0,00 | 1 | NA |
| CTD-2015A6.2  | 0,00 | 0,00 | 0,00 | 0,00 | 1 | NA |
| CTD-2015H3.2  | 0,00 | 0,00 | 0,00 | 0,00 | 1 | NA |
| CTD-2017C7.3  | 0,00 | 0,00 | 0,00 | 0,00 | 1 | NA |
| CTD-2022H16.2 | 0,00 | 0,00 | 0,00 | 0,00 | 1 | NA |
| CTD-2031P19.5 | 0,00 | 0,00 | 0,00 | 0,00 | 1 | NA |
| CTD-2034L19.1 | 0,00 | 0,00 | 0,00 | 0,00 | 1 | NA |
| CTD-2042D5.1  | 0,00 | 0,00 | 0,00 | 0,00 | 1 | NA |
| CTD-2045M21.1 | 0,00 | 0,00 | 0,00 | 0,00 | 1 | NA |
| CTD-2046I8.1  | 0,00 | 0,00 | 0,00 | 0,00 | 1 | NA |
| CTD-2061E9.1  | 0,00 | 0,00 | 0,00 | 0,00 | 1 | NA |
| CTD-2081K17.1 | 0,00 | 0,00 | 0,00 | 0,00 | 1 | 1  |
| CTD-2108O9.2  | 0,00 | 0,00 | 0,00 | 0,00 | 1 | NA |
| CTD-2122P11.1 | 0,00 | 0,00 | 0,00 | 0,00 | 1 | NA |
| CTD-2134P3.2  | 0,00 | 0,00 | 0,00 | 0,00 | 1 | NA |
| CTD-2140B24.4 | 0,00 | 0,00 | 0,00 | 0,00 | 1 | NA |
| CTD-2145A24.4 | 0,00 | 0,00 | 0,00 | 0,00 | 1 | NA |



|               |      |      |      |      |   |    |
|---------------|------|------|------|------|---|----|
| CTD-2154B17.1 | 0,00 | 0,00 | 0,00 | 0,00 | 1 | NA |
| CTD-2161F6.1  | 0,00 | 0,00 | 0,00 | 0,00 | 1 | NA |
| CTD-2175M1.3  | 0,00 | 0,00 | 0,00 | 0,00 | 1 | NA |
| CTD-2199O4.6  | 0,00 | 0,00 | 0,00 | 0,00 | 1 | NA |
| CTD-2201E18.2 | 0,00 | 0,00 | 0,00 | 0,00 | 1 | NA |
| CTD-2210A23.1 | 0,00 | 0,00 | 0,00 | 0,00 | 1 | NA |
| CTD-2213F21.4 | 0,00 | 0,00 | 0,00 | 0,00 | 1 | NA |
| CTD-2218K11.3 | 0,00 | 0,00 | 0,00 | 0,00 | 1 | NA |
| CTD-2233C11.2 | 0,00 | 0,00 | 0,00 | 0,00 | 1 | NA |
| CTD-2260A17.3 | 0,00 | 0,00 | 0,00 | 0,00 | 1 | NA |
| CTD-2272D18.2 | 0,00 | 0,00 | 0,00 | 0,00 | 1 | NA |
| CTD-2278B20.1 | 0,00 | 0,00 | 0,00 | 0,00 | 1 | NA |
| CTD-2287O16.4 | 0,00 | 0,00 | 0,00 | 0,00 | 1 | NA |
| CTD-2301A4.5  | 0,00 | 0,00 | 0,00 | 0,00 | 1 | NA |
| CTD-2308G16.1 | 0,00 | 0,00 | 0,00 | 0,00 | 1 | NA |
| CTD-2308N23.3 | 0,00 | 0,00 | 0,00 | 0,00 | 1 | NA |
| CTD-2311B13.2 | 0,00 | 0,00 | 0,00 | 0,00 | 1 | NA |
| CTD-2313J17.7 | 0,00 | 0,00 | 0,00 | 0,00 | 1 | NA |
| CTD-2313N18.8 | 0,00 | 0,00 | 0,00 | 0,00 | 1 | NA |
| CTD-2313P7.1  | 0,00 | 0,00 | 0,00 | 0,00 | 1 | NA |
| CTD-2315A10.1 | 0,00 | 0,00 | 0,00 | 0,00 | 1 | NA |
| CTD-2320G14.2 | 0,00 | 0,00 | 0,00 | 0,00 | 1 | NA |
| CTD-2320O4.2  | 0,00 | 0,00 | 0,00 | 0,00 | 1 | NA |
| CTD-2325P2.2  | 0,00 | 0,00 | 0,00 | 0,00 | 1 | NA |
| CTD-2325P2.4  | 0,00 | 0,00 | 0,00 | 0,00 | 1 | NA |
| CTD-2331H12.5 | 0,00 | 0,00 | 0,00 | 0,00 | 1 | NA |
| CTD-2350C19.2 | 0,00 | 0,00 | 0,00 | 0,00 | 1 | NA |
| CTD-2350C19.5 | 0,00 | 0,00 | 0,00 | 0,00 | 1 | NA |
| CTD-2353N24.1 | 0,00 | 0,00 | 0,00 | 0,00 | 1 | NA |
| CTD-2373J19.1 | 0,00 | 0,00 | 0,00 | 0,00 | 1 | NA |
| CTD-2373J6.1  | 0,00 | 0,00 | 0,00 | 0,00 | 1 | NA |
| CTD-2373N4.3  | 0,00 | 0,00 | 0,00 | 0,00 | 1 | NA |
| CTD-2375G15.1 | 0,00 | 0,00 | 0,00 | 0,00 | 1 | NA |
| CTD-2376I4.2  | 0,00 | 0,00 | 0,00 | 0,00 | 1 | NA |
| CTD-2382E5.2  | 0,00 | 0,00 | 0,00 | 0,00 | 1 | NA |
| CTD-2501E16.2 | 0,00 | 0,00 | 0,00 | 0,00 | 1 | NA |
| CTD-2514A21.4 | 0,00 | 0,00 | 0,00 | 0,00 | 1 | NA |
| CTD-2516F10.4 | 0,00 | 0,00 | 0,00 | 0,00 | 1 | NA |
| CTD-2517O10.5 | 0,00 | 0,00 | 0,00 | 0,00 | 1 | NA |
| CTD-2517O10.6 | 0,00 | 0,00 | 0,00 | 0,00 | 1 | NA |
| CTD-2525P14.5 | 0,00 | 0,00 | 0,00 | 0,00 | 1 | NA |
| CTD-2526L21.1 | 0,00 | 0,00 | 0,00 | 0,00 | 1 | NA |
| CTD-2526L21.2 | 0,00 | 0,00 | 0,00 | 0,00 | 1 | NA |
| CTD-2528L19.3 | 0,00 | 0,00 | 0,00 | 0,00 | 1 | NA |
| CTD-2530H12.8 | 0,00 | 0,00 | 0,00 | 0,00 | 1 | NA |
| CTD-2533G20.1 | 0,00 | 0,00 | 0,00 | 0,00 | 1 | NA |
| CTD-2536I1.3  | 0,00 | 0,00 | 0,00 | 0,00 | 1 | NA |
| CTD-2555C10.3 | 0,00 | 0,00 | 0,00 | 0,00 | 1 | NA |
| CTD-2561B21.3 | 0,00 | 0,00 | 0,00 | 0,00 | 1 | NA |
| CTD-2582D11.1 | 0,00 | 0,00 | 0,00 | 0,00 | 1 | NA |
| CTD-2583P5.3  | 0,00 | 0,00 | 0,00 | 0,00 | 1 | NA |
| CTD-2588C8.8  | 0,00 | 0,00 | 0,00 | 0,00 | 1 | NA |
| CTD-2589M5.5  | 0,00 | 0,00 | 0,00 | 0,00 | 1 | NA |
| CTD-2591A1.1  | 0,00 | 0,00 | 0,00 | 0,00 | 1 | NA |
| CTD-2623N2.11 | 0,00 | 0,00 | 0,00 | 0,00 | 1 | NA |

|               |      |      |      |      |   |    |
|---------------|------|------|------|------|---|----|
| CTD-2643K12.3 | 0,00 | 0,00 | 0,00 | 0,00 | 1 | NA |
| CTD-3001H11.2 | 0,00 | 0,00 | 0,00 | 0,00 | 1 | NA |
| CTD-3010D24.3 | 0,00 | 0,00 | 0,00 | 0,00 | 1 | NA |
| CTD-3012A18.1 | 0,00 | 0,00 | 0,00 | 0,00 | 1 | NA |
| CTD-3064H18.1 | 0,00 | 0,00 | 0,00 | 0,00 | 1 | NA |
| CTD-3074O7.7  | 0,00 | 0,00 | 0,00 | 0,00 | 1 | NA |
| CTD-3179P9.1  | 0,00 | 0,00 | 0,00 | 0,00 | 1 | NA |
| CTD-3203P2.1  | 0,00 | 0,00 | 0,00 | 0,00 | 1 | NA |
| CTNNAP1       | 0,00 | 0,00 | 0,00 | 0,00 | 1 | NA |
| CTNND2        | 0,00 | 0,00 | 0,00 | 0,00 | 1 | NA |
| CXCL11        | 0,00 | 0,00 | 0,00 | 0,00 | 1 | NA |
| CYLC1         | 0,00 | 0,00 | 0,00 | 0,00 | 1 | NA |
| CYP11B2       | 0,00 | 0,00 | 0,00 | 0,00 | 1 | NA |
| CYP2D8P1      | 0,00 | 0,00 | 0,00 | 0,00 | 1 | NA |
| CYP2G1P       | 0,00 | 0,00 | 0,00 | 0,00 | 1 | NA |
| CYP2G2P       | 0,00 | 0,00 | 0,00 | 0,00 | 1 | NA |
| CYP7A1        | 0,00 | 0,00 | 0,00 | 0,00 | 1 | NA |
| CYSRT1        | 0,00 | 0,00 | 0,00 | 0,00 | 1 | NA |
| DBIL5P        | 0,00 | 0,00 | 0,00 | 0,00 | 1 | NA |
| DCSTAMP       | 0,00 | 0,00 | 0,00 | 0,00 | 1 | NA |
| DDI1          | 0,00 | 0,00 | 0,00 | 0,00 | 1 | NA |
| DEFB127       | 0,00 | 0,00 | 0,00 | 0,00 | 1 | NA |
| DEFT1P        | 0,00 | 0,00 | 0,00 | 0,00 | 1 | NA |
| DENND6A-AS1   | 0,00 | 0,00 | 0,00 | 0,00 | 1 | NA |
| DGAT2L6       | 0,00 | 0,00 | 0,00 | 0,00 | 1 | NA |
| DKK4          | 0,00 | 0,00 | 0,00 | 0,00 | 1 | NA |
| DLL3          | 0,00 | 0,00 | 0,00 | 0,00 | 1 | NA |
| DMRTB1        | 0,00 | 0,00 | 0,00 | 0,00 | 1 | NA |
| DNM1P31       | 0,00 | 0,00 | 0,00 | 0,00 | 1 | NA |
| DPRXP7        | 0,00 | 0,00 | 0,00 | 0,00 | 1 | NA |
| DPYS          | 0,00 | 0,00 | 0,00 | 0,00 | 1 | NA |
| DUX4L16       | 0,00 | 0,00 | 0,00 | 0,00 | 1 | NA |
| EBF3          | 0,00 | 0,00 | 0,00 | 0,00 | 1 | NA |
| ECEL1P2       | 0,00 | 0,00 | 0,00 | 0,00 | 1 | NA |
| ECEL1P3       | 0,00 | 0,00 | 0,00 | 0,00 | 1 | NA |
| EDDM3A        | 0,00 | 0,00 | 0,00 | 0,00 | 1 | NA |
| EDN2          | 0,00 | 0,00 | 0,00 | 0,00 | 1 | NA |
| EEF1A1P       | 0,00 | 0,00 | 0,00 | 0,00 | 1 | NA |
| ELMO2P1       | 0,00 | 0,00 | 0,00 | 0,00 | 1 | NA |
| EN2           | 0,00 | 0,00 | 0,00 | 0,00 | 1 | NA |
| ENTPD8        | 0,00 | 0,00 | 0,00 | 0,00 | 1 | NA |
| EPOP          | 0,00 | 0,00 | 0,00 | 0,00 | 1 | NA |
| EPYC          | 0,00 | 0,00 | 0,00 | 0,00 | 1 | NA |
| FAM127C       | 0,00 | 0,00 | 0,00 | 0,00 | 1 | NA |
| FAM136B       | 0,00 | 0,00 | 0,00 | 0,00 | 1 | NA |
| FAM150B       | 0,00 | 0,00 | 0,00 | 0,00 | 1 | NA |
| FAM171A1      | 0,00 | 0,00 | 0,00 | 0,00 | 1 | NA |
| FAM197Y7      | 0,00 | 0,00 | 0,00 | 0,00 | 1 | NA |
| FAM19A4       | 0,00 | 0,00 | 0,00 | 0,00 | 1 | NA |
| FAM60BP       | 0,00 | 0,00 | 0,00 | 0,00 | 1 | NA |
| FAM60CP       | 0,00 | 0,00 | 0,00 | 0,00 | 1 | NA |
| FAM90A10      | 0,00 | 0,00 | 0,00 | 0,00 | 1 | NA |
| FAM91A3P      | 0,00 | 0,00 | 0,00 | 0,00 | 1 | NA |
| FBXO39        | 0,00 | 0,00 | 0,00 | 0,00 | 1 | NA |
| FGF10         | 0,00 | 0,00 | 0,00 | 0,00 | 1 | NA |

|               |      |      |      |      |   |    |
|---------------|------|------|------|------|---|----|
| FNDC8         | 0,00 | 0,00 | 0,00 | 0,00 | 1 | NA |
| FOXA2         | 0,00 | 0,00 | 0,00 | 0,00 | 1 | NA |
| FOXD4         | 0,00 | 0,00 | 0,00 | 0,00 | 1 | NA |
| FOXI1         | 0,00 | 0,00 | 0,00 | 0,00 | 1 | NA |
| FREM3         | 0,00 | 0,00 | 0,00 | 0,00 | 1 | NA |
| FTHL25        | 0,00 | 0,00 | 0,00 | 0,00 | 1 | NA |
| FZD7          | 0,00 | 0,00 | 0,00 | 0,00 | 1 | NA |
| GAD1          | 0,00 | 0,00 | 0,00 | 0,00 | 1 | NA |
| GAGE10        | 0,00 | 0,00 | 0,00 | 0,00 | 1 | NA |
| GAL3ST3       | 0,00 | 0,00 | 0,00 | 0,00 | 1 | NA |
| GAPDHP14      | 0,00 | 0,00 | 0,00 | 0,00 | 1 | NA |
| GAS1          | 0,00 | 0,00 | 0,00 | 0,00 | 1 | NA |
| GATA2         | 0,00 | 0,00 | 0,00 | 0,00 | 1 | NA |
| GC            | 0,00 | 0,00 | 0,00 | 0,00 | 1 | NA |
| GGTLC1        | 0,00 | 0,00 | 0,00 | 0,00 | 1 | NA |
| GHRH          | 0,00 | 0,00 | 0,00 | 0,00 | 1 | NA |
| GIMAP1-GIMAP5 | 0,00 | 0,00 | 0,00 | 0,00 | 1 | NA |
| GJC2          | 0,00 | 0,00 | 0,00 | 0,00 | 1 | NA |
| GKN1          | 0,00 | 0,00 | 0,00 | 0,00 | 1 | NA |
| GKN3P         | 0,00 | 0,00 | 0,00 | 0,00 | 1 | NA |
| GLRB          | 0,00 | 0,00 | 0,00 | 0,00 | 1 | NA |
| GLYATL1P2     | 0,00 | 0,00 | 0,00 | 0,00 | 1 | NA |
| GMCL1P2       | 0,00 | 0,00 | 0,00 | 0,00 | 1 | NA |
| GNB3          | 0,00 | 0,00 | 0,00 | 0,00 | 1 | NA |
| GOLGA6L2      | 0,00 | 0,00 | 0,00 | 0,00 | 1 | NA |
| GOT2L2        | 0,00 | 0,00 | 0,00 | 0,00 | 1 | NA |
| GPC5          | 0,00 | 0,00 | 0,00 | 0,00 | 1 | NA |
| GPR153        | 0,00 | 0,00 | 0,00 | 0,00 | 1 | NA |
| GPR182        | 0,00 | 0,00 | 0,00 | 0,00 | 1 | NA |
| GPR75-ASB3    | 0,00 | 0,00 | 0,00 | 0,00 | 1 | NA |
| GPX5          | 0,00 | 0,00 | 0,00 | 0,00 | 1 | NA |
| GRB14         | 0,00 | 0,00 | 0,00 | 0,00 | 1 | NA |
| GRB7          | 0,00 | 0,00 | 0,00 | 0,00 | 1 | NA |
| GS1-103B18.1  | 0,00 | 0,00 | 0,00 | 0,00 | 1 | NA |
| GS1-18A18.2   | 0,00 | 0,00 | 0,00 | 0,00 | 1 | NA |
| GS1-304P7.1   | 0,00 | 0,00 | 0,00 | 0,00 | 1 | NA |
| GS1-304P7.2   | 0,00 | 0,00 | 0,00 | 0,00 | 1 | NA |
| GS1-309P15.2  | 0,00 | 0,00 | 0,00 | 0,00 | 1 | NA |
| GS1-433O24.1  | 0,00 | 0,00 | 0,00 | 0,00 | 1 | NA |
| GS1-536K7.3   | 0,00 | 0,00 | 0,00 | 0,00 | 1 | NA |
| GS1-541M1.1   | 0,00 | 0,00 | 0,00 | 0,00 | 1 | NA |
| GS1-542M4.2   | 0,00 | 0,00 | 0,00 | 0,00 | 1 | NA |
| GSTA2         | 0,00 | 0,00 | 0,00 | 0,00 | 1 | NA |
| GSTA5         | 0,00 | 0,00 | 0,00 | 0,00 | 1 | NA |
| GTSCR1        | 0,00 | 0,00 | 0,00 | 0,00 | 1 | NA |
| GUCA1A        | 0,00 | 0,00 | 0,00 | 0,00 | 1 | NA |
| GUCA1B        | 0,00 | 0,00 | 0,00 | 0,00 | 1 | NA |
| H2AFZP        | 0,00 | 0,00 | 0,00 | 0,00 | 1 | NA |
| HAGLR         | 0,00 | 0,00 | 0,00 | 0,00 | 1 | NA |
| HAND2         | 0,00 | 0,00 | 0,00 | 0,00 | 1 | NA |
| HBBP1         | 0,00 | 0,00 | 0,00 | 0,00 | 1 | NA |
| HBE1          | 0,00 | 0,00 | 0,00 | 0,00 | 1 | NA |
| HCG17         | 0,00 | 0,00 | 0,00 | 0,00 | 1 | NA |
| HCG4          | 0,00 | 0,00 | 0,00 | 0,00 | 1 | NA |
| HCG4P3        | 0,00 | 0,00 | 0,00 | 0,00 | 1 | NA |

|              |      |      |      |      |   |    |
|--------------|------|------|------|------|---|----|
| HCG4P7       | 0,00 | 0,00 | 0,00 | 0,00 | 1 | NA |
| HELT         | 0,00 | 0,00 | 0,00 | 0,00 | 1 | NA |
| HEPACAM2     | 0,00 | 0,00 | 0,00 | 0,00 | 1 | NA |
| HIN1L        | 0,00 | 0,00 | 0,00 | 0,00 | 1 | NA |
| HIST1H3C     | 0,00 | 0,00 | 0,00 | 0,00 | 1 | NA |
| HIST3H3      | 0,00 | 0,00 | 0,00 | 0,00 | 1 | NA |
| HNRNPCL3     | 0,00 | 0,00 | 0,00 | 0,00 | 1 | NA |
| HOXA4        | 0,00 | 0,00 | 0,00 | 0,00 | 1 | NA |
| HOXB1        | 0,00 | 0,00 | 0,00 | 0,00 | 1 | NA |
| HPX          | 0,00 | 0,00 | 0,00 | 0,00 | 1 | NA |
| HS3ST3A1     | 0,00 | 0,00 | 0,00 | 0,00 | 1 | NA |
| HSD11B1      | 0,00 | 0,00 | 0,00 | 0,00 | 1 | NA |
| HSD17B3      | 0,00 | 0,00 | 0,00 | 0,00 | 1 | NA |
| HSF2BP       | 0,00 | 0,00 | 0,00 | 0,00 | 1 | NA |
| HSPB7        | 0,00 | 0,00 | 0,00 | 0,00 | 1 | NA |
| HTR2C        | 0,00 | 0,00 | 0,00 | 0,00 | 1 | NA |
| HTR3C        | 0,00 | 0,00 | 0,00 | 0,00 | 1 | NA |
| IFITM4P      | 0,00 | 0,00 | 0,00 | 0,00 | 1 | NA |
| IFNE         | 0,00 | 0,00 | 0,00 | 0,00 | 1 | NA |
| IGHV1-67     | 0,00 | 0,00 | 0,00 | 0,00 | 1 | NA |
| IGHV1OR15-3  | 0,00 | 0,00 | 0,00 | 0,00 | 1 | NA |
| IGHV3-20     | 0,00 | 0,00 | 0,00 | 0,00 | 1 | NA |
| IGHV3-41     | 0,00 | 0,00 | 0,00 | 0,00 | 1 | NA |
| IGHV3-60     | 0,00 | 0,00 | 0,00 | 0,00 | 1 | NA |
| IGHV4-28     | 0,00 | 0,00 | 0,00 | 0,00 | 1 | NA |
| IGHV4OR15-8  | 0,00 | 0,00 | 0,00 | 0,00 | 1 | NA |
| IGHV5-10-1   | 0,00 | 0,00 | 0,00 | 0,00 | 1 | NA |
| IGHV7-4-1    | 0,00 | 0,00 | 0,00 | 0,00 | 1 | NA |
| IGHVII-1-1   | 0,00 | 0,00 | 0,00 | 0,00 | 1 | NA |
| IGHVIII-82   | 0,00 | 0,00 | 0,00 | 0,00 | 1 | NA |
| IGKV1-16     | 0,00 | 0,00 | 0,00 | 0,00 | 1 | NA |
| IGKV1D-17    | 0,00 | 0,00 | 0,00 | 0,00 | 1 | NA |
| IGKV1D-42    | 0,00 | 0,00 | 0,00 | 0,00 | 1 | NA |
| IGKV1D-43    | 0,00 | 0,00 | 0,00 | 0,00 | 1 | NA |
| IGKV1OR22-1  | 0,00 | 0,00 | 0,00 | 0,00 | 1 | NA |
| IGKV2OR22-4  | 0,00 | 0,00 | 0,00 | 0,00 | 1 | NA |
| IGKV6-21     | 0,00 | 0,00 | 0,00 | 0,00 | 1 | NA |
| IGKV6D-21    | 0,00 | 0,00 | 0,00 | 0,00 | 1 | NA |
| IGLC6        | 0,00 | 0,00 | 0,00 | 0,00 | 1 | NA |
| IGLV1-62     | 0,00 | 0,00 | 0,00 | 0,00 | 1 | NA |
| IGLV3-16     | 0,00 | 0,00 | 0,00 | 0,00 | 1 | NA |
| IGLV4-69     | 0,00 | 0,00 | 0,00 | 0,00 | 1 | NA |
| IGLV5-52     | 0,00 | 0,00 | 0,00 | 0,00 | 1 | NA |
| IGLV7-46     | 0,00 | 0,00 | 0,00 | 0,00 | 1 | NA |
| IGLVI-63     | 0,00 | 0,00 | 0,00 | 0,00 | 1 | NA |
| IGLVI-68     | 0,00 | 0,00 | 0,00 | 0,00 | 1 | NA |
| IGLVIVOR22-2 | 0,00 | 0,00 | 0,00 | 0,00 | 1 | NA |
| IL17B        | 0,00 | 0,00 | 0,00 | 0,00 | 1 | NA |
| IL17C        | 0,00 | 0,00 | 0,00 | 0,00 | 1 | NA |
| IL17REL      | 0,00 | 0,00 | 0,00 | 0,00 | 1 | NA |
| IL1RAPL2     | 0,00 | 0,00 | 0,00 | 0,00 | 1 | NA |
| IL2          | 0,00 | 0,00 | 0,00 | 0,00 | 1 | NA |
| IL22RA2      | 0,00 | 0,00 | 0,00 | 0,00 | 1 | NA |
| IL26         | 0,00 | 0,00 | 0,00 | 0,00 | 1 | NA |
| IL5          | 0,00 | 0,00 | 0,00 | 0,00 | 1 | NA |

|                |      |      |      |      |   |    |
|----------------|------|------|------|------|---|----|
| IL9RP2         | 0,00 | 0,00 | 0,00 | 0,00 | 1 | NA |
| IMPDH1P11      | 0,00 | 0,00 | 0,00 | 0,00 | 1 | NA |
| INHBC          | 0,00 | 0,00 | 0,00 | 0,00 | 1 | NA |
| INSC           | 0,00 | 0,00 | 0,00 | 0,00 | 1 | NA |
| INSL5          | 0,00 | 0,00 | 0,00 | 0,00 | 1 | NA |
| IQCJ           | 0,00 | 0,00 | 0,00 | 0,00 | 1 | NA |
| IRX4           | 0,00 | 0,00 | 0,00 | 0,00 | 1 | NA |
| ITLN2          | 0,00 | 0,00 | 0,00 | 0,00 | 1 | NA |
| IZUMO3         | 0,00 | 0,00 | 0,00 | 0,00 | 1 | NA |
| KAZALD1        | 0,00 | 0,00 | 0,00 | 0,00 | 1 | NA |
| KB-1027C11.4   | 0,00 | 0,00 | 0,00 | 0,00 | 1 | NA |
| KB-1043D8.6    | 0,00 | 0,00 | 0,00 | 0,00 | 1 | NA |
| KB-1073A2.1    | 0,00 | 0,00 | 0,00 | 0,00 | 1 | NA |
| KB-1299A7.2    | 0,00 | 0,00 | 0,00 | 0,00 | 1 | NA |
| KB-1458E12.1   | 0,00 | 0,00 | 0,00 | 0,00 | 1 | NA |
| KB-1589B1.1    | 0,00 | 0,00 | 0,00 | 0,00 | 1 | NA |
| KB-1592A4.16   | 0,00 | 0,00 | 0,00 | 0,00 | 1 | NA |
| KB-1639H6.6    | 0,00 | 0,00 | 0,00 | 0,00 | 1 | NA |
| KB-1930G5.4    | 0,00 | 0,00 | 0,00 | 0,00 | 1 | NA |
| KB-1958F4.2    | 0,00 | 0,00 | 0,00 | 0,00 | 1 | NA |
| KBTBD13        | 0,00 | 0,00 | 0,00 | 0,00 | 1 | NA |
| KCNA6          | 0,00 | 0,00 | 0,00 | 0,00 | 1 | NA |
| KCNG3          | 0,00 | 0,00 | 0,00 | 0,00 | 1 | NA |
| KCNK9          | 0,00 | 0,00 | 0,00 | 0,00 | 1 | NA |
| KCNQ1DN        | 0,00 | 0,00 | 0,00 | 0,00 | 1 | NA |
| KIAA1211L      | 0,00 | 0,00 | 0,00 | 0,00 | 1 | NA |
| KIR3DL1        | 0,00 | 0,00 | 0,00 | 0,00 | 1 | NA |
| KITLG          | 0,00 | 0,00 | 0,00 | 0,00 | 1 | NA |
| KLKB1          | 0,00 | 0,06 | 0,00 | 0,00 | 1 | NA |
| KLRC4          | 0,00 | 0,00 | 0,00 | 0,00 | 1 | NA |
| KPNA7          | 0,00 | 0,00 | 0,00 | 0,00 | 1 | NA |
| KRT12          | 0,00 | 0,00 | 0,00 | 0,00 | 1 | NA |
| KRT18P20       | 0,00 | 0,00 | 0,00 | 0,00 | 1 | NA |
| KRT18P51       | 0,00 | 0,00 | 0,00 | 0,00 | 1 | NA |
| KRT20          | 0,00 | 0,00 | 0,00 | 0,00 | 1 | NA |
| KRT6B          | 0,00 | 0,00 | 0,00 | 0,00 | 1 | NA |
| KRT77          | 0,00 | 0,00 | 0,00 | 0,00 | 1 | NA |
| KRT79          | 0,00 | 0,00 | 0,00 | 0,00 | 1 | NA |
| KRT8P49        | 0,00 | 0,00 | 0,00 | 0,00 | 1 | NA |
| KRT9           | 0,00 | 0,00 | 0,00 | 0,00 | 1 | NA |
| KRTAP10-3      | 0,00 | 0,00 | 0,00 | 0,00 | 1 | NA |
| KRTAP5-3       | 0,00 | 0,00 | 0,00 | 0,00 | 1 | NA |
| LA16c-313D11.9 | 0,00 | 0,00 | 0,00 | 0,00 | 1 | NA |
| LA16c-58F10.2  | 0,00 | 0,00 | 0,00 | 0,00 | 1 | NA |
| LALBA          | 0,00 | 0,00 | 0,00 | 0,00 | 1 | NA |
| LARP4P         | 0,00 | 0,00 | 0,00 | 0,00 | 1 | NA |
| LBX1-AS1       | 0,00 | 0,00 | 0,00 | 0,00 | 1 | NA |
| LCN1L1         | 0,00 | 0,00 | 0,00 | 0,00 | 1 | NA |
| LHX2           | 0,00 | 0,00 | 0,00 | 0,00 | 1 | NA |
| LINC00052      | 0,00 | 0,00 | 0,00 | 0,00 | 1 | NA |
| LINC00239      | 0,00 | 0,00 | 0,00 | 0,00 | 1 | NA |
| LINC00242      | 0,00 | 0,00 | 0,00 | 0,00 | 1 | NA |
| LINC00472      | 0,00 | 0,00 | 0,00 | 0,00 | 1 | NA |
| LINC00543      | 0,00 | 0,00 | 0,00 | 0,00 | 1 | NA |
| LINC00661      | 0,00 | 0,00 | 0,00 | 0,00 | 1 | NA |

|                   |      |      |      |      |   |    |
|-------------------|------|------|------|------|---|----|
| LINC00710         | 0,00 | 0,00 | 0,00 | 0,00 | 1 | NA |
| LINC01241         | 0,00 | 0,00 | 0,00 | 0,00 | 1 | NA |
| LINC01402         | 0,00 | 0,00 | 0,00 | 0,00 | 1 | NA |
| LINC01594         | 0,00 | 0,00 | 0,00 | 0,00 | 1 | NA |
| LINC01620         | 0,00 | 0,00 | 0,00 | 0,00 | 1 | NA |
| LLOXNC01-240C2.1  | 0,00 | 0,00 | 0,00 | 0,00 | 1 | NA |
| LLOXNC01-250H12.3 | 0,00 | 0,00 | 0,00 | 0,00 | 1 | NA |
| LLOXNC01-36H8.1   | 0,00 | 0,00 | 0,00 | 0,00 | 1 | NA |
| LL22NC03-44A4.3   | 0,00 | 0,00 | 0,00 | 0,00 | 1 | NA |
| LL22NC03-84E4.8   | 0,00 | 0,00 | 0,00 | 0,00 | 1 | NA |
| LLNLF-18A12.1     | 0,00 | 0,00 | 0,00 | 0,00 | 1 | NA |
| LLNLR-231D4.1     | 0,00 | 0,00 | 0,00 | 0,00 | 1 | NA |
| LLNLR-307A6.1     | 0,00 | 0,00 | 0,00 | 0,00 | 1 | NA |
| LMO1              | 0,00 | 0,00 | 0,00 | 0,00 | 1 | NA |
| LMX1A             | 0,00 | 0,00 | 0,00 | 0,00 | 1 | NA |
| LRFN2             | 0,00 | 0,00 | 0,00 | 0,00 | 1 | NA |
| LRRC14B           | 0,00 | 0,00 | 0,00 | 0,00 | 1 | NA |
| LRRC17            | 0,00 | 0,00 | 0,00 | 0,00 | 1 | NA |
| LRRC66            | 0,00 | 0,00 | 0,00 | 0,00 | 1 | NA |
| LRRC71            | 0,00 | 0,00 | 0,00 | 0,00 | 1 | NA |
| LY6G6F            | 0,00 | 0,00 | 0,00 | 0,00 | 1 | NA |
| LYNX1-SLURP2      | 0,00 | 0,00 | 0,00 | 0,00 | 1 | NA |
| LYPD1             | 0,00 | 0,00 | 0,00 | 0,00 | 1 | NA |
| LYPD6B            | 0,00 | 0,00 | 0,00 | 0,00 | 1 | NA |
| MAG               | 0,00 | 0,00 | 0,00 | 0,00 | 1 | NA |
| MAGEA2B           | 0,00 | 0,00 | 0,00 | 0,00 | 1 | NA |
| MAGEA6            | 0,00 | 0,00 | 0,00 | 0,00 | 1 | NA |
| MAGEC3            | 0,00 | 0,00 | 0,00 | 0,00 | 1 | NA |
| MAGI1-AS1         | 0,00 | 0,00 | 0,00 | 0,00 | 1 | NA |
| MAGOH2            | 0,00 | 0,00 | 0,00 | 0,00 | 1 | NA |
| MANSC4            | 0,00 | 0,00 | 0,00 | 0,00 | 1 | NA |
| MAPK15            | 0,00 | 0,00 | 0,00 | 0,00 | 1 | NA |
| MARCH10           | 0,00 | 0,00 | 0,00 | 0,00 | 1 | NA |
| MATN4             | 0,00 | 0,00 | 0,00 | 0,00 | 1 | NA |
| MBL1P             | 0,00 | 0,00 | 0,00 | 0,00 | 1 | NA |
| MEI4              | 0,00 | 0,00 | 0,00 | 0,00 | 1 | NA |
| MEIS1-AS2         | 0,00 | 0,00 | 0,00 | 0,00 | 1 | NA |
| MEIS3P1           | 0,00 | 0,00 | 0,00 | 0,00 | 1 | NA |
| MGARP             | 0,00 | 0,00 | 0,00 | 0,00 | 1 | NA |
| MIR101-1          | 0,00 | 0,00 | 0,00 | 0,00 | 1 | NA |
| MIR106B           | 0,00 | 0,00 | 0,00 | 0,00 | 1 | NA |
| MIR1202           | 0,00 | 0,00 | 0,00 | 0,00 | 1 | NA |
| MIR1276           | 0,00 | 0,00 | 0,00 | 0,00 | 1 | NA |
| MIR1278           | 0,00 | 0,00 | 0,00 | 0,00 | 1 | NA |
| MIR1285-2         | 0,00 | 0,00 | 0,00 | 0,00 | 1 | NA |
| MIR153-1          | 0,00 | 0,00 | 0,00 | 0,00 | 1 | NA |
| MIR181A2          | 0,00 | 0,00 | 0,00 | 0,00 | 1 | NA |
| MIR181B1          | 0,00 | 0,00 | 0,00 | 0,00 | 1 | NA |
| MIR2052           | 0,00 | 0,00 | 0,00 | 0,00 | 1 | NA |
| MIR211            | 0,00 | 0,00 | 0,00 | 0,00 | 1 | NA |
| MIR2278           | 0,00 | 0,00 | 0,00 | 0,00 | 1 | NA |
| MIR2355           | 0,00 | 0,00 | 0,00 | 0,00 | 1 | NA |
| MIR297            | 0,00 | 0,00 | 0,00 | 0,00 | 1 | NA |
| MIR3115           | 0,00 | 0,00 | 0,00 | 0,00 | 1 | NA |
| MIR3116-1         | 0,00 | 0,00 | 0,00 | 0,00 | 1 | NA |

|           |      |      |      |      |   |    |
|-----------|------|------|------|------|---|----|
| MIR3117   | 0,00 | 0,00 | 0,00 | 0,00 | 1 | NA |
| MIR3133   | 0,00 | 0,00 | 0,00 | 0,00 | 1 | NA |
| MIR3139   | 0,00 | 0,00 | 0,00 | 0,00 | 1 | NA |
| MIR3144   | 0,00 | 0,00 | 0,00 | 0,00 | 1 | NA |
| MIR3145   | 0,00 | 0,00 | 0,00 | 0,00 | 1 | NA |
| MIR3148   | 0,00 | 0,00 | 0,00 | 0,00 | 1 | NA |
| MIR3149   | 0,00 | 0,00 | 0,00 | 0,00 | 1 | NA |
| MIR3152   | 0,00 | 0,00 | 0,00 | 0,00 | 1 | NA |
| MIR3162   | 0,00 | 0,00 | 0,00 | 0,00 | 1 | NA |
| MIR3192   | 0,00 | 0,00 | 0,00 | 0,00 | 1 | NA |
| MIR320C1  | 0,00 | 0,00 | 0,00 | 0,00 | 1 | NA |
| MIR345    | 0,00 | 0,00 | 0,00 | 0,00 | 1 | NA |
| MIR3681   | 0,00 | 0,00 | 0,00 | 0,00 | 1 | NA |
| MIR3685   | 0,00 | 0,00 | 0,00 | 0,00 | 1 | NA |
| MIR374A   | 0,00 | 0,00 | 0,00 | 0,00 | 1 | NA |
| MIR374B   | 0,00 | 0,00 | 0,00 | 0,00 | 1 | NA |
| MIR378J   | 0,00 | 0,00 | 0,00 | 0,00 | 1 | NA |
| MIR3935   | 0,00 | 0,00 | 0,00 | 0,00 | 1 | NA |
| MIR3978   | 0,00 | 0,00 | 0,00 | 0,00 | 1 | NA |
| MIR421    | 0,00 | 0,00 | 0,00 | 0,00 | 1 | NA |
| MIR4278   | 0,00 | 0,00 | 0,00 | 0,00 | 1 | NA |
| MIR4316   | 0,00 | 0,00 | 0,00 | 0,00 | 1 | NA |
| MIR4328   | 0,00 | 0,00 | 0,00 | 0,00 | 1 | NA |
| MIR4428   | 0,00 | 0,00 | 0,00 | 0,00 | 1 | NA |
| MIR4440   | 0,00 | 0,00 | 0,00 | 0,00 | 1 | NA |
| MIR4451   | 0,00 | 0,00 | 0,00 | 0,00 | 1 | NA |
| MIR4505   | 0,00 | 0,00 | 0,00 | 0,00 | 1 | NA |
| MIR4506   | 0,00 | 0,00 | 0,00 | 0,00 | 1 | NA |
| MIR4529   | 0,00 | 0,00 | 0,00 | 0,00 | 1 | NA |
| MIR4644   | 0,00 | 0,00 | 0,00 | 0,00 | 1 | NA |
| MIR466    | 0,00 | 0,00 | 0,00 | 0,00 | 1 | NA |
| MIR4676   | 0,00 | 0,00 | 0,00 | 0,00 | 1 | NA |
| MIR4698   | 0,00 | 0,00 | 0,00 | 0,00 | 1 | NA |
| MIR4736   | 0,00 | 0,00 | 0,00 | 0,00 | 1 | NA |
| MIR4772   | 0,00 | 0,00 | 0,00 | 0,00 | 1 | NA |
| MIR4780   | 0,00 | 0,00 | 0,00 | 0,00 | 1 | NA |
| MIR4783   | 0,00 | 0,00 | 0,00 | 0,00 | 1 | NA |
| MIR506    | 0,00 | 0,00 | 0,00 | 0,00 | 1 | NA |
| MIR507    | 0,00 | 0,00 | 0,00 | 0,00 | 1 | NA |
| MIR510    | 0,00 | 0,00 | 0,00 | 0,00 | 1 | NA |
| MIR513B   | 0,00 | 0,00 | 0,00 | 0,00 | 1 | NA |
| MIR518F   | 0,00 | 0,00 | 0,00 | 0,00 | 1 | NA |
| MIR545    | 0,00 | 0,00 | 0,00 | 0,00 | 1 | NA |
| MIR548A2  | 0,00 | 0,00 | 0,00 | 0,00 | 1 | NA |
| MIR548AI  | 0,00 | 0,00 | 0,00 | 0,00 | 1 | NA |
| MIR548AK  | 0,00 | 0,00 | 0,00 | 0,00 | 1 | NA |
| MIR5581   | 0,00 | 0,00 | 0,00 | 0,00 | 1 | NA |
| MIR5583-1 | 0,00 | 0,00 | 0,00 | 0,00 | 1 | NA |
| MIR5583-2 | 0,00 | 0,00 | 0,00 | 0,00 | 1 | NA |
| MIR5685   | 0,00 | 0,00 | 0,00 | 0,00 | 1 | NA |
| MIR5687   | 0,00 | 0,00 | 0,00 | 0,00 | 1 | NA |
| MIR5692A1 | 0,00 | 0,00 | 0,00 | 0,00 | 1 | NA |
| MIR5692B  | 0,00 | 0,00 | 0,00 | 0,00 | 1 | NA |
| MIR5706   | 0,00 | 0,00 | 0,00 | 0,00 | 1 | NA |
| MIR579    | 0,00 | 0,00 | 0,00 | 0,00 | 1 | NA |

|            |      |      |      |      |   |    |
|------------|------|------|------|------|---|----|
| MIR580     | 0,00 | 0,00 | 0,00 | 0,00 | 1 | NA |
| MIR588     | 0,00 | 0,00 | 0,00 | 0,00 | 1 | NA |
| MIR589     | 0,00 | 0,00 | 0,00 | 0,00 | 1 | NA |
| MIR591     | 0,00 | 0,00 | 0,00 | 0,00 | 1 | NA |
| MIR604     | 0,00 | 0,00 | 0,00 | 0,00 | 1 | NA |
| MIR607     | 0,00 | 0,00 | 0,00 | 0,00 | 1 | NA |
| MIR6071    | 0,00 | 0,00 | 0,00 | 0,00 | 1 | NA |
| MIR6075    | 0,00 | 0,00 | 0,00 | 0,00 | 1 | NA |
| MIR625     | 0,00 | 0,00 | 0,00 | 0,00 | 1 | NA |
| MIR648     | 0,00 | 0,00 | 0,00 | 0,00 | 1 | NA |
| MIR6500    | 0,00 | 0,00 | 0,00 | 0,00 | 1 | NA |
| MIR6715A   | 0,00 | 0,00 | 0,00 | 0,00 | 1 | NA |
| MIR6813    | 0,00 | 0,00 | 0,00 | 0,00 | 1 | NA |
| MIR6876    | 0,00 | 0,00 | 0,00 | 0,00 | 1 | NA |
| MIR8052    | 0,00 | 0,00 | 0,00 | 0,00 | 1 | NA |
| MIR8055    | 0,00 | 0,00 | 0,00 | 0,00 | 1 | NA |
| MIR8057    | 0,00 | 0,00 | 0,00 | 0,00 | 1 | NA |
| MIR8064    | 0,00 | 0,00 | 0,00 | 0,00 | 1 | NA |
| MIR876     | 0,00 | 0,00 | 0,00 | 0,00 | 1 | NA |
| MIR98      | 0,00 | 0,00 | 0,00 | 0,00 | 1 | NA |
| MMP23A     | 0,00 | 0,00 | 0,00 | 0,00 | 1 | NA |
| MMP26      | 0,00 | 0,00 | 0,00 | 0,00 | 1 | NA |
| MMP27      | 0,00 | 0,00 | 0,00 | 0,00 | 1 | NA |
| MRGPRD     | 0,00 | 0,00 | 0,00 | 0,00 | 1 | NA |
| MRGPRX2    | 0,00 | 0,00 | 0,00 | 0,00 | 1 | NA |
| MRPL51P2   | 0,00 | 0,00 | 0,00 | 0,00 | 1 | NA |
| MRPS15P2   | 0,00 | 0,00 | 0,00 | 0,00 | 1 | NA |
| MRPS21P7   | 0,00 | 0,00 | 0,00 | 0,00 | 1 | NA |
| MSMP       | 0,00 | 0,00 | 0,00 | 0,00 | 1 | NA |
| MT1L       | 0,00 | 0,00 | 0,00 | 0,00 | 1 | NA |
| MT1M       | 0,00 | 0,00 | 0,00 | 0,00 | 1 | NA |
| MTRNR2L13  | 0,00 | 0,00 | 0,00 | 0,00 | 1 | NA |
| MYBPH      | 0,00 | 0,00 | 0,00 | 0,00 | 1 | NA |
| MYH2       | 0,00 | 0,00 | 0,00 | 0,00 | 1 | NA |
| MYH4       | 0,00 | 0,00 | 0,00 | 0,00 | 1 | NA |
| MYL1       | 0,00 | 0,26 | 0,00 | 0,00 | 1 | NA |
| MYL3       | 0,00 | 0,00 | 0,00 | 0,00 | 1 | NA |
| MYOCD      | 0,00 | 0,00 | 0,00 | 0,00 | 1 | NA |
| MYOZ1      | 0,00 | 0,00 | 0,00 | 0,00 | 1 | NA |
| NANOGP8    | 0,00 | 0,00 | 0,00 | 0,00 | 1 | NA |
| NBPF22P    | 0,00 | 0,00 | 0,00 | 0,00 | 1 | NA |
| NBPF4      | 0,00 | 0,00 | 0,00 | 0,00 | 1 | NA |
| NBPF6      | 0,00 | 0,00 | 0,00 | 0,00 | 1 | NA |
| NCRNA00186 | 0,00 | 0,00 | 0,00 | 0,00 | 1 | NA |
| NEK4P2     | 0,00 | 0,00 | 0,00 | 0,00 | 1 | NA |
| NEK4P3     | 0,00 | 0,00 | 0,00 | 0,00 | 1 | NA |
| NGFR       | 0,00 | 0,00 | 0,00 | 0,00 | 1 | NA |
| NKAIN2     | 0,00 | 0,00 | 0,00 | 0,00 | 1 | NA |
| NKAIN4     | 0,00 | 0,11 | 0,00 | 0,00 | 1 | NA |
| NKD2       | 0,00 | 0,00 | 0,00 | 0,00 | 1 | NA |
| NKX2-5     | 0,00 | 0,00 | 0,00 | 0,00 | 1 | NA |
| NMBR       | 0,00 | 0,00 | 0,00 | 0,00 | 1 | NA |
| NMRK2      | 0,00 | 0,00 | 0,00 | 0,00 | 1 | NA |
| NODAL      | 0,00 | 0,00 | 0,00 | 0,00 | 1 | NA |
| NPM1P19    | 0,00 | 0,00 | 0,00 | 0,00 | 1 | NA |



|          |      |      |      |      |   |    |
|----------|------|------|------|------|---|----|
| NPTX2    | 0,00 | 0,00 | 0,00 | 0,00 | 1 | NA |
| NPY2R    | 0,00 | 0,00 | 0,00 | 0,00 | 1 | NA |
| NR1H5P   | 0,00 | 0,00 | 0,00 | 0,00 | 1 | NA |
| NR1I2    | 0,00 | 0,00 | 0,00 | 0,00 | 1 | NA |
| NRBF2P5  | 0,00 | 0,00 | 0,00 | 0,00 | 1 | NA |
| NRG3-AS1 | 0,00 | 0,00 | 0,00 | 0,00 | 1 | NA |
| NRSN1    | 0,00 | 0,00 | 0,00 | 0,00 | 1 | NA |
| NUDT19P4 | 0,00 | 0,00 | 0,00 | 0,00 | 1 | NA |
| NXF4     | 0,00 | 0,00 | 0,00 | 0,00 | 1 | NA |
| OCSTAMP  | 0,00 | 0,00 | 0,00 | 0,00 | 1 | NA |
| OLFM2    | 0,00 | 0,00 | 0,00 | 0,00 | 1 | NA |
| OPN1LW   | 0,00 | 0,00 | 0,00 | 0,00 | 1 | NA |
| OPN5     | 0,00 | 0,00 | 0,00 | 0,00 | 1 | NA |
| OR10A5   | 0,00 | 0,00 | 0,00 | 0,00 | 1 | NA |
| OR10AA1P | 0,00 | 0,00 | 0,00 | 0,00 | 1 | NA |
| OR10AD1  | 0,00 | 0,00 | 0,00 | 0,00 | 1 | NA |
| OR10G7   | 0,00 | 0,00 | 0,00 | 0,00 | 1 | NA |
| OR10J5   | 0,00 | 0,00 | 0,00 | 0,00 | 1 | NA |
| OR10J8P  | 0,00 | 0,00 | 0,00 | 0,00 | 1 | NA |
| OR10S1   | 0,00 | 0,00 | 0,00 | 0,00 | 1 | NA |
| OR10Y1P  | 0,00 | 0,00 | 0,00 | 0,00 | 1 | NA |
| OR11G1P  | 0,00 | 0,00 | 0,00 | 0,00 | 1 | NA |
| OR11H1   | 0,00 | 0,00 | 0,00 | 0,00 | 1 | NA |
| OR11H12  | 0,00 | 0,00 | 0,00 | 0,00 | 1 | NA |
| OR11H13P | 0,00 | 0,00 | 0,00 | 0,00 | 1 | NA |
| OR14A2   | 0,00 | 0,00 | 0,00 | 0,00 | 1 | NA |
| OR1D5    | 0,00 | 0,00 | 0,00 | 0,00 | 1 | NA |
| OR1L1    | 0,00 | 0,00 | 0,00 | 0,00 | 1 | NA |
| OR1L6    | 0,00 | 0,00 | 0,00 | 0,00 | 1 | NA |
| OR2A4    | 0,00 | 0,00 | 0,00 | 0,00 | 1 | NA |
| OR2A7    | 0,00 | 0,00 | 0,00 | 0,00 | 1 | NA |
| OR2AI1P  | 0,00 | 0,00 | 0,00 | 0,00 | 1 | NA |
| OR2AK2   | 0,00 | 0,00 | 0,00 | 0,00 | 1 | NA |
| OR2AL1P  | 0,00 | 0,00 | 0,00 | 0,00 | 1 | NA |
| OR2B2    | 0,00 | 0,00 | 0,00 | 0,00 | 1 | NA |
| OR2D2    | 0,00 | 0,00 | 0,00 | 0,00 | 1 | NA |
| OR2T27   | 0,00 | 0,00 | 0,00 | 0,00 | 1 | NA |
| OR2T34   | 0,00 | 0,00 | 0,00 | 0,00 | 1 | NA |
| OR2W6P   | 0,00 | 0,00 | 0,00 | 0,00 | 1 | NA |
| OR3D1P   | 0,00 | 0,00 | 0,00 | 0,00 | 1 | NA |
| OR4C49P  | 0,00 | 0,00 | 0,00 | 0,00 | 1 | NA |
| OR4C6    | 0,00 | 0,00 | 0,00 | 0,00 | 1 | NA |
| OR4G3P   | 0,00 | 0,00 | 0,00 | 0,00 | 1 | NA |
| OR4K12P  | 0,00 | 0,00 | 0,00 | 0,00 | 1 | NA |
| OR4S1    | 0,00 | 0,00 | 0,00 | 0,00 | 1 | NA |
| OR51A3P  | 0,00 | 0,00 | 0,00 | 0,00 | 1 | NA |
| OR51B3P  | 0,00 | 0,00 | 0,00 | 0,00 | 1 | NA |
| OR51E1   | 0,00 | 0,00 | 0,00 | 0,00 | 1 | NA |
| OR51G1   | 0,00 | 0,00 | 0,00 | 0,00 | 1 | NA |
| OR51G2   | 0,00 | 0,00 | 0,00 | 0,00 | 1 | NA |
| OR51K1P  | 0,00 | 0,00 | 0,00 | 0,00 | 1 | NA |
| OR51R1P  | 0,00 | 0,00 | 0,00 | 0,00 | 1 | NA |
| OR52D1   | 0,00 | 0,00 | 0,00 | 0,00 | 1 | NA |
| OR52H2P  | 0,00 | 0,00 | 0,00 | 0,00 | 1 | NA |
| OR52P2P  | 0,00 | 0,00 | 0,00 | 0,00 | 1 | NA |

|           |      |      |      |      |   |    |
|-----------|------|------|------|------|---|----|
| OR5AM1P   | 0,00 | 0,00 | 0,00 | 0,00 | 1 | NA |
| OR5AR1    | 0,00 | 0,00 | 0,00 | 0,00 | 1 | NA |
| OR5BR1P   | 0,00 | 0,00 | 0,00 | 0,00 | 1 | NA |
| OR5BT1P   | 0,00 | 0,00 | 0,00 | 0,00 | 1 | NA |
| OR5D15P   | 0,00 | 0,00 | 0,00 | 0,00 | 1 | NA |
| OR5L1     | 0,00 | 0,00 | 0,00 | 0,00 | 1 | NA |
| OR5M7P    | 0,00 | 0,00 | 0,00 | 0,00 | 1 | NA |
| OR5T3     | 0,00 | 0,00 | 0,00 | 0,00 | 1 | NA |
| OR6A2     | 0,00 | 0,00 | 0,00 | 0,00 | 1 | NA |
| OR6C74    | 0,00 | 0,00 | 0,00 | 0,00 | 1 | NA |
| OR6K4P    | 0,00 | 0,00 | 0,00 | 0,00 | 1 | NA |
| OR6V1     | 0,00 | 0,00 | 0,00 | 0,00 | 1 | NA |
| OR7A1P    | 0,00 | 0,00 | 0,00 | 0,00 | 1 | NA |
| OR7E19P   | 0,00 | 0,00 | 0,00 | 0,00 | 1 | NA |
| OR7E39P   | 0,00 | 0,00 | 0,00 | 0,00 | 1 | NA |
| OR8K2P    | 0,00 | 0,00 | 0,00 | 0,00 | 1 | NA |
| OR9G3P    | 0,00 | 0,00 | 0,00 | 0,00 | 1 | NA |
| OR9K2     | 0,00 | 0,00 | 0,00 | 0,00 | 1 | NA |
| O STF1P1  | 0,00 | 0,00 | 0,00 | 0,00 | 1 | NA |
| OSTN      | 0,00 | 0,00 | 0,00 | 0,00 | 1 | NA |
| OTOP1     | 0,00 | 0,00 | 0,00 | 0,00 | 1 | NA |
| OTOS      | 0,00 | 0,00 | 0,00 | 0,00 | 1 | NA |
| OTX1      | 0,00 | 0,00 | 0,00 | 0,00 | 1 | NA |
| OTX2      | 0,00 | 0,00 | 0,00 | 0,00 | 1 | NA |
| OVOL1     | 0,00 | 0,00 | 0,00 | 0,00 | 1 | NA |
| PAGE2     | 0,00 | 0,00 | 0,00 | 0,00 | 1 | NA |
| PANDAR    | 0,00 | 0,00 | 0,00 | 0,00 | 1 | NA |
| PAPPA     | 0,00 | 0,00 | 0,00 | 0,00 | 1 | NA |
| PAX7      | 0,00 | 0,00 | 0,00 | 0,00 | 1 | NA |
| PCDHB3    | 0,00 | 0,00 | 0,00 | 0,00 | 1 | NA |
| PCDHGB9P  | 0,00 | 0,00 | 0,00 | 0,00 | 1 | NA |
| PCDHGC4   | 0,00 | 0,00 | 0,00 | 0,00 | 1 | NA |
| PCP4L1    | 0,00 | 0,00 | 0,00 | 0,00 | 1 | NA |
| PDC       | 0,00 | 0,00 | 0,00 | 0,00 | 1 | NA |
| PDCL2     | 0,00 | 0,00 | 0,00 | 0,00 | 1 | NA |
| PDHA2     | 0,00 | 0,00 | 0,00 | 0,00 | 1 | NA |
| PLEK2     | 0,00 | 0,00 | 0,00 | 0,00 | 1 | NA |
| PLPPR4    | 0,00 | 0,00 | 0,00 | 0,00 | 1 | NA |
| POM121L2  | 0,00 | 0,00 | 0,00 | 0,00 | 1 | NA |
| POM121L3P | 0,00 | 0,00 | 0,00 | 0,00 | 1 | NA |
| POTED     | 0,00 | 0,00 | 0,00 | 0,00 | 1 | NA |
| POU1F1    | 0,00 | 0,00 | 0,00 | 0,00 | 1 | NA |
| PPIHP1    | 0,00 | 0,00 | 0,00 | 0,00 | 1 | NA |
| PPP1R26P3 | 0,00 | 0,00 | 0,00 | 0,00 | 1 | NA |
| PQLC2L    | 0,00 | 0,00 | 0,00 | 0,00 | 1 | NA |
| PRAMEF8   | 0,00 | 0,00 | 0,00 | 0,00 | 1 | NA |
| PRICKLE4  | 0,00 | 0,00 | 0,00 | 0,00 | 1 | NA |
| PROB1     | 0,00 | 0,00 | 0,00 | 0,00 | 1 | NA |
| PRODH2    | 0,00 | 0,00 | 0,00 | 0,00 | 1 | NA |
| PROX1-AS1 | 0,00 | 0,00 | 0,00 | 0,00 | 1 | NA |
| PRR25     | 0,00 | 0,00 | 0,00 | 0,00 | 1 | NA |
| PRR32     | 0,00 | 0,00 | 0,00 | 0,00 | 1 | NA |
| PRR35     | 0,00 | 0,00 | 0,00 | 0,00 | 1 | NA |
| PRRT4     | 0,00 | 0,00 | 0,00 | 0,00 | 1 | NA |
| PTP4A2P1  | 0,00 | 0,00 | 0,00 | 0,00 | 1 | NA |

|           |      |      |      |      |   |    |
|-----------|------|------|------|------|---|----|
| PTPN21    | 0,00 | 0,00 | 0,00 | 0,00 | 1 | NA |
| PTTG4P    | 0,00 | 0,00 | 0,00 | 0,00 | 1 | NA |
| PVALB     | 0,00 | 0,00 | 0,00 | 0,00 | 1 | NA |
| RAB25     | 0,00 | 0,00 | 0,00 | 0,00 | 1 | NA |
| RBM24     | 0,00 | 0,00 | 0,00 | 0,00 | 1 | NA |
| RBMY1A1   | 0,00 | 0,00 | 0,00 | 0,00 | 1 | NA |
| RBPM5L    | 0,00 | 0,00 | 0,00 | 0,00 | 1 | NA |
| REG1A     | 0,00 | 0,00 | 0,00 | 0,00 | 1 | NA |
| REG3A     | 0,00 | 0,00 | 0,00 | 0,00 | 1 | NA |
| REP15     | 0,00 | 0,00 | 0,00 | 0,00 | 1 | NA |
| RF00006   | 0,00 | 0,00 | 0,00 | 0,00 | 1 | NA |
| RF00070   | 0,00 | 0,00 | 0,00 | 0,00 | 1 | NA |
| RF00072   | 0,00 | 0,00 | 0,00 | 0,00 | 1 | NA |
| RF00092   | 0,00 | 0,00 | 0,00 | 0,00 | 1 | NA |
| RF00105   | 0,00 | 0,00 | 0,00 | 0,00 | 1 | NA |
| RF00157   | 0,00 | 0,00 | 0,00 | 0,00 | 1 | NA |
| RF00394   | 0,00 | 0,00 | 0,00 | 0,00 | 1 | NA |
| RF00404   | 0,00 | 0,00 | 0,00 | 0,00 | 1 | NA |
| RF00418   | 0,00 | 0,00 | 0,00 | 0,00 | 1 | NA |
| RF00568   | 0,00 | 0,00 | 0,00 | 0,00 | 1 | NA |
| RF00593   | 0,00 | 0,00 | 0,00 | 0,00 | 1 | NA |
| RF00602   | 0,00 | 0,00 | 0,00 | 0,00 | 1 | NA |
| RF02122   | 0,00 | 0,00 | 0,00 | 0,00 | 1 | NA |
| RGAG1     | 0,00 | 0,00 | 0,00 | 0,00 | 1 | NA |
| RHBDF1    | 0,00 | 0,00 | 0,00 | 0,00 | 1 | NA |
| RHO       | 0,00 | 0,00 | 0,00 | 0,00 | 1 | NA |
| RIMKLB2   | 0,00 | 0,00 | 0,00 | 0,00 | 1 | NA |
| RLN1      | 0,00 | 0,00 | 0,00 | 0,00 | 1 | NA |
| RLN2      | 0,00 | 0,00 | 0,00 | 0,00 | 1 | NA |
| RN7SKP115 | 0,00 | 0,00 | 0,00 | 0,00 | 1 | NA |
| RN7SKP143 | 0,00 | 0,00 | 0,00 | 0,00 | 1 | NA |
| RN7SKP157 | 0,00 | 0,00 | 0,00 | 0,00 | 1 | NA |
| RN7SKP173 | 0,00 | 0,00 | 0,00 | 0,00 | 1 | NA |
| RN7SKP180 | 0,00 | 0,00 | 0,00 | 0,00 | 1 | NA |
| RN7SKP218 | 0,00 | 0,00 | 0,00 | 0,00 | 1 | NA |
| RN7SKP223 | 0,00 | 0,00 | 0,00 | 0,00 | 1 | NA |
| RN7SKP227 | 0,00 | 0,00 | 0,00 | 0,00 | 1 | NA |
| RN7SKP237 | 0,00 | 0,00 | 0,00 | 0,00 | 1 | NA |
| RN7SKP245 | 0,00 | 0,00 | 0,00 | 0,00 | 1 | NA |
| RN7SKP251 | 0,00 | 0,00 | 0,00 | 0,00 | 1 | NA |
| RN7SKP269 | 0,00 | 0,00 | 0,00 | 0,00 | 1 | NA |
| RN7SKP272 | 0,00 | 0,00 | 0,00 | 0,00 | 1 | NA |
| RN7SKP296 | 0,00 | 0,00 | 0,00 | 0,00 | 1 | NA |
| RN7SKP299 | 0,00 | 0,00 | 0,00 | 0,00 | 1 | NA |
| RN7SKP36  | 0,00 | 0,00 | 0,00 | 0,00 | 1 | NA |
| RN7SKP56  | 0,00 | 0,00 | 0,00 | 0,00 | 1 | NA |
| RN7SL151P | 0,00 | 0,00 | 0,00 | 0,00 | 1 | NA |
| RN7SL167P | 0,00 | 0,00 | 0,00 | 0,00 | 1 | NA |
| RN7SL215P | 0,00 | 0,00 | 0,00 | 0,00 | 1 | NA |
| RN7SL252P | 0,00 | 0,00 | 0,00 | 0,00 | 1 | NA |
| RN7SL258P | 0,00 | 0,00 | 0,00 | 0,00 | 1 | NA |
| RN7SL313P | 0,00 | 0,00 | 0,00 | 0,00 | 1 | NA |
| RN7SL39P  | 0,00 | 0,00 | 0,00 | 0,00 | 1 | NA |
| RN7SL569P | 0,00 | 0,00 | 0,00 | 0,00 | 1 | NA |
| RN7SL629P | 0,00 | 0,00 | 0,00 | 0,00 | 1 | NA |

|            |      |      |      |      |   |    |
|------------|------|------|------|------|---|----|
| RN7SL67P   | 0,00 | 0,00 | 0,00 | 0,00 | 1 | NA |
| RN7SL69P   | 0,00 | 0,00 | 0,00 | 0,00 | 1 | NA |
| RN7SL81P   | 0,00 | 0,00 | 0,00 | 0,00 | 1 | NA |
| RNA5SP118  | 0,00 | 0,00 | 0,00 | 0,00 | 1 | NA |
| RNA5SP138  | 0,00 | 0,00 | 0,00 | 0,00 | 1 | NA |
| RNA5SP140  | 0,00 | 0,00 | 0,00 | 0,00 | 1 | NA |
| RNA5SP155  | 0,00 | 0,00 | 0,00 | 0,00 | 1 | NA |
| RNA5SP159  | 0,00 | 0,00 | 0,00 | 0,00 | 1 | NA |
| RNA5SP168  | 0,00 | 0,00 | 0,00 | 0,00 | 1 | NA |
| RNA5SP182  | 0,00 | 0,00 | 0,00 | 0,00 | 1 | NA |
| RNA5SP184  | 0,00 | 0,00 | 0,00 | 0,00 | 1 | NA |
| RNA5SP188  | 0,00 | 0,00 | 0,00 | 0,00 | 1 | NA |
| RNA5SP218  | 0,00 | 0,00 | 0,00 | 0,00 | 1 | NA |
| RNA5SP221  | 0,00 | 0,00 | 0,00 | 0,00 | 1 | NA |
| RNA5SP239  | 0,00 | 0,00 | 0,00 | 0,00 | 1 | NA |
| RNA5SP246  | 0,00 | 0,00 | 0,00 | 0,00 | 1 | NA |
| RNA5SP308  | 0,00 | 0,00 | 0,00 | 0,00 | 1 | NA |
| RNA5SP328  | 0,00 | 0,00 | 0,00 | 0,00 | 1 | NA |
| RNA5SP353  | 0,00 | 0,00 | 0,00 | 0,00 | 1 | NA |
| RNA5SP354  | 0,00 | 0,00 | 0,00 | 0,00 | 1 | NA |
| RNA5SP372  | 0,00 | 0,00 | 0,00 | 0,00 | 1 | NA |
| RNA5SP425  | 0,00 | 0,00 | 0,00 | 0,00 | 1 | NA |
| RNA5SP461  | 0,00 | 0,00 | 0,00 | 0,00 | 1 | NA |
| RNA5SP490  | 0,00 | 0,00 | 0,00 | 0,00 | 1 | NA |
| RNA5SP525  | 0,00 | 0,00 | 0,00 | 0,00 | 1 | NA |
| RNA5SP53   | 0,00 | 0,00 | 0,00 | 0,00 | 1 | NA |
| RNA5SP62   | 0,00 | 0,00 | 0,00 | 0,00 | 1 | NA |
| RNASE11    | 0,00 | 0,00 | 0,00 | 0,00 | 1 | NA |
| RNASE13    | 0,00 | 0,00 | 0,00 | 0,00 | 1 | NA |
| RNASE7     | 0,00 | 0,00 | 0,00 | 0,00 | 1 | NA |
| RNF183     | 0,00 | 0,00 | 0,00 | 0,00 | 1 | NA |
| RNU1-136P  | 0,00 | 0,00 | 0,00 | 0,00 | 1 | NA |
| RNU1-56P   | 0,00 | 0,00 | 0,00 | 0,00 | 1 | NA |
| RNU1-89P   | 0,00 | 0,00 | 0,00 | 0,00 | 1 | NA |
| RNU2-33P   | 0,00 | 0,00 | 0,00 | 0,00 | 1 | NA |
| RNU2-39P   | 0,00 | 0,00 | 0,00 | 0,00 | 1 | NA |
| RNU2-50P   | 0,00 | 0,00 | 0,00 | 0,00 | 1 | NA |
| RNU4-35P   | 0,00 | 0,00 | 0,00 | 0,00 | 1 | NA |
| RNU5A-4P   | 0,00 | 0,00 | 0,00 | 0,00 | 1 | NA |
| RNU5A-6P   | 0,00 | 0,00 | 0,00 | 0,00 | 1 | NA |
| RNU6-1001P | 0,00 | 0,00 | 0,00 | 0,00 | 1 | NA |
| RNU6-1048P | 0,00 | 0,00 | 0,00 | 0,00 | 1 | NA |
| RNU6-1062P | 0,00 | 0,00 | 0,00 | 0,00 | 1 | NA |
| RNU6-1079P | 0,00 | 0,00 | 0,00 | 0,00 | 1 | NA |
| RNU6-1086P | 0,00 | 0,00 | 0,00 | 0,00 | 1 | NA |
| RNU6-1109P | 0,00 | 0,00 | 0,00 | 0,00 | 1 | NA |
| RNU6-1112P | 0,00 | 0,00 | 0,00 | 0,00 | 1 | NA |
| RNU6-1164P | 0,00 | 0,00 | 0,00 | 0,00 | 1 | NA |
| RNU6-117P  | 0,00 | 0,00 | 0,00 | 0,00 | 1 | NA |
| RNU6-1193P | 0,00 | 0,00 | 0,00 | 0,00 | 1 | NA |
| RNU6-1199P | 0,00 | 0,00 | 0,00 | 0,00 | 1 | NA |
| RNU6-1213P | 0,00 | 0,00 | 0,00 | 0,00 | 1 | NA |
| RNU6-1227P | 0,00 | 0,00 | 0,00 | 0,00 | 1 | NA |
| RNU6-1228P | 0,00 | 0,00 | 0,00 | 0,00 | 1 | NA |
| RNU6-1262P | 0,00 | 0,00 | 0,00 | 0,00 | 1 | NA |

|            |      |      |      |      |   |    |
|------------|------|------|------|------|---|----|
| RNU6-1264P | 0,00 | 0,00 | 0,00 | 0,00 | 1 | NA |
| RNU6-1269P | 0,00 | 0,00 | 0,00 | 0,00 | 1 | NA |
| RNU6-1290P | 0,00 | 0,00 | 0,00 | 0,00 | 1 | NA |
| RNU6-1320P | 0,00 | 0,00 | 0,00 | 0,00 | 1 | NA |
| RNU6-160P  | 0,00 | 0,00 | 0,00 | 0,00 | 1 | NA |
| RNU6-163P  | 0,00 | 0,00 | 0,00 | 0,00 | 1 | NA |
| RNU6-188P  | 0,00 | 0,00 | 0,00 | 0,00 | 1 | NA |
| RNU6-197P  | 0,00 | 0,00 | 0,00 | 0,00 | 1 | NA |
| RNU6-202P  | 0,00 | 0,00 | 0,00 | 0,00 | 1 | NA |
| RNU6-229P  | 0,00 | 0,00 | 0,00 | 0,00 | 1 | NA |
| RNU6-243P  | 0,00 | 0,00 | 0,00 | 0,00 | 1 | NA |
| RNU6-291P  | 0,00 | 0,00 | 0,00 | 0,00 | 1 | NA |
| RNU6-296P  | 0,00 | 0,00 | 0,00 | 0,00 | 1 | NA |
| RNU6-314P  | 0,00 | 0,00 | 0,00 | 0,00 | 1 | NA |
| RNU6-31P   | 0,00 | 0,00 | 0,00 | 0,00 | 1 | NA |
| RNU6-320P  | 0,00 | 0,00 | 0,00 | 0,00 | 1 | NA |
| RNU6-324P  | 0,00 | 0,00 | 0,00 | 0,00 | 1 | NA |
| RNU6-337P  | 0,00 | 0,00 | 0,00 | 0,00 | 1 | NA |
| RNU6-368P  | 0,00 | 0,00 | 0,00 | 0,00 | 1 | NA |
| RNU6-378P  | 0,00 | 0,00 | 0,00 | 0,00 | 1 | NA |
| RNU6-389P  | 0,00 | 0,00 | 0,00 | 0,00 | 1 | NA |
| RNU6-445P  | 0,00 | 0,00 | 0,00 | 0,00 | 1 | NA |
| RNU6-446P  | 0,00 | 0,00 | 0,00 | 0,00 | 1 | NA |
| RNU6-484P  | 0,00 | 0,00 | 0,00 | 0,00 | 1 | NA |
| RNU6-490P  | 0,00 | 0,00 | 0,00 | 0,00 | 1 | NA |
| RNU6-504P  | 0,00 | 0,00 | 0,00 | 0,00 | 1 | NA |
| RNU6-509P  | 0,00 | 0,00 | 0,00 | 0,00 | 1 | NA |
| RNU6-511P  | 0,00 | 0,00 | 0,00 | 0,00 | 1 | NA |
| RNU6-514P  | 0,00 | 0,00 | 0,00 | 0,00 | 1 | NA |
| RNU6-524P  | 0,00 | 0,00 | 0,00 | 0,00 | 1 | NA |
| RNU6-537P  | 0,00 | 0,00 | 0,00 | 0,00 | 1 | NA |
| RNU6-538P  | 0,00 | 0,00 | 0,00 | 0,00 | 1 | NA |
| RNU6-555P  | 0,00 | 0,00 | 0,00 | 0,00 | 1 | NA |
| RNU6-565P  | 0,00 | 0,00 | 0,00 | 0,00 | 1 | NA |
| RNU6-577P  | 0,00 | 0,00 | 0,00 | 0,00 | 1 | NA |
| RNU6-608P  | 0,00 | 0,00 | 0,00 | 0,00 | 1 | NA |
| RNU6-620P  | 0,00 | 0,00 | 0,00 | 0,00 | 1 | NA |
| RNU6-623P  | 0,00 | 0,00 | 0,00 | 0,00 | 1 | NA |
| RNU6-626P  | 0,00 | 0,00 | 0,00 | 0,00 | 1 | NA |
| RNU6-640P  | 0,00 | 0,00 | 0,00 | 0,00 | 1 | NA |
| RNU6-662P  | 0,00 | 0,00 | 0,00 | 0,00 | 1 | NA |
| RNU6-664P  | 0,00 | 0,00 | 0,00 | 0,00 | 1 | NA |
| RNU6-685P  | 0,00 | 0,00 | 0,00 | 0,00 | 1 | NA |
| RNU6-693P  | 0,00 | 0,00 | 0,00 | 0,00 | 1 | NA |
| RNU6-723P  | 0,00 | 0,00 | 0,00 | 0,00 | 1 | NA |
| RNU6-73P   | 0,00 | 0,00 | 0,00 | 0,00 | 1 | NA |
| RNU6-766P  | 0,00 | 0,00 | 0,00 | 0,00 | 1 | NA |
| RNU6-769P  | 0,00 | 0,00 | 0,00 | 0,00 | 1 | NA |
| RNU6-795P  | 0,00 | 0,00 | 0,00 | 0,00 | 1 | NA |
| RNU6-808P  | 0,00 | 0,00 | 0,00 | 0,00 | 1 | NA |
| RNU6-810P  | 0,00 | 0,00 | 0,00 | 0,00 | 1 | NA |
| RNU6-815P  | 0,00 | 0,00 | 0,00 | 0,00 | 1 | NA |
| RNU6-823P  | 0,00 | 0,00 | 0,00 | 0,00 | 1 | NA |
| RNU6-826P  | 0,00 | 0,00 | 0,00 | 0,00 | 1 | NA |
| RNU6-840P  | 0,00 | 0,00 | 0,00 | 0,00 | 1 | NA |

|                |      |      |      |      |   |    |
|----------------|------|------|------|------|---|----|
| RNU6-854P      | 0,00 | 0,00 | 0,00 | 0,00 | 1 | NA |
| RNU6-883P      | 0,00 | 0,00 | 0,00 | 0,00 | 1 | NA |
| RNU6-915P      | 0,00 | 0,00 | 0,00 | 0,00 | 1 | NA |
| RNU6-91P       | 0,00 | 0,00 | 0,00 | 0,00 | 1 | NA |
| RNU6-932P      | 0,00 | 0,00 | 0,00 | 0,00 | 1 | NA |
| RNU6-972P      | 0,00 | 0,00 | 0,00 | 0,00 | 1 | NA |
| RNU6-979P      | 0,00 | 0,00 | 0,00 | 0,00 | 1 | NA |
| RNU6-983P      | 0,00 | 0,00 | 0,00 | 0,00 | 1 | NA |
| RNU6-989P      | 0,00 | 0,00 | 0,00 | 0,00 | 1 | NA |
| RNU6ATAC15P    | 0,00 | 0,00 | 0,00 | 0,00 | 1 | NA |
| RNU6ATAC23P    | 0,00 | 0,00 | 0,00 | 0,00 | 1 | NA |
| RNU6ATAC6P     | 0,00 | 0,00 | 0,00 | 0,00 | 1 | NA |
| RNU7-107P      | 0,00 | 0,00 | 0,00 | 0,00 | 1 | NA |
| RNU7-171P      | 0,00 | 0,00 | 0,00 | 0,00 | 1 | NA |
| RNU7-180P      | 0,00 | 0,00 | 0,00 | 0,00 | 1 | NA |
| RNU7-24P       | 0,00 | 0,00 | 0,00 | 0,00 | 1 | NA |
| RNY1P14        | 0,00 | 0,00 | 0,00 | 0,00 | 1 | NA |
| ROS1           | 0,00 | 0,00 | 0,00 | 0,00 | 1 | NA |
| RP1-111D6.1    | 0,00 | 0,00 | 0,00 | 0,00 | 1 | NA |
| RP1-121G13.2   | 0,00 | 0,00 | 0,00 | 0,00 | 1 | NA |
| RP1-128M12.3   | 0,00 | 0,00 | 0,00 | 0,00 | 1 | NA |
| RP1-136J15.1   | 0,00 | 0,00 | 0,00 | 0,00 | 1 | NA |
| RP1-137F1.3    | 0,00 | 0,00 | 0,00 | 0,00 | 1 | NA |
| RP1-137K24.1   | 0,00 | 0,00 | 0,00 | 0,00 | 1 | NA |
| RP1-138A5.2    | 0,00 | 0,00 | 0,00 | 0,00 | 1 | NA |
| RP1-13D10.5    | 0,00 | 0,00 | 0,00 | 0,00 | 1 | NA |
| RP1-144F13.3   | 0,00 | 0,00 | 0,00 | 0,00 | 1 | NA |
| RP1-149M18.3   | 0,00 | 0,00 | 0,00 | 0,00 | 1 | NA |
| RP1-159A19.4   | 0,00 | 0,00 | 0,00 | 0,00 | 1 | NA |
| RP1-167F1.1    | 0,00 | 0,00 | 0,00 | 0,00 | 1 | NA |
| RP1-168L15.4   | 0,00 | 0,00 | 0,00 | 0,00 | 1 | NA |
| RP1-172N19.3   | 0,00 | 0,00 | 0,00 | 0,00 | 1 | NA |
| RP1-179E13.1   | 0,00 | 0,00 | 0,00 | 0,00 | 1 | NA |
| RP1-197B17.4   | 0,00 | 0,00 | 0,00 | 0,00 | 1 | NA |
| RP1-197J16.2   | 0,00 | 0,00 | 0,00 | 0,00 | 1 | NA |
| RP1-202I21.5   | 0,00 | 0,00 | 0,00 | 0,00 | 1 | NA |
| RP1-205E24.1   | 0,00 | 0,00 | 0,00 | 0,00 | 1 | NA |
| RP1-213J1P_B.1 | 0,00 | 0,00 | 0,00 | 0,00 | 1 | NA |
| RP1-21O18.3    | 0,00 | 0,00 | 0,00 | 0,00 | 1 | NA |
| RP1-221C16.7   | 0,00 | 0,00 | 0,00 | 0,00 | 1 | NA |
| RP1-229K20.8   | 0,00 | 0,00 | 0,00 | 0,00 | 1 | NA |
| RP1-231P7P.1   | 0,00 | 0,00 | 0,00 | 0,00 | 1 | NA |
| RP1-232L22_B.1 | 0,00 | 0,00 | 0,00 | 0,00 | 1 | NA |
| RP1-249I4.2    | 0,00 | 0,00 | 0,00 | 0,00 | 1 | NA |
| RP1-257I20.13  | 0,00 | 0,00 | 0,00 | 0,00 | 1 | NA |
| RP1-263J7.2    | 0,00 | 0,00 | 0,00 | 0,00 | 1 | NA |
| RP1-273G13.1   | 0,00 | 0,00 | 0,00 | 0,00 | 1 | NA |
| RP1-27K12.4    | 0,00 | 0,00 | 0,00 | 0,00 | 1 | NA |
| RP1-287H17.1   | 0,00 | 0,00 | 0,00 | 0,00 | 1 | NA |
| RP1-288H2.5    | 0,00 | 0,00 | 0,00 | 0,00 | 1 | NA |
| RP1-293L8.5    | 0,00 | 0,00 | 0,00 | 0,00 | 1 | NA |
| RP1-309F20.3   | 0,00 | 0,00 | 0,00 | 0,00 | 1 | NA |
| RP1-319M7.2    | 0,00 | 0,00 | 0,00 | 0,00 | 1 | NA |
| RP1-321E8.4    | 0,00 | 0,00 | 0,00 | 0,00 | 1 | NA |
| RP1-37E16.12   | 0,00 | 0,00 | 0,00 | 0,00 | 1 | NA |

|                 |      |      |      |      |   |    |
|-----------------|------|------|------|------|---|----|
| RP1-38C16.1     | 0,00 | 0,00 | 0,00 | 0,00 | 1 | NA |
| RP1-38C16.3     | 0,00 | 0,00 | 0,00 | 0,00 | 1 | NA |
| RP1-39G22.4     | 0,00 | 0,00 | 0,00 | 0,00 | 1 | NA |
| RP1-41P2.7      | 0,00 | 0,00 | 0,00 | 0,00 | 1 | NA |
| RP1-55C23.8     | 0,00 | 0,00 | 0,00 | 0,00 | 1 | NA |
| RP1-59D14.10    | 0,00 | 0,00 | 0,00 | 0,00 | 1 | NA |
| RP1-73A14.2     | 0,00 | 0,00 | 0,00 | 0,00 | 1 | NA |
| RP1-81F6.1      | 0,00 | 0,00 | 0,00 | 0,00 | 1 | NA |
| RP1-84O15.1     | 0,00 | 0,00 | 0,00 | 0,00 | 1 | NA |
| RP1-90G24.11    | 0,00 | 0,00 | 0,00 | 0,00 | 1 | NA |
| RP1-90J4.1      | 0,00 | 0,00 | 0,00 | 0,00 | 1 | NA |
| RP1-92C4.1      | 0,00 | 0,00 | 0,00 | 0,00 | 1 | NA |
| RP1-97D16.1     | 0,00 | 0,00 | 0,00 | 0,00 | 1 | NA |
| RP1-97D16.4     | 0,00 | 0,00 | 0,00 | 0,00 | 1 | NA |
| RP11-1000B6.2   | 0,00 | 0,00 | 0,00 | 0,00 | 1 | NA |
| RP11-1003J3.1   | 0,00 | 0,00 | 0,00 | 0,00 | 1 | NA |
| RP11-1006G14.5  | 0,00 | 0,00 | 0,00 | 0,00 | 1 | NA |
| RP11-100M12.1   | 0,00 | 0,00 | 0,00 | 0,00 | 1 | NA |
| RP11-100M12.3   | 0,00 | 0,00 | 0,00 | 0,00 | 1 | NA |
| RP11-101O6.2    | 0,00 | 0,00 | 0,00 | 0,00 | 1 | NA |
| RP11-1038A11.3  | 0,00 | 0,00 | 0,00 | 0,00 | 1 | NA |
| RP11-103G8.1    | 0,00 | 0,00 | 0,00 | 0,00 | 1 | NA |
| RP11-103H7.2    | 0,00 | 0,00 | 0,00 | 0,00 | 1 | NA |
| RP11-103J17.2   | 0,00 | 0,00 | 0,00 | 0,00 | 1 | NA |
| RP11-104O19.4   | 0,00 | 0,00 | 0,00 | 0,00 | 1 | NA |
| RP11-1055B8.3   | 0,00 | 0,00 | 0,00 | 0,00 | 1 | NA |
| RP11-105N14.1   | 0,00 | 0,00 | 0,00 | 0,00 | 1 | NA |
| RP11-105N14.3   | 0,00 | 0,00 | 0,00 | 0,00 | 1 | NA |
| RP11-1060J15.5  | 0,00 | 0,00 | 0,00 | 0,29 | 1 | NA |
| RP11-1070N10.5  | 0,00 | 0,00 | 0,00 | 0,00 | 1 | NA |
| RP11-1072A3.4   | 0,00 | 0,00 | 0,00 | 0,00 | 1 | NA |
| RP11-1072N2.2   | 0,00 | 0,00 | 0,00 | 0,00 | 1 | NA |
| RP11-1074O12.1  | 0,00 | 0,00 | 0,00 | 0,00 | 1 | NA |
| RP11-1079K10.4  | 0,00 | 0,00 | 0,00 | 0,00 | 1 | NA |
| RP11-107K17.1   | 0,00 | 0,00 | 0,00 | 0,00 | 1 | NA |
| RP11-107K17.2   | 0,00 | 0,00 | 0,00 | 0,00 | 1 | NA |
| RP11-107P7.5    | 0,00 | 0,00 | 0,00 | 0,00 | 1 | NA |
| RP11-1081L13.4  | 0,00 | 0,00 | 0,00 | 0,00 | 1 | NA |
| RP11-1084I9.1   | 0,00 | 0,00 | 0,00 | 0,00 | 1 | NA |
| RP11-1084J3.3   | 0,00 | 0,00 | 0,00 | 0,00 | 1 | NA |
| RP11-1085N6.2   | 0,00 | 0,00 | 0,00 | 0,00 | 1 | NA |
| RP11-108K14.8   | 0,00 | 0,00 | 0,00 | 0,00 | 1 | NA |
| RP11-108K3.4    | 0,00 | 0,00 | 0,00 | 0,00 | 1 | NA |
| RP11-108M9.1    | 0,00 | 0,00 | 0,00 | 0,00 | 1 | NA |
| RP11-108P20.2   | 0,00 | 0,00 | 0,00 | 0,00 | 1 | NA |
| RP11-1094M14.10 | 0,00 | 0,00 | 0,00 | 0,00 | 1 | NA |
| RP11-109A6.3    | 0,00 | 0,00 | 0,00 | 0,00 | 1 | NA |
| RP11-109B6.2    | 0,00 | 0,00 | 0,00 | 0,00 | 1 | NA |
| RP11-109E24.1   | 0,00 | 0,00 | 0,00 | 0,00 | 1 | NA |
| RP11-109G23.1   | 0,00 | 0,00 | 0,00 | 0,00 | 1 | NA |
| RP11-109L13.5   | 0,00 | 0,00 | 0,00 | 0,00 | 1 | NA |
| RP11-10J21.3    | 0,00 | 0,00 | 0,00 | 0,00 | 1 | NA |
| RP11-10K17.3    | 0,00 | 0,00 | 0,00 | 0,00 | 1 | NA |
| RP11-1109F11.3  | 0,00 | 0,00 | 0,00 | 0,00 | 1 | NA |
| RP11-110H1.9    | 0,00 | 0,00 | 0,00 | 0,00 | 1 | NA |

|                |      |      |      |      |   |    |
|----------------|------|------|------|------|---|----|
| RP11-110I1.14  | 0,00 | 0,00 | 0,00 | 0,00 | 1 | NA |
| RP11-111F5.2   | 0,00 | 0,00 | 0,00 | 0,00 | 1 | NA |
| RP11-111F5.8   | 0,00 | 0,00 | 0,00 | 0,00 | 1 | NA |
| RP11-112H10.4  | 0,00 | 0,00 | 0,00 | 0,00 | 1 | NA |
| RP11-112N19.2  | 0,00 | 0,00 | 0,00 | 0,00 | 1 | NA |
| RP11-112N23.1  | 0,00 | 0,00 | 0,00 | 0,00 | 1 | NA |
| RP11-113A11.1  | 0,00 | 0,00 | 0,00 | 0,00 | 1 | NA |
| RP11-113D6.9   | 0,00 | 0,00 | 0,00 | 0,00 | 1 | NA |
| RP11-1143G9.2  | 0,00 | 0,00 | 0,00 | 0,00 | 1 | NA |
| RP11-1148L6.5  | 0,00 | 0,00 | 0,00 | 0,00 | 1 | NA |
| RP11-114G11.5  | 0,00 | 0,00 | 0,00 | 0,00 | 1 | NA |
| RP11-114M1.3   | 0,00 | 0,00 | 0,00 | 0,00 | 1 | NA |
| RP11-115C21.4  | 0,00 | 0,00 | 0,00 | 0,00 | 1 | NA |
| RP11-115F18.1  | 0,00 | 0,00 | 0,00 | 0,00 | 1 | NA |
| RP11-115M14.1  | 0,00 | 0,00 | 0,00 | 0,00 | 1 | NA |
| RP11-115N4.2   | 0,00 | 0,00 | 0,00 | 0,00 | 1 | NA |
| RP11-115O13.1  | 0,00 | 0,00 | 0,00 | 0,00 | 1 | NA |
| RP11-116A1.1   | 0,00 | 0,00 | 0,00 | 0,00 | 1 | NA |
| RP11-116D17.5  | 0,00 | 0,00 | 0,00 | 0,00 | 1 | NA |
| RP11-116N8.1   | 0,00 | 0,00 | 0,00 | 0,00 | 1 | NA |
| RP11-117D22.1  | 0,00 | 0,00 | 0,00 | 0,00 | 1 | NA |
| RP11-117L15.1  | 0,00 | 0,00 | 0,00 | 0,00 | 1 | NA |
| RP11-117N4.1   | 0,00 | 0,00 | 0,00 | 0,00 | 1 | NA |
| RP11-117O7.2   | 0,00 | 0,00 | 0,00 | 0,00 | 1 | NA |
| RP11-1182P23.5 | 0,00 | 0,00 | 0,00 | 0,00 | 1 | NA |
| RP11-118B18.3  | 0,00 | 0,00 | 0,00 | 0,00 | 1 | NA |
| RP11-118B22.3  | 0,00 | 0,00 | 0,00 | 0,00 | 1 | NA |
| RP11-118E18.4  | 0,00 | 0,00 | 0,00 | 0,00 | 1 | NA |
| RP11-118M12.1  | 0,00 | 0,00 | 0,00 | 0,00 | 1 | NA |
| RP11-1195F20.7 | 0,00 | 0,00 | 0,00 | 0,00 | 1 | NA |
| RP11-119D9.5   | 0,00 | 0,00 | 0,00 | 0,00 | 1 | NA |
| RP11-119K6.4   | 0,00 | 0,00 | 0,00 | 0,00 | 1 | NA |
| RP11-119K6.6   | 0,00 | 0,00 | 0,00 | 0,00 | 1 | NA |
| RP11-11C5.1    | 0,00 | 0,00 | 0,00 | 0,00 | 1 | NA |
| RP11-11N9.3    | 0,00 | 0,00 | 0,00 | 0,00 | 1 | NA |
| RP11-11P22.1   | 0,00 | 0,00 | 0,00 | 0,00 | 1 | NA |
| RP11-120K24.2  | 0,00 | 0,00 | 0,00 | 0,00 | 1 | NA |
| RP11-120K24.3  | 0,00 | 0,00 | 0,00 | 0,00 | 1 | NA |
| RP11-1216L17.1 | 0,00 | 0,00 | 0,00 | 0,00 | 1 | NA |
| RP11-121A14.3  | 0,00 | 0,00 | 0,00 | 0,00 | 1 | NA |
| RP11-121J20.1  | 0,00 | 0,00 | 0,00 | 0,00 | 1 | NA |
| RP11-1223D19.5 | 0,00 | 0,00 | 0,00 | 0,00 | 1 | NA |
| RP11-1228E12.1 | 0,00 | 0,00 | 0,00 | 0,00 | 1 | NA |
| RP11-123C21.1  | 0,00 | 0,00 | 0,00 | 0,00 | 1 | NA |
| RP11-123C21.3  | 0,00 | 0,00 | 0,00 | 0,00 | 1 | NA |
| RP11-124A7.1   | 0,00 | 0,00 | 0,00 | 0,00 | 1 | NA |
| RP11-124D2.1   | 0,00 | 0,00 | 0,00 | 0,00 | 1 | NA |
| RP11-126O22.11 | 0,00 | 0,00 | 0,00 | 0,00 | 1 | NA |
| RP11-126O22.2  | 0,00 | 0,00 | 0,00 | 0,00 | 1 | NA |
| RP11-126O22.3  | 0,00 | 0,00 | 0,00 | 0,00 | 1 | NA |
| RP11-126O22.6  | 0,00 | 0,00 | 0,00 | 0,00 | 1 | NA |
| RP11-1275H24.2 | 0,00 | 0,00 | 0,00 | 0,00 | 1 | NA |
| RP11-1277H1.3  | 0,00 | 0,00 | 0,00 | 0,00 | 1 | NA |
| RP11-127O4.2   | 0,00 | 0,00 | 0,00 | 0,00 | 1 | NA |
| RP11-1281K21.3 | 0,00 | 0,00 | 0,00 | 0,00 | 1 | NA |



|                |      |      |      |      |   |    |
|----------------|------|------|------|------|---|----|
| RP11-128N14.3  | 0,00 | 0,00 | 0,00 | 0,00 | 1 | NA |
| RP11-128P17.2  | 0,00 | 0,00 | 0,00 | 0,00 | 1 | NA |
| RP11-128P17.3  | 0,00 | 0,00 | 0,00 | 0,00 | 1 | NA |
| RP11-1293J14.1 | 0,00 | 0,00 | 0,00 | 0,00 | 1 | NA |
| RP11-129B22.2  | 0,00 | 0,00 | 0,00 | 0,00 | 1 | NA |
| RP11-130C19.1  | 0,00 | 0,00 | 0,00 | 0,00 | 1 | NA |
| RP11-131K5.1   | 0,00 | 0,00 | 0,00 | 0,00 | 1 | NA |
| RP11-132N15.3  | 0,00 | 0,00 | 0,00 | 0,00 | 1 | NA |
| RP11-133N21.6  | 0,00 | 0,00 | 0,00 | 0,00 | 1 | NA |
| RP11-133N21.7  | 0,00 | 0,00 | 0,00 | 0,00 | 1 | NA |
| RP11-134K13.2  | 0,00 | 0,00 | 0,00 | 0,00 | 1 | NA |
| RP11-134L4.1   | 0,00 | 0,00 | 0,00 | 0,00 | 1 | NA |
| RP11-134N1.1   | 0,00 | 0,00 | 0,00 | 0,00 | 1 | NA |
| RP11-1379J22.3 | 0,00 | 0,00 | 0,00 | 0,00 | 1 | NA |
| RP11-137J7.2   | 0,00 | 0,00 | 0,00 | 0,00 | 1 | NA |
| RP11-138A23.2  | 0,00 | 0,00 | 0,00 | 0,00 | 1 | NA |
| RP11-138B4.1   | 0,00 | 0,00 | 0,00 | 0,00 | 1 | NA |
| RP11-138H18.2  | 0,00 | 0,00 | 0,00 | 0,00 | 1 | NA |
| RP11-1396O13.1 | 0,00 | 0,00 | 0,00 | 0,00 | 1 | NA |
| RP11-139E19.2  | 0,00 | 0,00 | 0,00 | 0,00 | 1 | NA |
| RP11-140A10.3  | 0,00 | 0,00 | 0,00 | 0,00 | 1 | NA |
| RP11-140C5.3   | 0,00 | 0,00 | 0,00 | 0,00 | 1 | NA |
| RP11-142A22.4  | 0,00 | 0,00 | 0,00 | 0,00 | 1 | NA |
| RP11-1437A8.4  | 0,00 | 0,00 | 0,00 | 0,00 | 1 | NA |
| RP11-143M1.3   | 0,00 | 0,00 | 0,00 | 0,00 | 1 | NA |
| RP11-145B3.2   | 0,00 | 0,00 | 0,00 | 0,00 | 1 | NA |
| RP11-145E5.5   | 0,00 | 0,00 | 0,00 | 0,00 | 1 | NA |
| RP11-145H9.3   | 0,00 | 0,00 | 0,00 | 0,00 | 1 | NA |
| RP11-145M9.3   | 0,00 | 0,00 | 0,00 | 0,00 | 1 | NA |
| RP11-145M9.5   | 0,00 | 0,00 | 0,00 | 0,00 | 1 | NA |
| RP11-147L13.7  | 0,00 | 0,00 | 0,00 | 0,00 | 1 | NA |
| RP11-149B7.4   | 0,00 | 0,00 | 0,00 | 0,00 | 1 | NA |
| RP11-149I9.2   | 0,00 | 0,00 | 0,00 | 0,00 | 1 | NA |
| RP11-149P24.1  | 0,00 | 0,00 | 0,00 | 0,00 | 1 | NA |
| RP11-14J7.1    | 0,00 | 0,00 | 0,00 | 0,00 | 1 | NA |
| RP11-150O12.6  | 0,00 | 0,00 | 0,00 | 0,00 | 1 | NA |
| RP11-151A10.3  | 0,00 | 0,00 | 0,00 | 0,00 | 1 | NA |
| RP11-152C15.1  | 0,00 | 0,00 | 0,00 | 0,00 | 1 | NA |
| RP11-152H18.4  | 0,00 | 0,00 | 0,00 | 0,00 | 1 | NA |
| RP11-153K11.3  | 0,00 | 0,00 | 0,00 | 0,00 | 1 | NA |
| RP11-153M7.1   | 0,00 | 0,00 | 0,00 | 0,00 | 1 | NA |
| RP11-154H12.2  | 0,00 | 0,00 | 0,00 | 0,00 | 1 | NA |
| RP11-155G14.6  | 0,00 | 0,00 | 0,00 | 0,00 | 1 | NA |
| RP11-155G15.1  | 0,00 | 0,00 | 0,00 | 0,00 | 1 | NA |
| RP11-155L15.1  | 0,00 | 0,00 | 0,00 | 0,00 | 1 | NA |
| RP11-155N3.3   | 0,00 | 0,00 | 0,00 | 0,00 | 1 | NA |
| RP11-158M2.5   | 0,00 | 0,00 | 0,00 | 0,00 | 1 | NA |
| RP11-15A1.8    | 0,00 | 0,00 | 0,00 | 0,00 | 1 | NA |
| RP11-15B17.1   | 0,00 | 0,00 | 0,00 | 0,00 | 1 | NA |
| RP11-15B17.3   | 0,00 | 0,00 | 0,00 | 0,00 | 1 | NA |
| RP11-15F12.6   | 0,00 | 0,00 | 0,00 | 0,00 | 1 | NA |
| RP11-15M15.2   | 0,00 | 0,00 | 0,00 | 0,00 | 1 | NA |
| RP11-15N24.3   | 0,00 | 0,00 | 0,00 | 0,00 | 1 | NA |
| RP11-160H22.4  | 0,00 | 0,00 | 0,00 | 0,00 | 1 | NA |
| RP11-161I6.2   | 0,00 | 0,00 | 0,00 | 0,00 | 1 | NA |

|               |      |      |      |      |   |    |
|---------------|------|------|------|------|---|----|
| RP11-161M6.6  | 0,00 | 0,00 | 0,00 | 0,00 | 1 | NA |
| RP11-161P17.2 | 0,00 | 0,00 | 0,00 | 0,00 | 1 | NA |
| RP11-162D16.4 | 0,00 | 0,00 | 0,00 | 0,00 | 1 | NA |
| RP11-162G10.1 | 0,00 | 0,00 | 0,00 | 0,00 | 1 | NA |
| RP11-162G10.4 | 0,00 | 0,00 | 0,00 | 0,00 | 1 | NA |
| RP11-163G10.4 | 0,00 | 0,00 | 0,00 | 0,00 | 1 | NA |
| RP11-164O23.6 | 0,00 | 0,00 | 0,00 | 0,00 | 1 | NA |
| RP11-164O23.7 | 0,00 | 0,00 | 0,00 | 0,00 | 1 | NA |
| RP11-165H4.1  | 0,00 | 0,00 | 0,00 | 0,00 | 1 | NA |
| RP11-165H4.2  | 0,00 | 0,00 | 0,00 | 0,00 | 1 | NA |
| RP11-165M6.3  | 0,00 | 0,00 | 0,00 | 0,00 | 1 | NA |
| RP11-167P22.5 | 0,00 | 0,00 | 0,00 | 0,00 | 1 | NA |
| RP11-168P6.2  | 0,00 | 0,00 | 0,00 | 0,00 | 1 | NA |
| RP11-168P8.5  | 0,00 | 0,00 | 0,00 | 0,00 | 1 | NA |
| RP11-16D22.1  | 0,00 | 0,00 | 0,00 | 0,00 | 1 | NA |
| RP11-16L21.7  | 0,00 | 0,00 | 0,00 | 0,00 | 1 | NA |
| RP11-16L6.2   | 0,00 | 0,00 | 0,00 | 0,00 | 1 | NA |
| RP11-16L9.4   | 0,00 | 0,00 | 0,00 | 0,00 | 1 | NA |
| RP11-170M17.1 | 0,00 | 0,00 | 0,00 | 0,00 | 1 | NA |
| RP11-172C16.2 | 0,00 | 0,00 | 0,00 | 0,00 | 1 | NA |
| RP11-173A6.2  | 0,00 | 0,00 | 0,00 | 0,00 | 1 | NA |
| RP11-173D3.2  | 0,00 | 0,00 | 0,00 | 0,00 | 1 | NA |
| RP11-175G14.1 | 0,00 | 0,00 | 0,00 | 0,00 | 1 | NA |
| RP11-175P19.2 | 0,00 | 0,00 | 0,00 | 0,00 | 1 | NA |
| RP11-177H22.2 | 0,00 | 0,00 | 0,00 | 0,00 | 1 | NA |
| RP11-177J6.1  | 0,00 | 0,00 | 0,00 | 0,00 | 1 | NA |
| RP11-177N22.2 | 0,00 | 0,00 | 0,00 | 0,00 | 1 | NA |
| RP11-179A7.2  | 0,00 | 0,00 | 0,00 | 0,00 | 1 | NA |
| RP11-17A4.4   | 0,00 | 0,00 | 0,00 | 0,00 | 1 | NA |
| RP11-181B11.1 | 0,00 | 0,00 | 0,00 | 0,00 | 1 | NA |
| RP11-181B18.1 | 0,00 | 0,00 | 0,00 | 0,00 | 1 | NA |
| RP11-182I10.4 | 0,00 | 0,00 | 0,00 | 0,00 | 1 | NA |
| RP11-183K14.2 | 0,00 | 0,00 | 0,00 | 0,00 | 1 | NA |
| RP11-189B4.7  | 0,00 | 0,00 | 0,00 | 0,00 | 1 | NA |
| RP11-189G24.2 | 0,00 | 0,00 | 0,00 | 0,00 | 1 | NA |
| RP11-18B16.1  | 0,00 | 0,00 | 0,00 | 0,00 | 1 | NA |
| RP11-18B16.2  | 0,00 | 0,00 | 0,00 | 0,00 | 1 | NA |
| RP11-18N21.2  | 0,00 | 0,00 | 0,00 | 0,00 | 1 | NA |
| RP11-190D6.2  | 0,00 | 0,00 | 0,00 | 0,00 | 1 | NA |
| RP11-190G13.4 | 0,00 | 0,00 | 0,00 | 0,00 | 1 | NA |
| RP11-191F9.3  | 0,00 | 0,00 | 0,00 | 0,00 | 1 | NA |
| RP11-193H5.9  | 0,00 | 0,00 | 0,00 | 0,00 | 1 | NA |
| RP11-195C7.3  | 0,00 | 0,00 | 0,00 | 0,00 | 1 | NA |
| RP11-195E2.1  | 0,00 | 0,00 | 0,00 | 0,00 | 1 | NA |
| RP11-196D18.5 | 0,00 | 0,00 | 0,00 | 0,00 | 1 | NA |
| RP11-198M11.2 | 0,00 | 0,00 | 0,00 | 0,00 | 1 | NA |
| RP11-19E18.1  | 0,00 | 0,00 | 0,00 | 0,00 | 1 | NA |
| RP11-19G24.1  | 0,00 | 0,00 | 0,00 | 0,00 | 1 | NA |
| RP11-19O2.1   | 0,00 | 0,00 | 0,00 | 0,00 | 1 | NA |
| RP11-1C1.5    | 0,00 | 0,23 | 0,00 | 0,00 | 1 | NA |
| RP11-1E3.1    | 0,00 | 0,00 | 0,00 | 0,00 | 1 | NA |
| RP11-1K20.2   | 0,00 | 0,00 | 0,00 | 0,00 | 1 | NA |
| RP11-1P8.7    | 0,00 | 0,00 | 0,00 | 0,00 | 1 | NA |
| RP11-201O14.1 | 0,00 | 0,00 | 0,00 | 0,00 | 1 | NA |
| RP11-201O14.2 | 0,00 | 0,00 | 0,00 | 0,00 | 1 | NA |

|               |      |      |      |      |   |    |
|---------------|------|------|------|------|---|----|
| RP11-202G18.1 | 0,00 | 0,00 | 0,00 | 0,00 | 1 | NA |
| RP11-203I2.1  | 0,00 | 0,00 | 0,00 | 0,00 | 1 | NA |
| RP11-203L2.4  | 0,00 | 0,00 | 0,00 | 0,00 | 1 | NA |
| RP11-204L24.2 | 0,00 | 0,00 | 0,00 | 0,00 | 1 | NA |
| RP11-205M20.7 | 0,00 | 0,00 | 0,00 | 0,00 | 1 | NA |
| RP11-208N14.4 | 0,00 | 0,00 | 0,00 | 0,00 | 1 | NA |
| RP11-209E8.1  | 0,00 | 0,00 | 0,00 | 0,00 | 1 | NA |
| RP11-209P2.1  | 0,00 | 0,00 | 0,00 | 0,00 | 1 | NA |
| RP11-20D14.1  | 0,00 | 0,00 | 0,00 | 0,00 | 1 | NA |
| RP11-20D14.7  | 0,00 | 0,00 | 0,00 | 0,00 | 1 | NA |
| RP11-20G13.3  | 0,00 | 0,00 | 0,00 | 0,00 | 1 | NA |
| RP11-20I20.2  | 0,00 | 0,00 | 0,00 | 0,00 | 1 | NA |
| RP11-212I19.1 | 0,00 | 0,00 | 0,00 | 0,00 | 1 | NA |
| RP11-213G2.2  | 0,00 | 0,00 | 0,00 | 0,00 | 1 | NA |
| RP11-213G6.2  | 0,00 | 0,00 | 0,00 | 0,00 | 1 | NA |
| RP11-214K3.22 | 0,00 | 0,00 | 0,00 | 0,00 | 1 | NA |
| RP11-214O11.2 | 0,00 | 0,00 | 0,00 | 0,00 | 1 | NA |
| RP11-215H18.5 | 0,00 | 0,00 | 0,00 | 0,00 | 1 | NA |
| RP11-217F17.1 | 0,00 | 0,00 | 0,00 | 0,00 | 1 | NA |
| RP11-219O3.2  | 0,00 | 0,00 | 0,00 | 0,00 | 1 | NA |
| RP11-21C4.5   | 0,00 | 0,00 | 0,00 | 0,00 | 1 | NA |
| RP11-21L23.3  | 0,00 | 0,00 | 0,00 | 0,00 | 1 | NA |
| RP11-21L23.4  | 0,00 | 0,00 | 0,00 | 0,00 | 1 | NA |
| RP11-220M1.1  | 0,00 | 0,00 | 0,00 | 0,00 | 1 | NA |
| RP11-220M1.2  | 0,00 | 0,00 | 0,00 | 0,00 | 1 | NA |
| RP11-222K16.1 | 0,00 | 0,00 | 0,00 | 0,00 | 1 | NA |
| RP11-223D18.1 | 0,00 | 0,00 | 0,00 | 0,00 | 1 | NA |
| RP11-223F20.1 | 0,00 | 0,00 | 0,00 | 0,00 | 1 | NA |
| RP11-225H22.4 | 0,00 | 0,00 | 0,00 | 0,00 | 1 | NA |
| RP11-225H22.7 | 0,00 | 0,00 | 0,00 | 0,00 | 1 | NA |
| RP11-226F19.1 | 0,00 | 0,00 | 0,00 | 0,00 | 1 | NA |
| RP11-227D13.5 | 0,00 | 0,00 | 0,00 | 0,00 | 1 | NA |
| RP11-22A3.1   | 0,00 | 0,00 | 0,00 | 0,00 | 1 | NA |
| RP11-22A3.2   | 0,00 | 0,00 | 0,00 | 0,00 | 1 | NA |
| RP11-22M7.2   | 0,00 | 0,00 | 0,00 | 0,00 | 1 | NA |
| RP11-230C9.1  | 0,00 | 0,00 | 0,00 | 0,00 | 1 | NA |
| RP11-230C9.2  | 0,00 | 0,00 | 0,00 | 0,00 | 1 | NA |
| RP11-231E6.3  | 0,00 | 0,00 | 0,00 | 0,00 | 1 | NA |
| RP11-232C2.2  | 0,00 | 0,00 | 0,00 | 0,00 | 1 | NA |
| RP11-233E12.4 | 0,00 | 0,00 | 0,00 | 0,00 | 1 | NA |
| RP11-234O6.2  | 0,00 | 0,00 | 0,00 | 0,00 | 1 | NA |
| RP11-235E17.5 | 0,00 | 0,00 | 0,00 | 0,00 | 1 | NA |
| RP11-236P13.1 | 0,00 | 0,00 | 0,00 | 0,00 | 1 | NA |
| RP11-238F2.1  | 0,00 | 0,00 | 0,00 | 0,00 | 1 | NA |
| RP11-239E10.2 | 0,00 | 0,00 | 0,00 | 0,00 | 1 | NA |
| RP11-240D10.4 | 0,00 | 0,00 | 0,00 | 0,00 | 1 | NA |
| RP11-240M16.2 | 0,00 | 0,00 | 0,00 | 0,00 | 1 | NA |
| RP11-241F15.7 | 0,00 | 0,00 | 0,00 | 0,00 | 1 | NA |
| RP11-242D8.2  | 0,00 | 0,00 | 0,00 | 0,00 | 1 | NA |
| RP11-242I7.1  | 0,00 | 0,00 | 0,00 | 0,00 | 1 | NA |
| RP11-243I16.7 | 0,00 | 0,00 | 0,00 | 0,00 | 1 | NA |
| RP11-243I16.8 | 0,00 | 0,00 | 0,00 | 0,00 | 1 | NA |
| RP11-243M5.4  | 0,00 | 0,00 | 0,00 | 0,00 | 1 | NA |
| RP11-245J24.1 | 0,00 | 0,00 | 0,00 | 0,00 | 1 | NA |
| RP11-247I13.5 | 0,00 | 0,00 | 0,00 | 0,00 | 1 | NA |

|               |      |      |      |      |   |    |
|---------------|------|------|------|------|---|----|
| RP11-248B10.3 | 0,00 | 0,00 | 0,00 | 0,00 | 1 | NA |
| RP11-248E9.4  | 0,00 | 0,00 | 0,00 | 0,00 | 1 | NA |
| RP11-249J13.1 | 0,00 | 0,00 | 0,00 | 0,00 | 1 | NA |
| RP11-249L12.1 | 0,00 | 0,00 | 0,00 | 0,00 | 1 | NA |
| RP11-24B13.1  | 0,00 | 0,00 | 0,00 | 0,00 | 1 | NA |
| RP11-24D15.1  | 0,00 | 0,00 | 0,00 | 0,00 | 1 | NA |
| RP11-24J20.5  | 0,00 | 0,00 | 0,00 | 0,00 | 1 | NA |
| RP11-24J23.3  | 0,00 | 0,00 | 0,00 | 0,00 | 1 | NA |
| RP11-24O5.2   | 0,00 | 0,00 | 0,00 | 0,00 | 1 | NA |
| RP11-25O2.4   | 0,00 | 0,00 | 0,00 | 0,00 | 1 | NA |
| RP11-252I14.2 | 0,00 | 0,00 | 0,00 | 0,00 | 1 | NA |
| RP11-253D19.1 | 0,00 | 0,00 | 0,00 | 0,00 | 1 | NA |
| RP11-253D19.2 | 0,00 | 0,00 | 0,00 | 0,00 | 1 | NA |
| RP11-253I19.4 | 0,00 | 0,00 | 0,00 | 0,00 | 1 | NA |
| RP11-255E6.5  | 0,00 | 0,00 | 0,00 | 0,00 | 1 | NA |
| RP11-255G12.1 | 0,00 | 0,00 | 0,00 | 0,00 | 1 | NA |
| RP11-255G12.3 | 0,00 | 0,00 | 0,00 | 0,00 | 1 | NA |
| RP11-255H23.4 | 0,00 | 0,00 | 0,00 | 0,00 | 1 | NA |
| RP11-257A22.1 | 0,00 | 0,00 | 0,00 | 0,00 | 1 | NA |
| RP11-258F22.2 | 0,00 | 0,00 | 0,00 | 0,00 | 1 | NA |
| RP11-258O13.1 | 0,00 | 0,00 | 0,00 | 0,00 | 1 | NA |
| RP11-259O2.1  | 0,00 | 0,00 | 0,00 | 0,00 | 1 | NA |
| RP11-259P15.3 | 0,00 | 0,00 | 0,00 | 0,00 | 1 | NA |
| RP11-261B23.2 | 0,00 | 0,00 | 0,00 | 0,00 | 1 | NA |
| RP11-262H14.2 | 0,00 | 0,00 | 0,00 | 0,00 | 1 | NA |
| RP11-262H14.8 | 0,00 | 0,00 | 0,00 | 0,00 | 1 | NA |
| RP11-262H14.9 | 0,00 | 0,00 | 0,00 | 0,00 | 1 | NA |
| RP11-264M12.2 | 0,00 | 0,00 | 0,00 | 0,00 | 1 | NA |
| RP11-265N6.3  | 0,00 | 0,00 | 0,00 | 0,00 | 1 | NA |
| RP11-265P11.1 | 0,00 | 0,00 | 0,00 | 0,00 | 1 | NA |
| RP11-266I3.7  | 0,00 | 0,00 | 0,00 | 0,00 | 1 | NA |
| RP11-266K4.16 | 0,00 | 0,00 | 0,00 | 0,00 | 1 | NA |
| RP11-266N13.2 | 0,00 | 0,00 | 0,00 | 0,00 | 1 | NA |
| RP11-268I9.3  | 0,00 | 0,00 | 0,00 | 0,00 | 1 | NA |
| RP11-269F19.4 | 0,00 | 0,00 | 0,00 | 0,00 | 1 | NA |
| RP11-269G24.8 | 0,00 | 0,00 | 0,00 | 0,00 | 1 | NA |
| RP11-269M20.2 | 0,00 | 0,00 | 0,00 | 0,00 | 1 | NA |
| RP11-270F18.2 | 0,00 | 0,00 | 0,00 | 0,00 | 1 | NA |
| RP11-271M24.2 | 0,00 | 0,00 | 0,00 | 0,00 | 1 | NA |
| RP11-272J7.5  | 0,00 | 0,00 | 0,00 | 0,00 | 1 | NA |
| RP11-273B20.3 | 0,00 | 0,00 | 0,00 | 0,00 | 1 | NA |
| RP11-274B18.3 | 0,00 | 0,00 | 0,00 | 0,00 | 1 | NA |
| RP11-274P12.2 | 0,00 | 0,00 | 0,00 | 0,00 | 1 | NA |
| RP11-275B14.1 | 0,00 | 0,00 | 0,00 | 0,00 | 1 | NA |
| RP11-275H4.1  | 0,00 | 0,00 | 0,00 | 0,00 | 1 | NA |
| RP11-276E15.4 | 0,00 | 0,00 | 0,00 | 0,00 | 1 | NA |
| RP11-276H7.3  | 0,00 | 0,36 | 0,00 | 0,00 | 1 | NA |
| RP11-279O9.4  | 0,00 | 0,00 | 0,00 | 0,00 | 1 | NA |
| RP11-27M24.3  | 0,00 | 0,00 | 0,00 | 0,00 | 1 | NA |
| RP11-281A20.1 | 0,00 | 0,00 | 0,00 | 0,00 | 1 | NA |
| RP11-282O18.7 | 0,00 | 0,00 | 0,00 | 0,00 | 1 | NA |
| RP11-284F21.7 | 0,00 | 0,00 | 0,00 | 0,00 | 1 | NA |
| RP11-285G1.2  | 0,00 | 0,00 | 0,00 | 0,00 | 1 | NA |
| RP11-285G1.9  | 0,00 | 0,00 | 0,00 | 0,00 | 1 | NA |
| RP11-285M22.3 | 0,00 | 0,00 | 0,00 | 0,00 | 1 | NA |

|                |      |      |      |      |   |    |
|----------------|------|------|------|------|---|----|
| RP11-286N3.2   | 0,00 | 0,00 | 0,00 | 0,00 | 1 | NA |
| RP11-287D1.4   | 0,00 | 0,00 | 0,00 | 0,00 | 1 | NA |
| RP11-289C17.2  | 0,00 | 0,00 | 0,00 | 0,00 | 1 | NA |
| RP11-290F24.6  | 0,00 | 0,00 | 0,00 | 0,00 | 1 | NA |
| RP11-290K4.2   | 0,00 | 0,00 | 0,00 | 0,00 | 1 | NA |
| RP11-290M5.2   | 0,00 | 0,00 | 0,00 | 0,00 | 1 | NA |
| RP11-292D4.1   | 0,00 | 0,00 | 0,00 | 0,00 | 1 | NA |
| RP11-293A21.2  | 0,00 | 0,00 | 0,00 | 0,00 | 1 | NA |
| RP11-293E1.1   | 0,00 | 0,00 | 0,00 | 0,00 | 1 | NA |
| RP11-293G6_B.5 | 0,00 | 0,00 | 0,00 | 0,00 | 1 | NA |
| RP11-293G6_B.6 | 0,00 | 0,00 | 0,00 | 0,00 | 1 | NA |
| RP11-293K20.3  | 0,00 | 0,00 | 0,00 | 0,00 | 1 | NA |
| RP11-293N1.1   | 0,00 | 0,00 | 0,00 | 0,00 | 1 | NA |
| RP11-294C11.2  | 0,00 | 0,00 | 0,00 | 0,00 | 1 | NA |
| RP11-294C11.5  | 0,00 | 0,00 | 0,00 | 0,00 | 1 | NA |
| RP11-296E23.1  | 0,00 | 0,00 | 0,00 | 0,00 | 1 | NA |
| RP11-296I10.3  | 0,00 | 0,00 | 0,00 | 0,00 | 1 | NA |
| RP11-296P7.4   | 0,00 | 0,00 | 0,00 | 0,00 | 1 | NA |
| RP11-297I6.2   | 0,00 | 0,00 | 0,00 | 0,00 | 1 | NA |
| RP11-297L17.1  | 0,00 | 0,00 | 0,00 | 0,00 | 1 | NA |
| RP11-297L21.1  | 0,00 | 0,00 | 0,00 | 0,00 | 1 | NA |
| RP11-298D21.2  | 0,00 | 0,00 | 0,00 | 0,00 | 1 | NA |
| RP11-298I3.3   | 0,00 | 0,00 | 0,00 | 0,00 | 1 | NA |
| RP11-299L17.1  | 0,00 | 0,00 | 0,00 | 0,00 | 1 | NA |
| RP11-299P2.2   | 0,00 | 0,00 | 0,00 | 0,00 | 1 | NA |
| RP11-29B2.6    | 0,00 | 0,00 | 0,00 | 0,00 | 1 | NA |
| RP11-2A4.3     | 0,00 | 0,00 | 0,00 | 0,00 | 1 | NA |
| RP11-2A4.4     | 0,00 | 0,00 | 0,00 | 0,00 | 1 | NA |
| RP11-2C23.2    | 0,00 | 0,00 | 0,00 | 0,00 | 1 | NA |
| RP11-2C23.3    | 0,00 | 0,00 | 0,00 | 0,00 | 1 | NA |
| RP11-2H3.6     | 0,00 | 0,00 | 0,00 | 0,00 | 1 | NA |
| RP11-2I7.1     | 0,00 | 0,00 | 0,00 | 0,00 | 1 | NA |
| RP11-2I8.1     | 0,00 | 0,00 | 0,00 | 0,00 | 1 | NA |
| RP11-300A12.2  | 0,00 | 0,00 | 0,00 | 0,00 | 1 | NA |
| RP11-300M6.1   | 0,00 | 0,00 | 0,00 | 0,00 | 1 | NA |
| RP11-301G23.1  | 0,00 | 0,00 | 0,00 | 0,00 | 1 | NA |
| RP11-302L19.2  | 0,00 | 0,00 | 0,00 | 0,00 | 1 | NA |
| RP11-303E16.6  | 0,00 | 0,00 | 0,00 | 0,00 | 1 | NA |
| RP11-305D15.5  | 0,00 | 0,00 | 0,00 | 0,00 | 1 | NA |
| RP11-305L7.3   | 0,00 | 0,00 | 0,00 | 0,00 | 1 | NA |
| RP11-305O4.2   | 0,00 | 0,00 | 0,00 | 0,00 | 1 | NA |
| RP11-307L14.2  | 0,00 | 0,00 | 0,00 | 0,00 | 1 | NA |
| RP11-307N16.5  | 0,00 | 0,00 | 0,00 | 0,00 | 1 | NA |
| RP11-308D16.3  | 0,00 | 0,00 | 0,00 | 0,00 | 1 | NA |
| RP11-309I15.2  | 0,00 | 0,00 | 0,00 | 0,00 | 1 | NA |
| RP11-30G13.1   | 0,00 | 0,00 | 0,00 | 0,00 | 1 | NA |
| RP11-30P21.2   | 0,00 | 0,00 | 0,00 | 0,00 | 1 | NA |
| RP11-310H4.2   | 0,00 | 0,00 | 0,00 | 0,00 | 1 | NA |
| RP11-311B14.1  | 0,00 | 0,00 | 0,00 | 0,00 | 1 | NA |
| RP11-313L6.2   | 0,00 | 0,00 | 0,00 | 0,00 | 1 | NA |
| RP11-313L9.1   | 0,00 | 0,00 | 0,00 | 0,00 | 1 | NA |
| RP11-314I18.6  | 0,00 | 0,00 | 0,00 | 0,00 | 1 | NA |
| RP11-317F4.1   | 0,00 | 0,00 | 0,00 | 0,00 | 1 | NA |
| RP11-317L10.1  | 0,00 | 0,00 | 0,00 | 0,00 | 1 | NA |
| RP11-318G21.3  | 0,00 | 0,00 | 0,00 | 0,00 | 1 | NA |

|               |      |      |      |      |   |    |
|---------------|------|------|------|------|---|----|
| RP11-318G8.2  | 0,00 | 0,00 | 0,00 | 0,00 | 1 | NA |
| RP11-319G9.5  | 0,00 | 0,00 | 0,00 | 0,00 | 1 | NA |
| RP11-31K23.1  | 0,00 | 0,00 | 0,00 | 0,00 | 1 | NA |
| RP11-320A16.1 | 0,00 | 0,00 | 0,00 | 0,00 | 1 | NA |
| RP11-320L13.2 | 0,00 | 0,00 | 0,00 | 0,00 | 1 | NA |
| RP11-320P7.2  | 0,00 | 0,00 | 0,00 | 0,00 | 1 | NA |
| RP11-321A17.5 | 0,00 | 0,00 | 0,00 | 0,00 | 1 | NA |
| RP11-321E2.8  | 0,00 | 0,11 | 0,00 | 0,00 | 1 | NA |
| RP11-322D14.1 | 0,00 | 0,00 | 0,00 | 0,00 | 1 | NA |
| RP11-323F24.3 | 0,00 | 0,00 | 0,00 | 0,00 | 1 | NA |
| RP11-324E6.10 | 0,00 | 0,00 | 0,00 | 0,00 | 1 | NA |
| RP11-324J13.1 | 0,00 | 0,00 | 0,00 | 0,00 | 1 | NA |
| RP11-325E14.5 | 0,00 | 0,00 | 0,00 | 0,00 | 1 | NA |
| RP11-325L12.5 | 0,00 | 0,00 | 0,00 | 0,00 | 1 | NA |
| RP11-325O24.6 | 0,00 | 0,00 | 0,00 | 0,00 | 1 | NA |
| RP11-326C3.7  | 0,00 | 0,00 | 0,00 | 0,00 | 1 | NA |
| RP11-326I11.1 | 0,00 | 0,00 | 0,00 | 0,00 | 1 | NA |
| RP11-327I3.1  | 0,00 | 0,00 | 0,00 | 0,00 | 1 | NA |
| RP11-327J17.8 | 0,00 | 0,00 | 0,00 | 0,00 | 1 | NA |
| RP11-327L9.1  | 0,00 | 0,00 | 0,00 | 0,00 | 1 | NA |
| RP11-327P2.6  | 0,00 | 0,00 | 0,00 | 0,00 | 1 | NA |
| RP11-328I14.1 | 0,00 | 0,00 | 0,00 | 0,00 | 1 | NA |
| RP11-328K2.1  | 0,00 | 0,00 | 0,00 | 0,00 | 1 | NA |
| RP11-328M4.2  | 0,00 | 0,00 | 0,00 | 0,00 | 1 | NA |
| RP11-32B5.7   | 0,00 | 0,00 | 0,00 | 0,00 | 1 | NA |
| RP11-32K4.2   | 0,00 | 0,00 | 0,00 | 0,00 | 1 | NA |
| RP11-330M19.1 | 0,00 | 0,00 | 0,00 | 0,00 | 1 | NA |
| RP11-331G2.4  | 0,00 | 0,00 | 0,00 | 0,00 | 1 | NA |
| RP11-331H2.4  | 0,00 | 0,00 | 0,00 | 0,00 | 1 | NA |
| RP11-332K15.1 | 0,00 | 0,00 | 0,00 | 0,00 | 1 | NA |
| RP11-333A23.1 | 0,00 | 0,00 | 0,00 | 0,00 | 1 | NA |
| RP11-333A23.3 | 0,00 | 0,00 | 0,00 | 0,00 | 1 | NA |
| RP11-334A14.2 | 0,00 | 0,00 | 0,00 | 0,00 | 1 | NA |
| RP11-334E6.2  | 0,00 | 0,00 | 0,00 | 0,00 | 1 | NA |
| RP11-334E6.4  | 0,00 | 0,00 | 0,00 | 0,00 | 1 | NA |
| RP11-334J6.6  | 0,00 | 0,00 | 0,00 | 0,00 | 1 | NA |
| RP11-335F8.1  | 0,00 | 0,00 | 0,00 | 0,00 | 1 | NA |
| RP11-338E21.1 | 0,00 | 0,00 | 0,00 | 0,00 | 1 | NA |
| RP11-338K17.6 | 0,00 | 0,00 | 0,00 | 0,00 | 1 | NA |
| RP11-338N10.3 | 0,00 | 0,00 | 0,00 | 0,00 | 1 | NA |
| RP11-338O1.3  | 0,00 | 0,00 | 0,00 | 0,00 | 1 | NA |
| RP11-33B1.4   | 0,00 | 0,00 | 0,00 | 0,00 | 1 | NA |
| RP11-341N2.1  | 0,00 | 0,00 | 0,00 | 0,00 | 1 | NA |
| RP11-342K6.3  | 0,00 | 0,00 | 0,00 | 0,00 | 1 | NA |
| RP11-343B18.2 | 0,00 | 0,00 | 0,00 | 0,00 | 1 | NA |
| RP11-343H5.6  | 0,00 | 0,00 | 0,00 | 0,00 | 1 | NA |
| RP11-343J3.7  | 0,00 | 0,00 | 0,00 | 0,00 | 1 | NA |
| RP11-343L14.1 | 0,00 | 0,00 | 0,00 | 0,00 | 1 | NA |
| RP11-344N17.3 | 0,00 | 0,00 | 0,00 | 0,00 | 1 | NA |
| RP11-344P13.4 | 0,00 | 0,00 | 0,00 | 0,00 | 1 | NA |
| RP11-345I18.2 | 0,00 | 0,00 | 0,00 | 0,00 | 1 | NA |
| RP11-346J10.3 | 0,00 | 0,00 | 0,00 | 0,00 | 1 | NA |
| RP11-347C18.3 | 0,00 | 0,00 | 0,00 | 0,00 | 1 | NA |
| RP11-347D21.1 | 0,00 | 0,00 | 0,00 | 0,00 | 1 | NA |
| RP11-347D21.3 | 0,00 | 0,00 | 0,00 | 0,00 | 1 | NA |

|                |      |      |      |      |   |    |
|----------------|------|------|------|------|---|----|
| RP11-347I19.8  | 0,00 | 0,00 | 0,00 | 0,00 | 1 | NA |
| RP11-347L15.1  | 0,00 | 0,00 | 0,00 | 0,00 | 1 | NA |
| RP11-349A22.2  | 0,00 | 0,00 | 0,00 | 0,00 | 1 | NA |
| RP11-349O10.1  | 0,00 | 0,00 | 0,00 | 0,00 | 1 | NA |
| RP11-34A14.3   | 0,00 | 0,00 | 0,00 | 0,00 | 1 | NA |
| RP11-350F16.1  | 0,00 | 0,00 | 0,00 | 0,00 | 1 | NA |
| RP11-350G8.9   | 0,00 | 0,00 | 0,00 | 0,00 | 1 | NA |
| RP11-353N14.1  | 0,00 | 0,00 | 0,00 | 0,00 | 1 | NA |
| RP11-354K1.1   | 0,00 | 0,00 | 0,00 | 0,00 | 1 | NA |
| RP11-354P11.2  | 0,00 | 0,00 | 0,00 | 0,00 | 1 | NA |
| RP11-354P17.12 | 0,00 | 0,00 | 0,00 | 0,00 | 1 | NA |
| RP11-355C3.2   | 0,00 | 0,00 | 0,00 | 0,00 | 1 | NA |
| RP11-355E10.1  | 0,00 | 0,00 | 0,00 | 0,00 | 1 | NA |
| RP11-355I22.2  | 0,00 | 0,00 | 0,00 | 0,00 | 1 | NA |
| RP11-356I5.13  | 0,00 | 0,00 | 0,00 | 0,00 | 1 | NA |
| RP11-356O23.1  | 0,00 | 0,00 | 0,00 | 0,00 | 1 | NA |
| RP11-358B23.7  | 0,00 | 0,00 | 0,00 | 0,00 | 1 | NA |
| RP11-359J14.3  | 0,00 | 0,00 | 0,00 | 0,00 | 1 | NA |
| RP11-359K18.1  | 0,00 | 0,00 | 0,00 | 0,00 | 1 | NA |
| RP11-35J10.4   | 0,00 | 0,00 | 0,00 | 0,00 | 1 | NA |
| RP11-360A9.1   | 0,00 | 0,00 | 0,00 | 0,00 | 1 | NA |
| RP11-360D2.2   | 0,00 | 0,00 | 0,00 | 0,00 | 1 | NA |
| RP11-360G10.2  | 0,00 | 0,00 | 0,00 | 0,00 | 1 | NA |
| RP11-360G10.3  | 0,00 | 0,00 | 0,00 | 0,00 | 1 | NA |
| RP11-361A23.2  | 0,00 | 0,00 | 0,00 | 0,00 | 1 | NA |
| RP11-361F15.3  | 0,00 | 0,00 | 0,00 | 0,00 | 1 | NA |
| RP11-361H10.3  | 0,00 | 0,00 | 0,00 | 0,00 | 1 | NA |
| RP11-361M4.1   | 0,00 | 0,00 | 0,00 | 0,00 | 1 | NA |
| RP11-362H12.1  | 0,00 | 0,00 | 0,00 | 0,00 | 1 | NA |
| RP11-363E7.3   | 0,00 | 0,00 | 0,00 | 0,00 | 1 | NA |
| RP11-363J17.1  | 0,00 | 0,00 | 0,00 | 0,00 | 1 | NA |
| RP11-364C11.2  | 0,00 | 0,00 | 0,00 | 0,00 | 1 | NA |
| RP11-365F18.1  | 0,00 | 0,00 | 0,00 | 0,00 | 1 | NA |
| RP11-365H23.1  | 0,00 | 0,00 | 0,00 | 0,00 | 1 | NA |
| RP11-365O16.6  | 0,00 | 0,00 | 0,00 | 0,00 | 1 | NA |
| RP11-366F6.2   | 0,00 | 0,00 | 0,00 | 0,00 | 1 | NA |
| RP11-366M4.1   | 0,00 | 0,00 | 0,00 | 0,00 | 1 | NA |
| RP11-366O17.3  | 0,00 | 0,00 | 0,00 | 0,00 | 1 | NA |
| RP11-366O17.4  | 0,00 | 0,00 | 0,00 | 0,00 | 1 | NA |
| RP11-367N14.3  | 0,00 | 0,00 | 0,00 | 0,00 | 1 | NA |
| RP11-368M16.7  | 0,00 | 0,00 | 0,00 | 0,00 | 1 | NA |
| RP11-369E15.4  | 0,00 | 0,00 | 0,00 | 0,00 | 1 | NA |
| RP11-369F10.2  | 0,00 | 0,00 | 0,00 | 0,00 | 1 | NA |
| RP11-36D19.4   | 0,00 | 0,00 | 0,00 | 0,00 | 1 | NA |
| RP11-36N20.1   | 0,00 | 0,00 | 0,00 | 0,00 | 1 | NA |
| RP11-36N20.2   | 0,00 | 0,00 | 0,00 | 0,00 | 1 | NA |
| RP11-370P15.2  | 0,00 | 0,00 | 0,00 | 0,00 | 1 | NA |
| RP11-373N22.1  | 0,00 | 0,00 | 0,00 | 0,00 | 1 | NA |
| RP11-373N24.2  | 0,00 | 0,00 | 0,00 | 0,00 | 1 | NA |
| RP11-374A22.1  | 0,00 | 0,00 | 0,00 | 0,00 | 1 | NA |
| RP11-374F3.3   | 0,00 | 0,00 | 0,00 | 0,00 | 1 | NA |
| RP11-375B1.2   | 0,00 | 0,00 | 0,00 | 0,00 | 1 | NA |
| RP11-376N17.4  | 0,00 | 0,00 | 0,00 | 0,00 | 1 | NA |
| RP11-377B2.2   | 0,00 | 0,00 | 0,00 | 0,00 | 1 | NA |
| RP11-377D9.3   | 0,00 | 0,00 | 0,00 | 0,00 | 1 | NA |

|                |      |      |      |      |   |    |
|----------------|------|------|------|------|---|----|
| RP11-379B18.2  | 0,00 | 0,00 | 0,00 | 0,00 | 1 | NA |
| RP11-379B18.4  | 0,00 | 0,00 | 0,00 | 0,00 | 1 | NA |
| RP11-379H8.1   | 0,00 | 0,00 | 0,00 | 0,00 | 1 | NA |
| RP11-37C7.3    | 0,00 | 0,00 | 0,00 | 0,00 | 1 | NA |
| RP11-380P16.7  | 0,00 | 0,00 | 0,00 | 0,00 | 1 | NA |
| RP11-381K7.2   | 0,00 | 0,00 | 0,00 | 0,00 | 1 | NA |
| RP11-382D8.4   | 0,00 | 0,00 | 0,00 | 0,00 | 1 | NA |
| RP11-382F24.1  | 0,00 | 0,00 | 0,00 | 0,00 | 1 | NA |
| RP11-383C12.2  | 0,00 | 0,00 | 0,00 | 0,00 | 1 | NA |
| RP11-384A12.1  | 0,00 | 0,00 | 0,00 | 0,00 | 1 | NA |
| RP11-385E5.6   | 0,00 | 0,00 | 0,00 | 0,00 | 1 | NA |
| RP11-385F5.4   | 0,00 | 0,00 | 0,00 | 0,00 | 1 | NA |
| RP11-385M4.3   | 0,00 | 0,00 | 0,00 | 0,00 | 1 | NA |
| RP11-385M4.4   | 0,00 | 0,00 | 0,00 | 0,00 | 1 | NA |
| RP11-385N23.1  | 0,00 | 0,00 | 0,00 | 0,00 | 1 | NA |
| RP11-386I8.2   | 0,00 | 0,00 | 0,00 | 0,00 | 1 | NA |
| RP11-386P4.1   | 0,00 | 0,00 | 0,00 | 0,00 | 1 | NA |
| RP11-388B24.1  | 0,00 | 0,00 | 0,00 | 0,00 | 1 | NA |
| RP11-388K2.1   | 0,00 | 0,00 | 0,00 | 0,00 | 1 | NA |
| RP11-389C8.1   | 0,00 | 0,00 | 0,00 | 0,00 | 1 | NA |
| RP11-38G5.2    | 0,00 | 0,00 | 0,00 | 0,00 | 1 | NA |
| RP11-38J22.2   | 0,00 | 0,00 | 0,00 | 0,00 | 1 | NA |
| RP11-38O23.3   | 0,00 | 0,00 | 0,00 | 0,00 | 1 | NA |
| RP11-392L5.1   | 0,00 | 0,00 | 0,00 | 0,00 | 1 | NA |
| RP11-393I23.4  | 0,00 | 0,00 | 0,00 | 0,00 | 1 | NA |
| RP11-393M18.4  | 0,00 | 0,00 | 0,00 | 0,00 | 1 | NA |
| RP11-396D18.1  | 0,00 | 0,00 | 0,00 | 0,00 | 1 | NA |
| RP11-396I6.1   | 0,00 | 0,00 | 0,00 | 0,00 | 1 | NA |
| RP11-396O20.2  | 0,00 | 0,00 | 0,00 | 0,00 | 1 | NA |
| RP11-397F23.3  | 0,00 | 0,00 | 0,00 | 0,00 | 1 | NA |
| RP11-397J18.1  | 0,00 | 0,00 | 0,00 | 0,00 | 1 | NA |
| RP11-397O8.7   | 0,00 | 0,00 | 0,00 | 0,00 | 1 | NA |
| RP11-398I10.2  | 0,00 | 0,00 | 0,00 | 0,00 | 1 | NA |
| RP11-398K22.13 | 0,00 | 0,00 | 0,00 | 0,00 | 1 | NA |
| RP11-399F2.2   | 0,00 | 0,00 | 0,00 | 0,00 | 1 | NA |
| RP11-3D4.4     | 0,00 | 0,00 | 0,00 | 0,00 | 1 | NA |
| RP11-3K15.1    | 0,00 | 0,00 | 0,00 | 0,00 | 1 | NA |
| RP11-3K16.1    | 0,00 | 0,00 | 0,00 | 0,00 | 1 | NA |
| RP11-3L10.2    | 0,00 | 0,00 | 0,00 | 0,00 | 1 | NA |
| RP11-400D2.2   | 0,00 | 0,00 | 0,00 | 0,00 | 1 | NA |
| RP11-400G3.2   | 0,00 | 0,00 | 0,00 | 0,00 | 1 | NA |
| RP11-401L13.7  | 0,00 | 0,00 | 0,00 | 0,00 | 1 | NA |
| RP11-401P9.1   | 0,00 | 0,00 | 0,00 | 0,00 | 1 | NA |
| RP11-402G3.4   | 0,00 | 0,00 | 0,00 | 0,00 | 1 | NA |
| RP11-402G3.5   | 0,00 | 0,00 | 0,00 | 0,00 | 1 | NA |
| RP11-402L5.2   | 0,00 | 0,00 | 0,00 | 0,00 | 1 | NA |
| RP11-403A21.1  | 0,00 | 0,00 | 0,00 | 0,00 | 1 | NA |
| RP11-403A21.3  | 0,00 | 0,00 | 0,00 | 0,00 | 1 | NA |
| RP11-403D15.1  | 0,00 | 0,00 | 0,00 | 0,00 | 1 | NA |
| RP11-404P21.5  | 0,00 | 0,00 | 0,00 | 0,00 | 1 | NA |
| RP11-404P21.6  | 0,00 | 0,00 | 0,00 | 0,00 | 1 | NA |
| RP11-405F3.2   | 0,00 | 0,00 | 0,00 | 0,00 | 1 | NA |
| RP11-405K6.1   | 0,00 | 0,00 | 0,00 | 0,00 | 1 | NA |
| RP11-407N8.5   | 0,00 | 0,00 | 0,00 | 0,00 | 1 | NA |
| RP11-407P10.1  | 0,00 | 0,00 | 0,00 | 0,00 | 1 | NA |



|                 |      |      |      |      |   |    |
|-----------------|------|------|------|------|---|----|
| RP11-408A13.1   | 0,00 | 0,00 | 0,00 | 0,00 | 1 | NA |
| RP11-408E5.4    | 0,00 | 0,00 | 0,00 | 0,00 | 1 | NA |
| RP11-40B20.1    | 0,00 | 0,00 | 0,00 | 0,00 | 1 | NA |
| RP11-410B16.1   | 0,00 | 0,00 | 0,00 | 0,00 | 1 | NA |
| RP11-410C4.2    | 0,00 | 0,00 | 0,00 | 0,00 | 1 | NA |
| RP11-411B10.2   | 0,00 | 0,00 | 0,00 | 0,00 | 1 | NA |
| RP11-411G9.2    | 0,00 | 0,00 | 0,00 | 0,00 | 1 | NA |
| RP11-412B14.1   | 0,00 | 0,00 | 0,00 | 0,00 | 1 | NA |
| RP11-414C23.1   | 0,00 | 0,00 | 0,00 | 0,00 | 1 | NA |
| RP11-415C15.3   | 0,00 | 0,00 | 0,00 | 0,00 | 1 | NA |
| RP11-415G4.1    | 0,00 | 0,00 | 0,00 | 0,00 | 1 | NA |
| RP11-415J8.5    | 0,00 | 0,00 | 0,00 | 0,00 | 1 | NA |
| RP11-416H1.1    | 0,00 | 0,00 | 0,00 | 0,00 | 1 | NA |
| RP11-417D4.1    | 0,00 | 0,00 | 0,00 | 0,00 | 1 | NA |
| RP11-417N10.5   | 0,00 | 0,00 | 0,00 | 0,00 | 1 | NA |
| RP11-418J17.3   | 0,00 | 0,00 | 0,00 | 0,00 | 1 | NA |
| RP11-419C23.2   | 0,00 | 0,00 | 0,00 | 0,00 | 1 | NA |
| RP11-421M1.3    | 0,00 | 0,00 | 0,00 | 0,00 | 1 | NA |
| RP11-421P11.6   | 0,00 | 0,00 | 0,00 | 0,00 | 1 | NA |
| RP11-422N16.3   | 0,00 | 0,00 | 0,00 | 0,00 | 1 | NA |
| RP11-424C20.2   | 0,00 | 0,00 | 0,00 | 0,00 | 1 | NA |
| RP11-424E7.5    | 0,00 | 0,00 | 0,00 | 0,00 | 1 | NA |
| RP11-425D17.1   | 0,00 | 0,00 | 0,00 | 0,00 | 1 | NA |
| RP11-426K3.1    | 0,00 | 0,00 | 0,00 | 0,00 | 1 | NA |
| RP11-428C19.4   | 0,00 | 0,00 | 0,00 | 0,00 | 1 | NA |
| RP11-42O4.2     | 0,00 | 0,00 | 0,00 | 0,00 | 1 | NA |
| RP11-430G17.1   | 0,00 | 0,00 | 0,00 | 0,00 | 1 | NA |
| RP11-430K10.1   | 0,00 | 0,00 | 0,00 | 0,00 | 1 | NA |
| RP11-430K22.1   | 0,00 | 0,00 | 0,00 | 0,00 | 1 | NA |
| RP11-431M3.2    | 0,00 | 0,00 | 0,00 | 0,00 | 1 | NA |
| RP11-431M7.2    | 0,00 | 0,00 | 0,00 | 0,00 | 1 | NA |
| RP11-432B6.1    | 0,00 | 0,00 | 0,00 | 0,00 | 1 | NA |
| RP11-432M8.15   | 0,00 | 0,00 | 0,00 | 0,00 | 1 | NA |
| RP11-432M8.22   | 0,00 | 0,00 | 0,00 | 0,00 | 1 | NA |
| RP11-432M8.5    | 0,00 | 0,11 | 0,00 | 0,00 | 1 | NA |
| RP11-434I12.2   | 0,00 | 0,00 | 0,00 | 0,00 | 1 | NA |
| RP11-434O22.1   | 0,00 | 0,00 | 0,00 | 0,00 | 1 | NA |
| RP11-435M3.2    | 0,00 | 0,00 | 0,00 | 0,00 | 1 | NA |
| RP11-435O5.4    | 0,00 | 0,00 | 0,00 | 0,00 | 1 | NA |
| RP11-436F9.2    | 0,00 | 0,00 | 0,00 | 0,00 | 1 | NA |
| RP11-436I9.4    | 0,00 | 0,00 | 0,00 | 0,00 | 1 | NA |
| RP11-437G21.4   | 0,00 | 0,00 | 0,00 | 0,00 | 1 | NA |
| RP11-437G21.5   | 0,00 | 0,00 | 0,00 | 0,00 | 1 | NA |
| RP11-438N5.2    | 0,00 | 0,00 | 0,00 | 0,00 | 1 | NA |
| RP11-439I14.3   | 0,00 | 0,00 | 0,00 | 0,00 | 1 | NA |
| RP11-441F11.1   | 0,00 | 0,00 | 0,00 | 0,00 | 1 | NA |
| RP11-441F2.2    | 0,00 | 0,00 | 0,00 | 0,00 | 1 | NA |
| RP11-442O18.1   | 0,00 | 0,00 | 0,00 | 0,00 | 1 | NA |
| RP11-443P15.2   | 0,00 | 0,00 | 0,00 | 0,00 | 1 | NA |
| RP11-443P15.3   | 0,00 | 0,00 | 0,00 | 0,00 | 1 | NA |
| RP11-444M10.3   | 0,00 | 0,00 | 0,00 | 0,00 | 1 | NA |
| RP11-445H22.4   | 0,00 | 0,00 | 0,00 | 0,00 | 1 | NA |
| RP11-445L13_B.3 | 0,00 | 0,00 | 0,00 | 0,00 | 1 | NA |
| RP11-445O16.2   | 0,00 | 0,00 | 0,00 | 0,00 | 1 | NA |
| RP11-446E24.4   | 0,00 | 0,00 | 0,00 | 0,00 | 1 | NA |

|                |      |      |      |      |   |    |
|----------------|------|------|------|------|---|----|
| RP11-446G24.4  | 0,00 | 0,00 | 0,00 | 0,00 | 1 | NA |
| RP11-447H19.3  | 0,00 | 0,00 | 0,00 | 0,00 | 1 | NA |
| RP11-448G15.1  | 0,00 | 0,00 | 0,00 | 0,00 | 1 | NA |
| RP11-448G4.3   | 0,00 | 0,00 | 0,00 | 0,00 | 1 | NA |
| RP11-44D5.2    | 0,00 | 0,00 | 0,00 | 0,00 | 1 | NA |
| RP11-44F21.5   | 0,00 | 0,00 | 0,00 | 0,00 | 1 | NA |
| RP11-44N11.2   | 0,00 | 0,00 | 0,00 | 0,00 | 1 | NA |
| RP11-44N17.2   | 0,00 | 0,00 | 0,00 | 0,00 | 1 | NA |
| RP11-451F20.4  | 0,00 | 0,00 | 0,00 | 0,00 | 1 | NA |
| RP11-451G4.3   | 0,00 | 0,00 | 0,00 | 0,00 | 1 | NA |
| RP11-451M19.2  | 0,00 | 0,00 | 0,00 | 0,00 | 1 | NA |
| RP11-452B18.2  | 0,00 | 0,00 | 0,00 | 0,00 | 1 | NA |
| RP11-452K12.3  | 0,00 | 0,00 | 0,00 | 0,00 | 1 | NA |
| RP11-453D21.1  | 0,00 | 0,00 | 0,00 | 0,00 | 1 | NA |
| RP11-454C18.1  | 0,00 | 0,00 | 0,00 | 0,00 | 1 | NA |
| RP11-454L1.2   | 0,00 | 0,00 | 0,00 | 0,00 | 1 | NA |
| RP11-455B2.8   | 0,00 | 0,00 | 0,00 | 0,00 | 1 | NA |
| RP11-455I9.1   | 0,00 | 0,00 | 0,00 | 0,00 | 1 | NA |
| RP11-456E1.2   | 0,00 | 0,00 | 0,00 | 0,00 | 1 | NA |
| RP11-459E5.1   | 0,00 | 0,00 | 0,00 | 0,00 | 1 | NA |
| RP11-45B20.3   | 0,00 | 0,00 | 0,00 | 0,00 | 1 | NA |
| RP11-45F15.2   | 0,00 | 0,00 | 0,00 | 0,00 | 1 | NA |
| RP11-45J1.1    | 0,00 | 0,00 | 0,00 | 0,00 | 1 | NA |
| RP11-45M22.5   | 0,00 | 0,00 | 0,00 | 0,00 | 1 | NA |
| RP11-460B17.2  | 0,00 | 0,00 | 0,00 | 0,00 | 1 | NA |
| RP11-461A8.4   | 0,00 | 0,00 | 0,00 | 0,00 | 1 | NA |
| RP11-461F11.3  | 0,00 | 0,00 | 0,00 | 0,00 | 1 | NA |
| RP11-461L13.2  | 0,00 | 0,00 | 0,00 | 0,00 | 1 | NA |
| RP11-461N23.3  | 0,00 | 0,00 | 0,00 | 0,00 | 1 | NA |
| RP11-462G22.2  | 0,00 | 0,00 | 0,00 | 0,00 | 1 | NA |
| RP11-465C12.1  | 0,00 | 0,00 | 0,00 | 0,00 | 1 | NA |
| RP11-465L10.10 | 0,00 | 0,00 | 0,00 | 0,00 | 1 | NA |
| RP11-466A17.1  | 0,00 | 0,00 | 0,00 | 0,00 | 1 | NA |
| RP11-466A19.8  | 0,00 | 0,00 | 0,00 | 0,00 | 1 | NA |
| RP11-466F5.3   | 0,00 | 0,00 | 0,00 | 0,00 | 1 | NA |
| RP11-466G12.3  | 0,00 | 0,00 | 0,00 | 0,00 | 1 | NA |
| RP11-467L19.8  | 0,00 | 0,00 | 0,00 | 0,00 | 1 | NA |
| RP11-468N14.13 | 0,00 | 0,00 | 0,00 | 0,00 | 1 | NA |
| RP11-468O2.1   | 0,00 | 0,00 | 0,00 | 0,00 | 1 | NA |
| RP11-469J4.2   | 0,00 | 0,00 | 0,00 | 0,00 | 1 | NA |
| RP11-46A10.4   | 0,00 | 0,00 | 0,00 | 0,00 | 1 | NA |
| RP11-46A10.6   | 0,00 | 0,00 | 0,00 | 0,00 | 1 | NA |
| RP11-46I8.4    | 0,00 | 0,00 | 0,00 | 0,00 | 1 | NA |
| RP11-46P12.1   | 0,00 | 0,00 | 0,00 | 0,00 | 1 | NA |
| RP11-471B18.1  | 0,00 | 0,00 | 0,00 | 0,00 | 1 | NA |
| RP11-472I20.5  | 0,00 | 0,00 | 0,00 | 0,00 | 1 | NA |
| RP11-473L15.3  | 0,00 | 0,00 | 0,00 | 0,00 | 1 | NA |
| RP11-473M14.4  | 0,00 | 0,00 | 0,00 | 0,00 | 1 | NA |
| RP11-474D1.4   | 0,00 | 0,00 | 0,00 | 0,00 | 1 | NA |
| RP11-474I11.8  | 0,00 | 0,00 | 0,00 | 0,00 | 1 | NA |
| RP11-474L7.4   | 0,00 | 0,00 | 0,00 | 0,00 | 1 | NA |
| RP11-475D12.2  | 0,00 | 0,00 | 0,00 | 0,00 | 1 | NA |
| RP11-475E11.5  | 0,00 | 0,00 | 0,00 | 0,00 | 1 | NA |
| RP11-476I15.2  | 0,00 | 0,00 | 0,00 | 0,00 | 1 | NA |
| RP11-476M19.2  | 0,00 | 0,00 | 0,00 | 0,00 | 1 | NA |

|                |      |      |      |      |   |    |
|----------------|------|------|------|------|---|----|
| RP11-477G18.3  | 0,00 | 0,00 | 0,00 | 0,00 | 1 | NA |
| RP11-477J21.2  | 0,00 | 0,00 | 0,00 | 0,00 | 1 | NA |
| RP11-478C1.8   | 0,00 | 0,00 | 0,00 | 0,00 | 1 | NA |
| RP11-478C6.6   | 0,00 | 0,00 | 0,00 | 0,00 | 1 | NA |
| RP11-478H13.1  | 0,00 | 0,00 | 0,00 | 0,00 | 1 | NA |
| RP11-478H16.1  | 0,00 | 0,00 | 0,00 | 0,00 | 1 | NA |
| RP11-478J18.2  | 0,00 | 0,00 | 0,00 | 0,00 | 1 | NA |
| RP11-47I22.1   | 0,00 | 0,00 | 0,00 | 0,00 | 1 | NA |
| RP11-47P18.1   | 0,00 | 0,00 | 0,00 | 0,00 | 1 | NA |
| RP11-47P18.2   | 0,00 | 0,00 | 0,00 | 0,00 | 1 | NA |
| RP11-480D4.4   | 0,00 | 0,00 | 0,00 | 0,00 | 1 | NA |
| RP11-480N24.4  | 0,00 | 0,00 | 0,00 | 0,00 | 1 | NA |
| RP11-481I2.3   | 0,00 | 0,00 | 0,00 | 0,00 | 1 | NA |
| RP11-482E14.1  | 0,00 | 0,00 | 0,00 | 0,00 | 1 | NA |
| RP11-482H16.1  | 0,00 | 0,00 | 0,00 | 0,00 | 1 | NA |
| RP11-484J3.1   | 0,00 | 0,00 | 0,00 | 0,00 | 1 | NA |
| RP11-484N16.1  | 0,00 | 0,00 | 0,00 | 0,00 | 1 | NA |
| RP11-484P15.2  | 0,00 | 0,00 | 0,00 | 0,00 | 1 | NA |
| RP11-487E1.2   | 0,00 | 0,00 | 0,00 | 0,00 | 1 | NA |
| RP11-489C13.1  | 0,00 | 0,00 | 0,00 | 0,00 | 1 | NA |
| RP11-48D4.2    | 0,00 | 0,00 | 0,00 | 0,00 | 1 | NA |
| RP11-48L13.1   | 0,00 | 0,00 | 0,00 | 0,00 | 1 | NA |
| RP11-490B18.6  | 0,00 | 0,00 | 0,00 | 0,00 | 1 | NA |
| RP11-490B18.9  | 0,00 | 0,00 | 0,00 | 0,00 | 1 | NA |
| RP11-493L12.5  | 0,00 | 0,00 | 0,00 | 0,00 | 1 | NA |
| RP11-496I9.1   | 0,00 | 0,00 | 0,00 | 0,00 | 1 | NA |
| RP11-498A13.1  | 0,00 | 0,00 | 0,00 | 0,00 | 1 | NA |
| RP11-498P14.4  | 0,00 | 0,00 | 0,00 | 0,00 | 1 | NA |
| RP11-499F19.3  | 0,00 | 0,00 | 0,00 | 0,00 | 1 | NA |
| RP11-499O7.5   | 0,00 | 0,00 | 0,00 | 0,00 | 1 | NA |
| RP11-49K24.5   | 0,00 | 0,00 | 0,00 | 0,00 | 1 | NA |
| RP11-4C20.4    | 0,00 | 0,00 | 0,00 | 0,00 | 1 | NA |
| RP11-4M23.4    | 0,00 | 0,00 | 0,00 | 0,00 | 1 | NA |
| RP11-500G22.4  | 0,00 | 0,00 | 0,00 | 0,00 | 1 | NA |
| RP11-500K19.1  | 0,00 | 0,00 | 0,00 | 0,00 | 1 | NA |
| RP11-501J20.5  | 0,00 | 0,00 | 0,00 | 0,00 | 1 | NA |
| RP11-501M7.1   | 0,00 | 0,00 | 0,00 | 0,00 | 1 | NA |
| RP11-501O2.4   | 0,00 | 0,00 | 0,00 | 0,00 | 1 | NA |
| RP11-502L5.2   | 0,00 | 0,00 | 0,00 | 0,00 | 1 | NA |
| RP11-503D12.1  | 0,00 | 0,00 | 0,00 | 0,00 | 1 | NA |
| RP11-503P10.1  | 0,00 | 0,00 | 0,00 | 0,00 | 1 | NA |
| RP11-504G3.2   | 0,00 | 0,00 | 0,00 | 0,00 | 1 | NA |
| RP11-504G3.4   | 0,00 | 0,00 | 0,00 | 0,00 | 1 | NA |
| RP11-505F3.2   | 0,00 | 0,00 | 0,00 | 0,00 | 1 | NA |
| RP11-506C15.1  | 0,00 | 0,00 | 0,00 | 0,00 | 1 | NA |
| RP11-506E9.1   | 0,00 | 0,49 | 0,00 | 0,00 | 1 | NA |
| RP11-507E23.1  | 0,00 | 0,00 | 0,00 | 0,00 | 1 | NA |
| RP11-508N22.11 | 0,00 | 0,00 | 0,00 | 0,00 | 1 | NA |
| RP11-509J21.4  | 0,00 | 0,00 | 0,00 | 0,00 | 1 | NA |
| RP11-509P12.1  | 0,00 | 0,00 | 0,00 | 0,00 | 1 | NA |
| RP11-510M2.7   | 0,00 | 0,00 | 0,00 | 0,00 | 1 | NA |
| RP11-513D5.2   | 0,00 | 0,00 | 0,00 | 0,00 | 1 | NA |
| RP11-513P18.2  | 0,00 | 0,00 | 0,00 | 0,00 | 1 | NA |
| RP11-514D23.2  | 0,00 | 0,00 | 0,00 | 0,00 | 1 | NA |
| RP11-514P8.8   | 0,00 | 0,00 | 0,00 | 0,00 | 1 | NA |

|               |      |      |      |      |   |    |
|---------------|------|------|------|------|---|----|
| RP11-517O13.2 | 0,00 | 0,00 | 0,00 | 0,00 | 1 | NA |
| RP11-51C14.2  | 0,00 | 0,00 | 0,00 | 0,00 | 1 | NA |
| RP11-520B13.3 | 0,00 | 0,00 | 0,00 | 0,00 | 1 | NA |
| RP11-521P1.1  | 0,00 | 0,00 | 0,00 | 0,00 | 1 | NA |
| RP11-522B15.7 | 0,00 | 0,00 | 0,00 | 0,00 | 1 | NA |
| RP11-522M21.3 | 0,00 | 0,00 | 0,00 | 0,00 | 1 | NA |
| RP11-523L1.2  | 0,00 | 0,00 | 0,00 | 0,00 | 1 | NA |
| RP11-524G24.2 | 0,00 | 0,00 | 0,00 | 0,00 | 1 | NA |
| RP11-525A16.4 | 0,00 | 0,00 | 0,00 | 0,00 | 1 | NA |
| RP11-526P5.1  | 0,00 | 0,00 | 0,00 | 0,00 | 1 | NA |
| RP11-526P5.2  | 0,00 | 0,00 | 0,00 | 0,00 | 1 | NA |
| RP11-527D15.1 | 0,00 | 0,00 | 0,00 | 0,00 | 1 | NA |
| RP11-528N21.2 | 0,00 | 0,00 | 0,00 | 0,00 | 1 | NA |
| RP11-529A4.4  | 0,00 | 0,00 | 0,00 | 0,00 | 1 | NA |
| RP11-52L11.3  | 0,00 | 0,00 | 0,00 | 0,00 | 1 | NA |
| RP11-530I17.1 | 0,00 | 0,00 | 0,00 | 0,00 | 1 | NA |
| RP11-530N7.3  | 0,00 | 0,00 | 0,00 | 0,00 | 1 | NA |
| RP11-532F12.6 | 0,00 | 0,00 | 0,00 | 0,00 | 1 | NA |
| RP11-533F5.2  | 0,00 | 0,00 | 0,00 | 0,00 | 1 | NA |
| RP11-533K9.3  | 0,00 | 0,00 | 0,00 | 0,00 | 1 | NA |
| RP11-534L6.3  | 0,00 | 0,00 | 0,00 | 0,00 | 1 | NA |
| RP11-535K1.1  | 0,00 | 0,00 | 0,00 | 0,00 | 1 | NA |
| RP11-535M15.2 | 0,00 | 0,00 | 0,00 | 0,00 | 1 | NA |
| RP11-536C10.5 | 0,00 | 0,00 | 0,00 | 0,00 | 1 | NA |
| RP11-536G4.5  | 0,00 | 0,00 | 0,00 | 0,00 | 1 | NA |
| RP11-536L15.1 | 0,00 | 0,00 | 0,00 | 0,00 | 1 | NA |
| RP11-536N17.1 | 0,00 | 0,00 | 0,00 | 0,00 | 1 | NA |
| RP11-538C21.1 | 0,00 | 0,00 | 0,00 | 0,00 | 1 | NA |
| RP11-539G18.1 | 0,00 | 0,00 | 0,00 | 0,00 | 1 | NA |
| RP11-53D15.1  | 0,00 | 0,00 | 0,00 | 0,00 | 1 | NA |
| RP11-53D5.1   | 0,00 | 0,00 | 0,00 | 0,00 | 1 | NA |
| RP11-53L24.2  | 0,00 | 0,00 | 0,00 | 0,00 | 1 | NA |
| RP11-53M11.4  | 0,00 | 0,00 | 0,00 | 0,00 | 1 | NA |
| RP11-540D4.3  | 0,00 | 0,00 | 0,00 | 0,00 | 1 | NA |
| RP11-542F9.1  | 0,00 | 0,00 | 0,00 | 0,00 | 1 | NA |
| RP11-543B16.1 | 0,00 | 0,00 | 0,00 | 0,00 | 1 | NA |
| RP11-543F8.1  | 0,00 | 0,00 | 0,00 | 0,00 | 1 | NA |
| RP11-543H23.2 | 0,00 | 0,00 | 0,00 | 0,00 | 1 | NA |
| RP11-544K18.2 | 0,00 | 0,00 | 0,00 | 0,00 | 1 | NA |
| RP11-545H22.1 | 0,00 | 0,00 | 0,00 | 0,00 | 1 | NA |
| RP11-545I10.2 | 0,00 | 0,00 | 0,00 | 0,00 | 1 | NA |
| RP11-545M17.2 | 0,00 | 0,00 | 0,00 | 0,00 | 1 | NA |
| RP11-546B8.6  | 0,00 | 0,00 | 0,00 | 0,00 | 1 | NA |
| RP11-547L9.1  | 0,00 | 0,00 | 0,00 | 0,00 | 1 | NA |
| RP11-548H18.1 | 0,00 | 0,00 | 0,00 | 0,00 | 1 | NA |
| RP11-548L20.1 | 0,00 | 0,00 | 0,00 | 0,00 | 1 | NA |
| RP11-549B18.1 | 0,00 | 0,00 | 0,00 | 0,00 | 1 | NA |
| RP11-54A1.2   | 0,00 | 0,00 | 0,00 | 0,00 | 1 | NA |
| RP11-54O7.16  | 0,00 | 0,00 | 0,00 | 0,00 | 1 | NA |
| RP11-550E18.1 | 0,00 | 0,00 | 0,00 | 0,00 | 1 | NA |
| RP11-550H2.1  | 0,00 | 0,00 | 0,00 | 0,00 | 1 | NA |
| RP11-552D4.1  | 0,00 | 0,00 | 0,00 | 0,00 | 1 | NA |
| RP11-552E20.3 | 0,00 | 0,00 | 0,00 | 0,00 | 1 | NA |
| RP11-552F3.10 | 0,00 | 0,00 | 0,00 | 0,00 | 1 | NA |
| RP11-553L6.3  | 0,00 | 0,00 | 0,00 | 0,00 | 1 | NA |

|               |      |      |      |      |   |    |
|---------------|------|------|------|------|---|----|
| RP11-553N19.1 | 0,00 | 0,00 | 0,00 | 0,00 | 1 | NA |
| RP11-554A11.7 | 0,00 | 0,00 | 0,00 | 0,00 | 1 | NA |
| RP11-554D14.8 | 0,00 | 0,00 | 0,00 | 0,00 | 1 | NA |
| RP11-555M1.3  | 0,00 | 0,00 | 0,00 | 0,00 | 1 | NA |
| RP11-556I14.2 | 0,00 | 0,00 | 0,00 | 0,00 | 1 | NA |
| RP11-557C9.2  | 0,00 | 0,00 | 0,00 | 0,00 | 1 | NA |
| RP11-560I19.1 | 0,00 | 0,00 | 0,00 | 0,00 | 1 | NA |
| RP11-561N12.2 | 0,00 | 0,00 | 0,00 | 0,00 | 1 | NA |
| RP11-561P12.2 | 0,00 | 0,00 | 0,00 | 0,00 | 1 | NA |
| RP11-562F9.1  | 0,00 | 0,00 | 0,00 | 0,00 | 1 | NA |
| RP11-562I5.2  | 0,00 | 0,00 | 0,00 | 0,00 | 1 | NA |
| RP11-563D10.1 | 0,00 | 0,00 | 0,00 | 0,00 | 1 | NA |
| RP11-565P22.2 | 0,00 | 0,00 | 0,00 | 0,00 | 1 | NA |
| RP11-566K11.7 | 0,00 | 0,00 | 0,00 | 0,00 | 1 | NA |
| RP11-567C2.1  | 0,00 | 0,00 | 0,00 | 0,00 | 1 | NA |
| RP11-56B16.6  | 0,00 | 0,00 | 0,00 | 0,00 | 1 | NA |
| RP11-571L19.2 | 0,00 | 0,00 | 0,00 | 0,00 | 1 | NA |
| RP11-571L19.7 | 0,00 | 0,00 | 0,00 | 0,00 | 1 | NA |
| RP11-573G6.9  | 0,00 | 0,00 | 0,00 | 0,00 | 1 | NA |
| RP11-573M3.3  | 0,00 | 0,00 | 0,00 | 0,00 | 1 | NA |
| RP11-574O7.1  | 0,00 | 0,00 | 0,00 | 0,00 | 1 | NA |
| RP11-575G13.2 | 0,00 | 0,00 | 0,00 | 0,00 | 1 | NA |
| RP11-57C13.6  | 0,00 | 0,00 | 0,00 | 0,00 | 1 | NA |
| RP11-580I1.1  | 0,00 | 0,00 | 0,00 | 0,00 | 1 | NA |
| RP11-582E3.2  | 0,00 | 0,00 | 0,00 | 0,00 | 1 | NA |
| RP11-585P4.6  | 0,00 | 0,00 | 0,00 | 0,00 | 1 | NA |
| RP11-587O9.1  | 0,00 | 0,00 | 0,00 | 0,00 | 1 | NA |
| RP11-588F18.1 | 0,00 | 0,00 | 0,00 | 0,00 | 1 | NA |
| RP11-589B3.6  | 0,00 | 0,00 | 0,00 | 0,00 | 1 | NA |
| RP11-589C21.2 | 0,00 | 0,00 | 0,00 | 0,00 | 1 | NA |
| RP11-589C21.5 | 0,00 | 0,00 | 0,00 | 0,00 | 1 | NA |
| RP11-58A12.3  | 0,00 | 0,00 | 0,00 | 0,00 | 1 | NA |
| RP11-58E21.6  | 0,00 | 0,00 | 0,00 | 0,00 | 1 | NA |
| RP11-58H20.3  | 0,00 | 0,00 | 0,00 | 0,00 | 1 | NA |
| RP11-58N10.1  | 0,00 | 0,00 | 0,00 | 0,00 | 1 | NA |
| RP11-58O3.1   | 0,00 | 0,00 | 0,00 | 0,00 | 1 | NA |
| RP11-592N21.2 | 0,00 | 0,00 | 0,00 | 0,00 | 1 | NA |
| RP11-592P9.3  | 0,00 | 0,00 | 0,00 | 0,00 | 1 | NA |
| RP11-597A11.1 | 0,00 | 0,00 | 0,00 | 0,00 | 1 | NA |
| RP11-59J16.2  | 0,00 | 0,00 | 0,00 | 0,00 | 1 | NA |
| RP11-5N11.4   | 0,00 | 0,00 | 0,00 | 0,00 | 1 | NA |
| RP11-5O17.2   | 0,00 | 0,00 | 0,00 | 0,00 | 1 | NA |
| RP11-5P15.1   | 0,00 | 0,00 | 0,00 | 0,00 | 1 | NA |
| RP11-603B13.1 | 0,00 | 0,00 | 0,00 | 0,00 | 1 | NA |
| RP11-603B24.6 | 0,00 | 0,00 | 0,00 | 0,00 | 1 | NA |
| RP11-603K19.1 | 0,00 | 0,00 | 0,00 | 0,00 | 1 | NA |
| RP11-605B16.1 | 0,00 | 0,00 | 0,00 | 0,00 | 1 | NA |
| RP11-60C6.3   | 0,00 | 0,00 | 0,00 | 0,00 | 1 | NA |
| RP11-60C6.5   | 0,00 | 0,00 | 0,00 | 0,00 | 1 | NA |
| RP11-60L3.6   | 0,00 | 0,00 | 0,00 | 0,00 | 1 | NA |
| RP11-611L7.2  | 0,00 | 0,00 | 0,00 | 0,00 | 1 | NA |
| RP11-612I15.1 | 0,00 | 0,00 | 0,00 | 0,00 | 1 | NA |
| RP11-612L3.1  | 0,00 | 0,00 | 0,00 | 0,00 | 1 | NA |
| RP11-618M23.4 | 0,00 | 0,00 | 0,00 | 0,00 | 1 | NA |
| RP11-618N24.1 | 0,00 | 0,00 | 0,00 | 0,00 | 1 | NA |

|                |      |      |      |      |   |    |
|----------------|------|------|------|------|---|----|
| RP11-618P13.1  | 0,00 | 0,00 | 0,00 | 0,00 | 1 | NA |
| RP11-618P17.4  | 0,00 | 0,00 | 0,00 | 0,00 | 1 | NA |
| RP11-61E11.2   | 0,00 | 0,00 | 0,00 | 0,00 | 1 | NA |
| RP11-61G23.2   | 0,00 | 0,00 | 0,00 | 0,00 | 1 | NA |
| RP11-622J8.1   | 0,00 | 0,00 | 0,00 | 0,00 | 1 | NA |
| RP11-624D20.1  | 0,00 | 0,00 | 0,00 | 0,00 | 1 | NA |
| RP11-625L16.3  | 0,00 | 0,00 | 0,00 | 0,00 | 1 | NA |
| RP11-626G11.6  | 0,00 | 0,00 | 0,00 | 0,00 | 1 | NA |
| RP11-626H12.3  | 0,00 | 0,00 | 0,00 | 0,00 | 1 | NA |
| RP11-627H22.3  | 0,00 | 0,00 | 0,00 | 0,00 | 1 | NA |
| RP11-628J14.2  | 0,00 | 0,00 | 0,00 | 0,00 | 1 | NA |
| RP11-62C3.6    | 0,00 | 0,00 | 0,00 | 0,00 | 1 | NA |
| RP11-62L18.3   | 0,00 | 0,00 | 0,00 | 0,00 | 1 | NA |
| RP11-631M21.1  | 0,00 | 0,00 | 0,00 | 0,00 | 1 | NA |
| RP11-638I2.9   | 0,00 | 0,00 | 0,00 | 0,00 | 1 | NA |
| RP11-63H19.2   | 0,00 | 0,00 | 0,00 | 0,00 | 1 | NA |
| RP11-63H19.6   | 0,00 | 0,00 | 0,00 | 0,00 | 1 | NA |
| RP11-640N20.9  | 0,00 | 0,00 | 0,00 | 0,00 | 1 | NA |
| RP11-641C17.3  | 0,00 | 0,00 | 0,00 | 0,00 | 1 | NA |
| RP11-641C17.4  | 0,00 | 0,00 | 0,00 | 0,00 | 1 | NA |
| RP11-641J8.1   | 0,00 | 0,00 | 0,00 | 0,00 | 1 | NA |
| RP11-641J8.2   | 0,00 | 0,00 | 0,00 | 0,00 | 1 | NA |
| RP11-642D6.1   | 0,00 | 0,00 | 0,00 | 0,00 | 1 | NA |
| RP11-642E20.4  | 0,00 | 0,00 | 0,00 | 0,00 | 1 | NA |
| RP11-643E14.2  | 0,00 | 0,00 | 0,00 | 0,00 | 1 | NA |
| RP11-643G5.2   | 0,00 | 0,00 | 0,00 | 0,00 | 1 | NA |
| RP11-644A7.2   | 0,00 | 0,00 | 0,00 | 0,00 | 1 | NA |
| RP11-644K8.1   | 0,00 | 0,00 | 0,00 | 0,00 | 1 | NA |
| RP11-646I6.6   | 0,00 | 0,00 | 0,00 | 0,00 | 1 | NA |
| RP11-646J21.7  | 0,00 | 0,00 | 0,00 | 0,00 | 1 | NA |
| RP11-647F2.2   | 0,00 | 0,00 | 0,00 | 0,00 | 1 | NA |
| RP11-647K16.1  | 0,00 | 0,00 | 0,00 | 0,00 | 1 | NA |
| RP11-647O20.1  | 0,00 | 0,00 | 0,00 | 0,00 | 1 | NA |
| RP11-64J24.2   | 0,00 | 0,00 | 0,00 | 0,00 | 1 | NA |
| RP11-650K20.2  | 0,00 | 0,00 | 0,00 | 0,00 | 1 | NA |
| RP11-651J20.1  | 0,00 | 0,00 | 0,00 | 0,00 | 1 | NA |
| RP11-651P23.3  | 0,00 | 0,00 | 0,00 | 0,00 | 1 | NA |
| RP11-652G5.2   | 0,00 | 0,00 | 0,00 | 0,00 | 1 | NA |
| RP11-656D10.7  | 0,00 | 0,00 | 0,00 | 0,00 | 1 | NA |
| RP11-659G9.1   | 0,00 | 0,00 | 0,00 | 0,00 | 1 | NA |
| RP11-65B23.4   | 0,00 | 0,00 | 0,00 | 0,00 | 1 | NA |
| RP11-65B7.2    | 0,00 | 0,00 | 0,00 | 0,00 | 1 | NA |
| RP11-65C6.1    | 0,00 | 0,00 | 0,00 | 0,00 | 1 | NA |
| RP11-65N13.8   | 0,00 | 0,00 | 0,00 | 0,00 | 1 | NA |
| RP11-660I20.1  | 0,00 | 0,00 | 0,00 | 0,00 | 1 | NA |
| RP11-665C16.9  | 0,00 | 0,00 | 0,00 | 0,00 | 1 | NA |
| RP11-665O4.1   | 0,00 | 0,00 | 0,00 | 0,00 | 1 | NA |
| RP11-666A8.12  | 0,00 | 0,00 | 0,00 | 0,00 | 1 | NA |
| RP11-666F17.2  | 0,00 | 0,00 | 0,00 | 0,00 | 1 | NA |
| RP11-666O2.6   | 0,00 | 0,00 | 0,00 | 0,00 | 1 | NA |
| RP11-667K14.10 | 0,00 | 0,00 | 0,00 | 0,00 | 1 | NA |
| RP11-667M19.9  | 0,00 | 0,00 | 0,00 | 0,00 | 1 | NA |
| RP11-66B24.9   | 0,00 | 0,00 | 0,00 | 0,00 | 1 | NA |
| RP11-670N15.1  | 0,00 | 0,00 | 0,00 | 0,00 | 1 | NA |
| RP11-671P2.1   | 0,00 | 0,00 | 0,00 | 0,00 | 1 | NA |

|               |      |      |      |      |   |    |
|---------------|------|------|------|------|---|----|
| RP11-673P17.4 | 0,00 | 0,00 | 0,00 | 0,00 | 1 | NA |
| RP11-674E16.1 | 0,00 | 0,00 | 0,00 | 0,00 | 1 | NA |
| RP11-674N8.1  | 0,00 | 0,00 | 0,00 | 0,00 | 1 | NA |
| RP11-677N16.1 | 0,00 | 0,00 | 0,00 | 0,00 | 1 | NA |
| RP11-67M1.1   | 0,00 | 0,00 | 0,00 | 0,00 | 1 | NA |
| RP11-680H20.2 | 0,00 | 0,00 | 0,00 | 0,00 | 1 | NA |
| RP11-681B3.3  | 0,00 | 0,00 | 0,00 | 0,00 | 1 | NA |
| RP11-688H10.1 | 0,00 | 0,00 | 0,00 | 0,00 | 1 | NA |
| RP11-690I21.1 | 0,00 | 0,00 | 0,00 | 0,00 | 1 | NA |
| RP11-692P14.1 | 0,00 | 0,00 | 0,00 | 0,00 | 1 | NA |
| RP11-697H9.5  | 0,00 | 0,00 | 0,00 | 0,00 | 1 | NA |
| RP11-697N18.1 | 0,00 | 0,00 | 0,00 | 0,00 | 1 | NA |
| RP11-697N18.3 | 0,00 | 0,00 | 0,00 | 0,00 | 1 | NA |
| RP11-698N11.3 | 0,00 | 0,00 | 0,00 | 0,00 | 1 | NA |
| RP11-69C17.2  | 0,00 | 0,00 | 0,00 | 0,00 | 1 | NA |
| RP11-69L16.6  | 0,00 | 0,00 | 0,00 | 0,00 | 1 | NA |
| RP11-6E9.4    | 0,00 | 0,00 | 0,00 | 0,00 | 1 | NA |
| RP11-6F6.1    | 0,00 | 0,00 | 0,00 | 0,00 | 1 | NA |
| RP11-6J21.2   | 0,00 | 0,00 | 0,00 | 0,00 | 1 | NA |
| RP11-6N17.9   | 0,00 | 0,00 | 0,00 | 0,00 | 1 | NA |
| RP11-700H6.1  | 0,00 | 0,00 | 0,00 | 0,00 | 1 | NA |
| RP11-700H6.4  | 0,00 | 0,00 | 0,00 | 0,00 | 1 | NA |
| RP11-701H24.4 | 0,00 | 0,00 | 0,00 | 0,00 | 1 | NA |
| RP11-702B10.2 | 0,00 | 0,00 | 0,00 | 0,00 | 1 | NA |
| RP11-705O24.2 | 0,00 | 0,00 | 0,00 | 0,00 | 1 | NA |
| RP11-709A23.1 | 0,00 | 0,00 | 0,00 | 0,00 | 1 | NA |
| RP11-70D24.2  | 0,00 | 0,00 | 0,00 | 0,00 | 1 | NA |
| RP11-70F11.11 | 0,00 | 0,00 | 0,00 | 0,00 | 1 | NA |
| RP11-70F11.7  | 0,00 | 0,00 | 0,00 | 0,00 | 1 | NA |
| RP11-710C12.1 | 0,00 | 0,00 | 0,00 | 0,00 | 1 | NA |
| RP11-710F7.2  | 0,00 | 0,00 | 0,00 | 0,00 | 1 | NA |
| RP11-712B9.6  | 0,00 | 0,00 | 0,00 | 0,00 | 1 | NA |
| RP11-712L6.8  | 0,00 | 0,00 | 0,00 | 0,00 | 1 | NA |
| RP11-713N11.3 | 0,00 | 0,00 | 0,00 | 0,00 | 1 | NA |
| RP11-713P17.5 | 0,00 | 0,00 | 0,00 | 0,00 | 1 | NA |
| RP11-715G15.1 | 0,00 | 0,00 | 0,00 | 0,00 | 1 | NA |
| RP11-715H19.2 | 0,00 | 0,00 | 0,00 | 0,00 | 1 | NA |
| RP11-715J22.1 | 0,00 | 0,00 | 0,00 | 0,00 | 1 | NA |
| RP11-718I15.1 | 0,00 | 0,00 | 0,00 | 0,00 | 1 | NA |
| RP11-719N22.1 | 0,00 | 0,00 | 0,00 | 0,00 | 1 | NA |
| RP11-71E19.2  | 0,00 | 0,00 | 0,00 | 0,00 | 1 | NA |
| RP11-71H17.6  | 0,00 | 0,00 | 0,00 | 0,00 | 1 | NA |
| RP11-71H9.1   | 0,00 | 0,00 | 0,00 | 0,00 | 1 | NA |
| RP11-725M22.1 | 0,00 | 0,00 | 0,00 | 0,00 | 1 | NA |
| RP11-728B21.3 | 0,00 | 0,00 | 0,00 | 0,00 | 1 | NA |
| RP11-728E14.2 | 0,00 | 0,00 | 0,00 | 0,00 | 1 | NA |
| RP11-72B4.2   | 0,00 | 0,00 | 0,00 | 0,00 | 1 | NA |
| RP11-72I2.1   | 0,00 | 0,00 | 0,00 | 0,00 | 1 | NA |
| RP11-72M10.6  | 0,00 | 0,00 | 0,00 | 0,00 | 1 | NA |
| RP11-72P19.2  | 0,00 | 0,00 | 0,00 | 0,00 | 1 | NA |
| RP11-731I8.3  | 0,00 | 0,00 | 0,00 | 0,00 | 1 | NA |
| RP11-736P16.1 | 0,00 | 0,00 | 0,00 | 0,00 | 1 | NA |
| RP11-739A13.1 | 0,00 | 0,00 | 0,00 | 0,00 | 1 | NA |
| RP11-742D12.2 | 0,00 | 0,00 | 0,00 | 0,00 | 1 | NA |
| RP11-745K9.1  | 0,00 | 0,00 | 0,00 | 0,00 | 1 | NA |

|                |      |      |      |      |   |    |
|----------------|------|------|------|------|---|----|
| RP11-747I9.1   | 0,00 | 0,00 | 0,00 | 0,00 | 1 | NA |
| RP11-74E22.6   | 0,00 | 0,00 | 0,00 | 0,00 | 1 | NA |
| RP11-74K11.2   | 0,00 | 0,00 | 0,00 | 0,00 | 1 | NA |
| RP11-752D24.3  | 0,00 | 0,00 | 0,00 | 0,00 | 1 | NA |
| RP11-752G15.10 | 0,00 | 0,00 | 0,00 | 0,00 | 1 | NA |
| RP11-753E22.3  | 0,00 | 0,00 | 0,00 | 0,00 | 1 | NA |
| RP11-754J4.1   | 0,00 | 0,00 | 0,00 | 0,00 | 1 | NA |
| RP11-754N21.1  | 0,00 | 0,00 | 0,00 | 0,00 | 1 | NA |
| RP11-755E23.3  | 0,00 | 0,00 | 0,00 | 0,00 | 1 | NA |
| RP11-757A13.1  | 0,00 | 0,00 | 0,00 | 0,00 | 1 | NA |
| RP11-758M4.3   | 0,00 | 0,00 | 0,00 | 0,00 | 1 | NA |
| RP11-75L1.6    | 0,00 | 0,00 | 0,00 | 0,00 | 1 | NA |
| RP11-761I4.5   | 0,00 | 0,00 | 0,00 | 0,00 | 1 | NA |
| RP11-766H1.1   | 0,00 | 0,00 | 0,00 | 0,00 | 1 | NA |
| RP11-766N7.1   | 0,00 | 0,00 | 0,00 | 0,00 | 1 | NA |
| RP11-769N19.2  | 0,00 | 0,00 | 0,00 | 0,00 | 1 | NA |
| RP11-76C10.4   | 0,00 | 0,00 | 0,00 | 0,00 | 1 | NA |
| RP11-76F14.1   | 0,00 | 0,00 | 0,00 | 0,00 | 1 | NA |
| RP11-76G10.1   | 0,00 | 0,00 | 0,00 | 0,00 | 1 | NA |
| RP11-76K19.1   | 0,00 | 0,00 | 0,00 | 0,00 | 1 | NA |
| RP11-76P2.3    | 0,00 | 0,00 | 0,00 | 0,00 | 1 | NA |
| RP11-770E5.2   | 0,00 | 0,00 | 0,00 | 0,00 | 1 | NA |
| RP11-770J1.3   | 0,00 | 0,00 | 0,00 | 0,00 | 1 | NA |
| RP11-770J1.7   | 0,00 | 0,00 | 0,00 | 0,00 | 1 | NA |
| RP11-775A3.1   | 0,00 | 0,00 | 0,00 | 0,00 | 1 | NA |
| RP11-779P15.1  | 0,00 | 0,00 | 0,00 | 0,00 | 1 | NA |
| RP11-77G22.2   | 0,00 | 0,00 | 0,00 | 0,00 | 1 | NA |
| RP11-77K12.8   | 0,00 | 0,00 | 0,00 | 0,00 | 1 | NA |
| RP11-780K2.1   | 0,00 | 0,00 | 0,00 | 0,00 | 1 | NA |
| RP11-781D11.1  | 0,00 | 0,00 | 0,00 | 0,00 | 1 | NA |
| RP11-781E19.1  | 0,00 | 0,00 | 0,00 | 0,00 | 1 | NA |
| RP11-783L4.1   | 0,00 | 0,00 | 0,00 | 0,00 | 1 | NA |
| RP11-788H18.1  | 0,00 | 0,00 | 0,00 | 0,00 | 1 | NA |
| RP11-78A18.2   | 0,00 | 0,00 | 0,00 | 0,00 | 1 | NA |
| RP11-790I12.2  | 0,00 | 0,00 | 0,00 | 0,00 | 1 | NA |
| RP11-793H13.12 | 0,00 | 0,00 | 0,00 | 0,00 | 1 | NA |
| RP11-794P6.2   | 0,00 | 0,00 | 0,00 | 0,00 | 1 | NA |
| RP11-795J1.1   | 0,00 | 0,00 | 0,00 | 0,00 | 1 | NA |
| RP11-796G6.1   | 0,00 | 0,00 | 0,00 | 0,00 | 1 | NA |
| RP11-799D4.3   | 0,00 | 0,00 | 0,00 | 0,00 | 1 | NA |
| RP11-79E3.1    | 0,00 | 0,00 | 0,00 | 0,00 | 1 | NA |
| RP11-79J24.1   | 0,00 | 0,00 | 0,00 | 0,00 | 1 | NA |
| RP11-79P5.9    | 0,00 | 0,00 | 0,00 | 0,00 | 1 | NA |
| RP11-7F17.4    | 0,00 | 0,00 | 0,00 | 0,00 | 1 | NA |
| RP11-802F5.1   | 0,00 | 0,00 | 0,00 | 0,00 | 1 | NA |
| RP11-803J6.1   | 0,00 | 0,00 | 0,00 | 0,00 | 1 | NA |
| RP11-805L22.1  | 0,00 | 0,00 | 0,00 | 0,00 | 1 | NA |
| RP11-807H7.2   | 0,00 | 0,00 | 0,00 | 0,00 | 1 | NA |
| RP11-80A15.1   | 0,00 | 0,00 | 0,00 | 0,00 | 1 | NA |
| RP11-80F22.8   | 0,00 | 0,00 | 0,00 | 0,00 | 1 | NA |
| RP11-80G7.1    | 0,00 | 0,00 | 0,00 | 0,00 | 1 | NA |
| RP11-80H12.2   | 0,00 | 0,00 | 0,00 | 0,00 | 1 | NA |
| RP11-810F22.1  | 0,00 | 0,00 | 0,00 | 0,00 | 1 | NA |
| RP11-810K23.10 | 0,00 | 0,00 | 0,00 | 0,00 | 1 | NA |
| RP11-813N20.3  | 0,00 | 0,00 | 0,00 | 0,00 | 1 | NA |



|               |      |      |      |      |   |    |
|---------------|------|------|------|------|---|----|
| RP11-813P10.2 | 0,00 | 0,00 | 0,00 | 0,00 | 1 | NA |
| RP11-815I22.1 | 0,00 | 0,00 | 0,00 | 0,00 | 1 | NA |
| RP11-815I9.4  | 0,00 | 0,00 | 0,00 | 0,00 | 1 | NA |
| RP11-815J4.1  | 0,00 | 0,00 | 0,00 | 0,00 | 1 | NA |
| RP11-815K11.1 | 0,00 | 0,00 | 0,00 | 0,00 | 1 | NA |
| RP11-815N9.2  | 0,00 | 0,00 | 0,00 | 0,00 | 1 | NA |
| RP11-815N9.3  | 0,00 | 0,00 | 0,00 | 0,00 | 1 | NA |
| RP11-81F11.2  | 0,00 | 0,00 | 0,00 | 0,00 | 1 | NA |
| RP11-824M15.3 | 0,00 | 0,00 | 0,00 | 0,00 | 1 | NA |
| RP11-835E18.4 | 0,00 | 0,00 | 0,00 | 0,00 | 1 | NA |
| RP11-839G9.1  | 0,00 | 0,00 | 0,00 | 0,00 | 1 | NA |
| RP11-83B20.2  | 0,00 | 0,00 | 0,00 | 0,00 | 1 | NA |
| RP11-83B20.5  | 0,00 | 0,00 | 0,00 | 0,00 | 1 | NA |
| RP11-847H18.2 | 0,00 | 0,00 | 0,00 | 0,00 | 1 | NA |
| RP11-847H18.3 | 0,00 | 0,00 | 0,00 | 0,00 | 1 | NA |
| RP11-84C10.4  | 0,00 | 0,00 | 0,00 | 0,00 | 1 | NA |
| RP11-84D1.2   | 0,00 | 0,00 | 0,00 | 0,00 | 1 | NA |
| RP11-852E15.1 | 0,00 | 0,00 | 0,00 | 0,00 | 1 | NA |
| RP11-854K16.2 | 0,00 | 0,00 | 0,00 | 0,00 | 1 | NA |
| RP11-85G21.2  | 0,00 | 0,00 | 0,00 | 0,00 | 1 | NA |
| RP11-861L17.2 | 0,00 | 0,00 | 0,00 | 0,00 | 1 | NA |
| RP11-861L17.4 | 0,00 | 0,00 | 0,00 | 0,00 | 1 | NA |
| RP11-863N1.1  | 0,00 | 0,00 | 0,00 | 0,00 | 1 | NA |
| RP11-864G5.1  | 0,00 | 0,00 | 0,00 | 0,00 | 1 | NA |
| RP11-864N7.6  | 0,00 | 0,00 | 0,00 | 0,00 | 1 | NA |
| RP11-874J12.4 | 0,00 | 0,00 | 0,00 | 0,00 | 1 | NA |
| RP11-875H7.5  | 0,00 | 0,00 | 0,00 | 0,00 | 1 | NA |
| RP11-875O11.4 | 0,00 | 0,00 | 0,00 | 0,00 | 1 | NA |
| RP11-875O11.5 | 0,00 | 0,00 | 0,00 | 0,00 | 1 | NA |
| RP11-876F14.2 | 0,00 | 0,00 | 0,00 | 0,00 | 1 | NA |
| RP11-878E11.1 | 0,00 | 0,00 | 0,00 | 0,00 | 1 | NA |
| RP11-879F14.2 | 0,00 | 0,00 | 0,00 | 0,00 | 1 | NA |
| RP11-87F15.2  | 0,00 | 0,00 | 0,00 | 0,00 | 1 | NA |
| RP11-87N24.1  | 0,00 | 0,00 | 0,00 | 0,00 | 1 | NA |
| RP11-87P13.2  | 0,00 | 0,00 | 0,00 | 0,00 | 1 | NA |
| RP11-882G5.1  | 0,00 | 0,00 | 0,00 | 0,00 | 1 | NA |
| RP11-886D15.2 | 0,00 | 0,00 | 0,00 | 0,00 | 1 | NA |
| RP11-88E18.1  | 0,00 | 0,00 | 0,00 | 0,00 | 1 | NA |
| RP11-88H10.2  | 0,00 | 0,00 | 0,00 | 0,00 | 1 | NA |
| RP11-88I18.3  | 0,00 | 0,00 | 0,00 | 0,00 | 1 | NA |
| RP11-895M11.2 | 0,00 | 0,00 | 0,00 | 0,00 | 1 | NA |
| RP11-899L11.1 | 0,00 | 0,00 | 0,00 | 0,00 | 1 | NA |
| RP11-8H2.1    | 0,00 | 0,00 | 0,00 | 0,00 | 1 | NA |
| RP11-8L18.2   | 0,00 | 0,00 | 0,00 | 0,00 | 1 | NA |
| RP11-8L8.1    | 0,00 | 0,00 | 0,00 | 0,00 | 1 | NA |
| RP11-8P17.1   | 0,00 | 0,00 | 0,00 | 0,00 | 1 | NA |
| RP11-90C4.2   | 0,00 | 0,00 | 0,00 | 0,00 | 1 | NA |
| RP11-90C4.3   | 0,00 | 0,00 | 0,00 | 0,00 | 1 | NA |
| RP11-90H3.1   | 0,00 | 0,00 | 0,00 | 0,00 | 1 | NA |
| RP11-90K18.1  | 0,00 | 0,00 | 0,00 | 0,00 | 1 | NA |
| RP11-90O23.1  | 0,00 | 0,00 | 0,00 | 0,00 | 1 | NA |
| RP11-91A15.1  | 0,00 | 0,00 | 0,00 | 0,00 | 1 | NA |
| RP11-91A15.2  | 0,00 | 0,00 | 0,00 | 0,00 | 1 | NA |
| RP11-91A18.4  | 0,00 | 0,00 | 0,00 | 0,00 | 1 | NA |
| RP11-91J19.2  | 0,00 | 0,00 | 0,00 | 0,00 | 1 | NA |

|                |      |      |      |      |   |    |
|----------------|------|------|------|------|---|----|
| RP11-928F19.2  | 0,00 | 0,00 | 0,00 | 0,00 | 1 | NA |
| RP11-92J19.1   | 0,00 | 0,00 | 0,00 | 0,00 | 1 | NA |
| RP11-92K15.1   | 0,00 | 0,00 | 0,00 | 0,00 | 1 | NA |
| RP11-92K15.3   | 0,00 | 0,00 | 0,00 | 0,00 | 1 | NA |
| RP11-934B9.3   | 0,00 | 0,00 | 0,00 | 0,00 | 1 | NA |
| RP11-93B14.10  | 0,00 | 0,00 | 0,00 | 0,00 | 1 | NA |
| RP11-93H10.1   | 0,00 | 0,00 | 0,00 | 0,00 | 1 | NA |
| RP11-93K22.1   | 0,00 | 0,00 | 0,00 | 0,00 | 1 | NA |
| RP11-93N20.1   | 0,00 | 0,00 | 0,00 | 0,00 | 1 | NA |
| RP11-94A24.1   | 0,00 | 0,00 | 0,00 | 0,00 | 1 | NA |
| RP11-94B19.6   | 0,00 | 0,00 | 0,00 | 0,00 | 1 | NA |
| RP11-94P11.3   | 0,00 | 0,00 | 0,00 | 0,00 | 1 | NA |
| RP11-950C14.10 | 0,00 | 0,00 | 0,00 | 0,00 | 1 | NA |
| RP11-95G6.1    | 0,00 | 0,00 | 0,00 | 0,00 | 1 | NA |
| RP11-967K21.2  | 0,00 | 0,00 | 0,00 | 0,00 | 1 | NA |
| RP11-96A1.5    | 0,00 | 0,00 | 0,00 | 0,00 | 1 | NA |
| RP11-96A15.1   | 0,00 | 0,00 | 0,00 | 0,00 | 1 | NA |
| RP11-96C23.5   | 0,00 | 0,00 | 0,00 | 0,00 | 1 | NA |
| RP11-96D1.6    | 0,00 | 0,00 | 0,00 | 0,00 | 1 | NA |
| RP11-96F3.2    | 0,00 | 0,00 | 0,00 | 0,00 | 1 | NA |
| RP11-96L7.2    | 0,00 | 0,00 | 0,00 | 0,00 | 1 | NA |
| RP11-97E23.3   | 0,00 | 0,00 | 0,00 | 0,00 | 1 | NA |
| RP11-981G7.7   | 0,00 | 0,00 | 0,00 | 0,00 | 1 | NA |
| RP11-98H4.4    | 0,00 | 0,00 | 0,00 | 0,00 | 1 | NA |
| RP11-98L5.5    | 0,00 | 0,00 | 0,00 | 0,00 | 1 | NA |
| RP11-996F15.4  | 0,00 | 0,00 | 0,00 | 0,00 | 1 | NA |
| RP11-999E24.3  | 0,00 | 0,00 | 0,00 | 0,00 | 1 | NA |
| RP11-99C10.1   | 0,00 | 0,00 | 0,00 | 0,00 | 1 | NA |
| RP11-9N20.1    | 0,00 | 0,00 | 0,00 | 0,00 | 1 | NA |
| RP13-1039J1.3  | 0,00 | 0,00 | 0,00 | 0,00 | 1 | NA |
| RP13-13A3.1    | 0,00 | 0,00 | 0,00 | 0,00 | 1 | NA |
| RP13-146A14.1  | 0,00 | 0,00 | 0,00 | 0,00 | 1 | NA |
| RP13-16H11.9   | 0,00 | 0,00 | 0,00 | 0,00 | 1 | NA |
| RP13-204A15.4  | 0,00 | 0,00 | 0,00 | 0,00 | 1 | NA |
| RP13-210D15.9  | 0,00 | 0,00 | 0,00 | 0,00 | 1 | NA |
| RP13-213K19.1  | 0,00 | 0,00 | 0,00 | 0,00 | 1 | NA |
| RP13-362E11.3  | 0,00 | 0,00 | 0,00 | 0,00 | 1 | NA |
| RP13-395E19.4  | 0,00 | 0,00 | 0,00 | 0,00 | 1 | NA |
| RP13-415G19.2  | 0,00 | 0,00 | 0,00 | 0,00 | 1 | NA |
| RP13-439H18.4  | 0,00 | 0,00 | 0,00 | 0,00 | 1 | NA |
| RP13-455A7.1   | 0,00 | 0,00 | 0,00 | 0,00 | 1 | NA |
| RP13-467H17.1  | 0,00 | 0,00 | 0,00 | 0,00 | 1 | NA |
| RP13-554M15.8  | 0,00 | 0,00 | 0,00 | 0,00 | 1 | NA |
| RP13-565O16.2  | 0,00 | 0,00 | 0,00 | 0,00 | 1 | NA |
| RP13-635I23.3  | 0,00 | 0,00 | 0,00 | 0,00 | 1 | NA |
| RP13-638C3.2   | 0,00 | 0,00 | 0,00 | 0,00 | 1 | NA |
| RP13-644M16.2  | 0,00 | 0,00 | 0,00 | 0,00 | 1 | NA |
| RP13-644M16.3  | 0,00 | 0,00 | 0,00 | 0,00 | 1 | NA |
| RP13-75G22.1   | 0,00 | 0,00 | 0,00 | 0,00 | 1 | NA |
| RP13-77O11.11  | 0,00 | 0,00 | 0,00 | 0,00 | 1 | NA |
| RP13-884E18.2  | 0,00 | 0,00 | 0,00 | 0,00 | 1 | NA |
| RP13-895I2.6   | 0,00 | 0,00 | 0,00 | 0,00 | 1 | NA |
| RP13-977E11.1  | 0,00 | 0,00 | 0,00 | 0,00 | 1 | NA |
| RP13-977J11.3  | 0,00 | 0,00 | 0,00 | 0,00 | 1 | NA |
| RP3-322L4.2    | 0,00 | 0,00 | 0,00 | 0,00 | 1 | NA |

|              |      |      |      |      |   |    |
|--------------|------|------|------|------|---|----|
| RP3-326L13.2 | 0,00 | 0,00 | 0,00 | 0,00 | 1 | NA |
| RP3-332O11.1 | 0,00 | 0,00 | 0,00 | 0,00 | 1 | NA |
| RP3-333B15.5 | 0,00 | 0,00 | 0,00 | 0,00 | 1 | NA |
| RP3-357D13.1 | 0,00 | 0,00 | 0,00 | 0,00 | 1 | NA |
| RP3-365O12.2 | 0,00 | 0,00 | 0,00 | 0,00 | 1 | NA |
| RP3-380B8.4  | 0,00 | 0,00 | 0,00 | 0,00 | 1 | NA |
| RP3-382I10.2 | 0,00 | 0,00 | 0,00 | 0,00 | 1 | NA |
| RP3-382I10.3 | 0,00 | 0,00 | 0,00 | 0,00 | 1 | NA |
| RP3-382I10.4 | 0,00 | 0,00 | 0,00 | 0,00 | 1 | NA |
| RP3-391O22.1 | 0,00 | 0,00 | 0,00 | 0,00 | 1 | NA |
| RP3-393P12.3 | 0,00 | 0,00 | 0,00 | 0,00 | 1 | NA |
| RP3-395M20.3 | 0,00 | 0,00 | 0,00 | 0,00 | 1 | NA |
| RP3-400B16.3 | 0,00 | 0,00 | 0,00 | 0,00 | 1 | NA |
| RP3-406A7.4  | 0,00 | 0,00 | 0,00 | 0,00 | 1 | NA |
| RP3-408N23.4 | 0,00 | 0,00 | 0,00 | 0,00 | 1 | NA |
| RP3-408N23.7 | 0,00 | 0,00 | 0,00 | 0,00 | 1 | NA |
| RP3-416H24.1 | 0,00 | 0,00 | 0,00 | 0,00 | 1 | NA |
| RP3-417O22.1 | 0,00 | 0,00 | 0,00 | 0,00 | 1 | NA |
| RP3-418A9.3  | 0,00 | 0,00 | 0,00 | 0,00 | 1 | NA |
| RP3-426I6.3  | 0,00 | 0,00 | 0,00 | 0,00 | 1 | NA |
| RP3-428L16.1 | 0,00 | 0,00 | 0,00 | 0,00 | 1 | NA |
| RP3-429G5.5  | 0,00 | 0,00 | 0,00 | 0,00 | 1 | NA |
| RP3-429O6.1  | 0,00 | 0,00 | 0,00 | 0,00 | 1 | NA |
| RP3-430N8.8  | 0,00 | 0,00 | 0,00 | 0,00 | 1 | NA |
| RP3-432I18.1 | 0,00 | 0,00 | 0,00 | 0,00 | 1 | NA |
| RP3-433G13.1 | 0,00 | 0,00 | 0,00 | 0,00 | 1 | NA |
| RP3-449H6.2  | 0,00 | 0,00 | 0,00 | 0,00 | 1 | NA |
| RP3-463P15.1 | 0,00 | 0,00 | 0,00 | 0,00 | 1 | NA |
| RP3-468K18.7 | 0,00 | 0,00 | 0,00 | 0,00 | 1 | NA |
| RP3-470B24.5 | 0,00 | 0,00 | 0,00 | 0,00 | 1 | NA |
| RP3-471M13.1 | 0,00 | 0,00 | 0,00 | 0,00 | 1 | NA |
| RP3-481A17.1 | 0,00 | 0,00 | 0,00 | 0,00 | 1 | NA |
| RP3-481F12.4 | 0,00 | 0,00 | 0,00 | 0,00 | 1 | NA |
| RP3-514A23.2 | 0,00 | 0,00 | 0,00 | 0,00 | 1 | NA |
| RP3-518E13.2 | 0,00 | 0,00 | 0,00 | 0,00 | 1 | NA |
| RP3-523E19.2 | 0,00 | 0,00 | 0,00 | 0,00 | 1 | NA |
| RP3-523K23.2 | 0,00 | 0,00 | 0,00 | 0,00 | 1 | NA |
| RP3-527F8.2  | 0,00 | 0,00 | 0,00 | 0,00 | 1 | NA |
| RP4-529N6.2  | 0,00 | 0,00 | 0,00 | 0,00 | 1 | NA |
| RP4-539M6.21 | 0,00 | 0,00 | 0,00 | 0,00 | 1 | NA |
| RP4-550H1.4  | 0,00 | 0,00 | 0,00 | 0,00 | 1 | NA |
| RP4-555D20.2 | 0,00 | 0,00 | 0,00 | 0,00 | 1 | NA |
| RP4-562J12.1 | 0,00 | 0,00 | 0,00 | 0,00 | 1 | NA |
| RP4-564O4.1  | 0,00 | 0,00 | 0,00 | 0,00 | 1 | NA |
| RP4-569M23.2 | 0,00 | 0,00 | 0,00 | 0,00 | 1 | NA |
| RP4-575N6.4  | 0,00 | 0,00 | 0,00 | 0,00 | 1 | NA |
| RP4-584D14.5 | 0,00 | 0,00 | 0,00 | 0,00 | 1 | NA |
| RP4-584D14.6 | 0,00 | 0,00 | 0,00 | 0,00 | 1 | NA |
| RP4-587D13.2 | 0,00 | 0,00 | 0,00 | 0,00 | 1 | NA |
| RP4-597N16.1 | 0,00 | 0,00 | 0,00 | 0,00 | 1 | NA |
| RP4-599G15.4 | 0,00 | 0,00 | 0,00 | 0,00 | 1 | NA |
| RP4-604A21.1 | 0,00 | 0,00 | 0,00 | 0,00 | 1 | NA |
| RP4-612B18.4 | 0,00 | 0,00 | 0,00 | 0,00 | 1 | NA |
| RP4-612C19.2 | 0,00 | 0,00 | 0,00 | 0,00 | 1 | NA |
| RP4-613B23.5 | 0,00 | 0,00 | 0,00 | 0,00 | 1 | NA |

|                |      |      |      |      |   |    |
|----------------|------|------|------|------|---|----|
| RP4-614C10.4   | 0,00 | 0,00 | 0,00 | 0,00 | 1 | NA |
| RP4-622L5.2    | 0,00 | 0,00 | 0,00 | 0,00 | 1 | NA |
| RP4-631H13.6   | 0,00 | 0,00 | 0,00 | 0,00 | 1 | NA |
| RP4-633H17.2   | 0,00 | 0,00 | 0,00 | 0,00 | 1 | NA |
| RP4-635A23.3   | 0,00 | 0,00 | 0,00 | 0,00 | 1 | NA |
| RP4-635E18.6   | 0,00 | 0,00 | 0,00 | 0,00 | 1 | NA |
| RP4-639J15.1   | 0,00 | 0,00 | 0,00 | 0,00 | 1 | NA |
| RP4-640E24.1   | 0,00 | 0,00 | 0,00 | 0,00 | 1 | NA |
| RP4-644L1.2    | 0,00 | 0,00 | 0,00 | 0,00 | 1 | NA |
| RP4-665N4.8    | 0,00 | 0,00 | 0,00 | 0,00 | 1 | NA |
| RP4-668E10.3   | 0,00 | 0,00 | 0,00 | 0,00 | 1 | NA |
| RP4-683M8.2    | 0,00 | 0,00 | 0,00 | 0,00 | 1 | NA |
| RP4-684L20.2   | 0,00 | 0,00 | 0,00 | 0,00 | 1 | NA |
| RP4-686J16.2   | 0,00 | 0,00 | 0,00 | 0,00 | 1 | NA |
| RP4-694B14.8   | 0,00 | 0,00 | 0,00 | 0,00 | 1 | NA |
| RP4-696H22.2   | 0,00 | 0,00 | 0,00 | 0,00 | 1 | NA |
| RP4-710M3.1    | 0,00 | 0,00 | 0,00 | 0,00 | 1 | NA |
| RP4-713A8.1    | 0,00 | 0,00 | 0,00 | 0,00 | 1 | NA |
| RP4-717M23.2   | 0,00 | 0,00 | 0,00 | 0,00 | 1 | NA |
| RP4-718P11.1   | 0,00 | 0,00 | 0,00 | 0,00 | 1 | NA |
| RP4-725K1.1    | 0,00 | 0,00 | 0,00 | 0,00 | 1 | NA |
| RP4-744I24.4   | 0,00 | 0,00 | 0,00 | 0,00 | 1 | NA |
| RP4-769N13.2   | 0,00 | 0,00 | 0,00 | 0,00 | 1 | NA |
| RP4-777O23.3   | 0,00 | 0,00 | 0,00 | 0,00 | 1 | NA |
| RP4-782L23.2   | 0,00 | 0,00 | 0,00 | 0,00 | 1 | NA |
| RP4-784A16.1   | 0,00 | 0,00 | 0,00 | 0,00 | 1 | NA |
| RP4-784A16.3   | 0,00 | 0,00 | 0,00 | 0,00 | 1 | NA |
| RP4-789D17.4   | 0,00 | 0,00 | 0,00 | 0,00 | 1 | NA |
| RP4-798A17.5   | 0,00 | 0,00 | 0,00 | 0,00 | 1 | NA |
| RP4-802A10.1   | 0,00 | 0,00 | 0,00 | 0,00 | 1 | NA |
| RP4-811H24.9   | 0,00 | 0,00 | 0,00 | 0,00 | 1 | NA |
| RP4-816N1.8    | 0,00 | 0,00 | 0,00 | 0,00 | 1 | NA |
| RP5-1007F24.1  | 0,00 | 0,00 | 0,00 | 0,00 | 1 | NA |
| RP5-1007H16.1  | 0,00 | 0,00 | 0,00 | 0,00 | 1 | NA |
| RP5-1024G6.9   | 0,00 | 0,00 | 0,00 | 0,00 | 1 | NA |
| RP5-1024N4.4   | 0,00 | 0,00 | 0,00 | 0,00 | 1 | NA |
| RP5-1027O15.1  | 0,00 | 0,00 | 0,00 | 0,00 | 1 | NA |
| RP5-1027O15.2  | 0,00 | 0,00 | 0,00 | 0,00 | 1 | NA |
| RP5-1028K7.1   | 0,00 | 0,00 | 0,00 | 0,00 | 1 | NA |
| RP5-1029F21.2  | 0,00 | 0,00 | 0,00 | 0,00 | 1 | NA |
| RP5-1037N22.3  | 0,00 | 0,00 | 0,00 | 0,00 | 1 | NA |
| RP5-1037N22.4  | 0,00 | 0,00 | 0,00 | 0,00 | 1 | NA |
| RP5-1042K10.12 | 0,00 | 0,00 | 0,00 | 0,00 | 1 | NA |
| RP5-1044H5.1   | 0,00 | 0,00 | 0,00 | 0,00 | 1 | NA |
| RP5-1049N15.2  | 0,00 | 0,00 | 0,00 | 0,00 | 1 | NA |
| RP5-1059E7.2   | 0,00 | 0,00 | 0,00 | 0,00 | 1 | NA |
| RP5-1065J22.4  | 0,00 | 0,00 | 0,00 | 0,00 | 1 | NA |
| RP5-1068E13.4  | 0,00 | 0,00 | 0,00 | 0,00 | 1 | NA |
| RP5-1073O3.2   | 0,00 | 0,00 | 0,00 | 0,00 | 1 | NA |
| RP5-1077I2.4   | 0,00 | 0,00 | 0,00 | 0,00 | 1 | NA |
| RP5-1087E8.2   | 0,00 | 0,00 | 0,00 | 0,00 | 1 | NA |
| RP5-1108M17.2  | 0,00 | 0,00 | 0,00 | 0,00 | 1 | NA |
| RP5-1109J22.2  | 0,00 | 0,00 | 0,00 | 0,00 | 1 | NA |
| RP5-1110E20.1  | 0,00 | 0,00 | 0,00 | 0,00 | 1 | NA |
| RP5-1121A15.3  | 0,00 | 0,00 | 0,00 | 0,00 | 1 | NA |

|               |      |      |      |      |   |    |
|---------------|------|------|------|------|---|----|
| RP5-1148A21.3 | 0,00 | 0,00 | 0,00 | 0,00 | 1 | NA |
| RP5-1158E12.2 | 0,00 | 0,00 | 0,00 | 0,00 | 1 | NA |
| RP5-1160K1.3  | 0,00 | 0,00 | 0,00 | 0,00 | 1 | NA |
| RP5-1163L11.3 | 0,00 | 0,00 | 0,00 | 0,00 | 1 | NA |
| RP5-1170K4.7  | 0,00 | 0,00 | 0,00 | 0,00 | 1 | NA |
| RP5-1174J21.2 | 0,00 | 0,00 | 0,00 | 0,00 | 1 | NA |
| RP5-1189B24.3 | 0,00 | 0,00 | 0,00 | 0,00 | 1 | NA |
| RP5-1193P9.1  | 0,00 | 0,00 | 0,00 | 0,00 | 1 | NA |
| RP5-1195D24.1 | 0,00 | 0,00 | 0,00 | 0,00 | 1 | NA |
| RP5-827O9.1   | 0,00 | 0,00 | 0,00 | 0,00 | 1 | NA |
| RP5-833A20.1  | 0,00 | 0,00 | 0,00 | 0,00 | 1 | NA |
| RP5-836J3.1   | 0,00 | 0,00 | 0,00 | 0,00 | 1 | NA |
| RP5-837I24.2  | 0,00 | 0,00 | 0,00 | 0,00 | 1 | NA |
| RP5-837J1.6   | 0,00 | 0,00 | 0,00 | 0,00 | 1 | NA |
| RP5-837M10.2  | 0,00 | 0,00 | 0,00 | 0,00 | 1 | NA |
| RP5-837M10.4  | 0,00 | 0,00 | 0,00 | 0,00 | 1 | NA |
| RP5-837O21.1  | 0,00 | 0,00 | 0,00 | 0,00 | 1 | NA |
| RP5-837O21.6  | 0,00 | 0,00 | 0,00 | 0,00 | 1 | NA |
| RP5-837O21.7  | 0,00 | 0,00 | 0,00 | 0,00 | 1 | NA |
| RP5-839B4.8   | 0,00 | 0,00 | 0,00 | 0,00 | 1 | NA |
| RP5-855F16.1  | 0,00 | 0,00 | 0,00 | 0,00 | 1 | NA |
| RP5-865M20.1  | 0,00 | 0,00 | 0,00 | 0,00 | 1 | NA |
| RP5-866L20.3  | 0,00 | 0,00 | 0,00 | 0,00 | 1 | NA |
| RP5-878I13.2  | 0,00 | 0,00 | 0,00 | 0,00 | 1 | NA |
| RP5-882O7.3   | 0,00 | 0,00 | 0,00 | 0,00 | 1 | NA |
| RP5-891H21.5  | 0,00 | 0,00 | 0,00 | 0,00 | 1 | NA |
| RP5-894D12.3  | 0,00 | 0,00 | 0,00 | 0,00 | 1 | NA |
| RP5-906A24.1  | 0,00 | 0,00 | 0,00 | 0,00 | 1 | NA |
| RP5-914P14.4  | 0,00 | 0,00 | 0,00 | 0,00 | 1 | NA |
| RP5-919F19.5  | 0,00 | 0,00 | 0,00 | 0,00 | 1 | NA |
| RP5-920G3.2   | 0,00 | 0,00 | 0,00 | 0,00 | 1 | NA |
| RP5-933E2.1   | 0,00 | 0,00 | 0,00 | 0,00 | 1 | NA |
| RP5-940J5.3   | 0,00 | 0,00 | 0,00 | 0,00 | 1 | NA |
| RP5-942I16.1  | 0,00 | 0,00 | 0,00 | 0,00 | 1 | NA |
| RP5-944M2.1   | 0,00 | 0,00 | 0,00 | 0,00 | 1 | NA |
| RP5-944M2.3   | 0,00 | 0,00 | 0,00 | 0,00 | 1 | NA |
| RP5-963E22.6  | 0,00 | 0,00 | 0,00 | 0,00 | 1 | NA |
| RP5-965F6.1   | 0,00 | 0,00 | 0,00 | 0,00 | 1 | NA |
| RP5-968D22.1  | 0,00 | 0,00 | 0,00 | 0,00 | 1 | NA |
| RP5-986I17.2  | 0,00 | 0,00 | 0,00 | 0,00 | 1 | NA |
| RP5-991G20.6  | 0,00 | 0,00 | 0,00 | 0,00 | 1 | NA |
| RP5-997D24.3  | 0,00 | 0,00 | 0,00 | 0,00 | 1 | NA |
| RP5-997K18.1  | 0,00 | 0,00 | 0,00 | 0,00 | 1 | NA |
| RP6-191P20.3  | 0,00 | 0,00 | 0,00 | 0,00 | 1 | NA |
| RP6-204F4.5   | 0,00 | 0,00 | 0,00 | 0,00 | 1 | NA |
| RP6-218J18.3  | 0,00 | 0,00 | 0,00 | 0,00 | 1 | NA |
| RP6-22P16.1   | 0,00 | 0,00 | 0,00 | 0,00 | 1 | NA |
| RPL12P29      | 0,00 | 0,00 | 0,00 | 0,00 | 1 | NA |
| RPL12P4       | 0,00 | 0,00 | 0,00 | 0,00 | 1 | NA |
| RPL13AP17     | 0,00 | 0,00 | 0,00 | 0,00 | 1 | NA |
| RPL15P1       | 0,00 | 0,00 | 0,00 | 0,00 | 1 | NA |
| RPL17P26      | 0,00 | 0,00 | 0,00 | 0,00 | 1 | NA |
| RPL19P1       | 0,00 | 0,00 | 0,00 | 0,00 | 1 | NA |
| RPL19P13      | 0,00 | 0,00 | 0,00 | 0,00 | 1 | NA |
| RPL19P14      | 0,00 | 0,00 | 0,00 | 0,00 | 1 | NA |

|           |      |      |      |      |   |    |
|-----------|------|------|------|------|---|----|
| RPL21P131 | 0,00 | 0,00 | 0,00 | 0,00 | 1 | NA |
| RPL23AP68 | 0,00 | 0,00 | 0,00 | 0,00 | 1 | NA |
| RPL27P12  | 0,00 | 0,00 | 0,00 | 0,00 | 1 | NA |
| RPL31P28  | 0,00 | 0,00 | 0,00 | 0,00 | 1 | NA |
| RPL31P33  | 0,00 | 0,00 | 0,00 | 0,00 | 1 | NA |
| RPL34P33  | 0,00 | 0,00 | 0,00 | 0,00 | 1 | NA |
| RPL36AP26 | 0,00 | 0,00 | 0,00 | 0,00 | 1 | NA |
| RPL36P2   | 0,00 | 0,00 | 0,00 | 0,00 | 1 | NA |
| RPL37AP8  | 0,00 | 0,00 | 0,00 | 0,00 | 1 | NA |
| RPL39P18  | 0,00 | 0,00 | 0,00 | 0,00 | 1 | NA |
| RPL5P30   | 0,00 | 0,00 | 0,00 | 0,00 | 1 | NA |
| RPL7AP14  | 0,00 | 0,00 | 0,00 | 0,00 | 1 | NA |
| RPL7AP15  | 0,00 | 0,00 | 0,00 | 0,00 | 1 | NA |
| RPL7P4    | 0,00 | 0,00 | 0,00 | 0,00 | 1 | NA |
| RPL9P16   | 0,00 | 0,00 | 0,00 | 0,00 | 1 | NA |
| RPRM      | 0,00 | 0,00 | 0,00 | 0,00 | 1 | NA |
| RPS12P18  | 0,00 | 0,00 | 0,00 | 0,00 | 1 | NA |
| RPS15AP3  | 0,00 | 0,00 | 0,00 | 0,00 | 1 | NA |
| RPS15AP5  | 0,00 | 0,00 | 0,00 | 0,00 | 1 | NA |
| RPS17P1   | 0,00 | 0,00 | 0,00 | 0,00 | 1 | NA |
| RPS20P35  | 0,00 | 0,00 | 0,00 | 0,00 | 1 | NA |
| RPS24P18  | 0,00 | 0,00 | 0,00 | 0,00 | 1 | NA |
| RPS27AP3  | 0,00 | 0,47 | 0,00 | 0,00 | 1 | NA |
| RPS4XP20  | 0,00 | 0,00 | 0,00 | 0,00 | 1 | NA |
| RPS4XP23  | 0,00 | 0,00 | 0,00 | 0,00 | 1 | NA |
| RPS6P16   | 0,00 | 0,00 | 0,00 | 0,00 | 1 | NA |
| RPS6P22   | 0,00 | 0,00 | 0,00 | 0,00 | 1 | NA |
| RPS6P8    | 0,00 | 0,00 | 0,00 | 0,00 | 1 | NA |
| RPSAP4    | 0,00 | 0,00 | 0,00 | 0,00 | 1 | NA |
| RPSAP47   | 0,00 | 0,00 | 0,00 | 0,00 | 1 | NA |
| RTN4R     | 0,00 | 0,00 | 0,00 | 0,00 | 1 | NA |
| S100A1    | 0,00 | 0,00 | 0,00 | 0,00 | 1 | NA |
| S100A16   | 0,00 | 0,00 | 0,00 | 0,00 | 1 | NA |
| S100G     | 0,00 | 0,00 | 0,00 | 0,00 | 1 | NA |
| SAP18P3   | 0,00 | 0,00 | 0,00 | 0,00 | 1 | NA |
| SCARNA6   | 0,00 | 0,00 | 0,00 | 0,00 | 1 | NA |
| SCARNA8   | 0,00 | 0,00 | 0,00 | 0,00 | 1 | NA |
| SDC1      | 0,00 | 0,00 | 0,00 | 0,00 | 1 | NA |
| SEPT5     | 0,00 | 0,00 | 0,00 | 0,00 | 1 | NA |
| SERPINA12 | 0,00 | 0,00 | 0,00 | 0,00 | 1 | NA |
| SERPINB3  | 0,00 | 0,00 | 0,00 | 0,00 | 1 | NA |
| SEZ6L2    | 0,00 | 0,00 | 0,00 | 0,00 | 1 | NA |
| SFRP1     | 0,00 | 0,00 | 0,00 | 0,00 | 1 | NA |
| SFRS9P1   | 0,00 | 0,00 | 0,00 | 0,00 | 1 | NA |
| SFTPD     | 0,00 | 0,00 | 0,00 | 0,00 | 1 | NA |
| SHC1P2    | 0,00 | 0,00 | 0,00 | 0,00 | 1 | NA |
| SHISA6    | 0,00 | 0,00 | 0,00 | 0,00 | 1 | NA |
| SIGLEC28P | 0,00 | 0,00 | 0,00 | 0,00 | 1 | NA |
| SKOR2     | 0,00 | 0,00 | 0,00 | 0,00 | 1 | NA |
| SLC13A2   | 0,00 | 0,00 | 0,00 | 0,00 | 1 | NA |
| SLC16A11  | 0,00 | 0,00 | 0,00 | 0,00 | 1 | NA |
| SLC17A3   | 0,00 | 0,00 | 0,00 | 0,00 | 1 | NA |
| SLC22A14  | 0,00 | 0,00 | 0,00 | 0,00 | 1 | NA |
| SLC22A24  | 0,00 | 0,00 | 0,00 | 0,00 | 1 | NA |
| SLC34A3   | 0,00 | 0,00 | 0,00 | 0,00 | 1 | NA |

|             |      |      |      |      |   |    |
|-------------|------|------|------|------|---|----|
| SLC39A12    | 0,00 | 0,00 | 0,00 | 0,00 | 1 | NA |
| SLC45A1     | 0,00 | 0,00 | 0,00 | 0,00 | 1 | NA |
| SLC6A10P    | 0,00 | 0,00 | 0,00 | 0,00 | 1 | NA |
| SLC7A13     | 0,00 | 0,00 | 0,00 | 0,00 | 1 | NA |
| SLCO1B1     | 0,00 | 0,00 | 0,00 | 0,00 | 1 | NA |
| SNAP23P     | 0,00 | 0,00 | 0,00 | 0,00 | 1 | NA |
| SNCG        | 0,00 | 0,00 | 0,00 | 0,00 | 1 | NA |
| SNORA13     | 0,00 | 0,00 | 0,00 | 0,00 | 1 | NA |
| SNORA15     | 0,00 | 0,00 | 0,00 | 0,00 | 1 | NA |
| SNORA22C    | 0,00 | 0,00 | 0,00 | 0,00 | 1 | NA |
| SNORA24B    | 0,00 | 0,00 | 0,00 | 0,00 | 1 | NA |
| SNORA2A     | 0,00 | 0,00 | 0,00 | 0,00 | 1 | NA |
| SNORA36B    | 0,00 | 0,00 | 0,00 | 0,00 | 1 | NA |
| SNORA46     | 0,00 | 0,00 | 0,00 | 0,00 | 1 | NA |
| SNORA58B    | 0,00 | 0,00 | 0,00 | 0,00 | 1 | NA |
| SNORA71A    | 0,00 | 0,00 | 0,00 | 0,00 | 1 | NA |
| SNORA71B    | 0,00 | 0,00 | 0,00 | 0,00 | 1 | NA |
| SNORA80A    | 0,00 | 0,00 | 0,00 | 0,00 | 1 | NA |
| SNORD3C     | 0,00 | 0,00 | 0,00 | 0,00 | 1 | NA |
| SNORD3J     | 0,00 | 0,00 | 0,00 | 0,00 | 1 | NA |
| SNORD90     | 0,00 | 0,00 | 0,00 | 0,00 | 1 | NA |
| SNX6P1      | 0,00 | 0,00 | 0,00 | 0,00 | 1 | NA |
| SOAT2       | 0,00 | 0,00 | 0,00 | 0,00 | 1 | NA |
| SOSTDC1     | 0,00 | 0,00 | 0,00 | 0,00 | 1 | NA |
| SOX17       | 0,00 | 0,00 | 0,00 | 0,00 | 1 | NA |
| SPATA31A1   | 0,00 | 0,00 | 0,00 | 0,00 | 1 | NA |
| SPATA31D3   | 0,00 | 0,00 | 0,00 | 0,00 | 1 | NA |
| SPATA31D4   | 0,00 | 0,00 | 0,00 | 0,00 | 1 | NA |
| SPATA8      | 0,00 | 0,00 | 0,00 | 0,00 | 1 | NA |
| SPDYC       | 0,00 | 0,00 | 0,00 | 0,00 | 1 | NA |
| SPERT       | 0,00 | 0,00 | 0,00 | 0,00 | 1 | NA |
| SPHKAP      | 0,00 | 0,00 | 0,00 | 0,00 | 1 | NA |
| SPIC        | 0,00 | 0,00 | 0,00 | 0,00 | 1 | NA |
| SPINK2      | 0,00 | 0,00 | 0,00 | 0,00 | 1 | NA |
| SPPL2C      | 0,00 | 0,00 | 0,00 | 0,00 | 1 | NA |
| SPRR2D      | 0,00 | 0,00 | 0,00 | 0,00 | 1 | NA |
| SPSB1       | 0,00 | 0,00 | 0,00 | 0,00 | 1 | NA |
| SRRM3       | 0,00 | 0,00 | 0,00 | 0,00 | 1 | NA |
| SSTR3       | 0,00 | 0,00 | 0,00 | 0,00 | 1 | NA |
| STEAP1B     | 0,00 | 0,00 | 0,00 | 0,00 | 1 | NA |
| STXBP5L     | 0,00 | 0,00 | 0,00 | 0,00 | 1 | NA |
| SUGT1P      | 0,00 | 0,00 | 0,00 | 0,00 | 1 | NA |
| SUN5        | 0,00 | 0,00 | 0,00 | 0,00 | 1 | NA |
| SYN2        | 0,00 | 0,00 | 0,00 | 0,00 | 1 | NA |
| SYS1-DBNDD2 | 0,00 | 0,00 | 0,00 | 0,00 | 1 | NA |
| SYT9        | 0,00 | 0,00 | 0,00 | 0,00 | 1 | NA |
| SYTL5       | 0,00 | 0,00 | 0,00 | 0,00 | 1 | NA |
| TACR3       | 0,00 | 0,00 | 0,00 | 0,00 | 1 | NA |
| TAS2R13     | 0,00 | 0,00 | 0,00 | 0,00 | 1 | NA |
| TAS2R20     | 0,00 | 0,00 | 0,00 | 0,00 | 1 | NA |
| TAS2R38     | 0,00 | 0,00 | 0,00 | 0,00 | 1 | NA |
| TAS2R41     | 0,00 | 0,00 | 0,00 | 0,00 | 1 | NA |
| TAS2R50     | 0,00 | 0,00 | 0,00 | 0,00 | 1 | NA |
| TBC1D3E     | 0,00 | 0,00 | 0,00 | 0,00 | 1 | NA |
| TBX3        | 0,00 | 0,06 | 0,00 | 0,00 | 1 | NA |

|                |      |      |      |      |   |    |
|----------------|------|------|------|------|---|----|
| TCEAL5         | 0,00 | 0,00 | 0,00 | 0,00 | 1 | NA |
| TCP10L2        | 0,00 | 0,00 | 0,00 | 0,00 | 1 | NA |
| TCTEX1D1       | 0,00 | 0,00 | 0,00 | 0,00 | 1 | NA |
| TEAD2          | 0,00 | 0,00 | 0,00 | 0,00 | 1 | NA |
| TEKT1          | 0,00 | 0,00 | 0,00 | 0,00 | 1 | NA |
| TERF1P         | 0,00 | 0,00 | 0,00 | 0,00 | 1 | NA |
| TEX13D         | 0,00 | 0,00 | 0,00 | 0,00 | 1 | NA |
| TEX19          | 0,00 | 0,00 | 0,00 | 0,00 | 1 | NA |
| TEX29          | 0,00 | 0,00 | 0,00 | 0,00 | 1 | NA |
| TEX50          | 0,00 | 0,00 | 0,00 | 0,00 | 1 | NA |
| TFDP3          | 0,00 | 0,00 | 0,00 | 0,00 | 1 | NA |
| TFP3           | 0,00 | 0,00 | 0,00 | 0,00 | 1 | NA |
| TGIF2-C20orf24 | 0,00 | 0,00 | 0,00 | 0,00 | 1 | NA |
| TGM4           | 0,00 | 0,00 | 0,00 | 0,00 | 1 | 1  |
| THEM7P         | 0,00 | 0,00 | 0,00 | 0,00 | 1 | NA |
| TLX1           | 0,00 | 0,00 | 0,00 | 0,00 | 1 | NA |
| TMEFF1         | 0,00 | 0,00 | 0,00 | 0,00 | 1 | NA |
| TMEM183AP1     | 0,00 | 0,00 | 0,00 | 0,00 | 1 | NA |
| TMEM256-PLSCR3 | 0,00 | 0,00 | 0,00 | 0,00 | 1 | NA |
| TMEM52         | 0,00 | 0,00 | 0,00 | 0,00 | 1 | NA |
| TMEM56-RWDD3   | 0,00 | 0,00 | 0,00 | 0,00 | 1 | NA |
| TMIGD1         | 0,00 | 0,00 | 0,00 | 0,00 | 1 | NA |
| TMPRSS11F      | 0,00 | 0,00 | 0,00 | 0,00 | 1 | NA |
| TNFAIP6        | 0,00 | 0,00 | 0,00 | 0,00 | 1 | NA |
| TNFSF18        | 0,00 | 0,00 | 0,00 | 0,00 | 1 | NA |
| TNMD           | 0,00 | 0,00 | 0,00 | 0,00 | 1 | NA |
| TNNC1          | 0,00 | 0,00 | 0,00 | 0,00 | 1 | NA |
| TOP3B2         | 0,00 | 0,00 | 0,00 | 0,00 | 1 | NA |
| TP53TG3D       | 0,00 | 0,00 | 0,00 | 0,00 | 1 | NA |
| TP53TG3E       | 0,00 | 0,00 | 0,00 | 0,00 | 1 | NA |
| TP73           | 0,00 | 0,00 | 0,00 | 0,00 | 1 | NA |
| TPPP2          | 0,00 | 0,00 | 0,00 | 0,00 | 1 | NA |
| TRAJ17         | 0,00 | 0,00 | 0,00 | 0,00 | 1 | NA |
| TRAJ19         | 0,00 | 0,00 | 0,00 | 0,00 | 1 | NA |
| TRAJ20         | 0,00 | 0,00 | 0,00 | 0,00 | 1 | NA |
| TRAV10         | 0,00 | 0,00 | 0,00 | 0,00 | 1 | NA |
| TRAV13-1       | 0,00 | 0,00 | 0,00 | 0,00 | 1 | NA |
| TRAV21         | 0,00 | 0,00 | 0,00 | 0,00 | 1 | NA |
| TRAV23DV6      | 0,00 | 0,00 | 0,00 | 0,00 | 1 | NA |
| TRAV26-1       | 0,00 | 0,00 | 0,00 | 0,00 | 1 | NA |
| TRAV35         | 0,00 | 0,00 | 0,00 | 0,00 | 1 | NA |
| TRAV37         | 0,00 | 0,00 | 0,00 | 0,00 | 1 | NA |
| TRAV38-1       | 0,00 | 0,00 | 0,00 | 0,00 | 1 | NA |
| TRAV39         | 0,00 | 0,00 | 0,00 | 0,00 | 1 | NA |
| TRAV5          | 0,00 | 0,00 | 0,00 | 0,00 | 1 | NA |
| TRAV8-4        | 0,00 | 0,00 | 0,00 | 0,00 | 1 | NA |
| TRBJ1-5        | 0,00 | 0,00 | 0,00 | 0,00 | 1 | NA |
| TRBV11-2       | 0,00 | 0,00 | 0,00 | 0,00 | 1 | NA |
| TRBV11-3       | 0,00 | 0,00 | 0,00 | 0,00 | 1 | NA |
| TRBV12-3       | 0,00 | 0,00 | 0,00 | 0,00 | 1 | NA |
| TRBV13         | 0,00 | 0,00 | 0,00 | 0,00 | 1 | NA |
| TRBV16         | 0,00 | 0,00 | 0,00 | 0,00 | 1 | NA |
| TRBV2          | 0,00 | 0,00 | 0,00 | 0,00 | 1 | NA |
| TRBV24OR9-2    | 0,00 | 0,00 | 0,00 | 0,00 | 1 | NA |
| TRBV26OR9-2    | 0,00 | 0,00 | 0,00 | 0,00 | 1 | NA |



|                  |      |      |      |      |   |    |
|------------------|------|------|------|------|---|----|
| TRBV28           | 0,00 | 0,00 | 0,00 | 0,00 | 1 | NA |
| TRBV6-4          | 0,00 | 0,00 | 0,00 | 0,00 | 1 | NA |
| TRBV7-4          | 0,00 | 0,00 | 0,00 | 0,00 | 1 | NA |
| TRGJP1           | 0,00 | 0,00 | 0,00 | 0,00 | 1 | NA |
| TRGJP2           | 0,00 | 0,00 | 0,00 | 0,00 | 1 | NA |
| TRGV8            | 0,00 | 0,00 | 0,00 | 0,00 | 1 | NA |
| TRIM10           | 0,00 | 0,00 | 0,00 | 0,00 | 1 | NA |
| TRIM49           | 0,00 | 0,00 | 0,00 | 0,00 | 1 | NA |
| TRIM49B          | 0,00 | 0,00 | 0,00 | 0,00 | 1 | NA |
| TRIM77           | 0,00 | 0,00 | 0,00 | 0,00 | 1 | NA |
| TRPV4            | 0,00 | 0,00 | 0,00 | 0,00 | 1 | NA |
| TRPV5            | 0,00 | 0,00 | 0,00 | 0,00 | 1 | NA |
| TSHB             | 0,00 | 0,00 | 0,00 | 0,00 | 1 | NA |
| TSNAXIP1         | 0,00 | 0,00 | 0,00 | 0,00 | 1 | NA |
| TSPAN8           | 0,00 | 0,00 | 0,00 | 0,00 | 1 | NA |
| TTC29            | 0,00 | 0,00 | 0,00 | 0,00 | 1 | NA |
| TTY10            | 0,00 | 0,00 | 0,00 | 0,00 | 1 | NA |
| TTY22            | 0,00 | 0,00 | 0,00 | 0,00 | 1 | NA |
| TUB              | 0,00 | 0,00 | 0,00 | 0,00 | 1 | NA |
| TUBB2BP1         | 0,00 | 0,00 | 0,00 | 0,00 | 1 | NA |
| TUFMP1           | 0,00 | 0,00 | 0,00 | 0,00 | 1 | NA |
| TULP3P1          | 0,00 | 0,00 | 0,00 | 0,00 | 1 | NA |
| TXNDC2           | 0,00 | 0,00 | 0,00 | 0,00 | 1 | NA |
| U91324.1         | 0,00 | 0,00 | 0,00 | 0,00 | 1 | NA |
| U91328.2         | 0,00 | 0,00 | 0,00 | 0,00 | 1 | NA |
| UBA52P3          | 0,00 | 0,00 | 0,00 | 0,00 | 1 | NA |
| UGT1A8           | 0,00 | 0,00 | 0,00 | 0,00 | 1 | NA |
| UGT2A3           | 0,00 | 0,00 | 0,00 | 0,00 | 1 | NA |
| UGT2B11          | 0,00 | 0,00 | 0,00 | 0,00 | 1 | NA |
| VAX2             | 0,00 | 0,00 | 0,00 | 0,00 | 1 | NA |
| VCAM1            | 0,00 | 0,00 | 0,00 | 0,00 | 1 | NA |
| VENTXP6          | 0,00 | 0,00 | 0,00 | 0,00 | 1 | NA |
| VGLL2            | 0,00 | 0,00 | 0,00 | 0,00 | 1 | NA |
| VN1R107P         | 0,00 | 0,00 | 0,00 | 0,00 | 1 | NA |
| VN1R20P          | 0,00 | 0,00 | 0,00 | 0,00 | 1 | NA |
| VN1R3            | 0,00 | 0,00 | 0,00 | 0,00 | 1 | NA |
| VN1R46P          | 0,00 | 0,00 | 0,00 | 0,00 | 1 | NA |
| VN2R10P          | 0,00 | 0,00 | 0,00 | 0,00 | 1 | NA |
| VN2R17P          | 0,00 | 0,00 | 0,00 | 0,00 | 1 | NA |
| VWA8-AS1         | 0,00 | 0,00 | 0,00 | 0,00 | 1 | NA |
| WBSCR28          | 0,00 | 0,00 | 0,00 | 0,00 | 1 | NA |
| WFDC5            | 0,00 | 0,00 | 0,00 | 0,00 | 1 | NA |
| WNT8A            | 0,00 | 0,00 | 0,00 | 0,00 | 1 | NA |
| XIRP2            | 0,00 | 0,00 | 0,00 | 0,00 | 1 | NA |
| XX-C2158C12.1    | 0,00 | 0,00 | 0,00 | 0,00 | 1 | NA |
| XX-FW83128A1.2   | 0,00 | 0,00 | 0,00 | 0,00 | 1 | NA |
| XXbac-B135H6.19  | 0,00 | 0,00 | 0,00 | 0,00 | 1 | NA |
| XXbac-B444P24.10 | 0,00 | 0,00 | 0,00 | 0,00 | 1 | NA |
| XXbac-B444P24.14 | 0,00 | 0,00 | 0,00 | 0,00 | 1 | NA |
| XXbac-BPG32J3.19 | 0,00 | 0,00 | 0,00 | 0,00 | 1 | NA |
| XXbac-BPG34I8.2  | 0,00 | 0,00 | 0,00 | 0,00 | 1 | NA |
| XXcos-LUCA11.4   | 0,00 | 0,00 | 0,00 | 0,00 | 1 | NA |
| XXyac-YM21GA2.2  | 0,00 | 0,00 | 0,00 | 0,00 | 1 | NA |
| XXyac-YM21GA2.4  | 0,00 | 0,00 | 0,00 | 0,00 | 1 | NA |
| Z83851.4         | 0,00 | 0,00 | 0,00 | 0,00 | 1 | NA |

|                    |      |      |      |      |    |    |
|--------------------|------|------|------|------|----|----|
| Z95114.3           | 0,00 | 0,00 | 0,00 | 0,00 | 1  | NA |
| Z95114.5           | 0,00 | 0,00 | 0,00 | 0,00 | 1  | NA |
| ZCCHC16            | 0,00 | 0,00 | 0,00 | 0,00 | 1  | NA |
| ZCCHC18            | 0,00 | 0,00 | 0,00 | 0,00 | 1  | NA |
| ZFP64P1            | 0,00 | 0,00 | 0,00 | 0,00 | 1  | NA |
| ZIM2               | 0,00 | 0,00 | 0,00 | 0,00 | 1  | NA |
| ZNF355P            | 0,00 | 0,00 | 0,00 | 0,00 | 1  | NA |
| ZNF389             | 0,00 | 0,00 | 0,00 | 0,00 | 1  | NA |
| ZNF463P            | 0,00 | 0,00 | 0,00 | 0,00 | 1  | NA |
| ZNF676             | 0,00 | 0,00 | 0,00 | 0,00 | 1  | NA |
| ZNF860             | 0,00 | 0,00 | 0,00 | 0,04 | 1  | NA |
| ZSCAN5B            | 0,00 | 0,00 | 0,00 | 0,00 | 1  | NA |
| ZSCAN5C            | 0,00 | 0,00 | 0,00 | 0,00 | 1  | NA |
| A3GALT2            | 0,00 | 0,00 | 0,00 | 0,00 | NA | NA |
| AADAC              | 0,00 | 0,00 | 0,00 | 0,00 | NA | NA |
| AADA4L4            | 0,00 | 0,00 | 0,00 | 0,00 | NA | NA |
| AB015752.4         | 0,00 | 0,00 | 0,00 | 0,00 | NA | NA |
| AB019438.63        | 0,00 | 0,00 | 0,00 | 0,00 | NA | NA |
| AB019438.66        | 0,00 | 0,00 | 0,00 | 0,00 | NA | NA |
| AB019439.67        | 0,00 | 0,00 | 0,00 | 0,00 | NA | NA |
| AB019439.68        | 0,00 | 0,00 | 0,00 | 0,00 | NA | NA |
| AB019440.50        | 0,00 | 0,00 | 0,00 | 0,00 | NA | NA |
| AB020862.1         | 0,00 | 0,00 | 0,00 | 0,00 | NA | NA |
| ABBA01000934.1     | 0,00 | 0,00 | 0,00 | 0,00 | NA | NA |
| ABC11-48400900C8.1 | 0,00 | 0,00 | 0,00 | 0,00 | NA | NA |
| ABC11-4932300O16.1 | 0,00 | 0,00 | 0,00 | 0,00 | NA | NA |
| ABC12-47043100G14. | 0,00 | 0,00 | 0,00 | 0,00 | NA | NA |
| ABC12-47964100C23. | 0,00 | 0,00 | 0,00 | 0,00 | NA | NA |
| ABC13-47488600E17. | 0,00 | 0,00 | 0,00 | 0,00 | NA | NA |
| ABC13-47656900H15. | 0,00 | 0,00 | 0,00 | 0,00 | NA | NA |
| ABC7-42391500H16.4 | 0,00 | 0,00 | 0,00 | 0,00 | NA | NA |
| ABC7-42418200C9.1  | 0,00 | 0,00 | 0,00 | 0,04 | NA | NA |
| ABC7-43041300I9.1  | 0,00 | 0,00 | 0,00 | 0,00 | NA | NA |
| ABC7-43046700E7.1  | 0,00 | 0,00 | 0,00 | 0,00 | NA | NA |
| ABC8-43014700C16.1 | 0,00 | 0,00 | 0,00 | 0,00 | NA | NA |
| ABCA12             | 0,00 | 0,01 | 0,00 | 0,00 | NA | NA |
| ABCB1              | 0,00 | 0,00 | 0,00 | 0,00 | NA | NA |
| ABCB10P3           | 0,00 | 0,00 | 0,00 | 0,00 | NA | NA |
| ABCB10P4           | 0,00 | 0,00 | 0,00 | 0,00 | NA | NA |
| ABCD1P2            | 0,00 | 0,00 | 0,00 | 0,00 | NA | NA |
| ABCD1P3            | 0,00 | 0,00 | 0,00 | 0,00 | NA | NA |
| ABCD1P4            | 0,00 | 0,00 | 0,00 | 0,00 | NA | NA |
| ABCD2              | 0,00 | 0,00 | 0,00 | 0,00 | NA | NA |
| ABHD17AP1          | 0,00 | 0,00 | 0,00 | 0,00 | NA | NA |
| ABHD17AP9          | 0,00 | 0,00 | 0,00 | 0,00 | NA | NA |
| AC000035.3         | 0,00 | 0,00 | 0,00 | 0,00 | NA | NA |
| AC000041.10        | 0,00 | 0,00 | 0,00 | 0,00 | NA | NA |
| AC000067.1         | 0,00 | 0,00 | 0,00 | 0,00 | NA | NA |
| AC000077.2         | 0,00 | 0,00 | 0,00 | 0,00 | NA | NA |
| AC000081.2         | 0,00 | 0,00 | 0,00 | 0,00 | NA | NA |
| AC000094.3         | 0,00 | 0,00 | 0,00 | 0,00 | NA | NA |
| AC000095.11        | 0,00 | 0,00 | 0,00 | 0,00 | NA | NA |
| AC000095.13        | 0,00 | 0,00 | 0,00 | 0,00 | NA | NA |
| AC000095.9         | 0,00 | 0,00 | 0,00 | 0,00 | NA | NA |
| AC000110.1         | 0,00 | 0,00 | 0,00 | 0,00 | NA | NA |

|             |      |      |      |      |    |    |
|-------------|------|------|------|------|----|----|
| AC000111.3  | 0,00 | 0,00 | 0,00 | 0,00 | NA | NA |
| AC000111.4  | 0,00 | 0,00 | 0,00 | 0,00 | NA | NA |
| AC000111.5  | 0,00 | 0,00 | 0,00 | 0,00 | NA | NA |
| AC000124.1  | 0,00 | 0,00 | 0,00 | 0,00 | NA | NA |
| AC000362.1  | 0,00 | 0,00 | 0,00 | 0,00 | NA | NA |
| AC000374.1  | 0,00 | 0,00 | 0,00 | 0,00 | NA | NA |
| AC001226.1  | 0,00 | 0,00 | 0,00 | 0,00 | NA | NA |
| AC002056.3  | 0,00 | 0,00 | 0,00 | 0,00 | NA | NA |
| AC002056.5  | 0,00 | 0,00 | 0,00 | 0,00 | NA | NA |
| AC002064.3  | 0,00 | 0,00 | 0,00 | 0,00 | NA | NA |
| AC002064.4  | 0,00 | 0,00 | 0,00 | 0,00 | NA | NA |
| AC002064.5  | 0,00 | 0,00 | 0,00 | 0,00 | NA | NA |
| AC002064.7  | 0,00 | 0,00 | 0,00 | 0,00 | NA | NA |
| AC002069.5  | 0,00 | 0,00 | 0,00 | 0,00 | NA | NA |
| AC002069.6  | 0,00 | 0,00 | 0,00 | 0,00 | NA | NA |
| AC002069.7  | 0,00 | 0,00 | 0,00 | 0,00 | NA | NA |
| AC002076.9  | 0,00 | 0,00 | 0,00 | 0,00 | NA | NA |
| AC002115.5  | 0,00 | 0,00 | 0,00 | 0,00 | NA | NA |
| AC002115.9  | 0,00 | 0,00 | 0,00 | 0,00 | NA | NA |
| AC002127.2  | 0,00 | 0,00 | 0,00 | 0,00 | NA | NA |
| AC002128.4  | 0,00 | 0,00 | 0,00 | 0,00 | NA | NA |
| AC002128.5  | 0,00 | 0,00 | 0,00 | 0,00 | NA | NA |
| AC002310.10 | 0,00 | 0,00 | 0,00 | 0,00 | NA | NA |
| AC002310.11 | 0,00 | 0,00 | 0,00 | 0,00 | NA | NA |
| AC002314.4  | 0,00 | 0,00 | 0,00 | 0,00 | NA | NA |
| AC002331.1  | 0,00 | 0,00 | 0,00 | 0,00 | NA | NA |
| AC002365.2  | 0,00 | 0,00 | 0,00 | 0,00 | NA | NA |
| AC002365.4  | 0,00 | 0,00 | 0,00 | 0,00 | NA | NA |
| AC002366.3  | 0,00 | 0,00 | 0,00 | 0,00 | NA | NA |
| AC002368.2  | 0,00 | 0,00 | 0,00 | 0,00 | NA | NA |
| AC002368.3  | 0,00 | 0,00 | 0,00 | 0,00 | NA | NA |
| AC002368.4  | 0,00 | 0,00 | 0,00 | 0,00 | NA | NA |
| AC002398.12 | 0,00 | 0,00 | 0,00 | 0,00 | NA | NA |
| AC002400.4  | 0,00 | 0,00 | 0,00 | 0,00 | NA | NA |
| AC002401.1  | 0,00 | 0,00 | 0,00 | 0,00 | NA | NA |
| AC002407.1  | 0,00 | 0,00 | 0,00 | 0,00 | NA | NA |
| AC002407.2  | 0,00 | 0,00 | 0,00 | 0,00 | NA | NA |
| AC002407.3  | 0,00 | 0,00 | 0,00 | 0,00 | NA | NA |
| AC002429.4  | 0,00 | 0,00 | 0,00 | 0,00 | NA | NA |
| AC002454.1  | 0,00 | 0,00 | 0,00 | 0,00 | NA | NA |
| AC002458.1  | 0,00 | 0,00 | 0,00 | 0,00 | NA | NA |
| AC002463.3  | 0,00 | 0,00 | 0,00 | 0,00 | NA | NA |
| AC002465.2  | 0,00 | 0,00 | 0,00 | 0,00 | NA | NA |
| AC002472.16 | 0,00 | 0,00 | 0,00 | 0,00 | NA | NA |
| AC002472.17 | 0,00 | 0,00 | 0,00 | 0,00 | NA | NA |
| AC002472.8  | 0,00 | 0,00 | 0,00 | 0,00 | NA | NA |
| AC002480.4  | 0,00 | 0,00 | 0,00 | 0,00 | NA | NA |
| AC002480.5  | 0,00 | 0,00 | 0,00 | 0,00 | NA | NA |
| AC002481.5  | 0,00 | 0,00 | 0,00 | 0,00 | NA | NA |
| AC002486.3  | 0,00 | 0,00 | 0,00 | 0,00 | NA | NA |
| AC002531.2  | 0,00 | 0,00 | 0,00 | 0,00 | NA | NA |
| AC002550.5  | 0,00 | 0,00 | 0,00 | 0,00 | NA | NA |
| AC002992.1  | 0,00 | 0,00 | 0,00 | 0,00 | NA | NA |
| AC002992.2  | 0,00 | 0,00 | 0,00 | 0,00 | NA | NA |
| AC002992.3  | 0,00 | 0,00 | 0,00 | 0,00 | NA | NA |

|             |      |      |      |      |    |    |
|-------------|------|------|------|------|----|----|
| AC003002.4  | 0,00 | 0,00 | 0,00 | 0,00 | NA | NA |
| AC003009.1  | 0,00 | 0,00 | 0,00 | 0,00 | NA | NA |
| AC003009.2  | 0,00 | 0,00 | 0,00 | 0,00 | NA | NA |
| AC003045.1  | 0,00 | 0,00 | 0,00 | 0,00 | NA | NA |
| AC003080.4  | 0,00 | 0,00 | 0,00 | 0,00 | NA | NA |
| AC003084.2  | 0,00 | 0,00 | 0,00 | 0,00 | NA | NA |
| AC003087.4  | 0,00 | 0,00 | 0,00 | 0,00 | NA | NA |
| AC003088.1  | 0,00 | 0,00 | 0,00 | 0,00 | NA | NA |
| AC003090.1  | 0,00 | 0,00 | 0,00 | 0,00 | NA | NA |
| AC003092.2  | 0,00 | 0,00 | 0,00 | 0,00 | NA | NA |
| AC003101.1  | 0,00 | 0,00 | 0,00 | 0,00 | NA | NA |
| AC003664.1  | 0,22 | 0,44 | 0,32 | 0,00 | NA | NA |
| AC003682.16 | 0,00 | 0,00 | 0,00 | 0,00 | NA | NA |
| AC003682.17 | 0,00 | 0,00 | 0,00 | 0,00 | NA | NA |
| AC003956.1  | 0,00 | 0,00 | 0,00 | 0,00 | NA | NA |
| AC003958.5  | 0,00 | 0,00 | 0,00 | 0,00 | NA | NA |
| AC003958.6  | 0,00 | 0,00 | 0,00 | 0,00 | NA | NA |
| AC003973.1  | 0,00 | 0,00 | 0,00 | 0,00 | NA | NA |
| AC003973.3  | 0,04 | 0,09 | 0,04 | 0,05 | NA | NA |
| AC003973.5  | 0,00 | 0,00 | 0,00 | 0,00 | NA | NA |
| AC003985.1  | 0,00 | 0,00 | 0,00 | 0,00 | NA | NA |
| AC003986.5  | 0,00 | 0,00 | 0,00 | 0,00 | NA | NA |
| AC003986.6  | 0,00 | 0,00 | 0,00 | 0,00 | NA | NA |
| AC003986.7  | 0,00 | 0,00 | 0,00 | 0,00 | NA | NA |
| AC003988.1  | 0,00 | 0,00 | 0,00 | 0,00 | NA | NA |
| AC003989.4  | 0,00 | 0,00 | 0,00 | 0,00 | NA | NA |
| AC004004.2  | 0,00 | 0,00 | 0,00 | 0,00 | NA | NA |
| AC004006.2  | 0,00 | 0,00 | 0,00 | 0,00 | NA | NA |
| AC004009.1  | 0,00 | 0,00 | 0,00 | 0,00 | NA | NA |
| AC004009.3  | 0,00 | 0,00 | 0,00 | 0,00 | NA | NA |
| AC004012.1  | 0,00 | 0,00 | 0,00 | 0,00 | NA | NA |
| AC004014.4  | 0,00 | 0,00 | 0,00 | 0,00 | NA | NA |
| AC004019.16 | 0,00 | 0,00 | 0,00 | 0,00 | NA | NA |
| AC004019.17 | 0,00 | 0,00 | 0,00 | 0,00 | NA | NA |
| AC004022.8  | 0,00 | 0,00 | 0,00 | 0,00 | NA | NA |
| AC004049.3  | 0,00 | 0,00 | 0,00 | 0,00 | NA | NA |
| AC004051.1  | 0,00 | 0,00 | 0,00 | 0,00 | NA | NA |
| AC004051.2  | 0,00 | 0,00 | 0,00 | 0,00 | NA | NA |
| AC004062.1  | 0,00 | 0,00 | 0,00 | 0,00 | NA | NA |
| AC004062.2  | 0,00 | 0,00 | 0,00 | 0,00 | NA | NA |
| AC004066.3  | 0,00 | 0,00 | 0,00 | 0,00 | NA | NA |
| AC004066.5  | 0,00 | 0,00 | 0,00 | 0,00 | NA | NA |
| AC004067.4  | 0,00 | 0,00 | 0,00 | 0,00 | NA | NA |
| AC004067.5  | 0,00 | 0,00 | 0,00 | 0,00 | NA | NA |
| AC004069.1  | 0,00 | 0,00 | 0,00 | 0,00 | NA | NA |
| AC004070.1  | 0,00 | 0,00 | 0,00 | 0,00 | NA | NA |
| AC004073.1  | 0,00 | 0,00 | 0,00 | 0,00 | NA | NA |
| AC004073.2  | 0,00 | 0,00 | 0,00 | 0,00 | NA | NA |
| AC004073.4  | 0,00 | 0,00 | 0,00 | 0,00 | NA | NA |
| AC004074.1  | 0,00 | 0,00 | 0,00 | 0,00 | NA | NA |
| AC004074.3  | 0,00 | 0,00 | 0,00 | 0,00 | NA | NA |
| AC004074.4  | 0,00 | 0,00 | 0,00 | 0,00 | NA | NA |
| AC004076.5  | 0,07 | 0,15 | 0,16 | 0,17 | NA | NA |
| AC004112.7  | 0,00 | 0,00 | 0,00 | 0,00 | NA | NA |
| AC004125.3  | 0,00 | 0,00 | 0,00 | 0,00 | NA | NA |

|            |      |      |      |      |    |    |
|------------|------|------|------|------|----|----|
| AC004129.7 | 0,00 | 0,00 | 0,00 | 0,00 | NA | NA |
| AC004129.8 | 0,00 | 0,00 | 0,00 | 0,00 | NA | NA |
| AC004129.9 | 0,00 | 0,00 | 0,00 | 0,00 | NA | NA |
| AC004160.4 | 0,00 | 0,00 | 0,00 | 0,00 | NA | NA |
| AC004161.3 | 0,00 | 0,00 | 0,00 | 0,00 | NA | NA |
| AC004161.4 | 0,00 | 0,00 | 0,00 | 0,00 | NA | NA |
| AC004221.2 | 0,00 | 0,00 | 0,00 | 0,00 | NA | NA |
| AC004231.2 | 0,00 | 0,00 | 0,00 | 0,00 | NA | NA |
| AC004381.6 | 0,05 | 0,00 | 0,00 | 0,00 | NA | NA |
| AC004381.7 | 0,00 | 0,00 | 0,00 | 0,00 | NA | NA |
| AC004381.8 | 0,00 | 0,00 | 0,00 | 0,00 | NA | NA |
| AC004381.9 | 0,00 | 0,00 | 0,00 | 0,00 | NA | NA |
| AC004383.3 | 0,00 | 0,00 | 0,00 | 0,00 | NA | NA |
| AC004383.5 | 0,00 | 0,00 | 0,00 | 0,00 | NA | NA |
| AC004386.3 | 0,00 | 0,00 | 0,00 | 0,00 | NA | NA |
| AC004448.2 | 0,00 | 0,00 | 0,00 | 0,00 | NA | NA |
| AC004449.6 | 0,00 | 0,00 | 0,00 | 0,00 | NA | NA |
| AC004461.4 | 0,00 | 0,00 | 0,00 | 0,00 | NA | NA |
| AC004463.6 | 0,00 | 0,00 | 0,00 | 0,00 | NA | NA |
| AC004474.2 | 0,00 | 0,00 | 0,00 | 0,00 | NA | NA |
| AC004478.2 | 0,00 | 0,00 | 0,00 | 0,00 | NA | NA |
| AC004485.3 | 0,00 | 0,00 | 0,00 | 0,00 | NA | NA |
| AC004535.2 | 0,00 | 0,00 | 0,00 | 0,00 | NA | NA |
| AC004540.5 | 0,00 | 0,00 | 0,00 | 0,00 | NA | NA |
| AC004558.3 | 0,00 | 0,00 | 0,00 | 0,00 | NA | NA |
| AC004603.4 | 0,00 | 0,00 | 0,00 | 0,00 | NA | NA |
| AC004609.1 | 0,00 | 0,00 | 0,00 | 0,00 | NA | NA |
| AC004617.1 | 0,00 | 0,00 | 0,00 | 0,00 | NA | NA |
| AC004617.2 | 0,00 | 0,00 | 0,00 | 0,00 | NA | NA |
| AC004623.3 | 0,00 | 0,00 | 0,00 | 0,00 | NA | NA |
| AC004691.5 | 0,00 | 0,00 | 0,00 | 0,00 | NA | NA |
| AC004692.4 | 0,00 | 0,00 | 0,00 | 0,00 | NA | NA |
| AC004692.5 | 0,00 | 0,00 | 0,00 | 0,00 | NA | NA |
| AC004702.2 | 0,00 | 1,79 | 0,00 | 1,57 | NA | NA |
| AC004741.3 | 0,00 | 0,28 | 0,00 | 0,00 | NA | NA |
| AC004754.3 | 0,00 | 0,00 | 0,00 | 0,00 | NA | NA |
| AC004772.1 | 0,00 | 0,00 | 0,00 | 0,00 | NA | NA |
| AC004772.2 | 0,00 | 0,00 | 0,00 | 0,00 | NA | NA |
| AC004775.5 | 0,00 | 0,00 | 0,00 | 0,00 | NA | NA |
| AC004790.4 | 0,00 | 0,00 | 0,00 | 0,00 | NA | NA |
| AC004791.2 | 0,00 | 0,00 | 0,00 | 0,00 | NA | NA |
| AC004792.1 | 0,00 | 0,00 | 0,00 | 0,00 | NA | NA |
| AC004810.1 | 0,00 | 0,00 | 0,00 | 0,00 | NA | NA |
| AC004854.5 | 0,00 | 0,00 | 0,00 | 0,00 | NA | NA |
| AC004866.1 | 0,00 | 0,00 | 0,00 | 0,00 | NA | NA |
| AC004866.3 | 0,00 | 0,00 | 0,00 | 0,00 | NA | NA |
| AC004869.2 | 0,00 | 0,00 | 0,00 | 0,00 | NA | NA |
| AC004869.3 | 0,00 | 0,00 | 0,00 | 0,00 | NA | NA |
| AC004870.4 | 0,00 | 0,00 | 0,00 | 0,00 | NA | NA |
| AC004870.5 | 0,00 | 0,00 | 0,00 | 0,00 | NA | NA |
| AC004870.6 | 0,00 | 0,00 | 0,00 | 0,00 | NA | NA |
| AC004894.2 | 0,00 | 0,00 | 0,00 | 0,00 | NA | NA |
| AC004895.4 | 0,30 | 0,00 | 0,00 | 0,00 | NA | NA |
| AC004899.3 | 0,00 | 0,00 | 0,00 | 0,00 | NA | NA |
| AC004901.1 | 0,00 | 0,00 | 0,00 | 0,00 | NA | NA |

|             |      |      |      |      |    |    |
|-------------|------|------|------|------|----|----|
| AC004907.2  | 0,00 | 0,00 | 0,00 | 0,00 | NA | NA |
| AC004909.3  | 0,00 | 0,00 | 0,00 | 0,00 | NA | NA |
| AC004911.2  | 0,00 | 0,00 | 0,00 | 0,00 | NA | NA |
| AC004920.2  | 0,00 | 0,00 | 0,00 | 0,00 | NA | NA |
| AC004920.3  | 0,00 | 0,00 | 0,00 | 0,00 | NA | NA |
| AC004921.2  | 0,00 | 0,00 | 0,00 | 0,00 | NA | NA |
| AC004938.5  | 0,00 | 0,00 | 0,00 | 0,00 | NA | NA |
| AC004941.5  | 0,00 | 0,00 | 0,00 | 0,00 | NA | NA |
| AC004945.1  | 0,00 | 0,00 | 0,00 | 0,00 | NA | NA |
| AC004945.2  | 0,08 | 0,16 | 0,11 | 0,12 | NA | NA |
| AC004947.2  | 0,00 | 0,00 | 0,00 | 0,00 | NA | NA |
| AC004980.10 | 0,00 | 0,00 | 0,00 | 0,00 | NA | NA |
| AC004985.12 | 0,00 | 0,00 | 0,00 | 0,00 | NA | NA |
| AC004987.10 | 0,00 | 0,00 | 0,00 | 0,00 | NA | NA |
| AC004987.8  | 0,00 | 0,00 | 0,00 | 0,00 | NA | NA |
| AC004987.9  | 0,00 | 0,00 | 0,00 | 0,00 | NA | NA |
| AC004994.2  | 0,00 | 0,00 | 0,00 | 0,00 | NA | NA |
| AC004996.1  | 0,00 | 0,00 | 0,00 | 0,00 | NA | NA |
| AC005007.3  | 0,00 | 0,00 | 0,00 | 0,00 | NA | NA |
| AC005008.2  | 0,00 | 0,00 | 0,00 | 0,00 | NA | NA |
| AC005008.3  | 0,00 | 0,00 | 0,00 | 0,00 | NA | NA |
| AC005009.1  | 0,00 | 0,00 | 0,00 | 0,00 | NA | NA |
| AC005013.5  | 0,00 | 0,00 | 0,00 | 0,00 | NA | NA |
| AC005014.5  | 0,00 | 0,00 | 0,00 | 0,00 | NA | NA |
| AC005019.2  | 0,00 | 0,00 | 0,00 | 0,00 | NA | NA |
| AC005019.3  | 0,00 | 0,00 | 0,00 | 0,00 | NA | NA |
| AC005029.1  | 0,00 | 0,00 | 0,00 | 0,00 | NA | NA |
| AC005033.5  | 0,00 | 0,00 | 0,00 | 0,00 | NA | NA |
| AC005034.2  | 0,00 | 0,00 | 0,00 | 0,00 | NA | NA |
| AC005037.1  | 0,00 | 0,00 | 0,00 | 0,00 | NA | NA |
| AC005037.3  | 0,00 | 0,00 | 0,00 | 0,00 | NA | NA |
| AC005037.5  | 0,00 | 0,00 | 0,00 | 0,00 | NA | NA |
| AC005037.6  | 0,00 | 0,00 | 0,00 | 0,00 | NA | NA |
| AC005040.2  | 0,00 | 0,00 | 0,00 | 0,00 | NA | NA |
| AC005040.3  | 0,00 | 0,00 | 0,00 | 0,00 | NA | NA |
| AC005041.10 | 0,00 | 0,00 | 0,00 | 0,00 | NA | NA |
| AC005041.11 | 0,00 | 0,00 | 0,00 | 0,00 | NA | NA |
| AC005041.6  | 0,00 | 0,00 | 0,00 | 0,00 | NA | NA |
| AC005041.8  | 0,00 | 0,00 | 0,00 | 0,00 | NA | NA |
| AC005042.3  | 0,00 | 0,00 | 0,00 | 0,00 | NA | NA |
| AC005042.4  | 0,00 | 0,00 | 0,00 | 0,00 | NA | NA |
| AC005042.5  | 0,00 | 0,00 | 0,00 | 0,00 | NA | NA |
| AC005046.5  | 0,00 | 0,00 | 0,00 | 0,00 | NA | NA |
| AC005068.4  | 0,00 | 0,00 | 0,00 | 0,00 | NA | NA |
| AC005076.5  | 0,00 | 0,00 | 0,00 | 0,00 | NA | NA |
| AC005077.14 | 0,00 | 0,00 | 0,00 | 0,00 | NA | NA |
| AC005077.5  | 0,00 | 0,00 | 0,00 | 0,00 | NA | NA |
| AC005094.2  | 0,00 | 0,00 | 0,00 | 0,00 | NA | NA |
| AC005102.1  | 0,00 | 0,00 | 0,00 | 0,00 | NA | NA |
| AC005105.2  | 0,00 | 0,00 | 0,00 | 0,00 | NA | NA |
| AC005152.3  | 0,00 | 0,00 | 0,00 | 0,00 | NA | NA |
| AC005160.3  | 0,00 | 0,00 | 0,00 | 0,00 | NA | NA |
| AC005174.2  | 0,00 | 0,00 | 0,00 | 0,00 | NA | NA |
| AC005176.1  | 0,00 | 0,00 | 0,00 | 0,00 | NA | NA |
| AC005176.3  | 0,00 | 0,00 | 0,00 | 0,00 | NA | NA |

|             |      |      |      |      |    |    |
|-------------|------|------|------|------|----|----|
| AC005187.1  | 0,00 | 0,00 | 0,00 | 0,00 | NA | NA |
| AC005189.6  | 0,00 | 0,00 | 0,00 | 0,00 | NA | NA |
| AC005215.1  | 0,00 | 0,00 | 0,00 | 0,00 | NA | NA |
| AC005220.3  | 0,00 | 0,00 | 0,00 | 0,00 | NA | NA |
| AC005224.2  | 0,00 | 0,00 | 0,04 | 0,00 | NA | NA |
| AC005229.7  | 0,00 | 0,00 | 0,00 | 0,00 | NA | NA |
| AC005237.2  | 0,00 | 0,00 | 0,00 | 0,00 | NA | NA |
| AC005237.4  | 0,00 | 0,00 | 0,00 | 0,00 | NA | NA |
| AC005251.4  | 0,00 | 0,00 | 0,00 | 0,00 | NA | NA |
| AC005253.4  | 0,00 | 0,00 | 0,00 | 0,00 | NA | NA |
| AC005255.3  | 0,00 | 0,00 | 0,00 | 0,00 | NA | NA |
| AC005256.1  | 0,00 | 0,00 | 0,00 | 0,00 | NA | NA |
| AC005262.2  | 0,00 | 0,00 | 0,00 | 0,00 | NA | NA |
| AC005262.3  | 0,00 | 0,00 | 0,00 | 0,00 | NA | NA |
| AC005262.4  | 0,00 | 0,00 | 0,00 | 0,00 | NA | NA |
| AC005281.2  | 0,00 | 0,00 | 0,00 | 0,00 | NA | NA |
| AC005301.8  | 0,00 | 0,00 | 0,00 | 0,00 | NA | NA |
| AC005304.1  | 0,00 | 0,00 | 0,00 | 0,00 | NA | NA |
| AC005307.3  | 0,00 | 0,00 | 0,00 | 0,00 | NA | NA |
| AC005324.7  | 0,00 | 0,00 | 0,00 | 0,00 | NA | NA |
| AC005324.8  | 0,00 | 0,00 | 0,00 | 0,00 | NA | NA |
| AC005336.4  | 0,00 | 0,00 | 0,00 | 0,00 | NA | NA |
| AC005336.5  | 0,00 | 0,00 | 0,00 | 0,00 | NA | NA |
| AC005355.1  | 0,00 | 0,00 | 0,00 | 0,00 | NA | NA |
| AC005355.3  | 0,00 | 0,00 | 0,00 | 0,00 | NA | NA |
| AC005356.1  | 0,00 | 0,00 | 0,00 | 0,00 | NA | NA |
| AC005357.1  | 0,00 | 0,00 | 0,00 | 0,00 | NA | NA |
| AC005387.2  | 0,00 | 0,00 | 0,00 | 0,00 | NA | NA |
| AC005387.3  | 0,00 | 0,00 | 0,00 | 0,00 | NA | NA |
| AC005391.2  | 0,00 | 0,00 | 0,00 | 0,00 | NA | NA |
| AC005392.13 | 0,00 | 0,00 | 0,00 | 0,00 | NA | NA |
| AC005394.1  | 0,00 | 0,00 | 0,00 | 0,00 | NA | NA |
| AC005481.5  | 0,00 | 0,00 | 0,00 | 0,00 | NA | NA |
| AC005487.2  | 0,00 | 0,00 | 0,00 | 0,00 | NA | NA |
| AC005488.11 | 0,00 | 0,00 | 0,00 | 0,00 | NA | NA |
| AC005492.2  | 0,00 | 0,00 | 0,00 | 0,00 | NA | NA |
| AC005498.4  | 0,00 | 0,00 | 0,00 | 0,00 | NA | NA |
| AC005510.1  | 0,00 | 0,00 | 0,00 | 0,00 | NA | NA |
| AC005510.3  | 0,00 | 0,00 | 0,00 | 0,00 | NA | NA |
| AC005514.2  | 0,00 | 1,22 | 0,00 | 0,00 | NA | NA |
| AC005518.2  | 0,00 | 0,00 | 0,00 | 0,00 | NA | NA |
| AC005522.7  | 0,00 | 0,00 | 0,00 | 0,00 | NA | NA |
| AC005522.8  | 0,00 | 0,00 | 0,00 | 0,00 | NA | NA |
| AC005523.3  | 0,00 | 0,00 | 0,00 | 0,00 | NA | NA |
| AC005534.6  | 0,00 | 0,00 | 0,00 | 0,00 | NA | NA |
| AC005538.2  | 0,00 | 0,00 | 0,00 | 0,00 | NA | NA |
| AC005538.3  | 0,00 | 0,00 | 0,00 | 0,00 | NA | NA |
| AC005538.5  | 0,00 | 0,00 | 0,00 | 0,00 | NA | NA |
| AC005539.2  | 0,00 | 0,00 | 0,00 | 0,00 | NA | NA |
| AC005539.3  | 0,00 | 0,00 | 0,00 | 0,00 | NA | NA |
| AC005539.4  | 0,00 | 0,00 | 0,00 | 0,00 | NA | NA |
| AC005540.3  | 0,00 | 0,00 | 0,00 | 0,17 | NA | NA |
| AC005550.4  | 0,00 | 0,00 | 0,00 | 0,00 | NA | NA |
| AC005550.5  | 0,00 | 0,00 | 0,00 | 0,00 | NA | NA |
| AC005559.3  | 0,00 | 0,00 | 0,00 | 0,00 | NA | NA |

|             |      |      |      |      |    |    |
|-------------|------|------|------|------|----|----|
| AC005578.3  | 0,11 | 0,17 | 0,00 | 0,15 | NA | NA |
| AC005588.2  | 0,00 | 0,00 | 0,00 | 0,00 | NA | NA |
| AC005592.1  | 0,00 | 0,00 | 0,00 | 0,00 | NA | NA |
| AC005594.3  | 0,00 | 0,00 | 0,00 | 0,00 | NA | NA |
| AC005597.1  | 0,00 | 0,00 | 0,00 | 0,00 | NA | NA |
| AC005609.16 | 0,00 | 0,00 | 0,00 | 0,00 | NA | NA |
| AC005609.17 | 0,00 | 0,00 | 0,00 | 0,00 | NA | NA |
| AC005609.18 | 0,00 | 0,00 | 0,00 | 0,00 | NA | NA |
| AC005609.19 | 0,00 | 0,00 | 0,00 | 0,00 | NA | NA |
| AC005609.2  | 0,00 | 0,00 | 0,00 | 0,00 | NA | NA |
| AC005609.20 | 0,00 | 0,00 | 0,00 | 0,00 | NA | NA |
| AC005618.8  | 0,00 | 0,00 | 0,00 | 0,00 | NA | NA |
| AC005618.9  | 0,00 | 0,00 | 0,00 | 0,00 | NA | NA |
| AC005625.1  | 0,00 | 0,00 | 0,00 | 0,00 | NA | NA |
| AC005626.3  | 0,00 | 0,00 | 0,00 | 0,00 | NA | NA |
| AC005703.2  | 0,00 | 0,00 | 0,00 | 0,00 | NA | NA |
| AC005703.3  | 0,00 | 0,00 | 0,00 | 0,00 | NA | NA |
| AC005722.4  | 0,00 | 0,17 | 0,00 | 0,00 | NA | NA |
| AC005730.2  | 0,00 | 0,00 | 0,00 | 0,00 | NA | NA |
| AC005740.3  | 0,00 | 0,00 | 0,00 | 0,00 | NA | NA |
| AC005740.4  | 0,00 | 0,00 | 0,00 | 0,00 | NA | NA |
| AC005740.6  | 0,00 | 0,00 | 0,00 | 0,00 | NA | NA |
| AC005741.1  | 0,00 | 0,00 | 0,00 | 0,00 | NA | NA |
| AC005741.2  | 0,00 | 0,00 | 0,00 | 0,00 | NA | NA |
| AC005753.1  | 0,00 | 0,00 | 0,00 | 0,00 | NA | NA |
| AC005772.2  | 0,00 | 0,00 | 0,00 | 0,00 | NA | NA |
| AC005777.3  | 0,00 | 0,00 | 0,00 | 0,00 | NA | NA |
| AC005779.2  | 0,00 | 0,00 | 0,00 | 0,00 | NA | NA |
| AC005786.3  | 0,00 | 0,00 | 0,00 | 0,00 | NA | NA |
| AC005787.5  | 0,00 | 0,00 | 0,00 | 0,00 | NA | NA |
| AC005789.9  | 0,00 | 0,00 | 0,00 | 0,00 | NA | NA |
| AC005795.1  | 0,00 | 0,00 | 0,00 | 0,00 | NA | NA |
| AC005796.2  | 0,00 | 0,00 | 0,00 | 0,00 | NA | NA |
| AC005808.3  | 0,00 | 0,00 | 0,00 | 0,00 | NA | NA |
| AC005820.1  | 0,00 | 0,00 | 0,00 | 0,00 | NA | NA |
| AC005820.2  | 0,00 | 0,00 | 0,00 | 0,00 | NA | NA |
| AC005826.3  | 0,00 | 0,00 | 0,00 | 0,00 | NA | NA |
| AC005838.2  | 0,00 | 0,00 | 0,00 | 0,00 | NA | NA |
| AC005863.2  | 0,00 | 0,00 | 0,00 | 0,00 | NA | NA |
| AC005884.1  | 0,00 | 0,00 | 0,00 | 0,00 | NA | NA |
| AC005915.1  | 0,00 | 0,00 | 0,00 | 0,00 | NA | NA |
| AC005922.3  | 0,00 | 0,00 | 0,00 | 0,00 | NA | NA |
| AC005932.1  | 0,00 | 0,33 | 0,00 | 0,19 | NA | NA |
| AC005943.2  | 0,00 | 0,00 | 0,00 | 0,00 | NA | NA |
| AC005955.4  | 0,00 | 0,00 | 0,00 | 0,00 | NA | NA |
| AC005955.5  | 0,00 | 0,00 | 0,00 | 0,00 | NA | NA |
| AC006000.4  | 0,00 | 0,00 | 0,00 | 0,00 | NA | NA |
| AC006003.3  | 0,00 | 0,00 | 0,00 | 0,00 | NA | NA |
| AC006007.1  | 0,00 | 0,00 | 0,00 | 0,00 | NA | NA |
| AC006014.7  | 0,00 | 0,00 | 0,00 | 0,00 | NA | NA |
| AC006019.4  | 0,00 | 0,00 | 0,00 | 0,00 | NA | NA |
| AC006022.4  | 0,00 | 0,00 | 0,00 | 0,00 | NA | NA |
| AC006023.8  | 0,00 | 0,00 | 0,00 | 0,00 | NA | NA |
| AC006024.3  | 0,00 | 0,00 | 0,00 | 0,00 | NA | NA |
| AC006024.4  | 0,00 | 0,00 | 0,00 | 0,00 | NA | NA |



|             |      |      |      |      |    |    |
|-------------|------|------|------|------|----|----|
| AC006026.10 | 0,00 | 0,00 | 0,00 | 0,00 | NA | NA |
| AC006026.13 | 0,00 | 0,00 | 0,00 | 0,00 | NA | NA |
| AC006026.9  | 0,00 | 0,00 | 0,00 | 0,00 | NA | NA |
| AC006029.3  | 0,00 | 0,00 | 0,00 | 0,00 | NA | NA |
| AC006032.1  | 0,00 | 0,39 | 0,00 | 0,00 | NA | NA |
| AC006037.2  | 0,00 | 0,00 | 0,00 | 0,00 | NA | NA |
| AC006040.4  | 0,00 | 0,00 | 0,00 | 0,00 | NA | NA |
| AC006040.5  | 0,00 | 0,00 | 0,00 | 0,00 | NA | NA |
| AC006040.7  | 0,00 | 0,00 | 0,00 | 0,00 | NA | NA |
| AC006041.1  | 0,00 | 0,00 | 0,00 | 0,00 | NA | NA |
| AC006042.8  | 0,00 | 0,11 | 0,00 | 0,00 | NA | NA |
| AC006045.3  | 0,00 | 0,00 | 0,00 | 0,00 | NA | NA |
| AC006050.2  | 0,00 | 0,00 | 0,00 | 0,00 | NA | NA |
| AC006052.1  | 0,00 | 0,00 | 0,00 | 0,00 | NA | NA |
| AC006070.11 | 0,00 | 0,00 | 0,00 | 0,00 | NA | NA |
| AC006070.12 | 0,00 | 0,00 | 0,00 | 0,00 | NA | NA |
| AC006070.13 | 0,00 | 0,00 | 0,00 | 0,00 | NA | NA |
| AC006076.1  | 0,00 | 0,00 | 0,00 | 0,00 | NA | NA |
| AC006077.4  | 0,00 | 0,00 | 0,00 | 0,00 | NA | NA |
| AC006115.3  | 0,00 | 0,00 | 0,00 | 0,00 | NA | NA |
| AC006115.6  | 0,00 | 0,00 | 0,00 | 0,00 | NA | NA |
| AC006116.13 | 0,00 | 0,00 | 0,00 | 0,00 | NA | NA |
| AC006116.14 | 0,00 | 0,00 | 0,00 | 0,00 | NA | NA |
| AC006116.19 | 0,00 | 0,00 | 0,00 | 0,00 | NA | NA |
| AC006116.26 | 0,00 | 0,00 | 0,00 | 0,00 | NA | NA |
| AC006126.3  | 0,00 | 0,00 | 0,00 | 0,00 | NA | NA |
| AC006128.2  | 0,00 | 0,00 | 0,00 | 0,00 | NA | NA |
| AC006130.3  | 0,00 | 0,00 | 0,00 | 0,00 | NA | NA |
| AC006130.4  | 0,00 | 0,00 | 0,00 | 0,00 | NA | NA |
| AC006133.3  | 0,00 | 0,00 | 0,00 | 0,00 | NA | NA |
| AC006133.7  | 0,00 | 0,00 | 0,00 | 0,00 | NA | NA |
| AC006150.1  | 0,00 | 0,00 | 0,00 | 0,00 | NA | NA |
| AC006152.1  | 0,00 | 0,00 | 0,00 | 0,00 | NA | NA |
| AC006156.2  | 0,00 | 0,00 | 0,00 | 0,00 | NA | NA |
| AC006156.5  | 0,00 | 0,00 | 0,00 | 0,00 | NA | NA |
| AC006157.1  | 0,00 | 0,00 | 0,00 | 0,00 | NA | NA |
| AC006157.4  | 0,00 | 0,00 | 0,00 | 0,00 | NA | NA |
| AC006157.5  | 0,00 | 0,00 | 0,00 | 0,00 | NA | NA |
| AC006158.5  | 0,00 | 0,00 | 0,00 | 0,00 | NA | NA |
| AC006158.8  | 0,00 | 0,00 | 0,00 | 0,00 | NA | NA |
| AC006159.4  | 0,00 | 0,00 | 0,00 | 0,00 | NA | NA |
| AC006159.5  | 0,00 | 0,00 | 0,00 | 0,00 | NA | NA |
| AC006160.4  | 0,00 | 0,00 | 0,00 | 0,00 | NA | NA |
| AC006160.8  | 0,00 | 0,00 | 0,00 | 0,00 | NA | NA |
| AC006195.2  | 0,00 | 0,00 | 0,00 | 0,00 | NA | NA |
| AC006230.3  | 0,00 | 0,00 | 0,00 | 0,00 | NA | NA |
| AC006262.10 | 0,00 | 0,00 | 0,00 | 0,00 | NA | NA |
| AC006262.11 | 0,00 | 0,00 | 0,00 | 0,00 | NA | NA |
| AC006273.5  | 0,00 | 0,00 | 0,00 | 0,00 | NA | NA |
| AC006277.3  | 0,00 | 0,00 | 0,00 | 0,08 | NA | NA |
| AC006296.1  | 0,00 | 0,00 | 0,00 | 0,00 | NA | NA |
| AC006296.2  | 0,00 | 0,00 | 0,00 | 0,00 | NA | NA |
| AC006324.1  | 0,00 | 0,00 | 0,00 | 0,00 | NA | NA |
| AC006326.2  | 0,00 | 0,00 | 0,00 | 0,00 | NA | NA |
| AC006326.5  | 0,00 | 0,00 | 0,00 | 0,00 | NA | NA |

|             |      |      |      |      |    |    |
|-------------|------|------|------|------|----|----|
| AC006328.10 | 0,00 | 0,00 | 0,00 | 0,00 | NA | NA |
| AC006328.2  | 0,00 | 0,00 | 0,00 | 0,00 | NA | NA |
| AC006328.3  | 0,00 | 0,00 | 0,00 | 0,00 | NA | NA |
| AC006328.4  | 0,00 | 0,00 | 0,00 | 0,00 | NA | NA |
| AC006328.5  | 0,00 | 0,00 | 0,00 | 0,00 | NA | NA |
| AC006328.6  | 0,00 | 0,00 | 0,00 | 0,00 | NA | NA |
| AC006328.7  | 0,00 | 0,00 | 0,00 | 0,00 | NA | NA |
| AC006328.8  | 0,00 | 0,00 | 0,00 | 0,00 | NA | NA |
| AC006328.9  | 0,00 | 0,00 | 0,00 | 0,00 | NA | NA |
| AC006335.10 | 0,00 | 0,00 | 0,00 | 0,00 | NA | NA |
| AC006335.13 | 0,00 | 0,00 | 0,00 | 0,00 | NA | NA |
| AC006335.5  | 0,00 | 0,00 | 0,00 | 0,00 | NA | NA |
| AC006335.6  | 0,00 | 0,00 | 0,00 | 0,00 | NA | NA |
| AC006335.9  | 0,00 | 0,00 | 0,00 | 0,00 | NA | NA |
| AC006338.2  | 0,00 | 0,00 | 0,00 | 0,00 | NA | NA |
| AC006338.3  | 0,00 | 0,00 | 0,00 | 0,00 | NA | NA |
| AC006355.3  | 0,00 | 0,00 | 0,00 | 0,00 | NA | NA |
| AC006366.1  | 0,00 | 0,00 | 0,00 | 0,00 | NA | NA |
| AC006366.3  | 0,00 | 0,00 | 0,00 | 0,00 | NA | NA |
| AC006366.4  | 0,00 | 0,00 | 0,00 | 0,00 | NA | NA |
| AC006366.5  | 0,00 | 0,00 | 0,00 | 0,00 | NA | NA |
| AC006372.5  | 0,00 | 0,00 | 0,00 | 0,00 | NA | NA |
| AC006372.6  | 0,00 | 0,00 | 0,00 | 0,00 | NA | NA |
| AC006373.1  | 0,00 | 0,00 | 0,00 | 0,00 | NA | NA |
| AC006374.2  | 0,00 | 0,00 | 0,00 | 0,00 | NA | NA |
| AC006380.3  | 0,00 | 0,00 | 0,00 | 0,00 | NA | NA |
| AC006382.1  | 0,00 | 0,00 | 0,00 | 0,00 | NA | NA |
| AC006385.4  | 0,00 | 0,00 | 0,00 | 0,00 | NA | NA |
| AC006386.1  | 0,00 | 0,00 | 0,00 | 0,00 | NA | NA |
| AC006386.2  | 0,00 | 0,00 | 0,00 | 0,00 | NA | NA |
| AC006386.3  | 0,00 | 0,00 | 0,00 | 0,00 | NA | NA |
| AC006390.3  | 0,00 | 0,00 | 0,00 | 0,00 | NA | NA |
| AC006390.4  | 0,00 | 0,00 | 0,00 | 0,00 | NA | NA |
| AC006427.1  | 0,00 | 0,00 | 0,00 | 0,00 | NA | NA |
| AC006427.2  | 0,00 | 0,00 | 0,00 | 0,00 | NA | NA |
| AC006445.6  | 0,00 | 0,00 | 0,00 | 0,00 | NA | NA |
| AC006445.7  | 0,00 | 0,00 | 0,00 | 0,00 | NA | NA |
| AC006445.8  | 0,00 | 0,00 | 0,00 | 0,00 | NA | NA |
| AC006458.3  | 0,00 | 0,00 | 0,00 | 0,00 | NA | NA |
| AC006460.2  | 0,00 | 0,27 | 0,00 | 0,24 | NA | NA |
| AC006461.2  | 0,00 | 0,00 | 0,00 | 0,00 | NA | NA |
| AC006465.4  | 0,00 | 0,00 | 0,00 | 0,00 | NA | NA |
| AC006466.5  | 0,00 | 0,00 | 0,00 | 0,00 | NA | NA |
| AC006481.1  | 0,00 | 0,00 | 0,00 | 0,00 | NA | NA |
| AC006482.1  | 0,00 | 0,00 | 0,00 | 0,00 | NA | NA |
| AC006483.5  | 0,00 | 0,00 | 0,00 | 0,00 | NA | NA |
| AC006483.7  | 0,00 | 0,00 | 0,00 | 0,00 | NA | NA |
| AC006499.1  | 0,00 | 0,00 | 0,00 | 0,00 | NA | NA |
| AC006499.2  | 0,00 | 0,00 | 0,00 | 0,00 | NA | NA |
| AC006499.3  | 0,00 | 0,00 | 0,00 | 0,00 | NA | NA |
| AC006499.4  | 0,00 | 0,00 | 0,00 | 0,00 | NA | NA |
| AC006499.5  | 0,00 | 0,00 | 0,00 | 0,00 | NA | NA |
| AC006499.6  | 0,00 | 0,00 | 0,00 | 0,00 | NA | NA |
| AC006499.7  | 0,00 | 0,00 | 0,00 | 0,00 | NA | NA |
| AC006499.9  | 0,00 | 0,00 | 0,00 | 0,00 | NA | NA |

|             |      |      |      |      |    |    |
|-------------|------|------|------|------|----|----|
| AC006509.4  | 0,00 | 0,00 | 0,00 | 0,00 | NA | NA |
| AC006538.4  | 0,00 | 0,00 | 0,00 | 0,00 | NA | NA |
| AC006539.2  | 0,00 | 0,00 | 0,00 | 0,00 | NA | NA |
| AC006539.4  | 0,00 | 0,00 | 0,00 | 0,00 | NA | NA |
| AC006539.6  | 0,00 | 0,00 | 0,00 | 0,00 | NA | NA |
| AC006547.15 | 0,00 | 0,00 | 0,00 | 0,00 | NA | NA |
| AC006548.26 | 0,00 | 0,00 | 0,00 | 0,00 | NA | NA |
| AC006548.29 | 0,00 | 0,00 | 0,00 | 0,00 | NA | NA |
| AC006840.1  | 0,00 | 0,00 | 0,00 | 0,00 | NA | NA |
| AC006942.4  | 0,00 | 0,00 | 0,00 | 0,00 | NA | NA |
| AC006946.12 | 0,00 | 0,00 | 0,00 | 0,00 | NA | NA |
| AC006946.17 | 0,00 | 0,00 | 0,00 | 0,00 | NA | NA |
| AC006960.5  | 0,00 | 0,00 | 0,00 | 0,00 | NA | NA |
| AC006983.2  | 0,00 | 0,00 | 0,00 | 0,00 | NA | NA |
| AC006986.1  | 0,00 | 0,00 | 0,00 | 0,00 | NA | NA |
| AC006986.2  | 0,00 | 0,00 | 0,00 | 0,00 | NA | NA |
| AC006986.4  | 0,00 | 0,00 | 0,00 | 0,00 | NA | NA |
| AC006987.1  | 0,00 | 0,00 | 0,00 | 0,00 | NA | NA |
| AC006987.2  | 0,00 | 0,00 | 0,00 | 0,00 | NA | NA |
| AC006987.3  | 0,00 | 0,00 | 0,00 | 0,00 | NA | NA |
| AC006987.5  | 0,00 | 0,00 | 0,00 | 0,00 | NA | NA |
| AC006987.6  | 0,00 | 0,00 | 0,00 | 0,00 | NA | NA |
| AC006987.8  | 0,00 | 0,00 | 0,00 | 0,00 | NA | NA |
| AC006988.4  | 0,00 | 0,00 | 0,00 | 0,00 | NA | NA |
| AC006989.1  | 0,00 | 0,00 | 0,00 | 0,00 | NA | NA |
| AC006989.2  | 0,00 | 0,00 | 0,00 | 0,00 | NA | NA |
| AC006991.1  | 0,00 | 0,00 | 0,00 | 0,00 | NA | NA |
| AC006991.2  | 0,00 | 0,00 | 0,00 | 0,00 | NA | NA |
| AC006998.1  | 0,00 | 0,00 | 0,00 | 0,00 | NA | NA |
| AC006999.1  | 0,00 | 0,00 | 0,00 | 0,00 | NA | NA |
| AC007000.10 | 0,00 | 0,43 | 0,00 | 0,00 | NA | NA |
| AC007000.12 | 0,00 | 0,00 | 0,00 | 0,00 | NA | NA |
| AC007003.1  | 0,00 | 0,00 | 0,00 | 0,00 | NA | NA |
| AC007014.1  | 0,00 | 0,00 | 0,00 | 0,00 | NA | NA |
| AC007033.2  | 0,00 | 0,00 | 0,00 | 0,00 | NA | NA |
| AC007036.5  | 0,00 | 0,00 | 0,00 | 0,00 | NA | NA |
| AC007040.7  | 0,00 | 0,00 | 0,00 | 0,00 | NA | NA |
| AC007041.3  | 0,00 | 0,00 | 0,00 | 0,00 | NA | NA |
| AC007050.11 | 0,00 | 0,00 | 0,00 | 0,00 | NA | NA |
| AC007050.14 | 0,00 | 0,00 | 0,00 | 0,00 | NA | NA |
| AC007064.21 | 0,00 | 0,00 | 0,00 | 0,00 | NA | NA |
| AC007064.22 | 0,00 | 0,00 | 0,00 | 0,00 | NA | NA |
| AC007064.23 | 0,00 | 0,00 | 0,00 | 0,00 | NA | NA |
| AC007064.25 | 0,00 | 0,00 | 0,00 | 0,00 | NA | NA |
| AC007064.26 | 0,00 | 0,00 | 0,00 | 0,00 | NA | NA |
| AC007064.29 | 0,00 | 0,00 | 0,00 | 0,00 | NA | NA |
| AC007078.4  | 0,00 | 0,00 | 0,00 | 0,00 | NA | NA |
| AC007092.1  | 0,14 | 0,24 | 0,11 | 0,17 | NA | NA |
| AC007095.2  | 0,00 | 0,00 | 0,00 | 0,00 | NA | NA |
| AC007098.1  | 0,00 | 0,00 | 0,00 | 0,00 | NA | NA |
| AC007099.2  | 0,00 | 0,00 | 0,00 | 0,00 | NA | NA |
| AC007106.1  | 0,00 | 0,00 | 0,00 | 0,00 | NA | NA |
| AC007115.3  | 0,00 | 0,00 | 0,00 | 0,00 | NA | NA |
| AC007128.1  | 0,00 | 0,00 | 0,00 | 0,00 | NA | NA |
| AC007131.2  | 0,00 | 0,00 | 0,00 | 0,00 | NA | NA |

|             |      |      |      |      |    |    |
|-------------|------|------|------|------|----|----|
| AC007136.1  | 0,00 | 0,00 | 0,00 | 0,00 | NA | NA |
| AC007163.10 | 0,00 | 0,00 | 0,00 | 0,00 | NA | NA |
| AC007163.11 | 0,00 | 0,00 | 0,00 | 0,00 | NA | NA |
| AC007163.12 | 0,00 | 0,00 | 0,00 | 0,00 | NA | NA |
| AC007163.13 | 0,00 | 0,00 | 0,00 | 0,00 | NA | NA |
| AC007163.6  | 0,00 | 0,00 | 0,00 | 0,00 | NA | NA |
| AC007163.8  | 0,00 | 0,00 | 0,00 | 0,00 | NA | NA |
| AC007163.9  | 0,00 | 0,00 | 0,00 | 0,00 | NA | NA |
| AC007179.1  | 0,00 | 0,00 | 0,00 | 0,00 | NA | NA |
| AC007189.2  | 0,00 | 0,00 | 0,00 | 0,00 | NA | NA |
| AC007193.10 | 0,00 | 0,00 | 0,00 | 0,00 | NA | NA |
| AC007193.9  | 0,00 | 0,00 | 0,00 | 0,00 | NA | NA |
| AC007204.3  | 0,00 | 0,00 | 0,00 | 0,00 | NA | NA |
| AC007228.11 | 0,00 | 0,07 | 0,00 | 0,00 | NA | NA |
| AC007229.3  | 0,00 | 0,00 | 0,00 | 0,00 | NA | NA |
| AC007237.2  | 0,00 | 0,00 | 0,00 | 0,00 | NA | NA |
| AC007238.1  | 0,00 | 0,08 | 0,00 | 0,00 | NA | NA |
| AC007242.3  | 0,00 | 0,00 | 0,00 | 0,00 | NA | NA |
| AC007248.6  | 0,00 | 0,00 | 0,00 | 0,00 | NA | NA |
| AC007248.7  | 0,00 | 0,00 | 0,00 | 0,00 | NA | NA |
| AC007249.3  | 0,00 | 0,00 | 0,00 | 0,00 | NA | NA |
| AC007251.2  | 0,00 | 0,00 | 0,00 | 0,00 | NA | NA |
| AC007253.1  | 0,00 | 0,00 | 0,00 | 0,00 | NA | NA |
| AC007255.8  | 0,00 | 0,00 | 0,00 | 0,00 | NA | NA |
| AC007271.3  | 0,00 | 0,00 | 0,00 | 0,00 | NA | NA |
| AC007272.3  | 0,00 | 0,00 | 0,00 | 0,00 | NA | NA |
| AC007274.1  | 0,00 | 0,00 | 0,00 | 0,00 | NA | NA |
| AC007274.2  | 0,00 | 0,00 | 0,00 | 0,00 | NA | NA |
| AC007274.4  | 0,00 | 0,00 | 0,00 | 0,00 | NA | NA |
| AC007274.5  | 0,00 | 0,00 | 0,00 | 0,00 | NA | NA |
| AC007275.3  | 0,00 | 0,00 | 0,00 | 0,00 | NA | NA |
| AC007276.2  | 0,00 | 0,00 | 0,00 | 0,00 | NA | NA |
| AC007276.6  | 0,00 | 0,00 | 0,00 | 0,00 | NA | NA |
| AC007277.2  | 0,00 | 0,00 | 0,00 | 0,00 | NA | NA |
| AC007278.2  | 0,00 | 0,00 | 0,00 | 0,00 | NA | NA |
| AC007282.4  | 0,00 | 0,00 | 0,00 | 0,00 | NA | NA |
| AC007282.6  | 0,00 | 0,00 | 0,00 | 0,00 | NA | NA |
| AC007292.7  | 0,00 | 0,00 | 0,00 | 0,00 | NA | NA |
| AC007312.3  | 0,00 | 0,00 | 0,00 | 0,00 | NA | NA |
| AC007316.3  | 0,00 | 0,00 | 0,00 | 0,00 | NA | NA |
| AC007322.1  | 0,00 | 0,00 | 0,00 | 0,00 | NA | NA |
| AC007322.3  | 0,00 | 0,00 | 0,00 | 0,00 | NA | NA |
| AC007322.5  | 0,00 | 0,00 | 0,00 | 0,00 | NA | NA |
| AC007322.7  | 0,00 | 0,00 | 0,00 | 0,00 | NA | NA |
| AC007322.8  | 0,00 | 0,00 | 0,00 | 0,00 | NA | NA |
| AC007326.12 | 0,00 | 0,00 | 0,00 | 0,00 | NA | NA |
| AC007326.9  | 0,00 | 0,00 | 0,00 | 0,00 | NA | NA |
| AC007327.5  | 0,00 | 0,00 | 0,00 | 0,00 | NA | NA |
| AC007327.6  | 0,00 | 0,00 | 0,00 | 0,00 | NA | NA |
| AC007359.1  | 0,00 | 0,00 | 0,00 | 0,00 | NA | NA |
| AC007359.2  | 0,00 | 0,00 | 0,00 | 0,00 | NA | NA |
| AC007365.1  | 0,00 | 0,00 | 0,00 | 0,00 | NA | NA |
| AC007365.4  | 0,00 | 0,00 | 0,00 | 0,00 | NA | NA |
| AC007379.10 | 0,00 | 0,00 | 0,00 | 0,00 | NA | NA |
| AC007379.11 | 0,00 | 0,00 | 0,00 | 0,00 | NA | NA |

|             |      |      |      |      |    |    |
|-------------|------|------|------|------|----|----|
| AC007379.4  | 0,00 | 0,00 | 0,00 | 0,00 | NA | NA |
| AC007379.6  | 0,00 | 0,00 | 0,00 | 0,00 | NA | NA |
| AC007379.7  | 0,00 | 0,00 | 0,00 | 0,00 | NA | NA |
| AC007379.8  | 0,00 | 0,00 | 0,00 | 0,00 | NA | NA |
| AC007379.9  | 0,00 | 0,00 | 0,00 | 0,00 | NA | NA |
| AC007381.3  | 0,00 | 0,07 | 0,00 | 0,00 | NA | NA |
| AC007383.6  | 0,00 | 0,00 | 0,00 | 0,00 | NA | NA |
| AC007383.7  | 0,00 | 0,00 | 0,00 | 0,00 | NA | NA |
| AC007386.3  | 0,00 | 0,00 | 0,00 | 0,00 | NA | NA |
| AC007387.2  | 0,00 | 0,00 | 0,00 | 0,00 | NA | NA |
| AC007389.1  | 0,00 | 0,00 | 0,00 | 0,00 | NA | NA |
| AC007389.2  | 0,00 | 0,00 | 0,00 | 0,00 | NA | NA |
| AC007389.4  | 0,00 | 0,00 | 0,00 | 0,00 | NA | NA |
| AC007390.4  | 0,00 | 0,00 | 0,00 | 0,00 | NA | NA |
| AC007392.4  | 0,00 | 0,00 | 0,00 | 0,00 | NA | NA |
| AC007394.2  | 0,00 | 0,00 | 0,00 | 0,00 | NA | NA |
| AC007394.3  | 0,00 | 0,00 | 0,00 | 0,00 | NA | NA |
| AC007395.3  | 0,00 | 0,00 | 0,00 | 0,00 | NA | NA |
| AC007395.4  | 0,00 | 0,00 | 0,00 | 0,00 | NA | NA |
| AC007395.5  | 0,00 | 0,00 | 0,00 | 0,00 | NA | NA |
| AC007403.1  | 0,00 | 0,00 | 0,00 | 0,00 | NA | NA |
| AC007403.2  | 0,00 | 0,00 | 0,00 | 0,00 | NA | NA |
| AC007405.2  | 0,00 | 0,00 | 0,00 | 0,00 | NA | NA |
| AC007405.4  | 0,52 | 1,20 | 0,68 | 0,65 | NA | NA |
| AC007405.5  | 0,00 | 0,00 | 0,00 | 0,00 | NA | NA |
| AC007405.6  | 0,00 | 0,00 | 0,00 | 0,00 | NA | NA |
| AC007461.2  | 0,00 | 0,00 | 0,00 | 0,00 | NA | NA |
| AC007463.2  | 0,00 | 0,00 | 0,00 | 0,00 | NA | NA |
| AC007491.1  | 0,00 | 0,71 | 0,00 | 0,09 | NA | NA |
| AC007551.2  | 0,00 | 0,00 | 0,00 | 0,00 | NA | NA |
| AC007556.2  | 0,00 | 0,00 | 0,00 | 0,00 | NA | NA |
| AC007557.1  | 0,00 | 0,00 | 0,00 | 0,00 | NA | NA |
| AC007557.2  | 0,00 | 0,00 | 0,00 | 0,00 | NA | NA |
| AC007557.3  | 0,00 | 0,00 | 0,00 | 0,00 | NA | NA |
| AC007557.4  | 0,00 | 0,00 | 0,00 | 0,00 | NA | NA |
| AC007559.1  | 0,00 | 0,00 | 0,00 | 0,00 | NA | NA |
| AC007560.1  | 0,00 | 0,00 | 0,00 | 0,00 | NA | NA |
| AC007562.1  | 0,00 | 0,00 | 0,00 | 0,00 | NA | NA |
| AC007562.2  | 0,00 | 0,00 | 0,00 | 0,00 | NA | NA |
| AC007562.3  | 0,00 | 0,00 | 0,00 | 0,00 | NA | NA |
| AC007562.4  | 0,00 | 0,00 | 0,00 | 0,00 | NA | NA |
| AC007562.5  | 0,00 | 0,00 | 0,00 | 0,00 | NA | NA |
| AC007563.1  | 0,00 | 0,00 | 0,00 | 0,00 | NA | NA |
| AC007563.2  | 0,00 | 0,00 | 0,00 | 0,00 | NA | NA |
| AC007563.3  | 0,00 | 0,00 | 0,00 | 0,00 | NA | NA |
| AC007563.4  | 0,00 | 0,00 | 0,00 | 0,00 | NA | NA |
| AC007631.1  | 0,00 | 0,00 | 0,00 | 0,00 | NA | NA |
| AC007677.2  | 0,00 | 0,00 | 0,00 | 0,00 | NA | NA |
| AC007679.3  | 0,28 | 0,22 | 0,30 | 0,21 | NA | NA |
| AC007679.4  | 0,00 | 0,00 | 0,00 | 0,00 | NA | NA |
| AC007731.1  | 0,00 | 0,00 | 0,00 | 0,00 | NA | NA |
| AC007740.1  | 0,00 | 0,00 | 0,00 | 0,00 | NA | NA |
| AC007742.1  | 0,00 | 0,00 | 0,00 | 0,00 | NA | NA |
| AC007742.10 | 0,00 | 0,00 | 0,00 | 0,00 | NA | NA |
| AC007742.2  | 0,00 | 0,00 | 0,00 | 0,00 | NA | NA |

|             |      |      |      |      |    |    |
|-------------|------|------|------|------|----|----|
| AC007742.3  | 0,00 | 0,00 | 0,00 | 0,00 | NA | NA |
| AC007742.4  | 0,00 | 0,00 | 0,00 | 0,00 | NA | NA |
| AC007742.7  | 0,00 | 0,00 | 0,00 | 0,00 | NA | NA |
| AC007742.8  | 0,00 | 0,00 | 0,00 | 0,00 | NA | NA |
| AC007742.9  | 0,00 | 0,00 | 0,00 | 0,00 | NA | NA |
| AC007750.5  | 0,00 | 0,00 | 0,00 | 0,00 | NA | NA |
| AC007787.3  | 0,00 | 0,00 | 0,00 | 0,00 | NA | NA |
| AC007790.3  | 0,00 | 0,00 | 0,00 | 0,00 | NA | NA |
| AC007795.1  | 0,00 | 0,00 | 0,00 | 0,00 | NA | NA |
| AC007876.1  | 0,00 | 0,00 | 0,00 | 0,00 | NA | NA |
| AC007879.1  | 0,00 | 0,00 | 0,00 | 0,00 | NA | NA |
| AC007881.4  | 0,00 | 0,00 | 0,00 | 0,00 | NA | NA |
| AC007919.18 | 0,00 | 0,00 | 0,00 | 0,00 | NA | NA |
| AC007952.4  | 0,00 | 0,00 | 0,00 | 0,00 | NA | NA |
| AC007952.6  | 0,00 | 0,00 | 0,00 | 0,00 | NA | NA |
| AC007965.1  | 0,00 | 0,00 | 0,00 | 0,00 | NA | NA |
| AC007965.10 | 0,00 | 0,00 | 0,00 | 0,00 | NA | NA |
| AC007965.11 | 0,00 | 0,00 | 0,00 | 0,00 | NA | NA |
| AC007965.2  | 0,00 | 0,00 | 0,00 | 0,00 | NA | NA |
| AC007965.3  | 0,00 | 0,00 | 0,00 | 0,00 | NA | NA |
| AC007965.5  | 0,00 | 0,00 | 0,00 | 0,00 | NA | NA |
| AC007965.7  | 0,00 | 0,00 | 0,00 | 0,00 | NA | NA |
| AC007965.8  | 0,00 | 0,00 | 0,00 | 0,00 | NA | NA |
| AC007965.9  | 0,00 | 0,00 | 0,00 | 0,00 | NA | NA |
| AC007966.1  | 0,00 | 0,00 | 0,00 | 0,00 | NA | NA |
| AC007967.2  | 0,00 | 0,00 | 0,00 | 0,00 | NA | NA |
| AC007967.3  | 0,00 | 0,00 | 0,00 | 0,00 | NA | NA |
| AC007967.4  | 0,00 | 0,00 | 0,00 | 0,00 | NA | NA |
| AC007969.4  | 0,00 | 0,00 | 0,00 | 0,00 | NA | NA |
| AC008060.5  | 0,00 | 0,00 | 0,00 | 0,00 | NA | NA |
| AC008060.7  | 0,00 | 0,00 | 0,00 | 0,00 | NA | NA |
| AC008060.8  | 0,00 | 0,00 | 0,00 | 0,00 | NA | NA |
| AC008063.3  | 0,00 | 0,00 | 0,00 | 0,00 | NA | NA |
| AC008069.1  | 0,00 | 0,00 | 0,00 | 0,00 | NA | NA |
| AC008069.2  | 0,00 | 0,00 | 0,00 | 0,00 | NA | NA |
| AC008070.1  | 0,00 | 0,00 | 0,00 | 0,00 | NA | NA |
| AC008071.2  | 0,00 | 0,00 | 0,00 | 0,00 | NA | NA |
| AC008073.9  | 0,00 | 0,00 | 0,00 | 0,00 | NA | NA |
| AC008074.4  | 0,00 | 0,00 | 0,00 | 0,00 | NA | NA |
| AC008074.5  | 0,00 | 0,00 | 0,00 | 0,00 | NA | NA |
| AC008079.9  | 0,00 | 0,00 | 0,00 | 0,00 | NA | NA |
| AC008088.4  | 0,00 | 0,00 | 0,00 | 0,00 | NA | NA |
| AC008103.2  | 0,00 | 0,00 | 0,00 | 0,00 | NA | NA |
| AC008103.3  | 0,00 | 0,00 | 0,00 | 0,00 | NA | NA |
| AC008103.4  | 0,00 | 0,00 | 0,00 | 0,00 | NA | NA |
| AC008132.12 | 0,00 | 0,00 | 0,00 | 0,00 | NA | NA |
| AC008132.13 | 0,04 | 0,07 | 0,06 | 0,03 | NA | NA |
| AC008154.4  | 0,00 | 0,00 | 0,00 | 0,00 | NA | NA |
| AC008154.5  | 0,00 | 0,00 | 0,00 | 0,00 | NA | NA |
| AC008155.1  | 0,00 | 0,00 | 0,00 | 0,00 | NA | NA |
| AC008155.2  | 0,00 | 0,00 | 0,00 | 0,00 | NA | NA |
| AC008163.6  | 0,00 | 0,00 | 0,00 | 0,00 | NA | NA |
| AC008171.1  | 0,00 | 0,00 | 0,00 | 0,00 | NA | NA |
| AC008173.1  | 0,00 | 0,00 | 0,00 | 0,00 | NA | NA |
| AC008175.5  | 0,00 | 0,00 | 0,00 | 0,00 | NA | NA |

|             |      |      |      |      |    |    |
|-------------|------|------|------|------|----|----|
| AC008175.6  | 0,00 | 0,00 | 0,00 | 0,00 | NA | NA |
| AC008175.7  | 0,00 | 0,00 | 0,00 | 0,00 | NA | NA |
| AC008175.8  | 0,00 | 0,00 | 0,00 | 0,00 | NA | NA |
| AC008175.9  | 0,00 | 0,00 | 0,00 | 0,00 | NA | NA |
| AC008176.2  | 0,00 | 0,00 | 0,00 | 0,00 | NA | NA |
| AC008264.4  | 0,00 | 0,00 | 0,00 | 0,00 | NA | NA |
| AC008268.1  | 0,00 | 0,00 | 0,00 | 0,00 | NA | NA |
| AC008269.2  | 0,00 | 0,00 | 0,00 | 0,00 | NA | NA |
| AC008271.1  | 0,00 | 0,00 | 0,00 | 0,00 | NA | NA |
| AC008278.2  | 0,00 | 0,00 | 0,00 | 0,00 | NA | NA |
| AC008278.3  | 0,00 | 0,00 | 0,00 | 0,00 | NA | NA |
| AC008279.1  | 0,00 | 0,00 | 0,00 | 0,00 | NA | NA |
| AC008280.1  | 0,00 | 0,00 | 0,00 | 0,00 | NA | NA |
| AC008280.3  | 0,00 | 0,00 | 0,00 | 0,00 | NA | NA |
| AC008281.1  | 0,00 | 0,00 | 0,00 | 0,00 | NA | NA |
| AC008500.1  | 0,00 | 0,00 | 0,00 | 0,00 | NA | NA |
| AC008592.5  | 0,00 | 0,00 | 0,00 | 0,00 | NA | NA |
| AC008592.6  | 0,00 | 0,00 | 0,00 | 0,00 | NA | NA |
| AC008592.7  | 0,00 | 0,00 | 0,00 | 0,00 | NA | NA |
| AC008694.3  | 0,00 | 0,00 | 0,00 | 0,00 | NA | NA |
| AC008703.1  | 0,00 | 0,00 | 0,00 | 0,00 | NA | NA |
| AC008728.2  | 0,00 | 0,00 | 0,00 | 0,00 | NA | NA |
| AC008746.3  | 0,00 | 0,00 | 0,00 | 0,00 | NA | NA |
| AC008746.5  | 0,00 | 0,00 | 0,00 | 0,00 | NA | NA |
| AC008746.9  | 0,00 | 0,00 | 0,00 | 0,00 | NA | NA |
| AC008753.1  | 0,00 | 0,00 | 0,00 | 0,00 | NA | NA |
| AC008753.3  | 0,00 | 0,87 | 0,00 | 0,00 | NA | NA |
| AC008781.7  | 0,00 | 0,00 | 0,00 | 0,00 | NA | NA |
| AC008834.1  | 0,00 | 0,00 | 0,00 | 0,00 | NA | NA |
| AC008834.2  | 0,00 | 0,00 | 0,00 | 0,00 | NA | NA |
| AC008937.3  | 0,00 | 0,00 | 0,00 | 0,00 | NA | NA |
| AC008984.4  | 0,00 | 0,00 | 0,00 | 0,00 | NA | NA |
| AC008984.5  | 0,00 | 0,00 | 0,00 | 0,00 | NA | NA |
| AC008984.6  | 0,00 | 0,00 | 0,00 | 0,00 | NA | NA |
| AC008991.1  | 0,00 | 0,00 | 0,00 | 0,00 | NA | NA |
| AC008992.1  | 0,00 | 0,00 | 0,00 | 0,00 | NA | NA |
| AC009014.3  | 0,00 | 0,00 | 0,00 | 0,00 | NA | NA |
| AC009052.12 | 0,00 | 0,00 | 0,00 | 0,00 | NA | NA |
| AC009110.1  | 0,00 | 0,00 | 0,00 | 0,00 | NA | NA |
| AC009120.8  | 0,00 | 0,00 | 0,00 | 0,00 | NA | NA |
| AC009120.9  | 0,00 | 0,00 | 0,00 | 0,00 | NA | NA |
| AC009133.22 | 0,00 | 0,00 | 0,00 | 0,00 | NA | NA |
| AC009133.23 | 0,00 | 0,00 | 0,00 | 0,00 | NA | NA |
| AC009133.24 | 0,00 | 0,00 | 0,00 | 0,00 | NA | NA |
| AC009134.1  | 0,00 | 0,00 | 0,00 | 0,00 | NA | NA |
| AC009158.1  | 0,00 | 0,00 | 0,13 | 0,46 | NA | NA |
| AC009161.1  | 0,00 | 0,00 | 0,00 | 0,00 | NA | NA |
| AC009166.3  | 0,00 | 0,00 | 0,00 | 0,00 | NA | NA |
| AC009166.5  | 0,00 | 0,00 | 0,00 | 0,00 | NA | NA |
| AC009223.1  | 0,00 | 0,00 | 0,00 | 0,00 | NA | NA |
| AC009229.4  | 0,00 | 0,00 | 0,00 | 0,00 | NA | NA |
| AC009229.5  | 0,00 | 0,00 | 0,00 | 0,00 | NA | NA |
| AC009233.1  | 0,00 | 0,00 | 0,00 | 0,00 | NA | NA |
| AC009233.2  | 0,00 | 0,00 | 0,00 | 0,00 | NA | NA |
| AC009234.1  | 0,00 | 0,00 | 0,00 | 0,00 | NA | NA |

|             |      |      |      |      |    |    |
|-------------|------|------|------|------|----|----|
| AC009235.2  | 0,00 | 0,00 | 0,00 | 0,00 | NA | NA |
| AC009236.2  | 0,00 | 0,00 | 0,00 | 0,00 | NA | NA |
| AC009237.12 | 0,00 | 0,00 | 0,00 | 0,00 | NA | NA |
| AC009237.13 | 0,00 | 0,00 | 0,00 | 0,00 | NA | NA |
| AC009237.14 | 0,00 | 0,00 | 0,00 | 0,00 | NA | NA |
| AC009237.16 | 0,00 | 0,00 | 0,00 | 0,00 | NA | NA |
| AC009237.17 | 0,00 | 0,00 | 0,00 | 0,00 | NA | NA |
| AC009237.2  | 0,00 | 0,00 | 0,00 | 0,00 | NA | NA |
| AC009237.4  | 0,00 | 0,00 | 0,00 | 0,00 | NA | NA |
| AC009237.5  | 0,00 | 0,00 | 0,00 | 0,00 | NA | NA |
| AC009237.6  | 0,00 | 0,00 | 0,00 | 0,00 | NA | NA |
| AC009237.7  | 0,00 | 0,11 | 0,00 | 0,00 | NA | NA |
| AC009238.5  | 0,00 | 0,00 | 0,00 | 0,00 | NA | NA |
| AC009238.6  | 0,00 | 0,00 | 0,00 | 0,00 | NA | NA |
| AC009238.7  | 0,00 | 0,00 | 0,00 | 0,00 | NA | NA |
| AC009238.8  | 0,00 | 0,00 | 0,00 | 0,00 | NA | NA |
| AC009239.1  | 0,00 | 0,00 | 0,00 | 0,00 | NA | NA |
| AC009240.1  | 0,00 | 0,00 | 0,00 | 0,00 | NA | NA |
| AC009262.2  | 0,00 | 0,00 | 0,00 | 0,00 | NA | NA |
| AC009263.2  | 0,00 | 0,00 | 0,00 | 0,00 | NA | NA |
| AC009274.6  | 0,00 | 0,00 | 0,00 | 0,00 | NA | NA |
| AC009276.4  | 0,00 | 0,00 | 0,00 | 0,00 | NA | NA |
| AC009297.1  | 0,00 | 0,00 | 0,00 | 0,00 | NA | NA |
| AC009299.5  | 0,00 | 0,00 | 0,00 | 0,00 | NA | NA |
| AC009302.2  | 0,00 | 0,00 | 0,00 | 0,00 | NA | NA |
| AC009302.3  | 0,00 | 0,00 | 0,00 | 0,00 | NA | NA |
| AC009302.4  | 0,00 | 0,00 | 0,00 | 0,00 | NA | NA |
| AC009305.1  | 0,00 | 0,00 | 0,00 | 0,00 | NA | NA |
| AC009310.1  | 0,00 | 0,00 | 0,00 | 0,00 | NA | NA |
| AC009313.2  | 0,00 | 0,00 | 0,00 | 0,00 | NA | NA |
| AC009336.19 | 0,00 | 0,00 | 0,00 | 0,00 | NA | NA |
| AC009336.24 | 0,00 | 0,00 | 0,00 | 0,00 | NA | NA |
| AC009362.2  | 0,00 | 0,00 | 0,00 | 0,00 | NA | NA |
| AC009365.4  | 0,00 | 0,00 | 0,00 | 0,00 | NA | NA |
| AC009410.1  | 0,00 | 0,00 | 0,00 | 0,00 | NA | NA |
| AC009411.2  | 0,00 | 0,00 | 0,00 | 0,00 | NA | NA |
| AC009413.1  | 0,00 | 0,00 | 0,00 | 0,00 | NA | NA |
| AC009414.1  | 0,00 | 0,00 | 0,00 | 0,00 | NA | NA |
| AC009429.1  | 0,00 | 0,25 | 0,00 | 0,00 | NA | NA |
| AC009473.1  | 0,00 | 0,00 | 0,00 | 0,00 | NA | NA |
| AC009474.1  | 0,00 | 0,00 | 0,00 | 0,00 | NA | NA |
| AC009476.1  | 0,00 | 0,00 | 0,00 | 0,00 | NA | NA |
| AC009477.6  | 0,00 | 0,00 | 0,00 | 0,00 | NA | NA |
| AC009477.8  | 0,00 | 0,00 | 0,00 | 0,00 | NA | NA |
| AC009480.4  | 0,00 | 0,00 | 0,00 | 0,00 | NA | NA |
| AC009484.1  | 0,00 | 0,00 | 0,00 | 0,00 | NA | NA |
| AC009487.4  | 0,00 | 0,00 | 0,00 | 0,00 | NA | NA |
| AC009487.5  | 0,00 | 0,00 | 0,00 | 0,00 | NA | NA |
| AC009487.7  | 0,00 | 0,00 | 0,00 | 0,00 | NA | NA |
| AC009489.1  | 0,00 | 0,00 | 0,00 | 0,00 | NA | NA |
| AC009492.1  | 0,00 | 0,00 | 0,00 | 0,00 | NA | NA |
| AC009494.1  | 0,00 | 0,00 | 0,00 | 0,00 | NA | NA |
| AC009494.3  | 0,00 | 0,00 | 0,00 | 0,00 | NA | NA |
| AC009494.4  | 0,00 | 0,00 | 0,00 | 0,00 | NA | NA |
| AC009494.5  | 0,00 | 0,00 | 0,00 | 0,00 | NA | NA |



|             |      |      |      |      |    |    |
|-------------|------|------|------|------|----|----|
| AC009498.1  | 0,00 | 0,00 | 0,00 | 0,00 | NA | NA |
| AC009498.2  | 0,00 | 0,00 | 0,00 | 0,00 | NA | NA |
| AC009500.2  | 0,00 | 0,00 | 0,00 | 0,00 | NA | NA |
| AC009501.4  | 0,00 | 0,13 | 0,00 | 0,00 | NA | NA |
| AC009501.5  | 0,00 | 0,00 | 0,00 | 0,00 | NA | NA |
| AC009502.1  | 0,00 | 0,00 | 0,00 | 0,00 | NA | NA |
| AC009502.2  | 0,00 | 0,00 | 0,00 | 0,00 | NA | NA |
| AC009505.4  | 0,00 | 0,00 | 0,00 | 0,00 | NA | NA |
| AC009508.1  | 0,00 | 0,00 | 0,00 | 0,00 | NA | NA |
| AC009517.2  | 0,00 | 1,13 | 0,00 | 0,00 | NA | NA |
| AC009518.2  | 0,00 | 0,00 | 0,00 | 0,00 | NA | NA |
| AC009518.3  | 0,00 | 0,00 | 0,00 | 0,00 | NA | NA |
| AC009518.4  | 0,00 | 0,00 | 0,00 | 0,00 | NA | NA |
| AC009518.8  | 0,00 | 0,00 | 0,00 | 0,00 | NA | NA |
| AC009530.1  | 0,00 | 0,00 | 0,00 | 0,00 | NA | NA |
| AC009531.2  | 0,00 | 0,00 | 0,00 | 0,00 | NA | NA |
| AC009541.1  | 0,00 | 0,00 | 0,00 | 0,00 | NA | NA |
| AC009784.3  | 0,30 | 0,00 | 0,00 | 1,15 | NA | NA |
| AC009784.4  | 0,00 | 0,00 | 0,00 | 0,00 | NA | NA |
| AC009878.2  | 0,00 | 0,00 | 0,00 | 0,00 | NA | NA |
| AC009892.10 | 0,00 | 0,00 | 0,00 | 0,00 | NA | NA |
| AC009892.2  | 0,00 | 0,00 | 0,00 | 0,00 | NA | NA |
| AC009892.5  | 0,00 | 0,00 | 0,00 | 0,00 | NA | NA |
| AC009892.8  | 0,00 | 0,00 | 0,00 | 0,00 | NA | NA |
| AC009892.9  | 0,00 | 0,00 | 0,00 | 0,00 | NA | NA |
| AC009945.4  | 0,00 | 0,00 | 0,00 | 0,00 | NA | NA |
| AC009947.1  | 0,00 | 0,00 | 0,00 | 0,00 | NA | NA |
| AC009947.2  | 0,00 | 0,00 | 0,00 | 0,00 | NA | NA |
| AC009947.3  | 0,00 | 0,00 | 0,00 | 0,00 | NA | NA |
| AC009947.5  | 0,00 | 0,00 | 0,00 | 0,00 | NA | NA |
| AC009952.1  | 0,00 | 0,00 | 0,00 | 0,00 | NA | NA |
| AC009952.2  | 0,00 | 0,00 | 0,00 | 0,00 | NA | NA |
| AC009952.4  | 0,00 | 0,00 | 0,00 | 0,00 | NA | NA |
| AC009955.8  | 0,00 | 0,00 | 0,00 | 0,00 | NA | NA |
| AC009960.1  | 0,00 | 0,00 | 0,00 | 0,00 | NA | NA |
| AC009960.2  | 0,00 | 0,00 | 0,00 | 0,00 | NA | NA |
| AC009960.3  | 0,00 | 0,00 | 0,00 | 0,00 | NA | NA |
| AC009960.4  | 0,00 | 0,00 | 0,00 | 0,00 | NA | NA |
| AC009960.5  | 0,00 | 0,00 | 0,00 | 0,00 | NA | NA |
| AC009960.6  | 0,00 | 0,00 | 0,00 | 0,00 | NA | NA |
| AC009960.7  | 0,00 | 0,00 | 0,00 | 0,00 | NA | NA |
| AC009961.2  | 0,00 | 0,00 | 0,00 | 0,00 | NA | NA |
| AC009962.2  | 0,00 | 0,00 | 0,00 | 0,00 | NA | NA |
| AC009963.4  | 0,00 | 0,00 | 0,00 | 0,00 | NA | NA |
| AC009963.5  | 0,00 | 0,00 | 0,00 | 0,00 | NA | NA |
| AC009963.6  | 0,00 | 0,00 | 0,00 | 0,00 | NA | NA |
| AC009965.1  | 0,00 | 0,00 | 0,00 | 0,00 | NA | NA |
| AC009967.6  | 0,00 | 0,00 | 0,00 | 0,00 | NA | NA |
| AC009969.1  | 0,00 | 0,00 | 0,00 | 0,00 | NA | NA |
| AC009969.2  | 0,00 | 0,00 | 0,00 | 0,00 | NA | NA |
| AC009973.2  | 0,00 | 0,00 | 0,00 | 0,00 | NA | NA |
| AC009974.11 | 0,00 | 0,00 | 0,00 | 0,00 | NA | NA |
| AC009976.2  | 0,00 | 0,00 | 0,00 | 0,00 | NA | NA |
| AC009976.3  | 0,00 | 0,00 | 0,00 | 0,00 | NA | NA |
| AC009976.4  | 0,00 | 0,00 | 0,00 | 0,00 | NA | NA |

|             |      |      |      |      |    |    |
|-------------|------|------|------|------|----|----|
| AC009976.5  | 0,00 | 0,00 | 0,00 | 0,00 | NA | NA |
| AC009976.7  | 0,00 | 0,00 | 0,00 | 0,00 | NA | NA |
| AC009976.8  | 0,00 | 0,00 | 0,00 | 0,00 | NA | NA |
| AC009976.9  | 0,00 | 0,00 | 0,00 | 0,00 | NA | NA |
| AC010080.1  | 0,00 | 0,00 | 0,00 | 0,00 | NA | NA |
| AC010084.1  | 0,00 | 0,00 | 0,00 | 0,00 | NA | NA |
| AC010086.1  | 0,00 | 0,00 | 0,00 | 0,00 | NA | NA |
| AC010086.5  | 0,00 | 0,00 | 0,00 | 0,00 | NA | NA |
| AC010086.6  | 0,00 | 0,00 | 0,00 | 0,00 | NA | NA |
| AC010088.1  | 0,00 | 0,00 | 0,00 | 0,00 | NA | NA |
| AC010088.2  | 0,00 | 0,00 | 0,00 | 0,00 | NA | NA |
| AC010091.4  | 0,00 | 0,00 | 0,00 | 0,00 | NA | NA |
| AC010095.6  | 0,00 | 0,00 | 0,00 | 0,00 | NA | NA |
| AC010105.1  | 0,00 | 0,00 | 0,00 | 0,00 | NA | NA |
| AC010132.10 | 0,00 | 0,00 | 0,00 | 0,00 | NA | NA |
| AC010132.11 | 0,00 | 0,00 | 0,00 | 0,00 | NA | NA |
| AC010132.9  | 0,00 | 0,00 | 0,00 | 0,00 | NA | NA |
| AC010133.1  | 0,00 | 0,00 | 0,00 | 0,00 | NA | NA |
| AC010136.2  | 0,00 | 0,00 | 0,00 | 0,00 | NA | NA |
| AC010140.1  | 0,00 | 0,00 | 0,00 | 0,00 | NA | NA |
| AC010141.1  | 0,00 | 0,00 | 0,00 | 0,00 | NA | NA |
| AC010141.2  | 0,00 | 0,00 | 0,00 | 0,00 | NA | NA |
| AC010141.4  | 0,00 | 0,00 | 0,00 | 0,00 | NA | NA |
| AC010141.6  | 0,00 | 0,00 | 0,00 | 0,00 | NA | NA |
| AC010141.8  | 0,00 | 0,00 | 0,00 | 0,00 | NA | NA |
| AC010144.1  | 0,00 | 0,00 | 0,00 | 0,00 | NA | NA |
| AC010145.3  | 0,00 | 0,00 | 0,00 | 0,00 | NA | NA |
| AC010146.1  | 0,00 | 0,00 | 0,00 | 0,00 | NA | NA |
| AC010149.3  | 0,00 | 0,00 | 0,00 | 0,00 | NA | NA |
| AC010153.2  | 0,00 | 0,00 | 0,00 | 0,00 | NA | NA |
| AC010153.3  | 0,00 | 0,00 | 0,00 | 0,00 | NA | NA |
| AC010154.2  | 0,00 | 0,00 | 0,00 | 0,00 | NA | NA |
| AC010240.3  | 0,00 | 0,00 | 0,00 | 0,00 | NA | NA |
| AC010423.1  | 0,00 | 0,00 | 0,00 | 0,00 | NA | NA |
| AC010468.3  | 0,00 | 0,00 | 0,00 | 0,00 | NA | NA |
| AC010492.4  | 0,00 | 0,00 | 0,00 | 0,00 | NA | NA |
| AC010492.5  | 0,00 | 0,00 | 0,00 | 0,00 | NA | NA |
| AC010518.2  | 0,00 | 0,00 | 0,00 | 0,00 | NA | NA |
| AC010518.3  | 0,00 | 0,00 | 0,00 | 0,00 | NA | NA |
| AC010525.5  | 0,00 | 0,00 | 0,00 | 0,00 | NA | NA |
| AC010641.1  | 0,00 | 0,00 | 0,00 | 0,00 | NA | NA |
| AC010646.3  | 0,00 | 0,00 | 0,00 | 0,00 | NA | NA |
| AC010678.1  | 0,00 | 0,00 | 0,00 | 0,00 | NA | NA |
| AC010678.2  | 0,00 | 0,00 | 0,00 | 0,00 | NA | NA |
| AC010682.1  | 0,00 | 0,00 | 0,00 | 0,00 | NA | NA |
| AC010682.2  | 0,00 | 0,00 | 0,00 | 0,00 | NA | NA |
| AC010682.3  | 0,00 | 0,00 | 0,00 | 0,00 | NA | NA |
| AC010682.4  | 0,00 | 0,00 | 0,00 | 0,00 | NA | NA |
| AC010682.5  | 0,00 | 0,00 | 0,00 | 0,00 | NA | NA |
| AC010682.6  | 0,00 | 0,00 | 0,00 | 0,00 | NA | NA |
| AC010682.7  | 0,00 | 0,00 | 0,00 | 0,00 | NA | NA |
| AC010685.1  | 0,00 | 0,00 | 0,00 | 0,00 | NA | NA |
| AC010723.1  | 0,00 | 0,00 | 0,00 | 0,00 | NA | NA |
| AC010729.1  | 0,00 | 0,00 | 0,00 | 0,00 | NA | NA |
| AC010729.3  | 0,00 | 0,00 | 0,00 | 0,00 | NA | NA |

|            |      |      |      |      |    |    |
|------------|------|------|------|------|----|----|
| AC010731.2 | 0,00 | 0,00 | 0,00 | 0,00 | NA | NA |
| AC010731.6 | 0,00 | 0,00 | 0,00 | 0,00 | NA | NA |
| AC010740.1 | 0,00 | 0,00 | 0,00 | 0,00 | NA | NA |
| AC010745.1 | 0,00 | 0,00 | 0,00 | 0,00 | NA | NA |
| AC010745.2 | 0,00 | 0,00 | 0,00 | 0,00 | NA | NA |
| AC010745.3 | 0,00 | 0,00 | 0,00 | 0,00 | NA | NA |
| AC010745.4 | 0,00 | 0,00 | 0,00 | 0,00 | NA | NA |
| AC010746.3 | 0,00 | 0,00 | 0,00 | 0,00 | NA | NA |
| AC010747.2 | 0,00 | 0,00 | 0,00 | 0,00 | NA | NA |
| AC010761.9 | 0,00 | 0,00 | 0,00 | 0,00 | NA | NA |
| AC010872.1 | 0,00 | 0,00 | 0,00 | 0,00 | NA | NA |
| AC010874.1 | 0,00 | 0,00 | 0,00 | 0,00 | NA | NA |
| AC010891.3 | 0,00 | 0,00 | 0,00 | 0,00 | NA | NA |
| AC010894.4 | 0,00 | 0,00 | 0,00 | 0,00 | NA | NA |
| AC010900.2 | 0,00 | 0,00 | 0,00 | 0,00 | NA | NA |
| AC010902.1 | 0,00 | 0,00 | 0,00 | 0,00 | NA | NA |
| AC010907.5 | 0,00 | 0,00 | 0,00 | 0,00 | NA | NA |
| AC010907.6 | 0,00 | 0,00 | 0,00 | 0,00 | NA | NA |
| AC010967.1 | 0,00 | 0,00 | 0,00 | 0,00 | NA | NA |
| AC010967.3 | 0,00 | 0,00 | 0,00 | 0,00 | NA | NA |
| AC010970.1 | 0,00 | 0,00 | 0,00 | 0,00 | NA | NA |
| AC010974.3 | 0,00 | 0,00 | 0,00 | 0,00 | NA | NA |
| AC010975.1 | 0,00 | 0,00 | 0,00 | 0,00 | NA | NA |
| AC010979.2 | 0,00 | 0,00 | 0,00 | 0,00 | NA | NA |
| AC010982.2 | 0,00 | 0,00 | 0,00 | 0,00 | NA | NA |
| AC010983.1 | 0,00 | 0,00 | 0,00 | 0,00 | NA | NA |
| AC010984.3 | 0,00 | 0,00 | 0,00 | 0,00 | NA | NA |
| AC010984.4 | 0,00 | 0,00 | 0,00 | 0,00 | NA | NA |
| AC010987.5 | 0,00 | 0,00 | 0,00 | 0,00 | NA | NA |
| AC010987.6 | 0,00 | 0,00 | 0,00 | 0,00 | NA | NA |
| AC011193.1 | 0,00 | 0,00 | 0,00 | 0,00 | NA | NA |
| AC011196.3 | 0,00 | 0,00 | 0,00 | 0,00 | NA | NA |
| AC011225.1 | 0,00 | 0,00 | 0,00 | 0,00 | NA | NA |
| AC011233.2 | 0,00 | 0,00 | 0,00 | 0,00 | NA | NA |
| AC011236.7 | 0,00 | 0,00 | 0,00 | 0,00 | NA | NA |
| AC011236.8 | 0,00 | 0,00 | 0,00 | 0,00 | NA | NA |
| AC011239.1 | 0,00 | 0,00 | 0,00 | 0,00 | NA | NA |
| AC011239.2 | 0,00 | 0,00 | 0,00 | 0,00 | NA | NA |
| AC011242.5 | 0,00 | 0,00 | 0,00 | 0,00 | NA | NA |
| AC011243.1 | 0,00 | 0,00 | 0,00 | 0,00 | NA | NA |
| AC011284.3 | 0,00 | 0,00 | 0,00 | 0,00 | NA | NA |
| AC011286.1 | 0,00 | 0,00 | 0,00 | 0,00 | NA | NA |
| AC011290.4 | 0,00 | 0,00 | 0,00 | 0,00 | NA | NA |
| AC011290.5 | 0,00 | 0,00 | 0,00 | 0,00 | NA | NA |
| AC011292.2 | 0,00 | 0,00 | 0,00 | 0,00 | NA | NA |
| AC011294.2 | 0,00 | 0,00 | 0,00 | 0,00 | NA | NA |
| AC011297.1 | 0,00 | 0,00 | 0,00 | 0,00 | NA | NA |
| AC011298.2 | 0,00 | 0,00 | 0,00 | 0,00 | NA | NA |
| AC011302.1 | 0,00 | 0,00 | 0,00 | 0,00 | NA | NA |
| AC011303.2 | 0,00 | 0,00 | 0,00 | 0,00 | NA | NA |
| AC011306.1 | 0,00 | 0,00 | 0,00 | 0,00 | NA | NA |
| AC011306.2 | 0,00 | 0,00 | 0,00 | 0,00 | NA | NA |
| AC011309.4 | 0,00 | 0,00 | 0,00 | 0,00 | NA | NA |
| AC011325.1 | 0,00 | 0,00 | 0,00 | 0,00 | NA | NA |
| AC011330.5 | 0,00 | 0,00 | 0,00 | 0,00 | NA | NA |

|            |      |      |      |      |    |    |
|------------|------|------|------|------|----|----|
| AC011330.6 | 0,00 | 0,00 | 0,00 | 0,00 | NA | NA |
| AC011330.8 | 0,00 | 0,00 | 0,00 | 0,00 | NA | NA |
| AC011366.3 | 0,00 | 0,00 | 0,00 | 0,00 | NA | NA |
| AC011366.4 | 0,00 | 0,00 | 0,00 | 0,00 | NA | NA |
| AC011380.8 | 0,00 | 0,00 | 0,00 | 1,51 | NA | NA |
| AC011431.1 | 0,00 | 0,00 | 0,00 | 0,00 | NA | NA |
| AC011513.3 | 0,00 | 0,00 | 0,00 | 0,00 | NA | NA |
| AC011513.4 | 0,00 | 0,00 | 0,00 | 0,00 | NA | NA |
| AC011516.1 | 0,00 | 0,00 | 0,00 | 0,00 | NA | NA |
| AC011518.2 | 0,00 | 0,00 | 0,00 | 0,00 | NA | NA |
| AC011523.2 | 0,00 | 0,00 | 0,00 | 0,00 | NA | NA |
| AC011524.1 | 0,00 | 0,00 | 0,00 | 0,00 | NA | NA |
| AC011524.3 | 0,00 | 0,00 | 0,00 | 0,00 | NA | NA |
| AC011530.4 | 0,00 | 0,00 | 0,00 | 0,00 | NA | NA |
| AC011609.3 | 0,00 | 0,00 | 0,00 | 0,00 | NA | NA |
| AC011648.1 | 0,00 | 0,00 | 0,00 | 0,00 | NA | NA |
| AC011718.3 | 0,00 | 0,00 | 0,00 | 0,00 | NA | NA |
| AC011738.4 | 0,00 | 0,00 | 0,00 | 0,00 | NA | NA |
| AC011740.3 | 0,00 | 0,00 | 0,00 | 0,00 | NA | NA |
| AC011742.5 | 0,00 | 0,00 | 0,00 | 0,00 | NA | NA |
| AC011747.3 | 0,00 | 0,00 | 0,00 | 0,00 | NA | NA |
| AC011753.6 | 0,00 | 0,00 | 0,00 | 0,00 | NA | NA |
| AC011753.7 | 0,00 | 0,00 | 0,00 | 0,00 | NA | NA |
| AC011754.1 | 0,00 | 0,00 | 0,00 | 0,00 | NA | NA |
| AC011816.1 | 0,00 | 0,00 | 0,00 | 0,00 | NA | NA |
| AC011901.1 | 0,00 | 0,00 | 0,00 | 0,00 | NA | NA |
| AC011901.2 | 0,00 | 0,00 | 0,00 | 0,00 | NA | NA |
| AC011995.1 | 0,00 | 0,00 | 0,00 | 0,00 | NA | NA |
| AC011995.3 | 0,00 | 0,00 | 0,00 | 0,00 | NA | NA |
| AC011996.1 | 0,00 | 0,00 | 0,00 | 0,00 | NA | NA |
| AC011997.1 | 0,00 | 0,00 | 0,00 | 0,00 | NA | NA |
| AC011998.2 | 0,00 | 0,00 | 0,00 | 0,00 | NA | NA |
| AC011998.3 | 0,00 | 0,00 | 0,00 | 0,00 | NA | NA |
| AC011998.4 | 0,00 | 0,00 | 0,00 | 0,00 | NA | NA |
| AC011998.5 | 0,00 | 0,00 | 0,00 | 0,00 | NA | NA |
| AC011999.1 | 0,00 | 0,00 | 0,00 | 0,00 | NA | NA |
| AC012005.2 | 0,00 | 0,00 | 0,00 | 0,00 | NA | NA |
| AC012005.3 | 0,00 | 0,00 | 0,00 | 0,00 | NA | NA |
| AC012005.4 | 0,00 | 0,00 | 0,00 | 0,00 | NA | NA |
| AC012005.5 | 0,00 | 0,00 | 0,00 | 0,00 | NA | NA |
| AC012005.6 | 0,00 | 0,00 | 0,00 | 0,00 | NA | NA |
| AC012065.4 | 0,00 | 0,00 | 0,00 | 0,00 | NA | NA |
| AC012066.1 | 0,00 | 0,00 | 0,00 | 0,00 | NA | NA |
| AC012068.2 | 0,00 | 0,00 | 0,00 | 0,00 | NA | NA |
| AC012075.1 | 0,00 | 0,00 | 0,00 | 0,00 | NA | NA |
| AC012078.1 | 0,00 | 0,00 | 0,00 | 0,00 | NA | NA |
| AC012078.2 | 0,00 | 0,00 | 0,00 | 0,00 | NA | NA |
| AC012078.3 | 0,00 | 0,00 | 0,00 | 0,00 | NA | NA |
| AC012087.1 | 0,00 | 0,00 | 0,00 | 0,00 | NA | NA |
| AC012305.1 | 0,00 | 0,00 | 0,00 | 0,00 | NA | NA |
| AC012306.2 | 0,00 | 0,00 | 0,00 | 0,00 | NA | NA |
| AC012307.2 | 0,00 | 0,00 | 0,00 | 0,00 | NA | NA |
| AC012318.3 | 0,00 | 0,00 | 0,00 | 0,00 | NA | NA |
| AC012354.8 | 0,00 | 0,00 | 0,00 | 0,00 | NA | NA |
| AC012361.1 | 0,00 | 0,00 | 0,00 | 0,00 | NA | NA |

|             |      |      |      |      |    |    |
|-------------|------|------|------|------|----|----|
| AC012362.3  | 0,00 | 0,00 | 0,00 | 0,00 | NA | NA |
| AC012363.10 | 0,00 | 0,00 | 0,00 | 0,00 | NA | NA |
| AC012363.11 | 0,00 | 0,00 | 0,00 | 0,00 | NA | NA |
| AC012363.4  | 0,00 | 0,00 | 0,00 | 0,00 | NA | NA |
| AC012363.7  | 0,00 | 0,00 | 0,00 | 0,00 | NA | NA |
| AC012363.9  | 0,00 | 0,00 | 0,00 | 0,00 | NA | NA |
| AC012365.1  | 0,00 | 0,00 | 0,00 | 0,00 | NA | NA |
| AC012365.2  | 0,00 | 0,00 | 0,00 | 0,00 | NA | NA |
| AC012365.3  | 0,00 | 0,00 | 0,00 | 0,00 | NA | NA |
| AC012442.6  | 0,00 | 0,00 | 0,00 | 0,00 | NA | NA |
| AC012445.1  | 0,00 | 0,00 | 0,00 | 0,00 | NA | NA |
| AC012451.1  | 0,00 | 0,00 | 0,00 | 0,00 | NA | NA |
| AC012451.2  | 0,00 | 0,00 | 0,00 | 0,00 | NA | NA |
| AC012456.4  | 0,00 | 0,00 | 0,00 | 0,00 | NA | NA |
| AC012462.1  | 0,00 | 0,00 | 0,00 | 0,00 | NA | NA |
| AC012462.2  | 0,00 | 0,00 | 0,00 | 0,00 | NA | NA |
| AC012462.3  | 0,00 | 0,00 | 0,00 | 0,00 | NA | NA |
| AC012485.2  | 0,00 | 0,00 | 0,00 | 0,00 | NA | NA |
| AC012493.1  | 0,00 | 0,00 | 0,00 | 0,00 | NA | NA |
| AC012497.1  | 0,00 | 0,00 | 0,00 | 0,00 | NA | NA |
| AC012499.1  | 0,00 | 0,00 | 0,00 | 0,00 | NA | NA |
| AC012501.1  | 0,00 | 0,00 | 0,00 | 0,00 | NA | NA |
| AC012501.2  | 0,00 | 0,51 | 0,00 | 0,00 | NA | NA |
| AC012501.3  | 0,00 | 0,00 | 0,00 | 0,00 | NA | NA |
| AC012502.1  | 0,00 | 0,00 | 0,00 | 0,00 | NA | NA |
| AC012506.1  | 0,00 | 0,00 | 0,00 | 0,00 | NA | NA |
| AC012506.2  | 0,00 | 0,00 | 0,00 | 0,00 | NA | NA |
| AC012506.3  | 0,00 | 0,00 | 0,00 | 0,00 | NA | NA |
| AC012507.4  | 0,00 | 0,00 | 0,00 | 0,00 | NA | NA |
| AC012512.1  | 0,00 | 0,00 | 0,00 | 0,00 | NA | NA |
| AC012513.3  | 0,00 | 0,00 | 0,00 | 0,00 | NA | NA |
| AC012531.14 | 0,00 | 0,00 | 0,00 | 0,00 | NA | NA |
| AC012531.16 | 0,00 | 0,00 | 0,00 | 0,00 | NA | NA |
| AC012531.25 | 0,00 | 0,00 | 0,00 | 0,00 | NA | NA |
| AC012531.4  | 0,00 | 0,00 | 0,00 | 0,00 | NA | NA |
| AC012531.5  | 0,00 | 0,00 | 0,00 | 0,00 | NA | NA |
| AC012613.2  | 0,00 | 0,00 | 0,00 | 0,00 | NA | NA |
| AC012667.1  | 0,00 | 0,00 | 0,00 | 0,00 | NA | NA |
| AC012668.2  | 0,00 | 0,00 | 0,00 | 0,00 | NA | NA |
| AC012668.3  | 0,00 | 0,00 | 0,00 | 0,00 | NA | NA |
| AC012671.2  | 0,00 | 0,00 | 0,00 | 0,00 | NA | NA |
| AC013262.1  | 0,00 | 0,00 | 0,00 | 0,00 | NA | NA |
| AC013264.2  | 0,00 | 0,00 | 0,00 | 0,00 | NA | NA |
| AC013268.1  | 0,00 | 0,00 | 0,00 | 0,00 | NA | NA |
| AC013268.2  | 0,00 | 0,00 | 0,00 | 0,00 | NA | NA |
| AC013268.3  | 0,00 | 0,00 | 0,00 | 0,00 | NA | NA |
| AC013268.4  | 0,00 | 0,00 | 0,00 | 0,00 | NA | NA |
| AC013268.5  | 0,00 | 0,00 | 0,00 | 0,00 | NA | NA |
| AC013269.3  | 0,00 | 0,00 | 0,00 | 0,00 | NA | NA |
| AC013269.4  | 0,00 | 0,00 | 0,00 | 0,00 | NA | NA |
| AC013269.5  | 0,00 | 0,00 | 0,00 | 0,00 | NA | NA |
| AC013271.3  | 0,00 | 0,00 | 0,00 | 0,00 | NA | NA |
| AC013271.5  | 0,00 | 0,00 | 0,00 | 0,00 | NA | NA |
| AC013401.1  | 0,00 | 0,00 | 0,00 | 0,00 | NA | NA |
| AC013401.2  | 0,00 | 0,00 | 0,00 | 0,00 | NA | NA |

|             |      |      |      |      |    |    |
|-------------|------|------|------|------|----|----|
| AC013402.3  | 0,00 | 0,00 | 0,00 | 0,00 | NA | NA |
| AC013402.4  | 0,00 | 0,00 | 0,00 | 0,00 | NA | NA |
| AC013402.5  | 0,00 | 0,00 | 0,00 | 0,00 | NA | NA |
| AC013403.13 | 0,00 | 0,00 | 0,00 | 0,00 | NA | NA |
| AC013409.1  | 0,00 | 0,00 | 0,00 | 0,00 | NA | NA |
| AC013409.2  | 0,00 | 0,00 | 0,00 | 0,00 | NA | NA |
| AC013409.4  | 0,00 | 0,00 | 0,00 | 0,00 | NA | NA |
| AC013410.1  | 0,00 | 0,00 | 0,00 | 0,00 | NA | NA |
| AC013410.2  | 0,00 | 0,00 | 0,00 | 0,00 | NA | NA |
| AC013412.1  | 0,00 | 0,00 | 0,00 | 0,00 | NA | NA |
| AC013412.2  | 0,00 | 0,00 | 0,00 | 0,00 | NA | NA |
| AC013429.4  | 0,00 | 0,00 | 0,00 | 0,00 | NA | NA |
| AC013436.6  | 0,00 | 0,00 | 0,00 | 0,00 | NA | NA |
| AC013437.2  | 0,00 | 0,00 | 0,00 | 0,00 | NA | NA |
| AC013437.3  | 0,00 | 0,00 | 0,00 | 0,00 | NA | NA |
| AC013437.5  | 0,00 | 0,00 | 0,00 | 0,00 | NA | NA |
| AC013437.7  | 0,00 | 0,00 | 0,00 | 0,00 | NA | NA |
| AC013437.8  | 0,00 | 0,00 | 0,00 | 0,00 | NA | NA |
| AC013442.1  | 0,00 | 0,00 | 0,00 | 0,00 | NA | NA |
| AC013448.2  | 0,00 | 0,00 | 0,00 | 0,00 | NA | NA |
| AC013449.1  | 0,00 | 0,00 | 0,00 | 0,00 | NA | NA |
| AC013460.1  | 0,00 | 0,00 | 0,00 | 0,00 | NA | NA |
| AC013467.1  | 0,00 | 0,00 | 0,00 | 0,00 | NA | NA |
| AC013470.6  | 0,00 | 0,00 | 0,00 | 0,00 | NA | NA |
| AC013470.7  | 0,00 | 0,00 | 0,00 | 0,00 | NA | NA |
| AC013472.6  | 0,00 | 0,00 | 0,00 | 0,00 | NA | NA |
| AC013476.2  | 0,00 | 0,00 | 0,00 | 0,00 | NA | NA |
| AC013480.2  | 0,00 | 0,00 | 0,00 | 0,00 | NA | NA |
| AC013717.3  | 0,00 | 0,00 | 0,00 | 0,00 | NA | NA |
| AC013727.1  | 0,00 | 0,00 | 0,00 | 0,00 | NA | NA |
| AC013727.2  | 0,00 | 0,00 | 0,00 | 0,00 | NA | NA |
| AC013733.3  | 0,00 | 0,00 | 0,00 | 0,00 | NA | NA |
| AC013733.4  | 0,00 | 0,00 | 0,00 | 0,00 | NA | NA |
| AC013733.5  | 0,00 | 0,00 | 0,00 | 0,00 | NA | NA |
| AC013734.1  | 0,00 | 0,00 | 0,00 | 0,00 | NA | NA |
| AC013734.3  | 0,00 | 0,00 | 0,00 | 0,00 | NA | NA |
| AC013791.1  | 0,00 | 0,00 | 0,00 | 0,00 | NA | NA |
| AC015691.7  | 0,00 | 0,00 | 0,00 | 0,00 | NA | NA |
| AC015726.1  | 0,00 | 0,00 | 0,00 | 0,00 | NA | NA |
| AC015818.5  | 0,00 | 0,00 | 0,00 | 0,00 | NA | NA |
| AC015818.6  | 0,00 | 0,00 | 0,00 | 0,00 | NA | NA |
| AC015849.14 | 0,00 | 0,00 | 0,00 | 0,00 | NA | NA |
| AC015849.2  | 0,00 | 0,00 | 0,00 | 0,00 | NA | NA |
| AC015922.7  | 0,00 | 0,00 | 0,00 | 0,00 | NA | NA |
| AC015933.2  | 0,00 | 0,00 | 0,00 | 0,00 | NA | NA |
| AC015977.5  | 0,00 | 0,00 | 0,00 | 0,00 | NA | NA |
| AC015977.6  | 0,00 | 0,00 | 0,00 | 0,00 | NA | NA |
| AC016292.3  | 0,00 | 0,00 | 0,00 | 0,00 | NA | NA |
| AC016405.1  | 0,00 | 0,00 | 0,00 | 0,00 | NA | NA |
| AC016561.1  | 0,00 | 0,00 | 0,00 | 0,00 | NA | NA |
| AC016626.1  | 0,00 | 0,00 | 0,00 | 0,00 | NA | NA |
| AC016682.1  | 0,00 | 0,00 | 0,00 | 0,00 | NA | NA |
| AC016683.5  | 0,00 | 0,00 | 0,00 | 0,00 | NA | NA |
| AC016694.2  | 0,00 | 0,00 | 0,00 | 0,00 | NA | NA |
| AC016696.1  | 0,00 | 0,00 | 0,00 | 0,00 | NA | NA |

|             |      |      |      |      |    |    |
|-------------|------|------|------|------|----|----|
| AC016697.1  | 0,00 | 0,00 | 0,00 | 0,00 | NA | NA |
| AC016697.6  | 0,00 | 0,00 | 0,00 | 0,00 | NA | NA |
| AC016698.1  | 0,00 | 0,00 | 0,00 | 0,00 | NA | NA |
| AC016698.2  | 0,00 | 0,00 | 0,00 | 0,00 | NA | NA |
| AC016698.3  | 0,00 | 0,00 | 0,00 | 0,00 | NA | NA |
| AC016698.4  | 0,00 | 0,00 | 0,00 | 0,00 | NA | NA |
| AC016700.2  | 0,00 | 0,00 | 0,00 | 0,00 | NA | NA |
| AC016700.4  | 0,00 | 0,00 | 0,00 | 0,00 | NA | NA |
| AC016700.6  | 0,00 | 0,00 | 0,00 | 0,00 | NA | NA |
| AC016708.1  | 0,00 | 0,00 | 0,00 | 0,00 | NA | NA |
| AC016716.1  | 0,00 | 0,00 | 0,00 | 0,00 | NA | NA |
| AC016716.2  | 0,00 | 0,00 | 0,00 | 0,00 | NA | NA |
| AC016717.1  | 0,00 | 0,00 | 0,00 | 0,00 | NA | NA |
| AC016724.5  | 0,00 | 0,00 | 0,00 | 0,00 | NA | NA |
| AC016724.6  | 0,00 | 0,00 | 0,00 | 0,00 | NA | NA |
| AC016725.4  | 0,00 | 0,00 | 0,00 | 0,45 | NA | NA |
| AC016727.3  | 0,00 | 0,00 | 0,00 | 0,00 | NA | NA |
| AC016728.1  | 0,00 | 0,00 | 0,00 | 0,00 | NA | NA |
| AC016730.1  | 0,00 | 0,00 | 0,00 | 0,00 | NA | NA |
| AC016732.2  | 0,00 | 0,00 | 0,00 | 0,00 | NA | NA |
| AC016735.3  | 0,00 | 0,00 | 0,00 | 0,00 | NA | NA |
| AC016738.4  | 0,00 | 0,00 | 0,00 | 0,00 | NA | NA |
| AC016739.1  | 0,00 | 0,00 | 0,00 | 0,00 | NA | NA |
| AC016739.2  | 1,11 | 1,86 | 1,64 | 1,91 | NA | NA |
| AC016749.1  | 0,00 | 0,00 | 0,00 | 0,00 | NA | NA |
| AC016751.1  | 0,00 | 0,00 | 0,00 | 0,00 | NA | NA |
| AC016751.2  | 0,00 | 0,00 | 0,00 | 0,00 | NA | NA |
| AC016752.1  | 0,00 | 0,00 | 0,00 | 0,00 | NA | NA |
| AC016752.10 | 0,00 | 0,00 | 0,00 | 0,00 | NA | NA |
| AC016752.11 | 0,00 | 0,00 | 0,00 | 0,00 | NA | NA |
| AC016752.2  | 0,00 | 0,00 | 0,00 | 0,00 | NA | NA |
| AC016752.3  | 0,00 | 0,00 | 0,00 | 0,00 | NA | NA |
| AC016752.4  | 0,00 | 0,00 | 0,00 | 0,00 | NA | NA |
| AC016752.5  | 0,00 | 0,00 | 0,00 | 0,00 | NA | NA |
| AC016752.8  | 0,00 | 0,00 | 0,00 | 0,00 | NA | NA |
| AC016752.9  | 0,00 | 0,00 | 0,00 | 0,00 | NA | NA |
| AC016753.7  | 0,00 | 0,00 | 0,00 | 0,00 | NA | NA |
| AC016768.1  | 0,00 | 0,00 | 0,00 | 0,00 | NA | NA |
| AC016772.4  | 0,00 | 0,00 | 0,00 | 0,00 | NA | NA |
| AC016903.1  | 0,00 | 0,00 | 0,00 | 0,00 | NA | NA |
| AC016903.2  | 0,00 | 0,00 | 0,00 | 0,00 | NA | NA |
| AC016906.1  | 0,00 | 0,00 | 0,00 | 0,00 | NA | NA |
| AC016907.2  | 0,00 | 0,00 | 0,00 | 0,00 | NA | NA |
| AC016908.1  | 0,00 | 0,00 | 0,00 | 0,00 | NA | NA |
| AC016908.2  | 0,00 | 0,00 | 0,00 | 0,00 | NA | NA |
| AC016912.3  | 0,00 | 0,00 | 0,00 | 0,00 | NA | NA |
| AC016994.1  | 0,00 | 0,00 | 0,00 | 0,00 | NA | NA |
| AC016994.2  | 0,00 | 0,00 | 0,00 | 0,00 | NA | NA |
| AC016995.2  | 0,00 | 0,00 | 0,00 | 0,00 | NA | NA |
| AC016999.2  | 0,00 | 0,00 | 0,00 | 0,00 | NA | NA |
| AC017002.2  | 0,00 | 0,00 | 0,00 | 0,00 | NA | NA |
| AC017002.4  | 0,00 | 0,00 | 0,00 | 0,00 | NA | NA |
| AC017005.1  | 0,00 | 0,00 | 0,00 | 0,00 | NA | NA |
| AC017005.2  | 0,00 | 0,00 | 0,00 | 0,00 | NA | NA |
| AC017005.3  | 0,00 | 0,00 | 0,00 | 0,00 | NA | NA |

|             |      |      |      |      |    |    |
|-------------|------|------|------|------|----|----|
| AC017019.1  | 0,00 | 0,00 | 0,00 | 0,00 | NA | NA |
| AC017032.1  | 0,00 | 0,00 | 0,00 | 0,00 | NA | NA |
| AC017040.1  | 0,00 | 0,00 | 0,00 | 0,00 | NA | NA |
| AC017048.1  | 0,00 | 0,00 | 0,00 | 0,00 | NA | NA |
| AC017050.2  | 0,00 | 0,00 | 0,00 | 0,00 | NA | NA |
| AC017053.1  | 0,00 | 0,00 | 0,00 | 0,00 | NA | NA |
| AC017070.1  | 0,00 | 0,00 | 0,00 | 0,00 | NA | NA |
| AC017071.1  | 0,00 | 0,38 | 0,00 | 0,00 | NA | NA |
| AC017074.1  | 0,00 | 0,00 | 0,00 | 0,00 | NA | NA |
| AC017074.2  | 0,28 | 0,00 | 0,00 | 0,00 | NA | NA |
| AC017078.1  | 0,00 | 0,00 | 0,00 | 0,00 | NA | NA |
| AC017079.3  | 0,00 | 0,00 | 0,00 | 0,00 | NA | NA |
| AC017079.4  | 0,00 | 0,00 | 0,00 | 0,00 | NA | NA |
| AC017080.1  | 0,00 | 0,00 | 0,00 | 0,00 | NA | NA |
| AC017081.2  | 0,00 | 0,00 | 0,00 | 0,00 | NA | NA |
| AC017081.3  | 0,00 | 0,00 | 0,00 | 0,00 | NA | NA |
| AC017084.6  | 0,00 | 0,00 | 0,00 | 0,00 | NA | NA |
| AC017101.10 | 0,00 | 0,00 | 0,00 | 0,00 | NA | NA |
| AC017104.3  | 0,00 | 0,00 | 0,00 | 0,00 | NA | NA |
| AC017104.4  | 0,00 | 0,00 | 0,00 | 0,00 | NA | NA |
| AC018463.4  | 0,00 | 0,00 | 0,00 | 0,00 | NA | NA |
| AC018463.5  | 0,00 | 0,00 | 0,00 | 0,00 | NA | NA |
| AC018470.4  | 0,00 | 0,00 | 0,00 | 0,00 | NA | NA |
| AC018495.2  | 0,00 | 0,00 | 0,00 | 0,00 | NA | NA |
| AC018495.3  | 0,00 | 0,00 | 0,00 | 0,00 | NA | NA |
| AC018502.1  | 0,00 | 0,00 | 0,00 | 0,00 | NA | NA |
| AC018641.6  | 0,00 | 0,00 | 0,00 | 0,00 | NA | NA |
| AC018641.7  | 0,00 | 0,00 | 0,00 | 0,00 | NA | NA |
| AC018647.3  | 0,00 | 0,12 | 0,00 | 0,13 | NA | NA |
| AC018648.6  | 0,00 | 0,00 | 0,00 | 0,00 | NA | NA |
| AC018677.2  | 0,00 | 0,00 | 0,00 | 0,00 | NA | NA |
| AC018682.7  | 0,00 | 0,00 | 0,00 | 0,00 | NA | NA |
| AC018682.8  | 0,00 | 0,00 | 0,00 | 0,00 | NA | NA |
| AC018685.1  | 0,00 | 0,00 | 0,00 | 0,00 | NA | NA |
| AC018685.2  | 0,00 | 0,00 | 0,00 | 0,00 | NA | NA |
| AC018691.1  | 0,00 | 0,00 | 0,00 | 0,00 | NA | NA |
| AC018693.4  | 0,00 | 0,00 | 0,00 | 0,00 | NA | NA |
| AC018693.7  | 0,00 | 0,00 | 0,00 | 0,00 | NA | NA |
| AC018696.1  | 0,00 | 0,00 | 0,00 | 0,00 | NA | NA |
| AC018696.4  | 0,00 | 0,00 | 0,00 | 0,00 | NA | NA |
| AC018705.5  | 0,00 | 0,08 | 0,00 | 0,00 | NA | NA |
| AC018712.2  | 0,00 | 0,00 | 0,00 | 0,00 | NA | NA |
| AC018712.3  | 0,00 | 0,00 | 0,00 | 0,00 | NA | NA |
| AC018717.1  | 0,00 | 0,00 | 0,00 | 0,00 | NA | NA |
| AC018717.2  | 0,00 | 0,00 | 0,00 | 0,00 | NA | NA |
| AC018730.3  | 0,00 | 0,00 | 0,00 | 0,00 | NA | NA |
| AC018730.4  | 0,00 | 0,00 | 0,00 | 0,00 | NA | NA |
| AC018731.3  | 0,00 | 0,00 | 0,00 | 0,00 | NA | NA |
| AC018731.4  | 0,00 | 0,00 | 0,00 | 0,00 | NA | NA |
| AC018735.1  | 0,00 | 0,00 | 0,00 | 0,00 | NA | NA |
| AC018737.3  | 0,00 | 0,00 | 0,00 | 0,00 | NA | NA |
| AC018737.4  | 0,00 | 0,00 | 0,00 | 0,00 | NA | NA |
| AC018737.6  | 0,00 | 0,00 | 0,00 | 0,00 | NA | NA |
| AC018738.2  | 0,00 | 0,00 | 0,00 | 0,00 | NA | NA |
| AC018742.1  | 0,00 | 0,00 | 0,00 | 0,00 | NA | NA |



|             |      |      |      |      |    |    |
|-------------|------|------|------|------|----|----|
| AC018755.17 | 0,00 | 0,00 | 0,00 | 0,00 | NA | NA |
| AC018766.6  | 0,00 | 0,00 | 0,00 | 0,00 | NA | NA |
| AC018804.5  | 0,00 | 0,00 | 0,00 | 0,00 | NA | NA |
| AC018804.7  | 0,00 | 0,00 | 0,00 | 0,00 | NA | NA |
| AC018832.1  | 0,00 | 0,38 | 0,00 | 0,00 | NA | NA |
| AC018839.1  | 0,00 | 0,00 | 0,00 | 0,00 | NA | NA |
| AC018865.10 | 0,00 | 0,00 | 0,00 | 0,00 | NA | NA |
| AC018865.11 | 0,00 | 0,00 | 0,00 | 0,00 | NA | NA |
| AC018865.5  | 0,00 | 0,00 | 0,00 | 0,00 | NA | NA |
| AC018865.8  | 0,37 | 0,23 | 0,32 | 0,16 | NA | NA |
| AC018865.9  | 0,00 | 0,00 | 0,00 | 0,00 | NA | NA |
| AC018878.3  | 0,00 | 0,00 | 0,00 | 0,00 | NA | NA |
| AC018880.1  | 0,00 | 0,00 | 0,00 | 0,00 | NA | NA |
| AC018880.2  | 0,00 | 0,00 | 0,00 | 0,00 | NA | NA |
| AC018890.6  | 0,00 | 0,00 | 0,00 | 0,00 | NA | NA |
| AC018892.3  | 0,00 | 0,00 | 0,00 | 0,00 | NA | NA |
| AC018892.4  | 0,00 | 0,00 | 0,00 | 0,00 | NA | NA |
| AC018892.8  | 0,00 | 0,00 | 0,00 | 0,00 | NA | NA |
| AC018892.9  | 0,00 | 0,00 | 0,00 | 0,00 | NA | NA |
| AC019048.1  | 0,00 | 0,00 | 0,00 | 0,00 | NA | NA |
| AC019050.1  | 0,00 | 0,00 | 0,00 | 0,00 | NA | NA |
| AC019058.1  | 0,00 | 0,00 | 0,00 | 0,00 | NA | NA |
| AC019060.1  | 0,00 | 0,00 | 0,00 | 0,00 | NA | NA |
| AC019064.1  | 0,00 | 0,00 | 0,00 | 0,00 | NA | NA |
| AC019068.2  | 0,00 | 0,00 | 0,00 | 0,00 | NA | NA |
| AC019084.7  | 0,00 | 0,00 | 0,00 | 0,00 | NA | NA |
| AC019097.7  | 0,00 | 0,00 | 0,00 | 0,00 | NA | NA |
| AC019099.1  | 0,00 | 0,00 | 0,00 | 0,00 | NA | NA |
| AC019099.2  | 0,00 | 0,00 | 0,00 | 0,00 | NA | NA |
| AC019099.4  | 0,00 | 0,00 | 0,00 | 0,00 | NA | NA |
| AC019099.5  | 0,00 | 0,00 | 0,00 | 0,00 | NA | NA |
| AC019099.6  | 0,00 | 0,00 | 0,00 | 0,00 | NA | NA |
| AC019102.1  | 0,00 | 0,00 | 0,00 | 0,00 | NA | NA |
| AC019118.3  | 0,00 | 0,00 | 0,00 | 0,00 | NA | NA |
| AC019118.4  | 0,00 | 0,00 | 0,00 | 0,00 | NA | NA |
| AC019129.1  | 0,00 | 0,00 | 0,00 | 0,00 | NA | NA |
| AC019129.2  | 0,00 | 0,00 | 0,00 | 0,00 | NA | NA |
| AC019159.1  | 0,00 | 0,00 | 0,00 | 0,00 | NA | NA |
| AC019171.4  | 0,00 | 0,00 | 0,00 | 0,00 | NA | NA |
| AC019171.5  | 0,00 | 0,00 | 0,00 | 0,00 | NA | NA |
| AC019178.2  | 0,00 | 0,00 | 0,00 | 0,00 | NA | NA |
| AC019178.3  | 0,00 | 0,00 | 0,00 | 0,00 | NA | NA |
| AC019185.2  | 0,00 | 0,00 | 0,00 | 0,00 | NA | NA |
| AC019185.3  | 0,00 | 0,00 | 0,00 | 0,00 | NA | NA |
| AC019186.1  | 0,00 | 0,00 | 0,00 | 0,00 | NA | NA |
| AC019349.2  | 0,00 | 0,49 | 0,00 | 0,00 | NA | NA |
| AC019349.5  | 0,00 | 0,00 | 0,00 | 0,00 | NA | NA |
| AC020581.4  | 0,00 | 0,00 | 0,00 | 0,00 | NA | NA |
| AC020595.1  | 0,00 | 0,00 | 0,00 | 0,00 | NA | NA |
| AC020743.3  | 0,00 | 0,00 | 0,00 | 0,00 | NA | NA |
| AC020915.2  | 0,00 | 0,00 | 0,00 | 0,00 | NA | NA |
| AC020947.2  | 0,00 | 0,00 | 0,00 | 0,00 | NA | NA |
| AC020951.1  | 0,17 | 0,00 | 0,59 | 0,12 | NA | NA |
| AC020956.1  | 0,00 | 0,00 | 0,00 | 0,00 | NA | NA |
| AC020983.5  | 0,00 | 0,00 | 0,00 | 0,00 | NA | NA |

|             |      |      |      |      |    |    |
|-------------|------|------|------|------|----|----|
| AC021016.7  | 0,00 | 0,00 | 0,00 | 0,00 | NA | NA |
| AC021016.8  | 0,00 | 0,00 | 0,00 | 0,00 | NA | NA |
| AC021021.1  | 0,00 | 0,00 | 0,00 | 0,00 | NA | NA |
| AC021021.2  | 0,00 | 0,00 | 0,00 | 0,00 | NA | NA |
| AC021107.2  | 0,00 | 0,00 | 0,00 | 0,00 | NA | NA |
| AC021107.4  | 0,00 | 0,00 | 0,00 | 0,00 | NA | NA |
| AC021107.5  | 0,00 | 0,00 | 0,00 | 0,00 | NA | NA |
| AC021849.1  | 0,00 | 0,00 | 0,00 | 0,00 | NA | NA |
| AC021851.1  | 0,00 | 0,00 | 0,00 | 0,00 | NA | NA |
| AC021876.4  | 0,00 | 0,00 | 0,00 | 0,00 | NA | NA |
| AC022002.4  | 0,00 | 0,00 | 0,00 | 0,00 | NA | NA |
| AC022002.5  | 0,00 | 0,00 | 0,00 | 0,00 | NA | NA |
| AC022182.2  | 0,00 | 0,00 | 0,00 | 0,00 | NA | NA |
| AC022201.5  | 0,00 | 0,00 | 0,00 | 0,00 | NA | NA |
| AC022202.8  | 0,00 | 0,00 | 0,00 | 0,00 | NA | NA |
| AC022486.1  | 0,00 | 0,00 | 0,00 | 0,00 | NA | NA |
| AC022486.10 | 0,00 | 0,00 | 0,00 | 0,00 | NA | NA |
| AC022486.2  | 0,00 | 0,00 | 0,00 | 0,00 | NA | NA |
| AC022486.3  | 0,00 | 0,00 | 0,00 | 0,00 | NA | NA |
| AC022486.4  | 0,00 | 0,00 | 0,00 | 0,00 | NA | NA |
| AC022486.8  | 0,00 | 0,00 | 0,00 | 0,00 | NA | NA |
| AC022486.9  | 0,00 | 0,00 | 0,00 | 0,00 | NA | NA |
| AC022596.2  | 0,00 | 0,00 | 0,00 | 0,00 | NA | NA |
| AC022596.6  | 0,00 | 0,00 | 0,00 | 0,00 | NA | NA |
| AC023105.3  | 0,00 | 0,18 | 0,16 | 0,17 | NA | NA |
| AC023128.1  | 0,00 | 0,00 | 0,00 | 0,00 | NA | NA |
| AC023128.2  | 0,00 | 0,00 | 0,00 | 0,00 | NA | NA |
| AC023137.2  | 0,00 | 0,00 | 0,00 | 0,00 | NA | NA |
| AC023271.2  | 0,00 | 0,00 | 0,00 | 0,00 | NA | NA |
| AC023271.3  | 0,00 | 0,00 | 0,00 | 0,00 | NA | NA |
| AC023274.1  | 0,00 | 0,00 | 0,00 | 0,00 | NA | NA |
| AC023274.2  | 0,00 | 0,00 | 0,00 | 0,00 | NA | NA |
| AC023274.3  | 0,00 | 0,00 | 0,00 | 0,00 | NA | NA |
| AC023274.4  | 0,00 | 0,00 | 0,00 | 0,00 | NA | NA |
| AC023274.5  | 0,00 | 0,00 | 0,00 | 0,00 | NA | NA |
| AC023274.6  | 0,00 | 0,00 | 0,00 | 0,00 | NA | NA |
| AC023274.7  | 0,00 | 0,00 | 0,00 | 0,00 | NA | NA |
| AC023347.2  | 0,00 | 0,00 | 0,00 | 0,00 | NA | NA |
| AC023449.2  | 0,00 | 0,00 | 0,00 | 0,00 | NA | NA |
| AC023468.1  | 0,00 | 0,00 | 0,00 | 0,00 | NA | NA |
| AC023468.2  | 0,00 | 0,00 | 0,00 | 0,00 | NA | NA |
| AC023469.1  | 0,00 | 0,00 | 0,00 | 0,00 | NA | NA |
| AC023469.2  | 0,00 | 0,00 | 0,00 | 0,00 | NA | NA |
| AC023480.1  | 0,00 | 0,00 | 0,00 | 0,00 | NA | NA |
| AC023481.1  | 0,00 | 0,17 | 0,00 | 0,00 | NA | NA |
| AC023485.1  | 0,00 | 0,00 | 0,00 | 0,00 | NA | NA |
| AC023669.1  | 0,00 | 0,00 | 0,00 | 0,00 | NA | NA |
| AC023881.1  | 0,00 | 0,00 | 0,00 | 0,00 | NA | NA |
| AC024028.1  | 0,00 | 0,00 | 0,00 | 0,00 | NA | NA |
| AC024038.1  | 0,00 | 0,00 | 0,00 | 0,00 | NA | NA |
| AC024067.2  | 0,00 | 0,00 | 0,00 | 0,00 | NA | NA |
| AC024082.3  | 0,00 | 0,00 | 0,00 | 0,00 | NA | NA |
| AC024082.4  | 0,00 | 0,00 | 0,00 | 0,00 | NA | NA |
| AC024132.1  | 0,00 | 0,00 | 0,00 | 0,00 | NA | NA |
| AC024162.2  | 0,00 | 0,00 | 0,00 | 0,00 | NA | NA |

|             |      |      |      |      |    |    |
|-------------|------|------|------|------|----|----|
| AC024183.1  | 0,00 | 0,00 | 0,00 | 0,00 | NA | NA |
| AC024183.10 | 0,00 | 0,00 | 0,00 | 0,00 | NA | NA |
| AC024183.2  | 0,00 | 0,00 | 0,00 | 0,00 | NA | NA |
| AC024183.3  | 0,00 | 0,00 | 0,00 | 0,00 | NA | NA |
| AC024183.5  | 0,00 | 0,00 | 0,00 | 0,00 | NA | NA |
| AC024183.6  | 0,00 | 0,00 | 0,00 | 0,00 | NA | NA |
| AC024183.7  | 0,00 | 0,00 | 0,00 | 0,00 | NA | NA |
| AC024183.8  | 0,00 | 0,00 | 0,00 | 0,00 | NA | NA |
| AC024183.9  | 0,00 | 0,00 | 0,00 | 0,00 | NA | NA |
| AC024560.2  | 0,00 | 0,10 | 0,00 | 0,00 | NA | NA |
| AC024704.2  | 0,00 | 0,00 | 0,00 | 0,00 | NA | NA |
| AC024910.2  | 0,00 | 0,00 | 0,00 | 0,00 | NA | NA |
| AC024937.2  | 0,00 | 0,00 | 0,00 | 0,00 | NA | NA |
| AC024937.4  | 0,00 | 0,00 | 0,00 | 0,00 | NA | NA |
| AC025165.8  | 0,00 | 0,00 | 0,00 | 0,00 | NA | NA |
| AC025226.2  | 0,00 | 0,00 | 0,00 | 0,00 | NA | NA |
| AC025227.2  | 0,00 | 0,00 | 0,00 | 0,00 | NA | NA |
| AC025246.1  | 0,00 | 0,00 | 0,00 | 0,00 | NA | NA |
| AC025263.3  | 0,00 | 0,00 | 0,00 | 0,00 | NA | NA |
| AC025283.2  | 0,00 | 0,00 | 0,00 | 0,00 | NA | NA |
| AC025442.3  | 0,00 | 0,00 | 0,00 | 0,00 | NA | NA |
| AC025627.4  | 0,00 | 0,00 | 0,00 | 0,00 | NA | NA |
| AC025627.7  | 0,00 | 0,00 | 0,00 | 0,00 | NA | NA |
| AC025627.8  | 0,00 | 0,00 | 0,00 | 0,00 | NA | NA |
| AC025627.9  | 0,00 | 0,00 | 0,00 | 0,00 | NA | NA |
| AC025731.1  | 0,00 | 0,00 | 0,00 | 0,00 | NA | NA |
| AC025731.2  | 0,00 | 0,00 | 0,00 | 0,00 | NA | NA |
| AC025731.3  | 0,00 | 0,00 | 0,00 | 0,00 | NA | NA |
| AC025731.4  | 0,00 | 0,00 | 0,00 | 0,00 | NA | NA |
| AC025731.5  | 0,00 | 0,00 | 0,00 | 0,00 | NA | NA |
| AC025731.6  | 0,00 | 0,00 | 0,00 | 0,00 | NA | NA |
| AC025731.7  | 0,00 | 0,00 | 0,00 | 0,00 | NA | NA |
| AC025735.2  | 0,00 | 0,00 | 0,00 | 0,00 | NA | NA |
| AC025735.3  | 0,00 | 0,00 | 0,00 | 0,00 | NA | NA |
| AC025750.6  | 0,00 | 0,00 | 0,00 | 0,00 | NA | NA |
| AC025750.7  | 0,00 | 0,00 | 0,00 | 0,00 | NA | NA |
| AC025811.1  | 0,00 | 0,00 | 0,00 | 0,00 | NA | NA |
| AC025811.2  | 0,00 | 0,00 | 0,00 | 0,00 | NA | NA |
| AC025811.3  | 0,00 | 0,00 | 0,00 | 0,00 | NA | NA |
| AC025819.1  | 0,00 | 0,00 | 0,00 | 0,00 | NA | NA |
| AC025819.2  | 0,00 | 0,00 | 0,00 | 0,00 | NA | NA |
| AC025819.3  | 0,00 | 0,00 | 0,00 | 0,00 | NA | NA |
| AC026166.2  | 0,00 | 0,00 | 0,00 | 0,00 | NA | NA |
| AC026167.1  | 0,00 | 0,00 | 0,00 | 0,00 | NA | NA |
| AC026170.2  | 0,00 | 0,00 | 0,00 | 0,00 | NA | NA |
| AC026185.1  | 0,00 | 0,00 | 0,00 | 0,00 | NA | NA |
| AC026191.2  | 0,00 | 0,00 | 0,00 | 0,00 | NA | NA |
| AC026194.2  | 0,00 | 0,00 | 0,00 | 0,00 | NA | NA |
| AC026202.5  | 0,00 | 0,00 | 0,00 | 0,00 | NA | NA |
| AC026214.2  | 0,00 | 0,00 | 0,00 | 0,00 | NA | NA |
| AC026271.5  | 0,00 | 0,00 | 0,00 | 0,00 | NA | NA |
| AC026471.6  | 0,00 | 0,00 | 0,00 | 0,00 | NA | NA |
| AC026803.14 | 0,00 | 0,00 | 0,00 | 0,00 | NA | NA |
| AC026882.1  | 0,00 | 0,00 | 0,00 | 0,00 | NA | NA |
| AC026904.1  | 0,00 | 0,00 | 0,00 | 0,00 | NA | NA |

|             |      |      |      |      |    |    |
|-------------|------|------|------|------|----|----|
| AC027119.1  | 0,00 | 0,00 | 0,00 | 0,00 | NA | NA |
| AC027124.2  | 0,00 | 0,00 | 0,00 | 0,00 | NA | NA |
| AC027124.3  | 0,00 | 0,00 | 0,00 | 0,00 | NA | NA |
| AC027124.4  | 0,00 | 0,00 | 0,00 | 0,00 | NA | NA |
| AC027601.2  | 0,00 | 0,00 | 0,00 | 0,00 | NA | NA |
| AC027612.1  | 0,00 | 0,00 | 0,00 | 0,00 | NA | NA |
| AC027612.2  | 0,00 | 0,00 | 0,00 | 0,00 | NA | NA |
| AC027612.4  | 0,00 | 0,00 | 0,00 | 0,00 | NA | NA |
| AC027612.5  | 0,00 | 0,00 | 0,00 | 0,00 | NA | NA |
| AC034186.2  | 0,00 | 0,00 | 0,00 | 0,00 | NA | NA |
| AC034193.7  | 0,00 | 0,00 | 0,00 | 0,00 | NA | NA |
| AC034198.5  | 0,00 | 0,00 | 0,00 | 0,00 | NA | NA |
| AC034198.7  | 0,00 | 0,00 | 0,00 | 0,00 | NA | NA |
| AC034228.3  | 0,00 | 0,00 | 0,00 | 0,00 | NA | NA |
| AC034243.1  | 0,00 | 0,00 | 0,00 | 0,00 | NA | NA |
| AC037459.4  | 0,00 | 0,00 | 0,00 | 0,00 | NA | NA |
| AC040963.1  | 0,00 | 0,00 | 0,00 | 0,00 | NA | NA |
| AC046143.3  | 0,00 | 0,00 | 0,14 | 0,00 | NA | NA |
| AC046143.6  | 0,00 | 0,00 | 0,00 | 0,00 | NA | NA |
| AC048382.4  | 0,00 | 0,00 | 0,00 | 0,00 | NA | NA |
| AC051649.12 | 0,00 | 0,00 | 0,00 | 0,00 | NA | NA |
| AC051649.6  | 0,00 | 0,00 | 0,00 | 0,00 | NA | NA |
| AC051663.1  | 0,00 | 0,00 | 0,00 | 0,00 | NA | NA |
| AC051663.3  | 0,00 | 0,00 | 0,00 | 0,00 | NA | NA |
| AC053503.11 | 0,00 | 0,00 | 0,00 | 0,00 | NA | NA |
| AC053503.2  | 0,00 | 0,00 | 0,00 | 0,00 | NA | NA |
| AC053503.4  | 0,00 | 0,00 | 0,00 | 0,00 | NA | NA |
| AC053545.3  | 0,00 | 0,00 | 0,00 | 0,00 | NA | NA |
| AC055811.5  | 0,00 | 0,00 | 0,00 | 0,00 | NA | NA |
| AC055876.1  | 0,00 | 0,00 | 0,00 | 0,00 | NA | NA |
| AC060834.3  | 0,00 | 0,00 | 0,00 | 0,00 | NA | NA |
| AC061961.2  | 0,00 | 0,00 | 0,00 | 0,00 | NA | NA |
| AC062016.1  | 0,00 | 0,00 | 0,00 | 0,00 | NA | NA |
| AC062016.2  | 0,00 | 0,00 | 0,00 | 0,00 | NA | NA |
| AC062016.3  | 0,00 | 0,00 | 0,00 | 0,00 | NA | NA |
| AC062020.1  | 0,00 | 0,00 | 0,00 | 0,00 | NA | NA |
| AC062021.1  | 0,00 | 0,39 | 0,00 | 0,00 | NA | NA |
| AC062022.1  | 0,00 | 0,00 | 0,00 | 0,00 | NA | NA |
| AC062031.1  | 0,00 | 0,00 | 0,00 | 0,00 | NA | NA |
| AC062032.1  | 0,00 | 0,00 | 0,00 | 0,00 | NA | NA |
| AC063961.1  | 0,00 | 0,00 | 0,00 | 0,00 | NA | NA |
| AC063976.1  | 0,00 | 0,00 | 0,00 | 0,00 | NA | NA |
| AC063976.2  | 0,00 | 0,00 | 0,00 | 0,00 | NA | NA |
| AC063976.3  | 0,00 | 0,00 | 0,00 | 0,00 | NA | NA |
| AC063979.1  | 0,00 | 0,00 | 0,00 | 0,00 | NA | NA |
| AC063980.2  | 0,00 | 0,00 | 0,00 | 0,00 | NA | NA |
| AC064826.2  | 0,00 | 1,40 | 0,00 | 0,00 | NA | NA |
| AC064829.1  | 0,00 | 0,00 | 0,00 | 0,00 | NA | NA |
| AC064834.4  | 0,00 | 0,00 | 0,00 | 0,00 | NA | NA |
| AC064836.3  | 0,00 | 0,00 | 0,00 | 0,00 | NA | NA |
| AC064847.2  | 0,00 | 0,00 | 0,00 | 0,00 | NA | NA |
| AC064847.4  | 0,00 | 0,00 | 0,00 | 0,00 | NA | NA |
| AC064850.4  | 0,00 | 0,00 | 0,00 | 0,00 | NA | NA |
| AC064852.5  | 0,00 | 0,27 | 0,00 | 0,00 | NA | NA |
| AC064853.2  | 0,00 | 0,00 | 0,00 | 0,00 | NA | NA |

|             |      |      |      |      |    |    |
|-------------|------|------|------|------|----|----|
| AC064865.1  | 0,00 | 0,00 | 0,00 | 0,00 | NA | NA |
| AC064868.1  | 0,00 | 0,00 | 0,00 | 0,00 | NA | NA |
| AC064871.2  | 0,00 | 0,00 | 0,00 | 0,00 | NA | NA |
| AC064872.1  | 0,00 | 0,00 | 0,00 | 0,00 | NA | NA |
| AC064874.1  | 0,00 | 0,00 | 0,00 | 0,00 | NA | NA |
| AC066595.1  | 0,00 | 0,00 | 0,00 | 0,00 | NA | NA |
| AC066692.5  | 0,00 | 0,00 | 0,00 | 0,00 | NA | NA |
| AC067945.3  | 0,00 | 0,00 | 0,00 | 0,00 | NA | NA |
| AC067956.1  | 0,00 | 0,00 | 0,00 | 0,00 | NA | NA |
| AC067960.1  | 0,00 | 0,00 | 0,00 | 0,00 | NA | NA |
| AC067968.3  | 0,00 | 0,00 | 0,00 | 0,00 | NA | NA |
| AC067969.1  | 0,00 | 0,00 | 0,00 | 0,00 | NA | NA |
| AC067969.2  | 0,00 | 0,00 | 0,00 | 0,00 | NA | NA |
| AC068042.1  | 0,00 | 0,00 | 0,00 | 0,00 | NA | NA |
| AC068057.1  | 0,00 | 0,00 | 0,00 | 0,00 | NA | NA |
| AC068057.3  | 0,00 | 0,00 | 0,00 | 0,00 | NA | NA |
| AC068129.1  | 0,00 | 0,00 | 0,00 | 0,00 | NA | NA |
| AC068129.2  | 0,00 | 0,00 | 0,00 | 0,00 | NA | NA |
| AC068134.4  | 0,00 | 0,00 | 0,00 | 0,00 | NA | NA |
| AC068134.5  | 0,00 | 0,00 | 0,00 | 0,00 | NA | NA |
| AC068134.6  | 0,00 | 0,00 | 0,00 | 0,00 | NA | NA |
| AC068134.8  | 0,00 | 0,00 | 0,00 | 0,00 | NA | NA |
| AC068135.1  | 0,00 | 0,00 | 0,00 | 0,00 | NA | NA |
| AC068137.10 | 0,00 | 0,00 | 0,00 | 0,00 | NA | NA |
| AC068137.11 | 0,00 | 0,00 | 0,00 | 0,00 | NA | NA |
| AC068137.12 | 0,00 | 0,00 | 0,00 | 0,00 | NA | NA |
| AC068137.2  | 0,00 | 0,00 | 0,00 | 0,00 | NA | NA |
| AC068137.3  | 0,00 | 0,00 | 0,00 | 0,00 | NA | NA |
| AC068137.4  | 0,00 | 0,00 | 0,00 | 0,00 | NA | NA |
| AC068137.5  | 0,00 | 0,00 | 0,00 | 0,00 | NA | NA |
| AC068137.6  | 0,00 | 0,00 | 0,00 | 0,00 | NA | NA |
| AC068137.7  | 0,00 | 0,00 | 0,00 | 0,00 | NA | NA |
| AC068137.8  | 0,00 | 0,00 | 0,00 | 0,00 | NA | NA |
| AC068137.9  | 0,00 | 0,00 | 0,00 | 0,00 | NA | NA |
| AC068138.1  | 0,00 | 0,00 | 0,00 | 0,00 | NA | NA |
| AC068196.1  | 0,00 | 0,40 | 0,00 | 0,00 | NA | NA |
| AC068279.3  | 0,00 | 0,00 | 0,00 | 0,00 | NA | NA |
| AC068287.1  | 0,00 | 0,00 | 0,00 | 0,00 | NA | NA |
| AC068302.3  | 0,00 | 0,00 | 0,00 | 0,00 | NA | NA |
| AC068483.1  | 0,00 | 0,00 | 0,00 | 0,00 | NA | NA |
| AC068490.2  | 0,00 | 0,00 | 0,00 | 0,00 | NA | NA |
| AC068491.2  | 0,00 | 0,00 | 0,00 | 0,00 | NA | NA |
| AC068492.1  | 0,00 | 0,00 | 0,00 | 0,00 | NA | NA |
| AC068535.2  | 0,00 | 0,00 | 0,00 | 0,00 | NA | NA |
| AC068535.3  | 0,00 | 0,00 | 0,00 | 0,00 | NA | NA |
| AC068535.4  | 0,00 | 0,00 | 0,00 | 0,00 | NA | NA |
| AC068535.5  | 0,00 | 0,00 | 0,00 | 0,00 | NA | NA |
| AC068538.2  | 0,00 | 0,00 | 0,00 | 0,00 | NA | NA |
| AC068538.5  | 0,00 | 0,00 | 0,00 | 0,00 | NA | NA |
| AC068541.1  | 0,00 | 0,00 | 0,00 | 0,00 | NA | NA |
| AC068541.2  | 0,00 | 0,00 | 0,00 | 0,00 | NA | NA |
| AC068541.3  | 0,00 | 0,00 | 0,00 | 0,00 | NA | NA |
| AC068542.1  | 0,00 | 0,00 | 0,00 | 0,00 | NA | NA |
| AC068542.2  | 0,00 | 0,00 | 0,00 | 0,00 | NA | NA |
| AC068580.5  | 0,00 | 0,00 | 0,00 | 0,00 | NA | NA |

|             |      |      |      |      |    |    |
|-------------|------|------|------|------|----|----|
| AC068580.6  | 0,00 | 0,00 | 0,00 | 0,00 | NA | NA |
| AC068580.7  | 0,00 | 0,00 | 0,00 | 0,00 | NA | NA |
| AC068601.1  | 0,00 | 0,00 | 0,00 | 0,00 | NA | NA |
| AC068601.2  | 0,00 | 0,00 | 0,00 | 0,00 | NA | NA |
| AC068601.4  | 0,00 | 0,00 | 0,00 | 0,00 | NA | NA |
| AC068610.4  | 0,00 | 0,00 | 0,00 | 0,00 | NA | NA |
| AC068614.1  | 0,00 | 0,00 | 0,00 | 0,00 | NA | NA |
| AC068657.2  | 0,00 | 0,00 | 0,00 | 0,00 | NA | NA |
| AC068704.2  | 0,00 | 0,00 | 0,00 | 0,00 | NA | NA |
| AC068719.1  | 0,00 | 0,00 | 0,00 | 0,00 | NA | NA |
| AC068724.2  | 0,00 | 0,00 | 0,00 | 0,00 | NA | NA |
| AC068831.11 | 0,00 | 0,00 | 0,00 | 0,00 | NA | NA |
| AC068831.12 | 0,00 | 0,00 | 0,00 | 0,00 | NA | NA |
| AC068831.17 | 0,00 | 0,00 | 0,00 | 0,00 | NA | NA |
| AC068831.8  | 0,00 | 0,00 | 0,00 | 0,00 | NA | NA |
| AC068858.1  | 0,00 | 0,00 | 0,00 | 0,00 | NA | NA |
| AC069146.2  | 0,00 | 0,00 | 0,00 | 0,00 | NA | NA |
| AC069154.4  | 0,00 | 0,00 | 0,00 | 0,00 | NA | NA |
| AC069155.1  | 0,00 | 0,00 | 0,00 | 0,00 | NA | NA |
| AC069157.1  | 0,00 | 0,00 | 0,00 | 0,00 | NA | NA |
| AC069213.1  | 0,00 | 0,00 | 0,00 | 0,00 | NA | NA |
| AC069257.6  | 0,00 | 0,00 | 0,00 | 0,00 | NA | NA |
| AC069257.8  | 0,00 | 0,00 | 0,00 | 0,00 | NA | NA |
| AC069282.4  | 0,00 | 0,00 | 0,00 | 0,00 | NA | NA |
| AC069303.1  | 0,00 | 0,00 | 0,00 | 0,00 | NA | NA |
| AC069363.1  | 0,24 | 0,54 | 0,55 | 0,52 | NA | NA |
| AC069394.1  | 0,00 | 0,00 | 0,00 | 0,00 | NA | NA |
| AC069513.4  | 0,00 | 0,00 | 0,00 | 0,00 | NA | NA |
| AC069542.2  | 0,00 | 0,00 | 0,00 | 0,00 | NA | NA |
| AC072052.7  | 0,00 | 0,00 | 0,00 | 0,00 | NA | NA |
| AC072061.2  | 0,00 | 0,00 | 0,00 | 0,00 | NA | NA |
| AC073057.5  | 0,00 | 0,00 | 0,00 | 0,00 | NA | NA |
| AC073065.4  | 0,00 | 0,00 | 0,00 | 0,00 | NA | NA |
| AC073069.2  | 0,00 | 0,00 | 0,00 | 0,00 | NA | NA |
| AC073071.1  | 0,00 | 0,00 | 0,00 | 0,00 | NA | NA |
| AC073072.6  | 0,00 | 0,00 | 0,00 | 0,00 | NA | NA |
| AC073072.7  | 0,00 | 0,00 | 0,00 | 0,00 | NA | NA |
| AC073082.3  | 0,00 | 0,00 | 0,00 | 0,00 | NA | NA |
| AC073091.2  | 0,00 | 0,00 | 0,00 | 0,00 | NA | NA |
| AC073094.4  | 0,00 | 0,00 | 0,00 | 0,00 | NA | NA |
| AC073109.2  | 0,00 | 0,00 | 0,00 | 0,00 | NA | NA |
| AC073115.4  | 0,00 | 0,00 | 0,00 | 0,00 | NA | NA |
| AC073115.5  | 0,00 | 0,00 | 0,00 | 0,00 | NA | NA |
| AC073115.6  | 0,00 | 0,00 | 0,00 | 0,00 | NA | NA |
| AC073115.7  | 0,00 | 0,00 | 0,00 | 0,00 | NA | NA |
| AC073133.2  | 0,00 | 0,00 | 0,00 | 0,00 | NA | NA |
| AC073143.1  | 0,00 | 0,00 | 0,00 | 0,00 | NA | NA |
| AC073150.4  | 0,00 | 0,00 | 0,00 | 0,00 | NA | NA |
| AC073150.5  | 0,00 | 0,00 | 0,00 | 0,00 | NA | NA |
| AC073188.5  | 0,00 | 0,00 | 0,00 | 0,00 | NA | NA |
| AC073188.6  | 0,00 | 0,00 | 0,00 | 0,00 | NA | NA |
| AC073218.1  | 0,00 | 0,00 | 0,00 | 0,00 | NA | NA |
| AC073218.3  | 0,00 | 0,00 | 0,00 | 0,00 | NA | NA |
| AC073264.11 | 0,00 | 0,00 | 0,00 | 0,00 | NA | NA |
| AC073271.1  | 0,00 | 0,00 | 0,00 | 0,00 | NA | NA |

|             |      |      |      |      |    |    |
|-------------|------|------|------|------|----|----|
| AC073310.4  | 0,00 | 0,00 | 0,00 | 0,00 | NA | NA |
| AC073316.1  | 0,00 | 0,00 | 0,00 | 0,00 | NA | NA |
| AC073316.2  | 0,00 | 0,00 | 0,00 | 0,00 | NA | NA |
| AC073321.2  | 0,00 | 0,00 | 0,00 | 0,00 | NA | NA |
| AC073321.3  | 0,00 | 0,00 | 0,00 | 0,00 | NA | NA |
| AC073321.4  | 0,00 | 0,00 | 0,00 | 0,00 | NA | NA |
| AC073325.1  | 0,00 | 0,00 | 0,00 | 0,00 | NA | NA |
| AC073325.2  | 0,00 | 0,00 | 0,00 | 0,00 | NA | NA |
| AC073331.2  | 0,00 | 0,00 | 0,00 | 0,00 | NA | NA |
| AC073342.13 | 0,00 | 0,00 | 0,00 | 0,00 | NA | NA |
| AC073409.1  | 0,00 | 0,00 | 0,00 | 0,00 | NA | NA |
| AC073410.1  | 0,00 | 0,32 | 0,00 | 0,00 | NA | NA |
| AC073415.2  | 0,00 | 0,00 | 0,00 | 0,00 | NA | NA |
| AC073421.2  | 0,00 | 0,00 | 0,00 | 0,00 | NA | NA |
| AC073464.11 | 0,00 | 0,00 | 0,00 | 0,00 | NA | NA |
| AC073464.3  | 0,00 | 0,00 | 0,00 | 0,00 | NA | NA |
| AC073464.4  | 0,00 | 0,00 | 0,00 | 0,00 | NA | NA |
| AC073464.5  | 0,00 | 0,00 | 0,00 | 0,00 | NA | NA |
| AC073464.6  | 0,00 | 0,00 | 0,00 | 0,00 | NA | NA |
| AC073464.7  | 0,00 | 0,00 | 0,00 | 0,00 | NA | NA |
| AC073464.8  | 0,00 | 0,00 | 0,00 | 0,00 | NA | NA |
| AC073464.9  | 0,00 | 0,00 | 0,00 | 0,00 | NA | NA |
| AC073465.1  | 0,00 | 0,00 | 0,00 | 0,00 | NA | NA |
| AC073465.2  | 0,00 | 0,00 | 0,00 | 0,00 | NA | NA |
| AC073465.3  | 0,00 | 0,00 | 0,00 | 0,00 | NA | NA |
| AC073476.4  | 0,00 | 0,00 | 0,00 | 0,00 | NA | NA |
| AC073502.1  | 0,00 | 0,00 | 0,00 | 0,00 | NA | NA |
| AC073621.2  | 0,00 | 0,00 | 0,00 | 0,00 | NA | NA |
| AC073626.2  | 0,00 | 0,00 | 0,00 | 0,00 | NA | NA |
| AC073628.1  | 0,00 | 0,00 | 0,00 | 0,00 | NA | NA |
| AC073629.2  | 0,00 | 0,00 | 0,00 | 0,00 | NA | NA |
| AC073636.1  | 0,00 | 0,00 | 0,00 | 0,00 | NA | NA |
| AC073649.1  | 0,00 | 0,00 | 0,00 | 0,00 | NA | NA |
| AC073649.2  | 0,00 | 0,00 | 0,00 | 0,00 | NA | NA |
| AC073649.3  | 0,00 | 0,00 | 0,00 | 0,00 | NA | NA |
| AC073834.3  | 0,00 | 0,00 | 0,00 | 0,00 | NA | NA |
| AC073850.6  | 0,00 | 0,00 | 0,00 | 0,00 | NA | NA |
| AC073852.3  | 0,00 | 0,00 | 0,00 | 0,00 | NA | NA |
| AC073869.10 | 0,00 | 0,00 | 0,00 | 0,00 | NA | NA |
| AC073869.12 | 0,00 | 0,00 | 0,00 | 0,00 | NA | NA |
| AC073869.13 | 0,00 | 0,00 | 0,00 | 0,00 | NA | NA |
| AC073869.19 | 0,00 | 0,00 | 0,00 | 0,00 | NA | NA |
| AC073869.2  | 0,00 | 0,00 | 0,00 | 0,00 | NA | NA |
| AC073869.20 | 0,00 | 0,00 | 0,00 | 0,00 | NA | NA |
| AC073869.22 | 0,00 | 0,00 | 0,00 | 0,00 | NA | NA |
| AC073869.4  | 0,00 | 0,00 | 0,00 | 0,00 | NA | NA |
| AC073869.5  | 0,00 | 0,00 | 0,00 | 0,00 | NA | NA |
| AC073869.6  | 0,00 | 0,00 | 0,00 | 0,00 | NA | NA |
| AC073869.7  | 0,00 | 0,00 | 0,00 | 0,00 | NA | NA |
| AC073869.8  | 0,00 | 0,00 | 0,00 | 0,00 | NA | NA |
| AC073869.9  | 0,00 | 0,00 | 0,00 | 0,00 | NA | NA |
| AC073893.1  | 0,00 | 0,00 | 0,00 | 0,00 | NA | NA |
| AC073893.2  | 0,00 | 0,00 | 0,00 | 0,00 | NA | NA |
| AC073893.3  | 0,00 | 0,00 | 0,00 | 0,00 | NA | NA |
| AC073893.4  | 0,00 | 0,00 | 0,00 | 0,00 | NA | NA |

|             |      |      |      |      |    |    |
|-------------|------|------|------|------|----|----|
| AC073893.5  | 0,00 | 0,00 | 0,00 | 0,00 | NA | NA |
| AC073900.4  | 0,00 | 0,00 | 0,00 | 0,00 | NA | NA |
| AC073928.2  | 0,00 | 0,00 | 0,00 | 0,00 | NA | NA |
| AC073957.15 | 0,00 | 0,00 | 0,00 | 0,00 | NA | NA |
| AC073958.2  | 0,00 | 0,00 | 0,00 | 0,00 | NA | NA |
| AC073987.2  | 0,00 | 0,00 | 0,00 | 0,00 | NA | NA |
| AC074008.1  | 0,00 | 0,00 | 0,00 | 0,00 | NA | NA |
| AC074011.2  | 0,00 | 0,00 | 0,00 | 0,00 | NA | NA |
| AC074019.1  | 0,00 | 0,00 | 0,00 | 0,00 | NA | NA |
| AC074019.2  | 0,18 | 0,01 | 0,01 | 0,14 | NA | NA |
| AC074091.13 | 0,04 | 0,05 | 0,10 | 0,17 | NA | NA |
| AC074112.1  | 0,00 | 0,00 | 0,00 | 0,00 | NA | NA |
| AC074117.13 | 0,00 | 0,00 | 0,00 | 0,00 | NA | NA |
| AC074138.3  | 0,00 | 0,00 | 0,00 | 0,00 | NA | NA |
| AC074183.2  | 0,00 | 0,00 | 0,00 | 0,00 | NA | NA |
| AC074183.4  | 0,00 | 0,00 | 0,00 | 0,00 | NA | NA |
| AC074212.5  | 0,00 | 0,00 | 0,00 | 0,00 | NA | NA |
| AC074212.6  | 0,00 | 0,00 | 0,00 | 0,00 | NA | NA |
| AC074290.1  | 0,00 | 0,00 | 0,00 | 0,00 | NA | NA |
| AC074338.5  | 0,00 | 0,00 | 0,00 | 0,00 | NA | NA |
| AC074363.1  | 0,00 | 0,00 | 0,00 | 0,00 | NA | NA |
| AC074375.1  | 0,00 | 0,00 | 0,00 | 0,00 | NA | NA |
| AC074387.1  | 0,00 | 0,00 | 0,00 | 0,00 | NA | NA |
| AC074389.4  | 0,00 | 0,00 | 0,00 | 0,00 | NA | NA |
| AC074389.6  | 0,00 | 0,00 | 0,00 | 0,00 | NA | NA |
| AC074389.7  | 0,00 | 0,00 | 0,00 | 0,00 | NA | NA |
| AC078791.3  | 0,00 | 0,00 | 0,00 | 0,00 | NA | NA |
| AC078841.5  | 0,00 | 0,00 | 0,00 | 0,00 | NA | NA |
| AC078842.3  | 0,00 | 0,00 | 0,00 | 0,00 | NA | NA |
| AC078851.1  | 0,00 | 0,00 | 0,00 | 0,00 | NA | NA |
| AC078852.1  | 0,00 | 0,00 | 0,00 | 0,00 | NA | NA |
| AC078852.2  | 0,00 | 0,00 | 0,00 | 0,00 | NA | NA |
| AC078882.1  | 0,00 | 0,00 | 0,00 | 0,00 | NA | NA |
| AC078883.3  | 0,00 | 0,00 | 0,00 | 0,00 | NA | NA |
| AC078883.4  | 0,00 | 0,00 | 0,00 | 0,00 | NA | NA |
| AC078899.2  | 0,00 | 0,00 | 0,00 | 0,00 | NA | NA |
| AC078899.3  | 0,00 | 0,00 | 0,00 | 0,00 | NA | NA |
| AC078899.4  | 0,00 | 0,00 | 0,00 | 0,00 | NA | NA |
| AC078937.5  | 0,00 | 0,00 | 0,00 | 0,00 | NA | NA |
| AC078942.1  | 0,00 | 0,00 | 0,00 | 0,00 | NA | NA |
| AC078974.2  | 0,00 | 0,00 | 0,00 | 0,00 | NA | NA |
| AC078994.2  | 0,00 | 0,00 | 0,00 | 0,00 | NA | NA |
| AC079005.1  | 0,00 | 0,00 | 0,00 | 0,00 | NA | NA |
| AC079005.2  | 0,00 | 0,00 | 0,00 | 0,00 | NA | NA |
| AC079090.1  | 0,00 | 0,00 | 0,00 | 0,00 | NA | NA |
| AC079112.1  | 0,00 | 0,00 | 0,00 | 0,00 | NA | NA |
| AC079117.1  | 0,00 | 0,00 | 0,00 | 0,00 | NA | NA |
| AC079120.1  | 0,00 | 0,00 | 0,00 | 0,00 | NA | NA |
| AC079135.1  | 0,00 | 0,00 | 0,00 | 0,00 | NA | NA |
| AC079150.2  | 0,00 | 0,00 | 0,00 | 0,00 | NA | NA |
| AC079150.3  | 0,00 | 0,00 | 0,00 | 0,00 | NA | NA |
| AC079154.1  | 0,00 | 0,00 | 0,00 | 0,00 | NA | NA |
| AC079163.1  | 0,00 | 0,00 | 0,00 | 0,00 | NA | NA |
| AC079199.2  | 0,00 | 1,47 | 0,00 | 0,00 | NA | NA |
| AC079305.5  | 0,00 | 0,00 | 0,00 | 0,00 | NA | NA |



|             |      |      |      |      |    |    |
|-------------|------|------|------|------|----|----|
| AC079305.6  | 0,00 | 0,00 | 0,00 | 0,00 | NA | NA |
| AC079305.8  | 0,00 | 0,00 | 0,00 | 0,00 | NA | NA |
| AC079337.1  | 0,00 | 0,00 | 0,00 | 0,00 | NA | NA |
| AC079354.2  | 0,00 | 0,00 | 0,00 | 0,00 | NA | NA |
| AC079354.4  | 0,00 | 0,00 | 0,00 | 0,00 | NA | NA |
| AC079354.5  | 0,00 | 0,00 | 0,00 | 0,00 | NA | NA |
| AC079354.6  | 0,00 | 0,00 | 0,00 | 0,00 | NA | NA |
| AC079395.1  | 0,00 | 0,00 | 0,00 | 0,00 | NA | NA |
| AC079584.2  | 0,00 | 0,00 | 0,00 | 0,00 | NA | NA |
| AC079610.1  | 0,00 | 0,00 | 0,00 | 0,00 | NA | NA |
| AC079612.2  | 0,00 | 0,00 | 0,00 | 0,00 | NA | NA |
| AC079613.1  | 0,00 | 0,00 | 0,00 | 0,00 | NA | NA |
| AC079621.4  | 0,00 | 0,00 | 0,00 | 0,00 | NA | NA |
| AC079741.2  | 0,00 | 0,00 | 0,00 | 0,00 | NA | NA |
| AC079753.5  | 0,00 | 0,00 | 0,00 | 0,00 | NA | NA |
| AC079767.3  | 0,00 | 0,00 | 0,00 | 0,00 | NA | NA |
| AC079776.2  | 0,00 | 0,00 | 0,00 | 0,00 | NA | NA |
| AC079776.4  | 0,00 | 0,00 | 0,00 | 0,00 | NA | NA |
| AC079776.6  | 0,00 | 0,00 | 0,00 | 0,00 | NA | NA |
| AC079776.7  | 0,10 | 0,30 | 0,00 | 0,00 | NA | NA |
| AC079777.1  | 0,00 | 0,00 | 0,00 | 0,00 | NA | NA |
| AC079779.5  | 0,00 | 0,00 | 0,00 | 0,00 | NA | NA |
| AC079779.6  | 0,00 | 0,00 | 0,00 | 0,00 | NA | NA |
| AC079779.7  | 0,00 | 0,00 | 0,00 | 0,00 | NA | NA |
| AC079780.3  | 0,00 | 0,00 | 0,00 | 0,00 | NA | NA |
| AC079781.5  | 0,00 | 0,00 | 0,00 | 0,00 | NA | NA |
| AC079781.7  | 0,00 | 0,00 | 0,00 | 0,00 | NA | NA |
| AC079781.8  | 0,00 | 0,00 | 0,00 | 0,00 | NA | NA |
| AC079789.2  | 0,00 | 0,00 | 0,00 | 0,00 | NA | NA |
| AC079790.2  | 0,00 | 0,00 | 0,00 | 0,00 | NA | NA |
| AC079790.3  | 0,00 | 0,00 | 0,00 | 0,00 | NA | NA |
| AC079799.2  | 0,00 | 0,00 | 0,00 | 0,00 | NA | NA |
| AC079807.1  | 0,00 | 0,00 | 0,00 | 0,00 | NA | NA |
| AC079880.1  | 0,00 | 0,00 | 0,00 | 0,00 | NA | NA |
| AC079922.2  | 0,00 | 0,00 | 0,00 | 0,00 | NA | NA |
| AC080002.1  | 0,00 | 0,00 | 0,00 | 0,00 | NA | NA |
| AC080075.3  | 0,00 | 0,00 | 0,00 | 0,00 | NA | NA |
| AC080091.1  | 0,00 | 0,00 | 0,00 | 0,00 | NA | NA |
| AC080094.1  | 0,00 | 0,00 | 0,00 | 0,00 | NA | NA |
| AC080125.1  | 0,00 | 0,00 | 0,00 | 0,00 | NA | NA |
| AC083760.1  | 0,00 | 0,00 | 0,00 | 0,00 | NA | NA |
| AC083822.2  | 0,00 | 0,00 | 0,00 | 0,00 | NA | NA |
| AC083843.4  | 0,00 | 0,00 | 0,00 | 0,00 | NA | NA |
| AC083855.5  | 0,00 | 0,00 | 0,00 | 0,00 | NA | NA |
| AC083862.6  | 0,00 | 0,00 | 0,00 | 0,00 | NA | NA |
| AC083863.5  | 0,00 | 0,00 | 0,00 | 0,00 | NA | NA |
| AC083867.3  | 0,00 | 0,00 | 0,00 | 0,00 | NA | NA |
| AC083871.2  | 0,00 | 0,00 | 0,00 | 0,00 | NA | NA |
| AC083873.4  | 0,00 | 0,00 | 0,00 | 0,00 | NA | NA |
| AC083874.3  | 0,00 | 0,00 | 0,00 | 0,00 | NA | NA |
| AC083939.1  | 0,00 | 0,00 | 0,00 | 0,00 | NA | NA |
| AC084082.3  | 0,00 | 0,17 | 0,00 | 0,00 | NA | NA |
| AC084121.14 | 0,00 | 0,00 | 0,00 | 0,00 | NA | NA |
| AC084121.17 | 0,00 | 0,00 | 0,00 | 0,00 | NA | NA |
| AC084121.18 | 0,00 | 0,00 | 0,00 | 0,00 | NA | NA |

|             |      |      |      |      |    |    |
|-------------|------|------|------|------|----|----|
| AC084121.19 | 0,00 | 0,00 | 0,00 | 0,00 | NA | NA |
| AC084149.1  | 0,00 | 0,00 | 0,00 | 0,00 | NA | NA |
| AC084290.2  | 0,00 | 0,00 | 0,00 | 0,00 | NA | NA |
| AC084809.2  | 0,00 | 0,00 | 0,00 | 0,00 | NA | NA |
| AC084809.3  | 0,00 | 0,00 | 0,00 | 0,00 | NA | NA |
| AC084854.4  | 0,00 | 0,00 | 0,00 | 0,00 | NA | NA |
| AC087072.4  | 0,00 | 0,00 | 0,00 | 0,00 | NA | NA |
| AC087073.1  | 0,00 | 0,00 | 0,00 | 0,00 | NA | NA |
| AC087380.14 | 0,00 | 0,00 | 0,00 | 0,00 | NA | NA |
| AC087393.1  | 0,00 | 0,00 | 0,00 | 0,00 | NA | NA |
| AC087491.2  | 0,00 | 0,00 | 0,00 | 0,00 | NA | NA |
| AC087499.2  | 0,00 | 0,00 | 0,00 | 0,00 | NA | NA |
| AC087499.4  | 0,00 | 0,00 | 0,00 | 0,00 | NA | NA |
| AC087499.7  | 0,00 | 0,00 | 0,00 | 0,00 | NA | NA |
| AC087499.8  | 0,00 | 0,00 | 0,00 | 0,00 | NA | NA |
| AC087499.9  | 0,00 | 0,00 | 0,00 | 0,00 | NA | NA |
| AC087650.1  | 0,00 | 0,00 | 0,00 | 0,00 | NA | NA |
| AC090018.1  | 0,00 | 0,00 | 0,00 | 0,00 | NA | NA |
| AC090042.1  | 0,00 | 0,00 | 0,00 | 0,00 | NA | NA |
| AC090043.1  | 0,00 | 0,00 | 0,00 | 0,00 | NA | NA |
| AC090283.3  | 0,00 | 0,00 | 0,00 | 0,00 | NA | NA |
| AC090286.4  | 0,00 | 0,00 | 0,00 | 0,00 | NA | NA |
| AC090453.1  | 0,00 | 0,00 | 0,00 | 0,00 | NA | NA |
| AC090505.1  | 0,00 | 0,00 | 0,00 | 0,00 | NA | NA |
| AC090505.5  | 0,00 | 0,00 | 0,00 | 0,00 | NA | NA |
| AC090505.6  | 0,00 | 0,00 | 0,26 | 0,00 | NA | NA |
| AC090516.2  | 0,00 | 0,00 | 0,00 | 0,00 | NA | NA |
| AC090587.4  | 0,00 | 0,00 | 0,00 | 0,00 | NA | NA |
| AC090587.5  | 0,00 | 0,00 | 0,00 | 0,00 | NA | NA |
| AC090616.2  | 0,00 | 0,00 | 0,10 | 0,00 | NA | NA |
| AC090617.1  | 0,00 | 0,00 | 0,00 | 0,00 | NA | NA |
| AC090625.1  | 0,00 | 0,00 | 0,00 | 0,00 | NA | NA |
| AC090696.2  | 0,00 | 0,00 | 0,00 | 0,00 | NA | NA |
| AC090774.2  | 0,00 | 0,00 | 0,00 | 0,00 | NA | NA |
| AC090945.1  | 0,00 | 0,00 | 0,00 | 0,00 | NA | NA |
| AC090952.4  | 0,00 | 0,00 | 0,00 | 0,00 | NA | NA |
| AC090954.4  | 0,00 | 0,00 | 0,00 | 0,00 | NA | NA |
| AC090954.5  | 0,00 | 0,00 | 0,00 | 0,00 | NA | NA |
| AC090955.3  | 0,00 | 0,00 | 0,00 | 0,00 | NA | NA |
| AC090955.4  | 0,00 | 0,00 | 0,00 | 0,00 | NA | NA |
| AC090955.5  | 0,00 | 0,00 | 0,00 | 0,00 | NA | NA |
| AC090957.2  | 0,00 | 0,00 | 0,00 | 0,00 | NA | NA |
| AC090958.1  | 0,00 | 0,00 | 0,00 | 0,00 | NA | NA |
| AC090958.2  | 0,00 | 0,00 | 0,00 | 0,00 | NA | NA |
| AC090958.4  | 0,00 | 0,00 | 0,00 | 0,00 | NA | NA |
| AC090958.5  | 0,00 | 0,00 | 0,00 | 0,00 | NA | NA |
| AC090958.6  | 0,00 | 0,00 | 0,00 | 0,00 | NA | NA |
| AC090985.2  | 0,00 | 0,00 | 0,00 | 0,00 | NA | NA |
| AC091069.1  | 0,00 | 0,00 | 0,00 | 0,00 | NA | NA |
| AC091133.1  | 0,00 | 0,00 | 0,00 | 0,00 | NA | NA |
| AC091167.3  | 0,00 | 0,00 | 0,00 | 0,00 | NA | NA |
| AC091199.1  | 0,00 | 0,00 | 0,00 | 0,00 | NA | NA |
| AC091491.2  | 0,00 | 0,00 | 0,00 | 0,00 | NA | NA |
| AC091492.2  | 0,00 | 0,00 | 0,00 | 0,00 | NA | NA |
| AC091492.3  | 0,00 | 0,00 | 0,00 | 0,00 | NA | NA |

|            |      |      |      |      |    |    |
|------------|------|------|------|------|----|----|
| AC091493.1 | 0,09 | 0,11 | 0,00 | 0,00 | NA | NA |
| AC091633.2 | 0,00 | 0,00 | 0,00 | 0,00 | NA | NA |
| AC091652.2 | 0,00 | 0,00 | 0,00 | 0,00 | NA | NA |
| AC091654.7 | 0,00 | 0,00 | 0,00 | 0,00 | NA | NA |
| AC091685.7 | 0,00 | 0,00 | 0,00 | 0,00 | NA | NA |
| AC091705.1 | 0,00 | 0,00 | 0,00 | 0,00 | NA | NA |
| AC091729.8 | 0,00 | 0,00 | 0,00 | 0,00 | NA | NA |
| AC091770.3 | 0,00 | 0,00 | 0,00 | 0,00 | NA | NA |
| AC091788.2 | 0,00 | 0,00 | 0,00 | 0,00 | NA | NA |
| AC091813.2 | 0,00 | 0,00 | 0,00 | 0,00 | NA | NA |
| AC092013.1 | 0,00 | 0,00 | 0,00 | 0,00 | NA | NA |
| AC092071.1 | 0,00 | 0,00 | 0,00 | 0,39 | NA | NA |
| AC092106.1 | 0,00 | 0,00 | 0,00 | 0,00 | NA | NA |
| AC092106.2 | 0,00 | 0,00 | 0,00 | 0,00 | NA | NA |
| AC092155.2 | 0,00 | 0,00 | 0,00 | 0,00 | NA | NA |
| AC092155.3 | 0,00 | 0,00 | 0,00 | 0,00 | NA | NA |
| AC092155.4 | 0,00 | 0,00 | 0,00 | 0,00 | NA | NA |
| AC092156.1 | 0,00 | 0,00 | 0,00 | 0,00 | NA | NA |
| AC092156.3 | 0,00 | 0,00 | 0,00 | 0,00 | NA | NA |
| AC092162.2 | 0,00 | 0,00 | 0,00 | 0,00 | NA | NA |
| AC092162.3 | 0,00 | 0,00 | 0,00 | 0,00 | NA | NA |
| AC092168.2 | 0,00 | 0,00 | 0,00 | 0,00 | NA | NA |
| AC092168.3 | 0,00 | 0,00 | 0,00 | 0,00 | NA | NA |
| AC092168.4 | 0,00 | 0,00 | 0,00 | 0,00 | NA | NA |
| AC092170.1 | 0,00 | 0,00 | 0,00 | 0,00 | NA | NA |
| AC092180.2 | 0,00 | 0,00 | 0,00 | 0,00 | NA | NA |
| AC092198.1 | 0,00 | 0,00 | 0,00 | 0,00 | NA | NA |
| AC092214.4 | 0,00 | 0,00 | 0,00 | 0,00 | NA | NA |
| AC092295.4 | 0,00 | 0,00 | 0,00 | 0,00 | NA | NA |
| AC092295.7 | 0,53 | 0,95 | 0,86 | 0,16 | NA | NA |
| AC092299.1 | 0,00 | 0,00 | 0,00 | 0,00 | NA | NA |
| AC092421.1 | 0,00 | 0,00 | 0,00 | 0,00 | NA | NA |
| AC092442.3 | 0,00 | 0,00 | 0,00 | 0,00 | NA | NA |
| AC092534.1 | 0,00 | 0,00 | 0,00 | 0,00 | NA | NA |
| AC092566.1 | 0,00 | 0,00 | 0,00 | 0,00 | NA | NA |
| AC092568.1 | 0,00 | 0,00 | 0,00 | 0,00 | NA | NA |
| AC092569.2 | 0,00 | 0,00 | 0,00 | 0,00 | NA | NA |
| AC092570.1 | 0,00 | 0,00 | 0,00 | 0,00 | NA | NA |
| AC092570.2 | 0,00 | 0,00 | 0,00 | 0,00 | NA | NA |
| AC092570.4 | 0,00 | 0,00 | 0,00 | 0,00 | NA | NA |
| AC092580.1 | 0,00 | 0,00 | 0,00 | 0,00 | NA | NA |
| AC092580.2 | 0,00 | 0,00 | 0,00 | 0,00 | NA | NA |
| AC092580.3 | 0,00 | 0,00 | 0,00 | 0,00 | NA | NA |
| AC092584.1 | 0,00 | 0,00 | 0,00 | 0,00 | NA | NA |
| AC092595.2 | 0,00 | 0,00 | 0,00 | 0,00 | NA | NA |
| AC092601.1 | 0,00 | 0,00 | 0,00 | 0,00 | NA | NA |
| AC092614.2 | 0,00 | 0,00 | 0,00 | 0,00 | NA | NA |
| AC092619.1 | 0,00 | 0,14 | 0,00 | 0,00 | NA | NA |
| AC092625.1 | 0,00 | 0,00 | 0,00 | 0,00 | NA | NA |
| AC092628.3 | 0,00 | 0,00 | 0,00 | 0,00 | NA | NA |
| AC092634.9 | 0,00 | 0,00 | 0,00 | 0,00 | NA | NA |
| AC092635.1 | 0,00 | 0,00 | 0,00 | 0,00 | NA | NA |
| AC092638.2 | 0,00 | 0,00 | 0,00 | 0,00 | NA | NA |
| AC092640.1 | 0,00 | 0,00 | 0,00 | 0,00 | NA | NA |
| AC092642.1 | 0,00 | 0,00 | 0,00 | 0,00 | NA | NA |

|            |      |      |      |      |    |    |
|------------|------|------|------|------|----|----|
| AC092646.1 | 0,00 | 0,00 | 0,00 | 0,00 | NA | NA |
| AC092646.2 | 0,00 | 0,00 | 0,00 | 0,00 | NA | NA |
| AC092657.2 | 0,00 | 0,00 | 0,00 | 0,00 | NA | NA |
| AC092660.1 | 0,00 | 0,00 | 0,00 | 0,00 | NA | NA |
| AC092661.1 | 0,18 | 0,79 | 0,00 | 0,25 | NA | NA |
| AC092661.2 | 0,00 | 0,00 | 0,00 | 0,00 | NA | NA |
| AC092662.1 | 0,00 | 0,00 | 0,00 | 0,00 | NA | NA |
| AC092662.2 | 0,00 | 0,00 | 0,00 | 0,00 | NA | NA |
| AC092662.3 | 0,00 | 0,00 | 0,00 | 0,00 | NA | NA |
| AC092662.4 | 0,00 | 0,00 | 0,00 | 0,00 | NA | NA |
| AC092662.5 | 0,00 | 0,00 | 0,00 | 0,00 | NA | NA |
| AC092662.6 | 0,00 | 0,00 | 0,00 | 0,00 | NA | NA |
| AC092662.7 | 0,00 | 0,00 | 0,00 | 0,00 | NA | NA |
| AC092664.1 | 0,00 | 0,00 | 0,00 | 0,00 | NA | NA |
| AC092667.2 | 0,00 | 0,05 | 0,00 | 0,00 | NA | NA |
| AC092669.6 | 0,00 | 0,00 | 0,00 | 0,00 | NA | NA |
| AC092675.4 | 0,00 | 0,00 | 0,00 | 0,00 | NA | NA |
| AC092676.2 | 0,00 | 0,00 | 0,00 | 0,00 | NA | NA |
| AC092676.3 | 0,00 | 0,00 | 0,00 | 0,00 | NA | NA |
| AC092687.3 | 0,00 | 0,00 | 0,00 | 0,00 | NA | NA |
| AC092687.4 | 0,00 | 0,00 | 0,00 | 0,00 | NA | NA |
| AC092687.5 | 0,00 | 0,00 | 0,00 | 0,00 | NA | NA |
| AC092755.4 | 0,00 | 0,00 | 0,00 | 0,00 | NA | NA |
| AC092796.1 | 0,00 | 0,00 | 0,00 | 0,00 | NA | NA |
| AC092839.1 | 0,00 | 0,00 | 0,00 | 0,00 | NA | NA |
| AC092839.3 | 0,00 | 0,00 | 0,00 | 0,00 | NA | NA |
| AC092841.3 | 0,00 | 0,00 | 0,00 | 0,00 | NA | NA |
| AC092843.1 | 0,00 | 0,00 | 0,00 | 0,00 | NA | NA |
| AC092933.3 | 0,00 | 0,00 | 0,00 | 0,00 | NA | NA |
| AC092937.2 | 0,00 | 0,00 | 0,00 | 0,00 | NA | NA |
| AC093063.2 | 0,00 | 0,00 | 0,00 | 0,00 | NA | NA |
| AC093063.3 | 0,00 | 0,00 | 0,00 | 0,00 | NA | NA |
| AC093074.1 | 0,00 | 0,00 | 0,00 | 0,00 | NA | NA |
| AC093081.2 | 0,00 | 0,00 | 0,00 | 0,00 | NA | NA |
| AC093084.1 | 0,00 | 0,00 | 0,00 | 0,00 | NA | NA |
| AC093106.4 | 0,00 | 0,00 | 0,00 | 0,00 | NA | NA |
| AC093106.5 | 0,00 | 0,00 | 0,00 | 0,00 | NA | NA |
| AC093106.6 | 0,00 | 0,00 | 0,00 | 0,00 | NA | NA |
| AC093107.7 | 0,00 | 0,00 | 0,00 | 0,00 | NA | NA |
| AC093112.1 | 0,00 | 0,00 | 0,00 | 0,00 | NA | NA |
| AC093113.1 | 0,00 | 0,00 | 0,00 | 0,00 | NA | NA |
| AC093142.2 | 0,00 | 0,00 | 0,00 | 0,00 | NA | NA |
| AC093142.3 | 0,00 | 0,00 | 0,00 | 0,00 | NA | NA |
| AC093162.3 | 0,00 | 0,00 | 0,00 | 0,00 | NA | NA |
| AC093166.1 | 0,00 | 0,00 | 0,00 | 0,00 | NA | NA |
| AC093166.2 | 0,00 | 0,00 | 0,00 | 0,00 | NA | NA |
| AC093166.3 | 0,00 | 0,00 | 0,00 | 0,00 | NA | NA |
| AC093166.4 | 0,00 | 0,00 | 0,00 | 0,00 | NA | NA |
| AC093230.2 | 0,00 | 0,00 | 0,00 | 0,00 | NA | NA |
| AC093377.1 | 0,00 | 0,00 | 0,00 | 0,00 | NA | NA |
| AC093381.1 | 0,00 | 0,00 | 0,00 | 0,00 | NA | NA |
| AC093382.1 | 0,00 | 0,00 | 0,00 | 0,00 | NA | NA |
| AC093390.1 | 0,00 | 0,00 | 0,00 | 0,00 | NA | NA |
| AC093411.1 | 0,00 | 0,00 | 0,00 | 0,00 | NA | NA |
| AC093415.5 | 0,00 | 0,00 | 0,00 | 0,00 | NA | NA |

|             |      |      |      |      |    |    |
|-------------|------|------|------|------|----|----|
| AC093416.3  | 0,00 | 0,00 | 0,00 | 0,00 | NA | NA |
| AC093509.1  | 0,00 | 0,00 | 0,00 | 0,00 | NA | NA |
| AC093555.1  | 0,00 | 0,00 | 0,00 | 0,00 | NA | NA |
| AC093585.6  | 0,00 | 0,00 | 0,00 | 0,00 | NA | NA |
| AC093590.2  | 0,00 | 0,00 | 0,00 | 0,00 | NA | NA |
| AC093627.11 | 0,00 | 0,00 | 0,00 | 0,00 | NA | NA |
| AC093627.12 | 0,00 | 0,00 | 0,00 | 0,00 | NA | NA |
| AC093642.6  | 0,00 | 0,00 | 0,00 | 0,00 | NA | NA |
| AC093662.5  | 0,00 | 0,00 | 0,00 | 0,00 | NA | NA |
| AC093698.1  | 0,00 | 0,34 | 0,00 | 0,00 | NA | NA |
| AC093698.2  | 0,00 | 0,00 | 0,00 | 0,00 | NA | NA |
| AC093698.3  | 0,00 | 0,00 | 0,00 | 0,00 | NA | NA |
| AC093698.4  | 0,00 | 0,00 | 0,00 | 0,00 | NA | NA |
| AC093702.1  | 0,00 | 0,00 | 0,00 | 0,00 | NA | NA |
| AC093724.2  | 0,00 | 0,00 | 0,00 | 0,00 | NA | NA |
| AC093734.11 | 0,09 | 0,20 | 0,00 | 0,02 | NA | NA |
| AC093743.4  | 0,00 | 0,00 | 0,00 | 0,00 | NA | NA |
| AC093762.1  | 0,00 | 0,00 | 0,00 | 0,00 | NA | NA |
| AC093787.1  | 0,00 | 0,00 | 0,00 | 0,00 | NA | NA |
| AC093822.1  | 0,00 | 0,00 | 0,00 | 0,00 | NA | NA |
| AC093838.5  | 0,00 | 0,00 | 0,00 | 0,00 | NA | NA |
| AC093843.1  | 0,00 | 0,00 | 0,00 | 0,00 | NA | NA |
| AC093850.1  | 0,00 | 0,00 | 0,00 | 0,00 | NA | NA |
| AC093850.2  | 0,00 | 0,00 | 0,00 | 0,00 | NA | NA |
| AC093899.3  | 0,00 | 0,00 | 0,00 | 0,00 | NA | NA |
| AC093901.1  | 0,00 | 0,00 | 0,00 | 0,00 | NA | NA |
| AC093911.1  | 0,00 | 0,00 | 0,00 | 0,00 | NA | NA |
| AC094019.1  | 0,00 | 0,00 | 0,00 | 0,00 | NA | NA |
| AC094019.2  | 0,00 | 0,00 | 0,00 | 0,00 | NA | NA |
| AC095380.1  | 0,00 | 0,00 | 0,00 | 0,00 | NA | NA |
| AC095381.1  | 0,00 | 0,00 | 0,00 | 0,00 | NA | NA |
| AC095381.2  | 0,00 | 0,00 | 0,00 | 0,00 | NA | NA |
| AC096553.5  | 0,00 | 0,00 | 0,00 | 0,00 | NA | NA |
| AC096554.1  | 0,00 | 0,00 | 0,00 | 0,00 | NA | NA |
| AC096559.2  | 0,00 | 0,00 | 0,00 | 0,00 | NA | NA |
| AC096568.3  | 0,00 | 0,00 | 0,00 | 0,00 | NA | NA |
| AC096570.1  | 0,00 | 0,00 | 0,00 | 0,00 | NA | NA |
| AC096570.2  | 0,00 | 0,00 | 0,00 | 0,00 | NA | NA |
| AC096574.5  | 0,00 | 0,00 | 0,00 | 0,00 | NA | NA |
| AC096579.13 | 0,00 | 0,00 | 0,00 | 0,00 | NA | NA |
| AC096579.15 | 0,00 | 0,00 | 0,00 | 0,00 | NA | NA |
| AC096582.10 | 0,00 | 0,00 | 0,00 | 0,00 | NA | NA |
| AC096582.8  | 0,00 | 0,00 | 0,00 | 0,00 | NA | NA |
| AC096582.9  | 0,00 | 0,00 | 0,00 | 0,00 | NA | NA |
| AC096583.1  | 0,00 | 0,00 | 0,00 | 0,00 | NA | NA |
| AC096649.1  | 0,00 | 0,00 | 0,00 | 0,00 | NA | NA |
| AC096649.2  | 0,00 | 0,00 | 0,00 | 0,00 | NA | NA |
| AC096664.2  | 0,00 | 0,00 | 0,00 | 0,00 | NA | NA |
| AC096664.3  | 0,00 | 0,00 | 0,00 | 0,00 | NA | NA |
| AC096732.1  | 0,00 | 0,00 | 0,00 | 0,00 | NA | NA |
| AC096732.2  | 0,00 | 0,00 | 0,00 | 0,00 | NA | NA |
| AC096772.4  | 0,00 | 0,00 | 0,00 | 0,00 | NA | NA |
| AC096918.1  | 0,00 | 0,00 | 0,00 | 0,00 | NA | NA |
| AC097359.2  | 0,00 | 0,00 | 0,00 | 0,00 | NA | NA |
| AC097361.1  | 0,00 | 0,00 | 0,00 | 0,00 | NA | NA |

|            |      |      |      |      |    |    |
|------------|------|------|------|------|----|----|
| AC097374.3 | 0,00 | 0,00 | 0,00 | 0,00 | NA | NA |
| AC097374.4 | 0,00 | 0,00 | 0,00 | 0,00 | NA | NA |
| AC097374.5 | 0,00 | 0,00 | 0,00 | 0,00 | NA | NA |
| AC097381.1 | 0,00 | 0,00 | 0,00 | 0,00 | NA | NA |
| AC097461.3 | 0,00 | 0,00 | 0,00 | 0,00 | NA | NA |
| AC097463.1 | 0,00 | 0,00 | 0,00 | 0,00 | NA | NA |
| AC097463.2 | 0,00 | 0,00 | 0,00 | 0,00 | NA | NA |
| AC097468.4 | 0,00 | 0,00 | 0,00 | 0,00 | NA | NA |
| AC097468.6 | 0,00 | 0,00 | 0,00 | 0,00 | NA | NA |
| AC097499.1 | 0,00 | 0,00 | 0,00 | 0,00 | NA | NA |
| AC097499.2 | 0,00 | 0,00 | 0,00 | 0,00 | NA | NA |
| AC097523.1 | 0,00 | 0,00 | 0,28 | 0,27 | NA | NA |
| AC097532.2 | 0,00 | 0,00 | 0,00 | 0,00 | NA | NA |
| AC097533.1 | 0,00 | 0,00 | 0,00 | 0,00 | NA | NA |
| AC097639.4 | 0,00 | 0,00 | 0,00 | 0,00 | NA | NA |
| AC097713.2 | 0,00 | 0,00 | 0,00 | 0,00 | NA | NA |
| AC097713.5 | 0,00 | 0,00 | 0,00 | 0,00 | NA | NA |
| AC097721.1 | 0,00 | 0,00 | 0,00 | 0,00 | NA | NA |
| AC098477.1 | 0,00 | 0,00 | 0,00 | 0,00 | NA | NA |
| AC098581.1 | 0,00 | 0,00 | 0,00 | 0,00 | NA | NA |
| AC098592.5 | 0,00 | 0,00 | 0,00 | 0,00 | NA | NA |
| AC098592.6 | 0,00 | 0,00 | 0,00 | 0,00 | NA | NA |
| AC098592.7 | 0,00 | 0,00 | 0,00 | 0,00 | NA | NA |
| AC098592.8 | 0,00 | 0,00 | 0,00 | 0,00 | NA | NA |
| AC098614.2 | 0,00 | 0,00 | 0,00 | 0,00 | NA | NA |
| AC098614.3 | 0,00 | 0,00 | 0,00 | 0,00 | NA | NA |
| AC098647.1 | 0,00 | 0,00 | 0,00 | 0,00 | NA | NA |
| AC098648.2 | 0,00 | 0,00 | 0,00 | 0,00 | NA | NA |
| AC098650.1 | 0,00 | 0,00 | 0,00 | 0,00 | NA | NA |
| AC098784.1 | 0,00 | 0,00 | 0,00 | 0,00 | NA | NA |
| AC098795.1 | 0,00 | 0,00 | 0,00 | 0,00 | NA | NA |
| AC098800.1 | 0,00 | 0,00 | 0,00 | 0,00 | NA | NA |
| AC098817.3 | 0,00 | 0,00 | 0,00 | 0,00 | NA | NA |
| AC098817.4 | 0,00 | 0,00 | 0,00 | 0,00 | NA | NA |
| AC098817.5 | 0,00 | 0,00 | 0,00 | 0,00 | NA | NA |
| AC098820.2 | 0,00 | 0,00 | 0,00 | 0,00 | NA | NA |
| AC098824.6 | 0,00 | 0,00 | 0,00 | 0,00 | NA | NA |
| AC098826.4 | 0,00 | 0,00 | 0,00 | 0,00 | NA | NA |
| AC098826.5 | 0,00 | 0,00 | 0,00 | 0,00 | NA | NA |
| AC098872.3 | 0,00 | 0,00 | 0,00 | 0,00 | NA | NA |
| AC098971.1 | 0,00 | 0,00 | 0,00 | 0,00 | NA | NA |
| AC098973.1 | 0,00 | 0,00 | 0,00 | 0,00 | NA | NA |
| AC099342.1 | 0,00 | 0,14 | 0,00 | 0,00 | NA | NA |
| AC099344.2 | 0,00 | 0,00 | 0,00 | 0,00 | NA | NA |
| AC099344.3 | 0,00 | 0,00 | 0,00 | 0,00 | NA | NA |
| AC099344.4 | 0,00 | 0,00 | 0,00 | 0,00 | NA | NA |
| AC099540.1 | 0,00 | 0,00 | 0,00 | 0,00 | NA | NA |
| AC099544.1 | 0,00 | 0,00 | 0,00 | 0,00 | NA | NA |
| AC099544.2 | 0,00 | 0,00 | 0,00 | 0,00 | NA | NA |
| AC099548.6 | 0,00 | 0,00 | 0,00 | 0,00 | NA | NA |
| AC099552.2 | 0,00 | 0,00 | 0,00 | 0,00 | NA | NA |
| AC099552.4 | 0,00 | 0,00 | 0,00 | 0,00 | NA | NA |
| AC099668.5 | 0,00 | 0,00 | 0,00 | 0,00 | NA | NA |
| AC099684.1 | 0,00 | 0,00 | 0,00 | 0,00 | NA | NA |
| AC099754.1 | 0,00 | 0,00 | 0,00 | 0,00 | NA | NA |

|             |      |      |      |      |    |    |
|-------------|------|------|------|------|----|----|
| AC099799.1  | 0,00 | 0,00 | 0,00 | 0,00 | NA | NA |
| AC100748.2  | 0,00 | 0,00 | 0,00 | 0,00 | NA | NA |
| AC100848.1  | 0,00 | 0,00 | 0,00 | 0,00 | NA | NA |
| AC102953.4  | 0,00 | 0,00 | 0,00 | 0,00 | NA | NA |
| AC102953.6  | 0,00 | 0,00 | 0,00 | 0,00 | NA | NA |
| AC103563.3  | 0,00 | 0,00 | 0,00 | 0,00 | NA | NA |
| AC103563.4  | 0,00 | 0,00 | 0,00 | 0,00 | NA | NA |
| AC103563.5  | 0,00 | 0,00 | 0,00 | 0,00 | NA | NA |
| AC103563.7  | 0,00 | 0,00 | 0,00 | 0,00 | NA | NA |
| AC103563.8  | 0,00 | 0,00 | 0,00 | 0,00 | NA | NA |
| AC103563.9  | 0,00 | 0,00 | 0,00 | 0,00 | NA | NA |
| AC103564.7  | 0,00 | 0,00 | 0,00 | 0,00 | NA | NA |
| AC103796.1  | 0,00 | 0,00 | 0,00 | 0,00 | NA | NA |
| AC103881.1  | 0,00 | 0,00 | 0,00 | 0,00 | NA | NA |
| AC104076.2  | 0,00 | 0,00 | 0,00 | 0,00 | NA | NA |
| AC104076.3  | 0,00 | 0,00 | 0,00 | 0,00 | NA | NA |
| AC104088.1  | 0,00 | 0,00 | 0,00 | 0,00 | NA | NA |
| AC104131.1  | 0,00 | 0,00 | 0,00 | 0,00 | NA | NA |
| AC104297.1  | 0,00 | 0,00 | 0,00 | 0,00 | NA | NA |
| AC104304.4  | 0,00 | 0,00 | 0,00 | 0,00 | NA | NA |
| AC104306.4  | 0,00 | 0,00 | 0,00 | 0,00 | NA | NA |
| AC104306.5  | 0,00 | 0,00 | 0,00 | 0,00 | NA | NA |
| AC104308.2  | 0,00 | 0,00 | 0,00 | 0,00 | NA | NA |
| AC104389.16 | 0,00 | 0,00 | 0,00 | 0,00 | NA | NA |
| AC104389.31 | 0,00 | 0,00 | 0,00 | 0,00 | NA | NA |
| AC104389.32 | 0,00 | 0,00 | 0,00 | 0,00 | NA | NA |
| AC104439.4  | 0,00 | 0,00 | 0,00 | 0,00 | NA | NA |
| AC104532.2  | 0,00 | 0,00 | 0,00 | 0,00 | NA | NA |
| AC104623.2  | 0,00 | 0,00 | 0,00 | 0,00 | NA | NA |
| AC104634.2  | 0,00 | 0,00 | 0,00 | 0,00 | NA | NA |
| AC104634.3  | 0,00 | 0,00 | 0,00 | 0,00 | NA | NA |
| AC104651.1  | 0,00 | 0,00 | 0,00 | 0,00 | NA | NA |
| AC104651.2  | 0,00 | 0,00 | 0,00 | 0,00 | NA | NA |
| AC104651.3  | 0,00 | 0,00 | 0,00 | 0,00 | NA | NA |
| AC104654.1  | 0,00 | 0,00 | 0,00 | 0,00 | NA | NA |
| AC104655.3  | 0,00 | 0,00 | 0,00 | 0,00 | NA | NA |
| AC104697.1  | 0,00 | 0,00 | 0,00 | 0,00 | NA | NA |
| AC104698.2  | 0,00 | 0,00 | 0,00 | 0,00 | NA | NA |
| AC104699.1  | 0,00 | 0,00 | 0,00 | 0,00 | NA | NA |
| AC104700.2  | 0,00 | 0,00 | 0,00 | 0,00 | NA | NA |
| AC104772.1  | 0,00 | 0,00 | 0,00 | 0,00 | NA | NA |
| AC104777.3  | 0,00 | 0,00 | 0,00 | 0,00 | NA | NA |
| AC104777.4  | 0,00 | 0,00 | 0,00 | 0,00 | NA | NA |
| AC104781.1  | 0,00 | 0,00 | 0,00 | 0,00 | NA | NA |
| AC104794.4  | 0,00 | 0,00 | 0,00 | 0,00 | NA | NA |
| AC104801.1  | 0,00 | 0,00 | 0,00 | 0,00 | NA | NA |
| AC104843.3  | 0,00 | 0,00 | 0,00 | 0,00 | NA | NA |
| AC104843.4  | 0,00 | 0,00 | 0,00 | 0,00 | NA | NA |
| AC104978.1  | 0,00 | 0,00 | 0,00 | 0,00 | NA | NA |
| AC104984.4  | 0,00 | 0,00 | 0,00 | 0,00 | NA | NA |
| AC105050.1  | 0,00 | 0,00 | 0,00 | 0,00 | NA | NA |
| AC105342.1  | 0,00 | 0,00 | 0,00 | 0,00 | NA | NA |
| AC105393.1  | 0,00 | 0,00 | 0,00 | 0,00 | NA | NA |
| AC105393.2  | 0,00 | 0,00 | 0,00 | 0,00 | NA | NA |
| AC105398.3  | 0,00 | 0,00 | 0,00 | 0,00 | NA | NA |

|             |      |      |      |      |    |    |
|-------------|------|------|------|------|----|----|
| AC105399.2  | 0,00 | 0,00 | 0,00 | 0,00 | NA | NA |
| AC105402.1  | 0,00 | 0,00 | 0,00 | 0,00 | NA | NA |
| AC105402.2  | 0,00 | 0,00 | 0,00 | 0,00 | NA | NA |
| AC105443.2  | 0,00 | 0,00 | 0,00 | 0,00 | NA | NA |
| AC105761.1  | 0,00 | 0,00 | 0,00 | 0,00 | NA | NA |
| AC105901.1  | 0,00 | 0,00 | 0,00 | 0,00 | NA | NA |
| AC106053.1  | 0,00 | 0,00 | 0,00 | 0,00 | NA | NA |
| AC106706.1  | 0,00 | 0,00 | 0,00 | 0,00 | NA | NA |
| AC106782.20 | 0,00 | 0,00 | 0,00 | 0,00 | NA | NA |
| AC106786.1  | 0,00 | 0,00 | 0,00 | 0,00 | NA | NA |
| AC106869.2  | 0,00 | 0,00 | 0,00 | 0,00 | NA | NA |
| AC106870.1  | 0,00 | 0,00 | 0,00 | 0,00 | NA | NA |
| AC106875.1  | 0,00 | 0,00 | 0,00 | 0,00 | NA | NA |
| AC106876.2  | 0,00 | 0,00 | 0,00 | 0,00 | NA | NA |
| AC106883.1  | 0,00 | 0,00 | 0,00 | 0,00 | NA | NA |
| AC106900.7  | 0,00 | 0,00 | 0,00 | 0,00 | NA | NA |
| AC106901.1  | 0,00 | 0,00 | 0,00 | 0,00 | NA | NA |
| AC107057.1  | 0,00 | 0,00 | 0,00 | 0,00 | NA | NA |
| AC107057.2  | 0,00 | 0,00 | 0,00 | 0,00 | NA | NA |
| AC107083.1  | 0,00 | 0,00 | 0,00 | 0,00 | NA | NA |
| AC107218.3  | 0,00 | 0,00 | 0,00 | 0,00 | NA | NA |
| AC107399.1  | 0,00 | 0,00 | 0,00 | 0,00 | NA | NA |
| AC107399.2  | 0,00 | 0,00 | 0,00 | 0,00 | NA | NA |
| AC107620.1  | 0,00 | 0,00 | 0,00 | 0,00 | NA | NA |
| AC107983.4  | 0,00 | 0,00 | 0,00 | 0,00 | NA | NA |
| AC108004.2  | 0,00 | 0,00 | 0,00 | 0,00 | NA | NA |
| AC108004.3  | 0,00 | 0,00 | 0,00 | 0,00 | NA | NA |
| AC108032.1  | 0,00 | 0,00 | 0,00 | 0,00 | NA | NA |
| AC108039.1  | 0,00 | 0,00 | 0,00 | 0,00 | NA | NA |
| AC108039.2  | 0,00 | 0,00 | 0,00 | 0,00 | NA | NA |
| AC108039.3  | 0,00 | 0,00 | 0,00 | 0,00 | NA | NA |
| AC108051.1  | 0,00 | 0,00 | 0,00 | 0,00 | NA | NA |
| AC108059.1  | 0,00 | 0,00 | 0,00 | 0,00 | NA | NA |
| AC108059.4  | 0,00 | 0,00 | 0,00 | 0,00 | NA | NA |
| AC108171.5  | 0,00 | 0,00 | 0,00 | 0,00 | NA | NA |
| AC108448.2  | 0,00 | 0,00 | 0,00 | 0,00 | NA | NA |
| AC108448.3  | 0,00 | 0,00 | 0,00 | 0,00 | NA | NA |
| AC108462.1  | 0,00 | 0,00 | 0,00 | 0,00 | NA | NA |
| AC108479.1  | 0,00 | 0,00 | 0,00 | 0,00 | NA | NA |
| AC108479.2  | 0,00 | 0,00 | 0,00 | 0,00 | NA | NA |
| AC108510.2  | 0,00 | 0,00 | 0,00 | 0,00 | NA | NA |
| AC108938.2  | 0,00 | 0,00 | 0,00 | 0,00 | NA | NA |
| AC108938.3  | 0,00 | 0,00 | 0,00 | 0,00 | NA | NA |
| AC108938.5  | 0,00 | 0,00 | 0,00 | 0,00 | NA | NA |
| AC109309.4  | 0,00 | 0,00 | 0,00 | 0,00 | NA | NA |
| AC109309.5  | 0,00 | 0,00 | 0,00 | 0,00 | NA | NA |
| AC109309.6  | 0,00 | 0,00 | 0,00 | 0,00 | NA | NA |
| AC109585.1  | 0,00 | 0,00 | 0,00 | 0,00 | NA | NA |
| AC109638.1  | 0,00 | 0,00 | 0,00 | 0,00 | NA | NA |
| AC109826.1  | 0,00 | 0,00 | 0,00 | 0,00 | NA | NA |
| AC110078.2  | 0,00 | 0,00 | 0,00 | 0,00 | NA | NA |
| AC110078.3  | 0,00 | 0,00 | 0,00 | 0,00 | NA | NA |
| AC110299.1  | 0,00 | 0,00 | 0,00 | 0,00 | NA | NA |
| AC110299.5  | 0,00 | 0,27 | 0,00 | 0,00 | NA | NA |
| AC110620.1  | 0,00 | 0,00 | 0,00 | 0,00 | NA | NA |



|             |      |      |      |      |    |    |
|-------------|------|------|------|------|----|----|
| AC110620.2  | 0,00 | 0,00 | 0,00 | 0,00 | NA | NA |
| AC110754.3  | 0,00 | 0,00 | 0,00 | 0,00 | NA | NA |
| AC110926.2  | 0,00 | 0,00 | 0,00 | 0,00 | NA | NA |
| AC111155.1  | 0,00 | 0,00 | 0,00 | 0,00 | NA | NA |
| AC111200.7  | 0,00 | 0,00 | 0,00 | 0,00 | NA | NA |
| AC111200.8  | 0,00 | 0,00 | 0,00 | 0,00 | NA | NA |
| AC112211.2  | 0,00 | 0,00 | 0,00 | 0,00 | NA | NA |
| AC112220.1  | 0,00 | 0,00 | 0,00 | 0,00 | NA | NA |
| AC112220.2  | 0,00 | 0,00 | 0,00 | 0,00 | NA | NA |
| AC112229.1  | 0,00 | 0,00 | 0,00 | 0,00 | NA | NA |
| AC112229.6  | 0,00 | 0,00 | 0,00 | 0,00 | NA | NA |
| AC112497.1  | 0,00 | 0,00 | 0,00 | 0,00 | NA | NA |
| AC112518.3  | 0,00 | 0,00 | 0,00 | 0,00 | NA | NA |
| AC112715.2  | 0,00 | 0,00 | 0,00 | 0,00 | NA | NA |
| AC112721.1  | 0,00 | 0,00 | 0,00 | 0,00 | NA | NA |
| AC113331.9  | 0,00 | 0,00 | 0,00 | 0,00 | NA | NA |
| AC113554.3  | 0,00 | 0,00 | 0,00 | 0,00 | NA | NA |
| AC113607.1  | 0,00 | 0,00 | 0,00 | 0,00 | NA | NA |
| AC113607.2  | 0,00 | 0,63 | 0,00 | 0,00 | NA | NA |
| AC113607.3  | 0,00 | 0,00 | 0,00 | 0,00 | NA | NA |
| AC113610.1  | 0,00 | 0,00 | 0,00 | 0,00 | NA | NA |
| AC113617.2  | 0,00 | 0,00 | 0,00 | 0,00 | NA | NA |
| AC113618.1  | 0,00 | 0,00 | 0,00 | 0,00 | NA | NA |
| AC113618.2  | 0,00 | 0,00 | 0,00 | 0,00 | NA | NA |
| AC114273.1  | 0,00 | 0,00 | 0,00 | 0,00 | NA | NA |
| AC114477.1  | 0,00 | 0,00 | 0,00 | 0,00 | NA | NA |
| AC114730.11 | 0,00 | 0,00 | 0,00 | 0,00 | NA | NA |
| AC114730.8  | 0,00 | 0,00 | 0,00 | 0,00 | NA | NA |
| AC114737.3  | 0,00 | 0,00 | 0,00 | 0,00 | NA | NA |
| AC114737.5  | 0,00 | 0,00 | 0,00 | 0,00 | NA | NA |
| AC114737.6  | 0,00 | 0,00 | 0,00 | 0,00 | NA | NA |
| AC114737.7  | 0,00 | 0,00 | 0,00 | 0,00 | NA | NA |
| AC114752.2  | 0,00 | 0,00 | 0,00 | 0,00 | NA | NA |
| AC114752.3  | 0,00 | 0,00 | 0,00 | 0,00 | NA | NA |
| AC114755.2  | 0,00 | 0,00 | 0,00 | 0,00 | NA | NA |
| AC114755.3  | 0,00 | 0,00 | 0,00 | 0,00 | NA | NA |
| AC114755.4  | 0,00 | 0,00 | 0,00 | 0,00 | NA | NA |
| AC114755.5  | 0,00 | 0,00 | 0,00 | 0,00 | NA | NA |
| AC114755.7  | 0,00 | 0,00 | 0,00 | 0,00 | NA | NA |
| AC114760.1  | 0,00 | 0,00 | 0,00 | 0,00 | NA | NA |
| AC114765.1  | 0,00 | 0,00 | 0,00 | 0,00 | NA | NA |
| AC114776.1  | 0,00 | 0,00 | 0,00 | 0,00 | NA | NA |
| AC114783.1  | 0,00 | 0,00 | 0,00 | 0,00 | NA | NA |
| AC114803.3  | 0,00 | 0,00 | 0,00 | 0,00 | NA | NA |
| AC114808.2  | 0,00 | 0,00 | 0,00 | 0,00 | NA | NA |
| AC114808.3  | 0,00 | 0,00 | 0,00 | 0,00 | NA | NA |
| AC114810.5  | 0,00 | 0,00 | 0,00 | 0,00 | NA | NA |
| AC114812.5  | 0,00 | 0,00 | 0,00 | 0,00 | NA | NA |
| AC114812.9  | 0,00 | 0,00 | 0,00 | 0,00 | NA | NA |
| AC114813.1  | 0,00 | 0,00 | 0,00 | 0,00 | NA | NA |
| AC114814.2  | 0,00 | 0,00 | 0,00 | 0,00 | NA | NA |
| AC114814.3  | 0,00 | 0,00 | 0,00 | 0,00 | NA | NA |
| AC114814.4  | 0,00 | 0,00 | 0,00 | 0,00 | NA | NA |
| AC114877.3  | 0,00 | 0,00 | 0,00 | 0,00 | NA | NA |
| AC114973.1  | 0,00 | 0,00 | 0,00 | 0,00 | NA | NA |

|            |      |      |      |      |    |    |
|------------|------|------|------|------|----|----|
| AC115115.4 | 0,00 | 0,76 | 0,00 | 0,00 | NA | NA |
| AC115283.1 | 0,00 | 0,00 | 0,00 | 0,00 | NA | NA |
| AC116035.2 | 0,00 | 0,00 | 0,00 | 0,00 | NA | NA |
| AC116609.2 | 0,00 | 0,00 | 0,00 | 0,00 | NA | NA |
| AC116609.3 | 0,00 | 0,00 | 0,00 | 0,00 | NA | NA |
| AC116614.1 | 0,00 | 0,00 | 0,00 | 0,00 | NA | NA |
| AC117490.2 | 0,00 | 0,00 | 0,00 | 0,00 | NA | NA |
| AC118063.1 | 0,00 | 0,00 | 0,00 | 0,00 | NA | NA |
| AC118345.1 | 0,00 | 0,00 | 0,00 | 0,00 | NA | NA |
| AC118653.2 | 0,00 | 0,00 | 0,00 | 0,00 | NA | NA |
| AC118754.4 | 0,00 | 0,00 | 0,00 | 0,00 | NA | NA |
| AC119403.1 | 0,00 | 0,00 | 0,00 | 0,00 | NA | NA |
| AC122136.2 | 0,00 | 0,00 | 0,00 | 0,00 | NA | NA |
| AC123788.4 | 0,00 | 0,00 | 0,00 | 0,00 | NA | NA |
| AC123900.2 | 0,00 | 0,00 | 0,00 | 0,00 | NA | NA |
| AC124057.5 | 0,00 | 0,00 | 0,00 | 0,00 | NA | NA |
| AC124861.1 | 0,00 | 0,00 | 0,00 | 0,00 | NA | NA |
| AC124914.3 | 0,00 | 0,00 | 0,00 | 0,00 | NA | NA |
| AC125238.2 | 0,00 | 0,00 | 0,00 | 0,00 | NA | NA |
| AC125421.1 | 0,00 | 0,00 | 0,00 | 0,00 | NA | NA |
| AC126118.2 | 0,00 | 0,00 | 0,00 | 0,00 | NA | NA |
| AC126365.1 | 0,00 | 0,00 | 0,00 | 0,00 | NA | NA |
| AC126365.2 | 0,00 | 0,00 | 0,00 | 0,00 | NA | NA |
| AC126365.3 | 0,00 | 0,00 | 0,00 | 0,00 | NA | NA |
| AC126365.4 | 0,33 | 0,17 | 0,37 | 0,34 | NA | NA |
| AC127383.1 | 0,00 | 0,00 | 0,00 | 0,00 | NA | NA |
| AC127391.3 | 0,00 | 0,00 | 0,00 | 0,00 | NA | NA |
| AC127391.4 | 0,00 | 0,00 | 0,00 | 0,00 | NA | NA |
| AC128677.2 | 0,00 | 0,00 | 0,00 | 0,00 | NA | NA |
| AC128677.3 | 0,00 | 0,00 | 0,00 | 0,00 | NA | NA |
| AC128677.4 | 0,00 | 0,00 | 0,00 | 0,00 | NA | NA |
| AC128709.2 | 0,00 | 0,00 | 0,00 | 0,00 | NA | NA |
| AC128709.3 | 0,00 | 0,00 | 0,00 | 0,00 | NA | NA |
| AC128709.4 | 0,00 | 0,00 | 0,00 | 0,00 | NA | NA |
| AC130464.1 | 0,00 | 0,00 | 0,00 | 0,00 | NA | NA |
| AC130689.5 | 0,00 | 0,00 | 0,00 | 0,00 | NA | NA |
| AC130709.1 | 0,00 | 0,00 | 0,00 | 0,00 | NA | NA |
| AC130710.1 | 0,00 | 0,00 | 0,00 | 0,00 | NA | NA |
| AC131056.6 | 0,00 | 1,94 | 0,00 | 0,00 | NA | NA |
| AC131180.2 | 0,00 | 0,00 | 0,00 | 0,00 | NA | NA |
| AC131180.5 | 0,00 | 0,00 | 0,00 | 0,00 | NA | NA |
| AC132217.4 | 0,00 | 0,00 | 0,00 | 0,00 | NA | NA |
| AC132515.1 | 0,00 | 0,00 | 0,00 | 0,00 | NA | NA |
| AC132807.1 | 0,00 | 0,00 | 0,00 | 0,00 | NA | NA |
| AC133104.2 | 0,00 | 0,00 | 0,00 | 0,00 | NA | NA |
| AC133106.2 | 0,00 | 0,00 | 0,00 | 0,00 | NA | NA |
| AC133141.1 | 0,00 | 0,00 | 0,00 | 0,00 | NA | NA |
| AC133633.1 | 0,00 | 0,00 | 0,00 | 0,00 | NA | NA |
| AC133644.3 | 0,00 | 0,00 | 0,00 | 0,00 | NA | NA |
| AC133680.1 | 0,00 | 0,00 | 0,00 | 0,00 | NA | NA |
| AC134594.3 | 0,00 | 0,00 | 0,00 | 0,00 | NA | NA |
| AC134873.1 | 0,00 | 0,00 | 0,00 | 0,00 | NA | NA |
| AC134915.1 | 0,00 | 0,00 | 0,00 | 0,00 | NA | NA |
| AC135721.3 | 0,00 | 0,00 | 0,00 | 0,00 | NA | NA |
| AC136896.1 | 0,00 | 0,00 | 0,00 | 0,00 | NA | NA |

|             |      |      |      |      |    |    |
|-------------|------|------|------|------|----|----|
| AC136896.2  | 0,00 | 0,00 | 0,00 | 0,00 | NA | NA |
| AC136940.3  | 0,00 | 0,00 | 0,00 | 0,00 | NA | NA |
| AC137527.2  | 0,00 | 0,00 | 0,00 | 0,00 | NA | NA |
| AC137675.1  | 0,00 | 0,00 | 0,00 | 0,00 | NA | NA |
| AC137723.5  | 0,00 | 0,00 | 0,00 | 0,00 | NA | NA |
| AC138031.1  | 0,00 | 0,00 | 0,00 | 0,00 | NA | NA |
| AC138035.1  | 0,00 | 0,00 | 0,00 | 0,00 | NA | NA |
| AC138035.2  | 0,00 | 0,00 | 0,09 | 0,15 | NA | NA |
| AC138035.3  | 0,00 | 0,00 | 0,00 | 0,00 | NA | NA |
| AC138472.4  | 0,00 | 0,00 | 0,00 | 0,00 | NA | NA |
| AC138472.6  | 0,00 | 0,00 | 0,00 | 0,00 | NA | NA |
| AC138517.5  | 0,00 | 0,00 | 0,00 | 0,00 | NA | NA |
| AC138623.1  | 0,00 | 0,00 | 0,00 | 0,00 | NA | NA |
| AC138647.1  | 0,00 | 0,00 | 0,00 | 0,00 | NA | NA |
| AC138649.1  | 0,00 | 0,00 | 0,00 | 0,00 | NA | NA |
| AC138655.4  | 0,00 | 0,00 | 0,00 | 0,00 | NA | NA |
| AC138744.2  | 0,00 | 0,00 | 0,00 | 0,00 | NA | NA |
| AC138783.10 | 0,00 | 0,00 | 0,00 | 0,00 | NA | NA |
| AC139085.1  | 0,00 | 0,00 | 0,00 | 0,00 | NA | NA |
| AC139085.2  | 0,00 | 0,00 | 0,00 | 0,00 | NA | NA |
| AC139099.4  | 0,00 | 0,00 | 0,00 | 0,00 | NA | NA |
| AC139099.5  | 0,00 | 0,06 | 0,00 | 0,00 | NA | NA |
| AC139099.6  | 0,00 | 0,00 | 0,00 | 0,00 | NA | NA |
| AC139099.7  | 0,00 | 0,00 | 0,00 | 0,00 | NA | NA |
| AC139100.3  | 0,00 | 0,00 | 0,00 | 0,00 | NA | NA |
| AC139143.1  | 0,00 | 0,00 | 0,00 | 0,00 | NA | NA |
| AC139237.1  | 0,00 | 0,00 | 0,00 | 0,00 | NA | NA |
| AC139712.1  | 0,00 | 0,00 | 0,00 | 0,00 | NA | NA |
| AC139713.1  | 0,00 | 0,00 | 0,00 | 0,00 | NA | NA |
| AC139932.1  | 0,00 | 0,00 | 0,00 | 0,00 | NA | NA |
| AC140481.2  | 0,32 | 0,34 | 0,22 | 0,18 | NA | NA |
| AC140481.4  | 0,00 | 0,00 | 0,00 | 0,00 | NA | NA |
| AC140481.8  | 0,00 | 0,00 | 0,00 | 0,00 | NA | NA |
| AC140481.9  | 0,00 | 0,00 | 0,00 | 0,00 | NA | NA |
| AC140542.2  | 0,00 | 0,00 | 0,00 | 0,00 | NA | NA |
| AC140725.4  | 0,00 | 0,54 | 0,00 | 0,00 | NA | NA |
| AC140912.1  | 0,00 | 0,00 | 0,00 | 0,00 | NA | NA |
| AC141928.1  | 0,00 | 0,00 | 0,00 | 0,00 | NA | NA |
| AC141930.2  | 0,00 | 0,00 | 0,00 | 0,00 | NA | NA |
| AC141930.3  | 0,00 | 0,00 | 0,00 | 0,00 | NA | NA |
| AC142293.3  | 0,00 | 0,00 | 0,00 | 0,00 | NA | NA |
| AC142472.6  | 0,00 | 0,00 | 0,00 | 0,00 | NA | NA |
| AC144525.1  | 0,00 | 0,00 | 0,00 | 0,00 | NA | NA |
| AC144536.4  | 0,00 | 0,00 | 0,00 | 0,00 | NA | NA |
| AC144568.2  | 0,00 | 0,00 | 0,00 | 0,00 | NA | NA |
| AC144568.4  | 0,00 | 0,00 | 0,00 | 0,00 | NA | NA |
| AC144831.3  | 0,00 | 0,00 | 0,00 | 0,00 | NA | NA |
| AC144835.1  | 0,00 | 0,00 | 0,00 | 0,00 | NA | NA |
| AC144838.3  | 0,00 | 0,00 | 0,00 | 0,00 | NA | NA |
| AC145123.2  | 0,00 | 0,00 | 0,00 | 0,00 | NA | NA |
| AC145124.1  | 0,00 | 0,00 | 0,00 | 0,00 | NA | NA |
| AC145436.1  | 0,00 | 0,00 | 0,00 | 0,00 | NA | NA |
| AC145627.1  | 0,00 | 0,00 | 0,00 | 0,00 | NA | NA |
| AC147651.1  | 0,00 | 0,00 | 0,00 | 0,00 | NA | NA |
| AC147651.5  | 0,00 | 0,00 | 0,00 | 0,00 | NA | NA |

|            |      |      |      |      |    |    |
|------------|------|------|------|------|----|----|
| AC151960.1 | 0,00 | 0,00 | 0,00 | 0,00 | NA | NA |
| AC152010.1 | 0,00 | 0,00 | 0,00 | 0,00 | NA | NA |
| AC156455.1 | 0,27 | 0,19 | 0,18 | 0,00 | NA | NA |
| AC159540.3 | 0,00 | 0,00 | 0,00 | 0,00 | NA | NA |
| AC190387.1 | 0,00 | 0,00 | 0,00 | 0,00 | NA | NA |
| AC226119.1 | 0,00 | 0,00 | 0,00 | 0,00 | NA | NA |
| AC226119.3 | 0,00 | 0,00 | 0,00 | 0,00 | NA | NA |
| AC226119.4 | 0,00 | 0,00 | 0,00 | 0,00 | NA | NA |
| AC226119.5 | 0,00 | 0,00 | 0,00 | 0,00 | NA | NA |
| AC226150.3 | 0,00 | 0,00 | 0,00 | 0,00 | NA | NA |
| ACAN       | 0,02 | 0,06 | 0,00 | 0,04 | NA | NA |
| ACER2      | 0,00 | 0,00 | 0,00 | 0,00 | NA | NA |
| ACKR1      | 0,00 | 0,00 | 0,00 | 0,00 | NA | NA |
| ACKR4      | 0,00 | 0,08 | 0,00 | 0,07 | NA | NA |
| ACOT4      | 0,04 | 0,17 | 0,11 | 0,32 | NA | NA |
| ACR        | 0,00 | 0,00 | 0,00 | 0,00 | NA | NA |
| ACSBG2     | 0,00 | 0,00 | 0,00 | 0,00 | NA | NA |
| ACTBL2     | 0,00 | 0,00 | 0,00 | 0,00 | NA | NA |
| ACTBP9     | 0,00 | 0,00 | 0,00 | 0,00 | NA | NA |
| ACTC1      | 0,00 | 0,00 | 0,00 | 0,00 | NA | NA |
| ACTG1P1    | 0,00 | 0,00 | 0,00 | 0,00 | NA | NA |
| ACTG1P2    | 0,00 | 0,00 | 0,00 | 0,00 | NA | NA |
| ACTGP3     | 0,00 | 0,00 | 0,00 | 0,00 | NA | NA |
| ACTL6B     | 0,00 | 0,00 | 0,00 | 0,00 | NA | NA |
| ACTL8      | 0,00 | 0,00 | 0,00 | 0,00 | NA | NA |
| ACTL9      | 0,00 | 0,00 | 0,00 | 0,00 | NA | NA |
| ACTN1-AS1  | 0,00 | 0,00 | 0,00 | 0,00 | NA | NA |
| ACTN3      | 0,00 | 0,00 | 0,00 | 0,00 | NA | NA |
| ACTP1      | 0,00 | 0,00 | 0,00 | 0,00 | NA | NA |
| ACTRT2     | 0,00 | 0,00 | 0,00 | 0,00 | NA | NA |
| AD000091.3 | 0,00 | 0,00 | 0,00 | 0,00 | NA | NA |
| AD001527.4 | 0,00 | 0,00 | 0,00 | 0,00 | NA | NA |
| ADAD1      | 0,00 | 0,00 | 0,00 | 0,00 | NA | NA |
| ADAD2      | 0,00 | 0,00 | 0,00 | 0,00 | NA | NA |
| ADAM2      | 0,00 | 0,00 | 0,00 | 0,00 | NA | NA |
| ADAM21     | 0,00 | 0,00 | 0,00 | 0,00 | NA | NA |
| ADAM21P1   | 0,00 | 0,00 | 0,00 | 0,00 | NA | NA |
| ADAM23     | 0,00 | 0,00 | 0,00 | 0,00 | NA | NA |
| ADAM30     | 0,00 | 0,00 | 0,00 | 0,00 | NA | NA |
| ADAM3B     | 0,00 | 0,00 | 0,00 | 0,00 | NA | NA |
| ADAM6      | 0,00 | 0,00 | 0,00 | 0,00 | NA | NA |
| ADAMTS15   | 0,00 | 0,05 | 0,00 | 0,00 | NA | NA |
| ADAMTS7    | 0,00 | 0,00 | 0,00 | 0,03 | NA | NA |
| ADAMTSL1   | 0,00 | 0,08 | 0,00 | 0,00 | NA | NA |
| ADCY1      | 0,01 | 0,07 | 0,02 | 0,04 | NA | NA |
| ADCYAP1R1  | 0,00 | 0,02 | 0,00 | 0,02 | NA | NA |
| ADGRA1     | 0,00 | 0,00 | 0,00 | 0,00 | NA | NA |
| ADGRB1     | 0,00 | 0,00 | 0,00 | 0,00 | NA | NA |
| ADGRB2     | 0,00 | 0,00 | 0,00 | 0,00 | NA | NA |
| ADGRB3     | 0,00 | 0,00 | 0,00 | 0,00 | NA | NA |
| ADGRF2     | 0,04 | 0,04 | 0,03 | 0,10 | NA | NA |
| ADGRF4     | 0,00 | 0,00 | 0,00 | 0,00 | NA | NA |
| ADGRG3     | 0,00 | 0,00 | 0,00 | 0,00 | NA | NA |
| ADGRL2     | 0,00 | 0,20 | 0,00 | 0,00 | NA | NA |
| ADH1C      | 0,00 | 0,00 | 0,00 | 0,00 | NA | NA |

|             |      |      |      |      |    |    |
|-------------|------|------|------|------|----|----|
| ADH5P2      | 0,00 | 0,00 | 0,00 | 0,00 | NA | NA |
| ADH5P4      | 0,00 | 0,00 | 0,00 | 0,00 | NA | NA |
| ADIG        | 0,00 | 0,00 | 0,00 | 0,00 | NA | NA |
| ADORA1      | 0,00 | 0,00 | 0,00 | 0,00 | NA | NA |
| ADORA2BP    | 0,00 | 0,00 | 0,00 | 0,00 | NA | NA |
| ADRA1B      | 0,00 | 0,00 | 0,00 | 0,00 | NA | NA |
| ADRA1D      | 0,00 | 0,00 | 0,00 | 0,00 | NA | NA |
| ADRA2A      | 0,00 | 0,03 | 0,00 | 0,00 | NA | NA |
| ADRA2C      | 0,00 | 0,00 | 0,00 | 0,00 | NA | NA |
| ADTB1L2     | 0,00 | 0,00 | 0,00 | 0,00 | NA | NA |
| AE000658.20 | 0,00 | 0,00 | 0,00 | 0,00 | NA | NA |
| AE000658.22 | 0,00 | 0,00 | 0,00 | 0,00 | NA | NA |
| AE000658.27 | 0,00 | 0,00 | 0,00 | 0,00 | NA | NA |
| AE000658.29 | 0,00 | 0,00 | 0,00 | 0,00 | NA | NA |
| AE000658.30 | 0,00 | 0,00 | 0,00 | 0,00 | NA | NA |
| AE000659.23 | 0,00 | 0,00 | 0,00 | 0,00 | NA | NA |
| AE000659.41 | 0,00 | 0,00 | 0,00 | 0,00 | NA | NA |
| AE000660.21 | 0,00 | 0,00 | 0,00 | 0,00 | NA | NA |
| AE000660.4  | 0,00 | 0,00 | 0,00 | 0,00 | NA | NA |
| AE000661.36 | 0,00 | 0,00 | 0,00 | 0,00 | NA | NA |
| AE000661.50 | 0,00 | 0,00 | 0,00 | 0,00 | NA | NA |
| AE000662.93 | 0,00 | 0,00 | 0,00 | 0,00 | NA | NA |
| AF001548.6  | 0,00 | 0,00 | 0,00 | 0,00 | NA | NA |
| AF001550.7  | 0,00 | 0,00 | 0,00 | 0,00 | NA | NA |
| AF003625.1  | 0,00 | 0,00 | 0,00 | 0,00 | NA | NA |
| AF003625.3  | 0,00 | 0,00 | 0,00 | 0,00 | NA | NA |
| AF013593.1  | 0,00 | 0,00 | 0,00 | 0,00 | NA | NA |
| AF015262.2  | 0,00 | 0,00 | 0,00 | 0,00 | NA | NA |
| AF015726.1  | 0,00 | 0,00 | 0,00 | 0,00 | NA | NA |
| AF027390.1  | 0,00 | 0,00 | 0,00 | 0,00 | NA | NA |
| AF043945.1  | 0,00 | 0,00 | 0,00 | 0,00 | NA | NA |
| AF064859.2  | 0,00 | 0,00 | 0,00 | 0,00 | NA | NA |
| AF064860.5  | 0,00 | 0,00 | 0,00 | 0,00 | NA | NA |
| AF064860.7  | 0,00 | 0,00 | 0,00 | 0,00 | NA | NA |
| AF064861.93 | 0,00 | 0,00 | 0,00 | 0,00 | NA | NA |
| AF064861.94 | 0,00 | 0,00 | 0,00 | 0,00 | NA | NA |
| AF067845.1  | 0,00 | 0,00 | 0,00 | 0,00 | NA | NA |
| AF067845.2  | 0,00 | 0,00 | 0,00 | 0,00 | NA | NA |
| AF067845.3  | 0,00 | 0,00 | 0,00 | 0,00 | NA | NA |
| AF096876.1  | 0,00 | 0,00 | 0,00 | 0,00 | NA | NA |
| AF117829.2  | 0,00 | 0,00 | 0,00 | 0,00 | NA | NA |
| AF121781.18 | 0,00 | 0,00 | 0,00 | 0,00 | NA | NA |
| AF121897.4  | 0,00 | 0,00 | 0,00 | 0,00 | NA | NA |
| AF121898.2  | 0,00 | 0,00 | 0,00 | 0,00 | NA | NA |
| AF127577.12 | 0,00 | 0,00 | 0,00 | 0,00 | NA | NA |
| AF127936.3  | 0,34 | 0,00 | 0,15 | 0,24 | NA | NA |
| AF127936.6  | 0,00 | 0,00 | 0,00 | 0,00 | NA | NA |
| AF127936.8  | 0,00 | 0,00 | 0,00 | 0,00 | NA | NA |
| AF129075.18 | 0,00 | 0,00 | 0,00 | 0,00 | NA | NA |
| AF131215.2  | 0,00 | 0,00 | 0,00 | 0,00 | NA | NA |
| AF131215.6  | 0,00 | 0,00 | 0,00 | 0,00 | NA | NA |
| AF131215.8  | 0,00 | 0,00 | 0,00 | 0,00 | NA | NA |
| AF146191.8  | 0,00 | 0,00 | 0,00 | 0,00 | NA | NA |
| AF165138.6  | 0,00 | 0,00 | 0,00 | 0,00 | NA | NA |
| AF165176.2  | 0,00 | 0,00 | 0,00 | 0,00 | NA | NA |

|             |      |      |      |      |    |    |
|-------------|------|------|------|------|----|----|
| AF186192.5  | 0,00 | 0,00 | 0,00 | 0,00 | NA | NA |
| AF196779.11 | 0,00 | 0,00 | 0,00 | 0,00 | NA | NA |
| AF196969.5  | 0,00 | 0,00 | 0,00 | 0,00 | NA | NA |
| AF196972.10 | 0,00 | 0,00 | 0,00 | 0,00 | NA | NA |
| AF196972.4  | 0,00 | 0,00 | 0,00 | 0,00 | NA | NA |
| AF213884.1  | 0,00 | 0,00 | 0,00 | 0,00 | NA | NA |
| AF224669.3  | 0,00 | 0,00 | 0,00 | 0,00 | NA | NA |
| AF228730.12 | 0,00 | 0,00 | 0,00 | 0,00 | NA | NA |
| AF228730.13 | 0,00 | 0,00 | 0,00 | 0,00 | NA | NA |
| AF228730.15 | 0,00 | 0,00 | 0,00 | 0,00 | NA | NA |
| AF228730.16 | 0,00 | 0,00 | 0,00 | 0,00 | NA | NA |
| AF228730.5  | 0,00 | 0,00 | 0,00 | 0,00 | NA | NA |
| AF228730.7  | 0,00 | 0,00 | 0,00 | 0,00 | NA | NA |
| AF228730.8  | 0,00 | 0,00 | 0,00 | 0,00 | NA | NA |
| AF238378.3  | 0,00 | 0,00 | 0,00 | 0,00 | NA | NA |
| AF238378.5  | 0,00 | 0,00 | 0,00 | 0,00 | NA | NA |
| AF238378.7  | 0,00 | 0,00 | 0,00 | 0,00 | NA | NA |
| AF238380.8  | 0,00 | 0,00 | 0,00 | 0,00 | NA | NA |
| AF241725.4  | 0,00 | 0,00 | 0,00 | 0,00 | NA | NA |
| AF241725.6  | 0,00 | 0,00 | 0,00 | 0,00 | NA | NA |
| AF241726.2  | 0,00 | 0,00 | 0,00 | 0,00 | NA | NA |
| AF241726.3  | 0,00 | 0,00 | 0,00 | 0,00 | NA | NA |
| AF241726.6  | 0,00 | 0,00 | 0,00 | 0,00 | NA | NA |
| AF246928.1  | 0,00 | 0,00 | 0,00 | 0,00 | NA | NA |
| AF254982.2  | 0,00 | 0,00 | 0,00 | 0,00 | NA | NA |
| AF254982.3  | 0,00 | 0,00 | 0,00 | 0,00 | NA | NA |
| AF277315.13 | 0,00 | 0,00 | 0,00 | 0,00 | NA | NA |
| AF277315.19 | 0,00 | 0,00 | 0,00 | 0,00 | NA | NA |
| AFAP1L1     | 0,09 | 0,13 | 0,04 | 0,00 | NA | NA |
| AFG3L2P1    | 0,00 | 0,00 | 0,00 | 0,00 | NA | NA |
| AFP         | 0,00 | 0,00 | 0,00 | 0,00 | NA | NA |
| AGAP2       | 0,04 | 0,14 | 0,12 | 0,23 | NA | NA |
| AGAP2-AS1   | 0,00 | 0,00 | 0,00 | 0,00 | NA | NA |
| AGBL2       | 0,23 | 1,37 | 0,42 | 0,75 | NA | NA |
| AGGF1P10    | 0,00 | 0,00 | 0,00 | 0,00 | NA | NA |
| AGGF1P3     | 0,00 | 0,00 | 0,00 | 0,00 | NA | NA |
| AGGF1P4     | 0,00 | 0,00 | 0,00 | 0,00 | NA | NA |
| AGGF1P5     | 0,00 | 0,00 | 0,00 | 0,00 | NA | NA |
| AGGF1P6     | 0,00 | 0,00 | 0,00 | 0,00 | NA | NA |
| AGGF1P7     | 0,00 | 0,00 | 0,00 | 0,00 | NA | NA |
| AGGF1P9     | 0,00 | 0,00 | 0,00 | 0,00 | NA | NA |
| AGR2        | 0,00 | 0,00 | 0,00 | 0,00 | NA | NA |
| AGTR1       | 0,00 | 0,00 | 0,00 | 0,00 | NA | NA |
| AGTR2       | 0,00 | 0,00 | 0,00 | 0,00 | NA | NA |
| AGXT        | 0,10 | 0,37 | 0,14 | 0,30 | NA | NA |
| AHSG        | 0,00 | 0,00 | 0,00 | 0,00 | NA | NA |
| AIM2        | 0,20 | 0,41 | 0,21 | 0,76 | NA | NA |
| AJ003147.8  | 0,00 | 0,00 | 0,00 | 0,00 | NA | NA |
| AJ003147.9  | 0,00 | 0,00 | 0,00 | 0,00 | NA | NA |
| AJ009632.3  | 0,00 | 0,00 | 0,00 | 0,00 | NA | NA |
| AJ011932.1  | 0,00 | 0,00 | 0,00 | 0,00 | NA | NA |
| AJ239321.3  | 0,00 | 0,00 | 0,00 | 0,00 | NA | NA |
| AJ239322.3  | 0,00 | 0,00 | 0,00 | 0,00 | NA | NA |
| AJ271736.1  | 0,00 | 0,00 | 0,00 | 0,00 | NA | NA |
| AJ271736.10 | 0,00 | 0,00 | 0,00 | 0,00 | NA | NA |

|             |      |      |      |      |    |    |
|-------------|------|------|------|------|----|----|
| AJ271736.3  | 0,00 | 0,00 | 0,00 | 0,00 | NA | NA |
| AJ271736.5  | 0,00 | 0,00 | 0,00 | 0,00 | NA | NA |
| AJAP1       | 0,00 | 0,00 | 0,00 | 0,01 | NA | NA |
| AK1         | 0,63 | 0,20 | 0,32 | 0,37 | NA | NA |
| AK4P1       | 0,00 | 0,00 | 0,00 | 0,00 | NA | NA |
| AK4P5       | 0,00 | 0,00 | 0,00 | 0,00 | NA | NA |
| AK6P1       | 0,00 | 0,00 | 0,00 | 0,00 | NA | NA |
| AK6P2       | 0,00 | 0,00 | 0,00 | 0,00 | NA | NA |
| AK7         | 0,29 | 0,48 | 0,45 | 0,14 | NA | NA |
| AKAP12      | 0,01 | 0,00 | 0,02 | 0,02 | NA | NA |
| AKAP14      | 0,00 | 0,00 | 0,00 | 0,00 | NA | NA |
| AKAP3       | 0,00 | 0,00 | 0,00 | 0,00 | NA | NA |
| AKAP4       | 0,00 | 0,00 | 0,00 | 0,00 | NA | NA |
| AKR1B1P6    | 0,00 | 0,00 | 0,00 | 0,00 | NA | NA |
| AKR1B1P7    | 0,00 | 0,00 | 0,00 | 0,00 | NA | NA |
| AKR1C2      | 0,00 | 0,58 | 0,08 | 0,35 | NA | NA |
| AKR1C3      | 0,19 | 0,38 | 0,16 | 0,62 | NA | NA |
| AKR1CL1     | 0,00 | 0,00 | 0,00 | 0,00 | NA | NA |
| AKR1E2      | 0,00 | 0,00 | 0,00 | 0,00 | NA | NA |
| AKR7A2P1    | 0,00 | 0,00 | 0,00 | 0,00 | NA | NA |
| AKR7A3      | 0,00 | 0,00 | 0,00 | 0,00 | NA | NA |
| AL021546.6  | 0,00 | 0,00 | 0,00 | 0,00 | NA | NA |
| AL022237.3  | 0,00 | 0,00 | 0,00 | 0,00 | NA | NA |
| AL022344.3  | 0,00 | 0,00 | 0,00 | 0,00 | NA | NA |
| AL022344.6  | 0,00 | 0,00 | 0,00 | 0,00 | NA | NA |
| AL022344.7  | 0,00 | 0,00 | 0,00 | 0,00 | NA | NA |
| AL022345.10 | 0,00 | 0,00 | 0,00 | 0,00 | NA | NA |
| AL022345.11 | 0,00 | 0,00 | 0,00 | 0,00 | NA | NA |
| AL022393.6  | 0,00 | 0,00 | 0,00 | 0,00 | NA | NA |
| AL022393.7  | 0,00 | 0,00 | 0,00 | 0,00 | NA | NA |
| AL031601.1  | 0,00 | 0,00 | 0,00 | 0,00 | NA | NA |
| AL031601.3  | 0,00 | 0,00 | 0,00 | 0,00 | NA | NA |
| AL031601.4  | 0,00 | 0,00 | 0,00 | 0,00 | NA | NA |
| AL031601.5  | 0,00 | 0,00 | 0,00 | 0,00 | NA | NA |
| AL031705.1  | 0,00 | 0,00 | 0,00 | 0,00 | NA | NA |
| AL049757.2  | 0,00 | 0,00 | 0,00 | 0,00 | NA | NA |
| AL049758.2  | 0,00 | 0,57 | 0,00 | 0,00 | NA | NA |
| AL050303.11 | 0,00 | 0,00 | 0,00 | 0,00 | NA | NA |
| AL050303.12 | 0,00 | 0,00 | 0,00 | 0,00 | NA | NA |
| AL050303.5  | 0,00 | 0,00 | 0,00 | 0,00 | NA | NA |
| AL050303.7  | 0,00 | 0,00 | 0,00 | 0,00 | NA | NA |
| AL050303.9  | 0,00 | 0,00 | 0,00 | 0,00 | NA | NA |
| AL078471.4  | 0,00 | 0,00 | 0,00 | 0,00 | NA | NA |
| AL079295.1  | 0,00 | 0,00 | 0,00 | 0,00 | NA | NA |
| AL109748.17 | 0,00 | 0,00 | 0,00 | 0,00 | NA | NA |
| AL109748.4  | 0,00 | 0,00 | 0,00 | 0,00 | NA | NA |
| AL109748.5  | 0,00 | 0,00 | 0,00 | 0,00 | NA | NA |
| AL109748.6  | 0,00 | 0,00 | 0,00 | 0,00 | NA | NA |
| AL109763.1  | 0,00 | 0,00 | 0,00 | 0,00 | NA | NA |
| AL117190.3  | 0,00 | 0,00 | 0,00 | 0,00 | NA | NA |
| AL121578.5  | 0,00 | 0,00 | 0,00 | 0,00 | NA | NA |
| AL121590.1  | 0,00 | 0,00 | 0,00 | 0,00 | NA | NA |
| AL121652.2  | 0,00 | 0,00 | 0,00 | 0,00 | NA | NA |
| AL121656.5  | 0,00 | 0,00 | 0,00 | 0,00 | NA | NA |
| AL121657.4  | 0,00 | 0,00 | 0,00 | 0,00 | NA | NA |

|             |      |      |      |      |    |    |
|-------------|------|------|------|------|----|----|
| AL122127.25 | 0,00 | 0,00 | 0,00 | 0,00 | NA | NA |
| AL132709.1  | 0,00 | 0,00 | 0,00 | 0,00 | NA | NA |
| AL132796.1  | 0,00 | 0,00 | 0,00 | 0,00 | NA | NA |
| AL133244.1  | 0,00 | 0,00 | 0,00 | 0,00 | NA | NA |
| AL133247.2  | 0,00 | 0,00 | 0,00 | 0,00 | NA | NA |
| AL137067.1  | 0,00 | 0,00 | 0,00 | 0,00 | NA | NA |
| AL137067.2  | 0,00 | 0,00 | 0,00 | 0,00 | NA | NA |
| AL138935.1  | 0,00 | 0,00 | 0,00 | 0,00 | NA | NA |
| AL157359.3  | 0,00 | 0,00 | 0,00 | 0,00 | NA | NA |
| AL157359.4  | 0,00 | 0,00 | 0,00 | 0,00 | NA | NA |
| AL157871.2  | 0,00 | 0,00 | 0,00 | 0,00 | NA | NA |
| AL160471.6  | 0,00 | 0,00 | 0,00 | 0,00 | NA | NA |
| AL162151.3  | 0,00 | 0,00 | 0,00 | 0,00 | NA | NA |
| AL162151.4  | 0,00 | 0,00 | 0,00 | 0,00 | NA | NA |
| AL162415.2  | 0,00 | 0,00 | 0,00 | 0,00 | NA | NA |
| AL162759.1  | 0,00 | 0,00 | 0,00 | 0,00 | NA | NA |
| AL163953.2  | 0,00 | 0,00 | 0,00 | 0,00 | NA | NA |
| AL353997.11 | 0,00 | 0,00 | 0,00 | 0,00 | NA | NA |
| AL353997.2  | 0,00 | 0,00 | 0,00 | 0,00 | NA | NA |
| AL353997.4  | 0,32 | 0,75 | 0,76 | 0,18 | NA | NA |
| AL353997.7  | 0,00 | 0,00 | 0,00 | 0,00 | NA | NA |
| AL353999.2  | 0,00 | 0,00 | 0,00 | 0,00 | NA | NA |
| AL355301.1  | 0,00 | 0,00 | 0,00 | 0,00 | NA | NA |
| AL355480.1  | 0,00 | 0,00 | 0,00 | 0,00 | NA | NA |
| AL355480.2  | 0,00 | 0,00 | 0,00 | 0,00 | NA | NA |
| AL356806.3  | 0,00 | 0,00 | 0,00 | 0,00 | NA | NA |
| AL359314.1  | 0,00 | 0,00 | 0,00 | 0,00 | NA | NA |
| AL365331.2  | 0,00 | 0,00 | 0,00 | 0,00 | NA | NA |
| AL390877.1  | 0,00 | 0,00 | 0,00 | 0,00 | NA | NA |
| AL450226.2  | 0,00 | 0,00 | 0,00 | 0,00 | NA | NA |
| AL450992.2  | 0,00 | 0,00 | 0,00 | 0,00 | NA | NA |
| AL450992.6  | 0,00 | 0,00 | 0,00 | 0,00 | NA | NA |
| AL512362.1  | 0,00 | 0,00 | 0,00 | 0,00 | NA | NA |
| AL589986.2  | 0,00 | 0,00 | 0,00 | 0,00 | NA | NA |
| AL590762.10 | 0,00 | 0,00 | 0,00 | 0,00 | NA | NA |
| AL590762.6  | 0,00 | 0,00 | 0,00 | 0,00 | NA | NA |
| AL590762.7  | 0,00 | 0,00 | 0,00 | 0,00 | NA | NA |
| AL590763.16 | 0,00 | 0,00 | 0,00 | 0,00 | NA | NA |
| AL590763.5  | 0,00 | 0,00 | 0,00 | 0,00 | NA | NA |
| AL591704.5  | 0,00 | 0,00 | 0,00 | 0,00 | NA | NA |
| AL591704.7  | 0,00 | 0,00 | 0,00 | 0,00 | NA | NA |
| AL591704.9  | 0,00 | 0,00 | 0,00 | 0,00 | NA | NA |
| AL591893.3  | 0,00 | 0,00 | 0,00 | 0,00 | NA | NA |
| AL592528.1  | 0,00 | 0,00 | 0,00 | 0,00 | NA | NA |
| AL672294.1  | 0,00 | 0,00 | 0,00 | 0,00 | NA | NA |
| AL672296.1  | 0,00 | 0,00 | 0,00 | 0,00 | NA | NA |
| AL691477.1  | 0,00 | 0,00 | 0,00 | 0,00 | NA | NA |
| AL772307.1  | 0,00 | 0,00 | 0,00 | 0,00 | NA | NA |
| AL773604.6  | 0,00 | 0,00 | 0,00 | 0,00 | NA | NA |
| AL845154.2  | 0,00 | 0,00 | 0,00 | 0,00 | NA | NA |
| AL928742.10 | 0,00 | 0,00 | 0,00 | 0,00 | NA | NA |
| AL928769.2  | 0,00 | 0,00 | 0,00 | 0,00 | NA | NA |
| ALAS2       | 0,00 | 0,17 | 0,03 | 0,00 | NA | NA |
| ALDH1A1     | 0,00 | 1,22 | 0,00 | 0,00 | NA | NA |
| ALDH1L2     | 0,13 | 0,16 | 0,12 | 0,20 | NA | NA |



|             |      |      |      |      |    |    |
|-------------|------|------|------|------|----|----|
| ALDH3A1     | 0,00 | 0,00 | 0,00 | 0,00 | NA | NA |
| ALDOAP1     | 0,00 | 0,00 | 0,00 | 0,00 | NA | NA |
| ALDOAP2     | 0,00 | 0,00 | 0,00 | 0,00 | NA | NA |
| ALG1L       | 0,00 | 0,00 | 0,00 | 0,00 | NA | NA |
| ALG1L14P    | 0,00 | 0,00 | 0,00 | 0,00 | NA | NA |
| ALLC        | 0,00 | 0,00 | 0,00 | 0,00 | NA | NA |
| ALOX12B     | 0,00 | 0,00 | 0,00 | 0,00 | NA | NA |
| ALOX12P1    | 0,00 | 0,12 | 0,00 | 0,00 | NA | NA |
| ALOXE3      | 0,00 | 0,00 | 0,00 | 0,00 | NA | NA |
| ALPK2       | 0,56 | 0,88 | 0,92 | 0,19 | NA | NA |
| ALPK3       | 0,00 | 0,01 | 0,00 | 0,00 | NA | NA |
| ALPPL2      | 0,00 | 0,00 | 0,00 | 0,00 | NA | NA |
| AMBN        | 0,00 | 0,00 | 0,00 | 0,00 | NA | NA |
| AMELX       | 0,00 | 0,00 | 0,00 | 0,00 | NA | NA |
| AMELY       | 0,00 | 0,00 | 0,00 | 0,00 | NA | NA |
| AMER1       | 0,05 | 0,05 | 0,05 | 0,07 | NA | NA |
| AMIGO1      | 0,00 | 0,00 | 0,00 | 0,00 | NA | NA |
| AMTN        | 0,00 | 0,00 | 0,00 | 0,00 | NA | NA |
| AMY1A       | 0,00 | 0,00 | 0,00 | 0,00 | NA | NA |
| AMY1B       | 0,00 | 0,00 | 0,00 | 0,00 | NA | NA |
| AMYP1       | 0,00 | 0,00 | 0,00 | 0,00 | NA | NA |
| ANGPTL1     | 0,00 | 0,00 | 0,00 | 0,00 | NA | NA |
| ANGPTL2     | 0,00 | 0,00 | 0,00 | 0,00 | NA | NA |
| ANK2        | 0,00 | 0,00 | 0,02 | 0,02 | NA | NA |
| ANKFN1      | 0,00 | 0,00 | 0,11 | 0,00 | NA | NA |
| ANKRD2      | 0,00 | 0,00 | 0,00 | 0,00 | NA | NA |
| ANKRD30BL   | 0,10 | 0,62 | 0,16 | 0,14 | NA | NA |
| ANKRD33     | 0,00 | 0,00 | 0,00 | 0,00 | NA | NA |
| ANKRD35     | 0,00 | 0,00 | 0,00 | 0,00 | NA | NA |
| ANKRD52     | 0,23 | 1,15 | 1,22 | 1,65 | NA | NA |
| ANKRD53     | 0,00 | 0,00 | 0,00 | 0,00 | NA | NA |
| ANKRD60     | 0,00 | 0,00 | 0,00 | 0,00 | NA | NA |
| ANKRD63     | 0,00 | 0,00 | 0,00 | 0,00 | NA | NA |
| ANKRD66     | 0,00 | 0,00 | 0,00 | 0,00 | NA | NA |
| ANO3        | 0,00 | 0,00 | 0,00 | 0,00 | NA | NA |
| ANO9        | 0,00 | 0,00 | 0,00 | 0,00 | NA | NA |
| ANP32D      | 0,00 | 0,00 | 0,00 | 0,00 | NA | NA |
| ANTXRL      | 0,00 | 0,08 | 0,00 | 0,00 | NA | NA |
| ANTXRLP1    | 0,00 | 0,08 | 0,00 | 0,00 | NA | NA |
| ANXA2P1     | 0,00 | 0,00 | 0,00 | 0,00 | NA | NA |
| ANXA2P3     | 0,00 | 0,00 | 0,00 | 0,00 | NA | NA |
| AOX1        | 0,00 | 0,00 | 0,00 | 0,00 | NA | NA |
| AOX3P-AOX2P | 0,00 | 0,00 | 0,00 | 0,00 | NA | NA |
| AP000146.2  | 0,00 | 0,00 | 0,00 | 0,00 | NA | NA |
| AP000221.1  | 0,00 | 0,00 | 0,00 | 0,00 | NA | NA |
| AP000226.9  | 0,00 | 0,00 | 0,00 | 0,00 | NA | NA |
| AP000233.2  | 0,00 | 0,00 | 0,00 | 0,00 | NA | NA |
| AP000233.3  | 0,00 | 0,00 | 0,00 | 0,00 | NA | NA |
| AP000233.4  | 0,00 | 0,00 | 0,00 | 0,00 | NA | NA |
| AP000235.3  | 0,00 | 0,00 | 0,00 | 0,00 | NA | NA |
| AP000243.18 | 0,00 | 0,00 | 0,00 | 0,00 | NA | NA |
| AP000251.3  | 0,00 | 0,00 | 0,00 | 0,00 | NA | NA |
| AP000255.6  | 0,00 | 0,00 | 0,00 | 0,00 | NA | NA |
| AP000260.4  | 0,00 | 0,00 | 0,00 | 0,00 | NA | NA |
| AP000275.64 | 0,00 | 0,00 | 0,00 | 0,00 | NA | NA |

|             |      |      |      |      |    |    |
|-------------|------|------|------|------|----|----|
| AP000282.3  | 0,00 | 0,00 | 0,00 | 0,00 | NA | NA |
| AP000288.2  | 0,00 | 0,00 | 0,00 | 0,00 | NA | NA |
| AP000290.7  | 0,00 | 0,00 | 0,00 | 0,00 | NA | NA |
| AP000295.9  | 0,00 | 0,00 | 0,00 | 0,00 | NA | NA |
| AP000297.1  | 0,00 | 0,00 | 0,00 | 0,00 | NA | NA |
| AP000303.1  | 0,00 | 0,00 | 0,00 | 0,00 | NA | NA |
| AP000320.6  | 0,00 | 0,00 | 0,00 | 0,00 | NA | NA |
| AP000320.7  | 0,00 | 0,00 | 0,00 | 0,00 | NA | NA |
| AP000336.1  | 0,00 | 0,00 | 0,00 | 0,00 | NA | NA |
| AP000339.4  | 1,31 | 0,00 | 0,00 | 0,00 | NA | NA |
| AP000344.1  | 0,00 | 0,00 | 0,00 | 0,00 | NA | NA |
| AP000345.1  | 0,00 | 0,00 | 0,00 | 0,00 | NA | NA |
| AP000345.2  | 0,00 | 0,00 | 0,00 | 0,00 | NA | NA |
| AP000345.4  | 0,00 | 0,00 | 0,00 | 0,00 | NA | NA |
| AP000347.3  | 0,00 | 0,00 | 0,00 | 0,00 | NA | NA |
| AP000350.10 | 0,00 | 0,00 | 0,00 | 0,00 | NA | NA |
| AP000350.7  | 0,00 | 0,00 | 0,00 | 0,00 | NA | NA |
| AP000350.8  | 0,00 | 0,00 | 0,00 | 0,00 | NA | NA |
| AP000351.12 | 0,14 | 0,24 | 0,11 | 0,14 | NA | NA |
| AP000351.4  | 0,00 | 0,00 | 0,00 | 0,00 | NA | NA |
| AP000354.2  | 0,00 | 0,00 | 0,00 | 0,00 | NA | NA |
| AP000354.3  | 0,00 | 0,00 | 0,00 | 0,00 | NA | NA |
| AP000354.4  | 0,00 | 0,00 | 0,00 | 0,00 | NA | NA |
| AP000357.4  | 0,00 | 0,00 | 0,00 | 0,00 | NA | NA |
| AP000357.5  | 0,00 | 0,00 | 0,00 | 0,00 | NA | NA |
| AP000358.3  | 0,00 | 0,00 | 0,00 | 0,00 | NA | NA |
| AP000358.5  | 0,00 | 1,49 | 0,00 | 0,00 | NA | NA |
| AP000361.2  | 0,00 | 0,00 | 0,00 | 0,00 | NA | NA |
| AP000362.1  | 0,00 | 0,00 | 0,00 | 0,00 | NA | NA |
| AP000402.3  | 0,00 | 0,00 | 0,00 | 0,00 | NA | NA |
| AP000403.3  | 0,00 | 0,00 | 0,00 | 0,00 | NA | NA |
| AP000431.1  | 0,00 | 0,00 | 0,00 | 0,00 | NA | NA |
| AP000431.2  | 0,00 | 0,00 | 0,00 | 0,00 | NA | NA |
| AP000432.2  | 0,00 | 0,00 | 0,00 | 0,00 | NA | NA |
| AP000435.3  | 0,00 | 0,00 | 0,00 | 0,00 | NA | NA |
| AP000436.4  | 0,00 | 0,00 | 0,00 | 0,00 | NA | NA |
| AP000438.2  | 0,00 | 0,00 | 0,00 | 0,00 | NA | NA |
| AP000438.4  | 0,00 | 0,00 | 0,00 | 0,00 | NA | NA |
| AP000439.1  | 0,00 | 0,00 | 0,00 | 0,00 | NA | NA |
| AP000439.2  | 0,00 | 0,00 | 0,00 | 0,00 | NA | NA |
| AP000439.3  | 0,00 | 0,00 | 0,00 | 0,00 | NA | NA |
| AP000439.5  | 0,00 | 0,00 | 0,00 | 0,00 | NA | NA |
| AP000445.1  | 0,00 | 0,00 | 0,00 | 0,00 | NA | NA |
| AP000445.2  | 0,00 | 0,00 | 0,00 | 0,00 | NA | NA |
| AP000457.1  | 0,00 | 0,00 | 0,00 | 0,00 | NA | NA |
| AP000457.2  | 0,00 | 0,00 | 0,00 | 0,00 | NA | NA |
| AP000462.3  | 0,00 | 0,00 | 0,00 | 0,00 | NA | NA |
| AP000472.2  | 0,00 | 0,00 | 0,00 | 0,00 | NA | NA |
| AP000474.1  | 0,00 | 0,00 | 0,00 | 0,00 | NA | NA |
| AP000477.2  | 0,00 | 0,00 | 0,00 | 0,00 | NA | NA |
| AP000525.10 | 0,00 | 0,00 | 0,00 | 0,00 | NA | NA |
| AP000525.9  | 0,31 | 0,75 | 0,28 | 0,15 | NA | NA |
| AP000567.27 | 0,00 | 0,00 | 0,00 | 0,00 | NA | NA |
| AP000568.2  | 0,00 | 0,00 | 0,00 | 0,00 | NA | NA |
| AP000569.9  | 0,00 | 0,00 | 0,00 | 0,00 | NA | NA |

|             |      |      |      |      |    |    |
|-------------|------|------|------|------|----|----|
| AP000593.5  | 0,00 | 0,00 | 0,00 | 0,00 | NA | NA |
| AP000619.5  | 0,00 | 0,00 | 0,00 | 0,00 | NA | NA |
| AP000619.6  | 0,00 | 0,00 | 0,00 | 0,00 | NA | NA |
| AP000620.1  | 0,00 | 0,00 | 0,00 | 0,00 | NA | NA |
| AP000640.10 | 0,00 | 0,00 | 0,00 | 0,00 | NA | NA |
| AP000641.1  | 0,00 | 0,00 | 0,00 | 0,00 | NA | NA |
| AP000647.3  | 0,00 | 0,00 | 0,00 | 0,00 | NA | NA |
| AP000648.3  | 0,00 | 0,00 | 0,00 | 0,00 | NA | NA |
| AP000648.4  | 0,00 | 0,00 | 0,00 | 0,00 | NA | NA |
| AP000648.6  | 0,00 | 0,00 | 0,00 | 0,00 | NA | NA |
| AP000654.5  | 0,00 | 0,00 | 0,00 | 0,00 | NA | NA |
| AP000662.9  | 0,00 | 0,00 | 0,00 | 0,00 | NA | NA |
| AP000695.4  | 0,00 | 0,26 | 0,00 | 0,00 | NA | NA |
| AP000695.6  | 0,00 | 0,00 | 0,00 | 0,00 | NA | NA |
| AP000696.2  | 0,00 | 0,00 | 0,00 | 0,00 | NA | NA |
| AP000697.6  | 0,00 | 0,00 | 0,00 | 0,00 | NA | NA |
| AP000699.2  | 0,00 | 0,00 | 0,00 | 0,00 | NA | NA |
| AP000705.6  | 0,00 | 0,00 | 0,00 | 0,00 | NA | NA |
| AP000705.8  | 0,00 | 0,00 | 0,00 | 0,00 | NA | NA |
| AP000711.1  | 0,00 | 0,00 | 0,00 | 0,00 | NA | NA |
| AP000721.4  | 0,00 | 0,00 | 0,00 | 0,00 | NA | NA |
| AP000725.1  | 0,00 | 0,00 | 0,00 | 0,00 | NA | NA |
| AP000741.1  | 0,00 | 0,00 | 0,00 | 0,00 | NA | NA |
| AP000769.7  | 0,00 | 0,00 | 0,00 | 0,00 | NA | NA |
| AP000769.8  | 0,00 | 0,00 | 0,00 | 0,00 | NA | NA |
| AP000770.1  | 0,00 | 0,00 | 0,00 | 0,00 | NA | NA |
| AP000770.2  | 0,00 | 0,00 | 0,00 | 0,00 | NA | NA |
| AP000797.1  | 0,00 | 0,00 | 0,00 | 0,00 | NA | NA |
| AP000797.2  | 0,00 | 0,00 | 0,00 | 0,00 | NA | NA |
| AP000797.3  | 0,00 | 0,00 | 0,00 | 0,00 | NA | NA |
| AP000797.4  | 0,00 | 0,00 | 0,00 | 0,00 | NA | NA |
| AP000855.4  | 0,00 | 0,00 | 0,00 | 0,00 | NA | NA |
| AP000857.2  | 0,00 | 0,00 | 0,00 | 0,00 | NA | NA |
| AP000859.4  | 0,00 | 0,00 | 0,00 | 0,00 | NA | NA |
| AP000860.1  | 0,00 | 0,00 | 0,00 | 0,00 | NA | NA |
| AP000860.2  | 0,00 | 0,00 | 0,00 | 0,00 | NA | NA |
| AP000867.13 | 0,00 | 0,00 | 0,00 | 0,00 | NA | NA |
| AP000867.14 | 0,00 | 0,00 | 0,00 | 0,00 | NA | NA |
| AP000889.1  | 0,00 | 0,00 | 0,00 | 0,00 | NA | NA |
| AP000889.2  | 0,00 | 0,00 | 0,00 | 0,00 | NA | NA |
| AP000892.8  | 0,00 | 0,00 | 0,00 | 0,00 | NA | NA |
| AP000936.5  | 0,00 | 0,00 | 0,00 | 0,00 | NA | NA |
| AP000963.2  | 0,00 | 0,00 | 0,00 | 0,00 | NA | NA |
| AP000963.3  | 0,00 | 0,00 | 0,00 | 0,00 | NA | NA |
| AP000998.2  | 0,00 | 0,00 | 0,00 | 0,00 | NA | NA |
| AP001037.1  | 0,00 | 0,00 | 0,00 | 0,00 | NA | NA |
| AP001042.1  | 0,00 | 0,00 | 0,00 | 0,00 | NA | NA |
| AP001043.1  | 0,00 | 0,00 | 0,00 | 0,00 | NA | NA |
| AP001043.2  | 0,00 | 0,00 | 0,00 | 0,00 | NA | NA |
| AP001046.4  | 0,00 | 0,00 | 0,00 | 0,00 | NA | NA |
| AP001046.6  | 0,00 | 0,00 | 0,00 | 0,00 | NA | NA |
| AP001048.4  | 0,00 | 0,00 | 0,00 | 0,00 | NA | NA |
| AP001052.1  | 0,00 | 0,00 | 0,00 | 0,00 | NA | NA |
| AP001053.13 | 0,00 | 0,00 | 0,00 | 0,00 | NA | NA |
| AP001056.1  | 0,34 | 1,35 | 0,21 | 0,28 | NA | NA |

|             |      |      |      |      |    |    |
|-------------|------|------|------|------|----|----|
| AP001059.6  | 0,00 | 0,00 | 0,00 | 0,00 | NA | NA |
| AP001062.9  | 0,00 | 0,00 | 0,00 | 0,00 | NA | NA |
| AP001063.1  | 0,00 | 0,00 | 0,00 | 0,00 | NA | NA |
| AP001065.15 | 0,00 | 0,00 | 0,00 | 0,00 | NA | NA |
| AP001065.3  | 0,00 | 0,00 | 0,00 | 0,00 | NA | NA |
| AP001065.7  | 0,00 | 0,00 | 0,00 | 0,00 | NA | NA |
| AP001065.8  | 0,00 | 0,00 | 0,00 | 0,00 | NA | NA |
| AP001116.3  | 0,00 | 0,00 | 0,00 | 0,00 | NA | NA |
| AP001171.1  | 0,00 | 0,00 | 0,00 | 0,00 | NA | NA |
| AP001172.3  | 0,00 | 0,00 | 0,00 | 0,00 | NA | NA |
| AP001187.11 | 0,00 | 0,00 | 0,00 | 0,00 | NA | NA |
| AP001255.2  | 0,00 | 0,00 | 0,00 | 0,00 | NA | NA |
| AP001257.1  | 0,00 | 0,00 | 0,00 | 0,00 | NA | NA |
| AP001271.3  | 0,00 | 0,00 | 0,00 | 0,00 | NA | NA |
| AP001271.4  | 0,00 | 0,00 | 0,00 | 0,00 | NA | NA |
| AP001331.1  | 0,00 | 0,00 | 0,00 | 0,00 | NA | NA |
| AP001340.3  | 0,00 | 0,00 | 0,00 | 0,00 | NA | NA |
| AP001342.1  | 0,00 | 0,00 | 0,00 | 0,00 | NA | NA |
| AP001346.3  | 0,00 | 0,00 | 0,00 | 0,00 | NA | NA |
| AP001347.5  | 0,00 | 0,00 | 0,00 | 0,00 | NA | NA |
| AP001347.8  | 0,00 | 0,00 | 0,00 | 0,00 | NA | NA |
| AP001415.1  | 0,00 | 0,00 | 0,00 | 0,00 | NA | NA |
| AP001430.2  | 0,00 | 0,00 | 0,00 | 0,00 | NA | NA |
| AP001432.11 | 0,00 | 0,00 | 0,00 | 0,00 | NA | NA |
| AP001432.14 | 0,00 | 0,00 | 0,00 | 0,00 | NA | NA |
| AP001434.1  | 0,00 | 0,00 | 0,00 | 0,00 | NA | NA |
| AP001434.2  | 0,00 | 0,00 | 0,00 | 0,00 | NA | NA |
| AP001437.1  | 0,00 | 0,00 | 0,00 | 0,00 | NA | NA |
| AP001466.7  | 0,00 | 0,00 | 0,00 | 0,00 | NA | NA |
| AP001466.8  | 0,00 | 0,00 | 0,00 | 0,00 | NA | NA |
| AP001471.1  | 0,00 | 0,00 | 0,00 | 0,00 | NA | NA |
| AP001475.1  | 0,00 | 0,00 | 0,00 | 0,00 | NA | NA |
| AP001476.3  | 0,00 | 0,00 | 0,00 | 0,00 | NA | NA |
| AP001476.4  | 0,00 | 0,00 | 0,00 | 0,00 | NA | NA |
| AP001506.1  | 0,00 | 0,00 | 0,00 | 0,00 | NA | NA |
| AP001596.6  | 0,00 | 0,00 | 0,00 | 0,00 | NA | NA |
| AP001601.2  | 0,00 | 0,00 | 0,00 | 0,00 | NA | NA |
| AP001604.3  | 0,00 | 0,00 | 0,00 | 0,00 | NA | NA |
| AP001605.6  | 0,00 | 0,00 | 0,00 | 0,00 | NA | NA |
| AP001607.1  | 0,00 | 0,00 | 0,00 | 0,00 | NA | NA |
| AP001610.5  | 0,23 | 0,14 | 0,14 | 0,00 | NA | NA |
| AP001610.9  | 0,00 | 0,00 | 0,00 | 0,00 | NA | NA |
| AP001615.9  | 0,00 | 0,00 | 0,00 | 0,00 | NA | NA |
| AP001619.3  | 0,00 | 0,00 | 0,00 | 0,00 | NA | NA |
| AP001625.5  | 0,00 | 0,00 | 0,00 | 0,00 | NA | NA |
| AP001627.1  | 0,00 | 0,00 | 0,00 | 0,00 | NA | NA |
| AP001628.7  | 0,00 | 0,00 | 0,00 | 0,00 | NA | NA |
| AP001629.8  | 0,13 | 0,05 | 0,13 | 0,16 | NA | NA |
| AP001631.10 | 0,00 | 0,00 | 0,00 | 0,00 | NA | NA |
| AP001631.9  | 0,00 | 0,00 | 0,00 | 0,00 | NA | NA |
| AP001634.5  | 0,00 | 0,00 | 0,00 | 0,00 | NA | NA |
| AP001634.6  | 0,00 | 0,00 | 0,00 | 0,00 | NA | NA |
| AP001891.1  | 0,00 | 0,00 | 0,00 | 0,00 | NA | NA |
| AP002026.2  | 0,00 | 0,25 | 0,00 | 0,00 | NA | NA |
| AP002075.1  | 0,00 | 0,00 | 0,00 | 0,00 | NA | NA |

|             |      |      |      |      |    |    |
|-------------|------|------|------|------|----|----|
| AP002414.1  | 0,00 | 0,00 | 0,00 | 0,00 | NA | NA |
| AP002530.2  | 0,00 | 0,00 | 0,00 | 0,00 | NA | NA |
| AP002856.6  | 0,00 | 0,00 | 0,00 | 0,00 | NA | NA |
| AP002954.4  | 0,00 | 0,33 | 0,00 | 0,18 | NA | NA |
| AP002954.6  | 0,00 | 0,00 | 0,00 | 0,00 | NA | NA |
| AP003025.2  | 0,00 | 0,53 | 0,03 | 0,03 | NA | NA |
| AP003068.12 | 0,00 | 0,00 | 0,00 | 0,00 | NA | NA |
| AP003068.16 | 0,00 | 0,00 | 0,00 | 0,00 | NA | NA |
| AP003068.17 | 0,00 | 0,00 | 0,00 | 0,00 | NA | NA |
| AP003385.2  | 0,00 | 0,00 | 0,00 | 0,00 | NA | NA |
| AP003774.4  | 0,11 | 0,00 | 0,07 | 0,16 | NA | NA |
| AP004248.4  | 0,00 | 0,00 | 0,00 | 0,00 | NA | NA |
| AP004289.2  | 0,00 | 0,00 | 0,00 | 0,00 | NA | NA |
| AP004372.1  | 0,00 | 0,00 | 0,00 | 0,00 | NA | NA |
| AP004550.1  | 0,00 | 0,00 | 0,00 | 0,00 | NA | NA |
| AP005019.3  | 0,00 | 0,00 | 0,00 | 0,00 | NA | NA |
| AP005135.2  | 0,00 | 0,00 | 0,00 | 0,00 | NA | NA |
| AP005136.2  | 0,00 | 0,00 | 0,00 | 0,00 | NA | NA |
| AP005232.1  | 0,00 | 0,00 | 0,00 | 0,00 | NA | NA |
| AP005273.1  | 0,00 | 0,00 | 0,00 | 0,00 | NA | NA |
| AP006216.5  | 0,00 | 0,00 | 0,00 | 0,00 | NA | NA |
| AP006285.6  | 0,00 | 0,00 | 0,00 | 0,00 | NA | NA |
| AP006285.7  | 0,00 | 0,00 | 0,00 | 0,00 | NA | NA |
| AP006288.1  | 0,00 | 0,00 | 0,00 | 0,00 | NA | NA |
| AP006294.2  | 0,00 | 0,00 | 0,00 | 0,00 | NA | NA |
| AP006547.3  | 0,00 | 0,00 | 0,00 | 0,00 | NA | NA |
| AP006621.6  | 0,00 | 0,00 | 0,00 | 0,00 | NA | NA |
| AP006621.9  | 0,00 | 0,00 | 0,00 | 0,00 | NA | NA |
| AP006748.1  | 0,00 | 0,00 | 0,00 | 0,00 | NA | NA |
| APCDD1L     | 0,00 | 0,00 | 0,00 | 0,00 | NA | NA |
| APCS        | 0,00 | 0,00 | 0,00 | 0,00 | NA | NA |
| APLN        | 0,00 | 0,00 | 0,00 | 0,00 | NA | NA |
| APOA5       | 0,00 | 0,00 | 0,00 | 0,00 | NA | NA |
| APOBEC4     | 0,00 | 0,00 | 0,00 | 0,00 | NA | NA |
| APOC3       | 0,00 | 0,00 | 0,00 | 0,00 | NA | NA |
| APOC4-APOC2 | 0,00 | 0,00 | 0,00 | 0,00 | NA | NA |
| APOH        | 0,00 | 0,26 | 0,00 | 0,00 | NA | NA |
| APOL5       | 0,00 | 0,00 | 0,00 | 0,00 | NA | NA |
| APOOP5      | 0,00 | 0,00 | 0,00 | 0,00 | NA | NA |
| AQP1        | 0,00 | 0,00 | 0,00 | 0,00 | NA | NA |
| AQP12A      | 0,00 | 0,00 | 0,00 | 0,00 | NA | NA |
| AQP2        | 0,00 | 0,00 | 0,00 | 0,00 | NA | NA |
| AQP4        | 0,00 | 0,00 | 0,00 | 0,00 | NA | NA |
| AQP5        | 0,00 | 0,00 | 0,00 | 0,00 | NA | NA |
| AQP7P1      | 0,00 | 0,00 | 0,00 | 0,00 | NA | NA |
| AQP7P2      | 0,00 | 0,00 | 0,00 | 0,00 | NA | NA |
| AQP7P3      | 0,00 | 0,00 | 0,00 | 0,00 | NA | NA |
| AQP7P4      | 0,00 | 0,00 | 0,00 | 0,00 | NA | NA |
| AQP8        | 0,00 | 0,00 | 0,00 | 0,00 | NA | NA |
| ARF4P2      | 0,00 | 0,00 | 0,00 | 0,00 | NA | NA |
| ARG1        | 0,00 | 0,52 | 0,00 | 0,24 | NA | NA |
| ARHGAP40    | 0,00 | 0,00 | 0,00 | 0,00 | NA | NA |
| ARHGEF16    | 0,00 | 0,00 | 0,00 | 0,00 | NA | NA |
| ARHGEF25    | 0,00 | 0,00 | 0,00 | 0,00 | NA | NA |
| ARHGEF33    | 0,00 | 0,00 | 0,00 | 0,00 | NA | NA |

|              |      |      |      |      |    |    |
|--------------|------|------|------|------|----|----|
| ARID3C       | 0,00 | 0,00 | 0,00 | 0,00 | NA | NA |
| ARIH2P1      | 0,00 | 0,00 | 0,00 | 0,00 | NA | NA |
| ARL14EPL     | 0,00 | 0,00 | 0,00 | 0,00 | NA | NA |
| ARL2-SNX15   | 0,00 | 0,00 | 0,00 | 0,00 | NA | NA |
| ARL2BPP1     | 0,00 | 0,00 | 0,00 | 0,00 | NA | NA |
| ARL2BPP8     | 0,00 | 0,00 | 0,00 | 0,00 | NA | NA |
| ARL4P        | 0,00 | 0,00 | 0,00 | 0,00 | NA | NA |
| ARMC12       | 0,00 | 0,14 | 0,00 | 0,00 | NA | NA |
| ARMC3        | 0,00 | 0,00 | 0,10 | 0,09 | NA | NA |
| ARMC9        | 0,14 | 0,20 | 0,17 | 0,16 | NA | NA |
| ARMS2        | 0,00 | 0,00 | 0,00 | 0,00 | NA | NA |
| ARSH         | 0,00 | 0,00 | 0,00 | 0,00 | NA | NA |
| ART1         | 0,00 | 0,00 | 0,00 | 0,00 | NA | NA |
| ART5         | 0,00 | 0,00 | 0,00 | 0,00 | NA | NA |
| ARTN         | 0,00 | 0,00 | 0,00 | 0,00 | NA | NA |
| ARX          | 0,00 | 0,05 | 0,00 | 0,00 | NA | NA |
| ASB12        | 0,00 | 0,00 | 0,00 | 0,00 | NA | NA |
| ASB17        | 0,00 | 0,00 | 0,00 | 0,00 | NA | NA |
| ASB5         | 0,00 | 0,00 | 0,00 | 0,00 | NA | NA |
| ASCL1        | 0,00 | 0,00 | 0,00 | 0,00 | NA | NA |
| ASCL3        | 0,00 | 0,00 | 0,00 | 0,00 | NA | NA |
| ASCL4        | 0,00 | 0,06 | 0,00 | 0,00 | NA | NA |
| ASCL5        | 0,00 | 0,07 | 0,00 | 0,00 | NA | NA |
| ASH2LP1      | 0,00 | 0,00 | 0,00 | 0,00 | NA | NA |
| ASIC1        | 0,00 | 0,00 | 0,00 | 0,00 | NA | NA |
| ASIC2        | 0,00 | 0,00 | 0,00 | 0,00 | NA | NA |
| ASIC5        | 0,00 | 0,00 | 0,00 | 0,00 | NA | NA |
| ASPDH        | 0,00 | 0,00 | 0,00 | 0,00 | NA | NA |
| ASXL3        | 0,45 | 0,00 | 0,13 | 0,24 | NA | NA |
| ATF4P1       | 0,00 | 0,00 | 0,00 | 0,00 | NA | NA |
| ATF4P2       | 0,00 | 0,00 | 0,00 | 0,00 | NA | NA |
| ATOH1        | 0,00 | 0,00 | 0,00 | 0,00 | NA | NA |
| ATOH7        | 0,00 | 0,00 | 0,00 | 0,00 | NA | NA |
| ATP11AUN     | 0,00 | 0,00 | 0,00 | 0,00 | NA | NA |
| ATP12A       | 0,00 | 0,00 | 0,00 | 0,00 | NA | NA |
| ATP13A4      | 0,00 | 0,06 | 0,00 | 0,00 | NA | NA |
| ATP1A3       | 0,00 | 0,19 | 0,17 | 0,16 | NA | NA |
| ATP1B2       | 0,07 | 0,29 | 0,14 | 0,27 | NA | NA |
| ATP1B3P1     | 0,00 | 0,00 | 0,00 | 0,00 | NA | NA |
| ATP2A1       | 0,00 | 0,00 | 0,00 | 0,00 | NA | NA |
| ATP2B2       | 0,00 | 0,00 | 0,00 | 0,00 | NA | NA |
| ATP2B3       | 0,00 | 0,02 | 0,00 | 0,00 | NA | NA |
| ATP5A1P10    | 0,00 | 0,00 | 0,00 | 0,00 | NA | NA |
| ATP5A1P3     | 0,00 | 0,00 | 0,00 | 0,00 | NA | NA |
| ATP5EP1      | 0,00 | 0,00 | 0,00 | 0,00 | NA | NA |
| ATP5G1P6     | 0,00 | 0,00 | 0,00 | 0,00 | NA | NA |
| ATP5HP1      | 0,00 | 0,00 | 0,00 | 0,00 | NA | NA |
| ATP5J2-PTCD1 | 0,00 | 0,00 | 0,00 | 0,10 | NA | NA |
| ATP5J2P3     | 0,00 | 0,00 | 0,00 | 0,00 | NA | NA |
| ATP5LP6      | 0,00 | 0,00 | 0,00 | 0,00 | NA | NA |
| ATP5LP7      | 0,00 | 0,00 | 0,00 | 0,00 | NA | NA |
| ATP6V0CP1    | 0,00 | 0,00 | 0,00 | 0,00 | NA | NA |
| ATP6V1C2     | 0,09 | 0,00 | 0,07 | 0,00 | NA | NA |
| ATP6V1G1P2   | 0,00 | 0,00 | 0,00 | 0,00 | NA | NA |
| ATP6V1G3     | 0,00 | 0,00 | 0,00 | 0,00 | NA | NA |

|            |      |      |      |      |    |    |
|------------|------|------|------|------|----|----|
| ATQL4      | 0,00 | 0,00 | 0,00 | 0,00 | NA | NA |
| ATXN3L     | 0,00 | 0,00 | 0,00 | 0,00 | NA | NA |
| AURKA      | 0,20 | 0,45 | 0,21 | 0,00 | NA | NA |
| AVP        | 0,00 | 0,00 | 0,00 | 0,00 | NA | NA |
| AVPR1A     | 0,00 | 0,00 | 0,00 | 0,00 | NA | NA |
| AVPR1B     | 0,00 | 0,00 | 0,00 | 0,00 | NA | NA |
| AVPR2      | 0,00 | 0,00 | 0,00 | 0,00 | NA | NA |
| AY269186.1 | 0,00 | 0,00 | 0,00 | 0,00 | NA | NA |
| B3GNT3     | 0,00 | 0,00 | 0,00 | 0,00 | NA | NA |
| B4GALNT1   | 0,00 | 0,00 | 0,00 | 0,00 | NA | NA |
| B4GALNT4   | 0,00 | 0,00 | 0,00 | 0,00 | NA | NA |
| B4GAT1     | 0,00 | 0,00 | 0,00 | 0,07 | NA | NA |
| B9D1       | 0,00 | 0,44 | 0,00 | 0,00 | NA | NA |
| BAALCOS    | 0,00 | 0,00 | 0,00 | 0,00 | NA | NA |
| BAATP1     | 0,00 | 0,00 | 0,00 | 0,00 | NA | NA |
| BACE2      | 0,00 | 0,06 | 0,02 | 0,01 | NA | NA |
| BAG3       | 0,14 | 0,05 | 0,06 | 0,05 | NA | NA |
| BAK1P2     | 0,00 | 0,00 | 0,00 | 0,00 | NA | NA |
| BAMBI      | 0,00 | 0,00 | 0,00 | 0,00 | NA | NA |
| BARHL1     | 0,00 | 0,00 | 0,00 | 0,00 | NA | NA |
| BARHL2     | 0,00 | 0,00 | 0,00 | 0,00 | NA | NA |
| BARX1      | 0,00 | 0,00 | 0,00 | 0,00 | NA | NA |
| BAT1P2     | 0,00 | 0,00 | 0,00 | 0,00 | NA | NA |
| BBOX1      | 0,00 | 0,00 | 0,00 | 0,00 | NA | NA |
| BCAR4      | 0,00 | 0,00 | 0,00 | 0,00 | NA | NA |
| BCAS1      | 0,03 | 0,04 | 0,10 | 0,21 | NA | NA |
| BCHE       | 0,00 | 0,00 | 0,00 | 0,00 | NA | NA |
| BCL2L10    | 0,00 | 0,00 | 0,00 | 0,00 | NA | NA |
| BCL2L7P1   | 0,00 | 0,00 | 0,00 | 0,00 | NA | NA |
| BCO1       | 0,00 | 0,00 | 0,00 | 0,00 | NA | NA |
| BCRL4      | 0,00 | 0,00 | 0,00 | 0,00 | NA | NA |
| BDH2P1     | 0,00 | 0,00 | 0,00 | 0,00 | NA | NA |
| BDNF-AS1   | 0,00 | 0,17 | 0,00 | 0,17 | NA | NA |
| BDP1P      | 0,00 | 0,00 | 0,00 | 0,00 | NA | NA |
| BECN2      | 0,00 | 0,00 | 0,00 | 0,00 | NA | NA |
| BEND7      | 0,00 | 0,00 | 0,01 | 0,02 | NA | NA |
| BEX1       | 0,00 | 0,00 | 0,00 | 0,00 | NA | NA |
| BEX2       | 0,00 | 0,00 | 0,00 | 0,18 | NA | NA |
| BHLHA15    | 0,00 | 0,00 | 0,00 | 0,00 | NA | NA |
| BHLHA9     | 0,00 | 0,00 | 0,00 | 0,00 | NA | NA |
| BHLHB9     | 0,03 | 0,14 | 0,07 | 0,07 | NA | NA |
| BHLHE22    | 0,00 | 0,00 | 0,00 | 0,00 | NA | NA |
| BHLHE23    | 0,00 | 0,00 | 0,00 | 0,00 | NA | NA |
| BHMT2      | 0,11 | 0,13 | 0,19 | 0,15 | NA | NA |
| BIRC7      | 0,00 | 0,00 | 0,00 | 0,00 | NA | NA |
| BIRC8      | 0,00 | 0,00 | 0,00 | 0,00 | NA | NA |
| BLID       | 0,00 | 0,00 | 0,00 | 0,00 | NA | NA |
| BMP10      | 0,00 | 0,00 | 0,00 | 0,00 | NA | NA |
| BMP15      | 0,00 | 0,00 | 0,00 | 0,00 | NA | NA |
| BMP4       | 0,00 | 0,00 | 0,00 | 0,00 | NA | NA |
| BMP6P1     | 0,00 | 0,00 | 0,00 | 0,00 | NA | NA |
| BMPR1APS2  | 0,00 | 0,00 | 0,00 | 0,00 | NA | NA |
| BMS1P21    | 0,00 | 0,00 | 0,00 | 0,00 | NA | NA |
| BMS1P3     | 0,00 | 0,00 | 0,00 | 0,00 | NA | NA |
| BNIP3P     | 0,00 | 0,00 | 0,00 | 0,00 | NA | NA |

|              |      |      |      |      |    |    |
|--------------|------|------|------|------|----|----|
| BNIP3P29     | 0,00 | 0,00 | 0,00 | 0,00 | NA | NA |
| BNIP3P3      | 0,00 | 0,00 | 0,00 | 0,00 | NA | NA |
| BNIP3P4      | 0,00 | 0,00 | 0,00 | 0,00 | NA | NA |
| BOD1L2       | 0,00 | 0,00 | 0,00 | 0,00 | NA | NA |
| BOK          | 0,00 | 0,00 | 0,00 | 0,00 | NA | NA |
| bP-21264C1.1 | 0,00 | 0,00 | 0,00 | 0,00 | NA | NA |
| bP-2168N6.1  | 0,00 | 0,00 | 0,00 | 0,00 | NA | NA |
| bP-2168N6.3  | 0,00 | 0,00 | 0,00 | 0,00 | NA | NA |
| bP-2171C21.3 | 0,00 | 0,00 | 0,00 | 0,00 | NA | NA |
| bP-2171C21.4 | 0,00 | 0,00 | 0,00 | 0,00 | NA | NA |
| bP-2171C21.5 | 0,00 | 0,00 | 0,00 | 0,00 | NA | NA |
| bP-2171C21.6 | 0,00 | 0,00 | 0,00 | 0,00 | NA | NA |
| bP-2189O9.3  | 0,00 | 0,00 | 0,00 | 0,00 | NA | NA |
| bP-2189O9.4  | 0,00 | 0,00 | 0,00 | 0,00 | NA | NA |
| BPI          | 0,00 | 0,00 | 0,00 | 0,00 | NA | NA |
| BPIFA1       | 0,00 | 0,00 | 0,00 | 0,00 | NA | NA |
| BPIFA2       | 0,00 | 0,00 | 0,00 | 0,00 | NA | NA |
| BPIFB3       | 0,00 | 0,00 | 0,00 | 0,00 | NA | NA |
| BPIFB4       | 0,00 | 0,00 | 0,00 | 0,00 | NA | NA |
| BPIFB6       | 0,00 | 0,00 | 0,00 | 0,00 | NA | NA |
| BPY2         | 0,00 | 0,00 | 0,00 | 0,00 | NA | NA |
| BPY2B        | 0,00 | 0,00 | 0,00 | 0,00 | NA | NA |
| BPY2C        | 0,00 | 0,00 | 0,00 | 0,00 | NA | NA |
| BRD7P6       | 0,00 | 0,00 | 0,00 | 0,00 | NA | NA |
| BRINP1       | 0,00 | 0,00 | 0,00 | 0,00 | NA | NA |
| BRINP3       | 0,00 | 0,00 | 0,00 | 0,00 | NA | NA |
| BRS3         | 0,00 | 0,00 | 0,00 | 0,00 | NA | NA |
| BSPH1        | 0,00 | 0,00 | 0,00 | 0,00 | NA | NA |
| BSX          | 0,00 | 0,00 | 0,00 | 0,00 | NA | NA |
| BTBD17       | 0,00 | 0,00 | 0,00 | 0,00 | NA | NA |
| BTBD18       | 0,03 | 0,69 | 0,00 | 0,00 | NA | NA |
| BTBD19       | 0,74 | 2,17 | 0,68 | 0,45 | NA | NA |
| BTC          | 0,00 | 0,00 | 0,00 | 0,00 | NA | NA |
| BTF3L1       | 0,00 | 0,00 | 0,00 | 0,00 | NA | NA |
| BTF3P14      | 0,00 | 0,00 | 0,00 | 0,00 | NA | NA |
| BTF3P2       | 0,00 | 0,00 | 0,00 | 0,00 | NA | NA |
| BTF3P5       | 0,00 | 0,00 | 0,00 | 0,00 | NA | NA |
| BTG4         | 0,00 | 0,00 | 0,00 | 0,00 | NA | NA |
| BTN1A1       | 0,00 | 0,00 | 0,00 | 0,00 | NA | NA |
| BTNL2        | 0,00 | 0,00 | 0,00 | 0,00 | NA | NA |
| BTNL3        | 0,00 | 0,00 | 0,00 | 0,00 | NA | NA |
| BUB1         | 0,19 | 0,26 | 0,29 | 0,50 | NA | NA |
| BX255923.2   | 0,00 | 0,00 | 0,00 | 0,00 | NA | NA |
| BX255923.3   | 0,00 | 0,00 | 0,00 | 0,00 | NA | NA |
| BX322557.13  | 0,00 | 0,00 | 0,00 | 0,00 | NA | NA |
| BX322559.2   | 0,00 | 0,00 | 0,00 | 0,00 | NA | NA |
| BX322559.3   | 0,00 | 0,00 | 0,00 | 0,00 | NA | NA |
| BX322563.3   | 0,00 | 0,00 | 0,00 | 0,00 | NA | NA |
| BX664724.1   | 0,00 | 0,00 | 0,00 | 0,00 | NA | NA |
| BX664724.2   | 0,00 | 0,00 | 0,00 | 0,00 | NA | NA |
| BX664724.4   | 0,00 | 0,00 | 0,00 | 0,00 | NA | NA |
| BX842568.1   | 0,00 | 0,00 | 0,00 | 0,00 | NA | NA |
| BX842568.2   | 0,00 | 0,00 | 0,00 | 0,00 | NA | NA |
| BX842568.4   | 0,00 | 0,00 | 0,00 | 0,00 | NA | NA |
| BXDC1P       | 0,00 | 0,00 | 0,00 | 0,00 | NA | NA |



|            |      |      |      |      |    |    |
|------------|------|------|------|------|----|----|
| C10orf105  | 0,00 | 0,00 | 0,00 | 0,00 | NA | NA |
| C10orf107  | 0,00 | 0,00 | 0,00 | 0,00 | NA | NA |
| C10orf120  | 0,00 | 0,00 | 0,00 | 0,00 | NA | NA |
| C10orf136  | 0,00 | 0,00 | 0,00 | 0,00 | NA | NA |
| C10orf142  | 0,00 | 0,00 | 0,00 | 0,00 | NA | NA |
| C10orf37   | 0,00 | 0,00 | 0,00 | 0,00 | NA | NA |
| C10orf62   | 0,00 | 0,00 | 0,00 | 0,00 | NA | NA |
| C10orf85   | 0,00 | 0,00 | 0,00 | 0,00 | NA | NA |
| C10orf90   | 0,00 | 0,00 | 0,00 | 0,00 | NA | NA |
| C10orf99   | 0,00 | 0,00 | 0,00 | 0,00 | NA | NA |
| C11orf16   | 0,00 | 0,00 | 0,00 | 0,00 | NA | NA |
| C11orf36   | 0,00 | 0,00 | 0,00 | 0,00 | NA | NA |
| C11orf40   | 0,00 | 0,00 | 0,00 | 0,00 | NA | NA |
| C11orf42   | 0,00 | 0,00 | 0,00 | 0,00 | NA | NA |
| C11orf85   | 0,00 | 0,00 | 0,00 | 0,00 | NA | NA |
| C11orf86   | 0,00 | 0,00 | 0,00 | 0,00 | NA | NA |
| C11orf87   | 0,00 | 0,00 | 0,00 | 0,00 | NA | NA |
| C11orf91   | 0,00 | 0,00 | 0,00 | 0,00 | NA | NA |
| C11orf94   | 0,00 | 0,00 | 0,00 | 0,00 | NA | NA |
| C11orf97   | 0,00 | 0,00 | 0,00 | 0,00 | NA | NA |
| C12orf71   | 0,00 | 0,00 | 0,00 | 0,00 | NA | NA |
| C12orf74   | 0,00 | 0,00 | 0,00 | 0,00 | NA | NA |
| C14orf177  | 0,00 | 0,00 | 0,00 | 0,00 | NA | NA |
| C14orf39   | 0,00 | 0,00 | 0,00 | 0,00 | NA | NA |
| C14orf79   | 0,31 | 0,51 | 0,46 | 0,25 | NA | NA |
| C16orf45   | 0,27 | 0,00 | 0,50 | 0,08 | NA | NA |
| C16orf92   | 0,00 | 0,00 | 0,00 | 0,00 | NA | NA |
| C17orf112  | 0,00 | 0,00 | 0,00 | 0,00 | NA | NA |
| C17orf50   | 0,00 | 0,00 | 0,00 | 0,00 | NA | NA |
| C17orf74   | 0,00 | 0,00 | 0,00 | 0,00 | NA | NA |
| C17orf78   | 0,00 | 0,00 | 0,00 | 0,00 | NA | NA |
| C17orf82   | 0,00 | 0,00 | 0,00 | 0,00 | NA | NA |
| C18orf42   | 0,00 | 0,00 | 0,00 | 0,00 | NA | NA |
| C19orf57   | 0,00 | 0,00 | 0,00 | 0,00 | NA | NA |
| C19orf67   | 0,00 | 0,00 | 0,00 | 0,00 | NA | NA |
| C19orf80   | 0,00 | 0,00 | 0,00 | 0,00 | NA | NA |
| C1DP2      | 0,00 | 0,00 | 0,00 | 0,00 | NA | NA |
| C1DP3      | 0,00 | 0,00 | 0,00 | 0,00 | NA | NA |
| C1DP4      | 0,00 | 0,00 | 0,00 | 0,00 | NA | NA |
| C1GALT1C1L | 0,00 | 0,00 | 0,00 | 0,00 | NA | NA |
| C1orf115   | 0,00 | 0,00 | 0,00 | 0,00 | NA | NA |
| C1orf116   | 0,00 | 0,00 | 0,00 | 0,00 | NA | NA |
| C1orf120   | 0,00 | 0,00 | 0,00 | 0,00 | NA | NA |
| C1orf143   | 0,00 | 0,60 | 0,00 | 0,00 | NA | NA |
| C1orf185   | 0,00 | 0,00 | 0,00 | 0,00 | NA | NA |
| C1orf189   | 0,00 | 0,00 | 0,00 | 0,00 | NA | NA |
| C1orf200   | 0,00 | 0,00 | 0,00 | 0,30 | NA | NA |
| C1orf226   | 0,00 | 0,00 | 0,00 | 0,00 | NA | NA |
| C1orf234   | 0,00 | 0,00 | 0,00 | 0,00 | NA | NA |
| C1orf68    | 0,00 | 0,00 | 0,00 | 0,00 | NA | NA |
| C1orf87    | 0,00 | 0,00 | 0,00 | 0,00 | NA | NA |
| C1orf94    | 0,00 | 0,00 | 0,00 | 0,00 | NA | NA |
| C1QL1      | 0,00 | 0,00 | 0,00 | 0,00 | NA | NA |
| C1QL1P1    | 0,00 | 0,00 | 0,00 | 0,00 | NA | NA |
| C1QL2      | 0,00 | 0,00 | 0,00 | 0,00 | NA | NA |

|             |      |      |      |      |    |    |
|-------------|------|------|------|------|----|----|
| C1QL4       | 0,00 | 0,00 | 0,00 | 0,00 | NA | NA |
| C1QTNF1-AS1 | 0,00 | 0,00 | 0,00 | 0,00 | NA | NA |
| C1QTNF5     | 0,00 | 0,00 | 0,00 | 0,00 | NA | NA |
| C1QTNF7     | 0,00 | 0,00 | 0,00 | 0,00 | NA | NA |
| C1QTNF9     | 0,00 | 0,08 | 0,00 | 0,07 | NA | NA |
| C1QTNF9-AS1 | 0,00 | 0,00 | 0,00 | 0,00 | NA | NA |
| C1R         | 0,05 | 0,11 | 0,18 | 0,59 | NA | NA |
| C20orf141   | 0,00 | 0,00 | 0,00 | 0,00 | NA | NA |
| C20orf181   | 0,00 | 0,00 | 0,00 | 0,00 | NA | NA |
| C20orf187   | 0,00 | 0,00 | 0,00 | 0,00 | NA | NA |
| C20orf195   | 0,00 | 0,00 | 0,00 | 0,00 | NA | NA |
| C20orf202   | 0,00 | 0,00 | 0,00 | 0,00 | NA | NA |
| C20orf203   | 0,00 | 0,00 | 0,00 | 0,00 | NA | NA |
| C20orf78    | 0,00 | 0,00 | 0,00 | 0,00 | NA | NA |
| C20orf82    | 0,00 | 0,00 | 0,00 | 0,00 | NA | NA |
| C20orf83    | 0,00 | 0,00 | 0,00 | 0,00 | NA | NA |
| C20orf85    | 0,00 | 0,00 | 0,00 | 0,00 | NA | NA |
| C21orf117   | 0,00 | 0,00 | 0,00 | 0,00 | NA | NA |
| C21orf125   | 0,00 | 0,00 | 0,00 | 0,00 | NA | NA |
| C21orf130   | 0,00 | 0,00 | 0,00 | 0,00 | NA | NA |
| C21orf140   | 0,00 | 0,00 | 0,00 | 0,00 | NA | NA |
| C21orf54    | 0,00 | 0,00 | 0,00 | 0,00 | NA | NA |
| C21orf62    | 0,00 | 0,00 | 0,00 | 0,00 | NA | NA |
| C22orf24    | 0,00 | 0,00 | 0,00 | 0,00 | NA | NA |
| C22orf31    | 0,00 | 0,00 | 0,00 | 0,00 | NA | NA |
| C2CD4B      | 0,00 | 0,00 | 0,00 | 0,00 | NA | NA |
| C2CD4C      | 0,00 | 0,00 | 0,00 | 0,00 | NA | NA |
| C2CD4D      | 0,00 | 0,00 | 0,00 | 0,00 | NA | NA |
| C2orf27B    | 0,00 | 0,00 | 0,00 | 0,00 | NA | NA |
| C2orf40     | 0,00 | 0,00 | 0,00 | 0,00 | NA | NA |
| C2orf44     | 0,00 | 0,38 | 0,00 | 0,11 | NA | NA |
| C2orf61     | 0,00 | 0,09 | 0,00 | 0,08 | NA | NA |
| C2orf66     | 0,00 | 0,00 | 0,00 | 0,00 | NA | NA |
| C2orf69P1   | 0,00 | 0,00 | 0,00 | 0,00 | NA | NA |
| C2orf69P3   | 0,00 | 0,00 | 0,00 | 0,00 | NA | NA |
| C2orf69P4   | 0,00 | 0,00 | 0,00 | 0,00 | NA | NA |
| C2orf70     | 0,00 | 0,00 | 0,00 | 0,00 | NA | NA |
| C2orf71     | 0,00 | 0,00 | 0,00 | 0,00 | NA | NA |
| C2orf73     | 0,00 | 0,11 | 0,00 | 0,00 | NA | NA |
| C2orf78     | 0,00 | 0,00 | 0,00 | 0,00 | NA | NA |
| C2orf82     | 0,00 | 0,05 | 0,00 | 0,32 | NA | NA |
| C3orf20     | 0,00 | 0,00 | 0,00 | 0,00 | NA | NA |
| C3orf22     | 0,00 | 0,00 | 0,00 | 0,00 | NA | NA |
| C3orf30     | 0,00 | 0,00 | 0,00 | 0,00 | NA | NA |
| C3orf36     | 0,00 | 0,00 | 0,00 | 0,00 | NA | NA |
| C3orf56     | 0,00 | 0,00 | 0,00 | 0,00 | NA | NA |
| C3orf79     | 0,00 | 0,00 | 0,00 | 0,00 | NA | NA |
| C3orf84     | 0,00 | 0,00 | 0,00 | 0,00 | NA | NA |
| C3P1        | 0,00 | 0,00 | 0,00 | 0,00 | NA | NA |
| C4orf51     | 0,00 | 0,00 | 0,00 | 0,00 | NA | NA |
| C4orf6      | 0,00 | 0,00 | 0,00 | 0,00 | NA | NA |
| C5orf38     | 0,00 | 0,00 | 0,00 | 0,00 | NA | NA |
| C5orf46     | 0,00 | 0,00 | 0,00 | 0,00 | NA | NA |
| C5orf47     | 0,00 | 0,00 | 0,00 | 0,00 | NA | NA |
| C5orf49     | 0,00 | 0,00 | 0,00 | 0,00 | NA | NA |

|                |      |      |      |      |    |    |
|----------------|------|------|------|------|----|----|
| C5orf63        | 0,53 | 0,16 | 0,21 | 0,21 | NA | NA |
| C5orf67        | 0,00 | 0,00 | 0,00 | 0,00 | NA | NA |
| C6             | 0,00 | 0,00 | 0,00 | 0,00 | NA | NA |
| C6orf10        | 0,00 | 0,00 | 0,00 | 0,00 | NA | NA |
| C6orf100       | 0,00 | 0,00 | 0,00 | 0,00 | NA | NA |
| C6orf112       | 0,00 | 0,00 | 0,00 | 0,00 | NA | NA |
| C6orf118       | 0,00 | 0,00 | 0,00 | 0,00 | NA | NA |
| C6orf15        | 0,00 | 0,00 | 0,00 | 0,00 | NA | NA |
| C6orf163       | 0,08 | 0,40 | 0,00 | 0,00 | NA | NA |
| C6orf195       | 0,00 | 0,00 | 0,00 | 0,00 | NA | NA |
| C6orf222       | 0,00 | 0,00 | 0,00 | 0,00 | NA | NA |
| C6orf223       | 0,00 | 0,00 | 0,00 | 0,00 | NA | NA |
| C6orf3         | 0,00 | 0,00 | 0,00 | 0,05 | NA | NA |
| C6orf38        | 0,00 | 0,00 | 0,00 | 0,00 | NA | NA |
| C7             | 0,00 | 0,00 | 0,03 | 0,11 | NA | NA |
| C7orf33        | 0,00 | 0,00 | 0,00 | 0,00 | NA | NA |
| C7orf34        | 0,00 | 0,00 | 0,00 | 0,00 | NA | NA |
| C7orf55-LUC7L2 | 0,00 | 0,00 | 0,00 | 0,00 | NA | NA |
| C7orf57        | 0,00 | 0,00 | 0,00 | 0,00 | NA | NA |
| C7orf62        | 0,00 | 0,00 | 0,00 | 0,00 | NA | NA |
| C7orf66        | 0,00 | 0,00 | 0,00 | 0,00 | NA | NA |
| C7orf72        | 0,00 | 0,00 | 0,00 | 0,00 | NA | NA |
| C8B            | 0,00 | 0,00 | 0,00 | 0,00 | NA | NA |
| C8G            | 0,00 | 0,35 | 0,00 | 0,34 | NA | NA |
| C8orf22        | 0,00 | 0,00 | 0,00 | 0,00 | NA | NA |
| C8orf4         | 0,00 | 0,00 | 0,00 | 0,00 | NA | NA |
| C8orf48        | 0,00 | 0,00 | 0,00 | 0,00 | NA | NA |
| C8orf75        | 0,00 | 0,00 | 0,00 | 0,00 | NA | NA |
| C8orf87        | 0,00 | 0,00 | 0,00 | 0,00 | NA | NA |
| C9orf106       | 0,00 | 0,14 | 0,11 | 0,27 | NA | NA |
| C9orf107       | 0,00 | 0,00 | 0,00 | 0,00 | NA | NA |
| C9orf129       | 0,00 | 0,00 | 0,00 | 0,00 | NA | NA |
| C9orf163       | 0,00 | 0,00 | 0,00 | 0,00 | NA | NA |
| C9orf173       | 0,00 | 0,00 | 0,00 | 0,00 | NA | NA |
| C9orf24        | 0,00 | 0,00 | 0,00 | 0,00 | NA | NA |
| C9orf27        | 0,00 | 0,00 | 0,00 | 0,00 | NA | NA |
| C9orf43        | 0,00 | 0,00 | 0,00 | 0,00 | NA | NA |
| C9orf73        | 0,00 | 0,00 | 0,00 | 0,00 | NA | NA |
| C9orf92        | 0,00 | 0,00 | 0,00 | 0,00 | NA | NA |
| CA10           | 0,00 | 0,00 | 0,00 | 0,00 | NA | NA |
| CA4            | 0,00 | 0,00 | 0,00 | 0,00 | NA | NA |
| CA7            | 0,00 | 0,00 | 0,00 | 0,00 | NA | NA |
| CA8            | 0,00 | 0,00 | 0,00 | 0,00 | NA | NA |
| CA9            | 0,00 | 0,00 | 0,00 | 0,00 | NA | NA |
| CABLES2        | 0,10 | 0,58 | 0,11 | 0,00 | NA | NA |
| CABP7          | 0,00 | 0,08 | 0,00 | 0,00 | NA | NA |
| CABS1          | 0,00 | 0,00 | 0,00 | 0,00 | NA | NA |
| CACHD1         | 0,00 | 0,00 | 0,00 | 0,00 | NA | NA |
| CACNA1B        | 0,00 | 0,00 | 0,00 | 0,02 | NA | NA |
| CACNA1C        | 0,00 | 0,28 | 0,00 | 0,00 | NA | NA |
| CACNA1E        | 0,00 | 0,00 | 0,01 | 0,00 | NA | NA |
| CACNA1I        | 0,00 | 0,01 | 0,00 | 0,01 | NA | NA |
| CACNA1S        | 0,00 | 0,04 | 0,00 | 0,00 | NA | NA |
| CACNA2D2       | 0,00 | 0,00 | 0,00 | 0,00 | NA | NA |
| CACNG2         | 0,04 | 0,00 | 0,03 | 0,11 | NA | NA |

|                |      |      |      |      |    |    |
|----------------|------|------|------|------|----|----|
| CACNG5         | 0,00 | 0,00 | 0,00 | 0,00 | NA | NA |
| CACNG6         | 0,00 | 0,00 | 0,00 | 0,00 | NA | NA |
| CACNG7         | 0,00 | 0,00 | 0,00 | 0,00 | NA | NA |
| CACNG8         | 0,30 | 0,25 | 0,32 | 0,58 | NA | NA |
| CACTIN-AS1     | 0,00 | 0,00 | 0,00 | 0,00 | NA | NA |
| CACYBPP1       | 0,00 | 0,26 | 0,00 | 0,00 | NA | NA |
| CADPS          | 0,09 | 0,36 | 0,13 | 0,09 | NA | NA |
| CALB2          | 0,00 | 0,00 | 0,00 | 0,00 | NA | NA |
| CALCP          | 0,00 | 0,00 | 0,00 | 0,00 | NA | NA |
| CALCR          | 0,00 | 0,00 | 0,00 | 0,00 | NA | NA |
| CALHM3         | 0,00 | 0,00 | 0,00 | 0,00 | NA | NA |
| CALHM4         | 0,00 | 0,00 | 0,00 | 0,00 | NA | NA |
| CALM1P2        | 0,00 | 0,00 | 0,00 | 0,00 | NA | NA |
| CALML3         | 0,00 | 0,00 | 0,00 | 0,00 | NA | NA |
| CALML5         | 0,00 | 0,00 | 0,00 | 0,00 | NA | NA |
| CALML6         | 0,00 | 0,00 | 0,00 | 0,00 | NA | NA |
| CALR3          | 0,00 | 0,00 | 0,00 | 0,00 | NA | NA |
| CALY           | 0,00 | 0,00 | 0,00 | 0,00 | NA | NA |
| CAMK2A         | 0,00 | 0,29 | 0,07 | 0,08 | NA | NA |
| CAMK2N2        | 0,00 | 0,00 | 0,00 | 0,00 | NA | NA |
| CAMKV          | 0,00 | 0,00 | 0,00 | 0,00 | NA | NA |
| CAND2          | 0,00 | 0,00 | 0,00 | 0,00 | NA | NA |
| CAPN9          | 0,00 | 0,00 | 0,00 | 0,00 | NA | NA |
| CAPNS2         | 0,00 | 0,00 | 0,00 | 0,00 | NA | NA |
| CAPZA3         | 0,00 | 0,00 | 0,00 | 0,00 | NA | NA |
| CARTPT         | 0,00 | 0,00 | 0,00 | 0,00 | NA | NA |
| CASKIN1        | 0,00 | 0,00 | 0,00 | 0,00 | NA | NA |
| CASP12         | 0,00 | 0,00 | 0,00 | 0,00 | NA | NA |
| CATSPER3       | 0,00 | 0,00 | 0,00 | 0,00 | NA | NA |
| CATSPER4       | 0,00 | 0,00 | 0,00 | 0,00 | NA | NA |
| CATSPERD       | 0,00 | 0,10 | 0,00 | 0,00 | NA | NA |
| CAV3           | 0,00 | 0,00 | 0,00 | 0,00 | NA | NA |
| CBLN2          | 0,00 | 0,00 | 0,02 | 0,03 | NA | NA |
| CBLN4          | 0,00 | 0,00 | 0,00 | 0,00 | NA | NA |
| CBSL           | 0,00 | 0,03 | 0,00 | 0,00 | NA | NA |
| CBX5           | 3,66 | 4,85 | 3,53 | 2,96 | NA | NA |
| CBY3           | 0,00 | 0,00 | 0,00 | 0,00 | NA | NA |
| CCAT2          | 0,00 | 0,00 | 0,00 | 0,00 | NA | NA |
| CCDC103        | 0,00 | 0,00 | 0,00 | 0,00 | NA | NA |
| CCDC105        | 0,00 | 0,00 | 0,00 | 0,00 | NA | NA |
| CCDC113        | 0,10 | 0,36 | 0,23 | 0,22 | NA | NA |
| CCDC116        | 0,00 | 0,00 | 0,00 | 0,00 | NA | NA |
| CCDC121        | 0,00 | 0,00 | 0,04 | 0,00 | NA | NA |
| CCDC140        | 0,00 | 0,00 | 0,00 | 0,00 | NA | NA |
| CCDC163P       | 1,22 | 0,60 | 0,61 | 0,47 | NA | NA |
| CCDC166        | 0,00 | 0,00 | 0,00 | 0,00 | NA | NA |
| CCDC169-SOHLH2 | 0,00 | 0,00 | 0,00 | 0,00 | NA | NA |
| CCDC172        | 0,00 | 0,09 | 0,00 | 0,00 | NA | NA |
| CCDC177        | 0,00 | 0,03 | 0,00 | 0,00 | NA | NA |
| CCDC178        | 0,00 | 0,00 | 0,00 | 0,00 | NA | NA |
| CCDC179        | 0,00 | 0,00 | 0,00 | 0,00 | NA | NA |
| CCDC182        | 0,00 | 0,00 | 0,00 | 0,00 | NA | NA |
| CCDC185        | 0,00 | 0,00 | 0,00 | 0,00 | NA | NA |
| CCDC188        | 0,00 | 0,00 | 0,00 | 0,00 | NA | NA |
| CCDC3          | 0,00 | 0,00 | 0,00 | 0,00 | NA | NA |

|             |      |      |      |      |    |    |
|-------------|------|------|------|------|----|----|
| CCDC33      | 0,00 | 0,00 | 0,00 | 0,00 | NA | NA |
| CCDC54      | 0,00 | 0,00 | 0,00 | 0,00 | NA | NA |
| CCDC63      | 0,00 | 0,00 | 0,00 | 0,00 | NA | NA |
| CCDC65      | 0,00 | 0,16 | 0,00 | 0,00 | NA | NA |
| CCDC67      | 0,00 | 0,00 | 0,05 | 0,00 | NA | NA |
| CCDC70      | 0,00 | 0,00 | 0,00 | 0,00 | NA | NA |
| CCDC81      | 0,26 | 0,48 | 0,25 | 0,61 | NA | NA |
| CCDC85C     | 0,05 | 0,19 | 0,14 | 0,06 | NA | NA |
| CCDC87      | 0,00 | 0,00 | 0,00 | 0,00 | NA | NA |
| CCDC89      | 0,00 | 0,00 | 0,00 | 0,00 | NA | NA |
| CCDC96      | 0,00 | 0,00 | 0,00 | 0,00 | NA | NA |
| CCER1       | 0,00 | 0,00 | 0,00 | 0,00 | NA | NA |
| CCK         | 0,00 | 0,00 | 0,00 | 0,00 | NA | NA |
| CCKAR       | 0,00 | 0,00 | 0,00 | 0,00 | NA | NA |
| CCL1        | 0,00 | 0,00 | 0,00 | 0,00 | NA | NA |
| CCL11       | 0,00 | 0,00 | 0,00 | 0,00 | NA | NA |
| CCL13       | 0,00 | 0,00 | 0,00 | 0,00 | NA | NA |
| CCL14       | 0,00 | 0,00 | 0,00 | 0,00 | NA | NA |
| CCL15-CCL14 | 0,00 | 0,00 | 0,00 | 0,00 | NA | NA |
| CCL18       | 0,00 | 0,00 | 0,00 | 0,00 | NA | NA |
| CCL20       | 0,00 | 0,27 | 0,00 | 0,00 | NA | NA |
| CCL21       | 0,00 | 0,00 | 0,00 | 0,00 | NA | NA |
| CCL24       | 0,00 | 0,00 | 0,00 | 0,00 | NA | NA |
| CCL25       | 0,00 | 0,00 | 0,00 | 0,00 | NA | NA |
| CCL26       | 0,00 | 0,00 | 0,00 | 0,00 | NA | NA |
| CCL7        | 0,00 | 0,00 | 0,00 | 0,00 | NA | NA |
| CCM2L       | 0,00 | 0,00 | 0,00 | 0,00 | NA | NA |
| CCNA1       | 0,00 | 0,00 | 0,00 | 0,00 | NA | NA |
| CCNB3       | 0,00 | 0,00 | 0,00 | 0,05 | NA | NA |
| CCND2-AS1   | 0,00 | 0,05 | 0,00 | 0,05 | NA | NA |
| CCR8        | 0,00 | 0,00 | 0,00 | 0,00 | NA | NA |
| CCT4P2      | 0,00 | 0,00 | 0,00 | 0,00 | NA | NA |
| CCT5P2      | 0,00 | 0,00 | 0,00 | 0,00 | NA | NA |
| CD163L1     | 0,00 | 0,03 | 0,00 | 0,00 | NA | NA |
| CD177       | 0,00 | 0,00 | 0,00 | 0,00 | NA | NA |
| CD248       | 0,00 | 0,00 | 0,00 | 0,00 | NA | NA |
| CD24L4      | 0,00 | 0,00 | 0,00 | 0,00 | NA | NA |
| CD276       | 0,05 | 0,00 | 0,05 | 0,06 | NA | NA |
| CD300LG     | 0,00 | 0,19 | 0,11 | 0,16 | NA | NA |
| CD46P       | 0,00 | 0,00 | 0,00 | 0,00 | NA | NA |
| CD5L        | 0,00 | 0,00 | 0,00 | 0,00 | NA | NA |
| CDC14B      | 0,02 | 0,13 | 0,04 | 0,06 | NA | NA |
| CDC20P      | 0,00 | 0,00 | 0,00 | 0,00 | NA | NA |
| CDC25C      | 0,00 | 0,00 | 0,00 | 0,07 | NA | NA |
| CDC37P1     | 0,00 | 0,00 | 0,00 | 0,00 | NA | NA |
| CDC42EP5    | 0,00 | 0,00 | 0,00 | 0,00 | NA | NA |
| CDC42P1     | 0,00 | 0,00 | 0,00 | 0,00 | NA | NA |
| CDC45       | 0,00 | 0,00 | 0,00 | 0,00 | NA | NA |
| CDCA2       | 0,00 | 0,00 | 0,00 | 0,00 | NA | NA |
| CDCA8       | 0,00 | 0,00 | 0,00 | 0,00 | NA | NA |
| CDCP2       | 0,00 | 0,00 | 0,00 | 0,00 | NA | NA |
| CDH10       | 0,00 | 0,08 | 0,00 | 0,00 | NA | NA |
| CDH12P4     | 0,00 | 0,00 | 0,00 | 0,00 | NA | NA |
| CDH16       | 0,00 | 0,00 | 0,00 | 0,00 | NA | NA |
| CDH26       | 0,00 | 1,15 | 0,03 | 0,08 | NA | NA |

|            |      |      |      |      |    |    |
|------------|------|------|------|------|----|----|
| CDH5       | 0,07 | 0,07 | 0,08 | 0,14 | NA | NA |
| CDK15      | 0,03 | 0,06 | 0,02 | 0,00 | NA | NA |
| CDK5R2     | 0,00 | 0,00 | 0,00 | 0,00 | NA | NA |
| CDKL2      | 0,00 | 0,00 | 0,00 | 0,00 | NA | NA |
| CDKN2A-AS1 | 0,00 | 0,00 | 0,00 | 0,00 | NA | NA |
| CDNF       | 0,00 | 0,00 | 0,00 | 0,09 | NA | NA |
| CDO1       | 0,00 | 0,00 | 0,00 | 0,00 | NA | NA |
| CDR1       | 0,00 | 0,00 | 0,00 | 0,00 | NA | NA |
| CDR1-AS    | 0,00 | 0,00 | 0,00 | 0,00 | NA | NA |
| CDRT15L2   | 0,00 | 0,00 | 0,00 | 0,00 | NA | NA |
| CDRT15P2   | 0,00 | 0,00 | 0,00 | 0,00 | NA | NA |
| CDRT7      | 0,00 | 0,00 | 0,00 | 0,00 | NA | NA |
| CDSN       | 0,00 | 0,00 | 0,00 | 0,00 | NA | NA |
| CDX1       | 0,00 | 0,00 | 0,00 | 0,00 | NA | NA |
| CDX2       | 0,00 | 0,00 | 0,00 | 0,00 | NA | NA |
| CDX4       | 0,00 | 0,00 | 0,00 | 0,00 | NA | NA |
| CDY1       | 0,00 | 0,00 | 0,00 | 0,00 | NA | NA |
| CDY12P     | 0,00 | 0,00 | 0,00 | 0,00 | NA | NA |
| CDY1B      | 0,00 | 0,00 | 0,00 | 0,00 | NA | NA |
| CDY2A      | 0,00 | 0,00 | 0,00 | 0,00 | NA | NA |
| CDY2B      | 0,00 | 0,00 | 0,00 | 0,00 | NA | NA |
| CEACAMP11  | 0,00 | 0,00 | 0,00 | 0,00 | NA | NA |
| CEACAMP2   | 0,00 | 0,00 | 0,00 | 0,00 | NA | NA |
| CEACAMP4   | 0,00 | 0,00 | 0,00 | 0,00 | NA | NA |
| CEACAMP5   | 0,00 | 0,00 | 0,00 | 0,00 | NA | NA |
| CEACAMP6   | 0,00 | 0,00 | 0,00 | 0,00 | NA | NA |
| CEACAMP7   | 0,00 | 0,00 | 0,00 | 0,00 | NA | NA |
| CEACAMP8   | 0,00 | 0,00 | 0,00 | 0,00 | NA | NA |
| CEACAMP9   | 0,00 | 0,00 | 0,00 | 0,00 | NA | NA |
| CECR9      | 0,00 | 0,00 | 0,00 | 0,00 | NA | NA |
| CEL        | 0,00 | 0,00 | 0,00 | 0,00 | NA | NA |
| CELA3A     | 0,00 | 0,00 | 0,00 | 0,00 | NA | NA |
| CELF3      | 0,00 | 0,00 | 0,00 | 0,00 | NA | NA |
| CELSR3     | 0,00 | 0,01 | 0,00 | 0,02 | NA | NA |
| CEMIP      | 0,03 | 0,00 | 0,02 | 0,04 | NA | NA |
| CENPC2     | 0,00 | 0,00 | 0,00 | 0,00 | NA | NA |
| CENPQ      | 0,06 | 0,00 | 0,05 | 0,08 | NA | NA |
| CEP170B    | 0,00 | 0,00 | 0,00 | 0,00 | NA | NA |
| CEP295NL   | 0,00 | 0,29 | 0,03 | 0,00 | NA | NA |
| CER1       | 0,00 | 0,00 | 0,00 | 0,00 | NA | NA |
| CES1P1     | 0,14 | 0,29 | 0,08 | 0,06 | NA | NA |
| CES1P2     | 0,00 | 0,00 | 0,00 | 0,00 | NA | NA |
| CETN1      | 0,00 | 0,00 | 0,00 | 0,00 | NA | NA |
| CFAP100    | 0,00 | 0,00 | 0,00 | 0,00 | NA | NA |
| CFAP53     | 0,00 | 0,00 | 0,00 | 0,00 | NA | NA |
| CFAP57     | 0,06 | 0,03 | 0,03 | 0,00 | NA | NA |
| CFAP58     | 0,00 | 0,00 | 0,00 | 0,00 | NA | NA |
| CFAP77     | 0,00 | 0,00 | 0,00 | 0,00 | NA | NA |
| CFAP99     | 0,00 | 0,00 | 0,00 | 0,00 | NA | NA |
| CFC1       | 0,00 | 0,00 | 0,00 | 0,00 | NA | NA |
| CFC1B      | 0,00 | 0,00 | 0,00 | 0,00 | NA | NA |
| CFHR2      | 0,00 | 0,00 | 0,00 | 0,00 | NA | NA |
| CFHR4      | 0,00 | 0,00 | 0,00 | 0,00 | NA | NA |
| CFHR5      | 0,00 | 0,00 | 0,00 | 0,00 | NA | NA |
| CFL1P4     | 0,00 | 0,00 | 0,00 | 0,00 | NA | NA |

|               |      |      |      |      |    |    |
|---------------|------|------|------|------|----|----|
| CFLP2         | 0,00 | 0,00 | 0,00 | 0,00 | NA | NA |
| CFLP3         | 0,00 | 0,00 | 0,00 | 0,00 | NA | NA |
| CFLP6         | 0,00 | 0,00 | 0,00 | 0,00 | NA | NA |
| CFTRP2        | 0,00 | 0,00 | 0,00 | 0,00 | NA | NA |
| CFTRP3        | 0,00 | 0,00 | 0,00 | 0,00 | NA | NA |
| CGB5          | 0,00 | 0,00 | 0,00 | 0,00 | NA | NA |
| CGB7          | 0,00 | 0,00 | 0,00 | 0,00 | NA | NA |
| CGB8          | 0,00 | 0,00 | 0,00 | 0,00 | NA | NA |
| CH17-118O6.4  | 0,00 | 0,00 | 0,00 | 0,00 | NA | NA |
| CH17-118O6.7  | 0,00 | 0,00 | 0,00 | 0,00 | NA | NA |
| CH17-125A10.2 | 0,35 | 0,74 | 0,54 | 0,64 | NA | NA |
| CH17-128G5.1  | 0,00 | 0,00 | 0,00 | 0,00 | NA | NA |
| CH17-132F21.4 | 0,00 | 0,00 | 0,00 | 0,00 | NA | NA |
| CH17-13I23.2  | 0,00 | 0,00 | 0,00 | 0,00 | NA | NA |
| CH17-13I23.3  | 0,00 | 0,00 | 0,00 | 0,00 | NA | NA |
| CH17-140K24.1 | 0,00 | 0,00 | 0,00 | 0,00 | NA | NA |
| CH17-140K24.2 | 0,00 | 0,00 | 0,00 | 0,00 | NA | NA |
| CH17-140K24.3 | 0,00 | 0,00 | 0,00 | 0,00 | NA | NA |
| CH17-140K24.4 | 0,00 | 0,00 | 0,00 | 0,00 | NA | NA |
| CH17-140K24.5 | 0,00 | 0,00 | 0,00 | 0,00 | NA | NA |
| CH17-140K24.6 | 0,00 | 0,00 | 0,00 | 0,00 | NA | NA |
| CH17-140K24.7 | 0,00 | 0,00 | 0,00 | 0,00 | NA | NA |
| CH17-140K24.8 | 0,00 | 0,00 | 0,00 | 0,00 | NA | NA |
| CH17-159N18.3 | 0,00 | 0,00 | 0,00 | 0,00 | NA | NA |
| CH17-16P3.3   | 0,00 | 0,00 | 0,00 | 0,00 | NA | NA |
| CH17-172B3.2  | 0,00 | 0,00 | 0,00 | 0,00 | NA | NA |
| CH17-195P21.1 | 0,00 | 0,00 | 0,00 | 0,00 | NA | NA |
| CH17-212P11.8 | 0,00 | 0,00 | 0,00 | 0,00 | NA | NA |
| CH17-219N22.1 | 0,00 | 0,00 | 0,00 | 0,00 | NA | NA |
| CH17-224D4.3  | 0,00 | 0,00 | 0,00 | 0,00 | NA | NA |
| CH17-232I21.1 | 0,00 | 0,00 | 0,00 | 0,00 | NA | NA |
| CH17-248H7.2  | 0,00 | 0,00 | 0,00 | 0,00 | NA | NA |
| CH17-248H7.3  | 0,00 | 0,00 | 0,00 | 0,00 | NA | NA |
| CH17-262O2.2  | 0,00 | 0,00 | 0,00 | 0,00 | NA | NA |
| CH17-270A2.1  | 0,00 | 0,00 | 0,00 | 0,00 | NA | NA |
| CH17-270A2.2  | 0,00 | 0,00 | 0,00 | 0,00 | NA | NA |
| CH17-296N19.1 | 0,00 | 0,00 | 0,00 | 0,00 | NA | NA |
| CH17-333M13.1 | 0,00 | 0,00 | 0,00 | 0,00 | NA | NA |
| CH17-333M13.2 | 0,00 | 0,00 | 0,00 | 0,00 | NA | NA |
| CH17-335B8.4  | 0,00 | 0,00 | 0,00 | 0,00 | NA | NA |
| CH17-342O10.1 | 0,00 | 0,00 | 0,00 | 0,00 | NA | NA |
| CH17-343M10.2 | 0,00 | 0,00 | 0,00 | 0,00 | NA | NA |
| CH17-351M24.1 | 0,00 | 0,00 | 0,00 | 0,00 | NA | NA |
| CH17-360D5.1  | 0,00 | 0,00 | 0,00 | 0,00 | NA | NA |
| CH17-360D5.2  | 0,00 | 0,00 | 0,00 | 0,00 | NA | NA |
| CH17-360D5.3  | 0,00 | 0,00 | 0,00 | 0,00 | NA | NA |
| CH17-385C13.3 | 0,00 | 0,00 | 0,00 | 0,00 | NA | NA |
| CH17-38B12.4  | 0,00 | 0,00 | 0,00 | 0,00 | NA | NA |
| CH17-408M7.1  | 0,00 | 0,00 | 0,00 | 0,00 | NA | NA |
| CH17-409J4.2  | 0,00 | 0,00 | 0,00 | 0,00 | NA | NA |
| CH17-469D17.1 | 0,00 | 0,00 | 0,00 | 0,00 | NA | NA |
| CH17-472G23.1 | 0,00 | 0,21 | 0,00 | 0,00 | NA | NA |
| CH17-478G19.1 | 0,00 | 0,00 | 0,00 | 0,00 | NA | NA |
| CH17-52D20.1  | 0,00 | 0,00 | 0,00 | 0,00 | NA | NA |
| CH17-52D20.2  | 0,00 | 0,00 | 0,00 | 0,00 | NA | NA |

|                |      |      |      |      |    |    |
|----------------|------|------|------|------|----|----|
| CH17-53B9.2    | 0,00 | 0,00 | 0,00 | 0,00 | NA | NA |
| CH17-53B9.4    | 0,00 | 0,00 | 0,00 | 0,00 | NA | NA |
| CH17-66N5.1    | 0,00 | 0,00 | 0,00 | 0,00 | NA | NA |
| CH17-78J1.1    | 0,00 | 0,00 | 0,00 | 0,00 | NA | NA |
| CH25H          | 0,03 | 0,24 | 0,00 | 0,00 | NA | NA |
| CH507-145C22.2 | 0,00 | 0,00 | 0,00 | 0,00 | NA | NA |
| CH507-152C13.3 | 0,00 | 0,00 | 0,00 | 0,00 | NA | NA |
| CH507-152C13.4 | 0,00 | 0,00 | 0,00 | 0,00 | NA | NA |
| CH507-152C13.5 | 0,00 | 0,00 | 0,00 | 0,00 | NA | NA |
| CH507-152C13.6 | 0,00 | 0,00 | 0,00 | 0,00 | NA | NA |
| CH507-154B10.2 | 0,00 | 0,00 | 0,00 | 0,00 | NA | NA |
| CH507-154B10.3 | 0,00 | 0,00 | 0,00 | 0,00 | NA | NA |
| CH507-210P18.1 | 0,00 | 0,00 | 0,00 | 0,00 | NA | NA |
| CH507-210P18.3 | 0,00 | 0,00 | 0,00 | 0,00 | NA | NA |
| CH507-210P18.5 | 0,00 | 0,00 | 0,00 | 0,00 | NA | NA |
| CH507-216K13.1 | 0,00 | 0,00 | 0,00 | 0,00 | NA | NA |
| CH507-216K13.2 | 0,00 | 0,41 | 0,08 | 0,00 | NA | NA |
| CH507-236L23.2 | 0,00 | 0,00 | 0,00 | 0,00 | NA | NA |
| CH507-236L23.4 | 0,00 | 0,00 | 0,00 | 0,00 | NA | NA |
| CH507-236L23.5 | 0,00 | 0,00 | 0,00 | 0,00 | NA | NA |
| CH507-254M2.2  | 0,00 | 0,00 | 0,00 | 0,00 | NA | NA |
| CH507-254M2.5  | 0,00 | 0,00 | 0,00 | 0,00 | NA | NA |
| CH507-254M2.6  | 0,00 | 0,00 | 0,00 | 0,00 | NA | NA |
| CH507-338C24.2 | 0,00 | 0,00 | 0,00 | 0,00 | NA | NA |
| CH507-396I9.7  | 0,00 | 0,00 | 0,00 | 0,00 | NA | NA |
| CH507-42P11.2  | 0,00 | 0,00 | 0,00 | 0,00 | NA | NA |
| CH507-42P11.3  | 0,00 | 0,00 | 0,00 | 0,00 | NA | NA |
| CH507-42P11.5  | 0,00 | 0,00 | 0,00 | 0,00 | NA | NA |
| CH507-42P11.6  | 0,00 | 0,00 | 0,00 | 0,00 | NA | NA |
| CH507-9B2.2    | 0,00 | 0,00 | 0,00 | 0,00 | NA | NA |
| CHAC1          | 0,00 | 0,00 | 0,00 | 0,00 | NA | NA |
| CHCHD2P3       | 0,00 | 0,00 | 0,00 | 0,00 | NA | NA |
| CHCHD9         | 0,00 | 0,00 | 0,00 | 0,00 | NA | NA |
| CHD5           | 0,00 | 0,03 | 0,00 | 0,00 | NA | NA |
| CHEK2P5        | 0,00 | 0,00 | 0,00 | 0,00 | NA | NA |
| CHGA           | 0,00 | 0,00 | 0,00 | 0,00 | NA | NA |
| CHIA           | 0,00 | 0,00 | 0,00 | 0,00 | NA | NA |
| CHPF           | 0,00 | 0,00 | 0,00 | 0,10 | NA | NA |
| CHRM1          | 0,00 | 0,00 | 0,00 | 0,00 | NA | NA |
| CHRM4          | 0,00 | 0,00 | 0,00 | 0,00 | NA | NA |
| CHRNA9         | 0,00 | 0,00 | 0,00 | 0,00 | NA | NA |
| CHRND          | 0,00 | 0,07 | 0,00 | 0,00 | NA | NA |
| CHRNG          | 0,00 | 0,00 | 0,00 | 0,00 | NA | NA |
| CHST1          | 0,00 | 0,00 | 0,00 | 0,00 | NA | NA |
| CHST4          | 0,00 | 0,00 | 0,00 | 0,00 | NA | NA |
| CHST6          | 0,10 | 0,28 | 0,12 | 0,26 | NA | NA |
| CHST7          | 0,00 | 0,00 | 0,00 | 0,05 | NA | NA |
| CHST8          | 0,00 | 0,00 | 0,00 | 0,00 | NA | NA |
| CHSY3          | 0,00 | 0,00 | 0,00 | 0,00 | NA | NA |
| CHTF8P         | 0,00 | 0,00 | 0,00 | 0,00 | NA | NA |
| CIAPIN1P       | 0,00 | 0,00 | 0,00 | 0,00 | NA | NA |
| CIART          | 0,15 | 0,13 | 0,14 | 0,39 | NA | NA |
| CIB2           | 0,00 | 0,00 | 0,00 | 0,00 | NA | NA |
| CIB3           | 0,00 | 0,00 | 0,00 | 0,00 | NA | NA |
| CICP6          | 0,00 | 0,00 | 0,00 | 0,00 | NA | NA |



|                |      |      |      |      |    |    |
|----------------|------|------|------|------|----|----|
| CICP7          | 0,00 | 0,00 | 0,00 | 0,00 | NA | NA |
| CILP2          | 0,00 | 0,00 | 0,00 | 0,00 | NA | NA |
| CIT            | 0,00 | 0,00 | 0,04 | 0,00 | NA | NA |
| CITF22-123F2.1 | 0,03 | 0,15 | 0,10 | 0,36 | NA | NA |
| CITF22-45C1.3  | 0,00 | 0,00 | 0,00 | 0,00 | NA | NA |
| CKAP2L         | 0,06 | 0,25 | 0,07 | 0,10 | NA | NA |
| CKBP1          | 0,00 | 0,00 | 0,00 | 0,00 | NA | NA |
| CKM            | 0,00 | 0,09 | 0,00 | 0,07 | NA | NA |
| CKMT2          | 0,00 | 0,00 | 0,00 | 0,00 | NA | NA |
| CKS1A          | 0,00 | 0,00 | 0,00 | 0,00 | NA | NA |
| CKS1BP6        | 0,00 | 0,00 | 0,00 | 0,00 | NA | NA |
| CLC            | 0,00 | 0,00 | 0,00 | 0,00 | NA | NA |
| CLCA4          | 0,00 | 0,00 | 0,00 | 0,00 | NA | NA |
| CLCF1          | 0,00 | 0,00 | 0,00 | 0,00 | NA | NA |
| CLCNKB         | 0,00 | 0,00 | 0,00 | 0,00 | NA | NA |
| CLDN17         | 0,00 | 0,00 | 0,00 | 0,00 | NA | NA |
| CLDN22         | 0,00 | 0,00 | 0,00 | 0,00 | NA | NA |
| CLDN24         | 0,00 | 0,00 | 0,00 | 0,00 | NA | NA |
| CLDN25         | 0,00 | 0,00 | 0,00 | 0,00 | NA | NA |
| CLDN3          | 0,00 | 0,00 | 0,00 | 0,00 | NA | NA |
| CLDN34         | 0,00 | 0,00 | 0,00 | 0,00 | NA | NA |
| CLDN6          | 0,00 | 0,00 | 0,00 | 0,00 | NA | NA |
| CLDN7          | 0,00 | 0,00 | 0,00 | 0,00 | NA | NA |
| CLEC14A        | 0,00 | 0,00 | 0,00 | 0,00 | NA | NA |
| CLEC18B        | 0,00 | 0,08 | 0,00 | 0,00 | NA | NA |
| CLEC18C        | 0,00 | 0,18 | 0,00 | 0,00 | NA | NA |
| CLEC2L         | 0,00 | 0,00 | 0,00 | 0,00 | NA | NA |
| CLIC1P1        | 0,00 | 0,00 | 0,00 | 0,00 | NA | NA |
| CLIC6          | 0,03 | 0,43 | 0,04 | 0,05 | NA | NA |
| CLIP3          | 0,00 | 0,04 | 0,00 | 0,08 | NA | NA |
| CLUU10S        | 0,00 | 0,00 | 0,00 | 0,00 | NA | NA |
| CLPS           | 0,00 | 0,00 | 0,00 | 0,00 | NA | NA |
| CLPSL1         | 0,00 | 0,00 | 0,00 | 0,00 | NA | NA |
| CLPSL2         | 0,00 | 0,00 | 0,00 | 0,00 | NA | NA |
| CLRN2          | 0,00 | 0,00 | 0,00 | 0,00 | NA | NA |
| CLRN3          | 0,00 | 0,00 | 0,00 | 0,00 | NA | NA |
| CLSTN3         | 1,00 | 1,12 | 0,38 | 1,05 | NA | NA |
| CLU            | 0,52 | 0,50 | 0,27 | 1,31 | NA | NA |
| CLUHP10        | 0,00 | 0,00 | 0,00 | 0,00 | NA | NA |
| CLUHP11        | 0,00 | 0,00 | 0,00 | 0,00 | NA | NA |
| CLUHP2         | 0,00 | 0,00 | 0,00 | 0,00 | NA | NA |
| CLUHP4         | 0,00 | 0,00 | 0,00 | 0,00 | NA | NA |
| CLUHP5         | 0,00 | 0,00 | 0,00 | 0,00 | NA | NA |
| CLUHP8         | 0,00 | 0,00 | 0,00 | 0,00 | NA | NA |
| CLVS2          | 0,00 | 0,00 | 0,00 | 0,00 | NA | NA |
| CMB9-43M24.1   | 0,00 | 0,00 | 0,00 | 0,00 | NA | NA |
| CMB9-44E22.1   | 0,00 | 0,00 | 0,00 | 0,00 | NA | NA |
| CMB9-55F22.1   | 0,00 | 0,00 | 0,00 | 0,00 | NA | NA |
| CMYA5          | 0,00 | 0,02 | 0,00 | 0,00 | NA | NA |
| CNGA2          | 0,00 | 0,00 | 0,00 | 0,00 | NA | NA |
| CNIH2          | 0,00 | 0,00 | 0,00 | 0,00 | NA | NA |
| CNKSR3         | 0,20 | 0,23 | 0,28 | 0,39 | NA | NA |
| CNN1           | 0,44 | 1,92 | 0,46 | 1,14 | NA | NA |
| CNN2P4         | 0,00 | 0,00 | 0,00 | 0,00 | NA | NA |
| CNN2P9         | 0,00 | 0,00 | 0,00 | 0,00 | NA | NA |

|             |      |      |      |      |    |    |
|-------------|------|------|------|------|----|----|
| CNR1        | 0,00 | 0,02 | 0,00 | 0,00 | NA | NA |
| CNTF        | 0,00 | 0,00 | 0,00 | 0,00 | NA | NA |
| CNTFR       | 0,00 | 0,00 | 0,00 | 0,00 | NA | NA |
| CNTN6       | 0,00 | 0,00 | 0,00 | 0,00 | NA | NA |
| CNTNAP4     | 0,00 | 0,00 | 0,00 | 0,00 | NA | NA |
| COBL        | 0,00 | 0,00 | 0,00 | 0,00 | NA | NA |
| COL11A1     | 0,00 | 0,00 | 0,00 | 0,02 | NA | NA |
| COL11A2     | 0,00 | 0,00 | 0,00 | 0,00 | NA | NA |
| COL11A2P    | 0,00 | 0,00 | 0,00 | 0,00 | NA | NA |
| COL12A1     | 0,00 | 0,00 | 0,00 | 0,00 | NA | NA |
| COL13A1     | 0,00 | 0,00 | 0,00 | 0,00 | NA | NA |
| COL16A1     | 0,00 | 0,00 | 0,00 | 0,04 | NA | NA |
| COL18A1-AS1 | 0,00 | 0,00 | 0,00 | 0,00 | NA | NA |
| COL1A1      | 0,41 | 0,43 | 0,40 | 0,39 | NA | NA |
| COL22A1     | 0,00 | 0,00 | 0,00 | 0,00 | NA | NA |
| COL25A1     | 0,00 | 0,00 | 0,00 | 0,00 | NA | NA |
| COL2A1      | 0,00 | 0,00 | 0,00 | 0,00 | NA | NA |
| COL4A2      | 0,00 | 0,02 | 0,00 | 0,00 | NA | NA |
| COL4A2-AS2  | 0,00 | 0,00 | 0,00 | 0,00 | NA | NA |
| COL4A4      | 0,01 | 0,01 | 0,00 | 0,01 | NA | NA |
| COL4A6      | 0,00 | 0,00 | 0,00 | 0,00 | NA | NA |
| COL5A1-AS1  | 0,00 | 0,00 | 0,00 | 0,00 | NA | NA |
| COL6A1      | 0,00 | 0,00 | 0,00 | 0,00 | NA | NA |
| COL6A6      | 0,09 | 0,01 | 0,04 | 0,00 | NA | NA |
| COL7A1      | 0,00 | 0,22 | 0,05 | 0,00 | NA | NA |
| COL8A1      | 0,84 | 1,31 | 1,14 | 0,94 | NA | NA |
| COL9A3      | 0,00 | 0,25 | 0,25 | 0,00 | NA | NA |
| COLCA2      | 0,00 | 0,00 | 0,00 | 0,00 | NA | NA |
| COLGALT2    | 0,00 | 0,00 | 0,00 | 0,03 | NA | NA |
| COPZ2       | 0,00 | 0,00 | 0,00 | 0,00 | NA | NA |
| COTL1P1     | 0,00 | 0,00 | 0,00 | 0,00 | NA | NA |
| COTL1P2     | 0,00 | 0,00 | 0,00 | 0,00 | NA | NA |
| COX20P1     | 0,00 | 0,00 | 0,00 | 0,00 | NA | NA |
| COX4I2      | 0,00 | 0,00 | 0,00 | 0,00 | NA | NA |
| COX5AP2     | 0,00 | 0,00 | 0,00 | 0,00 | NA | NA |
| COX6A1P3    | 0,00 | 0,00 | 0,00 | 0,00 | NA | NA |
| COX6A2      | 0,00 | 0,00 | 0,00 | 0,00 | NA | NA |
| COX6CP2     | 0,00 | 0,00 | 0,00 | 0,00 | NA | NA |
| COX6CP3     | 0,00 | 0,00 | 0,00 | 0,00 | NA | NA |
| COX7A1      | 0,00 | 0,00 | 0,00 | 0,00 | NA | NA |
| COX7A2P1    | 0,00 | 0,00 | 0,00 | 0,00 | NA | NA |
| COX7A2P2    | 0,00 | 0,00 | 0,00 | 0,00 | NA | NA |
| COX7B2      | 0,00 | 0,00 | 0,00 | 0,00 | NA | NA |
| COX7BP2     | 0,00 | 2,38 | 0,00 | 0,00 | NA | NA |
| COX8C       | 0,00 | 0,00 | 0,00 | 0,00 | NA | NA |
| CPA2        | 0,00 | 0,00 | 0,00 | 0,00 | NA | NA |
| CPA5        | 0,00 | 0,00 | 0,00 | 0,00 | NA | NA |
| CPB1        | 0,03 | 0,04 | 0,04 | 0,00 | NA | NA |
| CPB2        | 0,00 | 0,00 | 0,00 | 0,00 | NA | NA |
| CPHXL       | 0,00 | 0,00 | 0,00 | 0,00 | NA | NA |
| CPLX1       | 0,00 | 0,00 | 0,00 | 0,00 | NA | NA |
| CPN1        | 0,00 | 0,00 | 0,00 | 0,00 | NA | NA |
| CPNE4       | 0,00 | 0,02 | 0,00 | 0,00 | NA | NA |
| CPNE5       | 0,00 | 0,40 | 0,15 | 0,20 | NA | NA |
| CPNE6       | 0,00 | 0,00 | 0,00 | 0,00 | NA | NA |

|            |      |      |      |      |    |    |
|------------|------|------|------|------|----|----|
| CPS1-IT1   | 0,00 | 0,00 | 0,00 | 0,00 | NA | NA |
| CPSF4L     | 0,00 | 0,00 | 0,00 | 0,00 | NA | NA |
| CPXCR1     | 0,00 | 0,00 | 0,00 | 0,00 | NA | NA |
| CPZ        | 0,00 | 0,07 | 0,00 | 0,00 | NA | NA |
| CR2        | 0,14 | 0,00 | 0,43 | 0,85 | NA | NA |
| CR848007.2 | 0,00 | 0,08 | 0,00 | 0,00 | NA | NA |
| CR848007.5 | 0,00 | 0,00 | 0,00 | 0,00 | NA | NA |
| CRCT1      | 0,00 | 0,00 | 0,00 | 0,00 | NA | NA |
| CREB3L3    | 0,00 | 0,00 | 0,00 | 0,00 | NA | NA |
| CRH        | 0,00 | 0,00 | 0,00 | 0,00 | NA | NA |
| CRISP2     | 0,00 | 0,00 | 0,00 | 0,00 | NA | NA |
| CRISPLD1   | 0,00 | 0,00 | 0,00 | 0,00 | NA | NA |
| CRMP1      | 0,00 | 0,00 | 0,00 | 0,00 | NA | NA |
| CRNN       | 0,00 | 0,00 | 0,00 | 0,00 | NA | NA |
| CRP        | 0,00 | 0,00 | 0,00 | 0,00 | NA | NA |
| CRYAA      | 0,00 | 0,00 | 0,00 | 0,00 | NA | NA |
| CRYBA2     | 0,00 | 0,00 | 0,00 | 0,00 | NA | NA |
| CRYBB1     | 0,00 | 0,00 | 0,00 | 0,00 | NA | NA |
| CRYBB2     | 0,00 | 0,00 | 0,00 | 0,00 | NA | NA |
| CRYGA      | 0,00 | 0,00 | 0,00 | 0,00 | NA | NA |
| CRYGD      | 0,00 | 0,00 | 0,00 | 0,00 | NA | NA |
| CRYGN      | 0,00 | 0,00 | 0,00 | 0,00 | NA | NA |
| CSAG1      | 0,00 | 0,00 | 0,00 | 0,00 | NA | NA |
| CSAG2      | 0,00 | 0,00 | 0,00 | 0,00 | NA | NA |
| CSAG4      | 0,00 | 0,00 | 0,00 | 0,00 | NA | NA |
| CSDAP1     | 0,00 | 0,00 | 0,00 | 0,00 | NA | NA |
| CSDC2      | 0,00 | 0,00 | 0,05 | 0,13 | NA | NA |
| CSF3       | 0,00 | 0,00 | 0,00 | 0,00 | NA | NA |
| CSH1       | 0,00 | 0,00 | 0,00 | 0,00 | NA | NA |
| CSH2       | 0,00 | 0,00 | 0,00 | 0,00 | NA | NA |
| CSHL1      | 0,00 | 0,00 | 0,00 | 0,00 | NA | NA |
| CSN1S1     | 0,00 | 0,00 | 0,00 | 0,00 | NA | NA |
| CSN2       | 0,00 | 0,00 | 0,00 | 0,00 | NA | NA |
| CSNK1A1L   | 0,00 | 0,00 | 0,00 | 0,00 | NA | NA |
| CSNK1A1P1  | 0,00 | 0,00 | 0,00 | 0,00 | NA | NA |
| CSNK2A3    | 0,00 | 0,00 | 0,00 | 0,00 | NA | NA |
| CSPG4      | 0,00 | 0,02 | 0,00 | 0,00 | NA | NA |
| CSPG4LYP1  | 0,00 | 0,00 | 0,00 | 0,00 | NA | NA |
| CSPG4P5    | 0,00 | 0,00 | 0,00 | 0,00 | NA | NA |
| CSPG5      | 0,00 | 0,00 | 0,00 | 0,00 | NA | NA |
| CST2       | 0,00 | 0,00 | 0,00 | 0,00 | NA | NA |
| CST4       | 0,00 | 0,00 | 0,00 | 0,00 | NA | NA |
| CST5       | 0,00 | 0,00 | 0,00 | 0,00 | NA | NA |
| CST6       | 0,00 | 0,00 | 0,00 | 0,00 | NA | NA |
| CST8       | 0,00 | 0,00 | 0,00 | 0,00 | NA | NA |
| CST9       | 0,00 | 0,00 | 0,00 | 0,00 | NA | NA |
| CST9L      | 0,00 | 0,00 | 0,00 | 0,00 | NA | NA |
| CST9LP1    | 0,00 | 0,00 | 0,00 | 0,00 | NA | NA |
| CSTP1      | 0,00 | 0,00 | 0,00 | 0,00 | NA | NA |
| CSTP2      | 0,00 | 0,00 | 0,00 | 0,00 | NA | NA |
| CT45A1     | 0,00 | 0,00 | 0,00 | 0,00 | NA | NA |
| CT45A10    | 0,00 | 0,00 | 0,00 | 0,00 | NA | NA |
| CT45A3     | 0,00 | 0,00 | 0,00 | 0,00 | NA | NA |
| CT45A5     | 0,00 | 0,00 | 0,00 | 0,00 | NA | NA |
| CT45A7     | 0,00 | 0,00 | 0,00 | 0,00 | NA | NA |

|               |      |      |      |      |    |    |
|---------------|------|------|------|------|----|----|
| CT45A9        | 0,00 | 0,00 | 0,00 | 0,00 | NA | NA |
| CT47A1        | 0,00 | 0,00 | 0,00 | 0,00 | NA | NA |
| CT47A10       | 0,00 | 0,00 | 0,00 | 0,00 | NA | NA |
| CT47A11       | 0,00 | 0,00 | 0,00 | 0,00 | NA | NA |
| CT47A2        | 0,00 | 0,00 | 0,00 | 0,00 | NA | NA |
| CT47A3        | 0,00 | 0,00 | 0,00 | 0,00 | NA | NA |
| CT47A4        | 0,00 | 0,00 | 0,00 | 0,00 | NA | NA |
| CT47A5        | 0,00 | 0,00 | 0,00 | 0,00 | NA | NA |
| CT47A6        | 0,00 | 0,00 | 0,00 | 0,00 | NA | NA |
| CT47A7        | 0,00 | 0,00 | 0,00 | 0,00 | NA | NA |
| CT47A8        | 0,00 | 0,00 | 0,00 | 0,00 | NA | NA |
| CT47A9        | 0,00 | 0,00 | 0,00 | 0,00 | NA | NA |
| CT47B1        | 0,00 | 0,00 | 0,00 | 0,00 | NA | NA |
| CT62          | 0,00 | 0,00 | 0,00 | 0,00 | NA | NA |
| CT83          | 0,00 | 0,00 | 0,00 | 0,00 | NA | NA |
| CTA-109P11.1  | 0,00 | 0,00 | 0,00 | 0,00 | NA | NA |
| CTA-109P11.4  | 0,00 | 0,00 | 0,00 | 0,00 | NA | NA |
| CTA-125H2.3   | 0,00 | 0,00 | 0,00 | 0,00 | NA | NA |
| CTA-14H9.6    | 0,00 | 0,00 | 0,00 | 0,00 | NA | NA |
| CTA-150C2.13  | 0,00 | 0,00 | 0,00 | 0,00 | NA | NA |
| CTA-150C2.20  | 0,00 | 0,00 | 0,00 | 0,00 | NA | NA |
| CTA-217C2.2   | 0,00 | 0,00 | 0,00 | 0,00 | NA | NA |
| CTA-221G9.10  | 0,00 | 0,00 | 0,00 | 0,00 | NA | NA |
| CTA-221G9.7   | 0,00 | 0,00 | 0,00 | 0,00 | NA | NA |
| CTA-242H14.1  | 0,00 | 0,00 | 0,00 | 0,00 | NA | NA |
| CTA-243E7.2   | 0,00 | 0,09 | 0,00 | 0,00 | NA | NA |
| CTA-246H3.7   | 0,00 | 0,00 | 0,00 | 0,00 | NA | NA |
| CTA-246H3.8   | 0,00 | 0,00 | 0,00 | 0,00 | NA | NA |
| CTA-250D10.15 | 0,00 | 0,00 | 0,00 | 0,00 | NA | NA |
| CTA-250D10.19 | 0,00 | 0,00 | 0,00 | 0,00 | NA | NA |
| CTA-250D13.1  | 0,00 | 0,00 | 0,00 | 0,00 | NA | NA |
| CTA-268H5.9   | 0,00 | 0,00 | 0,00 | 0,00 | NA | NA |
| CTA-276F8.2   | 0,00 | 0,00 | 0,00 | 0,00 | NA | NA |
| CTA-276O3.1   | 0,00 | 0,00 | 0,00 | 0,00 | NA | NA |
| CTA-277P6.1   | 0,00 | 0,00 | 0,00 | 0,00 | NA | NA |
| CTA-280A3_B.2 | 0,00 | 0,00 | 0,00 | 0,00 | NA | NA |
| CTA-282F2.4   | 0,00 | 0,00 | 0,00 | 0,00 | NA | NA |
| CTA-292E10.7  | 0,00 | 0,00 | 0,00 | 0,00 | NA | NA |
| CTA-298G8.1   | 0,00 | 0,00 | 0,00 | 0,00 | NA | NA |
| CTA-298G8.2   | 0,00 | 0,00 | 0,00 | 0,00 | NA | NA |
| CTA-313A17.3  | 0,00 | 0,00 | 0,00 | 0,00 | NA | NA |
| CTA-313A17.5  | 0,00 | 0,00 | 0,00 | 0,00 | NA | NA |
| CTA-326K9.1   | 0,00 | 0,00 | 0,00 | 0,00 | NA | NA |
| CTA-332P12.2  | 0,00 | 0,00 | 0,00 | 0,00 | NA | NA |
| CTA-342B11.1  | 0,00 | 0,00 | 0,00 | 0,00 | NA | NA |
| CTA-363E19.2  | 0,00 | 0,00 | 0,00 | 0,20 | NA | NA |
| CTA-363E6.5   | 0,00 | 0,00 | 0,00 | 0,00 | NA | NA |
| CTA-363E6.8   | 0,00 | 0,00 | 0,00 | 0,00 | NA | NA |
| CTA-369K23.1  | 0,00 | 0,00 | 0,00 | 0,00 | NA | NA |
| CTA-373H7.5   | 0,00 | 0,00 | 0,00 | 0,00 | NA | NA |
| CTA-384D8.20  | 0,00 | 0,33 | 0,00 | 0,00 | NA | NA |
| CTA-384D8.33  | 0,00 | 0,00 | 0,00 | 0,00 | NA | NA |
| CTA-38K21.2   | 0,00 | 0,00 | 0,00 | 0,00 | NA | NA |
| CTA-390C10.9  | 0,00 | 0,00 | 0,00 | 0,00 | NA | NA |
| CTA-392C11.1  | 0,00 | 0,00 | 0,00 | 0,00 | NA | NA |

|              |      |      |      |      |    |    |
|--------------|------|------|------|------|----|----|
| CTA-397C4.2  | 0,00 | 0,00 | 0,00 | 0,00 | NA | NA |
| CTA-397C4.3  | 0,00 | 0,00 | 0,00 | 0,00 | NA | NA |
| CTA-397H3.3  | 0,00 | 0,00 | 0,00 | 0,00 | NA | NA |
| CTA-407F11.9 | 0,00 | 0,00 | 0,00 | 0,00 | NA | NA |
| CTA-444M12.2 | 0,00 | 0,00 | 0,00 | 0,00 | NA | NA |
| CTA-444M12.3 | 0,00 | 0,00 | 0,00 | 0,00 | NA | NA |
| CTA-445C9.14 | 0,00 | 0,00 | 0,00 | 0,00 | NA | NA |
| CTA-481E9.2  | 0,00 | 0,00 | 0,00 | 0,00 | NA | NA |
| CTA-503F6.2  | 0,00 | 0,00 | 0,00 | 0,00 | NA | NA |
| CTA-520D8.2  | 0,00 | 0,00 | 0,00 | 0,00 | NA | NA |
| CTA-714B7.4  | 0,00 | 0,00 | 0,00 | 0,00 | NA | NA |
| CTA-714B7.6  | 0,00 | 0,00 | 0,00 | 0,00 | NA | NA |
| CTA-714B7.7  | 0,00 | 0,00 | 0,00 | 0,00 | NA | NA |
| CTA-747E2.8  | 0,00 | 0,00 | 0,00 | 0,00 | NA | NA |
| CTA-797E19.3 | 0,00 | 0,00 | 0,00 | 0,00 | NA | NA |
| CTA-833B7.2  | 0,00 | 0,00 | 0,00 | 0,00 | NA | NA |
| CTA-85E5.6   | 0,00 | 0,00 | 0,00 | 0,00 | NA | NA |
| CTA-85E5.7   | 0,00 | 0,00 | 0,00 | 0,00 | NA | NA |
| CTA-929C8.5  | 0,00 | 0,00 | 0,00 | 0,00 | NA | NA |
| CTA-929C8.7  | 0,00 | 0,00 | 0,00 | 0,00 | NA | NA |
| CTA-929C8.8  | 0,00 | 0,00 | 0,00 | 0,00 | NA | NA |
| CTA-941F9.9  | 0,00 | 0,00 | 0,00 | 0,00 | NA | NA |
| CTA-984G1.5  | 0,00 | 0,00 | 0,90 | 1,21 | NA | NA |
| CTA-992D9.6  | 0,00 | 0,00 | 0,00 | 0,00 | NA | NA |
| CTA-992D9.7  | 0,00 | 0,00 | 0,00 | 0,00 | NA | NA |
| CTAG1A       | 0,00 | 0,00 | 0,00 | 0,00 | NA | NA |
| CTAG1B       | 0,00 | 0,00 | 0,00 | 0,00 | NA | NA |
| CTAG2        | 0,00 | 0,00 | 0,00 | 0,00 | NA | NA |
| CTAGE15      | 0,00 | 0,00 | 0,00 | 0,00 | NA | NA |
| CTAGE7       | 0,00 | 0,00 | 0,00 | 0,00 | NA | NA |
| CTAGE8       | 0,00 | 0,00 | 0,00 | 0,00 | NA | NA |
| CTB-105L4.2  | 0,00 | 0,00 | 0,00 | 0,00 | NA | NA |
| CTB-107P3.1  | 0,00 | 0,00 | 0,00 | 0,00 | NA | NA |
| CTB-108O6.2  | 0,00 | 0,00 | 0,00 | 0,00 | NA | NA |
| CTB-10G5.1   | 0,00 | 0,00 | 0,00 | 0,00 | NA | NA |
| CTB-111H14.1 | 0,00 | 0,00 | 0,22 | 0,00 | NA | NA |
| CTB-113P19.4 | 0,00 | 0,00 | 0,00 | 0,00 | NA | NA |
| CTB-1144G6.5 | 0,00 | 0,00 | 0,00 | 0,00 | NA | NA |
| CTB-114C7.3  | 0,00 | 0,00 | 0,00 | 0,00 | NA | NA |
| CTB-118P15.2 | 0,00 | 0,00 | 0,00 | 0,00 | NA | NA |
| CTB-118P15.3 | 0,00 | 0,00 | 0,00 | 0,00 | NA | NA |
| CTB-11I22.1  | 0,00 | 0,00 | 0,00 | 0,00 | NA | NA |
| CTB-122H10.1 | 0,00 | 0,00 | 0,00 | 0,00 | NA | NA |
| CTB-127M13.1 | 0,00 | 0,00 | 0,00 | 0,00 | NA | NA |
| CTB-134F13.1 | 0,00 | 0,00 | 0,00 | 0,00 | NA | NA |
| CTB-13L3.1   | 0,00 | 0,00 | 0,00 | 0,00 | NA | NA |
| CTB-147C13.1 | 0,00 | 0,00 | 0,00 | 0,00 | NA | NA |
| CTB-147C22.3 | 0,00 | 0,00 | 0,00 | 0,00 | NA | NA |
| CTB-147C22.8 | 0,00 | 0,00 | 0,00 | 0,00 | NA | NA |
| CTB-147C22.9 | 0,00 | 0,00 | 0,00 | 0,00 | NA | NA |
| CTB-147N14.3 | 0,00 | 0,00 | 0,00 | 0,00 | NA | NA |
| CTB-147N14.4 | 0,00 | 0,00 | 0,00 | 0,00 | NA | NA |
| CTB-147N14.6 | 0,00 | 0,00 | 0,00 | 0,00 | NA | NA |
| CTB-147N14.7 | 0,00 | 0,00 | 0,00 | 0,00 | NA | NA |
| CTB-14A14.1  | 0,00 | 0,00 | 0,00 | 0,00 | NA | NA |

|              |      |      |      |      |    |    |
|--------------|------|------|------|------|----|----|
| CTB-14A14.2  | 0,00 | 0,00 | 0,00 | 0,00 | NA | NA |
| CTB-14A14.3  | 0,00 | 0,00 | 0,00 | 0,00 | NA | NA |
| CTB-152G17.4 | 0,00 | 0,00 | 0,00 | 0,00 | NA | NA |
| CTB-152G17.5 | 0,00 | 0,00 | 0,00 | 0,00 | NA | NA |
| CTB-158E9.2  | 0,00 | 0,00 | 0,00 | 0,00 | NA | NA |
| CTB-159G17.2 | 0,00 | 0,00 | 0,00 | 0,00 | NA | NA |
| CTB-160O22.1 | 0,00 | 0,00 | 0,00 | 0,00 | NA | NA |
| CTB-161C1.1  | 0,00 | 0,00 | 0,00 | 0,00 | NA | NA |
| CTB-161J7.1  | 0,00 | 0,00 | 0,00 | 0,00 | NA | NA |
| CTB-161J7.2  | 0,00 | 0,00 | 0,00 | 0,00 | NA | NA |
| CTB-161K23.1 | 0,00 | 0,00 | 0,00 | 0,00 | NA | NA |
| CTB-161M19.1 | 0,00 | 0,00 | 0,00 | 0,00 | NA | NA |
| CTB-162E12.1 | 0,00 | 0,00 | 0,00 | 0,00 | NA | NA |
| CTB-162J7.1  | 0,00 | 0,00 | 0,00 | 0,00 | NA | NA |
| CTB-164L20.1 | 0,00 | 0,00 | 0,00 | 0,00 | NA | NA |
| CTB-167G5.3  | 0,00 | 0,00 | 0,00 | 0,00 | NA | NA |
| CTB-167G5.7  | 0,00 | 0,00 | 0,00 | 0,00 | NA | NA |
| CTB-16J4.1   | 0,00 | 0,00 | 0,00 | 0,00 | NA | NA |
| CTB-171A8.1  | 0,00 | 0,00 | 0,00 | 0,00 | NA | NA |
| CTB-174D11.1 | 0,00 | 0,00 | 0,00 | 0,00 | NA | NA |
| CTB-174D11.2 | 0,00 | 0,00 | 0,00 | 0,00 | NA | NA |
| CTB-174D11.3 | 0,00 | 0,16 | 0,00 | 0,00 | NA | NA |
| CTB-175P5.1  | 0,00 | 0,00 | 0,00 | 0,00 | NA | NA |
| CTB-175P5.2  | 0,00 | 0,00 | 0,00 | 0,00 | NA | NA |
| CTB-178M22.2 | 0,00 | 0,00 | 0,00 | 0,00 | NA | NA |
| CTB-179I1.1  | 0,00 | 0,00 | 0,00 | 0,00 | NA | NA |
| CTB-179I1.2  | 0,00 | 0,00 | 0,00 | 0,00 | NA | NA |
| CTB-179I1.3  | 0,00 | 0,00 | 0,00 | 0,00 | NA | NA |
| CTB-179K24.3 | 0,86 | 0,89 | 0,48 | 0,00 | NA | NA |
| CTB-17P3.4   | 0,00 | 0,00 | 0,00 | 0,00 | NA | NA |
| CTB-180A7.3  | 0,00 | 0,00 | 0,00 | 0,00 | NA | NA |
| CTB-180A7.8  | 0,00 | 0,00 | 0,00 | 0,00 | NA | NA |
| CTB-180C19.1 | 0,00 | 0,00 | 0,00 | 0,00 | NA | NA |
| CTB-181F24.1 | 0,00 | 0,00 | 0,00 | 0,00 | NA | NA |
| CTB-186G2.4  | 0,00 | 0,00 | 0,00 | 0,00 | NA | NA |
| CTB-187M2.1  | 0,00 | 0,00 | 0,00 | 0,00 | NA | NA |
| CTB-187M2.2  | 0,00 | 0,00 | 0,00 | 0,00 | NA | NA |
| CTB-191D16.1 | 0,00 | 0,00 | 0,00 | 0,00 | NA | NA |
| CTB-191K22.5 | 0,00 | 0,00 | 0,00 | 0,00 | NA | NA |
| CTB-191K22.6 | 0,00 | 0,00 | 0,00 | 0,00 | NA | NA |
| CTB-1H10.1   | 0,00 | 0,00 | 0,00 | 0,00 | NA | NA |
| CTB-1I21.2   | 0,00 | 0,00 | 0,00 | 0,00 | NA | NA |
| CTB-22K21.2  | 0,00 | 0,00 | 0,00 | 0,00 | NA | NA |
| CTB-23I7.1   | 0,00 | 0,00 | 0,00 | 0,00 | NA | NA |
| CTB-23I7.2   | 0,00 | 0,00 | 0,00 | 0,00 | NA | NA |
| CTB-23I7.3   | 0,00 | 0,00 | 0,00 | 0,00 | NA | NA |
| CTB-25B13.9  | 0,00 | 0,00 | 0,00 | 0,00 | NA | NA |
| CTB-25J19.1  | 0,00 | 0,00 | 0,00 | 0,00 | NA | NA |
| CTB-26E19.1  | 0,00 | 0,00 | 0,00 | 0,00 | NA | NA |
| CTB-28J9.2   | 0,00 | 0,00 | 0,00 | 0,00 | NA | NA |
| CTB-28J9.3   | 0,00 | 0,00 | 0,00 | 0,00 | NA | NA |
| CTB-2L9.1    | 0,00 | 0,00 | 0,00 | 0,00 | NA | NA |
| CTB-30L5.1   | 0,00 | 0,00 | 0,00 | 0,00 | NA | NA |
| CTB-31C7.3   | 0,00 | 0,00 | 0,00 | 0,00 | NA | NA |
| CTB-31N19.2  | 0,00 | 0,00 | 0,00 | 0,00 | NA | NA |

|              |      |      |      |      |    |    |
|--------------|------|------|------|------|----|----|
| CTB-31N19.4  | 0,00 | 0,00 | 0,00 | 0,00 | NA | NA |
| CTB-31N19.5  | 0,00 | 0,00 | 0,00 | 0,00 | NA | NA |
| CTB-31O20.4  | 0,00 | 0,00 | 0,00 | 0,00 | NA | NA |
| CTB-31O20.9  | 0,00 | 0,00 | 0,00 | 0,00 | NA | NA |
| CTB-32O4.3   | 0,00 | 0,00 | 0,00 | 0,00 | NA | NA |
| CTB-32O4.4   | 0,00 | 0,00 | 0,00 | 0,00 | NA | NA |
| CTB-32P11.1  | 0,00 | 0,00 | 0,00 | 0,00 | NA | NA |
| CTB-33G10.1  | 0,00 | 0,00 | 0,00 | 0,00 | NA | NA |
| CTB-33G10.11 | 0,00 | 0,00 | 0,00 | 0,00 | NA | NA |
| CTB-33O18.1  | 0,00 | 0,00 | 0,00 | 0,00 | NA | NA |
| CTB-33O18.2  | 0,00 | 0,00 | 0,00 | 0,00 | NA | NA |
| CTB-35F21.2  | 0,00 | 0,00 | 0,00 | 0,00 | NA | NA |
| CTB-35F21.4  | 0,00 | 0,00 | 0,00 | 0,00 | NA | NA |
| CTB-35F21.5  | 0,00 | 0,00 | 0,00 | 0,00 | NA | NA |
| CTB-36O1.3   | 0,00 | 0,00 | 0,00 | 0,00 | NA | NA |
| CTB-39G8.2   | 0,00 | 0,00 | 0,00 | 0,00 | NA | NA |
| CTB-39G8.3   | 0,00 | 0,00 | 0,00 | 0,00 | NA | NA |
| CTB-3M24.1   | 0,00 | 0,00 | 0,00 | 0,00 | NA | NA |
| CTB-3M24.2   | 0,00 | 0,00 | 0,00 | 0,00 | NA | NA |
| CTB-3M24.3   | 0,00 | 0,00 | 0,00 | 0,00 | NA | NA |
| CTB-40D4.1   | 0,00 | 0,00 | 0,00 | 0,00 | NA | NA |
| CTB-40H15.1  | 0,00 | 0,00 | 0,00 | 0,00 | NA | NA |
| CTB-40H15.2  | 0,00 | 0,00 | 0,00 | 0,00 | NA | NA |
| CTB-40H15.3  | 0,00 | 0,00 | 0,00 | 0,00 | NA | NA |
| CTB-43E15.1  | 0,00 | 0,00 | 0,00 | 0,00 | NA | NA |
| CTB-43E15.2  | 0,00 | 0,00 | 0,00 | 0,00 | NA | NA |
| CTB-43E15.3  | 0,32 | 0,40 | 0,49 | 0,13 | NA | NA |
| CTB-43I4.1   | 0,00 | 0,00 | 0,00 | 0,00 | NA | NA |
| CTB-46B19.1  | 0,00 | 0,00 | 0,00 | 0,00 | NA | NA |
| CTB-47B11.1  | 0,00 | 0,00 | 0,00 | 0,00 | NA | NA |
| CTB-47B8.1   | 0,00 | 0,00 | 0,00 | 0,00 | NA | NA |
| CTB-47B8.2   | 0,00 | 0,00 | 0,00 | 0,00 | NA | NA |
| CTB-47B8.4   | 0,00 | 0,00 | 0,00 | 0,00 | NA | NA |
| CTB-47B8.5   | 0,00 | 0,00 | 0,00 | 0,00 | NA | NA |
| CTB-49A3.1   | 0,00 | 0,00 | 0,00 | 0,00 | NA | NA |
| CTB-49A3.4   | 0,00 | 0,00 | 0,00 | 0,00 | NA | NA |
| CTB-49A3.5   | 0,00 | 0,00 | 0,00 | 0,00 | NA | NA |
| CTB-4E7.1    | 0,00 | 0,00 | 0,00 | 0,00 | NA | NA |
| CTB-50E14.4  | 0,00 | 0,00 | 0,00 | 0,00 | NA | NA |
| CTB-50L17.2  | 0,00 | 0,00 | 0,00 | 0,00 | NA | NA |
| CTB-50L17.7  | 0,00 | 0,00 | 0,00 | 0,00 | NA | NA |
| CTB-51J22.1  | 0,00 | 0,00 | 0,00 | 0,00 | NA | NA |
| CTB-52I2.3   | 0,00 | 0,00 | 0,00 | 0,00 | NA | NA |
| CTB-52I2.7   | 0,00 | 0,00 | 0,00 | 0,00 | NA | NA |
| CTB-54I1.1   | 0,00 | 0,00 | 0,00 | 0,00 | NA | NA |
| CTB-54O9.9   | 0,00 | 0,00 | 0,00 | 0,00 | NA | NA |
| CTB-55O6.4   | 0,00 | 0,00 | 0,00 | 0,00 | NA | NA |
| CTB-55O6.8   | 0,00 | 0,00 | 0,00 | 0,00 | NA | NA |
| CTB-55P19.1  | 0,00 | 0,00 | 0,00 | 0,00 | NA | NA |
| CTB-56J15.1  | 0,00 | 0,00 | 0,00 | 0,00 | NA | NA |
| CTB-57H20.1  | 0,00 | 0,00 | 0,00 | 0,00 | NA | NA |
| CTB-58E17.10 | 0,00 | 0,00 | 0,00 | 0,00 | NA | NA |
| CTB-58E17.2  | 0,00 | 0,00 | 0,00 | 0,00 | NA | NA |
| CTB-58E17.3  | 0,00 | 0,00 | 0,00 | 0,00 | NA | NA |
| CTB-58E17.5  | 0,00 | 0,00 | 0,00 | 0,00 | NA | NA |

|               |      |      |      |      |    |    |
|---------------|------|------|------|------|----|----|
| CTB-58E17.9   | 0,00 | 0,00 | 0,00 | 0,00 | NA | NA |
| CTB-60B18.10  | 0,00 | 0,00 | 0,00 | 0,00 | NA | NA |
| CTB-60B18.12  | 0,00 | 0,00 | 0,00 | 0,00 | NA | NA |
| CTB-60B18.15  | 0,00 | 0,00 | 0,00 | 0,00 | NA | NA |
| CTB-60B18.17  | 0,00 | 0,00 | 0,00 | 0,00 | NA | NA |
| CTB-60B18.18  | 0,00 | 0,00 | 0,00 | 0,00 | NA | NA |
| CTB-60B18.22  | 0,00 | 0,00 | 0,00 | 0,00 | NA | NA |
| CTB-60B18.23  | 0,00 | 0,00 | 0,00 | 0,00 | NA | NA |
| CTB-60B18.6   | 0,00 | 0,00 | 0,00 | 0,00 | NA | NA |
| CTB-60E11.11  | 0,00 | 0,00 | 0,00 | 0,00 | NA | NA |
| CTB-60E11.12  | 0,00 | 0,00 | 0,00 | 0,00 | NA | NA |
| CTB-61M7.1    | 0,00 | 0,00 | 0,00 | 0,00 | NA | NA |
| CTB-67I13.1   | 0,00 | 0,00 | 0,00 | 0,13 | NA | NA |
| CTB-70D19.1   | 0,00 | 0,00 | 0,00 | 0,00 | NA | NA |
| CTB-70G10.1   | 0,00 | 0,00 | 0,00 | 0,00 | NA | NA |
| CTB-73N10.1   | 0,00 | 0,00 | 0,00 | 0,00 | NA | NA |
| CTB-78F1.1    | 0,00 | 0,17 | 0,03 | 0,15 | NA | NA |
| CTB-78F1.2    | 0,00 | 0,00 | 0,00 | 0,00 | NA | NA |
| CTB-78H18.1   | 0,00 | 0,00 | 0,00 | 0,00 | NA | NA |
| CTB-78O21.1   | 0,00 | 0,00 | 0,00 | 0,00 | NA | NA |
| CTB-79E8.4    | 0,00 | 0,00 | 0,00 | 0,00 | NA | NA |
| CTB-7E3.1     | 0,00 | 0,00 | 0,00 | 0,00 | NA | NA |
| CTB-83D3.1    | 0,00 | 0,00 | 0,00 | 0,00 | NA | NA |
| CTB-83J4.1    | 0,00 | 0,00 | 0,00 | 0,00 | NA | NA |
| CTB-88F18.2   | 0,00 | 0,00 | 0,00 | 0,00 | NA | NA |
| CTB-88F18.3   | 0,00 | 0,00 | 0,00 | 0,00 | NA | NA |
| CTB-88F18.4   | 0,00 | 0,00 | 0,00 | 0,00 | NA | NA |
| CTB-95B16.1   | 0,00 | 0,00 | 0,00 | 0,00 | NA | NA |
| CTB-95D12.1   | 0,00 | 0,06 | 0,00 | 0,00 | NA | NA |
| CTB-96E2.10   | 0,00 | 0,00 | 0,00 | 0,00 | NA | NA |
| CTB-96E2.2    | 0,00 | 0,00 | 0,00 | 0,00 | NA | NA |
| CTC-1337H24.3 | 0,00 | 0,00 | 0,00 | 0,00 | NA | NA |
| CTC-1337H24.4 | 0,00 | 0,00 | 0,00 | 0,00 | NA | NA |
| CTC-205M6.1   | 0,00 | 0,00 | 0,00 | 0,00 | NA | NA |
| CTC-209L16.1  | 0,00 | 0,00 | 0,00 | 0,00 | NA | NA |
| CTC-210G5.1   | 0,00 | 0,38 | 0,00 | 0,00 | NA | NA |
| CTC-218B8.3   | 0,00 | 0,00 | 0,00 | 0,00 | NA | NA |
| CTC-218H9.1   | 0,00 | 0,00 | 0,00 | 0,00 | NA | NA |
| CTC-224D3.1   | 0,00 | 0,00 | 0,00 | 0,00 | NA | NA |
| CTC-228N24.2  | 0,00 | 0,00 | 0,00 | 0,00 | NA | NA |
| CTC-229L21.1  | 0,00 | 0,00 | 0,00 | 0,00 | NA | NA |
| CTC-232H10.1  | 0,00 | 0,00 | 0,00 | 0,00 | NA | NA |
| CTC-233O10.1  | 0,00 | 0,00 | 0,00 | 0,00 | NA | NA |
| CTC-235G5.1   | 0,00 | 0,00 | 0,00 | 0,00 | NA | NA |
| CTC-235G5.2   | 0,00 | 0,00 | 0,00 | 0,00 | NA | NA |
| CTC-235G5.3   | 0,00 | 0,00 | 0,00 | 0,00 | NA | NA |
| CTC-246B18.12 | 0,00 | 0,00 | 0,00 | 0,00 | NA | NA |
| CTC-246B18.8  | 0,00 | 0,00 | 0,00 | 0,00 | NA | NA |
| CTC-250P20.1  | 0,00 | 0,00 | 0,00 | 0,00 | NA | NA |
| CTC-251H24.14 | 0,00 | 0,00 | 0,00 | 0,00 | NA | NA |
| CTC-254B4.1   | 0,00 | 0,00 | 0,00 | 0,00 | NA | NA |
| CTC-255N20.1  | 0,00 | 0,00 | 0,00 | 0,00 | NA | NA |
| CTC-258N23.3  | 0,00 | 0,00 | 0,00 | 0,00 | NA | NA |
| CTC-259J15.1  | 0,00 | 0,00 | 0,00 | 0,00 | NA | NA |
| CTC-260E6.11  | 0,00 | 0,00 | 0,00 | 0,00 | NA | NA |



|               |      |      |      |      |    |    |
|---------------|------|------|------|------|----|----|
| CTC-260E6.12  | 0,00 | 0,00 | 0,00 | 0,00 | NA | NA |
| CTC-260E6.7   | 0,00 | 0,00 | 0,00 | 0,00 | NA | NA |
| CTC-260E6.9   | 0,00 | 0,00 | 0,00 | 0,00 | NA | NA |
| CTC-261N6.2   | 0,00 | 0,00 | 0,00 | 0,00 | NA | NA |
| CTC-261N6.3   | 0,00 | 0,00 | 0,00 | 0,00 | NA | NA |
| CTC-264K15.6  | 0,00 | 0,00 | 0,00 | 0,00 | NA | NA |
| CTC-264O10.1  | 0,00 | 0,00 | 0,00 | 0,00 | NA | NA |
| CTC-264O10.2  | 0,00 | 0,00 | 0,00 | 0,00 | NA | NA |
| CTC-269P20.1  | 0,00 | 0,00 | 0,00 | 0,00 | NA | NA |
| CTC-270D5.2   | 0,00 | 0,00 | 0,00 | 0,00 | NA | NA |
| CTC-273B12.10 | 0,00 | 0,00 | 0,00 | 0,00 | NA | NA |
| CTC-273B12.7  | 0,00 | 0,00 | 0,00 | 0,00 | NA | NA |
| CTC-276P9.1   | 0,00 | 0,00 | 0,00 | 0,00 | NA | NA |
| CTC-276P9.2   | 0,00 | 0,00 | 0,00 | 0,00 | NA | NA |
| CTC-276P9.3   | 0,00 | 0,00 | 0,00 | 0,00 | NA | NA |
| CTC-276P9.4   | 0,00 | 0,00 | 0,00 | 0,00 | NA | NA |
| CTC-278L1.1   | 0,00 | 0,00 | 0,00 | 0,00 | NA | NA |
| CTC-280C13.1  | 0,00 | 0,00 | 0,00 | 0,00 | NA | NA |
| CTC-281F24.2  | 0,00 | 0,00 | 0,00 | 0,00 | NA | NA |
| CTC-281M20.2  | 0,00 | 0,00 | 0,00 | 0,00 | NA | NA |
| CTC-281M20.3  | 0,00 | 0,00 | 0,00 | 0,00 | NA | NA |
| CTC-281M20.4  | 0,00 | 0,00 | 0,00 | 0,00 | NA | NA |
| CTC-286N12.1  | 0,00 | 0,00 | 0,00 | 0,27 | NA | NA |
| CTC-293A9.2   | 0,00 | 0,00 | 0,00 | 0,00 | NA | NA |
| CTC-295J13.2  | 0,00 | 0,00 | 0,00 | 0,00 | NA | NA |
| CTC-295J13.3  | 0,00 | 0,00 | 0,00 | 0,00 | NA | NA |
| CTC-296K1.4   | 0,00 | 0,33 | 0,00 | 0,00 | NA | NA |
| CTC-297N7.10  | 0,00 | 0,00 | 0,00 | 0,00 | NA | NA |
| CTC-297N7.9   | 0,00 | 0,00 | 0,00 | 0,00 | NA | NA |
| CTC-298B17.1  | 0,00 | 0,00 | 0,00 | 0,00 | NA | NA |
| CTC-304I17.2  | 0,00 | 0,00 | 0,00 | 0,00 | NA | NA |
| CTC-304I17.3  | 0,00 | 0,00 | 0,00 | 0,00 | NA | NA |
| CTC-304I17.4  | 0,00 | 0,00 | 0,00 | 0,00 | NA | NA |
| CTC-305H11.1  | 0,00 | 0,00 | 0,00 | 0,00 | NA | NA |
| CTC-308K20.3  | 0,00 | 0,00 | 0,00 | 0,00 | NA | NA |
| CTC-311G1.1   | 0,00 | 0,00 | 0,00 | 0,00 | NA | NA |
| CTC-311G1.2   | 0,00 | 0,00 | 0,00 | 0,00 | NA | NA |
| CTC-312O10.2  | 0,00 | 0,00 | 0,00 | 0,00 | NA | NA |
| CTC-312O10.3  | 0,00 | 0,00 | 0,00 | 0,00 | NA | NA |
| CTC-313D10.1  | 0,00 | 0,00 | 0,00 | 0,00 | NA | NA |
| CTC-320C6.1   | 0,00 | 0,00 | 0,00 | 0,00 | NA | NA |
| CTC-321K16.1  | 0,00 | 0,00 | 0,00 | 0,00 | NA | NA |
| CTC-321K16.4  | 0,00 | 0,00 | 0,00 | 0,00 | NA | NA |
| CTC-325H20.7  | 0,00 | 0,00 | 0,00 | 0,00 | NA | NA |
| CTC-325J23.4  | 0,00 | 0,00 | 0,00 | 0,00 | NA | NA |
| CTC-326K19.6  | 0,00 | 0,00 | 0,00 | 0,00 | NA | NA |
| CTC-327F10.3  | 0,00 | 0,00 | 0,00 | 0,00 | NA | NA |
| CTC-327F10.4  | 0,00 | 0,00 | 0,00 | 0,00 | NA | NA |
| CTC-329H14.1  | 0,00 | 0,00 | 0,00 | 0,00 | NA | NA |
| CTC-337B15.3  | 0,00 | 0,00 | 0,00 | 0,00 | NA | NA |
| CTC-338M12.1  | 0,00 | 0,00 | 0,00 | 0,00 | NA | NA |
| CTC-338M12.13 | 0,00 | 0,00 | 0,00 | 0,00 | NA | NA |
| CTC-338M12.2  | 0,00 | 0,00 | 0,00 | 0,00 | NA | NA |
| CTC-338M12.7  | 0,00 | 0,00 | 0,00 | 0,00 | NA | NA |
| CTC-339F2.2   | 0,00 | 0,00 | 0,00 | 0,00 | NA | NA |

|              |      |      |      |      |    |    |
|--------------|------|------|------|------|----|----|
| CTC-339O9.2  | 0,00 | 0,00 | 0,00 | 0,00 | NA | NA |
| CTC-340A15.1 | 0,00 | 0,00 | 0,00 | 0,00 | NA | NA |
| CTC-340I23.2 | 0,00 | 0,00 | 0,00 | 0,00 | NA | NA |
| CTC-342M10.1 | 0,00 | 0,00 | 0,00 | 0,00 | NA | NA |
| CTC-342P15.1 | 0,00 | 0,00 | 0,00 | 0,00 | NA | NA |
| CTC-343N3.1  | 0,00 | 0,00 | 0,00 | 0,00 | NA | NA |
| CTC-344H19.6 | 0,00 | 0,00 | 0,00 | 0,00 | NA | NA |
| CTC-345K18.2 | 0,00 | 0,00 | 0,00 | 0,00 | NA | NA |
| CTC-347C20.1 | 0,00 | 0,00 | 0,00 | 0,00 | NA | NA |
| CTC-348L5.1  | 0,00 | 0,00 | 0,00 | 0,00 | NA | NA |
| CTC-349C3.2  | 0,00 | 0,00 | 0,00 | 0,00 | NA | NA |
| CTC-350I8.1  | 0,00 | 0,00 | 0,00 | 0,00 | NA | NA |
| CTC-353G13.1 | 0,00 | 0,00 | 0,00 | 0,00 | NA | NA |
| CTC-359D24.1 | 0,00 | 0,00 | 0,00 | 0,00 | NA | NA |
| CTC-360G5.6  | 0,91 | 1,41 | 1,15 | 0,76 | NA | NA |
| CTC-360G5.8  | 0,00 | 0,00 | 0,00 | 0,00 | NA | NA |
| CTC-360J11.5 | 0,00 | 0,00 | 0,00 | 0,00 | NA | NA |
| CTC-360J11.6 | 0,00 | 0,00 | 0,00 | 0,00 | NA | NA |
| CTC-360J11.7 | 0,00 | 0,00 | 0,00 | 0,00 | NA | NA |
| CTC-360P9.1  | 0,00 | 0,00 | 0,00 | 0,00 | NA | NA |
| CTC-360P9.3  | 0,00 | 0,00 | 0,00 | 0,00 | NA | NA |
| CTC-362D12.1 | 0,00 | 0,00 | 0,00 | 0,00 | NA | NA |
| CTC-367F4.2  | 0,00 | 0,00 | 0,00 | 0,00 | NA | NA |
| CTC-367J11.1 | 0,00 | 0,00 | 0,00 | 0,00 | NA | NA |
| CTC-369M3.1  | 0,00 | 0,00 | 0,00 | 0,00 | NA | NA |
| CTC-370J7.1  | 0,00 | 0,00 | 0,00 | 0,00 | NA | NA |
| CTC-391G2.1  | 0,00 | 0,00 | 0,00 | 0,00 | NA | NA |
| CTC-398G3.2  | 0,00 | 0,00 | 0,00 | 0,00 | NA | NA |
| CTC-398G3.6  | 0,00 | 0,00 | 0,00 | 0,00 | NA | NA |
| CTC-400I9.1  | 0,00 | 0,00 | 0,00 | 0,00 | NA | NA |
| CTC-400I9.2  | 0,00 | 0,00 | 0,00 | 0,00 | NA | NA |
| CTC-400I9.3  | 0,00 | 0,00 | 0,00 | 0,00 | NA | NA |
| CTC-412M14.5 | 0,00 | 0,00 | 0,00 | 0,00 | NA | NA |
| CTC-412M14.6 | 0,00 | 0,00 | 0,00 | 0,00 | NA | NA |
| CTC-419K13.1 | 0,00 | 0,00 | 0,00 | 0,00 | NA | NA |
| CTC-422A18.1 | 0,00 | 0,00 | 0,00 | 0,00 | NA | NA |
| CTC-422A18.2 | 0,00 | 0,00 | 0,00 | 0,00 | NA | NA |
| CTC-425H14.1 | 0,00 | 0,00 | 0,00 | 0,00 | NA | NA |
| CTC-425K20.1 | 0,00 | 0,00 | 0,00 | 0,00 | NA | NA |
| CTC-426L22.1 | 0,00 | 0,00 | 0,00 | 0,00 | NA | NA |
| CTC-428G20.2 | 0,00 | 0,00 | 0,00 | 0,00 | NA | NA |
| CTC-428G20.6 | 0,00 | 0,00 | 0,00 | 0,00 | NA | NA |
| CTC-428I3.1  | 0,00 | 0,00 | 0,00 | 0,00 | NA | NA |
| CTC-429C10.2 | 0,00 | 0,00 | 0,00 | 0,00 | NA | NA |
| CTC-429C10.7 | 0,00 | 0,00 | 0,00 | 0,00 | NA | NA |
| CTC-430J12.2 | 0,00 | 0,00 | 0,00 | 0,00 | NA | NA |
| CTC-432M15.3 | 0,00 | 0,00 | 0,00 | 0,00 | NA | NA |
| CTC-435M10.6 | 0,00 | 0,00 | 0,00 | 0,00 | NA | NA |
| CTC-436K13.2 | 0,00 | 0,00 | 0,00 | 0,00 | NA | NA |
| CTC-436K13.4 | 0,00 | 0,00 | 0,00 | 0,00 | NA | NA |
| CTC-436P18.1 | 0,00 | 0,00 | 0,00 | 0,00 | NA | NA |
| CTC-438O3.1  | 0,00 | 0,00 | 0,00 | 0,00 | NA | NA |
| CTC-441N14.1 | 0,00 | 0,00 | 0,00 | 0,00 | NA | NA |
| CTC-441N14.4 | 0,00 | 0,00 | 0,00 | 0,00 | NA | NA |
| CTC-444D3.7  | 0,00 | 0,00 | 0,00 | 0,00 | NA | NA |

|               |      |      |      |      |    |    |
|---------------|------|------|------|------|----|----|
| CTC-444N24.13 | 0,00 | 0,00 | 0,00 | 0,00 | NA | NA |
| CTC-447K7.1   | 0,00 | 0,00 | 0,00 | 0,00 | NA | NA |
| CTC-447O6.1   | 0,00 | 0,00 | 0,00 | 0,00 | NA | NA |
| CTC-448F2.3   | 0,00 | 0,00 | 0,00 | 0,00 | NA | NA |
| CTC-448F2.6   | 0,00 | 0,00 | 0,00 | 0,00 | NA | NA |
| CTC-451A6.5   | 0,00 | 0,00 | 0,00 | 0,00 | NA | NA |
| CTC-453G23.5  | 0,00 | 0,00 | 0,00 | 0,00 | NA | NA |
| CTC-453G23.8  | 0,00 | 0,00 | 0,00 | 0,00 | NA | NA |
| CTC-454I21.4  | 0,00 | 0,00 | 0,00 | 0,00 | NA | NA |
| CTC-455F18.3  | 0,00 | 0,00 | 0,00 | 0,00 | NA | NA |
| CTC-457E21.1  | 0,00 | 0,00 | 0,00 | 0,00 | NA | NA |
| CTC-457E21.10 | 0,00 | 0,00 | 0,00 | 0,00 | NA | NA |
| CTC-457E21.4  | 0,00 | 0,00 | 0,00 | 0,00 | NA | NA |
| CTC-457E21.5  | 0,00 | 0,00 | 0,00 | 0,00 | NA | NA |
| CTC-457E21.6  | 0,00 | 0,00 | 0,00 | 0,00 | NA | NA |
| CTC-457E21.7  | 0,00 | 0,00 | 0,00 | 0,00 | NA | NA |
| CTC-457E21.9  | 0,00 | 0,00 | 0,00 | 0,00 | NA | NA |
| CTC-458A3.1   | 0,00 | 0,00 | 0,00 | 0,00 | NA | NA |
| CTC-458G6.1   | 0,00 | 0,00 | 0,00 | 0,00 | NA | NA |
| CTC-458G6.3   | 0,00 | 0,00 | 0,00 | 0,00 | NA | NA |
| CTC-459F4.5   | 0,00 | 0,00 | 0,00 | 0,00 | NA | NA |
| CTC-459F4.7   | 0,00 | 0,00 | 0,00 | 0,00 | NA | NA |
| CTC-459F4.8   | 0,00 | 0,00 | 0,00 | 0,00 | NA | NA |
| CTC-459M5.1   | 0,00 | 0,89 | 0,00 | 0,00 | NA | NA |
| CTC-461H2.2   | 0,00 | 0,00 | 0,00 | 0,00 | NA | NA |
| CTC-461H2.3   | 0,00 | 0,00 | 0,00 | 0,00 | NA | NA |
| CTC-463N11.1  | 0,00 | 0,00 | 0,00 | 0,00 | NA | NA |
| CTC-463N11.4  | 0,00 | 0,00 | 0,00 | 0,00 | NA | NA |
| CTC-465D4.1   | 0,00 | 0,00 | 0,00 | 0,00 | NA | NA |
| CTC-467M3.2   | 0,00 | 0,00 | 0,00 | 0,00 | NA | NA |
| CTC-467M3.3   | 0,00 | 0,00 | 0,00 | 0,00 | NA | NA |
| CTC-470C15.1  | 0,00 | 0,00 | 0,00 | 0,00 | NA | NA |
| CTC-470E21.1  | 0,00 | 0,00 | 0,00 | 0,00 | NA | NA |
| CTC-471C19.1  | 0,00 | 0,00 | 0,00 | 0,00 | NA | NA |
| CTC-471C19.2  | 0,00 | 0,00 | 0,00 | 0,00 | NA | NA |
| CTC-471F3.4   | 0,00 | 0,00 | 0,00 | 0,00 | NA | NA |
| CTC-471J1.10  | 0,00 | 0,00 | 0,00 | 0,00 | NA | NA |
| CTC-472C24.1  | 0,00 | 0,00 | 0,00 | 0,00 | NA | NA |
| CTC-479C5.11  | 0,00 | 0,00 | 0,00 | 0,00 | NA | NA |
| CTC-479C5.6   | 0,00 | 0,00 | 0,00 | 0,00 | NA | NA |
| CTC-484P3.3   | 0,00 | 0,00 | 0,00 | 0,00 | NA | NA |
| CTC-490E21.12 | 0,00 | 0,00 | 0,00 | 0,00 | NA | NA |
| CTC-490E21.13 | 0,00 | 0,00 | 0,00 | 0,00 | NA | NA |
| CTC-490G23.4  | 0,00 | 0,00 | 0,00 | 0,00 | NA | NA |
| CTC-490G23.5  | 0,00 | 0,00 | 0,00 | 0,00 | NA | NA |
| CTC-490G23.6  | 0,00 | 0,66 | 0,00 | 0,46 | NA | NA |
| CTC-493L21.1  | 0,00 | 0,00 | 0,00 | 0,00 | NA | NA |
| CTC-493L21.2  | 0,00 | 0,00 | 0,00 | 0,00 | NA | NA |
| CTC-493P15.2  | 0,00 | 0,38 | 0,00 | 0,00 | NA | NA |
| CTC-493P15.3  | 0,00 | 0,00 | 0,00 | 0,00 | NA | NA |
| CTC-496I23.1  | 0,00 | 0,00 | 0,00 | 0,00 | NA | NA |
| CTC-497E21.3  | 0,00 | 0,00 | 0,00 | 0,00 | NA | NA |
| CTC-497E21.5  | 0,00 | 0,00 | 0,00 | 0,00 | NA | NA |
| CTC-498J12.2  | 0,00 | 0,00 | 0,00 | 0,00 | NA | NA |
| CTC-498M16.1  | 0,00 | 0,00 | 0,00 | 0,00 | NA | NA |

|               |      |      |      |      |    |    |
|---------------|------|------|------|------|----|----|
| CTC-498M16.2  | 0,00 | 0,00 | 0,00 | 0,00 | NA | NA |
| CTC-498M16.3  | 0,00 | 0,00 | 0,00 | 0,00 | NA | NA |
| CTC-498M16.4  | 0,00 | 0,00 | 0,00 | 0,00 | NA | NA |
| CTC-499B15.1  | 0,00 | 0,00 | 0,00 | 0,00 | NA | NA |
| CTC-499B15.4  | 0,00 | 0,00 | 0,00 | 0,00 | NA | NA |
| CTC-501O10.1  | 0,91 | 0,40 | 1,11 | 0,68 | NA | NA |
| CTC-503J8.2   | 0,00 | 0,00 | 0,00 | 0,00 | NA | NA |
| CTC-503J8.9   | 0,00 | 0,00 | 0,00 | 0,00 | NA | NA |
| CTC-505O3.1   | 0,00 | 0,00 | 0,00 | 0,00 | NA | NA |
| CTC-505O3.2   | 0,00 | 0,00 | 0,00 | 0,00 | NA | NA |
| CTC-505O3.3   | 0,00 | 0,51 | 0,26 | 0,25 | NA | NA |
| CTC-507E12.1  | 0,00 | 0,00 | 0,00 | 0,00 | NA | NA |
| CTC-508F8.1   | 0,00 | 0,00 | 0,00 | 0,00 | NA | NA |
| CTC-512J12.4  | 0,00 | 0,00 | 0,00 | 0,00 | NA | NA |
| CTC-512J12.6  | 0,00 | 0,00 | 0,00 | 0,00 | NA | NA |
| CTC-512J14.1  | 0,00 | 0,00 | 0,00 | 0,00 | NA | NA |
| CTC-512J14.2  | 0,00 | 0,00 | 0,00 | 0,00 | NA | NA |
| CTC-513N18.3  | 0,00 | 0,00 | 0,00 | 0,00 | NA | NA |
| CTC-513N18.5  | 0,00 | 0,00 | 0,00 | 0,00 | NA | NA |
| CTC-518B2.8   | 0,00 | 0,00 | 0,00 | 0,00 | NA | NA |
| CTC-518B2.9   | 0,00 | 0,00 | 0,00 | 0,00 | NA | NA |
| CTC-523E23.1  | 0,00 | 0,05 | 0,00 | 0,00 | NA | NA |
| CTC-523E23.10 | 0,00 | 0,00 | 0,00 | 0,00 | NA | NA |
| CTC-523E23.15 | 0,00 | 0,00 | 0,00 | 0,00 | NA | NA |
| CTC-523E23.6  | 0,00 | 0,00 | 0,00 | 0,00 | NA | NA |
| CTC-523E23.8  | 0,00 | 0,00 | 0,00 | 0,00 | NA | NA |
| CTC-523E23.9  | 0,00 | 0,00 | 0,00 | 0,00 | NA | NA |
| CTC-524C5.5   | 0,00 | 0,00 | 0,00 | 0,00 | NA | NA |
| CTC-525D6.2   | 0,00 | 0,00 | 0,00 | 0,00 | NA | NA |
| CTC-525D6.5   | 0,00 | 0,00 | 0,00 | 0,00 | NA | NA |
| CTC-527H23.4  | 0,00 | 0,00 | 0,00 | 0,00 | NA | NA |
| CTC-529G1.1   | 0,00 | 0,00 | 0,00 | 0,00 | NA | NA |
| CTC-534B23.1  | 0,00 | 0,00 | 0,00 | 0,00 | NA | NA |
| CTC-535M15.1  | 0,00 | 0,00 | 0,00 | 0,00 | NA | NA |
| CTC-535M15.2  | 0,00 | 0,00 | 0,00 | 0,00 | NA | NA |
| CTC-537E7.1   | 0,00 | 0,00 | 0,00 | 0,00 | NA | NA |
| CTC-537E7.2   | 0,00 | 0,00 | 0,00 | 0,00 | NA | NA |
| CTC-537E7.3   | 0,00 | 0,00 | 0,00 | 0,00 | NA | NA |
| CTC-542B22.1  | 0,00 | 0,00 | 0,00 | 0,00 | NA | NA |
| CTC-542B22.2  | 0,55 | 0,00 | 0,41 | 0,47 | NA | NA |
| CTC-546K23.2  | 0,00 | 0,00 | 0,00 | 0,00 | NA | NA |
| CTC-548H10.2  | 0,00 | 0,00 | 0,00 | 0,00 | NA | NA |
| CTC-548K16.5  | 0,00 | 0,00 | 0,00 | 0,00 | NA | NA |
| CTC-550B14.1  | 0,00 | 0,00 | 0,00 | 0,00 | NA | NA |
| CTC-550B14.10 | 0,00 | 0,00 | 0,00 | 0,00 | NA | NA |
| CTC-550M4.1   | 0,00 | 0,00 | 0,00 | 0,00 | NA | NA |
| CTC-551A13.2  | 0,00 | 0,00 | 0,00 | 0,00 | NA | NA |
| CTC-552D5.1   | 0,00 | 0,00 | 0,00 | 0,00 | NA | NA |
| CTC-555I19.1  | 0,00 | 0,00 | 0,00 | 0,00 | NA | NA |
| CTC-556K20.1  | 0,00 | 0,00 | 0,00 | 0,00 | NA | NA |
| CTC-558O2.1   | 0,04 | 0,04 | 0,00 | 0,05 | NA | NA |
| CTC-558O2.2   | 0,00 | 0,00 | 0,00 | 0,00 | NA | NA |
| CTC-559E9.10  | 0,00 | 0,00 | 0,00 | 0,00 | NA | NA |
| CTC-559E9.11  | 0,00 | 0,00 | 0,00 | 0,00 | NA | NA |
| CTC-559E9.2   | 0,00 | 0,00 | 0,00 | 0,00 | NA | NA |

|               |      |      |      |      |    |    |
|---------------|------|------|------|------|----|----|
| CTC-563A5.4   | 0,00 | 0,00 | 0,00 | 0,00 | NA | NA |
| CTC-564N23.6  | 0,00 | 0,00 | 0,00 | 0,00 | NA | NA |
| CTC-565M22.1  | 0,00 | 0,00 | 0,00 | 0,00 | NA | NA |
| CTC-566C5.1   | 0,00 | 0,00 | 0,00 | 0,00 | NA | NA |
| CTC-571O20.1  | 0,00 | 0,00 | 0,00 | 0,00 | NA | NA |
| CTC-575C13.1  | 0,00 | 0,00 | 0,00 | 0,00 | NA | NA |
| CTC-575C13.2  | 0,00 | 0,00 | 0,00 | 0,00 | NA | NA |
| CTC-575C13.4  | 0,00 | 0,00 | 0,00 | 0,00 | NA | NA |
| CTC-575D19.1  | 0,49 | 0,53 | 0,31 | 0,64 | NA | NA |
| CTC-661I16.1  | 0,00 | 0,00 | 0,00 | 0,00 | NA | NA |
| CTC-661I16.2  | 0,00 | 0,00 | 0,00 | 0,00 | NA | NA |
| CTC-756D1.1   | 0,00 | 0,00 | 0,00 | 0,00 | NA | NA |
| CTC-756D1.3   | 0,00 | 0,00 | 0,00 | 0,00 | NA | NA |
| CTC-774J1.1   | 0,00 | 0,09 | 0,05 | 0,00 | NA | NA |
| CTC-782O7.1   | 0,00 | 0,00 | 0,00 | 0,00 | NA | NA |
| CTC-782O7.2   | 0,00 | 0,00 | 0,00 | 0,00 | NA | NA |
| CTC-786C10.2  | 0,00 | 0,00 | 0,00 | 0,00 | NA | NA |
| CTC-788C1.2   | 0,00 | 0,00 | 0,00 | 0,00 | NA | NA |
| CTC-806A22.1  | 0,00 | 0,00 | 0,00 | 0,00 | NA | NA |
| CTC-820M8.1   | 0,00 | 0,00 | 0,00 | 0,00 | NA | NA |
| CTC-830E23.1  | 0,00 | 0,00 | 0,00 | 0,00 | NA | NA |
| CTD-2001A16.1 | 0,00 | 0,00 | 0,00 | 0,00 | NA | NA |
| CTD-2001E22.2 | 0,00 | 0,00 | 0,00 | 0,00 | NA | NA |
| CTD-2003D5.1  | 0,00 | 0,00 | 0,00 | 0,00 | NA | NA |
| CTD-2004A9.1  | 0,00 | 0,00 | 0,00 | 0,00 | NA | NA |
| CTD-2005D20.1 | 0,00 | 0,00 | 0,00 | 0,00 | NA | NA |
| CTD-2005H7.1  | 0,00 | 0,00 | 0,00 | 0,00 | NA | NA |
| CTD-2005H7.2  | 0,00 | 0,00 | 0,00 | 0,00 | NA | NA |
| CTD-2006B8.1  | 0,00 | 0,00 | 0,00 | 0,00 | NA | NA |
| CTD-2006C1.12 | 0,00 | 0,00 | 0,00 | 0,00 | NA | NA |
| CTD-2006C1.6  | 0,00 | 0,00 | 0,00 | 0,00 | NA | NA |
| CTD-2006H14.1 | 0,00 | 0,00 | 0,00 | 0,00 | NA | NA |
| CTD-2006H14.2 | 0,00 | 0,24 | 0,11 | 0,23 | NA | NA |
| CTD-2006M22.1 | 0,00 | 0,00 | 0,00 | 0,00 | NA | NA |
| CTD-2006M22.2 | 0,00 | 0,00 | 0,00 | 0,00 | NA | NA |
| CTD-2006O16.2 | 0,00 | 0,00 | 0,00 | 0,00 | NA | NA |
| CTD-2007A10.1 | 0,00 | 0,00 | 0,00 | 0,00 | NA | NA |
| CTD-2007H13.1 | 0,00 | 0,00 | 0,00 | 0,00 | NA | NA |
| CTD-2007H13.2 | 0,00 | 0,00 | 0,00 | 0,00 | NA | NA |
| CTD-2008A1.1  | 0,00 | 0,00 | 0,00 | 0,00 | NA | NA |
| CTD-2008A1.3  | 0,00 | 0,00 | 0,00 | 0,00 | NA | NA |
| CTD-2008N3.1  | 0,00 | 0,00 | 0,00 | 0,00 | NA | NA |
| CTD-2008O4.1  | 0,00 | 0,00 | 0,00 | 0,00 | NA | NA |
| CTD-2008P7.10 | 0,00 | 0,00 | 0,00 | 0,00 | NA | NA |
| CTD-2008P7.3  | 0,00 | 0,00 | 0,00 | 0,00 | NA | NA |
| CTD-2008P7.5  | 0,00 | 0,00 | 0,00 | 0,00 | NA | NA |
| CTD-2008P7.6  | 0,00 | 0,00 | 0,00 | 0,00 | NA | NA |
| CTD-2008P7.7  | 0,00 | 0,00 | 0,00 | 0,00 | NA | NA |
| CTD-2008P7.8  | 0,00 | 0,00 | 0,00 | 0,00 | NA | NA |
| CTD-2009A10.1 | 0,00 | 0,00 | 0,00 | 0,00 | NA | NA |
| CTD-2010I22.2 | 0,75 | 1,63 | 1,44 | 1,00 | NA | NA |
| CTD-2011G17.1 | 0,00 | 0,00 | 0,00 | 0,00 | NA | NA |
| CTD-2012B7.1  | 0,00 | 0,00 | 0,00 | 0,00 | NA | NA |
| CTD-2012J19.1 | 0,00 | 0,00 | 0,00 | 0,00 | NA | NA |
| CTD-2012J19.2 | 0,00 | 0,00 | 0,00 | 0,00 | NA | NA |

|               |      |      |      |      |    |    |
|---------------|------|------|------|------|----|----|
| CTD-2012K14.2 | 0,00 | 0,00 | 0,00 | 0,00 | NA | NA |
| CTD-2012K14.3 | 0,00 | 0,00 | 0,00 | 0,00 | NA | NA |
| CTD-2012K14.4 | 0,00 | 0,00 | 0,00 | 0,00 | NA | NA |
| CTD-2012M11.3 | 0,00 | 0,00 | 0,00 | 0,00 | NA | NA |
| CTD-2014B16.1 | 0,00 | 0,00 | 0,00 | 0,00 | NA | NA |
| CTD-2014B16.2 | 0,00 | 0,00 | 0,00 | 0,00 | NA | NA |
| CTD-2014B16.5 | 0,00 | 0,00 | 0,00 | 0,00 | NA | NA |
| CTD-2014E2.5  | 0,00 | 0,00 | 0,00 | 0,00 | NA | NA |
| CTD-2014E2.6  | 0,00 | 0,00 | 0,00 | 0,00 | NA | NA |
| CTD-2014E2.7  | 0,00 | 0,00 | 0,00 | 0,00 | NA | NA |
| CTD-2014N11.1 | 0,00 | 0,00 | 0,00 | 0,00 | NA | NA |
| CTD-2014N11.2 | 0,00 | 0,00 | 0,00 | 0,00 | NA | NA |
| CTD-2014N11.3 | 0,00 | 0,00 | 0,00 | 0,00 | NA | NA |
| CTD-2015B23.2 | 0,00 | 0,00 | 0,00 | 0,00 | NA | NA |
| CTD-2015C24.1 | 0,00 | 0,00 | 0,00 | 0,00 | NA | NA |
| CTD-2015G9.1  | 0,00 | 0,00 | 0,00 | 0,00 | NA | NA |
| CTD-2015H3.1  | 0,00 | 0,00 | 0,00 | 0,00 | NA | NA |
| CTD-2016O11.1 | 0,00 | 0,00 | 0,00 | 0,00 | NA | NA |
| CTD-2017D11.3 | 0,00 | 0,00 | 0,00 | 0,00 | NA | NA |
| CTD-2017D15.1 | 0,00 | 0,00 | 0,00 | 0,00 | NA | NA |
| CTD-2019H15.1 | 0,00 | 0,00 | 0,00 | 0,00 | NA | NA |
| CTD-2020P22.1 | 0,00 | 0,00 | 0,00 | 0,00 | NA | NA |
| CTD-2021A8.1  | 0,00 | 0,00 | 0,00 | 0,00 | NA | NA |
| CTD-2021H9.1  | 0,00 | 0,00 | 0,00 | 0,00 | NA | NA |
| CTD-2021J15.1 | 0,00 | 0,00 | 0,00 | 0,00 | NA | NA |
| CTD-2021J15.2 | 0,00 | 0,00 | 0,00 | 0,00 | NA | NA |
| CTD-2022H16.1 | 0,00 | 0,00 | 0,00 | 0,00 | NA | NA |
| CTD-2023N9.3  | 0,00 | 0,00 | 0,00 | 0,00 | NA | NA |
| CTD-2024F21.1 | 0,00 | 0,00 | 0,00 | 0,00 | NA | NA |
| CTD-2024I7.1  | 0,00 | 0,00 | 0,00 | 0,00 | NA | NA |
| CTD-2024I7.18 | 0,00 | 0,00 | 0,00 | 0,00 | NA | NA |
| CTD-2024P10.1 | 0,00 | 0,00 | 0,00 | 0,00 | NA | NA |
| CTD-2024P10.2 | 0,00 | 0,00 | 0,00 | 0,00 | NA | NA |
| CTD-2025J6.1  | 0,00 | 0,00 | 0,00 | 0,00 | NA | NA |
| CTD-2026A21.1 | 0,00 | 0,00 | 0,00 | 0,00 | NA | NA |
| CTD-2026D23.1 | 0,00 | 0,00 | 0,00 | 0,00 | NA | NA |
| CTD-2026G22.1 | 0,00 | 0,00 | 0,00 | 0,00 | NA | NA |
| CTD-2026G6.2  | 0,00 | 0,00 | 0,00 | 0,00 | NA | NA |
| CTD-2026J24.1 | 0,00 | 0,00 | 0,00 | 0,00 | NA | NA |
| CTD-2026K11.1 | 0,00 | 0,00 | 0,00 | 0,00 | NA | NA |
| CTD-2026K11.5 | 0,00 | 0,00 | 0,00 | 0,00 | NA | NA |
| CTD-2027G2.1  | 0,00 | 0,00 | 0,00 | 0,00 | NA | NA |
| CTD-2027I19.2 | 0,00 | 0,00 | 0,00 | 0,00 | NA | NA |
| CTD-2027I19.3 | 0,00 | 0,00 | 0,00 | 0,00 | NA | NA |
| CTD-2028E8.1  | 0,00 | 0,00 | 0,00 | 0,00 | NA | NA |
| CTD-2028E8.2  | 0,00 | 0,00 | 0,00 | 0,00 | NA | NA |
| CTD-2031P19.4 | 0,00 | 0,00 | 0,00 | 0,00 | NA | NA |
| CTD-2033A16.2 | 0,00 | 0,00 | 0,00 | 0,00 | NA | NA |
| CTD-2033D15.2 | 0,00 | 0,24 | 0,00 | 0,00 | NA | NA |
| CTD-2033D24.1 | 0,00 | 0,00 | 0,00 | 0,00 | NA | NA |
| CTD-2034I21.1 | 0,00 | 0,00 | 0,00 | 0,00 | NA | NA |
| CTD-2036A18.1 | 0,00 | 0,00 | 0,00 | 0,00 | NA | NA |
| CTD-2036A18.2 | 0,00 | 0,00 | 0,00 | 0,00 | NA | NA |
| CTD-2036J7.1  | 0,00 | 0,00 | 0,00 | 0,00 | NA | NA |
| CTD-2037K23.1 | 0,00 | 0,00 | 0,00 | 0,00 | NA | NA |

|                |      |      |      |      |    |    |
|----------------|------|------|------|------|----|----|
| CTD-2037L6.1   | 0,00 | 0,00 | 0,00 | 0,00 | NA | NA |
| CTD-2037L6.2   | 0,00 | 0,00 | 0,00 | 0,00 | NA | NA |
| CTD-2043I16.1  | 0,00 | 0,00 | 0,00 | 0,00 | NA | NA |
| CTD-2044J15.1  | 0,00 | 0,00 | 0,00 | 0,00 | NA | NA |
| CTD-2046J7.1   | 0,00 | 0,00 | 0,00 | 0,00 | NA | NA |
| CTD-2049J23.3  | 0,00 | 0,00 | 0,00 | 0,00 | NA | NA |
| CTD-2049O17.1  | 0,00 | 0,00 | 0,00 | 0,00 | NA | NA |
| CTD-2049O4.2   | 0,00 | 0,00 | 0,00 | 0,00 | NA | NA |
| CTD-2050E21.2  | 0,00 | 0,00 | 0,00 | 0,00 | NA | NA |
| CTD-2050I18.1  | 0,00 | 0,00 | 0,00 | 0,00 | NA | NA |
| CTD-2050I18.2  | 0,00 | 0,00 | 0,00 | 0,00 | NA | NA |
| CTD-2053J20.1  | 0,00 | 0,00 | 0,00 | 0,00 | NA | NA |
| CTD-2054H24.1  | 0,00 | 0,00 | 0,00 | 0,00 | NA | NA |
| CTD-2054N24.1  | 0,00 | 0,00 | 0,00 | 0,00 | NA | NA |
| CTD-2057D4.2   | 0,00 | 0,00 | 0,00 | 0,00 | NA | NA |
| CTD-2057J6.2   | 0,00 | 0,00 | 0,00 | 0,00 | NA | NA |
| CTD-2058B24.3  | 0,00 | 0,00 | 0,00 | 0,00 | NA | NA |
| CTD-2060C23.1  | 0,00 | 0,00 | 0,00 | 0,00 | NA | NA |
| CTD-2060F24.1  | 0,00 | 0,00 | 0,00 | 0,00 | NA | NA |
| CTD-2061E19.1  | 0,00 | 0,00 | 0,00 | 0,00 | NA | NA |
| CTD-2062F14.3  | 0,00 | 0,00 | 0,00 | 0,00 | NA | NA |
| CTD-2062O1.1   | 0,00 | 0,00 | 0,00 | 0,00 | NA | NA |
| CTD-2063L20.1  | 0,00 | 0,00 | 0,00 | 0,00 | NA | NA |
| CTD-2066L21.1  | 0,00 | 0,00 | 0,00 | 0,00 | NA | NA |
| CTD-2066L21.2  | 0,00 | 0,00 | 0,00 | 0,00 | NA | NA |
| CTD-2071L7.1   | 0,00 | 0,00 | 0,00 | 0,00 | NA | NA |
| CTD-2071N1.1   | 0,00 | 0,00 | 0,00 | 0,00 | NA | NA |
| CTD-2071N1.2   | 0,00 | 0,00 | 0,00 | 0,00 | NA | NA |
| CTD-2072I24.1  | 0,00 | 0,00 | 0,00 | 0,00 | NA | NA |
| CTD-2074D8.1   | 0,00 | 0,00 | 0,00 | 0,00 | NA | NA |
| CTD-2078B5.1   | 0,00 | 0,00 | 0,00 | 0,00 | NA | NA |
| CTD-2078B5.2   | 0,00 | 0,00 | 0,00 | 0,00 | NA | NA |
| CTD-2081C10.2  | 0,00 | 0,00 | 0,00 | 0,00 | NA | NA |
| CTD-2083E4.5   | 0,00 | 0,00 | 0,00 | 0,00 | NA | NA |
| CTD-2083E4.7   | 0,00 | 0,00 | 0,00 | 0,00 | NA | NA |
| CTD-2085F10.1  | 0,00 | 0,00 | 0,00 | 0,00 | NA | NA |
| CTD-2085J24.5  | 0,00 | 0,00 | 0,00 | 0,00 | NA | NA |
| CTD-2086L14.7  | 0,00 | 0,00 | 0,00 | 0,00 | NA | NA |
| CTD-2086O20.1  | 0,00 | 0,00 | 0,00 | 0,00 | NA | NA |
| CTD-2089N3.1   | 0,00 | 0,00 | 0,00 | 0,00 | NA | NA |
| CTD-2089N3.2   | 0,00 | 0,00 | 0,00 | 0,00 | NA | NA |
| CTD-2089N3.3   | 0,00 | 0,00 | 0,00 | 0,00 | NA | NA |
| CTD-2089O24.2  | 0,00 | 0,00 | 0,00 | 0,00 | NA | NA |
| CTD-2090I13.3  | 0,00 | 0,00 | 0,00 | 0,00 | NA | NA |
| CTD-2095E4.1   | 0,00 | 0,00 | 0,00 | 0,00 | NA | NA |
| CTD-2102P23.1  | 0,00 | 0,00 | 0,00 | 0,00 | NA | NA |
| CTD-2104P17.1  | 0,00 | 0,00 | 0,00 | 0,00 | NA | NA |
| CTD-2105E13.14 | 0,00 | 0,00 | 0,00 | 0,00 | NA | NA |
| CTD-2105E13.15 | 0,00 | 0,00 | 0,00 | 0,00 | NA | NA |
| CTD-2105E13.6  | 0,00 | 0,00 | 0,00 | 0,00 | NA | NA |
| CTD-2108O9.1   | 0,00 | 0,00 | 0,00 | 0,00 | NA | NA |
| CTD-2108O9.3   | 0,00 | 0,00 | 0,00 | 0,00 | NA | NA |
| CTD-2108O9.4   | 0,00 | 0,00 | 0,00 | 0,00 | NA | NA |
| CTD-2110K23.1  | 0,00 | 0,00 | 0,00 | 0,00 | NA | NA |
| CTD-2113L7.1   | 0,00 | 0,00 | 0,00 | 0,00 | NA | NA |

|                |      |      |      |      |    |    |
|----------------|------|------|------|------|----|----|
| CTD-2114J12.1  | 0,00 | 0,00 | 0,00 | 0,00 | NA | NA |
| CTD-2116N17.1  | 0,00 | 0,00 | 0,00 | 0,07 | NA | NA |
| CTD-2117L12.3  | 0,00 | 0,00 | 0,00 | 0,00 | NA | NA |
| CTD-2119L1.1   | 0,00 | 0,00 | 0,00 | 0,00 | NA | NA |
| CTD-2120M21.1  | 0,00 | 0,00 | 0,00 | 0,00 | NA | NA |
| CTD-2123J17.2  | 0,00 | 0,00 | 0,00 | 0,00 | NA | NA |
| CTD-2124B20.3  | 0,00 | 0,00 | 0,00 | 0,00 | NA | NA |
| CTD-2124B8.1   | 0,00 | 0,00 | 0,00 | 0,00 | NA | NA |
| CTD-2126E3.1   | 0,00 | 0,00 | 0,00 | 0,00 | NA | NA |
| CTD-2126E3.3   | 0,00 | 0,00 | 0,00 | 0,00 | NA | NA |
| CTD-2126E3.4   | 0,00 | 0,00 | 0,00 | 0,00 | NA | NA |
| CTD-2126E3.5   | 0,00 | 0,00 | 0,00 | 0,00 | NA | NA |
| CTD-2127F10.1  | 0,00 | 0,00 | 0,00 | 0,00 | NA | NA |
| CTD-2127O16.1  | 0,00 | 0,00 | 0,00 | 0,00 | NA | NA |
| CTD-2127O16.2  | 0,00 | 0,00 | 0,00 | 0,00 | NA | NA |
| CTD-2128A3.2   | 0,00 | 0,00 | 0,00 | 0,00 | NA | NA |
| CTD-2128A3.3   | 0,00 | 0,00 | 0,00 | 0,00 | NA | NA |
| CTD-2128F4.1   | 0,00 | 0,00 | 0,00 | 0,00 | NA | NA |
| CTD-2129N1.1   | 0,00 | 0,00 | 0,00 | 0,00 | NA | NA |
| CTD-2130F23.1  | 0,00 | 0,00 | 0,00 | 0,00 | NA | NA |
| CTD-2130F23.2  | 0,00 | 0,00 | 0,00 | 0,00 | NA | NA |
| CTD-2131I18.1  | 0,00 | 0,00 | 0,00 | 0,00 | NA | NA |
| CTD-2132H18.3  | 0,00 | 0,00 | 0,00 | 0,00 | NA | NA |
| CTD-2132H18.5  | 0,00 | 0,00 | 0,00 | 0,00 | NA | NA |
| CTD-2132N18.2  | 0,03 | 0,04 | 0,08 | 0,04 | NA | NA |
| CTD-2134A5.3   | 0,00 | 0,00 | 0,00 | 0,00 | NA | NA |
| CTD-2134P3.1   | 0,00 | 0,00 | 0,00 | 0,00 | NA | NA |
| CTD-2135J3.4   | 0,00 | 0,00 | 0,00 | 0,00 | NA | NA |
| CTD-2138O14.1  | 0,00 | 0,00 | 0,00 | 0,00 | NA | NA |
| CTD-2139B15.1  | 0,00 | 0,00 | 0,00 | 0,00 | NA | NA |
| CTD-2139B15.4  | 0,00 | 0,00 | 0,00 | 0,00 | NA | NA |
| CTD-2139B15.5  | 0,00 | 0,00 | 0,00 | 0,00 | NA | NA |
| CTD-2140B24.6  | 0,00 | 0,00 | 0,00 | 0,00 | NA | NA |
| CTD-2140G10.1  | 0,00 | 0,00 | 0,00 | 0,00 | NA | NA |
| CTD-2140G10.4  | 0,00 | 0,00 | 0,00 | 0,00 | NA | NA |
| CTD-2141G3.1   | 0,25 | 0,52 | 0,25 | 0,46 | NA | NA |
| CTD-2144E22.11 | 0,00 | 0,00 | 0,00 | 0,00 | NA | NA |
| CTD-2144E22.12 | 0,00 | 0,00 | 0,00 | 0,00 | NA | NA |
| CTD-2144E22.5  | 0,00 | 0,00 | 0,00 | 0,00 | NA | NA |
| CTD-2144E22.6  | 0,00 | 0,00 | 0,00 | 0,00 | NA | NA |
| CTD-2144E22.8  | 0,00 | 0,00 | 0,00 | 0,00 | NA | NA |
| CTD-2146O16.1  | 0,00 | 0,00 | 0,00 | 0,00 | NA | NA |
| CTD-2151A2.1   | 0,00 | 0,00 | 0,00 | 0,00 | NA | NA |
| CTD-2151A2.2   | 0,00 | 0,00 | 0,00 | 0,00 | NA | NA |
| CTD-2151A2.3   | 0,00 | 0,00 | 0,00 | 0,00 | NA | NA |
| CTD-2151L9.1   | 0,00 | 0,00 | 0,00 | 0,00 | NA | NA |
| CTD-2152M20.2  | 0,00 | 0,00 | 0,00 | 0,00 | NA | NA |
| CTD-2154B17.2  | 0,00 | 0,00 | 0,00 | 0,00 | NA | NA |
| CTD-2154B17.3  | 0,00 | 0,00 | 0,00 | 0,00 | NA | NA |
| CTD-2154H6.1   | 0,00 | 0,00 | 0,00 | 0,00 | NA | NA |
| CTD-2156G10.1  | 0,00 | 0,00 | 0,00 | 0,00 | NA | NA |
| CTD-2156G10.2  | 0,00 | 0,00 | 0,00 | 0,00 | NA | NA |
| CTD-2158P22.1  | 0,00 | 0,00 | 0,00 | 0,00 | NA | NA |
| CTD-2158P22.2  | 0,00 | 0,00 | 0,00 | 0,00 | NA | NA |
| CTD-2158P22.4  | 0,00 | 0,00 | 0,00 | 0,00 | NA | NA |



|                |      |      |      |      |    |    |
|----------------|------|------|------|------|----|----|
| CTD-2160D9.1   | 0,00 | 0,00 | 0,00 | 0,00 | NA | NA |
| CTD-2161E19.1  | 0,00 | 0,00 | 0,00 | 0,00 | NA | NA |
| CTD-2161F6.2   | 0,00 | 0,00 | 0,00 | 0,00 | NA | NA |
| CTD-2161F6.3   | 0,00 | 0,00 | 0,00 | 0,00 | NA | NA |
| CTD-2165H16.2  | 0,00 | 0,00 | 0,00 | 0,00 | NA | NA |
| CTD-2168K21.1  | 0,00 | 0,00 | 0,00 | 0,00 | NA | NA |
| CTD-2168K21.2  | 0,00 | 0,00 | 0,00 | 0,00 | NA | NA |
| CTD-2170G1.2   | 0,00 | 0,00 | 0,00 | 0,00 | NA | NA |
| CTD-2171N6.1   | 0,00 | 0,00 | 0,00 | 0,00 | NA | NA |
| CTD-2175M1.4   | 0,00 | 0,00 | 0,00 | 0,00 | NA | NA |
| CTD-2176I21.1  | 0,00 | 0,00 | 0,00 | 0,00 | NA | NA |
| CTD-2176I21.2  | 0,00 | 0,00 | 0,00 | 0,00 | NA | NA |
| CTD-2182N23.1  | 0,00 | 0,00 | 0,00 | 0,00 | NA | NA |
| CTD-2183H9.3   | 0,00 | 0,00 | 0,00 | 0,00 | NA | NA |
| CTD-2183H9.7   | 0,00 | 0,00 | 0,00 | 0,00 | NA | NA |
| CTD-2184C24.1  | 0,00 | 0,00 | 0,00 | 0,00 | NA | NA |
| CTD-2184D3.1   | 0,00 | 0,00 | 0,00 | 0,00 | NA | NA |
| CTD-2184D3.3   | 0,00 | 0,00 | 0,00 | 0,00 | NA | NA |
| CTD-2184D3.7   | 0,00 | 0,21 | 0,00 | 0,00 | NA | NA |
| CTD-2186M15.1  | 0,00 | 0,00 | 0,00 | 0,00 | NA | NA |
| CTD-2186M15.3  | 0,18 | 0,00 | 0,38 | 0,22 | NA | NA |
| CTD-2187J20.1  | 0,00 | 0,00 | 0,00 | 0,00 | NA | NA |
| CTD-2189E23.2  | 0,00 | 0,00 | 0,00 | 0,00 | NA | NA |
| CTD-2192A1.1   | 0,00 | 0,00 | 0,00 | 0,00 | NA | NA |
| CTD-2192J16.11 | 0,00 | 0,00 | 0,00 | 0,00 | NA | NA |
| CTD-2192J16.24 | 0,00 | 0,00 | 0,00 | 0,00 | NA | NA |
| CTD-2193G5.1   | 0,00 | 0,00 | 0,00 | 0,00 | NA | NA |
| CTD-2193I10.1  | 0,00 | 0,00 | 0,00 | 0,00 | NA | NA |
| CTD-2193P3.1   | 0,00 | 0,00 | 0,00 | 0,00 | NA | NA |
| CTD-2193P3.2   | 0,00 | 0,00 | 0,00 | 0,00 | NA | NA |
| CTD-2194A8.2   | 0,00 | 0,25 | 0,00 | 0,00 | NA | NA |
| CTD-2194D22.1  | 0,00 | 0,00 | 0,00 | 0,00 | NA | NA |
| CTD-2194D22.2  | 0,00 | 0,00 | 0,00 | 0,00 | NA | NA |
| CTD-2194D22.3  | 0,00 | 0,00 | 0,00 | 0,00 | NA | NA |
| CTD-2194D22.5  | 0,00 | 0,00 | 0,00 | 0,00 | NA | NA |
| CTD-2194F4.1   | 0,00 | 0,00 | 0,00 | 0,00 | NA | NA |
| CTD-2194F4.2   | 0,00 | 0,00 | 0,00 | 0,00 | NA | NA |
| CTD-2194L12.3  | 0,00 | 0,00 | 0,00 | 0,00 | NA | NA |
| CTD-2194M22.1  | 0,00 | 0,00 | 0,00 | 0,00 | NA | NA |
| CTD-2195M15.1  | 0,00 | 0,00 | 0,00 | 0,00 | NA | NA |
| CTD-2195M15.2  | 0,00 | 0,00 | 0,00 | 0,00 | NA | NA |
| CTD-2195M15.3  | 0,00 | 0,00 | 0,00 | 0,00 | NA | NA |
| CTD-2195M15.4  | 0,00 | 0,00 | 0,00 | 0,00 | NA | NA |
| CTD-2195M18.2  | 0,00 | 0,00 | 0,00 | 0,00 | NA | NA |
| CTD-2196E14.5  | 0,00 | 0,00 | 0,00 | 0,00 | NA | NA |
| CTD-2196P11.2  | 0,00 | 0,00 | 0,00 | 0,00 | NA | NA |
| CTD-2197M16.1  | 0,00 | 0,00 | 0,00 | 0,00 | NA | NA |
| CTD-2198K18.1  | 0,00 | 0,00 | 0,00 | 0,00 | NA | NA |
| CTD-2199O4.1   | 0,20 | 0,19 | 0,10 | 0,47 | NA | NA |
| CTD-2199O4.3   | 0,00 | 0,00 | 0,00 | 0,00 | NA | NA |
| CTD-2199O4.4   | 0,00 | 0,00 | 0,00 | 0,00 | NA | NA |
| CTD-2199O4.5   | 0,00 | 0,00 | 0,00 | 0,00 | NA | NA |
| CTD-2199O4.7   | 0,00 | 0,06 | 0,00 | 0,00 | NA | NA |
| CTD-2200A16.1  | 0,00 | 0,00 | 0,00 | 0,00 | NA | NA |
| CTD-2200P10.1  | 0,00 | 0,00 | 0,00 | 0,00 | NA | NA |

|                |      |      |      |      |    |    |
|----------------|------|------|------|------|----|----|
| CTD-2200P10.3  | 0,00 | 0,00 | 0,00 | 0,00 | NA | NA |
| CTD-2201E18.1  | 0,00 | 0,00 | 0,00 | 0,00 | NA | NA |
| CTD-2201E18.4  | 0,00 | 0,00 | 0,00 | 0,00 | NA | NA |
| CTD-2201E9.1   | 0,00 | 0,00 | 0,00 | 0,00 | NA | NA |
| CTD-2201E9.2   | 0,00 | 0,00 | 0,00 | 0,00 | NA | NA |
| CTD-2201E9.3   | 0,00 | 0,00 | 0,00 | 0,00 | NA | NA |
| CTD-2201E9.4   | 0,00 | 0,00 | 0,00 | 0,00 | NA | NA |
| CTD-2201G16.1  | 0,00 | 0,00 | 0,00 | 0,00 | NA | NA |
| CTD-2206G10.1  | 0,00 | 0,00 | 0,00 | 0,00 | NA | NA |
| CTD-2206G10.2  | 0,00 | 0,00 | 0,00 | 0,00 | NA | NA |
| CTD-2206N4.1   | 0,00 | 0,00 | 0,00 | 0,00 | NA | NA |
| CTD-2206N4.2   | 0,00 | 0,00 | 0,00 | 0,00 | NA | NA |
| CTD-2206N4.5   | 0,00 | 0,00 | 0,00 | 0,00 | NA | NA |
| CTD-2207L17.1  | 0,00 | 0,00 | 0,00 | 0,00 | NA | NA |
| CTD-2207L17.2  | 0,00 | 0,00 | 0,00 | 0,00 | NA | NA |
| CTD-2207O23.10 | 0,00 | 0,00 | 0,00 | 0,00 | NA | NA |
| CTD-2207O23.11 | 0,00 | 0,00 | 0,00 | 0,00 | NA | NA |
| CTD-2207O23.12 | 0,00 | 0,00 | 0,00 | 0,00 | NA | NA |
| CTD-2207P18.1  | 0,00 | 0,00 | 0,00 | 0,00 | NA | NA |
| CTD-2207P18.2  | 0,00 | 0,00 | 0,00 | 0,00 | NA | NA |
| CTD-2209N14.1  | 0,00 | 0,00 | 0,00 | 0,00 | NA | NA |
| CTD-2210P15.2  | 0,00 | 0,00 | 0,00 | 0,00 | NA | NA |
| CTD-2210P15.3  | 0,00 | 0,13 | 0,00 | 0,00 | NA | NA |
| CTD-2210P24.2  | 0,00 | 0,00 | 0,00 | 0,00 | NA | NA |
| CTD-2210P24.3  | 0,00 | 0,00 | 0,00 | 0,00 | NA | NA |
| CTD-2210P24.4  | 0,00 | 0,00 | 0,00 | 0,00 | NA | NA |
| CTD-2210P24.6  | 0,00 | 0,00 | 0,00 | 0,00 | NA | NA |
| CTD-2213F21.1  | 0,00 | 0,00 | 0,00 | 0,00 | NA | NA |
| CTD-2213F21.2  | 1,23 | 0,53 | 0,59 | 1,20 | NA | NA |
| CTD-2215E18.2  | 0,00 | 0,00 | 0,00 | 0,00 | NA | NA |
| CTD-2215E18.3  | 0,00 | 0,00 | 0,00 | 0,00 | NA | NA |
| CTD-2215L10.1  | 0,00 | 0,00 | 0,00 | 0,00 | NA | NA |
| CTD-2216M2.1   | 0,00 | 0,00 | 0,00 | 0,00 | NA | NA |
| CTD-2218G20.2  | 0,00 | 0,00 | 0,00 | 0,00 | NA | NA |
| CTD-2218K11.1  | 0,00 | 0,00 | 0,00 | 0,00 | NA | NA |
| CTD-2218K11.2  | 0,00 | 0,00 | 0,00 | 0,00 | NA | NA |
| CTD-2223O18.1  | 0,00 | 0,00 | 0,00 | 0,00 | NA | NA |
| CTD-2224J9.4   | 0,00 | 0,00 | 0,00 | 0,00 | NA | NA |
| CTD-2224J9.7   | 0,00 | 0,00 | 0,00 | 0,00 | NA | NA |
| CTD-2225F20.1  | 0,00 | 0,00 | 0,00 | 0,00 | NA | NA |
| CTD-2227C6.1   | 0,00 | 0,00 | 0,00 | 0,00 | NA | NA |
| CTD-2227C6.3   | 0,00 | 0,00 | 0,00 | 0,00 | NA | NA |
| CTD-2227E11.1  | 0,00 | 0,00 | 0,00 | 0,00 | NA | NA |
| CTD-2228A4.1   | 0,00 | 0,00 | 0,00 | 0,00 | NA | NA |
| CTD-2228K2.2   | 0,00 | 0,00 | 0,00 | 0,00 | NA | NA |
| CTD-2228K2.7   | 0,00 | 0,00 | 0,00 | 0,00 | NA | NA |
| CTD-2230M5.1   | 0,00 | 0,00 | 0,00 | 0,00 | NA | NA |
| CTD-2230M5.2   | 0,00 | 0,00 | 0,00 | 0,00 | NA | NA |
| CTD-2230M5.3   | 0,00 | 0,00 | 0,00 | 0,00 | NA | NA |
| CTD-2231E14.4  | 0,00 | 0,00 | 0,00 | 0,00 | NA | NA |
| CTD-2234B20.1  | 0,00 | 0,00 | 0,00 | 0,00 | NA | NA |
| CTD-2240G15.1  | 0,00 | 0,00 | 0,00 | 0,00 | NA | NA |
| CTD-2240H23.2  | 0,00 | 0,00 | 0,00 | 0,00 | NA | NA |
| CTD-2240J17.4  | 0,00 | 0,00 | 0,00 | 0,00 | NA | NA |
| CTD-2240J17.5  | 0,00 | 0,00 | 0,00 | 0,00 | NA | NA |

|                |      |      |      |      |    |    |
|----------------|------|------|------|------|----|----|
| CTD-2243E23.1  | 0,00 | 0,00 | 0,00 | 0,00 | NA | NA |
| CTD-2244C20.1  | 0,00 | 0,00 | 0,00 | 0,00 | NA | NA |
| CTD-2244C20.2  | 0,00 | 0,00 | 0,00 | 0,00 | NA | NA |
| CTD-2244F11.2  | 0,00 | 0,00 | 0,00 | 0,00 | NA | NA |
| CTD-2245E15.3  | 0,00 | 0,00 | 0,00 | 0,00 | NA | NA |
| CTD-2245F17.11 | 0,00 | 0,00 | 0,00 | 0,00 | NA | NA |
| CTD-2245F17.2  | 0,00 | 0,00 | 0,00 | 0,00 | NA | NA |
| CTD-2245F17.6  | 0,00 | 0,00 | 0,00 | 0,00 | NA | NA |
| CTD-2247C11.1  | 0,00 | 0,00 | 0,00 | 0,00 | NA | NA |
| CTD-2247C11.2  | 0,00 | 0,00 | 0,00 | 0,00 | NA | NA |
| CTD-2247C11.3  | 0,00 | 0,00 | 0,00 | 0,00 | NA | NA |
| CTD-2247C11.5  | 0,00 | 0,00 | 0,00 | 0,00 | NA | NA |
| CTD-2248H3.1   | 0,00 | 0,96 | 0,00 | 0,00 | NA | NA |
| CTD-2249K22.1  | 0,00 | 0,00 | 0,00 | 0,00 | NA | NA |
| CTD-2254N19.1  | 0,00 | 0,00 | 0,00 | 0,00 | NA | NA |
| CTD-2256P15.3  | 0,00 | 0,00 | 0,00 | 0,00 | NA | NA |
| CTD-2256P15.5  | 0,00 | 0,00 | 0,00 | 0,00 | NA | NA |
| CTD-2258A20.3  | 0,00 | 0,00 | 0,00 | 0,00 | NA | NA |
| CTD-2258A20.4  | 0,00 | 0,13 | 0,00 | 0,00 | NA | NA |
| CTD-2263F21.1  | 0,00 | 0,00 | 0,00 | 0,00 | NA | NA |
| CTD-2265D6.1   | 0,00 | 0,00 | 0,00 | 0,00 | NA | NA |
| CTD-2265D6.2   | 0,00 | 0,00 | 0,00 | 0,00 | NA | NA |
| CTD-2265O21.3  | 0,00 | 0,00 | 0,00 | 0,00 | NA | NA |
| CTD-2266L18.1  | 0,00 | 0,00 | 0,00 | 0,00 | NA | NA |
| CTD-2267D19.4  | 0,00 | 0,00 | 0,00 | 0,00 | NA | NA |
| CTD-2267D19.7  | 0,00 | 0,00 | 0,00 | 0,00 | NA | NA |
| CTD-2267G17.2  | 0,00 | 0,00 | 0,00 | 0,00 | NA | NA |
| CTD-2269E23.1  | 0,00 | 0,00 | 0,00 | 0,00 | NA | NA |
| CTD-2269E23.2  | 0,00 | 0,00 | 0,00 | 0,00 | NA | NA |
| CTD-2269E23.3  | 0,00 | 0,00 | 0,00 | 0,00 | NA | NA |
| CTD-2269E23.4  | 0,00 | 0,00 | 0,00 | 0,00 | NA | NA |
| CTD-2272D18.1  | 0,00 | 0,00 | 0,00 | 0,00 | NA | NA |
| CTD-2272G21.1  | 0,00 | 0,00 | 0,00 | 0,00 | NA | NA |
| CTD-2272G21.2  | 0,00 | 0,00 | 0,00 | 0,00 | NA | NA |
| CTD-2272G21.3  | 0,00 | 0,00 | 0,00 | 0,00 | NA | NA |
| CTD-2275D10.2  | 0,00 | 0,00 | 0,00 | 0,00 | NA | NA |
| CTD-2275D24.1  | 0,00 | 0,00 | 0,00 | 0,00 | NA | NA |
| CTD-2275D24.2  | 0,00 | 0,00 | 0,00 | 0,00 | NA | NA |
| CTD-2275D24.3  | 0,00 | 0,00 | 0,00 | 0,00 | NA | NA |
| CTD-2275D24.4  | 0,00 | 0,00 | 0,00 | 0,00 | NA | NA |
| CTD-2278I10.1  | 0,00 | 0,00 | 0,00 | 0,00 | NA | NA |
| CTD-2278I10.6  | 0,00 | 0,00 | 0,00 | 0,00 | NA | NA |
| CTD-2281D19.1  | 0,00 | 0,00 | 0,00 | 0,00 | NA | NA |
| CTD-2281E23.1  | 0,00 | 0,00 | 0,00 | 0,00 | NA | NA |
| CTD-2281E23.3  | 0,00 | 0,00 | 0,00 | 0,00 | NA | NA |
| CTD-2281M20.1  | 0,00 | 0,00 | 0,00 | 0,00 | NA | NA |
| CTD-2282P23.1  | 0,00 | 0,00 | 0,00 | 0,00 | NA | NA |
| CTD-2284O10.3  | 0,00 | 0,00 | 0,00 | 0,00 | NA | NA |
| CTD-2285G11.1  | 0,00 | 0,00 | 0,00 | 0,00 | NA | NA |
| CTD-2286N8.2   | 0,00 | 0,25 | 0,00 | 0,00 | NA | NA |
| CTD-2287N17.1  | 0,00 | 0,00 | 0,00 | 0,00 | NA | NA |
| CTD-2287O16.5  | 0,00 | 0,00 | 0,00 | 0,00 | NA | NA |
| CTD-2288O8.1   | 0,00 | 0,00 | 0,00 | 0,00 | NA | NA |
| CTD-2290C23.2  | 0,00 | 0,00 | 0,00 | 0,00 | NA | NA |
| CTD-2290C23.3  | 0,00 | 0,00 | 0,00 | 0,00 | NA | NA |

|                |      |      |      |      |    |    |
|----------------|------|------|------|------|----|----|
| CTD-2291D10.2  | 0,00 | 0,00 | 0,00 | 0,00 | NA | NA |
| CTD-2291D10.3  | 0,00 | 0,00 | 0,00 | 0,00 | NA | NA |
| CTD-2292M14.1  | 0,00 | 0,00 | 0,00 | 0,00 | NA | NA |
| CTD-2292M16.7  | 0,00 | 0,00 | 0,00 | 0,00 | NA | NA |
| CTD-2292P10.2  | 0,00 | 0,00 | 0,00 | 0,00 | NA | NA |
| CTD-2293H3.3   | 0,00 | 0,00 | 0,00 | 0,00 | NA | NA |
| CTD-2296D1.1   | 0,00 | 0,00 | 0,00 | 0,00 | NA | NA |
| CTD-2296D1.2   | 0,00 | 0,00 | 0,00 | 0,00 | NA | NA |
| CTD-2296D1.3   | 0,00 | 0,00 | 0,00 | 0,00 | NA | NA |
| CTD-2296D1.4   | 0,00 | 0,00 | 0,00 | 0,00 | NA | NA |
| CTD-2297D10.1  | 0,00 | 0,00 | 0,00 | 0,00 | NA | NA |
| CTD-2297D10.2  | 0,00 | 0,00 | 0,00 | 0,00 | NA | NA |
| CTD-2298D17.1  | 0,00 | 0,00 | 0,00 | 0,00 | NA | NA |
| CTD-2298J14.1  | 0,00 | 0,00 | 0,00 | 0,00 | NA | NA |
| CTD-2299E8.1   | 0,00 | 0,00 | 0,00 | 0,00 | NA | NA |
| CTD-2299I21.1  | 0,00 | 0,00 | 0,00 | 0,00 | NA | NA |
| CTD-2299N12.1  | 0,00 | 0,00 | 0,00 | 0,00 | NA | NA |
| CTD-2301A4.1   | 0,00 | 0,00 | 0,00 | 0,00 | NA | NA |
| CTD-2302A16.2  | 0,00 | 0,00 | 0,00 | 0,00 | NA | NA |
| CTD-2302E22.1  | 0,00 | 0,00 | 0,00 | 0,00 | NA | NA |
| CTD-2302E22.2  | 0,00 | 0,00 | 0,00 | 0,00 | NA | NA |
| CTD-2302E22.3  | 0,00 | 0,00 | 0,00 | 0,00 | NA | NA |
| CTD-2302E22.5  | 0,00 | 0,00 | 0,00 | 0,00 | NA | NA |
| CTD-2302M15.1  | 0,00 | 0,00 | 0,00 | 0,00 | NA | NA |
| CTD-2307P3.1   | 0,00 | 0,00 | 0,00 | 0,00 | NA | NA |
| CTD-2308B18.1  | 0,00 | 0,00 | 0,00 | 0,00 | NA | NA |
| CTD-2308B18.2  | 0,00 | 0,00 | 0,00 | 0,00 | NA | NA |
| CTD-2308B18.4  | 0,00 | 0,00 | 0,00 | 0,00 | NA | NA |
| CTD-2308L22.1  | 0,00 | 0,00 | 0,00 | 0,00 | NA | NA |
| CTD-2308N23.4  | 0,00 | 0,00 | 0,00 | 0,00 | NA | NA |
| CTD-2309H9.1   | 0,00 | 0,00 | 0,00 | 0,00 | NA | NA |
| CTD-2309H9.2   | 0,00 | 0,21 | 0,00 | 0,00 | NA | NA |
| CTD-2309H9.4   | 0,00 | 0,00 | 0,00 | 0,00 | NA | NA |
| CTD-2309O5.3   | 0,00 | 0,00 | 0,00 | 0,00 | NA | NA |
| CTD-2311A18.1  | 0,00 | 0,00 | 0,00 | 0,00 | NA | NA |
| CTD-2311B13.10 | 0,00 | 0,00 | 0,00 | 0,00 | NA | NA |
| CTD-2311M21.4  | 0,00 | 0,00 | 0,00 | 0,00 | NA | NA |
| CTD-2311M21.5  | 0,00 | 0,00 | 0,00 | 0,00 | NA | NA |
| CTD-2312P21.1  | 0,00 | 0,00 | 0,00 | 0,00 | NA | NA |
| CTD-2313B8.1   | 0,00 | 0,00 | 0,00 | 0,00 | NA | NA |
| CTD-2313D3.1   | 0,00 | 0,00 | 0,00 | 0,00 | NA | NA |
| CTD-2313F11.4  | 0,00 | 0,00 | 0,00 | 0,00 | NA | NA |
| CTD-2313J17.3  | 0,00 | 0,00 | 0,00 | 0,00 | NA | NA |
| CTD-2313J17.4  | 0,00 | 0,00 | 0,00 | 0,00 | NA | NA |
| CTD-2313N18.4  | 0,00 | 0,00 | 0,00 | 0,00 | NA | NA |
| CTD-2313N18.7  | 0,00 | 0,00 | 0,00 | 0,00 | NA | NA |
| CTD-2314B22.1  | 0,00 | 0,00 | 0,00 | 0,00 | NA | NA |
| CTD-2314B22.2  | 0,00 | 0,00 | 0,00 | 0,00 | NA | NA |
| CTD-2314G24.2  | 0,00 | 0,00 | 0,00 | 0,00 | NA | NA |
| CTD-2315A10.2  | 0,00 | 0,00 | 0,00 | 0,00 | NA | NA |
| CTD-2315M5.2   | 0,00 | 0,00 | 0,00 | 0,00 | NA | NA |
| CTD-2316B1.1   | 0,00 | 0,00 | 0,00 | 0,00 | NA | NA |
| CTD-2316B1.2   | 0,00 | 0,00 | 0,00 | 0,00 | NA | NA |
| CTD-2318B16.1  | 0,00 | 0,00 | 0,00 | 0,00 | NA | NA |
| CTD-2318B16.2  | 0,00 | 0,00 | 0,00 | 0,00 | NA | NA |

|               |      |      |      |      |    |    |
|---------------|------|------|------|------|----|----|
| CTD-2318B16.4 | 0,00 | 0,00 | 0,00 | 0,00 | NA | NA |
| CTD-2318H23.1 | 0,00 | 0,00 | 0,00 | 0,00 | NA | NA |
| CTD-2318O12.1 | 0,00 | 0,00 | 0,00 | 0,00 | NA | NA |
| CTD-2319I12.3 | 0,00 | 0,00 | 0,00 | 0,00 | NA | NA |
| CTD-2319I12.4 | 0,00 | 0,00 | 0,00 | 0,00 | NA | NA |
| CTD-2319I12.5 | 0,00 | 0,00 | 0,00 | 0,00 | NA | NA |
| CTD-2319I12.9 | 0,00 | 0,00 | 0,00 | 0,00 | NA | NA |
| CTD-2320B12.1 | 0,00 | 0,00 | 0,00 | 0,00 | NA | NA |
| CTD-2320B12.2 | 0,00 | 0,00 | 0,00 | 0,00 | NA | NA |
| CTD-2320B12.3 | 0,00 | 0,00 | 0,00 | 0,00 | NA | NA |
| CTD-2320J21.2 | 0,00 | 0,00 | 0,00 | 0,00 | NA | NA |
| CTD-2323K18.3 | 0,00 | 0,00 | 0,00 | 0,00 | NA | NA |
| CTD-2324A24.1 | 0,00 | 0,17 | 0,19 | 0,13 | NA | NA |
| CTD-2324A24.2 | 0,00 | 0,00 | 0,00 | 0,00 | NA | NA |
| CTD-2325A15.2 | 0,00 | 0,00 | 0,00 | 0,00 | NA | NA |
| CTD-2325A15.3 | 0,00 | 0,00 | 0,00 | 0,00 | NA | NA |
| CTD-2325B11.1 | 0,00 | 0,00 | 0,00 | 0,00 | NA | NA |
| CTD-2325K12.1 | 0,00 | 0,00 | 0,00 | 0,00 | NA | NA |
| CTD-2330J20.1 | 0,00 | 0,00 | 0,00 | 0,00 | NA | NA |
| CTD-2330J20.2 | 0,00 | 0,00 | 0,00 | 0,00 | NA | NA |
| CTD-2330K9.2  | 0,00 | 0,00 | 0,00 | 0,00 | NA | NA |
| CTD-2330K9.3  | 0,00 | 0,00 | 0,00 | 0,00 | NA | NA |
| CTD-2331C18.5 | 0,00 | 0,00 | 0,00 | 0,00 | NA | NA |
| CTD-2331D11.1 | 0,00 | 0,00 | 0,00 | 0,00 | NA | NA |
| CTD-2331D11.2 | 0,00 | 0,00 | 0,00 | 0,00 | NA | NA |
| CTD-2331D11.3 | 0,00 | 0,00 | 0,00 | 0,00 | NA | NA |
| CTD-2331H12.9 | 0,00 | 0,00 | 0,00 | 0,00 | NA | NA |
| CTD-2331H7.1  | 0,00 | 0,00 | 0,00 | 0,00 | NA | NA |
| CTD-2331H7.2  | 0,00 | 0,00 | 0,00 | 0,00 | NA | NA |
| CTD-2332E11.2 | 0,00 | 0,00 | 0,00 | 0,00 | NA | NA |
| CTD-2333K2.1  | 0,00 | 0,00 | 0,00 | 0,00 | NA | NA |
| CTD-2335A18.2 | 0,00 | 0,00 | 0,00 | 0,00 | NA | NA |
| CTD-2335L22.6 | 0,00 | 0,00 | 0,00 | 0,00 | NA | NA |
| CTD-2335O3.1  | 0,00 | 0,00 | 0,00 | 0,00 | NA | NA |
| CTD-2335O3.2  | 0,00 | 0,00 | 0,00 | 0,00 | NA | NA |
| CTD-2335O3.3  | 0,00 | 0,00 | 0,00 | 0,00 | NA | NA |
| CTD-2336H13.1 | 0,00 | 0,00 | 0,00 | 0,00 | NA | NA |
| CTD-2336H13.2 | 0,00 | 0,00 | 0,00 | 0,00 | NA | NA |
| CTD-2336O2.2  | 0,00 | 0,00 | 0,00 | 0,00 | NA | NA |
| CTD-2336O2.4  | 0,00 | 0,00 | 0,00 | 0,00 | NA | NA |
| CTD-2340E1.1  | 0,00 | 0,00 | 0,00 | 0,00 | NA | NA |
| CTD-2342I9.1  | 0,00 | 0,00 | 0,00 | 0,00 | NA | NA |
| CTD-2342N23.1 | 0,00 | 0,00 | 0,00 | 0,00 | NA | NA |
| CTD-2342N23.2 | 0,00 | 0,00 | 0,00 | 0,00 | NA | NA |
| CTD-2343L8.1  | 0,00 | 0,00 | 0,00 | 0,00 | NA | NA |
| CTD-2343P13.1 | 0,00 | 0,00 | 0,00 | 0,00 | NA | NA |
| CTD-2345H1.1  | 0,00 | 0,00 | 0,00 | 0,00 | NA | NA |
| CTD-2345M20.2 | 0,00 | 0,00 | 0,00 | 0,00 | NA | NA |
| CTD-2347I17.1 | 0,00 | 0,00 | 0,00 | 0,00 | NA | NA |
| CTD-2349B8.1  | 0,00 | 0,00 | 0,33 | 0,00 | NA | NA |
| CTD-2349P21.5 | 0,00 | 0,00 | 0,10 | 0,33 | NA | NA |
| CTD-2349P21.6 | 0,59 | 1,43 | 0,61 | 0,00 | NA | NA |
| CTD-2350I17.1 | 0,00 | 0,00 | 0,00 | 0,00 | NA | NA |
| CTD-2351A8.1  | 0,00 | 0,00 | 0,00 | 0,00 | NA | NA |
| CTD-2355J17.2 | 0,00 | 0,00 | 0,00 | 0,00 | NA | NA |

|               |      |      |      |      |    |    |
|---------------|------|------|------|------|----|----|
| CTD-2356P16.6 | 0,00 | 0,00 | 0,00 | 0,00 | NA | NA |
| CTD-2357A8.3  | 0,19 | 0,45 | 0,45 | 0,42 | NA | NA |
| CTD-2358C21.1 | 0,00 | 0,00 | 0,00 | 0,00 | NA | NA |
| CTD-2358C21.2 | 0,00 | 0,00 | 0,00 | 0,00 | NA | NA |
| CTD-2358C21.3 | 0,00 | 0,00 | 0,00 | 0,00 | NA | NA |
| CTD-2358C21.4 | 0,00 | 0,00 | 0,00 | 0,00 | NA | NA |
| CTD-2358C21.5 | 0,00 | 0,00 | 0,00 | 0,00 | NA | NA |
| CTD-2360A17.2 | 0,00 | 0,00 | 0,00 | 0,00 | NA | NA |
| CTD-2363C16.2 | 0,00 | 0,00 | 0,00 | 0,00 | NA | NA |
| CTD-2366F13.2 | 0,00 | 0,49 | 0,00 | 0,00 | NA | NA |
| CTD-2367A17.1 | 0,00 | 0,00 | 0,00 | 0,00 | NA | NA |
| CTD-2367A17.2 | 0,00 | 0,00 | 0,00 | 0,00 | NA | NA |
| CTD-2371O3.3  | 0,10 | 0,00 | 0,55 | 1,00 | NA | NA |
| CTD-2372A4.1  | 0,00 | 0,00 | 0,00 | 0,00 | NA | NA |
| CTD-2374C24.1 | 0,00 | 0,00 | 0,00 | 0,00 | NA | NA |
| CTD-2376I20.1 | 0,00 | 0,37 | 0,00 | 0,00 | NA | NA |
| CTD-2376I4.1  | 0,00 | 0,00 | 0,00 | 0,00 | NA | NA |
| CTD-2377D24.2 | 0,00 | 0,00 | 0,00 | 0,00 | NA | NA |
| CTD-2377D24.4 | 0,00 | 0,00 | 0,00 | 0,00 | NA | NA |
| CTD-2377D24.7 | 0,00 | 0,00 | 0,00 | 0,00 | NA | NA |
| CTD-2377O17.1 | 0,00 | 0,00 | 0,00 | 0,00 | NA | NA |
| CTD-2378E21.1 | 0,00 | 0,00 | 0,00 | 0,00 | NA | NA |
| CTD-2378H7.2  | 0,00 | 0,00 | 0,00 | 0,00 | NA | NA |
| CTD-2381F24.1 | 0,00 | 0,00 | 0,00 | 0,00 | NA | NA |
| CTD-2382H12.1 | 0,00 | 0,00 | 0,00 | 0,00 | NA | NA |
| CTD-2382H12.2 | 0,00 | 0,00 | 0,00 | 0,00 | NA | NA |
| CTD-2383M3.1  | 0,00 | 0,00 | 0,00 | 0,00 | NA | NA |
| CTD-2384A14.2 | 0,00 | 0,00 | 0,00 | 0,00 | NA | NA |
| CTD-2385L22.1 | 0,00 | 0,00 | 0,00 | 0,00 | NA | NA |
| CTD-2396E7.10 | 0,00 | 0,00 | 0,00 | 0,00 | NA | NA |
| CTD-2396E7.7  | 0,00 | 0,00 | 0,00 | 0,00 | NA | NA |
| CTD-2396E7.8  | 0,00 | 0,00 | 0,00 | 0,00 | NA | NA |
| CTD-2396E7.9  | 0,00 | 0,00 | 0,00 | 0,00 | NA | NA |
| CTD-2410N18.1 | 0,00 | 0,00 | 0,00 | 0,00 | NA | NA |
| CTD-2410N18.5 | 0,00 | 0,00 | 0,00 | 0,00 | NA | NA |
| CTD-2501E16.1 | 0,00 | 0,00 | 0,00 | 0,00 | NA | NA |
| CTD-2501O3.1  | 0,00 | 0,00 | 0,00 | 0,00 | NA | NA |
| CTD-2501O3.2  | 0,00 | 0,00 | 0,00 | 0,00 | NA | NA |
| CTD-2501O3.3  | 0,00 | 0,00 | 0,00 | 0,00 | NA | NA |
| CTD-2503H21.2 | 0,00 | 0,00 | 0,00 | 0,00 | NA | NA |
| CTD-2503O16.1 | 0,00 | 0,00 | 0,00 | 0,00 | NA | NA |
| CTD-2503O16.2 | 0,00 | 0,00 | 0,00 | 0,00 | NA | NA |
| CTD-2503O16.3 | 0,00 | 0,00 | 0,00 | 0,00 | NA | NA |
| CTD-2503O16.4 | 0,00 | 0,00 | 0,00 | 0,00 | NA | NA |
| CTD-2506P8.2  | 0,00 | 0,00 | 0,00 | 0,00 | NA | NA |
| CTD-2506P8.6  | 0,00 | 0,00 | 0,00 | 0,00 | NA | NA |
| CTD-2509G16.1 | 0,00 | 0,00 | 0,00 | 0,00 | NA | NA |
| CTD-2509G16.3 | 0,00 | 0,00 | 0,00 | 0,00 | NA | NA |
| CTD-2509G16.6 | 0,00 | 0,00 | 0,00 | 0,00 | NA | NA |
| CTD-2510F5.2  | 0,00 | 0,00 | 0,00 | 0,00 | NA | NA |
| CTD-2514A21.3 | 0,00 | 0,00 | 0,00 | 0,00 | NA | NA |
| CTD-2515C13.1 | 0,00 | 0,00 | 0,00 | 0,00 | NA | NA |
| CTD-2515H24.1 | 0,00 | 0,00 | 0,00 | 0,00 | NA | NA |
| CTD-2515H24.2 | 0,00 | 0,00 | 0,00 | 0,00 | NA | NA |
| CTD-2515H24.3 | 0,00 | 0,00 | 0,00 | 0,00 | NA | NA |

|                |      |      |      |      |    |    |
|----------------|------|------|------|------|----|----|
| CTD-2515H24.4  | 0,00 | 0,00 | 0,00 | 0,00 | NA | NA |
| CTD-2515O10.5  | 0,00 | 0,00 | 0,00 | 0,00 | NA | NA |
| CTD-2516K3.1   | 0,00 | 0,00 | 0,00 | 0,00 | NA | NA |
| CTD-2516K3.3   | 0,00 | 0,00 | 0,00 | 0,00 | NA | NA |
| CTD-2517M22.17 | 0,00 | 0,00 | 0,00 | 0,00 | NA | NA |
| CTD-2517M22.9  | 0,54 | 0,56 | 0,61 | 0,59 | NA | NA |
| CTD-2520I13.1  | 0,00 | 0,00 | 0,00 | 0,00 | NA | NA |
| CTD-2521M24.10 | 0,00 | 0,00 | 0,00 | 0,00 | NA | NA |
| CTD-2521M24.11 | 0,00 | 0,00 | 0,00 | 0,00 | NA | NA |
| CTD-2522B17.8  | 0,00 | 0,00 | 0,00 | 0,00 | NA | NA |
| CTD-2523D13.1  | 0,00 | 0,00 | 0,00 | 0,00 | NA | NA |
| CTD-2523D13.2  | 0,00 | 0,00 | 0,00 | 0,00 | NA | NA |
| CTD-2525I3.8   | 0,00 | 0,00 | 0,00 | 0,00 | NA | NA |
| CTD-2526A2.2   | 0,00 | 0,00 | 0,00 | 0,00 | NA | NA |
| CTD-2526A2.5   | 0,00 | 0,00 | 0,00 | 0,00 | NA | NA |
| CTD-2526A2.6   | 0,00 | 0,00 | 0,00 | 0,00 | NA | NA |
| CTD-2526L21.3  | 0,00 | 0,00 | 0,00 | 0,00 | NA | NA |
| CTD-2526L21.4  | 0,00 | 0,00 | 0,00 | 0,00 | NA | NA |
| CTD-2526M8.2   | 0,00 | 0,00 | 0,00 | 0,00 | NA | NA |
| CTD-2526M8.3   | 0,00 | 0,00 | 0,00 | 0,00 | NA | NA |
| CTD-2527I21.15 | 0,00 | 0,00 | 0,00 | 0,00 | NA | NA |
| CTD-2527I21.4  | 0,00 | 0,00 | 0,00 | 0,00 | NA | NA |
| CTD-2528A14.3  | 0,00 | 0,00 | 0,00 | 0,00 | NA | NA |
| CTD-2528N2.1   | 0,00 | 0,00 | 0,00 | 0,00 | NA | NA |
| CTD-2529O21.1  | 0,00 | 0,00 | 0,00 | 0,00 | NA | NA |
| CTD-2529O21.2  | 0,00 | 0,00 | 0,00 | 0,00 | NA | NA |
| CTD-2529P6.3   | 0,00 | 0,00 | 0,00 | 0,00 | NA | NA |
| CTD-2529P6.4   | 0,00 | 0,00 | 0,00 | 0,00 | NA | NA |
| CTD-2530H12.1  | 0,00 | 0,00 | 0,00 | 0,00 | NA | NA |
| CTD-2530H12.2  | 0,00 | 0,00 | 0,00 | 0,00 | NA | NA |
| CTD-2530H12.4  | 0,00 | 0,00 | 0,00 | 0,00 | NA | NA |
| CTD-2530H12.5  | 0,00 | 0,00 | 0,00 | 0,00 | NA | NA |
| CTD-2530H12.7  | 0,00 | 0,00 | 0,00 | 0,00 | NA | NA |
| CTD-2530N21.5  | 0,00 | 0,08 | 0,00 | 0,10 | NA | NA |
| CTD-2532D12.4  | 0,00 | 0,00 | 0,00 | 0,00 | NA | NA |
| CTD-2532D12.5  | 0,00 | 0,00 | 0,00 | 0,00 | NA | NA |
| CTD-2532K18.1  | 0,00 | 0,00 | 0,00 | 0,00 | NA | NA |
| CTD-2532K18.2  | 0,00 | 0,00 | 0,00 | 0,00 | NA | NA |
| CTD-2533K21.1  | 0,00 | 0,00 | 0,00 | 0,00 | NA | NA |
| CTD-2533K21.4  | 0,00 | 0,00 | 0,00 | 0,00 | NA | NA |
| CTD-2534I21.8  | 0,00 | 0,00 | 0,00 | 0,00 | NA | NA |
| CTD-2534I21.9  | 0,00 | 0,97 | 0,00 | 0,00 | NA | NA |
| CTD-2534J5.1   | 0,00 | 0,00 | 0,00 | 0,00 | NA | NA |
| CTD-2535I10.1  | 0,00 | 0,00 | 0,00 | 0,00 | NA | NA |
| CTD-2535L24.3  | 0,00 | 0,00 | 0,00 | 0,00 | NA | NA |
| CTD-2535P7.1   | 0,00 | 0,00 | 0,00 | 0,00 | NA | NA |
| CTD-2535P7.2   | 0,00 | 0,00 | 0,00 | 0,00 | NA | NA |
| CTD-2536I1.2   | 0,00 | 0,00 | 0,00 | 0,00 | NA | NA |
| CTD-2537I9.15  | 0,00 | 0,00 | 0,00 | 0,00 | NA | NA |
| CTD-2537I9.19  | 0,00 | 0,00 | 0,00 | 0,00 | NA | NA |
| CTD-2537L20.1  | 0,00 | 0,00 | 0,00 | 0,00 | NA | NA |
| CTD-2537O9.1   | 0,00 | 0,00 | 0,00 | 0,00 | NA | NA |
| CTD-2538A21.1  | 0,00 | 0,00 | 0,00 | 0,00 | NA | NA |
| CTD-2538C1.2   | 0,00 | 0,00 | 0,00 | 0,00 | NA | NA |
| CTD-2538G9.3   | 0,00 | 0,00 | 0,00 | 0,00 | NA | NA |

|                |      |      |      |      |    |    |
|----------------|------|------|------|------|----|----|
| CTD-2540B15.6  | 0,00 | 0,00 | 0,00 | 0,00 | NA | NA |
| CTD-2540B15.7  | 0,00 | 0,00 | 0,00 | 0,00 | NA | NA |
| CTD-2540L5.5   | 0,00 | 0,00 | 0,00 | 0,00 | NA | NA |
| CTD-2540L5.6   | 0,00 | 0,00 | 0,00 | 0,00 | NA | NA |
| CTD-2540L5.9   | 0,00 | 0,00 | 0,00 | 0,00 | NA | NA |
| CTD-2541J13.1  | 0,00 | 0,00 | 0,00 | 0,00 | NA | NA |
| CTD-2541J13.2  | 0,00 | 0,00 | 0,00 | 0,00 | NA | NA |
| CTD-2541M15.3  | 0,00 | 0,00 | 0,00 | 0,00 | NA | NA |
| CTD-2542C24.3  | 0,00 | 0,00 | 0,00 | 0,00 | NA | NA |
| CTD-2542C24.8  | 0,00 | 0,00 | 0,00 | 0,00 | NA | NA |
| CTD-2542C24.9  | 0,00 | 0,00 | 0,00 | 0,00 | NA | NA |
| CTD-2542O7.2   | 0,00 | 0,00 | 0,00 | 0,00 | NA | NA |
| CTD-2544D21.1  | 0,00 | 0,00 | 0,00 | 0,00 | NA | NA |
| CTD-2544H17.1  | 0,00 | 0,00 | 0,00 | 0,00 | NA | NA |
| CTD-2544H17.2  | 0,00 | 0,00 | 0,00 | 0,00 | NA | NA |
| CTD-2544M6.1   | 0,00 | 0,00 | 0,00 | 0,00 | NA | NA |
| CTD-2545G14.4  | 0,00 | 0,00 | 0,00 | 0,00 | NA | NA |
| CTD-2545H1.1   | 0,00 | 0,00 | 0,00 | 0,00 | NA | NA |
| CTD-2545M3.6   | 0,00 | 0,00 | 0,00 | 0,00 | NA | NA |
| CTD-2547E10.3  | 0,00 | 0,00 | 0,00 | 0,00 | NA | NA |
| CTD-2547E10.5  | 0,00 | 0,00 | 0,00 | 0,00 | NA | NA |
| CTD-2547G23.2  | 0,00 | 0,00 | 0,00 | 0,00 | NA | NA |
| CTD-2547L16.2  | 0,00 | 0,00 | 0,00 | 0,00 | NA | NA |
| CTD-2550O8.5   | 0,00 | 0,00 | 0,00 | 0,00 | NA | NA |
| CTD-2550O8.7   | 0,00 | 0,00 | 0,00 | 0,00 | NA | NA |
| CTD-2552B11.2  | 0,00 | 0,00 | 0,00 | 0,00 | NA | NA |
| CTD-2552B11.3  | 0,00 | 0,00 | 0,00 | 0,00 | NA | NA |
| CTD-2552K11.2  | 0,00 | 0,00 | 0,00 | 0,00 | NA | NA |
| CTD-2553C6.1   | 0,00 | 0,00 | 0,00 | 0,00 | NA | NA |
| CTD-2553L13.7  | 0,00 | 0,00 | 0,00 | 0,00 | NA | NA |
| CTD-2554C21.1  | 0,00 | 0,00 | 0,00 | 0,00 | NA | NA |
| CTD-2555A7.1   | 0,00 | 0,00 | 0,00 | 0,00 | NA | NA |
| CTD-2555A7.3   | 0,00 | 0,00 | 0,00 | 0,00 | NA | NA |
| CTD-2555I5.1   | 0,00 | 0,00 | 0,00 | 0,00 | NA | NA |
| CTD-2555K7.1   | 0,00 | 0,00 | 0,00 | 0,00 | NA | NA |
| CTD-2555K7.3   | 0,00 | 0,00 | 0,00 | 0,00 | NA | NA |
| CTD-2560C21.1  | 0,00 | 0,00 | 0,00 | 0,00 | NA | NA |
| CTD-2560E9.3   | 0,00 | 0,00 | 0,00 | 0,00 | NA | NA |
| CTD-2560E9.5   | 0,00 | 0,00 | 0,00 | 0,00 | NA | NA |
| CTD-2560K21.6  | 0,00 | 0,00 | 0,00 | 0,00 | NA | NA |
| CTD-2561B21.10 | 0,00 | 0,00 | 0,00 | 0,00 | NA | NA |
| CTD-2561J22.1  | 0,00 | 0,00 | 0,00 | 0,00 | NA | NA |
| CTD-2561J22.3  | 0,00 | 0,00 | 0,00 | 0,00 | NA | NA |
| CTD-2562J17.4  | 0,00 | 0,00 | 0,00 | 0,00 | NA | NA |
| CTD-2562J17.5  | 0,00 | 0,00 | 0,00 | 0,00 | NA | NA |
| CTD-2563K22.1  | 0,00 | 0,00 | 0,00 | 0,00 | NA | NA |
| CTD-2564P9.3   | 0,00 | 0,00 | 0,00 | 0,00 | NA | NA |
| CTD-2566J3.1   | 0,00 | 0,00 | 0,00 | 0,00 | NA | NA |
| CTD-2566J3.2   | 0,00 | 0,00 | 0,00 | 0,00 | NA | NA |
| CTD-2568A17.11 | 0,00 | 0,00 | 0,00 | 0,00 | NA | NA |
| CTD-2568A17.5  | 0,00 | 0,00 | 0,00 | 0,00 | NA | NA |
| CTD-2568P10.1  | 0,00 | 0,00 | 0,00 | 0,00 | NA | NA |
| CTD-2568P8.1   | 0,00 | 0,00 | 0,00 | 0,00 | NA | NA |
| CTD-2568P8.3   | 0,00 | 0,00 | 0,00 | 0,00 | NA | NA |
| CTD-2571E19.1  | 0,00 | 0,00 | 0,00 | 0,00 | NA | NA |



|                |      |      |      |      |    |    |
|----------------|------|------|------|------|----|----|
| CTD-2571E19.3  | 0,00 | 0,00 | 0,00 | 0,00 | NA | NA |
| CTD-2571L23.9  | 0,00 | 0,00 | 0,00 | 0,00 | NA | NA |
| CTD-2572N17.1  | 0,00 | 0,00 | 0,00 | 0,00 | NA | NA |
| CTD-2574D22.5  | 0,00 | 0,00 | 0,00 | 0,00 | NA | NA |
| CTD-2574D22.6  | 0,00 | 0,00 | 0,00 | 0,00 | NA | NA |
| CTD-2574D22.7  | 0,00 | 0,00 | 0,00 | 0,00 | NA | NA |
| CTD-2575K13.8  | 0,00 | 0,00 | 0,00 | 0,00 | NA | NA |
| CTD-2576D5.3   | 0,00 | 0,00 | 0,00 | 0,00 | NA | NA |
| CTD-2576F9.2   | 0,00 | 0,00 | 0,00 | 0,00 | NA | NA |
| CTD-2576N18.1  | 0,00 | 0,00 | 0,00 | 0,00 | NA | NA |
| CTD-2579N5.3   | 0,00 | 0,00 | 0,00 | 0,00 | NA | NA |
| CTD-2579N5.4   | 0,00 | 0,00 | 0,00 | 0,00 | NA | NA |
| CTD-2579N5.5   | 0,00 | 0,00 | 0,00 | 0,00 | NA | NA |
| CTD-2582M21.1  | 0,00 | 0,00 | 0,00 | 0,00 | NA | NA |
| CTD-2583A14.1  | 0,00 | 0,00 | 0,00 | 0,00 | NA | NA |
| CTD-2583A14.10 | 0,00 | 0,78 | 0,00 | 0,00 | NA | NA |
| CTD-2587H19.2  | 0,00 | 0,00 | 0,00 | 0,00 | NA | NA |
| CTD-2587H24.1  | 0,00 | 0,00 | 0,00 | 0,00 | NA | NA |
| CTD-2587H24.4  | 0,00 | 0,00 | 0,00 | 0,00 | NA | NA |
| CTD-2587H24.5  | 0,00 | 0,00 | 0,00 | 0,00 | NA | NA |
| CTD-2588J1.1   | 0,00 | 0,00 | 0,00 | 0,00 | NA | NA |
| CTD-2588J6.1   | 0,00 | 0,00 | 0,00 | 0,00 | NA | NA |
| CTD-2589H19.4  | 0,00 | 0,00 | 0,00 | 0,00 | NA | NA |
| CTD-2589H19.6  | 0,00 | 0,00 | 0,00 | 0,00 | NA | NA |
| CTD-2589M5.4   | 0,00 | 0,00 | 0,00 | 0,00 | NA | NA |
| CTD-2589O24.1  | 0,00 | 0,00 | 0,00 | 0,00 | NA | NA |
| CTD-2593A12.2  | 0,00 | 0,00 | 0,00 | 0,00 | NA | NA |
| CTD-2593A12.3  | 0,00 | 0,00 | 0,00 | 0,00 | NA | NA |
| CTD-2593A12.4  | 0,00 | 0,00 | 0,00 | 0,00 | NA | NA |
| CTD-2594A10.3  | 0,00 | 0,00 | 0,00 | 0,00 | NA | NA |
| CTD-2594A10.4  | 0,00 | 0,00 | 0,00 | 0,00 | NA | NA |
| CTD-2594K21.1  | 0,00 | 0,00 | 0,00 | 0,00 | NA | NA |
| CTD-2595P9.1   | 0,00 | 0,00 | 0,00 | 0,00 | NA | NA |
| CTD-2595P9.4   | 0,00 | 0,00 | 0,00 | 0,00 | NA | NA |
| CTD-2596O15.1  | 0,00 | 0,00 | 0,00 | 0,00 | NA | NA |
| CTD-2600O9.2   | 0,00 | 0,00 | 0,00 | 0,00 | NA | NA |
| CTD-2607J13.1  | 0,00 | 0,00 | 0,00 | 0,00 | NA | NA |
| CTD-2611K5.1   | 0,00 | 0,00 | 0,00 | 0,00 | NA | NA |
| CTD-2611O12.3  | 0,00 | 0,00 | 0,00 | 0,00 | NA | NA |
| CTD-2613O8.1   | 0,00 | 0,00 | 0,00 | 0,00 | NA | NA |
| CTD-2616J11.12 | 0,00 | 0,00 | 0,00 | 0,00 | NA | NA |
| CTD-2616J11.14 | 0,00 | 0,00 | 0,00 | 0,00 | NA | NA |
| CTD-2616J11.15 | 0,00 | 0,00 | 0,00 | 0,00 | NA | NA |
| CTD-2616J11.2  | 0,00 | 0,00 | 0,00 | 0,00 | NA | NA |
| CTD-2616J11.3  | 0,00 | 0,00 | 0,00 | 0,00 | NA | NA |
| CTD-2616J11.9  | 0,00 | 0,00 | 0,00 | 0,00 | NA | NA |
| CTD-2619J13.13 | 0,00 | 0,00 | 0,00 | 0,00 | NA | NA |
| CTD-2619J13.27 | 0,00 | 0,00 | 0,00 | 0,00 | NA | NA |
| CTD-2619J13.5  | 0,00 | 0,00 | 0,00 | 0,00 | NA | NA |
| CTD-2619J13.9  | 0,00 | 0,00 | 0,00 | 0,00 | NA | NA |
| CTD-2620I22.1  | 0,00 | 0,00 | 0,00 | 0,00 | NA | NA |
| CTD-2620I22.2  | 0,00 | 0,00 | 0,00 | 0,00 | NA | NA |
| CTD-2621I17.3  | 0,00 | 0,00 | 0,00 | 0,00 | NA | NA |
| CTD-2621I17.8  | 0,00 | 0,00 | 0,00 | 0,00 | NA | NA |
| CTD-2622I13.3  | 0,00 | 0,00 | 0,00 | 0,00 | NA | NA |

|                |      |      |      |      |    |    |
|----------------|------|------|------|------|----|----|
| CTD-2623H2.3   | 0,00 | 0,00 | 0,00 | 0,00 | NA | NA |
| CTD-2623H2.7   | 0,00 | 0,00 | 0,00 | 0,00 | NA | NA |
| CTD-2623H2.8   | 0,00 | 0,00 | 0,00 | 0,00 | NA | NA |
| CTD-2623N2.5   | 0,00 | 0,00 | 0,00 | 0,00 | NA | NA |
| CTD-2626G11.3  | 0,00 | 0,00 | 0,00 | 0,00 | NA | NA |
| CTD-2630F21.2  | 0,00 | 0,00 | 0,00 | 0,00 | NA | NA |
| CTD-2632K10.1  | 0,00 | 0,00 | 0,00 | 0,00 | NA | NA |
| CTD-2639E6.9   | 0,00 | 0,00 | 0,00 | 0,00 | NA | NA |
| CTD-2643I7.4   | 0,00 | 0,00 | 0,00 | 0,00 | NA | NA |
| CTD-2643I7.6   | 0,00 | 0,00 | 0,00 | 0,00 | NA | NA |
| CTD-2643K12.2  | 0,00 | 0,00 | 0,00 | 0,00 | NA | NA |
| CTD-2644I21.1  | 0,00 | 0,00 | 0,00 | 0,00 | NA | NA |
| CTD-2647E9.1   | 0,00 | 0,00 | 0,00 | 0,00 | NA | NA |
| CTD-2649C14.1  | 0,00 | 0,00 | 0,00 | 0,00 | NA | NA |
| CTD-2649C14.3  | 0,00 | 0,00 | 0,00 | 0,00 | NA | NA |
| CTD-2650P22.1  | 0,00 | 0,20 | 0,04 | 0,00 | NA | NA |
| CTD-2651B20.2  | 0,00 | 0,00 | 0,00 | 0,00 | NA | NA |
| CTD-2651B20.8  | 0,00 | 0,00 | 0,00 | 0,00 | NA | NA |
| CTD-2651C21.3  | 0,00 | 0,00 | 0,00 | 0,00 | NA | NA |
| CTD-2651L24.1  | 0,00 | 0,00 | 0,00 | 0,00 | NA | NA |
| CTD-2653M23.3  | 0,00 | 0,00 | 0,00 | 0,00 | NA | NA |
| CTD-2659N19.11 | 0,00 | 0,00 | 0,00 | 0,00 | NA | NA |
| CTD-2659N19.4  | 0,00 | 0,00 | 0,00 | 0,00 | NA | NA |
| CTD-2659N19.9  | 0,00 | 0,00 | 0,00 | 0,96 | NA | NA |
| CTD-2666L21.3  | 0,00 | 0,00 | 0,00 | 0,00 | NA | NA |
| CTD-3006G17.2  | 0,39 | 0,56 | 0,31 | 0,32 | NA | NA |
| CTD-3007L5.1   | 0,00 | 0,00 | 0,00 | 0,00 | NA | NA |
| CTD-3014H8.1   | 0,00 | 0,00 | 0,00 | 0,00 | NA | NA |
| CTD-3018O17.5  | 0,00 | 0,00 | 0,00 | 0,00 | NA | NA |
| CTD-3018O17.6  | 0,00 | 0,00 | 0,00 | 0,00 | NA | NA |
| CTD-3020H12.3  | 0,00 | 0,00 | 0,00 | 0,00 | NA | NA |
| CTD-3022L24.1  | 0,04 | 0,11 | 0,02 | 0,19 | NA | NA |
| CTD-3023L14.2  | 0,00 | 0,00 | 0,00 | 0,00 | NA | NA |
| CTD-3023L14.3  | 0,00 | 0,00 | 0,00 | 0,00 | NA | NA |
| CTD-3028N15.1  | 0,00 | 0,00 | 0,00 | 0,00 | NA | NA |
| CTD-3030D20.1  | 0,00 | 0,00 | 0,00 | 0,00 | NA | NA |
| CTD-3032H12.1  | 0,00 | 0,00 | 0,00 | 0,00 | NA | NA |
| CTD-3032H12.3  | 0,00 | 0,00 | 0,00 | 0,00 | NA | NA |
| CTD-3035K23.3  | 0,00 | 0,00 | 0,00 | 0,00 | NA | NA |
| CTD-3035K23.6  | 0,00 | 0,00 | 0,00 | 0,00 | NA | NA |
| CTD-3037G24.3  | 0,00 | 0,00 | 0,00 | 0,00 | NA | NA |
| CTD-3037G24.5  | 0,00 | 0,00 | 0,00 | 0,00 | NA | NA |
| CTD-3051D23.3  | 0,00 | 0,00 | 0,00 | 0,00 | NA | NA |
| CTD-3051L14.13 | 0,00 | 0,00 | 0,00 | 0,00 | NA | NA |
| CTD-3051L14.14 | 0,00 | 0,00 | 0,00 | 0,00 | NA | NA |
| CTD-3060P21.1  | 0,00 | 0,00 | 0,00 | 0,00 | NA | NA |
| CTD-3064H18.2  | 0,00 | 0,00 | 0,00 | 0,00 | NA | NA |
| CTD-3064M3.1   | 0,00 | 0,00 | 0,00 | 0,00 | NA | NA |
| CTD-3064M3.3   | 0,00 | 0,00 | 0,00 | 0,00 | NA | NA |
| CTD-3064M3.4   | 0,20 | 0,11 | 0,19 | 0,23 | NA | NA |
| CTD-3064M3.6   | 0,00 | 0,00 | 0,00 | 0,00 | NA | NA |
| CTD-3065A13.1  | 0,00 | 0,00 | 0,00 | 0,00 | NA | NA |
| CTD-3065J16.9  | 0,00 | 0,00 | 0,00 | 0,00 | NA | NA |
| CTD-3066C23.1  | 0,00 | 0,00 | 0,00 | 0,00 | NA | NA |
| CTD-3073N11.5  | 0,00 | 0,00 | 0,00 | 0,00 | NA | NA |

|                |      |      |      |      |    |    |
|----------------|------|------|------|------|----|----|
| CTD-3073N11.7  | 0,00 | 0,00 | 0,00 | 0,00 | NA | NA |
| CTD-3074O7.11  | 0,00 | 0,00 | 0,00 | 0,00 | NA | NA |
| CTD-3074O7.2   | 0,00 | 0,00 | 0,00 | 0,00 | NA | NA |
| CTD-3076O17.1  | 0,00 | 0,00 | 0,00 | 0,00 | NA | NA |
| CTD-3080F16.3  | 0,00 | 0,00 | 0,00 | 0,00 | NA | NA |
| CTD-3083F21.5  | 0,00 | 0,11 | 0,00 | 0,00 | NA | NA |
| CTD-3088G3.4   | 0,00 | 0,00 | 0,00 | 0,00 | NA | NA |
| CTD-3088G3.8   | 0,36 | 0,77 | 0,42 | 0,43 | NA | NA |
| CTD-3093B17.2  | 0,00 | 0,00 | 0,00 | 0,00 | NA | NA |
| CTD-3093M3.1   | 0,00 | 0,00 | 0,00 | 0,00 | NA | NA |
| CTD-3096M3.1   | 0,00 | 0,00 | 0,00 | 0,00 | NA | NA |
| CTD-3096P4.1   | 0,00 | 0,00 | 0,00 | 0,00 | NA | NA |
| CTD-3099C6.5   | 0,00 | 0,00 | 0,00 | 0,00 | NA | NA |
| CTD-3105H18.10 | 0,00 | 0,00 | 0,00 | 0,00 | NA | NA |
| CTD-3105H18.5  | 0,00 | 0,00 | 0,00 | 0,00 | NA | NA |
| CTD-3105H18.9  | 0,00 | 0,00 | 0,00 | 0,00 | NA | NA |
| CTD-3107M8.1   | 0,00 | 0,00 | 0,00 | 0,00 | NA | NA |
| CTD-3107M8.2   | 0,00 | 0,00 | 0,00 | 0,00 | NA | NA |
| CTD-3107M8.4   | 0,00 | 0,00 | 0,00 | 0,00 | NA | NA |
| CTD-3110P2.2   | 0,00 | 0,00 | 0,00 | 0,00 | NA | NA |
| CTD-3113P16.5  | 0,00 | 0,00 | 0,00 | 0,00 | NA | NA |
| CTD-3118D11.3  | 0,00 | 0,00 | 0,00 | 0,00 | NA | NA |
| CTD-3126B10.1  | 0,00 | 0,00 | 0,00 | 0,00 | NA | NA |
| CTD-3131K8.1   | 0,00 | 0,00 | 0,00 | 0,00 | NA | NA |
| CTD-3138B18.1  | 0,00 | 0,00 | 0,00 | 0,00 | NA | NA |
| CTD-3138B18.4  | 0,00 | 0,00 | 0,00 | 0,00 | NA | NA |
| CTD-3138F19.1  | 0,00 | 0,00 | 0,00 | 0,00 | NA | NA |
| CTD-3141N22.1  | 0,00 | 0,00 | 0,00 | 0,00 | NA | NA |
| CTD-3145H4.1   | 0,00 | 0,00 | 0,00 | 0,00 | NA | NA |
| CTD-3148I10.13 | 0,00 | 0,00 | 0,00 | 0,00 | NA | NA |
| CTD-3149D2.2   | 0,00 | 0,00 | 0,00 | 0,00 | NA | NA |
| CTD-3149D2.4   | 0,00 | 0,00 | 0,00 | 0,00 | NA | NA |
| CTD-3154N5.1   | 0,00 | 0,00 | 0,00 | 0,00 | NA | NA |
| CTD-3154N5.2   | 0,00 | 0,00 | 0,00 | 0,00 | NA | NA |
| CTD-3157E16.1  | 0,00 | 0,68 | 0,00 | 0,00 | NA | NA |
| CTD-3157E16.2  | 0,00 | 0,00 | 0,00 | 0,00 | NA | NA |
| CTD-3162L10.3  | 0,00 | 0,00 | 0,00 | 0,00 | NA | NA |
| CTD-3162L10.4  | 0,00 | 0,00 | 0,00 | 0,00 | NA | NA |
| CTD-3162L10.5  | 0,00 | 0,00 | 0,00 | 0,00 | NA | NA |
| CTD-3187F8.11  | 0,00 | 0,00 | 0,00 | 0,27 | NA | NA |
| CTD-3187F8.12  | 0,00 | 0,00 | 0,00 | 0,00 | NA | NA |
| CTD-3187F8.2   | 0,00 | 0,00 | 0,00 | 0,00 | NA | NA |
| CTD-3187F8.6   | 0,00 | 0,00 | 0,00 | 0,00 | NA | NA |
| CTD-3187F8.7   | 0,00 | 0,00 | 0,00 | 0,00 | NA | NA |
| CTD-3193K9.11  | 0,00 | 0,00 | 0,00 | 0,00 | NA | NA |
| CTD-3193K9.3   | 0,00 | 0,00 | 0,00 | 0,00 | NA | NA |
| CTD-3193O13.11 | 0,00 | 0,00 | 0,00 | 0,00 | NA | NA |
| CTD-3193O13.13 | 0,00 | 0,00 | 0,00 | 0,00 | NA | NA |
| CTD-3193O13.8  | 0,00 | 0,00 | 0,00 | 0,00 | NA | NA |
| CTD-3194G12.1  | 0,00 | 0,00 | 0,00 | 0,00 | NA | NA |
| CTD-3199J23.6  | 0,00 | 0,00 | 0,00 | 0,00 | NA | NA |
| CTD-3203P2.3   | 0,00 | 0,00 | 0,00 | 0,00 | NA | NA |
| CTD-3212A4.2   | 0,00 | 0,00 | 0,00 | 0,00 | NA | NA |
| CTD-3214H19.16 | 0,00 | 0,00 | 0,00 | 0,00 | NA | NA |
| CTD-3214H19.4  | 0,00 | 0,00 | 0,00 | 0,00 | NA | NA |

|                |      |      |      |      |    |    |
|----------------|------|------|------|------|----|----|
| CTD-3214K23.1  | 0,00 | 0,00 | 0,00 | 0,00 | NA | NA |
| CTD-3216D2.4   | 0,00 | 0,00 | 0,00 | 0,00 | NA | NA |
| CTD-3220F14.1  | 0,02 | 0,21 | 0,00 | 0,00 | NA | NA |
| CTD-3222D19.10 | 0,00 | 0,00 | 0,00 | 0,00 | NA | NA |
| CTD-3222D19.2  | 0,00 | 0,00 | 0,00 | 0,00 | NA | NA |
| CTD-3224I3.2   | 0,00 | 0,00 | 0,00 | 0,00 | NA | NA |
| CTD-3224I3.3   | 0,00 | 0,00 | 0,00 | 0,00 | NA | NA |
| CTD-3224K15.2  | 0,00 | 0,00 | 0,00 | 0,00 | NA | NA |
| CTD-3224K15.3  | 0,00 | 0,00 | 0,00 | 0,00 | NA | NA |
| CTD-3229I4.1   | 0,00 | 0,00 | 0,00 | 0,00 | NA | NA |
| CTD-3233P19.7  | 0,00 | 0,00 | 0,00 | 0,00 | NA | NA |
| CTD-3233P19.8  | 0,00 | 0,00 | 0,00 | 0,00 | NA | NA |
| CTD-3234P18.6  | 0,00 | 0,11 | 0,00 | 0,10 | NA | NA |
| CTD-3244O18.5  | 0,00 | 0,00 | 0,00 | 0,00 | NA | NA |
| CTD-3244O18.6  | 0,00 | 0,00 | 0,00 | 0,00 | NA | NA |
| CTD-3244O18.7  | 0,00 | 0,00 | 0,00 | 0,00 | NA | NA |
| CTD-3247H4.2   | 0,00 | 0,00 | 0,00 | 0,00 | NA | NA |
| CTD-3252C9.2   | 0,00 | 0,00 | 0,00 | 0,00 | NA | NA |
| CTF2P          | 0,00 | 0,00 | 0,00 | 0,00 | NA | NA |
| CTGLF12P       | 0,07 | 0,13 | 0,12 | 0,08 | NA | NA |
| CTNNAL1        | 0,00 | 0,00 | 0,00 | 0,00 | NA | NA |
| CTRB2          | 0,00 | 0,00 | 0,00 | 0,00 | NA | NA |
| CTSG           | 0,00 | 0,00 | 0,00 | 0,00 | NA | NA |
| CTSLL1         | 0,00 | 0,00 | 0,00 | 0,00 | NA | NA |
| CTSLL4         | 0,00 | 0,00 | 0,00 | 0,00 | NA | NA |
| CTSLL6         | 0,00 | 0,00 | 0,00 | 0,00 | NA | NA |
| CTSLP2         | 0,00 | 0,00 | 0,00 | 0,00 | NA | NA |
| CTTN           | 0,10 | 0,15 | 0,10 | 0,19 | NA | NA |
| CTXN1          | 0,00 | 0,00 | 0,00 | 0,00 | NA | NA |
| CTXN2          | 0,00 | 0,00 | 0,00 | 0,00 | NA | NA |
| CTXN3          | 0,00 | 0,00 | 0,00 | 0,00 | NA | NA |
| CUX2           | 0,00 | 0,04 | 0,00 | 0,02 | NA | NA |
| CUX2P1         | 0,00 | 0,00 | 0,00 | 0,00 | NA | NA |
| CXADRP2        | 0,00 | 0,00 | 0,00 | 0,00 | NA | NA |
| CXCL1          | 0,00 | 0,00 | 0,00 | 0,00 | NA | NA |
| CXCL10         | 0,00 | 0,00 | 0,03 | 0,15 | NA | NA |
| CXCL12         | 0,00 | 0,00 | 0,00 | 0,00 | NA | NA |
| CXCL13         | 0,00 | 0,00 | 0,00 | 0,00 | NA | NA |
| CXCL17         | 0,00 | 0,00 | 0,00 | 0,00 | NA | NA |
| CXCL6          | 0,00 | 0,00 | 0,00 | 0,00 | NA | NA |
| CXCR6          | 0,00 | 0,18 | 0,00 | 0,12 | NA | NA |
| CXorf18        | 0,00 | 0,09 | 0,00 | 0,00 | NA | NA |
| CXorf24        | 0,00 | 0,00 | 0,00 | 0,14 | NA | NA |
| CXorf28        | 0,00 | 0,00 | 0,00 | 0,00 | NA | NA |
| CXorf46        | 0,00 | 0,00 | 0,00 | 0,00 | NA | NA |
| CXorf49        | 0,00 | 0,00 | 0,00 | 0,00 | NA | NA |
| CXorf49B       | 0,00 | 0,00 | 0,00 | 0,00 | NA | NA |
| CXorf51A       | 0,00 | 0,00 | 0,00 | 0,00 | NA | NA |
| CXorf51B       | 0,00 | 0,00 | 0,00 | 0,00 | NA | NA |
| CXorf57        | 0,00 | 0,00 | 0,06 | 0,30 | NA | NA |
| CXorf58        | 0,00 | 0,00 | 0,00 | 0,00 | NA | NA |
| CXorf66        | 0,00 | 0,00 | 0,00 | 0,00 | NA | NA |
| CXorf67        | 0,00 | 0,00 | 0,00 | 0,00 | NA | NA |
| CYB5P4         | 0,00 | 0,00 | 0,00 | 0,00 | NA | NA |
| CYCSP2         | 0,00 | 0,00 | 0,00 | 0,00 | NA | NA |

|              |      |      |      |      |    |    |
|--------------|------|------|------|------|----|----|
| CYCSP25      | 0,00 | 0,00 | 0,00 | 0,00 | NA | NA |
| CYCSP26      | 0,00 | 0,00 | 0,00 | 0,00 | NA | NA |
| CYCSP29      | 0,00 | 0,00 | 0,00 | 0,00 | NA | NA |
| CYCSP30      | 0,00 | 0,00 | 0,00 | 0,00 | NA | NA |
| CYCSP34      | 0,00 | 0,00 | 0,00 | 0,00 | NA | NA |
| CYCSP39      | 0,00 | 0,00 | 0,00 | 0,00 | NA | NA |
| CYCSP42      | 0,00 | 0,00 | 0,00 | 0,00 | NA | NA |
| CYGB         | 0,00 | 0,00 | 0,00 | 0,00 | NA | NA |
| CYMP         | 0,00 | 0,00 | 0,00 | 0,00 | NA | NA |
| CYP11B1      | 0,00 | 0,00 | 0,00 | 0,00 | NA | NA |
| CYP17A1OS    | 0,00 | 0,00 | 0,00 | 0,00 | NA | NA |
| CYP19A1      | 0,00 | 0,00 | 0,00 | 0,00 | NA | NA |
| CYP1A1       | 0,00 | 0,00 | 0,00 | 0,00 | NA | NA |
| CYP1B1       | 0,00 | 0,00 | 0,03 | 0,28 | NA | NA |
| CYP26A1      | 0,00 | 0,00 | 0,00 | 0,00 | NA | NA |
| CYP26B1      | 0,00 | 0,00 | 0,00 | 0,00 | NA | NA |
| CYP26C1      | 0,00 | 0,00 | 0,00 | 0,00 | NA | NA |
| CYP2A7P1     | 0,00 | 0,00 | 0,00 | 0,00 | NA | NA |
| CYP2AC1P     | 0,00 | 0,14 | 0,00 | 0,00 | NA | NA |
| CYP2C18      | 0,00 | 0,00 | 0,00 | 0,00 | NA | NA |
| CYP2C8       | 0,00 | 0,00 | 0,00 | 0,00 | NA | NA |
| CYP2F1P      | 0,00 | 0,00 | 0,00 | 0,00 | NA | NA |
| CYP2J2       | 0,00 | 0,00 | 0,00 | 0,00 | NA | NA |
| CYP3A51P     | 0,00 | 0,00 | 0,00 | 0,00 | NA | NA |
| CYP4F10P     | 0,00 | 0,00 | 0,00 | 0,00 | NA | NA |
| CYP4F23P     | 0,00 | 0,00 | 0,00 | 0,00 | NA | NA |
| CYP4F24P     | 0,00 | 0,00 | 0,00 | 0,00 | NA | NA |
| CYP4F30P     | 0,00 | 0,00 | 0,00 | 0,00 | NA | NA |
| CYP4F36P     | 0,00 | 0,00 | 0,00 | 0,00 | NA | NA |
| CYP4X1       | 0,00 | 0,00 | 0,00 | 0,00 | NA | NA |
| CYP4Z1       | 0,00 | 0,00 | 0,00 | 0,00 | NA | NA |
| CYP7B1       | 0,00 | 0,00 | 0,00 | 0,00 | NA | NA |
| CYR61        | 0,00 | 0,00 | 0,00 | 0,00 | NA | NA |
| CYS1         | 0,00 | 0,00 | 0,00 | 0,00 | NA | NA |
| CYTL1        | 0,00 | 0,00 | 0,00 | 0,00 | NA | NA |
| DAB1         | 0,00 | 0,00 | 0,00 | 0,00 | NA | NA |
| DAB2IP       | 0,00 | 0,00 | 0,00 | 0,00 | NA | NA |
| DAGLA        | 0,00 | 0,00 | 0,00 | 0,03 | NA | NA |
| DAO          | 0,00 | 0,00 | 0,00 | 0,00 | NA | NA |
| DAOA         | 0,00 | 0,00 | 0,00 | 0,00 | NA | NA |
| DAQB-12N14.5 | 0,00 | 0,00 | 0,00 | 0,00 | NA | NA |
| DAZ1         | 0,00 | 0,00 | 0,00 | 0,00 | NA | NA |
| DAZ2         | 0,00 | 0,00 | 0,00 | 0,00 | NA | NA |
| DAZ3         | 0,00 | 0,00 | 0,00 | 0,00 | NA | NA |
| DAZ4         | 0,00 | 0,00 | 0,00 | 0,00 | NA | NA |
| DAZL         | 0,00 | 0,00 | 0,00 | 0,00 | NA | NA |
| DBH          | 0,00 | 0,00 | 0,00 | 0,00 | NA | NA |
| DBIP1        | 0,00 | 0,00 | 0,00 | 0,00 | NA | NA |
| DBNDD1       | 0,00 | 0,00 | 0,00 | 0,00 | NA | NA |
| DBX2         | 0,00 | 0,00 | 0,00 | 0,00 | NA | NA |
| DCAF12L1     | 0,00 | 0,00 | 0,00 | 0,00 | NA | NA |
| DCAF12L2     | 0,00 | 0,00 | 0,00 | 0,00 | NA | NA |
| DCAF8L1      | 0,00 | 0,00 | 0,00 | 0,00 | NA | NA |
| DCAF8L2      | 0,00 | 0,00 | 0,00 | 0,00 | NA | NA |
| DCDC2B       | 0,00 | 0,00 | 0,00 | 0,00 | NA | NA |

|            |      |      |      |      |    |    |
|------------|------|------|------|------|----|----|
| DCLK3      | 0,00 | 0,02 | 0,00 | 0,00 | NA | NA |
| DCST1      | 0,00 | 0,00 | 0,00 | 0,00 | NA | NA |
| DCST2      | 0,00 | 0,00 | 0,00 | 0,00 | NA | NA |
| DCX        | 0,02 | 0,02 | 0,02 | 0,05 | NA | NA |
| DDAH1      | 0,00 | 0,00 | 0,00 | 0,00 | NA | NA |
| DDC        | 0,00 | 0,00 | 0,00 | 0,00 | NA | NA |
| DDIT4L     | 0,00 | 0,00 | 0,00 | 0,00 | NA | NA |
| DDX11L1    | 0,00 | 0,00 | 0,00 | 0,00 | NA | NA |
| DDX11L10   | 0,00 | 0,18 | 0,00 | 0,00 | NA | NA |
| DDX11L16   | 0,00 | 0,00 | 0,00 | 0,00 | NA | NA |
| DDX11L5    | 0,00 | 0,00 | 0,00 | 0,00 | NA | NA |
| DDX39BP1   | 0,00 | 0,00 | 0,00 | 0,00 | NA | NA |
| DDX3Y      | 0,01 | 0,03 | 0,04 | 0,05 | NA | NA |
| DDX53      | 0,00 | 0,00 | 0,00 | 0,03 | NA | NA |
| DDX6P      | 0,00 | 0,00 | 0,00 | 0,00 | NA | NA |
| DEFA1      | 0,00 | 0,00 | 0,00 | 0,00 | NA | NA |
| DEFA10P    | 0,00 | 0,00 | 0,00 | 0,00 | NA | NA |
| DEFA1B     | 0,00 | 0,00 | 0,00 | 0,00 | NA | NA |
| DEFA3      | 0,00 | 0,00 | 0,00 | 0,00 | NA | NA |
| DEFA4      | 0,00 | 0,00 | 0,00 | 0,00 | NA | NA |
| DEFA5      | 0,00 | 0,00 | 0,00 | 0,00 | NA | NA |
| DEFA6      | 0,00 | 0,00 | 0,00 | 0,00 | NA | NA |
| DEFA8P     | 0,00 | 0,00 | 0,00 | 0,00 | NA | NA |
| DEFA9P     | 0,00 | 0,00 | 0,00 | 0,00 | NA | NA |
| DEFB1      | 0,00 | 0,00 | 0,00 | 0,00 | NA | NA |
| DEFB104A   | 0,00 | 0,00 | 0,00 | 0,00 | NA | NA |
| DEFB104B   | 0,00 | 0,00 | 0,00 | 0,00 | NA | NA |
| DEFB105A   | 0,00 | 0,00 | 0,00 | 0,00 | NA | NA |
| DEFB105B   | 0,00 | 0,00 | 0,00 | 0,00 | NA | NA |
| DEFB106A   | 0,00 | 0,00 | 0,00 | 0,00 | NA | NA |
| DEFB106B   | 0,00 | 0,00 | 0,00 | 0,00 | NA | NA |
| DEFB107A   | 0,00 | 0,00 | 0,00 | 0,00 | NA | NA |
| DEFB107B   | 0,00 | 0,00 | 0,00 | 0,00 | NA | NA |
| DEFB108B   | 0,00 | 0,00 | 0,00 | 0,00 | NA | NA |
| DEFB108P2  | 0,00 | 0,00 | 0,00 | 0,00 | NA | NA |
| DEFB108P3  | 0,00 | 0,00 | 0,00 | 0,00 | NA | NA |
| DEFB108P4  | 0,00 | 1,04 | 0,00 | 0,00 | NA | NA |
| DEFB109    | 0,00 | 0,00 | 0,00 | 0,00 | NA | NA |
| DEFB109P1  | 0,00 | 0,00 | 0,00 | 0,00 | NA | NA |
| DEFB109P1B | 0,00 | 0,00 | 0,00 | 0,00 | NA | NA |
| DEFB110    | 0,00 | 0,00 | 0,00 | 0,00 | NA | NA |
| DEFB112    | 0,00 | 0,00 | 0,00 | 0,00 | NA | NA |
| DEFB113    | 0,00 | 0,00 | 0,00 | 0,00 | NA | NA |
| DEFB114    | 0,00 | 0,00 | 0,00 | 0,00 | NA | NA |
| DEFB115    | 0,00 | 0,00 | 0,00 | 0,00 | NA | NA |
| DEFB116    | 0,00 | 0,00 | 0,00 | 0,00 | NA | NA |
| DEFB119    | 0,00 | 0,00 | 0,00 | 0,00 | NA | NA |
| DEFB121    | 0,00 | 0,00 | 0,00 | 0,00 | NA | NA |
| DEFB123    | 0,00 | 0,00 | 0,00 | 0,00 | NA | NA |
| DEFB124    | 0,00 | 0,00 | 0,00 | 0,00 | NA | NA |
| DEFB125    | 0,00 | 0,00 | 0,00 | 0,00 | NA | NA |
| DEFB126    | 0,00 | 0,00 | 0,00 | 0,00 | NA | NA |
| DEFB128    | 0,00 | 0,00 | 0,00 | 0,00 | NA | NA |
| DEFB129    | 0,00 | 0,00 | 0,00 | 0,00 | NA | NA |
| DEFB130    | 0,00 | 0,00 | 0,00 | 0,00 | NA | NA |

|         |      |      |      |      |    |    |
|---------|------|------|------|------|----|----|
| DEFB131 | 0,00 | 0,00 | 0,00 | 0,00 | NA | NA |
| DEFB132 | 0,00 | 0,00 | 0,00 | 0,00 | NA | NA |
| DEFB133 | 0,00 | 0,00 | 0,00 | 0,00 | NA | NA |
| DEFB134 | 0,00 | 0,00 | 0,00 | 0,00 | NA | NA |
| DEFB135 | 0,00 | 0,00 | 0,00 | 0,00 | NA | NA |
| DEFB136 | 0,00 | 0,00 | 0,00 | 0,00 | NA | NA |
| DEFB4A  | 0,00 | 0,00 | 0,00 | 0,00 | NA | NA |
| DEFB4B  | 0,00 | 0,00 | 0,00 | 0,00 | NA | NA |
| DES     | 0,00 | 0,00 | 0,00 | 0,00 | NA | NA |
| DFNA5   | 0,02 | 0,07 | 0,05 | 0,07 | NA | NA |
| DHDH    | 0,00 | 0,00 | 0,00 | 0,00 | NA | NA |
| DHFRP2  | 0,00 | 0,00 | 0,00 | 0,00 | NA | NA |
| DHH     | 0,00 | 0,00 | 0,00 | 0,00 | NA | NA |
| DHRS7C  | 0,00 | 0,00 | 0,00 | 0,00 | NA | NA |
| DIO3    | 0,00 | 0,00 | 0,00 | 0,00 | NA | NA |
| DIRAS3  | 0,00 | 0,00 | 0,00 | 0,00 | NA | NA |
| DIRC1   | 0,00 | 0,00 | 0,00 | 0,00 | NA | NA |
| DISP1   | 0,18 | 0,00 | 0,24 | 0,15 | NA | NA |
| DKK1    | 0,00 | 0,00 | 0,00 | 0,00 | NA | NA |
| DLEU2L  | 0,00 | 0,04 | 0,00 | 0,03 | NA | NA |
| DLG3    | 0,00 | 0,00 | 0,00 | 0,02 | NA | NA |
| DLGAP2  | 0,00 | 0,00 | 0,00 | 0,04 | NA | NA |
| DLK1    | 0,00 | 0,00 | 0,00 | 0,00 | NA | NA |
| DLL1    | 0,00 | 0,00 | 0,00 | 0,00 | NA | NA |
| DLL4    | 0,00 | 0,00 | 0,00 | 0,00 | NA | NA |
| DLX1    | 0,00 | 0,00 | 0,00 | 0,00 | NA | NA |
| DLX3    | 0,00 | 0,00 | 0,00 | 0,00 | NA | NA |
| DLX5    | 0,00 | 0,00 | 0,00 | 0,00 | NA | NA |
| DMBT1   | 0,00 | 0,07 | 0,00 | 0,00 | NA | NA |
| DMP1    | 0,00 | 0,05 | 0,00 | 0,00 | NA | NA |
| DMRT2   | 0,00 | 0,00 | 0,00 | 0,00 | NA | NA |
| DMRT3   | 0,00 | 0,00 | 0,00 | 0,00 | NA | NA |
| DMRTA1  | 0,00 | 0,00 | 0,00 | 0,00 | NA | NA |
| DMRTA2  | 0,00 | 0,00 | 0,00 | 0,00 | NA | NA |
| DNAAF3  | 0,00 | 0,00 | 0,00 | 0,00 | NA | NA |
| DNAH10  | 0,00 | 0,07 | 0,00 | 0,09 | NA | NA |
| DNAH14  | 0,07 | 0,13 | 0,10 | 0,14 | NA | NA |
| DNAJB1P | 0,00 | 0,00 | 0,00 | 0,00 | NA | NA |
| DNAJB3  | 0,00 | 0,00 | 0,00 | 0,00 | NA | NA |
| DNAJB8  | 0,00 | 0,00 | 0,00 | 0,00 | NA | NA |
| DNAJC12 | 0,10 | 0,32 | 0,00 | 0,09 | NA | NA |
| DNAJC18 | 0,36 | 0,43 | 0,37 | 0,83 | NA | NA |
| DNM1P17 | 0,00 | 0,00 | 0,00 | 0,00 | NA | NA |
| DNM1P24 | 0,00 | 0,00 | 0,00 | 0,00 | NA | NA |
| DNM1P30 | 0,00 | 0,00 | 0,00 | 0,00 | NA | NA |
| DNM1P32 | 0,00 | 0,00 | 0,00 | 0,00 | NA | NA |
| DNM1P33 | 0,00 | 0,00 | 0,00 | 0,00 | NA | NA |
| DNM1P34 | 0,00 | 0,00 | 0,00 | 0,00 | NA | NA |
| DNM1P35 | 0,00 | 0,00 | 0,00 | 0,00 | NA | NA |
| DNM3OS  | 0,14 | 0,09 | 0,10 | 0,21 | NA | NA |
| DNTT    | 0,00 | 0,00 | 0,00 | 0,00 | NA | NA |
| DOK4    | 0,00 | 0,00 | 0,00 | 0,00 | NA | NA |
| DOK7    | 0,00 | 0,06 | 0,00 | 0,00 | NA | NA |
| DPF3    | 0,00 | 0,00 | 0,00 | 0,03 | NA | NA |
| DPPA2   | 0,00 | 0,11 | 0,00 | 0,00 | NA | NA |

|           |      |      |      |      |    |    |
|-----------|------|------|------|------|----|----|
| DPPA3P1   | 0,00 | 0,00 | 0,00 | 0,00 | NA | NA |
| DPPA5     | 0,00 | 0,00 | 0,00 | 0,00 | NA | NA |
| DPPA5P1   | 0,00 | 0,00 | 0,00 | 0,00 | NA | NA |
| DPRX      | 0,00 | 0,00 | 0,00 | 0,00 | NA | NA |
| DPRXP1    | 0,00 | 0,00 | 0,00 | 0,00 | NA | NA |
| DPRXP2    | 0,00 | 0,00 | 0,00 | 0,00 | NA | NA |
| DPRXP5    | 0,00 | 0,00 | 0,00 | 0,00 | NA | NA |
| DPRXP6    | 0,00 | 0,00 | 0,00 | 0,00 | NA | NA |
| DPT       | 0,00 | 0,00 | 0,00 | 0,00 | NA | NA |
| DPY19L2   | 0,00 | 0,00 | 0,00 | 0,00 | NA | NA |
| DPY19L2P4 | 0,00 | 0,00 | 0,00 | 0,00 | NA | NA |
| DPY19L2P5 | 0,00 | 0,00 | 0,00 | 0,00 | NA | NA |
| DRC1      | 0,00 | 0,00 | 0,00 | 0,00 | NA | NA |
| DRD2      | 0,00 | 0,00 | 0,00 | 0,00 | NA | NA |
| DRD4      | 0,00 | 0,00 | 0,00 | 0,00 | NA | NA |
| DRD5      | 0,00 | 0,00 | 0,00 | 0,00 | NA | NA |
| DSC2      | 0,07 | 0,05 | 0,06 | 0,03 | NA | NA |
| DSCAML1   | 0,00 | 0,00 | 0,00 | 0,00 | NA | NA |
| DSCR10    | 0,00 | 0,00 | 0,00 | 0,00 | NA | NA |
| DSCR4     | 0,00 | 0,00 | 0,00 | 0,00 | NA | NA |
| DSCR8     | 0,00 | 0,00 | 0,00 | 0,00 | NA | NA |
| DSPP      | 0,00 | 0,00 | 0,00 | 0,00 | NA | NA |
| DTL       | 0,00 | 0,00 | 0,00 | 0,00 | NA | NA |
| DUOXA1    | 0,00 | 0,00 | 0,00 | 0,00 | NA | NA |
| DUOXA2    | 0,00 | 0,00 | 0,00 | 0,00 | NA | NA |
| DUPD1     | 0,00 | 0,00 | 0,00 | 0,00 | NA | NA |
| DUSP12P1  | 0,00 | 0,00 | 0,00 | 0,00 | NA | NA |
| DUSP13    | 0,00 | 0,00 | 0,00 | 0,00 | NA | NA |
| DUSP15    | 0,00 | 0,00 | 0,00 | 0,00 | NA | NA |
| DUSP21    | 0,00 | 0,00 | 0,00 | 0,00 | NA | NA |
| DUSP26    | 0,00 | 0,00 | 0,00 | 0,00 | NA | NA |
| DUSP27    | 0,00 | 0,00 | 0,00 | 0,00 | NA | NA |
| DUSP5P    | 0,00 | 0,00 | 0,00 | 0,00 | NA | NA |
| DUSP8     | 0,00 | 0,06 | 0,00 | 0,00 | NA | NA |
| DUSP8P2   | 0,00 | 0,00 | 0,00 | 0,00 | NA | NA |
| DUSP9     | 0,00 | 0,00 | 0,00 | 0,00 | NA | NA |
| DUX4L1    | 0,00 | 0,00 | 0,00 | 0,00 | NA | NA |
| DUX4L10   | 0,00 | 0,00 | 0,00 | 0,00 | NA | NA |
| DUX4L11   | 0,00 | 0,00 | 0,00 | 0,00 | NA | NA |
| DUX4L12   | 0,00 | 0,00 | 0,00 | 0,00 | NA | NA |
| DUX4L13   | 0,00 | 0,00 | 0,00 | 0,00 | NA | NA |
| DUX4L14   | 0,00 | 0,00 | 0,00 | 0,00 | NA | NA |
| DUX4L15   | 0,00 | 0,00 | 0,00 | 0,00 | NA | NA |
| DUX4L2    | 0,00 | 0,00 | 0,00 | 0,00 | NA | NA |
| DUX4L20   | 0,00 | 0,01 | 0,00 | 0,00 | NA | NA |
| DUX4L21   | 0,00 | 0,00 | 0,00 | 0,00 | NA | NA |
| DUX4L22   | 0,00 | 0,01 | 0,00 | 0,00 | NA | NA |
| DUX4L23   | 0,00 | 0,01 | 0,00 | 0,00 | NA | NA |
| DUX4L24   | 0,00 | 0,01 | 0,00 | 0,00 | NA | NA |
| DUX4L25   | 0,00 | 0,00 | 0,00 | 0,00 | NA | NA |
| DUX4L27   | 0,00 | 0,00 | 0,00 | 0,00 | NA | NA |
| DUX4L28   | 0,00 | 0,00 | 0,00 | 0,00 | NA | NA |
| DUX4L29   | 0,00 | 0,00 | 0,00 | 0,00 | NA | NA |
| DUX4L3    | 0,00 | 0,00 | 0,00 | 0,00 | NA | NA |
| DUX4L30   | 0,00 | 0,00 | 0,00 | 0,00 | NA | NA |



|                |      |      |      |      |    |    |
|----------------|------|------|------|------|----|----|
| DUX4L33        | 0,00 | 0,00 | 0,00 | 0,00 | NA | NA |
| DUX4L35        | 0,00 | 0,00 | 0,00 | 0,00 | NA | NA |
| DUX4L45        | 0,00 | 0,00 | 0,00 | 0,00 | NA | NA |
| DUX4L46        | 0,00 | 0,00 | 0,00 | 0,00 | NA | NA |
| DUX4L47        | 0,00 | 0,00 | 0,00 | 0,00 | NA | NA |
| DUX4L5         | 0,00 | 0,00 | 0,00 | 0,00 | NA | NA |
| DUX4L6         | 0,00 | 0,00 | 0,00 | 0,00 | NA | NA |
| DUX4L7         | 0,00 | 0,00 | 0,00 | 0,00 | NA | NA |
| DUX4L8         | 0,00 | 0,00 | 0,00 | 0,00 | NA | NA |
| DUXA           | 0,00 | 0,00 | 0,00 | 0,43 | NA | NA |
| DUXAP1         | 0,00 | 0,00 | 0,00 | 0,00 | NA | NA |
| DUXAP2         | 0,00 | 0,00 | 0,00 | 0,00 | NA | NA |
| DUXAP3         | 0,00 | 0,00 | 0,00 | 0,00 | NA | NA |
| DUXAP4         | 0,00 | 0,00 | 0,00 | 0,00 | NA | NA |
| DUXAP5         | 0,00 | 0,00 | 0,00 | 0,00 | NA | NA |
| DUXAP6         | 0,00 | 0,00 | 0,00 | 0,00 | NA | NA |
| DUXAP8         | 0,00 | 0,00 | 0,00 | 0,00 | NA | NA |
| DUXB           | 0,00 | 0,00 | 0,00 | 0,00 | NA | NA |
| DYNC2H1        | 0,04 | 0,06 | 0,35 | 0,48 | NA | NA |
| DYNLRB2        | 0,00 | 0,00 | 0,00 | 0,00 | NA | NA |
| DYNLT3P1       | 0,00 | 0,00 | 0,00 | 0,00 | NA | NA |
| DYNLT3P2       | 0,00 | 0,00 | 0,00 | 0,00 | NA | NA |
| EBI3           | 0,00 | 0,00 | 0,00 | 0,00 | NA | NA |
| EBLN1          | 0,00 | 0,00 | 0,00 | 0,00 | NA | NA |
| ECE2           | 0,00 | 0,00 | 0,00 | 0,00 | NA | NA |
| ECEL1          | 0,00 | 0,00 | 0,00 | 0,00 | NA | NA |
| ECSCR          | 0,00 | 0,00 | 0,00 | 0,00 | NA | NA |
| EDA            | 0,12 | 0,29 | 0,14 | 0,00 | NA | NA |
| EDA2R          | 0,00 | 0,25 | 0,00 | 0,08 | NA | NA |
| EDAR           | 0,00 | 0,00 | 0,00 | 0,00 | NA | NA |
| EDDM3B         | 0,00 | 0,00 | 0,00 | 0,00 | NA | NA |
| EDIL3          | 0,00 | 0,00 | 0,00 | 0,09 | NA | NA |
| EDN3           | 0,00 | 0,00 | 0,00 | 0,00 | NA | NA |
| EDNRA          | 0,00 | 0,00 | 0,00 | 0,00 | NA | NA |
| EDNRB          | 0,00 | 0,00 | 0,00 | 0,08 | NA | NA |
| EEF1A1P38      | 0,07 | 0,00 | 0,00 | 0,10 | NA | NA |
| EEF1AKMT4-ECE2 | 0,00 | 0,00 | 0,00 | 0,00 | NA | NA |
| EEF1B2P5       | 0,00 | 0,00 | 0,00 | 0,00 | NA | NA |
| EEF1DP1        | 0,00 | 0,19 | 0,00 | 0,00 | NA | NA |
| EEF1E1-BLOC1S5 | 0,00 | 0,00 | 0,00 | 0,00 | NA | NA |
| EFCAB10        | 0,48 | 0,35 | 0,63 | 0,36 | NA | NA |
| EFCAB4A        | 0,00 | 0,09 | 0,00 | 0,00 | NA | NA |
| EFCC1          | 0,00 | 0,00 | 0,00 | 0,00 | NA | NA |
| EFEMP1         | 0,00 | 0,00 | 0,00 | 0,00 | NA | NA |
| EFNA1          | 0,00 | 0,00 | 0,00 | 0,00 | NA | NA |
| EFNA2          | 0,00 | 0,00 | 0,00 | 0,00 | NA | NA |
| EFNA5          | 0,09 | 0,11 | 0,08 | 0,12 | NA | NA |
| EFNB2          | 0,00 | 0,00 | 0,00 | 0,00 | NA | NA |
| EFS            | 0,00 | 0,00 | 0,00 | 0,00 | NA | NA |
| EGF            | 0,00 | 0,00 | 0,00 | 0,00 | NA | NA |
| EGFEM1P        | 0,04 | 0,00 | 0,14 | 0,05 | NA | NA |
| EGFL6          | 0,00 | 0,00 | 0,00 | 0,00 | NA | NA |
| EGFR           | 0,00 | 0,00 | 0,00 | 0,00 | NA | NA |
| EGLN3          | 0,14 | 0,20 | 0,10 | 0,04 | NA | NA |
| EIF1AP1        | 0,00 | 0,00 | 0,00 | 0,19 | NA | NA |

|             |      |      |      |      |    |    |
|-------------|------|------|------|------|----|----|
| EIF1AY      | 0,30 | 0,25 | 0,22 | 0,87 | NA | NA |
| EIF4A1P     | 0,00 | 0,00 | 0,00 | 0,00 | NA | NA |
| EIF4A2P3    | 0,00 | 0,00 | 0,00 | 0,00 | NA | NA |
| EIF4E1B     | 0,00 | 0,00 | 0,00 | 0,00 | NA | NA |
| EIF4E2P1    | 0,00 | 0,00 | 0,00 | 0,00 | NA | NA |
| EIF4EBP2P   | 0,00 | 0,00 | 0,00 | 0,00 | NA | NA |
| EIF5A2      | 0,06 | 0,19 | 0,07 | 0,10 | NA | NA |
| EIF5AP4     | 0,00 | 0,00 | 0,00 | 0,00 | NA | NA |
| ELANE       | 0,00 | 0,00 | 0,00 | 0,00 | NA | NA |
| ELOA3       | 0,00 | 0,08 | 0,00 | 0,00 | NA | NA |
| ELOA3B      | 0,00 | 0,17 | 0,00 | 0,00 | NA | NA |
| ELOA3D      | 0,00 | 0,00 | 0,00 | 0,00 | NA | NA |
| ELOVL2      | 0,00 | 0,03 | 0,00 | 0,00 | NA | NA |
| ELOVL3      | 0,00 | 0,00 | 0,00 | 0,00 | NA | NA |
| ELOVL4      | 0,00 | 0,00 | 0,00 | 0,00 | NA | NA |
| ELOVL7      | 0,03 | 0,00 | 0,06 | 0,09 | NA | NA |
| EMID1       | 0,00 | 0,00 | 0,00 | 0,00 | NA | NA |
| EMX1        | 0,00 | 0,00 | 0,00 | 0,00 | NA | NA |
| EN1         | 0,00 | 0,00 | 0,00 | 0,00 | NA | NA |
| ENDOU       | 0,00 | 0,00 | 0,00 | 0,00 | NA | NA |
| ENPP7       | 0,00 | 0,00 | 0,00 | 0,00 | NA | NA |
| ENPP7P2     | 0,00 | 0,00 | 0,00 | 0,00 | NA | NA |
| ENTHD1      | 0,00 | 0,00 | 0,00 | 0,00 | NA | NA |
| ENTPD2      | 0,00 | 0,00 | 0,00 | 0,00 | NA | NA |
| ENTPD3      | 0,00 | 0,36 | 0,00 | 0,10 | NA | NA |
| EPB41L5     | 0,00 | 0,05 | 0,00 | 0,04 | NA | NA |
| EPB42       | 0,00 | 0,00 | 0,00 | 0,00 | NA | NA |
| EPCAM       | 0,00 | 0,19 | 0,00 | 0,00 | NA | NA |
| EPGN        | 0,00 | 0,00 | 0,00 | 0,00 | NA | NA |
| EPHA3       | 0,04 | 0,11 | 0,08 | 0,05 | NA | NA |
| EPHA5       | 0,02 | 0,04 | 0,02 | 0,00 | NA | NA |
| EPHA7       | 0,00 | 0,04 | 0,00 | 0,00 | NA | NA |
| EPHX1       | 0,00 | 0,00 | 0,00 | 0,10 | NA | NA |
| EPHX2       | 1,16 | 1,50 | 1,13 | 1,19 | NA | NA |
| EPO         | 0,00 | 0,00 | 0,00 | 0,00 | NA | NA |
| EPPIN-WFDC6 | 0,00 | 0,00 | 0,00 | 0,00 | NA | NA |
| EPS8L1      | 0,00 | 0,36 | 0,00 | 0,00 | NA | NA |
| EPS8L2      | 0,00 | 0,00 | 0,00 | 0,00 | NA | NA |
| EPS8L3      | 0,00 | 0,00 | 0,00 | 0,00 | NA | NA |
| ERAS        | 0,00 | 0,00 | 0,00 | 0,00 | NA | NA |
| ERBB4       | 0,01 | 0,03 | 0,01 | 0,01 | NA | NA |
| ERICH2      | 0,00 | 0,00 | 0,00 | 0,00 | NA | NA |
| ERICH3      | 0,00 | 0,00 | 0,00 | 0,00 | NA | NA |
| ERICH4      | 0,00 | 0,00 | 0,00 | 0,00 | NA | NA |
| ERICH5      | 0,00 | 0,00 | 0,00 | 0,00 | NA | NA |
| ERVV-1      | 0,00 | 0,00 | 0,00 | 0,00 | NA | NA |
| ERVV-2      | 0,00 | 0,00 | 0,00 | 0,00 | NA | NA |
| ERVWE2      | 0,00 | 0,00 | 0,00 | 0,00 | NA | NA |
| ESAM        | 0,18 | 0,30 | 0,27 | 0,46 | NA | NA |
| ESM1        | 0,00 | 0,00 | 0,00 | 0,00 | NA | NA |
| ESRP1       | 0,00 | 0,00 | 0,00 | 0,00 | NA | NA |
| ESRP2       | 0,29 | 0,22 | 0,23 | 0,20 | NA | NA |
| ESRRB       | 0,00 | 0,00 | 0,00 | 0,00 | NA | NA |
| ESRRG       | 0,00 | 0,40 | 0,05 | 0,09 | NA | NA |
| ESX1        | 0,00 | 0,00 | 0,00 | 0,00 | NA | NA |

|            |      |      |      |      |    |    |
|------------|------|------|------|------|----|----|
| ETF1P2     | 0,20 | 0,19 | 0,27 | 0,63 | NA | NA |
| ETV3L      | 0,00 | 0,00 | 0,00 | 0,00 | NA | NA |
| EVA1A      | 0,00 | 0,00 | 0,00 | 0,00 | NA | NA |
| EVC2       | 0,00 | 0,06 | 0,00 | 0,00 | NA | NA |
| EVPLL      | 0,00 | 0,00 | 0,00 | 0,00 | NA | NA |
| EVX1       | 0,00 | 0,00 | 0,00 | 0,00 | NA | NA |
| EVX2       | 0,00 | 0,00 | 0,00 | 0,00 | NA | NA |
| EXO1       | 0,00 | 0,00 | 0,00 | 0,00 | NA | NA |
| EXOSC3P2   | 0,00 | 0,00 | 0,00 | 0,00 | NA | NA |
| EXTL1      | 0,00 | 0,00 | 0,00 | 0,00 | NA | NA |
| EYA1       | 0,58 | 0,93 | 0,83 | 0,96 | NA | NA |
| EYA2       | 0,00 | 0,00 | 0,00 | 0,00 | NA | NA |
| F10        | 0,00 | 0,00 | 0,00 | 0,00 | NA | NA |
| F11        | 0,00 | 0,00 | 0,00 | 0,00 | NA | NA |
| F12        | 0,00 | 0,00 | 0,00 | 0,00 | NA | NA |
| F13B       | 0,00 | 0,00 | 0,00 | 0,00 | NA | NA |
| F7         | 0,00 | 0,00 | 0,00 | 0,00 | NA | NA |
| F8         | 0,07 | 0,15 | 0,37 | 0,15 | NA | NA |
| F8A2       | 0,00 | 0,00 | 0,00 | 0,00 | NA | NA |
| F9         | 0,00 | 0,00 | 0,00 | 0,00 | NA | NA |
| FA2H       | 0,00 | 0,00 | 0,00 | 0,00 | NA | NA |
| FABP1      | 0,00 | 0,00 | 0,00 | 0,00 | NA | NA |
| FABP12     | 0,00 | 0,00 | 0,00 | 0,00 | NA | NA |
| FABP3      | 0,00 | 0,00 | 0,00 | 0,00 | NA | NA |
| FABP3P2    | 0,00 | 0,00 | 0,00 | 0,00 | NA | NA |
| FABP5L4    | 0,00 | 0,00 | 0,00 | 0,00 | NA | NA |
| FABP6      | 0,00 | 0,00 | 0,00 | 0,00 | NA | NA |
| FABP9      | 0,00 | 0,00 | 0,00 | 0,00 | NA | NA |
| FADS2P1    | 0,00 | 0,00 | 0,00 | 0,00 | NA | NA |
| FAM101A    | 0,00 | 0,00 | 0,00 | 0,00 | NA | NA |
| FAM108A5   | 0,00 | 0,00 | 0,00 | 0,00 | NA | NA |
| FAM108A7P  | 0,00 | 0,00 | 0,00 | 0,00 | NA | NA |
| FAM108A8P  | 0,00 | 0,00 | 0,00 | 0,00 | NA | NA |
| FAM108A9P  | 0,00 | 0,00 | 0,00 | 0,00 | NA | NA |
| FAM131B    | 0,00 | 0,00 | 0,00 | 0,00 | NA | NA |
| FAM131C    | 0,00 | 0,00 | 0,00 | 0,00 | NA | NA |
| FAM133A    | 0,00 | 0,00 | 0,00 | 0,00 | NA | NA |
| FAM138C    | 0,00 | 0,00 | 0,00 | 0,00 | NA | NA |
| FAM138F    | 0,00 | 0,00 | 0,00 | 0,00 | NA | NA |
| FAM150A    | 0,00 | 0,00 | 0,00 | 0,00 | NA | NA |
| FAM155B    | 0,00 | 0,00 | 0,00 | 0,00 | NA | NA |
| FAM162B    | 0,00 | 0,00 | 0,00 | 0,00 | NA | NA |
| FAM163B    | 0,00 | 0,00 | 0,00 | 0,00 | NA | NA |
| FAM166A    | 0,00 | 0,00 | 0,00 | 0,00 | NA | NA |
| FAM166AP1  | 0,00 | 0,00 | 0,00 | 0,00 | NA | NA |
| FAM166AP10 | 0,00 | 0,00 | 0,00 | 0,00 | NA | NA |
| FAM166AP2  | 0,00 | 0,00 | 0,00 | 0,00 | NA | NA |
| FAM166AP3  | 0,00 | 0,00 | 0,00 | 0,00 | NA | NA |
| FAM166AP4  | 0,00 | 0,00 | 0,00 | 0,00 | NA | NA |
| FAM166AP5  | 0,00 | 0,00 | 0,00 | 0,00 | NA | NA |
| FAM166AP6  | 0,00 | 0,00 | 0,00 | 0,00 | NA | NA |
| FAM166AP7  | 0,00 | 0,00 | 0,00 | 0,00 | NA | NA |
| FAM166AP9  | 0,00 | 0,00 | 0,00 | 0,00 | NA | NA |
| FAM166B    | 0,00 | 0,00 | 0,00 | 0,00 | NA | NA |
| FAM170A    | 0,00 | 0,00 | 0,00 | 0,00 | NA | NA |

|          |      |      |      |      |    |    |
|----------|------|------|------|------|----|----|
| FAM170B  | 0,00 | 0,00 | 0,00 | 0,00 | NA | NA |
| FAM171A2 | 0,00 | 0,00 | 0,00 | 0,00 | NA | NA |
| FAM172B  | 0,00 | 0,00 | 0,00 | 0,00 | NA | NA |
| FAM181A  | 0,00 | 0,00 | 0,00 | 0,00 | NA | NA |
| FAM182B  | 0,00 | 0,35 | 0,00 | 0,00 | NA | NA |
| FAM183A  | 0,00 | 0,00 | 0,00 | 0,00 | NA | NA |
| FAM187B  | 0,00 | 0,00 | 0,00 | 0,00 | NA | NA |
| FAM189A1 | 0,00 | 0,00 | 0,00 | 0,00 | NA | NA |
| FAM196B  | 0,00 | 0,00 | 0,00 | 0,05 | NA | NA |
| FAM197Y1 | 0,00 | 0,00 | 0,00 | 0,00 | NA | NA |
| FAM197Y4 | 0,00 | 0,00 | 0,00 | 0,00 | NA | NA |
| FAM197Y5 | 0,00 | 0,00 | 0,00 | 0,00 | NA | NA |
| FAM197Y6 | 0,00 | 0,00 | 0,00 | 0,00 | NA | NA |
| FAM19A1  | 0,00 | 0,00 | 0,00 | 0,00 | NA | NA |
| FAM19A3  | 0,00 | 0,00 | 0,00 | 0,00 | NA | NA |
| FAM19A5  | 0,00 | 0,00 | 0,00 | 0,00 | NA | NA |
| FAM205A  | 0,00 | 0,00 | 0,00 | 0,00 | NA | NA |
| FAM205B  | 0,00 | 0,00 | 0,00 | 0,00 | NA | NA |
| FAM205C  | 0,00 | 0,00 | 0,00 | 0,00 | NA | NA |
| FAM212A  | 0,00 | 0,00 | 0,00 | 0,00 | NA | NA |
| FAM218A  | 0,00 | 0,00 | 0,00 | 0,00 | NA | NA |
| FAM21EP  | 0,05 | 0,07 | 0,01 | 0,06 | NA | NA |
| FAM237A  | 0,00 | 0,00 | 0,00 | 0,00 | NA | NA |
| FAM24A   | 0,00 | 0,00 | 0,00 | 0,00 | NA | NA |
| FAM25A   | 0,00 | 0,00 | 0,00 | 0,00 | NA | NA |
| FAM25BP  | 0,00 | 0,00 | 0,00 | 0,00 | NA | NA |
| FAM25C   | 0,00 | 0,00 | 0,00 | 0,00 | NA | NA |
| FAM27B   | 0,00 | 0,00 | 0,00 | 0,00 | NA | NA |
| FAM27E4P | 0,00 | 0,00 | 0,00 | 0,00 | NA | NA |
| FAM27L   | 0,00 | 0,00 | 0,00 | 0,00 | NA | NA |
| FAM35BP  | 0,07 | 0,00 | 0,13 | 0,04 | NA | NA |
| FAM3D    | 0,00 | 0,00 | 0,00 | 0,00 | NA | NA |
| FAM41AY1 | 0,00 | 0,00 | 0,00 | 0,00 | NA | NA |
| FAM41AY2 | 0,00 | 0,00 | 0,00 | 0,00 | NA | NA |
| FAM43B   | 0,00 | 0,00 | 0,00 | 0,00 | NA | NA |
| FAM45B   | 0,00 | 0,00 | 0,00 | 0,00 | NA | NA |
| FAM46D   | 0,00 | 0,00 | 0,00 | 0,00 | NA | NA |
| FAM47A   | 0,00 | 0,00 | 0,00 | 0,00 | NA | NA |
| FAM47B   | 0,00 | 0,00 | 0,00 | 0,00 | NA | NA |
| FAM47C   | 0,00 | 0,00 | 0,00 | 0,00 | NA | NA |
| FAM47DP  | 0,00 | 0,00 | 0,00 | 0,00 | NA | NA |
| FAM53A   | 0,00 | 0,00 | 0,00 | 0,00 | NA | NA |
| FAM57A   | 0,00 | 0,00 | 0,00 | 0,00 | NA | NA |
| FAM66A   | 0,00 | 0,00 | 0,00 | 0,00 | NA | NA |
| FAM66C   | 0,94 | 1,84 | 0,48 | 1,66 | NA | NA |
| FAM71A   | 0,00 | 0,00 | 0,00 | 0,00 | NA | NA |
| FAM71B   | 0,00 | 0,00 | 0,00 | 0,00 | NA | NA |
| FAM71C   | 0,00 | 0,00 | 0,00 | 0,00 | NA | NA |
| FAM71D   | 0,00 | 0,00 | 0,00 | 0,00 | NA | NA |
| FAM71E2  | 0,00 | 0,00 | 0,00 | 0,00 | NA | NA |
| FAM71F1  | 0,00 | 0,00 | 0,00 | 0,00 | NA | NA |
| FAM74A4  | 0,00 | 0,00 | 0,00 | 0,00 | NA | NA |
| FAM74A5  | 0,00 | 0,00 | 0,00 | 0,00 | NA | NA |
| FAM74A7  | 0,00 | 0,00 | 0,00 | 0,00 | NA | NA |
| FAM81B   | 0,00 | 0,00 | 0,00 | 0,10 | NA | NA |

|           |      |      |      |      |    |    |
|-----------|------|------|------|------|----|----|
| FAM83B    | 0,00 | 0,00 | 0,00 | 0,00 | NA | NA |
| FAM86B2   | 0,00 | 0,00 | 0,00 | 0,00 | NA | NA |
| FAM86EP   | 0,04 | 0,00 | 0,00 | 0,00 | NA | NA |
| FAM86KP   | 0,00 | 0,00 | 0,00 | 0,00 | NA | NA |
| FAM8A2P   | 0,00 | 0,00 | 0,00 | 0,00 | NA | NA |
| FAM90A11  | 0,00 | 0,00 | 0,00 | 0,00 | NA | NA |
| FAM90A12  | 0,00 | 0,00 | 0,00 | 0,00 | NA | NA |
| FAM90A13  | 0,00 | 0,00 | 0,00 | 0,00 | NA | NA |
| FAM90A14  | 0,00 | 0,00 | 0,00 | 0,00 | NA | NA |
| FAM90A15  | 0,00 | 0,00 | 0,00 | 0,00 | NA | NA |
| FAM90A16  | 0,00 | 0,00 | 0,00 | 0,00 | NA | NA |
| FAM90A18  | 0,00 | 0,00 | 0,00 | 0,00 | NA | NA |
| FAM90A19  | 0,00 | 0,00 | 0,00 | 0,00 | NA | NA |
| FAM90A20  | 0,00 | 0,00 | 0,00 | 0,00 | NA | NA |
| FAM90A21P | 0,00 | 0,00 | 0,00 | 0,00 | NA | NA |
| FAM90A22  | 0,00 | 0,00 | 0,00 | 0,00 | NA | NA |
| FAM90A23  | 0,00 | 0,00 | 0,00 | 0,00 | NA | NA |
| FAM90A25P | 0,00 | 0,00 | 0,00 | 0,00 | NA | NA |
| FAM90A26  | 0,00 | 0,00 | 0,00 | 0,00 | NA | NA |
| FAM90A27P | 0,00 | 0,00 | 0,00 | 0,00 | NA | NA |
| FAM90A2P  | 0,00 | 0,00 | 0,00 | 0,00 | NA | NA |
| FAM90A3   | 0,00 | 0,00 | 0,00 | 0,00 | NA | NA |
| FAM90A4P  | 0,00 | 0,00 | 0,00 | 0,00 | NA | NA |
| FAM90A5   | 0,00 | 0,00 | 0,00 | 0,00 | NA | NA |
| FAM90A6P  | 0,00 | 0,00 | 0,00 | 0,00 | NA | NA |
| FAM90A7   | 0,00 | 0,00 | 0,00 | 0,00 | NA | NA |
| FAM90A8   | 0,00 | 0,00 | 0,00 | 0,00 | NA | NA |
| FAM90A9   | 0,00 | 0,00 | 0,00 | 0,00 | NA | NA |
| FAM99A    | 0,00 | 0,00 | 0,00 | 0,00 | NA | NA |
| FAM99B    | 0,00 | 0,00 | 0,00 | 0,00 | NA | NA |
| FAM9C     | 0,10 | 0,12 | 0,13 | 0,09 | NA | NA |
| FANCE     | 0,05 | 0,11 | 0,10 | 0,26 | NA | NA |
| FANCI     | 1,71 | 0,42 | 1,69 | 1,86 | NA | NA |
| FARSBP1   | 0,00 | 0,00 | 0,00 | 0,00 | NA | NA |
| FAT1P1    | 0,00 | 0,00 | 0,00 | 0,00 | NA | NA |
| FATE1     | 0,00 | 0,00 | 0,00 | 0,00 | NA | NA |
| FBLL1     | 0,00 | 0,00 | 0,00 | 0,00 | NA | NA |
| FBN2      | 0,00 | 0,07 | 0,10 | 0,20 | NA | NA |
| FBP2      | 0,00 | 0,00 | 0,00 | 0,00 | NA | NA |
| FBXL13    | 0,00 | 0,00 | 0,00 | 0,00 | NA | NA |
| FBXL14    | 0,00 | 0,13 | 0,00 | 0,00 | NA | NA |
| FBXL7     | 0,00 | 0,00 | 0,00 | 0,00 | NA | NA |
| FBXO2     | 0,33 | 0,19 | 0,29 | 0,17 | NA | NA |
| FBXO32    | 0,08 | 0,29 | 0,09 | 0,24 | NA | NA |
| FBXO47    | 0,00 | 0,00 | 0,00 | 0,00 | NA | NA |
| FBXW11P1  | 0,00 | 0,00 | 0,00 | 0,00 | NA | NA |
| FCAMR     | 0,00 | 0,00 | 0,00 | 0,00 | NA | NA |
| FCER2     | 0,00 | 0,00 | 0,17 | 0,00 | NA | NA |
| FCGR3B    | 0,00 | 0,00 | 0,00 | 0,00 | NA | NA |
| FCN2      | 0,00 | 0,00 | 0,00 | 0,00 | NA | NA |
| FDCSP     | 0,00 | 0,00 | 0,00 | 0,00 | NA | NA |
| FDSP      | 0,00 | 0,00 | 0,00 | 0,00 | NA | NA |
| FDXP2     | 0,00 | 0,00 | 0,00 | 0,00 | NA | NA |
| FEM1DP    | 0,00 | 0,00 | 0,00 | 0,00 | NA | NA |
| FERD3L    | 0,00 | 0,00 | 0,00 | 0,00 | NA | NA |

|          |      |      |      |      |    |    |
|----------|------|------|------|------|----|----|
| FETUB    | 0,00 | 0,00 | 0,00 | 0,00 | NA | NA |
| FEV      | 0,00 | 0,00 | 0,00 | 0,00 | NA | NA |
| FEZF1    | 0,00 | 0,00 | 0,00 | 0,00 | NA | NA |
| FEZF2    | 0,00 | 0,00 | 0,00 | 0,00 | NA | NA |
| FFAR3    | 0,00 | 0,08 | 0,00 | 0,00 | NA | NA |
| FGB      | 0,00 | 0,00 | 0,00 | 0,00 | NA | NA |
| FGD5     | 0,05 | 0,09 | 0,08 | 0,07 | NA | NA |
| FGF12    | 0,04 | 0,02 | 0,06 | 0,06 | NA | NA |
| FGF14    | 0,00 | 0,00 | 0,00 | 0,00 | NA | NA |
| FGF16    | 0,00 | 0,00 | 0,00 | 0,00 | NA | NA |
| FGF17    | 0,00 | 0,00 | 0,00 | 0,00 | NA | NA |
| FGF19    | 0,00 | 0,00 | 0,00 | 0,00 | NA | NA |
| FGF20    | 0,00 | 0,00 | 0,00 | 0,00 | NA | NA |
| FGF21    | 0,00 | 0,00 | 0,00 | 0,00 | NA | NA |
| FGF3     | 0,00 | 0,00 | 0,00 | 0,00 | NA | NA |
| FGF4     | 0,00 | 0,00 | 0,00 | 0,00 | NA | NA |
| FGF6     | 0,00 | 0,00 | 0,00 | 0,00 | NA | NA |
| FGF7P2   | 0,00 | 0,00 | 0,00 | 0,00 | NA | NA |
| FGFBP1   | 0,00 | 0,00 | 0,00 | 0,00 | NA | NA |
| FGFR3P1  | 0,00 | 0,00 | 0,00 | 0,00 | NA | NA |
| FGFR3P5  | 0,00 | 0,00 | 0,00 | 0,00 | NA | NA |
| FGL1     | 0,00 | 0,00 | 0,00 | 0,00 | NA | NA |
| FHL5     | 0,00 | 0,00 | 0,00 | 0,00 | NA | NA |
| FIBCD1   | 0,00 | 0,00 | 0,00 | 0,00 | NA | NA |
| FIBIN    | 0,00 | 0,00 | 0,00 | 0,00 | NA | NA |
| FIGF     | 0,00 | 0,00 | 0,00 | 0,00 | NA | NA |
| FJX1     | 0,00 | 0,00 | 0,00 | 0,00 | NA | NA |
| FKBP1AP2 | 0,00 | 0,00 | 0,00 | 0,00 | NA | NA |
| FLG      | 0,00 | 0,02 | 0,00 | 0,00 | NA | NA |
| FLRT1    | 0,00 | 0,00 | 0,00 | 0,00 | NA | NA |
| FLRT2    | 0,10 | 0,16 | 0,13 | 0,20 | NA | NA |
| FLT1     | 0,35 | 0,91 | 0,36 | 0,56 | NA | NA |
| FMO10P   | 0,00 | 0,00 | 0,00 | 0,00 | NA | NA |
| FMO11P   | 0,00 | 0,00 | 0,00 | 0,00 | NA | NA |
| FMO2     | 0,00 | 0,00 | 0,00 | 0,00 | NA | NA |
| FMO7P    | 0,00 | 0,00 | 0,00 | 0,00 | NA | NA |
| FMO8P    | 0,00 | 0,00 | 0,00 | 0,00 | NA | NA |
| FMO9P    | 0,00 | 0,00 | 0,00 | 0,00 | NA | NA |
| FMOD     | 0,00 | 0,00 | 0,00 | 0,00 | NA | NA |
| FMR1NB   | 0,00 | 0,00 | 0,00 | 0,00 | NA | NA |
| FNBP1L   | 0,06 | 0,12 | 0,27 | 0,00 | NA | NA |
| FNDC1    | 0,00 | 0,00 | 0,00 | 0,00 | NA | NA |
| FNDC3CP  | 0,00 | 0,00 | 0,00 | 0,00 | NA | NA |
| FNDC4    | 0,00 | 0,00 | 0,00 | 0,00 | NA | NA |
| FNDC5    | 0,00 | 0,00 | 0,00 | 0,00 | NA | NA |
| FNTAL1   | 0,00 | 0,00 | 0,00 | 0,00 | NA | NA |
| FOLH1B   | 0,00 | 0,00 | 0,00 | 0,00 | NA | NA |
| FOXA3    | 0,00 | 0,00 | 0,00 | 0,00 | NA | NA |
| FOXB1    | 0,00 | 0,04 | 0,00 | 0,00 | NA | NA |
| FOXB2    | 0,00 | 0,00 | 0,00 | 0,00 | NA | NA |
| FOXCUT   | 0,00 | 0,00 | 0,00 | 0,00 | NA | NA |
| FOXD1    | 0,00 | 0,00 | 0,00 | 0,00 | NA | NA |
| FOXD3    | 0,00 | 0,00 | 0,00 | 0,00 | NA | NA |
| FOXD4L1  | 0,00 | 0,00 | 0,00 | 0,00 | NA | NA |
| FOXD4L3  | 0,00 | 0,00 | 0,00 | 0,00 | NA | NA |

|               |      |      |      |      |    |    |
|---------------|------|------|------|------|----|----|
| FOXD4L5       | 0,00 | 0,00 | 0,00 | 0,00 | NA | NA |
| FOXD4L6       | 0,00 | 0,00 | 0,00 | 0,00 | NA | NA |
| FOX E3        | 0,00 | 0,00 | 0,00 | 0,00 | NA | NA |
| FOXF2         | 0,00 | 0,00 | 0,00 | 0,00 | NA | NA |
| FOXG1         | 0,00 | 0,03 | 0,00 | 0,00 | NA | NA |
| FOXI2         | 0,00 | 0,00 | 0,00 | 0,00 | NA | NA |
| FOXJ1         | 0,00 | 0,00 | 0,00 | 0,00 | NA | NA |
| FOXL2         | 0,00 | 0,00 | 0,00 | 0,00 | NA | NA |
| FOXN3-AS1     | 0,00 | 0,00 | 0,00 | 0,00 | NA | NA |
| FOXN4         | 0,00 | 0,00 | 0,00 | 0,00 | NA | NA |
| FOXO3B        | 0,00 | 0,00 | 0,00 | 0,00 | NA | NA |
| FOXO6         | 0,00 | 0,00 | 0,00 | 0,00 | NA | NA |
| FOXQ1         | 0,00 | 0,00 | 0,00 | 0,00 | NA | NA |
| FOXR1         | 0,00 | 0,00 | 0,00 | 0,00 | NA | NA |
| FOXR2         | 0,00 | 0,00 | 0,00 | 0,00 | NA | NA |
| FPGT-TNNI3K   | 0,04 | 0,09 | 0,06 | 0,05 | NA | NA |
| FRG2DP        | 0,00 | 0,00 | 0,00 | 0,00 | NA | NA |
| FRG2EP        | 0,00 | 0,00 | 0,00 | 0,00 | NA | NA |
| FRG2FP        | 0,00 | 0,00 | 0,00 | 0,00 | NA | NA |
| FRG2GP        | 0,00 | 0,00 | 0,00 | 0,00 | NA | NA |
| FRG2HP        | 0,00 | 0,00 | 0,00 | 0,00 | NA | NA |
| FRG2IP        | 0,00 | 0,00 | 0,00 | 0,00 | NA | NA |
| FRG2JP        | 0,00 | 0,00 | 0,00 | 0,00 | NA | NA |
| FRMD3         | 0,03 | 0,10 | 0,09 | 0,38 | NA | NA |
| FRMD7         | 0,00 | 0,00 | 0,00 | 0,00 | NA | NA |
| FRMPD2        | 0,03 | 0,00 | 0,01 | 0,08 | NA | NA |
| FRMPD4        | 0,00 | 0,00 | 0,00 | 0,00 | NA | NA |
| FSBP          | 0,00 | 0,00 | 0,00 | 0,00 | NA | NA |
| FSCB          | 0,00 | 0,00 | 0,00 | 0,00 | NA | NA |
| FSHB          | 0,00 | 0,00 | 0,00 | 0,00 | NA | NA |
| FSHR          | 0,00 | 0,00 | 0,00 | 0,00 | NA | NA |
| FSTL1         | 0,00 | 0,21 | 0,00 | 0,00 | NA | NA |
| FSTL5         | 0,00 | 0,00 | 0,00 | 0,00 | NA | NA |
| FTH1P19       | 0,00 | 0,00 | 0,00 | 0,00 | NA | NA |
| FTH1P27       | 0,00 | 0,00 | 0,00 | 0,00 | NA | NA |
| FTHL17        | 0,00 | 0,00 | 0,00 | 0,00 | NA | NA |
| FTHL18        | 0,00 | 0,00 | 0,00 | 0,00 | NA | NA |
| FTHL26        | 0,00 | 0,00 | 0,00 | 0,00 | NA | NA |
| FTLP          | 0,00 | 0,00 | 0,00 | 0,00 | NA | NA |
| FTLP12        | 0,00 | 0,00 | 0,00 | 0,00 | NA | NA |
| FTLP13        | 0,00 | 0,00 | 0,00 | 0,00 | NA | NA |
| FTMT          | 0,00 | 0,00 | 0,00 | 0,00 | NA | NA |
| FUT5          | 0,00 | 0,00 | 0,00 | 0,00 | NA | NA |
| FX YD1        | 0,00 | 0,00 | 0,00 | 0,00 | NA | NA |
| FX YD2        | 0,00 | 0,09 | 0,00 | 0,38 | NA | NA |
| FX YD6-FX YD2 | 0,00 | 0,00 | 0,00 | 0,00 | NA | NA |
| FX YD6P1      | 0,00 | 0,00 | 0,00 | 0,00 | NA | NA |
| FX YD8        | 0,00 | 0,00 | 0,00 | 0,00 | NA | NA |
| FZD6          | 0,10 | 0,00 | 0,03 | 0,00 | NA | NA |
| FZD9          | 0,00 | 0,00 | 0,00 | 0,00 | NA | NA |
| GABARAPL3     | 0,00 | 0,00 | 0,00 | 0,00 | NA | NA |
| GABRA6        | 0,00 | 0,00 | 0,00 | 0,00 | NA | NA |
| GABRB2        | 0,00 | 0,02 | 0,00 | 0,00 | NA | NA |
| GABRR1        | 0,00 | 0,00 | 0,00 | 0,00 | NA | NA |
| GABRR3        | 0,02 | 0,06 | 0,00 | 0,00 | NA | NA |

|          |      |      |      |      |    |    |
|----------|------|------|------|------|----|----|
| GAGE12B  | 0,00 | 0,00 | 0,00 | 0,00 | NA | NA |
| GAGE12C  | 0,00 | 0,00 | 0,00 | 0,00 | NA | NA |
| GAGE12D  | 0,00 | 0,00 | 0,00 | 0,00 | NA | NA |
| GAGE12E  | 0,00 | 0,00 | 0,00 | 0,00 | NA | NA |
| GAGE12G  | 0,00 | 0,00 | 0,00 | 0,00 | NA | NA |
| GAGE12H  | 0,00 | 0,00 | 0,00 | 0,00 | NA | NA |
| GAGE12J  | 0,00 | 0,00 | 0,00 | 0,00 | NA | NA |
| GAGE13   | 0,00 | 0,00 | 0,00 | 0,00 | NA | NA |
| GAGE2A   | 0,00 | 0,00 | 0,00 | 0,00 | NA | NA |
| GAGE2E   | 0,00 | 0,00 | 0,00 | 0,00 | NA | NA |
| GAL      | 0,00 | 0,00 | 0,00 | 0,00 | NA | NA |
| GAL3ST4  | 0,17 | 0,24 | 0,14 | 0,06 | NA | NA |
| GALNT14  | 0,00 | 0,00 | 0,00 | 0,00 | NA | NA |
| GALNT16  | 0,35 | 0,25 | 0,41 | 0,44 | NA | NA |
| GALNT8   | 0,04 | 0,00 | 0,00 | 0,20 | NA | NA |
| GALNTL6  | 0,00 | 0,00 | 0,00 | 0,00 | NA | NA |
| GALR3    | 0,00 | 0,00 | 0,00 | 0,00 | NA | NA |
| GAPDHP15 | 0,00 | 0,00 | 0,00 | 0,00 | NA | NA |
| GAPDHP66 | 0,00 | 0,00 | 0,00 | 0,00 | NA | NA |
| GAPDHS   | 0,00 | 0,00 | 0,00 | 0,00 | NA | NA |
| GAPDP2   | 0,00 | 0,00 | 0,00 | 0,00 | NA | NA |
| GARNL3   | 0,70 | 0,14 | 0,45 | 0,47 | NA | NA |
| GAS2L2   | 0,00 | 0,00 | 0,00 | 0,00 | NA | NA |
| GAS8     | 0,00 | 0,00 | 0,00 | 0,75 | NA | NA |
| GAS8-AS1 | 0,00 | 0,00 | 0,00 | 0,00 | NA | NA |
| GAST     | 0,00 | 0,00 | 0,00 | 0,00 | NA | NA |
| GATA1    | 0,00 | 0,00 | 0,00 | 0,00 | NA | NA |
| GATA3    | 0,00 | 0,05 | 0,00 | 0,19 | NA | NA |
| GATA5    | 0,00 | 0,00 | 0,00 | 0,00 | NA | NA |
| GBX1     | 0,00 | 0,00 | 0,00 | 0,00 | NA | NA |
| GBX2     | 0,00 | 0,00 | 0,00 | 0,00 | NA | NA |
| GCAT     | 0,06 | 0,25 | 0,00 | 0,00 | NA | NA |
| GCG      | 0,00 | 0,00 | 0,00 | 0,00 | NA | NA |
| GCK      | 0,00 | 0,00 | 0,00 | 0,00 | NA | NA |
| GCM2     | 0,00 | 0,00 | 0,00 | 0,00 | NA | NA |
| GCNT1P   | 0,00 | 0,00 | 0,00 | 0,00 | NA | NA |
| GCNT1P4  | 0,00 | 0,00 | 0,00 | 0,00 | NA | NA |
| GCNT3    | 0,43 | 0,46 | 0,51 | 0,53 | NA | NA |
| GCOM1    | 0,00 | 0,16 | 0,00 | 0,00 | NA | NA |
| GCOM2    | 0,00 | 0,00 | 0,00 | 0,00 | NA | NA |
| GCSAM    | 0,01 | 0,04 | 0,10 | 0,00 | NA | NA |
| GCSAML   | 0,55 | 0,39 | 0,84 | 0,54 | NA | NA |
| GDA      | 0,23 | 0,69 | 0,40 | 0,47 | NA | NA |
| GDEP     | 0,00 | 0,00 | 0,00 | 0,00 | NA | NA |
| GDF1     | 0,00 | 0,00 | 0,00 | 0,00 | NA | NA |
| GDF10    | 0,00 | 0,00 | 0,00 | 0,00 | NA | NA |
| GDF2     | 0,00 | 0,00 | 0,00 | 0,00 | NA | NA |
| GDF3     | 0,00 | 0,00 | 0,00 | 0,00 | NA | NA |
| GDF5     | 0,00 | 0,06 | 0,00 | 0,00 | NA | NA |
| GEMIN8P2 | 0,00 | 0,00 | 0,00 | 0,00 | NA | NA |
| GF11     | 0,00 | 0,00 | 0,00 | 0,00 | NA | NA |
| GFPT2    | 0,00 | 0,00 | 0,00 | 0,00 | NA | NA |
| GFRA1    | 0,00 | 0,03 | 0,00 | 0,00 | NA | NA |
| GFRA3    | 0,00 | 0,00 | 0,00 | 0,00 | NA | NA |
| GFRA4    | 0,00 | 0,00 | 0,00 | 0,00 | NA | NA |



|              |      |      |      |      |    |    |
|--------------|------|------|------|------|----|----|
| GFRAL        | 0,00 | 0,00 | 0,00 | 0,00 | NA | NA |
| GFY          | 0,00 | 0,00 | 0,00 | 0,00 | NA | NA |
| GGN          | 0,00 | 0,00 | 0,00 | 0,00 | NA | NA |
| GGT2         | 0,00 | 0,00 | 0,00 | 0,00 | NA | NA |
| GGT5         | 0,17 | 0,28 | 0,30 | 0,28 | NA | NA |
| GGTLC3       | 0,00 | 0,00 | 0,00 | 0,00 | NA | NA |
| GGTLC5P      | 0,00 | 0,00 | 0,00 | 0,00 | NA | NA |
| GH1          | 0,00 | 0,00 | 0,00 | 0,00 | NA | NA |
| GH2          | 0,00 | 0,00 | 0,00 | 0,00 | NA | NA |
| GHC-1077H7.2 | 0,00 | 0,00 | 0,00 | 0,00 | NA | NA |
| GHC-602D8.2  | 0,00 | 0,00 | 0,00 | 0,00 | NA | NA |
| GHRLOS2      | 0,08 | 0,12 | 0,10 | 0,00 | NA | NA |
| GHSR         | 0,00 | 0,00 | 0,00 | 0,00 | NA | NA |
| GIF          | 0,00 | 0,00 | 0,00 | 0,00 | NA | NA |
| GIMD1        | 0,00 | 0,00 | 0,00 | 0,00 | NA | NA |
| GIPC3        | 0,00 | 0,00 | 0,00 | 0,00 | NA | NA |
| GJA3         | 0,00 | 0,00 | 0,00 | 0,00 | NA | NA |
| GJA4         | 0,00 | 0,00 | 0,00 | 0,00 | NA | NA |
| GJA8         | 0,00 | 0,00 | 0,00 | 0,00 | NA | NA |
| GJA9         | 0,00 | 0,00 | 0,00 | 0,00 | NA | NA |
| GJB2         | 0,00 | 0,00 | 0,00 | 0,00 | NA | NA |
| GJB3         | 0,00 | 0,00 | 0,00 | 0,00 | NA | NA |
| GJB4         | 0,00 | 0,00 | 0,00 | 0,00 | NA | NA |
| GJB5         | 0,00 | 0,00 | 0,00 | 0,00 | NA | NA |
| GJB6         | 0,00 | 0,00 | 0,00 | 0,00 | NA | NA |
| GJD3         | 0,00 | 0,00 | 0,00 | 0,00 | NA | NA |
| GJE1         | 0,00 | 0,00 | 0,00 | 0,00 | NA | NA |
| GK2          | 0,00 | 0,00 | 0,00 | 0,00 | NA | NA |
| GKN2         | 0,00 | 0,00 | 0,00 | 0,00 | NA | NA |
| GLDCP1       | 0,00 | 0,00 | 0,00 | 0,00 | NA | NA |
| GLDN         | 0,04 | 0,09 | 0,09 | 0,40 | NA | NA |
| GLIS1        | 0,00 | 0,00 | 0,00 | 0,00 | NA | NA |
| GLIS3        | 0,00 | 0,00 | 0,00 | 0,02 | NA | NA |
| GLOD5        | 0,00 | 0,00 | 0,00 | 0,00 | NA | NA |
| GLRA4        | 0,00 | 0,00 | 0,00 | 0,00 | NA | NA |
| GLRXP        | 0,00 | 0,00 | 0,00 | 0,00 | NA | NA |
| GLS2         | 0,00 | 0,00 | 0,00 | 0,00 | NA | NA |
| GLT6D1       | 0,00 | 0,00 | 0,00 | 0,00 | NA | NA |
| GLT8D2       | 0,00 | 0,00 | 0,00 | 0,00 | NA | NA |
| GLTSCR1-AS1  | 0,00 | 0,00 | 0,00 | 0,00 | NA | NA |
| GLTSCR2-AS1  | 0,00 | 0,00 | 0,00 | 0,00 | NA | NA |
| GLUD1P4      | 0,00 | 0,00 | 0,00 | 0,00 | NA | NA |
| GLUDP5       | 0,00 | 0,00 | 0,00 | 0,00 | NA | NA |
| GLULP3       | 0,00 | 0,00 | 0,00 | 0,00 | NA | NA |
| GLYATL1P4    | 0,00 | 0,00 | 0,00 | 0,00 | NA | NA |
| GLYATL3      | 0,00 | 0,00 | 0,00 | 0,00 | NA | NA |
| GLYCAM1      | 0,00 | 0,00 | 0,00 | 0,00 | NA | NA |
| GLYCTK       | 1,65 | 0,14 | 1,24 | 1,75 | NA | NA |
| GML          | 0,00 | 0,00 | 0,00 | 0,00 | NA | NA |
| GMNC         | 0,00 | 0,00 | 0,00 | 0,00 | NA | NA |
| GNA14        | 0,00 | 0,00 | 0,00 | 0,00 | NA | NA |
| GNAI2P2      | 0,00 | 0,00 | 0,00 | 0,00 | NA | NA |
| GNAO1        | 0,00 | 0,00 | 0,00 | 0,09 | NA | NA |
| GNAT1        | 0,00 | 0,00 | 0,00 | 0,00 | NA | NA |
| GNAT2        | 0,00 | 0,00 | 0,00 | 0,00 | NA | NA |

|         |      |      |      |      |    |    |
|---------|------|------|------|------|----|----|
| GNAT3   | 0,00 | 0,00 | 0,00 | 0,00 | NA | NA |
| GNAZ    | 0,00 | 0,08 | 0,02 | 0,04 | NA | NA |
| GNG12   | 0,00 | 0,00 | 0,00 | 0,00 | NA | NA |
| GNG13   | 0,00 | 0,00 | 0,00 | 0,00 | NA | NA |
| GNG3    | 0,00 | 0,19 | 0,00 | 0,00 | NA | NA |
| GNG5P2  | 0,00 | 0,00 | 0,00 | 0,00 | NA | NA |
| GNG5P3  | 0,00 | 0,00 | 0,00 | 0,00 | NA | NA |
| GNG8    | 0,00 | 0,00 | 0,00 | 0,00 | NA | NA |
| GNPATP  | 0,00 | 0,00 | 0,00 | 0,00 | NA | NA |
| GNRHR   | 0,00 | 0,00 | 0,00 | 0,00 | NA | NA |
| GOLGA6D | 0,00 | 0,00 | 0,00 | 0,00 | NA | NA |
| GOLGA8C | 0,00 | 0,00 | 0,00 | 0,00 | NA | NA |
| GOLGA8E | 0,00 | 0,07 | 0,00 | 0,00 | NA | NA |
| GOLGA8G | 0,00 | 0,02 | 0,00 | 0,04 | NA | NA |
| GOLT1A  | 0,00 | 0,00 | 0,00 | 0,00 | NA | NA |
| GOT2L1  | 0,00 | 0,00 | 0,00 | 0,00 | NA | NA |
| GP1BB   | 0,00 | 0,00 | 0,00 | 0,11 | NA | NA |
| GP9     | 0,00 | 0,19 | 0,00 | 0,00 | NA | NA |
| GPA33   | 0,00 | 0,00 | 0,00 | 0,05 | NA | NA |
| GPC4    | 0,00 | 0,00 | 0,00 | 0,00 | NA | NA |
| GPC6    | 0,00 | 0,00 | 0,00 | 0,00 | NA | NA |
| GPD1    | 0,00 | 0,00 | 0,00 | 0,00 | NA | NA |
| GPHA2   | 0,00 | 0,00 | 0,00 | 0,00 | NA | NA |
| GPHB5   | 0,00 | 0,00 | 0,00 | 0,00 | NA | NA |
| GPIHBP1 | 0,00 | 0,00 | 0,00 | 0,00 | NA | NA |
| GPR101  | 0,00 | 0,00 | 0,00 | 0,00 | NA | NA |
| GPR119  | 0,00 | 0,00 | 0,00 | 0,00 | NA | NA |
| GPR139  | 0,00 | 0,00 | 0,00 | 0,00 | NA | NA |
| GPR142  | 0,00 | 0,00 | 0,00 | 0,00 | NA | NA |
| GPR146  | 0,00 | 0,28 | 0,00 | 0,14 | NA | NA |
| GPR148  | 0,00 | 0,00 | 0,00 | 0,00 | NA | NA |
| GPR149  | 0,00 | 0,00 | 0,00 | 0,00 | NA | NA |
| GPR15   | 0,00 | 0,00 | 0,00 | 0,00 | NA | NA |
| GPR150  | 0,00 | 0,00 | 0,00 | 0,00 | NA | NA |
| GPR152  | 0,00 | 0,00 | 0,00 | 0,00 | NA | NA |
| GPR156  | 0,00 | 0,00 | 0,00 | 0,00 | NA | NA |
| GPR17   | 0,00 | 0,00 | 0,00 | 0,00 | NA | NA |
| GPR176  | 0,00 | 0,00 | 0,00 | 0,00 | NA | NA |
| GPR20   | 0,00 | 0,00 | 0,00 | 0,00 | NA | NA |
| GPR25   | 0,00 | 0,00 | 0,00 | 0,00 | NA | NA |
| GPR31   | 0,00 | 0,00 | 0,00 | 0,00 | NA | NA |
| GPR32P1 | 0,00 | 0,00 | 0,00 | 0,00 | NA | NA |
| GPR37   | 0,00 | 0,00 | 0,00 | 0,00 | NA | NA |
| GPR42   | 0,00 | 0,00 | 0,00 | 0,00 | NA | NA |
| GPR45   | 0,00 | 0,00 | 0,00 | 0,00 | NA | NA |
| GPR50   | 0,00 | 0,00 | 0,00 | 0,00 | NA | NA |
| GPR53P  | 0,00 | 0,00 | 0,00 | 0,00 | NA | NA |
| GPR6    | 0,00 | 0,00 | 0,00 | 0,00 | NA | NA |
| GPR62   | 0,00 | 0,00 | 0,00 | 0,00 | NA | NA |
| GPR78   | 0,00 | 0,00 | 0,00 | 0,00 | NA | NA |
| GPR79   | 0,00 | 0,00 | 0,00 | 0,00 | NA | NA |
| GPR84   | 0,00 | 0,44 | 0,04 | 0,00 | NA | NA |
| GPR88   | 0,00 | 0,00 | 0,00 | 0,00 | NA | NA |
| GPRC5B  | 0,00 | 0,00 | 0,00 | 0,00 | NA | NA |
| GPRC6A  | 0,00 | 0,00 | 0,00 | 0,00 | NA | NA |

|               |      |      |      |      |    |    |
|---------------|------|------|------|------|----|----|
| GPRIN1        | 0,00 | 0,00 | 0,00 | 0,00 | NA | NA |
| GPRIN2        | 0,00 | 0,00 | 0,00 | 0,00 | NA | NA |
| GPX7          | 0,00 | 0,25 | 0,13 | 0,24 | NA | NA |
| GPXP2         | 0,00 | 0,00 | 0,00 | 0,00 | NA | NA |
| GRAMD1C       | 0,11 | 1,16 | 0,30 | 0,69 | NA | NA |
| GRAP2         | 0,00 | 0,32 | 0,00 | 0,03 | NA | NA |
| GREB1         | 0,33 | 0,16 | 0,27 | 0,40 | NA | NA |
| GRIA2         | 0,00 | 0,00 | 0,00 | 0,00 | NA | NA |
| GRID1-AS1     | 0,00 | 0,00 | 0,00 | 0,00 | NA | NA |
| GRID2         | 0,00 | 0,00 | 0,00 | 0,00 | NA | NA |
| GRIFIN        | 0,00 | 0,00 | 0,00 | 0,00 | NA | NA |
| GRIK3         | 0,00 | 0,00 | 0,00 | 0,00 | NA | NA |
| GRIN1         | 0,00 | 0,00 | 0,00 | 0,00 | NA | NA |
| GRIN3A        | 0,00 | 0,03 | 0,00 | 0,00 | NA | NA |
| GRIN3B        | 0,00 | 0,00 | 0,00 | 0,00 | NA | NA |
| GRM7          | 0,13 | 0,03 | 0,11 | 0,17 | NA | NA |
| GRP           | 0,00 | 0,00 | 0,00 | 0,00 | NA | NA |
| GRPR          | 0,00 | 0,00 | 0,00 | 0,00 | NA | NA |
| GS1-111G14.1  | 0,00 | 0,00 | 0,00 | 0,00 | NA | NA |
| GS1-115G20.2  | 0,00 | 0,00 | 0,00 | 0,00 | NA | NA |
| GS1-115M3.3   | 0,00 | 0,00 | 0,00 | 0,00 | NA | NA |
| GS1-115M3.4   | 0,00 | 0,00 | 0,00 | 0,00 | NA | NA |
| GS1-120K12.4  | 0,00 | 0,00 | 0,00 | 0,00 | NA | NA |
| GS1-122H1.1   | 0,00 | 0,00 | 0,00 | 0,00 | NA | NA |
| GS1-122H1.3   | 0,00 | 0,00 | 0,00 | 0,00 | NA | NA |
| GS1-124K5.6   | 0,00 | 0,00 | 0,00 | 0,00 | NA | NA |
| GS1-124K5.7   | 0,00 | 0,00 | 0,00 | 0,00 | NA | NA |
| GS1-124K5.8   | 0,00 | 0,00 | 0,00 | 0,00 | NA | NA |
| GS1-124K5.9   | 0,00 | 0,00 | 0,00 | 0,00 | NA | NA |
| GS1-164F24.1  | 0,00 | 0,00 | 0,00 | 0,00 | NA | NA |
| GS1-165B14.2  | 0,00 | 0,00 | 0,00 | 0,00 | NA | NA |
| GS1-166A23.1  | 0,00 | 0,00 | 0,00 | 0,00 | NA | NA |
| GS1-184P14.2  | 0,00 | 0,00 | 0,00 | 0,00 | NA | NA |
| GS1-18A18.1   | 0,00 | 0,00 | 0,00 | 0,00 | NA | NA |
| GS1-18A18.3   | 0,00 | 0,00 | 0,00 | 0,00 | NA | NA |
| GS1-200K5.1   | 0,00 | 0,00 | 0,00 | 0,00 | NA | NA |
| GS1-204I12.1  | 0,00 | 0,00 | 0,00 | 0,00 | NA | NA |
| GS1-204I12.3  | 0,00 | 0,00 | 0,00 | 0,00 | NA | NA |
| GS1-204I12.4  | 0,00 | 0,00 | 0,00 | 0,00 | NA | NA |
| GS1-214D18.3  | 0,00 | 0,00 | 0,00 | 0,00 | NA | NA |
| GS1-21A4.1    | 0,00 | 0,00 | 0,00 | 0,00 | NA | NA |
| GS1-24F4.1    | 0,00 | 0,00 | 0,00 | 0,00 | NA | NA |
| GS1-24F4.2    | 0,00 | 0,00 | 0,00 | 0,00 | NA | NA |
| GS1-24F4.3    | 0,00 | 0,00 | 0,00 | 0,00 | NA | NA |
| GS1-251I9.2   | 0,00 | 0,00 | 0,00 | 0,00 | NA | NA |
| GS1-251I9.3   | 0,00 | 0,00 | 0,00 | 0,00 | NA | NA |
| GS1-256O22.3  | 0,00 | 0,00 | 0,00 | 0,00 | NA | NA |
| GS1-257G1.1   | 0,00 | 0,00 | 0,00 | 0,00 | NA | NA |
| GS1-259H13.13 | 0,00 | 0,00 | 0,00 | 0,00 | NA | NA |
| GS1-259H13.7  | 0,00 | 0,00 | 0,00 | 0,00 | NA | NA |
| GS1-25M2.1    | 0,00 | 0,00 | 0,00 | 0,00 | NA | NA |
| GS1-278J22.1  | 0,00 | 0,00 | 0,00 | 0,00 | NA | NA |
| GS1-278J22.2  | 0,00 | 0,00 | 0,00 | 0,00 | NA | NA |
| GS1-293C5.1   | 0,00 | 0,00 | 0,00 | 0,00 | NA | NA |
| GS1-304P7.3   | 0,00 | 0,00 | 0,00 | 0,00 | NA | NA |

|               |      |      |      |      |    |    |
|---------------|------|------|------|------|----|----|
| GS1-309P15.1  | 0,00 | 0,00 | 0,00 | 0,00 | NA | NA |
| GS1-309P15.3  | 0,00 | 0,00 | 0,00 | 0,00 | NA | NA |
| GS1-309P15.4  | 0,00 | 0,00 | 0,00 | 0,00 | NA | NA |
| GS1-324M7.3   | 0,00 | 0,00 | 0,00 | 0,00 | NA | NA |
| GS1-324M7.4   | 0,00 | 0,00 | 0,00 | 0,00 | NA | NA |
| GS1-345D13.1  | 0,00 | 0,00 | 0,00 | 0,00 | NA | NA |
| GS1-358P8.2   | 0,00 | 0,00 | 0,00 | 0,00 | NA | NA |
| GS1-358P8.4   | 0,49 | 0,03 | 0,29 | 0,53 | NA | NA |
| GS1-383H3.6   | 0,00 | 0,00 | 0,00 | 0,00 | NA | NA |
| GS1-383H3.7   | 0,00 | 0,00 | 0,00 | 0,00 | NA | NA |
| GS1-388B5.1   | 0,00 | 0,00 | 0,00 | 0,00 | NA | NA |
| GS1-388B5.2   | 0,00 | 0,00 | 0,00 | 0,00 | NA | NA |
| GS1-388B5.8   | 0,00 | 0,00 | 0,00 | 0,00 | NA | NA |
| GS1-393G12.13 | 0,00 | 0,00 | 0,00 | 0,00 | NA | NA |
| GS1-393G12.14 | 0,00 | 0,00 | 0,00 | 0,00 | NA | NA |
| GS1-39E22.1   | 0,00 | 0,00 | 0,00 | 0,00 | NA | NA |
| GS1-39E22.2   | 0,00 | 0,00 | 0,00 | 0,00 | NA | NA |
| GS1-410F4.1   | 0,00 | 0,00 | 0,00 | 0,00 | NA | NA |
| GS1-410F4.2   | 0,00 | 0,35 | 0,00 | 0,07 | NA | NA |
| GS1-410F4.3   | 0,00 | 0,00 | 0,00 | 0,00 | NA | NA |
| GS1-410F4.5   | 0,00 | 0,00 | 0,00 | 0,00 | NA | NA |
| GS1-44D20.1   | 0,00 | 0,00 | 0,00 | 0,00 | NA | NA |
| GS1-45N23.3   | 0,00 | 0,00 | 0,00 | 0,00 | NA | NA |
| GS1-466O4.2   | 0,00 | 0,00 | 0,00 | 0,00 | NA | NA |
| GS1-466O4.3   | 0,00 | 0,00 | 0,00 | 0,00 | NA | NA |
| GS1-466O4.5   | 0,00 | 0,00 | 0,00 | 0,00 | NA | NA |
| GS1-531I17.2  | 0,00 | 0,00 | 0,00 | 0,00 | NA | NA |
| GS1-531I17.3  | 0,00 | 0,00 | 0,00 | 0,00 | NA | NA |
| GS1-541M1.2   | 0,00 | 0,00 | 0,00 | 0,00 | NA | NA |
| GS1-542M4.3   | 0,00 | 0,00 | 0,00 | 0,00 | NA | NA |
| GS1-542M4.4   | 0,00 | 0,00 | 0,00 | 0,00 | NA | NA |
| GS1-54N10.1   | 0,00 | 0,00 | 0,00 | 0,00 | NA | NA |
| GS1-590J15.1  | 0,00 | 0,00 | 0,00 | 0,00 | NA | NA |
| GS1-590J6.2   | 0,00 | 0,00 | 0,00 | 0,00 | NA | NA |
| GS1-594A7.3   | 0,00 | 0,00 | 0,00 | 0,00 | NA | NA |
| GS1-594A7.5   | 0,00 | 0,00 | 0,00 | 0,00 | NA | NA |
| GS1-5L10.1    | 0,00 | 0,00 | 0,00 | 0,00 | NA | NA |
| GS1-600G8.4   | 0,00 | 0,00 | 0,00 | 0,00 | NA | NA |
| GS1-600G8.5   | 0,00 | 0,11 | 0,00 | 0,17 | NA | NA |
| GS1-69O6.1    | 0,00 | 0,00 | 0,00 | 0,00 | NA | NA |
| GS1-72M22.1   | 0,00 | 0,00 | 0,00 | 0,00 | NA | NA |
| GS1-756B1.1   | 0,00 | 0,00 | 0,00 | 0,00 | NA | NA |
| GS1-756B1.2   | 0,00 | 0,00 | 0,00 | 0,00 | NA | NA |
| GS1-82I1.3    | 0,00 | 0,00 | 0,00 | 0,00 | NA | NA |
| GSC           | 0,00 | 0,00 | 0,00 | 0,00 | NA | NA |
| GSC2          | 0,00 | 0,00 | 0,00 | 0,00 | NA | NA |
| GSG1L2        | 0,00 | 0,00 | 0,00 | 0,00 | NA | NA |
| GSTA3         | 0,00 | 0,00 | 0,00 | 0,00 | NA | NA |
| GSTM3P        | 0,00 | 0,00 | 0,00 | 0,00 | NA | NA |
| GSTM5         | 0,00 | 0,00 | 0,00 | 0,00 | NA | NA |
| GSTP1P1       | 0,00 | 0,00 | 0,00 | 0,00 | NA | NA |
| GSTT2         | 0,00 | 0,00 | 0,00 | 0,00 | NA | NA |
| GSTT2B        | 0,00 | 0,00 | 0,00 | 0,00 | NA | NA |
| GSX1          | 0,00 | 0,00 | 0,00 | 0,00 | NA | NA |
| GSX2          | 0,00 | 0,00 | 0,00 | 0,00 | NA | NA |

|             |      |      |      |      |    |    |
|-------------|------|------|------|------|----|----|
| GTF2IP2     | 0,00 | 0,00 | 0,00 | 0,00 | NA | NA |
| GTSE1-AS1   | 0,00 | 0,00 | 0,00 | 0,00 | NA | NA |
| GTSF1L      | 0,00 | 0,00 | 0,00 | 0,00 | NA | NA |
| GUCA2A      | 0,00 | 0,00 | 0,00 | 0,00 | NA | NA |
| GUCA2B      | 0,00 | 0,00 | 0,00 | 0,00 | NA | NA |
| GUCY2GP     | 0,00 | 0,04 | 0,00 | 0,00 | NA | NA |
| GULOP       | 0,00 | 0,00 | 0,00 | 0,00 | NA | NA |
| GVINP2      | 0,00 | 0,00 | 0,00 | 0,00 | NA | NA |
| GXYLT1P5    | 0,00 | 0,00 | 0,00 | 0,00 | NA | NA |
| GYLTL1B     | 0,00 | 0,00 | 0,00 | 0,00 | NA | NA |
| H19         | 0,00 | 0,00 | 0,00 | 0,00 | NA | NA |
| H2AFB2      | 0,00 | 0,00 | 0,00 | 0,00 | NA | NA |
| H2AFB3      | 0,00 | 0,00 | 0,00 | 0,00 | NA | NA |
| H2BFM       | 0,00 | 0,00 | 0,00 | 0,00 | NA | NA |
| H2BFWT      | 0,00 | 0,00 | 0,00 | 0,00 | NA | NA |
| H3F3BP2     | 0,00 | 0,00 | 0,00 | 0,00 | NA | NA |
| HABP2       | 0,00 | 0,00 | 0,00 | 0,00 | NA | NA |
| HAND1       | 0,00 | 0,00 | 0,00 | 0,00 | NA | NA |
| HAO1        | 0,00 | 0,00 | 0,00 | 0,00 | NA | NA |
| HAO2        | 0,00 | 0,00 | 0,00 | 0,00 | NA | NA |
| HAPLN2      | 0,00 | 0,00 | 0,00 | 0,00 | NA | NA |
| HAPLN3      | 0,11 | 0,48 | 0,33 | 1,00 | NA | NA |
| HBA1        | 0,00 | 1,23 | 0,48 | 0,00 | NA | NA |
| HBB         | 1,55 | 5,48 | 3,74 | 4,27 | NA | NA |
| HBG1        | 0,00 | 0,00 | 0,00 | 0,00 | NA | NA |
| HBXIP1      | 0,00 | 0,00 | 0,00 | 0,00 | NA | NA |
| HBZ         | 0,00 | 0,00 | 0,00 | 0,00 | NA | NA |
| HCG16       | 0,00 | 0,00 | 0,00 | 0,00 | NA | NA |
| HCG19P      | 0,00 | 0,00 | 0,00 | 0,00 | NA | NA |
| HCG20       | 0,76 | 1,25 | 1,08 | 0,88 | NA | NA |
| HCG21       | 0,00 | 0,00 | 0,00 | 0,00 | NA | NA |
| HCG4P8      | 0,00 | 0,00 | 0,00 | 0,00 | NA | NA |
| HCN2        | 0,00 | 0,04 | 0,00 | 0,00 | NA | NA |
| HCN4        | 0,00 | 0,00 | 0,00 | 0,00 | NA | NA |
| HCRTR2      | 0,00 | 0,00 | 0,00 | 0,00 | NA | NA |
| HDGFL1      | 0,00 | 0,00 | 0,00 | 0,00 | NA | NA |
| HDHD1P2     | 0,00 | 0,00 | 0,00 | 0,00 | NA | NA |
| HEPH1       | 0,00 | 0,00 | 0,00 | 0,00 | NA | NA |
| HEPN1       | 0,00 | 0,00 | 0,00 | 0,00 | NA | NA |
| HERC2P7     | 0,00 | 0,00 | 0,00 | 0,00 | NA | NA |
| HES3        | 0,00 | 0,00 | 0,00 | 0,00 | NA | NA |
| HES5        | 0,00 | 0,00 | 0,00 | 0,00 | NA | NA |
| HEY2        | 0,00 | 0,00 | 0,00 | 0,00 | NA | NA |
| HFM1        | 0,00 | 0,00 | 0,00 | 0,00 | NA | NA |
| HGFAC       | 0,00 | 0,00 | 0,00 | 0,00 | NA | NA |
| HHATL       | 0,00 | 0,00 | 0,00 | 0,00 | NA | NA |
| HHLA2       | 0,11 | 0,12 | 0,11 | 0,00 | NA | NA |
| HILS1       | 0,00 | 0,00 | 0,00 | 0,00 | NA | NA |
| HIRAP1      | 0,00 | 0,00 | 0,00 | 0,00 | NA | NA |
| HIST1H1PS2  | 0,00 | 0,00 | 0,00 | 0,00 | NA | NA |
| HIST1H1T    | 0,00 | 0,00 | 0,00 | 0,00 | NA | NA |
| HIST1H2AA   | 0,00 | 0,00 | 0,00 | 0,00 | NA | NA |
| HIST1H2AI   | 0,00 | 0,00 | 0,00 | 0,00 | NA | NA |
| HIST1H2AJ   | 0,57 | 0,00 | 0,31 | 0,00 | NA | NA |
| HIST1H2APS1 | 0,00 | 0,00 | 0,00 | 0,00 | NA | NA |

|             |      |      |      |      |    |    |
|-------------|------|------|------|------|----|----|
| HIST1H2APS2 | 0,00 | 0,00 | 0,00 | 0,00 | NA | NA |
| HIST1H2APS4 | 0,00 | 0,00 | 0,00 | 0,00 | NA | NA |
| HIST1H2BA   | 0,00 | 0,00 | 0,00 | 0,00 | NA | NA |
| HIST1H2BI   | 0,00 | 0,00 | 0,00 | 0,00 | NA | NA |
| HIST1H2BL   | 0,00 | 0,00 | 0,00 | 0,00 | NA | NA |
| HIST1H2BM   | 0,00 | 0,00 | 0,00 | 0,00 | NA | NA |
| HIST1H2BPS1 | 0,00 | 0,00 | 0,00 | 0,00 | NA | NA |
| HIST1H3F    | 0,00 | 0,00 | 0,00 | 0,00 | NA | NA |
| HIST1H3H    | 0,00 | 0,00 | 0,00 | 0,00 | NA | NA |
| HIST1H3I    | 0,00 | 0,00 | 0,00 | 0,00 | NA | NA |
| HIST1H3J    | 0,00 | 0,40 | 0,00 | 0,00 | NA | NA |
| HIST1H4A    | 0,00 | 0,00 | 0,00 | 0,00 | NA | NA |
| HIST1H4G    | 0,00 | 0,00 | 0,00 | 0,00 | NA | NA |
| HIST1H4K    | 0,00 | 0,00 | 0,00 | 0,00 | NA | NA |
| HIST1H4L    | 0,00 | 0,00 | 0,00 | 0,00 | NA | NA |
| HIST1H4PS1  | 0,00 | 0,00 | 0,00 | 0,00 | NA | NA |
| HIST2H2AA3  | 0,00 | 0,00 | 0,00 | 0,00 | NA | NA |
| HIST2H2BA   | 0,00 | 0,00 | 0,00 | 0,00 | NA | NA |
| HIST2H2BB   | 0,00 | 0,00 | 0,00 | 0,00 | NA | NA |
| HIST3H2BA   | 0,00 | 0,00 | 0,00 | 0,00 | NA | NA |
| HLA-DQB3    | 0,00 | 0,00 | 0,00 | 0,00 | NA | NA |
| HLA-N       | 0,00 | 0,00 | 0,00 | 0,00 | NA | NA |
| HLA-P       | 0,00 | 0,00 | 0,00 | 0,00 | NA | NA |
| HLA-S       | 0,00 | 0,00 | 0,00 | 0,00 | NA | NA |
| HLA-T       | 0,00 | 0,00 | 0,00 | 0,00 | NA | NA |
| HLA-Z       | 0,00 | 0,00 | 0,00 | 0,00 | NA | NA |
| HMCN2       | 0,00 | 0,44 | 0,00 | 0,06 | NA | NA |
| HMGA1L1     | 0,00 | 0,00 | 0,00 | 0,00 | NA | NA |
| HMGA1L5     | 0,00 | 0,00 | 0,00 | 0,00 | NA | NA |
| HMGA1L6     | 0,00 | 0,00 | 0,00 | 0,00 | NA | NA |
| HMGB1L11    | 0,00 | 0,00 | 0,00 | 0,00 | NA | NA |
| HMGB1L12    | 0,00 | 0,00 | 0,00 | 0,00 | NA | NA |
| HMGB1L9     | 0,00 | 0,00 | 0,00 | 0,00 | NA | NA |
| HMGB1P10    | 0,00 | 0,00 | 0,00 | 0,00 | NA | NA |
| HMGB2P1     | 0,00 | 0,00 | 0,00 | 0,00 | NA | NA |
| HMGB3L1     | 0,00 | 0,00 | 0,00 | 0,00 | NA | NA |
| HMGB3L2     | 0,00 | 0,00 | 0,00 | 0,00 | NA | NA |
| HMGB3P20    | 0,00 | 0,00 | 0,00 | 0,00 | NA | NA |
| HMGB3P27    | 0,00 | 0,00 | 0,00 | 0,00 | NA | NA |
| HMGB3P32    | 0,00 | 0,00 | 0,00 | 0,00 | NA | NA |
| HMGB4       | 0,00 | 0,00 | 0,00 | 0,00 | NA | NA |
| HMGCLL1     | 0,00 | 0,00 | 0,00 | 0,00 | NA | NA |
| HMGCS2      | 0,00 | 0,00 | 0,00 | 0,00 | NA | NA |
| HMGN1L2     | 0,00 | 0,00 | 0,00 | 0,00 | NA | NA |
| HMGN1P3     | 0,00 | 0,00 | 0,00 | 0,00 | NA | NA |
| HMGN1P30    | 0,00 | 0,00 | 0,00 | 0,00 | NA | NA |
| HMGN2L      | 0,00 | 0,00 | 0,00 | 0,00 | NA | NA |
| HMGN2L10    | 0,00 | 0,00 | 0,00 | 0,00 | NA | NA |
| HMGN2L8     | 0,00 | 0,00 | 0,00 | 0,00 | NA | NA |
| HMGN2L9     | 0,00 | 0,00 | 0,00 | 0,00 | NA | NA |
| HMGN2P15    | 0,00 | 0,00 | 0,00 | 0,00 | NA | NA |
| HMGN2P36    | 0,00 | 0,00 | 0,00 | 0,00 | NA | NA |
| HMGN2P41    | 0,00 | 0,00 | 0,00 | 0,00 | NA | NA |
| HMGN2P46    | 0,00 | 0,00 | 0,00 | 0,00 | NA | NA |
| HMGN2P6     | 0,00 | 0,00 | 0,00 | 0,00 | NA | NA |

|              |      |      |      |      |    |    |
|--------------|------|------|------|------|----|----|
| HMHB1        | 0,00 | 0,00 | 0,00 | 0,00 | NA | NA |
| HMP19        | 0,00 | 0,00 | 0,00 | 0,00 | NA | NA |
| HMSD         | 0,00 | 0,00 | 0,00 | 0,00 | NA | NA |
| HMX1         | 0,00 | 0,00 | 0,00 | 0,00 | NA | NA |
| HMX2         | 0,00 | 0,00 | 0,00 | 0,00 | NA | NA |
| HMX3         | 0,00 | 0,00 | 0,00 | 0,00 | NA | NA |
| HNRNPA1P11   | 0,00 | 0,00 | 0,00 | 0,00 | NA | NA |
| HNRNPA1P33   | 0,00 | 0,00 | 0,00 | 0,00 | NA | NA |
| HNRNPCL1     | 0,00 | 0,00 | 0,00 | 0,00 | NA | NA |
| HNRNPCL2     | 0,00 | 0,00 | 0,00 | 0,00 | NA | NA |
| HNRNPCL4     | 0,00 | 0,00 | 0,00 | 0,00 | NA | NA |
| HNRPA1P2     | 0,00 | 0,17 | 0,00 | 0,00 | NA | NA |
| HNRPA3P2     | 0,00 | 0,00 | 0,00 | 0,00 | NA | NA |
| HORMAD2      | 0,00 | 0,13 | 0,00 | 0,00 | NA | NA |
| HOTTIP       | 0,00 | 0,00 | 0,00 | 0,00 | NA | NA |
| HOXA1        | 0,00 | 0,00 | 0,00 | 0,00 | NA | NA |
| HOXA10-HOXA9 | 0,00 | 0,00 | 0,00 | 0,00 | NA | NA |
| HOXA11       | 0,00 | 0,00 | 0,00 | 0,00 | NA | NA |
| HOXA11-AS1   | 0,00 | 0,00 | 0,00 | 0,00 | NA | NA |
| HOXA13       | 0,00 | 0,00 | 0,00 | 0,00 | NA | NA |
| HOXA2        | 0,00 | 0,00 | 0,00 | 0,00 | NA | NA |
| HOXB-AS3     | 0,00 | 0,00 | 0,00 | 0,00 | NA | NA |
| HOXB4        | 0,00 | 0,00 | 0,00 | 0,00 | NA | NA |
| HOXB5        | 0,00 | 0,00 | 0,00 | 0,00 | NA | NA |
| HOXB7        | 0,00 | 0,82 | 0,00 | 0,00 | NA | NA |
| HOXB8        | 0,00 | 0,00 | 0,00 | 0,00 | NA | NA |
| HOXB9        | 0,00 | 0,00 | 0,00 | 0,00 | NA | NA |
| HOXC-AS1     | 0,00 | 0,00 | 0,00 | 0,00 | NA | NA |
| HOXC-AS5     | 0,00 | 0,00 | 0,00 | 0,00 | NA | NA |
| HOXC10       | 0,00 | 0,00 | 0,00 | 0,00 | NA | NA |
| HOXC11       | 0,00 | 0,00 | 0,00 | 0,00 | NA | NA |
| HOXC12       | 0,00 | 0,00 | 0,00 | 0,00 | NA | NA |
| HOXC13       | 0,00 | 0,00 | 0,00 | 0,00 | NA | NA |
| HOXC5        | 0,00 | 0,00 | 0,00 | 0,00 | NA | NA |
| HOXC8        | 0,00 | 0,00 | 0,00 | 0,00 | NA | NA |
| HOXC9        | 0,00 | 0,00 | 0,00 | 0,00 | NA | NA |
| HOXD-AS2     | 0,00 | 0,00 | 0,00 | 0,00 | NA | NA |
| HOXD1        | 0,00 | 0,00 | 0,00 | 0,00 | NA | NA |
| HOXD10       | 0,00 | 0,00 | 0,00 | 0,00 | NA | NA |
| HOXD11       | 0,00 | 0,00 | 0,00 | 0,00 | NA | NA |
| HOXD12       | 0,00 | 0,00 | 0,00 | 0,00 | NA | NA |
| HOXD13       | 0,00 | 0,00 | 0,00 | 0,00 | NA | NA |
| HOXD3        | 0,00 | 0,00 | 0,00 | 0,00 | NA | NA |
| HOXD4        | 0,00 | 0,00 | 0,00 | 0,00 | NA | NA |
| HOXD8        | 0,00 | 0,00 | 0,00 | 0,00 | NA | NA |
| HOXD9        | 0,00 | 0,00 | 0,00 | 0,00 | NA | NA |
| HPCA         | 0,00 | 0,00 | 0,00 | 0,00 | NA | NA |
| HPCAL4       | 0,00 | 0,00 | 0,00 | 0,00 | NA | NA |
| HPR          | 0,00 | 0,00 | 0,00 | 0,00 | NA | NA |
| HP RTP3      | 0,00 | 0,00 | 0,00 | 0,00 | NA | NA |
| HP RTP4      | 0,00 | 0,00 | 0,00 | 0,00 | NA | NA |
| HRASLS       | 0,00 | 0,00 | 0,00 | 0,00 | NA | NA |
| HRASLS2      | 0,00 | 0,00 | 0,00 | 0,00 | NA | NA |
| HRASLS5      | 0,00 | 0,00 | 0,00 | 0,00 | NA | NA |
| HRCT1        | 0,00 | 0,00 | 0,00 | 0,00 | NA | NA |

|                |      |      |      |      |    |    |
|----------------|------|------|------|------|----|----|
| HRH3           | 0,00 | 0,00 | 0,00 | 0,00 | NA | NA |
| HRNR           | 0,00 | 0,01 | 0,00 | 0,00 | NA | NA |
| HS3ST3B1       | 0,22 | 0,05 | 0,10 | 0,05 | NA | NA |
| HS3ST4         | 0,00 | 0,00 | 0,00 | 0,00 | NA | NA |
| HS3ST6         | 0,00 | 0,00 | 0,00 | 0,00 | NA | NA |
| HS6ST1P        | 0,00 | 0,00 | 0,00 | 0,00 | NA | NA |
| HS6ST2         | 0,00 | 0,00 | 0,00 | 0,00 | NA | NA |
| hsa-mir-3607   | 0,00 | 0,00 | 0,00 | 0,00 | NA | NA |
| HSD11B2        | 0,00 | 0,00 | 0,00 | 0,57 | NA | NA |
| HSD17B1P1      | 0,00 | 0,00 | 0,00 | 0,00 | NA | NA |
| HSD17B7P1      | 0,00 | 0,00 | 0,00 | 0,00 | NA | NA |
| HSD3B1         | 0,00 | 0,00 | 0,00 | 0,00 | NA | NA |
| HSFY2          | 0,00 | 0,00 | 0,00 | 0,00 | NA | NA |
| HSFYP1         | 0,00 | 0,00 | 0,00 | 0,00 | NA | NA |
| HSP90AA5P      | 0,00 | 0,06 | 0,00 | 0,00 | NA | NA |
| HSP90AA6P      | 0,00 | 0,00 | 0,00 | 0,00 | NA | NA |
| HSP90AB3P      | 0,06 | 0,12 | 0,08 | 0,06 | NA | NA |
| HSPA1L         | 0,00 | 0,00 | 0,00 | 0,00 | NA | NA |
| HSPA2          | 0,05 | 0,10 | 0,06 | 0,13 | NA | NA |
| HSPB2-C11orf52 | 0,00 | 0,00 | 0,00 | 0,00 | NA | NA |
| HSPB3          | 0,00 | 0,00 | 0,00 | 0,00 | NA | NA |
| HSPB6          | 0,00 | 0,00 | 0,00 | 0,00 | NA | NA |
| HSPB8          | 0,00 | 0,00 | 0,00 | 0,00 | NA | NA |
| HSPBL3         | 0,00 | 0,00 | 0,00 | 0,00 | NA | NA |
| HSPD1P14       | 0,00 | 0,00 | 0,00 | 0,00 | NA | NA |
| HSPD1P2        | 0,00 | 0,00 | 0,00 | 0,00 | NA | NA |
| HSPD1P3        | 0,00 | 0,00 | 0,00 | 0,00 | NA | NA |
| HSPD1P5        | 0,00 | 0,00 | 0,00 | 0,00 | NA | NA |
| HSPDP7         | 0,00 | 0,00 | 0,00 | 0,00 | NA | NA |
| HSPEP1         | 0,00 | 0,00 | 0,00 | 0,00 | NA | NA |
| HSPG2          | 0,28 | 0,50 | 0,30 | 0,03 | NA | NA |
| HTATSF1P       | 0,00 | 0,00 | 0,00 | 0,00 | NA | NA |
| HTR1A          | 0,00 | 0,00 | 0,00 | 0,00 | NA | NA |
| HTR1B          | 0,00 | 0,00 | 0,00 | 0,00 | NA | NA |
| HTR1E          | 0,00 | 0,00 | 0,00 | 0,00 | NA | NA |
| HTR1F          | 0,00 | 0,00 | 0,00 | 0,04 | NA | NA |
| HTR3D          | 0,00 | 0,00 | 0,00 | 0,00 | NA | NA |
| HTR3E          | 0,00 | 0,00 | 0,00 | 0,00 | NA | NA |
| HTR4           | 0,00 | 0,00 | 0,00 | 0,00 | NA | NA |
| HTR6           | 0,00 | 0,00 | 0,00 | 0,00 | NA | NA |
| HTRA1          | 0,00 | 0,00 | 0,00 | 0,00 | NA | NA |
| HTRA3          | 0,00 | 0,00 | 0,00 | 0,00 | NA | NA |
| HUS1B          | 0,00 | 0,16 | 0,00 | 0,18 | NA | NA |
| HYPM           | 0,00 | 0,00 | 0,00 | 0,00 | NA | NA |
| IBA57-AS1      | 0,00 | 0,00 | 0,15 | 0,55 | NA | NA |
| IBSP           | 0,00 | 0,00 | 0,00 | 0,00 | NA | NA |
| ICAM5          | 0,00 | 0,05 | 0,00 | 0,00 | NA | NA |
| ICI-14BB7.1    | 0,00 | 0,11 | 0,00 | 0,00 | NA | NA |
| ICOS           | 0,00 | 0,00 | 0,00 | 0,00 | NA | NA |
| IFIT1B         | 0,00 | 0,00 | 0,00 | 0,00 | NA | NA |
| IFITM5         | 0,00 | 0,00 | 0,00 | 0,00 | NA | NA |
| IFNA1          | 0,00 | 0,00 | 0,00 | 0,00 | NA | NA |
| IFNA13         | 0,00 | 0,00 | 0,00 | 0,00 | NA | NA |
| IFNA14         | 0,00 | 0,00 | 0,00 | 0,00 | NA | NA |
| IFNA16         | 0,00 | 0,00 | 0,00 | 0,00 | NA | NA |



|              |      |      |      |      |    |    |
|--------------|------|------|------|------|----|----|
| IFNA2        | 0,00 | 0,00 | 0,00 | 0,00 | NA | NA |
| IFNA21       | 0,00 | 0,00 | 0,00 | 0,00 | NA | NA |
| IFNA4        | 0,00 | 0,00 | 0,00 | 0,00 | NA | NA |
| IFNA5        | 0,00 | 0,00 | 0,00 | 0,00 | NA | NA |
| IFNA6        | 0,00 | 0,00 | 0,00 | 0,00 | NA | NA |
| IFNA7        | 0,00 | 0,00 | 0,00 | 0,00 | NA | NA |
| IFNA8        | 0,00 | 0,00 | 0,00 | 0,00 | NA | NA |
| IFNB1        | 0,00 | 0,00 | 0,00 | 0,00 | NA | NA |
| IFNL2        | 0,00 | 0,00 | 0,00 | 0,00 | NA | NA |
| IFNL3        | 0,00 | 0,00 | 0,00 | 0,00 | NA | NA |
| IFNL3P1      | 0,00 | 0,00 | 0,00 | 0,00 | NA | NA |
| IFNL4        | 0,00 | 0,00 | 0,00 | 0,00 | NA | NA |
| IGDCC4       | 0,00 | 0,00 | 0,00 | 0,00 | NA | NA |
| IGF1         | 0,00 | 0,32 | 0,00 | 0,00 | NA | NA |
| IGF2AS       | 0,00 | 0,00 | 0,00 | 0,00 | NA | NA |
| IGF2BP3      | 0,09 | 0,70 | 0,15 | 0,12 | NA | NA |
| IGFALS       | 0,00 | 0,06 | 0,00 | 0,00 | NA | NA |
| IGFBP1       | 0,00 | 0,00 | 0,00 | 0,00 | NA | NA |
| IGFBP4       | 0,00 | 0,00 | 0,00 | 0,00 | NA | NA |
| IGFBP6       | 0,00 | 0,00 | 0,00 | 0,00 | NA | NA |
| IGFBPL1      | 0,00 | 0,00 | 0,00 | 0,00 | NA | NA |
| IGFL1        | 0,00 | 0,00 | 0,00 | 0,00 | NA | NA |
| IGFL1P1      | 0,00 | 0,00 | 0,00 | 0,00 | NA | NA |
| IGFL1P2      | 0,00 | 0,00 | 0,00 | 0,00 | NA | NA |
| IGFN1        | 0,00 | 0,06 | 0,00 | 0,00 | NA | NA |
| IGHD1-1      | 0,00 | 0,00 | 0,00 | 0,00 | NA | NA |
| IGHD1-14     | 0,00 | 0,00 | 0,00 | 0,00 | NA | NA |
| IGHD1-20     | 0,00 | 0,00 | 0,00 | 0,00 | NA | NA |
| IGHD1-26     | 0,00 | 0,00 | 0,00 | 0,00 | NA | NA |
| IGHD1-7      | 0,00 | 0,00 | 0,00 | 0,00 | NA | NA |
| IGHD1OR15-1A | 0,00 | 0,00 | 0,00 | 0,00 | NA | NA |
| IGHD1OR15-1B | 0,00 | 0,00 | 0,00 | 0,00 | NA | NA |
| IGHD2-15     | 0,00 | 0,00 | 0,00 | 0,00 | NA | NA |
| IGHD2-2      | 0,00 | 0,00 | 0,00 | 0,00 | NA | NA |
| IGHD2-21     | 0,00 | 0,00 | 0,00 | 0,00 | NA | NA |
| IGHD2-8      | 0,00 | 0,00 | 0,00 | 0,00 | NA | NA |
| IGHD2OR15-2A | 0,00 | 0,00 | 0,00 | 0,00 | NA | NA |
| IGHD2OR15-2B | 0,00 | 0,00 | 0,00 | 0,00 | NA | NA |
| IGHD3-10     | 0,00 | 0,00 | 0,00 | 0,00 | NA | NA |
| IGHD3-16     | 0,00 | 0,00 | 0,00 | 0,00 | NA | NA |
| IGHD3-22     | 0,00 | 0,00 | 0,00 | 0,00 | NA | NA |
| IGHD3-3      | 0,00 | 0,00 | 0,00 | 0,00 | NA | NA |
| IGHD3-9      | 0,00 | 0,00 | 0,00 | 0,00 | NA | NA |
| IGHD3OR15-3A | 0,00 | 0,00 | 0,00 | 0,00 | NA | NA |
| IGHD3OR15-3B | 0,00 | 0,00 | 0,00 | 0,00 | NA | NA |
| IGHD4-11     | 0,00 | 0,00 | 0,00 | 0,00 | NA | NA |
| IGHD4-17     | 0,00 | 0,00 | 0,00 | 0,00 | NA | NA |
| IGHD4-23     | 0,00 | 0,00 | 0,00 | 0,00 | NA | NA |
| IGHD4-4      | 0,00 | 0,00 | 0,00 | 0,00 | NA | NA |
| IGHD4OR15-4A | 0,00 | 0,00 | 0,00 | 0,00 | NA | NA |
| IGHD4OR15-4B | 0,00 | 0,00 | 0,00 | 0,00 | NA | NA |
| IGHD5-12     | 0,00 | 0,00 | 0,00 | 0,00 | NA | NA |
| IGHD5-18     | 0,00 | 0,00 | 0,00 | 0,00 | NA | NA |
| IGHD5-24     | 0,00 | 0,00 | 0,00 | 0,00 | NA | NA |
| IGHD5-5      | 0,00 | 0,00 | 0,00 | 0,00 | NA | NA |

|              |      |      |      |      |    |    |
|--------------|------|------|------|------|----|----|
| IGHD5OR15-5A | 0,00 | 0,00 | 0,00 | 0,00 | NA | NA |
| IGHD5OR15-5B | 0,00 | 0,00 | 0,00 | 0,00 | NA | NA |
| IGHD6-13     | 0,00 | 0,00 | 0,00 | 0,00 | NA | NA |
| IGHD6-19     | 0,00 | 0,00 | 0,00 | 0,00 | NA | NA |
| IGHD6-25     | 0,00 | 0,00 | 0,00 | 0,00 | NA | NA |
| IGHD6-6      | 0,00 | 0,00 | 0,00 | 0,00 | NA | NA |
| IGHD7-27     | 0,00 | 0,00 | 0,00 | 0,00 | NA | NA |
| IGHEP1       | 0,00 | 0,00 | 0,00 | 0,00 | NA | NA |
| IGHJ1        | 0,00 | 0,00 | 0,00 | 0,00 | NA | NA |
| IGHJ1P       | 0,00 | 0,00 | 0,00 | 0,00 | NA | NA |
| IGHJ2        | 0,00 | 0,00 | 0,00 | 0,00 | NA | NA |
| IGHJ2P       | 0,00 | 0,00 | 0,00 | 0,00 | NA | NA |
| IGHJ3        | 0,00 | 0,00 | 0,00 | 0,00 | NA | NA |
| IGHJ3P       | 0,00 | 0,00 | 0,00 | 0,00 | NA | NA |
| IGHJ5        | 0,00 | 0,00 | 0,00 | 0,00 | NA | NA |
| IGHJ6        | 0,00 | 0,00 | 0,00 | 0,00 | NA | NA |
| IGHV1-12     | 0,00 | 0,00 | 0,00 | 0,00 | NA | NA |
| IGHV1-14     | 0,00 | 0,00 | 0,00 | 0,00 | NA | NA |
| IGHV1-17     | 0,00 | 0,00 | 0,00 | 0,00 | NA | NA |
| IGHV1-45     | 0,00 | 0,00 | 0,00 | 0,00 | NA | NA |
| IGHV1-46     | 0,00 | 0,00 | 0,00 | 0,00 | NA | NA |
| IGHV1-58     | 0,00 | 0,00 | 0,00 | 0,00 | NA | NA |
| IGHV1-69     | 0,00 | 0,00 | 0,00 | 0,00 | NA | NA |
| IGHV1-69D    | 0,00 | 0,00 | 0,00 | 0,00 | NA | NA |
| IGHV1OR15-2  | 0,00 | 0,00 | 0,00 | 0,00 | NA | NA |
| IGHV1OR15-4  | 0,00 | 0,00 | 0,00 | 0,00 | NA | NA |
| IGHV1OR15-6  | 0,00 | 0,00 | 0,00 | 0,00 | NA | NA |
| IGHV1OR15-9  | 0,00 | 0,00 | 0,00 | 0,00 | NA | NA |
| IGHV1OR16-1  | 0,00 | 0,00 | 0,00 | 0,00 | NA | NA |
| IGHV1OR16-2  | 0,00 | 0,00 | 0,00 | 0,00 | NA | NA |
| IGHV1OR16-3  | 0,00 | 0,00 | 0,00 | 0,00 | NA | NA |
| IGHV1OR16-4  | 0,00 | 0,00 | 0,00 | 0,00 | NA | NA |
| IGHV1OR21-1  | 0,00 | 0,00 | 0,00 | 0,00 | NA | NA |
| IGHV2-26     | 0,00 | 0,00 | 0,00 | 0,00 | NA | NA |
| IGHV2-5      | 0,00 | 0,63 | 0,00 | 0,00 | NA | NA |
| IGHV2-70     | 0,00 | 0,00 | 0,00 | 0,00 | NA | NA |
| IGHV2-70D    | 0,00 | 0,00 | 0,00 | 0,00 | NA | NA |
| IGHV2OR16-5  | 0,00 | 0,00 | 0,00 | 0,00 | NA | NA |
| IGHV3-11     | 0,00 | 0,00 | 0,00 | 0,00 | NA | NA |
| IGHV3-13     | 0,00 | 0,00 | 0,00 | 0,00 | NA | NA |
| IGHV3-19     | 0,00 | 0,00 | 0,00 | 0,00 | NA | NA |
| IGHV3-22     | 0,00 | 0,00 | 0,00 | 0,00 | NA | NA |
| IGHV3-23     | 0,00 | 1,47 | 0,00 | 0,61 | NA | NA |
| IGHV3-25     | 0,00 | 0,00 | 0,00 | 0,00 | NA | NA |
| IGHV3-29     | 0,00 | 0,00 | 0,00 | 0,00 | NA | NA |
| IGHV3-30-2   | 0,00 | 0,00 | 0,00 | 0,00 | NA | NA |
| IGHV3-33-2   | 0,00 | 0,00 | 0,00 | 0,00 | NA | NA |
| IGHV3-35     | 0,00 | 0,00 | 0,00 | 0,00 | NA | NA |
| IGHV3-36     | 0,00 | 0,00 | 0,00 | 0,00 | NA | NA |
| IGHV3-37     | 0,00 | 0,00 | 0,00 | 0,00 | NA | NA |
| IGHV3-38     | 0,00 | 0,00 | 0,00 | 0,00 | NA | NA |
| IGHV3-42     | 0,00 | 0,00 | 0,00 | 0,00 | NA | NA |
| IGHV3-47     | 0,00 | 0,00 | 0,00 | 0,00 | NA | NA |
| IGHV3-50     | 0,00 | 0,00 | 0,00 | 0,00 | NA | NA |
| IGHV3-52     | 0,00 | 0,00 | 0,00 | 0,00 | NA | NA |

|              |      |      |      |      |    |    |
|--------------|------|------|------|------|----|----|
| IGHV3-53     | 0,00 | 0,00 | 0,00 | 0,00 | NA | NA |
| IGHV3-54     | 0,00 | 0,00 | 0,00 | 0,00 | NA | NA |
| IGHV3-57     | 0,00 | 0,00 | 0,00 | 0,00 | NA | NA |
| IGHV3-6      | 0,00 | 0,00 | 0,00 | 0,00 | NA | NA |
| IGHV3-62     | 0,00 | 0,00 | 0,00 | 0,00 | NA | NA |
| IGHV3-63     | 0,00 | 0,00 | 0,00 | 0,00 | NA | NA |
| IGHV3-64     | 0,00 | 0,00 | 0,00 | 0,00 | NA | NA |
| IGHV3-64D    | 0,00 | 0,00 | 0,00 | 0,00 | NA | NA |
| IGHV3-65     | 0,00 | 0,00 | 0,00 | 0,00 | NA | NA |
| IGHV3-66     | 0,00 | 0,00 | 0,00 | 0,00 | NA | NA |
| IGHV3-71     | 0,00 | 0,00 | 0,00 | 0,00 | NA | NA |
| IGHV3-72     | 0,00 | 0,00 | 0,00 | 0,00 | NA | NA |
| IGHV3-73     | 0,00 | 0,00 | 0,00 | 0,00 | NA | NA |
| IGHV3-75     | 0,00 | 0,00 | 0,00 | 0,00 | NA | NA |
| IGHV3-76     | 0,00 | 0,00 | 0,00 | 0,00 | NA | NA |
| IGHV3-79     | 0,00 | 0,00 | 0,00 | 0,00 | NA | NA |
| IGHV3OR15-7  | 0,00 | 0,00 | 0,00 | 0,00 | NA | NA |
| IGHV3OR16-10 | 0,00 | 0,00 | 0,00 | 0,00 | NA | NA |
| IGHV3OR16-11 | 0,00 | 0,00 | 0,00 | 0,00 | NA | NA |
| IGHV3OR16-12 | 0,00 | 0,00 | 0,00 | 0,00 | NA | NA |
| IGHV3OR16-13 | 0,00 | 0,00 | 0,00 | 0,00 | NA | NA |
| IGHV3OR16-6  | 0,00 | 0,00 | 0,00 | 0,00 | NA | NA |
| IGHV3OR16-7  | 0,00 | 0,00 | 0,00 | 0,00 | NA | NA |
| IGHV3OR16-8  | 0,00 | 0,00 | 0,00 | 0,00 | NA | NA |
| IGHV3OR16-9  | 0,00 | 0,00 | 0,00 | 0,00 | NA | NA |
| IGHV4-30-2   | 0,00 | 0,00 | 0,00 | 0,00 | NA | NA |
| IGHV4-34     | 0,00 | 0,00 | 0,00 | 0,00 | NA | NA |
| IGHV4-4      | 0,00 | 0,00 | 0,00 | 0,00 | NA | NA |
| IGHV4-55     | 0,00 | 0,00 | 0,00 | 0,00 | NA | NA |
| IGHV4-59     | 0,00 | 0,42 | 0,00 | 0,00 | NA | NA |
| IGHV4-80     | 0,00 | 0,00 | 0,00 | 0,00 | NA | NA |
| IGHV6-1      | 0,00 | 0,55 | 0,00 | 0,00 | NA | NA |
| IGHV7-27     | 0,00 | 0,00 | 0,00 | 0,00 | NA | NA |
| IGHV7-34-1   | 0,00 | 0,00 | 0,00 | 0,00 | NA | NA |
| IGHV7-40     | 0,00 | 0,00 | 0,00 | 0,00 | NA | NA |
| IGHV7-56     | 0,00 | 0,00 | 0,00 | 0,00 | NA | NA |
| IGHV7-81     | 0,00 | 0,00 | 0,00 | 0,00 | NA | NA |
| IGHVII-15-1  | 0,00 | 0,00 | 0,00 | 0,00 | NA | NA |
| IGHVII-22-1  | 0,00 | 0,00 | 0,00 | 0,00 | NA | NA |
| IGHVII-26-2  | 0,00 | 0,00 | 0,00 | 0,00 | NA | NA |
| IGHVII-28-1  | 0,00 | 0,00 | 0,00 | 0,00 | NA | NA |
| IGHVII-30-1  | 0,00 | 0,00 | 0,00 | 0,00 | NA | NA |
| IGHVII-31-1  | 0,00 | 0,00 | 0,00 | 0,00 | NA | NA |
| IGHVII-33-1  | 0,00 | 0,00 | 0,00 | 0,00 | NA | NA |
| IGHVII-40-1  | 0,00 | 0,00 | 0,00 | 0,00 | NA | NA |
| IGHVII-43-1  | 0,00 | 0,00 | 0,00 | 0,00 | NA | NA |
| IGHVII-44-2  | 0,00 | 0,00 | 0,00 | 0,00 | NA | NA |
| IGHVII-46-1  | 0,00 | 0,00 | 0,00 | 0,00 | NA | NA |
| IGHVII-49-1  | 0,00 | 0,00 | 0,00 | 0,00 | NA | NA |
| IGHVII-51-2  | 0,00 | 0,00 | 0,00 | 0,00 | NA | NA |
| IGHVII-53-1  | 0,00 | 0,00 | 0,00 | 0,00 | NA | NA |
| IGHVII-60-1  | 0,00 | 0,00 | 0,00 | 0,00 | NA | NA |
| IGHVII-62-1  | 0,00 | 0,00 | 0,00 | 0,00 | NA | NA |
| IGHVII-65-1  | 0,00 | 0,00 | 0,00 | 0,00 | NA | NA |
| IGHVII-67-1  | 0,00 | 0,00 | 0,00 | 0,00 | NA | NA |

|              |      |      |      |      |    |    |
|--------------|------|------|------|------|----|----|
| IGHVII-74-1  | 0,00 | 0,00 | 0,00 | 0,00 | NA | NA |
| IGHVII-78-1  | 0,00 | 0,00 | 0,00 | 0,00 | NA | NA |
| IGHVIII-11-1 | 0,00 | 0,00 | 0,00 | 0,00 | NA | NA |
| IGHVIII-13-1 | 0,00 | 0,00 | 0,00 | 0,00 | NA | NA |
| IGHVIII-16-1 | 0,00 | 0,00 | 0,00 | 0,00 | NA | NA |
| IGHVIII-2-1  | 0,00 | 0,00 | 0,00 | 0,00 | NA | NA |
| IGHVIII-22-2 | 0,00 | 0,00 | 0,00 | 0,00 | NA | NA |
| IGHVIII-25-1 | 0,00 | 0,00 | 0,00 | 0,00 | NA | NA |
| IGHVIII-26-1 | 0,00 | 0,00 | 0,00 | 0,00 | NA | NA |
| IGHVIII-38-1 | 0,00 | 0,00 | 0,00 | 0,00 | NA | NA |
| IGHVIII-44   | 0,00 | 0,00 | 0,00 | 0,00 | NA | NA |
| IGHVIII-47-1 | 0,00 | 0,00 | 0,00 | 0,00 | NA | NA |
| IGHVIII-5-1  | 0,00 | 0,00 | 0,00 | 0,00 | NA | NA |
| IGHVIII-5-2  | 0,00 | 0,00 | 0,00 | 0,00 | NA | NA |
| IGHVIII-51-1 | 0,00 | 0,00 | 0,00 | 0,00 | NA | NA |
| IGHVIII-67-2 | 0,00 | 0,00 | 0,00 | 0,00 | NA | NA |
| IGHVIII-67-3 | 0,00 | 0,00 | 0,00 | 0,00 | NA | NA |
| IGHVIII-67-4 | 0,00 | 0,00 | 0,00 | 0,00 | NA | NA |
| IGHVIII-76-1 | 0,00 | 0,00 | 0,00 | 0,00 | NA | NA |
| IGHVIV-44-1  | 0,00 | 0,00 | 0,00 | 0,00 | NA | NA |
| IGIP         | 0,00 | 0,00 | 0,00 | 0,00 | NA | NA |
| IGJP1        | 0,00 | 0,00 | 0,00 | 0,00 | NA | NA |
| IGKJ3        | 0,00 | 0,00 | 0,00 | 0,00 | NA | NA |
| IGKV1-12     | 0,00 | 0,00 | 0,00 | 0,00 | NA | NA |
| IGKV1-13     | 0,00 | 0,00 | 0,00 | 0,00 | NA | NA |
| IGKV1-22     | 0,00 | 0,00 | 0,00 | 0,00 | NA | NA |
| IGKV1-27     | 0,00 | 0,00 | 0,00 | 0,00 | NA | NA |
| IGKV1-32     | 0,00 | 0,00 | 0,00 | 0,00 | NA | NA |
| IGKV1-35     | 0,00 | 0,00 | 0,00 | 0,00 | NA | NA |
| IGKV1-37     | 0,00 | 0,00 | 0,00 | 0,00 | NA | NA |
| IGKV1-6      | 0,00 | 0,00 | 0,00 | 0,00 | NA | NA |
| IGKV1-8      | 0,00 | 0,00 | 0,00 | 0,00 | NA | NA |
| IGKV1D-12    | 0,00 | 0,00 | 0,00 | 0,00 | NA | NA |
| IGKV1D-13    | 0,00 | 0,00 | 0,00 | 0,00 | NA | NA |
| IGKV1D-16    | 0,00 | 0,00 | 0,00 | 0,00 | NA | NA |
| IGKV1D-22    | 0,00 | 0,00 | 0,00 | 0,00 | NA | NA |
| IGKV1D-27    | 0,00 | 0,00 | 0,00 | 0,00 | NA | NA |
| IGKV1D-32    | 0,00 | 0,00 | 0,00 | 0,00 | NA | NA |
| IGKV1D-35    | 0,00 | 0,00 | 0,00 | 0,00 | NA | NA |
| IGKV1D-37    | 0,00 | 0,00 | 0,00 | 0,00 | NA | NA |
| IGKV1D-8     | 0,00 | 0,70 | 0,00 | 0,00 | NA | NA |
| IGKV1OR-2    | 0,00 | 0,00 | 0,00 | 0,00 | NA | NA |
| IGKV1OR-3    | 0,00 | 0,00 | 0,00 | 0,00 | NA | NA |
| IGKV1OR2-108 | 0,00 | 0,00 | 0,00 | 0,00 | NA | NA |
| IGKV1OR2-11  | 0,00 | 0,00 | 0,00 | 0,00 | NA | NA |
| IGKV1OR2-118 | 0,00 | 0,00 | 0,00 | 0,00 | NA | NA |
| IGKV1OR2-3   | 0,00 | 0,00 | 0,00 | 0,00 | NA | NA |
| IGKV1OR2-9   | 0,00 | 0,00 | 0,00 | 0,00 | NA | NA |
| IGKV1OR22-5  | 0,00 | 0,00 | 0,00 | 0,00 | NA | NA |
| IGKV1OR9-1   | 0,00 | 0,00 | 0,00 | 0,00 | NA | NA |
| IGKV1OR9-2   | 0,00 | 0,00 | 0,00 | 0,00 | NA | NA |
| IGKV2-10     | 0,00 | 0,00 | 0,00 | 0,00 | NA | NA |
| IGKV2-14     | 0,00 | 0,00 | 0,00 | 0,00 | NA | NA |
| IGKV2-18     | 0,00 | 0,00 | 0,00 | 0,00 | NA | NA |
| IGKV2-19     | 0,00 | 0,00 | 0,00 | 0,00 | NA | NA |

|              |      |      |      |      |    |    |
|--------------|------|------|------|------|----|----|
| IGKV2-23     | 0,00 | 0,00 | 0,00 | 0,00 | NA | NA |
| IGKV2-24     | 0,00 | 0,00 | 0,00 | 0,00 | NA | NA |
| IGKV2-26     | 0,00 | 0,00 | 0,00 | 0,00 | NA | NA |
| IGKV2-28     | 0,00 | 1,02 | 0,00 | 0,00 | NA | NA |
| IGKV2-29     | 0,00 | 0,00 | 0,00 | 0,00 | NA | NA |
| IGKV2-30     | 0,00 | 1,41 | 0,00 | 0,00 | NA | NA |
| IGKV2-36     | 0,00 | 0,00 | 0,00 | 0,00 | NA | NA |
| IGKV2-38     | 0,00 | 0,00 | 0,00 | 0,00 | NA | NA |
| IGKV2-4      | 0,00 | 0,00 | 0,00 | 0,00 | NA | NA |
| IGKV2-40     | 0,00 | 0,00 | 0,00 | 0,00 | NA | NA |
| IGKV2D-10    | 0,00 | 0,00 | 0,00 | 0,00 | NA | NA |
| IGKV2D-14    | 0,00 | 0,00 | 0,00 | 0,00 | NA | NA |
| IGKV2D-18    | 0,00 | 0,00 | 0,00 | 0,00 | NA | NA |
| IGKV2D-19    | 0,00 | 0,00 | 0,00 | 0,00 | NA | NA |
| IGKV2D-23    | 0,00 | 0,00 | 0,00 | 0,00 | NA | NA |
| IGKV2D-24    | 0,00 | 0,00 | 0,00 | 0,00 | NA | NA |
| IGKV2D-26    | 0,00 | 0,00 | 0,00 | 0,00 | NA | NA |
| IGKV2D-28    | 0,00 | 0,00 | 0,00 | 0,00 | NA | NA |
| IGKV2D-29    | 0,00 | 0,00 | 0,00 | 0,00 | NA | NA |
| IGKV2D-30    | 0,00 | 0,00 | 0,00 | 0,00 | NA | NA |
| IGKV2D-38    | 0,00 | 0,00 | 0,00 | 0,00 | NA | NA |
| IGKV2D-40    | 0,00 | 0,00 | 0,00 | 0,00 | NA | NA |
| IGKV2OR2-1   | 0,00 | 0,00 | 0,00 | 0,00 | NA | NA |
| IGKV2OR2-10  | 0,00 | 0,00 | 0,00 | 0,00 | NA | NA |
| IGKV2OR2-2   | 0,00 | 0,00 | 0,00 | 0,00 | NA | NA |
| IGKV2OR2-7   | 0,00 | 0,00 | 0,00 | 0,00 | NA | NA |
| IGKV2OR2-7D  | 0,00 | 0,00 | 0,00 | 0,00 | NA | NA |
| IGKV2OR2-8   | 0,00 | 0,00 | 0,00 | 0,00 | NA | NA |
| IGKV2OR22-3  | 0,00 | 0,00 | 0,00 | 0,00 | NA | NA |
| IGKV3-25     | 0,00 | 0,00 | 0,00 | 0,00 | NA | NA |
| IGKV3-31     | 0,00 | 0,00 | 0,00 | 0,00 | NA | NA |
| IGKV3-34     | 0,00 | 0,00 | 0,00 | 0,00 | NA | NA |
| IGKV3-7      | 0,00 | 0,00 | 0,00 | 0,00 | NA | NA |
| IGKV3D-25    | 0,00 | 0,00 | 0,00 | 0,00 | NA | NA |
| IGKV3D-31    | 0,00 | 0,00 | 0,00 | 0,00 | NA | NA |
| IGKV3D-34    | 0,00 | 0,00 | 0,00 | 0,00 | NA | NA |
| IGKV3D-7     | 0,00 | 0,00 | 0,00 | 0,00 | NA | NA |
| IGKV3OR2-268 | 0,00 | 0,00 | 0,00 | 0,00 | NA | NA |
| IGKV3OR2-5   | 0,00 | 0,00 | 0,00 | 0,00 | NA | NA |
| IGKV3OR22-2  | 0,00 | 0,00 | 0,00 | 0,00 | NA | NA |
| IGKV5-2      | 0,00 | 0,56 | 0,00 | 0,00 | NA | NA |
| IGKV6D-41    | 0,00 | 0,00 | 0,00 | 0,00 | NA | NA |
| IGKV7-3      | 0,00 | 0,00 | 0,00 | 0,00 | NA | NA |
| IGLC2        | 3,47 | 5,66 | 3,57 | 5,22 | NA | NA |
| IGLC3        | 1,40 | 3,34 | 2,51 | 2,49 | NA | NA |
| IGLC4        | 0,00 | 0,00 | 0,00 | 0,00 | NA | NA |
| IGLC5        | 0,00 | 0,00 | 0,00 | 0,00 | NA | NA |
| IGLCOR22-1   | 0,00 | 0,00 | 0,00 | 0,00 | NA | NA |
| IGLCOR22-2   | 0,00 | 0,00 | 0,00 | 0,00 | NA | NA |
| IGLJ1        | 0,00 | 0,00 | 0,00 | 0,00 | NA | NA |
| IGLJ4        | 0,00 | 0,00 | 0,00 | 0,00 | NA | NA |
| IGLJ5        | 0,00 | 0,00 | 0,00 | 0,00 | NA | NA |
| IGLJ7        | 0,00 | 0,00 | 0,00 | 0,00 | NA | NA |
| IGLL1        | 0,00 | 0,00 | 0,00 | 0,00 | NA | NA |
| IGLL4P       | 0,00 | 0,00 | 0,00 | 0,00 | NA | NA |

|              |      |      |      |      |    |    |
|--------------|------|------|------|------|----|----|
| IGLV1-36     | 0,00 | 0,00 | 0,00 | 0,00 | NA | NA |
| IGLV1-41     | 0,00 | 0,00 | 0,00 | 0,00 | NA | NA |
| IGLV1-44     | 0,00 | 1,16 | 0,00 | 0,00 | NA | NA |
| IGLV1-50     | 0,00 | 0,00 | 0,00 | 0,00 | NA | NA |
| IGLV10-54    | 0,00 | 0,67 | 0,00 | 0,00 | NA | NA |
| IGLV10-67    | 0,00 | 0,00 | 0,00 | 0,00 | NA | NA |
| IGLV11-55    | 0,00 | 0,00 | 0,00 | 0,00 | NA | NA |
| IGLV2-28     | 0,00 | 0,00 | 0,00 | 0,00 | NA | NA |
| IGLV2-33     | 0,00 | 0,00 | 0,00 | 0,00 | NA | NA |
| IGLV2-34     | 0,00 | 0,00 | 0,00 | 0,00 | NA | NA |
| IGLV3-1      | 1,00 | 1,99 | 1,81 | 2,34 | NA | NA |
| IGLV3-12     | 0,00 | 0,00 | 0,00 | 0,00 | NA | NA |
| IGLV3-13     | 0,00 | 0,00 | 0,00 | 0,00 | NA | NA |
| IGLV3-15     | 0,00 | 0,00 | 0,00 | 0,00 | NA | NA |
| IGLV3-17     | 0,00 | 0,00 | 0,00 | 0,00 | NA | NA |
| IGLV3-2      | 0,00 | 0,00 | 0,00 | 0,00 | NA | NA |
| IGLV3-22     | 0,00 | 0,00 | 0,00 | 0,00 | NA | NA |
| IGLV3-24     | 0,00 | 0,00 | 0,00 | 0,00 | NA | NA |
| IGLV3-26     | 0,00 | 0,00 | 0,00 | 0,00 | NA | NA |
| IGLV3-27     | 0,00 | 0,63 | 0,00 | 0,00 | NA | NA |
| IGLV3-29     | 0,00 | 0,00 | 0,00 | 0,00 | NA | NA |
| IGLV3-30     | 0,00 | 0,00 | 0,00 | 0,00 | NA | NA |
| IGLV3-31     | 0,00 | 0,00 | 0,00 | 0,00 | NA | NA |
| IGLV3-32     | 0,00 | 0,00 | 0,00 | 0,00 | NA | NA |
| IGLV3-4      | 0,00 | 0,00 | 0,00 | 0,00 | NA | NA |
| IGLV3-6      | 0,00 | 0,00 | 0,00 | 0,00 | NA | NA |
| IGLV3-7      | 0,00 | 0,00 | 0,00 | 0,00 | NA | NA |
| IGLV4-3      | 0,00 | 0,00 | 0,00 | 0,00 | NA | NA |
| IGLV5-45     | 0,00 | 0,00 | 0,00 | 0,00 | NA | NA |
| IGLV5-48     | 0,00 | 0,00 | 0,00 | 0,00 | NA | NA |
| IGLV7-35     | 0,00 | 0,00 | 0,00 | 0,00 | NA | NA |
| IGLV7-43     | 0,00 | 0,00 | 0,00 | 0,00 | NA | NA |
| IGLV8-61     | 0,00 | 0,53 | 0,00 | 0,00 | NA | NA |
| IGLV8OR8-1   | 0,00 | 0,00 | 0,00 | 0,00 | NA | NA |
| IGLV9-49     | 0,00 | 0,00 | 0,00 | 0,00 | NA | NA |
| IGLVI-20     | 0,00 | 0,00 | 0,00 | 0,00 | NA | NA |
| IGLVI-38     | 0,00 | 0,00 | 0,00 | 0,00 | NA | NA |
| IGLVI-42     | 0,00 | 0,00 | 0,00 | 0,00 | NA | NA |
| IGLVI-56     | 0,00 | 0,00 | 0,00 | 0,00 | NA | NA |
| IGLVI-70     | 0,00 | 0,00 | 0,00 | 0,00 | NA | NA |
| IGLVIV-53    | 0,00 | 0,00 | 0,00 | 0,00 | NA | NA |
| IGLVIV-59    | 0,00 | 0,00 | 0,00 | 0,00 | NA | NA |
| IGLVIV-64    | 0,00 | 0,00 | 0,00 | 0,00 | NA | NA |
| IGLVIV-65    | 0,00 | 0,00 | 0,00 | 0,00 | NA | NA |
| IGLVIV-66-1  | 0,00 | 0,00 | 0,00 | 0,00 | NA | NA |
| IGLVIVOR22-1 | 0,00 | 0,00 | 0,00 | 0,00 | NA | NA |
| IGLVV-58     | 0,00 | 0,00 | 0,00 | 0,00 | NA | NA |
| IGLVV-66     | 0,00 | 0,00 | 0,00 | 0,00 | NA | NA |
| IGLVVI-22-1  | 0,00 | 0,00 | 0,00 | 0,00 | NA | NA |
| IGLVVI-25-1  | 0,00 | 0,00 | 0,00 | 0,00 | NA | NA |
| IGLVVII-41-1 | 0,00 | 0,00 | 0,00 | 0,00 | NA | NA |
| IGSF21       | 0,00 | 0,00 | 0,00 | 0,00 | NA | NA |
| IHH          | 0,00 | 0,00 | 0,00 | 0,00 | NA | NA |
| IKBKGP1      | 0,00 | 0,00 | 0,00 | 0,00 | NA | NA |
| IL12RB2      | 0,05 | 0,07 | 0,15 | 0,14 | NA | NA |

|              |      |      |      |      |    |    |
|--------------|------|------|------|------|----|----|
| IL13         | 0,00 | 0,00 | 0,00 | 0,00 | NA | NA |
| IL13RA2      | 0,00 | 0,00 | 0,00 | 0,00 | NA | NA |
| IL17D        | 0,00 | 0,00 | 0,00 | 0,00 | NA | NA |
| IL17F        | 0,00 | 0,00 | 0,00 | 0,00 | NA | NA |
| IL17RB       | 0,00 | 0,00 | 0,00 | 0,00 | NA | NA |
| IL1F10       | 0,00 | 0,00 | 0,00 | 0,00 | NA | NA |
| IL1RAPL1     | 0,00 | 0,00 | 0,00 | 0,00 | NA | NA |
| IL1RL1       | 0,03 | 0,15 | 0,00 | 0,12 | NA | NA |
| IL20         | 0,00 | 0,00 | 0,00 | 0,00 | NA | NA |
| IL20RA       | 0,00 | 0,00 | 0,00 | 0,00 | NA | NA |
| IL20RB       | 0,06 | 0,56 | 0,25 | 0,17 | NA | NA |
| IL21         | 0,00 | 0,00 | 0,00 | 0,00 | NA | NA |
| IL21R        | 0,32 | 0,28 | 0,57 | 0,70 | NA | NA |
| IL22RA1      | 0,00 | 0,00 | 0,00 | 0,00 | NA | NA |
| IL23A        | 0,12 | 0,15 | 0,00 | 0,00 | NA | NA |
| IL24         | 0,07 | 0,00 | 0,00 | 0,13 | NA | NA |
| IL25         | 0,00 | 0,00 | 0,00 | 0,00 | NA | NA |
| IL3          | 0,00 | 0,00 | 0,00 | 0,00 | NA | NA |
| IL31         | 0,00 | 0,00 | 0,00 | 0,00 | NA | NA |
| IL36A        | 0,00 | 0,00 | 0,00 | 0,00 | NA | NA |
| IL36B        | 0,00 | 0,00 | 0,00 | 0,00 | NA | NA |
| IL36G        | 0,00 | 0,00 | 0,00 | 0,00 | NA | NA |
| IL36RN       | 0,00 | 0,19 | 0,00 | 0,00 | NA | NA |
| IL37         | 0,00 | 0,00 | 0,00 | 0,00 | NA | NA |
| IL4          | 0,00 | 0,00 | 0,00 | 0,00 | NA | NA |
| IL6STP1      | 0,00 | 0,00 | 0,00 | 0,00 | NA | NA |
| IL9          | 0,00 | 0,00 | 0,00 | 0,00 | NA | NA |
| ILD2         | 0,04 | 0,11 | 0,03 | 0,03 | NA | NA |
| IMMTP        | 0,00 | 0,00 | 0,00 | 0,00 | NA | NA |
| IMPA1P       | 0,00 | 0,00 | 0,00 | 0,00 | NA | NA |
| IMPDH1P6     | 0,00 | 0,00 | 0,00 | 0,00 | NA | NA |
| INA          | 0,00 | 0,00 | 0,00 | 0,00 | NA | NA |
| INCA1        | 0,00 | 0,00 | 0,00 | 0,23 | NA | NA |
| INHA         | 0,00 | 0,00 | 0,00 | 0,00 | NA | NA |
| INHBB        | 0,00 | 0,00 | 0,00 | 0,00 | NA | NA |
| INMT-FAM188B | 0,00 | 0,00 | 0,00 | 0,00 | NA | NA |
| INS          | 0,00 | 0,00 | 0,00 | 0,00 | NA | NA |
| INS-IGF2     | 0,00 | 0,00 | 0,00 | 0,00 | NA | NA |
| INSM2        | 0,00 | 0,00 | 0,00 | 0,00 | NA | NA |
| INTS4L2      | 0,00 | 0,00 | 0,00 | 0,00 | NA | NA |
| IP6K3        | 0,00 | 0,00 | 0,00 | 0,00 | NA | NA |
| IQCA1        | 0,00 | 0,09 | 0,00 | 0,00 | NA | NA |
| IQCA1L       | 0,00 | 0,00 | 0,00 | 0,00 | NA | NA |
| IQCD         | 0,00 | 0,00 | 0,00 | 0,00 | NA | NA |
| IQCF1        | 0,00 | 0,00 | 0,21 | 0,27 | NA | NA |
| IQCF2        | 0,00 | 0,00 | 0,00 | 0,00 | NA | NA |
| IQCF5        | 0,00 | 0,00 | 0,00 | 0,00 | NA | NA |
| IQCF6        | 0,00 | 0,00 | 0,00 | 0,00 | NA | NA |
| IQSEC3       | 0,00 | 0,10 | 0,00 | 0,00 | NA | NA |
| IRGC         | 0,00 | 0,00 | 0,00 | 0,00 | NA | NA |
| IRS1         | 0,01 | 0,12 | 0,08 | 0,06 | NA | NA |
| IRS4         | 0,00 | 0,00 | 0,00 | 0,00 | NA | NA |
| IRX1         | 0,00 | 0,00 | 0,00 | 0,00 | NA | NA |
| IRX1P1       | 0,00 | 0,00 | 0,00 | 0,00 | NA | NA |
| IRX3         | 0,00 | 0,00 | 0,00 | 0,00 | NA | NA |

|              |      |      |      |      |    |    |
|--------------|------|------|------|------|----|----|
| IRX6         | 0,00 | 0,00 | 0,00 | 0,00 | NA | NA |
| ISCA1P3      | 0,00 | 0,00 | 0,00 | 0,00 | NA | NA |
| ISCA1P4      | 0,00 | 0,00 | 0,00 | 0,00 | NA | NA |
| ISL1         | 0,00 | 0,00 | 0,00 | 0,00 | NA | NA |
| ISL2         | 0,00 | 0,00 | 0,00 | 0,00 | NA | NA |
| ISLR         | 0,00 | 0,00 | 0,00 | 0,00 | NA | NA |
| ISM2         | 0,00 | 0,00 | 0,00 | 0,00 | NA | NA |
| ISX          | 0,00 | 0,00 | 0,00 | 0,00 | NA | NA |
| ITGA11       | 0,17 | 0,51 | 0,32 | 0,31 | NA | NA |
| ITGA2B       | 0,00 | 0,04 | 0,14 | 0,04 | NA | NA |
| ITGA3        | 0,45 | 0,73 | 0,38 | 0,29 | NA | NA |
| ITGA9        | 0,00 | 0,06 | 0,00 | 0,02 | NA | NA |
| ITGB1BP2     | 0,00 | 0,00 | 0,00 | 0,00 | NA | NA |
| ITGB6        | 0,00 | 0,00 | 0,00 | 0,00 | NA | NA |
| ITIH1        | 0,27 | 0,57 | 0,00 | 0,31 | NA | NA |
| ITLN1        | 0,00 | 0,00 | 0,00 | 0,00 | NA | NA |
| ITM2BP1      | 0,00 | 0,00 | 0,00 | 0,00 | NA | NA |
| ITPKA        | 0,00 | 0,00 | 0,00 | 0,00 | NA | NA |
| IZUMO1R      | 0,00 | 0,00 | 0,00 | 0,00 | NA | NA |
| JADE3        | 0,00 | 0,05 | 0,00 | 0,00 | NA | NA |
| JAG1         | 0,03 | 3,01 | 0,29 | 0,04 | NA | NA |
| JAM3         | 0,02 | 0,27 | 0,00 | 0,06 | NA | NA |
| JPH1         | 0,00 | 0,00 | 0,00 | 0,00 | NA | NA |
| JPH2         | 0,00 | 0,00 | 0,00 | 0,00 | NA | NA |
| KAAG1        | 0,00 | 0,00 | 0,00 | 0,00 | NA | NA |
| KANK1        | 0,18 | 0,12 | 0,26 | 0,14 | NA | NA |
| KANK4        | 0,00 | 0,00 | 0,00 | 0,00 | NA | NA |
| KB-1000E4.2  | 0,00 | 0,00 | 0,00 | 0,00 | NA | NA |
| KB-1042C11.1 | 0,00 | 0,00 | 0,00 | 0,00 | NA | NA |
| KB-1043D8.8  | 0,00 | 0,00 | 0,00 | 0,00 | NA | NA |
| KB-1047C11.1 | 0,00 | 0,00 | 0,00 | 0,00 | NA | NA |
| KB-1047C11.2 | 0,00 | 0,00 | 0,00 | 0,00 | NA | NA |
| KB-1058D3.1  | 0,00 | 0,00 | 0,00 | 0,00 | NA | NA |
| KB-1083B1.1  | 0,00 | 0,00 | 0,00 | 0,00 | NA | NA |
| KB-1090H4.2  | 0,00 | 0,00 | 0,00 | 0,00 | NA | NA |
| KB-1107E3.1  | 0,00 | 0,00 | 0,00 | 0,00 | NA | NA |
| KB-1125A3.11 | 0,00 | 0,00 | 0,00 | 0,00 | NA | NA |
| KB-1183D5.12 | 0,00 | 0,00 | 0,00 | 0,00 | NA | NA |
| KB-1183D5.14 | 0,00 | 0,00 | 0,00 | 0,00 | NA | NA |
| KB-1183D5.15 | 0,00 | 0,00 | 0,00 | 0,00 | NA | NA |
| KB-1183D5.16 | 0,00 | 0,00 | 0,00 | 0,00 | NA | NA |
| KB-1183D5.9  | 0,00 | 0,00 | 0,00 | 0,00 | NA | NA |
| KB-1184D12.1 | 0,00 | 0,00 | 0,00 | 0,00 | NA | NA |
| KB-1247B1.1  | 0,00 | 0,00 | 0,00 | 0,00 | NA | NA |
| KB-1269D1.8  | 0,00 | 0,00 | 0,00 | 0,00 | NA | NA |
| KB-1296F8.1  | 0,00 | 0,00 | 0,00 | 0,00 | NA | NA |
| KB-1299A7.1  | 0,00 | 0,00 | 0,00 | 0,00 | NA | NA |
| KB-1303B4.1  | 0,00 | 0,00 | 0,00 | 0,00 | NA | NA |
| KB-1396H2.2  | 0,00 | 0,24 | 0,00 | 0,00 | NA | NA |
| KB-1410C5.1  | 0,00 | 0,00 | 0,00 | 0,00 | NA | NA |
| KB-1410C5.4  | 0,00 | 0,00 | 0,00 | 0,00 | NA | NA |
| KB-1433G4.1  | 0,00 | 0,00 | 0,00 | 0,00 | NA | NA |
| KB-1434A12.1 | 0,00 | 0,00 | 0,00 | 0,00 | NA | NA |
| KB-1440D3.13 | 0,00 | 0,00 | 0,00 | 0,00 | NA | NA |
| KB-1440D3.14 | 0,00 | 0,00 | 0,00 | 0,00 | NA | NA |



|              |      |      |      |      |    |    |
|--------------|------|------|------|------|----|----|
| KB-1440D3.15 | 0,00 | 0,00 | 0,00 | 0,00 | NA | NA |
| KB-1440D3.17 | 0,00 | 0,00 | 0,00 | 0,00 | NA | NA |
| KB-1440D3.18 | 0,00 | 0,00 | 0,00 | 0,00 | NA | NA |
| KB-1440D3.19 | 0,00 | 0,00 | 0,00 | 0,00 | NA | NA |
| KB-1448A5.1  | 0,00 | 0,00 | 0,00 | 0,00 | NA | NA |
| KB-1460A1.1  | 0,00 | 0,00 | 0,00 | 0,00 | NA | NA |
| KB-1460A1.2  | 0,00 | 0,00 | 0,00 | 0,00 | NA | NA |
| KB-1466C5.1  | 0,00 | 0,00 | 0,00 | 0,00 | NA | NA |
| KB-1517D11.2 | 0,00 | 0,00 | 0,00 | 0,00 | NA | NA |
| KB-1517D11.3 | 0,00 | 0,00 | 0,00 | 0,00 | NA | NA |
| KB-1554H10.1 | 0,00 | 0,00 | 0,00 | 0,00 | NA | NA |
| KB-1562D12.1 | 0,00 | 0,00 | 0,00 | 0,00 | NA | NA |
| KB-1562D12.2 | 0,00 | 0,00 | 0,00 | 0,00 | NA | NA |
| KB-1562D12.3 | 0,00 | 0,00 | 0,00 | 0,00 | NA | NA |
| KB-1572G7.3  | 0,00 | 0,17 | 0,00 | 0,16 | NA | NA |
| KB-1572G7.4  | 0,00 | 0,00 | 0,00 | 0,00 | NA | NA |
| KB-1572G7.5  | 0,00 | 0,00 | 0,00 | 0,00 | NA | NA |
| KB-1582A10.1 | 0,00 | 0,00 | 0,00 | 0,00 | NA | NA |
| KB-1582A10.2 | 0,00 | 0,00 | 0,00 | 0,00 | NA | NA |
| KB-1589B1.3  | 0,00 | 0,00 | 0,00 | 0,00 | NA | NA |
| KB-1589B1.4  | 0,00 | 0,00 | 0,00 | 0,00 | NA | NA |
| KB-1592A4.13 | 0,00 | 0,00 | 0,00 | 0,00 | NA | NA |
| KB-1592A4.14 | 0,00 | 0,00 | 0,00 | 0,00 | NA | NA |
| KB-1592A4.17 | 0,00 | 0,00 | 0,00 | 0,00 | NA | NA |
| KB-1615E4.1  | 0,00 | 0,00 | 0,00 | 0,00 | NA | NA |
| KB-1615E4.2  | 0,00 | 0,00 | 0,00 | 0,00 | NA | NA |
| KB-1615E4.3  | 0,00 | 0,00 | 0,00 | 0,00 | NA | NA |
| KB-1639H6.2  | 0,00 | 0,00 | 0,00 | 0,00 | NA | NA |
| KB-1639H6.3  | 0,00 | 0,00 | 0,00 | 0,00 | NA | NA |
| KB-1639H6.4  | 0,00 | 0,00 | 0,00 | 0,00 | NA | NA |
| KB-1639H6.7  | 0,00 | 0,00 | 0,00 | 0,00 | NA | NA |
| KB-1639H6.8  | 0,00 | 0,00 | 0,00 | 0,00 | NA | NA |
| KB-173C10.1  | 0,00 | 0,00 | 0,00 | 0,00 | NA | NA |
| KB-173C10.2  | 0,00 | 0,00 | 0,00 | 0,00 | NA | NA |
| KB-1836B5.3  | 0,00 | 0,00 | 0,00 | 0,00 | NA | NA |
| KB-1880F11.1 | 0,00 | 0,00 | 0,00 | 0,00 | NA | NA |
| KB-1907C4.2  | 0,00 | 0,00 | 0,00 | 0,00 | NA | NA |
| KB-1930G5.3  | 0,00 | 0,00 | 0,00 | 0,00 | NA | NA |
| KB-1980E6.4  | 0,00 | 0,00 | 0,00 | 0,00 | NA | NA |
| KB-1991G8.1  | 0,00 | 0,40 | 0,00 | 0,00 | NA | NA |
| KB-1995A5.4  | 0,00 | 0,00 | 0,00 | 0,00 | NA | NA |
| KB-208E9.1   | 0,00 | 0,00 | 0,00 | 0,00 | NA | NA |
| KB-288A10.17 | 0,00 | 0,00 | 0,00 | 0,00 | NA | NA |
| KB-288A10.19 | 0,00 | 0,00 | 0,00 | 0,00 | NA | NA |
| KB-318B8.7   | 0,00 | 0,00 | 0,00 | 0,00 | NA | NA |
| KB-431C1.3   | 0,00 | 0,00 | 0,00 | 0,00 | NA | NA |
| KB-431C1.5   | 0,00 | 0,00 | 0,00 | 0,00 | NA | NA |
| KB-51A8.1    | 0,00 | 0,00 | 0,00 | 0,00 | NA | NA |
| KB-67B5.11   | 0,00 | 0,00 | 0,00 | 0,00 | NA | NA |
| KB-67B5.12   | 0,00 | 0,00 | 0,00 | 0,00 | NA | NA |
| KB-67B5.16   | 0,00 | 0,00 | 0,00 | 0,00 | NA | NA |
| KB-68A7.1    | 0,00 | 0,00 | 0,00 | 0,00 | NA | NA |
| KB-7G2.3     | 0,00 | 0,00 | 0,00 | 0,00 | NA | NA |
| KB-7G2.7     | 0,00 | 0,00 | 0,00 | 0,00 | NA | NA |
| KB-7G2.8     | 0,00 | 0,00 | 0,00 | 0,00 | NA | NA |

|            |      |      |      |      |    |    |
|------------|------|------|------|------|----|----|
| KCCAT333   | 0,00 | 0,00 | 0,00 | 0,00 | NA | NA |
| KCNA10     | 0,00 | 0,00 | 0,00 | 0,00 | NA | NA |
| KCNA4      | 0,00 | 0,00 | 0,00 | 0,00 | NA | NA |
| KCNA5      | 0,00 | 0,00 | 0,00 | 0,00 | NA | NA |
| KCNB2      | 0,00 | 0,00 | 0,00 | 0,00 | NA | NA |
| KCND1      | 0,00 | 0,06 | 0,00 | 0,00 | NA | NA |
| KCND3      | 0,01 | 0,09 | 0,03 | 0,02 | NA | NA |
| KCNE2      | 0,00 | 0,00 | 0,00 | 0,00 | NA | NA |
| KCNF1      | 0,00 | 0,00 | 0,00 | 0,00 | NA | NA |
| KCNH2      | 0,00 | 0,00 | 0,00 | 0,00 | NA | NA |
| KCNH4      | 0,00 | 0,00 | 0,00 | 0,00 | NA | NA |
| KCNIP1     | 0,00 | 0,00 | 0,00 | 0,00 | NA | NA |
| KCNIP4     | 0,00 | 0,47 | 0,00 | 0,00 | NA | NA |
| KCNJ11     | 0,08 | 0,27 | 0,04 | 0,12 | NA | NA |
| KCNJ18     | 0,00 | 0,07 | 0,00 | 0,00 | NA | NA |
| KCNJ4      | 0,00 | 0,00 | 0,00 | 0,00 | NA | NA |
| KCNJ8      | 0,00 | 0,00 | 0,00 | 0,00 | NA | NA |
| KCNJ9      | 0,00 | 0,03 | 0,00 | 0,00 | NA | NA |
| KCNK15     | 0,00 | 0,05 | 0,00 | 0,00 | NA | NA |
| KCNK16     | 0,00 | 0,00 | 0,00 | 0,00 | NA | NA |
| KCNK18     | 0,00 | 0,00 | 0,00 | 0,00 | NA | NA |
| KCNK4      | 0,00 | 0,08 | 0,00 | 0,00 | NA | NA |
| KCNK5      | 0,00 | 0,00 | 0,00 | 0,00 | NA | NA |
| KCNMA1     | 0,08 | 0,19 | 0,08 | 0,15 | NA | NA |
| KCNMB2-IT1 | 0,00 | 0,00 | 0,00 | 0,00 | NA | NA |
| KCNN2      | 0,00 | 0,00 | 0,00 | 0,00 | NA | NA |
| KCNN3      | 0,01 | 0,13 | 0,02 | 0,03 | NA | NA |
| KCNS2      | 0,00 | 0,00 | 0,00 | 0,00 | NA | NA |
| KCNT2      | 0,00 | 0,00 | 0,00 | 0,00 | NA | NA |
| KCNU1      | 0,00 | 0,04 | 0,00 | 0,00 | NA | NA |
| KCTD4      | 0,00 | 0,00 | 0,00 | 0,00 | NA | NA |
| KCTD8      | 0,00 | 0,00 | 0,00 | 0,00 | NA | NA |
| KCTD9P2    | 0,00 | 0,00 | 0,00 | 0,00 | NA | NA |
| KDF1       | 0,00 | 0,00 | 0,00 | 0,00 | NA | NA |
| KDM4E      | 0,00 | 0,00 | 0,00 | 0,00 | NA | NA |
| KDM5D      | 0,12 | 0,19 | 0,15 | 0,20 | NA | NA |
| KERA       | 0,00 | 0,00 | 0,00 | 0,00 | NA | NA |
| KHDC1L     | 0,00 | 0,00 | 0,00 | 0,00 | NA | NA |
| KHDC3L     | 0,00 | 0,00 | 0,00 | 0,00 | NA | NA |
| KHDRBS2    | 0,00 | 0,00 | 0,00 | 0,05 | NA | NA |
| KHDRBS3    | 0,00 | 0,00 | 0,00 | 0,00 | NA | NA |
| KIAA0087   | 0,00 | 0,03 | 0,01 | 0,03 | NA | NA |
| KIAA1211   | 0,00 | 0,03 | 0,00 | 0,00 | NA | NA |
| KIAA1549L  | 0,00 | 0,00 | 0,00 | 0,00 | NA | NA |
| KIAA1644   | 0,00 | 0,00 | 0,00 | 0,00 | NA | NA |
| KIF18BP1   | 0,00 | 0,00 | 0,00 | 0,00 | NA | NA |
| KIF1A      | 0,00 | 0,00 | 0,00 | 0,00 | NA | NA |
| KIF20A     | 0,00 | 0,00 | 0,00 | 0,00 | NA | NA |
| KIF24      | 0,00 | 0,00 | 0,00 | 0,00 | NA | NA |
| KIF2B      | 0,00 | 0,00 | 0,00 | 0,00 | NA | NA |
| KIF5A      | 0,00 | 0,02 | 0,00 | 0,00 | NA | NA |
| KIR2DL1    | 0,00 | 0,00 | 0,00 | 0,00 | NA | NA |
| KIR2DL4    | 0,00 | 0,00 | 0,00 | 0,00 | NA | NA |
| KIR3DL2    | 0,00 | 0,00 | 0,00 | 0,00 | NA | NA |
| KIR3DL3    | 0,00 | 0,00 | 0,00 | 0,00 | NA | NA |

|          |      |      |      |      |    |    |
|----------|------|------|------|------|----|----|
| KIRREL   | 0,00 | 0,00 | 0,00 | 0,00 | NA | NA |
| KISS1    | 0,00 | 0,00 | 0,00 | 0,00 | NA | NA |
| KISS1R   | 0,00 | 0,00 | 0,00 | 0,00 | NA | NA |
| KL       | 0,00 | 0,00 | 0,00 | 0,00 | NA | NA |
| KLF1     | 0,00 | 0,00 | 0,00 | 0,00 | NA | NA |
| KLF14    | 0,00 | 0,00 | 0,00 | 0,00 | NA | NA |
| KLF5     | 0,00 | 0,00 | 0,00 | 0,00 | NA | NA |
| KLF8P1   | 0,00 | 0,00 | 0,00 | 0,00 | NA | NA |
| KLHDC7A  | 0,00 | 0,00 | 0,00 | 0,00 | NA | NA |
| KLHDC8A  | 0,00 | 0,00 | 0,00 | 0,00 | NA | NA |
| KLHDC8B  | 0,00 | 0,00 | 0,00 | 0,06 | NA | NA |
| KLHL1    | 0,00 | 0,00 | 0,00 | 0,00 | NA | NA |
| KLHL10   | 0,00 | 0,00 | 0,00 | 0,00 | NA | NA |
| KLHL25   | 0,00 | 0,11 | 0,00 | 0,00 | NA | NA |
| KLHL38   | 0,00 | 0,00 | 0,00 | 0,00 | NA | NA |
| KLHL40   | 0,00 | 0,00 | 0,00 | 0,00 | NA | NA |
| KLHL41   | 0,00 | 0,00 | 0,00 | 0,00 | NA | NA |
| KLK12    | 0,00 | 0,00 | 0,00 | 0,00 | NA | NA |
| KLK13    | 0,00 | 0,00 | 0,00 | 0,00 | NA | NA |
| KLK14    | 0,00 | 0,00 | 0,00 | 0,00 | NA | NA |
| KLK3     | 0,00 | 0,00 | 0,00 | 0,00 | NA | NA |
| KLK5     | 0,00 | 0,00 | 0,00 | 0,00 | NA | NA |
| KLK6     | 0,00 | 0,00 | 0,00 | 0,00 | NA | NA |
| KLK8     | 0,00 | 0,00 | 0,00 | 0,00 | NA | NA |
| KLK9     | 0,00 | 0,00 | 0,00 | 0,00 | NA | NA |
| KLRC2    | 0,00 | 0,00 | 0,00 | 0,00 | NA | NA |
| KLRF2    | 0,00 | 0,00 | 0,00 | 0,00 | NA | NA |
| KLRG2    | 0,00 | 0,00 | 0,00 | 0,00 | NA | NA |
| KNCN     | 0,00 | 0,00 | 0,00 | 0,00 | NA | NA |
| KPRP     | 0,00 | 0,00 | 0,00 | 0,00 | NA | NA |
| KRBOX1   | 0,00 | 0,00 | 0,00 | 0,00 | NA | NA |
| KREMEN2  | 0,00 | 0,00 | 0,00 | 0,00 | NA | NA |
| KRT1     | 0,00 | 0,00 | 0,00 | 0,00 | NA | NA |
| KRT13    | 0,00 | 0,00 | 0,00 | 0,00 | NA | NA |
| KRT14    | 0,00 | 0,00 | 0,00 | 0,00 | NA | NA |
| KRT16    | 0,00 | 0,00 | 0,00 | 0,00 | NA | NA |
| KRT16P1  | 0,00 | 0,00 | 0,00 | 0,00 | NA | NA |
| KRT16P2  | 0,00 | 0,00 | 0,00 | 0,00 | NA | NA |
| KRT16P3  | 0,00 | 0,00 | 0,00 | 0,00 | NA | NA |
| KRT16P5  | 0,00 | 0,00 | 0,00 | 0,00 | NA | NA |
| KRT17P1  | 0,00 | 0,00 | 0,00 | 0,00 | NA | NA |
| KRT17P3  | 0,00 | 0,00 | 0,00 | 0,00 | NA | NA |
| KRT18P16 | 0,00 | 0,00 | 0,00 | 0,00 | NA | NA |
| KRT18P2  | 0,00 | 0,00 | 0,00 | 0,00 | NA | NA |
| KRT18P27 | 0,00 | 0,00 | 0,00 | 0,00 | NA | NA |
| KRT18P3  | 0,00 | 0,00 | 0,00 | 0,00 | NA | NA |
| KRT18P37 | 0,00 | 0,00 | 0,00 | 0,00 | NA | NA |
| KRT18P40 | 0,00 | 0,00 | 0,00 | 0,00 | NA | NA |
| KRT18P42 | 0,00 | 0,00 | 0,00 | 0,00 | NA | NA |
| KRT18P54 | 0,00 | 0,00 | 0,00 | 0,00 | NA | NA |
| KRT18P8  | 0,00 | 0,00 | 0,00 | 0,00 | NA | NA |
| KRT18P9  | 0,00 | 0,00 | 0,00 | 0,00 | NA | NA |
| KRT19    | 0,00 | 0,00 | 0,00 | 0,00 | NA | NA |
| KRT19P1  | 0,00 | 0,00 | 0,00 | 0,00 | NA | NA |
| KRT19P3  | 0,00 | 0,00 | 0,00 | 0,00 | NA | NA |

|            |      |      |      |      |    |    |
|------------|------|------|------|------|----|----|
| KRT2       | 0,00 | 0,00 | 0,00 | 0,00 | NA | NA |
| KRT223P    | 0,00 | 0,00 | 0,00 | 0,00 | NA | NA |
| KRT24      | 0,00 | 0,00 | 0,00 | 0,00 | NA | NA |
| KRT25      | 0,00 | 0,00 | 0,00 | 0,00 | NA | NA |
| KRT27      | 0,00 | 0,00 | 0,00 | 0,00 | NA | NA |
| KRT3       | 0,00 | 0,00 | 0,00 | 0,00 | NA | NA |
| KRT31      | 0,00 | 0,00 | 0,00 | 0,00 | NA | NA |
| KRT32      | 0,00 | 0,00 | 0,00 | 0,00 | NA | NA |
| KRT33A     | 0,00 | 0,00 | 0,00 | 0,00 | NA | NA |
| KRT33B     | 0,00 | 0,00 | 0,00 | 0,00 | NA | NA |
| KRT34      | 0,00 | 0,00 | 0,00 | 0,00 | NA | NA |
| KRT35      | 0,00 | 0,00 | 0,00 | 0,00 | NA | NA |
| KRT36      | 0,00 | 0,00 | 0,00 | 0,00 | NA | NA |
| KRT37      | 0,00 | 0,11 | 0,00 | 0,00 | NA | NA |
| KRT38      | 0,00 | 0,00 | 0,00 | 0,00 | NA | NA |
| KRT39      | 0,00 | 0,00 | 0,00 | 0,00 | NA | NA |
| KRT4       | 0,00 | 0,00 | 0,00 | 0,00 | NA | NA |
| KRT40      | 0,00 | 0,00 | 0,00 | 0,00 | NA | NA |
| KRT41P     | 0,00 | 0,00 | 0,00 | 0,00 | NA | NA |
| KRT5       | 0,00 | 0,00 | 0,00 | 0,00 | NA | NA |
| KRT6A      | 0,00 | 0,00 | 0,00 | 0,00 | NA | NA |
| KRT71      | 0,00 | 0,00 | 0,00 | 0,00 | NA | NA |
| KRT72      | 0,00 | 0,00 | 0,00 | 0,00 | NA | NA |
| KRT74      | 0,00 | 0,00 | 0,00 | 0,00 | NA | NA |
| KRT76      | 0,00 | 0,00 | 0,00 | 0,00 | NA | NA |
| KRT81      | 0,00 | 0,00 | 0,00 | 0,00 | NA | NA |
| KRT83      | 0,00 | 0,00 | 0,00 | 0,00 | NA | NA |
| KRT84      | 0,00 | 0,00 | 0,00 | 0,00 | NA | NA |
| KRT85      | 0,00 | 0,00 | 0,00 | 0,00 | NA | NA |
| KRT86      | 0,00 | 0,00 | 0,00 | 0,00 | NA | NA |
| KRT8P11    | 0,00 | 0,00 | 0,00 | 0,00 | NA | NA |
| KRT8P19    | 0,00 | 0,00 | 0,00 | 0,00 | NA | NA |
| KRT8P23    | 0,00 | 0,00 | 0,00 | 0,00 | NA | NA |
| KRT8P25    | 0,00 | 0,00 | 0,00 | 0,00 | NA | NA |
| KRT8P26    | 0,00 | 0,00 | 0,00 | 0,00 | NA | NA |
| KRT8P28    | 0,00 | 0,00 | 0,00 | 0,00 | NA | NA |
| KRT8P34    | 0,00 | 0,00 | 0,00 | 0,00 | NA | NA |
| KRT8P47    | 0,00 | 0,00 | 0,00 | 0,00 | NA | NA |
| KRT8P7     | 0,00 | 0,10 | 0,00 | 0,00 | NA | NA |
| KRT8P9     | 0,00 | 0,00 | 0,00 | 0,00 | NA | NA |
| KRTAP1-1   | 0,00 | 0,00 | 0,00 | 0,00 | NA | NA |
| KRTAP1-3   | 0,00 | 0,00 | 0,00 | 0,00 | NA | NA |
| KRTAP1-4   | 0,00 | 0,00 | 0,00 | 0,00 | NA | NA |
| KRTAP10-1  | 0,00 | 0,00 | 0,00 | 0,00 | NA | NA |
| KRTAP10-10 | 0,00 | 0,00 | 0,00 | 0,00 | NA | NA |
| KRTAP10-11 | 0,00 | 0,00 | 0,00 | 0,00 | NA | NA |
| KRTAP10-12 | 0,00 | 0,00 | 0,00 | 0,00 | NA | NA |
| KRTAP10-2  | 0,00 | 0,00 | 0,00 | 0,00 | NA | NA |
| KRTAP10-4  | 0,00 | 0,00 | 0,00 | 0,00 | NA | NA |
| KRTAP10-5  | 0,00 | 0,00 | 0,00 | 0,00 | NA | NA |
| KRTAP10-6  | 0,00 | 0,00 | 0,00 | 0,00 | NA | NA |
| KRTAP10-7  | 0,00 | 0,00 | 0,00 | 0,00 | NA | NA |
| KRTAP10-8  | 0,00 | 0,00 | 0,00 | 0,00 | NA | NA |
| KRTAP10-9  | 0,00 | 0,00 | 0,00 | 0,00 | NA | NA |
| KRTAP11-1  | 0,00 | 0,00 | 0,00 | 0,00 | NA | NA |

|            |      |      |      |      |    |    |
|------------|------|------|------|------|----|----|
| KRTAP12-1  | 0,00 | 0,00 | 0,00 | 0,00 | NA | NA |
| KRTAP12-2  | 0,00 | 0,00 | 0,00 | 0,00 | NA | NA |
| KRTAP12-3  | 0,00 | 0,00 | 0,00 | 0,00 | NA | NA |
| KRTAP12-4  | 0,00 | 0,00 | 0,00 | 0,00 | NA | NA |
| KRTAP13-1  | 0,00 | 0,00 | 0,00 | 0,00 | NA | NA |
| KRTAP13-2  | 0,00 | 0,00 | 0,00 | 0,00 | NA | NA |
| KRTAP13-3  | 0,00 | 0,00 | 0,00 | 0,00 | NA | NA |
| KRTAP13-4  | 0,00 | 0,00 | 0,00 | 0,00 | NA | NA |
| KRTAP13P1  | 0,00 | 0,00 | 0,00 | 0,00 | NA | NA |
| KRTAP13P2  | 0,00 | 0,00 | 0,00 | 0,00 | NA | NA |
| KRTAP15-1  | 0,00 | 0,00 | 0,00 | 0,00 | NA | NA |
| KRTAP16-1  | 0,00 | 0,00 | 0,00 | 0,00 | NA | NA |
| KRTAP17-1  | 0,00 | 0,00 | 0,00 | 0,00 | NA | NA |
| KRTAP19-1  | 0,00 | 0,00 | 0,00 | 0,00 | NA | NA |
| KRTAP19-2  | 0,00 | 0,00 | 0,00 | 0,00 | NA | NA |
| KRTAP19-3  | 0,00 | 0,00 | 0,00 | 0,00 | NA | NA |
| KRTAP19-4  | 0,00 | 0,00 | 0,00 | 0,00 | NA | NA |
| KRTAP19-5  | 0,00 | 0,00 | 0,00 | 0,00 | NA | NA |
| KRTAP19-6  | 0,00 | 0,00 | 0,00 | 0,00 | NA | NA |
| KRTAP19-7  | 0,00 | 0,00 | 0,00 | 0,00 | NA | NA |
| KRTAP19-8  | 0,00 | 0,00 | 0,00 | 0,00 | NA | NA |
| KRTAP19P1  | 0,00 | 0,00 | 0,00 | 0,00 | NA | NA |
| KRTAP19P2  | 0,00 | 0,00 | 0,00 | 0,00 | NA | NA |
| KRTAP19P3  | 0,00 | 0,00 | 0,00 | 0,00 | NA | NA |
| KRTAP2-1   | 0,00 | 0,00 | 0,00 | 0,00 | NA | NA |
| KRTAP2-2   | 0,00 | 0,00 | 0,00 | 0,00 | NA | NA |
| KRTAP2-3   | 0,00 | 0,00 | 0,00 | 0,00 | NA | NA |
| KRTAP2-4   | 0,00 | 0,00 | 0,00 | 0,00 | NA | NA |
| KRTAP2-5P  | 0,00 | 0,00 | 0,00 | 0,00 | NA | NA |
| KRTAP20-1  | 0,00 | 0,00 | 0,00 | 0,00 | NA | NA |
| KRTAP20-2  | 0,00 | 0,00 | 0,00 | 0,00 | NA | NA |
| KRTAP20-3  | 0,00 | 0,00 | 0,00 | 0,00 | NA | NA |
| KRTAP20-4  | 0,00 | 0,00 | 0,00 | 0,00 | NA | NA |
| KRTAP21-1  | 0,00 | 0,00 | 0,00 | 0,00 | NA | NA |
| KRTAP21-2  | 0,00 | 0,00 | 0,00 | 0,00 | NA | NA |
| KRTAP21-3  | 0,00 | 0,00 | 0,00 | 0,00 | NA | NA |
| KRTAP22-1  | 0,00 | 0,00 | 0,00 | 0,00 | NA | NA |
| KRTAP22-2  | 0,00 | 0,00 | 0,00 | 0,00 | NA | NA |
| KRTAP23-1  | 0,00 | 0,00 | 0,00 | 0,00 | NA | NA |
| KRTAP24-1  | 0,00 | 0,00 | 0,00 | 0,00 | NA | NA |
| KRTAP25-1  | 0,00 | 0,00 | 0,00 | 0,00 | NA | NA |
| KRTAP26-1  | 0,00 | 0,00 | 0,00 | 0,00 | NA | NA |
| KRTAP27-1  | 0,00 | 0,00 | 0,00 | 0,00 | NA | NA |
| KRTAP29-1  | 0,00 | 0,00 | 0,00 | 0,00 | NA | NA |
| KRTAP3-1   | 0,00 | 0,61 | 0,00 | 0,13 | NA | NA |
| KRTAP3-2   | 0,00 | 0,00 | 0,00 | 0,00 | NA | NA |
| KRTAP3-3   | 0,00 | 0,00 | 0,00 | 0,00 | NA | NA |
| KRTAP3-4P  | 0,00 | 0,00 | 0,00 | 0,00 | NA | NA |
| KRTAP4-1   | 0,00 | 0,00 | 0,00 | 0,00 | NA | NA |
| KRTAP4-11  | 0,00 | 0,00 | 0,00 | 0,00 | NA | NA |
| KRTAP4-12  | 0,00 | 0,00 | 0,00 | 0,00 | NA | NA |
| KRTAP4-16P | 0,00 | 0,00 | 0,00 | 0,00 | NA | NA |
| KRTAP4-2   | 0,00 | 0,00 | 0,00 | 0,00 | NA | NA |
| KRTAP4-3   | 0,00 | 0,00 | 0,00 | 0,00 | NA | NA |
| KRTAP4-4   | 0,00 | 0,00 | 0,00 | 0,00 | NA | NA |

|                 |      |      |      |      |    |    |
|-----------------|------|------|------|------|----|----|
| KRTAP4-5        | 0,00 | 0,00 | 0,00 | 0,00 | NA | NA |
| KRTAP4-7        | 0,00 | 0,00 | 0,00 | 0,00 | NA | NA |
| KRTAP4-8        | 0,00 | 0,00 | 0,00 | 0,00 | NA | NA |
| KRTAP4-9        | 0,00 | 0,00 | 0,00 | 0,00 | NA | NA |
| KRTAP5-1        | 0,00 | 0,00 | 0,00 | 0,00 | NA | NA |
| KRTAP5-10       | 0,00 | 0,00 | 0,00 | 0,00 | NA | NA |
| KRTAP5-11       | 0,00 | 0,00 | 0,00 | 0,00 | NA | NA |
| KRTAP5-2        | 0,00 | 0,00 | 0,00 | 0,00 | NA | NA |
| KRTAP5-5        | 0,00 | 0,00 | 0,00 | 0,00 | NA | NA |
| KRTAP5-6        | 0,00 | 0,00 | 0,00 | 0,00 | NA | NA |
| KRTAP5-7        | 0,00 | 0,00 | 0,00 | 0,00 | NA | NA |
| KRTAP5-9        | 0,00 | 0,00 | 0,00 | 0,00 | NA | NA |
| KRTAP6-1        | 0,00 | 0,00 | 0,00 | 0,00 | NA | NA |
| KRTAP6-2        | 0,00 | 0,00 | 0,00 | 0,00 | NA | NA |
| KRTAP6-3        | 0,00 | 0,00 | 0,00 | 0,00 | NA | NA |
| KRTAP7-1        | 0,00 | 0,00 | 0,00 | 0,00 | NA | NA |
| KRTAP8-1        | 0,00 | 0,00 | 0,00 | 0,00 | NA | NA |
| KRTAP8P1        | 0,00 | 0,00 | 0,00 | 0,00 | NA | NA |
| KRTAP8P2        | 0,00 | 0,00 | 0,00 | 0,00 | NA | NA |
| KRTAP9-1        | 0,00 | 0,00 | 0,00 | 0,00 | NA | NA |
| KRTAP9-11P      | 0,00 | 0,00 | 0,00 | 0,00 | NA | NA |
| KRTAP9-2        | 0,00 | 0,00 | 0,00 | 0,00 | NA | NA |
| KRTAP9-3        | 0,00 | 0,00 | 0,00 | 0,00 | NA | NA |
| KRTAP9-4        | 0,00 | 0,00 | 0,00 | 0,00 | NA | NA |
| KRTAP9-7        | 0,00 | 0,00 | 0,00 | 0,00 | NA | NA |
| KRTAP9-8        | 0,00 | 0,00 | 0,00 | 0,00 | NA | NA |
| KRTAP9-9        | 0,00 | 0,00 | 0,00 | 0,00 | NA | NA |
| KY              | 0,03 | 0,07 | 0,03 | 0,03 | NA | NA |
| KYNUP1          | 0,00 | 0,00 | 0,00 | 0,00 | NA | NA |
| KYNUP2          | 0,00 | 0,00 | 0,00 | 0,00 | NA | NA |
| KYNUP3          | 0,00 | 0,00 | 0,00 | 0,00 | NA | NA |
| L29074.3        | 0,00 | 0,00 | 0,00 | 0,00 | NA | NA |
| L34079.2        | 0,00 | 0,00 | 0,00 | 0,00 | NA | NA |
| L34079.3        | 0,00 | 0,00 | 0,00 | 0,00 | NA | NA |
| LA16c-13E4.2    | 0,00 | 0,00 | 0,00 | 0,00 | NA | NA |
| LA16c-18E3.2    | 0,00 | 0,00 | 0,00 | 0,00 | NA | NA |
| LA16c-23H5.6    | 0,00 | 0,00 | 0,00 | 0,00 | NA | NA |
| LA16c-2F2.4     | 0,00 | 0,00 | 0,00 | 0,00 | NA | NA |
| LA16c-2F2.5     | 0,00 | 0,00 | 0,00 | 0,00 | NA | NA |
| LA16c-2F2.7     | 0,00 | 0,00 | 0,00 | 0,00 | NA | NA |
| LA16c-2F2.8     | 0,08 | 0,08 | 0,18 | 0,21 | NA | NA |
| LA16c-306A4.1   | 0,00 | 0,00 | 0,00 | 0,00 | NA | NA |
| LA16c-312E8.2   | 0,00 | 0,00 | 0,00 | 0,00 | NA | NA |
| LA16c-312E8.5   | 0,00 | 0,00 | 0,00 | 0,00 | NA | NA |
| LA16c-313D11.12 | 0,17 | 0,18 | 0,19 | 0,30 | NA | NA |
| LA16c-313D11.13 | 0,00 | 0,00 | 0,00 | 0,00 | NA | NA |
| LA16c-313F4.1   | 0,00 | 0,00 | 0,10 | 0,15 | NA | NA |
| LA16c-321D4.1   | 0,00 | 0,00 | 0,00 | 0,00 | NA | NA |
| LA16c-325D7.2   | 0,00 | 0,00 | 0,00 | 0,00 | NA | NA |
| LA16c-329F2.1   | 0,00 | 0,00 | 0,00 | 0,00 | NA | NA |
| LA16c-335H7.2   | 0,00 | 0,00 | 0,00 | 0,00 | NA | NA |
| LA16c-349E11.1  | 0,00 | 0,00 | 0,00 | 0,00 | NA | NA |
| LA16c-352F10.1  | 0,00 | 0,00 | 0,00 | 0,00 | NA | NA |
| LA16c-352F7.1   | 0,00 | 0,00 | 0,00 | 0,00 | NA | NA |
| LA16c-358B7.2   | 0,00 | 0,00 | 0,00 | 0,00 | NA | NA |

|                |      |      |      |      |    |    |
|----------------|------|------|------|------|----|----|
| LA16c-360A4.1  | 0,00 | 0,00 | 0,00 | 0,00 | NA | NA |
| LA16c-360H6.2  | 0,00 | 0,00 | 0,00 | 0,00 | NA | NA |
| LA16c-366D1.3  | 0,00 | 0,00 | 0,00 | 0,00 | NA | NA |
| LA16c-380A1.1  | 0,00 | 0,00 | 0,00 | 0,00 | NA | NA |
| LA16c-380A1.2  | 0,00 | 0,00 | 0,00 | 0,00 | NA | NA |
| LA16c-380F5.1  | 0,00 | 0,00 | 0,00 | 0,00 | NA | NA |
| LA16c-380F5.3  | 0,00 | 0,00 | 0,00 | 0,00 | NA | NA |
| LA16c-380H5.3  | 0,00 | 0,00 | 0,00 | 0,00 | NA | NA |
| LA16c-390E6.3  | 0,00 | 0,00 | 0,00 | 0,00 | NA | NA |
| LA16c-390H2.1  | 0,00 | 0,00 | 0,00 | 0,00 | NA | NA |
| LA16c-395F10.1 | 0,00 | 0,00 | 0,00 | 0,00 | NA | NA |
| LA16c-395F10.2 | 0,00 | 0,00 | 0,00 | 0,00 | NA | NA |
| LA16c-407A10.3 | 0,00 | 0,00 | 0,00 | 0,00 | NA | NA |
| LA16c-425C2.1  | 0,00 | 0,00 | 0,00 | 0,00 | NA | NA |
| LA16c-429E7.1  | 0,00 | 1,20 | 1,21 | 0,00 | NA | NA |
| LA16c-444G7.1  | 0,00 | 0,00 | 0,00 | 0,00 | NA | NA |
| LA16c-4G1.4    | 0,00 | 0,00 | 0,00 | 0,00 | NA | NA |
| LA16c-53D1.2   | 0,00 | 0,00 | 0,00 | 0,00 | NA | NA |
| LA16c-59E1.2   | 0,00 | 0,00 | 0,00 | 0,00 | NA | NA |
| LA16c-60G3.5   | 0,00 | 0,00 | 0,00 | 0,00 | NA | NA |
| LA16c-60G3.6   | 0,00 | 0,00 | 0,00 | 0,00 | NA | NA |
| LA16c-60G3.7   | 0,00 | 0,00 | 0,00 | 0,00 | NA | NA |
| LA16c-60G3.8   | 0,00 | 0,00 | 0,00 | 0,00 | NA | NA |
| LA16c-60H5.7   | 0,00 | 0,00 | 0,00 | 0,00 | NA | NA |
| LA16c-68B10.3  | 0,00 | 0,00 | 0,00 | 0,00 | NA | NA |
| LA16c-68B10.4  | 0,00 | 0,00 | 0,00 | 0,00 | NA | NA |
| LA16c-83F12.6  | 0,00 | 0,00 | 0,00 | 0,00 | NA | NA |
| LA16c-91G6.3   | 0,00 | 0,00 | 0,00 | 0,00 | NA | NA |
| LACRT          | 0,00 | 0,00 | 0,00 | 0,00 | NA | NA |
| LACTBL1        | 0,00 | 0,00 | 0,00 | 0,00 | NA | NA |
| LAD1           | 0,00 | 0,00 | 0,00 | 0,00 | NA | NA |
| LAG3           | 0,00 | 0,27 | 0,00 | 0,00 | NA | NA |
| LAIR2          | 0,00 | 0,00 | 0,00 | 0,00 | NA | NA |
| LAMA5          | 0,16 | 1,71 | 0,10 | 0,22 | NA | NA |
| LBP            | 0,00 | 0,00 | 0,00 | 0,00 | NA | NA |
| LBX1           | 0,00 | 0,00 | 0,00 | 0,00 | NA | NA |
| LBX2-AS1       | 0,00 | 0,00 | 0,00 | 0,00 | NA | NA |
| LCA5           | 0,00 | 0,05 | 0,00 | 0,07 | NA | NA |
| LCE1A          | 0,00 | 0,00 | 0,00 | 0,00 | NA | NA |
| LCE1B          | 0,00 | 0,00 | 0,00 | 0,00 | NA | NA |
| LCE1C          | 0,00 | 0,00 | 0,00 | 0,00 | NA | NA |
| LCE1D          | 0,00 | 0,00 | 0,00 | 0,00 | NA | NA |
| LCE1E          | 0,00 | 0,00 | 0,00 | 0,00 | NA | NA |
| LCE1F          | 0,00 | 0,00 | 0,00 | 0,00 | NA | NA |
| LCE2A          | 0,00 | 0,00 | 0,00 | 0,00 | NA | NA |
| LCE2B          | 0,00 | 0,00 | 0,00 | 0,00 | NA | NA |
| LCE2C          | 0,00 | 0,00 | 0,00 | 0,00 | NA | NA |
| LCE2D          | 0,00 | 0,00 | 0,00 | 0,00 | NA | NA |
| LCE3A          | 0,00 | 0,00 | 0,00 | 0,00 | NA | NA |
| LCE3B          | 0,00 | 0,00 | 0,00 | 0,00 | NA | NA |
| LCE3C          | 0,00 | 0,00 | 0,00 | 0,00 | NA | NA |
| LCE3D          | 0,00 | 0,00 | 0,00 | 0,00 | NA | NA |
| LCE3E          | 0,00 | 0,00 | 0,00 | 0,00 | NA | NA |
| LCE4A          | 0,00 | 0,00 | 0,00 | 0,00 | NA | NA |
| LCE5A          | 0,00 | 0,00 | 0,00 | 0,00 | NA | NA |

|            |      |      |      |      |    |    |
|------------|------|------|------|------|----|----|
| LCN1       | 0,00 | 0,00 | 0,00 | 0,00 | NA | NA |
| LCN1L2     | 0,00 | 0,00 | 0,00 | 0,00 | NA | NA |
| LCN6       | 0,00 | 0,00 | 0,00 | 0,00 | NA | NA |
| LCN8       | 0,00 | 0,00 | 0,00 | 0,00 | NA | NA |
| LCN9       | 0,00 | 0,00 | 0,00 | 0,00 | NA | NA |
| LCNL1      | 0,00 | 0,00 | 0,00 | 0,00 | NA | NA |
| LCT        | 0,00 | 0,04 | 0,00 | 0,00 | NA | NA |
| LDB2       | 0,00 | 0,00 | 0,00 | 0,00 | NA | NA |
| LDHAL6EP   | 0,00 | 0,00 | 0,00 | 0,00 | NA | NA |
| LDHBP      | 0,00 | 0,00 | 0,00 | 0,00 | NA | NA |
| LDHC       | 0,00 | 0,13 | 0,15 | 0,07 | NA | NA |
| LDLRAD3    | 0,03 | 0,20 | 0,23 | 0,37 | NA | NA |
| LDOC1      | 0,00 | 0,00 | 0,00 | 0,00 | NA | NA |
| LEF1       | 0,17 | 2,03 | 0,04 | 1,17 | NA | NA |
| LEFTY2     | 0,00 | 0,00 | 0,00 | 0,00 | NA | NA |
| LELP1      | 0,00 | 0,00 | 0,00 | 0,00 | NA | NA |
| LEMD1      | 0,00 | 0,00 | 0,00 | 0,00 | NA | NA |
| LENEP      | 0,00 | 0,00 | 0,00 | 0,00 | NA | NA |
| LEUTX      | 0,00 | 0,00 | 0,00 | 0,00 | NA | NA |
| LEXM       | 0,00 | 0,00 | 0,00 | 0,00 | NA | NA |
| LGALS12    | 0,12 | 0,00 | 0,00 | 0,10 | NA | NA |
| LGALS13    | 0,00 | 0,00 | 0,00 | 0,00 | NA | NA |
| LGALS14    | 0,00 | 0,58 | 0,21 | 0,19 | NA | NA |
| LGALS7     | 0,00 | 0,00 | 0,00 | 0,00 | NA | NA |
| LG12       | 0,00 | 0,00 | 0,00 | 0,00 | NA | NA |
| LG13       | 0,00 | 0,00 | 0,00 | 0,00 | NA | NA |
| LHB        | 0,00 | 0,00 | 0,00 | 0,00 | NA | NA |
| LHFPL1     | 0,00 | 0,00 | 0,00 | 0,00 | NA | NA |
| LHFPL3     | 0,00 | 0,00 | 0,00 | 0,00 | NA | NA |
| LHFPL3-AS2 | 0,29 | 0,36 | 0,27 | 0,51 | NA | NA |
| LHFPL4     | 0,00 | 0,00 | 0,00 | 0,00 | NA | NA |
| LHX3       | 0,00 | 0,00 | 0,00 | 0,00 | NA | NA |
| LHX5       | 0,00 | 0,05 | 0,00 | 0,00 | NA | NA |
| LHX6       | 0,00 | 0,00 | 0,00 | 0,00 | NA | NA |
| LHX8       | 0,00 | 0,00 | 0,00 | 0,00 | NA | NA |
| LHX9       | 0,00 | 0,00 | 0,00 | 0,00 | NA | NA |
| LILRP2     | 0,00 | 0,00 | 0,00 | 0,00 | NA | NA |
| LIM2       | 0,00 | 0,00 | 0,00 | 0,00 | NA | NA |
| LIMS2      | 0,00 | 0,00 | 0,00 | 0,32 | NA | NA |
| LINC00165  | 0,00 | 0,00 | 0,00 | 0,00 | NA | NA |
| LINC00207  | 0,00 | 0,00 | 0,00 | 0,00 | NA | NA |
| LINC00210  | 0,00 | 0,00 | 0,00 | 0,00 | NA | NA |
| LINC00243  | 0,41 | 0,44 | 0,28 | 0,64 | NA | NA |
| LINC00251  | 0,00 | 0,00 | 0,00 | 0,00 | NA | NA |
| LINC00254  | 0,00 | 0,00 | 0,00 | 0,00 | NA | NA |
| LINC00261  | 0,10 | 0,00 | 0,00 | 0,30 | NA | NA |
| LINC00302  | 0,00 | 0,00 | 0,00 | 0,00 | NA | NA |
| LINC00305  | 0,00 | 0,00 | 0,00 | 0,00 | NA | NA |
| LINC00313  | 0,00 | 0,00 | 0,00 | 0,00 | NA | NA |
| LINC00334  | 0,00 | 0,00 | 0,00 | 0,00 | NA | NA |
| LINC00364  | 0,00 | 0,00 | 0,00 | 0,00 | NA | NA |
| LINC00453  | 0,00 | 0,00 | 0,00 | 0,00 | NA | NA |
| LINC00469  | 0,00 | 0,00 | 0,00 | 0,00 | NA | NA |
| LINC00489  | 0,00 | 0,00 | 0,00 | 0,00 | NA | NA |
| LINC00538  | 0,00 | 0,00 | 0,00 | 0,00 | NA | NA |



|                   |      |      |      |      |    |    |
|-------------------|------|------|------|------|----|----|
| LINC00540         | 0,02 | 0,00 | 0,07 | 0,02 | NA | NA |
| LINC00544         | 0,00 | 0,00 | 0,00 | 0,00 | NA | NA |
| LINC00602         | 0,00 | 0,00 | 0,00 | 0,00 | NA | NA |
| LINC00612         | 0,00 | 0,07 | 0,00 | 0,00 | NA | NA |
| LINC00628         | 0,00 | 0,00 | 0,00 | 0,00 | NA | NA |
| LINC00636         | 0,00 | 0,00 | 0,00 | 0,00 | NA | NA |
| LINC00675         | 0,00 | 0,00 | 0,00 | 0,00 | NA | NA |
| LINC00706         | 0,00 | 0,00 | 0,00 | 0,00 | NA | NA |
| LINC00850         | 0,00 | 0,00 | 0,00 | 0,00 | NA | NA |
| LINC01097         | 0,00 | 0,00 | 0,00 | 0,00 | NA | NA |
| LINC01126         | 0,00 | 0,00 | 0,00 | 0,15 | NA | NA |
| LINC01163         | 0,00 | 0,00 | 0,00 | 0,00 | NA | NA |
| LINC01164         | 0,00 | 0,00 | 0,00 | 0,00 | NA | NA |
| LINC01173         | 0,00 | 0,00 | 0,00 | 0,00 | NA | NA |
| LINC01202         | 0,00 | 0,00 | 0,00 | 0,00 | NA | NA |
| LINC01262         | 0,00 | 0,00 | 0,00 | 0,00 | NA | NA |
| LINC01338         | 0,00 | 0,00 | 0,00 | 0,00 | NA | NA |
| LINC01377         | 0,00 | 0,00 | 0,00 | 0,00 | NA | NA |
| LINC01394         | 0,00 | 0,00 | 0,00 | 0,00 | NA | NA |
| LINC01395         | 0,00 | 0,00 | 0,00 | 0,00 | NA | NA |
| LINC01541         | 0,12 | 0,11 | 0,06 | 0,10 | NA | NA |
| LINC01566         | 0,00 | 0,00 | 0,00 | 0,00 | NA | NA |
| LINC01593         | 0,00 | 0,00 | 0,00 | 0,00 | NA | NA |
| LINC01598         | 0,00 | 0,88 | 0,00 | 0,00 | NA | NA |
| LINGO1            | 0,00 | 0,00 | 0,00 | 0,00 | NA | NA |
| LINGO4            | 0,00 | 0,04 | 0,00 | 0,00 | NA | NA |
| LIPF              | 0,00 | 0,00 | 0,00 | 0,00 | NA | NA |
| LIP1              | 0,00 | 0,00 | 0,00 | 0,00 | NA | NA |
| LIPK              | 0,00 | 0,13 | 0,00 | 0,00 | NA | NA |
| LKAAEAR1          | 0,00 | 0,00 | 0,00 | 0,00 | NA | NA |
| LL09NC01-254D11.1 | 0,00 | 0,00 | 0,00 | 0,00 | NA | NA |
| LL0XNC01-105G4.3  | 0,00 | 0,00 | 0,00 | 0,00 | NA | NA |
| LL0XNC01-116E7.1  | 0,00 | 0,00 | 0,00 | 0,00 | NA | NA |
| LL0XNC01-116E7.4  | 0,00 | 0,00 | 0,00 | 0,00 | NA | NA |
| LL0XNC01-116E7.5  | 0,00 | 0,00 | 0,00 | 0,00 | NA | NA |
| LL0XNC01-131B10.2 | 0,00 | 0,00 | 0,00 | 0,00 | NA | NA |
| LL0XNC01-138C3.2  | 0,00 | 0,00 | 0,00 | 0,00 | NA | NA |
| LL0XNC01-144A10.1 | 0,00 | 0,00 | 0,00 | 0,00 | NA | NA |
| LL0XNC01-177E8.2  | 0,00 | 0,00 | 0,00 | 0,00 | NA | NA |
| LL0XNC01-221F2.2  | 0,00 | 0,00 | 0,00 | 0,00 | NA | NA |
| LL0XNC01-244G10.2 | 0,00 | 0,00 | 0,00 | 0,00 | NA | NA |
| LL0XNC01-37G1.2   | 0,00 | 0,00 | 0,00 | 0,00 | NA | NA |
| LL0XNC01-39B3.1   | 0,00 | 0,00 | 0,00 | 0,00 | NA | NA |
| LL0XNC01-73E8.1   | 0,00 | 0,00 | 0,00 | 0,00 | NA | NA |
| LL0XNC01-7P3.1    | 0,00 | 0,00 | 0,00 | 0,00 | NA | NA |
| LL0YNC03-29C1.1   | 0,00 | 0,00 | 0,00 | 0,00 | NA | NA |
| LL21NC02-1C16.1   | 0,00 | 0,00 | 0,00 | 0,00 | NA | NA |
| LL21NC02-21A1.1   | 0,00 | 0,00 | 0,00 | 0,00 | NA | NA |
| LL22NC01-116C6.1  | 0,00 | 0,00 | 0,00 | 0,00 | NA | NA |
| LL22NC03-102D1.16 | 0,00 | 0,00 | 0,00 | 0,00 | NA | NA |
| LL22NC03-102D1.18 | 0,00 | 0,00 | 0,00 | 0,00 | NA | NA |
| LL22NC03-121E8.3  | 0,00 | 0,00 | 0,00 | 0,00 | NA | NA |
| LL22NC03-121E8.4  | 0,00 | 0,00 | 0,00 | 0,00 | NA | NA |
| LL22NC03-123E1.5  | 0,00 | 0,00 | 0,00 | 0,00 | NA | NA |
| LL22NC03-13G6.2   | 0,00 | 0,00 | 0,00 | 0,00 | NA | NA |

|                   |      |      |      |      |    |    |
|-------------------|------|------|------|------|----|----|
| LL22NC03-22A12.12 | 0,00 | 0,00 | 0,00 | 0,00 | NA | NA |
| LL22NC03-22A12.9  | 0,00 | 0,00 | 0,00 | 0,00 | NA | NA |
| LL22NC03-23C6.12  | 0,00 | 0,00 | 0,00 | 0,00 | NA | NA |
| LL22NC03-23C6.15  | 0,00 | 0,00 | 0,00 | 0,00 | NA | NA |
| LL22NC03-24A12.9  | 0,00 | 0,00 | 0,00 | 0,00 | NA | NA |
| LL22NC03-30E12.10 | 0,00 | 0,00 | 0,00 | 0,00 | NA | NA |
| LL22NC03-30E12.11 | 0,00 | 0,00 | 0,00 | 0,00 | NA | NA |
| LL22NC03-30E12.13 | 0,00 | 0,00 | 0,00 | 0,00 | NA | NA |
| LL22NC03-32F9.1   | 0,00 | 0,00 | 0,00 | 0,00 | NA | NA |
| LL22NC03-33B6.4   | 0,00 | 0,00 | 0,00 | 0,00 | NA | NA |
| LL22NC03-48A11.14 | 0,00 | 0,00 | 0,00 | 0,00 | NA | NA |
| LL22NC03-75A1.9   | 0,00 | 0,00 | 0,00 | 0,00 | NA | NA |
| LL22NC03-75H12.2  | 0,00 | 0,00 | 0,00 | 0,00 | NA | NA |
| LL22NC03-80A10.11 | 0,00 | 0,00 | 0,00 | 0,00 | NA | NA |
| LL22NC03-84E4.11  | 0,00 | 0,00 | 0,00 | 0,00 | NA | NA |
| LL22NC03-84E4.13  | 0,00 | 0,00 | 0,00 | 0,00 | NA | NA |
| LL22NC03-86D4.1   | 0,00 | 0,00 | 0,00 | 0,00 | NA | NA |
| LL22NC03-88E1.17  | 0,00 | 0,00 | 0,00 | 0,00 | NA | NA |
| LL22NC03-88E1.18  | 0,00 | 0,00 | 0,00 | 0,00 | NA | NA |
| Llfos-48D6.2      | 0,00 | 0,00 | 0,00 | 0,00 | NA | NA |
| LLNLF-136C3.1     | 0,00 | 0,00 | 0,00 | 0,00 | NA | NA |
| LLNLF-173C4.1     | 0,00 | 0,00 | 0,00 | 0,00 | NA | NA |
| LLNLF-191C12.1    | 0,00 | 0,00 | 0,00 | 0,00 | NA | NA |
| LLNLF-65H9.1      | 0,00 | 0,00 | 0,00 | 0,00 | NA | NA |
| LLNLR-225F10.1    | 0,00 | 0,00 | 0,00 | 0,00 | NA | NA |
| LLNLR-249E10.1    | 0,00 | 0,00 | 0,00 | 0,00 | NA | NA |
| LLNLR-260G6.1     | 0,00 | 0,00 | 0,00 | 0,00 | NA | NA |
| LLNLR-276E7.1     | 0,00 | 0,00 | 0,00 | 0,00 | NA | NA |
| LLNLR-304A6.2     | 0,00 | 0,00 | 0,00 | 0,00 | NA | NA |
| LLNLR-304G9.1     | 0,00 | 0,00 | 0,00 | 0,00 | NA | NA |
| Llpac-136A2.1     | 0,00 | 0,00 | 0,00 | 0,00 | NA | NA |
| LMAN1L            | 0,00 | 0,00 | 0,00 | 0,00 | NA | NA |
| LMCD1             | 0,11 | 0,05 | 0,15 | 0,12 | NA | NA |
| LMNTD2            | 0,00 | 0,00 | 0,00 | 0,00 | NA | NA |
| LMOD1             | 0,00 | 0,00 | 0,00 | 0,00 | NA | NA |
| LMTK3             | 0,00 | 0,00 | 0,00 | 0,00 | NA | NA |
| LNCPRESS1         | 0,00 | 0,00 | 0,00 | 0,00 | NA | NA |
| LNx1              | 0,23 | 0,00 | 0,14 | 0,00 | NA | NA |
| LOC100127976      | 0,00 | 0,00 | 0,00 | 0,00 | NA | NA |
| LOC134466         | 0,00 | 0,00 | 0,00 | 0,00 | NA | NA |
| LOC401913         | 0,00 | 0,00 | 0,00 | 0,00 | NA | NA |
| LOC732538         | 0,00 | 0,00 | 0,00 | 0,00 | NA | NA |
| LONRF2P1          | 0,00 | 0,00 | 0,00 | 0,00 | NA | NA |
| LOR               | 0,00 | 0,00 | 0,00 | 0,00 | NA | NA |
| LOXHD1            | 0,00 | 0,00 | 0,00 | 0,00 | NA | NA |
| LPL               | 0,00 | 0,00 | 0,00 | 0,00 | NA | NA |
| LPPR3             | 0,00 | 0,06 | 0,00 | 0,00 | NA | NA |
| LRCH2             | 0,00 | 0,00 | 0,00 | 0,00 | NA | NA |
| LRCOL1            | 0,00 | 0,00 | 0,00 | 0,00 | NA | NA |
| LRIG1             | 1,04 | 0,57 | 0,15 | 0,03 | NA | NA |
| LRIT1             | 0,00 | 0,00 | 0,00 | 0,00 | NA | NA |
| LRIT2             | 0,00 | 0,00 | 0,00 | 0,00 | NA | NA |
| LRP5              | 0,00 | 0,00 | 0,00 | 0,87 | NA | NA |
| LRRC10B           | 0,00 | 0,00 | 0,00 | 0,00 | NA | NA |
| LRRC15            | 0,00 | 0,00 | 0,00 | 0,00 | NA | NA |

|             |      |      |      |      |    |    |
|-------------|------|------|------|------|----|----|
| LRRC24      | 0,00 | 0,00 | 0,00 | 0,00 | NA | NA |
| LRRC30      | 0,00 | 0,00 | 0,00 | 0,00 | NA | NA |
| LRRC32      | 0,00 | 0,00 | 0,00 | 0,00 | NA | NA |
| LRRC39      | 0,00 | 0,00 | 0,14 | 0,00 | NA | NA |
| LRRC3C      | 0,00 | 0,00 | 0,00 | 0,00 | NA | NA |
| LRRC4       | 0,00 | 0,07 | 0,05 | 0,00 | NA | NA |
| LRRC4B      | 0,00 | 0,00 | 0,00 | 0,00 | NA | NA |
| LRRC52      | 0,00 | 0,00 | 0,00 | 0,00 | NA | NA |
| LRRC63      | 0,00 | 0,00 | 0,00 | 0,00 | NA | NA |
| LRRC72      | 0,00 | 0,00 | 0,00 | 0,00 | NA | NA |
| LRRC74A     | 0,00 | 0,00 | 0,00 | 0,00 | NA | NA |
| LRRC75A     | 0,00 | 0,00 | 0,00 | 0,09 | NA | NA |
| LRRIQ3      | 0,00 | 0,00 | 0,00 | 0,00 | NA | NA |
| LRRIQ4      | 0,00 | 0,00 | 0,00 | 0,00 | NA | NA |
| LRRN3       | 0,06 | 0,04 | 0,04 | 0,13 | NA | NA |
| LRRTM1      | 0,00 | 0,13 | 0,00 | 0,00 | NA | NA |
| LRRTM3      | 0,00 | 0,00 | 0,00 | 0,00 | NA | NA |
| LRTM2       | 0,00 | 0,00 | 0,00 | 0,00 | NA | NA |
| LRWD1       | 0,07 | 0,05 | 0,18 | 0,04 | NA | NA |
| LSAMP-AS1   | 0,00 | 0,00 | 0,00 | 0,00 | NA | NA |
| LSMEM2      | 0,00 | 0,00 | 0,00 | 0,00 | NA | NA |
| LSP1P2      | 0,00 | 0,00 | 0,00 | 0,00 | NA | NA |
| LURAP1L     | 0,00 | 0,00 | 0,00 | 0,00 | NA | NA |
| LUZP2       | 0,12 | 0,12 | 0,29 | 0,15 | NA | NA |
| LUZP4       | 0,00 | 0,00 | 0,00 | 0,00 | NA | NA |
| LY6D        | 0,00 | 0,00 | 0,00 | 0,00 | NA | NA |
| LY6G6D      | 0,00 | 0,00 | 0,00 | 0,00 | NA | NA |
| LY6H        | 0,00 | 0,00 | 0,00 | 0,00 | NA | NA |
| LYPD6       | 0,00 | 0,04 | 0,00 | 0,00 | NA | NA |
| LYPD8       | 0,00 | 0,12 | 0,00 | 0,20 | NA | NA |
| LYPLA2P1    | 0,00 | 0,00 | 0,00 | 0,00 | NA | NA |
| LYPLA2P2    | 0,00 | 0,00 | 0,00 | 0,00 | NA | NA |
| LYZL1       | 0,00 | 0,00 | 0,00 | 0,00 | NA | NA |
| LYZL2       | 0,00 | 0,00 | 0,00 | 0,00 | NA | NA |
| LYZL4       | 0,00 | 0,00 | 0,00 | 0,00 | NA | NA |
| LYZL6       | 0,00 | 0,00 | 0,00 | 0,00 | NA | NA |
| M1AP        | 0,09 | 0,24 | 0,27 | 0,90 | NA | NA |
| MAB21L1     | 0,00 | 0,00 | 0,00 | 0,00 | NA | NA |
| MACC1       | 0,45 | 1,00 | 0,32 | 0,84 | NA | NA |
| MACROD2-IT1 | 0,00 | 0,00 | 0,00 | 0,00 | NA | NA |
| MADCAM1     | 0,00 | 0,12 | 0,00 | 0,00 | NA | NA |
| MAFIP       | 0,00 | 0,00 | 0,00 | 0,00 | NA | NA |
| MAGEA1      | 0,00 | 0,00 | 0,00 | 0,00 | NA | NA |
| MAGEA11     | 0,00 | 0,00 | 0,00 | 0,00 | NA | NA |
| MAGEA12     | 0,00 | 0,00 | 0,00 | 0,00 | NA | NA |
| MAGEA2      | 0,00 | 0,00 | 0,00 | 0,00 | NA | NA |
| MAGEA3      | 0,00 | 0,00 | 0,00 | 0,00 | NA | NA |
| MAGEA9      | 0,00 | 0,00 | 0,00 | 0,00 | NA | NA |
| MAGEA9B     | 0,00 | 0,00 | 0,00 | 0,00 | NA | NA |
| MAGEB1      | 0,00 | 0,00 | 0,00 | 0,00 | NA | NA |
| MAGEB16     | 0,00 | 0,00 | 0,00 | 0,00 | NA | NA |
| MAGEB17     | 0,00 | 0,00 | 0,00 | 0,00 | NA | NA |
| MAGEB18     | 0,00 | 0,00 | 0,00 | 0,00 | NA | NA |
| MAGEB2      | 0,00 | 0,00 | 0,00 | 0,00 | NA | NA |
| MAGEB4      | 0,00 | 0,00 | 0,00 | 0,00 | NA | NA |

|          |      |      |      |      |    |    |
|----------|------|------|------|------|----|----|
| MAGEB5   | 0,00 | 0,00 | 0,00 | 0,00 | NA | NA |
| MAGEB6   | 0,00 | 0,00 | 0,00 | 0,00 | NA | NA |
| MAGEC2   | 0,00 | 0,00 | 0,00 | 0,00 | NA | NA |
| MAGED4   | 0,00 | 0,00 | 0,00 | 0,00 | NA | NA |
| MAGED4B  | 0,00 | 0,00 | 0,00 | 0,00 | NA | NA |
| MAGEE1   | 0,00 | 0,00 | 0,00 | 0,00 | NA | NA |
| MAGEE2   | 0,00 | 0,00 | 0,00 | 0,00 | NA | NA |
| MAGEL2   | 0,00 | 0,00 | 0,00 | 0,00 | NA | NA |
| MAL2     | 0,00 | 0,00 | 0,00 | 0,00 | NA | NA |
| MAML1    | 1,43 | 0,74 | 1,00 | 0,26 | NA | NA |
| MAOA     | 0,00 | 0,00 | 0,00 | 0,00 | NA | NA |
| MAP1LC3C | 0,00 | 0,00 | 0,00 | 0,00 | NA | NA |
| MAP1LC3P | 0,00 | 0,00 | 0,00 | 0,00 | NA | NA |
| MAP2K1P1 | 0,00 | 0,00 | 0,00 | 0,00 | NA | NA |
| MAP2K4P1 | 0,00 | 0,13 | 0,00 | 0,05 | NA | NA |
| MAP3K19  | 0,00 | 0,00 | 0,00 | 0,00 | NA | NA |
| MAP6     | 0,00 | 0,00 | 0,00 | 0,00 | NA | NA |
| MAP6D1   | 0,00 | 0,00 | 0,00 | 0,00 | NA | NA |
| MAPK11   | 0,00 | 0,00 | 0,00 | 0,00 | NA | NA |
| MAPK13   | 0,42 | 0,39 | 0,33 | 0,53 | NA | NA |
| MAPK6PS2 | 0,00 | 0,00 | 0,00 | 0,00 | NA | NA |
| MAPK6PS4 | 0,00 | 0,00 | 0,00 | 0,00 | NA | NA |
| MAPRE1P1 | 0,00 | 0,00 | 0,00 | 0,00 | NA | NA |
| MAPT-IT1 | 0,00 | 0,00 | 0,00 | 0,00 | NA | NA |
| MARC2    | 0,00 | 0,00 | 0,00 | 0,00 | NA | NA |
| MARCH11  | 0,00 | 0,00 | 0,00 | 0,00 | NA | NA |
| MARCH3   | 0,42 | 1,37 | 0,37 | 1,06 | NA | NA |
| MARS2    | 0,04 | 0,04 | 0,00 | 0,00 | NA | NA |
| MAS1L    | 0,00 | 0,00 | 0,00 | 0,00 | NA | NA |
| MAS1LP   | 0,00 | 0,00 | 0,00 | 0,00 | NA | NA |
| MAT1A    | 0,00 | 0,00 | 0,00 | 0,00 | NA | NA |
| MBD3L1   | 0,00 | 0,00 | 0,00 | 0,00 | NA | NA |
| MBD3L2   | 0,00 | 0,00 | 0,00 | 0,00 | NA | NA |
| MBD3L5   | 0,00 | 0,00 | 0,00 | 0,00 | NA | NA |
| MBL2     | 0,00 | 0,00 | 0,00 | 0,00 | NA | NA |
| MBL3P    | 0,00 | 0,00 | 0,00 | 0,00 | NA | NA |
| MC3R     | 0,00 | 0,00 | 0,00 | 0,00 | NA | NA |
| MC4R     | 0,00 | 0,00 | 0,00 | 0,00 | NA | NA |
| MCART3P  | 0,00 | 0,00 | 0,00 | 0,00 | NA | NA |
| MCART4P  | 0,00 | 0,00 | 0,00 | 0,00 | NA | NA |
| MCART5P  | 0,00 | 0,00 | 0,00 | 0,00 | NA | NA |
| MCCD1P1  | 0,00 | 0,00 | 0,00 | 0,00 | NA | NA |
| MCCD1P2  | 0,00 | 0,00 | 0,00 | 0,00 | NA | NA |
| MCF2     | 0,00 | 0,05 | 0,00 | 0,00 | NA | NA |
| MCFD2L   | 0,00 | 0,00 | 0,00 | 0,00 | NA | NA |
| MCHR1    | 0,00 | 0,00 | 0,00 | 0,00 | NA | NA |
| MCIDAS   | 0,00 | 0,00 | 0,00 | 0,00 | NA | NA |
| MDFI     | 0,00 | 0,00 | 0,00 | 0,00 | NA | NA |
| ME1      | 0,00 | 0,00 | 0,00 | 0,00 | NA | NA |
| MED15P6  | 0,00 | 0,00 | 0,00 | 0,00 | NA | NA |
| MEDAG    | 0,00 | 0,00 | 0,00 | 0,00 | NA | NA |
| MEG9     | 0,00 | 0,00 | 0,00 | 0,00 | NA | NA |
| MEIG1    | 0,34 | 1,12 | 0,00 | 0,00 | NA | NA |
| MEIKIN   | 0,00 | 0,00 | 0,00 | 0,00 | NA | NA |
| MEIOC    | 0,60 | 0,59 | 0,51 | 0,90 | NA | NA |

|           |      |      |      |      |    |    |
|-----------|------|------|------|------|----|----|
| MEIS1-AS3 | 0,00 | 0,00 | 0,00 | 0,00 | NA | NA |
| MEIS3P2   | 0,00 | 0,00 | 0,00 | 0,00 | NA | NA |
| MEOX1     | 0,00 | 0,00 | 0,00 | 0,00 | NA | NA |
| MEP1A     | 0,00 | 0,00 | 0,00 | 0,00 | NA | NA |
| MEP1B     | 0,00 | 0,00 | 0,00 | 0,00 | NA | NA |
| MESP1     | 0,00 | 0,00 | 0,00 | 0,00 | NA | NA |
| METTL11B  | 0,00 | 0,00 | 0,00 | 0,00 | NA | NA |
| METTL18   | 0,15 | 0,00 | 0,11 | 0,10 | NA | NA |
| METTL21C  | 0,00 | 0,00 | 0,00 | 0,00 | NA | NA |
| METTL24   | 0,00 | 0,00 | 0,00 | 0,00 | NA | NA |
| MFAP4     | 0,00 | 0,00 | 0,00 | 0,36 | NA | NA |
| MFRP      | 0,00 | 0,00 | 0,00 | 0,00 | NA | NA |
| MFSD6L    | 0,00 | 0,00 | 0,00 | 0,00 | NA | NA |
| MGAM2     | 0,00 | 0,00 | 0,00 | 0,00 | NA | NA |
| MICC      | 0,00 | 0,00 | 0,00 | 0,00 | NA | NA |
| MICD      | 0,00 | 0,00 | 0,00 | 0,00 | NA | NA |
| MICE      | 0,00 | 0,00 | 0,00 | 0,00 | NA | NA |
| MICF      | 0,00 | 0,00 | 0,00 | 0,00 | NA | NA |
| MICG      | 0,00 | 0,00 | 0,00 | 0,00 | NA | NA |
| MICU3     | 0,00 | 0,00 | 0,00 | 0,00 | NA | NA |
| MID2      | 0,00 | 0,00 | 0,00 | 0,00 | NA | NA |
| MIEF2     | 0,07 | 0,19 | 0,11 | 0,08 | NA | NA |
| MIMT1     | 0,00 | 0,00 | 0,00 | 0,00 | NA | NA |
| MINDY4B   | 0,00 | 0,00 | 0,00 | 0,00 | NA | NA |
| MINOS1P2  | 0,00 | 0,00 | 0,00 | 0,00 | NA | NA |
| MIR1-1    | 0,00 | 0,00 | 0,00 | 0,00 | NA | NA |
| MIR1-2    | 0,00 | 0,00 | 0,00 | 0,00 | NA | NA |
| MIR100    | 0,00 | 0,00 | 0,00 | 0,00 | NA | NA |
| MIR101-2  | 0,00 | 0,00 | 0,00 | 0,00 | NA | NA |
| MIR103A1  | 0,00 | 0,00 | 0,00 | 0,00 | NA | NA |
| MIR103B1  | 0,00 | 0,00 | 0,00 | 0,00 | NA | NA |
| MIR103B2  | 0,00 | 0,00 | 0,00 | 0,00 | NA | NA |
| MIR105-1  | 0,00 | 0,00 | 0,00 | 0,00 | NA | NA |
| MIR105-2  | 0,00 | 0,00 | 0,00 | 0,00 | NA | NA |
| MIR106A   | 0,00 | 0,00 | 0,00 | 0,00 | NA | NA |
| MIR107    | 0,00 | 0,00 | 0,00 | 0,00 | NA | NA |
| MIR10A    | 0,00 | 0,00 | 0,00 | 0,00 | NA | NA |
| MIR10B    | 0,00 | 0,00 | 0,00 | 0,00 | NA | NA |
| MIR1178   | 0,00 | 0,00 | 0,00 | 0,00 | NA | NA |
| MIR1179   | 0,00 | 0,00 | 0,00 | 0,00 | NA | NA |
| MIR1180   | 0,00 | 0,00 | 0,00 | 0,00 | NA | NA |
| MIR1181   | 0,00 | 0,00 | 0,00 | 0,00 | NA | NA |
| MIR1182   | 0,00 | 0,00 | 0,00 | 0,00 | NA | NA |
| MIR1183   | 0,00 | 0,00 | 0,00 | 0,00 | NA | NA |
| MIR1184-1 | 0,00 | 0,00 | 0,00 | 0,00 | NA | NA |
| MIR1184-2 | 0,00 | 0,00 | 0,00 | 0,00 | NA | NA |
| MIR1184-3 | 0,00 | 0,00 | 0,00 | 0,00 | NA | NA |
| MIR1185-1 | 0,00 | 0,00 | 0,00 | 0,00 | NA | NA |
| MIR1185-2 | 0,00 | 0,00 | 0,00 | 0,00 | NA | NA |
| MIR1193   | 0,00 | 0,00 | 0,00 | 0,00 | NA | NA |
| MIR1197   | 0,00 | 0,00 | 0,00 | 0,00 | NA | NA |
| MIR1199   | 0,00 | 0,00 | 0,00 | 0,00 | NA | NA |
| MIR1203   | 0,00 | 0,00 | 0,00 | 0,00 | NA | NA |
| MIR1204   | 0,00 | 0,00 | 0,00 | 0,00 | NA | NA |
| MIR1205   | 0,00 | 0,00 | 0,00 | 0,00 | NA | NA |

|           |      |      |      |      |    |    |
|-----------|------|------|------|------|----|----|
| MIR1206   | 0,00 | 0,00 | 0,00 | 0,00 | NA | NA |
| MIR1207   | 0,00 | 0,00 | 0,00 | 0,00 | NA | NA |
| MIR1208   | 0,00 | 0,00 | 0,00 | 0,00 | NA | NA |
| MIR122    | 0,00 | 0,00 | 0,00 | 0,00 | NA | NA |
| MIR1224   | 0,00 | 0,00 | 0,00 | 0,00 | NA | NA |
| MIR1225   | 0,00 | 0,00 | 0,00 | 0,00 | NA | NA |
| MIR1226   | 0,00 | 0,00 | 0,00 | 0,00 | NA | NA |
| MIR1227   | 0,00 | 0,00 | 0,00 | 0,00 | NA | NA |
| MIR1228   | 0,00 | 0,00 | 0,00 | 0,00 | NA | NA |
| MIR1229   | 0,00 | 0,00 | 0,00 | 0,00 | NA | NA |
| MIR1231   | 0,00 | 0,00 | 0,00 | 0,00 | NA | NA |
| MIR1233-1 | 0,00 | 0,00 | 0,00 | 0,00 | NA | NA |
| MIR1233-2 | 0,00 | 0,00 | 0,00 | 0,00 | NA | NA |
| MIR1234   | 0,00 | 0,00 | 0,00 | 0,00 | NA | NA |
| MIR1236   | 0,00 | 0,00 | 0,00 | 0,00 | NA | NA |
| MIR1237   | 0,00 | 0,00 | 0,00 | 0,00 | NA | NA |
| MIR1238   | 0,00 | 0,00 | 0,00 | 0,00 | NA | NA |
| MIR124-1  | 0,00 | 0,00 | 0,00 | 0,00 | NA | NA |
| MIR124-2  | 0,00 | 0,00 | 0,00 | 0,00 | NA | NA |
| MIR124-3  | 0,00 | 0,00 | 0,00 | 0,00 | NA | NA |
| MIR1243   | 0,00 | 0,00 | 0,00 | 0,00 | NA | NA |
| MIR1244-1 | 0,00 | 0,00 | 0,00 | 0,00 | NA | NA |
| MIR1244-2 | 0,00 | 0,00 | 0,00 | 0,00 | NA | NA |
| MIR1244-3 | 0,00 | 0,00 | 0,00 | 0,00 | NA | NA |
| MIR1244-4 | 0,00 | 0,00 | 0,00 | 0,00 | NA | NA |
| MIR1245A  | 0,00 | 0,00 | 0,00 | 0,00 | NA | NA |
| MIR1245B  | 0,00 | 0,00 | 0,00 | 0,00 | NA | NA |
| MIR1246   | 0,00 | 0,00 | 0,00 | 0,00 | NA | NA |
| MIR1247   | 0,00 | 0,00 | 0,00 | 0,00 | NA | NA |
| MIR1249   | 0,00 | 0,00 | 0,00 | 0,00 | NA | NA |
| MIR1251   | 0,00 | 0,00 | 0,00 | 0,00 | NA | NA |
| MIR1252   | 0,00 | 0,00 | 0,00 | 0,00 | NA | NA |
| MIR1253   | 0,00 | 0,00 | 0,00 | 0,00 | NA | NA |
| MIR1254-2 | 0,00 | 0,00 | 0,00 | 0,00 | NA | NA |
| MIR1255A  | 0,00 | 0,00 | 0,00 | 0,00 | NA | NA |
| MIR1255B1 | 0,00 | 0,00 | 0,00 | 0,00 | NA | NA |
| MIR1256   | 0,00 | 0,00 | 0,00 | 0,00 | NA | NA |
| MIR1257   | 0,00 | 0,00 | 0,00 | 0,00 | NA | NA |
| MIR1258   | 0,00 | 0,00 | 0,00 | 0,00 | NA | NA |
| MIR125A   | 0,00 | 0,00 | 0,00 | 0,00 | NA | NA |
| MIR125B1  | 0,00 | 0,00 | 0,00 | 0,00 | NA | NA |
| MIR125B2  | 0,00 | 0,00 | 0,00 | 0,00 | NA | NA |
| MIR126    | 0,00 | 0,00 | 0,00 | 0,00 | NA | NA |
| MIR1260A  | 0,00 | 0,00 | 0,00 | 0,00 | NA | NA |
| MIR1260B  | 0,00 | 0,00 | 0,00 | 0,00 | NA | NA |
| MIR1261   | 0,00 | 0,00 | 0,00 | 0,00 | NA | NA |
| MIR1262   | 0,00 | 0,00 | 0,00 | 0,00 | NA | NA |
| MIR1263   | 0,00 | 0,00 | 0,00 | 0,00 | NA | NA |
| MIR1264   | 0,00 | 0,00 | 0,00 | 0,00 | NA | NA |
| MIR1265   | 0,00 | 0,00 | 0,00 | 0,00 | NA | NA |
| MIR1266   | 0,00 | 0,00 | 0,00 | 0,00 | NA | NA |
| MIR1268B  | 0,00 | 0,00 | 0,00 | 0,00 | NA | NA |
| MIR1269A  | 0,00 | 0,00 | 0,00 | 0,00 | NA | NA |
| MIR1269B  | 0,00 | 0,00 | 0,00 | 0,00 | NA | NA |
| MIR127    | 0,00 | 0,00 | 0,00 | 0,00 | NA | NA |

|            |      |      |      |      |    |    |
|------------|------|------|------|------|----|----|
| MIR1270    | 0,00 | 0,00 | 0,00 | 0,00 | NA | NA |
| MIR1271    | 0,00 | 0,00 | 0,00 | 0,00 | NA | NA |
| MIR1272    | 0,00 | 0,00 | 0,00 | 0,00 | NA | NA |
| MIR1273C   | 0,00 | 0,00 | 0,00 | 0,00 | NA | NA |
| MIR1273F   | 0,00 | 0,00 | 0,00 | 0,00 | NA | NA |
| MIR1275    | 0,00 | 0,00 | 0,00 | 0,00 | NA | NA |
| MIR1277    | 0,00 | 0,00 | 0,00 | 0,00 | NA | NA |
| MIR1279    | 0,00 | 0,00 | 0,00 | 0,00 | NA | NA |
| MIR128-2   | 0,00 | 0,00 | 0,00 | 0,00 | NA | NA |
| MIR1281    | 0,00 | 0,00 | 0,00 | 0,00 | NA | NA |
| MIR1282    | 0,00 | 0,00 | 0,00 | 0,00 | NA | NA |
| MIR1283-1  | 0,00 | 0,00 | 0,00 | 0,00 | NA | NA |
| MIR1283-2  | 0,00 | 0,00 | 0,00 | 0,00 | NA | NA |
| MIR1284    | 0,00 | 0,00 | 0,00 | 0,00 | NA | NA |
| MIR1286    | 0,00 | 0,00 | 0,00 | 0,00 | NA | NA |
| MIR1287    | 0,00 | 0,00 | 0,00 | 0,00 | NA | NA |
| MIR1288    | 0,00 | 0,00 | 0,00 | 0,00 | NA | NA |
| MIR1289-1  | 0,00 | 0,00 | 0,00 | 0,00 | NA | NA |
| MIR1289-2  | 0,00 | 0,00 | 0,00 | 0,00 | NA | NA |
| MIR129-1   | 0,00 | 0,00 | 0,00 | 0,00 | NA | NA |
| MIR129-2   | 0,00 | 0,00 | 0,00 | 0,00 | NA | NA |
| MIR1292    | 0,00 | 0,00 | 0,00 | 0,00 | NA | NA |
| MIR1293    | 0,00 | 0,00 | 0,00 | 0,00 | NA | NA |
| MIR1294    | 0,00 | 0,00 | 0,00 | 0,00 | NA | NA |
| MIR1295A   | 0,00 | 0,00 | 0,00 | 0,00 | NA | NA |
| MIR1295B   | 0,00 | 0,00 | 0,00 | 0,00 | NA | NA |
| MIR1296    | 0,00 | 0,00 | 0,00 | 0,00 | NA | NA |
| MIR1297    | 0,00 | 0,00 | 0,00 | 0,00 | NA | NA |
| MIR1298    | 0,00 | 0,00 | 0,00 | 0,00 | NA | NA |
| MIR1301    | 0,00 | 0,00 | 0,00 | 0,00 | NA | NA |
| MIR1302-1  | 0,00 | 0,00 | 0,00 | 0,00 | NA | NA |
| MIR1302-10 | 0,00 | 0,00 | 0,00 | 0,00 | NA | NA |
| MIR1302-11 | 0,00 | 0,00 | 0,00 | 0,00 | NA | NA |
| MIR1302-2  | 0,00 | 0,00 | 0,00 | 0,00 | NA | NA |
| MIR1302-3  | 0,00 | 0,00 | 0,00 | 0,00 | NA | NA |
| MIR1302-4  | 0,00 | 0,00 | 0,00 | 0,00 | NA | NA |
| MIR1302-5  | 0,00 | 0,00 | 0,00 | 0,00 | NA | NA |
| MIR1302-6  | 0,00 | 0,00 | 0,00 | 0,00 | NA | NA |
| MIR1302-7  | 0,00 | 0,00 | 0,00 | 0,00 | NA | NA |
| MIR1302-8  | 0,00 | 0,00 | 0,00 | 0,00 | NA | NA |
| MIR1302-9  | 0,00 | 0,00 | 0,00 | 0,00 | NA | NA |
| MIR1303    | 0,00 | 0,00 | 0,00 | 0,00 | NA | NA |
| MIR1304    | 0,00 | 0,00 | 0,00 | 0,00 | NA | NA |
| MIR1305    | 0,00 | 0,00 | 0,00 | 0,00 | NA | NA |
| MIR1306    | 0,00 | 0,00 | 0,00 | 0,00 | NA | NA |
| MIR1307    | 0,00 | 0,00 | 0,00 | 0,00 | NA | NA |
| MIR130A    | 0,00 | 0,00 | 0,00 | 0,00 | NA | NA |
| MIR130B    | 0,00 | 0,00 | 0,00 | 0,00 | NA | NA |
| MIR132     | 0,00 | 0,00 | 0,00 | 0,00 | NA | NA |
| MIR1321    | 0,00 | 0,00 | 0,00 | 0,00 | NA | NA |
| MIR1322    | 0,00 | 0,00 | 0,00 | 0,00 | NA | NA |
| MIR1323    | 0,00 | 0,00 | 0,00 | 0,00 | NA | NA |
| MIR1324    | 0,00 | 0,00 | 0,00 | 0,00 | NA | NA |
| MIR133A1   | 0,00 | 0,00 | 0,00 | 0,00 | NA | NA |
| MIR133A2   | 0,00 | 0,00 | 0,00 | 0,00 | NA | NA |

|          |      |      |      |      |    |    |
|----------|------|------|------|------|----|----|
| MIR133B  | 0,00 | 0,00 | 0,00 | 0,00 | NA | NA |
| MIR134   | 0,00 | 0,00 | 0,00 | 0,00 | NA | NA |
| MIR1343  | 0,00 | 0,00 | 0,00 | 0,00 | NA | NA |
| MIR135A2 | 0,00 | 0,00 | 0,00 | 0,00 | NA | NA |
| MIR135B  | 0,00 | 0,00 | 0,00 | 0,00 | NA | NA |
| MIR136   | 0,00 | 0,00 | 0,00 | 0,00 | NA | NA |
| MIR137   | 0,00 | 0,00 | 0,00 | 0,00 | NA | NA |
| MIR138-1 | 0,00 | 0,00 | 0,00 | 0,00 | NA | NA |
| MIR138-2 | 0,00 | 0,00 | 0,00 | 0,00 | NA | NA |
| MIR139   | 0,00 | 0,00 | 0,00 | 0,00 | NA | NA |
| MIR140   | 0,00 | 0,00 | 0,00 | 0,00 | NA | NA |
| MIR141   | 0,00 | 0,00 | 0,00 | 0,00 | NA | NA |
| MIR143   | 0,00 | 0,00 | 0,00 | 0,00 | NA | NA |
| MIR144   | 0,00 | 0,00 | 0,00 | 0,00 | NA | NA |
| MIR145   | 0,00 | 0,00 | 0,00 | 0,00 | NA | NA |
| MIR1468  | 0,00 | 0,00 | 0,00 | 0,00 | NA | NA |
| MIR1469  | 0,00 | 0,00 | 0,00 | 0,00 | NA | NA |
| MIR146A  | 0,00 | 0,00 | 0,00 | 0,00 | NA | NA |
| MIR146B  | 0,00 | 0,00 | 0,00 | 0,00 | NA | NA |
| MIR1470  | 0,00 | 0,00 | 0,00 | 0,00 | NA | NA |
| MIR1471  | 0,00 | 0,00 | 0,00 | 0,00 | NA | NA |
| MIR147A  | 0,00 | 0,00 | 0,00 | 0,00 | NA | NA |
| MIR147B  | 0,00 | 0,00 | 0,00 | 0,00 | NA | NA |
| MIR148A  | 0,00 | 0,00 | 0,00 | 0,00 | NA | NA |
| MIR148B  | 0,00 | 0,00 | 0,00 | 0,00 | NA | NA |
| MIR149   | 0,00 | 0,00 | 0,00 | 0,00 | NA | NA |
| MIR150   | 0,00 | 0,00 | 0,00 | 0,00 | NA | NA |
| MIR151A  | 0,00 | 0,00 | 0,00 | 0,00 | NA | NA |
| MIR151B  | 0,00 | 0,00 | 0,00 | 0,00 | NA | NA |
| MIR152   | 0,00 | 0,00 | 0,00 | 0,00 | NA | NA |
| MIR153-2 | 0,00 | 0,00 | 0,00 | 0,00 | NA | NA |
| MIR1538  | 0,00 | 0,00 | 0,00 | 0,00 | NA | NA |
| MIR154   | 0,00 | 0,00 | 0,00 | 0,00 | NA | NA |
| MIR155   | 0,00 | 0,00 | 0,00 | 0,00 | NA | NA |
| MIR1587  | 0,00 | 0,00 | 0,00 | 0,00 | NA | NA |
| MIR15A   | 0,00 | 0,00 | 0,00 | 0,00 | NA | NA |
| MIR15B   | 0,00 | 0,00 | 0,00 | 0,00 | NA | NA |
| MIR16-1  | 0,00 | 0,00 | 0,00 | 0,00 | NA | NA |
| MIR16-2  | 0,00 | 0,00 | 0,00 | 0,00 | NA | NA |
| MIR17    | 0,00 | 0,00 | 0,00 | 0,00 | NA | NA |
| MIR181A1 | 0,00 | 0,00 | 0,00 | 0,00 | NA | NA |
| MIR181B2 | 0,00 | 0,00 | 0,00 | 0,00 | NA | NA |
| MIR181C  | 0,00 | 0,00 | 0,00 | 0,00 | NA | NA |
| MIR181D  | 0,00 | 0,00 | 0,00 | 0,00 | NA | NA |
| MIR182   | 0,00 | 0,00 | 0,00 | 0,00 | NA | NA |
| MIR1825  | 0,00 | 0,00 | 0,00 | 0,00 | NA | NA |
| MIR1827  | 0,00 | 0,00 | 0,00 | 0,00 | NA | NA |
| MIR183   | 0,00 | 0,00 | 0,00 | 0,00 | NA | NA |
| MIR184   | 0,00 | 0,00 | 0,00 | 0,00 | NA | NA |
| MIR185   | 0,00 | 0,00 | 0,00 | 0,00 | NA | NA |
| MIR187   | 0,00 | 0,00 | 0,00 | 0,00 | NA | NA |
| MIR188   | 0,00 | 0,00 | 0,00 | 0,00 | NA | NA |
| MIR18A   | 0,00 | 0,00 | 0,00 | 0,00 | NA | NA |
| MIR18B   | 0,00 | 0,00 | 0,00 | 0,00 | NA | NA |
| MIR1908  | 0,00 | 0,00 | 0,00 | 0,00 | NA | NA |



|          |      |      |      |      |    |    |
|----------|------|------|------|------|----|----|
| MIR1909  | 0,00 | 0,00 | 0,00 | 0,00 | NA | NA |
| MIR190A  | 0,00 | 0,00 | 0,00 | 0,00 | NA | NA |
| MIR190B  | 0,00 | 0,00 | 0,00 | 0,00 | NA | NA |
| MIR1910  | 0,00 | 0,00 | 0,00 | 0,00 | NA | NA |
| MIR1911  | 0,00 | 0,00 | 0,00 | 0,00 | NA | NA |
| MIR1912  | 0,00 | 0,00 | 0,00 | 0,00 | NA | NA |
| MIR1913  | 0,00 | 0,00 | 0,00 | 0,00 | NA | NA |
| MIR1914  | 0,00 | 0,00 | 0,00 | 0,00 | NA | NA |
| MIR1915  | 0,00 | 0,00 | 0,00 | 0,00 | NA | NA |
| MIR192   | 0,00 | 0,00 | 0,00 | 0,00 | NA | NA |
| MIR193A  | 0,00 | 0,00 | 0,00 | 0,00 | NA | NA |
| MIR193B  | 0,00 | 0,00 | 0,00 | 0,00 | NA | NA |
| MIR194-1 | 0,00 | 0,00 | 0,00 | 0,00 | NA | NA |
| MIR194-2 | 0,00 | 0,00 | 0,00 | 0,00 | NA | NA |
| MIR195   | 0,00 | 0,00 | 0,00 | 0,00 | NA | NA |
| MIR196A1 | 0,00 | 0,00 | 0,00 | 0,00 | NA | NA |
| MIR196A2 | 0,00 | 0,00 | 0,00 | 0,00 | NA | NA |
| MIR196B  | 0,00 | 0,00 | 0,00 | 0,00 | NA | NA |
| MIR197   | 0,00 | 0,00 | 0,00 | 0,00 | NA | NA |
| MIR1973  | 0,00 | 0,00 | 0,00 | 0,00 | NA | NA |
| MIR1976  | 0,00 | 0,00 | 0,00 | 0,00 | NA | NA |
| MIR198   | 0,00 | 0,00 | 0,00 | 0,00 | NA | NA |
| MIR199A1 | 0,00 | 0,00 | 0,00 | 0,00 | NA | NA |
| MIR199A2 | 0,00 | 0,00 | 0,00 | 0,00 | NA | NA |
| MIR199B  | 0,00 | 0,00 | 0,00 | 0,00 | NA | NA |
| MIR19A   | 0,00 | 0,00 | 0,00 | 0,00 | NA | NA |
| MIR19B1  | 0,00 | 0,00 | 0,00 | 0,00 | NA | NA |
| MIR19B2  | 0,00 | 0,00 | 0,00 | 0,00 | NA | NA |
| MIR200A  | 0,00 | 0,00 | 0,00 | 0,00 | NA | NA |
| MIR200B  | 0,00 | 0,00 | 0,00 | 0,00 | NA | NA |
| MIR200C  | 0,00 | 0,00 | 0,00 | 0,00 | NA | NA |
| MIR202   | 0,00 | 0,00 | 0,00 | 0,00 | NA | NA |
| MIR203A  | 0,00 | 0,00 | 0,00 | 0,00 | NA | NA |
| MIR203B  | 0,00 | 0,00 | 0,00 | 0,00 | NA | NA |
| MIR204   | 0,00 | 0,00 | 0,00 | 0,00 | NA | NA |
| MIR205   | 0,00 | 0,00 | 0,00 | 0,00 | NA | NA |
| MIR2053  | 0,00 | 0,00 | 0,00 | 0,00 | NA | NA |
| MIR2054  | 0,00 | 0,00 | 0,00 | 0,00 | NA | NA |
| MIR206   | 0,00 | 0,00 | 0,00 | 0,00 | NA | NA |
| MIR208A  | 0,00 | 0,00 | 0,00 | 0,00 | NA | NA |
| MIR208B  | 0,00 | 0,00 | 0,00 | 0,00 | NA | NA |
| MIR20A   | 0,00 | 0,00 | 0,00 | 0,00 | NA | NA |
| MIR20B   | 0,00 | 0,00 | 0,00 | 0,00 | NA | NA |
| MIR21    | 0,00 | 0,00 | 0,00 | 0,00 | NA | NA |
| MIR210   | 0,00 | 0,00 | 0,00 | 0,00 | NA | NA |
| MIR2110  | 0,00 | 0,00 | 0,00 | 0,00 | NA | NA |
| MIR2113  | 0,00 | 0,00 | 0,00 | 0,00 | NA | NA |
| MIR2114  | 0,00 | 0,00 | 0,00 | 0,00 | NA | NA |
| MIR2115  | 0,00 | 0,00 | 0,00 | 0,00 | NA | NA |
| MIR2116  | 0,00 | 0,00 | 0,00 | 0,00 | NA | NA |
| MIR2117  | 0,00 | 0,00 | 0,00 | 0,00 | NA | NA |
| MIR212   | 0,00 | 0,00 | 0,00 | 0,00 | NA | NA |
| MIR214   | 0,00 | 0,00 | 0,00 | 0,00 | NA | NA |
| MIR215   | 0,00 | 0,00 | 0,00 | 0,00 | NA | NA |
| MIR216A  | 0,00 | 0,00 | 0,00 | 0,00 | NA | NA |

|           |      |      |      |      |    |    |
|-----------|------|------|------|------|----|----|
| MIR216B   | 0,00 | 0,00 | 0,00 | 0,00 | NA | NA |
| MIR217    | 0,00 | 0,00 | 0,00 | 0,00 | NA | NA |
| MIR218-1  | 0,00 | 0,00 | 0,00 | 0,00 | NA | NA |
| MIR218-2  | 0,00 | 0,00 | 0,00 | 0,00 | NA | NA |
| MIR219A2  | 0,00 | 0,00 | 0,00 | 0,00 | NA | NA |
| MIR219B   | 0,00 | 0,00 | 0,00 | 0,00 | NA | NA |
| MIR22     | 0,00 | 0,00 | 0,00 | 0,00 | NA | NA |
| MIR221    | 0,00 | 0,00 | 0,00 | 0,00 | NA | NA |
| MIR222    | 0,00 | 0,00 | 0,00 | 0,00 | NA | NA |
| MIR223    | 0,00 | 0,00 | 0,00 | 1,51 | NA | NA |
| MIR224    | 0,00 | 0,00 | 0,00 | 0,00 | NA | NA |
| MIR2276   | 0,00 | 0,00 | 0,00 | 0,00 | NA | NA |
| MIR2277   | 0,00 | 0,00 | 0,00 | 0,00 | NA | NA |
| MIR2392   | 0,00 | 0,00 | 0,00 | 0,00 | NA | NA |
| MIR23B    | 0,00 | 0,00 | 0,00 | 0,00 | NA | NA |
| MIR23C    | 0,00 | 0,00 | 0,00 | 0,00 | NA | NA |
| MIR24-1   | 0,00 | 0,00 | 0,00 | 0,00 | NA | NA |
| MIR2467   | 0,00 | 0,00 | 0,00 | 0,00 | NA | NA |
| MIR25     | 0,00 | 0,00 | 0,00 | 0,00 | NA | NA |
| MIR2681   | 0,00 | 0,00 | 0,00 | 0,00 | NA | NA |
| MIR2682   | 0,00 | 0,00 | 0,00 | 0,00 | NA | NA |
| MIR26A1   | 0,00 | 0,00 | 0,00 | 0,00 | NA | NA |
| MIR26A2   | 0,00 | 0,00 | 0,00 | 0,00 | NA | NA |
| MIR26B    | 0,00 | 0,00 | 0,00 | 0,00 | NA | NA |
| MIR2861   | 0,00 | 0,00 | 0,00 | 0,00 | NA | NA |
| MIR2909   | 0,00 | 0,00 | 0,00 | 0,00 | NA | NA |
| MIR296    | 0,00 | 0,00 | 0,00 | 0,00 | NA | NA |
| MIR298    | 0,00 | 0,00 | 0,00 | 0,00 | NA | NA |
| MIR299    | 0,00 | 0,00 | 0,00 | 0,00 | NA | NA |
| MIR29A    | 0,00 | 0,00 | 0,00 | 0,00 | NA | NA |
| MIR29B1   | 0,00 | 0,00 | 0,00 | 0,00 | NA | NA |
| MIR29B2   | 0,00 | 0,00 | 0,00 | 0,00 | NA | NA |
| MIR29C    | 0,00 | 0,00 | 0,00 | 0,00 | NA | NA |
| MIR300    | 0,00 | 0,00 | 0,00 | 0,00 | NA | NA |
| MIR301A   | 0,00 | 0,00 | 0,00 | 0,00 | NA | NA |
| MIR301B   | 0,00 | 0,00 | 0,00 | 0,00 | NA | NA |
| MIR302B   | 0,00 | 0,00 | 0,00 | 0,00 | NA | NA |
| MIR302E   | 0,00 | 0,00 | 0,00 | 0,00 | NA | NA |
| MIR302F   | 0,00 | 0,00 | 0,00 | 0,00 | NA | NA |
| MIR3064   | 0,00 | 0,00 | 0,00 | 0,00 | NA | NA |
| MIR3065   | 0,00 | 0,00 | 0,00 | 0,00 | NA | NA |
| MIR3074   | 0,00 | 0,00 | 0,00 | 0,00 | NA | NA |
| MIR30A    | 0,00 | 0,00 | 0,00 | 0,00 | NA | NA |
| MIR30B    | 0,00 | 0,00 | 0,00 | 0,00 | NA | NA |
| MIR30C1   | 0,00 | 0,00 | 0,00 | 0,00 | NA | NA |
| MIR30C2   | 0,00 | 0,00 | 0,00 | 0,00 | NA | NA |
| MIR30D    | 0,00 | 0,00 | 0,00 | 0,00 | NA | NA |
| MIR30E    | 0,00 | 0,00 | 0,00 | 0,00 | NA | NA |
| MIR31     | 0,00 | 0,00 | 0,00 | 0,00 | NA | NA |
| MIR3116-2 | 0,00 | 0,00 | 0,00 | 0,00 | NA | NA |
| MIR3118-1 | 0,00 | 0,00 | 0,00 | 0,00 | NA | NA |
| MIR3118-2 | 0,00 | 0,00 | 0,00 | 0,00 | NA | NA |
| MIR3118-3 | 0,00 | 0,00 | 0,00 | 0,00 | NA | NA |
| MIR3118-4 | 0,00 | 0,00 | 0,00 | 0,00 | NA | NA |
| MIR3119-1 | 0,00 | 0,00 | 0,00 | 0,00 | NA | NA |

|           |      |      |      |      |    |    |
|-----------|------|------|------|------|----|----|
| MIR3119-2 | 0,00 | 0,00 | 0,00 | 0,00 | NA | NA |
| MIR3120   | 0,00 | 0,00 | 0,00 | 0,00 | NA | NA |
| MIR3121   | 0,00 | 0,00 | 0,00 | 0,00 | NA | NA |
| MIR3122   | 0,00 | 0,00 | 0,00 | 0,00 | NA | NA |
| MIR3123   | 0,00 | 0,00 | 0,00 | 0,00 | NA | NA |
| MIR3124   | 0,00 | 0,00 | 0,00 | 0,00 | NA | NA |
| MIR3125   | 0,00 | 0,00 | 0,00 | 0,00 | NA | NA |
| MIR3126   | 0,00 | 0,00 | 0,00 | 0,00 | NA | NA |
| MIR3127   | 0,00 | 0,00 | 0,00 | 0,00 | NA | NA |
| MIR3129   | 0,00 | 0,00 | 0,00 | 0,00 | NA | NA |
| MIR3130-1 | 0,00 | 0,00 | 0,00 | 0,00 | NA | NA |
| MIR3130-2 | 0,00 | 0,00 | 0,00 | 0,00 | NA | NA |
| MIR3131   | 0,00 | 0,00 | 0,00 | 0,00 | NA | NA |
| MIR3132   | 0,00 | 0,00 | 0,00 | 0,00 | NA | NA |
| MIR3138   | 0,00 | 0,00 | 0,00 | 0,00 | NA | NA |
| MIR3141   | 0,00 | 0,00 | 0,00 | 0,00 | NA | NA |
| MIR3142   | 0,00 | 0,00 | 0,00 | 0,00 | NA | NA |
| MIR3142HG | 0,00 | 0,00 | 0,00 | 0,00 | NA | NA |
| MIR3143   | 0,00 | 0,00 | 0,00 | 0,00 | NA | NA |
| MIR3147   | 0,00 | 0,00 | 0,00 | 0,00 | NA | NA |
| MIR3150A  | 0,00 | 0,00 | 0,00 | 0,00 | NA | NA |
| MIR3150B  | 0,00 | 0,00 | 0,00 | 0,00 | NA | NA |
| MIR3151   | 0,00 | 0,00 | 0,00 | 0,00 | NA | NA |
| MIR3154   | 0,00 | 0,00 | 0,00 | 0,00 | NA | NA |
| MIR3155B  | 0,00 | 0,00 | 0,00 | 0,00 | NA | NA |
| MIR3156-1 | 0,00 | 0,00 | 0,00 | 0,00 | NA | NA |
| MIR3156-2 | 0,00 | 0,00 | 0,00 | 0,00 | NA | NA |
| MIR3156-3 | 0,00 | 0,00 | 0,00 | 0,00 | NA | NA |
| MIR3157   | 0,00 | 0,00 | 0,00 | 0,00 | NA | NA |
| MIR3158-1 | 0,00 | 0,00 | 0,00 | 0,00 | NA | NA |
| MIR3158-2 | 0,00 | 0,00 | 0,00 | 0,00 | NA | NA |
| MIR3160-1 | 0,00 | 0,00 | 0,00 | 0,00 | NA | NA |
| MIR3160-2 | 0,00 | 0,00 | 0,00 | 0,00 | NA | NA |
| MIR3163   | 0,00 | 0,00 | 0,00 | 0,00 | NA | NA |
| MIR3164   | 0,00 | 0,00 | 0,00 | 0,00 | NA | NA |
| MIR3165   | 0,00 | 0,00 | 0,00 | 0,00 | NA | NA |
| MIR3166   | 0,00 | 0,00 | 0,00 | 0,00 | NA | NA |
| MIR3167   | 0,00 | 0,00 | 0,00 | 0,00 | NA | NA |
| MIR3168   | 0,00 | 0,00 | 0,00 | 0,00 | NA | NA |
| MIR3169   | 0,00 | 0,00 | 0,00 | 0,00 | NA | NA |
| MIR3170   | 0,00 | 0,00 | 0,00 | 0,00 | NA | NA |
| MIR3171   | 0,00 | 0,00 | 0,00 | 0,00 | NA | NA |
| MIR3176   | 0,00 | 0,00 | 0,00 | 0,00 | NA | NA |
| MIR3177   | 0,00 | 0,00 | 0,00 | 0,00 | NA | NA |
| MIR3178   | 0,00 | 0,00 | 0,00 | 0,00 | NA | NA |
| MIR3179-1 | 0,00 | 0,00 | 0,00 | 0,00 | NA | NA |
| MIR3179-2 | 0,00 | 0,00 | 0,00 | 0,00 | NA | NA |
| MIR3179-3 | 0,00 | 0,00 | 0,00 | 0,00 | NA | NA |
| MIR3179-4 | 0,00 | 0,00 | 0,00 | 0,00 | NA | NA |
| MIR3180-5 | 0,00 | 0,00 | 0,00 | 0,00 | NA | NA |
| MIR3181   | 0,00 | 0,00 | 0,00 | 0,00 | NA | NA |
| MIR3182   | 0,00 | 0,00 | 0,00 | 0,00 | NA | NA |
| MIR3183   | 0,00 | 0,00 | 0,00 | 0,00 | NA | NA |
| MIR3184   | 0,00 | 0,00 | 0,00 | 0,00 | NA | NA |
| MIR3185   | 0,00 | 0,00 | 0,00 | 0,00 | NA | NA |

|           |      |      |      |      |    |    |
|-----------|------|------|------|------|----|----|
| MIR3186   | 0,00 | 0,00 | 0,00 | 0,00 | NA | NA |
| MIR3187   | 0,00 | 0,00 | 0,00 | 0,00 | NA | NA |
| MIR3189   | 0,00 | 0,00 | 0,00 | 0,00 | NA | NA |
| MIR3190   | 0,00 | 0,00 | 0,00 | 0,00 | NA | NA |
| MIR3191   | 0,00 | 0,00 | 0,00 | 0,00 | NA | NA |
| MIR3193   | 0,00 | 0,00 | 0,00 | 0,00 | NA | NA |
| MIR3194   | 0,00 | 0,00 | 0,00 | 0,00 | NA | NA |
| MIR3195   | 0,00 | 0,00 | 0,00 | 0,00 | NA | NA |
| MIR3196   | 0,00 | 0,00 | 0,00 | 0,00 | NA | NA |
| MIR3197   | 0,00 | 0,00 | 0,00 | 0,00 | NA | NA |
| MIR3199-1 | 0,00 | 0,00 | 0,00 | 0,00 | NA | NA |
| MIR3199-2 | 0,00 | 0,00 | 0,00 | 0,00 | NA | NA |
| MIR32     | 0,00 | 0,00 | 0,00 | 0,00 | NA | NA |
| MIR3200   | 0,00 | 0,00 | 0,00 | 0,00 | NA | NA |
| MIR3201   | 0,00 | 0,00 | 0,00 | 0,00 | NA | NA |
| MIR3202-1 | 0,00 | 0,00 | 0,00 | 0,00 | NA | NA |
| MIR3202-2 | 0,00 | 0,00 | 0,00 | 0,00 | NA | NA |
| MIR320B1  | 0,00 | 0,00 | 0,00 | 0,00 | NA | NA |
| MIR320C2  | 0,00 | 0,00 | 0,00 | 0,00 | NA | NA |
| MIR320D2  | 0,00 | 0,00 | 0,00 | 0,00 | NA | NA |
| MIR320E   | 0,00 | 0,00 | 0,00 | 0,00 | NA | NA |
| MIR323A   | 0,00 | 0,00 | 0,00 | 0,00 | NA | NA |
| MIR323B   | 0,00 | 0,00 | 0,00 | 0,00 | NA | NA |
| MIR324    | 0,00 | 0,00 | 0,00 | 0,00 | NA | NA |
| MIR325    | 0,00 | 0,00 | 0,00 | 0,00 | NA | NA |
| MIR325HG  | 0,00 | 0,00 | 0,00 | 0,00 | NA | NA |
| MIR328    | 0,00 | 0,00 | 0,00 | 0,00 | NA | NA |
| MIR329-1  | 0,00 | 0,00 | 0,00 | 0,00 | NA | NA |
| MIR329-2  | 0,00 | 0,00 | 0,00 | 0,00 | NA | NA |
| MIR330    | 0,00 | 0,00 | 0,00 | 0,00 | NA | NA |
| MIR331    | 0,00 | 0,00 | 0,00 | 0,00 | NA | NA |
| MIR335    | 0,00 | 0,00 | 0,00 | 0,00 | NA | NA |
| MIR338    | 0,00 | 0,00 | 0,00 | 0,00 | NA | NA |
| MIR33A    | 0,00 | 0,00 | 0,00 | 0,00 | NA | NA |
| MIR33B    | 0,00 | 0,00 | 0,00 | 0,00 | NA | NA |
| MIR340    | 0,00 | 0,00 | 0,00 | 0,00 | NA | NA |
| MIR346    | 0,00 | 0,00 | 0,00 | 0,00 | NA | NA |
| MIR34A    | 0,00 | 0,00 | 0,00 | 0,00 | NA | NA |
| MIR34B    | 0,00 | 0,00 | 0,00 | 0,00 | NA | NA |
| MIR34C    | 0,00 | 0,00 | 0,00 | 0,00 | NA | NA |
| MIR3529   | 0,00 | 0,00 | 0,00 | 0,00 | NA | NA |
| MIR3591   | 0,00 | 0,00 | 0,00 | 0,00 | NA | NA |
| MIR3605   | 0,00 | 0,00 | 0,00 | 0,00 | NA | NA |
| MIR3606   | 0,00 | 0,00 | 0,00 | 0,00 | NA | NA |
| MIR3609   | 0,00 | 0,00 | 0,00 | 0,00 | NA | NA |
| MIR3610   | 0,00 | 0,00 | 0,00 | 0,00 | NA | NA |
| MIR3611   | 0,00 | 0,00 | 0,00 | 0,00 | NA | NA |
| MIR3612   | 0,00 | 0,00 | 0,00 | 0,00 | NA | NA |
| MIR3613   | 0,00 | 0,00 | 0,00 | 0,00 | NA | NA |
| MIR3614   | 0,00 | 0,00 | 0,00 | 0,00 | NA | NA |
| MIR3615   | 0,00 | 0,00 | 0,00 | 0,00 | NA | NA |
| MIR3616   | 0,00 | 0,00 | 0,00 | 0,00 | NA | NA |
| MIR3617   | 0,00 | 0,00 | 0,00 | 0,00 | NA | NA |
| MIR3618   | 0,00 | 0,00 | 0,00 | 0,00 | NA | NA |
| MIR3619   | 0,00 | 0,00 | 0,00 | 0,00 | NA | NA |

|           |      |      |      |      |    |    |
|-----------|------|------|------|------|----|----|
| MIR362    | 0,00 | 0,00 | 0,00 | 0,00 | NA | NA |
| MIR3620   | 0,00 | 0,00 | 0,00 | 0,00 | NA | NA |
| MIR3621   | 0,00 | 0,00 | 0,00 | 0,00 | NA | NA |
| MIR3622A  | 0,00 | 0,00 | 0,00 | 0,00 | NA | NA |
| MIR3622B  | 0,00 | 0,00 | 0,00 | 0,00 | NA | NA |
| MIR363    | 0,00 | 0,00 | 0,00 | 0,00 | NA | NA |
| MIR3646   | 0,00 | 0,00 | 0,00 | 0,00 | NA | NA |
| MIR3648-1 | 0,00 | 0,00 | 0,00 | 0,00 | NA | NA |
| MIR3648-2 | 0,00 | 0,00 | 0,00 | 0,00 | NA | NA |
| MIR3649   | 0,00 | 0,00 | 0,00 | 0,00 | NA | NA |
| MIR3650   | 0,00 | 0,00 | 0,00 | 0,00 | NA | NA |
| MIR3651   | 0,00 | 0,00 | 0,00 | 0,00 | NA | NA |
| MIR3652   | 0,00 | 0,00 | 0,00 | 0,00 | NA | NA |
| MIR3653   | 0,00 | 0,00 | 0,00 | 0,00 | NA | NA |
| MIR3654   | 0,00 | 0,00 | 0,00 | 0,00 | NA | NA |
| MIR3655   | 0,00 | 0,00 | 0,00 | 0,00 | NA | NA |
| MIR3656   | 0,00 | 0,00 | 0,00 | 0,00 | NA | NA |
| MIR3657   | 0,00 | 0,00 | 0,00 | 0,00 | NA | NA |
| MIR3658   | 0,00 | 0,00 | 0,00 | 0,00 | NA | NA |
| MIR3659   | 0,00 | 0,00 | 0,00 | 0,00 | NA | NA |
| MIR365A   | 0,00 | 0,00 | 0,00 | 0,00 | NA | NA |
| MIR365B   | 0,00 | 0,00 | 0,00 | 0,00 | NA | NA |
| MIR3660   | 0,00 | 0,00 | 0,00 | 0,00 | NA | NA |
| MIR3663   | 0,00 | 0,00 | 0,00 | 0,00 | NA | NA |
| MIR3664   | 0,00 | 0,00 | 0,00 | 0,00 | NA | NA |
| MIR3665   | 0,00 | 0,00 | 0,00 | 0,00 | NA | NA |
| MIR3666   | 0,00 | 0,00 | 0,00 | 0,00 | NA | NA |
| MIR3667   | 0,00 | 0,00 | 0,00 | 0,00 | NA | NA |
| MIR3668   | 0,00 | 0,00 | 0,00 | 0,00 | NA | NA |
| MIR3670-1 | 0,00 | 0,00 | 0,00 | 0,00 | NA | NA |
| MIR3670-2 | 0,00 | 0,00 | 0,00 | 0,00 | NA | NA |
| MIR3670-3 | 0,00 | 0,00 | 0,00 | 0,00 | NA | NA |
| MIR3670-4 | 0,00 | 0,00 | 0,00 | 0,00 | NA | NA |
| MIR3672   | 0,00 | 0,00 | 0,00 | 0,00 | NA | NA |
| MIR3674   | 0,00 | 0,00 | 0,00 | 0,00 | NA | NA |
| MIR3675   | 0,00 | 0,00 | 0,00 | 0,00 | NA | NA |
| MIR3677   | 0,00 | 0,00 | 0,00 | 0,00 | NA | NA |
| MIR3678   | 0,00 | 0,00 | 0,00 | 0,00 | NA | NA |
| MIR3679   | 0,00 | 2,66 | 0,00 | 0,00 | NA | NA |
| MIR3683   | 0,00 | 0,00 | 0,00 | 0,00 | NA | NA |
| MIR3684   | 0,00 | 0,00 | 0,00 | 0,00 | NA | NA |
| MIR3686   | 0,00 | 0,00 | 0,00 | 0,00 | NA | NA |
| MIR3687-1 | 0,00 | 0,00 | 0,00 | 0,00 | NA | NA |
| MIR3687-2 | 0,00 | 0,00 | 0,00 | 0,00 | NA | NA |
| MIR3688-1 | 0,00 | 0,00 | 0,00 | 0,00 | NA | NA |
| MIR3688-2 | 0,00 | 0,00 | 0,00 | 0,00 | NA | NA |
| MIR3689A  | 0,00 | 0,00 | 0,00 | 0,00 | NA | NA |
| MIR3689B  | 0,00 | 0,00 | 0,00 | 0,00 | NA | NA |
| MIR3689C  | 0,00 | 0,00 | 0,00 | 0,00 | NA | NA |
| MIR3689D1 | 0,00 | 0,00 | 0,00 | 0,00 | NA | NA |
| MIR3689D2 | 0,00 | 0,00 | 0,00 | 0,00 | NA | NA |
| MIR3689E  | 0,00 | 0,00 | 0,00 | 0,00 | NA | NA |
| MIR3689F  | 0,00 | 0,00 | 0,00 | 0,00 | NA | NA |
| MIR369    | 0,00 | 0,00 | 0,00 | 0,00 | NA | NA |
| MIR3691   | 0,00 | 0,00 | 0,00 | 0,00 | NA | NA |

|           |      |      |      |      |    |    |
|-----------|------|------|------|------|----|----|
| MIR3692   | 0,00 | 0,00 | 0,00 | 0,00 | NA | NA |
| MIR370    | 0,00 | 0,00 | 0,00 | 0,00 | NA | NA |
| MIR3713   | 0,00 | 0,00 | 0,00 | 0,00 | NA | NA |
| MIR3714   | 0,00 | 0,00 | 0,00 | 0,00 | NA | NA |
| MIR371A   | 0,00 | 0,00 | 0,00 | 0,00 | NA | NA |
| MIR371B   | 0,00 | 0,00 | 0,00 | 0,00 | NA | NA |
| MIR372    | 0,00 | 0,00 | 0,00 | 0,00 | NA | NA |
| MIR373    | 0,00 | 0,00 | 0,00 | 0,00 | NA | NA |
| MIR374C   | 0,00 | 0,00 | 0,00 | 0,00 | NA | NA |
| MIR375    | 0,00 | 0,00 | 0,00 | 0,00 | NA | NA |
| MIR376A1  | 0,00 | 0,00 | 0,00 | 0,00 | NA | NA |
| MIR376A2  | 0,00 | 0,00 | 0,00 | 0,00 | NA | NA |
| MIR376B   | 0,00 | 0,00 | 0,00 | 0,00 | NA | NA |
| MIR376C   | 0,00 | 0,00 | 0,00 | 0,00 | NA | NA |
| MIR377    | 0,00 | 0,00 | 0,00 | 0,00 | NA | NA |
| MIR378A   | 0,00 | 0,00 | 0,00 | 0,00 | NA | NA |
| MIR378B   | 0,00 | 0,00 | 0,00 | 0,00 | NA | NA |
| MIR378C   | 0,00 | 0,00 | 0,00 | 0,00 | NA | NA |
| MIR378D1  | 0,00 | 0,00 | 0,00 | 0,00 | NA | NA |
| MIR378D2  | 0,00 | 0,00 | 0,00 | 0,00 | NA | NA |
| MIR378E   | 0,00 | 0,00 | 0,00 | 0,00 | NA | NA |
| MIR378F   | 0,00 | 0,00 | 0,00 | 0,00 | NA | NA |
| MIR378G   | 0,00 | 0,00 | 0,00 | 0,00 | NA | NA |
| MIR378H   | 0,00 | 0,00 | 0,00 | 0,00 | NA | NA |
| MIR378I   | 0,00 | 0,00 | 0,00 | 0,00 | NA | NA |
| MIR379    | 0,00 | 0,00 | 0,00 | 0,00 | NA | NA |
| MIR380    | 0,00 | 0,00 | 0,00 | 0,00 | NA | NA |
| MIR381    | 0,00 | 0,00 | 0,00 | 0,00 | NA | NA |
| MIR382    | 0,00 | 0,00 | 0,00 | 0,00 | NA | NA |
| MIR383    | 0,00 | 0,00 | 0,00 | 0,00 | NA | NA |
| MIR384    | 0,00 | 0,00 | 0,00 | 0,00 | NA | NA |
| MIR3907   | 0,00 | 0,00 | 0,00 | 0,00 | NA | NA |
| MIR3909   | 0,00 | 0,00 | 0,00 | 0,00 | NA | NA |
| MIR3910-1 | 0,00 | 0,00 | 0,00 | 0,00 | NA | NA |
| MIR3910-2 | 0,00 | 0,00 | 0,00 | 0,00 | NA | NA |
| MIR3911   | 0,00 | 0,00 | 0,00 | 0,00 | NA | NA |
| MIR3912   | 0,00 | 0,00 | 0,00 | 0,00 | NA | NA |
| MIR3913-1 | 0,00 | 0,00 | 0,00 | 0,00 | NA | NA |
| MIR3913-2 | 0,00 | 0,00 | 0,00 | 0,00 | NA | NA |
| MIR3914-1 | 0,00 | 0,00 | 0,00 | 0,00 | NA | NA |
| MIR3914-2 | 0,00 | 0,00 | 0,00 | 0,00 | NA | NA |
| MIR3915   | 0,00 | 0,00 | 0,00 | 0,00 | NA | NA |
| MIR3916   | 0,00 | 0,00 | 0,00 | 0,00 | NA | NA |
| MIR3917   | 0,00 | 0,00 | 0,00 | 0,00 | NA | NA |
| MIR3918   | 0,00 | 0,00 | 0,00 | 0,00 | NA | NA |
| MIR3919   | 0,00 | 0,00 | 0,00 | 0,00 | NA | NA |
| MIR3920   | 0,00 | 0,00 | 0,00 | 0,00 | NA | NA |
| MIR3921   | 0,00 | 0,00 | 0,00 | 0,00 | NA | NA |
| MIR3922   | 0,00 | 0,00 | 0,00 | 0,00 | NA | NA |
| MIR3923   | 0,00 | 0,00 | 0,00 | 0,00 | NA | NA |
| MIR3924   | 0,00 | 0,00 | 0,00 | 0,00 | NA | NA |
| MIR3925   | 0,00 | 0,00 | 0,00 | 0,00 | NA | NA |
| MIR3926-1 | 0,00 | 0,00 | 0,00 | 0,00 | NA | NA |
| MIR3926-2 | 0,00 | 0,00 | 0,00 | 0,00 | NA | NA |
| MIR3927   | 0,00 | 0,00 | 0,00 | 0,00 | NA | NA |

|           |      |      |      |      |    |    |
|-----------|------|------|------|------|----|----|
| MIR3928   | 0,00 | 0,00 | 0,00 | 0,00 | NA | NA |
| MIR3934   | 0,00 | 0,00 | 0,00 | 0,00 | NA | NA |
| MIR3936   | 0,00 | 0,00 | 0,00 | 0,00 | NA | NA |
| MIR3937   | 0,00 | 0,00 | 0,00 | 0,00 | NA | NA |
| MIR3938   | 0,00 | 0,00 | 0,00 | 0,00 | NA | NA |
| MIR3940   | 0,00 | 0,00 | 0,00 | 0,00 | NA | NA |
| MIR3941   | 0,00 | 0,00 | 0,00 | 0,00 | NA | NA |
| MIR3943   | 0,00 | 0,00 | 0,00 | 0,00 | NA | NA |
| MIR3944   | 0,00 | 0,00 | 0,00 | 0,00 | NA | NA |
| MIR3945   | 0,00 | 0,00 | 0,00 | 0,00 | NA | NA |
| MIR3960   | 0,00 | 0,00 | 0,00 | 0,00 | NA | NA |
| MIR3972   | 0,00 | 0,00 | 0,00 | 0,00 | NA | NA |
| MIR3973   | 0,00 | 0,00 | 0,00 | 0,00 | NA | NA |
| MIR3974   | 0,00 | 0,00 | 0,00 | 0,00 | NA | NA |
| MIR3976   | 0,00 | 0,00 | 0,00 | 0,00 | NA | NA |
| MIR3977   | 0,00 | 0,00 | 0,00 | 0,00 | NA | NA |
| MIR409    | 0,00 | 0,00 | 0,00 | 0,00 | NA | NA |
| MIR410    | 0,00 | 0,00 | 0,00 | 0,00 | NA | NA |
| MIR411    | 0,00 | 0,00 | 0,00 | 0,00 | NA | NA |
| MIR412    | 0,00 | 0,00 | 0,00 | 0,00 | NA | NA |
| MIR422A   | 0,00 | 0,00 | 0,00 | 0,00 | NA | NA |
| MIR423    | 0,00 | 0,00 | 0,00 | 0,00 | NA | NA |
| MIR424    | 0,00 | 0,00 | 0,00 | 0,00 | NA | NA |
| MIR4251   | 0,00 | 0,00 | 0,00 | 0,00 | NA | NA |
| MIR4252   | 0,00 | 0,00 | 0,00 | 0,00 | NA | NA |
| MIR4253   | 0,00 | 0,00 | 0,00 | 0,00 | NA | NA |
| MIR4254   | 0,00 | 0,00 | 0,00 | 0,00 | NA | NA |
| MIR4255   | 0,00 | 0,00 | 0,00 | 0,00 | NA | NA |
| MIR4257   | 0,00 | 0,00 | 0,00 | 0,00 | NA | NA |
| MIR4258   | 0,00 | 0,00 | 0,00 | 0,00 | NA | NA |
| MIR4259   | 0,00 | 0,00 | 0,00 | 0,00 | NA | NA |
| MIR4260   | 0,00 | 0,00 | 0,00 | 0,00 | NA | NA |
| MIR4261   | 0,00 | 0,00 | 0,00 | 0,00 | NA | NA |
| MIR4262   | 0,00 | 0,00 | 0,00 | 0,00 | NA | NA |
| MIR4264   | 0,00 | 0,00 | 0,00 | 0,00 | NA | NA |
| MIR4265   | 0,00 | 0,00 | 0,00 | 0,00 | NA | NA |
| MIR4266   | 0,00 | 0,00 | 0,00 | 0,00 | NA | NA |
| MIR4267   | 0,00 | 0,00 | 0,00 | 0,00 | NA | NA |
| MIR4268   | 0,00 | 0,00 | 0,00 | 0,00 | NA | NA |
| MIR4269   | 0,00 | 0,00 | 0,00 | 0,00 | NA | NA |
| MIR4270   | 0,00 | 0,00 | 0,00 | 0,00 | NA | NA |
| MIR4271   | 0,00 | 0,00 | 0,00 | 0,00 | NA | NA |
| MIR4272   | 0,00 | 0,00 | 0,00 | 0,00 | NA | NA |
| MIR4273   | 0,00 | 0,00 | 0,00 | 0,00 | NA | NA |
| MIR4274   | 0,00 | 0,00 | 0,00 | 0,00 | NA | NA |
| MIR4275   | 0,00 | 0,00 | 0,00 | 0,00 | NA | NA |
| MIR4276   | 0,00 | 0,00 | 0,00 | 0,00 | NA | NA |
| MIR4277   | 0,00 | 0,00 | 0,00 | 0,00 | NA | NA |
| MIR4279   | 0,00 | 0,00 | 0,00 | 0,00 | NA | NA |
| MIR4280   | 0,00 | 0,00 | 0,00 | 0,00 | NA | NA |
| MIR4281   | 0,00 | 0,00 | 0,00 | 0,00 | NA | NA |
| MIR4282   | 0,00 | 0,00 | 0,00 | 0,00 | NA | NA |
| MIR4283-1 | 0,00 | 0,00 | 0,00 | 0,00 | NA | NA |
| MIR4283-2 | 0,00 | 0,00 | 0,00 | 0,00 | NA | NA |
| MIR4284   | 0,00 | 0,00 | 0,00 | 0,00 | NA | NA |

|           |      |      |      |      |    |    |
|-----------|------|------|------|------|----|----|
| MIR4285   | 0,00 | 0,00 | 0,00 | 0,00 | NA | NA |
| MIR4286   | 0,00 | 0,00 | 0,00 | 0,00 | NA | NA |
| MIR4287   | 0,00 | 0,00 | 0,00 | 0,00 | NA | NA |
| MIR4288   | 0,00 | 0,00 | 0,00 | 0,00 | NA | NA |
| MIR4289   | 0,00 | 0,00 | 0,00 | 0,00 | NA | NA |
| MIR4290   | 0,00 | 0,00 | 0,00 | 0,00 | NA | NA |
| MIR4291   | 0,00 | 0,00 | 0,00 | 0,00 | NA | NA |
| MIR4292   | 0,00 | 0,00 | 0,00 | 0,00 | NA | NA |
| MIR4293   | 0,00 | 0,00 | 0,00 | 0,00 | NA | NA |
| MIR4294   | 0,00 | 0,00 | 0,00 | 0,00 | NA | NA |
| MIR4295   | 0,00 | 0,00 | 0,00 | 0,00 | NA | NA |
| MIR4296   | 0,00 | 0,00 | 0,00 | 0,00 | NA | NA |
| MIR4297   | 0,00 | 0,00 | 0,00 | 0,00 | NA | NA |
| MIR4299   | 0,00 | 0,00 | 0,00 | 0,00 | NA | NA |
| MIR4300   | 0,00 | 0,00 | 0,00 | 0,00 | NA | NA |
| MIR4301   | 0,00 | 0,00 | 0,00 | 0,00 | NA | NA |
| MIR4302   | 0,00 | 0,00 | 0,00 | 0,00 | NA | NA |
| MIR4303   | 0,00 | 0,00 | 0,00 | 0,00 | NA | NA |
| MIR4304   | 0,00 | 0,00 | 0,00 | 0,00 | NA | NA |
| MIR4305   | 0,00 | 0,00 | 0,00 | 0,00 | NA | NA |
| MIR4307   | 0,00 | 0,00 | 0,00 | 0,00 | NA | NA |
| MIR431    | 0,00 | 0,00 | 0,00 | 0,00 | NA | NA |
| MIR4310   | 0,00 | 0,00 | 0,00 | 0,00 | NA | NA |
| MIR4311   | 0,00 | 0,00 | 0,00 | 0,00 | NA | NA |
| MIR4313   | 0,00 | 0,00 | 0,00 | 0,00 | NA | NA |
| MIR4314   | 0,00 | 0,00 | 0,00 | 0,00 | NA | NA |
| MIR4315-1 | 0,00 | 0,00 | 0,00 | 0,00 | NA | NA |
| MIR4315-2 | 0,00 | 0,00 | 0,00 | 0,00 | NA | NA |
| MIR4317   | 0,00 | 0,00 | 0,00 | 0,00 | NA | NA |
| MIR4318   | 0,00 | 0,00 | 0,00 | 0,00 | NA | NA |
| MIR4319   | 0,00 | 0,00 | 0,00 | 0,00 | NA | NA |
| MIR432    | 0,00 | 0,00 | 0,00 | 0,00 | NA | NA |
| MIR4320   | 0,00 | 0,00 | 0,00 | 0,00 | NA | NA |
| MIR4321   | 0,00 | 0,00 | 0,00 | 0,00 | NA | NA |
| MIR4322   | 0,00 | 0,00 | 0,00 | 0,00 | NA | NA |
| MIR4323   | 0,00 | 0,00 | 0,00 | 0,00 | NA | NA |
| MIR4324   | 0,00 | 0,00 | 0,00 | 0,00 | NA | NA |
| MIR4325   | 0,00 | 0,00 | 0,00 | 0,00 | NA | NA |
| MIR4326   | 0,00 | 0,00 | 0,00 | 0,00 | NA | NA |
| MIR4327   | 0,00 | 0,00 | 0,00 | 0,00 | NA | NA |
| MIR4329   | 0,00 | 0,00 | 0,00 | 0,00 | NA | NA |
| MIR433    | 0,00 | 0,00 | 0,00 | 0,00 | NA | NA |
| MIR4330   | 0,00 | 0,00 | 0,00 | 0,00 | NA | NA |
| MIR4417   | 0,00 | 0,00 | 0,00 | 0,00 | NA | NA |
| MIR4418   | 0,00 | 0,00 | 0,00 | 0,00 | NA | NA |
| MIR4419A  | 0,00 | 0,00 | 0,00 | 0,00 | NA | NA |
| MIR4419B  | 0,00 | 0,00 | 0,00 | 0,00 | NA | NA |
| MIR4421   | 0,00 | 0,00 | 0,00 | 0,00 | NA | NA |
| MIR4422   | 0,00 | 0,00 | 0,00 | 0,00 | NA | NA |
| MIR4423   | 0,00 | 0,00 | 0,00 | 0,00 | NA | NA |
| MIR4424   | 0,00 | 0,00 | 0,00 | 0,00 | NA | NA |
| MIR4426   | 0,00 | 0,00 | 0,00 | 0,00 | NA | NA |
| MIR4427   | 0,00 | 0,00 | 0,00 | 0,00 | NA | NA |
| MIR4429   | 0,00 | 0,00 | 0,00 | 0,00 | NA | NA |
| MIR4430   | 0,00 | 0,00 | 0,00 | 0,00 | NA | NA |



|           |      |      |      |      |    |    |
|-----------|------|------|------|------|----|----|
| MIR4431   | 0,00 | 0,00 | 0,00 | 0,00 | NA | NA |
| MIR4432   | 0,00 | 0,00 | 0,00 | 0,00 | NA | NA |
| MIR4433A  | 0,00 | 0,00 | 0,00 | 0,00 | NA | NA |
| MIR4433B  | 0,00 | 0,00 | 0,00 | 0,00 | NA | NA |
| MIR4435-1 | 0,00 | 0,00 | 0,00 | 0,00 | NA | NA |
| MIR4435-2 | 0,00 | 0,00 | 0,00 | 0,00 | NA | NA |
| MIR4436A  | 0,00 | 0,00 | 0,00 | 0,00 | NA | NA |
| MIR4436B1 | 0,00 | 0,00 | 0,00 | 0,00 | NA | NA |
| MIR4436B2 | 0,00 | 0,00 | 0,00 | 0,00 | NA | NA |
| MIR4438   | 0,00 | 0,00 | 0,00 | 0,00 | NA | NA |
| MIR4439   | 0,00 | 0,00 | 0,00 | 0,00 | NA | NA |
| MIR4441   | 0,00 | 0,00 | 0,00 | 0,00 | NA | NA |
| MIR4442   | 0,00 | 0,00 | 0,00 | 0,00 | NA | NA |
| MIR4443   | 0,00 | 0,00 | 0,00 | 0,00 | NA | NA |
| MIR4444-1 | 0,00 | 0,00 | 0,00 | 0,00 | NA | NA |
| MIR4444-2 | 0,00 | 0,00 | 0,00 | 0,00 | NA | NA |
| MIR4445   | 0,00 | 0,00 | 0,00 | 0,00 | NA | NA |
| MIR4446   | 0,00 | 0,00 | 0,00 | 0,00 | NA | NA |
| MIR4447   | 0,00 | 0,00 | 0,00 | 0,00 | NA | NA |
| MIR4448   | 0,00 | 0,00 | 0,00 | 0,00 | NA | NA |
| MIR4449   | 0,00 | 0,00 | 0,00 | 0,00 | NA | NA |
| MIR4450   | 0,00 | 0,00 | 0,00 | 0,00 | NA | NA |
| MIR4452   | 0,00 | 0,00 | 0,00 | 0,00 | NA | NA |
| MIR4453   | 0,00 | 0,00 | 0,00 | 0,00 | NA | NA |
| MIR4454   | 0,00 | 0,00 | 0,00 | 0,00 | NA | NA |
| MIR4455   | 0,00 | 0,00 | 0,00 | 0,00 | NA | NA |
| MIR4456   | 0,00 | 0,00 | 0,00 | 0,00 | NA | NA |
| MIR4457   | 0,00 | 0,00 | 0,00 | 0,00 | NA | NA |
| MIR4458   | 0,00 | 0,00 | 0,00 | 0,00 | NA | NA |
| MIR4460   | 0,00 | 0,00 | 0,00 | 0,00 | NA | NA |
| MIR4463   | 0,00 | 0,00 | 0,00 | 0,00 | NA | NA |
| MIR4464   | 0,00 | 0,00 | 0,00 | 0,00 | NA | NA |
| MIR4465   | 0,00 | 0,00 | 0,00 | 0,00 | NA | NA |
| MIR4466   | 0,00 | 0,00 | 0,00 | 0,00 | NA | NA |
| MIR4467   | 0,00 | 0,00 | 0,00 | 0,00 | NA | NA |
| MIR4468   | 0,00 | 0,00 | 0,00 | 0,00 | NA | NA |
| MIR4470   | 0,00 | 0,00 | 0,00 | 0,00 | NA | NA |
| MIR4471   | 0,00 | 0,00 | 0,00 | 0,00 | NA | NA |
| MIR4472-1 | 0,00 | 0,00 | 0,00 | 0,00 | NA | NA |
| MIR4473   | 0,00 | 0,00 | 0,00 | 0,00 | NA | NA |
| MIR4474   | 0,00 | 0,00 | 0,00 | 0,00 | NA | NA |
| MIR4475   | 0,00 | 0,00 | 0,00 | 0,00 | NA | NA |
| MIR4476   | 0,00 | 0,00 | 0,00 | 0,00 | NA | NA |
| MIR4478   | 0,00 | 0,00 | 0,00 | 0,00 | NA | NA |
| MIR4479   | 0,00 | 0,00 | 0,00 | 0,00 | NA | NA |
| MIR448    | 0,00 | 0,00 | 0,00 | 0,00 | NA | NA |
| MIR4480   | 0,00 | 0,00 | 0,00 | 0,00 | NA | NA |
| MIR4483   | 0,00 | 0,00 | 0,00 | 0,00 | NA | NA |
| MIR4484   | 0,00 | 0,00 | 0,00 | 0,00 | NA | NA |
| MIR4485   | 0,00 | 0,00 | 0,00 | 0,00 | NA | NA |
| MIR4486   | 0,00 | 0,00 | 0,00 | 0,00 | NA | NA |
| MIR4487   | 0,00 | 0,00 | 0,00 | 0,00 | NA | NA |
| MIR4488   | 0,00 | 0,00 | 0,00 | 0,00 | NA | NA |
| MIR4490   | 0,00 | 0,00 | 0,00 | 0,00 | NA | NA |
| MIR4491   | 0,00 | 0,00 | 0,00 | 0,00 | NA | NA |

|           |      |      |      |      |    |    |
|-----------|------|------|------|------|----|----|
| MIR4492   | 0,00 | 0,00 | 0,00 | 0,00 | NA | NA |
| MIR4493   | 0,00 | 0,00 | 0,00 | 0,00 | NA | NA |
| MIR4494   | 0,00 | 0,00 | 0,00 | 0,00 | NA | NA |
| MIR4495   | 0,00 | 0,00 | 0,00 | 0,00 | NA | NA |
| MIR4497   | 0,00 | 0,00 | 0,00 | 0,00 | NA | NA |
| MIR4498   | 0,00 | 0,00 | 0,00 | 0,00 | NA | NA |
| MIR4499   | 0,00 | 0,00 | 0,00 | 0,00 | NA | NA |
| MIR449A   | 0,00 | 0,00 | 0,00 | 0,00 | NA | NA |
| MIR449B   | 0,00 | 0,00 | 0,00 | 0,00 | NA | NA |
| MIR449C   | 0,00 | 0,00 | 0,00 | 0,00 | NA | NA |
| MIR4500   | 0,00 | 0,00 | 0,00 | 0,00 | NA | NA |
| MIR4501   | 0,00 | 0,00 | 0,00 | 0,00 | NA | NA |
| MIR4503   | 0,00 | 0,00 | 0,00 | 0,00 | NA | NA |
| MIR4504   | 0,00 | 0,00 | 0,00 | 0,00 | NA | NA |
| MIR4507   | 0,00 | 0,00 | 0,00 | 0,00 | NA | NA |
| MIR4508   | 0,00 | 0,00 | 0,00 | 0,00 | NA | NA |
| MIR4509-1 | 0,00 | 0,00 | 0,00 | 0,00 | NA | NA |
| MIR4509-2 | 0,00 | 0,00 | 0,00 | 0,00 | NA | NA |
| MIR4509-3 | 0,00 | 0,00 | 0,00 | 0,00 | NA | NA |
| MIR450A1  | 0,00 | 0,00 | 0,00 | 0,00 | NA | NA |
| MIR450A2  | 0,00 | 0,00 | 0,00 | 0,00 | NA | NA |
| MIR450B   | 0,00 | 0,00 | 0,00 | 0,00 | NA | NA |
| MIR4510   | 0,00 | 0,00 | 0,00 | 0,00 | NA | NA |
| MIR4512   | 0,00 | 0,00 | 0,00 | 0,00 | NA | NA |
| MIR4513   | 0,00 | 0,00 | 0,00 | 0,00 | NA | NA |
| MIR4514   | 0,00 | 0,00 | 0,00 | 0,00 | NA | NA |
| MIR4515   | 0,00 | 0,00 | 0,00 | 0,00 | NA | NA |
| MIR4516   | 0,00 | 0,00 | 0,00 | 0,00 | NA | NA |
| MIR4517   | 0,00 | 0,00 | 0,00 | 0,00 | NA | NA |
| MIR4518   | 0,00 | 0,00 | 0,00 | 0,00 | NA | NA |
| MIR4519   | 0,00 | 0,00 | 0,00 | 0,00 | NA | NA |
| MIR451A   | 0,00 | 0,00 | 0,00 | 0,00 | NA | NA |
| MIR451B   | 0,00 | 0,00 | 0,00 | 0,00 | NA | NA |
| MIR452    | 0,00 | 0,00 | 0,00 | 0,00 | NA | NA |
| MIR4520-1 | 0,00 | 0,00 | 0,00 | 0,00 | NA | NA |
| MIR4520-2 | 0,00 | 0,00 | 0,00 | 0,00 | NA | NA |
| MIR4521   | 0,00 | 0,00 | 0,00 | 0,00 | NA | NA |
| MIR4522   | 0,00 | 0,00 | 0,00 | 0,00 | NA | NA |
| MIR4523   | 0,00 | 0,00 | 0,00 | 0,00 | NA | NA |
| MIR4524A  | 0,00 | 0,00 | 0,00 | 0,00 | NA | NA |
| MIR4524B  | 0,00 | 0,00 | 0,00 | 0,00 | NA | NA |
| MIR4525   | 0,00 | 0,00 | 0,00 | 0,00 | NA | NA |
| MIR4527   | 0,00 | 0,00 | 0,00 | 0,00 | NA | NA |
| MIR4528   | 0,00 | 0,00 | 0,00 | 0,00 | NA | NA |
| MIR4531   | 0,00 | 0,00 | 0,00 | 0,00 | NA | NA |
| MIR4532   | 0,00 | 0,00 | 0,00 | 0,00 | NA | NA |
| MIR4533   | 0,00 | 0,00 | 0,00 | 0,00 | NA | NA |
| MIR4534   | 0,00 | 0,00 | 0,00 | 0,00 | NA | NA |
| MIR4535   | 0,00 | 0,00 | 0,00 | 0,00 | NA | NA |
| MIR4536-1 | 0,00 | 0,00 | 0,00 | 0,00 | NA | NA |
| MIR4536-2 | 0,00 | 0,00 | 0,00 | 0,00 | NA | NA |
| MIR4537   | 0,00 | 0,00 | 0,00 | 0,00 | NA | NA |
| MIR4538   | 0,00 | 0,00 | 0,00 | 0,00 | NA | NA |
| MIR4539   | 0,00 | 0,00 | 0,00 | 0,00 | NA | NA |
| MIR454    | 0,00 | 0,00 | 0,00 | 0,00 | NA | NA |

|           |      |      |      |      |    |    |
|-----------|------|------|------|------|----|----|
| MIR4540   | 0,00 | 0,00 | 0,00 | 0,00 | NA | NA |
| MIR455    | 0,00 | 0,00 | 0,00 | 0,00 | NA | NA |
| MIR4632   | 0,00 | 0,00 | 0,00 | 0,00 | NA | NA |
| MIR4633   | 0,00 | 0,00 | 0,00 | 0,00 | NA | NA |
| MIR4634   | 0,00 | 0,00 | 0,00 | 0,00 | NA | NA |
| MIR4635   | 0,00 | 0,00 | 0,00 | 0,00 | NA | NA |
| MIR4636   | 0,00 | 0,00 | 0,00 | 0,00 | NA | NA |
| MIR4638   | 0,00 | 0,00 | 0,00 | 0,00 | NA | NA |
| MIR4640   | 0,00 | 0,00 | 0,00 | 0,00 | NA | NA |
| MIR4641   | 0,00 | 0,00 | 0,00 | 0,00 | NA | NA |
| MIR4642   | 0,00 | 0,00 | 0,00 | 0,00 | NA | NA |
| MIR4643   | 0,00 | 0,00 | 0,00 | 0,00 | NA | NA |
| MIR4645   | 0,00 | 0,00 | 0,00 | 0,00 | NA | NA |
| MIR4646   | 0,00 | 0,00 | 0,00 | 0,00 | NA | NA |
| MIR4647   | 0,00 | 0,00 | 0,00 | 0,00 | NA | NA |
| MIR4648   | 0,00 | 0,00 | 0,00 | 0,00 | NA | NA |
| MIR4649   | 0,00 | 0,00 | 0,00 | 0,00 | NA | NA |
| MIR4650-1 | 0,00 | 0,00 | 0,00 | 0,00 | NA | NA |
| MIR4650-2 | 0,00 | 0,00 | 0,00 | 0,00 | NA | NA |
| MIR4651   | 0,00 | 0,00 | 0,00 | 0,00 | NA | NA |
| MIR4652   | 0,00 | 0,00 | 0,00 | 0,00 | NA | NA |
| MIR4653   | 0,00 | 0,00 | 0,00 | 0,00 | NA | NA |
| MIR4654   | 0,00 | 0,00 | 0,00 | 0,00 | NA | NA |
| MIR4655   | 0,00 | 0,00 | 0,00 | 0,00 | NA | NA |
| MIR4656   | 0,00 | 0,00 | 0,00 | 0,00 | NA | NA |
| MIR4657   | 0,00 | 0,00 | 0,00 | 0,00 | NA | NA |
| MIR4658   | 0,00 | 0,00 | 0,00 | 0,00 | NA | NA |
| MIR4659A  | 0,00 | 0,00 | 0,00 | 0,00 | NA | NA |
| MIR4659B  | 0,00 | 0,00 | 0,00 | 0,00 | NA | NA |
| MIR4660   | 0,00 | 0,00 | 0,00 | 0,00 | NA | NA |
| MIR4662A  | 0,00 | 0,00 | 0,00 | 0,00 | NA | NA |
| MIR4662B  | 0,00 | 0,00 | 0,00 | 0,00 | NA | NA |
| MIR4663   | 0,00 | 0,00 | 0,00 | 0,00 | NA | NA |
| MIR4664   | 0,00 | 0,00 | 0,00 | 0,00 | NA | NA |
| MIR4665   | 0,00 | 0,00 | 0,00 | 0,00 | NA | NA |
| MIR4666A  | 0,00 | 0,00 | 0,00 | 0,00 | NA | NA |
| MIR4667   | 0,00 | 0,00 | 0,00 | 0,00 | NA | NA |
| MIR4669   | 0,00 | 0,00 | 0,00 | 0,00 | NA | NA |
| MIR4670   | 0,00 | 0,00 | 0,00 | 0,00 | NA | NA |
| MIR4671   | 0,00 | 0,00 | 0,00 | 0,00 | NA | NA |
| MIR4672   | 0,00 | 0,00 | 0,00 | 0,00 | NA | NA |
| MIR4673   | 0,00 | 0,00 | 0,00 | 0,00 | NA | NA |
| MIR4674   | 0,00 | 0,00 | 0,00 | 0,00 | NA | NA |
| MIR4675   | 0,00 | 0,00 | 0,00 | 0,00 | NA | NA |
| MIR4678   | 0,00 | 0,00 | 0,00 | 0,00 | NA | NA |
| MIR4679-1 | 0,00 | 0,00 | 0,00 | 0,00 | NA | NA |
| MIR4679-2 | 0,00 | 0,00 | 0,00 | 0,00 | NA | NA |
| MIR4680   | 0,00 | 0,00 | 0,00 | 0,00 | NA | NA |
| MIR4681   | 0,00 | 0,00 | 0,00 | 0,00 | NA | NA |
| MIR4682   | 0,00 | 0,00 | 0,00 | 0,00 | NA | NA |
| MIR4683   | 0,00 | 0,00 | 0,00 | 0,00 | NA | NA |
| MIR4684   | 0,00 | 0,00 | 0,00 | 0,00 | NA | NA |
| MIR4685   | 0,00 | 0,00 | 0,00 | 0,00 | NA | NA |
| MIR4686   | 0,00 | 0,00 | 0,00 | 0,00 | NA | NA |
| MIR4687   | 0,00 | 0,00 | 0,00 | 0,00 | NA | NA |

|         |      |      |      |      |    |    |
|---------|------|------|------|------|----|----|
| MIR4688 | 0,00 | 0,00 | 0,00 | 0,00 | NA | NA |
| MIR4689 | 0,00 | 0,00 | 0,00 | 0,00 | NA | NA |
| MIR4690 | 0,00 | 0,00 | 0,00 | 0,00 | NA | NA |
| MIR4691 | 0,00 | 0,00 | 0,00 | 0,00 | NA | NA |
| MIR4692 | 0,00 | 0,00 | 0,00 | 0,00 | NA | NA |
| MIR4693 | 0,00 | 0,00 | 0,00 | 0,00 | NA | NA |
| MIR4694 | 0,00 | 0,00 | 0,00 | 0,00 | NA | NA |
| MIR4695 | 0,00 | 0,00 | 0,00 | 0,00 | NA | NA |
| MIR4696 | 0,00 | 0,00 | 0,00 | 0,00 | NA | NA |
| MIR4697 | 0,00 | 0,00 | 0,00 | 0,00 | NA | NA |
| MIR4699 | 0,00 | 0,00 | 0,00 | 0,00 | NA | NA |
| MIR4700 | 0,00 | 0,00 | 0,00 | 0,00 | NA | NA |
| MIR4701 | 0,00 | 0,00 | 0,00 | 0,00 | NA | NA |
| MIR4703 | 0,00 | 0,00 | 0,00 | 0,00 | NA | NA |
| MIR4704 | 0,00 | 0,00 | 0,00 | 0,00 | NA | NA |
| MIR4706 | 0,00 | 0,00 | 0,00 | 0,00 | NA | NA |
| MIR4707 | 0,00 | 0,00 | 0,00 | 0,00 | NA | NA |
| MIR4708 | 0,00 | 0,00 | 0,00 | 0,00 | NA | NA |
| MIR4709 | 0,00 | 0,00 | 0,00 | 0,00 | NA | NA |
| MIR4710 | 0,00 | 0,00 | 0,00 | 0,00 | NA | NA |
| MIR4711 | 0,00 | 0,00 | 0,00 | 0,00 | NA | NA |
| MIR4712 | 0,00 | 0,00 | 0,00 | 0,00 | NA | NA |
| MIR4713 | 0,00 | 0,00 | 0,00 | 0,00 | NA | NA |
| MIR4714 | 0,00 | 0,00 | 0,00 | 0,00 | NA | NA |
| MIR4715 | 0,00 | 0,00 | 0,00 | 0,00 | NA | NA |
| MIR4716 | 0,00 | 0,00 | 0,00 | 0,00 | NA | NA |
| MIR4717 | 0,00 | 0,00 | 0,00 | 0,00 | NA | NA |
| MIR4718 | 0,00 | 0,00 | 0,00 | 0,00 | NA | NA |
| MIR4719 | 0,00 | 0,00 | 0,00 | 0,00 | NA | NA |
| MIR4720 | 0,00 | 0,00 | 0,00 | 0,00 | NA | NA |
| MIR4721 | 0,00 | 0,00 | 0,00 | 0,00 | NA | NA |
| MIR4723 | 0,00 | 0,00 | 0,00 | 0,00 | NA | NA |
| MIR4724 | 0,00 | 0,00 | 0,00 | 0,00 | NA | NA |
| MIR4725 | 0,00 | 0,00 | 0,00 | 0,00 | NA | NA |
| MIR4726 | 0,00 | 0,00 | 0,00 | 0,00 | NA | NA |
| MIR4728 | 0,00 | 0,00 | 0,00 | 0,00 | NA | NA |
| MIR4729 | 0,00 | 0,00 | 0,00 | 0,00 | NA | NA |
| MIR4731 | 0,00 | 0,00 | 0,00 | 0,00 | NA | NA |
| MIR4732 | 0,00 | 0,00 | 0,00 | 0,00 | NA | NA |
| MIR4733 | 0,00 | 0,00 | 0,00 | 0,00 | NA | NA |
| MIR4735 | 0,00 | 0,00 | 0,00 | 0,00 | NA | NA |
| MIR4738 | 0,00 | 0,00 | 0,00 | 0,00 | NA | NA |
| MIR4739 | 0,00 | 0,00 | 0,00 | 0,00 | NA | NA |
| MIR4740 | 0,00 | 0,00 | 0,00 | 0,00 | NA | NA |
| MIR4741 | 0,00 | 0,00 | 0,00 | 0,00 | NA | NA |
| MIR4742 | 0,00 | 0,00 | 0,00 | 0,00 | NA | NA |
| MIR4743 | 0,00 | 0,00 | 0,00 | 0,00 | NA | NA |
| MIR4744 | 0,00 | 0,00 | 0,00 | 0,00 | NA | NA |
| MIR4745 | 0,00 | 0,00 | 0,00 | 0,00 | NA | NA |
| MIR4746 | 0,00 | 0,00 | 0,00 | 0,00 | NA | NA |
| MIR4747 | 0,00 | 0,00 | 0,00 | 0,00 | NA | NA |
| MIR4748 | 0,00 | 0,00 | 0,00 | 0,00 | NA | NA |
| MIR4749 | 0,00 | 0,00 | 0,00 | 0,00 | NA | NA |
| MIR4750 | 0,00 | 0,00 | 0,00 | 0,00 | NA | NA |
| MIR4751 | 0,00 | 0,00 | 0,00 | 0,00 | NA | NA |

|           |      |      |      |      |    |    |
|-----------|------|------|------|------|----|----|
| MIR4752   | 0,00 | 0,00 | 0,00 | 0,00 | NA | NA |
| MIR4753   | 0,00 | 0,00 | 0,00 | 0,00 | NA | NA |
| MIR4755   | 0,00 | 0,00 | 0,00 | 0,00 | NA | NA |
| MIR4756   | 0,00 | 0,00 | 0,00 | 0,00 | NA | NA |
| MIR4757   | 0,00 | 0,00 | 0,00 | 0,00 | NA | NA |
| MIR4758   | 0,00 | 0,00 | 0,00 | 0,00 | NA | NA |
| MIR4759   | 0,00 | 0,00 | 0,00 | 0,00 | NA | NA |
| MIR4760   | 0,00 | 0,00 | 0,00 | 0,00 | NA | NA |
| MIR4761   | 0,00 | 0,00 | 0,00 | 0,00 | NA | NA |
| MIR4763   | 0,00 | 0,00 | 0,00 | 0,00 | NA | NA |
| MIR4764   | 0,00 | 0,00 | 0,00 | 0,00 | NA | NA |
| MIR4765   | 0,00 | 0,00 | 0,00 | 0,00 | NA | NA |
| MIR4767   | 0,00 | 0,00 | 0,00 | 0,00 | NA | NA |
| MIR4768   | 0,00 | 0,00 | 0,00 | 0,00 | NA | NA |
| MIR4769   | 0,00 | 0,00 | 0,00 | 0,00 | NA | NA |
| MIR4770   | 0,00 | 0,00 | 0,00 | 0,00 | NA | NA |
| MIR4771-1 | 0,00 | 0,00 | 0,00 | 0,00 | NA | NA |
| MIR4771-2 | 0,00 | 0,00 | 0,00 | 0,00 | NA | NA |
| MIR4773-1 | 0,00 | 0,00 | 0,00 | 0,00 | NA | NA |
| MIR4773-2 | 0,00 | 0,00 | 0,00 | 0,00 | NA | NA |
| MIR4775   | 0,00 | 0,00 | 0,00 | 0,00 | NA | NA |
| MIR4776-1 | 0,00 | 0,00 | 0,00 | 0,00 | NA | NA |
| MIR4776-2 | 0,00 | 0,00 | 0,00 | 0,00 | NA | NA |
| MIR4777   | 0,00 | 0,00 | 0,00 | 0,00 | NA | NA |
| MIR4778   | 0,00 | 0,00 | 0,00 | 0,00 | NA | NA |
| MIR4779   | 0,00 | 0,00 | 0,00 | 0,00 | NA | NA |
| MIR4781   | 0,00 | 0,00 | 0,00 | 0,00 | NA | NA |
| MIR4782   | 0,00 | 0,00 | 0,00 | 0,00 | NA | NA |
| MIR4784   | 0,00 | 0,00 | 0,00 | 0,00 | NA | NA |
| MIR4785   | 0,00 | 0,00 | 0,00 | 0,00 | NA | NA |
| MIR4786   | 0,00 | 0,00 | 0,00 | 0,00 | NA | NA |
| MIR4787   | 0,00 | 0,00 | 0,00 | 0,00 | NA | NA |
| MIR4788   | 0,00 | 0,00 | 0,00 | 0,00 | NA | NA |
| MIR4789   | 0,00 | 0,00 | 0,00 | 0,00 | NA | NA |
| MIR4790   | 0,00 | 0,00 | 0,00 | 0,00 | NA | NA |
| MIR4791   | 0,00 | 0,00 | 0,00 | 0,00 | NA | NA |
| MIR4792   | 0,00 | 0,00 | 0,00 | 0,00 | NA | NA |
| MIR4793   | 0,00 | 0,00 | 0,00 | 0,00 | NA | NA |
| MIR4794   | 0,00 | 0,00 | 0,00 | 0,00 | NA | NA |
| MIR4795   | 0,00 | 0,00 | 0,00 | 0,00 | NA | NA |
| MIR4797   | 0,00 | 0,00 | 0,00 | 0,00 | NA | NA |
| MIR4798   | 0,00 | 0,00 | 0,00 | 0,00 | NA | NA |
| MIR4799   | 0,00 | 0,00 | 0,00 | 0,00 | NA | NA |
| MIR4800   | 0,00 | 0,00 | 0,00 | 0,00 | NA | NA |
| MIR4801   | 0,00 | 0,00 | 0,00 | 0,00 | NA | NA |
| MIR4803   | 0,00 | 0,00 | 0,00 | 0,00 | NA | NA |
| MIR483    | 0,00 | 0,00 | 0,00 | 0,00 | NA | NA |
| MIR484    | 0,00 | 0,00 | 0,00 | 0,00 | NA | NA |
| MIR485    | 0,00 | 0,00 | 0,00 | 0,00 | NA | NA |
| MIR486-1  | 0,00 | 0,00 | 0,00 | 0,00 | NA | NA |
| MIR486-2  | 0,00 | 0,00 | 0,00 | 0,00 | NA | NA |
| MIR487A   | 0,00 | 0,00 | 0,00 | 0,00 | NA | NA |
| MIR487B   | 0,00 | 0,00 | 0,00 | 0,00 | NA | NA |
| MIR488    | 0,00 | 0,00 | 0,00 | 0,00 | NA | NA |
| MIR489    | 0,00 | 0,00 | 0,00 | 0,00 | NA | NA |

|          |      |      |      |      |    |    |
|----------|------|------|------|------|----|----|
| MIR490   | 0,00 | 0,00 | 0,00 | 0,00 | NA | NA |
| MIR492   | 0,00 | 0,00 | 0,00 | 0,00 | NA | NA |
| MIR493   | 0,00 | 0,00 | 0,00 | 0,00 | NA | NA |
| MIR494   | 0,00 | 0,00 | 0,00 | 0,00 | NA | NA |
| MIR495   | 0,00 | 0,00 | 0,00 | 0,00 | NA | NA |
| MIR496   | 0,00 | 0,00 | 0,00 | 0,00 | NA | NA |
| MIR497   | 0,00 | 0,00 | 0,00 | 0,00 | NA | NA |
| MIR498   | 0,00 | 0,00 | 0,00 | 0,00 | NA | NA |
| MIR4999  | 0,00 | 0,00 | 0,00 | 0,00 | NA | NA |
| MIR499A  | 0,00 | 0,00 | 0,00 | 0,00 | NA | NA |
| MIR499B  | 0,00 | 0,00 | 0,00 | 0,00 | NA | NA |
| MIR5001  | 0,00 | 0,00 | 0,00 | 0,00 | NA | NA |
| MIR5002  | 0,00 | 0,00 | 0,00 | 0,00 | NA | NA |
| MIR5003  | 0,00 | 0,00 | 0,00 | 0,00 | NA | NA |
| MIR5004  | 0,00 | 0,00 | 0,00 | 0,00 | NA | NA |
| MIR5006  | 0,00 | 0,00 | 0,00 | 0,00 | NA | NA |
| MIR5007  | 0,00 | 0,00 | 0,00 | 0,00 | NA | NA |
| MIR5008  | 0,00 | 0,00 | 0,00 | 0,00 | NA | NA |
| MIR500A  | 0,00 | 0,00 | 0,00 | 0,00 | NA | NA |
| MIR500B  | 0,00 | 0,00 | 0,00 | 0,00 | NA | NA |
| MIR501   | 0,00 | 0,00 | 0,00 | 0,00 | NA | NA |
| MIR5010  | 0,00 | 0,00 | 0,00 | 0,00 | NA | NA |
| MIR5011  | 0,00 | 0,00 | 0,00 | 0,00 | NA | NA |
| MIR502   | 0,00 | 0,00 | 0,00 | 0,00 | NA | NA |
| MIR503   | 0,00 | 0,00 | 0,00 | 0,00 | NA | NA |
| MIR504   | 0,00 | 0,00 | 0,00 | 0,00 | NA | NA |
| MIR5047  | 0,00 | 0,00 | 0,00 | 0,00 | NA | NA |
| MIR508   | 0,00 | 0,00 | 0,00 | 0,00 | NA | NA |
| MIR5088  | 0,00 | 0,00 | 0,00 | 0,00 | NA | NA |
| MIR5089  | 0,00 | 0,00 | 0,00 | 0,00 | NA | NA |
| MIR509-1 | 0,00 | 0,00 | 0,00 | 0,00 | NA | NA |
| MIR509-2 | 0,00 | 0,00 | 0,00 | 0,00 | NA | NA |
| MIR509-3 | 0,00 | 0,00 | 0,00 | 0,00 | NA | NA |
| MIR5090  | 0,00 | 0,00 | 0,00 | 0,00 | NA | NA |
| MIR5091  | 0,00 | 0,00 | 0,00 | 0,00 | NA | NA |
| MIR5092  | 0,00 | 0,00 | 0,00 | 0,00 | NA | NA |
| MIR5093  | 0,00 | 0,00 | 0,00 | 0,00 | NA | NA |
| MIR5100  | 0,00 | 0,00 | 0,00 | 0,00 | NA | NA |
| MIR512-1 | 0,00 | 0,00 | 0,00 | 0,00 | NA | NA |
| MIR512-2 | 0,00 | 0,00 | 0,00 | 0,00 | NA | NA |
| MIR513A1 | 0,00 | 0,00 | 0,00 | 0,00 | NA | NA |
| MIR513A2 | 0,00 | 0,00 | 0,00 | 0,00 | NA | NA |
| MIR513C  | 0,00 | 0,00 | 0,00 | 0,00 | NA | NA |
| MIR514A1 | 0,00 | 0,00 | 0,00 | 0,00 | NA | NA |
| MIR514A2 | 0,00 | 0,00 | 0,00 | 0,00 | NA | NA |
| MIR514A3 | 0,00 | 0,00 | 0,00 | 0,00 | NA | NA |
| MIR514B  | 0,00 | 0,00 | 0,00 | 0,00 | NA | NA |
| MIR515-1 | 0,00 | 0,00 | 0,00 | 0,00 | NA | NA |
| MIR515-2 | 0,00 | 0,00 | 0,00 | 0,00 | NA | NA |
| MIR516A1 | 0,00 | 0,00 | 0,00 | 0,00 | NA | NA |
| MIR516A2 | 0,00 | 0,00 | 0,00 | 0,00 | NA | NA |
| MIR516B1 | 0,00 | 0,00 | 0,00 | 0,00 | NA | NA |
| MIR516B2 | 0,00 | 0,00 | 0,00 | 0,00 | NA | NA |
| MIR517A  | 0,00 | 0,00 | 0,00 | 0,00 | NA | NA |
| MIR517B  | 0,00 | 0,00 | 0,00 | 0,00 | NA | NA |

|           |      |      |      |      |    |    |
|-----------|------|------|------|------|----|----|
| MIR517C   | 0,00 | 0,00 | 0,00 | 0,00 | NA | NA |
| MIR5187   | 0,00 | 0,00 | 0,00 | 0,00 | NA | NA |
| MIR5189   | 0,00 | 0,00 | 0,00 | 0,00 | NA | NA |
| MIR518A1  | 0,00 | 0,00 | 0,00 | 0,00 | NA | NA |
| MIR518A2  | 0,00 | 0,00 | 0,00 | 0,00 | NA | NA |
| MIR518B   | 0,00 | 0,00 | 0,00 | 0,00 | NA | NA |
| MIR518C   | 0,00 | 0,00 | 0,00 | 0,00 | NA | NA |
| MIR518D   | 0,00 | 0,00 | 0,00 | 0,00 | NA | NA |
| MIR518E   | 0,00 | 0,00 | 0,00 | 0,00 | NA | NA |
| MIR5190   | 0,00 | 0,00 | 0,00 | 0,00 | NA | NA |
| MIR5191   | 0,00 | 0,00 | 0,00 | 0,00 | NA | NA |
| MIR5193   | 0,00 | 0,00 | 0,00 | 0,00 | NA | NA |
| MIR5196   | 0,00 | 0,00 | 0,00 | 0,00 | NA | NA |
| MIR5197   | 0,00 | 0,00 | 0,00 | 0,00 | NA | NA |
| MIR519A1  | 0,00 | 0,00 | 0,00 | 0,00 | NA | NA |
| MIR519A2  | 0,00 | 0,00 | 0,00 | 0,00 | NA | NA |
| MIR519B   | 0,00 | 0,00 | 0,00 | 0,00 | NA | NA |
| MIR519C   | 0,00 | 0,00 | 0,00 | 0,00 | NA | NA |
| MIR519D   | 0,00 | 0,00 | 0,00 | 0,00 | NA | NA |
| MIR519E   | 0,00 | 0,00 | 0,00 | 0,00 | NA | NA |
| MIR520A   | 0,00 | 0,00 | 0,00 | 0,00 | NA | NA |
| MIR520B   | 0,00 | 0,00 | 0,00 | 0,00 | NA | NA |
| MIR520C   | 0,00 | 0,00 | 0,00 | 0,00 | NA | NA |
| MIR520D   | 0,00 | 0,00 | 0,00 | 0,00 | NA | NA |
| MIR520E   | 0,00 | 0,00 | 0,00 | 0,00 | NA | NA |
| MIR520F   | 0,00 | 0,00 | 0,00 | 0,00 | NA | NA |
| MIR520G   | 0,00 | 0,00 | 0,00 | 0,00 | NA | NA |
| MIR520H   | 0,00 | 0,00 | 0,00 | 0,00 | NA | NA |
| MIR521-1  | 0,00 | 0,00 | 0,00 | 0,00 | NA | NA |
| MIR521-2  | 0,00 | 0,00 | 0,00 | 0,00 | NA | NA |
| MIR522    | 0,00 | 0,00 | 0,00 | 0,00 | NA | NA |
| MIR523    | 0,00 | 0,00 | 0,00 | 0,00 | NA | NA |
| MIR524    | 0,00 | 0,00 | 0,00 | 0,00 | NA | NA |
| MIR525    | 0,00 | 0,00 | 0,00 | 0,00 | NA | NA |
| MIR526A1  | 0,00 | 0,00 | 0,00 | 0,00 | NA | NA |
| MIR526A2  | 0,00 | 0,00 | 0,00 | 0,00 | NA | NA |
| MIR526B   | 0,00 | 0,00 | 0,00 | 0,00 | NA | NA |
| MIR527    | 0,00 | 0,00 | 0,00 | 0,00 | NA | NA |
| MIR532    | 0,00 | 0,00 | 0,00 | 0,00 | NA | NA |
| MIR539    | 0,00 | 0,00 | 0,00 | 0,00 | NA | NA |
| MIR541    | 0,00 | 0,00 | 0,00 | 0,00 | NA | NA |
| MIR542    | 0,00 | 0,00 | 0,00 | 0,00 | NA | NA |
| MIR543    | 0,00 | 0,00 | 0,00 | 0,00 | NA | NA |
| MIR544A   | 0,00 | 0,00 | 0,00 | 0,00 | NA | NA |
| MIR544B   | 0,00 | 0,00 | 0,00 | 0,00 | NA | NA |
| MIR548A3  | 0,00 | 0,00 | 0,00 | 0,00 | NA | NA |
| MIR548AB  | 0,00 | 0,00 | 0,00 | 0,00 | NA | NA |
| MIR548AE1 | 0,00 | 0,00 | 0,00 | 0,00 | NA | NA |
| MIR548AG1 | 0,00 | 0,00 | 0,00 | 0,00 | NA | NA |
| MIR548AG2 | 0,00 | 0,00 | 0,00 | 0,00 | NA | NA |
| MIR548AH  | 0,00 | 0,00 | 0,00 | 0,00 | NA | NA |
| MIR548AM  | 0,00 | 0,00 | 0,00 | 0,00 | NA | NA |
| MIR548AN  | 0,00 | 0,00 | 0,00 | 0,00 | NA | NA |
| MIR548AO  | 0,00 | 0,00 | 0,00 | 0,00 | NA | NA |
| MIR548AR  | 0,00 | 0,00 | 0,00 | 0,00 | NA | NA |

|          |      |      |      |      |    |    |
|----------|------|------|------|------|----|----|
| MIR548AS | 0,00 | 0,00 | 0,00 | 0,00 | NA | NA |
| MIR548AT | 0,00 | 0,00 | 0,00 | 0,00 | NA | NA |
| MIR548AV | 0,00 | 0,00 | 0,00 | 0,00 | NA | NA |
| MIR548AW | 0,00 | 0,00 | 0,00 | 0,00 | NA | NA |
| MIR548AX | 0,00 | 0,00 | 0,00 | 0,00 | NA | NA |
| MIR548AY | 0,00 | 0,00 | 0,00 | 0,00 | NA | NA |
| MIR548B  | 0,00 | 0,00 | 0,00 | 0,00 | NA | NA |
| MIR548BA | 0,00 | 0,00 | 0,00 | 0,00 | NA | NA |
| MIR548BB | 0,00 | 0,00 | 0,00 | 0,00 | NA | NA |
| MIR548F1 | 0,00 | 0,00 | 0,00 | 0,00 | NA | NA |
| MIR548F3 | 0,00 | 0,00 | 0,00 | 0,00 | NA | NA |
| MIR548F4 | 0,00 | 0,00 | 0,00 | 0,00 | NA | NA |
| MIR548F5 | 0,00 | 0,00 | 0,00 | 0,00 | NA | NA |
| MIR548G  | 0,00 | 0,00 | 0,00 | 0,00 | NA | NA |
| MIR548H1 | 0,00 | 0,00 | 0,00 | 0,00 | NA | NA |
| MIR548H2 | 0,00 | 0,00 | 0,00 | 0,00 | NA | NA |
| MIR548H5 | 0,00 | 0,00 | 0,00 | 0,00 | NA | NA |
| MIR548I1 | 0,00 | 0,00 | 0,00 | 0,00 | NA | NA |
| MIR548I2 | 0,00 | 0,00 | 0,00 | 0,00 | NA | NA |
| MIR548I3 | 0,00 | 0,00 | 0,00 | 0,00 | NA | NA |
| MIR548I4 | 0,00 | 0,00 | 0,00 | 0,00 | NA | NA |
| MIR548J  | 0,00 | 0,00 | 0,00 | 0,00 | NA | NA |
| MIR548K  | 0,00 | 0,00 | 0,00 | 0,00 | NA | NA |
| MIR548M  | 0,00 | 0,00 | 0,00 | 0,00 | NA | NA |
| MIR548N  | 0,00 | 0,00 | 0,00 | 0,00 | NA | NA |
| MIR548P  | 0,00 | 0,00 | 0,00 | 0,00 | NA | NA |
| MIR548S  | 0,00 | 0,00 | 0,00 | 0,00 | NA | NA |
| MIR548U  | 0,00 | 0,00 | 0,00 | 0,00 | NA | NA |
| MIR548V  | 0,00 | 0,00 | 0,00 | 0,00 | NA | NA |
| MIR548X  | 0,00 | 0,00 | 0,00 | 0,00 | NA | NA |
| MIR549A  | 0,00 | 0,00 | 0,00 | 0,00 | NA | NA |
| MIR550A1 | 0,00 | 0,00 | 0,00 | 0,00 | NA | NA |
| MIR550A2 | 0,00 | 0,00 | 0,00 | 0,00 | NA | NA |
| MIR550A3 | 0,00 | 0,00 | 0,00 | 0,00 | NA | NA |
| MIR550B1 | 0,00 | 0,00 | 0,00 | 0,00 | NA | NA |
| MIR550B2 | 0,00 | 0,00 | 0,00 | 0,00 | NA | NA |
| MIR551A  | 0,00 | 0,00 | 0,00 | 0,00 | NA | NA |
| MIR551B  | 0,00 | 0,00 | 0,00 | 0,00 | NA | NA |
| MIR552   | 0,00 | 0,00 | 0,00 | 0,00 | NA | NA |
| MIR553   | 0,00 | 0,00 | 0,00 | 0,00 | NA | NA |
| MIR554   | 0,00 | 0,00 | 0,00 | 0,00 | NA | NA |
| MIR556   | 0,00 | 0,00 | 0,00 | 0,00 | NA | NA |
| MIR557   | 0,00 | 0,00 | 0,00 | 0,00 | NA | NA |
| MIR5571  | 0,00 | 0,00 | 0,00 | 0,00 | NA | NA |
| MIR5572  | 0,00 | 0,00 | 0,00 | 0,00 | NA | NA |
| MIR5579  | 0,00 | 0,00 | 0,00 | 0,00 | NA | NA |
| MIR558   | 0,00 | 0,00 | 0,00 | 0,00 | NA | NA |
| MIR5580  | 0,00 | 0,00 | 0,00 | 0,00 | NA | NA |
| MIR5582  | 0,00 | 0,00 | 0,00 | 0,00 | NA | NA |
| MIR5584  | 0,00 | 0,00 | 0,00 | 0,00 | NA | NA |
| MIR5586  | 0,00 | 0,00 | 0,00 | 0,00 | NA | NA |
| MIR5587  | 0,00 | 0,00 | 0,00 | 0,00 | NA | NA |
| MIR5588  | 0,00 | 0,00 | 0,00 | 0,00 | NA | NA |
| MIR5589  | 0,00 | 0,00 | 0,00 | 0,00 | NA | NA |
| MIR559   | 0,00 | 0,00 | 0,00 | 0,00 | NA | NA |



|           |      |      |      |      |    |    |
|-----------|------|------|------|------|----|----|
| MIR5590   | 0,00 | 0,00 | 0,00 | 0,00 | NA | NA |
| MIR5591   | 0,00 | 0,00 | 0,00 | 0,00 | NA | NA |
| MIR562    | 0,00 | 0,00 | 0,00 | 0,00 | NA | NA |
| MIR563    | 0,00 | 0,00 | 0,00 | 0,00 | NA | NA |
| MIR564    | 0,00 | 0,00 | 0,00 | 0,00 | NA | NA |
| MIR566    | 0,00 | 0,00 | 0,00 | 0,00 | NA | NA |
| MIR567    | 0,00 | 0,00 | 0,00 | 0,00 | NA | NA |
| MIR5680   | 0,00 | 0,00 | 0,00 | 0,00 | NA | NA |
| MIR5681A  | 0,00 | 0,00 | 0,00 | 0,00 | NA | NA |
| MIR5681B  | 0,00 | 0,00 | 0,00 | 0,00 | NA | NA |
| MIR5682   | 0,00 | 0,00 | 0,00 | 0,00 | NA | NA |
| MIR5683   | 0,00 | 0,00 | 0,00 | 0,00 | NA | NA |
| MIR5684   | 0,00 | 0,00 | 0,00 | 0,00 | NA | NA |
| MIR5688   | 0,00 | 0,00 | 0,00 | 0,00 | NA | NA |
| MIR5689   | 0,00 | 0,00 | 0,00 | 0,00 | NA | NA |
| MIR569    | 0,00 | 0,00 | 0,00 | 0,00 | NA | NA |
| MIR5691   | 0,00 | 0,00 | 0,00 | 0,00 | NA | NA |
| MIR5692A2 | 0,00 | 0,00 | 0,00 | 0,00 | NA | NA |
| MIR5692C1 | 0,00 | 0,00 | 0,00 | 0,00 | NA | NA |
| MIR5693   | 0,00 | 0,00 | 0,00 | 0,00 | NA | NA |
| MIR5694   | 0,00 | 0,00 | 0,00 | 0,00 | NA | NA |
| MIR5696   | 0,00 | 0,00 | 0,00 | 0,00 | NA | NA |
| MIR5697   | 0,00 | 0,00 | 0,00 | 0,00 | NA | NA |
| MIR5698   | 0,00 | 0,00 | 0,00 | 0,00 | NA | NA |
| MIR5699   | 0,00 | 0,00 | 0,00 | 0,00 | NA | NA |
| MIR5700   | 0,00 | 0,00 | 0,00 | 0,00 | NA | NA |
| MIR5701-1 | 0,00 | 0,00 | 0,00 | 0,00 | NA | NA |
| MIR5701-2 | 0,00 | 0,00 | 0,00 | 0,00 | NA | NA |
| MIR5701-3 | 0,00 | 0,00 | 0,00 | 0,00 | NA | NA |
| MIR5702   | 0,00 | 0,00 | 0,00 | 0,00 | NA | NA |
| MIR5703   | 0,00 | 0,00 | 0,00 | 0,00 | NA | NA |
| MIR5704   | 0,00 | 0,00 | 0,00 | 0,00 | NA | NA |
| MIR5705   | 0,00 | 0,00 | 0,00 | 0,00 | NA | NA |
| MIR5707   | 0,00 | 0,00 | 0,00 | 0,00 | NA | NA |
| MIR571    | 0,00 | 0,00 | 0,00 | 0,00 | NA | NA |
| MIR572    | 0,00 | 0,00 | 0,00 | 0,00 | NA | NA |
| MIR5739   | 0,00 | 0,00 | 0,00 | 0,00 | NA | NA |
| MIR574    | 0,00 | 0,00 | 0,00 | 0,00 | NA | NA |
| MIR575    | 0,00 | 0,00 | 0,00 | 0,00 | NA | NA |
| MIR577    | 0,00 | 0,00 | 0,00 | 0,00 | NA | NA |
| MIR578    | 0,00 | 0,00 | 0,00 | 0,00 | NA | NA |
| MIR5787   | 0,00 | 0,00 | 0,00 | 0,00 | NA | NA |
| MIR582    | 0,00 | 0,00 | 0,00 | 0,00 | NA | NA |
| MIR583    | 0,00 | 0,00 | 0,00 | 0,00 | NA | NA |
| MIR584    | 0,00 | 0,00 | 0,00 | 0,00 | NA | NA |
| MIR585    | 0,00 | 0,00 | 0,00 | 0,00 | NA | NA |
| MIR586    | 0,00 | 0,00 | 0,00 | 0,00 | NA | NA |
| MIR587    | 0,00 | 0,00 | 0,00 | 0,00 | NA | NA |
| MIR590    | 0,00 | 0,00 | 0,00 | 0,00 | NA | NA |
| MIR592    | 0,00 | 0,00 | 0,00 | 0,00 | NA | NA |
| MIR593    | 0,00 | 0,00 | 0,00 | 0,00 | NA | NA |
| MIR595    | 0,00 | 0,00 | 0,00 | 0,00 | NA | NA |
| MIR596    | 0,00 | 0,00 | 0,00 | 0,00 | NA | NA |
| MIR598    | 0,00 | 0,00 | 0,00 | 0,00 | NA | NA |
| MIR599    | 0,00 | 0,00 | 0,00 | 0,00 | NA | NA |

|         |      |      |      |      |    |    |
|---------|------|------|------|------|----|----|
| MIR600  | 0,00 | 0,00 | 0,00 | 0,00 | NA | NA |
| MIR603  | 0,00 | 0,00 | 0,00 | 0,00 | NA | NA |
| MIR605  | 0,00 | 0,00 | 0,00 | 0,00 | NA | NA |
| MIR6068 | 0,00 | 0,00 | 0,00 | 0,00 | NA | NA |
| MIR6069 | 0,00 | 0,00 | 0,00 | 0,00 | NA | NA |
| MIR6070 | 0,00 | 0,00 | 0,00 | 0,00 | NA | NA |
| MIR6072 | 0,00 | 0,00 | 0,00 | 0,00 | NA | NA |
| MIR6073 | 0,00 | 0,00 | 0,00 | 0,00 | NA | NA |
| MIR6074 | 0,00 | 0,00 | 0,00 | 0,00 | NA | NA |
| MIR6076 | 0,00 | 0,00 | 0,00 | 0,00 | NA | NA |
| MIR6078 | 0,00 | 0,00 | 0,00 | 0,00 | NA | NA |
| MIR6079 | 0,00 | 0,00 | 0,00 | 0,00 | NA | NA |
| MIR608  | 0,00 | 0,00 | 0,00 | 0,00 | NA | NA |
| MIR6080 | 0,00 | 0,00 | 0,00 | 0,00 | NA | NA |
| MIR6081 | 0,00 | 0,00 | 0,00 | 0,00 | NA | NA |
| MIR6082 | 0,00 | 0,00 | 0,00 | 0,00 | NA | NA |
| MIR6083 | 0,00 | 0,00 | 0,00 | 0,00 | NA | NA |
| MIR6084 | 0,00 | 0,00 | 0,00 | 0,00 | NA | NA |
| MIR6085 | 0,00 | 0,00 | 0,00 | 0,00 | NA | NA |
| MIR6086 | 0,00 | 0,00 | 0,00 | 0,00 | NA | NA |
| MIR6088 | 0,00 | 0,00 | 0,00 | 0,00 | NA | NA |
| MIR6089 | 0,00 | 0,00 | 0,00 | 0,00 | NA | NA |
| MIR609  | 0,00 | 0,00 | 0,00 | 0,00 | NA | NA |
| MIR6090 | 0,00 | 0,00 | 0,00 | 0,00 | NA | NA |
| MIR610  | 0,00 | 0,00 | 0,00 | 0,00 | NA | NA |
| MIR611  | 0,00 | 0,00 | 0,00 | 0,00 | NA | NA |
| MIR612  | 0,00 | 0,00 | 0,00 | 0,00 | NA | NA |
| MIR6124 | 0,00 | 0,00 | 0,00 | 0,00 | NA | NA |
| MIR6125 | 0,00 | 0,00 | 0,00 | 0,00 | NA | NA |
| MIR6126 | 0,00 | 0,00 | 0,00 | 0,00 | NA | NA |
| MIR6127 | 0,00 | 0,00 | 0,00 | 0,00 | NA | NA |
| MIR6128 | 0,00 | 0,00 | 0,00 | 0,00 | NA | NA |
| MIR6129 | 0,00 | 0,00 | 0,00 | 0,00 | NA | NA |
| MIR613  | 0,00 | 0,00 | 0,00 | 0,00 | NA | NA |
| MIR6130 | 0,00 | 0,00 | 0,00 | 0,00 | NA | NA |
| MIR6131 | 0,00 | 0,00 | 0,00 | 0,00 | NA | NA |
| MIR6132 | 0,00 | 0,00 | 0,00 | 0,00 | NA | NA |
| MIR6134 | 0,00 | 0,00 | 0,00 | 0,00 | NA | NA |
| MIR614  | 0,00 | 0,00 | 0,00 | 0,00 | NA | NA |
| MIR615  | 0,00 | 0,00 | 0,00 | 0,00 | NA | NA |
| MIR6165 | 0,00 | 0,00 | 0,00 | 0,00 | NA | NA |
| MIR617  | 0,00 | 0,00 | 0,00 | 0,00 | NA | NA |
| MIR618  | 0,00 | 0,00 | 0,00 | 0,00 | NA | NA |
| MIR620  | 0,00 | 0,00 | 0,00 | 0,00 | NA | NA |
| MIR621  | 0,00 | 0,00 | 0,00 | 0,00 | NA | NA |
| MIR622  | 0,00 | 0,00 | 0,00 | 0,00 | NA | NA |
| MIR623  | 0,00 | 0,00 | 0,00 | 0,00 | NA | NA |
| MIR624  | 0,00 | 0,00 | 0,00 | 0,00 | NA | NA |
| MIR626  | 0,00 | 0,00 | 0,00 | 0,00 | NA | NA |
| MIR627  | 0,00 | 0,00 | 0,00 | 0,00 | NA | NA |
| MIR628  | 0,00 | 0,00 | 0,00 | 0,00 | NA | NA |
| MIR629  | 0,00 | 0,00 | 0,00 | 0,00 | NA | NA |
| MIR631  | 0,00 | 0,00 | 0,00 | 0,00 | NA | NA |
| MIR633  | 0,00 | 0,00 | 0,00 | 0,00 | NA | NA |
| MIR634  | 0,00 | 0,00 | 0,00 | 0,00 | NA | NA |

|           |      |      |      |      |    |    |
|-----------|------|------|------|------|----|----|
| MIR636    | 0,00 | 0,00 | 0,00 | 0,00 | NA | NA |
| MIR637    | 0,00 | 0,00 | 0,00 | 0,00 | NA | NA |
| MIR638    | 0,00 | 0,00 | 0,00 | 0,00 | NA | NA |
| MIR639    | 0,00 | 0,00 | 0,00 | 0,00 | NA | NA |
| MIR640    | 0,00 | 0,00 | 0,00 | 0,00 | NA | NA |
| MIR641    | 0,00 | 0,00 | 0,00 | 0,00 | NA | NA |
| MIR642A   | 0,00 | 0,00 | 0,00 | 0,00 | NA | NA |
| MIR642B   | 0,00 | 0,00 | 0,00 | 0,00 | NA | NA |
| MIR643    | 0,00 | 0,00 | 0,00 | 0,00 | NA | NA |
| MIR646    | 0,00 | 0,00 | 0,00 | 0,00 | NA | NA |
| MIR647    | 0,00 | 0,00 | 0,00 | 0,00 | NA | NA |
| MIR649    | 0,00 | 0,00 | 0,00 | 0,00 | NA | NA |
| MIR6499   | 0,00 | 0,00 | 0,00 | 0,00 | NA | NA |
| MIR650    | 0,00 | 1,50 | 0,00 | 0,00 | NA | NA |
| MIR6501   | 0,00 | 0,00 | 0,00 | 0,00 | NA | NA |
| MIR6502   | 0,00 | 0,00 | 0,00 | 0,00 | NA | NA |
| MIR6503   | 0,00 | 0,00 | 0,00 | 0,00 | NA | NA |
| MIR6504   | 0,00 | 0,00 | 0,00 | 0,00 | NA | NA |
| MIR6505   | 0,00 | 0,00 | 0,00 | 0,00 | NA | NA |
| MIR6506   | 0,00 | 0,00 | 0,00 | 0,00 | NA | NA |
| MIR6507   | 0,00 | 0,00 | 0,00 | 0,00 | NA | NA |
| MIR6508   | 0,00 | 0,00 | 0,00 | 0,00 | NA | NA |
| MIR6509   | 0,00 | 0,00 | 0,00 | 0,00 | NA | NA |
| MIR651    | 0,00 | 0,00 | 0,00 | 0,00 | NA | NA |
| MIR6510   | 0,00 | 0,00 | 0,00 | 0,00 | NA | NA |
| MIR6511A1 | 0,00 | 0,00 | 0,00 | 0,00 | NA | NA |
| MIR6511A2 | 0,00 | 0,00 | 0,00 | 0,00 | NA | NA |
| MIR6511A3 | 0,00 | 0,00 | 0,00 | 0,00 | NA | NA |
| MIR6511A4 | 0,00 | 0,00 | 0,00 | 0,00 | NA | NA |
| MIR6511B1 | 0,00 | 0,00 | 0,00 | 0,00 | NA | NA |
| MIR6511B2 | 0,00 | 0,00 | 0,00 | 0,00 | NA | NA |
| MIR6512   | 0,00 | 0,00 | 0,00 | 0,00 | NA | NA |
| MIR6513   | 0,00 | 0,00 | 0,00 | 0,00 | NA | NA |
| MIR6515   | 0,00 | 0,00 | 0,00 | 0,00 | NA | NA |
| MIR6516   | 0,00 | 0,00 | 0,00 | 0,00 | NA | NA |
| MIR652    | 0,00 | 0,00 | 0,00 | 0,00 | NA | NA |
| MIR653    | 0,00 | 0,00 | 0,00 | 0,00 | NA | NA |
| MIR654    | 0,00 | 0,00 | 0,00 | 0,00 | NA | NA |
| MIR655    | 0,00 | 0,00 | 0,00 | 0,00 | NA | NA |
| MIR656    | 0,00 | 0,00 | 0,00 | 0,00 | NA | NA |
| MIR657    | 0,00 | 0,00 | 0,00 | 0,00 | NA | NA |
| MIR658    | 0,00 | 0,00 | 0,00 | 0,00 | NA | NA |
| MIR659    | 0,00 | 0,00 | 0,00 | 0,00 | NA | NA |
| MIR660    | 0,00 | 0,00 | 0,00 | 0,00 | NA | NA |
| MIR661    | 0,00 | 0,00 | 0,00 | 0,00 | NA | NA |
| MIR662    | 0,00 | 0,00 | 0,00 | 0,00 | NA | NA |
| MIR663B   | 0,00 | 0,00 | 0,00 | 0,00 | NA | NA |
| MIR664B   | 0,00 | 0,00 | 0,00 | 0,00 | NA | NA |
| MIR665    | 0,00 | 0,00 | 0,00 | 0,00 | NA | NA |
| MIR668    | 0,00 | 0,00 | 0,00 | 0,00 | NA | NA |
| MIR670    | 0,00 | 0,00 | 0,00 | 0,00 | NA | NA |
| MIR671    | 0,00 | 0,00 | 0,00 | 0,00 | NA | NA |
| MIR6715B  | 0,00 | 0,00 | 0,00 | 0,00 | NA | NA |
| MIR6716   | 0,00 | 0,00 | 0,00 | 0,00 | NA | NA |
| MIR6717   | 0,00 | 0,00 | 0,00 | 0,00 | NA | NA |

|           |      |      |      |      |    |    |
|-----------|------|------|------|------|----|----|
| MIR6718   | 0,00 | 0,00 | 0,00 | 0,00 | NA | NA |
| MIR6720   | 0,00 | 0,00 | 0,00 | 0,00 | NA | NA |
| MIR6721   | 0,00 | 0,00 | 0,00 | 0,00 | NA | NA |
| MIR6722   | 0,00 | 0,00 | 0,00 | 0,00 | NA | NA |
| MIR6723   | 0,00 | 0,00 | 0,00 | 0,00 | NA | NA |
| MIR6726   | 0,00 | 0,00 | 0,00 | 0,00 | NA | NA |
| MIR6727   | 0,00 | 0,00 | 0,00 | 0,00 | NA | NA |
| MIR6729   | 0,00 | 0,00 | 0,00 | 0,00 | NA | NA |
| MIR6730   | 0,00 | 0,00 | 0,00 | 0,00 | NA | NA |
| MIR6731   | 0,00 | 0,00 | 0,00 | 0,00 | NA | NA |
| MIR6732   | 0,00 | 0,00 | 0,00 | 0,00 | NA | NA |
| MIR6733   | 0,00 | 0,00 | 0,00 | 0,00 | NA | NA |
| MIR6734   | 0,00 | 0,00 | 0,00 | 0,00 | NA | NA |
| MIR6735   | 0,00 | 0,00 | 0,00 | 0,00 | NA | NA |
| MIR6736   | 0,00 | 0,00 | 0,00 | 0,00 | NA | NA |
| MIR6737   | 0,00 | 0,00 | 0,00 | 0,00 | NA | NA |
| MIR6738   | 0,00 | 0,00 | 0,00 | 0,00 | NA | NA |
| MIR6739   | 0,00 | 0,00 | 0,00 | 0,00 | NA | NA |
| MIR6740   | 0,00 | 0,00 | 0,00 | 0,00 | NA | NA |
| MIR6741   | 0,00 | 0,00 | 0,00 | 0,00 | NA | NA |
| MIR6742   | 0,00 | 0,00 | 0,00 | 0,00 | NA | NA |
| MIR6743   | 0,00 | 0,00 | 0,00 | 0,00 | NA | NA |
| MIR6744   | 0,00 | 0,00 | 0,00 | 0,00 | NA | NA |
| MIR6745   | 0,00 | 0,00 | 0,00 | 0,00 | NA | NA |
| MIR6746   | 0,00 | 0,00 | 0,00 | 0,00 | NA | NA |
| MIR6747   | 0,00 | 0,00 | 0,00 | 0,00 | NA | NA |
| MIR6748   | 0,00 | 0,00 | 0,00 | 0,00 | NA | NA |
| MIR6749   | 0,00 | 0,00 | 0,00 | 0,00 | NA | NA |
| MIR675    | 0,00 | 0,00 | 0,00 | 0,00 | NA | NA |
| MIR6750   | 0,00 | 0,00 | 0,00 | 0,00 | NA | NA |
| MIR6751   | 0,00 | 0,00 | 0,00 | 0,00 | NA | NA |
| MIR6752   | 0,00 | 0,00 | 0,00 | 0,00 | NA | NA |
| MIR6753   | 0,00 | 0,00 | 0,00 | 0,00 | NA | NA |
| MIR6754   | 0,00 | 0,00 | 0,00 | 0,00 | NA | NA |
| MIR6755   | 0,00 | 0,00 | 0,00 | 0,00 | NA | NA |
| MIR6756   | 0,00 | 0,00 | 0,00 | 0,00 | NA | NA |
| MIR6757   | 0,00 | 0,00 | 0,00 | 0,00 | NA | NA |
| MIR6758   | 0,00 | 0,00 | 0,00 | 0,00 | NA | NA |
| MIR6759   | 0,00 | 0,00 | 0,00 | 0,00 | NA | NA |
| MIR676    | 0,00 | 0,00 | 0,00 | 0,00 | NA | NA |
| MIR6760   | 0,00 | 0,00 | 0,00 | 0,00 | NA | NA |
| MIR6762   | 0,00 | 0,00 | 0,00 | 0,00 | NA | NA |
| MIR6763   | 0,00 | 0,00 | 0,00 | 0,00 | NA | NA |
| MIR6764   | 0,00 | 0,00 | 0,00 | 0,00 | NA | NA |
| MIR6765   | 0,00 | 0,00 | 0,00 | 0,00 | NA | NA |
| MIR6766   | 0,00 | 0,00 | 0,00 | 0,00 | NA | NA |
| MIR6767   | 0,00 | 0,00 | 0,00 | 0,00 | NA | NA |
| MIR6768   | 0,00 | 0,00 | 0,00 | 0,00 | NA | NA |
| MIR6769A  | 0,00 | 0,00 | 0,00 | 0,00 | NA | NA |
| MIR6769B  | 0,00 | 0,00 | 0,00 | 0,00 | NA | NA |
| MIR6770-1 | 0,00 | 0,00 | 0,00 | 0,00 | NA | NA |
| MIR6770-2 | 0,00 | 0,00 | 0,00 | 0,00 | NA | NA |
| MIR6770-3 | 0,00 | 0,00 | 0,00 | 0,00 | NA | NA |
| MIR6771   | 0,00 | 0,00 | 0,00 | 0,00 | NA | NA |
| MIR6772   | 0,00 | 0,00 | 0,00 | 0,00 | NA | NA |

|          |      |      |      |      |    |    |
|----------|------|------|------|------|----|----|
| MIR6773  | 0,00 | 0,00 | 0,00 | 0,00 | NA | NA |
| MIR6774  | 0,00 | 0,00 | 0,00 | 0,00 | NA | NA |
| MIR6775  | 0,00 | 0,00 | 0,00 | 0,00 | NA | NA |
| MIR6776  | 0,00 | 0,00 | 0,00 | 0,00 | NA | NA |
| MIR6777  | 0,00 | 0,00 | 0,00 | 0,00 | NA | NA |
| MIR6778  | 0,00 | 0,00 | 0,00 | 0,00 | NA | NA |
| MIR6779  | 0,00 | 0,00 | 0,00 | 0,00 | NA | NA |
| MIR6780A | 0,00 | 0,00 | 0,00 | 0,00 | NA | NA |
| MIR6780B | 0,00 | 0,00 | 0,00 | 0,00 | NA | NA |
| MIR6782  | 0,00 | 0,00 | 0,00 | 0,00 | NA | NA |
| MIR6783  | 0,00 | 0,00 | 0,00 | 0,00 | NA | NA |
| MIR6784  | 0,00 | 0,00 | 0,00 | 0,00 | NA | NA |
| MIR6785  | 0,00 | 0,00 | 0,00 | 0,00 | NA | NA |
| MIR6786  | 0,00 | 0,00 | 0,00 | 0,00 | NA | NA |
| MIR6787  | 0,00 | 0,00 | 0,00 | 0,00 | NA | NA |
| MIR6788  | 0,00 | 0,00 | 0,00 | 0,00 | NA | NA |
| MIR6789  | 0,00 | 0,00 | 0,00 | 0,00 | NA | NA |
| MIR6790  | 0,00 | 0,00 | 0,00 | 0,00 | NA | NA |
| MIR6791  | 0,00 | 0,00 | 0,00 | 0,00 | NA | NA |
| MIR6792  | 0,00 | 0,00 | 0,00 | 0,00 | NA | NA |
| MIR6793  | 0,00 | 0,00 | 0,00 | 0,00 | NA | NA |
| MIR6794  | 0,00 | 0,00 | 0,00 | 0,00 | NA | NA |
| MIR6795  | 0,00 | 0,00 | 0,00 | 0,00 | NA | NA |
| MIR6796  | 0,00 | 0,00 | 0,00 | 0,00 | NA | NA |
| MIR6798  | 0,00 | 0,00 | 0,00 | 0,00 | NA | NA |
| MIR6799  | 0,00 | 0,00 | 0,00 | 0,00 | NA | NA |
| MIR6800  | 0,00 | 0,00 | 0,00 | 0,00 | NA | NA |
| MIR6801  | 0,00 | 0,00 | 0,00 | 0,00 | NA | NA |
| MIR6802  | 0,00 | 0,00 | 0,00 | 0,00 | NA | NA |
| MIR6803  | 0,00 | 0,00 | 0,00 | 0,00 | NA | NA |
| MIR6804  | 0,00 | 0,00 | 0,00 | 0,00 | NA | NA |
| MIR6805  | 0,00 | 0,00 | 0,00 | 0,00 | NA | NA |
| MIR6806  | 0,00 | 0,00 | 0,00 | 0,00 | NA | NA |
| MIR6808  | 0,00 | 0,00 | 0,00 | 0,00 | NA | NA |
| MIR6809  | 0,00 | 0,00 | 0,00 | 0,00 | NA | NA |
| MIR6810  | 0,00 | 0,00 | 0,00 | 0,00 | NA | NA |
| MIR6811  | 0,00 | 0,00 | 0,00 | 0,00 | NA | NA |
| MIR6812  | 0,00 | 0,00 | 0,00 | 0,00 | NA | NA |
| MIR6814  | 0,00 | 0,00 | 0,00 | 0,00 | NA | NA |
| MIR6815  | 0,00 | 0,00 | 0,00 | 0,00 | NA | NA |
| MIR6816  | 0,00 | 0,00 | 0,00 | 0,00 | NA | NA |
| MIR6817  | 0,00 | 0,00 | 0,00 | 0,00 | NA | NA |
| MIR6818  | 0,00 | 0,00 | 0,00 | 0,00 | NA | NA |
| MIR6819  | 0,00 | 0,00 | 0,00 | 0,00 | NA | NA |
| MIR6820  | 0,00 | 0,00 | 0,00 | 0,00 | NA | NA |
| MIR6821  | 0,00 | 0,00 | 0,00 | 0,00 | NA | NA |
| MIR6823  | 0,00 | 0,00 | 0,00 | 0,00 | NA | NA |
| MIR6824  | 0,00 | 0,00 | 0,00 | 0,00 | NA | NA |
| MIR6825  | 0,00 | 0,00 | 0,00 | 0,00 | NA | NA |
| MIR6826  | 0,00 | 0,00 | 0,00 | 0,00 | NA | NA |
| MIR6827  | 0,00 | 0,00 | 0,00 | 0,00 | NA | NA |
| MIR6828  | 0,00 | 0,00 | 0,00 | 0,00 | NA | NA |
| MIR6829  | 0,00 | 0,00 | 0,00 | 0,00 | NA | NA |
| MIR6830  | 0,00 | 0,00 | 0,00 | 0,00 | NA | NA |
| MIR6831  | 0,00 | 0,00 | 0,00 | 0,00 | NA | NA |

|           |      |      |      |      |    |    |
|-----------|------|------|------|------|----|----|
| MIR6832   | 0,00 | 0,00 | 0,00 | 0,00 | NA | NA |
| MIR6833   | 0,00 | 0,00 | 0,00 | 0,00 | NA | NA |
| MIR6834   | 0,00 | 0,00 | 0,00 | 0,00 | NA | NA |
| MIR6835   | 0,00 | 0,00 | 0,00 | 0,00 | NA | NA |
| MIR6836   | 0,00 | 0,00 | 0,00 | 0,00 | NA | NA |
| MIR6837   | 0,00 | 0,00 | 0,00 | 0,00 | NA | NA |
| MIR6838   | 0,00 | 0,00 | 0,00 | 0,00 | NA | NA |
| MIR6839   | 0,00 | 0,00 | 0,00 | 0,00 | NA | NA |
| MIR6840   | 0,00 | 0,00 | 0,00 | 0,00 | NA | NA |
| MIR6841   | 0,00 | 0,00 | 0,00 | 0,00 | NA | NA |
| MIR6842   | 0,00 | 0,00 | 0,00 | 0,00 | NA | NA |
| MIR6843   | 0,00 | 0,00 | 0,00 | 0,00 | NA | NA |
| MIR6844   | 0,00 | 0,00 | 0,00 | 0,00 | NA | NA |
| MIR6845   | 0,00 | 0,00 | 0,00 | 0,00 | NA | NA |
| MIR6846   | 0,00 | 0,00 | 0,00 | 0,00 | NA | NA |
| MIR6847   | 0,00 | 0,00 | 0,00 | 0,00 | NA | NA |
| MIR6848   | 0,00 | 0,00 | 0,00 | 0,00 | NA | NA |
| MIR6849   | 0,00 | 0,00 | 0,00 | 0,00 | NA | NA |
| MIR6850   | 0,00 | 0,00 | 0,00 | 0,00 | NA | NA |
| MIR6851   | 0,00 | 0,00 | 0,00 | 0,00 | NA | NA |
| MIR6852   | 0,00 | 0,00 | 0,00 | 0,00 | NA | NA |
| MIR6853   | 0,00 | 0,00 | 0,00 | 0,00 | NA | NA |
| MIR6854   | 0,00 | 0,00 | 0,00 | 0,00 | NA | NA |
| MIR6855   | 0,00 | 0,00 | 0,00 | 0,00 | NA | NA |
| MIR6856   | 0,00 | 0,00 | 0,00 | 0,00 | NA | NA |
| MIR6857   | 0,00 | 0,00 | 0,00 | 0,00 | NA | NA |
| MIR6858   | 0,00 | 0,00 | 0,00 | 0,00 | NA | NA |
| MIR6859-1 | 0,00 | 0,00 | 0,00 | 0,00 | NA | NA |
| MIR6859-2 | 0,00 | 0,00 | 0,00 | 0,00 | NA | NA |
| MIR6859-3 | 0,00 | 0,00 | 0,00 | 0,00 | NA | NA |
| MIR6859-4 | 0,00 | 0,00 | 0,00 | 0,00 | NA | NA |
| MIR6860   | 0,00 | 0,00 | 0,00 | 0,00 | NA | NA |
| MIR6863   | 0,00 | 0,00 | 0,00 | 0,00 | NA | NA |
| MIR6864   | 0,00 | 0,00 | 0,00 | 0,00 | NA | NA |
| MIR6865   | 0,00 | 0,00 | 0,00 | 0,00 | NA | NA |
| MIR6866   | 0,00 | 0,00 | 0,00 | 0,00 | NA | NA |
| MIR6867   | 0,00 | 0,00 | 0,00 | 0,00 | NA | NA |
| MIR6868   | 0,00 | 0,00 | 0,00 | 0,00 | NA | NA |
| MIR6869   | 0,00 | 0,00 | 0,00 | 0,00 | NA | NA |
| MIR6870   | 0,00 | 0,00 | 0,00 | 0,00 | NA | NA |
| MIR6871   | 0,00 | 0,00 | 0,00 | 0,00 | NA | NA |
| MIR6872   | 0,00 | 0,00 | 0,00 | 0,00 | NA | NA |
| MIR6873   | 0,00 | 0,00 | 0,00 | 0,00 | NA | NA |
| MIR6874   | 0,00 | 0,00 | 0,00 | 0,00 | NA | NA |
| MIR6875   | 0,00 | 0,00 | 0,00 | 0,00 | NA | NA |
| MIR6878   | 0,00 | 0,00 | 0,00 | 0,00 | NA | NA |
| MIR6879   | 0,00 | 0,00 | 0,00 | 0,00 | NA | NA |
| MIR6880   | 0,00 | 0,00 | 0,00 | 0,00 | NA | NA |
| MIR6881   | 0,00 | 0,00 | 0,00 | 0,00 | NA | NA |
| MIR6882   | 0,00 | 0,00 | 0,00 | 0,00 | NA | NA |
| MIR6883   | 0,00 | 0,00 | 0,00 | 0,00 | NA | NA |
| MIR6884   | 0,00 | 0,00 | 0,00 | 0,00 | NA | NA |
| MIR6885   | 0,00 | 0,00 | 0,00 | 0,00 | NA | NA |
| MIR6886   | 0,00 | 0,00 | 0,00 | 0,00 | NA | NA |
| MIR6887   | 0,00 | 0,00 | 0,00 | 0,00 | NA | NA |

|           |      |      |      |      |    |    |
|-----------|------|------|------|------|----|----|
| MIR6888   | 0,00 | 0,00 | 0,00 | 0,00 | NA | NA |
| MIR6889   | 0,00 | 0,00 | 0,00 | 0,00 | NA | NA |
| MIR6890   | 0,00 | 0,00 | 0,00 | 0,00 | NA | NA |
| MIR6892   | 0,00 | 0,00 | 0,00 | 0,00 | NA | NA |
| MIR6893   | 0,00 | 0,00 | 0,00 | 0,00 | NA | NA |
| MIR6894   | 0,00 | 0,00 | 0,00 | 0,00 | NA | NA |
| MIR6895   | 0,00 | 0,00 | 0,00 | 0,00 | NA | NA |
| MIR7-1    | 0,00 | 0,00 | 0,00 | 0,00 | NA | NA |
| MIR7-2    | 0,00 | 0,00 | 0,00 | 0,00 | NA | NA |
| MIR7-3    | 0,00 | 0,00 | 0,00 | 0,00 | NA | NA |
| MIR7106   | 0,00 | 0,00 | 0,00 | 0,00 | NA | NA |
| MIR7107   | 0,00 | 0,00 | 0,00 | 0,00 | NA | NA |
| MIR7108   | 0,00 | 0,00 | 0,00 | 0,00 | NA | NA |
| MIR7109   | 0,00 | 0,00 | 0,00 | 0,00 | NA | NA |
| MIR711    | 0,00 | 0,00 | 0,00 | 0,00 | NA | NA |
| MIR7110   | 0,00 | 0,00 | 0,00 | 0,00 | NA | NA |
| MIR7112   | 0,00 | 0,00 | 0,00 | 0,00 | NA | NA |
| MIR7113   | 0,00 | 0,00 | 0,00 | 0,00 | NA | NA |
| MIR7114   | 0,00 | 0,00 | 0,00 | 0,00 | NA | NA |
| MIR7150   | 0,00 | 0,00 | 0,00 | 0,00 | NA | NA |
| MIR7151   | 0,00 | 0,00 | 0,00 | 0,00 | NA | NA |
| MIR7152   | 0,00 | 0,00 | 0,00 | 0,00 | NA | NA |
| MIR7153   | 0,00 | 0,00 | 0,00 | 0,00 | NA | NA |
| MIR7154   | 0,00 | 0,00 | 0,00 | 0,00 | NA | NA |
| MIR7155   | 0,00 | 0,00 | 0,00 | 0,00 | NA | NA |
| MIR7156   | 0,00 | 0,00 | 0,00 | 0,00 | NA | NA |
| MIR7157   | 0,00 | 0,00 | 0,00 | 0,00 | NA | NA |
| MIR7158   | 0,00 | 0,00 | 0,00 | 0,00 | NA | NA |
| MIR7159   | 0,00 | 0,00 | 0,00 | 0,00 | NA | NA |
| MIR7160   | 0,00 | 0,00 | 0,00 | 0,00 | NA | NA |
| MIR7161   | 0,00 | 0,00 | 0,00 | 0,00 | NA | NA |
| MIR7162   | 0,00 | 0,00 | 0,00 | 0,00 | NA | NA |
| MIR718    | 0,00 | 0,00 | 0,00 | 0,00 | NA | NA |
| MIR7515   | 0,00 | 0,00 | 0,00 | 0,00 | NA | NA |
| MIR758    | 0,00 | 0,00 | 0,00 | 0,00 | NA | NA |
| MIR759    | 0,00 | 0,00 | 0,00 | 0,00 | NA | NA |
| MIR761    | 0,00 | 0,00 | 0,00 | 0,00 | NA | NA |
| MIR762    | 0,00 | 0,00 | 0,00 | 0,00 | NA | NA |
| MIR764    | 0,00 | 0,00 | 0,00 | 0,00 | NA | NA |
| MIR7641-1 | 0,00 | 0,00 | 0,00 | 0,00 | NA | NA |
| MIR7641-2 | 0,00 | 0,00 | 0,00 | 0,00 | NA | NA |
| MIR765    | 0,00 | 0,00 | 0,00 | 0,00 | NA | NA |
| MIR766    | 0,00 | 0,00 | 0,00 | 0,00 | NA | NA |
| MIR767    | 0,00 | 0,00 | 0,00 | 0,00 | NA | NA |
| MIR769    | 0,00 | 0,00 | 0,00 | 0,00 | NA | NA |
| MIR770    | 0,00 | 0,00 | 0,00 | 0,00 | NA | NA |
| MIR7702   | 0,00 | 0,00 | 0,00 | 0,00 | NA | NA |
| MIR7703   | 0,00 | 0,00 | 0,00 | 0,00 | NA | NA |
| MIR7704   | 0,00 | 0,00 | 0,00 | 0,00 | NA | NA |
| MIR7706   | 0,00 | 0,00 | 0,00 | 0,00 | NA | NA |
| MIR7844   | 0,00 | 0,00 | 0,00 | 0,00 | NA | NA |
| MIR7846   | 0,00 | 0,00 | 0,00 | 0,00 | NA | NA |
| MIR7847   | 0,00 | 0,00 | 0,00 | 0,00 | NA | NA |
| MIR7849   | 0,00 | 0,00 | 0,00 | 0,00 | NA | NA |
| MIR7850   | 0,00 | 0,00 | 0,00 | 0,00 | NA | NA |

|           |      |      |      |      |    |    |
|-----------|------|------|------|------|----|----|
| MIR7852   | 0,00 | 0,00 | 0,00 | 0,00 | NA | NA |
| MIR7853   | 0,00 | 0,00 | 0,00 | 0,00 | NA | NA |
| MIR7855   | 0,00 | 0,00 | 0,00 | 0,00 | NA | NA |
| MIR7856   | 0,00 | 0,00 | 0,00 | 0,00 | NA | NA |
| MIR7973-1 | 0,00 | 0,00 | 0,00 | 0,00 | NA | NA |
| MIR7973-2 | 0,00 | 0,00 | 0,00 | 0,00 | NA | NA |
| MIR7974   | 0,00 | 0,00 | 0,00 | 0,00 | NA | NA |
| MIR7975   | 0,00 | 0,00 | 0,00 | 0,00 | NA | NA |
| MIR7977   | 0,00 | 0,00 | 0,00 | 0,00 | NA | NA |
| MIR7978   | 0,00 | 0,00 | 0,00 | 0,00 | NA | NA |
| MIR802    | 0,00 | 0,00 | 0,00 | 0,00 | NA | NA |
| MIR8053   | 0,00 | 0,00 | 0,00 | 0,00 | NA | NA |
| MIR8054   | 0,00 | 0,00 | 0,00 | 0,00 | NA | NA |
| MIR8056   | 0,00 | 0,00 | 0,00 | 0,00 | NA | NA |
| MIR8058   | 0,00 | 0,00 | 0,00 | 0,00 | NA | NA |
| MIR8059   | 0,00 | 0,00 | 0,00 | 0,00 | NA | NA |
| MIR8060   | 0,00 | 0,00 | 0,00 | 0,00 | NA | NA |
| MIR8061   | 0,00 | 0,00 | 0,00 | 0,00 | NA | NA |
| MIR8062   | 0,00 | 0,00 | 0,00 | 0,00 | NA | NA |
| MIR8063   | 0,00 | 0,00 | 0,00 | 0,00 | NA | NA |
| MIR8065   | 0,00 | 0,00 | 0,00 | 0,00 | NA | NA |
| MIR8066   | 0,00 | 0,00 | 0,00 | 0,00 | NA | NA |
| MIR8067   | 0,00 | 0,00 | 0,00 | 0,00 | NA | NA |
| MIR8068   | 0,00 | 0,00 | 0,00 | 0,00 | NA | NA |
| MIR8069-1 | 0,00 | 0,00 | 0,00 | 0,00 | NA | NA |
| MIR8069-2 | 0,00 | 0,00 | 0,00 | 0,00 | NA | NA |
| MIR8070   | 0,00 | 0,00 | 0,00 | 0,00 | NA | NA |
| MIR8071-1 | 0,00 | 0,00 | 0,00 | 0,00 | NA | NA |
| MIR8071-2 | 0,00 | 0,00 | 0,00 | 0,00 | NA | NA |
| MIR8072   | 0,00 | 0,00 | 0,00 | 0,00 | NA | NA |
| MIR8073   | 0,00 | 0,00 | 0,00 | 0,00 | NA | NA |
| MIR8074   | 0,00 | 0,00 | 0,00 | 0,00 | NA | NA |
| MIR8075   | 0,00 | 0,00 | 0,00 | 0,00 | NA | NA |
| MIR8076   | 0,00 | 0,00 | 0,00 | 0,00 | NA | NA |
| MIR8077   | 0,00 | 0,00 | 0,00 | 0,00 | NA | NA |
| MIR8079   | 0,00 | 0,00 | 0,00 | 0,00 | NA | NA |
| MIR8080   | 0,00 | 0,00 | 0,00 | 0,00 | NA | NA |
| MIR8081   | 0,00 | 0,00 | 0,00 | 0,00 | NA | NA |
| MIR8082   | 0,00 | 0,00 | 0,00 | 0,00 | NA | NA |
| MIR8083   | 0,00 | 0,00 | 0,00 | 0,00 | NA | NA |
| MIR8084   | 0,00 | 0,00 | 0,00 | 0,00 | NA | NA |
| MIR8085   | 0,00 | 0,00 | 0,00 | 0,00 | NA | NA |
| MIR8087   | 0,00 | 0,00 | 0,00 | 0,00 | NA | NA |
| MIR8088   | 0,00 | 0,00 | 0,00 | 0,00 | NA | NA |
| MIR8089   | 0,00 | 0,00 | 0,00 | 0,00 | NA | NA |
| MIR873    | 0,00 | 0,00 | 0,00 | 0,00 | NA | NA |
| MIR874    | 0,00 | 0,00 | 0,00 | 0,00 | NA | NA |
| MIR875    | 0,00 | 0,00 | 0,00 | 0,00 | NA | NA |
| MIR877    | 0,00 | 0,00 | 0,00 | 0,00 | NA | NA |
| MIR885    | 0,00 | 0,00 | 0,00 | 0,00 | NA | NA |
| MIR887    | 0,00 | 0,00 | 0,00 | 0,00 | NA | NA |
| MIR888    | 0,00 | 0,00 | 0,00 | 0,00 | NA | NA |
| MIR889    | 0,00 | 0,00 | 0,00 | 0,00 | NA | NA |
| MIR890    | 0,00 | 0,00 | 0,00 | 0,00 | NA | NA |
| MIR891A   | 0,00 | 0,00 | 0,00 | 0,00 | NA | NA |



|           |      |      |      |      |    |    |
|-----------|------|------|------|------|----|----|
| MIR891B   | 0,00 | 0,00 | 0,00 | 0,00 | NA | NA |
| MIR892A   | 0,00 | 0,00 | 0,00 | 0,00 | NA | NA |
| MIR892B   | 0,00 | 0,00 | 0,00 | 0,00 | NA | NA |
| MIR892C   | 0,00 | 0,00 | 0,00 | 0,00 | NA | NA |
| MIR9-1    | 0,00 | 0,00 | 0,00 | 0,00 | NA | NA |
| MIR9-2    | 0,00 | 0,00 | 0,00 | 0,00 | NA | NA |
| MIR9-3    | 0,00 | 0,00 | 0,00 | 0,00 | NA | NA |
| MIR920    | 0,00 | 0,00 | 0,00 | 0,00 | NA | NA |
| MIR921    | 0,00 | 0,00 | 0,00 | 0,00 | NA | NA |
| MIR922    | 0,00 | 0,00 | 0,00 | 0,00 | NA | NA |
| MIR924    | 0,00 | 0,00 | 0,00 | 0,00 | NA | NA |
| MIR92A1   | 0,00 | 0,00 | 0,00 | 0,00 | NA | NA |
| MIR92A2   | 0,00 | 0,00 | 0,00 | 0,00 | NA | NA |
| MIR92B    | 0,00 | 0,00 | 0,00 | 0,00 | NA | NA |
| MIR934    | 0,00 | 0,00 | 0,00 | 0,00 | NA | NA |
| MIR935    | 0,00 | 0,00 | 0,00 | 0,00 | NA | NA |
| MIR936    | 0,00 | 0,00 | 0,00 | 0,00 | NA | NA |
| MIR937    | 0,00 | 0,00 | 0,00 | 0,00 | NA | NA |
| MIR939    | 0,00 | 0,00 | 0,00 | 0,00 | NA | NA |
| MIR940    | 0,00 | 0,00 | 0,00 | 0,00 | NA | NA |
| MIR941-2  | 0,00 | 0,00 | 0,00 | 0,00 | NA | NA |
| MIR941-3  | 0,00 | 0,00 | 0,00 | 0,00 | NA | NA |
| MIR941-4  | 0,00 | 0,00 | 0,00 | 0,00 | NA | NA |
| MIR941-5  | 0,00 | 0,00 | 0,00 | 0,00 | NA | NA |
| MIR942    | 0,00 | 0,00 | 0,00 | 0,00 | NA | NA |
| MIR943    | 0,00 | 0,00 | 0,00 | 0,00 | NA | NA |
| MIR944    | 0,00 | 0,00 | 0,00 | 0,00 | NA | NA |
| MIR95     | 0,00 | 0,00 | 0,00 | 0,00 | NA | NA |
| MIR9500   | 0,00 | 0,00 | 0,00 | 0,00 | NA | NA |
| MIR96     | 0,00 | 0,00 | 0,00 | 0,00 | NA | NA |
| MIR99A    | 0,00 | 0,00 | 0,00 | 0,00 | NA | NA |
| MIR99B    | 0,00 | 0,00 | 0,00 | 0,00 | NA | NA |
| MIRLET7A1 | 0,00 | 0,00 | 0,00 | 0,00 | NA | NA |
| MIRLET7A2 | 0,00 | 0,00 | 0,00 | 0,00 | NA | NA |
| MIRLET7A3 | 0,00 | 0,00 | 0,00 | 0,00 | NA | NA |
| MIRLET7B  | 0,00 | 0,00 | 0,00 | 0,00 | NA | NA |
| MIRLET7C  | 0,00 | 0,00 | 0,00 | 0,00 | NA | NA |
| MIRLET7E  | 0,00 | 0,00 | 0,00 | 0,00 | NA | NA |
| MIRLET7F1 | 0,00 | 0,00 | 0,00 | 0,00 | NA | NA |
| MIRLET7F2 | 0,00 | 0,00 | 0,00 | 0,00 | NA | NA |
| MIRLET7G  | 0,00 | 0,00 | 0,00 | 0,00 | NA | NA |
| MKRN3-AS1 | 0,00 | 0,00 | 0,00 | 0,00 | NA | NA |
| MKRNP2    | 0,00 | 0,00 | 0,00 | 0,00 | NA | NA |
| MKX       | 0,00 | 0,00 | 0,00 | 0,00 | NA | NA |
| MLANA     | 0,31 | 0,89 | 0,69 | 0,17 | NA | NA |
| MLC1      | 0,00 | 0,00 | 0,00 | 0,26 | NA | NA |
| MLNR      | 0,00 | 0,00 | 0,00 | 0,00 | NA | NA |
| MMD2      | 0,00 | 0,00 | 0,00 | 0,00 | NA | NA |
| MMP1      | 0,00 | 0,00 | 0,00 | 0,00 | NA | NA |
| MMP10     | 0,00 | 0,00 | 0,00 | 0,00 | NA | NA |
| MMP12     | 0,00 | 0,00 | 0,00 | 0,00 | NA | NA |
| MMP13     | 0,00 | 0,00 | 0,00 | 0,17 | NA | NA |
| MMP19     | 0,00 | 0,37 | 0,06 | 0,06 | NA | NA |
| MMP20     | 0,00 | 0,07 | 0,00 | 0,00 | NA | NA |
| MMP21     | 0,00 | 0,00 | 0,00 | 0,00 | NA | NA |

|          |      |      |      |      |    |    |
|----------|------|------|------|------|----|----|
| MMP23B   | 0,00 | 0,00 | 0,00 | 0,00 | NA | NA |
| MMP28    | 0,00 | 0,00 | 0,00 | 0,00 | NA | NA |
| MMP3     | 0,00 | 0,00 | 0,00 | 0,00 | NA | NA |
| MMP9     | 0,00 | 0,37 | 0,08 | 0,00 | NA | NA |
| MNX1     | 0,00 | 0,00 | 0,00 | 0,00 | NA | NA |
| MNX1-AS1 | 0,00 | 0,00 | 0,00 | 0,00 | NA | NA |
| MOCS1P1  | 0,00 | 0,00 | 0,00 | 0,00 | NA | NA |
| MOG      | 0,12 | 0,37 | 0,37 | 0,74 | NA | NA |
| MOGAT2   | 0,00 | 0,00 | 0,00 | 0,00 | NA | NA |
| MORN3    | 0,34 | 0,62 | 0,64 | 0,78 | NA | NA |
| MORN5    | 0,00 | 0,00 | 0,00 | 0,00 | NA | NA |
| MOS      | 0,00 | 0,00 | 0,00 | 0,00 | NA | NA |
| MOXD1    | 0,00 | 0,00 | 0,00 | 0,00 | NA | NA |
| MOXD2    | 0,00 | 0,00 | 0,00 | 0,00 | NA | NA |
| MPC1L    | 0,00 | 0,00 | 0,00 | 0,00 | NA | NA |
| MPL      | 0,00 | 0,00 | 0,00 | 0,00 | NA | NA |
| MPPED1   | 0,00 | 0,00 | 0,00 | 0,00 | NA | NA |
| MPPED2   | 0,03 | 0,12 | 0,07 | 0,00 | NA | NA |
| MRGPRE   | 0,00 | 0,00 | 0,00 | 0,00 | NA | NA |
| MRGPRF   | 0,00 | 0,00 | 0,00 | 0,00 | NA | NA |
| MRGPRG   | 0,00 | 0,00 | 0,00 | 0,00 | NA | NA |
| MRGPRX1  | 0,00 | 0,00 | 0,00 | 0,00 | NA | NA |
| MRGPRX3  | 0,00 | 0,00 | 0,00 | 0,00 | NA | NA |
| MRGPRX4  | 0,00 | 0,00 | 0,00 | 0,00 | NA | NA |
| MROH3P   | 0,00 | 0,00 | 0,00 | 0,00 | NA | NA |
| MROH4P   | 0,00 | 0,00 | 0,00 | 0,00 | NA | NA |
| MROH5    | 0,00 | 0,00 | 0,00 | 0,00 | NA | NA |
| MRP63P7  | 0,00 | 0,00 | 0,00 | 0,00 | NA | NA |
| MRPL15P1 | 0,00 | 0,00 | 0,00 | 0,00 | NA | NA |
| MRPL20P1 | 0,00 | 0,00 | 0,00 | 0,00 | NA | NA |
| MRPL22P1 | 0,00 | 0,00 | 0,00 | 0,00 | NA | NA |
| MRPL2P1  | 0,00 | 0,00 | 0,00 | 0,00 | NA | NA |
| MRPL30P1 | 0,00 | 0,00 | 0,00 | 0,00 | NA | NA |
| MRPL45P1 | 0,00 | 0,00 | 0,00 | 0,00 | NA | NA |
| MRPL57P8 | 0,00 | 0,00 | 0,00 | 0,00 | NA | NA |
| MRPL9P1  | 0,00 | 0,00 | 0,00 | 0,00 | NA | NA |
| MRPS11P1 | 0,00 | 0,00 | 0,00 | 0,00 | NA | NA |
| MRPS15P1 | 0,00 | 0,00 | 0,00 | 0,00 | NA | NA |
| MRPS16P  | 0,00 | 0,00 | 0,00 | 0,00 | NA | NA |
| MRPS17P5 | 0,00 | 0,00 | 0,00 | 0,00 | NA | NA |
| MRPS21P9 | 0,00 | 0,00 | 0,00 | 0,00 | NA | NA |
| MRPS31P1 | 0,00 | 0,00 | 0,00 | 0,00 | NA | NA |
| MRPS35P3 | 0,00 | 0,00 | 0,00 | 0,00 | NA | NA |
| MRPS36P2 | 0,00 | 0,00 | 0,00 | 0,00 | NA | NA |
| MRPS36P3 | 0,00 | 0,00 | 0,00 | 0,00 | NA | NA |
| MRPS36P4 | 0,00 | 0,00 | 0,00 | 0,00 | NA | NA |
| MRPS5P3  | 0,00 | 0,00 | 0,00 | 0,00 | NA | NA |
| MRPS5P4  | 0,00 | 0,00 | 0,00 | 0,00 | NA | NA |
| MRPS6P4  | 0,00 | 0,00 | 0,00 | 0,00 | NA | NA |
| MRRFP1   | 0,00 | 0,00 | 0,00 | 0,00 | NA | NA |
| MS4A12   | 0,00 | 0,00 | 0,00 | 0,00 | NA | NA |
| MS4A13   | 0,00 | 0,00 | 0,00 | 0,00 | NA | NA |
| MS4A15   | 0,00 | 0,00 | 0,00 | 0,00 | NA | NA |
| MS4A18   | 0,00 | 0,00 | 0,00 | 0,00 | NA | NA |
| MSGN1    | 0,00 | 0,00 | 0,00 | 0,00 | NA | NA |

|           |      |      |      |      |    |    |
|-----------|------|------|------|------|----|----|
| MSH4      | 0,00 | 0,00 | 0,00 | 0,00 | NA | NA |
| MSLNL     | 0,00 | 0,00 | 0,00 | 0,00 | NA | NA |
| MSMB      | 0,00 | 0,00 | 0,00 | 0,00 | NA | NA |
| MSNP1     | 0,00 | 0,00 | 0,00 | 0,00 | NA | NA |
| MSRB1P1   | 0,00 | 0,00 | 0,00 | 0,00 | NA | NA |
| MSTN      | 0,00 | 0,00 | 0,00 | 0,00 | NA | NA |
| MSX2      | 0,00 | 0,00 | 0,00 | 0,00 | NA | NA |
| MSX2P1    | 0,00 | 0,00 | 0,00 | 0,00 | NA | NA |
| MT1A      | 0,00 | 0,00 | 0,00 | 0,00 | NA | NA |
| MT1CP     | 0,00 | 0,00 | 0,00 | 0,00 | NA | NA |
| MT1HL1    | 0,00 | 0,00 | 0,00 | 0,00 | NA | NA |
| MT1P1     | 0,00 | 0,00 | 0,00 | 0,00 | NA | NA |
| MT1P3     | 0,00 | 0,00 | 0,00 | 0,00 | NA | NA |
| MT3       | 0,00 | 0,00 | 0,00 | 0,00 | NA | NA |
| MT4       | 0,00 | 0,00 | 0,00 | 0,00 | NA | NA |
| MTCL1     | 0,00 | 0,04 | 0,00 | 0,00 | NA | NA |
| MTCO2L    | 0,00 | 0,00 | 0,00 | 0,00 | NA | NA |
| MTCO3P1   | 0,00 | 0,00 | 0,00 | 0,00 | NA | NA |
| MTMR8     | 0,00 | 0,26 | 0,00 | 0,00 | NA | NA |
| MTND1P14  | 0,00 | 0,00 | 0,00 | 0,00 | NA | NA |
| MTND1P15  | 0,00 | 0,00 | 0,00 | 0,00 | NA | NA |
| MTND5P10  | 0,00 | 0,00 | 0,00 | 0,00 | NA | NA |
| MTNR1A    | 0,00 | 0,00 | 0,00 | 0,00 | NA | NA |
| MTNR1B    | 0,00 | 0,00 | 0,00 | 0,00 | NA | NA |
| MTRNR2L1  | 0,37 | 0,72 | 0,53 | 0,48 | NA | NA |
| MTRNR2L12 | 1,01 | 1,95 | 1,41 | 1,84 | NA | NA |
| MTRNR2L2  | 0,00 | 0,00 | 0,00 | 0,00 | NA | NA |
| MTRNR2L5  | 0,00 | 0,00 | 0,00 | 0,00 | NA | NA |
| MTRNR2L7  | 0,00 | 0,00 | 0,00 | 0,00 | NA | NA |
| MTRNR2L9  | 0,00 | 0,00 | 0,00 | 0,00 | NA | NA |
| MTUS2     | 0,05 | 0,48 | 0,00 | 0,01 | NA | NA |
| MUC13     | 0,00 | 0,09 | 0,00 | 0,27 | NA | NA |
| MUC2      | 0,00 | 0,00 | 0,00 | 0,00 | NA | NA |
| MUC7      | 0,00 | 0,00 | 0,00 | 0,00 | NA | NA |
| MUM1L1    | 0,00 | 0,00 | 0,00 | 0,00 | NA | NA |
| MXRA5     | 0,00 | 0,00 | 0,00 | 0,00 | NA | NA |
| MYADML2   | 0,00 | 0,00 | 0,00 | 0,00 | NA | NA |
| MYBPC1    | 0,00 | 0,00 | 0,00 | 0,00 | NA | NA |
| MYBPHL    | 0,00 | 0,11 | 0,00 | 0,00 | NA | NA |
| MYCL2     | 0,00 | 0,00 | 0,00 | 0,00 | NA | NA |
| MYCN      | 0,00 | 0,00 | 0,00 | 0,00 | NA | NA |
| MYEOV     | 0,30 | 0,00 | 0,65 | 0,06 | NA | NA |
| MYF6      | 0,00 | 0,00 | 0,00 | 0,00 | NA | NA |
| MYH1      | 0,00 | 0,00 | 0,00 | 0,00 | NA | NA |
| MYH15     | 0,00 | 0,00 | 0,00 | 0,04 | NA | NA |
| MYH6      | 0,00 | 0,00 | 0,00 | 0,00 | NA | NA |
| MYH7      | 0,00 | 0,00 | 0,00 | 0,00 | NA | NA |
| MYH8      | 0,00 | 0,02 | 0,00 | 0,00 | NA | NA |
| MYL10     | 0,00 | 0,00 | 0,20 | 0,16 | NA | NA |
| MYL6P     | 0,00 | 0,00 | 0,00 | 0,00 | NA | NA |
| MYL7      | 0,00 | 0,00 | 0,00 | 0,00 | NA | NA |
| MYL8P     | 0,00 | 0,00 | 0,00 | 0,00 | NA | NA |
| MYLK2     | 0,00 | 0,00 | 0,00 | 0,00 | NA | NA |
| MYMX      | 0,00 | 0,00 | 0,00 | 0,00 | NA | NA |
| MYO18B    | 0,00 | 0,02 | 0,00 | 0,00 | NA | NA |

|            |      |      |      |      |    |    |
|------------|------|------|------|------|----|----|
| MYO5B      | 0,00 | 0,09 | 0,00 | 0,00 | NA | NA |
| MYOC       | 0,00 | 0,00 | 0,00 | 0,00 | NA | NA |
| MYOD1      | 0,00 | 0,00 | 0,00 | 0,00 | NA | NA |
| MYRF       | 0,00 | 0,00 | 0,00 | 0,00 | NA | NA |
| MYRFL      | 0,00 | 0,00 | 0,00 | 0,00 | NA | NA |
| MYT1L      | 0,05 | 0,10 | 0,12 | 0,11 | NA | NA |
| MYZAP      | 0,00 | 0,00 | 0,00 | 0,00 | NA | NA |
| MZB1       | 1,19 | 1,96 | 1,37 | 1,93 | NA | NA |
| NACA2      | 0,00 | 0,00 | 0,00 | 0,00 | NA | NA |
| NACC1      | 0,03 | 0,12 | 0,07 | 0,03 | NA | NA |
| NAGS       | 0,00 | 0,08 | 0,00 | 0,06 | NA | NA |
| NAMPTP3    | 0,00 | 0,00 | 0,00 | 0,00 | NA | NA |
| NANOGNBP1  | 0,00 | 0,00 | 0,00 | 0,00 | NA | NA |
| NANOGNBP2  | 0,00 | 0,00 | 0,00 | 0,00 | NA | NA |
| NANOGNBP3  | 0,00 | 0,00 | 0,00 | 0,00 | NA | NA |
| NANOGP10   | 0,00 | 0,00 | 0,00 | 0,00 | NA | NA |
| NANOGP11   | 0,00 | 0,00 | 0,00 | 0,00 | NA | NA |
| NANOGP2    | 0,00 | 0,00 | 0,00 | 0,00 | NA | NA |
| NANOGP3    | 0,00 | 0,00 | 0,00 | 0,00 | NA | NA |
| NANOGP6    | 0,00 | 0,20 | 0,00 | 0,00 | NA | NA |
| NANOGP7    | 0,00 | 0,00 | 0,00 | 0,00 | NA | NA |
| NANOGP9    | 0,00 | 0,00 | 0,00 | 0,00 | NA | NA |
| NANOS2     | 0,00 | 0,00 | 0,00 | 0,00 | NA | NA |
| NANOS3     | 0,00 | 0,92 | 0,00 | 0,00 | NA | NA |
| NAT2       | 0,00 | 0,00 | 0,00 | 0,00 | NA | NA |
| NAT8       | 0,00 | 0,00 | 0,00 | 0,00 | NA | NA |
| NAT8B      | 0,00 | 0,00 | 0,00 | 0,00 | NA | NA |
| NATD1      | 0,07 | 0,21 | 0,13 | 0,06 | NA | NA |
| NBEA       | 0,26 | 0,00 | 0,18 | 0,14 | NA | NA |
| NBEAP1     | 0,00 | 0,00 | 0,00 | 0,00 | NA | NA |
| NBEAP3     | 0,00 | 0,00 | 0,00 | 0,00 | NA | NA |
| NBPF13P    | 0,00 | 0,00 | 0,00 | 0,00 | NA | NA |
| NCAN       | 0,00 | 0,00 | 0,00 | 0,00 | NA | NA |
| NCKAP1     | 0,07 | 0,28 | 0,14 | 0,19 | NA | NA |
| NCLP2      | 0,00 | 0,00 | 0,00 | 0,00 | NA | NA |
| NCOR1P2    | 0,00 | 0,00 | 0,00 | 0,00 | NA | NA |
| NCR2       | 0,00 | 0,00 | 0,00 | 0,00 | NA | NA |
| NCR3LG1    | 0,05 | 0,14 | 0,17 | 0,06 | NA | NA |
| NCRNA00028 | 0,00 | 0,00 | 0,00 | 0,00 | NA | NA |
| NCRNA00029 | 0,00 | 0,00 | 0,00 | 0,00 | NA | NA |
| NCRNA00110 | 0,00 | 0,00 | 0,00 | 0,00 | NA | NA |
| NCRNA00112 | 0,00 | 0,00 | 0,00 | 0,00 | NA | NA |
| NCRNA00118 | 0,00 | 0,07 | 0,00 | 0,00 | NA | NA |
| NCRNA00154 | 0,00 | 0,00 | 0,00 | 0,00 | NA | NA |
| NCRNA00157 | 0,00 | 0,00 | 0,00 | 0,00 | NA | NA |
| NCRNA00159 | 0,00 | 0,00 | 0,00 | 0,00 | NA | NA |
| NCRNA00160 | 0,00 | 0,00 | 0,00 | 0,00 | NA | NA |
| NCRNA00162 | 0,00 | 0,00 | 0,00 | 0,00 | NA | NA |
| NCRNA00163 | 0,00 | 0,00 | 0,00 | 0,00 | NA | NA |
| NCRNA00184 | 0,00 | 0,06 | 0,00 | 0,00 | NA | NA |
| NCRNA00185 | 0,00 | 0,64 | 0,17 | 0,18 | NA | NA |
| NCRNA00316 | 0,00 | 0,00 | 0,00 | 0,00 | NA | NA |
| NDFIP2     | 0,19 | 0,00 | 0,26 | 0,19 | NA | NA |
| NDP        | 0,00 | 0,15 | 0,03 | 0,08 | NA | NA |
| NDST4      | 0,00 | 0,00 | 0,00 | 0,00 | NA | NA |

|               |      |      |      |      |    |    |
|---------------|------|------|------|------|----|----|
| NDUFA4L2      | 0,00 | 0,00 | 0,00 | 0,00 | NA | NA |
| NDUFB11P1     | 0,00 | 0,00 | 0,00 | 0,00 | NA | NA |
| NDUFB8P1      | 0,00 | 0,00 | 0,00 | 0,00 | NA | NA |
| NDUFB8P2      | 0,00 | 0,00 | 0,00 | 0,00 | NA | NA |
| NECAB2        | 0,00 | 0,00 | 0,00 | 0,00 | NA | NA |
| NEFH          | 0,00 | 0,00 | 0,03 | 0,00 | NA | NA |
| NEFHL         | 0,00 | 0,00 | 0,00 | 0,00 | NA | NA |
| NEFL          | 0,00 | 0,00 | 0,00 | 0,04 | NA | NA |
| NEFM          | 0,00 | 0,08 | 0,00 | 0,00 | NA | NA |
| NEPNP         | 0,00 | 0,00 | 0,00 | 0,00 | NA | NA |
| NEU2          | 0,00 | 0,00 | 0,00 | 0,00 | NA | NA |
| NEURL2        | 0,00 | 0,00 | 0,00 | 0,00 | NA | NA |
| NEUROD4       | 0,00 | 0,00 | 0,00 | 0,00 | NA | NA |
| NEUROD6       | 0,00 | 0,00 | 0,00 | 0,00 | NA | NA |
| NEUROG1       | 0,00 | 0,00 | 0,00 | 0,00 | NA | NA |
| NF1L2         | 0,00 | 0,00 | 0,00 | 0,00 | NA | NA |
| NF1P1         | 0,00 | 0,00 | 0,00 | 0,00 | NA | NA |
| NF1P2         | 0,00 | 0,00 | 0,00 | 0,00 | NA | NA |
| NF1P3         | 0,00 | 0,00 | 0,00 | 0,00 | NA | NA |
| NFASC         | 0,16 | 0,31 | 0,12 | 0,15 | NA | NA |
| NFATC4        | 0,00 | 0,08 | 0,00 | 0,00 | NA | NA |
| NFE2L3P1      | 0,00 | 0,00 | 0,00 | 0,00 | NA | NA |
| NGB           | 0,00 | 0,00 | 0,00 | 0,00 | NA | NA |
| NGF           | 0,00 | 0,00 | 0,00 | 0,00 | NA | NA |
| NHLH2         | 0,00 | 0,00 | 0,00 | 0,00 | NA | NA |
| NHP2P2        | 0,00 | 0,00 | 0,00 | 0,00 | NA | NA |
| NICN1         | 0,49 | 1,18 | 0,77 | 0,47 | NA | NA |
| NINL          | 0,00 | 0,07 | 0,00 | 0,00 | NA | NA |
| NKAIN1        | 0,00 | 0,00 | 0,00 | 0,00 | NA | NA |
| NKX1-1        | 0,00 | 0,00 | 0,00 | 0,00 | NA | NA |
| NKX1-2        | 0,00 | 0,00 | 0,00 | 0,00 | NA | NA |
| NKX2-1        | 0,00 | 0,00 | 0,00 | 0,00 | NA | NA |
| NKX2-1-AS1    | 0,00 | 0,00 | 0,00 | 0,00 | NA | NA |
| NKX2-2        | 0,00 | 0,00 | 0,00 | 0,00 | NA | NA |
| Nkx2-2os      | 0,00 | 0,00 | 0,00 | 0,00 | NA | NA |
| NKX2-3        | 0,00 | 0,00 | 0,00 | 0,00 | NA | NA |
| NKX2-4        | 0,00 | 0,00 | 0,00 | 0,00 | NA | NA |
| NKX2-6        | 0,00 | 0,00 | 0,00 | 0,00 | NA | NA |
| NKX2-8        | 0,00 | 0,00 | 0,00 | 0,00 | NA | NA |
| NKX3-2        | 0,00 | 0,00 | 0,00 | 0,00 | NA | NA |
| NKX6-1        | 0,00 | 0,07 | 0,00 | 0,00 | NA | NA |
| NKX6-3        | 0,00 | 0,00 | 0,00 | 0,00 | NA | NA |
| NLRP13        | 0,00 | 0,00 | 0,00 | 0,00 | NA | NA |
| NLRP14        | 0,00 | 0,00 | 0,00 | 0,00 | NA | NA |
| NLRP6         | 0,00 | 0,00 | 0,00 | 0,00 | NA | NA |
| NLRP9         | 0,00 | 0,00 | 0,00 | 0,00 | NA | NA |
| NLRP9P        | 0,00 | 0,00 | 0,00 | 0,00 | NA | NA |
| NME2P1        | 0,00 | 0,00 | 0,00 | 0,00 | NA | NA |
| NMS           | 0,00 | 0,00 | 0,00 | 0,00 | NA | NA |
| NMTRQ-TTG12-1 | 0,00 | 0,00 | 0,00 | 0,00 | NA | NA |
| NMU           | 0,00 | 0,00 | 0,00 | 0,00 | NA | NA |
| NMUR2         | 0,00 | 0,00 | 0,00 | 0,00 | NA | NA |
| NOBOX         | 0,00 | 0,00 | 0,00 | 0,00 | NA | NA |
| NOL4          | 0,00 | 0,00 | 0,00 | 0,00 | NA | NA |
| NOL5BP        | 0,00 | 0,00 | 0,00 | 0,00 | NA | NA |

|              |      |      |      |      |    |    |
|--------------|------|------|------|------|----|----|
| NOS2P2       | 0,00 | 0,00 | 0,00 | 0,00 | NA | NA |
| NOTUM        | 0,00 | 0,00 | 0,00 | 0,00 | NA | NA |
| NOX4         | 0,19 | 0,28 | 0,27 | 0,37 | NA | NA |
| NPAS2        | 0,02 | 0,08 | 0,02 | 0,06 | NA | NA |
| NPAS4        | 0,00 | 0,00 | 0,00 | 0,00 | NA | NA |
| NPBWR1       | 0,00 | 0,00 | 0,00 | 0,00 | NA | NA |
| NPBWR2       | 0,00 | 0,00 | 0,00 | 0,00 | NA | NA |
| NPFFR2       | 0,00 | 0,00 | 0,00 | 0,00 | NA | NA |
| NPHS2        | 0,00 | 0,00 | 0,00 | 0,00 | NA | NA |
| NPM1P2       | 0,00 | 0,00 | 0,00 | 0,00 | NA | NA |
| NPM1P45      | 0,00 | 0,00 | 0,00 | 0,00 | NA | NA |
| NPM1P50      | 0,00 | 0,00 | 0,00 | 0,00 | NA | NA |
| NPM2         | 0,00 | 0,00 | 0,00 | 0,00 | NA | NA |
| NPPA         | 0,00 | 0,00 | 0,00 | 0,00 | NA | NA |
| NPR1         | 0,00 | 0,00 | 0,00 | 0,00 | NA | NA |
| NPR2         | 0,00 | 0,00 | 0,00 | 0,04 | NA | NA |
| NPS          | 0,00 | 0,00 | 0,00 | 0,00 | NA | NA |
| NPVF         | 0,00 | 0,00 | 0,00 | 0,00 | NA | NA |
| NPY          | 0,00 | 0,00 | 0,00 | 0,00 | NA | NA |
| NPY4R        | 0,00 | 0,00 | 0,00 | 0,00 | NA | NA |
| NROB1        | 0,00 | 0,00 | 0,00 | 0,00 | NA | NA |
| NROB2        | 0,00 | 0,00 | 0,00 | 0,00 | NA | NA |
| NR2E1        | 0,05 | 0,11 | 0,15 | 0,05 | NA | NA |
| NRCAM        | 0,00 | 0,05 | 0,00 | 0,00 | NA | NA |
| NRG3         | 0,00 | 0,04 | 0,00 | 0,00 | NA | NA |
| NRIP3        | 0,09 | 0,72 | 0,29 | 0,41 | NA | NA |
| NRON         | 0,00 | 0,00 | 0,00 | 0,00 | NA | NA |
| NRTN         | 0,00 | 0,00 | 0,00 | 0,00 | NA | NA |
| NRXN2        | 0,00 | 0,00 | 0,00 | 0,00 | NA | NA |
| NRXN3        | 0,02 | 0,05 | 0,05 | 0,05 | NA | NA |
| NT5C1B-RDH14 | 0,00 | 0,00 | 0,00 | 0,00 | NA | NA |
| NT5CP2       | 0,00 | 0,00 | 0,00 | 0,00 | NA | NA |
| NT5E         | 0,00 | 0,00 | 0,00 | 0,00 | NA | NA |
| NTF3         | 0,00 | 0,00 | 0,00 | 0,00 | NA | NA |
| NTF4         | 0,00 | 0,00 | 0,00 | 0,00 | NA | NA |
| NTF6A        | 0,00 | 0,00 | 0,00 | 0,00 | NA | NA |
| NTF6B        | 0,00 | 0,00 | 0,00 | 0,00 | NA | NA |
| NTF6G        | 0,00 | 0,00 | 0,00 | 0,00 | NA | NA |
| NTN1         | 0,00 | 0,19 | 0,00 | 0,00 | NA | NA |
| NTN3         | 0,00 | 0,00 | 0,00 | 0,00 | NA | NA |
| NTN4         | 0,00 | 0,00 | 0,00 | 0,00 | NA | NA |
| NTRK2        | 0,00 | 0,02 | 0,00 | 0,15 | NA | NA |
| NTS          | 0,00 | 0,00 | 0,00 | 0,00 | NA | NA |
| NTSR2        | 0,00 | 0,00 | 0,00 | 0,00 | NA | NA |
| NUAK1        | 0,00 | 0,00 | 0,00 | 0,00 | NA | NA |
| NUDT10       | 0,00 | 0,00 | 0,00 | 0,00 | NA | NA |
| NUFIP1P      | 0,00 | 0,00 | 0,00 | 0,00 | NA | NA |
| NUP210L      | 0,00 | 0,00 | 0,01 | 0,06 | NA | NA |
| NUP62CL      | 0,00 | 0,00 | 0,00 | 0,00 | NA | NA |
| NUPR2        | 0,00 | 0,00 | 0,00 | 0,00 | NA | NA |
| NUTM2D       | 0,00 | 0,23 | 0,00 | 0,00 | NA | NA |
| NUTM2F       | 0,00 | 0,00 | 0,00 | 0,00 | NA | NA |
| NXF2         | 0,00 | 0,00 | 0,00 | 0,00 | NA | NA |
| NXF2B        | 0,00 | 0,00 | 0,00 | 0,00 | NA | NA |
| NXF3         | 0,00 | 0,00 | 0,00 | 0,00 | NA | NA |

|          |      |      |      |      |    |    |
|----------|------|------|------|------|----|----|
| NXF5     | 0,00 | 0,00 | 0,00 | 0,00 | NA | NA |
| NXPE1    | 0,00 | 0,00 | 0,00 | 0,00 | NA | NA |
| NXPE2    | 0,00 | 0,00 | 0,00 | 0,00 | NA | NA |
| NXPE4    | 0,00 | 0,00 | 0,00 | 0,00 | NA | NA |
| NXPH1    | 0,00 | 0,00 | 0,00 | 0,00 | NA | NA |
| NXPH2    | 0,00 | 0,00 | 0,00 | 0,00 | NA | NA |
| NXPH3    | 0,00 | 0,00 | 0,00 | 0,00 | NA | NA |
| NXPH4    | 0,00 | 0,00 | 0,00 | 0,00 | NA | NA |
| NYAP1    | 0,00 | 0,00 | 0,00 | 0,00 | NA | NA |
| NYX      | 0,00 | 0,00 | 0,00 | 0,00 | NA | NA |
| OBP2A    | 0,00 | 0,00 | 0,00 | 0,00 | NA | NA |
| OC90     | 0,00 | 0,00 | 0,00 | 0,00 | NA | NA |
| OCA2     | 0,00 | 0,00 | 0,00 | 0,00 | NA | NA |
| ODAM     | 0,00 | 0,00 | 0,00 | 0,00 | NA | NA |
| ODF1     | 0,00 | 0,00 | 0,00 | 0,00 | NA | NA |
| ODF3L2   | 0,00 | 0,00 | 0,00 | 0,00 | NA | NA |
| OFD1P16Y | 0,00 | 0,00 | 0,00 | 0,00 | NA | NA |
| OFD1P4Y  | 0,00 | 0,00 | 0,00 | 0,00 | NA | NA |
| OFD1P5Y  | 0,00 | 0,00 | 0,00 | 0,00 | NA | NA |
| OFD1P6Y  | 0,00 | 0,00 | 0,00 | 0,00 | NA | NA |
| OFDYP6   | 0,00 | 0,00 | 0,00 | 0,00 | NA | NA |
| OGN      | 0,00 | 0,00 | 0,06 | 0,00 | NA | NA |
| OIP5     | 0,00 | 0,13 | 0,00 | 0,79 | NA | NA |
| OLAH     | 0,07 | 0,37 | 0,26 | 0,22 | NA | NA |
| OLFM3    | 0,00 | 0,00 | 0,00 | 0,00 | NA | NA |
| OLFM4    | 0,00 | 0,00 | 0,00 | 0,00 | NA | NA |
| OLIG3    | 0,00 | 0,00 | 0,00 | 0,00 | NA | NA |
| OMP      | 0,00 | 0,00 | 0,00 | 0,00 | NA | NA |
| ONECUT2  | 0,00 | 0,01 | 0,00 | 0,00 | NA | NA |
| OOSP2    | 0,00 | 0,00 | 0,00 | 0,00 | NA | NA |
| OPALIN   | 0,00 | 0,00 | 0,00 | 0,00 | NA | NA |
| OPLAH    | 0,00 | 0,00 | 0,00 | 0,00 | NA | NA |
| OPN1MW3  | 0,00 | 0,00 | 0,00 | 0,00 | NA | NA |
| OPN1SW   | 0,00 | 0,00 | 0,00 | 0,00 | NA | NA |
| OPN4     | 0,00 | 0,00 | 0,00 | 0,00 | NA | NA |
| OPTC     | 0,00 | 0,00 | 0,00 | 0,00 | NA | NA |
| OR10A4   | 0,00 | 0,00 | 0,00 | 0,00 | NA | NA |
| OR10A7   | 0,00 | 0,00 | 0,00 | 0,00 | NA | NA |
| OR10AB1P | 0,00 | 0,00 | 0,00 | 0,00 | NA | NA |
| OR10AG1  | 0,00 | 0,00 | 0,00 | 0,00 | NA | NA |
| OR10AK1P | 0,00 | 0,00 | 0,00 | 0,00 | NA | NA |
| OR10B1P  | 0,00 | 0,00 | 0,00 | 0,00 | NA | NA |
| OR10C1   | 0,00 | 0,00 | 0,00 | 0,00 | NA | NA |
| OR10D1P  | 0,00 | 0,00 | 0,00 | 0,00 | NA | NA |
| OR10D3   | 0,00 | 0,00 | 0,00 | 0,00 | NA | NA |
| OR10D4P  | 0,00 | 0,00 | 0,00 | 0,00 | NA | NA |
| OR10D5P  | 0,00 | 0,00 | 0,00 | 0,00 | NA | NA |
| OR10G1P  | 0,00 | 0,00 | 0,00 | 0,00 | NA | NA |
| OR10G2   | 0,00 | 0,00 | 0,00 | 0,00 | NA | NA |
| OR10G5P  | 0,00 | 0,00 | 0,00 | 0,00 | NA | NA |
| OR10G8   | 0,00 | 0,00 | 0,00 | 0,00 | NA | NA |
| OR10G9   | 0,00 | 0,00 | 0,00 | 0,00 | NA | NA |
| OR10H2   | 0,00 | 0,00 | 0,00 | 0,00 | NA | NA |
| OR10H3   | 0,00 | 0,00 | 0,00 | 0,00 | NA | NA |
| OR10J3   | 0,00 | 0,00 | 0,00 | 0,00 | NA | NA |

|         |      |      |      |      |    |    |
|---------|------|------|------|------|----|----|
| OR10J4P | 0,00 | 0,00 | 0,00 | 0,00 | NA | NA |
| OR10J6P | 0,00 | 0,00 | 0,00 | 0,00 | NA | NA |
| OR10J7P | 0,00 | 0,00 | 0,00 | 0,00 | NA | NA |
| OR10J9P | 0,00 | 0,00 | 0,00 | 0,00 | NA | NA |
| OR10N1P | 0,00 | 0,00 | 0,00 | 0,00 | NA | NA |
| OR10P1  | 0,00 | 0,00 | 0,00 | 0,00 | NA | NA |
| OR10Q1  | 0,00 | 0,00 | 0,00 | 0,00 | NA | NA |
| OR10Q2P | 0,00 | 0,00 | 0,00 | 0,00 | NA | NA |
| OR10R1P | 0,00 | 0,00 | 0,00 | 0,00 | NA | NA |
| OR10R2  | 0,00 | 0,00 | 0,00 | 0,00 | NA | NA |
| OR10R3P | 0,00 | 0,00 | 0,00 | 0,00 | NA | NA |
| OR10T1P | 0,00 | 0,00 | 0,00 | 0,00 | NA | NA |
| OR10T2  | 0,00 | 0,00 | 0,00 | 0,00 | NA | NA |
| OR10U1P | 0,00 | 0,00 | 0,00 | 0,00 | NA | NA |
| OR10V1  | 0,00 | 0,00 | 0,00 | 0,00 | NA | NA |
| OR10V2P | 0,00 | 0,00 | 0,00 | 0,00 | NA | NA |
| OR10W1  | 0,00 | 0,00 | 0,00 | 0,00 | NA | NA |
| OR10X1  | 0,00 | 0,00 | 0,00 | 0,00 | NA | NA |
| OR10Z1  | 0,00 | 0,00 | 0,00 | 0,00 | NA | NA |
| OR11H3P | 0,00 | 0,00 | 0,00 | 0,00 | NA | NA |
| OR11H4  | 0,00 | 0,00 | 0,00 | 0,00 | NA | NA |
| OR11H6  | 0,00 | 0,00 | 0,00 | 0,00 | NA | NA |
| OR11H7  | 0,00 | 0,00 | 0,00 | 0,00 | NA | NA |
| OR11I1P | 0,00 | 0,00 | 0,00 | 0,00 | NA | NA |
| OR11J1P | 0,00 | 0,00 | 0,00 | 0,00 | NA | NA |
| OR11J2P | 0,00 | 0,00 | 0,00 | 0,00 | NA | NA |
| OR11J5P | 0,00 | 0,00 | 0,00 | 0,00 | NA | NA |
| OR11J6P | 0,00 | 0,00 | 0,00 | 0,00 | NA | NA |
| OR11J7P | 0,00 | 0,00 | 0,00 | 0,00 | NA | NA |
| OR11K1P | 0,00 | 0,00 | 0,00 | 0,00 | NA | NA |
| OR11K2P | 0,00 | 0,00 | 0,00 | 0,00 | NA | NA |
| OR11L1  | 0,00 | 0,00 | 0,00 | 0,00 | NA | NA |
| OR11M1P | 0,00 | 0,00 | 0,00 | 0,00 | NA | NA |
| OR11P1P | 0,00 | 0,00 | 0,00 | 0,00 | NA | NA |
| OR11Q1P | 0,00 | 0,00 | 0,00 | 0,00 | NA | NA |
| OR12D1P | 0,00 | 0,00 | 0,00 | 0,00 | NA | NA |
| OR12D2  | 0,00 | 0,00 | 0,00 | 0,00 | NA | NA |
| OR12D3  | 0,00 | 0,00 | 0,00 | 0,08 | NA | NA |
| OR13A1  | 0,00 | 0,00 | 0,00 | 0,00 | NA | NA |
| OR13C1P | 0,00 | 0,00 | 0,00 | 0,00 | NA | NA |
| OR13C2  | 0,00 | 0,00 | 0,00 | 0,00 | NA | NA |
| OR13C3  | 0,00 | 0,00 | 0,00 | 0,00 | NA | NA |
| OR13C4  | 0,00 | 0,00 | 0,00 | 0,00 | NA | NA |
| OR13C5  | 0,00 | 0,00 | 0,00 | 0,00 | NA | NA |
| OR13C6P | 0,00 | 0,00 | 0,00 | 0,00 | NA | NA |
| OR13C7P | 0,00 | 0,00 | 0,00 | 0,00 | NA | NA |
| OR13C8  | 0,00 | 0,00 | 0,00 | 0,00 | NA | NA |
| OR13C9  | 0,00 | 0,00 | 0,00 | 0,00 | NA | NA |
| OR13D1  | 0,00 | 0,00 | 0,00 | 0,00 | NA | NA |
| OR13D2P | 0,00 | 0,00 | 0,00 | 0,00 | NA | NA |
| OR13D3P | 0,00 | 0,00 | 0,00 | 0,00 | NA | NA |
| OR13E1P | 0,00 | 0,00 | 0,00 | 0,00 | NA | NA |
| OR13F1  | 0,00 | 0,00 | 0,00 | 0,00 | NA | NA |
| OR13H1  | 0,00 | 0,00 | 0,00 | 0,00 | NA | NA |
| OR13J1  | 0,00 | 0,00 | 0,00 | 0,00 | NA | NA |



|         |      |      |      |      |    |    |
|---------|------|------|------|------|----|----|
| OR13Z1P | 0,00 | 0,00 | 0,00 | 0,00 | NA | NA |
| OR13Z2P | 0,00 | 0,00 | 0,00 | 0,00 | NA | NA |
| OR13Z3P | 0,00 | 0,00 | 0,00 | 0,00 | NA | NA |
| OR14A16 | 0,00 | 0,00 | 0,00 | 0,00 | NA | NA |
| OR14C36 | 0,00 | 0,00 | 0,00 | 0,00 | NA | NA |
| OR14I1  | 0,00 | 0,00 | 0,00 | 0,00 | NA | NA |
| OR14K1  | 0,00 | 0,00 | 0,00 | 0,00 | NA | NA |
| OR1A2   | 0,00 | 0,00 | 0,00 | 0,00 | NA | NA |
| OR1AA1P | 0,00 | 0,00 | 0,00 | 0,00 | NA | NA |
| OR1AC1P | 0,00 | 0,00 | 0,00 | 0,00 | NA | NA |
| OR1B1   | 0,00 | 0,00 | 0,00 | 0,00 | NA | NA |
| OR1D3P  | 0,00 | 0,00 | 0,00 | 0,00 | NA | NA |
| OR1D4   | 0,00 | 0,00 | 0,00 | 0,00 | NA | NA |
| OR1E1   | 0,00 | 0,00 | 0,00 | 0,00 | NA | NA |
| OR1E2   | 0,00 | 0,00 | 0,00 | 0,00 | NA | NA |
| OR1E3   | 0,00 | 0,00 | 0,00 | 0,00 | NA | NA |
| OR1F1   | 0,00 | 0,00 | 0,00 | 0,00 | NA | NA |
| OR1F12  | 0,00 | 0,00 | 0,00 | 0,00 | NA | NA |
| OR1F2P  | 0,00 | 0,00 | 0,00 | 0,00 | NA | NA |
| OR1G1   | 0,00 | 0,00 | 0,00 | 0,00 | NA | NA |
| OR1H1P  | 0,00 | 0,00 | 0,00 | 0,00 | NA | NA |
| OR1J2   | 0,00 | 0,00 | 0,00 | 0,00 | NA | NA |
| OR1J4   | 0,00 | 0,00 | 0,00 | 0,00 | NA | NA |
| OR1K1   | 0,00 | 0,00 | 0,00 | 0,00 | NA | NA |
| OR1L4   | 0,00 | 0,00 | 0,00 | 0,00 | NA | NA |
| OR1M4P  | 0,00 | 0,00 | 0,00 | 0,00 | NA | NA |
| OR1N1   | 0,00 | 0,00 | 0,00 | 0,00 | NA | NA |
| OR1P1   | 0,00 | 0,00 | 0,00 | 0,00 | NA | NA |
| OR1Q1   | 0,00 | 0,00 | 0,00 | 0,00 | NA | NA |
| OR1R1P  | 0,00 | 0,00 | 0,00 | 0,00 | NA | NA |
| OR2A13P | 0,00 | 0,00 | 0,00 | 0,00 | NA | NA |
| OR2A15P | 0,00 | 0,00 | 0,00 | 0,00 | NA | NA |
| OR2A2   | 0,00 | 0,00 | 0,00 | 0,00 | NA | NA |
| OR2A20P | 0,00 | 0,00 | 0,00 | 0,00 | NA | NA |
| OR2A41P | 0,00 | 0,00 | 0,00 | 0,00 | NA | NA |
| OR2AD1P | 0,00 | 0,00 | 0,00 | 0,00 | NA | NA |
| OR2AE1  | 0,00 | 0,00 | 0,00 | 0,00 | NA | NA |
| OR2AF1P | 0,00 | 0,00 | 0,00 | 0,00 | NA | NA |
| OR2AJ1  | 0,00 | 0,00 | 0,00 | 0,00 | NA | NA |
| OR2AM1P | 0,00 | 0,00 | 0,00 | 0,00 | NA | NA |
| OR2AO1P | 0,00 | 0,00 | 0,00 | 0,00 | NA | NA |
| OR2AP1  | 0,16 | 0,19 | 0,09 | 0,00 | NA | NA |
| OR2AQ1P | 0,00 | 0,00 | 0,00 | 0,00 | NA | NA |
| OR2AS1P | 0,00 | 0,00 | 0,00 | 0,00 | NA | NA |
| OR2AS2P | 0,00 | 0,00 | 0,00 | 0,00 | NA | NA |
| OR2AT1P | 0,00 | 0,00 | 0,00 | 0,00 | NA | NA |
| OR2AT2P | 0,00 | 0,00 | 0,00 | 0,00 | NA | NA |
| OR2B3   | 0,00 | 0,00 | 0,00 | 0,00 | NA | NA |
| OR2B4P  | 0,00 | 0,00 | 0,00 | 0,00 | NA | NA |
| OR2B6   | 0,00 | 0,00 | 0,00 | 0,00 | NA | NA |
| OR2B7P  | 0,00 | 0,00 | 0,00 | 0,00 | NA | NA |
| OR2B8P  | 0,00 | 0,00 | 0,00 | 0,00 | NA | NA |
| OR2BH1P | 0,00 | 0,00 | 0,00 | 0,00 | NA | NA |
| OR2C1   | 0,00 | 0,00 | 0,00 | 0,00 | NA | NA |
| OR2D3   | 0,00 | 0,00 | 0,00 | 0,00 | NA | NA |

|         |      |      |      |      |    |    |
|---------|------|------|------|------|----|----|
| OR2E1P  | 0,00 | 0,00 | 0,00 | 0,00 | NA | NA |
| OR2F2   | 0,00 | 0,00 | 0,00 | 0,00 | NA | NA |
| OR2G1P  | 0,00 | 0,00 | 0,00 | 0,00 | NA | NA |
| OR2G2   | 0,00 | 0,00 | 0,00 | 0,00 | NA | NA |
| OR2G3   | 0,00 | 0,00 | 0,00 | 0,00 | NA | NA |
| OR2H1   | 0,00 | 0,00 | 0,00 | 0,00 | NA | NA |
| OR2H5P  | 0,00 | 0,00 | 0,00 | 0,00 | NA | NA |
| OR2J1   | 0,00 | 0,00 | 0,00 | 0,00 | NA | NA |
| OR2J3   | 0,12 | 0,04 | 0,04 | 0,00 | NA | NA |
| OR2K2   | 0,00 | 0,00 | 0,00 | 0,00 | NA | NA |
| OR2L13  | 0,00 | 0,00 | 0,00 | 0,00 | NA | NA |
| OR2L1P  | 0,00 | 0,00 | 0,00 | 0,00 | NA | NA |
| OR2L6P  | 0,00 | 0,00 | 0,00 | 0,00 | NA | NA |
| OR2L8   | 0,00 | 0,00 | 0,00 | 0,00 | NA | NA |
| OR2L9P  | 0,00 | 0,00 | 0,00 | 0,00 | NA | NA |
| OR2M1P  | 0,00 | 0,00 | 0,00 | 0,00 | NA | NA |
| OR2M5   | 0,00 | 0,00 | 0,00 | 0,00 | NA | NA |
| OR2M7   | 0,00 | 0,00 | 0,00 | 0,00 | NA | NA |
| OR2P1P  | 0,00 | 0,00 | 0,00 | 0,00 | NA | NA |
| OR2Q1P  | 0,00 | 0,00 | 0,00 | 0,00 | NA | NA |
| OR2S1P  | 0,00 | 0,00 | 0,00 | 0,00 | NA | NA |
| OR2S2   | 0,00 | 0,00 | 0,00 | 0,00 | NA | NA |
| OR2T1   | 0,00 | 0,00 | 0,00 | 0,00 | NA | NA |
| OR2T29  | 0,00 | 0,00 | 0,00 | 0,00 | NA | NA |
| OR2T3   | 0,00 | 0,00 | 0,00 | 0,00 | NA | NA |
| OR2T32P | 0,00 | 0,00 | 0,00 | 0,00 | NA | NA |
| OR2T35  | 0,00 | 0,00 | 0,00 | 0,00 | NA | NA |
| OR2T4   | 0,00 | 0,00 | 0,00 | 0,00 | NA | NA |
| OR2T5   | 0,00 | 0,00 | 0,00 | 0,00 | NA | NA |
| OR2T8   | 0,00 | 0,00 | 0,00 | 0,00 | NA | NA |
| OR2U1P  | 0,00 | 0,00 | 0,00 | 0,00 | NA | NA |
| OR2U2P  | 0,00 | 0,00 | 0,00 | 0,00 | NA | NA |
| OR2W1   | 0,00 | 0,00 | 0,00 | 0,00 | NA | NA |
| OR2W2P  | 0,00 | 0,00 | 0,00 | 0,00 | NA | NA |
| OR2W4P  | 0,00 | 0,00 | 0,00 | 0,00 | NA | NA |
| OR2W5   | 0,00 | 0,00 | 0,00 | 0,00 | NA | NA |
| OR2X1P  | 0,00 | 0,00 | 0,00 | 0,00 | NA | NA |
| OR2Y1   | 0,00 | 0,00 | 0,00 | 0,00 | NA | NA |
| OR2Z1   | 0,00 | 0,00 | 0,00 | 0,00 | NA | NA |
| OR3A2   | 0,00 | 0,00 | 0,07 | 0,26 | NA | NA |
| OR3A4P  | 0,00 | 0,00 | 0,00 | 0,00 | NA | NA |
| OR3B1P  | 0,00 | 0,00 | 0,00 | 0,00 | NA | NA |
| OR4A10P | 0,00 | 0,00 | 0,00 | 0,00 | NA | NA |
| OR4A11P | 0,00 | 0,00 | 0,00 | 0,00 | NA | NA |
| OR4A12P | 0,00 | 0,00 | 0,00 | 0,00 | NA | NA |
| OR4A13P | 0,00 | 0,00 | 0,00 | 0,00 | NA | NA |
| OR4A15  | 0,00 | 0,00 | 0,00 | 0,00 | NA | NA |
| OR4A16  | 0,00 | 0,00 | 0,00 | 0,00 | NA | NA |
| OR4A17P | 0,00 | 0,00 | 0,00 | 0,00 | NA | NA |
| OR4A18P | 0,00 | 0,00 | 0,00 | 0,00 | NA | NA |
| OR4A19P | 0,00 | 0,00 | 0,00 | 0,00 | NA | NA |
| OR4A1P  | 0,00 | 0,00 | 0,00 | 0,00 | NA | NA |
| OR4A21P | 0,00 | 0,00 | 0,00 | 0,00 | NA | NA |
| OR4A2P  | 0,00 | 0,00 | 0,00 | 0,00 | NA | NA |
| OR4A3P  | 0,00 | 0,00 | 0,00 | 0,00 | NA | NA |

|         |      |      |      |      |    |    |
|---------|------|------|------|------|----|----|
| OR4A40P | 0,00 | 0,00 | 0,00 | 0,00 | NA | NA |
| OR4A41P | 0,00 | 0,00 | 0,00 | 0,00 | NA | NA |
| OR4A42P | 0,00 | 0,00 | 0,00 | 0,00 | NA | NA |
| OR4A43P | 0,00 | 0,00 | 0,00 | 0,00 | NA | NA |
| OR4A44P | 0,00 | 0,00 | 0,00 | 0,00 | NA | NA |
| OR4A45P | 0,00 | 0,00 | 0,00 | 0,00 | NA | NA |
| OR4A46P | 0,00 | 0,00 | 0,00 | 0,00 | NA | NA |
| OR4A47  | 0,00 | 0,00 | 0,00 | 0,00 | NA | NA |
| OR4A48P | 0,00 | 0,00 | 0,00 | 0,00 | NA | NA |
| OR4A49P | 0,00 | 0,00 | 0,00 | 0,00 | NA | NA |
| OR4A4P  | 0,00 | 0,00 | 0,00 | 0,00 | NA | NA |
| OR4A5   | 0,00 | 0,00 | 0,00 | 0,00 | NA | NA |
| OR4A50P | 0,00 | 0,00 | 0,00 | 0,00 | NA | NA |
| OR4A7P  | 0,00 | 0,00 | 0,00 | 0,00 | NA | NA |
| OR4A8P  | 0,00 | 0,00 | 0,00 | 0,00 | NA | NA |
| OR4A9P  | 0,00 | 0,00 | 0,00 | 0,00 | NA | NA |
| OR4B1   | 0,00 | 0,00 | 0,00 | 0,00 | NA | NA |
| OR4B2P  | 0,00 | 0,00 | 0,00 | 0,00 | NA | NA |
| OR4C10P | 0,00 | 0,00 | 0,00 | 0,00 | NA | NA |
| OR4C11  | 0,00 | 0,00 | 0,00 | 0,00 | NA | NA |
| OR4C12  | 0,00 | 0,00 | 0,00 | 0,00 | NA | NA |
| OR4C13  | 0,00 | 0,00 | 0,00 | 0,00 | NA | NA |
| OR4C14P | 0,00 | 0,00 | 0,00 | 0,00 | NA | NA |
| OR4C15  | 0,00 | 0,00 | 0,00 | 0,00 | NA | NA |
| OR4C16  | 0,00 | 0,00 | 0,00 | 0,00 | NA | NA |
| OR4C1P  | 0,00 | 0,00 | 0,00 | 0,00 | NA | NA |
| OR4C2P  | 0,00 | 0,00 | 0,00 | 0,00 | NA | NA |
| OR4C3   | 0,00 | 0,00 | 0,00 | 0,00 | NA | NA |
| OR4C46  | 0,00 | 0,00 | 0,00 | 0,00 | NA | NA |
| OR4C48P | 0,00 | 0,00 | 0,00 | 0,00 | NA | NA |
| OR4C4P  | 0,00 | 0,00 | 0,00 | 0,00 | NA | NA |
| OR4C5   | 0,00 | 0,00 | 0,00 | 0,00 | NA | NA |
| OR4C50P | 0,00 | 0,00 | 0,00 | 0,00 | NA | NA |
| OR4C7P  | 0,00 | 0,00 | 0,00 | 0,00 | NA | NA |
| OR4C9P  | 0,00 | 0,00 | 0,00 | 0,00 | NA | NA |
| OR4D10  | 0,00 | 0,00 | 0,00 | 0,00 | NA | NA |
| OR4D11  | 0,00 | 0,00 | 0,00 | 0,00 | NA | NA |
| OR4D12P | 0,00 | 0,00 | 0,00 | 0,00 | NA | NA |
| OR4D2   | 0,00 | 0,00 | 0,00 | 0,00 | NA | NA |
| OR4D5   | 0,00 | 0,00 | 0,00 | 0,00 | NA | NA |
| OR4D6   | 0,00 | 0,00 | 0,00 | 0,00 | NA | NA |
| OR4D7P  | 0,00 | 0,00 | 0,00 | 0,00 | NA | NA |
| OR4D8P  | 0,00 | 0,00 | 0,00 | 0,00 | NA | NA |
| OR4F14P | 0,00 | 0,00 | 0,00 | 0,00 | NA | NA |
| OR4F16  | 0,00 | 0,00 | 0,00 | 0,00 | NA | NA |
| OR4F1P  | 0,00 | 0,00 | 0,00 | 0,00 | NA | NA |
| OR4F21  | 0,00 | 0,00 | 0,00 | 0,00 | NA | NA |
| OR4F28P | 0,00 | 0,00 | 0,00 | 0,00 | NA | NA |
| OR4F29  | 0,00 | 0,00 | 0,00 | 0,00 | NA | NA |
| OR4F2P  | 0,00 | 0,00 | 0,00 | 0,00 | NA | NA |
| OR4F3   | 0,00 | 0,00 | 0,00 | 0,00 | NA | NA |
| OR4F6   | 0,00 | 0,00 | 0,00 | 0,00 | NA | NA |
| OR4F7P  | 0,00 | 0,00 | 0,00 | 0,00 | NA | NA |
| OR4F8P  | 0,00 | 0,00 | 0,00 | 0,00 | NA | NA |
| OR4G11P | 0,00 | 0,00 | 0,00 | 0,00 | NA | NA |

|          |      |      |      |      |    |    |
|----------|------|------|------|------|----|----|
| OR4G2P   | 0,00 | 0,00 | 0,00 | 0,00 | NA | NA |
| OR4G4P   | 0,00 | 0,00 | 0,00 | 0,00 | NA | NA |
| OR4G6P   | 0,00 | 0,00 | 0,00 | 0,00 | NA | NA |
| OR4H12P  | 0,00 | 0,00 | 0,00 | 0,00 | NA | NA |
| OR4H6P   | 0,00 | 0,00 | 0,00 | 0,00 | NA | NA |
| OR4K1    | 0,00 | 0,00 | 0,00 | 0,00 | NA | NA |
| OR4K11P  | 0,00 | 0,00 | 0,00 | 0,00 | NA | NA |
| OR4K15   | 0,00 | 0,00 | 0,00 | 0,00 | NA | NA |
| OR4K3P   | 0,00 | 0,00 | 0,00 | 0,00 | NA | NA |
| OR4K4P   | 0,00 | 0,00 | 0,00 | 0,00 | NA | NA |
| OR4K5    | 0,00 | 0,00 | 0,00 | 0,00 | NA | NA |
| OR4K6P   | 0,00 | 0,00 | 0,00 | 0,00 | NA | NA |
| OR4K7P   | 0,00 | 0,00 | 0,00 | 0,00 | NA | NA |
| OR4L1    | 0,00 | 0,00 | 0,00 | 0,00 | NA | NA |
| OR4M1    | 0,00 | 0,00 | 0,00 | 0,00 | NA | NA |
| OR4N1P   | 0,00 | 0,00 | 0,00 | 0,00 | NA | NA |
| OR4N4    | 0,00 | 0,00 | 0,00 | 0,00 | NA | NA |
| OR4P1P   | 0,00 | 0,00 | 0,00 | 0,00 | NA | NA |
| OR4Q1P   | 0,00 | 0,00 | 0,00 | 0,00 | NA | NA |
| OR4Q2    | 0,00 | 0,00 | 0,00 | 0,00 | NA | NA |
| OR4Q3    | 0,00 | 0,07 | 0,00 | 0,00 | NA | NA |
| OR4R1P   | 0,00 | 0,00 | 0,00 | 0,00 | NA | NA |
| OR4R2P   | 0,00 | 0,00 | 0,00 | 0,00 | NA | NA |
| OR4R3P   | 0,00 | 0,00 | 0,00 | 0,00 | NA | NA |
| OR4S2    | 0,00 | 0,00 | 0,00 | 0,00 | NA | NA |
| OR4T1P   | 0,00 | 0,00 | 0,00 | 0,00 | NA | NA |
| OR4U1P   | 0,00 | 0,00 | 0,00 | 0,00 | NA | NA |
| OR4V1P   | 0,00 | 0,00 | 0,00 | 0,00 | NA | NA |
| OR4W1P   | 0,00 | 0,00 | 0,00 | 0,00 | NA | NA |
| OR4X1    | 0,00 | 0,00 | 0,00 | 0,00 | NA | NA |
| OR4X2    | 0,00 | 0,00 | 0,00 | 0,00 | NA | NA |
| OR4X7P   | 0,00 | 0,00 | 0,00 | 0,00 | NA | NA |
| OR51A10P | 0,00 | 0,00 | 0,00 | 0,00 | NA | NA |
| OR51A1P  | 0,00 | 0,00 | 0,00 | 0,00 | NA | NA |
| OR51A2   | 0,00 | 0,00 | 0,00 | 0,00 | NA | NA |
| OR51A4   | 0,00 | 0,00 | 0,00 | 0,00 | NA | NA |
| OR51A5P  | 0,00 | 0,00 | 0,00 | 0,00 | NA | NA |
| OR51A6P  | 0,00 | 0,00 | 0,00 | 0,00 | NA | NA |
| OR51A7   | 0,00 | 0,00 | 0,00 | 0,00 | NA | NA |
| OR51A8P  | 0,00 | 0,00 | 0,00 | 0,00 | NA | NA |
| OR51A9P  | 0,00 | 0,00 | 0,00 | 0,00 | NA | NA |
| OR51B6   | 0,00 | 0,00 | 0,00 | 0,00 | NA | NA |
| OR51C1P  | 0,00 | 0,00 | 0,00 | 0,00 | NA | NA |
| OR51C4P  | 0,00 | 0,00 | 0,00 | 0,00 | NA | NA |
| OR51D1   | 0,04 | 0,00 | 0,04 | 0,09 | NA | NA |
| OR51F1   | 0,00 | 0,00 | 0,00 | 0,00 | NA | NA |
| OR51F2   | 0,00 | 0,00 | 0,00 | 0,00 | NA | NA |
| OR51F3P  | 0,00 | 0,00 | 0,00 | 0,00 | NA | NA |
| OR51F4P  | 0,00 | 0,00 | 0,00 | 0,00 | NA | NA |
| OR51F5P  | 0,00 | 0,00 | 0,00 | 0,00 | NA | NA |
| OR51H1   | 0,00 | 0,00 | 0,00 | 0,00 | NA | NA |
| OR51H2P  | 0,00 | 0,00 | 0,00 | 0,00 | NA | NA |
| OR51J1   | 0,00 | 0,00 | 0,00 | 0,00 | NA | NA |
| OR51N1P  | 0,00 | 0,00 | 0,00 | 0,00 | NA | NA |
| OR51P1P  | 0,00 | 0,00 | 0,00 | 0,00 | NA | NA |

|         |      |      |      |      |    |    |
|---------|------|------|------|------|----|----|
| OR51Q1  | 0,00 | 0,00 | 0,00 | 0,00 | NA | NA |
| OR51S1  | 0,00 | 0,00 | 0,00 | 0,00 | NA | NA |
| OR51T1  | 0,00 | 0,00 | 0,00 | 0,00 | NA | NA |
| OR51V1  | 0,00 | 0,00 | 0,00 | 0,00 | NA | NA |
| OR52A4  | 0,00 | 0,00 | 0,00 | 0,00 | NA | NA |
| OR52A5  | 0,00 | 0,00 | 0,00 | 0,03 | NA | NA |
| OR52B1P | 0,00 | 0,00 | 0,00 | 0,00 | NA | NA |
| OR52B2  | 0,00 | 0,00 | 0,00 | 0,00 | NA | NA |
| OR52B3P | 0,00 | 0,00 | 0,00 | 0,00 | NA | NA |
| OR52B4  | 0,00 | 0,00 | 0,00 | 0,00 | NA | NA |
| OR52B6  | 0,00 | 0,00 | 0,00 | 0,00 | NA | NA |
| OR52E1  | 0,00 | 0,00 | 0,00 | 0,00 | NA | NA |
| OR52E2  | 0,00 | 0,00 | 0,00 | 0,00 | NA | NA |
| OR52E3P | 0,00 | 0,00 | 0,00 | 0,00 | NA | NA |
| OR52E5  | 0,00 | 0,00 | 0,00 | 0,00 | NA | NA |
| OR52E6  | 0,00 | 0,00 | 0,00 | 0,00 | NA | NA |
| OR52E7P | 0,00 | 0,00 | 0,00 | 0,00 | NA | NA |
| OR52E8  | 0,00 | 0,00 | 0,00 | 0,00 | NA | NA |
| OR52H1  | 0,00 | 0,00 | 0,00 | 0,00 | NA | NA |
| OR52I2  | 0,00 | 0,00 | 0,00 | 0,00 | NA | NA |
| OR52J1P | 0,00 | 0,00 | 0,00 | 0,00 | NA | NA |
| OR52J2P | 0,00 | 0,00 | 0,00 | 0,00 | NA | NA |
| OR52L1  | 0,00 | 0,00 | 0,00 | 0,00 | NA | NA |
| OR52L2P | 0,00 | 0,00 | 0,00 | 0,00 | NA | NA |
| OR52M1  | 0,00 | 0,00 | 0,00 | 0,00 | NA | NA |
| OR52M2P | 0,00 | 0,00 | 0,00 | 0,00 | NA | NA |
| OR52N2  | 0,00 | 0,00 | 0,00 | 0,00 | NA | NA |
| OR52N3P | 0,00 | 0,00 | 0,00 | 0,00 | NA | NA |
| OR52N5  | 0,00 | 0,00 | 0,00 | 0,04 | NA | NA |
| OR52P1P | 0,00 | 0,00 | 0,00 | 0,00 | NA | NA |
| OR52Q1P | 0,00 | 0,00 | 0,00 | 0,00 | NA | NA |
| OR52R1  | 0,00 | 0,00 | 0,00 | 0,00 | NA | NA |
| OR52S1P | 0,00 | 0,00 | 0,00 | 0,00 | NA | NA |
| OR52T1P | 0,00 | 0,00 | 0,00 | 0,00 | NA | NA |
| OR52V1P | 0,00 | 0,00 | 0,00 | 0,00 | NA | NA |
| OR52W1  | 0,00 | 0,00 | 0,00 | 0,00 | NA | NA |
| OR52X1P | 0,00 | 0,00 | 0,00 | 0,00 | NA | NA |
| OR52Y1P | 0,00 | 0,00 | 0,00 | 0,00 | NA | NA |
| OR52Z1  | 0,00 | 0,00 | 0,00 | 0,00 | NA | NA |
| OR56A5  | 0,00 | 0,00 | 0,00 | 0,00 | NA | NA |
| OR56A7P | 0,00 | 0,00 | 0,00 | 0,00 | NA | NA |
| OR56B3P | 0,00 | 0,00 | 0,00 | 0,00 | NA | NA |
| OR56B4  | 0,00 | 0,00 | 0,00 | 0,00 | NA | NA |
| OR5AC1  | 0,00 | 0,00 | 0,00 | 0,00 | NA | NA |
| OR5AC2  | 0,00 | 0,00 | 0,00 | 0,00 | NA | NA |
| OR5AH1P | 0,00 | 0,00 | 0,00 | 0,00 | NA | NA |
| OR5AK1P | 0,00 | 0,00 | 0,00 | 0,00 | NA | NA |
| OR5AK2  | 0,00 | 0,00 | 0,00 | 0,00 | NA | NA |
| OR5AK3P | 0,00 | 0,00 | 0,00 | 0,00 | NA | NA |
| OR5AK4P | 0,00 | 0,00 | 0,00 | 0,00 | NA | NA |
| OR5AL1  | 0,00 | 0,00 | 0,00 | 0,00 | NA | NA |
| OR5AL2P | 0,00 | 0,00 | 0,00 | 0,00 | NA | NA |
| OR5AN2P | 0,00 | 0,00 | 0,00 | 0,00 | NA | NA |
| OR5AO1P | 0,00 | 0,00 | 0,00 | 0,00 | NA | NA |
| OR5AP1P | 0,00 | 0,00 | 0,00 | 0,00 | NA | NA |

|         |      |      |      |      |    |    |
|---------|------|------|------|------|----|----|
| OR5AP2  | 0,00 | 0,00 | 0,00 | 0,00 | NA | NA |
| OR5AQ1P | 0,00 | 0,00 | 0,00 | 0,00 | NA | NA |
| OR5AW1P | 0,00 | 0,00 | 0,00 | 0,00 | NA | NA |
| OR5AZ1P | 0,00 | 0,00 | 0,00 | 0,00 | NA | NA |
| OR5B10P | 0,00 | 0,00 | 0,00 | 0,00 | NA | NA |
| OR5B15P | 0,00 | 0,00 | 0,00 | 0,00 | NA | NA |
| OR5B19P | 0,00 | 0,00 | 0,00 | 0,00 | NA | NA |
| OR5B1P  | 0,00 | 0,00 | 0,00 | 0,00 | NA | NA |
| OR5B21  | 0,00 | 0,00 | 0,00 | 0,00 | NA | NA |
| OR5B3   | 0,00 | 0,00 | 0,00 | 0,00 | NA | NA |
| OR5BC1P | 0,00 | 0,00 | 0,00 | 0,00 | NA | NA |
| OR5BD1P | 0,00 | 0,00 | 0,00 | 0,00 | NA | NA |
| OR5BE1P | 0,00 | 0,00 | 0,00 | 0,00 | NA | NA |
| OR5BH1P | 0,00 | 0,00 | 0,00 | 0,00 | NA | NA |
| OR5BJ1P | 0,00 | 0,00 | 0,00 | 0,00 | NA | NA |
| OR5BK1P | 0,00 | 0,00 | 0,00 | 0,00 | NA | NA |
| OR5BL1P | 0,00 | 0,00 | 0,00 | 0,00 | NA | NA |
| OR5BM1P | 0,00 | 0,00 | 0,00 | 0,00 | NA | NA |
| OR5BN1P | 0,00 | 0,00 | 0,00 | 0,00 | NA | NA |
| OR5BN2P | 0,00 | 0,00 | 0,00 | 0,00 | NA | NA |
| OR5BP1P | 0,00 | 0,00 | 0,00 | 0,00 | NA | NA |
| OR5BQ1P | 0,00 | 0,00 | 0,00 | 0,00 | NA | NA |
| OR5BS1P | 0,00 | 0,00 | 0,00 | 0,00 | NA | NA |
| OR5C1   | 0,00 | 0,00 | 0,00 | 0,00 | NA | NA |
| OR5D13  | 0,00 | 0,00 | 0,00 | 0,00 | NA | NA |
| OR5D14  | 0,00 | 0,00 | 0,00 | 0,00 | NA | NA |
| OR5D16  | 0,00 | 0,00 | 0,00 | 0,00 | NA | NA |
| OR5D17P | 0,00 | 0,00 | 0,00 | 0,00 | NA | NA |
| OR5D18  | 0,00 | 0,00 | 0,00 | 0,00 | NA | NA |
| OR5D2P  | 0,00 | 0,00 | 0,00 | 0,00 | NA | NA |
| OR5E1P  | 0,00 | 0,00 | 0,00 | 0,00 | NA | NA |
| OR5F2P  | 0,00 | 0,00 | 0,00 | 0,00 | NA | NA |
| OR5G1P  | 0,00 | 0,00 | 0,00 | 0,00 | NA | NA |
| OR5G3   | 0,00 | 0,00 | 0,00 | 0,00 | NA | NA |
| OR5G4P  | 0,00 | 0,00 | 0,00 | 0,00 | NA | NA |
| OR5G5P  | 0,00 | 0,00 | 0,00 | 0,00 | NA | NA |
| OR5H15  | 0,00 | 0,00 | 0,00 | 0,00 | NA | NA |
| OR5H2   | 0,00 | 0,00 | 0,00 | 0,00 | NA | NA |
| OR5H3P  | 0,00 | 0,00 | 0,00 | 0,00 | NA | NA |
| OR5H4P  | 0,00 | 0,00 | 0,00 | 0,00 | NA | NA |
| OR5H5P  | 0,00 | 0,00 | 0,00 | 0,00 | NA | NA |
| OR5H6   | 0,00 | 0,00 | 0,00 | 0,00 | NA | NA |
| OR5H7P  | 0,00 | 0,00 | 0,00 | 0,00 | NA | NA |
| OR5H8P  | 0,00 | 0,00 | 0,00 | 0,00 | NA | NA |
| OR5I1   | 0,00 | 0,00 | 0,00 | 0,00 | NA | NA |
| OR5I1P  | 0,00 | 0,00 | 0,00 | 0,00 | NA | NA |
| OR5I2   | 0,00 | 0,00 | 0,00 | 0,00 | NA | NA |
| OR5I7P  | 0,00 | 0,00 | 0,00 | 0,00 | NA | NA |
| OR5K1   | 0,00 | 0,00 | 0,00 | 0,00 | NA | NA |
| OR5K2   | 0,00 | 0,00 | 0,00 | 0,00 | NA | NA |
| OR5K3   | 0,00 | 0,00 | 0,00 | 0,00 | NA | NA |
| OR5K4   | 0,00 | 0,00 | 0,00 | 0,00 | NA | NA |
| OR5L2   | 0,00 | 0,00 | 0,00 | 0,00 | NA | NA |
| OR5M10  | 0,00 | 0,00 | 0,00 | 0,00 | NA | NA |
| OR5M11  | 0,00 | 0,00 | 0,00 | 0,00 | NA | NA |

|          |      |      |      |      |    |    |
|----------|------|------|------|------|----|----|
| OR5M12P  | 0,00 | 0,00 | 0,00 | 0,00 | NA | NA |
| OR5M13P  | 0,00 | 0,00 | 0,00 | 0,00 | NA | NA |
| OR5M14P  | 0,00 | 0,00 | 0,00 | 0,00 | NA | NA |
| OR5M3    | 0,00 | 0,00 | 0,00 | 0,00 | NA | NA |
| OR5M4P   | 0,00 | 0,00 | 0,00 | 0,00 | NA | NA |
| OR5M5P   | 0,00 | 0,00 | 0,00 | 0,00 | NA | NA |
| OR5M8    | 0,00 | 0,00 | 0,00 | 0,00 | NA | NA |
| OR5M9    | 0,00 | 0,00 | 0,00 | 0,00 | NA | NA |
| OR5P3    | 0,00 | 0,00 | 0,00 | 0,00 | NA | NA |
| OR5P4P   | 0,00 | 0,00 | 0,00 | 0,00 | NA | NA |
| OR5R1    | 0,00 | 0,00 | 0,00 | 0,00 | NA | NA |
| OR5S1P   | 0,00 | 0,00 | 0,00 | 0,00 | NA | NA |
| OR5T1    | 0,00 | 0,00 | 0,00 | 0,00 | NA | NA |
| OR5V1    | 0,00 | 0,13 | 0,00 | 0,00 | NA | NA |
| OR5W1P   | 0,00 | 0,00 | 0,00 | 0,00 | NA | NA |
| OR5W2    | 0,00 | 0,00 | 0,00 | 0,00 | NA | NA |
| OR6B2    | 0,00 | 0,00 | 0,00 | 0,00 | NA | NA |
| OR6C1    | 0,00 | 0,00 | 0,00 | 0,00 | NA | NA |
| OR6C2    | 0,00 | 0,00 | 0,00 | 0,00 | NA | NA |
| OR6C3    | 0,00 | 0,00 | 0,00 | 0,00 | NA | NA |
| OR6C5P   | 0,00 | 0,00 | 0,00 | 0,00 | NA | NA |
| OR6C64P  | 0,00 | 0,00 | 0,00 | 0,00 | NA | NA |
| OR6C65   | 0,00 | 0,00 | 0,00 | 0,00 | NA | NA |
| OR6C68   | 0,00 | 0,00 | 0,00 | 0,00 | NA | NA |
| OR6C69P  | 0,00 | 0,00 | 0,00 | 0,00 | NA | NA |
| OR6C70   | 0,00 | 0,00 | 0,00 | 0,00 | NA | NA |
| OR6C71P  | 0,00 | 0,00 | 0,00 | 0,00 | NA | NA |
| OR6C72P  | 0,00 | 0,00 | 0,00 | 0,00 | NA | NA |
| OR6C73P  | 0,00 | 0,00 | 0,00 | 0,00 | NA | NA |
| OR6C76   | 0,00 | 0,00 | 0,00 | 0,00 | NA | NA |
| OR6E1P   | 0,00 | 0,00 | 0,00 | 0,00 | NA | NA |
| OR6F1    | 0,00 | 0,00 | 0,00 | 0,00 | NA | NA |
| OR6K2    | 0,00 | 0,00 | 0,00 | 0,00 | NA | NA |
| OR6K5P   | 0,00 | 0,00 | 0,00 | 0,00 | NA | NA |
| OR6K6    | 0,00 | 0,00 | 0,00 | 0,00 | NA | NA |
| OR6L1P   | 0,00 | 0,00 | 0,00 | 0,00 | NA | NA |
| OR6L2P   | 0,00 | 0,00 | 0,00 | 0,00 | NA | NA |
| OR6M3P   | 0,00 | 0,00 | 0,00 | 0,00 | NA | NA |
| OR6N2    | 0,00 | 0,00 | 0,00 | 0,00 | NA | NA |
| OR6Q1    | 0,00 | 0,00 | 0,00 | 0,00 | NA | NA |
| OR6R1P   | 0,00 | 0,00 | 0,00 | 0,00 | NA | NA |
| OR6S1    | 0,00 | 0,00 | 0,00 | 0,00 | NA | NA |
| OR6W1P   | 0,00 | 0,00 | 0,00 | 0,00 | NA | NA |
| OR6X1    | 0,00 | 0,00 | 0,00 | 0,00 | NA | NA |
| OR7A10   | 0,00 | 0,00 | 0,00 | 0,00 | NA | NA |
| OR7A11P  | 0,00 | 0,00 | 0,00 | 0,00 | NA | NA |
| OR7A15P  | 0,00 | 0,00 | 0,00 | 0,00 | NA | NA |
| OR7A18P  | 0,00 | 0,00 | 0,00 | 0,00 | NA | NA |
| OR7A2P   | 0,00 | 0,30 | 0,00 | 0,00 | NA | NA |
| OR7A8P   | 0,00 | 0,00 | 0,00 | 0,00 | NA | NA |
| OR7C2    | 0,00 | 0,00 | 0,00 | 0,00 | NA | NA |
| OR7D11P  | 0,00 | 0,00 | 0,00 | 0,00 | NA | NA |
| OR7E101P | 0,00 | 0,00 | 0,00 | 0,00 | NA | NA |
| OR7E102P | 0,00 | 0,00 | 0,00 | 0,00 | NA | NA |
| OR7E105P | 0,00 | 0,00 | 0,00 | 0,00 | NA | NA |

|          |      |      |      |      |    |    |
|----------|------|------|------|------|----|----|
| OR7E106P | 0,00 | 0,00 | 0,00 | 0,00 | NA | NA |
| OR7E109P | 0,00 | 0,00 | 0,00 | 0,00 | NA | NA |
| OR7E10P  | 0,00 | 0,00 | 0,00 | 0,00 | NA | NA |
| OR7E111P | 0,00 | 0,00 | 0,00 | 0,00 | NA | NA |
| OR7E115P | 0,00 | 0,00 | 0,00 | 0,00 | NA | NA |
| OR7E116P | 0,00 | 0,00 | 0,00 | 0,00 | NA | NA |
| OR7E117P | 0,00 | 0,00 | 0,00 | 0,00 | NA | NA |
| OR7E11P  | 0,00 | 0,00 | 0,00 | 0,00 | NA | NA |
| OR7E121P | 0,00 | 0,00 | 0,00 | 0,00 | NA | NA |
| OR7E125P | 0,00 | 0,00 | 0,00 | 0,00 | NA | NA |
| OR7E129P | 0,00 | 0,00 | 0,00 | 0,00 | NA | NA |
| OR7E12P  | 0,00 | 0,00 | 0,00 | 0,00 | NA | NA |
| OR7E130P | 0,00 | 0,00 | 0,00 | 0,00 | NA | NA |
| OR7E136P | 0,00 | 0,00 | 0,00 | 0,00 | NA | NA |
| OR7E13P  | 0,00 | 0,00 | 0,00 | 0,00 | NA | NA |
| OR7E145P | 0,00 | 0,00 | 0,00 | 0,00 | NA | NA |
| OR7E148P | 0,00 | 0,00 | 0,00 | 0,00 | NA | NA |
| OR7E149P | 0,00 | 0,00 | 0,00 | 0,00 | NA | NA |
| OR7E14P  | 0,00 | 0,00 | 0,00 | 0,00 | NA | NA |
| OR7E154P | 0,00 | 0,00 | 0,00 | 0,00 | NA | NA |
| OR7E155P | 0,00 | 0,00 | 0,00 | 0,00 | NA | NA |
| OR7E156P | 0,00 | 0,00 | 0,00 | 0,00 | NA | NA |
| OR7E157P | 0,00 | 0,00 | 0,00 | 0,00 | NA | NA |
| OR7E158P | 0,00 | 0,00 | 0,00 | 0,00 | NA | NA |
| OR7E159P | 0,00 | 0,00 | 0,00 | 0,00 | NA | NA |
| OR7E15P  | 0,00 | 0,00 | 0,00 | 0,00 | NA | NA |
| OR7E160P | 0,00 | 0,00 | 0,00 | 0,00 | NA | NA |
| OR7E161P | 0,00 | 0,00 | 0,00 | 0,00 | NA | NA |
| OR7E163P | 0,00 | 0,00 | 0,00 | 0,00 | NA | NA |
| OR7E16P  | 0,00 | 0,00 | 0,00 | 0,00 | NA | NA |
| OR7E18P  | 0,00 | 0,00 | 0,00 | 0,00 | NA | NA |
| OR7E1P   | 0,00 | 0,00 | 0,00 | 0,00 | NA | NA |
| OR7E21P  | 0,00 | 0,00 | 0,00 | 0,00 | NA | NA |
| OR7E22P  | 0,00 | 0,00 | 0,00 | 0,00 | NA | NA |
| OR7E24   | 0,00 | 0,00 | 0,00 | 0,00 | NA | NA |
| OR7E26P  | 0,00 | 0,00 | 0,00 | 0,00 | NA | NA |
| OR7E28P  | 0,00 | 0,00 | 0,00 | 0,00 | NA | NA |
| OR7E29P  | 0,00 | 0,00 | 0,00 | 0,00 | NA | NA |
| OR7E2P   | 0,00 | 0,00 | 0,00 | 0,00 | NA | NA |
| OR7E31P  | 0,00 | 0,00 | 0,00 | 0,00 | NA | NA |
| OR7E35P  | 0,00 | 0,00 | 0,00 | 0,00 | NA | NA |
| OR7E36P  | 0,00 | 0,00 | 0,00 | 0,00 | NA | NA |
| OR7E37P  | 0,00 | 0,00 | 0,00 | 0,00 | NA | NA |
| OR7E41P  | 0,00 | 0,00 | 0,00 | 0,00 | NA | NA |
| OR7E43P  | 0,00 | 0,00 | 0,00 | 0,00 | NA | NA |
| OR7E46P  | 0,00 | 0,00 | 0,00 | 0,00 | NA | NA |
| OR7E47P  | 0,00 | 0,00 | 0,00 | 0,00 | NA | NA |
| OR7E4P   | 0,00 | 0,00 | 0,00 | 0,00 | NA | NA |
| OR7E53P  | 0,00 | 0,00 | 0,00 | 0,00 | NA | NA |
| OR7E55P  | 0,00 | 0,00 | 0,00 | 0,00 | NA | NA |
| OR7E59P  | 0,00 | 0,00 | 0,00 | 0,13 | NA | NA |
| OR7E5P   | 0,00 | 0,00 | 0,00 | 0,00 | NA | NA |
| OR7E62P  | 0,00 | 0,00 | 0,00 | 0,00 | NA | NA |
| OR7E66P  | 0,00 | 0,18 | 0,00 | 0,00 | NA | NA |
| OR7E83P  | 0,00 | 0,00 | 0,00 | 0,00 | NA | NA |



|         |      |      |      |      |    |    |
|---------|------|------|------|------|----|----|
| OR7E85P | 0,00 | 0,00 | 0,00 | 0,00 | NA | NA |
| OR7E86P | 0,00 | 0,00 | 0,00 | 0,00 | NA | NA |
| OR7E87P | 0,00 | 0,00 | 0,00 | 0,00 | NA | NA |
| OR7E89P | 0,00 | 0,00 | 0,00 | 0,00 | NA | NA |
| OR7E8P  | 0,00 | 0,00 | 0,00 | 0,00 | NA | NA |
| OR7E90P | 0,00 | 0,00 | 0,00 | 0,00 | NA | NA |
| OR7E93P | 0,00 | 0,00 | 0,00 | 0,00 | NA | NA |
| OR7E96P | 0,00 | 0,00 | 0,00 | 0,00 | NA | NA |
| OR7E97P | 0,00 | 0,00 | 0,00 | 0,00 | NA | NA |
| OR7E99P | 0,00 | 0,00 | 0,00 | 0,00 | NA | NA |
| OR7G1   | 0,00 | 0,00 | 0,00 | 0,00 | NA | NA |
| OR7G15P | 0,00 | 0,00 | 0,00 | 0,00 | NA | NA |
| OR7G3   | 0,00 | 0,00 | 0,00 | 0,00 | NA | NA |
| OR7H1P  | 0,00 | 0,00 | 0,00 | 0,00 | NA | NA |
| OR7H2P  | 0,00 | 0,00 | 0,00 | 0,00 | NA | NA |
| OR7K1P  | 0,00 | 0,00 | 0,00 | 0,00 | NA | NA |
| OR7L1P  | 0,00 | 0,00 | 0,00 | 0,00 | NA | NA |
| OR7M1P  | 0,00 | 0,00 | 0,00 | 0,00 | NA | NA |
| OR8A2P  | 0,00 | 0,00 | 0,00 | 0,00 | NA | NA |
| OR8A3P  | 0,00 | 0,00 | 0,00 | 0,00 | NA | NA |
| OR8B10P | 0,00 | 0,00 | 0,00 | 0,00 | NA | NA |
| OR8B12  | 0,00 | 0,00 | 0,00 | 0,00 | NA | NA |
| OR8B1P  | 0,00 | 0,00 | 0,00 | 0,00 | NA | NA |
| OR8B2   | 0,00 | 0,00 | 0,00 | 0,00 | NA | NA |
| OR8B3   | 0,00 | 0,00 | 0,00 | 0,00 | NA | NA |
| OR8B4   | 0,00 | 0,00 | 0,00 | 0,00 | NA | NA |
| OR8B6P  | 0,00 | 0,00 | 0,00 | 0,00 | NA | NA |
| OR8B7P  | 0,00 | 0,00 | 0,00 | 0,15 | NA | NA |
| OR8C1P  | 0,00 | 0,00 | 0,00 | 0,00 | NA | NA |
| OR8D2   | 0,00 | 0,00 | 0,00 | 0,00 | NA | NA |
| OR8F1P  | 0,00 | 0,00 | 0,00 | 0,00 | NA | NA |
| OR8G3P  | 0,00 | 0,00 | 0,00 | 0,00 | NA | NA |
| OR8G5   | 0,00 | 0,00 | 0,00 | 0,00 | NA | NA |
| OR8G7P  | 0,00 | 0,00 | 0,00 | 0,00 | NA | NA |
| OR8H3   | 0,00 | 0,00 | 0,00 | 0,00 | NA | NA |
| OR8I1P  | 0,00 | 0,00 | 0,00 | 0,00 | NA | NA |
| OR8I2   | 0,00 | 0,00 | 0,00 | 0,00 | NA | NA |
| OR8I4P  | 0,00 | 0,00 | 0,00 | 0,00 | NA | NA |
| OR8J1   | 0,00 | 0,00 | 0,00 | 0,00 | NA | NA |
| OR8J2   | 0,00 | 0,00 | 0,00 | 0,00 | NA | NA |
| OR8K1   | 0,00 | 0,00 | 0,00 | 0,00 | NA | NA |
| OR8K3   | 0,00 | 0,00 | 0,00 | 0,00 | NA | NA |
| OR8K4P  | 0,00 | 0,00 | 0,00 | 0,00 | NA | NA |
| OR8K5   | 0,00 | 0,00 | 0,00 | 0,00 | NA | NA |
| OR8L1P  | 0,00 | 0,00 | 0,00 | 0,00 | NA | NA |
| OR8R1P  | 0,00 | 0,00 | 0,00 | 0,00 | NA | NA |
| OR8S1   | 0,00 | 0,00 | 0,00 | 0,00 | NA | NA |
| OR8S21P | 0,00 | 0,00 | 0,00 | 0,00 | NA | NA |
| OR8T1P  | 0,00 | 0,00 | 0,00 | 0,00 | NA | NA |
| OR8U1   | 0,00 | 0,00 | 0,00 | 0,00 | NA | NA |
| OR8V1P  | 0,00 | 0,00 | 0,00 | 0,00 | NA | NA |
| OR8X1P  | 0,00 | 0,00 | 0,00 | 0,00 | NA | NA |
| OR9A1P  | 0,00 | 0,00 | 0,00 | 0,00 | NA | NA |
| OR9A3P  | 0,00 | 0,00 | 0,00 | 0,00 | NA | NA |
| OR9A4   | 0,00 | 0,00 | 0,00 | 0,00 | NA | NA |

|           |      |      |      |      |    |    |
|-----------|------|------|------|------|----|----|
| OR9G2P    | 0,00 | 0,00 | 0,00 | 0,00 | NA | NA |
| OR9I1     | 0,00 | 0,00 | 0,00 | 0,00 | NA | NA |
| OR9I2P    | 0,00 | 0,00 | 0,00 | 0,00 | NA | NA |
| OR9I3P    | 0,00 | 0,00 | 0,00 | 0,00 | NA | NA |
| OR9L1P    | 0,00 | 0,00 | 0,00 | 0,00 | NA | NA |
| OR9N1P    | 0,00 | 0,00 | 0,00 | 0,00 | NA | NA |
| OR9P1P    | 0,00 | 0,00 | 0,00 | 0,00 | NA | NA |
| OR9Q1     | 0,00 | 0,00 | 0,00 | 0,05 | NA | NA |
| OR9R1P    | 0,00 | 0,00 | 0,00 | 0,00 | NA | NA |
| OR9S24P   | 0,00 | 0,00 | 0,00 | 0,00 | NA | NA |
| ORA0V1P1  | 0,00 | 0,00 | 0,00 | 0,00 | NA | NA |
| OSBPL5    | 1,79 | 0,84 | 1,06 | 1,23 | NA | NA |
| OTC       | 0,00 | 0,00 | 0,00 | 0,00 | NA | NA |
| OTOG      | 0,00 | 0,00 | 0,00 | 0,00 | NA | NA |
| OTOP2     | 0,00 | 0,00 | 0,00 | 0,00 | NA | NA |
| OTOP3     | 0,00 | 0,00 | 0,00 | 0,00 | NA | NA |
| OTOR      | 0,00 | 0,00 | 0,00 | 0,00 | NA | NA |
| OTP       | 0,00 | 0,00 | 0,00 | 0,00 | NA | NA |
| OTX2P1    | 0,00 | 0,00 | 0,00 | 0,00 | NA | NA |
| OVGP1     | 0,00 | 0,06 | 0,21 | 0,00 | NA | NA |
| OVOL2     | 0,00 | 0,00 | 0,00 | 0,00 | NA | NA |
| OVOL3     | 0,00 | 0,00 | 0,00 | 0,00 | NA | NA |
| OVOS2     | 0,15 | 0,02 | 0,12 | 0,22 | NA | NA |
| P2RY12    | 0,13 | 0,00 | 0,14 | 0,09 | NA | NA |
| P2RY4     | 0,00 | 0,00 | 0,00 | 0,00 | NA | NA |
| PA2G4P1   | 0,00 | 0,00 | 0,00 | 0,00 | NA | NA |
| PA2G4P2   | 0,00 | 0,00 | 0,00 | 0,00 | NA | NA |
| PA2G4P3   | 0,00 | 0,00 | 0,00 | 0,00 | NA | NA |
| PABPC1L2B | 0,00 | 0,00 | 0,00 | 0,00 | NA | NA |
| PABPC1P13 | 0,00 | 0,00 | 0,00 | 0,00 | NA | NA |
| PABPC1P5  | 0,00 | 0,00 | 0,00 | 0,00 | NA | NA |
| PACSIN1   | 0,02 | 0,03 | 0,00 | 0,03 | NA | NA |
| PACSIN3   | 0,00 | 0,00 | 0,00 | 0,00 | NA | NA |
| PAGE1     | 0,00 | 0,00 | 0,00 | 0,00 | NA | NA |
| PAGE2B    | 0,00 | 0,00 | 0,00 | 0,00 | NA | NA |
| PAGE3     | 0,00 | 0,00 | 0,00 | 0,00 | NA | NA |
| PAGE5     | 0,00 | 0,00 | 0,00 | 0,00 | NA | NA |
| PALM3     | 0,00 | 0,00 | 0,00 | 0,00 | NA | NA |
| PALMD     | 0,10 | 0,05 | 0,06 | 0,30 | NA | NA |
| PAMR1     | 0,00 | 0,17 | 0,00 | 0,00 | NA | NA |
| PAPOLB    | 0,00 | 0,00 | 0,00 | 0,00 | NA | NA |
| PARD6A    | 0,09 | 0,27 | 0,11 | 0,00 | NA | NA |
| PARD6B    | 0,28 | 0,60 | 0,61 | 1,01 | NA | NA |
| PARP4P3   | 0,00 | 0,00 | 0,00 | 0,00 | NA | NA |
| PATE3     | 0,00 | 0,00 | 0,00 | 0,00 | NA | NA |
| PAX2      | 0,00 | 0,00 | 0,00 | 0,00 | NA | NA |
| PAX9      | 0,00 | 0,00 | 0,00 | 0,00 | NA | NA |
| PBOV1     | 0,10 | 0,31 | 0,15 | 0,23 | NA | NA |
| PBX2P1    | 0,00 | 0,00 | 0,00 | 0,00 | NA | NA |
| PCBP2P1   | 0,00 | 0,00 | 0,00 | 0,00 | NA | NA |
| PCBP3-OT1 | 0,00 | 0,00 | 0,00 | 0,00 | NA | NA |
| PCDH1     | 0,00 | 0,21 | 0,00 | 0,00 | NA | NA |
| PCDH18    | 0,00 | 0,00 | 0,00 | 0,00 | NA | NA |
| PCDH19    | 0,00 | 0,00 | 0,00 | 0,00 | NA | NA |
| PCDH20    | 0,00 | 0,00 | 0,00 | 0,00 | NA | NA |

|           |      |      |      |      |    |    |
|-----------|------|------|------|------|----|----|
| PCDH8     | 0,00 | 0,00 | 0,00 | 0,00 | NA | NA |
| PCDH8P1   | 0,00 | 0,00 | 0,00 | 0,00 | NA | NA |
| PCDH9-AS2 | 0,00 | 0,00 | 0,00 | 0,00 | NA | NA |
| PCDHA1    | 0,00 | 0,00 | 0,00 | 0,00 | NA | NA |
| PCDHA11   | 0,00 | 0,00 | 0,00 | 0,00 | NA | NA |
| PCDHA12   | 0,00 | 0,00 | 0,00 | 0,00 | NA | NA |
| PCDHA13   | 0,00 | 0,00 | 0,00 | 0,00 | NA | NA |
| PCDHA14   | 0,00 | 0,00 | 0,00 | 0,00 | NA | NA |
| PCDHA2    | 0,00 | 0,00 | 0,00 | 0,00 | NA | NA |
| PCDHA3    | 0,00 | 0,00 | 0,00 | 0,00 | NA | NA |
| PCDHA6    | 0,00 | 0,00 | 0,00 | 0,00 | NA | NA |
| PCDHA7    | 0,00 | 0,00 | 0,00 | 0,00 | NA | NA |
| PCDHA8    | 0,00 | 0,00 | 0,00 | 0,00 | NA | NA |
| PCDHAC2   | 0,00 | 0,00 | 0,00 | 0,00 | NA | NA |
| PCDHB10   | 0,00 | 0,00 | 0,00 | 0,00 | NA | NA |
| PCDHB12   | 0,00 | 0,00 | 0,00 | 0,00 | NA | NA |
| PCDHB17   | 0,00 | 0,00 | 0,00 | 0,00 | NA | NA |
| PCDHB4    | 0,00 | 0,00 | 0,00 | 0,00 | NA | NA |
| PCDHB5    | 0,00 | 0,00 | 0,00 | 0,00 | NA | NA |
| PCDHB6    | 0,00 | 0,00 | 0,00 | 0,00 | NA | NA |
| PCDHB7    | 0,00 | 0,00 | 0,00 | 0,00 | NA | NA |
| PCDHB8    | 0,00 | 0,00 | 0,00 | 0,00 | NA | NA |
| PCDHGA12  | 0,00 | 0,00 | 0,00 | 0,00 | NA | NA |
| PCDHGA2   | 0,00 | 0,00 | 0,00 | 0,00 | NA | NA |
| PCDHGA3   | 0,00 | 0,00 | 0,00 | 0,00 | NA | NA |
| PCDHGA7   | 0,00 | 0,00 | 0,00 | 0,00 | NA | NA |
| PCDHGB2   | 0,00 | 0,00 | 0,00 | 0,00 | NA | NA |
| PCDHGB3   | 0,00 | 0,00 | 0,00 | 0,00 | NA | NA |
| PCDHGB4   | 0,00 | 0,00 | 0,00 | 0,00 | NA | NA |
| PCDHGB7   | 0,00 | 0,00 | 0,00 | 0,00 | NA | NA |
| PCGF7P    | 0,00 | 0,00 | 0,00 | 0,00 | NA | NA |
| PCMTD1P2  | 0,00 | 0,00 | 0,00 | 0,00 | NA | NA |
| PCMTD1P7  | 0,00 | 0,00 | 0,00 | 0,00 | NA | NA |
| PCNPP     | 0,00 | 0,00 | 0,00 | 0,00 | NA | NA |
| PCP4      | 0,00 | 0,00 | 0,00 | 0,00 | NA | NA |
| PCSK9     | 0,00 | 0,00 | 0,00 | 0,00 | NA | NA |
| PDCD1     | 0,00 | 0,00 | 0,00 | 0,00 | NA | NA |
| PDDC1     | 1,82 | 1,09 | 1,85 | 1,13 | NA | NA |
| PDE2A     | 0,03 | 0,16 | 0,05 | 0,04 | NA | NA |
| PDE9A     | 0,00 | 0,00 | 0,00 | 0,00 | NA | NA |
| PDIA2     | 0,00 | 0,00 | 0,00 | 0,00 | NA | NA |
| PDX1      | 0,00 | 0,00 | 0,00 | 0,00 | NA | NA |
| PDX1-AS1  | 0,00 | 0,00 | 0,00 | 0,00 | NA | NA |
| PDYN      | 0,00 | 0,00 | 0,00 | 0,00 | NA | NA |
| PDZD3     | 0,00 | 0,00 | 0,00 | 0,00 | NA | NA |
| PDZK1IP1  | 0,00 | 0,00 | 0,00 | 0,00 | NA | NA |
| PDZRN3    | 0,00 | 0,00 | 0,00 | 0,00 | NA | NA |
| PEAR1     | 0,00 | 0,00 | 0,00 | 0,00 | NA | NA |
| PEBP1P2   | 0,00 | 0,00 | 0,00 | 0,00 | NA | NA |
| PEBP4     | 0,00 | 0,00 | 0,00 | 0,00 | NA | NA |
| PEG10     | 0,00 | 0,00 | 0,00 | 0,00 | NA | NA |
| PELI3     | 0,00 | 0,14 | 0,21 | 0,00 | NA | NA |
| PEX12     | 0,00 | 0,05 | 0,00 | 0,00 | NA | NA |
| PEX26     | 0,78 | 1,45 | 0,89 | 0,92 | NA | NA |
| PEX5L     | 0,01 | 0,00 | 0,02 | 0,07 | NA | NA |

|          |      |      |      |      |    |    |
|----------|------|------|------|------|----|----|
| PFKFB1   | 0,00 | 0,00 | 0,00 | 0,00 | NA | NA |
| PFN1P12  | 0,00 | 0,00 | 0,00 | 0,00 | NA | NA |
| PFN3     | 0,00 | 0,00 | 0,00 | 0,00 | NA | NA |
| PFN4     | 0,00 | 0,00 | 0,00 | 0,00 | NA | NA |
| PGA4     | 0,00 | 0,04 | 0,00 | 0,00 | NA | NA |
| PGA5     | 0,00 | 0,00 | 0,00 | 0,00 | NA | NA |
| PGAM2    | 0,00 | 0,00 | 0,00 | 0,00 | NA | NA |
| PGAM3P   | 0,00 | 0,00 | 0,00 | 0,00 | NA | NA |
| PGBD4P2  | 0,00 | 0,00 | 0,00 | 0,00 | NA | NA |
| PGDP1    | 0,00 | 0,00 | 0,00 | 0,00 | NA | NA |
| PGGT1BP2 | 0,00 | 0,00 | 0,00 | 0,00 | NA | NA |
| PGK1P2   | 0,00 | 0,00 | 0,00 | 0,00 | NA | NA |
| PGK2     | 0,00 | 0,00 | 0,00 | 0,00 | NA | NA |
| PGLYRP1  | 0,00 | 0,00 | 0,00 | 0,00 | NA | NA |
| PGLYRP2  | 0,00 | 0,00 | 0,00 | 0,00 | NA | NA |
| PGLYRP3  | 0,00 | 0,00 | 0,00 | 0,00 | NA | NA |
| PGM5P4   | 0,00 | 0,00 | 0,00 | 0,00 | NA | NA |
| PGPEP1L  | 0,00 | 0,00 | 0,00 | 0,00 | NA | NA |
| PGR      | 0,00 | 0,00 | 0,00 | 0,00 | NA | NA |
| PHC1B    | 0,00 | 0,00 | 0,00 | 0,00 | NA | NA |
| PHF21B   | 0,00 | 0,00 | 0,00 | 0,00 | NA | NA |
| PHF5CP   | 0,00 | 0,00 | 0,00 | 0,00 | NA | NA |
| PHGR1    | 0,00 | 0,00 | 0,00 | 0,00 | NA | NA |
| PHKA1    | 0,00 | 0,00 | 0,00 | 0,00 | NA | NA |
| PHKBP1   | 0,00 | 0,00 | 0,00 | 0,00 | NA | NA |
| PHKBP2   | 0,00 | 0,00 | 0,00 | 0,00 | NA | NA |
| PHOX2A   | 0,00 | 0,00 | 0,00 | 0,00 | NA | NA |
| PHYHIP   | 0,00 | 0,00 | 0,00 | 0,00 | NA | NA |
| PHYHIPL  | 0,00 | 0,00 | 0,00 | 0,00 | NA | NA |
| PI15     | 0,00 | 0,00 | 0,00 | 0,00 | NA | NA |
| PI16     | 0,00 | 0,00 | 0,00 | 0,00 | NA | NA |
| PI3      | 0,00 | 0,00 | 0,00 | 0,00 | NA | NA |
| PIFO     | 0,00 | 0,00 | 0,00 | 0,00 | NA | NA |
| PIGY     | 0,00 | 0,00 | 0,00 | 0,00 | NA | NA |
| PIN1L    | 0,00 | 0,00 | 0,00 | 0,00 | NA | NA |
| PIP      | 0,00 | 0,00 | 0,00 | 0,00 | NA | NA |
| PIRT     | 0,00 | 0,00 | 0,00 | 0,00 | NA | NA |
| PISRT1   | 0,00 | 0,00 | 0,00 | 0,00 | NA | NA |
| PITPNM2  | 0,18 | 0,87 | 0,17 | 0,12 | NA | NA |
| PITX3    | 0,00 | 0,00 | 0,00 | 0,00 | NA | NA |
| PKD1P5   | 0,00 | 0,00 | 0,00 | 0,00 | NA | NA |
| PKD2L1   | 0,00 | 0,00 | 0,00 | 0,00 | NA | NA |
| PKDCC    | 0,00 | 0,00 | 0,00 | 0,00 | NA | NA |
| PKDREJ   | 0,00 | 0,00 | 0,00 | 0,00 | NA | NA |
| PKP3     | 0,00 | 0,00 | 0,00 | 0,00 | NA | NA |
| PLA2G12B | 0,00 | 0,00 | 0,00 | 0,00 | NA | NA |
| PLA2G1B  | 0,00 | 0,00 | 0,00 | 0,00 | NA | NA |
| PLA2G2E  | 0,00 | 0,00 | 0,00 | 0,00 | NA | NA |
| PLA2G3   | 0,00 | 0,00 | 0,00 | 0,00 | NA | NA |
| PLA2G4E  | 0,03 | 0,03 | 0,04 | 0,10 | NA | NA |
| PLA2G5   | 0,00 | 0,16 | 0,00 | 0,00 | NA | NA |
| PLAC1    | 0,00 | 0,00 | 0,00 | 0,00 | NA | NA |
| PLAC8L1  | 0,00 | 0,00 | 0,00 | 0,00 | NA | NA |
| PLAC9    | 0,00 | 0,00 | 0,00 | 0,93 | NA | NA |
| PLCB4    | 0,00 | 0,03 | 0,00 | 0,03 | NA | NA |

|            |      |      |      |      |    |    |
|------------|------|------|------|------|----|----|
| PLCH1      | 0,00 | 0,02 | 0,00 | 0,02 | NA | NA |
| PLCZ1      | 0,00 | 0,00 | 0,00 | 0,00 | NA | NA |
| PLD6       | 0,10 | 0,16 | 0,13 | 0,06 | NA | NA |
| PLEKHB1    | 0,00 | 0,00 | 0,00 | 0,00 | NA | NA |
| PLEKHS1    | 0,00 | 0,04 | 0,02 | 0,07 | NA | NA |
| PLGLA      | 0,00 | 0,00 | 0,00 | 0,00 | NA | NA |
| PLIN1      | 0,00 | 0,00 | 0,00 | 0,00 | NA | NA |
| PLP1       | 0,00 | 0,00 | 0,00 | 0,00 | NA | NA |
| PLPP4      | 0,00 | 0,00 | 0,00 | 0,00 | NA | NA |
| PLPP6      | 0,00 | 0,00 | 0,02 | 0,05 | NA | NA |
| PLPPR1     | 0,00 | 0,00 | 0,00 | 0,00 | NA | NA |
| PLPPR5     | 0,00 | 0,00 | 0,00 | 0,00 | NA | NA |
| PLSCR2     | 0,00 | 0,00 | 0,00 | 0,39 | NA | NA |
| PLSCR5     | 0,00 | 0,00 | 0,00 | 0,00 | NA | NA |
| PLXNB1     | 0,00 | 0,00 | 0,00 | 0,08 | NA | NA |
| PM20D1     | 0,00 | 0,00 | 0,00 | 0,00 | NA | NA |
| PMEL       | 0,00 | 0,00 | 0,00 | 0,00 | NA | NA |
| PMM2P1     | 0,00 | 0,00 | 0,00 | 0,00 | NA | NA |
| PMP2       | 0,24 | 0,15 | 0,13 | 0,04 | NA | NA |
| PNLDC1     | 0,00 | 0,00 | 0,00 | 0,00 | NA | NA |
| PNMA3      | 0,00 | 0,00 | 0,00 | 0,00 | NA | NA |
| PNMA6B     | 0,00 | 0,00 | 0,00 | 0,00 | NA | NA |
| PNMA6F     | 0,00 | 0,00 | 0,00 | 0,00 | NA | NA |
| PNMAL2     | 0,00 | 0,00 | 0,00 | 0,00 | NA | NA |
| PNMT       | 0,00 | 0,00 | 0,00 | 0,00 | NA | NA |
| PNPLA3     | 0,19 | 0,00 | 0,06 | 0,09 | NA | NA |
| POLR2CP    | 0,00 | 0,00 | 0,00 | 0,00 | NA | NA |
| POLR2LP    | 0,00 | 0,00 | 0,00 | 0,00 | NA | NA |
| POLR3KP2   | 0,00 | 0,00 | 0,00 | 0,00 | NA | NA |
| POM121L12  | 0,00 | 0,00 | 0,00 | 0,00 | NA | NA |
| POM121L1P  | 0,00 | 0,00 | 0,00 | 0,00 | NA | NA |
| POM121L6P  | 0,00 | 0,00 | 0,00 | 0,00 | NA | NA |
| POM121L8P  | 0,00 | 0,00 | 0,00 | 0,00 | NA | NA |
| POM121L9P  | 0,00 | 0,00 | 0,00 | 0,03 | NA | NA |
| POPDC3     | 0,00 | 0,00 | 0,00 | 0,00 | NA | NA |
| POTEB3     | 0,00 | 0,00 | 0,00 | 0,00 | NA | NA |
| POTEG      | 0,06 | 0,04 | 0,00 | 0,00 | NA | NA |
| POTEJ      | 0,00 | 0,00 | 0,00 | 0,00 | NA | NA |
| POTEM      | 0,00 | 0,00 | 0,00 | 0,00 | NA | NA |
| POU3F1     | 0,00 | 0,00 | 0,00 | 0,00 | NA | NA |
| POU3F4     | 0,00 | 0,07 | 0,00 | 0,00 | NA | NA |
| POU4F1     | 0,00 | 0,00 | 0,00 | 0,00 | NA | NA |
| POU4F3     | 0,00 | 0,00 | 0,00 | 0,00 | NA | NA |
| POU5F1P4   | 0,00 | 0,00 | 0,00 | 0,00 | NA | NA |
| POU5F1P7   | 0,00 | 0,00 | 0,00 | 0,00 | NA | NA |
| POU6F2-AS1 | 0,00 | 0,00 | 0,00 | 0,00 | NA | NA |
| PPARA      | 2,30 | 2,17 | 2,29 | 2,37 | NA | NA |
| PPARGC1A   | 0,00 | 0,10 | 0,01 | 0,00 | NA | NA |
| PPBPL2     | 0,00 | 0,00 | 0,00 | 0,00 | NA | NA |
| PPEF1      | 0,21 | 0,19 | 0,10 | 0,33 | NA | NA |
| PPFIA3     | 0,00 | 0,00 | 0,00 | 0,00 | NA | NA |
| PPIAL4A    | 0,00 | 0,00 | 0,00 | 0,00 | NA | NA |
| PPIAL4D    | 0,00 | 0,00 | 0,00 | 0,00 | NA | NA |
| PPIAL4F    | 0,00 | 0,00 | 0,00 | 0,00 | NA | NA |
| PPIAP      | 0,00 | 0,00 | 0,00 | 0,00 | NA | NA |

|           |      |      |      |      |    |    |
|-----------|------|------|------|------|----|----|
| PPIAP10   | 0,00 | 0,00 | 0,00 | 0,00 | NA | NA |
| PPIAP14   | 0,00 | 0,42 | 0,00 | 0,00 | NA | NA |
| PPIAP16   | 0,00 | 0,00 | 0,00 | 0,00 | NA | NA |
| PPIAP17   | 0,00 | 0,00 | 0,00 | 0,00 | NA | NA |
| PPIAP3    | 0,00 | 0,00 | 0,00 | 0,00 | NA | NA |
| PPIC      | 0,00 | 0,14 | 0,06 | 0,13 | NA | NA |
| PPIL1P1   | 0,00 | 0,00 | 0,00 | 0,00 | NA | NA |
| PPL       | 0,00 | 0,00 | 0,00 | 0,00 | NA | NA |
| PPP1R13L  | 0,55 | 0,70 | 0,51 | 0,75 | NA | NA |
| PPP1R14C  | 0,00 | 0,00 | 0,00 | 0,00 | NA | NA |
| PPP1R17   | 0,00 | 0,00 | 0,00 | 0,00 | NA | NA |
| PPP1R1AP2 | 0,00 | 0,00 | 0,00 | 0,00 | NA | NA |
| PPP1R1B   | 0,00 | 0,00 | 0,00 | 0,00 | NA | NA |
| PPP1R26P4 | 0,00 | 0,00 | 0,00 | 0,00 | NA | NA |
| PPP1R2P2  | 0,00 | 0,00 | 0,00 | 0,00 | NA | NA |
| PPP1R2P9  | 0,00 | 0,00 | 0,00 | 0,00 | NA | NA |
| PPP1R3A   | 0,00 | 0,00 | 0,00 | 0,00 | NA | NA |
| PPP1R3C   | 0,00 | 0,00 | 0,00 | 0,00 | NA | NA |
| PPP3R2    | 0,00 | 0,00 | 0,00 | 0,00 | NA | NA |
| PPP4R4    | 0,00 | 0,03 | 0,00 | 0,00 | NA | NA |
| PPY       | 0,00 | 0,00 | 0,00 | 0,00 | NA | NA |
| PPY2      | 0,00 | 0,00 | 0,00 | 0,00 | NA | NA |
| PRAC1     | 0,00 | 0,00 | 0,00 | 0,00 | NA | NA |
| PRAC2     | 0,00 | 0,00 | 0,00 | 0,00 | NA | NA |
| PRAME     | 0,00 | 0,00 | 0,00 | 0,00 | NA | NA |
| PRAMEF10  | 0,00 | 0,00 | 0,00 | 0,00 | NA | NA |
| PRAMEF11  | 0,00 | 0,00 | 0,00 | 0,00 | NA | NA |
| PRAMEF12  | 0,00 | 0,00 | 0,00 | 0,00 | NA | NA |
| PRAMEF13  | 0,00 | 0,00 | 0,00 | 0,00 | NA | NA |
| PRAMEF15  | 0,00 | 0,00 | 0,00 | 0,00 | NA | NA |
| PRAMEF17  | 0,00 | 0,00 | 0,00 | 0,00 | NA | NA |
| PRAMEF19  | 0,00 | 0,00 | 0,00 | 0,00 | NA | NA |
| PRAMEF2   | 0,00 | 0,00 | 0,00 | 0,00 | NA | NA |
| PRAMEF20  | 0,00 | 0,00 | 0,00 | 0,00 | NA | NA |
| PRAMEF26  | 0,00 | 0,00 | 0,00 | 0,00 | NA | NA |
| PRAMEF27  | 0,00 | 0,00 | 0,00 | 0,00 | NA | NA |
| PRAMEF5   | 0,00 | 0,00 | 0,00 | 0,00 | NA | NA |
| PRAMEF7   | 0,00 | 0,00 | 0,00 | 0,00 | NA | NA |
| PRAMEF9   | 0,00 | 0,00 | 0,00 | 0,00 | NA | NA |
| PRAMEL    | 0,00 | 0,00 | 0,00 | 0,00 | NA | NA |
| PRB1      | 0,00 | 0,00 | 0,00 | 0,00 | NA | NA |
| PRB4      | 0,00 | 0,00 | 0,00 | 0,00 | NA | NA |
| PRDM8     | 0,08 | 0,05 | 0,41 | 0,09 | NA | NA |
| PRG3      | 0,00 | 0,00 | 0,00 | 0,00 | NA | NA |
| PRKACG    | 0,00 | 0,09 | 0,00 | 0,00 | NA | NA |
| PRL       | 0,00 | 0,00 | 0,00 | 0,00 | NA | NA |
| PRLH      | 0,00 | 0,00 | 0,00 | 0,00 | NA | NA |
| PRM1      | 0,00 | 0,00 | 0,00 | 0,00 | NA | NA |
| PRM2      | 0,00 | 0,00 | 0,00 | 0,00 | NA | NA |
| PRM3      | 0,00 | 0,00 | 0,00 | 0,00 | NA | NA |
| PRNT      | 0,00 | 0,00 | 0,00 | 0,00 | NA | NA |
| PROK1     | 0,00 | 0,00 | 0,00 | 0,00 | NA | NA |
| PROK2     | 0,00 | 0,00 | 0,00 | 0,00 | NA | NA |
| PROKR1    | 0,00 | 0,00 | 0,00 | 0,00 | NA | NA |
| PROKR2    | 0,00 | 0,00 | 0,00 | 0,00 | NA | NA |

|         |      |      |      |      |    |    |
|---------|------|------|------|------|----|----|
| PROM1   | 0,00 | 0,55 | 0,00 | 0,05 | NA | NA |
| PROP1   | 0,00 | 0,00 | 0,00 | 0,00 | NA | NA |
| PROSP   | 0,00 | 0,00 | 0,00 | 0,00 | NA | NA |
| PROZ    | 0,00 | 0,00 | 0,00 | 0,00 | NA | NA |
| PRPF19P | 0,00 | 0,00 | 0,00 | 0,00 | NA | NA |
| PRPH    | 0,00 | 0,00 | 0,00 | 0,00 | NA | NA |
| PRPS1L1 | 0,00 | 0,00 | 0,00 | 0,00 | NA | NA |
| PRR15   | 0,00 | 0,00 | 0,00 | 0,00 | NA | NA |
| PRR15L  | 0,00 | 0,00 | 0,00 | 0,00 | NA | NA |
| PRR18   | 0,00 | 0,00 | 0,00 | 0,00 | NA | NA |
| PRR20A  | 0,00 | 0,00 | 0,00 | 0,00 | NA | NA |
| PRR20B  | 0,00 | 0,00 | 0,00 | 0,00 | NA | NA |
| PRR20C  | 0,00 | 0,00 | 0,00 | 0,00 | NA | NA |
| PRR20D  | 0,00 | 0,00 | 0,00 | 0,00 | NA | NA |
| PRR20E  | 0,00 | 0,00 | 0,00 | 0,00 | NA | NA |
| PRR23B  | 0,00 | 0,00 | 0,00 | 0,00 | NA | NA |
| PRR23D1 | 0,00 | 0,00 | 0,00 | 0,00 | NA | NA |
| PRR23D2 | 0,00 | 0,00 | 0,00 | 0,00 | NA | NA |
| PRR34   | 0,24 | 0,36 | 0,19 | 0,40 | NA | NA |
| PRR36   | 0,00 | 0,00 | 0,00 | 0,00 | NA | NA |
| PRR9    | 0,00 | 0,00 | 0,00 | 0,00 | NA | NA |
| PRRT1   | 0,00 | 0,00 | 0,00 | 0,00 | NA | NA |
| PRRT3   | 0,11 | 0,04 | 0,03 | 0,00 | NA | NA |
| PRRX2   | 0,00 | 0,00 | 0,00 | 0,00 | NA | NA |
| PRSS1   | 0,00 | 0,00 | 0,00 | 0,00 | NA | NA |
| PRSS12  | 0,03 | 0,00 | 0,18 | 0,03 | NA | NA |
| PRSS2   | 0,00 | 0,00 | 0,00 | 0,00 | NA | NA |
| PRSS22  | 0,00 | 0,00 | 0,00 | 0,00 | NA | NA |
| PRSS29P | 0,00 | 0,00 | 0,00 | 0,00 | NA | NA |
| PRSS30P | 0,00 | 0,00 | 0,00 | 0,00 | NA | NA |
| PRSS33  | 0,00 | 0,00 | 0,00 | 0,00 | NA | NA |
| PRSS35  | 0,00 | 0,00 | 0,00 | 0,00 | NA | NA |
| PRSS37  | 0,00 | 0,00 | 0,00 | 0,00 | NA | NA |
| PRSS38  | 0,00 | 0,00 | 0,00 | 0,00 | NA | NA |
| PRSS3P1 | 0,00 | 0,00 | 0,00 | 0,00 | NA | NA |
| PRSS41  | 0,00 | 0,00 | 0,00 | 0,00 | NA | NA |
| PRSS42  | 0,00 | 0,00 | 0,00 | 0,00 | NA | NA |
| PRSS45  | 0,00 | 0,00 | 0,00 | 0,00 | NA | NA |
| PRSS48  | 0,00 | 0,00 | 0,00 | 0,00 | NA | NA |
| PRSS50  | 0,00 | 0,00 | 0,00 | 0,00 | NA | NA |
| PRSS53  | 0,04 | 0,07 | 0,09 | 0,14 | NA | NA |
| PRSS54  | 0,00 | 0,00 | 0,00 | 0,00 | NA | NA |
| PRSS56  | 0,00 | 0,00 | 0,00 | 0,00 | NA | NA |
| PRSS58  | 0,00 | 0,00 | 0,00 | 0,00 | NA | NA |
| PRTN3   | 0,00 | 0,00 | 0,00 | 0,00 | NA | NA |
| PRUNE2  | 1,41 | 0,16 | 0,86 | 0,53 | NA | NA |
| PRY     | 0,00 | 0,00 | 0,00 | 0,00 | NA | NA |
| PRY2    | 0,00 | 0,00 | 0,00 | 0,00 | NA | NA |
| PSCA    | 0,00 | 0,00 | 0,00 | 0,00 | NA | NA |
| PSD2    | 0,00 | 0,03 | 0,00 | 0,00 | NA | NA |
| PSG10P  | 0,00 | 0,00 | 0,00 | 0,00 | NA | NA |
| PSKH2   | 0,00 | 0,00 | 0,00 | 0,00 | NA | NA |
| PSMB11  | 0,00 | 0,00 | 0,00 | 0,00 | NA | NA |
| PSMD10P | 0,00 | 0,00 | 0,00 | 0,00 | NA | NA |
| PSMD12P | 0,00 | 0,00 | 0,00 | 0,00 | NA | NA |

|          |      |      |      |      |    |    |
|----------|------|------|------|------|----|----|
| PSMD15   | 0,00 | 0,00 | 0,00 | 0,00 | NA | NA |
| PSMD7P1  | 0,00 | 0,00 | 0,00 | 0,00 | NA | NA |
| PSORS1C2 | 0,00 | 0,00 | 0,00 | 0,00 | NA | NA |
| PSPC1P2  | 0,00 | 0,00 | 0,00 | 0,00 | NA | NA |
| PTCH1    | 0,11 | 0,10 | 0,18 | 0,12 | NA | NA |
| PTCHD1   | 0,13 | 0,08 | 0,17 | 0,25 | NA | NA |
| PTCRA    | 0,00 | 0,16 | 0,00 | 0,00 | NA | NA |
| PTENP1   | 0,03 | 0,00 | 0,03 | 0,00 | NA | NA |
| PTF1A    | 0,00 | 0,00 | 0,00 | 0,00 | NA | NA |
| PTGER1   | 0,00 | 0,00 | 0,00 | 0,00 | NA | NA |
| PTGFR    | 0,00 | 0,00 | 0,00 | 0,00 | NA | NA |
| PTH      | 0,00 | 0,00 | 0,00 | 0,00 | NA | NA |
| PTH1R    | 0,00 | 0,24 | 0,00 | 0,00 | NA | NA |
| PTH2     | 0,00 | 0,00 | 0,00 | 0,00 | NA | NA |
| PTHLH    | 0,00 | 0,00 | 0,00 | 0,00 | NA | NA |
| PTMAP3   | 0,00 | 0,00 | 0,00 | 0,00 | NA | NA |
| PTMAP6   | 0,00 | 0,00 | 0,00 | 0,00 | NA | NA |
| PTN      | 0,00 | 0,00 | 0,00 | 0,00 | NA | NA |
| PTP4A2P2 | 0,00 | 0,41 | 0,00 | 0,00 | NA | NA |
| PTP4A3   | 0,00 | 0,00 | 0,00 | 0,16 | NA | NA |
| PTPN20C  | 0,00 | 0,00 | 0,00 | 0,00 | NA | NA |
| PTPRB    | 0,08 | 0,09 | 0,08 | 0,28 | NA | NA |
| PTPRQ    | 0,00 | 0,00 | 0,00 | 0,00 | NA | NA |
| PTPRR    | 0,00 | 0,00 | 0,00 | 0,00 | NA | NA |
| PTPRT    | 0,00 | 0,04 | 0,00 | 0,00 | NA | NA |
| PTPRVP   | 0,19 | 0,60 | 0,33 | 0,32 | NA | NA |
| PTX4     | 0,00 | 0,00 | 0,00 | 0,00 | NA | NA |
| PVRIG2P  | 0,00 | 0,00 | 0,00 | 0,00 | NA | NA |
| PWRN2    | 0,00 | 0,00 | 0,00 | 0,00 | NA | NA |
| PYCR1    | 0,25 | 0,37 | 0,16 | 0,35 | NA | NA |
| PYDC2    | 0,00 | 0,00 | 0,00 | 0,00 | NA | NA |
| PYY      | 0,00 | 0,00 | 0,00 | 0,00 | NA | NA |
| PYY3     | 0,00 | 0,00 | 0,00 | 0,00 | NA | NA |
| QRFPR    | 0,00 | 0,00 | 0,00 | 0,00 | NA | NA |
| RAB15    | 0,00 | 0,00 | 0,04 | 0,00 | NA | NA |
| RAB19    | 0,00 | 0,00 | 0,00 | 0,00 | NA | NA |
| RAB1C    | 0,00 | 0,00 | 0,00 | 0,00 | NA | NA |
| RAB28P3  | 0,00 | 0,00 | 0,00 | 0,00 | NA | NA |
| RAB3C    | 0,00 | 0,00 | 0,02 | 0,03 | NA | NA |
| RAB31L1  | 0,00 | 0,00 | 0,00 | 0,00 | NA | NA |
| RAB40AL  | 0,00 | 0,00 | 0,00 | 0,00 | NA | NA |
| RAB42P1  | 0,00 | 0,00 | 0,00 | 0,00 | NA | NA |
| RAB6B    | 0,00 | 0,03 | 0,00 | 0,00 | NA | NA |
| RAB6C    | 0,00 | 0,00 | 0,00 | 0,00 | NA | NA |
| RAB7B    | 0,04 | 0,17 | 0,00 | 0,05 | NA | NA |
| RAB9B    | 0,00 | 0,00 | 0,00 | 0,00 | NA | NA |
| RAC1P1   | 0,00 | 0,00 | 0,00 | 0,00 | NA | NA |
| RAD21L1  | 0,00 | 0,00 | 0,00 | 0,00 | NA | NA |
| RAD23BLP | 0,00 | 0,00 | 0,00 | 0,00 | NA | NA |
| RAD51AP2 | 0,00 | 0,00 | 0,00 | 0,00 | NA | NA |
| RAD54B   | 0,00 | 0,00 | 0,00 | 0,00 | NA | NA |
| RAD54L   | 0,00 | 0,00 | 0,00 | 0,19 | NA | NA |
| RAET1G   | 0,00 | 0,00 | 0,00 | 0,00 | NA | NA |
| RAET1L   | 0,00 | 0,00 | 0,00 | 0,00 | NA | NA |
| RAG2     | 0,00 | 0,00 | 0,00 | 0,00 | NA | NA |



|            |      |      |      |      |    |    |
|------------|------|------|------|------|----|----|
| RAI2       | 0,00 | 0,00 | 0,00 | 0,00 | NA | NA |
| RAMP2      | 0,00 | 0,00 | 0,00 | 0,00 | NA | NA |
| RAMP3      | 0,00 | 0,00 | 0,00 | 0,00 | NA | NA |
| RANBP3L    | 0,00 | 0,00 | 0,00 | 0,00 | NA | NA |
| RAP1AP     | 0,00 | 0,00 | 0,00 | 0,00 | NA | NA |
| RAP1BL     | 0,00 | 0,00 | 0,00 | 0,00 | NA | NA |
| RAPGEF3    | 0,00 | 0,00 | 0,00 | 0,00 | NA | NA |
| RARB       | 0,00 | 0,00 | 0,00 | 0,05 | NA | NA |
| RARRES1    | 0,00 | 0,00 | 0,00 | 0,00 | NA | NA |
| RARRES2    | 0,00 | 0,00 | 0,00 | 0,00 | NA | NA |
| RARRES2P1  | 0,00 | 0,00 | 0,00 | 0,00 | NA | NA |
| RARRES2P10 | 0,00 | 0,00 | 0,00 | 0,00 | NA | NA |
| RARRES2P11 | 0,00 | 0,00 | 0,00 | 0,00 | NA | NA |
| RARRES2P2  | 0,00 | 0,00 | 0,00 | 0,00 | NA | NA |
| RARRES2P5  | 0,00 | 0,00 | 0,00 | 0,00 | NA | NA |
| RARRES2P6  | 0,00 | 0,00 | 0,00 | 0,00 | NA | NA |
| RARRES2P7  | 0,00 | 0,00 | 0,00 | 0,00 | NA | NA |
| RARRES2P8  | 0,00 | 0,00 | 0,00 | 0,00 | NA | NA |
| RARRES2P9  | 0,00 | 0,00 | 0,00 | 0,00 | NA | NA |
| RASGEF1C   | 0,00 | 0,00 | 0,00 | 0,00 | NA | NA |
| RASGRF1    | 0,15 | 0,28 | 0,24 | 0,12 | NA | NA |
| RASL11A    | 0,00 | 0,19 | 0,13 | 0,10 | NA | NA |
| RASL12     | 0,00 | 0,00 | 0,00 | 0,05 | NA | NA |
| RASSF10    | 0,00 | 0,00 | 0,00 | 0,00 | NA | NA |
| RAX        | 0,00 | 0,00 | 0,00 | 0,00 | NA | NA |
| RBBP4P3    | 0,00 | 0,00 | 0,00 | 0,00 | NA | NA |
| RBBP4P4    | 0,00 | 0,00 | 0,00 | 0,00 | NA | NA |
| RBBP8NL    | 0,00 | 0,05 | 0,00 | 0,00 | NA | NA |
| RBFOX2     | 0,00 | 0,00 | 0,00 | 0,00 | NA | NA |
| RBM11      | 0,00 | 0,00 | 0,00 | 0,00 | NA | NA |
| RBM22P1    | 0,00 | 0,00 | 0,00 | 0,00 | NA | NA |
| RBM22P4    | 0,00 | 0,00 | 0,00 | 0,00 | NA | NA |
| RBM22P6    | 0,00 | 0,00 | 0,00 | 0,00 | NA | NA |
| RBM46      | 0,00 | 0,00 | 0,00 | 0,00 | NA | NA |
| RBMXL2     | 0,00 | 0,00 | 0,00 | 0,00 | NA | NA |
| RBMXL3     | 0,00 | 0,00 | 0,00 | 0,00 | NA | NA |
| RBMXP1     | 0,00 | 0,00 | 0,00 | 0,00 | NA | NA |
| RBM1A3P    | 0,00 | 0,00 | 0,00 | 0,00 | NA | NA |
| RBM1B      | 0,00 | 0,00 | 0,00 | 0,00 | NA | NA |
| RBM1D      | 0,00 | 0,00 | 0,00 | 0,00 | NA | NA |
| RBM1E      | 0,00 | 0,00 | 0,00 | 0,00 | NA | NA |
| RBM1F      | 0,00 | 0,00 | 0,00 | 0,00 | NA | NA |
| RBM1H      | 0,00 | 0,00 | 0,00 | 0,00 | NA | NA |
| RBM1J      | 0,00 | 0,00 | 0,00 | 0,00 | NA | NA |
| RBM2AP     | 0,00 | 0,00 | 0,00 | 0,00 | NA | NA |
| RBM2BP     | 0,00 | 0,00 | 0,00 | 0,00 | NA | NA |
| RBM2EP     | 0,00 | 0,00 | 0,00 | 0,00 | NA | NA |
| RBM2UP     | 0,00 | 0,00 | 0,00 | 0,00 | NA | NA |
| RBP4       | 0,00 | 0,00 | 0,00 | 0,00 | NA | NA |
| RBPJL      | 0,00 | 0,09 | 0,00 | 0,00 | NA | NA |
| RBPJP6     | 0,00 | 0,00 | 0,00 | 0,00 | NA | NA |
| RBPM52     | 0,00 | 0,00 | 0,00 | 0,00 | NA | NA |
| RCAN2      | 0,00 | 0,00 | 0,00 | 0,00 | NA | NA |
| RCC2P7     | 0,00 | 0,00 | 0,00 | 0,00 | NA | NA |
| RCOR2      | 0,00 | 0,00 | 0,00 | 0,00 | NA | NA |

|           |      |      |      |      |    |    |
|-----------|------|------|------|------|----|----|
| RD3L      | 0,00 | 0,00 | 0,00 | 0,00 | NA | NA |
| RDM1      | 0,00 | 0,00 | 0,00 | 0,31 | NA | NA |
| REG1B     | 0,00 | 0,31 | 0,00 | 0,00 | NA | NA |
| REG1P     | 0,00 | 0,00 | 0,00 | 0,00 | NA | NA |
| REG3G     | 0,00 | 0,00 | 0,00 | 0,00 | NA | NA |
| REM1      | 0,00 | 0,00 | 0,00 | 0,00 | NA | NA |
| REM2      | 0,00 | 0,07 | 0,00 | 0,00 | NA | NA |
| REN       | 0,00 | 0,10 | 0,00 | 0,00 | NA | NA |
| RESP18    | 0,00 | 0,00 | 0,00 | 0,00 | NA | NA |
| RETNLB    | 0,00 | 0,00 | 0,00 | 0,00 | NA | NA |
| REXO1L10P | 0,00 | 0,00 | 0,00 | 0,00 | NA | NA |
| REXO1L11P | 0,00 | 0,00 | 0,00 | 0,00 | NA | NA |
| REXO1L12P | 0,00 | 0,00 | 0,00 | 0,00 | NA | NA |
| REXO1L3P  | 0,00 | 0,14 | 0,00 | 0,00 | NA | NA |
| REXO1L4P  | 0,00 | 0,00 | 0,00 | 0,00 | NA | NA |
| REXO1L5P  | 0,00 | 0,00 | 0,00 | 0,00 | NA | NA |
| REXO1L7P  | 0,00 | 0,00 | 0,00 | 0,00 | NA | NA |
| REXO1L8P  | 0,00 | 0,00 | 0,00 | 0,00 | NA | NA |
| REXO1L9P  | 0,00 | 0,00 | 0,00 | 0,00 | NA | NA |
| RF00002   | 0,00 | 0,00 | 0,00 | 0,00 | NA | NA |
| RF00016   | 0,00 | 0,00 | 0,00 | 0,00 | NA | NA |
| RF00049   | 0,00 | 0,00 | 0,00 | 0,00 | NA | NA |
| RF00056   | 0,00 | 0,00 | 0,00 | 0,00 | NA | NA |
| RF00066   | 0,00 | 0,00 | 0,00 | 0,00 | NA | NA |
| RF00088   | 0,00 | 0,00 | 0,00 | 0,00 | NA | NA |
| RF00093   | 0,00 | 0,00 | 0,00 | 0,00 | NA | NA |
| RF00099   | 0,00 | 0,00 | 0,00 | 0,00 | NA | NA |
| RF00133   | 0,00 | 0,00 | 0,00 | 0,00 | NA | NA |
| RF00134   | 0,00 | 0,00 | 0,00 | 0,00 | NA | NA |
| RF00136   | 0,00 | 0,00 | 0,00 | 0,00 | NA | NA |
| RF00137   | 0,00 | 0,00 | 0,00 | 0,00 | NA | NA |
| RF00150   | 0,00 | 0,00 | 0,00 | 0,00 | NA | NA |
| RF00151   | 2,72 | 2,69 | 0,00 | 0,00 | NA | NA |
| RF00152   | 0,00 | 0,00 | 0,00 | 0,00 | NA | NA |
| RF00154   | 0,00 | 0,00 | 0,00 | 0,00 | NA | NA |
| RF00181   | 0,00 | 0,00 | 0,00 | 0,00 | NA | NA |
| RF00189   | 0,00 | 0,00 | 0,00 | 0,00 | NA | NA |
| RF00201   | 0,00 | 0,00 | 0,00 | 0,00 | NA | NA |
| RF00218   | 0,00 | 0,00 | 0,00 | 0,00 | NA | NA |
| RF00263   | 0,00 | 0,00 | 0,00 | 0,00 | NA | NA |
| RF00265   | 0,00 | 0,00 | 0,00 | 0,00 | NA | NA |
| RF00271   | 0,00 | 0,00 | 0,00 | 0,00 | NA | NA |
| RF00273   | 0,00 | 0,00 | 0,00 | 0,00 | NA | NA |
| RF00275   | 0,00 | 0,00 | 0,00 | 0,00 | NA | NA |
| RF00278   | 0,00 | 0,00 | 0,00 | 0,00 | NA | NA |
| RF00280   | 0,00 | 0,00 | 0,00 | 0,00 | NA | NA |
| RF00283   | 0,00 | 0,00 | 0,00 | 0,00 | NA | NA |
| RF00285   | 0,00 | 0,00 | 0,00 | 0,00 | NA | NA |
| RF00287   | 0,00 | 0,00 | 0,00 | 0,00 | NA | NA |
| RF00324   | 0,00 | 0,00 | 0,00 | 0,00 | NA | NA |
| RF00340   | 0,00 | 0,00 | 0,00 | 0,00 | NA | NA |
| RF00342   | 0,00 | 0,00 | 0,00 | 0,00 | NA | NA |
| RF00345   | 0,00 | 0,00 | 0,00 | 0,00 | NA | NA |
| RF00392   | 0,00 | 0,00 | 0,00 | 0,00 | NA | NA |
| RF00393   | 0,00 | 0,00 | 0,00 | 0,00 | NA | NA |

|         |      |      |      |      |    |    |
|---------|------|------|------|------|----|----|
| RF00397 | 0,00 | 0,00 | 0,00 | 0,00 | NA | NA |
| RF00398 | 0,00 | 0,00 | 0,00 | 0,00 | NA | NA |
| RF00399 | 0,00 | 0,00 | 0,00 | 0,00 | NA | NA |
| RF00401 | 0,00 | 0,00 | 0,00 | 0,00 | NA | NA |
| RF00405 | 0,00 | 0,00 | 0,00 | 0,00 | NA | NA |
| RF00406 | 0,00 | 0,00 | 0,00 | 0,00 | NA | NA |
| RF00407 | 0,00 | 0,00 | 0,00 | 0,00 | NA | NA |
| RF00408 | 0,00 | 0,00 | 0,00 | 0,00 | NA | NA |
| RF00414 | 0,00 | 0,00 | 0,00 | 0,00 | NA | NA |
| RF00415 | 0,00 | 0,00 | 0,00 | 0,00 | NA | NA |
| RF00421 | 0,00 | 0,00 | 0,00 | 0,00 | NA | NA |
| RF00422 | 0,00 | 0,00 | 0,00 | 0,00 | NA | NA |
| RF00423 | 0,00 | 0,00 | 0,00 | 0,00 | NA | NA |
| RF00424 | 0,00 | 0,00 | 0,00 | 0,00 | NA | NA |
| RF00426 | 0,00 | 0,00 | 0,00 | 0,00 | NA | NA |
| RF00428 | 0,00 | 0,00 | 0,00 | 0,00 | NA | NA |
| RF00438 | 0,00 | 2,74 | 0,00 | 0,00 | NA | NA |
| RF00440 | 0,00 | 0,00 | 0,00 | 0,00 | NA | NA |
| RF00477 | 0,00 | 0,00 | 0,00 | 0,00 | NA | NA |
| RF00478 | 0,00 | 0,00 | 0,00 | 0,00 | NA | NA |
| RF00537 | 0,00 | 0,00 | 0,00 | 0,00 | NA | NA |
| RF00564 | 0,00 | 0,00 | 0,00 | 0,00 | NA | NA |
| RF00566 | 0,00 | 0,00 | 0,00 | 0,00 | NA | NA |
| RF00569 | 0,00 | 0,00 | 0,00 | 0,00 | NA | NA |
| RF00570 | 0,00 | 0,00 | 0,00 | 0,00 | NA | NA |
| RF00571 | 0,00 | 0,00 | 0,00 | 0,00 | NA | NA |
| RF00572 | 0,00 | 0,00 | 0,00 | 0,00 | NA | NA |
| RF00575 | 0,00 | 0,00 | 0,00 | 0,00 | NA | NA |
| RF00588 | 0,00 | 0,00 | 0,00 | 0,00 | NA | NA |
| RF00601 | 0,00 | 0,00 | 0,00 | 0,00 | NA | NA |
| RF00603 | 0,00 | 0,00 | 0,00 | 0,00 | NA | NA |
| RF00611 | 0,00 | 0,00 | 0,00 | 0,00 | NA | NA |
| RF00612 | 0,00 | 0,00 | 0,00 | 0,00 | NA | NA |
| RF00614 | 0,00 | 0,00 | 0,00 | 0,00 | NA | NA |
| RF00618 | 0,00 | 0,00 | 0,00 | 0,00 | NA | NA |
| RF00619 | 0,00 | 0,00 | 0,00 | 0,00 | NA | NA |
| RF00621 | 0,00 | 0,00 | 0,00 | 0,00 | NA | NA |
| RF00635 | 0,00 | 0,00 | 0,00 | 0,00 | NA | NA |
| RF01159 | 0,00 | 0,00 | 0,00 | 0,00 | NA | NA |
| RF01161 | 0,00 | 0,00 | 0,00 | 0,00 | NA | NA |
| RF01182 | 0,00 | 0,00 | 0,00 | 0,00 | NA | NA |
| RF01183 | 0,00 | 0,00 | 0,00 | 0,00 | NA | NA |
| RF01299 | 0,00 | 0,00 | 0,00 | 0,00 | NA | NA |
| RF01684 | 0,00 | 0,00 | 0,00 | 0,00 | NA | NA |
| RF01778 | 0,00 | 0,00 | 0,00 | 0,00 | NA | NA |
| RF01848 | 0,00 | 0,00 | 0,00 | 0,00 | NA | NA |
| RF01871 | 0,00 | 0,00 | 0,00 | 0,00 | NA | NA |
| RF01872 | 0,00 | 0,00 | 0,00 | 0,00 | NA | NA |
| RF01873 | 0,00 | 0,00 | 0,00 | 0,00 | NA | NA |
| RF01874 | 0,00 | 0,00 | 0,00 | 0,00 | NA | NA |
| RF01875 | 0,00 | 0,00 | 0,00 | 0,00 | NA | NA |
| RF01876 | 0,00 | 0,00 | 0,00 | 0,00 | NA | NA |
| RF01879 | 0,00 | 0,00 | 0,00 | 0,00 | NA | NA |
| RF01880 | 0,00 | 0,00 | 0,00 | 0,00 | NA | NA |
| RF01881 | 0,00 | 0,00 | 0,00 | 0,00 | NA | NA |

|         |      |      |      |      |    |    |
|---------|------|------|------|------|----|----|
| RF01882 | 0,00 | 0,00 | 0,00 | 0,00 | NA | NA |
| RF01883 | 0,00 | 0,00 | 0,00 | 0,00 | NA | NA |
| RF01884 | 0,00 | 0,00 | 0,00 | 0,00 | NA | NA |
| RF01887 | 0,00 | 0,00 | 0,00 | 0,00 | NA | NA |
| RF01888 | 0,00 | 0,00 | 0,00 | 0,00 | NA | NA |
| RF01891 | 0,00 | 0,00 | 0,00 | 0,00 | NA | NA |
| RF01892 | 0,00 | 0,00 | 0,00 | 0,00 | NA | NA |
| RF01894 | 0,00 | 0,00 | 0,00 | 0,00 | NA | NA |
| RF01905 | 0,00 | 0,00 | 0,00 | 0,00 | NA | NA |
| RF01906 | 0,00 | 0,00 | 0,00 | 0,00 | NA | NA |
| RF01909 | 0,00 | 0,00 | 0,00 | 0,00 | NA | NA |
| RF01928 | 0,00 | 0,00 | 0,00 | 0,00 | NA | NA |
| RF01946 | 0,00 | 0,00 | 0,00 | 0,00 | NA | NA |
| RF01947 | 0,00 | 0,00 | 0,00 | 0,00 | NA | NA |
| RF01948 | 0,00 | 0,00 | 0,00 | 0,00 | NA | NA |
| RF01950 | 0,00 | 0,00 | 0,00 | 0,00 | NA | NA |
| RF01951 | 0,00 | 0,00 | 0,00 | 0,00 | NA | NA |
| RF01953 | 0,00 | 0,00 | 0,00 | 0,00 | NA | NA |
| RF01954 | 0,00 | 0,00 | 0,00 | 0,00 | NA | NA |
| RF01955 | 0,00 | 0,00 | 0,00 | 0,00 | NA | NA |
| RF01956 | 0,00 | 0,00 | 0,00 | 0,00 | NA | NA |
| RF01957 | 0,00 | 0,00 | 0,00 | 0,00 | NA | NA |
| RF01963 | 0,00 | 0,00 | 0,00 | 0,00 | NA | NA |
| RF01964 | 0,00 | 0,00 | 0,00 | 0,00 | NA | NA |
| RF01965 | 0,00 | 0,00 | 0,00 | 0,00 | NA | NA |
| RF01966 | 0,00 | 0,00 | 0,00 | 0,00 | NA | NA |
| RF01967 | 0,00 | 0,00 | 0,00 | 0,00 | NA | NA |
| RF01968 | 0,00 | 0,00 | 0,00 | 0,00 | NA | NA |
| RF01969 | 0,00 | 0,00 | 0,00 | 0,00 | NA | NA |
| RF01970 | 0,00 | 0,00 | 0,00 | 0,00 | NA | NA |
| RF01971 | 0,00 | 0,00 | 0,00 | 0,00 | NA | NA |
| RF01972 | 0,00 | 0,00 | 0,00 | 0,00 | NA | NA |
| RF01973 | 0,00 | 0,00 | 0,00 | 0,00 | NA | NA |
| RF01974 | 0,00 | 0,00 | 0,00 | 0,00 | NA | NA |
| RF01975 | 0,00 | 0,00 | 0,00 | 0,00 | NA | NA |
| RF01976 | 0,00 | 0,00 | 0,00 | 0,00 | NA | NA |
| RF01977 | 0,00 | 0,00 | 0,00 | 0,00 | NA | NA |
| RF01981 | 0,00 | 0,00 | 0,00 | 0,00 | NA | NA |
| RF01983 | 0,00 | 0,00 | 0,00 | 0,00 | NA | NA |
| RF01984 | 0,00 | 0,00 | 0,00 | 0,00 | NA | NA |
| RF01986 | 0,00 | 0,00 | 0,00 | 0,00 | NA | NA |
| RF01987 | 0,00 | 0,00 | 0,00 | 0,00 | NA | NA |
| RF02038 | 0,00 | 0,00 | 0,00 | 0,00 | NA | NA |
| RF02039 | 0,00 | 0,00 | 0,00 | 0,00 | NA | NA |
| RF02040 | 0,00 | 0,00 | 0,00 | 0,00 | NA | NA |
| RF02041 | 0,00 | 0,00 | 0,00 | 0,00 | NA | NA |
| RF02042 | 0,00 | 0,00 | 0,00 | 0,00 | NA | NA |
| RF02043 | 0,00 | 0,00 | 0,00 | 0,00 | NA | NA |
| RF02045 | 0,00 | 0,00 | 0,00 | 0,00 | NA | NA |
| RF02089 | 0,00 | 0,00 | 0,00 | 0,00 | NA | NA |
| RF02090 | 0,00 | 0,00 | 0,00 | 0,00 | NA | NA |
| RF02091 | 0,00 | 0,00 | 0,00 | 0,00 | NA | NA |
| RF02101 | 0,00 | 0,00 | 0,00 | 0,00 | NA | NA |
| RF02103 | 0,00 | 0,00 | 0,00 | 0,00 | NA | NA |
| RF02105 | 0,00 | 0,00 | 0,00 | 1,10 | NA | NA |

|         |      |      |      |      |    |    |
|---------|------|------|------|------|----|----|
| RF02106 | 0,00 | 0,00 | 0,00 | 0,00 | NA | NA |
| RF02108 | 0,00 | 0,00 | 0,00 | 0,00 | NA | NA |
| RF02109 | 0,00 | 0,00 | 0,00 | 0,00 | NA | NA |
| RF02110 | 0,00 | 0,00 | 0,00 | 0,00 | NA | NA |
| RF02112 | 0,00 | 0,00 | 0,00 | 0,00 | NA | NA |
| RF02113 | 0,00 | 0,00 | 0,00 | 0,00 | NA | NA |
| RF02115 | 0,00 | 0,00 | 0,00 | 0,00 | NA | NA |
| RF02116 | 0,00 | 0,00 | 0,00 | 0,00 | NA | NA |
| RF02118 | 0,00 | 0,00 | 0,00 | 0,00 | NA | NA |
| RF02119 | 0,00 | 0,00 | 0,00 | 0,00 | NA | NA |
| RF02120 | 0,00 | 0,00 | 0,00 | 0,00 | NA | NA |
| RF02121 | 0,00 | 0,00 | 0,00 | 0,00 | NA | NA |
| RF02123 | 0,00 | 0,00 | 0,00 | 0,00 | NA | NA |
| RF02125 | 0,00 | 0,00 | 0,00 | 0,00 | NA | NA |
| RF02127 | 0,00 | 0,00 | 0,00 | 0,00 | NA | NA |
| RF02128 | 0,00 | 0,00 | 0,00 | 0,00 | NA | NA |
| RF02130 | 0,00 | 0,00 | 0,00 | 0,00 | NA | NA |
| RF02131 | 0,00 | 0,00 | 0,00 | 0,00 | NA | NA |
| RF02132 | 0,00 | 0,00 | 0,00 | 0,00 | NA | NA |
| RF02133 | 0,00 | 0,00 | 0,00 | 0,00 | NA | NA |
| RF02134 | 0,00 | 0,00 | 0,00 | 0,00 | NA | NA |
| RF02135 | 0,00 | 0,00 | 0,00 | 0,00 | NA | NA |
| RF02137 | 0,00 | 0,00 | 0,00 | 0,00 | NA | NA |
| RF02138 | 0,00 | 0,00 | 0,00 | 0,00 | NA | NA |
| RF02139 | 0,00 | 0,00 | 0,00 | 0,00 | NA | NA |
| RF02140 | 0,00 | 0,00 | 0,00 | 0,00 | NA | NA |
| RF02141 | 0,00 | 0,00 | 0,00 | 0,00 | NA | NA |
| RF02142 | 0,00 | 0,00 | 0,00 | 0,00 | NA | NA |
| RF02143 | 0,00 | 0,00 | 0,00 | 0,00 | NA | NA |
| RF02145 | 0,00 | 0,00 | 0,00 | 0,00 | NA | NA |
| RF02146 | 0,00 | 0,00 | 0,00 | 0,00 | NA | NA |
| RF02148 | 0,00 | 0,00 | 0,00 | 0,00 | NA | NA |
| RF02149 | 0,00 | 0,00 | 0,00 | 0,00 | NA | NA |
| RF02150 | 0,00 | 0,00 | 0,00 | 0,00 | NA | NA |
| RF02154 | 0,00 | 0,00 | 0,00 | 0,00 | NA | NA |
| RF02155 | 0,00 | 0,00 | 0,00 | 0,00 | NA | NA |
| RF02156 | 0,00 | 0,00 | 0,00 | 0,00 | NA | NA |
| RF02157 | 0,00 | 0,00 | 0,00 | 0,00 | NA | NA |
| RF02158 | 0,00 | 0,00 | 0,00 | 0,00 | NA | NA |
| RF02160 | 0,00 | 0,00 | 0,00 | 0,00 | NA | NA |
| RF02161 | 0,00 | 0,00 | 0,00 | 0,00 | NA | NA |
| RF02164 | 0,00 | 0,00 | 0,00 | 0,00 | NA | NA |
| RF02166 | 0,00 | 0,00 | 0,00 | 0,00 | NA | NA |
| RF02171 | 0,00 | 0,00 | 0,00 | 0,00 | NA | NA |
| RF02172 | 0,00 | 0,00 | 0,00 | 0,00 | NA | NA |
| RF02173 | 0,00 | 0,00 | 0,00 | 0,00 | NA | NA |
| RF02174 | 0,00 | 0,00 | 0,00 | 0,00 | NA | NA |
| RF02175 | 0,00 | 0,00 | 0,00 | 0,00 | NA | NA |
| RF02176 | 0,00 | 0,00 | 0,00 | 0,00 | NA | NA |
| RF02177 | 0,00 | 0,00 | 0,00 | 0,00 | NA | NA |
| RF02178 | 0,00 | 0,00 | 0,00 | 0,00 | NA | NA |
| RF02179 | 0,00 | 0,00 | 0,00 | 0,00 | NA | NA |
| RF02180 | 0,00 | 0,00 | 0,00 | 0,00 | NA | NA |
| RF02181 | 0,00 | 0,00 | 0,00 | 0,00 | NA | NA |
| RF02183 | 0,00 | 0,00 | 0,00 | 0,00 | NA | NA |

|          |      |      |      |      |    |    |
|----------|------|------|------|------|----|----|
| RF02184  | 0,00 | 0,00 | 0,00 | 0,00 | NA | NA |
| RF02185  | 0,00 | 0,00 | 0,00 | 0,00 | NA | NA |
| RF02190  | 0,00 | 0,00 | 0,00 | 0,00 | NA | NA |
| RF02192  | 0,00 | 0,00 | 0,00 | 0,00 | NA | NA |
| RF02193  | 0,00 | 0,00 | 0,00 | 0,00 | NA | NA |
| RF02195  | 0,00 | 0,00 | 0,00 | 0,00 | NA | NA |
| RF02196  | 0,00 | 0,00 | 0,00 | 0,00 | NA | NA |
| RF02197  | 0,00 | 0,00 | 0,00 | 0,00 | NA | NA |
| RF02198  | 0,00 | 0,00 | 0,00 | 0,00 | NA | NA |
| RF02199  | 0,00 | 0,00 | 0,00 | 0,00 | NA | NA |
| RF02200  | 0,00 | 0,00 | 0,00 | 0,00 | NA | NA |
| RF02201  | 0,00 | 0,00 | 0,00 | 0,00 | NA | NA |
| RF02202  | 0,00 | 0,00 | 0,00 | 0,00 | NA | NA |
| RF02203  | 0,00 | 0,00 | 0,00 | 0,00 | NA | NA |
| RF02204  | 0,00 | 0,00 | 0,00 | 0,00 | NA | NA |
| RF02205  | 0,00 | 0,00 | 0,00 | 0,00 | NA | NA |
| RF02208  | 0,00 | 0,00 | 0,00 | 0,00 | NA | NA |
| RF02209  | 0,00 | 0,00 | 0,00 | 0,00 | NA | NA |
| RF02210  | 0,00 | 0,00 | 0,00 | 0,00 | NA | NA |
| RF02211  | 0,00 | 0,00 | 0,00 | 0,00 | NA | NA |
| RF02212  | 0,00 | 0,00 | 0,00 | 0,00 | NA | NA |
| RF02213  | 0,00 | 0,00 | 0,00 | 0,00 | NA | NA |
| RF02215  | 0,00 | 0,00 | 0,00 | 0,00 | NA | NA |
| RF02216  | 0,00 | 0,00 | 0,00 | 0,00 | NA | NA |
| RF02218  | 0,00 | 0,00 | 0,00 | 0,00 | NA | NA |
| RF02219  | 0,00 | 0,00 | 0,00 | 0,00 | NA | NA |
| RF02220  | 0,00 | 0,00 | 0,00 | 0,00 | NA | NA |
| RF02246  | 0,00 | 0,00 | 0,00 | 0,00 | NA | NA |
| RF02247  | 0,00 | 0,00 | 0,00 | 0,00 | NA | NA |
| RF02248  | 0,00 | 0,00 | 0,00 | 0,00 | NA | NA |
| RF02249  | 0,00 | 0,00 | 0,00 | 0,00 | NA | NA |
| RF02250  | 0,00 | 0,00 | 0,00 | 0,00 | NA | NA |
| RF02251  | 0,00 | 0,00 | 0,00 | 0,00 | NA | NA |
| RF02252  | 0,00 | 0,00 | 0,00 | 0,00 | NA | NA |
| RF02272  | 0,00 | 0,00 | 0,00 | 0,00 | NA | NA |
| RF02275  | 0,00 | 0,00 | 0,00 | 0,00 | NA | NA |
| RF02277  | 0,00 | 0,00 | 0,00 | 0,00 | NA | NA |
| RFPL1    | 0,00 | 0,00 | 0,00 | 0,00 | NA | NA |
| RFPL3    | 0,00 | 0,00 | 0,00 | 0,00 | NA | NA |
| RFPL4AP6 | 0,00 | 0,00 | 0,00 | 0,00 | NA | NA |
| RFPL4B   | 0,00 | 0,00 | 0,00 | 0,00 | NA | NA |
| RFWD2P1  | 0,00 | 0,00 | 0,00 | 0,00 | NA | NA |
| RFX4     | 0,00 | 0,00 | 0,00 | 0,05 | NA | NA |
| RGMA     | 0,06 | 0,18 | 0,07 | 0,14 | NA | NA |
| RGPD3    | 0,00 | 0,00 | 0,00 | 0,05 | NA | NA |
| RGS21    | 0,00 | 0,00 | 0,00 | 0,00 | NA | NA |
| RGS4     | 0,00 | 0,08 | 0,00 | 0,13 | NA | NA |
| RGS5     | 0,00 | 0,00 | 0,00 | 0,00 | NA | NA |
| RGS7     | 0,00 | 0,00 | 0,00 | 0,00 | NA | NA |
| RGS7BP   | 0,00 | 0,00 | 0,00 | 0,00 | NA | NA |
| RGS8     | 0,00 | 0,00 | 0,00 | 0,00 | NA | NA |
| RGS9BP   | 0,00 | 0,00 | 0,00 | 0,00 | NA | NA |
| RGSL1    | 0,13 | 0,07 | 0,23 | 0,24 | NA | NA |
| RHCE     | 0,00 | 0,14 | 0,00 | 0,00 | NA | NA |
| RHEBL1   | 0,00 | 0,16 | 0,00 | 0,00 | NA | NA |

|           |      |      |      |      |    |    |
|-----------|------|------|------|------|----|----|
| RHOQP1    | 0,00 | 0,00 | 0,00 | 0,00 | NA | NA |
| RHOT1P1   | 0,00 | 0,00 | 0,00 | 0,00 | NA | NA |
| RHOV      | 0,00 | 0,00 | 0,00 | 0,00 | NA | NA |
| RHOXF1    | 0,00 | 0,00 | 0,00 | 0,00 | NA | NA |
| RHOXF1P1  | 0,00 | 0,00 | 0,00 | 0,00 | NA | NA |
| RHPN2     | 0,41 | 0,74 | 0,25 | 0,13 | NA | NA |
| RIMBP3B   | 0,00 | 0,00 | 0,00 | 0,00 | NA | NA |
| RIPPLY1   | 0,00 | 0,00 | 0,00 | 0,00 | NA | NA |
| RIPPLY2   | 0,00 | 0,00 | 0,00 | 0,00 | NA | NA |
| RLN3      | 0,00 | 0,00 | 0,00 | 0,00 | NA | NA |
| RMRPP5    | 0,00 | 0,00 | 0,00 | 0,00 | NA | NA |
| RMST      | 0,00 | 0,00 | 0,00 | 0,00 | NA | NA |
| RN7SK     | 0,00 | 0,00 | 0,00 | 0,00 | NA | NA |
| RN7SKP1   | 0,00 | 0,00 | 0,00 | 0,00 | NA | NA |
| RN7SKP10  | 0,00 | 0,00 | 0,00 | 0,00 | NA | NA |
| RN7SKP100 | 0,00 | 0,00 | 0,00 | 0,00 | NA | NA |
| RN7SKP101 | 0,00 | 0,00 | 0,00 | 0,00 | NA | NA |
| RN7SKP102 | 0,00 | 0,00 | 0,00 | 0,00 | NA | NA |
| RN7SKP103 | 0,00 | 0,00 | 0,00 | 0,00 | NA | NA |
| RN7SKP104 | 0,00 | 0,00 | 0,00 | 0,00 | NA | NA |
| RN7SKP105 | 0,00 | 0,00 | 0,00 | 0,00 | NA | NA |
| RN7SKP106 | 0,00 | 0,00 | 0,00 | 0,00 | NA | NA |
| RN7SKP107 | 0,00 | 0,00 | 0,00 | 0,00 | NA | NA |
| RN7SKP108 | 0,00 | 0,00 | 0,00 | 0,00 | NA | NA |
| RN7SKP109 | 0,00 | 0,00 | 0,00 | 0,00 | NA | NA |
| RN7SKP11  | 0,00 | 0,00 | 0,00 | 0,00 | NA | NA |
| RN7SKP111 | 0,00 | 0,00 | 0,00 | 0,00 | NA | NA |
| RN7SKP112 | 0,00 | 0,00 | 0,00 | 0,00 | NA | NA |
| RN7SKP113 | 0,00 | 0,00 | 0,00 | 0,00 | NA | NA |
| RN7SKP114 | 0,00 | 0,00 | 0,00 | 0,00 | NA | NA |
| RN7SKP116 | 0,00 | 0,00 | 0,00 | 0,00 | NA | NA |
| RN7SKP117 | 0,00 | 0,00 | 0,00 | 0,00 | NA | NA |
| RN7SKP118 | 0,00 | 0,00 | 0,00 | 0,00 | NA | NA |
| RN7SKP119 | 0,00 | 0,00 | 0,00 | 0,00 | NA | NA |
| RN7SKP12  | 0,00 | 0,00 | 0,00 | 0,00 | NA | NA |
| RN7SKP120 | 0,00 | 0,00 | 0,00 | 0,00 | NA | NA |
| RN7SKP121 | 0,00 | 0,00 | 0,00 | 0,00 | NA | NA |
| RN7SKP122 | 0,00 | 0,00 | 0,00 | 0,00 | NA | NA |
| RN7SKP123 | 0,00 | 0,00 | 0,00 | 0,00 | NA | NA |
| RN7SKP124 | 0,00 | 0,00 | 0,00 | 0,00 | NA | NA |
| RN7SKP125 | 0,00 | 0,00 | 0,00 | 0,00 | NA | NA |
| RN7SKP126 | 0,00 | 0,00 | 0,00 | 0,00 | NA | NA |
| RN7SKP128 | 0,00 | 0,00 | 0,00 | 0,00 | NA | NA |
| RN7SKP129 | 0,00 | 0,00 | 0,00 | 0,00 | NA | NA |
| RN7SKP13  | 0,00 | 0,00 | 0,00 | 0,00 | NA | NA |
| RN7SKP130 | 0,00 | 0,00 | 0,00 | 0,00 | NA | NA |
| RN7SKP131 | 0,00 | 0,00 | 0,00 | 0,00 | NA | NA |
| RN7SKP132 | 0,00 | 0,00 | 0,00 | 0,00 | NA | NA |
| RN7SKP133 | 0,00 | 0,00 | 0,00 | 0,00 | NA | NA |
| RN7SKP134 | 0,00 | 0,00 | 0,00 | 0,00 | NA | NA |
| RN7SKP135 | 0,00 | 0,00 | 0,00 | 0,00 | NA | NA |
| RN7SKP136 | 0,00 | 0,00 | 0,00 | 0,00 | NA | NA |
| RN7SKP137 | 0,00 | 0,00 | 0,00 | 0,00 | NA | NA |
| RN7SKP139 | 0,00 | 0,00 | 0,00 | 0,00 | NA | NA |
| RN7SKP14  | 0,00 | 0,00 | 0,00 | 0,00 | NA | NA |

|           |      |      |      |      |    |    |
|-----------|------|------|------|------|----|----|
| RN7SKP141 | 0,00 | 0,00 | 0,00 | 0,00 | NA | NA |
| RN7SKP142 | 0,00 | 0,00 | 0,00 | 0,00 | NA | NA |
| RN7SKP144 | 0,00 | 0,00 | 0,00 | 0,00 | NA | NA |
| RN7SKP145 | 0,00 | 0,00 | 0,00 | 0,00 | NA | NA |
| RN7SKP146 | 0,00 | 0,00 | 0,00 | 0,00 | NA | NA |
| RN7SKP147 | 0,00 | 0,00 | 0,00 | 0,00 | NA | NA |
| RN7SKP148 | 0,00 | 0,00 | 0,00 | 0,00 | NA | NA |
| RN7SKP15  | 0,00 | 0,00 | 0,00 | 0,00 | NA | NA |
| RN7SKP150 | 0,00 | 0,00 | 0,00 | 0,00 | NA | NA |
| RN7SKP152 | 0,00 | 0,00 | 0,00 | 0,00 | NA | NA |
| RN7SKP153 | 0,00 | 0,00 | 0,00 | 0,00 | NA | NA |
| RN7SKP154 | 0,00 | 0,00 | 0,00 | 0,00 | NA | NA |
| RN7SKP155 | 0,00 | 0,00 | 0,00 | 0,00 | NA | NA |
| RN7SKP156 | 0,00 | 0,00 | 0,00 | 0,00 | NA | NA |
| RN7SKP158 | 0,00 | 0,00 | 0,00 | 0,00 | NA | NA |
| RN7SKP159 | 0,00 | 0,00 | 0,00 | 0,00 | NA | NA |
| RN7SKP160 | 0,00 | 0,00 | 0,00 | 0,00 | NA | NA |
| RN7SKP161 | 0,00 | 0,00 | 0,00 | 0,00 | NA | NA |
| RN7SKP162 | 0,00 | 0,00 | 0,00 | 0,00 | NA | NA |
| RN7SKP164 | 0,00 | 0,00 | 0,00 | 0,00 | NA | NA |
| RN7SKP167 | 0,00 | 0,00 | 0,00 | 0,00 | NA | NA |
| RN7SKP168 | 0,00 | 0,00 | 0,00 | 0,00 | NA | NA |
| RN7SKP169 | 0,00 | 0,00 | 0,00 | 0,00 | NA | NA |
| RN7SKP17  | 0,00 | 0,00 | 0,00 | 0,00 | NA | NA |
| RN7SKP170 | 0,00 | 0,00 | 0,00 | 0,00 | NA | NA |
| RN7SKP171 | 0,00 | 0,00 | 0,00 | 0,00 | NA | NA |
| RN7SKP172 | 0,00 | 0,00 | 0,00 | 0,00 | NA | NA |
| RN7SKP174 | 0,00 | 0,00 | 0,00 | 0,00 | NA | NA |
| RN7SKP175 | 0,00 | 0,00 | 0,00 | 0,00 | NA | NA |
| RN7SKP178 | 0,00 | 0,00 | 0,00 | 0,00 | NA | NA |
| RN7SKP179 | 0,00 | 0,00 | 0,00 | 0,00 | NA | NA |
| RN7SKP18  | 0,00 | 0,00 | 0,00 | 0,00 | NA | NA |
| RN7SKP182 | 0,00 | 0,00 | 0,00 | 0,00 | NA | NA |
| RN7SKP183 | 0,00 | 0,00 | 0,00 | 0,00 | NA | NA |
| RN7SKP184 | 0,00 | 0,00 | 0,00 | 0,00 | NA | NA |
| RN7SKP186 | 0,00 | 0,00 | 0,00 | 0,00 | NA | NA |
| RN7SKP188 | 0,00 | 0,00 | 0,00 | 0,00 | NA | NA |
| RN7SKP189 | 0,00 | 0,00 | 0,00 | 0,00 | NA | NA |
| RN7SKP191 | 0,00 | 0,00 | 0,00 | 0,00 | NA | NA |
| RN7SKP194 | 0,00 | 0,00 | 0,00 | 0,00 | NA | NA |
| RN7SKP196 | 0,00 | 0,00 | 0,00 | 0,00 | NA | NA |
| RN7SKP197 | 0,00 | 0,00 | 0,00 | 0,00 | NA | NA |
| RN7SKP198 | 0,00 | 0,00 | 0,00 | 0,00 | NA | NA |
| RN7SKP199 | 0,00 | 0,00 | 0,00 | 0,00 | NA | NA |
| RN7SKP2   | 0,00 | 0,00 | 0,00 | 0,00 | NA | NA |
| RN7SKP20  | 0,00 | 0,00 | 0,00 | 0,00 | NA | NA |
| RN7SKP200 | 0,00 | 0,00 | 0,00 | 0,00 | NA | NA |
| RN7SKP202 | 0,00 | 0,00 | 0,00 | 0,00 | NA | NA |
| RN7SKP203 | 0,00 | 0,00 | 0,00 | 0,00 | NA | NA |
| RN7SKP204 | 0,00 | 0,00 | 0,00 | 0,00 | NA | NA |
| RN7SKP205 | 0,00 | 0,00 | 0,00 | 0,00 | NA | NA |
| RN7SKP207 | 0,00 | 0,00 | 0,00 | 0,00 | NA | NA |
| RN7SKP208 | 0,00 | 0,00 | 0,00 | 0,00 | NA | NA |
| RN7SKP209 | 0,00 | 0,00 | 0,00 | 0,00 | NA | NA |
| RN7SKP21  | 0,00 | 0,00 | 0,00 | 0,00 | NA | NA |



|           |      |      |      |      |    |    |
|-----------|------|------|------|------|----|----|
| RN7SKP210 | 0,00 | 0,00 | 0,00 | 0,00 | NA | NA |
| RN7SKP211 | 0,00 | 0,00 | 0,00 | 0,00 | NA | NA |
| RN7SKP212 | 0,00 | 0,00 | 0,00 | 0,00 | NA | NA |
| RN7SKP213 | 0,00 | 0,89 | 0,00 | 0,80 | NA | NA |
| RN7SKP214 | 0,00 | 0,00 | 0,00 | 0,00 | NA | NA |
| RN7SKP216 | 0,00 | 0,00 | 0,00 | 0,00 | NA | NA |
| RN7SKP217 | 0,00 | 0,00 | 0,00 | 0,00 | NA | NA |
| RN7SKP219 | 0,00 | 0,00 | 0,00 | 0,00 | NA | NA |
| RN7SKP22  | 0,00 | 0,00 | 0,00 | 0,00 | NA | NA |
| RN7SKP220 | 0,00 | 0,00 | 0,00 | 0,00 | NA | NA |
| RN7SKP225 | 0,00 | 0,00 | 0,00 | 0,00 | NA | NA |
| RN7SKP226 | 0,00 | 0,00 | 0,00 | 0,00 | NA | NA |
| RN7SKP228 | 0,00 | 0,00 | 0,00 | 0,00 | NA | NA |
| RN7SKP229 | 0,00 | 0,00 | 0,00 | 0,00 | NA | NA |
| RN7SKP231 | 0,00 | 0,00 | 0,00 | 0,00 | NA | NA |
| RN7SKP232 | 0,00 | 0,00 | 0,00 | 0,00 | NA | NA |
| RN7SKP233 | 0,00 | 0,00 | 0,00 | 0,00 | NA | NA |
| RN7SKP234 | 0,00 | 0,00 | 0,00 | 0,00 | NA | NA |
| RN7SKP235 | 0,00 | 0,00 | 0,00 | 0,00 | NA | NA |
| RN7SKP236 | 0,00 | 0,00 | 0,00 | 0,00 | NA | NA |
| RN7SKP238 | 0,00 | 0,00 | 0,00 | 0,00 | NA | NA |
| RN7SKP239 | 0,00 | 0,00 | 0,00 | 0,00 | NA | NA |
| RN7SKP24  | 0,00 | 0,00 | 0,00 | 0,00 | NA | NA |
| RN7SKP240 | 0,00 | 0,00 | 0,00 | 0,00 | NA | NA |
| RN7SKP241 | 0,00 | 0,00 | 0,00 | 0,00 | NA | NA |
| RN7SKP242 | 0,00 | 0,00 | 0,00 | 0,00 | NA | NA |
| RN7SKP243 | 0,00 | 0,00 | 0,00 | 0,00 | NA | NA |
| RN7SKP244 | 0,00 | 0,00 | 0,00 | 0,00 | NA | NA |
| RN7SKP249 | 0,00 | 0,00 | 0,00 | 0,00 | NA | NA |
| RN7SKP25  | 0,00 | 0,00 | 0,00 | 0,00 | NA | NA |
| RN7SKP250 | 0,00 | 0,00 | 0,00 | 0,00 | NA | NA |
| RN7SKP252 | 0,00 | 0,00 | 0,00 | 0,00 | NA | NA |
| RN7SKP254 | 0,00 | 0,00 | 0,00 | 0,00 | NA | NA |
| RN7SKP255 | 0,00 | 0,00 | 0,00 | 0,00 | NA | NA |
| RN7SKP256 | 0,00 | 0,00 | 0,00 | 0,00 | NA | NA |
| RN7SKP257 | 0,00 | 0,00 | 0,00 | 0,00 | NA | NA |
| RN7SKP258 | 0,00 | 0,00 | 0,00 | 0,00 | NA | NA |
| RN7SKP259 | 0,00 | 0,00 | 0,00 | 0,00 | NA | NA |
| RN7SKP260 | 0,00 | 0,00 | 0,00 | 0,00 | NA | NA |
| RN7SKP261 | 0,00 | 0,00 | 0,00 | 0,00 | NA | NA |
| RN7SKP262 | 0,00 | 0,00 | 0,00 | 0,00 | NA | NA |
| RN7SKP263 | 0,00 | 0,00 | 0,00 | 0,00 | NA | NA |
| RN7SKP264 | 0,00 | 0,00 | 0,00 | 0,00 | NA | NA |
| RN7SKP265 | 0,00 | 0,00 | 0,00 | 0,00 | NA | NA |
| RN7SKP267 | 0,00 | 0,00 | 0,00 | 0,00 | NA | NA |
| RN7SKP268 | 0,00 | 0,00 | 0,00 | 0,00 | NA | NA |
| RN7SKP27  | 0,00 | 0,00 | 0,00 | 0,00 | NA | NA |
| RN7SKP270 | 0,00 | 0,00 | 0,00 | 0,00 | NA | NA |
| RN7SKP271 | 0,00 | 0,00 | 0,00 | 0,00 | NA | NA |
| RN7SKP273 | 0,00 | 0,00 | 0,00 | 0,00 | NA | NA |
| RN7SKP275 | 0,00 | 0,00 | 0,00 | 0,00 | NA | NA |
| RN7SKP276 | 0,00 | 0,00 | 0,00 | 0,00 | NA | NA |
| RN7SKP277 | 0,00 | 0,00 | 0,00 | 0,00 | NA | NA |
| RN7SKP278 | 0,00 | 0,00 | 0,00 | 0,00 | NA | NA |
| RN7SKP279 | 0,00 | 0,00 | 0,00 | 0,00 | NA | NA |

|           |      |      |      |      |    |    |
|-----------|------|------|------|------|----|----|
| RN7SKP28  | 0,00 | 0,00 | 0,00 | 0,00 | NA | NA |
| RN7SKP280 | 0,00 | 0,00 | 0,00 | 0,00 | NA | NA |
| RN7SKP281 | 0,00 | 0,00 | 0,00 | 0,00 | NA | NA |
| RN7SKP282 | 0,00 | 0,00 | 0,00 | 0,00 | NA | NA |
| RN7SKP284 | 0,00 | 0,00 | 0,00 | 0,00 | NA | NA |
| RN7SKP286 | 0,00 | 0,00 | 0,00 | 0,00 | NA | NA |
| RN7SKP288 | 0,00 | 0,00 | 0,00 | 0,00 | NA | NA |
| RN7SKP289 | 0,00 | 0,00 | 0,00 | 0,00 | NA | NA |
| RN7SKP29  | 0,00 | 0,00 | 0,00 | 0,00 | NA | NA |
| RN7SKP291 | 0,00 | 0,00 | 0,00 | 0,00 | NA | NA |
| RN7SKP293 | 0,00 | 0,00 | 0,00 | 0,00 | NA | NA |
| RN7SKP294 | 0,00 | 0,00 | 0,00 | 0,00 | NA | NA |
| RN7SKP295 | 0,00 | 0,00 | 0,00 | 0,00 | NA | NA |
| RN7SKP297 | 0,00 | 0,00 | 0,00 | 0,00 | NA | NA |
| RN7SKP298 | 0,00 | 0,00 | 0,00 | 0,00 | NA | NA |
| RN7SKP31  | 0,00 | 0,00 | 0,00 | 0,00 | NA | NA |
| RN7SKP32  | 0,00 | 0,00 | 0,00 | 0,00 | NA | NA |
| RN7SKP33  | 0,00 | 0,00 | 0,00 | 0,00 | NA | NA |
| RN7SKP34  | 0,00 | 0,00 | 0,00 | 0,00 | NA | NA |
| RN7SKP35  | 0,00 | 0,00 | 0,00 | 0,00 | NA | NA |
| RN7SKP38  | 0,00 | 0,00 | 0,00 | 0,00 | NA | NA |
| RN7SKP39  | 0,00 | 0,00 | 0,00 | 0,00 | NA | NA |
| RN7SKP40  | 0,00 | 0,00 | 0,00 | 0,00 | NA | NA |
| RN7SKP42  | 0,00 | 0,00 | 0,00 | 0,00 | NA | NA |
| RN7SKP43  | 0,00 | 0,00 | 0,00 | 0,00 | NA | NA |
| RN7SKP44  | 0,00 | 0,00 | 0,00 | 0,00 | NA | NA |
| RN7SKP45  | 0,00 | 0,00 | 0,00 | 0,00 | NA | NA |
| RN7SKP46  | 0,00 | 0,00 | 0,00 | 0,00 | NA | NA |
| RN7SKP47  | 0,00 | 0,00 | 0,00 | 0,00 | NA | NA |
| RN7SKP48  | 0,00 | 0,00 | 0,00 | 0,00 | NA | NA |
| RN7SKP49  | 0,00 | 0,00 | 0,00 | 0,00 | NA | NA |
| RN7SKP5   | 0,00 | 0,00 | 0,00 | 0,00 | NA | NA |
| RN7SKP50  | 0,00 | 0,00 | 0,00 | 0,00 | NA | NA |
| RN7SKP51  | 0,00 | 0,00 | 0,00 | 0,00 | NA | NA |
| RN7SKP52  | 0,00 | 0,00 | 0,00 | 0,00 | NA | NA |
| RN7SKP53  | 0,00 | 0,00 | 0,00 | 0,00 | NA | NA |
| RN7SKP54  | 0,00 | 0,00 | 0,00 | 0,00 | NA | NA |
| RN7SKP55  | 0,00 | 0,00 | 0,00 | 0,00 | NA | NA |
| RN7SKP57  | 0,00 | 0,00 | 0,00 | 0,00 | NA | NA |
| RN7SKP58  | 0,00 | 0,00 | 0,00 | 0,00 | NA | NA |
| RN7SKP59  | 0,00 | 0,00 | 0,00 | 0,00 | NA | NA |
| RN7SKP6   | 0,00 | 0,00 | 0,00 | 0,00 | NA | NA |
| RN7SKP60  | 0,00 | 0,00 | 0,00 | 0,00 | NA | NA |
| RN7SKP61  | 0,00 | 0,00 | 0,00 | 0,00 | NA | NA |
| RN7SKP62  | 0,00 | 0,00 | 0,00 | 0,00 | NA | NA |
| RN7SKP63  | 0,00 | 0,00 | 0,00 | 0,00 | NA | NA |
| RN7SKP64  | 0,00 | 0,00 | 0,00 | 0,00 | NA | NA |
| RN7SKP65  | 0,00 | 0,00 | 0,00 | 0,00 | NA | NA |
| RN7SKP66  | 0,00 | 0,00 | 0,00 | 0,00 | NA | NA |
| RN7SKP67  | 0,00 | 0,00 | 0,00 | 0,00 | NA | NA |
| RN7SKP68  | 0,00 | 0,00 | 0,00 | 0,00 | NA | NA |
| RN7SKP7   | 0,00 | 0,00 | 0,00 | 0,00 | NA | NA |
| RN7SKP70  | 0,00 | 0,00 | 0,00 | 0,00 | NA | NA |
| RN7SKP71  | 0,00 | 0,00 | 0,00 | 0,00 | NA | NA |
| RN7SKP72  | 0,00 | 0,00 | 0,00 | 0,00 | NA | NA |

|           |      |      |      |      |    |    |
|-----------|------|------|------|------|----|----|
| RN7SKP73  | 0,00 | 0,00 | 0,00 | 0,00 | NA | NA |
| RN7SKP74  | 0,00 | 0,00 | 0,00 | 0,00 | NA | NA |
| RN7SKP75  | 0,00 | 0,00 | 0,00 | 0,00 | NA | NA |
| RN7SKP76  | 0,00 | 0,00 | 0,00 | 0,00 | NA | NA |
| RN7SKP77  | 0,00 | 0,00 | 0,00 | 0,00 | NA | NA |
| RN7SKP79  | 0,00 | 0,00 | 0,00 | 0,84 | NA | NA |
| RN7SKP8   | 0,00 | 0,00 | 0,00 | 0,00 | NA | NA |
| RN7SKP81  | 0,00 | 0,00 | 0,00 | 0,00 | NA | NA |
| RN7SKP82  | 0,00 | 0,00 | 0,00 | 0,00 | NA | NA |
| RN7SKP83  | 0,00 | 0,00 | 0,00 | 0,00 | NA | NA |
| RN7SKP85  | 0,00 | 0,00 | 0,00 | 0,00 | NA | NA |
| RN7SKP86  | 0,00 | 0,00 | 0,00 | 0,00 | NA | NA |
| RN7SKP87  | 0,00 | 0,00 | 0,00 | 0,00 | NA | NA |
| RN7SKP88  | 0,00 | 0,00 | 0,00 | 0,00 | NA | NA |
| RN7SKP9   | 0,00 | 0,00 | 0,00 | 0,00 | NA | NA |
| RN7SKP90  | 0,00 | 0,00 | 0,00 | 0,00 | NA | NA |
| RN7SKP91  | 0,00 | 0,00 | 0,00 | 0,00 | NA | NA |
| RN7SKP92  | 0,00 | 0,00 | 0,00 | 0,00 | NA | NA |
| RN7SKP93  | 0,00 | 0,00 | 0,00 | 0,00 | NA | NA |
| RN7SKP96  | 0,00 | 0,00 | 0,00 | 0,00 | NA | NA |
| RN7SKP97  | 0,00 | 0,00 | 0,00 | 0,00 | NA | NA |
| RN7SKP98  | 0,00 | 0,00 | 0,00 | 0,00 | NA | NA |
| RN7SKP99  | 0,00 | 0,00 | 0,00 | 0,00 | NA | NA |
| RN7SL101P | 0,00 | 0,00 | 0,00 | 0,00 | NA | NA |
| RN7SL104P | 0,00 | 0,00 | 0,00 | 0,00 | NA | NA |
| RN7SL106P | 0,00 | 0,00 | 0,00 | 0,00 | NA | NA |
| RN7SL108P | 0,00 | 0,00 | 0,00 | 0,00 | NA | NA |
| RN7SL116P | 0,00 | 0,00 | 0,00 | 0,00 | NA | NA |
| RN7SL117P | 0,00 | 0,00 | 0,00 | 0,00 | NA | NA |
| RN7SL120P | 0,00 | 0,00 | 0,00 | 0,00 | NA | NA |
| RN7SL128P | 0,00 | 0,00 | 0,50 | 1,22 | NA | NA |
| RN7SL135P | 0,00 | 0,00 | 0,00 | 0,00 | NA | NA |
| RN7SL152P | 0,00 | 0,00 | 0,00 | 0,00 | NA | NA |
| RN7SL153P | 0,00 | 0,00 | 0,00 | 0,00 | NA | NA |
| RN7SL159P | 0,00 | 0,00 | 0,00 | 0,00 | NA | NA |
| RN7SL160P | 0,00 | 0,00 | 0,00 | 0,00 | NA | NA |
| RN7SL164P | 0,00 | 0,00 | 0,00 | 0,00 | NA | NA |
| RN7SL169P | 0,00 | 0,00 | 0,00 | 0,00 | NA | NA |
| RN7SL176P | 0,00 | 0,00 | 0,00 | 0,00 | NA | NA |
| RN7SL177P | 0,00 | 0,00 | 0,00 | 0,00 | NA | NA |
| RN7SL178P | 0,00 | 2,01 | 0,84 | 0,00 | NA | NA |
| RN7SL182P | 0,00 | 0,00 | 0,00 | 0,00 | NA | NA |
| RN7SL184P | 0,00 | 0,00 | 0,00 | 0,00 | NA | NA |
| RN7SL185P | 0,00 | 0,00 | 0,00 | 0,00 | NA | NA |
| RN7SL187P | 0,00 | 1,04 | 1,45 | 1,19 | NA | NA |
| RN7SL192P | 0,00 | 0,00 | 0,00 | 0,00 | NA | NA |
| RN7SL193P | 0,00 | 0,00 | 0,00 | 0,00 | NA | NA |
| RN7SL196P | 0,00 | 0,00 | 0,00 | 0,00 | NA | NA |
| RN7SL200P | 0,00 | 0,00 | 0,00 | 0,00 | NA | NA |
| RN7SL208P | 0,00 | 0,00 | 0,00 | 0,00 | NA | NA |
| RN7SL209P | 0,00 | 0,00 | 0,00 | 0,00 | NA | NA |
| RN7SL214P | 0,00 | 0,00 | 0,00 | 0,00 | NA | NA |
| RN7SL216P | 0,00 | 0,00 | 0,00 | 0,00 | NA | NA |
| RN7SL218P | 0,00 | 0,00 | 0,00 | 0,00 | NA | NA |
| RN7SL219P | 0,00 | 0,00 | 0,00 | 0,00 | NA | NA |

|           |      |      |      |      |    |    |
|-----------|------|------|------|------|----|----|
| RN7SL221P | 0,00 | 0,00 | 0,00 | 0,00 | NA | NA |
| RN7SL223P | 0,00 | 0,00 | 0,00 | 0,00 | NA | NA |
| RN7SL228P | 0,00 | 0,00 | 0,00 | 0,00 | NA | NA |
| RN7SL229P | 0,00 | 0,00 | 0,00 | 0,00 | NA | NA |
| RN7SL22P  | 0,00 | 1,02 | 0,00 | 0,92 | NA | NA |
| RN7SL233P | 0,00 | 0,00 | 0,00 | 0,81 | NA | NA |
| RN7SL238P | 0,00 | 0,00 | 0,00 | 0,00 | NA | NA |
| RN7SL239P | 1,46 | 0,75 | 1,05 | 1,93 | NA | NA |
| RN7SL23P  | 0,00 | 0,00 | 0,00 | 0,00 | NA | NA |
| RN7SL240P | 0,00 | 0,00 | 0,00 | 0,00 | NA | NA |
| RN7SL241P | 0,00 | 0,00 | 0,00 | 0,00 | NA | NA |
| RN7SL244P | 0,00 | 0,00 | 0,00 | 0,00 | NA | NA |
| RN7SL253P | 0,00 | 0,00 | 0,00 | 0,00 | NA | NA |
| RN7SL260P | 0,00 | 0,00 | 0,00 | 0,00 | NA | NA |
| RN7SL261P | 0,00 | 0,00 | 0,00 | 0,00 | NA | NA |
| RN7SL263P | 0,00 | 0,00 | 0,00 | 0,00 | NA | NA |
| RN7SL267P | 0,00 | 0,00 | 0,00 | 0,00 | NA | NA |
| RN7SL268P | 0,00 | 0,00 | 0,00 | 0,00 | NA | NA |
| RN7SL26P  | 0,00 | 0,00 | 0,00 | 0,00 | NA | NA |
| RN7SL272P | 0,00 | 0,00 | 0,00 | 0,00 | NA | NA |
| RN7SL273P | 0,00 | 0,00 | 0,00 | 0,00 | NA | NA |
| RN7SL286P | 0,00 | 0,00 | 0,00 | 0,00 | NA | NA |
| RN7SL292P | 0,00 | 0,00 | 0,00 | 0,00 | NA | NA |
| RN7SL293P | 1,10 | 0,00 | 0,00 | 0,98 | NA | NA |
| RN7SL299P | 0,00 | 0,00 | 0,00 | 0,00 | NA | NA |
| RN7SL305P | 0,00 | 0,00 | 0,00 | 0,00 | NA | NA |
| RN7SL309P | 0,00 | 0,00 | 0,00 | 0,00 | NA | NA |
| RN7SL311P | 0,00 | 0,00 | 0,00 | 0,00 | NA | NA |
| RN7SL314P | 0,00 | 0,00 | 0,00 | 0,00 | NA | NA |
| RN7SL318P | 0,00 | 0,00 | 0,15 | 0,80 | NA | NA |
| RN7SL319P | 0,00 | 0,00 | 0,00 | 0,00 | NA | NA |
| RN7SL323P | 0,00 | 1,44 | 1,01 | 1,06 | NA | NA |
| RN7SL327P | 0,00 | 0,00 | 0,00 | 0,00 | NA | NA |
| RN7SL328P | 0,00 | 0,00 | 0,00 | 0,00 | NA | NA |
| RN7SL331P | 0,00 | 0,00 | 0,00 | 0,00 | NA | NA |
| RN7SL335P | 0,00 | 0,00 | 0,00 | 0,00 | NA | NA |
| RN7SL340P | 0,00 | 0,00 | 0,00 | 0,00 | NA | NA |
| RN7SL343P | 0,00 | 0,00 | 0,00 | 0,00 | NA | NA |
| RN7SL352P | 0,00 | 0,00 | 0,00 | 0,00 | NA | NA |
| RN7SL354P | 0,00 | 0,00 | 0,00 | 0,00 | NA | NA |
| RN7SL359P | 0,00 | 0,00 | 0,00 | 0,00 | NA | NA |
| RN7SL35P  | 0,00 | 0,00 | 0,00 | 0,00 | NA | NA |
| RN7SL362P | 0,00 | 0,00 | 0,00 | 0,00 | NA | NA |
| RN7SL36P  | 0,00 | 0,00 | 0,00 | 0,00 | NA | NA |
| RN7SL372P | 0,00 | 0,00 | 0,00 | 0,00 | NA | NA |
| RN7SL379P | 0,00 | 0,00 | 0,00 | 0,00 | NA | NA |
| RN7SL37P  | 0,00 | 0,00 | 0,75 | 1,74 | NA | NA |
| RN7SL384P | 0,00 | 0,00 | 0,00 | 0,00 | NA | NA |
| RN7SL390P | 0,00 | 0,00 | 0,00 | 0,00 | NA | NA |
| RN7SL393P | 0,00 | 0,00 | 0,00 | 0,00 | NA | NA |
| RN7SL394P | 0,00 | 0,00 | 0,00 | 0,00 | NA | NA |
| RN7SL396P | 0,00 | 0,00 | 0,00 | 0,00 | NA | NA |
| RN7SL400P | 0,00 | 0,00 | 0,00 | 0,00 | NA | NA |
| RN7SL404P | 0,00 | 0,00 | 0,00 | 0,00 | NA | NA |
| RN7SL417P | 0,00 | 0,00 | 0,00 | 0,00 | NA | NA |

|           |      |      |      |      |    |    |
|-----------|------|------|------|------|----|----|
| RN7SL41P  | 0,00 | 0,00 | 0,00 | 0,00 | NA | NA |
| RN7SL422P | 0,00 | 0,00 | 0,00 | 0,00 | NA | NA |
| RN7SL428P | 0,00 | 0,00 | 0,00 | 0,00 | NA | NA |
| RN7SL429P | 0,00 | 0,00 | 0,00 | 0,00 | NA | NA |
| RN7SL42P  | 0,00 | 0,00 | 0,00 | 0,00 | NA | NA |
| RN7SL430P | 0,00 | 0,00 | 0,00 | 0,00 | NA | NA |
| RN7SL432P | 0,00 | 0,00 | 0,00 | 0,00 | NA | NA |
| RN7SL442P | 0,00 | 0,75 | 0,00 | 0,00 | NA | NA |
| RN7SL443P | 0,00 | 0,00 | 0,00 | 0,00 | NA | NA |
| RN7SL446P | 0,00 | 0,00 | 0,00 | 0,00 | NA | NA |
| RN7SL447P | 0,00 | 0,00 | 0,00 | 0,00 | NA | NA |
| RN7SL449P | 0,00 | 0,00 | 0,00 | 0,00 | NA | NA |
| RN7SL451P | 0,00 | 0,00 | 0,00 | 0,00 | NA | NA |
| RN7SL452P | 0,00 | 0,00 | 0,00 | 0,00 | NA | NA |
| RN7SL456P | 0,00 | 0,00 | 0,00 | 0,00 | NA | NA |
| RN7SL459P | 0,00 | 0,00 | 0,00 | 0,00 | NA | NA |
| RN7SL462P | 0,00 | 0,00 | 0,00 | 0,00 | NA | NA |
| RN7SL466P | 0,00 | 0,00 | 0,00 | 0,00 | NA | NA |
| RN7SL469P | 0,00 | 0,00 | 0,00 | 0,00 | NA | NA |
| RN7SL475P | 0,00 | 0,00 | 0,00 | 0,00 | NA | NA |
| RN7SL479P | 0,00 | 0,00 | 0,00 | 0,72 | NA | NA |
| RN7SL480P | 0,00 | 0,00 | 0,00 | 0,00 | NA | NA |
| RN7SL484P | 0,00 | 0,00 | 0,00 | 0,00 | NA | NA |
| RN7SL489P | 0,00 | 0,00 | 0,00 | 0,00 | NA | NA |
| RN7SL495P | 0,00 | 0,00 | 0,00 | 0,00 | NA | NA |
| RN7SL496P | 0,00 | 0,85 | 0,00 | 0,00 | NA | NA |
| RN7SL513P | 0,00 | 0,00 | 0,00 | 0,00 | NA | NA |
| RN7SL515P | 0,00 | 0,00 | 0,00 | 0,00 | NA | NA |
| RN7SL51P  | 0,00 | 0,00 | 0,00 | 0,00 | NA | NA |
| RN7SL536P | 0,00 | 0,00 | 0,00 | 0,00 | NA | NA |
| RN7SL539P | 0,00 | 0,00 | 0,00 | 0,00 | NA | NA |
| RN7SL545P | 0,00 | 0,00 | 0,00 | 0,00 | NA | NA |
| RN7SL549P | 0,00 | 0,00 | 0,00 | 0,00 | NA | NA |
| RN7SL554P | 0,00 | 0,00 | 0,00 | 0,00 | NA | NA |
| RN7SL555P | 0,00 | 0,00 | 0,00 | 0,00 | NA | NA |
| RN7SL557P | 0,00 | 0,00 | 0,00 | 0,00 | NA | NA |
| RN7SL563P | 0,00 | 0,00 | 0,00 | 0,00 | NA | NA |
| RN7SL564P | 0,00 | 0,00 | 0,00 | 0,00 | NA | NA |
| RN7SL568P | 0,00 | 0,00 | 0,00 | 0,00 | NA | NA |
| RN7SL571P | 0,00 | 0,00 | 0,00 | 0,00 | NA | NA |
| RN7SL573P | 0,00 | 0,00 | 0,00 | 0,00 | NA | NA |
| RN7SL580P | 0,00 | 0,00 | 0,00 | 0,00 | NA | NA |
| RN7SL581P | 0,00 | 0,00 | 0,00 | 0,00 | NA | NA |
| RN7SL583P | 0,00 | 0,00 | 0,00 | 0,00 | NA | NA |
| RN7SL584P | 0,00 | 0,00 | 0,00 | 0,00 | NA | NA |
| RN7SL589P | 0,00 | 0,93 | 0,00 | 0,82 | NA | NA |
| RN7SL594P | 0,00 | 0,00 | 0,00 | 0,00 | NA | NA |
| RN7SL598P | 0,00 | 0,00 | 0,00 | 0,00 | NA | NA |
| RN7SL601P | 0,00 | 0,00 | 0,00 | 0,00 | NA | NA |
| RN7SL612P | 0,00 | 0,90 | 0,00 | 0,00 | NA | NA |
| RN7SL614P | 0,00 | 0,00 | 0,00 | 0,00 | NA | NA |
| RN7SL616P | 0,00 | 0,00 | 0,00 | 0,00 | NA | NA |
| RN7SL625P | 0,00 | 0,00 | 0,00 | 0,00 | NA | NA |
| RN7SL627P | 0,00 | 0,00 | 0,00 | 0,00 | NA | NA |
| RN7SL628P | 0,00 | 0,00 | 0,00 | 0,00 | NA | NA |

|           |      |      |      |      |    |    |
|-----------|------|------|------|------|----|----|
| RN7SL62P  | 0,00 | 0,00 | 0,00 | 0,00 | NA | NA |
| RN7SL630P | 0,00 | 0,00 | 0,00 | 0,73 | NA | NA |
| RN7SL632P | 0,00 | 0,00 | 0,00 | 0,00 | NA | NA |
| RN7SL633P | 0,00 | 0,00 | 0,00 | 0,00 | NA | NA |
| RN7SL634P | 0,00 | 0,00 | 0,00 | 0,00 | NA | NA |
| RN7SL635P | 0,00 | 0,00 | 0,00 | 0,00 | NA | NA |
| RN7SL63P  | 0,00 | 0,00 | 0,00 | 0,00 | NA | NA |
| RN7SL640P | 0,00 | 0,00 | 0,00 | 0,00 | NA | NA |
| RN7SL643P | 0,00 | 0,00 | 0,00 | 0,00 | NA | NA |
| RN7SL645P | 0,00 | 0,00 | 0,00 | 0,00 | NA | NA |
| RN7SL646P | 0,00 | 0,85 | 0,00 | 0,00 | NA | NA |
| RN7SL652P | 0,00 | 0,00 | 0,57 | 0,72 | NA | NA |
| RN7SL654P | 0,00 | 0,00 | 0,00 | 0,00 | NA | NA |
| RN7SL659P | 0,00 | 0,00 | 0,00 | 0,00 | NA | NA |
| RN7SL673P | 0,00 | 0,00 | 0,00 | 0,00 | NA | NA |
| RN7SL675P | 0,00 | 0,00 | 0,00 | 0,00 | NA | NA |
| RN7SL679P | 0,00 | 0,00 | 0,00 | 0,00 | NA | NA |
| RN7SL681P | 0,00 | 0,00 | 0,00 | 0,00 | NA | NA |
| RN7SL687P | 0,00 | 0,00 | 0,00 | 0,00 | NA | NA |
| RN7SL691P | 0,00 | 0,00 | 0,00 | 0,00 | NA | NA |
| RN7SL702P | 0,00 | 0,00 | 0,00 | 0,00 | NA | NA |
| RN7SL704P | 0,00 | 0,00 | 0,00 | 0,00 | NA | NA |
| RN7SL705P | 0,00 | 0,00 | 0,00 | 0,00 | NA | NA |
| RN7SL706P | 0,00 | 0,00 | 0,00 | 0,00 | NA | NA |
| RN7SL712P | 0,00 | 0,00 | 0,00 | 0,00 | NA | NA |
| RN7SL715P | 0,00 | 0,00 | 0,00 | 0,00 | NA | NA |
| RN7SL717P | 0,00 | 0,00 | 0,00 | 0,00 | NA | NA |
| RN7SL719P | 0,00 | 0,00 | 0,00 | 0,00 | NA | NA |
| RN7SL720P | 0,00 | 0,00 | 0,00 | 0,00 | NA | NA |
| RN7SL725P | 0,00 | 0,00 | 0,00 | 0,00 | NA | NA |
| RN7SL727P | 0,00 | 0,00 | 0,00 | 0,00 | NA | NA |
| RN7SL736P | 0,00 | 0,00 | 0,00 | 0,00 | NA | NA |
| RN7SL738P | 0,00 | 0,00 | 0,00 | 0,00 | NA | NA |
| RN7SL741P | 0,00 | 0,00 | 0,00 | 0,00 | NA | NA |
| RN7SL745P | 0,00 | 0,00 | 0,00 | 0,00 | NA | NA |
| RN7SL749P | 0,00 | 0,00 | 0,00 | 0,00 | NA | NA |
| RN7SL756P | 0,00 | 0,00 | 0,00 | 0,00 | NA | NA |
| RN7SL757P | 0,00 | 0,00 | 0,00 | 0,00 | NA | NA |
| RN7SL759P | 0,00 | 0,00 | 0,00 | 0,00 | NA | NA |
| RN7SL75P  | 0,00 | 0,00 | 0,00 | 0,86 | NA | NA |
| RN7SL767P | 0,00 | 0,00 | 0,00 | 0,00 | NA | NA |
| RN7SL77P  | 0,00 | 0,00 | 0,00 | 0,00 | NA | NA |
| RN7SL782P | 0,00 | 0,00 | 0,00 | 0,00 | NA | NA |
| RN7SL787P | 0,65 | 0,80 | 0,15 | 1,37 | NA | NA |
| RN7SL789P | 0,00 | 0,00 | 0,63 | 0,00 | NA | NA |
| RN7SL792P | 0,00 | 0,00 | 0,00 | 0,00 | NA | NA |
| RN7SL796P | 0,00 | 0,00 | 0,00 | 0,00 | NA | NA |
| RN7SL79P  | 0,00 | 0,00 | 0,00 | 0,00 | NA | NA |
| RN7SL802P | 0,00 | 0,00 | 0,00 | 0,00 | NA | NA |
| RN7SL803P | 0,00 | 0,00 | 0,00 | 0,00 | NA | NA |
| RN7SL804P | 0,00 | 0,00 | 0,00 | 0,00 | NA | NA |
| RN7SL807P | 0,00 | 0,00 | 0,00 | 0,00 | NA | NA |
| RN7SL808P | 0,00 | 0,00 | 0,00 | 0,00 | NA | NA |
| RN7SL814P | 0,79 | 1,37 | 1,76 | 1,86 | NA | NA |
| RN7SL818P | 0,00 | 0,00 | 0,00 | 0,00 | NA | NA |

|           |      |      |      |      |    |    |
|-----------|------|------|------|------|----|----|
| RN7SL820P | 0,00 | 0,52 | 0,22 | 0,00 | NA | NA |
| RN7SL825P | 0,00 | 0,00 | 0,00 | 0,00 | NA | NA |
| RN7SL82P  | 0,00 | 0,00 | 0,00 | 0,00 | NA | NA |
| RN7SL831P | 0,00 | 0,00 | 0,00 | 0,00 | NA | NA |
| RN7SL838P | 0,00 | 0,00 | 0,00 | 0,00 | NA | NA |
| RN7SL83P  | 0,00 | 0,00 | 0,00 | 0,00 | NA | NA |
| RN7SL843P | 0,00 | 0,00 | 0,00 | 0,00 | NA | NA |
| RN7SL845P | 0,00 | 0,00 | 0,00 | 0,00 | NA | NA |
| RN7SL849P | 0,00 | 0,00 | 0,00 | 0,00 | NA | NA |
| RN7SL853P | 0,00 | 0,00 | 0,00 | 0,00 | NA | NA |
| RN7SL854P | 0,00 | 0,00 | 0,00 | 0,00 | NA | NA |
| RN7SL856P | 0,00 | 0,85 | 0,00 | 0,00 | NA | NA |
| RN7SL860P | 0,00 | 0,00 | 0,00 | 0,00 | NA | NA |
| RN7SL864P | 0,00 | 0,00 | 0,00 | 0,00 | NA | NA |
| RN7SL869P | 0,00 | 0,00 | 0,00 | 0,00 | NA | NA |
| RN7SL870P | 0,00 | 0,00 | 0,00 | 0,00 | NA | NA |
| RN7SL87P  | 0,00 | 0,00 | 0,00 | 0,00 | NA | NA |
| RN7SL8P   | 0,00 | 0,00 | 0,00 | 0,00 | NA | NA |
| RN7SL93P  | 0,00 | 0,00 | 0,00 | 0,00 | NA | NA |
| RN7SL97P  | 0,00 | 0,00 | 0,00 | 0,00 | NA | NA |
| RNA5-8SP2 | 0,00 | 0,00 | 0,00 | 0,00 | NA | NA |
| RNA5-8SP4 | 0,00 | 0,00 | 0,00 | 0,00 | NA | NA |
| RNA5-8SP5 | 0,00 | 0,00 | 0,00 | 0,00 | NA | NA |
| RNA5-8SP6 | 0,00 | 0,00 | 0,00 | 0,00 | NA | NA |
| RNA5-8SP7 | 0,00 | 0,00 | 0,00 | 0,00 | NA | NA |
| RNA5SP100 | 0,00 | 0,00 | 0,00 | 0,00 | NA | NA |
| RNA5SP101 | 0,00 | 0,00 | 0,00 | 0,00 | NA | NA |
| RNA5SP102 | 0,00 | 0,00 | 0,00 | 0,00 | NA | NA |
| RNA5SP103 | 0,00 | 0,00 | 0,00 | 0,00 | NA | NA |
| RNA5SP104 | 0,00 | 0,00 | 0,00 | 0,00 | NA | NA |
| RNA5SP105 | 0,00 | 0,00 | 0,00 | 0,00 | NA | NA |
| RNA5SP106 | 0,00 | 0,00 | 0,00 | 0,00 | NA | NA |
| RNA5SP107 | 0,00 | 0,00 | 0,00 | 0,00 | NA | NA |
| RNA5SP108 | 0,00 | 0,00 | 0,00 | 0,00 | NA | NA |
| RNA5SP109 | 0,00 | 0,00 | 0,00 | 0,00 | NA | NA |
| RNA5SP110 | 0,00 | 0,00 | 0,00 | 0,00 | NA | NA |
| RNA5SP111 | 0,00 | 0,00 | 0,00 | 0,00 | NA | NA |
| RNA5SP112 | 0,00 | 0,00 | 0,00 | 0,00 | NA | NA |
| RNA5SP113 | 0,00 | 0,00 | 0,00 | 0,00 | NA | NA |
| RNA5SP114 | 0,00 | 0,00 | 0,00 | 0,00 | NA | NA |
| RNA5SP115 | 0,00 | 0,00 | 0,00 | 0,00 | NA | NA |
| RNA5SP116 | 0,00 | 0,00 | 0,00 | 0,00 | NA | NA |
| RNA5SP117 | 0,00 | 0,00 | 0,00 | 0,00 | NA | NA |
| RNA5SP119 | 0,00 | 0,00 | 0,00 | 0,00 | NA | NA |
| RNA5SP120 | 0,00 | 0,00 | 0,00 | 0,00 | NA | NA |
| RNA5SP121 | 0,00 | 0,00 | 0,00 | 0,00 | NA | NA |
| RNA5SP122 | 0,00 | 0,00 | 0,00 | 0,00 | NA | NA |
| RNA5SP124 | 0,00 | 0,00 | 0,00 | 0,00 | NA | NA |
| RNA5SP125 | 0,00 | 0,00 | 0,00 | 0,00 | NA | NA |
| RNA5SP126 | 0,00 | 0,00 | 0,00 | 0,00 | NA | NA |
| RNA5SP129 | 0,00 | 0,00 | 0,00 | 0,00 | NA | NA |
| RNA5SP130 | 0,00 | 0,00 | 0,00 | 0,00 | NA | NA |
| RNA5SP132 | 0,00 | 0,00 | 0,00 | 0,00 | NA | NA |
| RNA5SP133 | 0,00 | 0,00 | 0,00 | 0,00 | NA | NA |
| RNA5SP134 | 0,00 | 0,00 | 0,00 | 0,00 | NA | NA |

|           |      |      |      |      |    |    |
|-----------|------|------|------|------|----|----|
| RNA5SP135 | 0,00 | 0,00 | 0,00 | 0,00 | NA | NA |
| RNA5SP136 | 0,00 | 0,00 | 0,00 | 0,00 | NA | NA |
| RNA5SP137 | 0,00 | 0,00 | 0,00 | 0,00 | NA | NA |
| RNA5SP139 | 0,00 | 0,00 | 0,00 | 0,00 | NA | NA |
| RNA5SP141 | 0,00 | 0,00 | 0,00 | 0,00 | NA | NA |
| RNA5SP142 | 0,00 | 0,00 | 0,00 | 0,00 | NA | NA |
| RNA5SP143 | 0,00 | 0,00 | 0,00 | 0,00 | NA | NA |
| RNA5SP144 | 0,00 | 0,00 | 0,00 | 0,00 | NA | NA |
| RNA5SP145 | 0,00 | 0,00 | 0,00 | 0,00 | NA | NA |
| RNA5SP147 | 0,00 | 0,00 | 0,00 | 0,00 | NA | NA |
| RNA5SP148 | 0,00 | 0,00 | 0,00 | 0,00 | NA | NA |
| RNA5SP149 | 0,00 | 0,00 | 0,00 | 0,00 | NA | NA |
| RNA5SP150 | 0,00 | 0,00 | 0,00 | 0,00 | NA | NA |
| RNA5SP152 | 0,00 | 0,00 | 0,00 | 0,00 | NA | NA |
| RNA5SP156 | 0,00 | 0,00 | 0,00 | 0,00 | NA | NA |
| RNA5SP157 | 0,00 | 0,00 | 0,00 | 0,00 | NA | NA |
| RNA5SP158 | 0,00 | 0,00 | 0,00 | 0,00 | NA | NA |
| RNA5SP160 | 0,00 | 0,00 | 0,00 | 0,00 | NA | NA |
| RNA5SP162 | 0,00 | 0,00 | 0,00 | 0,00 | NA | NA |
| RNA5SP163 | 0,00 | 0,00 | 0,00 | 0,00 | NA | NA |
| RNA5SP164 | 0,00 | 0,00 | 0,00 | 0,00 | NA | NA |
| RNA5SP165 | 0,00 | 0,00 | 0,00 | 0,00 | NA | NA |
| RNA5SP166 | 0,00 | 0,00 | 0,00 | 0,00 | NA | NA |
| RNA5SP167 | 0,00 | 0,00 | 0,00 | 0,00 | NA | NA |
| RNA5SP169 | 0,00 | 0,00 | 0,00 | 0,00 | NA | NA |
| RNA5SP170 | 0,00 | 0,00 | 0,00 | 0,00 | NA | NA |
| RNA5SP171 | 0,00 | 0,00 | 0,00 | 0,00 | NA | NA |
| RNA5SP173 | 0,00 | 0,00 | 0,00 | 0,00 | NA | NA |
| RNA5SP174 | 0,00 | 0,00 | 0,00 | 0,00 | NA | NA |
| RNA5SP175 | 0,00 | 0,00 | 0,00 | 0,00 | NA | NA |
| RNA5SP176 | 0,00 | 0,00 | 0,00 | 0,00 | NA | NA |
| RNA5SP177 | 0,00 | 0,00 | 0,00 | 0,00 | NA | NA |
| RNA5SP178 | 0,00 | 0,00 | 0,00 | 0,00 | NA | NA |
| RNA5SP179 | 0,00 | 0,00 | 0,00 | 0,00 | NA | NA |
| RNA5SP18  | 0,00 | 0,00 | 0,00 | 0,00 | NA | NA |
| RNA5SP180 | 0,00 | 0,00 | 0,00 | 0,00 | NA | NA |
| RNA5SP181 | 0,00 | 0,00 | 0,00 | 0,00 | NA | NA |
| RNA5SP183 | 0,00 | 0,00 | 0,00 | 0,00 | NA | NA |
| RNA5SP185 | 0,00 | 0,00 | 0,00 | 0,00 | NA | NA |
| RNA5SP186 | 0,00 | 0,00 | 0,00 | 0,00 | NA | NA |
| RNA5SP189 | 0,00 | 0,00 | 0,00 | 0,00 | NA | NA |
| RNA5SP19  | 0,00 | 0,00 | 0,00 | 0,00 | NA | NA |
| RNA5SP191 | 0,00 | 0,00 | 0,00 | 0,00 | NA | NA |
| RNA5SP192 | 0,00 | 0,00 | 0,00 | 0,00 | NA | NA |
| RNA5SP193 | 0,00 | 0,00 | 0,00 | 0,00 | NA | NA |
| RNA5SP194 | 0,00 | 0,00 | 0,00 | 0,00 | NA | NA |
| RNA5SP196 | 0,00 | 0,00 | 0,00 | 0,00 | NA | NA |
| RNA5SP197 | 0,00 | 0,00 | 0,00 | 0,00 | NA | NA |
| RNA5SP198 | 0,00 | 0,00 | 0,00 | 0,00 | NA | NA |
| RNA5SP200 | 0,00 | 0,00 | 0,00 | 0,00 | NA | NA |
| RNA5SP202 | 0,00 | 0,00 | 0,00 | 0,00 | NA | NA |
| RNA5SP203 | 0,00 | 0,00 | 0,00 | 0,00 | NA | NA |
| RNA5SP204 | 0,00 | 0,00 | 0,00 | 0,00 | NA | NA |
| RNA5SP205 | 0,00 | 0,00 | 0,00 | 0,00 | NA | NA |
| RNA5SP206 | 0,00 | 0,00 | 0,00 | 0,00 | NA | NA |



|           |      |      |      |      |    |    |
|-----------|------|------|------|------|----|----|
| RNA5SP208 | 0,00 | 0,00 | 0,00 | 0,00 | NA | NA |
| RNA5SP209 | 0,00 | 0,00 | 0,00 | 0,00 | NA | NA |
| RNA5SP21  | 0,00 | 0,00 | 0,00 | 0,00 | NA | NA |
| RNA5SP210 | 0,00 | 0,00 | 0,00 | 0,00 | NA | NA |
| RNA5SP211 | 0,00 | 0,00 | 0,00 | 0,00 | NA | NA |
| RNA5SP212 | 0,00 | 0,00 | 0,00 | 0,00 | NA | NA |
| RNA5SP213 | 0,00 | 0,00 | 0,00 | 0,00 | NA | NA |
| RNA5SP214 | 0,00 | 0,00 | 0,00 | 0,00 | NA | NA |
| RNA5SP215 | 0,00 | 0,00 | 0,00 | 0,00 | NA | NA |
| RNA5SP219 | 0,00 | 0,00 | 0,00 | 0,00 | NA | NA |
| RNA5SP22  | 0,00 | 0,00 | 0,00 | 0,00 | NA | NA |
| RNA5SP220 | 0,00 | 0,00 | 0,00 | 0,00 | NA | NA |
| RNA5SP222 | 0,00 | 0,00 | 0,00 | 0,00 | NA | NA |
| RNA5SP223 | 0,00 | 0,00 | 0,00 | 0,00 | NA | NA |
| RNA5SP224 | 0,00 | 0,00 | 0,00 | 0,00 | NA | NA |
| RNA5SP225 | 0,00 | 0,00 | 0,00 | 0,00 | NA | NA |
| RNA5SP226 | 0,00 | 0,00 | 0,00 | 0,00 | NA | NA |
| RNA5SP227 | 0,00 | 0,00 | 0,00 | 0,00 | NA | NA |
| RNA5SP228 | 0,00 | 0,00 | 0,00 | 0,00 | NA | NA |
| RNA5SP23  | 0,00 | 0,00 | 0,00 | 0,00 | NA | NA |
| RNA5SP230 | 0,00 | 0,00 | 0,00 | 0,00 | NA | NA |
| RNA5SP231 | 0,00 | 0,00 | 0,00 | 0,00 | NA | NA |
| RNA5SP232 | 0,00 | 0,00 | 0,00 | 0,00 | NA | NA |
| RNA5SP233 | 0,00 | 0,00 | 0,00 | 0,00 | NA | NA |
| RNA5SP234 | 0,00 | 0,00 | 0,00 | 0,00 | NA | NA |
| RNA5SP235 | 0,00 | 0,00 | 0,00 | 0,00 | NA | NA |
| RNA5SP236 | 0,00 | 0,00 | 0,00 | 0,00 | NA | NA |
| RNA5SP237 | 0,00 | 0,00 | 0,00 | 0,00 | NA | NA |
| RNA5SP238 | 0,00 | 0,00 | 0,00 | 0,00 | NA | NA |
| RNA5SP24  | 0,00 | 0,00 | 0,00 | 0,00 | NA | NA |
| RNA5SP240 | 0,00 | 0,00 | 0,00 | 0,00 | NA | NA |
| RNA5SP241 | 0,00 | 0,00 | 0,00 | 0,00 | NA | NA |
| RNA5SP242 | 0,00 | 0,00 | 0,00 | 0,00 | NA | NA |
| RNA5SP243 | 0,00 | 0,00 | 0,00 | 0,00 | NA | NA |
| RNA5SP244 | 0,00 | 0,00 | 0,00 | 0,00 | NA | NA |
| RNA5SP245 | 0,00 | 0,00 | 0,00 | 0,00 | NA | NA |
| RNA5SP247 | 0,00 | 0,00 | 0,00 | 0,00 | NA | NA |
| RNA5SP248 | 0,00 | 0,00 | 0,00 | 0,00 | NA | NA |
| RNA5SP249 | 0,00 | 0,00 | 0,00 | 0,00 | NA | NA |
| RNA5SP250 | 0,00 | 0,00 | 0,00 | 0,00 | NA | NA |
| RNA5SP251 | 0,00 | 0,00 | 0,00 | 0,00 | NA | NA |
| RNA5SP252 | 0,00 | 0,00 | 0,00 | 0,00 | NA | NA |
| RNA5SP253 | 0,00 | 0,00 | 0,00 | 0,00 | NA | NA |
| RNA5SP254 | 0,00 | 0,00 | 0,00 | 0,00 | NA | NA |
| RNA5SP255 | 0,00 | 0,00 | 0,00 | 0,00 | NA | NA |
| RNA5SP256 | 0,00 | 0,00 | 0,00 | 0,00 | NA | NA |
| RNA5SP257 | 0,00 | 0,00 | 0,00 | 0,00 | NA | NA |
| RNA5SP258 | 0,00 | 0,00 | 0,00 | 0,00 | NA | NA |
| RNA5SP259 | 0,00 | 0,00 | 0,00 | 0,00 | NA | NA |
| RNA5SP26  | 0,00 | 0,00 | 0,00 | 0,00 | NA | NA |
| RNA5SP260 | 0,00 | 0,00 | 0,00 | 0,00 | NA | NA |
| RNA5SP261 | 0,00 | 0,00 | 0,00 | 0,00 | NA | NA |
| RNA5SP262 | 0,00 | 0,00 | 0,00 | 0,00 | NA | NA |
| RNA5SP264 | 0,00 | 0,00 | 0,00 | 0,00 | NA | NA |
| RNA5SP265 | 0,00 | 0,00 | 0,00 | 0,00 | NA | NA |

|           |      |      |      |      |    |    |
|-----------|------|------|------|------|----|----|
| RNA5SP266 | 0,00 | 0,00 | 0,00 | 0,00 | NA | NA |
| RNA5SP267 | 0,00 | 0,00 | 0,00 | 0,00 | NA | NA |
| RNA5SP268 | 0,00 | 0,00 | 0,00 | 0,00 | NA | NA |
| RNA5SP269 | 0,00 | 0,00 | 0,00 | 0,00 | NA | NA |
| RNA5SP27  | 0,00 | 0,00 | 0,00 | 0,00 | NA | NA |
| RNA5SP270 | 0,00 | 0,00 | 0,00 | 0,00 | NA | NA |
| RNA5SP271 | 0,00 | 0,00 | 0,00 | 0,00 | NA | NA |
| RNA5SP272 | 0,00 | 0,00 | 0,00 | 0,00 | NA | NA |
| RNA5SP273 | 0,00 | 0,00 | 0,00 | 0,00 | NA | NA |
| RNA5SP274 | 0,00 | 0,00 | 0,00 | 0,00 | NA | NA |
| RNA5SP275 | 0,00 | 0,00 | 0,00 | 0,00 | NA | NA |
| RNA5SP276 | 0,00 | 0,00 | 0,00 | 0,00 | NA | NA |
| RNA5SP277 | 0,00 | 0,00 | 0,00 | 0,00 | NA | NA |
| RNA5SP279 | 0,00 | 0,00 | 0,00 | 0,00 | NA | NA |
| RNA5SP28  | 0,00 | 0,00 | 0,00 | 0,00 | NA | NA |
| RNA5SP284 | 0,00 | 0,00 | 0,00 | 0,00 | NA | NA |
| RNA5SP285 | 0,00 | 0,00 | 0,00 | 0,00 | NA | NA |
| RNA5SP286 | 0,00 | 0,00 | 0,00 | 0,00 | NA | NA |
| RNA5SP287 | 0,00 | 0,00 | 0,00 | 0,00 | NA | NA |
| RNA5SP289 | 0,00 | 0,00 | 0,00 | 0,00 | NA | NA |
| RNA5SP29  | 0,00 | 0,00 | 0,00 | 0,00 | NA | NA |
| RNA5SP291 | 0,00 | 0,00 | 0,00 | 0,00 | NA | NA |
| RNA5SP292 | 0,00 | 0,00 | 0,00 | 0,00 | NA | NA |
| RNA5SP293 | 0,00 | 0,00 | 0,00 | 0,00 | NA | NA |
| RNA5SP296 | 0,00 | 0,00 | 0,00 | 0,00 | NA | NA |
| RNA5SP297 | 0,00 | 0,00 | 0,00 | 0,00 | NA | NA |
| RNA5SP299 | 0,00 | 0,00 | 0,00 | 0,00 | NA | NA |
| RNA5SP30  | 0,00 | 0,00 | 0,00 | 0,00 | NA | NA |
| RNA5SP300 | 0,00 | 0,00 | 0,00 | 0,00 | NA | NA |
| RNA5SP301 | 0,00 | 0,00 | 0,00 | 0,00 | NA | NA |
| RNA5SP303 | 0,00 | 0,00 | 0,00 | 0,00 | NA | NA |
| RNA5SP304 | 0,00 | 0,00 | 0,00 | 0,00 | NA | NA |
| RNA5SP305 | 0,00 | 0,00 | 0,00 | 0,00 | NA | NA |
| RNA5SP306 | 0,00 | 0,00 | 0,00 | 0,00 | NA | NA |
| RNA5SP309 | 0,00 | 0,00 | 0,00 | 0,00 | NA | NA |
| RNA5SP31  | 0,00 | 0,00 | 0,00 | 0,00 | NA | NA |
| RNA5SP310 | 0,00 | 0,00 | 0,00 | 0,00 | NA | NA |
| RNA5SP318 | 0,00 | 0,00 | 0,00 | 0,00 | NA | NA |
| RNA5SP320 | 0,00 | 0,00 | 0,00 | 0,00 | NA | NA |
| RNA5SP321 | 0,00 | 0,00 | 0,00 | 0,00 | NA | NA |
| RNA5SP322 | 0,00 | 0,00 | 0,00 | 0,00 | NA | NA |
| RNA5SP323 | 0,00 | 0,00 | 0,00 | 0,00 | NA | NA |
| RNA5SP324 | 0,00 | 0,00 | 0,00 | 0,00 | NA | NA |
| RNA5SP325 | 0,00 | 0,00 | 0,00 | 0,00 | NA | NA |
| RNA5SP326 | 0,00 | 0,00 | 0,00 | 0,00 | NA | NA |
| RNA5SP327 | 0,00 | 0,00 | 0,00 | 0,00 | NA | NA |
| RNA5SP329 | 0,00 | 0,00 | 0,00 | 0,00 | NA | NA |
| RNA5SP33  | 0,00 | 0,00 | 0,00 | 0,00 | NA | NA |
| RNA5SP330 | 0,00 | 0,00 | 0,00 | 0,00 | NA | NA |
| RNA5SP331 | 0,00 | 0,00 | 0,00 | 0,00 | NA | NA |
| RNA5SP332 | 0,00 | 0,00 | 0,00 | 0,00 | NA | NA |
| RNA5SP333 | 0,00 | 0,00 | 0,00 | 0,00 | NA | NA |
| RNA5SP334 | 0,00 | 0,00 | 0,00 | 0,00 | NA | NA |
| RNA5SP335 | 0,00 | 0,00 | 0,00 | 0,00 | NA | NA |
| RNA5SP336 | 0,00 | 0,00 | 0,00 | 0,00 | NA | NA |

|           |      |      |      |      |    |    |
|-----------|------|------|------|------|----|----|
| RNA5SP337 | 0,00 | 0,00 | 0,00 | 0,00 | NA | NA |
| RNA5SP338 | 0,00 | 0,00 | 0,00 | 0,00 | NA | NA |
| RNA5SP339 | 0,00 | 0,00 | 0,00 | 0,00 | NA | NA |
| RNA5SP34  | 0,00 | 0,00 | 0,00 | 0,00 | NA | NA |
| RNA5SP340 | 0,00 | 0,00 | 0,00 | 0,00 | NA | NA |
| RNA5SP341 | 0,00 | 0,00 | 0,00 | 0,00 | NA | NA |
| RNA5SP342 | 0,00 | 0,00 | 0,00 | 0,00 | NA | NA |
| RNA5SP343 | 0,00 | 0,00 | 0,00 | 0,00 | NA | NA |
| RNA5SP345 | 0,00 | 0,00 | 0,00 | 0,00 | NA | NA |
| RNA5SP346 | 0,00 | 0,00 | 0,00 | 0,00 | NA | NA |
| RNA5SP347 | 0,00 | 0,00 | 0,00 | 0,00 | NA | NA |
| RNA5SP349 | 0,00 | 0,00 | 0,00 | 0,00 | NA | NA |
| RNA5SP35  | 0,00 | 0,00 | 0,00 | 0,00 | NA | NA |
| RNA5SP350 | 0,00 | 0,00 | 0,00 | 0,00 | NA | NA |
| RNA5SP351 | 0,00 | 0,00 | 0,00 | 0,00 | NA | NA |
| RNA5SP352 | 0,00 | 0,00 | 0,00 | 0,00 | NA | NA |
| RNA5SP355 | 0,00 | 0,00 | 0,00 | 0,00 | NA | NA |
| RNA5SP356 | 0,00 | 0,00 | 0,00 | 0,00 | NA | NA |
| RNA5SP357 | 0,00 | 0,00 | 0,00 | 0,00 | NA | NA |
| RNA5SP358 | 0,00 | 0,00 | 0,00 | 0,00 | NA | NA |
| RNA5SP359 | 0,00 | 0,00 | 0,00 | 0,00 | NA | NA |
| RNA5SP36  | 0,00 | 0,00 | 0,00 | 0,00 | NA | NA |
| RNA5SP360 | 0,00 | 0,00 | 0,00 | 0,00 | NA | NA |
| RNA5SP361 | 0,00 | 0,00 | 0,00 | 0,00 | NA | NA |
| RNA5SP362 | 0,00 | 0,00 | 0,00 | 0,00 | NA | NA |
| RNA5SP364 | 0,00 | 0,00 | 0,00 | 0,00 | NA | NA |
| RNA5SP365 | 0,00 | 0,00 | 0,00 | 0,00 | NA | NA |
| RNA5SP366 | 0,00 | 0,00 | 0,00 | 0,00 | NA | NA |
| RNA5SP367 | 0,00 | 0,00 | 0,00 | 0,00 | NA | NA |
| RNA5SP368 | 0,00 | 0,00 | 0,00 | 0,00 | NA | NA |
| RNA5SP369 | 0,00 | 0,00 | 0,00 | 0,00 | NA | NA |
| RNA5SP370 | 0,00 | 0,00 | 0,00 | 0,00 | NA | NA |
| RNA5SP373 | 0,00 | 0,00 | 0,00 | 0,00 | NA | NA |
| RNA5SP374 | 0,00 | 0,00 | 0,00 | 0,00 | NA | NA |
| RNA5SP375 | 0,00 | 0,00 | 0,00 | 0,00 | NA | NA |
| RNA5SP376 | 0,00 | 0,00 | 0,00 | 0,00 | NA | NA |
| RNA5SP377 | 0,00 | 0,00 | 0,00 | 0,00 | NA | NA |
| RNA5SP379 | 0,00 | 0,00 | 0,00 | 0,00 | NA | NA |
| RNA5SP38  | 0,00 | 0,00 | 0,00 | 0,00 | NA | NA |
| RNA5SP380 | 0,00 | 0,00 | 0,00 | 0,00 | NA | NA |
| RNA5SP382 | 0,00 | 0,00 | 0,00 | 0,00 | NA | NA |
| RNA5SP384 | 0,00 | 0,00 | 0,00 | 0,00 | NA | NA |
| RNA5SP385 | 0,00 | 0,00 | 0,00 | 0,00 | NA | NA |
| RNA5SP386 | 0,00 | 0,00 | 0,00 | 0,00 | NA | NA |
| RNA5SP388 | 0,00 | 0,00 | 0,00 | 0,00 | NA | NA |
| RNA5SP390 | 0,00 | 0,00 | 0,00 | 0,00 | NA | NA |
| RNA5SP391 | 0,00 | 0,00 | 0,00 | 0,00 | NA | NA |
| RNA5SP392 | 0,00 | 0,00 | 0,00 | 0,00 | NA | NA |
| RNA5SP393 | 0,00 | 0,00 | 0,00 | 0,00 | NA | NA |
| RNA5SP396 | 0,00 | 0,00 | 0,00 | 0,00 | NA | NA |
| RNA5SP397 | 0,00 | 0,00 | 0,00 | 0,00 | NA | NA |
| RNA5SP399 | 0,00 | 0,00 | 0,00 | 0,00 | NA | NA |
| RNA5SP40  | 0,00 | 0,00 | 0,00 | 0,00 | NA | NA |
| RNA5SP400 | 0,00 | 0,00 | 0,00 | 0,00 | NA | NA |
| RNA5SP401 | 0,00 | 0,00 | 0,00 | 0,00 | NA | NA |

|           |      |      |      |      |    |    |
|-----------|------|------|------|------|----|----|
| RNA5SP402 | 0,00 | 0,00 | 0,00 | 0,00 | NA | NA |
| RNA5SP403 | 0,00 | 0,00 | 0,00 | 0,00 | NA | NA |
| RNA5SP404 | 0,00 | 0,00 | 0,00 | 0,00 | NA | NA |
| RNA5SP405 | 0,00 | 0,00 | 0,00 | 0,00 | NA | NA |
| RNA5SP406 | 0,00 | 0,00 | 0,00 | 0,00 | NA | NA |
| RNA5SP407 | 0,00 | 0,00 | 0,00 | 0,00 | NA | NA |
| RNA5SP409 | 0,00 | 0,00 | 0,00 | 0,00 | NA | NA |
| RNA5SP41  | 0,00 | 0,00 | 0,00 | 0,00 | NA | NA |
| RNA5SP410 | 0,00 | 0,00 | 0,00 | 0,00 | NA | NA |
| RNA5SP411 | 0,00 | 0,00 | 0,00 | 0,00 | NA | NA |
| RNA5SP412 | 0,00 | 0,00 | 0,00 | 0,00 | NA | NA |
| RNA5SP413 | 0,00 | 0,00 | 0,00 | 0,00 | NA | NA |
| RNA5SP414 | 0,00 | 0,00 | 0,00 | 0,00 | NA | NA |
| RNA5SP415 | 0,00 | 0,00 | 0,00 | 0,00 | NA | NA |
| RNA5SP416 | 0,00 | 0,00 | 0,00 | 0,00 | NA | NA |
| RNA5SP417 | 0,00 | 0,00 | 0,00 | 0,00 | NA | NA |
| RNA5SP418 | 0,00 | 0,00 | 0,00 | 0,00 | NA | NA |
| RNA5SP419 | 0,00 | 0,00 | 0,00 | 0,00 | NA | NA |
| RNA5SP42  | 0,00 | 0,00 | 0,00 | 0,00 | NA | NA |
| RNA5SP420 | 0,00 | 0,00 | 0,00 | 0,00 | NA | NA |
| RNA5SP421 | 0,00 | 0,00 | 0,00 | 0,00 | NA | NA |
| RNA5SP422 | 0,00 | 0,00 | 0,00 | 0,00 | NA | NA |
| RNA5SP423 | 0,00 | 0,00 | 0,00 | 0,00 | NA | NA |
| RNA5SP426 | 0,00 | 0,00 | 0,00 | 0,00 | NA | NA |
| RNA5SP427 | 0,00 | 0,00 | 0,00 | 0,00 | NA | NA |
| RNA5SP429 | 0,00 | 0,00 | 0,00 | 0,00 | NA | NA |
| RNA5SP43  | 0,00 | 0,00 | 0,00 | 0,00 | NA | NA |
| RNA5SP430 | 0,00 | 0,00 | 0,00 | 0,00 | NA | NA |
| RNA5SP431 | 0,00 | 0,00 | 0,00 | 0,00 | NA | NA |
| RNA5SP432 | 0,00 | 0,00 | 0,00 | 0,00 | NA | NA |
| RNA5SP433 | 0,00 | 0,00 | 0,00 | 0,00 | NA | NA |
| RNA5SP434 | 0,00 | 0,00 | 0,00 | 0,00 | NA | NA |
| RNA5SP436 | 0,00 | 0,00 | 0,00 | 0,00 | NA | NA |
| RNA5SP437 | 0,00 | 0,00 | 0,00 | 0,00 | NA | NA |
| RNA5SP438 | 0,00 | 0,00 | 0,00 | 0,00 | NA | NA |
| RNA5SP439 | 0,00 | 0,00 | 0,00 | 0,00 | NA | NA |
| RNA5SP44  | 0,00 | 0,00 | 0,00 | 0,00 | NA | NA |
| RNA5SP440 | 0,00 | 0,00 | 0,00 | 0,00 | NA | NA |
| RNA5SP441 | 0,00 | 0,00 | 0,00 | 0,00 | NA | NA |
| RNA5SP443 | 0,00 | 0,00 | 0,00 | 0,00 | NA | NA |
| RNA5SP444 | 0,00 | 0,00 | 0,00 | 0,00 | NA | NA |
| RNA5SP445 | 0,00 | 0,00 | 0,00 | 0,00 | NA | NA |
| RNA5SP446 | 0,00 | 0,00 | 0,00 | 0,00 | NA | NA |
| RNA5SP447 | 0,00 | 0,00 | 0,00 | 0,00 | NA | NA |
| RNA5SP45  | 0,00 | 0,00 | 0,00 | 0,00 | NA | NA |
| RNA5SP451 | 0,00 | 0,00 | 0,00 | 0,00 | NA | NA |
| RNA5SP453 | 0,00 | 0,00 | 0,00 | 0,00 | NA | NA |
| RNA5SP454 | 0,00 | 0,00 | 0,00 | 0,00 | NA | NA |
| RNA5SP456 | 0,00 | 0,00 | 0,00 | 0,00 | NA | NA |
| RNA5SP457 | 0,00 | 0,00 | 0,00 | 0,00 | NA | NA |
| RNA5SP458 | 0,00 | 0,00 | 0,00 | 0,00 | NA | NA |
| RNA5SP459 | 0,00 | 0,00 | 0,00 | 0,00 | NA | NA |
| RNA5SP46  | 0,00 | 0,00 | 0,00 | 0,00 | NA | NA |
| RNA5SP460 | 0,00 | 0,00 | 0,00 | 0,00 | NA | NA |
| RNA5SP462 | 0,00 | 0,00 | 0,00 | 0,00 | NA | NA |

|           |      |      |      |      |    |    |
|-----------|------|------|------|------|----|----|
| RNA5SP463 | 0,00 | 0,00 | 0,00 | 0,00 | NA | NA |
| RNA5SP464 | 0,00 | 0,00 | 0,00 | 0,00 | NA | NA |
| RNA5SP466 | 0,00 | 0,00 | 0,00 | 0,00 | NA | NA |
| RNA5SP467 | 0,00 | 0,00 | 0,00 | 0,00 | NA | NA |
| RNA5SP468 | 0,00 | 0,00 | 0,00 | 0,00 | NA | NA |
| RNA5SP469 | 0,00 | 0,00 | 0,00 | 0,00 | NA | NA |
| RNA5SP47  | 0,00 | 0,00 | 0,00 | 0,00 | NA | NA |
| RNA5SP470 | 0,00 | 0,00 | 0,00 | 0,00 | NA | NA |
| RNA5SP471 | 0,00 | 0,00 | 0,00 | 0,00 | NA | NA |
| RNA5SP472 | 0,00 | 0,00 | 0,00 | 0,00 | NA | NA |
| RNA5SP473 | 0,00 | 0,00 | 0,00 | 0,00 | NA | NA |
| RNA5SP474 | 0,00 | 0,00 | 0,00 | 0,00 | NA | NA |
| RNA5SP475 | 0,00 | 0,00 | 0,00 | 0,00 | NA | NA |
| RNA5SP476 | 0,00 | 0,00 | 0,00 | 0,00 | NA | NA |
| RNA5SP478 | 0,00 | 0,00 | 0,00 | 0,00 | NA | NA |
| RNA5SP48  | 0,00 | 0,00 | 0,00 | 0,00 | NA | NA |
| RNA5SP480 | 0,00 | 0,00 | 0,00 | 0,00 | NA | NA |
| RNA5SP481 | 0,00 | 0,00 | 0,00 | 0,00 | NA | NA |
| RNA5SP482 | 0,00 | 0,00 | 0,00 | 0,00 | NA | NA |
| RNA5SP484 | 0,00 | 0,00 | 0,00 | 0,00 | NA | NA |
| RNA5SP485 | 0,00 | 0,00 | 0,00 | 0,00 | NA | NA |
| RNA5SP486 | 0,00 | 0,00 | 0,00 | 0,00 | NA | NA |
| RNA5SP487 | 0,00 | 0,00 | 0,00 | 0,00 | NA | NA |
| RNA5SP488 | 0,00 | 0,00 | 0,00 | 0,00 | NA | NA |
| RNA5SP489 | 0,00 | 0,00 | 0,00 | 0,00 | NA | NA |
| RNA5SP49  | 0,00 | 0,00 | 0,00 | 0,00 | NA | NA |
| RNA5SP491 | 0,00 | 0,00 | 0,00 | 0,00 | NA | NA |
| RNA5SP492 | 0,00 | 0,00 | 0,00 | 0,00 | NA | NA |
| RNA5SP495 | 0,00 | 0,00 | 0,00 | 0,00 | NA | NA |
| RNA5SP496 | 0,00 | 0,00 | 0,00 | 0,00 | NA | NA |
| RNA5SP497 | 0,00 | 0,00 | 0,00 | 0,00 | NA | NA |
| RNA5SP499 | 0,00 | 0,00 | 0,00 | 0,00 | NA | NA |
| RNA5SP50  | 0,00 | 0,00 | 0,00 | 0,00 | NA | NA |
| RNA5SP500 | 0,00 | 0,00 | 0,00 | 0,00 | NA | NA |
| RNA5SP501 | 0,00 | 0,00 | 0,00 | 0,00 | NA | NA |
| RNA5SP502 | 0,00 | 0,00 | 0,00 | 0,00 | NA | NA |
| RNA5SP503 | 0,00 | 0,00 | 0,00 | 0,00 | NA | NA |
| RNA5SP504 | 0,00 | 0,00 | 0,00 | 0,00 | NA | NA |
| RNA5SP505 | 0,00 | 0,00 | 0,00 | 0,00 | NA | NA |
| RNA5SP506 | 0,00 | 0,00 | 0,00 | 0,00 | NA | NA |
| RNA5SP507 | 0,00 | 0,00 | 0,00 | 0,00 | NA | NA |
| RNA5SP508 | 0,00 | 0,00 | 0,00 | 0,00 | NA | NA |
| RNA5SP509 | 0,00 | 0,00 | 0,00 | 0,00 | NA | NA |
| RNA5SP51  | 0,00 | 0,00 | 0,00 | 0,00 | NA | NA |
| RNA5SP510 | 0,00 | 0,00 | 0,00 | 0,00 | NA | NA |
| RNA5SP511 | 0,00 | 0,00 | 0,00 | 0,00 | NA | NA |
| RNA5SP512 | 0,00 | 0,00 | 0,00 | 0,00 | NA | NA |
| RNA5SP513 | 0,00 | 0,00 | 0,00 | 0,00 | NA | NA |
| RNA5SP514 | 0,00 | 0,00 | 0,00 | 0,00 | NA | NA |
| RNA5SP516 | 0,00 | 0,00 | 0,00 | 0,00 | NA | NA |
| RNA5SP517 | 0,00 | 0,00 | 0,00 | 0,00 | NA | NA |
| RNA5SP518 | 0,00 | 0,00 | 0,00 | 0,00 | NA | NA |
| RNA5SP519 | 0,00 | 0,00 | 0,00 | 0,00 | NA | NA |
| RNA5SP52  | 0,00 | 0,00 | 0,00 | 0,00 | NA | NA |
| RNA5SP520 | 0,00 | 0,00 | 0,00 | 0,00 | NA | NA |

|              |      |      |      |      |    |    |
|--------------|------|------|------|------|----|----|
| RNA5SP521    | 0,00 | 0,00 | 0,00 | 0,00 | NA | NA |
| RNA5SP522    | 0,00 | 0,00 | 0,00 | 0,00 | NA | NA |
| RNA5SP523    | 0,00 | 0,00 | 0,00 | 0,00 | NA | NA |
| RNA5SP524    | 0,00 | 0,00 | 0,00 | 0,00 | NA | NA |
| RNA5SP526    | 0,00 | 0,00 | 0,00 | 0,00 | NA | NA |
| RNA5SP528    | 0,00 | 0,00 | 0,00 | 0,00 | NA | NA |
| RNA5SP529    | 0,00 | 0,00 | 0,00 | 0,00 | NA | NA |
| RNA5SP530    | 0,00 | 0,00 | 0,00 | 0,00 | NA | NA |
| RNA5SP531    | 0,00 | 0,00 | 0,00 | 0,00 | NA | NA |
| RNA5SP533    | 0,00 | 0,00 | 0,00 | 0,00 | NA | NA |
| RNA5SP534    | 0,00 | 0,00 | 0,00 | 0,00 | NA | NA |
| RNA5SP535    | 0,00 | 0,00 | 0,00 | 0,00 | NA | NA |
| RNA5SP536    | 0,00 | 0,00 | 0,00 | 0,00 | NA | NA |
| RNA5SP54     | 0,00 | 0,00 | 0,00 | 0,00 | NA | NA |
| RNA5SP55     | 0,00 | 0,00 | 0,00 | 0,00 | NA | NA |
| RNA5SP56     | 0,00 | 0,00 | 0,00 | 0,00 | NA | NA |
| RNA5SP57     | 0,00 | 0,00 | 0,00 | 0,00 | NA | NA |
| RNA5SP59     | 0,00 | 0,00 | 0,00 | 0,00 | NA | NA |
| RNA5SP60     | 0,00 | 0,00 | 0,00 | 0,00 | NA | NA |
| RNA5SP61     | 0,00 | 0,00 | 0,00 | 0,00 | NA | NA |
| RNA5SP63     | 0,00 | 0,00 | 0,00 | 0,00 | NA | NA |
| RNA5SP64     | 0,00 | 0,00 | 0,00 | 0,00 | NA | NA |
| RNA5SP65     | 0,00 | 0,00 | 0,00 | 0,00 | NA | NA |
| RNA5SP66     | 0,00 | 0,00 | 0,00 | 0,00 | NA | NA |
| RNA5SP67     | 0,00 | 0,00 | 0,00 | 0,00 | NA | NA |
| RNA5SP69     | 0,00 | 0,00 | 0,00 | 0,00 | NA | NA |
| RNA5SP70     | 0,00 | 0,00 | 0,00 | 0,00 | NA | NA |
| RNA5SP71     | 0,00 | 0,00 | 0,00 | 0,00 | NA | NA |
| RNA5SP72     | 0,00 | 0,00 | 0,00 | 0,00 | NA | NA |
| RNA5SP73     | 0,00 | 0,00 | 0,00 | 0,00 | NA | NA |
| RNA5SP74     | 0,00 | 0,00 | 0,00 | 0,00 | NA | NA |
| RNA5SP75     | 0,00 | 0,00 | 0,00 | 0,00 | NA | NA |
| RNA5SP76     | 0,00 | 0,00 | 0,00 | 0,00 | NA | NA |
| RNA5SP77     | 0,00 | 0,00 | 0,00 | 0,00 | NA | NA |
| RNA5SP79     | 0,00 | 0,00 | 0,00 | 0,00 | NA | NA |
| RNA5SP80     | 0,00 | 0,00 | 0,00 | 0,00 | NA | NA |
| RNA5SP84     | 0,00 | 0,00 | 0,00 | 0,00 | NA | NA |
| RNA5SP86     | 0,00 | 0,00 | 0,00 | 0,00 | NA | NA |
| RNA5SP87     | 0,00 | 0,00 | 0,00 | 0,00 | NA | NA |
| RNA5SP88     | 0,00 | 0,00 | 0,00 | 0,00 | NA | NA |
| RNA5SP89     | 0,00 | 0,00 | 0,00 | 0,00 | NA | NA |
| RNA5SP90     | 0,00 | 0,00 | 0,00 | 0,00 | NA | NA |
| RNA5SP91     | 0,00 | 0,00 | 0,00 | 0,00 | NA | NA |
| RNA5SP92     | 0,00 | 0,00 | 0,00 | 0,00 | NA | NA |
| RNA5SP93     | 0,00 | 0,00 | 0,00 | 0,00 | NA | NA |
| RNA5SP95     | 0,00 | 0,00 | 0,00 | 0,00 | NA | NA |
| RNA5SP96     | 0,00 | 0,00 | 0,00 | 0,00 | NA | NA |
| RNA5SP97     | 0,00 | 0,00 | 0,00 | 0,00 | NA | NA |
| RNA5SP98     | 0,00 | 0,00 | 0,00 | 0,00 | NA | NA |
| RNA5SP99     | 0,00 | 0,00 | 0,00 | 0,00 | NA | NA |
| RNASE12      | 0,00 | 0,00 | 0,00 | 0,00 | NA | NA |
| RNASE8       | 0,00 | 0,00 | 0,00 | 0,00 | NA | NA |
| RNASEH1P1    | 0,00 | 0,00 | 0,00 | 0,00 | NA | NA |
| RNASEH1P2    | 0,00 | 0,00 | 0,00 | 0,00 | NA | NA |
| RNF103-CHMP3 | 0,00 | 0,00 | 0,00 | 0,00 | NA | NA |

|            |      |      |      |      |    |    |
|------------|------|------|------|------|----|----|
| RNF112     | 0,00 | 0,00 | 0,00 | 0,00 | NA | NA |
| RNF113B    | 0,00 | 0,00 | 0,00 | 0,00 | NA | NA |
| RNF11B     | 0,00 | 0,00 | 0,00 | 0,00 | NA | NA |
| RNF126P1   | 0,00 | 0,00 | 0,00 | 0,00 | NA | NA |
| RNF133     | 0,00 | 0,00 | 0,00 | 0,00 | NA | NA |
| RNF148     | 0,00 | 0,00 | 0,00 | 0,00 | NA | NA |
| RNF150     | 0,03 | 0,09 | 0,05 | 0,18 | NA | NA |
| RNF17      | 0,00 | 0,06 | 0,00 | 0,00 | NA | NA |
| RNF182     | 0,00 | 0,00 | 0,00 | 0,00 | NA | NA |
| RNF186     | 0,00 | 0,00 | 0,00 | 0,00 | NA | NA |
| RNF207     | 0,26 | 0,56 | 0,30 | 0,29 | NA | NA |
| RNF208     | 0,00 | 0,00 | 0,00 | 0,00 | NA | NA |
| RNF219-AS1 | 0,08 | 0,00 | 0,00 | 0,00 | NA | NA |
| RNF224     | 0,00 | 0,00 | 0,00 | 0,00 | NA | NA |
| RNF225     | 0,00 | 0,00 | 0,00 | 0,00 | NA | NA |
| RNF2P1     | 0,00 | 0,00 | 0,00 | 0,00 | NA | NA |
| RNF43      | 0,10 | 0,26 | 0,17 | 0,28 | NA | NA |
| RNF5P1     | 0,00 | 0,00 | 0,00 | 0,00 | NA | NA |
| RNU1-100P  | 0,00 | 0,00 | 0,00 | 0,00 | NA | NA |
| RNU1-101P  | 0,00 | 0,00 | 0,00 | 0,00 | NA | NA |
| RNU1-104P  | 0,00 | 0,00 | 0,00 | 0,00 | NA | NA |
| RNU1-105P  | 0,00 | 0,00 | 0,00 | 0,00 | NA | NA |
| RNU1-107P  | 0,00 | 0,00 | 0,00 | 0,00 | NA | NA |
| RNU1-108P  | 0,00 | 0,00 | 0,00 | 0,00 | NA | NA |
| RNU1-109P  | 0,00 | 0,00 | 0,00 | 0,00 | NA | NA |
| RNU1-112P  | 0,00 | 0,00 | 0,00 | 0,00 | NA | NA |
| RNU1-114P  | 0,00 | 0,00 | 0,00 | 0,00 | NA | NA |
| RNU1-115P  | 0,00 | 0,00 | 0,00 | 0,00 | NA | NA |
| RNU1-117P  | 0,00 | 0,00 | 0,00 | 0,00 | NA | NA |
| RNU1-119P  | 0,00 | 0,00 | 0,00 | 0,00 | NA | NA |
| RNU1-120P  | 0,00 | 0,00 | 0,40 | 0,00 | NA | NA |
| RNU1-123P  | 0,00 | 0,00 | 0,00 | 0,00 | NA | NA |
| RNU1-124P  | 0,00 | 0,00 | 0,00 | 0,00 | NA | NA |
| RNU1-125P  | 0,00 | 0,00 | 0,00 | 0,00 | NA | NA |
| RNU1-128P  | 0,00 | 0,00 | 0,00 | 0,00 | NA | NA |
| RNU1-129P  | 0,00 | 0,00 | 0,00 | 0,00 | NA | NA |
| RNU1-131P  | 0,00 | 0,00 | 0,00 | 0,00 | NA | NA |
| RNU1-132P  | 0,00 | 0,00 | 0,00 | 0,00 | NA | NA |
| RNU1-133P  | 0,00 | 0,00 | 0,00 | 0,00 | NA | NA |
| RNU1-138P  | 0,00 | 0,00 | 0,00 | 0,00 | NA | NA |
| RNU1-139P  | 0,00 | 0,00 | 0,00 | 0,00 | NA | NA |
| RNU1-140P  | 0,00 | 0,00 | 0,00 | 0,00 | NA | NA |
| RNU1-141P  | 0,00 | 0,00 | 0,00 | 0,00 | NA | NA |
| RNU1-142P  | 0,00 | 0,00 | 0,00 | 0,00 | NA | NA |
| RNU1-143P  | 0,00 | 0,00 | 0,00 | 0,00 | NA | NA |
| RNU1-146P  | 0,00 | 0,00 | 0,00 | 0,00 | NA | NA |
| RNU1-148P  | 0,00 | 0,00 | 0,00 | 0,00 | NA | NA |
| RNU1-149P  | 0,00 | 0,00 | 0,00 | 0,00 | NA | NA |
| RNU1-14P   | 0,00 | 0,00 | 0,00 | 0,00 | NA | NA |
| RNU1-150P  | 0,00 | 0,00 | 0,00 | 0,00 | NA | NA |
| RNU1-151P  | 0,00 | 0,00 | 0,00 | 0,00 | NA | NA |
| RNU1-15P   | 0,00 | 0,00 | 0,00 | 0,00 | NA | NA |
| RNU1-17P   | 0,00 | 0,00 | 0,00 | 0,00 | NA | NA |
| RNU1-18P   | 0,00 | 0,00 | 0,00 | 0,00 | NA | NA |
| RNU1-19P   | 0,00 | 0,00 | 0,00 | 0,00 | NA | NA |

|          |      |      |      |      |    |    |
|----------|------|------|------|------|----|----|
| RNU1-20P | 0,00 | 0,00 | 0,00 | 0,00 | NA | NA |
| RNU1-21P | 0,00 | 0,00 | 0,00 | 0,00 | NA | NA |
| RNU1-22P | 0,00 | 0,00 | 0,00 | 0,00 | NA | NA |
| RNU1-23P | 0,00 | 0,00 | 0,00 | 0,00 | NA | NA |
| RNU1-24P | 0,00 | 0,00 | 0,00 | 0,00 | NA | NA |
| RNU1-29P | 0,00 | 0,00 | 0,00 | 0,00 | NA | NA |
| RNU1-30P | 0,00 | 0,00 | 0,00 | 0,00 | NA | NA |
| RNU1-31P | 0,00 | 0,00 | 0,00 | 0,00 | NA | NA |
| RNU1-34P | 0,00 | 0,00 | 0,00 | 0,00 | NA | NA |
| RNU1-35P | 0,00 | 0,00 | 0,00 | 0,00 | NA | NA |
| RNU1-36P | 0,00 | 0,00 | 0,00 | 0,00 | NA | NA |
| RNU1-38P | 0,00 | 0,00 | 0,00 | 0,00 | NA | NA |
| RNU1-39P | 0,00 | 0,00 | 0,00 | 0,00 | NA | NA |
| RNU1-40P | 0,00 | 0,00 | 0,00 | 0,00 | NA | NA |
| RNU1-41P | 0,00 | 0,00 | 0,00 | 0,00 | NA | NA |
| RNU1-42P | 0,00 | 0,00 | 0,00 | 0,00 | NA | NA |
| RNU1-43P | 0,00 | 0,00 | 0,00 | 0,00 | NA | NA |
| RNU1-44P | 0,00 | 0,00 | 0,00 | 0,00 | NA | NA |
| RNU1-45P | 0,00 | 0,00 | 0,00 | 0,00 | NA | NA |
| RNU1-47P | 0,00 | 0,00 | 0,00 | 0,00 | NA | NA |
| RNU1-48P | 0,00 | 0,00 | 0,00 | 0,00 | NA | NA |
| RNU1-49P | 0,00 | 0,00 | 0,00 | 0,00 | NA | NA |
| RNU1-51P | 0,00 | 0,00 | 0,00 | 0,00 | NA | NA |
| RNU1-52P | 0,00 | 0,00 | 0,00 | 0,00 | NA | NA |
| RNU1-54P | 0,00 | 0,00 | 0,00 | 0,00 | NA | NA |
| RNU1-55P | 0,00 | 0,00 | 0,00 | 0,00 | NA | NA |
| RNU1-57P | 0,00 | 0,00 | 0,00 | 0,00 | NA | NA |
| RNU1-58P | 0,00 | 0,00 | 0,00 | 0,00 | NA | NA |
| RNU1-5P  | 0,00 | 0,00 | 0,00 | 0,00 | NA | NA |
| RNU1-61P | 0,00 | 0,00 | 0,00 | 2,54 | NA | NA |
| RNU1-62P | 0,00 | 0,00 | 0,00 | 0,00 | NA | NA |
| RNU1-63P | 0,00 | 0,00 | 0,00 | 0,00 | NA | NA |
| RNU1-64P | 0,00 | 0,00 | 0,00 | 0,00 | NA | NA |
| RNU1-65P | 0,00 | 0,00 | 0,00 | 0,00 | NA | NA |
| RNU1-68P | 0,00 | 0,00 | 0,00 | 0,00 | NA | NA |
| RNU1-6P  | 0,00 | 0,00 | 0,00 | 0,00 | NA | NA |
| RNU1-70P | 0,00 | 0,00 | 0,00 | 0,00 | NA | NA |
| RNU1-72P | 0,00 | 0,00 | 0,00 | 0,00 | NA | NA |
| RNU1-73P | 0,00 | 0,00 | 0,00 | 0,00 | NA | NA |
| RNU1-74P | 0,00 | 0,00 | 0,00 | 0,00 | NA | NA |
| RNU1-75P | 0,00 | 0,00 | 0,00 | 0,00 | NA | NA |
| RNU1-76P | 0,00 | 0,00 | 0,00 | 0,00 | NA | NA |
| RNU1-78P | 0,00 | 0,00 | 0,00 | 0,00 | NA | NA |
| RNU1-7P  | 0,00 | 0,00 | 0,00 | 0,00 | NA | NA |
| RNU1-80P | 0,00 | 0,00 | 0,00 | 0,00 | NA | NA |
| RNU1-82P | 0,00 | 0,00 | 0,00 | 0,00 | NA | NA |
| RNU1-84P | 0,00 | 0,00 | 0,00 | 0,00 | NA | NA |
| RNU1-86P | 0,00 | 0,00 | 0,00 | 0,00 | NA | NA |
| RNU1-88P | 0,00 | 0,00 | 0,00 | 0,00 | NA | NA |
| RNU1-8P  | 0,00 | 0,00 | 0,00 | 0,00 | NA | NA |
| RNU1-92P | 0,00 | 0,00 | 0,00 | 0,00 | NA | NA |
| RNU1-95P | 0,00 | 0,00 | 0,00 | 0,00 | NA | NA |
| RNU1-96P | 0,00 | 0,00 | 0,00 | 0,00 | NA | NA |
| RNU1-97P | 0,00 | 0,00 | 0,00 | 0,00 | NA | NA |
| RNU1-98P | 0,00 | 0,00 | 0,00 | 0,00 | NA | NA |



|          |      |      |      |      |    |    |
|----------|------|------|------|------|----|----|
| RNU105B  | 0,00 | 0,00 | 0,00 | 0,00 | NA | NA |
| RNU105C  | 0,00 | 0,00 | 0,00 | 0,00 | NA | NA |
| RNU11-3P | 0,00 | 0,00 | 0,00 | 0,00 | NA | NA |
| RNU11-4P | 0,00 | 0,00 | 0,00 | 0,00 | NA | NA |
| RNU11-5P | 0,00 | 0,00 | 0,00 | 0,00 | NA | NA |
| RNU11-6P | 0,00 | 0,00 | 0,00 | 0,00 | NA | NA |
| RNU12-2P | 0,00 | 0,00 | 0,00 | 0,00 | NA | NA |
| RNU2-11P | 0,00 | 0,00 | 0,00 | 0,00 | NA | NA |
| RNU2-13P | 0,00 | 0,00 | 0,00 | 0,00 | NA | NA |
| RNU2-15P | 0,00 | 0,00 | 0,00 | 0,00 | NA | NA |
| RNU2-19P | 0,00 | 0,00 | 0,00 | 0,00 | NA | NA |
| RNU2-20P | 0,00 | 0,00 | 0,00 | 0,00 | NA | NA |
| RNU2-21P | 0,00 | 0,00 | 0,00 | 0,00 | NA | NA |
| RNU2-22P | 0,00 | 0,00 | 0,00 | 0,00 | NA | NA |
| RNU2-23P | 0,00 | 0,00 | 0,00 | 0,00 | NA | NA |
| RNU2-25P | 0,00 | 0,00 | 0,00 | 0,00 | NA | NA |
| RNU2-26P | 0,00 | 0,00 | 0,00 | 0,00 | NA | NA |
| RNU2-29P | 0,00 | 0,00 | 0,00 | 0,00 | NA | NA |
| RNU2-30P | 0,00 | 0,00 | 0,00 | 0,00 | NA | NA |
| RNU2-34P | 0,00 | 0,00 | 0,00 | 0,00 | NA | NA |
| RNU2-35P | 0,00 | 0,00 | 0,00 | 0,00 | NA | NA |
| RNU2-37P | 0,00 | 0,00 | 0,00 | 0,00 | NA | NA |
| RNU2-38P | 0,00 | 0,00 | 0,00 | 0,00 | NA | NA |
| RNU2-40P | 0,00 | 0,00 | 0,00 | 0,00 | NA | NA |
| RNU2-42P | 0,00 | 0,00 | 0,00 | 0,00 | NA | NA |
| RNU2-43P | 0,00 | 0,00 | 0,00 | 0,00 | NA | NA |
| RNU2-44P | 0,00 | 0,00 | 0,00 | 0,00 | NA | NA |
| RNU2-47P | 0,00 | 0,00 | 0,00 | 0,00 | NA | NA |
| RNU2-48P | 0,00 | 0,00 | 0,00 | 0,00 | NA | NA |
| RNU2-49P | 0,00 | 0,00 | 0,00 | 0,00 | NA | NA |
| RNU2-4P  | 0,00 | 0,00 | 0,00 | 0,00 | NA | NA |
| RNU2-51P | 0,00 | 0,00 | 0,00 | 0,00 | NA | NA |
| RNU2-52P | 0,00 | 0,00 | 0,00 | 0,00 | NA | NA |
| RNU2-53P | 0,00 | 0,00 | 0,00 | 0,00 | NA | NA |
| RNU2-54P | 0,00 | 0,00 | 0,00 | 0,00 | NA | NA |
| RNU2-56P | 0,00 | 0,00 | 0,00 | 0,00 | NA | NA |
| RNU2-57P | 0,00 | 0,00 | 0,00 | 0,00 | NA | NA |
| RNU2-61P | 0,00 | 0,00 | 0,00 | 0,00 | NA | NA |
| RNU2-62P | 0,00 | 0,00 | 0,00 | 0,00 | NA | NA |
| RNU2-64P | 0,00 | 0,00 | 0,00 | 0,00 | NA | NA |
| RNU2-69P | 0,00 | 0,00 | 0,00 | 0,00 | NA | NA |
| RNU2-71P | 0,00 | 0,00 | 0,00 | 0,00 | NA | NA |
| RNU2-72P | 0,00 | 0,00 | 0,00 | 0,00 | NA | NA |
| RNU2-8P  | 0,00 | 0,00 | 0,00 | 0,00 | NA | NA |
| RNU2-9P  | 0,00 | 0,00 | 0,00 | 0,00 | NA | NA |
| RNU4-11P | 0,00 | 0,00 | 0,00 | 0,00 | NA | NA |
| RNU4-12P | 0,00 | 0,00 | 0,00 | 0,00 | NA | NA |
| RNU4-13P | 0,00 | 0,00 | 0,00 | 0,00 | NA | NA |
| RNU4-14P | 0,00 | 0,00 | 0,00 | 0,00 | NA | NA |
| RNU4-15P | 0,00 | 0,00 | 0,00 | 0,00 | NA | NA |
| RNU4-16P | 0,00 | 0,00 | 0,00 | 0,00 | NA | NA |
| RNU4-17P | 0,00 | 0,00 | 0,00 | 0,00 | NA | NA |
| RNU4-18P | 0,00 | 0,00 | 0,00 | 0,00 | NA | NA |
| RNU4-21P | 0,00 | 0,00 | 0,00 | 0,00 | NA | NA |
| RNU4-22P | 0,00 | 0,00 | 0,00 | 0,00 | NA | NA |

|          |      |      |      |      |    |    |
|----------|------|------|------|------|----|----|
| RNU4-23P | 0,00 | 0,00 | 0,00 | 0,00 | NA | NA |
| RNU4-24P | 0,00 | 0,00 | 0,00 | 0,00 | NA | NA |
| RNU4-26P | 0,00 | 0,00 | 0,00 | 0,00 | NA | NA |
| RNU4-27P | 0,00 | 0,00 | 0,00 | 0,00 | NA | NA |
| RNU4-28P | 0,00 | 0,00 | 0,00 | 0,00 | NA | NA |
| RNU4-29P | 0,00 | 0,00 | 0,00 | 0,00 | NA | NA |
| RNU4-30P | 0,00 | 0,00 | 0,00 | 0,00 | NA | NA |
| RNU4-31P | 0,00 | 0,00 | 0,00 | 0,00 | NA | NA |
| RNU4-32P | 0,00 | 0,00 | 0,00 | 0,00 | NA | NA |
| RNU4-33P | 0,00 | 0,00 | 0,00 | 0,00 | NA | NA |
| RNU4-36P | 0,00 | 0,00 | 0,00 | 0,00 | NA | NA |
| RNU4-37P | 0,00 | 0,00 | 0,00 | 0,00 | NA | NA |
| RNU4-41P | 0,00 | 0,00 | 0,00 | 0,00 | NA | NA |
| RNU4-42P | 0,00 | 0,00 | 0,00 | 0,00 | NA | NA |
| RNU4-43P | 0,00 | 0,00 | 0,00 | 0,00 | NA | NA |
| RNU4-44P | 0,00 | 0,00 | 0,00 | 0,00 | NA | NA |
| RNU4-45P | 0,00 | 0,00 | 0,00 | 0,00 | NA | NA |
| RNU4-46P | 0,00 | 0,00 | 0,00 | 0,00 | NA | NA |
| RNU4-48P | 0,00 | 0,00 | 0,00 | 0,00 | NA | NA |
| RNU4-4P  | 0,00 | 0,00 | 0,00 | 0,00 | NA | NA |
| RNU4-50P | 0,00 | 0,00 | 0,00 | 0,00 | NA | NA |
| RNU4-52P | 0,00 | 0,00 | 0,00 | 0,00 | NA | NA |
| RNU4-53P | 0,00 | 0,00 | 0,00 | 0,00 | NA | NA |
| RNU4-54P | 0,00 | 0,00 | 0,00 | 0,00 | NA | NA |
| RNU4-55P | 0,00 | 0,00 | 0,00 | 0,00 | NA | NA |
| RNU4-56P | 0,00 | 0,00 | 0,00 | 0,00 | NA | NA |
| RNU4-57P | 0,00 | 0,00 | 0,00 | 0,00 | NA | NA |
| RNU4-58P | 0,00 | 0,00 | 0,00 | 0,00 | NA | NA |
| RNU4-5P  | 0,00 | 0,00 | 0,00 | 0,00 | NA | NA |
| RNU4-60P | 0,00 | 0,00 | 0,00 | 0,00 | NA | NA |
| RNU4-63P | 0,00 | 0,00 | 0,00 | 0,00 | NA | NA |
| RNU4-64P | 0,00 | 0,00 | 0,00 | 0,00 | NA | NA |
| RNU4-65P | 0,00 | 0,00 | 0,00 | 0,00 | NA | NA |
| RNU4-66P | 0,00 | 0,00 | 0,00 | 0,00 | NA | NA |
| RNU4-67P | 0,00 | 0,00 | 0,00 | 0,00 | NA | NA |
| RNU4-68P | 0,00 | 0,00 | 0,00 | 0,00 | NA | NA |
| RNU4-69P | 0,00 | 0,00 | 0,00 | 0,00 | NA | NA |
| RNU4-6P  | 0,00 | 0,00 | 0,00 | 0,00 | NA | NA |
| RNU4-70P | 0,00 | 0,00 | 0,00 | 0,00 | NA | NA |
| RNU4-73P | 0,00 | 0,00 | 0,00 | 0,00 | NA | NA |
| RNU4-74P | 0,00 | 0,00 | 0,00 | 0,00 | NA | NA |
| RNU4-75P | 0,00 | 0,00 | 0,00 | 0,00 | NA | NA |
| RNU4-76P | 0,00 | 0,00 | 0,00 | 0,00 | NA | NA |
| RNU4-77P | 0,00 | 0,00 | 0,00 | 0,00 | NA | NA |
| RNU4-79P | 0,00 | 0,00 | 0,00 | 0,00 | NA | NA |
| RNU4-7P  | 0,00 | 0,00 | 0,00 | 0,00 | NA | NA |
| RNU4-81P | 0,00 | 0,00 | 0,00 | 0,00 | NA | NA |
| RNU4-82P | 0,00 | 0,00 | 0,00 | 0,00 | NA | NA |
| RNU4-83P | 0,00 | 0,00 | 0,00 | 0,00 | NA | NA |
| RNU4-84P | 0,00 | 0,00 | 0,00 | 0,00 | NA | NA |
| RNU4-85P | 0,00 | 0,00 | 0,00 | 0,00 | NA | NA |
| RNU4-88P | 0,00 | 0,00 | 0,00 | 0,00 | NA | NA |
| RNU4-90P | 0,00 | 0,00 | 0,00 | 0,00 | NA | NA |
| RNU4-91P | 0,00 | 0,00 | 0,00 | 0,00 | NA | NA |
| RNU4-92P | 0,00 | 0,00 | 0,00 | 0,00 | NA | NA |

|             |      |      |      |      |    |    |
|-------------|------|------|------|------|----|----|
| RNU4ATAC10P | 0,00 | 0,00 | 0,00 | 0,00 | NA | NA |
| RNU4ATAC12P | 0,00 | 0,00 | 0,00 | 0,00 | NA | NA |
| RNU4ATAC13P | 0,00 | 0,00 | 0,00 | 0,00 | NA | NA |
| RNU4ATAC14P | 0,00 | 0,00 | 0,00 | 0,00 | NA | NA |
| RNU4ATAC15P | 0,00 | 0,00 | 0,00 | 0,00 | NA | NA |
| RNU4ATAC16P | 0,00 | 0,00 | 0,00 | 0,00 | NA | NA |
| RNU4ATAC2P  | 0,00 | 0,00 | 0,00 | 0,00 | NA | NA |
| RNU4ATAC3P  | 0,00 | 0,00 | 0,00 | 0,00 | NA | NA |
| RNU4ATAC4P  | 0,00 | 0,00 | 0,00 | 0,00 | NA | NA |
| RNU4ATAC5P  | 0,00 | 0,00 | 0,00 | 0,00 | NA | NA |
| RNU4ATAC6P  | 0,00 | 0,00 | 0,00 | 0,00 | NA | NA |
| RNU4ATAC7P  | 0,00 | 0,00 | 0,00 | 0,00 | NA | NA |
| RNU4ATAC8P  | 0,00 | 0,00 | 0,00 | 0,00 | NA | NA |
| RNU4ATAC9P  | 0,00 | 0,00 | 0,00 | 0,00 | NA | NA |
| RNU5A-2P    | 0,00 | 0,00 | 0,00 | 0,00 | NA | NA |
| RNU5A-5P    | 0,00 | 0,00 | 0,00 | 0,00 | NA | NA |
| RNU5A-7P    | 0,00 | 0,00 | 0,00 | 0,00 | NA | NA |
| RNU5B-3P    | 0,00 | 0,00 | 0,00 | 0,00 | NA | NA |
| RNU5B-4P    | 0,00 | 0,00 | 0,00 | 0,00 | NA | NA |
| RNU5B-6P    | 0,00 | 0,00 | 0,00 | 0,00 | NA | NA |
| RNU5D-2P    | 0,00 | 0,00 | 0,00 | 0,00 | NA | NA |
| RNU5E-5P    | 0,00 | 0,00 | 0,00 | 0,00 | NA | NA |
| RNU5E-7P    | 0,00 | 0,00 | 0,00 | 0,00 | NA | NA |
| RNU5E-8P    | 0,00 | 0,00 | 0,00 | 0,00 | NA | NA |
| RNU5E-9P    | 0,00 | 0,00 | 0,00 | 0,00 | NA | NA |
| RNU5F-3P    | 0,00 | 0,00 | 0,00 | 0,00 | NA | NA |
| RNU5F-4P    | 0,00 | 0,00 | 0,00 | 0,00 | NA | NA |
| RNU5F-7P    | 0,00 | 0,00 | 0,00 | 0,00 | NA | NA |
| RNU6-1000P  | 0,00 | 0,00 | 0,00 | 0,00 | NA | NA |
| RNU6-1004P  | 0,00 | 0,00 | 0,00 | 0,00 | NA | NA |
| RNU6-1006P  | 0,00 | 0,00 | 0,00 | 0,00 | NA | NA |
| RNU6-1007P  | 0,00 | 0,00 | 0,00 | 0,00 | NA | NA |
| RNU6-1008P  | 0,00 | 0,00 | 0,00 | 0,00 | NA | NA |
| RNU6-1009P  | 0,00 | 0,00 | 0,00 | 0,00 | NA | NA |
| RNU6-100P   | 0,00 | 0,00 | 0,00 | 0,00 | NA | NA |
| RNU6-1012P  | 0,00 | 0,00 | 0,00 | 0,00 | NA | NA |
| RNU6-1013P  | 0,00 | 0,00 | 0,00 | 0,00 | NA | NA |
| RNU6-1014P  | 0,00 | 0,00 | 0,00 | 0,00 | NA | NA |
| RNU6-1015P  | 0,00 | 0,00 | 0,00 | 0,00 | NA | NA |
| RNU6-1017P  | 0,00 | 0,00 | 0,00 | 0,00 | NA | NA |
| RNU6-1018P  | 0,00 | 0,00 | 0,00 | 0,00 | NA | NA |
| RNU6-1021P  | 0,00 | 0,00 | 0,00 | 0,00 | NA | NA |
| RNU6-1022P  | 0,00 | 0,00 | 0,00 | 0,00 | NA | NA |
| RNU6-1023P  | 0,00 | 0,00 | 0,00 | 0,00 | NA | NA |
| RNU6-1025P  | 0,00 | 0,00 | 0,00 | 0,00 | NA | NA |
| RNU6-1027P  | 0,00 | 0,00 | 0,00 | 0,00 | NA | NA |
| RNU6-1028P  | 0,00 | 0,00 | 0,00 | 0,00 | NA | NA |
| RNU6-1029P  | 0,00 | 0,00 | 0,00 | 0,00 | NA | NA |
| RNU6-102P   | 0,00 | 0,00 | 0,00 | 0,00 | NA | NA |
| RNU6-1031P  | 0,00 | 0,00 | 0,00 | 0,00 | NA | NA |
| RNU6-1032P  | 0,00 | 0,00 | 0,00 | 0,00 | NA | NA |
| RNU6-1035P  | 0,00 | 0,00 | 0,00 | 0,00 | NA | NA |
| RNU6-1036P  | 0,00 | 0,00 | 0,00 | 0,00 | NA | NA |
| RNU6-1037P  | 0,00 | 0,00 | 0,00 | 0,00 | NA | NA |
| RNU6-1038P  | 0,00 | 0,00 | 0,00 | 0,00 | NA | NA |

|            |      |      |      |      |    |    |
|------------|------|------|------|------|----|----|
| RNU6-1039P | 0,00 | 0,00 | 0,00 | 1,16 | NA | NA |
| RNU6-103P  | 0,00 | 0,00 | 0,00 | 0,00 | NA | NA |
| RNU6-1040P | 0,00 | 0,00 | 0,00 | 0,00 | NA | NA |
| RNU6-1041P | 0,00 | 0,00 | 0,00 | 0,00 | NA | NA |
| RNU6-1042P | 0,00 | 0,00 | 0,00 | 0,00 | NA | NA |
| RNU6-1043P | 0,00 | 0,00 | 0,00 | 0,00 | NA | NA |
| RNU6-1044P | 0,00 | 0,00 | 0,00 | 0,00 | NA | NA |
| RNU6-1045P | 0,00 | 0,00 | 0,00 | 0,00 | NA | NA |
| RNU6-1046P | 0,00 | 0,00 | 0,00 | 0,00 | NA | NA |
| RNU6-1047P | 0,00 | 0,00 | 0,00 | 0,00 | NA | NA |
| RNU6-1049P | 0,00 | 0,00 | 0,00 | 0,00 | NA | NA |
| RNU6-104P  | 0,00 | 0,00 | 0,00 | 0,00 | NA | NA |
| RNU6-1050P | 0,00 | 0,00 | 0,00 | 0,00 | NA | NA |
| RNU6-1051P | 0,00 | 0,00 | 0,00 | 0,00 | NA | NA |
| RNU6-1052P | 0,00 | 0,00 | 0,00 | 0,00 | NA | NA |
| RNU6-1054P | 0,00 | 0,00 | 0,00 | 0,00 | NA | NA |
| RNU6-1055P | 0,00 | 0,00 | 0,00 | 0,00 | NA | NA |
| RNU6-1056P | 0,00 | 0,00 | 0,00 | 0,00 | NA | NA |
| RNU6-1059P | 0,00 | 0,00 | 0,00 | 0,00 | NA | NA |
| RNU6-105P  | 0,00 | 0,00 | 0,00 | 0,00 | NA | NA |
| RNU6-1060P | 0,00 | 0,00 | 0,00 | 0,00 | NA | NA |
| RNU6-1061P | 0,00 | 0,00 | 0,00 | 0,00 | NA | NA |
| RNU6-1064P | 0,00 | 0,00 | 0,00 | 0,00 | NA | NA |
| RNU6-1065P | 0,00 | 0,00 | 0,00 | 0,00 | NA | NA |
| RNU6-1066P | 0,00 | 0,00 | 0,00 | 0,00 | NA | NA |
| RNU6-1067P | 0,00 | 0,00 | 0,00 | 0,00 | NA | NA |
| RNU6-1068P | 0,00 | 0,00 | 0,00 | 0,00 | NA | NA |
| RNU6-106P  | 0,00 | 0,00 | 0,00 | 0,00 | NA | NA |
| RNU6-1071P | 0,00 | 0,00 | 0,00 | 0,00 | NA | NA |
| RNU6-1072P | 0,00 | 0,00 | 0,00 | 0,00 | NA | NA |
| RNU6-1073P | 0,00 | 0,00 | 0,00 | 0,00 | NA | NA |
| RNU6-1074P | 0,00 | 0,00 | 0,00 | 0,00 | NA | NA |
| RNU6-1075P | 0,00 | 0,00 | 0,00 | 0,00 | NA | NA |
| RNU6-1076P | 0,00 | 0,00 | 0,00 | 0,24 | NA | NA |
| RNU6-1077P | 0,00 | 0,00 | 0,00 | 0,00 | NA | NA |
| RNU6-1078P | 0,00 | 0,00 | 0,00 | 0,00 | NA | NA |
| RNU6-1080P | 0,00 | 0,00 | 0,00 | 0,00 | NA | NA |
| RNU6-1081P | 0,00 | 0,00 | 0,00 | 0,00 | NA | NA |
| RNU6-1082P | 0,00 | 0,00 | 0,00 | 0,00 | NA | NA |
| RNU6-1083P | 0,00 | 0,00 | 0,00 | 0,00 | NA | NA |
| RNU6-1084P | 0,00 | 0,00 | 0,00 | 0,00 | NA | NA |
| RNU6-1085P | 0,00 | 0,00 | 0,00 | 0,00 | NA | NA |
| RNU6-1087P | 0,00 | 0,00 | 0,00 | 0,00 | NA | NA |
| RNU6-1088P | 0,00 | 0,00 | 0,00 | 0,00 | NA | NA |
| RNU6-1089P | 0,00 | 0,00 | 0,00 | 0,00 | NA | NA |
| RNU6-108P  | 0,00 | 0,00 | 0,00 | 0,00 | NA | NA |
| RNU6-1090P | 0,00 | 0,00 | 0,00 | 0,00 | NA | NA |
| RNU6-1091P | 0,00 | 0,00 | 0,00 | 0,00 | NA | NA |
| RNU6-1092P | 0,00 | 0,00 | 0,00 | 0,00 | NA | NA |
| RNU6-1093P | 0,00 | 0,00 | 0,00 | 0,00 | NA | NA |
| RNU6-1094P | 0,00 | 0,00 | 0,00 | 0,00 | NA | NA |
| RNU6-1095P | 0,00 | 0,00 | 0,00 | 0,00 | NA | NA |
| RNU6-1096P | 0,00 | 0,00 | 0,00 | 0,00 | NA | NA |
| RNU6-1097P | 0,00 | 0,00 | 0,00 | 0,00 | NA | NA |
| RNU6-1098P | 0,00 | 0,00 | 0,00 | 0,00 | NA | NA |

|            |      |      |      |      |    |    |
|------------|------|------|------|------|----|----|
| RNU6-109P  | 0,00 | 0,00 | 0,00 | 0,00 | NA | NA |
| RNU6-1100P | 0,00 | 0,00 | 0,00 | 0,24 | NA | NA |
| RNU6-1101P | 0,00 | 0,00 | 0,00 | 0,00 | NA | NA |
| RNU6-1102P | 0,00 | 0,00 | 0,00 | 0,00 | NA | NA |
| RNU6-1103P | 0,00 | 0,00 | 0,00 | 0,00 | NA | NA |
| RNU6-1104P | 0,00 | 0,00 | 0,00 | 0,00 | NA | NA |
| RNU6-1105P | 0,00 | 0,00 | 0,00 | 0,00 | NA | NA |
| RNU6-1106P | 0,00 | 0,00 | 0,00 | 0,00 | NA | NA |
| RNU6-1107P | 0,00 | 0,00 | 0,00 | 0,00 | NA | NA |
| RNU6-1108P | 0,00 | 0,00 | 0,00 | 0,00 | NA | NA |
| RNU6-110P  | 0,00 | 0,00 | 0,00 | 0,00 | NA | NA |
| RNU6-1110P | 0,00 | 0,00 | 0,00 | 0,00 | NA | NA |
| RNU6-1113P | 0,00 | 0,00 | 0,00 | 0,00 | NA | NA |
| RNU6-1114P | 0,00 | 0,00 | 0,00 | 0,00 | NA | NA |
| RNU6-1115P | 0,00 | 0,00 | 0,00 | 0,00 | NA | NA |
| RNU6-1116P | 0,00 | 0,00 | 0,00 | 0,00 | NA | NA |
| RNU6-1117P | 0,00 | 0,00 | 0,00 | 0,00 | NA | NA |
| RNU6-1118P | 0,00 | 0,00 | 0,00 | 0,24 | NA | NA |
| RNU6-1119P | 0,00 | 0,00 | 0,00 | 0,00 | NA | NA |
| RNU6-111P  | 0,00 | 0,00 | 0,00 | 0,00 | NA | NA |
| RNU6-1120P | 0,00 | 0,00 | 0,00 | 0,00 | NA | NA |
| RNU6-1121P | 0,00 | 0,00 | 0,00 | 0,00 | NA | NA |
| RNU6-1122P | 0,00 | 0,00 | 0,00 | 0,00 | NA | NA |
| RNU6-1123P | 0,00 | 0,00 | 0,00 | 0,00 | NA | NA |
| RNU6-1124P | 0,00 | 0,00 | 0,00 | 0,00 | NA | NA |
| RNU6-1125P | 0,00 | 0,00 | 0,00 | 0,00 | NA | NA |
| RNU6-1126P | 0,00 | 0,00 | 0,00 | 0,00 | NA | NA |
| RNU6-1128P | 0,00 | 0,00 | 0,00 | 0,00 | NA | NA |
| RNU6-1129P | 0,00 | 0,00 | 0,00 | 0,00 | NA | NA |
| RNU6-112P  | 0,00 | 0,00 | 0,00 | 0,00 | NA | NA |
| RNU6-1130P | 0,00 | 0,00 | 0,00 | 0,00 | NA | NA |
| RNU6-1131P | 0,00 | 0,00 | 0,00 | 0,00 | NA | NA |
| RNU6-1132P | 0,00 | 0,00 | 0,00 | 0,00 | NA | NA |
| RNU6-1133P | 0,00 | 0,00 | 0,00 | 0,00 | NA | NA |
| RNU6-1134P | 0,00 | 0,00 | 0,00 | 0,00 | NA | NA |
| RNU6-1136P | 0,00 | 0,00 | 0,00 | 0,00 | NA | NA |
| RNU6-1137P | 0,00 | 0,00 | 0,00 | 0,00 | NA | NA |
| RNU6-1138P | 0,00 | 0,00 | 0,00 | 0,00 | NA | NA |
| RNU6-113P  | 0,00 | 0,00 | 0,00 | 0,00 | NA | NA |
| RNU6-1140P | 0,00 | 0,00 | 0,00 | 0,00 | NA | NA |
| RNU6-1141P | 0,00 | 0,00 | 0,00 | 0,00 | NA | NA |
| RNU6-1143P | 0,00 | 0,00 | 0,00 | 0,00 | NA | NA |
| RNU6-1144P | 0,00 | 0,00 | 0,00 | 0,00 | NA | NA |
| RNU6-1145P | 0,00 | 0,00 | 0,00 | 0,00 | NA | NA |
| RNU6-1146P | 0,00 | 0,00 | 0,00 | 0,00 | NA | NA |
| RNU6-1147P | 0,00 | 0,00 | 0,00 | 0,00 | NA | NA |
| RNU6-1148P | 0,00 | 0,00 | 0,00 | 0,00 | NA | NA |
| RNU6-1149P | 0,00 | 0,00 | 0,00 | 0,00 | NA | NA |
| RNU6-114P  | 0,00 | 0,00 | 0,00 | 0,00 | NA | NA |
| RNU6-1150P | 0,00 | 0,00 | 0,00 | 0,00 | NA | NA |
| RNU6-1151P | 0,00 | 0,00 | 0,00 | 0,00 | NA | NA |
| RNU6-1154P | 0,00 | 0,00 | 0,00 | 0,00 | NA | NA |
| RNU6-1155P | 0,00 | 0,00 | 0,00 | 0,00 | NA | NA |
| RNU6-1156P | 0,00 | 0,00 | 0,00 | 0,00 | NA | NA |
| RNU6-1158P | 0,00 | 0,00 | 0,00 | 0,00 | NA | NA |

|            |      |      |      |      |    |    |
|------------|------|------|------|------|----|----|
| RNU6-1159P | 0,00 | 0,00 | 0,00 | 0,00 | NA | NA |
| RNU6-115P  | 0,00 | 0,00 | 0,00 | 0,00 | NA | NA |
| RNU6-1160P | 0,00 | 0,00 | 0,00 | 0,00 | NA | NA |
| RNU6-1161P | 0,00 | 0,00 | 0,00 | 0,00 | NA | NA |
| RNU6-1162P | 0,00 | 0,00 | 0,00 | 0,00 | NA | NA |
| RNU6-1163P | 0,00 | 0,00 | 0,00 | 0,00 | NA | NA |
| RNU6-1165P | 0,00 | 0,00 | 0,00 | 0,00 | NA | NA |
| RNU6-1167P | 0,00 | 0,00 | 0,00 | 0,00 | NA | NA |
| RNU6-1168P | 0,00 | 0,00 | 0,00 | 0,00 | NA | NA |
| RNU6-116P  | 0,00 | 0,00 | 0,00 | 0,00 | NA | NA |
| RNU6-1170P | 0,00 | 0,00 | 0,00 | 0,00 | NA | NA |
| RNU6-1171P | 0,00 | 0,00 | 0,00 | 0,00 | NA | NA |
| RNU6-1172P | 0,00 | 0,00 | 0,00 | 0,00 | NA | NA |
| RNU6-1174P | 0,00 | 0,00 | 0,00 | 0,00 | NA | NA |
| RNU6-1175P | 0,00 | 0,00 | 0,00 | 0,00 | NA | NA |
| RNU6-1176P | 0,00 | 0,00 | 0,00 | 0,00 | NA | NA |
| RNU6-1177P | 0,00 | 0,00 | 0,00 | 0,00 | NA | NA |
| RNU6-1178P | 0,00 | 0,00 | 0,00 | 0,00 | NA | NA |
| RNU6-1179P | 0,00 | 0,00 | 0,00 | 0,00 | NA | NA |
| RNU6-1180P | 0,00 | 0,00 | 0,00 | 0,00 | NA | NA |
| RNU6-1183P | 0,00 | 0,00 | 0,00 | 0,00 | NA | NA |
| RNU6-1184P | 0,00 | 0,00 | 0,00 | 0,00 | NA | NA |
| RNU6-1186P | 0,00 | 0,00 | 0,00 | 0,00 | NA | NA |
| RNU6-1187P | 0,00 | 0,00 | 0,00 | 0,00 | NA | NA |
| RNU6-1189P | 0,00 | 0,00 | 0,00 | 0,00 | NA | NA |
| RNU6-1191P | 0,00 | 0,00 | 0,00 | 0,00 | NA | NA |
| RNU6-1192P | 0,00 | 0,00 | 0,00 | 0,00 | NA | NA |
| RNU6-1194P | 0,00 | 0,00 | 0,00 | 0,00 | NA | NA |
| RNU6-1195P | 0,00 | 0,00 | 0,00 | 0,00 | NA | NA |
| RNU6-1196P | 0,00 | 0,00 | 0,00 | 0,00 | NA | NA |
| RNU6-1197P | 0,00 | 0,00 | 0,00 | 0,00 | NA | NA |
| RNU6-1198P | 0,00 | 0,00 | 0,00 | 0,00 | NA | NA |
| RNU6-119P  | 0,00 | 0,00 | 0,00 | 0,00 | NA | NA |
| RNU6-1200P | 0,00 | 0,00 | 0,00 | 0,00 | NA | NA |
| RNU6-1203P | 0,00 | 0,00 | 0,00 | 0,00 | NA | NA |
| RNU6-1204P | 0,00 | 0,00 | 0,00 | 0,00 | NA | NA |
| RNU6-1205P | 0,00 | 0,00 | 0,00 | 0,00 | NA | NA |
| RNU6-1206P | 0,00 | 0,00 | 0,00 | 0,00 | NA | NA |
| RNU6-1207P | 0,00 | 0,00 | 0,00 | 0,00 | NA | NA |
| RNU6-120P  | 0,00 | 0,00 | 0,00 | 0,00 | NA | NA |
| RNU6-1210P | 0,00 | 0,00 | 0,00 | 0,00 | NA | NA |
| RNU6-1211P | 0,00 | 0,00 | 0,00 | 0,00 | NA | NA |
| RNU6-1212P | 0,00 | 0,00 | 0,00 | 0,00 | NA | NA |
| RNU6-1215P | 0,00 | 0,00 | 0,00 | 0,00 | NA | NA |
| RNU6-1216P | 0,00 | 0,00 | 0,00 | 0,00 | NA | NA |
| RNU6-1217P | 0,00 | 0,00 | 0,00 | 0,24 | NA | NA |
| RNU6-1218P | 0,00 | 0,00 | 0,00 | 0,00 | NA | NA |
| RNU6-1219P | 0,00 | 0,00 | 0,00 | 0,00 | NA | NA |
| RNU6-121P  | 0,00 | 0,00 | 0,00 | 0,00 | NA | NA |
| RNU6-1220P | 0,00 | 0,00 | 0,00 | 0,00 | NA | NA |
| RNU6-1222P | 0,00 | 0,00 | 0,00 | 0,00 | NA | NA |
| RNU6-1223P | 0,00 | 0,00 | 0,00 | 0,00 | NA | NA |
| RNU6-1224P | 0,00 | 0,00 | 0,00 | 0,00 | NA | NA |
| RNU6-1226P | 0,00 | 0,00 | 0,00 | 0,00 | NA | NA |
| RNU6-1229P | 0,00 | 0,00 | 0,00 | 0,00 | NA | NA |

|            |      |      |      |      |    |    |
|------------|------|------|------|------|----|----|
| RNU6-122P  | 0,00 | 0,00 | 0,00 | 0,00 | NA | NA |
| RNU6-1230P | 0,00 | 0,00 | 0,00 | 0,00 | NA | NA |
| RNU6-1231P | 0,00 | 0,00 | 0,00 | 0,00 | NA | NA |
| RNU6-1232P | 0,00 | 0,00 | 0,00 | 0,00 | NA | NA |
| RNU6-1233P | 0,00 | 0,00 | 0,00 | 0,00 | NA | NA |
| RNU6-1234P | 0,00 | 0,00 | 0,00 | 0,00 | NA | NA |
| RNU6-1235P | 0,00 | 0,00 | 0,00 | 0,00 | NA | NA |
| RNU6-1236P | 0,00 | 0,00 | 0,00 | 0,00 | NA | NA |
| RNU6-1237P | 0,00 | 1,91 | 0,00 | 0,00 | NA | NA |
| RNU6-1238P | 0,00 | 0,00 | 0,00 | 0,00 | NA | NA |
| RNU6-123P  | 0,00 | 0,00 | 0,00 | 0,00 | NA | NA |
| RNU6-1240P | 0,00 | 0,00 | 0,00 | 0,00 | NA | NA |
| RNU6-1241P | 0,00 | 0,00 | 0,00 | 0,00 | NA | NA |
| RNU6-1242P | 0,00 | 0,00 | 0,00 | 0,00 | NA | NA |
| RNU6-1243P | 0,00 | 0,00 | 0,00 | 0,00 | NA | NA |
| RNU6-1244P | 0,00 | 0,00 | 0,00 | 0,00 | NA | NA |
| RNU6-1245P | 0,00 | 0,00 | 0,00 | 0,00 | NA | NA |
| RNU6-1246P | 0,00 | 0,00 | 0,00 | 0,00 | NA | NA |
| RNU6-1247P | 0,00 | 0,00 | 0,00 | 0,00 | NA | NA |
| RNU6-1249P | 0,00 | 0,00 | 0,00 | 0,00 | NA | NA |
| RNU6-1250P | 0,00 | 0,00 | 0,00 | 0,00 | NA | NA |
| RNU6-1251P | 0,00 | 0,00 | 0,00 | 0,00 | NA | NA |
| RNU6-1252P | 0,00 | 0,00 | 0,00 | 0,00 | NA | NA |
| RNU6-1254P | 0,00 | 0,00 | 0,00 | 0,00 | NA | NA |
| RNU6-1255P | 0,00 | 0,00 | 0,00 | 0,00 | NA | NA |
| RNU6-1256P | 0,00 | 0,00 | 0,00 | 0,00 | NA | NA |
| RNU6-1257P | 0,00 | 0,00 | 0,00 | 0,00 | NA | NA |
| RNU6-1258P | 0,00 | 0,00 | 0,00 | 0,00 | NA | NA |
| RNU6-1260P | 0,00 | 0,00 | 0,00 | 0,00 | NA | NA |
| RNU6-1261P | 0,00 | 0,00 | 0,00 | 0,00 | NA | NA |
| RNU6-1263P | 0,00 | 0,00 | 0,00 | 0,00 | NA | NA |
| RNU6-1265P | 0,00 | 0,00 | 0,00 | 0,00 | NA | NA |
| RNU6-1266P | 0,00 | 0,00 | 0,00 | 0,00 | NA | NA |
| RNU6-1267P | 0,00 | 0,00 | 0,00 | 0,00 | NA | NA |
| RNU6-1270P | 0,00 | 0,00 | 0,00 | 0,00 | NA | NA |
| RNU6-1271P | 0,00 | 0,00 | 0,00 | 0,00 | NA | NA |
| RNU6-1272P | 0,00 | 0,00 | 0,00 | 0,00 | NA | NA |
| RNU6-1273P | 0,00 | 0,00 | 0,00 | 0,00 | NA | NA |
| RNU6-1274P | 0,00 | 0,00 | 0,00 | 0,00 | NA | NA |
| RNU6-1275P | 0,00 | 1,89 | 0,00 | 0,00 | NA | NA |
| RNU6-1277P | 0,00 | 0,00 | 0,00 | 0,00 | NA | NA |
| RNU6-1278P | 0,00 | 0,00 | 0,00 | 0,00 | NA | NA |
| RNU6-1279P | 0,00 | 0,00 | 0,00 | 0,00 | NA | NA |
| RNU6-127P  | 0,00 | 0,00 | 0,00 | 0,00 | NA | NA |
| RNU6-1281P | 0,00 | 0,00 | 0,00 | 0,00 | NA | NA |
| RNU6-1282P | 0,00 | 0,00 | 0,00 | 0,00 | NA | NA |
| RNU6-1283P | 0,00 | 0,00 | 0,00 | 0,00 | NA | NA |
| RNU6-1286P | 0,00 | 0,00 | 0,00 | 0,00 | NA | NA |
| RNU6-1287P | 0,00 | 0,00 | 0,00 | 0,00 | NA | NA |
| RNU6-1288P | 0,00 | 0,00 | 0,00 | 0,00 | NA | NA |
| RNU6-1289P | 0,00 | 0,00 | 0,00 | 0,00 | NA | NA |
| RNU6-128P  | 0,00 | 0,00 | 0,00 | 0,00 | NA | NA |
| RNU6-1291P | 0,00 | 0,00 | 0,00 | 0,00 | NA | NA |
| RNU6-1292P | 0,00 | 0,00 | 0,00 | 0,00 | NA | NA |
| RNU6-1293P | 0,00 | 0,00 | 0,00 | 0,00 | NA | NA |

|            |      |      |      |      |    |    |
|------------|------|------|------|------|----|----|
| RNU6-1296P | 0,00 | 0,00 | 0,00 | 0,00 | NA | NA |
| RNU6-1297P | 0,00 | 0,00 | 0,00 | 0,00 | NA | NA |
| RNU6-1298P | 0,00 | 0,00 | 0,00 | 0,00 | NA | NA |
| RNU6-1299P | 0,00 | 0,00 | 0,00 | 0,00 | NA | NA |
| RNU6-129P  | 0,00 | 0,00 | 0,00 | 0,00 | NA | NA |
| RNU6-1300P | 0,00 | 0,00 | 0,00 | 0,00 | NA | NA |
| RNU6-1301P | 0,00 | 0,00 | 0,00 | 0,00 | NA | NA |
| RNU6-1303P | 0,00 | 0,00 | 0,00 | 0,00 | NA | NA |
| RNU6-1304P | 0,00 | 0,00 | 0,00 | 0,00 | NA | NA |
| RNU6-1305P | 0,00 | 0,00 | 0,00 | 0,00 | NA | NA |
| RNU6-1306P | 0,00 | 0,00 | 0,00 | 0,00 | NA | NA |
| RNU6-1307P | 0,00 | 0,00 | 0,00 | 0,00 | NA | NA |
| RNU6-1308P | 0,00 | 0,00 | 0,00 | 0,00 | NA | NA |
| RNU6-1309P | 0,00 | 0,00 | 0,00 | 0,00 | NA | NA |
| RNU6-1311P | 0,00 | 0,00 | 0,00 | 0,00 | NA | NA |
| RNU6-1312P | 0,00 | 0,00 | 0,00 | 0,00 | NA | NA |
| RNU6-1313P | 0,00 | 0,00 | 0,00 | 0,00 | NA | NA |
| RNU6-1314P | 0,00 | 0,00 | 0,00 | 0,00 | NA | NA |
| RNU6-1315P | 0,00 | 0,00 | 0,00 | 0,00 | NA | NA |
| RNU6-1316P | 0,00 | 0,00 | 0,00 | 0,00 | NA | NA |
| RNU6-1317P | 0,00 | 0,00 | 0,00 | 0,00 | NA | NA |
| RNU6-1318P | 0,00 | 0,00 | 0,00 | 0,00 | NA | NA |
| RNU6-1319P | 0,00 | 0,00 | 0,00 | 0,00 | NA | NA |
| RNU6-131P  | 0,00 | 0,00 | 0,00 | 0,00 | NA | NA |
| RNU6-1321P | 0,00 | 0,00 | 0,00 | 0,00 | NA | NA |
| RNU6-1322P | 0,00 | 0,00 | 0,00 | 0,00 | NA | NA |
| RNU6-1323P | 0,00 | 0,00 | 0,00 | 0,00 | NA | NA |
| RNU6-1324P | 0,00 | 0,00 | 0,00 | 0,00 | NA | NA |
| RNU6-1325P | 0,00 | 0,00 | 0,00 | 0,00 | NA | NA |
| RNU6-1326P | 0,00 | 0,00 | 0,00 | 0,00 | NA | NA |
| RNU6-1327P | 0,00 | 0,00 | 0,00 | 0,00 | NA | NA |
| RNU6-1328P | 0,00 | 0,00 | 0,00 | 0,00 | NA | NA |
| RNU6-1329P | 0,00 | 0,00 | 0,00 | 0,00 | NA | NA |
| RNU6-132P  | 0,00 | 0,00 | 0,00 | 0,00 | NA | NA |
| RNU6-1330P | 0,00 | 0,00 | 0,00 | 0,00 | NA | NA |
| RNU6-1331P | 0,00 | 0,00 | 0,00 | 0,00 | NA | NA |
| RNU6-1332P | 0,00 | 0,00 | 0,00 | 0,00 | NA | NA |
| RNU6-1334P | 0,00 | 0,00 | 0,00 | 0,00 | NA | NA |
| RNU6-1335P | 0,00 | 0,00 | 0,00 | 0,00 | NA | NA |
| RNU6-1336P | 0,00 | 0,00 | 0,00 | 0,00 | NA | NA |
| RNU6-1337P | 0,00 | 0,00 | 0,00 | 0,00 | NA | NA |
| RNU6-1338P | 0,00 | 0,00 | 0,00 | 0,00 | NA | NA |
| RNU6-1339P | 0,00 | 0,00 | 0,00 | 0,00 | NA | NA |
| RNU6-133P  | 0,00 | 0,00 | 0,00 | 0,00 | NA | NA |
| RNU6-1340P | 0,00 | 0,00 | 0,00 | 0,00 | NA | NA |
| RNU6-136P  | 0,00 | 0,00 | 0,00 | 0,00 | NA | NA |
| RNU6-137P  | 0,00 | 0,00 | 0,00 | 0,00 | NA | NA |
| RNU6-138P  | 0,00 | 0,00 | 0,00 | 0,00 | NA | NA |
| RNU6-139P  | 0,00 | 0,00 | 0,00 | 0,00 | NA | NA |
| RNU6-140P  | 0,00 | 0,00 | 0,00 | 0,00 | NA | NA |
| RNU6-143P  | 0,00 | 0,00 | 0,00 | 0,00 | NA | NA |
| RNU6-144P  | 0,00 | 0,00 | 0,00 | 0,00 | NA | NA |
| RNU6-145P  | 0,00 | 0,00 | 0,00 | 0,00 | NA | NA |
| RNU6-146P  | 0,00 | 0,00 | 0,00 | 0,00 | NA | NA |
| RNU6-147P  | 0,00 | 0,00 | 0,00 | 0,00 | NA | NA |



|           |      |      |      |      |    |    |
|-----------|------|------|------|------|----|----|
| RNU6-148P | 0,00 | 0,00 | 0,00 | 0,00 | NA | NA |
| RNU6-152P | 0,00 | 0,00 | 0,00 | 0,00 | NA | NA |
| RNU6-153P | 0,00 | 0,00 | 0,00 | 0,00 | NA | NA |
| RNU6-154P | 0,00 | 0,00 | 0,00 | 0,00 | NA | NA |
| RNU6-155P | 0,00 | 0,00 | 0,00 | 0,00 | NA | NA |
| RNU6-156P | 0,00 | 0,00 | 0,00 | 0,00 | NA | NA |
| RNU6-158P | 0,00 | 0,00 | 0,00 | 0,00 | NA | NA |
| RNU6-159P | 0,00 | 0,00 | 0,00 | 0,00 | NA | NA |
| RNU6-15P  | 0,00 | 0,00 | 0,00 | 0,00 | NA | NA |
| RNU6-161P | 0,00 | 0,00 | 0,00 | 0,00 | NA | NA |
| RNU6-162P | 0,00 | 0,00 | 0,00 | 0,00 | NA | NA |
| RNU6-164P | 0,00 | 0,00 | 0,00 | 0,00 | NA | NA |
| RNU6-165P | 0,00 | 0,00 | 0,00 | 0,00 | NA | NA |
| RNU6-166P | 0,00 | 0,00 | 0,00 | 0,00 | NA | NA |
| RNU6-167P | 0,00 | 0,00 | 0,00 | 0,00 | NA | NA |
| RNU6-168P | 0,00 | 0,00 | 0,00 | 0,00 | NA | NA |
| RNU6-169P | 0,00 | 0,00 | 0,00 | 0,00 | NA | NA |
| RNU6-16P  | 0,00 | 0,00 | 0,00 | 0,00 | NA | NA |
| RNU6-170P | 0,00 | 0,00 | 0,00 | 0,00 | NA | NA |
| RNU6-171P | 0,00 | 0,00 | 0,00 | 0,00 | NA | NA |
| RNU6-172P | 0,00 | 0,00 | 0,00 | 0,00 | NA | NA |
| RNU6-173P | 0,00 | 0,00 | 0,00 | 0,00 | NA | NA |
| RNU6-174P | 0,00 | 0,00 | 0,00 | 0,00 | NA | NA |
| RNU6-175P | 0,00 | 0,00 | 0,00 | 0,00 | NA | NA |
| RNU6-176P | 0,00 | 0,00 | 0,00 | 0,00 | NA | NA |
| RNU6-178P | 0,00 | 0,00 | 0,00 | 0,00 | NA | NA |
| RNU6-179P | 0,00 | 0,00 | 0,00 | 0,00 | NA | NA |
| RNU6-17P  | 0,00 | 0,00 | 0,00 | 0,00 | NA | NA |
| RNU6-180P | 0,00 | 0,00 | 0,00 | 0,00 | NA | NA |
| RNU6-183P | 0,00 | 0,00 | 0,00 | 0,00 | NA | NA |
| RNU6-184P | 0,00 | 0,00 | 0,00 | 0,00 | NA | NA |
| RNU6-185P | 0,00 | 0,00 | 0,00 | 0,00 | NA | NA |
| RNU6-187P | 0,00 | 0,00 | 0,00 | 0,00 | NA | NA |
| RNU6-189P | 0,00 | 0,00 | 0,00 | 0,00 | NA | NA |
| RNU6-18P  | 0,00 | 0,00 | 0,00 | 0,00 | NA | NA |
| RNU6-191P | 0,00 | 0,00 | 0,00 | 0,00 | NA | NA |
| RNU6-192P | 0,00 | 0,00 | 0,00 | 0,00 | NA | NA |
| RNU6-193P | 0,00 | 0,00 | 0,00 | 0,00 | NA | NA |
| RNU6-194P | 0,00 | 0,00 | 0,00 | 0,00 | NA | NA |
| RNU6-19P  | 0,00 | 0,00 | 0,00 | 0,00 | NA | NA |
| RNU6-200P | 0,00 | 0,00 | 0,00 | 0,00 | NA | NA |
| RNU6-201P | 0,00 | 0,00 | 0,00 | 0,00 | NA | NA |
| RNU6-203P | 0,00 | 0,00 | 0,00 | 0,00 | NA | NA |
| RNU6-205P | 0,00 | 0,00 | 0,00 | 0,00 | NA | NA |
| RNU6-206P | 0,00 | 0,00 | 0,00 | 0,00 | NA | NA |
| RNU6-207P | 0,00 | 0,00 | 0,00 | 0,00 | NA | NA |
| RNU6-209P | 0,00 | 0,00 | 0,00 | 0,00 | NA | NA |
| RNU6-210P | 0,00 | 0,00 | 0,00 | 0,00 | NA | NA |
| RNU6-211P | 0,00 | 0,00 | 0,00 | 0,00 | NA | NA |
| RNU6-213P | 0,00 | 0,00 | 0,00 | 0,00 | NA | NA |
| RNU6-214P | 0,00 | 0,00 | 0,00 | 0,00 | NA | NA |
| RNU6-215P | 0,00 | 0,00 | 0,00 | 0,00 | NA | NA |
| RNU6-217P | 0,00 | 0,00 | 0,00 | 0,00 | NA | NA |
| RNU6-219P | 0,00 | 0,00 | 0,00 | 0,00 | NA | NA |
| RNU6-21P  | 0,00 | 0,00 | 0,00 | 0,00 | NA | NA |

|           |      |      |      |      |    |    |
|-----------|------|------|------|------|----|----|
| RNU6-220P | 0,00 | 0,00 | 0,00 | 0,00 | NA | NA |
| RNU6-221P | 0,00 | 0,00 | 0,00 | 0,00 | NA | NA |
| RNU6-222P | 0,00 | 0,00 | 0,00 | 0,00 | NA | NA |
| RNU6-224P | 0,00 | 0,00 | 0,00 | 0,00 | NA | NA |
| RNU6-227P | 0,00 | 0,00 | 0,00 | 0,00 | NA | NA |
| RNU6-228P | 0,00 | 0,00 | 0,00 | 0,00 | NA | NA |
| RNU6-22P  | 0,00 | 0,00 | 0,00 | 0,00 | NA | NA |
| RNU6-230P | 0,00 | 0,00 | 0,00 | 0,00 | NA | NA |
| RNU6-231P | 0,00 | 0,00 | 0,00 | 0,00 | NA | NA |
| RNU6-232P | 0,00 | 0,00 | 0,00 | 0,00 | NA | NA |
| RNU6-236P | 0,00 | 0,00 | 0,00 | 0,00 | NA | NA |
| RNU6-238P | 0,00 | 0,00 | 0,00 | 0,00 | NA | NA |
| RNU6-239P | 0,00 | 0,00 | 0,00 | 0,00 | NA | NA |
| RNU6-23P  | 0,00 | 0,00 | 0,00 | 0,00 | NA | NA |
| RNU6-240P | 0,00 | 0,00 | 0,00 | 0,00 | NA | NA |
| RNU6-241P | 0,00 | 0,00 | 0,00 | 0,00 | NA | NA |
| RNU6-242P | 0,00 | 0,00 | 0,00 | 0,00 | NA | NA |
| RNU6-244P | 0,00 | 0,00 | 0,00 | 0,00 | NA | NA |
| RNU6-246P | 0,00 | 0,00 | 0,00 | 0,00 | NA | NA |
| RNU6-247P | 0,00 | 0,00 | 0,00 | 0,00 | NA | NA |
| RNU6-248P | 0,00 | 0,00 | 0,00 | 0,00 | NA | NA |
| RNU6-249P | 0,00 | 0,00 | 0,00 | 0,00 | NA | NA |
| RNU6-24P  | 0,00 | 0,00 | 0,00 | 0,00 | NA | NA |
| RNU6-250P | 0,00 | 0,00 | 0,00 | 0,00 | NA | NA |
| RNU6-251P | 0,00 | 0,00 | 0,00 | 0,00 | NA | NA |
| RNU6-252P | 0,00 | 0,00 | 0,00 | 0,00 | NA | NA |
| RNU6-255P | 0,00 | 0,00 | 0,00 | 0,00 | NA | NA |
| RNU6-256P | 0,00 | 0,00 | 0,00 | 0,00 | NA | NA |
| RNU6-257P | 0,00 | 0,00 | 0,00 | 0,00 | NA | NA |
| RNU6-258P | 0,00 | 0,00 | 0,00 | 0,00 | NA | NA |
| RNU6-259P | 0,00 | 0,00 | 0,00 | 0,00 | NA | NA |
| RNU6-25P  | 0,00 | 0,00 | 0,00 | 0,00 | NA | NA |
| RNU6-260P | 0,00 | 0,00 | 0,00 | 0,00 | NA | NA |
| RNU6-261P | 0,00 | 0,00 | 0,00 | 0,00 | NA | NA |
| RNU6-262P | 0,00 | 0,00 | 0,00 | 0,00 | NA | NA |
| RNU6-263P | 0,00 | 0,00 | 0,00 | 0,00 | NA | NA |
| RNU6-264P | 0,00 | 0,00 | 0,00 | 0,00 | NA | NA |
| RNU6-266P | 0,00 | 0,00 | 0,00 | 0,00 | NA | NA |
| RNU6-267P | 0,00 | 0,00 | 0,00 | 0,00 | NA | NA |
| RNU6-269P | 0,00 | 0,00 | 0,00 | 0,00 | NA | NA |
| RNU6-26P  | 0,00 | 0,00 | 0,00 | 0,00 | NA | NA |
| RNU6-270P | 0,00 | 0,00 | 0,00 | 0,00 | NA | NA |
| RNU6-271P | 0,00 | 0,00 | 0,00 | 0,00 | NA | NA |
| RNU6-273P | 0,00 | 0,00 | 0,00 | 0,00 | NA | NA |
| RNU6-274P | 0,00 | 0,00 | 0,00 | 0,00 | NA | NA |
| RNU6-276P | 0,00 | 0,00 | 0,00 | 0,00 | NA | NA |
| RNU6-277P | 0,00 | 0,00 | 0,00 | 0,00 | NA | NA |
| RNU6-278P | 0,00 | 0,00 | 0,00 | 0,00 | NA | NA |
| RNU6-279P | 0,00 | 0,00 | 0,00 | 0,00 | NA | NA |
| RNU6-27P  | 0,00 | 0,00 | 0,00 | 0,00 | NA | NA |
| RNU6-280P | 0,00 | 0,00 | 0,00 | 0,00 | NA | NA |
| RNU6-281P | 0,00 | 0,00 | 0,00 | 0,00 | NA | NA |
| RNU6-283P | 0,00 | 0,00 | 0,00 | 0,00 | NA | NA |
| RNU6-284P | 0,00 | 0,00 | 0,00 | 0,00 | NA | NA |
| RNU6-285P | 0,00 | 0,00 | 0,00 | 0,00 | NA | NA |

|           |      |      |      |      |    |    |
|-----------|------|------|------|------|----|----|
| RNU6-286P | 0,00 | 0,00 | 0,00 | 0,00 | NA | NA |
| RNU6-287P | 0,00 | 0,00 | 0,00 | 0,00 | NA | NA |
| RNU6-289P | 0,00 | 0,00 | 0,00 | 0,00 | NA | NA |
| RNU6-28P  | 0,00 | 0,00 | 0,00 | 0,00 | NA | NA |
| RNU6-290P | 0,00 | 0,00 | 0,00 | 0,00 | NA | NA |
| RNU6-293P | 0,00 | 0,00 | 0,00 | 0,00 | NA | NA |
| RNU6-294P | 0,00 | 0,00 | 0,00 | 0,00 | NA | NA |
| RNU6-295P | 0,00 | 0,00 | 0,00 | 0,00 | NA | NA |
| RNU6-297P | 0,00 | 0,00 | 0,00 | 0,00 | NA | NA |
| RNU6-299P | 0,00 | 0,00 | 0,00 | 0,00 | NA | NA |
| RNU6-29P  | 0,00 | 0,00 | 0,00 | 0,00 | NA | NA |
| RNU6-300P | 0,00 | 0,00 | 0,00 | 0,00 | NA | NA |
| RNU6-301P | 0,00 | 0,00 | 0,00 | 0,00 | NA | NA |
| RNU6-303P | 0,00 | 0,00 | 0,00 | 0,00 | NA | NA |
| RNU6-304P | 0,00 | 0,00 | 0,00 | 0,00 | NA | NA |
| RNU6-306P | 0,00 | 0,00 | 0,00 | 0,00 | NA | NA |
| RNU6-309P | 0,00 | 0,00 | 0,00 | 0,00 | NA | NA |
| RNU6-30P  | 0,00 | 0,00 | 0,00 | 0,00 | NA | NA |
| RNU6-311P | 0,00 | 0,00 | 0,00 | 0,00 | NA | NA |
| RNU6-312P | 0,00 | 0,00 | 0,00 | 0,00 | NA | NA |
| RNU6-313P | 0,00 | 0,00 | 0,00 | 0,00 | NA | NA |
| RNU6-316P | 0,00 | 0,00 | 0,00 | 0,00 | NA | NA |
| RNU6-317P | 0,00 | 0,00 | 0,00 | 0,00 | NA | NA |
| RNU6-318P | 0,00 | 0,00 | 0,00 | 0,00 | NA | NA |
| RNU6-321P | 0,00 | 0,00 | 0,00 | 0,00 | NA | NA |
| RNU6-323P | 0,00 | 0,00 | 0,00 | 0,00 | NA | NA |
| RNU6-325P | 0,00 | 0,00 | 0,00 | 0,00 | NA | NA |
| RNU6-326P | 0,00 | 0,00 | 0,00 | 0,00 | NA | NA |
| RNU6-327P | 0,00 | 0,00 | 0,00 | 0,00 | NA | NA |
| RNU6-328P | 0,00 | 0,00 | 0,00 | 0,00 | NA | NA |
| RNU6-329P | 0,00 | 0,00 | 0,00 | 0,00 | NA | NA |
| RNU6-330P | 0,00 | 0,00 | 0,00 | 0,00 | NA | NA |
| RNU6-331P | 0,00 | 0,00 | 0,00 | 0,00 | NA | NA |
| RNU6-332P | 0,00 | 0,00 | 0,00 | 0,00 | NA | NA |
| RNU6-333P | 0,00 | 0,00 | 0,00 | 0,00 | NA | NA |
| RNU6-334P | 0,00 | 0,00 | 0,00 | 0,00 | NA | NA |
| RNU6-335P | 0,00 | 0,00 | 0,00 | 0,00 | NA | NA |
| RNU6-336P | 0,00 | 0,00 | 0,00 | 0,00 | NA | NA |
| RNU6-338P | 0,00 | 0,00 | 0,00 | 0,00 | NA | NA |
| RNU6-339P | 0,00 | 0,00 | 0,00 | 0,00 | NA | NA |
| RNU6-33P  | 0,00 | 0,00 | 0,00 | 0,00 | NA | NA |
| RNU6-340P | 0,00 | 0,00 | 0,00 | 0,00 | NA | NA |
| RNU6-342P | 0,00 | 0,00 | 0,00 | 0,00 | NA | NA |
| RNU6-344P | 0,00 | 0,00 | 0,00 | 0,00 | NA | NA |
| RNU6-345P | 0,00 | 0,00 | 0,00 | 0,00 | NA | NA |
| RNU6-346P | 0,00 | 0,00 | 0,00 | 0,00 | NA | NA |
| RNU6-347P | 0,00 | 0,00 | 0,00 | 0,00 | NA | NA |
| RNU6-348P | 0,00 | 0,00 | 0,00 | 0,00 | NA | NA |
| RNU6-349P | 0,00 | 0,00 | 0,00 | 0,00 | NA | NA |
| RNU6-34P  | 0,00 | 0,00 | 0,00 | 0,00 | NA | NA |
| RNU6-351P | 0,00 | 0,00 | 0,00 | 0,00 | NA | NA |
| RNU6-352P | 0,00 | 0,00 | 0,00 | 0,00 | NA | NA |
| RNU6-353P | 0,00 | 0,00 | 0,00 | 0,00 | NA | NA |
| RNU6-355P | 0,00 | 0,00 | 0,00 | 0,24 | NA | NA |
| RNU6-356P | 0,00 | 0,00 | 0,00 | 0,00 | NA | NA |

|           |      |      |      |      |    |    |
|-----------|------|------|------|------|----|----|
| RNU6-358P | 0,00 | 0,00 | 0,00 | 0,00 | NA | NA |
| RNU6-359P | 0,00 | 0,00 | 0,00 | 0,00 | NA | NA |
| RNU6-35P  | 0,00 | 0,00 | 0,00 | 0,00 | NA | NA |
| RNU6-361P | 0,00 | 0,00 | 0,00 | 0,00 | NA | NA |
| RNU6-362P | 0,00 | 0,00 | 0,00 | 0,00 | NA | NA |
| RNU6-363P | 0,00 | 0,00 | 0,00 | 0,00 | NA | NA |
| RNU6-364P | 0,00 | 0,00 | 0,00 | 0,00 | NA | NA |
| RNU6-365P | 0,00 | 0,00 | 0,00 | 0,00 | NA | NA |
| RNU6-366P | 0,00 | 0,00 | 0,00 | 0,00 | NA | NA |
| RNU6-367P | 0,00 | 0,00 | 0,00 | 0,00 | NA | NA |
| RNU6-369P | 0,00 | 0,00 | 0,00 | 0,00 | NA | NA |
| RNU6-370P | 0,00 | 0,00 | 0,00 | 0,00 | NA | NA |
| RNU6-371P | 0,00 | 0,00 | 0,00 | 0,00 | NA | NA |
| RNU6-373P | 0,00 | 0,00 | 0,00 | 0,00 | NA | NA |
| RNU6-376P | 0,00 | 0,00 | 0,00 | 0,00 | NA | NA |
| RNU6-377P | 0,00 | 0,00 | 0,00 | 0,00 | NA | NA |
| RNU6-379P | 0,00 | 0,00 | 0,00 | 0,00 | NA | NA |
| RNU6-381P | 0,00 | 0,00 | 0,00 | 0,00 | NA | NA |
| RNU6-382P | 0,00 | 0,00 | 0,00 | 0,00 | NA | NA |
| RNU6-383P | 0,00 | 0,00 | 0,00 | 0,00 | NA | NA |
| RNU6-384P | 0,00 | 0,00 | 0,00 | 0,00 | NA | NA |
| RNU6-386P | 0,00 | 0,00 | 0,00 | 0,00 | NA | NA |
| RNU6-388P | 0,00 | 0,00 | 0,00 | 0,00 | NA | NA |
| RNU6-390P | 0,00 | 0,00 | 0,00 | 0,00 | NA | NA |
| RNU6-391P | 0,00 | 0,00 | 0,00 | 0,00 | NA | NA |
| RNU6-392P | 0,00 | 0,00 | 0,00 | 0,00 | NA | NA |
| RNU6-393P | 0,00 | 0,00 | 0,00 | 0,00 | NA | NA |
| RNU6-394P | 0,00 | 0,00 | 0,00 | 0,00 | NA | NA |
| RNU6-395P | 0,00 | 0,00 | 0,00 | 0,00 | NA | NA |
| RNU6-396P | 0,00 | 0,00 | 0,00 | 0,00 | NA | NA |
| RNU6-397P | 0,00 | 0,00 | 0,00 | 0,00 | NA | NA |
| RNU6-398P | 0,00 | 0,00 | 0,00 | 0,00 | NA | NA |
| RNU6-39P  | 0,00 | 0,00 | 0,00 | 0,00 | NA | NA |
| RNU6-400P | 0,00 | 0,00 | 0,00 | 0,00 | NA | NA |
| RNU6-401P | 0,00 | 0,00 | 0,00 | 0,00 | NA | NA |
| RNU6-403P | 0,00 | 0,00 | 0,00 | 0,00 | NA | NA |
| RNU6-405P | 0,00 | 0,00 | 0,00 | 0,00 | NA | NA |
| RNU6-406P | 0,00 | 0,00 | 0,00 | 0,00 | NA | NA |
| RNU6-407P | 0,00 | 0,00 | 0,00 | 0,00 | NA | NA |
| RNU6-408P | 0,00 | 0,00 | 0,00 | 0,00 | NA | NA |
| RNU6-409P | 0,00 | 0,00 | 0,00 | 0,00 | NA | NA |
| RNU6-40P  | 0,00 | 0,00 | 0,00 | 0,00 | NA | NA |
| RNU6-410P | 0,00 | 0,00 | 0,00 | 0,00 | NA | NA |
| RNU6-411P | 0,00 | 0,00 | 0,00 | 0,00 | NA | NA |
| RNU6-412P | 0,00 | 0,00 | 0,00 | 0,00 | NA | NA |
| RNU6-414P | 0,00 | 0,00 | 0,00 | 0,00 | NA | NA |
| RNU6-417P | 0,00 | 0,00 | 0,00 | 0,00 | NA | NA |
| RNU6-418P | 0,00 | 0,00 | 0,00 | 0,00 | NA | NA |
| RNU6-419P | 0,00 | 0,00 | 0,00 | 0,00 | NA | NA |
| RNU6-41P  | 0,00 | 0,00 | 0,00 | 0,00 | NA | NA |
| RNU6-420P | 0,00 | 0,00 | 0,00 | 0,00 | NA | NA |
| RNU6-421P | 0,00 | 0,00 | 0,00 | 0,00 | NA | NA |
| RNU6-424P | 0,00 | 0,00 | 0,00 | 0,00 | NA | NA |
| RNU6-425P | 0,00 | 0,00 | 0,00 | 0,00 | NA | NA |
| RNU6-426P | 0,00 | 0,00 | 0,00 | 0,00 | NA | NA |

|           |      |      |      |      |    |    |
|-----------|------|------|------|------|----|----|
| RNU6-429P | 0,00 | 0,00 | 0,00 | 0,00 | NA | NA |
| RNU6-432P | 0,00 | 0,00 | 0,00 | 0,00 | NA | NA |
| RNU6-433P | 0,00 | 0,00 | 0,00 | 0,00 | NA | NA |
| RNU6-434P | 0,00 | 0,00 | 0,00 | 0,00 | NA | NA |
| RNU6-435P | 0,00 | 0,00 | 0,00 | 0,00 | NA | NA |
| RNU6-436P | 0,00 | 0,00 | 0,00 | 0,00 | NA | NA |
| RNU6-437P | 0,00 | 0,00 | 0,00 | 0,00 | NA | NA |
| RNU6-438P | 0,00 | 0,00 | 0,00 | 0,00 | NA | NA |
| RNU6-439P | 0,00 | 0,00 | 0,00 | 0,00 | NA | NA |
| RNU6-43P  | 0,00 | 0,00 | 0,00 | 0,00 | NA | NA |
| RNU6-440P | 0,00 | 0,00 | 0,00 | 0,00 | NA | NA |
| RNU6-441P | 0,00 | 0,00 | 0,00 | 0,00 | NA | NA |
| RNU6-442P | 0,00 | 0,00 | 0,00 | 0,00 | NA | NA |
| RNU6-444P | 0,00 | 0,00 | 0,00 | 0,00 | NA | NA |
| RNU6-447P | 0,00 | 0,00 | 0,00 | 0,24 | NA | NA |
| RNU6-448P | 0,00 | 0,00 | 0,00 | 0,00 | NA | NA |
| RNU6-449P | 0,00 | 0,00 | 0,00 | 0,00 | NA | NA |
| RNU6-44P  | 0,00 | 0,00 | 0,00 | 0,00 | NA | NA |
| RNU6-450P | 0,00 | 0,00 | 0,00 | 0,00 | NA | NA |
| RNU6-451P | 0,00 | 0,00 | 0,00 | 0,00 | NA | NA |
| RNU6-452P | 0,00 | 0,00 | 0,00 | 0,00 | NA | NA |
| RNU6-453P | 0,00 | 0,00 | 0,00 | 0,00 | NA | NA |
| RNU6-456P | 0,00 | 0,00 | 0,00 | 0,00 | NA | NA |
| RNU6-457P | 0,00 | 0,00 | 0,00 | 0,00 | NA | NA |
| RNU6-458P | 0,00 | 0,00 | 0,00 | 0,00 | NA | NA |
| RNU6-45P  | 0,00 | 0,00 | 0,00 | 0,00 | NA | NA |
| RNU6-460P | 0,00 | 0,00 | 0,00 | 0,00 | NA | NA |
| RNU6-461P | 0,00 | 0,00 | 0,00 | 0,00 | NA | NA |
| RNU6-462P | 0,00 | 0,00 | 0,00 | 0,00 | NA | NA |
| RNU6-463P | 0,00 | 0,00 | 0,00 | 0,00 | NA | NA |
| RNU6-464P | 0,00 | 0,00 | 0,00 | 0,00 | NA | NA |
| RNU6-465P | 0,00 | 0,00 | 0,00 | 0,00 | NA | NA |
| RNU6-467P | 0,00 | 0,00 | 0,00 | 0,00 | NA | NA |
| RNU6-468P | 0,00 | 0,00 | 0,00 | 0,00 | NA | NA |
| RNU6-46P  | 0,00 | 0,00 | 0,00 | 0,00 | NA | NA |
| RNU6-470P | 0,00 | 0,00 | 0,00 | 0,00 | NA | NA |
| RNU6-471P | 0,00 | 0,00 | 0,00 | 0,00 | NA | NA |
| RNU6-472P | 0,00 | 0,00 | 0,00 | 0,00 | NA | NA |
| RNU6-473P | 0,00 | 0,00 | 0,00 | 0,00 | NA | NA |
| RNU6-474P | 0,00 | 0,00 | 0,00 | 0,00 | NA | NA |
| RNU6-475P | 0,00 | 0,00 | 0,00 | 0,00 | NA | NA |
| RNU6-476P | 0,00 | 0,00 | 0,86 | 2,82 | NA | NA |
| RNU6-477P | 0,00 | 0,00 | 0,00 | 0,00 | NA | NA |
| RNU6-478P | 0,00 | 0,00 | 0,00 | 0,00 | NA | NA |
| RNU6-479P | 0,00 | 0,00 | 0,00 | 0,00 | NA | NA |
| RNU6-47P  | 0,00 | 0,00 | 0,00 | 0,00 | NA | NA |
| RNU6-480P | 0,00 | 0,00 | 0,00 | 0,00 | NA | NA |
| RNU6-482P | 0,00 | 0,00 | 0,00 | 0,00 | NA | NA |
| RNU6-483P | 0,00 | 0,00 | 0,00 | 0,00 | NA | NA |
| RNU6-485P | 0,00 | 0,00 | 0,00 | 0,00 | NA | NA |
| RNU6-486P | 0,00 | 0,00 | 0,00 | 0,00 | NA | NA |
| RNU6-488P | 0,00 | 0,00 | 0,00 | 0,00 | NA | NA |
| RNU6-489P | 0,00 | 0,00 | 0,00 | 0,00 | NA | NA |
| RNU6-491P | 0,00 | 0,00 | 0,00 | 0,00 | NA | NA |
| RNU6-492P | 0,00 | 0,00 | 0,00 | 0,00 | NA | NA |

|           |      |      |      |      |    |    |
|-----------|------|------|------|------|----|----|
| RNU6-493P | 0,00 | 0,00 | 0,00 | 0,00 | NA | NA |
| RNU6-495P | 0,00 | 0,00 | 0,00 | 0,00 | NA | NA |
| RNU6-496P | 0,00 | 0,00 | 0,00 | 0,00 | NA | NA |
| RNU6-497P | 0,00 | 0,00 | 0,00 | 0,00 | NA | NA |
| RNU6-498P | 0,00 | 0,00 | 0,00 | 0,00 | NA | NA |
| RNU6-499P | 0,00 | 0,00 | 0,00 | 0,00 | NA | NA |
| RNU6-49P  | 0,00 | 0,00 | 0,00 | 0,00 | NA | NA |
| RNU6-500P | 0,00 | 0,00 | 0,00 | 0,00 | NA | NA |
| RNU6-501P | 0,00 | 0,00 | 0,00 | 0,00 | NA | NA |
| RNU6-502P | 0,00 | 0,00 | 0,00 | 0,00 | NA | NA |
| RNU6-503P | 0,00 | 0,00 | 0,00 | 0,00 | NA | NA |
| RNU6-505P | 0,00 | 0,00 | 0,00 | 0,00 | NA | NA |
| RNU6-506P | 0,00 | 0,00 | 0,00 | 0,00 | NA | NA |
| RNU6-507P | 0,00 | 0,00 | 0,00 | 0,00 | NA | NA |
| RNU6-508P | 0,00 | 0,00 | 0,00 | 0,00 | NA | NA |
| RNU6-513P | 0,00 | 0,00 | 0,00 | 0,00 | NA | NA |
| RNU6-518P | 0,00 | 0,00 | 0,00 | 0,00 | NA | NA |
| RNU6-519P | 0,00 | 0,00 | 0,00 | 0,00 | NA | NA |
| RNU6-520P | 0,00 | 0,00 | 0,00 | 0,00 | NA | NA |
| RNU6-521P | 0,00 | 0,00 | 0,00 | 0,00 | NA | NA |
| RNU6-523P | 0,00 | 0,00 | 0,00 | 0,00 | NA | NA |
| RNU6-525P | 0,00 | 0,00 | 0,00 | 0,00 | NA | NA |
| RNU6-526P | 0,00 | 0,00 | 0,00 | 0,00 | NA | NA |
| RNU6-528P | 0,00 | 0,00 | 0,00 | 0,00 | NA | NA |
| RNU6-529P | 0,00 | 0,00 | 0,00 | 0,00 | NA | NA |
| RNU6-530P | 0,00 | 0,00 | 0,00 | 0,00 | NA | NA |
| RNU6-532P | 0,00 | 0,00 | 0,00 | 0,00 | NA | NA |
| RNU6-533P | 0,00 | 0,00 | 0,00 | 0,00 | NA | NA |
| RNU6-535P | 0,00 | 0,00 | 0,00 | 0,00 | NA | NA |
| RNU6-536P | 0,00 | 0,00 | 0,00 | 0,00 | NA | NA |
| RNU6-53P  | 0,00 | 0,00 | 0,00 | 0,00 | NA | NA |
| RNU6-542P | 0,00 | 0,00 | 0,00 | 0,00 | NA | NA |
| RNU6-543P | 0,00 | 0,00 | 0,00 | 0,00 | NA | NA |
| RNU6-544P | 0,00 | 0,00 | 0,00 | 0,00 | NA | NA |
| RNU6-545P | 0,00 | 0,00 | 0,00 | 0,00 | NA | NA |
| RNU6-546P | 0,00 | 0,00 | 0,00 | 0,00 | NA | NA |
| RNU6-547P | 0,00 | 0,00 | 0,00 | 0,00 | NA | NA |
| RNU6-549P | 0,00 | 0,00 | 0,00 | 0,00 | NA | NA |
| RNU6-54P  | 0,00 | 0,00 | 0,00 | 0,00 | NA | NA |
| RNU6-551P | 0,00 | 0,00 | 0,00 | 0,00 | NA | NA |
| RNU6-552P | 0,00 | 0,00 | 0,00 | 0,00 | NA | NA |
| RNU6-553P | 0,00 | 0,00 | 0,00 | 0,00 | NA | NA |
| RNU6-554P | 0,00 | 0,00 | 0,00 | 0,00 | NA | NA |
| RNU6-556P | 0,00 | 0,00 | 0,00 | 0,00 | NA | NA |
| RNU6-557P | 0,00 | 0,00 | 0,00 | 0,00 | NA | NA |
| RNU6-558P | 0,00 | 0,00 | 0,00 | 0,00 | NA | NA |
| RNU6-559P | 0,00 | 0,00 | 0,00 | 0,00 | NA | NA |
| RNU6-55P  | 0,00 | 0,00 | 0,00 | 0,00 | NA | NA |
| RNU6-560P | 0,00 | 0,00 | 0,00 | 0,00 | NA | NA |
| RNU6-561P | 0,00 | 0,00 | 0,00 | 0,00 | NA | NA |
| RNU6-563P | 0,00 | 0,00 | 0,00 | 0,00 | NA | NA |
| RNU6-564P | 0,00 | 0,00 | 0,00 | 0,00 | NA | NA |
| RNU6-566P | 0,00 | 0,00 | 0,00 | 0,00 | NA | NA |
| RNU6-567P | 0,00 | 0,00 | 0,00 | 0,00 | NA | NA |
| RNU6-56P  | 0,00 | 0,00 | 0,00 | 0,00 | NA | NA |

|           |      |      |      |      |    |    |
|-----------|------|------|------|------|----|----|
| RNU6-570P | 0,00 | 0,00 | 0,00 | 0,00 | NA | NA |
| RNU6-571P | 0,00 | 0,00 | 0,00 | 0,00 | NA | NA |
| RNU6-572P | 0,00 | 0,00 | 0,00 | 0,00 | NA | NA |
| RNU6-573P | 0,00 | 0,00 | 0,00 | 0,00 | NA | NA |
| RNU6-575P | 0,00 | 0,00 | 0,00 | 0,00 | NA | NA |
| RNU6-576P | 0,00 | 0,00 | 0,00 | 0,00 | NA | NA |
| RNU6-578P | 0,00 | 0,00 | 0,00 | 0,00 | NA | NA |
| RNU6-579P | 0,00 | 0,00 | 0,00 | 0,00 | NA | NA |
| RNU6-57P  | 0,00 | 0,00 | 0,00 | 0,00 | NA | NA |
| RNU6-580P | 0,00 | 0,00 | 0,00 | 0,00 | NA | NA |
| RNU6-581P | 0,00 | 0,00 | 0,00 | 0,00 | NA | NA |
| RNU6-582P | 0,00 | 0,00 | 0,00 | 0,00 | NA | NA |
| RNU6-583P | 0,00 | 0,00 | 0,00 | 0,00 | NA | NA |
| RNU6-584P | 0,00 | 0,00 | 0,00 | 0,00 | NA | NA |
| RNU6-586P | 0,00 | 0,00 | 0,00 | 0,00 | NA | NA |
| RNU6-587P | 0,00 | 0,00 | 0,00 | 0,00 | NA | NA |
| RNU6-588P | 0,00 | 0,00 | 0,00 | 0,00 | NA | NA |
| RNU6-589P | 0,00 | 0,00 | 0,00 | 0,00 | NA | NA |
| RNU6-58P  | 0,00 | 0,00 | 0,00 | 0,00 | NA | NA |
| RNU6-590P | 0,00 | 0,00 | 0,00 | 0,00 | NA | NA |
| RNU6-591P | 0,00 | 0,00 | 0,00 | 0,00 | NA | NA |
| RNU6-592P | 0,00 | 0,00 | 0,00 | 0,00 | NA | NA |
| RNU6-596P | 0,00 | 0,00 | 0,00 | 0,00 | NA | NA |
| RNU6-598P | 0,00 | 0,00 | 0,00 | 0,00 | NA | NA |
| RNU6-599P | 0,00 | 0,00 | 0,00 | 0,00 | NA | NA |
| RNU6-600P | 0,00 | 0,00 | 0,00 | 0,00 | NA | NA |
| RNU6-601P | 0,00 | 0,00 | 0,00 | 0,00 | NA | NA |
| RNU6-602P | 0,00 | 0,00 | 0,00 | 0,00 | NA | NA |
| RNU6-604P | 0,00 | 0,00 | 0,00 | 0,00 | NA | NA |
| RNU6-605P | 0,00 | 0,00 | 0,00 | 0,00 | NA | NA |
| RNU6-607P | 0,00 | 0,00 | 0,00 | 0,00 | NA | NA |
| RNU6-609P | 0,00 | 0,00 | 0,00 | 0,00 | NA | NA |
| RNU6-612P | 0,00 | 0,00 | 0,00 | 0,00 | NA | NA |
| RNU6-614P | 0,00 | 0,00 | 0,00 | 0,00 | NA | NA |
| RNU6-615P | 0,00 | 0,00 | 0,00 | 0,00 | NA | NA |
| RNU6-616P | 0,00 | 0,00 | 0,00 | 0,00 | NA | NA |
| RNU6-617P | 0,00 | 0,00 | 0,00 | 0,00 | NA | NA |
| RNU6-619P | 0,00 | 0,00 | 0,00 | 0,00 | NA | NA |
| RNU6-61P  | 0,00 | 0,00 | 0,00 | 0,00 | NA | NA |
| RNU6-621P | 0,00 | 0,00 | 0,00 | 0,00 | NA | NA |
| RNU6-622P | 0,00 | 0,00 | 0,00 | 0,00 | NA | NA |
| RNU6-624P | 0,00 | 0,00 | 0,00 | 0,00 | NA | NA |
| RNU6-625P | 0,00 | 0,00 | 0,00 | 0,00 | NA | NA |
| RNU6-627P | 0,00 | 0,00 | 0,00 | 0,00 | NA | NA |
| RNU6-629P | 0,00 | 0,00 | 0,00 | 0,00 | NA | NA |
| RNU6-62P  | 0,00 | 0,00 | 0,00 | 0,00 | NA | NA |
| RNU6-630P | 0,00 | 0,00 | 0,00 | 0,00 | NA | NA |
| RNU6-631P | 0,00 | 0,00 | 0,00 | 0,00 | NA | NA |
| RNU6-633P | 0,00 | 0,00 | 0,00 | 0,00 | NA | NA |
| RNU6-634P | 0,00 | 0,00 | 0,00 | 0,00 | NA | NA |
| RNU6-635P | 0,00 | 0,00 | 0,00 | 0,00 | NA | NA |
| RNU6-636P | 0,00 | 0,00 | 0,00 | 0,00 | NA | NA |
| RNU6-637P | 0,00 | 0,00 | 0,00 | 0,00 | NA | NA |
| RNU6-639P | 0,00 | 0,00 | 0,00 | 0,00 | NA | NA |
| RNU6-63P  | 0,00 | 0,00 | 0,00 | 0,00 | NA | NA |

|           |      |      |      |      |    |    |
|-----------|------|------|------|------|----|----|
| RNU6-641P | 0,00 | 0,00 | 0,00 | 0,00 | NA | NA |
| RNU6-642P | 0,00 | 0,00 | 0,00 | 0,00 | NA | NA |
| RNU6-643P | 0,00 | 0,00 | 0,00 | 0,00 | NA | NA |
| RNU6-644P | 0,00 | 0,00 | 0,00 | 0,00 | NA | NA |
| RNU6-646P | 0,00 | 0,00 | 0,00 | 0,00 | NA | NA |
| RNU6-647P | 0,00 | 0,00 | 0,00 | 0,00 | NA | NA |
| RNU6-648P | 0,00 | 0,00 | 0,00 | 0,00 | NA | NA |
| RNU6-649P | 0,00 | 0,00 | 0,00 | 0,00 | NA | NA |
| RNU6-64P  | 0,00 | 0,00 | 0,00 | 0,00 | NA | NA |
| RNU6-650P | 0,00 | 0,00 | 0,00 | 0,00 | NA | NA |
| RNU6-651P | 0,00 | 0,00 | 0,00 | 0,00 | NA | NA |
| RNU6-653P | 0,00 | 0,00 | 0,00 | 0,00 | NA | NA |
| RNU6-654P | 0,00 | 0,00 | 0,00 | 0,00 | NA | NA |
| RNU6-655P | 0,00 | 0,00 | 0,00 | 0,00 | NA | NA |
| RNU6-656P | 0,00 | 0,00 | 0,00 | 0,00 | NA | NA |
| RNU6-657P | 0,00 | 0,00 | 0,00 | 0,00 | NA | NA |
| RNU6-658P | 0,00 | 0,00 | 0,00 | 0,00 | NA | NA |
| RNU6-659P | 0,00 | 0,00 | 0,00 | 0,00 | NA | NA |
| RNU6-65P  | 0,00 | 0,00 | 0,00 | 0,00 | NA | NA |
| RNU6-660P | 0,00 | 0,00 | 0,00 | 0,00 | NA | NA |
| RNU6-661P | 0,00 | 0,00 | 0,00 | 0,00 | NA | NA |
| RNU6-663P | 0,00 | 0,00 | 0,00 | 0,00 | NA | NA |
| RNU6-665P | 0,00 | 0,00 | 0,00 | 0,00 | NA | NA |
| RNU6-666P | 0,00 | 0,00 | 0,00 | 0,00 | NA | NA |
| RNU6-667P | 0,00 | 0,00 | 0,00 | 0,00 | NA | NA |
| RNU6-668P | 0,00 | 0,00 | 0,00 | 0,00 | NA | NA |
| RNU6-669P | 0,00 | 0,00 | 0,00 | 0,00 | NA | NA |
| RNU6-66P  | 0,00 | 0,00 | 0,00 | 0,00 | NA | NA |
| RNU6-670P | 0,00 | 0,00 | 0,00 | 0,00 | NA | NA |
| RNU6-673P | 0,00 | 0,00 | 0,00 | 0,00 | NA | NA |
| RNU6-674P | 0,00 | 0,00 | 0,00 | 0,00 | NA | NA |
| RNU6-675P | 0,00 | 0,00 | 0,00 | 0,00 | NA | NA |
| RNU6-677P | 0,00 | 0,00 | 0,00 | 0,00 | NA | NA |
| RNU6-678P | 0,00 | 0,00 | 0,00 | 0,00 | NA | NA |
| RNU6-679P | 0,00 | 0,00 | 0,00 | 0,00 | NA | NA |
| RNU6-67P  | 0,00 | 0,00 | 0,00 | 0,00 | NA | NA |
| RNU6-682P | 0,00 | 0,00 | 0,00 | 0,00 | NA | NA |
| RNU6-684P | 0,00 | 0,00 | 0,00 | 0,00 | NA | NA |
| RNU6-686P | 0,00 | 0,00 | 0,00 | 0,00 | NA | NA |
| RNU6-687P | 0,00 | 0,00 | 0,00 | 0,00 | NA | NA |
| RNU6-689P | 0,00 | 0,00 | 0,00 | 0,00 | NA | NA |
| RNU6-68P  | 0,00 | 0,00 | 0,00 | 0,00 | NA | NA |
| RNU6-690P | 0,00 | 0,00 | 0,00 | 0,00 | NA | NA |
| RNU6-692P | 0,00 | 0,00 | 0,00 | 0,00 | NA | NA |
| RNU6-694P | 0,00 | 0,00 | 0,00 | 0,00 | NA | NA |
| RNU6-695P | 0,00 | 0,00 | 0,00 | 0,00 | NA | NA |
| RNU6-696P | 0,00 | 0,00 | 0,00 | 0,00 | NA | NA |
| RNU6-697P | 0,00 | 0,00 | 0,00 | 0,00 | NA | NA |
| RNU6-698P | 0,00 | 0,00 | 0,00 | 0,00 | NA | NA |
| RNU6-699P | 0,00 | 0,00 | 0,00 | 0,00 | NA | NA |
| RNU6-700P | 0,00 | 0,00 | 0,00 | 0,00 | NA | NA |
| RNU6-702P | 0,00 | 0,00 | 0,00 | 0,00 | NA | NA |
| RNU6-703P | 0,00 | 0,00 | 0,00 | 0,00 | NA | NA |
| RNU6-704P | 0,00 | 0,00 | 0,00 | 0,00 | NA | NA |
| RNU6-706P | 0,00 | 0,00 | 0,00 | 0,00 | NA | NA |



|           |      |      |      |      |    |    |
|-----------|------|------|------|------|----|----|
| RNU6-707P | 0,00 | 0,00 | 0,00 | 0,00 | NA | NA |
| RNU6-708P | 0,00 | 0,00 | 0,00 | 0,00 | NA | NA |
| RNU6-709P | 0,00 | 0,00 | 0,00 | 0,00 | NA | NA |
| RNU6-70P  | 0,00 | 0,00 | 0,00 | 0,00 | NA | NA |
| RNU6-710P | 0,00 | 0,00 | 0,00 | 0,00 | NA | NA |
| RNU6-712P | 0,00 | 0,00 | 0,00 | 0,00 | NA | NA |
| RNU6-713P | 0,00 | 0,00 | 0,00 | 0,00 | NA | NA |
| RNU6-714P | 0,00 | 0,00 | 0,00 | 0,00 | NA | NA |
| RNU6-715P | 0,00 | 0,00 | 0,00 | 0,00 | NA | NA |
| RNU6-716P | 0,00 | 0,00 | 0,00 | 0,00 | NA | NA |
| RNU6-717P | 0,00 | 0,00 | 0,00 | 0,00 | NA | NA |
| RNU6-718P | 0,00 | 0,00 | 0,00 | 0,00 | NA | NA |
| RNU6-719P | 0,00 | 0,00 | 0,00 | 0,00 | NA | NA |
| RNU6-71P  | 0,00 | 0,00 | 0,00 | 0,00 | NA | NA |
| RNU6-721P | 0,00 | 0,00 | 0,00 | 0,00 | NA | NA |
| RNU6-724P | 0,00 | 0,00 | 0,00 | 0,00 | NA | NA |
| RNU6-725P | 0,00 | 0,00 | 0,00 | 0,00 | NA | NA |
| RNU6-726P | 0,00 | 0,00 | 0,00 | 0,00 | NA | NA |
| RNU6-727P | 0,00 | 0,00 | 0,00 | 0,00 | NA | NA |
| RNU6-728P | 0,00 | 0,00 | 0,00 | 0,00 | NA | NA |
| RNU6-72P  | 0,00 | 0,00 | 0,00 | 0,00 | NA | NA |
| RNU6-730P | 0,00 | 0,00 | 0,00 | 0,00 | NA | NA |
| RNU6-731P | 0,00 | 0,00 | 0,00 | 0,00 | NA | NA |
| RNU6-732P | 0,00 | 0,00 | 0,00 | 0,00 | NA | NA |
| RNU6-735P | 0,00 | 0,00 | 0,00 | 0,00 | NA | NA |
| RNU6-737P | 0,00 | 0,00 | 0,00 | 0,00 | NA | NA |
| RNU6-738P | 0,00 | 0,00 | 0,00 | 0,00 | NA | NA |
| RNU6-739P | 0,00 | 0,00 | 0,00 | 0,00 | NA | NA |
| RNU6-740P | 0,00 | 0,00 | 0,00 | 0,00 | NA | NA |
| RNU6-741P | 0,00 | 0,00 | 0,00 | 0,00 | NA | NA |
| RNU6-743P | 0,00 | 0,00 | 0,00 | 0,00 | NA | NA |
| RNU6-744P | 0,00 | 0,00 | 0,00 | 0,00 | NA | NA |
| RNU6-745P | 0,00 | 0,00 | 0,00 | 0,00 | NA | NA |
| RNU6-746P | 0,00 | 0,00 | 0,00 | 0,00 | NA | NA |
| RNU6-747P | 0,00 | 0,00 | 0,00 | 0,00 | NA | NA |
| RNU6-749P | 0,00 | 0,00 | 0,00 | 0,00 | NA | NA |
| RNU6-750P | 0,00 | 0,00 | 0,00 | 0,00 | NA | NA |
| RNU6-751P | 0,00 | 0,00 | 0,00 | 0,00 | NA | NA |
| RNU6-752P | 0,00 | 0,00 | 0,00 | 0,00 | NA | NA |
| RNU6-753P | 0,00 | 0,00 | 0,00 | 0,00 | NA | NA |
| RNU6-754P | 0,00 | 0,00 | 0,00 | 0,00 | NA | NA |
| RNU6-755P | 0,00 | 0,00 | 0,00 | 0,00 | NA | NA |
| RNU6-756P | 0,00 | 0,00 | 0,00 | 0,00 | NA | NA |
| RNU6-757P | 0,00 | 0,00 | 0,00 | 0,00 | NA | NA |
| RNU6-758P | 0,00 | 0,00 | 0,00 | 0,00 | NA | NA |
| RNU6-759P | 0,00 | 0,00 | 0,00 | 0,00 | NA | NA |
| RNU6-75P  | 0,00 | 0,00 | 0,00 | 0,00 | NA | NA |
| RNU6-760P | 0,00 | 0,00 | 0,00 | 0,00 | NA | NA |
| RNU6-761P | 0,00 | 0,00 | 0,00 | 0,00 | NA | NA |
| RNU6-763P | 0,00 | 0,00 | 0,00 | 0,00 | NA | NA |
| RNU6-764P | 0,00 | 0,00 | 0,00 | 0,00 | NA | NA |
| RNU6-765P | 0,00 | 0,00 | 0,00 | 0,00 | NA | NA |
| RNU6-767P | 0,00 | 0,00 | 0,00 | 0,00 | NA | NA |
| RNU6-768P | 0,00 | 0,00 | 0,00 | 0,00 | NA | NA |
| RNU6-76P  | 0,00 | 0,00 | 0,00 | 0,00 | NA | NA |

|           |      |      |      |      |    |    |
|-----------|------|------|------|------|----|----|
| RNU6-770P | 0,00 | 0,00 | 0,00 | 0,00 | NA | NA |
| RNU6-771P | 0,00 | 0,00 | 0,00 | 0,00 | NA | NA |
| RNU6-772P | 0,00 | 0,00 | 0,00 | 0,00 | NA | NA |
| RNU6-774P | 0,00 | 0,00 | 0,00 | 0,00 | NA | NA |
| RNU6-775P | 0,00 | 0,00 | 0,00 | 0,00 | NA | NA |
| RNU6-776P | 0,00 | 0,00 | 0,00 | 0,00 | NA | NA |
| RNU6-777P | 0,00 | 0,00 | 0,00 | 0,00 | NA | NA |
| RNU6-778P | 0,00 | 0,00 | 0,00 | 0,00 | NA | NA |
| RNU6-77P  | 0,00 | 0,00 | 0,00 | 0,00 | NA | NA |
| RNU6-781P | 0,00 | 0,00 | 0,00 | 0,00 | NA | NA |
| RNU6-782P | 0,00 | 0,00 | 0,00 | 0,00 | NA | NA |
| RNU6-783P | 0,00 | 0,00 | 0,00 | 0,00 | NA | NA |
| RNU6-784P | 0,00 | 0,00 | 0,00 | 0,00 | NA | NA |
| RNU6-785P | 0,00 | 0,00 | 0,00 | 0,24 | NA | NA |
| RNU6-787P | 0,00 | 0,00 | 0,00 | 0,00 | NA | NA |
| RNU6-788P | 0,00 | 0,00 | 0,00 | 0,00 | NA | NA |
| RNU6-78P  | 0,00 | 0,00 | 0,00 | 0,00 | NA | NA |
| RNU6-790P | 0,00 | 0,00 | 0,00 | 0,00 | NA | NA |
| RNU6-791P | 0,00 | 0,00 | 0,00 | 0,24 | NA | NA |
| RNU6-792P | 0,00 | 0,00 | 0,00 | 0,00 | NA | NA |
| RNU6-793P | 0,00 | 0,00 | 0,00 | 0,00 | NA | NA |
| RNU6-794P | 0,00 | 0,00 | 0,00 | 0,00 | NA | NA |
| RNU6-796P | 0,00 | 0,00 | 0,00 | 0,00 | NA | NA |
| RNU6-797P | 0,00 | 0,00 | 0,00 | 0,00 | NA | NA |
| RNU6-798P | 0,00 | 0,00 | 0,00 | 0,00 | NA | NA |
| RNU6-799P | 0,00 | 0,00 | 0,00 | 0,00 | NA | NA |
| RNU6-800P | 0,00 | 0,00 | 0,00 | 0,00 | NA | NA |
| RNU6-801P | 0,00 | 0,00 | 0,00 | 0,00 | NA | NA |
| RNU6-803P | 0,00 | 0,00 | 0,00 | 0,00 | NA | NA |
| RNU6-804P | 0,00 | 0,00 | 0,00 | 0,00 | NA | NA |
| RNU6-806P | 0,00 | 0,00 | 0,00 | 0,00 | NA | NA |
| RNU6-809P | 0,00 | 0,00 | 0,00 | 0,00 | NA | NA |
| RNU6-80P  | 0,00 | 0,00 | 0,00 | 0,00 | NA | NA |
| RNU6-811P | 0,00 | 0,00 | 0,00 | 0,00 | NA | NA |
| RNU6-813P | 0,00 | 0,00 | 0,00 | 0,00 | NA | NA |
| RNU6-817P | 0,00 | 0,00 | 0,00 | 0,00 | NA | NA |
| RNU6-818P | 0,00 | 0,00 | 0,00 | 0,00 | NA | NA |
| RNU6-819P | 0,00 | 0,00 | 0,00 | 0,00 | NA | NA |
| RNU6-81P  | 0,00 | 0,00 | 0,00 | 0,00 | NA | NA |
| RNU6-820P | 0,00 | 0,00 | 0,00 | 0,00 | NA | NA |
| RNU6-821P | 0,00 | 0,00 | 0,00 | 0,00 | NA | NA |
| RNU6-822P | 0,00 | 0,00 | 0,00 | 0,00 | NA | NA |
| RNU6-824P | 0,00 | 0,00 | 0,00 | 0,00 | NA | NA |
| RNU6-828P | 0,00 | 0,00 | 0,00 | 0,00 | NA | NA |
| RNU6-829P | 0,00 | 0,00 | 0,00 | 0,00 | NA | NA |
| RNU6-830P | 0,00 | 0,00 | 0,00 | 0,00 | NA | NA |
| RNU6-831P | 0,00 | 0,00 | 0,00 | 0,00 | NA | NA |
| RNU6-832P | 0,00 | 0,00 | 0,00 | 0,00 | NA | NA |
| RNU6-833P | 0,00 | 0,00 | 0,00 | 0,00 | NA | NA |
| RNU6-834P | 0,00 | 0,00 | 0,00 | 0,00 | NA | NA |
| RNU6-835P | 0,00 | 0,00 | 0,00 | 0,00 | NA | NA |
| RNU6-836P | 0,00 | 0,00 | 0,00 | 0,00 | NA | NA |
| RNU6-837P | 0,00 | 0,00 | 0,00 | 0,00 | NA | NA |
| RNU6-838P | 0,00 | 0,00 | 0,00 | 0,00 | NA | NA |
| RNU6-839P | 0,00 | 0,00 | 0,00 | 0,00 | NA | NA |

|           |      |      |      |      |    |    |
|-----------|------|------|------|------|----|----|
| RNU6-83P  | 0,00 | 0,00 | 0,00 | 0,00 | NA | NA |
| RNU6-841P | 0,00 | 0,00 | 0,00 | 0,00 | NA | NA |
| RNU6-842P | 0,00 | 0,00 | 0,00 | 0,00 | NA | NA |
| RNU6-843P | 0,00 | 0,00 | 0,00 | 0,00 | NA | NA |
| RNU6-844P | 0,00 | 0,00 | 0,00 | 0,00 | NA | NA |
| RNU6-845P | 0,00 | 0,00 | 0,00 | 0,00 | NA | NA |
| RNU6-847P | 0,00 | 0,00 | 0,00 | 0,00 | NA | NA |
| RNU6-848P | 0,00 | 0,00 | 0,00 | 0,00 | NA | NA |
| RNU6-849P | 0,00 | 0,00 | 0,00 | 0,00 | NA | NA |
| RNU6-84P  | 0,00 | 0,00 | 0,00 | 0,00 | NA | NA |
| RNU6-850P | 0,00 | 0,00 | 0,00 | 0,00 | NA | NA |
| RNU6-851P | 0,00 | 0,00 | 0,00 | 0,00 | NA | NA |
| RNU6-853P | 0,00 | 0,00 | 0,00 | 0,00 | NA | NA |
| RNU6-855P | 0,00 | 0,00 | 0,00 | 0,00 | NA | NA |
| RNU6-856P | 0,00 | 0,00 | 0,00 | 0,00 | NA | NA |
| RNU6-857P | 0,00 | 0,00 | 0,00 | 0,00 | NA | NA |
| RNU6-858P | 0,00 | 0,00 | 0,00 | 0,00 | NA | NA |
| RNU6-859P | 0,00 | 0,00 | 0,00 | 0,00 | NA | NA |
| RNU6-860P | 0,00 | 0,00 | 0,00 | 0,24 | NA | NA |
| RNU6-861P | 0,00 | 0,00 | 0,00 | 0,00 | NA | NA |
| RNU6-863P | 0,00 | 0,00 | 0,00 | 0,00 | NA | NA |
| RNU6-864P | 0,00 | 0,00 | 0,00 | 0,00 | NA | NA |
| RNU6-865P | 0,00 | 0,00 | 0,00 | 0,00 | NA | NA |
| RNU6-867P | 0,00 | 0,00 | 0,00 | 0,00 | NA | NA |
| RNU6-869P | 0,00 | 0,00 | 0,00 | 0,00 | NA | NA |
| RNU6-86P  | 0,00 | 0,00 | 0,00 | 0,00 | NA | NA |
| RNU6-871P | 0,00 | 0,00 | 0,00 | 0,00 | NA | NA |
| RNU6-873P | 0,00 | 0,00 | 0,00 | 0,00 | NA | NA |
| RNU6-874P | 0,00 | 0,00 | 0,00 | 0,00 | NA | NA |
| RNU6-875P | 0,00 | 0,00 | 0,00 | 0,00 | NA | NA |
| RNU6-876P | 0,00 | 0,00 | 0,00 | 0,00 | NA | NA |
| RNU6-87P  | 0,00 | 0,00 | 0,00 | 0,00 | NA | NA |
| RNU6-880P | 0,00 | 0,00 | 0,00 | 0,00 | NA | NA |
| RNU6-881P | 0,00 | 0,00 | 0,00 | 0,00 | NA | NA |
| RNU6-882P | 0,00 | 0,00 | 0,00 | 0,00 | NA | NA |
| RNU6-884P | 0,00 | 0,00 | 0,00 | 0,00 | NA | NA |
| RNU6-885P | 0,00 | 0,00 | 0,00 | 0,00 | NA | NA |
| RNU6-886P | 0,00 | 0,00 | 0,00 | 0,00 | NA | NA |
| RNU6-887P | 0,00 | 0,00 | 0,00 | 0,00 | NA | NA |
| RNU6-888P | 0,00 | 0,00 | 0,00 | 0,00 | NA | NA |
| RNU6-889P | 0,00 | 0,00 | 0,00 | 0,00 | NA | NA |
| RNU6-88P  | 0,00 | 0,00 | 0,00 | 0,00 | NA | NA |
| RNU6-891P | 0,00 | 0,00 | 0,00 | 0,00 | NA | NA |
| RNU6-893P | 0,00 | 0,00 | 0,00 | 0,00 | NA | NA |
| RNU6-894P | 0,00 | 0,00 | 0,00 | 0,00 | NA | NA |
| RNU6-895P | 0,00 | 0,00 | 0,00 | 0,00 | NA | NA |
| RNU6-896P | 0,00 | 0,00 | 0,00 | 0,00 | NA | NA |
| RNU6-897P | 0,00 | 0,00 | 0,00 | 0,00 | NA | NA |
| RNU6-898P | 0,00 | 0,00 | 0,00 | 0,00 | NA | NA |
| RNU6-899P | 0,00 | 0,00 | 0,00 | 0,00 | NA | NA |
| RNU6-89P  | 0,00 | 0,00 | 0,00 | 0,00 | NA | NA |
| RNU6-900P | 0,00 | 0,00 | 0,00 | 0,00 | NA | NA |
| RNU6-901P | 0,00 | 0,00 | 0,00 | 0,00 | NA | NA |
| RNU6-902P | 0,00 | 0,00 | 0,00 | 0,00 | NA | NA |
| RNU6-904P | 0,00 | 0,00 | 0,00 | 0,00 | NA | NA |

|           |      |      |      |      |    |    |
|-----------|------|------|------|------|----|----|
| RNU6-905P | 0,00 | 0,00 | 0,00 | 0,00 | NA | NA |
| RNU6-906P | 0,00 | 0,00 | 0,00 | 0,00 | NA | NA |
| RNU6-907P | 0,00 | 0,00 | 0,00 | 0,00 | NA | NA |
| RNU6-908P | 0,00 | 0,00 | 0,00 | 0,00 | NA | NA |
| RNU6-909P | 0,00 | 0,00 | 0,00 | 0,00 | NA | NA |
| RNU6-910P | 0,00 | 0,00 | 0,00 | 0,00 | NA | NA |
| RNU6-913P | 0,00 | 0,00 | 0,00 | 0,00 | NA | NA |
| RNU6-914P | 0,00 | 0,00 | 0,00 | 0,00 | NA | NA |
| RNU6-916P | 0,00 | 0,00 | 0,00 | 0,00 | NA | NA |
| RNU6-918P | 0,00 | 0,00 | 0,00 | 0,00 | NA | NA |
| RNU6-921P | 0,00 | 0,00 | 0,00 | 0,00 | NA | NA |
| RNU6-922P | 0,00 | 0,00 | 0,00 | 0,00 | NA | NA |
| RNU6-923P | 0,00 | 0,00 | 0,00 | 0,00 | NA | NA |
| RNU6-924P | 0,00 | 0,00 | 0,00 | 0,00 | NA | NA |
| RNU6-926P | 0,00 | 0,00 | 0,00 | 0,00 | NA | NA |
| RNU6-927P | 0,00 | 0,00 | 0,00 | 0,00 | NA | NA |
| RNU6-929P | 0,00 | 0,00 | 0,00 | 0,00 | NA | NA |
| RNU6-92P  | 0,00 | 0,00 | 0,00 | 0,00 | NA | NA |
| RNU6-930P | 0,00 | 0,00 | 0,00 | 0,00 | NA | NA |
| RNU6-931P | 0,00 | 0,00 | 0,00 | 0,00 | NA | NA |
| RNU6-933P | 0,00 | 0,00 | 0,00 | 0,00 | NA | NA |
| RNU6-934P | 0,00 | 0,00 | 0,00 | 0,00 | NA | NA |
| RNU6-935P | 0,00 | 0,00 | 0,00 | 0,00 | NA | NA |
| RNU6-937P | 0,00 | 0,00 | 0,00 | 0,00 | NA | NA |
| RNU6-938P | 0,00 | 0,00 | 0,00 | 0,00 | NA | NA |
| RNU6-940P | 0,00 | 0,00 | 0,00 | 0,00 | NA | NA |
| RNU6-941P | 0,00 | 0,00 | 0,00 | 0,00 | NA | NA |
| RNU6-943P | 0,00 | 0,00 | 0,00 | 0,00 | NA | NA |
| RNU6-945P | 0,00 | 0,00 | 0,00 | 0,00 | NA | NA |
| RNU6-947P | 0,00 | 0,00 | 0,00 | 0,00 | NA | NA |
| RNU6-948P | 0,00 | 0,00 | 0,00 | 0,00 | NA | NA |
| RNU6-949P | 0,00 | 0,00 | 0,00 | 0,00 | NA | NA |
| RNU6-950P | 0,00 | 0,00 | 0,00 | 0,00 | NA | NA |
| RNU6-951P | 0,00 | 0,00 | 0,00 | 0,00 | NA | NA |
| RNU6-952P | 0,00 | 0,00 | 0,00 | 0,00 | NA | NA |
| RNU6-953P | 0,00 | 0,00 | 0,00 | 0,00 | NA | NA |
| RNU6-954P | 0,00 | 0,00 | 0,00 | 0,00 | NA | NA |
| RNU6-955P | 0,00 | 0,00 | 0,00 | 0,00 | NA | NA |
| RNU6-956P | 0,00 | 0,00 | 0,00 | 0,00 | NA | NA |
| RNU6-958P | 0,00 | 0,00 | 0,00 | 0,00 | NA | NA |
| RNU6-959P | 0,00 | 0,00 | 0,00 | 0,00 | NA | NA |
| RNU6-95P  | 0,00 | 0,00 | 0,00 | 0,00 | NA | NA |
| RNU6-961P | 0,00 | 0,00 | 0,00 | 0,00 | NA | NA |
| RNU6-964P | 0,00 | 0,00 | 0,00 | 0,00 | NA | NA |
| RNU6-965P | 0,00 | 0,00 | 0,00 | 0,00 | NA | NA |
| RNU6-966P | 0,00 | 0,00 | 0,00 | 0,00 | NA | NA |
| RNU6-967P | 0,00 | 0,00 | 0,00 | 0,00 | NA | NA |
| RNU6-968P | 0,00 | 0,00 | 0,00 | 0,00 | NA | NA |
| RNU6-970P | 0,00 | 0,00 | 0,00 | 0,00 | NA | NA |
| RNU6-971P | 0,00 | 0,00 | 0,00 | 0,00 | NA | NA |
| RNU6-973P | 0,00 | 0,00 | 0,00 | 0,00 | NA | NA |
| RNU6-974P | 0,00 | 0,00 | 0,00 | 0,00 | NA | NA |
| RNU6-975P | 0,00 | 0,00 | 0,00 | 0,00 | NA | NA |
| RNU6-976P | 0,00 | 0,00 | 0,00 | 0,00 | NA | NA |
| RNU6-978P | 0,00 | 0,00 | 0,00 | 0,00 | NA | NA |

|             |      |      |      |      |    |    |
|-------------|------|------|------|------|----|----|
| RNU6-980P   | 0,00 | 0,00 | 0,00 | 0,00 | NA | NA |
| RNU6-982P   | 0,00 | 0,00 | 0,00 | 0,00 | NA | NA |
| RNU6-984P   | 0,00 | 0,00 | 0,00 | 0,00 | NA | NA |
| RNU6-985P   | 0,00 | 0,00 | 0,00 | 0,00 | NA | NA |
| RNU6-986P   | 0,00 | 0,00 | 0,00 | 0,00 | NA | NA |
| RNU6-988P   | 0,00 | 0,00 | 0,00 | 0,00 | NA | NA |
| RNU6-98P    | 0,00 | 0,00 | 0,00 | 0,00 | NA | NA |
| RNU6-990P   | 0,00 | 0,00 | 0,00 | 0,00 | NA | NA |
| RNU6-991P   | 0,00 | 0,00 | 0,00 | 0,00 | NA | NA |
| RNU6-992P   | 0,00 | 0,00 | 0,00 | 0,00 | NA | NA |
| RNU6-994P   | 0,00 | 0,00 | 0,00 | 0,00 | NA | NA |
| RNU6-995P   | 0,00 | 0,00 | 0,00 | 0,00 | NA | NA |
| RNU6-996P   | 0,00 | 0,00 | 0,00 | 0,00 | NA | NA |
| RNU6-997P   | 0,00 | 0,00 | 0,00 | 0,00 | NA | NA |
| RNU6-999P   | 0,00 | 0,00 | 0,00 | 0,00 | NA | NA |
| RNU6-99P    | 0,00 | 0,00 | 0,00 | 0,00 | NA | NA |
| RNU6ATAC    | 0,00 | 0,00 | 0,00 | 0,00 | NA | NA |
| RNU6ATAC10P | 0,00 | 0,00 | 0,00 | 0,00 | NA | NA |
| RNU6ATAC11P | 0,00 | 0,00 | 0,00 | 0,00 | NA | NA |
| RNU6ATAC12P | 0,00 | 0,00 | 0,00 | 0,00 | NA | NA |
| RNU6ATAC13P | 0,00 | 0,00 | 0,00 | 0,00 | NA | NA |
| RNU6ATAC16P | 0,00 | 0,00 | 0,00 | 0,00 | NA | NA |
| RNU6ATAC17P | 0,00 | 0,00 | 0,00 | 0,00 | NA | NA |
| RNU6ATAC18P | 0,00 | 0,00 | 0,00 | 0,00 | NA | NA |
| RNU6ATAC19P | 0,00 | 0,00 | 0,00 | 0,00 | NA | NA |
| RNU6ATAC20P | 0,00 | 0,00 | 0,00 | 0,00 | NA | NA |
| RNU6ATAC21P | 0,00 | 0,00 | 0,00 | 0,00 | NA | NA |
| RNU6ATAC22P | 0,00 | 0,00 | 0,00 | 0,00 | NA | NA |
| RNU6ATAC25P | 0,00 | 0,00 | 0,00 | 0,00 | NA | NA |
| RNU6ATAC26P | 0,00 | 0,00 | 0,00 | 0,00 | NA | NA |
| RNU6ATAC28P | 0,00 | 0,00 | 0,00 | 0,00 | NA | NA |
| RNU6ATAC29P | 0,00 | 0,00 | 0,00 | 0,00 | NA | NA |
| RNU6ATAC2P  | 0,00 | 0,00 | 0,00 | 0,00 | NA | NA |
| RNU6ATAC30P | 0,00 | 0,00 | 0,00 | 0,00 | NA | NA |
| RNU6ATAC31P | 0,00 | 0,00 | 0,00 | 0,00 | NA | NA |
| RNU6ATAC32P | 0,00 | 0,00 | 0,00 | 0,00 | NA | NA |
| RNU6ATAC33P | 0,00 | 0,00 | 0,00 | 0,00 | NA | NA |
| RNU6ATAC34P | 0,00 | 0,00 | 0,00 | 0,00 | NA | NA |
| RNU6ATAC36P | 0,00 | 0,00 | 0,00 | 0,00 | NA | NA |
| RNU6ATAC37P | 0,00 | 0,00 | 0,00 | 0,00 | NA | NA |
| RNU6ATAC38P | 0,00 | 0,00 | 0,00 | 0,00 | NA | NA |
| RNU6ATAC3P  | 0,00 | 0,00 | 0,00 | 0,00 | NA | NA |
| RNU6ATAC41P | 0,00 | 0,00 | 0,00 | 0,00 | NA | NA |
| RNU6ATAC42P | 0,00 | 0,00 | 0,00 | 0,00 | NA | NA |
| RNU6ATAC4P  | 0,00 | 0,00 | 0,00 | 0,00 | NA | NA |
| RNU6ATAC5P  | 0,00 | 0,00 | 0,00 | 0,00 | NA | NA |
| RNU6ATAC7P  | 0,00 | 0,00 | 0,00 | 0,00 | NA | NA |
| RNU6ATAC8P  | 0,00 | 0,00 | 0,00 | 0,00 | NA | NA |
| RNU7-1      | 0,00 | 0,00 | 0,00 | 0,00 | NA | NA |
| RNU7-102P   | 0,00 | 0,00 | 0,00 | 0,00 | NA | NA |
| RNU7-104P   | 0,00 | 0,00 | 0,00 | 0,00 | NA | NA |
| RNU7-105P   | 0,00 | 0,00 | 0,00 | 0,00 | NA | NA |
| RNU7-106P   | 0,00 | 0,00 | 0,00 | 0,00 | NA | NA |
| RNU7-111P   | 0,00 | 0,00 | 0,00 | 0,00 | NA | NA |
| RNU7-113P   | 0,00 | 0,00 | 0,00 | 0,00 | NA | NA |

|           |      |      |      |      |    |    |
|-----------|------|------|------|------|----|----|
| RNU7-116P | 0,00 | 0,00 | 0,00 | 0,00 | NA | NA |
| RNU7-119P | 0,00 | 0,00 | 0,00 | 0,00 | NA | NA |
| RNU7-11P  | 0,00 | 0,00 | 0,00 | 0,00 | NA | NA |
| RNU7-120P | 0,00 | 0,00 | 0,00 | 0,00 | NA | NA |
| RNU7-121P | 0,00 | 0,00 | 0,00 | 0,00 | NA | NA |
| RNU7-123P | 0,00 | 0,00 | 0,00 | 0,00 | NA | NA |
| RNU7-124P | 0,00 | 0,00 | 0,00 | 0,00 | NA | NA |
| RNU7-125P | 0,00 | 0,00 | 0,00 | 0,00 | NA | NA |
| RNU7-126P | 0,00 | 0,00 | 0,00 | 0,00 | NA | NA |
| RNU7-127P | 0,00 | 0,00 | 0,00 | 0,00 | NA | NA |
| RNU7-128P | 0,00 | 0,00 | 0,00 | 0,00 | NA | NA |
| RNU7-129P | 0,00 | 0,00 | 0,00 | 0,00 | NA | NA |
| RNU7-12P  | 0,00 | 0,00 | 0,00 | 0,00 | NA | NA |
| RNU7-130P | 0,00 | 0,00 | 0,00 | 0,00 | NA | NA |
| RNU7-134P | 0,00 | 0,00 | 0,00 | 0,00 | NA | NA |
| RNU7-136P | 0,00 | 0,00 | 0,00 | 0,00 | NA | NA |
| RNU7-137P | 0,00 | 0,00 | 0,00 | 0,00 | NA | NA |
| RNU7-138P | 0,00 | 0,00 | 0,00 | 0,00 | NA | NA |
| RNU7-13P  | 0,00 | 0,00 | 0,00 | 0,00 | NA | NA |
| RNU7-140P | 0,00 | 0,00 | 0,00 | 0,00 | NA | NA |
| RNU7-141P | 0,00 | 0,00 | 0,00 | 0,00 | NA | NA |
| RNU7-143P | 0,00 | 0,00 | 0,00 | 0,00 | NA | NA |
| RNU7-144P | 0,00 | 0,00 | 0,00 | 0,00 | NA | NA |
| RNU7-147P | 0,00 | 0,00 | 0,00 | 0,00 | NA | NA |
| RNU7-148P | 0,00 | 0,00 | 0,00 | 0,00 | NA | NA |
| RNU7-149P | 0,00 | 0,00 | 0,00 | 0,00 | NA | NA |
| RNU7-14P  | 0,00 | 0,00 | 0,00 | 0,00 | NA | NA |
| RNU7-153P | 0,00 | 0,00 | 0,00 | 0,00 | NA | NA |
| RNU7-154P | 0,00 | 0,00 | 0,00 | 0,00 | NA | NA |
| RNU7-155P | 0,00 | 0,00 | 0,00 | 0,00 | NA | NA |
| RNU7-156P | 0,00 | 0,00 | 0,00 | 0,00 | NA | NA |
| RNU7-157P | 0,00 | 0,00 | 0,00 | 0,00 | NA | NA |
| RNU7-159P | 0,00 | 0,00 | 0,00 | 0,00 | NA | NA |
| RNU7-160P | 0,00 | 0,00 | 0,00 | 0,00 | NA | NA |
| RNU7-161P | 0,00 | 0,00 | 0,00 | 0,00 | NA | NA |
| RNU7-164P | 0,00 | 0,00 | 0,00 | 0,00 | NA | NA |
| RNU7-165P | 0,00 | 0,00 | 0,00 | 0,00 | NA | NA |
| RNU7-167P | 0,00 | 0,00 | 0,00 | 0,00 | NA | NA |
| RNU7-170P | 0,00 | 0,00 | 0,00 | 0,00 | NA | NA |
| RNU7-173P | 0,00 | 0,00 | 0,00 | 0,00 | NA | NA |
| RNU7-174P | 0,00 | 0,00 | 0,00 | 0,00 | NA | NA |
| RNU7-175P | 0,00 | 0,00 | 0,00 | 0,00 | NA | NA |
| RNU7-176P | 0,00 | 0,00 | 0,00 | 0,00 | NA | NA |
| RNU7-179P | 0,00 | 0,00 | 0,00 | 0,00 | NA | NA |
| RNU7-182P | 0,00 | 0,00 | 0,00 | 0,00 | NA | NA |
| RNU7-183P | 0,00 | 0,00 | 0,00 | 0,00 | NA | NA |
| RNU7-185P | 0,00 | 0,00 | 0,00 | 0,00 | NA | NA |
| RNU7-186P | 0,00 | 0,00 | 0,00 | 0,00 | NA | NA |
| RNU7-187P | 0,00 | 0,00 | 0,00 | 0,00 | NA | NA |
| RNU7-188P | 0,00 | 0,00 | 0,00 | 0,00 | NA | NA |
| RNU7-190P | 0,00 | 0,00 | 0,00 | 0,00 | NA | NA |
| RNU7-192P | 0,00 | 0,00 | 0,00 | 0,00 | NA | NA |
| RNU7-193P | 0,00 | 0,00 | 0,00 | 0,00 | NA | NA |
| RNU7-194P | 0,00 | 0,00 | 0,00 | 0,00 | NA | NA |
| RNU7-195P | 0,00 | 0,00 | 0,00 | 0,00 | NA | NA |

|           |      |      |      |      |    |    |
|-----------|------|------|------|------|----|----|
| RNU7-196P | 0,00 | 0,00 | 0,00 | 0,00 | NA | NA |
| RNU7-197P | 0,00 | 0,00 | 0,00 | 0,00 | NA | NA |
| RNU7-19P  | 0,00 | 0,00 | 0,00 | 0,00 | NA | NA |
| RNU7-200P | 0,00 | 0,00 | 0,00 | 0,00 | NA | NA |
| RNU7-20P  | 0,00 | 0,00 | 0,00 | 0,00 | NA | NA |
| RNU7-21P  | 0,00 | 0,00 | 0,00 | 0,00 | NA | NA |
| RNU7-22P  | 0,00 | 0,00 | 0,00 | 0,00 | NA | NA |
| RNU7-23P  | 0,00 | 0,00 | 0,00 | 0,00 | NA | NA |
| RNU7-25P  | 0,00 | 0,00 | 0,00 | 0,00 | NA | NA |
| RNU7-26P  | 0,00 | 0,00 | 0,00 | 0,00 | NA | NA |
| RNU7-27P  | 0,00 | 0,00 | 0,00 | 0,00 | NA | NA |
| RNU7-29P  | 0,00 | 0,00 | 0,00 | 0,00 | NA | NA |
| RNU7-2P   | 0,00 | 0,00 | 0,00 | 0,00 | NA | NA |
| RNU7-34P  | 0,00 | 0,00 | 0,00 | 0,00 | NA | NA |
| RNU7-35P  | 0,00 | 0,00 | 0,00 | 0,00 | NA | NA |
| RNU7-37P  | 0,00 | 0,00 | 0,00 | 0,00 | NA | NA |
| RNU7-38P  | 0,00 | 0,00 | 0,00 | 0,00 | NA | NA |
| RNU7-3P   | 0,00 | 0,00 | 0,00 | 0,00 | NA | NA |
| RNU7-40P  | 0,00 | 0,00 | 0,00 | 0,00 | NA | NA |
| RNU7-43P  | 0,00 | 0,00 | 0,00 | 0,00 | NA | NA |
| RNU7-46P  | 0,00 | 0,00 | 0,00 | 0,00 | NA | NA |
| RNU7-47P  | 0,00 | 0,00 | 0,00 | 0,00 | NA | NA |
| RNU7-48P  | 0,00 | 0,00 | 0,00 | 0,00 | NA | NA |
| RNU7-4P   | 0,00 | 0,00 | 0,00 | 0,00 | NA | NA |
| RNU7-51P  | 0,00 | 0,00 | 0,00 | 0,00 | NA | NA |
| RNU7-52P  | 0,00 | 0,00 | 0,00 | 0,00 | NA | NA |
| RNU7-53P  | 0,00 | 0,00 | 0,00 | 0,00 | NA | NA |
| RNU7-54P  | 0,00 | 0,00 | 0,00 | 0,00 | NA | NA |
| RNU7-55P  | 0,00 | 0,00 | 0,00 | 0,00 | NA | NA |
| RNU7-57P  | 0,00 | 0,00 | 0,00 | 0,00 | NA | NA |
| RNU7-60P  | 0,00 | 0,00 | 0,00 | 0,00 | NA | NA |
| RNU7-61P  | 0,00 | 0,00 | 0,00 | 0,00 | NA | NA |
| RNU7-62P  | 0,00 | 0,00 | 0,00 | 0,00 | NA | NA |
| RNU7-65P  | 0,00 | 0,00 | 0,00 | 0,00 | NA | NA |
| RNU7-66P  | 0,00 | 0,00 | 0,00 | 0,00 | NA | NA |
| RNU7-67P  | 0,00 | 0,00 | 0,00 | 0,00 | NA | NA |
| RNU7-69P  | 0,00 | 0,00 | 0,00 | 0,00 | NA | NA |
| RNU7-6P   | 0,00 | 0,00 | 0,00 | 0,00 | NA | NA |
| RNU7-70P  | 0,00 | 0,00 | 0,00 | 0,00 | NA | NA |
| RNU7-71P  | 0,00 | 0,00 | 0,00 | 0,00 | NA | NA |
| RNU7-74P  | 0,00 | 0,00 | 0,00 | 0,00 | NA | NA |
| RNU7-7P   | 0,00 | 0,00 | 0,00 | 0,00 | NA | NA |
| RNU7-80P  | 0,00 | 0,00 | 0,00 | 0,00 | NA | NA |
| RNU7-81P  | 0,00 | 0,00 | 0,00 | 0,00 | NA | NA |
| RNU7-82P  | 0,00 | 0,00 | 0,00 | 0,00 | NA | NA |
| RNU7-85P  | 0,00 | 0,00 | 0,00 | 0,00 | NA | NA |
| RNU7-87P  | 0,00 | 0,00 | 0,00 | 0,00 | NA | NA |
| RNU7-88P  | 0,00 | 0,00 | 0,00 | 0,00 | NA | NA |
| RNU7-8P   | 0,00 | 0,00 | 0,00 | 0,00 | NA | NA |
| RNU7-90P  | 0,00 | 0,00 | 0,00 | 0,00 | NA | NA |
| RNU7-92P  | 0,00 | 0,00 | 0,00 | 0,00 | NA | NA |
| RNU7-93P  | 0,00 | 0,00 | 0,00 | 0,00 | NA | NA |
| RNU7-94P  | 0,00 | 0,00 | 0,00 | 0,00 | NA | NA |
| RNU7-95P  | 0,00 | 0,00 | 0,00 | 0,00 | NA | NA |
| RNU7-96P  | 0,00 | 0,00 | 0,00 | 0,00 | NA | NA |

|              |      |      |      |      |    |    |
|--------------|------|------|------|------|----|----|
| RNU7-97P     | 0,00 | 0,00 | 0,00 | 0,00 | NA | NA |
| RNU7-99P     | 0,00 | 0,00 | 0,00 | 0,00 | NA | NA |
| RNU7-9P      | 0,00 | 0,00 | 0,00 | 0,00 | NA | NA |
| RNVU1-1      | 0,00 | 0,00 | 0,00 | 0,00 | NA | NA |
| RNVU1-14     | 0,00 | 0,00 | 0,00 | 0,00 | NA | NA |
| RNVU1-17     | 0,00 | 0,00 | 0,00 | 0,00 | NA | NA |
| RNY1P1       | 0,00 | 0,00 | 0,00 | 0,00 | NA | NA |
| RNY1P10      | 0,00 | 0,00 | 0,00 | 0,00 | NA | NA |
| RNY1P2       | 0,00 | 0,00 | 0,00 | 0,00 | NA | NA |
| RNY1P3       | 0,00 | 0,00 | 0,00 | 0,00 | NA | NA |
| RNY1P4       | 0,00 | 0,00 | 0,00 | 0,00 | NA | NA |
| RNY1P5       | 0,00 | 0,00 | 0,00 | 0,00 | NA | NA |
| RNY1P6       | 0,00 | 0,00 | 0,00 | 0,00 | NA | NA |
| RNY1P7       | 0,00 | 0,00 | 0,00 | 0,00 | NA | NA |
| RNY1P8       | 0,00 | 0,00 | 0,00 | 0,00 | NA | NA |
| RNY3P1       | 0,00 | 0,00 | 0,00 | 0,00 | NA | NA |
| RNY3P10      | 0,00 | 0,00 | 0,00 | 0,00 | NA | NA |
| RNY3P12      | 0,00 | 0,00 | 0,00 | 0,00 | NA | NA |
| RNY3P15      | 0,00 | 0,00 | 0,00 | 0,00 | NA | NA |
| RNY3P16      | 0,00 | 0,00 | 0,00 | 0,00 | NA | NA |
| RNY3P3       | 0,00 | 0,00 | 0,00 | 0,00 | NA | NA |
| RNY3P4       | 0,00 | 0,00 | 0,00 | 0,00 | NA | NA |
| RNY3P5       | 0,00 | 0,00 | 0,00 | 0,00 | NA | NA |
| RNY3P7       | 0,00 | 0,00 | 0,00 | 0,00 | NA | NA |
| RNY3P8       | 0,00 | 0,00 | 0,00 | 0,00 | NA | NA |
| RNY3P9       | 0,00 | 0,00 | 0,00 | 0,00 | NA | NA |
| RNY4P13      | 0,00 | 0,00 | 0,00 | 0,00 | NA | NA |
| RNY4P14      | 0,00 | 0,00 | 0,00 | 0,00 | NA | NA |
| RNY4P16      | 0,00 | 0,00 | 0,00 | 0,00 | NA | NA |
| RNY4P17      | 0,00 | 0,00 | 0,00 | 0,00 | NA | NA |
| RNY4P18      | 0,00 | 0,00 | 0,00 | 0,00 | NA | NA |
| RNY4P19      | 0,00 | 0,00 | 0,00 | 0,00 | NA | NA |
| RNY4P20      | 0,00 | 0,00 | 0,00 | 0,00 | NA | NA |
| RNY4P23      | 0,00 | 0,00 | 0,00 | 0,00 | NA | NA |
| RNY4P27      | 0,00 | 0,00 | 0,00 | 0,00 | NA | NA |
| RNY4P28      | 0,00 | 0,00 | 0,00 | 0,00 | NA | NA |
| RNY4P29      | 0,00 | 0,00 | 0,00 | 0,00 | NA | NA |
| RNY4P30      | 0,00 | 0,00 | 0,00 | 0,00 | NA | NA |
| RNY4P36      | 0,00 | 0,00 | 0,00 | 0,00 | NA | NA |
| RNY4P37      | 0,00 | 0,00 | 0,00 | 0,00 | NA | NA |
| RNY4P9       | 0,00 | 0,00 | 0,00 | 0,00 | NA | NA |
| ROBO2        | 0,07 | 0,00 | 0,08 | 0,04 | NA | NA |
| ROPN1B       | 0,00 | 0,00 | 0,00 | 0,00 | NA | NA |
| ROPN1L       | 0,00 | 0,00 | 0,00 | 0,00 | NA | NA |
| RP1          | 0,00 | 0,00 | 0,02 | 0,00 | NA | NA |
| RP1-101G11.2 | 0,00 | 0,00 | 0,00 | 0,00 | NA | NA |
| RP1-101K10.4 | 0,00 | 0,00 | 0,00 | 0,00 | NA | NA |
| RP1-102D24.5 | 0,00 | 0,00 | 0,00 | 0,00 | NA | NA |
| RP1-102E24.1 | 0,00 | 0,00 | 0,00 | 0,00 | NA | NA |
| RP1-102E24.9 | 0,00 | 0,00 | 0,00 | 0,00 | NA | NA |
| RP1-102H19.1 | 0,00 | 0,00 | 0,00 | 0,00 | NA | NA |
| RP1-102K2.8  | 0,00 | 0,00 | 0,00 | 0,00 | NA | NA |
| RP1-104O17.3 | 0,00 | 0,00 | 0,00 | 0,00 | NA | NA |
| RP1-105O18.1 | 0,00 | 0,00 | 0,00 | 0,00 | NA | NA |
| RP1-106C24.1 | 0,00 | 0,00 | 0,00 | 0,00 | NA | NA |



|               |      |      |      |      |    |    |
|---------------|------|------|------|------|----|----|
| RP1-107N3.1   | 0,00 | 0,00 | 0,00 | 0,00 | NA | NA |
| RP1-107N3.2   | 0,00 | 0,00 | 0,00 | 0,00 | NA | NA |
| RP1-108C2.2   | 0,00 | 0,00 | 0,00 | 0,00 | NA | NA |
| RP1-10C16.1   | 0,00 | 0,00 | 0,00 | 0,00 | NA | NA |
| RP1-10C16.2   | 0,00 | 0,00 | 0,00 | 0,00 | NA | NA |
| RP1-111B22.3  | 0,00 | 0,00 | 0,00 | 0,00 | NA | NA |
| RP1-111J24.1  | 0,00 | 0,00 | 0,00 | 0,00 | NA | NA |
| RP1-115K14.2  | 0,00 | 0,00 | 0,00 | 0,00 | NA | NA |
| RP1-117B12.4  | 0,00 | 0,00 | 0,00 | 0,00 | NA | NA |
| RP1-117P20.3  | 0,00 | 0,00 | 0,00 | 0,00 | NA | NA |
| RP1-118J21.24 | 0,00 | 0,00 | 0,00 | 0,00 | NA | NA |
| RP1-118J21.25 | 0,00 | 0,00 | 0,00 | 0,00 | NA | NA |
| RP1-118J21.5  | 0,00 | 0,00 | 0,00 | 0,00 | NA | NA |
| RP1-120G22.11 | 0,00 | 0,00 | 0,00 | 0,00 | NA | NA |
| RP1-122K4.2   | 0,00 | 0,00 | 0,00 | 0,00 | NA | NA |
| RP1-122O8.7   | 0,00 | 0,00 | 0,00 | 0,00 | NA | NA |
| RP1-124C6.1   | 0,00 | 0,00 | 0,00 | 0,00 | NA | NA |
| RP1-124O9.1   | 0,00 | 0,00 | 0,00 | 0,00 | NA | NA |
| RP1-125I3.4   | 0,00 | 0,00 | 0,00 | 0,00 | NA | NA |
| RP1-125I3.7   | 0,00 | 0,00 | 0,00 | 0,00 | NA | NA |
| RP1-125N5.2   | 0,00 | 0,00 | 0,00 | 0,00 | NA | NA |
| RP1-127B20.4  | 0,00 | 0,00 | 0,00 | 0,00 | NA | NA |
| RP1-127H14.3  | 0,00 | 0,00 | 0,00 | 0,00 | NA | NA |
| RP1-127L4.10  | 0,00 | 0,00 | 0,00 | 0,00 | NA | NA |
| RP1-127L4.7   | 0,00 | 0,00 | 0,00 | 0,00 | NA | NA |
| RP1-128M12.1  | 0,00 | 0,00 | 0,00 | 0,00 | NA | NA |
| RP1-128O3.5   | 0,00 | 0,00 | 0,00 | 0,00 | NA | NA |
| RP1-128O3.6   | 0,00 | 0,00 | 0,00 | 0,00 | NA | NA |
| RP1-12G14.5   | 0,00 | 0,00 | 0,00 | 0,00 | NA | NA |
| RP1-131F15.2  | 0,00 | 0,00 | 0,00 | 0,00 | NA | NA |
| RP1-131H7.2   | 0,00 | 0,00 | 0,00 | 0,00 | NA | NA |
| RP1-133P16.1  | 0,00 | 0,00 | 0,00 | 0,00 | NA | NA |
| RP1-134O19.3  | 0,00 | 0,00 | 0,00 | 0,00 | NA | NA |
| RP1-135L22.1  | 0,00 | 0,00 | 0,00 | 0,00 | NA | NA |
| RP1-136B1.1   | 0,00 | 0,00 | 0,00 | 0,00 | NA | NA |
| RP1-136J15.5  | 0,00 | 0,00 | 0,00 | 0,00 | NA | NA |
| RP1-136O14.1  | 0,00 | 0,00 | 0,00 | 0,00 | NA | NA |
| RP1-136O17.1  | 0,00 | 0,00 | 0,00 | 0,00 | NA | NA |
| RP1-137D17.1  | 0,00 | 0,00 | 0,00 | 0,00 | NA | NA |
| RP1-137D17.2  | 0,00 | 0,00 | 0,00 | 0,00 | NA | NA |
| RP1-137H15.2  | 0,00 | 0,00 | 0,00 | 0,00 | NA | NA |
| RP1-138A5.3   | 0,00 | 0,00 | 0,00 | 0,00 | NA | NA |
| RP1-138B7.7   | 0,00 | 0,00 | 0,00 | 0,00 | NA | NA |
| RP1-139G21.4  | 0,00 | 0,00 | 0,00 | 0,00 | NA | NA |
| RP1-13D10.2   | 0,00 | 0,00 | 0,00 | 0,00 | NA | NA |
| RP1-13D10.4   | 0,00 | 0,00 | 0,00 | 0,00 | NA | NA |
| RP1-140J1.1   | 0,00 | 0,00 | 0,00 | 0,00 | NA | NA |
| RP1-140K8.1   | 0,00 | 0,00 | 0,00 | 0,00 | NA | NA |
| RP1-140K8.2   | 0,00 | 0,00 | 0,00 | 0,00 | NA | NA |
| RP1-140K8.3   | 0,00 | 0,00 | 0,00 | 0,00 | NA | NA |
| RP1-140K8.4   | 0,00 | 0,00 | 0,00 | 0,00 | NA | NA |
| RP1-142F18.2  | 0,00 | 0,00 | 0,00 | 0,00 | NA | NA |
| RP1-142L7.8   | 0,00 | 0,00 | 0,00 | 0,00 | NA | NA |
| RP1-142O9.1   | 0,00 | 0,00 | 0,00 | 0,00 | NA | NA |
| RP1-142O9.2   | 0,00 | 0,00 | 0,00 | 0,00 | NA | NA |

|               |      |      |      |      |    |    |
|---------------|------|------|------|------|----|----|
| RP1-144C9.2   | 0,00 | 0,00 | 0,00 | 0,00 | NA | NA |
| RP1-144F13.4  | 0,00 | 0,00 | 0,00 | 0,00 | NA | NA |
| RP1-146A15.1  | 0,00 | 0,00 | 0,00 | 0,00 | NA | NA |
| RP1-146H21.3  | 0,00 | 0,00 | 0,00 | 0,00 | NA | NA |
| RP1-146H21.4  | 0,00 | 0,00 | 0,00 | 0,00 | NA | NA |
| RP1-146I3.1   | 0,00 | 0,00 | 0,00 | 0,00 | NA | NA |
| RP1-148M19.2  | 0,00 | 0,00 | 0,00 | 0,00 | NA | NA |
| RP1-149A16.12 | 0,00 | 0,00 | 0,00 | 0,00 | NA | NA |
| RP1-149L1.1   | 0,00 | 0,00 | 0,00 | 0,00 | NA | NA |
| RP1-149M18.4  | 0,00 | 0,00 | 0,00 | 0,00 | NA | NA |
| RP1-149P10.1  | 0,00 | 0,00 | 0,00 | 0,00 | NA | NA |
| RP1-14D6.7    | 0,00 | 0,00 | 0,00 | 0,00 | NA | NA |
| RP1-150O5.3   | 0,00 | 0,00 | 0,00 | 0,00 | NA | NA |
| RP1-151B14.6  | 0,00 | 0,00 | 0,00 | 0,00 | NA | NA |
| RP1-151B14.9  | 0,00 | 0,00 | 0,00 | 0,00 | NA | NA |
| RP1-151F17.2  | 0,00 | 0,00 | 0,00 | 0,00 | NA | NA |
| RP1-152L7.1   | 0,00 | 0,00 | 0,00 | 0,00 | NA | NA |
| RP1-152L7.3   | 0,00 | 0,00 | 0,00 | 0,00 | NA | NA |
| RP1-152L7.5   | 0,00 | 0,00 | 0,00 | 0,00 | NA | NA |
| RP1-152L7.8   | 0,00 | 0,00 | 0,00 | 0,00 | NA | NA |
| RP1-152L7.9   | 0,00 | 0,00 | 0,00 | 0,00 | NA | NA |
| RP1-153P14.3  | 0,00 | 0,00 | 0,00 | 0,00 | NA | NA |
| RP1-153P14.5  | 0,00 | 0,00 | 0,00 | 0,00 | NA | NA |
| RP1-153P14.7  | 0,00 | 0,00 | 0,00 | 0,00 | NA | NA |
| RP1-153P14.8  | 0,00 | 0,00 | 0,00 | 0,00 | NA | NA |
| RP1-154J13.2  | 0,00 | 0,00 | 0,00 | 0,00 | NA | NA |
| RP1-154J13.3  | 0,00 | 0,00 | 0,00 | 0,00 | NA | NA |
| RP1-154K9.2   | 0,00 | 0,00 | 0,00 | 0,00 | NA | NA |
| RP1-155O2.1   | 0,00 | 0,00 | 0,00 | 0,00 | NA | NA |
| RP1-158I15.1  | 0,00 | 0,00 | 0,00 | 0,00 | NA | NA |
| RP1-158P9.1   | 0,00 | 0,00 | 0,00 | 0,00 | NA | NA |
| RP1-158P9.3   | 0,00 | 0,00 | 0,00 | 0,00 | NA | NA |
| RP1-159A19.3  | 0,00 | 0,00 | 0,00 | 0,00 | NA | NA |
| RP1-159G19.1  | 0,00 | 0,00 | 0,00 | 0,00 | NA | NA |
| RP1-159M24.1  | 0,00 | 0,00 | 0,00 | 0,00 | NA | NA |
| RP1-15D23.2   | 0,00 | 0,00 | 0,00 | 0,00 | NA | NA |
| RP1-15D7.1    | 0,00 | 0,00 | 0,00 | 0,00 | NA | NA |
| RP1-161C16.1  | 0,00 | 0,00 | 0,00 | 0,00 | NA | NA |
| RP1-161P9.5   | 0,00 | 0,00 | 0,00 | 0,00 | NA | NA |
| RP1-163G9.1   | 0,00 | 0,00 | 0,00 | 0,00 | NA | NA |
| RP1-163G9.2   | 0,00 | 0,00 | 0,00 | 0,00 | NA | NA |
| RP1-163M9.5   | 0,00 | 0,35 | 0,00 | 0,00 | NA | NA |
| RP1-164F3.8   | 0,00 | 0,00 | 0,00 | 0,00 | NA | NA |
| RP1-164L12.1  | 0,00 | 0,00 | 0,00 | 0,00 | NA | NA |
| RP1-166H1.2   | 0,00 | 0,00 | 0,00 | 0,00 | NA | NA |
| RP1-167A19.5  | 0,00 | 0,00 | 0,00 | 0,00 | NA | NA |
| RP1-167G20.1  | 0,00 | 0,00 | 0,00 | 0,00 | NA | NA |
| RP1-167G20.2  | 0,00 | 0,00 | 0,00 | 0,00 | NA | NA |
| RP1-168P16.1  | 0,00 | 0,00 | 0,00 | 0,00 | NA | NA |
| RP1-169I5.4   | 0,00 | 0,00 | 0,00 | 0,00 | NA | NA |
| RP1-169K13.1  | 0,00 | 0,00 | 0,00 | 0,00 | NA | NA |
| RP1-169K13.2  | 0,00 | 0,00 | 0,00 | 0,00 | NA | NA |
| RP1-169P22.1  | 0,00 | 0,00 | 0,00 | 0,00 | NA | NA |
| RP1-169P22.2  | 0,00 | 0,00 | 0,00 | 0,00 | NA | NA |
| RP1-16A9.1    | 0,00 | 0,00 | 0,00 | 0,00 | NA | NA |

|               |      |      |      |      |    |    |
|---------------|------|------|------|------|----|----|
| RP1-170B16.1  | 0,00 | 0,00 | 0,00 | 0,00 | NA | NA |
| RP1-170O19.14 | 0,00 | 0,00 | 0,00 | 0,00 | NA | NA |
| RP1-170O19.16 | 0,00 | 0,00 | 0,00 | 0,00 | NA | NA |
| RP1-170O19.17 | 0,00 | 0,00 | 0,00 | 0,00 | NA | NA |
| RP1-170O19.22 | 0,00 | 0,00 | 0,00 | 0,00 | NA | NA |
| RP1-170O19.23 | 0,00 | 0,00 | 0,00 | 0,00 | NA | NA |
| RP1-170O19.24 | 0,00 | 0,00 | 0,00 | 0,00 | NA | NA |
| RP1-171K16.5  | 0,00 | 0,00 | 0,00 | 0,00 | NA | NA |
| RP1-172B20.6  | 0,00 | 0,00 | 0,00 | 0,00 | NA | NA |
| RP1-172H20.4  | 0,00 | 0,00 | 0,00 | 0,00 | NA | NA |
| RP1-172N19.1  | 0,00 | 0,00 | 0,00 | 0,00 | NA | NA |
| RP1-172N19.4  | 0,00 | 0,00 | 0,00 | 0,00 | NA | NA |
| RP1-172N19.5  | 0,00 | 0,00 | 0,00 | 0,00 | NA | NA |
| RP1-177A13.1  | 0,00 | 0,00 | 0,00 | 0,00 | NA | NA |
| RP1-177I10.1  | 0,00 | 0,00 | 0,00 | 0,00 | NA | NA |
| RP1-17K7.1    | 0,00 | 0,00 | 0,00 | 0,00 | NA | NA |
| RP1-17K7.3    | 0,00 | 0,00 | 0,00 | 0,00 | NA | NA |
| RP1-181C9.2   | 0,00 | 0,00 | 0,00 | 0,00 | NA | NA |
| RP1-181J22.1  | 0,00 | 0,00 | 0,00 | 0,00 | NA | NA |
| RP1-182D15.2  | 0,00 | 0,00 | 0,00 | 0,00 | NA | NA |
| RP1-186E20.1  | 0,00 | 0,00 | 0,00 | 0,00 | NA | NA |
| RP1-186E20.2  | 0,00 | 0,00 | 0,00 | 0,00 | NA | NA |
| RP1-188K17.2  | 0,00 | 0,00 | 0,00 | 0,00 | NA | NA |
| RP1-18D14.2   | 0,00 | 0,00 | 0,00 | 0,00 | NA | NA |
| RP1-18D14.4   | 0,00 | 0,00 | 0,00 | 0,00 | NA | NA |
| RP1-18D14.7   | 0,00 | 0,00 | 0,00 | 0,00 | NA | NA |
| RP1-191J18.2  | 0,00 | 0,48 | 0,00 | 0,00 | NA | NA |
| RP1-191J18.3  | 0,00 | 0,00 | 0,00 | 0,00 | NA | NA |
| RP1-191L6.2   | 0,00 | 0,00 | 0,00 | 0,00 | NA | NA |
| RP1-192P9.1   | 0,00 | 0,00 | 0,00 | 0,00 | NA | NA |
| RP1-193M11.1  | 0,00 | 0,00 | 0,00 | 0,00 | NA | NA |
| RP1-196A12.1  | 0,00 | 0,00 | 0,00 | 0,00 | NA | NA |
| RP1-197J16.1  | 0,00 | 0,00 | 0,00 | 0,00 | NA | NA |
| RP1-197L1.1   | 0,00 | 0,00 | 0,00 | 0,00 | NA | NA |
| RP1-197O17.2  | 0,00 | 0,00 | 0,00 | 0,00 | NA | NA |
| RP1-197O17.3  | 0,00 | 0,00 | 0,00 | 0,00 | NA | NA |
| RP1-198G23.1  | 0,00 | 0,00 | 0,00 | 0,00 | NA | NA |
| RP1-198G23.2  | 0,00 | 0,00 | 0,00 | 0,00 | NA | NA |
| RP1-198K11.3  | 0,00 | 0,00 | 0,00 | 0,00 | NA | NA |
| RP1-198K11.5  | 0,00 | 0,00 | 0,00 | 0,00 | NA | NA |
| RP1-199H16.6  | 0,00 | 0,00 | 0,00 | 0,00 | NA | NA |
| RP1-199J3.6   | 0,00 | 0,00 | 0,00 | 0,00 | NA | NA |
| RP1-199J3.7   | 0,00 | 0,00 | 0,00 | 0,00 | NA | NA |
| RP1-199L16.1  | 0,00 | 0,00 | 0,00 | 0,00 | NA | NA |
| RP1-19N1.1    | 0,00 | 0,00 | 0,00 | 0,00 | NA | NA |
| RP1-200G19.1  | 0,00 | 0,00 | 0,00 | 0,00 | NA | NA |
| RP1-200K18.1  | 0,00 | 0,00 | 0,00 | 0,00 | NA | NA |
| RP1-202I21.3  | 0,00 | 0,00 | 0,00 | 0,00 | NA | NA |
| RP1-203C2.2   | 0,00 | 0,00 | 0,00 | 0,00 | NA | NA |
| RP1-203C2.3   | 0,00 | 0,00 | 0,00 | 0,00 | NA | NA |
| RP1-203C2.4   | 0,00 | 0,00 | 0,00 | 0,00 | NA | NA |
| RP1-203P18.1  | 0,00 | 0,00 | 0,00 | 0,00 | NA | NA |
| RP1-205F14P.1 | 0,00 | 0,00 | 0,00 | 0,00 | NA | NA |
| RP1-206D15.5  | 0,00 | 0,00 | 0,00 | 0,00 | NA | NA |
| RP1-207H1.2   | 0,00 | 0,00 | 0,00 | 0,00 | NA | NA |

|                |      |      |      |      |    |    |
|----------------|------|------|------|------|----|----|
| RP1-207H1.3    | 0,00 | 0,00 | 0,00 | 0,00 | NA | NA |
| RP1-209B9.2    | 0,00 | 0,00 | 0,00 | 0,00 | NA | NA |
| RP1-20B11.2    | 0,31 | 0,00 | 0,75 | 0,00 | NA | NA |
| RP1-20I3.3     | 0,00 | 0,00 | 0,00 | 0,00 | NA | NA |
| RP1-20J23.1    | 0,00 | 0,00 | 0,00 | 0,00 | NA | NA |
| RP1-20N18.10   | 0,00 | 0,00 | 0,00 | 0,00 | NA | NA |
| RP1-20N18.4    | 0,00 | 0,00 | 0,00 | 0,00 | NA | NA |
| RP1-20N18.6    | 0,00 | 0,00 | 0,00 | 0,00 | NA | NA |
| RP1-20N2.7     | 0,00 | 0,00 | 0,00 | 0,00 | NA | NA |
| RP1-20N4.1     | 0,00 | 0,00 | 0,00 | 0,00 | NA | NA |
| RP1-212G6.4    | 0,00 | 0,00 | 0,00 | 0,00 | NA | NA |
| RP1-212P9.3    | 0,00 | 0,00 | 0,00 | 0,00 | NA | NA |
| RP1-213J1P_B.2 | 0,00 | 0,00 | 0,00 | 0,00 | NA | NA |
| RP1-215K18.4   | 0,00 | 0,00 | 0,00 | 0,00 | NA | NA |
| RP1-21K4.1     | 0,00 | 0,00 | 0,00 | 0,00 | NA | NA |
| RP1-21P18.1    | 0,00 | 0,00 | 0,00 | 0,00 | NA | NA |
| RP1-223B1.1    | 0,00 | 0,00 | 0,00 | 0,00 | NA | NA |
| RP1-223D17.1   | 0,00 | 0,00 | 0,00 | 0,00 | NA | NA |
| RP1-223E5.4    | 0,00 | 0,00 | 0,00 | 0,00 | NA | NA |
| RP1-223H12.4   | 0,00 | 0,00 | 0,00 | 0,00 | NA | NA |
| RP1-224A6.3    | 0,00 | 0,00 | 0,00 | 0,00 | NA | NA |
| RP1-225D2.1    | 0,00 | 0,00 | 0,00 | 0,00 | NA | NA |
| RP1-225E12.3   | 0,00 | 0,00 | 0,00 | 0,00 | NA | NA |
| RP1-225L15.1   | 0,00 | 0,00 | 0,00 | 0,00 | NA | NA |
| RP1-228H13.1   | 0,00 | 0,00 | 0,00 | 0,00 | NA | NA |
| RP1-228H13.6   | 0,00 | 0,00 | 0,00 | 0,00 | NA | NA |
| RP1-228J4.1    | 0,00 | 0,00 | 0,00 | 0,00 | NA | NA |
| RP1-228P16.1   | 0,00 | 0,00 | 0,00 | 0,00 | NA | NA |
| RP1-228P16.5   | 0,00 | 0,00 | 0,00 | 0,00 | NA | NA |
| RP1-22N22.1    | 0,00 | 0,00 | 0,00 | 0,00 | NA | NA |
| RP1-230G1.4    | 0,00 | 0,00 | 0,00 | 0,00 | NA | NA |
| RP1-230G1.7    | 0,00 | 0,00 | 0,00 | 0,00 | NA | NA |
| RP1-230L10.1   | 0,00 | 0,00 | 0,00 | 0,00 | NA | NA |
| RP1-231L4.2    | 0,00 | 0,00 | 0,00 | 0,00 | NA | NA |
| RP1-232L22_A.1 | 0,00 | 0,00 | 0,00 | 0,00 | NA | NA |
| RP1-232L24.2   | 0,00 | 0,00 | 0,00 | 0,00 | NA | NA |
| RP1-232L24.3   | 0,00 | 0,00 | 0,00 | 0,00 | NA | NA |
| RP1-232L24.4   | 0,00 | 0,00 | 0,00 | 0,00 | NA | NA |
| RP1-232N11.2   | 0,00 | 0,00 | 0,00 | 0,00 | NA | NA |
| RP1-236J16.1   | 0,00 | 0,00 | 0,00 | 0,00 | NA | NA |
| RP1-239B22.4   | 0,00 | 0,00 | 0,00 | 0,00 | NA | NA |
| RP1-23E21.1    | 0,00 | 0,00 | 0,00 | 0,00 | NA | NA |
| RP1-23K20.2    | 0,00 | 0,00 | 0,00 | 0,00 | NA | NA |
| RP1-23O21.1    | 0,00 | 0,00 | 0,00 | 0,00 | NA | NA |
| RP1-240B8.3    | 0,00 | 0,00 | 0,00 | 0,00 | NA | NA |
| RP1-241P17.1   | 0,00 | 0,00 | 0,00 | 0,00 | NA | NA |
| RP1-241P17.4   | 0,00 | 0,00 | 0,00 | 0,00 | NA | NA |
| RP1-241P17.7   | 0,00 | 0,00 | 0,00 | 0,00 | NA | NA |
| RP1-242N11.1   | 0,00 | 0,00 | 0,00 | 0,00 | NA | NA |
| RP1-244F1.1    | 0,00 | 0,00 | 0,00 | 0,00 | NA | NA |
| RP1-244F1.2    | 0,00 | 0,00 | 0,00 | 0,00 | NA | NA |
| RP1-245M18.2   | 0,00 | 0,00 | 0,00 | 0,00 | NA | NA |
| RP1-248E1.2    | 0,00 | 0,00 | 0,00 | 0,00 | NA | NA |
| RP1-249C1.1    | 0,00 | 0,00 | 0,00 | 0,00 | NA | NA |
| RP1-249F5.3    | 0,00 | 0,00 | 0,00 | 0,00 | NA | NA |

|              |      |      |      |      |    |    |
|--------------|------|------|------|------|----|----|
| RP1-249H1.2  | 0,00 | 0,00 | 0,00 | 0,00 | NA | NA |
| RP1-249H1.3  | 0,00 | 0,00 | 0,00 | 0,00 | NA | NA |
| RP1-24O22.3  | 0,00 | 0,00 | 0,00 | 0,00 | NA | NA |
| RP1-24O22.5  | 0,00 | 0,00 | 0,00 | 0,00 | NA | NA |
| RP1-251I12.1 | 0,00 | 0,00 | 0,00 | 0,00 | NA | NA |
| RP1-251M9.2  | 0,00 | 0,00 | 0,00 | 0,00 | NA | NA |
| RP1-251M9.3  | 0,00 | 0,00 | 0,00 | 0,00 | NA | NA |
| RP1-253B10.1 | 0,00 | 0,00 | 0,00 | 0,00 | NA | NA |
| RP1-253B10.2 | 0,00 | 0,00 | 0,00 | 0,00 | NA | NA |
| RP1-253P7.1  | 0,00 | 0,00 | 0,00 | 0,00 | NA | NA |
| RP1-254P11.1 | 0,00 | 0,00 | 0,00 | 0,00 | NA | NA |
| RP1-257A15.1 | 0,00 | 0,00 | 0,00 | 0,00 | NA | NA |
| RP1-257I9.2  | 0,00 | 0,00 | 0,00 | 0,00 | NA | NA |
| RP1-258N20.3 | 0,00 | 0,00 | 0,00 | 0,00 | NA | NA |
| RP1-261G23.4 | 0,00 | 0,00 | 0,00 | 0,00 | NA | NA |
| RP1-261G23.5 | 0,00 | 0,00 | 0,00 | 0,00 | NA | NA |
| RP1-262D12.1 | 0,00 | 0,00 | 0,00 | 0,00 | NA | NA |
| RP1-263J7.1  | 0,00 | 0,00 | 0,00 | 0,00 | NA | NA |
| RP1-265C24.5 | 0,00 | 0,00 | 0,00 | 0,00 | NA | NA |
| RP1-266L20.2 | 0,00 | 0,96 | 1,43 | 0,00 | NA | NA |
| RP1-266L20.4 | 0,00 | 0,00 | 0,47 | 0,00 | NA | NA |
| RP1-267D11.1 | 0,00 | 0,00 | 0,00 | 0,00 | NA | NA |
| RP1-267M5.1  | 0,00 | 0,00 | 0,00 | 0,00 | NA | NA |
| RP1-267M5.2  | 0,00 | 0,00 | 0,00 | 0,00 | NA | NA |
| RP1-267M5.3  | 0,00 | 0,00 | 0,00 | 0,00 | NA | NA |
| RP1-269M15.3 | 0,00 | 0,00 | 0,00 | 0,00 | NA | NA |
| RP1-269O5.3  | 0,00 | 0,00 | 0,00 | 0,00 | NA | NA |
| RP1-272E8.2  | 0,00 | 0,00 | 0,00 | 0,00 | NA | NA |
| RP1-272J12.1 | 0,00 | 0,00 | 0,00 | 0,00 | NA | NA |
| RP1-272L16.1 | 0,00 | 0,00 | 0,00 | 0,00 | NA | NA |
| RP1-273G13.2 | 0,00 | 0,00 | 0,00 | 0,00 | NA | NA |
| RP1-273P12.1 | 0,00 | 0,00 | 0,00 | 0,00 | NA | NA |
| RP1-274L14.2 | 0,00 | 0,00 | 0,00 | 0,00 | NA | NA |
| RP1-274L7.3  | 0,00 | 0,00 | 0,00 | 0,00 | NA | NA |
| RP1-276E15.1 | 0,00 | 0,00 | 0,00 | 0,00 | NA | NA |
| RP1-276J11.2 | 0,00 | 0,00 | 0,00 | 0,00 | NA | NA |
| RP1-276J11.3 | 0,00 | 0,00 | 0,00 | 0,00 | NA | NA |
| RP1-276N6.2  | 0,00 | 0,00 | 0,00 | 0,00 | NA | NA |
| RP1-278C19.8 | 0,00 | 0,00 | 0,00 | 0,00 | NA | NA |
| RP1-278D1.2  | 0,00 | 0,00 | 0,00 | 0,00 | NA | NA |
| RP1-278E11.5 | 0,00 | 0,00 | 0,00 | 0,00 | NA | NA |
| RP1-278O22.1 | 0,00 | 0,00 | 0,00 | 0,00 | NA | NA |
| RP1-278O22.2 | 0,00 | 0,00 | 0,00 | 0,00 | NA | NA |
| RP1-279N11.1 | 0,00 | 0,00 | 0,00 | 0,00 | NA | NA |
| RP1-27C22.1  | 0,00 | 0,00 | 0,00 | 0,00 | NA | NA |
| RP1-281E18.1 | 0,00 | 0,00 | 0,00 | 0,00 | NA | NA |
| RP1-283K11.2 | 0,00 | 0,00 | 0,00 | 0,00 | NA | NA |
| RP1-283K11.3 | 0,00 | 0,00 | 0,00 | 0,00 | NA | NA |
| RP1-286D6.5  | 0,00 | 0,00 | 0,00 | 0,00 | NA | NA |
| RP1-288L1.4  | 0,00 | 0,00 | 0,00 | 0,00 | NA | NA |
| RP1-288L1.5  | 0,00 | 0,00 | 0,00 | 0,00 | NA | NA |
| RP1-288M22.1 | 0,00 | 0,00 | 0,00 | 0,00 | NA | NA |
| RP1-288M22.2 | 0,00 | 0,00 | 0,00 | 0,00 | NA | NA |
| RP1-28C20.1  | 0,00 | 0,00 | 0,00 | 0,00 | NA | NA |
| RP1-28H20.3  | 0,00 | 0,00 | 0,00 | 0,00 | NA | NA |

|               |      |      |      |      |    |    |
|---------------|------|------|------|------|----|----|
| RP1-28O17.1   | 0,00 | 0,00 | 0,00 | 0,00 | NA | NA |
| RP1-290B4.1   | 0,00 | 0,00 | 0,00 | 0,00 | NA | NA |
| RP1-290C9.2   | 0,00 | 0,00 | 0,00 | 0,00 | NA | NA |
| RP1-290I10.2  | 0,00 | 0,00 | 0,00 | 0,00 | NA | NA |
| RP1-290I10.3  | 0,00 | 0,00 | 0,00 | 0,00 | NA | NA |
| RP1-290I10.4  | 0,00 | 0,00 | 0,00 | 0,00 | NA | NA |
| RP1-290I10.5  | 0,00 | 0,00 | 0,00 | 0,00 | NA | NA |
| RP1-290I10.6  | 0,00 | 0,00 | 0,00 | 0,00 | NA | NA |
| RP1-292B18.1  | 0,00 | 0,00 | 0,00 | 0,00 | NA | NA |
| RP1-292B18.4  | 0,00 | 0,00 | 0,00 | 0,00 | NA | NA |
| RP1-292L20.2  | 0,00 | 0,00 | 0,00 | 0,00 | NA | NA |
| RP1-293L6.1   | 0,00 | 0,00 | 0,00 | 0,00 | NA | NA |
| RP1-293L8.2   | 0,00 | 0,00 | 0,00 | 0,00 | NA | NA |
| RP1-296L11.1  | 0,00 | 0,00 | 0,00 | 0,00 | NA | NA |
| RP1-298M8.1   | 0,00 | 0,00 | 0,00 | 0,00 | NA | NA |
| RP1-29G21.1   | 0,00 | 0,00 | 0,00 | 0,00 | NA | NA |
| RP1-29I24.2   | 0,00 | 0,00 | 0,00 | 0,00 | NA | NA |
| RP1-29K1.4    | 0,00 | 0,00 | 0,00 | 0,00 | NA | NA |
| RP1-300I2.2   | 0,00 | 0,00 | 0,00 | 0,00 | NA | NA |
| RP1-300I2.3   | 0,00 | 0,00 | 0,00 | 0,00 | NA | NA |
| RP1-302D9.1   | 0,00 | 0,00 | 0,00 | 0,00 | NA | NA |
| RP1-302D9.2   | 0,00 | 0,00 | 0,00 | 0,00 | NA | NA |
| RP1-302D9.3   | 0,00 | 0,00 | 0,00 | 0,00 | NA | NA |
| RP1-302D9.5   | 0,00 | 0,00 | 0,00 | 0,00 | NA | NA |
| RP1-303A1.1   | 0,00 | 0,00 | 0,00 | 0,00 | NA | NA |
| RP1-305B16.3  | 0,00 | 0,00 | 0,00 | 0,00 | NA | NA |
| RP1-305G21.1  | 0,00 | 0,00 | 0,00 | 0,00 | NA | NA |
| RP1-309F20.4  | 0,00 | 0,00 | 0,00 | 0,00 | NA | NA |
| RP1-309H15.2  | 0,00 | 0,00 | 0,00 | 0,00 | NA | NA |
| RP1-309K20.6  | 0,00 | 0,00 | 0,00 | 0,00 | NA | NA |
| RP1-30E17.1   | 0,00 | 0,00 | 0,00 | 0,00 | NA | NA |
| RP1-30E17.2   | 0,00 | 0,00 | 0,00 | 0,00 | NA | NA |
| RP1-30G7.2    | 0,00 | 0,00 | 0,00 | 0,00 | NA | NA |
| RP1-30P20.1   | 0,00 | 0,00 | 0,00 | 0,00 | NA | NA |
| RP1-310O13.13 | 0,00 | 0,00 | 0,00 | 0,00 | NA | NA |
| RP1-310P5.1   | 0,00 | 0,00 | 0,00 | 0,00 | NA | NA |
| RP1-313L4.4   | 0,00 | 0,00 | 0,00 | 0,00 | NA | NA |
| RP1-317E23.6  | 0,00 | 0,00 | 0,00 | 0,00 | NA | NA |
| RP1-317E23.7  | 0,00 | 0,00 | 0,00 | 0,00 | NA | NA |
| RP1-31B8.1    | 0,00 | 0,00 | 0,00 | 0,00 | NA | NA |
| RP1-320J15.3  | 0,00 | 0,00 | 0,00 | 0,00 | NA | NA |
| RP1-321E8.5   | 0,00 | 0,00 | 0,00 | 0,00 | NA | NA |
| RP1-32I10.11  | 0,00 | 0,00 | 0,00 | 0,00 | NA | NA |
| RP1-34B20.19  | 0,00 | 0,00 | 0,00 | 0,00 | NA | NA |
| RP1-34B20.4   | 0,00 | 0,00 | 0,00 | 0,00 | NA | NA |
| RP1-34M23.5   | 0,00 | 0,00 | 0,00 | 0,00 | NA | NA |
| RP1-34P24.2   | 0,00 | 0,00 | 0,00 | 0,00 | NA | NA |
| RP1-34P24.3   | 0,00 | 0,00 | 0,00 | 0,00 | NA | NA |
| RP1-35C21.1   | 0,00 | 0,00 | 0,00 | 0,00 | NA | NA |
| RP1-35C21.2   | 0,00 | 0,00 | 0,00 | 0,00 | NA | NA |
| RP1-37J18.1   | 0,00 | 0,00 | 0,00 | 0,00 | NA | NA |
| RP1-37J18.2   | 0,00 | 0,00 | 0,00 | 0,00 | NA | NA |
| RP1-37N7.2    | 0,00 | 0,00 | 0,00 | 0,00 | NA | NA |
| RP1-37N7.5    | 0,00 | 0,00 | 0,00 | 0,00 | NA | NA |
| RP1-37N7.6    | 0,00 | 0,00 | 0,00 | 0,00 | NA | NA |

|             |      |      |      |      |    |    |
|-------------|------|------|------|------|----|----|
| RP1-37N7.7  | 0,00 | 0,00 | 0,00 | 0,00 | NA | NA |
| RP1-39J2.1  | 0,00 | 0,00 | 0,00 | 0,00 | NA | NA |
| RP1-3D11.1  | 0,00 | 0,00 | 0,00 | 0,00 | NA | NA |
| RP1-3D11.2  | 0,00 | 0,00 | 0,00 | 0,00 | NA | NA |
| RP1-3E10.2  | 0,00 | 0,00 | 0,00 | 0,00 | NA | NA |
| RP1-40E16.4 | 0,00 | 0,00 | 0,00 | 0,00 | NA | NA |
| RP1-40E16.9 | 0,00 | 0,00 | 0,00 | 0,00 | NA | NA |
| RP1-41C23.4 | 0,00 | 0,00 | 0,00 | 0,00 | NA | NA |
| RP1-41P2.6  | 0,00 | 0,00 | 0,00 | 0,00 | NA | NA |
| RP1-43O17.1 | 0,00 | 0,00 | 0,00 | 0,00 | NA | NA |
| RP1-44A20.4 | 0,00 | 0,00 | 0,00 | 0,00 | NA | NA |
| RP1-45I14.1 | 0,00 | 0,00 | 0,00 | 0,00 | NA | NA |
| RP1-45I4.3  | 0,00 | 0,00 | 0,00 | 0,00 | NA | NA |
| RP1-46F2.2  | 0,00 | 0,00 | 0,00 | 0,00 | NA | NA |
| RP1-47A17.1 | 0,00 | 0,00 | 0,00 | 0,00 | NA | NA |
| RP1-47M23.3 | 0,00 | 0,05 | 0,00 | 0,09 | NA | NA |
| RP1-48J14.1 | 0,00 | 0,00 | 0,00 | 0,00 | NA | NA |
| RP1-49C23.1 | 0,00 | 0,00 | 0,00 | 0,00 | NA | NA |
| RP1-4G17.2  | 0,00 | 0,00 | 0,00 | 0,00 | NA | NA |
| RP1-4G17.5  | 0,00 | 0,00 | 0,00 | 0,00 | NA | NA |
| RP1-50A13.1 | 0,00 | 0,00 | 0,00 | 0,00 | NA | NA |
| RP1-50J22.4 | 0,00 | 0,00 | 0,00 | 0,00 | NA | NA |
| RP1-52D1.1  | 0,00 | 0,00 | 0,00 | 0,00 | NA | NA |
| RP1-52J10.9 | 0,00 | 0,00 | 0,00 | 0,00 | NA | NA |
| RP1-53C18.2 | 0,00 | 0,00 | 0,00 | 0,00 | NA | NA |
| RP1-53C18.3 | 0,00 | 0,00 | 0,00 | 0,00 | NA | NA |
| RP1-53O8.1  | 0,00 | 0,00 | 0,00 | 0,00 | NA | NA |
| RP1-53O8.2  | 0,00 | 0,00 | 0,00 | 0,00 | NA | NA |
| RP1-54B20.7 | 0,00 | 0,00 | 0,00 | 0,00 | NA | NA |
| RP1-54G6.1  | 0,00 | 0,00 | 0,00 | 0,00 | NA | NA |
| RP1-55C23.4 | 0,00 | 0,00 | 0,00 | 0,00 | NA | NA |
| RP1-55C23.5 | 0,00 | 0,00 | 0,00 | 0,00 | NA | NA |
| RP1-56K13.6 | 0,00 | 0,00 | 0,00 | 0,00 | NA | NA |
| RP1-56L9.6  | 0,00 | 0,00 | 0,00 | 0,00 | NA | NA |
| RP1-57E3.1  | 0,00 | 0,00 | 0,00 | 0,00 | NA | NA |
| RP1-58B11.1 | 0,00 | 0,00 | 0,00 | 0,00 | NA | NA |
| RP1-58B11.3 | 0,00 | 0,00 | 0,00 | 0,00 | NA | NA |
| RP1-59M18.2 | 0,00 | 0,00 | 0,00 | 0,00 | NA | NA |
| RP1-60G11.1 | 0,00 | 0,00 | 0,00 | 0,00 | NA | NA |
| RP1-60N8.2  | 0,00 | 0,00 | 0,00 | 0,00 | NA | NA |
| RP1-60O19.1 | 0,27 | 0,00 | 0,14 | 0,56 | NA | NA |
| RP1-61A9.4  | 0,00 | 0,00 | 0,00 | 0,00 | NA | NA |
| RP1-62D2.4  | 0,00 | 0,00 | 0,00 | 0,00 | NA | NA |
| RP1-63G5.5  | 0,00 | 0,00 | 0,00 | 0,00 | NA | NA |
| RP1-63G5.7  | 0,00 | 0,00 | 0,00 | 0,00 | NA | NA |
| RP1-63G5.8  | 0,00 | 0,00 | 0,00 | 0,00 | NA | NA |
| RP1-63M2.5  | 0,00 | 0,00 | 0,00 | 0,00 | NA | NA |
| RP1-63P18.2 | 0,00 | 0,00 | 0,00 | 0,00 | NA | NA |
| RP1-65P5.4  | 0,00 | 0,00 | 0,00 | 0,00 | NA | NA |
| RP1-65P5.6  | 0,00 | 0,00 | 0,00 | 0,00 | NA | NA |
| RP1-66C13.1 | 0,00 | 0,00 | 0,00 | 0,00 | NA | NA |
| RP1-66C13.2 | 0,00 | 0,00 | 0,00 | 0,00 | NA | NA |
| RP1-66C13.3 | 0,00 | 0,00 | 0,00 | 0,00 | NA | NA |
| RP1-66C13.4 | 0,00 | 0,00 | 0,00 | 0,00 | NA | NA |
| RP1-66H9.1  | 0,00 | 0,00 | 0,00 | 0,00 | NA | NA |

|              |      |      |      |      |    |    |
|--------------|------|------|------|------|----|----|
| RP1-66N13.1  | 0,00 | 0,00 | 0,00 | 0,00 | NA | NA |
| RP1-66N13.3  | 0,00 | 0,04 | 0,02 | 0,00 | NA | NA |
| RP1-66N13.4  | 0,00 | 0,00 | 0,00 | 0,00 | NA | NA |
| RP1-67A8.3   | 0,00 | 0,00 | 0,00 | 0,00 | NA | NA |
| RP1-67K17.3  | 0,00 | 0,00 | 0,00 | 0,00 | NA | NA |
| RP1-68D18.3  | 0,00 | 0,00 | 0,00 | 0,00 | NA | NA |
| RP1-69B13.2  | 0,00 | 0,00 | 0,00 | 0,00 | NA | NA |
| RP1-69D17.3  | 0,00 | 0,00 | 0,00 | 0,00 | NA | NA |
| RP1-69D17.4  | 0,00 | 0,00 | 0,00 | 0,00 | NA | NA |
| RP1-69E11.2  | 0,00 | 0,00 | 0,00 | 0,00 | NA | NA |
| RP1-6P5.1    | 0,00 | 0,00 | 0,00 | 0,00 | NA | NA |
| RP1-6P5.2    | 0,00 | 0,00 | 0,00 | 0,00 | NA | NA |
| RP1-71H24.4  | 0,00 | 0,00 | 0,00 | 0,00 | NA | NA |
| RP1-71L16.3  | 0,00 | 0,00 | 0,00 | 0,00 | NA | NA |
| RP1-71L16.9  | 0,00 | 0,00 | 0,00 | 0,00 | NA | NA |
| RP1-72A23.1  | 0,00 | 0,00 | 0,00 | 0,00 | NA | NA |
| RP1-72A23.4  | 0,00 | 0,00 | 0,00 | 0,00 | NA | NA |
| RP1-72E17.2  | 0,00 | 0,00 | 0,00 | 0,00 | NA | NA |
| RP1-73A14.1  | 0,00 | 0,00 | 0,00 | 0,00 | NA | NA |
| RP1-75H8.3   | 0,00 | 0,00 | 0,00 | 0,00 | NA | NA |
| RP1-76B20.12 | 0,00 | 0,00 | 0,00 | 0,00 | NA | NA |
| RP1-78O14.1  | 1,43 | 3,50 | 1,10 | 2,13 | NA | NA |
| RP1-79C4.4   | 0,00 | 0,00 | 0,00 | 0,00 | NA | NA |
| RP1-80N2.2   | 0,00 | 0,00 | 0,00 | 0,00 | NA | NA |
| RP1-80N2.4   | 0,00 | 0,00 | 0,00 | 0,00 | NA | NA |
| RP1-81D8.4   | 0,00 | 0,00 | 0,00 | 0,00 | NA | NA |
| RP1-81D8.5   | 0,00 | 0,00 | 0,00 | 0,00 | NA | NA |
| RP1-81D8.6   | 0,00 | 0,00 | 0,00 | 0,00 | NA | NA |
| RP1-81F6.2   | 0,00 | 0,00 | 0,00 | 0,00 | NA | NA |
| RP1-81P11.1  | 0,00 | 0,00 | 0,00 | 0,00 | NA | NA |
| RP1-83M4.2   | 0,00 | 0,00 | 0,00 | 0,00 | NA | NA |
| RP1-84O15.2  | 0,00 | 0,00 | 0,00 | 0,00 | NA | NA |
| RP1-85D24.1  | 0,00 | 0,00 | 0,00 | 0,00 | NA | NA |
| RP1-85D24.2  | 0,00 | 0,00 | 0,00 | 0,00 | NA | NA |
| RP1-85D24.3  | 0,00 | 0,00 | 0,00 | 0,00 | NA | NA |
| RP1-85D24.4  | 0,00 | 0,00 | 0,00 | 0,00 | NA | NA |
| RP1-85D24.5  | 0,00 | 0,00 | 0,00 | 0,00 | NA | NA |
| RP1-8B22.1   | 0,00 | 0,00 | 0,00 | 0,00 | NA | NA |
| RP1-8B22.2   | 0,00 | 0,00 | 0,00 | 0,00 | NA | NA |
| RP1-8N8.10   | 0,00 | 0,00 | 0,00 | 0,00 | NA | NA |
| RP1-8N8.11   | 0,00 | 0,00 | 0,00 | 0,00 | NA | NA |
| RP1-90G24.10 | 0,00 | 0,00 | 0,00 | 0,00 | NA | NA |
| RP1-90G24.8  | 0,00 | 0,00 | 0,00 | 0,00 | NA | NA |
| RP1-90J20.10 | 0,00 | 0,00 | 0,00 | 0,00 | NA | NA |
| RP1-90J20.14 | 0,00 | 0,00 | 0,00 | 0,00 | NA | NA |
| RP1-90J20.2  | 0,00 | 0,00 | 0,00 | 0,00 | NA | NA |
| RP1-90J20.7  | 0,34 | 0,10 | 0,44 | 0,32 | NA | NA |
| RP1-90J20.8  | 0,00 | 0,00 | 0,00 | 0,00 | NA | NA |
| RP1-90J4.2   | 0,00 | 0,00 | 0,00 | 0,00 | NA | NA |
| RP1-90J4.3   | 0,00 | 0,00 | 0,00 | 0,00 | NA | NA |
| RP1-90K10.4  | 0,00 | 0,00 | 0,00 | 0,00 | NA | NA |
| RP1-90L14.1  | 0,00 | 0,00 | 0,00 | 0,00 | NA | NA |
| RP1-90L6.3   | 0,00 | 0,00 | 0,00 | 0,00 | NA | NA |
| RP1-91G5.1   | 0,00 | 0,00 | 0,00 | 0,00 | NA | NA |
| RP1-91N13.1  | 0,00 | 0,00 | 0,00 | 0,00 | NA | NA |



|                |      |      |      |      |    |    |
|----------------|------|------|------|------|----|----|
| RP1-92C4.2     | 0,00 | 0,00 | 0,00 | 0,00 | NA | NA |
| RP1-92C8.3     | 0,00 | 0,00 | 0,00 | 0,00 | NA | NA |
| RP1-93C23.1    | 0,00 | 0,00 | 0,00 | 0,00 | NA | NA |
| RP1-93H18.3    | 0,00 | 0,00 | 0,00 | 0,00 | NA | NA |
| RP1-93H18.4    | 0,00 | 0,00 | 0,00 | 0,00 | NA | NA |
| RP1-93H18.6    | 0,00 | 0,00 | 0,00 | 0,00 | NA | NA |
| RP1-93L7.3     | 0,00 | 0,00 | 0,00 | 0,00 | NA | NA |
| RP1-93L7.4     | 0,00 | 0,00 | 0,00 | 0,00 | NA | NA |
| RP1-95L4.2     | 0,00 | 0,00 | 0,00 | 0,00 | NA | NA |
| RP1-95L4.3     | 0,00 | 0,62 | 0,00 | 0,00 | NA | NA |
| RP1-95L4.4     | 0,00 | 0,00 | 0,00 | 0,00 | NA | NA |
| RP1-96H9.5     | 0,00 | 0,00 | 0,00 | 0,00 | NA | NA |
| RP1-97G4.1     | 0,00 | 0,00 | 0,00 | 0,00 | NA | NA |
| RP1-9B16.2     | 0,00 | 0,00 | 0,00 | 0,00 | NA | NA |
| RP1-9E21.2     | 0,00 | 0,00 | 0,00 | 0,00 | NA | NA |
| RP1-9E21.5     | 0,00 | 0,00 | 0,00 | 0,00 | NA | NA |
| RP11-1000B6.8  | 0,00 | 0,00 | 0,00 | 0,00 | NA | NA |
| RP11-1005I1.1  | 0,00 | 0,00 | 0,00 | 0,00 | NA | NA |
| RP11-1006B19.1 | 0,00 | 0,00 | 0,00 | 0,00 | NA | NA |
| RP11-1006G14.3 | 0,00 | 0,00 | 0,00 | 0,00 | NA | NA |
| RP11-1007G5.2  | 0,00 | 0,00 | 0,00 | 0,00 | NA | NA |
| RP11-1007I13.2 | 0,00 | 0,00 | 0,00 | 0,00 | NA | NA |
| RP11-1007I13.3 | 0,00 | 0,00 | 0,00 | 0,00 | NA | NA |
| RP11-1007I13.4 | 0,00 | 0,00 | 0,00 | 0,00 | NA | NA |
| RP11-1007I4.1  | 0,00 | 0,00 | 0,00 | 0,00 | NA | NA |
| RP11-1007J8.1  | 0,00 | 0,00 | 0,00 | 0,00 | NA | NA |
| RP11-1007O24.4 | 0,00 | 0,00 | 0,00 | 0,00 | NA | NA |
| RP11-1008M1.1  | 0,00 | 0,00 | 0,00 | 0,00 | NA | NA |
| RP11-100A13.1  | 0,00 | 0,00 | 0,00 | 0,00 | NA | NA |
| RP11-100C24.1  | 0,00 | 0,00 | 0,00 | 0,00 | NA | NA |
| RP11-100D1.1   | 0,00 | 0,00 | 0,00 | 0,00 | NA | NA |
| RP11-100E13.1  | 0,00 | 0,00 | 0,00 | 0,00 | NA | NA |
| RP11-100E13.2  | 0,00 | 0,00 | 0,00 | 0,00 | NA | NA |
| RP11-100E13.3  | 0,00 | 0,00 | 0,00 | 0,00 | NA | NA |
| RP11-100E5.2   | 0,00 | 0,41 | 0,00 | 0,00 | NA | NA |
| RP11-100F15.2  | 0,00 | 0,00 | 0,00 | 0,00 | NA | NA |
| RP11-100F15.3  | 0,00 | 0,00 | 0,00 | 0,00 | NA | NA |
| RP11-100F22.1  | 0,00 | 0,00 | 0,00 | 0,00 | NA | NA |
| RP11-100G15.10 | 0,00 | 0,00 | 0,00 | 0,00 | NA | NA |
| RP11-100G15.11 | 0,00 | 0,00 | 0,00 | 0,00 | NA | NA |
| RP11-100G15.12 | 0,00 | 0,00 | 0,00 | 0,00 | NA | NA |
| RP11-100G15.3  | 0,00 | 0,00 | 0,00 | 0,00 | NA | NA |
| RP11-100G15.4  | 0,00 | 0,00 | 0,00 | 0,00 | NA | NA |
| RP11-100G15.5  | 0,00 | 0,00 | 0,00 | 0,00 | NA | NA |
| RP11-100G15.7  | 0,00 | 0,00 | 0,00 | 0,00 | NA | NA |
| RP11-100I16.4  | 0,00 | 0,00 | 0,00 | 0,00 | NA | NA |
| RP11-100K18.1  | 0,00 | 0,00 | 0,00 | 0,00 | NA | NA |
| RP11-100L22.4  | 0,00 | 0,00 | 0,00 | 0,00 | NA | NA |
| RP11-100N20.1  | 0,00 | 0,00 | 0,00 | 0,42 | NA | NA |
| RP11-100N3.2   | 0,00 | 0,00 | 0,00 | 0,00 | NA | NA |
| RP11-1012A1.10 | 0,00 | 0,00 | 0,00 | 0,00 | NA | NA |
| RP11-1012A1.5  | 0,00 | 0,00 | 0,00 | 0,00 | NA | NA |
| RP11-1012A1.7  | 0,00 | 0,00 | 0,00 | 0,00 | NA | NA |
| RP11-1012E15.2 | 0,00 | 0,00 | 0,00 | 0,00 | NA | NA |
| RP11-1016B18.1 | 0,09 | 0,22 | 0,14 | 0,15 | NA | NA |

|                 |      |      |      |      |    |    |
|-----------------|------|------|------|------|----|----|
| RP11-1017G21.4  | 0,00 | 0,00 | 0,00 | 0,00 | NA | NA |
| RP11-1017G21.5  | 0,00 | 0,00 | 0,00 | 0,00 | NA | NA |
| RP11-1018J11.1  | 0,00 | 0,00 | 0,00 | 0,00 | NA | NA |
| RP11-1018J8.2   | 0,00 | 0,00 | 0,00 | 0,00 | NA | NA |
| RP11-1018J8.3   | 0,00 | 0,00 | 0,00 | 0,00 | NA | NA |
| RP11-1018N14.3  | 0,00 | 0,00 | 0,00 | 0,00 | NA | NA |
| RP11-1018N14.4  | 0,00 | 0,00 | 0,00 | 0,00 | NA | NA |
| RP11-101B14.1   | 0,00 | 0,00 | 0,00 | 0,00 | NA | NA |
| RP11-101B14.4   | 0,00 | 0,00 | 0,00 | 0,00 | NA | NA |
| RP11-101E13.1   | 0,00 | 0,00 | 0,00 | 0,00 | NA | NA |
| RP11-101E14.2   | 0,00 | 0,00 | 0,00 | 0,00 | NA | NA |
| RP11-101E14.3   | 0,00 | 0,00 | 0,00 | 0,00 | NA | NA |
| RP11-101E19.1   | 0,00 | 0,00 | 0,00 | 0,00 | NA | NA |
| RP11-101E19.10  | 0,00 | 0,00 | 0,00 | 0,00 | NA | NA |
| RP11-101E19.2   | 0,00 | 0,00 | 0,00 | 0,00 | NA | NA |
| RP11-101E19.4   | 0,00 | 0,00 | 0,00 | 0,00 | NA | NA |
| RP11-101E19.5   | 0,00 | 0,00 | 0,00 | 0,00 | NA | NA |
| RP11-101E19.6   | 0,00 | 0,00 | 0,00 | 0,00 | NA | NA |
| RP11-101E19.7   | 0,00 | 0,00 | 0,00 | 0,00 | NA | NA |
| RP11-101E19.8   | 0,00 | 0,00 | 0,00 | 0,00 | NA | NA |
| RP11-101E5.2    | 0,00 | 0,00 | 0,00 | 0,00 | NA | NA |
| RP11-101E5.7    | 0,00 | 0,00 | 0,00 | 0,00 | NA | NA |
| RP11-101E7.2    | 0,00 | 0,00 | 0,00 | 0,00 | NA | NA |
| RP11-101J8.2    | 0,00 | 0,00 | 0,00 | 0,00 | NA | NA |
| RP11-101K23.1   | 0,00 | 0,00 | 0,00 | 0,00 | NA | NA |
| RP11-101P17.10  | 0,00 | 0,00 | 0,00 | 0,00 | NA | NA |
| RP11-101P17.14  | 0,00 | 0,00 | 0,00 | 0,00 | NA | NA |
| RP11-101P17.15  | 0,00 | 0,00 | 0,00 | 0,00 | NA | NA |
| RP11-101P17.8   | 0,00 | 0,00 | 0,00 | 0,00 | NA | NA |
| RP11-1020M18.10 | 0,00 | 0,00 | 0,00 | 0,00 | NA | NA |
| RP11-1021N1.1   | 0,00 | 0,49 | 0,18 | 0,67 | NA | NA |
| RP11-1021O19.2  | 0,00 | 0,00 | 0,00 | 0,00 | NA | NA |
| RP11-1022B3.1   | 0,00 | 0,00 | 0,00 | 0,00 | NA | NA |
| RP11-1022B3.2   | 0,00 | 0,00 | 0,00 | 0,00 | NA | NA |
| RP11-1023L17.2  | 0,12 | 0,56 | 0,11 | 0,00 | NA | NA |
| RP11-1026M7.2   | 0,00 | 0,00 | 0,00 | 0,00 | NA | NA |
| RP11-1026M7.3   | 0,00 | 0,00 | 0,00 | 0,00 | NA | NA |
| RP11-1028N23.3  | 0,00 | 0,00 | 0,00 | 0,00 | NA | NA |
| RP11-1029J19.4  | 0,00 | 0,00 | 0,00 | 0,00 | NA | NA |
| RP11-1029J19.5  | 0,00 | 0,00 | 0,00 | 0,00 | NA | NA |
| RP11-1029M24.2  | 0,00 | 0,00 | 0,00 | 0,00 | NA | NA |
| RP11-1029M24.3  | 0,00 | 0,00 | 0,00 | 0,00 | NA | NA |
| RP11-1029M24.4  | 0,00 | 0,00 | 0,00 | 0,00 | NA | NA |
| RP11-102C16.3   | 0,00 | 0,00 | 0,00 | 0,00 | NA | NA |
| RP11-102D18.1   | 0,00 | 0,00 | 0,00 | 0,00 | NA | NA |
| RP11-102F4.2    | 0,00 | 0,00 | 0,00 | 0,00 | NA | NA |
| RP11-102H24.1   | 0,00 | 0,00 | 0,00 | 0,00 | NA | NA |
| RP11-102J14.1   | 0,00 | 0,00 | 0,00 | 0,00 | NA | NA |
| RP11-102N11.1   | 0,00 | 0,00 | 0,00 | 0,00 | NA | NA |
| RP11-102O5.1    | 0,00 | 0,00 | 0,00 | 0,00 | NA | NA |
| RP11-1030E3.1   | 0,00 | 1,61 | 0,00 | 0,00 | NA | NA |
| RP11-1030E3.2   | 0,00 | 0,00 | 0,00 | 0,00 | NA | NA |
| RP11-1033H12.3  | 0,00 | 0,00 | 0,00 | 0,00 | NA | NA |
| RP11-1036E20.10 | 0,00 | 0,00 | 0,00 | 0,00 | NA | NA |
| RP11-1036E20.8  | 0,00 | 0,00 | 0,00 | 0,00 | NA | NA |

|                |      |      |      |      |    |    |
|----------------|------|------|------|------|----|----|
| RP11-1036F1.1  | 0,00 | 0,00 | 0,00 | 0,00 | NA | NA |
| RP11-1037D22.1 | 0,00 | 0,00 | 0,00 | 0,00 | NA | NA |
| RP11-1037J10.1 | 0,00 | 0,00 | 0,00 | 0,00 | NA | NA |
| RP11-103B5.2   | 0,00 | 0,00 | 0,00 | 0,00 | NA | NA |
| RP11-103C16.2  | 0,00 | 0,00 | 0,00 | 0,00 | NA | NA |
| RP11-103C3.2   | 0,00 | 0,00 | 0,00 | 0,00 | NA | NA |
| RP11-103F13.1  | 0,00 | 0,00 | 0,00 | 0,00 | NA | NA |
| RP11-103F13.3  | 0,00 | 0,00 | 0,00 | 0,00 | NA | NA |
| RP11-103H7.3   | 0,00 | 0,00 | 0,00 | 0,00 | NA | NA |
| RP11-103J17.1  | 0,00 | 0,00 | 0,00 | 0,00 | NA | NA |
| RP11-103J8.2   | 0,00 | 0,00 | 0,00 | 0,00 | NA | NA |
| RP11-1042B17.1 | 0,00 | 0,00 | 0,00 | 0,00 | NA | NA |
| RP11-1042B17.2 | 0,00 | 0,00 | 0,00 | 0,00 | NA | NA |
| RP11-1042B17.4 | 0,00 | 0,00 | 0,00 | 0,00 | NA | NA |
| RP11-1046B16.1 | 0,00 | 0,00 | 0,00 | 0,00 | NA | NA |
| RP11-1049A21.2 | 0,00 | 0,00 | 0,00 | 0,00 | NA | NA |
| RP11-1049H7.2  | 0,00 | 0,00 | 0,00 | 0,00 | NA | NA |
| RP11-104A24.1  | 0,00 | 0,00 | 0,00 | 0,00 | NA | NA |
| RP11-104C4.4   | 0,00 | 0,00 | 0,00 | 0,00 | NA | NA |
| RP11-104C4.5   | 0,00 | 0,00 | 0,00 | 0,00 | NA | NA |
| RP11-104D21.1  | 0,00 | 0,00 | 0,00 | 0,00 | NA | NA |
| RP11-104D21.2  | 0,00 | 0,00 | 0,00 | 0,00 | NA | NA |
| RP11-104D3.1   | 0,00 | 0,00 | 0,00 | 0,00 | NA | NA |
| RP11-104D3.2   | 0,00 | 0,00 | 0,00 | 0,00 | NA | NA |
| RP11-104F15.7  | 0,00 | 0,00 | 0,00 | 0,00 | NA | NA |
| RP11-104G3.1   | 0,00 | 0,00 | 0,00 | 0,00 | NA | NA |
| RP11-104G3.5   | 0,00 | 0,00 | 0,00 | 0,00 | NA | NA |
| RP11-104H15.10 | 0,00 | 0,00 | 0,00 | 0,00 | NA | NA |
| RP11-104H15.12 | 0,00 | 0,00 | 0,00 | 0,00 | NA | NA |
| RP11-104H15.7  | 0,00 | 0,00 | 0,00 | 0,00 | NA | NA |
| RP11-104H15.8  | 0,00 | 0,00 | 0,00 | 0,00 | NA | NA |
| RP11-104H15.9  | 0,00 | 0,00 | 0,00 | 0,00 | NA | NA |
| RP11-104J23.2  | 0,00 | 0,00 | 0,00 | 0,00 | NA | NA |
| RP11-104L21.2  | 0,00 | 0,00 | 0,00 | 0,00 | NA | NA |
| RP11-104N10.1  | 0,00 | 0,60 | 0,19 | 0,22 | NA | NA |
| RP11-104O19.2  | 0,00 | 0,11 | 0,05 | 0,00 | NA | NA |
| RP11-1053O12.1 | 0,00 | 0,00 | 0,00 | 0,00 | NA | NA |
| RP11-1055B8.8  | 0,00 | 0,00 | 0,00 | 0,00 | NA | NA |
| RP11-1057B8.1  | 0,00 | 0,00 | 0,00 | 0,00 | NA | NA |
| RP11-1058G23.1 | 0,00 | 0,00 | 0,00 | 0,00 | NA | NA |
| RP11-1058N17.1 | 0,00 | 0,00 | 0,00 | 0,00 | NA | NA |
| RP11-1059L18.1 | 0,00 | 0,00 | 0,00 | 0,00 | NA | NA |
| RP11-105A24.1  | 0,00 | 0,00 | 0,00 | 0,00 | NA | NA |
| RP11-105C19.2  | 0,00 | 0,00 | 0,00 | 0,00 | NA | NA |
| RP11-105C20.3  | 0,00 | 0,00 | 0,00 | 0,00 | NA | NA |
| RP11-105I12.1  | 0,00 | 0,00 | 0,00 | 0,00 | NA | NA |
| RP11-105L10.1  | 0,00 | 0,00 | 0,00 | 0,00 | NA | NA |
| RP11-105N13.4  | 0,00 | 0,00 | 0,00 | 0,00 | NA | NA |
| RP11-105N14.2  | 0,00 | 0,00 | 0,00 | 0,00 | NA | NA |
| RP11-1060G2.1  | 0,00 | 0,00 | 0,00 | 0,00 | NA | NA |
| RP11-1060J15.9 | 0,00 | 0,00 | 0,00 | 0,00 | NA | NA |
| RP11-1069G10.2 | 0,00 | 0,00 | 0,00 | 0,00 | NA | NA |
| RP11-106A1.2   | 0,00 | 0,00 | 0,00 | 0,00 | NA | NA |
| RP11-106A1.3   | 0,00 | 0,00 | 0,00 | 0,00 | NA | NA |
| RP11-106F1.1   | 0,00 | 0,00 | 0,00 | 0,00 | NA | NA |

|                |      |      |      |      |    |    |
|----------------|------|------|------|------|----|----|
| RP11-106M14.2  | 0,00 | 0,00 | 0,00 | 0,00 | NA | NA |
| RP11-106M3.5   | 0,00 | 0,00 | 0,00 | 0,00 | NA | NA |
| RP11-106M7.2   | 0,00 | 0,00 | 0,00 | 0,00 | NA | NA |
| RP11-106M7.4   | 0,00 | 0,00 | 0,00 | 0,00 | NA | NA |
| RP11-1070A24.1 | 0,00 | 0,00 | 0,00 | 0,00 | NA | NA |
| RP11-1070A24.2 | 0,00 | 0,00 | 0,00 | 0,00 | NA | NA |
| RP11-1070N10.7 | 0,00 | 0,00 | 0,00 | 0,00 | NA | NA |
| RP11-1072C15.1 | 0,00 | 0,00 | 0,00 | 0,00 | NA | NA |
| RP11-1072C15.2 | 0,63 | 0,47 | 0,39 | 0,52 | NA | NA |
| RP11-1072C15.3 | 0,00 | 0,00 | 0,00 | 0,00 | NA | NA |
| RP11-1072C15.7 | 0,00 | 0,00 | 0,00 | 0,00 | NA | NA |
| RP11-1072N2.1  | 0,00 | 0,00 | 0,00 | 0,00 | NA | NA |
| RP11-1072N2.4  | 0,00 | 0,00 | 0,00 | 0,00 | NA | NA |
| RP11-1078H9.2  | 0,00 | 0,00 | 0,00 | 0,00 | NA | NA |
| RP11-1079H9.1  | 0,00 | 0,00 | 0,00 | 0,00 | NA | NA |
| RP11-1079J22.1 | 0,00 | 0,00 | 0,00 | 0,00 | NA | NA |
| RP11-1079K10.1 | 0,00 | 0,00 | 0,00 | 0,00 | NA | NA |
| RP11-107B1.1   | 0,00 | 0,00 | 0,00 | 0,00 | NA | NA |
| RP11-107C10.1  | 0,00 | 0,00 | 0,00 | 0,00 | NA | NA |
| RP11-107D24.2  | 0,00 | 0,00 | 0,00 | 0,00 | NA | NA |
| RP11-107E21.1  | 0,00 | 0,00 | 0,00 | 0,00 | NA | NA |
| RP11-107G24.3  | 0,00 | 0,00 | 0,00 | 0,00 | NA | NA |
| RP11-107I14.2  | 0,00 | 0,00 | 0,00 | 0,00 | NA | NA |
| RP11-107I14.5  | 0,00 | 0,00 | 0,00 | 0,00 | NA | NA |
| RP11-107M16.2  | 0,00 | 0,00 | 0,00 | 0,00 | NA | NA |
| RP11-107N15.1  | 0,00 | 0,00 | 0,00 | 0,00 | NA | NA |
| RP11-107N4.1   | 0,00 | 0,00 | 0,00 | 0,00 | NA | NA |
| RP11-107P7.1   | 0,00 | 0,00 | 0,00 | 0,00 | NA | NA |
| RP11-107P7.2   | 0,00 | 0,00 | 0,00 | 0,00 | NA | NA |
| RP11-107P7.6   | 0,00 | 0,00 | 0,00 | 0,00 | NA | NA |
| RP11-1081K18.1 | 0,00 | 0,00 | 0,00 | 0,00 | NA | NA |
| RP11-1081L13.3 | 0,00 | 0,00 | 0,00 | 0,00 | NA | NA |
| RP11-1081L13.5 | 0,00 | 0,00 | 0,00 | 0,00 | NA | NA |
| RP11-1081M5.1  | 0,00 | 0,00 | 0,00 | 0,00 | NA | NA |
| RP11-1081M5.2  | 0,00 | 0,00 | 0,00 | 0,00 | NA | NA |
| RP11-1081M5.3  | 0,00 | 0,00 | 0,00 | 0,00 | NA | NA |
| RP11-1082A3.1  | 0,00 | 0,00 | 0,00 | 0,00 | NA | NA |
| RP11-1082I11.2 | 0,00 | 0,00 | 0,00 | 0,00 | NA | NA |
| RP11-1082L8.1  | 0,00 | 0,00 | 0,00 | 0,00 | NA | NA |
| RP11-1082L8.2  | 0,00 | 0,00 | 0,00 | 0,00 | NA | NA |
| RP11-1084A12.2 | 0,00 | 0,00 | 0,00 | 0,00 | NA | NA |
| RP11-1084E5.1  | 0,00 | 0,00 | 0,00 | 0,00 | NA | NA |
| RP11-1084I9.2  | 0,00 | 0,00 | 0,00 | 0,00 | NA | NA |
| RP11-1084J3.1  | 0,00 | 0,00 | 0,00 | 0,00 | NA | NA |
| RP11-1085N6.1  | 0,00 | 0,00 | 0,00 | 0,00 | NA | NA |
| RP11-1085N6.4  | 0,00 | 0,00 | 0,00 | 0,00 | NA | NA |
| RP11-1085N6.5  | 0,00 | 0,00 | 0,00 | 0,00 | NA | NA |
| RP11-1086I4.2  | 0,00 | 0,00 | 0,00 | 0,00 | NA | NA |
| RP11-108A14.1  | 0,00 | 0,00 | 0,00 | 0,00 | NA | NA |
| RP11-108A14.2  | 0,00 | 0,00 | 0,00 | 0,00 | NA | NA |
| RP11-108A15.2  | 0,00 | 0,00 | 0,00 | 0,00 | NA | NA |
| RP11-108B14.1  | 0,00 | 0,00 | 0,00 | 0,00 | NA | NA |
| RP11-108B14.2  | 0,00 | 0,00 | 0,00 | 0,00 | NA | NA |
| RP11-108B14.4  | 0,00 | 0,00 | 0,00 | 0,00 | NA | NA |
| RP11-108F13.2  | 0,00 | 0,00 | 0,00 | 0,00 | NA | NA |

|                 |      |      |      |      |    |    |
|-----------------|------|------|------|------|----|----|
| RP11-108F13.3   | 0,00 | 0,00 | 0,00 | 0,00 | NA | NA |
| RP11-108F14.1   | 0,00 | 0,00 | 0,00 | 0,00 | NA | NA |
| RP11-108K3.1    | 0,00 | 0,00 | 0,00 | 0,00 | NA | NA |
| RP11-108K3.2    | 0,00 | 0,00 | 0,00 | 0,00 | NA | NA |
| RP11-108K3.3    | 0,00 | 0,00 | 0,00 | 0,00 | NA | NA |
| RP11-108K3.5    | 0,00 | 0,00 | 0,00 | 0,00 | NA | NA |
| RP11-108L7.15   | 0,00 | 0,00 | 0,00 | 0,00 | NA | NA |
| RP11-108L7.4    | 0,00 | 0,00 | 0,00 | 0,00 | NA | NA |
| RP11-108M11.3   | 0,00 | 0,00 | 0,00 | 0,00 | NA | NA |
| RP11-108M12.1   | 0,00 | 0,00 | 0,00 | 0,00 | NA | NA |
| RP11-108M12.2   | 0,00 | 0,00 | 0,00 | 0,00 | NA | NA |
| RP11-108M9.2    | 0,00 | 0,00 | 0,00 | 0,00 | NA | NA |
| RP11-108N13.1   | 0,00 | 0,00 | 0,00 | 0,00 | NA | NA |
| RP11-108P20.4   | 0,00 | 0,00 | 0,00 | 0,00 | NA | NA |
| RP11-1090M7.3   | 0,00 | 0,00 | 0,00 | 0,00 | NA | NA |
| RP11-1094H24.4  | 0,00 | 0,00 | 0,00 | 0,00 | NA | NA |
| RP11-1094M14.1  | 0,00 | 0,00 | 0,00 | 0,00 | NA | NA |
| RP11-1094M14.12 | 0,00 | 0,00 | 0,00 | 0,00 | NA | NA |
| RP11-1094M14.5  | 0,00 | 0,00 | 0,00 | 0,00 | NA | NA |
| RP11-1094M14.7  | 0,00 | 0,00 | 0,00 | 0,00 | NA | NA |
| RP11-1094M14.9  | 0,00 | 0,00 | 0,00 | 0,00 | NA | NA |
| RP11-1096G20.5  | 0,00 | 0,00 | 0,12 | 0,00 | NA | NA |
| RP11-1099M24.7  | 0,00 | 0,00 | 0,00 | 0,00 | NA | NA |
| RP11-1099M24.8  | 0,00 | 0,00 | 0,00 | 0,00 | NA | NA |
| RP11-1099M24.9  | 0,00 | 0,00 | 0,00 | 0,00 | NA | NA |
| RP11-109D20.1   | 0,00 | 0,00 | 0,00 | 0,31 | NA | NA |
| RP11-109D24.1   | 0,00 | 0,00 | 0,00 | 0,00 | NA | NA |
| RP11-109D9.4    | 0,00 | 0,00 | 0,00 | 0,00 | NA | NA |
| RP11-109E10.2   | 0,00 | 0,00 | 0,00 | 0,00 | NA | NA |
| RP11-109E12.10  | 0,00 | 0,00 | 0,00 | 0,00 | NA | NA |
| RP11-109E12.4   | 0,00 | 0,00 | 0,00 | 0,00 | NA | NA |
| RP11-109E12.5   | 0,00 | 0,00 | 0,00 | 0,00 | NA | NA |
| RP11-109E12.6   | 0,00 | 0,00 | 0,00 | 0,00 | NA | NA |
| RP11-109E12.7   | 0,00 | 0,00 | 0,00 | 0,00 | NA | NA |
| RP11-109E12.8   | 0,00 | 0,00 | 0,00 | 0,00 | NA | NA |
| RP11-109E12.9   | 0,00 | 0,00 | 0,00 | 0,00 | NA | NA |
| RP11-109E24.2   | 0,00 | 0,00 | 0,00 | 0,00 | NA | NA |
| RP11-109F19.1   | 0,00 | 0,00 | 0,00 | 0,00 | NA | NA |
| RP11-109L13.1   | 0,00 | 0,00 | 0,00 | 0,00 | NA | NA |
| RP11-109M17.1   | 0,00 | 0,00 | 0,00 | 0,00 | NA | NA |
| RP11-109M17.2   | 0,00 | 0,00 | 0,00 | 0,00 | NA | NA |
| RP11-109M19.1   | 0,00 | 0,00 | 0,00 | 0,00 | NA | NA |
| RP11-109M19.2   | 0,00 | 0,00 | 0,00 | 0,00 | NA | NA |
| RP11-109M19.3   | 0,00 | 0,00 | 0,00 | 0,00 | NA | NA |
| RP11-109M19.4   | 0,00 | 0,00 | 0,00 | 0,00 | NA | NA |
| RP11-109M19.5   | 0,00 | 0,00 | 0,00 | 0,00 | NA | NA |
| RP11-109N23.1   | 0,00 | 0,00 | 0,00 | 0,00 | NA | NA |
| RP11-109N23.6   | 0,00 | 0,00 | 0,00 | 0,00 | NA | NA |
| RP11-109P11.1   | 0,00 | 0,00 | 0,00 | 0,00 | NA | NA |
| RP11-109P14.1   | 0,00 | 0,00 | 0,00 | 0,00 | NA | NA |
| RP11-109P14.2   | 0,00 | 0,00 | 0,00 | 0,00 | NA | NA |
| RP11-109P14.8   | 0,00 | 0,00 | 0,00 | 0,00 | NA | NA |
| RP11-109P14.9   | 0,00 | 0,00 | 0,00 | 0,00 | NA | NA |
| RP11-109P6.1    | 0,00 | 0,00 | 0,00 | 0,00 | NA | NA |
| RP11-109P6.2    | 0,00 | 0,00 | 0,00 | 0,00 | NA | NA |

|                 |      |      |      |      |    |    |
|-----------------|------|------|------|------|----|----|
| RP11-10A14.6    | 0,00 | 0,00 | 0,00 | 0,00 | NA | NA |
| RP11-10A14.8    | 0,00 | 0,00 | 0,00 | 0,00 | NA | NA |
| RP11-10A14.9    | 0,00 | 0,00 | 0,00 | 0,00 | NA | NA |
| RP11-10A2.1     | 0,00 | 0,00 | 0,00 | 0,00 | NA | NA |
| RP11-10A7.1     | 0,00 | 0,00 | 0,00 | 0,00 | NA | NA |
| RP11-10B2.1     | 0,00 | 0,00 | 0,00 | 0,00 | NA | NA |
| RP11-10C24.2    | 0,00 | 0,00 | 0,00 | 0,00 | NA | NA |
| RP11-10C8.1     | 0,00 | 0,00 | 0,00 | 0,00 | NA | NA |
| RP11-10D7.2     | 0,00 | 0,00 | 0,00 | 0,00 | NA | NA |
| RP11-10D7.5     | 0,00 | 0,00 | 0,00 | 0,00 | NA | NA |
| RP11-10E18.6    | 0,15 | 0,14 | 0,10 | 0,42 | NA | NA |
| RP11-10E6.1     | 0,00 | 0,00 | 0,00 | 0,00 | NA | NA |
| RP11-10F11.1    | 0,00 | 0,00 | 0,00 | 0,00 | NA | NA |
| RP11-10F11.2    | 0,00 | 0,17 | 0,00 | 0,00 | NA | NA |
| RP11-10F11.3    | 0,00 | 0,00 | 0,00 | 0,00 | NA | NA |
| RP11-10F11.4    | 0,00 | 0,00 | 0,00 | 0,00 | NA | NA |
| RP11-10G12.2    | 0,00 | 0,00 | 0,00 | 0,00 | NA | NA |
| RP11-10G15.4    | 0,00 | 0,00 | 0,00 | 0,00 | NA | NA |
| RP11-10I6.2     | 0,00 | 0,00 | 0,00 | 0,00 | NA | NA |
| RP11-10J21.5    | 0,00 | 0,00 | 0,00 | 0,00 | NA | NA |
| RP11-10J5.1     | 0,00 | 0,00 | 0,00 | 0,00 | NA | NA |
| RP11-10K17.6    | 0,00 | 0,00 | 0,00 | 0,00 | NA | NA |
| RP11-10K17.7    | 0,00 | 0,00 | 0,00 | 0,00 | NA | NA |
| RP11-10N16.3    | 0,00 | 0,00 | 0,00 | 0,00 | NA | NA |
| RP11-1100L3.4   | 0,00 | 0,00 | 0,00 | 0,00 | NA | NA |
| RP11-1101H11.1  | 0,00 | 0,00 | 0,00 | 0,00 | NA | NA |
| RP11-1101K5.2   | 0,00 | 0,00 | 0,00 | 0,00 | NA | NA |
| RP11-1105O14.1  | 0,00 | 0,00 | 0,00 | 0,00 | NA | NA |
| RP11-1109F11.5  | 0,00 | 0,00 | 0,00 | 0,00 | NA | NA |
| RP11-1109M24.12 | 0,00 | 0,00 | 0,00 | 0,00 | NA | NA |
| RP11-1109M24.15 | 0,00 | 0,00 | 0,00 | 0,00 | NA | NA |
| RP11-110A12.2   | 0,00 | 0,00 | 0,00 | 0,00 | NA | NA |
| RP11-110C15.4   | 0,29 | 0,17 | 0,14 | 0,14 | NA | NA |
| RP11-110F24.1   | 0,00 | 0,00 | 0,00 | 0,00 | NA | NA |
| RP11-110H1.1    | 0,00 | 0,00 | 0,00 | 0,00 | NA | NA |
| RP11-110I1.5    | 0,00 | 0,00 | 0,00 | 0,00 | NA | NA |
| RP11-110J1.2    | 0,00 | 0,10 | 0,00 | 0,00 | NA | NA |
| RP11-110J1.3    | 0,00 | 0,00 | 0,00 | 0,00 | NA | NA |
| RP11-110K18.2   | 0,00 | 0,00 | 0,00 | 0,00 | NA | NA |
| RP11-110K8.1    | 0,00 | 0,00 | 0,00 | 0,00 | NA | NA |
| RP11-1110J8.1   | 0,00 | 0,00 | 0,00 | 0,00 | NA | NA |
| RP11-1112C15.2  | 0,00 | 0,00 | 0,00 | 0,00 | NA | NA |
| RP11-1112G13.3  | 0,00 | 0,00 | 0,00 | 0,00 | NA | NA |
| RP11-1112J20.1  | 0,00 | 0,00 | 0,00 | 0,00 | NA | NA |
| RP11-1112J20.2  | 0,00 | 0,00 | 0,00 | 0,00 | NA | NA |
| RP11-1113C11.2  | 0,00 | 0,00 | 0,00 | 0,00 | NA | NA |
| RP11-1113L8.1   | 0,00 | 0,00 | 0,00 | 0,00 | NA | NA |
| RP11-1113L8.2   | 0,00 | 0,00 | 0,00 | 0,00 | NA | NA |
| RP11-1113L8.6   | 0,00 | 0,00 | 0,00 | 0,00 | NA | NA |
| RP11-1113L8.7   | 0,00 | 0,00 | 0,00 | 0,00 | NA | NA |
| RP11-1113N2.3   | 0,00 | 0,00 | 0,00 | 0,00 | NA | NA |
| RP11-1113N2.4   | 0,00 | 0,00 | 0,00 | 0,00 | NA | NA |
| RP11-1114A5.2   | 0,00 | 0,00 | 0,00 | 0,00 | NA | NA |
| RP11-1114A5.3   | 0,00 | 0,00 | 0,00 | 0,00 | NA | NA |
| RP11-1114A5.5   | 0,00 | 0,00 | 0,00 | 0,00 | NA | NA |

|                |      |      |      |      |    |    |
|----------------|------|------|------|------|----|----|
| RP11-1114A5.6  | 0,00 | 0,00 | 0,00 | 0,00 | NA | NA |
| RP11-1118M6.2  | 0,00 | 0,00 | 0,00 | 0,00 | NA | NA |
| RP11-1118M6.3  | 0,00 | 0,00 | 0,00 | 0,00 | NA | NA |
| RP11-111A21.1  | 0,00 | 0,00 | 0,00 | 0,00 | NA | NA |
| RP11-111A24.1  | 0,00 | 0,00 | 0,00 | 0,00 | NA | NA |
| RP11-111A24.2  | 0,00 | 0,00 | 0,00 | 0,00 | NA | NA |
| RP11-111D3.1   | 0,00 | 0,00 | 0,00 | 0,00 | NA | NA |
| RP11-111E14.1  | 0,00 | 0,00 | 0,00 | 0,00 | NA | NA |
| RP11-111E14.2  | 0,00 | 0,00 | 0,00 | 0,00 | NA | NA |
| RP11-111E2.1   | 0,00 | 0,00 | 0,00 | 0,00 | NA | NA |
| RP11-111F10.2  | 0,00 | 0,00 | 0,00 | 0,00 | NA | NA |
| RP11-111F10.3  | 0,00 | 0,00 | 0,00 | 0,00 | NA | NA |
| RP11-111F5.1   | 0,00 | 0,00 | 0,00 | 0,00 | NA | NA |
| RP11-111G20.1  | 0,00 | 0,00 | 0,00 | 0,00 | NA | NA |
| RP11-111G20.3  | 0,00 | 0,00 | 0,00 | 0,00 | NA | NA |
| RP11-111H3.2   | 0,06 | 0,07 | 0,09 | 0,10 | NA | NA |
| RP11-111H3.3   | 0,00 | 0,00 | 0,00 | 0,00 | NA | NA |
| RP11-111I12.1  | 0,00 | 0,00 | 0,00 | 0,00 | NA | NA |
| RP11-111K18.2  | 0,00 | 0,00 | 0,00 | 0,00 | NA | NA |
| RP11-111M22.4  | 0,00 | 0,00 | 0,00 | 0,00 | NA | NA |
| RP11-111N20.3  | 0,00 | 0,00 | 0,00 | 0,00 | NA | NA |
| RP11-111N20.4  | 0,00 | 0,00 | 0,00 | 0,00 | NA | NA |
| RP11-1123I8.1  | 0,00 | 0,00 | 0,00 | 0,00 | NA | NA |
| RP11-1127D7.2  | 0,00 | 0,00 | 0,00 | 0,00 | NA | NA |
| RP11-112E16.1  | 0,00 | 0,00 | 0,00 | 0,00 | NA | NA |
| RP11-112J1.3   | 0,00 | 0,00 | 0,00 | 0,00 | NA | NA |
| RP11-112J3.13  | 0,00 | 0,00 | 0,00 | 0,00 | NA | NA |
| RP11-112L15.3  | 0,00 | 0,30 | 0,00 | 0,00 | NA | NA |
| RP11-112N19.1  | 0,00 | 0,00 | 0,00 | 0,00 | NA | NA |
| RP11-1133J7.1  | 0,00 | 0,00 | 0,00 | 0,00 | NA | NA |
| RP11-1134I14.3 | 0,00 | 0,00 | 0,00 | 0,00 | NA | NA |
| RP11-1134I14.4 | 0,00 | 0,00 | 0,00 | 0,00 | NA | NA |
| RP11-1134I14.6 | 0,00 | 0,00 | 0,00 | 0,00 | NA | NA |
| RP11-1134I14.8 | 0,00 | 0,00 | 0,00 | 0,00 | NA | NA |
| RP11-1136G11.5 | 0,00 | 0,00 | 0,00 | 0,00 | NA | NA |
| RP11-1136G11.8 | 0,00 | 0,00 | 0,00 | 0,00 | NA | NA |
| RP11-1137G4.4  | 0,00 | 0,00 | 0,00 | 0,00 | NA | NA |
| RP11-1137G4.5  | 0,00 | 0,00 | 0,00 | 0,00 | NA | NA |
| RP11-113A11.3  | 0,00 | 0,00 | 0,00 | 0,00 | NA | NA |
| RP11-113C12.8  | 0,00 | 0,00 | 0,00 | 0,00 | NA | NA |
| RP11-113D19.3  | 0,00 | 0,00 | 0,00 | 0,00 | NA | NA |
| RP11-113D19.6  | 0,00 | 0,00 | 0,00 | 0,00 | NA | NA |
| RP11-113D19.9  | 0,00 | 0,00 | 0,00 | 0,00 | NA | NA |
| RP11-113D6.2   | 0,00 | 0,00 | 0,00 | 0,00 | NA | NA |
| RP11-113D6.3   | 0,00 | 0,00 | 0,00 | 0,00 | NA | NA |
| RP11-113D6.5   | 0,00 | 0,00 | 0,00 | 0,00 | NA | NA |
| RP11-113D6.6   | 0,00 | 0,00 | 0,00 | 0,00 | NA | NA |
| RP11-113D6.8   | 0,00 | 0,00 | 0,00 | 0,00 | NA | NA |
| RP11-113E21.2  | 0,00 | 0,00 | 0,00 | 0,00 | NA | NA |
| RP11-113E21.3  | 0,00 | 0,00 | 0,00 | 0,00 | NA | NA |
| RP11-113G13.2  | 0,00 | 0,00 | 0,00 | 0,00 | NA | NA |
| RP11-113I22.1  | 0,00 | 0,00 | 0,00 | 0,00 | NA | NA |
| RP11-113K21.1  | 0,00 | 0,00 | 0,00 | 0,00 | NA | NA |
| RP11-113K21.2  | 0,00 | 0,00 | 0,00 | 0,00 | NA | NA |
| RP11-113K21.3  | 0,00 | 0,00 | 0,00 | 0,00 | NA | NA |

|                 |      |      |      |      |    |    |
|-----------------|------|------|------|------|----|----|
| RP11-113O24.3   | 0,00 | 0,00 | 0,00 | 0,00 | NA | NA |
| RP11-1141N12.1  | 0,00 | 0,00 | 0,00 | 0,00 | NA | NA |
| RP11-1144P22.1  | 0,00 | 0,00 | 0,00 | 0,00 | NA | NA |
| RP11-1145L24.1  | 0,00 | 0,00 | 0,00 | 0,00 | NA | NA |
| RP11-1147P1.1   | 0,00 | 0,00 | 0,00 | 0,00 | NA | NA |
| RP11-1148O4.1   | 0,00 | 0,00 | 0,00 | 0,00 | NA | NA |
| RP11-1149M10.2  | 0,00 | 0,71 | 0,87 | 1,10 | NA | NA |
| RP11-1149M3.2   | 0,00 | 0,00 | 0,00 | 0,00 | NA | NA |
| RP11-1149O23.2  | 0,37 | 0,74 | 0,89 | 0,51 | NA | NA |
| RP11-114F3.2    | 0,00 | 0,00 | 0,00 | 0,00 | NA | NA |
| RP11-114F3.5    | 0,00 | 0,00 | 0,00 | 0,00 | NA | NA |
| RP11-114G1.1    | 0,00 | 0,00 | 0,00 | 0,00 | NA | NA |
| RP11-114G1.2    | 0,00 | 0,00 | 0,00 | 0,00 | NA | NA |
| RP11-114G11.2   | 0,00 | 0,00 | 0,00 | 0,00 | NA | NA |
| RP11-114H21.1   | 0,00 | 0,00 | 0,00 | 0,00 | NA | NA |
| RP11-114H23.1   | 0,00 | 0,00 | 0,00 | 0,00 | NA | NA |
| RP11-114H23.2   | 0,00 | 0,00 | 0,00 | 0,00 | NA | NA |
| RP11-114H24.1   | 0,00 | 0,00 | 0,00 | 0,00 | NA | NA |
| RP11-114H24.2   | 0,00 | 0,00 | 0,00 | 0,00 | NA | NA |
| RP11-114H24.4   | 0,00 | 0,00 | 0,00 | 0,00 | NA | NA |
| RP11-114H24.5   | 0,00 | 0,00 | 0,00 | 0,00 | NA | NA |
| RP11-114H24.7   | 0,00 | 0,00 | 0,00 | 0,00 | NA | NA |
| RP11-114H7.1    | 0,00 | 0,00 | 0,00 | 0,00 | NA | NA |
| RP11-114H7.2    | 0,00 | 0,00 | 0,00 | 0,00 | NA | NA |
| RP11-114H7.3    | 0,00 | 0,00 | 0,00 | 0,00 | NA | NA |
| RP11-114L10.2   | 0,00 | 0,00 | 0,00 | 0,00 | NA | NA |
| RP11-114M1.1    | 0,00 | 0,00 | 0,00 | 0,00 | NA | NA |
| RP11-114M5.3    | 0,00 | 0,00 | 0,00 | 0,00 | NA | NA |
| RP11-114N19.1   | 0,00 | 0,00 | 0,00 | 0,00 | NA | NA |
| RP11-114N19.2   | 0,00 | 0,00 | 0,00 | 0,00 | NA | NA |
| RP11-114N19.4   | 0,00 | 0,00 | 0,00 | 0,00 | NA | NA |
| RP11-114N19.5   | 0,00 | 0,00 | 0,00 | 0,00 | NA | NA |
| RP11-114O13.1   | 0,00 | 0,00 | 0,00 | 0,00 | NA | NA |
| RP11-114O8.1    | 0,00 | 0,00 | 0,00 | 0,00 | NA | NA |
| RP11-1151B14.1  | 0,00 | 0,00 | 0,00 | 0,00 | NA | NA |
| RP11-1151B14.2  | 0,00 | 0,00 | 0,00 | 0,00 | NA | NA |
| RP11-1151B14.4  | 0,00 | 0,05 | 0,00 | 0,00 | NA | NA |
| RP11-1151B14.5  | 0,00 | 0,00 | 0,00 | 0,00 | NA | NA |
| RP11-1152B5.1   | 0,00 | 0,00 | 0,00 | 0,00 | NA | NA |
| RP11-1157N2_A.1 | 0,00 | 0,00 | 0,00 | 0,00 | NA | NA |
| RP11-115A14.1   | 0,00 | 0,00 | 0,00 | 0,00 | NA | NA |
| RP11-115A15.2   | 0,00 | 0,00 | 0,00 | 0,00 | NA | NA |
| RP11-115A15.3   | 0,00 | 0,00 | 0,00 | 0,00 | NA | NA |
| RP11-115A15.4   | 0,00 | 0,00 | 0,00 | 0,00 | NA | NA |
| RP11-115C10.1   | 0,00 | 0,00 | 0,00 | 0,00 | NA | NA |
| RP11-115D19.1   | 0,30 | 0,71 | 0,43 | 1,03 | NA | NA |
| RP11-115D19.3   | 0,00 | 0,00 | 0,00 | 0,00 | NA | NA |
| RP11-115I3.1    | 0,00 | 0,00 | 0,00 | 0,00 | NA | NA |
| RP11-115I9.1    | 0,00 | 0,00 | 0,00 | 0,00 | NA | NA |
| RP11-115I16.2   | 0,00 | 0,00 | 0,52 | 0,42 | NA | NA |
| RP11-115I16.3   | 0,00 | 0,00 | 0,00 | 0,00 | NA | NA |
| RP11-115M6.4    | 0,00 | 0,00 | 0,00 | 0,00 | NA | NA |
| RP11-115N12.1   | 0,00 | 0,00 | 0,00 | 0,00 | NA | NA |
| RP11-115N4.1    | 0,00 | 0,00 | 0,00 | 0,00 | NA | NA |
| RP11-115P16.1   | 0,00 | 0,00 | 0,00 | 0,00 | NA | NA |



|                |      |      |      |      |    |    |
|----------------|------|------|------|------|----|----|
| RP11-115P21.1  | 0,00 | 0,00 | 0,00 | 0,00 | NA | NA |
| RP11-1166P10.7 | 0,00 | 0,00 | 0,00 | 0,00 | NA | NA |
| RP11-1166P10.8 | 0,00 | 0,00 | 0,00 | 0,00 | NA | NA |
| RP11-1167A19.2 | 0,00 | 0,00 | 0,00 | 0,00 | NA | NA |
| RP11-1167A19.6 | 0,00 | 0,00 | 0,00 | 0,00 | NA | NA |
| RP11-116D17.1  | 0,00 | 0,00 | 0,00 | 0,00 | NA | NA |
| RP11-116G8.5   | 0,00 | 0,00 | 0,00 | 0,00 | NA | NA |
| RP11-116K4.1   | 0,00 | 0,00 | 0,00 | 0,00 | NA | NA |
| RP11-116N8.3   | 0,00 | 0,00 | 0,00 | 0,00 | NA | NA |
| RP11-116O11.1  | 0,00 | 0,00 | 0,00 | 0,00 | NA | NA |
| RP11-116O11.2  | 0,00 | 0,00 | 0,00 | 0,00 | NA | NA |
| RP11-116O18.1  | 0,00 | 0,00 | 0,00 | 0,00 | NA | NA |
| RP11-116O18.3  | 0,00 | 0,00 | 0,00 | 0,00 | NA | NA |
| RP11-1174L13.2 | 0,00 | 0,00 | 0,00 | 0,00 | NA | NA |
| RP11-1174L13.3 | 0,00 | 0,00 | 0,00 | 0,00 | NA | NA |
| RP11-117L15.3  | 0,00 | 0,00 | 0,00 | 0,00 | NA | NA |
| RP11-117L5.3   | 0,00 | 0,00 | 0,00 | 0,00 | NA | NA |
| RP11-117L5.4   | 0,00 | 0,00 | 0,00 | 0,00 | NA | NA |
| RP11-117L6.1   | 0,00 | 0,00 | 0,00 | 0,00 | NA | NA |
| RP11-117O7.1   | 0,00 | 0,00 | 0,00 | 0,00 | NA | NA |
| RP11-117P22.1  | 0,00 | 0,00 | 0,00 | 0,00 | NA | NA |
| RP11-117P22.2  | 0,00 | 0,09 | 0,00 | 0,00 | NA | NA |
| RP11-1180F24.1 | 0,00 | 0,00 | 0,00 | 0,00 | NA | NA |
| RP11-1180F24.3 | 0,00 | 0,00 | 0,00 | 0,00 | NA | NA |
| RP11-118A3.1   | 0,00 | 0,00 | 0,00 | 0,00 | NA | NA |
| RP11-118A3.2   | 0,00 | 0,00 | 0,00 | 0,00 | NA | NA |
| RP11-118B13.1  | 0,00 | 0,00 | 0,00 | 0,00 | NA | NA |
| RP11-118B22.1  | 0,00 | 0,00 | 0,00 | 0,00 | NA | NA |
| RP11-118B22.4  | 0,00 | 0,00 | 0,00 | 0,00 | NA | NA |
| RP11-118B22.6  | 0,00 | 0,38 | 0,00 | 0,00 | NA | NA |
| RP11-118D22.3  | 0,00 | 0,00 | 0,00 | 0,00 | NA | NA |
| RP11-118D22.4  | 0,00 | 0,00 | 0,00 | 0,00 | NA | NA |
| RP11-118E18.2  | 0,00 | 0,00 | 0,00 | 0,00 | NA | NA |
| RP11-118E9.1   | 0,00 | 0,00 | 0,00 | 0,00 | NA | NA |
| RP11-118F16.1  | 0,00 | 0,00 | 0,00 | 0,00 | NA | NA |
| RP11-118F2.2   | 0,00 | 0,00 | 0,00 | 0,00 | NA | NA |
| RP11-118F2.3   | 0,00 | 0,00 | 0,00 | 0,00 | NA | NA |
| RP11-118G23.1  | 0,00 | 0,00 | 0,00 | 0,00 | NA | NA |
| RP11-118G23.2  | 0,00 | 0,00 | 0,00 | 0,00 | NA | NA |
| RP11-118G23.4  | 0,00 | 0,00 | 0,00 | 0,00 | NA | NA |
| RP11-118H15.1  | 0,00 | 0,00 | 0,00 | 0,00 | NA | NA |
| RP11-118H4.2   | 0,00 | 0,00 | 0,00 | 0,00 | NA | NA |
| RP11-118H4.3   | 0,00 | 0,00 | 0,00 | 0,00 | NA | NA |
| RP11-118J16.1  | 0,00 | 0,00 | 0,00 | 0,00 | NA | NA |
| RP11-118K6.2   | 0,00 | 0,00 | 0,00 | 0,26 | NA | NA |
| RP11-118K6.3   | 0,00 | 0,00 | 0,00 | 0,00 | NA | NA |
| RP11-118M9.3   | 0,00 | 0,00 | 0,00 | 0,00 | NA | NA |
| RP11-118N24.1  | 0,00 | 0,00 | 0,00 | 0,00 | NA | NA |
| RP11-118N24.2  | 0,00 | 0,00 | 0,00 | 0,00 | NA | NA |
| RP11-1191J2.2  | 0,00 | 0,00 | 0,00 | 0,00 | NA | NA |
| RP11-1191J2.4  | 0,00 | 0,00 | 0,00 | 0,00 | NA | NA |
| RP11-1193F23.1 | 0,00 | 0,00 | 0,00 | 0,00 | NA | NA |
| RP11-119D18.1  | 0,00 | 0,00 | 0,00 | 0,00 | NA | NA |
| RP11-119D9.3   | 0,00 | 0,00 | 0,00 | 0,00 | NA | NA |
| RP11-119D9.4   | 0,00 | 0,00 | 0,00 | 0,00 | NA | NA |

|                |      |      |      |      |    |    |
|----------------|------|------|------|------|----|----|
| RP11-119F19.4  | 0,00 | 0,00 | 0,00 | 0,00 | NA | NA |
| RP11-119F7.3   | 0,00 | 0,00 | 0,00 | 0,00 | NA | NA |
| RP11-119F7.6   | 0,00 | 0,00 | 0,00 | 0,00 | NA | NA |
| RP11-119H12.1  | 0,00 | 0,00 | 0,00 | 0,43 | NA | NA |
| RP11-119H12.3  | 0,00 | 0,00 | 0,00 | 0,00 | NA | NA |
| RP11-119H12.4  | 0,00 | 0,00 | 0,00 | 0,00 | NA | NA |
| RP11-119H12.5  | 0,00 | 0,00 | 0,00 | 0,00 | NA | NA |
| RP11-119H12.6  | 0,00 | 0,00 | 0,00 | 0,00 | NA | NA |
| RP11-119I18.1  | 0,00 | 0,00 | 0,00 | 0,00 | NA | NA |
| RP11-119N19.1  | 0,00 | 0,00 | 0,00 | 0,00 | NA | NA |
| RP11-119P22.1  | 0,00 | 0,00 | 0,00 | 0,00 | NA | NA |
| RP11-11A18.1   | 0,00 | 0,00 | 0,00 | 0,00 | NA | NA |
| RP11-11A5.1    | 0,00 | 0,00 | 0,00 | 0,00 | NA | NA |
| RP11-11A9.1    | 0,00 | 0,00 | 0,00 | 0,00 | NA | NA |
| RP11-11A9.2    | 0,00 | 0,00 | 0,00 | 0,00 | NA | NA |
| RP11-11C20.1   | 0,00 | 0,00 | 0,00 | 0,00 | NA | NA |
| RP11-11D8.3    | 0,00 | 0,00 | 0,00 | 0,00 | NA | NA |
| RP11-11K13.1   | 0,00 | 0,00 | 0,00 | 0,00 | NA | NA |
| RP11-11L12.2   | 0,00 | 0,00 | 0,00 | 0,00 | NA | NA |
| RP11-11M20.4   | 0,00 | 0,00 | 0,00 | 0,00 | NA | NA |
| RP11-11N5.1    | 0,00 | 0,00 | 0,00 | 0,00 | NA | NA |
| RP11-11N5.3    | 0,00 | 0,00 | 0,00 | 0,00 | NA | NA |
| RP11-11N7.4    | 0,00 | 0,41 | 0,00 | 0,00 | NA | NA |
| RP11-120B7.1   | 0,00 | 0,00 | 0,00 | 0,00 | NA | NA |
| RP11-120D12.2  | 0,00 | 0,00 | 0,00 | 0,00 | NA | NA |
| RP11-120E13.1  | 0,00 | 0,00 | 0,00 | 0,00 | NA | NA |
| RP11-120E5.1   | 0,00 | 0,00 | 0,00 | 0,00 | NA | NA |
| RP11-120E5.2   | 0,00 | 0,00 | 0,00 | 0,00 | NA | NA |
| RP11-120I21.1  | 0,00 | 0,00 | 0,00 | 0,00 | NA | NA |
| RP11-120I21.3  | 0,00 | 0,00 | 0,00 | 0,00 | NA | NA |
| RP11-120J1.1   | 0,00 | 0,00 | 0,00 | 0,00 | NA | NA |
| RP11-120J20.1  | 0,00 | 0,00 | 0,00 | 0,00 | NA | NA |
| RP11-120K18.3  | 0,00 | 0,00 | 0,00 | 0,00 | NA | NA |
| RP11-120K19.4  | 0,00 | 0,60 | 0,00 | 0,00 | NA | NA |
| RP11-120K24.4  | 0,00 | 0,00 | 0,00 | 0,00 | NA | NA |
| RP11-120K24.5  | 0,00 | 0,00 | 0,00 | 0,00 | NA | NA |
| RP11-120M18.5  | 0,00 | 0,00 | 0,00 | 0,00 | NA | NA |
| RP11-1212A22.7 | 0,00 | 0,00 | 0,00 | 0,00 | NA | NA |
| RP11-1212A22.8 | 0,00 | 0,00 | 0,00 | 0,00 | NA | NA |
| RP11-1217F2.1  | 0,00 | 0,00 | 0,00 | 0,00 | NA | NA |
| RP11-1217F2.11 | 0,00 | 0,00 | 0,00 | 0,00 | NA | NA |
| RP11-1217F2.12 | 0,00 | 0,00 | 0,00 | 0,00 | NA | NA |
| RP11-1217F2.13 | 0,00 | 0,00 | 0,00 | 0,00 | NA | NA |
| RP11-1217F2.17 | 0,00 | 0,00 | 0,00 | 0,00 | NA | NA |
| RP11-1217F2.18 | 0,00 | 0,00 | 0,00 | 0,00 | NA | NA |
| RP11-1217F2.19 | 0,00 | 0,00 | 0,00 | 0,00 | NA | NA |
| RP11-1217F2.2  | 0,00 | 0,00 | 0,00 | 0,00 | NA | NA |
| RP11-1217F2.20 | 0,00 | 0,00 | 0,00 | 0,00 | NA | NA |
| RP11-1217F2.21 | 0,00 | 0,00 | 0,00 | 0,00 | NA | NA |
| RP11-1217F2.24 | 0,00 | 0,00 | 0,00 | 0,00 | NA | NA |
| RP11-1217F2.25 | 0,00 | 0,00 | 0,00 | 0,00 | NA | NA |
| RP11-1217F2.26 | 0,00 | 0,00 | 0,00 | 0,00 | NA | NA |
| RP11-1217F2.27 | 0,00 | 0,00 | 0,00 | 0,00 | NA | NA |
| RP11-1217F2.28 | 0,00 | 0,00 | 0,00 | 0,00 | NA | NA |
| RP11-1217F2.3  | 0,00 | 0,00 | 0,00 | 0,00 | NA | NA |

|                |      |      |      |      |    |    |
|----------------|------|------|------|------|----|----|
| RP11-1217F2.4  | 0,00 | 0,00 | 0,00 | 0,00 | NA | NA |
| RP11-1217F2.5  | 0,00 | 0,00 | 0,00 | 0,00 | NA | NA |
| RP11-1217F2.6  | 0,00 | 0,00 | 0,00 | 0,00 | NA | NA |
| RP11-1217F2.7  | 0,00 | 0,00 | 0,00 | 0,00 | NA | NA |
| RP11-1217F2.8  | 0,00 | 0,00 | 0,00 | 0,00 | NA | NA |
| RP11-1217F2.9  | 0,00 | 0,00 | 0,00 | 0,00 | NA | NA |
| RP11-121A13.3  | 0,00 | 0,00 | 0,00 | 0,00 | NA | NA |
| RP11-121C1.1   | 0,00 | 0,00 | 0,00 | 0,00 | NA | NA |
| RP11-121C2.2   | 0,04 | 0,03 | 0,00 | 0,03 | NA | NA |
| RP11-121C2.3   | 0,00 | 0,00 | 0,00 | 0,00 | NA | NA |
| RP11-121C22.1  | 0,00 | 0,00 | 0,00 | 0,00 | NA | NA |
| RP11-121C6.4   | 0,00 | 0,00 | 0,00 | 0,00 | NA | NA |
| RP11-121L11.1  | 0,00 | 0,00 | 0,00 | 0,00 | NA | NA |
| RP11-121L11.2  | 0,00 | 0,00 | 0,00 | 0,00 | NA | NA |
| RP11-121M22.1  | 0,00 | 0,00 | 0,00 | 0,00 | NA | NA |
| RP11-121P10.1  | 0,00 | 0,00 | 0,00 | 0,00 | NA | NA |
| RP11-121P12.1  | 0,00 | 0,00 | 0,00 | 0,00 | NA | NA |
| RP11-1221G12.2 | 0,00 | 0,00 | 0,00 | 0,00 | NA | NA |
| RP11-1221G12.3 | 0,00 | 0,00 | 0,00 | 0,00 | NA | NA |
| RP11-1223D19.2 | 0,00 | 0,00 | 0,00 | 0,00 | NA | NA |
| RP11-1223D19.3 | 0,00 | 0,00 | 0,00 | 0,00 | NA | NA |
| RP11-1223D19.6 | 0,00 | 0,00 | 0,00 | 0,00 | NA | NA |
| RP11-122A21.2  | 0,00 | 0,00 | 0,00 | 0,00 | NA | NA |
| RP11-122A8.1   | 0,00 | 0,00 | 0,00 | 0,00 | NA | NA |
| RP11-122A8.3   | 0,00 | 0,00 | 0,00 | 0,00 | NA | NA |
| RP11-122A8.4   | 0,00 | 0,00 | 0,00 | 0,00 | NA | NA |
| RP11-122C21.2  | 0,00 | 0,00 | 0,00 | 0,00 | NA | NA |
| RP11-122C21.4  | 0,00 | 0,00 | 0,00 | 0,00 | NA | NA |
| RP11-122C5.2   | 0,00 | 0,00 | 0,00 | 0,00 | NA | NA |
| RP11-122C5.3   | 0,00 | 0,00 | 0,00 | 0,00 | NA | NA |
| RP11-122D10.1  | 0,00 | 0,00 | 0,00 | 0,00 | NA | NA |
| RP11-122D19.1  | 0,00 | 0,00 | 0,00 | 0,00 | NA | NA |
| RP11-122F24.1  | 0,00 | 0,00 | 0,00 | 0,00 | NA | NA |
| RP11-122G11.1  | 0,00 | 0,00 | 0,00 | 0,00 | NA | NA |
| RP11-122G18.6  | 0,00 | 0,00 | 0,00 | 0,00 | NA | NA |
| RP11-122K13.15 | 0,00 | 0,00 | 0,00 | 0,00 | NA | NA |
| RP11-122M14.3  | 0,00 | 0,00 | 0,00 | 0,00 | NA | NA |
| RP11-1236K1.1  | 0,00 | 0,00 | 0,00 | 0,00 | NA | NA |
| RP11-1236K1.11 | 0,00 | 0,00 | 0,00 | 0,00 | NA | NA |
| RP11-1236K1.8  | 0,00 | 0,00 | 0,00 | 0,00 | NA | NA |
| RP11-123B3.2   | 0,00 | 0,00 | 0,00 | 0,00 | NA | NA |
| RP11-123C5.5   | 0,00 | 0,00 | 0,00 | 0,00 | NA | NA |
| RP11-123D12.1  | 0,00 | 0,00 | 0,00 | 0,00 | NA | NA |
| RP11-123G9.1   | 0,00 | 0,00 | 0,00 | 0,00 | NA | NA |
| RP11-123H21.1  | 0,00 | 0,00 | 0,00 | 0,00 | NA | NA |
| RP11-123H22.1  | 0,00 | 0,00 | 0,00 | 0,00 | NA | NA |
| RP11-123I22.1  | 0,00 | 0,00 | 0,00 | 0,00 | NA | NA |
| RP11-123J14.1  | 0,00 | 0,00 | 0,00 | 0,00 | NA | NA |
| RP11-123J14.4  | 0,00 | 0,00 | 0,00 | 0,00 | NA | NA |
| RP11-123K19.2  | 0,00 | 0,00 | 0,00 | 0,00 | NA | NA |
| RP11-123K3.4   | 0,00 | 0,00 | 0,00 | 0,00 | NA | NA |
| RP11-123K3.9   | 0,00 | 0,00 | 0,00 | 0,00 | NA | NA |
| RP11-123M21.1  | 0,00 | 0,00 | 0,00 | 0,00 | NA | NA |
| RP11-123M21.2  | 0,00 | 0,00 | 0,00 | 0,00 | NA | NA |
| RP11-123M6.2   | 0,00 | 0,00 | 0,00 | 0,00 | NA | NA |

|                |      |      |      |      |    |    |
|----------------|------|------|------|------|----|----|
| RP11-123N4.4   | 0,00 | 0,00 | 0,00 | 0,00 | NA | NA |
| RP11-123O10.2  | 0,00 | 0,00 | 0,00 | 0,00 | NA | NA |
| RP11-123O22.1  | 0,00 | 0,00 | 0,00 | 0,00 | NA | NA |
| RP11-124D2.3   | 0,00 | 0,00 | 0,00 | 0,00 | NA | NA |
| RP11-124D9.1   | 0,00 | 0,00 | 0,00 | 0,00 | NA | NA |
| RP11-124G5.1   | 0,00 | 0,00 | 0,00 | 0,00 | NA | NA |
| RP11-124G5.2   | 0,00 | 0,00 | 0,00 | 0,00 | NA | NA |
| RP11-124G5.3   | 0,00 | 0,00 | 0,00 | 0,00 | NA | NA |
| RP11-124I4.2   | 0,00 | 0,00 | 0,00 | 0,00 | NA | NA |
| RP11-124L5.7   | 0,00 | 0,00 | 0,00 | 0,00 | NA | NA |
| RP11-124N19.1  | 0,00 | 0,00 | 0,00 | 0,00 | NA | NA |
| RP11-124N19.2  | 0,00 | 0,00 | 0,00 | 0,00 | NA | NA |
| RP11-124N19.4  | 0,00 | 0,00 | 0,00 | 0,00 | NA | NA |
| RP11-124N2.2   | 0,00 | 0,00 | 0,00 | 0,00 | NA | NA |
| RP11-124N2.3   | 0,00 | 0,00 | 0,00 | 0,00 | NA | NA |
| RP11-124N23.1  | 0,00 | 0,00 | 0,00 | 0,00 | NA | NA |
| RP11-124N23.2  | 0,00 | 0,68 | 0,00 | 0,00 | NA | NA |
| RP11-124N3.1   | 0,00 | 0,00 | 0,00 | 0,00 | NA | NA |
| RP11-124O11.2  | 0,00 | 0,00 | 0,00 | 0,00 | NA | NA |
| RP11-1252D15.1 | 0,00 | 0,00 | 0,00 | 0,00 | NA | NA |
| RP11-1252I4.1  | 0,00 | 0,00 | 0,00 | 0,00 | NA | NA |
| RP11-1252I4.2  | 0,00 | 0,00 | 0,00 | 0,00 | NA | NA |
| RP11-1258F18.1 | 0,00 | 0,00 | 0,00 | 0,00 | NA | NA |
| RP11-1259L22.1 | 0,00 | 0,00 | 0,00 | 0,00 | NA | NA |
| RP11-1259L22.2 | 0,00 | 0,00 | 0,00 | 0,00 | NA | NA |
| RP11-125A15.1  | 0,00 | 0,00 | 0,00 | 0,00 | NA | NA |
| RP11-125A15.3  | 0,00 | 0,00 | 0,00 | 0,00 | NA | NA |
| RP11-125D12.1  | 0,00 | 0,00 | 0,00 | 0,00 | NA | NA |
| RP11-125D12.2  | 0,00 | 0,00 | 0,00 | 0,00 | NA | NA |
| RP11-125F14.2  | 0,00 | 0,00 | 0,00 | 0,00 | NA | NA |
| RP11-125I23.3  | 0,00 | 0,00 | 0,00 | 0,00 | NA | NA |
| RP11-125K10.5  | 0,00 | 0,00 | 0,00 | 0,00 | NA | NA |
| RP11-125O18.1  | 0,00 | 0,00 | 0,00 | 0,00 | NA | NA |
| RP11-125O5.2   | 0,00 | 0,00 | 0,00 | 0,00 | NA | NA |
| RP11-125P18.1  | 0,00 | 0,00 | 0,00 | 0,00 | NA | NA |
| RP11-1260E13.1 | 0,00 | 0,00 | 0,00 | 0,00 | NA | NA |
| RP11-1260E13.2 | 0,00 | 0,00 | 0,00 | 0,00 | NA | NA |
| RP11-1260E13.3 | 0,00 | 0,00 | 0,00 | 0,00 | NA | NA |
| RP11-1263C18.2 | 0,00 | 0,00 | 0,00 | 0,00 | NA | NA |
| RP11-1263C18.3 | 0,00 | 0,00 | 0,00 | 0,00 | NA | NA |
| RP11-1267H10.1 | 0,00 | 0,00 | 0,00 | 0,00 | NA | NA |
| RP11-1267H10.2 | 0,00 | 0,00 | 0,00 | 0,00 | NA | NA |
| RP11-1267H10.3 | 0,00 | 0,00 | 0,00 | 0,00 | NA | NA |
| RP11-1267H10.4 | 0,00 | 0,00 | 0,00 | 0,00 | NA | NA |
| RP11-126F18.1  | 0,00 | 0,00 | 0,00 | 0,00 | NA | NA |
| RP11-126F18.2  | 0,00 | 0,00 | 0,00 | 0,00 | NA | NA |
| RP11-126H7.2   | 0,00 | 0,00 | 0,00 | 0,00 | NA | NA |
| RP11-126H7.4   | 0,00 | 0,00 | 0,00 | 0,00 | NA | NA |
| RP11-126K1.9   | 0,00 | 0,00 | 0,00 | 0,00 | NA | NA |
| RP11-126K15.1  | 0,00 | 0,00 | 0,00 | 0,00 | NA | NA |
| RP11-126M14.1  | 0,00 | 0,00 | 0,00 | 0,00 | NA | NA |
| RP11-126O1.2   | 0,00 | 0,00 | 0,00 | 0,00 | NA | NA |
| RP11-126O22.10 | 0,00 | 0,00 | 0,00 | 0,00 | NA | NA |
| RP11-1277A3.3  | 0,00 | 0,00 | 0,00 | 0,00 | NA | NA |
| RP11-127A9.1   | 0,00 | 0,00 | 0,00 | 0,00 | NA | NA |

|                 |      |      |      |      |    |    |
|-----------------|------|------|------|------|----|----|
| RP11-127B1.1    | 0,00 | 0,00 | 0,00 | 0,00 | NA | NA |
| RP11-127B20.1   | 0,00 | 0,00 | 0,00 | 0,00 | NA | NA |
| RP11-127H13.1   | 0,00 | 0,00 | 0,00 | 0,00 | NA | NA |
| RP11-127I20.5   | 0,00 | 0,00 | 0,00 | 0,00 | NA | NA |
| RP11-127I20.7   | 0,00 | 0,00 | 0,00 | 0,00 | NA | NA |
| RP11-127L20.5   | 0,00 | 0,00 | 0,00 | 0,00 | NA | NA |
| RP11-127L21.1   | 0,00 | 0,00 | 0,00 | 0,00 | NA | NA |
| RP11-127L21.2   | 0,00 | 0,00 | 0,00 | 0,00 | NA | NA |
| RP11-127P7.2    | 0,00 | 0,00 | 0,00 | 0,00 | NA | NA |
| RP11-1281K21.1  | 0,00 | 0,00 | 0,00 | 0,00 | NA | NA |
| RP11-1281K21.10 | 0,00 | 0,00 | 0,00 | 0,00 | NA | NA |
| RP11-1281K21.2  | 0,00 | 0,00 | 0,00 | 0,00 | NA | NA |
| RP11-1281K21.4  | 0,00 | 0,00 | 0,00 | 0,00 | NA | NA |
| RP11-1281K21.7  | 0,00 | 0,00 | 0,00 | 0,00 | NA | NA |
| RP11-1281K21.9  | 0,00 | 0,00 | 0,00 | 0,00 | NA | NA |
| RP11-1286E23.11 | 0,00 | 0,00 | 0,00 | 0,00 | NA | NA |
| RP11-1286E23.9  | 0,00 | 0,00 | 0,00 | 0,00 | NA | NA |
| RP11-128A17.1   | 0,00 | 0,00 | 0,00 | 0,00 | NA | NA |
| RP11-128A17.2   | 0,00 | 0,00 | 0,00 | 0,00 | NA | NA |
| RP11-128A6.3    | 0,00 | 0,00 | 0,00 | 0,00 | NA | NA |
| RP11-128D14.1   | 0,00 | 0,00 | 0,00 | 0,00 | NA | NA |
| RP11-128I7.1    | 0,00 | 0,00 | 0,00 | 0,00 | NA | NA |
| RP11-128L5.1    | 0,00 | 0,00 | 0,00 | 0,00 | NA | NA |
| RP11-128P10.1   | 0,00 | 0,00 | 0,00 | 0,00 | NA | NA |
| RP11-128P17.4   | 0,00 | 0,00 | 0,00 | 0,00 | NA | NA |
| RP11-1292F20.1  | 0,00 | 0,00 | 0,00 | 0,00 | NA | NA |
| RP11-1299A16.1  | 0,00 | 0,00 | 0,00 | 0,00 | NA | NA |
| RP11-1299A16.2  | 0,00 | 0,00 | 0,00 | 0,00 | NA | NA |
| RP11-129B22.4   | 0,00 | 0,00 | 0,00 | 0,00 | NA | NA |
| RP11-129B22.5   | 0,00 | 0,00 | 0,00 | 0,00 | NA | NA |
| RP11-129B22.6   | 0,00 | 0,00 | 0,00 | 0,00 | NA | NA |
| RP11-129B9.1    | 0,00 | 0,00 | 0,00 | 0,00 | NA | NA |
| RP11-129G17.2   | 0,00 | 0,00 | 0,00 | 0,00 | NA | NA |
| RP11-129H15.1   | 0,00 | 0,00 | 0,00 | 0,00 | NA | NA |
| RP11-129H15.2   | 0,00 | 0,00 | 0,00 | 0,00 | NA | NA |
| RP11-129H15.4   | 0,00 | 0,00 | 0,00 | 0,00 | NA | NA |
| RP11-129I12.3   | 0,00 | 0,00 | 0,00 | 0,00 | NA | NA |
| RP11-129I19.2   | 0,00 | 0,00 | 0,00 | 0,00 | NA | NA |
| RP11-129I12.1   | 0,00 | 0,00 | 0,00 | 0,00 | NA | NA |
| RP11-129I12.2   | 0,00 | 0,00 | 0,00 | 0,00 | NA | NA |
| RP11-129K12.1   | 0,00 | 0,00 | 0,00 | 0,00 | NA | NA |
| RP11-129K20.1   | 0,00 | 0,00 | 0,00 | 0,00 | NA | NA |
| RP11-129K24.3   | 0,00 | 0,00 | 0,00 | 0,00 | NA | NA |
| RP11-129M14.1   | 0,00 | 0,00 | 0,00 | 0,00 | NA | NA |
| RP11-129M6.1    | 0,00 | 0,00 | 0,00 | 0,00 | NA | NA |
| RP11-129O7.2    | 0,00 | 0,00 | 0,00 | 0,00 | NA | NA |
| RP11-12A2.3     | 0,00 | 0,00 | 0,00 | 0,00 | NA | NA |
| RP11-12A20.10   | 0,00 | 0,00 | 0,00 | 0,00 | NA | NA |
| RP11-12A20.11   | 0,00 | 0,00 | 0,00 | 0,00 | NA | NA |
| RP11-12A20.12   | 0,00 | 0,00 | 0,00 | 0,00 | NA | NA |
| RP11-12A20.13   | 0,00 | 0,00 | 0,00 | 0,00 | NA | NA |
| RP11-12A20.4    | 0,00 | 0,00 | 0,00 | 0,00 | NA | NA |
| RP11-12A20.8    | 0,00 | 0,00 | 0,00 | 0,00 | NA | NA |
| RP11-12C17.2    | 0,00 | 0,00 | 0,00 | 0,00 | NA | NA |
| RP11-12D16.2    | 0,00 | 0,00 | 0,00 | 0,00 | NA | NA |

|                |      |      |      |      |    |    |
|----------------|------|------|------|------|----|----|
| RP11-12D24.10  | 0,00 | 0,00 | 0,00 | 0,00 | NA | NA |
| RP11-12D24.6   | 0,00 | 0,00 | 0,00 | 0,00 | NA | NA |
| RP11-12D24.7   | 0,00 | 0,00 | 0,00 | 0,00 | NA | NA |
| RP11-12D5.2    | 0,00 | 0,00 | 0,00 | 0,00 | NA | NA |
| RP11-12D5.3    | 0,00 | 0,00 | 0,00 | 0,00 | NA | NA |
| RP11-12D5.4    | 0,00 | 0,00 | 0,00 | 0,00 | NA | NA |
| RP11-12D5.5    | 0,00 | 0,00 | 0,00 | 0,00 | NA | NA |
| RP11-12D5.6    | 0,00 | 0,00 | 0,00 | 0,00 | NA | NA |
| RP11-12G12.3   | 0,00 | 0,00 | 0,00 | 0,00 | NA | NA |
| RP11-12G12.4   | 0,00 | 0,00 | 0,00 | 0,00 | NA | NA |
| RP11-12I24.3   | 0,00 | 0,00 | 0,00 | 0,00 | NA | NA |
| RP11-12K11.1   | 0,00 | 0,00 | 0,00 | 0,00 | NA | NA |
| RP11-12K22.1   | 0,00 | 0,00 | 0,00 | 0,00 | NA | NA |
| RP11-12K6.2    | 0,00 | 0,00 | 0,00 | 0,00 | NA | NA |
| RP11-12L8.1    | 0,00 | 0,00 | 0,00 | 0,00 | NA | NA |
| RP11-12L8.2    | 0,00 | 0,00 | 0,00 | 0,00 | NA | NA |
| RP11-12M5.1    | 0,00 | 0,00 | 0,00 | 0,00 | NA | NA |
| RP11-12M5.3    | 0,00 | 0,00 | 0,00 | 0,00 | NA | NA |
| RP11-12M5.4    | 0,00 | 0,00 | 0,00 | 0,00 | NA | NA |
| RP11-12N13.1   | 0,00 | 0,00 | 0,00 | 0,00 | NA | NA |
| RP11-12N13.2   | 0,00 | 0,00 | 0,00 | 0,00 | NA | NA |
| RP11-12N13.3   | 0,00 | 0,00 | 0,00 | 0,00 | NA | NA |
| RP11-12N13.4   | 0,00 | 0,00 | 0,00 | 0,00 | NA | NA |
| RP11-12N13.5   | 0,00 | 0,00 | 0,00 | 0,00 | NA | NA |
| RP11-12N13.6   | 0,00 | 0,00 | 0,00 | 0,00 | NA | NA |
| RP11-12P19.1   | 0,00 | 0,00 | 0,00 | 0,00 | NA | NA |
| RP11-12P19.2   | 0,00 | 0,00 | 0,00 | 0,00 | NA | NA |
| RP11-130C6.1   | 0,00 | 0,00 | 0,00 | 0,00 | NA | NA |
| RP11-130F5.1   | 0,00 | 0,00 | 0,00 | 0,00 | NA | NA |
| RP11-130L8.3   | 0,00 | 0,00 | 0,00 | 0,00 | NA | NA |
| RP11-130N24.2  | 0,00 | 0,00 | 0,00 | 0,00 | NA | NA |
| RP11-1315F8.2  | 0,00 | 0,00 | 0,00 | 0,00 | NA | NA |
| RP11-131K17.1  | 0,00 | 0,00 | 0,00 | 0,00 | NA | NA |
| RP11-131L12.2  | 0,00 | 0,00 | 0,00 | 0,00 | NA | NA |
| RP11-131M6.1   | 0,00 | 0,00 | 0,00 | 0,00 | NA | NA |
| RP11-131M6.3   | 0,00 | 0,00 | 0,00 | 0,00 | NA | NA |
| RP11-131M6.4   | 0,00 | 0,00 | 0,00 | 0,00 | NA | NA |
| RP11-131N11.4  | 0,00 | 0,00 | 0,00 | 0,00 | NA | NA |
| RP11-131O15.2  | 0,00 | 0,00 | 0,00 | 0,00 | NA | NA |
| RP11-1324A7.2  | 0,00 | 0,00 | 0,00 | 0,00 | NA | NA |
| RP11-1325J9.1  | 0,00 | 0,00 | 0,00 | 0,00 | NA | NA |
| RP11-132A1.2   | 0,00 | 0,00 | 0,00 | 0,00 | NA | NA |
| RP11-132A1.4   | 0,00 | 0,00 | 0,00 | 0,00 | NA | NA |
| RP11-132A1.6   | 0,00 | 0,00 | 0,00 | 0,00 | NA | NA |
| RP11-132E11.2  | 0,00 | 0,00 | 0,00 | 0,00 | NA | NA |
| RP11-132E11.3  | 0,00 | 0,00 | 0,00 | 0,00 | NA | NA |
| RP11-132E11.4  | 0,00 | 0,00 | 0,00 | 0,00 | NA | NA |
| RP11-132F7.2   | 0,00 | 0,00 | 0,00 | 0,00 | NA | NA |
| RP11-132J14.3  | 0,00 | 0,00 | 0,00 | 0,00 | NA | NA |
| RP11-132L12.1  | 0,00 | 0,00 | 0,00 | 0,00 | NA | NA |
| RP11-132M7.2   | 0,00 | 0,00 | 0,00 | 0,00 | NA | NA |
| RP11-132N15.1  | 0,00 | 0,00 | 0,00 | 0,00 | NA | NA |
| RP11-132N15.2  | 0,00 | 0,00 | 0,00 | 0,00 | NA | NA |
| RP11-1336O20.2 | 0,00 | 0,00 | 0,00 | 0,00 | NA | NA |
| RP11-1338A24.1 | 0,00 | 0,00 | 0,00 | 0,00 | NA | NA |

|                 |      |      |      |      |    |    |
|-----------------|------|------|------|------|----|----|
| RP11-133K1.1    | 0,00 | 0,11 | 0,00 | 0,00 | NA | NA |
| RP11-133K1.11   | 0,00 | 0,00 | 0,00 | 0,00 | NA | NA |
| RP11-133K1.2    | 0,00 | 0,00 | 0,00 | 0,00 | NA | NA |
| RP11-133K1.5    | 0,00 | 0,00 | 0,00 | 0,00 | NA | NA |
| RP11-133K1.8    | 0,00 | 0,00 | 0,00 | 0,00 | NA | NA |
| RP11-133K18.1   | 0,00 | 0,00 | 0,00 | 0,00 | NA | NA |
| RP11-133L14.4   | 0,00 | 0,00 | 0,00 | 0,00 | NA | NA |
| RP11-133L14.5   | 0,00 | 0,00 | 0,00 | 0,00 | NA | NA |
| RP11-133L19.1   | 0,00 | 0,00 | 0,00 | 0,00 | NA | NA |
| RP11-133L19.2   | 0,00 | 0,00 | 0,00 | 0,00 | NA | NA |
| RP11-133N21.10  | 0,00 | 0,00 | 0,00 | 0,00 | NA | NA |
| RP11-133N21.12  | 0,00 | 0,00 | 0,00 | 0,00 | NA | NA |
| RP11-133N21.8   | 0,00 | 0,00 | 0,00 | 0,00 | NA | NA |
| RP11-1348G14.6  | 0,00 | 0,00 | 0,00 | 0,00 | NA | NA |
| RP11-1348G14.7  | 0,00 | 0,00 | 0,00 | 0,00 | NA | NA |
| RP11-1348G14.8  | 0,00 | 0,00 | 0,00 | 0,00 | NA | NA |
| RP11-134A8.1    | 0,00 | 0,00 | 0,00 | 0,00 | NA | NA |
| RP11-134C1.1    | 0,00 | 0,00 | 0,00 | 0,00 | NA | NA |
| RP11-134D3.2    | 0,00 | 0,00 | 0,00 | 0,00 | NA | NA |
| RP11-134E15.1   | 0,00 | 0,00 | 0,00 | 0,00 | NA | NA |
| RP11-134J21.1   | 0,00 | 0,00 | 0,00 | 0,00 | NA | NA |
| RP11-134K13.4   | 0,00 | 0,00 | 0,00 | 0,00 | NA | NA |
| RP11-134L4.2    | 0,00 | 0,00 | 0,00 | 0,00 | NA | NA |
| RP11-134N1.3    | 0,00 | 0,00 | 0,00 | 0,00 | NA | NA |
| RP11-134N8.2    | 0,00 | 0,00 | 0,00 | 0,00 | NA | NA |
| RP11-135A1.2    | 0,00 | 0,00 | 0,00 | 0,00 | NA | NA |
| RP11-135A1.3    | 0,00 | 0,00 | 0,00 | 0,00 | NA | NA |
| RP11-135D11.3   | 0,00 | 0,00 | 0,00 | 0,00 | NA | NA |
| RP11-135F9.1    | 0,00 | 0,00 | 0,00 | 0,00 | NA | NA |
| RP11-135L13.4   | 0,00 | 0,00 | 0,00 | 0,00 | NA | NA |
| RP11-135M8_A.1  | 0,00 | 0,00 | 0,00 | 0,00 | NA | NA |
| RP11-135N5.1    | 0,00 | 0,00 | 0,00 | 0,00 | NA | NA |
| RP11-135N5.2    | 0,00 | 0,00 | 0,00 | 0,00 | NA | NA |
| RP11-1360M22.10 | 0,00 | 0,00 | 0,00 | 0,00 | NA | NA |
| RP11-136B18.1   | 0,00 | 0,00 | 0,00 | 0,00 | NA | NA |
| RP11-136B18.2   | 0,00 | 0,00 | 0,00 | 0,00 | NA | NA |
| RP11-136C24.2   | 0,00 | 0,00 | 0,00 | 0,00 | NA | NA |
| RP11-136C24.3   | 0,00 | 0,00 | 0,00 | 0,00 | NA | NA |
| RP11-136F16.2   | 0,00 | 0,00 | 0,00 | 0,00 | NA | NA |
| RP11-136G2.1    | 0,00 | 0,00 | 0,00 | 0,00 | NA | NA |
| RP11-136H13.1   | 0,00 | 0,00 | 0,00 | 0,00 | NA | NA |
| RP11-136H13.2   | 0,00 | 0,00 | 0,00 | 0,00 | NA | NA |
| RP11-136I13.1   | 0,00 | 0,00 | 0,00 | 0,00 | NA | NA |
| RP11-136I13.2   | 0,00 | 0,00 | 0,00 | 0,00 | NA | NA |
| RP11-136I14.2   | 0,00 | 0,00 | 0,00 | 0,00 | NA | NA |
| RP11-136I14.3   | 0,00 | 0,00 | 0,00 | 0,00 | NA | NA |
| RP11-136I14.4   | 0,00 | 0,00 | 0,00 | 0,00 | NA | NA |
| RP11-136K14.1   | 0,00 | 0,00 | 0,00 | 0,00 | NA | NA |
| RP11-136K7.1    | 0,00 | 0,00 | 0,00 | 0,00 | NA | NA |
| RP11-136K7.3    | 0,00 | 0,00 | 0,00 | 0,00 | NA | NA |
| RP11-136L23.2   | 0,00 | 0,00 | 0,00 | 0,00 | NA | NA |
| RP11-136O12.2   | 0,00 | 0,00 | 0,00 | 0,00 | NA | NA |
| RP11-1378G18.1  | 0,00 | 0,00 | 0,00 | 0,00 | NA | NA |
| RP11-1379J22.7  | 0,00 | 0,00 | 0,00 | 0,00 | NA | NA |
| RP11-137D19.1   | 0,00 | 0,00 | 0,00 | 0,00 | NA | NA |

|                 |      |      |      |      |    |    |
|-----------------|------|------|------|------|----|----|
| RP11-137F15.1   | 0,00 | 0,00 | 0,00 | 0,00 | NA | NA |
| RP11-137H2.4    | 0,00 | 0,00 | 0,00 | 0,00 | NA | NA |
| RP11-137J7.3    | 0,00 | 0,00 | 0,00 | 0,00 | NA | NA |
| RP11-137L10.5   | 0,00 | 0,00 | 0,00 | 0,00 | NA | NA |
| RP11-137M6.2    | 0,00 | 0,00 | 0,00 | 0,00 | NA | NA |
| RP11-137N23.1   | 0,00 | 0,00 | 0,00 | 0,00 | NA | NA |
| RP11-137P24.5   | 0,00 | 0,00 | 0,00 | 0,00 | NA | NA |
| RP11-138A23.1   | 0,00 | 0,00 | 0,00 | 0,00 | NA | NA |
| RP11-138B9.1    | 0,00 | 0,00 | 0,00 | 0,00 | NA | NA |
| RP11-138C24.2   | 0,00 | 0,00 | 0,00 | 0,00 | NA | NA |
| RP11-138D23.2   | 0,00 | 0,00 | 0,00 | 0,00 | NA | NA |
| RP11-138D23.3   | 0,00 | 0,00 | 0,00 | 0,00 | NA | NA |
| RP11-138E16.1   | 0,00 | 0,00 | 0,00 | 0,00 | NA | NA |
| RP11-138E16.2   | 0,00 | 0,00 | 0,00 | 0,00 | NA | NA |
| RP11-138E9.2    | 0,00 | 0,00 | 0,00 | 0,00 | NA | NA |
| RP11-138H14.1   | 0,00 | 0,00 | 0,00 | 0,00 | NA | NA |
| RP11-138H8.3    | 0,00 | 0,00 | 0,00 | 0,00 | NA | NA |
| RP11-138H8.4    | 0,00 | 0,00 | 0,00 | 0,00 | NA | NA |
| RP11-138I17.1   | 0,00 | 0,00 | 0,00 | 0,00 | NA | NA |
| RP11-139A016.1  | 0,00 | 0,00 | 0,00 | 0,00 | NA | NA |
| RP11-139A013.10 | 0,00 | 0,00 | 0,00 | 0,00 | NA | NA |
| RP11-139A013.13 | 0,00 | 0,00 | 0,00 | 0,00 | NA | NA |
| RP11-139A013.14 | 0,00 | 0,00 | 0,00 | 0,00 | NA | NA |
| RP11-139A013.15 | 0,00 | 0,00 | 0,00 | 0,00 | NA | NA |
| RP11-139A013.20 | 0,00 | 0,00 | 0,00 | 0,00 | NA | NA |
| RP11-139A013.22 | 0,00 | 0,00 | 0,00 | 0,00 | NA | NA |
| RP11-139B1.1    | 0,00 | 0,00 | 0,00 | 0,00 | NA | NA |
| RP11-139F4.1    | 0,00 | 0,00 | 0,00 | 0,00 | NA | NA |
| RP11-139F4.2    | 0,00 | 0,00 | 0,00 | 0,00 | NA | NA |
| RP11-139F9.1    | 0,00 | 0,00 | 0,00 | 0,00 | NA | NA |
| RP11-139G7.1    | 0,00 | 0,00 | 0,00 | 0,00 | NA | NA |
| RP11-139H14.3   | 0,09 | 0,46 | 0,07 | 0,30 | NA | NA |
| RP11-139H15.7   | 0,00 | 0,00 | 0,00 | 0,00 | NA | NA |
| RP11-139I15.4   | 0,00 | 0,00 | 0,00 | 0,00 | NA | NA |
| RP11-139I15.5   | 0,00 | 0,00 | 0,00 | 0,00 | NA | NA |
| RP11-139K4.1    | 0,00 | 0,00 | 0,00 | 0,00 | NA | NA |
| RP11-139K4.2    | 0,00 | 0,00 | 0,00 | 0,00 | NA | NA |
| RP11-139K4.4    | 0,00 | 0,00 | 0,00 | 0,00 | NA | NA |
| RP11-13A1.1     | 0,00 | 0,00 | 0,00 | 0,00 | NA | NA |
| RP11-13A1.2     | 0,00 | 0,00 | 0,00 | 0,00 | NA | NA |
| RP11-13A1.3     | 0,00 | 0,00 | 0,00 | 0,00 | NA | NA |
| RP11-13J10.1    | 0,00 | 0,00 | 0,00 | 0,00 | NA | NA |
| RP11-13J12.2    | 0,00 | 0,00 | 0,00 | 0,00 | NA | NA |
| RP11-13K12.6    | 0,00 | 0,00 | 0,00 | 0,00 | NA | NA |
| RP11-13L2.1     | 0,00 | 0,00 | 0,00 | 0,00 | NA | NA |
| RP11-13L2.2     | 0,00 | 0,00 | 0,00 | 0,00 | NA | NA |
| RP11-13M3.1     | 0,00 | 0,00 | 0,00 | 0,00 | NA | NA |
| RP11-13N12.1    | 0,00 | 0,00 | 0,00 | 0,00 | NA | NA |
| RP11-13N13.6    | 0,00 | 0,00 | 0,00 | 0,00 | NA | NA |
| RP11-13P5.2     | 0,00 | 0,00 | 0,00 | 0,00 | NA | NA |
| RP11-140C18.2   | 0,00 | 0,00 | 0,00 | 0,00 | NA | NA |
| RP11-140H17.1   | 0,00 | 0,00 | 0,00 | 0,00 | NA | NA |
| RP11-140I16.2   | 0,00 | 0,00 | 0,00 | 0,00 | NA | NA |
| RP11-140I16.3   | 0,00 | 0,00 | 0,00 | 0,00 | NA | NA |
| RP11-140K17.2   | 0,00 | 0,00 | 0,00 | 0,00 | NA | NA |



|               |      |      |      |      |    |    |
|---------------|------|------|------|------|----|----|
| RP11-140M13.1 | 0,00 | 0,00 | 0,00 | 0,00 | NA | NA |
| RP11-141A19.1 | 0,00 | 0,00 | 0,00 | 0,00 | NA | NA |
| RP11-141A19.2 | 0,00 | 0,00 | 0,00 | 0,00 | NA | NA |
| RP11-141C7.2  | 0,00 | 0,00 | 0,00 | 0,00 | NA | NA |
| RP11-141C7.5  | 0,00 | 0,00 | 0,00 | 0,00 | NA | NA |
| RP11-141E13.1 | 0,00 | 0,00 | 0,00 | 0,00 | NA | NA |
| RP11-141I10.1 | 0,00 | 0,00 | 0,00 | 0,00 | NA | NA |
| RP11-141I10.2 | 0,00 | 0,00 | 0,00 | 0,00 | NA | NA |
| RP11-141I13.4 | 0,00 | 0,00 | 0,00 | 0,00 | NA | NA |
| RP11-141M3.3  | 0,00 | 0,00 | 0,00 | 0,00 | NA | NA |
| RP11-141O11.1 | 0,00 | 0,00 | 0,00 | 0,00 | NA | NA |
| RP11-141O19.1 | 0,00 | 0,00 | 0,00 | 0,00 | NA | NA |
| RP11-141P6.1  | 0,00 | 0,00 | 0,00 | 0,00 | NA | NA |
| RP11-142A22.1 | 0,00 | 0,00 | 0,00 | 0,00 | NA | NA |
| RP11-142A22.2 | 0,00 | 0,00 | 0,00 | 0,00 | NA | NA |
| RP11-142A22.3 | 0,00 | 0,00 | 0,00 | 0,00 | NA | NA |
| RP11-142A5.1  | 0,00 | 0,00 | 0,00 | 0,00 | NA | NA |
| RP11-142C4.4  | 0,00 | 0,00 | 0,00 | 0,00 | NA | NA |
| RP11-142G1.1  | 0,00 | 0,00 | 0,00 | 0,00 | NA | NA |
| RP11-142G7.2  | 0,00 | 0,00 | 0,00 | 0,00 | NA | NA |
| RP11-142I2.1  | 0,00 | 0,00 | 0,00 | 0,00 | NA | NA |
| RP11-142J21.1 | 0,00 | 0,00 | 0,00 | 0,00 | NA | NA |
| RP11-142L1.2  | 0,00 | 0,00 | 0,00 | 0,00 | NA | NA |
| RP11-142L1.3  | 0,00 | 0,00 | 0,00 | 0,00 | NA | NA |
| RP11-142L4.2  | 0,00 | 0,00 | 0,00 | 0,00 | NA | NA |
| RP11-142L4.3  | 0,00 | 0,00 | 0,00 | 0,00 | NA | NA |
| RP11-142M10.2 | 0,00 | 0,00 | 0,00 | 0,00 | NA | NA |
| RP11-143O06.1 | 0,00 | 0,00 | 0,00 | 0,00 | NA | NA |
| RP11-1437A8.2 | 0,00 | 0,00 | 0,00 | 0,00 | NA | NA |
| RP11-1437A8.3 | 0,00 | 0,00 | 0,00 | 0,00 | NA | NA |
| RP11-1437A8.5 | 0,00 | 0,00 | 0,00 | 0,00 | NA | NA |
| RP11-1437A8.6 | 0,00 | 0,00 | 0,00 | 0,00 | NA | NA |
| RP11-1437A8.7 | 0,00 | 0,00 | 0,00 | 0,00 | NA | NA |
| RP11-143A12.1 | 0,00 | 0,00 | 0,00 | 0,00 | NA | NA |
| RP11-143E21.1 | 0,00 | 0,00 | 0,00 | 0,00 | NA | NA |
| RP11-143E21.2 | 0,00 | 0,00 | 0,00 | 0,00 | NA | NA |
| RP11-143E21.3 | 0,00 | 0,00 | 0,00 | 0,00 | NA | NA |
| RP11-143E21.4 | 0,00 | 0,00 | 0,00 | 0,00 | NA | NA |
| RP11-143E21.6 | 0,00 | 0,00 | 0,00 | 0,00 | NA | NA |
| RP11-143H17.1 | 0,00 | 0,00 | 0,00 | 0,00 | NA | NA |
| RP11-143I21.1 | 0,00 | 0,00 | 0,00 | 0,00 | NA | NA |
| RP11-143J24.1 | 0,00 | 0,00 | 0,00 | 0,00 | NA | NA |
| RP11-143K11.5 | 0,00 | 0,00 | 0,00 | 0,00 | NA | NA |
| RP11-143M1.4  | 0,00 | 0,00 | 0,00 | 0,00 | NA | NA |
| RP11-143N13.2 | 0,00 | 0,00 | 0,00 | 0,00 | NA | NA |
| RP11-143N13.3 | 0,00 | 0,00 | 0,00 | 0,00 | NA | NA |
| RP11-143N13.4 | 0,00 | 0,00 | 0,00 | 0,00 | NA | NA |
| RP11-143P4.2  | 0,00 | 0,00 | 0,00 | 0,00 | NA | NA |
| RP11-144A16.4 | 0,00 | 0,00 | 0,00 | 0,00 | NA | NA |
| RP11-144C15.1 | 0,00 | 0,00 | 0,00 | 0,00 | NA | NA |
| RP11-144C15.2 | 0,00 | 0,00 | 0,00 | 0,00 | NA | NA |
| RP11-144C9.1  | 0,00 | 0,00 | 0,00 | 0,00 | NA | NA |
| RP11-144G6.4  | 0,00 | 0,00 | 0,00 | 0,00 | NA | NA |
| RP11-144G6.9  | 0,00 | 0,00 | 0,00 | 0,00 | NA | NA |
| RP11-144H23.2 | 0,00 | 0,00 | 0,00 | 0,00 | NA | NA |

|                |      |      |      |      |    |    |
|----------------|------|------|------|------|----|----|
| RP11-144L1.4   | 0,00 | 0,00 | 0,00 | 0,00 | NA | NA |
| RP11-144L1.8   | 0,00 | 0,00 | 0,00 | 0,00 | NA | NA |
| RP11-144M17.1  | 0,00 | 0,00 | 0,00 | 0,00 | NA | NA |
| RP11-144N1.1   | 0,00 | 0,00 | 0,00 | 0,00 | NA | NA |
| RP11-144N1.4   | 0,00 | 0,00 | 0,00 | 0,00 | NA | NA |
| RP11-144O23.8  | 0,00 | 0,00 | 0,00 | 0,00 | NA | NA |
| RP11-145A3.1   | 0,00 | 0,00 | 0,00 | 0,00 | NA | NA |
| RP11-145A3.2   | 0,00 | 0,00 | 0,00 | 0,00 | NA | NA |
| RP11-145A3.4   | 0,00 | 0,00 | 0,00 | 0,00 | NA | NA |
| RP11-145E17.2  | 0,00 | 0,00 | 0,00 | 0,00 | NA | NA |
| RP11-145M4.1   | 0,00 | 0,00 | 0,00 | 0,00 | NA | NA |
| RP11-145M4.2   | 0,00 | 0,00 | 0,00 | 0,00 | NA | NA |
| RP11-145M9.2   | 0,00 | 0,00 | 0,00 | 0,00 | NA | NA |
| RP11-145O15.2  | 0,00 | 0,00 | 0,00 | 0,00 | NA | NA |
| RP11-145P16.1  | 0,00 | 0,00 | 0,00 | 0,00 | NA | NA |
| RP11-145P16.3  | 0,00 | 0,00 | 0,00 | 0,00 | NA | NA |
| RP11-145P16.4  | 0,00 | 0,00 | 0,00 | 0,00 | NA | NA |
| RP11-146D12.5  | 0,00 | 0,00 | 0,00 | 0,00 | NA | NA |
| RP11-146D12.6  | 0,00 | 0,00 | 0,00 | 0,00 | NA | NA |
| RP11-146D12.7  | 0,00 | 0,00 | 0,00 | 0,00 | NA | NA |
| RP11-146D5.3   | 0,00 | 0,00 | 0,00 | 0,00 | NA | NA |
| RP11-146E13.5  | 0,00 | 0,00 | 0,00 | 0,00 | NA | NA |
| RP11-146E13.8  | 0,00 | 0,00 | 0,00 | 0,00 | NA | NA |
| RP11-146E23.2  | 0,00 | 0,00 | 0,00 | 0,00 | NA | NA |
| RP11-146F11.2  | 0,00 | 0,00 | 0,00 | 0,00 | NA | NA |
| RP11-146F11.3  | 0,00 | 0,00 | 0,00 | 0,00 | NA | NA |
| RP11-146F11.4  | 0,00 | 0,00 | 0,00 | 0,00 | NA | NA |
| RP11-146G7.2   | 0,00 | 0,00 | 0,00 | 0,00 | NA | NA |
| RP11-146G7.4   | 0,00 | 0,00 | 0,00 | 0,00 | NA | NA |
| RP11-146N18.1  | 0,00 | 0,00 | 0,00 | 0,00 | NA | NA |
| RP11-146N23.1  | 0,00 | 0,00 | 0,00 | 0,00 | NA | NA |
| RP11-146P2.1   | 0,00 | 0,00 | 0,00 | 0,00 | NA | NA |
| RP11-147G16.1  | 0,00 | 0,00 | 0,00 | 0,00 | NA | NA |
| RP11-147H23.3  | 0,00 | 0,00 | 0,00 | 0,00 | NA | NA |
| RP11-147I11.1  | 0,00 | 0,00 | 0,00 | 0,00 | NA | NA |
| RP11-147K16.3  | 0,00 | 0,00 | 0,00 | 0,00 | NA | NA |
| RP11-147K6.1   | 0,00 | 0,00 | 0,00 | 0,00 | NA | NA |
| RP11-147K6.2   | 0,00 | 0,00 | 0,00 | 0,00 | NA | NA |
| RP11-147L13.14 | 0,00 | 0,00 | 0,00 | 0,00 | NA | NA |
| RP11-147N17.1  | 0,00 | 0,00 | 0,00 | 0,00 | NA | NA |
| RP11-148B18.2  | 0,00 | 0,00 | 0,00 | 0,00 | NA | NA |
| RP11-148B3.1   | 0,00 | 0,00 | 0,00 | 0,00 | NA | NA |
| RP11-148B3.2   | 0,00 | 0,00 | 0,00 | 0,00 | NA | NA |
| RP11-148B6.3   | 0,00 | 0,00 | 0,00 | 0,00 | NA | NA |
| RP11-148B6.4   | 0,00 | 0,00 | 0,00 | 0,00 | NA | NA |
| RP11-148I19.1  | 0,00 | 0,00 | 0,00 | 0,00 | NA | NA |
| RP11-148K14.1  | 0,00 | 0,00 | 0,00 | 0,00 | NA | NA |
| RP11-148K14.3  | 0,00 | 0,00 | 0,00 | 0,00 | NA | NA |
| RP11-148L24.1  | 0,32 | 0,00 | 0,18 | 0,15 | NA | NA |
| RP11-148M9.1   | 0,00 | 0,00 | 0,00 | 0,00 | NA | NA |
| RP11-148O7.2   | 0,00 | 0,00 | 0,00 | 0,00 | NA | NA |
| RP11-149A7.1   | 0,00 | 0,00 | 0,00 | 0,00 | NA | NA |
| RP11-149A7.2   | 0,00 | 0,00 | 0,00 | 0,00 | NA | NA |
| RP11-149B7.1   | 0,00 | 0,00 | 0,00 | 0,00 | NA | NA |
| RP11-149B9.2   | 0,00 | 0,00 | 0,00 | 0,00 | NA | NA |

|                |      |      |      |      |    |    |
|----------------|------|------|------|------|----|----|
| RP11-149F8.3   | 0,00 | 0,00 | 0,00 | 0,00 | NA | NA |
| RP11-149F8.4   | 0,00 | 0,00 | 0,00 | 0,00 | NA | NA |
| RP11-149F8.5   | 0,00 | 0,00 | 0,00 | 0,00 | NA | NA |
| RP11-149F8.7   | 0,00 | 0,00 | 0,00 | 0,00 | NA | NA |
| RP11-149F8.8   | 0,00 | 0,00 | 0,00 | 0,00 | NA | NA |
| RP11-149I2.4   | 0,00 | 0,00 | 0,00 | 0,00 | NA | NA |
| RP11-149I2.5   | 0,00 | 0,00 | 0,00 | 0,00 | NA | NA |
| RP11-149I23.5  | 0,00 | 0,00 | 0,00 | 0,00 | NA | NA |
| RP11-149P14.1  | 0,00 | 0,00 | 0,00 | 0,00 | NA | NA |
| RP11-14C10.1   | 0,00 | 0,00 | 0,00 | 0,00 | NA | NA |
| RP11-14C10.2   | 0,00 | 0,00 | 0,00 | 0,00 | NA | NA |
| RP11-14C10.3   | 0,00 | 0,00 | 0,00 | 0,00 | NA | NA |
| RP11-14C10.4   | 0,00 | 0,00 | 0,00 | 0,00 | NA | NA |
| RP11-14C10.5   | 0,00 | 0,00 | 0,00 | 0,00 | NA | NA |
| RP11-14D22.1   | 0,00 | 0,00 | 0,00 | 0,00 | NA | NA |
| RP11-14H3.3    | 0,00 | 0,00 | 0,00 | 0,00 | NA | NA |
| RP11-14I17.1   | 0,00 | 0,00 | 0,00 | 0,00 | NA | NA |
| RP11-14I4.2    | 0,00 | 0,00 | 0,00 | 0,00 | NA | NA |
| RP11-14I4.3    | 0,00 | 0,51 | 0,00 | 0,00 | NA | NA |
| RP11-14J16.1   | 0,00 | 0,00 | 0,00 | 0,00 | NA | NA |
| RP11-14J7.2    | 0,00 | 0,00 | 0,00 | 0,00 | NA | NA |
| RP11-14J7.3    | 0,00 | 0,00 | 0,00 | 0,00 | NA | NA |
| RP11-14J7.7    | 0,00 | 0,00 | 0,00 | 0,00 | NA | NA |
| RP11-14K2.1    | 0,00 | 0,00 | 0,00 | 0,00 | NA | NA |
| RP11-14K3.7    | 0,00 | 0,00 | 0,00 | 0,00 | NA | NA |
| RP11-14N4.1    | 0,00 | 0,00 | 0,00 | 0,00 | NA | NA |
| RP11-14N7.1    | 0,00 | 0,00 | 0,00 | 0,00 | NA | NA |
| RP11-14N9.1    | 0,00 | 0,00 | 0,00 | 0,00 | NA | NA |
| RP11-14O19.1   | 0,00 | 0,00 | 0,00 | 0,00 | NA | NA |
| RP11-14P20.1   | 0,00 | 0,00 | 0,00 | 0,00 | NA | NA |
| RP11-150C16.1  | 0,00 | 0,00 | 0,00 | 0,00 | NA | NA |
| RP11-150D20.5  | 0,00 | 0,00 | 0,00 | 0,00 | NA | NA |
| RP11-150D5.2   | 0,00 | 0,00 | 0,00 | 0,00 | NA | NA |
| RP11-150L8.3   | 0,00 | 0,00 | 0,00 | 0,00 | NA | NA |
| RP11-150L8.4   | 0,00 | 0,00 | 0,00 | 0,00 | NA | NA |
| RP11-150O12.2  | 0,00 | 0,00 | 0,00 | 0,00 | NA | NA |
| RP11-150O12.3  | 0,00 | 0,00 | 0,00 | 0,00 | NA | NA |
| RP11-150O12.5  | 0,00 | 0,00 | 0,00 | 0,00 | NA | NA |
| RP11-151A10.2  | 0,00 | 0,00 | 0,00 | 0,00 | NA | NA |
| RP11-151A2.2   | 0,00 | 0,00 | 0,00 | 0,00 | NA | NA |
| RP11-151A6.4   | 0,00 | 0,20 | 0,00 | 0,00 | NA | NA |
| RP11-151F5.2   | 0,00 | 0,62 | 0,00 | 0,54 | NA | NA |
| RP11-151G12.1  | 0,00 | 0,00 | 0,00 | 0,00 | NA | NA |
| RP11-151G12.2  | 0,00 | 0,00 | 0,00 | 0,00 | NA | NA |
| RP11-151G14.1  | 0,00 | 0,00 | 0,00 | 0,00 | NA | NA |
| RP11-151H2.1   | 0,00 | 0,00 | 0,00 | 0,00 | NA | NA |
| RP11-151H2.3   | 0,00 | 0,00 | 0,00 | 0,00 | NA | NA |
| RP11-151J4.2   | 0,00 | 0,00 | 0,00 | 0,00 | NA | NA |
| RP11-151M7.1   | 0,00 | 0,00 | 0,00 | 0,00 | NA | NA |
| RP11-152C17.1  | 0,00 | 0,00 | 0,00 | 0,00 | NA | NA |
| RP11-152F13.10 | 0,00 | 0,00 | 0,00 | 0,00 | NA | NA |
| RP11-152F13.3  | 0,00 | 0,00 | 0,00 | 0,00 | NA | NA |
| RP11-152K4.1   | 0,00 | 0,00 | 0,00 | 0,00 | NA | NA |
| RP11-152L7.1   | 0,00 | 0,00 | 0,00 | 0,00 | NA | NA |
| RP11-152N13.5  | 0,00 | 0,00 | 0,00 | 0,00 | NA | NA |

|                |      |      |      |      |    |    |
|----------------|------|------|------|------|----|----|
| RP11-152N13.8  | 0,00 | 0,00 | 0,00 | 0,00 | NA | NA |
| RP11-152O14.2  | 0,00 | 0,00 | 0,00 | 0,00 | NA | NA |
| RP11-152O14.3  | 0,00 | 0,00 | 0,00 | 0,00 | NA | NA |
| RP11-152O14.4  | 0,00 | 0,00 | 0,00 | 0,00 | NA | NA |
| RP11-152P17.1  | 0,00 | 0,00 | 0,00 | 0,00 | NA | NA |
| RP11-152P17.3  | 0,00 | 0,00 | 0,00 | 0,00 | NA | NA |
| RP11-153A23.8  | 0,00 | 0,00 | 0,00 | 0,00 | NA | NA |
| RP11-153F1.1   | 0,00 | 0,00 | 0,00 | 0,00 | NA | NA |
| RP11-153F1.2   | 0,00 | 0,00 | 0,00 | 0,00 | NA | NA |
| RP11-153F5.2   | 0,00 | 0,00 | 0,00 | 0,00 | NA | NA |
| RP11-153F5.3   | 0,00 | 0,00 | 0,00 | 0,00 | NA | NA |
| RP11-153G4.2   | 0,00 | 0,00 | 0,00 | 0,00 | NA | NA |
| RP11-153K11.6  | 0,00 | 0,00 | 0,00 | 0,00 | NA | NA |
| RP11-153M3.1   | 0,00 | 0,00 | 0,00 | 0,00 | NA | NA |
| RP11-153N17.1  | 0,00 | 0,00 | 0,00 | 0,00 | NA | NA |
| RP11-154B12.2  | 0,00 | 0,00 | 0,00 | 0,00 | NA | NA |
| RP11-154B12.3  | 0,00 | 0,00 | 0,11 | 0,00 | NA | NA |
| RP11-154B12.4  | 0,00 | 0,00 | 0,00 | 0,00 | NA | NA |
| RP11-154C3.3   | 0,00 | 0,00 | 0,00 | 0,00 | NA | NA |
| RP11-154D3.1   | 0,00 | 0,00 | 0,00 | 0,00 | NA | NA |
| RP11-154D9.1   | 0,00 | 0,00 | 0,00 | 0,00 | NA | NA |
| RP11-154F14.2  | 0,00 | 0,00 | 0,00 | 0,00 | NA | NA |
| RP11-154F14.3  | 0,00 | 0,00 | 0,00 | 0,00 | NA | NA |
| RP11-154P18.2  | 0,00 | 0,00 | 0,00 | 0,00 | NA | NA |
| RP11-155D18.12 | 0,00 | 0,00 | 0,00 | 0,00 | NA | NA |
| RP11-155G14.1  | 0,00 | 0,00 | 0,00 | 0,00 | NA | NA |
| RP11-155G15.3  | 0,00 | 0,00 | 0,00 | 0,00 | NA | NA |
| RP11-155I9.1   | 0,00 | 0,00 | 0,00 | 0,00 | NA | NA |
| RP11-155I9.2   | 0,00 | 0,00 | 0,00 | 0,00 | NA | NA |
| RP11-155L15.2  | 0,00 | 0,00 | 0,00 | 0,00 | NA | NA |
| RP11-155N3.4   | 0,00 | 0,00 | 0,00 | 0,00 | NA | NA |
| RP11-155O18.3  | 0,00 | 0,00 | 0,00 | 0,00 | NA | NA |
| RP11-155O18.6  | 0,00 | 0,00 | 0,00 | 0,00 | NA | NA |
| RP11-156F12.1  | 0,00 | 0,00 | 0,00 | 0,00 | NA | NA |
| RP11-156F23.2  | 0,00 | 0,00 | 0,00 | 0,00 | NA | NA |
| RP11-156G14.4  | 0,00 | 0,00 | 0,00 | 0,00 | NA | NA |
| RP11-156G14.5  | 0,00 | 0,00 | 0,00 | 0,00 | NA | NA |
| RP11-156G14.6  | 0,00 | 0,00 | 0,00 | 0,00 | NA | NA |
| RP11-156I23.1  | 0,00 | 0,00 | 0,00 | 0,00 | NA | NA |
| RP11-156K13.1  | 0,00 | 0,00 | 0,00 | 0,00 | NA | NA |
| RP11-156K13.2  | 0,00 | 0,00 | 0,00 | 0,00 | NA | NA |
| RP11-156K23.2  | 0,00 | 0,07 | 0,00 | 0,00 | NA | NA |
| RP11-156N15.1  | 0,00 | 0,00 | 0,00 | 0,00 | NA | NA |
| RP11-157B13.1  | 0,00 | 0,00 | 0,00 | 0,00 | NA | NA |
| RP11-157B13.10 | 0,00 | 0,00 | 0,00 | 0,00 | NA | NA |
| RP11-157B13.3  | 0,00 | 0,00 | 0,00 | 0,00 | NA | NA |
| RP11-157B13.6  | 0,00 | 0,00 | 0,00 | 0,00 | NA | NA |
| RP11-157B13.8  | 0,00 | 0,00 | 0,00 | 0,00 | NA | NA |
| RP11-157B13.9  | 0,00 | 0,00 | 0,00 | 0,00 | NA | NA |
| RP11-157D18.2  | 0,00 | 0,00 | 0,00 | 0,00 | NA | NA |
| RP11-157D23.2  | 0,00 | 0,00 | 0,00 | 0,00 | NA | NA |
| RP11-157D6.1   | 0,00 | 0,00 | 0,00 | 0,00 | NA | NA |
| RP11-157E14.1  | 0,00 | 0,00 | 0,00 | 0,00 | NA | NA |
| RP11-157E21.1  | 0,00 | 0,00 | 0,00 | 0,00 | NA | NA |
| RP11-157E21.2  | 0,00 | 0,00 | 0,00 | 0,00 | NA | NA |

|                |      |      |      |      |    |    |
|----------------|------|------|------|------|----|----|
| RP11-157E21.3  | 0,00 | 0,00 | 0,00 | 0,00 | NA | NA |
| RP11-157F20.3  | 0,00 | 0,00 | 0,00 | 0,00 | NA | NA |
| RP11-157F24.1  | 0,00 | 0,00 | 0,00 | 0,00 | NA | NA |
| RP11-157G21.1  | 0,00 | 0,00 | 0,00 | 0,00 | NA | NA |
| RP11-157I4.4   | 0,63 | 0,36 | 0,37 | 0,00 | NA | NA |
| RP11-157J13.1  | 0,00 | 0,00 | 0,00 | 0,00 | NA | NA |
| RP11-157J24.1  | 0,00 | 0,00 | 0,00 | 0,00 | NA | NA |
| RP11-157J24.2  | 0,00 | 0,00 | 0,00 | 0,00 | NA | NA |
| RP11-157L10.1  | 0,00 | 0,00 | 0,00 | 0,00 | NA | NA |
| RP11-157L3.10  | 0,00 | 0,00 | 0,00 | 0,00 | NA | NA |
| RP11-157L3.12  | 0,00 | 0,00 | 0,00 | 0,00 | NA | NA |
| RP11-157L3.3   | 0,00 | 0,00 | 0,00 | 0,00 | NA | NA |
| RP11-157L3.5   | 0,00 | 0,00 | 0,00 | 0,00 | NA | NA |
| RP11-157L3.6   | 0,00 | 0,00 | 0,00 | 0,00 | NA | NA |
| RP11-157L3.9   | 0,00 | 0,00 | 0,00 | 0,00 | NA | NA |
| RP11-157N3.1   | 0,00 | 1,44 | 0,09 | 0,55 | NA | NA |
| RP11-157P1.5   | 0,00 | 0,00 | 0,00 | 0,00 | NA | NA |
| RP11-157P23.1  | 0,00 | 0,00 | 0,00 | 0,00 | NA | NA |
| RP11-158A14.1  | 0,00 | 0,00 | 0,00 | 0,00 | NA | NA |
| RP11-158A8.1   | 0,00 | 0,00 | 0,00 | 0,00 | NA | NA |
| RP11-158C21.2  | 0,00 | 0,00 | 0,00 | 0,00 | NA | NA |
| RP11-158C21.3  | 0,00 | 0,00 | 0,00 | 0,00 | NA | NA |
| RP11-158D1.1   | 0,00 | 0,00 | 0,00 | 0,00 | NA | NA |
| RP11-158D2.1   | 0,00 | 0,00 | 0,00 | 0,00 | NA | NA |
| RP11-158G18.1  | 0,22 | 0,50 | 0,17 | 0,16 | NA | NA |
| RP11-158H5.8   | 0,00 | 0,00 | 0,00 | 0,00 | NA | NA |
| RP11-158I23.1  | 0,00 | 0,00 | 0,00 | 0,00 | NA | NA |
| RP11-158I3.1   | 0,00 | 0,00 | 0,00 | 0,00 | NA | NA |
| RP11-158I3.2   | 0,00 | 0,00 | 0,00 | 0,00 | NA | NA |
| RP11-158I3.3   | 0,00 | 0,00 | 0,00 | 0,00 | NA | NA |
| RP11-158I9.1   | 0,00 | 0,00 | 0,00 | 0,00 | NA | NA |
| RP11-158I9.5   | 0,00 | 0,17 | 0,00 | 0,00 | NA | NA |
| RP11-158I9.6   | 0,00 | 0,00 | 0,00 | 0,00 | NA | NA |
| RP11-158L12.2  | 0,00 | 0,00 | 0,00 | 0,00 | NA | NA |
| RP11-158L12.5  | 0,00 | 0,00 | 0,00 | 0,00 | NA | NA |
| RP11-158M2.4   | 0,00 | 0,00 | 0,00 | 0,00 | NA | NA |
| RP11-158M2.6   | 0,00 | 0,00 | 0,00 | 0,00 | NA | NA |
| RP11-158M9.1   | 0,00 | 0,00 | 0,00 | 0,00 | NA | NA |
| RP11-158N24.1  | 0,00 | 0,00 | 0,00 | 0,00 | NA | NA |
| RP11-158O16.1  | 0,00 | 0,00 | 0,00 | 0,00 | NA | NA |
| RP11-159A18.1  | 0,00 | 0,00 | 0,00 | 0,00 | NA | NA |
| RP11-159C21.3  | 0,00 | 0,00 | 0,00 | 0,00 | NA | NA |
| RP11-159D12.11 | 0,00 | 0,00 | 0,00 | 0,00 | NA | NA |
| RP11-159D12.3  | 0,00 | 0,00 | 0,00 | 0,00 | NA | NA |
| RP11-159D23.2  | 0,00 | 0,00 | 0,00 | 0,00 | NA | NA |
| RP11-159D8.1   | 0,00 | 0,00 | 0,00 | 0,00 | NA | NA |
| RP11-159D8.2   | 0,00 | 0,00 | 0,00 | 0,00 | NA | NA |
| RP11-159H10.1  | 0,00 | 0,00 | 0,00 | 0,00 | NA | NA |
| RP11-159H10.4  | 0,00 | 0,00 | 0,00 | 0,00 | NA | NA |
| RP11-159H20.2  | 0,00 | 0,00 | 0,00 | 0,00 | NA | NA |
| RP11-159H20.3  | 0,00 | 0,00 | 0,00 | 0,00 | NA | NA |
| RP11-159H22.1  | 0,00 | 0,00 | 0,00 | 0,00 | NA | NA |
| RP11-159H3.1   | 0,00 | 0,00 | 0,00 | 0,00 | NA | NA |
| RP11-159H3.2   | 0,00 | 0,00 | 0,00 | 0,00 | NA | NA |
| RP11-159J16.1  | 0,00 | 0,00 | 0,00 | 0,00 | NA | NA |

|               |      |      |      |      |    |    |
|---------------|------|------|------|------|----|----|
| RP11-159J2.1  | 0,00 | 0,00 | 0,00 | 0,00 | NA | NA |
| RP11-159J2.2  | 0,00 | 0,00 | 0,00 | 0,00 | NA | NA |
| RP11-159K7.1  | 0,00 | 0,00 | 0,00 | 0,00 | NA | NA |
| RP11-159K7.2  | 0,00 | 0,00 | 0,00 | 0,00 | NA | NA |
| RP11-159L20.2 | 0,00 | 0,00 | 0,00 | 0,00 | NA | NA |
| RP11-159L8.2  | 0,00 | 0,00 | 0,00 | 0,00 | NA | NA |
| RP11-159N11.3 | 0,00 | 0,00 | 0,00 | 0,00 | NA | NA |
| RP11-15A1.2   | 0,00 | 0,00 | 0,00 | 0,00 | NA | NA |
| RP11-15A1.9   | 0,00 | 0,00 | 0,00 | 0,00 | NA | NA |
| RP11-15B17.2  | 0,00 | 0,00 | 0,00 | 0,00 | NA | NA |
| RP11-15B24.2  | 0,00 | 0,00 | 0,00 | 0,00 | NA | NA |
| RP11-15B24.3  | 0,00 | 0,00 | 0,00 | 0,00 | NA | NA |
| RP11-15B24.4  | 0,00 | 0,40 | 0,00 | 0,00 | NA | NA |
| RP11-15D14.1  | 0,00 | 0,00 | 0,00 | 0,00 | NA | NA |
| RP11-15D14.2  | 0,00 | 0,00 | 0,00 | 0,00 | NA | NA |
| RP11-15E1.1   | 0,00 | 0,00 | 0,00 | 0,00 | NA | NA |
| RP11-15E1.4   | 0,00 | 0,00 | 0,00 | 0,00 | NA | NA |
| RP11-15E1.6   | 0,00 | 0,00 | 0,00 | 0,00 | NA | NA |
| RP11-15E18.2  | 0,00 | 0,00 | 0,00 | 0,00 | NA | NA |
| RP11-15E18.3  | 0,00 | 0,00 | 0,00 | 0,00 | NA | NA |
| RP11-15H20.2  | 0,00 | 0,00 | 0,00 | 0,00 | NA | NA |
| RP11-15H20.3  | 0,00 | 0,00 | 0,00 | 0,00 | NA | NA |
| RP11-15H20.8  | 0,00 | 0,00 | 0,00 | 0,00 | NA | NA |
| RP11-15H7.1   | 0,00 | 0,00 | 0,00 | 0,00 | NA | NA |
| RP11-15H7.2   | 0,00 | 0,00 | 0,00 | 0,00 | NA | NA |
| RP11-15I20.1  | 0,00 | 0,00 | 0,00 | 0,00 | NA | NA |
| RP11-15J10.9  | 0,00 | 0,00 | 0,00 | 0,00 | NA | NA |
| RP11-15J23.1  | 0,00 | 0,00 | 0,00 | 0,00 | NA | NA |
| RP11-15K2.2   | 0,00 | 0,00 | 0,00 | 0,00 | NA | NA |
| RP11-15K3.1   | 0,00 | 0,00 | 0,00 | 0,00 | NA | NA |
| RP11-15M15.1  | 0,00 | 0,00 | 0,00 | 0,00 | NA | NA |
| RP11-15P13.1  | 0,00 | 0,00 | 0,00 | 0,00 | NA | NA |
| RP11-160A9.1  | 0,00 | 0,00 | 0,00 | 0,00 | NA | NA |
| RP11-160A9.3  | 0,00 | 0,00 | 0,00 | 0,00 | NA | NA |
| RP11-160C18.2 | 0,00 | 0,09 | 0,00 | 0,51 | NA | NA |
| RP11-160C18.4 | 0,00 | 0,00 | 0,00 | 0,00 | NA | NA |
| RP11-160C18.5 | 0,00 | 0,00 | 0,00 | 0,00 | NA | NA |
| RP11-160E2.16 | 0,00 | 0,51 | 0,00 | 0,00 | NA | NA |
| RP11-160E2.17 | 0,00 | 0,51 | 0,00 | 0,00 | NA | NA |
| RP11-160E2.19 | 0,00 | 0,00 | 0,00 | 0,00 | NA | NA |
| RP11-160H12.1 | 0,00 | 0,00 | 0,00 | 0,00 | NA | NA |
| RP11-160H12.2 | 0,00 | 0,00 | 0,00 | 0,00 | NA | NA |
| RP11-160H12.3 | 0,00 | 0,00 | 0,00 | 0,00 | NA | NA |
| RP11-160K17.1 | 0,00 | 0,00 | 0,00 | 0,00 | NA | NA |
| RP11-160N1.11 | 0,00 | 0,00 | 0,00 | 0,00 | NA | NA |
| RP11-160N1.8  | 0,00 | 0,00 | 0,00 | 0,00 | NA | NA |
| RP11-160N1.9  | 0,00 | 0,00 | 0,00 | 0,00 | NA | NA |
| RP11-161D15.1 | 0,00 | 0,00 | 0,00 | 0,00 | NA | NA |
| RP11-161D15.2 | 0,00 | 0,00 | 0,00 | 0,00 | NA | NA |
| RP11-161E22.2 | 0,00 | 0,00 | 0,00 | 0,00 | NA | NA |
| RP11-161I10.1 | 0,00 | 0,00 | 0,00 | 0,00 | NA | NA |
| RP11-161I19.3 | 0,00 | 0,00 | 0,00 | 0,00 | NA | NA |
| RP11-161M6.2  | 0,28 | 0,71 | 0,14 | 0,39 | NA | NA |
| RP11-161M6.5  | 0,00 | 0,00 | 0,00 | 0,00 | NA | NA |
| RP11-161N3.3  | 0,00 | 0,00 | 0,00 | 0,00 | NA | NA |

|                |      |      |      |      |    |    |
|----------------|------|------|------|------|----|----|
| RP11-161P17.1  | 0,00 | 0,00 | 0,00 | 0,00 | NA | NA |
| RP11-162A12.3  | 0,00 | 0,00 | 0,00 | 0,00 | NA | NA |
| RP11-162A23.5  | 0,00 | 0,00 | 0,00 | 0,00 | NA | NA |
| RP11-162D9.1   | 0,00 | 0,00 | 0,00 | 0,00 | NA | NA |
| RP11-162I7.1   | 0,00 | 0,00 | 0,00 | 0,00 | NA | NA |
| RP11-162I7.2   | 0,00 | 0,00 | 0,00 | 0,00 | NA | NA |
| RP11-162I8.2   | 0,00 | 0,00 | 0,00 | 0,00 | NA | NA |
| RP11-162I8.3   | 0,00 | 0,00 | 0,00 | 0,00 | NA | NA |
| RP11-162K11.4  | 0,00 | 0,00 | 0,00 | 0,00 | NA | NA |
| RP11-162K6.1   | 0,00 | 0,00 | 0,00 | 0,00 | NA | NA |
| RP11-162L10.1  | 0,00 | 0,00 | 0,00 | 0,00 | NA | NA |
| RP11-162N7.1   | 0,00 | 0,00 | 0,00 | 0,00 | NA | NA |
| RP11-162O12.1  | 0,00 | 0,00 | 0,00 | 0,00 | NA | NA |
| RP11-162P23.2  | 0,00 | 0,00 | 0,00 | 0,00 | NA | NA |
| RP11-163B6.2   | 0,00 | 0,00 | 0,00 | 0,00 | NA | NA |
| RP11-163D8.1   | 0,00 | 0,00 | 0,00 | 0,00 | NA | NA |
| RP11-163F8.3   | 0,28 | 0,07 | 1,10 | 0,94 | NA | NA |
| RP11-163I18.2  | 0,00 | 0,00 | 0,00 | 0,00 | NA | NA |
| RP11-163M2.1   | 0,00 | 0,00 | 0,00 | 0,00 | NA | NA |
| RP11-163N15.1  | 0,00 | 0,00 | 0,00 | 0,00 | NA | NA |
| RP11-163N6.1   | 0,00 | 0,00 | 0,00 | 0,00 | NA | NA |
| RP11-163O19.1  | 0,00 | 0,00 | 0,00 | 0,00 | NA | NA |
| RP11-163O19.10 | 0,00 | 0,00 | 0,00 | 0,00 | NA | NA |
| RP11-163O19.11 | 0,00 | 0,00 | 0,00 | 0,00 | NA | NA |
| RP11-163O19.2  | 0,00 | 0,00 | 0,00 | 0,00 | NA | NA |
| RP11-163O19.3  | 0,00 | 0,00 | 0,00 | 0,00 | NA | NA |
| RP11-163O19.8  | 0,00 | 0,00 | 0,00 | 0,00 | NA | NA |
| RP11-164A6.1   | 0,00 | 0,00 | 0,00 | 0,00 | NA | NA |
| RP11-164C1.2   | 0,00 | 0,00 | 0,00 | 0,00 | NA | NA |
| RP11-164C12.1  | 0,00 | 0,00 | 0,00 | 0,00 | NA | NA |
| RP11-164D18.2  | 0,00 | 0,00 | 0,00 | 0,00 | NA | NA |
| RP11-164H5.1   | 0,00 | 0,00 | 0,00 | 0,00 | NA | NA |
| RP11-164N20.2  | 0,00 | 0,00 | 0,00 | 0,00 | NA | NA |
| RP11-164N3.1   | 0,00 | 0,00 | 0,00 | 0,00 | NA | NA |
| RP11-164N3.2   | 0,00 | 0,00 | 0,00 | 0,00 | NA | NA |
| RP11-164O23.5  | 0,00 | 0,00 | 0,00 | 0,00 | NA | NA |
| RP11-164O23.8  | 0,00 | 0,00 | 0,00 | 0,00 | NA | NA |
| RP11-164P12.3  | 0,00 | 0,00 | 0,00 | 0,00 | NA | NA |
| RP11-164P12.4  | 0,00 | 0,00 | 0,00 | 0,00 | NA | NA |
| RP11-165A20.3  | 0,00 | 0,00 | 0,00 | 0,00 | NA | NA |
| RP11-165D20.1  | 0,00 | 0,00 | 0,00 | 0,00 | NA | NA |
| RP11-165D7.3   | 0,00 | 0,00 | 0,00 | 0,00 | NA | NA |
| RP11-165D7.4   | 0,00 | 0,00 | 0,00 | 0,00 | NA | NA |
| RP11-165F24.5  | 0,00 | 0,00 | 0,00 | 0,00 | NA | NA |
| RP11-165H20.4  | 0,00 | 0,00 | 0,00 | 0,00 | NA | NA |
| RP11-165H23.1  | 0,00 | 0,00 | 0,00 | 0,00 | NA | NA |
| RP11-165H4.3   | 0,00 | 0,00 | 0,00 | 0,00 | NA | NA |
| RP11-165H4.4   | 0,00 | 0,00 | 0,00 | 0,00 | NA | NA |
| RP11-165I9.10  | 0,00 | 0,00 | 0,00 | 0,00 | NA | NA |
| RP11-165I9.4   | 0,00 | 0,00 | 0,00 | 0,00 | NA | NA |
| RP11-165I9.6   | 0,00 | 0,00 | 0,00 | 0,00 | NA | NA |
| RP11-165I9.7   | 0,00 | 0,00 | 0,00 | 0,00 | NA | NA |
| RP11-165I9.8   | 0,00 | 0,00 | 0,00 | 0,00 | NA | NA |
| RP11-165I9.9   | 0,00 | 0,00 | 0,00 | 0,00 | NA | NA |
| RP11-165K20.2  | 0,00 | 0,00 | 0,00 | 0,00 | NA | NA |

|               |      |      |      |      |    |    |
|---------------|------|------|------|------|----|----|
| RP11-165N12.1 | 0,00 | 0,00 | 0,00 | 0,00 | NA | NA |
| RP11-165O3.2  | 0,00 | 0,00 | 0,00 | 0,00 | NA | NA |
| RP11-165P7.1  | 0,00 | 0,00 | 0,00 | 0,00 | NA | NA |
| RP11-166B14.1 | 0,00 | 0,00 | 0,00 | 0,00 | NA | NA |
| RP11-166B2.6  | 0,00 | 0,00 | 0,00 | 0,00 | NA | NA |
| RP11-166B2.7  | 0,00 | 0,00 | 0,00 | 0,00 | NA | NA |
| RP11-166B2.9  | 0,00 | 0,00 | 0,00 | 0,00 | NA | NA |
| RP11-166D18.1 | 0,00 | 0,68 | 0,00 | 0,00 | NA | NA |
| RP11-166D18.2 | 0,00 | 0,00 | 0,00 | 0,00 | NA | NA |
| RP11-166E2.1  | 0,00 | 0,00 | 0,00 | 0,00 | NA | NA |
| RP11-166J22.1 | 0,00 | 0,00 | 0,00 | 0,00 | NA | NA |
| RP11-166J5.2  | 0,00 | 0,00 | 0,00 | 0,00 | NA | NA |
| RP11-166N17.1 | 0,00 | 0,00 | 0,00 | 0,00 | NA | NA |
| RP11-167B3.1  | 0,00 | 0,00 | 0,00 | 0,00 | NA | NA |
| RP11-167B3.2  | 0,00 | 0,00 | 0,00 | 0,00 | NA | NA |
| RP11-167H9.1  | 0,00 | 0,00 | 0,00 | 0,00 | NA | NA |
| RP11-167H9.2  | 0,00 | 0,00 | 0,00 | 0,00 | NA | NA |
| RP11-167H9.4  | 0,00 | 0,00 | 0,00 | 0,00 | NA | NA |
| RP11-167H9.5  | 0,00 | 0,00 | 0,00 | 0,00 | NA | NA |
| RP11-167H9.6  | 0,00 | 0,00 | 0,00 | 0,00 | NA | NA |
| RP11-167J8.3  | 0,00 | 0,00 | 0,00 | 0,00 | NA | NA |
| RP11-167J8.4  | 0,00 | 0,00 | 0,00 | 0,00 | NA | NA |
| RP11-167N19.1 | 0,00 | 0,00 | 0,00 | 0,00 | NA | NA |
| RP11-167N19.2 | 0,00 | 0,00 | 0,00 | 0,00 | NA | NA |
| RP11-167N24.5 | 0,00 | 0,00 | 0,00 | 0,00 | NA | NA |
| RP11-167N4.2  | 0,00 | 0,00 | 0,00 | 0,00 | NA | NA |
| RP11-167N4.5  | 0,00 | 0,00 | 0,00 | 0,00 | NA | NA |
| RP11-167O6.2  | 0,00 | 0,00 | 0,00 | 0,00 | NA | NA |
| RP11-167P23.2 | 0,00 | 0,00 | 0,00 | 0,00 | NA | NA |
| RP11-167P23.4 | 0,00 | 0,00 | 0,00 | 0,00 | NA | NA |
| RP11-168A11.1 | 0,00 | 0,00 | 0,00 | 0,00 | NA | NA |
| RP11-168A11.3 | 0,00 | 0,00 | 0,00 | 0,00 | NA | NA |
| RP11-168A11.4 | 0,00 | 0,00 | 0,00 | 0,00 | NA | NA |
| RP11-168C9.1  | 0,00 | 0,00 | 0,00 | 0,00 | NA | NA |
| RP11-168E17.1 | 0,00 | 0,00 | 0,00 | 0,00 | NA | NA |
| RP11-168F24.2 | 0,00 | 0,00 | 0,00 | 0,00 | NA | NA |
| RP11-168G16.2 | 0,00 | 0,00 | 0,00 | 0,00 | NA | NA |
| RP11-168G22.1 | 0,00 | 0,00 | 0,00 | 0,00 | NA | NA |
| RP11-168G22.2 | 0,00 | 0,00 | 0,00 | 0,00 | NA | NA |
| RP11-168G22.3 | 0,00 | 0,00 | 0,00 | 0,00 | NA | NA |
| RP11-168G22.4 | 0,00 | 0,00 | 0,00 | 0,00 | NA | NA |
| RP11-168J5.2  | 0,00 | 0,00 | 0,00 | 0,00 | NA | NA |
| RP11-168K11.2 | 0,00 | 0,00 | 0,00 | 0,00 | NA | NA |
| RP11-168K11.3 | 0,00 | 0,00 | 0,00 | 0,00 | NA | NA |
| RP11-168K11.5 | 0,00 | 0,00 | 0,00 | 0,00 | NA | NA |
| RP11-168L22.2 | 0,00 | 0,00 | 0,00 | 0,00 | NA | NA |
| RP11-168L7.1  | 0,00 | 0,00 | 0,00 | 0,00 | NA | NA |
| RP11-168L7.2  | 0,00 | 0,00 | 0,00 | 0,00 | NA | NA |
| RP11-168L7.3  | 0,00 | 0,00 | 0,00 | 0,00 | NA | NA |
| RP11-168O10.6 | 0,00 | 0,00 | 0,00 | 0,00 | NA | NA |
| RP11-168O16.2 | 0,00 | 0,00 | 0,00 | 0,00 | NA | NA |
| RP11-168P13.1 | 0,00 | 0,00 | 0,00 | 0,00 | NA | NA |
| RP11-168P8.3  | 0,00 | 0,00 | 0,00 | 0,00 | NA | NA |
| RP11-168P8.7  | 0,00 | 0,00 | 0,00 | 0,00 | NA | NA |
| RP11-169D4.3  | 0,00 | 0,00 | 0,00 | 0,00 | NA | NA |



|               |      |      |      |      |    |    |
|---------------|------|------|------|------|----|----|
| RP11-169D4.4  | 0,00 | 0,00 | 0,00 | 0,00 | NA | NA |
| RP11-169E6.3  | 0,00 | 0,00 | 0,00 | 0,00 | NA | NA |
| RP11-169I9.2  | 0,00 | 0,00 | 0,00 | 0,00 | NA | NA |
| RP11-169K16.6 | 0,00 | 0,00 | 0,00 | 0,00 | NA | NA |
| RP11-169K17.3 | 0,00 | 0,35 | 0,00 | 0,00 | NA | NA |
| RP11-169K19.1 | 0,00 | 0,00 | 0,00 | 0,00 | NA | NA |
| RP11-169L17.4 | 0,00 | 0,00 | 0,00 | 0,00 | NA | NA |
| RP11-169L17.5 | 0,00 | 0,00 | 0,00 | 0,00 | NA | NA |
| RP11-169N13.1 | 0,00 | 0,00 | 0,00 | 0,00 | NA | NA |
| RP11-169N13.4 | 0,00 | 0,00 | 0,00 | 0,00 | NA | NA |
| RP11-169O17.1 | 0,00 | 0,00 | 0,00 | 0,00 | NA | NA |
| RP11-169O17.6 | 0,34 | 0,00 | 0,16 | 0,00 | NA | NA |
| RP11-16C18.3  | 0,00 | 0,00 | 0,00 | 0,00 | NA | NA |
| RP11-16D22.2  | 0,00 | 0,00 | 0,00 | 0,00 | NA | NA |
| RP11-16E18.1  | 0,00 | 0,00 | 0,00 | 0,00 | NA | NA |
| RP11-16F15.4  | 0,00 | 0,00 | 0,00 | 0,00 | NA | NA |
| RP11-16K12.2  | 0,00 | 0,00 | 0,00 | 0,00 | NA | NA |
| RP11-16L14.2  | 0,00 | 0,00 | 0,00 | 0,00 | NA | NA |
| RP11-16L6.3   | 0,00 | 0,00 | 0,00 | 0,00 | NA | NA |
| RP11-16L9.2   | 0,00 | 0,00 | 0,00 | 0,00 | NA | NA |
| RP11-16L9.3   | 0,00 | 0,00 | 0,00 | 0,00 | NA | NA |
| RP11-16M8.1   | 0,00 | 0,00 | 0,00 | 0,00 | NA | NA |
| RP11-16O13.1  | 0,00 | 0,00 | 0,00 | 0,00 | NA | NA |
| RP11-16P13.1  | 0,00 | 0,00 | 0,00 | 0,00 | NA | NA |
| RP11-16P20.2  | 0,00 | 0,00 | 0,00 | 0,00 | NA | NA |
| RP11-16P6.1   | 0,00 | 0,06 | 0,06 | 0,06 | NA | NA |
| RP11-170L3.2  | 0,00 | 0,00 | 0,00 | 0,00 | NA | NA |
| RP11-170L3.5  | 0,00 | 0,00 | 0,00 | 0,00 | NA | NA |
| RP11-170L3.6  | 0,00 | 0,00 | 0,00 | 0,00 | NA | NA |
| RP11-170L9.1  | 0,00 | 0,00 | 0,00 | 0,00 | NA | NA |
| RP11-170N16.1 | 0,00 | 0,00 | 0,00 | 0,00 | NA | NA |
| RP11-170N16.2 | 0,00 | 0,00 | 0,00 | 0,00 | NA | NA |
| RP11-171A24.2 | 0,00 | 0,00 | 0,00 | 0,00 | NA | NA |
| RP11-171G2.1  | 0,00 | 0,00 | 0,00 | 0,00 | NA | NA |
| RP11-171G7.1  | 0,00 | 0,00 | 0,00 | 0,00 | NA | NA |
| RP11-171I2.1  | 0,00 | 0,00 | 0,00 | 0,00 | NA | NA |
| RP11-171I2.3  | 0,00 | 0,00 | 0,00 | 0,00 | NA | NA |
| RP11-171N4.1  | 0,00 | 0,00 | 0,00 | 0,00 | NA | NA |
| RP11-171N4.3  | 0,00 | 0,00 | 0,00 | 0,00 | NA | NA |
| RP11-171N4.4  | 0,00 | 0,00 | 0,00 | 0,00 | NA | NA |
| RP11-172C16.4 | 0,00 | 0,00 | 0,00 | 0,00 | NA | NA |
| RP11-172C16.5 | 0,00 | 0,00 | 0,00 | 0,00 | NA | NA |
| RP11-172F4.2  | 0,00 | 0,00 | 0,00 | 0,00 | NA | NA |
| RP11-173A6.4  | 0,00 | 0,00 | 0,00 | 0,00 | NA | NA |
| RP11-173C1.1  | 0,00 | 0,00 | 0,00 | 0,00 | NA | NA |
| RP11-173D14.3 | 0,00 | 0,00 | 0,00 | 0,00 | NA | NA |
| RP11-173D3.1  | 0,00 | 0,21 | 0,00 | 0,00 | NA | NA |
| RP11-173D3.3  | 0,00 | 0,00 | 0,00 | 0,00 | NA | NA |
| RP11-173D3.4  | 0,02 | 0,29 | 0,01 | 0,14 | NA | NA |
| RP11-173D9.1  | 0,00 | 0,00 | 0,00 | 0,00 | NA | NA |
| RP11-173E2.1  | 0,00 | 0,00 | 0,00 | 0,00 | NA | NA |
| RP11-173E2.2  | 0,00 | 0,00 | 0,00 | 0,00 | NA | NA |
| RP11-173G21.1 | 0,00 | 0,00 | 0,00 | 0,00 | NA | NA |
| RP11-173L6.1  | 0,00 | 0,00 | 0,00 | 0,00 | NA | NA |
| RP11-173M1.3  | 0,00 | 0,00 | 0,00 | 0,00 | NA | NA |

|               |      |      |      |      |    |    |
|---------------|------|------|------|------|----|----|
| RP11-173M1.5  | 0,00 | 0,00 | 0,00 | 0,00 | NA | NA |
| RP11-173M11.2 | 0,00 | 0,00 | 0,00 | 0,00 | NA | NA |
| RP11-173N17.2 | 0,00 | 0,00 | 0,00 | 0,00 | NA | NA |
| RP11-173N7.1  | 0,00 | 0,00 | 0,00 | 0,00 | NA | NA |
| RP11-173N7.2  | 0,00 | 0,00 | 0,00 | 0,00 | NA | NA |
| RP11-173O8.1  | 0,00 | 0,00 | 0,00 | 0,00 | NA | NA |
| RP11-173P15.7 | 0,00 | 0,00 | 0,00 | 0,00 | NA | NA |
| RP11-173P16.2 | 0,00 | 0,00 | 0,00 | 0,00 | NA | NA |
| RP11-174B4.2  | 0,00 | 0,00 | 0,00 | 0,00 | NA | NA |
| RP11-174C7.1  | 0,00 | 0,00 | 0,00 | 0,00 | NA | NA |
| RP11-174C7.2  | 0,00 | 0,00 | 0,00 | 0,00 | NA | NA |
| RP11-174C7.3  | 0,00 | 0,00 | 0,00 | 0,00 | NA | NA |
| RP11-174E22.1 | 0,00 | 0,00 | 0,00 | 0,00 | NA | NA |
| RP11-174E22.2 | 0,00 | 0,00 | 0,00 | 0,00 | NA | NA |
| RP11-174F8.1  | 0,00 | 0,31 | 0,00 | 0,00 | NA | NA |
| RP11-174G17   | 0,00 | 0,00 | 0,00 | 0,00 | NA | NA |
| RP11-174G17.2 | 0,00 | 0,00 | 0,00 | 0,00 | NA | NA |
| RP11-174I12.2 | 0,00 | 0,00 | 0,00 | 0,00 | NA | NA |
| RP11-174J11.1 | 0,00 | 0,00 | 0,00 | 0,00 | NA | NA |
| RP11-174M13.2 | 0,00 | 0,00 | 0,00 | 0,00 | NA | NA |
| RP11-174O3.1  | 0,00 | 0,00 | 0,00 | 0,00 | NA | NA |
| RP11-174O3.4  | 0,00 | 0,00 | 0,00 | 0,00 | NA | NA |
| RP11-174O3.6  | 0,00 | 0,00 | 0,00 | 0,00 | NA | NA |
| RP11-175B12.2 | 0,00 | 0,00 | 0,00 | 0,00 | NA | NA |
| RP11-175B9.3  | 0,00 | 1,78 | 1,11 | 1,13 | NA | NA |
| RP11-175E9.1  | 0,00 | 0,00 | 0,00 | 0,00 | NA | NA |
| RP11-175E9.2  | 0,00 | 0,00 | 0,00 | 0,00 | NA | NA |
| RP11-175F9.1  | 0,00 | 0,00 | 0,00 | 0,00 | NA | NA |
| RP11-175I17.3 | 0,00 | 0,00 | 0,00 | 0,00 | NA | NA |
| RP11-175I17.6 | 0,00 | 0,00 | 0,00 | 0,00 | NA | NA |
| RP11-175I6.1  | 0,00 | 0,00 | 0,00 | 0,00 | NA | NA |
| RP11-175I6.3  | 0,00 | 0,00 | 0,00 | 0,00 | NA | NA |
| RP11-175I6.5  | 0,00 | 0,00 | 0,00 | 0,00 | NA | NA |
| RP11-175I10.1 | 0,00 | 0,00 | 0,00 | 0,00 | NA | NA |
| RP11-175I10.2 | 0,00 | 0,00 | 0,00 | 0,00 | NA | NA |
| RP11-175K6.2  | 0,04 | 0,07 | 0,00 | 0,12 | NA | NA |
| RP11-175M2.1  | 0,00 | 0,00 | 0,00 | 0,00 | NA | NA |
| RP11-175M2.2  | 0,00 | 0,00 | 0,00 | 0,00 | NA | NA |
| RP11-176D17.3 | 0,00 | 0,00 | 0,00 | 0,00 | NA | NA |
| RP11-176H8.3  | 0,00 | 0,00 | 0,00 | 0,00 | NA | NA |
| RP11-176P14.1 | 0,00 | 0,00 | 0,00 | 0,00 | NA | NA |
| RP11-177B4.2  | 0,00 | 0,09 | 0,00 | 0,00 | NA | NA |
| RP11-177C12.5 | 0,00 | 0,00 | 0,00 | 0,00 | NA | NA |
| RP11-177G23.1 | 0,00 | 0,00 | 0,00 | 0,00 | NA | NA |
| RP11-177H2.1  | 0,00 | 0,00 | 0,00 | 0,00 | NA | NA |
| RP11-177I8.1  | 0,00 | 0,00 | 0,00 | 0,00 | NA | NA |
| RP11-178A10.3 | 0,00 | 0,00 | 0,00 | 0,00 | NA | NA |
| RP11-178C3.1  | 0,00 | 0,00 | 0,00 | 0,00 | NA | NA |
| RP11-178C3.3  | 0,00 | 0,00 | 0,00 | 0,00 | NA | NA |
| RP11-178C3.5  | 0,00 | 0,00 | 0,00 | 0,00 | NA | NA |
| RP11-178C3.6  | 0,00 | 0,00 | 0,00 | 0,00 | NA | NA |
| RP11-178C3.7  | 0,00 | 0,00 | 0,00 | 0,00 | NA | NA |
| RP11-178C3.8  | 0,00 | 0,00 | 0,00 | 0,00 | NA | NA |
| RP11-178D12.2 | 0,00 | 0,00 | 0,00 | 0,00 | NA | NA |
| RP11-178F10.2 | 0,00 | 0,00 | 0,00 | 0,00 | NA | NA |

|               |      |      |      |      |    |    |
|---------------|------|------|------|------|----|----|
| RP11-178F10.4 | 0,00 | 0,00 | 0,00 | 0,00 | NA | NA |
| RP11-178H8.1  | 0,00 | 0,00 | 0,00 | 0,00 | NA | NA |
| RP11-178H8.3  | 0,00 | 0,00 | 0,00 | 0,00 | NA | NA |
| RP11-178L8.1  | 0,00 | 0,00 | 0,00 | 0,00 | NA | NA |
| RP11-178L8.4  | 0,00 | 0,00 | 0,00 | 0,00 | NA | NA |
| RP11-178L8.6  | 0,00 | 0,00 | 0,00 | 0,00 | NA | NA |
| RP11-178L8.8  | 0,00 | 0,43 | 0,00 | 0,00 | NA | NA |
| RP11-178M5.1  | 0,00 | 0,00 | 0,00 | 0,00 | NA | NA |
| RP11-179A10.1 | 0,00 | 0,00 | 0,00 | 0,00 | NA | NA |
| RP11-179A10.3 | 0,00 | 0,00 | 0,00 | 0,00 | NA | NA |
| RP11-179A18.1 | 0,00 | 0,19 | 0,00 | 0,00 | NA | NA |
| RP11-179A9.3  | 0,00 | 0,00 | 0,00 | 0,00 | NA | NA |
| RP11-179A9.4  | 0,00 | 0,00 | 0,00 | 0,00 | NA | NA |
| RP11-179B15.5 | 0,00 | 0,00 | 0,00 | 0,00 | NA | NA |
| RP11-179B15.6 | 0,00 | 0,00 | 0,00 | 0,00 | NA | NA |
| RP11-179D22.1 | 0,00 | 0,00 | 0,00 | 0,00 | NA | NA |
| RP11-179F17.2 | 0,00 | 0,00 | 0,00 | 0,00 | NA | NA |
| RP11-179G5.1  | 0,00 | 0,00 | 0,00 | 0,00 | NA | NA |
| RP11-179G5.4  | 0,00 | 0,86 | 0,00 | 0,00 | NA | NA |
| RP11-179G8.1  | 0,00 | 0,00 | 0,00 | 0,00 | NA | NA |
| RP11-179H18.4 | 0,00 | 0,00 | 0,00 | 0,00 | NA | NA |
| RP11-179H18.5 | 0,00 | 0,00 | 0,00 | 0,00 | NA | NA |
| RP11-179H18.7 | 0,00 | 0,00 | 0,00 | 0,00 | NA | NA |
| RP11-179H18.8 | 0,00 | 0,00 | 0,00 | 0,00 | NA | NA |
| RP11-17A19.2  | 0,00 | 0,00 | 0,00 | 0,00 | NA | NA |
| RP11-17A4.3   | 0,00 | 0,00 | 0,00 | 0,00 | NA | NA |
| RP11-17E13.2  | 0,00 | 0,00 | 0,00 | 0,00 | NA | NA |
| RP11-17E15.1  | 0,00 | 0,00 | 0,00 | 0,00 | NA | NA |
| RP11-17E3.1   | 0,00 | 0,00 | 0,00 | 0,00 | NA | NA |
| RP11-17E4.1   | 0,00 | 0,00 | 0,00 | 0,00 | NA | NA |
| RP11-17G11.1  | 0,00 | 0,00 | 0,00 | 0,00 | NA | NA |
| RP11-17G12.3  | 0,00 | 0,00 | 0,00 | 0,00 | NA | NA |
| RP11-17G2.1   | 0,00 | 0,00 | 0,00 | 0,00 | NA | NA |
| RP11-17J14.2  | 0,00 | 0,00 | 0,00 | 0,00 | NA | NA |
| RP11-17M15.1  | 0,00 | 0,00 | 0,00 | 0,00 | NA | NA |
| RP11-17M15.4  | 0,00 | 0,00 | 0,00 | 0,00 | NA | NA |
| RP11-17M24.2  | 0,00 | 0,00 | 0,00 | 0,00 | NA | NA |
| RP11-17M24.3  | 0,00 | 0,00 | 0,00 | 0,00 | NA | NA |
| RP11-17P16.2  | 0,00 | 0,00 | 0,00 | 0,00 | NA | NA |
| RP11-180A12.1 | 0,00 | 0,00 | 0,00 | 0,00 | NA | NA |
| RP11-180A12.3 | 0,00 | 0,00 | 0,00 | 0,00 | NA | NA |
| RP11-180A12.4 | 0,00 | 0,00 | 0,00 | 0,00 | NA | NA |
| RP11-180C1.1  | 0,00 | 0,27 | 0,00 | 0,00 | NA | NA |
| RP11-180D15.1 | 0,00 | 0,00 | 0,00 | 0,00 | NA | NA |
| RP11-180D21.3 | 0,00 | 0,00 | 0,00 | 0,00 | NA | NA |
| RP11-180I22.2 | 0,00 | 0,00 | 0,00 | 0,00 | NA | NA |
| RP11-180I4.1  | 0,00 | 0,00 | 0,00 | 0,00 | NA | NA |
| RP11-180I4.4  | 0,00 | 0,00 | 0,00 | 0,00 | NA | NA |
| RP11-180K7.1  | 0,00 | 0,00 | 0,00 | 0,00 | NA | NA |
| RP11-180M15.3 | 0,00 | 0,00 | 0,00 | 0,00 | NA | NA |
| RP11-180M15.5 | 0,00 | 0,00 | 0,00 | 0,00 | NA | NA |
| RP11-180O5.2  | 0,00 | 0,00 | 0,00 | 0,00 | NA | NA |
| RP11-180P8.1  | 0,00 | 0,00 | 0,00 | 0,34 | NA | NA |
| RP11-180P8.2  | 0,00 | 0,00 | 0,00 | 0,00 | NA | NA |
| RP11-180P8.4  | 0,00 | 0,00 | 0,00 | 0,00 | NA | NA |

|               |      |      |      |      |    |    |
|---------------|------|------|------|------|----|----|
| RP11-180P8.5  | 0,00 | 0,00 | 0,00 | 0,00 | NA | NA |
| RP11-181B11.2 | 0,00 | 0,00 | 0,00 | 0,00 | NA | NA |
| RP11-181C21.4 | 0,00 | 0,00 | 0,00 | 0,00 | NA | NA |
| RP11-181C21.6 | 0,00 | 0,00 | 0,00 | 0,00 | NA | NA |
| RP11-181E22.1 | 0,00 | 0,00 | 0,00 | 0,00 | NA | NA |
| RP11-181E7.1  | 0,00 | 0,00 | 0,00 | 0,00 | NA | NA |
| RP11-181G12.4 | 0,00 | 0,00 | 0,00 | 0,00 | NA | NA |
| RP11-181K3.4  | 0,00 | 0,00 | 0,00 | 0,00 | NA | NA |
| RP11-182B22.4 | 0,00 | 0,68 | 0,00 | 0,00 | NA | NA |
| RP11-182E14.1 | 0,00 | 0,00 | 0,00 | 0,00 | NA | NA |
| RP11-182I21.1 | 0,00 | 0,00 | 0,00 | 0,00 | NA | NA |
| RP11-182I21.2 | 0,00 | 0,00 | 0,00 | 0,00 | NA | NA |
| RP11-182J1.10 | 0,00 | 0,00 | 0,00 | 0,00 | NA | NA |
| RP11-182J1.11 | 0,00 | 0,00 | 0,00 | 0,00 | NA | NA |
| RP11-182J1.12 | 0,39 | 0,00 | 0,00 | 0,00 | NA | NA |
| RP11-182J1.14 | 0,00 | 0,00 | 0,00 | 0,00 | NA | NA |
| RP11-182J1.15 | 0,00 | 0,00 | 0,00 | 0,00 | NA | NA |
| RP11-182J1.16 | 0,00 | 0,00 | 0,00 | 0,00 | NA | NA |
| RP11-182L7.1  | 0,00 | 0,00 | 0,00 | 0,00 | NA | NA |
| RP11-182M20.2 | 0,00 | 0,00 | 0,00 | 0,00 | NA | NA |
| RP11-182N22.8 | 0,00 | 0,00 | 0,00 | 0,00 | NA | NA |
| RP11-183A22.3 | 0,00 | 0,00 | 0,00 | 0,00 | NA | NA |
| RP11-183C12.1 | 0,00 | 0,00 | 0,00 | 0,00 | NA | NA |
| RP11-183E24.1 | 0,00 | 0,00 | 0,00 | 0,00 | NA | NA |
| RP11-183E24.2 | 0,00 | 0,00 | 0,00 | 0,00 | NA | NA |
| RP11-183E9.2  | 0,00 | 0,00 | 0,00 | 0,00 | NA | NA |
| RP11-183G22.2 | 0,00 | 0,31 | 0,00 | 0,00 | NA | NA |
| RP11-183G22.3 | 0,00 | 0,00 | 0,00 | 0,00 | NA | NA |
| RP11-183I6.2  | 0,00 | 0,00 | 0,00 | 0,00 | NA | NA |
| RP11-183K14.1 | 0,00 | 0,00 | 0,00 | 0,00 | NA | NA |
| RP11-184A2.2  | 0,00 | 0,00 | 0,00 | 0,00 | NA | NA |
| RP11-184A2.3  | 0,00 | 0,00 | 0,00 | 0,00 | NA | NA |
| RP11-184B22.2 | 0,00 | 0,00 | 0,00 | 0,00 | NA | NA |
| RP11-184C23.1 | 0,00 | 0,00 | 0,00 | 0,00 | NA | NA |
| RP11-184C23.3 | 0,00 | 0,00 | 0,00 | 0,00 | NA | NA |
| RP11-184C23.4 | 0,00 | 0,00 | 0,00 | 0,00 | NA | NA |
| RP11-184E9.2  | 0,00 | 0,00 | 0,00 | 0,00 | NA | NA |
| RP11-184E9.3  | 0,00 | 0,00 | 0,00 | 0,00 | NA | NA |
| RP11-184E9.4  | 0,00 | 0,00 | 0,00 | 0,00 | NA | NA |
| RP11-184J23.2 | 0,00 | 0,00 | 0,00 | 0,00 | NA | NA |
| RP11-184L18.1 | 0,00 | 0,00 | 0,00 | 0,00 | NA | NA |
| RP11-185B14.1 | 0,00 | 0,00 | 0,00 | 0,00 | NA | NA |
| RP11-185E12.2 | 0,00 | 0,00 | 0,00 | 0,00 | NA | NA |
| RP11-185E8.1  | 0,00 | 0,00 | 0,00 | 0,00 | NA | NA |
| RP11-185E8.2  | 0,00 | 0,00 | 0,00 | 0,00 | NA | NA |
| RP11-185H22.1 | 0,00 | 0,00 | 0,00 | 0,00 | NA | NA |
| RP11-185J20.1 | 0,00 | 0,00 | 0,00 | 0,00 | NA | NA |
| RP11-185J20.2 | 0,00 | 0,00 | 0,00 | 0,00 | NA | NA |
| RP11-185N2.1  | 0,00 | 0,00 | 0,00 | 0,00 | NA | NA |
| RP11-185O21.1 | 0,00 | 0,00 | 0,00 | 0,00 | NA | NA |
| RP11-186B7.7  | 0,00 | 0,00 | 0,00 | 0,00 | NA | NA |
| RP11-186F10.2 | 0,00 | 0,00 | 0,00 | 0,00 | NA | NA |
| RP11-186O14.5 | 0,00 | 0,00 | 0,00 | 0,00 | NA | NA |
| RP11-186O14.7 | 0,00 | 0,00 | 0,00 | 0,00 | NA | NA |
| RP11-187A9.2  | 0,00 | 0,00 | 0,00 | 0,00 | NA | NA |

|               |      |      |      |      |    |    |
|---------------|------|------|------|------|----|----|
| RP11-187C18.3 | 0,00 | 0,00 | 0,00 | 0,00 | NA | NA |
| RP11-187C18.4 | 0,00 | 0,00 | 0,00 | 0,00 | NA | NA |
| RP11-187C18.5 | 0,00 | 0,00 | 0,00 | 0,00 | NA | NA |
| RP11-187E13.1 | 0,00 | 0,00 | 0,00 | 0,00 | NA | NA |
| RP11-187E13.2 | 0,00 | 0,00 | 0,00 | 0,00 | NA | NA |
| RP11-187E13.3 | 0,00 | 0,00 | 0,00 | 0,00 | NA | NA |
| RP11-187O7.4  | 0,00 | 0,00 | 0,00 | 0,00 | NA | NA |
| RP11-188I24.1 | 0,00 | 0,00 | 0,00 | 0,00 | NA | NA |
| RP11-188P17.2 | 0,00 | 0,00 | 0,00 | 0,00 | NA | NA |
| RP11-188P8.2  | 0,00 | 0,00 | 0,00 | 0,00 | NA | NA |
| RP11-188P8.3  | 0,00 | 0,00 | 0,00 | 0,00 | NA | NA |
| RP11-189B4.1  | 0,00 | 0,00 | 0,00 | 0,00 | NA | NA |
| RP11-189B4.3  | 0,00 | 0,00 | 0,00 | 0,00 | NA | NA |
| RP11-189B4.4  | 0,00 | 0,00 | 0,00 | 0,00 | NA | NA |
| RP11-189E14.5 | 0,00 | 0,00 | 0,00 | 0,00 | NA | NA |
| RP11-18A3.2   | 0,00 | 0,00 | 0,00 | 0,00 | NA | NA |
| RP11-18C24.8  | 0,00 | 0,00 | 0,00 | 0,00 | NA | NA |
| RP11-18D7.2   | 0,00 | 0,00 | 0,00 | 0,00 | NA | NA |
| RP11-18D7.3   | 0,00 | 0,00 | 0,00 | 0,00 | NA | NA |
| RP11-18I14.11 | 0,00 | 0,00 | 0,00 | 0,00 | NA | NA |
| RP11-18K20.1  | 0,00 | 0,00 | 0,00 | 0,00 | NA | NA |
| RP11-18M11.1  | 0,00 | 0,00 | 0,00 | 0,00 | NA | NA |
| RP11-18M17.1  | 0,00 | 0,00 | 0,00 | 0,00 | NA | NA |
| RP11-18O11.1  | 0,00 | 0,00 | 0,00 | 0,00 | NA | NA |
| RP11-18O11.2  | 0,00 | 0,00 | 0,00 | 0,00 | NA | NA |
| RP11-18O15.1  | 0,00 | 0,00 | 0,00 | 0,00 | NA | NA |
| RP11-190A12.4 | 0,00 | 0,00 | 0,00 | 0,00 | NA | NA |
| RP11-190C21.4 | 0,00 | 0,00 | 0,00 | 0,00 | NA | NA |
| RP11-190E23.1 | 0,00 | 0,00 | 0,00 | 0,00 | NA | NA |
| RP11-190E23.2 | 0,00 | 0,00 | 0,00 | 0,00 | NA | NA |
| RP11-190I17.2 | 0,00 | 0,00 | 0,00 | 0,00 | NA | NA |
| RP11-190I17.4 | 0,00 | 0,00 | 0,00 | 0,00 | NA | NA |
| RP11-190I1.10 | 0,00 | 0,20 | 0,00 | 0,00 | NA | NA |
| RP11-190I1.3  | 0,00 | 0,91 | 0,00 | 0,00 | NA | NA |
| RP11-190J23.1 | 0,00 | 0,00 | 0,00 | 0,00 | NA | NA |
| RP11-190J23.2 | 0,00 | 0,00 | 0,00 | 0,00 | NA | NA |
| RP11-190K16.2 | 0,00 | 0,00 | 0,00 | 0,00 | NA | NA |
| RP11-190P13.1 | 0,00 | 0,00 | 0,00 | 0,00 | NA | NA |
| RP11-190P13.2 | 0,00 | 0,00 | 0,00 | 0,00 | NA | NA |
| RP11-191A15.1 | 0,00 | 0,00 | 0,00 | 0,00 | NA | NA |
| RP11-191F9.1  | 0,00 | 0,00 | 0,00 | 0,00 | NA | NA |
| RP11-191F9.2  | 0,00 | 0,00 | 0,00 | 0,00 | NA | NA |
| RP11-191F9.4  | 0,00 | 0,00 | 0,00 | 0,00 | NA | NA |
| RP11-191H23.1 | 0,00 | 0,00 | 0,00 | 0,00 | NA | NA |
| RP11-191L9.4  | 0,00 | 0,00 | 0,00 | 0,00 | NA | NA |
| RP11-191L9.5  | 0,00 | 0,00 | 0,00 | 0,00 | NA | NA |
| RP11-191L9.6  | 0,00 | 0,00 | 0,00 | 0,00 | NA | NA |
| RP11-191N8.2  | 0,00 | 0,00 | 0,00 | 0,00 | NA | NA |
| RP11-192B18.1 | 0,00 | 0,00 | 0,00 | 0,00 | NA | NA |
| RP11-192C21.1 | 0,00 | 0,33 | 0,00 | 0,00 | NA | NA |
| RP11-192C21.2 | 0,00 | 0,00 | 0,00 | 0,00 | NA | NA |
| RP11-192H23.7 | 0,00 | 0,00 | 0,00 | 0,00 | NA | NA |
| RP11-192H6.2  | 0,00 | 0,00 | 0,00 | 0,00 | NA | NA |
| RP11-192I24.1 | 0,00 | 0,00 | 0,00 | 0,00 | NA | NA |
| RP11-192I3.2  | 0,00 | 0,00 | 0,00 | 0,00 | NA | NA |

|                |      |      |      |      |    |    |
|----------------|------|------|------|------|----|----|
| RP11-192I3.3   | 0,00 | 0,00 | 0,00 | 0,00 | NA | NA |
| RP11-192K2.2   | 0,00 | 0,00 | 0,00 | 0,00 | NA | NA |
| RP11-192M23.1  | 0,00 | 0,00 | 0,00 | 0,00 | NA | NA |
| RP11-192N10.2  | 0,00 | 0,00 | 0,00 | 0,00 | NA | NA |
| RP11-192P9.1   | 0,00 | 0,00 | 0,00 | 0,00 | NA | NA |
| RP11-193F5.1   | 0,00 | 0,00 | 0,00 | 0,00 | NA | NA |
| RP11-193F5.4   | 0,00 | 0,00 | 0,00 | 0,00 | NA | NA |
| RP11-193H5.2   | 0,00 | 0,00 | 0,00 | 0,00 | NA | NA |
| RP11-193H5.3   | 0,00 | 0,00 | 0,00 | 0,00 | NA | NA |
| RP11-193H5.4   | 0,00 | 0,00 | 0,00 | 0,00 | NA | NA |
| RP11-193H5.5   | 0,00 | 0,00 | 0,00 | 0,00 | NA | NA |
| RP11-193H5.7   | 0,00 | 0,00 | 0,00 | 0,00 | NA | NA |
| RP11-193I22.1  | 0,00 | 0,00 | 0,00 | 0,00 | NA | NA |
| RP11-193M21.1  | 0,00 | 0,00 | 0,00 | 0,00 | NA | NA |
| RP11-193P11.1  | 0,00 | 0,00 | 0,00 | 0,00 | NA | NA |
| RP11-193P11.3  | 0,00 | 0,00 | 0,00 | 0,00 | NA | NA |
| RP11-194G10.1  | 0,00 | 0,00 | 0,00 | 0,00 | NA | NA |
| RP11-194G10.3  | 0,00 | 0,00 | 0,00 | 0,00 | NA | NA |
| RP11-195C7.2   | 0,00 | 0,00 | 0,00 | 0,00 | NA | NA |
| RP11-195F19.29 | 0,00 | 0,00 | 0,00 | 0,00 | NA | NA |
| RP11-195L15.2  | 0,00 | 0,00 | 0,00 | 0,00 | NA | NA |
| RP11-195M16.1  | 0,00 | 0,00 | 0,00 | 0,00 | NA | NA |
| RP11-195M16.3  | 0,00 | 0,00 | 0,00 | 0,00 | NA | NA |
| RP11-196B3.1   | 0,00 | 0,00 | 0,00 | 0,00 | NA | NA |
| RP11-196B3.2   | 0,00 | 0,00 | 0,00 | 0,00 | NA | NA |
| RP11-196B3.3   | 0,00 | 0,00 | 0,00 | 0,00 | NA | NA |
| RP11-196B3.4   | 0,00 | 0,00 | 0,00 | 0,00 | NA | NA |
| RP11-196D18.1  | 0,00 | 0,00 | 0,00 | 0,00 | NA | NA |
| RP11-196D18.4  | 0,00 | 0,00 | 0,00 | 0,00 | NA | NA |
| RP11-196G18.1  | 0,00 | 0,00 | 0,00 | 0,00 | NA | NA |
| RP11-196I18.2  | 0,00 | 0,00 | 0,00 | 0,00 | NA | NA |
| RP11-196I18.3  | 0,00 | 0,00 | 0,00 | 0,00 | NA | NA |
| RP11-196I18.4  | 0,00 | 0,00 | 0,00 | 0,00 | NA | NA |
| RP11-197B12.1  | 0,00 | 0,00 | 0,00 | 0,00 | NA | NA |
| RP11-197L7.2   | 0,00 | 0,00 | 0,00 | 0,00 | NA | NA |
| RP11-197M22.2  | 0,00 | 0,00 | 0,00 | 0,00 | NA | NA |
| RP11-197N18.7  | 0,00 | 0,00 | 0,00 | 0,00 | NA | NA |
| RP11-197O8.1   | 0,00 | 0,00 | 0,00 | 0,00 | NA | NA |
| RP11-197P3.1   | 0,00 | 0,00 | 0,00 | 0,00 | NA | NA |
| RP11-197P3.4   | 0,00 | 0,25 | 0,00 | 0,18 | NA | NA |
| RP11-198M15.1  | 0,00 | 0,00 | 0,00 | 0,26 | NA | NA |
| RP11-198M6.2   | 0,00 | 0,00 | 0,00 | 0,00 | NA | NA |
| RP11-198M8.1   | 0,00 | 0,00 | 0,00 | 0,00 | NA | NA |
| RP11-199A1.1   | 0,00 | 0,00 | 0,00 | 0,00 | NA | NA |
| RP11-199B17.1  | 0,00 | 0,00 | 0,00 | 0,00 | NA | NA |
| RP11-199F6.4   | 0,00 | 0,00 | 0,00 | 0,00 | NA | NA |
| RP11-199F6.5   | 0,00 | 0,00 | 0,00 | 0,00 | NA | NA |
| RP11-199F6.8   | 0,00 | 0,00 | 0,00 | 0,00 | NA | NA |
| RP11-199F6.9   | 0,00 | 0,00 | 0,00 | 0,00 | NA | NA |
| RP11-199H2.1   | 0,00 | 0,00 | 0,00 | 0,00 | NA | NA |
| RP11-19B4.1    | 0,00 | 0,00 | 0,00 | 0,00 | NA | NA |
| RP11-19D2.1    | 0,00 | 0,00 | 0,00 | 0,00 | NA | NA |
| RP11-19D2.2    | 0,00 | 0,00 | 0,00 | 0,00 | NA | NA |
| RP11-19E11.1   | 0,00 | 0,00 | 0,00 | 0,00 | NA | NA |
| RP11-19F9.1    | 0,00 | 0,00 | 0,00 | 0,00 | NA | NA |

|               |      |      |      |      |    |    |
|---------------|------|------|------|------|----|----|
| RP11-19G24.2  | 0,00 | 0,00 | 0,00 | 0,00 | NA | NA |
| RP11-19H6.1   | 0,00 | 0,00 | 0,00 | 0,00 | NA | NA |
| RP11-19J3.5   | 0,00 | 0,00 | 0,00 | 0,00 | NA | NA |
| RP11-19J5.1   | 0,00 | 0,00 | 0,00 | 0,00 | NA | NA |
| RP11-19J5.2   | 0,00 | 0,00 | 0,00 | 0,00 | NA | NA |
| RP11-19N8.2   | 0,00 | 0,00 | 0,00 | 0,00 | NA | NA |
| RP11-19N8.3   | 0,00 | 0,00 | 0,00 | 0,00 | NA | NA |
| RP11-19N8.6   | 0,00 | 0,00 | 0,00 | 0,00 | NA | NA |
| RP11-19N8.7   | 0,00 | 0,00 | 0,00 | 0,00 | NA | NA |
| RP11-19O2.4   | 0,00 | 0,00 | 0,00 | 0,00 | NA | NA |
| RP11-19P22.10 | 0,00 | 0,00 | 0,00 | 0,00 | NA | NA |
| RP11-19P22.2  | 0,00 | 0,00 | 0,00 | 0,00 | NA | NA |
| RP11-19P22.6  | 0,00 | 0,00 | 0,00 | 0,00 | NA | NA |
| RP11-19P22.7  | 0,00 | 0,19 | 0,00 | 0,00 | NA | NA |
| RP11-1A15.2   | 0,00 | 0,00 | 0,00 | 0,00 | NA | NA |
| RP11-1A24.2   | 0,00 | 0,00 | 0,00 | 0,00 | NA | NA |
| RP11-1C1.1    | 0,00 | 0,00 | 0,00 | 0,00 | NA | NA |
| RP11-1C1.3    | 0,00 | 0,00 | 0,00 | 0,00 | NA | NA |
| RP11-1C1.4    | 0,00 | 0,00 | 0,00 | 0,00 | NA | NA |
| RP11-1C1.6    | 0,00 | 0,00 | 0,00 | 0,00 | NA | NA |
| RP11-1C8.6    | 0,00 | 0,00 | 0,00 | 0,00 | NA | NA |
| RP11-1C8.7    | 0,00 | 0,00 | 0,00 | 0,00 | NA | NA |
| RP11-1D12.2   | 0,00 | 0,00 | 0,00 | 0,00 | NA | NA |
| RP11-1E1.1    | 0,00 | 0,00 | 0,00 | 0,00 | NA | NA |
| RP11-1E1.2    | 0,00 | 0,00 | 0,00 | 0,00 | NA | NA |
| RP11-1E11.1   | 0,00 | 0,00 | 0,00 | 0,00 | NA | NA |
| RP11-1E11.2   | 0,00 | 0,00 | 0,00 | 0,00 | NA | NA |
| RP11-1E6.1    | 0,00 | 0,00 | 0,00 | 0,00 | NA | NA |
| RP11-1G11.2   | 0,00 | 0,00 | 0,00 | 0,00 | NA | NA |
| RP11-1H8.1    | 0,00 | 0,00 | 0,00 | 0,00 | NA | NA |
| RP11-1H8.3    | 0,00 | 0,00 | 0,00 | 0,00 | NA | NA |
| RP11-1H8.4    | 0,00 | 0,00 | 0,00 | 0,00 | NA | NA |
| RP11-1H8.6    | 0,00 | 0,00 | 0,00 | 0,00 | NA | NA |
| RP11-1J2.1    | 0,00 | 0,00 | 0,00 | 0,00 | NA | NA |
| RP11-1J11.1   | 0,00 | 0,00 | 0,00 | 0,00 | NA | NA |
| RP11-1J4.1    | 0,00 | 0,00 | 0,00 | 0,00 | NA | NA |
| RP11-1J7.1    | 0,00 | 0,00 | 0,00 | 0,00 | NA | NA |
| RP11-1K11.1   | 0,00 | 0,00 | 0,00 | 0,00 | NA | NA |
| RP11-1K3.1    | 0,00 | 0,00 | 0,00 | 0,00 | NA | NA |
| RP11-1L9.1    | 0,00 | 0,00 | 0,00 | 0,00 | NA | NA |
| RP11-1M18.1   | 0,00 | 0,00 | 0,52 | 0,37 | NA | NA |
| RP11-1O10.1   | 0,00 | 0,00 | 0,00 | 0,00 | NA | NA |
| RP11-1O2.2    | 0,00 | 0,00 | 0,00 | 0,00 | NA | NA |
| RP11-1P8.1    | 0,00 | 0,00 | 0,00 | 0,00 | NA | NA |
| RP11-1P8.5    | 0,00 | 0,00 | 0,00 | 0,00 | NA | NA |
| RP11-200A1.1  | 0,00 | 0,00 | 0,00 | 0,00 | NA | NA |
| RP11-200A13.1 | 0,00 | 0,00 | 0,00 | 0,00 | NA | NA |
| RP11-200A13.2 | 0,00 | 0,00 | 0,00 | 0,00 | NA | NA |
| RP11-200A13.3 | 0,00 | 0,00 | 0,00 | 0,00 | NA | NA |
| RP11-200K10.1 | 0,00 | 0,00 | 0,00 | 0,00 | NA | NA |
| RP11-200K12.2 | 0,00 | 0,00 | 0,00 | 0,00 | NA | NA |
| RP11-200K12.3 | 0,00 | 0,00 | 0,00 | 0,00 | NA | NA |
| RP11-201A3.1  | 0,00 | 0,00 | 0,00 | 0,00 | NA | NA |
| RP11-201E8.1  | 0,00 | 0,00 | 0,00 | 0,00 | NA | NA |
| RP11-201K10.1 | 0,00 | 0,00 | 0,00 | 0,00 | NA | NA |

|                |      |      |      |      |    |    |
|----------------|------|------|------|------|----|----|
| RP11-201K10.3  | 0,00 | 0,00 | 0,00 | 0,00 | NA | NA |
| RP11-202A13.1  | 0,00 | 0,00 | 0,00 | 0,00 | NA | NA |
| RP11-202D1.2   | 0,00 | 0,00 | 0,00 | 0,00 | NA | NA |
| RP11-202D1.3   | 0,00 | 0,00 | 0,00 | 0,00 | NA | NA |
| RP11-202D18.2  | 0,00 | 0,00 | 0,00 | 0,00 | NA | NA |
| RP11-202H2.1   | 0,00 | 0,00 | 0,00 | 0,00 | NA | NA |
| RP11-202I11.2  | 0,00 | 0,00 | 0,00 | 0,00 | NA | NA |
| RP11-202P11.1  | 0,00 | 0,00 | 0,00 | 0,04 | NA | NA |
| RP11-202P3.1   | 0,00 | 0,00 | 0,00 | 0,00 | NA | NA |
| RP11-203B4.1   | 0,00 | 0,00 | 0,00 | 0,00 | NA | NA |
| RP11-203B7.1   | 0,00 | 0,00 | 0,00 | 0,00 | NA | NA |
| RP11-203E8.1   | 0,00 | 0,00 | 0,00 | 0,00 | NA | NA |
| RP11-203F10.1  | 0,00 | 0,00 | 0,00 | 0,00 | NA | NA |
| RP11-203F10.5  | 0,00 | 0,00 | 0,00 | 0,00 | NA | NA |
| RP11-203F8.1   | 0,00 | 0,00 | 0,00 | 0,00 | NA | NA |
| RP11-203H19.2  | 0,00 | 0,00 | 0,00 | 0,00 | NA | NA |
| RP11-203H2.2   | 0,00 | 0,00 | 0,00 | 0,00 | NA | NA |
| RP11-203I16.3  | 0,00 | 0,00 | 0,00 | 0,00 | NA | NA |
| RP11-203I16.7  | 0,00 | 0,00 | 0,00 | 0,00 | NA | NA |
| RP11-203L2.3   | 0,00 | 0,00 | 0,00 | 0,00 | NA | NA |
| RP11-203P2.2   | 0,00 | 0,00 | 0,00 | 0,00 | NA | NA |
| RP11-203P2.3   | 0,00 | 0,00 | 0,00 | 0,00 | NA | NA |
| RP11-203P23.2  | 0,00 | 0,00 | 0,00 | 0,00 | NA | NA |
| RP11-204E4.2   | 0,00 | 0,00 | 0,00 | 0,00 | NA | NA |
| RP11-204E4.3   | 0,00 | 0,00 | 0,00 | 0,00 | NA | NA |
| RP11-204E9.3   | 0,00 | 0,00 | 0,00 | 0,00 | NA | NA |
| RP11-204H9.2   | 0,00 | 0,00 | 0,00 | 0,00 | NA | NA |
| RP11-204I15.1  | 0,00 | 0,00 | 0,00 | 0,00 | NA | NA |
| RP11-204K16.1  | 0,00 | 0,00 | 0,00 | 0,00 | NA | NA |
| RP11-204N11.1  | 0,00 | 0,00 | 0,00 | 0,00 | NA | NA |
| RP11-204N11.2  | 0,00 | 0,00 | 0,00 | 0,00 | NA | NA |
| RP11-204P2.3   | 0,00 | 0,00 | 0,00 | 0,00 | NA | NA |
| RP11-205A8.3   | 0,00 | 0,00 | 0,00 | 0,00 | NA | NA |
| RP11-205K6.1   | 0,00 | 0,00 | 0,00 | 0,00 | NA | NA |
| RP11-205K6.2   | 0,00 | 0,00 | 0,00 | 0,00 | NA | NA |
| RP11-205M3.2   | 0,00 | 0,00 | 0,00 | 0,00 | NA | NA |
| RP11-206B11.1  | 0,00 | 0,00 | 0,00 | 0,00 | NA | NA |
| RP11-206F17.2  | 0,00 | 0,00 | 0,00 | 0,00 | NA | NA |
| RP11-206H15.2  | 0,00 | 0,00 | 0,00 | 0,00 | NA | NA |
| RP11-206I15.2  | 0,00 | 0,00 | 0,00 | 0,00 | NA | NA |
| RP11-206L1.2   | 0,00 | 0,00 | 0,00 | 0,00 | NA | NA |
| RP11-206L10.15 | 0,00 | 0,06 | 0,00 | 0,00 | NA | NA |
| RP11-206L10.18 | 0,00 | 0,00 | 0,00 | 0,00 | NA | NA |
| RP11-206P5.1   | 0,00 | 0,00 | 0,00 | 0,00 | NA | NA |
| RP11-206P5.2   | 0,00 | 0,00 | 0,00 | 0,00 | NA | NA |
| RP11-207C16.4  | 0,00 | 0,00 | 0,00 | 0,00 | NA | NA |
| RP11-207F8.1   | 0,00 | 0,00 | 0,00 | 0,00 | NA | NA |
| RP11-208C17.2  | 0,00 | 0,00 | 0,00 | 0,00 | NA | NA |
| RP11-208C17.3  | 0,00 | 0,00 | 0,00 | 0,00 | NA | NA |
| RP11-208C17.4  | 0,00 | 0,00 | 0,00 | 0,00 | NA | NA |
| RP11-208C17.7  | 0,00 | 0,00 | 0,00 | 0,00 | NA | NA |
| RP11-208G20.2  | 0,00 | 0,00 | 0,00 | 0,00 | NA | NA |
| RP11-208K4.1   | 0,00 | 0,00 | 0,00 | 0,00 | NA | NA |
| RP11-208N20.1  | 0,00 | 0,00 | 0,00 | 0,00 | NA | NA |
| RP11-208P4.1   | 0,00 | 0,00 | 0,00 | 0,00 | NA | NA |



|                 |      |      |      |      |    |    |
|-----------------|------|------|------|------|----|----|
| RP11-209A2.1    | 0,00 | 0,00 | 0,00 | 0,00 | NA | NA |
| RP11-209D14.2   | 0,00 | 0,00 | 0,00 | 0,00 | NA | NA |
| RP11-209K10.2   | 0,00 | 0,00 | 0,00 | 0,00 | NA | NA |
| RP11-20A20.2    | 0,00 | 0,00 | 0,00 | 0,00 | NA | NA |
| RP11-20B24.3    | 0,00 | 0,00 | 0,00 | 0,00 | NA | NA |
| RP11-20B24.5    | 0,00 | 0,49 | 0,00 | 0,32 | NA | NA |
| RP11-20B7.1     | 0,00 | 0,00 | 0,00 | 0,00 | NA | NA |
| RP11-20C6.1     | 0,00 | 0,00 | 0,00 | 0,00 | NA | NA |
| RP11-20C6.2     | 0,00 | 0,00 | 0,00 | 0,00 | NA | NA |
| RP11-20D14.4    | 0,00 | 0,00 | 0,00 | 0,00 | NA | NA |
| RP11-20E23.1    | 0,00 | 0,00 | 0,00 | 0,00 | NA | NA |
| RP11-20F18.1    | 0,00 | 0,00 | 0,00 | 0,00 | NA | NA |
| RP11-20F24.2    | 0,00 | 0,00 | 0,00 | 0,00 | NA | NA |
| RP11-20F24.3    | 0,00 | 0,00 | 0,00 | 0,00 | NA | NA |
| RP11-20F24.5    | 0,00 | 0,00 | 0,00 | 0,00 | NA | NA |
| RP11-20F24.6    | 0,00 | 0,00 | 0,00 | 0,00 | NA | NA |
| RP11-20G13.1    | 0,00 | 0,00 | 0,00 | 0,00 | NA | NA |
| RP11-20G13.4    | 0,00 | 0,00 | 0,00 | 0,00 | NA | NA |
| RP11-20G13.5    | 0,00 | 0,00 | 0,00 | 0,00 | NA | NA |
| RP11-20G6.3     | 0,00 | 0,00 | 0,00 | 0,00 | NA | NA |
| RP11-20I20.1    | 0,00 | 0,00 | 0,00 | 0,00 | NA | NA |
| RP11-20I20.4    | 0,00 | 0,00 | 0,00 | 0,00 | NA | NA |
| RP11-20I23.1    | 0,00 | 0,00 | 0,00 | 0,00 | NA | NA |
| RP11-20I6.1     | 0,00 | 0,00 | 0,00 | 0,00 | NA | NA |
| RP11-20J1.1     | 0,00 | 0,00 | 0,00 | 0,00 | NA | NA |
| RP11-20J15.2    | 0,00 | 0,00 | 0,00 | 0,00 | NA | NA |
| RP11-20L19.1    | 0,00 | 0,00 | 0,00 | 0,00 | NA | NA |
| RP11-20O12.1    | 0,00 | 0,00 | 0,00 | 0,00 | NA | NA |
| RP11-20O23.1    | 0,00 | 0,00 | 0,00 | 0,00 | NA | NA |
| RP11-20O24.2    | 0,00 | 0,00 | 0,00 | 0,00 | NA | NA |
| RP11-20P5.2     | 0,00 | 0,00 | 0,00 | 0,00 | NA | NA |
| RP11-210G22.1   | 0,00 | 0,00 | 0,00 | 0,00 | NA | NA |
| RP11-210H10_A.1 | 0,00 | 0,00 | 0,00 | 0,00 | NA | NA |
| RP11-210K20.6   | 0,00 | 0,00 | 0,00 | 0,00 | NA | NA |
| RP11-210L7.1    | 0,00 | 0,00 | 0,00 | 0,00 | NA | NA |
| RP11-211A18.1   | 0,00 | 0,00 | 0,00 | 0,00 | NA | NA |
| RP11-211A18.2   | 0,00 | 0,00 | 0,00 | 0,00 | NA | NA |
| RP11-211C9.1    | 0,00 | 0,28 | 0,31 | 0,69 | NA | NA |
| RP11-211C9.3    | 0,00 | 0,00 | 0,00 | 0,00 | NA | NA |
| RP11-211F2.1    | 0,00 | 0,00 | 0,00 | 0,00 | NA | NA |
| RP11-211G23.2   | 0,00 | 0,00 | 0,00 | 0,00 | NA | NA |
| RP11-211N8.3    | 0,00 | 0,00 | 0,00 | 0,00 | NA | NA |
| RP11-211N8.4    | 0,00 | 0,00 | 0,00 | 0,00 | NA | NA |
| RP11-211N8.5    | 0,00 | 0,00 | 0,00 | 0,00 | NA | NA |
| RP11-211N8.6    | 0,00 | 0,00 | 0,00 | 0,00 | NA | NA |
| RP11-211N8.7    | 0,00 | 0,00 | 0,00 | 0,00 | NA | NA |
| RP11-211P13.1   | 0,00 | 0,00 | 0,00 | 0,00 | NA | NA |
| RP11-212D19.5   | 0,00 | 0,00 | 0,00 | 0,00 | NA | NA |
| RP11-212E1.1    | 0,00 | 0,00 | 0,00 | 0,00 | NA | NA |
| RP11-212E4.1    | 0,00 | 0,00 | 0,00 | 0,00 | NA | NA |
| RP11-212E8.1    | 0,00 | 0,00 | 0,00 | 0,00 | NA | NA |
| RP11-212I21.3   | 0,00 | 0,00 | 0,00 | 0,00 | NA | NA |
| RP11-213G2.4    | 0,00 | 0,00 | 0,00 | 0,00 | NA | NA |
| RP11-213G2.5    | 0,00 | 0,00 | 0,00 | 0,00 | NA | NA |
| RP11-213G21.2   | 0,00 | 0,00 | 0,00 | 0,00 | NA | NA |

|                |      |      |      |      |    |    |
|----------------|------|------|------|------|----|----|
| RP11-213H22.1  | 0,00 | 0,00 | 0,00 | 0,00 | NA | NA |
| RP11-213K14.2  | 0,00 | 0,00 | 0,00 | 0,00 | NA | NA |
| RP11-213K17.1  | 0,00 | 0,00 | 0,00 | 0,00 | NA | NA |
| RP11-213L8.1   | 0,00 | 0,00 | 0,00 | 0,00 | NA | NA |
| RP11-213N20.1  | 0,00 | 0,00 | 0,00 | 0,00 | NA | NA |
| RP11-213O5.4   | 0,00 | 0,00 | 0,00 | 0,00 | NA | NA |
| RP11-214D15.2  | 0,00 | 0,00 | 0,00 | 0,00 | NA | NA |
| RP11-214F16.4  | 0,00 | 0,00 | 0,00 | 0,00 | NA | NA |
| RP11-214F16.5  | 0,00 | 0,00 | 0,00 | 0,00 | NA | NA |
| RP11-214F16.8  | 0,00 | 0,00 | 0,00 | 0,00 | NA | NA |
| RP11-214K3.18  | 0,00 | 0,00 | 0,00 | 0,00 | NA | NA |
| RP11-214K3.21  | 0,00 | 0,00 | 0,00 | 0,00 | NA | NA |
| RP11-214K3.5   | 0,00 | 0,00 | 0,00 | 0,00 | NA | NA |
| RP11-214L13.1  | 0,00 | 0,00 | 0,00 | 0,00 | NA | NA |
| RP11-214N1.1   | 0,00 | 0,00 | 0,00 | 0,00 | NA | NA |
| RP11-214N15.5  | 0,00 | 0,00 | 0,00 | 0,00 | NA | NA |
| RP11-214N16.2  | 0,00 | 0,00 | 0,00 | 0,00 | NA | NA |
| RP11-214O11.1  | 0,00 | 0,00 | 0,00 | 0,00 | NA | NA |
| RP11-215A19.1  | 0,00 | 0,00 | 0,00 | 0,00 | NA | NA |
| RP11-215A19.2  | 0,00 | 0,00 | 0,00 | 0,00 | NA | NA |
| RP11-215B13.2  | 0,00 | 0,00 | 0,00 | 0,00 | NA | NA |
| RP11-215C7.2   | 0,00 | 0,00 | 0,00 | 0,00 | NA | NA |
| RP11-215C7.3   | 0,00 | 0,00 | 0,00 | 0,00 | NA | NA |
| RP11-215D10.1  | 0,00 | 0,00 | 0,00 | 0,00 | NA | NA |
| RP11-215E13.1  | 0,00 | 0,00 | 0,00 | 0,00 | NA | NA |
| RP11-215E13.2  | 0,00 | 0,00 | 0,00 | 0,00 | NA | NA |
| RP11-215G15.4  | 0,00 | 0,00 | 0,00 | 0,00 | NA | NA |
| RP11-215I16.1  | 0,00 | 0,00 | 0,00 | 0,00 | NA | NA |
| RP11-215I16.2  | 0,00 | 0,00 | 0,00 | 0,00 | NA | NA |
| RP11-215I23.3  | 0,00 | 0,00 | 0,00 | 0,00 | NA | NA |
| RP11-215L17.1  | 0,00 | 0,00 | 0,00 | 0,00 | NA | NA |
| RP11-215P8.1   | 0,00 | 0,00 | 0,00 | 0,00 | NA | NA |
| RP11-216B9.4   | 0,00 | 0,00 | 0,00 | 0,00 | NA | NA |
| RP11-216F5.1   | 0,00 | 0,00 | 0,00 | 0,00 | NA | NA |
| RP11-216L13.16 | 0,00 | 0,00 | 0,00 | 0,00 | NA | NA |
| RP11-216L13.17 | 0,00 | 0,00 | 0,00 | 0,00 | NA | NA |
| RP11-216L13.18 | 0,00 | 0,00 | 0,00 | 0,00 | NA | NA |
| RP11-216L13.21 | 0,00 | 0,00 | 0,00 | 0,00 | NA | NA |
| RP11-216L13.6  | 0,00 | 0,00 | 0,00 | 0,00 | NA | NA |
| RP11-216L13.8  | 0,00 | 0,00 | 0,00 | 0,00 | NA | NA |
| RP11-216M21.2  | 0,00 | 0,00 | 0,00 | 0,00 | NA | NA |
| RP11-216M21.5  | 0,00 | 0,00 | 0,00 | 0,00 | NA | NA |
| RP11-216M21.8  | 0,00 | 0,00 | 0,00 | 0,00 | NA | NA |
| RP11-216M21.9  | 0,00 | 0,01 | 0,00 | 0,00 | NA | NA |
| RP11-216N14.1  | 0,00 | 0,00 | 0,00 | 0,00 | NA | NA |
| RP11-216N14.5  | 0,00 | 0,00 | 0,00 | 0,00 | NA | NA |
| RP11-216N14.7  | 0,09 | 0,11 | 0,00 | 0,11 | NA | NA |
| RP11-216N14.8  | 0,00 | 0,00 | 0,00 | 0,00 | NA | NA |
| RP11-216N14.9  | 0,00 | 0,00 | 0,00 | 0,00 | NA | NA |
| RP11-216N21.1  | 0,00 | 0,00 | 0,00 | 0,00 | NA | NA |
| RP11-216N21.2  | 0,00 | 0,00 | 0,00 | 0,00 | NA | NA |
| RP11-216P16.4  | 0,00 | 0,00 | 0,00 | 0,00 | NA | NA |
| RP11-216P16.5  | 0,00 | 0,00 | 0,00 | 0,00 | NA | NA |
| RP11-216P16.6  | 0,00 | 0,00 | 0,00 | 0,00 | NA | NA |
| RP11-216P16.7  | 0,00 | 0,00 | 0,00 | 0,00 | NA | NA |

|                |      |      |      |      |    |    |
|----------------|------|------|------|------|----|----|
| RP11-217B7.3   | 0,00 | 0,00 | 0,00 | 0,00 | NA | NA |
| RP11-217C7.1   | 0,00 | 0,00 | 0,00 | 0,00 | NA | NA |
| RP11-217E13.1  | 0,00 | 0,00 | 0,00 | 0,00 | NA | NA |
| RP11-217E22.1  | 0,00 | 0,00 | 0,00 | 0,00 | NA | NA |
| RP11-217F16.1  | 0,00 | 0,00 | 0,00 | 0,00 | NA | NA |
| RP11-217L21.1  | 0,00 | 0,00 | 0,00 | 0,00 | NA | NA |
| RP11-218A18.1  | 0,00 | 0,00 | 0,00 | 0,00 | NA | NA |
| RP11-218C14.2  | 0,00 | 0,00 | 0,00 | 0,00 | NA | NA |
| RP11-218C14.6  | 0,00 | 0,00 | 0,00 | 0,00 | NA | NA |
| RP11-218C14.8  | 0,00 | 0,00 | 0,00 | 0,00 | NA | NA |
| RP11-218C23.1  | 0,00 | 0,00 | 0,00 | 0,00 | NA | NA |
| RP11-218D6.2   | 0,00 | 0,00 | 0,00 | 0,00 | NA | NA |
| RP11-218D6.3   | 0,00 | 0,00 | 0,00 | 0,00 | NA | NA |
| RP11-218D6.4   | 0,00 | 0,00 | 0,00 | 0,00 | NA | NA |
| RP11-218E15.1  | 0,00 | 0,00 | 0,00 | 0,00 | NA | NA |
| RP11-218E20.2  | 0,00 | 0,00 | 0,00 | 0,00 | NA | NA |
| RP11-218E20.5  | 0,00 | 0,00 | 0,00 | 0,00 | NA | NA |
| RP11-218F4.1   | 0,00 | 0,00 | 0,00 | 0,00 | NA | NA |
| RP11-218F4.2   | 0,00 | 0,00 | 0,00 | 0,00 | NA | NA |
| RP11-218I21.1  | 0,00 | 0,00 | 0,00 | 0,00 | NA | NA |
| RP11-218I21.2  | 0,00 | 0,00 | 0,00 | 0,00 | NA | NA |
| RP11-218I7.2   | 0,00 | 0,00 | 0,00 | 0,00 | NA | NA |
| RP11-219A15.2  | 0,00 | 0,00 | 0,00 | 0,00 | NA | NA |
| RP11-219A15.3  | 0,00 | 0,00 | 0,00 | 0,00 | NA | NA |
| RP11-219A15.5  | 0,08 | 0,24 | 0,15 | 0,09 | NA | NA |
| RP11-219B17.2  | 0,00 | 0,00 | 0,00 | 0,00 | NA | NA |
| RP11-219B17.3  | 0,00 | 0,00 | 0,00 | 0,00 | NA | NA |
| RP11-219B4.6   | 0,00 | 0,00 | 0,00 | 0,00 | NA | NA |
| RP11-219B4.7   | 0,00 | 0,12 | 0,03 | 0,00 | NA | NA |
| RP11-219C11.1  | 0,00 | 0,00 | 0,00 | 0,00 | NA | NA |
| RP11-219C20.1  | 0,00 | 0,00 | 0,00 | 0,00 | NA | NA |
| RP11-219C24.10 | 0,00 | 0,00 | 0,00 | 0,00 | NA | NA |
| RP11-219C24.8  | 0,00 | 0,00 | 0,00 | 0,00 | NA | NA |
| RP11-219E7.4   | 0,00 | 0,00 | 0,00 | 0,00 | NA | NA |
| RP11-219F1.1   | 0,00 | 0,00 | 0,00 | 0,00 | NA | NA |
| RP11-219F10.1  | 0,00 | 0,00 | 0,00 | 0,00 | NA | NA |
| RP11-219G10.1  | 0,00 | 0,00 | 0,00 | 0,00 | NA | NA |
| RP11-219G10.2  | 0,00 | 0,00 | 0,00 | 0,00 | NA | NA |
| RP11-219G10.3  | 0,00 | 0,00 | 0,00 | 0,00 | NA | NA |
| RP11-219G17.6  | 0,00 | 0,00 | 0,00 | 0,00 | NA | NA |
| RP11-219G17.8  | 0,00 | 0,00 | 0,00 | 0,00 | NA | NA |
| RP11-219G17.9  | 0,00 | 0,00 | 0,00 | 0,00 | NA | NA |
| RP11-219H23.1  | 0,00 | 0,00 | 0,00 | 0,00 | NA | NA |
| RP11-219H23.2  | 0,00 | 0,00 | 0,00 | 0,00 | NA | NA |
| RP11-219I21.1  | 0,00 | 0,00 | 0,00 | 0,00 | NA | NA |
| RP11-219I21.1  | 0,00 | 0,00 | 0,00 | 0,00 | NA | NA |
| RP11-219I21.2  | 0,00 | 0,00 | 0,00 | 0,00 | NA | NA |
| RP11-219P18.3  | 0,00 | 0,00 | 0,00 | 0,00 | NA | NA |
| RP11-21A7A.2   | 0,00 | 0,00 | 0,00 | 0,00 | NA | NA |
| RP11-21A7A.3   | 0,00 | 0,00 | 0,00 | 0,00 | NA | NA |
| RP11-21A7A.4   | 0,00 | 0,00 | 0,00 | 0,00 | NA | NA |
| RP11-21B21.4   | 0,00 | 0,00 | 0,00 | 0,00 | NA | NA |
| RP11-21B23.1   | 0,00 | 0,00 | 0,00 | 0,00 | NA | NA |
| RP11-21B23.2   | 0,00 | 0,00 | 0,00 | 0,00 | NA | NA |
| RP11-21B23.3   | 0,08 | 0,15 | 0,10 | 0,04 | NA | NA |

|               |      |      |      |      |    |    |
|---------------|------|------|------|------|----|----|
| RP11-21C17.1  | 0,00 | 0,00 | 0,00 | 0,00 | NA | NA |
| RP11-21C4.1   | 0,00 | 0,00 | 0,00 | 0,00 | NA | NA |
| RP11-21C4.4   | 0,00 | 0,00 | 0,00 | 0,00 | NA | NA |
| RP11-21G15.1  | 0,00 | 0,00 | 0,00 | 0,00 | NA | NA |
| RP11-21G20.1  | 0,00 | 0,00 | 0,00 | 0,00 | NA | NA |
| RP11-21G20.3  | 0,00 | 0,00 | 0,00 | 0,00 | NA | NA |
| RP11-21G20.4  | 0,00 | 0,00 | 0,00 | 0,00 | NA | NA |
| RP11-21I4.2   | 0,00 | 0,00 | 0,00 | 0,00 | NA | NA |
| RP11-21I4.3   | 0,00 | 0,00 | 0,00 | 0,00 | NA | NA |
| RP11-21I4.4   | 0,00 | 0,00 | 0,00 | 0,00 | NA | NA |
| RP11-21J7.1   | 0,00 | 0,00 | 0,00 | 0,00 | NA | NA |
| RP11-21L19.1  | 0,00 | 0,00 | 0,00 | 0,00 | NA | NA |
| RP11-21M4.2   | 0,00 | 0,00 | 0,00 | 0,00 | NA | NA |
| RP11-220C2.1  | 0,00 | 0,00 | 0,00 | 0,00 | NA | NA |
| RP11-220H4.1  | 0,00 | 0,00 | 0,00 | 0,00 | NA | NA |
| RP11-220H4.4  | 0,00 | 0,00 | 0,00 | 0,00 | NA | NA |
| RP11-220H4.6  | 0,00 | 0,00 | 0,00 | 0,00 | NA | NA |
| RP11-220I1.2  | 0,00 | 0,00 | 0,00 | 0,00 | NA | NA |
| RP11-220I1.4  | 0,00 | 0,00 | 0,00 | 0,00 | NA | NA |
| RP11-221E20.3 | 0,00 | 0,00 | 0,00 | 0,00 | NA | NA |
| RP11-221E20.4 | 0,00 | 0,00 | 0,00 | 0,00 | NA | NA |
| RP11-221E20.5 | 0,00 | 0,00 | 0,00 | 0,00 | NA | NA |
| RP11-221H10.1 | 0,00 | 0,00 | 0,00 | 0,00 | NA | NA |
| RP11-221H10.2 | 0,00 | 0,00 | 0,00 | 0,00 | NA | NA |
| RP11-221N13.1 | 0,00 | 0,00 | 0,00 | 0,00 | NA | NA |
| RP11-221N13.2 | 0,00 | 0,00 | 0,00 | 0,00 | NA | NA |
| RP11-221N13.3 | 0,00 | 0,00 | 0,00 | 0,00 | NA | NA |
| RP11-221N13.4 | 0,00 | 0,00 | 0,00 | 0,00 | NA | NA |
| RP11-222A5.1  | 0,00 | 0,00 | 0,00 | 0,00 | NA | NA |
| RP11-222G7.2  | 0,00 | 0,00 | 0,00 | 0,00 | NA | NA |
| RP11-222K16.2 | 0,00 | 0,00 | 0,00 | 0,26 | NA | NA |
| RP11-222N13.1 | 0,00 | 0,00 | 0,00 | 0,00 | NA | NA |
| RP11-222O23.1 | 0,00 | 0,00 | 0,00 | 0,00 | NA | NA |
| RP11-223A2.1  | 0,00 | 0,00 | 0,00 | 0,00 | NA | NA |
| RP11-223A3.1  | 0,00 | 0,00 | 0,00 | 0,00 | NA | NA |
| RP11-223C24.1 | 0,00 | 0,00 | 0,00 | 0,00 | NA | NA |
| RP11-223C24.2 | 0,00 | 0,00 | 0,00 | 0,00 | NA | NA |
| RP11-223E19.2 | 0,00 | 0,00 | 0,00 | 0,00 | NA | NA |
| RP11-223F20.2 | 0,00 | 0,00 | 0,00 | 0,00 | NA | NA |
| RP11-223J15.2 | 0,00 | 0,00 | 0,00 | 0,00 | NA | NA |
| RP11-223J6.1  | 0,00 | 0,00 | 0,00 | 0,00 | NA | NA |
| RP11-223J6.2  | 0,00 | 0,00 | 0,00 | 0,00 | NA | NA |
| RP11-223P11.2 | 0,00 | 0,00 | 0,00 | 0,00 | NA | NA |
| RP11-223P11.3 | 0,00 | 0,78 | 0,00 | 0,12 | NA | NA |
| RP11-224O19.5 | 0,00 | 0,00 | 0,00 | 0,00 | NA | NA |
| RP11-224P11.1 | 0,00 | 0,00 | 0,00 | 0,00 | NA | NA |
| RP11-225B17.1 | 0,00 | 0,00 | 0,00 | 0,00 | NA | NA |
| RP11-225H22.5 | 0,00 | 0,00 | 0,00 | 0,00 | NA | NA |
| RP11-226I21.1 | 0,00 | 0,00 | 0,00 | 0,00 | NA | NA |
| RP11-226L15.1 | 0,00 | 0,00 | 0,00 | 0,00 | NA | NA |
| RP11-226P1.1  | 0,00 | 0,00 | 0,00 | 0,00 | NA | NA |
| RP11-226P1.2  | 0,00 | 0,00 | 0,00 | 0,00 | NA | NA |
| RP11-226P1.3  | 0,00 | 0,00 | 0,00 | 0,00 | NA | NA |
| RP11-227B21.2 | 0,00 | 0,00 | 0,00 | 0,00 | NA | NA |
| RP11-227D13.1 | 0,00 | 0,00 | 0,00 | 0,00 | NA | NA |

|                |      |      |      |      |    |    |
|----------------|------|------|------|------|----|----|
| RP11-227D13.2  | 0,00 | 0,00 | 0,00 | 0,00 | NA | NA |
| RP11-227D2.3   | 0,00 | 0,00 | 0,00 | 0,00 | NA | NA |
| RP11-227F19.1  | 0,00 | 0,00 | 0,00 | 0,00 | NA | NA |
| RP11-227F19.2  | 0,00 | 0,00 | 0,00 | 0,00 | NA | NA |
| RP11-227F19.5  | 0,00 | 0,00 | 0,00 | 0,00 | NA | NA |
| RP11-227F8.2   | 0,00 | 0,00 | 0,00 | 0,00 | NA | NA |
| RP11-227G15.3  | 0,00 | 0,00 | 0,00 | 0,00 | NA | NA |
| RP11-227G15.5  | 0,00 | 0,00 | 0,00 | 0,00 | NA | NA |
| RP11-227G15.6  | 0,00 | 0,00 | 0,00 | 0,00 | NA | NA |
| RP11-227H15.5  | 0,00 | 0,00 | 0,00 | 0,00 | NA | NA |
| RP11-227H15.7  | 0,00 | 0,00 | 0,00 | 0,00 | NA | NA |
| RP11-227H4.1   | 0,00 | 0,00 | 0,00 | 0,00 | NA | NA |
| RP11-227H4.4   | 0,00 | 0,00 | 0,00 | 0,00 | NA | NA |
| RP11-227H4.5   | 0,00 | 0,00 | 0,00 | 0,00 | NA | NA |
| RP11-228G3.1   | 0,00 | 0,00 | 0,00 | 0,00 | NA | NA |
| RP11-228O6.2   | 0,00 | 0,00 | 0,00 | 0,00 | NA | NA |
| RP11-229A12.2  | 0,00 | 0,00 | 0,00 | 0,00 | NA | NA |
| RP11-229A19.3  | 0,00 | 0,00 | 0,00 | 0,00 | NA | NA |
| RP11-229C3.2   | 0,00 | 0,00 | 0,00 | 0,00 | NA | NA |
| RP11-229C3.4   | 0,00 | 0,00 | 0,00 | 0,00 | NA | NA |
| RP11-229M1.2   | 0,00 | 0,00 | 0,00 | 0,00 | NA | NA |
| RP11-229P13.15 | 0,00 | 0,00 | 0,00 | 0,00 | NA | NA |
| RP11-229P13.23 | 0,00 | 0,00 | 0,00 | 0,00 | NA | NA |
| RP11-229P13.25 | 0,00 | 0,23 | 0,00 | 0,00 | NA | NA |
| RP11-229P13.27 | 0,00 | 0,00 | 0,00 | 0,00 | NA | NA |
| RP11-229P13.28 | 0,00 | 0,00 | 0,00 | 0,00 | NA | NA |
| RP11-229P13.5  | 0,00 | 0,00 | 0,00 | 0,00 | NA | NA |
| RP11-22B10.1   | 0,00 | 0,00 | 0,00 | 0,00 | NA | NA |
| RP11-22B10.3   | 0,00 | 0,00 | 0,00 | 0,00 | NA | NA |
| RP11-22B23.2   | 0,00 | 0,00 | 0,00 | 0,00 | NA | NA |
| RP11-22C11.1   | 0,00 | 0,00 | 0,00 | 0,00 | NA | NA |
| RP11-22C13.1   | 0,00 | 0,00 | 0,00 | 0,00 | NA | NA |
| RP11-22C8.1    | 0,00 | 0,00 | 0,00 | 0,00 | NA | NA |
| RP11-22D3.1    | 0,00 | 0,00 | 0,00 | 0,00 | NA | NA |
| RP11-22D3.2    | 0,00 | 0,00 | 0,00 | 0,00 | NA | NA |
| RP11-22H5.1    | 0,00 | 0,00 | 0,00 | 0,00 | NA | NA |
| RP11-22J15.2   | 0,00 | 0,00 | 0,00 | 0,00 | NA | NA |
| RP11-22J15.3   | 0,00 | 0,00 | 0,00 | 0,00 | NA | NA |
| RP11-22K10.1   | 0,00 | 0,00 | 0,00 | 0,00 | NA | NA |
| RP11-22N12.2   | 0,00 | 0,00 | 0,00 | 0,00 | NA | NA |
| RP11-230F18.2  | 0,00 | 0,00 | 0,00 | 0,00 | NA | NA |
| RP11-231C14.5  | 0,00 | 0,00 | 0,00 | 0,00 | NA | NA |
| RP11-231C14.8  | 0,00 | 0,00 | 0,00 | 0,00 | NA | NA |
| RP11-231C18.1  | 0,00 | 0,00 | 0,00 | 0,00 | NA | NA |
| RP11-231C18.2  | 0,00 | 0,00 | 0,00 | 0,00 | NA | NA |
| RP11-231C18.3  | 0,00 | 0,00 | 0,00 | 0,00 | NA | NA |
| RP11-231E4.3   | 0,00 | 0,00 | 0,00 | 0,00 | NA | NA |
| RP11-231G15.1  | 0,00 | 0,00 | 0,00 | 0,00 | NA | NA |
| RP11-231G15.3  | 0,00 | 0,00 | 0,00 | 0,00 | NA | NA |
| RP11-231I13.1  | 0,00 | 0,00 | 0,00 | 0,00 | NA | NA |
| RP11-231I13.2  | 0,00 | 0,00 | 0,00 | 0,00 | NA | NA |
| RP11-231K24.2  | 0,00 | 0,00 | 0,00 | 0,00 | NA | NA |
| RP11-231L11.1  | 0,00 | 0,00 | 0,00 | 0,00 | NA | NA |
| RP11-231L11.3  | 0,00 | 0,00 | 0,00 | 0,00 | NA | NA |
| RP11-231N3.1   | 0,00 | 0,00 | 0,00 | 0,00 | NA | NA |

|                 |      |      |      |      |    |    |
|-----------------|------|------|------|------|----|----|
| RP11-231N9.1    | 0,00 | 0,00 | 0,00 | 0,00 | NA | NA |
| RP11-232A1.1    | 0,00 | 0,00 | 0,00 | 0,00 | NA | NA |
| RP11-232A1.2    | 0,00 | 0,00 | 0,00 | 0,00 | NA | NA |
| RP11-232C2.1    | 0,00 | 0,00 | 0,00 | 0,00 | NA | NA |
| RP11-232C2.3    | 0,00 | 0,00 | 0,00 | 0,00 | NA | NA |
| RP11-232D9.1    | 0,00 | 0,00 | 0,00 | 0,00 | NA | NA |
| RP11-232D9.2    | 0,00 | 0,00 | 0,00 | 0,00 | NA | NA |
| RP11-232D9.3    | 0,00 | 0,00 | 0,00 | 0,00 | NA | NA |
| RP11-232D9.4    | 0,00 | 0,00 | 0,00 | 0,00 | NA | NA |
| RP11-232L2.1    | 0,00 | 0,00 | 0,00 | 0,00 | NA | NA |
| RP11-232L2.2    | 0,00 | 0,00 | 0,00 | 0,00 | NA | NA |
| RP11-232M24.1   | 0,00 | 0,00 | 0,00 | 0,00 | NA | NA |
| RP11-233E12.1   | 0,00 | 0,00 | 0,00 | 0,00 | NA | NA |
| RP11-233E12.2   | 0,00 | 0,00 | 0,00 | 0,00 | NA | NA |
| RP11-233G1.4    | 0,00 | 0,00 | 0,00 | 0,00 | NA | NA |
| RP11-234B24.4   | 0,00 | 0,00 | 0,00 | 0,00 | NA | NA |
| RP11-234B24.5   | 0,00 | 0,00 | 0,00 | 0,00 | NA | NA |
| RP11-234G16.4   | 0,00 | 0,00 | 0,00 | 0,00 | NA | NA |
| RP11-234G16.5   | 0,00 | 0,00 | 0,00 | 0,00 | NA | NA |
| RP11-234K24.3   | 0,08 | 0,41 | 0,08 | 0,09 | NA | NA |
| RP11-234K24.6   | 0,00 | 0,00 | 0,00 | 0,00 | NA | NA |
| RP11-234N17.1   | 0,00 | 0,00 | 0,00 | 0,00 | NA | NA |
| RP11-234O23.1   | 0,00 | 0,00 | 0,00 | 0,00 | NA | NA |
| RP11-234P3.2    | 0,00 | 0,00 | 0,00 | 0,00 | NA | NA |
| RP11-234P3.3    | 0,00 | 0,00 | 0,00 | 0,00 | NA | NA |
| RP11-234P3.4    | 0,00 | 0,00 | 0,00 | 0,00 | NA | NA |
| RP11-234P3.5    | 0,00 | 0,00 | 0,00 | 0,00 | NA | NA |
| RP11-235C23.6   | 0,00 | 0,00 | 0,00 | 0,00 | NA | NA |
| RP11-235D19.2   | 0,00 | 0,00 | 0,00 | 0,00 | NA | NA |
| RP11-235D19.3   | 0,00 | 0,00 | 0,00 | 0,00 | NA | NA |
| RP11-235E17.6   | 0,00 | 0,00 | 0,00 | 0,00 | NA | NA |
| RP11-235G24.1   | 0,00 | 0,00 | 0,00 | 0,00 | NA | NA |
| RP11-235G24.2   | 0,00 | 0,00 | 0,00 | 0,00 | NA | NA |
| RP11-235P11.1   | 0,00 | 0,00 | 0,00 | 0,00 | NA | NA |
| RP11-236B18.1   | 0,00 | 0,00 | 0,00 | 0,00 | NA | NA |
| RP11-236B18.2   | 0,00 | 0,00 | 0,00 | 0,00 | NA | NA |
| RP11-236B18.4   | 0,00 | 0,00 | 0,00 | 0,00 | NA | NA |
| RP11-236B18.5   | 0,00 | 0,00 | 0,00 | 0,00 | NA | NA |
| RP11-236J17.1   | 0,00 | 0,00 | 0,00 | 0,00 | NA | NA |
| RP11-236J17.3   | 0,00 | 0,00 | 0,00 | 0,00 | NA | NA |
| RP11-236J17.5   | 0,00 | 0,00 | 0,00 | 0,00 | NA | NA |
| RP11-236J17.6   | 0,00 | 0,00 | 0,00 | 0,00 | NA | NA |
| RP11-236J17.7   | 0,00 | 0,00 | 0,00 | 0,00 | NA | NA |
| RP11-236L14.1   | 0,00 | 0,00 | 0,00 | 0,00 | NA | NA |
| RP11-236L14.2   | 0,00 | 0,00 | 0,00 | 0,00 | NA | NA |
| RP11-236M15.1   | 0,00 | 0,00 | 0,00 | 0,00 | NA | NA |
| RP11-236M5.1    | 0,00 | 0,00 | 0,00 | 0,00 | NA | NA |
| RP11-236P24.1   | 0,00 | 0,00 | 0,00 | 0,00 | NA | NA |
| RP11-236P24.3   | 0,00 | 0,00 | 0,00 | 0,00 | NA | NA |
| RP11-237D3.1    | 0,00 | 0,00 | 0,00 | 0,00 | NA | NA |
| RP11-237F13_B.2 | 0,00 | 0,00 | 0,00 | 0,00 | NA | NA |
| RP11-237N19.1   | 0,00 | 0,00 | 0,00 | 0,00 | NA | NA |
| RP11-237N19.3   | 0,00 | 0,00 | 0,00 | 0,00 | NA | NA |
| RP11-237P21.1   | 0,00 | 0,00 | 0,00 | 0,00 | NA | NA |
| RP11-238I10.1   | 0,00 | 0,00 | 0,00 | 0,00 | NA | NA |

|                |      |      |      |      |    |    |
|----------------|------|------|------|------|----|----|
| RP11-238K6.1   | 0,00 | 0,00 | 0,00 | 0,00 | NA | NA |
| RP11-238K6.2   | 0,00 | 0,00 | 0,00 | 0,00 | NA | NA |
| RP11-238M12.1  | 0,00 | 0,00 | 0,00 | 0,00 | NA | NA |
| RP11-239C9.1   | 0,00 | 0,00 | 0,00 | 0,00 | NA | NA |
| RP11-239L20.6  | 0,00 | 0,00 | 0,00 | 0,00 | NA | NA |
| RP11-23A22.1   | 0,00 | 0,00 | 0,00 | 0,00 | NA | NA |
| RP11-23B15.1   | 0,00 | 0,00 | 0,00 | 0,00 | NA | NA |
| RP11-23B5.1    | 0,00 | 0,00 | 0,00 | 0,00 | NA | NA |
| RP11-23B5.2    | 0,00 | 0,00 | 0,00 | 0,00 | NA | NA |
| RP11-23B7.3    | 0,00 | 0,00 | 0,00 | 0,00 | NA | NA |
| RP11-23B7.4    | 0,00 | 0,00 | 0,00 | 0,00 | NA | NA |
| RP11-23D5.1    | 0,00 | 0,87 | 0,00 | 0,00 | NA | NA |
| RP11-23E10.2   | 0,00 | 0,00 | 0,00 | 0,00 | NA | NA |
| RP11-23E10.5   | 0,00 | 0,00 | 0,00 | 0,00 | NA | NA |
| RP11-23E10.7   | 0,00 | 0,00 | 0,00 | 0,00 | NA | NA |
| RP11-23F23.2   | 0,00 | 0,00 | 0,00 | 0,00 | NA | NA |
| RP11-23F23.3   | 0,00 | 0,00 | 0,00 | 0,00 | NA | NA |
| RP11-23I7.1    | 0,00 | 0,00 | 0,00 | 0,00 | NA | NA |
| RP11-23J14.1   | 0,00 | 0,00 | 0,00 | 0,00 | NA | NA |
| RP11-23J9.6    | 0,00 | 0,00 | 0,00 | 0,00 | NA | NA |
| RP11-23J9.7    | 0,00 | 0,00 | 0,00 | 0,00 | NA | NA |
| RP11-23N2.1    | 0,26 | 0,27 | 0,00 | 0,00 | NA | NA |
| RP11-23N2.4    | 0,00 | 0,00 | 0,00 | 0,00 | NA | NA |
| RP11-23O13.1   | 0,00 | 0,00 | 0,00 | 0,00 | NA | NA |
| RP11-23P11.2   | 0,00 | 0,00 | 0,00 | 0,00 | NA | NA |
| RP11-240B13.2  | 0,00 | 0,00 | 0,00 | 0,00 | NA | NA |
| RP11-240E19.1  | 0,00 | 0,00 | 0,00 | 0,00 | NA | NA |
| RP11-240E2.3   | 0,00 | 0,00 | 0,00 | 0,00 | NA | NA |
| RP11-240G22.1  | 0,00 | 0,00 | 0,00 | 0,00 | NA | NA |
| RP11-240G22.4  | 0,00 | 0,00 | 0,00 | 0,00 | NA | NA |
| RP11-240L7.4   | 0,00 | 0,00 | 0,00 | 0,00 | NA | NA |
| RP11-241F15.11 | 0,00 | 0,00 | 0,00 | 0,00 | NA | NA |
| RP11-241F15.5  | 0,00 | 0,00 | 0,00 | 0,00 | NA | NA |
| RP11-241F15.6  | 0,00 | 0,00 | 0,00 | 0,00 | NA | NA |
| RP11-241F15.8  | 0,00 | 0,00 | 0,00 | 0,00 | NA | NA |
| RP11-241F15.9  | 0,00 | 0,00 | 0,00 | 0,00 | NA | NA |
| RP11-241G9.3   | 0,00 | 0,00 | 0,00 | 0,00 | NA | NA |
| RP11-241I20.1  | 0,00 | 0,00 | 0,00 | 0,00 | NA | NA |
| RP11-241I20.4  | 0,00 | 0,00 | 0,00 | 0,00 | NA | NA |
| RP11-241I20.5  | 0,00 | 0,00 | 0,00 | 0,00 | NA | NA |
| RP11-241I12.1  | 0,00 | 0,00 | 0,00 | 0,00 | NA | NA |
| RP11-241K18.1  | 0,00 | 0,00 | 0,00 | 0,00 | NA | NA |
| RP11-241K18.2  | 0,00 | 0,00 | 0,00 | 0,00 | NA | NA |
| RP11-241M13.2  | 0,00 | 0,00 | 0,00 | 0,00 | NA | NA |
| RP11-241N4.2   | 0,00 | 0,00 | 0,00 | 0,00 | NA | NA |
| RP11-241P3.1   | 0,00 | 0,00 | 0,00 | 0,00 | NA | NA |
| RP11-241P3.2   | 0,00 | 0,00 | 0,00 | 0,00 | NA | NA |
| RP11-242C24.2  | 0,00 | 0,00 | 0,00 | 0,00 | NA | NA |
| RP11-242C24.3  | 0,00 | 0,00 | 0,00 | 0,00 | NA | NA |
| RP11-242D10.2  | 0,00 | 0,00 | 0,00 | 0,00 | NA | NA |
| RP11-242F11.2  | 0,00 | 0,00 | 0,00 | 0,00 | NA | NA |
| RP11-242G20.1  | 0,00 | 0,00 | 0,00 | 0,00 | NA | NA |
| RP11-242G20.2  | 0,00 | 0,00 | 0,00 | 0,00 | NA | NA |
| RP11-242O24.3  | 0,00 | 0,00 | 0,00 | 0,00 | NA | NA |
| RP11-242P2.1   | 0,00 | 0,00 | 0,00 | 0,00 | NA | NA |

|                |      |      |      |      |    |    |
|----------------|------|------|------|------|----|----|
| RP11-243A14.2  | 0,00 | 0,00 | 0,00 | 0,00 | NA | NA |
| RP11-243A14.3  | 0,00 | 0,00 | 0,00 | 0,00 | NA | NA |
| RP11-243E13.2  | 0,00 | 0,00 | 0,00 | 0,00 | NA | NA |
| RP11-243I18.2  | 0,00 | 0,00 | 0,00 | 0,00 | NA | NA |
| RP11-243M12.1  | 0,00 | 0,00 | 0,00 | 0,00 | NA | NA |
| RP11-243M5.1   | 0,00 | 0,00 | 0,00 | 0,00 | NA | NA |
| RP11-243M5.5   | 0,00 | 0,00 | 0,00 | 0,00 | NA | NA |
| RP11-243O10.3  | 0,00 | 0,00 | 0,00 | 0,00 | NA | NA |
| RP11-244B22.6  | 0,00 | 0,00 | 0,00 | 0,00 | NA | NA |
| RP11-244B22.7  | 0,00 | 0,00 | 0,00 | 0,00 | NA | NA |
| RP11-244C20.1  | 0,00 | 0,00 | 0,00 | 0,00 | NA | NA |
| RP11-244C20.2  | 0,00 | 0,00 | 0,00 | 0,00 | NA | NA |
| RP11-244F12.1  | 0,00 | 0,00 | 0,00 | 0,00 | NA | NA |
| RP11-244G12.1  | 0,00 | 0,00 | 0,00 | 0,00 | NA | NA |
| RP11-244H18.1  | 0,00 | 0,15 | 0,00 | 0,00 | NA | NA |
| RP11-244H18.3  | 0,00 | 0,00 | 0,00 | 0,00 | NA | NA |
| RP11-244H18.4  | 0,00 | 0,00 | 0,00 | 0,00 | NA | NA |
| RP11-244K5.1   | 0,00 | 0,00 | 0,00 | 0,00 | NA | NA |
| RP11-244K5.7   | 0,00 | 0,00 | 0,00 | 0,00 | NA | NA |
| RP11-244K5.8   | 0,00 | 0,00 | 0,00 | 0,00 | NA | NA |
| RP11-244N9.6   | 0,00 | 0,00 | 0,00 | 0,00 | NA | NA |
| RP11-245A18.1  | 0,00 | 0,00 | 0,00 | 0,00 | NA | NA |
| RP11-245A18.2  | 0,00 | 0,00 | 0,00 | 0,00 | NA | NA |
| RP11-245B11.2  | 0,00 | 0,00 | 0,00 | 0,00 | NA | NA |
| RP11-245C17.5  | 0,00 | 0,00 | 0,00 | 0,00 | NA | NA |
| RP11-245D16.4  | 0,00 | 0,00 | 0,34 | 0,00 | NA | NA |
| RP11-245G13.1  | 0,00 | 0,00 | 0,00 | 0,00 | NA | NA |
| RP11-245M24.2  | 0,00 | 0,00 | 0,00 | 0,00 | NA | NA |
| RP11-245P10.6  | 0,00 | 0,00 | 0,00 | 0,00 | NA | NA |
| RP11-246K15.1  | 0,00 | 0,00 | 0,00 | 0,00 | NA | NA |
| RP11-247A12.1  | 0,00 | 0,00 | 0,00 | 0,00 | NA | NA |
| RP11-247A12.7  | 0,00 | 0,00 | 0,00 | 0,00 | NA | NA |
| RP11-247A12.8  | 0,00 | 0,00 | 0,00 | 0,00 | NA | NA |
| RP11-247C2.1   | 0,00 | 0,00 | 0,00 | 0,00 | NA | NA |
| RP11-247M1.2   | 0,00 | 0,00 | 0,00 | 0,00 | NA | NA |
| RP11-247M1.5   | 0,00 | 0,00 | 0,00 | 0,00 | NA | NA |
| RP11-248B10.2  | 0,00 | 0,00 | 0,00 | 0,00 | NA | NA |
| RP11-248B24.4  | 0,00 | 0,00 | 0,00 | 0,00 | NA | NA |
| RP11-248B24.5  | 0,00 | 0,00 | 0,00 | 0,00 | NA | NA |
| RP11-248C1.4   | 0,00 | 0,00 | 0,00 | 0,00 | NA | NA |
| RP11-248E9.1   | 0,00 | 0,00 | 0,00 | 0,00 | NA | NA |
| RP11-248E9.5   | 0,00 | 0,00 | 0,00 | 0,00 | NA | NA |
| RP11-248E9.7   | 0,00 | 0,00 | 0,00 | 0,00 | NA | NA |
| RP11-248G5.11  | 0,00 | 0,00 | 0,00 | 0,00 | NA | NA |
| RP11-248G5.12  | 0,25 | 0,00 | 0,00 | 0,00 | NA | NA |
| RP11-248G5.9   | 0,00 | 0,00 | 0,00 | 0,00 | NA | NA |
| RP11-248I9.2   | 0,00 | 0,00 | 0,00 | 0,00 | NA | NA |
| RP11-248J23.5  | 0,00 | 0,50 | 0,00 | 0,43 | NA | NA |
| RP11-248J23.7  | 0,00 | 0,00 | 0,00 | 0,00 | NA | NA |
| RP11-248N22.1  | 0,00 | 0,00 | 0,00 | 0,00 | NA | NA |
| RP11-248N22.2  | 0,00 | 0,00 | 0,00 | 0,00 | NA | NA |
| RP11-248N6.3   | 0,00 | 0,00 | 0,00 | 0,00 | NA | NA |
| RP11-248N6.4   | 0,00 | 0,00 | 0,00 | 0,00 | NA | NA |
| RP11-249C24.10 | 0,00 | 0,00 | 0,00 | 0,00 | NA | NA |
| RP11-249C24.11 | 0,00 | 0,00 | 0,00 | 0,00 | NA | NA |



|                |      |      |      |      |    |    |
|----------------|------|------|------|------|----|----|
| RP11-249C24.12 | 0,00 | 0,00 | 0,00 | 0,00 | NA | NA |
| RP11-249C24.3  | 0,00 | 0,00 | 0,00 | 0,00 | NA | NA |
| RP11-249L21.2  | 0,00 | 0,00 | 0,00 | 0,00 | NA | NA |
| RP11-249L21.4  | 0,00 | 0,00 | 0,00 | 0,00 | NA | NA |
| RP11-249L21.5  | 0,00 | 0,00 | 0,00 | 0,00 | NA | NA |
| RP11-24C14.1   | 0,00 | 0,00 | 0,00 | 0,00 | NA | NA |
| RP11-24D11.1   | 0,00 | 0,00 | 0,00 | 0,00 | NA | NA |
| RP11-24E1.1    | 0,00 | 0,00 | 0,00 | 0,00 | NA | NA |
| RP11-24H2.2    | 0,00 | 0,00 | 0,00 | 0,00 | NA | NA |
| RP11-24H2.3    | 0,00 | 0,00 | 0,00 | 0,00 | NA | NA |
| RP11-24I21.1   | 0,00 | 0,00 | 0,00 | 0,00 | NA | NA |
| RP11-24J11.1   | 0,00 | 0,00 | 0,00 | 0,00 | NA | NA |
| RP11-24M17.3   | 0,00 | 0,00 | 0,00 | 0,00 | NA | NA |
| RP11-24M17.4   | 0,17 | 0,43 | 0,32 | 0,41 | NA | NA |
| RP11-24M17.6   | 0,00 | 0,00 | 0,00 | 0,00 | NA | NA |
| RP11-24P24.1   | 0,00 | 0,00 | 0,00 | 0,00 | NA | NA |
| RP11-24P4.1    | 0,00 | 0,00 | 0,00 | 0,00 | NA | NA |
| RP11-250B16.1  | 0,00 | 0,00 | 0,00 | 0,20 | NA | NA |
| RP11-250B2.2   | 0,00 | 0,00 | 0,00 | 0,00 | NA | NA |
| RP11-250B2.5   | 0,00 | 0,00 | 0,00 | 0,00 | NA | NA |
| RP11-250G15.1  | 0,00 | 0,00 | 0,00 | 0,00 | NA | NA |
| RP11-250H24.1  | 0,00 | 0,00 | 0,00 | 0,00 | NA | NA |
| RP11-250H24.4  | 0,00 | 0,00 | 0,00 | 0,00 | NA | NA |
| RP11-250H24.6  | 0,00 | 0,00 | 0,00 | 0,00 | NA | NA |
| RP11-250H24.7  | 0,00 | 0,00 | 0,00 | 0,00 | NA | NA |
| RP11-250N10.1  | 0,00 | 0,00 | 0,00 | 0,00 | NA | NA |
| RP11-251A15.1  | 0,00 | 0,00 | 0,00 | 0,00 | NA | NA |
| RP11-251A15.5  | 0,00 | 0,00 | 0,00 | 0,00 | NA | NA |
| RP11-251G23.3  | 0,00 | 0,00 | 0,00 | 0,00 | NA | NA |
| RP11-251M1.1   | 0,00 | 0,00 | 0,00 | 0,00 | NA | NA |
| RP11-251M8.1   | 0,00 | 0,00 | 0,00 | 0,00 | NA | NA |
| RP11-252A24.3  | 0,05 | 0,28 | 0,10 | 0,14 | NA | NA |
| RP11-252A24.5  | 0,00 | 0,00 | 0,00 | 0,00 | NA | NA |
| RP11-252A24.8  | 0,00 | 0,00 | 0,00 | 0,00 | NA | NA |
| RP11-252C15.2  | 0,00 | 0,00 | 0,00 | 0,00 | NA | NA |
| RP11-252C19.2  | 0,00 | 0,00 | 0,00 | 0,00 | NA | NA |
| RP11-252C24.1  | 0,00 | 0,00 | 0,00 | 0,00 | NA | NA |
| RP11-252C24.2  | 0,00 | 0,00 | 0,00 | 0,00 | NA | NA |
| RP11-252E3.2   | 0,00 | 0,00 | 0,00 | 0,00 | NA | NA |
| RP11-252F15.1  | 0,00 | 0,00 | 0,00 | 0,00 | NA | NA |
| RP11-252I13.1  | 0,00 | 0,00 | 0,00 | 0,00 | NA | NA |
| RP11-252K7.1   | 0,00 | 0,00 | 0,00 | 0,00 | NA | NA |
| RP11-252M18.3  | 0,00 | 0,00 | 0,00 | 0,00 | NA | NA |
| RP11-252M21.1  | 0,00 | 0,00 | 0,00 | 0,00 | NA | NA |
| RP11-252M21.6  | 0,00 | 0,00 | 0,00 | 0,00 | NA | NA |
| RP11-252M21.7  | 0,00 | 0,00 | 0,00 | 0,00 | NA | NA |
| RP11-252M24.1  | 0,00 | 0,00 | 0,00 | 0,00 | NA | NA |
| RP11-252O18.2  | 0,00 | 0,00 | 0,00 | 0,00 | NA | NA |
| RP11-252O18.3  | 0,00 | 0,00 | 0,00 | 0,00 | NA | NA |
| RP11-252O2.2   | 0,00 | 0,00 | 0,00 | 0,00 | NA | NA |
| RP11-252O7.2   | 0,00 | 0,00 | 0,00 | 0,00 | NA | NA |
| RP11-252P18.1  | 0,00 | 0,00 | 0,00 | 0,00 | NA | NA |
| RP11-252P19.1  | 0,00 | 0,00 | 0,00 | 0,00 | NA | NA |
| RP11-252P19.2  | 0,00 | 0,00 | 0,00 | 0,00 | NA | NA |
| RP11-253M7.3   | 0,00 | 0,00 | 0,00 | 0,00 | NA | NA |

|                |      |      |      |      |    |    |
|----------------|------|------|------|------|----|----|
| RP11-253M7.6   | 0,00 | 0,00 | 0,00 | 0,00 | NA | NA |
| RP11-254A17.1  | 0,00 | 0,00 | 0,00 | 0,00 | NA | NA |
| RP11-254B13.1  | 0,46 | 0,95 | 0,72 | 0,61 | NA | NA |
| RP11-254F19.4  | 0,00 | 0,00 | 0,00 | 0,00 | NA | NA |
| RP11-254F7.1   | 0,00 | 0,00 | 0,00 | 0,00 | NA | NA |
| RP11-254G11.1  | 0,00 | 0,00 | 0,00 | 0,00 | NA | NA |
| RP11-254I22.1  | 0,00 | 0,00 | 0,00 | 0,00 | NA | NA |
| RP11-254I22.2  | 0,00 | 0,00 | 0,00 | 0,00 | NA | NA |
| RP11-255A11.14 | 0,00 | 0,00 | 0,00 | 0,00 | NA | NA |
| RP11-255A11.21 | 0,00 | 0,00 | 0,00 | 0,00 | NA | NA |
| RP11-255A11.4  | 0,00 | 0,00 | 0,00 | 0,00 | NA | NA |
| RP11-255A11.7  | 0,00 | 0,00 | 0,00 | 0,00 | NA | NA |
| RP11-255B23.1  | 0,00 | 0,00 | 0,00 | 0,00 | NA | NA |
| RP11-255E6.1   | 0,00 | 0,00 | 0,00 | 0,00 | NA | NA |
| RP11-255E6.6   | 0,00 | 0,00 | 0,00 | 0,00 | NA | NA |
| RP11-255G12.2  | 0,00 | 0,00 | 0,00 | 0,00 | NA | NA |
| RP11-255G12.4  | 0,00 | 0,00 | 0,00 | 0,00 | NA | NA |
| RP11-255H23.2  | 0,00 | 0,18 | 0,00 | 0,00 | NA | NA |
| RP11-255H23.3  | 0,00 | 0,00 | 0,00 | 0,00 | NA | NA |
| RP11-255H23.5  | 0,00 | 0,00 | 0,00 | 0,00 | NA | NA |
| RP11-255I10.1  | 0,00 | 0,00 | 0,00 | 0,00 | NA | NA |
| RP11-255I10.2  | 0,00 | 0,00 | 0,00 | 0,00 | NA | NA |
| RP11-255J3.3   | 0,00 | 0,00 | 0,00 | 0,00 | NA | NA |
| RP11-255M1.1   | 0,00 | 0,00 | 0,00 | 0,00 | NA | NA |
| RP11-255M2.1   | 0,00 | 0,00 | 0,00 | 0,00 | NA | NA |
| RP11-255M2.2   | 0,00 | 0,00 | 0,00 | 0,00 | NA | NA |
| RP11-255M6.1   | 0,00 | 0,00 | 0,00 | 0,00 | NA | NA |
| RP11-255N24.1  | 0,00 | 0,00 | 0,00 | 0,00 | NA | NA |
| RP11-255N24.3  | 0,00 | 0,00 | 0,00 | 0,00 | NA | NA |
| RP11-255N24.4  | 0,00 | 0,00 | 0,00 | 0,00 | NA | NA |
| RP11-255P5.2   | 0,00 | 0,00 | 0,00 | 0,00 | NA | NA |
| RP11-255P5.3   | 0,00 | 0,00 | 0,00 | 0,00 | NA | NA |
| RP11-256G5.1   | 0,00 | 0,00 | 0,00 | 0,00 | NA | NA |
| RP11-256I23.1  | 0,00 | 0,00 | 0,00 | 0,00 | NA | NA |
| RP11-256I23.2  | 0,00 | 0,00 | 0,00 | 0,00 | NA | NA |
| RP11-256K7.1   | 0,00 | 0,00 | 0,00 | 0,00 | NA | NA |
| RP11-256K9.1   | 0,00 | 0,00 | 0,00 | 0,00 | NA | NA |
| RP11-256L11.3  | 0,00 | 0,00 | 0,00 | 0,00 | NA | NA |
| RP11-256L6.2   | 0,00 | 0,00 | 0,00 | 0,00 | NA | NA |
| RP11-256L6.4   | 0,00 | 0,00 | 0,00 | 0,00 | NA | NA |
| RP11-257I8.1   | 0,00 | 0,00 | 0,00 | 0,00 | NA | NA |
| RP11-257K9.3   | 0,00 | 0,00 | 0,00 | 0,00 | NA | NA |
| RP11-257K9.6   | 0,00 | 0,00 | 0,00 | 0,00 | NA | NA |
| RP11-257K9.8   | 0,00 | 0,00 | 0,00 | 0,00 | NA | NA |
| RP11-257O5.4   | 0,00 | 0,00 | 0,00 | 0,00 | NA | NA |
| RP11-258C19.4  | 0,00 | 0,00 | 0,00 | 0,00 | NA | NA |
| RP11-258I10.1  | 0,00 | 0,00 | 0,00 | 0,00 | NA | NA |
| RP11-259A24.1  | 0,00 | 0,00 | 0,00 | 0,00 | NA | NA |
| RP11-259F16.3  | 0,00 | 0,00 | 0,00 | 0,00 | NA | NA |
| RP11-259K15.3  | 0,00 | 0,00 | 0,00 | 0,00 | NA | NA |
| RP11-259O18.4  | 0,00 | 0,00 | 0,00 | 0,00 | NA | NA |
| RP11-259O2.2   | 0,00 | 0,00 | 0,00 | 0,00 | NA | NA |
| RP11-259P15.1  | 0,00 | 0,00 | 0,00 | 0,00 | NA | NA |
| RP11-259P15.2  | 0,00 | 0,00 | 0,00 | 0,00 | NA | NA |
| RP11-259P15.4  | 0,00 | 0,13 | 0,00 | 0,00 | NA | NA |

|                |      |      |      |      |    |    |
|----------------|------|------|------|------|----|----|
| RP11-259P6.2   | 0,00 | 0,00 | 0,00 | 0,00 | NA | NA |
| RP11-259P6.3   | 0,00 | 0,00 | 0,00 | 0,00 | NA | NA |
| RP11-25B14.1   | 0,00 | 0,00 | 0,00 | 0,00 | NA | NA |
| RP11-25B14.2   | 0,00 | 0,00 | 0,00 | 0,00 | NA | NA |
| RP11-25B7.1    | 0,00 | 0,00 | 0,00 | 0,00 | NA | NA |
| RP11-25C15.1   | 0,00 | 0,00 | 0,00 | 0,00 | NA | NA |
| RP11-25D10.1   | 0,00 | 0,00 | 0,00 | 0,00 | NA | NA |
| RP11-25D10.2   | 0,00 | 0,00 | 0,00 | 0,00 | NA | NA |
| RP11-25E2.1    | 0,00 | 0,00 | 0,00 | 0,00 | NA | NA |
| RP11-25G10.2   | 0,00 | 0,00 | 0,00 | 0,00 | NA | NA |
| RP11-25H11.1   | 0,00 | 0,00 | 0,00 | 0,00 | NA | NA |
| RP11-25I11.1   | 0,00 | 0,00 | 0,00 | 0,00 | NA | NA |
| RP11-25I9.2    | 0,00 | 0,00 | 0,00 | 0,00 | NA | NA |
| RP11-25I9.3    | 0,00 | 0,00 | 0,00 | 0,00 | NA | NA |
| RP11-25J23.3   | 0,00 | 0,00 | 0,00 | 0,00 | NA | NA |
| RP11-25J3.2    | 0,00 | 0,00 | 0,00 | 0,00 | NA | NA |
| RP11-25K19.1   | 0,11 | 0,30 | 0,00 | 0,00 | NA | NA |
| RP11-25K21.5   | 0,00 | 0,00 | 0,00 | 0,00 | NA | NA |
| RP11-25K21.6   | 0,00 | 0,00 | 0,00 | 0,00 | NA | NA |
| RP11-25L3.1    | 0,00 | 0,00 | 0,00 | 0,00 | NA | NA |
| RP11-25L3.3    | 0,00 | 0,00 | 0,00 | 0,00 | NA | NA |
| RP11-25L5.1    | 0,00 | 0,00 | 0,00 | 0,00 | NA | NA |
| RP11-25L5.2    | 0,00 | 0,00 | 0,00 | 0,00 | NA | NA |
| RP11-25O10.1   | 0,00 | 0,00 | 0,00 | 0,00 | NA | NA |
| RP11-25O10.2   | 0,00 | 0,00 | 0,00 | 0,00 | NA | NA |
| RP11-25O3.1    | 0,00 | 0,00 | 0,00 | 0,00 | NA | NA |
| RP11-25P11.2   | 0,00 | 0,00 | 0,00 | 0,00 | NA | NA |
| RP11-260A9.1   | 0,00 | 0,00 | 0,00 | 0,00 | NA | NA |
| RP11-260A9.4   | 0,00 | 0,00 | 0,00 | 0,00 | NA | NA |
| RP11-260A9.5   | 0,00 | 0,00 | 0,00 | 0,00 | NA | NA |
| RP11-260A9.6   | 0,00 | 0,00 | 0,00 | 0,00 | NA | NA |
| RP11-260M19.2  | 0,00 | 0,00 | 0,00 | 0,00 | NA | NA |
| RP11-261B23.1  | 0,00 | 0,00 | 0,00 | 0,00 | NA | NA |
| RP11-261C10.1  | 0,00 | 0,00 | 0,00 | 0,00 | NA | NA |
| RP11-261C10.7  | 0,00 | 0,00 | 0,00 | 0,00 | NA | NA |
| RP11-261C10.8  | 0,00 | 0,00 | 0,00 | 0,00 | NA | NA |
| RP11-261E12.2  | 0,00 | 0,00 | 0,00 | 0,00 | NA | NA |
| RP11-261N11.8  | 0,00 | 0,00 | 0,00 | 0,00 | NA | NA |
| RP11-261P13.6  | 0,00 | 0,00 | 0,00 | 0,00 | NA | NA |
| RP11-261P24.2  | 0,00 | 0,00 | 0,00 | 0,00 | NA | NA |
| RP11-261P9.4   | 0,00 | 0,00 | 0,00 | 0,00 | NA | NA |
| RP11-262A16.1  | 0,00 | 0,00 | 0,00 | 0,00 | NA | NA |
| RP11-262H14.11 | 0,00 | 0,00 | 0,00 | 0,00 | NA | NA |
| RP11-262H14.7  | 0,00 | 0,00 | 0,00 | 0,00 | NA | NA |
| RP11-262I2.2   | 0,00 | 0,00 | 0,00 | 0,00 | NA | NA |
| RP11-262K1.1   | 0,00 | 0,00 | 0,00 | 0,00 | NA | NA |
| RP11-262M14.1  | 0,00 | 0,00 | 0,00 | 0,00 | NA | NA |
| RP11-262M14.2  | 0,00 | 0,00 | 0,00 | 0,00 | NA | NA |
| RP11-263A24.1  | 0,00 | 0,00 | 0,00 | 0,00 | NA | NA |
| RP11-263C16.2  | 0,00 | 0,00 | 0,00 | 0,00 | NA | NA |
| RP11-263C24.2  | 0,00 | 0,00 | 0,00 | 0,00 | NA | NA |
| RP11-263C24.3  | 0,00 | 0,00 | 0,00 | 0,00 | NA | NA |
| RP11-263E1.1   | 0,00 | 0,00 | 0,00 | 0,00 | NA | NA |
| RP11-263F14.3  | 0,00 | 0,00 | 0,00 | 0,00 | NA | NA |
| RP11-263F19.1  | 0,00 | 0,00 | 0,00 | 0,00 | NA | NA |

|               |      |      |      |      |    |    |
|---------------|------|------|------|------|----|----|
| RP11-263J14.1 | 0,00 | 0,00 | 0,00 | 0,00 | NA | NA |
| RP11-263K19.6 | 0,00 | 0,00 | 0,00 | 0,00 | NA | NA |
| RP11-263K4.4  | 0,00 | 0,00 | 0,00 | 0,00 | NA | NA |
| RP11-264A11.1 | 0,00 | 0,00 | 0,00 | 0,00 | NA | NA |
| RP11-264B14.1 | 0,00 | 0,00 | 0,00 | 0,00 | NA | NA |
| RP11-264C15.2 | 0,00 | 0,00 | 0,00 | 0,00 | NA | NA |
| RP11-264E23.1 | 0,00 | 0,00 | 0,00 | 0,00 | NA | NA |
| RP11-264E23.3 | 0,00 | 0,00 | 0,00 | 0,00 | NA | NA |
| RP11-264F23.1 | 0,00 | 0,00 | 0,00 | 0,47 | NA | NA |
| RP11-264J4.10 | 0,00 | 0,00 | 0,00 | 0,00 | NA | NA |
| RP11-264J4.4  | 0,00 | 0,00 | 0,00 | 0,00 | NA | NA |
| RP11-264J4.5  | 0,00 | 0,00 | 0,00 | 0,00 | NA | NA |
| RP11-264J4.8  | 0,08 | 0,29 | 0,00 | 0,21 | NA | NA |
| RP11-264J4.9  | 0,45 | 0,39 | 0,19 | 0,00 | NA | NA |
| RP11-264K23.1 | 0,00 | 0,00 | 0,00 | 0,00 | NA | NA |
| RP11-264L1.3  | 0,00 | 0,00 | 0,00 | 0,00 | NA | NA |
| RP11-264M12.4 | 0,00 | 0,00 | 0,00 | 0,00 | NA | NA |
| RP11-264M20.1 | 0,00 | 0,00 | 0,00 | 0,00 | NA | NA |
| RP11-264P13.2 | 0,00 | 0,00 | 0,00 | 0,00 | NA | NA |
| RP11-265B7.1  | 0,00 | 0,00 | 0,00 | 0,00 | NA | NA |
| RP11-265C3.1  | 0,00 | 0,00 | 0,00 | 0,00 | NA | NA |
| RP11-265D19.5 | 0,00 | 0,00 | 0,00 | 0,00 | NA | NA |
| RP11-265D19.7 | 0,00 | 0,00 | 0,00 | 0,00 | NA | NA |
| RP11-265D19.8 | 0,00 | 0,00 | 0,00 | 0,00 | NA | NA |
| RP11-265D20.1 | 0,00 | 0,00 | 0,00 | 0,00 | NA | NA |
| RP11-265E18.1 | 0,00 | 0,00 | 0,00 | 0,00 | NA | NA |
| RP11-265G8.1  | 0,00 | 0,00 | 0,00 | 0,00 | NA | NA |
| RP11-265N6.4  | 0,00 | 0,00 | 0,00 | 0,00 | NA | NA |
| RP11-265N7.2  | 0,00 | 0,00 | 0,00 | 0,00 | NA | NA |
| RP11-266E14.1 | 0,00 | 0,00 | 0,00 | 0,00 | NA | NA |
| RP11-266E6.2  | 0,00 | 0,00 | 0,00 | 0,00 | NA | NA |
| RP11-266E6.3  | 0,00 | 0,00 | 0,00 | 0,00 | NA | NA |
| RP11-266E8.2  | 0,00 | 0,00 | 0,00 | 0,00 | NA | NA |
| RP11-266F12.1 | 0,00 | 0,00 | 0,00 | 0,00 | NA | NA |
| RP11-266I3.5  | 0,00 | 0,00 | 0,00 | 0,00 | NA | NA |
| RP11-266I3.8  | 0,00 | 0,00 | 0,00 | 0,00 | NA | NA |
| RP11-266I3.9  | 0,00 | 0,00 | 0,00 | 0,00 | NA | NA |
| RP11-266K4.1  | 0,00 | 0,00 | 0,00 | 0,00 | NA | NA |
| RP11-266K4.11 | 0,00 | 0,00 | 0,00 | 0,00 | NA | NA |
| RP11-266K4.15 | 0,00 | 0,00 | 0,00 | 0,00 | NA | NA |
| RP11-266K4.3  | 0,00 | 0,00 | 0,00 | 0,00 | NA | NA |
| RP11-266L9.3  | 0,00 | 0,00 | 0,00 | 0,00 | NA | NA |
| RP11-266O15.3 | 0,00 | 0,00 | 0,00 | 0,00 | NA | NA |
| RP11-267A15.2 | 0,00 | 0,00 | 0,00 | 0,00 | NA | NA |
| RP11-267C16.2 | 0,00 | 0,00 | 0,00 | 0,00 | NA | NA |
| RP11-267C16.3 | 0,00 | 0,00 | 0,00 | 0,00 | NA | NA |
| RP11-267D19.1 | 0,00 | 0,00 | 0,00 | 0,00 | NA | NA |
| RP11-267D19.2 | 0,00 | 0,00 | 0,00 | 0,00 | NA | NA |
| RP11-267L5.1  | 0,00 | 0,00 | 0,00 | 0,00 | NA | NA |
| RP11-267M23.5 | 0,00 | 0,00 | 0,00 | 0,00 | NA | NA |
| RP11-267M23.6 | 0,00 | 0,00 | 0,00 | 0,00 | NA | NA |
| RP11-267M23.7 | 0,00 | 0,00 | 0,00 | 0,00 | NA | NA |
| RP11-267N12.2 | 0,00 | 0,00 | 0,00 | 0,00 | NA | NA |
| RP11-268E23.2 | 0,00 | 0,00 | 0,00 | 0,00 | NA | NA |
| RP11-268G12.2 | 0,00 | 0,00 | 0,00 | 0,00 | NA | NA |

|               |      |      |      |      |    |    |
|---------------|------|------|------|------|----|----|
| RP11-268I9.1  | 0,00 | 0,00 | 0,00 | 0,00 | NA | NA |
| RP11-268I9.4  | 0,00 | 0,00 | 0,00 | 0,00 | NA | NA |
| RP11-268P4.1  | 0,00 | 0,00 | 0,00 | 0,00 | NA | NA |
| RP11-268P4.2  | 0,00 | 0,00 | 0,00 | 0,00 | NA | NA |
| RP11-269C23.3 | 0,00 | 0,00 | 0,00 | 0,00 | NA | NA |
| RP11-269C23.4 | 0,00 | 0,00 | 0,00 | 0,00 | NA | NA |
| RP11-269C23.5 | 0,00 | 0,00 | 0,00 | 0,00 | NA | NA |
| RP11-269C4.1  | 0,00 | 0,00 | 0,00 | 0,00 | NA | NA |
| RP11-269F21.2 | 0,00 | 0,00 | 0,00 | 0,00 | NA | NA |
| RP11-269G2.1  | 0,00 | 0,00 | 0,00 | 0,00 | NA | NA |
| RP11-269G24.6 | 0,00 | 0,00 | 0,00 | 0,00 | NA | NA |
| RP11-269G24.7 | 0,00 | 0,00 | 0,00 | 0,00 | NA | NA |
| RP11-269M20.1 | 0,00 | 0,00 | 0,00 | 0,00 | NA | NA |
| RP11-26C10.1  | 0,00 | 0,00 | 0,00 | 0,00 | NA | NA |
| RP11-26F2.2   | 0,00 | 0,00 | 0,00 | 0,00 | NA | NA |
| RP11-26G10.1  | 0,00 | 0,00 | 0,00 | 0,00 | NA | NA |
| RP11-26H16.1  | 0,00 | 0,43 | 0,00 | 0,00 | NA | NA |
| RP11-26H16.4  | 0,00 | 0,00 | 0,00 | 0,00 | NA | NA |
| RP11-26L20.4  | 0,00 | 0,00 | 0,00 | 0,00 | NA | NA |
| RP11-26L20.5  | 0,00 | 0,00 | 0,00 | 0,00 | NA | NA |
| RP11-26M5.3   | 0,00 | 0,00 | 0,00 | 0,31 | NA | NA |
| RP11-26O3.1   | 0,00 | 0,00 | 0,00 | 0,00 | NA | NA |
| RP11-26P13.2  | 0,00 | 0,00 | 0,00 | 0,00 | NA | NA |
| RP11-270C18.2 | 0,00 | 0,00 | 0,00 | 0,00 | NA | NA |
| RP11-270G15.2 | 0,00 | 0,00 | 0,00 | 0,00 | NA | NA |
| RP11-270L13.1 | 0,00 | 0,00 | 0,00 | 0,00 | NA | NA |
| RP11-270M14.5 | 0,00 | 0,00 | 0,00 | 0,00 | NA | NA |
| RP11-271F18.1 | 0,00 | 0,00 | 0,00 | 0,00 | NA | NA |
| RP11-271F18.3 | 0,00 | 0,00 | 0,00 | 0,00 | NA | NA |
| RP11-271K11.2 | 0,00 | 0,00 | 0,00 | 0,00 | NA | NA |
| RP11-271K11.6 | 0,00 | 0,00 | 0,00 | 0,00 | NA | NA |
| RP11-271K21.2 | 0,00 | 0,00 | 0,00 | 0,00 | NA | NA |
| RP11-271M1.2  | 0,00 | 0,00 | 0,00 | 0,00 | NA | NA |
| RP11-271O3.1  | 0,00 | 0,00 | 0,00 | 0,00 | NA | NA |
| RP11-272B17.1 | 0,00 | 0,00 | 0,00 | 0,00 | NA | NA |
| RP11-272B17.2 | 0,00 | 0,00 | 0,00 | 0,00 | NA | NA |
| RP11-272D12.1 | 0,00 | 0,00 | 0,00 | 0,00 | NA | NA |
| RP11-272D12.2 | 0,00 | 0,00 | 0,00 | 0,00 | NA | NA |
| RP11-272D20.2 | 0,00 | 0,00 | 0,00 | 0,00 | NA | NA |
| RP11-272G11.1 | 0,00 | 0,00 | 0,00 | 0,00 | NA | NA |
| RP11-272G22.2 | 0,00 | 0,00 | 0,00 | 0,00 | NA | NA |
| RP11-272G22.3 | 0,00 | 0,00 | 0,00 | 0,00 | NA | NA |
| RP11-272I7.1  | 0,00 | 0,00 | 0,00 | 0,00 | NA | NA |
| RP11-272I7.3  | 0,00 | 0,00 | 0,00 | 0,00 | NA | NA |
| RP11-272I7.4  | 0,00 | 0,00 | 0,00 | 0,00 | NA | NA |
| RP11-272I7.6  | 0,00 | 0,00 | 0,00 | 0,00 | NA | NA |
| RP11-272K23.3 | 0,00 | 0,00 | 0,00 | 0,00 | NA | NA |
| RP11-272K23.4 | 0,00 | 0,00 | 0,00 | 0,00 | NA | NA |
| RP11-272L14.2 | 0,00 | 0,00 | 0,00 | 0,00 | NA | NA |
| RP11-272M24.2 | 0,00 | 0,00 | 0,00 | 0,00 | NA | NA |
| RP11-272P10.2 | 0,00 | 0,00 | 0,00 | 0,00 | NA | NA |
| RP11-272P10.3 | 0,00 | 0,00 | 0,00 | 0,00 | NA | NA |
| RP11-273B19.1 | 0,00 | 0,00 | 0,00 | 0,00 | NA | NA |
| RP11-273B19.2 | 0,00 | 0,00 | 0,00 | 0,00 | NA | NA |
| RP11-273B20.1 | 0,00 | 0,00 | 0,00 | 0,00 | NA | NA |

|                |      |      |      |      |    |    |
|----------------|------|------|------|------|----|----|
| RP11-273F15.2  | 0,00 | 0,00 | 0,00 | 0,00 | NA | NA |
| RP11-273G15.1  | 0,00 | 0,00 | 0,00 | 0,00 | NA | NA |
| RP11-273P3.1   | 0,00 | 0,00 | 0,00 | 0,00 | NA | NA |
| RP11-274A11.3  | 0,00 | 0,00 | 0,00 | 0,00 | NA | NA |
| RP11-274A11.5  | 0,00 | 0,00 | 0,00 | 0,00 | NA | NA |
| RP11-274A8.2   | 0,00 | 0,00 | 0,00 | 0,00 | NA | NA |
| RP11-274B18.4  | 0,00 | 0,00 | 0,00 | 0,00 | NA | NA |
| RP11-274B21.11 | 0,00 | 0,10 | 0,00 | 0,00 | NA | NA |
| RP11-274B21.13 | 0,00 | 0,00 | 0,00 | 0,00 | NA | NA |
| RP11-274B21.5  | 0,00 | 0,00 | 0,00 | 0,00 | NA | NA |
| RP11-274B21.7  | 0,00 | 0,00 | 0,00 | 0,00 | NA | NA |
| RP11-274E6.1   | 0,00 | 0,00 | 0,00 | 0,00 | NA | NA |
| RP11-274E7.1   | 0,00 | 0,00 | 0,00 | 0,00 | NA | NA |
| RP11-274H2.5   | 0,00 | 0,00 | 0,00 | 0,00 | NA | NA |
| RP11-274J15.2  | 0,00 | 0,00 | 0,00 | 0,00 | NA | NA |
| RP11-274J16.5  | 0,00 | 0,00 | 0,00 | 0,00 | NA | NA |
| RP11-274J2.1   | 0,00 | 0,00 | 0,00 | 0,00 | NA | NA |
| RP11-274K13.4  | 0,00 | 0,00 | 0,00 | 0,00 | NA | NA |
| RP11-274K13.5  | 0,00 | 0,00 | 0,00 | 0,00 | NA | NA |
| RP11-274M17.1  | 0,00 | 0,00 | 0,00 | 0,00 | NA | NA |
| RP11-274M17.2  | 0,00 | 0,00 | 0,00 | 0,00 | NA | NA |
| RP11-274M17.3  | 0,00 | 0,00 | 0,00 | 0,00 | NA | NA |
| RP11-274M4.1   | 0,00 | 0,00 | 0,00 | 0,00 | NA | NA |
| RP11-275A14.1  | 0,00 | 0,00 | 0,00 | 0,00 | NA | NA |
| RP11-275E15.2  | 0,00 | 0,00 | 0,00 | 0,00 | NA | NA |
| RP11-275E15.3  | 0,00 | 0,00 | 0,00 | 0,00 | NA | NA |
| RP11-275I14.2  | 0,00 | 0,00 | 0,00 | 0,00 | NA | NA |
| RP11-275I14.4  | 0,00 | 0,00 | 0,00 | 0,00 | NA | NA |
| RP11-275N1.2   | 0,00 | 0,00 | 0,00 | 0,00 | NA | NA |
| RP11-275N1.3   | 0,00 | 0,00 | 0,00 | 0,00 | NA | NA |
| RP11-275O18.1  | 0,00 | 0,00 | 0,00 | 0,00 | NA | NA |
| RP11-275O4.4   | 0,00 | 0,00 | 0,00 | 0,00 | NA | NA |
| RP11-276G3.1   | 0,00 | 0,00 | 0,00 | 0,00 | NA | NA |
| RP11-276H19.4  | 0,00 | 0,00 | 0,00 | 0,00 | NA | NA |
| RP11-276H7.2   | 0,00 | 0,00 | 0,00 | 0,00 | NA | NA |
| RP11-277B15.1  | 0,00 | 0,00 | 0,00 | 0,00 | NA | NA |
| RP11-277B15.3  | 0,00 | 0,00 | 0,00 | 0,00 | NA | NA |
| RP11-277G18.1  | 0,00 | 0,00 | 0,00 | 0,00 | NA | NA |
| RP11-277G24.1  | 0,00 | 0,00 | 0,00 | 0,00 | NA | NA |
| RP11-277J24.1  | 0,00 | 0,00 | 0,00 | 0,00 | NA | NA |
| RP11-277J6.2   | 0,00 | 0,00 | 0,00 | 0,00 | NA | NA |
| RP11-277J6.3   | 0,00 | 0,00 | 0,00 | 0,00 | NA | NA |
| RP11-277K23.1  | 0,00 | 0,00 | 0,00 | 0,00 | NA | NA |
| RP11-278C7.2   | 0,00 | 0,00 | 0,00 | 0,00 | NA | NA |
| RP11-278H7.3   | 0,00 | 0,00 | 0,00 | 0,00 | NA | NA |
| RP11-278H7.4   | 0,00 | 0,00 | 0,00 | 0,00 | NA | NA |
| RP11-278I4.1   | 0,00 | 0,00 | 0,00 | 0,00 | NA | NA |
| RP11-278I4.2   | 0,00 | 0,00 | 0,00 | 0,00 | NA | NA |
| RP11-278J20.2  | 0,00 | 0,00 | 0,00 | 0,00 | NA | NA |
| RP11-278J6.4   | 0,00 | 0,00 | 0,00 | 0,00 | NA | NA |
| RP11-278L15.1  | 0,00 | 0,00 | 0,00 | 0,00 | NA | NA |
| RP11-278L15.3  | 0,00 | 0,00 | 0,00 | 0,00 | NA | NA |
| RP11-278L15.4  | 0,00 | 0,00 | 0,00 | 0,00 | NA | NA |
| RP11-278L15.6  | 0,00 | 0,00 | 0,00 | 0,00 | NA | NA |
| RP11-278L15.7  | 0,00 | 0,00 | 0,00 | 0,00 | NA | NA |

|               |      |      |      |      |    |    |
|---------------|------|------|------|------|----|----|
| RP11-279D17.1 | 0,00 | 0,00 | 0,00 | 0,00 | NA | NA |
| RP11-279D17.2 | 0,00 | 0,00 | 0,00 | 0,00 | NA | NA |
| RP11-279E1.1  | 0,00 | 0,00 | 0,00 | 0,00 | NA | NA |
| RP11-279F15.6 | 0,00 | 0,00 | 0,00 | 0,00 | NA | NA |
| RP11-279F6.2  | 0,00 | 0,00 | 0,00 | 0,00 | NA | NA |
| RP11-279L11.1 | 0,00 | 0,00 | 0,00 | 0,00 | NA | NA |
| RP11-279N21.1 | 0,00 | 0,00 | 0,00 | 0,00 | NA | NA |
| RP11-279O17.1 | 0,00 | 0,00 | 0,00 | 0,00 | NA | NA |
| RP11-279O17.2 | 0,00 | 0,00 | 0,00 | 0,00 | NA | NA |
| RP11-279O17.3 | 0,00 | 0,00 | 0,00 | 0,00 | NA | NA |
| RP11-279O22.1 | 0,00 | 0,00 | 0,00 | 0,00 | NA | NA |
| RP11-27G13.1  | 0,00 | 0,00 | 0,00 | 0,00 | NA | NA |
| RP11-27G13.3  | 0,00 | 0,00 | 0,00 | 0,00 | NA | NA |
| RP11-27G13.4  | 0,00 | 0,00 | 0,00 | 0,00 | NA | NA |
| RP11-27G13.5  | 0,00 | 0,00 | 0,00 | 0,00 | NA | NA |
| RP11-27G14.4  | 0,00 | 0,00 | 0,00 | 0,00 | NA | NA |
| RP11-27G22.1  | 0,00 | 0,00 | 0,00 | 0,00 | NA | NA |
| RP11-27G24.1  | 0,00 | 0,00 | 0,00 | 0,00 | NA | NA |
| RP11-27G9.1   | 0,00 | 0,00 | 0,00 | 0,00 | NA | NA |
| RP11-27I1.6   | 0,00 | 0,00 | 0,00 | 0,00 | NA | NA |
| RP11-27M24.2  | 0,00 | 0,00 | 0,00 | 0,00 | NA | NA |
| RP11-27M5.1   | 0,00 | 0,00 | 0,00 | 0,00 | NA | NA |
| RP11-27M9.1   | 0,00 | 0,00 | 0,00 | 0,00 | NA | NA |
| RP11-27N21.3  | 0,00 | 0,00 | 0,00 | 0,00 | NA | NA |
| RP11-27P7.1   | 0,00 | 0,00 | 0,00 | 0,00 | NA | NA |
| RP11-27P7.2   | 0,00 | 0,00 | 0,00 | 0,00 | NA | NA |
| RP11-280F2.1  | 0,00 | 0,00 | 0,00 | 0,00 | NA | NA |
| RP11-280G19.1 | 0,00 | 0,00 | 0,00 | 0,00 | NA | NA |
| RP11-280G9.1  | 0,00 | 0,00 | 0,00 | 0,00 | NA | NA |
| RP11-280H21.1 | 0,00 | 0,00 | 0,00 | 0,00 | NA | NA |
| RP11-280K24.6 | 0,00 | 0,00 | 0,00 | 0,00 | NA | NA |
| RP11-280O24.1 | 0,00 | 0,00 | 0,00 | 0,00 | NA | NA |
| RP11-280O24.3 | 0,00 | 0,00 | 0,00 | 0,00 | NA | NA |
| RP11-281B1.2  | 0,00 | 0,00 | 0,00 | 0,00 | NA | NA |
| RP11-281H11.1 | 0,00 | 0,00 | 0,00 | 0,00 | NA | NA |
| RP11-281H11.2 | 0,00 | 0,00 | 0,00 | 0,00 | NA | NA |
| RP11-281J9.1  | 0,00 | 0,00 | 0,00 | 0,00 | NA | NA |
| RP11-281N10.1 | 0,00 | 0,25 | 0,00 | 0,00 | NA | NA |
| RP11-281O15.1 | 0,00 | 0,00 | 0,00 | 0,00 | NA | NA |
| RP11-281O15.2 | 0,00 | 0,00 | 0,00 | 0,00 | NA | NA |
| RP11-281O15.4 | 0,00 | 0,00 | 0,00 | 0,00 | NA | NA |
| RP11-281O15.5 | 0,00 | 0,00 | 0,00 | 0,00 | NA | NA |
| RP11-281P11.1 | 0,00 | 0,00 | 0,00 | 0,00 | NA | NA |
| RP11-282A11.1 | 0,00 | 0,00 | 0,00 | 0,00 | NA | NA |
| RP11-282A11.2 | 0,00 | 0,00 | 0,00 | 0,00 | NA | NA |
| RP11-282A11.4 | 0,00 | 0,00 | 0,00 | 0,00 | NA | NA |
| RP11-282C5.1  | 0,00 | 0,00 | 0,00 | 0,00 | NA | NA |
| RP11-282I1.2  | 0,00 | 0,00 | 0,00 | 0,00 | NA | NA |
| RP11-282K24.2 | 0,00 | 0,00 | 0,00 | 0,00 | NA | NA |
| RP11-282M16.1 | 0,00 | 0,00 | 0,00 | 0,00 | NA | NA |
| RP11-282M24.1 | 0,00 | 0,00 | 0,00 | 0,00 | NA | NA |
| RP11-283C24.1 | 0,00 | 0,00 | 0,00 | 0,00 | NA | NA |
| RP11-283C24.2 | 0,00 | 0,00 | 0,00 | 0,00 | NA | NA |
| RP11-283G6.3  | 0,00 | 0,00 | 0,00 | 0,00 | NA | NA |
| RP11-283G6.5  | 0,00 | 0,00 | 0,00 | 0,00 | NA | NA |

|                |      |      |      |      |    |    |
|----------------|------|------|------|------|----|----|
| RP11-283I3.1   | 0,00 | 0,00 | 0,00 | 0,00 | NA | NA |
| RP11-283I3.2   | 0,00 | 0,00 | 0,00 | 0,00 | NA | NA |
| RP11-283I3.4   | 0,00 | 0,00 | 0,00 | 0,00 | NA | NA |
| RP11-284A20.2  | 0,00 | 0,00 | 0,00 | 0,00 | NA | NA |
| RP11-284B18.3  | 0,00 | 0,00 | 0,00 | 0,00 | NA | NA |
| RP11-284F21.11 | 0,00 | 0,00 | 0,00 | 0,00 | NA | NA |
| RP11-284H12.1  | 0,00 | 0,00 | 0,00 | 0,00 | NA | NA |
| RP11-284H18.1  | 0,00 | 0,00 | 0,00 | 0,00 | NA | NA |
| RP11-284H19.1  | 0,00 | 0,00 | 0,00 | 0,00 | NA | NA |
| RP11-284J1.1   | 0,00 | 0,00 | 0,00 | 0,00 | NA | NA |
| RP11-284P20.1  | 0,00 | 0,00 | 0,00 | 0,00 | NA | NA |
| RP11-284P20.3  | 0,00 | 0,00 | 0,00 | 0,00 | NA | NA |
| RP11-285A15.1  | 0,00 | 0,00 | 0,00 | 0,00 | NA | NA |
| RP11-285A18.2  | 0,00 | 0,00 | 0,00 | 0,00 | NA | NA |
| RP11-285B24.1  | 0,00 | 0,00 | 0,00 | 0,00 | NA | NA |
| RP11-285E18.2  | 0,00 | 0,00 | 0,00 | 0,00 | NA | NA |
| RP11-285E23.2  | 0,00 | 0,00 | 0,00 | 0,00 | NA | NA |
| RP11-285E9.6   | 0,00 | 0,00 | 0,00 | 0,00 | NA | NA |
| RP11-285J16.1  | 0,00 | 0,00 | 0,00 | 0,00 | NA | NA |
| RP11-285M22.1  | 0,00 | 0,00 | 0,00 | 0,00 | NA | NA |
| RP11-285M22.2  | 0,00 | 0,00 | 0,00 | 0,00 | NA | NA |
| RP11-286B14.1  | 0,00 | 0,00 | 0,00 | 0,00 | NA | NA |
| RP11-286B5.1   | 0,00 | 0,00 | 0,00 | 0,00 | NA | NA |
| RP11-286H14.1  | 0,00 | 0,00 | 0,00 | 0,00 | NA | NA |
| RP11-286H14.2  | 0,00 | 0,00 | 0,00 | 0,00 | NA | NA |
| RP11-286H14.3  | 0,00 | 0,00 | 0,00 | 0,00 | NA | NA |
| RP11-286H14.8  | 0,00 | 0,00 | 0,00 | 0,00 | NA | NA |
| RP11-286M16.1  | 0,00 | 0,00 | 0,00 | 0,00 | NA | NA |
| RP11-286N22.10 | 0,00 | 0,00 | 0,00 | 0,00 | NA | NA |
| RP11-286N22.16 | 0,00 | 0,00 | 0,00 | 0,00 | NA | NA |
| RP11-286O1.2   | 0,00 | 0,00 | 0,00 | 0,00 | NA | NA |
| RP11-287A8.2   | 0,00 | 0,00 | 0,03 | 0,00 | NA | NA |
| RP11-287D1.5   | 0,00 | 0,00 | 0,00 | 0,00 | NA | NA |
| RP11-287J9.1   | 0,00 | 0,00 | 0,00 | 0,00 | NA | NA |
| RP11-287J9.2   | 0,00 | 0,00 | 0,00 | 0,27 | NA | NA |
| RP11-288A5.2   | 0,00 | 0,00 | 0,00 | 0,00 | NA | NA |
| RP11-288B15.1  | 0,00 | 0,00 | 0,00 | 0,00 | NA | NA |
| RP11-288C17.1  | 0,00 | 0,00 | 0,00 | 0,00 | NA | NA |
| RP11-288C17.3  | 0,00 | 0,00 | 0,00 | 0,00 | NA | NA |
| RP11-288D15.1  | 0,00 | 0,00 | 0,00 | 0,00 | NA | NA |
| RP11-288D15.2  | 0,00 | 0,00 | 0,00 | 0,00 | NA | NA |
| RP11-288G3.2   | 0,00 | 0,00 | 0,00 | 0,00 | NA | NA |
| RP11-288G3.3   | 0,00 | 0,00 | 0,00 | 0,00 | NA | NA |
| RP11-288G3.4   | 0,00 | 0,00 | 0,00 | 0,00 | NA | NA |
| RP11-288L9.3   | 0,00 | 0,00 | 0,00 | 0,00 | NA | NA |
| RP11-289A15.1  | 0,00 | 0,00 | 0,00 | 0,00 | NA | NA |
| RP11-289C17.1  | 0,00 | 0,00 | 0,00 | 0,00 | NA | NA |
| RP11-289E15.1  | 0,00 | 0,00 | 0,00 | 0,00 | NA | NA |
| RP11-289I10.2  | 0,00 | 0,00 | 0,00 | 0,00 | NA | NA |
| RP11-289I10.3  | 0,00 | 0,00 | 0,00 | 0,00 | NA | NA |
| RP11-289K10.1  | 0,00 | 0,00 | 0,00 | 0,00 | NA | NA |
| RP11-28A22.2   | 0,00 | 0,00 | 0,00 | 0,00 | NA | NA |
| RP11-28O3.1    | 0,00 | 0,00 | 0,00 | 0,00 | NA | NA |
| RP11-28O3.2    | 0,00 | 0,00 | 0,00 | 0,00 | NA | NA |
| RP11-28P17.2   | 0,00 | 0,00 | 0,00 | 0,00 | NA | NA |



|                |      |      |      |      |    |    |
|----------------|------|------|------|------|----|----|
| RP11-28P17.3   | 0,00 | 0,00 | 0,00 | 0,00 | NA | NA |
| RP11-290F20.2  | 0,00 | 0,00 | 0,00 | 0,00 | NA | NA |
| RP11-290H9.2   | 0,00 | 0,00 | 0,00 | 0,00 | NA | NA |
| RP11-290H9.4   | 0,00 | 0,00 | 0,00 | 0,00 | NA | NA |
| RP11-290H9.5   | 0,00 | 0,00 | 0,00 | 0,00 | NA | NA |
| RP11-290I21.2  | 0,00 | 0,00 | 0,00 | 0,00 | NA | NA |
| RP11-290K4.1   | 0,00 | 0,00 | 0,00 | 0,00 | NA | NA |
| RP11-290L1.2   | 0,00 | 0,00 | 0,00 | 0,00 | NA | NA |
| RP11-290L1.5   | 0,00 | 0,00 | 0,00 | 0,00 | NA | NA |
| RP11-290L1.6   | 0,00 | 0,00 | 0,00 | 0,00 | NA | NA |
| RP11-290L1.7   | 0,00 | 0,00 | 0,00 | 0,00 | NA | NA |
| RP11-290L7.2   | 0,00 | 0,00 | 0,00 | 0,00 | NA | NA |
| RP11-290L7.3   | 0,00 | 0,00 | 0,00 | 0,00 | NA | NA |
| RP11-290M5.4   | 0,00 | 0,00 | 0,00 | 0,00 | NA | NA |
| RP11-290P14.2  | 0,00 | 0,00 | 0,00 | 0,00 | NA | NA |
| RP11-291B21.2  | 0,00 | 0,00 | 0,00 | 0,00 | NA | NA |
| RP11-291H24.1  | 0,00 | 0,00 | 0,00 | 0,00 | NA | NA |
| RP11-291I6.2   | 0,00 | 0,00 | 0,00 | 0,00 | NA | NA |
| RP11-291J9.1   | 0,00 | 0,00 | 0,00 | 0,00 | NA | NA |
| RP11-291J9.2   | 0,00 | 0,00 | 0,00 | 0,00 | NA | NA |
| RP11-291L22.4  | 0,00 | 0,00 | 0,00 | 0,00 | NA | NA |
| RP11-291L22.5  | 0,00 | 0,00 | 0,00 | 0,00 | NA | NA |
| RP11-291O7.1   | 0,00 | 0,00 | 0,00 | 0,00 | NA | NA |
| RP11-292B1.1   | 0,00 | 0,00 | 0,00 | 0,00 | NA | NA |
| RP11-292B1.2   | 0,00 | 0,00 | 0,00 | 0,00 | NA | NA |
| RP11-292B8.1   | 0,00 | 0,00 | 0,00 | 0,00 | NA | NA |
| RP11-292B8.2   | 0,00 | 0,00 | 0,00 | 0,00 | NA | NA |
| RP11-292D4.2   | 0,00 | 0,00 | 0,00 | 0,00 | NA | NA |
| RP11-292D4.4   | 0,00 | 0,00 | 0,00 | 0,00 | NA | NA |
| RP11-292E2.1   | 0,00 | 0,00 | 0,00 | 0,00 | NA | NA |
| RP11-292E2.4   | 0,00 | 0,00 | 0,00 | 0,00 | NA | NA |
| RP11-292I17.1  | 0,00 | 0,00 | 0,00 | 0,00 | NA | NA |
| RP11-292K15.1  | 0,00 | 0,00 | 0,00 | 0,00 | NA | NA |
| RP11-292K15.2  | 0,00 | 0,00 | 0,00 | 0,00 | NA | NA |
| RP11-293A10.3  | 0,00 | 0,00 | 0,00 | 0,00 | NA | NA |
| RP11-293A21.1  | 0,00 | 0,00 | 0,00 | 0,00 | NA | NA |
| RP11-293B7.1   | 0,00 | 0,00 | 0,00 | 0,00 | NA | NA |
| RP11-293D9.2   | 0,00 | 0,00 | 0,00 | 0,00 | NA | NA |
| RP11-293E1.2   | 0,00 | 0,00 | 0,00 | 0,00 | NA | NA |
| RP11-293F5.1   | 0,00 | 0,00 | 0,00 | 0,00 | NA | NA |
| RP11-293F5.6   | 0,00 | 0,00 | 0,00 | 0,00 | NA | NA |
| RP11-293F5.8   | 0,00 | 0,00 | 0,00 | 0,00 | NA | NA |
| RP11-293G6_A.3 | 0,00 | 0,00 | 0,00 | 0,00 | NA | NA |
| RP11-293G6_B.2 | 0,00 | 0,00 | 0,00 | 0,00 | NA | NA |
| RP11-293G6_B.3 | 0,00 | 0,00 | 0,00 | 0,00 | NA | NA |
| RP11-293G6_B.4 | 0,00 | 0,00 | 0,00 | 0,00 | NA | NA |
| RP11-293G6_B.7 | 0,00 | 0,00 | 0,00 | 0,00 | NA | NA |
| RP11-293G6_B.8 | 0,00 | 0,00 | 0,00 | 0,00 | NA | NA |
| RP11-293I14.2  | 0,00 | 0,00 | 0,00 | 0,00 | NA | NA |
| RP11-293N14.1  | 0,00 | 0,00 | 0,00 | 0,00 | NA | NA |
| RP11-294C11.11 | 0,00 | 0,00 | 0,00 | 0,00 | NA | NA |
| RP11-294C11.12 | 0,00 | 0,00 | 0,00 | 0,00 | NA | NA |
| RP11-294C11.3  | 0,00 | 0,00 | 0,00 | 0,00 | NA | NA |
| RP11-294C11.6  | 0,00 | 0,00 | 0,00 | 0,00 | NA | NA |
| RP11-294C11.7  | 0,00 | 0,00 | 0,00 | 0,00 | NA | NA |

|               |      |      |      |      |    |    |
|---------------|------|------|------|------|----|----|
| RP11-294C11.8 | 0,00 | 0,00 | 0,00 | 0,00 | NA | NA |
| RP11-294C11.9 | 0,00 | 0,00 | 0,00 | 0,00 | NA | NA |
| RP11-294J22.5 | 0,00 | 0,00 | 0,00 | 0,00 | NA | NA |
| RP11-294L11.1 | 0,00 | 0,00 | 0,00 | 0,00 | NA | NA |
| RP11-294L13.1 | 0,00 | 0,00 | 0,00 | 0,00 | NA | NA |
| RP11-295B17.2 | 0,00 | 0,00 | 0,00 | 0,00 | NA | NA |
| RP11-295B17.3 | 0,00 | 0,00 | 0,00 | 0,00 | NA | NA |
| RP11-295B17.4 | 0,00 | 0,00 | 0,00 | 0,00 | NA | NA |
| RP11-295D22.1 | 0,00 | 0,00 | 0,00 | 0,00 | NA | NA |
| RP11-295D4.7  | 0,00 | 0,00 | 0,00 | 0,00 | NA | NA |
| RP11-295F4.4  | 0,00 | 0,00 | 0,00 | 0,00 | NA | NA |
| RP11-295G12.1 | 0,00 | 0,00 | 0,00 | 0,00 | NA | NA |
| RP11-295G20.1 | 0,00 | 0,00 | 0,00 | 0,00 | NA | NA |
| RP11-295H24.4 | 0,00 | 0,00 | 0,00 | 0,00 | NA | NA |
| RP11-295H24.5 | 0,00 | 0,00 | 0,00 | 0,00 | NA | NA |
| RP11-295J3.2  | 0,00 | 0,00 | 0,00 | 0,00 | NA | NA |
| RP11-295J3.3  | 0,00 | 0,00 | 0,00 | 0,00 | NA | NA |
| RP11-295M18.2 | 0,00 | 0,00 | 0,00 | 0,00 | NA | NA |
| RP11-295M18.5 | 0,00 | 0,00 | 0,00 | 0,00 | NA | NA |
| RP11-295M18.6 | 0,00 | 0,00 | 0,00 | 0,00 | NA | NA |
| RP11-295M18.7 | 0,00 | 0,00 | 0,00 | 0,00 | NA | NA |
| RP11-295O23.2 | 0,00 | 0,00 | 0,00 | 0,00 | NA | NA |
| RP11-295O23.4 | 0,00 | 0,00 | 0,00 | 0,00 | NA | NA |
| RP11-295P22.3 | 0,00 | 0,00 | 0,00 | 0,00 | NA | NA |
| RP11-295P22.4 | 0,00 | 0,00 | 0,00 | 0,00 | NA | NA |
| RP11-295P22.5 | 0,00 | 0,00 | 0,00 | 0,00 | NA | NA |
| RP11-295P9.13 | 0,00 | 0,00 | 0,00 | 0,00 | NA | NA |
| RP11-295P9.6  | 0,00 | 0,00 | 0,00 | 0,00 | NA | NA |
| RP11-296A16.1 | 0,00 | 0,00 | 0,00 | 0,00 | NA | NA |
| RP11-296C13.1 | 0,00 | 0,00 | 0,00 | 0,00 | NA | NA |
| RP11-296E3.2  | 0,00 | 0,00 | 0,00 | 0,00 | NA | NA |
| RP11-296I10.5 | 0,00 | 0,00 | 0,00 | 0,00 | NA | NA |
| RP11-296L20.1 | 0,00 | 0,00 | 0,00 | 0,00 | NA | NA |
| RP11-296L22.7 | 0,00 | 0,00 | 0,00 | 0,00 | NA | NA |
| RP11-296L22.8 | 0,00 | 0,00 | 0,00 | 0,00 | NA | NA |
| RP11-296O14.1 | 0,00 | 0,00 | 0,00 | 0,00 | NA | NA |
| RP11-297A16.2 | 0,00 | 0,00 | 0,00 | 0,00 | NA | NA |
| RP11-297D21.2 | 0,00 | 0,00 | 0,00 | 0,00 | NA | NA |
| RP11-297H3.2  | 0,00 | 0,00 | 0,00 | 0,00 | NA | NA |
| RP11-297H3.4  | 0,00 | 0,00 | 0,00 | 0,00 | NA | NA |
| RP11-297I6.5  | 0,00 | 0,00 | 0,00 | 0,00 | NA | NA |
| RP11-297J22.1 | 0,00 | 0,00 | 0,00 | 0,00 | NA | NA |
| RP11-297K7.1  | 0,00 | 0,00 | 0,00 | 0,00 | NA | NA |
| RP11-297L17.2 | 0,00 | 0,00 | 0,00 | 0,00 | NA | NA |
| RP11-297L17.3 | 0,00 | 0,00 | 0,00 | 0,00 | NA | NA |
| RP11-297M9.1  | 0,00 | 0,00 | 0,00 | 0,00 | NA | NA |
| RP11-297M9.2  | 0,00 | 0,00 | 0,00 | 0,00 | NA | NA |
| RP11-297P16.1 | 0,00 | 0,00 | 0,00 | 0,00 | NA | NA |
| RP11-297P16.3 | 0,00 | 0,00 | 0,00 | 0,00 | NA | NA |
| RP11-297P16.4 | 0,00 | 0,20 | 0,00 | 0,00 | NA | NA |
| RP11-298A8.2  | 0,00 | 0,00 | 0,00 | 0,00 | NA | NA |
| RP11-298C3.2  | 0,00 | 0,00 | 0,00 | 0,00 | NA | NA |
| RP11-298D21.3 | 0,00 | 0,00 | 0,00 | 0,00 | NA | NA |
| RP11-298E10.1 | 0,00 | 0,00 | 0,00 | 0,00 | NA | NA |
| RP11-298E9.3  | 0,01 | 0,06 | 0,00 | 0,00 | NA | NA |

|               |      |      |      |      |    |    |
|---------------|------|------|------|------|----|----|
| RP11-298E9.7  | 0,00 | 0,00 | 0,00 | 0,00 | NA | NA |
| RP11-298I3.4  | 0,00 | 0,00 | 0,00 | 0,00 | NA | NA |
| RP11-298I3.6  | 0,00 | 0,00 | 0,00 | 0,00 | NA | NA |
| RP11-298J23.5 | 0,00 | 0,00 | 0,00 | 0,00 | NA | NA |
| RP11-298J23.9 | 0,00 | 0,00 | 0,00 | 0,00 | NA | NA |
| RP11-298K24.2 | 0,00 | 0,00 | 0,00 | 0,00 | NA | NA |
| RP11-298O21.4 | 0,00 | 0,00 | 0,00 | 0,00 | NA | NA |
| RP11-298P3.1  | 0,00 | 0,00 | 0,00 | 0,00 | NA | NA |
| RP11-298P3.4  | 0,00 | 0,00 | 0,00 | 0,00 | NA | NA |
| RP11-298P6.2  | 0,00 | 0,00 | 0,00 | 0,00 | NA | NA |
| RP11-298P6.5  | 0,00 | 0,00 | 0,00 | 0,00 | NA | NA |
| RP11-299A16.1 | 0,00 | 0,00 | 0,00 | 0,00 | NA | NA |
| RP11-299D14.2 | 0,00 | 0,00 | 0,00 | 0,00 | NA | NA |
| RP11-299H22.3 | 0,00 | 0,00 | 0,00 | 0,00 | NA | NA |
| RP11-299H22.4 | 0,00 | 0,00 | 0,00 | 0,00 | NA | NA |
| RP11-299J3.1  | 0,00 | 0,00 | 0,00 | 0,00 | NA | NA |
| RP11-299J5.1  | 0,00 | 0,00 | 0,00 | 0,00 | NA | NA |
| RP11-299L17.3 | 0,00 | 0,00 | 0,00 | 0,00 | NA | NA |
| RP11-299L17.4 | 0,00 | 0,00 | 0,00 | 0,00 | NA | NA |
| RP11-299M14.2 | 0,00 | 0,00 | 0,00 | 0,00 | NA | NA |
| RP11-29A1.3   | 0,00 | 0,00 | 0,00 | 0,00 | NA | NA |
| RP11-29A2.1   | 0,00 | 0,00 | 0,00 | 0,00 | NA | NA |
| RP11-29B11.5  | 0,00 | 0,00 | 0,00 | 0,00 | NA | NA |
| RP11-29B2.4   | 0,00 | 0,00 | 0,00 | 0,00 | NA | NA |
| RP11-29B9.1   | 0,00 | 0,00 | 0,00 | 0,00 | NA | NA |
| RP11-29B9.2   | 0,00 | 0,00 | 0,00 | 0,00 | NA | NA |
| RP11-29C12.1  | 0,00 | 0,00 | 0,00 | 0,00 | NA | NA |
| RP11-29G8.2   | 0,00 | 0,00 | 0,00 | 0,00 | NA | NA |
| RP11-29H23.6  | 0,00 | 0,00 | 0,00 | 0,00 | NA | NA |
| RP11-29L10.1  | 0,00 | 0,00 | 0,00 | 0,00 | NA | NA |
| RP11-29O6.2   | 0,00 | 0,00 | 0,00 | 0,00 | NA | NA |
| RP11-29P20.1  | 0,00 | 0,00 | 0,00 | 0,00 | NA | NA |
| RP11-2A1.1    | 0,00 | 0,00 | 0,00 | 0,00 | NA | NA |
| RP11-2B19.1   | 0,00 | 0,00 | 0,00 | 0,00 | NA | NA |
| RP11-2C15.1   | 0,00 | 0,00 | 0,00 | 0,00 | NA | NA |
| RP11-2C24.4   | 0,00 | 0,00 | 0,00 | 0,00 | NA | NA |
| RP11-2C24.5   | 0,00 | 0,00 | 0,00 | 0,00 | NA | NA |
| RP11-2C7.1    | 0,00 | 0,00 | 0,00 | 0,00 | NA | NA |
| RP11-2F20.1   | 0,00 | 0,00 | 0,00 | 0,00 | NA | NA |
| RP11-2F9.3    | 0,00 | 0,00 | 0,00 | 0,00 | NA | NA |
| RP11-2F9.4    | 0,00 | 0,00 | 0,00 | 0,00 | NA | NA |
| RP11-2G1.1    | 0,00 | 0,00 | 0,00 | 0,00 | NA | NA |
| RP11-2G1.2    | 0,00 | 0,00 | 0,00 | 0,00 | NA | NA |
| RP11-2G1.3    | 0,00 | 0,00 | 0,00 | 0,00 | NA | NA |
| RP11-2G17.1   | 0,00 | 0,00 | 0,00 | 0,00 | NA | NA |
| RP11-2H3.2    | 0,00 | 0,00 | 0,00 | 0,00 | NA | NA |
| RP11-2H3.7    | 0,00 | 0,00 | 0,00 | 0,00 | NA | NA |
| RP11-2H8.3    | 0,00 | 0,00 | 0,00 | 0,00 | NA | NA |
| RP11-2I17.4   | 0,00 | 0,00 | 0,00 | 0,00 | NA | NA |
| RP11-2K6.2    | 0,00 | 0,00 | 0,00 | 0,00 | NA | NA |
| RP11-2L13.1   | 0,00 | 0,00 | 0,00 | 0,00 | NA | NA |
| RP11-2L4.1    | 0,00 | 0,00 | 0,00 | 0,00 | NA | NA |
| RP11-2L8.2    | 0,00 | 0,00 | 0,00 | 0,00 | NA | NA |
| RP11-2N1.2    | 0,00 | 0,00 | 0,00 | 0,00 | NA | NA |
| RP11-2N1.3    | 0,00 | 0,00 | 0,00 | 0,00 | NA | NA |

|                |      |      |      |      |    |    |
|----------------|------|------|------|------|----|----|
| RP11-2N21.2    | 0,00 | 0,00 | 0,00 | 0,00 | NA | NA |
| RP11-2N5.1     | 0,00 | 0,00 | 0,00 | 0,00 | NA | NA |
| RP11-2O17.2    | 0,00 | 0,40 | 0,00 | 0,00 | NA | NA |
| RP11-2P2.1     | 0,00 | 0,00 | 0,00 | 0,00 | NA | NA |
| RP11-300A12.1  | 0,00 | 0,00 | 0,00 | 0,00 | NA | NA |
| RP11-300E4.2   | 0,00 | 0,00 | 0,00 | 0,00 | NA | NA |
| RP11-300G22.2  | 0,00 | 0,00 | 0,00 | 0,00 | NA | NA |
| RP11-300I6.5   | 0,00 | 0,00 | 0,00 | 0,00 | NA | NA |
| RP11-300J18.1  | 0,00 | 0,00 | 0,00 | 0,00 | NA | NA |
| RP11-300J18.2  | 0,00 | 0,00 | 0,00 | 0,00 | NA | NA |
| RP11-301A5.2   | 0,00 | 0,00 | 0,00 | 0,00 | NA | NA |
| RP11-301G21.1  | 0,00 | 0,00 | 0,00 | 0,00 | NA | NA |
| RP11-301G7.1   | 0,29 | 0,00 | 0,16 | 0,00 | NA | NA |
| RP11-301H24.2  | 0,00 | 0,00 | 0,00 | 0,00 | NA | NA |
| RP11-301H24.4  | 0,00 | 0,00 | 0,00 | 0,00 | NA | NA |
| RP11-301J16.2  | 0,00 | 0,00 | 0,00 | 0,00 | NA | NA |
| RP11-301J16.3  | 0,00 | 0,00 | 0,00 | 0,00 | NA | NA |
| RP11-301J16.5  | 0,00 | 0,00 | 0,00 | 0,00 | NA | NA |
| RP11-301J16.7  | 0,00 | 0,00 | 0,00 | 0,00 | NA | NA |
| RP11-301M17.1  | 0,00 | 0,00 | 0,00 | 0,00 | NA | NA |
| RP11-301M17.2  | 0,00 | 0,00 | 0,00 | 0,00 | NA | NA |
| RP11-301N24.5  | 0,00 | 0,00 | 0,00 | 0,00 | NA | NA |
| RP11-302F12.1  | 0,00 | 0,00 | 0,00 | 0,00 | NA | NA |
| RP11-302F12.2  | 0,00 | 0,00 | 0,00 | 0,00 | NA | NA |
| RP11-302F12.3  | 0,00 | 0,00 | 0,00 | 0,00 | NA | NA |
| RP11-302F12.4  | 0,00 | 0,00 | 0,00 | 0,00 | NA | NA |
| RP11-302F12.5  | 0,00 | 0,00 | 0,00 | 0,00 | NA | NA |
| RP11-302F12.6  | 0,00 | 0,00 | 0,00 | 0,00 | NA | NA |
| RP11-302F12.7  | 0,00 | 0,00 | 0,00 | 0,00 | NA | NA |
| RP11-302F12.8  | 0,00 | 0,00 | 0,00 | 0,00 | NA | NA |
| RP11-302I18.2  | 0,00 | 0,00 | 0,00 | 0,00 | NA | NA |
| RP11-302I18.3  | 0,00 | 0,00 | 0,00 | 0,00 | NA | NA |
| RP11-302J23.1  | 0,00 | 0,08 | 0,00 | 0,00 | NA | NA |
| RP11-302K17.3  | 0,00 | 0,00 | 0,00 | 0,00 | NA | NA |
| RP11-302K17.4  | 0,00 | 0,00 | 0,00 | 0,00 | NA | NA |
| RP11-302L19.1  | 0,00 | 0,00 | 0,00 | 0,00 | NA | NA |
| RP11-302L19.3  | 0,00 | 0,00 | 0,00 | 0,00 | NA | NA |
| RP11-302M6.4   | 0,00 | 0,00 | 0,00 | 0,00 | NA | NA |
| RP11-303G3.10  | 0,00 | 0,00 | 0,00 | 0,00 | NA | NA |
| RP11-303G3.11  | 0,00 | 0,00 | 0,00 | 0,00 | NA | NA |
| RP11-303G3.12  | 0,00 | 0,00 | 0,00 | 0,00 | NA | NA |
| RP11-303G3.6   | 0,00 | 0,00 | 0,00 | 0,00 | NA | NA |
| RP11-303G3.9   | 0,00 | 0,00 | 0,00 | 0,00 | NA | NA |
| RP11-304C12.3  | 0,00 | 0,00 | 0,00 | 0,00 | NA | NA |
| RP11-304C12.4  | 0,00 | 0,00 | 0,00 | 0,00 | NA | NA |
| RP11-304C16.1  | 0,00 | 0,00 | 0,00 | 0,00 | NA | NA |
| RP11-304C16.2  | 0,00 | 0,00 | 0,00 | 0,00 | NA | NA |
| RP11-304C16.3  | 0,00 | 0,00 | 0,00 | 0,00 | NA | NA |
| RP11-304F15.3  | 0,00 | 0,08 | 0,00 | 0,00 | NA | NA |
| RP11-304F15.5  | 0,00 | 0,00 | 0,00 | 0,00 | NA | NA |
| RP11-304F15.6  | 0,00 | 0,00 | 0,00 | 0,00 | NA | NA |
| RP11-304F15.7  | 0,00 | 0,00 | 0,00 | 0,00 | NA | NA |
| RP11-304L19.12 | 0,00 | 0,00 | 0,00 | 0,00 | NA | NA |
| RP11-304L19.4  | 0,00 | 0,00 | 0,00 | 0,00 | NA | NA |
| RP11-304L20.1  | 0,00 | 0,00 | 0,07 | 0,00 | NA | NA |

|               |      |      |      |      |    |    |
|---------------|------|------|------|------|----|----|
| RP11-304M2.1  | 0,00 | 0,00 | 0,00 | 0,00 | NA | NA |
| RP11-304M2.5  | 0,00 | 0,00 | 0,00 | 0,00 | NA | NA |
| RP11-304M2.6  | 0,00 | 0,00 | 0,00 | 0,00 | NA | NA |
| RP11-304M2.7  | 0,00 | 0,00 | 0,00 | 0,00 | NA | NA |
| RP11-304M3.2  | 0,00 | 0,00 | 0,00 | 0,00 | NA | NA |
| RP11-304N14.2 | 0,00 | 0,00 | 0,00 | 0,00 | NA | NA |
| RP11-305A4.2  | 0,00 | 0,00 | 0,00 | 0,00 | NA | NA |
| RP11-305A4.5  | 0,00 | 0,00 | 0,00 | 0,00 | NA | NA |
| RP11-305B6.1  | 0,00 | 0,00 | 0,00 | 0,00 | NA | NA |
| RP11-305B6.2  | 0,00 | 0,00 | 0,00 | 0,00 | NA | NA |
| RP11-305B6.3  | 0,00 | 0,00 | 0,00 | 0,00 | NA | NA |
| RP11-305D15.8 | 0,00 | 0,00 | 0,00 | 0,00 | NA | NA |
| RP11-305E17.4 | 0,00 | 0,00 | 0,00 | 0,00 | NA | NA |
| RP11-305E17.5 | 0,00 | 0,00 | 0,00 | 0,00 | NA | NA |
| RP11-305E17.7 | 0,00 | 0,00 | 0,00 | 0,00 | NA | NA |
| RP11-305E6.2  | 0,00 | 0,00 | 0,00 | 0,00 | NA | NA |
| RP11-305F18.1 | 0,00 | 0,00 | 0,00 | 0,00 | NA | NA |
| RP11-305F5.2  | 0,00 | 0,00 | 0,00 | 0,00 | NA | NA |
| RP11-305L7.5  | 0,00 | 0,00 | 0,00 | 0,00 | NA | NA |
| RP11-305L7.6  | 0,00 | 0,00 | 0,00 | 0,00 | NA | NA |
| RP11-305M3.2  | 0,00 | 0,00 | 0,00 | 0,00 | NA | NA |
| RP11-305M3.5  | 0,00 | 0,00 | 0,00 | 0,00 | NA | NA |
| RP11-305O4.1  | 0,00 | 0,00 | 0,00 | 0,00 | NA | NA |
| RP11-305O6.2  | 0,00 | 0,00 | 0,00 | 0,00 | NA | NA |
| RP11-305P14.1 | 0,00 | 0,00 | 0,00 | 0,00 | NA | NA |
| RP11-305P22.5 | 0,00 | 0,00 | 0,00 | 0,00 | NA | NA |
| RP11-305P22.9 | 0,00 | 0,00 | 0,00 | 0,00 | NA | NA |
| RP11-306B9.1  | 0,00 | 0,00 | 0,00 | 0,00 | NA | NA |
| RP11-306H5.1  | 0,00 | 0,00 | 0,00 | 0,00 | NA | NA |
| RP11-306I1.1  | 0,00 | 0,00 | 0,00 | 0,00 | NA | NA |
| RP11-306K13.1 | 0,00 | 0,00 | 0,00 | 0,00 | NA | NA |
| RP11-306L14.1 | 0,00 | 0,00 | 0,00 | 0,00 | NA | NA |
| RP11-306O1.1  | 0,00 | 0,00 | 0,00 | 0,00 | NA | NA |
| RP11-307B23.2 | 0,00 | 0,00 | 0,00 | 0,00 | NA | NA |
| RP11-307B6.3  | 0,00 | 0,00 | 0,00 | 0,00 | NA | NA |
| RP11-307B9.2  | 0,00 | 0,00 | 0,00 | 0,00 | NA | NA |
| RP11-307C19.1 | 0,00 | 0,00 | 0,00 | 0,00 | NA | NA |
| RP11-307C19.2 | 0,00 | 0,00 | 0,00 | 0,00 | NA | NA |
| RP11-307C19.3 | 0,00 | 0,00 | 0,00 | 0,00 | NA | NA |
| RP11-307E17.2 | 0,00 | 0,00 | 0,00 | 0,00 | NA | NA |
| RP11-307E17.9 | 0,00 | 0,00 | 0,00 | 0,00 | NA | NA |
| RP11-307F22.2 | 0,00 | 0,00 | 0,00 | 0,00 | NA | NA |
| RP11-307I14.4 | 0,00 | 0,00 | 0,00 | 0,00 | NA | NA |
| RP11-307I2.1  | 0,00 | 0,00 | 0,00 | 0,00 | NA | NA |
| RP11-307I2.2  | 0,00 | 0,00 | 0,00 | 0,00 | NA | NA |
| RP11-307L3.4  | 0,00 | 0,00 | 0,00 | 0,00 | NA | NA |
| RP11-307N16.2 | 0,00 | 0,00 | 0,00 | 0,00 | NA | NA |
| RP11-307N16.6 | 0,00 | 0,00 | 0,00 | 0,00 | NA | NA |
| RP11-307N16.7 | 0,00 | 0,00 | 0,00 | 0,00 | NA | NA |
| RP11-307O1.1  | 0,00 | 0,00 | 0,00 | 0,00 | NA | NA |
| RP11-307O10.1 | 0,00 | 0,00 | 0,00 | 0,00 | NA | NA |
| RP11-307P22.1 | 0,00 | 0,00 | 0,00 | 0,00 | NA | NA |
| RP11-307P5.1  | 0,00 | 0,00 | 0,00 | 0,00 | NA | NA |
| RP11-308B5.3  | 0,00 | 0,00 | 0,00 | 0,00 | NA | NA |
| RP11-308B5.4  | 0,00 | 0,00 | 0,00 | 0,00 | NA | NA |

|               |      |      |      |      |    |    |
|---------------|------|------|------|------|----|----|
| RP11-308D13.1 | 0,00 | 0,00 | 0,00 | 0,00 | NA | NA |
| RP11-308D13.3 | 0,00 | 0,00 | 0,00 | 0,00 | NA | NA |
| RP11-308D16.1 | 0,00 | 0,00 | 0,00 | 0,00 | NA | NA |
| RP11-308K19.2 | 0,00 | 0,00 | 0,00 | 0,00 | NA | NA |
| RP11-308N19.1 | 0,00 | 0,00 | 0,00 | 0,00 | NA | NA |
| RP11-308N19.3 | 0,00 | 0,00 | 0,00 | 0,00 | NA | NA |
| RP11-308N19.5 | 0,00 | 0,00 | 0,00 | 0,00 | NA | NA |
| RP11-309B5.1  | 0,00 | 0,00 | 0,00 | 0,00 | NA | NA |
| RP11-309E23.2 | 0,00 | 0,00 | 0,00 | 0,00 | NA | NA |
| RP11-309H21.1 | 0,00 | 0,00 | 0,00 | 0,00 | NA | NA |
| RP11-309H21.2 | 0,00 | 0,00 | 0,00 | 0,00 | NA | NA |
| RP11-309H21.4 | 0,00 | 0,00 | 0,00 | 0,00 | NA | NA |
| RP11-309H8.2  | 0,00 | 0,00 | 0,00 | 0,00 | NA | NA |
| RP11-309I15.1 | 0,00 | 0,00 | 0,00 | 0,00 | NA | NA |
| RP11-309I13.1 | 0,00 | 0,00 | 0,00 | 0,00 | NA | NA |
| RP11-309L24.2 | 0,00 | 0,00 | 0,00 | 0,00 | NA | NA |
| RP11-309L24.6 | 0,00 | 0,00 | 0,00 | 0,00 | NA | NA |
| RP11-309M23.2 | 0,00 | 0,00 | 0,00 | 0,00 | NA | NA |
| RP11-309P22.1 | 0,00 | 0,00 | 0,00 | 0,00 | NA | NA |
| RP11-30A20.2  | 0,00 | 0,00 | 0,00 | 0,00 | NA | NA |
| RP11-30B1.1   | 0,00 | 0,35 | 0,00 | 0,00 | NA | NA |
| RP11-30C8.1   | 0,00 | 0,00 | 0,00 | 0,00 | NA | NA |
| RP11-30C8.2   | 0,00 | 0,00 | 0,00 | 0,00 | NA | NA |
| RP11-30G8.1   | 0,00 | 0,00 | 0,00 | 0,00 | NA | NA |
| RP11-30G8.2   | 0,00 | 0,00 | 0,00 | 0,00 | NA | NA |
| RP11-30H9.1   | 0,00 | 0,00 | 0,00 | 0,00 | NA | NA |
| RP11-30K9.1   | 0,00 | 0,00 | 0,00 | 0,00 | NA | NA |
| RP11-30K9.2   | 0,00 | 0,00 | 0,00 | 0,00 | NA | NA |
| RP11-30K9.5   | 0,00 | 0,00 | 0,00 | 0,00 | NA | NA |
| RP11-30K9.7   | 0,00 | 0,00 | 0,00 | 0,00 | NA | NA |
| RP11-30L15.3  | 0,00 | 0,00 | 0,00 | 0,00 | NA | NA |
| RP11-30L8.1   | 0,00 | 0,00 | 0,00 | 0,00 | NA | NA |
| RP11-30M20.1  | 0,00 | 0,00 | 0,00 | 0,00 | NA | NA |
| RP11-30O15.1  | 0,00 | 0,00 | 0,00 | 0,00 | NA | NA |
| RP11-30P16.1  | 0,00 | 0,00 | 0,00 | 0,00 | NA | NA |
| RP11-30P21.1  | 0,00 | 0,00 | 0,00 | 0,00 | NA | NA |
| RP11-30P6.1   | 0,00 | 0,00 | 0,00 | 0,00 | NA | NA |
| RP11-30P6.2   | 0,00 | 0,13 | 0,00 | 0,00 | NA | NA |
| RP11-30P6.3   | 0,00 | 0,00 | 0,00 | 0,00 | NA | NA |
| RP11-30P6.4   | 0,00 | 0,00 | 0,00 | 0,00 | NA | NA |
| RP11-30P6.6   | 0,00 | 0,00 | 0,00 | 0,00 | NA | NA |
| RP11-310A13.2 | 0,00 | 0,00 | 0,00 | 0,00 | NA | NA |
| RP11-310E22.2 | 0,00 | 0,00 | 0,00 | 0,00 | NA | NA |
| RP11-310E22.4 | 0,00 | 0,00 | 0,00 | 0,00 | NA | NA |
| RP11-310E22.6 | 0,00 | 0,00 | 0,00 | 0,00 | NA | NA |
| RP11-310F12.1 | 0,00 | 0,00 | 0,00 | 0,00 | NA | NA |
| RP11-310H4.1  | 0,00 | 0,00 | 0,00 | 0,00 | NA | NA |
| RP11-310H4.3  | 0,00 | 0,00 | 0,00 | 0,00 | NA | NA |
| RP11-310H4.4  | 0,00 | 0,00 | 0,00 | 0,00 | NA | NA |
| RP11-310H4.5  | 0,00 | 0,00 | 0,00 | 0,00 | NA | NA |
| RP11-310H4.6  | 0,00 | 0,00 | 0,00 | 0,00 | NA | NA |
| RP11-310I24.1 | 0,00 | 0,00 | 0,00 | 0,00 | NA | NA |
| RP11-310K10.1 | 0,00 | 0,00 | 0,00 | 0,00 | NA | NA |
| RP11-310P5.1  | 0,00 | 0,00 | 0,00 | 0,00 | NA | NA |
| RP11-310P5.2  | 0,00 | 0,00 | 0,00 | 0,00 | NA | NA |

|               |      |      |      |      |    |    |
|---------------|------|------|------|------|----|----|
| RP11-311D14.1 | 0,00 | 0,00 | 0,00 | 0,00 | NA | NA |
| RP11-311F12.2 | 0,00 | 0,00 | 0,00 | 0,00 | NA | NA |
| RP11-311H10.4 | 0,00 | 0,00 | 0,00 | 0,00 | NA | NA |
| RP11-311H10.7 | 0,00 | 0,00 | 0,00 | 0,00 | NA | NA |
| RP11-312A15.2 | 0,00 | 0,00 | 0,00 | 0,00 | NA | NA |
| RP11-312A15.3 | 0,00 | 0,00 | 0,00 | 0,00 | NA | NA |
| RP11-312B18.1 | 0,00 | 0,00 | 0,00 | 0,00 | NA | NA |
| RP11-312B8.2  | 0,00 | 0,00 | 0,00 | 0,00 | NA | NA |
| RP11-312H1.1  | 0,00 | 0,00 | 0,00 | 0,00 | NA | NA |
| RP11-312H15.3 | 0,00 | 0,00 | 0,00 | 0,00 | NA | NA |
| RP11-312J18.3 | 0,00 | 0,00 | 0,00 | 0,00 | NA | NA |
| RP11-312J18.5 | 0,00 | 0,00 | 0,00 | 0,00 | NA | NA |
| RP11-312J18.6 | 0,00 | 0,00 | 0,00 | 0,00 | NA | NA |
| RP11-312J18.7 | 0,00 | 0,00 | 0,00 | 0,00 | NA | NA |
| RP11-312P12.2 | 0,00 | 0,00 | 0,00 | 0,00 | NA | NA |
| RP11-312P21.1 | 0,00 | 0,00 | 0,00 | 0,00 | NA | NA |
| RP11-313C15.1 | 0,00 | 0,00 | 0,00 | 0,00 | NA | NA |
| RP11-313C15.2 | 0,00 | 0,00 | 0,00 | 0,00 | NA | NA |
| RP11-313C4.1  | 0,00 | 0,00 | 0,00 | 0,00 | NA | NA |
| RP11-313E19.1 | 0,00 | 0,00 | 0,00 | 0,00 | NA | NA |
| RP11-313E19.2 | 0,00 | 0,00 | 0,00 | 0,00 | NA | NA |
| RP11-313E4.1  | 0,00 | 0,00 | 0,00 | 0,00 | NA | NA |
| RP11-313F23.3 | 0,00 | 0,00 | 0,00 | 0,00 | NA | NA |
| RP11-313H3.1  | 0,00 | 0,00 | 0,00 | 0,00 | NA | NA |
| RP11-313I2.10 | 0,00 | 0,00 | 0,00 | 0,00 | NA | NA |
| RP11-313I2.13 | 0,00 | 0,00 | 0,00 | 0,00 | NA | NA |
| RP11-313I2.2  | 0,00 | 0,00 | 0,00 | 0,00 | NA | NA |
| RP11-313I2.3  | 0,00 | 0,00 | 0,00 | 0,00 | NA | NA |
| RP11-313I2.5  | 0,00 | 0,00 | 0,00 | 0,00 | NA | NA |
| RP11-313I2.6  | 0,00 | 0,00 | 0,00 | 0,00 | NA | NA |
| RP11-313I2.7  | 0,00 | 0,00 | 0,00 | 0,00 | NA | NA |
| RP11-313I2.8  | 0,00 | 0,00 | 0,00 | 0,00 | NA | NA |
| RP11-313M3.1  | 0,00 | 0,00 | 0,00 | 0,00 | NA | NA |
| RP11-313P18.1 | 0,00 | 0,00 | 0,00 | 0,00 | NA | NA |
| RP11-313P18.2 | 0,00 | 0,00 | 0,00 | 0,00 | NA | NA |
| RP11-314A15.1 | 0,00 | 0,00 | 0,00 | 0,00 | NA | NA |
| RP11-314A15.2 | 0,00 | 0,00 | 0,00 | 0,00 | NA | NA |
| RP11-314A15.3 | 0,00 | 0,00 | 0,00 | 0,00 | NA | NA |
| RP11-314A5.3  | 0,00 | 0,00 | 0,00 | 0,00 | NA | NA |
| RP11-314A5.5  | 0,00 | 0,00 | 0,00 | 0,00 | NA | NA |
| RP11-314B1.2  | 0,00 | 0,00 | 0,00 | 0,00 | NA | NA |
| RP11-314C16.1 | 0,00 | 0,00 | 0,00 | 0,00 | NA | NA |
| RP11-314C9.1  | 0,00 | 0,00 | 0,00 | 0,00 | NA | NA |
| RP11-314C9.2  | 0,00 | 0,00 | 0,00 | 0,00 | NA | NA |
| RP11-314D7.1  | 0,00 | 0,00 | 0,00 | 0,00 | NA | NA |
| RP11-314D7.3  | 0,00 | 0,00 | 0,00 | 0,00 | NA | NA |
| RP11-314E23.1 | 0,00 | 0,00 | 0,00 | 0,00 | NA | NA |
| RP11-314J18.5 | 0,00 | 0,00 | 0,00 | 0,00 | NA | NA |
| RP11-314N13.3 | 0,00 | 0,45 | 0,00 | 0,00 | NA | NA |
| RP11-314N2.2  | 0,00 | 0,00 | 0,00 | 0,00 | NA | NA |
| RP11-314P15.1 | 0,00 | 0,00 | 0,00 | 0,00 | NA | NA |
| RP11-315A16.2 | 0,00 | 0,00 | 0,00 | 0,00 | NA | NA |
| RP11-315A16.4 | 0,00 | 0,00 | 0,00 | 0,00 | NA | NA |
| RP11-315A19.1 | 0,00 | 0,00 | 0,00 | 0,00 | NA | NA |
| RP11-315D13.1 | 0,00 | 0,00 | 0,00 | 0,00 | NA | NA |

|               |      |      |      |      |    |    |
|---------------|------|------|------|------|----|----|
| RP11-315D16.3 | 0,00 | 0,00 | 0,00 | 0,00 | NA | NA |
| RP11-315D16.4 | 0,00 | 0,00 | 0,00 | 0,00 | NA | NA |
| RP11-315E23.1 | 0,00 | 0,00 | 0,00 | 0,00 | NA | NA |
| RP11-315F22.1 | 0,00 | 0,00 | 0,00 | 0,00 | NA | NA |
| RP11-315H12.1 | 0,00 | 0,00 | 0,00 | 0,00 | NA | NA |
| RP11-315H15.2 | 0,00 | 0,00 | 0,00 | 0,00 | NA | NA |
| RP11-315I14.1 | 0,00 | 0,00 | 0,00 | 0,00 | NA | NA |
| RP11-315I14.2 | 0,00 | 0,00 | 0,00 | 0,00 | NA | NA |
| RP11-315I14.5 | 0,00 | 0,00 | 0,00 | 0,00 | NA | NA |
| RP11-315I20.3 | 0,00 | 0,00 | 0,00 | 0,00 | NA | NA |
| RP11-315J22.5 | 0,00 | 0,00 | 0,00 | 0,00 | NA | NA |
| RP11-315L6.1  | 0,00 | 0,00 | 0,00 | 0,00 | NA | NA |
| RP11-315O19.1 | 0,00 | 0,00 | 0,00 | 0,00 | NA | NA |
| RP11-315O6.2  | 0,00 | 0,00 | 0,00 | 0,00 | NA | NA |
| RP11-315O8.1  | 0,00 | 0,00 | 0,00 | 0,00 | NA | NA |
| RP11-316E14.2 | 0,00 | 0,00 | 0,00 | 0,00 | NA | NA |
| RP11-316F12.1 | 0,00 | 0,00 | 0,00 | 0,00 | NA | NA |
| RP11-316F12.2 | 0,00 | 0,00 | 0,00 | 0,00 | NA | NA |
| RP11-316I3.2  | 0,00 | 0,00 | 0,00 | 0,00 | NA | NA |
| RP11-316I5.1  | 0,00 | 0,00 | 0,00 | 0,00 | NA | NA |
| RP11-316I7.4  | 0,00 | 0,00 | 0,00 | 0,00 | NA | NA |
| RP11-316K19.3 | 0,00 | 0,00 | 0,00 | 0,00 | NA | NA |
| RP11-316M1.3  | 0,00 | 0,00 | 0,00 | 0,00 | NA | NA |
| RP11-316M20.1 | 0,00 | 0,00 | 0,00 | 0,00 | NA | NA |
| RP11-316M21.9 | 0,00 | 0,00 | 0,00 | 0,00 | NA | NA |
| RP11-316N24.2 | 0,00 | 0,00 | 0,00 | 0,00 | NA | NA |
| RP11-316O1.1  | 0,00 | 0,00 | 0,00 | 0,00 | NA | NA |
| RP11-316P17.2 | 0,00 | 0,20 | 0,00 | 0,00 | NA | NA |
| RP11-317B17.2 | 0,00 | 0,00 | 0,00 | 0,00 | NA | NA |
| RP11-317B17.3 | 0,00 | 0,00 | 0,00 | 0,00 | NA | NA |
| RP11-317B7.2  | 0,00 | 0,00 | 0,00 | 0,00 | NA | NA |
| RP11-317B7.3  | 0,00 | 0,00 | 0,00 | 0,00 | NA | NA |
| RP11-317F20.2 | 0,00 | 0,00 | 0,00 | 0,00 | NA | NA |
| RP11-317G22.1 | 0,00 | 0,00 | 0,00 | 0,00 | NA | NA |
| RP11-317G22.2 | 0,00 | 0,00 | 0,00 | 0,00 | NA | NA |
| RP11-317J10.2 | 0,00 | 0,00 | 0,00 | 0,00 | NA | NA |
| RP11-317J10.4 | 0,00 | 0,00 | 0,00 | 0,00 | NA | NA |
| RP11-317J19.1 | 0,00 | 0,00 | 0,00 | 0,00 | NA | NA |
| RP11-317J9.1  | 0,00 | 0,00 | 0,00 | 0,00 | NA | NA |
| RP11-317M22.1 | 0,00 | 0,00 | 0,00 | 0,00 | NA | NA |
| RP11-317N6.1  | 0,00 | 0,00 | 0,00 | 0,00 | NA | NA |
| RP11-317N8.2  | 0,00 | 0,00 | 0,00 | 0,00 | NA | NA |
| RP11-317N8.4  | 0,00 | 0,00 | 0,00 | 0,00 | NA | NA |
| RP11-317O24.1 | 0,00 | 0,00 | 0,00 | 0,00 | NA | NA |
| RP11-317O24.2 | 0,00 | 0,00 | 0,00 | 0,00 | NA | NA |
| RP11-317O24.3 | 0,00 | 0,00 | 0,00 | 0,00 | NA | NA |
| RP11-317P15.3 | 0,00 | 0,00 | 0,00 | 0,00 | NA | NA |
| RP11-317P15.4 | 0,00 | 0,00 | 0,00 | 0,00 | NA | NA |
| RP11-317P15.6 | 0,00 | 0,00 | 0,00 | 0,00 | NA | NA |
| RP11-318A15.7 | 0,00 | 0,00 | 0,00 | 0,00 | NA | NA |
| RP11-318A15.8 | 0,00 | 0,00 | 0,00 | 0,00 | NA | NA |
| RP11-318C2.1  | 0,00 | 0,00 | 0,00 | 0,00 | NA | NA |
| RP11-318G11.2 | 0,00 | 0,00 | 0,00 | 0,00 | NA | NA |
| RP11-318G21.2 | 0,00 | 0,00 | 0,00 | 0,00 | NA | NA |
| RP11-318G8.1  | 0,00 | 0,00 | 0,00 | 0,00 | NA | NA |



|               |      |      |      |      |    |    |
|---------------|------|------|------|------|----|----|
| RP11-318G8.3  | 0,00 | 0,00 | 0,00 | 0,00 | NA | NA |
| RP11-318I4.1  | 0,00 | 0,00 | 0,00 | 0,00 | NA | NA |
| RP11-318I4.2  | 0,00 | 0,00 | 0,00 | 0,00 | NA | NA |
| RP11-318K12.1 | 0,00 | 0,00 | 0,00 | 0,00 | NA | NA |
| RP11-318K12.3 | 0,00 | 0,00 | 0,00 | 0,00 | NA | NA |
| RP11-318L16.5 | 0,00 | 0,00 | 0,00 | 0,00 | NA | NA |
| RP11-318M2.3  | 0,00 | 0,00 | 0,00 | 0,00 | NA | NA |
| RP11-319C21.1 | 0,00 | 0,00 | 0,00 | 0,00 | NA | NA |
| RP11-319E12.1 | 0,00 | 0,00 | 0,00 | 0,00 | NA | NA |
| RP11-319E16.1 | 0,00 | 0,00 | 0,00 | 0,00 | NA | NA |
| RP11-319F12.2 | 0,00 | 0,00 | 0,00 | 0,00 | NA | NA |
| RP11-319G6.3  | 0,00 | 0,00 | 0,00 | 0,00 | NA | NA |
| RP11-319I23.2 | 0,00 | 0,00 | 0,00 | 0,00 | NA | NA |
| RP11-319J24.1 | 0,00 | 0,00 | 0,00 | 0,00 | NA | NA |
| RP11-319J24.3 | 0,94 | 0,00 | 1,00 | 0,47 | NA | NA |
| RP11-319L6.1  | 0,00 | 0,00 | 0,00 | 0,00 | NA | NA |
| RP11-31A20.1  | 0,00 | 0,00 | 0,00 | 0,00 | NA | NA |
| RP11-31A23.1  | 0,00 | 0,00 | 0,00 | 0,00 | NA | NA |
| RP11-31E13.2  | 0,00 | 0,00 | 0,00 | 0,00 | NA | NA |
| RP11-31F19.1  | 0,00 | 0,00 | 0,00 | 0,00 | NA | NA |
| RP11-31H15.2  | 0,00 | 0,00 | 0,00 | 0,00 | NA | NA |
| RP11-31H2.2   | 0,00 | 0,00 | 0,00 | 0,00 | NA | NA |
| RP11-31H5.1   | 0,00 | 0,00 | 0,00 | 0,00 | NA | NA |
| RP11-31H5.2   | 0,00 | 0,00 | 0,00 | 0,00 | NA | NA |
| RP11-31H5.3   | 0,00 | 0,26 | 0,00 | 0,00 | NA | NA |
| RP11-31I22.1  | 0,00 | 0,00 | 0,00 | 0,00 | NA | NA |
| RP11-31I22.4  | 0,00 | 0,00 | 0,00 | 0,00 | NA | NA |
| RP11-31K13.1  | 0,00 | 0,00 | 0,00 | 0,00 | NA | NA |
| RP11-31K22.3  | 0,00 | 0,00 | 0,00 | 0,00 | NA | NA |
| RP11-320E2.1  | 0,00 | 0,00 | 0,00 | 0,00 | NA | NA |
| RP11-320H14.1 | 0,00 | 0,00 | 0,00 | 0,00 | NA | NA |
| RP11-320J16.1 | 0,00 | 0,00 | 0,00 | 0,00 | NA | NA |
| RP11-320L11.2 | 0,00 | 0,23 | 0,00 | 0,00 | NA | NA |
| RP11-320L24.1 | 0,00 | 0,00 | 0,00 | 0,00 | NA | NA |
| RP11-320N7.1  | 0,00 | 0,00 | 0,00 | 0,00 | NA | NA |
| RP11-320N7.2  | 0,00 | 0,00 | 0,00 | 0,00 | NA | NA |
| RP11-320N7.3  | 0,00 | 0,00 | 0,00 | 0,00 | NA | NA |
| RP11-320P11.1 | 0,00 | 0,00 | 0,00 | 0,00 | NA | NA |
| RP11-321A17.4 | 0,00 | 0,00 | 0,00 | 0,00 | NA | NA |
| RP11-321C24.1 | 0,00 | 0,00 | 0,00 | 0,00 | NA | NA |
| RP11-321C24.4 | 0,00 | 0,00 | 0,00 | 0,00 | NA | NA |
| RP11-321C3.1  | 0,00 | 0,20 | 0,00 | 0,00 | NA | NA |
| RP11-321E2.10 | 0,00 | 0,00 | 0,00 | 0,00 | NA | NA |
| RP11-321E2.11 | 0,00 | 0,00 | 0,00 | 0,00 | NA | NA |
| RP11-321E2.12 | 0,00 | 0,00 | 0,00 | 0,00 | NA | NA |
| RP11-321E2.13 | 0,00 | 0,00 | 0,00 | 0,00 | NA | NA |
| RP11-321E2.2  | 0,00 | 0,00 | 0,00 | 0,00 | NA | NA |
| RP11-321E2.4  | 0,00 | 0,00 | 0,00 | 0,00 | NA | NA |
| RP11-321E2.5  | 0,00 | 0,00 | 0,00 | 0,00 | NA | NA |
| RP11-321E2.6  | 0,00 | 0,00 | 0,00 | 0,00 | NA | NA |
| RP11-321E2.7  | 0,00 | 0,06 | 0,00 | 0,00 | NA | NA |
| RP11-321E2.9  | 0,00 | 0,11 | 0,00 | 0,00 | NA | NA |
| RP11-321E8.1  | 0,00 | 0,00 | 0,00 | 0,00 | NA | NA |
| RP11-321E8.2  | 0,00 | 0,00 | 0,00 | 0,00 | NA | NA |
| RP11-321E8.4  | 0,00 | 0,00 | 0,00 | 0,00 | NA | NA |

|                 |      |      |      |      |    |    |
|-----------------|------|------|------|------|----|----|
| RP11-321E8.8    | 0,00 | 0,00 | 0,00 | 0,00 | NA | NA |
| RP11-321F8.4    | 0,00 | 0,00 | 0,00 | 0,00 | NA | NA |
| RP11-321L2.1    | 0,00 | 0,00 | 0,00 | 0,00 | NA | NA |
| RP11-321L2.3    | 0,00 | 0,00 | 0,00 | 0,00 | NA | NA |
| RP11-321M21.1   | 0,00 | 0,00 | 0,00 | 0,00 | NA | NA |
| RP11-321M21.3   | 0,00 | 0,00 | 0,00 | 0,00 | NA | NA |
| RP11-321M21.4   | 0,00 | 0,00 | 0,00 | 0,00 | NA | NA |
| RP11-321P16.1   | 0,00 | 0,00 | 0,00 | 0,00 | NA | NA |
| RP11-322A17.1   | 0,00 | 0,00 | 0,00 | 0,00 | NA | NA |
| RP11-322A17.3   | 0,00 | 0,00 | 0,00 | 0,00 | NA | NA |
| RP11-322C8.2    | 0,00 | 0,00 | 0,00 | 0,00 | NA | NA |
| RP11-322E11.1   | 0,00 | 0,00 | 0,00 | 0,00 | NA | NA |
| RP11-322E11.6   | 0,00 | 0,00 | 0,00 | 0,00 | NA | NA |
| RP11-322I2.1    | 0,00 | 0,00 | 0,00 | 0,00 | NA | NA |
| RP11-322I2.2    | 0,00 | 0,00 | 0,00 | 0,00 | NA | NA |
| RP11-322I23.1   | 0,00 | 0,00 | 0,00 | 0,00 | NA | NA |
| RP11-322L17.1   | 0,00 | 0,00 | 0,00 | 0,00 | NA | NA |
| RP11-322N21.2   | 0,00 | 0,00 | 0,00 | 0,00 | NA | NA |
| RP11-323A7.1    | 0,00 | 0,00 | 0,00 | 0,00 | NA | NA |
| RP11-323C15.1   | 0,00 | 0,00 | 0,00 | 0,00 | NA | NA |
| RP11-323C15.2   | 0,00 | 0,00 | 0,00 | 0,00 | NA | NA |
| RP11-323F24.4   | 0,00 | 0,00 | 0,00 | 0,00 | NA | NA |
| RP11-323H21.2   | 0,00 | 0,00 | 0,00 | 0,00 | NA | NA |
| RP11-323I1.1    | 0,00 | 0,00 | 0,00 | 0,00 | NA | NA |
| RP11-323I14_A.1 | 0,00 | 0,00 | 0,00 | 0,00 | NA | NA |
| RP11-323I15.2   | 0,00 | 0,00 | 0,00 | 0,00 | NA | NA |
| RP11-323I15.3   | 0,00 | 0,00 | 0,00 | 0,00 | NA | NA |
| RP11-323I15.4   | 0,00 | 0,00 | 0,00 | 0,00 | NA | NA |
| RP11-323I15.5   | 0,00 | 0,00 | 0,00 | 0,00 | NA | NA |
| RP11-323K10.1   | 0,00 | 0,00 | 0,00 | 0,00 | NA | NA |
| RP11-323K3.1    | 0,00 | 0,00 | 0,00 | 0,00 | NA | NA |
| RP11-323N10.1   | 0,00 | 0,00 | 0,00 | 0,00 | NA | NA |
| RP11-323N23.1   | 0,00 | 0,00 | 0,00 | 0,00 | NA | NA |
| RP11-324B6.1    | 0,00 | 0,00 | 0,00 | 0,00 | NA | NA |
| RP11-324D17.1   | 0,00 | 0,00 | 0,00 | 0,00 | NA | NA |
| RP11-324D17.2   | 0,00 | 0,00 | 0,00 | 0,00 | NA | NA |
| RP11-324E6.8    | 0,00 | 0,00 | 0,00 | 0,00 | NA | NA |
| RP11-324F11.1   | 0,00 | 0,00 | 0,00 | 0,00 | NA | NA |
| RP11-324F21.1   | 0,00 | 0,00 | 0,00 | 0,00 | NA | NA |
| RP11-324H4.1    | 0,00 | 0,00 | 0,00 | 0,00 | NA | NA |
| RP11-324H9.1    | 0,00 | 0,00 | 0,00 | 0,00 | NA | NA |
| RP11-324I10.3   | 0,00 | 0,00 | 0,00 | 0,00 | NA | NA |
| RP11-324I22.2   | 0,00 | 0,00 | 0,00 | 0,00 | NA | NA |
| RP11-324I13.3   | 0,00 | 0,00 | 0,00 | 0,00 | NA | NA |
| RP11-324J3.1    | 0,00 | 0,00 | 0,00 | 0,00 | NA | NA |
| RP11-324K6.1    | 0,00 | 0,00 | 0,00 | 0,00 | NA | NA |
| RP11-324L17.1   | 0,00 | 0,00 | 0,00 | 0,00 | NA | NA |
| RP11-324L3.5    | 0,00 | 0,00 | 0,00 | 0,00 | NA | NA |
| RP11-325B23.2   | 0,00 | 0,00 | 0,00 | 0,00 | NA | NA |
| RP11-325D15.2   | 0,00 | 0,00 | 0,00 | 0,00 | NA | NA |
| RP11-325D8.1    | 0,00 | 0,00 | 0,00 | 0,00 | NA | NA |
| RP11-325E14.1   | 0,00 | 0,00 | 0,00 | 0,00 | NA | NA |
| RP11-325E14.2   | 0,00 | 0,00 | 0,00 | 0,00 | NA | NA |
| RP11-325E14.3   | 0,00 | 0,00 | 0,00 | 0,00 | NA | NA |
| RP11-325E5.4    | 0,00 | 0,00 | 0,00 | 0,00 | NA | NA |

|               |      |      |      |      |    |    |
|---------------|------|------|------|------|----|----|
| RP11-325I22.1 | 0,00 | 0,00 | 0,00 | 0,00 | NA | NA |
| RP11-325I22.2 | 0,00 | 0,00 | 0,00 | 0,00 | NA | NA |
| RP11-325K19.2 | 0,00 | 0,00 | 0,00 | 0,00 | NA | NA |
| RP11-325K19.3 | 0,00 | 0,00 | 0,00 | 0,00 | NA | NA |
| RP11-325K19.5 | 0,00 | 0,00 | 0,00 | 0,00 | NA | NA |
| RP11-325K19.6 | 0,00 | 0,00 | 0,00 | 0,00 | NA | NA |
| RP11-325K2.1  | 0,00 | 0,00 | 0,00 | 0,00 | NA | NA |
| RP11-325L12.3 | 0,00 | 0,00 | 0,00 | 0,00 | NA | NA |
| RP11-325L12.6 | 0,00 | 0,00 | 0,00 | 0,00 | NA | NA |
| RP11-325L12.7 | 0,00 | 0,00 | 0,00 | 0,00 | NA | NA |
| RP11-325L2.1  | 0,00 | 0,00 | 0,00 | 0,00 | NA | NA |
| RP11-325L7.1  | 0,00 | 0,00 | 0,00 | 0,00 | NA | NA |
| RP11-325M4.2  | 0,00 | 0,00 | 0,00 | 0,00 | NA | NA |
| RP11-325N19.2 | 0,00 | 0,00 | 0,00 | 0,00 | NA | NA |
| RP11-325O24.1 | 0,00 | 0,00 | 0,00 | 0,00 | NA | NA |
| RP11-325O24.2 | 0,00 | 0,00 | 0,00 | 0,00 | NA | NA |
| RP11-325P15.1 | 0,00 | 0,00 | 0,00 | 0,00 | NA | NA |
| RP11-325P15.2 | 0,00 | 0,00 | 0,00 | 0,00 | NA | NA |
| RP11-326A19.2 | 0,00 | 0,00 | 0,00 | 0,00 | NA | NA |
| RP11-326A19.3 | 0,00 | 0,00 | 0,00 | 0,00 | NA | NA |
| RP11-326A19.4 | 0,00 | 0,00 | 0,00 | 0,00 | NA | NA |
| RP11-326C3.10 | 0,00 | 0,00 | 0,00 | 0,00 | NA | NA |
| RP11-326C3.16 | 0,00 | 0,00 | 0,00 | 0,00 | NA | NA |
| RP11-326C3.2  | 0,00 | 0,00 | 0,00 | 0,00 | NA | NA |
| RP11-326C3.4  | 0,00 | 0,00 | 0,00 | 0,00 | NA | NA |
| RP11-326E22.1 | 0,00 | 0,00 | 0,00 | 0,00 | NA | NA |
| RP11-326E7.1  | 0,00 | 0,00 | 0,00 | 0,00 | NA | NA |
| RP11-326I19.1 | 0,00 | 0,00 | 0,00 | 0,00 | NA | NA |
| RP11-326I19.3 | 0,00 | 0,00 | 0,00 | 0,00 | NA | NA |
| RP11-326I18.1 | 0,00 | 0,00 | 0,00 | 0,00 | NA | NA |
| RP11-326K13.2 | 0,00 | 0,00 | 0,00 | 0,00 | NA | NA |
| RP11-326K13.4 | 0,00 | 0,18 | 0,00 | 0,00 | NA | NA |
| RP11-326L17.1 | 0,00 | 0,00 | 0,00 | 0,00 | NA | NA |
| RP11-326L24.9 | 0,00 | 0,00 | 0,00 | 0,00 | NA | NA |
| RP11-326L9.1  | 0,00 | 0,00 | 0,00 | 0,00 | NA | NA |
| RP11-326L9.2  | 0,00 | 0,00 | 0,00 | 0,00 | NA | NA |
| RP11-327E2.3  | 0,00 | 0,00 | 0,00 | 0,00 | NA | NA |
| RP11-327F22.5 | 0,00 | 0,00 | 0,00 | 0,00 | NA | NA |
| RP11-327I22.3 | 0,00 | 0,00 | 0,00 | 0,00 | NA | NA |
| RP11-327I22.5 | 0,00 | 0,16 | 0,00 | 0,00 | NA | NA |
| RP11-327I22.7 | 0,00 | 0,13 | 0,00 | 0,00 | NA | NA |
| RP11-327I22.8 | 0,00 | 0,00 | 0,00 | 0,00 | NA | NA |
| RP11-327J17.1 | 0,00 | 0,00 | 0,00 | 0,00 | NA | NA |
| RP11-327J17.2 | 0,00 | 0,00 | 0,00 | 0,00 | NA | NA |
| RP11-327J17.3 | 0,00 | 0,00 | 0,00 | 0,00 | NA | NA |
| RP11-327P2.7  | 0,02 | 0,07 | 0,06 | 0,11 | NA | NA |
| RP11-328C8.5  | 0,00 | 0,00 | 0,00 | 0,00 | NA | NA |
| RP11-328J14.2 | 0,00 | 0,00 | 0,00 | 0,00 | NA | NA |
| RP11-328J6.1  | 0,00 | 0,00 | 0,00 | 0,00 | NA | NA |
| RP11-328K15.1 | 0,00 | 0,00 | 0,00 | 0,00 | NA | NA |
| RP11-328K22.1 | 0,00 | 0,00 | 0,00 | 0,00 | NA | NA |
| RP11-328M4.3  | 0,00 | 0,00 | 0,00 | 0,00 | NA | NA |
| RP11-328P23.2 | 0,00 | 0,00 | 0,00 | 0,00 | NA | NA |
| RP11-328P23.3 | 0,00 | 0,00 | 0,00 | 0,00 | NA | NA |
| RP11-329A14.2 | 0,00 | 0,00 | 0,00 | 0,00 | NA | NA |

|               |      |      |      |      |    |    |
|---------------|------|------|------|------|----|----|
| RP11-329A6.1  | 0,00 | 0,00 | 0,00 | 0,00 | NA | NA |
| RP11-329B9.5  | 0,00 | 0,00 | 0,00 | 0,00 | NA | NA |
| RP11-329I18.2 | 0,00 | 0,00 | 0,00 | 0,00 | NA | NA |
| RP11-329I18.4 | 0,00 | 0,00 | 0,00 | 0,00 | NA | NA |
| RP11-329N22.2 | 0,00 | 0,00 | 0,00 | 0,00 | NA | NA |
| RP11-32A1.2   | 0,00 | 0,00 | 0,00 | 0,00 | NA | NA |
| RP11-32B5.2   | 0,00 | 0,00 | 0,00 | 0,00 | NA | NA |
| RP11-32B5.4   | 0,00 | 0,00 | 0,00 | 0,00 | NA | NA |
| RP11-32B5.5   | 0,00 | 0,00 | 0,00 | 0,00 | NA | NA |
| RP11-32B5.6   | 0,00 | 0,00 | 0,00 | 0,00 | NA | NA |
| RP11-32D16.1  | 0,00 | 0,00 | 0,00 | 0,00 | NA | NA |
| RP11-32D4.1   | 0,00 | 0,00 | 0,00 | 0,00 | NA | NA |
| RP11-32F11.2  | 0,00 | 0,00 | 0,00 | 0,00 | NA | NA |
| RP11-32I2.1   | 0,00 | 0,00 | 0,00 | 0,00 | NA | NA |
| RP11-32K4.3   | 0,00 | 0,00 | 0,00 | 0,00 | NA | NA |
| RP11-330A16.1 | 0,00 | 0,00 | 0,00 | 0,00 | NA | NA |
| RP11-330C15.1 | 0,00 | 0,00 | 0,00 | 0,00 | NA | NA |
| RP11-330C7.2  | 0,00 | 0,00 | 0,00 | 0,00 | NA | NA |
| RP11-330M2.3  | 0,00 | 0,00 | 0,00 | 0,00 | NA | NA |
| RP11-330M2.4  | 0,00 | 0,00 | 0,00 | 0,00 | NA | NA |
| RP11-330O11.3 | 0,00 | 0,00 | 0,00 | 0,00 | NA | NA |
| RP11-330O19.1 | 0,00 | 0,00 | 0,00 | 0,00 | NA | NA |
| RP11-331D5.2  | 0,00 | 0,00 | 0,00 | 0,00 | NA | NA |
| RP11-331F4.1  | 0,00 | 0,00 | 0,00 | 0,00 | NA | NA |
| RP11-331H13.1 | 0,00 | 0,00 | 0,00 | 0,00 | NA | NA |
| RP11-331H2.3  | 0,00 | 0,00 | 0,00 | 0,00 | NA | NA |
| RP11-331K15.1 | 0,00 | 0,00 | 0,00 | 0,00 | NA | NA |
| RP11-331K21.1 | 0,00 | 0,00 | 0,00 | 0,00 | NA | NA |
| RP11-331N16.1 | 0,00 | 0,00 | 0,00 | 0,00 | NA | NA |
| RP11-331O1.1  | 0,00 | 0,00 | 0,00 | 0,00 | NA | NA |
| RP11-331O9.1  | 0,00 | 0,00 | 0,00 | 0,00 | NA | NA |
| RP11-331O9.2  | 0,00 | 0,00 | 0,00 | 0,00 | NA | NA |
| RP11-331O9.3  | 0,00 | 0,00 | 0,00 | 0,00 | NA | NA |
| RP11-331O9.4  | 0,00 | 0,00 | 0,00 | 0,00 | NA | NA |
| RP11-331O9.5  | 0,00 | 0,00 | 0,00 | 0,00 | NA | NA |
| RP11-331O9.6  | 0,00 | 0,00 | 0,00 | 0,00 | NA | NA |
| RP11-332E19.1 | 0,00 | 0,00 | 0,00 | 0,00 | NA | NA |
| RP11-332E19.2 | 0,00 | 0,00 | 0,00 | 0,00 | NA | NA |
| RP11-332E3.2  | 0,00 | 0,00 | 0,00 | 0,00 | NA | NA |
| RP11-332E3.4  | 0,00 | 0,00 | 0,00 | 0,00 | NA | NA |
| RP11-332E4.1  | 0,00 | 0,00 | 0,00 | 0,00 | NA | NA |
| RP11-332G1.1  | 0,00 | 0,00 | 0,00 | 0,00 | NA | NA |
| RP11-332H17.1 | 0,00 | 0,00 | 0,00 | 0,00 | NA | NA |
| RP11-332H18.3 | 0,00 | 0,00 | 0,00 | 0,00 | NA | NA |
| RP11-332H18.4 | 0,00 | 0,00 | 0,00 | 0,00 | NA | NA |
| RP11-332H18.5 | 0,00 | 0,00 | 0,00 | 0,00 | NA | NA |
| RP11-332I15.1 | 0,00 | 0,00 | 0,00 | 0,00 | NA | NA |
| RP11-332I15.2 | 0,00 | 0,00 | 0,00 | 0,00 | NA | NA |
| RP11-332L18.3 | 0,00 | 0,00 | 0,00 | 0,00 | NA | NA |
| RP11-332L8.1  | 0,00 | 0,00 | 0,00 | 0,00 | NA | NA |
| RP11-332L8.2  | 0,00 | 0,00 | 0,00 | 0,00 | NA | NA |
| RP11-332M4.1  | 0,00 | 0,00 | 0,00 | 0,00 | NA | NA |
| RP11-332O19.3 | 0,00 | 0,00 | 0,00 | 0,00 | NA | NA |
| RP11-332O19.4 | 0,00 | 0,00 | 0,00 | 0,00 | NA | NA |
| RP11-332P22.2 | 0,00 | 0,00 | 0,00 | 0,00 | NA | NA |

|               |      |      |      |      |    |    |
|---------------|------|------|------|------|----|----|
| RP11-333A23.2 | 0,00 | 0,00 | 0,00 | 0,00 | NA | NA |
| RP11-333B11.1 | 0,00 | 0,00 | 0,00 | 0,00 | NA | NA |
| RP11-333B6.1  | 0,00 | 0,00 | 0,00 | 0,00 | NA | NA |
| RP11-333E13.3 | 0,00 | 0,00 | 0,00 | 0,00 | NA | NA |
| RP11-333E5.1  | 0,00 | 0,00 | 0,00 | 0,00 | NA | NA |
| RP11-333O1.1  | 0,00 | 0,00 | 0,00 | 0,00 | NA | NA |
| RP11-334A14.3 | 0,00 | 0,00 | 0,00 | 0,00 | NA | NA |
| RP11-334A14.5 | 0,00 | 0,00 | 0,00 | 0,00 | NA | NA |
| RP11-334A14.6 | 0,00 | 0,00 | 0,00 | 0,00 | NA | NA |
| RP11-334A14.8 | 0,00 | 0,00 | 0,00 | 0,00 | NA | NA |
| RP11-334C17.6 | 0,00 | 0,00 | 0,00 | 0,00 | NA | NA |
| RP11-334E6.12 | 0,00 | 0,00 | 0,00 | 0,00 | NA | NA |
| RP11-334E6.3  | 0,00 | 0,00 | 0,00 | 0,00 | NA | NA |
| RP11-334G8.1  | 0,00 | 0,00 | 0,00 | 0,00 | NA | NA |
| RP11-334L9.2  | 0,00 | 0,00 | 0,00 | 0,00 | NA | NA |
| RP11-334N17.1 | 0,00 | 0,00 | 0,00 | 0,00 | NA | NA |
| RP11-334O13.1 | 0,00 | 0,00 | 0,00 | 0,00 | NA | NA |
| RP11-335E14.1 | 0,00 | 0,00 | 0,00 | 0,00 | NA | NA |
| RP11-335E8.1  | 0,00 | 0,00 | 0,00 | 0,00 | NA | NA |
| RP11-335F8.2  | 0,00 | 0,00 | 0,00 | 0,00 | NA | NA |
| RP11-335G20.1 | 0,00 | 0,00 | 0,00 | 0,00 | NA | NA |
| RP11-335H2.2  | 0,00 | 0,00 | 0,00 | 0,00 | NA | NA |
| RP11-335I12.3 | 0,00 | 0,28 | 0,00 | 0,00 | NA | NA |
| RP11-335L23.2 | 0,00 | 0,00 | 0,00 | 0,00 | NA | NA |
| RP11-335L23.3 | 0,00 | 0,00 | 0,00 | 0,00 | NA | NA |
| RP11-335L23.4 | 0,00 | 0,00 | 0,00 | 0,00 | NA | NA |
| RP11-335L23.5 | 0,00 | 0,00 | 0,00 | 0,00 | NA | NA |
| RP11-335L9.1  | 0,00 | 0,00 | 0,00 | 0,00 | NA | NA |
| RP11-335M9.1  | 0,00 | 0,00 | 0,00 | 0,00 | NA | NA |
| RP11-335N6.1  | 0,00 | 0,00 | 0,00 | 0,00 | NA | NA |
| RP11-335O13.7 | 0,00 | 0,00 | 0,00 | 0,00 | NA | NA |
| RP11-335O13.8 | 0,00 | 0,00 | 0,00 | 0,00 | NA | NA |
| RP11-335O4.1  | 0,00 | 0,00 | 0,00 | 0,00 | NA | NA |
| RP11-335P18.2 | 0,00 | 0,00 | 0,00 | 0,00 | NA | NA |
| RP11-336A10.4 | 0,00 | 0,31 | 0,00 | 0,00 | NA | NA |
| RP11-336A10.5 | 0,00 | 0,00 | 0,00 | 0,00 | NA | NA |
| RP11-336A10.7 | 0,00 | 0,00 | 0,00 | 0,00 | NA | NA |
| RP11-336F14.1 | 0,00 | 0,00 | 0,00 | 0,00 | NA | NA |
| RP11-336K24.5 | 0,00 | 0,00 | 0,00 | 0,00 | NA | NA |
| RP11-336M17.1 | 0,00 | 0,00 | 0,00 | 0,00 | NA | NA |
| RP11-336N8.1  | 0,00 | 0,00 | 0,00 | 0,00 | NA | NA |
| RP11-336N8.2  | 0,00 | 0,00 | 0,00 | 0,00 | NA | NA |
| RP11-336N8.4  | 0,00 | 0,00 | 0,00 | 0,00 | NA | NA |
| RP11-337C18.4 | 0,00 | 0,00 | 0,00 | 0,00 | NA | NA |
| RP11-337L12.1 | 0,00 | 0,00 | 0,00 | 0,00 | NA | NA |
| RP11-337N6.3  | 0,00 | 0,00 | 0,00 | 0,00 | NA | NA |
| RP11-338C15.2 | 0,00 | 0,00 | 0,00 | 0,00 | NA | NA |
| RP11-338H14.1 | 0,00 | 0,00 | 0,00 | 0,00 | NA | NA |
| RP11-338I24.1 | 0,00 | 0,00 | 0,00 | 0,00 | NA | NA |
| RP11-338K13.1 | 0,00 | 0,00 | 0,00 | 0,00 | NA | NA |
| RP11-338L18.1 | 0,00 | 0,00 | 0,00 | 0,00 | NA | NA |
| RP11-338L22.3 | 0,00 | 0,00 | 0,00 | 0,00 | NA | NA |
| RP11-338N12.1 | 0,00 | 0,00 | 0,00 | 0,00 | NA | NA |
| RP11-338O1.2  | 0,00 | 0,00 | 0,00 | 0,00 | NA | NA |
| RP11-339A11.1 | 0,00 | 0,00 | 0,00 | 0,00 | NA | NA |

|                |      |      |      |      |    |    |
|----------------|------|------|------|------|----|----|
| RP11-339A11.3  | 0,00 | 0,00 | 0,00 | 0,00 | NA | NA |
| RP11-339B21.10 | 0,00 | 0,00 | 0,00 | 0,00 | NA | NA |
| RP11-339B21.12 | 0,00 | 0,00 | 0,00 | 0,00 | NA | NA |
| RP11-339B21.13 | 0,00 | 0,00 | 0,00 | 0,00 | NA | NA |
| RP11-339B21.8  | 0,00 | 0,00 | 0,00 | 0,00 | NA | NA |
| RP11-339B9.1   | 0,00 | 0,07 | 0,04 | 0,16 | NA | NA |
| RP11-339D20.1  | 0,00 | 0,00 | 0,00 | 0,00 | NA | NA |
| RP11-339D23.1  | 0,00 | 0,00 | 0,00 | 0,00 | NA | NA |
| RP11-339F13.2  | 0,00 | 0,00 | 0,00 | 0,00 | NA | NA |
| RP11-339I24.1  | 0,00 | 0,00 | 0,00 | 0,00 | NA | NA |
| RP11-339N8.2   | 0,00 | 0,00 | 0,00 | 0,00 | NA | NA |
| RP11-33A14.3   | 0,00 | 0,00 | 0,00 | 0,00 | NA | NA |
| RP11-33E12.2   | 0,00 | 0,00 | 0,00 | 0,00 | NA | NA |
| RP11-33E24.3   | 0,00 | 0,00 | 0,00 | 0,00 | NA | NA |
| RP11-33H15.1   | 0,00 | 0,00 | 0,00 | 0,00 | NA | NA |
| RP11-33I11.2   | 0,00 | 0,00 | 0,00 | 0,00 | NA | NA |
| RP11-33I11.3   | 0,00 | 0,00 | 0,00 | 0,00 | NA | NA |
| RP11-33K5.1    | 0,00 | 0,00 | 0,00 | 0,00 | NA | NA |
| RP11-33M22.2   | 0,00 | 0,00 | 0,00 | 0,00 | NA | NA |
| RP11-33N11.1   | 0,00 | 0,00 | 0,00 | 0,00 | NA | NA |
| RP11-33N14.3   | 0,00 | 0,00 | 0,00 | 0,00 | NA | NA |
| RP11-33N14.5   | 0,00 | 0,00 | 0,00 | 0,00 | NA | NA |
| RP11-340A13.1  | 0,00 | 0,00 | 0,00 | 0,00 | NA | NA |
| RP11-340A13.2  | 0,00 | 0,00 | 0,00 | 0,00 | NA | NA |
| RP11-340A13.3  | 0,00 | 0,00 | 0,00 | 0,00 | NA | NA |
| RP11-340B24.3  | 0,00 | 0,00 | 0,00 | 0,00 | NA | NA |
| RP11-340C20.2  | 0,27 | 0,00 | 0,30 | 0,55 | NA | NA |
| RP11-340C20.3  | 0,00 | 0,00 | 0,00 | 0,00 | NA | NA |
| RP11-340E6.1   | 0,00 | 0,00 | 0,00 | 0,00 | NA | NA |
| RP11-340E6.2   | 0,00 | 0,00 | 0,00 | 0,00 | NA | NA |
| RP11-340F16.2  | 0,00 | 0,00 | 0,00 | 0,00 | NA | NA |
| RP11-340I6.10  | 0,00 | 0,00 | 0,00 | 0,00 | NA | NA |
| RP11-340I6.11  | 0,00 | 0,00 | 0,00 | 0,00 | NA | NA |
| RP11-340I6.12  | 0,00 | 0,00 | 0,00 | 0,00 | NA | NA |
| RP11-340I6.2   | 0,00 | 0,00 | 0,00 | 0,00 | NA | NA |
| RP11-340I6.3   | 0,00 | 0,00 | 0,00 | 0,00 | NA | NA |
| RP11-340I6.4   | 0,00 | 0,00 | 0,00 | 0,00 | NA | NA |
| RP11-340I6.5   | 0,00 | 0,16 | 0,00 | 0,00 | NA | NA |
| RP11-340M11.1  | 0,00 | 0,00 | 0,00 | 0,00 | NA | NA |
| RP11-341A11.1  | 0,00 | 0,00 | 0,00 | 0,00 | NA | NA |
| RP11-341A11.2  | 0,00 | 0,00 | 0,00 | 0,00 | NA | NA |
| RP11-341A11.3  | 0,00 | 0,00 | 0,00 | 0,00 | NA | NA |
| RP11-341A22.1  | 0,00 | 0,00 | 0,00 | 0,00 | NA | NA |
| RP11-341B24.3  | 0,00 | 0,00 | 0,00 | 0,00 | NA | NA |
| RP11-341D18.4  | 0,00 | 0,00 | 0,00 | 0,00 | NA | NA |
| RP11-341D18.6  | 0,00 | 0,00 | 0,00 | 0,00 | NA | NA |
| RP11-341D18.7  | 0,00 | 0,00 | 0,00 | 0,00 | NA | NA |
| RP11-341D18.9  | 0,00 | 0,00 | 0,00 | 0,00 | NA | NA |
| RP11-341G2.1   | 0,00 | 0,00 | 0,00 | 0,00 | NA | NA |
| RP11-341G2.3   | 0,00 | 0,00 | 0,00 | 0,00 | NA | NA |
| RP11-341G23.2  | 0,00 | 0,00 | 0,00 | 0,00 | NA | NA |
| RP11-341G23.3  | 0,00 | 0,00 | 0,00 | 0,00 | NA | NA |
| RP11-341G23.4  | 0,00 | 0,77 | 0,00 | 0,00 | NA | NA |
| RP11-341G5.2   | 0,00 | 0,00 | 0,00 | 0,00 | NA | NA |
| RP11-342A1.1   | 0,00 | 0,00 | 0,00 | 0,00 | NA | NA |

|                |      |      |      |      |    |    |
|----------------|------|------|------|------|----|----|
| RP11-342A23.1  | 0,00 | 0,00 | 0,00 | 0,00 | NA | NA |
| RP11-342C20.1  | 0,00 | 0,00 | 0,00 | 0,00 | NA | NA |
| RP11-342C20.2  | 0,00 | 0,00 | 0,00 | 0,00 | NA | NA |
| RP11-342D11.2  | 0,00 | 0,00 | 0,00 | 0,00 | NA | NA |
| RP11-342F17.1  | 0,00 | 0,00 | 0,00 | 0,00 | NA | NA |
| RP11-342F17.2  | 0,00 | 0,00 | 0,00 | 0,00 | NA | NA |
| RP11-342H21.2  | 0,00 | 0,00 | 0,00 | 0,00 | NA | NA |
| RP11-342L8.2   | 0,00 | 0,00 | 0,00 | 0,00 | NA | NA |
| RP11-342M1.6   | 0,00 | 0,00 | 0,00 | 0,00 | NA | NA |
| RP11-342M1.7   | 0,00 | 0,00 | 0,00 | 0,00 | NA | NA |
| RP11-342M21.1  | 0,00 | 0,00 | 0,00 | 0,00 | NA | NA |
| RP11-342M21.2  | 0,00 | 0,00 | 0,00 | 0,00 | NA | NA |
| RP11-342M3.1   | 0,00 | 0,00 | 0,00 | 0,00 | NA | NA |
| RP11-342M3.2   | 0,00 | 0,00 | 0,00 | 0,00 | NA | NA |
| RP11-343B22.2  | 0,00 | 0,00 | 0,00 | 0,00 | NA | NA |
| RP11-343C2.10  | 0,00 | 0,00 | 0,00 | 0,00 | NA | NA |
| RP11-343C2.7   | 0,00 | 0,00 | 0,00 | 0,00 | NA | NA |
| RP11-343C2.9   | 0,00 | 0,00 | 0,00 | 0,00 | NA | NA |
| RP11-343D2.11  | 0,00 | 0,00 | 0,00 | 0,00 | NA | NA |
| RP11-343D24.1  | 0,00 | 0,00 | 0,00 | 0,00 | NA | NA |
| RP11-343D24.2  | 0,00 | 0,00 | 0,00 | 0,00 | NA | NA |
| RP11-343H19.1  | 0,00 | 0,00 | 0,00 | 0,00 | NA | NA |
| RP11-343H19.2  | 0,00 | 0,00 | 0,00 | 0,00 | NA | NA |
| RP11-343J18.2  | 0,00 | 0,00 | 0,00 | 0,00 | NA | NA |
| RP11-343J3.3   | 0,00 | 0,00 | 0,00 | 0,00 | NA | NA |
| RP11-343J3.4   | 0,00 | 0,00 | 0,00 | 0,00 | NA | NA |
| RP11-343J3.5   | 0,00 | 0,00 | 0,00 | 0,00 | NA | NA |
| RP11-343J3.6   | 0,00 | 0,00 | 0,00 | 0,00 | NA | NA |
| RP11-343K8.3   | 0,00 | 0,00 | 0,00 | 0,00 | NA | NA |
| RP11-343L14.2  | 0,00 | 0,00 | 0,00 | 0,00 | NA | NA |
| RP11-343P9.1   | 0,00 | 0,00 | 0,00 | 0,00 | NA | NA |
| RP11-344A5.1   | 0,00 | 0,00 | 0,00 | 0,00 | NA | NA |
| RP11-344A7.1   | 0,00 | 0,00 | 0,00 | 0,00 | NA | NA |
| RP11-344B2.2   | 0,00 | 0,00 | 0,00 | 0,00 | NA | NA |
| RP11-344B23.2  | 0,00 | 0,00 | 0,00 | 0,00 | NA | NA |
| RP11-344B5.3   | 0,00 | 0,00 | 0,00 | 0,00 | NA | NA |
| RP11-344B5.4   | 0,00 | 0,00 | 0,00 | 0,00 | NA | NA |
| RP11-344E13.1  | 0,00 | 0,00 | 0,00 | 0,00 | NA | NA |
| RP11-344F13.1  | 0,00 | 0,00 | 0,00 | 0,00 | NA | NA |
| RP11-344F20.1  | 0,00 | 0,00 | 0,00 | 0,00 | NA | NA |
| RP11-344G13.2  | 0,00 | 0,00 | 0,00 | 0,00 | NA | NA |
| RP11-344H11.4  | 0,00 | 0,00 | 0,00 | 0,00 | NA | NA |
| RP11-344H11.5  | 0,00 | 0,00 | 0,00 | 0,00 | NA | NA |
| RP11-344H11.6  | 0,00 | 0,00 | 0,00 | 0,00 | NA | NA |
| RP11-344J7.2   | 0,00 | 0,00 | 0,00 | 0,00 | NA | NA |
| RP11-344J7.3   | 0,00 | 0,00 | 0,00 | 0,00 | NA | NA |
| RP11-344J7.4   | 0,00 | 0,00 | 0,00 | 0,00 | NA | NA |
| RP11-344L13.1  | 0,00 | 0,00 | 0,00 | 0,00 | NA | NA |
| RP11-344L13.2  | 0,00 | 0,00 | 0,00 | 0,00 | NA | NA |
| RP11-344L21.1  | 0,00 | 0,00 | 0,00 | 0,00 | NA | NA |
| RP11-344N10.4  | 0,00 | 0,00 | 0,00 | 0,00 | NA | NA |
| RP11-344N17.11 | 0,00 | 0,00 | 0,00 | 0,00 | NA | NA |
| RP11-344N17.12 | 0,00 | 0,00 | 0,00 | 0,00 | NA | NA |
| RP11-344N17.13 | 0,00 | 0,00 | 0,00 | 0,00 | NA | NA |
| RP11-344N17.15 | 0,00 | 0,00 | 0,00 | 0,00 | NA | NA |

|               |      |      |      |      |    |    |
|---------------|------|------|------|------|----|----|
| RP11-344N17.2 | 0,00 | 0,00 | 0,00 | 0,00 | NA | NA |
| RP11-344N17.6 | 0,00 | 0,00 | 0,00 | 0,00 | NA | NA |
| RP11-344N17.7 | 0,00 | 0,00 | 0,00 | 0,00 | NA | NA |
| RP11-344N17.9 | 0,00 | 0,00 | 0,00 | 0,00 | NA | NA |
| RP11-344P13.3 | 0,00 | 0,00 | 0,00 | 0,00 | NA | NA |
| RP11-345E19.2 | 0,00 | 0,00 | 0,00 | 0,00 | NA | NA |
| RP11-345F18.1 | 0,00 | 0,00 | 0,00 | 0,00 | NA | NA |
| RP11-345I18.1 | 0,00 | 0,00 | 0,00 | 0,00 | NA | NA |
| RP11-345I18.6 | 0,00 | 0,00 | 0,00 | 0,00 | NA | NA |
| RP11-345I19.6 | 0,00 | 0,00 | 0,00 | 0,00 | NA | NA |
| RP11-345J13.1 | 0,00 | 0,00 | 0,00 | 0,00 | NA | NA |
| RP11-345K20.2 | 0,00 | 0,00 | 0,00 | 0,52 | NA | NA |
| RP11-345K9.1  | 0,00 | 0,00 | 0,00 | 0,00 | NA | NA |
| RP11-345K9.3  | 0,00 | 0,00 | 0,00 | 0,00 | NA | NA |
| RP11-345L23.1 | 0,00 | 0,00 | 0,00 | 0,00 | NA | NA |
| RP11-345L8.2  | 0,00 | 0,00 | 0,00 | 0,00 | NA | NA |
| RP11-345M22.1 | 0,00 | 0,00 | 0,00 | 0,00 | NA | NA |
| RP11-345N11.1 | 0,00 | 0,00 | 0,00 | 0,00 | NA | NA |
| RP11-345P4.11 | 0,00 | 0,00 | 0,00 | 0,00 | NA | NA |
| RP11-346A9.1  | 0,00 | 0,00 | 0,00 | 0,00 | NA | NA |
| RP11-346C16.1 | 0,00 | 3,03 | 0,73 | 0,00 | NA | NA |
| RP11-346C16.2 | 0,00 | 0,00 | 0,00 | 0,00 | NA | NA |
| RP11-346C16.4 | 0,00 | 0,00 | 0,00 | 0,00 | NA | NA |
| RP11-346C16.6 | 0,00 | 0,00 | 0,00 | 0,00 | NA | NA |
| RP11-346C20.2 | 0,00 | 0,00 | 0,00 | 0,00 | NA | NA |
| RP11-346C4.2  | 0,00 | 0,00 | 0,00 | 0,00 | NA | NA |
| RP11-346D19.1 | 0,00 | 0,00 | 0,00 | 0,00 | NA | NA |
| RP11-346D6.4  | 0,00 | 0,00 | 0,00 | 0,00 | NA | NA |
| RP11-346D6.5  | 0,00 | 0,00 | 0,00 | 0,00 | NA | NA |
| RP11-346D6.6  | 0,00 | 0,00 | 0,00 | 0,00 | NA | NA |
| RP11-346E17.4 | 0,00 | 0,00 | 0,00 | 0,00 | NA | NA |
| RP11-346J10.1 | 0,00 | 0,00 | 0,00 | 0,00 | NA | NA |
| RP11-346K17.3 | 0,00 | 0,00 | 0,00 | 0,00 | NA | NA |
| RP11-346L13.3 | 0,00 | 0,00 | 0,00 | 0,00 | NA | NA |
| RP11-346L6.1  | 0,00 | 0,00 | 0,00 | 0,00 | NA | NA |
| RP11-346M10.1 | 0,00 | 0,00 | 0,00 | 0,00 | NA | NA |
| RP11-346M10.2 | 0,00 | 0,00 | 0,00 | 0,00 | NA | NA |
| RP11-346M5.1  | 0,00 | 0,00 | 0,00 | 0,00 | NA | NA |
| RP11-346M5.3  | 0,00 | 0,00 | 0,00 | 0,00 | NA | NA |
| RP11-346M5.4  | 0,00 | 0,00 | 0,00 | 0,00 | NA | NA |
| RP11-346M5.5  | 0,00 | 0,00 | 0,00 | 0,00 | NA | NA |
| RP11-346M5.6  | 0,00 | 0,00 | 0,00 | 0,00 | NA | NA |
| RP11-347C12.9 | 0,00 | 0,00 | 0,00 | 0,00 | NA | NA |
| RP11-347C18.1 | 0,00 | 0,00 | 0,00 | 0,00 | NA | NA |
| RP11-347C18.4 | 0,00 | 0,00 | 0,00 | 0,00 | NA | NA |
| RP11-347C18.5 | 0,00 | 0,00 | 0,00 | 0,00 | NA | NA |
| RP11-347D21.2 | 0,00 | 0,00 | 0,00 | 0,00 | NA | NA |
| RP11-347D21.4 | 0,00 | 0,00 | 0,00 | 0,00 | NA | NA |
| RP11-347G18.1 | 0,00 | 0,00 | 0,00 | 0,00 | NA | NA |
| RP11-347H15.1 | 0,00 | 0,00 | 0,00 | 0,00 | NA | NA |
| RP11-347H15.2 | 0,00 | 0,00 | 0,00 | 0,00 | NA | NA |
| RP11-347H15.6 | 0,00 | 0,00 | 0,00 | 0,00 | NA | NA |
| RP11-347J14.8 | 0,00 | 0,00 | 0,00 | 0,00 | NA | NA |
| RP11-347L18.1 | 0,00 | 0,00 | 0,00 | 0,00 | NA | NA |
| RP11-347N5.1  | 0,00 | 0,00 | 0,00 | 0,00 | NA | NA |



|               |      |      |      |      |    |    |
|---------------|------|------|------|------|----|----|
| RP11-347N5.2  | 0,00 | 0,00 | 0,00 | 0,00 | NA | NA |
| RP11-347N5.3  | 0,00 | 0,00 | 0,00 | 0,00 | NA | NA |
| RP11-348A7.1  | 0,00 | 0,00 | 0,00 | 0,00 | NA | NA |
| RP11-348A7.2  | 0,00 | 0,00 | 0,00 | 0,00 | NA | NA |
| RP11-348B17.1 | 0,00 | 0,00 | 0,00 | 0,00 | NA | NA |
| RP11-348F1.2  | 0,00 | 0,00 | 0,00 | 0,00 | NA | NA |
| RP11-348F1.3  | 0,00 | 0,00 | 0,00 | 0,00 | NA | NA |
| RP11-348H3.2  | 0,00 | 0,00 | 0,00 | 0,00 | NA | NA |
| RP11-348H3.4  | 0,00 | 0,00 | 0,00 | 0,00 | NA | NA |
| RP11-348H3.5  | 0,00 | 0,00 | 0,00 | 0,00 | NA | NA |
| RP11-348J12.5 | 0,00 | 0,00 | 0,00 | 0,00 | NA | NA |
| RP11-348J24.1 | 0,00 | 0,00 | 0,00 | 0,00 | NA | NA |
| RP11-348J24.2 | 0,03 | 0,00 | 0,00 | 0,19 | NA | NA |
| RP11-348M17.2 | 0,00 | 0,00 | 0,00 | 0,00 | NA | NA |
| RP11-348M3.2  | 0,00 | 0,00 | 0,00 | 0,00 | NA | NA |
| RP11-348M3.6  | 0,00 | 0,00 | 0,00 | 0,00 | NA | NA |
| RP11-349A22.3 | 0,00 | 0,00 | 0,00 | 0,00 | NA | NA |
| RP11-349A8.3  | 0,00 | 0,00 | 0,00 | 0,00 | NA | NA |
| RP11-349E4.1  | 0,00 | 0,00 | 0,00 | 0,00 | NA | NA |
| RP11-349F12.3 | 0,00 | 0,00 | 0,00 | 0,00 | NA | NA |
| RP11-349F12.4 | 0,00 | 0,00 | 0,00 | 0,00 | NA | NA |
| RP11-349F21.1 | 0,00 | 0,00 | 0,00 | 0,00 | NA | NA |
| RP11-349F21.3 | 0,00 | 0,00 | 0,00 | 0,00 | NA | NA |
| RP11-349F21.4 | 0,00 | 0,00 | 0,00 | 0,00 | NA | NA |
| RP11-349G13.1 | 0,00 | 0,00 | 0,00 | 0,00 | NA | NA |
| RP11-349G13.2 | 0,00 | 0,00 | 0,00 | 0,00 | NA | NA |
| RP11-349G13.3 | 0,00 | 0,00 | 0,00 | 0,00 | NA | NA |
| RP11-349H17.2 | 0,00 | 0,00 | 0,00 | 0,00 | NA | NA |
| RP11-349I1.2  | 0,00 | 0,00 | 0,00 | 0,00 | NA | NA |
| RP11-349J5.2  | 0,00 | 0,00 | 0,00 | 0,00 | NA | NA |
| RP11-349K16.1 | 0,00 | 0,00 | 0,00 | 0,00 | NA | NA |
| RP11-349K21.1 | 0,00 | 0,00 | 0,00 | 0,00 | NA | NA |
| RP11-349N19.2 | 0,54 | 0,00 | 0,59 | 0,00 | NA | NA |
| RP11-349P19.1 | 0,00 | 0,00 | 0,00 | 0,00 | NA | NA |
| RP11-34D15.2  | 0,00 | 0,00 | 0,00 | 0,00 | NA | NA |
| RP11-34F13.3  | 0,00 | 0,00 | 0,00 | 0,00 | NA | NA |
| RP11-34H11.3  | 0,00 | 0,00 | 0,00 | 0,00 | NA | NA |
| RP11-34H11.6  | 0,00 | 0,00 | 0,00 | 0,00 | NA | NA |
| RP11-34I24.1  | 0,00 | 0,00 | 0,00 | 0,00 | NA | NA |
| RP11-34M16.4  | 0,00 | 0,00 | 0,00 | 0,00 | NA | NA |
| RP11-34M16.6  | 0,00 | 0,00 | 0,00 | 0,00 | NA | NA |
| RP11-34N19.1  | 0,00 | 0,00 | 0,00 | 0,00 | NA | NA |
| RP11-34P1.4   | 0,00 | 0,00 | 0,00 | 0,00 | NA | NA |
| RP11-34P13.16 | 0,00 | 0,00 | 0,00 | 0,00 | NA | NA |
| RP11-34P13.3  | 0,00 | 0,00 | 0,00 | 0,00 | NA | NA |
| RP11-350D17.2 | 0,00 | 0,00 | 0,00 | 0,00 | NA | NA |
| RP11-350D23.4 | 0,00 | 0,00 | 0,00 | 0,00 | NA | NA |
| RP11-350E12.4 | 0,00 | 0,00 | 0,00 | 0,00 | NA | NA |
| RP11-350E12.5 | 0,00 | 0,00 | 0,00 | 0,00 | NA | NA |
| RP11-350E12.6 | 0,00 | 0,00 | 0,00 | 0,00 | NA | NA |
| RP11-350F16.2 | 0,00 | 0,00 | 0,00 | 0,00 | NA | NA |
| RP11-350G8.4  | 0,00 | 0,00 | 0,00 | 0,00 | NA | NA |
| RP11-350J20.6 | 0,00 | 0,00 | 0,00 | 0,00 | NA | NA |
| RP11-350J20.9 | 0,00 | 0,00 | 0,00 | 0,00 | NA | NA |
| RP11-350N15.6 | 0,00 | 0,00 | 0,00 | 0,00 | NA | NA |

|                |      |      |      |      |    |    |
|----------------|------|------|------|------|----|----|
| RP11-350O14.18 | 0,00 | 0,00 | 0,00 | 0,00 | NA | NA |
| RP11-351A20.1  | 0,00 | 0,00 | 0,00 | 0,00 | NA | NA |
| RP11-351A20.2  | 0,00 | 0,00 | 0,00 | 0,00 | NA | NA |
| RP11-351C8.1   | 0,00 | 0,00 | 0,00 | 0,00 | NA | NA |
| RP11-351E7.1   | 0,00 | 0,00 | 0,00 | 0,00 | NA | NA |
| RP11-351E7.2   | 0,00 | 0,00 | 0,00 | 0,00 | NA | NA |
| RP11-351I21.10 | 0,00 | 0,00 | 0,00 | 0,00 | NA | NA |
| RP11-351I21.2  | 0,00 | 0,00 | 0,00 | 0,00 | NA | NA |
| RP11-351I21.6  | 0,00 | 0,00 | 0,00 | 0,00 | NA | NA |
| RP11-351I21.7  | 0,00 | 0,00 | 0,00 | 0,00 | NA | NA |
| RP11-351I24.1  | 0,00 | 0,00 | 0,00 | 0,00 | NA | NA |
| RP11-351J23.2  | 0,00 | 0,00 | 0,00 | 0,00 | NA | NA |
| RP11-351K23.2  | 0,00 | 0,00 | 0,00 | 0,00 | NA | NA |
| RP11-351K23.3  | 0,00 | 0,00 | 0,00 | 0,00 | NA | NA |
| RP11-351K3.4   | 0,00 | 0,00 | 0,00 | 0,00 | NA | NA |
| RP11-351M16.2  | 0,00 | 0,00 | 0,00 | 0,00 | NA | NA |
| RP11-351M16.3  | 0,00 | 0,00 | 0,00 | 0,00 | NA | NA |
| RP11-351N4.2   | 0,00 | 0,00 | 0,00 | 0,00 | NA | NA |
| RP11-351N4.3   | 0,00 | 0,00 | 0,00 | 0,00 | NA | NA |
| RP11-351N4.4   | 0,00 | 0,00 | 0,00 | 0,00 | NA | NA |
| RP11-351N6.1   | 0,00 | 0,00 | 0,00 | 0,00 | NA | NA |
| RP11-351O1.2   | 0,00 | 0,00 | 0,00 | 0,00 | NA | NA |
| RP11-351O1.4   | 0,00 | 0,00 | 0,00 | 0,00 | NA | NA |
| RP11-351O2.2   | 0,00 | 0,00 | 0,00 | 0,00 | NA | NA |
| RP11-352B15.2  | 0,00 | 0,00 | 0,00 | 0,00 | NA | NA |
| RP11-352B15.5  | 0,00 | 0,00 | 0,00 | 0,00 | NA | NA |
| RP11-352D3.2   | 0,00 | 0,00 | 0,00 | 0,00 | NA | NA |
| RP11-352E6.1   | 0,00 | 0,00 | 0,00 | 0,00 | NA | NA |
| RP11-352E6.2   | 0,00 | 0,00 | 0,00 | 0,00 | NA | NA |
| RP11-352J21.1  | 0,00 | 0,00 | 0,00 | 0,00 | NA | NA |
| RP11-352M15.1  | 0,00 | 0,00 | 0,00 | 0,00 | NA | NA |
| RP11-353J17.3  | 0,00 | 0,00 | 0,00 | 0,00 | NA | NA |
| RP11-353K11.1  | 0,00 | 0,00 | 0,00 | 0,00 | NA | NA |
| RP11-353M9.1   | 0,00 | 0,00 | 0,00 | 0,00 | NA | NA |
| RP11-353N14.3  | 0,00 | 0,00 | 0,00 | 0,00 | NA | NA |
| RP11-353P15.1  | 0,00 | 0,00 | 0,00 | 0,00 | NA | NA |
| RP11-354A14.1  | 0,00 | 0,00 | 0,00 | 0,00 | NA | NA |
| RP11-354B3.1   | 0,00 | 0,00 | 0,00 | 0,00 | NA | NA |
| RP11-354G16.1  | 0,00 | 0,00 | 0,00 | 0,00 | NA | NA |
| RP11-354H21.1  | 0,00 | 0,00 | 0,00 | 0,00 | NA | NA |
| RP11-354I10.1  | 0,00 | 0,00 | 0,00 | 0,00 | NA | NA |
| RP11-354I13.1  | 0,00 | 0,48 | 0,00 | 0,00 | NA | NA |
| RP11-354M1.3   | 0,00 | 0,00 | 0,00 | 0,00 | NA | NA |
| RP11-354O24.1  | 0,00 | 0,00 | 0,00 | 0,00 | NA | NA |
| RP11-354O24.2  | 0,00 | 0,00 | 0,00 | 0,00 | NA | NA |
| RP11-354P11.8  | 0,00 | 0,00 | 0,00 | 0,00 | NA | NA |
| RP11-354P17.10 | 0,00 | 0,00 | 0,00 | 0,00 | NA | NA |
| RP11-354P17.15 | 0,00 | 0,00 | 0,00 | 0,00 | NA | NA |
| RP11-354P17.8  | 0,00 | 0,00 | 0,00 | 0,00 | NA | NA |
| RP11-354P17.9  | 0,00 | 0,00 | 0,00 | 0,00 | NA | NA |
| RP11-355B11.1  | 0,00 | 0,00 | 0,00 | 0,00 | NA | NA |
| RP11-355I22.4  | 0,00 | 0,00 | 0,00 | 0,00 | NA | NA |
| RP11-355I22.5  | 0,00 | 0,00 | 0,00 | 0,00 | NA | NA |
| RP11-355I22.8  | 0,00 | 0,00 | 0,00 | 0,00 | NA | NA |
| RP11-355K23B.1 | 0,00 | 0,00 | 0,00 | 0,00 | NA | NA |

|               |      |      |      |      |    |    |
|---------------|------|------|------|------|----|----|
| RP11-355N15.2 | 0,00 | 0,00 | 0,00 | 0,00 | NA | NA |
| RP11-355N15.3 | 0,00 | 0,00 | 0,00 | 0,00 | NA | NA |
| RP11-356B18.1 | 0,00 | 0,00 | 0,00 | 0,00 | NA | NA |
| RP11-356B18.2 | 0,00 | 0,00 | 0,00 | 0,00 | NA | NA |
| RP11-356C4.6  | 0,00 | 0,00 | 0,00 | 0,00 | NA | NA |
| RP11-356D23.2 | 0,00 | 0,00 | 0,00 | 0,00 | NA | NA |
| RP11-356I18.1 | 0,00 | 0,00 | 0,00 | 0,00 | NA | NA |
| RP11-356J5.11 | 0,00 | 0,00 | 0,00 | 0,00 | NA | NA |
| RP11-356K22.1 | 0,00 | 0,00 | 0,00 | 0,00 | NA | NA |
| RP11-356K23.3 | 0,00 | 0,38 | 0,00 | 0,09 | NA | NA |
| RP11-356M17.1 | 0,00 | 0,00 | 0,00 | 0,00 | NA | NA |
| RP11-356M6.1  | 0,00 | 0,00 | 0,00 | 0,00 | NA | NA |
| RP11-356O22.4 | 0,00 | 0,00 | 0,00 | 0,00 | NA | NA |
| RP11-356O24.1 | 0,00 | 0,00 | 0,00 | 0,00 | NA | NA |
| RP11-356O9.1  | 0,00 | 0,00 | 0,00 | 0,00 | NA | NA |
| RP11-356O9.2  | 0,00 | 0,00 | 0,00 | 0,00 | NA | NA |
| RP11-357C3.2  | 0,00 | 0,00 | 0,00 | 0,00 | NA | NA |
| RP11-357D18.1 | 0,00 | 0,00 | 0,00 | 0,00 | NA | NA |
| RP11-357E16.1 | 0,00 | 0,00 | 0,00 | 0,00 | NA | NA |
| RP11-357G3.1  | 0,00 | 0,00 | 0,00 | 0,00 | NA | NA |
| RP11-357H14.4 | 0,00 | 0,00 | 0,00 | 0,00 | NA | NA |
| RP11-357H3.1  | 0,00 | 0,00 | 0,00 | 0,00 | NA | NA |
| RP11-357J22.1 | 0,00 | 0,00 | 0,00 | 0,00 | NA | NA |
| RP11-357J22.2 | 0,00 | 0,00 | 0,00 | 0,00 | NA | NA |
| RP11-357K6.2  | 0,00 | 0,00 | 0,00 | 0,00 | NA | NA |
| RP11-357K9.2  | 0,00 | 0,00 | 0,00 | 0,00 | NA | NA |
| RP11-357L1.1  | 0,00 | 0,00 | 0,00 | 0,71 | NA | NA |
| RP11-357P18.3 | 0,00 | 0,00 | 0,00 | 0,00 | NA | NA |
| RP11-358D14.2 | 0,00 | 0,00 | 0,00 | 0,00 | NA | NA |
| RP11-358D14.3 | 0,00 | 0,00 | 0,00 | 0,00 | NA | NA |
| RP11-358D17.1 | 0,00 | 0,00 | 0,00 | 0,00 | NA | NA |
| RP11-358H12.1 | 0,00 | 0,00 | 0,00 | 0,00 | NA | NA |
| RP11-358H18.2 | 0,00 | 0,00 | 0,00 | 0,00 | NA | NA |
| RP11-358H18.3 | 0,00 | 0,00 | 0,00 | 0,00 | NA | NA |
| RP11-358H9.1  | 0,00 | 0,00 | 0,00 | 0,00 | NA | NA |
| RP11-358L22.1 | 0,00 | 0,00 | 0,00 | 0,00 | NA | NA |
| RP11-358M11.3 | 0,00 | 0,00 | 0,00 | 0,00 | NA | NA |
| RP11-358M11.4 | 0,00 | 0,00 | 0,00 | 0,00 | NA | NA |
| RP11-358M14.2 | 0,00 | 0,00 | 0,00 | 0,00 | NA | NA |
| RP11-358M3.1  | 0,00 | 0,00 | 0,00 | 0,00 | NA | NA |
| RP11-358N2.2  | 0,00 | 0,00 | 0,00 | 0,00 | NA | NA |
| RP11-358N4.3  | 0,00 | 0,00 | 0,00 | 0,00 | NA | NA |
| RP11-358N4.5  | 0,00 | 0,00 | 0,00 | 0,00 | NA | NA |
| RP11-358N4.6  | 0,00 | 0,12 | 0,00 | 0,00 | NA | NA |
| RP11-359B20.1 | 0,00 | 0,00 | 0,00 | 0,00 | NA | NA |
| RP11-359B20.5 | 0,00 | 0,00 | 0,00 | 0,00 | NA | NA |
| RP11-359B3.1  | 0,00 | 0,00 | 0,00 | 0,00 | NA | NA |
| RP11-359D14.2 | 0,00 | 0,00 | 0,00 | 0,00 | NA | NA |
| RP11-359D14.3 | 0,00 | 0,00 | 0,00 | 0,00 | NA | NA |
| RP11-359D24.1 | 0,00 | 0,00 | 0,00 | 0,00 | NA | NA |
| RP11-359E10.1 | 0,00 | 0,09 | 0,00 | 0,00 | NA | NA |
| RP11-359E19.1 | 0,00 | 0,00 | 0,00 | 0,00 | NA | NA |
| RP11-359E7.2  | 0,00 | 0,00 | 0,00 | 0,00 | NA | NA |
| RP11-359E7.3  | 0,00 | 0,00 | 0,00 | 0,00 | NA | NA |
| RP11-359E8.3  | 0,00 | 0,00 | 0,00 | 0,00 | NA | NA |

|               |      |      |      |      |    |    |
|---------------|------|------|------|------|----|----|
| RP11-359E8.5  | 0,00 | 0,00 | 0,00 | 0,00 | NA | NA |
| RP11-359G22.4 | 0,00 | 0,00 | 0,00 | 0,00 | NA | NA |
| RP11-359H18.2 | 0,00 | 0,00 | 0,00 | 0,00 | NA | NA |
| RP11-359H3.1  | 0,00 | 0,00 | 0,00 | 0,00 | NA | NA |
| RP11-359H3.4  | 0,00 | 0,00 | 0,00 | 0,00 | NA | NA |
| RP11-359I18.1 | 0,00 | 0,00 | 0,00 | 0,00 | NA | NA |
| RP11-359I18.5 | 0,00 | 0,00 | 0,00 | 0,00 | NA | NA |
| RP11-359J23.1 | 0,04 | 0,00 | 0,00 | 0,00 | NA | NA |
| RP11-359J6.1  | 0,00 | 0,00 | 0,00 | 0,00 | NA | NA |
| RP11-359M6.1  | 0,00 | 0,00 | 0,00 | 0,00 | NA | NA |
| RP11-359M6.2  | 0,00 | 0,00 | 0,00 | 0,00 | NA | NA |
| RP11-359M6.3  | 0,00 | 0,00 | 0,00 | 0,00 | NA | NA |
| RP11-359N11.1 | 0,00 | 0,00 | 0,00 | 0,00 | NA | NA |
| RP11-359N5.1  | 0,00 | 0,00 | 0,00 | 0,00 | NA | NA |
| RP11-359P14.1 | 0,00 | 0,00 | 0,00 | 0,00 | NA | NA |
| RP11-359P14.2 | 0,00 | 0,00 | 0,00 | 0,00 | NA | NA |
| RP11-359P14.3 | 0,00 | 0,00 | 0,00 | 0,00 | NA | NA |
| RP11-359P18.1 | 0,00 | 0,00 | 0,00 | 0,00 | NA | NA |
| RP11-359P18.2 | 0,00 | 0,00 | 0,00 | 0,00 | NA | NA |
| RP11-359P18.4 | 0,00 | 0,00 | 0,00 | 0,00 | NA | NA |
| RP11-359P18.5 | 0,00 | 0,00 | 0,00 | 0,00 | NA | NA |
| RP11-359P18.6 | 0,00 | 0,00 | 0,00 | 0,00 | NA | NA |
| RP11-359P18.7 | 0,00 | 0,00 | 0,00 | 0,00 | NA | NA |
| RP11-359P18.8 | 0,00 | 0,00 | 0,00 | 0,00 | NA | NA |
| RP11-359P18.9 | 0,00 | 0,22 | 0,00 | 0,00 | NA | NA |
| RP11-359P5.1  | 0,00 | 0,00 | 0,00 | 0,00 | NA | NA |
| RP11-35B20.1  | 0,00 | 0,00 | 0,00 | 0,00 | NA | NA |
| RP11-35D5.1   | 0,00 | 0,00 | 0,00 | 0,00 | NA | NA |
| RP11-35D5.4   | 0,00 | 0,00 | 0,00 | 0,00 | NA | NA |
| RP11-35J1.1   | 0,00 | 0,00 | 0,00 | 0,00 | NA | NA |
| RP11-35J10.5  | 0,00 | 0,00 | 0,00 | 0,00 | NA | NA |
| RP11-35J10.6  | 0,00 | 0,00 | 0,00 | 0,00 | NA | NA |
| RP11-35J23.1  | 0,00 | 0,00 | 0,00 | 0,00 | NA | NA |
| RP11-35L17.2  | 0,00 | 0,00 | 0,00 | 0,00 | NA | NA |
| RP11-35L17.3  | 0,00 | 0,00 | 0,00 | 0,00 | NA | NA |
| RP11-35L17.4  | 0,00 | 0,00 | 0,00 | 0,00 | NA | NA |
| RP11-35N6.2   | 0,00 | 0,00 | 0,00 | 0,00 | NA | NA |
| RP11-35N6.4   | 0,00 | 0,00 | 0,00 | 0,00 | NA | NA |
| RP11-35N6.6   | 0,00 | 0,00 | 0,00 | 0,00 | NA | NA |
| RP11-35O15.1  | 0,00 | 0,00 | 0,00 | 0,00 | NA | NA |
| RP11-35O7.1   | 0,00 | 0,00 | 0,00 | 0,00 | NA | NA |
| RP11-35P15.1  | 0,00 | 0,00 | 0,00 | 0,00 | NA | NA |
| RP11-360A10.1 | 0,00 | 0,00 | 0,00 | 0,00 | NA | NA |
| RP11-360A18.1 | 0,00 | 0,00 | 0,00 | 0,00 | NA | NA |
| RP11-360A18.2 | 0,00 | 0,00 | 0,00 | 0,00 | NA | NA |
| RP11-360I2.1  | 0,00 | 0,00 | 0,00 | 0,00 | NA | NA |
| RP11-360K13.2 | 0,00 | 0,00 | 0,00 | 0,00 | NA | NA |
| RP11-360O19.1 | 0,00 | 0,00 | 0,00 | 0,00 | NA | NA |
| RP11-360O19.4 | 0,00 | 0,00 | 0,00 | 0,00 | NA | NA |
| RP11-360O19.5 | 0,00 | 0,00 | 0,00 | 0,00 | NA | NA |
| RP11-361A21.1 | 0,00 | 0,00 | 0,00 | 0,00 | NA | NA |
| RP11-361A23.1 | 0,00 | 0,00 | 0,00 | 0,00 | NA | NA |
| RP11-361A23.3 | 0,00 | 0,00 | 0,00 | 0,00 | NA | NA |
| RP11-361C13.1 | 0,00 | 0,00 | 0,00 | 0,00 | NA | NA |
| RP11-361F15.5 | 0,00 | 0,00 | 0,00 | 0,00 | NA | NA |

|               |      |      |      |      |    |    |
|---------------|------|------|------|------|----|----|
| RP11-361F19.1 | 0,00 | 0,00 | 0,00 | 0,00 | NA | NA |
| RP11-361H10.7 | 0,00 | 0,00 | 0,00 | 0,00 | NA | NA |
| RP11-361I14.2 | 0,00 | 0,00 | 0,00 | 0,00 | NA | NA |
| RP11-361M10.4 | 0,00 | 0,00 | 0,00 | 0,00 | NA | NA |
| RP11-362A1.1  | 0,00 | 0,00 | 0,00 | 0,00 | NA | NA |
| RP11-362A1.2  | 0,00 | 0,00 | 0,00 | 0,00 | NA | NA |
| RP11-362A9.3  | 0,00 | 0,00 | 0,00 | 0,00 | NA | NA |
| RP11-362B23.1 | 0,00 | 0,00 | 0,00 | 0,00 | NA | NA |
| RP11-362F19.3 | 0,00 | 0,00 | 0,00 | 0,00 | NA | NA |
| RP11-362I1.2  | 0,00 | 0,00 | 0,00 | 0,00 | NA | NA |
| RP11-362J17.1 | 0,00 | 0,00 | 0,00 | 0,00 | NA | NA |
| RP11-362L22.1 | 0,00 | 0,00 | 0,00 | 0,00 | NA | NA |
| RP11-362M19.1 | 0,00 | 0,00 | 0,00 | 0,00 | NA | NA |
| RP11-363D14.1 | 0,00 | 0,00 | 0,00 | 0,00 | NA | NA |
| RP11-363D24.1 | 0,00 | 0,00 | 0,00 | 0,00 | NA | NA |
| RP11-363D24.2 | 0,00 | 0,00 | 0,00 | 0,00 | NA | NA |
| RP11-363E6.4  | 0,00 | 0,00 | 0,00 | 0,00 | NA | NA |
| RP11-363G10.3 | 0,00 | 0,00 | 0,00 | 0,00 | NA | NA |
| RP11-363G15.1 | 0,00 | 0,00 | 0,00 | 0,00 | NA | NA |
| RP11-363G2.1  | 0,00 | 0,00 | 0,00 | 0,00 | NA | NA |
| RP11-363G2.2  | 0,00 | 0,00 | 0,00 | 0,00 | NA | NA |
| RP11-363G2.3  | 0,00 | 0,00 | 0,00 | 0,00 | NA | NA |
| RP11-363I22.3 | 0,00 | 0,00 | 0,00 | 0,00 | NA | NA |
| RP11-363I22.5 | 0,00 | 0,00 | 0,00 | 0,00 | NA | NA |
| RP11-363J20.1 | 0,00 | 0,00 | 0,00 | 0,00 | NA | NA |
| RP11-363J20.2 | 0,00 | 0,00 | 0,00 | 0,00 | NA | NA |
| RP11-363L24.2 | 0,00 | 0,00 | 0,00 | 0,00 | NA | NA |
| RP11-364B14.1 | 0,00 | 0,00 | 0,00 | 0,00 | NA | NA |
| RP11-364B14.3 | 0,00 | 0,00 | 0,00 | 0,00 | NA | NA |
| RP11-364B6.3  | 0,00 | 0,00 | 0,00 | 0,00 | NA | NA |
| RP11-364L4.3  | 0,00 | 0,00 | 0,00 | 0,00 | NA | NA |
| RP11-364M6.1  | 0,00 | 0,00 | 0,00 | 0,00 | NA | NA |
| RP11-364P2.1  | 0,00 | 0,00 | 0,00 | 0,00 | NA | NA |
| RP11-364P2.2  | 0,00 | 0,00 | 0,00 | 0,00 | NA | NA |
| RP11-364P22.3 | 0,00 | 0,00 | 0,00 | 0,00 | NA | NA |
| RP11-365D23.1 | 0,00 | 0,00 | 0,00 | 0,00 | NA | NA |
| RP11-365D23.2 | 0,00 | 0,00 | 0,00 | 0,00 | NA | NA |
| RP11-365D23.3 | 0,00 | 0,00 | 0,00 | 0,00 | NA | NA |
| RP11-365D23.4 | 0,00 | 0,00 | 0,00 | 0,00 | NA | NA |
| RP11-365F18.5 | 0,00 | 0,00 | 0,00 | 0,00 | NA | NA |
| RP11-365F18.6 | 0,00 | 0,00 | 0,00 | 0,00 | NA | NA |
| RP11-365H22.1 | 0,00 | 0,00 | 0,00 | 0,00 | NA | NA |
| RP11-365H22.2 | 0,00 | 0,00 | 0,00 | 0,00 | NA | NA |
| RP11-365H8.2  | 0,00 | 0,00 | 0,00 | 0,00 | NA | NA |
| RP11-365O10.1 | 0,00 | 0,00 | 0,00 | 0,00 | NA | NA |
| RP11-365O16.1 | 0,00 | 0,00 | 0,00 | 0,00 | NA | NA |
| RP11-365O16.5 | 0,00 | 0,00 | 0,00 | 0,00 | NA | NA |
| RP11-365P13.2 | 0,00 | 0,00 | 0,00 | 0,00 | NA | NA |
| RP11-365P13.6 | 0,00 | 0,00 | 0,00 | 0,00 | NA | NA |
| RP11-366G5.1  | 0,00 | 0,00 | 0,00 | 0,00 | NA | NA |
| RP11-366H4.1  | 0,00 | 0,00 | 0,00 | 0,00 | NA | NA |
| RP11-366I13.3 | 0,00 | 0,00 | 0,00 | 0,00 | NA | NA |
| RP11-366I21.1 | 0,00 | 0,00 | 0,00 | 0,00 | NA | NA |
| RP11-366K1.1  | 0,00 | 0,00 | 0,00 | 0,00 | NA | NA |
| RP11-366L18.1 | 0,00 | 0,00 | 0,00 | 0,00 | NA | NA |

|                |      |      |      |      |    |    |
|----------------|------|------|------|------|----|----|
| RP11-366L20.3  | 0,00 | 0,00 | 0,00 | 0,00 | NA | NA |
| RP11-366L20.4  | 0,00 | 0,00 | 0,00 | 0,00 | NA | NA |
| RP11-366M4.12  | 0,00 | 0,00 | 0,00 | 0,00 | NA | NA |
| RP11-366M4.13  | 0,00 | 0,00 | 0,00 | 0,00 | NA | NA |
| RP11-366M4.14  | 0,00 | 0,00 | 0,00 | 0,00 | NA | NA |
| RP11-366M4.15  | 0,00 | 0,00 | 0,00 | 0,00 | NA | NA |
| RP11-366M4.17  | 0,00 | 0,00 | 0,00 | 0,00 | NA | NA |
| RP11-366M4.18  | 0,00 | 0,00 | 0,00 | 0,00 | NA | NA |
| RP11-366M4.19  | 0,00 | 0,00 | 0,00 | 0,00 | NA | NA |
| RP11-366M4.2   | 0,00 | 0,00 | 0,00 | 0,00 | NA | NA |
| RP11-366M4.5   | 0,00 | 0,00 | 0,00 | 0,00 | NA | NA |
| RP11-366M4.6   | 0,00 | 0,00 | 0,00 | 0,00 | NA | NA |
| RP11-366M4.8   | 0,00 | 0,00 | 0,00 | 0,00 | NA | NA |
| RP11-366N18.2  | 0,00 | 0,00 | 0,00 | 0,00 | NA | NA |
| RP11-366N18.5  | 0,00 | 0,00 | 0,00 | 0,00 | NA | NA |
| RP11-366O20.4  | 0,00 | 0,00 | 0,00 | 0,00 | NA | NA |
| RP11-366O20.5  | 0,00 | 0,00 | 0,00 | 0,00 | NA | NA |
| RP11-367E12.2  | 0,00 | 0,00 | 0,00 | 0,00 | NA | NA |
| RP11-367E12.4  | 0,00 | 0,00 | 0,00 | 0,00 | NA | NA |
| RP11-367H1.1   | 0,00 | 0,00 | 0,00 | 0,00 | NA | NA |
| RP11-367H5.8   | 0,00 | 0,00 | 0,00 | 0,00 | NA | NA |
| RP11-367J11.2  | 0,00 | 0,00 | 0,04 | 0,34 | NA | NA |
| RP11-367J11.3  | 0,48 | 0,66 | 0,56 | 0,69 | NA | NA |
| RP11-367J7.3   | 0,00 | 0,00 | 0,00 | 0,00 | NA | NA |
| RP11-367J7.4   | 0,00 | 0,00 | 0,00 | 0,00 | NA | NA |
| RP11-367J7.5   | 0,00 | 0,00 | 0,00 | 0,00 | NA | NA |
| RP11-367N14.1  | 0,00 | 0,00 | 0,00 | 0,00 | NA | NA |
| RP11-367N14.2  | 0,00 | 0,00 | 0,00 | 0,00 | NA | NA |
| RP11-367O10.1  | 0,00 | 0,00 | 0,00 | 0,00 | NA | NA |
| RP11-368E13.1  | 0,00 | 0,00 | 0,00 | 0,00 | NA | NA |
| RP11-368G3.1   | 0,00 | 0,00 | 0,00 | 0,00 | NA | NA |
| RP11-368I23.1  | 0,00 | 0,00 | 0,00 | 0,00 | NA | NA |
| RP11-368I23.3  | 0,00 | 0,00 | 0,00 | 0,00 | NA | NA |
| RP11-368I23.4  | 0,00 | 0,00 | 0,00 | 0,00 | NA | NA |
| RP11-368I7.2   | 0,00 | 0,00 | 0,00 | 0,00 | NA | NA |
| RP11-368J21.3  | 0,20 | 0,24 | 0,50 | 0,55 | NA | NA |
| RP11-368J21.4  | 0,00 | 0,00 | 0,00 | 0,00 | NA | NA |
| RP11-368J22.2  | 0,00 | 0,00 | 0,00 | 0,00 | NA | NA |
| RP11-368L12.1  | 0,00 | 0,00 | 0,00 | 0,00 | NA | NA |
| RP11-368M16.1  | 0,00 | 0,00 | 0,00 | 0,00 | NA | NA |
| RP11-368M16.10 | 0,00 | 0,00 | 0,00 | 0,00 | NA | NA |
| RP11-368M16.3  | 0,00 | 0,00 | 0,00 | 0,27 | NA | NA |
| RP11-368M16.4  | 0,00 | 0,00 | 0,00 | 0,00 | NA | NA |
| RP11-368M16.5  | 0,00 | 0,00 | 0,00 | 0,00 | NA | NA |
| RP11-368M16.8  | 0,00 | 0,00 | 0,00 | 0,00 | NA | NA |
| RP11-368N21.1  | 0,00 | 0,00 | 0,00 | 0,00 | NA | NA |
| RP11-368N21.3  | 0,00 | 0,00 | 0,00 | 0,00 | NA | NA |
| RP11-368P15.1  | 0,00 | 0,00 | 0,00 | 0,00 | NA | NA |
| RP11-369E15.2  | 0,00 | 0,00 | 0,00 | 0,00 | NA | NA |
| RP11-369E15.3  | 0,00 | 0,00 | 0,00 | 0,00 | NA | NA |
| RP11-369E15.5  | 0,00 | 0,00 | 0,00 | 0,00 | NA | NA |
| RP11-369G6.2   | 0,00 | 0,00 | 0,00 | 0,00 | NA | NA |
| RP11-369I16.1  | 0,00 | 0,00 | 0,00 | 0,00 | NA | NA |
| RP11-369J21.11 | 0,00 | 0,00 | 0,00 | 0,00 | NA | NA |
| RP11-369J21.13 | 0,00 | 0,00 | 0,00 | 0,00 | NA | NA |

|               |      |      |      |      |    |    |
|---------------|------|------|------|------|----|----|
| RP11-369J9.1  | 0,00 | 0,00 | 0,00 | 0,00 | NA | NA |
| RP11-369K16.1 | 0,00 | 0,00 | 0,00 | 0,00 | NA | NA |
| RP11-369K17.2 | 0,00 | 0,00 | 0,00 | 0,00 | NA | NA |
| RP11-36D19.8  | 0,00 | 0,00 | 0,00 | 0,00 | NA | NA |
| RP11-36I17.2  | 0,00 | 0,00 | 0,00 | 0,00 | NA | NA |
| RP11-36N22.1  | 0,00 | 0,00 | 0,00 | 0,00 | NA | NA |
| RP11-36N22.3  | 0,00 | 0,00 | 0,00 | 0,00 | NA | NA |
| RP11-370A5.2  | 0,00 | 0,00 | 0,00 | 0,00 | NA | NA |
| RP11-370B1.1  | 0,00 | 0,00 | 0,00 | 0,00 | NA | NA |
| RP11-370B11.1 | 0,00 | 0,00 | 0,00 | 0,00 | NA | NA |
| RP11-370B11.3 | 0,00 | 0,00 | 0,00 | 0,00 | NA | NA |
| RP11-370B6.1  | 0,00 | 0,00 | 0,00 | 0,00 | NA | NA |
| RP11-370I10.4 | 0,00 | 0,00 | 0,00 | 0,00 | NA | NA |
| RP11-370K11.1 | 0,00 | 0,00 | 0,00 | 0,00 | NA | NA |
| RP11-370K11.2 | 0,00 | 0,00 | 0,00 | 0,00 | NA | NA |
| RP11-370L12.1 | 0,00 | 0,00 | 0,00 | 0,00 | NA | NA |
| RP11-370P15.1 | 0,00 | 0,00 | 0,00 | 0,00 | NA | NA |
| RP11-371A19.2 | 0,00 | 0,00 | 0,00 | 0,00 | NA | NA |
| RP11-371I1.2  | 0,00 | 0,00 | 0,00 | 0,00 | NA | NA |
| RP11-371M22.1 | 0,00 | 0,00 | 0,00 | 0,00 | NA | NA |
| RP11-372E1.1  | 0,00 | 0,00 | 0,00 | 0,00 | NA | NA |
| RP11-372E1.7  | 0,00 | 0,00 | 0,00 | 0,00 | NA | NA |
| RP11-372H2.1  | 0,00 | 0,00 | 0,00 | 0,00 | NA | NA |
| RP11-372K20.1 | 0,00 | 0,00 | 0,00 | 0,00 | NA | NA |
| RP11-372M18.1 | 0,00 | 0,00 | 0,00 | 0,00 | NA | NA |
| RP11-372M18.2 | 0,00 | 0,00 | 0,00 | 0,00 | NA | NA |
| RP11-373A6.1  | 0,00 | 0,00 | 0,00 | 0,00 | NA | NA |
| RP11-373A9.1  | 0,00 | 0,00 | 0,00 | 0,00 | NA | NA |
| RP11-373A9.3  | 0,06 | 0,00 | 0,12 | 0,08 | NA | NA |
| RP11-373D23.1 | 0,00 | 0,00 | 0,00 | 0,00 | NA | NA |
| RP11-373D7.1  | 0,00 | 0,00 | 0,00 | 0,00 | NA | NA |
| RP11-373E16.1 | 0,00 | 0,00 | 0,00 | 0,00 | NA | NA |
| RP11-373F14.1 | 0,00 | 0,00 | 0,00 | 0,00 | NA | NA |
| RP11-373F14.2 | 0,00 | 0,00 | 0,00 | 0,00 | NA | NA |
| RP11-373J16.3 | 0,00 | 0,00 | 0,00 | 0,00 | NA | NA |
| RP11-373J21.1 | 0,00 | 0,00 | 0,00 | 0,00 | NA | NA |
| RP11-373N22.4 | 0,00 | 0,00 | 0,00 | 0,00 | NA | NA |
| RP11-373O10.1 | 0,00 | 0,00 | 0,00 | 0,00 | NA | NA |
| RP11-374C13.1 | 0,00 | 0,00 | 0,00 | 0,00 | NA | NA |
| RP11-374F3.2  | 0,00 | 0,00 | 0,00 | 0,00 | NA | NA |
| RP11-374I15.1 | 0,00 | 0,00 | 0,00 | 0,00 | NA | NA |
| RP11-374I17.1 | 0,00 | 0,00 | 0,00 | 0,00 | NA | NA |
| RP11-374M1.10 | 0,00 | 0,00 | 0,00 | 0,00 | NA | NA |
| RP11-374M1.11 | 0,00 | 0,00 | 0,00 | 0,00 | NA | NA |
| RP11-374M1.3  | 0,00 | 0,00 | 0,00 | 0,00 | NA | NA |
| RP11-374M1.5  | 0,00 | 0,00 | 0,00 | 0,00 | NA | NA |
| RP11-374M1.7  | 0,00 | 0,00 | 0,00 | 0,00 | NA | NA |
| RP11-374M1.9  | 0,00 | 0,00 | 0,00 | 0,00 | NA | NA |
| RP11-374N7.1  | 0,00 | 0,00 | 0,00 | 0,00 | NA | NA |
| RP11-374P20.4 | 0,00 | 0,00 | 0,00 | 0,00 | NA | NA |
| RP11-375A20.1 | 0,00 | 0,00 | 0,00 | 0,00 | NA | NA |
| RP11-375A5.1  | 0,00 | 0,00 | 0,00 | 0,00 | NA | NA |
| RP11-375B1.3  | 0,00 | 0,00 | 0,00 | 0,00 | NA | NA |
| RP11-375D13.1 | 0,00 | 0,00 | 0,00 | 0,00 | NA | NA |
| RP11-375D13.3 | 0,00 | 0,00 | 0,00 | 0,00 | NA | NA |

|                |      |      |      |      |    |    |
|----------------|------|------|------|------|----|----|
| RP11-375D13.4  | 0,00 | 0,00 | 0,00 | 0,00 | NA | NA |
| RP11-375F2.1   | 0,00 | 0,00 | 0,00 | 0,00 | NA | NA |
| RP11-375F2.3   | 0,00 | 0,00 | 0,00 | 0,00 | NA | NA |
| RP11-375H17.1  | 0,00 | 0,00 | 0,00 | 0,00 | NA | NA |
| RP11-375I20.2  | 0,00 | 0,00 | 0,00 | 0,00 | NA | NA |
| RP11-375I20.3  | 0,00 | 0,00 | 0,00 | 0,00 | NA | NA |
| RP11-375N9.2   | 0,00 | 0,00 | 0,00 | 0,00 | NA | NA |
| RP11-376O6.2   | 0,00 | 0,00 | 0,00 | 0,00 | NA | NA |
| RP11-376P6.3   | 0,00 | 0,00 | 0,00 | 0,00 | NA | NA |
| RP11-377D9.1   | 0,00 | 0,00 | 0,00 | 0,00 | NA | NA |
| RP11-377G16.2  | 0,00 | 0,00 | 0,00 | 0,00 | NA | NA |
| RP11-377H23.1  | 0,00 | 0,00 | 0,00 | 0,00 | NA | NA |
| RP11-377K22.2  | 0,00 | 0,00 | 0,00 | 0,00 | NA | NA |
| RP11-377K22.3  | 0,00 | 0,00 | 0,00 | 0,00 | NA | NA |
| RP11-377O11.1  | 0,00 | 0,00 | 0,00 | 0,00 | NA | NA |
| RP11-378G13.2  | 0,00 | 0,00 | 0,00 | 0,00 | NA | NA |
| RP11-378I6.2   | 0,00 | 0,00 | 0,00 | 0,00 | NA | NA |
| RP11-378I6.3   | 0,00 | 0,00 | 0,00 | 0,00 | NA | NA |
| RP11-378J18.10 | 0,00 | 0,00 | 0,00 | 0,00 | NA | NA |
| RP11-378N18.1  | 0,00 | 0,00 | 0,00 | 0,00 | NA | NA |
| RP11-379B18.1  | 0,00 | 0,00 | 0,00 | 0,00 | NA | NA |
| RP11-379B18.3  | 0,00 | 0,00 | 0,00 | 0,00 | NA | NA |
| RP11-379B18.7  | 0,00 | 0,00 | 0,00 | 0,00 | NA | NA |
| RP11-379B8.1   | 0,00 | 0,00 | 0,00 | 0,00 | NA | NA |
| RP11-379C10.4  | 0,00 | 0,00 | 0,00 | 0,00 | NA | NA |
| RP11-379D21.2  | 0,00 | 0,00 | 0,00 | 0,00 | NA | NA |
| RP11-379F12.4  | 0,00 | 0,00 | 0,00 | 0,00 | NA | NA |
| RP11-379F12.7  | 0,00 | 0,00 | 0,00 | 0,00 | NA | NA |
| RP11-379F4.1   | 0,00 | 0,00 | 0,00 | 0,00 | NA | NA |
| RP11-379F4.7   | 0,00 | 0,00 | 0,00 | 0,00 | NA | NA |
| RP11-379F4.8   | 0,00 | 0,00 | 0,00 | 0,00 | NA | NA |
| RP11-379F4.9   | 0,00 | 0,00 | 0,00 | 0,00 | NA | NA |
| RP11-379I19.2  | 0,00 | 0,00 | 0,00 | 0,00 | NA | NA |
| RP11-379J13.1  | 0,00 | 0,00 | 0,00 | 0,00 | NA | NA |
| RP11-379J13.2  | 0,00 | 0,00 | 0,00 | 0,00 | NA | NA |
| RP11-379J5.5   | 0,00 | 0,00 | 0,00 | 0,00 | NA | NA |
| RP11-379K17.2  | 0,00 | 0,00 | 0,00 | 0,00 | NA | NA |
| RP11-379K17.3  | 0,00 | 0,00 | 0,00 | 0,00 | NA | NA |
| RP11-379K17.5  | 0,00 | 0,00 | 0,00 | 0,00 | NA | NA |
| RP11-379K22.3  | 0,00 | 0,00 | 0,00 | 0,00 | NA | NA |
| RP11-379L18.1  | 0,00 | 0,00 | 0,00 | 0,00 | NA | NA |
| RP11-379L18.2  | 0,00 | 0,00 | 0,00 | 0,00 | NA | NA |
| RP11-379L18.3  | 0,00 | 0,00 | 0,00 | 0,00 | NA | NA |
| RP11-379N22.1  | 0,00 | 0,00 | 0,00 | 0,00 | NA | NA |
| RP11-379P1.4   | 0,00 | 0,00 | 0,00 | 0,00 | NA | NA |
| RP11-379P15.1  | 0,00 | 0,00 | 0,00 | 0,00 | NA | NA |
| RP11-37C7.1    | 0,00 | 0,00 | 0,00 | 0,00 | NA | NA |
| RP11-37C7.2    | 0,00 | 0,00 | 0,00 | 0,00 | NA | NA |
| RP11-37J13.1   | 0,00 | 0,00 | 0,00 | 0,00 | NA | NA |
| RP11-37K18.1   | 0,00 | 0,00 | 0,00 | 0,00 | NA | NA |
| RP11-37L2.1    | 0,00 | 0,00 | 0,00 | 0,00 | NA | NA |
| RP11-37O16.1   | 0,00 | 0,00 | 0,00 | 0,00 | NA | NA |
| RP11-37O16.4   | 0,00 | 0,00 | 0,00 | 0,00 | NA | NA |
| RP11-37O16.6   | 0,00 | 0,00 | 0,00 | 0,00 | NA | NA |
| RP11-37O16.7   | 0,00 | 0,00 | 0,00 | 0,00 | NA | NA |



|               |      |      |      |      |    |    |
|---------------|------|------|------|------|----|----|
| RP11-37O16.8  | 0,00 | 0,00 | 0,00 | 0,00 | NA | NA |
| RP11-37P5.1   | 0,00 | 0,00 | 0,00 | 0,00 | NA | NA |
| RP11-380B22.1 | 0,00 | 0,00 | 0,00 | 0,00 | NA | NA |
| RP11-380B4.2  | 0,00 | 0,00 | 0,00 | 0,00 | NA | NA |
| RP11-380D11.2 | 0,00 | 0,00 | 0,00 | 0,00 | NA | NA |
| RP11-380D15.2 | 0,00 | 0,00 | 0,00 | 0,00 | NA | NA |
| RP11-380D15.3 | 0,00 | 0,00 | 0,00 | 0,00 | NA | NA |
| RP11-380F14.2 | 0,00 | 0,00 | 0,00 | 0,00 | NA | NA |
| RP11-380G10.1 | 0,00 | 0,00 | 0,00 | 0,00 | NA | NA |
| RP11-380G5.4  | 0,00 | 0,00 | 0,00 | 0,00 | NA | NA |
| RP11-380I10.2 | 0,00 | 0,00 | 0,00 | 0,00 | NA | NA |
| RP11-380I10.3 | 0,00 | 0,00 | 0,00 | 0,00 | NA | NA |
| RP11-380I10.4 | 0,00 | 0,00 | 0,00 | 0,00 | NA | NA |
| RP11-380I20.2 | 0,00 | 0,00 | 0,00 | 0,00 | NA | NA |
| RP11-380I14.4 | 0,00 | 0,00 | 0,00 | 0,00 | NA | NA |
| RP11-380M3.1  | 0,00 | 0,10 | 0,00 | 0,00 | NA | NA |
| RP11-380M3.3  | 0,00 | 0,00 | 0,00 | 0,00 | NA | NA |
| RP11-380N8.1  | 0,00 | 0,00 | 0,00 | 0,00 | NA | NA |
| RP11-380N8.3  | 0,00 | 0,00 | 0,00 | 0,00 | NA | NA |
| RP11-380N8.6  | 0,00 | 0,00 | 0,00 | 0,00 | NA | NA |
| RP11-380P16.2 | 0,00 | 0,00 | 0,00 | 0,00 | NA | NA |
| RP11-380P16.4 | 0,00 | 0,00 | 0,00 | 0,00 | NA | NA |
| RP11-381E24.1 | 0,00 | 0,00 | 0,00 | 0,34 | NA | NA |
| RP11-381E24.4 | 0,00 | 0,00 | 0,00 | 0,00 | NA | NA |
| RP11-381I15.1 | 0,00 | 0,00 | 0,00 | 0,00 | NA | NA |
| RP11-381K20.4 | 0,00 | 0,00 | 0,00 | 0,00 | NA | NA |
| RP11-381K7.1  | 0,00 | 0,00 | 0,00 | 0,00 | NA | NA |
| RP11-381L18.2 | 0,00 | 0,00 | 0,00 | 0,00 | NA | NA |
| RP11-381N20.1 | 0,00 | 0,00 | 0,00 | 0,00 | NA | NA |
| RP11-381O7.1  | 0,00 | 0,00 | 0,00 | 0,00 | NA | NA |
| RP11-382A18.1 | 0,00 | 0,00 | 0,00 | 0,00 | NA | NA |
| RP11-382A18.3 | 0,00 | 0,00 | 0,00 | 0,00 | NA | NA |
| RP11-382A20.2 | 0,00 | 0,00 | 0,00 | 0,00 | NA | NA |
| RP11-382A20.7 | 0,00 | 0,00 | 0,00 | 0,00 | NA | NA |
| RP11-382B18.3 | 0,00 | 0,00 | 0,00 | 0,00 | NA | NA |
| RP11-382B18.5 | 0,00 | 0,00 | 0,00 | 0,00 | NA | NA |
| RP11-382B18.6 | 0,00 | 0,00 | 0,00 | 0,00 | NA | NA |
| RP11-382D12.1 | 0,00 | 0,00 | 0,00 | 0,00 | NA | NA |
| RP11-382D12.2 | 0,00 | 0,00 | 0,00 | 0,00 | NA | NA |
| RP11-382D8.3  | 0,00 | 0,00 | 0,00 | 0,00 | NA | NA |
| RP11-382E15.2 | 0,00 | 0,00 | 0,00 | 0,00 | NA | NA |
| RP11-382F24.3 | 0,00 | 0,00 | 0,00 | 0,00 | NA | NA |
| RP11-382H24.3 | 0,00 | 0,00 | 0,00 | 0,00 | NA | NA |
| RP11-382K22.1 | 0,00 | 0,00 | 0,00 | 0,00 | NA | NA |
| RP11-382M14.1 | 0,00 | 0,00 | 0,00 | 0,00 | NA | NA |
| RP11-382N13.1 | 0,00 | 0,00 | 0,00 | 0,00 | NA | NA |
| RP11-382N13.2 | 0,00 | 0,00 | 0,00 | 0,00 | NA | NA |
| RP11-382N13.3 | 0,00 | 0,00 | 0,00 | 0,00 | NA | NA |
| RP11-382N13.4 | 0,00 | 0,00 | 0,00 | 0,00 | NA | NA |
| RP11-382N13.5 | 0,00 | 0,00 | 0,00 | 0,00 | NA | NA |
| RP11-382N13.6 | 0,00 | 0,00 | 0,00 | 0,00 | NA | NA |
| RP11-383B24.3 | 0,00 | 0,00 | 0,00 | 0,00 | NA | NA |
| RP11-383C5.5  | 0,00 | 0,00 | 0,00 | 0,00 | NA | NA |
| RP11-383C5.7  | 0,80 | 0,51 | 1,10 | 0,48 | NA | NA |
| RP11-383C5.8  | 0,00 | 0,00 | 0,00 | 0,00 | NA | NA |

|                |      |      |      |      |    |    |
|----------------|------|------|------|------|----|----|
| RP11-383D22.1  | 0,00 | 0,00 | 0,00 | 0,00 | NA | NA |
| RP11-383D22.2  | 0,00 | 0,00 | 0,00 | 0,00 | NA | NA |
| RP11-383F12.2  | 0,00 | 0,00 | 0,00 | 0,00 | NA | NA |
| RP11-383G10.1  | 0,00 | 0,00 | 0,00 | 0,00 | NA | NA |
| RP11-383G10.5  | 0,00 | 0,00 | 0,00 | 0,00 | NA | NA |
| RP11-383H17.1  | 0,00 | 0,00 | 0,00 | 0,00 | NA | NA |
| RP11-383H17.3  | 0,00 | 0,00 | 0,00 | 0,00 | NA | NA |
| RP11-383H17.4  | 0,00 | 0,00 | 0,00 | 0,00 | NA | NA |
| RP11-383M4.2   | 0,00 | 0,00 | 0,00 | 0,00 | NA | NA |
| RP11-384B12.2  | 0,00 | 0,00 | 0,00 | 0,00 | NA | NA |
| RP11-384C12.1  | 0,00 | 0,00 | 0,00 | 0,00 | NA | NA |
| RP11-384C12.2  | 0,00 | 0,00 | 0,00 | 0,00 | NA | NA |
| RP11-384C4.6   | 0,00 | 0,00 | 0,00 | 0,00 | NA | NA |
| RP11-384D10.1  | 0,00 | 0,00 | 0,00 | 0,00 | NA | NA |
| RP11-384F7.1   | 0,00 | 0,00 | 0,00 | 0,00 | NA | NA |
| RP11-384F7.2   | 0,00 | 0,00 | 0,00 | 0,00 | NA | NA |
| RP11-384G23.2  | 0,00 | 0,00 | 0,00 | 0,00 | NA | NA |
| RP11-384J4.1   | 0,00 | 0,00 | 0,00 | 0,00 | NA | NA |
| RP11-384K6.4   | 0,00 | 0,00 | 0,00 | 0,00 | NA | NA |
| RP11-384K6.5   | 0,00 | 0,00 | 0,00 | 0,00 | NA | NA |
| RP11-384K6.6   | 0,27 | 0,06 | 0,07 | 0,10 | NA | NA |
| RP11-384L1.1   | 0,00 | 0,00 | 0,00 | 0,00 | NA | NA |
| RP11-384L8.1   | 0,00 | 0,00 | 0,00 | 0,00 | NA | NA |
| RP11-384L8.2   | 0,00 | 0,00 | 0,00 | 0,00 | NA | NA |
| RP11-384M20.1  | 0,00 | 0,00 | 0,00 | 0,00 | NA | NA |
| RP11-384O8.1   | 0,00 | 0,00 | 0,00 | 0,00 | NA | NA |
| RP11-384P14.1  | 0,00 | 0,00 | 0,00 | 0,00 | NA | NA |
| RP11-384P7.5   | 0,00 | 0,00 | 0,00 | 0,00 | NA | NA |
| RP11-384P7.6   | 0,00 | 0,00 | 0,00 | 0,00 | NA | NA |
| RP11-385D13.1  | 0,00 | 0,00 | 0,00 | 0,02 | NA | NA |
| RP11-385E5.1   | 0,00 | 0,00 | 0,00 | 0,00 | NA | NA |
| RP11-385E5.3   | 0,00 | 0,00 | 0,00 | 0,00 | NA | NA |
| RP11-385E5.4   | 0,00 | 0,00 | 0,00 | 0,00 | NA | NA |
| RP11-385E5.8   | 0,00 | 0,00 | 0,00 | 0,00 | NA | NA |
| RP11-385F23.1  | 0,00 | 0,00 | 0,00 | 0,00 | NA | NA |
| RP11-385F5.5   | 0,00 | 0,36 | 0,00 | 0,00 | NA | NA |
| RP11-385G16.1  | 0,00 | 0,00 | 0,00 | 0,00 | NA | NA |
| RP11-385J1.3   | 0,00 | 0,00 | 0,00 | 0,00 | NA | NA |
| RP11-385J23.1  | 0,00 | 0,00 | 0,00 | 0,00 | NA | NA |
| RP11-385M4.1   | 0,00 | 0,00 | 0,00 | 0,00 | NA | NA |
| RP11-385M4.2   | 0,00 | 0,00 | 0,00 | 0,00 | NA | NA |
| RP11-385N17.1  | 0,00 | 0,00 | 0,00 | 0,00 | NA | NA |
| RP11-385N17.3  | 0,00 | 0,00 | 0,00 | 0,00 | NA | NA |
| RP11-386B1.1   | 0,00 | 0,00 | 0,00 | 0,00 | NA | NA |
| RP11-386B13.1  | 0,00 | 0,00 | 0,00 | 0,00 | NA | NA |
| RP11-386B13.4  | 0,00 | 0,00 | 0,00 | 0,00 | NA | NA |
| RP11-386C23.1  | 0,00 | 0,00 | 0,00 | 0,00 | NA | NA |
| RP11-386D6.1   | 0,00 | 0,00 | 0,00 | 0,00 | NA | NA |
| RP11-386D6.3   | 0,00 | 0,00 | 0,00 | 0,00 | NA | NA |
| RP11-386E5.1   | 0,00 | 0,00 | 0,00 | 0,00 | NA | NA |
| RP11-386G11.11 | 0,00 | 0,00 | 0,00 | 0,00 | NA | NA |
| RP11-386G21.1  | 0,00 | 0,00 | 0,00 | 0,00 | NA | NA |
| RP11-386G21.2  | 0,00 | 0,00 | 0,00 | 0,00 | NA | NA |
| RP11-386I14.2  | 0,00 | 0,00 | 0,00 | 0,00 | NA | NA |
| RP11-386I14.3  | 0,00 | 0,00 | 0,00 | 0,00 | NA | NA |

|                |      |      |      |      |    |    |
|----------------|------|------|------|------|----|----|
| RP11-386I8.4   | 0,00 | 0,00 | 0,00 | 0,00 | NA | NA |
| RP11-386M24.1  | 0,00 | 0,00 | 0,00 | 0,00 | NA | NA |
| RP11-386M24.10 | 0,00 | 0,00 | 0,00 | 0,00 | NA | NA |
| RP11-386M24.2  | 0,00 | 0,00 | 0,00 | 0,00 | NA | NA |
| RP11-386M24.3  | 0,00 | 0,00 | 0,00 | 0,00 | NA | NA |
| RP11-386M24.5  | 0,00 | 0,00 | 0,00 | 0,00 | NA | NA |
| RP11-386M24.6  | 0,00 | 0,00 | 0,00 | 0,00 | NA | NA |
| RP11-386M24.9  | 0,00 | 0,00 | 0,00 | 0,00 | NA | NA |
| RP11-387A1.5   | 0,00 | 0,00 | 0,00 | 0,00 | NA | NA |
| RP11-387H17.4  | 0,00 | 0,59 | 0,00 | 0,00 | NA | NA |
| RP11-387M24.5  | 0,00 | 0,00 | 0,00 | 0,00 | NA | NA |
| RP11-388B24.3  | 0,00 | 0,05 | 0,00 | 0,00 | NA | NA |
| RP11-388B24.4  | 0,00 | 0,00 | 0,00 | 0,00 | NA | NA |
| RP11-388C12.1  | 0,00 | 0,00 | 0,00 | 0,00 | NA | NA |
| RP11-388C12.5  | 0,00 | 0,00 | 0,00 | 0,00 | NA | NA |
| RP11-388D4.1   | 0,00 | 0,00 | 0,00 | 0,00 | NA | NA |
| RP11-388E20.1  | 0,00 | 0,00 | 0,00 | 0,00 | NA | NA |
| RP11-388E23.2  | 0,00 | 0,00 | 0,00 | 0,00 | NA | NA |
| RP11-388E23.3  | 0,00 | 0,00 | 0,00 | 0,00 | NA | NA |
| RP11-388E23.4  | 0,00 | 0,00 | 0,00 | 0,00 | NA | NA |
| RP11-388G22.1  | 0,00 | 0,00 | 0,00 | 0,00 | NA | NA |
| RP11-388G3.1   | 0,00 | 0,00 | 0,00 | 0,00 | NA | NA |
| RP11-388K12.1  | 0,00 | 0,00 | 0,00 | 0,00 | NA | NA |
| RP11-388K12.2  | 0,00 | 0,00 | 0,00 | 0,00 | NA | NA |
| RP11-388K12.3  | 0,00 | 0,00 | 0,00 | 0,00 | NA | NA |
| RP11-388M20.2  | 0,00 | 0,00 | 0,00 | 0,00 | NA | NA |
| RP11-388M20.7  | 0,00 | 0,00 | 0,00 | 0,00 | NA | NA |
| RP11-388M20.8  | 0,00 | 0,00 | 0,00 | 0,00 | NA | NA |
| RP11-388N2.1   | 0,00 | 0,00 | 0,00 | 0,00 | NA | NA |
| RP11-388P9.3   | 0,00 | 0,00 | 0,00 | 0,00 | NA | NA |
| RP11-389G6.5   | 0,00 | 0,00 | 0,00 | 0,00 | NA | NA |
| RP11-389J22.3  | 0,00 | 0,00 | 0,00 | 0,00 | NA | NA |
| RP11-389K14.3  | 0,00 | 0,00 | 0,00 | 0,00 | NA | NA |
| RP11-389O22.3  | 0,00 | 0,00 | 0,00 | 0,00 | NA | NA |
| RP11-389O22.4  | 0,00 | 0,00 | 0,00 | 0,00 | NA | NA |
| RP11-38C18.3   | 0,00 | 0,00 | 0,00 | 0,00 | NA | NA |
| RP11-38F22.1   | 0,00 | 0,00 | 0,00 | 0,00 | NA | NA |
| RP11-38G5.3    | 0,00 | 0,00 | 0,00 | 0,00 | NA | NA |
| RP11-38H17.1   | 0,00 | 0,00 | 0,00 | 0,00 | NA | NA |
| RP11-38J22.3   | 0,00 | 0,00 | 0,00 | 0,00 | NA | NA |
| RP11-38J6.1    | 0,00 | 0,00 | 0,00 | 0,00 | NA | NA |
| RP11-38M15.12  | 0,00 | 0,00 | 0,00 | 0,00 | NA | NA |
| RP11-38M15.2   | 0,00 | 0,00 | 0,00 | 0,00 | NA | NA |
| RP11-38M15.4   | 0,00 | 0,00 | 0,00 | 0,00 | NA | NA |
| RP11-38M15.5   | 0,00 | 0,00 | 0,00 | 0,00 | NA | NA |
| RP11-38M15.7   | 0,00 | 0,00 | 0,00 | 0,00 | NA | NA |
| RP11-38M15.8   | 0,00 | 0,00 | 0,00 | 0,00 | NA | NA |
| RP11-38M15.9   | 0,00 | 0,00 | 0,00 | 0,00 | NA | NA |
| RP11-38O14.1   | 0,00 | 0,00 | 0,00 | 0,00 | NA | NA |
| RP11-38O14.5   | 0,00 | 0,00 | 0,00 | 0,00 | NA | NA |
| RP11-38O14.6   | 0,00 | 0,00 | 0,00 | 0,00 | NA | NA |
| RP11-38O23.7   | 0,00 | 0,00 | 0,00 | 0,00 | NA | NA |
| RP11-38P22.3   | 0,00 | 0,00 | 0,00 | 0,00 | NA | NA |
| RP11-390B4.4   | 0,00 | 0,00 | 0,00 | 0,00 | NA | NA |
| RP11-390C19.1  | 0,00 | 0,00 | 0,00 | 0,00 | NA | NA |

|                |      |      |      |      |    |    |
|----------------|------|------|------|------|----|----|
| RP11-390E23.3  | 0,00 | 0,00 | 0,00 | 0,00 | NA | NA |
| RP11-390F10.2  | 0,00 | 0,00 | 0,00 | 0,00 | NA | NA |
| RP11-390F10.3  | 0,00 | 0,00 | 0,00 | 0,00 | NA | NA |
| RP11-390F4.2   | 0,00 | 0,00 | 0,00 | 0,00 | NA | NA |
| RP11-390F4.6   | 0,00 | 0,00 | 0,00 | 0,00 | NA | NA |
| RP11-390F4.9   | 0,00 | 0,00 | 0,00 | 0,00 | NA | NA |
| RP11-390G14.1  | 0,00 | 0,00 | 0,00 | 0,00 | NA | NA |
| RP11-390G14.7  | 0,00 | 0,00 | 0,00 | 0,00 | NA | NA |
| RP11-390K5.1   | 0,00 | 0,00 | 0,00 | 0,00 | NA | NA |
| RP11-390K5.3   | 0,00 | 0,00 | 0,00 | 0,00 | NA | NA |
| RP11-390N6.1   | 0,00 | 0,00 | 0,00 | 0,00 | NA | NA |
| RP11-391H12.5  | 0,00 | 0,00 | 0,00 | 0,00 | NA | NA |
| RP11-391H12.8  | 0,00 | 0,00 | 0,00 | 0,00 | NA | NA |
| RP11-391I13.1  | 0,00 | 0,00 | 0,00 | 0,00 | NA | NA |
| RP11-391I2.1   | 0,00 | 0,00 | 0,00 | 0,00 | NA | NA |
| RP11-391I3.5   | 0,53 | 0,46 | 0,44 | 0,41 | NA | NA |
| RP11-391M1.2   | 0,00 | 0,00 | 0,00 | 0,00 | NA | NA |
| RP11-391M7.3   | 0,00 | 0,00 | 0,00 | 0,00 | NA | NA |
| RP11-392A14.6  | 0,00 | 0,00 | 0,00 | 0,00 | NA | NA |
| RP11-392A14.9  | 0,00 | 0,00 | 0,00 | 0,00 | NA | NA |
| RP11-392A19.1  | 0,00 | 0,00 | 0,00 | 0,00 | NA | NA |
| RP11-392A23.3  | 0,00 | 0,00 | 0,00 | 0,00 | NA | NA |
| RP11-392A23.5  | 0,00 | 0,00 | 0,00 | 0,00 | NA | NA |
| RP11-392C20.1  | 0,00 | 0,00 | 0,00 | 0,00 | NA | NA |
| RP11-392E22.1  | 0,00 | 0,00 | 0,00 | 0,00 | NA | NA |
| RP11-392E22.10 | 0,00 | 0,00 | 0,00 | 0,00 | NA | NA |
| RP11-392E22.11 | 0,00 | 0,00 | 0,00 | 0,00 | NA | NA |
| RP11-392E22.2  | 0,00 | 0,00 | 0,00 | 0,00 | NA | NA |
| RP11-392E22.3  | 0,00 | 0,00 | 0,00 | 0,00 | NA | NA |
| RP11-392E22.5  | 0,00 | 0,00 | 0,00 | 0,00 | NA | NA |
| RP11-392E22.7  | 0,00 | 0,00 | 0,00 | 0,00 | NA | NA |
| RP11-392E22.8  | 0,00 | 0,00 | 0,00 | 0,00 | NA | NA |
| RP11-392E22.9  | 0,00 | 0,00 | 0,00 | 0,00 | NA | NA |
| RP11-392L5.2   | 0,00 | 0,00 | 0,00 | 0,00 | NA | NA |
| RP11-392O18.2  | 0,00 | 0,00 | 0,00 | 0,00 | NA | NA |
| RP11-392P7.7   | 0,00 | 0,00 | 0,00 | 0,00 | NA | NA |
| RP11-393B14.2  | 0,00 | 0,00 | 0,00 | 0,00 | NA | NA |
| RP11-393H6.2   | 0,00 | 0,00 | 0,00 | 0,00 | NA | NA |
| RP11-393H6.3   | 0,00 | 0,00 | 0,00 | 0,00 | NA | NA |
| RP11-393I2.1   | 0,00 | 0,00 | 0,00 | 0,00 | NA | NA |
| RP11-393I23.2  | 0,00 | 0,80 | 0,00 | 0,00 | NA | NA |
| RP11-393I23.3  | 0,00 | 0,00 | 0,00 | 0,00 | NA | NA |
| RP11-393I16.2  | 0,00 | 0,00 | 0,00 | 0,00 | NA | NA |
| RP11-393I16.4  | 0,00 | 0,00 | 0,00 | 0,00 | NA | NA |
| RP11-393K12.2  | 0,00 | 0,00 | 0,00 | 0,00 | NA | NA |
| RP11-393K12.4  | 0,00 | 0,00 | 0,00 | 0,00 | NA | NA |
| RP11-393M18.2  | 0,00 | 0,00 | 0,00 | 0,00 | NA | NA |
| RP11-393M18.5  | 0,00 | 0,00 | 0,00 | 0,00 | NA | NA |
| RP11-393N21.1  | 0,00 | 0,00 | 0,00 | 0,00 | NA | NA |
| RP11-393N21.2  | 0,00 | 0,00 | 0,00 | 0,43 | NA | NA |
| RP11-393N4.1   | 0,00 | 0,00 | 0,00 | 0,00 | NA | NA |
| RP11-393P9.1   | 0,00 | 0,00 | 0,00 | 0,00 | NA | NA |
| RP11-394A14.1  | 0,00 | 0,00 | 0,00 | 0,00 | NA | NA |
| RP11-394B2.1   | 0,00 | 0,00 | 0,00 | 0,00 | NA | NA |
| RP11-394B2.6   | 0,00 | 0,00 | 0,00 | 0,00 | NA | NA |

|                |      |      |      |      |    |    |
|----------------|------|------|------|------|----|----|
| RP11-394B2.7   | 0,00 | 0,00 | 0,00 | 0,00 | NA | NA |
| RP11-394B5.2   | 0,00 | 0,00 | 0,00 | 0,00 | NA | NA |
| RP11-394D2.1   | 0,00 | 0,00 | 0,00 | 0,00 | NA | NA |
| RP11-394G3.2   | 0,00 | 0,00 | 0,00 | 0,00 | NA | NA |
| RP11-394I13.1  | 0,00 | 0,00 | 0,00 | 0,00 | NA | NA |
| RP11-394I13.3  | 0,00 | 0,00 | 0,00 | 0,00 | NA | NA |
| RP11-394J1.2   | 0,98 | 1,02 | 0,57 | 0,40 | NA | NA |
| RP11-394M3.2   | 0,00 | 0,00 | 0,00 | 0,00 | NA | NA |
| RP11-394O4.4   | 0,00 | 0,00 | 0,00 | 0,00 | NA | NA |
| RP11-394O4.6   | 0,00 | 0,00 | 0,00 | 0,00 | NA | NA |
| RP11-394O9.1   | 0,00 | 0,00 | 0,00 | 0,00 | NA | NA |
| RP11-395A23.1  | 0,00 | 0,00 | 0,00 | 0,00 | NA | NA |
| RP11-395B20.1  | 0,00 | 0,00 | 0,00 | 0,00 | NA | NA |
| RP11-395B20.2  | 0,00 | 0,00 | 0,00 | 0,00 | NA | NA |
| RP11-395C17.1  | 0,00 | 0,00 | 0,00 | 0,00 | NA | NA |
| RP11-395C3.1   | 0,00 | 0,00 | 0,00 | 0,00 | NA | NA |
| RP11-395D3.1   | 0,00 | 0,00 | 0,00 | 0,00 | NA | NA |
| RP11-395E19.3  | 0,00 | 0,00 | 0,00 | 0,00 | NA | NA |
| RP11-395E19.4  | 0,00 | 0,00 | 0,00 | 0,00 | NA | NA |
| RP11-395E19.5  | 0,00 | 0,00 | 0,00 | 0,00 | NA | NA |
| RP11-395I6.1   | 0,00 | 0,00 | 0,00 | 0,00 | NA | NA |
| RP11-395L14.13 | 0,00 | 0,00 | 0,00 | 0,00 | NA | NA |
| RP11-395L14.17 | 0,00 | 0,00 | 0,00 | 0,00 | NA | NA |
| RP11-395M19.1  | 0,00 | 0,00 | 0,00 | 0,00 | NA | NA |
| RP11-395N3.1   | 0,00 | 0,00 | 0,00 | 0,00 | NA | NA |
| RP11-395N3.2   | 0,00 | 0,00 | 0,00 | 0,00 | NA | NA |
| RP11-395N6.1   | 0,00 | 0,00 | 0,00 | 0,00 | NA | NA |
| RP11-395N6.4   | 0,00 | 0,00 | 0,00 | 0,00 | NA | NA |
| RP11-395P13.4  | 0,00 | 0,00 | 0,00 | 0,00 | NA | NA |
| RP11-395P16.1  | 0,00 | 0,00 | 0,00 | 0,00 | NA | NA |
| RP11-396A22.4  | 0,00 | 0,00 | 0,00 | 0,00 | NA | NA |
| RP11-396C23.3  | 0,00 | 0,00 | 0,00 | 0,00 | NA | NA |
| RP11-396I6.2   | 0,00 | 0,00 | 0,00 | 0,00 | NA | NA |
| RP11-396M11.1  | 0,00 | 0,00 | 0,00 | 0,00 | NA | NA |
| RP11-397A15.4  | 0,00 | 0,00 | 0,00 | 0,00 | NA | NA |
| RP11-397C12.1  | 0,00 | 0,47 | 0,00 | 0,00 | NA | NA |
| RP11-397C18.2  | 0,00 | 0,00 | 0,00 | 0,00 | NA | NA |
| RP11-397D12.4  | 0,00 | 0,00 | 0,00 | 0,00 | NA | NA |
| RP11-397D12.7  | 0,00 | 0,00 | 0,00 | 0,00 | NA | NA |
| RP11-397D21.1  | 0,00 | 0,00 | 0,00 | 0,00 | NA | NA |
| RP11-397E7.1   | 0,00 | 0,00 | 0,00 | 0,00 | NA | NA |
| RP11-397E7.2   | 0,00 | 0,00 | 0,00 | 0,00 | NA | NA |
| RP11-397G5.2   | 0,00 | 0,00 | 0,00 | 0,00 | NA | NA |
| RP11-397G5.5   | 0,00 | 0,00 | 0,00 | 0,00 | NA | NA |
| RP11-397H6.1   | 0,00 | 0,00 | 0,00 | 0,00 | NA | NA |
| RP11-397K18.1  | 0,00 | 0,00 | 0,00 | 0,00 | NA | NA |
| RP11-397O4.1   | 0,00 | 0,00 | 0,00 | 0,00 | NA | NA |
| RP11-397O8.3   | 0,00 | 0,00 | 0,00 | 0,00 | NA | NA |
| RP11-397P14.3  | 0,00 | 0,16 | 0,00 | 0,00 | NA | NA |
| RP11-398B16.2  | 0,00 | 0,00 | 0,00 | 0,00 | NA | NA |
| RP11-398C13.2  | 0,00 | 0,00 | 0,00 | 0,00 | NA | NA |
| RP11-398I16.1  | 0,00 | 0,00 | 0,00 | 0,00 | NA | NA |
| RP11-398J5.1   | 0,00 | 0,00 | 0,00 | 0,00 | NA | NA |
| RP11-398K14.1  | 0,00 | 0,00 | 0,00 | 0,00 | NA | NA |
| RP11-398K22.10 | 0,00 | 0,00 | 0,00 | 0,00 | NA | NA |

|                |      |      |      |      |    |    |
|----------------|------|------|------|------|----|----|
| RP11-398K22.6  | 0,00 | 0,00 | 0,00 | 0,00 | NA | NA |
| RP11-398M15.1  | 0,00 | 0,00 | 0,00 | 0,00 | NA | NA |
| RP11-398O19.3  | 0,00 | 0,00 | 0,00 | 0,00 | NA | NA |
| RP11-398O21.2  | 0,00 | 0,00 | 0,00 | 0,00 | NA | NA |
| RP11-399B17.1  | 0,00 | 0,00 | 0,00 | 0,00 | NA | NA |
| RP11-399D15.1  | 0,00 | 0,00 | 0,00 | 0,00 | NA | NA |
| RP11-399E6.1   | 0,00 | 0,00 | 0,00 | 0,00 | NA | NA |
| RP11-399E6.2   | 0,00 | 0,00 | 0,00 | 0,00 | NA | NA |
| RP11-399E6.4   | 0,00 | 0,63 | 0,00 | 0,00 | NA | NA |
| RP11-399F2.1   | 0,00 | 0,00 | 0,00 | 0,00 | NA | NA |
| RP11-399F4.1   | 0,00 | 0,00 | 0,00 | 0,00 | NA | NA |
| RP11-399H11.2  | 0,00 | 0,00 | 0,00 | 0,00 | NA | NA |
| RP11-399H11.3  | 0,00 | 0,00 | 0,00 | 0,00 | NA | NA |
| RP11-399J13.2  | 0,00 | 0,22 | 0,00 | 0,19 | NA | NA |
| RP11-399K21.13 | 0,00 | 0,00 | 0,00 | 0,00 | NA | NA |
| RP11-399K21.14 | 0,00 | 0,00 | 0,00 | 0,00 | NA | NA |
| RP11-399K21.5  | 0,00 | 0,00 | 0,00 | 0,00 | NA | NA |
| RP11-399K21.6  | 0,20 | 0,57 | 0,12 | 0,00 | NA | NA |
| RP11-399L7.2   | 0,00 | 0,00 | 0,00 | 0,00 | NA | NA |
| RP11-399L7.3   | 0,00 | 0,00 | 0,00 | 0,00 | NA | NA |
| RP11-399N22.3  | 0,00 | 0,00 | 0,00 | 0,00 | NA | NA |
| RP11-399O19.5  | 0,00 | 0,00 | 0,00 | 0,00 | NA | NA |
| RP11-399O19.6  | 0,00 | 0,00 | 0,00 | 0,00 | NA | NA |
| RP11-39C10.2   | 0,00 | 0,00 | 0,00 | 0,00 | NA | NA |
| RP11-39E3.4    | 0,00 | 0,00 | 0,00 | 0,00 | NA | NA |
| RP11-39E3.5    | 0,00 | 0,00 | 0,00 | 0,00 | NA | NA |
| RP11-39H13.1   | 0,00 | 0,00 | 0,00 | 0,00 | NA | NA |
| RP11-39H3.1    | 0,00 | 0,00 | 0,00 | 0,00 | NA | NA |
| RP11-39K24.5   | 0,00 | 0,00 | 0,00 | 0,00 | NA | NA |
| RP11-39M21.1   | 0,00 | 0,00 | 0,00 | 0,00 | NA | NA |
| RP11-39M21.2   | 0,00 | 0,00 | 0,00 | 0,00 | NA | NA |
| RP11-3B12.2    | 0,00 | 0,00 | 0,00 | 0,00 | NA | NA |
| RP11-3B12.4    | 0,00 | 0,00 | 0,00 | 0,00 | NA | NA |
| RP11-3B12.5    | 0,00 | 0,00 | 0,00 | 0,00 | NA | NA |
| RP11-3B7.1     | 0,23 | 0,24 | 0,12 | 0,00 | NA | NA |
| RP11-3B7.7     | 0,00 | 0,00 | 0,00 | 0,00 | NA | NA |
| RP11-3D23.1    | 0,00 | 0,00 | 0,00 | 0,00 | NA | NA |
| RP11-3D4.2     | 0,00 | 0,36 | 0,00 | 0,00 | NA | NA |
| RP11-3G20.1    | 0,00 | 0,00 | 0,00 | 0,00 | NA | NA |
| RP11-3G21.1    | 0,00 | 0,00 | 0,00 | 0,00 | NA | NA |
| RP11-3J10.7    | 0,00 | 0,00 | 0,00 | 0,00 | NA | NA |
| RP11-3J11.1    | 0,00 | 0,00 | 0,00 | 0,00 | NA | NA |
| RP11-3K16.2    | 0,00 | 0,00 | 0,00 | 0,00 | NA | NA |
| RP11-3K24.2    | 0,00 | 0,00 | 0,00 | 0,00 | NA | NA |
| RP11-3K24.3    | 0,00 | 0,00 | 0,00 | 0,00 | NA | NA |
| RP11-3L10.1    | 0,00 | 0,00 | 0,00 | 0,00 | NA | NA |
| RP11-3L10.3    | 0,00 | 0,00 | 0,00 | 0,00 | NA | NA |
| RP11-3L23.2    | 0,00 | 0,00 | 0,00 | 0,00 | NA | NA |
| RP11-3L8.3     | 0,00 | 0,00 | 0,00 | 0,00 | NA | NA |
| RP11-3M1.1     | 0,00 | 0,00 | 0,00 | 0,00 | NA | NA |
| RP11-3M1.3     | 0,00 | 0,00 | 0,00 | 0,00 | NA | NA |
| RP11-3N13.2    | 0,00 | 0,00 | 0,00 | 0,00 | NA | NA |
| RP11-3N2.10    | 0,00 | 0,00 | 0,00 | 0,00 | NA | NA |
| RP11-3N2.11    | 0,00 | 0,00 | 0,00 | 0,00 | NA | NA |
| RP11-3N2.12    | 0,00 | 0,00 | 0,00 | 0,00 | NA | NA |

|               |      |      |      |      |    |    |
|---------------|------|------|------|------|----|----|
| RP11-3N2.3    | 0,00 | 0,00 | 0,00 | 0,00 | NA | NA |
| RP11-3N2.4    | 0,00 | 0,00 | 0,00 | 0,00 | NA | NA |
| RP11-3N2.6    | 0,00 | 0,00 | 0,00 | 0,00 | NA | NA |
| RP11-3N2.7    | 0,00 | 0,00 | 0,00 | 0,00 | NA | NA |
| RP11-3N2.8    | 0,00 | 0,00 | 0,00 | 0,00 | NA | NA |
| RP11-3N2.9    | 0,00 | 0,00 | 0,00 | 0,00 | NA | NA |
| RP11-3P17.4   | 0,00 | 0,00 | 0,00 | 0,00 | NA | NA |
| RP11-3P22.1   | 0,00 | 0,00 | 0,00 | 0,00 | NA | NA |
| RP11-400D2.1  | 0,00 | 0,00 | 0,00 | 0,00 | NA | NA |
| RP11-400D2.3  | 0,00 | 0,00 | 0,00 | 0,00 | NA | NA |
| RP11-400F19.8 | 0,00 | 0,00 | 0,00 | 0,00 | NA | NA |
| RP11-400G3.3  | 0,00 | 0,00 | 0,00 | 0,00 | NA | NA |
| RP11-400G3.5  | 0,00 | 0,00 | 0,00 | 0,00 | NA | NA |
| RP11-400K9.2  | 0,00 | 0,00 | 0,00 | 0,00 | NA | NA |
| RP11-400K9.3  | 0,00 | 0,00 | 0,00 | 0,00 | NA | NA |
| RP11-400N13.1 | 0,00 | 0,00 | 0,00 | 0,00 | NA | NA |
| RP11-400N13.3 | 0,00 | 0,35 | 0,00 | 0,00 | NA | NA |
| RP11-401A10.2 | 0,00 | 0,00 | 0,00 | 0,00 | NA | NA |
| RP11-401E14.1 | 0,00 | 0,00 | 0,00 | 0,00 | NA | NA |
| RP11-401E14.3 | 0,00 | 0,00 | 0,00 | 0,00 | NA | NA |
| RP11-401E5.1  | 0,00 | 0,00 | 0,00 | 0,00 | NA | NA |
| RP11-401F2.2  | 0,00 | 0,00 | 0,00 | 0,00 | NA | NA |
| RP11-401F2.4  | 0,00 | 0,00 | 0,00 | 0,00 | NA | NA |
| RP11-401G5.1  | 0,00 | 0,00 | 0,00 | 0,00 | NA | NA |
| RP11-401H2.1  | 0,00 | 0,00 | 0,00 | 0,00 | NA | NA |
| RP11-401I19.1 | 0,00 | 0,00 | 0,00 | 0,00 | NA | NA |
| RP11-401L13.4 | 0,00 | 0,36 | 0,00 | 0,00 | NA | NA |
| RP11-401L13.5 | 0,00 | 0,00 | 0,00 | 0,00 | NA | NA |
| RP11-401M16.3 | 0,00 | 0,00 | 0,00 | 0,00 | NA | NA |
| RP11-401N16.1 | 0,00 | 0,00 | 0,00 | 0,00 | NA | NA |
| RP11-401N18.1 | 0,00 | 0,00 | 0,00 | 0,00 | NA | NA |
| RP11-401P9.5  | 0,00 | 0,07 | 0,00 | 0,00 | NA | NA |
| RP11-401P9.6  | 0,00 | 0,00 | 0,00 | 0,00 | NA | NA |
| RP11-402C9.1  | 0,00 | 0,00 | 0,00 | 0,00 | NA | NA |
| RP11-402D21.2 | 0,00 | 0,00 | 0,00 | 0,00 | NA | NA |
| RP11-402D21.3 | 0,00 | 0,00 | 0,00 | 0,00 | NA | NA |
| RP11-402F9.3  | 0,00 | 0,00 | 0,00 | 0,00 | NA | NA |
| RP11-402G3.3  | 0,00 | 0,00 | 0,00 | 0,00 | NA | NA |
| RP11-402G3.6  | 0,00 | 0,00 | 0,00 | 0,00 | NA | NA |
| RP11-402J6.2  | 0,00 | 0,00 | 0,00 | 0,00 | NA | NA |
| RP11-402J6.3  | 0,00 | 0,00 | 0,00 | 0,00 | NA | NA |
| RP11-402J7.3  | 0,00 | 0,00 | 0,00 | 0,00 | NA | NA |
| RP11-402L1.11 | 0,00 | 0,00 | 0,00 | 0,00 | NA | NA |
| RP11-402L1.12 | 0,00 | 0,00 | 0,00 | 0,00 | NA | NA |
| RP11-402L1.4  | 0,00 | 0,00 | 0,00 | 0,00 | NA | NA |
| RP11-402L11.1 | 0,00 | 0,00 | 0,00 | 0,00 | NA | NA |
| RP11-402L6.1  | 0,00 | 0,00 | 0,00 | 0,00 | NA | NA |
| RP11-402N18.1 | 0,00 | 0,00 | 0,00 | 0,00 | NA | NA |
| RP11-402N18.2 | 0,00 | 0,00 | 0,00 | 0,00 | NA | NA |
| RP11-402N8.1  | 0,00 | 0,00 | 0,00 | 0,00 | NA | NA |
| RP11-402P6.12 | 0,00 | 0,00 | 0,00 | 0,00 | NA | NA |
| RP11-402P6.13 | 0,00 | 0,00 | 0,00 | 0,00 | NA | NA |
| RP11-402P6.15 | 0,00 | 0,08 | 0,00 | 0,00 | NA | NA |
| RP11-402P6.2  | 0,00 | 0,00 | 0,00 | 0,00 | NA | NA |
| RP11-402P6.3  | 0,00 | 0,00 | 0,00 | 0,00 | NA | NA |

|                |      |      |      |      |    |    |
|----------------|------|------|------|------|----|----|
| RP11-402P6.4   | 0,00 | 0,00 | 0,00 | 0,00 | NA | NA |
| RP11-402P6.5   | 0,00 | 0,00 | 0,00 | 0,00 | NA | NA |
| RP11-402P6.6   | 0,00 | 0,00 | 0,00 | 0,00 | NA | NA |
| RP11-402P6.9   | 0,00 | 0,00 | 0,00 | 0,00 | NA | NA |
| RP11-403A3.1   | 0,00 | 0,00 | 0,00 | 0,00 | NA | NA |
| RP11-403A3.3   | 0,00 | 0,00 | 0,00 | 0,00 | NA | NA |
| RP11-403B2.10  | 0,00 | 0,00 | 0,00 | 0,00 | NA | NA |
| RP11-403B2.3   | 0,00 | 0,00 | 0,00 | 0,00 | NA | NA |
| RP11-403B2.4   | 0,00 | 0,00 | 0,00 | 0,00 | NA | NA |
| RP11-403B2.5   | 0,00 | 0,00 | 0,00 | 0,00 | NA | NA |
| RP11-403B2.6   | 0,00 | 0,00 | 0,00 | 0,00 | NA | NA |
| RP11-403D15.2  | 0,00 | 0,00 | 0,00 | 0,00 | NA | NA |
| RP11-403F21.3  | 0,00 | 0,00 | 0,00 | 0,00 | NA | NA |
| RP11-403F21.4  | 0,00 | 0,00 | 0,00 | 0,00 | NA | NA |
| RP11-403H13.1  | 0,00 | 0,00 | 0,00 | 0,00 | NA | NA |
| RP11-403I13.10 | 0,00 | 0,00 | 0,00 | 0,00 | NA | NA |
| RP11-403I13.7  | 0,00 | 0,00 | 0,00 | 0,00 | NA | NA |
| RP11-403M22.1  | 0,00 | 0,00 | 0,00 | 0,00 | NA | NA |
| RP11-403N16.2  | 0,00 | 0,00 | 0,00 | 0,00 | NA | NA |
| RP11-403N16.3  | 0,00 | 0,00 | 0,00 | 0,00 | NA | NA |
| RP11-403N16.5  | 0,00 | 0,00 | 0,00 | 0,00 | NA | NA |
| RP11-403P14.1  | 0,00 | 0,00 | 0,00 | 0,00 | NA | NA |
| RP11-403P17.2  | 0,00 | 0,00 | 0,00 | 0,00 | NA | NA |
| RP11-404C6.3   | 0,00 | 0,00 | 0,00 | 0,00 | NA | NA |
| RP11-404C6.5   | 0,00 | 0,00 | 0,00 | 0,00 | NA | NA |
| RP11-404E12.1  | 0,00 | 0,00 | 0,00 | 0,00 | NA | NA |
| RP11-404F10.5  | 0,00 | 0,00 | 0,00 | 0,00 | NA | NA |
| RP11-404F3.1   | 0,00 | 0,00 | 0,00 | 0,00 | NA | NA |
| RP11-404G16.1  | 0,00 | 0,00 | 0,00 | 0,00 | NA | NA |
| RP11-404G16.2  | 0,00 | 0,00 | 0,00 | 0,00 | NA | NA |
| RP11-404I7.1   | 0,00 | 0,00 | 0,00 | 0,00 | NA | NA |
| RP11-404I7.2   | 0,00 | 0,00 | 0,00 | 0,00 | NA | NA |
| RP11-404I23.1  | 0,00 | 0,00 | 0,00 | 0,00 | NA | NA |
| RP11-404I24.1  | 0,00 | 0,00 | 0,00 | 0,00 | NA | NA |
| RP11-404K5.1   | 0,00 | 0,00 | 0,00 | 0,00 | NA | NA |
| RP11-404K5.2   | 0,00 | 0,00 | 0,00 | 0,00 | NA | NA |
| RP11-404K5.3   | 0,00 | 0,00 | 0,00 | 0,00 | NA | NA |
| RP11-404K5.4   | 0,00 | 0,00 | 0,00 | 0,00 | NA | NA |
| RP11-404L6.1   | 0,00 | 0,27 | 0,00 | 0,00 | NA | NA |
| RP11-404O13.1  | 0,00 | 0,00 | 0,00 | 0,00 | NA | NA |
| RP11-404O13.2  | 0,00 | 0,00 | 0,00 | 0,00 | NA | NA |
| RP11-404O18.1  | 0,00 | 0,00 | 0,00 | 0,00 | NA | NA |
| RP11-404P21.1  | 0,00 | 0,00 | 0,00 | 0,00 | NA | NA |
| RP11-404P21.3  | 0,00 | 0,00 | 0,00 | 0,00 | NA | NA |
| RP11-404P21.9  | 0,00 | 0,00 | 0,00 | 0,00 | NA | NA |
| RP11-405A12.1  | 0,00 | 0,00 | 0,00 | 0,00 | NA | NA |
| RP11-405F3.5   | 0,00 | 0,00 | 0,00 | 0,00 | NA | NA |
| RP11-405L18.2  | 0,00 | 0,00 | 0,00 | 0,00 | NA | NA |
| RP11-405L18.4  | 0,00 | 0,00 | 0,00 | 0,00 | NA | NA |
| RP11-405P11.1  | 0,00 | 0,00 | 0,00 | 0,00 | NA | NA |
| RP11-406A20.1  | 0,00 | 0,00 | 0,00 | 0,00 | NA | NA |
| RP11-406A20.2  | 0,00 | 0,00 | 0,00 | 0,00 | NA | NA |
| RP11-406A20.5  | 0,00 | 0,00 | 0,00 | 0,00 | NA | NA |
| RP11-406A9.1   | 0,00 | 0,00 | 0,00 | 0,00 | NA | NA |
| RP11-406H23.4  | 0,00 | 0,00 | 0,00 | 0,00 | NA | NA |



|               |      |      |      |      |    |    |
|---------------|------|------|------|------|----|----|
| RP11-406H23.5 | 0,00 | 0,00 | 0,00 | 0,00 | NA | NA |
| RP11-406H4.1  | 0,00 | 0,00 | 0,00 | 0,00 | NA | NA |
| RP11-406O23.2 | 0,00 | 0,00 | 0,00 | 0,00 | NA | NA |
| RP11-407A16.1 | 0,00 | 0,00 | 0,00 | 0,00 | NA | NA |
| RP11-407A16.2 | 0,00 | 0,00 | 0,00 | 0,00 | NA | NA |
| RP11-407A16.3 | 0,00 | 0,00 | 0,00 | 0,00 | NA | NA |
| RP11-407A16.4 | 0,00 | 0,00 | 0,00 | 0,00 | NA | NA |
| RP11-407A16.5 | 0,00 | 0,00 | 0,00 | 0,00 | NA | NA |
| RP11-407A16.6 | 0,00 | 0,00 | 0,00 | 0,00 | NA | NA |
| RP11-407A16.7 | 0,00 | 0,00 | 0,00 | 0,00 | NA | NA |
| RP11-407A16.8 | 0,00 | 0,00 | 0,00 | 0,00 | NA | NA |
| RP11-407B7.2  | 0,00 | 0,00 | 0,00 | 0,00 | NA | NA |
| RP11-407B7.3  | 0,00 | 0,00 | 0,00 | 0,00 | NA | NA |
| RP11-407E23.1 | 0,00 | 0,00 | 0,00 | 0,00 | NA | NA |
| RP11-407G23.1 | 0,00 | 0,00 | 0,00 | 0,00 | NA | NA |
| RP11-407G6.1  | 0,00 | 0,00 | 0,00 | 0,00 | NA | NA |
| RP11-407H12.8 | 0,00 | 0,00 | 0,00 | 0,00 | NA | NA |
| RP11-407N17.1 | 0,00 | 0,00 | 0,00 | 0,00 | NA | NA |
| RP11-407N17.2 | 0,00 | 0,00 | 0,00 | 0,00 | NA | NA |
| RP11-407N8.4  | 0,00 | 0,00 | 0,00 | 0,00 | NA | NA |
| RP11-407N8.6  | 0,00 | 0,00 | 0,00 | 0,00 | NA | NA |
| RP11-407P15.2 | 0,00 | 0,00 | 0,00 | 0,00 | NA | NA |
| RP11-408A13.2 | 0,00 | 0,00 | 0,00 | 0,00 | NA | NA |
| RP11-408A13.3 | 0,00 | 0,00 | 0,00 | 0,00 | NA | NA |
| RP11-408B11.2 | 0,00 | 0,00 | 0,00 | 0,00 | NA | NA |
| RP11-408E1.1  | 0,00 | 0,00 | 0,00 | 0,00 | NA | NA |
| RP11-408E5.1  | 0,00 | 0,00 | 0,00 | 0,00 | NA | NA |
| RP11-408E5.5  | 0,00 | 0,00 | 0,00 | 0,00 | NA | NA |
| RP11-408E5.6  | 0,00 | 0,00 | 0,00 | 0,00 | NA | NA |
| RP11-408E5.8  | 0,00 | 0,00 | 0,00 | 0,00 | NA | NA |
| RP11-408H1.2  | 0,00 | 0,00 | 0,00 | 0,00 | NA | NA |
| RP11-408H20.2 | 0,00 | 0,00 | 0,00 | 0,00 | NA | NA |
| RP11-408J6.1  | 0,00 | 0,00 | 0,00 | 0,00 | NA | NA |
| RP11-408K19.3 | 0,00 | 0,00 | 0,00 | 0,00 | NA | NA |
| RP11-408N14.1 | 0,00 | 0,00 | 0,00 | 0,00 | NA | NA |
| RP11-408O13.3 | 0,00 | 0,00 | 0,00 | 0,00 | NA | NA |
| RP11-408O19.3 | 0,00 | 0,00 | 0,00 | 0,00 | NA | NA |
| RP11-409C19.2 | 0,00 | 0,00 | 0,00 | 0,00 | NA | NA |
| RP11-409K15.1 | 0,00 | 0,00 | 0,00 | 0,00 | NA | NA |
| RP11-409K20.7 | 0,00 | 0,00 | 0,00 | 0,00 | NA | NA |
| RP11-409O11.3 | 0,00 | 0,00 | 0,00 | 0,00 | NA | NA |
| RP11-40A13.1  | 0,00 | 0,00 | 0,00 | 0,00 | NA | NA |
| RP11-40A13.2  | 0,00 | 0,00 | 0,00 | 0,00 | NA | NA |
| RP11-40A7.2   | 0,00 | 0,00 | 0,00 | 0,00 | NA | NA |
| RP11-40C11.2  | 0,00 | 0,00 | 0,00 | 0,00 | NA | NA |
| RP11-40E6.1   | 0,00 | 0,00 | 0,00 | 0,00 | NA | NA |
| RP11-40E6.2   | 0,00 | 0,00 | 0,00 | 0,00 | NA | NA |
| RP11-40F8.2   | 0,00 | 0,00 | 0,00 | 0,00 | NA | NA |
| RP11-40G16.1  | 0,00 | 0,00 | 0,00 | 0,00 | NA | NA |
| RP11-40H20.1  | 0,00 | 0,00 | 0,00 | 0,00 | NA | NA |
| RP11-40H20.3  | 0,00 | 0,00 | 0,00 | 0,00 | NA | NA |
| RP11-40H20.5  | 0,00 | 0,00 | 0,00 | 0,00 | NA | NA |
| RP11-40M23.1  | 0,00 | 0,00 | 0,00 | 0,00 | NA | NA |
| RP11-410C4.1  | 0,00 | 0,00 | 0,00 | 0,00 | NA | NA |
| RP11-410C4.3  | 0,00 | 0,00 | 0,00 | 0,00 | NA | NA |

|               |      |      |      |      |    |    |
|---------------|------|------|------|------|----|----|
| RP11-410C4.4  | 0,00 | 0,00 | 0,00 | 0,00 | NA | NA |
| RP11-410F13.1 | 0,00 | 0,00 | 0,00 | 0,00 | NA | NA |
| RP11-410F13.2 | 0,00 | 0,00 | 0,00 | 0,00 | NA | NA |
| RP11-410L14.1 | 0,00 | 0,00 | 0,00 | 0,00 | NA | NA |
| RP11-410N8.1  | 0,00 | 0,00 | 0,00 | 0,00 | NA | NA |
| RP11-410N8.4  | 0,00 | 0,00 | 0,00 | 0,00 | NA | NA |
| RP11-411B10.3 | 0,00 | 0,00 | 0,00 | 0,00 | NA | NA |
| RP11-411B10.5 | 0,00 | 0,00 | 0,00 | 0,00 | NA | NA |
| RP11-411B10.6 | 0,00 | 0,00 | 0,00 | 0,00 | NA | NA |
| RP11-411B10.8 | 0,00 | 0,00 | 0,00 | 0,00 | NA | NA |
| RP11-411G2.1  | 0,00 | 0,00 | 0,00 | 0,00 | NA | NA |
| RP11-411G2.2  | 0,00 | 0,00 | 0,00 | 0,00 | NA | NA |
| RP11-411K7.2  | 0,00 | 0,00 | 0,00 | 0,00 | NA | NA |
| RP11-411M4.1  | 0,00 | 0,00 | 0,00 | 0,00 | NA | NA |
| RP11-411P18.2 | 0,00 | 0,00 | 0,00 | 0,00 | NA | NA |
| RP11-412B14.2 | 0,00 | 0,00 | 0,00 | 0,00 | NA | NA |
| RP11-412D9.4  | 0,00 | 0,00 | 0,00 | 0,00 | NA | NA |
| RP11-412H8.2  | 0,00 | 0,00 | 0,00 | 0,00 | NA | NA |
| RP11-412H9.1  | 0,00 | 0,00 | 0,00 | 0,00 | NA | NA |
| RP11-412H9.2  | 0,00 | 0,00 | 0,00 | 0,00 | NA | NA |
| RP11-413B19.2 | 0,00 | 0,00 | 0,00 | 0,00 | NA | NA |
| RP11-413E6.11 | 0,00 | 0,00 | 0,00 | 0,00 | NA | NA |
| RP11-413E6.12 | 0,00 | 0,00 | 0,00 | 0,00 | NA | NA |
| RP11-413E6.2  | 0,00 | 0,00 | 0,00 | 0,00 | NA | NA |
| RP11-413G15.1 | 0,00 | 0,00 | 0,00 | 0,00 | NA | NA |
| RP11-413H22.3 | 0,00 | 0,00 | 0,00 | 0,00 | NA | NA |
| RP11-413M3.4  | 0,00 | 0,00 | 0,00 | 0,00 | NA | NA |
| RP11-413N13.1 | 0,00 | 0,00 | 0,00 | 0,00 | NA | NA |
| RP11-413P11.1 | 0,00 | 0,00 | 0,00 | 0,00 | NA | NA |
| RP11-414C16.1 | 0,00 | 0,00 | 0,00 | 0,00 | NA | NA |
| RP11-414H17.2 | 0,00 | 0,00 | 0,00 | 0,00 | NA | NA |
| RP11-414H23.3 | 0,00 | 0,00 | 0,00 | 0,00 | NA | NA |
| RP11-414J4.2  | 0,00 | 0,00 | 0,00 | 0,00 | NA | NA |
| RP11-414P19.1 | 0,00 | 0,00 | 0,00 | 0,00 | NA | NA |
| RP11-415A20.1 | 0,00 | 0,00 | 0,00 | 0,00 | NA | NA |
| RP11-415D17.1 | 0,00 | 0,00 | 0,00 | 0,00 | NA | NA |
| RP11-415D17.3 | 0,92 | 1,50 | 0,98 | 1,01 | NA | NA |
| RP11-415D17.4 | 0,00 | 0,00 | 0,00 | 0,00 | NA | NA |
| RP11-415H23.4 | 0,00 | 0,00 | 0,00 | 0,00 | NA | NA |
| RP11-415I12.1 | 0,00 | 0,00 | 0,00 | 0,00 | NA | NA |
| RP11-415I12.5 | 0,00 | 0,00 | 0,00 | 0,00 | NA | NA |
| RP11-415K20.1 | 0,00 | 0,00 | 0,00 | 0,00 | NA | NA |
| RP11-415L24.1 | 0,00 | 0,00 | 0,00 | 0,00 | NA | NA |
| RP11-416A17.1 | 0,00 | 0,00 | 0,00 | 0,00 | NA | NA |
| RP11-416K24.1 | 0,00 | 0,00 | 0,00 | 0,00 | NA | NA |
| RP11-416K24.2 | 0,00 | 0,00 | 0,00 | 0,00 | NA | NA |
| RP11-416L21.1 | 0,00 | 0,00 | 0,00 | 0,00 | NA | NA |
| RP11-416L21.2 | 0,00 | 0,00 | 0,00 | 0,00 | NA | NA |
| RP11-416N13.1 | 0,00 | 0,00 | 0,00 | 0,00 | NA | NA |
| RP11-416N4.1  | 0,00 | 0,00 | 0,00 | 0,00 | NA | NA |
| RP11-416N4.4  | 0,00 | 0,00 | 0,00 | 0,00 | NA | NA |
| RP11-416O18.2 | 0,00 | 0,00 | 0,00 | 0,00 | NA | NA |
| RP11-417A17.1 | 0,00 | 0,00 | 0,00 | 0,00 | NA | NA |
| RP11-417B4.2  | 0,00 | 0,00 | 0,00 | 0,00 | NA | NA |
| RP11-417C21.2 | 0,00 | 0,00 | 0,00 | 0,00 | NA | NA |

|               |      |      |      |      |    |    |
|---------------|------|------|------|------|----|----|
| RP11-417J1.1  | 0,00 | 0,00 | 0,00 | 0,00 | NA | NA |
| RP11-417J1.2  | 0,00 | 0,00 | 0,00 | 0,00 | NA | NA |
| RP11-417J1.3  | 0,00 | 0,00 | 0,00 | 0,00 | NA | NA |
| RP11-417J1.4  | 0,00 | 0,00 | 0,00 | 0,00 | NA | NA |
| RP11-417J1.5  | 0,00 | 0,00 | 0,00 | 0,00 | NA | NA |
| RP11-417J1.6  | 0,00 | 0,00 | 0,00 | 0,00 | NA | NA |
| RP11-417J1.7  | 0,00 | 0,00 | 0,00 | 0,00 | NA | NA |
| RP11-417J1.8  | 0,00 | 0,00 | 0,00 | 0,00 | NA | NA |
| RP11-417L14.1 | 0,00 | 0,00 | 0,00 | 0,00 | NA | NA |
| RP11-417L19.4 | 0,00 | 0,00 | 0,00 | 0,00 | NA | NA |
| RP11-417L19.5 | 0,00 | 0,00 | 0,00 | 0,08 | NA | NA |
| RP11-417M17.1 | 0,00 | 0,00 | 0,00 | 0,00 | NA | NA |
| RP11-417O18.2 | 0,00 | 0,00 | 0,00 | 0,00 | NA | NA |
| RP11-417P24.1 | 0,00 | 0,00 | 0,00 | 0,00 | NA | NA |
| RP11-418J17.2 | 0,00 | 0,00 | 0,00 | 0,00 | NA | NA |
| RP11-418N10.1 | 0,00 | 0,00 | 0,00 | 0,00 | NA | NA |
| RP11-419C19.1 | 0,00 | 0,00 | 0,00 | 0,00 | NA | NA |
| RP11-419C19.2 | 0,00 | 0,00 | 0,00 | 0,00 | NA | NA |
| RP11-419C19.3 | 0,00 | 0,00 | 0,00 | 0,00 | NA | NA |
| RP11-419C23.1 | 0,00 | 0,00 | 0,00 | 0,00 | NA | NA |
| RP11-419C5.3  | 0,00 | 0,00 | 0,00 | 0,00 | NA | NA |
| RP11-419F8.1  | 0,00 | 0,00 | 0,00 | 0,00 | NA | NA |
| RP11-419I17.3 | 0,00 | 0,00 | 0,00 | 0,00 | NA | NA |
| RP11-419I17.4 | 0,00 | 0,00 | 0,00 | 0,00 | NA | NA |
| RP11-419J16.1 | 0,00 | 0,00 | 0,00 | 0,00 | NA | NA |
| RP11-419L20.2 | 0,00 | 0,00 | 0,00 | 0,00 | NA | NA |
| RP11-419L9.1  | 0,00 | 0,00 | 0,00 | 0,00 | NA | NA |
| RP11-419M24.1 | 0,00 | 0,00 | 0,00 | 0,00 | NA | NA |
| RP11-419M24.2 | 0,00 | 0,00 | 0,00 | 0,00 | NA | NA |
| RP11-419M24.4 | 0,00 | 0,00 | 0,00 | 0,00 | NA | NA |
| RP11-419M24.5 | 0,00 | 0,00 | 0,00 | 0,00 | NA | NA |
| RP11-419M24.6 | 0,00 | 0,00 | 0,00 | 0,00 | NA | NA |
| RP11-419N10.3 | 0,00 | 0,00 | 0,00 | 0,00 | NA | NA |
| RP11-419N10.5 | 0,00 | 0,00 | 0,00 | 0,00 | NA | NA |
| RP11-419N10.6 | 0,00 | 0,00 | 0,00 | 0,00 | NA | NA |
| RP11-41L14.1  | 0,00 | 0,00 | 0,00 | 0,00 | NA | NA |
| RP11-41O4.3   | 0,00 | 0,00 | 0,00 | 0,00 | NA | NA |
| RP11-420B22.1 | 0,00 | 0,00 | 0,00 | 0,00 | NA | NA |
| RP11-420B22.2 | 0,00 | 0,00 | 0,00 | 0,00 | NA | NA |
| RP11-420C9.1  | 0,00 | 0,00 | 0,00 | 0,00 | NA | NA |
| RP11-420H19.1 | 0,00 | 0,00 | 0,00 | 0,00 | NA | NA |
| RP11-420H19.2 | 0,00 | 0,00 | 0,00 | 0,00 | NA | NA |
| RP11-420H19.3 | 0,00 | 0,00 | 0,00 | 0,00 | NA | NA |
| RP11-420J11.1 | 0,00 | 0,00 | 0,00 | 0,00 | NA | NA |
| RP11-420J11.2 | 0,00 | 0,00 | 0,00 | 0,00 | NA | NA |
| RP11-420K10.1 | 0,00 | 0,00 | 0,00 | 0,00 | NA | NA |
| RP11-420K14.1 | 0,00 | 0,00 | 0,00 | 0,00 | NA | NA |
| RP11-420K14.2 | 0,00 | 0,00 | 0,00 | 0,00 | NA | NA |
| RP11-420K14.3 | 0,00 | 0,00 | 0,00 | 0,00 | NA | NA |
| RP11-420K5.1  | 0,00 | 0,00 | 0,00 | 0,00 | NA | NA |
| RP11-420K8.1  | 0,00 | 0,00 | 0,00 | 0,66 | NA | NA |
| RP11-420K8.2  | 0,00 | 0,00 | 0,00 | 0,00 | NA | NA |
| RP11-420M1.2  | 0,00 | 0,00 | 0,00 | 0,00 | NA | NA |
| RP11-420O16.1 | 0,00 | 0,00 | 0,00 | 0,00 | NA | NA |
| RP11-420O16.2 | 0,00 | 0,00 | 0,00 | 0,00 | NA | NA |

|                |      |      |      |      |    |    |
|----------------|------|------|------|------|----|----|
| RP11-421B23.1  | 0,00 | 0,00 | 0,00 | 0,00 | NA | NA |
| RP11-421B23.2  | 0,00 | 0,00 | 0,00 | 0,00 | NA | NA |
| RP11-421E17.4  | 0,00 | 0,00 | 0,00 | 0,00 | NA | NA |
| RP11-421H10.2  | 0,00 | 0,00 | 0,00 | 0,00 | NA | NA |
| RP11-421K23.1  | 0,00 | 0,00 | 0,00 | 0,00 | NA | NA |
| RP11-421M1.8   | 0,00 | 0,00 | 0,00 | 0,00 | NA | NA |
| RP11-421N10.1  | 0,00 | 0,00 | 0,00 | 0,00 | NA | NA |
| RP11-421N8.2   | 0,00 | 0,00 | 0,00 | 0,00 | NA | NA |
| RP11-421P11.5  | 0,00 | 0,00 | 0,00 | 0,00 | NA | NA |
| RP11-421P11.7  | 0,00 | 0,00 | 0,00 | 0,00 | NA | NA |
| RP11-421P11.8  | 0,00 | 0,00 | 0,00 | 0,00 | NA | NA |
| RP11-421P23.1  | 0,00 | 0,00 | 0,00 | 0,00 | NA | NA |
| RP11-421P23.2  | 0,00 | 0,00 | 0,00 | 0,00 | NA | NA |
| RP11-422P24.1  | 0,00 | 0,00 | 0,00 | 0,00 | NA | NA |
| RP11-422P24.13 | 0,00 | 0,00 | 0,00 | 0,00 | NA | NA |
| RP11-423E7.1   | 0,00 | 0,00 | 0,00 | 0,00 | NA | NA |
| RP11-423E7.2   | 0,07 | 0,20 | 0,15 | 0,18 | NA | NA |
| RP11-423F24.3  | 0,00 | 0,00 | 0,00 | 0,00 | NA | NA |
| RP11-423G4.10  | 0,00 | 0,00 | 0,00 | 0,00 | NA | NA |
| RP11-423H2.4   | 0,00 | 0,00 | 0,00 | 0,00 | NA | NA |
| RP11-423H2.5   | 0,00 | 0,91 | 0,00 | 0,00 | NA | NA |
| RP11-423J7.1   | 0,00 | 0,00 | 0,00 | 0,00 | NA | NA |
| RP11-424A16.1  | 0,00 | 0,00 | 0,00 | 0,00 | NA | NA |
| RP11-424D14.1  | 0,00 | 0,00 | 0,00 | 0,00 | NA | NA |
| RP11-424E7.3   | 0,00 | 0,00 | 0,00 | 0,00 | NA | NA |
| RP11-424E7.6   | 0,00 | 0,00 | 0,00 | 0,00 | NA | NA |
| RP11-424I19.1  | 0,00 | 0,00 | 0,00 | 0,00 | NA | NA |
| RP11-424I19.2  | 0,00 | 0,00 | 0,00 | 0,00 | NA | NA |
| RP11-424I3.1   | 0,00 | 0,00 | 0,00 | 0,00 | NA | NA |
| RP11-424M21.1  | 0,00 | 0,00 | 0,00 | 0,00 | NA | NA |
| RP11-424M22.1  | 0,00 | 0,00 | 0,00 | 0,00 | NA | NA |
| RP11-424M22.3  | 0,00 | 0,00 | 0,00 | 0,00 | NA | NA |
| RP11-424M24.3  | 0,00 | 0,28 | 0,00 | 0,00 | NA | NA |
| RP11-425D10.1  | 0,00 | 0,00 | 0,00 | 0,00 | NA | NA |
| RP11-425D10.2  | 0,00 | 0,00 | 0,00 | 0,00 | NA | NA |
| RP11-425D10.4  | 0,00 | 0,00 | 0,00 | 0,00 | NA | NA |
| RP11-425D17.2  | 0,00 | 0,00 | 0,00 | 0,00 | NA | NA |
| RP11-425E13.2  | 0,00 | 0,00 | 0,00 | 0,00 | NA | NA |
| RP11-425I13.2  | 0,00 | 0,00 | 0,00 | 0,00 | NA | NA |
| RP11-425J20.1  | 0,00 | 0,00 | 0,00 | 0,00 | NA | NA |
| RP11-425J20.2  | 0,00 | 0,00 | 0,00 | 0,00 | NA | NA |
| RP11-425M17.3  | 0,00 | 0,00 | 0,00 | 0,00 | NA | NA |
| RP11-425M5.8   | 0,00 | 0,00 | 0,00 | 0,00 | NA | NA |
| RP11-425P5.1   | 0,00 | 0,00 | 0,00 | 0,00 | NA | NA |
| RP11-426A6.5   | 0,00 | 0,00 | 0,00 | 0,00 | NA | NA |
| RP11-426A6.9   | 0,00 | 0,00 | 0,00 | 0,00 | NA | NA |
| RP11-426C22.6  | 0,00 | 0,39 | 0,00 | 0,00 | NA | NA |
| RP11-426J5.1   | 0,00 | 0,00 | 0,00 | 0,00 | NA | NA |
| RP11-426J5.2   | 0,00 | 0,00 | 0,00 | 0,00 | NA | NA |
| RP11-426L16.7  | 0,00 | 0,00 | 0,00 | 0,00 | NA | NA |
| RP11-426L16.9  | 0,00 | 0,00 | 0,00 | 0,00 | NA | NA |
| RP11-426M1.2   | 0,00 | 0,00 | 0,00 | 0,00 | NA | NA |
| RP11-427D1.1   | 0,00 | 0,00 | 0,00 | 0,00 | NA | NA |
| RP11-427E4.1   | 0,00 | 0,00 | 0,00 | 0,00 | NA | NA |
| RP11-427G18.1  | 0,00 | 0,00 | 0,00 | 0,00 | NA | NA |

|               |      |      |      |      |    |    |
|---------------|------|------|------|------|----|----|
| RP11-427M20.1 | 0,00 | 0,00 | 0,00 | 0,00 | NA | NA |
| RP11-427O13.1 | 0,00 | 0,00 | 0,00 | 0,00 | NA | NA |
| RP11-427O13.2 | 0,00 | 0,00 | 0,00 | 0,00 | NA | NA |
| RP11-427O13.3 | 0,00 | 0,31 | 0,00 | 0,00 | NA | NA |
| RP11-427P5.2  | 0,00 | 0,00 | 0,00 | 0,00 | NA | NA |
| RP11-428C19.5 | 0,00 | 0,00 | 0,00 | 0,00 | NA | NA |
| RP11-428C19.6 | 0,00 | 0,00 | 0,00 | 0,00 | NA | NA |
| RP11-428F18.2 | 0,00 | 0,00 | 0,00 | 0,00 | NA | NA |
| RP11-428F8.2  | 0,00 | 0,00 | 0,00 | 0,00 | NA | NA |
| RP11-428G2.1  | 0,00 | 0,00 | 0,00 | 0,00 | NA | NA |
| RP11-428G5.1  | 0,00 | 0,00 | 0,00 | 0,00 | NA | NA |
| RP11-428G5.2  | 0,00 | 0,00 | 0,00 | 0,00 | NA | NA |
| RP11-428G5.4  | 0,00 | 0,00 | 0,00 | 0,00 | NA | NA |
| RP11-428G5.6  | 0,00 | 0,00 | 0,00 | 0,00 | NA | NA |
| RP11-428I12.1 | 0,00 | 0,00 | 0,00 | 0,00 | NA | NA |
| RP11-428I1.2  | 0,00 | 0,00 | 0,00 | 0,00 | NA | NA |
| RP11-428K13.1 | 0,00 | 0,00 | 0,00 | 0,00 | NA | NA |
| RP11-428K3.1  | 0,00 | 0,00 | 0,00 | 0,00 | NA | NA |
| RP11-428L21.1 | 0,00 | 0,00 | 0,00 | 0,00 | NA | NA |
| RP11-428L21.2 | 0,00 | 0,00 | 0,00 | 0,00 | NA | NA |
| RP11-428L9.1  | 0,00 | 0,00 | 0,00 | 0,00 | NA | NA |
| RP11-428L9.2  | 0,00 | 0,00 | 0,00 | 0,00 | NA | NA |
| RP11-428O18.4 | 0,00 | 0,00 | 0,00 | 0,00 | NA | NA |
| RP11-428O23.1 | 0,00 | 0,00 | 0,00 | 0,00 | NA | NA |
| RP11-428P16.2 | 0,00 | 0,00 | 0,00 | 0,00 | NA | NA |
| RP11-428P16.3 | 0,00 | 0,00 | 0,00 | 0,00 | NA | NA |
| RP11-429A20.2 | 0,00 | 0,00 | 0,00 | 0,00 | NA | NA |
| RP11-429B11.2 | 0,00 | 0,00 | 0,00 | 0,00 | NA | NA |
| RP11-429B14.2 | 0,00 | 0,00 | 0,00 | 0,00 | NA | NA |
| RP11-429E11.2 | 0,00 | 0,00 | 0,00 | 0,00 | NA | NA |
| RP11-429G17.1 | 0,00 | 0,00 | 0,00 | 0,00 | NA | NA |
| RP11-429G17.2 | 0,00 | 0,00 | 0,00 | 0,00 | NA | NA |
| RP11-429I17.2 | 0,00 | 0,00 | 0,02 | 0,08 | NA | NA |
| RP11-429I17.4 | 0,00 | 0,00 | 0,00 | 0,00 | NA | NA |
| RP11-429I17.5 | 0,00 | 0,00 | 0,00 | 0,00 | NA | NA |
| RP11-429O1.1  | 0,00 | 0,00 | 0,00 | 0,00 | NA | NA |
| RP11-429O2.1  | 0,00 | 0,00 | 0,00 | 0,00 | NA | NA |
| RP11-429P3.4  | 0,00 | 0,00 | 0,00 | 0,00 | NA | NA |
| RP11-429P7.1  | 0,00 | 0,00 | 0,00 | 0,00 | NA | NA |
| RP11-42D20.1  | 0,00 | 0,00 | 0,00 | 0,00 | NA | NA |
| RP11-42H13.1  | 0,00 | 0,00 | 0,00 | 0,00 | NA | NA |
| RP11-42I10.3  | 0,00 | 0,00 | 0,00 | 0,00 | NA | NA |
| RP11-42L13.2  | 0,00 | 0,00 | 0,00 | 0,00 | NA | NA |
| RP11-42L13.3  | 0,00 | 0,00 | 0,00 | 0,00 | NA | NA |
| RP11-42O15.2  | 0,00 | 0,00 | 0,00 | 0,00 | NA | NA |
| RP11-430A19.2 | 0,00 | 0,00 | 0,00 | 0,00 | NA | NA |
| RP11-430E17.1 | 0,00 | 0,00 | 0,00 | 0,00 | NA | NA |
| RP11-430G17.3 | 0,00 | 0,00 | 0,00 | 0,00 | NA | NA |
| RP11-430H10.1 | 0,00 | 0,00 | 0,00 | 0,00 | NA | NA |
| RP11-430H10.3 | 0,00 | 0,00 | 0,00 | 0,00 | NA | NA |
| RP11-430H10.4 | 0,00 | 0,00 | 0,00 | 0,00 | NA | NA |
| RP11-430H12.2 | 0,00 | 0,00 | 0,00 | 0,00 | NA | NA |
| RP11-430I3.2  | 0,00 | 0,00 | 0,00 | 0,00 | NA | NA |
| RP11-430J3.1  | 0,00 | 0,00 | 0,00 | 0,00 | NA | NA |
| RP11-430J3.2  | 0,00 | 0,00 | 0,00 | 0,00 | NA | NA |

|               |      |      |      |      |    |    |
|---------------|------|------|------|------|----|----|
| RP11-430K21.2 | 0,00 | 0,00 | 0,00 | 0,00 | NA | NA |
| RP11-430K22.2 | 0,00 | 0,00 | 0,00 | 0,00 | NA | NA |
| RP11-430L16.1 | 0,00 | 0,00 | 0,00 | 0,00 | NA | NA |
| RP11-430L17.1 | 0,00 | 0,00 | 0,00 | 0,00 | NA | NA |
| RP11-430L3.1  | 0,00 | 0,00 | 0,00 | 0,00 | NA | NA |
| RP11-431D12.1 | 0,00 | 0,00 | 0,00 | 0,00 | NA | NA |
| RP11-431I17.1 | 0,00 | 0,00 | 0,00 | 0,00 | NA | NA |
| RP11-431J24.2 | 0,00 | 0,00 | 0,00 | 0,00 | NA | NA |
| RP11-431J24.4 | 0,00 | 0,00 | 0,00 | 0,00 | NA | NA |
| RP11-431K24.3 | 0,00 | 0,00 | 0,00 | 0,00 | NA | NA |
| RP11-431O22.2 | 0,00 | 0,00 | 0,00 | 0,00 | NA | NA |
| RP11-432A8.1  | 0,00 | 0,00 | 0,00 | 0,00 | NA | NA |
| RP11-432A8.2  | 0,00 | 0,00 | 0,00 | 0,00 | NA | NA |
| RP11-432D22.1 | 0,00 | 0,00 | 0,00 | 0,00 | NA | NA |
| RP11-432F4.2  | 0,00 | 0,00 | 0,00 | 0,00 | NA | NA |
| RP11-432I13.1 | 0,00 | 0,00 | 0,00 | 0,00 | NA | NA |
| RP11-432I13.3 | 0,00 | 0,00 | 0,00 | 0,00 | NA | NA |
| RP11-432I13.5 | 0,00 | 0,00 | 0,00 | 0,00 | NA | NA |
| RP11-432I5.2  | 0,00 | 0,00 | 0,00 | 0,00 | NA | NA |
| RP11-432I5.4  | 0,19 | 0,32 | 0,04 | 0,18 | NA | NA |
| RP11-432I5.6  | 0,00 | 0,00 | 0,00 | 0,00 | NA | NA |
| RP11-432I5.8  | 0,00 | 0,00 | 0,00 | 0,00 | NA | NA |
| RP11-432J22.2 | 0,00 | 0,00 | 0,00 | 0,00 | NA | NA |
| RP11-432J24.6 | 0,00 | 0,00 | 0,00 | 0,00 | NA | NA |
| RP11-432J3.4  | 0,00 | 0,00 | 0,00 | 0,00 | NA | NA |
| RP11-432J9.3  | 0,00 | 0,00 | 0,00 | 0,00 | NA | NA |
| RP11-432J9.6  | 0,00 | 0,00 | 0,00 | 0,00 | NA | NA |
| RP11-432L12.1 | 0,00 | 0,00 | 0,00 | 0,00 | NA | NA |
| RP11-432M24.4 | 0,00 | 0,00 | 0,00 | 0,00 | NA | NA |
| RP11-432M8.1  | 0,00 | 0,00 | 0,00 | 0,00 | NA | NA |
| RP11-432M8.10 | 0,00 | 0,00 | 0,00 | 0,00 | NA | NA |
| RP11-432M8.11 | 0,00 | 0,00 | 0,00 | 0,00 | NA | NA |
| RP11-432M8.12 | 0,00 | 0,00 | 0,00 | 0,00 | NA | NA |
| RP11-432M8.13 | 0,00 | 0,00 | 0,00 | 0,00 | NA | NA |
| RP11-432M8.14 | 0,00 | 0,00 | 0,00 | 0,00 | NA | NA |
| RP11-432M8.16 | 0,00 | 0,00 | 0,00 | 0,00 | NA | NA |
| RP11-432M8.17 | 0,00 | 0,00 | 0,00 | 0,00 | NA | NA |
| RP11-432M8.19 | 0,00 | 0,00 | 0,00 | 0,00 | NA | NA |
| RP11-432M8.2  | 0,00 | 0,00 | 0,00 | 0,00 | NA | NA |
| RP11-432M8.20 | 0,00 | 0,00 | 0,00 | 0,00 | NA | NA |
| RP11-432M8.21 | 0,00 | 0,00 | 0,00 | 0,00 | NA | NA |
| RP11-432M8.3  | 0,00 | 0,00 | 0,00 | 0,00 | NA | NA |
| RP11-432M8.4  | 0,00 | 0,00 | 0,00 | 0,00 | NA | NA |
| RP11-432M8.6  | 0,00 | 0,00 | 0,00 | 0,00 | NA | NA |
| RP11-432M8.7  | 0,00 | 0,00 | 0,00 | 0,00 | NA | NA |
| RP11-432M8.9  | 0,00 | 0,00 | 0,00 | 0,00 | NA | NA |
| RP11-432N13.2 | 0,00 | 0,00 | 0,00 | 0,00 | NA | NA |
| RP11-432N13.4 | 0,00 | 0,00 | 0,00 | 0,00 | NA | NA |
| RP11-433A10.1 | 0,00 | 0,00 | 0,00 | 0,00 | NA | NA |
| RP11-433A10.2 | 0,00 | 0,00 | 0,00 | 0,00 | NA | NA |
| RP11-433A10.3 | 0,00 | 0,00 | 0,00 | 0,00 | NA | NA |
| RP11-433A19.1 | 0,00 | 0,00 | 0,00 | 0,00 | NA | NA |
| RP11-433A19.2 | 0,00 | 0,00 | 0,00 | 0,00 | NA | NA |
| RP11-433B3.1  | 0,00 | 0,00 | 0,00 | 0,00 | NA | NA |
| RP11-433B3.2  | 0,00 | 0,00 | 0,00 | 0,00 | NA | NA |

|               |      |      |      |      |    |    |
|---------------|------|------|------|------|----|----|
| RP11-433C9.1  | 0,00 | 0,00 | 0,00 | 0,00 | NA | NA |
| RP11-433C9.3  | 0,00 | 0,00 | 0,00 | 0,00 | NA | NA |
| RP11-433J20.2 | 0,00 | 0,00 | 0,00 | 0,00 | NA | NA |
| RP11-433J22.2 | 0,00 | 0,00 | 0,00 | 0,00 | NA | NA |
| RP11-433J22.3 | 0,00 | 0,00 | 0,00 | 0,00 | NA | NA |
| RP11-433J8.2  | 0,00 | 0,00 | 0,00 | 0,00 | NA | NA |
| RP11-433K2.1  | 0,00 | 0,00 | 0,00 | 0,00 | NA | NA |
| RP11-433O3.1  | 0,00 | 0,00 | 0,00 | 0,00 | NA | NA |
| RP11-433P17.1 | 0,00 | 0,00 | 0,00 | 0,00 | NA | NA |
| RP11-433P17.3 | 0,00 | 0,00 | 0,00 | 0,00 | NA | NA |
| RP11-434C1.2  | 0,00 | 0,00 | 0,00 | 0,00 | NA | NA |
| RP11-434C1.4  | 0,00 | 0,00 | 0,00 | 0,00 | NA | NA |
| RP11-434C1.5  | 0,00 | 0,00 | 0,00 | 0,00 | NA | NA |
| RP11-434C1.6  | 0,00 | 0,00 | 0,00 | 0,00 | NA | NA |
| RP11-434D11.4 | 0,00 | 0,00 | 0,00 | 0,00 | NA | NA |
| RP11-434D2.11 | 0,00 | 0,00 | 0,00 | 0,00 | NA | NA |
| RP11-434D2.12 | 0,00 | 0,00 | 0,00 | 0,00 | NA | NA |
| RP11-434D2.6  | 0,00 | 0,00 | 0,00 | 0,00 | NA | NA |
| RP11-434D2.7  | 0,00 | 0,00 | 0,00 | 0,00 | NA | NA |
| RP11-434D2.8  | 0,00 | 0,00 | 0,00 | 0,00 | NA | NA |
| RP11-434D2.9  | 0,00 | 0,00 | 0,00 | 0,00 | NA | NA |
| RP11-434E6.2  | 0,00 | 0,00 | 0,00 | 0,00 | NA | NA |
| RP11-434E6.4  | 0,00 | 0,00 | 0,00 | 0,00 | NA | NA |
| RP11-434E6.5  | 0,00 | 0,00 | 0,00 | 0,00 | NA | NA |
| RP11-434H6.2  | 0,00 | 0,00 | 0,00 | 0,00 | NA | NA |
| RP11-434I12.3 | 0,00 | 0,00 | 0,00 | 0,00 | NA | NA |
| RP11-434I12.4 | 0,00 | 0,00 | 0,00 | 0,00 | NA | NA |
| RP11-434I12.5 | 0,00 | 0,00 | 0,00 | 0,00 | NA | NA |
| RP11-434J24.2 | 0,00 | 0,00 | 0,00 | 0,00 | NA | NA |
| RP11-434J24.3 | 0,00 | 0,00 | 0,00 | 0,00 | NA | NA |
| RP11-434N15.1 | 0,00 | 0,00 | 0,00 | 0,00 | NA | NA |
| RP11-434N15.2 | 0,00 | 0,00 | 0,00 | 0,00 | NA | NA |
| RP11-434O22.2 | 0,00 | 0,00 | 0,00 | 0,00 | NA | NA |
| RP11-435D7.3  | 0,00 | 0,00 | 0,00 | 0,00 | NA | NA |
| RP11-435F13.1 | 0,00 | 0,00 | 0,00 | 0,00 | NA | NA |
| RP11-435F17.3 | 0,00 | 0,00 | 0,00 | 0,00 | NA | NA |
| RP11-435I10.3 | 0,00 | 0,00 | 0,00 | 0,00 | NA | NA |
| RP11-435I10.6 | 0,00 | 0,00 | 0,00 | 0,00 | NA | NA |
| RP11-435I3.1  | 0,00 | 0,00 | 0,00 | 0,00 | NA | NA |
| RP11-435J9.1  | 0,00 | 0,00 | 0,00 | 0,00 | NA | NA |
| RP11-435J9.2  | 0,00 | 0,00 | 0,00 | 0,00 | NA | NA |
| RP11-435O5.5  | 0,00 | 0,00 | 0,00 | 0,00 | NA | NA |
| RP11-435O5.6  | 0,00 | 0,00 | 0,00 | 0,00 | NA | NA |
| RP11-435O5.7  | 0,00 | 0,00 | 0,00 | 0,00 | NA | NA |
| RP11-435P24.2 | 0,00 | 0,00 | 0,00 | 0,00 | NA | NA |
| RP11-435P24.3 | 0,00 | 0,00 | 0,00 | 0,00 | NA | NA |
| RP11-436F21.1 | 0,00 | 0,00 | 0,00 | 0,00 | NA | NA |
| RP11-436F23.1 | 0,00 | 0,00 | 0,00 | 0,00 | NA | NA |
| RP11-436F9.1  | 0,00 | 0,00 | 0,00 | 0,00 | NA | NA |
| RP11-436H11.5 | 0,00 | 0,00 | 0,00 | 0,00 | NA | NA |
| RP11-436H16.1 | 0,00 | 0,00 | 0,00 | 0,00 | NA | NA |
| RP11-436I9.3  | 0,00 | 0,00 | 0,00 | 0,00 | NA | NA |
| RP11-436I9.5  | 0,00 | 0,00 | 0,00 | 0,00 | NA | NA |
| RP11-436J20.1 | 0,00 | 0,00 | 0,00 | 0,00 | NA | NA |
| RP11-436M15.1 | 0,00 | 0,00 | 0,00 | 0,00 | NA | NA |

|                |      |      |      |      |    |    |
|----------------|------|------|------|------|----|----|
| RP11-436M15.3  | 0,00 | 0,00 | 0,00 | 0,00 | NA | NA |
| RP11-436M15.4  | 0,00 | 0,00 | 0,00 | 0,00 | NA | NA |
| RP11-436P7.1   | 0,00 | 0,00 | 0,00 | 0,00 | NA | NA |
| RP11-436P7.2   | 0,00 | 0,00 | 0,00 | 0,00 | NA | NA |
| RP11-437F6.1   | 0,00 | 0,00 | 0,00 | 0,00 | NA | NA |
| RP11-437G21.1  | 0,00 | 0,00 | 0,00 | 0,00 | NA | NA |
| RP11-437G21.2  | 0,00 | 0,00 | 0,00 | 0,00 | NA | NA |
| RP11-437G21.3  | 0,00 | 0,00 | 0,00 | 0,00 | NA | NA |
| RP11-437J19.1  | 0,00 | 0,00 | 0,00 | 0,00 | NA | NA |
| RP11-438C19.1  | 0,00 | 0,00 | 0,00 | 0,00 | NA | NA |
| RP11-438C19.2  | 0,00 | 0,00 | 0,00 | 0,00 | NA | NA |
| RP11-438D14.2  | 0,00 | 0,00 | 0,00 | 0,00 | NA | NA |
| RP11-438D14.3  | 0,00 | 0,00 | 0,00 | 0,00 | NA | NA |
| RP11-438D8.2   | 0,00 | 0,00 | 0,00 | 0,00 | NA | NA |
| RP11-438D8.3   | 0,00 | 0,00 | 0,00 | 0,00 | NA | NA |
| RP11-438E8.2   | 0,00 | 0,00 | 0,00 | 0,00 | NA | NA |
| RP11-438F14.10 | 0,00 | 0,00 | 0,00 | 0,00 | NA | NA |
| RP11-438F14.3  | 0,00 | 0,00 | 0,00 | 0,00 | NA | NA |
| RP11-438H24.2  | 0,00 | 0,00 | 0,00 | 0,00 | NA | NA |
| RP11-438I12.1  | 0,00 | 0,19 | 0,00 | 0,00 | NA | NA |
| RP11-438J1.1   | 0,00 | 0,00 | 0,00 | 0,00 | NA | NA |
| RP11-438L7.3   | 0,00 | 0,00 | 0,00 | 0,00 | NA | NA |
| RP11-438N16.2  | 0,00 | 0,00 | 0,00 | 0,00 | NA | NA |
| RP11-438N5.4   | 0,00 | 0,00 | 0,00 | 0,00 | NA | NA |
| RP11-438O11.1  | 0,00 | 0,00 | 0,00 | 0,00 | NA | NA |
| RP11-439C15.2  | 0,00 | 0,00 | 0,00 | 0,00 | NA | NA |
| RP11-439C15.5  | 0,00 | 0,00 | 0,00 | 0,00 | NA | NA |
| RP11-439C8.2   | 0,00 | 0,00 | 0,00 | 0,00 | NA | NA |
| RP11-439E19.3  | 0,00 | 0,00 | 0,00 | 0,00 | NA | NA |
| RP11-439E19.6  | 0,00 | 0,00 | 0,00 | 0,00 | NA | NA |
| RP11-439E19.8  | 0,00 | 0,00 | 0,00 | 0,00 | NA | NA |
| RP11-439H13.2  | 0,00 | 0,00 | 0,00 | 0,00 | NA | NA |
| RP11-439H9.1   | 0,00 | 0,00 | 0,00 | 0,00 | NA | NA |
| RP11-439I14.1  | 0,00 | 0,00 | 0,00 | 0,00 | NA | NA |
| RP11-439K3.1   | 0,00 | 0,00 | 0,00 | 0,00 | NA | NA |
| RP11-439K3.4   | 0,00 | 0,00 | 0,00 | 0,00 | NA | NA |
| RP11-439L8.2   | 0,00 | 0,00 | 0,00 | 0,09 | NA | NA |
| RP11-439L8.3   | 0,00 | 0,00 | 0,00 | 0,00 | NA | NA |
| RP11-43A1.1    | 0,00 | 0,00 | 0,00 | 0,00 | NA | NA |
| RP11-43A14.2   | 0,00 | 0,00 | 0,00 | 0,00 | NA | NA |
| RP11-43D2.2    | 0,00 | 0,00 | 0,00 | 0,00 | NA | NA |
| RP11-43F13.4   | 0,00 | 0,00 | 0,00 | 0,00 | NA | NA |
| RP11-43N5.2    | 0,00 | 0,00 | 0,00 | 0,00 | NA | NA |
| RP11-440B23.1  | 0,00 | 0,00 | 0,00 | 0,00 | NA | NA |
| RP11-440D17.1  | 0,00 | 0,00 | 0,00 | 0,00 | NA | NA |
| RP11-440D17.2  | 0,00 | 0,00 | 0,00 | 0,00 | NA | NA |
| RP11-440D17.4  | 0,00 | 0,00 | 0,00 | 0,00 | NA | NA |
| RP11-440D17.5  | 0,00 | 0,00 | 0,00 | 0,00 | NA | NA |
| RP11-440D17.6  | 0,00 | 0,00 | 0,00 | 0,00 | NA | NA |
| RP11-440E5.1   | 0,00 | 0,00 | 0,00 | 0,00 | NA | NA |
| RP11-440G2.2   | 0,00 | 0,00 | 0,00 | 0,00 | NA | NA |
| RP11-440G5.2   | 0,00 | 0,00 | 0,00 | 0,00 | NA | NA |
| RP11-440I14.3  | 0,00 | 0,00 | 0,00 | 0,00 | NA | NA |
| RP11-440J4.1   | 0,00 | 0,00 | 0,00 | 0,00 | NA | NA |
| RP11-440J4.2   | 0,00 | 0,00 | 0,00 | 0,00 | NA | NA |



|               |      |      |      |      |    |    |
|---------------|------|------|------|------|----|----|
| RP11-440L14.3 | 0,00 | 0,00 | 0,00 | 0,00 | NA | NA |
| RP11-440L16.1 | 0,00 | 0,00 | 0,00 | 0,00 | NA | NA |
| RP11-440N4.1  | 0,00 | 0,00 | 0,00 | 0,00 | NA | NA |
| RP11-441A11.1 | 0,00 | 0,00 | 0,00 | 0,00 | NA | NA |
| RP11-441F11.2 | 0,00 | 0,00 | 0,00 | 0,00 | NA | NA |
| RP11-441F2.4  | 0,00 | 0,00 | 0,00 | 0,00 | NA | NA |
| RP11-441G8.1  | 0,00 | 0,00 | 0,00 | 0,00 | NA | NA |
| RP11-441M10.1 | 0,00 | 0,00 | 0,00 | 0,00 | NA | NA |
| RP11-441M8.1  | 0,00 | 0,00 | 0,00 | 0,00 | NA | NA |
| RP11-442A17.1 | 0,00 | 0,00 | 0,00 | 0,00 | NA | NA |
| RP11-442A17.2 | 0,00 | 0,00 | 0,00 | 0,00 | NA | NA |
| RP11-442F12.2 | 0,00 | 0,00 | 0,00 | 0,00 | NA | NA |
| RP11-442G21.1 | 0,00 | 0,00 | 0,00 | 0,00 | NA | NA |
| RP11-442I12.1 | 0,00 | 0,00 | 0,00 | 0,00 | NA | NA |
| RP11-442I17.1 | 0,00 | 0,00 | 0,00 | 0,00 | NA | NA |
| RP11-442I17.2 | 0,00 | 0,00 | 0,00 | 0,00 | NA | NA |
| RP11-442I17.3 | 0,00 | 0,00 | 0,00 | 0,00 | NA | NA |
| RP11-442I17.4 | 0,00 | 0,00 | 0,00 | 0,00 | NA | NA |
| RP11-442J21.1 | 0,00 | 0,00 | 0,00 | 0,00 | NA | NA |
| RP11-442N1.1  | 0,00 | 0,00 | 0,00 | 0,00 | NA | NA |
| RP11-442O1.3  | 0,00 | 0,00 | 0,00 | 0,04 | NA | NA |
| RP11-442O18.2 | 0,00 | 0,00 | 0,00 | 0,00 | NA | NA |
| RP11-442P12.2 | 0,00 | 0,00 | 0,00 | 0,00 | NA | NA |
| RP11-443A13.4 | 0,00 | 0,00 | 0,00 | 0,00 | NA | NA |
| RP11-443B7.3  | 0,19 | 0,00 | 0,27 | 0,00 | NA | NA |
| RP11-443B9.1  | 0,00 | 0,00 | 0,00 | 0,00 | NA | NA |
| RP11-443C10.1 | 0,00 | 0,00 | 0,00 | 0,00 | NA | NA |
| RP11-443C10.2 | 0,00 | 0,00 | 0,00 | 0,00 | NA | NA |
| RP11-443C10.3 | 0,00 | 0,00 | 0,00 | 0,00 | NA | NA |
| RP11-443G13.2 | 0,00 | 0,00 | 0,00 | 0,00 | NA | NA |
| RP11-443I9.1  | 0,00 | 0,00 | 0,00 | 0,00 | NA | NA |
| RP11-443J23.1 | 0,00 | 0,00 | 0,00 | 0,00 | NA | NA |
| RP11-443N24.1 | 0,00 | 0,00 | 0,00 | 0,00 | NA | NA |
| RP11-443N24.4 | 0,00 | 0,00 | 0,00 | 0,00 | NA | NA |
| RP11-443O13.3 | 0,00 | 0,00 | 0,00 | 0,00 | NA | NA |
| RP11-444A22.1 | 0,00 | 0,48 | 0,00 | 0,00 | NA | NA |
| RP11-444B24.2 | 0,00 | 0,00 | 0,00 | 0,00 | NA | NA |
| RP11-444C12.1 | 0,00 | 0,00 | 0,00 | 0,00 | NA | NA |
| RP11-444D13.1 | 0,00 | 0,00 | 0,00 | 0,00 | NA | NA |
| RP11-444J21.1 | 0,00 | 0,00 | 0,00 | 0,00 | NA | NA |
| RP11-444J21.2 | 0,00 | 0,00 | 0,00 | 0,00 | NA | NA |
| RP11-444J21.4 | 0,00 | 0,00 | 0,00 | 0,00 | NA | NA |
| RP11-444J21.5 | 0,00 | 0,00 | 0,00 | 0,00 | NA | NA |
| RP11-444J21.6 | 0,00 | 0,00 | 0,00 | 0,00 | NA | NA |
| RP11-444J21.7 | 0,00 | 0,00 | 0,00 | 0,00 | NA | NA |
| RP11-444K7.8  | 0,00 | 0,00 | 0,00 | 0,00 | NA | NA |
| RP11-444P10.1 | 0,00 | 0,00 | 0,00 | 0,00 | NA | NA |
| RP11-445F12.1 | 0,00 | 0,00 | 0,00 | 0,00 | NA | NA |
| RP11-445F12.2 | 0,00 | 0,00 | 0,00 | 0,00 | NA | NA |
| RP11-445H22.5 | 0,00 | 0,00 | 0,00 | 0,00 | NA | NA |
| RP11-445J14.1 | 0,00 | 0,00 | 0,00 | 0,00 | NA | NA |
| RP11-445J9.1  | 0,00 | 0,00 | 0,00 | 0,00 | NA | NA |
| RP11-445K13.2 | 0,00 | 0,00 | 0,00 | 0,00 | NA | NA |
| RP11-445L6.3  | 0,00 | 0,00 | 0,00 | 0,00 | NA | NA |
| RP11-445N18.3 | 0,00 | 0,00 | 0,00 | 0,00 | NA | NA |

|               |      |      |      |      |    |    |
|---------------|------|------|------|------|----|----|
| RP11-445N18.5 | 0,00 | 0,00 | 0,00 | 0,00 | NA | NA |
| RP11-445N18.6 | 0,00 | 0,00 | 0,00 | 0,00 | NA | NA |
| RP11-445N18.8 | 0,00 | 0,00 | 0,00 | 0,00 | NA | NA |
| RP11-445N20.2 | 0,00 | 0,00 | 0,00 | 0,00 | NA | NA |
| RP11-445N20.3 | 0,00 | 0,00 | 0,00 | 0,00 | NA | NA |
| RP11-445P17.3 | 0,00 | 0,00 | 0,00 | 0,00 | NA | NA |
| RP11-445P17.5 | 0,00 | 0,00 | 0,00 | 0,00 | NA | NA |
| RP11-445P17.6 | 0,00 | 0,00 | 0,00 | 0,00 | NA | NA |
| RP11-445P19.2 | 0,00 | 0,00 | 0,00 | 0,00 | NA | NA |
| RP11-446E9.1  | 0,00 | 0,00 | 0,00 | 0,00 | NA | NA |
| RP11-446F17.3 | 0,00 | 0,00 | 0,00 | 0,00 | NA | NA |
| RP11-446F3.2  | 0,00 | 0,00 | 0,00 | 0,00 | NA | NA |
| RP11-446H13.2 | 0,00 | 0,00 | 0,00 | 0,00 | NA | NA |
| RP11-446H18.1 | 0,00 | 0,00 | 0,00 | 0,00 | NA | NA |
| RP11-446H18.5 | 0,00 | 0,00 | 0,00 | 0,00 | NA | NA |
| RP11-446H18.6 | 0,00 | 0,00 | 0,00 | 0,00 | NA | NA |
| RP11-446J19.1 | 0,00 | 0,00 | 0,00 | 0,00 | NA | NA |
| RP11-446P9.1  | 0,00 | 0,00 | 0,00 | 0,00 | NA | NA |
| RP11-447B18.1 | 0,00 | 0,00 | 0,00 | 0,00 | NA | NA |
| RP11-447B21.1 | 0,00 | 0,00 | 0,00 | 0,00 | NA | NA |
| RP11-447E20.1 | 0,00 | 0,00 | 0,00 | 0,00 | NA | NA |
| RP11-447G11.1 | 0,00 | 0,00 | 0,00 | 0,00 | NA | NA |
| RP11-447H19.2 | 0,00 | 0,00 | 0,00 | 0,00 | NA | NA |
| RP11-447H19.4 | 0,00 | 0,00 | 0,00 | 0,00 | NA | NA |
| RP11-447J13.2 | 0,00 | 0,00 | 0,00 | 0,00 | NA | NA |
| RP11-447L10.1 | 0,00 | 0,00 | 0,00 | 0,00 | NA | NA |
| RP11-447M12.3 | 0,00 | 0,00 | 0,00 | 0,00 | NA | NA |
| RP11-448J14.1 | 0,00 | 0,00 | 0,00 | 0,00 | NA | NA |
| RP11-448K10.1 | 0,00 | 0,00 | 0,00 | 0,00 | NA | NA |
| RP11-448N11.1 | 0,00 | 0,00 | 0,00 | 0,00 | NA | NA |
| RP11-448N11.2 | 0,00 | 0,00 | 0,00 | 0,00 | NA | NA |
| RP11-448N11.3 | 0,00 | 0,00 | 0,00 | 0,00 | NA | NA |
| RP11-448N3.1  | 0,00 | 0,00 | 0,00 | 0,00 | NA | NA |
| RP11-448P19.1 | 0,00 | 0,00 | 0,00 | 0,00 | NA | NA |
| RP11-449D8.1  | 0,00 | 0,00 | 0,00 | 0,00 | NA | NA |
| RP11-449D8.2  | 0,00 | 0,00 | 0,00 | 0,00 | NA | NA |
| RP11-449D8.3  | 0,00 | 0,00 | 0,00 | 0,00 | NA | NA |
| RP11-449D8.5  | 0,00 | 0,00 | 0,00 | 0,00 | NA | NA |
| RP11-449H15.2 | 0,00 | 0,00 | 0,00 | 0,00 | NA | NA |
| RP11-449H3.1  | 0,00 | 0,00 | 0,00 | 0,00 | NA | NA |
| RP11-449H3.2  | 0,00 | 0,00 | 0,00 | 0,00 | NA | NA |
| RP11-449I17.3 | 0,00 | 0,00 | 0,00 | 0,00 | NA | NA |
| RP11-449I17.4 | 0,00 | 0,00 | 0,00 | 0,00 | NA | NA |
| RP11-449I17.5 | 0,00 | 0,00 | 0,00 | 0,00 | NA | NA |
| RP11-449I17.7 | 0,00 | 0,00 | 0,00 | 0,00 | NA | NA |
| RP11-449I17.9 | 0,00 | 0,00 | 0,00 | 0,00 | NA | NA |
| RP11-449J1.1  | 0,00 | 0,00 | 0,00 | 0,00 | NA | NA |
| RP11-449J10.1 | 0,00 | 0,00 | 0,00 | 0,00 | NA | NA |
| RP11-449J21.3 | 0,00 | 0,00 | 0,00 | 0,00 | NA | NA |
| RP11-449J3.3  | 0,00 | 0,00 | 0,00 | 0,00 | NA | NA |
| RP11-449L13.2 | 0,00 | 0,00 | 0,00 | 0,00 | NA | NA |
| RP11-449M6.1  | 0,00 | 0,00 | 0,00 | 0,00 | NA | NA |
| RP11-449M6.2  | 0,00 | 0,00 | 0,00 | 0,00 | NA | NA |
| RP11-449M6.3  | 0,00 | 0,00 | 0,00 | 0,00 | NA | NA |
| RP11-449O16.2 | 0,00 | 0,00 | 0,00 | 0,00 | NA | NA |

|               |      |      |      |      |    |    |
|---------------|------|------|------|------|----|----|
| RP11-449P1.1  | 0,00 | 0,00 | 0,00 | 0,00 | NA | NA |
| RP11-44B19.1  | 0,00 | 0,00 | 0,00 | 0,00 | NA | NA |
| RP11-44F14.10 | 0,00 | 0,00 | 0,00 | 0,00 | NA | NA |
| RP11-44F14.4  | 0,00 | 0,00 | 0,00 | 0,00 | NA | NA |
| RP11-44F14.9  | 0,00 | 0,00 | 0,00 | 0,00 | NA | NA |
| RP11-44F21.2  | 0,00 | 0,00 | 0,00 | 0,00 | NA | NA |
| RP11-44F21.4  | 0,00 | 0,00 | 0,00 | 0,00 | NA | NA |
| RP11-44H4.1   | 0,00 | 0,00 | 0,00 | 0,00 | NA | NA |
| RP11-44I10.5  | 0,00 | 0,00 | 0,00 | 0,00 | NA | NA |
| RP11-44I10.6  | 0,00 | 0,00 | 0,00 | 0,00 | NA | NA |
| RP11-44K6.2   | 0,00 | 0,00 | 0,00 | 0,00 | NA | NA |
| RP11-44K6.5   | 0,00 | 0,00 | 0,00 | 0,00 | NA | NA |
| RP11-44N12.4  | 0,00 | 0,00 | 0,00 | 0,00 | NA | NA |
| RP11-44N12.5  | 0,00 | 0,00 | 0,00 | 0,00 | NA | NA |
| RP11-44N17.1  | 0,00 | 0,00 | 0,00 | 0,00 | NA | NA |
| RP11-44N21.1  | 0,00 | 0,00 | 0,00 | 0,00 | NA | NA |
| RP11-44N21.2  | 0,00 | 0,00 | 0,00 | 0,00 | NA | NA |
| RP11-44N21.4  | 0,00 | 0,00 | 0,00 | 0,00 | NA | NA |
| RP11-450D21.1 | 0,00 | 0,00 | 0,00 | 0,00 | NA | NA |
| RP11-450D21.2 | 0,00 | 0,00 | 0,00 | 0,00 | NA | NA |
| RP11-450G15.2 | 0,00 | 0,00 | 0,00 | 0,00 | NA | NA |
| RP11-450H5.2  | 0,00 | 0,00 | 0,00 | 0,00 | NA | NA |
| RP11-450H5.3  | 0,00 | 0,00 | 0,00 | 0,00 | NA | NA |
| RP11-450H5.4  | 0,00 | 0,00 | 0,00 | 0,00 | NA | NA |
| RP11-450H6.1  | 0,00 | 0,00 | 0,00 | 0,00 | NA | NA |
| RP11-450H6.2  | 0,00 | 0,00 | 0,00 | 0,00 | NA | NA |
| RP11-450I1.2  | 0,00 | 0,00 | 0,00 | 0,00 | NA | NA |
| RP11-450I19.1 | 0,00 | 0,00 | 0,00 | 0,00 | NA | NA |
| RP11-450I19.2 | 0,00 | 0,00 | 0,00 | 0,00 | NA | NA |
| RP11-451B8.1  | 0,00 | 0,00 | 0,00 | 0,00 | NA | NA |
| RP11-451F14.1 | 0,00 | 0,00 | 0,00 | 0,00 | NA | NA |
| RP11-451F20.1 | 0,00 | 0,00 | 0,00 | 0,00 | NA | NA |
| RP11-451G4.1  | 0,00 | 0,00 | 0,00 | 0,00 | NA | NA |
| RP11-451G4.4  | 0,00 | 1,02 | 0,00 | 0,00 | NA | NA |
| RP11-451H23.1 | 0,00 | 0,00 | 0,00 | 0,00 | NA | NA |
| RP11-451H23.2 | 0,00 | 0,00 | 0,00 | 0,00 | NA | NA |
| RP11-451H23.3 | 0,00 | 0,00 | 0,00 | 0,00 | NA | NA |
| RP11-451I24.1 | 0,00 | 0,00 | 0,00 | 0,00 | NA | NA |
| RP11-451K18.3 | 0,00 | 0,00 | 0,00 | 0,00 | NA | NA |
| RP11-451L9.2  | 0,00 | 0,00 | 0,00 | 0,00 | NA | NA |
| RP11-451L9.3  | 0,00 | 0,00 | 0,00 | 0,00 | NA | NA |
| RP11-451N19.3 | 0,00 | 0,00 | 0,00 | 0,00 | NA | NA |
| RP11-451O13.1 | 0,00 | 0,15 | 0,00 | 0,00 | NA | NA |
| RP11-451O18.1 | 0,00 | 0,00 | 0,00 | 0,00 | NA | NA |
| RP11-452B18.1 | 0,00 | 0,00 | 0,00 | 0,00 | NA | NA |
| RP11-452D2.1  | 0,00 | 0,00 | 0,00 | 0,00 | NA | NA |
| RP11-452D21.2 | 0,00 | 0,00 | 0,00 | 0,00 | NA | NA |
| RP11-452G18.1 | 0,00 | 0,00 | 0,00 | 0,00 | NA | NA |
| RP11-452J6.2  | 0,00 | 0,00 | 0,00 | 0,00 | NA | NA |
| RP11-452K12.4 | 0,00 | 0,00 | 0,00 | 0,00 | NA | NA |
| RP11-452K12.7 | 0,00 | 0,00 | 0,00 | 0,00 | NA | NA |
| RP11-452L6.7  | 0,00 | 0,00 | 0,00 | 0,00 | NA | NA |
| RP11-452L6.8  | 0,00 | 0,00 | 0,00 | 0,00 | NA | NA |
| RP11-452N4.1  | 0,00 | 0,00 | 0,00 | 0,00 | NA | NA |
| RP11-452P23.2 | 0,00 | 0,00 | 0,00 | 0,00 | NA | NA |

|               |      |      |      |      |    |    |
|---------------|------|------|------|------|----|----|
| RP11-453A12.2 | 0,00 | 0,00 | 0,00 | 0,00 | NA | NA |
| RP11-453D16.1 | 0,00 | 0,00 | 0,00 | 0,00 | NA | NA |
| RP11-453D16.2 | 0,00 | 0,00 | 0,00 | 0,00 | NA | NA |
| RP11-453E17.4 | 0,00 | 0,00 | 0,00 | 0,00 | NA | NA |
| RP11-453E2.2  | 0,00 | 0,00 | 0,00 | 0,00 | NA | NA |
| RP11-453M23.1 | 0,00 | 0,00 | 0,00 | 0,00 | NA | NA |
| RP11-453N3.1  | 0,00 | 0,00 | 0,00 | 0,00 | NA | NA |
| RP11-453N3.3  | 0,00 | 0,00 | 0,00 | 0,00 | NA | NA |
| RP11-453N3.5  | 0,00 | 0,00 | 0,00 | 0,00 | NA | NA |
| RP11-453N3.7  | 0,00 | 0,00 | 0,00 | 0,00 | NA | NA |
| RP11-453O22.1 | 0,00 | 0,00 | 0,00 | 0,00 | NA | NA |
| RP11-453O5.1  | 0,00 | 0,00 | 0,00 | 0,00 | NA | NA |
| RP11-454C18.2 | 0,00 | 0,53 | 0,00 | 0,42 | NA | NA |
| RP11-454F8.3  | 0,00 | 0,00 | 0,00 | 0,00 | NA | NA |
| RP11-454H13.1 | 0,00 | 0,00 | 0,00 | 0,00 | NA | NA |
| RP11-454K24.1 | 0,00 | 0,00 | 0,00 | 0,00 | NA | NA |
| RP11-454K7.2  | 0,00 | 0,00 | 0,00 | 0,00 | NA | NA |
| RP11-454K7.3  | 0,00 | 0,00 | 0,00 | 0,00 | NA | NA |
| RP11-454L9.1  | 0,00 | 0,00 | 0,00 | 0,00 | NA | NA |
| RP11-455B2.3  | 0,00 | 0,00 | 0,00 | 0,00 | NA | NA |
| RP11-455B2.9  | 0,00 | 0,00 | 0,00 | 0,00 | NA | NA |
| RP11-455F15.1 | 0,00 | 0,00 | 0,00 | 0,00 | NA | NA |
| RP11-455F5.3  | 0,00 | 0,00 | 0,00 | 0,00 | NA | NA |
| RP11-455J15.1 | 0,00 | 0,00 | 0,00 | 0,00 | NA | NA |
| RP11-455O6.2  | 0,00 | 0,00 | 0,00 | 0,00 | NA | NA |
| RP11-455O6.8  | 0,00 | 0,00 | 0,00 | 0,00 | NA | NA |
| RP11-455P21.2 | 0,00 | 1,35 | 0,00 | 0,00 | NA | NA |
| RP11-456A14.1 | 0,00 | 0,00 | 0,00 | 0,00 | NA | NA |
| RP11-456A18.1 | 0,00 | 0,00 | 0,00 | 0,00 | NA | NA |
| RP11-456H18.1 | 0,00 | 0,00 | 0,00 | 0,00 | NA | NA |
| RP11-456J20.2 | 0,00 | 0,00 | 0,00 | 0,00 | NA | NA |
| RP11-456N14.6 | 0,00 | 0,00 | 0,00 | 0,00 | NA | NA |
| RP11-456O19.3 | 0,00 | 0,00 | 0,00 | 0,00 | NA | NA |
| RP11-456O19.4 | 0,00 | 0,00 | 0,00 | 0,00 | NA | NA |
| RP11-456O19.5 | 0,00 | 0,00 | 0,00 | 0,00 | NA | NA |
| RP11-457D13.1 | 0,00 | 0,00 | 0,00 | 0,00 | NA | NA |
| RP11-457D13.4 | 0,00 | 0,00 | 0,00 | 0,00 | NA | NA |
| RP11-457D20.1 | 0,00 | 0,00 | 0,00 | 0,00 | NA | NA |
| RP11-457D20.2 | 0,00 | 0,00 | 0,00 | 0,00 | NA | NA |
| RP11-457I16.4 | 0,00 | 0,00 | 0,00 | 0,00 | NA | NA |
| RP11-457K10.1 | 0,00 | 0,00 | 0,00 | 0,00 | NA | NA |
| RP11-457K10.2 | 0,00 | 0,00 | 0,00 | 0,00 | NA | NA |
| RP11-457L23.1 | 0,00 | 0,00 | 0,00 | 0,00 | NA | NA |
| RP11-457P14.2 | 0,00 | 0,00 | 0,00 | 0,00 | NA | NA |
| RP11-457P14.5 | 0,00 | 0,00 | 0,00 | 0,00 | NA | NA |
| RP11-457P14.6 | 0,00 | 0,00 | 0,00 | 0,00 | NA | NA |
| RP11-458F8.1  | 0,00 | 0,00 | 0,00 | 0,00 | NA | NA |
| RP11-458F8.3  | 0,00 | 0,00 | 0,00 | 0,00 | NA | NA |
| RP11-458F8.4  | 0,03 | 0,00 | 0,00 | 0,20 | NA | NA |
| RP11-458I4.1  | 0,00 | 0,00 | 0,00 | 0,00 | NA | NA |
| RP11-458K10.1 | 0,00 | 0,00 | 0,00 | 0,00 | NA | NA |
| RP11-458K10.2 | 0,00 | 0,00 | 0,00 | 0,00 | NA | NA |
| RP11-459A10.1 | 0,00 | 0,00 | 0,00 | 0,00 | NA | NA |
| RP11-459C13.1 | 0,00 | 0,00 | 0,00 | 0,00 | NA | NA |
| RP11-459D20.1 | 0,00 | 0,00 | 0,00 | 0,00 | NA | NA |

|               |      |      |      |      |    |    |
|---------------|------|------|------|------|----|----|
| RP11-459D22.1 | 0,00 | 0,00 | 0,00 | 0,00 | NA | NA |
| RP11-459D22.2 | 0,00 | 0,00 | 0,00 | 0,00 | NA | NA |
| RP11-459F1.2  | 0,00 | 0,00 | 0,00 | 0,00 | NA | NA |
| RP11-459F3.3  | 0,00 | 0,00 | 0,00 | 0,00 | NA | NA |
| RP11-459F6.1  | 0,00 | 0,00 | 0,00 | 0,00 | NA | NA |
| RP11-459J23.2 | 0,00 | 0,00 | 0,00 | 0,00 | NA | NA |
| RP11-459K23.1 | 0,00 | 0,00 | 0,00 | 0,00 | NA | NA |
| RP11-459K23.2 | 0,00 | 0,00 | 0,00 | 0,00 | NA | NA |
| RP11-459O1.2  | 0,00 | 0,00 | 0,00 | 0,00 | NA | NA |
| RP11-459O16.5 | 0,00 | 0,00 | 0,00 | 0,00 | NA | NA |
| RP11-459O16.8 | 0,00 | 0,12 | 0,00 | 0,00 | NA | NA |
| RP11-459O16.9 | 0,00 | 0,00 | 0,00 | 0,00 | NA | NA |
| RP11-459P23.1 | 0,00 | 0,00 | 0,00 | 0,00 | NA | NA |
| RP11-45A12.1  | 0,00 | 0,00 | 0,00 | 0,00 | NA | NA |
| RP11-45A12.2  | 0,00 | 0,00 | 0,00 | 0,00 | NA | NA |
| RP11-45A16.3  | 0,00 | 0,00 | 0,00 | 0,00 | NA | NA |
| RP11-45A16.4  | 0,00 | 0,00 | 0,00 | 0,00 | NA | NA |
| RP11-45D17.1  | 0,00 | 0,00 | 0,00 | 0,00 | NA | NA |
| RP11-45H22.1  | 0,00 | 0,00 | 0,00 | 0,00 | NA | NA |
| RP11-45H22.2  | 0,00 | 0,00 | 0,00 | 0,00 | NA | NA |
| RP11-45H22.3  | 0,00 | 0,00 | 0,00 | 0,00 | NA | NA |
| RP11-45I20.1  | 0,00 | 0,00 | 0,00 | 0,00 | NA | NA |
| RP11-45K10.1  | 0,00 | 0,00 | 0,00 | 0,00 | NA | NA |
| RP11-45M22.2  | 0,00 | 0,00 | 0,00 | 0,00 | NA | NA |
| RP11-45M22.3  | 0,00 | 0,00 | 0,00 | 0,00 | NA | NA |
| RP11-45M22.4  | 0,00 | 0,00 | 0,00 | 0,00 | NA | NA |
| RP11-45O22.1  | 0,00 | 0,00 | 0,00 | 0,00 | NA | NA |
| RP11-45O22.2  | 0,00 | 0,00 | 0,00 | 0,00 | NA | NA |
| RP11-45O22.3  | 0,00 | 0,00 | 0,00 | 0,00 | NA | NA |
| RP11-45P15.1  | 0,00 | 0,00 | 0,00 | 0,00 | NA | NA |
| RP11-45P15.2  | 0,00 | 0,00 | 0,00 | 0,00 | NA | NA |
| RP11-45P15.5  | 0,00 | 0,00 | 0,00 | 0,00 | NA | NA |
| RP11-45P22.1  | 0,00 | 0,00 | 0,00 | 0,00 | NA | NA |
| RP11-45P22.2  | 0,00 | 0,00 | 0,00 | 0,00 | NA | NA |
| RP11-460B17.3 | 0,00 | 0,00 | 0,00 | 0,00 | NA | NA |
| RP11-460C6.1  | 0,00 | 0,00 | 0,00 | 0,00 | NA | NA |
| RP11-460E7.9  | 0,00 | 0,00 | 0,00 | 0,00 | NA | NA |
| RP11-460G11.1 | 0,00 | 0,00 | 0,00 | 0,00 | NA | NA |
| RP11-460H14.1 | 0,00 | 0,53 | 0,00 | 0,00 | NA | NA |
| RP11-460H18.2 | 0,00 | 0,00 | 0,00 | 0,00 | NA | NA |
| RP11-460H9.1  | 0,00 | 0,00 | 0,00 | 0,00 | NA | NA |
| RP11-460I13.2 | 0,00 | 0,00 | 0,00 | 0,00 | NA | NA |
| RP11-460I13.6 | 0,00 | 0,00 | 0,00 | 0,00 | NA | NA |
| RP11-460I19.2 | 0,00 | 0,00 | 0,00 | 0,00 | NA | NA |
| RP11-460M2.1  | 0,00 | 0,00 | 0,00 | 0,00 | NA | NA |
| RP11-460N11.2 | 0,00 | 0,04 | 0,12 | 0,00 | NA | NA |
| RP11-460N20.3 | 0,00 | 0,00 | 0,00 | 0,00 | NA | NA |
| RP11-460N20.7 | 0,00 | 0,00 | 0,00 | 0,00 | NA | NA |
| RP11-461C13.2 | 0,00 | 0,00 | 0,00 | 0,00 | NA | NA |
| RP11-461G12.1 | 0,00 | 0,00 | 0,00 | 0,00 | NA | NA |
| RP11-461G12.2 | 0,00 | 0,00 | 0,06 | 0,00 | NA | NA |
| RP11-461H3.2  | 0,00 | 0,00 | 0,00 | 0,00 | NA | NA |
| RP11-461K13.1 | 0,00 | 0,00 | 0,00 | 0,00 | NA | NA |
| RP11-461L13.4 | 0,00 | 0,00 | 0,00 | 0,00 | NA | NA |
| RP11-461L18.1 | 0,00 | 0,00 | 0,00 | 0,00 | NA | NA |

|               |      |      |      |      |    |    |
|---------------|------|------|------|------|----|----|
| RP11-461M2.2  | 0,00 | 0,00 | 0,00 | 0,00 | NA | NA |
| RP11-461O14.3 | 0,00 | 0,00 | 0,00 | 0,00 | NA | NA |
| RP11-461O7.2  | 0,00 | 0,00 | 0,00 | 0,00 | NA | NA |
| RP11-462B18.2 | 0,00 | 0,00 | 0,00 | 0,00 | NA | NA |
| RP11-462B18.3 | 0,00 | 0,00 | 0,00 | 0,00 | NA | NA |
| RP11-462D18.4 | 0,00 | 0,00 | 0,00 | 0,00 | NA | NA |
| RP11-462G12.2 | 0,28 | 0,25 | 0,35 | 0,61 | NA | NA |
| RP11-462H3.2  | 0,00 | 0,00 | 0,00 | 0,00 | NA | NA |
| RP11-462L8.2  | 0,00 | 0,24 | 0,00 | 0,00 | NA | NA |
| RP11-463C14.1 | 0,00 | 0,00 | 0,00 | 0,00 | NA | NA |
| RP11-463C8.4  | 0,00 | 0,00 | 0,00 | 0,00 | NA | NA |
| RP11-463C8.7  | 0,00 | 0,00 | 0,00 | 0,00 | NA | NA |
| RP11-463H12.1 | 0,00 | 0,00 | 0,00 | 0,00 | NA | NA |
| RP11-463H12.2 | 0,00 | 0,00 | 0,00 | 0,00 | NA | NA |
| RP11-463H24.1 | 0,00 | 0,00 | 0,00 | 0,00 | NA | NA |
| RP11-463H24.4 | 0,00 | 0,00 | 0,00 | 0,00 | NA | NA |
| RP11-463I20.2 | 0,00 | 0,00 | 0,00 | 0,00 | NA | NA |
| RP11-463J10.3 | 0,00 | 0,00 | 0,00 | 0,00 | NA | NA |
| RP11-463J10.4 | 0,00 | 0,00 | 0,00 | 0,00 | NA | NA |
| RP11-463J7.1  | 0,00 | 0,00 | 0,00 | 0,00 | NA | NA |
| RP11-463J7.3  | 0,00 | 0,00 | 0,00 | 0,00 | NA | NA |
| RP11-463M14.1 | 0,00 | 0,00 | 0,00 | 0,00 | NA | NA |
| RP11-463M16.5 | 0,00 | 0,00 | 0,00 | 0,00 | NA | NA |
| RP11-463M3.1  | 0,00 | 0,00 | 0,00 | 0,00 | NA | NA |
| RP11-463O9.1  | 0,00 | 0,00 | 0,00 | 0,00 | NA | NA |
| RP11-463O9.2  | 0,00 | 0,00 | 0,00 | 0,00 | NA | NA |
| RP11-463O9.5  | 0,00 | 0,00 | 0,00 | 0,00 | NA | NA |
| RP11-463O9.6  | 0,00 | 0,00 | 0,00 | 0,00 | NA | NA |
| RP11-464C19.2 | 0,00 | 0,00 | 0,00 | 0,00 | NA | NA |
| RP11-464E15.2 | 0,00 | 0,00 | 0,00 | 0,00 | NA | NA |
| RP11-464E15.4 | 0,00 | 0,00 | 0,00 | 0,00 | NA | NA |
| RP11-464E15.5 | 0,00 | 0,00 | 0,00 | 0,00 | NA | NA |
| RP11-464F9.20 | 0,00 | 0,21 | 0,11 | 0,00 | NA | NA |
| RP11-464I4.1  | 0,00 | 0,00 | 0,00 | 0,00 | NA | NA |
| RP11-464O2.5  | 0,00 | 0,00 | 0,00 | 0,00 | NA | NA |
| RP11-465B22.5 | 0,00 | 0,00 | 0,00 | 0,00 | NA | NA |
| RP11-465B22.8 | 0,00 | 0,00 | 0,00 | 0,00 | NA | NA |
| RP11-465C5.1  | 0,00 | 0,00 | 0,00 | 0,00 | NA | NA |
| RP11-465I4.3  | 0,00 | 0,00 | 0,00 | 0,00 | NA | NA |
| RP11-465K16.1 | 0,00 | 0,00 | 0,00 | 0,00 | NA | NA |
| RP11-465K4.4  | 0,00 | 0,00 | 0,00 | 0,00 | NA | NA |
| RP11-465L8.1  | 0,00 | 0,00 | 0,00 | 0,00 | NA | NA |
| RP11-465M18.1 | 0,00 | 0,00 | 0,00 | 0,00 | NA | NA |
| RP11-465N4.2  | 0,00 | 0,00 | 0,00 | 0,00 | NA | NA |
| RP11-466A19.4 | 0,00 | 0,00 | 0,00 | 0,00 | NA | NA |
| RP11-466A19.5 | 0,00 | 0,00 | 0,00 | 0,00 | NA | NA |
| RP11-466A19.6 | 0,00 | 0,00 | 0,00 | 0,00 | NA | NA |
| RP11-466A19.7 | 0,00 | 0,00 | 0,00 | 0,00 | NA | NA |
| RP11-466F5.4  | 0,00 | 0,00 | 0,00 | 0,00 | NA | NA |
| RP11-466F5.9  | 0,00 | 0,00 | 0,00 | 0,00 | NA | NA |
| RP11-466G12.2 | 0,00 | 0,00 | 0,00 | 0,00 | NA | NA |
| RP11-466G12.5 | 0,00 | 0,00 | 0,00 | 0,00 | NA | NA |
| RP11-466H18.1 | 0,00 | 0,00 | 0,00 | 0,00 | NA | NA |
| RP11-466J14.3 | 0,00 | 0,00 | 0,00 | 0,00 | NA | NA |
| RP11-466M21.1 | 0,00 | 0,00 | 0,00 | 0,00 | NA | NA |

|                |      |      |      |      |    |    |
|----------------|------|------|------|------|----|----|
| RP11-466P24.4  | 0,00 | 0,00 | 0,00 | 0,00 | NA | NA |
| RP11-466P24.5  | 0,00 | 0,00 | 0,00 | 0,00 | NA | NA |
| RP11-467B13.2  | 0,00 | 0,00 | 0,00 | 0,00 | NA | NA |
| RP11-467D10.2  | 0,00 | 0,00 | 0,00 | 0,00 | NA | NA |
| RP11-467D18.2  | 0,00 | 0,00 | 0,00 | 0,00 | NA | NA |
| RP11-467H10.1  | 0,00 | 0,00 | 0,00 | 0,00 | NA | NA |
| RP11-467H10.2  | 0,00 | 0,00 | 0,00 | 0,00 | NA | NA |
| RP11-467I17.1  | 0,00 | 0,00 | 0,00 | 0,00 | NA | NA |
| RP11-467I20.2  | 0,00 | 0,00 | 0,00 | 0,00 | NA | NA |
| RP11-467I20.3  | 0,00 | 0,00 | 0,00 | 0,00 | NA | NA |
| RP11-467I20.4  | 0,00 | 0,00 | 0,00 | 0,00 | NA | NA |
| RP11-467I21.1  | 0,00 | 0,00 | 0,00 | 0,00 | NA | NA |
| RP11-467J12.1  | 0,00 | 0,00 | 0,00 | 0,00 | NA | NA |
| RP11-467J12.2  | 0,00 | 0,00 | 0,00 | 0,00 | NA | NA |
| RP11-467J12.3  | 0,00 | 0,00 | 0,00 | 0,00 | NA | NA |
| RP11-467K18.2  | 0,00 | 0,00 | 0,00 | 0,00 | NA | NA |
| RP11-467L19.11 | 0,00 | 0,00 | 0,00 | 0,00 | NA | NA |
| RP11-467L19.16 | 0,00 | 0,00 | 0,00 | 0,00 | NA | NA |
| RP11-467L20.10 | 0,00 | 0,00 | 0,00 | 0,00 | NA | NA |
| RP11-467M13.2  | 0,00 | 0,00 | 0,00 | 0,00 | NA | NA |
| RP11-467M13.3  | 0,00 | 0,00 | 0,00 | 0,00 | NA | NA |
| RP11-467N20.6  | 0,00 | 0,00 | 0,00 | 0,00 | NA | NA |
| RP11-467N20.7  | 0,00 | 0,00 | 0,00 | 0,00 | NA | NA |
| RP11-467N20.8  | 0,00 | 0,00 | 0,00 | 0,00 | NA | NA |
| RP11-467P22.4  | 0,00 | 0,00 | 0,00 | 0,00 | NA | NA |
| RP11-467P22.5  | 0,00 | 0,00 | 0,00 | 0,00 | NA | NA |
| RP11-467P9.1   | 0,00 | 0,00 | 0,00 | 0,00 | NA | NA |
| RP11-468C1.1   | 0,00 | 0,00 | 0,00 | 0,00 | NA | NA |
| RP11-468E2.6   | 0,00 | 0,00 | 0,00 | 0,00 | NA | NA |
| RP11-468F18.2  | 0,00 | 0,00 | 0,00 | 0,00 | NA | NA |
| RP11-468H14.1  | 0,00 | 0,00 | 0,00 | 0,00 | NA | NA |
| RP11-468H14.2  | 0,00 | 0,00 | 0,00 | 0,00 | NA | NA |
| RP11-468I15.1  | 0,00 | 0,00 | 0,00 | 0,00 | NA | NA |
| RP11-468L18.1  | 0,00 | 0,00 | 0,00 | 0,00 | NA | NA |
| RP11-468N14.09 | 0,00 | 0,00 | 0,00 | 0,00 | NA | NA |
| RP11-468N14.11 | 0,00 | 0,00 | 0,00 | 0,00 | NA | NA |
| RP11-468N14.12 | 0,00 | 0,00 | 0,00 | 0,00 | NA | NA |
| RP11-468N14.3  | 0,00 | 0,00 | 0,00 | 0,00 | NA | NA |
| RP11-468N14.4  | 0,00 | 0,00 | 0,00 | 0,00 | NA | NA |
| RP11-468N14.5  | 0,00 | 0,00 | 0,00 | 0,00 | NA | NA |
| RP11-468N14.6  | 0,00 | 0,00 | 0,00 | 0,00 | NA | NA |
| RP11-468N14.8  | 0,00 | 0,00 | 0,00 | 0,00 | NA | NA |
| RP11-469A15.2  | 0,15 | 0,00 | 0,00 | 0,00 | NA | NA |
| RP11-469E19.1  | 0,00 | 0,00 | 0,00 | 0,00 | NA | NA |
| RP11-469H8.6   | 0,00 | 0,00 | 0,00 | 0,00 | NA | NA |
| RP11-469H8.8   | 0,00 | 0,00 | 0,00 | 0,00 | NA | NA |
| RP11-469J4.3   | 0,00 | 0,00 | 0,00 | 0,00 | NA | NA |
| RP11-469L23.2  | 0,00 | 0,00 | 0,00 | 0,00 | NA | NA |
| RP11-469L4.1   | 0,00 | 0,00 | 0,00 | 0,00 | NA | NA |
| RP11-469N6.1   | 0,00 | 0,00 | 0,00 | 0,00 | NA | NA |
| RP11-469N6.2   | 0,00 | 0,00 | 0,00 | 0,00 | NA | NA |
| RP11-469O11.1  | 0,00 | 0,00 | 0,00 | 0,00 | NA | NA |
| RP11-469O11.2  | 0,00 | 0,00 | 0,00 | 0,00 | NA | NA |
| RP11-46A10.5   | 0,07 | 0,00 | 0,00 | 0,08 | NA | NA |
| RP11-46A10.8   | 0,00 | 0,00 | 0,00 | 0,00 | NA | NA |

|                |      |      |      |      |    |    |
|----------------|------|------|------|------|----|----|
| RP11-46B11.2   | 0,00 | 0,00 | 0,00 | 0,00 | NA | NA |
| RP11-46C24.3   | 0,00 | 0,00 | 0,00 | 0,00 | NA | NA |
| RP11-46C24.6   | 0,00 | 0,00 | 0,00 | 0,00 | NA | NA |
| RP11-46C24.7   | 0,08 | 0,07 | 0,06 | 0,21 | NA | NA |
| RP11-46D1.2    | 0,00 | 0,00 | 0,00 | 0,00 | NA | NA |
| RP11-46D6.4    | 0,00 | 0,00 | 0,00 | 0,00 | NA | NA |
| RP11-46D6.5    | 0,00 | 0,00 | 0,00 | 0,00 | NA | NA |
| RP11-46E17.6   | 0,00 | 0,00 | 0,00 | 0,00 | NA | NA |
| RP11-46F15.2   | 0,00 | 0,00 | 0,00 | 0,00 | NA | NA |
| RP11-46H11.2   | 0,00 | 0,00 | 0,00 | 0,00 | NA | NA |
| RP11-46I1.2    | 0,00 | 0,00 | 0,00 | 0,00 | NA | NA |
| RP11-46I8.1    | 0,00 | 0,00 | 0,00 | 0,00 | NA | NA |
| RP11-46J23.1   | 0,00 | 0,26 | 0,00 | 0,00 | NA | NA |
| RP11-470B22.1  | 0,00 | 0,00 | 0,00 | 0,00 | NA | NA |
| RP11-470C13.4  | 0,00 | 0,00 | 0,00 | 0,00 | NA | NA |
| RP11-470F18.1  | 0,00 | 0,00 | 0,00 | 0,00 | NA | NA |
| RP11-470L19.2  | 0,00 | 0,00 | 0,00 | 0,00 | NA | NA |
| RP11-470L19.5  | 0,00 | 0,00 | 0,00 | 0,00 | NA | NA |
| RP11-470L19.6  | 0,00 | 0,00 | 0,00 | 0,00 | NA | NA |
| RP11-470L19.7  | 0,00 | 0,00 | 0,00 | 0,00 | NA | NA |
| RP11-470M17.2  | 0,00 | 0,00 | 0,00 | 0,00 | NA | NA |
| RP11-471G13.1  | 0,00 | 0,00 | 0,00 | 0,00 | NA | NA |
| RP11-471G13.2  | 0,00 | 0,00 | 0,00 | 0,00 | NA | NA |
| RP11-471G13.3  | 0,00 | 0,00 | 0,00 | 0,00 | NA | NA |
| RP11-471G13.4  | 0,00 | 0,00 | 0,00 | 0,00 | NA | NA |
| RP11-471G13.5  | 0,00 | 0,00 | 0,00 | 0,00 | NA | NA |
| RP11-471I7.1   | 0,00 | 0,00 | 0,00 | 0,00 | NA | NA |
| RP11-471L13.2  | 0,00 | 0,00 | 0,00 | 0,00 | NA | NA |
| RP11-471M2.1   | 0,00 | 0,00 | 0,00 | 0,00 | NA | NA |
| RP11-471M2.4   | 0,00 | 0,00 | 0,00 | 0,00 | NA | NA |
| RP11-471N19.1  | 0,00 | 0,00 | 0,00 | 0,00 | NA | NA |
| RP11-472E5.3   | 0,00 | 0,00 | 0,00 | 0,00 | NA | NA |
| RP11-472F14.4  | 0,00 | 0,00 | 0,00 | 0,00 | NA | NA |
| RP11-472F19.1  | 0,00 | 0,00 | 0,00 | 0,00 | NA | NA |
| RP11-472F19.2  | 0,00 | 0,00 | 0,00 | 0,00 | NA | NA |
| RP11-472F21.1  | 0,00 | 0,00 | 0,00 | 0,00 | NA | NA |
| RP11-472G21.2  | 0,00 | 0,00 | 0,00 | 0,00 | NA | NA |
| RP11-472G23.10 | 0,00 | 0,00 | 0,00 | 0,00 | NA | NA |
| RP11-472G23.3  | 0,00 | 0,00 | 0,00 | 0,00 | NA | NA |
| RP11-472G23.6  | 0,00 | 0,00 | 0,00 | 0,00 | NA | NA |
| RP11-472G23.7  | 0,00 | 0,00 | 0,00 | 0,00 | NA | NA |
| RP11-472G23.8  | 0,00 | 0,00 | 0,00 | 0,00 | NA | NA |
| RP11-472I20.1  | 0,00 | 0,00 | 0,00 | 0,00 | NA | NA |
| RP11-472I20.2  | 0,00 | 0,00 | 0,00 | 0,00 | NA | NA |
| RP11-472I20.3  | 0,00 | 0,00 | 0,00 | 0,00 | NA | NA |
| RP11-472K17.1  | 0,00 | 0,00 | 0,00 | 0,00 | NA | NA |
| RP11-472K17.3  | 0,00 | 0,00 | 0,00 | 0,00 | NA | NA |
| RP11-472K22.1  | 0,00 | 0,00 | 0,00 | 0,00 | NA | NA |
| RP11-472N13.2  | 0,00 | 0,00 | 0,00 | 0,00 | NA | NA |
| RP11-473A10.2  | 0,00 | 0,00 | 0,00 | 0,00 | NA | NA |
| RP11-473A17.1  | 0,00 | 0,00 | 0,00 | 0,00 | NA | NA |
| RP11-473C18.2  | 0,00 | 0,00 | 0,00 | 0,00 | NA | NA |
| RP11-473C19.1  | 0,00 | 0,00 | 0,00 | 0,00 | NA | NA |
| RP11-473E1.1   | 0,00 | 0,00 | 0,00 | 0,00 | NA | NA |
| RP11-473E2.2   | 0,00 | 0,00 | 0,00 | 0,00 | NA | NA |



|               |      |      |      |      |    |    |
|---------------|------|------|------|------|----|----|
| RP11-473E2.3  | 0,00 | 0,00 | 0,00 | 0,00 | NA | NA |
| RP11-473E2.4  | 0,00 | 0,00 | 0,00 | 0,00 | NA | NA |
| RP11-473I1.5  | 0,00 | 0,00 | 0,00 | 0,00 | NA | NA |
| RP11-473L1.1  | 0,00 | 0,00 | 0,00 | 0,00 | NA | NA |
| RP11-473L15.2 | 0,00 | 0,00 | 0,00 | 0,00 | NA | NA |
| RP11-473M10.2 | 0,00 | 0,00 | 0,00 | 0,00 | NA | NA |
| RP11-473M14.3 | 0,00 | 0,00 | 0,00 | 0,00 | NA | NA |
| RP11-473N11.2 | 0,00 | 0,00 | 0,00 | 0,00 | NA | NA |
| RP11-473O3.1  | 0,00 | 0,00 | 0,00 | 0,00 | NA | NA |
| RP11-474C8.3  | 0,00 | 0,00 | 0,00 | 0,00 | NA | NA |
| RP11-474C8.4  | 0,00 | 0,00 | 0,00 | 0,00 | NA | NA |
| RP11-474C8.5  | 0,00 | 0,00 | 0,00 | 0,00 | NA | NA |
| RP11-474C8.7  | 0,00 | 0,00 | 0,00 | 0,00 | NA | NA |
| RP11-474G23.4 | 0,00 | 0,00 | 0,00 | 0,00 | NA | NA |
| RP11-474H20.1 | 0,00 | 0,00 | 0,00 | 0,00 | NA | NA |
| RP11-474I1.1  | 0,00 | 0,00 | 0,00 | 0,00 | NA | NA |
| RP11-474I18.1 | 0,00 | 0,00 | 0,00 | 0,00 | NA | NA |
| RP11-474I18.2 | 0,00 | 0,00 | 0,00 | 0,00 | NA | NA |
| RP11-474I18.3 | 0,00 | 0,00 | 0,00 | 0,00 | NA | NA |
| RP11-474I18.4 | 0,00 | 0,00 | 0,00 | 0,00 | NA | NA |
| RP11-474L11.3 | 0,00 | 0,00 | 0,00 | 0,00 | NA | NA |
| RP11-474N24.5 | 0,00 | 0,00 | 0,00 | 0,00 | NA | NA |
| RP11-474N8.9  | 0,00 | 0,00 | 0,00 | 0,00 | NA | NA |
| RP11-474O21.2 | 0,00 | 0,00 | 0,00 | 0,00 | NA | NA |
| RP11-474P12.3 | 0,00 | 0,00 | 0,00 | 0,00 | NA | NA |
| RP11-475C16.2 | 0,00 | 0,00 | 0,00 | 0,00 | NA | NA |
| RP11-475D10.5 | 0,00 | 0,00 | 0,00 | 0,00 | NA | NA |
| RP11-475D12.1 | 0,00 | 0,00 | 0,00 | 0,00 | NA | NA |
| RP11-475D8.3  | 0,00 | 0,00 | 0,00 | 0,00 | NA | NA |
| RP11-475E11.2 | 0,00 | 0,00 | 0,00 | 0,00 | NA | NA |
| RP11-475F14.1 | 0,00 | 0,00 | 0,00 | 0,00 | NA | NA |
| RP11-475I24.1 | 0,00 | 0,00 | 0,00 | 0,00 | NA | NA |
| RP11-475I24.7 | 0,00 | 0,00 | 0,00 | 0,00 | NA | NA |
| RP11-475J5.1  | 0,00 | 0,00 | 0,00 | 0,00 | NA | NA |
| RP11-475J5.10 | 0,00 | 0,00 | 0,00 | 0,00 | NA | NA |
| RP11-475J5.4  | 0,00 | 0,00 | 0,00 | 0,00 | NA | NA |
| RP11-475J5.7  | 0,00 | 0,00 | 0,00 | 0,00 | NA | NA |
| RP11-475J5.8  | 0,00 | 0,22 | 0,00 | 0,00 | NA | NA |
| RP11-475J5.9  | 0,00 | 0,00 | 0,00 | 0,00 | NA | NA |
| RP11-475N22.2 | 0,00 | 0,00 | 0,00 | 0,00 | NA | NA |
| RP11-475N22.5 | 0,00 | 0,00 | 0,00 | 0,00 | NA | NA |
| RP11-475O23.2 | 0,00 | 0,00 | 0,00 | 0,00 | NA | NA |
| RP11-475O6.1  | 0,10 | 0,09 | 0,12 | 0,22 | NA | NA |
| RP11-476D10.1 | 0,00 | 0,00 | 0,00 | 0,00 | NA | NA |
| RP11-476F14.1 | 0,00 | 0,00 | 0,00 | 0,00 | NA | NA |
| RP11-476H24.1 | 0,00 | 0,00 | 0,00 | 0,00 | NA | NA |
| RP11-476I15.5 | 0,00 | 0,00 | 0,00 | 0,00 | NA | NA |
| RP11-476I15.6 | 0,00 | 0,00 | 0,00 | 0,00 | NA | NA |
| RP11-476J6.1  | 0,00 | 0,00 | 0,00 | 0,00 | NA | NA |
| RP11-476K15.1 | 0,00 | 0,00 | 0,00 | 0,00 | NA | NA |
| RP11-476M19.1 | 0,00 | 0,00 | 0,00 | 0,00 | NA | NA |
| RP11-476M19.3 | 0,00 | 0,00 | 0,00 | 0,00 | NA | NA |
| RP11-476O21.1 | 0,00 | 0,00 | 0,00 | 0,00 | NA | NA |
| RP11-477B16.2 | 0,00 | 0,00 | 0,00 | 0,00 | NA | NA |
| RP11-477G18.1 | 0,00 | 0,00 | 0,00 | 0,00 | NA | NA |

|               |      |      |      |      |    |    |
|---------------|------|------|------|------|----|----|
| RP11-477G18.4 | 0,00 | 0,00 | 0,00 | 0,00 | NA | NA |
| RP11-477G9.1  | 0,00 | 0,00 | 0,00 | 0,00 | NA | NA |
| RP11-477H21.2 | 0,00 | 0,00 | 0,00 | 0,00 | NA | NA |
| RP11-477J21.6 | 0,00 | 0,00 | 0,00 | 0,00 | NA | NA |
| RP11-477N12.4 | 0,00 | 0,00 | 0,00 | 0,00 | NA | NA |
| RP11-477N12.6 | 0,00 | 0,00 | 0,00 | 0,00 | NA | NA |
| RP11-478A7.1  | 0,00 | 0,00 | 0,00 | 0,00 | NA | NA |
| RP11-478B11.1 | 0,00 | 0,00 | 0,00 | 0,00 | NA | NA |
| RP11-478B11.2 | 0,00 | 0,00 | 0,00 | 0,00 | NA | NA |
| RP11-478B9.1  | 0,00 | 0,00 | 0,00 | 0,00 | NA | NA |
| RP11-478B9.2  | 0,00 | 0,00 | 0,00 | 0,00 | NA | NA |
| RP11-478B9.3  | 0,00 | 0,00 | 0,00 | 0,00 | NA | NA |
| RP11-478C1.3  | 0,00 | 0,00 | 0,00 | 0,00 | NA | NA |
| RP11-478C1.7  | 0,00 | 0,00 | 0,00 | 0,00 | NA | NA |
| RP11-478C6.1  | 0,00 | 0,00 | 0,00 | 0,00 | NA | NA |
| RP11-478C6.2  | 0,00 | 0,00 | 0,00 | 0,49 | NA | NA |
| RP11-478C6.5  | 0,00 | 0,00 | 0,00 | 0,00 | NA | NA |
| RP11-478G16.1 | 0,03 | 0,12 | 0,07 | 0,05 | NA | NA |
| RP11-478H13.4 | 0,00 | 0,00 | 0,00 | 0,00 | NA | NA |
| RP11-478I12.1 | 0,00 | 0,00 | 0,00 | 0,00 | NA | NA |
| RP11-478K15.1 | 0,00 | 0,00 | 0,00 | 0,00 | NA | NA |
| RP11-478K15.3 | 0,00 | 0,00 | 0,00 | 0,00 | NA | NA |
| RP11-478K15.7 | 0,00 | 0,00 | 0,00 | 0,00 | NA | NA |
| RP11-478L17.1 | 0,00 | 0,00 | 0,00 | 0,00 | NA | NA |
| RP11-479A21.1 | 0,00 | 0,00 | 0,00 | 0,00 | NA | NA |
| RP11-479G22.5 | 0,00 | 0,00 | 0,00 | 0,00 | NA | NA |
| RP11-479G22.6 | 0,00 | 0,00 | 0,00 | 0,00 | NA | NA |
| RP11-479G22.7 | 0,00 | 0,00 | 0,00 | 0,00 | NA | NA |
| RP11-479J7.2  | 0,00 | 0,00 | 0,00 | 0,00 | NA | NA |
| RP11-479O9.2  | 0,00 | 0,00 | 0,00 | 0,00 | NA | NA |
| RP11-479O9.3  | 0,00 | 0,00 | 0,00 | 0,00 | NA | NA |
| RP11-479P21.1 | 0,00 | 0,00 | 0,00 | 0,00 | NA | NA |
| RP11-47A17.2  | 0,00 | 0,00 | 0,00 | 0,00 | NA | NA |
| RP11-47F1.1   | 0,00 | 0,00 | 0,00 | 0,00 | NA | NA |
| RP11-47G11.2  | 0,00 | 0,00 | 0,00 | 0,00 | NA | NA |
| RP11-47G11.3  | 0,00 | 0,00 | 0,00 | 0,00 | NA | NA |
| RP11-47G4.1   | 0,00 | 0,00 | 0,00 | 0,00 | NA | NA |
| RP11-47J17.3  | 0,00 | 0,00 | 0,00 | 0,00 | NA | NA |
| RP11-47K11.2  | 0,00 | 0,00 | 0,00 | 0,00 | NA | NA |
| RP11-47L3.1   | 0,00 | 0,00 | 0,00 | 0,47 | NA | NA |
| RP11-480C22.1 | 0,34 | 0,45 | 0,00 | 0,50 | NA | NA |
| RP11-480D4.1  | 0,00 | 0,00 | 0,00 | 0,00 | NA | NA |
| RP11-480D4.5  | 0,00 | 0,00 | 0,00 | 0,00 | NA | NA |
| RP11-480D4.6  | 0,00 | 0,00 | 0,00 | 0,00 | NA | NA |
| RP11-480D4.7  | 0,00 | 0,00 | 0,00 | 0,00 | NA | NA |
| RP11-480G3.1  | 0,00 | 0,00 | 0,00 | 0,00 | NA | NA |
| RP11-480G7.3  | 0,00 | 0,00 | 0,00 | 0,00 | NA | NA |
| RP11-480I12.1 | 0,00 | 0,00 | 0,00 | 0,00 | NA | NA |
| RP11-480M11.1 | 0,00 | 0,00 | 0,00 | 0,00 | NA | NA |
| RP11-480N24.3 | 0,00 | 0,00 | 0,00 | 0,00 | NA | NA |
| RP11-480O10.1 | 0,00 | 0,00 | 0,00 | 0,00 | NA | NA |
| RP11-480O10.2 | 0,00 | 0,00 | 0,00 | 0,00 | NA | NA |
| RP11-480P3.1  | 0,00 | 0,00 | 0,00 | 0,00 | NA | NA |
| RP11-481A20.4 | 0,00 | 0,00 | 0,00 | 0,00 | NA | NA |
| RP11-481A20.8 | 0,00 | 0,00 | 0,00 | 0,00 | NA | NA |

|                |      |      |      |      |    |    |
|----------------|------|------|------|------|----|----|
| RP11-481E4.1   | 0,00 | 0,00 | 0,00 | 0,00 | NA | NA |
| RP11-481F23.1  | 0,00 | 0,00 | 0,00 | 0,00 | NA | NA |
| RP11-481F24.3  | 0,00 | 0,00 | 0,03 | 0,00 | NA | NA |
| RP11-481K16.2  | 0,00 | 0,00 | 0,00 | 0,00 | NA | NA |
| RP11-481K9.4   | 0,00 | 0,00 | 0,00 | 0,00 | NA | NA |
| RP11-481N16.1  | 0,00 | 0,00 | 0,00 | 0,00 | NA | NA |
| RP11-482D24.2  | 0,00 | 0,00 | 0,00 | 0,00 | NA | NA |
| RP11-482D24.3  | 0,00 | 0,00 | 0,00 | 0,00 | NA | NA |
| RP11-482E14.2  | 0,00 | 0,00 | 0,00 | 0,00 | NA | NA |
| RP11-482L11.1  | 0,00 | 0,00 | 0,00 | 0,00 | NA | NA |
| RP11-482L14.1  | 0,00 | 0,00 | 0,00 | 0,00 | NA | NA |
| RP11-482M8.3   | 0,00 | 0,00 | 0,00 | 0,00 | NA | NA |
| RP11-483A20.3  | 0,00 | 0,00 | 0,00 | 0,00 | NA | NA |
| RP11-483B5.3   | 0,00 | 0,00 | 0,00 | 0,00 | NA | NA |
| RP11-483C6.1   | 0,00 | 0,00 | 0,00 | 0,00 | NA | NA |
| RP11-483C6.2   | 0,00 | 0,39 | 0,00 | 0,00 | NA | NA |
| RP11-483E17.1  | 0,00 | 0,00 | 0,00 | 0,00 | NA | NA |
| RP11-483E23.10 | 0,00 | 0,00 | 0,00 | 0,00 | NA | NA |
| RP11-483E23.4  | 0,00 | 0,00 | 0,00 | 0,00 | NA | NA |
| RP11-483E23.5  | 0,00 | 0,00 | 0,00 | 0,00 | NA | NA |
| RP11-483E23.7  | 0,00 | 0,00 | 0,00 | 0,00 | NA | NA |
| RP11-483E23.9  | 0,00 | 0,00 | 0,00 | 0,00 | NA | NA |
| RP11-483E7.1   | 0,00 | 0,00 | 0,00 | 0,00 | NA | NA |
| RP11-483H11.1  | 0,00 | 0,00 | 0,00 | 0,00 | NA | NA |
| RP11-483H20.4  | 0,00 | 0,00 | 0,00 | 0,00 | NA | NA |
| RP11-483H20.6  | 0,00 | 0,00 | 0,00 | 0,00 | NA | NA |
| RP11-483I13.5  | 0,00 | 0,00 | 0,00 | 0,00 | NA | NA |
| RP11-483I13.6  | 0,05 | 0,17 | 0,07 | 0,05 | NA | NA |
| RP11-483I24.1  | 0,00 | 0,00 | 0,00 | 0,00 | NA | NA |
| RP11-483K5.2   | 0,00 | 0,00 | 0,00 | 0,00 | NA | NA |
| RP11-483L5.1   | 0,00 | 0,00 | 0,00 | 0,00 | NA | NA |
| RP11-483M24.2  | 0,00 | 0,00 | 0,00 | 0,00 | NA | NA |
| RP11-483P21.6  | 0,00 | 0,00 | 0,00 | 0,00 | NA | NA |
| RP11-484D4.3   | 0,00 | 0,00 | 0,00 | 0,00 | NA | NA |
| RP11-484H12.2  | 0,00 | 0,00 | 0,00 | 0,00 | NA | NA |
| RP11-484H12.3  | 0,00 | 0,00 | 0,00 | 0,00 | NA | NA |
| RP11-484H12.4  | 0,00 | 0,00 | 0,00 | 0,00 | NA | NA |
| RP11-484H12.5  | 0,00 | 0,00 | 0,00 | 0,00 | NA | NA |
| RP11-484H12.7  | 0,00 | 0,00 | 0,00 | 0,00 | NA | NA |
| RP11-484I6.2   | 0,00 | 0,00 | 0,00 | 0,00 | NA | NA |
| RP11-484K9.4   | 0,00 | 0,00 | 0,00 | 0,00 | NA | NA |
| RP11-484M3.5   | 0,00 | 0,00 | 0,00 | 0,00 | NA | NA |
| RP11-485B17.10 | 0,00 | 0,00 | 0,00 | 0,00 | NA | NA |
| RP11-485B17.12 | 0,00 | 0,00 | 0,00 | 0,00 | NA | NA |
| RP11-485B17.3  | 0,00 | 0,00 | 0,00 | 0,00 | NA | NA |
| RP11-485B17.5  | 0,00 | 0,00 | 0,00 | 0,00 | NA | NA |
| RP11-485B17.9  | 0,00 | 0,00 | 0,00 | 0,00 | NA | NA |
| RP11-485C11.1  | 0,00 | 0,00 | 0,00 | 0,00 | NA | NA |
| RP11-485F13.1  | 0,00 | 0,00 | 0,00 | 0,00 | NA | NA |
| RP11-485G7.6   | 0,00 | 0,00 | 0,00 | 0,00 | NA | NA |
| RP11-485H8.2   | 0,00 | 0,00 | 0,00 | 0,00 | NA | NA |
| RP11-485M7.2   | 0,00 | 0,00 | 0,32 | 0,00 | NA | NA |
| RP11-485M7.3   | 0,00 | 0,00 | 0,00 | 0,00 | NA | NA |
| RP11-485O10.2  | 0,00 | 0,00 | 0,00 | 0,00 | NA | NA |
| RP11-485O10.3  | 0,00 | 0,00 | 0,00 | 0,00 | NA | NA |

|                |      |      |      |      |    |    |
|----------------|------|------|------|------|----|----|
| RP11-485O14.1  | 0,00 | 0,00 | 0,00 | 0,00 | NA | NA |
| RP11-486A14.2  | 0,00 | 0,00 | 0,00 | 0,00 | NA | NA |
| RP11-486B10.3  | 0,00 | 0,00 | 0,00 | 0,00 | NA | NA |
| RP11-486B10.5  | 0,00 | 0,00 | 0,00 | 0,00 | NA | NA |
| RP11-486E2.1   | 0,00 | 0,00 | 0,00 | 0,00 | NA | NA |
| RP11-486F17.1  | 0,00 | 0,00 | 0,00 | 0,00 | NA | NA |
| RP11-486G15.1  | 0,00 | 0,00 | 0,00 | 0,00 | NA | NA |
| RP11-486G15.2  | 0,00 | 0,00 | 0,00 | 0,00 | NA | NA |
| RP11-486M23.2  | 0,00 | 0,00 | 0,00 | 0,00 | NA | NA |
| RP11-486M3.3   | 0,00 | 0,00 | 0,00 | 0,00 | NA | NA |
| RP11-486O13.3  | 0,00 | 0,00 | 0,00 | 0,00 | NA | NA |
| RP11-486O13.5  | 0,00 | 0,00 | 0,00 | 0,00 | NA | NA |
| RP11-486P11.1  | 0,00 | 0,00 | 0,00 | 0,00 | NA | NA |
| RP11-487A2.1   | 0,00 | 0,00 | 0,00 | 0,00 | NA | NA |
| RP11-487I5.4   | 0,00 | 0,00 | 0,00 | 0,00 | NA | NA |
| RP11-488C13.1  | 0,00 | 0,00 | 0,00 | 0,00 | NA | NA |
| RP11-488C13.4  | 0,00 | 0,00 | 0,00 | 0,00 | NA | NA |
| RP11-488I20.8  | 0,00 | 0,00 | 0,00 | 0,00 | NA | NA |
| RP11-488I20.9  | 0,00 | 0,00 | 0,00 | 0,00 | NA | NA |
| RP11-488I4.2   | 0,00 | 0,00 | 0,00 | 0,00 | NA | NA |
| RP11-488L1.1   | 0,00 | 0,00 | 0,00 | 0,00 | NA | NA |
| RP11-488L18.1  | 0,00 | 0,00 | 0,00 | 0,00 | NA | NA |
| RP11-488L18.5  | 0,00 | 0,00 | 0,00 | 0,00 | NA | NA |
| RP11-488L18.6  | 0,00 | 0,00 | 0,00 | 0,00 | NA | NA |
| RP11-488P11.1  | 0,00 | 0,00 | 0,00 | 0,00 | NA | NA |
| RP11-489D6.2   | 0,00 | 0,00 | 0,00 | 0,00 | NA | NA |
| RP11-489G11.1  | 0,00 | 0,00 | 0,00 | 0,00 | NA | NA |
| RP11-489M13.1  | 0,00 | 0,00 | 0,00 | 0,00 | NA | NA |
| RP11-489M13.2  | 0,00 | 0,00 | 0,00 | 0,00 | NA | NA |
| RP11-489M13.3  | 0,00 | 0,00 | 0,00 | 0,00 | NA | NA |
| RP11-48B24.2   | 0,00 | 0,00 | 0,00 | 0,00 | NA | NA |
| RP11-48B3.2    | 0,00 | 0,00 | 0,00 | 0,00 | NA | NA |
| RP11-48C7.8    | 0,00 | 0,00 | 0,00 | 0,00 | NA | NA |
| RP11-48F14.1   | 0,00 | 0,00 | 0,00 | 0,00 | NA | NA |
| RP11-48F14.2   | 0,00 | 0,00 | 0,00 | 0,00 | NA | NA |
| RP11-48G14.1   | 0,00 | 0,00 | 0,00 | 0,00 | NA | NA |
| RP11-48G14.3   | 0,00 | 0,00 | 0,00 | 0,00 | NA | NA |
| RP11-48J8.2    | 0,00 | 0,00 | 0,00 | 0,00 | NA | NA |
| RP11-48O20.5   | 0,00 | 0,00 | 0,00 | 0,00 | NA | NA |
| RP11-490B18.3  | 0,00 | 0,00 | 0,00 | 0,00 | NA | NA |
| RP11-490C5.1   | 0,00 | 0,23 | 0,00 | 0,00 | NA | NA |
| RP11-490D19.11 | 0,00 | 0,00 | 0,00 | 0,00 | NA | NA |
| RP11-490D19.6  | 0,00 | 0,00 | 0,00 | 0,00 | NA | NA |
| RP11-490E15.2  | 0,00 | 0,00 | 0,00 | 0,00 | NA | NA |
| RP11-490F3.1   | 0,00 | 0,00 | 0,00 | 0,00 | NA | NA |
| RP11-490G2.2   | 0,00 | 0,00 | 0,00 | 0,00 | NA | NA |
| RP11-490G8.1   | 0,00 | 0,00 | 0,00 | 0,00 | NA | NA |
| RP11-490H9.1   | 0,00 | 0,00 | 0,00 | 0,00 | NA | NA |
| RP11-490M8.1   | 0,00 | 0,00 | 0,00 | 0,00 | NA | NA |
| RP11-490N5.1   | 0,00 | 0,00 | 0,00 | 0,00 | NA | NA |
| RP11-490N5.3   | 0,00 | 0,00 | 0,00 | 0,00 | NA | NA |
| RP11-490O24.1  | 0,00 | 0,00 | 0,00 | 0,00 | NA | NA |
| RP11-490O24.2  | 0,00 | 0,30 | 0,00 | 0,28 | NA | NA |
| RP11-490P13.1  | 0,00 | 0,00 | 0,00 | 0,00 | NA | NA |
| RP11-490P13.2  | 0,00 | 0,00 | 0,00 | 0,00 | NA | NA |

|                |      |      |      |      |    |    |
|----------------|------|------|------|------|----|----|
| RP11-491F9.1   | 0,00 | 0,00 | 0,00 | 0,00 | NA | NA |
| RP11-491H19.1  | 0,00 | 0,00 | 0,00 | 0,00 | NA | NA |
| RP11-491H9.4   | 0,00 | 0,00 | 0,00 | 0,00 | NA | NA |
| RP11-492A10.1  | 0,00 | 0,00 | 0,00 | 0,00 | NA | NA |
| RP11-492C2.1   | 0,00 | 0,00 | 0,00 | 0,00 | NA | NA |
| RP11-492L8.1   | 0,00 | 0,00 | 0,00 | 0,00 | NA | NA |
| RP11-492L8.2   | 0,00 | 0,00 | 0,00 | 0,00 | NA | NA |
| RP11-492M19.1  | 0,00 | 0,00 | 0,00 | 0,00 | NA | NA |
| RP11-492M19.3  | 0,00 | 0,00 | 0,00 | 0,00 | NA | NA |
| RP11-492O8.1   | 0,00 | 0,00 | 0,00 | 0,00 | NA | NA |
| RP11-493E3.2   | 0,00 | 0,39 | 0,00 | 0,00 | NA | NA |
| RP11-493K23.1  | 0,00 | 0,00 | 0,00 | 0,00 | NA | NA |
| RP11-493K23.4  | 0,00 | 0,00 | 0,00 | 0,00 | NA | NA |
| RP11-493L12.3  | 0,00 | 0,00 | 0,00 | 0,00 | NA | NA |
| RP11-493L12.6  | 0,00 | 0,00 | 0,00 | 0,00 | NA | NA |
| RP11-493L12.7  | 0,00 | 0,00 | 0,00 | 0,00 | NA | NA |
| RP11-494I9.1   | 0,00 | 0,00 | 0,00 | 0,00 | NA | NA |
| RP11-494I9.2   | 0,00 | 0,00 | 0,00 | 0,00 | NA | NA |
| RP11-494K3.2   | 0,00 | 0,00 | 0,00 | 0,00 | NA | NA |
| RP11-494M8.1   | 0,00 | 0,00 | 0,00 | 0,00 | NA | NA |
| RP11-495J3.1   | 0,00 | 0,00 | 0,00 | 0,00 | NA | NA |
| RP11-495K9.10  | 0,00 | 0,00 | 0,00 | 0,00 | NA | NA |
| RP11-495K9.6   | 0,00 | 0,00 | 0,00 | 0,00 | NA | NA |
| RP11-495K9.7   | 0,00 | 0,00 | 0,00 | 0,00 | NA | NA |
| RP11-495K9.8   | 0,00 | 0,00 | 0,00 | 0,00 | NA | NA |
| RP11-495L19.1  | 0,07 | 0,03 | 0,05 | 0,02 | NA | NA |
| RP11-495O10.1  | 0,00 | 0,00 | 0,00 | 0,00 | NA | NA |
| RP11-495O11.1  | 0,00 | 0,00 | 0,00 | 0,00 | NA | NA |
| RP11-495P10.10 | 0,00 | 0,00 | 0,00 | 0,00 | NA | NA |
| RP11-495P10.3  | 0,00 | 0,00 | 0,00 | 0,00 | NA | NA |
| RP11-495P10.4  | 0,00 | 0,00 | 0,00 | 0,00 | NA | NA |
| RP11-495P10.9  | 0,00 | 0,00 | 0,00 | 0,00 | NA | NA |
| RP11-496B10.1  | 0,00 | 0,00 | 0,00 | 0,00 | NA | NA |
| RP11-496B10.3  | 0,34 | 0,38 | 0,57 | 0,40 | NA | NA |
| RP11-496B10.5  | 0,00 | 0,00 | 0,00 | 0,00 | NA | NA |
| RP11-496B10.6  | 0,00 | 0,00 | 0,00 | 0,00 | NA | NA |
| RP11-496D1.2   | 0,00 | 0,00 | 0,00 | 0,00 | NA | NA |
| RP11-496H1.2   | 0,00 | 0,00 | 0,00 | 0,00 | NA | NA |
| RP11-496H15.2  | 0,00 | 0,00 | 0,00 | 0,00 | NA | NA |
| RP11-496H15.3  | 0,00 | 0,00 | 0,00 | 0,00 | NA | NA |
| RP11-496I2.2   | 0,00 | 0,00 | 0,00 | 0,00 | NA | NA |
| RP11-496I2.4   | 0,00 | 0,00 | 0,00 | 0,00 | NA | NA |
| RP11-496I2.7   | 0,00 | 0,00 | 0,00 | 0,00 | NA | NA |
| RP11-496I2.8   | 0,00 | 0,00 | 0,00 | 0,00 | NA | NA |
| RP11-496N12.6  | 0,00 | 0,00 | 0,00 | 0,00 | NA | NA |
| RP11-497D6.3   | 0,00 | 0,00 | 0,00 | 0,00 | NA | NA |
| RP11-497D6.5   | 0,00 | 0,07 | 0,00 | 0,00 | NA | NA |
| RP11-497E19.1  | 0,00 | 0,00 | 0,00 | 0,00 | NA | NA |
| RP11-497E19.2  | 0,00 | 0,00 | 0,00 | 0,00 | NA | NA |
| RP11-497G19.1  | 0,00 | 0,19 | 0,00 | 0,00 | NA | NA |
| RP11-497G19.3  | 0,00 | 0,00 | 0,00 | 0,00 | NA | NA |
| RP11-497H16.8  | 0,00 | 0,00 | 0,00 | 0,00 | NA | NA |
| RP11-497J7.1   | 0,00 | 0,00 | 0,00 | 0,00 | NA | NA |
| RP11-497J7.2   | 0,00 | 0,00 | 0,00 | 0,00 | NA | NA |
| RP11-497J7.4   | 0,00 | 0,00 | 0,00 | 0,00 | NA | NA |

|               |      |      |      |      |    |    |
|---------------|------|------|------|------|----|----|
| RP11-497K15.1 | 0,00 | 0,00 | 0,00 | 0,00 | NA | NA |
| RP11-498B4.5  | 0,00 | 0,00 | 0,00 | 0,00 | NA | NA |
| RP11-498B4.7  | 0,00 | 0,00 | 0,00 | 0,00 | NA | NA |
| RP11-498C9.12 | 0,00 | 0,00 | 0,00 | 0,00 | NA | NA |
| RP11-498C9.13 | 0,00 | 0,00 | 0,00 | 0,00 | NA | NA |
| RP11-498D10.8 | 0,00 | 0,00 | 0,00 | 0,00 | NA | NA |
| RP11-498E11.1 | 0,00 | 0,00 | 0,00 | 0,00 | NA | NA |
| RP11-498E11.2 | 0,00 | 0,00 | 0,00 | 0,00 | NA | NA |
| RP11-498J9.2  | 0,00 | 0,00 | 0,00 | 0,00 | NA | NA |
| RP11-498M14.1 | 0,00 | 0,00 | 0,00 | 0,00 | NA | NA |
| RP11-498M14.2 | 0,00 | 0,00 | 0,00 | 0,00 | NA | NA |
| RP11-498M15.1 | 0,00 | 0,00 | 0,00 | 0,00 | NA | NA |
| RP11-499A10.3 | 0,00 | 0,00 | 0,00 | 0,00 | NA | NA |
| RP11-499F3.1  | 0,00 | 0,00 | 0,00 | 0,00 | NA | NA |
| RP11-499O7.7  | 0,00 | 0,00 | 0,00 | 0,00 | NA | NA |
| RP11-499P1.1  | 0,00 | 0,00 | 0,00 | 0,00 | NA | NA |
| RP11-499P1.2  | 0,00 | 0,00 | 0,00 | 0,00 | NA | NA |
| RP11-49C9.2   | 0,00 | 0,00 | 0,00 | 0,00 | NA | NA |
| RP11-49E18.1  | 0,00 | 0,00 | 0,00 | 0,00 | NA | NA |
| RP11-49F1.1   | 0,00 | 0,00 | 0,00 | 0,00 | NA | NA |
| RP11-49F20.1  | 0,00 | 0,00 | 0,00 | 0,00 | NA | NA |
| RP11-49G10.3  | 0,00 | 0,00 | 0,00 | 0,00 | NA | NA |
| RP11-49G2.3   | 0,00 | 0,00 | 0,00 | 0,00 | NA | NA |
| RP11-49G2.4   | 0,00 | 0,00 | 0,00 | 0,00 | NA | NA |
| RP11-49I11.2  | 0,00 | 0,00 | 0,00 | 0,00 | NA | NA |
| RP11-49I11.3  | 0,00 | 0,00 | 0,00 | 0,00 | NA | NA |
| RP11-49K24.3  | 0,00 | 0,00 | 0,00 | 0,00 | NA | NA |
| RP11-49K24.4  | 0,00 | 0,00 | 0,00 | 0,00 | NA | NA |
| RP11-49K4.2   | 0,00 | 0,00 | 0,00 | 0,00 | NA | NA |
| RP11-49L2.1   | 0,00 | 0,00 | 0,00 | 0,00 | NA | NA |
| RP11-49M9.2   | 0,00 | 0,00 | 0,00 | 0,00 | NA | NA |
| RP11-49P4.7   | 0,00 | 0,00 | 0,00 | 0,00 | NA | NA |
| RP11-4B14.1   | 0,00 | 0,00 | 0,00 | 0,00 | NA | NA |
| RP11-4E23.2   | 0,00 | 0,00 | 0,00 | 0,00 | NA | NA |
| RP11-4F22.2   | 0,00 | 0,00 | 0,00 | 0,00 | NA | NA |
| RP11-4H14.1   | 0,00 | 0,00 | 0,00 | 0,00 | NA | NA |
| RP11-4I17.1   | 0,00 | 0,00 | 0,00 | 0,00 | NA | NA |
| RP11-4K16.2   | 0,00 | 0,35 | 0,00 | 0,00 | NA | NA |
| RP11-4L24.2   | 0,00 | 0,00 | 0,00 | 0,00 | NA | NA |
| RP11-4M23.2   | 0,00 | 0,00 | 0,00 | 0,00 | NA | NA |
| RP11-4M23.3   | 0,00 | 1,18 | 0,00 | 0,00 | NA | NA |
| RP11-4M23.7   | 0,00 | 0,00 | 0,00 | 0,00 | NA | NA |
| RP11-4N23.4   | 0,00 | 0,00 | 0,00 | 0,00 | NA | NA |
| RP11-4O3.2    | 0,00 | 0,00 | 0,00 | 0,00 | NA | NA |
| RP11-500B12.1 | 0,00 | 0,00 | 0,00 | 0,00 | NA | NA |
| RP11-500B12.2 | 0,00 | 0,00 | 0,00 | 0,00 | NA | NA |
| RP11-500G10.4 | 0,00 | 0,00 | 0,00 | 0,00 | NA | NA |
| RP11-500G10.5 | 0,00 | 0,00 | 0,00 | 0,00 | NA | NA |
| RP11-500G22.2 | 0,00 | 0,00 | 0,00 | 0,00 | NA | NA |
| RP11-500G9.1  | 0,00 | 0,00 | 0,00 | 0,00 | NA | NA |
| RP11-500K19.2 | 0,00 | 0,00 | 0,00 | 0,00 | NA | NA |
| RP11-500M10.1 | 0,00 | 0,00 | 0,00 | 0,00 | NA | NA |
| RP11-500M8.6  | 0,00 | 0,00 | 0,00 | 0,00 | NA | NA |
| RP11-501C14.5 | 0,00 | 0,00 | 0,00 | 0,00 | NA | NA |
| RP11-501C14.6 | 0,00 | 0,00 | 0,00 | 0,00 | NA | NA |

|               |      |      |      |      |    |    |
|---------------|------|------|------|------|----|----|
| RP11-501C14.7 | 0,00 | 0,00 | 0,00 | 0,00 | NA | NA |
| RP11-501C14.9 | 0,00 | 0,00 | 0,00 | 0,00 | NA | NA |
| RP11-501G6.1  | 0,00 | 0,00 | 0,00 | 0,00 | NA | NA |
| RP11-501G7.1  | 0,00 | 0,00 | 0,00 | 0,00 | NA | NA |
| RP11-501H19.2 | 0,00 | 0,00 | 0,00 | 0,00 | NA | NA |
| RP11-501I19.3 | 0,00 | 0,00 | 0,00 | 0,00 | NA | NA |
| RP11-501I19.4 | 0,00 | 0,00 | 0,00 | 0,00 | NA | NA |
| RP11-501J20.3 | 0,00 | 0,00 | 0,00 | 0,00 | NA | NA |
| RP11-501O2.1  | 0,00 | 0,00 | 0,00 | 0,00 | NA | NA |
| RP11-501O2.2  | 0,00 | 0,00 | 0,00 | 0,00 | NA | NA |
| RP11-502F1.2  | 0,00 | 0,00 | 0,00 | 0,00 | NA | NA |
| RP11-502H18.2 | 0,00 | 0,00 | 0,00 | 0,00 | NA | NA |
| RP11-502M1.1  | 0,00 | 0,00 | 0,00 | 0,00 | NA | NA |
| RP11-502M1.2  | 0,00 | 0,00 | 0,00 | 0,00 | NA | NA |
| RP11-502P1.2  | 0,00 | 0,00 | 0,00 | 0,00 | NA | NA |
| RP11-503C24.1 | 0,00 | 0,00 | 0,00 | 0,00 | NA | NA |
| RP11-503C24.2 | 0,00 | 0,00 | 0,00 | 0,00 | NA | NA |
| RP11-503C24.3 | 0,00 | 0,00 | 0,00 | 0,00 | NA | NA |
| RP11-503C24.5 | 0,00 | 0,00 | 0,00 | 0,00 | NA | NA |
| RP11-503C24.6 | 0,00 | 0,00 | 0,00 | 0,00 | NA | NA |
| RP11-503G7.2  | 0,00 | 0,00 | 0,00 | 0,00 | NA | NA |
| RP11-503I22.2 | 0,00 | 0,00 | 0,00 | 0,00 | NA | NA |
| RP11-503K16.2 | 0,00 | 0,00 | 0,00 | 0,00 | NA | NA |
| RP11-503L19.2 | 0,00 | 0,00 | 0,00 | 0,00 | NA | NA |
| RP11-503L23.1 | 0,00 | 0,00 | 0,00 | 0,00 | NA | NA |
| RP11-503N18.4 | 0,00 | 0,00 | 0,00 | 0,00 | NA | NA |
| RP11-504B1.1  | 0,00 | 0,00 | 0,00 | 0,00 | NA | NA |
| RP11-504E21.1 | 0,00 | 0,00 | 0,00 | 0,00 | NA | NA |
| RP11-504P24.1 | 0,00 | 0,00 | 0,00 | 0,00 | NA | NA |
| RP11-504P24.5 | 0,00 | 0,00 | 0,00 | 0,00 | NA | NA |
| RP11-504P24.9 | 0,62 | 0,00 | 0,48 | 1,13 | NA | NA |
| RP11-505J9.1  | 0,00 | 0,00 | 0,00 | 0,00 | NA | NA |
| RP11-505J9.4  | 0,00 | 0,00 | 0,00 | 0,00 | NA | NA |
| RP11-505K1.1  | 0,00 | 0,00 | 0,00 | 0,00 | NA | NA |
| RP11-505K9.3  | 0,00 | 0,00 | 0,00 | 0,00 | NA | NA |
| RP11-505K9.5  | 0,00 | 0,00 | 0,00 | 0,00 | NA | NA |
| RP11-505O17.1 | 0,00 | 0,00 | 0,00 | 0,00 | NA | NA |
| RP11-505O17.2 | 0,00 | 0,00 | 0,00 | 0,00 | NA | NA |
| RP11-505O17.3 | 0,00 | 0,00 | 0,00 | 0,00 | NA | NA |
| RP11-505P4.5  | 0,00 | 0,00 | 0,00 | 0,00 | NA | NA |
| RP11-506A18.1 | 0,00 | 0,00 | 0,00 | 0,00 | NA | NA |
| RP11-506B15.4 | 0,00 | 0,00 | 0,00 | 0,00 | NA | NA |
| RP11-506B15.6 | 0,00 | 0,00 | 0,00 | 0,00 | NA | NA |
| RP11-506B4.2  | 0,00 | 0,00 | 0,00 | 0,00 | NA | NA |
| RP11-506B6.1  | 0,00 | 0,00 | 0,00 | 0,00 | NA | NA |
| RP11-506B6.2  | 0,00 | 0,00 | 0,00 | 0,00 | NA | NA |
| RP11-506B6.3  | 0,00 | 0,00 | 0,00 | 0,00 | NA | NA |
| RP11-506B6.5  | 0,00 | 0,00 | 0,00 | 0,00 | NA | NA |
| RP11-506D12.5 | 0,00 | 0,00 | 0,00 | 0,00 | NA | NA |
| RP11-506E9.3  | 0,00 | 0,00 | 0,00 | 0,00 | NA | NA |
| RP11-506F17.1 | 0,00 | 0,00 | 0,00 | 0,00 | NA | NA |
| RP11-506H20.2 | 0,00 | 0,00 | 0,00 | 0,00 | NA | NA |
| RP11-506K19.1 | 0,00 | 0,00 | 0,00 | 0,00 | NA | NA |
| RP11-506K19.2 | 0,00 | 0,00 | 0,00 | 0,00 | NA | NA |
| RP11-506K6.4  | 0,00 | 0,00 | 0,00 | 0,00 | NA | NA |

|               |      |      |      |      |    |    |
|---------------|------|------|------|------|----|----|
| RP11-506O24.1 | 0,00 | 0,00 | 0,00 | 0,00 | NA | NA |
| RP11-507A3.1  | 0,00 | 0,00 | 0,00 | 0,00 | NA | NA |
| RP11-507B12.1 | 0,00 | 0,00 | 0,00 | 0,00 | NA | NA |
| RP11-507C10.4 | 0,00 | 0,00 | 0,00 | 0,00 | NA | NA |
| RP11-507F16.1 | 0,00 | 0,00 | 0,00 | 0,00 | NA | NA |
| RP11-507F17.1 | 0,00 | 0,00 | 0,00 | 0,00 | NA | NA |
| RP11-507J18.1 | 0,00 | 0,00 | 0,00 | 0,00 | NA | NA |
| RP11-507K13.4 | 0,00 | 0,00 | 0,00 | 0,00 | NA | NA |
| RP11-507K2.2  | 0,00 | 0,00 | 0,00 | 0,00 | NA | NA |
| RP11-507P23.3 | 0,00 | 0,00 | 0,00 | 0,00 | NA | NA |
| RP11-508N12.2 | 0,00 | 0,00 | 0,00 | 0,00 | NA | NA |
| RP11-508N12.3 | 0,00 | 0,00 | 0,00 | 0,00 | NA | NA |
| RP11-508N22.4 | 0,00 | 0,00 | 0,00 | 0,00 | NA | NA |
| RP11-508N22.5 | 0,00 | 0,00 | 0,00 | 0,00 | NA | NA |
| RP11-508N22.6 | 0,00 | 0,00 | 0,00 | 0,00 | NA | NA |
| RP11-508N22.9 | 0,00 | 0,00 | 0,00 | 0,00 | NA | NA |
| RP11-509A17.3 | 0,00 | 0,18 | 0,00 | 0,45 | NA | NA |
| RP11-509I21.2 | 0,00 | 0,00 | 0,00 | 0,00 | NA | NA |
| RP11-509M23.1 | 0,00 | 0,00 | 0,00 | 0,00 | NA | NA |
| RP11-50B3.1   | 0,00 | 0,00 | 0,00 | 0,00 | NA | NA |
| RP11-50B3.2   | 0,00 | 0,00 | 0,00 | 0,00 | NA | NA |
| RP11-50C13.2  | 0,00 | 0,00 | 0,00 | 0,00 | NA | NA |
| RP11-50F24.3  | 0,00 | 0,00 | 0,00 | 0,00 | NA | NA |
| RP11-50I19.1  | 0,00 | 0,00 | 0,00 | 0,00 | NA | NA |
| RP11-50K12.1  | 0,00 | 0,00 | 0,00 | 0,00 | NA | NA |
| RP11-50O21.1  | 0,00 | 0,00 | 0,00 | 0,00 | NA | NA |
| RP11-510C10.2 | 0,00 | 0,00 | 0,00 | 0,00 | NA | NA |
| RP11-510C10.3 | 0,00 | 0,00 | 0,00 | 0,00 | NA | NA |
| RP11-510D21.1 | 0,00 | 0,00 | 0,00 | 0,00 | NA | NA |
| RP11-510D21.2 | 0,00 | 0,00 | 0,00 | 0,00 | NA | NA |
| RP11-510I21.1 | 0,00 | 0,00 | 0,00 | 0,00 | NA | NA |
| RP11-510I5.4  | 0,00 | 0,00 | 0,00 | 0,00 | NA | NA |
| RP11-510I6.1  | 0,00 | 0,00 | 0,00 | 0,00 | NA | NA |
| RP11-510I6.2  | 0,00 | 0,00 | 0,00 | 0,00 | NA | NA |
| RP11-510I6.3  | 0,00 | 0,00 | 0,00 | 0,00 | NA | NA |
| RP11-510J16.5 | 0,00 | 0,00 | 0,00 | 0,00 | NA | NA |
| RP11-510J16.6 | 0,00 | 0,00 | 0,00 | 0,00 | NA | NA |
| RP11-510K18.1 | 0,00 | 0,00 | 0,00 | 0,00 | NA | NA |
| RP11-510M2.1  | 0,00 | 0,00 | 0,00 | 0,00 | NA | NA |
| RP11-510M2.4  | 0,00 | 0,00 | 0,00 | 0,00 | NA | NA |
| RP11-510M2.5  | 0,00 | 0,00 | 0,00 | 0,00 | NA | NA |
| RP11-510M2.6  | 0,00 | 0,00 | 0,00 | 0,00 | NA | NA |
| RP11-510M2.8  | 0,00 | 0,00 | 0,00 | 0,00 | NA | NA |
| RP11-510N19.2 | 0,00 | 0,00 | 0,00 | 0,00 | NA | NA |
| RP11-510N19.3 | 0,00 | 0,00 | 0,00 | 0,00 | NA | NA |
| RP11-510N19.4 | 0,00 | 0,00 | 0,00 | 0,00 | NA | NA |
| RP11-510N19.5 | 0,00 | 0,00 | 0,00 | 0,00 | NA | NA |
| RP11-510P12.1 | 0,00 | 0,00 | 0,00 | 0,00 | NA | NA |
| RP11-511B23.1 | 0,00 | 0,00 | 0,00 | 0,00 | NA | NA |
| RP11-511B23.3 | 0,00 | 0,00 | 0,00 | 0,00 | NA | NA |
| RP11-511B23.4 | 0,00 | 0,00 | 0,00 | 0,00 | NA | NA |
| RP11-511B7.1  | 0,00 | 0,00 | 0,00 | 0,00 | NA | NA |
| RP11-511H9.4  | 0,00 | 0,00 | 0,00 | 0,00 | NA | NA |
| RP11-511I11.1 | 0,00 | 0,84 | 0,00 | 0,00 | NA | NA |
| RP11-511I11.2 | 0,00 | 0,00 | 0,00 | 0,00 | NA | NA |



|               |      |      |      |      |    |    |
|---------------|------|------|------|------|----|----|
| RP11-511P7.4  | 0,00 | 0,00 | 0,00 | 0,00 | NA | NA |
| RP11-511P7.7  | 0,00 | 0,00 | 0,00 | 0,00 | NA | NA |
| RP11-512C24.1 | 0,00 | 0,00 | 0,00 | 0,00 | NA | NA |
| RP11-512G13.1 | 0,00 | 0,00 | 0,00 | 0,00 | NA | NA |
| RP11-512G4.1  | 0,00 | 0,00 | 0,00 | 0,00 | NA | NA |
| RP11-512M8.13 | 0,00 | 0,00 | 0,00 | 0,00 | NA | NA |
| RP11-512N21.1 | 0,00 | 0,00 | 0,00 | 0,00 | NA | NA |
| RP11-512N21.3 | 0,00 | 0,00 | 0,00 | 0,00 | NA | NA |
| RP11-512N4.2  | 0,00 | 0,67 | 0,00 | 0,00 | NA | NA |
| RP11-513D4.1  | 0,00 | 0,00 | 0,00 | 0,00 | NA | NA |
| RP11-513D4.2  | 0,00 | 0,00 | 0,00 | 0,00 | NA | NA |
| RP11-513D4.3  | 0,00 | 0,00 | 0,00 | 0,00 | NA | NA |
| RP11-513G11.2 | 0,00 | 0,00 | 0,00 | 0,00 | NA | NA |
| RP11-513G11.4 | 0,00 | 0,00 | 0,00 | 0,00 | NA | NA |
| RP11-513H8.1  | 0,00 | 0,00 | 0,00 | 0,00 | NA | NA |
| RP11-513I15.3 | 0,00 | 0,00 | 0,00 | 0,00 | NA | NA |
| RP11-513I7.2  | 0,00 | 0,00 | 0,00 | 0,00 | NA | NA |
| RP11-513I7.3  | 0,00 | 0,00 | 0,00 | 0,00 | NA | NA |
| RP11-513M1.1  | 0,00 | 0,00 | 0,00 | 0,00 | NA | NA |
| RP11-513M16.5 | 0,00 | 0,00 | 0,00 | 0,00 | NA | NA |
| RP11-513N24.1 | 0,00 | 0,00 | 0,00 | 0,11 | NA | NA |
| RP11-513O13.1 | 0,00 | 0,00 | 0,00 | 0,00 | NA | NA |
| RP11-513O17.1 | 0,00 | 0,00 | 0,00 | 0,00 | NA | NA |
| RP11-514A9.1  | 0,00 | 0,00 | 0,00 | 0,00 | NA | NA |
| RP11-514D23.1 | 0,00 | 0,00 | 0,00 | 0,07 | NA | NA |
| RP11-514D23.3 | 0,00 | 0,00 | 0,00 | 0,00 | NA | NA |
| RP11-514F3.4  | 0,00 | 0,00 | 0,00 | 0,00 | NA | NA |
| RP11-514F3.5  | 0,00 | 0,00 | 0,00 | 0,00 | NA | NA |
| RP11-514F8.2  | 0,00 | 0,00 | 0,00 | 0,00 | NA | NA |
| RP11-514O12.2 | 0,00 | 0,00 | 0,00 | 0,00 | NA | NA |
| RP11-515C16.2 | 0,00 | 0,21 | 0,00 | 0,00 | NA | NA |
| RP11-515C16.7 | 0,00 | 0,00 | 0,00 | 0,00 | NA | NA |
| RP11-515K14.1 | 0,00 | 0,00 | 0,00 | 0,00 | NA | NA |
| RP11-516A11.3 | 0,00 | 0,00 | 0,00 | 0,00 | NA | NA |
| RP11-517A5.6  | 0,00 | 0,00 | 0,00 | 0,00 | NA | NA |
| RP11-517A5.7  | 0,00 | 0,00 | 0,00 | 0,00 | NA | NA |
| RP11-517B11.2 | 0,00 | 0,00 | 0,00 | 0,00 | NA | NA |
| RP11-517B11.4 | 0,00 | 0,00 | 0,00 | 0,00 | NA | NA |
| RP11-517B11.6 | 0,00 | 0,00 | 0,00 | 0,00 | NA | NA |
| RP11-517C16.2 | 0,00 | 0,00 | 0,00 | 0,00 | NA | NA |
| RP11-517C16.4 | 0,00 | 0,00 | 0,00 | 0,00 | NA | NA |
| RP11-517D11.3 | 0,00 | 0,00 | 0,00 | 0,00 | NA | NA |
| RP11-517I24.6 | 0,00 | 0,00 | 0,00 | 0,00 | NA | NA |
| RP11-517I3.1  | 0,00 | 0,00 | 0,00 | 0,00 | NA | NA |
| RP11-517M22.1 | 0,00 | 0,00 | 0,00 | 0,00 | NA | NA |
| RP11-517P14.7 | 0,00 | 0,00 | 0,00 | 0,00 | NA | NA |
| RP11-518D3.4  | 0,00 | 0,00 | 0,00 | 0,00 | NA | NA |
| RP11-518D7.1  | 0,00 | 0,00 | 0,00 | 0,00 | NA | NA |
| RP11-518D7.2  | 0,00 | 0,00 | 0,00 | 0,00 | NA | NA |
| RP11-518K17.4 | 0,00 | 0,00 | 0,00 | 0,00 | NA | NA |
| RP11-518L10.5 | 0,00 | 0,00 | 0,00 | 0,00 | NA | NA |
| RP11-51B10.2  | 0,00 | 0,00 | 0,00 | 0,00 | NA | NA |
| RP11-51B10.3  | 0,00 | 0,00 | 0,00 | 0,00 | NA | NA |
| RP11-51B10.4  | 0,00 | 0,00 | 0,00 | 0,00 | NA | NA |
| RP11-51B13.1  | 0,00 | 0,00 | 0,00 | 0,00 | NA | NA |

|               |      |      |      |      |    |    |
|---------------|------|------|------|------|----|----|
| RP11-51B23.3  | 0,00 | 0,00 | 0,00 | 0,00 | NA | NA |
| RP11-51C14.1  | 0,00 | 0,00 | 0,00 | 0,00 | NA | NA |
| RP11-51E20.1  | 0,00 | 0,00 | 0,00 | 0,00 | NA | NA |
| RP11-51F16.8  | 0,00 | 0,00 | 0,00 | 0,00 | NA | NA |
| RP11-51G24.1  | 0,00 | 0,00 | 0,00 | 0,00 | NA | NA |
| RP11-51G5.1   | 0,00 | 0,00 | 0,00 | 0,00 | NA | NA |
| RP11-51I5.1   | 0,00 | 0,00 | 0,00 | 0,00 | NA | NA |
| RP11-51L5.1   | 0,00 | 0,00 | 0,00 | 0,00 | NA | NA |
| RP11-51L5.2   | 0,00 | 0,00 | 0,00 | 0,00 | NA | NA |
| RP11-51L5.4   | 0,00 | 0,00 | 0,00 | 0,00 | NA | NA |
| RP11-51L5.5   | 0,00 | 0,00 | 0,00 | 0,00 | NA | NA |
| RP11-51M24.1  | 0,00 | 0,00 | 0,00 | 0,00 | NA | NA |
| RP11-51N22.1  | 0,00 | 0,00 | 0,00 | 0,00 | NA | NA |
| RP11-51N22.2  | 0,00 | 0,00 | 0,00 | 0,00 | NA | NA |
| RP11-51O17.1  | 0,00 | 0,00 | 0,00 | 0,00 | NA | NA |
| RP11-51P8.1   | 0,00 | 0,59 | 0,09 | 0,26 | NA | NA |
| RP11-520A21.1 | 0,00 | 0,00 | 0,00 | 0,00 | NA | NA |
| RP11-520B13.4 | 0,00 | 0,00 | 0,00 | 0,00 | NA | NA |
| RP11-520B13.6 | 0,00 | 0,00 | 0,00 | 0,00 | NA | NA |
| RP11-520B13.7 | 0,00 | 0,00 | 0,00 | 0,00 | NA | NA |
| RP11-520B13.8 | 0,00 | 0,00 | 0,00 | 0,00 | NA | NA |
| RP11-520D19.2 | 0,00 | 0,00 | 0,00 | 0,28 | NA | NA |
| RP11-520E6.2  | 0,00 | 0,00 | 0,00 | 0,00 | NA | NA |
| RP11-520F24.1 | 0,00 | 0,00 | 0,00 | 0,00 | NA | NA |
| RP11-520F24.2 | 0,00 | 0,00 | 0,00 | 0,00 | NA | NA |
| RP11-520F24.3 | 0,00 | 0,00 | 0,00 | 0,00 | NA | NA |
| RP11-520F9.1  | 0,00 | 0,00 | 0,00 | 0,00 | NA | NA |
| RP11-520H14.1 | 0,00 | 0,00 | 0,00 | 0,00 | NA | NA |
| RP11-520H16.4 | 0,00 | 0,00 | 0,00 | 0,00 | NA | NA |
| RP11-520M5.6  | 0,00 | 0,00 | 0,00 | 0,00 | NA | NA |
| RP11-520P18.1 | 0,00 | 0,00 | 0,00 | 0,00 | NA | NA |
| RP11-520P18.2 | 0,00 | 0,00 | 0,00 | 0,00 | NA | NA |
| RP11-520P18.5 | 0,00 | 0,00 | 0,00 | 0,00 | NA | NA |
| RP11-521A24.1 | 0,00 | 0,00 | 0,00 | 0,00 | NA | NA |
| RP11-521C10.2 | 0,00 | 0,00 | 0,00 | 0,00 | NA | NA |
| RP11-521C20.1 | 0,00 | 0,00 | 0,00 | 0,00 | NA | NA |
| RP11-521C20.2 | 0,00 | 0,00 | 0,00 | 0,00 | NA | NA |
| RP11-521C20.3 | 0,00 | 0,00 | 0,00 | 0,00 | NA | NA |
| RP11-521C20.5 | 0,00 | 0,00 | 0,00 | 0,00 | NA | NA |
| RP11-521C22.2 | 0,00 | 0,00 | 0,00 | 0,08 | NA | NA |
| RP11-521D12.2 | 0,00 | 0,00 | 0,00 | 0,00 | NA | NA |
| RP11-521D12.4 | 0,00 | 0,00 | 0,00 | 0,00 | NA | NA |
| RP11-521E5.1  | 0,00 | 0,00 | 0,00 | 0,00 | NA | NA |
| RP11-521F1.1  | 0,00 | 0,00 | 0,00 | 0,00 | NA | NA |
| RP11-521H3.1  | 0,00 | 0,00 | 0,00 | 0,00 | NA | NA |
| RP11-521H3.2  | 0,00 | 0,00 | 0,00 | 0,00 | NA | NA |
| RP11-521H3.3  | 0,00 | 0,00 | 0,00 | 0,00 | NA | NA |
| RP11-521I2.1  | 0,00 | 0,00 | 0,00 | 0,00 | NA | NA |
| RP11-521J24.1 | 0,47 | 0,00 | 0,00 | 0,00 | NA | NA |
| RP11-521J24.2 | 0,00 | 0,00 | 0,00 | 0,00 | NA | NA |
| RP11-521M14.1 | 0,00 | 0,00 | 0,00 | 0,00 | NA | NA |
| RP11-521M14.2 | 0,00 | 0,00 | 0,00 | 0,00 | NA | NA |
| RP11-521O16.1 | 0,00 | 0,00 | 0,00 | 0,00 | NA | NA |
| RP11-522B15.1 | 0,00 | 0,00 | 0,00 | 0,00 | NA | NA |
| RP11-522B15.2 | 0,00 | 0,00 | 0,00 | 0,00 | NA | NA |

|               |      |      |      |      |    |    |
|---------------|------|------|------|------|----|----|
| RP11-522B15.5 | 0,00 | 0,39 | 0,00 | 0,00 | NA | NA |
| RP11-522B15.6 | 0,00 | 0,00 | 0,00 | 0,00 | NA | NA |
| RP11-522F22.1 | 0,00 | 0,00 | 0,00 | 0,00 | NA | NA |
| RP11-522L3.11 | 0,00 | 0,00 | 0,00 | 0,00 | NA | NA |
| RP11-522L3.3  | 0,00 | 0,00 | 0,00 | 0,00 | NA | NA |
| RP11-522L3.5  | 0,00 | 0,00 | 0,00 | 0,00 | NA | NA |
| RP11-522L3.6  | 0,00 | 0,00 | 0,00 | 0,00 | NA | NA |
| RP11-522L3.7  | 0,00 | 0,00 | 0,00 | 0,00 | NA | NA |
| RP11-522M21.2 | 0,00 | 0,00 | 0,00 | 0,00 | NA | NA |
| RP11-522N14.2 | 0,00 | 0,00 | 0,00 | 0,00 | NA | NA |
| RP11-523D22.1 | 0,00 | 0,00 | 0,00 | 0,00 | NA | NA |
| RP11-523H20.3 | 0,00 | 0,00 | 0,00 | 0,00 | NA | NA |
| RP11-523H24.5 | 0,00 | 0,00 | 0,00 | 0,00 | NA | NA |
| RP11-523J2.1  | 0,00 | 0,00 | 0,00 | 0,00 | NA | NA |
| RP11-523K4.2  | 0,00 | 0,00 | 0,00 | 0,00 | NA | NA |
| RP11-523L20.1 | 0,00 | 0,00 | 0,00 | 0,00 | NA | NA |
| RP11-523O18.1 | 0,00 | 0,00 | 0,00 | 0,00 | NA | NA |
| RP11-524C21.1 | 0,00 | 0,00 | 0,00 | 0,00 | NA | NA |
| RP11-524F1.1  | 0,00 | 0,00 | 0,00 | 0,00 | NA | NA |
| RP11-524F11.1 | 0,00 | 0,00 | 0,00 | 0,00 | NA | NA |
| RP11-524H19.2 | 0,00 | 0,00 | 0,00 | 0,00 | NA | NA |
| RP11-524K14.1 | 0,00 | 0,00 | 0,00 | 0,00 | NA | NA |
| RP11-524K22.1 | 0,00 | 0,00 | 0,00 | 0,00 | NA | NA |
| RP11-524L6.1  | 0,00 | 0,00 | 0,00 | 0,00 | NA | NA |
| RP11-524L6.2  | 0,00 | 0,00 | 0,00 | 0,00 | NA | NA |
| RP11-524L6.3  | 0,00 | 0,00 | 0,00 | 0,00 | NA | NA |
| RP11-524L6.4  | 0,00 | 0,00 | 0,00 | 0,00 | NA | NA |
| RP11-524N5.1  | 0,00 | 0,00 | 0,00 | 0,00 | NA | NA |
| RP11-524O24.3 | 0,00 | 0,00 | 0,00 | 0,00 | NA | NA |
| RP11-524P6.1  | 0,00 | 0,00 | 0,00 | 0,00 | NA | NA |
| RP11-525A16.3 | 0,00 | 0,00 | 0,00 | 0,00 | NA | NA |
| RP11-525E9.1  | 0,00 | 0,00 | 0,00 | 0,00 | NA | NA |
| RP11-525G13.2 | 0,00 | 0,00 | 0,00 | 0,00 | NA | NA |
| RP11-525K10.1 | 0,00 | 0,00 | 0,00 | 0,00 | NA | NA |
| RP11-525K10.2 | 0,00 | 0,00 | 0,00 | 0,00 | NA | NA |
| RP11-525K18.2 | 0,00 | 0,00 | 0,00 | 0,00 | NA | NA |
| RP11-526D8.8  | 0,00 | 0,00 | 0,00 | 0,00 | NA | NA |
| RP11-526F3.1  | 0,00 | 0,00 | 0,00 | 0,00 | NA | NA |
| RP11-526H11.1 | 0,00 | 0,00 | 0,00 | 0,00 | NA | NA |
| RP11-526I2.1  | 0,00 | 0,00 | 0,00 | 0,00 | NA | NA |
| RP11-526I2.5  | 0,23 | 0,33 | 0,31 | 0,30 | NA | NA |
| RP11-526I8.2  | 0,00 | 0,00 | 0,00 | 0,00 | NA | NA |
| RP11-526K17.2 | 0,00 | 0,00 | 0,00 | 0,00 | NA | NA |
| RP11-526K21.2 | 0,00 | 0,00 | 0,00 | 0,00 | NA | NA |
| RP11-526N18.1 | 0,00 | 0,00 | 0,00 | 0,00 | NA | NA |
| RP11-526P6.1  | 0,00 | 0,00 | 0,00 | 0,00 | NA | NA |
| RP11-527F13.2 | 0,00 | 0,00 | 0,00 | 0,00 | NA | NA |
| RP11-527H14.1 | 0,00 | 0,00 | 0,00 | 0,00 | NA | NA |
| RP11-527H14.3 | 0,00 | 0,00 | 0,00 | 0,00 | NA | NA |
| RP11-527H14.5 | 0,00 | 0,00 | 0,00 | 0,00 | NA | NA |
| RP11-527L4.2  | 0,00 | 0,00 | 0,00 | 0,00 | NA | NA |
| RP11-527L4.6  | 0,00 | 0,00 | 0,00 | 0,00 | NA | NA |
| RP11-527L4.9  | 0,00 | 0,00 | 0,00 | 0,00 | NA | NA |
| RP11-527N12.1 | 0,00 | 0,00 | 0,00 | 0,00 | NA | NA |
| RP11-527N12.2 | 0,00 | 0,00 | 0,00 | 0,00 | NA | NA |

|               |      |      |      |      |    |    |
|---------------|------|------|------|------|----|----|
| RP11-527N22.2 | 0,00 | 0,00 | 0,00 | 0,00 | NA | NA |
| RP11-528A10.1 | 0,00 | 0,00 | 0,00 | 0,00 | NA | NA |
| RP11-528A4.2  | 0,00 | 0,00 | 0,00 | 0,00 | NA | NA |
| RP11-528A4.3  | 0,00 | 0,00 | 0,00 | 0,00 | NA | NA |
| RP11-528B10.4 | 0,00 | 0,00 | 0,00 | 0,00 | NA | NA |
| RP11-528B10.5 | 0,00 | 0,00 | 0,00 | 0,00 | NA | NA |
| RP11-528G1.2  | 0,00 | 0,00 | 0,00 | 0,00 | NA | NA |
| RP11-528I4.2  | 0,00 | 0,00 | 0,00 | 0,00 | NA | NA |
| RP11-528M18.2 | 0,00 | 0,00 | 0,00 | 0,00 | NA | NA |
| RP11-528M18.3 | 0,00 | 0,00 | 0,00 | 0,00 | NA | NA |
| RP11-528N21.1 | 0,00 | 0,00 | 0,00 | 0,00 | NA | NA |
| RP11-528N21.3 | 0,00 | 0,00 | 0,00 | 0,00 | NA | NA |
| RP11-529A4.1  | 0,00 | 0,00 | 0,00 | 0,00 | NA | NA |
| RP11-529A4.10 | 0,00 | 0,00 | 0,00 | 0,00 | NA | NA |
| RP11-529A4.11 | 0,00 | 0,00 | 0,00 | 0,00 | NA | NA |
| RP11-529A4.12 | 0,00 | 0,00 | 0,00 | 0,00 | NA | NA |
| RP11-529A4.15 | 0,00 | 0,00 | 0,00 | 0,00 | NA | NA |
| RP11-529A4.16 | 0,00 | 0,00 | 0,00 | 0,00 | NA | NA |
| RP11-529A4.2  | 0,00 | 0,00 | 0,00 | 0,00 | NA | NA |
| RP11-529A4.5  | 0,00 | 0,00 | 0,00 | 0,00 | NA | NA |
| RP11-529A4.7  | 0,00 | 0,00 | 0,00 | 0,00 | NA | NA |
| RP11-529A4.9  | 0,00 | 0,00 | 0,00 | 0,00 | NA | NA |
| RP11-529E10.6 | 0,00 | 0,00 | 0,00 | 0,18 | NA | NA |
| RP11-529G21.3 | 0,00 | 0,00 | 0,00 | 0,00 | NA | NA |
| RP11-529G21.4 | 0,00 | 0,00 | 0,00 | 0,00 | NA | NA |
| RP11-529H2.1  | 0,00 | 0,00 | 0,00 | 0,00 | NA | NA |
| RP11-529H2.2  | 0,00 | 0,00 | 0,00 | 0,00 | NA | NA |
| RP11-529H20.3 | 0,00 | 0,00 | 0,00 | 0,00 | NA | NA |
| RP11-529H22.1 | 0,00 | 0,00 | 0,00 | 0,00 | NA | NA |
| RP11-529I21.1 | 0,00 | 0,00 | 0,00 | 0,00 | NA | NA |
| RP11-529I21.2 | 0,00 | 0,00 | 0,00 | 0,00 | NA | NA |
| RP11-529I17.1 | 0,00 | 0,00 | 0,00 | 0,00 | NA | NA |
| RP11-529I17.3 | 0,00 | 0,00 | 0,00 | 0,00 | NA | NA |
| RP11-529I17.5 | 0,00 | 0,00 | 0,00 | 0,00 | NA | NA |
| RP11-529K1.4  | 0,00 | 0,00 | 0,00 | 0,00 | NA | NA |
| RP11-529O20.2 | 0,00 | 0,00 | 0,00 | 0,00 | NA | NA |
| RP11-529P9.1  | 0,00 | 0,00 | 0,00 | 0,00 | NA | NA |
| RP11-52B19.1  | 0,00 | 0,00 | 0,00 | 0,00 | NA | NA |
| RP11-52B19.12 | 0,00 | 0,00 | 0,00 | 0,00 | NA | NA |
| RP11-52B19.13 | 0,00 | 0,00 | 0,00 | 0,00 | NA | NA |
| RP11-52B19.7  | 0,00 | 0,00 | 0,00 | 0,00 | NA | NA |
| RP11-52B19.8  | 0,00 | 0,00 | 0,00 | 0,00 | NA | NA |
| RP11-52E20.1  | 0,00 | 0,00 | 0,00 | 0,00 | NA | NA |
| RP11-52I18.1  | 0,00 | 0,00 | 0,00 | 0,00 | NA | NA |
| RP11-52L11.1  | 0,00 | 0,00 | 0,00 | 0,00 | NA | NA |
| RP11-52L11.10 | 0,00 | 0,00 | 0,00 | 0,00 | NA | NA |
| RP11-52L11.2  | 0,00 | 0,00 | 0,00 | 0,00 | NA | NA |
| RP11-52L11.4  | 0,00 | 0,00 | 0,00 | 0,00 | NA | NA |
| RP11-52L11.5  | 0,00 | 0,00 | 0,00 | 0,00 | NA | NA |
| RP11-52L11.6  | 0,00 | 0,00 | 0,00 | 0,00 | NA | NA |
| RP11-52L11.7  | 0,00 | 0,00 | 0,00 | 0,00 | NA | NA |
| RP11-52L11.8  | 0,00 | 0,00 | 0,00 | 0,00 | NA | NA |
| RP11-52L11.9  | 0,00 | 0,00 | 0,00 | 0,00 | NA | NA |
| RP11-52L5.1   | 0,00 | 0,00 | 0,00 | 0,00 | NA | NA |
| RP11-52L5.6   | 0,00 | 0,00 | 0,00 | 0,00 | NA | NA |

|                |      |      |      |      |    |    |
|----------------|------|------|------|------|----|----|
| RP11-52M17.1   | 0,00 | 0,00 | 0,00 | 0,00 | NA | NA |
| RP11-530A18.1  | 0,00 | 0,00 | 0,00 | 0,00 | NA | NA |
| RP11-530I17.2  | 0,00 | 0,00 | 0,00 | 0,00 | NA | NA |
| RP11-531A21.2  | 0,00 | 0,00 | 0,00 | 0,00 | NA | NA |
| RP11-531A21.3  | 0,00 | 0,00 | 0,00 | 0,00 | NA | NA |
| RP11-531A21.4  | 0,00 | 0,00 | 0,00 | 0,00 | NA | NA |
| RP11-531A21.5  | 0,00 | 0,00 | 0,00 | 0,00 | NA | NA |
| RP11-531H8.1   | 0,00 | 0,00 | 0,00 | 0,00 | NA | NA |
| RP11-531H8.2   | 0,00 | 0,00 | 0,00 | 0,00 | NA | NA |
| RP11-531P14.1  | 0,00 | 0,00 | 0,00 | 0,00 | NA | NA |
| RP11-531P20.1  | 0,00 | 0,00 | 0,00 | 0,00 | NA | NA |
| RP11-532E4.2   | 0,00 | 0,00 | 0,00 | 0,00 | NA | NA |
| RP11-532F6.4   | 0,00 | 0,00 | 0,00 | 0,00 | NA | NA |
| RP11-532F6.5   | 0,00 | 0,00 | 0,00 | 0,00 | NA | NA |
| RP11-532L16.3  | 0,00 | 0,00 | 0,00 | 0,00 | NA | NA |
| RP11-533E23.1  | 0,00 | 0,00 | 0,00 | 0,00 | NA | NA |
| RP11-533E23.2  | 0,00 | 0,00 | 0,00 | 0,00 | NA | NA |
| RP11-533K11.1  | 0,00 | 0,00 | 0,00 | 0,00 | NA | NA |
| RP11-533N14.3  | 0,00 | 0,00 | 0,00 | 0,00 | NA | NA |
| RP11-533O20.2  | 0,00 | 0,00 | 0,00 | 0,00 | NA | NA |
| RP11-534G20.4  | 0,00 | 0,26 | 0,00 | 0,00 | NA | NA |
| RP11-534I8.1   | 0,00 | 0,00 | 0,00 | 0,00 | NA | NA |
| RP11-534K14.2  | 0,00 | 0,00 | 0,00 | 0,00 | NA | NA |
| RP11-534L6.2   | 0,00 | 0,00 | 0,00 | 0,00 | NA | NA |
| RP11-534N16.1  | 0,00 | 0,00 | 0,00 | 0,00 | NA | NA |
| RP11-534P19.1  | 0,00 | 0,00 | 0,00 | 0,00 | NA | NA |
| RP11-535A15.1  | 0,00 | 0,00 | 0,00 | 0,00 | NA | NA |
| RP11-535A19.2  | 0,00 | 0,00 | 0,00 | 0,00 | NA | NA |
| RP11-535A5.1   | 0,00 | 0,00 | 0,00 | 0,00 | NA | NA |
| RP11-535C7.1   | 0,00 | 0,00 | 0,00 | 0,00 | NA | NA |
| RP11-535E8.2   | 0,00 | 0,00 | 0,00 | 0,00 | NA | NA |
| RP11-535I24.2  | 0,00 | 0,00 | 0,00 | 0,00 | NA | NA |
| RP11-535I8.1   | 0,00 | 0,00 | 0,00 | 0,00 | NA | NA |
| RP11-535K18.2  | 0,00 | 0,00 | 0,00 | 0,00 | NA | NA |
| RP11-535M15.1  | 0,00 | 0,00 | 0,00 | 0,00 | NA | NA |
| RP11-535N6.2   | 0,00 | 0,00 | 0,00 | 0,00 | NA | NA |
| RP11-536C10.1  | 0,00 | 0,00 | 0,00 | 0,00 | NA | NA |
| RP11-536C10.10 | 0,00 | 0,00 | 0,00 | 0,00 | NA | NA |
| RP11-536C10.11 | 0,00 | 0,00 | 0,00 | 0,00 | NA | NA |
| RP11-536C10.12 | 0,00 | 0,00 | 0,00 | 0,00 | NA | NA |
| RP11-536C10.13 | 0,00 | 0,00 | 0,00 | 0,00 | NA | NA |
| RP11-536C10.14 | 0,00 | 0,00 | 0,00 | 0,00 | NA | NA |
| RP11-536C10.15 | 0,00 | 0,00 | 0,00 | 0,00 | NA | NA |
| RP11-536C10.16 | 0,00 | 0,00 | 0,00 | 0,00 | NA | NA |
| RP11-536C10.17 | 0,00 | 0,00 | 0,00 | 0,00 | NA | NA |
| RP11-536C10.19 | 0,00 | 0,00 | 0,00 | 0,00 | NA | NA |
| RP11-536C10.2  | 0,00 | 0,00 | 0,00 | 0,00 | NA | NA |
| RP11-536C10.20 | 0,00 | 0,00 | 0,00 | 0,00 | NA | NA |
| RP11-536C10.21 | 0,00 | 0,00 | 0,00 | 0,00 | NA | NA |
| RP11-536C10.22 | 0,00 | 0,00 | 0,00 | 0,00 | NA | NA |
| RP11-536C10.25 | 0,00 | 0,24 | 0,00 | 0,00 | NA | NA |
| RP11-536C10.26 | 0,00 | 0,00 | 0,00 | 0,00 | NA | NA |
| RP11-536C10.4  | 0,00 | 0,00 | 0,00 | 0,00 | NA | NA |
| RP11-536C10.8  | 0,00 | 0,00 | 0,00 | 0,00 | NA | NA |
| RP11-536C10.9  | 0,00 | 0,00 | 0,00 | 0,00 | NA | NA |

|               |      |      |      |      |    |    |
|---------------|------|------|------|------|----|----|
| RP11-536C5.7  | 0,00 | 0,00 | 0,04 | 0,00 | NA | NA |
| RP11-536G4.1  | 0,00 | 0,00 | 0,00 | 0,00 | NA | NA |
| RP11-536G4.2  | 0,00 | 0,00 | 0,00 | 0,00 | NA | NA |
| RP11-536K17.1 | 0,00 | 0,00 | 0,00 | 0,00 | NA | NA |
| RP11-536K7.5  | 0,00 | 0,00 | 0,00 | 0,00 | NA | NA |
| RP11-536L3.4  | 0,00 | 0,00 | 0,00 | 0,00 | NA | NA |
| RP11-536O18.1 | 0,00 | 0,00 | 0,00 | 0,00 | NA | NA |
| RP11-536P16.2 | 0,00 | 0,00 | 0,00 | 0,00 | NA | NA |
| RP11-536P16.4 | 0,00 | 0,00 | 0,00 | 0,00 | NA | NA |
| RP11-536P16.5 | 0,00 | 0,00 | 0,00 | 0,00 | NA | NA |
| RP11-536P16.6 | 0,00 | 0,00 | 0,00 | 0,00 | NA | NA |
| RP11-537E18.1 | 0,00 | 0,00 | 0,00 | 0,00 | NA | NA |
| RP11-537H15.4 | 0,00 | 0,00 | 0,00 | 0,00 | NA | NA |
| RP11-538A16.1 | 0,00 | 0,00 | 0,00 | 0,00 | NA | NA |
| RP11-538D16.3 | 0,00 | 0,00 | 0,00 | 0,00 | NA | NA |
| RP11-538D9.1  | 0,00 | 0,00 | 0,00 | 0,00 | NA | NA |
| RP11-538D9.2  | 0,00 | 0,00 | 0,00 | 0,00 | NA | NA |
| RP11-539D10.1 | 0,00 | 0,00 | 0,00 | 0,00 | NA | NA |
| RP11-539D10.2 | 0,00 | 0,00 | 0,00 | 0,00 | NA | NA |
| RP11-539E17.3 | 0,00 | 0,00 | 0,00 | 0,00 | NA | NA |
| RP11-539E17.4 | 0,00 | 0,00 | 0,00 | 0,00 | NA | NA |
| RP11-539E17.5 | 0,00 | 0,00 | 0,00 | 0,00 | NA | NA |
| RP11-539E19.1 | 0,00 | 0,00 | 0,00 | 0,00 | NA | NA |
| RP11-539E19.2 | 0,00 | 0,00 | 0,00 | 0,00 | NA | NA |
| RP11-539G11.2 | 0,00 | 0,00 | 0,00 | 0,00 | NA | NA |
| RP11-539L10.2 | 0,00 | 0,08 | 0,00 | 0,00 | NA | NA |
| RP11-53C16.1  | 0,00 | 0,00 | 0,00 | 0,00 | NA | NA |
| RP11-53I6.1   | 0,00 | 0,00 | 0,00 | 0,00 | NA | NA |
| RP11-53I6.4   | 0,00 | 0,00 | 0,00 | 0,00 | NA | NA |
| RP11-53I6.5   | 0,00 | 0,00 | 0,00 | 0,00 | NA | NA |
| RP11-53L24.1  | 0,00 | 0,00 | 0,00 | 0,00 | NA | NA |
| RP11-53M11.2  | 0,00 | 0,00 | 0,00 | 0,00 | NA | NA |
| RP11-53M11.5  | 0,00 | 0,00 | 0,00 | 0,00 | NA | NA |
| RP11-540D14.8 | 0,00 | 0,00 | 0,00 | 0,00 | NA | NA |
| RP11-540E16.1 | 0,00 | 0,00 | 0,00 | 0,00 | NA | NA |
| RP11-540E16.2 | 0,00 | 0,00 | 0,00 | 0,00 | NA | NA |
| RP11-540H22.2 | 0,00 | 0,00 | 0,00 | 0,00 | NA | NA |
| RP11-540K16.2 | 0,00 | 0,00 | 0,00 | 0,00 | NA | NA |
| RP11-540L11.2 | 0,00 | 0,00 | 0,00 | 0,00 | NA | NA |
| RP11-540N6.1  | 0,00 | 0,00 | 0,00 | 0,00 | NA | NA |
| RP11-541E12.1 | 0,00 | 0,00 | 0,00 | 0,00 | NA | NA |
| RP11-541G7.4  | 0,00 | 0,00 | 0,00 | 0,00 | NA | NA |
| RP11-541G9.1  | 0,00 | 0,00 | 0,00 | 0,00 | NA | NA |
| RP11-541G9.2  | 0,00 | 0,00 | 0,00 | 0,00 | NA | NA |
| RP11-541H12.1 | 0,00 | 0,00 | 0,00 | 0,00 | NA | NA |
| RP11-541J2.1  | 0,00 | 0,00 | 0,00 | 0,00 | NA | NA |
| RP11-541J2.2  | 0,00 | 0,00 | 0,00 | 0,00 | NA | NA |
| RP11-541M12.3 | 0,00 | 0,00 | 0,00 | 0,00 | NA | NA |
| RP11-541M12.6 | 0,00 | 0,00 | 0,00 | 0,00 | NA | NA |
| RP11-541P9.1  | 0,00 | 0,00 | 0,00 | 0,00 | NA | NA |
| RP11-542A14.1 | 0,00 | 0,00 | 0,00 | 0,00 | NA | NA |
| RP11-542A14.2 | 0,00 | 0,00 | 0,00 | 0,00 | NA | NA |
| RP11-542C16.1 | 0,00 | 0,00 | 0,00 | 0,00 | NA | NA |
| RP11-542E6.3  | 0,00 | 0,00 | 0,00 | 0,00 | NA | NA |
| RP11-542G1.2  | 0,00 | 0,00 | 0,00 | 0,00 | NA | NA |

|                |      |      |      |      |    |    |
|----------------|------|------|------|------|----|----|
| RP11-542K23.10 | 0,00 | 0,00 | 0,00 | 0,00 | NA | NA |
| RP11-542K23.9  | 0,00 | 0,00 | 0,00 | 0,00 | NA | NA |
| RP11-542M13.4  | 0,00 | 0,00 | 0,00 | 0,00 | NA | NA |
| RP11-542M13.5  | 0,00 | 0,00 | 0,00 | 0,00 | NA | NA |
| RP11-543B16.2  | 0,00 | 0,00 | 0,00 | 0,00 | NA | NA |
| RP11-543B16.4  | 0,00 | 0,00 | 0,00 | 0,00 | NA | NA |
| RP11-543B16.5  | 0,00 | 0,00 | 0,00 | 0,00 | NA | NA |
| RP11-543C4.1   | 0,00 | 0,00 | 0,00 | 0,00 | NA | NA |
| RP11-543C4.3   | 0,00 | 0,00 | 0,00 | 0,00 | NA | NA |
| RP11-543D10.2  | 0,00 | 0,00 | 0,00 | 0,00 | NA | NA |
| RP11-543D5.1   | 0,00 | 0,00 | 0,00 | 0,00 | NA | NA |
| RP11-543D5.2   | 0,00 | 0,00 | 0,00 | 0,00 | NA | NA |
| RP11-543E8.2   | 0,00 | 0,00 | 0,00 | 0,00 | NA | NA |
| RP11-543F8.3   | 0,00 | 0,00 | 0,00 | 0,00 | NA | NA |
| RP11-543H12.1  | 0,00 | 0,00 | 0,00 | 0,00 | NA | NA |
| RP11-543H15.2  | 0,00 | 0,00 | 0,00 | 0,00 | NA | NA |
| RP11-543L14.1  | 0,00 | 0,00 | 0,00 | 0,00 | NA | NA |
| RP11-543N12.1  | 0,00 | 0,00 | 0,00 | 0,00 | NA | NA |
| RP11-543P15.2  | 0,00 | 0,00 | 0,00 | 0,00 | NA | NA |
| RP11-543P4.2   | 0,00 | 0,00 | 0,00 | 0,00 | NA | NA |
| RP11-544H14.1  | 0,00 | 0,00 | 0,00 | 0,00 | NA | NA |
| RP11-544M22.3  | 0,00 | 0,00 | 0,00 | 0,00 | NA | NA |
| RP11-544N10.1  | 0,00 | 0,00 | 0,00 | 0,00 | NA | NA |
| RP11-544O24.2  | 0,00 | 0,00 | 0,00 | 0,00 | NA | NA |
| RP11-544P1.3   | 0,00 | 0,00 | 0,00 | 0,00 | NA | NA |
| RP11-545A16.3  | 0,00 | 0,00 | 0,00 | 0,00 | NA | NA |
| RP11-545D22.1  | 0,00 | 0,00 | 0,00 | 0,00 | NA | NA |
| RP11-545E8.1   | 0,00 | 0,00 | 0,00 | 0,00 | NA | NA |
| RP11-545G3.1   | 0,00 | 0,00 | 0,00 | 0,00 | NA | NA |
| RP11-545G3.2   | 0,00 | 0,00 | 0,00 | 0,00 | NA | NA |
| RP11-545J16.1  | 0,00 | 0,00 | 0,00 | 0,00 | NA | NA |
| RP11-545L5.1   | 0,00 | 0,00 | 0,00 | 0,00 | NA | NA |
| RP11-545M17.1  | 0,00 | 0,00 | 0,00 | 0,00 | NA | NA |
| RP11-545M17.3  | 0,00 | 0,00 | 0,00 | 0,00 | NA | NA |
| RP11-545M8.1   | 0,00 | 0,00 | 0,00 | 0,00 | NA | NA |
| RP11-545M8.2   | 0,00 | 0,00 | 0,00 | 0,00 | NA | NA |
| RP11-545M8.3   | 0,00 | 0,00 | 0,00 | 0,00 | NA | NA |
| RP11-545M8.4   | 0,00 | 0,00 | 0,00 | 0,00 | NA | NA |
| RP11-545P6.1   | 0,00 | 0,00 | 0,00 | 0,00 | NA | NA |
| RP11-545P6.2   | 0,00 | 0,00 | 0,00 | 0,00 | NA | NA |
| RP11-545P7.4   | 0,00 | 0,00 | 0,00 | 0,00 | NA | NA |
| RP11-545P7.9   | 0,00 | 0,00 | 0,00 | 0,00 | NA | NA |
| RP11-546B8.1   | 0,00 | 0,00 | 0,00 | 0,00 | NA | NA |
| RP11-546B8.3   | 0,00 | 0,00 | 0,00 | 0,00 | NA | NA |
| RP11-546K22.1  | 0,00 | 0,00 | 0,00 | 0,00 | NA | NA |
| RP11-546K22.2  | 0,00 | 0,00 | 0,00 | 0,00 | NA | NA |
| RP11-546M4.1   | 0,00 | 0,00 | 0,00 | 0,00 | NA | NA |
| RP11-546N22.2  | 0,00 | 0,00 | 0,00 | 0,00 | NA | NA |
| RP11-546O6.3   | 0,00 | 0,00 | 0,00 | 0,00 | NA | NA |
| RP11-547C13.1  | 0,00 | 0,00 | 0,00 | 0,00 | NA | NA |
| RP11-547C18.3  | 0,00 | 0,00 | 0,00 | 0,00 | NA | NA |
| RP11-547C5.1   | 0,00 | 0,00 | 0,00 | 0,00 | NA | NA |
| RP11-547D24.3  | 0,00 | 0,00 | 0,00 | 0,00 | NA | NA |
| RP11-547I7.1   | 0,00 | 0,00 | 0,00 | 0,00 | NA | NA |
| RP11-547I7.2   | 0,00 | 0,00 | 0,00 | 0,00 | NA | NA |

|                |      |      |      |      |    |    |
|----------------|------|------|------|------|----|----|
| RP11-547M24.1  | 0,00 | 0,00 | 0,00 | 0,00 | NA | NA |
| RP11-547P4.1   | 0,00 | 0,00 | 0,00 | 0,00 | NA | NA |
| RP11-548B3.3   | 0,00 | 0,00 | 0,00 | 0,00 | NA | NA |
| RP11-548C21.1  | 0,00 | 0,00 | 0,00 | 0,00 | NA | NA |
| RP11-548H3.1   | 0,00 | 0,00 | 0,00 | 0,00 | NA | NA |
| RP11-548K12.10 | 0,00 | 0,00 | 0,00 | 0,00 | NA | NA |
| RP11-548K12.11 | 0,00 | 0,00 | 0,00 | 0,00 | NA | NA |
| RP11-548K12.12 | 0,00 | 0,00 | 0,00 | 0,00 | NA | NA |
| RP11-548K12.13 | 0,00 | 0,00 | 0,00 | 0,00 | NA | NA |
| RP11-548K12.2  | 0,00 | 0,00 | 0,00 | 0,00 | NA | NA |
| RP11-548K12.3  | 0,00 | 0,56 | 0,00 | 0,00 | NA | NA |
| RP11-548K12.5  | 0,00 | 0,00 | 0,00 | 0,00 | NA | NA |
| RP11-548K12.6  | 0,00 | 0,00 | 0,00 | 0,00 | NA | NA |
| RP11-548K12.7  | 0,00 | 0,00 | 0,00 | 0,00 | NA | NA |
| RP11-548K12.8  | 0,00 | 0,00 | 0,00 | 0,00 | NA | NA |
| RP11-548K12.9  | 0,00 | 0,00 | 0,00 | 0,00 | NA | NA |
| RP11-548N1.1   | 0,00 | 0,00 | 0,00 | 0,00 | NA | NA |
| RP11-548O1.1   | 0,00 | 0,00 | 0,00 | 0,00 | NA | NA |
| RP11-548P2.2   | 0,00 | 0,00 | 0,00 | 0,00 | NA | NA |
| RP11-549A6.1   | 0,00 | 0,00 | 0,00 | 0,00 | NA | NA |
| RP11-549B18.3  | 0,00 | 0,00 | 0,00 | 0,00 | NA | NA |
| RP11-549D18.1  | 0,00 | 0,00 | 0,00 | 0,00 | NA | NA |
| RP11-549K20.2  | 0,00 | 0,00 | 0,00 | 0,00 | NA | NA |
| RP11-549L3.2   | 0,00 | 0,00 | 0,00 | 0,00 | NA | NA |
| RP11-549L6.3   | 0,00 | 0,00 | 0,00 | 0,00 | NA | NA |
| RP11-54C4.2    | 0,00 | 0,00 | 0,00 | 0,00 | NA | NA |
| RP11-54D18.3   | 0,07 | 0,08 | 0,07 | 0,08 | NA | NA |
| RP11-54F2.1    | 0,00 | 0,00 | 0,00 | 0,00 | NA | NA |
| RP11-54F2.8    | 0,00 | 0,00 | 0,00 | 0,00 | NA | NA |
| RP11-54H7.2    | 0,00 | 0,00 | 0,00 | 0,00 | NA | NA |
| RP11-54H7.3    | 0,00 | 0,00 | 0,00 | 0,00 | NA | NA |
| RP11-54I5.1    | 0,00 | 0,00 | 0,00 | 0,00 | NA | NA |
| RP11-54J7.2    | 0,00 | 0,00 | 0,00 | 0,00 | NA | NA |
| RP11-54K16.2   | 0,00 | 0,44 | 0,00 | 0,00 | NA | NA |
| RP11-54O7.10   | 0,00 | 0,00 | 0,00 | 0,00 | NA | NA |
| RP11-54O7.14   | 0,00 | 0,00 | 0,00 | 0,00 | NA | NA |
| RP11-54P19.1   | 0,00 | 0,00 | 0,00 | 0,00 | NA | NA |
| RP11-550A18.1  | 0,00 | 0,00 | 0,00 | 0,00 | NA | NA |
| RP11-550A9.1   | 0,00 | 0,00 | 0,00 | 0,00 | NA | NA |
| RP11-550C4.4   | 0,00 | 0,00 | 0,00 | 0,00 | NA | NA |
| RP11-550C4.6   | 0,00 | 0,00 | 0,00 | 0,00 | NA | NA |
| RP11-550E22.5  | 0,00 | 0,00 | 0,00 | 0,00 | NA | NA |
| RP11-550H2.2   | 0,00 | 0,00 | 0,00 | 0,00 | NA | NA |
| RP11-550I15.1  | 0,00 | 0,00 | 0,00 | 0,00 | NA | NA |
| RP11-550I24.3  | 0,00 | 0,00 | 0,00 | 0,00 | NA | NA |
| RP11-550P23.4  | 0,00 | 0,00 | 0,00 | 0,00 | NA | NA |
| RP11-550P23.5  | 0,00 | 0,00 | 0,00 | 0,00 | NA | NA |
| RP11-551A11.1  | 0,00 | 0,00 | 0,00 | 0,00 | NA | NA |
| RP11-551G24.2  | 0,00 | 0,00 | 0,00 | 0,00 | NA | NA |
| RP11-551L14.5  | 0,00 | 0,00 | 0,00 | 0,00 | NA | NA |
| RP11-551L14.7  | 0,00 | 0,00 | 0,00 | 0,00 | NA | NA |
| RP11-551L14.8  | 0,00 | 0,00 | 0,00 | 0,00 | NA | NA |
| RP11-551M15.2  | 0,00 | 0,00 | 0,00 | 0,00 | NA | NA |
| RP11-551M15.3  | 0,00 | 0,00 | 0,00 | 0,00 | NA | NA |
| RP11-551M15.4  | 0,00 | 0,00 | 0,00 | 0,00 | NA | NA |



|               |      |      |      |      |    |    |
|---------------|------|------|------|------|----|----|
| RP11-552E10.1 | 0,00 | 0,00 | 0,00 | 0,00 | NA | NA |
| RP11-552E20.1 | 0,00 | 0,00 | 0,00 | 0,00 | NA | NA |
| RP11-552E4.2  | 0,00 | 0,00 | 0,00 | 0,00 | NA | NA |
| RP11-552E4.3  | 0,00 | 0,00 | 0,00 | 0,00 | NA | NA |
| RP11-552E4.4  | 0,00 | 0,00 | 0,00 | 0,00 | NA | NA |
| RP11-552E4.5  | 0,00 | 0,00 | 0,00 | 0,00 | NA | NA |
| RP11-552I14.1 | 0,00 | 0,00 | 0,00 | 0,00 | NA | NA |
| RP11-552J9.1  | 0,00 | 0,00 | 0,00 | 0,00 | NA | NA |
| RP11-552J9.10 | 0,00 | 0,00 | 0,00 | 0,00 | NA | NA |
| RP11-552J9.11 | 0,00 | 0,00 | 0,00 | 0,00 | NA | NA |
| RP11-552J9.12 | 0,00 | 0,00 | 0,00 | 0,00 | NA | NA |
| RP11-552J9.13 | 0,00 | 0,00 | 0,00 | 0,00 | NA | NA |
| RP11-552J9.14 | 0,00 | 0,00 | 0,00 | 0,00 | NA | NA |
| RP11-552J9.4  | 0,00 | 0,00 | 0,00 | 0,00 | NA | NA |
| RP11-552J9.5  | 0,00 | 0,00 | 0,00 | 0,00 | NA | NA |
| RP11-552J9.6  | 0,00 | 0,00 | 0,00 | 0,00 | NA | NA |
| RP11-552J9.9  | 0,00 | 0,00 | 0,00 | 0,00 | NA | NA |
| RP11-552O4.1  | 0,00 | 0,00 | 0,00 | 0,00 | NA | NA |
| RP11-552O4.2  | 0,00 | 0,00 | 0,00 | 0,00 | NA | NA |
| RP11-553A10.2 | 0,00 | 0,00 | 0,00 | 0,00 | NA | NA |
| RP11-553E24.1 | 0,00 | 0,00 | 0,00 | 0,00 | NA | NA |
| RP11-553E5.1  | 0,00 | 0,00 | 0,00 | 0,00 | NA | NA |
| RP11-553J6.1  | 0,00 | 0,00 | 0,00 | 0,00 | NA | NA |
| RP11-553K23.2 | 0,00 | 0,00 | 0,00 | 0,00 | NA | NA |
| RP11-553K8.2  | 0,00 | 0,00 | 0,00 | 0,00 | NA | NA |
| RP11-554A11.4 | 0,00 | 0,00 | 0,00 | 0,00 | NA | NA |
| RP11-554A11.5 | 0,00 | 0,00 | 0,00 | 0,00 | NA | NA |
| RP11-554A11.8 | 0,00 | 0,00 | 0,00 | 0,00 | NA | NA |
| RP11-554D14.1 | 0,00 | 0,00 | 0,00 | 0,00 | NA | NA |
| RP11-554D14.2 | 0,00 | 0,00 | 0,00 | 0,00 | NA | NA |
| RP11-554D14.3 | 0,00 | 0,00 | 0,00 | 0,00 | NA | NA |
| RP11-554D14.5 | 0,00 | 0,00 | 0,00 | 0,00 | NA | NA |
| RP11-554D14.7 | 0,00 | 0,00 | 0,00 | 0,00 | NA | NA |
| RP11-554D15.1 | 0,00 | 0,00 | 0,00 | 0,00 | NA | NA |
| RP11-554D15.2 | 0,00 | 0,00 | 0,00 | 0,00 | NA | NA |
| RP11-554D15.4 | 0,00 | 0,00 | 0,00 | 0,00 | NA | NA |
| RP11-554D20.1 | 0,00 | 0,00 | 0,00 | 0,00 | NA | NA |
| RP11-554E23.3 | 0,00 | 0,00 | 0,00 | 0,00 | NA | NA |
| RP11-554I8.1  | 0,00 | 0,00 | 0,00 | 0,00 | NA | NA |
| RP11-554I8.2  | 0,00 | 0,00 | 0,00 | 0,00 | NA | NA |
| RP11-554K11.1 | 0,00 | 0,00 | 0,00 | 0,00 | NA | NA |
| RP11-554K11.2 | 0,00 | 0,00 | 0,00 | 0,00 | NA | NA |
| RP11-554L12.1 | 0,00 | 0,00 | 0,00 | 0,00 | NA | NA |
| RP11-554L12.2 | 0,00 | 0,00 | 0,00 | 0,00 | NA | NA |
| RP11-554L12.3 | 0,00 | 0,00 | 0,00 | 0,00 | NA | NA |
| RP11-555E9.1  | 0,00 | 0,00 | 0,00 | 0,00 | NA | NA |
| RP11-555G19.1 | 0,00 | 0,00 | 0,00 | 0,00 | NA | NA |
| RP11-555G19.2 | 0,00 | 0,00 | 0,00 | 0,00 | NA | NA |
| RP11-555H23.1 | 0,00 | 0,00 | 0,00 | 0,00 | NA | NA |
| RP11-555H7.2  | 0,00 | 0,00 | 0,00 | 0,00 | NA | NA |
| RP11-555I4.2  | 0,00 | 0,00 | 0,00 | 0,00 | NA | NA |
| RP11-555I4.4  | 0,00 | 0,00 | 0,00 | 0,00 | NA | NA |
| RP11-555K12.2 | 0,00 | 0,00 | 0,00 | 0,00 | NA | NA |
| RP11-555K2.1  | 0,00 | 0,00 | 0,00 | 0,00 | NA | NA |
| RP11-555K2.2  | 0,00 | 0,00 | 0,00 | 0,00 | NA | NA |

|               |      |      |      |      |    |    |
|---------------|------|------|------|------|----|----|
| RP11-555K2.4  | 0,00 | 0,00 | 0,00 | 0,00 | NA | NA |
| RP11-555M1.1  | 0,00 | 0,00 | 0,00 | 0,00 | NA | NA |
| RP11-556E13.1 | 0,00 | 0,00 | 0,00 | 0,00 | NA | NA |
| RP11-556G22.1 | 0,00 | 0,00 | 0,00 | 0,00 | NA | NA |
| RP11-556G22.3 | 0,00 | 0,00 | 0,00 | 0,00 | NA | NA |
| RP11-556H2.3  | 0,00 | 0,00 | 0,00 | 0,00 | NA | NA |
| RP11-556H2.4  | 0,00 | 0,00 | 0,00 | 0,00 | NA | NA |
| RP11-556I13.1 | 0,00 | 0,00 | 0,00 | 0,00 | NA | NA |
| RP11-556I14.3 | 0,00 | 0,00 | 0,00 | 0,00 | NA | NA |
| RP11-556K13.1 | 0,68 | 0,84 | 1,01 | 0,84 | NA | NA |
| RP11-556N21.5 | 0,00 | 0,00 | 0,00 | 0,00 | NA | NA |
| RP11-556O5.1  | 0,00 | 0,00 | 0,00 | 0,00 | NA | NA |
| RP11-556O5.5  | 0,00 | 0,00 | 0,00 | 0,00 | NA | NA |
| RP11-556O5.6  | 0,00 | 0,16 | 0,14 | 0,13 | NA | NA |
| RP11-556O9.3  | 0,00 | 0,00 | 0,00 | 0,00 | NA | NA |
| RP11-556O9.4  | 0,00 | 0,00 | 0,00 | 0,00 | NA | NA |
| RP11-557B13.1 | 0,00 | 0,00 | 0,00 | 0,00 | NA | NA |
| RP11-557B9.1  | 0,00 | 0,00 | 0,00 | 0,00 | NA | NA |
| RP11-557C18.4 | 0,00 | 0,00 | 0,00 | 0,00 | NA | NA |
| RP11-557C9.1  | 0,00 | 0,00 | 0,00 | 0,00 | NA | NA |
| RP11-557C9.3  | 0,00 | 0,00 | 0,00 | 0,00 | NA | NA |
| RP11-557F20.2 | 0,00 | 0,00 | 0,00 | 0,00 | NA | NA |
| RP11-557H15.1 | 0,00 | 0,00 | 0,00 | 0,00 | NA | NA |
| RP11-557H15.4 | 0,00 | 0,00 | 0,00 | 0,00 | NA | NA |
| RP11-557H15.5 | 0,00 | 0,00 | 0,00 | 0,00 | NA | NA |
| RP11-557J10.3 | 0,00 | 0,00 | 0,00 | 0,00 | NA | NA |
| RP11-557J10.5 | 0,00 | 0,00 | 0,00 | 0,00 | NA | NA |
| RP11-558A11.2 | 0,00 | 0,00 | 0,00 | 0,00 | NA | NA |
| RP11-558A11.3 | 0,00 | 0,00 | 0,00 | 0,00 | NA | NA |
| RP11-558C24.1 | 0,00 | 0,00 | 0,00 | 0,00 | NA | NA |
| RP11-558F24.2 | 0,00 | 0,00 | 0,00 | 0,00 | NA | NA |
| RP11-558F24.6 | 0,00 | 0,00 | 0,00 | 0,00 | NA | NA |
| RP11-559N14.6 | 0,00 | 0,00 | 0,00 | 0,00 | NA | NA |
| RP11-55C6.1   | 0,00 | 0,00 | 0,00 | 0,00 | NA | NA |
| RP11-55C6.2   | 0,00 | 0,00 | 0,00 | 0,00 | NA | NA |
| RP11-55L3.2   | 0,00 | 0,00 | 0,00 | 0,00 | NA | NA |
| RP11-55L4.2   | 0,00 | 0,00 | 0,00 | 0,00 | NA | NA |
| RP11-560A15.4 | 0,00 | 0,00 | 0,00 | 0,00 | NA | NA |
| RP11-560A15.6 | 0,00 | 0,00 | 0,00 | 0,00 | NA | NA |
| RP11-560A7.1  | 0,00 | 0,00 | 0,00 | 0,00 | NA | NA |
| RP11-560B16.5 | 0,00 | 0,00 | 0,00 | 0,00 | NA | NA |
| RP11-560D2.1  | 0,00 | 0,00 | 0,00 | 0,00 | NA | NA |
| RP11-560D2.2  | 0,00 | 0,00 | 0,00 | 0,00 | NA | NA |
| RP11-560G2.1  | 0,00 | 0,00 | 0,00 | 0,00 | NA | NA |
| RP11-560G2.2  | 0,00 | 0,00 | 0,00 | 0,00 | NA | NA |
| RP11-560I19.2 | 0,00 | 0,00 | 0,00 | 0,00 | NA | NA |
| RP11-560I19.4 | 0,00 | 0,00 | 0,00 | 0,00 | NA | NA |
| RP11-560L11.1 | 0,00 | 0,00 | 0,00 | 0,00 | NA | NA |
| RP11-560O15.1 | 0,00 | 0,00 | 0,00 | 0,00 | NA | NA |
| RP11-560O20.1 | 0,00 | 0,00 | 0,00 | 0,00 | NA | NA |
| RP11-561B11.3 | 0,00 | 0,00 | 0,00 | 0,00 | NA | NA |
| RP11-561B11.4 | 0,00 | 0,00 | 0,00 | 0,00 | NA | NA |
| RP11-561B11.5 | 0,00 | 0,00 | 0,00 | 0,00 | NA | NA |
| RP11-561C5.1  | 0,00 | 0,00 | 0,00 | 0,00 | NA | NA |
| RP11-561C5.2  | 0,00 | 0,00 | 0,00 | 0,00 | NA | NA |

|               |      |      |      |      |    |    |
|---------------|------|------|------|------|----|----|
| RP11-561C5.4  | 0,00 | 0,00 | 0,00 | 0,00 | NA | NA |
| RP11-561C5.5  | 0,50 | 0,78 | 0,44 | 0,47 | NA | NA |
| RP11-561C5.7  | 0,00 | 0,00 | 0,00 | 0,00 | NA | NA |
| RP11-561E1.1  | 0,00 | 0,00 | 0,00 | 0,00 | NA | NA |
| RP11-561G1.2  | 0,00 | 0,00 | 0,00 | 0,00 | NA | NA |
| RP11-561G1.3  | 0,00 | 0,00 | 0,00 | 0,00 | NA | NA |
| RP11-561I11.4 | 0,00 | 0,00 | 0,00 | 0,00 | NA | NA |
| RP11-561N12.1 | 0,00 | 0,00 | 0,00 | 0,00 | NA | NA |
| RP11-561N12.4 | 0,00 | 0,00 | 0,00 | 0,00 | NA | NA |
| RP11-561N12.5 | 0,00 | 0,00 | 0,00 | 0,00 | NA | NA |
| RP11-561N12.6 | 0,00 | 0,00 | 0,00 | 0,00 | NA | NA |
| RP11-561N12.8 | 0,00 | 0,00 | 0,00 | 0,00 | NA | NA |
| RP11-561O23.5 | 0,00 | 0,16 | 0,00 | 0,06 | NA | NA |
| RP11-561O23.6 | 0,00 | 0,00 | 0,00 | 0,00 | NA | NA |
| RP11-561O23.7 | 0,00 | 0,00 | 0,00 | 0,00 | NA | NA |
| RP11-561O4.1  | 0,00 | 0,00 | 0,00 | 0,00 | NA | NA |
| RP11-561P12.5 | 0,00 | 0,00 | 0,00 | 0,00 | NA | NA |
| RP11-562A8.1  | 0,00 | 0,00 | 0,00 | 0,00 | NA | NA |
| RP11-562F9.2  | 0,00 | 0,00 | 0,00 | 0,00 | NA | NA |
| RP11-562F9.3  | 0,00 | 0,00 | 0,00 | 0,00 | NA | NA |
| RP11-562I5.1  | 0,00 | 0,00 | 0,00 | 0,00 | NA | NA |
| RP11-562M8.2  | 0,00 | 0,00 | 0,00 | 0,00 | NA | NA |
| RP11-562M8.4  | 0,00 | 0,00 | 0,00 | 0,00 | NA | NA |
| RP11-562P17.2 | 0,00 | 0,00 | 0,00 | 0,00 | NA | NA |
| RP11-563C6.1  | 0,00 | 0,00 | 0,00 | 0,00 | NA | NA |
| RP11-563E2.2  | 0,00 | 0,00 | 0,00 | 0,00 | NA | NA |
| RP11-563H6.1  | 0,00 | 0,00 | 0,00 | 0,00 | NA | NA |
| RP11-563H8.2  | 0,00 | 0,00 | 0,00 | 0,00 | NA | NA |
| RP11-563M4.1  | 0,00 | 0,00 | 0,00 | 0,00 | NA | NA |
| RP11-563N12.1 | 0,00 | 0,00 | 0,00 | 0,00 | NA | NA |
| RP11-563N12.2 | 0,00 | 0,00 | 0,00 | 0,00 | NA | NA |
| RP11-563P16.1 | 0,00 | 0,00 | 0,00 | 0,00 | NA | NA |
| RP11-564A8.8  | 0,00 | 0,00 | 0,00 | 0,00 | NA | NA |
| RP11-564C24.1 | 0,00 | 0,00 | 0,00 | 0,00 | NA | NA |
| RP11-564C4.4  | 0,00 | 0,00 | 0,00 | 0,00 | NA | NA |
| RP11-564C4.6  | 0,00 | 0,00 | 0,00 | 0,00 | NA | NA |
| RP11-564C4.8  | 0,00 | 0,00 | 0,00 | 0,00 | NA | NA |
| RP11-564D11.3 | 0,00 | 0,00 | 0,00 | 0,00 | NA | NA |
| RP11-564H18.1 | 0,00 | 0,00 | 0,00 | 0,00 | NA | NA |
| RP11-564N10.2 | 0,00 | 0,00 | 0,00 | 0,00 | NA | NA |
| RP11-564P9.1  | 0,00 | 0,00 | 0,00 | 0,00 | NA | NA |
| RP11-565A3.2  | 0,00 | 0,00 | 0,00 | 0,00 | NA | NA |
| RP11-565F4.1  | 0,00 | 0,00 | 0,00 | 0,00 | NA | NA |
| RP11-565G2.1  | 0,00 | 0,00 | 0,00 | 0,00 | NA | NA |
| RP11-565H13.2 | 0,00 | 0,00 | 0,00 | 0,00 | NA | NA |
| RP11-565H13.3 | 0,00 | 0,00 | 0,00 | 0,00 | NA | NA |
| RP11-565H13.4 | 0,00 | 0,00 | 0,00 | 0,00 | NA | NA |
| RP11-565J7.1  | 0,00 | 0,00 | 0,00 | 0,00 | NA | NA |
| RP11-565N2.1  | 0,00 | 0,00 | 0,00 | 0,00 | NA | NA |
| RP11-565P22.6 | 0,00 | 0,00 | 0,00 | 0,00 | NA | NA |
| RP11-566D24.2 | 0,00 | 0,00 | 0,00 | 0,00 | NA | NA |
| RP11-566E18.1 | 0,00 | 0,00 | 0,00 | 0,00 | NA | NA |
| RP11-566F5.1  | 0,00 | 0,00 | 0,00 | 0,00 | NA | NA |
| RP11-566F5.2  | 0,00 | 0,00 | 0,00 | 0,00 | NA | NA |
| RP11-566H16.1 | 0,00 | 0,00 | 0,00 | 0,00 | NA | NA |

|                |      |      |      |      |    |    |
|----------------|------|------|------|------|----|----|
| RP11-566H16.2  | 0,00 | 0,00 | 0,00 | 0,00 | NA | NA |
| RP11-566H8.1   | 0,00 | 0,00 | 0,00 | 0,00 | NA | NA |
| RP11-566J3.1   | 0,00 | 0,00 | 0,00 | 0,00 | NA | NA |
| RP11-566J3.2   | 0,00 | 0,00 | 0,00 | 0,00 | NA | NA |
| RP11-566K11.2  | 0,00 | 0,00 | 0,00 | 0,00 | NA | NA |
| RP11-566K19.11 | 0,00 | 0,00 | 0,00 | 0,00 | NA | NA |
| RP11-566K19.5  | 0,00 | 0,00 | 0,00 | 0,00 | NA | NA |
| RP11-566K19.6  | 0,08 | 0,11 | 0,00 | 0,00 | NA | NA |
| RP11-566K19.7  | 0,00 | 0,06 | 0,00 | 0,00 | NA | NA |
| RP11-566K19.9  | 0,00 | 0,00 | 0,00 | 0,00 | NA | NA |
| RP11-566K8.1   | 0,00 | 0,00 | 0,00 | 0,00 | NA | NA |
| RP11-567B20.1  | 0,00 | 0,00 | 0,00 | 0,00 | NA | NA |
| RP11-567B20.2  | 0,00 | 0,00 | 0,00 | 0,00 | NA | NA |
| RP11-567C20.3  | 0,00 | 0,00 | 0,00 | 0,00 | NA | NA |
| RP11-567C20.4  | 0,00 | 0,00 | 0,00 | 0,00 | NA | NA |
| RP11-567E21.3  | 0,00 | 0,00 | 0,00 | 0,00 | NA | NA |
| RP11-567G11.1  | 0,00 | 0,00 | 0,00 | 0,00 | NA | NA |
| RP11-567G24.1  | 0,00 | 0,00 | 0,00 | 0,00 | NA | NA |
| RP11-567G24.3  | 0,00 | 0,00 | 0,00 | 0,00 | NA | NA |
| RP11-567I13.1  | 0,00 | 0,00 | 0,00 | 0,00 | NA | NA |
| RP11-567J20.1  | 0,00 | 0,00 | 0,00 | 0,00 | NA | NA |
| RP11-567J20.3  | 0,00 | 0,00 | 0,00 | 0,00 | NA | NA |
| RP11-567J24.4  | 0,00 | 0,00 | 0,00 | 0,00 | NA | NA |
| RP11-567L7.5   | 0,00 | 0,00 | 0,00 | 0,00 | NA | NA |
| RP11-567L7.7   | 0,00 | 0,00 | 0,00 | 0,00 | NA | NA |
| RP11-567M16.2  | 0,00 | 0,00 | 0,00 | 0,00 | NA | NA |
| RP11-567M21.2  | 0,00 | 0,00 | 0,00 | 0,00 | NA | NA |
| RP11-567N4.2   | 0,00 | 0,00 | 0,00 | 0,00 | NA | NA |
| RP11-567N4.3   | 0,00 | 0,00 | 0,00 | 0,00 | NA | NA |
| RP11-567O16.1  | 0,00 | 0,00 | 0,00 | 0,00 | NA | NA |
| RP11-567O18.1  | 0,00 | 0,00 | 0,00 | 0,00 | NA | NA |
| RP11-567P17.1  | 0,00 | 0,00 | 0,00 | 0,00 | NA | NA |
| RP11-567P17.2  | 0,00 | 0,00 | 0,00 | 0,00 | NA | NA |
| RP11-567P19.1  | 0,29 | 0,00 | 0,78 | 0,00 | NA | NA |
| RP11-568A19.1  | 0,00 | 0,00 | 0,00 | 0,00 | NA | NA |
| RP11-568A7.1   | 0,00 | 0,00 | 0,00 | 0,00 | NA | NA |
| RP11-568A7.2   | 0,00 | 0,00 | 0,00 | 0,00 | NA | NA |
| RP11-568F20.1  | 0,00 | 0,00 | 0,00 | 0,00 | NA | NA |
| RP11-568G11.5  | 0,00 | 0,00 | 0,00 | 0,00 | NA | NA |
| RP11-568G20.2  | 0,00 | 0,00 | 0,00 | 0,00 | NA | NA |
| RP11-568J23.1  | 0,00 | 0,00 | 0,00 | 0,00 | NA | NA |
| RP11-568J23.5  | 0,00 | 0,00 | 0,00 | 0,00 | NA | NA |
| RP11-568J23.7  | 0,00 | 0,00 | 0,00 | 0,00 | NA | NA |
| RP11-568K15.2  | 0,00 | 0,00 | 0,00 | 0,00 | NA | NA |
| RP11-569A11.2  | 0,00 | 0,00 | 0,00 | 0,00 | NA | NA |
| RP11-569D9.3   | 0,00 | 0,00 | 0,00 | 0,00 | NA | NA |
| RP11-569D9.5   | 0,00 | 0,00 | 0,00 | 0,00 | NA | NA |
| RP11-569G13.1  | 0,00 | 0,00 | 0,00 | 0,00 | NA | NA |
| RP11-569G13.3  | 0,00 | 0,00 | 0,05 | 0,06 | NA | NA |
| RP11-569G9.7   | 0,00 | 0,00 | 0,00 | 0,00 | NA | NA |
| RP11-569H14.1  | 0,00 | 0,00 | 0,00 | 0,00 | NA | NA |
| RP11-569H17.1  | 0,00 | 0,00 | 0,00 | 0,00 | NA | NA |
| RP11-569O4.3   | 0,00 | 0,00 | 0,00 | 0,00 | NA | NA |
| RP11-569O4.4   | 0,00 | 0,00 | 0,00 | 0,00 | NA | NA |
| RP11-569O4.6   | 0,00 | 0,00 | 0,00 | 0,00 | NA | NA |

|               |      |      |      |      |    |    |
|---------------|------|------|------|------|----|----|
| RP11-56B16.5  | 0,00 | 0,00 | 0,00 | 0,00 | NA | NA |
| RP11-56F10.3  | 0,00 | 0,00 | 0,00 | 0,00 | NA | NA |
| RP11-56H2.1   | 0,00 | 0,00 | 0,00 | 0,00 | NA | NA |
| RP11-56H7.2   | 0,00 | 0,00 | 0,00 | 0,00 | NA | NA |
| RP11-56H7.3   | 0,00 | 0,00 | 0,00 | 0,00 | NA | NA |
| RP11-56I23.1  | 0,00 | 0,00 | 0,00 | 0,00 | NA | NA |
| RP11-56L13.1  | 0,00 | 0,00 | 0,00 | 0,00 | NA | NA |
| RP11-56L13.4  | 0,00 | 0,00 | 0,00 | 0,00 | NA | NA |
| RP11-56L13.6  | 0,00 | 0,00 | 0,00 | 0,00 | NA | NA |
| RP11-56L13.7  | 0,00 | 0,00 | 0,00 | 0,00 | NA | NA |
| RP11-56M2.1   | 0,00 | 0,00 | 0,00 | 0,00 | NA | NA |
| RP11-56M3.1   | 0,00 | 0,00 | 0,00 | 0,00 | NA | NA |
| RP11-56O18.1  | 0,00 | 0,00 | 0,00 | 0,00 | NA | NA |
| RP11-56P2.2   | 0,00 | 0,00 | 0,00 | 0,00 | NA | NA |
| RP11-56P9.10  | 0,00 | 0,00 | 0,00 | 0,00 | NA | NA |
| RP11-56P9.11  | 0,00 | 0,00 | 0,00 | 0,00 | NA | NA |
| RP11-56P9.2   | 0,00 | 0,00 | 0,00 | 0,00 | NA | NA |
| RP11-56P9.4   | 0,00 | 0,00 | 0,00 | 0,00 | NA | NA |
| RP11-56P9.6   | 0,00 | 0,00 | 0,00 | 0,00 | NA | NA |
| RP11-56P9.8   | 0,00 | 0,00 | 0,00 | 0,00 | NA | NA |
| RP11-56P9.9   | 0,00 | 0,00 | 0,00 | 0,00 | NA | NA |
| RP11-570H19.2 | 0,00 | 0,00 | 0,00 | 0,00 | NA | NA |
| RP11-570J4.1  | 0,00 | 0,00 | 0,00 | 0,00 | NA | NA |
| RP11-570J4.2  | 0,00 | 0,00 | 0,00 | 0,00 | NA | NA |
| RP11-570K4.1  | 0,00 | 0,00 | 0,00 | 0,00 | NA | NA |
| RP11-570P14.1 | 0,00 | 0,00 | 0,00 | 0,00 | NA | NA |
| RP11-571E6.1  | 0,00 | 0,00 | 0,00 | 0,00 | NA | NA |
| RP11-571E6.4  | 0,00 | 0,00 | 0,00 | 0,00 | NA | NA |
| RP11-571F15.6 | 0,00 | 0,00 | 0,00 | 0,00 | NA | NA |
| RP11-571G1.1  | 0,00 | 0,00 | 0,00 | 0,00 | NA | NA |
| RP11-571G1.2  | 0,00 | 0,00 | 0,00 | 0,00 | NA | NA |
| RP11-571I18.2 | 0,00 | 0,00 | 0,00 | 0,00 | NA | NA |
| RP11-571I18.3 | 0,00 | 0,00 | 0,00 | 0,00 | NA | NA |
| RP11-571I18.4 | 0,00 | 0,00 | 0,00 | 0,00 | NA | NA |
| RP11-571L19.1 | 0,00 | 0,00 | 0,00 | 0,00 | NA | NA |
| RP11-571L19.4 | 0,00 | 0,00 | 0,00 | 0,00 | NA | NA |
| RP11-571M6.18 | 0,00 | 0,00 | 0,00 | 0,00 | NA | NA |
| RP11-571O6.1  | 0,00 | 0,00 | 0,00 | 0,00 | NA | NA |
| RP11-572C15.3 | 0,00 | 0,00 | 0,00 | 0,00 | NA | NA |
| RP11-572C21.2 | 0,00 | 0,00 | 0,00 | 0,00 | NA | NA |
| RP11-572F4.1  | 0,00 | 0,46 | 0,00 | 0,00 | NA | NA |
| RP11-572H4.1  | 0,00 | 0,00 | 0,00 | 0,00 | NA | NA |
| RP11-572H4.2  | 0,00 | 0,00 | 0,00 | 0,00 | NA | NA |
| RP11-572M11.2 | 0,00 | 0,00 | 0,00 | 0,00 | NA | NA |
| RP11-572M18.1 | 0,00 | 0,00 | 0,00 | 0,00 | NA | NA |
| RP11-572N21.1 | 0,00 | 0,00 | 0,00 | 0,00 | NA | NA |
| RP11-572O17.1 | 0,00 | 0,00 | 0,00 | 0,22 | NA | NA |
| RP11-572P18.2 | 0,00 | 0,00 | 0,00 | 0,00 | NA | NA |
| RP11-573C10.1 | 0,00 | 0,00 | 0,00 | 0,00 | NA | NA |
| RP11-573D15.1 | 0,00 | 0,00 | 0,00 | 0,00 | NA | NA |
| RP11-573D15.7 | 0,45 | 0,39 | 0,45 | 0,37 | NA | NA |
| RP11-573G6.2  | 0,00 | 0,00 | 0,00 | 0,00 | NA | NA |
| RP11-573G6.6  | 0,00 | 0,00 | 0,00 | 0,00 | NA | NA |
| RP11-573G6.8  | 0,00 | 0,00 | 0,00 | 0,00 | NA | NA |
| RP11-573M3.6  | 0,00 | 0,00 | 0,00 | 0,00 | NA | NA |

|                |      |      |      |      |    |    |
|----------------|------|------|------|------|----|----|
| RP11-573N10.1  | 0,00 | 0,00 | 0,00 | 0,00 | NA | NA |
| RP11-574H6.1   | 0,00 | 0,00 | 0,00 | 0,00 | NA | NA |
| RP11-574K11.20 | 0,00 | 0,00 | 0,00 | 0,00 | NA | NA |
| RP11-574K11.26 | 0,00 | 0,00 | 0,00 | 0,00 | NA | NA |
| RP11-574O16.1  | 0,00 | 0,00 | 0,00 | 0,00 | NA | NA |
| RP11-574O7.2   | 0,00 | 0,00 | 0,00 | 0,00 | NA | NA |
| RP11-575B7.2   | 0,00 | 0,00 | 0,00 | 0,00 | NA | NA |
| RP11-575B7.3   | 0,00 | 0,00 | 0,00 | 0,00 | NA | NA |
| RP11-575C1.1   | 0,00 | 0,00 | 0,00 | 0,00 | NA | NA |
| RP11-575F12.1  | 0,00 | 0,00 | 0,00 | 0,00 | NA | NA |
| RP11-575F12.3  | 0,00 | 0,05 | 0,04 | 0,00 | NA | NA |
| RP11-575G13.3  | 0,00 | 0,00 | 0,00 | 0,00 | NA | NA |
| RP11-575L16.1  | 0,00 | 0,00 | 0,00 | 0,00 | NA | NA |
| RP11-575M4.1   | 0,00 | 0,00 | 0,00 | 0,00 | NA | NA |
| RP11-575N15.1  | 0,00 | 0,00 | 0,00 | 0,00 | NA | NA |
| RP11-576C2.1   | 0,00 | 0,00 | 0,00 | 0,00 | NA | NA |
| RP11-576D8.1   | 0,00 | 0,00 | 0,00 | 0,00 | NA | NA |
| RP11-576I22.1  | 0,00 | 0,00 | 0,00 | 0,00 | NA | NA |
| RP11-576M8.2   | 0,00 | 0,00 | 0,00 | 0,00 | NA | NA |
| RP11-576N17.2  | 0,00 | 0,00 | 0,00 | 0,00 | NA | NA |
| RP11-576N17.3  | 0,00 | 0,00 | 0,00 | 0,00 | NA | NA |
| RP11-576N17.4  | 0,00 | 0,00 | 0,00 | 0,00 | NA | NA |
| RP11-576N17.6  | 0,00 | 0,00 | 0,00 | 0,00 | NA | NA |
| RP11-577G20.1  | 0,00 | 0,00 | 0,00 | 0,00 | NA | NA |
| RP11-577G20.2  | 0,00 | 0,00 | 0,00 | 0,00 | NA | NA |
| RP11-577H5.1   | 0,00 | 0,00 | 0,00 | 0,00 | NA | NA |
| RP11-577N1.1   | 0,00 | 0,00 | 0,00 | 0,00 | NA | NA |
| RP11-577N1.2   | 0,00 | 0,00 | 0,00 | 0,00 | NA | NA |
| RP11-577O19.1  | 0,00 | 0,00 | 0,00 | 0,00 | NA | NA |
| RP11-578B16.1  | 0,00 | 0,00 | 0,00 | 0,00 | NA | NA |
| RP11-578C11.2  | 0,00 | 0,00 | 0,00 | 0,00 | NA | NA |
| RP11-578F21.10 | 0,00 | 0,00 | 0,00 | 0,00 | NA | NA |
| RP11-578F21.13 | 0,00 | 0,00 | 0,00 | 0,00 | NA | NA |
| RP11-578F21.2  | 0,00 | 0,00 | 0,00 | 0,00 | NA | NA |
| RP11-578F21.4  | 0,00 | 0,00 | 0,00 | 0,00 | NA | NA |
| RP11-579A4.1   | 0,00 | 0,00 | 0,00 | 0,00 | NA | NA |
| RP11-579C11.1  | 0,00 | 0,00 | 0,00 | 0,00 | NA | NA |
| RP11-579D7.1   | 0,00 | 0,00 | 0,00 | 0,00 | NA | NA |
| RP11-579D7.4   | 0,00 | 0,00 | 0,00 | 0,00 | NA | NA |
| RP11-579D7.8   | 0,00 | 0,00 | 0,00 | 0,00 | NA | NA |
| RP11-579E24.2  | 0,00 | 0,00 | 0,00 | 0,00 | NA | NA |
| RP11-579O24.1  | 0,00 | 0,00 | 0,00 | 0,00 | NA | NA |
| RP11-57A1.1    | 0,00 | 0,00 | 0,00 | 0,00 | NA | NA |
| RP11-57A19.4   | 0,00 | 0,00 | 0,00 | 0,00 | NA | NA |
| RP11-57A19.6   | 0,00 | 0,00 | 0,00 | 0,00 | NA | NA |
| RP11-57B24.1   | 0,00 | 0,00 | 0,00 | 0,00 | NA | NA |
| RP11-57B24.2   | 0,00 | 0,00 | 0,00 | 0,00 | NA | NA |
| RP11-57C13.4   | 0,00 | 0,00 | 0,00 | 0,00 | NA | NA |
| RP11-57C19.2   | 0,00 | 0,00 | 0,00 | 0,00 | NA | NA |
| RP11-57C19.6   | 0,00 | 0,00 | 0,00 | 0,00 | NA | NA |
| RP11-57G10.1   | 0,00 | 0,00 | 0,00 | 0,00 | NA | NA |
| RP11-57G10.6   | 0,00 | 0,00 | 0,00 | 0,00 | NA | NA |
| RP11-57G22.1   | 0,00 | 0,00 | 0,00 | 0,00 | NA | NA |
| RP11-57H12.2   | 0,00 | 0,54 | 0,00 | 0,00 | NA | NA |
| RP11-57H14.2   | 0,00 | 0,00 | 0,00 | 0,00 | NA | NA |

|                |      |      |      |      |    |    |
|----------------|------|------|------|------|----|----|
| RP11-57H24.1   | 0,00 | 0,00 | 0,00 | 0,00 | NA | NA |
| RP11-57I17.3   | 0,00 | 0,00 | 0,00 | 0,00 | NA | NA |
| RP11-57K17.1   | 0,00 | 0,00 | 0,00 | 0,05 | NA | NA |
| RP11-57O2.3    | 0,00 | 0,00 | 0,00 | 0,00 | NA | NA |
| RP11-58O1.3    | 0,00 | 0,00 | 0,00 | 0,00 | NA | NA |
| RP11-58OJ4.1   | 0,00 | 0,00 | 0,00 | 0,00 | NA | NA |
| RP11-582E3.5   | 0,00 | 0,00 | 0,00 | 0,00 | NA | NA |
| RP11-582I16.3  | 0,00 | 0,00 | 0,00 | 0,00 | NA | NA |
| RP11-583F2.6   | 0,00 | 0,00 | 0,00 | 0,00 | NA | NA |
| RP11-583F2.7   | 0,00 | 0,00 | 0,00 | 0,00 | NA | NA |
| RP11-583F24.3  | 0,00 | 0,00 | 0,00 | 0,00 | NA | NA |
| RP11-583F24.4  | 0,00 | 0,00 | 0,00 | 0,00 | NA | NA |
| RP11-583F24.5  | 0,00 | 0,00 | 0,00 | 0,00 | NA | NA |
| RP11-583F24.6  | 0,00 | 0,00 | 0,00 | 0,00 | NA | NA |
| RP11-583F24.7  | 0,00 | 0,00 | 0,00 | 0,00 | NA | NA |
| RP11-583F24.8  | 0,00 | 0,00 | 0,00 | 0,00 | NA | NA |
| RP11-584M7.3   | 0,00 | 0,00 | 0,00 | 0,00 | NA | NA |
| RP11-584P21.4  | 0,00 | 0,00 | 0,00 | 0,00 | NA | NA |
| RP11-585F1.2   | 0,00 | 0,00 | 0,00 | 0,00 | NA | NA |
| RP11-585F1.3   | 0,00 | 0,00 | 0,00 | 0,00 | NA | NA |
| RP11-585F20.1  | 0,00 | 0,00 | 0,00 | 0,00 | NA | NA |
| RP11-585K14.1  | 0,00 | 0,00 | 0,00 | 0,00 | NA | NA |
| RP11-585K14.2  | 0,00 | 0,00 | 0,00 | 0,00 | NA | NA |
| RP11-585K6.2   | 0,00 | 0,00 | 0,00 | 0,00 | NA | NA |
| RP11-585O21.1  | 0,00 | 0,00 | 0,00 | 0,00 | NA | NA |
| RP11-585P4.5   | 0,12 | 0,11 | 0,35 | 0,25 | NA | NA |
| RP11-586D5.3   | 0,00 | 0,00 | 0,00 | 0,00 | NA | NA |
| RP11-586K12.10 | 0,00 | 0,00 | 0,00 | 0,00 | NA | NA |
| RP11-586K12.2  | 0,00 | 0,67 | 0,00 | 0,15 | NA | NA |
| RP11-586K12.4  | 0,00 | 0,00 | 0,00 | 0,00 | NA | NA |
| RP11-586K12.5  | 0,00 | 0,00 | 0,00 | 0,00 | NA | NA |
| RP11-586K12.7  | 0,00 | 0,00 | 0,00 | 0,00 | NA | NA |
| RP11-586K12.8  | 0,00 | 0,00 | 0,00 | 0,00 | NA | NA |
| RP11-587D21.4  | 0,00 | 0,00 | 0,00 | 0,00 | NA | NA |
| RP11-587H10.2  | 0,00 | 0,00 | 0,00 | 0,00 | NA | NA |
| RP11-587P21.1  | 0,00 | 0,00 | 0,00 | 0,00 | NA | NA |
| RP11-587P21.2  | 0,00 | 0,00 | 0,00 | 0,00 | NA | NA |
| RP11-588D3.1   | 0,00 | 0,00 | 0,00 | 0,00 | NA | NA |
| RP11-588F10.1  | 0,00 | 0,00 | 0,00 | 0,00 | NA | NA |
| RP11-588G21.1  | 0,00 | 0,00 | 0,00 | 0,00 | NA | NA |
| RP11-588K22.2  | 0,00 | 0,00 | 0,00 | 0,04 | NA | NA |
| RP11-588P7.1   | 0,00 | 0,00 | 0,00 | 0,00 | NA | NA |
| RP11-588P7.2   | 0,00 | 0,00 | 0,00 | 0,00 | NA | NA |
| RP11-588P8.1   | 0,00 | 0,00 | 0,00 | 0,00 | NA | NA |
| RP11-589B3.7   | 0,00 | 0,00 | 0,00 | 0,00 | NA | NA |
| RP11-589C21.1  | 0,00 | 0,00 | 0,00 | 0,00 | NA | NA |
| RP11-589E1.1   | 0,00 | 0,00 | 0,00 | 0,00 | NA | NA |
| RP11-589F4.2   | 0,00 | 0,00 | 0,00 | 0,00 | NA | NA |
| RP11-589F5.4   | 0,00 | 0,00 | 0,00 | 0,00 | NA | NA |
| RP11-589M2.1   | 0,00 | 0,00 | 0,00 | 0,00 | NA | NA |
| RP11-589M4.4   | 0,00 | 0,00 | 0,00 | 0,00 | NA | NA |
| RP11-58A17.2   | 0,00 | 0,00 | 0,00 | 0,00 | NA | NA |
| RP11-58A17.3   | 0,00 | 0,00 | 0,00 | 0,00 | NA | NA |
| RP11-58A17.4   | 0,00 | 0,00 | 0,00 | 0,00 | NA | NA |
| RP11-58A18.1   | 0,00 | 0,00 | 0,00 | 0,00 | NA | NA |

|                |      |      |      |      |    |    |
|----------------|------|------|------|------|----|----|
| RP11-58A18.2   | 0,00 | 0,00 | 0,00 | 0,00 | NA | NA |
| RP11-58B2.1    | 0,00 | 0,00 | 0,00 | 0,00 | NA | NA |
| RP11-58C22.1   | 0,00 | 0,00 | 0,00 | 0,00 | NA | NA |
| RP11-58G13.1   | 0,00 | 0,00 | 0,00 | 0,00 | NA | NA |
| RP11-58H15.3   | 0,00 | 0,00 | 0,00 | 0,00 | NA | NA |
| RP11-58K22.1   | 0,00 | 0,00 | 0,00 | 0,00 | NA | NA |
| RP11-58K22.2   | 0,00 | 0,00 | 0,00 | 0,00 | NA | NA |
| RP11-58K22.5   | 0,00 | 0,00 | 0,00 | 0,00 | NA | NA |
| RP11-590C23.1  | 0,00 | 0,00 | 0,00 | 0,00 | NA | NA |
| RP11-591L14.1  | 0,00 | 0,00 | 0,00 | 0,00 | NA | NA |
| RP11-591L14.2  | 0,00 | 0,00 | 0,00 | 0,00 | NA | NA |
| RP11-592H6.3   | 0,00 | 0,00 | 0,00 | 0,00 | NA | NA |
| RP11-593B8.3   | 0,00 | 0,00 | 0,00 | 0,00 | NA | NA |
| RP11-593F23.1  | 0,00 | 0,00 | 0,00 | 0,00 | NA | NA |
| RP11-593F5.1   | 0,00 | 0,00 | 0,00 | 0,00 | NA | NA |
| RP11-593F5.2   | 0,00 | 0,00 | 0,00 | 0,00 | NA | NA |
| RP11-593P24.1  | 0,00 | 0,00 | 0,00 | 0,00 | NA | NA |
| RP11-593P24.3  | 0,00 | 0,00 | 0,00 | 0,00 | NA | NA |
| RP11-593P24.4  | 0,00 | 0,00 | 0,00 | 0,00 | NA | NA |
| RP11-594C13.1  | 0,00 | 0,00 | 0,00 | 0,00 | NA | NA |
| RP11-594C13.2  | 0,00 | 0,00 | 0,00 | 0,00 | NA | NA |
| RP11-594N15.3  | 0,00 | 0,00 | 0,00 | 0,00 | NA | NA |
| RP11-597A11.10 | 0,00 | 0,00 | 0,00 | 0,00 | NA | NA |
| RP11-597A11.11 | 0,00 | 0,00 | 0,00 | 0,00 | NA | NA |
| RP11-597A11.3  | 0,00 | 0,00 | 0,00 | 0,00 | NA | NA |
| RP11-597A11.6  | 0,00 | 0,00 | 0,00 | 0,00 | NA | NA |
| RP11-597D13.1  | 0,00 | 0,00 | 0,00 | 0,00 | NA | NA |
| RP11-597K23.1  | 0,00 | 0,00 | 0,00 | 0,00 | NA | NA |
| RP11-597M12.1  | 0,00 | 0,00 | 0,00 | 0,00 | NA | NA |
| RP11-597M12.2  | 0,00 | 0,00 | 0,00 | 0,00 | NA | NA |
| RP11-597M17.1  | 0,00 | 0,00 | 0,00 | 0,00 | NA | NA |
| RP11-597M17.2  | 0,00 | 0,00 | 0,00 | 0,00 | NA | NA |
| RP11-597M17.3  | 0,00 | 0,00 | 0,00 | 0,00 | NA | NA |
| RP11-598C10.1  | 0,00 | 0,00 | 0,00 | 0,00 | NA | NA |
| RP11-598C10.2  | 0,00 | 0,00 | 0,00 | 0,00 | NA | NA |
| RP11-598D12.1  | 0,00 | 0,00 | 0,00 | 0,00 | NA | NA |
| RP11-598D12.2  | 0,00 | 0,00 | 0,00 | 0,00 | NA | NA |
| RP11-598D12.3  | 0,00 | 0,00 | 0,00 | 0,00 | NA | NA |
| RP11-598D12.4  | 0,00 | 0,00 | 0,00 | 0,00 | NA | NA |
| RP11-598D12.5  | 0,00 | 0,00 | 0,00 | 0,00 | NA | NA |
| RP11-598D14.1  | 0,00 | 0,00 | 0,00 | 0,00 | NA | NA |
| RP11-598F17.1  | 0,00 | 0,00 | 0,00 | 0,00 | NA | NA |
| RP11-598F17.2  | 0,00 | 0,00 | 0,00 | 0,00 | NA | NA |
| RP11-598F7.5   | 0,00 | 0,27 | 0,00 | 0,00 | NA | NA |
| RP11-598F7.6   | 0,00 | 0,29 | 0,07 | 0,42 | NA | NA |
| RP11-598G2.1   | 0,00 | 0,00 | 0,00 | 0,00 | NA | NA |
| RP11-598O12.1  | 0,00 | 0,00 | 0,00 | 0,00 | NA | NA |
| RP11-598O12.2  | 0,00 | 0,06 | 0,00 | 0,00 | NA | NA |
| RP11-598O8.1   | 0,00 | 0,00 | 0,00 | 0,00 | NA | NA |
| RP11-598P20.5  | 0,00 | 0,00 | 0,00 | 0,00 | NA | NA |
| RP11-599B13.3  | 0,00 | 0,00 | 0,00 | 0,00 | NA | NA |
| RP11-599B13.7  | 0,00 | 0,00 | 0,00 | 0,00 | NA | NA |
| RP11-599B13.8  | 0,00 | 0,00 | 0,00 | 0,00 | NA | NA |
| RP11-599B13.9  | 0,00 | 0,00 | 0,00 | 0,00 | NA | NA |
| RP11-599J14.2  | 0,00 | 0,00 | 0,00 | 0,00 | NA | NA |



|               |      |      |      |      |    |    |
|---------------|------|------|------|------|----|----|
| RP11-59D5_B.3 | 0,00 | 0,00 | 0,00 | 0,00 | NA | NA |
| RP11-59E19.1  | 0,00 | 0,00 | 0,00 | 0,00 | NA | NA |
| RP11-59E19.3  | 0,00 | 0,00 | 0,00 | 0,00 | NA | NA |
| RP11-59H1.1   | 0,00 | 0,00 | 0,00 | 0,00 | NA | NA |
| RP11-59H7.1   | 0,00 | 0,00 | 0,00 | 0,00 | NA | NA |
| RP11-59J16.3  | 0,00 | 0,00 | 0,00 | 0,00 | NA | NA |
| RP11-59N23.1  | 0,00 | 0,00 | 0,00 | 0,00 | NA | NA |
| RP11-59N23.3  | 0,00 | 0,00 | 0,00 | 0,00 | NA | NA |
| RP11-59O2.1   | 0,00 | 0,00 | 0,00 | 0,00 | NA | NA |
| RP11-5A1.1    | 0,00 | 0,00 | 0,00 | 0,00 | NA | NA |
| RP11-5A11.1   | 0,00 | 0,00 | 0,00 | 0,00 | NA | NA |
| RP11-5A11.2   | 0,00 | 0,00 | 0,00 | 0,00 | NA | NA |
| RP11-5A19.5   | 0,00 | 0,00 | 0,00 | 0,00 | NA | NA |
| RP11-5C23.1   | 0,00 | 0,00 | 0,00 | 0,00 | NA | NA |
| RP11-5C23.4   | 0,00 | 0,00 | 0,00 | 0,00 | NA | NA |
| RP11-5G18.2   | 0,00 | 0,00 | 0,00 | 0,00 | NA | NA |
| RP11-5G9.4    | 0,00 | 0,00 | 0,00 | 0,00 | NA | NA |
| RP11-5J2.2    | 0,00 | 0,00 | 0,00 | 0,00 | NA | NA |
| RP11-5K10.1   | 0,00 | 0,00 | 0,00 | 0,00 | NA | NA |
| RP11-5K16.3   | 0,00 | 0,00 | 0,00 | 0,00 | NA | NA |
| RP11-5K23.3   | 0,00 | 0,00 | 0,00 | 0,00 | NA | NA |
| RP11-5N11.1   | 0,00 | 0,00 | 0,00 | 0,00 | NA | NA |
| RP11-5N11.2   | 0,00 | 0,00 | 0,00 | 0,00 | NA | NA |
| RP11-5N11.3   | 0,00 | 0,00 | 0,00 | 0,00 | NA | NA |
| RP11-5N11.5   | 0,00 | 0,00 | 0,00 | 0,00 | NA | NA |
| RP11-5N11.6   | 0,00 | 0,00 | 0,00 | 0,00 | NA | NA |
| RP11-5N11.7   | 0,00 | 0,00 | 0,00 | 0,00 | NA | NA |
| RP11-5N19.4   | 0,00 | 0,00 | 0,00 | 0,00 | NA | NA |
| RP11-5O17.1   | 0,00 | 0,00 | 0,00 | 0,00 | NA | NA |
| RP11-5O23.1   | 0,00 | 0,00 | 0,00 | 0,00 | NA | NA |
| RP11-5O23.2   | 0,00 | 0,00 | 0,00 | 0,00 | NA | NA |
| RP11-5P18.10  | 0,00 | 0,00 | 0,00 | 0,00 | NA | NA |
| RP11-5P18.11  | 0,00 | 0,00 | 0,00 | 0,00 | NA | NA |
| RP11-5P18.2   | 0,00 | 0,00 | 0,00 | 0,00 | NA | NA |
| RP11-5P18.3   | 0,00 | 0,00 | 0,00 | 0,00 | NA | NA |
| RP11-5P18.5   | 0,00 | 0,00 | 0,00 | 0,00 | NA | NA |
| RP11-5P22.1   | 0,00 | 0,00 | 0,00 | 0,00 | NA | NA |
| RP11-5P22.3   | 0,00 | 0,00 | 0,00 | 0,00 | NA | NA |
| RP11-5P4.1    | 0,00 | 0,00 | 0,00 | 0,00 | NA | NA |
| RP11-5P4.2    | 0,00 | 0,00 | 0,00 | 0,00 | NA | NA |
| RP11-5P4.3    | 0,00 | 0,00 | 0,00 | 0,00 | NA | NA |
| RP11-600F24.6 | 0,00 | 0,00 | 0,00 | 0,00 | NA | NA |
| RP11-600G3.1  | 0,00 | 0,00 | 0,00 | 0,00 | NA | NA |
| RP11-600K15.1 | 0,00 | 0,00 | 0,00 | 0,00 | NA | NA |
| RP11-600L4.1  | 0,00 | 0,00 | 0,00 | 0,00 | NA | NA |
| RP11-600P1.1  | 0,00 | 0,00 | 0,00 | 0,00 | NA | NA |
| RP11-600P1.2  | 0,00 | 0,00 | 0,00 | 0,00 | NA | NA |
| RP11-600P1.3  | 0,00 | 0,00 | 0,00 | 0,00 | NA | NA |
| RP11-601G18.1 | 0,00 | 0,00 | 0,00 | 0,00 | NA | NA |
| RP11-601H16.1 | 0,00 | 0,00 | 0,00 | 0,00 | NA | NA |
| RP11-601I15.1 | 0,00 | 0,00 | 0,00 | 0,00 | NA | NA |
| RP11-602M11.3 | 0,00 | 0,00 | 0,00 | 0,00 | NA | NA |
| RP11-603B13.2 | 0,00 | 0,00 | 0,00 | 0,00 | NA | NA |
| RP11-603B24.1 | 0,00 | 0,00 | 0,00 | 0,00 | NA | NA |
| RP11-603B24.2 | 0,00 | 0,00 | 0,00 | 0,00 | NA | NA |

|                |      |      |      |      |    |    |
|----------------|------|------|------|------|----|----|
| RP11-603J24.14 | 0,00 | 0,00 | 0,00 | 0,00 | NA | NA |
| RP11-603J24.21 | 0,00 | 0,00 | 0,00 | 0,00 | NA | NA |
| RP11-603J24.4  | 0,00 | 0,00 | 0,00 | 0,00 | NA | NA |
| RP11-603J24.9  | 0,00 | 0,00 | 0,00 | 0,00 | NA | NA |
| RP11-603O17.1  | 0,00 | 0,00 | 0,00 | 0,00 | NA | NA |
| RP11-605F14.1  | 0,00 | 0,00 | 0,00 | 0,00 | NA | NA |
| RP11-605F14.2  | 0,00 | 0,00 | 0,00 | 0,00 | NA | NA |
| RP11-605F14.3  | 0,00 | 0,00 | 0,00 | 0,00 | NA | NA |
| RP11-605F20.1  | 0,00 | 0,00 | 0,00 | 0,00 | NA | NA |
| RP11-605F22.1  | 0,00 | 0,00 | 0,00 | 0,00 | NA | NA |
| RP11-606D9.1   | 0,00 | 0,00 | 0,00 | 0,00 | NA | NA |
| RP11-606M12.1  | 0,00 | 0,35 | 0,00 | 0,16 | NA | NA |
| RP11-606P2.1   | 0,00 | 0,00 | 0,00 | 0,00 | NA | NA |
| RP11-607P23.1  | 0,00 | 0,00 | 0,00 | 0,00 | NA | NA |
| RP11-608O8.2   | 0,00 | 0,15 | 0,00 | 0,00 | NA | NA |
| RP11-609L23.2  | 0,00 | 0,00 | 0,00 | 0,00 | NA | NA |
| RP11-609L23.3  | 0,00 | 0,00 | 0,00 | 0,00 | NA | NA |
| RP11-609L3.1   | 0,00 | 0,00 | 0,00 | 0,00 | NA | NA |
| RP11-609L3.2   | 0,00 | 0,00 | 0,00 | 0,00 | NA | NA |
| RP11-60A1.1    | 0,00 | 0,00 | 0,00 | 0,00 | NA | NA |
| RP11-60A14.1   | 0,00 | 0,00 | 0,00 | 0,00 | NA | NA |
| RP11-60A24.3   | 0,00 | 0,00 | 0,00 | 0,00 | NA | NA |
| RP11-60A8.2    | 0,00 | 0,00 | 0,00 | 0,00 | NA | NA |
| RP11-60C6.6    | 0,00 | 0,00 | 0,00 | 0,00 | NA | NA |
| RP11-60C6.8    | 0,00 | 0,00 | 0,00 | 0,00 | NA | NA |
| RP11-60E8.2    | 0,00 | 0,00 | 0,00 | 0,00 | NA | NA |
| RP11-60I3.4    | 0,00 | 0,00 | 0,00 | 0,00 | NA | NA |
| RP11-60L3.2    | 0,00 | 0,00 | 0,00 | 0,00 | NA | NA |
| RP11-60L3.3    | 0,00 | 0,00 | 0,00 | 0,00 | NA | NA |
| RP11-610J23.1  | 0,00 | 0,00 | 0,00 | 0,00 | NA | NA |
| RP11-611E13.3  | 0,00 | 0,00 | 0,00 | 0,00 | NA | NA |
| RP11-611L7.3   | 0,00 | 0,00 | 0,00 | 0,00 | NA | NA |
| RP11-611O2.2   | 0,00 | 0,00 | 0,00 | 0,00 | NA | NA |
| RP11-611O2.6   | 0,00 | 0,00 | 0,00 | 0,00 | NA | NA |
| RP11-612A1.1   | 0,00 | 0,00 | 0,00 | 0,00 | NA | NA |
| RP11-612B6.1   | 0,00 | 0,00 | 0,00 | 0,00 | NA | NA |
| RP11-612J15.3  | 0,00 | 0,00 | 0,00 | 0,00 | NA | NA |
| RP11-613C6.2   | 0,00 | 0,00 | 0,00 | 0,00 | NA | NA |
| RP11-613D13.4  | 0,00 | 0,00 | 0,00 | 0,00 | NA | NA |
| RP11-613E4.2   | 0,00 | 0,00 | 0,00 | 0,00 | NA | NA |
| RP11-613E4.4   | 0,00 | 0,00 | 0,00 | 0,00 | NA | NA |
| RP11-613E4.5   | 0,00 | 0,00 | 0,00 | 0,00 | NA | NA |
| RP11-613F22.6  | 0,00 | 0,00 | 0,00 | 0,00 | NA | NA |
| RP11-613F22.7  | 0,00 | 0,00 | 0,00 | 0,00 | NA | NA |
| RP11-613F7.1   | 0,00 | 0,00 | 0,00 | 0,00 | NA | NA |
| RP11-613G13.1  | 0,00 | 0,00 | 0,00 | 0,00 | NA | NA |
| RP11-613H2.1   | 0,00 | 0,00 | 0,00 | 0,00 | NA | NA |
| RP11-613H2.2   | 0,00 | 0,00 | 0,00 | 0,00 | NA | NA |
| RP11-613H2.3   | 0,00 | 0,00 | 0,00 | 0,00 | NA | NA |
| RP11-613M10.6  | 0,00 | 0,00 | 0,00 | 0,00 | NA | NA |
| RP11-613M10.8  | 0,00 | 0,00 | 0,00 | 0,00 | NA | NA |
| RP11-613M5.1   | 0,00 | 0,00 | 0,00 | 0,00 | NA | NA |
| RP11-613M5.3   | 0,00 | 0,23 | 0,00 | 0,00 | NA | NA |
| RP11-614F17.1  | 0,00 | 0,00 | 0,00 | 0,00 | NA | NA |
| RP11-614O9.1   | 0,00 | 0,00 | 0,00 | 0,00 | NA | NA |

|                |      |      |      |      |    |    |
|----------------|------|------|------|------|----|----|
| RP11-615I16.1  | 0,00 | 0,00 | 0,00 | 0,00 | NA | NA |
| RP11-615I16.3  | 0,00 | 0,00 | 0,00 | 0,00 | NA | NA |
| RP11-615I2.3   | 0,00 | 0,00 | 0,00 | 0,00 | NA | NA |
| RP11-615J4.2   | 0,00 | 0,00 | 0,00 | 0,00 | NA | NA |
| RP11-615J4.4   | 0,00 | 0,00 | 0,00 | 0,00 | NA | NA |
| RP11-616K22.2  | 0,00 | 0,00 | 0,00 | 0,00 | NA | NA |
| RP11-616K6.1   | 0,00 | 0,00 | 0,00 | 0,00 | NA | NA |
| RP11-616L12.4  | 0,00 | 0,00 | 0,00 | 0,00 | NA | NA |
| RP11-616M17.1  | 0,00 | 0,00 | 0,00 | 0,00 | NA | NA |
| RP11-616M22.1  | 0,00 | 0,00 | 0,00 | 0,00 | NA | NA |
| RP11-616M22.10 | 0,00 | 0,00 | 0,00 | 0,00 | NA | NA |
| RP11-616M22.11 | 0,00 | 0,00 | 0,00 | 0,00 | NA | NA |
| RP11-616M22.12 | 0,00 | 0,00 | 0,00 | 0,00 | NA | NA |
| RP11-616M22.2  | 0,00 | 0,00 | 0,00 | 0,00 | NA | NA |
| RP11-616M22.3  | 0,00 | 0,00 | 0,00 | 0,00 | NA | NA |
| RP11-616M22.5  | 0,00 | 0,00 | 0,00 | 0,00 | NA | NA |
| RP11-616M22.6  | 0,00 | 0,07 | 0,00 | 0,00 | NA | NA |
| RP11-616M22.7  | 0,00 | 0,00 | 0,00 | 0,00 | NA | NA |
| RP11-616M22.9  | 0,00 | 0,00 | 0,00 | 0,00 | NA | NA |
| RP11-617I14.1  | 0,00 | 0,00 | 0,00 | 0,00 | NA | NA |
| RP11-617O8.1   | 0,00 | 0,00 | 0,00 | 0,00 | NA | NA |
| RP11-618G20.4  | 0,00 | 0,00 | 0,00 | 0,00 | NA | NA |
| RP11-618I10.1  | 0,00 | 0,00 | 0,00 | 0,00 | NA | NA |
| RP11-618I10.2  | 0,00 | 0,00 | 0,00 | 0,00 | NA | NA |
| RP11-618I10.3  | 0,00 | 0,00 | 0,00 | 0,00 | NA | NA |
| RP11-618I10.4  | 0,00 | 0,00 | 0,00 | 0,00 | NA | NA |
| RP11-618K16.4  | 0,00 | 0,00 | 0,00 | 0,00 | NA | NA |
| RP11-618L22.1  | 0,00 | 0,00 | 0,00 | 0,00 | NA | NA |
| RP11-618M23.1  | 0,00 | 0,00 | 0,00 | 0,00 | NA | NA |
| RP11-618M23.2  | 0,00 | 0,00 | 0,00 | 0,00 | NA | NA |
| RP11-618M23.3  | 0,00 | 0,00 | 0,00 | 0,00 | NA | NA |
| RP11-618M23.5  | 0,00 | 0,00 | 0,00 | 0,00 | NA | NA |
| RP11-618N24.3  | 0,00 | 0,00 | 0,00 | 0,00 | NA | NA |
| RP11-619A14.2  | 0,00 | 0,00 | 0,00 | 0,00 | NA | NA |
| RP11-619A14.3  | 0,00 | 0,00 | 0,00 | 0,00 | NA | NA |
| RP11-619F23.2  | 0,00 | 0,00 | 0,00 | 0,00 | NA | NA |
| RP11-619J20.1  | 0,00 | 0,00 | 0,00 | 0,00 | NA | NA |
| RP11-619L12.1  | 0,00 | 0,00 | 0,00 | 0,00 | NA | NA |
| RP11-619L12.3  | 0,00 | 0,00 | 0,00 | 0,00 | NA | NA |
| RP11-619L12.4  | 0,00 | 0,00 | 0,00 | 0,00 | NA | NA |
| RP11-619L19.2  | 0,00 | 0,00 | 0,00 | 0,00 | NA | NA |
| RP11-61A14.1   | 0,00 | 0,00 | 0,00 | 0,00 | NA | NA |
| RP11-61D1.2    | 0,00 | 0,00 | 0,00 | 0,00 | NA | NA |
| RP11-61D1.3    | 0,00 | 0,00 | 0,00 | 0,00 | NA | NA |
| RP11-61D3.1    | 0,00 | 0,00 | 0,00 | 0,00 | NA | NA |
| RP11-61E5.1    | 0,00 | 0,00 | 0,00 | 0,00 | NA | NA |
| RP11-61F5.1    | 0,00 | 0,00 | 0,00 | 0,00 | NA | NA |
| RP11-61G19.2   | 0,00 | 0,00 | 0,00 | 0,00 | NA | NA |
| RP11-61G23.1   | 0,00 | 0,00 | 0,00 | 0,00 | NA | NA |
| RP11-61G24.1   | 0,00 | 0,00 | 0,00 | 0,00 | NA | NA |
| RP11-61J19.2   | 0,00 | 0,00 | 0,00 | 0,00 | NA | NA |
| RP11-61K20.1   | 0,00 | 0,00 | 0,00 | 0,00 | NA | NA |
| RP11-61L14.2   | 0,00 | 0,00 | 0,00 | 0,00 | NA | NA |
| RP11-61L19.2   | 0,00 | 0,00 | 0,00 | 0,00 | NA | NA |
| RP11-61N20.1   | 0,00 | 0,00 | 0,00 | 0,00 | NA | NA |

|                |      |      |      |      |    |    |
|----------------|------|------|------|------|----|----|
| RP11-61N20.3   | 0,00 | 0,00 | 0,00 | 0,00 | NA | NA |
| RP11-61O1.1    | 0,00 | 0,00 | 0,00 | 0,00 | NA | NA |
| RP11-61O1.2    | 0,00 | 0,00 | 0,00 | 0,00 | NA | NA |
| RP11-620A17.1  | 0,00 | 0,00 | 0,00 | 0,00 | NA | NA |
| RP11-620E11.1  | 0,00 | 0,00 | 0,00 | 0,00 | NA | NA |
| RP11-620J15.2  | 0,00 | 0,00 | 0,00 | 0,00 | NA | NA |
| RP11-620J15.4  | 0,00 | 0,00 | 0,00 | 0,00 | NA | NA |
| RP11-621H8.1   | 0,00 | 0,00 | 0,00 | 0,00 | NA | NA |
| RP11-621H8.2   | 0,00 | 0,00 | 0,00 | 0,00 | NA | NA |
| RP11-621I20.1  | 0,00 | 0,00 | 0,00 | 0,00 | NA | NA |
| RP11-622A1.1   | 0,00 | 0,00 | 0,00 | 0,00 | NA | NA |
| RP11-622A1.2   | 0,00 | 0,00 | 0,00 | 0,00 | NA | NA |
| RP11-622C24.1  | 0,00 | 0,00 | 0,00 | 0,00 | NA | NA |
| RP11-622C24.2  | 0,00 | 0,02 | 0,00 | 0,00 | NA | NA |
| RP11-622J9.1   | 0,00 | 0,00 | 0,00 | 0,00 | NA | NA |
| RP11-622O11.3  | 0,00 | 0,00 | 0,00 | 0,00 | NA | NA |
| RP11-622O11.5  | 0,00 | 0,00 | 0,00 | 0,00 | NA | NA |
| RP11-624A4.1   | 0,00 | 0,00 | 0,00 | 0,00 | NA | NA |
| RP11-624D11.2  | 0,00 | 0,00 | 0,00 | 0,00 | NA | NA |
| RP11-624G17.1  | 0,00 | 0,00 | 0,00 | 0,00 | NA | NA |
| RP11-624G19.1  | 0,00 | 0,00 | 0,00 | 0,00 | NA | NA |
| RP11-624M8.1   | 0,10 | 0,00 | 0,01 | 0,10 | NA | NA |
| RP11-625H11.1  | 0,00 | 0,00 | 0,00 | 0,00 | NA | NA |
| RP11-625L16.1  | 0,00 | 0,00 | 0,00 | 0,00 | NA | NA |
| RP11-625N16.1  | 0,00 | 0,00 | 0,00 | 0,00 | NA | NA |
| RP11-626A1.1   | 0,00 | 0,00 | 0,00 | 0,00 | NA | NA |
| RP11-626A1.2   | 0,00 | 0,00 | 0,00 | 0,00 | NA | NA |
| RP11-626A5.2   | 0,00 | 0,00 | 0,00 | 0,00 | NA | NA |
| RP11-626E13.1  | 0,00 | 0,00 | 0,00 | 0,00 | NA | NA |
| RP11-626H12.1  | 0,00 | 0,00 | 0,00 | 0,00 | NA | NA |
| RP11-626H12.4  | 0,00 | 0,00 | 0,00 | 0,00 | NA | NA |
| RP11-626I20.1  | 0,00 | 0,00 | 0,00 | 0,00 | NA | NA |
| RP11-626I20.2  | 0,00 | 0,00 | 0,00 | 0,00 | NA | NA |
| RP11-626I20.3  | 0,00 | 0,00 | 0,00 | 0,00 | NA | NA |
| RP11-626K17.2  | 0,00 | 0,00 | 0,00 | 0,00 | NA | NA |
| RP11-626P14.1  | 0,00 | 0,00 | 0,00 | 0,00 | NA | NA |
| RP11-626P14.2  | 0,00 | 0,00 | 0,00 | 0,00 | NA | NA |
| RP11-627D16.2  | 0,00 | 0,00 | 0,00 | 0,00 | NA | NA |
| RP11-627G1.1   | 0,00 | 0,00 | 0,00 | 0,00 | NA | NA |
| RP11-627G18.1  | 0,00 | 0,00 | 0,00 | 0,00 | NA | NA |
| RP11-627G18.2  | 0,00 | 0,00 | 0,00 | 0,00 | NA | NA |
| RP11-627G18.3  | 0,00 | 0,00 | 0,00 | 0,00 | NA | NA |
| RP11-627G23.1  | 0,00 | 0,00 | 0,07 | 0,08 | NA | NA |
| RP11-627H22.1  | 0,00 | 0,00 | 0,00 | 0,00 | NA | NA |
| RP11-627H22.10 | 0,00 | 0,00 | 0,00 | 0,00 | NA | NA |
| RP11-627H22.11 | 0,00 | 0,00 | 0,00 | 0,00 | NA | NA |
| RP11-627H22.2  | 0,00 | 0,00 | 0,00 | 0,00 | NA | NA |
| RP11-627H22.4  | 0,00 | 0,00 | 0,00 | 0,00 | NA | NA |
| RP11-627H22.5  | 0,00 | 0,00 | 0,00 | 0,00 | NA | NA |
| RP11-627H22.6  | 0,00 | 0,00 | 0,00 | 0,00 | NA | NA |
| RP11-627H22.7  | 0,00 | 0,00 | 0,00 | 0,00 | NA | NA |
| RP11-627H22.9  | 0,00 | 0,00 | 0,00 | 0,00 | NA | NA |
| RP11-627J17.1  | 0,00 | 0,00 | 0,00 | 0,00 | NA | NA |
| RP11-627K11.4  | 0,00 | 0,00 | 0,00 | 0,00 | NA | NA |
| RP11-627K11.5  | 0,00 | 0,00 | 0,00 | 0,00 | NA | NA |

|               |      |      |      |      |    |    |
|---------------|------|------|------|------|----|----|
| RP11-628E19.2 | 0,00 | 0,00 | 0,00 | 0,00 | NA | NA |
| RP11-628O18.1 | 0,00 | 0,00 | 0,00 | 0,00 | NA | NA |
| RP11-629B11.2 | 0,00 | 0,00 | 0,00 | 0,00 | NA | NA |
| RP11-629B11.4 | 0,00 | 0,00 | 0,00 | 0,00 | NA | NA |
| RP11-629F19.1 | 0,00 | 0,11 | 0,00 | 0,00 | NA | NA |
| RP11-629I23.1 | 0,00 | 0,00 | 0,00 | 0,00 | NA | NA |
| RP11-629N8.5  | 0,00 | 0,00 | 0,00 | 0,00 | NA | NA |
| RP11-629O1.3  | 0,00 | 0,00 | 0,00 | 0,00 | NA | NA |
| RP11-629O19.1 | 0,00 | 0,00 | 0,00 | 0,00 | NA | NA |
| RP11-629O4.1  | 0,00 | 0,00 | 0,00 | 0,00 | NA | NA |
| RP11-629P16.1 | 0,00 | 0,00 | 0,00 | 0,00 | NA | NA |
| RP11-62C22.1  | 0,00 | 0,00 | 0,00 | 0,00 | NA | NA |
| RP11-62C3.10  | 0,00 | 0,00 | 0,00 | 0,00 | NA | NA |
| RP11-62C3.8   | 0,00 | 0,00 | 0,00 | 0,00 | NA | NA |
| RP11-62D23.2  | 0,00 | 0,00 | 0,00 | 0,00 | NA | NA |
| RP11-62F24.1  | 0,00 | 0,00 | 0,00 | 0,00 | NA | NA |
| RP11-62F24.2  | 0,00 | 0,00 | 0,00 | 0,00 | NA | NA |
| RP11-62G11.1  | 0,00 | 0,00 | 0,00 | 0,00 | NA | NA |
| RP11-62G11.2  | 0,00 | 0,00 | 0,00 | 0,00 | NA | NA |
| RP11-62H20.1  | 0,00 | 0,00 | 0,00 | 0,00 | NA | NA |
| RP11-62H7.2   | 0,00 | 0,00 | 0,00 | 0,00 | NA | NA |
| RP11-62H7.3   | 0,00 | 0,00 | 0,00 | 0,00 | NA | NA |
| RP11-62I21.2  | 0,00 | 0,00 | 0,00 | 0,00 | NA | NA |
| RP11-62J1.4   | 0,00 | 0,00 | 0,00 | 0,00 | NA | NA |
| RP11-62L10.1  | 0,00 | 0,00 | 0,00 | 0,00 | NA | NA |
| RP11-62N21.1  | 0,00 | 0,00 | 0,00 | 0,00 | NA | NA |
| RP11-630C16.1 | 0,00 | 0,00 | 0,00 | 0,00 | NA | NA |
| RP11-630D6.1  | 0,00 | 0,00 | 0,00 | 0,00 | NA | NA |
| RP11-630H24.3 | 0,00 | 0,00 | 0,00 | 0,00 | NA | NA |
| RP11-630H24.4 | 0,00 | 0,00 | 0,00 | 0,00 | NA | NA |
| RP11-631F7.1  | 0,00 | 0,00 | 0,00 | 0,00 | NA | NA |
| RP11-631F7.2  | 0,00 | 0,00 | 0,00 | 0,00 | NA | NA |
| RP11-632B21.1 | 0,00 | 0,00 | 0,00 | 0,00 | NA | NA |
| RP11-632F7.1  | 0,00 | 0,00 | 0,00 | 0,00 | NA | NA |
| RP11-632F7.3  | 0,00 | 0,00 | 0,00 | 0,00 | NA | NA |
| RP11-632K21.1 | 0,00 | 0,00 | 0,00 | 0,00 | NA | NA |
| RP11-632K21.3 | 0,00 | 0,00 | 0,00 | 0,00 | NA | NA |
| RP11-632K5.2  | 0,00 | 0,00 | 0,00 | 0,00 | NA | NA |
| RP11-632L2.1  | 0,00 | 0,00 | 0,00 | 0,00 | NA | NA |
| RP11-632L2.2  | 0,00 | 0,00 | 0,00 | 0,00 | NA | NA |
| RP11-632P5.1  | 0,00 | 0,00 | 0,00 | 0,00 | NA | NA |
| RP11-633G11.1 | 0,00 | 0,00 | 0,00 | 0,00 | NA | NA |
| RP11-634B7.5  | 0,00 | 0,00 | 0,00 | 0,00 | NA | NA |
| RP11-635L1.2  | 0,00 | 0,00 | 0,00 | 0,00 | NA | NA |
| RP11-635L1.3  | 0,00 | 0,00 | 0,00 | 0,00 | NA | NA |
| RP11-635N19.1 | 0,00 | 0,00 | 0,00 | 0,00 | NA | NA |
| RP11-635N19.2 | 0,00 | 0,00 | 0,00 | 0,00 | NA | NA |
| RP11-635N19.3 | 0,00 | 0,00 | 0,00 | 0,00 | NA | NA |
| RP11-635O16.1 | 0,00 | 0,00 | 0,00 | 0,00 | NA | NA |
| RP11-636N17.1 | 0,00 | 0,00 | 0,00 | 0,00 | NA | NA |
| RP11-637A17.1 | 0,00 | 0,00 | 0,00 | 0,00 | NA | NA |
| RP11-637B23.1 | 0,00 | 0,00 | 0,00 | 0,00 | NA | NA |
| RP11-637B23.3 | 0,00 | 0,00 | 0,00 | 0,00 | NA | NA |
| RP11-637C24.5 | 0,00 | 0,00 | 0,00 | 0,00 | NA | NA |
| RP11-637I8.2  | 0,00 | 0,00 | 0,00 | 0,00 | NA | NA |

|               |      |      |      |      |    |    |
|---------------|------|------|------|------|----|----|
| RP11-637O11.2 | 0,00 | 0,00 | 0,00 | 0,00 | NA | NA |
| RP11-638D14.1 | 0,00 | 0,00 | 0,00 | 0,00 | NA | NA |
| RP11-638L3.2  | 0,00 | 0,00 | 0,00 | 0,00 | NA | NA |
| RP11-638O6.1  | 0,00 | 0,00 | 0,00 | 0,00 | NA | NA |
| RP11-639B1.1  | 0,00 | 0,00 | 0,00 | 0,00 | NA | NA |
| RP11-639B4.1  | 0,00 | 0,00 | 0,00 | 0,00 | NA | NA |
| RP11-639F1.1  | 0,00 | 0,00 | 0,00 | 0,00 | NA | NA |
| RP11-639F1.2  | 0,00 | 0,00 | 0,00 | 0,00 | NA | NA |
| RP11-639F1.3  | 0,00 | 0,00 | 0,00 | 0,00 | NA | NA |
| RP11-63A1.2   | 0,00 | 0,00 | 0,00 | 0,00 | NA | NA |
| RP11-63A2.2   | 0,00 | 0,00 | 0,00 | 0,00 | NA | NA |
| RP11-63A23.1  | 0,00 | 0,00 | 0,00 | 0,00 | NA | NA |
| RP11-63A23.2  | 0,00 | 0,45 | 0,00 | 0,00 | NA | NA |
| RP11-63B13.2  | 0,00 | 0,00 | 0,00 | 0,00 | NA | NA |
| RP11-63B13.3  | 0,00 | 0,00 | 0,00 | 0,00 | NA | NA |
| RP11-63B19.1  | 0,00 | 0,00 | 0,00 | 0,00 | NA | NA |
| RP11-63D14.1  | 0,00 | 0,00 | 0,00 | 0,00 | NA | NA |
| RP11-63E16.1  | 0,00 | 0,00 | 0,00 | 0,00 | NA | NA |
| RP11-63E5.1   | 0,00 | 0,00 | 0,00 | 0,00 | NA | NA |
| RP11-63E5.6   | 0,00 | 0,00 | 0,00 | 0,00 | NA | NA |
| RP11-63G10.3  | 0,00 | 0,00 | 0,00 | 0,00 | NA | NA |
| RP11-63H19.1  | 0,00 | 0,00 | 0,00 | 0,00 | NA | NA |
| RP11-63H19.3  | 0,00 | 0,00 | 0,00 | 0,00 | NA | NA |
| RP11-63H19.5  | 0,00 | 0,00 | 0,00 | 0,00 | NA | NA |
| RP11-63H19.7  | 0,00 | 0,00 | 0,00 | 0,00 | NA | NA |
| RP11-63H19.8  | 0,00 | 0,00 | 0,00 | 0,00 | NA | NA |
| RP11-63I8.1   | 0,00 | 0,00 | 0,00 | 0,00 | NA | NA |
| RP11-63K6.4   | 0,00 | 0,00 | 0,00 | 0,00 | NA | NA |
| RP11-63K6.5   | 0,00 | 0,00 | 0,00 | 0,00 | NA | NA |
| RP11-63N3.1   | 0,00 | 0,00 | 0,00 | 0,00 | NA | NA |
| RP11-63N3.2   | 0,00 | 0,00 | 0,00 | 0,00 | NA | NA |
| RP11-63N8.3   | 0,00 | 0,00 | 0,00 | 0,00 | NA | NA |
| RP11-63P12.2  | 0,00 | 0,00 | 0,00 | 0,00 | NA | NA |
| RP11-640A1.4  | 0,00 | 0,00 | 0,00 | 0,00 | NA | NA |
| RP11-640B6.1  | 0,00 | 0,00 | 0,00 | 0,00 | NA | NA |
| RP11-640E11.1 | 0,00 | 0,00 | 0,00 | 0,00 | NA | NA |
| RP11-640E11.2 | 0,00 | 0,00 | 0,00 | 0,00 | NA | NA |
| RP11-640I15.2 | 0,00 | 0,00 | 0,00 | 0,00 | NA | NA |
| RP11-640I2.1  | 0,00 | 0,00 | 0,00 | 0,00 | NA | NA |
| RP11-640M9.4  | 0,00 | 0,00 | 0,00 | 0,00 | NA | NA |
| RP11-640N20.1 | 0,00 | 0,00 | 0,00 | 0,00 | NA | NA |
| RP11-640N20.5 | 0,00 | 0,00 | 0,00 | 0,00 | NA | NA |
| RP11-640N20.6 | 0,00 | 0,00 | 0,00 | 0,00 | NA | NA |
| RP11-640N20.8 | 0,00 | 0,00 | 0,00 | 0,00 | NA | NA |
| RP11-641A6.2  | 0,07 | 0,07 | 0,04 | 0,03 | NA | NA |
| RP11-641A6.3  | 0,00 | 0,00 | 0,00 | 0,00 | NA | NA |
| RP11-641A6.4  | 0,00 | 0,00 | 0,00 | 0,00 | NA | NA |
| RP11-641A6.5  | 0,00 | 0,00 | 0,00 | 0,00 | NA | NA |
| RP11-641A6.6  | 0,00 | 0,00 | 0,00 | 0,00 | NA | NA |
| RP11-641A6.7  | 0,00 | 0,00 | 0,00 | 0,00 | NA | NA |
| RP11-641A6.8  | 0,00 | 0,00 | 0,00 | 0,00 | NA | NA |
| RP11-641A6.9  | 0,00 | 0,00 | 0,00 | 0,00 | NA | NA |
| RP11-641C17.2 | 0,00 | 0,00 | 0,00 | 0,00 | NA | NA |
| RP11-641D5.2  | 0,00 | 0,00 | 0,00 | 0,00 | NA | NA |
| RP11-642C5.1  | 0,00 | 0,00 | 0,00 | 0,00 | NA | NA |

|               |      |      |      |      |    |    |
|---------------|------|------|------|------|----|----|
| RP11-642D21.1 | 0,00 | 0,00 | 0,00 | 0,00 | NA | NA |
| RP11-642D21.2 | 0,00 | 0,00 | 0,00 | 0,00 | NA | NA |
| RP11-642E20.2 | 0,00 | 0,00 | 0,00 | 0,00 | NA | NA |
| RP11-642E20.3 | 0,00 | 0,00 | 0,00 | 0,00 | NA | NA |
| RP11-642E20.5 | 0,00 | 0,00 | 0,00 | 0,00 | NA | NA |
| RP11-642M2.1  | 0,00 | 0,00 | 0,00 | 0,00 | NA | NA |
| RP11-642N14.2 | 0,00 | 0,00 | 0,00 | 0,00 | NA | NA |
| RP11-643A5.1  | 0,00 | 0,00 | 0,00 | 0,00 | NA | NA |
| RP11-643A5.2  | 0,00 | 0,24 | 0,16 | 0,23 | NA | NA |
| RP11-643C9.1  | 0,00 | 0,00 | 0,00 | 0,00 | NA | NA |
| RP11-643C9.2  | 0,00 | 0,00 | 0,00 | 0,00 | NA | NA |
| RP11-643G16.4 | 0,00 | 0,00 | 0,00 | 0,00 | NA | NA |
| RP11-643G5.1  | 0,00 | 0,00 | 0,00 | 0,00 | NA | NA |
| RP11-643G5.4  | 0,00 | 0,00 | 0,00 | 0,00 | NA | NA |
| RP11-643G5.5  | 0,00 | 0,00 | 0,00 | 0,00 | NA | NA |
| RP11-643G5.7  | 0,00 | 0,00 | 0,00 | 0,00 | NA | NA |
| RP11-643M14.3 | 0,00 | 0,00 | 0,00 | 0,00 | NA | NA |
| RP11-643N23.1 | 0,00 | 0,00 | 0,00 | 0,00 | NA | NA |
| RP11-643N23.2 | 0,00 | 0,00 | 0,00 | 0,00 | NA | NA |
| RP11-644C3.1  | 0,00 | 0,00 | 0,00 | 0,00 | NA | NA |
| RP11-644F5.12 | 0,00 | 0,00 | 0,00 | 0,00 | NA | NA |
| RP11-644F5.15 | 0,00 | 0,00 | 0,00 | 0,00 | NA | NA |
| RP11-644F5.16 | 0,59 | 2,15 | 0,81 | 1,47 | NA | NA |
| RP11-644F5.17 | 0,00 | 0,00 | 0,00 | 0,00 | NA | NA |
| RP11-644L4.1  | 0,00 | 0,00 | 0,00 | 0,00 | NA | NA |
| RP11-644N4.1  | 0,00 | 0,00 | 0,00 | 0,00 | NA | NA |
| RP11-645C24.6 | 0,00 | 0,00 | 0,00 | 0,00 | NA | NA |
| RP11-645N11.3 | 0,00 | 0,00 | 0,00 | 0,00 | NA | NA |
| RP11-646D13.1 | 1,04 | 1,09 | 0,85 | 0,89 | NA | NA |
| RP11-646E18.1 | 0,00 | 0,00 | 0,00 | 0,00 | NA | NA |
| RP11-646E18.3 | 0,00 | 0,00 | 0,00 | 0,00 | NA | NA |
| RP11-646I19.1 | 0,00 | 0,00 | 0,00 | 0,00 | NA | NA |
| RP11-646I6.5  | 0,00 | 0,00 | 0,00 | 0,00 | NA | NA |
| RP11-646J21.2 | 0,00 | 0,00 | 0,00 | 0,00 | NA | NA |
| RP11-646J21.3 | 0,00 | 0,00 | 0,00 | 0,00 | NA | NA |
| RP11-646J21.4 | 0,00 | 0,00 | 0,00 | 0,00 | NA | NA |
| RP11-646J21.5 | 0,00 | 0,00 | 0,00 | 0,00 | NA | NA |
| RP11-646J21.6 | 0,00 | 0,00 | 0,00 | 0,00 | NA | NA |
| RP11-647I17.1 | 0,00 | 0,00 | 0,00 | 0,00 | NA | NA |
| RP11-647P12.1 | 0,00 | 0,00 | 0,00 | 0,00 | NA | NA |
| RP11-647P12.2 | 0,00 | 0,00 | 0,00 | 0,00 | NA | NA |
| RP11-648L3.1  | 0,00 | 0,00 | 0,00 | 0,00 | NA | NA |
| RP11-648M2.1  | 0,00 | 0,00 | 0,00 | 0,00 | NA | NA |
| RP11-648O15.2 | 0,00 | 0,00 | 0,00 | 0,00 | NA | NA |
| RP11-649A16.5 | 0,00 | 0,00 | 0,00 | 0,00 | NA | NA |
| RP11-649E7.8  | 0,00 | 0,00 | 0,00 | 0,00 | NA | NA |
| RP11-64B16.2  | 0,00 | 0,00 | 0,00 | 0,00 | NA | NA |
| RP11-64B16.4  | 0,00 | 0,00 | 0,00 | 0,00 | NA | NA |
| RP11-64B16.5  | 0,00 | 0,00 | 0,00 | 0,00 | NA | NA |
| RP11-64C12.4  | 0,00 | 0,00 | 0,00 | 0,00 | NA | NA |
| RP11-64C12.5  | 0,00 | 0,00 | 0,00 | 0,00 | NA | NA |
| RP11-64C12.6  | 0,00 | 0,00 | 0,00 | 0,00 | NA | NA |
| RP11-64C12.7  | 0,00 | 0,00 | 0,00 | 0,00 | NA | NA |
| RP11-64C12.8  | 0,00 | 0,00 | 0,00 | 0,00 | NA | NA |
| RP11-64C12.9  | 0,00 | 0,00 | 0,00 | 0,00 | NA | NA |

|                |      |      |      |      |    |    |
|----------------|------|------|------|------|----|----|
| RP11-64D22.5   | 0,00 | 0,00 | 0,00 | 0,00 | NA | NA |
| RP11-64I1.2    | 0,00 | 0,00 | 0,00 | 0,00 | NA | NA |
| RP11-64I17.1   | 0,00 | 0,00 | 0,00 | 0,00 | NA | NA |
| RP11-64I24.1   | 0,00 | 0,00 | 0,00 | 0,00 | NA | NA |
| RP11-64J19.1   | 0,00 | 0,00 | 0,00 | 0,00 | NA | NA |
| RP11-64J21.2   | 0,00 | 0,00 | 0,00 | 0,00 | NA | NA |
| RP11-64J21.3   | 0,00 | 0,00 | 0,00 | 0,00 | NA | NA |
| RP11-64K10.1   | 0,00 | 0,00 | 0,00 | 0,00 | NA | NA |
| RP11-64K12.4   | 0,00 | 0,00 | 0,00 | 0,00 | NA | NA |
| RP11-64K12.8   | 0,00 | 0,00 | 0,00 | 0,00 | NA | NA |
| RP11-64P14.6   | 0,00 | 0,00 | 0,00 | 0,00 | NA | NA |
| RP11-64P14.7   | 0,00 | 0,00 | 0,00 | 0,00 | NA | NA |
| RP11-65O17.2   | 0,00 | 0,00 | 0,00 | 0,00 | NA | NA |
| RP11-65OK20.3  | 0,00 | 0,00 | 0,00 | 0,00 | NA | NA |
| RP11-65OL12.4  | 0,00 | 0,00 | 0,00 | 0,00 | NA | NA |
| RP11-65OP15.1  | 0,00 | 0,00 | 0,00 | 0,00 | NA | NA |
| RP11-651E20.1  | 0,00 | 0,00 | 0,00 | 0,00 | NA | NA |
| RP11-651H2.1   | 0,00 | 0,00 | 0,00 | 0,00 | NA | NA |
| RP11-651K21.1  | 0,00 | 0,00 | 0,00 | 0,00 | NA | NA |
| RP11-651L5.2   | 0,00 | 0,00 | 0,00 | 0,00 | NA | NA |
| RP11-652G5.1   | 0,00 | 0,00 | 0,00 | 0,00 | NA | NA |
| RP11-653G8.1   | 0,00 | 0,00 | 0,00 | 0,00 | NA | NA |
| RP11-653G8.2   | 0,00 | 0,00 | 0,00 | 0,00 | NA | NA |
| RP11-653J6.1   | 0,00 | 0,00 | 0,00 | 0,00 | NA | NA |
| RP11-654A16.1  | 0,00 | 0,00 | 0,00 | 0,92 | NA | NA |
| RP11-654C20.1  | 0,00 | 0,00 | 0,00 | 0,00 | NA | NA |
| RP11-654C22.1  | 0,00 | 0,00 | 0,00 | 0,00 | NA | NA |
| RP11-654C22.2  | 0,00 | 0,00 | 0,00 | 0,16 | NA | NA |
| RP11-654D12.1  | 0,00 | 0,00 | 0,00 | 0,00 | NA | NA |
| RP11-654D12.2  | 0,00 | 0,00 | 0,00 | 0,00 | NA | NA |
| RP11-654E17.2  | 0,00 | 0,00 | 0,00 | 0,00 | NA | NA |
| RP11-654F3.1   | 0,00 | 0,00 | 0,00 | 0,00 | NA | NA |
| RP11-654G14.1  | 0,00 | 0,00 | 0,00 | 0,00 | NA | NA |
| RP11-654K19.4  | 0,00 | 0,00 | 0,00 | 0,00 | NA | NA |
| RP11-655B23.1  | 0,00 | 0,00 | 0,00 | 0,00 | NA | NA |
| RP11-655C2.3   | 0,00 | 0,00 | 0,00 | 0,00 | NA | NA |
| RP11-655G22.2  | 0,00 | 0,00 | 0,00 | 0,00 | NA | NA |
| RP11-655H13.1  | 0,00 | 0,00 | 0,00 | 0,00 | NA | NA |
| RP11-655M14.12 | 0,00 | 0,00 | 0,00 | 0,00 | NA | NA |
| RP11-655M14.14 | 0,00 | 0,00 | 0,00 | 0,00 | NA | NA |
| RP11-655M14.4  | 0,00 | 0,00 | 0,00 | 0,00 | NA | NA |
| RP11-655M14.7  | 0,00 | 0,00 | 0,00 | 0,00 | NA | NA |
| RP11-656A10.1  | 0,00 | 0,00 | 0,00 | 0,00 | NA | NA |
| RP11-656A15.1  | 0,00 | 0,00 | 0,00 | 0,00 | NA | NA |
| RP11-656D10.5  | 0,00 | 0,00 | 0,00 | 0,00 | NA | NA |
| RP11-656G20.1  | 0,00 | 0,00 | 0,00 | 0,00 | NA | NA |
| RP11-657G2.1   | 0,00 | 0,00 | 0,00 | 0,00 | NA | NA |
| RP11-657G5.1   | 0,00 | 0,00 | 0,00 | 0,00 | NA | NA |
| RP11-657G5.2   | 0,00 | 0,00 | 0,00 | 0,00 | NA | NA |
| RP11-657K20.2  | 0,00 | 0,00 | 0,00 | 0,00 | NA | NA |
| RP11-658E23.1  | 0,00 | 0,00 | 0,00 | 0,00 | NA | NA |
| RP11-658F2.3   | 0,00 | 0,00 | 0,00 | 0,00 | NA | NA |
| RP11-659E9.4   | 0,00 | 0,00 | 0,00 | 0,00 | NA | NA |
| RP11-659F24.1  | 0,00 | 0,00 | 0,00 | 0,00 | NA | NA |
| RP11-659O3.2   | 0,00 | 0,00 | 0,00 | 0,00 | NA | NA |



|               |      |      |      |      |    |    |
|---------------|------|------|------|------|----|----|
| RP11-659O3.3  | 0,00 | 0,00 | 0,00 | 0,00 | NA | NA |
| RP11-659P15.2 | 0,00 | 0,00 | 0,00 | 0,00 | NA | NA |
| RP11-65B23.3  | 0,00 | 0,00 | 0,00 | 0,00 | NA | NA |
| RP11-65B23.5  | 0,00 | 0,00 | 0,00 | 0,00 | NA | NA |
| RP11-65D24.2  | 0,00 | 0,00 | 0,00 | 0,00 | NA | NA |
| RP11-65E10.1  | 0,00 | 0,00 | 0,00 | 0,00 | NA | NA |
| RP11-65E22.3  | 0,00 | 0,00 | 0,00 | 0,00 | NA | NA |
| RP11-65F13.3  | 0,00 | 0,00 | 0,00 | 0,00 | NA | NA |
| RP11-65J21.1  | 0,00 | 0,00 | 0,00 | 0,00 | NA | NA |
| RP11-65J3.14  | 0,00 | 0,00 | 0,00 | 0,00 | NA | NA |
| RP11-65J3.15  | 0,00 | 0,00 | 0,00 | 0,00 | NA | NA |
| RP11-65J3.3   | 0,00 | 0,00 | 0,00 | 0,00 | NA | NA |
| RP11-65J3.6   | 0,00 | 0,00 | 0,00 | 0,00 | NA | NA |
| RP11-65L19.1  | 0,00 | 0,00 | 0,00 | 0,00 | NA | NA |
| RP11-65L3.2   | 0,00 | 0,00 | 0,00 | 0,00 | NA | NA |
| RP11-65M17.1  | 0,00 | 0,00 | 0,00 | 0,00 | NA | NA |
| RP11-660I20.4 | 0,00 | 0,00 | 0,00 | 0,00 | NA | NA |
| RP11-660M18.1 | 0,00 | 0,00 | 0,00 | 0,00 | NA | NA |
| RP11-661A12.9 | 0,00 | 0,00 | 0,00 | 0,00 | NA | NA |
| RP11-661C8.2  | 0,00 | 0,00 | 0,00 | 0,00 | NA | NA |
| RP11-661C8.3  | 0,00 | 0,00 | 0,00 | 0,00 | NA | NA |
| RP11-661D19.1 | 0,00 | 0,00 | 0,00 | 0,00 | NA | NA |
| RP11-661G16.1 | 0,00 | 0,00 | 0,00 | 0,00 | NA | NA |
| RP11-661G16.2 | 0,00 | 0,00 | 0,00 | 0,00 | NA | NA |
| RP11-662G20.1 | 0,00 | 0,00 | 0,00 | 0,00 | NA | NA |
| RP11-662I13.1 | 0,00 | 0,00 | 0,00 | 0,00 | NA | NA |
| RP11-662I13.2 | 0,00 | 0,00 | 0,00 | 0,00 | NA | NA |
| RP11-662I14.1 | 0,00 | 0,00 | 0,00 | 0,00 | NA | NA |
| RP11-663C11.1 | 0,00 | 0,00 | 0,00 | 0,00 | NA | NA |
| RP11-663P9.1  | 0,00 | 0,00 | 0,00 | 0,00 | NA | NA |
| RP11-663P9.2  | 0,00 | 0,00 | 0,00 | 0,00 | NA | NA |
| RP11-664D1.1  | 0,00 | 0,00 | 0,00 | 0,00 | NA | NA |
| RP11-664H7.1  | 0,00 | 0,00 | 0,00 | 0,00 | NA | NA |
| RP11-664H7.2  | 0,00 | 0,00 | 0,00 | 0,00 | NA | NA |
| RP11-665A22.1 | 0,00 | 0,00 | 0,00 | 0,00 | NA | NA |
| RP11-665C14.1 | 0,00 | 0,00 | 0,00 | 0,00 | NA | NA |
| RP11-665C14.2 | 0,00 | 0,00 | 0,00 | 0,00 | NA | NA |
| RP11-665C16.8 | 0,00 | 0,00 | 0,00 | 0,00 | NA | NA |
| RP11-665E10.1 | 0,00 | 0,00 | 0,00 | 0,00 | NA | NA |
| RP11-665E10.2 | 0,00 | 0,00 | 0,00 | 0,00 | NA | NA |
| RP11-665E10.3 | 0,00 | 0,00 | 0,00 | 0,00 | NA | NA |
| RP11-665E10.4 | 0,00 | 0,00 | 0,00 | 0,00 | NA | NA |
| RP11-665E10.5 | 0,00 | 0,00 | 0,00 | 0,00 | NA | NA |
| RP11-665I14.1 | 0,00 | 0,00 | 0,00 | 0,00 | NA | NA |
| RP11-665I20.1 | 0,00 | 0,00 | 0,00 | 0,00 | NA | NA |
| RP11-666A1.4  | 0,00 | 0,00 | 0,00 | 0,00 | NA | NA |
| RP11-666A1.7  | 0,00 | 0,49 | 0,00 | 0,00 | NA | NA |
| RP11-666A20.3 | 0,00 | 0,00 | 0,00 | 0,00 | NA | NA |
| RP11-666A8.11 | 0,00 | 0,00 | 0,00 | 0,00 | NA | NA |
| RP11-666A8.9  | 0,00 | 0,00 | 0,00 | 0,00 | NA | NA |
| RP11-666G4.2  | 0,00 | 0,00 | 0,00 | 0,00 | NA | NA |
| RP11-666L21.2 | 0,00 | 0,00 | 0,00 | 0,00 | NA | NA |
| RP11-666O2.1  | 0,00 | 0,00 | 0,00 | 0,00 | NA | NA |
| RP11-666O2.4  | 0,00 | 0,00 | 0,00 | 0,00 | NA | NA |
| RP11-667F9.1  | 0,00 | 0,00 | 0,00 | 0,00 | NA | NA |

|                |      |      |      |      |    |    |
|----------------|------|------|------|------|----|----|
| RP11-667F9.2   | 0,00 | 0,00 | 0,00 | 0,00 | NA | NA |
| RP11-667K14.14 | 0,00 | 0,00 | 0,00 | 0,00 | NA | NA |
| RP11-667M19.2  | 0,00 | 0,00 | 0,00 | 0,00 | NA | NA |
| RP11-667M19.4  | 0,00 | 0,00 | 0,00 | 0,00 | NA | NA |
| RP11-667M19.5  | 0,00 | 0,00 | 0,00 | 0,00 | NA | NA |
| RP11-667M19.7  | 0,00 | 0,00 | 0,00 | 0,00 | NA | NA |
| RP11-668N23.1  | 0,00 | 0,00 | 0,00 | 0,00 | NA | NA |
| RP11-669B18.1  | 0,00 | 0,00 | 0,00 | 0,00 | NA | NA |
| RP11-669E14.4  | 0,00 | 0,00 | 0,00 | 0,00 | NA | NA |
| RP11-669E14.6  | 0,00 | 0,00 | 0,00 | 0,00 | NA | NA |
| RP11-669M2.2   | 0,00 | 0,00 | 0,00 | 0,00 | NA | NA |
| RP11-669N7.3   | 0,00 | 0,00 | 0,00 | 0,00 | NA | NA |
| RP11-66A2.1    | 0,00 | 0,00 | 0,00 | 0,00 | NA | NA |
| RP11-66B24.1   | 0,00 | 0,00 | 0,00 | 0,00 | NA | NA |
| RP11-66B24.4   | 0,08 | 0,15 | 0,09 | 0,00 | NA | NA |
| RP11-66B24.5   | 0,00 | 0,00 | 0,00 | 0,00 | NA | NA |
| RP11-66B24.8   | 0,00 | 0,29 | 0,00 | 0,00 | NA | NA |
| RP11-66C24.1   | 0,00 | 0,00 | 0,00 | 0,00 | NA | NA |
| RP11-66D17.5   | 0,00 | 0,00 | 0,00 | 0,00 | NA | NA |
| RP11-66E20.2   | 0,00 | 0,00 | 0,00 | 0,00 | NA | NA |
| RP11-66H6.3    | 0,00 | 0,00 | 0,00 | 0,00 | NA | NA |
| RP11-66N11.5   | 0,00 | 0,00 | 0,00 | 0,00 | NA | NA |
| RP11-66N24.6   | 0,00 | 0,00 | 0,00 | 0,00 | NA | NA |
| RP11-66N5.2    | 0,00 | 0,00 | 0,00 | 0,00 | NA | NA |
| RP11-670E13.5  | 0,00 | 0,00 | 0,00 | 0,00 | NA | NA |
| RP11-670N15.2  | 0,00 | 0,00 | 0,00 | 0,00 | NA | NA |
| RP11-671C19.2  | 0,00 | 0,00 | 0,00 | 0,00 | NA | NA |
| RP11-671E7.1   | 0,00 | 0,00 | 0,00 | 0,00 | NA | NA |
| RP11-671J11.1  | 0,00 | 0,00 | 0,00 | 0,00 | NA | NA |
| RP11-671J11.4  | 0,00 | 1,64 | 0,00 | 0,39 | NA | NA |
| RP11-671M22.4  | 0,00 | 0,00 | 0,00 | 0,00 | NA | NA |
| RP11-671M22.5  | 0,00 | 0,00 | 0,00 | 0,00 | NA | NA |
| RP11-671M22.6  | 0,00 | 0,00 | 0,00 | 0,00 | NA | NA |
| RP11-672A2.2   | 0,00 | 0,00 | 0,00 | 0,00 | NA | NA |
| RP11-672A2.3   | 0,00 | 0,00 | 0,00 | 0,00 | NA | NA |
| RP11-672A2.4   | 0,00 | 0,00 | 0,00 | 0,00 | NA | NA |
| RP11-672A2.7   | 0,00 | 0,00 | 0,00 | 0,00 | NA | NA |
| RP11-672F9.1   | 0,00 | 0,00 | 0,00 | 0,00 | NA | NA |
| RP11-672I14.1  | 0,00 | 0,00 | 0,00 | 0,00 | NA | NA |
| RP11-672L10.1  | 0,00 | 0,00 | 0,00 | 0,00 | NA | NA |
| RP11-672L10.3  | 0,00 | 0,00 | 0,00 | 0,00 | NA | NA |
| RP11-672L10.5  | 0,00 | 0,00 | 0,00 | 0,00 | NA | NA |
| RP11-672L10.6  | 0,00 | 0,00 | 0,00 | 0,00 | NA | NA |
| RP11-673E11.2  | 0,00 | 0,00 | 0,00 | 0,00 | NA | NA |
| RP11-673F18.1  | 0,00 | 0,00 | 0,00 | 0,00 | NA | NA |
| RP11-673P17.1  | 0,00 | 0,00 | 0,00 | 0,00 | NA | NA |
| RP11-673P17.2  | 0,00 | 0,00 | 0,00 | 0,00 | NA | NA |
| RP11-674I16.1  | 0,00 | 0,00 | 0,00 | 0,00 | NA | NA |
| RP11-674N23.1  | 0,00 | 0,00 | 0,00 | 0,00 | NA | NA |
| RP11-674N23.2  | 0,00 | 0,00 | 0,00 | 0,00 | NA | NA |
| RP11-674N23.4  | 0,00 | 0,00 | 0,00 | 0,00 | NA | NA |
| RP11-674P14.1  | 0,00 | 0,00 | 0,00 | 0,00 | NA | NA |
| RP11-674P19.2  | 0,00 | 0,07 | 0,00 | 0,00 | NA | NA |
| RP11-675F6.4   | 0,00 | 0,00 | 0,00 | 0,00 | NA | NA |
| RP11-675M1.1   | 0,00 | 0,00 | 0,00 | 0,00 | NA | NA |

|               |      |      |      |      |    |    |
|---------------|------|------|------|------|----|----|
| RP11-675M1.2  | 0,00 | 0,00 | 0,00 | 0,00 | NA | NA |
| RP11-675P14.1 | 0,00 | 0,00 | 0,00 | 0,00 | NA | NA |
| RP11-676B18.2 | 0,00 | 0,00 | 0,00 | 0,00 | NA | NA |
| RP11-676F20.1 | 0,00 | 0,00 | 0,00 | 0,00 | NA | NA |
| RP11-676F20.2 | 0,00 | 0,00 | 0,00 | 0,00 | NA | NA |
| RP11-676F20.3 | 0,00 | 0,00 | 0,00 | 0,00 | NA | NA |
| RP11-676J12.6 | 0,00 | 0,00 | 0,00 | 0,00 | NA | NA |
| RP11-676J12.8 | 0,00 | 0,00 | 0,00 | 0,00 | NA | NA |
| RP11-676J12.9 | 0,00 | 0,00 | 0,00 | 0,00 | NA | NA |
| RP11-677I18.3 | 0,00 | 0,00 | 0,00 | 0,00 | NA | NA |
| RP11-677I18.4 | 0,00 | 0,00 | 0,00 | 0,00 | NA | NA |
| RP11-677M14.5 | 0,00 | 0,00 | 0,00 | 0,00 | NA | NA |
| RP11-677M14.6 | 0,00 | 0,00 | 0,00 | 0,00 | NA | NA |
| RP11-677M14.8 | 0,04 | 0,04 | 0,02 | 0,17 | NA | NA |
| RP11-677M24.1 | 0,00 | 0,00 | 0,00 | 0,00 | NA | NA |
| RP11-677O4.1  | 0,00 | 0,00 | 0,00 | 0,00 | NA | NA |
| RP11-677O4.4  | 0,00 | 0,00 | 0,00 | 0,00 | NA | NA |
| RP11-677O4.5  | 0,00 | 0,00 | 0,00 | 0,00 | NA | NA |
| RP11-677O4.7  | 0,00 | 0,00 | 0,00 | 0,00 | NA | NA |
| RP11-678B3.1  | 0,00 | 0,00 | 0,00 | 0,00 | NA | NA |
| RP11-678B3.3  | 0,00 | 0,00 | 0,00 | 0,00 | NA | NA |
| RP11-678D18.1 | 0,00 | 0,00 | 0,00 | 0,00 | NA | NA |
| RP11-678G14.3 | 0,00 | 0,00 | 0,00 | 0,00 | NA | NA |
| RP11-678G14.5 | 0,00 | 0,00 | 0,00 | 0,00 | NA | NA |
| RP11-678G14.6 | 0,00 | 0,00 | 0,00 | 0,00 | NA | NA |
| RP11-678G15.2 | 0,00 | 0,00 | 0,00 | 0,00 | NA | NA |
| RP11-678K21.1 | 0,00 | 0,00 | 0,00 | 0,00 | NA | NA |
| RP11-678P19.1 | 0,00 | 0,00 | 0,00 | 0,00 | NA | NA |
| RP11-679B17.2 | 0,00 | 0,00 | 0,00 | 0,00 | NA | NA |
| RP11-679B19.1 | 0,00 | 0,00 | 0,00 | 0,00 | NA | NA |
| RP11-679B19.2 | 0,00 | 0,00 | 0,00 | 0,00 | NA | NA |
| RP11-679I18.4 | 0,00 | 0,00 | 0,00 | 0,00 | NA | NA |
| RP11-67A1.2   | 0,00 | 0,36 | 0,00 | 0,67 | NA | NA |
| RP11-67F24.1  | 0,00 | 0,00 | 0,00 | 0,00 | NA | NA |
| RP11-67H2.1   | 0,00 | 0,00 | 0,00 | 0,00 | NA | NA |
| RP11-67H24.1  | 0,00 | 0,00 | 0,00 | 0,00 | NA | NA |
| RP11-67L3.2   | 0,00 | 0,00 | 0,00 | 0,00 | NA | NA |
| RP11-67L3.4   | 0,00 | 0,00 | 0,00 | 0,00 | NA | NA |
| RP11-67L3.5   | 0,00 | 0,00 | 0,00 | 0,00 | NA | NA |
| RP11-67M9.1   | 0,00 | 0,00 | 0,00 | 0,00 | NA | NA |
| RP11-67P15.1  | 0,00 | 0,00 | 0,00 | 0,00 | NA | NA |
| RP11-680E19.2 | 0,00 | 0,00 | 0,00 | 0,00 | NA | NA |
| RP11-680F20.9 | 0,00 | 0,00 | 0,00 | 0,00 | NA | NA |
| RP11-680F8.4  | 0,00 | 0,00 | 0,00 | 0,00 | NA | NA |
| RP11-680G24.1 | 0,00 | 0,00 | 0,00 | 0,00 | NA | NA |
| RP11-680G24.7 | 0,00 | 0,00 | 0,00 | 0,00 | NA | NA |
| RP11-680H20.1 | 0,00 | 0,00 | 0,00 | 0,00 | NA | NA |
| RP11-680L20.1 | 0,00 | 0,00 | 0,00 | 0,00 | NA | NA |
| RP11-680N20.1 | 0,00 | 0,00 | 0,00 | 0,00 | NA | NA |
| RP11-681H10.1 | 0,00 | 0,00 | 0,00 | 0,00 | NA | NA |
| RP11-681L4.1  | 0,00 | 0,00 | 0,00 | 0,00 | NA | NA |
| RP11-681L4.2  | 0,00 | 0,00 | 0,00 | 0,00 | NA | NA |
| RP11-683L23.6 | 0,00 | 0,00 | 0,00 | 0,00 | NA | NA |
| RP11-683L23.7 | 0,00 | 0,00 | 0,00 | 0,00 | NA | NA |
| RP11-683O4.1  | 0,00 | 0,00 | 0,00 | 0,00 | NA | NA |

|               |      |      |      |      |    |    |
|---------------|------|------|------|------|----|----|
| RP11-684B2.3  | 0,00 | 0,00 | 0,00 | 0,00 | NA | NA |
| RP11-684B2.5  | 0,00 | 0,00 | 0,00 | 0,00 | NA | NA |
| RP11-684B2.6  | 0,00 | 0,00 | 0,00 | 0,00 | NA | NA |
| RP11-684B20.1 | 0,00 | 0,00 | 0,00 | 0,00 | NA | NA |
| RP11-684B21.1 | 0,00 | 0,00 | 0,00 | 0,00 | NA | NA |
| RP11-684N3.1  | 0,00 | 0,00 | 0,00 | 0,00 | NA | NA |
| RP11-685A21.1 | 0,00 | 0,00 | 0,00 | 0,00 | NA | NA |
| RP11-685B14.1 | 0,00 | 0,00 | 0,00 | 0,00 | NA | NA |
| RP11-685B14.2 | 0,00 | 0,00 | 0,00 | 0,00 | NA | NA |
| RP11-685B14.3 | 0,00 | 0,00 | 0,00 | 0,00 | NA | NA |
| RP11-685B24.1 | 0,00 | 0,00 | 0,00 | 0,00 | NA | NA |
| RP11-685F15.1 | 0,00 | 0,00 | 0,00 | 0,00 | NA | NA |
| RP11-685G9.2  | 0,00 | 0,00 | 0,00 | 0,00 | NA | NA |
| RP11-685G9.4  | 0,00 | 0,00 | 0,00 | 0,00 | NA | NA |
| RP11-686D16.1 | 0,00 | 0,00 | 0,00 | 0,00 | NA | NA |
| RP11-686D22.2 | 0,00 | 0,00 | 0,00 | 0,00 | NA | NA |
| RP11-686D22.6 | 0,00 | 0,00 | 0,00 | 0,00 | NA | NA |
| RP11-686D22.9 | 0,00 | 0,00 | 0,00 | 0,00 | NA | NA |
| RP11-686G17.1 | 0,00 | 0,00 | 0,00 | 0,00 | NA | NA |
| RP11-686G23.1 | 0,00 | 0,00 | 0,00 | 0,00 | NA | NA |
| RP11-686G23.2 | 0,00 | 0,00 | 0,00 | 0,00 | NA | NA |
| RP11-686G8.1  | 0,00 | 0,00 | 0,00 | 0,00 | NA | NA |
| RP11-686N4.1  | 0,00 | 0,00 | 0,00 | 0,00 | NA | NA |
| RP11-686O6.1  | 0,00 | 0,00 | 0,00 | 0,00 | NA | NA |
| RP11-687D19.1 | 0,00 | 0,00 | 0,00 | 0,00 | NA | NA |
| RP11-687M24.4 | 0,00 | 0,00 | 0,00 | 0,00 | NA | NA |
| RP11-687M24.5 | 0,00 | 0,00 | 0,00 | 0,00 | NA | NA |
| RP11-687M24.8 | 0,00 | 0,00 | 0,00 | 0,00 | NA | NA |
| RP11-688D15.1 | 0,00 | 0,00 | 0,00 | 0,00 | NA | NA |
| RP11-688D15.2 | 0,00 | 0,17 | 0,00 | 0,00 | NA | NA |
| RP11-688G15.3 | 0,00 | 0,00 | 0,00 | 0,00 | NA | NA |
| RP11-688I9.2  | 0,00 | 0,00 | 0,00 | 0,00 | NA | NA |
| RP11-688I9.4  | 0,00 | 0,00 | 0,00 | 0,00 | NA | NA |
| RP11-689E3.2  | 0,00 | 0,00 | 0,00 | 0,00 | NA | NA |
| RP11-689K5.2  | 0,00 | 0,00 | 0,00 | 0,00 | NA | NA |
| RP11-68D16.1  | 0,00 | 0,00 | 0,00 | 0,00 | NA | NA |
| RP11-68D19.1  | 0,00 | 0,00 | 0,00 | 0,00 | NA | NA |
| RP11-68E19.1  | 0,00 | 0,00 | 0,00 | 0,00 | NA | NA |
| RP11-68I18.10 | 0,00 | 0,00 | 0,00 | 0,00 | NA | NA |
| RP11-68I18.2  | 0,00 | 0,00 | 0,00 | 0,00 | NA | NA |
| RP11-68I3.10  | 0,00 | 0,00 | 0,00 | 0,00 | NA | NA |
| RP11-68I3.7   | 0,00 | 0,00 | 0,00 | 0,00 | NA | NA |
| RP11-68L1.1   | 0,00 | 0,00 | 0,00 | 0,00 | NA | NA |
| RP11-68L1.2   | 0,00 | 0,00 | 0,00 | 0,00 | NA | NA |
| RP11-68L18.2  | 0,00 | 0,00 | 0,00 | 0,00 | NA | NA |
| RP11-690C23.3 | 0,00 | 0,00 | 0,00 | 0,00 | NA | NA |
| RP11-690C23.4 | 0,00 | 0,00 | 0,00 | 0,00 | NA | NA |
| RP11-690C23.5 | 0,00 | 0,00 | 0,00 | 0,00 | NA | NA |
| RP11-690D19.1 | 0,00 | 0,00 | 0,00 | 0,00 | NA | NA |
| RP11-690D19.4 | 0,00 | 0,00 | 0,00 | 0,00 | NA | NA |
| RP11-690I21.3 | 0,00 | 0,00 | 0,00 | 0,00 | NA | NA |
| RP11-691E1.1  | 0,00 | 0,00 | 0,00 | 0,00 | NA | NA |
| RP11-691F15.1 | 0,00 | 0,00 | 0,00 | 0,00 | NA | NA |
| RP11-691L4.2  | 0,00 | 0,00 | 0,00 | 0,00 | NA | NA |
| RP11-691N7.6  | 0,00 | 0,00 | 0,00 | 0,35 | NA | NA |

|               |      |      |      |      |    |    |
|---------------|------|------|------|------|----|----|
| RP11-692C23.1 | 0,00 | 0,00 | 0,00 | 0,00 | NA | NA |
| RP11-692C24.1 | 0,00 | 0,00 | 0,00 | 0,00 | NA | NA |
| RP11-692C24.3 | 0,00 | 0,00 | 0,00 | 0,00 | NA | NA |
| RP11-692D12.1 | 0,00 | 0,00 | 0,00 | 0,00 | NA | NA |
| RP11-692E14.1 | 0,00 | 0,00 | 0,00 | 0,00 | NA | NA |
| RP11-692M12.4 | 0,00 | 0,00 | 0,00 | 0,00 | NA | NA |
| RP11-692M12.5 | 0,00 | 0,00 | 0,00 | 0,00 | NA | NA |
| RP11-693I21.1 | 0,00 | 0,00 | 0,00 | 0,00 | NA | NA |
| RP11-693I15.3 | 0,00 | 0,00 | 0,00 | 0,00 | NA | NA |
| RP11-693I15.6 | 0,00 | 0,00 | 0,00 | 0,00 | NA | NA |
| RP11-693N9.1  | 0,00 | 0,00 | 0,00 | 0,00 | NA | NA |
| RP11-694D5.1  | 0,00 | 0,00 | 0,00 | 0,00 | NA | NA |
| RP11-694F24.2 | 0,00 | 0,00 | 0,00 | 0,00 | NA | NA |
| RP11-694H12.1 | 0,00 | 0,00 | 0,00 | 0,00 | NA | NA |
| RP11-695I20.1 | 0,00 | 0,00 | 0,00 | 0,00 | NA | NA |
| RP11-695I20.2 | 0,00 | 0,00 | 0,00 | 0,00 | NA | NA |
| RP11-696F10.1 | 0,00 | 0,00 | 0,00 | 0,00 | NA | NA |
| RP11-696F12.1 | 0,00 | 0,00 | 0,00 | 0,00 | NA | NA |
| RP11-696N14.3 | 0,00 | 0,00 | 0,00 | 0,00 | NA | NA |
| RP11-696P8.2  | 0,00 | 0,00 | 0,00 | 0,00 | NA | NA |
| RP11-697B24.1 | 0,00 | 0,00 | 0,00 | 0,00 | NA | NA |
| RP11-697E14.2 | 0,00 | 0,00 | 0,00 | 0,00 | NA | NA |
| RP11-697E2.10 | 0,00 | 0,00 | 0,00 | 0,00 | NA | NA |
| RP11-697E2.11 | 0,00 | 0,00 | 0,00 | 0,00 | NA | NA |
| RP11-697E2.13 | 0,00 | 0,00 | 0,00 | 0,00 | NA | NA |
| RP11-697E2.6  | 0,00 | 0,00 | 0,00 | 0,00 | NA | NA |
| RP11-697E2.9  | 0,00 | 0,00 | 0,00 | 0,00 | NA | NA |
| RP11-697E23.1 | 0,00 | 0,00 | 0,00 | 0,00 | NA | NA |
| RP11-697G4.3  | 0,00 | 0,00 | 0,00 | 0,00 | NA | NA |
| RP11-697G4.4  | 0,00 | 0,00 | 0,00 | 0,00 | NA | NA |
| RP11-697H10.1 | 0,00 | 0,00 | 0,00 | 0,00 | NA | NA |
| RP11-697H9.4  | 0,00 | 0,00 | 0,00 | 0,00 | NA | NA |
| RP11-697N18.2 | 0,00 | 0,00 | 0,00 | 0,00 | NA | NA |
| RP11-698E18.1 | 0,00 | 0,00 | 0,00 | 0,00 | NA | NA |
| RP11-698F20.3 | 0,00 | 0,00 | 0,00 | 0,00 | NA | NA |
| RP11-698N11.2 | 0,00 | 0,00 | 0,00 | 0,00 | NA | NA |
| RP11-699A5.1  | 0,00 | 0,00 | 0,00 | 0,00 | NA | NA |
| RP11-699A5.2  | 0,00 | 0,00 | 0,00 | 0,00 | NA | NA |
| RP11-699A7.1  | 0,00 | 0,00 | 0,00 | 0,00 | NA | NA |
| RP11-699F16.1 | 0,00 | 0,00 | 0,00 | 0,00 | NA | NA |
| RP11-699F16.2 | 0,00 | 0,00 | 0,00 | 0,00 | NA | NA |
| RP11-699F16.3 | 0,00 | 0,00 | 0,00 | 0,00 | NA | NA |
| RP11-699L21.1 | 0,00 | 0,00 | 0,00 | 0,00 | NA | NA |
| RP11-699L21.2 | 0,00 | 0,00 | 0,00 | 0,00 | NA | NA |
| RP11-69A21.2  | 0,00 | 0,00 | 0,00 | 0,00 | NA | NA |
| RP11-69C17.4  | 0,00 | 0,00 | 0,00 | 0,00 | NA | NA |
| RP11-69E9.1   | 0,00 | 0,00 | 0,00 | 0,00 | NA | NA |
| RP11-69G7.1   | 0,00 | 0,00 | 0,00 | 0,00 | NA | NA |
| RP11-69H14.10 | 0,00 | 0,00 | 0,00 | 0,00 | NA | NA |
| RP11-69H14.6  | 0,00 | 0,00 | 0,00 | 0,00 | NA | NA |
| RP11-69H7.2   | 0,00 | 0,05 | 0,00 | 0,00 | NA | NA |
| RP11-69H7.4   | 0,00 | 0,00 | 0,00 | 0,00 | NA | NA |
| RP11-69I13.1  | 0,00 | 0,00 | 0,00 | 0,00 | NA | NA |
| RP11-69I22.2  | 0,00 | 0,00 | 0,00 | 0,00 | NA | NA |
| RP11-69I8.3   | 0,00 | 0,00 | 0,00 | 0,00 | NA | NA |

|                |      |      |      |      |    |    |
|----------------|------|------|------|------|----|----|
| RP11-69J16.4   | 0,00 | 0,00 | 0,00 | 0,00 | NA | NA |
| RP11-69J7.1    | 0,00 | 0,00 | 0,00 | 0,00 | NA | NA |
| RP11-69L16.3   | 0,00 | 0,00 | 0,00 | 0,00 | NA | NA |
| RP11-69M1.1    | 0,00 | 0,00 | 0,00 | 0,00 | NA | NA |
| RP11-69M1.3    | 0,00 | 0,00 | 0,00 | 0,00 | NA | NA |
| RP11-69M1.4    | 0,00 | 0,00 | 0,00 | 0,00 | NA | NA |
| RP11-69M1.8    | 0,00 | 0,00 | 0,00 | 0,00 | NA | NA |
| RP11-6B4.1     | 0,00 | 0,00 | 0,00 | 0,00 | NA | NA |
| RP11-6C10.1    | 0,00 | 0,00 | 0,00 | 0,00 | NA | NA |
| RP11-6C14.1    | 0,00 | 0,00 | 0,00 | 0,00 | NA | NA |
| RP11-6E2.1     | 0,00 | 0,00 | 0,00 | 0,00 | NA | NA |
| RP11-6E9.1     | 0,00 | 0,00 | 0,00 | 0,00 | NA | NA |
| RP11-6E9.5     | 0,00 | 0,00 | 0,00 | 0,00 | NA | NA |
| RP11-6F2.2     | 0,00 | 0,00 | 0,00 | 0,00 | NA | NA |
| RP11-6F2.3     | 0,00 | 0,00 | 0,00 | 0,00 | NA | NA |
| RP11-6F2.5     | 0,00 | 0,19 | 0,19 | 0,00 | NA | NA |
| RP11-6I2.4     | 0,00 | 0,00 | 0,00 | 0,00 | NA | NA |
| RP11-6J21.1    | 0,00 | 0,00 | 0,00 | 0,00 | NA | NA |
| RP11-6J24.3    | 0,00 | 0,00 | 0,00 | 0,00 | NA | NA |
| RP11-6K23.1    | 0,00 | 0,00 | 0,00 | 0,00 | NA | NA |
| RP11-6L6.2     | 0,00 | 0,06 | 0,00 | 0,06 | NA | NA |
| RP11-6L6.3     | 0,00 | 0,00 | 0,00 | 0,00 | NA | NA |
| RP11-6L6.6     | 0,00 | 0,00 | 0,00 | 0,00 | NA | NA |
| RP11-6L6.7     | 0,00 | 0,00 | 0,00 | 0,00 | NA | NA |
| RP11-6N13.1    | 0,00 | 0,00 | 0,00 | 0,00 | NA | NA |
| RP11-6N13.4    | 0,00 | 0,00 | 0,00 | 0,00 | NA | NA |
| RP11-6N17.3    | 0,00 | 0,00 | 0,00 | 0,00 | NA | NA |
| RP11-6O2.4     | 0,00 | 0,00 | 0,00 | 0,00 | NA | NA |
| RP11-6O24.1    | 0,00 | 0,00 | 0,00 | 0,00 | NA | NA |
| RP11-700E23.1  | 0,00 | 0,00 | 0,00 | 0,00 | NA | NA |
| RP11-700E23.2  | 0,00 | 0,00 | 0,00 | 0,00 | NA | NA |
| RP11-700E23.3  | 0,00 | 0,00 | 0,00 | 0,00 | NA | NA |
| RP11-700F16.2  | 0,00 | 0,00 | 0,00 | 0,00 | NA | NA |
| RP11-700H13.1  | 0,00 | 0,00 | 0,00 | 0,00 | NA | NA |
| RP11-700J17.2  | 0,00 | 0,00 | 0,00 | 0,00 | NA | NA |
| RP11-700N1.1   | 0,00 | 0,00 | 0,00 | 0,00 | NA | NA |
| RP11-700P18.2  | 0,00 | 0,00 | 0,00 | 0,00 | NA | NA |
| RP11-701B6.1   | 0,00 | 0,00 | 0,00 | 0,00 | NA | NA |
| RP11-701H16.4  | 0,00 | 0,00 | 0,00 | 0,00 | NA | NA |
| RP11-701H24.10 | 0,00 | 0,00 | 0,00 | 0,00 | NA | NA |
| RP11-701H24.2  | 0,00 | 0,03 | 0,00 | 0,00 | NA | NA |
| RP11-701I24.1  | 0,00 | 0,00 | 0,00 | 0,00 | NA | NA |
| RP11-701I24.3  | 0,00 | 0,00 | 0,00 | 0,00 | NA | NA |
| RP11-701P16.3  | 0,00 | 0,00 | 0,00 | 0,00 | NA | NA |
| RP11-701P16.5  | 0,47 | 0,48 | 0,92 | 1,44 | NA | NA |
| RP11-702B10.1  | 0,00 | 0,00 | 0,00 | 0,00 | NA | NA |
| RP11-702C7.1   | 0,00 | 0,00 | 0,00 | 0,00 | NA | NA |
| RP11-702C7.2   | 0,00 | 0,00 | 0,00 | 0,00 | NA | NA |
| RP11-702F3.2   | 0,00 | 0,00 | 0,00 | 0,00 | NA | NA |
| RP11-702F3.4   | 0,00 | 0,00 | 0,09 | 0,19 | NA | NA |
| RP11-702H23.2  | 0,00 | 0,00 | 0,00 | 0,00 | NA | NA |
| RP11-702H23.3  | 0,00 | 0,00 | 0,00 | 0,00 | NA | NA |
| RP11-702H23.4  | 0,00 | 0,00 | 0,00 | 0,00 | NA | NA |
| RP11-702L6.1   | 0,00 | 0,00 | 0,00 | 0,00 | NA | NA |
| RP11-702L6.2   | 0,00 | 0,00 | 0,00 | 0,00 | NA | NA |

|                |      |      |      |      |    |    |
|----------------|------|------|------|------|----|----|
| RP11-702L6.3   | 0,00 | 0,00 | 0,00 | 0,00 | NA | NA |
| RP11-702M1.1   | 0,00 | 0,00 | 0,00 | 0,00 | NA | NA |
| RP11-702M1.2   | 0,00 | 0,00 | 0,00 | 0,00 | NA | NA |
| RP11-703C10.1  | 0,00 | 0,00 | 0,00 | 0,00 | NA | NA |
| RP11-703H8.9   | 0,00 | 0,00 | 0,00 | 0,00 | NA | NA |
| RP11-703I16.1  | 0,00 | 0,97 | 0,40 | 0,79 | NA | NA |
| RP11-703I16.2  | 0,00 | 0,00 | 0,00 | 0,00 | NA | NA |
| RP11-703I16.3  | 0,00 | 0,00 | 0,00 | 0,00 | NA | NA |
| RP11-703P11.1  | 0,00 | 0,00 | 0,00 | 0,00 | NA | NA |
| RP11-704C2.1   | 0,00 | 0,00 | 0,00 | 0,00 | NA | NA |
| RP11-704G19.1  | 0,00 | 0,00 | 0,00 | 0,00 | NA | NA |
| RP11-704J17.2  | 0,00 | 0,00 | 0,00 | 0,00 | NA | NA |
| RP11-704J17.5  | 0,00 | 0,00 | 0,00 | 0,00 | NA | NA |
| RP11-704M14.2  | 0,00 | 0,00 | 0,00 | 0,00 | NA | NA |
| RP11-705B14.1  | 0,00 | 0,00 | 0,00 | 0,00 | NA | NA |
| RP11-705C15.4  | 0,00 | 0,00 | 0,00 | 0,00 | NA | NA |
| RP11-705C15.6  | 0,00 | 0,00 | 0,00 | 0,00 | NA | NA |
| RP11-705F7.1   | 0,00 | 0,00 | 0,00 | 0,00 | NA | NA |
| RP11-705O24.3  | 0,00 | 0,00 | 0,00 | 0,00 | NA | NA |
| RP11-706C16.13 | 0,00 | 0,00 | 0,00 | 0,00 | NA | NA |
| RP11-706C16.4  | 0,00 | 0,00 | 0,00 | 0,00 | NA | NA |
| RP11-706C16.5  | 0,00 | 0,00 | 0,00 | 0,00 | NA | NA |
| RP11-706C16.7  | 0,00 | 0,00 | 0,00 | 0,00 | NA | NA |
| RP11-706D8.1   | 0,00 | 0,00 | 0,00 | 0,00 | NA | NA |
| RP11-706D8.3   | 0,00 | 0,00 | 0,16 | 0,00 | NA | NA |
| RP11-706F1.1   | 0,00 | 0,59 | 0,00 | 0,64 | NA | NA |
| RP11-706F1.2   | 0,00 | 0,00 | 0,00 | 0,00 | NA | NA |
| RP11-706J10.1  | 0,00 | 0,00 | 0,00 | 0,00 | NA | NA |
| RP11-706J10.2  | 0,00 | 0,00 | 0,00 | 0,00 | NA | NA |
| RP11-706O15.3  | 0,69 | 0,61 | 1,04 | 0,87 | NA | NA |
| RP11-706O15.5  | 0,00 | 0,00 | 0,00 | 0,00 | NA | NA |
| RP11-706O15.8  | 0,00 | 0,00 | 0,00 | 0,00 | NA | NA |
| RP11-707E21.1  | 0,00 | 0,00 | 0,00 | 0,00 | NA | NA |
| RP11-707G14.1  | 0,00 | 0,00 | 0,00 | 0,00 | NA | NA |
| RP11-707G14.8  | 0,00 | 0,00 | 0,00 | 0,00 | NA | NA |
| RP11-707M1.7   | 0,00 | 0,00 | 0,00 | 0,00 | NA | NA |
| RP11-707M1.9   | 0,00 | 0,00 | 0,00 | 0,00 | NA | NA |
| RP11-707O23.5  | 0,00 | 0,00 | 0,00 | 0,00 | NA | NA |
| RP11-707P17.1  | 0,00 | 0,00 | 0,00 | 0,00 | NA | NA |
| RP11-707P17.2  | 0,00 | 0,00 | 0,00 | 0,00 | NA | NA |
| RP11-708H21.1  | 0,00 | 0,00 | 0,00 | 0,00 | NA | NA |
| RP11-708J19.3  | 0,00 | 0,00 | 0,00 | 0,00 | NA | NA |
| RP11-708L7.7   | 0,00 | 0,00 | 0,00 | 0,00 | NA | NA |
| RP11-708L7.9   | 0,00 | 0,00 | 0,00 | 0,00 | NA | NA |
| RP11-709D24.4  | 0,00 | 0,00 | 0,00 | 0,00 | NA | NA |
| RP11-709D24.6  | 0,00 | 0,00 | 0,00 | 0,00 | NA | NA |
| RP11-709P2.1   | 0,00 | 0,00 | 0,00 | 0,00 | NA | NA |
| RP11-70D24.3   | 0,00 | 0,00 | 0,00 | 0,00 | NA | NA |
| RP11-70D24.4   | 0,00 | 0,00 | 0,00 | 0,00 | NA | NA |
| RP11-70F11.2   | 0,00 | 0,00 | 0,00 | 0,00 | NA | NA |
| RP11-70F11.4   | 0,00 | 0,00 | 0,00 | 0,00 | NA | NA |
| RP11-70J12.1   | 0,00 | 0,00 | 0,00 | 0,00 | NA | NA |
| RP11-70K10.2   | 0,00 | 0,00 | 0,00 | 0,00 | NA | NA |
| RP11-70L8.1    | 0,00 | 0,00 | 0,00 | 0,00 | NA | NA |
| RP11-70N22.1   | 0,00 | 0,00 | 0,00 | 0,00 | NA | NA |

|               |      |      |      |      |    |    |
|---------------|------|------|------|------|----|----|
| RP11-710E1.1  | 0,00 | 0,00 | 0,00 | 0,00 | NA | NA |
| RP11-710N8.1  | 0,00 | 0,00 | 0,00 | 0,00 | NA | NA |
| RP11-710N8.2  | 0,00 | 0,00 | 0,00 | 0,00 | NA | NA |
| RP11-710N8.3  | 0,00 | 0,00 | 0,00 | 0,00 | NA | NA |
| RP11-711C17.1 | 0,00 | 0,00 | 0,00 | 0,00 | NA | NA |
| RP11-711G10.1 | 0,00 | 0,00 | 0,00 | 0,00 | NA | NA |
| RP11-711M9.2  | 0,00 | 0,00 | 0,00 | 0,00 | NA | NA |
| RP11-712B9.2  | 0,07 | 0,15 | 0,05 | 0,31 | NA | NA |
| RP11-712B9.4  | 0,00 | 0,00 | 0,00 | 0,00 | NA | NA |
| RP11-712C19.1 | 0,00 | 0,00 | 0,00 | 0,00 | NA | NA |
| RP11-712C7.1  | 0,00 | 0,00 | 0,00 | 0,00 | NA | NA |
| RP11-712C7.2  | 0,00 | 0,00 | 0,00 | 0,00 | NA | NA |
| RP11-713C19.1 | 0,00 | 0,00 | 0,00 | 0,00 | NA | NA |
| RP11-713C19.2 | 0,00 | 0,00 | 0,00 | 0,00 | NA | NA |
| RP11-713C9.1  | 0,00 | 0,00 | 0,00 | 0,00 | NA | NA |
| RP11-713D19.1 | 0,00 | 0,00 | 0,00 | 0,00 | NA | NA |
| RP11-713H12.1 | 0,00 | 0,00 | 0,00 | 0,00 | NA | NA |
| RP11-713H12.2 | 0,00 | 0,00 | 0,00 | 0,00 | NA | NA |
| RP11-713M15.2 | 0,00 | 0,00 | 0,00 | 0,00 | NA | NA |
| RP11-713M6.1  | 0,00 | 0,00 | 0,00 | 0,00 | NA | NA |
| RP11-713P14.1 | 0,00 | 0,00 | 0,00 | 0,00 | NA | NA |
| RP11-714G12.1 | 0,00 | 0,00 | 0,00 | 0,00 | NA | NA |
| RP11-714G18.1 | 0,00 | 0,00 | 0,00 | 0,00 | NA | NA |
| RP11-715C4.1  | 0,00 | 0,00 | 0,00 | 0,00 | NA | NA |
| RP11-715D1.1  | 0,00 | 0,00 | 0,00 | 0,00 | NA | NA |
| RP11-715F10.6 | 0,00 | 0,00 | 0,00 | 0,00 | NA | NA |
| RP11-715F3.1  | 0,00 | 0,00 | 0,00 | 0,00 | NA | NA |
| RP11-715G15.2 | 0,00 | 0,00 | 0,00 | 0,00 | NA | NA |
| RP11-715G18.3 | 0,00 | 0,00 | 0,00 | 0,00 | NA | NA |
| RP11-715I4.1  | 0,00 | 0,00 | 0,00 | 0,00 | NA | NA |
| RP11-715I22.3 | 0,00 | 0,00 | 0,00 | 0,00 | NA | NA |
| RP11-715I22.4 | 0,00 | 0,00 | 0,00 | 0,00 | NA | NA |
| RP11-715L17.1 | 0,00 | 0,00 | 0,00 | 0,00 | NA | NA |
| RP11-716A19.3 | 0,00 | 0,00 | 0,00 | 0,00 | NA | NA |
| RP11-716D19.1 | 0,00 | 0,00 | 0,00 | 0,00 | NA | NA |
| RP11-716H6.2  | 0,00 | 0,00 | 0,00 | 0,00 | NA | NA |
| RP11-716O23.3 | 0,00 | 0,00 | 0,00 | 0,00 | NA | NA |
| RP11-717A5.1  | 0,00 | 0,00 | 0,00 | 0,00 | NA | NA |
| RP11-717I24.1 | 0,00 | 0,00 | 0,00 | 0,00 | NA | NA |
| RP11-718B12.1 | 0,00 | 0,00 | 0,00 | 0,00 | NA | NA |
| RP11-718G2.5  | 0,00 | 0,00 | 0,00 | 0,00 | NA | NA |
| RP11-718L23.1 | 0,00 | 0,00 | 0,00 | 0,00 | NA | NA |
| RP11-718M20.5 | 0,00 | 0,00 | 0,00 | 0,00 | NA | NA |
| RP11-719C20.1 | 0,00 | 0,00 | 0,00 | 0,00 | NA | NA |
| RP11-719K4.3  | 0,00 | 0,00 | 0,00 | 0,00 | NA | NA |
| RP11-719K4.7  | 0,00 | 0,00 | 0,00 | 0,00 | NA | NA |
| RP11-719L21.1 | 0,00 | 0,00 | 0,00 | 0,00 | NA | NA |
| RP11-719N22.2 | 0,00 | 0,00 | 0,00 | 0,00 | NA | NA |
| RP11-71A24.3  | 0,00 | 0,00 | 0,00 | 0,00 | NA | NA |
| RP11-71B7.1   | 0,00 | 0,00 | 0,00 | 0,00 | NA | NA |
| RP11-71C5.2   | 0,00 | 0,00 | 0,00 | 0,00 | NA | NA |
| RP11-71E19.1  | 0,00 | 0,00 | 0,00 | 0,00 | NA | NA |
| RP11-71E19.5  | 0,00 | 0,00 | 0,00 | 0,00 | NA | NA |
| RP11-71E22.1  | 0,00 | 0,00 | 0,00 | 0,00 | NA | NA |
| RP11-71G12.2  | 0,00 | 0,00 | 0,00 | 0,00 | NA | NA |



|                |      |      |      |      |    |    |
|----------------|------|------|------|------|----|----|
| RP11-71G7.1    | 0,00 | 0,00 | 0,00 | 0,00 | NA | NA |
| RP11-71H17.1   | 0,00 | 0,00 | 0,00 | 0,00 | NA | NA |
| RP11-71H17.4   | 0,00 | 0,00 | 0,00 | 0,00 | NA | NA |
| RP11-71H17.7   | 0,00 | 0,00 | 0,00 | 0,00 | NA | NA |
| RP11-71H17.8   | 0,00 | 0,00 | 0,00 | 0,00 | NA | NA |
| RP11-71H9.2    | 0,00 | 0,00 | 0,00 | 0,00 | NA | NA |
| RP11-71J2.1    | 0,00 | 0,00 | 0,00 | 0,00 | NA | NA |
| RP11-71J4.2    | 0,00 | 0,00 | 0,00 | 0,00 | NA | NA |
| RP11-71L7.1    | 0,00 | 0,00 | 0,00 | 0,00 | NA | NA |
| RP11-720D4.2   | 0,00 | 0,00 | 0,00 | 0,00 | NA | NA |
| RP11-720D4.3   | 0,00 | 0,00 | 0,00 | 0,00 | NA | NA |
| RP11-720G6.1   | 0,00 | 0,00 | 0,00 | 0,00 | NA | NA |
| RP11-720L2.2   | 0,00 | 0,00 | 0,00 | 0,00 | NA | NA |
| RP11-720L8.1   | 0,00 | 0,00 | 0,00 | 0,00 | NA | NA |
| RP11-720N19.1  | 0,00 | 0,00 | 0,00 | 0,00 | NA | NA |
| RP11-721G13.1  | 0,00 | 0,00 | 0,00 | 0,00 | NA | NA |
| RP11-722P11.1  | 0,00 | 0,00 | 0,00 | 0,00 | NA | NA |
| RP11-722P11.4  | 0,00 | 0,00 | 0,00 | 0,00 | NA | NA |
| RP11-722P15.1  | 0,00 | 0,00 | 0,00 | 0,00 | NA | NA |
| RP11-722P15.2  | 0,00 | 0,00 | 0,00 | 0,00 | NA | NA |
| RP11-723C11.2  | 0,00 | 0,00 | 0,00 | 0,00 | NA | NA |
| RP11-723G8.1   | 0,00 | 0,00 | 0,00 | 0,00 | NA | NA |
| RP11-723G8.2   | 0,00 | 0,00 | 0,00 | 0,00 | NA | NA |
| RP11-723O4.7   | 0,00 | 0,00 | 0,00 | 0,00 | NA | NA |
| RP11-723P16.3  | 0,00 | 0,00 | 0,00 | 0,00 | NA | NA |
| RP11-724M22.1  | 0,00 | 0,00 | 0,00 | 0,00 | NA | NA |
| RP11-724O16.1  | 0,00 | 0,00 | 0,00 | 0,00 | NA | NA |
| RP11-725G5.2   | 0,00 | 0,00 | 0,00 | 0,00 | NA | NA |
| RP11-725K16.2  | 0,00 | 0,00 | 0,00 | 0,00 | NA | NA |
| RP11-725P16.2  | 0,00 | 0,00 | 0,00 | 0,00 | NA | NA |
| RP11-726G23.10 | 0,00 | 0,00 | 0,00 | 0,00 | NA | NA |
| RP11-726G23.11 | 0,00 | 0,00 | 0,00 | 0,00 | NA | NA |
| RP11-726G23.2  | 0,00 | 0,00 | 0,00 | 0,00 | NA | NA |
| RP11-726G23.3  | 0,00 | 0,00 | 0,00 | 0,00 | NA | NA |
| RP11-726G23.6  | 0,00 | 0,00 | 0,00 | 0,00 | NA | NA |
| RP11-726G23.8  | 0,00 | 0,00 | 0,00 | 0,00 | NA | NA |
| RP11-727A23.7  | 0,00 | 0,00 | 0,00 | 0,00 | NA | NA |
| RP11-727A23.8  | 0,00 | 0,00 | 0,00 | 0,00 | NA | NA |
| RP11-728C8.1   | 0,00 | 0,00 | 0,00 | 0,00 | NA | NA |
| RP11-728D14.6  | 0,00 | 0,00 | 0,00 | 0,00 | NA | NA |
| RP11-728E14.4  | 0,00 | 0,00 | 0,00 | 0,00 | NA | NA |
| RP11-728F11.3  | 0,00 | 0,00 | 0,00 | 0,00 | NA | NA |
| RP11-728K20.1  | 0,00 | 0,00 | 0,00 | 0,00 | NA | NA |
| RP11-728K20.2  | 0,00 | 0,00 | 0,00 | 0,00 | NA | NA |
| RP11-728K20.3  | 0,00 | 0,00 | 0,00 | 0,00 | NA | NA |
| RP11-728L1.1   | 0,00 | 0,00 | 0,00 | 0,00 | NA | NA |
| RP11-729I10.3  | 0,00 | 0,00 | 0,00 | 0,00 | NA | NA |
| RP11-729M20.1  | 0,00 | 0,00 | 0,00 | 0,00 | NA | NA |
| RP11-72I18.1   | 0,00 | 0,00 | 0,00 | 0,00 | NA | NA |
| RP11-72I2.2    | 0,00 | 0,00 | 0,00 | 0,00 | NA | NA |
| RP11-72I8.2    | 0,00 | 0,00 | 0,00 | 0,00 | NA | NA |
| RP11-72J9.1    | 0,00 | 0,00 | 0,00 | 0,00 | NA | NA |
| RP11-72K17.1   | 0,00 | 0,00 | 0,00 | 0,00 | NA | NA |
| RP11-72K17.2   | 0,00 | 0,00 | 0,00 | 0,00 | NA | NA |
| RP11-72L22.1   | 0,00 | 0,00 | 0,00 | 0,00 | NA | NA |

|                |      |      |      |      |    |    |
|----------------|------|------|------|------|----|----|
| RP11-72M10.2   | 0,00 | 0,00 | 0,00 | 0,00 | NA | NA |
| RP11-72M10.4   | 0,00 | 0,00 | 0,00 | 0,00 | NA | NA |
| RP11-72M10.5   | 0,00 | 0,00 | 0,00 | 0,00 | NA | NA |
| RP11-72M10.8   | 0,00 | 0,00 | 0,00 | 0,00 | NA | NA |
| RP11-72P19.3   | 0,00 | 0,00 | 0,00 | 0,00 | NA | NA |
| RP11-730A19.2  | 0,00 | 0,00 | 0,00 | 0,00 | NA | NA |
| RP11-730A19.7  | 0,00 | 0,00 | 0,00 | 0,00 | NA | NA |
| RP11-730A19.9  | 0,00 | 0,00 | 0,00 | 0,00 | NA | NA |
| RP11-730B22.4  | 0,00 | 0,00 | 0,00 | 0,00 | NA | NA |
| RP11-730G20.1  | 0,00 | 0,00 | 0,00 | 0,00 | NA | NA |
| RP11-730G20.2  | 0,00 | 0,00 | 0,00 | 0,00 | NA | NA |
| RP11-730N24.2  | 0,00 | 0,00 | 0,00 | 0,00 | NA | NA |
| RP11-731C17.1  | 0,00 | 0,00 | 0,00 | 0,00 | NA | NA |
| RP11-731D1.1   | 0,00 | 0,00 | 0,00 | 0,00 | NA | NA |
| RP11-731D1.3   | 0,00 | 0,00 | 0,00 | 0,00 | NA | NA |
| RP11-731F5.2   | 0,00 | 0,00 | 0,00 | 0,00 | NA | NA |
| RP11-731N10.1  | 0,00 | 0,00 | 0,00 | 0,00 | NA | NA |
| RP11-732A19.2  | 0,00 | 0,00 | 0,00 | 0,00 | NA | NA |
| RP11-732A19.6  | 0,00 | 0,00 | 0,00 | 0,00 | NA | NA |
| RP11-732A21.3  | 0,00 | 0,00 | 0,00 | 0,00 | NA | NA |
| RP11-732M18.2  | 0,00 | 0,00 | 0,00 | 0,00 | NA | NA |
| RP11-733C7.1   | 0,00 | 0,00 | 0,00 | 0,00 | NA | NA |
| RP11-733C7.3   | 0,00 | 0,00 | 0,00 | 0,00 | NA | NA |
| RP11-733D4.1   | 0,00 | 0,00 | 0,00 | 0,00 | NA | NA |
| RP11-733D4.2   | 0,00 | 0,00 | 0,00 | 0,00 | NA | NA |
| RP11-734C14.2  | 0,00 | 0,00 | 0,00 | 0,00 | NA | NA |
| RP11-734K21.1  | 0,00 | 0,00 | 0,00 | 0,00 | NA | NA |
| RP11-734K21.2  | 0,00 | 0,00 | 0,00 | 0,00 | NA | NA |
| RP11-734K21.3  | 0,00 | 0,00 | 0,00 | 0,00 | NA | NA |
| RP11-734K21.4  | 0,00 | 0,00 | 0,00 | 0,00 | NA | NA |
| RP11-735A19.2  | 0,00 | 0,00 | 0,00 | 0,00 | NA | NA |
| RP11-735A19.3  | 0,00 | 0,00 | 0,00 | 0,00 | NA | NA |
| RP11-735A5.1   | 0,00 | 0,00 | 0,00 | 0,00 | NA | NA |
| RP11-735D6.2   | 0,00 | 0,00 | 0,00 | 0,00 | NA | NA |
| RP11-735O9.1   | 0,00 | 0,00 | 0,00 | 0,00 | NA | NA |
| RP11-736E3.1   | 0,00 | 0,00 | 0,00 | 0,00 | NA | NA |
| RP11-736E3.3   | 0,00 | 0,00 | 0,00 | 0,00 | NA | NA |
| RP11-736G13.1  | 0,00 | 0,00 | 0,00 | 0,00 | NA | NA |
| RP11-736I10.2  | 0,00 | 0,00 | 0,00 | 0,00 | NA | NA |
| RP11-736I10.7  | 0,00 | 0,00 | 0,00 | 0,00 | NA | NA |
| RP11-736I10.8  | 0,00 | 0,00 | 0,00 | 0,00 | NA | NA |
| RP11-736I24.5  | 0,00 | 0,00 | 0,13 | 0,15 | NA | NA |
| RP11-736K12.1  | 0,00 | 0,00 | 0,00 | 0,00 | NA | NA |
| RP11-736K12.3  | 0,00 | 0,00 | 0,00 | 0,00 | NA | NA |
| RP11-736K20.5  | 0,00 | 0,00 | 0,00 | 0,00 | NA | NA |
| RP11-736K20.6  | 0,00 | 0,00 | 0,00 | 0,00 | NA | NA |
| RP11-736L22.1  | 0,00 | 0,00 | 0,00 | 0,00 | NA | NA |
| RP11-736N17.1  | 0,00 | 0,00 | 0,00 | 0,00 | NA | NA |
| RP11-736N17.11 | 0,00 | 0,00 | 0,00 | 0,00 | NA | NA |
| RP11-736N17.3  | 0,00 | 0,00 | 0,00 | 0,00 | NA | NA |
| RP11-736N17.8  | 0,00 | 0,00 | 0,00 | 0,00 | NA | NA |
| RP11-736N17.9  | 0,00 | 0,00 | 0,00 | 0,00 | NA | NA |
| RP11-737F10.1  | 0,00 | 0,00 | 0,00 | 0,00 | NA | NA |
| RP11-737F9.1   | 0,00 | 0,00 | 0,00 | 0,00 | NA | NA |
| RP11-737F9.2   | 0,00 | 0,00 | 0,00 | 0,00 | NA | NA |

|                |      |      |      |      |    |    |
|----------------|------|------|------|------|----|----|
| RP11-737G21.1  | 0,00 | 0,00 | 0,00 | 0,00 | NA | NA |
| RP11-738B7.1   | 0,00 | 0,00 | 0,00 | 0,00 | NA | NA |
| RP11-738G5.1   | 0,00 | 0,00 | 0,00 | 0,00 | NA | NA |
| RP11-738G5.2   | 0,00 | 0,00 | 0,00 | 0,62 | NA | NA |
| RP11-738O11.12 | 0,00 | 0,00 | 0,00 | 0,00 | NA | NA |
| RP11-738O11.13 | 0,00 | 0,00 | 0,00 | 0,00 | NA | NA |
| RP11-738O11.9  | 0,00 | 0,00 | 0,00 | 0,00 | NA | NA |
| RP11-739G5.1   | 0,00 | 0,00 | 0,00 | 0,00 | NA | NA |
| RP11-739N20.2  | 0,00 | 0,00 | 0,00 | 0,00 | NA | NA |
| RP11-739P1.2   | 0,00 | 0,00 | 0,00 | 0,00 | NA | NA |
| RP11-739P6.2   | 0,00 | 0,00 | 0,00 | 0,00 | NA | NA |
| RP11-73B2.1    | 0,00 | 0,00 | 0,00 | 0,00 | NA | NA |
| RP11-73B2.2    | 0,00 | 0,00 | 0,00 | 0,00 | NA | NA |
| RP11-73B2.3    | 0,00 | 0,00 | 0,00 | 0,00 | NA | NA |
| RP11-73B2.5    | 0,00 | 0,00 | 0,00 | 0,00 | NA | NA |
| RP11-73B2.8    | 0,00 | 0,00 | 0,00 | 0,00 | NA | NA |
| RP11-73B8.1    | 0,00 | 0,00 | 0,00 | 0,00 | NA | NA |
| RP11-73B8.2    | 0,00 | 0,00 | 0,00 | 0,00 | NA | NA |
| RP11-73B8.3    | 0,00 | 0,00 | 0,00 | 0,00 | NA | NA |
| RP11-73E17.3   | 0,00 | 0,00 | 0,00 | 0,00 | NA | NA |
| RP11-73E6.2    | 0,00 | 0,00 | 0,00 | 0,00 | NA | NA |
| RP11-73G16.3   | 0,00 | 0,00 | 0,00 | 0,00 | NA | NA |
| RP11-73G8.1    | 0,00 | 0,00 | 0,00 | 0,00 | NA | NA |
| RP11-73H14.1   | 0,00 | 0,00 | 0,00 | 0,00 | NA | NA |
| RP11-73I17.2   | 0,00 | 0,00 | 0,00 | 0,00 | NA | NA |
| RP11-73M14.1   | 0,00 | 0,00 | 0,00 | 0,00 | NA | NA |
| RP11-73M18.11  | 0,00 | 0,00 | 0,00 | 0,00 | NA | NA |
| RP11-73M7.1    | 0,00 | 0,00 | 0,00 | 0,00 | NA | NA |
| RP11-740C1.2   | 0,00 | 0,00 | 0,00 | 0,00 | NA | NA |
| RP11-740D6.3   | 0,00 | 0,00 | 0,00 | 0,00 | NA | NA |
| RP11-740N7.3   | 0,00 | 0,00 | 0,00 | 0,00 | NA | NA |
| RP11-740N7.4   | 0,00 | 0,00 | 0,00 | 0,00 | NA | NA |
| RP11-740N7.5   | 0,00 | 0,00 | 0,00 | 0,00 | NA | NA |
| RP11-740N7.6   | 0,00 | 0,00 | 0,00 | 0,00 | NA | NA |
| RP11-740P5.2   | 0,00 | 0,00 | 0,00 | 0,00 | NA | NA |
| RP11-740P5.3   | 0,00 | 0,00 | 0,00 | 0,00 | NA | NA |
| RP11-741G21.1  | 0,00 | 0,00 | 0,00 | 0,00 | NA | NA |
| RP11-742D12.1  | 0,00 | 0,00 | 0,00 | 0,00 | NA | NA |
| RP11-744A16.4  | 0,00 | 0,00 | 0,00 | 0,00 | NA | NA |
| RP11-744D14.1  | 0,00 | 0,00 | 0,00 | 0,00 | NA | NA |
| RP11-744D14.2  | 0,00 | 0,00 | 0,00 | 0,00 | NA | NA |
| RP11-744H18.1  | 0,00 | 0,05 | 0,00 | 0,00 | NA | NA |
| RP11-744I24.2  | 0,00 | 0,00 | 0,00 | 0,00 | NA | NA |
| RP11-744I24.3  | 0,00 | 0,00 | 0,00 | 0,00 | NA | NA |
| RP11-744I10.2  | 0,00 | 0,00 | 0,00 | 0,00 | NA | NA |
| RP11-744I10.3  | 0,00 | 0,00 | 0,00 | 0,00 | NA | NA |
| RP11-744K17.3  | 0,00 | 0,00 | 0,00 | 0,00 | NA | NA |
| RP11-744O11.1  | 0,00 | 0,00 | 0,00 | 0,00 | NA | NA |
| RP11-744O11.2  | 0,00 | 0,00 | 0,00 | 0,00 | NA | NA |
| RP11-745A24.2  | 0,00 | 0,00 | 0,00 | 0,00 | NA | NA |
| RP11-745A24.3  | 0,00 | 0,00 | 0,00 | 0,00 | NA | NA |
| RP11-745C15.2  | 0,00 | 0,00 | 0,00 | 0,00 | NA | NA |
| RP11-745H7.1   | 0,00 | 0,00 | 0,00 | 0,00 | NA | NA |
| RP11-745I13.1  | 0,00 | 0,00 | 0,00 | 0,00 | NA | NA |
| RP11-745K9.2   | 0,00 | 0,00 | 0,00 | 0,00 | NA | NA |

|               |      |      |      |      |    |    |
|---------------|------|------|------|------|----|----|
| RP11-746M1.2  | 0,00 | 0,00 | 0,00 | 0,00 | NA | NA |
| RP11-746P2.3  | 0,00 | 0,00 | 0,00 | 0,00 | NA | NA |
| RP11-746P2.5  | 0,00 | 0,00 | 0,00 | 0,00 | NA | NA |
| RP11-746P2.6  | 0,00 | 0,00 | 0,00 | 0,00 | NA | NA |
| RP11-747E23.1 | 0,00 | 0,00 | 0,00 | 0,00 | NA | NA |
| RP11-747H12.1 | 0,00 | 0,00 | 0,00 | 0,00 | NA | NA |
| RP11-747H12.2 | 0,00 | 0,00 | 0,00 | 0,00 | NA | NA |
| RP11-747H12.3 | 0,00 | 0,00 | 0,00 | 0,00 | NA | NA |
| RP11-747H12.4 | 0,00 | 0,00 | 0,00 | 0,00 | NA | NA |
| RP11-747H12.5 | 0,00 | 0,00 | 0,00 | 0,00 | NA | NA |
| RP11-747H12.6 | 0,00 | 0,00 | 0,00 | 0,00 | NA | NA |
| RP11-747H12.7 | 0,00 | 0,00 | 0,00 | 0,00 | NA | NA |
| RP11-747H12.8 | 0,00 | 0,00 | 0,00 | 0,00 | NA | NA |
| RP11-747H7.1  | 0,00 | 0,00 | 0,00 | 0,00 | NA | NA |
| RP11-748H22.1 | 0,00 | 0,06 | 0,00 | 0,00 | NA | NA |
| RP11-748H22.2 | 0,00 | 0,00 | 0,00 | 0,00 | NA | NA |
| RP11-748L13.1 | 0,00 | 0,00 | 0,00 | 0,00 | NA | NA |
| RP11-748L13.2 | 0,00 | 0,00 | 0,00 | 0,00 | NA | NA |
| RP11-748L13.3 | 0,00 | 0,00 | 0,00 | 0,00 | NA | NA |
| RP11-748L13.4 | 0,00 | 0,00 | 0,00 | 0,00 | NA | NA |
| RP11-748L13.6 | 0,00 | 0,00 | 0,00 | 0,00 | NA | NA |
| RP11-748L13.7 | 0,00 | 0,00 | 0,00 | 0,00 | NA | NA |
| RP11-749H17.1 | 0,38 | 0,25 | 0,19 | 0,16 | NA | NA |
| RP11-749H17.2 | 0,00 | 0,00 | 0,00 | 0,00 | NA | NA |
| RP11-749H20.2 | 0,00 | 0,00 | 0,00 | 0,00 | NA | NA |
| RP11-749H20.4 | 0,00 | 0,00 | 0,00 | 0,00 | NA | NA |
| RP11-749H20.7 | 0,00 | 0,00 | 0,00 | 0,00 | NA | NA |
| RP11-74A12.2  | 0,00 | 0,00 | 0,00 | 0,00 | NA | NA |
| RP11-74B21.1  | 0,00 | 0,00 | 0,00 | 0,00 | NA | NA |
| RP11-74C13.3  | 0,00 | 0,00 | 0,00 | 0,00 | NA | NA |
| RP11-74C13.4  | 0,00 | 0,00 | 0,00 | 0,00 | NA | NA |
| RP11-74C3.1   | 0,00 | 0,00 | 0,00 | 0,00 | NA | NA |
| RP11-74D3.1   | 0,00 | 0,00 | 0,00 | 0,00 | NA | NA |
| RP11-74D3.2   | 0,00 | 0,00 | 0,00 | 0,00 | NA | NA |
| RP11-74D7.1   | 0,00 | 0,00 | 0,00 | 0,00 | NA | NA |
| RP11-74D7.3   | 0,00 | 0,00 | 0,00 | 0,00 | NA | NA |
| RP11-74E22.4  | 0,00 | 0,00 | 0,00 | 0,00 | NA | NA |
| RP11-74H8.1   | 0,00 | 0,00 | 0,00 | 0,00 | NA | NA |
| RP11-74J13.2  | 0,00 | 0,00 | 0,00 | 0,00 | NA | NA |
| RP11-74J13.6  | 0,00 | 0,00 | 0,00 | 0,00 | NA | NA |
| RP11-74J13.7  | 0,00 | 0,00 | 0,00 | 0,00 | NA | NA |
| RP11-74J13.9  | 0,00 | 1,25 | 0,00 | 0,00 | NA | NA |
| RP11-74K11.1  | 0,00 | 0,00 | 0,00 | 0,00 | NA | NA |
| RP11-74K19.1  | 0,00 | 0,00 | 0,00 | 0,00 | NA | NA |
| RP11-74M13.3  | 0,00 | 0,00 | 0,00 | 0,00 | NA | NA |
| RP11-74M13.5  | 0,00 | 0,00 | 0,00 | 0,00 | NA | NA |
| RP11-74M13.6  | 0,00 | 0,00 | 0,00 | 0,00 | NA | NA |
| RP11-74N9.1   | 0,00 | 0,00 | 0,00 | 0,00 | NA | NA |
| RP11-750I4.2  | 0,00 | 0,00 | 0,00 | 0,00 | NA | NA |
| RP11-751K21.1 | 0,00 | 0,00 | 0,00 | 0,00 | NA | NA |
| RP11-751L19.1 | 0,00 | 0,00 | 0,00 | 0,00 | NA | NA |
| RP11-752D24.2 | 0,00 | 0,11 | 0,00 | 0,15 | NA | NA |
| RP11-752G15.4 | 0,00 | 0,00 | 0,00 | 0,00 | NA | NA |
| RP11-752L20.1 | 0,00 | 0,00 | 0,00 | 0,00 | NA | NA |
| RP11-752L20.4 | 0,00 | 0,00 | 0,00 | 0,00 | NA | NA |

|               |      |      |      |      |    |    |
|---------------|------|------|------|------|----|----|
| RP11-752L20.5 | 0,00 | 0,00 | 0,00 | 0,00 | NA | NA |
| RP11-752P2.1  | 0,00 | 0,00 | 0,00 | 0,00 | NA | NA |
| RP11-752P2.2  | 0,00 | 0,00 | 0,00 | 0,00 | NA | NA |
| RP11-753A21.1 | 0,11 | 0,23 | 0,14 | 0,08 | NA | NA |
| RP11-753A21.2 | 0,00 | 0,00 | 0,00 | 0,00 | NA | NA |
| RP11-753B14.1 | 0,00 | 0,00 | 0,00 | 0,00 | NA | NA |
| RP11-753B7.2  | 0,00 | 0,00 | 0,00 | 0,00 | NA | NA |
| RP11-753C18.4 | 0,00 | 0,00 | 0,00 | 0,00 | NA | NA |
| RP11-753C18.7 | 0,00 | 0,00 | 0,00 | 0,00 | NA | NA |
| RP11-753C18.8 | 0,00 | 0,00 | 0,00 | 0,00 | NA | NA |
| RP11-753D20.1 | 0,00 | 0,00 | 0,00 | 0,00 | NA | NA |
| RP11-753D20.3 | 0,00 | 0,00 | 0,00 | 0,00 | NA | NA |
| RP11-753D20.4 | 0,00 | 0,00 | 0,00 | 0,00 | NA | NA |
| RP11-753E22.2 | 0,00 | 0,00 | 0,00 | 0,00 | NA | NA |
| RP11-753E22.4 | 0,00 | 0,00 | 0,00 | 0,00 | NA | NA |
| RP11-753G20.2 | 0,00 | 0,00 | 0,00 | 0,00 | NA | NA |
| RP11-753H16.4 | 0,00 | 0,00 | 0,00 | 0,00 | NA | NA |
| RP11-753I4.1  | 0,00 | 0,00 | 0,00 | 0,00 | NA | NA |
| RP11-753I4.2  | 0,00 | 0,00 | 0,00 | 0,00 | NA | NA |
| RP11-754I20.1 | 0,00 | 0,00 | 0,00 | 0,00 | NA | NA |
| RP11-754I20.2 | 0,00 | 0,00 | 0,00 | 0,00 | NA | NA |
| RP11-754I4.2  | 0,00 | 0,00 | 0,00 | 0,00 | NA | NA |
| RP11-755F10.3 | 0,00 | 0,00 | 0,00 | 0,00 | NA | NA |
| RP11-755H23.1 | 0,00 | 0,00 | 0,00 | 0,00 | NA | NA |
| RP11-755I8.1  | 0,00 | 0,00 | 0,00 | 0,00 | NA | NA |
| RP11-755O11.2 | 0,00 | 0,00 | 0,00 | 0,00 | NA | NA |
| RP11-756A22.4 | 0,00 | 0,00 | 0,00 | 0,00 | NA | NA |
| RP11-756D7.1  | 0,00 | 0,00 | 0,00 | 0,00 | NA | NA |
| RP11-756G12.1 | 0,00 | 0,00 | 0,00 | 0,00 | NA | NA |
| RP11-756G20.1 | 0,17 | 0,00 | 0,00 | 0,00 | NA | NA |
| RP11-756I15.2 | 0,00 | 0,00 | 0,00 | 0,00 | NA | NA |
| RP11-756K15.1 | 0,00 | 0,00 | 0,00 | 0,00 | NA | NA |
| RP11-756P10.1 | 0,00 | 0,00 | 0,00 | 0,00 | NA | NA |
| RP11-756P10.2 | 0,12 | 0,10 | 0,13 | 0,06 | NA | NA |
| RP11-756P10.4 | 0,00 | 0,00 | 0,00 | 0,00 | NA | NA |
| RP11-756P10.5 | 0,00 | 0,00 | 0,00 | 0,00 | NA | NA |
| RP11-756P10.7 | 0,00 | 0,00 | 0,00 | 0,00 | NA | NA |
| RP11-757C15.4 | 0,00 | 0,00 | 0,00 | 0,00 | NA | NA |
| RP11-757F18.3 | 0,00 | 0,00 | 0,00 | 0,00 | NA | NA |
| RP11-757G1.5  | 0,00 | 0,00 | 0,00 | 0,00 | NA | NA |
| RP11-757G14.3 | 0,00 | 0,00 | 0,00 | 0,00 | NA | NA |
| RP11-757H14.2 | 0,00 | 0,00 | 0,00 | 0,00 | NA | NA |
| RP11-757I12.4 | 0,00 | 0,00 | 0,00 | 0,00 | NA | NA |
| RP11-757O6.4  | 0,00 | 0,00 | 0,00 | 0,00 | NA | NA |
| RP11-757O6.6  | 0,00 | 0,00 | 0,00 | 0,00 | NA | NA |
| RP11-757O6.7  | 0,00 | 0,00 | 0,00 | 0,00 | NA | NA |
| RP11-758B24.1 | 0,00 | 0,00 | 0,00 | 0,00 | NA | NA |
| RP11-758E17.1 | 0,00 | 0,00 | 0,00 | 0,00 | NA | NA |
| RP11-758E17.2 | 0,00 | 0,00 | 0,00 | 0,00 | NA | NA |
| RP11-758H6.1  | 0,00 | 0,00 | 0,00 | 0,00 | NA | NA |
| RP11-758I14.2 | 0,00 | 0,00 | 0,00 | 0,00 | NA | NA |
| RP11-758I14.3 | 0,00 | 0,00 | 0,00 | 0,00 | NA | NA |
| RP11-758N13.1 | 0,00 | 0,00 | 0,00 | 0,00 | NA | NA |
| RP11-759A24.3 | 0,00 | 0,00 | 0,00 | 0,00 | NA | NA |
| RP11-759A9.2  | 0,00 | 0,00 | 0,00 | 0,00 | NA | NA |

|                |      |      |      |      |    |    |
|----------------|------|------|------|------|----|----|
| RP11-759L5.2   | 0,00 | 0,00 | 0,00 | 0,00 | NA | NA |
| RP11-75A5.1    | 0,00 | 0,00 | 0,00 | 0,00 | NA | NA |
| RP11-75C23.1   | 0,00 | 0,00 | 0,00 | 0,00 | NA | NA |
| RP11-75D3.1    | 0,00 | 0,00 | 0,00 | 0,00 | NA | NA |
| RP11-75F3.1    | 0,00 | 0,00 | 0,00 | 0,00 | NA | NA |
| RP11-75G10.2   | 0,00 | 0,00 | 0,00 | 0,00 | NA | NA |
| RP11-75N20.2   | 0,00 | 0,00 | 0,00 | 0,00 | NA | NA |
| RP11-75N20.3   | 0,00 | 0,00 | 0,00 | 0,00 | NA | NA |
| RP11-75N4.2    | 0,00 | 0,00 | 0,00 | 0,00 | NA | NA |
| RP11-75N6.2    | 0,00 | 0,00 | 0,00 | 0,00 | NA | NA |
| RP11-75N6.3    | 0,00 | 0,00 | 0,00 | 0,00 | NA | NA |
| RP11-760D2.1   | 0,00 | 0,00 | 0,00 | 0,00 | NA | NA |
| RP11-760D2.10  | 0,00 | 0,00 | 0,00 | 0,00 | NA | NA |
| RP11-760D2.11  | 0,00 | 0,00 | 0,00 | 0,00 | NA | NA |
| RP11-760D2.12  | 0,00 | 0,00 | 0,00 | 0,00 | NA | NA |
| RP11-760D2.13  | 0,00 | 0,00 | 0,00 | 0,00 | NA | NA |
| RP11-760D2.2   | 0,00 | 0,00 | 0,00 | 0,00 | NA | NA |
| RP11-760D2.3   | 0,00 | 0,00 | 0,00 | 0,00 | NA | NA |
| RP11-760D2.4   | 0,00 | 0,00 | 0,00 | 0,00 | NA | NA |
| RP11-760D2.6   | 0,00 | 0,00 | 0,00 | 0,00 | NA | NA |
| RP11-760D2.7   | 0,00 | 0,00 | 0,00 | 0,00 | NA | NA |
| RP11-760D2.9   | 0,00 | 0,00 | 0,00 | 0,00 | NA | NA |
| RP11-760L24.1  | 0,00 | 0,00 | 0,00 | 0,00 | NA | NA |
| RP11-760M1.1   | 0,00 | 0,00 | 0,00 | 0,00 | NA | NA |
| RP11-761B3.1   | 0,00 | 0,00 | 0,00 | 0,00 | NA | NA |
| RP11-761I4.3   | 0,00 | 0,12 | 0,10 | 0,00 | NA | NA |
| RP11-762B21.5  | 0,00 | 0,00 | 0,00 | 0,00 | NA | NA |
| RP11-762E8.1   | 0,00 | 0,00 | 0,00 | 0,00 | NA | NA |
| RP11-762H8.3   | 0,45 | 0,58 | 0,59 | 0,00 | NA | NA |
| RP11-762H8.5   | 0,00 | 0,00 | 0,00 | 0,00 | NA | NA |
| RP11-762J3.1   | 0,00 | 0,00 | 0,00 | 0,00 | NA | NA |
| RP11-762L8.4   | 0,00 | 0,00 | 0,00 | 0,00 | NA | NA |
| RP11-762N20.1  | 0,00 | 0,00 | 0,00 | 0,00 | NA | NA |
| RP11-763B22.11 | 0,00 | 0,00 | 0,00 | 0,00 | NA | NA |
| RP11-763B22.3  | 0,00 | 0,00 | 0,00 | 0,00 | NA | NA |
| RP11-763B22.8  | 0,00 | 0,00 | 0,00 | 0,00 | NA | NA |
| RP11-763K15.1  | 0,00 | 0,00 | 0,00 | 0,00 | NA | NA |
| RP11-763K15.2  | 0,00 | 0,00 | 0,00 | 0,00 | NA | NA |
| RP11-764E7.1   | 0,00 | 0,00 | 0,00 | 0,00 | NA | NA |
| RP11-764E9.1   | 0,00 | 0,00 | 0,00 | 0,18 | NA | NA |
| RP11-764I5.1   | 0,00 | 0,00 | 0,00 | 0,00 | NA | NA |
| RP11-765K14.1  | 0,00 | 0,00 | 0,00 | 0,00 | NA | NA |
| RP11-766F14.1  | 0,00 | 0,00 | 0,00 | 0,00 | NA | NA |
| RP11-766F14.2  | 0,00 | 0,00 | 0,00 | 0,00 | NA | NA |
| RP11-766N7.3   | 0,00 | 0,00 | 0,00 | 0,00 | NA | NA |
| RP11-767C1.1   | 0,00 | 0,00 | 0,00 | 0,00 | NA | NA |
| RP11-767C4.1   | 0,00 | 0,00 | 0,00 | 0,00 | NA | NA |
| RP11-767C6.1   | 0,00 | 0,00 | 0,00 | 0,00 | NA | NA |
| RP11-767N15.1  | 0,00 | 0,00 | 0,00 | 0,00 | NA | NA |
| RP11-768G3.1   | 0,00 | 0,00 | 0,00 | 0,00 | NA | NA |
| RP11-768G7.1   | 0,00 | 0,00 | 0,00 | 0,00 | NA | NA |
| RP11-768G7.3   | 0,00 | 0,00 | 0,00 | 0,00 | NA | NA |
| RP11-769N19.1  | 0,00 | 0,00 | 0,00 | 0,00 | NA | NA |
| RP11-769N21.2  | 0,00 | 0,00 | 0,00 | 0,00 | NA | NA |
| RP11-769N22.2  | 0,00 | 0,00 | 0,00 | 0,00 | NA | NA |

|               |      |      |      |      |    |    |
|---------------|------|------|------|------|----|----|
| RP11-769O8.2  | 0,00 | 0,00 | 0,00 | 0,00 | NA | NA |
| RP11-76C10.2  | 0,00 | 0,00 | 0,00 | 0,00 | NA | NA |
| RP11-76C10.6  | 0,00 | 0,00 | 0,00 | 0,00 | NA | NA |
| RP11-76E12.1  | 0,00 | 0,00 | 0,00 | 0,05 | NA | NA |
| RP11-76E16.2  | 0,00 | 0,00 | 0,00 | 0,00 | NA | NA |
| RP11-76E17.1  | 0,00 | 0,00 | 0,00 | 0,00 | NA | NA |
| RP11-76E17.2  | 0,00 | 0,00 | 0,00 | 0,00 | NA | NA |
| RP11-76H14.2  | 0,00 | 0,00 | 0,00 | 0,00 | NA | NA |
| RP11-76H14.3  | 0,00 | 0,00 | 0,00 | 0,00 | NA | NA |
| RP11-76H14.4  | 0,00 | 0,00 | 0,00 | 0,00 | NA | NA |
| RP11-76H14.5  | 0,00 | 0,00 | 0,00 | 0,00 | NA | NA |
| RP11-76K10.1  | 0,00 | 0,00 | 0,00 | 0,00 | NA | NA |
| RP11-76K13.3  | 0,00 | 0,00 | 0,00 | 0,00 | NA | NA |
| RP11-76K19.2  | 0,00 | 0,00 | 0,00 | 0,00 | NA | NA |
| RP11-76K19.4  | 0,00 | 0,00 | 0,00 | 0,00 | NA | NA |
| RP11-76K19.5  | 0,00 | 0,00 | 0,00 | 0,00 | NA | NA |
| RP11-76N22.1  | 0,00 | 0,00 | 0,00 | 0,00 | NA | NA |
| RP11-76N22.3  | 0,00 | 0,00 | 0,00 | 0,00 | NA | NA |
| RP11-76P2.4   | 0,00 | 0,00 | 0,00 | 0,00 | NA | NA |
| RP11-770E5.1  | 0,00 | 0,00 | 0,00 | 0,00 | NA | NA |
| RP11-770E5.3  | 0,00 | 0,00 | 0,00 | 0,00 | NA | NA |
| RP11-770G2.4  | 0,00 | 0,00 | 0,00 | 0,00 | NA | NA |
| RP11-770G2.5  | 0,00 | 0,00 | 0,00 | 0,00 | NA | NA |
| RP11-771D21.2 | 0,00 | 0,00 | 0,00 | 0,00 | NA | NA |
| RP11-771K4.1  | 0,00 | 0,00 | 0,00 | 0,00 | NA | NA |
| RP11-771O11.3 | 0,00 | 0,00 | 0,00 | 0,00 | NA | NA |
| RP11-772E11.1 | 0,00 | 0,00 | 0,00 | 0,00 | NA | NA |
| RP11-773H22.1 | 0,00 | 0,00 | 0,00 | 0,00 | NA | NA |
| RP11-773H22.2 | 0,00 | 0,00 | 0,00 | 0,00 | NA | NA |
| RP11-774G5.1  | 0,00 | 0,00 | 0,00 | 0,00 | NA | NA |
| RP11-774I5.1  | 0,00 | 0,00 | 0,00 | 0,00 | NA | NA |
| RP11-775A1.2  | 0,00 | 0,00 | 0,00 | 0,00 | NA | NA |
| RP11-775B15.3 | 0,00 | 0,00 | 0,00 | 0,00 | NA | NA |
| RP11-775C24.1 | 0,00 | 0,00 | 0,00 | 0,00 | NA | NA |
| RP11-775C24.4 | 0,00 | 0,00 | 0,00 | 0,00 | NA | NA |
| RP11-775D22.3 | 0,00 | 0,00 | 0,00 | 0,00 | NA | NA |
| RP11-775E10.1 | 0,00 | 0,00 | 0,00 | 0,00 | NA | NA |
| RP11-775I22.2 | 0,00 | 0,00 | 0,00 | 0,00 | NA | NA |
| RP11-775I23.2 | 0,00 | 0,00 | 0,00 | 0,00 | NA | NA |
| RP11-775L16.1 | 0,00 | 0,00 | 0,00 | 0,00 | NA | NA |
| RP11-776A13.2 | 0,00 | 0,00 | 0,00 | 0,00 | NA | NA |
| RP11-776A13.3 | 0,00 | 0,00 | 0,00 | 0,00 | NA | NA |
| RP11-776A13.4 | 0,00 | 0,00 | 0,00 | 0,00 | NA | NA |
| RP11-776K3.1  | 0,00 | 0,00 | 0,00 | 0,00 | NA | NA |
| RP11-777B9.2  | 0,00 | 0,00 | 0,00 | 0,00 | NA | NA |
| RP11-777B9.3  | 0,00 | 0,00 | 0,00 | 0,00 | NA | NA |
| RP11-777F6.2  | 0,00 | 0,00 | 0,00 | 0,00 | NA | NA |
| RP11-777F6.3  | 0,00 | 0,00 | 0,00 | 0,00 | NA | NA |
| RP11-777N19.1 | 0,00 | 0,00 | 0,00 | 0,00 | NA | NA |
| RP11-778D12.1 | 0,00 | 0,00 | 0,00 | 0,00 | NA | NA |
| RP11-778D12.2 | 0,00 | 0,00 | 0,00 | 0,00 | NA | NA |
| RP11-778D9.12 | 0,00 | 0,00 | 0,00 | 0,00 | NA | NA |
| RP11-778D9.13 | 0,00 | 0,00 | 0,00 | 0,00 | NA | NA |
| RP11-778D9.9  | 0,00 | 0,00 | 0,00 | 0,00 | NA | NA |
| RP11-778H2.1  | 0,00 | 0,00 | 0,00 | 0,00 | NA | NA |

|                |      |      |      |      |    |    |
|----------------|------|------|------|------|----|----|
| RP11-778J15.1  | 0,00 | 0,00 | 0,00 | 0,00 | NA | NA |
| RP11-778J16.1  | 0,00 | 0,00 | 0,00 | 0,00 | NA | NA |
| RP11-778J16.2  | 0,00 | 0,00 | 0,00 | 0,00 | NA | NA |
| RP11-778J16.3  | 0,00 | 0,00 | 0,00 | 0,00 | NA | NA |
| RP11-778O17.4  | 0,00 | 0,00 | 0,00 | 0,00 | NA | NA |
| RP11-779O18.2  | 0,00 | 0,00 | 0,00 | 0,00 | NA | NA |
| RP11-779O18.4  | 0,00 | 0,00 | 0,00 | 0,00 | NA | NA |
| RP11-779P15.2  | 0,00 | 0,00 | 0,00 | 0,00 | NA | NA |
| RP11-77B22.1   | 0,00 | 0,00 | 0,00 | 0,00 | NA | NA |
| RP11-77B22.2   | 0,00 | 0,00 | 0,00 | 0,00 | NA | NA |
| RP11-77E14.2   | 0,00 | 0,00 | 0,00 | 0,00 | NA | NA |
| RP11-77G22.3   | 0,00 | 0,00 | 0,00 | 0,00 | NA | NA |
| RP11-77G23.2   | 0,00 | 0,00 | 0,00 | 0,00 | NA | NA |
| RP11-77H9.6    | 0,00 | 0,00 | 0,00 | 0,00 | NA | NA |
| RP11-77I22.2   | 0,00 | 0,00 | 0,00 | 0,00 | NA | NA |
| RP11-77I22.4   | 0,00 | 0,00 | 0,00 | 0,00 | NA | NA |
| RP11-77K12.7   | 0,00 | 0,00 | 0,00 | 0,00 | NA | NA |
| RP11-77O7.1    | 0,00 | 0,00 | 0,00 | 0,00 | NA | NA |
| RP11-77P16.1   | 0,00 | 0,00 | 0,00 | 0,00 | NA | NA |
| RP11-77P16.3   | 0,00 | 0,00 | 0,00 | 0,00 | NA | NA |
| RP11-77P19.2   | 0,00 | 0,00 | 0,00 | 0,17 | NA | NA |
| RP11-77P19.3   | 0,00 | 0,00 | 0,00 | 0,00 | NA | NA |
| RP11-780M14.1  | 0,00 | 0,00 | 0,00 | 0,00 | NA | NA |
| RP11-780O24.2  | 0,00 | 0,00 | 0,00 | 0,00 | NA | NA |
| RP11-781A6.1   | 0,00 | 0,00 | 0,00 | 0,00 | NA | NA |
| RP11-781M16.1  | 0,00 | 0,00 | 0,00 | 0,00 | NA | NA |
| RP11-781M16.2  | 0,00 | 0,00 | 0,00 | 0,00 | NA | NA |
| RP11-781P14.3  | 0,00 | 0,00 | 0,00 | 0,00 | NA | NA |
| RP11-782E2.1   | 0,00 | 0,00 | 0,00 | 0,00 | NA | NA |
| RP11-782E2.2   | 0,00 | 0,00 | 0,00 | 0,00 | NA | NA |
| RP11-782K4.1   | 0,00 | 0,00 | 0,00 | 0,00 | NA | NA |
| RP11-783K16.10 | 0,00 | 0,00 | 0,00 | 0,00 | NA | NA |
| RP11-783P22.2  | 0,00 | 0,00 | 0,00 | 0,00 | NA | NA |
| RP11-785D16.1  | 0,00 | 0,00 | 0,00 | 0,00 | NA | NA |
| RP11-785D18.2  | 0,00 | 0,00 | 0,00 | 0,00 | NA | NA |
| RP11-785D18.3  | 0,00 | 0,00 | 0,00 | 0,00 | NA | NA |
| RP11-785F11.1  | 0,00 | 0,00 | 0,00 | 0,00 | NA | NA |
| RP11-785G17.1  | 0,00 | 0,00 | 0,00 | 0,00 | NA | NA |
| RP11-785G3.1   | 0,00 | 0,00 | 0,00 | 0,00 | NA | NA |
| RP11-785H2.1   | 0,00 | 0,00 | 0,00 | 0,00 | NA | NA |
| RP11-785H20.1  | 0,00 | 0,00 | 0,00 | 0,00 | NA | NA |
| RP11-785H23.2  | 0,00 | 0,00 | 0,00 | 0,00 | NA | NA |
| RP11-786A20.1  | 0,00 | 0,00 | 0,00 | 0,00 | NA | NA |
| RP11-786A6.1   | 0,00 | 0,00 | 0,00 | 0,00 | NA | NA |
| RP11-786O7.1   | 0,00 | 0,00 | 0,00 | 0,00 | NA | NA |
| RP11-787B4.2   | 0,00 | 0,00 | 0,00 | 0,00 | NA | NA |
| RP11-787D11.1  | 0,00 | 0,00 | 0,00 | 0,00 | NA | NA |
| RP11-787D18.1  | 0,00 | 0,00 | 0,00 | 0,00 | NA | NA |
| RP11-787P24.1  | 0,00 | 0,00 | 0,00 | 0,00 | NA | NA |
| RP11-787P24.2  | 0,00 | 0,00 | 0,00 | 0,00 | NA | NA |
| RP11-787P24.3  | 0,00 | 0,00 | 0,00 | 0,00 | NA | NA |
| RP11-787P24.4  | 0,00 | 0,00 | 0,00 | 0,00 | NA | NA |
| RP11-788A1.1   | 0,00 | 0,00 | 0,00 | 0,00 | NA | NA |
| RP11-788A4.1   | 0,00 | 0,00 | 0,00 | 0,00 | NA | NA |
| RP11-788M5.3   | 0,00 | 0,00 | 0,00 | 0,00 | NA | NA |



|               |      |      |      |      |    |    |
|---------------|------|------|------|------|----|----|
| RP11-789A21.1 | 0,00 | 0,00 | 0,00 | 0,00 | NA | NA |
| RP11-789A7.1  | 0,00 | 0,00 | 0,00 | 0,00 | NA | NA |
| RP11-789C1.1  | 0,00 | 0,00 | 0,00 | 0,00 | NA | NA |
| RP11-789C1.2  | 0,00 | 0,00 | 0,00 | 0,49 | NA | NA |
| RP11-789C17.3 | 0,00 | 0,00 | 0,00 | 0,00 | NA | NA |
| RP11-789C17.5 | 0,00 | 0,00 | 0,00 | 0,00 | NA | NA |
| RP11-789F5.1  | 0,00 | 0,00 | 0,00 | 0,00 | NA | NA |
| RP11-789G22.1 | 0,00 | 0,00 | 0,00 | 0,00 | NA | NA |
| RP11-789L4.1  | 0,00 | 0,00 | 0,00 | 0,00 | NA | NA |
| RP11-78A19.2  | 0,00 | 0,00 | 0,00 | 0,00 | NA | NA |
| RP11-78A19.4  | 0,00 | 0,00 | 0,00 | 0,00 | NA | NA |
| RP11-78B10.2  | 0,00 | 0,00 | 0,00 | 0,00 | NA | NA |
| RP11-78C3.1   | 0,00 | 0,00 | 0,00 | 0,00 | NA | NA |
| RP11-78E6.1   | 0,00 | 0,00 | 0,00 | 0,00 | NA | NA |
| RP11-78F17.3  | 0,00 | 0,00 | 0,00 | 0,00 | NA | NA |
| RP11-78H18.2  | 0,00 | 0,05 | 0,00 | 0,00 | NA | NA |
| RP11-78H24.1  | 0,27 | 0,00 | 0,08 | 0,00 | NA | NA |
| RP11-78I14.1  | 0,00 | 0,00 | 0,00 | 0,00 | NA | NA |
| RP11-78J21.4  | 0,00 | 0,00 | 0,00 | 0,00 | NA | NA |
| RP11-78J21.5  | 0,00 | 0,00 | 0,00 | 0,00 | NA | NA |
| RP11-78L16.1  | 0,00 | 0,00 | 0,00 | 0,00 | NA | NA |
| RP11-78O22.1  | 0,00 | 0,00 | 0,00 | 0,00 | NA | NA |
| RP11-78O7.1   | 0,00 | 0,00 | 0,00 | 0,00 | NA | NA |
| RP11-78O7.3   | 0,00 | 0,00 | 0,00 | 0,00 | NA | NA |
| RP11-78O9.1   | 0,00 | 0,00 | 0,00 | 0,00 | NA | NA |
| RP11-790G19.2 | 0,00 | 0,00 | 0,00 | 0,00 | NA | NA |
| RP11-790I12.1 | 0,00 | 0,00 | 0,00 | 0,00 | NA | NA |
| RP11-790I12.3 | 0,00 | 0,00 | 0,00 | 0,00 | NA | NA |
| RP11-790I12.4 | 0,00 | 0,00 | 0,00 | 0,00 | NA | NA |
| RP11-790I12.6 | 0,00 | 0,00 | 0,00 | 0,00 | NA | NA |
| RP11-790I24.1 | 0,00 | 0,00 | 0,00 | 0,00 | NA | NA |
| RP11-790I24.2 | 0,00 | 0,00 | 0,00 | 0,00 | NA | NA |
| RP11-790L1.1  | 0,00 | 0,00 | 0,00 | 0,00 | NA | NA |
| RP11-790L1.3  | 0,00 | 0,00 | 0,00 | 0,00 | NA | NA |
| RP11-791G16.4 | 0,00 | 0,00 | 0,00 | 0,00 | NA | NA |
| RP11-791G16.5 | 0,00 | 0,00 | 0,00 | 0,00 | NA | NA |
| RP11-791G22.1 | 0,00 | 0,00 | 0,00 | 0,00 | NA | NA |
| RP11-791G22.2 | 0,00 | 0,00 | 0,00 | 0,00 | NA | NA |
| RP11-791M20.1 | 0,00 | 0,00 | 0,00 | 0,00 | NA | NA |
| RP11-791O21.1 | 0,00 | 0,00 | 0,00 | 0,00 | NA | NA |
| RP11-791O21.5 | 0,00 | 0,00 | 0,00 | 0,00 | NA | NA |
| RP11-792D21.1 | 0,00 | 0,00 | 0,00 | 0,00 | NA | NA |
| RP11-793A3.1  | 0,00 | 0,00 | 0,00 | 0,00 | NA | NA |
| RP11-793A3.2  | 0,00 | 0,00 | 0,00 | 0,00 | NA | NA |
| RP11-793B9.1  | 0,00 | 0,00 | 0,00 | 0,00 | NA | NA |
| RP11-793E15.1 | 0,00 | 0,00 | 0,00 | 0,00 | NA | NA |
| RP11-793G16.2 | 0,00 | 0,00 | 0,00 | 0,00 | NA | NA |
| RP11-793H4.1  | 0,00 | 0,00 | 0,00 | 0,00 | NA | NA |
| RP11-793I11.1 | 0,00 | 0,00 | 0,00 | 0,00 | NA | NA |
| RP11-793K1.1  | 0,00 | 0,00 | 0,00 | 0,00 | NA | NA |
| RP11-793L10.1 | 0,00 | 0,00 | 0,00 | 0,00 | NA | NA |
| RP11-794C22.2 | 0,00 | 0,00 | 0,00 | 0,00 | NA | NA |
| RP11-794G24.1 | 0,00 | 0,00 | 0,00 | 0,00 | NA | NA |
| RP11-794M8.2  | 0,00 | 0,00 | 0,00 | 0,00 | NA | NA |
| RP11-794P6.6  | 0,00 | 0,00 | 0,00 | 0,00 | NA | NA |

|               |      |      |      |      |    |    |
|---------------|------|------|------|------|----|----|
| RP11-795A2.2  | 0,00 | 0,00 | 0,00 | 0,00 | NA | NA |
| RP11-795H16.2 | 0,00 | 0,00 | 0,00 | 0,00 | NA | NA |
| RP11-795I1.2  | 0,00 | 0,00 | 0,00 | 0,00 | NA | NA |
| RP11-796A5.2  | 0,00 | 0,00 | 0,00 | 0,00 | NA | NA |
| RP11-796A5.3  | 0,00 | 0,00 | 0,00 | 0,00 | NA | NA |
| RP11-796E10.1 | 0,00 | 0,00 | 0,00 | 0,00 | NA | NA |
| RP11-796I2.1  | 0,00 | 0,00 | 0,00 | 0,00 | NA | NA |
| RP11-796L2.1  | 0,00 | 0,00 | 0,00 | 0,00 | NA | NA |
| RP11-797D24.3 | 0,00 | 0,00 | 0,00 | 0,00 | NA | NA |
| RP11-797E24.1 | 0,00 | 0,00 | 0,00 | 0,00 | NA | NA |
| RP11-797E24.3 | 0,00 | 0,00 | 0,00 | 0,00 | NA | NA |
| RP11-797H7.1  | 0,00 | 0,00 | 0,00 | 0,00 | NA | NA |
| RP11-797H7.2  | 0,00 | 0,00 | 0,00 | 0,00 | NA | NA |
| RP11-797H7.5  | 0,00 | 0,00 | 0,00 | 0,00 | NA | NA |
| RP11-797H7.6  | 0,00 | 0,00 | 0,00 | 0,00 | NA | NA |
| RP11-797J4.1  | 0,00 | 0,00 | 0,00 | 0,00 | NA | NA |
| RP11-797M17.1 | 0,00 | 0,00 | 0,00 | 0,00 | NA | NA |
| RP11-798K23.1 | 0,00 | 0,39 | 0,00 | 0,00 | NA | NA |
| RP11-798K23.3 | 0,00 | 0,00 | 0,00 | 0,00 | NA | NA |
| RP11-798K23.4 | 0,00 | 0,00 | 0,00 | 0,00 | NA | NA |
| RP11-798K3.2  | 0,00 | 0,00 | 0,00 | 0,00 | NA | NA |
| RP11-799A12.2 | 0,00 | 0,00 | 0,00 | 0,00 | NA | NA |
| RP11-799B12.4 | 0,00 | 0,00 | 0,00 | 0,00 | NA | NA |
| RP11-799D4.1  | 0,00 | 0,00 | 0,00 | 0,00 | NA | NA |
| RP11-799M12.2 | 0,00 | 0,00 | 0,00 | 0,00 | NA | NA |
| RP11-799N11.1 | 0,00 | 0,00 | 0,00 | 0,00 | NA | NA |
| RP11-799O21.2 | 0,00 | 0,00 | 0,00 | 0,00 | NA | NA |
| RP11-79C23.1  | 0,00 | 0,00 | 0,00 | 0,00 | NA | NA |
| RP11-79C6.1   | 0,00 | 0,00 | 0,00 | 0,00 | NA | NA |
| RP11-79C6.2   | 0,00 | 0,00 | 0,00 | 0,00 | NA | NA |
| RP11-79C6.3   | 0,00 | 0,00 | 0,00 | 0,00 | NA | NA |
| RP11-79H23.2  | 0,00 | 0,06 | 0,00 | 0,05 | NA | NA |
| RP11-79M19.2  | 0,00 | 0,00 | 0,00 | 0,00 | NA | NA |
| RP11-79M21.2  | 0,00 | 0,00 | 0,00 | 0,00 | NA | NA |
| RP11-79M21.3  | 0,00 | 0,00 | 0,00 | 0,00 | NA | NA |
| RP11-79N23.1  | 0,00 | 0,00 | 0,00 | 0,00 | NA | NA |
| RP11-79O8.1   | 0,00 | 0,00 | 0,00 | 0,00 | NA | NA |
| RP11-79P5.2   | 0,00 | 0,00 | 0,00 | 0,00 | NA | NA |
| RP11-79P5.3   | 0,00 | 0,00 | 0,00 | 0,00 | NA | NA |
| RP11-79P5.5   | 0,00 | 0,00 | 0,00 | 0,00 | NA | NA |
| RP11-79P5.7   | 0,00 | 0,00 | 0,00 | 0,00 | NA | NA |
| RP11-7B3.2    | 0,00 | 0,00 | 0,00 | 0,00 | NA | NA |
| RP11-7B3.3    | 0,00 | 0,00 | 0,00 | 0,00 | NA | NA |
| RP11-7B3.4    | 0,00 | 0,00 | 0,00 | 0,00 | NA | NA |
| RP11-7C6.1    | 0,00 | 0,00 | 0,00 | 0,00 | NA | NA |
| RP11-7F17.7   | 0,00 | 0,00 | 0,00 | 0,00 | NA | NA |
| RP11-7F18.1   | 0,00 | 0,00 | 0,00 | 0,00 | NA | NA |
| RP11-7F18.2   | 0,00 | 0,00 | 0,00 | 0,00 | NA | NA |
| RP11-7G12.1   | 0,00 | 0,00 | 0,00 | 0,00 | NA | NA |
| RP11-7G12.2   | 0,00 | 0,00 | 0,00 | 0,00 | NA | NA |
| RP11-7I15.3   | 0,00 | 0,00 | 0,00 | 0,00 | NA | NA |
| RP11-7K9.2    | 0,00 | 0,00 | 0,00 | 0,00 | NA | NA |
| RP11-7M8.2    | 0,00 | 0,00 | 0,00 | 0,00 | NA | NA |
| RP11-7N14.1   | 0,00 | 0,00 | 0,00 | 0,00 | NA | NA |
| RP11-7O11.3   | 0,00 | 0,00 | 0,00 | 0,00 | NA | NA |

|               |      |      |      |      |    |    |
|---------------|------|------|------|------|----|----|
| RP11-7O11.7   | 0,00 | 0,00 | 0,00 | 0,00 | NA | NA |
| RP11-800A18.4 | 0,00 | 0,00 | 0,00 | 0,00 | NA | NA |
| RP11-800A3.7  | 0,00 | 0,00 | 0,00 | 0,00 | NA | NA |
| RP11-800K23.2 | 0,00 | 0,00 | 0,00 | 0,00 | NA | NA |
| RP11-801F7.1  | 0,00 | 0,00 | 0,00 | 0,00 | NA | NA |
| RP11-801I18.1 | 0,00 | 0,00 | 0,00 | 0,00 | NA | NA |
| RP11-802D6.1  | 0,00 | 0,00 | 0,00 | 0,00 | NA | NA |
| RP11-802H3.1  | 0,00 | 0,00 | 0,00 | 0,00 | NA | NA |
| RP11-802H3.2  | 0,00 | 0,00 | 0,00 | 0,00 | NA | NA |
| RP11-803A13.1 | 0,00 | 0,00 | 0,00 | 0,00 | NA | NA |
| RP11-803A13.2 | 0,00 | 0,00 | 0,00 | 0,00 | NA | NA |
| RP11-803A13.3 | 0,00 | 0,00 | 0,00 | 0,00 | NA | NA |
| RP11-803B1.2  | 0,00 | 0,00 | 0,00 | 0,00 | NA | NA |
| RP11-803B1.3  | 0,00 | 0,00 | 0,00 | 0,00 | NA | NA |
| RP11-804A23.1 | 0,00 | 0,00 | 0,00 | 0,00 | NA | NA |
| RP11-804H8.5  | 0,00 | 0,00 | 0,00 | 0,00 | NA | NA |
| RP11-804H8.7  | 0,00 | 0,00 | 0,00 | 0,00 | NA | NA |
| RP11-804L24.1 | 0,00 | 0,00 | 0,00 | 0,00 | NA | NA |
| RP11-804L24.2 | 0,00 | 0,00 | 0,00 | 0,00 | NA | NA |
| RP11-804M7.2  | 0,00 | 0,00 | 0,00 | 0,00 | NA | NA |
| RP11-804M7.3  | 0,00 | 0,00 | 0,00 | 0,00 | NA | NA |
| RP11-805F19.4 | 0,00 | 0,00 | 0,00 | 0,00 | NA | NA |
| RP11-805I24.2 | 0,00 | 0,00 | 0,00 | 0,00 | NA | NA |
| RP11-805I24.3 | 0,00 | 0,00 | 0,00 | 0,00 | NA | NA |
| RP11-805I24.4 | 0,00 | 0,00 | 0,00 | 0,00 | NA | NA |
| RP11-805J14.2 | 0,00 | 0,00 | 0,00 | 0,00 | NA | NA |
| RP11-806K15.1 | 0,00 | 0,00 | 0,00 | 0,00 | NA | NA |
| RP11-806L2.5  | 0,00 | 0,00 | 0,00 | 0,00 | NA | NA |
| RP11-806L2.6  | 0,00 | 0,00 | 0,00 | 0,00 | NA | NA |
| RP11-806N19.1 | 0,00 | 0,00 | 0,00 | 0,00 | NA | NA |
| RP11-806N19.2 | 0,00 | 0,00 | 0,00 | 0,00 | NA | NA |
| RP11-807E13.2 | 0,00 | 0,00 | 0,00 | 0,00 | NA | NA |
| RP11-807E13.3 | 0,00 | 0,00 | 0,00 | 0,00 | NA | NA |
| RP11-807H17.1 | 0,00 | 0,00 | 0,00 | 0,00 | NA | NA |
| RP11-807H22.4 | 0,00 | 0,00 | 0,00 | 0,00 | NA | NA |
| RP11-807H22.5 | 0,00 | 0,00 | 0,00 | 0,00 | NA | NA |
| RP11-807H22.6 | 0,00 | 0,00 | 0,00 | 0,00 | NA | NA |
| RP11-807H22.9 | 0,00 | 0,00 | 0,00 | 0,00 | NA | NA |
| RP11-807H7.1  | 0,00 | 0,00 | 0,00 | 0,00 | NA | NA |
| RP11-808N1.2  | 0,00 | 0,00 | 0,00 | 0,00 | NA | NA |
| RP11-809C18.3 | 0,00 | 0,00 | 0,00 | 0,00 | NA | NA |
| RP11-809F4.1  | 0,00 | 0,00 | 0,00 | 0,00 | NA | NA |
| RP11-809F4.2  | 0,00 | 0,00 | 0,00 | 0,00 | NA | NA |
| RP11-809F4.3  | 0,00 | 0,00 | 0,00 | 0,00 | NA | NA |
| RP11-809H16.3 | 0,00 | 0,00 | 0,00 | 0,00 | NA | NA |
| RP11-809H16.4 | 0,00 | 0,00 | 0,00 | 0,00 | NA | NA |
| RP11-809M12.1 | 0,00 | 0,00 | 0,00 | 0,00 | NA | NA |
| RP11-809N18.1 | 0,00 | 0,00 | 0,00 | 0,00 | NA | NA |
| RP11-809N8.5  | 0,00 | 0,00 | 0,00 | 0,00 | NA | NA |
| RP11-80B17.1  | 0,00 | 0,00 | 0,00 | 0,00 | NA | NA |
| RP11-80B9.2   | 0,00 | 0,00 | 0,00 | 0,00 | NA | NA |
| RP11-80B9.4   | 0,00 | 0,00 | 0,00 | 0,00 | NA | NA |
| RP11-80B9.5   | 0,00 | 0,00 | 0,00 | 0,00 | NA | NA |
| RP11-80F22.14 | 0,00 | 0,00 | 0,00 | 0,00 | NA | NA |
| RP11-80F22.15 | 0,00 | 0,00 | 0,00 | 0,00 | NA | NA |

|                |      |      |      |      |    |    |
|----------------|------|------|------|------|----|----|
| RP11-80F22.16  | 0,00 | 0,00 | 0,00 | 0,00 | NA | NA |
| RP11-80H18.4   | 0,00 | 0,00 | 0,00 | 0,00 | NA | NA |
| RP11-80H5.2    | 0,00 | 0,00 | 0,00 | 0,00 | NA | NA |
| RP11-80H5.5    | 0,00 | 0,00 | 0,00 | 0,00 | NA | NA |
| RP11-80H5.6    | 0,00 | 0,00 | 0,00 | 0,00 | NA | NA |
| RP11-80H5.7    | 0,00 | 0,00 | 0,00 | 0,00 | NA | NA |
| RP11-80H8.3    | 0,00 | 0,00 | 0,00 | 0,00 | NA | NA |
| RP11-80H8.4    | 0,00 | 0,00 | 0,54 | 0,00 | NA | NA |
| RP11-80I15.1   | 0,00 | 0,00 | 0,00 | 0,00 | NA | NA |
| RP11-80I15.4   | 0,00 | 0,00 | 0,00 | 0,00 | NA | NA |
| RP11-80K21.1   | 0,00 | 0,00 | 0,00 | 0,00 | NA | NA |
| RP11-80K6.2    | 0,00 | 0,00 | 0,00 | 0,00 | NA | NA |
| RP11-80N2.2    | 0,00 | 0,00 | 0,00 | 0,00 | NA | NA |
| RP11-810B23.1  | 0,00 | 0,00 | 0,00 | 0,00 | NA | NA |
| RP11-810C20.1  | 0,00 | 0,00 | 0,00 | 0,00 | NA | NA |
| RP11-810F7.1   | 0,00 | 0,00 | 0,00 | 0,00 | NA | NA |
| RP11-810H18.1  | 0,00 | 0,00 | 0,00 | 0,00 | NA | NA |
| RP11-810K23.3  | 0,00 | 0,00 | 0,00 | 0,00 | NA | NA |
| RP11-810K23.5  | 0,00 | 0,00 | 0,00 | 0,00 | NA | NA |
| RP11-810K23.6  | 0,00 | 0,00 | 0,00 | 0,00 | NA | NA |
| RP11-810K23.7  | 0,00 | 0,00 | 0,00 | 0,00 | NA | NA |
| RP11-810K23.8  | 0,00 | 0,00 | 0,00 | 0,00 | NA | NA |
| RP11-810K23.9  | 0,00 | 0,00 | 0,00 | 0,00 | NA | NA |
| RP11-810O3.2   | 0,00 | 0,00 | 0,00 | 0,00 | NA | NA |
| RP11-810P12.1  | 0,00 | 0,00 | 0,00 | 0,00 | NA | NA |
| RP11-810P12.6  | 0,00 | 0,00 | 0,00 | 0,00 | NA | NA |
| RP11-811I15.1  | 0,00 | 0,00 | 0,00 | 0,00 | NA | NA |
| RP11-811I10.1  | 0,00 | 0,00 | 0,00 | 0,00 | NA | NA |
| RP11-811O14.1  | 0,00 | 0,00 | 0,00 | 0,00 | NA | NA |
| RP11-811P12.2  | 0,00 | 0,00 | 0,00 | 0,00 | NA | NA |
| RP11-811P12.4  | 0,00 | 0,00 | 0,00 | 0,00 | NA | NA |
| RP11-812D23.1  | 0,00 | 0,00 | 0,00 | 0,00 | NA | NA |
| RP11-812E19.10 | 0,00 | 0,00 | 0,00 | 0,00 | NA | NA |
| RP11-812E19.12 | 0,00 | 0,00 | 0,00 | 0,00 | NA | NA |
| RP11-812E19.13 | 0,00 | 0,00 | 0,00 | 0,00 | NA | NA |
| RP11-812E19.14 | 0,00 | 0,00 | 0,00 | 0,00 | NA | NA |
| RP11-812E19.3  | 0,00 | 0,00 | 0,00 | 0,00 | NA | NA |
| RP11-812E19.5  | 0,00 | 0,00 | 0,00 | 0,00 | NA | NA |
| RP11-812E19.6  | 0,00 | 0,00 | 0,00 | 0,00 | NA | NA |
| RP11-812E19.7  | 0,00 | 0,00 | 0,00 | 0,00 | NA | NA |
| RP11-812E19.9  | 0,00 | 0,00 | 0,00 | 0,00 | NA | NA |
| RP11-812I20.2  | 0,00 | 0,00 | 0,00 | 0,00 | NA | NA |
| RP11-813B8.1   | 0,00 | 0,00 | 0,00 | 0,00 | NA | NA |
| RP11-813B8.2   | 0,00 | 0,00 | 0,00 | 0,00 | NA | NA |
| RP11-813F20.1  | 0,00 | 0,00 | 0,00 | 0,00 | NA | NA |
| RP11-813F20.4  | 0,00 | 0,00 | 0,00 | 0,00 | NA | NA |
| RP11-813I20.2  | 0,00 | 0,00 | 0,00 | 0,00 | NA | NA |
| RP11-813M16.1  | 0,00 | 0,00 | 0,00 | 0,00 | NA | NA |
| RP11-813N20.1  | 0,00 | 0,00 | 0,00 | 0,00 | NA | NA |
| RP11-813N20.2  | 0,00 | 0,00 | 0,00 | 0,00 | NA | NA |
| RP11-814E24.1  | 0,00 | 0,00 | 0,00 | 0,00 | NA | NA |
| RP11-814H16.2  | 0,00 | 0,00 | 0,00 | 0,00 | NA | NA |
| RP11-814M22.2  | 0,00 | 0,00 | 0,00 | 0,00 | NA | NA |
| RP11-815D16.1  | 0,00 | 0,00 | 0,00 | 0,00 | NA | NA |
| RP11-815I9.3   | 0,00 | 0,00 | 0,00 | 0,00 | NA | NA |

|               |      |      |      |      |    |    |
|---------------|------|------|------|------|----|----|
| RP11-815I9.5  | 0,00 | 0,00 | 0,00 | 0,00 | NA | NA |
| RP11-815I21.2 | 0,00 | 0,00 | 0,00 | 0,00 | NA | NA |
| RP11-815I4.4  | 0,00 | 0,00 | 0,00 | 0,00 | NA | NA |
| RP11-815I4.5  | 0,00 | 0,00 | 0,00 | 0,00 | NA | NA |
| RP11-815I4.7  | 0,00 | 0,00 | 0,00 | 0,00 | NA | NA |
| RP11-816B4.2  | 0,00 | 0,00 | 0,00 | 0,00 | NA | NA |
| RP11-816I6.3  | 0,00 | 0,00 | 0,00 | 0,00 | NA | NA |
| RP11-816I8.1  | 0,00 | 0,00 | 0,00 | 0,00 | NA | NA |
| RP11-817G13.3 | 0,00 | 0,00 | 0,00 | 0,00 | NA | NA |
| RP11-817I4.2  | 0,10 | 0,13 | 0,09 | 0,08 | NA | NA |
| RP11-817I15.3 | 0,00 | 0,00 | 0,00 | 0,00 | NA | NA |
| RP11-817O13.1 | 0,00 | 0,00 | 0,00 | 0,00 | NA | NA |
| RP11-818F20.4 | 0,00 | 0,00 | 0,00 | 0,00 | NA | NA |
| RP11-819M15.1 | 0,00 | 0,00 | 0,00 | 0,00 | NA | NA |
| RP11-819M15.2 | 0,00 | 0,00 | 0,00 | 0,00 | NA | NA |
| RP11-81A1.7   | 0,00 | 0,00 | 0,00 | 0,00 | NA | NA |
| RP11-81A1.8   | 0,00 | 0,00 | 0,00 | 0,00 | NA | NA |
| RP11-81B10.2  | 0,00 | 0,00 | 0,00 | 0,00 | NA | NA |
| RP11-81B23.1  | 0,00 | 0,00 | 0,00 | 0,00 | NA | NA |
| RP11-81C12.1  | 0,00 | 0,00 | 0,00 | 0,00 | NA | NA |
| RP11-81F13.1  | 0,00 | 0,00 | 0,00 | 0,00 | NA | NA |
| RP11-81F13.2  | 0,00 | 0,00 | 0,00 | 0,00 | NA | NA |
| RP11-81G24.1  | 0,00 | 0,00 | 0,00 | 0,00 | NA | NA |
| RP11-81H14.3  | 0,00 | 0,00 | 0,00 | 0,00 | NA | NA |
| RP11-81H14.4  | 0,00 | 0,00 | 0,00 | 0,00 | NA | NA |
| RP11-81K2.2   | 0,00 | 0,00 | 0,00 | 0,00 | NA | NA |
| RP11-81M19.1  | 0,00 | 0,00 | 0,00 | 0,00 | NA | NA |
| RP11-81M19.3  | 0,00 | 0,00 | 0,00 | 0,00 | NA | NA |
| RP11-81N13.1  | 0,14 | 0,07 | 0,20 | 0,13 | NA | NA |
| RP11-81P15.2  | 0,00 | 0,00 | 0,00 | 0,00 | NA | NA |
| RP11-820I16.1 | 0,00 | 0,00 | 0,00 | 0,00 | NA | NA |
| RP11-820I16.2 | 0,00 | 0,00 | 0,00 | 0,00 | NA | NA |
| RP11-820K3.1  | 0,00 | 0,00 | 0,00 | 0,00 | NA | NA |
| RP11-820K3.4  | 0,00 | 0,00 | 0,00 | 0,00 | NA | NA |
| RP11-820K3.5  | 0,00 | 0,00 | 0,00 | 0,00 | NA | NA |
| RP11-820K3.6  | 0,00 | 0,00 | 0,00 | 0,00 | NA | NA |
| RP11-822E23.2 | 0,00 | 0,00 | 0,00 | 0,00 | NA | NA |
| RP11-822E23.3 | 0,00 | 0,00 | 0,00 | 0,00 | NA | NA |
| RP11-822E23.4 | 0,00 | 0,00 | 0,00 | 0,00 | NA | NA |
| RP11-822E23.5 | 0,00 | 0,00 | 0,00 | 0,00 | NA | NA |
| RP11-822E23.6 | 0,00 | 0,61 | 0,00 | 0,00 | NA | NA |
| RP11-822E23.7 | 0,00 | 0,00 | 0,00 | 0,00 | NA | NA |
| RP11-822P1.1  | 0,00 | 0,00 | 0,00 | 0,00 | NA | NA |
| RP11-826F13.1 | 0,00 | 0,00 | 0,00 | 0,00 | NA | NA |
| RP11-826N14.1 | 0,00 | 0,00 | 0,00 | 0,00 | NA | NA |
| RP11-829H16.1 | 0,00 | 0,00 | 0,00 | 0,00 | NA | NA |
| RP11-82C23.2  | 0,00 | 0,00 | 0,00 | 0,00 | NA | NA |
| RP11-82H13.2  | 0,00 | 0,00 | 0,00 | 0,00 | NA | NA |
| RP11-82K18.2  | 0,00 | 0,00 | 0,00 | 0,00 | NA | NA |
| RP11-82L18.2  | 0,00 | 0,00 | 0,00 | 0,00 | NA | NA |
| RP11-82L20.1  | 0,00 | 0,00 | 0,00 | 0,00 | NA | NA |
| RP11-82L7.1   | 0,00 | 0,00 | 0,00 | 0,00 | NA | NA |
| RP11-82L7.3   | 0,00 | 0,00 | 0,00 | 0,00 | NA | NA |
| RP11-82O2.2   | 0,00 | 0,00 | 0,00 | 0,00 | NA | NA |
| RP11-831A10.1 | 0,00 | 0,00 | 0,00 | 0,00 | NA | NA |

|                |      |      |      |      |    |    |
|----------------|------|------|------|------|----|----|
| RP11-831A10.2  | 0,00 | 0,00 | 0,00 | 0,00 | NA | NA |
| RP11-831F12.3  | 0,00 | 0,00 | 0,00 | 0,00 | NA | NA |
| RP11-831F12.4  | 0,00 | 0,00 | 0,00 | 0,00 | NA | NA |
| RP11-831H9.11  | 0,00 | 0,00 | 0,00 | 0,00 | NA | NA |
| RP11-831H9.3   | 0,00 | 0,00 | 0,00 | 0,00 | NA | NA |
| RP11-832A4.7   | 0,00 | 0,00 | 0,00 | 0,00 | NA | NA |
| RP11-832N8.1   | 0,00 | 0,00 | 0,00 | 0,00 | NA | NA |
| RP11-834C11.10 | 0,00 | 0,00 | 0,00 | 0,00 | NA | NA |
| RP11-834C11.11 | 0,00 | 0,00 | 0,00 | 0,00 | NA | NA |
| RP11-834C11.12 | 0,00 | 0,00 | 0,00 | 0,00 | NA | NA |
| RP11-834C11.14 | 0,00 | 0,00 | 0,00 | 0,00 | NA | NA |
| RP11-834C11.4  | 0,00 | 0,00 | 0,14 | 0,13 | NA | NA |
| RP11-834C11.5  | 0,00 | 0,00 | 0,00 | 0,00 | NA | NA |
| RP11-834C11.6  | 0,00 | 0,00 | 0,00 | 0,00 | NA | NA |
| RP11-835E18.5  | 0,00 | 0,00 | 0,00 | 0,00 | NA | NA |
| RP11-838N2.3   | 0,00 | 0,00 | 0,00 | 0,00 | NA | NA |
| RP11-838N2.8   | 0,00 | 0,00 | 0,00 | 0,00 | NA | NA |
| RP11-839D17.2  | 0,00 | 0,00 | 0,00 | 0,00 | NA | NA |
| RP11-839D17.3  | 0,00 | 0,00 | 0,00 | 0,00 | NA | NA |
| RP11-83B20.10  | 0,00 | 0,00 | 0,00 | 0,00 | NA | NA |
| RP11-83B20.4   | 0,00 | 0,00 | 0,00 | 0,00 | NA | NA |
| RP11-83B20.6   | 0,00 | 0,00 | 0,00 | 0,00 | NA | NA |
| RP11-83B20.8   | 0,00 | 0,00 | 0,00 | 0,00 | NA | NA |
| RP11-83B20.9   | 0,00 | 0,00 | 0,00 | 0,00 | NA | NA |
| RP11-83C7.1    | 0,00 | 0,00 | 0,00 | 0,00 | NA | NA |
| RP11-83C7.2    | 0,00 | 0,00 | 0,00 | 0,00 | NA | NA |
| RP11-83J16.3   | 0,00 | 0,00 | 0,00 | 0,00 | NA | NA |
| RP11-83J21.3   | 0,00 | 0,00 | 0,00 | 0,00 | NA | NA |
| RP11-83M16.1   | 0,00 | 0,00 | 0,00 | 0,00 | NA | NA |
| RP11-83M16.2   | 0,00 | 0,00 | 0,00 | 0,00 | NA | NA |
| RP11-83M16.3   | 0,00 | 0,00 | 0,00 | 0,00 | NA | NA |
| RP11-83M16.4   | 0,00 | 0,00 | 0,00 | 0,00 | NA | NA |
| RP11-83M16.6   | 0,00 | 0,00 | 0,00 | 0,00 | NA | NA |
| RP11-83N23.2   | 0,00 | 0,00 | 0,00 | 0,00 | NA | NA |
| RP11-83N9.6    | 0,00 | 0,00 | 0,00 | 0,00 | NA | NA |
| RP11-840I19.5  | 0,00 | 0,00 | 0,00 | 0,00 | NA | NA |
| RP11-841C19.3  | 0,00 | 0,00 | 0,00 | 0,00 | NA | NA |
| RP11-841C19.4  | 0,00 | 0,00 | 0,00 | 0,00 | NA | NA |
| RP11-843A23.2  | 0,00 | 0,00 | 0,00 | 0,00 | NA | NA |
| RP11-843B15.3  | 0,00 | 0,00 | 0,00 | 0,00 | NA | NA |
| RP11-843F11.1  | 0,00 | 0,00 | 0,00 | 0,00 | NA | NA |
| RP11-843P14.2  | 0,00 | 0,00 | 0,00 | 0,00 | NA | NA |
| RP11-844G16.3  | 0,00 | 0,00 | 0,00 | 0,00 | NA | NA |
| RP11-844P9.2   | 0,00 | 0,00 | 0,00 | 0,00 | NA | NA |
| RP11-844P9.4   | 0,00 | 0,00 | 0,00 | 0,00 | NA | NA |
| RP11-845C23.3  | 0,00 | 0,00 | 0,00 | 0,00 | NA | NA |
| RP11-845M18.1  | 0,00 | 0,00 | 0,00 | 0,00 | NA | NA |
| RP11-845M18.3  | 0,00 | 0,00 | 0,00 | 0,00 | NA | NA |
| RP11-845M18.6  | 0,00 | 0,00 | 0,00 | 0,00 | NA | NA |
| RP11-845M18.7  | 0,00 | 0,00 | 0,00 | 0,00 | NA | NA |
| RP11-845M18.8  | 0,00 | 0,00 | 0,00 | 0,00 | NA | NA |
| RP11-846F4.1   | 0,00 | 0,00 | 0,00 | 0,00 | NA | NA |
| RP11-846F4.10  | 0,00 | 0,00 | 0,00 | 0,00 | NA | NA |
| RP11-846F4.11  | 0,00 | 0,00 | 0,00 | 0,00 | NA | NA |
| RP11-846F4.14  | 0,00 | 0,00 | 0,00 | 0,00 | NA | NA |

|               |      |      |      |      |    |    |
|---------------|------|------|------|------|----|----|
| RP11-846F4.8  | 0,00 | 0,00 | 0,00 | 0,00 | NA | NA |
| RP11-846F4.9  | 0,00 | 0,00 | 0,00 | 0,00 | NA | NA |
| RP11-848D3.4  | 0,00 | 0,00 | 0,00 | 0,00 | NA | NA |
| RP11-848D3.5  | 0,00 | 0,00 | 0,00 | 0,00 | NA | NA |
| RP11-849F2.10 | 0,00 | 0,00 | 0,00 | 0,00 | NA | NA |
| RP11-849F2.9  | 0,00 | 0,29 | 0,00 | 0,00 | NA | NA |
| RP11-849I19.1 | 0,00 | 0,00 | 0,00 | 0,00 | NA | NA |
| RP11-849N15.1 | 0,00 | 0,00 | 0,00 | 0,00 | NA | NA |
| RP11-849N15.3 | 0,00 | 0,00 | 0,00 | 0,00 | NA | NA |
| RP11-849N15.4 | 0,00 | 0,00 | 0,00 | 0,00 | NA | NA |
| RP11-84A1.1   | 0,00 | 0,58 | 0,00 | 0,00 | NA | NA |
| RP11-84A14.5  | 0,00 | 0,00 | 0,00 | 0,00 | NA | NA |
| RP11-84A14.6  | 0,00 | 0,00 | 0,00 | 0,00 | NA | NA |
| RP11-84A19.3  | 0,00 | 0,00 | 0,00 | 0,00 | NA | NA |
| RP11-84A19.4  | 0,00 | 0,00 | 0,00 | 0,00 | NA | NA |
| RP11-84C10.1  | 0,00 | 0,00 | 0,00 | 0,00 | NA | NA |
| RP11-84C10.3  | 0,00 | 0,00 | 0,00 | 0,00 | NA | NA |
| RP11-84D1.1   | 0,00 | 0,00 | 0,00 | 0,00 | NA | NA |
| RP11-84D7.1   | 0,00 | 0,00 | 0,00 | 0,00 | NA | NA |
| RP11-84E17.1  | 0,00 | 0,00 | 0,00 | 0,00 | NA | NA |
| RP11-84G21.2  | 0,00 | 0,00 | 0,00 | 0,00 | NA | NA |
| RP11-84H6.1   | 0,00 | 0,00 | 0,00 | 0,00 | NA | NA |
| RP11-84N7.1   | 0,00 | 0,00 | 0,00 | 0,00 | NA | NA |
| RP11-84O12.2  | 0,00 | 0,00 | 0,00 | 0,00 | NA | NA |
| RP11-84O12.3  | 0,00 | 0,00 | 0,00 | 0,00 | NA | NA |
| RP11-84O12.4  | 0,00 | 0,00 | 0,00 | 0,00 | NA | NA |
| RP11-850F7.7  | 0,00 | 0,00 | 0,00 | 0,00 | NA | NA |
| RP11-851M3.1  | 0,00 | 0,00 | 0,00 | 0,00 | NA | NA |
| RP11-851M3.2  | 0,00 | 0,00 | 0,00 | 0,00 | NA | NA |
| RP11-855C21.1 | 0,00 | 0,00 | 0,00 | 0,00 | NA | NA |
| RP11-855O10.2 | 0,00 | 0,00 | 0,00 | 0,00 | NA | NA |
| RP11-855O10.3 | 0,00 | 0,00 | 0,00 | 0,00 | NA | NA |
| RP11-856M7.1  | 0,00 | 0,00 | 0,00 | 0,00 | NA | NA |
| RP11-856M7.2  | 0,00 | 0,00 | 0,00 | 0,00 | NA | NA |
| RP11-856M7.6  | 0,00 | 0,00 | 0,00 | 0,00 | NA | NA |
| RP11-856M7.7  | 0,00 | 0,00 | 0,00 | 0,00 | NA | NA |
| RP11-856M7.8  | 0,00 | 0,00 | 0,00 | 0,00 | NA | NA |
| RP11-857B24.2 | 0,00 | 0,00 | 0,00 | 0,00 | NA | NA |
| RP11-857B24.3 | 0,00 | 0,00 | 0,00 | 0,00 | NA | NA |
| RP11-857B24.5 | 0,00 | 0,00 | 0,00 | 0,00 | NA | NA |
| RP11-85D18.1  | 0,00 | 0,00 | 0,00 | 0,00 | NA | NA |
| RP11-85F14.6  | 0,00 | 0,00 | 0,00 | 0,00 | NA | NA |
| RP11-85G18.4  | 0,00 | 0,00 | 0,00 | 0,00 | NA | NA |
| RP11-85G18.6  | 0,00 | 0,00 | 0,00 | 0,00 | NA | NA |
| RP11-85G20.1  | 0,00 | 0,00 | 0,00 | 0,00 | NA | NA |
| RP11-85G20.2  | 0,00 | 0,00 | 0,00 | 0,00 | NA | NA |
| RP11-85K15.1  | 0,00 | 0,00 | 0,00 | 0,00 | NA | NA |
| RP11-85L21.3  | 0,00 | 0,00 | 0,00 | 0,00 | NA | NA |
| RP11-85L21.6  | 0,00 | 0,00 | 0,00 | 0,00 | NA | NA |
| RP11-85M22.1  | 0,00 | 0,00 | 0,00 | 0,00 | NA | NA |
| RP11-85O21.2  | 0,00 | 0,00 | 0,00 | 0,00 | NA | NA |
| RP11-85O21.4  | 0,00 | 0,00 | 0,00 | 0,00 | NA | NA |
| RP11-85P9.2   | 0,00 | 0,00 | 0,00 | 0,00 | NA | NA |
| RP11-860B13.1 | 0,00 | 0,00 | 0,00 | 0,00 | NA | NA |
| RP11-861E21.1 | 0,00 | 0,00 | 0,00 | 0,00 | NA | NA |

|                |      |      |      |      |    |    |
|----------------|------|------|------|------|----|----|
| RP11-861E21.3  | 0,00 | 0,00 | 0,00 | 0,00 | NA | NA |
| RP11-861E23.1  | 0,00 | 0,00 | 0,00 | 0,00 | NA | NA |
| RP11-861L17.3  | 0,00 | 0,00 | 0,00 | 0,00 | NA | NA |
| RP11-862G15.2  | 0,00 | 0,00 | 0,00 | 0,00 | NA | NA |
| RP11-862L9.2   | 0,00 | 0,03 | 0,00 | 0,00 | NA | NA |
| RP11-863K10.2  | 0,00 | 0,00 | 0,00 | 0,00 | NA | NA |
| RP11-863N1.4   | 0,00 | 0,00 | 0,00 | 0,00 | NA | NA |
| RP11-864G5.3   | 0,00 | 0,00 | 0,00 | 0,00 | NA | NA |
| RP11-864G5.7   | 0,00 | 0,00 | 0,00 | 0,00 | NA | NA |
| RP11-864G5.8   | 0,00 | 0,00 | 0,00 | 0,00 | NA | NA |
| RP11-864J10.2  | 0,00 | 0,00 | 0,00 | 0,00 | NA | NA |
| RP11-864N7.1   | 0,00 | 0,00 | 0,00 | 0,00 | NA | NA |
| RP11-865B13.1  | 0,00 | 0,00 | 0,00 | 0,00 | NA | NA |
| RP11-866E20.1  | 0,00 | 0,00 | 0,00 | 0,00 | NA | NA |
| RP11-867G23.1  | 0,00 | 0,00 | 0,00 | 0,00 | NA | NA |
| RP11-867G23.10 | 0,00 | 0,00 | 0,00 | 0,00 | NA | NA |
| RP11-867G23.13 | 0,00 | 0,00 | 0,00 | 0,00 | NA | NA |
| RP11-867G23.9  | 0,00 | 0,00 | 0,00 | 0,00 | NA | NA |
| RP11-86A5.1    | 0,00 | 0,00 | 0,00 | 0,00 | NA | NA |
| RP11-86H7.3    | 0,00 | 0,00 | 0,00 | 0,00 | NA | NA |
| RP11-86K22.1   | 0,00 | 0,00 | 0,00 | 0,00 | NA | NA |
| RP11-86K22.2   | 0,00 | 0,00 | 0,00 | 0,00 | NA | NA |
| RP11-871F6.1   | 0,00 | 0,00 | 0,00 | 0,00 | NA | NA |
| RP11-871F6.2   | 0,00 | 0,00 | 0,00 | 0,00 | NA | NA |
| RP11-871F6.3   | 0,00 | 0,00 | 0,00 | 0,00 | NA | NA |
| RP11-872J21.5  | 0,00 | 0,00 | 0,00 | 0,00 | NA | NA |
| RP11-873E20.2  | 0,00 | 0,00 | 0,00 | 0,00 | NA | NA |
| RP11-874J12.3  | 0,00 | 0,00 | 0,00 | 0,00 | NA | NA |
| RP11-875H7.1   | 0,00 | 0,00 | 0,00 | 0,00 | NA | NA |
| RP11-875H7.2   | 0,00 | 0,00 | 0,00 | 0,00 | NA | NA |
| RP11-875O11.3  | 0,00 | 0,00 | 0,00 | 0,00 | NA | NA |
| RP11-876F14.1  | 0,00 | 0,00 | 0,00 | 0,00 | NA | NA |
| RP11-876N24.1  | 0,00 | 0,00 | 0,00 | 0,00 | NA | NA |
| RP11-876N24.2  | 0,00 | 0,00 | 0,00 | 0,00 | NA | NA |
| RP11-877E17.2  | 0,21 | 0,25 | 0,33 | 0,51 | NA | NA |
| RP11-879D6.1   | 0,00 | 0,00 | 0,00 | 0,00 | NA | NA |
| RP11-87C12.6   | 0,00 | 0,00 | 0,00 | 0,00 | NA | NA |
| RP11-87C7.2    | 0,00 | 0,00 | 0,00 | 0,00 | NA | NA |
| RP11-87E22.1   | 0,00 | 0,00 | 0,00 | 0,00 | NA | NA |
| RP11-87G24.3   | 0,00 | 0,00 | 0,00 | 0,00 | NA | NA |
| RP11-87G24.5   | 0,00 | 0,00 | 0,00 | 0,00 | NA | NA |
| RP11-87G24.6   | 0,00 | 0,00 | 0,00 | 0,00 | NA | NA |
| RP11-87M18.3   | 0,00 | 0,00 | 0,00 | 0,00 | NA | NA |
| RP11-87N3.6    | 0,00 | 0,00 | 0,00 | 0,00 | NA | NA |
| RP11-87O11.1   | 0,00 | 0,00 | 0,00 | 0,00 | NA | NA |
| RP11-87O6.1    | 0,00 | 0,00 | 0,00 | 0,00 | NA | NA |
| RP11-881M11.1  | 0,00 | 0,00 | 0,00 | 0,00 | NA | NA |
| RP11-882I15.1  | 0,00 | 0,00 | 0,00 | 0,00 | NA | NA |
| RP11-883G10.1  | 0,00 | 0,00 | 0,00 | 0,00 | NA | NA |
| RP11-883G14.2  | 0,00 | 0,00 | 0,00 | 0,00 | NA | NA |
| RP11-883G14.3  | 0,00 | 0,00 | 0,00 | 0,00 | NA | NA |
| RP11-884K10.6  | 0,00 | 0,00 | 0,00 | 0,00 | NA | NA |
| RP11-885B4.1   | 0,00 | 0,00 | 0,00 | 0,00 | NA | NA |
| RP11-885B4.2   | 0,00 | 0,00 | 0,00 | 0,00 | NA | NA |
| RP11-885B4.3   | 0,00 | 0,00 | 0,00 | 0,00 | NA | NA |



|               |      |      |      |      |    |    |
|---------------|------|------|------|------|----|----|
| RP11-885N19.6 | 0,00 | 0,00 | 0,00 | 0,00 | NA | NA |
| RP11-886D15.1 | 0,00 | 0,00 | 0,41 | 0,00 | NA | NA |
| RP11-886D15.4 | 0,00 | 0,00 | 0,00 | 0,00 | NA | NA |
| RP11-886D15.5 | 0,00 | 0,00 | 0,00 | 0,00 | NA | NA |
| RP11-886I11.6 | 0,00 | 0,00 | 0,00 | 0,00 | NA | NA |
| RP11-887P2.3  | 0,00 | 0,00 | 0,00 | 0,00 | NA | NA |
| RP11-887P2.5  | 0,00 | 0,70 | 0,00 | 0,37 | NA | NA |
| RP11-889D3.1  | 0,00 | 0,00 | 0,00 | 0,00 | NA | NA |
| RP11-889D3.2  | 0,00 | 0,00 | 0,00 | 0,00 | NA | NA |
| RP11-889I17.2 | 0,00 | 0,00 | 0,00 | 0,00 | NA | NA |
| RP11-889L3.4  | 0,00 | 0,00 | 0,00 | 0,00 | NA | NA |
| RP11-88B8.2   | 0,00 | 0,00 | 0,00 | 0,19 | NA | NA |
| RP11-88H1.1   | 0,00 | 0,00 | 0,00 | 0,00 | NA | NA |
| RP11-88H10.3  | 0,00 | 0,00 | 0,00 | 0,00 | NA | NA |
| RP11-88I21.1  | 0,00 | 0,00 | 0,00 | 0,00 | NA | NA |
| RP11-88J6.1   | 0,00 | 0,00 | 0,00 | 0,00 | NA | NA |
| RP11-88K11.1  | 0,00 | 0,00 | 0,00 | 0,00 | NA | NA |
| RP11-88L20.1  | 0,00 | 0,00 | 0,00 | 0,00 | NA | NA |
| RP11-88M19.3  | 0,00 | 0,00 | 0,00 | 0,00 | NA | NA |
| RP11-890B15.1 | 0,00 | 0,00 | 0,00 | 0,00 | NA | NA |
| RP11-892D12.1 | 0,00 | 0,00 | 0,00 | 0,00 | NA | NA |
| RP11-893F2.13 | 0,00 | 0,00 | 0,00 | 0,00 | NA | NA |
| RP11-893F2.15 | 0,00 | 0,00 | 0,00 | 0,00 | NA | NA |
| RP11-893F2.6  | 0,00 | 0,00 | 0,00 | 0,00 | NA | NA |
| RP11-893F2.7  | 0,00 | 0,00 | 0,00 | 0,00 | NA | NA |
| RP11-893F2.9  | 0,00 | 0,00 | 0,00 | 0,00 | NA | NA |
| RP11-893G17.4 | 0,00 | 0,00 | 0,00 | 0,00 | NA | NA |
| RP11-894I14.2 | 0,00 | 0,00 | 0,00 | 0,00 | NA | NA |
| RP11-895K13.2 | 0,00 | 0,00 | 0,00 | 0,00 | NA | NA |
| RP11-895M11.3 | 0,00 | 0,00 | 0,00 | 0,00 | NA | NA |
| RP11-896I10.3 | 0,00 | 0,00 | 0,00 | 0,00 | NA | NA |
| RP11-897M7.1  | 0,00 | 0,00 | 0,00 | 0,00 | NA | NA |
| RP11-897M7.2  | 0,00 | 0,00 | 0,00 | 0,00 | NA | NA |
| RP11-897M7.4  | 0,00 | 0,00 | 0,00 | 0,00 | NA | NA |
| RP11-899L11.3 | 0,00 | 0,00 | 0,00 | 0,00 | NA | NA |
| RP11-89A12.1  | 0,00 | 0,00 | 0,00 | 0,00 | NA | NA |
| RP11-89A16.1  | 0,00 | 0,00 | 0,00 | 0,00 | NA | NA |
| RP11-89B16.1  | 0,00 | 0,00 | 0,00 | 0,00 | NA | NA |
| RP11-89B16.2  | 0,00 | 0,00 | 0,00 | 0,00 | NA | NA |
| RP11-89C3.1   | 0,00 | 0,00 | 0,00 | 0,00 | NA | NA |
| RP11-89C3.2   | 0,00 | 0,00 | 0,00 | 0,00 | NA | NA |
| RP11-89C3.3   | 0,00 | 0,00 | 0,00 | 0,00 | NA | NA |
| RP11-89H19.2  | 0,00 | 0,00 | 0,00 | 0,00 | NA | NA |
| RP11-89I4.1   | 0,00 | 0,00 | 0,00 | 0,00 | NA | NA |
| RP11-89K18.1  | 0,00 | 0,00 | 0,00 | 0,00 | NA | NA |
| RP11-89K22.1  | 0,00 | 0,00 | 0,00 | 0,00 | NA | NA |
| RP11-89M20.1  | 0,00 | 0,00 | 0,00 | 0,00 | NA | NA |
| RP11-89M20.2  | 0,00 | 0,00 | 0,00 | 0,00 | NA | NA |
| RP11-89N17.1  | 0,00 | 0,00 | 0,00 | 0,00 | NA | NA |
| RP11-89N17.2  | 0,00 | 0,00 | 0,00 | 0,00 | NA | NA |
| RP11-89N17.3  | 0,00 | 0,00 | 0,00 | 0,00 | NA | NA |
| RP11-89N17.4  | 0,00 | 0,00 | 0,00 | 0,00 | NA | NA |
| RP11-8I8.1    | 0,00 | 0,00 | 0,00 | 0,00 | NA | NA |
| RP11-8J23.1   | 0,00 | 0,00 | 0,00 | 0,00 | NA | NA |
| RP11-8J9.1    | 0,00 | 0,00 | 0,00 | 0,00 | NA | NA |

|               |      |      |      |      |    |    |
|---------------|------|------|------|------|----|----|
| RP11-8J9.5    | 0,00 | 0,00 | 0,00 | 0,00 | NA | NA |
| RP11-8L18.3   | 0,00 | 0,00 | 0,00 | 0,00 | NA | NA |
| RP11-8L21.1   | 0,00 | 0,00 | 0,00 | 0,00 | NA | NA |
| RP11-8P11.3   | 0,00 | 0,00 | 0,00 | 0,00 | NA | NA |
| RP11-8P11.4   | 0,00 | 0,00 | 0,00 | 0,00 | NA | NA |
| RP11-900F13.2 | 0,00 | 0,00 | 0,00 | 0,00 | NA | NA |
| RP11-903H12.2 | 0,00 | 0,00 | 0,00 | 0,00 | NA | NA |
| RP11-903H12.3 | 0,00 | 0,00 | 0,00 | 0,00 | NA | NA |
| RP11-903H12.4 | 0,00 | 0,00 | 0,00 | 0,00 | NA | NA |
| RP11-903H12.5 | 0,00 | 0,00 | 0,00 | 0,00 | NA | NA |
| RP11-904M10.1 | 0,00 | 0,06 | 0,00 | 0,00 | NA | NA |
| RP11-907B8.1  | 0,00 | 0,00 | 0,00 | 0,00 | NA | NA |
| RP11-907D1.2  | 0,00 | 0,00 | 0,00 | 0,00 | NA | NA |
| RP11-909B2.1  | 0,00 | 0,00 | 0,00 | 0,00 | NA | NA |
| RP11-909M7.2  | 0,00 | 0,00 | 0,00 | 0,00 | NA | NA |
| RP11-909M7.3  | 0,00 | 0,00 | 0,00 | 0,00 | NA | NA |
| RP11-909N17.2 | 0,00 | 0,00 | 0,00 | 0,00 | NA | NA |
| RP11-909N17.3 | 0,00 | 0,00 | 0,00 | 0,00 | NA | NA |
| RP11-90B22.1  | 0,00 | 0,00 | 0,00 | 0,00 | NA | NA |
| RP11-90C1.1   | 0,00 | 0,00 | 0,00 | 0,00 | NA | NA |
| RP11-90C4.4   | 0,00 | 0,00 | 0,00 | 0,00 | NA | NA |
| RP11-90D4.4   | 0,00 | 0,00 | 0,00 | 0,00 | NA | NA |
| RP11-90D4.6   | 0,00 | 0,00 | 0,00 | 0,00 | NA | NA |
| RP11-90E9.1   | 0,00 | 0,00 | 0,00 | 0,00 | NA | NA |
| RP11-90H3.2   | 0,00 | 0,00 | 0,00 | 0,00 | NA | NA |
| RP11-90J7.2   | 0,00 | 0,00 | 0,00 | 0,00 | NA | NA |
| RP11-90K17.2  | 0,00 | 0,00 | 0,00 | 0,00 | NA | NA |
| RP11-90L1.7   | 0,00 | 0,00 | 0,00 | 0,00 | NA | NA |
| RP11-90L9.1   | 0,00 | 0,00 | 0,00 | 0,00 | NA | NA |
| RP11-90L9.2   | 0,00 | 0,00 | 0,00 | 0,00 | NA | NA |
| RP11-90L9.3   | 0,00 | 0,00 | 0,00 | 0,00 | NA | NA |
| RP11-90L9.5   | 0,00 | 0,00 | 0,00 | 0,00 | NA | NA |
| RP11-90L9.6   | 0,00 | 0,00 | 0,00 | 0,00 | NA | NA |
| RP11-90L9.7   | 0,00 | 0,00 | 0,00 | 0,00 | NA | NA |
| RP11-90L9.8   | 0,00 | 0,00 | 0,00 | 0,00 | NA | NA |
| RP11-90M11.1  | 0,00 | 0,11 | 0,00 | 0,00 | NA | NA |
| RP11-90M2.3   | 0,00 | 0,00 | 0,00 | 0,00 | NA | NA |
| RP11-90M2.5   | 0,00 | 0,00 | 0,00 | 0,00 | NA | NA |
| RP11-90M5.2   | 0,00 | 0,00 | 0,00 | 0,00 | NA | NA |
| RP11-90M5.4   | 0,00 | 0,00 | 0,00 | 0,00 | NA | NA |
| RP11-90M5.5   | 0,00 | 0,00 | 0,00 | 0,00 | NA | NA |
| RP11-90N16.1  | 0,00 | 0,00 | 0,00 | 0,00 | NA | NA |
| RP11-90P16.1  | 0,00 | 0,00 | 0,00 | 0,00 | NA | NA |
| RP11-90P16.2  | 0,00 | 0,00 | 0,00 | 0,00 | NA | NA |
| RP11-91A18.1  | 0,00 | 0,00 | 0,00 | 0,00 | NA | NA |
| RP11-91E8.1   | 0,00 | 0,00 | 0,00 | 0,00 | NA | NA |
| RP11-91H12.4  | 0,00 | 0,00 | 0,00 | 0,00 | NA | NA |
| RP11-91I11.1  | 0,00 | 0,00 | 0,00 | 0,00 | NA | NA |
| RP11-91I20.2  | 0,00 | 0,00 | 0,00 | 0,00 | NA | NA |
| RP11-91I8.1   | 0,00 | 0,00 | 0,00 | 0,00 | NA | NA |
| RP11-91I8.2   | 0,00 | 0,00 | 0,00 | 0,00 | NA | NA |
| RP11-91I8.3   | 0,00 | 0,00 | 0,00 | 0,00 | NA | NA |
| RP11-91J19.3  | 0,00 | 0,00 | 0,00 | 0,00 | NA | NA |
| RP11-91J3.1   | 0,00 | 0,00 | 0,00 | 0,00 | NA | NA |
| RP11-91J3.2   | 0,00 | 0,00 | 0,00 | 0,00 | NA | NA |

|                |      |      |      |      |    |    |
|----------------|------|------|------|------|----|----|
| RP11-91K11.2   | 0,00 | 0,00 | 0,00 | 0,00 | NA | NA |
| RP11-91K8.2    | 0,00 | 0,00 | 0,00 | 0,00 | NA | NA |
| RP11-91K8.4    | 0,00 | 0,00 | 0,00 | 0,00 | NA | NA |
| RP11-91K8.5    | 0,00 | 0,00 | 0,00 | 0,00 | NA | NA |
| RP11-91M9.1    | 0,00 | 0,00 | 0,00 | 0,00 | NA | NA |
| RP11-91M9.2    | 0,00 | 0,00 | 0,00 | 0,00 | NA | NA |
| RP11-91N2.3    | 0,00 | 0,00 | 0,00 | 0,00 | NA | NA |
| RP11-91P24.3   | 0,00 | 0,00 | 0,00 | 0,00 | NA | NA |
| RP11-923I11.5  | 0,00 | 0,00 | 0,00 | 0,00 | NA | NA |
| RP11-923I11.6  | 0,00 | 0,00 | 0,00 | 0,00 | NA | NA |
| RP11-923I11.8  | 0,00 | 0,00 | 0,00 | 0,00 | NA | NA |
| RP11-924A14.1  | 0,00 | 0,00 | 0,00 | 0,00 | NA | NA |
| RP11-925D8.1   | 0,00 | 0,00 | 0,00 | 0,00 | NA | NA |
| RP11-925D8.2   | 0,00 | 0,00 | 0,00 | 0,00 | NA | NA |
| RP11-925D8.3   | 0,00 | 0,00 | 0,00 | 0,00 | NA | NA |
| RP11-925D8.5   | 0,00 | 0,00 | 0,00 | 0,00 | NA | NA |
| RP11-925D8.6   | 0,00 | 0,00 | 0,00 | 0,00 | NA | NA |
| RP11-927P21.11 | 0,00 | 0,00 | 0,00 | 0,00 | NA | NA |
| RP11-927P21.6  | 0,00 | 0,00 | 0,00 | 0,00 | NA | NA |
| RP11-927P21.7  | 0,00 | 0,00 | 0,00 | 0,00 | NA | NA |
| RP11-927P21.8  | 0,00 | 0,00 | 0,00 | 0,00 | NA | NA |
| RP11-927P21.9  | 0,00 | 0,00 | 0,00 | 0,00 | NA | NA |
| RP11-92B11.4   | 0,00 | 0,00 | 0,00 | 0,00 | NA | NA |
| RP11-92C4.4    | 0,00 | 0,00 | 0,00 | 0,00 | NA | NA |
| RP11-92C4.6    | 0,00 | 0,00 | 0,00 | 0,00 | NA | NA |
| RP11-92G19.2   | 0,00 | 0,38 | 0,00 | 0,00 | NA | NA |
| RP11-92J19.2   | 0,00 | 0,00 | 0,00 | 0,00 | NA | NA |
| RP11-92J19.3   | 0,00 | 0,00 | 0,00 | 0,00 | NA | NA |
| RP11-92K2.2    | 0,00 | 0,00 | 0,00 | 0,00 | NA | NA |
| RP11-930O11.3  | 0,00 | 0,00 | 0,00 | 0,00 | NA | NA |
| RP11-932A10.1  | 0,00 | 0,00 | 0,00 | 0,00 | NA | NA |
| RP11-932O9.1   | 0,00 | 0,00 | 0,00 | 0,00 | NA | NA |
| RP11-932O9.3   | 0,00 | 0,00 | 0,00 | 0,00 | NA | NA |
| RP11-932O9.6   | 0,00 | 0,00 | 0,00 | 0,00 | NA | NA |
| RP11-936I5.1   | 0,00 | 0,00 | 0,00 | 0,13 | NA | NA |
| RP11-939C17.4  | 0,00 | 0,00 | 0,00 | 0,00 | NA | NA |
| RP11-93B14.4   | 0,00 | 0,00 | 0,00 | 0,00 | NA | NA |
| RP11-93B14.5   | 0,00 | 0,00 | 0,00 | 0,00 | NA | NA |
| RP11-93B14.7   | 0,00 | 0,00 | 0,00 | 0,00 | NA | NA |
| RP11-93B21.1   | 0,00 | 0,00 | 0,00 | 0,00 | NA | NA |
| RP11-93G23.1   | 0,00 | 0,00 | 0,00 | 0,00 | NA | NA |
| RP11-93H12.3   | 0,00 | 0,00 | 0,00 | 0,00 | NA | NA |
| RP11-93H12.4   | 0,00 | 0,00 | 0,00 | 0,00 | NA | NA |
| RP11-93I21.1   | 0,00 | 0,00 | 0,00 | 0,00 | NA | NA |
| RP11-93I21.2   | 0,00 | 0,00 | 0,00 | 0,00 | NA | NA |
| RP11-93K22.14  | 0,00 | 0,00 | 0,00 | 0,00 | NA | NA |
| RP11-93K22.15  | 0,00 | 0,00 | 0,00 | 0,00 | NA | NA |
| RP11-93K22.7   | 0,00 | 0,00 | 0,00 | 0,00 | NA | NA |
| RP11-93K7.1    | 0,00 | 0,00 | 0,00 | 0,00 | NA | NA |
| RP11-93L14.1   | 0,00 | 0,00 | 0,00 | 0,00 | NA | NA |
| RP11-93M12.1   | 0,00 | 0,00 | 0,00 | 0,00 | NA | NA |
| RP11-93N19.1   | 0,00 | 0,00 | 0,00 | 0,00 | NA | NA |
| RP11-93O14.1   | 0,00 | 0,00 | 0,00 | 0,00 | NA | NA |
| RP11-93O17.1   | 0,00 | 0,00 | 0,00 | 0,00 | NA | NA |
| RP11-93O17.3   | 0,00 | 0,00 | 0,00 | 0,00 | NA | NA |

|               |      |      |      |      |    |    |
|---------------|------|------|------|------|----|----|
| RP11-93O7.1   | 0,00 | 0,00 | 0,00 | 0,00 | NA | NA |
| RP11-93P10.3  | 0,00 | 0,00 | 0,00 | 0,00 | NA | NA |
| RP11-941H19.1 | 0,00 | 0,00 | 0,00 | 0,00 | NA | NA |
| RP11-941H19.2 | 0,00 | 0,00 | 0,00 | 0,00 | NA | NA |
| RP11-944C7.2  | 0,00 | 0,00 | 0,00 | 0,00 | NA | NA |
| RP11-944L7.2  | 0,00 | 0,00 | 0,00 | 0,00 | NA | NA |
| RP11-944L7.3  | 0,00 | 0,00 | 0,00 | 0,00 | NA | NA |
| RP11-944L7.4  | 0,00 | 0,00 | 0,00 | 0,00 | NA | NA |
| RP11-944L7.6  | 0,00 | 0,00 | 0,00 | 0,00 | NA | NA |
| RP11-945A11.1 | 0,00 | 0,00 | 0,00 | 0,00 | NA | NA |
| RP11-945A11.2 | 0,00 | 0,00 | 0,00 | 0,00 | NA | NA |
| RP11-945A13.1 | 0,00 | 0,00 | 0,00 | 0,00 | NA | NA |
| RP11-945C19.1 | 0,00 | 0,00 | 0,00 | 0,00 | NA | NA |
| RP11-945C19.4 | 0,00 | 0,00 | 0,00 | 0,00 | NA | NA |
| RP11-946L16.2 | 0,00 | 0,00 | 0,00 | 0,00 | NA | NA |
| RP11-94B19.1  | 0,00 | 0,00 | 0,00 | 0,00 | NA | NA |
| RP11-94B19.2  | 0,00 | 0,00 | 0,00 | 0,00 | NA | NA |
| RP11-94B19.4  | 0,00 | 0,00 | 0,00 | 0,00 | NA | NA |
| RP11-94B19.5  | 0,00 | 0,00 | 0,00 | 0,00 | NA | NA |
| RP11-94C24.10 | 0,00 | 0,00 | 0,00 | 0,00 | NA | NA |
| RP11-94C24.11 | 0,00 | 0,00 | 0,00 | 0,00 | NA | NA |
| RP11-94C24.8  | 0,00 | 0,00 | 0,00 | 0,00 | NA | NA |
| RP11-94D20.1  | 0,00 | 0,00 | 0,00 | 0,00 | NA | NA |
| RP11-94F13.1  | 0,00 | 0,11 | 0,00 | 0,00 | NA | NA |
| RP11-94H18.2  | 0,00 | 0,00 | 0,00 | 0,00 | NA | NA |
| RP11-94H18.3  | 0,00 | 0,00 | 0,05 | 0,05 | NA | NA |
| RP11-94H6.1   | 0,00 | 0,00 | 0,00 | 0,00 | NA | NA |
| RP11-94I2.1   | 0,00 | 0,00 | 0,00 | 0,00 | NA | NA |
| RP11-94M14.2  | 0,00 | 0,00 | 0,00 | 0,00 | NA | NA |
| RP11-94N9.1   | 0,00 | 0,00 | 0,00 | 0,00 | NA | NA |
| RP11-94P14.1  | 0,00 | 0,00 | 0,00 | 0,00 | NA | NA |
| RP11-950C14.8 | 0,00 | 0,00 | 0,00 | 0,00 | NA | NA |
| RP11-950K24.1 | 0,00 | 0,00 | 0,00 | 0,00 | NA | NA |
| RP11-953B20.1 | 0,00 | 0,00 | 0,00 | 0,00 | NA | NA |
| RP11-953B20.2 | 0,00 | 0,00 | 0,00 | 0,00 | NA | NA |
| RP11-955H22.1 | 0,00 | 0,00 | 0,00 | 0,00 | NA | NA |
| RP11-955H22.2 | 0,00 | 0,00 | 0,00 | 0,00 | NA | NA |
| RP11-955H22.3 | 0,00 | 0,00 | 0,00 | 0,00 | NA | NA |
| RP11-955H22.4 | 0,00 | 0,00 | 0,00 | 0,00 | NA | NA |
| RP11-956A19.1 | 0,00 | 0,00 | 0,00 | 0,00 | NA | NA |
| RP11-956J14.1 | 0,00 | 0,00 | 0,00 | 0,00 | NA | NA |
| RP11-956J14.2 | 0,00 | 0,00 | 0,00 | 0,00 | NA | NA |
| RP11-958F21.1 | 0,00 | 0,00 | 0,00 | 0,00 | NA | NA |
| RP11-958F21.3 | 0,00 | 0,00 | 0,00 | 0,00 | NA | NA |
| RP11-958J22.2 | 0,00 | 0,00 | 0,00 | 0,00 | NA | NA |
| RP11-958J22.3 | 0,00 | 0,00 | 0,00 | 0,00 | NA | NA |
| RP11-958N24.2 | 0,00 | 0,00 | 0,00 | 0,00 | NA | NA |
| RP11-958N24.4 | 0,00 | 0,00 | 0,00 | 0,00 | NA | NA |
| RP11-959F10.1 | 0,00 | 0,46 | 0,00 | 0,00 | NA | NA |
| RP11-959F10.4 | 0,00 | 0,00 | 0,00 | 0,00 | NA | NA |
| RP11-959F10.5 | 0,00 | 0,00 | 0,00 | 0,00 | NA | NA |
| RP11-959I15.1 | 0,00 | 0,00 | 0,00 | 0,00 | NA | NA |
| RP11-959I15.3 | 0,00 | 0,00 | 0,00 | 0,00 | NA | NA |
| RP11-959I15.4 | 0,00 | 0,00 | 0,00 | 0,00 | NA | NA |
| RP11-959I15.5 | 0,00 | 0,00 | 0,00 | 0,00 | NA | NA |

|               |      |      |      |      |    |    |
|---------------|------|------|------|------|----|----|
| RP11-95F22.1  | 0,00 | 0,00 | 0,00 | 0,00 | NA | NA |
| RP11-95H11.1  | 0,00 | 0,00 | 0,00 | 0,00 | NA | NA |
| RP11-95H3.1   | 0,00 | 0,00 | 0,00 | 0,00 | NA | NA |
| RP11-95I16.2  | 0,00 | 0,00 | 0,00 | 0,00 | NA | NA |
| RP11-95I16.6  | 0,00 | 0,00 | 0,00 | 0,00 | NA | NA |
| RP11-95I19.2  | 0,00 | 0,00 | 0,00 | 0,00 | NA | NA |
| RP11-95I19.3  | 0,00 | 0,00 | 0,00 | 0,00 | NA | NA |
| RP11-95L3.1   | 0,00 | 0,00 | 0,00 | 0,00 | NA | NA |
| RP11-95L3.2   | 0,00 | 0,00 | 0,00 | 0,00 | NA | NA |
| RP11-95M5.1   | 0,00 | 0,00 | 0,00 | 0,00 | NA | NA |
| RP11-95O2.5   | 0,00 | 0,00 | 0,00 | 0,00 | NA | NA |
| RP11-95P13.2  | 0,00 | 0,00 | 0,00 | 0,00 | NA | NA |
| RP11-95P2.3   | 0,00 | 0,00 | 0,00 | 0,00 | NA | NA |
| RP11-95P2.4   | 0,00 | 0,00 | 0,00 | 0,00 | NA | NA |
| RP11-95P9.1   | 0,00 | 0,00 | 0,00 | 0,00 | NA | NA |
| RP11-960B9.2  | 0,00 | 0,00 | 0,00 | 0,00 | NA | NA |
| RP11-960B9.3  | 0,00 | 0,00 | 0,00 | 0,00 | NA | NA |
| RP11-960D24.1 | 0,00 | 0,00 | 0,00 | 0,00 | NA | NA |
| RP11-960H2.1  | 0,00 | 0,00 | 0,00 | 0,00 | NA | NA |
| RP11-960H2.2  | 0,00 | 0,00 | 0,00 | 0,00 | NA | NA |
| RP11-961A15.3 | 0,00 | 0,00 | 0,00 | 0,00 | NA | NA |
| RP11-962G15.1 | 0,00 | 0,00 | 0,00 | 0,00 | NA | NA |
| RP11-962G15.2 | 0,00 | 0,00 | 0,00 | 0,00 | NA | NA |
| RP11-963H1.1  | 0,00 | 0,00 | 0,00 | 0,00 | NA | NA |
| RP11-963H4.2  | 0,00 | 0,00 | 0,00 | 0,00 | NA | NA |
| RP11-963H4.5  | 0,00 | 0,00 | 0,00 | 0,00 | NA | NA |
| RP11-963H4.6  | 0,00 | 0,00 | 0,00 | 0,00 | NA | NA |
| RP11-963H4.7  | 0,00 | 0,00 | 0,00 | 0,00 | NA | NA |
| RP11-964E11.2 | 0,00 | 0,00 | 0,00 | 0,00 | NA | NA |
| RP11-964E11.3 | 0,00 | 0,00 | 0,00 | 0,00 | NA | NA |
| RP11-966I7.2  | 0,00 | 0,00 | 0,00 | 0,00 | NA | NA |
| RP11-966I7.4  | 0,00 | 0,00 | 0,00 | 0,00 | NA | NA |
| RP11-96A1.3   | 0,00 | 0,00 | 0,00 | 0,00 | NA | NA |
| RP11-96A1.4   | 0,00 | 0,00 | 0,00 | 0,00 | NA | NA |
| RP11-96B5.2   | 0,00 | 0,00 | 0,00 | 0,00 | NA | NA |
| RP11-96B5.4   | 0,00 | 0,00 | 0,00 | 0,00 | NA | NA |
| RP11-96C21.1  | 0,00 | 0,00 | 0,00 | 0,00 | NA | NA |
| RP11-96C23.10 | 0,00 | 0,00 | 0,00 | 0,00 | NA | NA |
| RP11-96C23.11 | 0,00 | 0,00 | 0,00 | 0,00 | NA | NA |
| RP11-96C23.12 | 0,00 | 0,00 | 0,00 | 0,00 | NA | NA |
| RP11-96C23.14 | 0,00 | 0,00 | 0,00 | 0,00 | NA | NA |
| RP11-96C23.15 | 0,00 | 0,00 | 0,00 | 0,00 | NA | NA |
| RP11-96C23.9  | 0,00 | 0,00 | 0,00 | 0,00 | NA | NA |
| RP11-96D1.7   | 0,00 | 0,00 | 0,00 | 0,00 | NA | NA |
| RP11-96D24.1  | 0,00 | 0,00 | 0,00 | 0,00 | NA | NA |
| RP11-96H17.3  | 0,00 | 0,00 | 0,00 | 0,00 | NA | NA |
| RP11-96J15.1  | 0,00 | 0,00 | 0,00 | 0,00 | NA | NA |
| RP11-96J15.2  | 0,00 | 0,00 | 0,00 | 0,00 | NA | NA |
| RP11-96J19.1  | 0,00 | 0,00 | 0,00 | 0,00 | NA | NA |
| RP11-96J19.4  | 0,00 | 0,00 | 0,00 | 0,00 | NA | NA |
| RP11-96K14.1  | 0,00 | 0,00 | 0,00 | 0,00 | NA | NA |
| RP11-96K19.3  | 0,00 | 0,00 | 0,00 | 0,00 | NA | NA |
| RP11-96L14.7  | 0,00 | 0,00 | 0,00 | 0,00 | NA | NA |
| RP11-96L14.8  | 0,00 | 0,00 | 0,00 | 0,00 | NA | NA |
| RP11-96L14.9  | 0,00 | 0,00 | 0,00 | 0,00 | NA | NA |

|               |      |      |      |      |    |    |
|---------------|------|------|------|------|----|----|
| RP11-972K6.1  | 0,00 | 0,00 | 0,00 | 0,00 | NA | NA |
| RP11-972L6.2  | 0,00 | 0,00 | 0,00 | 0,00 | NA | NA |
| RP11-972P1.10 | 0,00 | 0,00 | 0,00 | 0,00 | NA | NA |
| RP11-972P1.11 | 0,00 | 0,00 | 0,00 | 0,00 | NA | NA |
| RP11-972P1.8  | 0,00 | 0,00 | 0,00 | 0,00 | NA | NA |
| RP11-973D8.4  | 0,00 | 0,00 | 0,00 | 0,00 | NA | NA |
| RP11-973D8.5  | 0,00 | 0,00 | 0,00 | 0,00 | NA | NA |
| RP11-973F15.2 | 0,00 | 0,00 | 0,00 | 0,00 | NA | NA |
| RP11-973H7.4  | 0,00 | 0,00 | 0,00 | 0,00 | NA | NA |
| RP11-973N13.2 | 0,00 | 0,00 | 0,00 | 0,00 | NA | NA |
| RP11-973N13.3 | 0,00 | 0,00 | 0,00 | 0,00 | NA | NA |
| RP11-973N13.5 | 0,00 | 0,00 | 0,00 | 0,00 | NA | NA |
| RP11-977P2.1  | 0,00 | 0,00 | 0,00 | 0,00 | NA | NA |
| RP11-978P4.2  | 0,00 | 0,33 | 0,00 | 0,00 | NA | NA |
| RP11-97C18.1  | 0,00 | 0,00 | 0,00 | 0,00 | NA | NA |
| RP11-97E7.2   | 0,00 | 0,00 | 0,00 | 0,00 | NA | NA |
| RP11-97F8.1   | 0,00 | 0,00 | 0,00 | 0,00 | NA | NA |
| RP11-97I14.1  | 0,00 | 0,00 | 0,00 | 0,00 | NA | NA |
| RP11-97N10.1  | 0,00 | 0,00 | 0,00 | 0,00 | NA | NA |
| RP11-97N19.2  | 0,00 | 0,00 | 0,00 | 0,00 | NA | NA |
| RP11-97N19.3  | 0,00 | 0,00 | 0,00 | 0,00 | NA | NA |
| RP11-97N5.2   | 0,00 | 0,00 | 0,00 | 0,00 | NA | NA |
| RP11-97O12.3  | 0,00 | 0,00 | 0,00 | 0,00 | NA | NA |
| RP11-97O12.7  | 0,00 | 0,00 | 0,00 | 0,00 | NA | NA |
| RP11-981G7.3  | 0,00 | 0,00 | 0,00 | 0,00 | NA | NA |
| RP11-982M15.5 | 0,00 | 0,00 | 0,00 | 0,00 | NA | NA |
| RP11-982M15.6 | 0,00 | 0,00 | 0,00 | 0,00 | NA | NA |
| RP11-983C2.1  | 0,00 | 0,00 | 0,00 | 0,00 | NA | NA |
| RP11-983C2.2  | 0,00 | 0,00 | 0,00 | 0,00 | NA | NA |
| RP11-983C2.3  | 0,00 | 0,00 | 0,00 | 0,00 | NA | NA |
| RP11-983C2.4  | 0,00 | 0,00 | 0,00 | 0,00 | NA | NA |
| RP11-983G14.1 | 0,00 | 0,00 | 0,00 | 0,00 | NA | NA |
| RP11-983G14.3 | 0,00 | 0,00 | 0,00 | 0,00 | NA | NA |
| RP11-986E7.2  | 0,00 | 0,00 | 0,00 | 0,00 | NA | NA |
| RP11-986E7.6  | 0,00 | 0,00 | 0,00 | 0,00 | NA | NA |
| RP11-986E7.7  | 0,00 | 0,00 | 0,00 | 0,00 | NA | NA |
| RP11-986G18.1 | 0,00 | 0,00 | 0,00 | 0,00 | NA | NA |
| RP11-986G18.2 | 0,00 | 0,00 | 0,00 | 0,00 | NA | NA |
| RP11-986G18.3 | 0,00 | 0,00 | 0,00 | 0,00 | NA | NA |
| RP11-989E6.1  | 0,00 | 0,00 | 0,00 | 0,00 | NA | NA |
| RP11-989E6.11 | 0,00 | 0,00 | 0,00 | 0,00 | NA | NA |
| RP11-989E6.13 | 0,00 | 0,00 | 0,00 | 0,00 | NA | NA |
| RP11-989E6.2  | 0,00 | 0,00 | 0,00 | 0,00 | NA | NA |
| RP11-989E6.3  | 0,00 | 0,00 | 0,00 | 0,00 | NA | NA |
| RP11-989E6.8  | 0,00 | 0,00 | 0,00 | 0,00 | NA | NA |
| RP11-989F5.1  | 0,00 | 0,00 | 0,00 | 0,00 | NA | NA |
| RP11-989F5.3  | 0,00 | 0,00 | 0,00 | 0,00 | NA | NA |
| RP11-989F5.4  | 0,00 | 0,00 | 0,00 | 0,00 | NA | NA |
| RP11-98C1.2   | 0,00 | 0,00 | 0,00 | 0,00 | NA | NA |
| RP11-98C8.1   | 0,00 | 0,00 | 0,00 | 0,00 | NA | NA |
| RP11-98D18.1  | 0,00 | 0,00 | 0,00 | 0,00 | NA | NA |
| RP11-98D18.16 | 0,00 | 0,00 | 0,00 | 0,00 | NA | NA |
| RP11-98D18.2  | 0,00 | 0,00 | 0,00 | 0,00 | NA | NA |
| RP11-98D18.3  | 0,00 | 0,00 | 0,00 | 0,00 | NA | NA |
| RP11-98D18.7  | 0,00 | 0,00 | 0,00 | 0,00 | NA | NA |

|                |      |      |      |      |    |    |
|----------------|------|------|------|------|----|----|
| RP11-98E6.1    | 0,00 | 0,00 | 0,00 | 0,00 | NA | NA |
| RP11-98F14.11  | 0,00 | 0,00 | 0,00 | 0,00 | NA | NA |
| RP11-98F14.4   | 0,00 | 0,00 | 0,00 | 0,00 | NA | NA |
| RP11-98F19.1   | 0,00 | 0,00 | 0,00 | 0,00 | NA | NA |
| RP11-98G13.1   | 0,00 | 0,00 | 0,00 | 0,00 | NA | NA |
| RP11-98H4.1    | 0,00 | 0,00 | 0,00 | 0,00 | NA | NA |
| RP11-98J9.1    | 0,00 | 0,00 | 0,00 | 0,00 | NA | NA |
| RP11-98J9.2    | 0,00 | 0,00 | 0,00 | 0,00 | NA | NA |
| RP11-98J9.3    | 0,00 | 0,00 | 0,00 | 0,00 | NA | NA |
| RP11-98L12.2   | 0,00 | 0,00 | 0,00 | 0,00 | NA | NA |
| RP11-98L4.1    | 0,00 | 0,00 | 0,00 | 0,00 | NA | NA |
| RP11-98L5.4    | 0,00 | 0,00 | 0,00 | 0,00 | NA | NA |
| RP11-98N22.5   | 0,00 | 0,00 | 0,00 | 0,00 | NA | NA |
| RP11-98N22.6   | 0,00 | 0,00 | 0,00 | 0,00 | NA | NA |
| RP11-98P2.1    | 0,00 | 0,00 | 0,00 | 0,00 | NA | NA |
| RP11-991C1.1   | 0,00 | 0,00 | 0,00 | 0,00 | NA | NA |
| RP11-991C1.2   | 0,00 | 0,00 | 0,00 | 0,00 | NA | NA |
| RP11-993B23.1  | 0,00 | 0,00 | 0,00 | 0,00 | NA | NA |
| RP11-993B23.3  | 0,00 | 0,00 | 0,00 | 0,00 | NA | NA |
| RP11-996F15.5  | 0,00 | 0,00 | 0,00 | 0,00 | NA | NA |
| RP11-998D10.4  | 0,00 | 0,00 | 0,00 | 0,00 | NA | NA |
| RP11-998D10.5  | 0,00 | 0,00 | 0,00 | 0,00 | NA | NA |
| RP11-99A1.2    | 0,00 | 0,00 | 0,00 | 0,00 | NA | NA |
| RP11-99E15.3   | 0,00 | 0,00 | 0,00 | 0,00 | NA | NA |
| RP11-99I9.2    | 0,00 | 0,00 | 0,00 | 0,00 | NA | NA |
| RP11-99L13.1   | 0,00 | 0,00 | 0,00 | 0,00 | NA | NA |
| RP11-99L13.2   | 0,00 | 0,00 | 0,00 | 0,00 | NA | NA |
| RP11-99M15.1   | 0,00 | 0,00 | 0,00 | 0,00 | NA | NA |
| RP11-9B6.1     | 0,00 | 0,00 | 0,00 | 0,00 | NA | NA |
| RP11-9E13.4    | 0,00 | 0,00 | 0,00 | 0,00 | NA | NA |
| RP11-9G1.2     | 0,00 | 0,00 | 0,00 | 0,00 | NA | NA |
| RP11-9G10.1    | 0,00 | 0,00 | 0,00 | 0,00 | NA | NA |
| RP11-9H12.6    | 0,00 | 0,00 | 0,00 | 0,00 | NA | NA |
| RP11-9H12.7    | 0,00 | 0,00 | 0,00 | 0,00 | NA | NA |
| RP11-9H12.8    | 0,00 | 0,00 | 0,00 | 0,00 | NA | NA |
| RP11-9H12.9    | 0,00 | 0,00 | 0,00 | 0,00 | NA | NA |
| RP11-9H20.2    | 0,00 | 0,00 | 0,00 | 0,00 | NA | NA |
| RP11-9L18.2    | 0,00 | 0,00 | 0,00 | 0,00 | NA | NA |
| RP11-9N12.2    | 0,00 | 0,00 | 0,00 | 0,00 | NA | NA |
| RP11-9N12.3    | 0,00 | 0,00 | 0,00 | 0,00 | NA | NA |
| RP11-9N20.3    | 0,00 | 0,00 | 0,00 | 0,00 | NA | NA |
| RP13-100A9.1   | 0,00 | 0,00 | 0,00 | 0,00 | NA | NA |
| RP13-100A9.2   | 0,00 | 0,00 | 0,00 | 0,00 | NA | NA |
| RP13-1016M1.2  | 0,00 | 0,00 | 0,00 | 0,00 | NA | NA |
| RP13-1032I1.10 | 0,00 | 0,00 | 0,00 | 0,00 | NA | NA |
| RP13-1032I1.11 | 0,00 | 0,00 | 0,00 | 0,00 | NA | NA |
| RP13-1039J1.2  | 0,00 | 0,00 | 0,00 | 0,00 | NA | NA |
| RP13-1039J1.4  | 0,00 | 0,00 | 0,00 | 0,00 | NA | NA |
| RP13-122B23.8  | 0,00 | 0,00 | 0,00 | 0,00 | NA | NA |
| RP13-125M24.2  | 0,00 | 0,00 | 0,00 | 0,00 | NA | NA |
| RP13-126P21.2  | 0,00 | 0,00 | 0,00 | 0,00 | NA | NA |
| RP13-128O4.3   | 0,00 | 0,00 | 0,23 | 0,12 | NA | NA |
| RP13-131K19.7  | 0,00 | 0,00 | 0,00 | 0,00 | NA | NA |
| RP13-137A17.5  | 0,00 | 0,00 | 0,00 | 0,00 | NA | NA |
| RP13-137A17.6  | 0,00 | 0,00 | 0,00 | 0,00 | NA | NA |

|               |      |      |      |      |    |    |
|---------------|------|------|------|------|----|----|
| RP13-138P15.2 | 0,00 | 0,00 | 0,00 | 0,00 | NA | NA |
| RP13-138P15.3 | 0,00 | 0,00 | 0,00 | 0,00 | NA | NA |
| RP13-140E4.1  | 0,00 | 0,00 | 0,00 | 0,00 | NA | NA |
| RP13-140E4.2  | 0,00 | 0,00 | 0,00 | 0,00 | NA | NA |
| RP13-143G15.1 | 0,00 | 0,00 | 0,00 | 0,00 | NA | NA |
| RP13-147D17.1 | 0,00 | 0,00 | 0,00 | 0,00 | NA | NA |
| RP13-150K15.1 | 0,00 | 0,00 | 0,00 | 0,00 | NA | NA |
| RP13-158L7.2  | 0,00 | 0,00 | 0,00 | 0,00 | NA | NA |
| RP13-16D10.1  | 0,00 | 0,00 | 0,00 | 0,00 | NA | NA |
| RP13-16H11.7  | 0,00 | 0,00 | 0,00 | 0,00 | NA | NA |
| RP13-172P16.1 | 0,00 | 0,00 | 0,00 | 0,00 | NA | NA |
| RP13-178D16.1 | 0,00 | 0,00 | 0,00 | 0,00 | NA | NA |
| RP13-192B19.1 | 0,00 | 0,00 | 0,00 | 0,00 | NA | NA |
| RP13-198D9.3  | 0,00 | 0,00 | 0,00 | 0,00 | NA | NA |
| RP13-202B6.2  | 0,00 | 0,00 | 0,00 | 0,00 | NA | NA |
| RP13-204A15.1 | 0,00 | 0,00 | 0,00 | 0,00 | NA | NA |
| RP13-204A15.2 | 0,00 | 0,00 | 0,00 | 0,00 | NA | NA |
| RP13-208E17.2 | 0,00 | 0,00 | 0,00 | 0,00 | NA | NA |
| RP13-20L14.2  | 0,00 | 0,00 | 0,00 | 0,00 | NA | NA |
| RP13-210D15.1 | 0,00 | 0,00 | 0,00 | 0,00 | NA | NA |
| RP13-210D15.4 | 0,00 | 0,00 | 0,00 | 0,00 | NA | NA |
| RP13-211P9.1  | 0,00 | 0,00 | 0,00 | 0,00 | NA | NA |
| RP13-221M14.2 | 0,00 | 0,00 | 0,00 | 0,00 | NA | NA |
| RP13-221M14.3 | 0,00 | 0,00 | 0,00 | 0,00 | NA | NA |
| RP13-221M14.4 | 0,00 | 0,00 | 0,00 | 0,00 | NA | NA |
| RP13-222H17.1 | 0,00 | 0,00 | 0,00 | 0,00 | NA | NA |
| RP13-225O21.2 | 0,00 | 0,00 | 0,00 | 0,00 | NA | NA |
| RP13-225O21.5 | 0,00 | 0,00 | 0,00 | 0,00 | NA | NA |
| RP13-228J13.8 | 0,00 | 0,00 | 0,00 | 0,00 | NA | NA |
| RP13-228J13.9 | 0,00 | 0,00 | 0,00 | 0,00 | NA | NA |
| RP13-238F13.3 | 0,00 | 0,00 | 0,00 | 0,00 | NA | NA |
| RP13-238N7.2  | 0,00 | 0,00 | 0,00 | 0,00 | NA | NA |
| RP13-24G8.2   | 0,00 | 0,00 | 0,00 | 0,00 | NA | NA |
| RP13-254B10.1 | 0,00 | 0,00 | 0,00 | 0,00 | NA | NA |
| RP13-258O15.1 | 0,00 | 0,00 | 0,00 | 0,00 | NA | NA |
| RP13-258O15.2 | 0,00 | 0,00 | 0,00 | 0,00 | NA | NA |
| RP13-259N13.2 | 1,22 | 1,29 | 1,43 | 0,18 | NA | NA |
| RP13-262C2.3  | 0,00 | 0,00 | 0,00 | 0,00 | NA | NA |
| RP13-266I11.1 | 0,00 | 0,00 | 0,00 | 0,00 | NA | NA |
| RP13-26D14.2  | 0,00 | 0,00 | 0,00 | 0,00 | NA | NA |
| RP13-278H16.2 | 0,00 | 0,00 | 0,00 | 0,00 | NA | NA |
| RP13-30A9.1   | 0,00 | 0,00 | 0,00 | 0,00 | NA | NA |
| RP13-30A9.2   | 0,00 | 0,00 | 0,00 | 0,00 | NA | NA |
| RP13-313G19.2 | 0,00 | 0,00 | 0,00 | 0,00 | NA | NA |
| RP13-324D24.1 | 0,00 | 0,00 | 0,00 | 0,00 | NA | NA |
| RP13-329D4.3  | 0,00 | 0,00 | 0,00 | 0,00 | NA | NA |
| RP13-331H15.1 | 0,00 | 0,00 | 0,00 | 0,00 | NA | NA |
| RP13-339P19.1 | 0,28 | 0,43 | 0,00 | 0,00 | NA | NA |
| RP13-33H18.1  | 0,00 | 0,00 | 0,00 | 0,00 | NA | NA |
| RP13-346H10.2 | 0,00 | 0,00 | 0,00 | 0,00 | NA | NA |
| RP13-347D8.1  | 0,00 | 0,00 | 0,00 | 0,00 | NA | NA |
| RP13-347D8.7  | 0,00 | 0,00 | 0,00 | 0,00 | NA | NA |
| RP13-348B13.1 | 0,00 | 0,00 | 0,00 | 0,00 | NA | NA |
| RP13-348B13.2 | 0,00 | 0,00 | 0,00 | 0,00 | NA | NA |
| RP13-349O20.2 | 0,00 | 0,00 | 0,00 | 0,00 | NA | NA |



|               |      |      |      |      |    |    |
|---------------|------|------|------|------|----|----|
| RP13-34C21.1  | 0,00 | 0,00 | 0,00 | 0,00 | NA | NA |
| RP13-34L8.7   | 0,00 | 0,00 | 0,00 | 0,00 | NA | NA |
| RP13-34L8.8   | 0,00 | 0,00 | 0,00 | 0,00 | NA | NA |
| RP13-359K18.1 | 0,00 | 0,00 | 0,00 | 0,00 | NA | NA |
| RP13-362E11.1 | 0,00 | 0,00 | 0,00 | 0,00 | NA | NA |
| RP13-362E11.2 | 0,00 | 0,00 | 0,00 | 0,00 | NA | NA |
| RP13-36C9.4   | 0,00 | 0,00 | 0,00 | 0,00 | NA | NA |
| RP13-36C9.5   | 0,00 | 0,00 | 0,00 | 0,00 | NA | NA |
| RP13-36G14.3  | 0,00 | 0,00 | 0,00 | 0,00 | NA | NA |
| RP13-379L11.1 | 0,00 | 0,00 | 0,00 | 0,00 | NA | NA |
| RP13-379L11.2 | 0,00 | 0,00 | 0,00 | 0,00 | NA | NA |
| RP13-379L11.3 | 0,00 | 0,00 | 0,00 | 0,00 | NA | NA |
| RP13-379L11.4 | 0,00 | 0,00 | 0,00 | 0,00 | NA | NA |
| RP13-379O24.2 | 0,00 | 0,00 | 0,00 | 0,00 | NA | NA |
| RP13-379O24.3 | 0,00 | 0,00 | 0,00 | 0,00 | NA | NA |
| RP13-383K5.4  | 0,00 | 0,00 | 0,00 | 0,00 | NA | NA |
| RP13-392I16.1 | 0,00 | 0,00 | 0,00 | 0,00 | NA | NA |
| RP13-395E19.2 | 0,00 | 0,00 | 0,00 | 0,00 | NA | NA |
| RP13-39P12.2  | 0,00 | 0,00 | 0,00 | 0,00 | NA | NA |
| RP13-39P12.3  | 0,00 | 0,18 | 0,00 | 0,00 | NA | NA |
| RP13-401N8.1  | 0,00 | 0,00 | 0,00 | 0,00 | NA | NA |
| RP13-401N8.3  | 0,00 | 0,00 | 0,00 | 0,00 | NA | NA |
| RP13-401N8.5  | 0,00 | 0,00 | 0,00 | 0,00 | NA | NA |
| RP13-401N8.6  | 0,00 | 0,00 | 0,00 | 0,00 | NA | NA |
| RP13-401N8.7  | 0,00 | 0,00 | 0,00 | 0,00 | NA | NA |
| RP13-401N8.8  | 0,00 | 0,00 | 0,00 | 0,00 | NA | NA |
| RP13-40J16.1  | 0,00 | 0,00 | 0,00 | 0,00 | NA | NA |
| RP13-436F16.1 | 0,00 | 0,00 | 0,00 | 0,00 | NA | NA |
| RP13-439H18.7 | 0,00 | 0,00 | 0,00 | 0,00 | NA | NA |
| RP13-461N9.2  | 0,00 | 0,00 | 0,00 | 0,00 | NA | NA |
| RP13-463N16.6 | 0,00 | 0,00 | 0,00 | 0,00 | NA | NA |
| RP13-465B17.2 | 0,00 | 0,00 | 0,00 | 0,00 | NA | NA |
| RP13-465B17.3 | 0,00 | 0,00 | 0,00 | 0,00 | NA | NA |
| RP13-465B17.4 | 0,00 | 0,00 | 0,00 | 0,00 | NA | NA |
| RP13-465B17.5 | 0,00 | 0,00 | 0,00 | 0,00 | NA | NA |
| RP13-469O16.1 | 0,00 | 0,00 | 0,00 | 0,00 | NA | NA |
| RP13-46H24.1  | 0,00 | 0,00 | 0,00 | 0,00 | NA | NA |
| RP13-470G3.1  | 0,00 | 0,00 | 0,00 | 0,00 | NA | NA |
| RP13-470G3.2  | 0,00 | 0,00 | 0,00 | 0,00 | NA | NA |
| RP13-480C15.1 | 0,00 | 0,00 | 0,00 | 0,00 | NA | NA |
| RP13-483F6.1  | 0,00 | 0,00 | 0,00 | 0,00 | NA | NA |
| RP13-483F6.2  | 0,00 | 0,00 | 0,00 | 0,00 | NA | NA |
| RP13-487C10.1 | 0,00 | 0,00 | 0,00 | 0,00 | NA | NA |
| RP13-488H8.1  | 0,00 | 0,00 | 0,00 | 0,00 | NA | NA |
| RP13-492C18.1 | 0,00 | 0,00 | 0,00 | 0,00 | NA | NA |
| RP13-492C18.2 | 0,00 | 0,00 | 0,00 | 0,00 | NA | NA |
| RP13-497K6.1  | 0,00 | 0,00 | 0,00 | 0,00 | NA | NA |
| RP13-503K1.1  | 0,00 | 0,12 | 0,00 | 0,00 | NA | NA |
| RP13-507P19.1 | 0,00 | 0,00 | 0,00 | 0,00 | NA | NA |
| RP13-511O19.1 | 0,00 | 0,00 | 0,00 | 0,00 | NA | NA |
| RP13-512J5.1  | 0,00 | 0,00 | 0,00 | 0,00 | NA | NA |
| RP13-526J3.1  | 0,00 | 0,00 | 0,00 | 0,00 | NA | NA |
| RP13-539F13.2 | 0,00 | 0,00 | 0,00 | 0,00 | NA | NA |
| RP13-539F13.3 | 0,00 | 0,00 | 0,00 | 0,00 | NA | NA |
| RP13-539J13.1 | 0,00 | 0,00 | 0,00 | 0,00 | NA | NA |

|               |      |      |      |      |    |    |
|---------------|------|------|------|------|----|----|
| RP13-546I2.1  | 0,00 | 0,00 | 0,00 | 0,00 | NA | NA |
| RP13-55H22.2  | 0,00 | 0,00 | 0,00 | 0,00 | NA | NA |
| RP13-560N11.1 | 0,00 | 0,00 | 0,00 | 0,00 | NA | NA |
| RP13-577H12.2 | 0,00 | 0,00 | 0,00 | 0,00 | NA | NA |
| RP13-577H12.3 | 0,00 | 0,00 | 0,00 | 0,00 | NA | NA |
| RP13-57D9.3   | 0,00 | 0,00 | 0,00 | 0,00 | NA | NA |
| RP13-580B18.2 | 0,00 | 0,00 | 0,00 | 0,00 | NA | NA |
| RP13-580B18.4 | 0,00 | 0,04 | 0,01 | 0,01 | NA | NA |
| RP13-582L3.4  | 0,00 | 0,00 | 0,00 | 0,00 | NA | NA |
| RP13-582O9.6  | 0,00 | 0,00 | 0,00 | 0,00 | NA | NA |
| RP13-588I20.1 | 0,00 | 0,00 | 0,00 | 0,00 | NA | NA |
| RP13-608F4.5  | 0,00 | 0,00 | 0,00 | 0,00 | NA | NA |
| RP13-60M5.2   | 0,00 | 0,00 | 0,00 | 0,00 | NA | NA |
| RP13-60P5.2   | 0,00 | 0,00 | 0,00 | 0,00 | NA | NA |
| RP13-60P5.3   | 0,00 | 0,00 | 0,00 | 0,00 | NA | NA |
| RP13-612N21.1 | 0,00 | 0,00 | 0,00 | 0,00 | NA | NA |
| RP13-619I2.2  | 0,00 | 0,00 | 0,00 | 0,00 | NA | NA |
| RP13-62H24.1  | 0,00 | 0,00 | 0,00 | 0,00 | NA | NA |
| RP13-631K18.5 | 0,00 | 0,00 | 0,00 | 0,00 | NA | NA |
| RP13-638C3.3  | 0,00 | 0,00 | 0,00 | 0,00 | NA | NA |
| RP13-638C3.6  | 0,00 | 0,00 | 0,20 | 0,49 | NA | NA |
| RP13-643D4.1  | 0,00 | 0,00 | 0,00 | 0,00 | NA | NA |
| RP13-644M16.1 | 0,00 | 0,00 | 0,00 | 0,00 | NA | NA |
| RP13-644M16.4 | 0,00 | 0,00 | 0,00 | 0,00 | NA | NA |
| RP13-644M16.5 | 0,00 | 0,00 | 0,00 | 0,00 | NA | NA |
| RP13-650G11.1 | 0,00 | 0,00 | 0,00 | 0,00 | NA | NA |
| RP13-653N12.1 | 0,00 | 0,00 | 0,00 | 0,00 | NA | NA |
| RP13-653N12.2 | 0,00 | 0,00 | 0,00 | 0,00 | NA | NA |
| RP13-672B3.2  | 0,00 | 0,00 | 0,00 | 0,00 | NA | NA |
| RP13-672B3.5  | 0,00 | 0,00 | 0,00 | 0,00 | NA | NA |
| RP13-685P2.4  | 0,00 | 0,00 | 0,00 | 0,00 | NA | NA |
| RP13-685P2.8  | 0,00 | 0,00 | 0,00 | 0,00 | NA | NA |
| RP13-726E6.2  | 0,00 | 0,00 | 0,00 | 0,00 | NA | NA |
| RP13-726E6.3  | 0,00 | 0,00 | 0,00 | 0,00 | NA | NA |
| RP13-766D20.2 | 0,00 | 0,00 | 0,00 | 0,00 | NA | NA |
| RP13-766D20.4 | 0,00 | 0,00 | 0,00 | 0,00 | NA | NA |
| RP13-77O11.12 | 0,00 | 0,00 | 0,00 | 0,00 | NA | NA |
| RP13-77O11.2  | 0,00 | 0,00 | 0,00 | 0,00 | NA | NA |
| RP13-77O11.8  | 0,00 | 0,00 | 0,00 | 0,00 | NA | NA |
| RP13-786C16.1 | 0,00 | 0,00 | 0,00 | 0,00 | NA | NA |
| RP13-81N3.1   | 0,00 | 0,00 | 0,00 | 0,00 | NA | NA |
| RP13-81N3.2   | 0,00 | 0,00 | 0,00 | 0,00 | NA | NA |
| RP13-820C6.4  | 0,00 | 0,00 | 0,00 | 0,00 | NA | NA |
| RP13-824C8.2  | 0,00 | 0,00 | 0,00 | 0,00 | NA | NA |
| RP13-83C14.1  | 0,00 | 0,00 | 0,00 | 0,00 | NA | NA |
| RP13-83C14.2  | 0,00 | 0,00 | 0,00 | 0,00 | NA | NA |
| RP13-884E18.3 | 0,00 | 0,00 | 0,00 | 0,00 | NA | NA |
| RP13-884E18.4 | 0,00 | 0,00 | 0,00 | 0,00 | NA | NA |
| RP13-88F20.1  | 0,00 | 0,00 | 0,00 | 0,00 | NA | NA |
| RP13-895J2.10 | 0,00 | 0,00 | 0,00 | 0,00 | NA | NA |
| RP13-895J2.11 | 0,00 | 0,00 | 0,00 | 0,00 | NA | NA |
| RP13-895J2.2  | 0,00 | 0,00 | 0,00 | 0,00 | NA | NA |
| RP13-895J2.3  | 0,00 | 0,00 | 0,00 | 0,00 | NA | NA |
| RP13-895J2.4  | 0,00 | 0,00 | 0,00 | 0,00 | NA | NA |
| RP13-895J2.7  | 0,00 | 0,00 | 0,00 | 0,00 | NA | NA |

|               |      |      |      |      |    |    |
|---------------|------|------|------|------|----|----|
| RP13-895J2.8  | 0,00 | 0,00 | 0,00 | 0,00 | NA | NA |
| RP13-895J2.9  | 0,00 | 0,00 | 0,00 | 0,00 | NA | NA |
| RP13-926M18.1 | 0,00 | 0,00 | 0,00 | 0,00 | NA | NA |
| RP13-928P6.3  | 0,00 | 0,00 | 0,00 | 0,00 | NA | NA |
| RP13-929K23.2 | 0,00 | 0,00 | 0,00 | 0,00 | NA | NA |
| RP13-929K23.3 | 0,00 | 0,00 | 0,00 | 0,00 | NA | NA |
| RP13-929K23.4 | 0,00 | 0,00 | 0,00 | 0,00 | NA | NA |
| RP13-929K23.5 | 0,00 | 0,00 | 0,00 | 0,00 | NA | NA |
| RP13-93L13.1  | 0,00 | 0,00 | 0,00 | 0,00 | NA | NA |
| RP13-977J11.2 | 0,00 | 0,00 | 0,00 | 0,00 | NA | NA |
| RP13-977J11.5 | 0,00 | 0,00 | 0,00 | 0,00 | NA | NA |
| RP13-977J11.6 | 0,00 | 0,00 | 0,00 | 0,00 | NA | NA |
| RP13-977J11.8 | 0,00 | 0,00 | 0,00 | 0,00 | NA | NA |
| RP13-977J11.9 | 0,00 | 0,00 | 0,00 | 0,00 | NA | NA |
| RP3-323B6.1   | 0,00 | 0,00 | 0,00 | 0,00 | NA | NA |
| RP3-323B6.2   | 0,00 | 0,00 | 0,00 | 0,00 | NA | NA |
| RP3-323M4.3   | 0,00 | 0,00 | 0,00 | 0,00 | NA | NA |
| RP3-323P24.3  | 0,00 | 0,00 | 0,00 | 0,00 | NA | NA |
| RP3-324O17.2  | 0,00 | 0,00 | 0,00 | 0,00 | NA | NA |
| RP3-324O17.4  | 0,00 | 0,00 | 0,00 | 0,00 | NA | NA |
| RP3-324O17.7  | 0,00 | 0,00 | 0,00 | 0,00 | NA | NA |
| RP3-329A5.1   | 0,00 | 0,00 | 0,00 | 0,00 | NA | NA |
| RP3-329E20.2  | 0,00 | 0,00 | 0,00 | 0,00 | NA | NA |
| RP3-331H24.4  | 0,00 | 0,00 | 0,00 | 0,00 | NA | NA |
| RP3-331H24.5  | 0,00 | 0,00 | 0,00 | 0,00 | NA | NA |
| RP3-332B22.1  | 0,00 | 0,00 | 0,00 | 0,00 | NA | NA |
| RP3-333B15.2  | 0,00 | 0,00 | 0,00 | 0,00 | NA | NA |
| RP3-333B15.4  | 0,00 | 0,00 | 0,00 | 0,00 | NA | NA |
| RP3-333B15.6  | 0,00 | 0,00 | 0,00 | 0,00 | NA | NA |
| RP3-334F4.1   | 0,00 | 0,00 | 0,00 | 0,00 | NA | NA |
| RP3-334F4.2   | 0,00 | 0,00 | 0,00 | 0,00 | NA | NA |
| RP3-335E1.1   | 0,00 | 0,00 | 0,00 | 0,00 | NA | NA |
| RP3-336H9.2   | 0,00 | 0,00 | 0,00 | 0,00 | NA | NA |
| RP3-337H4.6   | 0,11 | 0,00 | 0,00 | 0,00 | NA | NA |
| RP3-337O18.9  | 0,00 | 0,00 | 0,00 | 0,00 | NA | NA |
| RP3-339A18.3  | 0,00 | 0,00 | 0,00 | 0,00 | NA | NA |
| RP3-340B19.2  | 0,00 | 0,00 | 0,00 | 0,00 | NA | NA |
| RP3-340B19.3  | 0,00 | 0,00 | 0,00 | 0,00 | NA | NA |
| RP3-340N1.6   | 0,00 | 0,00 | 0,00 | 0,00 | NA | NA |
| RP3-340N1.7   | 0,00 | 0,00 | 0,00 | 0,00 | NA | NA |
| RP3-341D10.1  | 0,00 | 0,00 | 0,00 | 0,00 | NA | NA |
| RP3-341I10.1  | 0,00 | 0,00 | 0,00 | 0,00 | NA | NA |
| RP3-343K2.4   | 0,00 | 0,00 | 0,00 | 0,00 | NA | NA |
| RP3-344J20.1  | 0,00 | 0,00 | 0,00 | 0,00 | NA | NA |
| RP3-344J20.2  | 0,00 | 0,00 | 0,00 | 0,00 | NA | NA |
| RP3-344J20.3  | 0,00 | 0,00 | 0,00 | 0,00 | NA | NA |
| RP3-346O6.2   | 0,00 | 0,00 | 0,00 | 0,00 | NA | NA |
| RP3-347M6.2   | 0,00 | 0,00 | 0,00 | 0,00 | NA | NA |
| RP3-347M6.3   | 0,00 | 0,00 | 0,00 | 0,00 | NA | NA |
| RP3-351K20.3  | 0,00 | 0,00 | 0,00 | 0,00 | NA | NA |
| RP3-351K20.4  | 0,00 | 0,00 | 0,00 | 0,00 | NA | NA |
| RP3-352A20.1  | 0,00 | 0,00 | 0,00 | 0,00 | NA | NA |
| RP3-353H6.1   | 0,00 | 0,00 | 0,00 | 0,00 | NA | NA |
| RP3-354J5.3   | 0,00 | 0,00 | 0,00 | 0,00 | NA | NA |
| RP3-354N19.1  | 0,00 | 0,00 | 0,00 | 0,00 | NA | NA |

|               |      |      |      |      |    |    |
|---------------|------|------|------|------|----|----|
| RP3-357I16.1  | 0,00 | 0,00 | 0,00 | 0,00 | NA | NA |
| RP3-358H7.1   | 0,00 | 0,00 | 0,00 | 0,00 | NA | NA |
| RP3-359N14.2  | 0,00 | 0,00 | 0,00 | 0,00 | NA | NA |
| RP3-363L9.1   | 0,00 | 0,00 | 0,00 | 0,00 | NA | NA |
| RP3-364H10.1  | 0,00 | 0,00 | 0,00 | 0,00 | NA | NA |
| RP3-365I19.2  | 0,00 | 0,00 | 0,00 | 0,00 | NA | NA |
| RP3-366N23.4  | 0,00 | 0,00 | 0,00 | 0,00 | NA | NA |
| RP3-368B9.2   | 0,00 | 0,00 | 0,00 | 0,00 | NA | NA |
| RP3-369A17.2  | 0,00 | 0,00 | 0,00 | 0,00 | NA | NA |
| RP3-369A17.6  | 0,00 | 0,00 | 0,00 | 0,00 | NA | NA |
| RP3-372K1.1   | 0,00 | 0,00 | 0,00 | 0,00 | NA | NA |
| RP3-375P9.2   | 0,00 | 0,00 | 0,00 | 0,00 | NA | NA |
| RP3-377H17.2  | 0,00 | 0,00 | 0,00 | 0,00 | NA | NA |
| RP3-377H17.3  | 0,00 | 0,00 | 0,00 | 0,00 | NA | NA |
| RP3-377O6.1   | 0,00 | 0,00 | 0,00 | 0,00 | NA | NA |
| RP3-377O6.2   | 0,00 | 0,00 | 0,00 | 0,00 | NA | NA |
| RP3-378P9.1   | 0,00 | 0,00 | 0,00 | 0,00 | NA | NA |
| RP3-378P9.2   | 0,00 | 0,00 | 0,00 | 0,00 | NA | NA |
| RP3-380B4.1   | 0,00 | 0,00 | 0,00 | 0,00 | NA | NA |
| RP3-380B8.1   | 0,00 | 0,00 | 0,00 | 0,00 | NA | NA |
| RP3-380C13.1  | 0,00 | 0,00 | 0,00 | 0,00 | NA | NA |
| RP3-380C13.2  | 0,00 | 0,00 | 0,00 | 0,00 | NA | NA |
| RP3-380E11.2  | 0,00 | 0,00 | 0,00 | 0,00 | NA | NA |
| RP3-384D21.2  | 0,00 | 0,00 | 0,00 | 0,00 | NA | NA |
| RP3-388E23.2  | 0,00 | 0,00 | 0,00 | 0,00 | NA | NA |
| RP3-388M5.8   | 0,00 | 0,00 | 0,00 | 0,00 | NA | NA |
| RP3-388M5.9   | 0,00 | 0,00 | 0,00 | 0,00 | NA | NA |
| RP3-388N13.1  | 0,00 | 0,00 | 0,00 | 0,00 | NA | NA |
| RP3-388N15.2  | 0,00 | 0,00 | 0,00 | 0,00 | NA | NA |
| RP3-389A20.2  | 0,00 | 0,00 | 0,00 | 0,00 | NA | NA |
| RP3-389A20.5  | 0,00 | 0,00 | 0,00 | 0,00 | NA | NA |
| RP3-390M24.1  | 0,00 | 0,00 | 0,00 | 0,00 | NA | NA |
| RP3-390O13.1  | 0,00 | 0,00 | 0,00 | 0,00 | NA | NA |
| RP3-391O22.2  | 0,00 | 0,00 | 0,00 | 0,00 | NA | NA |
| RP3-392M17.2  | 0,00 | 0,00 | 0,00 | 0,00 | NA | NA |
| RP3-393B19.1  | 0,00 | 0,00 | 0,00 | 0,00 | NA | NA |
| RP3-393E18.2  | 0,00 | 0,00 | 0,00 | 0,00 | NA | NA |
| RP3-393E18.3  | 0,00 | 0,00 | 0,00 | 0,00 | NA | NA |
| RP3-393K13.1  | 0,00 | 0,00 | 0,00 | 0,00 | NA | NA |
| RP3-395C13.1  | 0,00 | 0,00 | 0,00 | 0,00 | NA | NA |
| RP3-395M20.12 | 0,11 | 0,16 | 0,00 | 0,15 | NA | NA |
| RP3-398D13.2  | 0,00 | 0,00 | 0,00 | 0,00 | NA | NA |
| RP3-398G3.3   | 0,00 | 0,00 | 0,00 | 0,00 | NA | NA |
| RP3-398G3.5   | 0,00 | 0,00 | 0,00 | 0,00 | NA | NA |
| RP3-399J4.1   | 0,00 | 0,00 | 0,00 | 0,00 | NA | NA |
| RP3-399J4.2   | 0,00 | 0,00 | 0,00 | 0,00 | NA | NA |
| RP3-399J4.3   | 0,00 | 0,00 | 0,00 | 0,00 | NA | NA |
| RP3-399L15.1  | 0,00 | 0,00 | 0,00 | 0,00 | NA | NA |
| RP3-399L15.2  | 0,00 | 0,00 | 0,00 | 0,00 | NA | NA |
| RP3-400B16.1  | 0,00 | 0,06 | 0,00 | 0,00 | NA | NA |
| RP3-400B16.2  | 0,00 | 0,00 | 0,00 | 0,00 | NA | NA |
| RP3-400B16.4  | 0,00 | 0,00 | 0,00 | 0,00 | NA | NA |
| RP3-400N23.9  | 0,60 | 1,34 | 0,95 | 1,01 | NA | NA |
| RP3-403A15.1  | 0,00 | 0,00 | 0,00 | 0,00 | NA | NA |
| RP3-403L10.2  | 0,00 | 0,00 | 0,00 | 0,00 | NA | NA |

|              |      |      |      |      |    |    |
|--------------|------|------|------|------|----|----|
| RP3-405J10.2 | 0,00 | 0,00 | 0,00 | 0,00 | NA | NA |
| RP3-405J10.4 | 0,00 | 0,00 | 0,00 | 0,00 | NA | NA |
| RP3-405J10.5 | 0,00 | 0,00 | 0,00 | 0,00 | NA | NA |
| RP3-406A7.1  | 0,00 | 0,00 | 0,00 | 0,00 | NA | NA |
| RP3-406A7.3  | 0,00 | 0,00 | 0,00 | 0,00 | NA | NA |
| RP3-406A7.5  | 0,00 | 0,00 | 0,00 | 0,00 | NA | NA |
| RP3-406C18.1 | 0,00 | 0,00 | 0,00 | 0,00 | NA | NA |
| RP3-406C18.2 | 0,00 | 0,00 | 0,00 | 0,00 | NA | NA |
| RP3-406P24.1 | 0,00 | 0,00 | 0,00 | 0,00 | NA | NA |
| RP3-407E4.2  | 0,00 | 0,00 | 0,00 | 0,00 | NA | NA |
| RP3-407E4.3  | 0,00 | 0,00 | 0,00 | 0,00 | NA | NA |
| RP3-410C9.2  | 0,00 | 0,00 | 0,00 | 0,00 | NA | NA |
| RP3-410I8.1  | 0,00 | 0,00 | 0,00 | 0,00 | NA | NA |
| RP3-412A9.12 | 0,00 | 0,00 | 0,00 | 0,00 | NA | NA |
| RP3-412A9.15 | 0,00 | 0,00 | 0,00 | 0,00 | NA | NA |
| RP3-413H6.2  | 0,00 | 0,00 | 0,00 | 0,00 | NA | NA |
| RP3-416F10.1 | 0,00 | 0,00 | 0,00 | 0,00 | NA | NA |
| RP3-416H24.4 | 0,00 | 0,00 | 0,00 | 0,00 | NA | NA |
| RP3-416H24.5 | 0,00 | 0,00 | 0,00 | 0,00 | NA | NA |
| RP3-416H24.7 | 0,00 | 0,00 | 0,00 | 0,00 | NA | NA |
| RP3-416H24.8 | 0,00 | 0,00 | 0,00 | 0,00 | NA | NA |
| RP3-416J7.1  | 0,00 | 0,00 | 0,00 | 0,00 | NA | NA |
| RP3-416J7.4  | 0,00 | 0,00 | 0,00 | 0,06 | NA | NA |
| RP3-416J7.5  | 0,00 | 0,00 | 0,00 | 0,00 | NA | NA |
| RP3-417G15.3 | 0,00 | 0,00 | 0,00 | 0,00 | NA | NA |
| RP3-417O22.3 | 0,00 | 0,00 | 0,00 | 0,00 | NA | NA |
| RP3-419C19.2 | 0,00 | 0,00 | 0,00 | 0,00 | NA | NA |
| RP3-422F24.2 | 0,00 | 0,00 | 0,00 | 0,00 | NA | NA |
| RP3-422G23.3 | 0,00 | 0,00 | 0,00 | 0,00 | NA | NA |
| RP3-422G23.4 | 0,00 | 0,00 | 0,00 | 0,00 | NA | NA |
| RP3-423B22.5 | 0,00 | 0,00 | 0,00 | 0,00 | NA | NA |
| RP3-425C14.7 | 0,00 | 0,00 | 0,00 | 0,00 | NA | NA |
| RP3-425P12.4 | 0,00 | 0,00 | 0,00 | 0,00 | NA | NA |
| RP3-425P12.5 | 0,00 | 0,00 | 0,00 | 0,00 | NA | NA |
| RP3-426I6.2  | 0,00 | 0,00 | 0,00 | 0,00 | NA | NA |
| RP3-426I6.6  | 0,00 | 0,00 | 0,00 | 0,00 | NA | NA |
| RP3-429G5.3  | 0,00 | 0,00 | 0,00 | 0,00 | NA | NA |
| RP3-430A16.1 | 0,00 | 0,00 | 0,00 | 0,00 | NA | NA |
| RP3-430N8.10 | 0,00 | 0,00 | 0,00 | 0,00 | NA | NA |
| RP3-431A14.6 | 0,00 | 0,00 | 0,00 | 0,00 | NA | NA |
| RP3-431C21.1 | 0,00 | 0,00 | 0,00 | 0,00 | NA | NA |
| RP3-431P23.2 | 0,00 | 0,00 | 0,00 | 0,00 | NA | NA |
| RP3-431P23.6 | 0,00 | 0,00 | 0,00 | 0,00 | NA | NA |
| RP3-433F14.1 | 0,00 | 0,00 | 0,00 | 0,00 | NA | NA |
| RP3-433F14.2 | 0,00 | 0,00 | 0,00 | 0,00 | NA | NA |
| RP3-433F14.4 | 0,00 | 0,00 | 0,00 | 0,00 | NA | NA |
| RP3-434P1.6  | 0,00 | 0,00 | 0,00 | 0,00 | NA | NA |
| RP3-435D1.4  | 0,00 | 0,00 | 0,00 | 0,00 | NA | NA |
| RP3-435K13.1 | 0,00 | 0,00 | 0,00 | 0,00 | NA | NA |
| RP3-436M11.3 | 0,00 | 0,00 | 0,00 | 0,00 | NA | NA |
| RP3-436N22.3 | 0,00 | 0,00 | 0,00 | 0,00 | NA | NA |
| RP3-437C15.1 | 0,00 | 0,00 | 0,00 | 0,00 | NA | NA |
| RP3-437C15.2 | 0,00 | 0,00 | 0,00 | 0,00 | NA | NA |
| RP3-437I16.1 | 0,00 | 0,00 | 0,00 | 0,00 | NA | NA |
| RP3-438G17.1 | 0,00 | 0,00 | 0,00 | 0,00 | NA | NA |

|               |      |      |      |      |    |    |
|---------------|------|------|------|------|----|----|
| RP3-438O4.4   | 0,00 | 0,00 | 0,00 | 0,00 | NA | NA |
| RP3-439F8.1   | 0,00 | 0,00 | 0,00 | 0,00 | NA | NA |
| RP3-441A12.1  | 0,00 | 0,00 | 0,00 | 0,00 | NA | NA |
| RP3-443E24.1  | 0,00 | 0,00 | 0,00 | 0,00 | NA | NA |
| RP3-445N2.1   | 0,00 | 0,00 | 0,00 | 0,00 | NA | NA |
| RP3-446N13.2  | 0,00 | 0,00 | 0,00 | 0,00 | NA | NA |
| RP3-446N13.4  | 0,00 | 0,00 | 0,00 | 0,00 | NA | NA |
| RP3-447F3.6   | 0,00 | 0,00 | 0,00 | 0,00 | NA | NA |
| RP3-448I9.2   | 0,00 | 0,00 | 0,00 | 0,00 | NA | NA |
| RP3-449H6.1   | 0,00 | 0,00 | 0,00 | 0,00 | NA | NA |
| RP3-449M8.6   | 0,00 | 0,00 | 0,00 | 0,00 | NA | NA |
| RP3-449M8.9   | 0,00 | 0,00 | 0,00 | 0,00 | NA | NA |
| RP3-450M14.1  | 0,00 | 0,00 | 0,00 | 0,00 | NA | NA |
| RP3-451B15.3  | 0,00 | 0,00 | 0,00 | 0,00 | NA | NA |
| RP3-452M16.1  | 0,00 | 0,00 | 0,00 | 0,00 | NA | NA |
| RP3-453A3.1   | 0,00 | 0,00 | 0,00 | 0,00 | NA | NA |
| RP3-453C12.14 | 0,00 | 0,00 | 0,00 | 0,00 | NA | NA |
| RP3-453C12.8  | 0,00 | 0,00 | 0,00 | 0,00 | NA | NA |
| RP3-453I5.2   | 0,00 | 0,00 | 0,00 | 0,00 | NA | NA |
| RP3-453P22.1  | 0,00 | 0,00 | 0,00 | 0,00 | NA | NA |
| RP3-453P22.2  | 0,00 | 0,00 | 0,00 | 0,00 | NA | NA |
| RP3-454B23.1  | 0,00 | 0,00 | 0,00 | 0,00 | NA | NA |
| RP3-455E7.1   | 0,00 | 0,00 | 0,00 | 0,00 | NA | NA |
| RP3-455H14.1  | 0,00 | 0,00 | 0,00 | 0,00 | NA | NA |
| RP3-455J7.3   | 0,00 | 0,00 | 0,00 | 0,00 | NA | NA |
| RP3-461F17.1  | 0,00 | 0,00 | 0,00 | 0,00 | NA | NA |
| RP3-461F17.2  | 0,00 | 0,00 | 0,00 | 0,00 | NA | NA |
| RP3-461P17.4  | 0,00 | 0,00 | 0,00 | 0,00 | NA | NA |
| RP3-461P17.6  | 0,00 | 0,00 | 0,00 | 0,00 | NA | NA |
| RP3-461P17.9  | 0,00 | 0,00 | 0,00 | 0,00 | NA | NA |
| RP3-462C17.1  | 0,00 | 0,00 | 0,00 | 0,00 | NA | NA |
| RP3-462D8.2   | 0,00 | 0,00 | 0,00 | 0,00 | NA | NA |
| RP3-465N24.5  | 0,00 | 0,00 | 0,00 | 0,00 | NA | NA |
| RP3-465N24.6  | 0,00 | 0,00 | 0,00 | 0,00 | NA | NA |
| RP3-467K16.7  | 0,00 | 0,00 | 0,00 | 0,00 | NA | NA |
| RP3-467L1.4   | 0,00 | 0,00 | 0,00 | 0,00 | NA | NA |
| RP3-467L1.6   | 0,00 | 0,59 | 0,00 | 0,00 | NA | NA |
| RP3-467N11.1  | 0,00 | 0,00 | 0,00 | 0,00 | NA | NA |
| RP3-468B3.4   | 0,00 | 0,00 | 0,00 | 0,00 | NA | NA |
| RP3-468K18.6  | 0,00 | 0,00 | 0,00 | 0,00 | NA | NA |
| RP3-468K3.1   | 0,00 | 0,00 | 0,00 | 0,00 | NA | NA |
| RP3-469D22.1  | 0,00 | 0,00 | 0,00 | 0,00 | NA | NA |
| RP3-470L14.1  | 0,00 | 0,00 | 0,00 | 0,32 | NA | NA |
| RP3-472M2.2   | 0,00 | 0,00 | 0,00 | 0,00 | NA | NA |
| RP3-473B4.3   | 0,00 | 0,00 | 0,00 | 0,00 | NA | NA |
| RP3-473B4.4   | 0,00 | 0,00 | 0,00 | 0,00 | NA | NA |
| RP3-474G15.1  | 0,00 | 0,00 | 0,00 | 0,00 | NA | NA |
| RP3-474I12.7  | 0,00 | 0,00 | 0,00 | 0,00 | NA | NA |
| RP3-475B7.3   | 0,00 | 0,00 | 0,00 | 0,00 | NA | NA |
| RP3-477J10.1  | 0,00 | 0,00 | 0,00 | 0,00 | NA | NA |
| RP3-477M7.5   | 0,00 | 0,00 | 0,00 | 0,00 | NA | NA |
| RP3-477M7.6   | 0,00 | 0,00 | 0,00 | 0,00 | NA | NA |
| RP3-481F12.1  | 0,00 | 0,00 | 0,00 | 0,00 | NA | NA |
| RP3-483K16.4  | 0,00 | 0,00 | 0,00 | 0,00 | NA | NA |
| RP3-486D24.1  | 0,00 | 0,00 | 0,00 | 0,00 | NA | NA |

|               |      |      |      |      |    |    |
|---------------|------|------|------|------|----|----|
| RP3-491M17.1  | 0,00 | 0,00 | 0,00 | 0,00 | NA | NA |
| RP3-492P14.2  | 0,00 | 0,00 | 0,00 | 0,00 | NA | NA |
| RP3-495K2.1   | 0,00 | 0,00 | 0,00 | 0,00 | NA | NA |
| RP3-495K2.2   | 0,00 | 0,00 | 0,00 | 0,00 | NA | NA |
| RP3-495K2.3   | 0,00 | 0,00 | 0,00 | 0,00 | NA | NA |
| RP3-495K2.4   | 0,00 | 0,00 | 0,00 | 0,00 | NA | NA |
| RP3-495O10.1  | 0,00 | 0,00 | 0,00 | 0,00 | NA | NA |
| RP3-499B10.5  | 0,00 | 0,00 | 0,00 | 0,00 | NA | NA |
| RP3-500L14.2  | 0,00 | 0,14 | 0,00 | 0,00 | NA | NA |
| RP3-501N12.3  | 0,00 | 0,00 | 0,00 | 0,00 | NA | NA |
| RP3-503A6.2   | 0,00 | 0,00 | 0,00 | 0,00 | NA | NA |
| RP3-507I15.1  | 0,00 | 0,00 | 0,00 | 0,00 | NA | NA |
| RP3-507I15.2  | 0,00 | 0,00 | 0,00 | 0,00 | NA | NA |
| RP3-508D13.1  | 0,00 | 0,00 | 0,00 | 0,00 | NA | NA |
| RP3-508I15.19 | 0,00 | 0,00 | 0,00 | 0,00 | NA | NA |
| RP3-509I19.1  | 0,00 | 0,00 | 0,00 | 0,00 | NA | NA |
| RP3-509I19.6  | 0,00 | 0,00 | 0,00 | 0,00 | NA | NA |
| RP3-509L4.1   | 0,00 | 0,00 | 0,00 | 0,00 | NA | NA |
| RP3-509L4.3   | 0,00 | 0,00 | 0,00 | 0,09 | NA | NA |
| RP3-510B21.1  | 0,00 | 0,00 | 0,00 | 0,00 | NA | NA |
| RP3-510D11.2  | 0,00 | 0,00 | 0,00 | 0,00 | NA | NA |
| RP3-510H16.3  | 0,00 | 0,00 | 0,00 | 0,00 | NA | NA |
| RP3-510O8.3   | 0,00 | 0,00 | 0,00 | 0,00 | NA | NA |
| RP3-511B24.5  | 0,00 | 0,00 | 0,00 | 0,00 | NA | NA |
| RP3-512B11.3  | 0,00 | 0,00 | 0,00 | 0,00 | NA | NA |
| RP3-513G18.2  | 0,00 | 0,00 | 0,00 | 0,00 | NA | NA |
| RP3-514P16.1  | 0,00 | 0,00 | 0,00 | 0,00 | NA | NA |
| RP3-515N1.10  | 0,00 | 0,00 | 0,00 | 0,00 | NA | NA |
| RP3-519P24.2  | 0,00 | 0,00 | 0,00 | 0,00 | NA | NA |
| RP3-520B18.1  | 0,00 | 0,00 | 0,00 | 0,00 | NA | NA |
| RP3-521E19.3  | 0,00 | 0,00 | 0,00 | 0,00 | NA | NA |
| RP3-522D1.1   | 0,00 | 0,65 | 0,00 | 0,00 | NA | NA |
| RP3-522D1.2   | 0,00 | 0,00 | 0,00 | 0,00 | NA | NA |
| RP3-522J7.5   | 0,00 | 0,00 | 0,00 | 0,00 | NA | NA |
| RP3-523C21.1  | 0,08 | 0,00 | 0,04 | 0,19 | NA | NA |
| RP3-523C21.2  | 0,00 | 0,00 | 0,00 | 0,00 | NA | NA |
| RP3-523C21.3  | 0,00 | 0,00 | 0,00 | 0,00 | NA | NA |
| RP3-525L6.2   | 0,00 | 0,00 | 0,00 | 0,00 | NA | NA |
| RP3-525N10.2  | 0,00 | 0,00 | 0,00 | 0,00 | NA | NA |
| RP3-526F5.2   | 0,00 | 0,00 | 0,00 | 0,00 | NA | NA |
| RP3-526L9.2   | 0,00 | 0,00 | 0,00 | 0,00 | NA | NA |
| RP3-527B10.1  | 0,00 | 0,00 | 0,00 | 0,00 | NA | NA |
| RP3-527G5.1   | 0,00 | 0,00 | 0,00 | 0,00 | NA | NA |
| RP4-529N6.1   | 0,00 | 0,00 | 0,00 | 0,00 | NA | NA |
| RP4-530I15.6  | 0,00 | 0,00 | 0,00 | 0,00 | NA | NA |
| RP4-533D7.3   | 0,00 | 0,00 | 0,00 | 0,00 | NA | NA |
| RP4-533D7.5   | 0,00 | 0,00 | 0,00 | 0,00 | NA | NA |
| RP4-533D7.6   | 0,00 | 0,00 | 0,00 | 0,00 | NA | NA |
| RP4-534P7.2   | 0,00 | 0,00 | 0,00 | 0,00 | NA | NA |
| RP4-535B20.1  | 0,00 | 0,00 | 0,00 | 0,00 | NA | NA |
| RP4-535B20.2  | 0,00 | 0,00 | 0,00 | 0,00 | NA | NA |
| RP4-535B20.3  | 0,00 | 0,00 | 0,00 | 0,00 | NA | NA |
| RP4-536B24.4  | 0,00 | 0,00 | 0,00 | 0,00 | NA | NA |
| RP4-537K23.2  | 0,00 | 0,00 | 0,00 | 0,00 | NA | NA |
| RP4-539M6.12  | 0,00 | 0,00 | 0,00 | 0,00 | NA | NA |

|               |      |      |      |      |    |    |
|---------------|------|------|------|------|----|----|
| RP4-539M6.18  | 0,00 | 0,00 | 0,00 | 0,00 | NA | NA |
| RP4-539M6.19  | 0,00 | 0,00 | 0,00 | 0,00 | NA | NA |
| RP4-539M6.22  | 0,00 | 0,26 | 0,00 | 0,00 | NA | NA |
| RP4-541C22.8  | 0,00 | 0,00 | 0,00 | 0,00 | NA | NA |
| RP4-543J13.1  | 0,00 | 0,00 | 0,00 | 0,00 | NA | NA |
| RP4-543J13.2  | 0,00 | 0,00 | 0,00 | 0,00 | NA | NA |
| RP4-543J19.9  | 0,00 | 0,00 | 0,00 | 0,00 | NA | NA |
| RP4-545K15.4  | 0,00 | 0,00 | 0,00 | 0,00 | NA | NA |
| RP4-545L17.12 | 0,00 | 0,00 | 0,00 | 0,00 | NA | NA |
| RP4-548D19.3  | 0,00 | 0,00 | 0,00 | 0,00 | NA | NA |
| RP4-549F15.1  | 0,00 | 0,00 | 0,00 | 0,00 | NA | NA |
| RP4-551E13.2  | 0,00 | 0,00 | 0,00 | 0,00 | NA | NA |
| RP4-551N11.1  | 0,00 | 0,00 | 0,00 | 0,00 | NA | NA |
| RP4-552O12.1  | 0,00 | 0,00 | 0,00 | 0,00 | NA | NA |
| RP4-552O12.3  | 0,00 | 0,00 | 0,00 | 0,00 | NA | NA |
| RP4-553F17.1  | 0,00 | 0,00 | 0,00 | 0,00 | NA | NA |
| RP4-553F4.2   | 0,00 | 0,00 | 0,00 | 0,00 | NA | NA |
| RP4-555D20.1  | 0,00 | 0,00 | 0,00 | 0,00 | NA | NA |
| RP4-555D20.3  | 0,00 | 0,00 | 0,00 | 0,00 | NA | NA |
| RP4-555D20.4  | 0,00 | 0,00 | 0,00 | 0,00 | NA | NA |
| RP4-555L14.4  | 0,00 | 0,00 | 0,00 | 0,00 | NA | NA |
| RP4-555L14.5  | 0,00 | 0,28 | 0,40 | 0,21 | NA | NA |
| RP4-555N2.2   | 0,00 | 0,00 | 0,00 | 0,00 | NA | NA |
| RP4-555N2.4   | 0,00 | 0,00 | 0,00 | 0,00 | NA | NA |
| RP4-559A3.6   | 0,00 | 0,00 | 0,00 | 0,00 | NA | NA |
| RP4-559A3.7   | 0,00 | 0,00 | 0,00 | 0,00 | NA | NA |
| RP4-560B9.4   | 0,00 | 0,00 | 0,00 | 0,00 | NA | NA |
| RP4-560B9.5   | 0,00 | 0,00 | 0,00 | 0,00 | NA | NA |
| RP4-560B9.6   | 0,00 | 0,00 | 0,00 | 0,00 | NA | NA |
| RP4-562D20.2  | 0,00 | 0,00 | 0,00 | 0,00 | NA | NA |
| RP4-564F22.6  | 0,00 | 0,00 | 0,00 | 0,00 | NA | NA |
| RP4-564F22.7  | 0,00 | 0,00 | 0,00 | 0,00 | NA | NA |
| RP4-564M11.2  | 0,00 | 0,00 | 0,00 | 0,00 | NA | NA |
| RP4-566D2.1   | 0,00 | 0,00 | 0,00 | 0,00 | NA | NA |
| RP4-568B10.1  | 0,00 | 0,00 | 0,00 | 0,00 | NA | NA |
| RP4-568F9.3   | 0,00 | 0,00 | 0,00 | 0,00 | NA | NA |
| RP4-569D19.8  | 0,00 | 0,00 | 0,00 | 0,00 | NA | NA |
| RP4-570O12.2  | 0,00 | 0,00 | 0,00 | 0,00 | NA | NA |
| RP4-570O12.3  | 0,00 | 0,40 | 0,07 | 0,08 | NA | NA |
| RP4-575N6.2   | 0,00 | 0,00 | 0,00 | 0,00 | NA | NA |
| RP4-575N6.3   | 0,00 | 0,00 | 0,00 | 0,00 | NA | NA |
| RP4-576H24.4  | 0,00 | 0,52 | 0,00 | 0,00 | NA | NA |
| RP4-576H24.5  | 0,00 | 0,00 | 0,00 | 0,00 | NA | NA |
| RP4-580G13.1  | 0,00 | 0,00 | 0,00 | 0,00 | NA | NA |
| RP4-580O19.2  | 0,00 | 0,00 | 0,00 | 0,00 | NA | NA |
| RP4-581F12.1  | 0,00 | 0,00 | 0,00 | 0,00 | NA | NA |
| RP4-581F12.2  | 0,00 | 0,00 | 0,00 | 0,00 | NA | NA |
| RP4-581O6.1   | 0,00 | 0,00 | 0,00 | 0,00 | NA | NA |
| RP4-583K8.1   | 0,00 | 0,00 | 0,00 | 0,00 | NA | NA |
| RP4-583P15.16 | 0,00 | 0,00 | 0,00 | 0,00 | NA | NA |
| RP4-584D14.7  | 0,00 | 0,00 | 0,00 | 0,00 | NA | NA |
| RP4-585I14.3  | 0,00 | 0,00 | 0,00 | 0,00 | NA | NA |
| RP4-586O15.1  | 0,00 | 0,00 | 0,00 | 0,00 | NA | NA |
| RP4-587D13.1  | 0,00 | 0,00 | 0,00 | 0,00 | NA | NA |
| RP4-590F24.1  | 0,00 | 0,00 | 0,00 | 0,00 | NA | NA |



|                |      |      |      |      |    |    |
|----------------|------|------|------|------|----|----|
| RP4-591B8.2    | 0,00 | 0,00 | 0,00 | 0,00 | NA | NA |
| RP4-591B8.3    | 0,00 | 0,00 | 0,00 | 0,00 | NA | NA |
| RP4-591L5.1    | 0,00 | 0,00 | 0,00 | 0,00 | NA | NA |
| RP4-591L5.2    | 0,00 | 0,00 | 0,00 | 0,00 | NA | NA |
| RP4-592A1.2    | 0,00 | 0,00 | 0,00 | 0,00 | NA | NA |
| RP4-592A1.4    | 0,00 | 0,00 | 0,00 | 0,00 | NA | NA |
| RP4-592G7.5    | 0,00 | 0,00 | 0,00 | 0,00 | NA | NA |
| RP4-593H12.1   | 0,00 | 0,00 | 0,00 | 0,00 | NA | NA |
| RP4-594L9.2    | 0,00 | 0,00 | 0,00 | 0,00 | NA | NA |
| RP4-595K12.1   | 0,00 | 0,00 | 0,00 | 0,00 | NA | NA |
| RP4-595K12.2   | 0,00 | 0,00 | 0,00 | 0,00 | NA | NA |
| RP4-597A16.2   | 0,00 | 0,00 | 0,00 | 0,00 | NA | NA |
| RP4-597A16.3   | 0,00 | 0,00 | 0,00 | 0,00 | NA | NA |
| RP4-597J3.1    | 0,00 | 0,00 | 0,00 | 0,00 | NA | NA |
| RP4-599G15.7   | 0,00 | 0,00 | 0,00 | 0,08 | NA | NA |
| RP4-603B14.1   | 0,00 | 0,00 | 0,00 | 0,00 | NA | NA |
| RP4-603B14.2   | 0,00 | 0,00 | 0,00 | 0,00 | NA | NA |
| RP4-603I14.3   | 0,00 | 0,00 | 0,00 | 0,00 | NA | NA |
| RP4-604G5.3    | 0,00 | 0,00 | 0,00 | 0,00 | NA | NA |
| RP4-604P14.2   | 0,00 | 0,00 | 0,00 | 0,00 | NA | NA |
| RP4-607I7.1    | 0,00 | 0,00 | 0,00 | 0,00 | NA | NA |
| RP4-607J2.1    | 0,00 | 0,00 | 0,00 | 0,00 | NA | NA |
| RP4-608O15.3   | 0,00 | 0,00 | 0,00 | 0,00 | NA | NA |
| RP4-609E1.2    | 0,00 | 0,00 | 0,00 | 0,00 | NA | NA |
| RP4-609E1.3    | 0,00 | 0,00 | 0,00 | 0,00 | NA | NA |
| RP4-610L12.2   | 0,00 | 0,00 | 0,00 | 0,00 | NA | NA |
| RP4-612B18.3   | 0,00 | 0,00 | 0,00 | 0,00 | NA | NA |
| RP4-612C19.1   | 0,00 | 0,00 | 0,00 | 0,00 | NA | NA |
| RP4-613A2.3    | 0,00 | 0,00 | 0,00 | 0,00 | NA | NA |
| RP4-613B23.3   | 0,00 | 0,00 | 0,00 | 0,00 | NA | NA |
| RP4-613B23.4   | 0,00 | 0,00 | 0,00 | 0,00 | NA | NA |
| RP4-614C10.1   | 0,00 | 0,00 | 0,00 | 0,00 | NA | NA |
| RP4-614C10.3   | 0,00 | 0,00 | 0,00 | 0,13 | NA | NA |
| RP4-614C10.5   | 0,00 | 0,00 | 0,00 | 0,00 | NA | NA |
| RP4-614C15.3   | 0,00 | 0,00 | 0,00 | 0,00 | NA | NA |
| RP4-614N24.1   | 0,00 | 0,00 | 0,00 | 0,00 | NA | NA |
| RP4-614N24.3   | 0,00 | 0,00 | 0,00 | 0,00 | NA | NA |
| RP4-614O4.13   | 0,09 | 0,00 | 0,08 | 0,00 | NA | NA |
| RP4-616B8.4    | 0,00 | 0,00 | 0,00 | 0,00 | NA | NA |
| RP4-620E11.5   | 0,00 | 0,00 | 0,00 | 0,00 | NA | NA |
| RP4-620F22.2   | 0,00 | 0,00 | 0,00 | 0,00 | NA | NA |
| RP4-621B10.5   | 0,00 | 0,00 | 0,00 | 0,00 | NA | NA |
| RP4-621B10.6   | 0,00 | 0,00 | 0,00 | 0,00 | NA | NA |
| RP4-621F18.2   | 0,00 | 0,00 | 0,00 | 0,00 | NA | NA |
| RP4-622L5.7    | 0,00 | 0,00 | 0,00 | 0,00 | NA | NA |
| RP4-629B2.1    | 0,00 | 0,00 | 0,00 | 0,05 | NA | NA |
| RP4-630A11.3   | 0,00 | 0,00 | 0,00 | 0,00 | NA | NA |
| RP4-630C24.1   | 0,00 | 0,00 | 0,00 | 0,00 | NA | NA |
| RP4-630J13.1   | 0,00 | 0,00 | 0,00 | 0,00 | NA | NA |
| RP4-631H13.2   | 0,00 | 0,00 | 0,00 | 0,00 | NA | NA |
| RP4-631H13.4   | 0,00 | 0,00 | 0,00 | 0,00 | NA | NA |
| RP4-631H13.5   | 0,00 | 0,00 | 0,00 | 0,00 | NA | NA |
| RP4-633I8.1    | 0,00 | 0,00 | 0,00 | 0,00 | NA | NA |
| RP4-633O19_A.1 | 0,00 | 0,00 | 0,00 | 0,00 | NA | NA |
| RP4-635A23.4   | 0,00 | 0,00 | 0,00 | 0,00 | NA | NA |

|              |      |      |      |      |    |    |
|--------------|------|------|------|------|----|----|
| RP4-635B5.1  | 0,00 | 0,00 | 0,00 | 0,00 | NA | NA |
| RP4-635E8.1  | 0,00 | 0,00 | 0,00 | 0,00 | NA | NA |
| RP4-635G19.1 | 0,00 | 0,00 | 0,00 | 0,00 | NA | NA |
| RP4-635O5.1  | 0,00 | 0,00 | 0,00 | 0,00 | NA | NA |
| RP4-639F20.1 | 0,00 | 0,00 | 0,00 | 0,00 | NA | NA |
| RP4-639J15.2 | 0,00 | 0,00 | 0,00 | 0,00 | NA | NA |
| RP4-641G12.4 | 0,00 | 0,00 | 0,00 | 0,00 | NA | NA |
| RP4-644F6.2  | 0,00 | 0,00 | 0,00 | 0,00 | NA | NA |
| RP4-646P19.1 | 0,00 | 0,00 | 0,00 | 0,00 | NA | NA |
| RP4-647M16.1 | 0,00 | 0,00 | 0,00 | 0,00 | NA | NA |
| RP4-650F12.2 | 0,00 | 0,00 | 0,00 | 0,00 | NA | NA |
| RP4-651E10.3 | 0,00 | 0,00 | 0,00 | 0,00 | NA | NA |
| RP4-651E10.4 | 0,00 | 0,39 | 0,00 | 0,00 | NA | NA |
| RP4-652L8.2  | 0,00 | 0,00 | 0,00 | 0,00 | NA | NA |
| RP4-654H19.2 | 0,00 | 0,00 | 0,00 | 0,00 | NA | NA |
| RP4-654J19.1 | 0,00 | 0,00 | 0,00 | 0,00 | NA | NA |
| RP4-655C4.1  | 0,00 | 0,00 | 0,00 | 0,00 | NA | NA |
| RP4-655C5.3  | 0,00 | 0,00 | 0,00 | 0,00 | NA | NA |
| RP4-655C5.4  | 0,00 | 0,00 | 0,00 | 0,00 | NA | NA |
| RP4-655C5.7  | 0,00 | 0,00 | 0,00 | 0,00 | NA | NA |
| RP4-655C5.9  | 0,00 | 0,00 | 0,00 | 0,00 | NA | NA |
| RP4-655L22.4 | 0,00 | 0,00 | 0,00 | 0,00 | NA | NA |
| RP4-655L22.5 | 0,00 | 0,00 | 0,00 | 0,00 | NA | NA |
| RP4-655N15.3 | 0,00 | 0,00 | 0,00 | 0,00 | NA | NA |
| RP4-656G21.1 | 0,00 | 0,00 | 0,00 | 0,00 | NA | NA |
| RP4-657D16.4 | 0,00 | 0,00 | 0,00 | 0,00 | NA | NA |
| RP4-657D16.5 | 0,00 | 0,00 | 0,00 | 0,00 | NA | NA |
| RP4-657M3.2  | 0,00 | 0,00 | 0,00 | 0,00 | NA | NA |
| RP4-659I19.1 | 0,00 | 0,00 | 0,00 | 0,00 | NA | NA |
| RP4-660B20.1 | 0,00 | 0,00 | 0,00 | 0,00 | NA | NA |
| RP4-660H19.1 | 0,00 | 0,00 | 0,00 | 0,00 | NA | NA |
| RP4-663N10.2 | 0,00 | 0,00 | 0,00 | 0,00 | NA | NA |
| RP4-663N10.3 | 0,00 | 0,00 | 0,00 | 0,00 | NA | NA |
| RP4-665J23.1 | 0,00 | 0,00 | 0,00 | 0,00 | NA | NA |
| RP4-665J23.2 | 0,00 | 0,00 | 0,00 | 0,00 | NA | NA |
| RP4-665N4.4  | 0,00 | 0,00 | 0,00 | 0,00 | NA | NA |
| RP4-666O22.1 | 0,00 | 0,00 | 0,00 | 0,00 | NA | NA |
| RP4-666O22.2 | 0,00 | 0,00 | 0,00 | 0,00 | NA | NA |
| RP4-666O22.3 | 0,00 | 0,00 | 0,00 | 0,00 | NA | NA |
| RP4-667H12.4 | 0,00 | 0,00 | 0,00 | 0,00 | NA | NA |
| RP4-668E10.2 | 0,00 | 0,00 | 0,00 | 0,00 | NA | NA |
| RP4-668E10.4 | 0,00 | 0,00 | 0,00 | 0,00 | NA | NA |
| RP4-668J24.2 | 0,00 | 0,00 | 0,00 | 0,00 | NA | NA |
| RP4-669B10.4 | 0,00 | 0,00 | 0,00 | 0,00 | NA | NA |
| RP4-669B10.6 | 0,00 | 0,00 | 0,00 | 0,00 | NA | NA |
| RP4-669L17.2 | 0,00 | 0,00 | 0,00 | 0,00 | NA | NA |
| RP4-669L17.6 | 0,00 | 0,00 | 0,00 | 0,00 | NA | NA |
| RP4-670F13.2 | 0,00 | 0,00 | 0,00 | 0,00 | NA | NA |
| RP4-671G15.2 | 0,00 | 0,00 | 0,00 | 0,00 | NA | NA |
| RP4-672J20.1 | 0,00 | 0,00 | 0,00 | 0,00 | NA | NA |
| RP4-672N11.1 | 0,00 | 0,00 | 0,00 | 0,00 | NA | NA |
| RP4-673D20.1 | 0,00 | 0,00 | 0,00 | 0,00 | NA | NA |
| RP4-673D20.4 | 0,00 | 0,00 | 0,00 | 0,00 | NA | NA |
| RP4-673D20.5 | 0,00 | 0,00 | 0,00 | 0,00 | NA | NA |
| RP4-675C20.2 | 0,00 | 0,00 | 0,00 | 0,00 | NA | NA |

|              |      |      |      |      |    |    |
|--------------|------|------|------|------|----|----|
| RP4-675G8.4  | 0,00 | 0,00 | 0,00 | 0,00 | NA | NA |
| RP4-680D5.4  | 0,00 | 0,00 | 0,00 | 0,00 | NA | NA |
| RP4-680D5.8  | 0,00 | 0,00 | 0,00 | 0,00 | NA | NA |
| RP4-681L3.2  | 0,00 | 0,00 | 0,00 | 0,00 | NA | NA |
| RP4-682E18.1 | 0,00 | 0,00 | 0,00 | 0,00 | NA | NA |
| RP4-684O24.5 | 0,00 | 0,00 | 0,00 | 0,00 | NA | NA |
| RP4-687K1.2  | 0,00 | 0,00 | 0,00 | 0,00 | NA | NA |
| RP4-694A7.2  | 0,00 | 0,00 | 0,00 | 0,00 | NA | NA |
| RP4-694A7.3  | 0,00 | 0,00 | 0,00 | 0,00 | NA | NA |
| RP4-694A7.4  | 0,00 | 0,00 | 0,00 | 0,00 | NA | NA |
| RP4-694B14.4 | 0,00 | 0,00 | 0,00 | 0,00 | NA | NA |
| RP4-696P19.2 | 0,00 | 0,00 | 0,00 | 0,00 | NA | NA |
| RP4-697E16.1 | 0,00 | 0,00 | 0,00 | 0,00 | NA | NA |
| RP4-697K14.3 | 0,00 | 0,00 | 0,00 | 0,00 | NA | NA |
| RP4-700A9.1  | 0,00 | 0,00 | 0,00 | 0,00 | NA | NA |
| RP4-701O16.4 | 0,00 | 0,00 | 0,00 | 0,00 | NA | NA |
| RP4-704D21.2 | 0,00 | 0,00 | 0,00 | 0,00 | NA | NA |
| RP4-704D23.1 | 0,00 | 0,00 | 0,00 | 0,00 | NA | NA |
| RP4-705F19.1 | 0,00 | 0,00 | 0,00 | 0,00 | NA | NA |
| RP4-705O1.1  | 0,00 | 0,00 | 0,00 | 0,00 | NA | NA |
| RP4-710L4.1  | 0,00 | 0,00 | 0,00 | 0,00 | NA | NA |
| RP4-710L4.2  | 0,00 | 0,00 | 0,00 | 0,00 | NA | NA |
| RP4-710M16.1 | 0,00 | 0,00 | 0,00 | 0,00 | NA | NA |
| RP4-710M16.2 | 0,00 | 0,00 | 0,00 | 0,00 | NA | NA |
| RP4-710M3.2  | 0,00 | 0,00 | 0,00 | 0,00 | NA | NA |
| RP4-712E4.1  | 0,00 | 0,00 | 0,00 | 0,00 | NA | NA |
| RP4-712E4.2  | 0,00 | 0,00 | 0,00 | 0,00 | NA | NA |
| RP4-714D9.4  | 0,00 | 0,00 | 0,00 | 0,00 | NA | NA |
| RP4-718D20.3 | 0,00 | 0,00 | 0,00 | 0,00 | NA | NA |
| RP4-718N17.1 | 0,00 | 0,00 | 0,00 | 0,00 | NA | NA |
| RP4-718N17.2 | 0,00 | 0,00 | 0,00 | 0,00 | NA | NA |
| RP4-719C8.1  | 0,00 | 0,00 | 0,00 | 0,00 | NA | NA |
| RP4-724E13.2 | 0,00 | 0,00 | 0,00 | 0,00 | NA | NA |
| RP4-724P12.1 | 0,00 | 0,00 | 0,00 | 0,00 | NA | NA |
| RP4-724P12.2 | 0,00 | 0,00 | 0,00 | 0,00 | NA | NA |
| RP4-725G10.2 | 0,00 | 0,00 | 0,00 | 0,00 | NA | NA |
| RP4-725G10.3 | 0,00 | 0,00 | 0,00 | 0,00 | NA | NA |
| RP4-725G10.4 | 0,00 | 0,00 | 0,00 | 0,00 | NA | NA |
| RP4-726C3.4  | 0,00 | 0,00 | 0,00 | 0,00 | NA | NA |
| RP4-726F1.2  | 0,00 | 0,00 | 0,00 | 0,00 | NA | NA |
| RP4-726N1.2  | 0,00 | 0,00 | 0,00 | 0,00 | NA | NA |
| RP4-728D4.3  | 0,00 | 0,00 | 0,00 | 0,00 | NA | NA |
| RP4-730D4.1  | 0,00 | 0,00 | 0,00 | 0,00 | NA | NA |
| RP4-733B9.1  | 0,00 | 0,00 | 0,00 | 0,00 | NA | NA |
| RP4-735C1.5  | 0,00 | 0,00 | 0,00 | 0,00 | NA | NA |
| RP4-735N21.1 | 0,00 | 0,00 | 0,00 | 0,00 | NA | NA |
| RP4-736H5.1  | 0,00 | 0,00 | 0,00 | 0,00 | NA | NA |
| RP4-736H5.2  | 0,00 | 0,00 | 0,00 | 0,00 | NA | NA |
| RP4-736H5.3  | 0,00 | 0,00 | 0,00 | 0,00 | NA | NA |
| RP4-736I12.1 | 0,00 | 0,00 | 0,00 | 0,00 | NA | NA |
| RP4-736I12.2 | 0,00 | 0,00 | 0,00 | 0,00 | NA | NA |
| RP4-736L20.3 | 0,00 | 0,00 | 0,00 | 0,00 | NA | NA |
| RP4-737E23.7 | 0,00 | 0,00 | 0,00 | 0,00 | NA | NA |
| RP4-738P11.3 | 0,00 | 0,00 | 0,00 | 0,00 | NA | NA |
| RP4-738P11.4 | 0,00 | 0,00 | 0,00 | 0,00 | NA | NA |

|               |      |      |      |      |    |    |
|---------------|------|------|------|------|----|----|
| RP4-738P15.4  | 0,00 | 0,00 | 0,00 | 0,00 | NA | NA |
| RP4-739H11.1  | 0,00 | 0,00 | 0,00 | 0,00 | NA | NA |
| RP4-739H11.3  | 0,00 | 0,00 | 0,00 | 0,00 | NA | NA |
| RP4-740O15.1  | 0,00 | 0,00 | 0,00 | 0,00 | NA | NA |
| RP4-741O10.1  | 0,00 | 0,00 | 0,00 | 0,00 | NA | NA |
| RP4-742C19.9  | 0,00 | 0,00 | 0,00 | 0,00 | NA | NA |
| RP4-742J24.2  | 0,00 | 0,08 | 0,06 | 0,22 | NA | NA |
| RP4-742N3.1   | 0,00 | 0,00 | 0,00 | 0,00 | NA | NA |
| RP4-743O11.1  | 0,00 | 0,00 | 0,00 | 0,00 | NA | NA |
| RP4-745E8.2   | 0,00 | 0,00 | 0,00 | 0,00 | NA | NA |
| RP4-745K6.1   | 0,00 | 0,00 | 0,00 | 0,00 | NA | NA |
| RP4-747G18.5  | 0,00 | 0,00 | 0,00 | 0,00 | NA | NA |
| RP4-749H3.2   | 0,00 | 0,00 | 0,00 | 0,00 | NA | NA |
| RP4-749H3.3   | 0,00 | 0,00 | 0,00 | 0,00 | NA | NA |
| RP4-749H3.4   | 0,00 | 0,00 | 0,00 | 0,00 | NA | NA |
| RP4-751H13.7  | 0,00 | 0,00 | 0,00 | 0,00 | NA | NA |
| RP4-753D10.3  | 0,00 | 0,00 | 0,00 | 0,00 | NA | NA |
| RP4-753D4.2   | 0,00 | 0,00 | 0,00 | 0,00 | NA | NA |
| RP4-753D5.3   | 0,00 | 0,00 | 0,00 | 0,00 | NA | NA |
| RP4-753F5.1   | 0,00 | 0,00 | 0,00 | 0,00 | NA | NA |
| RP4-753M9.1   | 0,00 | 0,00 | 0,00 | 0,00 | NA | NA |
| RP4-756H11.1  | 0,00 | 0,00 | 0,00 | 0,00 | NA | NA |
| RP4-756H11.4  | 0,00 | 0,00 | 0,00 | 0,00 | NA | NA |
| RP4-758J18.10 | 0,00 | 0,00 | 0,00 | 0,00 | NA | NA |
| RP4-758J18.7  | 0,00 | 0,00 | 0,00 | 0,00 | NA | NA |
| RP4-758J24.4  | 0,00 | 0,00 | 0,00 | 0,00 | NA | NA |
| RP4-760C5.3   | 0,00 | 0,00 | 0,00 | 0,00 | NA | NA |
| RP4-760C5.4   | 0,00 | 0,00 | 0,00 | 0,00 | NA | NA |
| RP4-761I2.5   | 0,00 | 0,00 | 0,00 | 0,00 | NA | NA |
| RP4-761J14.9  | 0,00 | 0,00 | 0,00 | 0,00 | NA | NA |
| RP4-764D2.1   | 0,00 | 0,00 | 0,00 | 0,00 | NA | NA |
| RP4-764O22.1  | 0,00 | 0,00 | 0,00 | 0,00 | NA | NA |
| RP4-764O22.2  | 0,00 | 0,00 | 0,00 | 0,00 | NA | NA |
| RP4-765F13.3  | 0,00 | 0,00 | 0,00 | 0,00 | NA | NA |
| RP4-769N13.6  | 0,96 | 0,57 | 0,87 | 1,50 | NA | NA |
| RP4-771M4.2   | 0,00 | 0,00 | 0,00 | 0,00 | NA | NA |
| RP4-773A18.4  | 0,00 | 0,00 | 0,00 | 0,00 | NA | NA |
| RP4-773N10.6  | 0,00 | 0,00 | 0,00 | 0,00 | NA | NA |
| RP4-774G10.1  | 0,00 | 0,00 | 0,00 | 0,00 | NA | NA |
| RP4-775C13.2  | 0,00 | 0,00 | 0,00 | 0,00 | NA | NA |
| RP4-775C13.3  | 0,00 | 0,00 | 0,00 | 0,00 | NA | NA |
| RP4-775D17.1  | 0,00 | 0,00 | 0,00 | 0,00 | NA | NA |
| RP4-777G9.1   | 0,00 | 0,00 | 0,00 | 0,00 | NA | NA |
| RP4-777L9.2   | 0,00 | 0,00 | 0,00 | 0,00 | NA | NA |
| RP4-777L9.3   | 0,00 | 0,00 | 0,00 | 0,00 | NA | NA |
| RP4-778K6.1   | 0,00 | 0,00 | 0,00 | 0,00 | NA | NA |
| RP4-781B1.5   | 0,00 | 0,00 | 0,00 | 0,00 | NA | NA |
| RP4-781K5.7   | 0,00 | 0,00 | 0,00 | 0,00 | NA | NA |
| RP4-781K5.9   | 0,00 | 0,00 | 0,00 | 0,00 | NA | NA |
| RP4-781L3.1   | 0,00 | 0,00 | 0,00 | 0,00 | NA | NA |
| RP4-784A16.2  | 0,00 | 0,00 | 0,00 | 0,00 | NA | NA |
| RP4-784A16.4  | 0,00 | 0,00 | 0,00 | 0,00 | NA | NA |
| RP4-785G19.2  | 0,00 | 0,00 | 0,00 | 0,00 | NA | NA |
| RP4-785J1.1   | 0,00 | 0,00 | 0,00 | 0,00 | NA | NA |
| RP4-788L20.3  | 0,00 | 0,00 | 0,00 | 0,00 | NA | NA |

|               |      |      |      |      |    |    |
|---------------|------|------|------|------|----|----|
| RP4-788P17.1  | 0,00 | 0,00 | 0,00 | 0,00 | NA | NA |
| RP4-791C19.1  | 0,00 | 0,00 | 0,00 | 0,00 | NA | NA |
| RP4-791M13.4  | 0,00 | 0,00 | 0,00 | 0,00 | NA | NA |
| RP4-792G4.2   | 0,00 | 0,00 | 0,00 | 0,00 | NA | NA |
| RP4-792G4.3   | 0,00 | 0,12 | 0,00 | 0,00 | NA | NA |
| RP4-794H19.1  | 0,00 | 0,00 | 0,00 | 0,00 | NA | NA |
| RP4-794H19.3  | 0,00 | 0,00 | 0,00 | 0,00 | NA | NA |
| RP4-795A5.1   | 0,00 | 0,00 | 0,00 | 0,00 | NA | NA |
| RP4-796B4.1   | 0,00 | 0,00 | 0,00 | 0,00 | NA | NA |
| RP4-796F18.2  | 0,00 | 0,00 | 0,00 | 0,00 | NA | NA |
| RP4-796F18.3  | 0,00 | 0,00 | 0,00 | 0,00 | NA | NA |
| RP4-797C5.2   | 0,00 | 0,00 | 0,00 | 0,00 | NA | NA |
| RP4-798A10.4  | 0,00 | 0,00 | 0,00 | 0,00 | NA | NA |
| RP4-798C17.5  | 0,00 | 0,00 | 0,00 | 0,00 | NA | NA |
| RP4-798C17.7  | 0,00 | 0,00 | 0,00 | 0,00 | NA | NA |
| RP4-799G3.1   | 0,00 | 0,00 | 0,00 | 0,00 | NA | NA |
| RP4-799G3.2   | 0,00 | 0,00 | 0,00 | 0,00 | NA | NA |
| RP4-799P18.2  | 0,00 | 0,00 | 0,00 | 0,00 | NA | NA |
| RP4-799P18.3  | 0,00 | 0,00 | 0,00 | 0,00 | NA | NA |
| RP4-799P18.5  | 0,00 | 0,00 | 0,00 | 0,00 | NA | NA |
| RP4-800F24.1  | 0,00 | 0,00 | 0,00 | 0,00 | NA | NA |
| RP4-800M22.1  | 0,00 | 0,00 | 0,00 | 0,00 | NA | NA |
| RP4-800M22.2  | 0,00 | 0,00 | 0,00 | 0,00 | NA | NA |
| RP4-800M22.3  | 0,00 | 0,00 | 0,00 | 0,00 | NA | NA |
| RP4-800M22.4  | 0,00 | 0,00 | 0,00 | 0,00 | NA | NA |
| RP4-800O15.1  | 0,00 | 0,00 | 0,00 | 0,00 | NA | NA |
| RP4-800O15.2  | 0,00 | 0,00 | 0,00 | 0,00 | NA | NA |
| RP4-800O15.3  | 0,00 | 0,00 | 0,00 | 0,00 | NA | NA |
| RP4-801G22.2  | 0,00 | 0,00 | 0,00 | 0,00 | NA | NA |
| RP4-801G22.3  | 0,00 | 0,00 | 0,00 | 0,00 | NA | NA |
| RP4-803A2.2   | 0,00 | 0,00 | 0,00 | 0,00 | NA | NA |
| RP4-806M20.2  | 0,00 | 0,00 | 0,00 | 0,00 | NA | NA |
| RP4-806M20.3  | 0,00 | 0,00 | 0,00 | 0,00 | NA | NA |
| RP4-806M20.4  | 0,00 | 0,00 | 0,00 | 0,00 | NA | NA |
| RP4-806M20.5  | 0,00 | 0,00 | 0,00 | 0,00 | NA | NA |
| RP4-808A1.1   | 0,00 | 0,00 | 0,00 | 0,00 | NA | NA |
| RP4-808O4.2   | 0,00 | 0,00 | 0,00 | 0,00 | NA | NA |
| RP4-809F4.1   | 0,00 | 0,00 | 0,00 | 0,00 | NA | NA |
| RP4-810F7.1   | 0,00 | 0,00 | 0,00 | 0,00 | NA | NA |
| RP4-811M8.1   | 0,00 | 0,00 | 0,00 | 0,00 | NA | NA |
| RP4-813D12.2  | 0,00 | 0,00 | 0,00 | 0,00 | NA | NA |
| RP4-813F11.1  | 0,00 | 0,00 | 0,00 | 0,00 | NA | NA |
| RP4-813F11.3  | 0,00 | 0,00 | 0,00 | 0,00 | NA | NA |
| RP4-814D15.1  | 0,00 | 0,00 | 0,00 | 0,00 | NA | NA |
| RP4-814E15.1  | 0,00 | 0,00 | 0,00 | 0,00 | NA | NA |
| RP4-814E15.2  | 0,00 | 0,00 | 0,00 | 0,00 | NA | NA |
| RP4-815D20.1  | 0,00 | 0,00 | 0,00 | 0,00 | NA | NA |
| RP4-816N1.1   | 0,00 | 0,00 | 0,00 | 0,00 | NA | NA |
| RP4-816N1.3   | 0,00 | 0,00 | 0,00 | 0,00 | NA | NA |
| RP5-1002M8.4  | 0,00 | 0,00 | 0,00 | 0,00 | NA | NA |
| RP5-1003J2.3  | 0,00 | 0,00 | 0,00 | 0,00 | NA | NA |
| RP5-1003J2.4  | 0,00 | 0,00 | 0,00 | 0,00 | NA | NA |
| RP5-1004I9.1  | 0,00 | 0,00 | 0,00 | 0,00 | NA | NA |
| RP5-1004I9.2  | 0,00 | 0,00 | 0,00 | 0,00 | NA | NA |
| RP5-1006K12.1 | 0,00 | 0,00 | 0,00 | 0,00 | NA | NA |

|                |      |      |      |      |    |    |
|----------------|------|------|------|------|----|----|
| RP5-1007G16.1  | 0,00 | 0,00 | 0,00 | 0,00 | NA | NA |
| RP5-1009E24.9  | 0,00 | 0,00 | 0,00 | 0,00 | NA | NA |
| RP5-1009N12.1  | 0,00 | 0,00 | 0,00 | 0,00 | NA | NA |
| RP5-1012F16.2  | 0,00 | 0,00 | 0,00 | 0,00 | NA | NA |
| RP5-1014O16.1  | 0,00 | 0,00 | 0,00 | 0,00 | NA | NA |
| RP5-1014O16.10 | 0,00 | 0,00 | 0,00 | 0,00 | NA | NA |
| RP5-1014O16.6  | 0,00 | 0,00 | 0,00 | 0,00 | NA | NA |
| RP5-1014O16.7  | 0,00 | 0,00 | 0,00 | 0,00 | NA | NA |
| RP5-1014O16.9  | 0,00 | 0,00 | 0,00 | 0,00 | NA | NA |
| RP5-1016A21.1  | 0,00 | 0,00 | 0,00 | 0,00 | NA | NA |
| RP5-1017F8.2   | 0,00 | 0,00 | 0,00 | 0,00 | NA | NA |
| RP5-1018D12.11 | 0,00 | 0,00 | 0,00 | 0,00 | NA | NA |
| RP5-1018D12.6  | 0,00 | 0,00 | 0,00 | 0,00 | NA | NA |
| RP5-1018K9.1   | 0,00 | 0,00 | 0,00 | 0,00 | NA | NA |
| RP5-1021I20.1  | 0,00 | 0,00 | 0,00 | 0,00 | NA | NA |
| RP5-1021I20.7  | 0,00 | 0,00 | 0,00 | 0,00 | NA | NA |
| RP5-1021I20.8  | 0,00 | 0,00 | 0,00 | 0,00 | NA | NA |
| RP5-1022J11.1  | 0,00 | 0,00 | 0,00 | 0,00 | NA | NA |
| RP5-1022J11.2  | 0,00 | 0,00 | 0,00 | 0,00 | NA | NA |
| RP5-1022P6.4   | 0,00 | 0,00 | 0,00 | 0,00 | NA | NA |
| RP5-1022P6.7   | 0,00 | 0,00 | 0,00 | 0,00 | NA | NA |
| RP5-1023B21.1  | 0,00 | 0,00 | 0,00 | 0,00 | NA | NA |
| RP5-1024C24.1  | 0,00 | 0,00 | 0,00 | 0,00 | NA | NA |
| RP5-1024N4.5   | 0,00 | 0,00 | 0,00 | 0,00 | NA | NA |
| RP5-1025A1.2   | 0,00 | 0,00 | 0,00 | 0,00 | NA | NA |
| RP5-1025A1.3   | 0,00 | 0,00 | 0,00 | 0,00 | NA | NA |
| RP5-1027G4.3   | 0,00 | 0,00 | 0,00 | 0,00 | NA | NA |
| RP5-1028K7.3   | 0,00 | 0,00 | 0,00 | 0,00 | NA | NA |
| RP5-1028L10.1  | 0,00 | 0,00 | 0,00 | 0,00 | NA | NA |
| RP5-1028L10.2  | 0,00 | 0,00 | 0,00 | 0,00 | NA | NA |
| RP5-1029F21.3  | 0,00 | 0,00 | 0,00 | 0,00 | NA | NA |
| RP5-1029K10.2  | 0,00 | 0,00 | 0,00 | 0,00 | NA | NA |
| RP5-1029K10.4  | 0,00 | 0,00 | 0,00 | 0,00 | NA | NA |
| RP5-1030M6.3   | 0,00 | 0,00 | 0,00 | 0,00 | NA | NA |
| RP5-1031D4.2   | 0,00 | 0,00 | 0,00 | 0,00 | NA | NA |
| RP5-1031J8.1   | 0,00 | 0,00 | 0,00 | 0,00 | NA | NA |
| RP5-1032F13.1  | 0,00 | 0,00 | 0,00 | 0,00 | NA | NA |
| RP5-1033E15.3  | 0,00 | 0,00 | 0,00 | 0,00 | NA | NA |
| RP5-1033H2.1   | 0,00 | 0,00 | 0,00 | 0,00 | NA | NA |
| RP5-1033K19.1  | 0,00 | 0,00 | 0,00 | 0,00 | NA | NA |
| RP5-1033K19.2  | 0,00 | 0,00 | 0,00 | 0,00 | NA | NA |
| RP5-1039K5.13  | 0,00 | 0,00 | 0,00 | 0,00 | NA | NA |
| RP5-1039K5.18  | 0,00 | 0,00 | 0,00 | 0,00 | NA | NA |
| RP5-1042I8.3   | 0,00 | 0,00 | 0,00 | 0,00 | NA | NA |
| RP5-1042I8.6   | 0,00 | 0,00 | 0,00 | 0,00 | NA | NA |
| RP5-1043E3.1   | 0,00 | 0,00 | 0,00 | 0,00 | NA | NA |
| RP5-1043F6.1   | 0,00 | 0,00 | 0,00 | 0,00 | NA | NA |
| RP5-1044H5.2   | 0,00 | 0,00 | 0,00 | 0,00 | NA | NA |
| RP5-1045J21.1  | 0,00 | 0,00 | 0,00 | 0,00 | NA | NA |
| RP5-1046G13.2  | 0,00 | 0,00 | 0,00 | 0,00 | NA | NA |
| RP5-1047A19.4  | 0,00 | 0,00 | 0,00 | 0,00 | NA | NA |
| RP5-1047A19.6  | 0,00 | 0,00 | 0,00 | 0,00 | NA | NA |
| RP5-1047E14.1  | 0,00 | 0,00 | 0,00 | 0,00 | NA | NA |
| RP5-1048B16.1  | 0,00 | 0,00 | 0,00 | 0,00 | NA | NA |
| RP5-1050D4.2   | 0,00 | 0,00 | 0,00 | 0,00 | NA | NA |

|               |      |      |      |      |    |    |
|---------------|------|------|------|------|----|----|
| RP5-1050E16.1 | 0,00 | 0,00 | 0,00 | 0,00 | NA | NA |
| RP5-1050E16.2 | 0,00 | 0,00 | 0,00 | 0,00 | NA | NA |
| RP5-1050K3.2  | 0,00 | 0,00 | 0,00 | 0,00 | NA | NA |
| RP5-1050K3.3  | 0,00 | 0,00 | 0,00 | 0,00 | NA | NA |
| RP5-1051D14.1 | 0,00 | 0,00 | 0,00 | 0,00 | NA | NA |
| RP5-1051D14.2 | 0,00 | 0,00 | 0,00 | 0,00 | NA | NA |
| RP5-1051I4.4  | 0,00 | 0,00 | 0,00 | 0,00 | NA | NA |
| RP5-1051I4.6  | 0,00 | 0,00 | 0,00 | 0,00 | NA | NA |
| RP5-1052M9.1  | 0,00 | 0,00 | 0,00 | 0,00 | NA | NA |
| RP5-1053E7.2  | 0,00 | 0,00 | 0,00 | 0,00 | NA | NA |
| RP5-1053E7.3  | 0,00 | 0,00 | 0,00 | 0,00 | NA | NA |
| RP5-1054A22.4 | 0,00 | 0,00 | 0,00 | 0,00 | NA | NA |
| RP5-1055C14.4 | 0,00 | 0,00 | 0,00 | 0,00 | NA | NA |
| RP5-1055C14.6 | 0,00 | 0,00 | 0,00 | 0,00 | NA | NA |
| RP5-1057I20.6 | 0,00 | 0,00 | 0,00 | 0,00 | NA | NA |
| RP5-1057I7.1  | 0,00 | 0,00 | 0,00 | 0,00 | NA | NA |
| RP5-1059H15.1 | 0,00 | 0,00 | 0,00 | 0,00 | NA | NA |
| RP5-1059M17.1 | 0,00 | 0,00 | 0,00 | 0,00 | NA | NA |
| RP5-1061H20.4 | 0,00 | 0,00 | 0,00 | 0,00 | NA | NA |
| RP5-1061H20.5 | 0,00 | 0,00 | 0,00 | 0,00 | NA | NA |
| RP5-1062I16.1 | 0,00 | 0,00 | 0,00 | 0,00 | NA | NA |
| RP5-1063M23.2 | 0,00 | 0,00 | 0,00 | 0,00 | NA | NA |
| RP5-1065P14.1 | 0,00 | 0,00 | 0,00 | 0,00 | NA | NA |
| RP5-1065P14.2 | 0,00 | 0,00 | 0,00 | 0,00 | NA | NA |
| RP5-1066H13.4 | 0,00 | 0,00 | 0,00 | 0,00 | NA | NA |
| RP5-1067M6.3  | 0,00 | 0,00 | 0,00 | 0,00 | NA | NA |
| RP5-1068B5.1  | 0,00 | 0,00 | 0,00 | 0,00 | NA | NA |
| RP5-1068B5.5  | 0,00 | 0,00 | 0,00 | 0,00 | NA | NA |
| RP5-1068E13.7 | 0,00 | 0,10 | 0,00 | 0,00 | NA | NA |
| RP5-1068F16.3 | 0,00 | 0,00 | 0,00 | 0,00 | NA | NA |
| RP5-1068H6.1  | 0,00 | 0,00 | 0,00 | 0,00 | NA | NA |
| RP5-1068H6.3  | 0,00 | 0,22 | 0,00 | 0,00 | NA | NA |
| RP5-1069C8.3  | 0,00 | 0,00 | 0,00 | 0,00 | NA | NA |
| RP5-1070G24.2 | 0,00 | 0,00 | 0,00 | 0,00 | NA | NA |
| RP5-1071N3.1  | 0,00 | 0,00 | 0,00 | 0,00 | NA | NA |
| RP5-1073F15.1 | 0,00 | 0,00 | 0,00 | 0,00 | NA | NA |
| RP5-1077B9.5  | 0,00 | 0,00 | 0,00 | 0,00 | NA | NA |
| RP5-1077H22.1 | 0,00 | 0,00 | 0,00 | 0,00 | NA | NA |
| RP5-1077H22.2 | 0,00 | 0,00 | 0,00 | 0,00 | NA | NA |
| RP5-1086D14.1 | 0,00 | 0,00 | 0,00 | 0,00 | NA | NA |
| RP5-1086D14.6 | 0,18 | 0,26 | 0,39 | 0,47 | NA | NA |
| RP5-1086I18.1 | 0,00 | 0,00 | 0,00 | 0,00 | NA | NA |
| RP5-1086L22.1 | 0,00 | 0,00 | 0,00 | 0,00 | NA | NA |
| RP5-1087E8.3  | 0,00 | 0,00 | 0,00 | 0,00 | NA | NA |
| RP5-1090E8.1  | 0,00 | 0,00 | 0,00 | 0,00 | NA | NA |
| RP5-1091N2.2  | 0,00 | 0,00 | 0,00 | 0,00 | NA | NA |
| RP5-1091N2.3  | 0,00 | 0,00 | 0,00 | 0,00 | NA | NA |
| RP5-1092A11.2 | 0,00 | 0,00 | 0,00 | 0,00 | NA | NA |
| RP5-1092E23.1 | 0,00 | 0,00 | 0,00 | 0,00 | NA | NA |
| RP5-1092K5.2  | 0,00 | 0,00 | 0,00 | 1,26 | NA | NA |
| RP5-1092L12.2 | 0,00 | 0,00 | 0,00 | 0,00 | NA | NA |
| RP5-1096D14.5 | 0,00 | 0,00 | 0,00 | 0,00 | NA | NA |
| RP5-1096D14.6 | 0,11 | 0,35 | 0,53 | 0,55 | NA | NA |
| RP5-1096D14.7 | 0,00 | 0,00 | 0,00 | 0,00 | NA | NA |
| RP5-1096I16.1 | 0,00 | 0,00 | 0,00 | 0,00 | NA | NA |

|                |      |      |      |      |    |    |
|----------------|------|------|------|------|----|----|
| RP5-1097F14.1  | 0,00 | 0,00 | 0,00 | 0,00 | NA | NA |
| RP5-1097P24.1  | 0,00 | 0,00 | 0,00 | 0,00 | NA | NA |
| RP5-1098D14.1  | 0,00 | 0,00 | 0,00 | 0,00 | NA | NA |
| RP5-1099E6.3   | 0,00 | 0,00 | 0,00 | 0,00 | NA | NA |
| RP5-1100E15.2  | 0,00 | 0,00 | 0,00 | 0,00 | NA | NA |
| RP5-1100E15.4  | 0,00 | 0,00 | 0,00 | 0,00 | NA | NA |
| RP5-1100H13.3  | 0,00 | 0,00 | 0,00 | 0,00 | NA | NA |
| RP5-1100I6.1   | 0,00 | 0,00 | 0,00 | 0,00 | NA | NA |
| RP5-1102E8.3   | 0,00 | 0,00 | 0,00 | 0,00 | NA | NA |
| RP5-1104E15.10 | 0,00 | 0,00 | 0,00 | 0,00 | NA | NA |
| RP5-1104E15.6  | 0,00 | 0,00 | 0,00 | 0,00 | NA | NA |
| RP5-1106E3.1   | 0,00 | 0,00 | 0,00 | 0,00 | NA | NA |
| RP5-1106E3.2   | 0,00 | 0,00 | 0,00 | 0,00 | NA | NA |
| RP5-1106H14.1  | 0,00 | 0,00 | 0,00 | 0,00 | NA | NA |
| RP5-1107A17.4  | 0,11 | 0,24 | 0,36 | 0,40 | NA | NA |
| RP5-1108M17.5  | 0,00 | 0,00 | 0,00 | 0,00 | NA | NA |
| RP5-1111A8.3   | 0,00 | 0,00 | 0,00 | 0,00 | NA | NA |
| RP5-1114G22.1  | 0,00 | 0,00 | 0,00 | 0,00 | NA | NA |
| RP5-1115A15.1  | 0,00 | 0,00 | 0,00 | 0,00 | NA | NA |
| RP5-1116H23.1  | 0,00 | 0,00 | 0,00 | 0,00 | NA | NA |
| RP5-1116H23.3  | 0,00 | 0,00 | 0,00 | 0,00 | NA | NA |
| RP5-1116H23.4  | 0,00 | 0,00 | 0,00 | 0,00 | NA | NA |
| RP5-1116H23.6  | 0,00 | 0,00 | 0,00 | 0,37 | NA | NA |
| RP5-1118D24.2  | 0,00 | 0,00 | 0,00 | 0,00 | NA | NA |
| RP5-1119A7.10  | 0,00 | 0,00 | 0,00 | 0,00 | NA | NA |
| RP5-1119A7.11  | 0,00 | 0,00 | 0,00 | 0,00 | NA | NA |
| RP5-1119A7.14  | 0,00 | 0,00 | 0,00 | 0,00 | NA | NA |
| RP5-1119A7.17  | 0,00 | 0,00 | 0,00 | 0,00 | NA | NA |
| RP5-1119D9.4   | 0,00 | 0,00 | 0,00 | 0,00 | NA | NA |
| RP5-1119O21.2  | 0,00 | 0,00 | 0,00 | 0,00 | NA | NA |
| RP5-1120P11.3  | 0,00 | 0,00 | 0,00 | 0,00 | NA | NA |
| RP5-1121A15.4  | 0,00 | 0,00 | 0,00 | 0,00 | NA | NA |
| RP5-1121H13.1  | 0,00 | 0,00 | 0,00 | 0,00 | NA | NA |
| RP5-1121H13.4  | 0,00 | 0,00 | 0,00 | 0,00 | NA | NA |
| RP5-1125A11.5  | 0,00 | 0,00 | 0,00 | 0,00 | NA | NA |
| RP5-1125K23.1  | 0,00 | 0,00 | 0,00 | 0,00 | NA | NA |
| RP5-1125M8.2   | 0,00 | 0,00 | 0,00 | 0,00 | NA | NA |
| RP5-1125M8.3   | 0,00 | 0,00 | 0,00 | 0,00 | NA | NA |
| RP5-1125M8.6   | 0,00 | 0,00 | 0,00 | 0,00 | NA | NA |
| RP5-1125M8.7   | 0,00 | 0,00 | 0,00 | 0,00 | NA | NA |
| RP5-1125N11.1  | 0,00 | 0,00 | 0,00 | 0,00 | NA | NA |
| RP5-1128N12.2  | 0,00 | 0,00 | 0,00 | 0,00 | NA | NA |
| RP5-1128N12.3  | 0,00 | 0,00 | 0,00 | 0,00 | NA | NA |
| RP5-1132H15.1  | 0,00 | 0,00 | 0,49 | 0,00 | NA | NA |
| RP5-1132H15.2  | 0,00 | 0,00 | 0,00 | 0,00 | NA | NA |
| RP5-1132H15.3  | 0,00 | 0,00 | 0,00 | 0,00 | NA | NA |
| RP5-1136G13.1  | 0,00 | 0,00 | 0,00 | 0,00 | NA | NA |
| RP5-1136G13.2  | 0,19 | 0,06 | 0,09 | 0,12 | NA | NA |
| RP5-1136G2.1   | 0,00 | 0,00 | 0,00 | 0,00 | NA | NA |
| RP5-1139B12.3  | 0,00 | 0,00 | 0,00 | 0,00 | NA | NA |
| RP5-1139B12.4  | 0,00 | 0,00 | 0,00 | 0,00 | NA | NA |
| RP5-1139I1.4   | 0,00 | 0,00 | 0,00 | 0,00 | NA | NA |
| RP5-1142A6.2   | 0,00 | 0,00 | 0,00 | 0,00 | NA | NA |
| RP5-1142A6.3   | 0,11 | 0,63 | 0,70 | 0,23 | NA | NA |
| RP5-1142A6.5   | 0,00 | 0,00 | 0,00 | 0,00 | NA | NA |



|               |      |      |      |      |    |    |
|---------------|------|------|------|------|----|----|
| RP5-1142A6.7  | 0,00 | 0,00 | 0,00 | 0,00 | NA | NA |
| RP5-1142J19.1 | 0,00 | 0,00 | 0,00 | 0,00 | NA | NA |
| RP5-1142J19.2 | 0,00 | 0,00 | 0,00 | 0,00 | NA | NA |
| RP5-1145L23.2 | 0,00 | 0,00 | 0,00 | 0,00 | NA | NA |
| RP5-1147A1.1  | 0,00 | 0,00 | 0,00 | 0,00 | NA | NA |
| RP5-1147A1.2  | 0,00 | 0,00 | 0,00 | 0,00 | NA | NA |
| RP5-1154E9.5  | 0,00 | 0,00 | 0,00 | 0,00 | NA | NA |
| RP5-1154E9.6  | 0,00 | 0,00 | 0,00 | 0,00 | NA | NA |
| RP5-1154E9.7  | 0,00 | 0,00 | 0,00 | 0,00 | NA | NA |
| RP5-1154E9.8  | 0,00 | 0,49 | 0,00 | 0,00 | NA | NA |
| RP5-1154L15.2 | 0,00 | 0,00 | 0,00 | 0,00 | NA | NA |
| RP5-1155K23.1 | 0,00 | 0,00 | 0,00 | 0,00 | NA | NA |
| RP5-1155K23.2 | 0,00 | 0,00 | 0,00 | 0,00 | NA | NA |
| RP5-1155K23.4 | 0,00 | 0,00 | 0,00 | 0,00 | NA | NA |
| RP5-1158B12.1 | 0,00 | 0,00 | 0,00 | 0,00 | NA | NA |
| RP5-1158B12.2 | 0,00 | 0,00 | 0,00 | 0,00 | NA | NA |
| RP5-1158E12.1 | 0,00 | 0,00 | 0,00 | 0,00 | NA | NA |
| RP5-1158E12.3 | 0,00 | 0,00 | 0,00 | 0,00 | NA | NA |
| RP5-1158H2.2  | 0,00 | 0,00 | 0,00 | 0,00 | NA | NA |
| RP5-1158H2.3  | 0,00 | 0,00 | 0,00 | 0,00 | NA | NA |
| RP5-1159O4.2  | 0,00 | 0,00 | 0,00 | 0,00 | NA | NA |
| RP5-1160K1.8  | 0,00 | 0,00 | 0,00 | 0,00 | NA | NA |
| RP5-1163L11.2 | 0,00 | 0,00 | 0,00 | 0,00 | NA | NA |
| RP5-1164C1.2  | 0,00 | 0,00 | 0,00 | 0,00 | NA | NA |
| RP5-1166A24.1 | 0,00 | 0,00 | 0,00 | 0,00 | NA | NA |
| RP5-1168A5.1  | 0,00 | 0,00 | 0,00 | 0,00 | NA | NA |
| RP5-1168M19.1 | 0,00 | 0,00 | 0,00 | 0,00 | NA | NA |
| RP5-1170D6.1  | 0,00 | 0,00 | 0,00 | 0,00 | NA | NA |
| RP5-1172A22.1 | 0,30 | 0,38 | 0,00 | 1,01 | NA | NA |
| RP5-1172N10.2 | 0,00 | 0,00 | 0,00 | 0,00 | NA | NA |
| RP5-1173A5.1  | 0,00 | 0,00 | 0,00 | 0,00 | NA | NA |
| RP5-1173P7.1  | 0,00 | 0,00 | 0,00 | 0,00 | NA | NA |
| RP5-1174J21.1 | 0,00 | 0,00 | 0,00 | 0,00 | NA | NA |
| RP5-1177I5.3  | 0,00 | 0,00 | 0,00 | 0,00 | NA | NA |
| RP5-1177M21.1 | 0,00 | 0,00 | 0,00 | 0,00 | NA | NA |
| RP5-1178H5.2  | 0,00 | 0,00 | 0,00 | 0,00 | NA | NA |
| RP5-1180C18.1 | 0,00 | 0,00 | 0,00 | 0,00 | NA | NA |
| RP5-1180E21.4 | 0,00 | 0,00 | 0,00 | 0,00 | NA | NA |
| RP5-1181K21.2 | 0,00 | 0,00 | 0,00 | 0,00 | NA | NA |
| RP5-1182A14.5 | 0,00 | 0,00 | 0,00 | 0,00 | NA | NA |
| RP5-1182A14.7 | 0,00 | 0,00 | 0,00 | 0,00 | NA | NA |
| RP5-1184F4.5  | 0,00 | 0,00 | 0,00 | 0,00 | NA | NA |
| RP5-1185K9.1  | 0,00 | 0,00 | 0,00 | 0,00 | NA | NA |
| RP5-1186N24.3 | 0,00 | 0,00 | 0,00 | 0,00 | NA | NA |
| RP5-1186P10.1 | 0,00 | 0,00 | 0,00 | 0,00 | NA | NA |
| RP5-1186P10.2 | 0,00 | 0,00 | 0,00 | 0,00 | NA | NA |
| RP5-1189B24.1 | 0,00 | 0,00 | 0,00 | 0,00 | NA | NA |
| RP5-1189B24.4 | 0,00 | 0,00 | 0,00 | 0,00 | NA | NA |
| RP5-1189K21.1 | 0,00 | 0,00 | 0,00 | 0,00 | NA | NA |
| RP5-1189K21.2 | 0,00 | 0,00 | 0,00 | 0,00 | NA | NA |
| RP5-1193P9.2  | 0,00 | 0,00 | 0,00 | 0,00 | NA | NA |
| RP5-1193P9.3  | 0,00 | 0,00 | 0,00 | 0,00 | NA | NA |
| RP5-1193P9.4  | 0,00 | 0,00 | 0,00 | 0,00 | NA | NA |
| RP5-817C23.1  | 0,00 | 0,00 | 0,00 | 0,00 | NA | NA |
| RP5-822J19.1  | 0,00 | 0,00 | 0,00 | 0,00 | NA | NA |

|               |      |      |      |      |    |    |
|---------------|------|------|------|------|----|----|
| RP5-824H1.1   | 0,00 | 0,00 | 0,00 | 0,00 | NA | NA |
| RP5-827A12.2  | 0,00 | 0,00 | 0,00 | 0,00 | NA | NA |
| RP5-827C21.1  | 0,00 | 0,00 | 0,00 | 0,00 | NA | NA |
| RP5-827C21.2  | 0,00 | 0,00 | 0,00 | 0,00 | NA | NA |
| RP5-827E24.1  | 0,00 | 0,00 | 0,00 | 0,00 | NA | NA |
| RP5-827L5.1   | 0,00 | 0,00 | 0,00 | 0,00 | NA | NA |
| RP5-827L5.2   | 0,00 | 0,00 | 0,00 | 0,00 | NA | NA |
| RP5-828H9.1   | 0,00 | 0,00 | 0,00 | 0,00 | NA | NA |
| RP5-828H9.4   | 0,00 | 0,00 | 0,00 | 0,00 | NA | NA |
| RP5-828K20.1  | 0,00 | 0,00 | 0,00 | 0,00 | NA | NA |
| RP5-831C21.1  | 0,00 | 0,00 | 0,00 | 0,00 | NA | NA |
| RP5-831D17.2  | 0,00 | 0,00 | 0,00 | 0,00 | NA | NA |
| RP5-834A16.1  | 0,00 | 0,00 | 0,00 | 0,00 | NA | NA |
| RP5-834N19.2  | 0,00 | 0,00 | 0,00 | 0,00 | NA | NA |
| RP5-836E8.1   | 0,00 | 0,00 | 0,00 | 0,00 | NA | NA |
| RP5-837G17.1  | 0,00 | 0,00 | 0,00 | 0,00 | NA | NA |
| RP5-837I24.1  | 0,00 | 0,00 | 0,00 | 0,00 | NA | NA |
| RP5-837I24.3  | 0,00 | 0,00 | 0,00 | 0,00 | NA | NA |
| RP5-837I24.4  | 0,00 | 0,00 | 0,00 | 0,00 | NA | NA |
| RP5-837I24.5  | 0,00 | 0,00 | 0,00 | 0,00 | NA | NA |
| RP5-837I24.6  | 0,00 | 0,00 | 0,00 | 0,00 | NA | NA |
| RP5-837J1.1   | 0,00 | 0,00 | 0,00 | 0,00 | NA | NA |
| RP5-837M10.1  | 0,00 | 0,00 | 0,00 | 0,00 | NA | NA |
| RP5-837M10.3  | 0,00 | 0,00 | 0,00 | 0,00 | NA | NA |
| RP5-837O21.2  | 0,00 | 0,00 | 0,00 | 0,00 | NA | NA |
| RP5-837O21.3  | 0,00 | 0,00 | 0,00 | 0,00 | NA | NA |
| RP5-837O21.4  | 0,00 | 0,00 | 0,00 | 0,00 | NA | NA |
| RP5-837O21.8  | 0,00 | 0,00 | 0,00 | 0,00 | NA | NA |
| RP5-837O21.9  | 0,00 | 0,00 | 0,00 | 0,00 | NA | NA |
| RP5-838N20.5  | 0,00 | 0,00 | 0,00 | 0,00 | NA | NA |
| RP5-839B11.2  | 0,00 | 0,00 | 0,00 | 0,00 | NA | NA |
| RP5-842K16.1  | 0,00 | 0,00 | 0,00 | 0,00 | NA | NA |
| RP5-843L14.1  | 0,00 | 0,00 | 0,00 | 0,00 | NA | NA |
| RP5-843L14.2  | 0,00 | 0,00 | 0,00 | 0,00 | NA | NA |
| RP5-845O24.3  | 0,00 | 0,00 | 0,00 | 0,00 | NA | NA |
| RP5-845O24.8  | 0,00 | 0,00 | 0,00 | 0,00 | NA | NA |
| RP5-848E13.1  | 0,00 | 0,00 | 0,00 | 0,00 | NA | NA |
| RP5-848E13.4  | 0,00 | 0,00 | 0,00 | 0,00 | NA | NA |
| RP5-849L7.1   | 0,00 | 0,00 | 0,00 | 0,00 | NA | NA |
| RP5-850E9.3   | 0,00 | 0,00 | 0,00 | 0,00 | NA | NA |
| RP5-850O15.3  | 0,00 | 0,00 | 0,00 | 0,00 | NA | NA |
| RP5-850O15.4  | 0,00 | 0,00 | 0,00 | 0,00 | NA | NA |
| RP5-854E16.1  | 0,00 | 0,00 | 0,00 | 0,00 | NA | NA |
| RP5-855F14.2  | 0,00 | 0,00 | 0,00 | 0,00 | NA | NA |
| RP5-856G1.1   | 0,00 | 0,00 | 0,00 | 0,00 | NA | NA |
| RP5-856G1.2   | 0,00 | 0,00 | 0,00 | 0,00 | NA | NA |
| RP5-857K21.12 | 0,00 | 0,00 | 0,00 | 0,00 | NA | NA |
| RP5-857K21.2  | 0,00 | 0,00 | 0,00 | 0,00 | NA | NA |
| RP5-858B6.1   | 0,00 | 0,00 | 0,00 | 0,00 | NA | NA |
| RP5-859D4.3   | 0,00 | 0,00 | 0,00 | 0,00 | NA | NA |
| RP5-859I17.2  | 0,00 | 0,00 | 0,00 | 0,00 | NA | NA |
| RP5-859I17.3  | 0,00 | 0,00 | 0,00 | 0,00 | NA | NA |
| RP5-860F19.8  | 0,00 | 0,00 | 0,00 | 0,00 | NA | NA |
| RP5-860P4.2   | 0,00 | 0,00 | 0,00 | 0,00 | NA | NA |
| RP5-862K6.4   | 0,00 | 0,00 | 0,00 | 0,00 | NA | NA |

|               |      |      |      |      |    |    |
|---------------|------|------|------|------|----|----|
| RP5-862P8.1   | 0,00 | 0,00 | 0,00 | 0,00 | NA | NA |
| RP5-864K19.6  | 0,00 | 0,00 | 0,00 | 0,00 | NA | NA |
| RP5-864K19.7  | 0,00 | 0,00 | 0,00 | 0,00 | NA | NA |
| RP5-865E18.2  | 0,00 | 0,00 | 0,00 | 0,00 | NA | NA |
| RP5-865N13.2  | 0,00 | 0,00 | 0,00 | 0,00 | NA | NA |
| RP5-866L20.1  | 0,00 | 0,00 | 0,00 | 0,00 | NA | NA |
| RP5-866L20.2  | 0,00 | 0,00 | 0,00 | 0,00 | NA | NA |
| RP5-869M20.2  | 0,00 | 0,00 | 0,00 | 0,00 | NA | NA |
| RP5-870F10.4  | 0,00 | 0,00 | 0,00 | 0,00 | NA | NA |
| RP5-871G17.3  | 0,00 | 0,00 | 0,00 | 0,00 | NA | NA |
| RP5-871G17.4  | 0,00 | 0,00 | 0,00 | 0,00 | NA | NA |
| RP5-871G17.5  | 0,00 | 0,00 | 0,00 | 0,00 | NA | NA |
| RP5-871G17.6  | 0,00 | 0,60 | 0,00 | 0,00 | NA | NA |
| RP5-871P9.1   | 0,00 | 0,00 | 0,00 | 0,00 | NA | NA |
| RP5-872K7.2   | 0,00 | 0,00 | 0,00 | 0,00 | NA | NA |
| RP5-872K7.8   | 0,00 | 0,00 | 0,00 | 0,00 | NA | NA |
| RP5-874C20.6  | 0,00 | 0,00 | 0,00 | 0,00 | NA | NA |
| RP5-874C20.7  | 0,00 | 0,00 | 0,00 | 0,00 | NA | NA |
| RP5-875H18.10 | 0,00 | 0,00 | 0,00 | 0,00 | NA | NA |
| RP5-875H18.4  | 0,00 | 0,00 | 0,00 | 0,00 | NA | NA |
| RP5-875H18.9  | 0,00 | 0,00 | 0,00 | 0,00 | NA | NA |
| RP5-875H3.2   | 0,00 | 0,00 | 0,00 | 0,00 | NA | NA |
| RP5-875O13.6  | 0,00 | 0,00 | 0,00 | 0,00 | NA | NA |
| RP5-877J2.1   | 0,00 | 0,00 | 0,00 | 0,00 | NA | NA |
| RP5-878I13.1  | 0,00 | 0,00 | 0,00 | 0,00 | NA | NA |
| RP5-879K22.1  | 0,00 | 0,00 | 0,00 | 0,00 | NA | NA |
| RP5-881L22.5  | 0,00 | 0,00 | 0,00 | 0,00 | NA | NA |
| RP5-881L22.6  | 0,00 | 0,00 | 0,00 | 0,00 | NA | NA |
| RP5-881P19.6  | 0,00 | 0,00 | 0,00 | 0,00 | NA | NA |
| RP5-882O7.4   | 0,00 | 0,00 | 0,00 | 0,00 | NA | NA |
| RP5-884C9.3   | 0,00 | 0,00 | 0,00 | 0,00 | NA | NA |
| RP5-884G6.2   | 0,00 | 0,00 | 0,00 | 0,00 | NA | NA |
| RP5-884M20.4  | 0,00 | 0,00 | 0,00 | 0,00 | NA | NA |
| RP5-885L7.10  | 0,00 | 0,00 | 0,00 | 0,00 | NA | NA |
| RP5-885L7.11  | 0,00 | 0,00 | 0,00 | 0,00 | NA | NA |
| RP5-890E16.5  | 0,00 | 0,00 | 0,00 | 0,00 | NA | NA |
| RP5-890O15.3  | 0,00 | 0,00 | 0,00 | 0,00 | NA | NA |
| RP5-890O3.3   | 0,00 | 0,00 | 0,00 | 0,00 | NA | NA |
| RP5-891H21.1  | 0,00 | 0,00 | 0,00 | 0,00 | NA | NA |
| RP5-891H21.4  | 0,00 | 0,00 | 0,00 | 0,00 | NA | NA |
| RP5-892F13.2  | 0,00 | 0,00 | 0,00 | 0,00 | NA | NA |
| RP5-892G5.2   | 0,00 | 0,00 | 0,00 | 0,00 | NA | NA |
| RP5-893G23.1  | 0,00 | 0,00 | 0,00 | 0,00 | NA | NA |
| RP5-894A10.5  | 0,00 | 0,00 | 0,00 | 0,00 | NA | NA |
| RP5-894D12.4  | 0,00 | 0,00 | 0,00 | 0,00 | NA | NA |
| RP5-894D12.5  | 0,00 | 0,00 | 0,00 | 0,00 | NA | NA |
| RP5-897D18.1  | 0,00 | 0,00 | 0,00 | 0,00 | NA | NA |
| RP5-901A4.4   | 0,00 | 0,00 | 0,00 | 0,00 | NA | NA |
| RP5-901A4.5   | 0,00 | 0,00 | 0,00 | 0,00 | NA | NA |
| RP5-903E17.2  | 0,00 | 0,00 | 0,00 | 0,00 | NA | NA |
| RP5-903G2.2   | 0,00 | 0,00 | 0,00 | 0,00 | NA | NA |
| RP5-905G11.3  | 0,00 | 0,00 | 0,00 | 0,00 | NA | NA |
| RP5-905H7.10  | 0,00 | 0,00 | 0,00 | 0,00 | NA | NA |
| RP5-905H7.2   | 0,00 | 0,00 | 0,00 | 0,00 | NA | NA |
| RP5-905H7.4   | 0,00 | 0,00 | 0,00 | 0,00 | NA | NA |

|              |      |      |      |      |    |    |
|--------------|------|------|------|------|----|----|
| RP5-905H7.5  | 0,00 | 0,00 | 0,00 | 0,00 | NA | NA |
| RP5-905H7.6  | 0,00 | 0,00 | 0,00 | 0,00 | NA | NA |
| RP5-905H7.7  | 0,00 | 0,00 | 0,00 | 0,00 | NA | NA |
| RP5-905H7.9  | 0,00 | 0,00 | 0,00 | 0,00 | NA | NA |
| RP5-905N1.2  | 0,00 | 0,00 | 0,00 | 0,00 | NA | NA |
| RP5-906A24.2 | 0,00 | 0,00 | 0,00 | 0,00 | NA | NA |
| RP5-907A6.1  | 0,00 | 0,00 | 0,00 | 0,00 | NA | NA |
| RP5-907D15.2 | 0,00 | 0,07 | 0,00 | 0,00 | NA | NA |
| RP5-907D15.3 | 0,00 | 0,00 | 0,00 | 0,00 | NA | NA |
| RP5-907D15.4 | 0,00 | 0,00 | 0,00 | 0,00 | NA | NA |
| RP5-908D6.1  | 0,00 | 0,00 | 0,00 | 0,00 | NA | NA |
| RP5-908D6.3  | 0,00 | 0,00 | 0,00 | 0,00 | NA | NA |
| RP5-908M14.5 | 0,00 | 0,00 | 0,00 | 0,00 | NA | NA |
| RP5-912I13.1 | 0,00 | 0,00 | 0,00 | 0,00 | NA | NA |
| RP5-912I13.2 | 0,00 | 0,00 | 0,00 | 0,00 | NA | NA |
| RP5-914M6.1  | 0,00 | 0,00 | 0,00 | 0,00 | NA | NA |
| RP5-915N17.3 | 0,00 | 0,00 | 0,00 | 0,00 | NA | NA |
| RP5-915N17.9 | 0,00 | 0,00 | 0,00 | 0,00 | NA | NA |
| RP5-916L7.2  | 0,00 | 0,00 | 0,00 | 0,09 | NA | NA |
| RP5-916O11.1 | 0,00 | 0,00 | 0,00 | 0,00 | NA | NA |
| RP5-916O11.3 | 0,00 | 0,00 | 0,00 | 0,00 | NA | NA |
| RP5-921G16.2 | 0,00 | 0,00 | 0,00 | 0,00 | NA | NA |
| RP5-924G13.2 | 0,00 | 0,00 | 0,00 | 0,00 | NA | NA |
| RP5-925F19.1 | 0,00 | 0,00 | 0,00 | 0,00 | NA | NA |
| RP5-926E3.1  | 0,00 | 0,00 | 0,00 | 0,00 | NA | NA |
| RP5-928E24.2 | 0,00 | 0,00 | 0,00 | 0,00 | NA | NA |
| RP5-930J4.5  | 0,00 | 0,00 | 0,00 | 0,00 | NA | NA |
| RP5-931E15.3 | 0,00 | 0,00 | 0,00 | 0,00 | NA | NA |
| RP5-931E15.4 | 0,00 | 0,00 | 0,00 | 0,00 | NA | NA |
| RP5-931K24.1 | 0,00 | 0,00 | 0,00 | 0,00 | NA | NA |
| RP5-933B4.1  | 0,00 | 0,00 | 0,00 | 0,00 | NA | NA |
| RP5-933K21.2 | 0,00 | 0,00 | 0,00 | 0,00 | NA | NA |
| RP5-934G17.6 | 0,00 | 0,00 | 0,00 | 0,00 | NA | NA |
| RP5-935K16.2 | 0,00 | 0,00 | 0,00 | 0,00 | NA | NA |
| RP5-937E21.1 | 0,00 | 0,00 | 0,00 | 0,00 | NA | NA |
| RP5-940F7.2  | 0,00 | 0,00 | 0,00 | 0,00 | NA | NA |
| RP5-940J5.10 | 0,00 | 0,00 | 0,00 | 0,00 | NA | NA |
| RP5-944M2.4  | 0,00 | 0,00 | 0,00 | 0,00 | NA | NA |
| RP5-944N9.2  | 0,00 | 0,00 | 0,00 | 0,00 | NA | NA |
| RP5-945F2.1  | 0,00 | 0,00 | 0,00 | 0,00 | NA | NA |
| RP5-945I17.2 | 0,00 | 0,00 | 0,00 | 0,00 | NA | NA |
| RP5-947P14.2 | 0,00 | 0,00 | 0,00 | 0,00 | NA | NA |
| RP5-955M13.4 | 0,00 | 0,00 | 0,00 | 0,00 | NA | NA |
| RP5-956O18.2 | 0,00 | 0,19 | 0,00 | 0,00 | NA | NA |
| RP5-956O18.3 | 0,00 | 0,00 | 0,00 | 0,00 | NA | NA |
| RP5-958B11.2 | 0,00 | 0,00 | 0,00 | 0,00 | NA | NA |
| RP5-958B3.2  | 0,00 | 1,65 | 0,00 | 0,00 | NA | NA |
| RP5-961K14.1 | 0,00 | 0,00 | 0,00 | 0,00 | NA | NA |
| RP5-963E22.4 | 0,00 | 0,00 | 0,00 | 0,00 | NA | NA |
| RP5-963E22.5 | 0,00 | 0,00 | 0,00 | 0,00 | NA | NA |
| RP5-964C11.1 | 0,00 | 0,00 | 0,00 | 0,00 | NA | NA |
| RP5-964H19.1 | 0,00 | 0,00 | 0,00 | 0,00 | NA | NA |
| RP5-964H19.2 | 0,00 | 0,00 | 0,00 | 0,00 | NA | NA |
| RP5-964H19.4 | 0,00 | 0,00 | 0,00 | 0,00 | NA | NA |
| RP5-964N17.1 | 0,00 | 0,00 | 0,00 | 0,00 | NA | NA |

|               |      |      |      |      |    |    |
|---------------|------|------|------|------|----|----|
| RP5-965F6.2   | 0,00 | 0,00 | 0,00 | 0,00 | NA | NA |
| RP5-965K10.2  | 0,00 | 0,00 | 0,00 | 0,00 | NA | NA |
| RP5-966M1.4   | 0,00 | 0,00 | 0,00 | 0,00 | NA | NA |
| RP5-966M1.5   | 0,00 | 0,00 | 0,00 | 0,00 | NA | NA |
| RP5-967N21.2  | 0,00 | 0,00 | 0,00 | 0,00 | NA | NA |
| RP5-972B16.2  | 0,00 | 0,00 | 0,00 | 0,00 | NA | NA |
| RP5-974N19.1  | 0,00 | 0,00 | 0,00 | 0,00 | NA | NA |
| RP5-977L1.1   | 0,00 | 0,00 | 0,00 | 0,00 | NA | NA |
| RP5-978I12.1  | 0,00 | 0,00 | 0,00 | 0,00 | NA | NA |
| RP5-979D14.1  | 0,00 | 0,00 | 0,00 | 0,00 | NA | NA |
| RP5-983L19.1  | 0,35 | 0,21 | 0,00 | 0,00 | NA | NA |
| RP5-984P4.1   | 0,00 | 0,00 | 0,00 | 0,00 | NA | NA |
| RP5-984P4.4   | 0,00 | 0,00 | 0,00 | 0,00 | NA | NA |
| RP5-988G15.1  | 0,00 | 0,00 | 0,00 | 0,00 | NA | NA |
| RP5-988G17.1  | 0,00 | 0,00 | 0,00 | 0,00 | NA | NA |
| RP5-991B18.1  | 0,00 | 0,00 | 0,00 | 0,00 | NA | NA |
| RP5-991B18.2  | 0,00 | 0,00 | 0,00 | 0,00 | NA | NA |
| RP5-991C6.2   | 0,00 | 0,00 | 0,00 | 0,00 | NA | NA |
| RP5-991C6.3   | 0,00 | 0,00 | 0,00 | 0,00 | NA | NA |
| RP5-994D16.3  | 0,00 | 0,00 | 0,00 | 0,00 | NA | NA |
| RP5-996D20.3  | 0,00 | 0,00 | 0,00 | 0,00 | NA | NA |
| RP5-998G20.1  | 0,00 | 0,00 | 0,00 | 0,00 | NA | NA |
| RP5-998H6.2   | 0,00 | 0,00 | 0,00 | 0,00 | NA | NA |
| RP5-998N21.3  | 0,00 | 0,00 | 0,00 | 0,00 | NA | NA |
| RP6-102O10.1  | 0,00 | 0,00 | 0,00 | 0,00 | NA | NA |
| RP6-114E22.1  | 0,00 | 0,00 | 0,00 | 0,00 | NA | NA |
| RP6-127F18.2  | 0,00 | 0,00 | 0,00 | 0,00 | NA | NA |
| RP6-145B8.2   | 0,00 | 0,00 | 0,00 | 0,00 | NA | NA |
| RP6-145B8.3   | 0,00 | 0,00 | 0,00 | 0,00 | NA | NA |
| RP6-145B8.4   | 0,00 | 0,00 | 0,00 | 0,00 | NA | NA |
| RP6-149D17.1  | 0,00 | 0,00 | 0,00 | 0,00 | NA | NA |
| RP6-14C6.3    | 0,00 | 0,00 | 0,00 | 0,00 | NA | NA |
| RP6-159A1.2   | 0,00 | 0,00 | 0,00 | 0,00 | NA | NA |
| RP6-159A1.3   | 0,00 | 0,00 | 0,00 | 0,00 | NA | NA |
| RP6-166C19.12 | 0,00 | 0,00 | 0,00 | 0,00 | NA | NA |
| RP6-166C19.13 | 0,00 | 0,00 | 0,00 | 0,00 | NA | NA |
| RP6-166C19.14 | 0,00 | 0,00 | 0,00 | 0,00 | NA | NA |
| RP6-166C19.15 | 0,00 | 0,00 | 0,00 | 0,00 | NA | NA |
| RP6-166C19.16 | 0,00 | 0,00 | 0,00 | 0,00 | NA | NA |
| RP6-166C19.17 | 0,00 | 0,00 | 0,00 | 0,00 | NA | NA |
| RP6-166C19.18 | 0,00 | 0,00 | 0,00 | 0,00 | NA | NA |
| RP6-166C19.19 | 0,00 | 0,00 | 0,00 | 0,00 | NA | NA |
| RP6-166C19.20 | 0,00 | 0,00 | 0,00 | 0,00 | NA | NA |
| RP6-166C19.21 | 0,00 | 0,00 | 0,00 | 0,00 | NA | NA |
| RP6-166C19.22 | 0,00 | 0,00 | 0,00 | 0,00 | NA | NA |
| RP6-166C19.23 | 0,00 | 0,00 | 0,00 | 0,00 | NA | NA |
| RP6-170F5.2   | 0,00 | 0,00 | 0,00 | 0,00 | NA | NA |
| RP6-186E3.1   | 0,00 | 0,00 | 0,00 | 0,00 | NA | NA |
| RP6-191P20.5  | 0,00 | 0,00 | 0,00 | 0,00 | NA | NA |
| RP6-1O2.1     | 0,00 | 0,00 | 0,00 | 0,00 | NA | NA |
| RP6-204F4.2   | 0,00 | 0,00 | 0,00 | 0,00 | NA | NA |
| RP6-227L5.1   | 0,00 | 0,00 | 0,00 | 0,00 | NA | NA |
| RP6-227L5.2   | 0,00 | 0,00 | 0,00 | 0,00 | NA | NA |
| RP6-24A23.3   | 0,00 | 0,00 | 0,00 | 0,00 | NA | NA |
| RP6-24A23.6   | 0,00 | 0,00 | 0,00 | 0,00 | NA | NA |

|             |      |      |      |      |    |    |
|-------------|------|------|------|------|----|----|
| RP6-24A23.8 | 0,00 | 0,00 | 0,00 | 0,00 | NA | NA |
| RP6-27P15.2 | 0,00 | 0,00 | 0,00 | 0,00 | NA | NA |
| RP6-29D12.2 | 0,00 | 0,00 | 0,00 | 0,00 | NA | NA |
| RP6-29D12.3 | 0,00 | 0,00 | 0,00 | 0,00 | NA | NA |
| RP6-29D12.4 | 0,00 | 0,00 | 0,00 | 0,00 | NA | NA |
| RP6-43L17.1 | 0,00 | 0,00 | 0,00 | 0,00 | NA | NA |
| RP6-43L17.2 | 0,00 | 0,00 | 0,00 | 0,00 | NA | NA |
| RP6-60B16.1 | 0,00 | 0,00 | 0,00 | 0,00 | NA | NA |
| RP6-65G23.3 | 0,00 | 0,00 | 0,00 | 0,00 | NA | NA |
| RP6-65G23.5 | 0,00 | 0,00 | 0,00 | 0,00 | NA | NA |
| RP6-91H8.2  | 0,00 | 0,00 | 0,00 | 0,00 | NA | NA |
| RP6-99M1.1  | 0,00 | 0,00 | 0,00 | 0,00 | NA | NA |
| RPA2P       | 0,00 | 0,00 | 0,00 | 0,00 | NA | NA |
| RPE65       | 0,00 | 0,00 | 0,00 | 0,00 | NA | NA |
| RPIAP1      | 0,00 | 0,00 | 0,00 | 0,00 | NA | NA |
| RPL10L      | 0,00 | 0,00 | 0,00 | 0,00 | NA | NA |
| RPL11P5     | 0,00 | 0,00 | 0,00 | 0,00 | NA | NA |
| RPL12P2     | 0,00 | 0,00 | 0,00 | 0,00 | NA | NA |
| RPL12P3     | 0,00 | 0,00 | 0,00 | 0,00 | NA | NA |
| RPL12P33    | 0,00 | 0,00 | 0,00 | 0,00 | NA | NA |
| RPL12P39    | 0,00 | 0,00 | 0,00 | 0,00 | NA | NA |
| RPL12P41    | 0,00 | 0,00 | 0,00 | 0,00 | NA | NA |
| RPL13AP     | 0,00 | 0,00 | 0,00 | 0,00 | NA | NA |
| RPL13AP2    | 0,00 | 0,00 | 0,00 | 0,00 | NA | NA |
| RPL13P      | 0,00 | 0,00 | 0,00 | 0,00 | NA | NA |
| RPL14P1     | 0,13 | 0,35 | 0,00 | 0,29 | NA | NA |
| RPL15P2     | 0,00 | 0,00 | 0,00 | 0,00 | NA | NA |
| RPL15P21    | 0,00 | 0,00 | 0,00 | 0,00 | NA | NA |
| RPL15P4     | 0,00 | 0,00 | 0,00 | 0,00 | NA | NA |
| RPL17P1     | 0,00 | 0,00 | 0,00 | 0,00 | NA | NA |
| RPL17P11    | 0,00 | 0,00 | 0,00 | 0,00 | NA | NA |
| RPL17P22    | 0,00 | 0,00 | 0,00 | 0,00 | NA | NA |
| RPL17P25    | 0,00 | 0,00 | 0,00 | 0,00 | NA | NA |
| RPL17P37    | 0,00 | 0,00 | 0,00 | 0,00 | NA | NA |
| RPL17P40    | 0,00 | 0,00 | 0,00 | 0,00 | NA | NA |
| RPL17P43    | 0,00 | 0,00 | 0,00 | 0,00 | NA | NA |
| RPL17P44    | 0,00 | 0,00 | 0,00 | 0,00 | NA | NA |
| RPL17P46    | 0,00 | 0,00 | 0,00 | 0,00 | NA | NA |
| RPL18P11    | 0,00 | 0,00 | 0,00 | 0,00 | NA | NA |
| RPL19P18    | 0,00 | 0,00 | 0,00 | 0,00 | NA | NA |
| RPL21P103   | 0,00 | 0,00 | 0,00 | 0,00 | NA | NA |
| RPL21P104   | 0,00 | 0,00 | 0,00 | 0,00 | NA | NA |
| RPL21P106   | 0,00 | 0,00 | 0,00 | 0,00 | NA | NA |
| RPL21P116   | 0,00 | 0,00 | 0,00 | 0,00 | NA | NA |
| RPL21P126   | 0,00 | 0,00 | 0,00 | 0,00 | NA | NA |
| RPL21P127   | 0,00 | 0,00 | 0,00 | 0,00 | NA | NA |
| RPL21P132   | 0,00 | 0,00 | 0,00 | 0,00 | NA | NA |
| RPL21P4     | 0,00 | 0,00 | 0,00 | 0,00 | NA | NA |
| RPL21P44    | 0,00 | 1,70 | 0,00 | 0,51 | NA | NA |
| RPL21P54    | 0,00 | 0,00 | 0,00 | 0,00 | NA | NA |
| RPL22P18    | 0,00 | 0,00 | 0,00 | 0,00 | NA | NA |
| RPL22P19    | 0,00 | 0,00 | 0,00 | 0,00 | NA | NA |
| RPL22P5     | 0,00 | 0,00 | 0,00 | 0,00 | NA | NA |
| RPL23AP20   | 0,00 | 0,00 | 0,00 | 0,00 | NA | NA |
| RPL23AP3    | 0,00 | 0,00 | 0,00 | 0,00 | NA | NA |

|           |      |      |      |      |    |    |
|-----------|------|------|------|------|----|----|
| RPL23AP4  | 0,00 | 0,00 | 0,00 | 0,00 | NA | NA |
| RPL23AP6  | 0,00 | 0,00 | 0,00 | 0,00 | NA | NA |
| RPL23AP60 | 0,00 | 0,00 | 0,00 | 0,00 | NA | NA |
| RPL23AP62 | 0,00 | 0,00 | 0,00 | 0,00 | NA | NA |
| RPL23AP67 | 0,00 | 0,00 | 0,00 | 0,00 | NA | NA |
| RPL23AP72 | 0,00 | 0,00 | 0,00 | 0,00 | NA | NA |
| RPL23AP73 | 0,00 | 0,00 | 0,00 | 0,00 | NA | NA |
| RPL23AP76 | 0,00 | 0,00 | 0,00 | 0,00 | NA | NA |
| RPL23AP78 | 0,00 | 0,00 | 0,00 | 0,00 | NA | NA |
| RPL23AP80 | 0,00 | 0,00 | 0,00 | 0,00 | NA | NA |
| RPL23AP81 | 0,00 | 0,00 | 0,00 | 0,00 | NA | NA |
| RPL26P20  | 0,00 | 0,00 | 0,00 | 0,00 | NA | NA |
| RPL26P3   | 0,00 | 0,00 | 0,00 | 0,00 | NA | NA |
| RPL26P31  | 0,00 | 0,00 | 0,00 | 0,00 | NA | NA |
| RPL27AP   | 0,00 | 0,00 | 0,00 | 0,00 | NA | NA |
| RPL29P22  | 0,00 | 0,00 | 0,00 | 0,00 | NA | NA |
| RPL29P24  | 0,00 | 0,00 | 0,00 | 0,00 | NA | NA |
| RPL29P3   | 0,00 | 0,00 | 0,00 | 0,00 | NA | NA |
| RPL29P30  | 0,00 | 0,00 | 0,00 | 0,00 | NA | NA |
| RPL29P32  | 0,00 | 0,00 | 0,00 | 0,00 | NA | NA |
| RPL30P14  | 0,00 | 0,00 | 0,00 | 0,00 | NA | NA |
| RPL31P1   | 0,00 | 0,00 | 0,00 | 0,00 | NA | NA |
| RPL31P2   | 0,00 | 0,00 | 0,00 | 0,00 | NA | NA |
| RPL31P3   | 0,00 | 0,00 | 0,00 | 0,00 | NA | NA |
| RPL31P40  | 0,00 | 0,00 | 0,00 | 0,00 | NA | NA |
| RPL31P41  | 0,00 | 0,00 | 0,00 | 0,00 | NA | NA |
| RPL31P56  | 0,00 | 0,00 | 0,00 | 0,00 | NA | NA |
| RPL31P57  | 0,00 | 0,00 | 0,00 | 0,00 | NA | NA |
| RPL31P58  | 0,00 | 0,00 | 0,00 | 0,00 | NA | NA |
| RPL31P59  | 0,00 | 0,00 | 0,00 | 0,00 | NA | NA |
| RPL31P60  | 0,00 | 0,00 | 0,00 | 0,00 | NA | NA |
| RPL31P7   | 0,00 | 0,00 | 0,00 | 0,00 | NA | NA |
| RPL31P9   | 0,00 | 0,00 | 0,00 | 0,00 | NA | NA |
| RPL32P26  | 0,00 | 0,56 | 0,00 | 0,00 | NA | NA |
| RPL32P31  | 0,00 | 0,00 | 0,00 | 0,00 | NA | NA |
| RPL32P33  | 0,00 | 0,00 | 0,00 | 0,00 | NA | NA |
| RPL32P34  | 0,00 | 0,00 | 0,00 | 0,00 | NA | NA |
| RPL34P1   | 0,00 | 0,00 | 0,00 | 0,00 | NA | NA |
| RPL34P17  | 0,00 | 0,00 | 0,00 | 0,00 | NA | NA |
| RPL34P23  | 0,00 | 0,00 | 0,00 | 0,00 | NA | NA |
| RPL34P29  | 0,00 | 0,00 | 0,00 | 0,00 | NA | NA |
| RPL34P3   | 0,00 | 0,00 | 0,00 | 0,00 | NA | NA |
| RPL34P31  | 0,00 | 0,00 | 0,00 | 0,00 | NA | NA |
| RPL35AP   | 0,00 | 0,00 | 0,00 | 0,00 | NA | NA |
| RPL35AP12 | 0,00 | 0,00 | 0,00 | 0,00 | NA | NA |
| RPL35AP18 | 0,00 | 0,00 | 0,00 | 0,00 | NA | NA |
| RPL35AP19 | 0,00 | 0,00 | 0,00 | 0,00 | NA | NA |
| RPL35AP25 | 0,00 | 0,00 | 0,00 | 0,00 | NA | NA |
| RPL35AP26 | 0,00 | 0,00 | 0,00 | 0,00 | NA | NA |
| RPL35AP30 | 0,00 | 0,00 | 0,00 | 0,00 | NA | NA |
| RPL35AP33 | 0,00 | 0,00 | 0,00 | 0,00 | NA | NA |
| RPL35AP35 | 0,00 | 0,00 | 0,00 | 0,00 | NA | NA |
| RPL35AP4  | 0,00 | 0,00 | 0,00 | 0,00 | NA | NA |
| RPL35P4   | 0,00 | 0,00 | 0,00 | 0,00 | NA | NA |
| RPL36AP40 | 0,00 | 0,00 | 0,00 | 0,00 | NA | NA |

|           |      |      |      |      |    |    |
|-----------|------|------|------|------|----|----|
| RPL36AP43 | 0,00 | 0,00 | 0,00 | 0,00 | NA | NA |
| RPL36AP47 | 0,00 | 0,00 | 0,00 | 0,00 | NA | NA |
| RPL36AP48 | 0,00 | 0,00 | 0,00 | 0,00 | NA | NA |
| RPL36AP51 | 0,00 | 0,00 | 0,00 | 0,00 | NA | NA |
| RPL36AP6  | 0,00 | 0,00 | 0,00 | 0,00 | NA | NA |
| RPL36P1   | 0,00 | 0,00 | 0,00 | 0,00 | NA | NA |
| RPL36P16  | 0,00 | 0,00 | 0,00 | 0,00 | NA | NA |
| RPL36P4   | 0,00 | 0,00 | 0,00 | 0,00 | NA | NA |
| RPL37AP1  | 0,00 | 0,00 | 0,00 | 0,00 | NA | NA |
| RPL37P1   | 0,00 | 0,00 | 0,00 | 0,00 | NA | NA |
| RPL37P15  | 0,00 | 0,00 | 0,00 | 0,00 | NA | NA |
| RPL37P2   | 0,00 | 0,00 | 0,00 | 0,00 | NA | NA |
| RPL37P3   | 0,00 | 0,00 | 0,00 | 0,00 | NA | NA |
| RPL37P4   | 0,00 | 0,00 | 0,00 | 0,00 | NA | NA |
| RPL39P    | 0,00 | 0,00 | 0,00 | 0,00 | NA | NA |
| RPL39P25  | 0,00 | 0,00 | 0,00 | 0,00 | NA | NA |
| RPL39P3   | 0,00 | 0,00 | 0,00 | 0,00 | NA | NA |
| RPL39P31  | 0,00 | 0,00 | 0,00 | 0,00 | NA | NA |
| RPL39P33  | 0,00 | 0,00 | 0,00 | 0,00 | NA | NA |
| RPL39P34  | 0,00 | 0,00 | 0,00 | 0,00 | NA | NA |
| RPL39P5   | 0,00 | 0,00 | 0,00 | 0,00 | NA | NA |
| RPL3P13   | 0,00 | 0,00 | 0,00 | 0,00 | NA | NA |
| RPL3P5    | 0,00 | 0,00 | 0,00 | 0,00 | NA | NA |
| RPL41P1   | 0,00 | 0,00 | 0,00 | 0,00 | NA | NA |
| RPL41P5   | 0,00 | 0,00 | 0,00 | 0,00 | NA | NA |
| RPL5P2    | 0,00 | 0,00 | 0,00 | 0,00 | NA | NA |
| RPL5P24   | 0,00 | 0,00 | 0,00 | 0,00 | NA | NA |
| RPL5P33   | 0,00 | 0,00 | 0,00 | 0,00 | NA | NA |
| RPL6P12   | 0,00 | 0,00 | 0,00 | 0,00 | NA | NA |
| RPL6P25   | 0,00 | 0,00 | 0,00 | 0,00 | NA | NA |
| RPL6P8    | 0,00 | 0,00 | 0,00 | 0,00 | NA | NA |
| RPL7AL2   | 0,00 | 0,00 | 0,00 | 0,00 | NA | NA |
| RPL7AL3   | 0,00 | 0,00 | 0,00 | 0,00 | NA | NA |
| RPL7AP30  | 0,00 | 0,00 | 0,00 | 0,00 | NA | NA |
| RPL7AP38  | 0,00 | 0,00 | 0,00 | 0,00 | NA | NA |
| RPL7AP57  | 0,00 | 0,00 | 0,00 | 0,00 | NA | NA |
| RPL7AP58  | 0,00 | 0,00 | 0,00 | 0,00 | NA | NA |
| RPL7AP65  | 0,00 | 0,00 | 0,00 | 0,00 | NA | NA |
| RPL7AP69  | 0,00 | 0,00 | 0,00 | 0,00 | NA | NA |
| RPL7AP7   | 0,00 | 0,00 | 0,00 | 0,00 | NA | NA |
| RPL7L1P5  | 0,00 | 0,00 | 0,00 | 0,00 | NA | NA |
| RPL7P23p  | 0,36 | 0,00 | 0,25 | 0,20 | NA | NA |
| RPL7P26   | 0,00 | 0,00 | 0,00 | 0,00 | NA | NA |
| RPL7P3    | 0,00 | 0,00 | 0,00 | 0,00 | NA | NA |
| RPL7P48   | 0,00 | 0,00 | 0,00 | 0,00 | NA | NA |
| RPL7P5    | 0,00 | 0,00 | 0,00 | 0,00 | NA | NA |
| RPL7P50   | 0,00 | 0,00 | 0,00 | 0,00 | NA | NA |
| RPL7P51   | 0,00 | 0,00 | 0,00 | 0,00 | NA | NA |
| RPL7P53   | 0,00 | 0,00 | 0,00 | 0,00 | NA | NA |
| RPL8P2    | 0,00 | 0,00 | 0,00 | 0,00 | NA | NA |
| RPL9P18   | 0,00 | 0,00 | 0,00 | 0,00 | NA | NA |
| RPL9P29   | 0,00 | 0,00 | 0,00 | 0,00 | NA | NA |
| RPL9P31   | 0,00 | 0,00 | 0,00 | 0,00 | NA | NA |
| RPL9P5    | 0,00 | 0,00 | 0,00 | 0,00 | NA | NA |
| RPLPOP11  | 0,00 | 0,00 | 0,00 | 0,00 | NA | NA |



|           |      |      |      |      |    |    |
|-----------|------|------|------|------|----|----|
| RPLP2P1   | 0,00 | 0,00 | 0,00 | 0,00 | NA | NA |
| RPPH1-2P  | 0,00 | 0,00 | 0,00 | 0,00 | NA | NA |
| RPPH1-3P  | 0,00 | 0,00 | 0,00 | 0,00 | NA | NA |
| RPRML     | 0,00 | 0,00 | 0,00 | 0,00 | NA | NA |
| RPS10P18  | 0,00 | 0,00 | 0,00 | 0,00 | NA | NA |
| RPS10P2   | 0,00 | 0,00 | 0,00 | 0,00 | NA | NA |
| RPS10P27  | 0,00 | 0,00 | 0,00 | 0,00 | NA | NA |
| RPS10P3   | 0,00 | 0,00 | 0,00 | 0,00 | NA | NA |
| RPS11P1   | 0,00 | 0,00 | 0,00 | 0,00 | NA | NA |
| RPS12P15  | 0,00 | 0,00 | 0,00 | 0,00 | NA | NA |
| RPS12P2   | 0,00 | 0,00 | 0,00 | 0,00 | NA | NA |
| RPS12P27  | 0,00 | 0,00 | 0,00 | 0,00 | NA | NA |
| RPS12P28  | 0,00 | 0,00 | 0,00 | 0,00 | NA | NA |
| RPS14P7   | 0,00 | 0,00 | 0,00 | 0,00 | NA | NA |
| RPS15AP1  | 0,00 | 0,00 | 0,00 | 0,00 | NA | NA |
| RPS15AP24 | 0,00 | 0,00 | 0,00 | 0,00 | NA | NA |
| RPS15AP25 | 0,00 | 0,00 | 0,00 | 0,00 | NA | NA |
| RPS15AP32 | 0,00 | 0,00 | 0,00 | 0,00 | NA | NA |
| RPS15AP34 | 0,00 | 0,00 | 0,00 | 0,00 | NA | NA |
| RPS15P9   | 0,00 | 0,00 | 0,00 | 0,00 | NA | NA |
| RPS16P5   | 0,00 | 0,00 | 0,00 | 0,00 | NA | NA |
| RPS16P8   | 0,00 | 0,00 | 0,00 | 0,00 | NA | NA |
| RPS17P14  | 0,00 | 0,00 | 0,00 | 0,00 | NA | NA |
| RPS17P5   | 0,00 | 0,00 | 0,00 | 0,00 | NA | NA |
| RPS18P13  | 0,00 | 0,00 | 0,00 | 0,00 | NA | NA |
| RPS20P1   | 0,00 | 0,00 | 0,00 | 0,00 | NA | NA |
| RPS20P20  | 0,00 | 0,00 | 0,00 | 0,00 | NA | NA |
| RPS20P21  | 0,00 | 0,00 | 0,00 | 0,00 | NA | NA |
| RPS20P31  | 0,00 | 0,00 | 0,00 | 0,00 | NA | NA |
| RPS23P5   | 0,00 | 0,00 | 0,00 | 0,00 | NA | NA |
| RPS23P7   | 0,00 | 0,00 | 0,00 | 0,00 | NA | NA |
| RPS24P14  | 0,00 | 0,00 | 0,00 | 0,00 | NA | NA |
| RPS24P17  | 0,00 | 0,00 | 0,00 | 0,00 | NA | NA |
| RPS26P11  | 0,00 | 0,00 | 0,00 | 0,00 | NA | NA |
| RPS26P2   | 0,00 | 0,00 | 0,00 | 0,00 | NA | NA |
| RPS26P34  | 0,00 | 0,00 | 0,00 | 0,00 | NA | NA |
| RPS26P35  | 0,00 | 0,00 | 0,00 | 0,00 | NA | NA |
| RPS26P4   | 0,00 | 0,00 | 0,00 | 0,00 | NA | NA |
| RPS26P43  | 0,00 | 0,00 | 0,00 | 0,00 | NA | NA |
| RPS26P49  | 0,00 | 0,00 | 0,00 | 0,00 | NA | NA |
| RPS26P52  | 0,00 | 0,00 | 0,00 | 0,00 | NA | NA |
| RPS26P54  | 0,00 | 0,00 | 0,00 | 0,00 | NA | NA |
| RPS26P55  | 0,00 | 0,00 | 0,00 | 0,00 | NA | NA |
| RPS27AP2  | 0,00 | 0,00 | 0,00 | 0,00 | NA | NA |
| RPS27P1   | 0,00 | 0,00 | 0,00 | 0,00 | NA | NA |
| RPS27P14  | 0,00 | 0,00 | 0,00 | 0,00 | NA | NA |
| RPS27P15  | 0,00 | 0,00 | 0,00 | 0,00 | NA | NA |
| RPS27P25  | 0,00 | 0,00 | 0,00 | 0,00 | NA | NA |
| RPS27P26  | 0,00 | 0,00 | 0,00 | 0,00 | NA | NA |
| RPS27P27  | 0,00 | 0,00 | 0,00 | 0,00 | NA | NA |
| RPS27P29  | 0,00 | 0,00 | 0,00 | 0,00 | NA | NA |
| RPS29P12  | 0,00 | 0,00 | 0,00 | 0,00 | NA | NA |
| RPS29P2   | 0,00 | 0,00 | 0,00 | 0,00 | NA | NA |
| RPS29P20  | 0,00 | 0,00 | 0,00 | 0,00 | NA | NA |
| RPS29P22  | 0,00 | 0,00 | 0,00 | 0,00 | NA | NA |

|           |      |      |      |      |    |    |
|-----------|------|------|------|------|----|----|
| RPS29P24  | 0,00 | 0,00 | 0,00 | 0,00 | NA | NA |
| RPS29P25  | 0,00 | 0,00 | 0,00 | 0,00 | NA | NA |
| RPS29P26  | 0,00 | 0,00 | 0,00 | 0,00 | NA | NA |
| RPS2P2    | 0,00 | 0,00 | 0,00 | 0,00 | NA | NA |
| RPS2P24   | 0,00 | 0,00 | 0,00 | 0,00 | NA | NA |
| RPS2P35   | 0,00 | 0,00 | 0,00 | 0,00 | NA | NA |
| RPS2P39   | 0,00 | 0,00 | 0,00 | 0,00 | NA | NA |
| RPS2P41   | 0,00 | 0,00 | 0,00 | 0,00 | NA | NA |
| RPS2P44   | 0,00 | 0,40 | 0,00 | 0,18 | NA | NA |
| RPS2P48   | 0,00 | 0,00 | 0,00 | 0,00 | NA | NA |
| RPS2P52   | 0,00 | 0,00 | 0,00 | 0,00 | NA | NA |
| RPS2P6    | 0,00 | 0,00 | 0,00 | 0,00 | NA | NA |
| RPS3AP1   | 0,00 | 0,00 | 0,00 | 0,00 | NA | NA |
| RPS3AP15  | 0,00 | 0,00 | 0,00 | 0,00 | NA | NA |
| RPS3AP30  | 0,00 | 0,00 | 0,00 | 0,00 | NA | NA |
| RPS3AP33  | 0,00 | 0,00 | 0,00 | 0,00 | NA | NA |
| RPS3AP35  | 0,00 | 0,00 | 0,00 | 0,00 | NA | NA |
| RPS3AP40  | 0,00 | 0,00 | 0,00 | 0,00 | NA | NA |
| RPS3AP42  | 0,00 | 0,00 | 0,00 | 0,00 | NA | NA |
| RPS3AP50  | 0,00 | 0,00 | 0,00 | 0,00 | NA | NA |
| RPS3P1    | 0,00 | 0,00 | 0,00 | 0,00 | NA | NA |
| RPS4XP12  | 0,00 | 0,00 | 0,00 | 0,00 | NA | NA |
| RPS4XP15  | 0,00 | 0,00 | 0,00 | 0,00 | NA | NA |
| RPS4XP19  | 0,00 | 0,00 | 0,00 | 0,00 | NA | NA |
| RPS4XP21  | 0,00 | 0,00 | 0,00 | 0,00 | NA | NA |
| RPS4Y1    | 0,15 | 0,00 | 0,22 | 0,20 | NA | NA |
| RPS4Y2    | 0,00 | 0,00 | 0,00 | 0,00 | NA | NA |
| RPS5P2    | 0,00 | 0,00 | 0,00 | 0,00 | NA | NA |
| RPS6P7    | 0,00 | 0,00 | 0,00 | 0,00 | NA | NA |
| RPS7P9    | 0,00 | 0,00 | 0,00 | 0,00 | NA | NA |
| RPS8P3    | 0,00 | 0,00 | 0,00 | 0,00 | NA | NA |
| RPSAP1    | 0,00 | 0,00 | 0,00 | 0,00 | NA | NA |
| RPSAP2    | 0,00 | 0,00 | 0,00 | 0,00 | NA | NA |
| RPSAP55   | 0,00 | 0,00 | 0,00 | 0,00 | NA | NA |
| RPSAP56   | 0,00 | 0,00 | 0,00 | 0,00 | NA | NA |
| RSC1A1    | 0,00 | 0,00 | 0,00 | 0,00 | NA | NA |
| RSL24D1P3 | 0,00 | 0,00 | 0,00 | 0,00 | NA | NA |
| RSL24D1P5 | 0,00 | 0,00 | 0,00 | 0,00 | NA | NA |
| RSL24D1P6 | 0,00 | 0,00 | 0,00 | 0,00 | NA | NA |
| RSL24D1P9 | 0,00 | 0,00 | 0,00 | 0,00 | NA | NA |
| RSPH6A    | 0,00 | 0,00 | 0,00 | 0,00 | NA | NA |
| RSPO1     | 0,07 | 0,12 | 0,11 | 0,06 | NA | NA |
| RSPO3     | 0,00 | 0,00 | 0,00 | 0,00 | NA | NA |
| RSPO4     | 0,00 | 0,00 | 0,00 | 0,00 | NA | NA |
| RSU1P2    | 0,00 | 0,08 | 0,00 | 0,00 | NA | NA |
| RTL1      | 0,00 | 0,00 | 0,00 | 0,00 | NA | NA |
| RTN4RL1   | 0,00 | 0,00 | 0,00 | 0,00 | NA | NA |
| RTN4RL2   | 0,00 | 0,00 | 0,00 | 0,00 | NA | NA |
| RTP2      | 0,00 | 0,00 | 0,00 | 0,00 | NA | NA |
| RTP3      | 0,00 | 0,00 | 0,00 | 0,00 | NA | NA |
| RTP5      | 0,00 | 0,00 | 0,00 | 0,00 | NA | NA |
| RUNDC3A   | 0,05 | 0,04 | 0,06 | 0,06 | NA | NA |
| RUNX1T1   | 0,17 | 0,58 | 0,16 | 0,11 | NA | NA |
| RXFP3     | 0,00 | 0,00 | 0,00 | 0,00 | NA | NA |
| RXRG      | 0,00 | 0,00 | 0,00 | 0,00 | NA | NA |

|               |      |      |      |      |    |    |
|---------------|------|------|------|------|----|----|
| RYR3          | 1,08 | 0,94 | 1,19 | 1,15 | NA | NA |
| S100A14       | 0,00 | 0,00 | 0,00 | 0,00 | NA | NA |
| S100A5        | 0,00 | 0,00 | 0,00 | 0,00 | NA | NA |
| S1PR5         | 0,00 | 0,32 | 0,00 | 0,10 | NA | NA |
| SAA2-SAA4     | 0,00 | 0,00 | 0,00 | 0,00 | NA | NA |
| SAA4          | 0,00 | 0,00 | 0,00 | 0,00 | NA | NA |
| SALL1         | 0,00 | 0,00 | 0,00 | 0,00 | NA | NA |
| SALL2         | 0,00 | 0,00 | 0,00 | 0,00 | NA | NA |
| SAMD12-AS1    | 0,00 | 0,00 | 0,00 | 0,00 | NA | NA |
| SAR1AP4       | 0,00 | 0,00 | 0,00 | 0,00 | NA | NA |
| SAR1P1        | 0,00 | 0,00 | 0,00 | 0,00 | NA | NA |
| SAR1P3        | 0,00 | 0,00 | 0,00 | 0,00 | NA | NA |
| SARDH         | 0,25 | 0,42 | 0,35 | 0,24 | NA | NA |
| SATB2-AS1     | 0,00 | 0,00 | 0,00 | 0,00 | NA | NA |
| SAXO1         | 0,00 | 0,00 | 0,00 | 0,00 | NA | NA |
| SBK2          | 0,00 | 0,00 | 0,00 | 0,00 | NA | NA |
| SBK3          | 0,00 | 0,00 | 0,00 | 0,00 | NA | NA |
| SBSN          | 0,00 | 0,00 | 0,00 | 0,00 | NA | NA |
| SBSPON        | 0,23 | 0,45 | 0,49 | 0,21 | NA | NA |
| SC22CB-1D7.1  | 0,00 | 0,00 | 0,00 | 0,00 | NA | NA |
| SC22CB-56B3.1 | 0,00 | 0,00 | 0,00 | 0,00 | NA | NA |
| SCAND2        | 0,74 | 0,39 | 0,82 | 0,65 | NA | NA |
| SCARNA1       | 0,00 | 0,00 | 0,00 | 0,00 | NA | NA |
| SCARNA11      | 0,00 | 0,00 | 0,00 | 0,00 | NA | NA |
| SCARNA14      | 0,00 | 0,00 | 0,00 | 0,00 | NA | NA |
| SCARNA15      | 0,00 | 0,00 | 0,00 | 0,00 | NA | NA |
| SCARNA18B     | 0,00 | 0,00 | 0,00 | 0,00 | NA | NA |
| SCARNA4       | 0,00 | 0,00 | 0,00 | 0,00 | NA | NA |
| SCDP1         | 0,00 | 0,00 | 0,00 | 0,00 | NA | NA |
| SCG5          | 0,00 | 0,00 | 0,00 | 0,00 | NA | NA |
| SCGB1A1       | 0,00 | 0,00 | 0,00 | 0,00 | NA | NA |
| SCGB1D1       | 0,00 | 0,00 | 0,00 | 0,00 | NA | NA |
| SCGB1D2       | 0,00 | 0,00 | 0,00 | 0,00 | NA | NA |
| SCGB1D4       | 0,00 | 0,00 | 0,00 | 0,00 | NA | NA |
| SCGB2A1       | 0,00 | 0,00 | 0,00 | 0,00 | NA | NA |
| SCGB2A2       | 0,00 | 0,00 | 0,00 | 0,00 | NA | NA |
| SCGB2B2       | 0,09 | 0,00 | 0,05 | 0,06 | NA | NA |
| SCGB2B3P      | 0,00 | 0,00 | 0,00 | 0,00 | NA | NA |
| SCGN          | 0,00 | 0,00 | 0,00 | 0,00 | NA | NA |
| SCML2P2       | 0,00 | 0,00 | 0,00 | 0,00 | NA | NA |
| SCN11A        | 0,01 | 0,00 | 0,01 | 0,02 | NA | NA |
| SCN3A         | 0,00 | 0,07 | 0,00 | 0,00 | NA | NA |
| SCNN1B        | 0,00 | 0,00 | 0,00 | 0,00 | NA | NA |
| SCNN1D        | 0,00 | 0,61 | 0,00 | 0,21 | NA | NA |
| SCP2D1        | 0,00 | 0,00 | 0,00 | 0,00 | NA | NA |
| SCRT1         | 0,00 | 0,00 | 0,00 | 0,00 | NA | NA |
| SCRT2         | 0,00 | 0,00 | 0,00 | 0,00 | NA | NA |
| SCT           | 0,00 | 0,00 | 0,00 | 0,00 | NA | NA |
| SCX           | 0,00 | 0,16 | 0,00 | 0,00 | NA | NA |
| SCYE1P        | 0,00 | 0,00 | 0,00 | 0,00 | NA | NA |
| SDC2          | 0,05 | 1,22 | 0,00 | 0,06 | NA | NA |
| SDC4P         | 0,00 | 0,00 | 0,00 | 0,00 | NA | NA |
| SDCCAG3P1     | 0,00 | 0,00 | 0,00 | 0,00 | NA | NA |
| SDHCP1        | 0,00 | 0,00 | 0,00 | 0,00 | NA | NA |
| SDR16C5       | 0,00 | 0,00 | 0,00 | 0,00 | NA | NA |

|             |      |      |      |      |    |    |
|-------------|------|------|------|------|----|----|
| SDR9C7      | 0,00 | 0,00 | 0,00 | 0,00 | NA | NA |
| SEBOX       | 0,00 | 0,00 | 0,00 | 0,00 | NA | NA |
| SEL1L2      | 0,00 | 0,00 | 0,00 | 0,00 | NA | NA |
| SELE        | 0,00 | 0,00 | 0,00 | 0,00 | NA | NA |
| SELP        | 0,00 | 0,00 | 0,00 | 0,00 | NA | NA |
| SEMA3A      | 0,00 | 0,29 | 0,00 | 0,00 | NA | NA |
| SEMA3E      | 0,05 | 0,00 | 0,06 | 0,00 | NA | NA |
| SEMA4F      | 0,07 | 0,00 | 0,04 | 0,04 | NA | NA |
| SEMA4G      | 0,00 | 0,07 | 0,00 | 0,00 | NA | NA |
| SEMA5B      | 0,00 | 0,10 | 0,00 | 0,00 | NA | NA |
| SEMA6C      | 0,00 | 0,00 | 0,00 | 0,00 | NA | NA |
| SEMG1       | 0,00 | 0,00 | 0,00 | 0,00 | NA | NA |
| SEMG2       | 0,00 | 0,00 | 0,00 | 0,00 | NA | NA |
| SEPP1       | 0,00 | 0,00 | 0,00 | 0,00 | NA | NA |
| SEPT10      | 0,00 | 0,00 | 0,00 | 0,16 | NA | NA |
| SEPT14P12   | 0,00 | 0,00 | 0,00 | 0,00 | NA | NA |
| SEPT14P3    | 0,00 | 0,00 | 0,00 | 0,00 | NA | NA |
| SEPT14P9    | 0,00 | 0,00 | 0,00 | 0,00 | NA | NA |
| SEPT5-GP1BB | 0,00 | 0,00 | 0,00 | 0,00 | NA | NA |
| SEPT7P1     | 0,00 | 0,00 | 0,00 | 0,00 | NA | NA |
| SEPW1P      | 0,00 | 0,00 | 0,00 | 0,00 | NA | NA |
| SERHL2      | 0,26 | 0,18 | 0,29 | 0,21 | NA | NA |
| SERINC2     | 0,00 | 0,00 | 0,00 | 0,21 | NA | NA |
| SERINC4     | 0,00 | 0,00 | 0,00 | 0,00 | NA | NA |
| SERP2       | 0,00 | 0,00 | 0,00 | 0,00 | NA | NA |
| SERPINA11   | 0,00 | 0,00 | 0,00 | 0,00 | NA | NA |
| SERPINA2    | 0,00 | 0,00 | 0,00 | 0,00 | NA | NA |
| SERPINA4    | 0,00 | 0,00 | 0,00 | 0,00 | NA | NA |
| SERPINA5    | 0,00 | 0,00 | 0,00 | 0,00 | NA | NA |
| SERPINA6    | 0,00 | 0,00 | 0,00 | 0,00 | NA | NA |
| SERPINA7    | 0,00 | 0,00 | 0,00 | 0,00 | NA | NA |
| SERPINA9    | 0,00 | 0,00 | 0,00 | 0,00 | NA | NA |
| SERPINB12   | 0,00 | 0,00 | 0,00 | 0,00 | NA | NA |
| SERPINB4    | 0,00 | 0,00 | 0,00 | 0,00 | NA | NA |
| SERPINC1    | 0,00 | 0,00 | 0,00 | 0,00 | NA | NA |
| SERPIND1    | 0,00 | 0,00 | 0,00 | 0,00 | NA | NA |
| SERPINI2    | 0,00 | 0,00 | 0,00 | 0,43 | NA | NA |
| SERTAD4     | 0,00 | 0,00 | 0,00 | 0,00 | NA | NA |
| SERTAD4-AS1 | 0,00 | 0,00 | 0,00 | 0,00 | NA | NA |
| SERTM1      | 0,00 | 0,00 | 0,00 | 0,00 | NA | NA |
| SETD6P1     | 0,00 | 0,00 | 0,00 | 0,00 | NA | NA |
| SETP3       | 0,00 | 0,00 | 0,00 | 0,00 | NA | NA |
| SETSIP      | 0,00 | 0,00 | 0,00 | 0,00 | NA | NA |
| SF3A3P2     | 0,00 | 0,00 | 0,00 | 0,00 | NA | NA |
| SFR1P1      | 0,00 | 0,00 | 0,00 | 0,00 | NA | NA |
| SFRP2       | 0,00 | 0,00 | 0,00 | 0,00 | NA | NA |
| SFRP4       | 0,00 | 0,00 | 0,00 | 0,00 | NA | NA |
| SFRP5       | 0,00 | 0,00 | 0,00 | 0,00 | NA | NA |
| SFTPA1      | 0,00 | 0,00 | 0,00 | 0,00 | NA | NA |
| SFTPA2      | 0,00 | 0,00 | 0,00 | 0,00 | NA | NA |
| SFTPA3P     | 0,00 | 0,00 | 0,00 | 0,00 | NA | NA |
| SFTPC       | 0,00 | 0,22 | 0,00 | 0,00 | NA | NA |
| SGCB        | 0,04 | 0,03 | 0,04 | 0,03 | NA | NA |
| SGCD        | 0,00 | 0,01 | 0,00 | 0,00 | NA | NA |
| SH2D1B      | 0,00 | 0,25 | 0,00 | 0,12 | NA | NA |

|           |      |      |      |      |    |    |
|-----------|------|------|------|------|----|----|
| SH2D4A    | 0,58 | 0,35 | 0,45 | 0,58 | NA | NA |
| SH2D4B    | 0,00 | 0,05 | 0,00 | 0,00 | NA | NA |
| SH2D7     | 0,00 | 0,00 | 0,00 | 0,00 | NA | NA |
| SH3GL2    | 0,00 | 0,00 | 0,00 | 0,00 | NA | NA |
| SH3GL3    | 0,06 | 0,00 | 0,03 | 0,00 | NA | NA |
| SH3GLB2   | 1,85 | 3,12 | 2,16 | 2,22 | NA | NA |
| SHBG      | 0,00 | 0,00 | 0,00 | 0,00 | NA | NA |
| SHC2      | 0,00 | 0,00 | 0,00 | 0,00 | NA | NA |
| SHE       | 0,22 | 0,17 | 0,10 | 0,13 | NA | NA |
| SHFM1P    | 0,00 | 0,00 | 0,00 | 0,00 | NA | NA |
| SHH       | 0,10 | 0,17 | 0,13 | 0,14 | NA | NA |
| SHISA3    | 0,00 | 0,00 | 0,00 | 0,00 | NA | NA |
| SHISA8    | 0,00 | 0,00 | 0,00 | 0,00 | NA | NA |
| SHPK      | 0,07 | 0,00 | 0,13 | 0,06 | NA | NA |
| SHROOM2   | 0,00 | 0,00 | 0,00 | 0,00 | NA | NA |
| SHROOM3   | 0,31 | 0,43 | 0,09 | 0,10 | NA | NA |
| SI        | 0,00 | 0,00 | 0,00 | 0,00 | NA | NA |
| SIAH1L    | 0,00 | 0,00 | 0,00 | 0,00 | NA | NA |
| SIGLEC19P | 0,00 | 0,00 | 0,00 | 0,00 | NA | NA |
| SIGLEC21P | 0,00 | 0,00 | 0,00 | 0,00 | NA | NA |
| SIGLEC26P | 0,00 | 0,00 | 0,00 | 0,00 | NA | NA |
| SIGLEC27P | 0,00 | 0,00 | 0,00 | 0,00 | NA | NA |
| SIGLEC29P | 0,00 | 0,00 | 0,00 | 0,00 | NA | NA |
| SIGLEC31P | 0,00 | 0,00 | 0,00 | 0,00 | NA | NA |
| SIX1      | 0,00 | 0,00 | 0,00 | 0,09 | NA | NA |
| SIX2      | 0,00 | 0,00 | 0,00 | 0,00 | NA | NA |
| SIX3-AS1  | 0,00 | 0,00 | 0,00 | 0,00 | NA | NA |
| SIX4      | 0,02 | 0,19 | 0,04 | 0,03 | NA | NA |
| SIX5      | 0,00 | 0,00 | 0,00 | 0,00 | NA | NA |
| SIX6      | 0,00 | 0,00 | 0,00 | 0,00 | NA | NA |
| SKA2L     | 0,00 | 0,00 | 0,00 | 0,00 | NA | NA |
| SKI       | 0,08 | 0,18 | 1,20 | 0,54 | NA | NA |
| SKOR1     | 0,00 | 0,00 | 0,00 | 0,00 | NA | NA |
| SLA2      | 0,17 | 0,17 | 0,29 | 0,47 | NA | NA |
| SLAMF1    | 0,13 | 0,00 | 0,00 | 0,06 | NA | NA |
| SLC10A4   | 0,00 | 0,00 | 0,00 | 0,00 | NA | NA |
| SLC10A6   | 0,00 | 0,00 | 0,00 | 0,00 | NA | NA |
| SLC12A1   | 0,04 | 0,14 | 0,02 | 0,02 | NA | NA |
| SLC15A5   | 0,00 | 0,00 | 0,00 | 0,00 | NA | NA |
| SLC16A10  | 0,23 | 0,42 | 0,27 | 0,34 | NA | NA |
| SLC16A8   | 0,00 | 0,00 | 0,00 | 0,00 | NA | NA |
| SLC17A1   | 0,00 | 0,00 | 0,00 | 0,00 | NA | NA |
| SLC17A2   | 0,00 | 0,00 | 0,00 | 0,00 | NA | NA |
| SLC17A4   | 0,00 | 0,12 | 0,00 | 0,00 | NA | NA |
| SLC17A6   | 0,00 | 0,00 | 0,00 | 0,00 | NA | NA |
| SLC18A3   | 0,00 | 0,00 | 0,00 | 0,00 | NA | NA |
| SLC1A7    | 0,00 | 0,00 | 0,00 | 0,00 | NA | NA |
| SLC20A1P3 | 0,00 | 0,00 | 0,00 | 0,00 | NA | NA |
| SLC22A12  | 0,00 | 0,00 | 0,00 | 0,00 | NA | NA |
| SLC22A17  | 0,00 | 0,00 | 0,00 | 0,00 | NA | NA |
| SLC22A31  | 0,00 | 0,00 | 0,00 | 0,00 | NA | NA |
| SLC22A6   | 0,00 | 0,00 | 0,00 | 0,00 | NA | NA |
| SLC24A5   | 0,00 | 0,00 | 0,00 | 0,00 | NA | NA |
| SLC25A1P4 | 0,00 | 0,00 | 0,00 | 0,00 | NA | NA |
| SLC25A1P5 | 0,00 | 0,00 | 0,00 | 0,00 | NA | NA |

|              |      |      |      |      |    |    |
|--------------|------|------|------|------|----|----|
| SLC25A2      | 0,00 | 0,00 | 0,00 | 0,00 | NA | NA |
| SLC25A21-AS1 | 0,00 | 0,00 | 0,00 | 0,00 | NA | NA |
| SLC25A27     | 0,00 | 0,00 | 0,00 | 0,00 | NA | NA |
| SLC25A47     | 0,00 | 0,00 | 0,00 | 0,00 | NA | NA |
| SLC25A52     | 0,00 | 0,00 | 0,00 | 0,00 | NA | NA |
| SLC25A5P1    | 0,00 | 0,00 | 0,00 | 0,00 | NA | NA |
| SLC25A5P6    | 0,00 | 0,00 | 0,00 | 0,00 | NA | NA |
| SLC25A6P1    | 0,00 | 0,22 | 0,00 | 0,00 | NA | NA |
| SLC25A6P4    | 0,00 | 0,00 | 0,00 | 0,00 | NA | NA |
| SLC26A10     | 0,00 | 0,00 | 0,00 | 0,00 | NA | NA |
| SLC26A4      | 0,13 | 0,00 | 0,15 | 0,10 | NA | NA |
| SLC26A7      | 0,00 | 0,00 | 0,00 | 0,00 | NA | NA |
| SLC27A2      | 0,00 | 0,00 | 0,00 | 0,00 | NA | NA |
| SLC27A6      | 0,00 | 0,00 | 0,00 | 0,00 | NA | NA |
| SLC29A2      | 0,00 | 0,00 | 0,00 | 0,05 | NA | NA |
| SLC2A12      | 0,00 | 0,00 | 0,00 | 0,00 | NA | NA |
| SLC2A2       | 0,00 | 0,00 | 0,00 | 0,00 | NA | NA |
| SLC35D3      | 0,00 | 0,00 | 0,00 | 0,00 | NA | NA |
| SLC35G3      | 0,00 | 0,00 | 0,00 | 0,00 | NA | NA |
| SLC35G4      | 0,00 | 0,00 | 0,00 | 0,00 | NA | NA |
| SLC36A2      | 0,21 | 0,28 | 0,33 | 0,47 | NA | NA |
| SLC38A8      | 0,00 | 0,00 | 0,00 | 0,00 | NA | NA |
| SLC39A14     | 0,14 | 0,00 | 0,19 | 0,00 | NA | NA |
| SLC39A2      | 0,00 | 0,00 | 0,00 | 0,00 | NA | NA |
| SLC47A2      | 0,00 | 0,13 | 0,00 | 0,00 | NA | NA |
| SLC4A9       | 0,00 | 0,00 | 0,00 | 0,00 | NA | NA |
| SLC52A3      | 0,14 | 0,22 | 0,29 | 0,09 | NA | NA |
| SLC5A10      | 0,00 | 0,07 | 0,00 | 0,00 | NA | NA |
| SLC5A11      | 0,00 | 0,00 | 0,00 | 0,00 | NA | NA |
| SLC5A7       | 0,00 | 0,00 | 0,00 | 0,00 | NA | NA |
| SLC5A9       | 0,00 | 0,00 | 0,00 | 0,24 | NA | NA |
| SLC6A15      | 0,00 | 0,16 | 0,00 | 0,00 | NA | NA |
| SLC6A18      | 0,00 | 0,07 | 0,00 | 0,00 | NA | NA |
| SLC6A20      | 0,15 | 0,48 | 0,08 | 0,48 | NA | NA |
| SLC6A21P     | 0,00 | 0,00 | 0,00 | 0,00 | NA | NA |
| SLC6A3       | 0,00 | 0,07 | 0,00 | 0,00 | NA | NA |
| SLC6A8       | 0,00 | 0,00 | 0,00 | 0,03 | NA | NA |
| SLC7A10      | 0,00 | 0,00 | 0,00 | 0,00 | NA | NA |
| SLC7A3       | 0,00 | 0,00 | 0,00 | 0,00 | NA | NA |
| SLC7A4       | 0,00 | 0,00 | 0,00 | 0,00 | NA | NA |
| SLC7A5P2     | 0,00 | 0,00 | 0,00 | 0,00 | NA | NA |
| SLC7A8       | 0,00 | 0,00 | 0,00 | 0,00 | NA | NA |
| SLC8A2       | 0,00 | 0,00 | 0,00 | 0,00 | NA | NA |
| SLC9A3P1     | 0,00 | 0,00 | 0,00 | 0,00 | NA | NA |
| SLC9A3P3     | 0,00 | 0,00 | 0,00 | 0,00 | NA | NA |
| SLC9A5       | 0,00 | 0,00 | 0,00 | 0,00 | NA | NA |
| SLC9B1P2     | 0,00 | 0,00 | 0,00 | 0,00 | NA | NA |
| SLC9C2       | 0,00 | 0,00 | 0,00 | 0,13 | NA | NA |
| SLCO1B3      | 0,00 | 0,00 | 0,00 | 0,00 | NA | NA |
| SLCO1B7      | 0,00 | 0,00 | 0,00 | 0,00 | NA | NA |
| SLCO1C1      | 0,00 | 0,00 | 0,00 | 0,00 | NA | NA |
| SLCO2B1      | 0,08 | 0,49 | 0,05 | 0,04 | NA | NA |
| SLITRK6      | 0,00 | 0,00 | 0,00 | 0,00 | NA | NA |
| SLN          | 0,00 | 0,00 | 0,00 | 0,00 | NA | NA |
| SLPI         | 0,00 | 0,00 | 0,00 | 0,00 | NA | NA |

|            |      |      |      |      |    |    |
|------------|------|------|------|------|----|----|
| SLURP1     | 0,00 | 0,00 | 0,00 | 0,00 | NA | NA |
| SLURP2     | 0,00 | 0,00 | 0,00 | 0,00 | NA | NA |
| SMARCA1    | 0,00 | 0,00 | 0,00 | 0,00 | NA | NA |
| SMCO1      | 0,00 | 0,08 | 0,00 | 0,00 | NA | NA |
| SMCP       | 0,00 | 0,00 | 0,00 | 0,00 | NA | NA |
| SMIM11P1   | 0,00 | 0,00 | 0,00 | 0,00 | NA | NA |
| SMIM12P1   | 0,00 | 0,00 | 0,00 | 0,00 | NA | NA |
| SMIM17     | 0,00 | 0,00 | 0,00 | 0,00 | NA | NA |
| SMIM2      | 0,00 | 0,00 | 0,00 | 0,00 | NA | NA |
| SMIM21     | 0,00 | 0,00 | 0,00 | 0,00 | NA | NA |
| SMIM23     | 0,00 | 0,00 | 0,00 | 0,00 | NA | NA |
| SMIM24     | 0,00 | 0,31 | 0,00 | 0,00 | NA | NA |
| SMLR1      | 0,00 | 0,00 | 0,00 | 0,00 | NA | NA |
| SMO        | 0,00 | 0,04 | 0,00 | 0,00 | NA | NA |
| SMOC2      | 0,00 | 0,00 | 0,00 | 0,00 | NA | NA |
| SMPDL3A    | 0,00 | 0,00 | 0,03 | 0,08 | NA | NA |
| SMPX       | 0,00 | 0,00 | 0,00 | 0,00 | NA | NA |
| SMR3A      | 0,00 | 0,00 | 0,00 | 0,00 | NA | NA |
| SMR3B      | 0,00 | 0,00 | 0,00 | 0,00 | NA | NA |
| SMTNL2     | 0,00 | 0,00 | 0,00 | 0,00 | NA | NA |
| SNAP25     | 0,00 | 0,00 | 0,00 | 0,00 | NA | NA |
| SNAP25-AS1 | 0,00 | 0,00 | 0,14 | 0,00 | NA | NA |
| SNAP91     | 0,00 | 0,00 | 0,00 | 0,00 | NA | NA |
| SNCB       | 0,00 | 0,00 | 0,00 | 0,00 | NA | NA |
| SNORA1     | 0,00 | 0,00 | 0,00 | 0,00 | NA | NA |
| SNORA10    | 0,00 | 0,00 | 0,00 | 0,00 | NA | NA |
| SNORA108   | 0,00 | 0,00 | 0,00 | 0,00 | NA | NA |
| SNORA10B   | 0,00 | 0,00 | 0,00 | 0,00 | NA | NA |
| SNORA11    | 0,00 | 0,00 | 0,00 | 0,00 | NA | NA |
| SNORA11C   | 0,00 | 0,00 | 0,00 | 0,00 | NA | NA |
| SNORA11D   | 0,00 | 0,00 | 0,00 | 0,00 | NA | NA |
| SNORA11E   | 0,00 | 0,00 | 0,00 | 0,00 | NA | NA |
| SNORA17A   | 0,00 | 0,00 | 0,00 | 0,00 | NA | NA |
| SNORA17B   | 0,00 | 0,00 | 0,00 | 0,00 | NA | NA |
| SNORA18    | 0,00 | 0,00 | 0,00 | 0,00 | NA | NA |
| SNORA20B   | 0,00 | 0,00 | 0,00 | 0,00 | NA | NA |
| SNORA21    | 0,00 | 0,00 | 0,00 | 0,00 | NA | NA |
| SNORA21B   | 0,00 | 0,00 | 0,00 | 0,00 | NA | NA |
| SNORA22B   | 0,00 | 0,00 | 0,00 | 0,00 | NA | NA |
| SNORA24    | 0,00 | 0,00 | 0,00 | 0,00 | NA | NA |
| SNORA25B   | 0,00 | 0,00 | 0,00 | 0,00 | NA | NA |
| SNORA26    | 0,00 | 0,00 | 0,00 | 0,00 | NA | NA |
| SNORA29    | 0,00 | 0,00 | 0,00 | 0,00 | NA | NA |
| SNORA30    | 0,00 | 0,00 | 0,00 | 0,00 | NA | NA |
| SNORA35    | 0,00 | 0,00 | 0,00 | 0,00 | NA | NA |
| SNORA35B   | 0,00 | 0,00 | 0,00 | 0,00 | NA | NA |
| SNORA36C   | 0,00 | 0,00 | 0,00 | 0,00 | NA | NA |
| SNORA38B   | 0,00 | 0,00 | 0,00 | 0,00 | NA | NA |
| SNORA3A    | 0,00 | 0,00 | 0,00 | 0,00 | NA | NA |
| SNORA3C    | 0,00 | 0,00 | 0,00 | 0,00 | NA | NA |
| SNORA4     | 0,00 | 0,00 | 0,00 | 0,00 | NA | NA |
| SNORA40    | 0,00 | 0,74 | 0,00 | 0,00 | NA | NA |
| SNORA40C   | 0,00 | 0,00 | 0,00 | 0,00 | NA | NA |
| SNORA41    | 0,00 | 0,00 | 0,00 | 0,00 | NA | NA |
| SNORA41B   | 0,00 | 0,00 | 0,00 | 0,00 | NA | NA |

|           |      |      |      |      |    |    |
|-----------|------|------|------|------|----|----|
| SNORA44   | 0,00 | 0,00 | 0,00 | 0,00 | NA | NA |
| SNORA48B  | 0,00 | 0,00 | 0,00 | 0,00 | NA | NA |
| SNORA49   | 0,00 | 0,00 | 0,00 | 0,00 | NA | NA |
| SNORA50B  | 0,00 | 0,00 | 0,00 | 0,00 | NA | NA |
| SNORA50C  | 0,00 | 0,00 | 0,00 | 0,00 | NA | NA |
| SNORA50D  | 0,00 | 0,00 | 0,00 | 0,00 | NA | NA |
| SNORA52   | 0,00 | 0,00 | 0,00 | 0,00 | NA | NA |
| SNORA54   | 0,00 | 0,00 | 0,00 | 0,00 | NA | NA |
| SNORA55   | 0,00 | 0,00 | 0,00 | 1,66 | NA | NA |
| SNORA56   | 0,00 | 0,00 | 0,00 | 0,00 | NA | NA |
| SNORA57   | 0,00 | 0,00 | 0,00 | 0,00 | NA | NA |
| SNORA59A  | 0,00 | 0,00 | 0,00 | 0,00 | NA | NA |
| SNORA5A   | 0,00 | 0,00 | 0,00 | 0,00 | NA | NA |
| SNORA5B   | 0,00 | 0,00 | 0,00 | 0,00 | NA | NA |
| SNORA5C   | 0,00 | 0,00 | 0,00 | 0,00 | NA | NA |
| SNORA6    | 0,00 | 0,00 | 0,00 | 0,00 | NA | NA |
| SNORA60   | 0,00 | 0,00 | 0,00 | 0,00 | NA | NA |
| SNORA61   | 0,00 | 0,00 | 0,00 | 0,00 | NA | NA |
| SNORA62   | 0,00 | 0,00 | 0,00 | 0,00 | NA | NA |
| SNORA63   | 0,00 | 0,00 | 0,00 | 0,00 | NA | NA |
| SNORA63C  | 0,00 | 0,00 | 0,00 | 0,00 | NA | NA |
| SNORA63D  | 0,00 | 0,00 | 0,00 | 0,00 | NA | NA |
| SNORA64   | 0,00 | 0,00 | 0,00 | 0,00 | NA | NA |
| SNORA65   | 0,00 | 0,00 | 0,00 | 0,00 | NA | NA |
| SNORA67   | 0,00 | 0,00 | 0,00 | 0,00 | NA | NA |
| SNORA68   | 0,00 | 0,00 | 0,00 | 0,00 | NA | NA |
| SNORA69   | 0,00 | 0,00 | 0,00 | 0,00 | NA | NA |
| SNORA70   | 0,00 | 0,00 | 0,00 | 0,00 | NA | NA |
| SNORA70C  | 0,00 | 0,00 | 0,00 | 0,00 | NA | NA |
| SNORA70D  | 0,00 | 0,00 | 0,00 | 0,00 | NA | NA |
| SNORA70E  | 0,00 | 0,00 | 0,00 | 0,00 | NA | NA |
| SNORA70F  | 0,00 | 0,00 | 0,00 | 0,00 | NA | NA |
| SNORA70H  | 0,00 | 0,00 | 0,00 | 0,00 | NA | NA |
| SNORA70I  | 0,00 | 0,00 | 0,00 | 0,00 | NA | NA |
| SNORA70J  | 0,00 | 0,00 | 0,00 | 0,00 | NA | NA |
| SNORA71C  | 0,00 | 0,00 | 0,00 | 0,00 | NA | NA |
| SNORA71D  | 0,00 | 0,00 | 0,00 | 0,00 | NA | NA |
| SNORA71E  | 0,00 | 0,00 | 0,00 | 0,00 | NA | NA |
| SNORA73A  | 0,00 | 0,00 | 0,00 | 0,00 | NA | NA |
| SNORA74A  | 0,00 | 0,00 | 0,00 | 0,00 | NA | NA |
| SNORA74B  | 0,00 | 0,00 | 0,00 | 0,00 | NA | NA |
| SNORA75B  | 0,00 | 0,00 | 0,00 | 0,00 | NA | NA |
| SNORA77B  | 0,00 | 0,00 | 0,00 | 0,00 | NA | NA |
| SNORA78   | 0,00 | 0,00 | 0,00 | 0,00 | NA | NA |
| SNORA79   | 0,00 | 0,00 | 0,00 | 0,00 | NA | NA |
| SNORA79B  | 0,00 | 0,00 | 0,00 | 0,00 | NA | NA |
| SNORA7B   | 0,00 | 0,00 | 0,00 | 0,00 | NA | NA |
| SNORA8    | 0,00 | 0,00 | 0,00 | 0,00 | NA | NA |
| SNORA80C  | 0,00 | 0,00 | 0,00 | 0,00 | NA | NA |
| SNORA81   | 0,00 | 0,00 | 0,00 | 0,00 | NA | NA |
| SNORA84   | 0,00 | 1,67 | 0,00 | 0,00 | NA | NA |
| SNORA9    | 0,00 | 0,00 | 0,00 | 0,00 | NA | NA |
| SNORD102  | 0,00 | 0,00 | 0,00 | 0,00 | NA | NA |
| SNORD105  | 0,00 | 0,00 | 0,00 | 0,00 | NA | NA |
| SNORD105B | 0,00 | 0,00 | 0,00 | 0,00 | NA | NA |



|             |      |      |      |      |    |    |
|-------------|------|------|------|------|----|----|
| SNORD107    | 0,00 | 0,00 | 0,00 | 0,00 | NA | NA |
| SNORD108    | 0,00 | 0,00 | 0,00 | 0,00 | NA | NA |
| SNORD109A   | 0,00 | 0,00 | 0,00 | 0,00 | NA | NA |
| SNORD109B   | 0,00 | 0,00 | 0,00 | 0,00 | NA | NA |
| SNORD110    | 0,00 | 0,00 | 0,00 | 0,00 | NA | NA |
| SNORD111    | 0,00 | 0,00 | 0,00 | 0,00 | NA | NA |
| SNORD111B   | 0,00 | 0,00 | 0,00 | 0,00 | NA | NA |
| SNORD112    | 0,00 | 0,00 | 0,00 | 0,00 | NA | NA |
| SNORD113-1  | 0,00 | 0,00 | 0,00 | 0,00 | NA | NA |
| SNORD113-2  | 0,00 | 0,00 | 0,00 | 0,00 | NA | NA |
| SNORD113-3  | 0,00 | 0,00 | 0,00 | 0,00 | NA | NA |
| SNORD113-4  | 0,00 | 0,00 | 0,00 | 0,00 | NA | NA |
| SNORD113-5  | 0,00 | 0,00 | 0,00 | 0,00 | NA | NA |
| SNORD113-6  | 0,00 | 0,00 | 0,00 | 0,00 | NA | NA |
| SNORD113-7  | 0,00 | 0,00 | 0,00 | 0,00 | NA | NA |
| SNORD113-8  | 0,00 | 0,00 | 0,00 | 0,00 | NA | NA |
| SNORD113-9  | 0,00 | 0,00 | 0,00 | 0,00 | NA | NA |
| SNORD114-1  | 0,00 | 0,00 | 0,00 | 0,00 | NA | NA |
| SNORD114-10 | 0,00 | 0,00 | 0,00 | 0,00 | NA | NA |
| SNORD114-11 | 0,00 | 0,00 | 0,00 | 0,00 | NA | NA |
| SNORD114-12 | 0,00 | 0,00 | 0,00 | 0,00 | NA | NA |
| SNORD114-13 | 0,00 | 0,00 | 0,00 | 0,00 | NA | NA |
| SNORD114-14 | 0,00 | 0,00 | 0,00 | 0,00 | NA | NA |
| SNORD114-15 | 0,00 | 0,00 | 0,00 | 0,00 | NA | NA |
| SNORD114-16 | 0,00 | 0,00 | 0,00 | 0,00 | NA | NA |
| SNORD114-17 | 0,00 | 0,00 | 0,00 | 0,00 | NA | NA |
| SNORD114-18 | 0,00 | 0,00 | 0,00 | 0,00 | NA | NA |
| SNORD114-19 | 0,00 | 0,00 | 0,00 | 0,00 | NA | NA |
| SNORD114-2  | 0,00 | 0,00 | 0,00 | 0,00 | NA | NA |
| SNORD114-20 | 0,00 | 0,00 | 0,00 | 0,00 | NA | NA |
| SNORD114-21 | 0,00 | 0,00 | 0,00 | 0,00 | NA | NA |
| SNORD114-22 | 0,00 | 0,00 | 0,00 | 0,00 | NA | NA |
| SNORD114-23 | 0,00 | 0,00 | 0,00 | 0,00 | NA | NA |
| SNORD114-24 | 0,00 | 0,00 | 0,00 | 0,00 | NA | NA |
| SNORD114-25 | 0,00 | 0,00 | 0,00 | 0,00 | NA | NA |
| SNORD114-26 | 0,00 | 0,00 | 0,00 | 0,00 | NA | NA |
| SNORD114-27 | 0,00 | 0,00 | 0,00 | 0,00 | NA | NA |
| SNORD114-28 | 0,00 | 0,00 | 0,00 | 0,00 | NA | NA |
| SNORD114-29 | 0,00 | 0,00 | 0,00 | 0,00 | NA | NA |
| SNORD114-3  | 0,00 | 0,00 | 0,00 | 0,00 | NA | NA |
| SNORD114-30 | 0,00 | 0,00 | 0,00 | 0,00 | NA | NA |
| SNORD114-31 | 0,00 | 0,00 | 0,00 | 0,00 | NA | NA |
| SNORD114-4  | 0,00 | 0,00 | 0,00 | 0,00 | NA | NA |
| SNORD114-5  | 0,00 | 0,00 | 0,00 | 0,00 | NA | NA |
| SNORD114-6  | 0,00 | 0,00 | 0,00 | 0,00 | NA | NA |
| SNORD114-7  | 0,00 | 0,00 | 0,00 | 0,00 | NA | NA |
| SNORD114-9  | 0,00 | 0,00 | 0,00 | 0,00 | NA | NA |
| SNORD115-1  | 0,00 | 0,00 | 0,00 | 0,00 | NA | NA |
| SNORD115-10 | 0,00 | 0,00 | 0,00 | 0,00 | NA | NA |
| SNORD115-11 | 0,00 | 0,00 | 0,00 | 0,00 | NA | NA |
| SNORD115-12 | 0,00 | 0,00 | 0,00 | 0,00 | NA | NA |
| SNORD115-13 | 0,00 | 0,00 | 0,00 | 0,00 | NA | NA |
| SNORD115-14 | 0,00 | 0,00 | 0,00 | 0,00 | NA | NA |
| SNORD115-15 | 0,00 | 0,00 | 0,00 | 0,00 | NA | NA |
| SNORD115-16 | 0,00 | 0,00 | 0,00 | 0,00 | NA | NA |

|             |      |      |      |      |    |    |
|-------------|------|------|------|------|----|----|
| SNORD115-17 | 0,00 | 0,00 | 0,00 | 0,00 | NA | NA |
| SNORD115-18 | 0,00 | 0,00 | 0,00 | 0,00 | NA | NA |
| SNORD115-19 | 0,00 | 0,00 | 0,00 | 0,00 | NA | NA |
| SNORD115-2  | 0,00 | 0,00 | 0,00 | 0,00 | NA | NA |
| SNORD115-20 | 0,00 | 0,00 | 0,00 | 0,00 | NA | NA |
| SNORD115-21 | 0,00 | 0,00 | 0,00 | 0,00 | NA | NA |
| SNORD115-22 | 0,00 | 0,00 | 0,00 | 0,00 | NA | NA |
| SNORD115-23 | 0,00 | 0,00 | 0,00 | 0,00 | NA | NA |
| SNORD115-24 | 0,00 | 0,00 | 0,00 | 0,00 | NA | NA |
| SNORD115-25 | 0,00 | 0,00 | 0,00 | 0,00 | NA | NA |
| SNORD115-26 | 0,00 | 0,00 | 0,00 | 0,00 | NA | NA |
| SNORD115-27 | 0,00 | 0,00 | 0,00 | 0,00 | NA | NA |
| SNORD115-28 | 0,00 | 0,00 | 0,00 | 0,00 | NA | NA |
| SNORD115-29 | 0,00 | 0,00 | 0,00 | 0,00 | NA | NA |
| SNORD115-3  | 0,00 | 0,00 | 0,00 | 0,00 | NA | NA |
| SNORD115-30 | 0,00 | 0,00 | 0,00 | 0,00 | NA | NA |
| SNORD115-31 | 0,00 | 0,00 | 0,00 | 0,00 | NA | NA |
| SNORD115-32 | 0,00 | 0,00 | 0,00 | 0,00 | NA | NA |
| SNORD115-33 | 0,00 | 0,00 | 0,00 | 0,00 | NA | NA |
| SNORD115-34 | 0,00 | 0,00 | 0,00 | 0,00 | NA | NA |
| SNORD115-35 | 0,00 | 0,00 | 0,00 | 0,00 | NA | NA |
| SNORD115-36 | 0,00 | 0,00 | 0,00 | 0,00 | NA | NA |
| SNORD115-37 | 0,00 | 0,00 | 0,00 | 0,00 | NA | NA |
| SNORD115-38 | 0,00 | 0,00 | 0,00 | 0,00 | NA | NA |
| SNORD115-39 | 0,00 | 0,00 | 0,00 | 0,00 | NA | NA |
| SNORD115-4  | 0,00 | 0,00 | 0,00 | 0,00 | NA | NA |
| SNORD115-40 | 0,00 | 0,00 | 0,00 | 0,00 | NA | NA |
| SNORD115-41 | 0,00 | 0,00 | 0,00 | 0,00 | NA | NA |
| SNORD115-42 | 0,00 | 0,00 | 0,00 | 0,00 | NA | NA |
| SNORD115-43 | 0,00 | 0,00 | 0,00 | 0,00 | NA | NA |
| SNORD115-44 | 0,00 | 0,00 | 0,00 | 0,00 | NA | NA |
| SNORD115-45 | 0,00 | 0,00 | 0,00 | 0,00 | NA | NA |
| SNORD115-46 | 0,00 | 0,00 | 0,00 | 0,00 | NA | NA |
| SNORD115-47 | 0,00 | 0,00 | 0,00 | 0,00 | NA | NA |
| SNORD115-48 | 0,00 | 0,00 | 0,00 | 0,00 | NA | NA |
| SNORD115-5  | 0,00 | 0,00 | 0,00 | 0,00 | NA | NA |
| SNORD115-6  | 0,00 | 0,00 | 0,00 | 0,00 | NA | NA |
| SNORD115-7  | 0,00 | 0,00 | 0,00 | 0,00 | NA | NA |
| SNORD115-8  | 0,00 | 0,00 | 0,00 | 0,00 | NA | NA |
| SNORD115-9  | 0,00 | 0,00 | 0,00 | 0,00 | NA | NA |
| SNORD116-1  | 0,00 | 0,00 | 0,00 | 0,00 | NA | NA |
| SNORD116-10 | 0,00 | 0,00 | 0,00 | 0,00 | NA | NA |
| SNORD116-11 | 0,00 | 0,00 | 0,00 | 0,00 | NA | NA |
| SNORD116-12 | 0,00 | 0,00 | 0,00 | 0,00 | NA | NA |
| SNORD116-13 | 0,00 | 0,00 | 0,00 | 0,00 | NA | NA |
| SNORD116-14 | 0,00 | 0,00 | 0,00 | 0,00 | NA | NA |
| SNORD116-15 | 0,00 | 0,00 | 0,00 | 0,00 | NA | NA |
| SNORD116-16 | 0,00 | 0,00 | 0,00 | 0,00 | NA | NA |
| SNORD116-17 | 0,00 | 0,00 | 0,00 | 0,00 | NA | NA |
| SNORD116-18 | 0,00 | 0,00 | 0,00 | 0,00 | NA | NA |
| SNORD116-19 | 0,00 | 0,00 | 0,00 | 0,00 | NA | NA |
| SNORD116-2  | 0,00 | 0,00 | 0,00 | 0,00 | NA | NA |
| SNORD116-20 | 0,00 | 0,00 | 0,00 | 0,00 | NA | NA |
| SNORD116-22 | 0,00 | 0,00 | 0,00 | 0,00 | NA | NA |
| SNORD116-23 | 0,00 | 0,00 | 0,00 | 0,00 | NA | NA |

|             |      |      |      |      |    |    |
|-------------|------|------|------|------|----|----|
| SNORD116-24 | 0,00 | 0,00 | 0,00 | 0,00 | NA | NA |
| SNORD116-25 | 0,00 | 0,00 | 0,00 | 0,00 | NA | NA |
| SNORD116-26 | 0,00 | 0,00 | 0,00 | 0,00 | NA | NA |
| SNORD116-27 | 0,00 | 0,00 | 0,00 | 0,00 | NA | NA |
| SNORD116-28 | 0,00 | 0,00 | 0,00 | 0,00 | NA | NA |
| SNORD116-29 | 0,00 | 0,00 | 0,00 | 0,00 | NA | NA |
| SNORD116-3  | 0,00 | 0,00 | 0,00 | 0,00 | NA | NA |
| SNORD116-30 | 0,00 | 0,00 | 0,00 | 0,00 | NA | NA |
| SNORD116-4  | 0,00 | 0,00 | 0,00 | 0,00 | NA | NA |
| SNORD116-5  | 0,00 | 0,00 | 0,00 | 0,00 | NA | NA |
| SNORD116-6  | 0,00 | 0,00 | 0,00 | 0,00 | NA | NA |
| SNORD116-7  | 0,00 | 0,00 | 0,00 | 0,00 | NA | NA |
| SNORD116-9  | 0,00 | 0,00 | 0,00 | 0,00 | NA | NA |
| SNORD12     | 0,00 | 0,00 | 0,00 | 0,00 | NA | NA |
| SNORD121A   | 0,00 | 0,00 | 0,00 | 0,00 | NA | NA |
| SNORD121B   | 0,00 | 0,00 | 0,00 | 0,00 | NA | NA |
| SNORD123    | 0,00 | 0,00 | 0,00 | 0,00 | NA | NA |
| SNORD124    | 0,00 | 0,00 | 0,00 | 0,00 | NA | NA |
| SNORD125    | 0,00 | 0,00 | 0,00 | 0,00 | NA | NA |
| SNORD126    | 0,00 | 0,00 | 0,00 | 0,00 | NA | NA |
| SNORD127    | 0,00 | 0,00 | 0,00 | 0,00 | NA | NA |
| SNORD13P1   | 0,00 | 0,00 | 0,00 | 0,00 | NA | NA |
| SNORD13P3   | 0,00 | 0,00 | 0,00 | 0,00 | NA | NA |
| SNORD14B    | 0,00 | 0,00 | 0,00 | 0,00 | NA | NA |
| SNORD14C    | 0,00 | 0,00 | 0,00 | 0,00 | NA | NA |
| SNORD14D    | 0,00 | 0,00 | 0,00 | 0,00 | NA | NA |
| SNORD15A    | 0,00 | 0,00 | 0,00 | 0,00 | NA | NA |
| SNORD16     | 0,00 | 0,00 | 0,00 | 0,00 | NA | NA |
| SNORD18A    | 0,00 | 0,00 | 0,00 | 0,00 | NA | NA |
| SNORD18B    | 0,00 | 0,00 | 0,00 | 0,00 | NA | NA |
| SNORD18C    | 0,00 | 0,00 | 0,00 | 0,00 | NA | NA |
| SNORD19     | 0,00 | 0,00 | 0,00 | 0,00 | NA | NA |
| SNORD19B    | 0,00 | 0,00 | 0,00 | 0,00 | NA | NA |
| SNORD1A     | 0,00 | 0,00 | 0,00 | 0,00 | NA | NA |
| SNORD1B     | 0,00 | 0,00 | 0,00 | 0,00 | NA | NA |
| SNORD1C     | 0,00 | 0,00 | 0,00 | 0,00 | NA | NA |
| SNORD2      | 0,00 | 0,00 | 0,00 | 0,00 | NA | NA |
| SNORD20     | 0,00 | 0,00 | 0,00 | 0,00 | NA | NA |
| SNORD21     | 0,00 | 0,00 | 0,00 | 0,00 | NA | NA |
| SNORD22     | 0,00 | 0,00 | 0,00 | 0,00 | NA | NA |
| SNORD23     | 0,00 | 0,00 | 0,00 | 0,00 | NA | NA |
| SNORD24     | 0,00 | 0,00 | 0,00 | 0,00 | NA | NA |
| SNORD25     | 0,00 | 0,00 | 0,00 | 0,00 | NA | NA |
| SNORD26     | 0,00 | 0,00 | 0,00 | 0,00 | NA | NA |
| SNORD28     | 0,00 | 0,00 | 0,00 | 0,00 | NA | NA |
| SNORD28B    | 0,00 | 0,00 | 0,00 | 0,00 | NA | NA |
| SNORD30     | 0,00 | 0,00 | 0,00 | 0,00 | NA | NA |
| SNORD31B    | 0,00 | 0,00 | 0,00 | 0,00 | NA | NA |
| SNORD32A    | 0,00 | 0,00 | 0,00 | 0,00 | NA | NA |
| SNORD32B    | 0,00 | 0,00 | 0,00 | 0,00 | NA | NA |
| SNORD33     | 0,00 | 0,00 | 0,00 | 0,00 | NA | NA |
| SNORD34     | 0,00 | 0,00 | 0,00 | 0,00 | NA | NA |
| SNORD35A    | 0,00 | 0,00 | 0,00 | 0,00 | NA | NA |
| SNORD35B    | 0,00 | 0,00 | 0,00 | 0,00 | NA | NA |
| SNORD36A    | 0,00 | 0,00 | 0,00 | 0,00 | NA | NA |

|          |      |      |      |      |    |    |
|----------|------|------|------|------|----|----|
| SNORD36B | 0,00 | 0,00 | 0,00 | 0,00 | NA | NA |
| SNORD37  | 0,00 | 0,00 | 0,00 | 0,00 | NA | NA |
| SNORD38B | 0,00 | 0,00 | 0,00 | 0,00 | NA | NA |
| SNORD3D  | 0,00 | 0,00 | 0,00 | 0,00 | NA | NA |
| SNORD3G  | 0,00 | 0,00 | 0,00 | 0,00 | NA | NA |
| SNORD41  | 0,00 | 0,00 | 0,00 | 0,00 | NA | NA |
| SNORD45A | 0,00 | 0,00 | 0,00 | 0,00 | NA | NA |
| SNORD45B | 0,00 | 0,00 | 0,00 | 0,00 | NA | NA |
| SNORD45C | 0,00 | 0,00 | 0,00 | 0,00 | NA | NA |
| SNORD48  | 0,00 | 0,00 | 0,00 | 0,00 | NA | NA |
| SNORD49A | 0,00 | 0,00 | 0,00 | 0,00 | NA | NA |
| SNORD49B | 0,00 | 0,00 | 0,00 | 0,00 | NA | NA |
| SNORD4A  | 0,00 | 0,00 | 0,00 | 0,00 | NA | NA |
| SNORD4B  | 0,00 | 0,00 | 0,00 | 0,00 | NA | NA |
| SNORD5   | 0,00 | 0,00 | 0,00 | 0,00 | NA | NA |
| SNORD51  | 0,00 | 0,00 | 0,00 | 0,00 | NA | NA |
| SNORD52  | 0,00 | 0,00 | 0,00 | 0,00 | NA | NA |
| SNORD53  | 0,00 | 0,00 | 0,00 | 0,00 | NA | NA |
| SNORD54  | 0,00 | 0,00 | 0,00 | 0,00 | NA | NA |
| SNORD55  | 0,00 | 0,00 | 0,00 | 0,00 | NA | NA |
| SNORD56  | 0,00 | 0,00 | 0,00 | 0,00 | NA | NA |
| SNORD57  | 0,00 | 0,00 | 0,00 | 0,00 | NA | NA |
| SNORD58A | 0,00 | 0,00 | 0,00 | 0,00 | NA | NA |
| SNORD58B | 0,00 | 0,00 | 0,00 | 0,00 | NA | NA |
| SNORD58C | 0,00 | 0,00 | 0,00 | 0,00 | NA | NA |
| SNORD61  | 0,00 | 0,00 | 0,00 | 0,00 | NA | NA |
| SNORD64  | 0,00 | 0,00 | 0,00 | 0,00 | NA | NA |
| SNORD65  | 0,00 | 0,00 | 0,00 | 0,00 | NA | NA |
| SNORD65C | 0,00 | 0,00 | 0,00 | 0,00 | NA | NA |
| SNORD66  | 0,00 | 0,00 | 0,00 | 0,00 | NA | NA |
| SNORD68  | 0,00 | 0,00 | 0,00 | 0,00 | NA | NA |
| SNORD7   | 0,00 | 0,00 | 0,00 | 0,00 | NA | NA |
| SNORD72  | 0,00 | 0,00 | 0,00 | 0,00 | NA | NA |
| SNORD73A | 0,00 | 0,00 | 0,00 | 0,00 | NA | NA |
| SNORD73B | 0,00 | 0,00 | 0,00 | 0,00 | NA | NA |
| SNORD74B | 0,00 | 0,00 | 0,00 | 0,00 | NA | NA |
| SNORD77B | 0,00 | 0,00 | 0,00 | 0,00 | NA | NA |
| SNORD8   | 0,00 | 0,00 | 0,00 | 0,00 | NA | NA |
| SNORD82  | 0,00 | 0,00 | 0,00 | 0,00 | NA | NA |
| SNORD83B | 0,00 | 0,00 | 0,00 | 0,00 | NA | NA |
| SNORD84  | 0,00 | 0,00 | 0,00 | 0,00 | NA | NA |
| SNORD86  | 0,00 | 0,00 | 0,00 | 0,00 | NA | NA |
| SNORD87  | 0,00 | 0,00 | 0,00 | 0,00 | NA | NA |
| SNORD88A | 0,00 | 0,00 | 0,00 | 0,00 | NA | NA |
| SNORD88B | 0,00 | 0,00 | 0,00 | 0,00 | NA | NA |
| SNORD88C | 0,00 | 0,00 | 0,00 | 0,00 | NA | NA |
| SNORD9   | 0,00 | 0,00 | 0,00 | 0,00 | NA | NA |
| SNORD91B | 0,00 | 0,00 | 0,00 | 0,00 | NA | NA |
| SNORD95  | 0,00 | 0,00 | 0,00 | 0,00 | NA | NA |
| SNORD96A | 0,00 | 0,00 | 0,00 | 0,00 | NA | NA |
| SNORD96B | 0,00 | 0,00 | 0,00 | 0,00 | NA | NA |
| SNORD97  | 0,00 | 0,00 | 0,00 | 0,00 | NA | NA |
| SNPH     | 0,00 | 0,00 | 0,00 | 0,00 | NA | NA |
| SNRPEP2  | 0,00 | 0,00 | 0,00 | 0,00 | NA | NA |
| SNRPPF1  | 0,00 | 0,00 | 0,00 | 0,00 | NA | NA |

|            |      |      |      |      |    |    |
|------------|------|------|------|------|----|----|
| SNRPGP2    | 0,00 | 0,00 | 0,00 | 0,00 | NA | NA |
| SNTN       | 0,03 | 0,14 | 0,16 | 0,19 | NA | NA |
| SNURF      | 0,00 | 0,00 | 0,00 | 0,00 | NA | NA |
| SNURFL     | 0,00 | 0,00 | 0,00 | 0,00 | NA | NA |
| SNX18P4    | 0,00 | 0,00 | 0,00 | 0,00 | NA | NA |
| SNX18P5    | 0,00 | 0,00 | 0,00 | 0,00 | NA | NA |
| SNX19P     | 0,00 | 0,00 | 0,00 | 0,00 | NA | NA |
| SNX31      | 0,00 | 0,00 | 0,00 | 0,00 | NA | NA |
| SNX3P1Y    | 0,00 | 0,00 | 0,00 | 0,00 | NA | NA |
| SOCS2      | 0,54 | 0,89 | 0,61 | 1,23 | NA | NA |
| SOCS2P1    | 0,00 | 0,00 | 0,00 | 0,00 | NA | NA |
| SOCS2P2    | 0,00 | 0,00 | 0,00 | 0,00 | NA | NA |
| SOD3       | 0,00 | 0,00 | 0,00 | 0,00 | NA | NA |
| SOGA1      | 1,00 | 0,42 | 0,71 | 0,33 | NA | NA |
| SOHLH1     | 0,00 | 0,00 | 0,00 | 0,00 | NA | NA |
| SORCS2     | 0,00 | 0,00 | 0,00 | 0,00 | NA | NA |
| SORCS3     | 0,00 | 0,00 | 0,00 | 0,00 | NA | NA |
| SOWAHA     | 0,00 | 0,00 | 0,00 | 0,00 | NA | NA |
| SOWAHB     | 0,00 | 0,00 | 0,00 | 0,00 | NA | NA |
| SOX1       | 0,00 | 0,00 | 0,00 | 0,00 | NA | NA |
| SOX10      | 0,00 | 0,00 | 0,00 | 0,00 | NA | NA |
| SOX14      | 0,00 | 0,00 | 0,00 | 0,00 | NA | NA |
| SOX15      | 0,00 | 0,00 | 0,00 | 0,00 | NA | NA |
| SOX18      | 0,00 | 0,00 | 0,00 | 0,00 | NA | NA |
| SOX21      | 0,00 | 0,00 | 0,00 | 0,00 | NA | NA |
| SOX3       | 0,00 | 0,00 | 0,00 | 0,00 | NA | NA |
| SOX8       | 0,00 | 0,00 | 0,00 | 0,00 | NA | NA |
| SOX9       | 0,00 | 0,00 | 0,00 | 0,00 | NA | NA |
| SP5        | 0,00 | 0,00 | 0,00 | 0,00 | NA | NA |
| SP6        | 0,00 | 0,00 | 0,00 | 0,00 | NA | NA |
| SP8        | 0,00 | 0,00 | 0,00 | 0,00 | NA | NA |
| SP9        | 0,00 | 0,00 | 0,00 | 0,00 | NA | NA |
| SPA17P1    | 0,00 | 0,00 | 0,00 | 0,00 | NA | NA |
| SPAAR      | 0,17 | 0,00 | 0,26 | 0,14 | NA | NA |
| SPACA1     | 0,00 | 0,00 | 0,00 | 0,00 | NA | NA |
| SPACA5B    | 0,00 | 0,00 | 0,00 | 0,00 | NA | NA |
| SPACA7     | 0,28 | 0,00 | 0,50 | 0,33 | NA | NA |
| SPANXA1    | 0,00 | 0,00 | 0,00 | 0,00 | NA | NA |
| SPANXA2    | 0,00 | 0,00 | 0,00 | 0,00 | NA | NA |
| SPANXB1    | 0,00 | 0,00 | 0,00 | 0,00 | NA | NA |
| SPANXC     | 0,00 | 0,00 | 0,00 | 0,00 | NA | NA |
| SPANXD     | 0,00 | 0,00 | 0,00 | 0,00 | NA | NA |
| SPANXN2    | 0,00 | 0,00 | 0,00 | 0,00 | NA | NA |
| SPANXN3    | 0,00 | 0,00 | 0,00 | 0,00 | NA | NA |
| SPANXN5    | 0,00 | 0,00 | 0,00 | 0,00 | NA | NA |
| SPATA16    | 0,00 | 0,00 | 0,00 | 0,00 | NA | NA |
| SPATA18    | 0,00 | 0,00 | 0,00 | 0,00 | NA | NA |
| SPATA19    | 0,00 | 0,00 | 0,00 | 0,00 | NA | NA |
| SPATA22    | 0,00 | 0,00 | 0,00 | 0,00 | NA | NA |
| SPATA24    | 0,00 | 0,00 | 0,00 | 0,00 | NA | NA |
| SPATA25    | 0,00 | 0,00 | 0,00 | 0,00 | NA | NA |
| SPATA3     | 0,00 | 0,09 | 0,00 | 0,00 | NA | NA |
| SPATA31D2P | 0,00 | 0,00 | 0,00 | 0,00 | NA | NA |
| SPATA31D5P | 0,00 | 0,00 | 0,00 | 0,00 | NA | NA |
| SPATA31E1  | 0,00 | 0,00 | 0,00 | 0,00 | NA | NA |

|            |      |      |      |      |    |    |
|------------|------|------|------|------|----|----|
| SPATA45    | 0,00 | 0,00 | 0,00 | 0,00 | NA | NA |
| SPATA46    | 0,00 | 0,00 | 0,00 | 0,00 | NA | NA |
| SPATA9     | 0,00 | 0,00 | 0,00 | 0,00 | NA | NA |
| SPATC1     | 0,00 | 0,00 | 0,00 | 0,00 | NA | NA |
| SPATS1     | 0,00 | 0,00 | 0,00 | 0,00 | NA | NA |
| SPEF1      | 0,00 | 0,00 | 0,00 | 0,00 | NA | NA |
| SPEM1      | 0,00 | 0,00 | 0,00 | 0,00 | NA | NA |
| SPHAR      | 0,00 | 0,00 | 0,00 | 0,00 | NA | NA |
| SPINK13    | 0,00 | 0,00 | 0,00 | 0,00 | NA | NA |
| SPINK14    | 0,00 | 0,00 | 0,00 | 0,00 | NA | NA |
| SPINK5     | 0,00 | 0,71 | 0,00 | 0,00 | NA | NA |
| SPINK6     | 0,00 | 0,00 | 0,00 | 0,00 | NA | NA |
| SPINK7     | 0,00 | 0,00 | 0,00 | 0,00 | NA | NA |
| SPINT4     | 0,00 | 0,00 | 0,00 | 0,00 | NA | NA |
| SPNS2      | 0,00 | 0,00 | 0,00 | 0,00 | NA | NA |
| SPO11      | 0,00 | 0,00 | 0,00 | 0,00 | NA | NA |
| SPOCK3     | 0,00 | 0,00 | 0,00 | 0,00 | NA | NA |
| SPON1      | 0,00 | 0,00 | 0,00 | 0,00 | NA | NA |
| SPRR1A     | 0,00 | 0,00 | 0,00 | 0,00 | NA | NA |
| SPRR1B     | 0,00 | 0,00 | 0,00 | 0,00 | NA | NA |
| SPRR2A     | 0,00 | 0,00 | 0,00 | 0,00 | NA | NA |
| SPRR2B     | 0,00 | 0,00 | 0,00 | 0,00 | NA | NA |
| SPRR2C     | 0,00 | 0,00 | 0,00 | 0,00 | NA | NA |
| SPRR2E     | 0,00 | 0,00 | 0,00 | 0,00 | NA | NA |
| SPRR2F     | 0,00 | 0,00 | 0,00 | 0,00 | NA | NA |
| SPRR2G     | 0,00 | 0,00 | 0,00 | 0,00 | NA | NA |
| SPRR3      | 0,00 | 0,00 | 0,00 | 0,00 | NA | NA |
| SPRR4      | 0,00 | 0,00 | 0,00 | 0,00 | NA | NA |
| SPSB4      | 0,00 | 0,00 | 0,00 | 0,00 | NA | NA |
| SPTA1      | 0,00 | 0,00 | 0,00 | 0,00 | NA | NA |
| SPTBN2     | 0,00 | 0,00 | 0,00 | 0,00 | NA | NA |
| SPTBN4     | 0,00 | 0,22 | 0,00 | 0,00 | NA | NA |
| SPTSSB     | 0,00 | 0,00 | 0,00 | 0,00 | NA | NA |
| SPZ1       | 0,00 | 0,00 | 0,00 | 0,00 | NA | NA |
| SRD5A2     | 0,00 | 0,00 | 0,00 | 0,00 | NA | NA |
| SRGAP2D    | 0,00 | 0,00 | 0,00 | 0,00 | NA | NA |
| SRGAP3-AS3 | 0,00 | 0,00 | 0,00 | 0,00 | NA | NA |
| SRMP1      | 0,00 | 0,00 | 0,00 | 0,00 | NA | NA |
| SRMS       | 0,00 | 0,00 | 0,00 | 0,00 | NA | NA |
| SRP68P1    | 0,00 | 0,00 | 0,00 | 0,00 | NA | NA |
| SRP68P2    | 0,00 | 0,00 | 0,00 | 0,00 | NA | NA |
| SRP72P1    | 0,00 | 0,00 | 0,00 | 0,00 | NA | NA |
| SRPX2      | 0,09 | 0,30 | 0,06 | 0,28 | NA | NA |
| SRY        | 0,00 | 0,00 | 0,00 | 0,00 | NA | NA |
| SSBP3-AS1  | 0,06 | 0,05 | 0,13 | 0,05 | NA | NA |
| SSMEM1     | 0,00 | 0,00 | 0,00 | 0,00 | NA | NA |
| SSPO       | 0,39 | 0,27 | 0,27 | 0,34 | NA | NA |
| SSR4P1     | 0,00 | 0,00 | 0,00 | 0,00 | NA | NA |
| SST        | 0,00 | 0,00 | 0,00 | 0,00 | NA | NA |
| SSTR1      | 0,00 | 0,00 | 0,00 | 0,00 | NA | NA |
| SSTR4      | 0,00 | 0,00 | 0,00 | 0,00 | NA | NA |
| SSTR5      | 0,00 | 0,00 | 0,00 | 0,00 | NA | NA |
| SSU72P6    | 0,00 | 0,00 | 0,00 | 0,00 | NA | NA |
| SSX8       | 0,00 | 0,00 | 0,00 | 0,00 | NA | NA |
| ST13P11    | 0,00 | 0,00 | 0,00 | 0,00 | NA | NA |

|            |      |      |      |      |    |    |
|------------|------|------|------|------|----|----|
| ST13P3     | 0,00 | 0,00 | 0,00 | 0,00 | NA | NA |
| ST13P5     | 0,00 | 0,00 | 0,00 | 0,00 | NA | NA |
| ST6GALNAC2 | 0,00 | 0,00 | 0,00 | 0,00 | NA | NA |
| ST6GALNAC5 | 0,00 | 0,00 | 0,00 | 0,00 | NA | NA |
| ST7OT2     | 0,35 | 0,14 | 0,72 | 0,49 | NA | NA |
| ST8SIA1    | 0,67 | 0,64 | 0,60 | 0,91 | NA | NA |
| ST8SIA2    | 0,00 | 0,00 | 0,00 | 0,00 | NA | NA |
| STAC       | 0,00 | 0,00 | 0,00 | 0,00 | NA | NA |
| STAR       | 0,03 | 0,04 | 0,07 | 0,11 | NA | NA |
| STARD13    | 0,00 | 0,21 | 0,01 | 0,06 | NA | NA |
| STATH      | 0,00 | 0,00 | 0,00 | 0,00 | NA | NA |
| STC2       | 0,00 | 0,00 | 0,00 | 0,00 | NA | NA |
| STH        | 0,00 | 0,00 | 0,00 | 0,00 | NA | NA |
| STK32A     | 0,00 | 0,09 | 0,00 | 0,02 | NA | NA |
| STKLD1     | 1,18 | 1,66 | 2,00 | 1,84 | NA | NA |
| STMN2      | 0,00 | 0,00 | 0,00 | 0,00 | NA | NA |
| STOML3     | 0,00 | 0,00 | 0,00 | 0,00 | NA | NA |
| STPG2      | 0,00 | 0,00 | 0,00 | 0,00 | NA | NA |
| STRA8      | 0,00 | 0,00 | 0,00 | 0,00 | NA | NA |
| STRIP2     | 0,12 | 0,24 | 0,08 | 0,13 | NA | NA |
| STX1A      | 0,00 | 0,00 | 0,00 | 0,00 | NA | NA |
| STX1B      | 0,02 | 0,06 | 0,01 | 0,05 | NA | NA |
| STXBP6     | 0,02 | 0,22 | 0,06 | 0,03 | NA | NA |
| SUB1P1     | 0,00 | 0,00 | 0,00 | 0,00 | NA | NA |
| SUB1P2     | 0,00 | 0,00 | 0,00 | 0,00 | NA | NA |
| SUCLA2P    | 0,00 | 0,00 | 0,00 | 0,00 | NA | NA |
| SUGCT      | 0,00 | 0,00 | 0,00 | 0,00 | NA | NA |
| SULT1A2    | 0,21 | 0,00 | 0,10 | 0,06 | NA | NA |
| SULT1C2P2  | 0,00 | 0,00 | 0,00 | 0,00 | NA | NA |
| SULT1C3    | 0,00 | 0,00 | 0,00 | 0,00 | NA | NA |
| SULT1D1P   | 0,00 | 0,00 | 0,00 | 0,00 | NA | NA |
| SULT4A1    | 0,00 | 0,00 | 0,00 | 0,00 | NA | NA |
| SUMO1P1    | 0,00 | 0,00 | 0,00 | 0,00 | NA | NA |
| SVOPL      | 0,00 | 0,00 | 0,00 | 0,00 | NA | NA |
| SYCE1      | 0,00 | 0,11 | 0,00 | 0,13 | NA | NA |
| SYCE3      | 0,00 | 0,00 | 0,00 | 0,00 | NA | NA |
| SYCN       | 0,00 | 0,00 | 0,00 | 0,00 | NA | NA |
| SYNDIG1    | 0,00 | 0,00 | 0,00 | 0,00 | NA | NA |
| SYNGR3     | 0,00 | 0,00 | 0,00 | 0,00 | NA | NA |
| SYT12      | 0,12 | 0,15 | 0,17 | 0,45 | NA | NA |
| SYT17      | 0,08 | 0,23 | 0,31 | 0,11 | NA | NA |
| SYT3       | 0,00 | 0,00 | 0,00 | 0,00 | NA | NA |
| SYT4       | 0,00 | 0,00 | 0,00 | 0,00 | NA | NA |
| SYT7       | 0,00 | 0,00 | 0,00 | 0,00 | NA | NA |
| TAAR1      | 0,00 | 0,00 | 0,00 | 0,00 | NA | NA |
| TAAR3      | 0,00 | 0,00 | 0,00 | 0,00 | NA | NA |
| TAAR4P     | 0,00 | 0,00 | 0,00 | 0,00 | NA | NA |
| TAAR5      | 0,00 | 0,00 | 0,00 | 0,00 | NA | NA |
| TAAR6      | 0,00 | 0,00 | 0,00 | 0,00 | NA | NA |
| TAAR7P     | 0,00 | 0,00 | 0,00 | 0,00 | NA | NA |
| TAAR8      | 0,00 | 0,00 | 0,00 | 0,00 | NA | NA |
| TAAR9      | 0,00 | 0,00 | 0,00 | 0,00 | NA | NA |
| TAC1       | 0,00 | 0,00 | 0,00 | 0,00 | NA | NA |
| TACR1      | 0,00 | 0,00 | 0,00 | 0,00 | NA | NA |
| TAF9P2     | 0,00 | 0,00 | 0,00 | 0,00 | NA | NA |

|                  |      |      |      |      |    |    |
|------------------|------|------|------|------|----|----|
| TAGLN3           | 0,00 | 0,00 | 0,00 | 0,00 | NA | NA |
| TAL2             | 0,00 | 0,00 | 0,00 | 0,00 | NA | NA |
| TARDBPL          | 0,00 | 0,00 | 0,00 | 0,00 | NA | NA |
| TARM1            | 0,00 | 0,13 | 0,00 | 0,14 | NA | NA |
| TAS2R1           | 0,00 | 0,00 | 0,00 | 0,00 | NA | NA |
| TAS2R12          | 0,00 | 0,00 | 0,00 | 0,43 | NA | NA |
| TAS2R16          | 0,00 | 0,00 | 0,00 | 0,00 | NA | NA |
| TAS2R3           | 0,00 | 0,00 | 0,00 | 0,00 | NA | NA |
| TAS2R39          | 0,00 | 0,00 | 0,00 | 0,00 | NA | NA |
| TAS2R40          | 0,00 | 0,00 | 0,00 | 0,00 | NA | NA |
| TAS2R42          | 0,00 | 0,00 | 0,00 | 0,00 | NA | NA |
| TAS2R6           | 0,00 | 0,00 | 0,00 | 0,00 | NA | NA |
| TAS2R7           | 0,00 | 0,00 | 0,00 | 0,00 | NA | NA |
| TAS2R8           | 0,00 | 0,00 | 0,00 | 0,00 | NA | NA |
| TAS2R9           | 0,00 | 0,00 | 0,00 | 0,00 | NA | NA |
| TBATA            | 0,00 | 0,00 | 0,00 | 0,00 | NA | NA |
| TBC1D28          | 0,00 | 0,00 | 0,00 | 0,00 | NA | NA |
| TBC1D3C          | 0,00 | 0,00 | 0,00 | 0,00 | NA | NA |
| TBC1D3F          | 0,00 | 0,00 | 0,00 | 0,00 | NA | NA |
| TBC1D3K          | 0,00 | 0,00 | 0,00 | 0,00 | NA | NA |
| TBC1D3P1-DHX40P1 | 0,00 | 0,00 | 0,00 | 0,00 | NA | NA |
| TBC1D3P5         | 0,00 | 0,15 | 0,00 | 0,00 | NA | NA |
| TBL1Y            | 0,00 | 0,00 | 0,00 | 0,00 | NA | NA |
| TBX10            | 0,00 | 0,00 | 0,00 | 0,00 | NA | NA |
| TBX20            | 0,00 | 0,00 | 0,00 | 0,00 | NA | NA |
| TBX22            | 0,00 | 0,00 | 0,00 | 0,00 | NA | NA |
| TCAP             | 0,00 | 0,00 | 0,00 | 0,00 | NA | NA |
| TCEAL2           | 0,00 | 0,14 | 0,00 | 0,00 | NA | NA |
| TCEAL6           | 0,00 | 0,00 | 0,00 | 0,00 | NA | NA |
| TCEAL7           | 0,00 | 0,00 | 0,00 | 0,00 | NA | NA |
| TCEB1P13         | 0,00 | 0,00 | 0,00 | 0,00 | NA | NA |
| TCEB1P15         | 0,00 | 0,00 | 0,00 | 0,00 | NA | NA |
| TCEB1P2          | 0,00 | 0,00 | 0,00 | 0,00 | NA | NA |
| TCEB1P21         | 0,00 | 0,00 | 0,00 | 0,00 | NA | NA |
| TCEB1P22         | 0,00 | 0,00 | 0,00 | 0,00 | NA | NA |
| TCF15            | 0,00 | 0,00 | 0,00 | 0,00 | NA | NA |
| TCF19            | 0,00 | 0,00 | 0,04 | 0,00 | NA | NA |
| TCF24            | 0,00 | 0,06 | 0,00 | 0,00 | NA | NA |
| TCHHL1           | 0,00 | 0,00 | 0,00 | 0,00 | NA | NA |
| TCL1A            | 0,55 | 0,39 | 0,58 | 0,85 | NA | NA |
| TCN1             | 0,00 | 0,00 | 0,00 | 0,00 | NA | NA |
| TCP11X2          | 0,00 | 0,00 | 0,00 | 0,00 | NA | NA |
| TCTE3            | 0,00 | 0,00 | 0,06 | 0,00 | NA | NA |
| TDGF1P7          | 0,00 | 0,00 | 0,00 | 0,00 | NA | NA |
| TDH              | 0,00 | 0,00 | 0,00 | 0,00 | NA | NA |
| TDRD15           | 0,00 | 0,00 | 0,00 | 0,00 | NA | NA |
| TEAD1            | 0,00 | 0,05 | 0,00 | 0,00 | NA | NA |
| TEAD4            | 0,00 | 0,00 | 0,00 | 0,00 | NA | NA |
| TECTB            | 0,00 | 0,00 | 0,00 | 0,00 | NA | NA |
| TEF              | 0,03 | 0,00 | 0,00 | 0,00 | NA | NA |
| TEKT5            | 0,00 | 0,00 | 0,00 | 0,00 | NA | NA |
| TENM2            | 0,00 | 0,00 | 0,00 | 0,00 | NA | NA |
| TERF1P2          | 0,00 | 0,00 | 0,00 | 0,00 | NA | NA |
| TERT             | 0,00 | 0,00 | 0,00 | 0,00 | NA | NA |
| TEX101           | 0,00 | 0,02 | 0,00 | 0,00 | NA | NA |



|                  |      |      |      |      |    |    |
|------------------|------|------|------|------|----|----|
| TEX13A           | 0,00 | 0,00 | 0,00 | 0,00 | NA | NA |
| TEX13B           | 0,00 | 0,00 | 0,00 | 0,00 | NA | NA |
| TEX22            | 0,00 | 0,00 | 0,00 | 0,00 | NA | NA |
| TEX26            | 0,00 | 0,00 | 0,00 | 0,00 | NA | NA |
| TEX28            | 0,00 | 0,00 | 0,00 | 0,00 | NA | NA |
| TEX28P1          | 0,00 | 0,00 | 0,00 | 0,00 | NA | NA |
| TEX28P2          | 0,00 | 0,00 | 0,00 | 0,00 | NA | NA |
| TEX33            | 0,00 | 0,00 | 0,00 | 0,00 | NA | NA |
| TEX36            | 0,00 | 0,00 | 0,00 | 0,00 | NA | NA |
| TEX38            | 0,00 | 0,00 | 0,00 | 0,00 | NA | NA |
| TEX43            | 0,00 | 0,00 | 0,00 | 0,00 | NA | NA |
| TEX44            | 0,00 | 0,00 | 0,00 | 0,00 | NA | NA |
| TFAMP2           | 0,00 | 0,00 | 0,00 | 0,00 | NA | NA |
| TFAP2A           | 0,00 | 0,00 | 0,00 | 0,00 | NA | NA |
| TFAP2B           | 0,00 | 0,00 | 0,00 | 0,00 | NA | NA |
| TFF1             | 0,00 | 0,00 | 0,00 | 0,00 | NA | NA |
| TFPI2            | 0,00 | 0,00 | 0,00 | 0,00 | NA | NA |
| TG               | 0,58 | 0,04 | 0,01 | 0,00 | NA | NA |
| TGFA             | 0,00 | 0,49 | 0,05 | 0,00 | NA | NA |
| TGIF1P1          | 0,00 | 0,00 | 0,00 | 0,00 | NA | NA |
| TGIF2LX          | 0,00 | 0,00 | 0,00 | 0,00 | NA | NA |
| TGIF2LY          | 0,00 | 0,00 | 0,00 | 0,00 | NA | NA |
| TGM3             | 0,00 | 0,00 | 0,00 | 0,00 | NA | NA |
| TGM6             | 0,00 | 0,00 | 0,00 | 0,00 | NA | NA |
| TH               | 0,00 | 0,00 | 0,00 | 0,00 | NA | NA |
| THA1P            | 0,00 | 0,00 | 0,00 | 0,00 | NA | NA |
| THAP8            | 0,00 | 0,16 | 0,00 | 0,07 | NA | NA |
| THBS2            | 0,00 | 0,00 | 0,00 | 0,02 | NA | NA |
| THEGL            | 0,00 | 0,00 | 0,00 | 0,00 | NA | NA |
| THEM5            | 0,00 | 0,00 | 0,00 | 0,00 | NA | NA |
| THPO             | 0,00 | 0,00 | 0,00 | 0,00 | NA | NA |
| THRSP            | 0,00 | 0,00 | 0,00 | 0,00 | NA | NA |
| THY1             | 0,00 | 0,00 | 0,00 | 0,00 | NA | NA |
| TICRR            | 0,00 | 0,06 | 0,00 | 0,00 | NA | NA |
| TIGD4            | 0,00 | 0,00 | 0,00 | 0,00 | NA | NA |
| TIGD6            | 0,15 | 0,55 | 0,11 | 0,49 | NA | NA |
| TIGIT            | 0,04 | 0,39 | 0,08 | 0,18 | NA | NA |
| TIMM8AP          | 0,00 | 0,00 | 0,00 | 0,00 | NA | NA |
| TIMP4            | 0,00 | 0,00 | 0,00 | 0,00 | NA | NA |
| TINAG            | 0,00 | 0,08 | 0,00 | 0,00 | NA | NA |
| TKTL2            | 0,00 | 0,00 | 0,00 | 0,00 | NA | NA |
| TLE6             | 0,00 | 0,00 | 0,00 | 0,00 | NA | NA |
| TLL1             | 0,00 | 0,00 | 0,00 | 0,00 | NA | NA |
| TLR9             | 0,00 | 0,00 | 0,00 | 0,00 | NA | NA |
| TLX1NB           | 0,00 | 0,00 | 0,00 | 0,00 | NA | NA |
| TLX2             | 0,00 | 0,00 | 0,00 | 0,00 | NA | NA |
| TLX3             | 0,00 | 0,00 | 0,00 | 0,00 | NA | NA |
| TM4SF19          | 0,08 | 0,16 | 0,09 | 0,08 | NA | NA |
| TM4SF19-TCTEX1D2 | 0,00 | 0,00 | 0,00 | 0,00 | NA | NA |
| TM4SF5           | 0,00 | 0,00 | 0,00 | 0,00 | NA | NA |
| TMA16P1          | 0,00 | 0,00 | 0,00 | 0,00 | NA | NA |
| TMCO5A           | 0,00 | 0,00 | 0,00 | 0,00 | NA | NA |
| TMED10P1         | 0,00 | 0,00 | 0,00 | 0,00 | NA | NA |
| TMEM114          | 0,00 | 0,00 | 0,00 | 0,00 | NA | NA |
| TMEM125          | 0,00 | 0,00 | 0,00 | 0,00 | NA | NA |

|             |      |      |      |      |    |    |
|-------------|------|------|------|------|----|----|
| TMEM129     | 0,03 | 0,61 | 0,33 | 0,16 | NA | NA |
| TMEM132D    | 0,00 | 0,00 | 0,00 | 0,00 | NA | NA |
| TMEM132E    | 0,00 | 0,00 | 0,00 | 0,00 | NA | NA |
| TMEM139     | 0,00 | 0,00 | 0,00 | 0,00 | NA | NA |
| TMEM151A    | 0,00 | 0,00 | 0,00 | 0,00 | NA | NA |
| TMEM151B    | 0,00 | 0,00 | 0,00 | 0,00 | NA | NA |
| TMEM158     | 0,00 | 0,00 | 0,00 | 0,00 | NA | NA |
| TMEM17      | 0,03 | 0,00 | 0,12 | 0,08 | NA | NA |
| TMEM171     | 0,00 | 0,00 | 0,00 | 0,00 | NA | NA |
| TMEM174     | 0,00 | 0,00 | 0,00 | 0,00 | NA | NA |
| TMEM178A    | 0,00 | 0,00 | 0,00 | 0,00 | NA | NA |
| TMEM179     | 0,00 | 0,00 | 0,00 | 0,00 | NA | NA |
| TMEM185AL   | 0,00 | 0,00 | 0,00 | 0,00 | NA | NA |
| TMEM190     | 0,00 | 0,00 | 0,00 | 0,00 | NA | NA |
| TMEM196     | 0,00 | 0,00 | 0,00 | 0,00 | NA | NA |
| TMEM198     | 0,00 | 0,00 | 0,00 | 0,00 | NA | NA |
| TMEM200A    | 0,00 | 0,00 | 0,00 | 0,00 | NA | NA |
| TMEM200C    | 0,00 | 0,00 | 0,00 | 0,00 | NA | NA |
| TMEM202     | 0,00 | 0,00 | 0,00 | 0,00 | NA | NA |
| TMEM207     | 0,00 | 0,00 | 0,00 | 0,00 | NA | NA |
| TMEM211     | 0,00 | 0,00 | 0,00 | 0,00 | NA | NA |
| TMEM215     | 0,00 | 0,00 | 0,00 | 0,00 | NA | NA |
| TMEM225     | 0,00 | 0,00 | 0,00 | 0,00 | NA | NA |
| TMEM229A    | 0,00 | 0,00 | 0,00 | 0,00 | NA | NA |
| TMEM231     | 1,06 | 0,61 | 0,38 | 0,73 | NA | NA |
| TMEM235     | 0,00 | 0,00 | 0,00 | 0,00 | NA | NA |
| TMEM240     | 0,00 | 0,00 | 0,00 | 0,00 | NA | NA |
| TMEM244     | 0,00 | 0,00 | 0,00 | 0,00 | NA | NA |
| TMEM246     | 0,00 | 0,00 | 0,00 | 0,00 | NA | NA |
| TMEM247     | 0,00 | 0,00 | 0,00 | 0,00 | NA | NA |
| TMEM252     | 0,00 | 0,00 | 0,00 | 0,00 | NA | NA |
| TMEM254-AS1 | 0,07 | 0,00 | 0,07 | 0,20 | NA | NA |
| TMEM26      | 0,00 | 0,00 | 0,00 | 0,00 | NA | NA |
| TMEM27      | 0,00 | 0,00 | 0,00 | 0,00 | NA | NA |
| TMEM30CP    | 0,00 | 0,00 | 0,00 | 0,00 | NA | NA |
| TMEM31      | 0,00 | 0,00 | 0,00 | 0,00 | NA | NA |
| TMEM37      | 0,00 | 0,00 | 0,00 | 0,00 | NA | NA |
| TMEM51-AS1  | 0,05 | 0,00 | 0,04 | 0,03 | NA | NA |
| TMEM54      | 0,00 | 0,00 | 0,00 | 0,00 | NA | NA |
| TMEM59L     | 0,00 | 0,00 | 0,00 | 0,00 | NA | NA |
| TMEM61      | 0,00 | 0,00 | 0,00 | 0,00 | NA | NA |
| TMEM63B     | 0,00 | 0,08 | 0,21 | 0,05 | NA | NA |
| TMEM63C     | 0,00 | 0,47 | 0,00 | 0,06 | NA | NA |
| TMEM74      | 0,00 | 0,00 | 0,00 | 0,00 | NA | NA |
| TMEM81      | 0,00 | 0,11 | 0,00 | 0,00 | NA | NA |
| TMEM82      | 0,00 | 0,00 | 0,00 | 0,00 | NA | NA |
| TMEM88B     | 0,00 | 0,00 | 0,00 | 0,00 | NA | NA |
| TMEM89      | 0,00 | 0,00 | 0,00 | 0,00 | NA | NA |
| TMEM8C      | 0,00 | 0,00 | 0,00 | 0,00 | NA | NA |
| TMEM92      | 0,00 | 0,05 | 0,02 | 0,00 | NA | NA |
| TMEM95      | 0,00 | 0,14 | 0,00 | 0,00 | NA | NA |
| TMIGD2      | 0,00 | 0,17 | 0,03 | 0,00 | NA | NA |
| TMIGD3      | 0,00 | 0,17 | 0,00 | 0,00 | NA | NA |
| TMOD4       | 0,00 | 0,00 | 0,00 | 0,89 | NA | NA |
| TMPOP1      | 0,00 | 0,00 | 0,00 | 0,00 | NA | NA |

|           |      |      |      |      |    |    |
|-----------|------|------|------|------|----|----|
| TMPPE     | 0,00 | 0,00 | 0,07 | 0,00 | NA | NA |
| TMPRSS11A | 0,00 | 0,00 | 0,00 | 0,00 | NA | NA |
| TMPRSS11D | 0,00 | 0,00 | 0,00 | 0,00 | NA | NA |
| TMPRSS11E | 0,00 | 0,00 | 0,00 | 0,00 | NA | NA |
| TMPRSS2   | 0,18 | 0,47 | 0,17 | 0,32 | NA | NA |
| TMPRSS4   | 0,18 | 0,18 | 0,10 | 0,10 | NA | NA |
| TMPRSS5   | 0,00 | 0,00 | 0,00 | 0,00 | NA | NA |
| TMPRSS6   | 0,00 | 0,00 | 0,00 | 0,00 | NA | NA |
| TMPRSS7   | 0,09 | 0,12 | 0,01 | 0,06 | NA | NA |
| TMSB15A   | 0,00 | 0,00 | 0,00 | 0,00 | NA | NA |
| TMSL6     | 0,00 | 0,00 | 0,00 | 0,00 | NA | NA |
| TNC       | 0,23 | 0,67 | 0,41 | 0,29 | NA | NA |
| TNFRSF11B | 0,00 | 0,14 | 0,02 | 0,00 | NA | NA |
| TNFRSF18  | 0,00 | 0,21 | 0,00 | 0,00 | NA | NA |
| TNFSF4    | 0,03 | 0,04 | 0,04 | 0,00 | NA | NA |
| TNKS1BP1  | 0,00 | 0,03 | 0,00 | 0,00 | NA | NA |
| TNNT3     | 0,00 | 0,77 | 0,70 | 1,25 | NA | NA |
| TNP1      | 0,00 | 0,00 | 0,00 | 0,00 | NA | NA |
| TNP2      | 0,00 | 0,00 | 0,00 | 0,00 | NA | NA |
| TNRC6C    | 0,33 | 0,60 | 0,19 | 0,67 | NA | NA |
| TNXA      | 0,00 | 0,00 | 0,00 | 0,00 | NA | NA |
| TOP1P1    | 0,00 | 0,00 | 0,00 | 0,00 | NA | NA |
| TOPAZ1    | 0,00 | 0,02 | 0,00 | 0,00 | NA | NA |
| TOPORSLP1 | 0,00 | 0,00 | 0,00 | 0,00 | NA | NA |
| TOX3      | 0,00 | 0,00 | 0,00 | 0,00 | NA | NA |
| TP53TG3   | 0,00 | 0,00 | 0,00 | 0,00 | NA | NA |
| TP53TG3B  | 0,00 | 0,00 | 0,00 | 0,00 | NA | NA |
| TP53TG3C  | 0,00 | 0,00 | 0,00 | 0,00 | NA | NA |
| TP53TG3F  | 0,00 | 0,00 | 0,00 | 0,00 | NA | NA |
| TP53TG3GP | 0,00 | 0,00 | 0,00 | 0,00 | NA | NA |
| TP53TG3HP | 0,00 | 0,00 | 0,00 | 0,00 | NA | NA |
| TPBGL     | 0,00 | 0,00 | 0,00 | 0,00 | NA | NA |
| TPM3P4    | 0,00 | 0,00 | 0,00 | 0,00 | NA | NA |
| TPM5P     | 0,00 | 0,00 | 0,00 | 0,00 | NA | NA |
| TPO       | 0,02 | 0,14 | 0,00 | 0,02 | NA | NA |
| TPRG1     | 0,00 | 2,13 | 0,34 | 1,05 | NA | NA |
| TPRX1     | 0,00 | 0,00 | 0,00 | 0,00 | NA | NA |
| TPRX1P1   | 0,00 | 0,00 | 0,00 | 0,00 | NA | NA |
| TPRX2P    | 0,00 | 0,00 | 0,00 | 0,00 | NA | NA |
| TPSAB1    | 0,00 | 0,00 | 0,00 | 0,00 | NA | NA |
| TPSD1     | 0,00 | 0,00 | 0,00 | 0,00 | NA | NA |
| TPSG1     | 0,00 | 0,00 | 0,00 | 0,00 | NA | NA |
| TPST1     | 0,00 | 0,06 | 0,00 | 0,00 | NA | NA |
| TPT1P     | 0,00 | 0,00 | 0,00 | 0,00 | NA | NA |
| TPX2      | 0,03 | 0,05 | 0,05 | 0,04 | NA | NA |
| TRABD2B   | 0,00 | 0,00 | 0,00 | 0,00 | NA | NA |
| TRAJ1     | 0,00 | 0,00 | 0,00 | 0,00 | NA | NA |
| TRAJ10    | 0,00 | 0,00 | 0,00 | 0,00 | NA | NA |
| TRAJ11    | 0,00 | 0,00 | 0,00 | 0,00 | NA | NA |
| TRAJ12    | 0,00 | 0,00 | 0,00 | 0,00 | NA | NA |
| TRAJ13    | 0,00 | 0,00 | 0,00 | 0,00 | NA | NA |
| TRAJ14    | 0,00 | 0,00 | 0,00 | 0,00 | NA | NA |
| TRAJ18    | 0,00 | 0,00 | 0,00 | 0,00 | NA | NA |
| TRAJ2     | 0,00 | 0,00 | 0,00 | 0,00 | NA | NA |
| TRAJ21    | 0,00 | 0,00 | 0,00 | 0,00 | NA | NA |

|           |      |      |      |      |    |    |
|-----------|------|------|------|------|----|----|
| TRAJ23    | 0,00 | 0,00 | 0,00 | 0,00 | NA | NA |
| TRAJ24    | 0,00 | 0,00 | 0,00 | 0,00 | NA | NA |
| TRAJ25    | 0,00 | 0,00 | 0,00 | 0,00 | NA | NA |
| TRAJ26    | 0,00 | 0,00 | 0,00 | 0,00 | NA | NA |
| TRAJ27    | 0,00 | 0,00 | 0,00 | 0,00 | NA | NA |
| TRAJ28    | 0,00 | 0,00 | 0,00 | 0,00 | NA | NA |
| TRAJ29    | 0,00 | 0,00 | 0,00 | 0,00 | NA | NA |
| TRAJ30    | 0,00 | 0,00 | 0,00 | 0,00 | NA | NA |
| TRAJ31    | 0,00 | 0,00 | 0,00 | 0,00 | NA | NA |
| TRAJ32    | 0,00 | 0,00 | 0,00 | 0,00 | NA | NA |
| TRAJ33    | 0,00 | 0,00 | 0,00 | 0,00 | NA | NA |
| TRAJ34    | 0,00 | 0,00 | 0,00 | 0,00 | NA | NA |
| TRAJ36    | 0,00 | 0,00 | 0,00 | 0,00 | NA | NA |
| TRAJ38    | 0,00 | 0,00 | 0,00 | 0,00 | NA | NA |
| TRAJ39    | 0,00 | 0,00 | 0,00 | 0,00 | NA | NA |
| TRAJ4     | 0,00 | 0,00 | 0,00 | 0,00 | NA | NA |
| TRAJ40    | 0,00 | 0,00 | 0,00 | 0,00 | NA | NA |
| TRAJ41    | 0,00 | 0,00 | 0,00 | 0,00 | NA | NA |
| TRAJ42    | 0,00 | 0,00 | 0,00 | 0,00 | NA | NA |
| TRAJ44    | 0,00 | 0,00 | 0,00 | 0,00 | NA | NA |
| TRAJ45    | 0,00 | 0,00 | 0,00 | 0,00 | NA | NA |
| TRAJ46    | 0,00 | 0,00 | 0,00 | 0,00 | NA | NA |
| TRAJ47    | 0,00 | 0,00 | 0,00 | 0,00 | NA | NA |
| TRAJ48    | 0,00 | 0,00 | 0,00 | 0,00 | NA | NA |
| TRAJ49    | 0,00 | 0,00 | 0,00 | 0,00 | NA | NA |
| TRAJ5     | 0,00 | 0,00 | 0,00 | 0,00 | NA | NA |
| TRAJ50    | 0,00 | 0,00 | 0,00 | 0,00 | NA | NA |
| TRAJ51    | 0,00 | 0,00 | 0,00 | 0,00 | NA | NA |
| TRAJ52    | 0,00 | 0,00 | 0,00 | 0,00 | NA | NA |
| TRAJ53    | 0,00 | 0,00 | 0,00 | 0,00 | NA | NA |
| TRAJ56    | 0,00 | 0,00 | 0,00 | 0,00 | NA | NA |
| TRAJ57    | 0,00 | 0,00 | 0,00 | 0,00 | NA | NA |
| TRAJ58    | 0,00 | 0,00 | 0,00 | 0,00 | NA | NA |
| TRAJ59    | 0,00 | 0,00 | 0,00 | 0,00 | NA | NA |
| TRAJ6     | 0,00 | 0,00 | 0,00 | 0,00 | NA | NA |
| TRAJ60    | 0,00 | 0,00 | 0,00 | 0,00 | NA | NA |
| TRAJ61    | 0,00 | 0,00 | 0,00 | 0,00 | NA | NA |
| TRAJ7     | 0,00 | 0,00 | 0,00 | 0,00 | NA | NA |
| TRAJ8     | 0,00 | 0,00 | 0,00 | 0,00 | NA | NA |
| TRAJ9     | 0,00 | 0,00 | 0,00 | 0,00 | NA | NA |
| TRAM1L1   | 0,00 | 0,00 | 0,00 | 0,00 | NA | NA |
| TRAPPC2P2 | 0,00 | 0,00 | 0,00 | 0,00 | NA | NA |
| TRAV1-1   | 0,00 | 0,00 | 0,00 | 0,00 | NA | NA |
| TRAV1-2   | 0,00 | 0,00 | 0,00 | 0,00 | NA | NA |
| TRAV11    | 0,00 | 0,00 | 0,00 | 0,00 | NA | NA |
| TRAV12-1  | 0,00 | 0,00 | 0,00 | 0,00 | NA | NA |
| TRAV15    | 0,00 | 0,00 | 0,00 | 0,00 | NA | NA |
| TRAV16    | 0,00 | 0,00 | 0,00 | 0,00 | NA | NA |
| TRAV17    | 0,00 | 0,00 | 0,00 | 0,00 | NA | NA |
| TRAV18    | 0,00 | 0,00 | 0,00 | 0,00 | NA | NA |
| TRAV20    | 0,00 | 0,00 | 0,00 | 0,00 | NA | NA |
| TRAV22    | 0,00 | 0,00 | 0,00 | 0,00 | NA | NA |
| TRAV24    | 0,00 | 0,00 | 0,00 | 0,00 | NA | NA |
| TRAV25    | 0,00 | 0,00 | 0,00 | 0,00 | NA | NA |
| TRAV26-2  | 0,00 | 0,00 | 0,00 | 0,00 | NA | NA |

|             |      |      |      |      |    |    |
|-------------|------|------|------|------|----|----|
| TRAV27      | 0,00 | 0,00 | 0,00 | 0,00 | NA | NA |
| TRAV28      | 0,00 | 0,00 | 0,00 | 0,00 | NA | NA |
| TRAV29DV5   | 0,00 | 0,00 | 0,00 | 0,00 | NA | NA |
| TRAV3       | 0,00 | 0,00 | 0,00 | 0,00 | NA | NA |
| TRAV30      | 0,00 | 0,00 | 0,00 | 0,00 | NA | NA |
| TRAV31      | 0,00 | 0,00 | 0,00 | 0,00 | NA | NA |
| TRAV32      | 0,00 | 0,00 | 0,00 | 0,00 | NA | NA |
| TRAV33      | 0,00 | 0,00 | 0,00 | 0,00 | NA | NA |
| TRAV34      | 0,00 | 0,00 | 0,00 | 0,00 | NA | NA |
| TRAV36DV7   | 0,00 | 0,00 | 0,00 | 0,00 | NA | NA |
| TRAV38-2DV8 | 0,00 | 0,00 | 0,00 | 0,00 | NA | NA |
| TRAV4       | 0,00 | 0,00 | 0,00 | 0,00 | NA | NA |
| TRAV40      | 0,00 | 0,00 | 0,00 | 0,00 | NA | NA |
| TRAV41      | 0,00 | 0,00 | 0,00 | 0,00 | NA | NA |
| TRAV7       | 0,00 | 0,00 | 0,00 | 0,00 | NA | NA |
| TRAV8-1     | 0,00 | 0,00 | 0,00 | 0,00 | NA | NA |
| TRAV8-2     | 0,00 | 0,00 | 0,00 | 0,00 | NA | NA |
| TRAV8-3     | 0,00 | 0,00 | 0,00 | 0,00 | NA | NA |
| TRAV8-5     | 0,00 | 0,00 | 0,00 | 0,00 | NA | NA |
| TRAV8-6     | 0,00 | 0,00 | 0,00 | 0,00 | NA | NA |
| TRAV8-7     | 0,00 | 0,00 | 0,00 | 0,00 | NA | NA |
| TRAV9-1     | 0,00 | 0,00 | 0,00 | 0,00 | NA | NA |
| TRAV9-2     | 0,00 | 0,00 | 0,00 | 0,00 | NA | NA |
| TRBD1       | 0,00 | 0,00 | 0,00 | 0,00 | NA | NA |
| TRBJ1-1     | 0,00 | 0,00 | 0,00 | 0,00 | NA | NA |
| TRBJ1-4     | 0,00 | 0,00 | 0,00 | 0,00 | NA | NA |
| TRBJ1-6     | 0,00 | 0,00 | 0,00 | 0,00 | NA | NA |
| TRBJ2-2     | 0,00 | 0,00 | 0,00 | 0,00 | NA | NA |
| TRBJ2-4     | 0,00 | 0,00 | 0,00 | 0,00 | NA | NA |
| TRBJ2-5     | 0,00 | 0,00 | 0,00 | 0,00 | NA | NA |
| TRBJ2-6     | 0,00 | 0,00 | 0,00 | 0,00 | NA | NA |
| TRBV1       | 0,00 | 0,00 | 0,00 | 0,00 | NA | NA |
| TRBV10-2    | 0,00 | 0,00 | 0,00 | 0,00 | NA | NA |
| TRBV10-3    | 0,00 | 0,00 | 0,00 | 0,00 | NA | NA |
| TRBV11-1    | 0,00 | 0,00 | 0,00 | 0,00 | NA | NA |
| TRBV12-1    | 0,00 | 0,00 | 0,00 | 0,00 | NA | NA |
| TRBV12-2    | 0,00 | 0,00 | 0,00 | 0,00 | NA | NA |
| TRBV12-5    | 0,00 | 0,00 | 0,00 | 0,00 | NA | NA |
| TRBV15      | 0,00 | 0,00 | 0,00 | 0,00 | NA | NA |
| TRBV17      | 0,00 | 0,00 | 0,00 | 0,00 | NA | NA |
| TRBV18      | 0,00 | 0,00 | 0,00 | 0,00 | NA | NA |
| TRBV19      | 0,00 | 0,00 | 0,00 | 0,00 | NA | NA |
| TRBV20OR9-2 | 0,00 | 0,00 | 0,00 | 0,00 | NA | NA |
| TRBV21-1    | 0,00 | 0,00 | 0,00 | 0,00 | NA | NA |
| TRBV21OR9-2 | 0,00 | 0,00 | 0,00 | 0,00 | NA | NA |
| TRBV22-1    | 0,00 | 0,00 | 0,00 | 0,00 | NA | NA |
| TRBV22OR9-2 | 0,00 | 0,00 | 0,00 | 0,00 | NA | NA |
| TRBV23-1    | 0,00 | 0,00 | 0,00 | 0,00 | NA | NA |
| TRBV23OR9-2 | 0,00 | 0,00 | 0,00 | 0,00 | NA | NA |
| TRBV24-1    | 0,00 | 0,65 | 0,00 | 0,00 | NA | NA |
| TRBV25OR9-2 | 0,00 | 0,00 | 0,00 | 0,00 | NA | NA |
| TRBV26      | 0,00 | 0,00 | 0,00 | 0,00 | NA | NA |
| TRBV29-1    | 0,00 | 0,00 | 0,00 | 0,00 | NA | NA |
| TRBV29OR9-2 | 0,00 | 0,00 | 0,00 | 0,00 | NA | NA |
| TRBV3-1     | 0,00 | 0,00 | 0,00 | 0,00 | NA | NA |

|          |      |      |      |      |    |    |
|----------|------|------|------|------|----|----|
| TRBV30   | 0,00 | 0,00 | 0,00 | 0,00 | NA | NA |
| TRBV4-2  | 0,00 | 0,00 | 0,00 | 0,00 | NA | NA |
| TRBV5-2  | 0,00 | 0,00 | 0,00 | 0,00 | NA | NA |
| TRBV5-3  | 0,00 | 0,00 | 0,00 | 0,00 | NA | NA |
| TRBV5-4  | 0,00 | 0,00 | 0,00 | 0,00 | NA | NA |
| TRBV5-5  | 0,00 | 0,00 | 0,00 | 0,00 | NA | NA |
| TRBV5-6  | 0,00 | 0,00 | 0,00 | 0,00 | NA | NA |
| TRBV5-7  | 0,00 | 0,00 | 0,00 | 0,00 | NA | NA |
| TRBV6-1  | 0,00 | 0,00 | 0,00 | 0,00 | NA | NA |
| TRBV6-5  | 0,00 | 0,00 | 0,00 | 0,00 | NA | NA |
| TRBV6-6  | 0,00 | 0,00 | 0,00 | 0,00 | NA | NA |
| TRBV6-7  | 0,00 | 0,00 | 0,00 | 0,00 | NA | NA |
| TRBV6-8  | 0,00 | 0,00 | 0,00 | 0,00 | NA | NA |
| TRBV7-1  | 0,00 | 0,00 | 0,00 | 0,00 | NA | NA |
| TRBV7-5  | 0,00 | 0,00 | 0,00 | 0,00 | NA | NA |
| TRBV7-6  | 0,00 | 0,00 | 0,00 | 0,00 | NA | NA |
| TRBV7-7  | 0,00 | 0,00 | 0,00 | 0,00 | NA | NA |
| TRBV7-9  | 0,00 | 0,00 | 0,00 | 0,00 | NA | NA |
| TRBV8-1  | 0,00 | 0,00 | 0,00 | 0,00 | NA | NA |
| TRBVA    | 0,00 | 0,00 | 0,00 | 0,00 | NA | NA |
| TRBVB    | 0,00 | 0,00 | 0,00 | 0,00 | NA | NA |
| TRDD1    | 0,00 | 0,00 | 0,00 | 0,00 | NA | NA |
| TRDD2    | 0,00 | 0,00 | 0,00 | 0,00 | NA | NA |
| TRDD3    | 0,00 | 0,00 | 0,00 | 0,00 | NA | NA |
| TRDJ2    | 0,00 | 0,00 | 0,00 | 0,00 | NA | NA |
| TRDJ3    | 0,00 | 0,00 | 0,00 | 0,00 | NA | NA |
| TRDJ4    | 0,00 | 0,00 | 0,00 | 0,00 | NA | NA |
| TRDV1    | 0,00 | 0,00 | 0,00 | 0,00 | NA | NA |
| TRDV2    | 0,00 | 0,00 | 0,00 | 0,00 | NA | NA |
| TRDV3    | 0,00 | 0,00 | 0,00 | 0,00 | NA | NA |
| TREM2    | 0,00 | 0,00 | 0,00 | 0,00 | NA | NA |
| TREML2P  | 0,00 | 0,00 | 0,00 | 0,00 | NA | NA |
| TREML4   | 0,00 | 0,00 | 0,08 | 0,00 | NA | NA |
| TREX2    | 0,00 | 0,00 | 0,00 | 0,00 | NA | NA |
| TRGJP    | 0,00 | 0,00 | 0,00 | 0,00 | NA | NA |
| TRGV1    | 0,00 | 0,00 | 0,00 | 0,00 | NA | NA |
| TRGV11   | 0,00 | 0,00 | 0,00 | 0,00 | NA | NA |
| TRGV5    | 0,00 | 0,00 | 0,00 | 0,00 | NA | NA |
| TRGV6    | 0,00 | 0,00 | 0,00 | 0,00 | NA | NA |
| TRGV7    | 0,00 | 0,00 | 0,00 | 0,00 | NA | NA |
| TRGVA    | 0,00 | 0,00 | 0,00 | 0,00 | NA | NA |
| TRH      | 0,00 | 0,00 | 0,00 | 0,00 | NA | NA |
| TRHR     | 0,00 | 0,00 | 0,00 | 0,00 | NA | NA |
| TRIL     | 0,00 | 0,00 | 0,00 | 0,00 | NA | NA |
| TRIM16   | 0,27 | 0,62 | 1,02 | 0,43 | NA | NA |
| TRIM23   | 1,32 | 1,06 | 0,77 | 0,85 | NA | NA |
| TRIM40   | 0,00 | 0,00 | 0,00 | 0,00 | NA | NA |
| TRIM42   | 0,00 | 0,00 | 0,00 | 0,00 | NA | NA |
| TRIM43   | 0,00 | 0,00 | 0,00 | 0,00 | NA | NA |
| TRIM47   | 0,00 | 0,00 | 0,00 | 0,00 | NA | NA |
| TRIM48   | 0,00 | 0,00 | 0,00 | 0,00 | NA | NA |
| TRIM49D1 | 0,00 | 0,00 | 0,00 | 0,00 | NA | NA |
| TRIM49D2 | 0,00 | 0,00 | 0,00 | 0,00 | NA | NA |
| TRIM49L2 | 0,00 | 0,00 | 0,00 | 0,00 | NA | NA |
| TRIM50   | 0,00 | 0,00 | 0,00 | 0,00 | NA | NA |

|           |      |      |      |      |    |    |
|-----------|------|------|------|------|----|----|
| TRIM51CP  | 0,00 | 0,00 | 0,00 | 0,00 | NA | NA |
| TRIM6     | 0,19 | 0,06 | 0,33 | 0,24 | NA | NA |
| TRIM60P17 | 0,00 | 0,00 | 0,00 | 0,00 | NA | NA |
| TRIM63    | 0,00 | 0,00 | 0,00 | 0,00 | NA | NA |
| TRIM64    | 0,00 | 0,00 | 0,00 | 0,00 | NA | NA |
| TRIM64C   | 0,00 | 0,00 | 0,00 | 0,00 | NA | NA |
| TRIM67    | 0,00 | 0,00 | 0,00 | 0,00 | NA | NA |
| TRIM68    | 0,12 | 0,17 | 0,14 | 0,04 | NA | NA |
| TRIM80P   | 0,00 | 0,00 | 0,00 | 0,00 | NA | NA |
| TRNAS30P  | 0,00 | 0,00 | 0,00 | 0,00 | NA | NA |
| TRNP1     | 0,00 | 0,07 | 0,00 | 0,00 | NA | NA |
| TRPA1     | 0,00 | 0,00 | 0,00 | 0,00 | NA | NA |
| TRPC4     | 0,00 | 0,00 | 0,00 | 0,00 | NA | NA |
| TRPC5OS   | 0,00 | 0,05 | 0,00 | 0,00 | NA | NA |
| TRPC7     | 0,00 | 0,05 | 0,00 | 0,00 | NA | NA |
| TRPM5     | 0,00 | 0,07 | 0,00 | 0,00 | NA | NA |
| TRPM8     | 0,42 | 0,35 | 0,09 | 0,74 | NA | NA |
| TRPV6     | 0,00 | 0,00 | 0,00 | 0,00 | NA | NA |
| TRY2P     | 0,00 | 0,00 | 0,00 | 0,00 | NA | NA |
| TSACC     | 0,00 | 0,00 | 0,00 | 0,00 | NA | NA |
| TSEN15P1  | 0,00 | 0,00 | 0,00 | 0,00 | NA | NA |
| TSGA13    | 0,00 | 0,07 | 0,00 | 0,14 | NA | NA |
| TSHZ3     | 0,00 | 0,00 | 0,00 | 0,00 | NA | NA |
| TSLP      | 0,00 | 0,00 | 0,00 | 0,00 | NA | NA |
| TSPAN1    | 0,00 | 0,00 | 0,00 | 0,00 | NA | NA |
| TSPAN12   | 0,00 | 0,00 | 0,00 | 0,00 | NA | NA |
| TSPAN7    | 0,00 | 0,00 | 0,00 | 0,00 | NA | NA |
| TSPAN9    | 0,00 | 0,00 | 0,00 | 0,00 | NA | NA |
| TSPEAR    | 0,00 | 0,00 | 0,00 | 0,00 | NA | NA |
| TSPO2     | 0,00 | 0,00 | 0,00 | 0,00 | NA | NA |
| TSPY1     | 0,00 | 0,00 | 0,00 | 0,00 | NA | NA |
| TSPY10    | 0,00 | 0,00 | 0,00 | 0,00 | NA | NA |
| TSPY2     | 0,00 | 0,00 | 0,00 | 0,00 | NA | NA |
| TSPY21P   | 0,00 | 0,00 | 0,00 | 0,00 | NA | NA |
| TSPY22P   | 0,00 | 0,00 | 0,00 | 0,00 | NA | NA |
| TSPY23P   | 0,00 | 0,00 | 0,00 | 0,00 | NA | NA |
| TSPY3     | 0,00 | 0,00 | 0,00 | 0,00 | NA | NA |
| TSPY4     | 0,00 | 0,00 | 0,00 | 0,00 | NA | NA |
| TSPY8     | 0,00 | 0,00 | 0,00 | 0,00 | NA | NA |
| TSPY9P    | 0,00 | 0,00 | 0,00 | 0,00 | NA | NA |
| TSSK1A    | 0,00 | 0,00 | 0,00 | 0,00 | NA | NA |
| TSSK1B    | 0,00 | 0,00 | 0,00 | 0,00 | NA | NA |
| TSSK2     | 0,00 | 0,00 | 0,00 | 0,00 | NA | NA |
| TSSK5P    | 0,00 | 0,00 | 0,00 | 0,00 | NA | NA |
| TTC22     | 0,06 | 0,09 | 0,15 | 0,18 | NA | NA |
| TTC23     | 0,11 | 1,39 | 0,12 | 0,62 | NA | NA |
| TTC28     | 0,13 | 0,24 | 0,11 | 0,19 | NA | NA |
| TTK       | 0,07 | 0,23 | 0,00 | 0,00 | NA | NA |
| TTLL10    | 0,00 | 0,00 | 0,00 | 0,00 | NA | NA |
| TTR       | 0,00 | 0,00 | 0,00 | 0,00 | NA | NA |
| TTY1      | 0,00 | 0,00 | 0,00 | 0,00 | NA | NA |
| TTY11     | 0,00 | 0,00 | 0,00 | 0,00 | NA | NA |
| TTY12     | 0,00 | 0,00 | 0,00 | 0,00 | NA | NA |
| TTY13     | 0,00 | 0,00 | 0,00 | 0,00 | NA | NA |
| TTY16     | 0,00 | 0,00 | 0,00 | 0,00 | NA | NA |

|           |      |      |      |      |    |    |
|-----------|------|------|------|------|----|----|
| TTY17A    | 0,00 | 0,00 | 0,00 | 0,00 | NA | NA |
| TTY18     | 0,00 | 0,00 | 0,00 | 0,00 | NA | NA |
| TTY19     | 0,00 | 0,00 | 0,00 | 0,00 | NA | NA |
| TTY1B     | 0,00 | 0,00 | 0,00 | 0,00 | NA | NA |
| TTY2      | 0,00 | 0,00 | 0,00 | 0,00 | NA | NA |
| TTY20     | 0,00 | 0,00 | 0,00 | 0,00 | NA | NA |
| TTY21     | 0,00 | 0,00 | 0,00 | 0,00 | NA | NA |
| TTY21B    | 0,00 | 0,00 | 0,00 | 0,00 | NA | NA |
| TTY23     | 0,00 | 0,00 | 0,00 | 0,00 | NA | NA |
| TTY25P    | 0,00 | 0,00 | 0,00 | 0,00 | NA | NA |
| TTY2B     | 0,00 | 0,00 | 0,00 | 0,00 | NA | NA |
| TTY3      | 0,00 | 0,00 | 0,00 | 0,00 | NA | NA |
| TTY3B     | 0,00 | 0,00 | 0,00 | 0,00 | NA | NA |
| TTY4C     | 0,00 | 0,00 | 0,00 | 0,00 | NA | NA |
| TTY5      | 0,00 | 0,00 | 0,00 | 0,00 | NA | NA |
| TTY6      | 0,00 | 0,00 | 0,00 | 0,00 | NA | NA |
| TTY6B     | 0,00 | 0,00 | 0,00 | 0,00 | NA | NA |
| TTY7      | 0,00 | 0,00 | 0,00 | 0,00 | NA | NA |
| TTY7B     | 0,00 | 0,00 | 0,00 | 0,00 | NA | NA |
| TTY9B     | 0,00 | 0,00 | 0,00 | 0,00 | NA | NA |
| TUBA3C    | 0,00 | 0,00 | 0,00 | 0,00 | NA | NA |
| TUBA3E    | 0,00 | 0,00 | 0,00 | 0,00 | NA | NA |
| TUBAL3    | 0,00 | 0,00 | 0,00 | 0,00 | NA | NA |
| TUBAP     | 0,00 | 0,00 | 0,00 | 0,00 | NA | NA |
| TUBB1     | 0,00 | 0,00 | 0,00 | 0,00 | NA | NA |
| TUBB1P1   | 0,00 | 0,00 | 0,00 | 0,00 | NA | NA |
| TUBB1P2   | 0,00 | 0,00 | 0,00 | 0,00 | NA | NA |
| TUBB7P    | 0,00 | 0,00 | 0,00 | 0,00 | NA | NA |
| TUBB8     | 0,00 | 0,00 | 0,00 | 0,00 | NA | NA |
| TUBB8P10  | 0,00 | 0,00 | 0,00 | 0,00 | NA | NA |
| TUBB8P11  | 0,00 | 0,00 | 0,00 | 0,00 | NA | NA |
| TUBB8P4   | 0,00 | 0,00 | 0,00 | 0,00 | NA | NA |
| TUBB8P5   | 0,00 | 0,00 | 0,00 | 0,00 | NA | NA |
| TUBB8P6   | 0,00 | 0,00 | 0,00 | 0,00 | NA | NA |
| TUBB8P8   | 0,00 | 0,00 | 0,00 | 0,00 | NA | NA |
| TUBB8P9   | 0,00 | 0,00 | 0,00 | 0,00 | NA | NA |
| TUBB5     | 0,00 | 0,10 | 0,00 | 0,00 | NA | NA |
| TUBG1P    | 0,00 | 0,00 | 0,00 | 0,00 | NA | NA |
| TUFT1     | 0,07 | 0,26 | 0,36 | 0,51 | NA | NA |
| TUNAR     | 0,03 | 0,05 | 0,00 | 0,04 | NA | NA |
| TUSC1     | 0,00 | 0,00 | 0,03 | 0,00 | NA | NA |
| TUSC2P1   | 0,00 | 0,00 | 0,00 | 0,00 | NA | NA |
| TUSC5     | 0,00 | 0,00 | 0,00 | 0,00 | NA | NA |
| TVP23CP2  | 0,00 | 0,00 | 0,00 | 0,00 | NA | NA |
| TWF1P1    | 0,00 | 0,00 | 0,00 | 0,00 | NA | NA |
| TWIST1    | 0,00 | 0,00 | 0,00 | 0,00 | NA | NA |
| TWIST2    | 0,00 | 0,00 | 0,00 | 0,00 | NA | NA |
| TXLNG2P   | 0,01 | 0,21 | 0,00 | 0,07 | NA | NA |
| TXNDC8    | 0,00 | 0,00 | 0,00 | 0,00 | NA | NA |
| TXNRD3    | 0,00 | 0,00 | 0,00 | 0,00 | NA | NA |
| TXNRD3NB  | 0,00 | 0,00 | 0,00 | 0,00 | NA | NA |
| TYRL      | 0,00 | 0,00 | 0,00 | 0,00 | NA | NA |
| U07000.5  | 0,00 | 0,00 | 0,00 | 0,00 | NA | NA |
| U40455.1  | 0,00 | 0,00 | 0,00 | 0,00 | NA | NA |
| U47924.29 | 0,00 | 0,00 | 0,00 | 0,00 | NA | NA |



|           |      |      |      |      |    |    |
|-----------|------|------|------|------|----|----|
| U52111.12 | 0,00 | 0,00 | 0,00 | 0,00 | NA | NA |
| U52111.3  | 0,00 | 0,39 | 0,00 | 0,00 | NA | NA |
| U52112.10 | 0,00 | 0,00 | 0,00 | 0,00 | NA | NA |
| U52112.13 | 0,00 | 0,00 | 0,00 | 0,00 | NA | NA |
| U66059.57 | 0,00 | 0,00 | 0,00 | 0,00 | NA | NA |
| U66059.58 | 0,00 | 0,00 | 0,00 | 0,00 | NA | NA |
| U66061.35 | 0,00 | 0,00 | 0,00 | 0,00 | NA | NA |
| U66061.42 | 0,00 | 0,00 | 0,00 | 0,00 | NA | NA |
| U70984.1  | 0,00 | 0,00 | 0,00 | 0,00 | NA | NA |
| U73167.7  | 0,00 | 0,00 | 0,00 | 0,00 | NA | NA |
| U82671.8  | 0,00 | 0,00 | 0,00 | 0,00 | NA | NA |
| U91328.22 | 0,00 | 0,00 | 0,00 | 0,00 | NA | NA |
| UBA52P5   | 0,00 | 0,00 | 0,00 | 0,00 | NA | NA |
| UBA52P7   | 0,00 | 0,00 | 0,00 | 0,00 | NA | NA |
| UBA52P9   | 0,00 | 0,00 | 0,00 | 0,00 | NA | NA |
| UBBP2     | 0,00 | 0,00 | 0,00 | 0,00 | NA | NA |
| UBDP1     | 0,00 | 0,00 | 0,00 | 0,00 | NA | NA |
| UBE2CP2   | 0,00 | 0,00 | 0,00 | 0,00 | NA | NA |
| UBE2D3P   | 0,00 | 0,00 | 0,00 | 0,00 | NA | NA |
| UBE2DNL   | 0,00 | 0,00 | 0,00 | 0,00 | NA | NA |
| UBE2HP    | 0,00 | 0,00 | 0,00 | 0,00 | NA | NA |
| UBE2L4    | 0,00 | 0,00 | 0,00 | 0,00 | NA | NA |
| UBE2MP1   | 0,00 | 0,00 | 0,00 | 0,00 | NA | NA |
| UBE2NL    | 0,00 | 0,00 | 0,00 | 0,00 | NA | NA |
| UBE2Q2P6  | 0,00 | 0,00 | 0,00 | 0,00 | NA | NA |
| UBE2QL1   | 0,00 | 0,00 | 0,00 | 0,00 | NA | NA |
| UBE2SP1   | 0,00 | 0,00 | 0,00 | 0,00 | NA | NA |
| UBE2U     | 0,00 | 0,00 | 0,00 | 0,00 | NA | NA |
| UBL4B     | 0,00 | 0,00 | 0,00 | 0,00 | NA | NA |
| UBQLN1P   | 0,00 | 0,00 | 0,00 | 0,00 | NA | NA |
| UBQLN3    | 0,00 | 0,06 | 0,00 | 0,00 | NA | NA |
| UBTFL1    | 0,00 | 0,00 | 0,00 | 0,00 | NA | NA |
| UBTFL2    | 0,00 | 0,00 | 0,00 | 0,00 | NA | NA |
| UBTFL3    | 0,00 | 0,00 | 0,00 | 0,00 | NA | NA |
| UBXN10    | 0,00 | 0,00 | 0,00 | 0,00 | NA | NA |
| UCMA      | 0,00 | 0,00 | 0,00 | 0,00 | NA | NA |
| UCN       | 0,00 | 0,00 | 0,00 | 0,00 | NA | NA |
| UCN2      | 0,00 | 0,00 | 0,00 | 0,00 | NA | NA |
| UCN3      | 0,00 | 0,00 | 0,00 | 0,00 | NA | NA |
| UCP3      | 0,00 | 0,36 | 0,00 | 0,00 | NA | NA |
| UGT1A10   | 0,00 | 0,00 | 0,00 | 0,00 | NA | NA |
| UGT1A11P  | 0,00 | 0,00 | 0,00 | 0,00 | NA | NA |
| UGT1A12P  | 0,00 | 0,00 | 0,00 | 0,00 | NA | NA |
| UGT1A13P  | 0,00 | 0,00 | 0,00 | 0,00 | NA | NA |
| UGT1A2P   | 0,00 | 0,00 | 0,00 | 0,00 | NA | NA |
| UGT1A3    | 0,00 | 0,00 | 0,00 | 0,00 | NA | NA |
| UGT1A4    | 0,00 | 0,00 | 0,00 | 0,00 | NA | NA |
| UGT1A5    | 0,00 | 0,00 | 0,00 | 0,00 | NA | NA |
| UGT1A6    | 0,00 | 0,00 | 0,00 | 0,00 | NA | NA |
| UGT1A9    | 0,00 | 0,00 | 0,00 | 0,00 | NA | NA |
| UGT2A2    | 0,00 | 0,00 | 0,00 | 0,00 | NA | NA |
| UGT2B10   | 0,00 | 0,00 | 0,00 | 0,00 | NA | NA |
| UGT2B17   | 0,00 | 0,00 | 0,00 | 0,00 | NA | NA |
| UGT2B28   | 0,00 | 0,00 | 0,00 | 0,00 | NA | NA |
| UGT2B29P  | 0,00 | 0,00 | 0,00 | 0,00 | NA | NA |

|              |      |      |      |      |    |    |
|--------------|------|------|------|------|----|----|
| UGT3A2       | 0,00 | 0,00 | 0,00 | 0,00 | NA | NA |
| ULBP3        | 0,00 | 0,00 | 0,00 | 0,00 | NA | NA |
| UMOD         | 0,00 | 0,00 | 0,00 | 0,00 | NA | NA |
| UNC13C       | 0,30 | 0,50 | 0,23 | 0,60 | NA | NA |
| UNC5B        | 0,00 | 0,00 | 0,00 | 0,03 | NA | NA |
| UNC5C        | 0,00 | 0,00 | 0,00 | 0,00 | NA | NA |
| UNC79        | 0,08 | 0,07 | 0,06 | 0,08 | NA | NA |
| UNC93A       | 0,00 | 0,00 | 0,00 | 0,00 | NA | NA |
| UNC93B3      | 0,00 | 0,00 | 0,00 | 0,00 | NA | NA |
| UNCX         | 0,00 | 0,00 | 0,00 | 0,00 | NA | NA |
| UPF3AP1      | 0,00 | 0,00 | 0,00 | 0,00 | NA | NA |
| UPF3AP2      | 0,00 | 0,00 | 0,00 | 0,00 | NA | NA |
| UPK3B        | 0,00 | 0,00 | 0,00 | 0,00 | NA | NA |
| UPP2         | 0,00 | 0,00 | 0,00 | 0,00 | NA | NA |
| UQCRBP1      | 0,00 | 0,00 | 0,00 | 0,00 | NA | NA |
| UQCRHP1      | 0,00 | 0,00 | 0,00 | 0,00 | NA | NA |
| URGCP-MRPS24 | 0,00 | 0,00 | 0,00 | 0,00 | NA | NA |
| USMG5P1      | 0,00 | 0,00 | 0,00 | 0,00 | NA | NA |
| USP17L1      | 0,00 | 0,00 | 0,00 | 0,00 | NA | NA |
| USP17L10     | 0,00 | 0,00 | 0,00 | 0,00 | NA | NA |
| USP17L12     | 0,00 | 0,00 | 0,00 | 0,00 | NA | NA |
| USP17L13     | 0,00 | 0,00 | 0,00 | 0,00 | NA | NA |
| USP17L17     | 0,00 | 0,00 | 0,00 | 0,00 | NA | NA |
| USP17L18     | 0,00 | 0,00 | 0,00 | 0,00 | NA | NA |
| USP17L19     | 0,00 | 0,00 | 0,00 | 0,00 | NA | NA |
| USP17L21     | 0,00 | 0,00 | 0,00 | 0,00 | NA | NA |
| USP17L23     | 0,00 | 0,00 | 0,00 | 0,00 | NA | NA |
| USP17L24     | 0,00 | 0,01 | 0,00 | 0,00 | NA | NA |
| USP17L25     | 0,00 | 0,01 | 0,00 | 0,00 | NA | NA |
| USP17L26     | 0,00 | 0,01 | 0,00 | 0,00 | NA | NA |
| USP17L27     | 0,00 | 0,00 | 0,00 | 0,00 | NA | NA |
| USP17L28     | 0,00 | 0,00 | 0,00 | 0,00 | NA | NA |
| USP17L29     | 0,00 | 0,00 | 0,00 | 0,00 | NA | NA |
| USP17L3      | 0,00 | 0,00 | 0,00 | 0,00 | NA | NA |
| USP17L30     | 0,00 | 0,00 | 0,00 | 0,00 | NA | NA |
| USP17L4      | 0,00 | 0,00 | 0,00 | 0,00 | NA | NA |
| USP17L5      | 0,00 | 0,00 | 0,00 | 0,00 | NA | NA |
| USP17L8      | 0,00 | 0,00 | 0,00 | 0,00 | NA | NA |
| USP26        | 0,03 | 0,00 | 0,01 | 0,09 | NA | NA |
| USP51        | 0,00 | 0,00 | 0,00 | 0,00 | NA | NA |
| UTS2R        | 0,00 | 0,00 | 0,00 | 0,00 | NA | NA |
| UTY          | 0,00 | 0,09 | 0,03 | 0,09 | NA | NA |
| VAT1L        | 0,00 | 0,00 | 0,00 | 0,00 | NA | NA |
| VCX          | 0,00 | 0,00 | 0,00 | 0,00 | NA | NA |
| VCX2         | 0,00 | 0,00 | 0,00 | 0,00 | NA | NA |
| VCX3A        | 0,00 | 0,00 | 0,00 | 0,00 | NA | NA |
| VCX3B        | 0,00 | 0,00 | 0,00 | 0,00 | NA | NA |
| VCY          | 0,00 | 0,00 | 0,00 | 0,00 | NA | NA |
| VCY1B        | 0,00 | 0,00 | 0,00 | 0,00 | NA | NA |
| VDAC1LP      | 0,00 | 0,00 | 0,00 | 0,00 | NA | NA |
| VDAC2P       | 0,00 | 0,00 | 0,00 | 0,00 | NA | NA |
| VEGFC        | 0,00 | 0,00 | 0,00 | 0,00 | NA | NA |
| VENTXP2      | 0,00 | 0,00 | 0,00 | 0,00 | NA | NA |
| VENTXP3      | 0,00 | 0,00 | 0,00 | 0,00 | NA | NA |
| VENTXP7      | 0,00 | 0,00 | 0,00 | 0,00 | NA | NA |

|            |      |      |      |      |    |    |
|------------|------|------|------|------|----|----|
| VEZF11     | 0,00 | 0,00 | 0,00 | 0,00 | NA | NA |
| VGF        | 0,00 | 0,00 | 0,00 | 0,00 | NA | NA |
| VGLL1      | 0,00 | 0,00 | 0,00 | 0,00 | NA | NA |
| VHLL       | 0,00 | 0,00 | 0,00 | 0,00 | NA | NA |
| VIT        | 0,00 | 0,00 | 0,00 | 0,10 | NA | NA |
| VMO1       | 0,22 | 0,00 | 0,13 | 0,26 | NA | NA |
| VN1R10P    | 0,00 | 0,00 | 0,00 | 0,00 | NA | NA |
| VN1R11P    | 0,00 | 0,00 | 0,00 | 0,00 | NA | NA |
| VN1R13P    | 0,00 | 0,00 | 0,00 | 0,00 | NA | NA |
| VN1R21P    | 0,00 | 0,00 | 0,00 | 0,00 | NA | NA |
| VN1R4      | 0,00 | 0,00 | 0,00 | 0,00 | NA | NA |
| VN1R64P    | 0,00 | 0,00 | 0,00 | 0,00 | NA | NA |
| VN1R65P    | 0,00 | 0,00 | 0,00 | 0,00 | NA | NA |
| VN1R66P    | 0,00 | 0,00 | 0,00 | 0,00 | NA | NA |
| VN1R67P    | 0,00 | 0,00 | 0,00 | 0,00 | NA | NA |
| VN1R68P    | 0,00 | 0,00 | 0,00 | 0,00 | NA | NA |
| VN1R69P    | 0,00 | 0,00 | 0,00 | 0,00 | NA | NA |
| VN1R6P     | 0,00 | 0,00 | 0,00 | 0,00 | NA | NA |
| VN1R70P    | 0,00 | 0,00 | 0,00 | 0,00 | NA | NA |
| VN1R71P    | 0,00 | 0,00 | 0,00 | 0,00 | NA | NA |
| VN1R76P    | 0,00 | 0,00 | 0,00 | 0,00 | NA | NA |
| VN1R78P    | 0,00 | 0,00 | 0,00 | 0,00 | NA | NA |
| VN1R79P    | 0,00 | 0,00 | 0,00 | 0,00 | NA | NA |
| VN1R7P     | 0,00 | 0,00 | 0,00 | 0,00 | NA | NA |
| VN1R80P    | 0,00 | 0,00 | 0,00 | 0,00 | NA | NA |
| VN1R85P    | 0,00 | 0,00 | 0,00 | 0,00 | NA | NA |
| VN1R87P    | 0,00 | 0,00 | 0,00 | 0,00 | NA | NA |
| VN1R88P    | 0,00 | 0,00 | 0,00 | 0,00 | NA | NA |
| VN1R90P    | 0,00 | 0,00 | 0,00 | 0,00 | NA | NA |
| VN1R91P    | 0,00 | 0,00 | 0,00 | 0,00 | NA | NA |
| VN1R92P    | 0,00 | 0,00 | 0,00 | 0,00 | NA | NA |
| VN1R93P    | 0,00 | 0,00 | 0,00 | 0,00 | NA | NA |
| VN1R96P    | 0,00 | 0,00 | 0,00 | 0,00 | NA | NA |
| VN1R9P     | 0,00 | 0,00 | 0,00 | 0,00 | NA | NA |
| VN2R3P     | 0,00 | 0,00 | 0,00 | 0,00 | NA | NA |
| VN2R9P     | 0,00 | 0,00 | 0,00 | 0,00 | NA | NA |
| VPREB1     | 0,00 | 0,00 | 0,00 | 0,00 | NA | NA |
| VPS13A-AS1 | 0,00 | 0,00 | 0,00 | 0,00 | NA | NA |
| VSIG1      | 0,00 | 0,06 | 0,08 | 0,09 | NA | NA |
| VSIG10L    | 0,00 | 0,00 | 0,00 | 0,00 | NA | NA |
| VSIG8      | 0,00 | 0,00 | 0,00 | 0,00 | NA | NA |
| VSTM2A     | 0,00 | 0,00 | 0,02 | 0,00 | NA | NA |
| VSTM2B     | 0,00 | 0,00 | 0,00 | 0,00 | NA | NA |
| VSTM2L     | 0,00 | 0,00 | 0,00 | 0,00 | NA | NA |
| VSTM5      | 0,00 | 0,00 | 0,00 | 0,00 | NA | NA |
| VSX2       | 0,00 | 0,00 | 0,00 | 0,00 | NA | NA |
| VTRNA1-2   | 0,00 | 0,00 | 0,00 | 0,00 | NA | NA |
| VTRNA2-2P  | 0,00 | 0,00 | 0,00 | 0,00 | NA | NA |
| VTRNA3-1P  | 0,00 | 0,00 | 0,00 | 0,00 | NA | NA |
| VWA1       | 0,00 | 0,03 | 0,00 | 0,00 | NA | NA |
| VWA7       | 0,00 | 0,00 | 0,00 | 0,00 | NA | NA |
| VWC2L      | 0,00 | 0,00 | 0,00 | 0,00 | NA | NA |
| VWF        | 0,00 | 2,33 | 0,00 | 0,09 | NA | NA |
| WASF1P1    | 0,00 | 0,00 | 0,00 | 0,00 | NA | NA |
| WASF5P     | 0,00 | 0,00 | 0,00 | 0,00 | NA | NA |

|                    |      |      |      |      |    |    |
|--------------------|------|------|------|------|----|----|
| WBP2P1             | 0,00 | 0,00 | 0,00 | 0,00 | NA | NA |
| WDR38              | 0,00 | 0,00 | 0,00 | 0,00 | NA | NA |
| WDR63              | 0,00 | 0,00 | 0,00 | 0,00 | NA | NA |
| WDR97              | 0,15 | 0,15 | 0,29 | 0,26 | NA | NA |
| WEE2               | 0,00 | 0,00 | 0,00 | 0,00 | NA | NA |
| WFDC10A            | 0,00 | 0,00 | 0,00 | 0,00 | NA | NA |
| WFDC10B            | 0,00 | 0,00 | 0,00 | 0,00 | NA | NA |
| WFDC13             | 0,00 | 0,00 | 0,00 | 0,00 | NA | NA |
| WFDC2              | 0,00 | 0,00 | 0,00 | 0,00 | NA | NA |
| WFDC6              | 0,00 | 0,00 | 0,00 | 0,00 | NA | NA |
| WFDC9              | 0,00 | 0,00 | 0,00 | 0,00 | NA | NA |
| WFIKKN1            | 0,00 | 0,00 | 0,00 | 0,00 | NA | NA |
| WFIKKN2            | 0,00 | 0,00 | 0,00 | 0,00 | NA | NA |
| WI2-1528O10.1      | 0,00 | 0,00 | 0,00 | 0,00 | NA | NA |
| WI2-1896O14.1      | 0,00 | 0,00 | 0,00 | 0,00 | NA | NA |
| WI2-1959D15.4      | 0,00 | 0,00 | 0,00 | 0,00 | NA | NA |
| WI2-2118C23.2      | 0,00 | 0,00 | 0,00 | 0,00 | NA | NA |
| WI2-2221J1.1       | 0,00 | 0,00 | 0,00 | 0,00 | NA | NA |
| WI2-2334D6.1       | 0,00 | 0,00 | 0,00 | 0,00 | NA | NA |
| WI2-2373I1.1       | 0,00 | 0,00 | 0,00 | 0,00 | NA | NA |
| WI2-2994D6.1       | 0,00 | 0,00 | 0,00 | 0,00 | NA | NA |
| WI2-3697E2.2       | 0,00 | 0,00 | 0,00 | 0,00 | NA | NA |
| WI2-80423F1.1      | 0,00 | 0,00 | 0,00 | 0,00 | NA | NA |
| WI2-81516E3.1      | 0,00 | 0,00 | 0,00 | 0,00 | NA | NA |
| WI2-8325B5.1       | 0,00 | 0,00 | 0,00 | 0,00 | NA | NA |
| WI2-87327B8.1      | 0,00 | 0,00 | 0,00 | 0,00 | NA | NA |
| WI2-88277B6.1      | 0,00 | 0,00 | 0,00 | 0,00 | NA | NA |
| WNT11              | 0,00 | 0,00 | 0,00 | 0,00 | NA | NA |
| WNT16              | 0,00 | 0,00 | 0,00 | 0,00 | NA | NA |
| WNT2               | 0,00 | 0,00 | 0,00 | 0,00 | NA | NA |
| WNT3               | 0,08 | 0,00 | 0,09 | 0,10 | NA | NA |
| WNT5B              | 0,00 | 0,00 | 0,00 | 0,00 | NA | NA |
| WNT7A              | 0,00 | 0,08 | 0,00 | 0,03 | NA | NA |
| WNT8B              | 0,00 | 0,00 | 0,00 | 0,00 | NA | NA |
| WSCD2              | 0,00 | 0,06 | 0,00 | 0,00 | NA | NA |
| WWC1               | 0,03 | 0,29 | 0,06 | 0,00 | NA | NA |
| XAGE2              | 0,00 | 0,00 | 0,00 | 0,00 | NA | NA |
| XAGE3              | 0,00 | 0,00 | 0,00 | 0,00 | NA | NA |
| XAGE5              | 0,00 | 0,00 | 0,00 | 0,00 | NA | NA |
| XBPP1              | 0,00 | 0,00 | 0,00 | 0,00 | NA | NA |
| XCL2               | 0,00 | 0,00 | 0,00 | 0,36 | NA | NA |
| XIRP1              | 0,00 | 0,00 | 0,00 | 0,00 | NA | NA |
| XK                 | 0,00 | 0,00 | 0,00 | 0,00 | NA | NA |
| XKR3               | 0,00 | 0,00 | 0,00 | 0,00 | NA | NA |
| XKR6               | 0,03 | 0,08 | 0,04 | 0,12 | NA | NA |
| XKR7               | 0,00 | 0,00 | 0,00 | 0,00 | NA | NA |
| XKRX               | 0,00 | 0,00 | 0,00 | 0,00 | NA | NA |
| XX-C00717C00720L.1 | 0,00 | 0,00 | 0,00 | 0,00 | NA | NA |
| XX-C2158C6.1       | 0,00 | 0,00 | 0,00 | 0,00 | NA | NA |
| XX-C2158C6.2       | 0,00 | 0,00 | 0,00 | 0,00 | NA | NA |
| XX-C2158C6.3       | 0,00 | 0,00 | 0,00 | 0,00 | NA | NA |
| XX-C283C717.1      | 0,00 | 0,00 | 0,00 | 0,00 | NA | NA |
| XX-CR54.2          | 0,00 | 0,00 | 0,00 | 0,00 | NA | NA |
| XX-DJ76P10_A.2     | 0,00 | 0,00 | 0,00 | 0,00 | NA | NA |
| XX-FW80269A6.1     | 0,00 | 0,00 | 0,00 | 0,00 | NA | NA |

|                    |      |      |      |      |    |    |
|--------------------|------|------|------|------|----|----|
| XX-FW87585A5.1     | 0,00 | 0,00 | 0,00 | 0,00 | NA | NA |
| XX-FW88884H1.1     | 0,00 | 0,00 | 0,00 | 0,00 | NA | NA |
| XX-FYM637E10_5.1   | 0,00 | 0,00 | 0,00 | 0,00 | NA | NA |
| XXbac-B33L19.10    | 0,00 | 0,00 | 0,00 | 0,00 | NA | NA |
| XXbac-B33L19.11    | 0,00 | 0,00 | 0,00 | 0,00 | NA | NA |
| XXbac-B33L19.12    | 0,00 | 0,00 | 0,00 | 0,00 | NA | NA |
| XXbac-B33L19.15    | 0,00 | 0,00 | 0,00 | 0,00 | NA | NA |
| XXbac-B476C20.11   | 0,00 | 0,00 | 0,00 | 0,00 | NA | NA |
| XXbac-B476C20.12   | 0,00 | 0,00 | 0,00 | 0,00 | NA | NA |
| XXbac-B476C20.14   | 0,00 | 0,00 | 0,00 | 0,00 | NA | NA |
| XXbac-B476C20.17   | 0,00 | 0,12 | 0,00 | 0,00 | NA | NA |
| XXbac-B562F10.12   | 0,00 | 0,00 | 0,00 | 0,00 | NA | NA |
| XXbac-BCX196D17.5  | 0,00 | 0,00 | 0,00 | 0,00 | NA | NA |
| XXbac-BPG116M5.17  | 0,00 | 0,00 | 0,00 | 0,00 | NA | NA |
| XXbac-BPG118E17.10 | 0,00 | 0,00 | 0,00 | 0,00 | NA | NA |
| XXbac-BPG118E17.6  | 0,00 | 0,00 | 0,00 | 0,00 | NA | NA |
| XXbac-BPG13B8.10   | 0,00 | 0,00 | 0,00 | 0,00 | NA | NA |
| XXbac-BPG13B8.11   | 0,00 | 0,00 | 0,00 | 0,00 | NA | NA |
| XXbac-BPG157A10.21 | 0,00 | 0,00 | 0,00 | 0,00 | NA | NA |
| XXbac-BPG16N22.5   | 0,00 | 0,00 | 0,00 | 0,00 | NA | NA |
| XXbac-BPG170G13.31 | 0,00 | 0,00 | 0,00 | 0,00 | NA | NA |
| XXbac-BPG181B23.6  | 0,00 | 0,00 | 0,00 | 0,00 | NA | NA |
| XXbac-BPG185D15.12 | 0,00 | 0,00 | 0,00 | 0,00 | NA | NA |
| XXbac-BPG246D15.9  | 0,00 | 0,00 | 0,00 | 0,00 | NA | NA |
| XXbac-BPG248L24.10 | 0,00 | 0,00 | 0,00 | 0,00 | NA | NA |
| XXbac-BPG248L24.13 | 0,00 | 0,00 | 0,00 | 0,00 | NA | NA |
| XXbac-BPG24O18.1   | 0,00 | 0,00 | 0,00 | 0,00 | NA | NA |
| XXbac-BPG25O18.13  | 0,00 | 0,00 | 0,00 | 0,00 | NA | NA |
| XXbac-BPG254B15.10 | 0,00 | 0,00 | 0,00 | 0,00 | NA | NA |
| XXbac-BPG27H4.7    | 0,00 | 0,00 | 0,00 | 0,00 | NA | NA |
| XXbac-BPG299F13.14 | 0,00 | 0,00 | 0,00 | 0,00 | NA | NA |
| XXbac-BPG299F13.15 | 0,00 | 0,00 | 0,00 | 0,00 | NA | NA |
| XXbac-BPG299F13.16 | 0,00 | 0,00 | 0,00 | 0,00 | NA | NA |
| XXbac-BPG300A18.14 | 0,00 | 0,00 | 0,00 | 0,00 | NA | NA |
| XXbac-BPG300A18.16 | 0,00 | 0,00 | 0,00 | 0,00 | NA | NA |
| XXbac-BPG32J3.20   | 0,00 | 0,00 | 0,00 | 0,00 | NA | NA |
| XXbac-BPG34I8.3    | 0,00 | 0,00 | 0,00 | 0,00 | NA | NA |
| XXbac-BPG55C20.3   | 0,00 | 0,00 | 0,00 | 0,00 | NA | NA |
| XXbac-BPGBPG24O18  | 0,00 | 0,00 | 0,00 | 0,00 | NA | NA |
| XXbac-BPGBPG34I8.1 | 0,00 | 0,00 | 0,00 | 0,00 | NA | NA |
| XXbac-BPGBPG34I8.2 | 0,00 | 0,00 | 0,00 | 0,00 | NA | NA |
| XXbac-BPGBPG55C20  | 0,00 | 0,00 | 0,00 | 0,00 | NA | NA |
| XXcos-LUCA11.5     | 0,00 | 0,00 | 0,00 | 0,00 | NA | NA |
| XXyac-YM21GA2.1    | 0,00 | 0,00 | 0,00 | 0,00 | NA | NA |
| XXyac-YM21GA2.6    | 0,00 | 0,00 | 0,00 | 0,00 | NA | NA |
| XXyac-YM21GA2.8    | 0,00 | 0,00 | 0,00 | 0,00 | NA | NA |
| XXyac-YMR12DG2.1   | 0,00 | 0,00 | 0,00 | 0,00 | NA | NA |
| XXyac-YR12DB5.1    | 0,00 | 0,00 | 0,00 | 0,00 | NA | NA |
| XXyac-YR21CG7.1    | 0,00 | 0,00 | 0,00 | 0,00 | NA | NA |
| XXyac-YR29IB3.1    | 0,00 | 0,00 | 0,00 | 0,00 | NA | NA |
| XXyac-YRM2136_A.2  | 0,00 | 0,00 | 0,00 | 0,00 | NA | NA |
| XXyac-YX60D10.2    | 0,00 | 0,00 | 0,00 | 0,00 | NA | NA |
| XXyac-YX65C7_A.4   | 0,00 | 0,00 | 0,00 | 0,00 | NA | NA |
| Y10196.2           | 0,00 | 0,00 | 0,00 | 0,00 | NA | NA |
| YAP1               | 0,00 | 0,00 | 0,00 | 0,03 | NA | NA |

|            |      |      |      |      |    |    |
|------------|------|------|------|------|----|----|
| YPEL4      | 0,00 | 0,33 | 0,00 | 0,00 | NA | NA |
| yR211F11.2 | 0,00 | 0,00 | 0,00 | 0,00 | NA | NA |
| YWHAQP7    | 0,00 | 0,00 | 0,00 | 0,00 | NA | NA |
| YWHAZP2    | 0,00 | 0,00 | 0,00 | 0,00 | NA | NA |
| Z69720.2   | 0,00 | 0,00 | 0,00 | 0,00 | NA | NA |
| Z69890.1   | 0,00 | 0,00 | 0,00 | 0,00 | NA | NA |
| Z82214.2   | 0,00 | 0,00 | 0,00 | 0,00 | NA | NA |
| Z82214.3   | 0,00 | 0,00 | 0,00 | 0,00 | NA | NA |
| Z83844.1   | 0,00 | 0,00 | 0,00 | 0,00 | NA | NA |
| Z83851.3   | 0,00 | 0,00 | 0,00 | 0,00 | NA | NA |
| Z84721.2   | 0,00 | 0,00 | 0,00 | 0,00 | NA | NA |
| Z84721.4   | 0,00 | 0,00 | 0,00 | 0,00 | NA | NA |
| Z84723.2   | 0,00 | 0,00 | 0,00 | 0,00 | NA | NA |
| Z95114.4   | 0,00 | 0,00 | 0,00 | 0,00 | NA | NA |
| Z95114.6   | 0,00 | 0,00 | 0,00 | 0,00 | NA | NA |
| Z95114.7   | 0,00 | 0,00 | 0,00 | 0,00 | NA | NA |
| Z95704.3   | 0,00 | 0,00 | 0,00 | 0,00 | NA | NA |
| Z98941.1   | 0,00 | 0,00 | 0,00 | 0,00 | NA | NA |
| ZAR1       | 0,00 | 0,00 | 0,00 | 0,00 | NA | NA |
| ZBBX       | 0,00 | 0,00 | 0,00 | 0,00 | NA | NA |
| ZBED2      | 0,00 | 0,00 | 0,00 | 0,00 | NA | NA |
| ZBED3      | 0,54 | 0,35 | 0,22 | 0,29 | NA | NA |
| ZBED6CL    | 0,00 | 0,09 | 0,00 | 0,00 | NA | NA |
| ZBED8      | 0,00 | 0,00 | 0,00 | 0,00 | NA | NA |
| ZBTB12     | 0,00 | 0,00 | 0,00 | 0,00 | NA | NA |
| ZBTB12B    | 0,00 | 0,00 | 0,00 | 0,00 | NA | NA |
| ZBTB42     | 0,03 | 0,07 | 0,08 | 0,09 | NA | NA |
| ZC3H11B    | 0,00 | 0,03 | 0,00 | 0,00 | NA | NA |
| ZC4H2      | 0,00 | 0,20 | 0,21 | 0,06 | NA | NA |
| ZCCHC12    | 0,00 | 0,00 | 0,00 | 0,00 | NA | NA |
| ZCCHC13    | 0,00 | 0,00 | 0,00 | 0,00 | NA | NA |
| ZCCHC5     | 0,00 | 0,00 | 0,00 | 0,00 | NA | NA |
| ZDHHHC19   | 0,00 | 0,00 | 0,00 | 0,00 | NA | NA |
| ZDHHHC20P1 | 0,00 | 0,00 | 0,00 | 0,00 | NA | NA |
| ZDHHHC20P2 | 0,00 | 0,00 | 0,00 | 0,00 | NA | NA |
| ZDHHHC9    | 0,05 | 0,00 | 0,02 | 0,12 | NA | NA |
| ZEB2P1     | 0,00 | 0,00 | 0,00 | 0,01 | NA | NA |
| ZFHX2      | 0,00 | 0,00 | 0,00 | 0,00 | NA | NA |
| ZFHX4      | 0,00 | 0,70 | 0,03 | 0,07 | NA | NA |
| ZFHX4-AS1  | 0,00 | 0,00 | 0,00 | 0,00 | NA | NA |
| ZFP2       | 0,00 | 0,21 | 0,00 | 0,00 | NA | NA |
| ZFY        | 0,00 | 0,00 | 0,00 | 0,24 | NA | NA |
| ZFYVE9     | 0,00 | 0,15 | 0,00 | 0,00 | NA | NA |
| ZG16B      | 0,00 | 0,00 | 0,00 | 0,09 | NA | NA |
| ZIC1       | 0,00 | 0,05 | 0,00 | 0,00 | NA | NA |
| ZIC2       | 0,00 | 0,00 | 0,00 | 0,00 | NA | NA |
| ZIC4       | 0,00 | 0,00 | 0,00 | 0,00 | NA | NA |
| ZIC5       | 0,00 | 0,00 | 0,00 | 0,00 | NA | NA |
| ZKSCAN2    | 0,01 | 0,00 | 0,04 | 0,02 | NA | NA |
| ZNF135     | 0,00 | 0,00 | 0,06 | 0,03 | NA | NA |
| ZNF137P    | 0,00 | 0,00 | 0,00 | 0,00 | NA | NA |
| ZNF177     | 0,00 | 0,00 | 0,00 | 0,00 | NA | NA |
| ZNF205     | 0,00 | 0,00 | 0,00 | 0,00 | NA | NA |
| ZNF209P    | 0,00 | 0,00 | 0,00 | 0,00 | NA | NA |
| ZNF214     | 0,00 | 0,00 | 0,00 | 0,00 | NA | NA |

|              |      |      |      |      |    |    |
|--------------|------|------|------|------|----|----|
| ZNF222       | 0,00 | 0,00 | 0,00 | 0,00 | NA | NA |
| ZNF239       | 0,00 | 0,00 | 0,00 | 0,00 | NA | NA |
| ZNF256       | 0,00 | 0,00 | 0,00 | 0,00 | NA | NA |
| ZNF259P1     | 0,00 | 0,00 | 0,00 | 0,00 | NA | NA |
| ZNF280A      | 0,00 | 0,00 | 0,00 | 0,00 | NA | NA |
| ZNF295-AS1   | 0,00 | 0,00 | 0,00 | 0,00 | NA | NA |
| ZNF299P      | 0,00 | 0,00 | 0,00 | 0,00 | NA | NA |
| ZNF29P       | 0,00 | 0,00 | 0,00 | 0,00 | NA | NA |
| ZNF300       | 0,00 | 0,26 | 0,02 | 0,04 | NA | NA |
| ZNF311       | 0,00 | 0,00 | 0,00 | 0,00 | NA | NA |
| ZNF314P      | 0,00 | 0,00 | 0,00 | 0,00 | NA | NA |
| ZNF32-AS3    | 0,00 | 0,00 | 0,00 | 0,00 | NA | NA |
| ZNF322B      | 0,00 | 0,00 | 0,00 | 0,00 | NA | NA |
| ZNF345       | 1,73 | 1,27 | 1,25 | 0,87 | NA | NA |
| ZNF385D      | 0,18 | 0,17 | 0,25 | 0,31 | NA | NA |
| ZNF415       | 0,34 | 0,40 | 0,37 | 0,33 | NA | NA |
| ZNF416       | 0,00 | 0,00 | 0,00 | 0,00 | NA | NA |
| ZNF418       | 0,12 | 0,34 | 0,05 | 0,00 | NA | NA |
| ZNF419       | 0,67 | 1,44 | 0,67 | 0,69 | NA | NA |
| ZNF443       | 0,00 | 0,00 | 0,00 | 0,05 | NA | NA |
| ZNF449       | 0,00 | 0,27 | 0,00 | 0,04 | NA | NA |
| ZNF474       | 0,00 | 0,00 | 0,00 | 0,00 | NA | NA |
| ZNF485       | 0,11 | 0,07 | 0,15 | 0,07 | NA | NA |
| ZNF488       | 0,00 | 0,00 | 0,00 | 0,00 | NA | NA |
| ZNF503-AS2   | 0,00 | 0,00 | 0,00 | 0,00 | NA | NA |
| ZNF511-PRAP1 | 0,00 | 0,00 | 0,00 | 0,00 | NA | NA |
| ZNF534       | 0,00 | 0,00 | 0,00 | 0,00 | NA | NA |
| ZNF536       | 0,00 | 0,00 | 0,00 | 0,00 | NA | NA |
| ZNF560       | 0,00 | 0,00 | 0,00 | 0,00 | NA | NA |
| ZNF571       | 1,52 | 2,19 | 1,49 | 0,66 | NA | NA |
| ZNF607       | 0,00 | 0,24 | 0,00 | 0,04 | NA | NA |
| ZNF608       | 0,00 | 0,00 | 0,00 | 0,00 | NA | NA |
| ZNF625-ZNF20 | 0,00 | 0,05 | 0,05 | 0,00 | NA | NA |
| ZNF645       | 0,00 | 0,00 | 0,00 | 0,00 | NA | NA |
| ZNF652P      | 0,00 | 0,11 | 0,00 | 0,00 | NA | NA |
| ZNF662       | 0,41 | 0,55 | 0,41 | 0,54 | NA | NA |
| ZNF663P      | 0,00 | 0,00 | 0,00 | 0,00 | NA | NA |
| ZNF665       | 0,52 | 0,81 | 0,92 | 0,60 | NA | NA |
| ZNF671       | 0,36 | 0,87 | 0,09 | 0,14 | NA | NA |
| ZNF679       | 0,00 | 0,00 | 0,00 | 0,00 | NA | NA |
| ZNF683       | 0,00 | 0,09 | 0,00 | 0,00 | NA | NA |
| ZNF691       | 0,00 | 0,10 | 0,35 | 0,00 | NA | NA |
| ZNF705A      | 0,00 | 0,00 | 0,00 | 0,00 | NA | NA |
| ZNF705B      | 0,00 | 0,00 | 0,00 | 0,00 | NA | NA |
| ZNF705D      | 0,00 | 0,10 | 0,00 | 0,00 | NA | NA |
| ZNF705E      | 0,00 | 0,00 | 0,00 | 0,07 | NA | NA |
| ZNF705G      | 0,00 | 0,00 | 0,00 | 0,00 | NA | NA |
| ZNF711       | 0,00 | 0,14 | 0,00 | 0,03 | NA | NA |
| ZNF720P1     | 0,00 | 0,00 | 0,00 | 0,00 | NA | NA |
| ZNF725P      | 0,00 | 0,00 | 0,00 | 0,00 | NA | NA |
| ZNF729       | 0,00 | 0,00 | 0,00 | 0,00 | NA | NA |
| ZNF732       | 0,00 | 0,00 | 0,00 | 0,00 | NA | NA |
| ZNF733       | 0,00 | 0,00 | 0,00 | 0,00 | NA | NA |
| ZNF735       | 0,00 | 0,00 | 0,00 | 0,00 | NA | NA |
| ZNF768       | 0,00 | 0,06 | 0,00 | 0,00 | NA | NA |

|                |      |      |      |      |    |    |
|----------------|------|------|------|------|----|----|
| ZNF775         | 0,00 | 0,00 | 0,00 | 0,06 | NA | NA |
| ZNF804B        | 0,00 | 0,00 | 0,00 | 0,00 | NA | NA |
| ZNF807         | 0,00 | 0,00 | 0,00 | 0,00 | NA | NA |
| ZNF816-ZNF321P | 0,00 | 0,00 | 0,00 | 0,00 | NA | NA |
| ZNF840P        | 0,00 | 0,00 | 0,00 | 0,00 | NA | NA |
| ZNF845         | 0,43 | 0,12 | 0,36 | 0,41 | NA | NA |
| ZNF849P        | 0,00 | 0,00 | 0,00 | 0,00 | NA | NA |
| ZNF853         | 0,00 | 0,00 | 0,00 | 0,00 | NA | NA |
| ZNF861P        | 0,00 | 0,00 | 0,00 | 0,00 | NA | NA |
| ZNF863P        | 0,00 | 0,00 | 0,00 | 0,00 | NA | NA |
| ZNF879         | 0,05 | 0,09 | 0,09 | 0,52 | NA | NA |
| ZNF92P2        | 0,00 | 0,00 | 0,00 | 0,00 | NA | NA |
| ZNF92P3        | 0,00 | 0,00 | 0,00 | 0,00 | NA | NA |
| ZNF970P        | 0,00 | 0,00 | 0,00 | 0,00 | NA | NA |
| ZNF971P        | 0,00 | 0,00 | 0,00 | 0,00 | NA | NA |
| ZNF98          | 0,00 | 0,60 | 0,00 | 0,00 | NA | NA |
| ZNRF3          | 0,02 | 0,04 | 0,05 | 0,04 | NA | NA |
| ZNRF4          | 0,00 | 0,00 | 0,00 | 0,00 | NA | NA |
| ZPBP           | 0,00 | 0,00 | 0,00 | 0,00 | NA | NA |
| ZSCAN23        | 0,00 | 0,11 | 0,00 | 0,00 | NA | NA |
| ZSCAN31        | 0,49 | 0,58 | 0,55 | 0,63 | NA | NA |
| ZSWIM5         | 0,00 | 0,06 | 0,00 | 0,00 | NA | NA |



| Supplementary Table 5 |           |                |          |          |          |            |
|-----------------------|-----------|----------------|----------|----------|----------|------------|
| geneSymbol            | baseMean  | log2FoldChange | lfcSE    | stat     | pvalue   | padj (FDR) |
| SLC4A3                | 201,62    | 6,16           | 0,633672 | 9,715949 | 2,58E-22 | 4,80E-18   |
| AP001605.4            | 14,54     | -25,68         | 3,074734 | -8,352   | 6,71E-17 | 6,24E-13   |
| RP11-43A14.1          | 13,92     | -25,39         | 3,079292 | -8,2441  | 1,66E-16 | 1,03E-12   |
| AC004112.6            | 13,18     | -25,24         | 3,076983 | -8,20253 | 2,35E-16 | 1,09E-12   |
| RP11-353J17.5         | 11,30     | -25,33         | 3,112714 | -8,13668 | 4,06E-16 | 1,51E-12   |
| LRRC53                | 10,47     | -25,22         | 3,148979 | -8,00751 | 1,17E-15 | 3,63E-12   |
| FOLR1                 | 9,50      | -25,08         | 3,192358 | -7,85561 | 3,98E-15 | 1,06E-11   |
| S100A7L2              | 8,47      | -24,91         | 3,212912 | -7,75456 | 8,87E-15 | 2,06E-11   |
| PRKCQ                 | 41,99     | -9,17          | 1,203428 | -7,61796 | 2,58E-14 | 5,33E-11   |
| CETP                  | 7,21      | -24,51         | 3,287754 | -7,45646 | 8,89E-14 | 1,65E-10   |
| RP4-726F1.3           | 24,59     | -26,43         | 3,635958 | -7,26808 | 3,65E-13 | 6,17E-10   |
| C9orf50               | 18,42     | -26,04         | 3,636135 | -7,16178 | 7,96E-13 | 1,23E-09   |
| CAMK4                 | 68,53     | -8,40          | 1,186223 | -7,07742 | 1,47E-12 | 2,10E-09   |
| S100A9                | 13859,27  | -2,00          | 0,288017 | -6,94855 | 3,69E-12 | 4,90E-09   |
| S1PR3                 | 49,35     | -4,86          | 0,708057 | -6,85691 | 7,04E-12 | 8,73E-09   |
| LGMN                  | 300,78    | 4,25           | 0,636485 | 6,670014 | 2,56E-11 | 2,87E-08   |
| CLIC2                 | 693,67    | 2,78           | 0,416363 | 6,666546 | 2,62E-11 | 2,87E-08   |
| S100A8                | 3071,38   | -2,48          | 0,393463 | -6,29652 | 3,04E-10 | 3,15E-07   |
| KPNA2                 | 521,47    | 3,03           | 0,486273 | 6,230068 | 4,66E-10 | 4,57E-07   |
| HLA-DPA1              | 42877,57  | 1,53           | 0,245499 | 6,212517 | 5,21E-10 | 4,85E-07   |
| DOPEY1                | 521,64    | 4,03           | 0,654508 | 6,152846 | 7,61E-10 | 6,74E-07   |
| NTNG1                 | 23,37     | -4,45          | 0,728742 | -6,1116  | 9,86E-10 | 8,34E-07   |
| RASSF5                | 1368,37   | 2,17           | 0,357517 | 6,068243 | 1,29E-09 | 1,05E-06   |
| HLA-DRA               | 117889,62 | 1,39           | 0,229416 | 6,05268  | 1,42E-09 | 1,10E-06   |
| KIF5C                 | 90,44     | -7,81          | 1,31354  | -5,94686 | 2,73E-09 | 2,03E-06   |
| CDA                   | 67,32     | -9,05          | 1,524788 | -5,9353  | 2,93E-09 | 2,10E-06   |
| GZMK                  | 28,93     | -7,83          | 1,324026 | -5,91354 | 3,35E-09 | 2,31E-06   |
| SV2C                  | 56,27     | -5,71          | 0,968961 | -5,89199 | 3,82E-09 | 2,54E-06   |
| CD74                  | 110098,84 | 1,16           | 0,197592 | 5,859876 | 4,63E-09 | 2,97E-06   |
| APMAP                 | 750,38    | 2,01           | 0,347352 | 5,772336 | 7,82E-09 | 4,85E-06   |
| GPR183                | 7811,19   | 1,95           | 0,341714 | 5,704919 | 1,16E-08 | 6,99E-06   |
| DPF1                  | 39,45     | -5,50          | 0,965262 | -5,69309 | 1,25E-08 | 7,25E-06   |
| MFGE8                 | 36,12     | -6,82          | 1,202754 | -5,67263 | 1,41E-08 | 7,93E-06   |
| CTD-2230D16.1         | 54,64     | -4,87          | 0,864083 | -5,63145 | 1,79E-08 | 9,78E-06   |
| PARVA                 | 27,96     | -4,93          | 0,88921  | -5,54937 | 2,87E-08 | 1,52E-05   |
| NUDT19                | 400,11    | 2,66           | 0,479796 | 5,534798 | 3,12E-08 | 1,61E-05   |
| NMNAT2                | 86,20     | -7,56          | 1,368257 | -5,52522 | 3,29E-08 | 1,65E-05   |
| GPX3                  | 150,07    | 6,03           | 1,098221 | 5,487887 | 4,07E-08 | 1,99E-05   |
| SACS                  | 318,70    | 4,35           | 0,797158 | 5,450756 | 5,02E-08 | 2,39E-05   |
| FRAS1                 | 17,54     | -8,59          | 1,581399 | -5,43459 | 5,49E-08 | 2,53E-05   |
| ZBTB33                | 192,87    | 3,92           | 0,72239  | 5,432215 | 5,57E-08 | 2,53E-05   |
| SPRY2                 | 80,87     | 5,12           | 0,948455 | 5,39949  | 6,68E-08 | 2,96E-05   |
| PTGS2                 | 1298,74   | 2,58           | 0,477805 | 5,39543  | 6,84E-08 | 2,96E-05   |
| SPINT2                | 1373,42   | 2,19           | 0,410628 | 5,338564 | 9,37E-08 | 3,95E-05   |
| CD14                  | 2683,61   | -1,93          | 0,362225 | -5,33508 | 9,55E-08 | 3,95E-05   |
| CTSD                  | 1401,52   | -1,63          | 0,305981 | -5,31109 | 1,09E-07 | 4,41E-05   |
| MYO6                  | 58,24     | -5,13          | 0,970632 | -5,2869  | 1,24E-07 | 4,92E-05   |
| ADAM28                | 1191,60   | 2,05           | 0,38817  | 5,271054 | 1,36E-07 | 5,26E-05   |

|               |          |       |          |          |          |          |
|---------------|----------|-------|----------|----------|----------|----------|
| INMT          | 52,89    | -4,41 | 0,84396  | -5,21946 | 1,79E-07 | 6,81E-05 |
| CD1C          | 6086,11  | 1,99  | 0,382581 | 5,206837 | 1,92E-07 | 7,15E-05 |
| NCF1          | 669,04   | -1,98 | 0,382355 | -5,17737 | 2,25E-07 | 8,21E-05 |
| AC079807.3    | 26,90    | 6,80  | 1,317535 | 5,163994 | 2,42E-07 | 8,65E-05 |
| TYROBP        | 5732,91  | -0,70 | 0,135757 | -5,1564  | 2,52E-07 | 8,84E-05 |
| FASTKD5       | 243,21   | 4,62  | 0,89802  | 5,145819 | 2,66E-07 | 9,18E-05 |
| RNVU1-15      | 14,45    | -2,30 | 0,44848  | -5,12051 | 3,05E-07 | 1,03E-04 |
| HLA-DRB1      | 23466,63 | 0,98  | 0,190698 | 5,113925 | 3,16E-07 | 1,05E-04 |
| ELOA          | 351,05   | 3,29  | 0,645798 | 5,088839 | 3,60E-07 | 1,18E-04 |
| RP13-104F24.1 | 143,66   | 4,45  | 0,874342 | 5,084595 | 3,68E-07 | 1,18E-04 |
| ACOT13        | 209,00   | 4,33  | 0,853893 | 5,070783 | 3,96E-07 | 1,25E-04 |
| HSPA9         | 1311,34  | 1,25  | 0,247907 | 5,051417 | 4,39E-07 | 1,35E-04 |
| AKIP1         | 191,45   | 3,92  | 0,776573 | 5,04897  | 4,44E-07 | 1,35E-04 |
| PLCG2         | 479,11   | 3,07  | 0,608176 | 5,040171 | 4,65E-07 | 1,40E-04 |
| RAPGEF4       | 17,93    | -3,95 | 0,787865 | -5,01936 | 5,18E-07 | 1,49E-04 |
| TRIM36        | 48,03    | 5,43  | 1,08245  | 5,019025 | 5,19E-07 | 1,49E-04 |
| CHMP4A        | 882,00   | 1,69  | 0,33729  | 5,018625 | 5,20E-07 | 1,49E-04 |
| STAG1         | 198,99   | 2,93  | 0,584681 | 5,007499 | 5,51E-07 | 1,55E-04 |
| REL           | 1871,26  | 1,61  | 0,321192 | 4,998934 | 5,76E-07 | 1,60E-04 |
| RITA1         | 79,02    | 4,81  | 0,964898 | 4,984098 | 6,23E-07 | 1,70E-04 |
| ENAH          | 230,37   | -4,89 | 0,982692 | -4,97476 | 6,53E-07 | 1,76E-04 |
| GJB1          | 1,64     | 18,44 | 3,728105 | 4,947504 | 7,52E-07 | NA       |
| FECH          | 231,88   | 4,62  | 0,933546 | 4,945882 | 7,58E-07 | 2,01E-04 |
| GPN3          | 206,84   | 3,60  | 0,728725 | 4,93657  | 7,95E-07 | 2,08E-04 |
| CTC-260F20.3  | 10,55    | -4,70 | 0,954117 | -4,92871 | 8,28E-07 | 2,12E-04 |
| RP11-46C20.1  | 24,06    | -5,92 | 1,20178  | -4,92785 | 8,31E-07 | 2,12E-04 |
| ARL4C         | 4001,36  | 1,73  | 0,352737 | 4,909188 | 9,15E-07 | 2,30E-04 |
| MCTP2         | 69,73    | -4,57 | 0,935539 | -4,88828 | 1,02E-06 | 2,52E-04 |
| NXT1          | 530,89   | 2,27  | 0,465388 | 4,869769 | 1,12E-06 | 2,72E-04 |
| LAMP1         | 158,96   | -2,00 | 0,411821 | -4,86813 | 1,13E-06 | 2,72E-04 |
| RP11-651E20.2 | 39,74    | 7,39  | 1,518715 | 4,865623 | 1,14E-06 | 2,72E-04 |
| MACROD2       | 76,62    | -3,37 | 0,694745 | -4,85184 | 1,22E-06 | 2,88E-04 |
| ITM2C         | 113,38   | 3,14  | 0,651356 | 4,821474 | 1,43E-06 | 3,28E-04 |
| NPTN-IT1      | 77,88    | 7,76  | 1,610182 | 4,820092 | 1,43E-06 | 3,28E-04 |
| HLA-DPB1      | 29441,99 | 1,34  | 0,279064 | 4,81793  | 1,45E-06 | 3,28E-04 |
| S100A12       | 285,42   | -2,48 | 0,515949 | -4,81552 | 1,47E-06 | 3,28E-04 |
| TNR           | 128,42   | -4,35 | 0,904098 | -4,81091 | 1,50E-06 | 3,28E-04 |
| NCKAP5        | 32,46    | 6,90  | 1,433919 | 4,810782 | 1,50E-06 | 3,28E-04 |
| STMN1         | 293,56   | 3,22  | 0,670579 | 4,809221 | 1,52E-06 | 3,28E-04 |
| APBB2         | 49,13    | -4,39 | 0,913598 | -4,80178 | 1,57E-06 | 3,36E-04 |
| SLC35F2       | 108,33   | 5,16  | 1,076314 | 4,789811 | 1,67E-06 | 3,53E-04 |
| TXN2          | 1310,04  | 1,30  | 0,27136  | 4,777796 | 1,77E-06 | 3,70E-04 |
| FCER1A        | 15248,73 | 1,69  | 0,357251 | 4,743916 | 2,10E-06 | 4,33E-04 |
| PRLR          | 15,10    | -7,46 | 1,577302 | -4,73114 | 2,23E-06 | 4,52E-04 |
| SCN1A         | 89,27    | -4,72 | 0,998106 | -4,73094 | 2,23E-06 | 4,52E-04 |
| TMEM108       | 43,41    | -6,52 | 1,378531 | -4,72673 | 2,28E-06 | 4,56E-04 |
| CYBB          | 2137,40  | -1,23 | 0,260985 | -4,71072 | 2,47E-06 | 4,89E-04 |
| SLC26A8       | 16,39    | -3,64 | 0,773898 | -4,70298 | 2,56E-06 | 5,02E-04 |
| KDSR          | 569,87   | 3,01  | 0,64104  | 4,699066 | 2,61E-06 | 5,02E-04 |
| PTGDR         | 26,29    | -9,31 | 1,981672 | -4,69892 | 2,62E-06 | 5,02E-04 |

|               |          |       |          |          |          |           |
|---------------|----------|-------|----------|----------|----------|-----------|
| RP11-117L5.1  | 10,72    | -3,76 | 0,803935 | -4,6826  | 2,83E-06 | 5,38E-04  |
| HIGD1A        | 532,95   | 1,83  | 0,392188 | 4,6772   | 2,91E-06 | 5,43E-04  |
| LAMB2         | 51,46    | 8,32  | 1,780727 | 4,67437  | 2,95E-06 | 5,43E-04  |
| ADTRP         | 19,70    | -5,50 | 1,175918 | -4,67436 | 2,95E-06 | 5,43E-04  |
| ABCC11        | 39,63    | 6,07  | 1,299638 | 4,670849 | 3,00E-06 | 5,44E-04  |
| NKTR          | 2483,08  | 1,06  | 0,227199 | 4,670023 | 3,01E-06 | 5,44E-04  |
| PPP1CB        | 5928,75  | 1,27  | 0,273971 | 4,642307 | 3,45E-06 | 6,16E-04  |
| AFF3          | 544,96   | 2,07  | 0,44634  | 4,630877 | 3,64E-06 | 6,45E-04  |
| BCL11A        | 1266,36  | 1,55  | 0,336192 | 4,621836 | 3,80E-06 | 6,68E-04  |
| TET2          | 2195,24  | 2,08  | 0,451834 | 4,611953 | 3,99E-06 | 6,94E-04  |
| AC005517.3    | 19,28    | 3,39  | 0,73904  | 4,589171 | 4,45E-06 | 7,67E-04  |
| RNA5SP151     | 33,43    | 7,12  | 1,552571 | 4,585797 | 4,52E-06 | 7,67E-04  |
| SNORA73B      | 9,60     | -4,98 | 1,085873 | -4,58518 | 4,54E-06 | 7,67E-04  |
| PMS2L3        | 33,97    | 7,02  | 1,535452 | 4,572257 | 4,82E-06 | 8,09E-04  |
| CREM          | 560,34   | 3,05  | 0,670785 | 4,550353 | 5,36E-06 | 8,90E-04  |
| C14orf145     | 139,74   | 3,19  | 0,701059 | 4,544804 | 5,50E-06 | 9,05E-04  |
| CST3          | 34800,61 | 0,93  | 0,204494 | 4,527612 | 5,97E-06 | 9,74E-04  |
| DISP2         | 69,24    | -3,52 | 0,779244 | -4,52201 | 6,13E-06 | 9,91E-04  |
| CXCL16        | 663,09   | 2,46  | 0,546112 | 4,507079 | 6,57E-06 | 0,0010542 |
| RP11-169F17.1 | 48,46    | -3,36 | 0,747835 | -4,49302 | 7,02E-06 | 0,0011166 |
| MFAP3L        | 15,62    | -7,11 | 1,583246 | -4,49023 | 7,11E-06 | 0,0011207 |
| RP11-573M3.2  | 12,35    | -5,56 | 1,238311 | -4,48864 | 7,17E-06 | 0,0011207 |
| CD1D          | 1087,90  | 1,23  | 0,27507  | 4,471137 | 7,78E-06 | 0,0011987 |
| IDH2          | 944,09   | 1,45  | 0,323523 | 4,470708 | 7,80E-06 | 0,0011987 |
| ERN2          | 39,67    | -4,25 | 0,950387 | -4,46751 | 7,91E-06 | 0,0012068 |
| HLA-DQB1      | 11801,38 | 1,17  | 0,261594 | 4,456292 | 8,34E-06 | 0,0012614 |
| CEACAM19      | 40,60    | -3,46 | 0,7767   | -4,45172 | 8,52E-06 | 0,0012781 |
| RP11-725C19.1 | 59,94    | -4,84 | 1,088432 | -4,44768 | 8,68E-06 | 0,001292  |
| AHNAK2        | 28,56    | 7,21  | 1,622291 | 4,445694 | 8,76E-06 | 0,0012936 |
| SIGLEC11      | 30,12    | -3,39 | 0,766383 | -4,42914 | 9,46E-06 | 0,0013802 |
| MYOM2         | 44,69    | 8,12  | 1,834245 | 4,427699 | 9,52E-06 | 0,0013802 |
| DUSP2         | 2088,67  | 2,41  | 0,545504 | 4,426116 | 9,59E-06 | 0,0013802 |
| CH17-373J23.1 | 320,71   | -1,35 | 0,304863 | -4,425   | 9,64E-06 | 0,0013802 |
| PGGT1B        | 733,84   | 2,49  | 0,564088 | 4,42073  | 9,84E-06 | 0,001397  |
| PDLIM3        | 12,75    | -3,40 | 0,773842 | -4,39283 | 1,12E-05 | 0,0015719 |
| TBC1D3L       | 67,74    | 4,94  | 1,123971 | 4,391892 | 1,12E-05 | 0,0015719 |
| ACSS3         | 7,20     | -4,27 | 0,973386 | -4,38887 | 1,14E-05 | 0,001582  |
| ACTG1         | 18557,26 | 0,71  | 0,162799 | 4,371612 | 1,23E-05 | 0,0016997 |
| ERG           | 24,13    | -7,05 | 1,612856 | -4,36941 | 1,25E-05 | 0,0017043 |
| CSF2RA        | 1462,77  | 1,10  | 0,252565 | 4,347182 | 1,38E-05 | 0,0018727 |
| SMIM12        | 722,42   | 2,39  | 0,55049  | 4,33849  | 1,43E-05 | 0,0019342 |
| RGS1          | 2591,10  | 2,19  | 0,504664 | 4,334466 | 1,46E-05 | 0,0019557 |
| BAIAP2        | 323,11   | 2,53  | 0,585328 | 4,330509 | 1,49E-05 | 0,001977  |
| MPIG6B        | 28,87    | -4,21 | 0,971879 | -4,32744 | 1,51E-05 | 0,0019905 |
| SLC25A39      | 799,56   | 2,02  | 0,466358 | 4,324477 | 1,53E-05 | 0,0020032 |
| ATP8B2        | 106,13   | -3,78 | 0,875813 | -4,31451 | 1,60E-05 | 0,0020811 |
| RP11-760H22.2 | 24,11    | 4,78  | 1,108929 | 4,310136 | 1,63E-05 | 0,002108  |
| DST           | 1214,67  | 1,42  | 0,33038  | 4,306994 | 1,65E-05 | 0,0021234 |
| ZNF37B        | 345,26   | -2,77 | 0,643651 | -4,30124 | 1,70E-05 | 0,0021642 |
| PCOLCE        | 44,25    | 6,03  | 1,402036 | 4,299743 | 1,71E-05 | 0,0021642 |

|                |         |       |          |          |          |           |
|----------------|---------|-------|----------|----------|----------|-----------|
| SCML4          | 47,95   | -4,86 | 1,132836 | -4,29331 | 1,76E-05 | 0,0022128 |
| HLA-DQA1       | 7112,69 | 1,69  | 0,39465  | 4,289908 | 1,79E-05 | 0,0022319 |
| GABRA3         | 39,20   | -5,51 | 1,285513 | -4,28433 | 1,83E-05 | 0,0022661 |
| GGTA1P         | 173,49  | 3,58  | 0,836053 | 4,28357  | 1,84E-05 | 0,0022661 |
| KYNU           | 1190,41 | 2,13  | 0,498469 | 4,277757 | 1,89E-05 | 0,0023108 |
| RP11-106M3.3   | 55,45   | 5,28  | 1,237848 | 4,268268 | 1,97E-05 | 0,0023955 |
| LAMC2          | 31,20   | -5,22 | 1,225287 | -4,26236 | 2,02E-05 | 0,0024438 |
| AF011889.2     | 28,49   | 4,88  | 1,146745 | 4,253481 | 2,10E-05 | 0,0025225 |
| CSMD1          | 35,27   | -4,86 | 1,142721 | -4,25238 | 2,12E-05 | 0,0025225 |
| CNR2           | 28,07   | -1,95 | 0,459479 | -4,24949 | 2,14E-05 | 0,0025391 |
| RIC3           | 36,25   | -4,35 | 1,024302 | -4,24612 | 2,18E-05 | 0,0025612 |
| SYTL2          | 81,94   | -5,20 | 1,226585 | -4,2433  | 2,20E-05 | 0,002572  |
| SH2B3          | 2011,54 | 1,64  | 0,386971 | 4,242309 | 2,21E-05 | 0,002572  |
| VPS33A         | 253,75  | 2,17  | 0,511658 | 4,240953 | 2,23E-05 | 0,002572  |
| RP11-327P2.5   | 20,99   | 5,75  | 1,357569 | 4,232391 | 2,31E-05 | 0,0026288 |
| CTD-2647L4.4   | 33,16   | 7,66  | 1,811189 | 4,231689 | 2,32E-05 | 0,0026288 |
| MTHFD1L        | 109,43  | 4,74  | 1,120086 | 4,230745 | 2,33E-05 | 0,0026288 |
| CHRM3          | 14,49   | -8,18 | 1,93364  | -4,22936 | 2,34E-05 | 0,0026288 |
| NR1D1          | 33,98   | 7,14  | 1,688812 | 4,229174 | 2,35E-05 | 0,0026288 |
| HDHD2          | 143,37  | 3,61  | 0,853917 | 4,225241 | 2,39E-05 | 0,0026591 |
| RFC2           | 200,45  | 2,61  | 0,619217 | 4,216585 | 2,48E-05 | 0,0027434 |
| ATG2B          | 249,66  | 3,07  | 0,728059 | 4,215526 | 2,49E-05 | 0,0027434 |
| PARVG          | 2287,19 | 0,90  | 0,214391 | 4,209063 | 2,56E-05 | 0,0027969 |
| VDAC2          | 1337,36 | 1,05  | 0,248584 | 4,208353 | 2,57E-05 | 0,0027969 |
| HLA-DOA        | 889,52  | 1,67  | 0,397031 | 4,207184 | 2,59E-05 | 0,0027969 |
| UBE2N          | 803,01  | 1,94  | 0,462636 | 4,204016 | 2,62E-05 | 0,00282   |
| TRDC           | 40,20   | -6,25 | 1,487848 | -4,20091 | 2,66E-05 | 0,0028312 |
| CD1B           | 84,50   | 5,83  | 1,386901 | 4,200517 | 2,66E-05 | 0,0028312 |
| WDR70          | 293,78  | -1,56 | 0,37064  | -4,19824 | 2,69E-05 | 0,0028435 |
| RP11-1186N24.5 | 19,85   | 6,30  | 1,503101 | 4,191713 | 2,77E-05 | 0,0029101 |
| ARHGAP28       | 180,22  | -2,28 | 0,544522 | -4,18219 | 2,89E-05 | 0,0030111 |
| CD96           | 95,81   | -4,77 | 1,141242 | -4,18142 | 2,90E-05 | 0,0030111 |
| CD1E           | 393,31  | 2,93  | 0,700667 | 4,177962 | 2,94E-05 | 0,0030402 |
| ELOB           | 862,70  | -1,08 | 0,257606 | -4,17595 | 2,97E-05 | 0,0030502 |
| NHLRC1         | 8,69    | -4,43 | 1,063087 | -4,1688  | 3,06E-05 | 0,0031243 |
| SMYD5          | 230,91  | -4,79 | 1,149047 | -4,16798 | 3,07E-05 | 0,0031243 |
| RP11-89M16.1   | 47,31   | -3,67 | 0,881797 | -4,1657  | 3,10E-05 | 0,0031386 |
| AC104809.4     | 18,86   | -7,30 | 1,753702 | -4,16158 | 3,16E-05 | 0,0031764 |
| PATL2          | 382,00  | -3,30 | 0,79446  | -4,15957 | 3,19E-05 | 0,0031764 |
| KRTAP9-6       | 6,83    | -6,49 | 1,561021 | -4,15847 | 3,20E-05 | 0,0031764 |
| RP11-268J15.5  | 39,28   | 3,10  | 0,745913 | 4,158055 | 3,21E-05 | 0,0031764 |
| RP11-44I10.3   | 49,72   | 5,96  | 1,437396 | 4,149647 | 3,33E-05 | 0,0032641 |
| CTD-2196E14.8  | 17,20   | -3,00 | 0,72279  | -4,1494  | 3,33E-05 | 0,0032641 |
| GMFG           | 2111,35 | -0,59 | 0,142231 | -4,14646 | 3,38E-05 | 0,003289  |
| PAQR5          | 19,28   | -2,67 | 0,645213 | -4,14362 | 3,42E-05 | 0,0033127 |
| AKAP2          | 348,67  | 2,88  | 0,695973 | 4,141029 | 3,46E-05 | 0,003333  |
| SLC9A7         | 854,41  | 2,54  | 0,614802 | 4,12889  | 3,65E-05 | 0,0034958 |
| C14orf2        | 972,83  | -0,78 | 0,18893  | -4,11017 | 3,95E-05 | 0,003741  |
| KIAA1671       | 18,87   | -2,95 | 0,718563 | -4,10949 | 3,97E-05 | 0,003741  |
| PTGES3         | 1535,10 | 1,14  | 0,276901 | 4,109069 | 3,97E-05 | 0,003741  |

|               |         |        |          |          |          |           |
|---------------|---------|--------|----------|----------|----------|-----------|
| MTFMT         | 260,79  | 2,63   | 0,639217 | 4,108562 | 3,98E-05 | 0,003741  |
| RP4-726N20.2  | 29,62   | -3,94  | 0,961127 | -4,10289 | 4,08E-05 | 0,0038147 |
| MORF4L2       | 474,09  | 2,23   | 0,544506 | 4,098181 | 4,16E-05 | 0,0038736 |
| RP11-627K11.1 | 4,88    | -3,23  | 0,788166 | -4,09384 | 4,24E-05 | 0,0039229 |
| MUC4          | 9,75    | -5,94  | 1,450706 | -4,09295 | 4,26E-05 | 0,0039229 |
| MAST2         | 227,16  | -3,05  | 0,747469 | -4,08149 | 4,47E-05 | 0,0041012 |
| TRUB2         | 385,95  | 2,85   | 0,6986   | 4,079277 | 4,52E-05 | 0,0041201 |
| SIM2          | 59,06   | -3,39  | 0,832063 | -4,07681 | 4,57E-05 | 0,0041436 |
| SLC25A6       | 4498,21 | 0,86   | 0,210761 | 4,074906 | 4,60E-05 | 0,0041575 |
| TAX1BP1       | 1278,57 | 0,95   | 0,234137 | 4,072843 | 4,64E-05 | 0,0041742 |
| DNAH9         | 55,52   | -6,32  | 1,554048 | -4,06532 | 4,80E-05 | 0,0042905 |
| OTUD7B        | 40,14   | -2,89  | 0,710678 | -4,06051 | 4,90E-05 | 0,0043589 |
| PNPLA1        | 8,08    | -4,66  | 1,149172 | -4,05366 | 5,04E-05 | 0,0044671 |
| ATG16L2       | 1469,45 | -1,11  | 0,274769 | -4,04738 | 5,18E-05 | 0,0045633 |
| PRIM1         | 89,98   | 4,85   | 1,198984 | 4,046462 | 5,20E-05 | 0,0045633 |
| SDHD          | 1367,17 | 1,60   | 0,395062 | 4,041882 | 5,30E-05 | 0,0046315 |
| ADORA2A-AS1   | 20,31   | -2,87  | 0,709965 | -4,03886 | 5,37E-05 | 0,0046696 |
| SLITRK5       | 42,96   | -2,81  | 0,695414 | -4,03651 | 5,43E-05 | 0,0046948 |
| C15orf41      | 148,32  | -4,35  | 1,077853 | -4,03133 | 5,55E-05 | 0,0047773 |
| SLAMF8        | 194,81  | 3,62   | 0,899155 | 4,02762  | 5,63E-05 | 0,0048308 |
| GRIP1         | 171,22  | 4,35   | 1,082978 | 4,015052 | 5,94E-05 | 0,0050405 |
| MCMDC2        | 7,91    | -3,87  | 0,963012 | -4,01454 | 5,96E-05 | 0,0050405 |
| RAVER2        | 116,21  | 3,69   | 0,919918 | 4,01438  | 5,96E-05 | 0,0050405 |
| RP11-96P7.1   | 7,21    | -6,44  | 1,605263 | -4,01155 | 6,03E-05 | 0,0050781 |
| GPM6A         | 115,96  | -2,48  | 0,619843 | -3,99392 | 6,50E-05 | 0,0054287 |
| KCNH6         | 22,18   | -4,78  | 1,196237 | -3,99346 | 6,51E-05 | 0,0054287 |
| MRVI1         | 11,54   | -5,24  | 1,313271 | -3,99257 | 6,54E-05 | 0,0054287 |
| CHD7          | 248,93  | -2,31  | 0,577573 | -3,99095 | 6,58E-05 | 0,0054417 |
| GAS2          | 17,69   | -7,75  | 1,943838 | -3,98932 | 6,63E-05 | 0,005455  |
| NR4A3         | 1456,62 | 2,55   | 0,639185 | 3,986436 | 6,71E-05 | 0,0054973 |
| CKB           | 28,56   | 6,81   | 1,710523 | 3,983999 | 6,78E-05 | 0,0055297 |
| MYL4          | 11,70   | -7,90  | 1,985967 | -3,97754 | 6,96E-05 | 0,005624  |
| PNPT1         | 300,25  | 2,51   | 0,631983 | 3,977225 | 6,97E-05 | 0,005624  |
| TSPYL5        | 74,23   | 5,82   | 1,462609 | 3,976872 | 6,98E-05 | 0,005624  |
| AF011889.4    | 86,79   | 3,87   | 0,973823 | 3,974736 | 7,05E-05 | 0,0056502 |
| CLEC4A        | 1555,02 | 1,36   | 0,342132 | 3,969002 | 7,22E-05 | 0,0057631 |
| GRID1         | 17,40   | -4,13  | 1,042015 | -3,9677  | 7,26E-05 | 0,00577   |
| AC079630.2    | 58,37   | -4,34  | 1,093564 | -3,96512 | 7,34E-05 | 0,005808  |
| PPP1R13B      | 58,65   | -3,11  | 0,784191 | -3,96367 | 7,38E-05 | 0,005812  |
| RP1-14N1.2    | 121,52  | -2,18  | 0,551079 | -3,96293 | 7,40E-05 | 0,005812  |
| ANKRD30B      | 17,44   | -4,42  | 1,116731 | -3,95401 | 7,69E-05 | 0,0060077 |
| NR5A2         | 26,35   | -2,15  | 0,544774 | -3,94976 | 7,82E-05 | 0,006077  |
| FAM168B       | 335,27  | 2,89   | 0,731904 | 3,947914 | 7,88E-05 | 0,006077  |
| AC128677.1    | 14,48   | -10,56 | 2,674436 | -3,9477  | 7,89E-05 | 0,006077  |
| MYO1D         | 25,80   | 6,14   | 1,554783 | 3,947276 | 7,90E-05 | 0,006077  |
| CFL1          | 9952,73 | 0,83   | 0,211065 | 3,942927 | 8,05E-05 | 0,0061629 |
| STAB1         | 538,50  | -2,10  | 0,532074 | -3,93793 | 8,22E-05 | 0,0062322 |
| GPAT3         | 1206,22 | 1,72   | 0,43696  | 3,937561 | 8,23E-05 | 0,0062322 |
| CTTNBP2       | 90,02   | 6,40   | 1,626182 | 3,9373   | 8,24E-05 | 0,0062322 |
| RP1-257A7.5   | 265,24  | 2,59   | 0,658064 | 3,934387 | 8,34E-05 | 0,0062827 |

|              |         |        |          |          |          |           |
|--------------|---------|--------|----------|----------|----------|-----------|
| INO80        | 309,98  | 2,43   | 0,617488 | 3,933404 | 8,38E-05 | 0,006283  |
| DUSP4        | 26,79   | 5,21   | 1,32481  | 3,929891 | 8,50E-05 | 0,0063499 |
| ALDOA        | 9131,66 | -0,53  | 0,134318 | -3,92724 | 8,59E-05 | 0,0063945 |
| LYPD3        | 88,35   | 4,71   | 1,199173 | 3,925153 | 8,67E-05 | 0,0064125 |
| CYC1         | 2459,20 | 0,98   | 0,250928 | 3,92465  | 8,69E-05 | 0,0064125 |
| C1orf27      | 336,19  | 2,71   | 0,690005 | 3,922172 | 8,78E-05 | 0,0064532 |
| PARVB        | 290,78  | 2,48   | 0,632889 | 3,91879  | 8,90E-05 | 0,0064777 |
| DUT          | 656,24  | 1,43   | 0,365871 | 3,917316 | 8,95E-05 | 0,0064777 |
| PTCHD4       | 23,29   | -2,63  | 0,670872 | -3,91597 | 9,00E-05 | 0,0064777 |
| ATP1B4       | 7,14    | -3,39  | 0,865188 | -3,91551 | 9,02E-05 | 0,0064777 |
| ATE1         | 196,76  | 2,01   | 0,512578 | 3,915486 | 9,02E-05 | 0,0064777 |
| NBR2         | 26,67   | 5,22   | 1,333733 | 3,915064 | 9,04E-05 | 0,0064777 |
| GRIN2B       | 20,27   | -4,17  | 1,066468 | -3,91468 | 9,05E-05 | 0,0064777 |
| TMTC1        | 55,08   | -4,61  | 1,179769 | -3,91016 | 9,22E-05 | 0,0065749 |
| MANBA        | 1146,56 | 1,17   | 0,299446 | 3,908798 | 9,28E-05 | 0,0065868 |
| CD24         | 13,61   | -5,04  | 1,289084 | -3,90749 | 9,33E-05 | 0,0065973 |
| CAMK2B       | 29,86   | -1,98  | 0,507374 | -3,90657 | 9,36E-05 | 0,0065973 |
| PKHD1L1      | 61,48   | -7,79  | 1,994945 | -3,90507 | 9,42E-05 | 0,0066133 |
| PPIF         | 1655,60 | 1,98   | 0,50797  | 3,901815 | 9,55E-05 | 0,0066778 |
| WDR60        | 249,55  | -2,49  | 0,639209 | -3,89651 | 9,76E-05 | 0,0068    |
| GYP A        | 22,20   | -3,08  | 0,792236 | -3,89355 | 9,88E-05 | 0,0068581 |
| COMMD3-BMI1  | 25,84   | 3,95   | 1,015961 | 3,891945 | 9,94E-05 | 0,0068779 |
| TIMM23       | 269,08  | 2,70   | 0,694071 | 3,889516 | 1,00E-04 | 0,0069214 |
| DMC1         | 13,32   | -3,19  | 0,822699 | -3,8835  | 1,03E-04 | 0,0070687 |
| GIPR         | 121,16  | 2,98   | 0,767126 | 3,882388 | 1,03E-04 | 0,0070693 |
| MARCKS       | 1226,04 | -1,22  | 0,315564 | -3,88102 | 1,04E-04 | 0,0070693 |
| AP000254.8   | 37,33   | 6,18   | 1,59333  | 3,880806 | 1,04E-04 | 0,0070693 |
| RP11-541F9.2 | 73,07   | 2,63   | 0,678522 | 3,869436 | 1,09E-04 | 0,0073802 |
| SNORD63      | 35,65   | 2,67   | 0,689775 | 3,868155 | 1,10E-04 | 0,0073923 |
| MEX3B        | 25,21   | 5,57   | 1,441524 | 3,866943 | 1,10E-04 | 0,0074023 |
| CA2          | 203,08  | 3,78   | 0,977493 | 3,86596  | 1,11E-04 | 0,0074054 |
| TCIRG1       | 3444,02 | -0,95  | 0,24672  | -3,86353 | 1,12E-04 | 0,0074488 |
| C2CD2        | 266,08  | 2,46   | 0,637632 | 3,862551 | 1,12E-04 | 0,0074488 |
| NTRK3        | 40,98   | -3,25  | 0,84108  | -3,86187 | 1,13E-04 | 0,0074488 |
| MTMR1        | 236,28  | -2,60  | 0,672989 | -3,86041 | 1,13E-04 | 0,0074488 |
| NPLOC4       | 751,26  | -1,52  | 0,393974 | -3,85973 | 1,14E-04 | 0,0074488 |
| MR1          | 385,77  | 2,15   | 0,557666 | 3,85896  | 1,14E-04 | 0,0074488 |
| IGLV3-19     | 14,34   | -8,18  | 2,121295 | -3,85846 | 1,14E-04 | 0,0074488 |
| MIF4GD       | 586,50  | 2,69   | 0,69667  | 3,857515 | 1,15E-04 | 0,0074515 |
| HK3          | 490,93  | -2,06  | 0,533769 | -3,85433 | 1,16E-04 | 0,0075229 |
| GHET1        | 110,16  | -2,39  | 0,620655 | -3,84895 | 1,19E-04 | 0,0076575 |
| RP13-262C2.4 | 45,74   | -4,71  | 1,224412 | -3,84829 | 1,19E-04 | 0,0076575 |
| IL18R1       | 180,35  | 3,27   | 0,850273 | 3,843534 | 1,21E-04 | 0,0077677 |
| BACH2        | 247,20  | 3,56   | 0,925892 | 3,843092 | 1,21E-04 | 0,0077677 |
| AC015971.2   | 61,39   | 4,35   | 1,13091  | 3,842049 | 1,22E-04 | 0,007774  |
| AC079448.1   | 13,88   | -10,28 | 2,677448 | -3,83818 | 1,24E-04 | 0,0078707 |
| MT-TL1       | 27,88   | -1,75  | 0,455539 | -3,83283 | 1,27E-04 | 0,0079985 |
| MKI67        | 132,91  | 4,69   | 1,222579 | 3,832547 | 1,27E-04 | 0,0079985 |
| PTPMT1       | 498,00  | 2,35   | 0,613405 | 3,826997 | 1,30E-04 | 0,0081533 |
| HIST1H4H     | 34,41   | -5,07  | 1,325966 | -3,82474 | 1,31E-04 | 0,0082007 |

|               |          |       |          |          |          |           |
|---------------|----------|-------|----------|----------|----------|-----------|
| RGPD2         | 180,33   | 5,16  | 1,349719 | 3,823176 | 1,32E-04 | 0,0082252 |
| PRTG          | 9,38     | -8,44 | 2,212734 | -3,81535 | 1,36E-04 | 0,0084618 |
| RP11-345P4.9  | 77,01    | 3,64  | 0,957017 | 3,802244 | 1,43E-04 | 0,0088927 |
| TUBA1B        | 7515,59  | 1,18  | 0,310874 | 3,790929 | 1,50E-04 | 0,0092479 |
| NKG7          | 740,39   | -2,30 | 0,60675  | -3,79088 | 1,50E-04 | 0,0092479 |
| NEK7          | 319,35   | 2,35  | 0,621628 | 3,785845 | 1,53E-04 | 0,0094061 |
| ABCB9         | 43,55    | -1,65 | 0,435392 | -3,7833  | 1,55E-04 | 0,0094253 |
| RBM39         | 4780,97  | 0,64  | 0,169186 | 3,782943 | 1,55E-04 | 0,0094253 |
| RP11-389C8.2  | 38,06    | 4,32  | 1,142448 | 3,782886 | 1,55E-04 | 0,0094253 |
| GNAS          | 3449,24  | 0,72  | 0,190065 | 3,781656 | 1,56E-04 | 0,0094412 |
| PTP4A2        | 5456,21  | 0,95  | 0,251137 | 3,773128 | 1,61E-04 | 0,0097382 |
| TTC16         | 35,07    | -2,46 | 0,652852 | -3,76451 | 1,67E-04 | 0,0100478 |
| RP11-300M24.1 | 43,60    | -2,78 | 0,739073 | -3,762   | 1,69E-04 | 0,0101041 |
| SARM1         | 91,88    | -3,37 | 0,897059 | -3,76134 | 1,69E-04 | 0,0101041 |
| HCST          | 932,90   | -1,21 | 0,321036 | -3,76069 | 1,69E-04 | 0,0101041 |
| RP11-141M3.6  | 26,76    | -4,38 | 1,165849 | -3,75655 | 1,72E-04 | 0,0102086 |
| RP11-513G11.1 | 15,89    | -2,93 | 0,780012 | -3,75602 | 1,73E-04 | 0,0102086 |
| HRK           | 19,94    | -4,85 | 1,292352 | -3,75572 | 1,73E-04 | 0,0102086 |
| PPA1          | 2026,29  | 0,92  | 0,244322 | 3,750607 | 1,76E-04 | 0,0103368 |
| IKZF2         | 42,58    | -5,62 | 1,499536 | -3,75028 | 1,77E-04 | 0,0103368 |
| DAPK2         | 42,56    | -2,57 | 0,684092 | -3,75012 | 1,77E-04 | 0,0103368 |
| GABRB1        | 11,79    | -9,20 | 2,452853 | -3,74944 | 1,77E-04 | 0,0103368 |
| AGTRAP        | 1917,41  | -1,21 | 0,322456 | -3,74596 | 1,80E-04 | 0,0104483 |
| LRRIQ1        | 3,07     | -4,39 | 1,171569 | -3,74366 | 1,81E-04 | NA        |
| HKDC1         | 6,85     | -7,47 | 1,994856 | -3,74251 | 1,82E-04 | 0,0105598 |
| BTBD10        | 318,59   | 2,57  | 0,687744 | 3,741098 | 1,83E-04 | 0,0105706 |
| GCNT4         | 6,90     | -3,25 | 0,867709 | -3,74069 | 1,84E-04 | 0,0105706 |
| ARV1          | 90,90    | 3,25  | 0,86976  | 3,738263 | 1,85E-04 | 0,0106121 |
| LYPD2         | 12,26    | -8,26 | 2,21062  | -3,73808 | 1,85E-04 | 0,0106121 |
| PSMD3         | 188,61   | 2,00  | 0,534571 | 3,737381 | 1,86E-04 | 0,0106121 |
| YPEL5         | 2528,82  | 0,95  | 0,254961 | 3,736426 | 1,87E-04 | 0,0106199 |
| AKAP1         | 243,88   | 2,95  | 0,790336 | 3,732101 | 1,90E-04 | 0,010771  |
| SGK1          | 3384,53  | 1,07  | 0,286936 | 3,719912 | 1,99E-04 | 0,01127   |
| USP38         | 305,73   | 2,15  | 0,578538 | 3,71736  | 2,01E-04 | 0,0113499 |
| ZNF366        | 143,65   | 3,09  | 0,831559 | 3,715872 | 2,03E-04 | 0,0113825 |
| FAHD2CP       | 23,41    | 5,17  | 1,393147 | 3,713788 | 2,04E-04 | 0,0114421 |
| KLRD1         | 614,63   | -3,14 | 0,846185 | -3,71168 | 2,06E-04 | 0,0114948 |
| HS3ST1        | 42,32    | -2,62 | 0,705663 | -3,71111 | 2,06E-04 | 0,0114948 |
| NGEF          | 10,21    | -7,88 | 2,12326  | -3,70902 | 2,08E-04 | 0,0115272 |
| TXNL4B        | 98,71    | 3,56  | 0,961234 | 3,708533 | 2,08E-04 | 0,0115272 |
| RP1-217P22.2  | 8,46     | -3,04 | 0,819303 | -3,70707 | 2,10E-04 | 0,0115272 |
| RCN2          | 387,70   | 2,25  | 0,605849 | 3,706638 | 2,10E-04 | 0,0115272 |
| CHML          | 420,57   | 2,30  | 0,620413 | 3,706629 | 2,10E-04 | 0,0115272 |
| ANO6          | 484,81   | -1,54 | 0,416067 | -3,70459 | 2,12E-04 | 0,0115695 |
| LRRFIP1       | 5447,07  | 0,77  | 0,208959 | 3,704209 | 2,12E-04 | 0,0115695 |
| PARM1         | 131,77   | 3,45  | 0,932736 | 3,70028  | 2,15E-04 | 0,0117088 |
| GPRC5A        | 95,70    | -3,14 | 0,84977  | -3,69954 | 2,16E-04 | 0,0117088 |
| MT-ND2        | 36625,65 | -1,09 | 0,294708 | -3,69786 | 2,17E-04 | 0,0117088 |
| C15orf48      | 44,24    | 4,89  | 1,321225 | 3,697839 | 2,17E-04 | 0,0117088 |
| CCL5          | 344,04   | -2,52 | 0,681718 | -3,69748 | 2,18E-04 | 0,0117088 |

|               |         |       |          |          |          |           |
|---------------|---------|-------|----------|----------|----------|-----------|
| SNRNP40       | 245,70  | 2,08  | 0,562345 | 3,693839 | 2,21E-04 | 0,0118436 |
| IKZF3         | 93,69   | -1,94 | 0,526617 | -3,69235 | 2,22E-04 | 0,0118789 |
| PRCP          | 2308,05 | 1,06  | 0,287804 | 3,686615 | 2,27E-04 | 0,0121149 |
| ZNF551        | 211,47  | 3,71  | 1,006095 | 3,685073 | 2,29E-04 | 0,0121356 |
| C12orf75      | 123,14  | 2,74  | 0,742852 | 3,684726 | 2,29E-04 | 0,0121356 |
| FAM120AOS     | 236,69  | 2,04  | 0,553625 | 3,683472 | 2,30E-04 | 0,0121608 |
| PITHD1        | 255,59  | 2,14  | 0,581755 | 3,681898 | 2,32E-04 | 0,0122015 |
| NHEJ1         | 87,69   | 4,46  | 1,212832 | 3,678759 | 2,34E-04 | 0,0122202 |
| CTD-2541M15.1 | 20,32   | -6,75 | 1,833671 | -3,67848 | 2,35E-04 | 0,0122202 |
| EDEM1         | 949,22  | 1,68  | 0,457045 | 3,678257 | 2,35E-04 | 0,0122202 |
| RB1           | 724,00  | 1,45  | 0,393099 | 3,677825 | 2,35E-04 | 0,0122202 |
| SH3BP2        | 1762,87 | -1,11 | 0,302375 | -3,67686 | 2,36E-04 | 0,0122202 |
| ZBTB16        | 185,26  | -3,84 | 1,043989 | -3,67664 | 2,36E-04 | 0,0122202 |
| RP5-1022P6.3  | 41,64   | 6,87  | 1,869916 | 3,676499 | 2,36E-04 | 0,0122202 |
| ULK4P3        | 25,65   | 5,10  | 1,388565 | 3,675005 | 2,38E-04 | 0,0122453 |
| CD300C        | 655,14  | 1,72  | 0,467906 | 3,674562 | 2,38E-04 | 0,0122453 |
| KLHL22        | 76,80   | 3,52  | 0,959454 | 3,672525 | 2,40E-04 | 0,012304  |
| THBD          | 130,51  | 3,79  | 1,032373 | 3,671568 | 2,41E-04 | 0,012304  |
| SOCS2         | 29,80   | -1,34 | 0,365776 | -3,67123 | 2,41E-04 | 0,012304  |
| ABHD18        | 189,22  | 2,65  | 0,723599 | 3,667836 | 2,45E-04 | 0,0124344 |
| C6orf136      | 55,14   | 3,15  | 0,85984  | 3,665683 | 2,47E-04 | 0,0125053 |
| ATP2B1        | 4963,53 | 1,04  | 0,283652 | 3,663897 | 2,48E-04 | 0,0125587 |
| C1orf106      | 31,88   | -2,08 | 0,567569 | -3,66296 | 2,49E-04 | 0,0125707 |
| RP11-567L7.3  | 5,86    | -5,24 | 1,430491 | -3,66048 | 2,52E-04 | 0,0126585 |
| IL13RA1       | 2516,14 | 0,95  | 0,260895 | 3,656593 | 2,56E-04 | 0,0128174 |
| PDP1          | 358,21  | 2,03  | 0,554288 | 3,655803 | 2,56E-04 | 0,0128224 |
| RP11-685M7.3  | 16,36   | -2,80 | 0,766489 | -3,65126 | 2,61E-04 | 0,0130164 |
| CCP110        | 198,11  | -2,23 | 0,611909 | -3,64794 | 2,64E-04 | 0,0131503 |
| SLC25A5       | 4176,08 | 1,10  | 0,302381 | 3,646696 | 2,66E-04 | 0,013179  |
| ZEB2          | 5485,36 | -1,03 | 0,281714 | -3,64278 | 2,70E-04 | 0,0133163 |
| TRMT10A       | 57,27   | 4,24  | 1,162757 | 3,642662 | 2,70E-04 | 0,0133163 |
| RNU6-522P     | 21,13   | 6,46  | 1,776379 | 3,636611 | 2,76E-04 | 0,0135969 |
| XIAP          | 461,90  | 2,31  | 0,637625 | 3,628578 | 2,85E-04 | 0,0139899 |
| MEF2C         | 1424,14 | 0,98  | 0,271086 | 3,62488  | 2,89E-04 | 0,014118  |
| ATP6V0A2      | 322,47  | -2,13 | 0,586766 | -3,62486 | 2,89E-04 | 0,014118  |
| HPGD          | 23,21   | 6,05  | 1,669927 | 3,621268 | 2,93E-04 | 0,0142783 |
| CTB-161M19.4  | 9,52    | -2,47 | 0,682239 | -3,61949 | 2,95E-04 | 0,0143394 |
| PER3          | 34,22   | -5,00 | 1,381059 | -3,61857 | 2,96E-04 | 0,0143528 |
| RP3-403L10.3  | 17,44   | 6,75  | 1,867097 | 3,614559 | 3,01E-04 | 0,0145389 |
| RP11-715J22.6 | 65,03   | -1,54 | 0,42502  | -3,61302 | 3,03E-04 | 0,0145878 |
| PRR16         | 6,39    | -5,79 | 1,603432 | -3,60935 | 3,07E-04 | 0,0147572 |
| HLA-DPB2      | 94,27   | 3,53  | 0,978462 | 3,60857  | 3,08E-04 | 0,0147636 |
| UBQLN1        | 575,43  | 2,01  | 0,556396 | 3,607273 | 3,09E-04 | 0,0147994 |
| PTP4A1        | 813,27  | 1,46  | 0,405556 | 3,604126 | 3,13E-04 | 0,0149415 |
| EPC1          | 890,53  | 1,16  | 0,321348 | 3,598861 | 3,20E-04 | 0,0152082 |
| INTU          | 859,37  | -1,80 | 0,500721 | -3,59604 | 3,23E-04 | 0,0153347 |
| UPRT          | 143,91  | 3,40  | 0,944937 | 3,59449  | 3,25E-04 | 0,0153808 |
| IL1B          | 3415,29 | 1,69  | 0,469091 | 3,593936 | 3,26E-04 | 0,0153808 |
| FLT3          | 1032,92 | 1,44  | 0,4004   | 3,591766 | 3,28E-04 | 0,0154701 |
| ADNP          | 822,01  | 1,99  | 0,55303  | 3,590686 | 3,30E-04 | 0,0154952 |



|               |          |       |          |          |          |           |
|---------------|----------|-------|----------|----------|----------|-----------|
| RPUSD4        | 224,54   | -2,10 | 0,58533  | -3,58502 | 3,37E-04 | 0,0157313 |
| SYNPO2        | 48,83    | -4,05 | 1,130362 | -3,58487 | 3,37E-04 | 0,0157313 |
| DCAF6         | 371,44   | 1,51  | 0,421471 | 3,584149 | 3,38E-04 | 0,0157313 |
| LAPTM4A       | 1157,45  | 1,33  | 0,37126  | 3,583156 | 3,39E-04 | 0,0157313 |
| PFDN5         | 5300,96  | -0,53 | 0,14928  | -3,58309 | 3,40E-04 | 0,0157313 |
| BNC2          | 9,58     | -3,12 | 0,870881 | -3,5823  | 3,41E-04 | 0,0157313 |
| ZDHHC17       | 404,84   | 2,17  | 0,604942 | 3,58217  | 3,41E-04 | 0,0157313 |
| FOS           | 36399,54 | 0,64  | 0,17921  | 3,577619 | 3,47E-04 | 0,015968  |
| RASSF3        | 649,27   | -1,07 | 0,29909  | -3,57596 | 3,49E-04 | 0,0160096 |
| CHST12        | 418,57   | 2,35  | 0,657868 | 3,575647 | 3,49E-04 | 0,0160096 |
| DHDDS         | 152,83   | -1,94 | 0,542465 | -3,57211 | 3,54E-04 | 0,0161878 |
| RP11-736N17.2 | 6,71     | -3,14 | 0,878323 | -3,57003 | 3,57E-04 | 0,0162376 |
| SUPT20H       | 369,28   | 1,69  | 0,472814 | 3,570019 | 3,57E-04 | 0,0162376 |
| LILRB1        | 334,57   | -1,89 | 0,528456 | -3,56803 | 3,60E-04 | 0,0163212 |
| TOB1          | 1783,41  | 1,08  | 0,30375  | 3,564037 | 3,65E-04 | 0,0165315 |
| AC055740.2    | 4,50     | -3,26 | 0,915291 | -3,55731 | 3,75E-04 | 0,01688   |
| RP11-16L21.8  | 9,64     | -2,77 | 0,780057 | -3,55729 | 3,75E-04 | 0,01688   |
| CYB561A3      | 339,74   | 1,87  | 0,526768 | 3,556299 | 3,76E-04 | 0,0169002 |
| TRIM69        | 225,45   | 2,19  | 0,616305 | 3,555695 | 3,77E-04 | 0,0169002 |
| RP11-140K17.3 | 10,20    | 5,26  | 1,47986  | 3,554992 | 3,78E-04 | 0,0169002 |
| PHACTR1       | 1801,39  | 1,34  | 0,376974 | 3,553857 | 3,80E-04 | 0,0169002 |
| GFOD2         | 92,19    | -2,06 | 0,578495 | -3,55381 | 3,80E-04 | 0,0169002 |
| TMEM144       | 230,44   | -3,12 | 0,877383 | -3,55248 | 3,82E-04 | 0,0169453 |
| RP11-118G23.3 | 53,29    | -3,07 | 0,865684 | -3,54781 | 3,88E-04 | 0,0172074 |
| RP11-439A17.9 | 9,04     | -8,76 | 2,469692 | -3,54667 | 3,90E-04 | 0,0172408 |
| ITIH6         | 9,76     | -7,10 | 2,003702 | -3,54453 | 3,93E-04 | 0,0173402 |
| RNF145        | 316,09   | 2,17  | 0,611971 | 3,541411 | 3,98E-04 | 0,0175051 |
| IMPAD1        | 294,63   | 2,09  | 0,590933 | 3,538256 | 4,03E-04 | 0,0176738 |
| GNLY          | 455,75   | -3,85 | 1,091269 | -3,53211 | 4,12E-04 | 0,0180475 |
| RP11-813C7.1  | 6,48     | -7,05 | 1,998007 | -3,53051 | 4,15E-04 | 0,0181144 |
| ANKH          | 433,52   | 2,34  | 0,663084 | 3,52962  | 4,16E-04 | 0,0181325 |
| AC009196.1    | 21,23    | 5,90  | 1,672932 | 3,52872  | 4,18E-04 | 0,0181518 |
| GEMIN5        | 86,03    | 4,03  | 1,143554 | 3,528013 | 4,19E-04 | 0,0181579 |
| SEMA7A        | 13,76    | 5,72  | 1,622862 | 3,526215 | 4,22E-04 | 0,018204  |
| CTD-2509G16.2 | 24,10    | -3,42 | 0,969136 | -3,52568 | 4,22E-04 | 0,018204  |
| DECR1         | 1491,99  | 0,93  | 0,264414 | 3,525497 | 4,23E-04 | 0,018204  |
| AP001066.10   | 10,72    | -8,71 | 2,472824 | -3,52328 | 4,26E-04 | 0,0183142 |
| RP11-440I14.4 | 15,84    | -7,45 | 2,115915 | -3,52103 | 4,30E-04 | 0,0184281 |
| FAHD2B        | 19,11    | 6,46  | 1,835838 | 3,519966 | 4,32E-04 | 0,0184451 |
| PTPRC         | 7527,85  | 0,72  | 0,203233 | 3,519566 | 4,32E-04 | 0,0184451 |
| PARD3B        | 18,68    | -7,44 | 2,11549  | -3,517   | 4,36E-04 | 0,0185083 |
| GPR109B       | 39,75    | 7,95  | 2,259715 | 3,516873 | 4,37E-04 | 0,0185083 |
| CCT5          | 1299,13  | 1,27  | 0,361877 | 3,516839 | 4,37E-04 | 0,0185083 |
| RP11-481C4.1  | 13,13    | 5,77  | 1,64037  | 3,515598 | 4,39E-04 | 0,0185505 |
| CTA-331P3.1   | 9,43     | -4,13 | 1,17372  | -3,51503 | 4,40E-04 | 0,0185505 |
| PLEKHG5       | 17,25    | -2,88 | 0,820097 | -3,51236 | 4,44E-04 | 0,0186552 |
| NONO          | 1501,20  | 1,03  | 0,294051 | 3,51233  | 4,44E-04 | 0,0186552 |
| TPGS2         | 335,58   | 2,28  | 0,649603 | 3,511236 | 4,46E-04 | 0,01869   |
| COLCA1        | 26,71    | -1,91 | 0,543809 | -3,50942 | 4,49E-04 | 0,0187755 |
| TUBA1A        | 6672,78  | 0,79  | 0,224919 | 3,497813 | 4,69E-04 | 0,0195582 |

|               |         |       |          |          |          |           |
|---------------|---------|-------|----------|----------|----------|-----------|
| RORA          | 88,76   | -3,00 | 0,857973 | -3,49689 | 4,71E-04 | 0,0195582 |
| ADARB2        | 6,90    | -3,61 | 1,031334 | -3,49676 | 4,71E-04 | 0,0195582 |
| TMEM258       | 487,72  | -0,92 | 0,262639 | -3,49409 | 4,76E-04 | 0,0197107 |
| FAM159A       | 33,87   | -2,32 | 0,663769 | -3,4923  | 4,79E-04 | 0,0197989 |
| CD63          | 2169,90 | -0,60 | 0,172602 | -3,48917 | 4,85E-04 | 0,019949  |
| VDAC1         | 1206,16 | 1,04  | 0,298971 | 3,489099 | 4,85E-04 | 0,019949  |
| RP11-17L5.4   | 12,64   | -8,15 | 2,337372 | -3,48818 | 4,86E-04 | 0,0199737 |
| SAMD12        | 33,23   | -3,91 | 1,121895 | -3,48666 | 4,89E-04 | 0,0199948 |
| LILRB4        | 524,25  | 1,77  | 0,507368 | 3,486251 | 4,90E-04 | 0,0199948 |
| RBBP4         | 1198,80 | 1,84  | 0,52792  | 3,48613  | 4,90E-04 | 0,0199948 |
| BUB1B         | 53,58   | -6,08 | 1,745943 | -3,48468 | 4,93E-04 | 0,0200303 |
| GTF2H4        | 38,70   | 4,54  | 1,30367  | 3,484484 | 4,93E-04 | 0,0200303 |
| RP11-380P13.1 | 2,92    | -5,19 | 1,489772 | -3,48267 | 4,96E-04 | NA        |
| CH507-42P11.8 | 691,61  | 1,84  | 0,529342 | 3,475835 | 5,09E-04 | 0,0206407 |
| RP11-372E1.6  | 14,93   | -2,05 | 0,589262 | -3,47527 | 5,10E-04 | 0,0206407 |
| SMAD9         | 22,62   | -2,92 | 0,83921  | -3,47465 | 5,12E-04 | 0,0206441 |
| KIT           | 19,01   | 5,76  | 1,659811 | 3,471811 | 5,17E-04 | 0,0208183 |
| PCSK1         | 11,63   | -7,10 | 2,046261 | -3,47001 | 5,20E-04 | 0,0208925 |
| KCNN1         | 29,07   | -4,53 | 1,306882 | -3,4697  | 5,21E-04 | 0,0208925 |
| SAMD10        | 26,05   | 6,73  | 1,942005 | 3,46648  | 5,27E-04 | 0,0210985 |
| LAYN          | 130,13  | 3,15  | 0,908205 | 3,465849 | 5,29E-04 | 0,0211027 |
| CTD-2621I17.6 | 13,87   | 4,64  | 1,338981 | 3,465123 | 5,30E-04 | 0,0211145 |
| COL6A5        | 10,32   | -8,07 | 2,328572 | -3,46412 | 5,32E-04 | 0,0211243 |
| CTA-398F10.2  | 21,28   | -2,21 | 0,637327 | -3,46385 | 5,33E-04 | 0,0211243 |
| CDON          | 22,46   | -3,05 | 0,880179 | -3,46147 | 5,37E-04 | 0,0212662 |
| EGR3          | 391,64  | 3,05  | 0,883092 | 3,454178 | 5,52E-04 | 0,0218035 |
| CTC-347C20.2  | 3,29    | -3,30 | 0,954755 | -3,4536  | 5,53E-04 | NA        |
| S100A6        | 6249,80 | -0,79 | 0,229426 | -3,44963 | 5,61E-04 | 0,02207   |
| MT-TV         | 11,48   | -2,20 | 0,63693  | -3,44937 | 5,62E-04 | 0,02207   |
| RP3-499B10.3  | 12,27   | -1,37 | 0,396739 | -3,44881 | 5,63E-04 | 0,02207   |
| CIITA         | 3679,93 | 1,10  | 0,318823 | 3,448617 | 5,63E-04 | 0,02207   |
| TPH1          | 45,07   | 4,21  | 1,222711 | 3,445084 | 5,71E-04 | 0,0223119 |
| PHAX          | 285,90  | 2,24  | 0,651169 | 3,444537 | 5,72E-04 | 0,0223119 |
| GADL1         | 98,28   | -1,43 | 0,416022 | -3,44336 | 5,75E-04 | 0,0223624 |
| RP11-397G17.1 | 8,59    | -7,44 | 2,162937 | -3,44199 | 5,77E-04 | 0,0224286 |
| KDM7A         | 1140,58 | 1,45  | 0,421657 | 3,439815 | 5,82E-04 | 0,0225629 |
| CYB5R4        | 918,63  | 1,70  | 0,492923 | 3,439107 | 5,84E-04 | 0,022575  |
| CFD           | 903,76  | -2,23 | 0,647647 | -3,4366  | 5,89E-04 | 0,0227185 |
| C22orf27      | 85,00   | -3,06 | 0,889559 | -3,43627 | 5,90E-04 | 0,0227185 |
| ADGRG5        | 52,65   | 4,85  | 1,41358  | 3,431862 | 5,99E-04 | 0,023043  |
| PON2          | 785,36  | 1,45  | 0,424268 | 3,427758 | 6,09E-04 | 0,0233084 |
| RP11-731C17.2 | 29,11   | -4,06 | 1,185127 | -3,42764 | 6,09E-04 | 0,0233084 |
| HTN1          | 76,99   | -2,15 | 0,629623 | -3,42154 | 6,23E-04 | 0,0237886 |
| FAM114A2      | 98,62   | 3,34  | 0,975563 | 3,418709 | 6,29E-04 | 0,0239878 |
| TMEM212       | 136,98  | -1,26 | 0,36767  | -3,41448 | 6,39E-04 | 0,0243135 |
| ERCC8         | 158,08  | 2,78  | 0,816153 | 3,410873 | 6,48E-04 | 0,0245872 |
| ADCK4         | 151,37  | -2,80 | 0,821132 | -3,40599 | 6,59E-04 | 0,0249696 |
| PCLO          | 4,65    | -5,32 | 1,561357 | -3,40555 | 6,60E-04 | 0,0249696 |
| ZNF326        | 301,37  | 1,38  | 0,404729 | 3,404213 | 6,64E-04 | 0,0250413 |
| NEK11         | 15,23   | 5,21  | 1,529977 | 3,403022 | 6,66E-04 | 0,0250998 |

|                |         |       |          |          |          |           |
|----------------|---------|-------|----------|----------|----------|-----------|
| MUL1           | 225,19  | 3,01  | 0,883547 | 3,401543 | 6,70E-04 | 0,025185  |
| RP11-138J23.1  | 2,31    | -4,41 | 1,297405 | -3,40103 | 6,71E-04 | NA        |
| CCDC150        | 9,45    | -2,30 | 0,676436 | -3,397   | 6,81E-04 | 0,0255407 |
| CCDC64         | 21,93   | -2,69 | 0,791991 | -3,3966  | 6,82E-04 | 0,0255407 |
| CH507-9B2.1    | 35,25   | 7,85  | 2,312482 | 3,39338  | 6,90E-04 | 0,0257914 |
| WDR75          | 356,53  | 2,15  | 0,633834 | 3,3927   | 6,92E-04 | 0,0258037 |
| NIPBL          | 1698,04 | 1,23  | 0,362191 | 3,391565 | 6,95E-04 | 0,0258383 |
| TBC1D9B        | 642,06  | 1,66  | 0,48841  | 3,391236 | 6,96E-04 | 0,0258383 |
| LINC01272      | 91,34   | -2,34 | 0,690995 | -3,39068 | 6,97E-04 | 0,0258391 |
| SCTR           | 15,30   | -4,04 | 1,191609 | -3,38849 | 7,03E-04 | 0,0259948 |
| VAPA           | 1880,71 | 1,29  | 0,381753 | 3,387142 | 7,06E-04 | 0,0260709 |
| CCDC152        | 71,48   | -4,02 | 1,188686 | -3,38056 | 7,23E-04 | 0,0266505 |
| RAB5A          | 313,08  | 1,73  | 0,511798 | 3,379291 | 7,27E-04 | 0,0267209 |
| Z95704.4       | 7,03    | -6,86 | 2,030547 | -3,37772 | 7,31E-04 | 0,0268011 |
| MT-TM          | 25,55   | -1,86 | 0,549433 | -3,37695 | 7,33E-04 | 0,0268011 |
| KCNE1B         | 14,93   | -8,89 | 2,632247 | -3,37684 | 7,33E-04 | 0,0268011 |
| RAB7A          | 1978,52 | 0,71  | 0,209895 | 3,376051 | 7,35E-04 | 0,0268256 |
| PURG           | 11,59   | -9,16 | 2,715027 | -3,37519 | 7,38E-04 | 0,0268569 |
| CXCR4          | 5953,57 | 1,39  | 0,410924 | 3,373794 | 7,41E-04 | 0,026936  |
| AC020743.2     | 10,95   | -1,75 | 0,518752 | -3,37331 | 7,43E-04 | 0,026936  |
| NYAP2          | 10,50   | -2,50 | 0,740895 | -3,37139 | 7,48E-04 | 0,0270222 |
| RP11-667K14.3  | 26,47   | 6,19  | 1,836871 | 3,371355 | 7,48E-04 | 0,0270222 |
| GEM            | 31,48   | 5,70  | 1,689978 | 3,369898 | 7,52E-04 | 0,0270876 |
| YWHAZ          | 6013,00 | 0,57  | 0,169707 | 3,369621 | 7,53E-04 | 0,0270876 |
| ICAM2          | 1074,42 | -1,35 | 0,40175  | -3,36706 | 7,60E-04 | 0,0272881 |
| TTN            | 500,25  | -2,65 | 0,787839 | -3,36483 | 7,66E-04 | 0,0274561 |
| RUNX1          | 825,57  | 1,68  | 0,499069 | 3,363523 | 7,70E-04 | 0,0275334 |
| RP11-480D4.3   | 8,66    | -3,51 | 1,044086 | -3,36246 | 7,73E-04 | 0,0275433 |
| RN7SL846P      | 10,99   | 6,10  | 1,812901 | 3,362364 | 7,73E-04 | 0,0275433 |
| NR2F6          | 44,50   | 5,10  | 1,516686 | 3,35938  | 7,81E-04 | 0,0277833 |
| SERPINA1       | 3190,04 | -1,13 | 0,33602  | -3,35891 | 7,83E-04 | 0,0277833 |
| RP11-577H5.5   | 31,73   | 7,62  | 2,268939 | 3,357873 | 7,85E-04 | 0,0278348 |
| RP11-861A13.5  | 23,08   | 4,14  | 1,234428 | 3,354615 | 7,95E-04 | 0,0281111 |
| EIF2D          | 459,00  | 1,69  | 0,50513  | 3,353379 | 7,98E-04 | 0,0281834 |
| RAD1           | 157,61  | 2,72  | 0,812662 | 3,352012 | 8,02E-04 | 0,0282692 |
| NCF1C          | 404,86  | -1,59 | 0,474087 | -3,3471  | 8,17E-04 | 0,0287205 |
| PPP1R14A       | 18,66   | 4,15  | 1,241385 | 3,346024 | 8,20E-04 | 0,0287485 |
| UBXN8          | 61,95   | 3,69  | 1,103958 | 3,345784 | 8,21E-04 | 0,0287485 |
| FUCA1          | 170,98  | 3,42  | 1,024383 | 3,343223 | 8,28E-04 | 0,0289606 |
| PDE11A         | 26,06   | -2,14 | 0,638894 | -3,34176 | 8,32E-04 | 0,0290587 |
| CTD-2349P21.11 | 7,60    | -2,38 | 0,712635 | -3,33875 | 8,42E-04 | 0,0292641 |
| SLC40A1        | 319,61  | 2,72  | 0,814643 | 3,338733 | 8,42E-04 | 0,0292641 |
| RNASEH1        | 148,77  | 1,82  | 0,544906 | 3,338249 | 8,43E-04 | 0,0292641 |
| SPIB           | 123,65  | 2,15  | 0,645245 | 3,33773  | 8,45E-04 | 0,0292642 |
| E2F7           | 21,47   | 6,64  | 1,991096 | 3,337039 | 8,47E-04 | 0,0292825 |
| LPP            | 1199,35 | 1,88  | 0,563604 | 3,334252 | 8,55E-04 | 0,0295181 |
| CD27           | 4,18    | -3,38 | 1,015197 | -3,33378 | 8,57E-04 | 0,0295181 |
| OST4           | 762,26  | -0,65 | 0,195178 | -3,33125 | 8,65E-04 | 0,029733  |
| CAMKK1         | 53,85   | 3,29  | 0,987694 | 3,329274 | 8,71E-04 | 0,0297918 |
| NME1-NME2      | 85,43   | 5,94  | 1,7829   | 3,329271 | 8,71E-04 | 0,0297918 |

|                |          |       |          |          |          |           |
|----------------|----------|-------|----------|----------|----------|-----------|
| GALR2          | 12,18    | 6,24  | 1,874391 | 3,329156 | 8,71E-04 | 0,0297918 |
| ACSL4          | 696,45   | 1,56  | 0,470199 | 3,326978 | 8,78E-04 | 0,0299122 |
| ARRB1          | 339,61   | -1,50 | 0,451418 | -3,32695 | 8,78E-04 | 0,0299122 |
| PTGFRN         | 100,91   | 4,23  | 1,270559 | 3,326501 | 8,79E-04 | 0,0299122 |
| XYLB           | 116,28   | -3,34 | 1,004337 | -3,32534 | 8,83E-04 | 0,0299824 |
| RP11-93B14.9   | 23,04    | -5,45 | 1,639686 | -3,32441 | 8,86E-04 | 0,030028  |
| ELOC           | 345,49   | -1,29 | 0,388883 | -3,3203  | 8,99E-04 | 0,0304175 |
| AGPHD1         | 67,98    | -2,03 | 0,610395 | -3,31963 | 9,01E-04 | 0,0304359 |
| C2             | 38,72    | -2,47 | 0,744041 | -3,31765 | 9,08E-04 | 0,0305966 |
| SVOP           | 31,13    | -3,17 | 0,955984 | -3,31452 | 9,18E-04 | 0,0308857 |
| ACER3          | 1134,26  | 1,60  | 0,4842   | 3,313055 | 9,23E-04 | 0,0309914 |
| RP1-12G14.9    | 57,99    | 4,29  | 1,296049 | 3,311787 | 9,27E-04 | 0,0310641 |
| RN7SL824P      | 6,44     | 4,74  | 1,432306 | 3,311391 | 9,28E-04 | 0,0310641 |
| LLNLR-246C6.1  | 30,05    | -1,88 | 0,566872 | -3,31084 | 9,30E-04 | 0,0310692 |
| IL1R2          | 1015,82  | 1,69  | 0,511326 | 3,309771 | 9,34E-04 | 0,0311325 |
| RP13-27G4.2    | 6,97     | -2,76 | 0,83588  | -3,30784 | 9,40E-04 | 0,0312914 |
| ZNF382         | 139,94   | -2,36 | 0,714073 | -3,30548 | 9,48E-04 | 0,0314998 |
| ACCS           | 231,55   | 2,32  | 0,70278  | 3,304465 | 9,52E-04 | 0,0315581 |
| MRPS30         | 299,12   | 2,08  | 0,630416 | 3,30131  | 9,62E-04 | 0,0318584 |
| FAM81A         | 46,04    | 3,90  | 1,18085  | 3,300742 | 9,64E-04 | 0,0318663 |
| TRIM56         | 343,78   | -1,48 | 0,448412 | -3,29972 | 9,68E-04 | 0,0319263 |
| RP11-384K6.8   | 13,95    | -5,01 | 1,518151 | -3,29695 | 9,77E-04 | 0,0321858 |
| TMEM138        | 170,67   | -1,47 | 0,445591 | -3,29231 | 9,94E-04 | 0,0326248 |
| RPS6KB1        | 338,50   | -1,81 | 0,550972 | -3,29215 | 9,94E-04 | 0,0326248 |
| NCMAP          | 14,66    | -1,52 | 0,462137 | -3,28946 | 0,001004 | 0,0328241 |
| SETD5          | 879,78   | -1,69 | 0,514333 | -3,28944 | 0,001004 | 0,0328241 |
| GSG1L          | 7,90     | 5,05  | 1,534803 | 3,288821 | 0,001006 | 0,0328388 |
| RP11-17M16.1   | 21,94    | 6,51  | 1,978499 | 3,288219 | 0,001008 | 0,0328515 |
| RP11-229D13.3  | 30,85    | -2,80 | 0,853435 | -3,28468 | 0,001021 | 0,0332083 |
| AUH            | 31,66    | 3,34  | 1,018057 | 3,283316 | 0,001026 | 0,0333116 |
| MIR34AHG       | 13,62    | -2,29 | 0,697914 | -3,28153 | 0,001032 | 0,0334643 |
| CTD-3092A11.3  | 5,48     | -6,17 | 1,882479 | -3,28024 | 0,001037 | 0,0335596 |
| NRARP          | 10,06    | 5,96  | 1,818312 | 3,278053 | 0,001045 | 0,0336776 |
| BTNL8          | 8,16     | -2,90 | 0,885959 | -3,27784 | 0,001046 | 0,0336776 |
| EP400NL        | 153,57   | -2,20 | 0,672415 | -3,27774 | 0,001046 | 0,0336776 |
| VCAN           | 10108,00 | -0,90 | 0,275826 | -3,2773  | 0,001048 | 0,0336776 |
| MYCL           | 315,93   | 2,41  | 0,736314 | 3,275824 | 0,001054 | 0,0337901 |
| CTD-2545G14.7  | 16,02    | 6,63  | 2,023945 | 3,274902 | 0,001057 | 0,0337901 |
| AC107982.5     | 4,34     | -4,54 | 1,384947 | -3,27457 | 0,001058 | 0,0337901 |
| MT-ND1         | 43699,07 | -0,93 | 0,28425  | -3,27411 | 0,00106  | 0,0337901 |
| CH507-236L23.1 | 7,01     | -7,15 | 2,184278 | -3,27392 | 0,001061 | 0,0337901 |
| ANKRD6         | 104,07   | 2,36  | 0,722475 | 3,272388 | 0,001066 | 0,0339162 |
| RP11-526D8.3   | 7,60     | -5,75 | 1,758064 | -3,27172 | 0,001069 | 0,0339387 |
| DZIP1          | 15,82    | -3,47 | 1,061088 | -3,27052 | 0,001074 | 0,0340139 |
| NELL2          | 5,29     | -5,81 | 1,77772  | -3,27013 | 0,001075 | 0,0340139 |
| NSRP1          | 468,91   | -0,93 | 0,284879 | -3,26904 | 0,001079 | 0,0340866 |
| TIGAR          | 351,72   | 2,57  | 0,786464 | 3,26843  | 0,001081 | 0,0341026 |
| ZNF626         | 170,10   | -2,78 | 0,852624 | -3,26582 | 0,001091 | 0,0343607 |
| PLXND1         | 196,58   | -1,37 | 0,419169 | -3,26519 | 0,001094 | 0,0343786 |
| VIM            | 18967,09 | 0,67  | 0,206431 | 3,263939 | 0,001099 | 0,0344571 |

|               |           |        |          |          |          |           |
|---------------|-----------|--------|----------|----------|----------|-----------|
| CTB-43E15.3   | 21,71     | 3,66   | 1,120037 | 3,263588 | 0,0011   | 0,0344571 |
| RP3-370M22.8  | 6,33      | -7,15  | 2,191143 | -3,26186 | 0,001107 | 0,0345997 |
| UBTD2         | 120,88    | 3,27   | 1,004016 | 3,261465 | 0,001108 | 0,0345997 |
| SAYS1D1       | 100,50    | 2,78   | 0,851385 | 3,260424 | 0,001112 | 0,0346417 |
| CTD-2378E12.1 | 42,95     | -2,47  | 0,756899 | -3,25969 | 0,001115 | 0,0346417 |
| NOS2P1        | 8,35      | -3,65  | 1,120024 | -3,25927 | 0,001117 | 0,0346417 |
| THEM4         | 123,67    | 2,23   | 0,684908 | 3,259224 | 0,001117 | 0,0346417 |
| LLNLR-276H7.1 | 1,80      | -3,82  | 1,170707 | -3,25914 | 0,001117 | NA        |
| C12orf36      | 16,72     | 4,76   | 1,459686 | 3,258484 | 0,00112  | 0,0346744 |
| CACFD1        | 72,95     | 4,40   | 1,351565 | 3,255941 | 0,00113  | 0,0349283 |
| PLK2          | 449,97    | 2,46   | 0,757126 | 3,254166 | 0,001137 | 0,035078  |
| ZNF41         | 112,60    | 3,63   | 1,114361 | 3,253785 | 0,001139 | 0,035078  |
| GXYLT1        | 182,24    | 2,58   | 0,793954 | 3,251901 | 0,001146 | 0,0352529 |
| PPTC7         | 378,72    | 1,41   | 0,434696 | 3,249725 | 0,001155 | 0,0354652 |
| MAP2K6        | 117,68    | 2,72   | 0,837593 | 3,247385 | 0,001165 | 0,0356981 |
| SNORA28       | 68,08     | 3,27   | 1,00718  | 3,246925 | 0,001167 | 0,0356981 |
| RP11-640L9.1  | 13,30     | 5,55   | 1,708933 | 3,245349 | 0,001173 | 0,0358374 |
| IL5RA         | 14,57     | -1,87  | 0,576157 | -3,24444 | 0,001177 | 0,0358927 |
| CTD-2235C13.3 | 8,16      | -3,79  | 1,169095 | -3,24342 | 0,001181 | 0,0359626 |
| RP1-118J21.27 | 17,04     | 6,18   | 1,906781 | 3,242758 | 0,001184 | 0,0359875 |
| MT-RNR2       | 353856,58 | -0,75  | 0,230844 | -3,24179 | 0,001188 | 0,0360174 |
| NCR3LG1       | 24,82     | 3,35   | 1,034332 | 3,241258 | 0,00119  | 0,0360174 |
| RP11-107.1    | 44,03     | -11,78 | 3,635728 | -3,24113 | 0,001191 | 0,0360174 |
| MARCH6        | 889,66    | 1,88   | 0,581051 | 3,240021 | 0,001195 | 0,0360988 |
| WWC2          | 121,28    | 3,58   | 1,104839 | 3,239479 | 0,001197 | 0,0361089 |
| DHRS3         | 157,60    | 2,75   | 0,850411 | 3,238342 | 0,001202 | 0,0361944 |
| RP11-362F19.2 | 41,17     | -3,75  | 1,159546 | -3,23745 | 0,001206 | 0,036195  |
| MTR           | 381,13    | 1,90   | 0,585916 | 3,237416 | 0,001206 | 0,036195  |
| MBNL2         | 249,17    | -2,13  | 0,657027 | -3,23524 | 0,001215 | 0,0364126 |
| GOS2          | 398,52    | 3,81   | 1,178637 | 3,233915 | 0,001221 | 0,0365237 |
| RP11-286N22.8 | 241,51    | 2,53   | 0,783704 | 3,231683 | 0,001231 | 0,0367202 |
| TDP1          | 125,05    | 2,30   | 0,711675 | 3,231465 | 0,001232 | 0,0367202 |
| HOXB13        | 22,62     | -3,59  | 1,110029 | -3,23058 | 0,001235 | 0,0367751 |
| RP11-96O20.5  | 26,05     | -4,37  | 1,354379 | -3,22916 | 0,001242 | 0,0368997 |
| ACTL6A        | 166,01    | 2,32   | 0,719779 | 3,227544 | 0,001249 | 0,0370491 |
| CACUL1        | 1421,71   | 1,53   | 0,473933 | 3,225873 | 0,001256 | 0,0371198 |
| DCAF12        | 203,44    | 2,33   | 0,721718 | 3,225871 | 0,001256 | 0,0371198 |
| RP3-422G23.2  | 16,96     | -2,51  | 0,778535 | -3,22563 | 0,001257 | 0,0371198 |
| TCAF2         | 128,73    | -2,41  | 0,746853 | -3,22363 | 0,001266 | 0,0373086 |
| PDE4B         | 613,34    | 1,97   | 0,611877 | 3,223273 | 0,001267 | 0,0373086 |
| HECTD1        | 1284,60   | 1,34   | 0,415506 | 3,222386 | 0,001271 | 0,0373651 |
| GRAMD1B       | 181,65    | 1,93   | 0,600762 | 3,220273 | 0,001281 | 0,0375519 |
| RP11-25H12.1  | 7,23      | -5,71  | 1,773475 | -3,22005 | 0,001282 | 0,0375519 |
| SMARCC2       | 414,66    | 1,79   | 0,557367 | 3,219305 | 0,001285 | 0,0375538 |
| RP11-574F11.3 | 11,49     | -3,90  | 1,210914 | -3,21914 | 0,001286 | 0,0375538 |
| XRCC6         | 2769,46   | 0,72   | 0,223779 | 3,217608 | 0,001293 | 0,037678  |
| RP13-131K19.1 | 7,21      | -7,03  | 2,184772 | -3,21729 | 0,001294 | 0,037678  |
| RP11-626G11.3 | 125,67    | 2,66   | 0,827042 | 3,214931 | 0,001305 | 0,0379014 |
| CTB-186H2.3   | 7,02      | -4,43  | 1,377192 | -3,21414 | 0,001308 | 0,0379014 |
| RPL26L1       | 176,30    | 1,43   | 0,446053 | 3,214122 | 0,001308 | 0,0379014 |

|                |         |       |          |          |          |           |
|----------------|---------|-------|----------|----------|----------|-----------|
| LAT            | 149,08  | -2,35 | 0,731257 | -3,2138  | 0,00131  | 0,0379014 |
| TBCD           | 552,54  | -1,30 | 0,404863 | -3,20919 | 0,001331 | 0,0384048 |
| RP11-167H9.3   | 9,04    | -5,07 | 1,580362 | -3,20878 | 0,001333 | 0,0384048 |
| DNASE2         | 70,18   | -3,17 | 0,987169 | -3,20867 | 0,001333 | 0,0384048 |
| RP11-77H9.2    | 46,17   | 3,48  | 1,084042 | 3,207608 | 0,001338 | 0,0384571 |
| FLAD1          | 414,67  | -0,87 | 0,272754 | -3,20739 | 0,001339 | 0,0384571 |
| PYHIN1         | 28,20   | -3,20 | 0,997716 | -3,20688 | 0,001342 | 0,0384664 |
| H2AFX          | 67,43   | 2,17  | 0,676725 | 3,204977 | 0,001351 | 0,0386621 |
| PTEN           | 2440,17 | 1,16  | 0,361176 | 3,201474 | 0,001367 | 0,0390752 |
| RP13-93L13.2   | 11,51   | -1,30 | 0,406937 | -3,19926 | 0,001378 | 0,0393161 |
| RP11-575L16.2  | 19,22   | 6,89  | 2,153838 | 3,197906 | 0,001384 | 0,0394408 |
| RP11-1102P22.1 | 32,83   | 3,89  | 1,216403 | 3,196822 | 0,00139  | 0,0395287 |
| AC005083.1     | 13,44   | 6,38  | 1,996106 | 3,195254 | 0,001397 | 0,0396834 |
| CTD-2185K10.1  | 2,09    | -2,94 | 0,919605 | -3,19431 | 0,001402 | NA        |
| TTYH1          | 25,86   | -1,85 | 0,580385 | -3,19266 | 0,00141  | 0,0399808 |
| TTC39B         | 183,61  | 2,68  | 0,839248 | 3,190775 | 0,001419 | 0,0401089 |
| SLC11A1        | 360,84  | -1,99 | 0,62473  | -3,19062 | 0,00142  | 0,0401089 |
| OR52K1         | 164,93  | -1,78 | 0,558541 | -3,19042 | 0,001421 | 0,0401089 |
| IFNG           | 3,63    | -5,83 | 1,828207 | -3,18949 | 0,001425 | NA        |
| CDH7           | 20,74   | -3,06 | 0,961639 | -3,18685 | 0,001438 | 0,0404827 |
| CD300E         | 1046,99 | -1,14 | 0,35626  | -3,18652 | 0,00144  | 0,0404827 |
| GTF2IP18       | 41,31   | -2,23 | 0,699493 | -3,18642 | 0,00144  | 0,0404827 |
| TRAF1          | 75,26   | 3,73  | 1,170685 | 3,185399 | 0,001446 | 0,0405435 |
| RAF1           | 984,39  | 1,41  | 0,442458 | 3,185114 | 0,001447 | 0,0405435 |
| LGALS4         | 6,27    | -2,82 | 0,884015 | -3,18435 | 0,001451 | 0,0405899 |
| RP11-143O10.1  | 2,77    | -3,78 | 1,186877 | -3,18275 | 0,001459 | NA        |
| CRISPLD2       | 82,94   | -1,90 | 0,597755 | -3,18211 | 0,001462 | 0,040843  |
| VKORC1L1       | 81,20   | -2,32 | 0,730578 | -3,18134 | 0,001466 | 0,0408907 |
| RPL7AP64       | 8,19    | -7,07 | 2,2243   | -3,18047 | 0,00147  | 0,0409524 |
| DTHD1          | 7,82    | -7,13 | 2,245152 | -3,17659 | 0,00149  | 0,041414  |
| GLYATL2        | 10,89   | -8,37 | 2,6349   | -3,17502 | 0,001498 | 0,041414  |
| POU2F2         | 1085,86 | -1,27 | 0,399109 | -3,17479 | 0,001499 | 0,041414  |
| RP1-228P16.4   | 4,55    | -2,98 | 0,938852 | -3,17419 | 0,001503 | 0,041414  |
| TPI1           | 7634,55 | 0,72  | 0,226033 | 3,173908 | 0,001504 | 0,041414  |
| SNX14          | 765,98  | 1,04  | 0,326474 | 3,173884 | 0,001504 | 0,041414  |
| MIR17HG        | 29,84   | 6,14  | 1,933268 | 3,17381  | 0,001505 | 0,041414  |
| RP11-115D19.4  | 10,01   | -4,43 | 1,396261 | -3,17377 | 0,001505 | 0,041414  |
| RP11-893F2.5   | 3,99    | -5,27 | 1,661082 | -3,17295 | 0,001509 | 0,0414325 |
| AC000123.2     | 25,20   | 3,52  | 1,108812 | 3,172779 | 0,00151  | 0,0414325 |
| ZNF704         | 55,42   | -4,30 | 1,357608 | -3,17004 | 0,001524 | 0,0417459 |
| RP11-158H5.7   | 41,81   | -3,89 | 1,228787 | -3,16973 | 0,001526 | 0,0417459 |
| SHANK1         | 4,59    | -3,27 | 1,033298 | -3,16921 | 0,001529 | 0,0417552 |
| NARS2          | 86,53   | 3,24  | 1,021278 | 3,168816 | 0,001531 | 0,0417552 |
| AC103965.1     | 11,96   | 5,51  | 1,740705 | 3,167892 | 0,001535 | 0,0418268 |
| CD8A           | 89,57   | -4,68 | 1,479095 | -3,16724 | 0,001539 | 0,0418588 |
| RP11-439E19.10 | 17,12   | -1,92 | 0,606363 | -3,16652 | 0,001543 | 0,0419017 |
| KIF21A         | 161,17  | -3,79 | 1,197946 | -3,16514 | 0,00155  | 0,0420099 |
| SLC39A6        | 231,47  | 1,82  | 0,574872 | 3,164923 | 0,001551 | 0,0420099 |
| FOXJ3          | 416,58  | 2,08  | 0,656996 | 3,164149 | 0,001555 | 0,0420103 |
| MTA1           | 45,34   | 2,40  | 0,759636 | 3,164074 | 0,001556 | 0,0420103 |

|               |           |       |          |          |          |           |
|---------------|-----------|-------|----------|----------|----------|-----------|
| C1orf61       | 8,62      | -2,13 | 0,673317 | -3,16341 | 0,001559 | 0,0420225 |
| RP9           | 154,53    | -1,64 | 0,517883 | -3,16315 | 0,001561 | 0,0420225 |
| RP11-10L12.5  | 13,88     | 6,43  | 2,032713 | 3,16271  | 0,001563 | 0,0420247 |
| LGI1          | 7,32      | -2,40 | 0,759811 | -3,16024 | 0,001576 | 0,0422982 |
| GREB1L        | 54,27     | -4,86 | 1,538323 | -3,15998 | 0,001578 | 0,0422982 |
| MT-CYB        | 240111,29 | -0,86 | 0,272269 | -3,15749 | 0,001591 | 0,0425991 |
| C12orf73      | 17,47     | 4,84  | 1,532419 | 3,15636  | 0,001598 | 0,0427038 |
| RGPD4         | 7,26      | -7,51 | 2,378583 | -3,15574 | 0,001601 | 0,0427337 |
| BRK1          | 2247,20   | 0,73  | 0,231149 | 3,1549   | 0,001606 | 0,0427576 |
| CALM1         | 5381,70   | 0,62  | 0,197246 | 3,154737 | 0,001606 | 0,0427576 |
| RP11-64C12.3  | 7,36      | -4,01 | 1,271218 | -3,15384 | 0,001611 | 0,0428072 |
| AGBL4         | 13,02     | -3,67 | 1,164944 | -3,15357 | 0,001613 | 0,0428072 |
| IGF2R         | 222,96    | -1,64 | 0,519713 | -3,1527  | 0,001618 | 0,0428732 |
| RP11-7K24.3   | 9,18      | -1,64 | 0,521113 | -3,15211 | 0,001621 | 0,0428993 |
| LSM14A        | 748,43    | 1,28  | 0,404897 | 3,150798 | 0,001628 | 0,0429809 |
| BNIP1         | 96,41     | 3,05  | 0,967404 | 3,150722 | 0,001629 | 0,0429809 |
| LGSN          | 26,54     | -2,37 | 0,752509 | -3,14968 | 0,001634 | 0,0430731 |
| CSTA          | 545,09    | -0,74 | 0,233695 | -3,14904 | 0,001638 | 0,0431074 |
| MRPL30        | 124,14    | 1,82  | 0,577857 | 3,148387 | 0,001642 | 0,0431421 |
| PDCD2L        | 48,75     | 5,51  | 1,751811 | 3,14644  | 0,001653 | 0,0433441 |
| SUZ12P        | 122,67    | 1,58  | 0,501014 | 3,146196 | 0,001654 | 0,0433441 |
| MPDZ          | 7,31      | -6,59 | 2,094589 | -3,14525 | 0,001659 | 0,0434233 |
| RAB39B        | 75,95     | 3,70  | 1,175259 | 3,144551 | 0,001663 | 0,0434661 |
| CH17-132F21.5 | 23,77     | -6,05 | 1,924266 | -3,14228 | 0,001676 | 0,0437428 |
| TRIM7         | 10,08     | -3,20 | 1,018452 | -3,14028 | 0,001688 | 0,0439807 |
| CHIC2         | 99,51     | 2,20  | 0,701034 | 3,138465 | 0,001698 | 0,0441928 |
| FGGY          | 137,71    | 2,80  | 0,893883 | 3,136549 | 0,001709 | 0,0444204 |
| PDHB          | 943,39    | 1,40  | 0,447429 | 3,134657 | 0,001721 | 0,0446455 |
| DCLRE1A       | 30,54     | 5,45  | 1,74024  | 3,133583 | 0,001727 | 0,0447469 |
| RP4-575N6.5   | 11,06     | -3,42 | 1,091526 | -3,13173 | 0,001738 | 0,0449617 |
| RP11-23E10.4  | 1,72      | -2,84 | 0,907961 | -3,13144 | 0,00174  | NA        |
| RP11-713P17.4 | 4,35      | -3,00 | 0,957968 | -3,13136 | 0,00174  | 0,0449617 |
| CERS5         | 469,15    | -1,17 | 0,37532  | -3,13031 | 0,001746 | 0,0450469 |
| FAM229B       | 20,81     | 3,30  | 1,052776 | 3,12999  | 0,001748 | 0,0450469 |
| ZNF35         | 51,72     | 3,23  | 1,032856 | 3,129065 | 0,001754 | 0,0451183 |
| ATF7          | 265,12    | 2,25  | 0,718465 | 3,128618 | 0,001756 | 0,0451183 |
| RP11-750H9.5  | 48,21     | 3,03  | 0,968172 | 3,128306 | 0,001758 | 0,0451183 |
| C1orf162      | 4409,67   | 0,86  | 0,275987 | 3,125845 | 0,001773 | 0,0453354 |
| HELQ          | 210,74    | 2,59  | 0,828504 | 3,125639 | 0,001774 | 0,0453354 |
| ARGLU1        | 2030,84   | -0,65 | 0,206635 | -3,12558 | 0,001775 | 0,0453354 |
| MT-ATP8       | 3966,14   | -1,01 | 0,324073 | -3,12524 | 0,001777 | 0,0453354 |
| RP11-20I23.13 | 74,64     | 2,75  | 0,87946  | 3,124476 | 0,001781 | 0,0453354 |
| STK24         | 765,01    | 1,02  | 0,325483 | 3,124471 | 0,001781 | 0,0453354 |
| STAC3         | 15,54     | 4,56  | 1,460889 | 3,122705 | 0,001792 | 0,0454858 |
| ADD2          | 77,84     | 3,12  | 0,998777 | 3,122693 | 0,001792 | 0,0454858 |
| RP11-511B23.2 | 9,06      | -7,67 | 2,456079 | -3,12115 | 0,001801 | 0,0456619 |
| RP11-217O12.1 | 16566,03  | -1,08 | 0,346591 | -3,11926 | 0,001813 | 0,0458944 |
| RP11-569O4.8  | 8,57      | 5,73  | 1,836968 | 3,118249 | 0,001819 | 0,0459251 |
| TMEM14A       | 38,56     | 5,06  | 1,622097 | 3,117911 | 0,001821 | 0,0459251 |
| RP11-60A8.1   | 23,25     | -4,93 | 1,581788 | -3,11786 | 0,001822 | 0,0459251 |

|                |          |        |          |          |          |           |
|----------------|----------|--------|----------|----------|----------|-----------|
| SDAD1          | 403,27   | 1,84   | 0,588998 | 3,116943 | 0,001827 | 0,0460057 |
| ITPK1          | 442,24   | 1,41   | 0,451012 | 3,115782 | 0,001835 | 0,0460947 |
| C11orf88       | 3,45     | -4,38  | 1,404584 | -3,11567 | 0,001835 | NA        |
| NUP54          | 234,90   | 1,86   | 0,596515 | 3,115576 | 0,001836 | 0,0460947 |
| FANK1          | 20,76    | 4,99   | 1,603194 | 3,114359 | 0,001843 | 0,046223  |
| KB-1507C5.2    | 14,96    | 2,72   | 0,873182 | 3,112853 | 0,001853 | 0,0463969 |
| TRMT61B        | 90,60    | 3,56   | 1,143716 | 3,110662 | 0,001867 | 0,0466198 |
| MT-ATP6        | 45775,95 | -0,85  | 0,2719   | -3,11037 | 0,001869 | 0,0466198 |
| TIMM17A        | 800,66   | 1,34   | 0,431142 | 3,10999  | 0,001871 | 0,0466198 |
| CAV2           | 34,74    | -3,31  | 1,064755 | -3,10985 | 0,001872 | 0,0466198 |
| GPAM           | 94,21    | 3,66   | 1,177084 | 3,107614 | 0,001886 | 0,0468808 |
| APPL2          | 147,57   | -2,01  | 0,647794 | -3,10689 | 0,001891 | 0,0468808 |
| CTA-280A3.2    | 7,64     | -3,53  | 1,137381 | -3,10681 | 0,001891 | 0,0468808 |
| MED31          | 62,70    | 2,97   | 0,956078 | 3,106624 | 0,001892 | 0,0468808 |
| WASH5P         | 189,24   | 2,73   | 0,880148 | 3,104827 | 0,001904 | 0,0471039 |
| RP11-508N22.12 | 11,52    | -3,24  | 1,045003 | -3,10436 | 0,001907 | 0,047116  |
| PMPCB          | 569,85   | 1,61   | 0,519817 | 3,102966 | 0,001916 | 0,047268  |
| MT-TE          | 88,93    | -1,42  | 0,456248 | -3,10199 | 0,001922 | 0,047268  |
| NDUFB7         | 672,56   | -0,79  | 0,253303 | -3,10131 | 0,001927 | 0,047268  |
| ARF4           | 846,45   | 1,36   | 0,437533 | 3,101157 | 0,001928 | 0,047268  |
| RP3-355L5.4    | 8,36     | -3,01  | 0,969401 | -3,10095 | 0,001929 | 0,047268  |
| MT-TR          | 11,93    | -1,97  | 0,634383 | -3,10088 | 0,001929 | 0,047268  |
| NPL            | 60,18    | -2,11  | 0,680908 | -3,10067 | 0,001931 | 0,047268  |
| AC012594.1     | 56,36    | -1,57  | 0,505681 | -3,09983 | 0,001936 | 0,0473228 |
| RP11-473C18.6  | 7,17     | -5,25  | 1,692715 | -3,09954 | 0,001938 | 0,0473228 |
| RP11-359B12.2  | 29,69    | 3,68   | 1,189439 | 3,097753 | 0,00195  | 0,0474598 |
| ILVBL          | 132,01   | -2,89  | 0,932804 | -3,09761 | 0,001951 | 0,0474598 |
| ATP5C1         | 2295,32  | 0,79   | 0,253551 | 3,097373 | 0,001952 | 0,0474598 |
| COL19A1        | 40,23    | -2,77  | 0,895237 | -3,09714 | 0,001954 | 0,0474598 |
| NRM            | 267,63   | 2,01   | 0,647756 | 3,09625  | 0,00196  | 0,0474629 |
| CPVL           | 7607,74  | 0,86   | 0,277743 | 3,096081 | 0,001961 | 0,0474629 |
| TFEC           | 561,55   | -1,47  | 0,474119 | -3,09596 | 0,001962 | 0,0474629 |
| RP11-659E9.6   | 104,85   | -1,51  | 0,48808  | -3,0953  | 0,001966 | 0,0475062 |
| IFI27L2        | 187,79   | -1,38  | 0,447183 | -3,09269 | 0,001983 | 0,0478553 |
| KIAA1217       | 6,94     | -6,98  | 2,256678 | -3,09236 | 0,001986 | 0,0478553 |
| TMEM109        | 1007,56  | 1,00   | 0,324778 | 3,091171 | 0,001994 | 0,0479853 |
| RP11-47J17.1   | 3,31     | -3,98  | 1,288943 | -3,09112 | 0,001994 | NA        |
| DCTPP1         | 261,82   | 2,13   | 0,689295 | 3,088987 | 0,002008 | 0,0482769 |
| CTD-2341M24.1  | 22,87    | 4,61   | 1,492787 | 3,086975 | 0,002022 | 0,0485006 |
| CFAP44         | 93,86    | -3,59  | 1,163237 | -3,08685 | 0,002023 | 0,0485006 |
| RP11-42A4.1    | 18,81    | -11,22 | 3,636117 | -3,08582 | 0,00203  | 0,0486049 |
| HLA-DMA        | 12161,95 | 0,60   | 0,194627 | 3,084346 | 0,00204  | 0,0487843 |
| ATHL1          | 229,92   | -2,07  | 0,670226 | -3,08376 | 0,002044 | 0,0488124 |
| MCU            | 93,73    | 2,95   | 0,955555 | 3,083133 | 0,002048 | 0,0488124 |
| AVL9           | 507,38   | 1,39   | 0,451507 | 3,08303  | 0,002049 | 0,0488124 |
| TMPRSS12       | 22,32    | -3,48  | 1,127817 | -3,08242 | 0,002053 | 0,0488452 |
| KIAA0664L3     | 35,32    | -2,99  | 0,971288 | -3,08188 | 0,002057 | 0,0488452 |
| RP11-356N1.2   | 88,69    | -2,61  | 0,846221 | -3,08134 | 0,002061 | 0,0488452 |
| EWSR1          | 1348,58  | 0,87   | 0,281783 | 3,081309 | 0,002061 | 0,0488452 |
| HMG4           | 281,50   | 1,72   | 0,558902 | 3,079933 | 0,00207  | 0,0490091 |



|               |          |       |          |          |          |           |
|---------------|----------|-------|----------|----------|----------|-----------|
| RP11-366L20.2 | 8,91     | -2,82 | 0,917429 | -3,07914 | 0,002076 | 0,0490772 |
| F11R          | 284,74   | 2,16  | 0,700863 | 3,077946 | 0,002084 | 0,0491717 |
| CTD-2014B16.3 | 6,60     | 4,20  | 1,364076 | 3,077811 | 0,002085 | 0,0491717 |
| EPB41L4B      | 10,74    | -8,22 | 2,672543 | -3,07655 | 0,002094 | 0,0493172 |
| ANO10         | 58,10    | 2,26  | 0,734983 | 3,074315 | 0,00211  | 0,0496258 |
| RP11-108H9.1  | 6,41     | -3,24 | 1,053652 | -3,07356 | 0,002115 | 0,049644  |
| TK1           | 24,51    | 4,96  | 1,612314 | 3,073353 | 0,002117 | 0,049644  |
| CTA-342B11.2  | 3,91     | -5,38 | 1,751626 | -3,07308 | 0,002119 | 0,049644  |
| GABPB1        | 163,78   | 2,83  | 0,92083  | 3,072277 | 0,002124 | 0,0497146 |
| TANC1         | 76,05    | -3,83 | 1,247353 | -3,06928 | 0,002146 | 0,0500891 |
| ENTPD1        | 1084,54  | 1,29  | 0,420225 | 3,069056 | 0,002147 | 0,0500891 |
| PEX7          | 57,11    | 3,55  | 1,158115 | 3,068911 | 0,002148 | 0,0500891 |
| ZNF583        | 76,18    | 3,21  | 1,046423 | 3,067046 | 0,002162 | 0,0503033 |
| LILRA1        | 488,90   | 1,50  | 0,490275 | 3,066823 | 0,002163 | 0,0503033 |
| ACY1          | 84,08    | 2,47  | 0,806236 | 3,065891 | 0,00217  | 0,0503033 |
| RP11-615I16.2 | 1,79     | -4,73 | 1,54252  | -3,06559 | 0,002172 | NA        |
| RP11-275D4.1  | 9,45     | -2,59 | 0,84457  | -3,06544 | 0,002174 | 0,0503033 |
| TMEM50B       | 483,71   | 1,23  | 0,402406 | 3,065308 | 0,002174 | 0,0503033 |
| RP11-74M13.4  | 6,73     | -2,61 | 0,852684 | -3,06513 | 0,002176 | 0,0503033 |
| RP11-311C24.1 | 49,72    | 5,21  | 1,701115 | 3,065024 | 0,002177 | 0,0503033 |
| HPD           | 21,55    | 7,04  | 2,298    | 3,064103 | 0,002183 | 0,0503835 |
| HULC          | 142,22   | -1,60 | 0,522808 | -3,06381 | 0,002185 | 0,0503835 |
| RN7SL474P     | 3,71     | -2,37 | 0,774119 | -3,06334 | 0,002189 | NA        |
| CLN6          | 204,87   | -1,42 | 0,464394 | -3,06274 | 0,002193 | 0,0505011 |
| SSX7          | 20,79    | -3,76 | 1,226957 | -3,06147 | 0,002203 | 0,0506524 |
| H3F3B         | 14696,54 | 0,76  | 0,248171 | 3,060556 | 0,002209 | 0,0507449 |
| RP1-261D10.1  | 11,54    | 6,16  | 2,01319  | 3,058622 | 0,002224 | 0,0510107 |
| RP11-71N10.1  | 3,39     | -4,44 | 1,45126  | -3,05841 | 0,002225 | NA        |
| CCR6          | 222,96   | 3,17  | 1,036442 | 3,056108 | 0,002242 | 0,0513264 |
| MMP9          | 14,04    | 6,44  | 2,108779 | 3,056034 | 0,002243 | 0,0513264 |
| TSPAN5        | 8,95     | -2,88 | 0,944324 | -3,05492 | 0,002251 | 0,0514479 |
| NAPRT         | 726,66   | -0,86 | 0,280376 | -3,05449 | 0,002254 | 0,0514479 |
| GALNT2        | 286,02   | -1,98 | 0,64748  | -3,05422 | 0,002256 | 0,0514479 |
| RRAGD         | 70,51    | 3,13  | 1,026275 | 3,053519 | 0,002262 | 0,0515053 |
| MGP           | 17,95    | -2,62 | 0,857561 | -3,05128 | 0,002279 | 0,0517396 |
| AREG          | 2486,77  | 2,68  | 0,878174 | 3,050842 | 0,002282 | 0,0517396 |
| HNF1B         | 11,87    | -3,14 | 1,029607 | -3,05079 | 0,002282 | 0,0517396 |
| DDHD1         | 1095,77  | 1,65  | 0,541348 | 3,05069  | 0,002283 | 0,0517396 |
| MRPL37        | 646,08   | 1,48  | 0,486336 | 3,049508 | 0,002292 | 0,0518804 |
| FBXO30        | 74,00    | 3,00  | 0,984289 | 3,048662 | 0,002299 | 0,0519635 |
| RP5-857K21.8  | 215,90   | -1,03 | 0,33642  | -3,04702 | 0,002311 | 0,0521855 |
| GABRA2        | 4,27     | -2,65 | 0,871446 | -3,04603 | 0,002319 | 0,0522932 |
| ZC3H11A       | 1051,67  | -1,15 | 0,376327 | -3,04481 | 0,002328 | 0,0524432 |
| CLEC3A        | 43,33    | -2,48 | 0,815829 | -3,04336 | 0,00234  | 0,052633  |
| CNTN3         | 12,99    | -8,37 | 2,751021 | -3,04218 | 0,002349 | 0,052775  |
| TMEM68        | 141,26   | -2,22 | 0,72954  | -3,04105 | 0,002358 | 0,0529096 |
| RP11-867G23.8 | 3,52     | -3,33 | 1,095532 | -3,04102 | 0,002358 | NA        |
| VAMP5         | 476,24   | -1,25 | 0,409508 | -3,04044 | 0,002362 | 0,0529525 |
| JKAMP         | 437,11   | 2,20  | 0,724034 | 3,03806  | 0,002381 | 0,053309  |
| RN7SKP4       | 4,30     | -3,12 | 1,02805  | -3,03653 | 0,002393 | 0,0535161 |

|                |          |       |          |          |          |           |
|----------------|----------|-------|----------|----------|----------|-----------|
| S100B          | 42,07    | 4,05  | 1,335278 | 3,033984 | 0,002413 | 0,0538788 |
| MAFB           | 428,16   | -1,56 | 0,515211 | -3,03377 | 0,002415 | 0,0538788 |
| DDX56          | 509,44   | -1,19 | 0,391966 | -3,03268 | 0,002424 | 0,0540077 |
| PTPRJ          | 495,10   | -1,75 | 0,578423 | -3,03226 | 0,002427 | 0,0540186 |
| TK2            | 319,32   | -1,76 | 0,579119 | -3,03142 | 0,002434 | 0,0541048 |
| LPCAT4         | 80,31    | 2,87  | 0,945905 | 3,029443 | 0,00245  | 0,0543952 |
| LAMTOR4        | 3395,09  | -0,61 | 0,203142 | -3,02689 | 0,002471 | 0,0547907 |
| TMEM156        | 64,68    | 1,96  | 0,647914 | 3,026533 | 0,002474 | 0,0547907 |
| ALDH2          | 2146,19  | 1,17  | 0,386054 | 3,025639 | 0,002481 | 0,0548878 |
| MATN2          | 31,40    | 3,94  | 1,303513 | 3,024618 | 0,002489 | 0,055008  |
| RP11-696N14.1  | 28,70    | -4,05 | 1,339122 | -3,02294 | 0,002503 | 0,0551186 |
| FTL            | 52653,11 | -0,56 | 0,183979 | -3,02275 | 0,002505 | 0,0551186 |
| AC011747.4     | 63,23    | -2,02 | 0,667963 | -3,02229 | 0,002509 | 0,0551186 |
| ZNF554         | 36,63    | -2,02 | 0,667738 | -3,02226 | 0,002509 | 0,0551186 |
| RPL3           | 19654,93 | 0,48  | 0,158573 | 3,022183 | 0,00251  | 0,0551186 |
| RNF5           | 372,72   | 1,74  | 0,576952 | 3,021556 | 0,002515 | 0,0551186 |
| RP11-120E11.2  | 4,33     | -5,30 | 1,755678 | -3,0212  | 0,002518 | 0,0551186 |
| GENE           | 127,50   | -2,20 | 0,726988 | -3,02115 | 0,002518 | 0,0551186 |
| ABCA17P        | 4,28     | -4,26 | 1,411675 | -3,02021 | 0,002526 | 0,0552251 |
| APLP2          | 4893,41  | -0,72 | 0,237569 | -3,01785 | 0,002546 | 0,0555908 |
| TRAPPC2B       | 64,80    | 2,62  | 0,870149 | 3,014525 | 0,002574 | 0,0561383 |
| MRPS15         | 624,96   | 1,29  | 0,428372 | 3,013535 | 0,002582 | 0,0562557 |
| RP11-219B17.1  | 4,03     | -5,65 | 1,876732 | -3,01193 | 0,002596 | 0,0564269 |
| RABGEF1        | 347,38   | 1,51  | 0,501205 | 3,011559 | 0,002599 | 0,0564269 |
| GNS            | 1019,39  | -1,02 | 0,339179 | -3,01111 | 0,002603 | 0,0564269 |
| TBC1D3I        | 4,37     | -5,81 | 1,928767 | -3,01055 | 0,002608 | 0,0564269 |
| CNOT11         | 327,58   | 1,79  | 0,596219 | 3,010321 | 0,00261  | 0,0564269 |
| ARFGEF2        | 620,43   | -1,81 | 0,599671 | -3,0102  | 0,002611 | 0,0564269 |
| CFAP70         | 18,52    | -2,70 | 0,896527 | -3,00991 | 0,002613 | 0,0564269 |
| CNTLN          | 269,58   | 1,45  | 0,481836 | 3,009455 | 0,002617 | 0,0564269 |
| KLHL2          | 150,52   | 2,03  | 0,67517  | 3,00943  | 0,002617 | 0,0564269 |
| RP5-1091N2.12  | 13,67    | 6,40  | 2,127069 | 3,008252 | 0,002628 | 0,0565136 |
| MPHOSPH10      | 245,99   | 1,55  | 0,51508  | 3,008089 | 0,002629 | 0,0565136 |
| BDP1           | 1186,57  | -0,79 | 0,262257 | -3,00785 | 0,002631 | 0,0565136 |
| RABL2A         | 47,76    | 3,08  | 1,02333  | 3,007559 | 0,002634 | 0,0565136 |
| LITAF          | 1557,10  | 1,30  | 0,433053 | 3,006118 | 0,002646 | 0,0567166 |
| RP11-338K17.10 | 10,86    | 5,51  | 1,83302  | 3,003519 | 0,002669 | 0,0571374 |
| WASF3          | 13,90    | -7,51 | 2,500729 | -3,00299 | 0,002673 | 0,0571711 |
| KRT42P         | 2,62     | -5,11 | 1,701431 | -3,00292 | 0,002674 | NA        |
| CASKIN2        | 23,95    | 4,68  | 1,559057 | 3,002485 | 0,002678 | 0,0572002 |
| AC092620.3     | 45,74    | 4,97  | 1,654416 | 3,001722 | 0,002685 | 0,0572781 |
| SLC9C2         | 5,92     | -6,72 | 2,239339 | -3,00046 | 0,002696 | 0,0574501 |
| AC006369.3     | 2,30     | -3,51 | 1,171718 | -2,99789 | 0,002719 | NA        |
| RP11-325O24.5  | 4,77     | -3,29 | 1,097521 | -2,99696 | 0,002727 | 0,0580104 |
| CYP4F11        | 17,67    | -2,67 | 0,889675 | -2,99658 | 0,00273  | 0,0580104 |
| CYP2S1         | 454,23   | 1,56  | 0,521429 | 2,996457 | 0,002731 | 0,0580104 |
| ATP1A1OS       | 15,91    | 5,99  | 1,998521 | 2,995943 | 0,002736 | 0,058042  |
| RPS3AP3        | 7,63     | -5,15 | 1,721203 | -2,99484 | 0,002746 | 0,0581853 |
| MT-ND3         | 1417,85  | -1,27 | 0,423681 | -2,99291 | 0,002763 | 0,0584884 |
| LINC01002      | 19,82    | -2,38 | 0,793687 | -2,99246 | 0,002767 | 0,0585085 |

|               |          |       |          |          |          |           |
|---------------|----------|-------|----------|----------|----------|-----------|
| CLEC10A       | 6581,68  | 1,17  | 0,390591 | 2,991949 | 0,002772 | 0,0585352 |
| POLR2C        | 130,60   | 2,35  | 0,786661 | 2,991626 | 0,002775 | 0,0585352 |
| EBF4          | 9,58     | -7,22 | 2,413541 | -2,99104 | 0,00278  | 0,0585811 |
| RP11-368N21.2 | 26,54    | 7,36  | 2,461256 | 2,989346 | 0,002796 | 0,0588404 |
| POLR3E        | 171,82   | 2,50  | 0,835917 | 2,988919 | 0,0028   | 0,0588562 |
| RAB8B         | 469,32   | -1,30 | 0,434054 | -2,98849 | 0,002804 | 0,0588731 |
| RP11-247I13.3 | 9,47     | -7,42 | 2,483148 | -2,98809 | 0,002807 | 0,0588837 |
| TRAC          | 33,33    | -3,41 | 1,140353 | -2,98743 | 0,002813 | 0,0589446 |
| PARP10        | 123,94   | -1,56 | 0,52357  | -2,98685 | 0,002819 | 0,0589894 |
| ARHGAP5       | 740,96   | 1,67  | 0,560164 | 2,986264 | 0,002824 | 0,0590361 |
| TRAF5         | 175,35   | 2,52  | 0,844591 | 2,985587 | 0,00283  | 0,059078  |
| CXCR2         | 33,50    | 4,06  | 1,361352 | 2,985238 | 0,002834 | 0,059078  |
| ADAM19        | 116,30   | 2,17  | 0,727297 | 2,984716 | 0,002838 | 0,059078  |
| KCNAB1        | 24,63    | 4,80  | 1,608999 | 2,984676 | 0,002839 | 0,059078  |
| GDI2          | 4085,86  | 0,63  | 0,211756 | 2,983873 | 0,002846 | 0,059167  |
| CCT2          | 865,91   | 0,78  | 0,262766 | 2,980582 | 0,002877 | 0,0596949 |
| STEAP4        | 184,98   | -2,96 | 0,992944 | -2,98047 | 0,002878 | 0,0596949 |
| UTF1          | 4,64     | -3,54 | 1,18889  | -2,9777  | 0,002904 | 0,0601695 |
| SLBP          | 224,73   | 1,89  | 0,635748 | 2,976847 | 0,002912 | 0,0602705 |
| CFL1P1        | 31,06    | -1,72 | 0,576694 | -2,97563 | 0,002924 | 0,0604439 |
| SLC7A7        | 1023,59  | -1,28 | 0,429135 | -2,97474 | 0,002932 | 0,0605507 |
| MT-CO3        | 84384,16 | -0,81 | 0,27393  | -2,97414 | 0,002938 | 0,0606023 |
| RP11-138A9.2  | 441,96   | 1,31  | 0,43999  | 2,972849 | 0,00295  | 0,0607906 |
| OVCH1-AS1     | 37,12    | -3,27 | 1,101229 | -2,97248 | 0,002954 | 0,0607966 |
| NFIB          | 7,39     | -1,89 | 0,635555 | -2,97146 | 0,002964 | 0,0609312 |
| NDUFV2P1      | 18,92    | 2,10  | 0,705954 | 2,970999 | 0,002968 | 0,0609556 |
| SYPL1         | 424,45   | 2,44  | 0,820896 | 2,968642 | 0,002991 | 0,0613573 |
| ZSCAN20       | 6,01     | -4,31 | 1,4506   | -2,96794 | 0,002998 | 0,0614304 |
| UBXN2B        | 252,10   | 2,19  | 0,736839 | 2,96745  | 0,003003 | 0,0614602 |
| STAM2         | 308,87   | 1,63  | 0,549029 | 2,966928 | 0,003008 | 0,061497  |
| ADCY6         | 10,07    | -3,30 | 1,112866 | -2,96621 | 0,003015 | 0,0615732 |
| TAB2          | 783,07   | 1,11  | 0,372776 | 2,964283 | 0,003034 | 0,0618921 |
| PARD6G-AS1    | 15,59    | 5,67  | 1,912658 | 2,962511 | 0,003051 | 0,0621812 |
| HIST2H4A      | 67,36    | 4,62  | 1,56143  | 2,957983 | 0,003097 | 0,0630328 |
| SLCO4A1       | 39,28    | 6,96  | 2,354394 | 2,957422 | 0,003102 | 0,0630788 |
| UCP2          | 2943,95  | 1,08  | 0,364779 | 2,955999 | 0,003117 | 0,0633014 |
| AC016722.4    | 48,53    | -2,77 | 0,938211 | -2,95408 | 0,003136 | 0,0636271 |
| RP11-540A21.3 | 238,11   | -1,86 | 0,630844 | -2,95254 | 0,003152 | 0,0638439 |
| RP11-541P9.3  | 34,68    | -2,50 | 0,845367 | -2,95236 | 0,003154 | 0,0638439 |
| LCP1          | 8034,39  | 0,47  | 0,159781 | 2,951441 | 0,003163 | 0,0638936 |
| TRBV6-2       | 8,28     | -6,78 | 2,296986 | -2,95096 | 0,003168 | 0,0638936 |
| RP11-18H21.1  | 16,42    | -5,27 | 1,786646 | -2,95093 | 0,003168 | 0,0638936 |
| PSIP1         | 384,17   | -0,95 | 0,322263 | -2,95077 | 0,00317  | 0,0638936 |
| UFC1          | 1173,80  | 1,05  | 0,357561 | 2,947716 | 0,003201 | 0,0644444 |
| SMN1          | 223,55   | 1,43  | 0,483828 | 2,947453 | 0,003204 | 0,0644444 |
| ZNF134        | 83,67    | 2,65  | 0,900887 | 2,945827 | 0,003221 | 0,0647014 |
| BTAF1         | 855,07   | 1,43  | 0,486963 | 2,945343 | 0,003226 | 0,0647014 |
| RP11-294J22.6 | 109,82   | 2,43  | 0,826369 | 2,945072 | 0,003229 | 0,0647014 |
| VMAC          | 28,62    | 3,52  | 1,195335 | 2,944887 | 0,003231 | 0,0647014 |
| MZT1          | 106,30   | 2,15  | 0,730113 | 2,944096 | 0,003239 | 0,0647973 |

|              |          |       |          |          |          |           |
|--------------|----------|-------|----------|----------|----------|-----------|
| CD83         | 3673,12  | 1,19  | 0,405378 | 2,942965 | 0,003251 | 0,0649647 |
| USP6NL       | 277,38   | 2,19  | 0,745073 | 2,942599 | 0,003255 | 0,0649718 |
| CTB-12A17.2  | 32,11    | -2,93 | 0,994742 | -2,9419  | 0,003262 | 0,0650032 |
| MYO16        | 5,86     | -3,11 | 1,057595 | -2,94179 | 0,003263 | 0,0650032 |
| RP11-90D4.2  | 187,57   | -2,39 | 0,812226 | -2,94137 | 0,003268 | 0,0650206 |
| SLC25A4      | 3,55     | -2,62 | 0,890032 | -2,94134 | 0,003268 | NA        |
| SEC22A       | 147,47   | 2,95  | 1,003295 | 2,940695 | 0,003275 | 0,0650808 |
| HLA-DQB2     | 985,56   | 1,92  | 0,654536 | 2,940161 | 0,00328  | 0,0650808 |
| ST5          | 20,06    | 3,29  | 1,118834 | 2,940092 | 0,003281 | 0,0650808 |
| SLC35D1      | 125,50   | 1,92  | 0,653912 | 2,939327 | 0,003289 | 0,0651547 |
| AC026150.8   | 22,65    | 5,56  | 1,892522 | 2,938879 | 0,003294 | 0,0651547 |
| PLEKHG4B     | 10,14    | -2,30 | 0,782405 | -2,93875 | 0,003295 | 0,0651547 |
| METTL8       | 203,63   | 2,14  | 0,728688 | 2,938158 | 0,003302 | 0,0652101 |
| UTP18        | 308,17   | 1,57  | 0,532892 | 2,937059 | 0,003313 | 0,0652631 |
| GPR89A       | 121,81   | 1,81  | 0,617137 | 2,936485 | 0,00332  | 0,0652631 |
| CACYBP       | 719,52   | 1,31  | 0,447758 | 2,936227 | 0,003322 | 0,0652631 |
| DNM1         | 88,45    | -2,90 | 0,986746 | -2,9362  | 0,003323 | 0,0652631 |
| SUB1         | 2872,08  | 0,61  | 0,207146 | 2,93611  | 0,003324 | 0,0652631 |
| MT-ND5       | 44795,94 | -0,77 | 0,262765 | -2,93581 | 0,003327 | 0,0652631 |
| GSK3B        | 313,32   | -1,90 | 0,647132 | -2,93561 | 0,003329 | 0,0652631 |
| RP5-977L11.2 | 8,42     | -2,14 | 0,730775 | -2,93489 | 0,003337 | 0,0653463 |
| RTBDN        | 1,60     | -3,43 | 1,17075  | -2,9338  | 0,003348 | NA        |
| KIF6         | 45,76    | -2,14 | 0,730057 | -2,93245 | 0,003363 | 0,0657925 |
| HLA-F        | 1125,48  | -0,76 | 0,257796 | -2,93189 | 0,003369 | 0,065841  |
| IL18         | 564,06   | 1,60  | 0,5451   | 2,930436 | 0,003385 | 0,0660814 |
| PAPOLG       | 220,33   | 2,14  | 0,730079 | 2,928727 | 0,003404 | 0,0663759 |
| IQCB1        | 230,25   | 2,04  | 0,698644 | 2,926786 | 0,003425 | 0,0666808 |
| AC074117.12  | 7,07     | -2,50 | 0,853157 | -2,92665 | 0,003426 | 0,0666808 |
| PDIK1L       | 82,27    | 3,27  | 1,117859 | 2,925471 | 0,003439 | 0,0668642 |
| TBCA         | 298,98   | 0,90  | 0,307147 | 2,924864 | 0,003446 | 0,0669249 |
| AC159540.14  | 23,45    | 3,33  | 1,140327 | 2,923735 | 0,003459 | 0,0670583 |
| PCGF5        | 515,39   | 1,87  | 0,639122 | 2,923595 | 0,00346  | 0,0670583 |
| GYPC         | 172,22   | 1,73  | 0,591714 | 2,922299 | 0,003475 | 0,067268  |
| MARCKSL1     | 229,15   | 1,68  | 0,576308 | 2,921416 | 0,003484 | 0,0673888 |
| ITPKC        | 27,84    | 4,57  | 1,564876 | 2,920444 | 0,003495 | 0,0675293 |
| CCDC162P     | 30,78    | -2,99 | 1,025768 | -2,91856 | 0,003516 | 0,0678673 |
| KRT15        | 34,70    | -2,87 | 0,984081 | -2,91732 | 0,003531 | 0,0680121 |
| HTR2B        | 41,87    | 4,83  | 1,655891 | 2,917107 | 0,003533 | 0,0680121 |
| ATP5F1       | 2948,35  | 0,90  | 0,308552 | 2,91693  | 0,003535 | 0,0680121 |
| CYB5A        | 306,09   | 1,82  | 0,622586 | 2,915773 | 0,003548 | 0,0681769 |
| HBS1L        | 353,65   | 2,17  | 0,743268 | 2,915233 | 0,003554 | 0,0681769 |
| BTBD9        | 330,73   | 2,69  | 0,922042 | 2,915209 | 0,003555 | 0,0681769 |
| PANK1        | 9,58     | 4,08  | 1,400486 | 2,914557 | 0,003562 | 0,0682491 |
| DMKN         | 25,21    | -2,17 | 0,746297 | -2,91385 | 0,00357  | 0,0683321 |
| CAPN10       | 154,02   | -1,55 | 0,531419 | -2,91354 | 0,003574 | 0,0683321 |
| MYD88        | 2222,10  | 0,98  | 0,335123 | 2,911209 | 0,0036   | 0,0687723 |
| MTHFD2       | 672,76   | 1,32  | 0,452043 | 2,910862 | 0,003604 | 0,0687781 |
| SAMD15       | 7,89     | -3,86 | 1,327291 | -2,91052 | 0,003608 | 0,0687821 |
| USP54        | 74,68    | -3,01 | 1,034456 | -2,90931 | 0,003622 | 0,0689799 |
| KARS         | 928,52   | 1,04  | 0,35665  | 2,908791 | 0,003628 | 0,0690061 |

|                 |         |       |          |          |          |           |
|-----------------|---------|-------|----------|----------|----------|-----------|
| RP13-297E16.5   | 2,76    | -4,90 | 1,685811 | -2,90874 | 0,003629 | NA        |
| PRDM14          | 7,65    | -3,09 | 1,06086  | -2,90855 | 0,003631 | 0,0690061 |
| NUDT6           | 89,44   | 2,42  | 0,83253  | 2,90721  | 0,003647 | 0,0691968 |
| RP11-1094M14.11 | 148,65  | 1,67  | 0,575184 | 2,906987 | 0,003649 | 0,0691968 |
| NDUFA7          | 423,00  | -0,74 | 0,254457 | -2,90652 | 0,003655 | 0,0691968 |
| RP11-287D1.1    | 5,97    | -2,54 | 0,873094 | -2,90641 | 0,003656 | 0,0691968 |
| PKIB            | 407,70  | 2,28  | 0,783446 | 2,906086 | 0,00366  | 0,0691979 |
| E2F5            | 31,36   | 3,15  | 1,082552 | 2,905745 | 0,003664 | 0,069203  |
| ZNF618          | 130,97  | 2,63  | 0,905375 | 2,904638 | 0,003677 | 0,0693778 |
| RP13-371D18.2   | 22,26   | 3,64  | 1,254476 | 2,904312 | 0,003681 | 0,0693798 |
| MRPL39          | 127,48  | 3,14  | 1,082807 | 2,903285 | 0,003693 | 0,0695097 |
| AD000671.6      | 191,67  | 2,23  | 0,769522 | 2,903092 | 0,003695 | 0,0695097 |
| SLC14A1         | 21,15   | -2,34 | 0,806208 | -2,90261 | 0,003701 | 0,0695473 |
| RGS12           | 274,23  | -2,28 | 0,785726 | -2,90109 | 0,003719 | 0,0698148 |
| RP11-402L5.1    | 6,95    | -7,29 | 2,512834 | -2,89956 | 0,003737 | 0,0700841 |
| RP5-857K21.10   | 5549,22 | -0,82 | 0,284177 | -2,89706 | 0,003767 | 0,0705741 |
| NQO2            | 987,68  | 1,74  | 0,601034 | 2,896167 | 0,003778 | 0,0707048 |
| TSPAN18         | 4,55    | -5,74 | 1,982374 | -2,8952  | 0,003789 | 0,0708527 |
| CSNK2B          | 1093,87 | 0,98  | 0,337058 | 2,894724 | 0,003795 | 0,0708881 |
| SRSF3           | 3666,74 | 0,59  | 0,202339 | 2,893191 | 0,003813 | 0,0711157 |
| CHST6           | 14,15   | -1,74 | 0,59979  | -2,8929  | 0,003817 | 0,0711157 |
| DHTKD1          | 263,02  | 2,40  | 0,828319 | 2,891919 | 0,003829 | 0,0713093 |
| PRKAG2          | 570,61  | -1,06 | 0,368341 | -2,88882 | 0,003867 | 0,0719444 |
| AC011753.3      | 84,33   | -1,19 | 0,413241 | -2,88844 | 0,003872 | 0,0719589 |
| PLA1A           | 45,50   | 2,99  | 1,035349 | 2,887853 | 0,003879 | 0,0720173 |
| ITGA8           | 4,37    | -3,23 | 1,118021 | -2,88756 | 0,003882 | 0,0720173 |
| PFKFB3          | 270,91  | 2,00  | 0,693145 | 2,88566  | 0,003906 | 0,0723804 |
| RP11-624C23.1   | 16,79   | 3,27  | 1,13268  | 2,884623 | 0,003919 | 0,0724849 |
| LRIF1           | 113,17  | 2,37  | 0,820643 | 2,88458  | 0,003919 | 0,0724849 |
| PLD5            | 11,37   | -1,67 | 0,578121 | -2,88405 | 0,003926 | 0,0725358 |
| MTRF1           | 36,75   | 2,56  | 0,886475 | 2,883353 | 0,003935 | 0,0726233 |
| RNF10           | 510,19  | 1,49  | 0,51808  | 2,882488 | 0,003945 | 0,0727107 |
| RP11-323F5.1    | 22,93   | 6,56  | 2,276226 | 2,88235  | 0,003947 | 0,0727107 |
| GZMA            | 93,68   | -3,71 | 1,28887  | -2,88164 | 0,003956 | 0,0728025 |
| SRD5A1          | 547,13  | 1,45  | 0,501803 | 2,880705 | 0,003968 | 0,0729246 |
| FILIP1          | 49,95   | -1,84 | 0,638359 | -2,88039 | 0,003972 | 0,0729246 |
| IGSF1           | 14,04   | -3,34 | 1,160131 | -2,88017 | 0,003975 | 0,0729246 |
| TSG101          | 507,61  | 1,68  | 0,582161 | 2,879862 | 0,003978 | 0,0729246 |
| IFT52           | 101,71  | 2,35  | 0,816205 | 2,879169 | 0,003987 | 0,0729246 |
| FCGR3A          | 79,17   | -4,24 | 1,472016 | -2,87896 | 0,00399  | 0,0729246 |
| AIF1            | 4697,70 | -0,52 | 0,180942 | -2,87887 | 0,003991 | 0,0729246 |
| MBNL1           | 3421,18 | 0,61  | 0,211203 | 2,878215 | 0,003999 | 0,0729246 |
| ZXDB            | 60,43   | 3,20  | 1,111588 | 2,87795  | 0,004003 | 0,0729246 |
| RP11-941H19.3   | 7,73    | -2,20 | 0,764935 | -2,87787 | 0,004004 | 0,0729246 |
| ACADVL          | 1170,69 | -0,67 | 0,233212 | -2,8777  | 0,004006 | 0,0729246 |
| RPRD2           | 194,81  | 1,95  | 0,676518 | 2,875471 | 0,004034 | 0,0733697 |
| CXADR           | 15,50   | -2,84 | 0,987887 | -2,8747  | 0,004044 | 0,0734741 |
| ZC3H14          | 309,16  | 1,61  | 0,560234 | 2,874405 | 0,004048 | 0,0734741 |
| FADD            | 27,34   | 5,45  | 1,897568 | 2,873744 | 0,004056 | 0,0734847 |
| PTPN9           | 445,41  | 2,84  | 0,986953 | 2,873666 | 0,004057 | 0,0734847 |

|               |           |       |          |          |          |           |
|---------------|-----------|-------|----------|----------|----------|-----------|
| ATG3          | 1825,45   | 0,86  | 0,300407 | 2,873404 | 0,004061 | 0,0734847 |
| MGLL          | 123,71    | 3,24  | 1,128265 | 2,87313  | 0,004064 | 0,0734847 |
| PARP16        | 76,48     | 3,06  | 1,065127 | 2,87263  | 0,004071 | 0,0735296 |
| RP5-1185I7.1  | 41,46     | 3,27  | 1,13772  | 2,871576 | 0,004084 | 0,0736926 |
| CCDC41        | 313,07    | 1,37  | 0,475471 | 2,871317 | 0,004088 | 0,0736926 |
| HPSE          | 90,26     | -2,61 | 0,909117 | -2,86955 | 0,004111 | 0,0739599 |
| EIF3CL        | 259,78    | 3,69  | 1,287004 | 2,869501 | 0,004111 | 0,0739599 |
| CCDC102A      | 6,64      | -7,24 | 2,522376 | -2,86925 | 0,004114 | 0,0739599 |
| COMMD9        | 919,39    | 1,24  | 0,432503 | 2,86841  | 0,004125 | 0,0740349 |
| RP11-411H5.1  | 23,88     | -3,82 | 1,332766 | -2,86832 | 0,004127 | 0,0740349 |
| PMP22         | 90,41     | 2,77  | 0,964845 | 2,867726 | 0,004134 | 0,0741034 |
| ZACN          | 69,63     | 4,25  | 1,481393 | 2,866219 | 0,004154 | 0,0743854 |
| KDEL2         | 93,24     | 2,50  | 0,872296 | 2,865905 | 0,004158 | 0,0743876 |
| ARMC1         | 114,70    | 2,22  | 0,774385 | 2,865164 | 0,004168 | 0,0744769 |
| PARP11        | 118,12    | 1,61  | 0,563282 | 2,864917 | 0,004171 | 0,0744769 |
| PCBP1         | 1559,62   | 1,18  | 0,41267  | 2,863413 | 0,004191 | 0,0747596 |
| MT-CO2        | 102294,01 | -0,83 | 0,290739 | -2,8614  | 0,004218 | 0,0751631 |
| RP11-343C2.11 | 13,53     | 6,38  | 2,231816 | 2,860548 | 0,004229 | 0,0752941 |
| MAP7          | 33,98     | 3,67  | 1,282989 | 2,860023 | 0,004236 | 0,0753467 |
| RP11-39K24.14 | 65,99     | 2,56  | 0,895333 | 2,859286 | 0,004246 | 0,07545   |
| ATP5E         | 1474,44   | -0,79 | 0,276446 | -2,85875 | 0,004253 | 0,0754962 |
| PBXIP1        | 182,16    | -1,86 | 0,650134 | -2,85849 | 0,004257 | 0,0754962 |
| NDEL1         | 452,80    | 1,37  | 0,48112  | 2,853725 | 0,004321 | 0,076513  |
| LSM12         | 917,19    | 0,72  | 0,251441 | 2,853634 | 0,004322 | 0,076513  |
| RP11-366K18.3 | 30,43     | -3,41 | 1,195984 | -2,85086 | 0,00436  | 0,0771038 |
| RP11-425L10.1 | 8,65      | 5,16  | 1,809457 | 2,850584 | 0,004364 | 0,0771038 |
| MT-ND4        | 183855,25 | -0,94 | 0,329988 | -2,84962 | 0,004377 | 0,0772655 |
| CCDC112       | 226,77    | 1,64  | 0,576542 | 2,849153 | 0,004384 | 0,0773047 |
| RP11-181C3.4  | 83,03     | -3,41 | 1,198792 | -2,84862 | 0,004391 | 0,0773601 |
| RP11-4O3.1    | 13,23     | 4,53  | 1,592503 | 2,847684 | 0,004404 | 0,0775156 |
| BTBD7         | 480,68    | -1,57 | 0,55001  | -2,84716 | 0,004411 | 0,0775703 |
| CCDC144A      | 484,86    | -1,45 | 0,510354 | -2,84642 | 0,004421 | 0,0776765 |
| DCUN1D4       | 78,05     | -2,78 | 0,978257 | -2,84567 | 0,004432 | 0,0777862 |
| POLR2D        | 433,70    | 2,08  | 0,732526 | 2,842883 | 0,004471 | 0,0783845 |
| GAPDHP42      | 19,85     | 5,78  | 2,033649 | 2,842418 | 0,004477 | 0,0783845 |
| RF00272       | 7,69      | 5,57  | 1,960832 | 2,84227  | 0,004479 | 0,0783845 |
| MAN1A1        | 308,62    | 1,97  | 0,691949 | 2,841852 | 0,004485 | 0,0783845 |
| CHCHD10       | 44,67     | -1,73 | 0,607459 | -2,84173 | 0,004487 | 0,0783845 |
| NAMPT         | 5396,07   | 0,71  | 0,249959 | 2,839279 | 0,004522 | 0,0789152 |
| RP11-77C3.3   | 1,61      | -3,82 | 1,346283 | -2,83899 | 0,004526 | NA        |
| HHLA2         | 6,83      | 4,78  | 1,684184 | 2,838816 | 0,004528 | 0,0789558 |
| CERS2         | 593,19    | 1,53  | 0,538393 | 2,836759 | 0,004557 | 0,0793917 |
| AGO2          | 1025,26   | 1,93  | 0,681836 | 2,835934 | 0,004569 | 0,0795228 |
| SRRM2         | 1185,48   | -0,91 | 0,322546 | -2,83449 | 0,00459  | 0,0798075 |
| RP11-609N14.4 | 93,39     | -1,47 | 0,516973 | -2,83398 | 0,004597 | 0,0798615 |
| AC010970.2    | 765122,98 | -0,85 | 0,299037 | -2,83234 | 0,004621 | 0,0801703 |
| SNW1          | 672,18    | 1,17  | 0,4144   | 2,832149 | 0,004624 | 0,0801703 |
| SGO1          | 21,72     | 3,82  | 1,348008 | 2,831531 | 0,004633 | 0,0802504 |
| IQGAP2        | 1410,77   | 1,05  | 0,369241 | 2,830753 | 0,004644 | 0,0802981 |
| SLC12A6       | 522,32    | 1,63  | 0,575253 | 2,830702 | 0,004645 | 0,0802981 |

|               |         |       |          |          |          |           |
|---------------|---------|-------|----------|----------|----------|-----------|
| CHPT1         | 279,50  | 1,55  | 0,548533 | 2,830449 | 0,004648 | 0,0802981 |
| COL24A1       | 15,17   | -3,66 | 1,293027 | -2,82974 | 0,004659 | 0,0803449 |
| MED9          | 127,88  | 2,64  | 0,931508 | 2,829518 | 0,004662 | 0,0803449 |
| AC105339.1    | 6,05    | -3,19 | 1,128839 | -2,82898 | 0,00467  | 0,0803449 |
| TMEM33        | 1179,63 | 1,34  | 0,47252  | 2,828903 | 0,004671 | 0,0803449 |
| RP5-940J5.9   | 16,54   | -1,29 | 0,456444 | -2,82878 | 0,004673 | 0,0803449 |
| CERK          | 804,08  | 1,40  | 0,496339 | 2,827361 | 0,004693 | 0,0806275 |
| BCL2L14       | 11,13   | -2,52 | 0,889791 | -2,82683 | 0,004701 | 0,0806875 |
| PHF12         | 366,97  | 1,92  | 0,678136 | 2,825427 | 0,004722 | 0,080878  |
| ORC5          | 47,80   | 2,90  | 1,027474 | 2,82536  | 0,004723 | 0,080878  |
| TOMM34        | 415,53  | 2,05  | 0,725169 | 2,825171 | 0,004726 | 0,080878  |
| S100PBP       | 344,93  | -1,93 | 0,683678 | -2,82489 | 0,00473  | 0,080878  |
| RN7SL454P     | 3,86    | -5,45 | 1,928653 | -2,82397 | 0,004743 | 0,0809114 |
| RP11-96D1.5   | 17,24   | 6,16  | 2,183245 | 2,823731 | 0,004747 | 0,0809114 |
| PSG3          | 7,76    | -8,16 | 2,890363 | -2,82362 | 0,004749 | 0,0809114 |
| RP11-108B14.5 | 20,25   | -2,19 | 0,776405 | -2,82358 | 0,004749 | 0,0809114 |
| JAKMIP1       | 11,03   | -4,22 | 1,496124 | -2,82149 | 0,00478  | 0,0812957 |
| RP11-700J17.1 | 20,85   | 5,90  | 2,089859 | 2,821414 | 0,004781 | 0,0812957 |
| TMEM120A      | 314,11  | -1,24 | 0,439897 | -2,82118 | 0,004785 | 0,0812957 |
| NEIL1         | 111,34  | -2,43 | 0,861485 | -2,81988 | 0,004804 | 0,0815147 |
| ABCC6         | 59,98   | -2,16 | 0,765633 | -2,81949 | 0,00481  | 0,0815147 |
| GRHL1         | 15,40   | -2,45 | 0,868701 | -2,81944 | 0,004811 | 0,0815147 |
| HNRNPLL       | 218,52  | 1,97  | 0,698108 | 2,818258 | 0,004829 | 0,0817418 |
| RP11-38L15.2  | 29,71   | 3,12  | 1,108021 | 2,815703 | 0,004867 | 0,0823197 |
| FAM206A       | 254,64  | 2,46  | 0,873645 | 2,814692 | 0,004882 | 0,0825041 |
| TMEM86A       | 65,07   | -4,20 | 1,491367 | -2,81431 | 0,004888 | 0,0825262 |
| ADAM8         | 1879,18 | 0,90  | 0,319841 | 2,813828 | 0,004896 | 0,0825763 |
| CLASRP        | 112,93  | -1,64 | 0,582018 | -2,81194 | 0,004924 | 0,082986  |
| DHODH         | 121,83  | 2,44  | 0,867685 | 2,81092  | 0,00494  | 0,0831755 |
| CTA-390C10.10 | 27,28   | -2,21 | 0,787628 | -2,81033 | 0,004949 | 0,0832519 |
| ARHGAP29      | 55,06   | -1,67 | 0,595786 | -2,80945 | 0,004963 | 0,0834065 |
| PNMA2         | 33,80   | 2,67  | 0,951676 | 2,807542 | 0,004992 | 0,0838251 |
| ST8SIA4       | 542,70  | 1,38  | 0,491101 | 2,806707 | 0,005005 | 0,0839671 |
| PARK7         | 2109,91 | 0,70  | 0,248214 | 2,804785 | 0,005035 | 0,0842056 |
| AD000092.3    | 8,71    | 5,19  | 1,849413 | 2,804589 | 0,005038 | 0,0842056 |
| ZNF146        | 247,36  | 1,86  | 0,664327 | 2,804395 | 0,005041 | 0,0842056 |
| SPOCK2        | 41,74   | -3,97 | 1,414    | -2,80431 | 0,005042 | 0,0842056 |
| KLHL21        | 119,91  | 1,73  | 0,617986 | 2,804124 | 0,005045 | 0,0842056 |
| ZBTB37        | 360,01  | -2,22 | 0,790964 | -2,80405 | 0,005046 | 0,0842056 |
| CLEC2A        | 8,67    | -7,75 | 2,763471 | -2,80353 | 0,005055 | 0,0842671 |
| CDKN3         | 10,76   | 5,44  | 1,942936 | 2,802171 | 0,005076 | 0,0844966 |
| SLC5A12       | 43,38   | -2,68 | 0,956509 | -2,80207 | 0,005078 | 0,0844966 |
| ANKRD30BP2    | 9,77    | -3,20 | 1,142153 | -2,80148 | 0,005087 | 0,0845373 |
| LRP12         | 66,49   | -2,75 | 0,980385 | -2,80134 | 0,005089 | 0,0845373 |
| AC008440.10   | 5,42    | -3,25 | 1,160657 | -2,80087 | 0,005096 | 0,0845846 |
| GPC2          | 10,45   | -2,38 | 0,848583 | -2,79947 | 0,005119 | 0,0848771 |
| CDK17         | 130,73  | 1,27  | 0,453476 | 2,797633 | 0,005148 | 0,0852512 |
| STRIP2        | 8,04    | -2,61 | 0,931348 | -2,79748 | 0,00515  | 0,0852512 |
| RALGDS        | 234,77  | 2,05  | 0,733399 | 2,797007 | 0,005158 | 0,0852991 |
| AKAP13        | 3349,47 | 0,67  | 0,240953 | 2,796496 | 0,005166 | 0,0853584 |

|               |         |       |          |          |          |           |
|---------------|---------|-------|----------|----------|----------|-----------|
| FOLR2         | 105,93  | -4,02 | 1,438889 | -2,79542 | 0,005183 | 0,0855282 |
| CNN2          | 1655,36 | 1,09  | 0,390481 | 2,79528  | 0,005185 | 0,0855282 |
| AC096558.1    | 24,98   | 3,08  | 1,101854 | 2,794222 | 0,005202 | 0,0857326 |
| POLD3         | 162,48  | -2,19 | 0,785244 | -2,79283 | 0,005225 | 0,0860241 |
| CDC25B        | 198,31  | -2,42 | 0,867698 | -2,79245 | 0,005231 | 0,0860241 |
| RPL34-AS1     | 9,35    | -2,11 | 0,755775 | -2,79227 | 0,005234 | 0,0860241 |
| RN7SL163P     | 9,96    | -2,28 | 0,815364 | -2,7919  | 0,00524  | 0,0860464 |
| FAM50A        | 365,79  | -1,17 | 0,417775 | -2,79074 | 0,005259 | 0,086191  |
| CTB-133G6.2   | 5,48    | -2,95 | 1,056406 | -2,79068 | 0,00526  | 0,086191  |
| TAGLN2        | 7296,30 | 0,74  | 0,265852 | 2,790316 | 0,005266 | 0,086191  |
| GTF3C1        | 388,05  | -1,74 | 0,624899 | -2,79012 | 0,005269 | 0,086191  |
| SYDE2         | 5,54    | -3,08 | 1,105002 | -2,78993 | 0,005272 | 0,086191  |
| RP11-252B20.1 | 9,22    | -4,51 | 1,616879 | -2,78737 | 0,005314 | 0,0867975 |
| RP11-447D11.3 | 25,27   | -3,99 | 1,432184 | -2,78627 | 0,005332 | 0,0868425 |
| DCTN5         | 678,27  | -1,42 | 0,509441 | -2,7861  | 0,005335 | 0,0868425 |
| RN7SL1        | 107,77  | -1,51 | 0,541097 | -2,78592 | 0,005338 | 0,0868425 |
| RP5-984P4.6   | 28,98   | 2,45  | 0,879561 | 2,785808 | 0,005339 | 0,0868425 |
| RP11-486O12.2 | 135,36  | -0,83 | 0,296326 | -2,78578 | 0,00534  | 0,0868425 |
| TRPC6         | 8,13    | 5,49  | 1,971544 | 2,78546  | 0,005345 | 0,0868533 |
| SLC13A5       | 19,64   | -1,41 | 0,506514 | -2,78458 | 0,00536  | 0,087013  |
| LZTFL1        | 80,83   | 2,96  | 1,062442 | 2,783613 | 0,005376 | 0,0871971 |
| NKRF          | 99,07   | 2,47  | 0,888094 | 2,783046 | 0,005385 | 0,0872337 |
| ROCK1         | 1854,24 | 0,64  | 0,230152 | 2,782912 | 0,005387 | 0,0872337 |
| KIAA1324      | 72,84   | -2,84 | 1,021688 | -2,78234 | 0,005397 | 0,0873114 |
| FAM96A        | 1219,76 | 0,95  | 0,341395 | 2,781504 | 0,005411 | 0,0874609 |
| APOBEC3F      | 53,43   | 2,81  | 1,010138 | 2,780865 | 0,005421 | 0,087557  |
| SUPT16H       | 927,82  | 1,42  | 0,511384 | 2,780211 | 0,005432 | 0,0876511 |
| ZC3H12B       | 24,28   | -3,09 | 1,112006 | -2,77995 | 0,005437 | 0,0876511 |
| JADE2         | 160,91  | -2,13 | 0,766898 | -2,77801 | 0,005469 | 0,0881003 |
| TRBC1         | 86,89   | -3,27 | 1,17802  | -2,77687 | 0,005489 | 0,0881473 |
| GZMH          | 57,15   | -3,75 | 1,351164 | -2,77674 | 0,005491 | 0,0881473 |
| RP11-154H23.5 | 12,71   | 6,29  | 2,266091 | 2,776579 | 0,005493 | 0,0881473 |
| LAMA1         | 15,85   | 2,64  | 0,951034 | 2,776507 | 0,005495 | 0,0881473 |
| MKKS          | 301,60  | 2,07  | 0,745697 | 2,776434 | 0,005496 | 0,0881473 |
| RP11-618G20.1 | 16,67   | 5,11  | 1,842649 | 2,773872 | 0,005539 | 0,0887679 |
| TRPM7         | 443,38  | -1,32 | 0,475496 | -2,76918 | 0,00562  | 0,0899784 |
| WNT2B         | 76,57   | -2,39 | 0,862115 | -2,76848 | 0,005632 | 0,0900484 |
| AP3S2         | 336,09  | 2,26  | 0,816264 | 2,768369 | 0,005634 | 0,0900484 |
| GIMAP7        | 882,09  | -1,62 | 0,586445 | -2,76746 | 0,00565  | 0,0902233 |
| NUMBL         | 34,68   | 2,90  | 1,048651 | 2,766285 | 0,00567  | 0,0904704 |
| RNF170        | 185,05  | -2,05 | 0,742843 | -2,76459 | 0,0057   | 0,090865  |
| TBC1D20       | 257,64  | -1,79 | 0,648792 | -2,76282 | 0,00573  | 0,091279  |
| DUS4L         | 31,76   | 3,20  | 1,159471 | 2,762114 | 0,005743 | 0,0913991 |
| MFSD14A       | 232,74  | 2,36  | 0,854269 | 2,761662 | 0,005751 | 0,0914419 |
| CHCHD8        | 342,83  | 1,11  | 0,403401 | 2,761403 | 0,005755 | 0,0914419 |
| USP37         | 142,03  | 2,19  | 0,791607 | 2,760659 | 0,005768 | 0,0915724 |
| YTHDF1        | 363,13  | 1,39  | 0,50405  | 2,759951 | 0,005781 | 0,0916262 |
| LINC00476     | 97,67   | -1,94 | 0,704325 | -2,75991 | 0,005782 | 0,0916262 |
| AXDND1        | 12,16   | 4,62  | 1,676498 | 2,758683 | 0,005803 | 0,0918538 |
| ZNF487        | 154,92  | 2,05  | 0,743363 | 2,758477 | 0,005807 | 0,0918538 |



|                |         |       |          |          |          |           |
|----------------|---------|-------|----------|----------|----------|-----------|
| RP11-397E7.5   | 76,45   | -2,69 | 0,974042 | -2,75826 | 0,005811 | 0,0918538 |
| SNX19          | 218,55  | 1,68  | 0,6106   | 2,757092 | 0,005832 | 0,0921057 |
| ZNF586         | 96,42   | 2,40  | 0,870803 | 2,756383 | 0,005844 | 0,0922274 |
| HOMER3         | 22,80   | -3,03 | 1,101062 | -2,75539 | 0,005862 | 0,0924286 |
| TMEM14C        | 934,73  | 0,82  | 0,298241 | 2,754401 | 0,00588  | 0,0926306 |
| ZDHHC1         | 24,07   | -3,42 | 1,240443 | -2,7533  | 0,0059   | 0,0928633 |
| GNPAT          | 371,28  | 1,53  | 0,554033 | 2,752733 | 0,00591  | 0,0928855 |
| PRR5L          | 58,31   | -2,97 | 1,07739  | -2,75267 | 0,005911 | 0,0928855 |
| MAL            | 25,28   | -5,56 | 2,020404 | -2,75136 | 0,005935 | 0,0931798 |
| RP11-351C21.2  | 11,65   | 6,17  | 2,241307 | 2,750632 | 0,005948 | 0,0933079 |
| RN7SKP283      | 13,29   | 6,37  | 2,315541 | 2,749302 | 0,005972 | 0,0936087 |
| ZNF395         | 108,56  | -1,79 | 0,650635 | -2,74865 | 0,005984 | 0,0937168 |
| SRSF5          | 3068,75 | 0,63  | 0,227654 | 2,747063 | 0,006013 | 0,0940914 |
| FYB1           | 2466,28 | -0,84 | 0,307424 | -2,74622 | 0,006029 | 0,0942547 |
| LINC00471      | 20,56   | -1,95 | 0,710046 | -2,74557 | 0,006041 | 0,0943095 |
| RP11-403A3.2   | 9,75    | 3,28  | 1,196057 | 2,745477 | 0,006042 | 0,0943095 |
| RP11-287A8.2   | 9,52    | 5,30  | 1,931176 | 2,744499 | 0,00606  | 0,0945118 |
| CTD-2369P2.4   | 4,25    | -3,10 | 1,130574 | -2,74366 | 0,006076 | 0,0946741 |
| RBM18          | 347,60  | 1,77  | 0,64431  | 2,742891 | 0,00609  | 0,0947971 |
| BLOC1S3        | 73,68   | 2,98  | 1,087745 | 2,742685 | 0,006094 | 0,0947971 |
| TNRC18         | 254,04  | -1,35 | 0,49341  | -2,74075 | 0,00613  | 0,0952764 |
| FCAR           | 41,74   | -2,66 | 0,96991  | -2,73955 | 0,006152 | 0,0954725 |
| HLCS           | 60,54   | 2,25  | 0,821207 | 2,739529 | 0,006153 | 0,0954725 |
| AC147651.3     | 29,16   | -2,71 | 0,989135 | -2,73917 | 0,006159 | 0,0954961 |
| RNVU1-6        | 69,94   | 2,25  | 0,82072  | 2,738545 | 0,006171 | 0,0955374 |
| KIDINS220      | 906,51  | -1,06 | 0,387691 | -2,73848 | 0,006172 | 0,0955374 |
| RP11-295K3.1   | 7,32    | -6,95 | 2,53718  | -2,73794 | 0,006182 | 0,0956151 |
| L1CAM          | 26,58   | -9,11 | 3,328317 | -2,7373  | 0,006195 | 0,0957228 |
| NUDCD2         | 453,28  | 1,96  | 0,716192 | 2,736147 | 0,006216 | 0,0959207 |
| EVA1C          | 66,96   | -3,12 | 1,140764 | -2,73607 | 0,006218 | 0,0959207 |
| RP11-1195F20.2 | 5,85    | -4,75 | 1,737685 | -2,7348  | 0,006242 | 0,0961459 |
| PIAS1          | 1279,86 | -1,01 | 0,369493 | -2,73456 | 0,006246 | 0,0961459 |
| RP11-20D14.6   | 80,74   | -2,22 | 0,811602 | -2,73448 | 0,006248 | 0,0961459 |
| RP11-575L7.8   | 10,69   | 2,60  | 0,952702 | 2,734165 | 0,006254 | 0,0961597 |
| RP11-34P13.7   | 17,40   | -1,78 | 0,650199 | -2,73336 | 0,006269 | 0,0963152 |
| TAP2           | 510,21  | -1,84 | 0,673498 | -2,73264 | 0,006283 | 0,096447  |
| PCED1A         | 205,90  | -1,38 | 0,506034 | -2,73199 | 0,006295 | 0,0965588 |
| LTC4S          | 68,83   | 2,86  | 1,048054 | 2,731641 | 0,006302 | 0,0965802 |
| KIF25          | 16,34   | -2,52 | 0,924467 | -2,73078 | 0,006318 | 0,0967084 |
| USP27X         | 7,19    | -2,28 | 0,836328 | -2,73051 | 0,006324 | 0,0967084 |
| NEO1           | 3,88    | -5,42 | 1,983981 | -2,73039 | 0,006326 | 0,0967084 |
| AP000936.1     | 29,49   | 2,31  | 0,845921 | 2,729749 | 0,006338 | 0,0968172 |
| MZB1           | 18,55   | -1,58 | 0,580133 | -2,72925 | 0,006348 | 0,0968832 |
| CDC40          | 540,99  | -0,78 | 0,287209 | -2,72767 | 0,006378 | 0,0972699 |
| TNFSF9         | 27,81   | 3,25  | 1,191592 | 2,726819 | 0,006395 | 0,0974409 |
| RP11-97E7.1    | 2,96    | 4,19  | 1,536208 | 2,726164 | 0,006408 | NA        |
| WDR26          | 733,66  | 1,13  | 0,413993 | 2,725955 | 0,006412 | 0,0975529 |
| CTD-3105H18.7  | 14,22   | 5,88  | 2,155517 | 2,7259   | 0,006413 | 0,0975529 |
| EID3           | 67,74   | 3,49  | 1,280137 | 2,72495  | 0,006431 | 0,0977073 |
| PIP5K1B        | 37,34   | 3,74  | 1,373155 | 2,724838 | 0,006433 | 0,0977073 |

|                |          |       |          |          |          |           |
|----------------|----------|-------|----------|----------|----------|-----------|
| PFN1           | 20638,67 | 0,42  | 0,152575 | 2,724415 | 0,006442 | 0,0977276 |
| ZNF211         | 51,82    | 2,96  | 1,087926 | 2,724053 | 0,006449 | 0,0977276 |
| TC2N           | 54,61    | -4,57 | 1,679459 | -2,72396 | 0,00645  | 0,0977276 |
| WBSR22         | 849,05   | 0,97  | 0,355585 | 2,723483 | 0,00646  | 0,09779   |
| DERL2          | 328,28   | 1,75  | 0,641986 | 2,722798 | 0,006473 | 0,0979133 |
| ZNF778         | 103,43   | 2,85  | 1,046988 | 2,720582 | 0,006517 | 0,0984918 |
| ANGEL1         | 73,41    | 3,25  | 1,195544 | 2,71955  | 0,006537 | 0,0987194 |
| RP11-1114A5.4  | 87,43    | -0,90 | 0,33015  | -2,71829 | 0,006562 | 0,0990156 |
| PRKAA2         | 6,70     | -3,17 | 1,167161 | -2,71779 | 0,006572 | 0,0990156 |
| CTD-2553L13.4  | 5,78     | -3,11 | 1,14371  | -2,71748 | 0,006578 | 0,0990156 |
| FNIP1          | 561,87   | 1,18  | 0,43551  | 2,717401 | 0,00658  | 0,0990156 |
| PTGDS          | 18,83    | -2,26 | 0,831325 | -2,71722 | 0,006583 | 0,0990156 |
| ZNF630         | 42,81    | -3,01 | 1,108726 | -2,71652 | 0,006597 | 0,0991437 |
| TMEM9B-AS1     | 13,64    | 4,73  | 1,742511 | 2,714279 | 0,006642 | 0,0997376 |
| RP11-186N15.3  | 27,59    | -2,63 | 0,970607 | -2,71385 | 0,006651 | 0,099785  |
| AP000330.8     | 12,54    | -4,17 | 1,538434 | -2,71307 | 0,006666 | 0,0998769 |
| UCK2           | 255,70   | 2,18  | 0,803119 | 2,713015 | 0,006667 | 0,0998769 |
| SAE1           | 308,27   | 1,59  | 0,587257 | 2,712438 | 0,006679 | 0,0999436 |
| PPIP5K2        | 737,49   | 0,74  | 0,272855 | 2,71226  | 0,006683 | 0,0999436 |
| CDK2AP2        | 814,01   | 0,85  | 0,313123 | 2,711207 | 0,006704 | 0,1001813 |
| RP13-212L9.1   | 20,22    | -1,45 | 0,534043 | -2,71086 | 0,006711 | 0,1002071 |
| RP11-503C24.4  | 6,43     | -2,31 | 0,852002 | -2,70894 | 0,00675  | 0,1007072 |
| MIR1255B2      | 8,76     | 4,59  | 1,695031 | 2,708502 | 0,006759 | 0,1007589 |
| STK4           | 2172,29  | 0,96  | 0,355213 | 2,706998 | 0,006789 | 0,1011353 |
| RP11-265O12.1  | 5,62     | -2,30 | 0,850272 | -2,70647 | 0,0068   | 0,1011771 |
| RP11-53B2.2    | 86,34    | 2,04  | 0,75251  | 2,70633  | 0,006803 | 0,1011771 |
| RP11-203J24.8  | 8,42     | -3,56 | 1,316899 | -2,70517 | 0,006827 | 0,1014494 |
| AL353997.4     | 3,40     | 3,71  | 1,369914 | 2,704971 | 0,006831 | NA        |
| PRDM15         | 146,49   | 2,26  | 0,834862 | 2,704732 | 0,006836 | 0,1015027 |
| HDDC3          | 206,33   | 2,07  | 0,763902 | 2,704009 | 0,006851 | 0,1015939 |
| NDST2          | 288,60   | -1,23 | 0,455948 | -2,70349 | 0,006862 | 0,1015939 |
| RNU6-681P      | 35,71    | 4,60  | 1,703003 | 2,703405 | 0,006863 | 0,1015939 |
| C3orf14        | 25,75    | 4,46  | 1,648747 | 2,703375 | 0,006864 | 0,1015939 |
| CH507-154B10.1 | 8,27     | -2,67 | 0,986934 | -2,70291 | 0,006874 | 0,1016556 |
| HLA-DMB        | 8653,19  | 0,74  | 0,273562 | 2,702242 | 0,006887 | 0,1017786 |
| KIAA0513       | 240,34   | -1,69 | 0,627307 | -2,70079 | 0,006918 | 0,1021436 |
| SYNE2          | 155,35   | -2,10 | 0,779179 | -2,70047 | 0,006924 | 0,1021603 |
| SLAMF7         | 144,14   | 1,99  | 0,737062 | 2,698776 | 0,00696  | 0,1026003 |
| Z83851.1       | 15,43    | 6,57  | 2,436545 | 2,697748 | 0,006981 | 0,1028128 |
| MNDA           | 3476,85  | -0,63 | 0,234791 | -2,69756 | 0,006985 | 0,1028128 |
| PLGLB1         | 62,68    | 2,89  | 1,072048 | 2,697134 | 0,006994 | 0,102863  |
| C9orf153       | 3,61     | 4,35  | 1,614445 | 2,696612 | 0,007005 | NA        |
| MAPK7          | 58,82    | 2,46  | 0,911737 | 2,696572 | 0,007006 | 0,1029554 |
| MRC1           | 967,99   | 1,68  | 0,621496 | 2,696274 | 0,007012 | 0,1029663 |
| NEB            | 71,16    | -2,66 | 0,985071 | -2,69554 | 0,007027 | 0,1031111 |
| NCAPG          | 26,90    | 3,36  | 1,248271 | 2,695203 | 0,007035 | 0,1031349 |
| C11orf1        | 88,08    | 1,76  | 0,653075 | 2,69461  | 0,007047 | 0,1032372 |
| ADAMT5         | 39,97    | -6,21 | 2,304716 | -2,69392 | 0,007062 | 0,1033701 |
| CTD-2554C21.2  | 134,96   | 2,05  | 0,762525 | 2,692574 | 0,00709  | 0,1036392 |
| NFKB1          | 1149,49  | 1,07  | 0,397244 | 2,692528 | 0,007091 | 0,1036392 |

|                |         |       |          |          |          |           |
|----------------|---------|-------|----------|----------|----------|-----------|
| BLM            | 50,32   | 3,26  | 1,210369 | 2,692032 | 0,007102 | 0,1036588 |
| S100A13        | 98,47   | -2,16 | 0,80397  | -2,69105 | 0,007123 | 0,1036588 |
| TCTN3          | 474,18  | 1,61  | 0,598575 | 2,690808 | 0,007128 | 0,1036588 |
| RP11-680F20.10 | 15,32   | -4,08 | 1,516489 | -2,69058 | 0,007133 | 0,1036588 |
| RP11-681B3.4   | 10,57   | -2,27 | 0,842905 | -2,69058 | 0,007133 | 0,1036588 |
| POT1           | 97,48   | 2,94  | 1,091651 | 2,690456 | 0,007135 | 0,1036588 |
| OGFOD2         | 103,18  | 2,02  | 0,750285 | 2,690172 | 0,007142 | 0,1036588 |
| NUAK2          | 135,48  | 1,87  | 0,696255 | 2,690169 | 0,007142 | 0,1036588 |
| FAM138A        | 16,34   | -2,17 | 0,806963 | -2,69012 | 0,007143 | 0,1036588 |
| RALY           | 805,23  | 0,90  | 0,334754 | 2,689757 | 0,00715  | 0,1036893 |
| RP11-166B2.8   | 20,12   | 6,41  | 2,384534 | 2,689154 | 0,007163 | 0,1037959 |
| COBLL1         | 71,85   | -3,15 | 1,171638 | -2,68865 | 0,007174 | 0,1038724 |
| SLC16A13       | 8,85    | -6,14 | 2,285532 | -2,68819 | 0,007184 | 0,1039354 |
| RP11-465B22.3  | 26,54   | 2,81  | 1,046357 | 2,687911 | 0,00719  | 0,1039402 |
| MIR1248        | 33,21   | -2,04 | 0,759931 | -2,68656 | 0,007219 | 0,1042791 |
| CACNA2D3       | 979,88  | 1,50  | 0,558933 | 2,68594  | 0,007233 | 0,104393  |
| RP11-305I9.1   | 54,94   | 2,50  | 0,931566 | 2,685321 | 0,007246 | 0,1044033 |
| RP11-69P2.1    | 17,11   | -1,49 | 0,55315  | -2,68519 | 0,007249 | 0,1044033 |
| CDH20          | 6,94    | -6,36 | 2,367853 | -2,68452 | 0,007263 | 0,1044033 |
| RP11-848P1.3   | 7,00    | 2,72  | 1,013878 | 2,684281 | 0,007269 | 0,1044033 |
| RMND5A         | 596,50  | 2,07  | 0,770199 | 2,684269 | 0,007269 | 0,1044033 |
| RP11-700A24.1  | 29,42   | -1,63 | 0,608321 | -2,68411 | 0,007272 | 0,1044033 |
| TES            | 1189,40 | 0,95  | 0,353977 | 2,684097 | 0,007273 | 0,1044033 |
| RP11-509J21.1  | 17,80   | -2,69 | 1,000669 | -2,68343 | 0,007287 | 0,1045326 |
| HLA-A          | 4946,56 | -0,51 | 0,189441 | -2,68245 | 0,007309 | 0,1047574 |
| PTCH2          | 58,52   | -1,18 | 0,439673 | -2,68129 | 0,007334 | 0,105041  |
| IL32           | 123,59  | -2,94 | 1,098413 | -2,68022 | 0,007357 | 0,1052953 |
| PTGES3L-AARSD1 | 13,01   | 4,28  | 1,597883 | 2,679854 | 0,007365 | 0,1053296 |
| EXPH5          | 66,20   | 2,16  | 0,80759  | 2,678751 | 0,00739  | 0,105596  |
| VPS36          | 512,02  | -1,01 | 0,37614  | -2,67788 | 0,007409 | 0,1057458 |
| CDH23          | 229,62  | -1,39 | 0,518751 | -2,67755 | 0,007416 | 0,1057458 |
| ZSCAN32        | 64,36   | -3,43 | 1,281355 | -2,6772  | 0,007424 | 0,1057458 |
| RP11-184I16.2  | 6,53    | -2,96 | 1,105282 | -2,67684 | 0,007432 | 0,1057458 |
| MTCH1          | 781,57  | 1,22  | 0,455191 | 2,676795 | 0,007433 | 0,1057458 |
| AC000403.4     | 30,61   | 2,42  | 0,905809 | 2,676736 | 0,007434 | 0,1057458 |
| LAMP5          | 53,15   | 3,30  | 1,235428 | 2,675065 | 0,007471 | 0,1061932 |
| CRHBP          | 23,94   | -4,19 | 1,567103 | -2,67381 | 0,007499 | 0,1064456 |
| RP11-114N19.3  | 107,97  | -1,41 | 0,527328 | -2,67352 | 0,007506 | 0,1064456 |
| CCNF           | 67,51   | -1,68 | 0,628789 | -2,6735  | 0,007506 | 0,1064456 |
| RP11-274B21.3  | 38,49   | 2,34  | 0,877168 | 2,673062 | 0,007516 | 0,1065037 |
| ANAPC11        | 853,58  | -0,63 | 0,235438 | -2,67274 | 0,007524 | 0,1065261 |
| AC144521.1     | 20,31   | 4,05  | 1,515924 | 2,672353 | 0,007532 | 0,1065668 |
| UPK1B          | 2,73    | -3,04 | 1,136283 | -2,672   | 0,00754  | NA        |
| CLEC12B        | 89,97   | 3,13  | 1,17206  | 2,670363 | 0,007577 | 0,1071192 |
| RP3-455J7.4    | 19,26   | -1,74 | 0,652912 | -2,66971 | 0,007592 | 0,1072455 |
| HSPD1          | 1293,07 | 0,80  | 0,298324 | 2,66931  | 0,007601 | 0,1072926 |
| TFAM           | 333,19  | 1,37  | 0,51445  | 2,667981 | 0,007631 | 0,1076361 |
| RP11-521L9.2   | 8,97    | 4,62  | 1,733088 | 2,667692 | 0,007637 | 0,1076395 |
| RP11-36B15.1   | 5,21    | -6,25 | 2,341493 | -2,66734 | 0,007645 | 0,1076395 |
| AC000095.6     | 21,63   | 2,62  | 0,980509 | 2,667207 | 0,007648 | 0,1076395 |

|               |         |       |          |          |          |           |
|---------------|---------|-------|----------|----------|----------|-----------|
| RP11-110L15.2 | 3,59    | -4,60 | 1,725606 | -2,6665  | 0,007665 | NA        |
| ROCK2         | 491,37  | 1,58  | 0,592193 | 2,666195 | 0,007672 | 0,1078825 |
| IDUA          | 76,78   | 2,34  | 0,876662 | 2,66563  | 0,007684 | 0,1079021 |
| RARRES3       | 467,41  | -1,29 | 0,482138 | -2,66563 | 0,007685 | 0,1079021 |
| RGL2          | 502,59  | 1,04  | 0,391923 | 2,66457  | 0,007709 | 0,1081399 |
| FAM84B        | 12,51   | -3,39 | 1,272696 | -2,66438 | 0,007713 | 0,1081399 |
| PLEKHF1       | 6,22    | -7,43 | 2,792582 | -2,66172 | 0,007774 | 0,1088152 |
| PTPN22        | 330,17  | 1,06  | 0,399568 | 2,661565 | 0,007778 | 0,1088152 |
| MT-TK         | 10,85   | -1,76 | 0,662398 | -2,66151 | 0,007779 | 0,1088152 |
| TTC17         | 764,72  | 1,08  | 0,406431 | 2,661269 | 0,007785 | 0,1088152 |
| MYO18A        | 377,41  | 1,59  | 0,597144 | 2,661018 | 0,00779  | 0,1088152 |
| RP11-48O20.4  | 23,32   | -2,03 | 0,763353 | -2,66059 | 0,0078   | 0,1088722 |
| RP11-262H14.1 | 198,30  | -1,41 | 0,531062 | -2,65952 | 0,007825 | 0,1089713 |
| PABPC4        | 1291,33 | 0,89  | 0,33379  | 2,659347 | 0,007829 | 0,1089713 |
| CAPN3         | 262,38  | 1,64  | 0,61646  | 2,659117 | 0,007835 | 0,1089713 |
| VPS8          | 368,28  | -1,51 | 0,566309 | -2,65906 | 0,007836 | 0,1089713 |
| FUCA2         | 347,35  | 1,38  | 0,518081 | 2,659022 | 0,007837 | 0,1089713 |
| HEPACAM       | 15,82   | -1,17 | 0,439532 | -2,65813 | 0,007858 | 0,1090817 |
| CCNYL1        | 134,66  | 1,76  | 0,662071 | 2,657871 | 0,007864 | 0,1090817 |
| AC137932.4    | 76,56   | -1,63 | 0,612059 | -2,65766 | 0,007869 | 0,1090817 |
| SLC7A6        | 374,65  | 1,65  | 0,619534 | 2,657466 | 0,007873 | 0,1090817 |
| C22orf29      | 60,35   | 2,93  | 1,102683 | 2,657423 | 0,007874 | 0,1090817 |
| KCTD19        | 37,95   | -2,55 | 0,960429 | -2,65603 | 0,007907 | 0,1093946 |
| PAQR4         | 11,52   | 4,67  | 1,759078 | 2,655956 | 0,007908 | 0,1093946 |
| RP11-308K2.1  | 1,28    | -3,30 | 1,242021 | -2,65593 | 0,007909 | NA        |
| AC017006.2    | 17,29   | 4,10  | 1,544252 | 2,655249 | 0,007925 | 0,1095426 |
| STRAP         | 1039,68 | 0,93  | 0,351281 | 2,654956 | 0,007932 | 0,1095564 |
| LSP1          | 3264,14 | 0,74  | 0,279021 | 2,654513 | 0,007942 | 0,1096191 |
| CTF1          | 5,62    | -2,25 | 0,847455 | -2,6527  | 0,007985 | 0,1100131 |
| CASD1         | 86,90   | 2,34  | 0,883864 | 2,652679 | 0,007986 | 0,1100131 |
| RP11-770J1.5  | 125,89  | 3,53  | 1,330085 | 2,652388 | 0,007992 | 0,1100131 |
| GXYLT2        | 11,49   | -2,67 | 1,00761  | -2,65225 | 0,007996 | 0,1100131 |
| AC009303.2    | 38,94   | 3,43  | 1,293776 | 2,652046 | 0,008001 | 0,1100131 |
| ZKSCAN3       | 65,66   | -2,42 | 0,912585 | -2,6518  | 0,008006 | 0,1100131 |
| LUC7L2        | 730,83  | 0,90  | 0,338886 | 2,650752 | 0,008031 | 0,1102744 |
| NDUFB1        | 233,21  | -0,93 | 0,349553 | -2,64999 | 0,008049 | 0,1104431 |
| ZNF793        | 31,96   | -1,46 | 0,549556 | -2,64933 | 0,008065 | 0,1105458 |
| PSMD12        | 456,58  | 1,30  | 0,49086  | 2,649175 | 0,008069 | 0,1105458 |
| PCIF1         | 368,43  | 1,28  | 0,482003 | 2,648806 | 0,008078 | 0,110585  |
| FAM225B       | 4,55    | -4,21 | 1,58964  | -2,6479  | 0,008099 | 0,1106331 |
| TATDN2        | 254,06  | 1,54  | 0,581246 | 2,647506 | 0,008109 | 0,1106331 |
| INHBA         | 36,37   | 2,87  | 1,08412  | 2,647387 | 0,008112 | 0,1106331 |
| PDZD7         | 66,45   | -1,86 | 0,703607 | -2,64724 | 0,008115 | 0,1106331 |
| RP11-64P12.3  | 33,00   | -2,55 | 0,963184 | -2,64682 | 0,008125 | 0,1106331 |
| RP11-52J3.3   | 13,68   | 6,40  | 2,419086 | 2,646641 | 0,00813  | 0,1106331 |
| RP11-527L4.5  | 4,80    | 4,85  | 1,833094 | 2,646464 | 0,008134 | 0,1106331 |
| EHMT2         | 271,00  | -1,58 | 0,598911 | -2,64637 | 0,008136 | 0,1106331 |
| RP11-747H7.3  | 47,49   | -2,45 | 0,924236 | -2,64633 | 0,008137 | 0,1106331 |
| RP11-966I7.1  | 4,84    | -3,25 | 1,229139 | -2,64575 | 0,008151 | 0,1106331 |
| NAPA-AS1      | 35,05   | -3,19 | 1,20557  | -2,6457  | 0,008152 | 0,1106331 |

|                |           |       |          |          |          |           |
|----------------|-----------|-------|----------|----------|----------|-----------|
| C17orf80       | 50,72     | 3,59  | 1,357145 | 2,645284 | 0,008162 | 0,1106331 |
| SIK1           | 186,82    | 1,89  | 0,714607 | 2,645203 | 0,008164 | 0,1106331 |
| HAVCR2         | 993,90    | 0,90  | 0,339413 | 2,645193 | 0,008164 | 0,1106331 |
| OR2A42         | 4,70      | -4,69 | 1,774593 | -2,64436 | 0,008184 | 0,1108241 |
| AC092171.2     | 3,66      | -2,39 | 0,905705 | -2,64273 | 0,008224 | NA        |
| BRCA2          | 134,74    | 2,16  | 0,816223 | 2,642363 | 0,008233 | 0,1113997 |
| SBK1           | 17,34     | -1,65 | 0,625724 | -2,64017 | 0,008286 | 0,1120383 |
| PTGR2          | 84,39     | -1,24 | 0,468635 | -2,63993 | 0,008292 | 0,1120383 |
| RP11-1018N14.5 | 142,01    | -2,21 | 0,838752 | -2,63884 | 0,008319 | 0,1120865 |
| TOPBP1         | 302,65    | 1,93  | 0,733    | 2,63881  | 0,00832  | 0,1120865 |
| ENHO           | 581,70    | 1,44  | 0,546308 | 2,638276 | 0,008333 | 0,1120865 |
| AC017099.3     | 88,22     | -1,69 | 0,642382 | -2,63823 | 0,008334 | 0,1120865 |
| RP11-220I1.1   | 605,90    | -1,81 | 0,686097 | -2,63812 | 0,008337 | 0,1120865 |
| LTB            | 238,35    | -1,63 | 0,619578 | -2,63794 | 0,008341 | 0,1120865 |
| RP11-69E11.8   | 12,36     | 3,38  | 1,28176  | 2,637867 | 0,008343 | 0,1120865 |
| CCL16          | 7,92      | -1,60 | 0,604911 | -2,63778 | 0,008345 | 0,1120865 |
| MT-ND4L        | 18000,71  | -0,84 | 0,31931  | -2,63758 | 0,00835  | 0,1120865 |
| MAP3K14        | 333,00    | 1,20  | 0,45628  | 2,635696 | 0,008396 | 0,1124793 |
| ZFYVE21        | 128,76    | 2,93  | 1,11044  | 2,635556 | 0,0084   | 0,1124793 |
| MT-RNR1        | 122171,54 | -0,70 | 0,267006 | -2,6355  | 0,008401 | 0,1124793 |
| LINC00173      | 89,05     | 2,33  | 0,883682 | 2,63533  | 0,008406 | 0,1124793 |
| RP11-113D6.10  | 79,77     | 2,32  | 0,882012 | 2,634936 | 0,008415 | 0,1124793 |
| IFT57          | 324,52    | 1,65  | 0,625482 | 2,634845 | 0,008418 | 0,1124793 |
| TRIM5          | 267,82    | 1,50  | 0,569287 | 2,63451  | 0,008426 | 0,1124793 |
| AMMECR1        | 187,15    | -2,23 | 0,847283 | -2,63444 | 0,008428 | 0,1124793 |
| LYL1           | 60,54     | -1,88 | 0,713016 | -2,63387 | 0,008442 | 0,1125883 |
| RNU6-82P       | 12,11     | 2,75  | 1,046124 | 2,633006 | 0,008463 | 0,1127933 |
| UBASH3A        | 3,86      | -5,58 | 2,118165 | -2,63208 | 0,008486 | 0,1130203 |
| CBFA2T3        | 189,06    | 1,16  | 0,439151 | 2,631802 | 0,008493 | 0,1130319 |
| ARPC2          | 10069,65  | 0,54  | 0,206269 | 2,63128  | 0,008506 | 0,1131247 |
| FAM189B        | 100,91    | 2,10  | 0,796768 | 2,629884 | 0,008541 | 0,1134478 |
| LUC7L3         | 1641,90   | -0,80 | 0,303907 | -2,62982 | 0,008543 | 0,1134478 |
| C4orf26        | 17,01     | -1,99 | 0,757257 | -2,62926 | 0,008557 | 0,1135559 |
| DTX4           | 137,26    | 2,21  | 0,83963  | 2,628832 | 0,008568 | 0,1136174 |
| KDM5C          | 215,40    | 2,23  | 0,850197 | 2,627942 | 0,00859  | 0,1138338 |
| POLK           | 474,00    | 1,18  | 0,448067 | 2,627645 | 0,008598 | 0,1138523 |
| EIF2B1         | 437,88    | 1,48  | 0,563168 | 2,627024 | 0,008614 | 0,1139792 |
| RP11-890B15.3  | 58,21     | 3,74  | 1,422398 | 2,626318 | 0,008631 | 0,1140672 |
| ABCA11         | 7,90      | 5,04  | 1,92075  | 2,626277 | 0,008632 | 0,1140672 |
| PGK1           | 3994,62   | 0,73  | 0,277363 | 2,625434 | 0,008654 | 0,1142691 |
| HIST4H4        | 39,37     | -2,52 | 0,9605   | -2,62465 | 0,008674 | 0,1144495 |
| DHX35          | 122,44    | 2,74  | 1,043961 | 2,622887 | 0,008719 | 0,1149637 |
| ZNF275         | 112,21    | 2,73  | 1,039637 | 2,621849 | 0,008745 | 0,115175  |
| ANKRA2         | 94,10     | 2,22  | 0,846785 | 2,62155  | 0,008753 | 0,115175  |
| STARD7         | 1641,76   | 0,72  | 0,274191 | 2,621537 | 0,008753 | 0,115175  |
| PCSK2          | 5,14      | -3,01 | 1,146536 | -2,62122 | 0,008761 | 0,1151996 |
| SALRNA3        | 14,81     | -2,44 | 0,932078 | -2,62042 | 0,008782 | 0,1153913 |
| AC016747.3     | 91,53     | -1,10 | 0,419489 | -2,61878 | 0,008824 | 0,1157977 |
| BASP1          | 323,41    | 1,17  | 0,445934 | 2,618735 | 0,008826 | 0,1157977 |
| MIS18A         | 76,79     | 2,84  | 1,085071 | 2,616654 | 0,00888  | 0,1164238 |

|                |         |       |          |          |          |           |
|----------------|---------|-------|----------|----------|----------|-----------|
| LIMS2          | 1,47    | -4,87 | 1,863073 | -2,61584 | 0,008901 | NA        |
| RP11-529K1.2   | 6,51    | -3,56 | 1,360101 | -2,61527 | 0,008916 | 0,116814  |
| CTD-2335A18.1  | 1,22    | -3,84 | 1,46992  | -2,61496 | 0,008924 | NA        |
| OTUD5          | 248,29  | -1,55 | 0,593915 | -2,61474 | 0,00893  | 0,1169031 |
| KLF3           | 953,33  | -1,02 | 0,391298 | -2,61453 | 0,008935 | 0,1169031 |
| KRT8           | 30,38   | -1,51 | 0,578655 | -2,61406 | 0,008947 | 0,1169828 |
| RP11-591N1.1   | 1595,24 | -0,66 | 0,25362  | -2,61322 | 0,008969 | 0,1170829 |
| RP11-1028N23.4 | 8,48    | -2,87 | 1,097378 | -2,61297 | 0,008976 | 0,1170829 |
| MST1           | 10,58   | 5,99  | 2,291078 | 2,612642 | 0,008985 | 0,1170829 |
| TPMT           | 411,56  | 1,29  | 0,494353 | 2,612542 | 0,008987 | 0,1170829 |
| RP11-566E18.3  | 7,27    | 3,85  | 1,47196  | 2,6125   | 0,008988 | 0,1170829 |
| C19orf52       | 18,54   | 2,15  | 0,822444 | 2,612327 | 0,008993 | 0,1170829 |
| RP11-887P2.1   | 53,97   | -1,22 | 0,467071 | -2,61108 | 0,009026 | 0,1174291 |
| VPS54          | 340,96  | 1,83  | 0,702726 | 2,610603 | 0,009038 | 0,1175102 |
| GBP5           | 135,35  | -2,66 | 1,019918 | -2,60946 | 0,009069 | 0,1178226 |
| DCBLD2         | 102,66  | 2,58  | 0,987706 | 2,608874 | 0,009084 | 0,1179408 |
| LARP4B         | 1159,17 | 1,15  | 0,441167 | 2,608322 | 0,009099 | 0,1180204 |
| RP11-83C7.3    | 11,61   | 2,92  | 1,118055 | 2,608166 | 0,009103 | 0,1180204 |
| CHCHD5         | 233,11  | -1,08 | 0,414324 | -2,60771 | 0,009115 | 0,118096  |
| RP1-257A7.4    | 187,83  | 1,69  | 0,64998  | 2,606469 | 0,009148 | 0,1181831 |
| RP11-87N24.3   | 34,28   | -1,23 | 0,470854 | -2,60631 | 0,009152 | 0,1181831 |
| PTTG1IP        | 1395,01 | 0,81  | 0,309072 | 2,606034 | 0,00916  | 0,1181831 |
| MAGI1          | 26,00   | -4,02 | 1,540727 | -2,60602 | 0,00916  | 0,1181831 |
| CAPZB          | 1717,23 | 0,97  | 0,370352 | 2,605721 | 0,009168 | 0,1181831 |
| RP11-285A1.1   | 6,35    | -2,10 | 0,806588 | -2,60569 | 0,009169 | 0,1181831 |
| SAMD8          | 459,41  | 1,44  | 0,553419 | 2,605639 | 0,00917  | 0,1181831 |
| KDR            | 9,19    | -3,92 | 1,504379 | -2,6055  | 0,009174 | 0,1181831 |
| NCR3           | 11,46   | -4,61 | 1,768789 | -2,60519 | 0,009182 | 0,1181831 |
| CNNM4          | 66,75   | 3,55  | 1,363469 | 2,605079 | 0,009185 | 0,1181831 |
| ZNF573         | 33,14   | 1,95  | 0,750091 | 2,604604 | 0,009198 | 0,1182652 |
| NADK2          | 201,51  | -1,47 | 0,564845 | -2,60423 | 0,009208 | 0,118306  |
| CCDC124        | 316,59  | 1,05  | 0,402677 | 2,604012 | 0,009214 | 0,118306  |
| PARP15         | 204,92  | -1,96 | 0,752103 | -2,60338 | 0,009231 | 0,1183728 |
| RP11-360A9.2   | 9,63    | 2,76  | 1,060603 | 2,603346 | 0,009232 | 0,1183728 |
| PLAG1          | 27,97   | -1,40 | 0,53807  | -2,60275 | 0,009248 | 0,1184634 |
| ASGR2          | 767,20  | -1,08 | 0,415091 | -2,60261 | 0,009252 | 0,1184634 |
| GLG1           | 1530,88 | 0,98  | 0,377375 | 2,601597 | 0,009279 | 0,1187328 |
| RBBP9          | 108,35  | 1,92  | 0,736324 | 2,600961 | 0,009296 | 0,1188712 |
| MBOAT1         | 34,21   | 3,81  | 1,464875 | 2,60027  | 0,009315 | 0,1189998 |
| PHTF2          | 262,20  | 1,57  | 0,603812 | 2,600119 | 0,009319 | 0,1189998 |
| GLIPR1         | 3394,67 | 0,98  | 0,376228 | 2,599548 | 0,009335 | 0,1191163 |
| MT-ND6         | 5528,38 | -0,64 | 0,246598 | -2,59881 | 0,009355 | 0,1192666 |
| CYP2B6         | 11,05   | -1,80 | 0,692698 | -2,59864 | 0,009359 | 0,1192666 |
| ZBTB38         | 274,68  | 1,45  | 0,557385 | 2,598209 | 0,009371 | 0,1193361 |
| TUBGCP3        | 301,90  | 1,60  | 0,617558 | 2,597492 | 0,009391 | 0,1195037 |
| EEF1A1P30      | 19,36   | -4,55 | 1,754628 | -2,59443 | 0,009475 | 0,1204154 |
| ENG            | 304,29  | -1,85 | 0,713366 | -2,59441 | 0,009475 | 0,1204154 |
| DHRS1          | 426,07  | -1,58 | 0,607939 | -2,59376 | 0,009493 | 0,1205381 |
| LACTB2         | 91,21   | 1,91  | 0,737157 | 2,593592 | 0,009498 | 0,1205381 |
| C1QBP          | 1322,23 | 0,98  | 0,376066 | 2,592892 | 0,009517 | 0,1206677 |

|               |         |       |          |          |          |           |
|---------------|---------|-------|----------|----------|----------|-----------|
| XPO1          | 1028,77 | -0,74 | 0,284624 | -2,59252 | 0,009528 | 0,1206677 |
| PLK4          | 35,55   | -4,58 | 1,766808 | -2,59246 | 0,009529 | 0,1206677 |
| ATL1          | 9,15    | -1,77 | 0,684641 | -2,59228 | 0,009534 | 0,1206677 |
| SLC35F5       | 154,35  | -1,52 | 0,584605 | -2,59185 | 0,009546 | 0,1207392 |
| RANBP2        | 1592,75 | 1,19  | 0,460411 | 2,591137 | 0,009566 | 0,1209064 |
| CTB-131B5.5   | 36,91   | -2,11 | 0,813269 | -2,5907  | 0,009578 | 0,1209459 |
| WFDC1         | 53,25   | -1,15 | 0,442108 | -2,59056 | 0,009582 | 0,1209459 |
| MSANTD4       | 192,04  | -2,99 | 1,153356 | -2,58848 | 0,00964  | 0,1213739 |
| TLR3          | 18,94   | 2,62  | 1,012909 | 2,588375 | 0,009643 | 0,1213739 |
| CH17-335B8.6  | 6,67    | 3,68  | 1,422331 | 2,588036 | 0,009652 | 0,1213739 |
| RP1-209A6.1   | 24,82   | 3,46  | 1,338037 | 2,587961 | 0,009655 | 0,1213739 |
| EFCAB14       | 803,82  | 1,26  | 0,486684 | 2,587817 | 0,009659 | 0,1213739 |
| AC093627.10   | 117,21  | 2,20  | 0,851714 | 2,587798 | 0,009659 | 0,1213739 |
| RP11-5N23.2   | 41,73   | -2,60 | 1,003095 | -2,58771 | 0,009662 | 0,1213739 |
| LST1          | 2739,02 | -0,40 | 0,152847 | -2,58741 | 0,00967  | 0,1213974 |
| DOK3          | 80,98   | -2,70 | 1,043313 | -2,58677 | 0,009688 | 0,121542  |
| SPACA3        | 2,04    | -3,58 | 1,383744 | -2,58581 | 0,009715 | NA        |
| MALT1         | 1116,57 | 1,43  | 0,551526 | 2,585173 | 0,009733 | 0,121874  |
| SEM1          | 668,14  | -0,71 | 0,273758 | -2,58514 | 0,009734 | 0,121874  |
| MAP3K6        | 82,64   | -2,09 | 0,809641 | -2,58513 | 0,009734 | 0,121874  |
| TYMP          | 3640,44 | -1,31 | 0,506558 | -2,58444 | 0,009754 | 0,1220106 |
| ZBTB39        | 19,50   | 3,47  | 1,344656 | 2,584281 | 0,009758 | 0,1220106 |
| AOX2P         | 5,43    | -2,78 | 1,077324 | -2,58312 | 0,009791 | 0,1221821 |
| CELSR1        | 16,57   | -5,12 | 1,980734 | -2,58311 | 0,009792 | 0,1221821 |
| GSDMA         | 9,69    | -1,54 | 0,596556 | -2,5831  | 0,009792 | 0,1221821 |
| PIK3CA        | 337,15  | -1,49 | 0,575941 | -2,58238 | 0,009812 | 0,1222396 |
| CENPF         | 91,86   | -1,90 | 0,734136 | -2,58236 | 0,009813 | 0,1222396 |
| RP11-499E14.1 | 5,52    | -2,02 | 0,78344  | -2,58204 | 0,009822 | 0,1222396 |
| RP11-410C4.5  | 136,47  | -1,97 | 0,762799 | -2,58202 | 0,009823 | 0,1222396 |
| ALPK2         | 31,14   | 2,99  | 1,157388 | 2,581497 | 0,009837 | 0,1223413 |
| RAD51AP1      | 3,80    | 4,64  | 1,79728  | 2,581028 | 0,009851 | 0,122426  |
| C19orf66      | 283,81  | 1,27  | 0,491551 | 2,58051  | 0,009865 | 0,122514  |
| RP11-65J3.1   | 61,96   | -2,60 | 1,006824 | -2,58032 | 0,009871 | 0,122514  |
| ZNF777        | 2,89    | -4,65 | 1,802661 | -2,57993 | 0,009882 | NA        |
| GALNT15       | 17,93   | 4,59  | 1,780089 | 2,579782 | 0,009886 | 0,1226226 |
| SOX9-AS1      | 10,53   | -2,96 | 1,149512 | -2,57874 | 0,009916 | 0,1229118 |
| MIR4312       | 3,86    | -5,94 | 2,303621 | -2,57826 | 0,00993  | 0,1229916 |
| OMA1          | 213,56  | -1,89 | 0,73257  | -2,57805 | 0,009936 | 0,1229916 |
| CTD-2568A17.3 | 136,44  | 1,63  | 0,630563 | 2,577718 | 0,009946 | 0,1230187 |
| DNAI2         | 9,21    | 5,86  | 2,273661 | 2,577518 | 0,009951 | 0,1230187 |
| RP11-587D21.5 | 5,81    | -3,42 | 1,326554 | -2,57716 | 0,009962 | 0,1230643 |
| COL9A3        | 6,51    | 4,74  | 1,841428 | 2,576309 | 0,009986 | 0,1232143 |
| RP11-171A24.3 | 3,82    | 4,57  | 1,773235 | 2,576281 | 0,009987 | 0,1232143 |
| C4orf22       | 4,58    | -2,74 | 1,0639   | -2,57545 | 0,010011 | 0,1234277 |
| KLF2          | 534,29  | -1,03 | 0,399204 | -2,57407 | 0,010051 | 0,1238399 |
| RRM2          | 87,77   | 3,03  | 1,176501 | 2,573078 | 0,01008  | 0,1240759 |
| RP11-546B8.5  | 1,70    | -4,00 | 1,555867 | -2,57294 | 0,010084 | NA        |
| TMOD3         | 789,40  | -1,34 | 0,520216 | -2,57279 | 0,010088 | 0,1240759 |
| RP11-416I2.1  | 4,77    | -2,79 | 1,0836   | -2,57273 | 0,01009  | 0,1240759 |
| EZR           | 3149,77 | 0,62  | 0,241847 | 2,571217 | 0,010134 | 0,1245351 |

|               |         |       |          |          |          |           |
|---------------|---------|-------|----------|----------|----------|-----------|
| THRAP3        | 1280,61 | 0,70  | 0,270887 | 2,570612 | 0,010152 | 0,1246705 |
| RP11-21M24.1  | 86,31   | 1,90  | 0,739669 | 2,570078 | 0,010168 | 0,1247292 |
| VPS13D        | 434,16  | 1,26  | 0,490691 | 2,569993 | 0,01017  | 0,1247292 |
| MYL12A        | 8584,50 | 0,51  | 0,199451 | 2,568742 | 0,010207 | 0,1250976 |
| CCDC50        | 941,89  | 1,20  | 0,467798 | 2,567941 | 0,01023  | 0,1253046 |
| CH17-472G23.4 | 114,59  | 2,60  | 1,012617 | 2,567081 | 0,010256 | 0,1255333 |
| DYNC2LI1      | 94,91   | 2,58  | 1,006132 | 2,56645  | 0,010275 | 0,1256768 |
| DYRK2         | 448,77  | 1,88  | 0,732778 | 2,566228 | 0,010281 | 0,1256768 |
| KDM2A         | 1091,50 | 1,01  | 0,395023 | 2,565471 | 0,010304 | 0,1257717 |
| RP5-1184F4.7  | 10,99   | -1,67 | 0,652921 | -2,56531 | 0,010308 | 0,1257717 |
| RP1-180E22.3  | 17,01   | 4,47  | 1,742221 | 2,565282 | 0,010309 | 0,1257717 |
| CTNS          | 123,46  | -2,15 | 0,837834 | -2,565   | 0,010318 | 0,1257717 |
| KB-1410C5.2   | 6,71    | -2,94 | 1,145063 | -2,56483 | 0,010323 | 0,1257717 |
| CLEC7A        | 2258,03 | -0,66 | 0,257534 | -2,56368 | 0,010357 | 0,1261062 |
| NDUFAB1       | 815,97  | 0,69  | 0,269494 | 2,563074 | 0,010375 | 0,1262436 |
| C19orf47      | 73,25   | -2,53 | 0,986636 | -2,56272 | 0,010385 | 0,1262492 |
| SLC25A19      | 243,48  | 1,62  | 0,631131 | 2,562395 | 0,010395 | 0,1262492 |
| RP11-642A1.2  | 7,80    | 5,01  | 1,954754 | 2,562378 | 0,010396 | 0,1262492 |
| NRDE2         | 305,69  | -1,73 | 0,676139 | -2,56186 | 0,010411 | 0,1263557 |
| FCRL1         | 45,00   | -2,25 | 0,878505 | -2,56064 | 0,010448 | 0,1266928 |
| CELF5         | 12,02   | 1,63  | 0,638072 | 2,560322 | 0,010458 | 0,1266928 |
| RP11-433M22.2 | 6,04    | -1,98 | 0,77447  | -2,56025 | 0,01046  | 0,1266928 |
| PLK5          | 16,05   | -1,51 | 0,588286 | -2,55971 | 0,010476 | 0,1268081 |
| ACAP3         | 125,65  | -1,31 | 0,51372  | -2,55895 | 0,010499 | 0,1270031 |
| PARS2         | 2,96    | -6,36 | 2,488266 | -2,55737 | 0,010547 | NA        |
| MANF          | 149,56  | 1,58  | 0,616718 | 2,557308 | 0,010549 | 0,1274205 |
| CHST3         | 8,65    | -2,34 | 0,913952 | -2,55721 | 0,010551 | 0,1274205 |
| GRASP         | 576,62  | 1,60  | 0,624432 | 2,557133 | 0,010554 | 0,1274205 |
| RPL28         | 2293,13 | -0,73 | 0,283822 | -2,55682 | 0,010563 | 0,1274537 |
| NET1          | 188,60  | 2,11  | 0,825675 | 2,556425 | 0,010575 | 0,1275147 |
| PSMA2         | 1662,58 | 0,65  | 0,254348 | 2,555175 | 0,010613 | 0,1278906 |
| FAM173A       | 188,34  | -1,28 | 0,502145 | -2,55492 | 0,010621 | 0,1279032 |
| RP4-594I10.3  | 7,50    | 5,55  | 2,170562 | 2,554669 | 0,010629 | 0,127911  |
| RBPJ          | 2426,93 | 0,74  | 0,289586 | 2,554401 | 0,010637 | 0,1279268 |
| DEDD          | 566,28  | 1,08  | 0,422539 | 2,553783 | 0,010656 | 0,1279386 |
| TAF2          | 207,68  | 1,33  | 0,519953 | 2,553718 | 0,010658 | 0,1279386 |
| CPEB2         | 409,51  | -1,97 | 0,771547 | -2,55369 | 0,010659 | 0,1279386 |
| AC087590.3    | 261,42  | 2,39  | 0,935631 | 2,553132 | 0,010676 | 0,1280627 |
| GOLGA6L5      | 9,98    | 5,35  | 2,094495 | 2,552879 | 0,010684 | 0,1280731 |
| AC008074.3    | 2,69    | -3,11 | 1,218187 | -2,55258 | 0,010693 | NA        |
| PRDM1         | 403,51  | 1,94  | 0,758543 | 2,55148  | 0,010727 | 0,1284294 |
| TMEM251       | 118,79  | 3,16  | 1,238499 | 2,551462 | 0,010727 | 0,1284294 |
| RP11-575A19.2 | 17,84   | -2,38 | 0,934732 | -2,5512  | 0,010735 | 0,128445  |
| PTPN2         | 1081,90 | 0,82  | 0,319977 | 2,550831 | 0,010747 | 0,128497  |
| PCDHGA10      | 8,48    | -1,49 | 0,58572  | -2,55047 | 0,010758 | 0,1285493 |
| STUB1         | 388,63  | -1,32 | 0,517323 | -2,54991 | 0,010775 | 0,1286706 |
| GTF2H3        | 175,56  | 2,14  | 0,839395 | 2,547934 | 0,010836 | 0,1293195 |
| SCMH1         | 97,62   | 3,28  | 1,287289 | 2,54703  | 0,010864 | 0,1295715 |
| RP11-384C4.2  | 2,26    | -5,31 | 2,082964 | -2,54703 | 0,010864 | NA        |
| CD3D          | 46,67   | -3,24 | 1,272174 | -2,54681 | 0,010871 | 0,1295715 |



|               |          |       |          |          |          |           |
|---------------|----------|-------|----------|----------|----------|-----------|
| CLP1          | 64,35    | 3,26  | 1,278879 | 2,546441 | 0,010883 | 0,1296247 |
| C12orf65      | 543,74   | -1,35 | 0,530102 | -2,54613 | 0,010892 | 0,129657  |
| AC008937.2    | 17,30    | -2,29 | 0,901083 | -2,54536 | 0,010916 | 0,1298598 |
| LDHA          | 3569,90  | 0,78  | 0,307182 | 2,544009 | 0,010959 | 0,1302806 |
| RP11-193J6.1  | 2,32     | -2,62 | 1,032185 | -2,54264 | 0,011002 | NA        |
| RP11-731J8.1  | 9,08     | -7,53 | 2,963077 | -2,54223 | 0,011015 | 0,1307509 |
| KNTC1         | 114,95   | -1,76 | 0,690806 | -2,54213 | 0,011018 | 0,1307509 |
| AL928654.7    | 12,33    | -2,06 | 0,812058 | -2,54208 | 0,011019 | 0,1307509 |
| MSH2          | 100,43   | 2,53  | 0,994464 | 2,541338 | 0,011043 | 0,1309452 |
| NBPF15        | 108,33   | -1,23 | 0,484232 | -2,54068 | 0,011064 | 0,1310319 |
| G6PD          | 59,47    | 1,48  | 0,580986 | 2,540662 | 0,011064 | 0,1310319 |
| CD300LB       | 412,39   | 1,20  | 0,472136 | 2,540247 | 0,011077 | 0,131104  |
| DSCR3         | 403,64   | 1,28  | 0,504469 | 2,538795 | 0,011123 | 0,1314257 |
| RP11-804H8.6  | 44,37    | 2,87  | 1,128991 | 2,538718 | 0,011126 | 0,1314257 |
| ITPRIP        | 374,67   | 1,33  | 0,522559 | 2,538691 | 0,011127 | 0,1314257 |
| PIGT          | 990,11   | -0,67 | 0,264517 | -2,5385  | 0,011133 | 0,1314257 |
| KLF17         | 2,68     | -2,86 | 1,126138 | -2,5371  | 0,011178 | NA        |
| PLEKHA7       | 63,34    | -4,33 | 1,708296 | -2,53666 | 0,011192 | 0,1319616 |
| ZNF350        | 184,61   | 1,72  | 0,676594 | 2,536632 | 0,011192 | 0,1319616 |
| ELAVL4        | 13,62    | 6,55  | 2,581525 | 2,536061 | 0,011211 | 0,1320247 |
| RCOR3         | 476,96   | 1,62  | 0,639149 | 2,536021 | 0,011212 | 0,1320247 |
| C14orf166     | 953,05   | 0,75  | 0,293948 | 2,534759 | 0,011252 | 0,1324176 |
| FAM69C        | 1,80     | -3,64 | 1,436779 | -2,53368 | 0,011287 | NA        |
| FCGR1B        | 51,27    | -3,23 | 1,273092 | -2,53357 | 0,011291 | 0,1327829 |
| C2orf88       | 13,90    | -1,30 | 0,514435 | -2,53325 | 0,011301 | 0,1328219 |
| ERCC2         | 173,92   | 2,25  | 0,889649 | 2,532874 | 0,011313 | 0,1328459 |
| NOP9          | 120,66   | -2,26 | 0,890865 | -2,53265 | 0,01132  | 0,1328459 |
| CS            | 1021,78  | 0,98  | 0,387159 | 2,532521 | 0,011325 | 0,1328459 |
| INSIG1        | 997,09   | 1,08  | 0,42508  | 2,531687 | 0,011352 | 0,1330781 |
| TRAK2         | 288,09   | -1,98 | 0,784252 | -2,53071 | 0,011383 | 0,1333338 |
| BAG2          | 38,40    | 3,02  | 1,19411  | 2,530572 | 0,011388 | 0,1333338 |
| CTD-2231E14.2 | 3,60     | -2,20 | 0,867855 | -2,53006 | 0,011404 | NA        |
| RN7SL834P     | 8,45     | 3,40  | 1,342572 | 2,52989  | 0,01141  | 0,1335092 |
| BMS1P1        | 195,43   | 1,31  | 0,517497 | 2,529419 | 0,011425 | 0,1336047 |
| MT-TG         | 3,27     | -2,52 | 0,99491  | -2,52922 | 0,011432 | NA        |
| PYGO1         | 3,82     | -2,03 | 0,803708 | -2,52876 | 0,011447 | 0,1337732 |
| RP11-886P16.3 | 15,83    | -2,92 | 1,1537   | -2,52804 | 0,01147  | 0,1339618 |
| VARS          | 397,75   | 1,48  | 0,587568 | 2,526257 | 0,011529 | 0,1345595 |
| RP11-974F13.5 | 38,70    | 2,03  | 0,804966 | 2,525978 | 0,011538 | 0,1345819 |
| CATIP         | 59,01    | -1,59 | 0,630197 | -2,52549 | 0,011554 | 0,1346801 |
| BRD7          | 1044,46  | 0,78  | 0,308545 | 2,525187 | 0,011564 | 0,1346801 |
| TRMT112       | 1276,43  | -0,59 | 0,23398  | -2,52499 | 0,01157  | 0,1346801 |
| BIN2          | 548,19   | -1,09 | 0,430086 | -2,52484 | 0,011575 | 0,1346801 |
| STX7          | 1218,52  | 0,99  | 0,390853 | 2,523611 | 0,011616 | 0,1349372 |
| PABPC1        | 14853,59 | 0,38  | 0,148626 | 2,5234   | 0,011623 | 0,1349372 |
| RN7SL460P     | 3,90     | -2,52 | 0,999782 | -2,5234  | 0,011623 | 0,1349372 |
| SPNS3         | 557,23   | 1,42  | 0,561104 | 2,523293 | 0,011626 | 0,1349372 |
| RERG          | 11,02    | -1,66 | 0,657673 | -2,52268 | 0,011646 | 0,1350878 |
| VARS2         | 46,06    | 2,13  | 0,845912 | 2,522449 | 0,011654 | 0,1350931 |
| PPP1R3G       | 6,31     | -3,77 | 1,494267 | -2,52093 | 0,011704 | 0,1355914 |

|                |         |       |          |          |          |           |
|----------------|---------|-------|----------|----------|----------|-----------|
| ATXN7L1        | 138,08  | 2,24  | 0,889511 | 2,520539 | 0,011718 | 0,1356594 |
| CTA-215D11.5   | 18,84   | -2,43 | 0,963815 | -2,51978 | 0,011743 | 0,1358683 |
| TMEM80         | 214,57  | 1,76  | 0,697128 | 2,519344 | 0,011757 | 0,1359516 |
| CELF1          | 892,79  | 0,86  | 0,34073  | 2,518362 | 0,01179  | 0,1362464 |
| RP11-474C8.8   | 7,02    | -2,18 | 0,866069 | -2,51654 | 0,011851 | 0,1368663 |
| TXK            | 65,04   | -1,84 | 0,730995 | -2,51601 | 0,011869 | 0,1369896 |
| RBCK1          | 722,35  | -1,06 | 0,422677 | -2,5148  | 0,01191  | 0,1373135 |
| RP11-437L7.1   | 13,11   | 4,53  | 1,799975 | 2,51463  | 0,011916 | 0,1373135 |
| PDE1C          | 73,73   | -4,26 | 1,693423 | -2,51452 | 0,011919 | 0,1373135 |
| LRTOMT         | 66,87   | -2,39 | 0,952462 | -2,51304 | 0,01197  | 0,1377683 |
| CTB-50E14.6    | 44,74   | -1,51 | 0,599337 | -2,51292 | 0,011974 | 0,1377683 |
| AC124944.3     | 3,27    | -2,92 | 1,16302  | -2,51215 | 0,012    | NA        |
| BRSK2          | 3,55    | -6,29 | 2,505243 | -2,51152 | 0,012021 | NA        |
| SIDT2          | 505,90  | 1,15  | 0,457495 | 2,511031 | 0,012038 | 0,1380982 |
| RP11-566K19.12 | 5,79    | -3,05 | 1,213607 | -2,51058 | 0,012053 | 0,1380982 |
| HIC1           | 19,35   | 3,10  | 1,233187 | 2,510474 | 0,012057 | 0,1380982 |
| SSR1           | 2858,73 | 0,95  | 0,38003  | 2,510386 | 0,01206  | 0,1380982 |
| RP11-63G10.4   | 18,42   | -1,92 | 0,765891 | -2,5103  | 0,012063 | 0,1380982 |
| RP11-266K22.2  | 4,03    | -4,71 | 1,876268 | -2,5102  | 0,012066 | 0,1380982 |
| SRGAP3         | 210,74  | 1,45  | 0,579518 | 2,509982 | 0,012074 | 0,1380982 |
| PKN2           | 571,93  | 1,34  | 0,532119 | 2,50968  | 0,012084 | 0,1380982 |
| MINPP1         | 30,52   | 3,50  | 1,396114 | 2,509382 | 0,012094 | 0,1380982 |
| SF3B4          | 149,83  | 1,03  | 0,411127 | 2,509265 | 0,012098 | 0,1380982 |
| RP11-57C13.3   | 6,06    | -2,12 | 0,84437  | -2,50925 | 0,012099 | 0,1380982 |
| CRIP3          | 158,17  | 1,58  | 0,628237 | 2,509198 | 0,012101 | 0,1380982 |
| CTB-32O4.2     | 4,78    | 2,74  | 1,090741 | 2,509189 | 0,012101 | 0,1380982 |
| RP11-284L19.1  | 9,14    | -7,99 | 3,18452  | -2,50903 | 0,012106 | 0,1380982 |
| ACOT9          | 883,00  | 1,01  | 0,401914 | 2,508553 | 0,012123 | 0,1382001 |
| CEACAM1        | 9,58    | -1,51 | 0,603467 | -2,50735 | 0,012164 | 0,1385827 |
| MCM8           | 99,89   | 1,94  | 0,772669 | 2,507143 | 0,012171 | 0,1385827 |
| RP11-419K12.2  | 26,96   | 2,15  | 0,857717 | 2,50616  | 0,012205 | 0,1388837 |
| PRMT6          | 44,52   | 3,35  | 1,33906  | 2,503879 | 0,012284 | 0,1396966 |
| RNU7-133P      | 5,24    | 4,44  | 1,775228 | 2,503008 | 0,012314 | 0,1399556 |
| RP11-26F2.1    | 9,28    | 5,22  | 2,086519 | 2,502299 | 0,012339 | 0,1401469 |
| RP11-280K24.4  | 111,23  | -2,16 | 0,86262  | -2,50209 | 0,012346 | 0,1401469 |
| CPEB1          | 52,33   | -1,93 | 0,77253  | -2,50095 | 0,012386 | 0,1405151 |
| PUM1           | 910,20  | 0,99  | 0,394918 | 2,50047  | 0,012403 | 0,1405631 |
| OR51M1         | 13,76   | -1,86 | 0,74474  | -2,50018 | 0,012413 | 0,1405631 |
| RND1           | 15,56   | 2,14  | 0,856514 | 2,500179 | 0,012413 | 0,1405631 |
| RP11-15J22.8   | 2,55    | 3,35  | 1,340681 | 2,500158 | 0,012414 | NA        |
| ZNF570         | 108,11  | 2,31  | 0,924331 | 2,499874 | 0,012424 | 0,1405986 |
| RP11-97O12.2   | 24,75   | -3,05 | 1,219143 | -2,49933 | 0,012443 | 0,140729  |
| RP11-406H21.2  | 5,14    | 4,99  | 1,996564 | 2,497636 | 0,012502 | 0,1413171 |
| RP11-526D8.11  | 60,83   | 1,22  | 0,489591 | 2,496423 | 0,012545 | 0,1416972 |
| MCM3           | 115,51  | 2,01  | 0,803516 | 2,496253 | 0,012551 | 0,1416972 |
| C15orf52       | 41,09   | 2,28  | 0,914932 | 2,494512 | 0,012613 | 0,1423077 |
| RP11-27G24.3   | 2,67    | -4,10 | 1,645798 | -2,49315 | 0,012661 | NA        |
| MYO1B          | 17,19   | 4,29  | 1,720926 | 2,493154 | 0,012661 | 0,1427669 |
| MPZL2          | 179,65  | 2,46  | 0,989047 | 2,491923 | 0,012705 | 0,1431454 |
| MBOAT4         | 3,31    | 4,36  | 1,750626 | 2,491904 | 0,012706 | NA        |

|                |          |       |          |          |          |           |
|----------------|----------|-------|----------|----------|----------|-----------|
| LRRC74B        | 33,82    | -1,62 | 0,65143  | -2,49174 | 0,012712 | 0,1431454 |
| RP3-333H23.10  | 9,51     | -2,40 | 0,964746 | -2,49157 | 0,012718 | 0,1431454 |
| SH2D3C         | 243,42   | 1,44  | 0,576295 | 2,491204 | 0,012731 | 0,1432057 |
| PLBD1          | 2191,54  | 1,04  | 0,416174 | 2,490866 | 0,012743 | 0,1432553 |
| RN7SKP94       | 8,65     | -7,91 | 3,178001 | -2,48876 | 0,012819 | 0,1440201 |
| C1QB           | 85,89    | 4,47  | 1,798213 | 2,48718  | 0,012876 | 0,1445735 |
| RP11-405O10.2  | 2,91     | 4,16  | 1,672813 | 2,487137 | 0,012878 | NA        |
| PHLDB3         | 105,36   | -1,48 | 0,59632  | -2,48613 | 0,012914 | 0,1449131 |
| CTD-2262B20.1  | 9,90     | 3,91  | 1,572768 | 2,48536  | 0,012942 | 0,1450074 |
| YIPF6          | 181,90   | 1,25  | 0,504435 | 2,485291 | 0,012945 | 0,1450074 |
| UNC93B1        | 273,00   | -1,19 | 0,47727  | -2,48526 | 0,012946 | 0,1450074 |
| RP11-342C24.8  | 13,05    | 1,55  | 0,623189 | 2,484918 | 0,012958 | 0,1450124 |
| FFAR2          | 42,37    | -1,33 | 0,536336 | -2,48482 | 0,012962 | 0,1450124 |
| RP11-247I13.11 | 2,65     | 3,98  | 1,601587 | 2,484631 | 0,012969 | NA        |
| HLA-B          | 9267,11  | -0,45 | 0,18055  | -2,48353 | 0,013009 | 0,1454494 |
| POLR3B         | 55,28    | 2,67  | 1,075079 | 2,483054 | 0,013026 | 0,1455564 |
| RP5-1109J22.1  | 2,82     | 4,15  | 1,672761 | 2,482269 | 0,013055 | NA        |
| LILRB3         | 738,80   | -0,81 | 0,325906 | -2,48129 | 0,013091 | 0,1461923 |
| CRNDE          | 55,18    | -2,56 | 1,032709 | -2,48077 | 0,01311  | 0,1462552 |
| ZNF684         | 36,35    | -1,75 | 0,707066 | -2,48062 | 0,013115 | 0,1462552 |
| NUDT1          | 234,59   | 0,74  | 0,299268 | 2,480492 | 0,01312  | 0,1462552 |
| MT-TN          | 17,40    | -1,06 | 0,42665  | -2,47992 | 0,013141 | 0,1464003 |
| SLFN5          | 300,87   | -1,37 | 0,553661 | -2,4789  | 0,013179 | 0,14666   |
| ACO23105.3     | 17,32    | 4,64  | 1,873962 | 2,478356 | 0,013199 | 0,14666   |
| TCEA3          | 45,89    | 2,70  | 1,088119 | 2,47832  | 0,0132   | 0,14666   |
| RP11-108M9.5   | 9,55     | 5,30  | 2,14058  | 2,478206 | 0,013204 | 0,14666   |
| SSH1           | 475,03   | 1,50  | 0,604236 | 2,478042 | 0,013211 | 0,14666   |
| PTPRK          | 7,66     | -2,46 | 0,994302 | -2,47801 | 0,013212 | 0,14666   |
| ITIH2          | 6,33     | -5,64 | 2,278344 | -2,47765 | 0,013225 | 0,1466644 |
| UBL5           | 717,54   | -0,63 | 0,252801 | -2,47758 | 0,013228 | 0,1466644 |
| CTB-51A17.1    | 5,28     | -1,92 | 0,775951 | -2,47721 | 0,013242 | 0,1467291 |
| TRIM37         | 97,85    | -2,12 | 0,856198 | -2,47655 | 0,013266 | 0,1468291 |
| EEF1A1         | 83874,07 | 0,46  | 0,187441 | 2,476539 | 0,013266 | 0,1468291 |
| ARL9           | 15,37    | 2,79  | 1,12816  | 2,475693 | 0,013298 | 0,1470898 |
| C1orf53        | 9,41     | 5,89  | 2,379839 | 2,474839 | 0,01333  | 0,1473544 |
| FAM57B         | 16,87    | -1,63 | 0,657339 | -2,47437 | 0,013347 | 0,1474617 |
| LINC00511      | 61,79    | -1,24 | 0,502535 | -2,47401 | 0,013361 | 0,1475224 |
| RNU1-28P       | 24,67    | -1,17 | 0,471563 | -2,47313 | 0,013393 | 0,1477965 |
| OAF            | 223,99   | -1,42 | 0,573186 | -2,47167 | 0,013448 | 0,1482399 |
| RP11-543H23.1  | 5,66     | -1,99 | 0,805056 | -2,47164 | 0,01345  | 0,1482399 |
| TMEM254        | 138,41   | 2,74  | 1,110225 | 2,470089 | 0,013508 | 0,1487954 |
| FAM213A        | 80,75    | 2,54  | 1,030186 | 2,469837 | 0,013517 | 0,1488121 |
| CTA-414D7.1    | 133,55   | 1,61  | 0,651568 | 2,469133 | 0,013544 | 0,1489322 |
| ACSL6          | 16,57    | -1,53 | 0,618574 | -2,46913 | 0,013544 | 0,1489322 |
| RP11-389E17.1  | 1,56     | -4,93 | 1,995511 | -2,46876 | 0,013558 | NA        |
| XPC            | 356,36   | -1,31 | 0,529654 | -2,46826 | 0,013577 | 0,1492052 |
| SLC16A4        | 22,15    | -2,32 | 0,940738 | -2,46711 | 0,013621 | 0,1495947 |
| N4BP2L1        | 473,48   | 1,16  | 0,471406 | 2,46639  | 0,013648 | 0,1498087 |
| RP13-516M14.2  | 8,42     | -2,72 | 1,102897 | -2,46591 | 0,013666 | 0,1499202 |
| Z97634.3       | 25,47    | 1,21  | 0,49196  | 2,46524  | 0,013692 | 0,1501132 |

|                   |         |       |          |          |          |           |
|-------------------|---------|-------|----------|----------|----------|-----------|
| RP11-350E12.1     | 25,81   | 2,02  | 0,818766 | 2,464616 | 0,013716 | 0,1502863 |
| AP004782.1        | 14,70   | -2,76 | 1,118787 | -2,46409 | 0,013736 | 0,1504206 |
| TSPO              | 5932,46 | -0,47 | 0,1897   | -2,46376 | 0,013749 | 0,1504665 |
| CKS2              | 144,94  | 2,07  | 0,841568 | 2,463296 | 0,013767 | 0,1505599 |
| AP5M1             | 376,79  | 1,87  | 0,760634 | 2,463121 | 0,013773 | 0,1505599 |
| SLC9C1            | 10,86   | -6,11 | 2,482589 | -2,46285 | 0,013784 | 0,1505863 |
| B3GNT9            | 5,22    | -4,47 | 1,814213 | -2,4624  | 0,013801 | 0,1506873 |
| ARID1A            | 1229,89 | 0,95  | 0,386429 | 2,461583 | 0,013833 | 0,1509089 |
| CEBPG             | 466,79  | 1,42  | 0,57853  | 2,461449 | 0,013838 | 0,1509089 |
| SLC38A1           | 1638,31 | 1,05  | 0,42778  | 2,460906 | 0,013859 | 0,1510491 |
| IGF2BP2           | 169,43  | 1,91  | 0,774795 | 2,460352 | 0,01388  | 0,1511517 |
| RASA4             | 408,72  | -1,19 | 0,483118 | -2,46024 | 0,013884 | 0,1511517 |
| LINC01595         | 1,45    | 3,17  | 1,288879 | 2,459998 | 0,013894 | NA        |
| LPP-AS2           | 26,59   | -2,46 | 0,999434 | -2,4599  | 0,013897 | 0,1512059 |
| PNPLA4            | 198,88  | 2,24  | 0,909296 | 2,459531 | 0,013912 | 0,1512387 |
| RP11-517P14.2     | 24,95   | 2,18  | 0,888223 | 2,459325 | 0,01392  | 0,1512387 |
| RP11-481G8.2      | 22,36   | -1,80 | 0,730266 | -2,4592  | 0,013925 | 0,1512387 |
| EMP3              | 1418,43 | -0,65 | 0,264315 | -2,45709 | 0,014007 | 0,1520394 |
| XXbac-BPG171B11.8 | 3,80    | -2,95 | 1,203087 | -2,45563 | 0,014064 | 0,1522507 |
| RP11-6N17.4       | 60,80   | -1,50 | 0,612042 | -2,45555 | 0,014067 | 0,1522507 |
| RNU1-1            | 24,74   | -1,16 | 0,472632 | -2,45492 | 0,014092 | 0,1522507 |
| RNU1-27P          | 24,74   | -1,16 | 0,472632 | -2,45492 | 0,014092 | 0,1522507 |
| RNU1-2            | 24,74   | -1,16 | 0,472632 | -2,45492 | 0,014092 | 0,1522507 |
| RNU1-3            | 24,74   | -1,16 | 0,472632 | -2,45492 | 0,014092 | 0,1522507 |
| RNU1-4            | 24,74   | -1,16 | 0,472632 | -2,45492 | 0,014092 | 0,1522507 |
| RNVU1-18          | 24,74   | -1,16 | 0,472632 | -2,45492 | 0,014092 | 0,1522507 |
| RP11-193H5.1      | 2,61    | -5,69 | 2,318009 | -2,45488 | 0,014093 | NA        |
| B4GALT7           | 173,29  | -2,28 | 0,930397 | -2,45435 | 0,014114 | 0,1523147 |
| LTBP3             | 104,07  | 2,04  | 0,832903 | 2,454027 | 0,014127 | 0,1523147 |
| PIGW              | 34,23   | 2,42  | 0,985258 | 2,453782 | 0,014136 | 0,1523147 |
| ZCCHC24           | 105,05  | 2,00  | 0,816906 | 2,453779 | 0,014136 | 0,1523147 |
| DOLK              | 40,41   | 4,31  | 1,754719 | 2,453724 | 0,014139 | 0,1523147 |
| UBE2L6            | 2409,16 | 0,95  | 0,388048 | 2,452434 | 0,014189 | 0,1527735 |
| AC113167.1        | 10,70   | 1,82  | 0,743987 | 2,451572 | 0,014223 | 0,1530378 |
| CCNY              | 1211,77 | -0,99 | 0,403089 | -2,45132 | 0,014234 | 0,1530378 |
| RP1-278E11.3      | 1,75    | -2,97 | 1,212985 | -2,45124 | 0,014236 | NA        |
| IGBP1             | 1143,76 | 1,03  | 0,419619 | 2,451188 | 0,014239 | 0,1530378 |
| ETV4              | 2,66    | 4,06  | 1,6582   | 2,450712 | 0,014257 | NA        |
| PIK3R6            | 87,98   | 1,80  | 0,735684 | 2,450209 | 0,014277 | 0,1533658 |
| CTB-109A12.1      | 1,36    | -4,52 | 1,847191 | -2,44929 | 0,014314 | NA        |
| TMEM39A           | 252,58  | 1,77  | 0,723061 | 2,448715 | 0,014337 | 0,1538321 |
| PEAK1             | 182,81  | -1,50 | 0,613908 | -2,4487  | 0,014337 | 0,1538321 |
| SKAP1             | 14,36   | -2,40 | 0,979556 | -2,44712 | 0,0144   | 0,1541932 |
| RP11-963H4.8      | 5,29    | 4,43  | 1,811875 | 2,447111 | 0,014401 | 0,1541932 |
| PLK1              | 42,64   | -3,47 | 1,418863 | -2,44705 | 0,014403 | 0,1541932 |
| RCOR1             | 625,37  | 1,57  | 0,642027 | 2,447025 | 0,014404 | 0,1541932 |
| XXbac-BPG181B23.7 | 33,73   | 3,18  | 1,297816 | 2,446465 | 0,014426 | 0,1542658 |
| ZAP70             | 144,69  | -3,29 | 1,346413 | -2,44644 | 0,014427 | 0,1542658 |
| PAXIP1            | 169,69  | -2,27 | 0,929367 | -2,44602 | 0,014444 | 0,1543576 |
| CTB-4116.1        | 10,55   | 3,64  | 1,489968 | 2,445334 | 0,014472 | 0,1545627 |

|                |         |       |          |          |          |           |
|----------------|---------|-------|----------|----------|----------|-----------|
| KB-1460A1.5    | 32,25   | -2,76 | 1,130989 | -2,44475 | 0,014495 | 0,1547262 |
| MIS12          | 82,74   | 2,31  | 0,943917 | 2,44452  | 0,014505 | 0,1547343 |
| AF064858.11    | 36,46   | 2,13  | 0,871577 | 2,442986 | 0,014566 | 0,1553044 |
| RP11-118F19.1  | 13,65   | 3,28  | 1,341776 | 2,442471 | 0,014587 | 0,1554368 |
| TSC22D1        | 108,44  | 2,47  | 1,011858 | 2,44188  | 0,014611 | 0,1555853 |
| RP11-1217F2.23 | 1,41    | -4,94 | 2,024477 | -2,44171 | 0,014618 | NA        |
| DNAH5          | 5,39    | -2,83 | 1,158636 | -2,44171 | 0,014618 | 0,1555853 |
| EDNRB          | 1,93    | -3,98 | 1,630825 | -2,4414  | 0,014631 | NA        |
| RN7SL301P      | 11,53   | -2,15 | 0,881715 | -2,44138 | 0,014631 | 0,1556413 |
| PCBP2          | 2158,83 | 0,61  | 0,248336 | 2,44052  | 0,014666 | 0,1559219 |
| RP5-1024G6.7   | 189,30  | -1,54 | 0,632906 | -2,43998 | 0,014688 | 0,1560652 |
| MRO            | 15,79   | -2,59 | 1,063041 | -2,4396  | 0,014703 | 0,1561059 |
| NTM            | 12,25   | -4,43 | 1,814169 | -2,43948 | 0,014709 | 0,1561059 |
| AL035610.2     | 268,58  | -1,25 | 0,510647 | -2,4384  | 0,014753 | 0,1564835 |
| RP11-357N13.6  | 1,53    | -4,17 | 1,709185 | -2,43816 | 0,014762 | NA        |
| OSM            | 557,95  | 1,93  | 0,791724 | 2,437829 | 0,014776 | 0,1566398 |
| TFB2M          | 133,08  | 2,04  | 0,835438 | 2,437394 | 0,014794 | 0,1567392 |
| KCNJ14         | 58,58   | -2,06 | 0,847219 | -2,43651 | 0,01483  | 0,1570321 |
| UQCR11         | 1063,15 | -0,58 | 0,237884 | -2,43625 | 0,014841 | 0,1570588 |
| FDXACB1        | 25,96   | 2,51  | 1,030597 | 2,435678 | 0,014864 | 0,1571011 |
| PITPNB         | 372,47  | 1,49  | 0,610554 | 2,435577 | 0,014868 | 0,1571011 |
| PLCB1          | 135,40  | -1,75 | 0,71763  | -2,43553 | 0,01487  | 0,1571011 |
| LY96           | 218,90  | -0,90 | 0,369967 | -2,4352  | 0,014884 | 0,1571559 |
| FAM221A        | 126,16  | 2,03  | 0,833704 | 2,434949 | 0,014894 | 0,1571756 |
| RP3-522J7.6    | 5,85    | -2,74 | 1,124801 | -2,43474 | 0,014903 | 0,1571787 |
| PRMT1          | 436,55  | 1,18  | 0,48434  | 2,434505 | 0,014912 | 0,1571903 |
| RP11-717D12.1  | 2,43    | 3,91  | 1,607429 | 2,434345 | 0,014919 | NA        |
| RP4-778K6.3    | 8,94    | 5,79  | 2,378113 | 2,434065 | 0,01493  | 0,1572764 |
| VCPKMT         | 150,34  | 1,75  | 0,719702 | 2,433897 | 0,014937 | 0,1572764 |
| RAB11FIP2      | 215,96  | 1,70  | 0,699011 | 2,433405 | 0,014958 | 0,1573964 |
| SGK494         | 77,15   | -1,50 | 0,616863 | -2,43306 | 0,014972 | 0,1573964 |
| SECISBP2L      | 262,15  | 1,50  | 0,614476 | 2,433007 | 0,014974 | 0,1573964 |
| RP11-449G16.1  | 12,75   | 6,31  | 2,593919 | 2,432478 | 0,014996 | 0,1575376 |
| PRORY          | 1,40    | -4,73 | 1,944722 | -2,43142 | 0,01504  | NA        |
| SSBP1          | 873,09  | 0,62  | 0,25389  | 2,430577 | 0,015075 | 0,1582768 |
| RPS6KA3        | 1394,33 | 0,91  | 0,374127 | 2,429392 | 0,015124 | 0,1587058 |
| KB-1836B5.1    | 6,31    | 3,45  | 1,418722 | 2,429032 | 0,015139 | 0,1587738 |
| RP11-330A.2    | 3,65    | -4,00 | 1,647876 | -2,42903 | 0,015139 | NA        |
| EXOG           | 170,55  | 1,88  | 0,773527 | 2,428318 | 0,015169 | 0,158954  |
| PANX1          | 36,09   | 3,03  | 1,24605  | 2,428212 | 0,015173 | 0,158954  |
| ATF3           | 696,12  | 1,34  | 0,551148 | 2,427719 | 0,015194 | 0,1589902 |
| OR11G2         | 7,01    | -2,00 | 0,821981 | -2,42758 | 0,0152   | 0,1589902 |
| SPRED2         | 21,84   | 3,82  | 1,57232  | 2,427459 | 0,015205 | 0,1589902 |
| AAMDC          | 110,74  | -1,20 | 0,493174 | -2,42714 | 0,015219 | 0,1589902 |
| AC004837.5     | 10,98   | 5,52  | 2,273308 | 2,42711  | 0,01522  | 0,1589902 |
| SLC39A14       | 3,49    | 3,59  | 1,479505 | 2,426559 | 0,015243 | NA        |
| KIAA1468       | 537,16  | -1,38 | 0,570159 | -2,42632 | 0,015253 | 0,1592488 |
| CTSZ           | 197,88  | -1,71 | 0,706769 | -2,42542 | 0,015291 | 0,1594735 |
| RP5-827C21.4   | 39,26   | -2,63 | 1,085279 | -2,42506 | 0,015306 | 0,1594735 |
| SNRPD3         | 733,89  | 0,66  | 0,273106 | 2,424768 | 0,015318 | 0,1594735 |

|               |          |       |          |          |          |           |
|---------------|----------|-------|----------|----------|----------|-----------|
| QSOX1         | 521,13   | -0,99 | 0,40693  | -2,42466 | 0,015323 | 0,1594735 |
| GRIN2A        | 23,94    | 3,07  | 1,266693 | 2,424658 | 0,015323 | 0,1594735 |
| RP4-550H1.5   | 9,78     | 2,10  | 0,865564 | 2,424415 | 0,015333 | 0,1594735 |
| PI4KB         | 423,41   | 0,97  | 0,398144 | 2,424382 | 0,015334 | 0,1594735 |
| BMPR1A        | 71,95    | -1,13 | 0,46746  | -2,42376 | 0,015361 | 0,1596407 |
| SMEK1         | 1148,04  | 0,88  | 0,364819 | 2,423595 | 0,015368 | 0,1596407 |
| OPTN          | 39,56    | -1,79 | 0,738827 | -2,42272 | 0,015405 | 0,1599354 |
| ZNF143        | 257,76   | -1,77 | 0,732723 | -2,42218 | 0,015428 | 0,1600832 |
| PSG5          | 22,59    | -2,71 | 1,117996 | -2,42192 | 0,015439 | 0,1601108 |
| CDPF1         | 35,90    | 4,39  | 1,814459 | 2,421151 | 0,015471 | 0,1603229 |
| CXorf65       | 3,83     | 4,12  | 1,70335  | 2,420947 | 0,01548  | 0,1603229 |
| C17orf49      | 1243,41  | 0,69  | 0,286171 | 2,420698 | 0,015491 | 0,1603229 |
| CCDC141       | 46,28    | -1,70 | 0,700937 | -2,42046 | 0,015501 | 0,1603229 |
| SLC14A2       | 51,59    | -1,77 | 0,731025 | -2,42043 | 0,015502 | 0,1603229 |
| C1orf228      | 105,66   | -1,86 | 0,766806 | -2,42017 | 0,015513 | 0,1603464 |
| CYP4F22       | 1,79     | -4,89 | 2,022508 | -2,41968 | 0,015534 | NA        |
| CTD-2090I13.1 | 4,30     | -6,50 | 2,685519 | -2,41962 | 0,015537 | 0,1604992 |
| AC016831.7    | 58,17    | 1,84  | 0,76006  | 2,419229 | 0,015553 | 0,1605837 |
| RP11-661C3.2  | 2,08     | 3,04  | 1,258544 | 2,41815  | 0,0156   | NA        |
| SH2D1A        | 34,68    | -4,42 | 1,825885 | -2,4181  | 0,015602 | 0,1609933 |
| AC000367.1    | 42,41    | -1,22 | 0,506533 | -2,41775 | 0,015617 | 0,1610578 |
| RP11-499E18.1 | 4,64     | -3,03 | 1,25247  | -2,41747 | 0,015629 | 0,1610923 |
| PKP4          | 122,79   | 2,21  | 0,914004 | 2,417189 | 0,015641 | 0,1611288 |
| RBMX2         | 84,33    | -2,02 | 0,836741 | -2,41696 | 0,015651 | 0,1611425 |
| UNC13D        | 274,66   | -1,16 | 0,479247 | -2,41572 | 0,015704 | 0,1616006 |
| SPAG5-AS1     | 65,42    | 2,46  | 1,016975 | 2,414473 | 0,015758 | 0,162066  |
| CISD3         | 229,83   | -1,06 | 0,438091 | -2,4139  | 0,015783 | 0,1622333 |
| RP11-261C10.3 | 10,67    | -3,30 | 1,369322 | -2,41329 | 0,015809 | 0,162352  |
| SMIM10L1      | 309,69   | 1,29  | 0,535802 | 2,413227 | 0,015812 | 0,162352  |
| DDX5          | 11624,07 | 0,49  | 0,204329 | 2,412906 | 0,015826 | 0,1624055 |
| SNORD3A       | 366,20   | -1,04 | 0,4296   | -2,41218 | 0,015857 | 0,1626373 |
| RP11-54H7.4   | 51,18    | -1,39 | 0,57611  | -2,41175 | 0,015876 | 0,1627419 |
| USP33         | 674,94   | -1,05 | 0,434181 | -2,41139 | 0,015892 | 0,1627711 |
| ZNF688        | 213,78   | -0,93 | 0,387098 | -2,41128 | 0,015897 | 0,1627711 |
| SPRYD3        | 139,78   | 2,14  | 0,887799 | 2,410607 | 0,015926 | 0,1629479 |
| SMARCAL1      | 157,35   | -2,39 | 0,992071 | -2,41017 | 0,015945 | 0,1629479 |
| C4BPB         | 38,40    | -1,57 | 0,650974 | -2,41016 | 0,015946 | 0,1629479 |
| NDUFA13       | 2061,43  | -0,62 | 0,25528  | -2,40998 | 0,015953 | 0,1629479 |
| RP11-16N11.2  | 13,69    | 5,82  | 2,417066 | 2,409884 | 0,015958 | 0,1629479 |
| FAM135A       | 280,64   | 1,43  | 0,594494 | 2,40957  | 0,015971 | 0,1629862 |
| RP5-1056L3.3  | 16,92    | 3,55  | 1,472395 | 2,409398 | 0,015979 | 0,1629862 |
| CH17-31A6.1   | 4,64     | 4,84  | 2,009506 | 2,408532 | 0,016017 | 0,1632839 |
| RP5-1014D13.2 | 292,45   | -0,96 | 0,400161 | -2,4078  | 0,016049 | 0,1635201 |
| RP4-798A10.2  | 26,95    | -1,38 | 0,573303 | -2,40684 | 0,016091 | 0,1638619 |
| COQ5          | 240,98   | 1,37  | 0,567917 | 2,405966 | 0,01613  | 0,1641653 |
| RP11-39K24.9  | 24,87    | 4,55  | 1,891358 | 2,405589 | 0,016146 | 0,1642451 |
| KSR1          | 144,70   | -1,59 | 0,66294  | -2,40447 | 0,016196 | 0,1646589 |
| STAT2         | 2951,20  | -0,67 | 0,276813 | -2,4041  | 0,016212 | 0,1647369 |
| SAA2          | 6,41     | -2,48 | 1,032869 | -2,40345 | 0,016241 | 0,1649264 |
| RP11-93O17.2  | 5,66     | -1,72 | 0,715882 | -2,40318 | 0,016253 | 0,1649264 |

|               |         |       |          |          |          |           |
|---------------|---------|-------|----------|----------|----------|-----------|
| RP11-529K1.3  | 10,61   | 5,03  | 2,093091 | 2,403078 | 0,016258 | 0,1649264 |
| FAM63B        | 243,21  | 1,56  | 0,648932 | 2,402547 | 0,016281 | 0,1650757 |
| BRAP          | 304,52  | 1,89  | 0,787233 | 2,402253 | 0,016294 | 0,1651187 |
| IK            | 1023,36 | 0,78  | 0,325576 | 2,401979 | 0,016307 | 0,1651524 |
| RP11-3B12.3   | 26,59   | -2,10 | 0,874668 | -2,40034 | 0,01638  | 0,1658015 |
| TSPAN14       | 522,11  | -1,11 | 0,462289 | -2,39941 | 0,016421 | 0,1661329 |
| FAM92A3       | 2,81    | -2,41 | 1,003686 | -2,39936 | 0,016424 | NA        |
| SLC7A5        | 101,88  | 1,96  | 0,817046 | 2,398565 | 0,016459 | 0,1664285 |
| SPON2         | 79,91   | -2,65 | 1,103317 | -2,39814 | 0,016478 | 0,1665225 |
| RP11-490B18.5 | 11,11   | 4,42  | 1,841544 | 2,39796  | 0,016487 | 0,1665225 |
| PITX1         | 11,03   | -1,12 | 0,466523 | -2,39742 | 0,016511 | 0,1665631 |
| ZNF502        | 112,98  | -3,77 | 1,570594 | -2,39736 | 0,016514 | 0,1665631 |
| CTD-3222D19.8 | 31,91   | 2,34  | 0,977753 | 2,397275 | 0,016518 | 0,1665631 |
| SYMPK         | 172,32  | -1,11 | 0,461102 | -2,39668 | 0,016545 | 0,1666223 |
| ABRACL        | 661,68  | 0,75  | 0,314782 | 2,396441 | 0,016555 | 0,1666223 |
| FOSL2         | 1279,98 | 1,05  | 0,436484 | 2,396365 | 0,016559 | 0,1666223 |
| PGM5P2        | 24,07   | -1,97 | 0,824024 | -2,39629 | 0,016562 | 0,1666223 |
| FAM35BP       | 23,99   | 3,89  | 1,624512 | 2,396153 | 0,016568 | 0,1666223 |
| CHMP4B        | 181,51  | -1,02 | 0,42633  | -2,39559 | 0,016594 | 0,1667871 |
| DAZAP2        | 4188,44 | 0,78  | 0,325056 | 2,395199 | 0,016611 | 0,166876  |
| NAA25         | 700,51  | 1,10  | 0,459825 | 2,394067 | 0,016663 | 0,1673015 |
| RP11-169K16.4 | 5,93    | 5,20  | 2,170567 | 2,393413 | 0,016692 | 0,1675027 |
| PTPN12        | 570,29  | 1,07  | 0,445616 | 2,393218 | 0,016701 | 0,1675027 |
| PSTPIP1       | 742,67  | -1,03 | 0,42898  | -2,39281 | 0,01672  | 0,1675027 |
| TRAPPC1       | 394,27  | 0,54  | 0,224947 | 2,392788 | 0,016721 | 0,1675027 |
| DRAIC         | 25,82   | -2,09 | 0,871656 | -2,39264 | 0,016728 | 0,1675027 |
| RP11-662G23.1 | 1,98    | -3,22 | 1,345897 | -2,3925  | 0,016734 | NA        |
| UBFD1         | 217,14  | -2,22 | 0,926809 | -2,39177 | 0,016768 | 0,1677184 |
| AC002511.1    | 23,39   | -1,29 | 0,537764 | -2,3917  | 0,01677  | 0,1677184 |
| FAM132B       | 4,88    | -2,05 | 0,855415 | -2,39127 | 0,01679  | 0,1677184 |
| UBE2W         | 542,93  | 1,06  | 0,441384 | 2,39122  | 0,016793 | 0,1677184 |
| MED23         | 263,44  | 1,28  | 0,533503 | 2,391179 | 0,016794 | 0,1677184 |
| BRCA1         | 56,74   | -1,71 | 0,716042 | -2,39027 | 0,016836 | 0,1679646 |
| SLIT1         | 47,01   | 2,85  | 1,193625 | 2,390157 | 0,016841 | 0,1679646 |
| POM121C       | 299,55  | -1,21 | 0,507101 | -2,39005 | 0,016846 | 0,1679646 |
| RP11-281P23.1 | 130,01  | -1,38 | 0,577045 | -2,38503 | 0,017078 | 0,1700976 |
| MYBBP1A       | 126,50  | -1,31 | 0,550663 | -2,38485 | 0,017086 | 0,1700976 |
| CECR6         | 29,13   | -4,16 | 1,74534  | -2,38482 | 0,017087 | 0,1700976 |
| SOX2-OT       | 193,89  | -1,20 | 0,502816 | -2,38422 | 0,017116 | 0,1702857 |
| AC079630.4    | 20,25   | 3,71  | 1,55849  | 2,38284  | 0,01718  | 0,1707183 |
| CLDN4         | 27,51   | -2,39 | 1,001069 | -2,38282 | 0,017181 | 0,1707183 |
| SF3B6         | 620,43  | 0,62  | 0,260952 | 2,382552 | 0,017193 | 0,1707183 |
| FYCO1         | 140,70  | -2,71 | 1,136    | -2,3825  | 0,017196 | 0,1707183 |
| JRK           | 58,05   | -2,28 | 0,95518  | -2,38213 | 0,017213 | 0,1707963 |
| RP11-332H14.2 | 34,61   | 2,67  | 1,121038 | 2,381857 | 0,017226 | 0,1708325 |
| LACC1         | 54,60   | 1,96  | 0,823955 | 2,38123  | 0,017255 | 0,1709733 |
| LECT2         | 58,91   | -1,62 | 0,680678 | -2,38116 | 0,017258 | 0,1709733 |
| GPR85         | 74,91   | -1,03 | 0,430946 | -2,38074 | 0,017278 | 0,1710778 |
| WDR44         | 150,04  | 1,70  | 0,716248 | 2,380177 | 0,017304 | 0,1712482 |
| ANXA5         | 4934,71 | 0,68  | 0,286176 | 2,379463 | 0,017338 | 0,1714895 |

|                |          |       |          |          |          |           |
|----------------|----------|-------|----------|----------|----------|-----------|
| AC006509.7     | 254,06   | -0,85 | 0,358268 | -2,37816 | 0,017399 | 0,1720047 |
| RNMTL1         | 136,09   | 2,11  | 0,886129 | 2,377796 | 0,017416 | 0,1720836 |
| RPAP2          | 876,69   | -1,17 | 0,492693 | -2,377   | 0,017454 | 0,1723649 |
| RP11-6N17.1    | 7,16     | -2,85 | 1,197284 | -2,37636 | 0,017484 | 0,1725694 |
| HSF5           | 2,61     | -6,01 | 2,530302 | -2,37633 | 0,017486 | NA        |
| TMEM222        | 231,23   | -2,12 | 0,893769 | -2,37586 | 0,017508 | 0,1726972 |
| AC018462.2     | 11,15    | 2,87  | 1,208416 | 2,3757   | 0,017516 | 0,1726972 |
| MRPL20         | 807,32   | -0,55 | 0,233031 | -2,37523 | 0,017538 | 0,1728245 |
| PPP1R9A        | 7,72     | -3,00 | 1,265391 | -2,37427 | 0,017584 | 0,1729486 |
| RP11-14206.1   | 38,08    | -1,94 | 0,816728 | -2,37426 | 0,017584 | 0,1729486 |
| RP11-715J22.2  | 19,34    | -1,06 | 0,444925 | -2,37397 | 0,017598 | 0,1729486 |
| TMBIM4         | 1981,24  | 0,54  | 0,225904 | 2,373962 | 0,017598 | 0,1729486 |
| RNU4-38P       | 4,43     | 4,79  | 2,01809  | 2,37388  | 0,017602 | 0,1729486 |
| MTDH           | 2940,78  | 0,45  | 0,188833 | 2,373796 | 0,017606 | 0,1729486 |
| SLC9A8         | 147,72   | 2,17  | 0,914654 | 2,373508 | 0,01762  | 0,1729922 |
| RTN1           | 809,28   | 1,12  | 0,472766 | 2,372931 | 0,017648 | 0,1731711 |
| TMCO1          | 634,18   | 0,93  | 0,390328 | 2,372422 | 0,017672 | 0,1732631 |
| MS4A4E         | 148,99   | 1,42  | 0,599868 | 2,372346 | 0,017676 | 0,1732631 |
| RHOBTB3        | 60,68    | 2,64  | 1,11179  | 2,371511 | 0,017715 | 0,1735634 |
| RP11-284G10.1  | 8,88     | -5,63 | 2,375991 | -2,37114 | 0,017733 | 0,1736454 |
| IFI27          | 692,72   | -3,55 | 1,499065 | -2,37085 | 0,017747 | 0,1736901 |
| CCDC91         | 274,76   | -0,95 | 0,400797 | -2,37055 | 0,017761 | 0,1737394 |
| ZNF655         | 629,38   | 0,86  | 0,363516 | 2,369641 | 0,017805 | 0,1740769 |
| CCDC47         | 592,54   | 1,17  | 0,493098 | 2,369435 | 0,017815 | 0,1740825 |
| MGMT           | 361,87   | -1,29 | 0,542694 | -2,3688  | 0,017846 | 0,1742905 |
| NAV2           | 43,50    | -4,48 | 1,893512 | -2,36795 | 0,017887 | 0,1745535 |
| EEF1G          | 15927,37 | 0,51  | 0,21468  | 2,367648 | 0,017902 | 0,1745535 |
| CYP8B1         | 3,90     | -2,60 | 1,098781 | -2,36762 | 0,017903 | 0,1745535 |
| TPP1           | 2290,85  | 0,54  | 0,226339 | 2,36739  | 0,017914 | 0,1745535 |
| WDFY4          | 757,96   | 0,93  | 0,394433 | 2,367272 | 0,01792  | 0,1745535 |
| AC097461.4     | 3,51     | 4,44  | 1,877009 | 2,366731 | 0,017946 | NA        |
| ADD3           | 854,22   | 1,02  | 0,43267  | 2,366653 | 0,01795  | 0,1747035 |
| APBA2          | 8,09     | -3,58 | 1,511148 | -2,36634 | 0,017965 | 0,1747035 |
| RP11-1109M24.5 | 61,37    | -1,96 | 0,829981 | -2,36596 | 0,017983 | 0,1747035 |
| PPP4R3B        | 631,05   | 1,10  | 0,463134 | 2,365895 | 0,017987 | 0,1747035 |
| KIAA0907       | 202,00   | -1,44 | 0,609168 | -2,36586 | 0,017988 | 0,1747035 |
| RP11-582J16.4  | 73,76    | 2,16  | 0,915076 | 2,365793 | 0,017992 | 0,1747035 |
| HIST1H2BE      | 3,79     | 4,38  | 1,852103 | 2,365184 | 0,018021 | 0,1748996 |
| CRYBG3         | 682,20   | 1,55  | 0,654491 | 2,364942 | 0,018033 | 0,1749227 |
| CABLES2        | 6,04     | 3,09  | 1,305435 | 2,364529 | 0,018053 | 0,1750268 |
| RP11-154H23.3  | 57,77    | -3,01 | 1,271508 | -2,36397 | 0,01808  | 0,1751621 |
| PPM1J          | 34,14    | 2,90  | 1,225719 | 2,363857 | 0,018086 | 0,1751621 |
| MEIS2          | 3,33     | -2,02 | 0,854552 | -2,36342 | 0,018107 | NA        |
| RP11-275I4.2   | 106,09   | -1,25 | 0,53112  | -2,36216 | 0,018169 | 0,1758706 |
| SDR39U1        | 434,19   | 1,38  | 0,585683 | 2,361936 | 0,01818  | 0,1758706 |
| TTC34          | 94,02    | -1,97 | 0,834369 | -2,36178 | 0,018187 | 0,1758706 |
| RP11-71L14.3   | 1,81     | -5,31 | 2,247147 | -2,36163 | 0,018195 | NA        |
| SIGLEC18P      | 4,63     | -6,85 | 2,900672 | -2,36076 | 0,018238 | 0,1762659 |
| RP11-69I8.2    | 144,13   | -1,31 | 0,553553 | -2,36046 | 0,018252 | 0,1763148 |
| AC017048.3     | 22,16    | -1,77 | 0,752211 | -2,35965 | 0,018292 | 0,1765212 |



|               |         |       |          |          |          |           |
|---------------|---------|-------|----------|----------|----------|-----------|
| DLG1          | 349,68  | 1,22  | 0,517767 | 2,359643 | 0,018293 | 0,1765212 |
| AC097500.1    | 2,86    | -5,50 | 2,329366 | -2,35921 | 0,018314 | NA        |
| ZNF121        | 505,05  | 1,42  | 0,601973 | 2,358651 | 0,018342 | 0,1768821 |
| DNASE1L3      | 65,13   | 2,32  | 0,984855 | 2,358061 | 0,018371 | 0,1768821 |
| ANKHD1        | 1287,98 | 0,68  | 0,289065 | 2,358046 | 0,018371 | 0,1768821 |
| ZNF181        | 75,81   | 3,14  | 1,331942 | 2,358001 | 0,018374 | 0,1768821 |
| SSX2B         | 10,37   | -4,97 | 2,106836 | -2,35792 | 0,018377 | 0,1768821 |
| AL844908.5    | 634,08  | 0,99  | 0,418955 | 2,357446 | 0,018401 | 0,1770183 |
| KLF11         | 310,02  | 1,67  | 0,70852  | 2,357052 | 0,018421 | 0,1771145 |
| TRGV9         | 3,68    | -6,18 | 2,621976 | -2,35661 | 0,018443 | NA        |
| SLC15A1       | 10,69   | -1,56 | 0,663183 | -2,35657 | 0,018444 | 0,1772165 |
| LMNA          | 1186,19 | 0,84  | 0,357964 | 2,356455 | 0,01845  | 0,1772165 |
| CTD-3035K23.7 | 6,45    | 3,17  | 1,345239 | 2,355377 | 0,018504 | 0,1776398 |
| SLC25A29      | 192,32  | 2,18  | 0,927862 | 2,354693 | 0,018538 | 0,1778753 |
| CFDP1         | 313,03  | -1,05 | 0,447508 | -2,35414 | 0,018566 | 0,1779207 |
| GOLGA6A       | 2,60    | -5,17 | 2,195743 | -2,354   | 0,018573 | NA        |
| POLR2A        | 409,42  | -1,43 | 0,607864 | -2,3538  | 0,018583 | 0,1779207 |
| ZP3           | 107,48  | -1,68 | 0,715451 | -2,35374 | 0,018586 | 0,1779207 |
| GNG7          | 191,00  | 1,21  | 0,512596 | 2,353691 | 0,018588 | 0,1779207 |
| CTD-2626G11.2 | 50,37   | 2,24  | 0,952758 | 2,35364  | 0,018591 | 0,1779207 |
| SETDB2        | 381,38  | 1,26  | 0,533512 | 2,353449 | 0,0186   | 0,1779209 |
| BMI1          | 229,21  | -1,84 | 0,781241 | -2,35286 | 0,01863  | 0,1781126 |
| CDCP1         | 117,48  | 2,00  | 0,851789 | 2,352666 | 0,018639 | 0,1781126 |
| AC068282.3    | 21,79   | 1,78  | 0,755596 | 2,352341 | 0,018656 | 0,1781706 |
| CTD-2095E4.3  | 35,35   | -2,56 | 1,086635 | -2,35215 | 0,018665 | 0,1781706 |
| UBAC1         | 278,23  | 1,44  | 0,614235 | 2,351787 | 0,018683 | 0,1781706 |
| RP11-44201.4  | 11,45   | 2,07  | 0,881688 | 2,351782 | 0,018684 | 0,1781706 |
| OR4D1         | 16,03   | -2,13 | 0,907784 | -2,35094 | 0,018726 | 0,1784849 |
| SRGAP2C       | 745,07  | 0,82  | 0,348948 | 2,350694 | 0,018738 | 0,1785091 |
| ZNF43         | 169,09  | 1,83  | 0,780822 | 2,349764 | 0,018785 | 0,1788645 |
| VTRNA1-3      | 2,71    | -2,67 | 1,13777  | -2,34921 | 0,018813 | NA        |
| RP11-94C24.13 | 9,54    | 2,22  | 0,944986 | 2,348801 | 0,018834 | 0,1792356 |
| RP11-462B18.1 | 3,87    | -3,23 | 1,377162 | -2,34755 | 0,018897 | 0,1797476 |
| DIDO1         | 216,43  | 1,39  | 0,594458 | 2,346598 | 0,018946 | 0,1801148 |
| ST6GAL1       | 568,67  | 1,46  | 0,622372 | 2,346004 | 0,018976 | 0,1803098 |
| APOLD1        | 35,12   | -2,26 | 0,963606 | -2,34565 | 0,018994 | 0,1803337 |
| FNIP2         | 663,93  | 1,37  | 0,584053 | 2,345278 | 0,019013 | 0,1803337 |
| MYBL1         | 63,70   | -4,01 | 1,709336 | -2,34521 | 0,019016 | 0,1803337 |
| GABBR1        | 1037,63 | -0,65 | 0,276854 | -2,34487 | 0,019034 | 0,1803337 |
| MSL3          | 519,06  | 0,90  | 0,385877 | 2,344822 | 0,019036 | 0,1803337 |
| CINP          | 342,58  | 1,31  | 0,558276 | 2,344814 | 0,019037 | 0,1803337 |
| RP11-549L6.2  | 1,91    | -3,65 | 1,556824 | -2,34365 | 0,019096 | NA        |
| EXTL2         | 68,04   | 2,65  | 1,130404 | 2,342945 | 0,019132 | 0,1811472 |
| ALDH6A1       | 171,74  | -1,47 | 0,627214 | -2,34271 | 0,019144 | 0,181171  |
| NEU4          | 8,71    | 5,85  | 2,49542  | 2,342369 | 0,019162 | 0,1812429 |
| VKORC1        | 687,20  | 0,80  | 0,341733 | 2,341509 | 0,019206 | 0,1815685 |
| SH3GL1P1      | 37,08   | 3,29  | 1,406766 | 2,341203 | 0,019222 | 0,181625  |
| RNU2-55P      | 2,86    | 4,14  | 1,768287 | 2,341093 | 0,019227 | NA        |
| TRIP11        | 444,55  | 1,23  | 0,524246 | 2,340743 | 0,019245 | 0,1817566 |
| ITGAX         | 3350,36 | 0,63  | 0,268195 | 2,340523 | 0,019257 | 0,1817714 |

|               |          |       |          |          |          |           |
|---------------|----------|-------|----------|----------|----------|-----------|
| TACR2         | 48,00    | -2,01 | 0,858152 | -2,33938 | 0,019316 | 0,1821782 |
| RNF149        | 1088,69  | 0,74  | 0,31807  | 2,33931  | 0,019319 | 0,1821782 |
| CTD-2246P4.1  | 28,15    | -1,52 | 0,649772 | -2,33903 | 0,019334 | 0,1822235 |
| ANKRD13A      | 729,00   | 0,87  | 0,371929 | 2,338792 | 0,019346 | 0,1822462 |
| AC092594.1    | 4,92     | -2,92 | 1,250833 | -2,33841 | 0,019366 | 0,1823401 |
| PRRG4         | 98,71    | -1,87 | 0,801278 | -2,33812 | 0,019381 | 0,1823906 |
| ANKRD36BP1    | 26,73    | -8,50 | 3,635775 | -2,3375  | 0,019413 | 0,1824512 |
| RP11-540011.7 | 29,07    | 2,09  | 0,892449 | 2,337465 | 0,019415 | 0,1824512 |
| GRIK1         | 48,71    | 2,61  | 1,117907 | 2,337427 | 0,019417 | 0,1824512 |
| AC097468.5    | 12,01    | -2,03 | 0,868853 | -2,3365  | 0,019465 | 0,1828085 |
| RP11-141015.1 | 7,54     | 3,39  | 1,452043 | 2,336318 | 0,019475 | 0,1828085 |
| SSBP3-AS1     | 13,55    | 3,56  | 1,522686 | 2,335605 | 0,019512 | 0,1830649 |
| UROS          | 365,87   | 1,19  | 0,51112  | 2,335104 | 0,019538 | 0,183218  |
| RP11-944L7.1  | 3,01     | -3,56 | 1,52402  | -2,33486 | 0,019551 | NA        |
| SRSF2         | 2214,52  | 0,70  | 0,30194  | 2,334702 | 0,019559 | 0,1832519 |
| CCNG1         | 358,52   | 1,52  | 0,649723 | 2,334658 | 0,019561 | 0,1832519 |
| DYTN          | 7,04     | -7,57 | 3,243654 | -2,33434 | 0,019578 | 0,1833133 |
| ABLIM1        | 94,12    | -2,91 | 1,246578 | -2,33338 | 0,019628 | 0,1836926 |
| RP11-45506.5  | 4,81     | -2,47 | 1,057868 | -2,33288 | 0,019655 | 0,1838007 |
| PDE8B         | 7,96     | 4,39  | 1,882873 | 2,332785 | 0,019659 | 0,1838007 |
| RP11-142E9.1  | 50,56    | 1,83  | 0,78296  | 2,332257 | 0,019687 | 0,183968  |
| OR1L8         | 1,75     | -4,59 | 1,967821 | -2,33181 | 0,019711 | NA        |
| RP11-332J15.4 | 5,57     | 3,93  | 1,686972 | 2,331537 | 0,019725 | 0,1842295 |
| PTPRCAP       | 102,12   | -2,26 | 0,968808 | -2,33123 | 0,019741 | 0,1842894 |
| RP11-429G19.3 | 15,89    | 5,06  | 2,169105 | 2,330677 | 0,01977  | 0,1844168 |
| RP11-434H6.6  | 33,94    | -2,88 | 1,235127 | -2,33059 | 0,019775 | 0,1844168 |
| RP11-815J21.4 | 162,75   | 1,94  | 0,831456 | 2,329952 | 0,019809 | 0,1844849 |
| CTC-548K16.2  | 4,91     | -2,62 | 1,123116 | -2,32995 | 0,019809 | 0,1844849 |
| OPHN1         | 565,23   | 1,15  | 0,493573 | 2,329718 | 0,019821 | 0,1844849 |
| DEXI          | 184,40   | 1,42  | 0,611543 | 2,329416 | 0,019837 | 0,1844849 |
| C8orf59       | 257,97   | 0,87  | 0,373436 | 2,329227 | 0,019847 | 0,1844849 |
| ZNF280D       | 247,83   | -1,52 | 0,653583 | -2,32914 | 0,019852 | 0,1844849 |
| PATJ          | 61,09    | -1,21 | 0,518196 | -2,32904 | 0,019857 | 0,1844849 |
| APOPT1        | 213,44   | 1,13  | 0,485322 | 2,328954 | 0,019862 | 0,1844849 |
| SCD5          | 125,93   | -1,39 | 0,598736 | -2,32811 | 0,019906 | 0,184764  |
| PLAC8         | 956,71   | -0,80 | 0,344854 | -2,32801 | 0,019911 | 0,184764  |
| CFAP97        | 257,23   | 1,66  | 0,712245 | 2,327511 | 0,019938 | 0,1848929 |
| CAMSAP1       | 200,75   | 1,85  | 0,792906 | 2,327334 | 0,019948 | 0,1848929 |
| RUNX3         | 621,30   | 1,07  | 0,460015 | 2,327191 | 0,019955 | 0,1848929 |
| B3GAT1        | 40,83    | -2,61 | 1,119608 | -2,327   | 0,019965 | 0,1848931 |
| RP11-395P17.3 | 161,18   | -1,00 | 0,428259 | -2,32669 | 0,019982 | 0,1849555 |
| RP11-638I2.10 | 7,87     | 3,55  | 1,526371 | 2,326379 | 0,019998 | 0,1849729 |
| RP11-370I6.2  | 5,29     | 5,03  | 2,164266 | 2,326282 | 0,020004 | 0,1849729 |
| GABARAP       | 10642,66 | 0,29  | 0,126272 | 2,325964 | 0,02002  | 0,1850377 |
| RP11-395B7.4  | 17,81    | 3,01  | 1,295882 | 2,3254   | 0,020051 | 0,1852189 |
| RNASEH2C      | 402,28   | -0,92 | 0,393528 | -2,32522 | 0,02006  | 0,1852189 |
| CYTIP         | 1544,31  | 0,65  | 0,279062 | 2,324257 | 0,020112 | 0,1855483 |
| GS1-324M7.6   | 6,29     | -6,84 | 2,944975 | -2,32418 | 0,020116 | 0,1855483 |
| TMEM93        | 281,74   | -0,87 | 0,37603  | -2,3225  | 0,020206 | 0,1862883 |
| FKBP7         | 47,16    | 3,36  | 1,446647 | 2,321965 | 0,020235 | 0,1864631 |

|                   |          |       |          |          |          |           |
|-------------------|----------|-------|----------|----------|----------|-----------|
| CCDC57            | 205,80   | -0,95 | 0,410281 | -2,32126 | 0,020273 | 0,1866622 |
| ARL14EP           | 375,92   | 1,59  | 0,68299  | 2,321152 | 0,020279 | 0,1866622 |
| EIF1              | 11082,55 | 0,45  | 0,191852 | 2,321006 | 0,020287 | 0,1866622 |
| XXbac-BPG283O16.9 | 199,83   | -1,48 | 0,637112 | -2,31993 | 0,020345 | 0,1869565 |
| SH3BP1            | 102,53   | -1,65 | 0,709988 | -2,31988 | 0,020347 | 0,1869565 |
| CMTM3             | 942,51   | 1,08  | 0,4639   | 2,319856 | 0,020349 | 0,1869565 |
| GNG5              | 1167,84  | 0,54  | 0,234767 | 2,318813 | 0,020405 | 0,1873303 |
| RP11-234B24.2     | 9,70     | 3,91  | 1,686435 | 2,318734 | 0,020409 | 0,1873303 |
| AC015849.13       | 7,98     | -2,57 | 1,107255 | -2,31845 | 0,020425 | 0,1873803 |
| CCNH              | 1023,65  | 0,99  | 0,427265 | 2,317891 | 0,020455 | 0,1875345 |
| ADPRHL2           | 290,91   | 2,31  | 0,996509 | 2,317767 | 0,020462 | 0,1875345 |
| LCORL             | 268,85   | 1,59  | 0,686598 | 2,317255 | 0,02049  | 0,1876973 |
| C9orf3            | 105,42   | -1,95 | 0,840057 | -2,31698 | 0,020505 | 0,1877447 |
| FAM134A           | 595,34   | -1,16 | 0,498758 | -2,31614 | 0,020551 | 0,1879781 |
| CD3EAP            | 62,51    | -2,22 | 0,960348 | -2,31614 | 0,020551 | 0,1879781 |
| CDH6              | 8,46     | -1,64 | 0,709093 | -2,31523 | 0,020601 | 0,1882262 |
| ATP7B             | 86,59    | -4,14 | 1,787012 | -2,31516 | 0,020604 | 0,1882262 |
| CTDSPL            | 30,85    | -2,53 | 1,090713 | -2,31509 | 0,020608 | 0,1882262 |
| RP11-7005.2       | 2,36     | 3,86  | 1,666283 | 2,314804 | 0,020624 | NA        |
| ABCA6             | 102,49   | -2,19 | 0,946993 | -2,31415 | 0,02066  | 0,1886038 |
| ZNF548            | 160,33   | -2,19 | 0,947589 | -2,31367 | 0,020686 | 0,1887481 |
| UBL7              | 604,50   | 1,07  | 0,464193 | 2,313415 | 0,0207   | 0,1887845 |
| CALHM1            | 6,35     | -2,82 | 1,219949 | -2,31295 | 0,020726 | 0,1889262 |
| RP11-649A18.12    | 11,54    | 3,07  | 1,326691 | 2,311442 | 0,020808 | 0,1895894 |
| RN7SL785P         | 28,73    | -1,29 | 0,556885 | -2,31095 | 0,020836 | 0,189745  |
| SMAD5             | 313,59   | -1,81 | 0,781755 | -2,31072 | 0,020848 | 0,1897495 |
| ARHGDI1A          | 416,86   | -1,06 | 0,45861  | -2,31024 | 0,020875 | 0,1897495 |
| RP11-553P9.2      | 7,68     | -1,87 | 0,808464 | -2,31022 | 0,020876 | 0,1897495 |
| PROCA1            | 42,36    | -2,51 | 1,08755  | -2,31002 | 0,020887 | 0,1897495 |
| ENTPD7            | 46,61    | 2,54  | 1,097784 | 2,310017 | 0,020887 | 0,1897495 |
| ZNF812P           | 9,10     | -4,10 | 1,775577 | -2,30962 | 0,020909 | 0,189854  |
| RP4-669H2.1       | 19,06    | -2,07 | 0,895046 | -2,30934 | 0,020924 | 0,1899022 |
| ZNF623            | 173,49   | 1,90  | 0,824274 | 2,308864 | 0,020951 | 0,1900516 |
| PEX2              | 358,66   | -1,95 | 0,846464 | -2,30854 | 0,020969 | 0,1901205 |
| RP1-56K13.1       | 53,08    | -1,47 | 0,636618 | -2,30805 | 0,020996 | 0,1901985 |
| RP11-38L15.8      | 2,58     | 4,01  | 1,73689  | 2,308043 | 0,020997 | NA        |
| PKNOX2            | 6,07     | -2,84 | 1,232453 | -2,30802 | 0,020998 | 0,1901985 |
| ARHGAP4           | 637,58   | -0,85 | 0,367206 | -2,30778 | 0,021012 | 0,1902295 |
| GNAI3             | 1382,70  | 0,99  | 0,428752 | 2,306637 | 0,021075 | 0,1907111 |
| RP3-406M12.1      | 75,52    | -2,01 | 0,87346  | -2,30596 | 0,021113 | 0,1909588 |
| NLRC5             | 478,23   | -1,33 | 0,57518  | -2,30492 | 0,021171 | 0,1913864 |
| RGS22             | 13,05    | -2,17 | 0,942118 | -2,30475 | 0,021181 | 0,1913864 |
| LRP2              | 34,91    | -2,76 | 1,197191 | -2,30411 | 0,021217 | 0,1916186 |
| UGT2B15           | 1,47     | -3,07 | 1,331779 | -2,304   | 0,021223 | NA        |
| MIR4737           | 11,19    | 6,12  | 2,657166 | 2,303709 | 0,021239 | 0,1917008 |
| NAPSB             | 8294,95  | 0,56  | 0,242511 | 2,303445 | 0,021254 | 0,1917008 |
| CCDC67            | 9,61     | 5,11  | 2,219694 | 2,303354 | 0,021259 | 0,1917008 |
| RP11-203J24.9     | 11,34    | -3,09 | 1,342661 | -2,30321 | 0,021267 | 0,1917008 |
| SSR3              | 1119,70  | -0,51 | 0,220301 | -2,30298 | 0,02128  | 0,1917269 |
| AC098823.3        | 12,67    | 2,08  | 0,905221 | 2,302705 | 0,021295 | 0,1917722 |

|                |          |       |          |          |          |           |
|----------------|----------|-------|----------|----------|----------|-----------|
| RN7SL648P      | 11,57    | 4,55  | 1,97573  | 2,302484 | 0,021308 | 0,1917918 |
| NACC2          | 330,36   | -1,21 | 0,526127 | -2,30225 | 0,021321 | 0,1918171 |
| KIAA1257       | 109,00   | -1,88 | 0,817876 | -2,30067 | 0,02141  | 0,1925273 |
| ADH4           | 15,37    | -2,09 | 0,908205 | -2,2997  | 0,021465 | 0,1928842 |
| MEIOB          | 7,14     | -7,10 | 3,088017 | -2,2996  | 0,021471 | 0,1928842 |
| APOC1          | 2,65     | 3,98  | 1,732279 | 2,298899 | 0,021511 | NA        |
| SAPCD1         | 7,48     | 3,78  | 1,646539 | 2,298711 | 0,021521 | 0,1931615 |
| RHEBL1         | 4,19     | -4,50 | 1,959766 | -2,29855 | 0,021531 | 0,1931615 |
| GRAP           | 14,97    | -3,98 | 1,73265  | -2,29851 | 0,021533 | 0,1931615 |
| RP11-394B2.3   | 12,14    | -3,48 | 1,514694 | -2,29717 | 0,021609 | 0,1937508 |
| RP11-448G4.1   | 50,28    | 2,32  | 1,009566 | 2,296264 | 0,021661 | 0,194123  |
| TMC7           | 32,63    | -2,05 | 0,89339  | -2,29587 | 0,021683 | 0,194229  |
| WDR1           | 1162,39  | 0,67  | 0,291801 | 2,295467 | 0,021706 | 0,1943071 |
| RP11-492E3.1   | 339,94   | -1,27 | 0,55136  | -2,29519 | 0,021722 | 0,1943071 |
| SERF2          | 4438,84  | -0,50 | 0,218576 | -2,29517 | 0,021723 | 0,1943071 |
| AARD           | 8,28     | 1,90  | 0,826968 | 2,293931 | 0,021794 | 0,1948515 |
| RP1-17K7.2     | 42,80    | -0,97 | 0,422215 | -2,29362 | 0,021812 | 0,1949168 |
| AGPAT1         | 348,93   | 1,42  | 0,617897 | 2,292119 | 0,021899 | 0,1955394 |
| TIFAB          | 107,88   | 2,96  | 1,292241 | 2,292047 | 0,021903 | 0,1955394 |
| ZNF497         | 27,20    | 1,82  | 0,793553 | 2,291565 | 0,021931 | 0,1956936 |
| AP4E1          | 151,31   | 1,58  | 0,690977 | 2,2912   | 0,021952 | 0,1957799 |
| MRPL33         | 400,80   | -0,64 | 0,280098 | -2,29088 | 0,02197  | 0,1957799 |
| MT-TD          | 7,56     | -1,54 | 0,671731 | -2,29085 | 0,021972 | 0,1957799 |
| SLAMF9         | 25,64    | 4,02  | 1,756397 | 2,29032  | 0,022003 | 0,1959141 |
| CTLA4          | 9,46     | 3,68  | 1,606202 | 2,290035 | 0,022019 | 0,1959141 |
| SP4            | 118,13   | -2,10 | 0,915563 | -2,29003 | 0,022019 | 0,1959141 |
| SLITRK2        | 19,79    | -1,36 | 0,595457 | -2,28986 | 0,022029 | 0,1959141 |
| ARL1           | 261,89   | 1,72  | 0,749951 | 2,289647 | 0,022042 | 0,1959331 |
| CENPB          | 83,83    | -1,18 | 0,515237 | -2,28825 | 0,022123 | 0,1965509 |
| ANKRD30A       | 13,48    | -5,61 | 2,451301 | -2,28794 | 0,022141 | 0,1965509 |
| CD226          | 204,59   | 2,07  | 0,904999 | 2,287906 | 0,022143 | 0,1965509 |
| RP11-491F9.2   | 4,57     | -1,77 | 0,772697 | -2,28733 | 0,022177 | 0,1967553 |
| DONSON         | 24,01    | 2,23  | 0,97334  | 2,286305 | 0,022236 | 0,1971921 |
| CTB-102L5.4    | 4,63     | 3,67  | 1,606749 | 2,285849 | 0,022263 | 0,1972474 |
| NHLRC3         | 365,38   | -1,14 | 0,497431 | -2,28584 | 0,022264 | 0,1972474 |
| CTD-2224J9.2   | 104,89   | 2,05  | 0,895741 | 2,285348 | 0,022292 | 0,1972804 |
| PLEKHG2        | 299,49   | 0,90  | 0,3923   | 2,285286 | 0,022296 | 0,1972804 |
| TOR3A          | 624,23   | 0,77  | 0,336115 | 2,285076 | 0,022308 | 0,1972804 |
| RP11-139I14.2  | 7,09     | -1,39 | 0,609196 | -2,28505 | 0,02231  | 0,1972804 |
| ATOX1          | 364,82   | -0,86 | 0,377702 | -2,28426 | 0,022356 | 0,1973992 |
| RP13-1056D16.2 | 23,61    | 3,97  | 1,73754  | 2,284205 | 0,02236  | 0,1973992 |
| TNFRSF1A       | 494,65   | -0,87 | 0,381011 | -2,28411 | 0,022365 | 0,1973992 |
| LARP1B         | 131,60   | 2,03  | 0,888873 | 2,283991 | 0,022372 | 0,1973992 |
| CCDC24         | 60,22    | -2,54 | 1,112848 | -2,28392 | 0,022377 | 0,1973992 |
| ACTB           | 84619,48 | 0,27  | 0,11921  | 2,283282 | 0,022414 | 0,1975762 |
| HGSNAT         | 674,64   | 1,00  | 0,438873 | 2,283213 | 0,022418 | 0,1975762 |
| RP11-10H3.1    | 2,33     | -3,62 | 1,585711 | -2,28284 | 0,02244  | NA        |
| ALKBH4         | 65,47    | 1,78  | 0,778102 | 2,28252  | 0,022459 | 0,1978257 |
| NAA38          | 452,14   | -0,71 | 0,312986 | -2,28237 | 0,022467 | 0,1978257 |
| SASS6          | 31,85    | 2,64  | 1,156491 | 2,282108 | 0,022483 | 0,1978695 |

|               |          |       |          |          |          |           |
|---------------|----------|-------|----------|----------|----------|-----------|
| RP11-364L4.1  | 36,24    | -2,74 | 1,202025 | -2,28124 | 0,022534 | 0,1982263 |
| GOLGA1        | 232,68   | -1,65 | 0,723415 | -2,2809  | 0,022554 | 0,1983093 |
| MYO1F         | 2353,41  | -0,55 | 0,242263 | -2,28008 | 0,022603 | 0,1985642 |
| ERMP1         | 88,10    | 2,13  | 0,935785 | 2,27983  | 0,022618 | 0,1985642 |
| ARNTL2        | 49,95    | -2,20 | 0,966293 | -2,2798  | 0,02262  | 0,1985642 |
| RP11-168K9.1  | 39,06    | -3,12 | 1,367257 | -2,27967 | 0,022627 | 0,1985642 |
| EIF3M         | 1917,06  | 0,75  | 0,330321 | 2,279218 | 0,022654 | 0,1985642 |
| RP11-371E8.4  | 9,35     | 5,26  | 2,30744  | 2,279055 | 0,022664 | 0,1985642 |
| RP11-161D15.3 | 3,90     | -4,08 | 1,792396 | -2,27891 | 0,022672 | 0,1985642 |
| PLEK          | 2850,65  | 0,69  | 0,302595 | 2,2788   | 0,022679 | 0,1985642 |
| RAD23B        | 378,27   | 1,03  | 0,450561 | 2,278794 | 0,022679 | 0,1985642 |
| RP11-290C10.1 | 9,65     | 5,32  | 2,336644 | 2,278172 | 0,022716 | 0,1987153 |
| IRF5          | 991,05   | -0,90 | 0,395257 | -2,27814 | 0,022718 | 0,1987153 |
| GGT7          | 8,04     | 4,27  | 1,876324 | 2,277966 | 0,022729 | 0,1987153 |
| GVINP1        | 84,80    | -1,92 | 0,841912 | -2,27663 | 0,022808 | 0,1992567 |
| KBTBD7        | 23,83    | 2,53  | 1,11085  | 2,276569 | 0,022812 | 0,1992567 |
| RP11-135N5.3  | 44,26    | -1,72 | 0,75566  | -2,27597 | 0,022848 | 0,199477  |
| TXNDC5        | 307,92   | 2,34  | 1,027851 | 2,274966 | 0,022908 | 0,1999077 |
| ZNF593        | 218,23   | -1,34 | 0,58714  | -2,27476 | 0,02292  | 0,1999202 |
| TRPC5         | 3,66     | -6,02 | 2,647843 | -2,27424 | 0,022952 | NA        |
| IFT122        | 85,76    | -2,46 | 1,08123  | -2,27399 | 0,022967 | 0,2002267 |
| METTL25       | 74,62    | -1,87 | 0,823465 | -2,27382 | 0,022977 | 0,2002267 |
| RP11-158J3.2  | 2,50     | -4,35 | 1,914673 | -2,2731  | 0,02302  | NA        |
| RP1-91J24.3   | 16,24    | 4,23  | 1,862805 | 2,273104 | 0,02302  | 0,200508  |
| CDH3          | 11,48    | 2,97  | 1,307828 | 2,27272  | 0,023043 | 0,2006158 |
| TMED2         | 1155,97  | 0,81  | 0,356104 | 2,272121 | 0,023079 | 0,2008016 |
| ZNF624        | 106,22   | -2,51 | 1,103385 | -2,27201 | 0,023086 | 0,2008016 |
| RPS12         | 4465,18  | -0,53 | 0,232997 | -2,27178 | 0,0231   | 0,2008254 |
| C14orf142     | 45,71    | 2,21  | 0,973608 | 2,271033 | 0,023145 | 0,2011269 |
| RP11-720N19.2 | 18,85    | -3,71 | 1,634726 | -2,27074 | 0,023163 | 0,201131  |
| PPM1D         | 259,33   | -1,30 | 0,57339  | -2,27066 | 0,023168 | 0,201131  |
| LCK           | 41,60    | -2,39 | 1,051731 | -2,27043 | 0,023181 | 0,201131  |
| RP11-30E17.3  | 6,69     | 2,56  | 1,129519 | 2,270311 | 0,023189 | 0,201131  |
| RASGRP2       | 334,72   | -0,91 | 0,401608 | -2,26957 | 0,023234 | 0,2013722 |
| CPPED1        | 1506,62  | 0,79  | 0,34958  | 2,269496 | 0,023238 | 0,2013722 |
| GPAA1         | 540,50   | -0,70 | 0,308849 | -2,26817 | 0,023319 | 0,2019762 |
| RN7SL339P     | 4,23     | 2,99  | 1,31711  | 2,267529 | 0,023358 | 0,2021385 |
| RPL41         | 10421,63 | -0,47 | 0,208459 | -2,26751 | 0,023359 | 0,2021385 |
| RP11-861E21.2 | 150,05   | -0,95 | 0,417056 | -2,26708 | 0,023385 | 0,2022701 |
| RP5-1011O1.3  | 7,99     | 2,10  | 0,927413 | 2,266629 | 0,023413 | 0,2023787 |
| MT-TY         | 13,30    | -1,02 | 0,450622 | -2,26651 | 0,02342  | 0,2023787 |
| KCNQ10T1      | 1485,94  | -0,65 | 0,285681 | -2,26634 | 0,02343  | 0,2023787 |
| RP11-305D15.2 | 7,44     | 5,05  | 2,227183 | 2,266037 | 0,023449 | 0,2024457 |
| COX5B         | 1583,34  | -0,48 | 0,210346 | -2,26579 | 0,023464 | 0,2024831 |
| RP11-542K23.7 | 4,00     | -3,23 | 1,42562  | -2,26526 | 0,023497 | 0,2025109 |
| NAA35         | 170,60   | 1,45  | 0,639838 | 2,265175 | 0,023502 | 0,2025109 |
| SEC24B        | 430,39   | -1,26 | 0,557073 | -2,26502 | 0,023511 | 0,2025109 |
| MBOAT2        | 215,57   | -2,17 | 0,957626 | -2,26502 | 0,023511 | 0,2025109 |
| RP11-461O14.1 | 10,16    | -4,43 | 1,954116 | -2,26458 | 0,023539 | 0,2025109 |
| RP5-857K21.14 | 1,49     | -1,72 | 0,760469 | -2,26456 | 0,023539 | NA        |

|               |         |       |          |          |          |           |
|---------------|---------|-------|----------|----------|----------|-----------|
| RP11-407G23.4 | 9,62    | -1,29 | 0,571648 | -2,2645  | 0,023543 | 0,2025109 |
| ACSM2B        | 74,87   | -2,30 | 1,017147 | -2,26438 | 0,023551 | 0,2025109 |
| NELFCD        | 396,65  | -1,12 | 0,492538 | -2,26432 | 0,023555 | 0,2025109 |
| RPL21P3       | 4,18    | -6,69 | 2,957587 | -2,26361 | 0,023598 | 0,2025415 |
| ZFYVE27       | 202,68  | 1,63  | 0,720931 | 2,263489 | 0,023606 | 0,2025415 |
| RPS27         | 5934,84 | -0,56 | 0,245907 | -2,26344 | 0,023609 | 0,2025415 |
| CD302         | 1100,32 | 0,79  | 0,348667 | 2,263406 | 0,023611 | 0,2025415 |
| PCAT7         | 6,65    | -2,28 | 1,005835 | -2,26337 | 0,023613 | 0,2025415 |
| UBASH3B       | 164,75  | 1,96  | 0,866637 | 2,262687 | 0,023655 | 0,2027594 |
| GTF2F2        | 374,43  | 1,12  | 0,494892 | 2,262609 | 0,02366  | 0,2027594 |
| RP1-127M18.1  | 1,48    | -4,18 | 1,846749 | -2,26246 | 0,023669 | NA        |
| SREBF2        | 510,53  | -1,17 | 0,516129 | -2,26208 | 0,023693 | 0,2029481 |
| KPNA1         | 477,67  | 1,02  | 0,449229 | 2,261866 | 0,023706 | 0,2029655 |
| RP11-421L21.2 | 1,41    | -4,54 | 2,009475 | -2,26128 | 0,023742 | NA        |
| RN7SL491P     | 1,32    | -3,19 | 1,412073 | -2,26123 | 0,023745 | NA        |
| CD200         | 3,83    | 3,87  | 1,713129 | 2,261101 | 0,023753 | 0,2032771 |
| RP11-259K5.1  | 4,84    | -4,15 | 1,837891 | -2,25978 | 0,023835 | 0,2038823 |
| RP11-383G6.3  | 34,00   | 2,64  | 1,168089 | 2,259607 | 0,023846 | 0,2038823 |
| ATP5G3        | 2286,83 | 0,51  | 0,226824 | 2,259206 | 0,023871 | 0,2040018 |
| SPDYA         | 112,35  | 1,43  | 0,6328   | 2,258506 | 0,023914 | 0,20428   |
| MSS51         | 23,22   | 2,27  | 1,006786 | 2,258298 | 0,023927 | 0,2042973 |
| ZNF713        | 78,29   | -1,56 | 0,688884 | -2,25787 | 0,023953 | 0,2044286 |
| CTA-212A2.4   | 33,00   | -1,45 | 0,64394  | -2,25768 | 0,023966 | 0,2044379 |
| RP11-415I12.2 | 5,92    | -7,46 | 3,303879 | -2,25654 | 0,024037 | 0,2049544 |
| EPDR1         | 16,53   | 5,16  | 2,288693 | 2,256303 | 0,024052 | 0,2049845 |
| RP11-154B12.3 | 6,78    | 4,81  | 2,131946 | 2,254984 | 0,024134 | 0,2055767 |
| QTRT2         | 630,04  | 1,06  | 0,469163 | 2,254842 | 0,024143 | 0,2055767 |
| CLIP4         | 103,82  | -2,54 | 1,125219 | -2,25439 | 0,024172 | 0,2057261 |
| TDGF1P3       | 1,02    | -3,05 | 1,352241 | -2,25411 | 0,024189 | NA        |
| RP11-628K18.1 | 0,90    | -4,02 | 1,784726 | -2,25396 | 0,024199 | NA        |
| HAUS2         | 184,28  | 1,45  | 0,644123 | 2,253944 | 0,0242   | 0,2058688 |
| USP39         | 482,67  | 0,87  | 0,386895 | 2,253681 | 0,024216 | 0,2059157 |
| HIST1H2BG     | 42,13   | -2,85 | 1,265611 | -2,25332 | 0,024239 | 0,2060145 |
| NRK           | 14,90   | -2,31 | 1,027874 | -2,25201 | 0,024321 | 0,2065503 |
| ATP2B4        | 618,19  | 1,39  | 0,616539 | 2,251845 | 0,024332 | 0,2065503 |
| AP001350.4    | 6,47    | 2,94  | 1,304721 | 2,251735 | 0,024339 | 0,2065503 |
| TIAM2         | 39,43   | -2,03 | 0,902284 | -2,25147 | 0,024356 | 0,2065503 |
| RP11-15H20.5  | 53,11   | -2,29 | 1,018879 | -2,25144 | 0,024358 | 0,2065503 |
| PTOV1-AS1     | 10,65   | 2,45  | 1,088089 | 2,250479 | 0,024419 | 0,206811  |
| RP1-212G6.7   | 12,22   | -2,38 | 1,057877 | -2,25029 | 0,024431 | 0,206811  |
| HERC2P5       | 21,23   | -1,49 | 0,664112 | -2,25026 | 0,024432 | 0,206811  |
| TAS2R18       | 6,55    | 4,75  | 2,110096 | 2,25013  | 0,024441 | 0,206811  |
| KIF13B        | 277,45  | -1,47 | 0,654587 | -2,25008 | 0,024444 | 0,206811  |
| CD247         | 41,41   | -4,08 | 1,814437 | -2,24953 | 0,024479 | 0,2070154 |
| U95743.1      | 9,91    | -5,02 | 2,23116  | -2,24899 | 0,024513 | 0,2072106 |
| RPL34         | 4188,87 | -0,59 | 0,261444 | -2,24874 | 0,024529 | 0,2072518 |
| MALRD1        | 2,38    | -5,61 | 2,495851 | -2,24826 | 0,024559 | NA        |
| FMNL3         | 76,17   | 2,02  | 0,896459 | 2,248156 | 0,024566 | 0,2074694 |
| NIPA1         | 58,95   | -2,71 | 1,206772 | -2,24774 | 0,024593 | 0,2075976 |
| RP11-394B2.4  | 4,58    | -1,85 | 0,824714 | -2,24744 | 0,024612 | 0,2076287 |

|               |         |       |          |          |          |           |
|---------------|---------|-------|----------|----------|----------|-----------|
| RPL10A        | 5887,11 | 0,35  | 0,154751 | 2,247335 | 0,024619 | 0,2076287 |
| COX8A         | 1353,15 | -0,50 | 0,224452 | -2,24635 | 0,024682 | 0,208006  |
| RP11-3J10.4   | 7,06    | 4,30  | 1,913192 | 2,246167 | 0,024693 | 0,208006  |
| CDK19         | 314,37  | 1,44  | 0,642833 | 2,246111 | 0,024697 | 0,208006  |
| RP11-16E23.3  | 103,39  | 1,70  | 0,757277 | 2,245646 | 0,024727 | 0,2081629 |
| RP11-436J20.2 | 64,19   | 2,99  | 1,330996 | 2,243663 | 0,024854 | 0,2091407 |
| RP11-274A11.4 | 4,84    | -4,43 | 1,973212 | -2,24335 | 0,024874 | 0,2092152 |
| UBE2D3        | 4927,98 | 0,59  | 0,264149 | 2,242713 | 0,024915 | 0,2094665 |
| NAT9          | 221,45  | 1,19  | 0,528641 | 2,242252 | 0,024945 | 0,209622  |
| FAM9A         | 0,93    | -2,56 | 1,142805 | -2,24207 | 0,024957 | NA        |
| RP11-351O2.1  | 7,10    | 3,62  | 1,615715 | 2,24168  | 0,024982 | 0,209791  |
| SMIM11B       | 113,80  | -1,59 | 0,709545 | -2,24159 | 0,024988 | 0,209791  |
| AC010733.7    | 3,26    | -1,73 | 0,773051 | -2,24134 | 0,025004 | NA        |
| CACNA1C       | 10,16   | 5,27  | 2,350482 | 2,241276 | 0,025008 | 0,2098679 |
| MFSD9         | 59,19   | 1,92  | 0,856782 | 2,240812 | 0,025038 | 0,2100255 |
| RP1-20N2.4    | 56,82   | 1,83  | 0,81884  | 2,240051 | 0,025088 | 0,2103286 |
| NEUROD2       | 89,96   | -1,05 | 0,468283 | -2,23984 | 0,025101 | 0,2103286 |
| LIN54         | 62,00   | 2,12  | 0,946943 | 2,23964  | 0,025114 | 0,2103286 |
| RP11-43N16.4  | 40,23   | 2,72  | 1,216401 | 2,239445 | 0,025127 | 0,2103286 |
| GALNS         | 134,07  | 1,53  | 0,684291 | 2,239167 | 0,025145 | 0,2103286 |
| SOAT1         | 661,07  | 0,87  | 0,387871 | 2,239153 | 0,025146 | 0,2103286 |
| PGAM5         | 81,82   | 1,27  | 0,568764 | 2,239037 | 0,025154 | 0,2103286 |
| RAD9A         | 141,96  | -1,58 | 0,706281 | -2,23852 | 0,025187 | 0,2104525 |
| TMX4          | 667,89  | 1,15  | 0,511953 | 2,238327 | 0,0252   | 0,2104525 |
| RP11-1338A7.1 | 12,90   | 5,15  | 2,302129 | 2,238076 | 0,025216 | 0,2104525 |
| NCF1B         | 153,60  | -1,97 | 0,879562 | -2,23804 | 0,025218 | 0,2104525 |
| FARS2         | 134,99  | 2,13  | 0,953199 | 2,237929 | 0,025226 | 0,2104525 |
| SCAMP4        | 131,74  | -1,34 | 0,597886 | -2,23762 | 0,025246 | 0,2104525 |
| CLINT1        | 1015,24 | 0,97  | 0,433183 | 2,237594 | 0,025248 | 0,2104525 |
| SERPINB10     | 6,40    | -2,20 | 0,981531 | -2,23734 | 0,025264 | 0,2104982 |
| FLNB          | 105,64  | -2,41 | 1,078381 | -2,23699 | 0,025287 | 0,2105612 |
| RCCD1         | 36,41   | -2,33 | 1,039912 | -2,23688 | 0,025295 | 0,2105612 |
| DET1          | 110,85  | -1,66 | 0,743776 | -2,23668 | 0,025307 | 0,210574  |
| RN7SL2        | 48,08   | -1,51 | 0,676233 | -2,23622 | 0,025338 | 0,2107309 |
| SNORD3B-1     | 41,09   | -1,68 | 0,751283 | -2,2349  | 0,025424 | 0,2113538 |
| DDOST         | 2343,32 | 0,72  | 0,324037 | 2,234616 | 0,025443 | 0,2114152 |
| TLR5          | 428,82  | -1,67 | 0,749579 | -2,23437 | 0,025459 | 0,2114561 |
| FRS2          | 152,90  | 1,51  | 0,676459 | 2,233397 | 0,025523 | 0,2118927 |
| TNFRSF1B      | 2546,99 | -0,67 | 0,300783 | -2,23305 | 0,025546 | 0,2119419 |
| RP11-153M7.3  | 33,53   | -1,50 | 0,672443 | -2,23269 | 0,02557  | 0,2119419 |
| ZNF773        | 50,61   | 1,71  | 0,767191 | 2,232636 | 0,025573 | 0,2119419 |
| OXLD1         | 159,48  | -1,39 | 0,6247   | -2,23262 | 0,025574 | 0,2119419 |
| KCTD6         | 109,54  | -1,74 | 0,779693 | -2,231   | 0,025681 | 0,2126758 |
| OTUB1         | 1549,57 | 0,73  | 0,327733 | 2,230931 | 0,025686 | 0,2126758 |
| UBA7          | 893,19  | -0,75 | 0,334483 | -2,23045 | 0,025718 | 0,2128142 |
| RP11-588G21.2 | 27,83   | -2,78 | 1,245441 | -2,23017 | 0,025736 | 0,2128142 |
| MRPL52        | 229,75  | -0,81 | 0,364557 | -2,23016 | 0,025737 | 0,2128142 |
| CHPF          | 0,85    | -3,11 | 1,393443 | -2,22921 | 0,0258   | NA        |
| ACADSB        | 151,71  | 1,74  | 0,780988 | 2,22901  | 0,025813 | 0,2133444 |
| CTD-2509G16.5 | 0,78    | -2,55 | 1,143079 | -2,22899 | 0,025814 | NA        |

|               |         |       |          |          |          |           |
|---------------|---------|-------|----------|----------|----------|-----------|
| TMEM170A      | 433,43  | 1,85  | 0,829088 | 2,228852 | 0,025824 | 0,2133444 |
| TRIM52        | 126,59  | -1,38 | 0,619852 | -2,22807 | 0,025876 | 0,2136812 |
| TSTD1         | 134,66  | -1,41 | 0,633115 | -2,22764 | 0,025905 | 0,2138233 |
| NLRP12        | 254,58  | -1,33 | 0,597898 | -2,22733 | 0,025925 | 0,2138912 |
| ELOVL5        | 1028,83 | 0,84  | 0,375698 | 2,227115 | 0,02594  | 0,2138912 |
| ZNF644        | 789,42  | 1,15  | 0,514652 | 2,226997 | 0,025947 | 0,2138912 |
| RP1L1         | 21,29   | -1,93 | 0,868299 | -2,22627 | 0,025996 | 0,2141988 |
| RASSF2        | 1380,67 | 0,84  | 0,376472 | 2,225837 | 0,026025 | 0,214271  |
| UHRF1BP1L     | 553,57  | -1,00 | 0,448488 | -2,22579 | 0,026028 | 0,214271  |
| ZNF575        | 12,91   | 3,88  | 1,744347 | 2,225205 | 0,026068 | 0,2145006 |
| GSTM4         | 156,66  | 1,89  | 0,849224 | 2,224475 | 0,026116 | 0,2147414 |
| MELK          | 6,89    | -2,04 | 0,916212 | -2,22443 | 0,02612  | 0,2147414 |
| GPR157        | 95,45   | 1,52  | 0,685141 | 2,22396  | 0,026151 | 0,2149039 |
| OR6J1         | 18,18   | -1,16 | 0,522796 | -2,22376 | 0,026165 | 0,2149186 |
| CTC-316M18.1  | 4,29    | -6,58 | 2,960852 | -2,22328 | 0,026197 | 0,2149511 |
| RP11-866E20.3 | 37,72   | -1,44 | 0,646339 | -2,22321 | 0,026202 | 0,2149511 |
| AC020956.3    | 82,98   | -1,00 | 0,448305 | -2,22308 | 0,026211 | 0,2149511 |
| PCYOX1        | 108,15  | -1,46 | 0,657739 | -2,22302 | 0,026215 | 0,2149511 |
| RP11-242C19.3 | 8,68    | -2,46 | 1,105297 | -2,22282 | 0,026228 | 0,2149644 |
| HECW2         | 100,09  | -2,28 | 1,025111 | -2,2223  | 0,026263 | 0,215157  |
| KIAA1024L     | 10,35   | -2,24 | 1,009894 | -2,22185 | 0,026294 | 0,2153134 |
| BRF1          | 161,08  | 1,37  | 0,61872  | 2,221588 | 0,026311 | 0,2153628 |
| SND1-IT1      | 218,13  | 1,74  | 0,782834 | 2,220832 | 0,026362 | 0,2156865 |
| RP11-90J7.3   | 2,44    | -5,72 | 2,577318 | -2,2206  | 0,026378 | NA        |
| RP11-163E9.2  | 9,98    | -3,32 | 1,493506 | -2,22058 | 0,02638  | 0,2157003 |
| E2F8          | 6,45    | 2,14  | 0,962792 | 2,220143 | 0,026409 | 0,2157003 |
| THUMPDI       | 648,56  | 0,89  | 0,400918 | 2,220068 | 0,026414 | 0,2157003 |
| CORO7-PAM16   | 9,54    | 5,47  | 2,465256 | 2,219982 | 0,02642  | 0,2157003 |
| WDFY3-AS2     | 10,60   | 5,35  | 2,411552 | 2,219948 | 0,026422 | 0,2157003 |
| RP11-568K15.1 | 125,61  | 1,29  | 0,583267 | 2,219782 | 0,026434 | 0,2157003 |
| IL1RN         | 976,71  | 1,13  | 0,507119 | 2,219531 | 0,026451 | 0,2157446 |
| TRMT2B        | 74,76   | 1,85  | 0,834203 | 2,219244 | 0,02647  | 0,2157536 |
| RP4-773A18.8  | 58,16   | 1,74  | 0,785619 | 2,219174 | 0,026475 | 0,2157536 |
| ATRN          | 251,64  | -2,07 | 0,932823 | -2,21833 | 0,026533 | 0,2161297 |
| TIGD2         | 17,73   | 3,06  | 1,37971  | 2,217727 | 0,026573 | 0,2161775 |
| ZNF236        | 181,84  | 1,56  | 0,705366 | 2,217701 | 0,026575 | 0,2161775 |
| C10orf110     | 9,12    | 3,64  | 1,641908 | 2,217613 | 0,026581 | 0,2161775 |
| RN7SKP78      | 5,51    | 5,09  | 2,29678  | 2,217558 | 0,026585 | 0,2161775 |
| RP11-298E2.2  | 6,88    | 5,41  | 2,442657 | 2,216634 | 0,026648 | 0,2164359 |
| RNA5SP363     | 6,64    | 5,37  | 2,423574 | 2,216572 | 0,026652 | 0,2164359 |
| PAPSS1        | 420,08  | -1,14 | 0,512986 | -2,21643 | 0,026662 | 0,2164359 |
| ATP1B3        | 1742,67 | 0,86  | 0,389267 | 2,216049 | 0,026688 | 0,2164359 |
| STAU2         | 228,03  | 1,53  | 0,689949 | 2,216016 | 0,02669  | 0,2164359 |
| HSDL1         | 65,53   | 2,21  | 0,995673 | 2,215998 | 0,026692 | 0,2164359 |
| ZNF567        | 57,70   | -2,03 | 0,918012 | -2,2159  | 0,026698 | 0,2164359 |
| RP11-365O16.3 | 27,39   | 1,05  | 0,472857 | 2,215249 | 0,026743 | 0,216704  |
| NME7          | 155,85  | 1,48  | 0,667619 | 2,214478 | 0,026796 | 0,2170368 |
| RP4-673M15.1  | 60,24   | -1,67 | 0,75286  | -2,21431 | 0,026807 | 0,2170368 |
| SBNO2         | 84,98   | -1,66 | 0,749567 | -2,21407 | 0,026824 | 0,2170762 |
| UTRN          | 1953,03 | -0,85 | 0,383451 | -2,21357 | 0,026858 | 0,2172328 |



|               |          |       |          |          |          |           |
|---------------|----------|-------|----------|----------|----------|-----------|
| TMEM150A      | 111,92   | 2,04  | 0,921201 | 2,213383 | 0,026871 | 0,2172328 |
| ADD1          | 1081,24  | -0,70 | 0,315711 | -2,21318 | 0,026885 | 0,2172328 |
| RP11-227G15.8 | 4,90     | -2,96 | 1,33791  | -2,21311 | 0,02689  | 0,2172328 |
| RP11-588L15.1 | 11,66    | 6,17  | 2,788106 | 2,212544 | 0,026929 | 0,2173289 |
| RP3-473L9.4   | 19,34    | 1,84  | 0,831106 | 2,212479 | 0,026934 | 0,2173289 |
| RP11-15J10.4  | 6,19     | 5,26  | 2,375986 | 2,212431 | 0,026937 | 0,2173289 |
| LGR4          | 3,49     | 2,88  | 1,300066 | 2,211954 | 0,02697  | NA        |
| MCFD2         | 426,57   | -1,10 | 0,499091 | -2,21055 | 0,027067 | 0,2182098 |
| TSPAN3        | 1002,94  | 1,03  | 0,466431 | 2,210514 | 0,02707  | 0,2182098 |
| AF129408.17   | 5,93     | 5,19  | 2,350368 | 2,209659 | 0,027129 | 0,2185935 |
| GYG2P1        | 21,10    | -1,80 | 0,81691  | -2,20939 | 0,027148 | 0,2186518 |
| CTC-507E2.2   | 6,46     | -4,85 | 2,197082 | -2,20893 | 0,02718  | 0,2188055 |
| UHMK1         | 940,71   | 0,99  | 0,449195 | 2,208773 | 0,02719  | 0,2188055 |
| ABI2          | 197,13   | 1,79  | 0,810415 | 2,207818 | 0,027257 | 0,2192137 |
| JAK2          | 1699,02  | 0,71  | 0,320274 | 2,207706 | 0,027265 | 0,2192137 |
| ZDHHC14       | 62,55    | 2,22  | 1,005167 | 2,206985 | 0,027315 | 0,2194507 |
| ANKRD13D      | 852,65   | -0,81 | 0,367018 | -2,20695 | 0,027318 | 0,2194507 |
| VPS4B         | 382,59   | -0,82 | 0,369499 | -2,20671 | 0,027334 | 0,2194859 |
| NOG           | 20,82    | -0,99 | 0,450792 | -2,20578 | 0,027399 | 0,2199161 |
| RP11-256L6.3  | 5,86     | -7,35 | 3,331726 | -2,2054  | 0,027426 | 0,2199277 |
| RPLP1         | 15348,21 | -0,47 | 0,212521 | -2,20537 | 0,027428 | 0,2199277 |
| HNF4G         | 4,75     | -1,60 | 0,726385 | -2,20507 | 0,027449 | 0,2199277 |
| RP11-214O1.3  | 22,91    | 1,89  | 0,855093 | 2,204745 | 0,027472 | 0,2199277 |
| CMAS          | 294,74   | -1,58 | 0,716692 | -2,20464 | 0,027479 | 0,2199277 |
| PNLIPRP1      | 9,97     | -2,27 | 1,02816  | -2,20461 | 0,027481 | 0,2199277 |
| ADSS          | 347,28   | -1,24 | 0,562032 | -2,20458 | 0,027484 | 0,2199277 |
| FBXO48        | 53,93    | -1,06 | 0,478718 | -2,20404 | 0,027522 | 0,2201377 |
| DOHH          | 4,08     | 4,67  | 2,118404 | 2,203633 | 0,02755  | 0,2202286 |
| PDZD9         | 7,54     | 3,58  | 1,623651 | 2,203025 | 0,027593 | 0,2202286 |
| DUSP6         | 1001,61  | -1,67 | 0,759068 | -2,20291 | 0,027601 | 0,2202286 |
| EMCN          | 21,41    | -2,31 | 1,050891 | -2,20269 | 0,027617 | 0,2202286 |
| CA6           | 9,34     | -1,29 | 0,58727  | -2,20262 | 0,027622 | 0,2202286 |
| ZNF45         | 24,80    | 2,39  | 1,085685 | 2,202575 | 0,027625 | 0,2202286 |
| FAM110B       | 5,24     | -3,15 | 1,429944 | -2,20254 | 0,027627 | 0,2202286 |
| SWI5          | 54,15    | 2,71  | 1,229773 | 2,202533 | 0,027628 | 0,2202286 |
| TRAF3IP2      | 41,29    | 2,23  | 1,013965 | 2,202128 | 0,027656 | 0,2203619 |
| RP11-6J24.6   | 11,21    | -4,16 | 1,889581 | -2,20182 | 0,027678 | 0,220412  |
| OR7C1         | 107,30   | -1,15 | 0,523315 | -2,20159 | 0,027694 | 0,220412  |
| RP11-538I12.2 | 3,97     | 4,62  | 2,098726 | 2,201536 | 0,027698 | 0,220412  |
| RP11-520E6.1  | 14,78    | -2,55 | 1,160238 | -2,20127 | 0,027717 | 0,2204663 |
| RN7SL538P     | 1,75     | -2,81 | 1,275044 | -2,20117 | 0,027724 | NA        |
| RP11-20B24.4  | 27,13    | 3,22  | 1,463166 | 2,200712 | 0,027756 | 0,2205993 |
| HIST1H3G      | 5,48     | 4,50  | 2,046635 | 2,200401 | 0,027778 | 0,2205993 |
| FMN1          | 670,67   | -1,80 | 0,817615 | -2,20032 | 0,027785 | 0,2205993 |
| CCDC88A       | 4045,78  | 0,31  | 0,142182 | 2,200291 | 0,027786 | 0,2205993 |
| RP13-228J13.6 | 14,40    | 3,83  | 1,742494 | 2,200145 | 0,027797 | 0,2205993 |
| SLC1A3        | 65,97    | 4,01  | 1,821965 | 2,19994  | 0,027811 | 0,2205993 |
| ANKRD42       | 102,39   | -1,53 | 0,697354 | -2,19984 | 0,027818 | 0,2205993 |
| TRNT1         | 175,67   | -1,12 | 0,508237 | -2,1997  | 0,027828 | 0,2205993 |
| TLR4          | 747,61   | -0,89 | 0,406081 | -2,19935 | 0,027853 | 0,2206123 |

|               |          |       |          |          |          |           |
|---------------|----------|-------|----------|----------|----------|-----------|
| INTS11        | 362,86   | -1,19 | 0,54261  | -2,19934 | 0,027854 | 0,2206123 |
| ATP13A2       | 100,06   | 1,97  | 0,897092 | 2,199078 | 0,027872 | 0,2206661 |
| CTC-281B15.1  | 56,76    | -2,01 | 0,914585 | -2,19888 | 0,027886 | 0,2206827 |
| RP11-791G15.1 | 12,17    | 2,53  | 1,150948 | 2,198385 | 0,027922 | 0,2208687 |
| NEDD4         | 483,43   | -0,65 | 0,296568 | -2,19742 | 0,02799  | 0,2213163 |
| RP11-324I22.3 | 5,15     | 4,99  | 2,269759 | 2,19709  | 0,028014 | 0,2213203 |
| KATNBL1       | 377,89   | -0,70 | 0,319993 | -2,19708 | 0,028014 | 0,2213203 |
| RN7SL377P     | 4,02     | 2,99  | 1,363118 | 2,196841 | 0,028032 | 0,2213632 |
| RP11-489M13.4 | 14,30    | 1,99  | 0,904694 | 2,196283 | 0,028072 | 0,2215842 |
| PCLAF         | 59,18    | 1,55  | 0,705618 | 2,195777 | 0,028108 | 0,2217582 |
| LLNLF-96A1.1  | 11455,68 | -1,12 | 0,508725 | -2,19564 | 0,028118 | 0,2217582 |
| TM4SF20       | 8,17     | 2,56  | 1,165241 | 2,194473 | 0,028201 | 0,222325  |
| RP11-89K11.1  | 4,97     | 4,08  | 1,859184 | 2,193673 | 0,028259 | 0,2224556 |
| IVD           | 472,72   | -1,01 | 0,460785 | -2,19363 | 0,028262 | 0,2224556 |
| KDM8          | 11,39    | 4,24  | 1,933836 | 2,193405 | 0,028278 | 0,2224556 |
| SIM1          | 4,07     | -3,09 | 1,406568 | -2,19337 | 0,028281 | 0,2224556 |
| CCBL2         | 276,68   | 1,94  | 0,883473 | 2,193293 | 0,028286 | 0,2224556 |
| RGPD1         | 62,73    | 2,87  | 1,308637 | 2,192974 | 0,028309 | 0,2224556 |
| UBR1          | 206,91   | 1,05  | 0,477934 | 2,192946 | 0,028311 | 0,2224556 |
| MYNN          | 213,05   | -1,74 | 0,791369 | -2,19291 | 0,028314 | 0,2224556 |
| IGHV1-69-2    | 1,37     | -4,44 | 2,026753 | -2,19284 | 0,028319 | NA        |
| RP11-498E2.9  | 6,86     | -4,43 | 2,021201 | -2,19256 | 0,028339 | 0,2224909 |
| HS6ST1        | 192,34   | -2,83 | 1,289008 | -2,19241 | 0,02835  | 0,2224909 |
| ZNF17         | 12,30    | -2,02 | 0,919943 | -2,19235 | 0,028354 | 0,2224909 |
| GOLGA6L10     | 6,20     | 4,42  | 2,01832  | 2,191823 | 0,028392 | 0,2226976 |
| SNORD3B-2     | 159,86   | -1,12 | 0,509798 | -2,19143 | 0,028421 | 0,2227345 |
| RP11-258B16.1 | 2,64     | -2,18 | 0,993048 | -2,19141 | 0,028422 | NA        |
| AC055764.1    | 10,38    | 4,86  | 2,218286 | 2,191296 | 0,02843  | 0,2227345 |
| RP11-267C16.1 | 82,21    | -1,40 | 0,640746 | -2,19102 | 0,02845  | 0,2227345 |
| MTM1          | 193,84   | 1,72  | 0,78619  | 2,19099  | 0,028453 | 0,2227345 |
| KIAA1524      | 78,57    | 2,52  | 1,150814 | 2,190683 | 0,028475 | 0,2227345 |
| CTB-184G21.3  | 6,55     | -1,61 | 0,734776 | -2,19064 | 0,028478 | 0,2227345 |
| PPP1R11       | 229,61   | 1,66  | 0,758926 | 2,190585 | 0,028482 | 0,2227345 |
| RP11-552F3.12 | 40,37    | -3,25 | 1,48555  | -2,19032 | 0,028501 | 0,2227345 |
| UBB           | 6707,44  | 0,45  | 0,203965 | 2,190235 | 0,028507 | 0,2227345 |
| RP11-175P19.1 | 3,08     | 4,23  | 1,929853 | 2,190067 | 0,028519 | NA        |
| RP11-556O5.3  | 55,79    | 2,27  | 1,036202 | 2,190056 | 0,02852  | 0,2227345 |
| C17orf99      | 5,70     | -1,80 | 0,822106 | -2,18991 | 0,028531 | 0,2227345 |
| RP11-245D16.4 | 4,88     | 4,34  | 1,981729 | 2,189631 | 0,028551 | 0,2227345 |
| GIN1          | 36,29    | 2,04  | 0,933191 | 2,189477 | 0,028562 | 0,2227345 |
| AC125232.1    | 34,53    | 3,04  | 1,386781 | 2,189349 | 0,028572 | 0,2227345 |
| TANGO6        | 113,46   | 1,25  | 0,569398 | 2,189279 | 0,028577 | 0,2227345 |
| CYP3A4        | 1,68     | -3,95 | 1,80345  | -2,18926 | 0,028578 | NA        |
| RP11-576I22.2 | 2,91     | -5,70 | 2,602888 | -2,18864 | 0,028623 | NA        |
| RP11-357G3.2  | 4,23     | 4,71  | 2,153885 | 2,188492 | 0,028634 | 0,2230084 |
| OVCH1         | 5,61     | -4,47 | 2,044725 | -2,18847 | 0,028636 | 0,2230084 |
| MAP4K5        | 378,12   | 1,46  | 0,666111 | 2,18758  | 0,0287   | 0,2234174 |
| ZNF716        | 28,31    | -2,32 | 1,062727 | -2,18726 | 0,028723 | 0,2234517 |
| AC024084.1    | 6,05     | 5,22  | 2,386143 | 2,18719  | 0,028729 | 0,2234517 |
| TRDJ1         | 3,52     | -6,44 | 2,946569 | -2,18645 | 0,028783 | NA        |

|                  |          |       |          |          |          |           |
|------------------|----------|-------|----------|----------|----------|-----------|
| SCNM1            | 950,39   | 0,64  | 0,292956 | 2,186033 | 0,028813 | 0,2240154 |
| RP11-63E5.8      | 2,32     | -2,53 | 1,156492 | -2,18508 | 0,028883 | NA        |
| METTL16          | 171,50   | 1,08  | 0,49609  | 2,184878 | 0,028898 | 0,2245796 |
| VSX1             | 1,08     | -2,44 | 1,114588 | -2,18484 | 0,028901 | NA        |
| RP11-580I1.2     | 2,75     | -5,73 | 2,624017 | -2,18463 | 0,028916 | NA        |
| RF00409          | 16,12    | -2,54 | 1,164473 | -2,18432 | 0,028938 | 0,2247994 |
| RP11-73B2.7      | 3,15     | -6,46 | 2,958147 | -2,18422 | 0,028946 | NA        |
| MT-TF            | 22,40    | -0,99 | 0,45375  | -2,18416 | 0,02895  | 0,2247994 |
| RP5-1093G23.1    | 3,01     | -6,38 | 2,923094 | -2,18403 | 0,02896  | NA        |
| CTD-2165H16.4    | 3,55     | 4,58  | 2,09554  | 2,183805 | 0,028977 | NA        |
| RP1-182O16.1     | 1,24     | -2,04 | 0,932647 | -2,1837  | 0,028984 | NA        |
| RP11-309H21.3    | 25,45    | 2,29  | 1,0498   | 2,183482 | 0,029    | 0,2250239 |
| FAM26F           | 1034,29  | 1,08  | 0,496438 | 2,183441 | 0,029003 | 0,2250239 |
| AC034187.2       | 12,86    | -1,78 | 0,813232 | -2,18288 | 0,029045 | 0,2252494 |
| CTPS1            | 177,52   | 1,36  | 0,622042 | 2,182563 | 0,029068 | 0,2253376 |
| UBXN1            | 1475,00  | 0,61  | 0,27825  | 2,18189  | 0,029118 | 0,2256286 |
| IGHEP2           | 85,00    | 2,96  | 1,358831 | 2,181683 | 0,029133 | 0,2256347 |
| RP1-149A16.17    | 11,41    | 6,14  | 2,815714 | 2,181497 | 0,029147 | 0,2256347 |
| CTC-490E21.11    | 229,14   | -1,10 | 0,503318 | -2,18127 | 0,029163 | 0,2256347 |
| GBAS             | 799,92   | 0,98  | 0,44869  | 2,181222 | 0,029167 | 0,2256347 |
| ARG2             | 11,44    | 3,36  | 1,542194 | 2,180952 | 0,029187 | 0,2256957 |
| ANXA1            | 10131,51 | 0,59  | 0,268465 | 2,180469 | 0,029223 | 0,2258778 |
| RP11-793H13.10   | 82,89    | -1,92 | 0,878397 | -2,18013 | 0,029248 | 0,2258793 |
| PXMP2            | 15,79    | 2,86  | 1,31338  | 2,180102 | 0,02925  | 0,2258793 |
| RF00003          | 293,78   | -0,60 | 0,276229 | -2,17998 | 0,029259 | 0,2258793 |
| RNF157           | 14,49    | -1,44 | 0,661335 | -2,17968 | 0,029281 | 0,2259551 |
| RP4-794H19.4     | 81,78    | -1,13 | 0,519222 | -2,17932 | 0,029308 | 0,2260655 |
| MRPS25           | 503,59   | 1,14  | 0,524743 | 2,17882  | 0,029345 | 0,2262594 |
| CALN1            | 7,91     | -1,51 | 0,690967 | -2,17838 | 0,029377 | 0,2264154 |
| E2F1             | 8,02     | 5,63  | 2,586722 | 2,178022 | 0,029404 | 0,2265295 |
| COA1             | 449,76   | 1,08  | 0,496448 | 2,177634 | 0,029433 | 0,2266584 |
| PSORS1C1         | 3,93     | -2,05 | 0,939943 | -2,17724 | 0,029463 | 0,2267111 |
| TPM4             | 1671,15  | 0,59  | 0,272075 | 2,177215 | 0,029465 | 0,2267111 |
| CCNB2            | 28,84    | 2,48  | 1,140496 | 2,175469 | 0,029595 | 0,2276203 |
| SOS2             | 460,69   | 1,42  | 0,651251 | 2,175306 | 0,029607 | 0,2276203 |
| CTA-407F11.8     | 2,75     | 4,09  | 1,880159 | 2,175033 | 0,029628 | NA        |
| RP11-596D21.1    | 22,63    | 4,45  | 2,04444  | 2,174443 | 0,029672 | 0,2280235 |
| RILPL2           | 1046,43  | 0,78  | 0,357506 | 2,174269 | 0,029685 | 0,2280297 |
| XXbac-B476C20.13 | 3,55     | -2,10 | 0,967083 | -2,17405 | 0,029702 | NA        |
| RP11-548K23.11   | 11,01    | 6,09  | 2,803164 | 2,173912 | 0,029712 | 0,2281418 |
| AC010226.4       | 16,96    | -2,86 | 1,316998 | -2,17354 | 0,02974  | 0,2282619 |
| RP11-379K22.2    | 7,17     | -1,46 | 0,669987 | -2,17325 | 0,029761 | 0,2283326 |
| ATRX             | 1761,92  | -0,90 | 0,4163   | -2,17211 | 0,029847 | 0,2288979 |
| CTD-2337A12.1    | 15,85    | 2,41  | 1,111017 | 2,171915 | 0,029862 | 0,2289179 |
| AC000099.1       | 1,92     | -3,47 | 1,598251 | -2,17059 | 0,029963 | NA        |
| ADAMTS2          | 18,10    | -1,96 | 0,903916 | -2,17028 | 0,029986 | 0,2296316 |
| SPA17            | 65,43    | -3,00 | 1,384492 | -2,17018 | 0,029993 | 0,2296316 |
| TMEM110          | 178,80   | -2,43 | 1,117673 | -2,17016 | 0,029994 | 0,2296316 |
| CTD-2540B15.11   | 271,67   | -1,08 | 0,496634 | -2,17003 | 0,030005 | 0,2296316 |
| MRPS22           | 412,13   | 1,48  | 0,682594 | 2,169727 | 0,030028 | 0,2297132 |

|                |         |       |          |          |          |           |
|----------------|---------|-------|----------|----------|----------|-----------|
| DCX            | 3,75    | -2,45 | 1,128469 | -2,16944 | 0,030049 | NA        |
| ZNF132         | 7,27    | 4,86  | 2,241586 | 2,1692   | 0,030068 | 0,2298303 |
| RP11-424G14.1  | 4,13    | -3,71 | 1,710243 | -2,1692  | 0,030068 | 0,2298303 |
| AF127936.9     | 34,11   | 3,70  | 1,707263 | 2,168577 | 0,030115 | 0,2300563 |
| PRSS12         | 15,06   | 3,24  | 1,494895 | 2,16839  | 0,030129 | 0,2300563 |
| STK10          | 1181,27 | -0,73 | 0,338478 | -2,16832 | 0,030134 | 0,2300563 |
| PPP6R1         | 407,65  | -1,17 | 0,539489 | -2,16804 | 0,030156 | 0,2301271 |
| HMG3           | 1182,69 | 0,59  | 0,27343  | 2,167572 | 0,030191 | 0,2303028 |
| RP11-630C16.2  | 5,11    | -2,60 | 1,20128  | -2,16694 | 0,03024  | 0,2304706 |
| RP11-178C10.3  | 12,64   | -1,74 | 0,803828 | -2,16682 | 0,030248 | 0,2304706 |
| SPTLC1         | 477,03  | -1,15 | 0,528701 | -2,16651 | 0,030273 | 0,2304706 |
| STAU1          | 436,13  | -0,99 | 0,45507  | -2,16644 | 0,030277 | 0,2304706 |
| RP11-261P13.5  | 3,25    | -3,21 | 1,483261 | -2,16639 | 0,030282 | NA        |
| CTD-2001J20.1  | 22,11   | -0,84 | 0,38607  | -2,16637 | 0,030283 | 0,2304706 |
| SHQ1           | 254,61  | 1,87  | 0,864835 | 2,166309 | 0,030288 | 0,2304706 |
| BIN1           | 342,98  | 1,16  | 0,537037 | 2,1659   | 0,030319 | 0,230611  |
| AVIL           | 47,41   | -2,41 | 1,111107 | -2,16574 | 0,030331 | 0,230611  |
| ABCG8          | 64,54   | -0,99 | 0,455732 | -2,16551 | 0,030348 | 0,2306314 |
| AC073283.4     | 66,82   | -1,38 | 0,636337 | -2,16538 | 0,030358 | 0,2306314 |
| RP11-28H5.2    | 3,08    | -2,09 | 0,964883 | -2,1653  | 0,030364 | NA        |
| CDC27P3        | 2,68    | -5,69 | 2,630147 | -2,16522 | 0,030371 | NA        |
| TP53INP2       | 127,43  | 2,41  | 1,113607 | 2,163665 | 0,03049  | 0,2314692 |
| KIAA1191       | 203,30  | 1,32  | 0,610446 | 2,163603 | 0,030495 | 0,2314692 |
| BRWD1          | 1056,24 | -1,07 | 0,492727 | -2,16346 | 0,030506 | 0,2314692 |
| RP11-192H23.6  | 35,34   | -2,16 | 0,998988 | -2,1625  | 0,030579 | 0,2316042 |
| AC092798.2     | 6,26    | 4,69  | 2,168956 | 2,162402 | 0,030587 | 0,2316042 |
| TRBC2          | 159,56  | -2,65 | 1,225911 | -2,16239 | 0,030588 | 0,2316042 |
| RP4-781K5.2    | 459,38  | 1,39  | 0,640552 | 2,162376 | 0,030589 | 0,2316042 |
| AC015818.3     | 3,76    | 2,71  | 1,255424 | 2,16231  | 0,030594 | 0,2316042 |
| NFAM1          | 235,55  | -1,30 | 0,600769 | -2,16205 | 0,030614 | 0,2316042 |
| AGL            | 168,90  | 2,04  | 0,94387  | 2,161685 | 0,030642 | 0,2316042 |
| RP4-736L20.5   | 45,04   | -1,45 | 0,672803 | -2,16167 | 0,030644 | 0,2316042 |
| RP11-884K10.5  | 853,73  | 1,00  | 0,463282 | 2,161565 | 0,030652 | 0,2316042 |
| OXCT2          | 13,73   | 5,26  | 2,432338 | 2,161476 | 0,030659 | 0,2316042 |
| RP11-296A18.6  | 5,61    | -2,11 | 0,978203 | -2,16145 | 0,030661 | 0,2316042 |
| TMEM187        | 44,58   | 3,56  | 1,645086 | 2,161244 | 0,030677 | 0,2316042 |
| ROMO1          | 342,07  | -0,81 | 0,375761 | -2,16113 | 0,030686 | 0,2316042 |
| KDM6B          | 600,48  | -1,27 | 0,589337 | -2,1608  | 0,030711 | 0,2317018 |
| FGF23          | 155,62  | -0,85 | 0,394622 | -2,16054 | 0,030731 | 0,2317209 |
| RP11-949J7.7   | 35,04   | 1,88  | 0,867905 | 2,160443 | 0,030738 | 0,2317209 |
| RP11-1152H15.1 | 52,13   | -1,46 | 0,67732  | -2,16005 | 0,030769 | 0,2318547 |
| MIS18BP1       | 1104,12 | 0,73  | 0,339118 | 2,159781 | 0,03079  | 0,2319183 |
| AC114271.2     | 10,84   | 3,36  | 1,556722 | 2,159622 | 0,030802 | 0,2319183 |
| RABAC1         | 1037,19 | -0,55 | 0,256744 | -2,15902 | 0,030848 | 0,2321741 |
| FOLH1          | 12,73   | -5,10 | 2,362066 | -2,15884 | 0,030863 | 0,2321878 |
| ELF4           | 330,75  | 1,02  | 0,473575 | 2,1583   | 0,030904 | 0,2322755 |
| DIS3L          | 274,91  | 1,35  | 0,623952 | 2,158021 | 0,030926 | 0,2322755 |
| CASP8AP2       | 330,54  | -1,48 | 0,685951 | -2,15797 | 0,03093  | 0,2322755 |
| VEGFA          | 275,85  | 1,43  | 0,663464 | 2,157964 | 0,030931 | 0,2322755 |
| WASHC1         | 139,96  | -1,43 | 0,66324  | -2,15788 | 0,030937 | 0,2322755 |

|               |          |       |          |          |          |           |
|---------------|----------|-------|----------|----------|----------|-----------|
| TRIM46        | 2,36     | -2,36 | 1,092451 | -2,15761 | 0,030958 | NA        |
| TMEM38B       | 85,10    | 2,01  | 0,930077 | 2,156669 | 0,031031 | 0,2327515 |
| SEPT7         | 1425,27  | 0,58  | 0,267522 | 2,15664  | 0,031034 | 0,2327515 |
| UPB1          | 23,82    | -1,85 | 0,856123 | -2,1565  | 0,031045 | 0,2327515 |
| AP001062.7    | 32,44    | 3,50  | 1,623029 | 2,156429 | 0,03105  | 0,2327515 |
| AC108142.1    | 5,01     | -2,01 | 0,930336 | -2,15595 | 0,031087 | 0,2329364 |
| CTD-2270N23.1 | 1,34     | -2,14 | 0,991378 | -2,15589 | 0,031092 | NA        |
| RP11-148K14.2 | 33,93    | -1,16 | 0,537884 | -2,15544 | 0,031127 | 0,2331421 |
| PPM1A         | 591,07   | 0,93  | 0,432032 | 2,155227 | 0,031144 | 0,2331731 |
| KIRREL3       | 1,87     | -2,80 | 1,30081  | -2,15501 | 0,031161 | NA        |
| MAFG-AS1      | 5,53     | -3,51 | 1,627278 | -2,15441 | 0,031208 | 0,2335568 |
| CYFIP2        | 382,20   | -1,60 | 0,74251  | -2,15425 | 0,03122  | 0,2335568 |
| ZBTB22        | 33,68    | -2,10 | 0,973586 | -2,15346 | 0,031282 | 0,2338209 |
| ZGRF1         | 98,08    | 1,72  | 0,798558 | 2,153376 | 0,031289 | 0,2338209 |
| NACA          | 3750,38  | 0,39  | 0,183144 | 2,153322 | 0,031293 | 0,2338209 |
| RP11-363P13.1 | 7,89     | -3,94 | 1,828915 | -2,15286 | 0,031329 | 0,2339952 |
| RN7SL461P     | 6,23     | 1,93  | 0,89673  | 2,151971 | 0,0314   | 0,2344262 |
| BTF3          | 5117,83  | 0,36  | 0,166859 | 2,151543 | 0,031433 | 0,2345841 |
| RP11-752L20.3 | 6,92     | -2,43 | 1,128067 | -2,1509  | 0,031484 | 0,2348607 |
| AP002387.1    | 6,97     | -2,06 | 0,958685 | -2,15069 | 0,031501 | 0,2348607 |
| RP13-198D9.5  | 13,08    | -1,39 | 0,646642 | -2,15059 | 0,031508 | 0,2348607 |
| PRKCZ         | 4,29     | 4,02  | 1,868139 | 2,149793 | 0,031572 | 0,2352382 |
| RP11-2E11.6   | 3,71     | -2,31 | 1,072759 | -2,14947 | 0,031597 | NA        |
| RBM15B        | 250,53   | 1,63  | 0,757221 | 2,149248 | 0,031615 | 0,2354155 |
| THEMIS2       | 1735,94  | 0,69  | 0,319177 | 2,149101 | 0,031626 | 0,2354155 |
| PRDX6         | 1295,16  | -0,62 | 0,28918  | -2,14901 | 0,031633 | 0,2354155 |
| AIDA          | 331,43   | -1,49 | 0,691297 | -2,14846 | 0,031677 | 0,2356465 |
| SEC31A        | 701,85   | -0,73 | 0,342057 | -2,14808 | 0,031707 | 0,2357269 |
| RP11-313F23.4 | 6,70     | 4,79  | 2,231284 | 2,148007 | 0,031713 | 0,2357269 |
| CPNE1         | 1256,85  | 0,52  | 0,241349 | 2,147478 | 0,031755 | 0,2359448 |
| ARHGEF39      | 21,15    | 1,62  | 0,752902 | 2,147129 | 0,031783 | 0,2360572 |
| RP3-329A5.4   | 39,67    | -2,07 | 0,966133 | -2,14662 | 0,031823 | 0,2362625 |
| UBE2L3        | 1195,81  | 0,49  | 0,229442 | 2,146219 | 0,031856 | 0,2363973 |
| RNF214        | 173,29   | -1,64 | 0,762838 | -2,14608 | 0,031867 | 0,2363973 |
| RP11-231C14.9 | 40,35    | 1,83  | 0,852777 | 2,145156 | 0,03194  | 0,2368354 |
| TRIM45        | 42,75    | 2,71  | 1,26336  | 2,145017 | 0,031951 | 0,2368354 |
| AC010761.8    | 28,57    | 1,67  | 0,779283 | 2,144089 | 0,032026 | 0,2372919 |
| SLC24A4       | 199,37   | -1,97 | 0,917526 | -2,14322 | 0,032096 | 0,237716  |
| KIF1C         | 144,23   | -1,46 | 0,681892 | -2,14185 | 0,032205 | 0,2384327 |
| RNF167        | 216,10   | 1,08  | 0,503522 | 2,140874 | 0,032284 | 0,2388411 |
| SMC3          | 690,62   | 1,13  | 0,526346 | 2,140849 | 0,032286 | 0,2388411 |
| MRPL35P3      | 6,70     | 4,79  | 2,23831  | 2,140161 | 0,032342 | 0,2391567 |
| RP11-252C24.3 | 24,98    | -1,43 | 0,669457 | -2,13974 | 0,032376 | 0,2392777 |
| AC093642.4    | 5,16     | 4,99  | 2,332961 | 2,13964  | 0,032384 | 0,2392777 |
| ZNF720        | 158,50   | 1,86  | 0,867859 | 2,139412 | 0,032402 | 0,2393195 |
| PSMA4         | 2969,74  | 0,65  | 0,303082 | 2,139138 | 0,032425 | 0,2393472 |
| AC005624.2    | 1,02     | -2,66 | 1,24195  | -2,13913 | 0,032426 | NA        |
| NIFK-AS1      | 35,68    | 2,20  | 1,02996  | 2,139047 | 0,032432 | 0,2393472 |
| AGMO          | 1,26     | -3,08 | 1,441556 | -2,13856 | 0,032471 | NA        |
| UBC           | 18682,96 | 0,41  | 0,192609 | 2,137483 | 0,032559 | 0,2401885 |

|                |          |       |          |          |          |           |
|----------------|----------|-------|----------|----------|----------|-----------|
| PGAM1          | 1917,76  | 0,54  | 0,250939 | 2,136853 | 0,03261  | 0,2404709 |
| VTI1B          | 622,01   | 1,08  | 0,504058 | 2,135704 | 0,032704 | 0,2408881 |
| TRPT1          | 144,36   | -1,66 | 0,775379 | -2,13559 | 0,032713 | 0,2408881 |
| RP11-496D24.2  | 12,17    | -1,79 | 0,837701 | -2,13526 | 0,03274  | 0,2408881 |
| RP11-53O19.1   | 64,38    | -1,43 | 0,66767  | -2,13525 | 0,03274  | 0,2408881 |
| RPL31P11       | 8,09     | 4,64  | 2,173403 | 2,135162 | 0,032748 | 0,2408881 |
| CTB-131B5.4    | 57,57    | -1,18 | 0,554595 | -2,13509 | 0,032753 | 0,2408881 |
| RP11-13G14.4   | 5,60     | -4,00 | 1,871185 | -2,13505 | 0,032757 | 0,2408881 |
| RP11-44N22.3   | 43,27    | -1,11 | 0,520128 | -2,13486 | 0,032772 | 0,2409049 |
| FAM162A        | 476,65   | 1,03  | 0,484477 | 2,13453  | 0,032799 | 0,2409137 |
| SF3A1          | 579,66   | 1,47  | 0,687603 | 2,134529 | 0,032799 | 0,2409137 |
| ANO9           | 1,12     | -3,70 | 1,733708 | -2,13452 | 0,0328   | NA        |
| CNBP           | 4188,06  | 0,63  | 0,297346 | 2,134016 | 0,032841 | 0,2410018 |
| RCL1           | 71,44    | 1,62  | 0,759835 | 2,133918 | 0,03285  | 0,2410018 |
| AKR1C1         | 20,12    | -1,70 | 0,797667 | -2,13373 | 0,032865 | 0,2410018 |
| AC096655.2     | 208,17   | -0,62 | 0,292413 | -2,1336  | 0,032875 | 0,2410018 |
| RP11-666F17.1  | 37,79    | 1,45  | 0,679555 | 2,133567 | 0,032878 | 0,2410018 |
| RP11-44F14.7   | 11,40    | -1,54 | 0,720444 | -2,13343 | 0,032889 | 0,2410018 |
| INTS1          | 604,08   | -1,26 | 0,591945 | -2,13285 | 0,032937 | 0,2411385 |
| FAM105A        | 1154,35  | 1,06  | 0,498048 | 2,132735 | 0,032946 | 0,2411385 |
| RN7SL605P      | 4,96     | -2,49 | 1,166523 | -2,13252 | 0,032964 | 0,2411385 |
| CFAP221        | 48,27    | -1,56 | 0,733412 | -2,13249 | 0,032966 | 0,2411385 |
| FRY            | 687,81   | -1,48 | 0,694109 | -2,13242 | 0,032973 | 0,2411385 |
| AP001340.2     | 0,84     | -2,67 | 1,254234 | -2,13184 | 0,03302  | NA        |
| YAP1           | 2,60     | -3,87 | 1,817087 | -2,1318  | 0,033024 | NA        |
| AC093627.9     | 6,90     | -3,59 | 1,68243  | -2,13143 | 0,033054 | 0,2416237 |
| RP5-1142A6.8   | 6,53     | 2,04  | 0,95731  | 2,131088 | 0,033082 | 0,2416237 |
| RP11-706O15.7  | 19,36    | -2,36 | 1,10716  | -2,13103 | 0,033086 | 0,2416237 |
| PSAP           | 14473,90 | -0,34 | 0,158969 | -2,13093 | 0,033095 | 0,2416237 |
| SNHG3          | 486,27   | -1,16 | 0,54235  | -2,13082 | 0,033104 | 0,2416237 |
| RP13-126P21.1  | 3,39     | 1,88  | 0,883224 | 2,130672 | 0,033116 | NA        |
| RP11-1277A3.2  | 8,18     | 3,90  | 1,830805 | 2,130501 | 0,03313  | 0,241721  |
| TRAPPC6B       | 234,40   | 1,40  | 0,655311 | 2,130299 | 0,033147 | 0,2417477 |
| KIF11          | 31,73    | 2,10  | 0,987988 | 2,13001  | 0,033171 | 0,2418268 |
| C6orf48        | 1010,94  | 0,63  | 0,29557  | 2,129822 | 0,033186 | 0,2418454 |
| SEMA3C         | 74,53    | 2,51  | 1,179077 | 2,129373 | 0,033223 | 0,2419331 |
| NDRG4          | 10,89    | 2,84  | 1,331911 | 2,129362 | 0,033224 | 0,2419331 |
| RP11-396B14.2  | 8,34     | -4,46 | 2,094297 | -2,12865 | 0,033283 | 0,2422646 |
| RP11-347C12.10 | 6,55     | 5,34  | 2,509051 | 2,127848 | 0,03335  | 0,242656  |
| RP11-241F15.2  | 8,48     | -4,75 | 2,23347  | -2,12743 | 0,033384 | 0,2426637 |
| SPATA5L1       | 103,40   | 1,46  | 0,685959 | 2,127359 | 0,03339  | 0,2426637 |
| USP8           | 1311,08  | -1,14 | 0,534431 | -2,12735 | 0,033391 | 0,2426637 |
| RP13-580B18.4  | 12,43    | 3,16  | 1,484996 | 2,127206 | 0,033403 | 0,2426637 |
| RP13-631K18.3  | 12,16    | -1,35 | 0,635917 | -2,12696 | 0,033424 | 0,2427183 |
| DHRS7B         | 142,93   | -1,89 | 0,88737  | -2,12655 | 0,033458 | 0,2428729 |
| ZSCAN26        | 188,23   | -3,00 | 1,40993  | -2,12607 | 0,033498 | 0,2430402 |
| TMEM40         | 36,68    | -2,25 | 1,058642 | -2,12539 | 0,033554 | 0,2430402 |
| RP11-861A13.4  | 29,52    | 1,83  | 0,859462 | 2,125178 | 0,033572 | 0,2430402 |
| ZNF410         | 269,00   | 1,34  | 0,629709 | 2,125154 | 0,033574 | 0,2430402 |
| AL022393.9     | 4,64     | -6,40 | 3,009594 | -2,12508 | 0,03358  | 0,2430402 |

|                |         |       |          |          |          |           |
|----------------|---------|-------|----------|----------|----------|-----------|
| BCKDHA         | 416,52  | -0,68 | 0,321809 | -2,12504 | 0,033583 | 0,2430402 |
| TEDDM1         | 5,17    | -3,15 | 1,483627 | -2,12493 | 0,033593 | 0,2430402 |
| NRP1           | 94,24   | -1,60 | 0,754498 | -2,12488 | 0,033596 | 0,2430402 |
| AC005301.5     | 220,33  | -1,27 | 0,596163 | -2,12486 | 0,033598 | 0,2430402 |
| AC139100.4     | 1,38    | -4,04 | 1,901127 | -2,12416 | 0,033657 | NA        |
| FGFR1OP        | 494,38  | 1,58  | 0,741899 | 2,123996 | 0,03367  | 0,2432589 |
| RNF130         | 3399,36 | 0,60  | 0,281042 | 2,123706 | 0,033695 | 0,2432589 |
| KLF12          | 307,14  | -1,55 | 0,728956 | -2,12361 | 0,033703 | 0,2432589 |
| APCDD1         | 1,01    | -2,80 | 1,319256 | -2,12351 | 0,033711 | NA        |
| ZNF346         | 101,45  | 1,95  | 0,920408 | 2,123466 | 0,033715 | 0,2432589 |
| RPL36          | 2716,74 | -0,58 | 0,27107  | -2,12343 | 0,033718 | 0,2432589 |
| ANKRD12        | 1312,65 | 0,69  | 0,32695  | 2,123117 | 0,033744 | 0,2432589 |
| CTC-327F10.5   | 5,14    | 4,99  | 2,352647 | 2,123065 | 0,033748 | 0,2432589 |
| TBX21          | 17,91   | -4,84 | 2,278439 | -2,12306 | 0,033749 | 0,2432589 |
| C20orf197      | 64,42   | 2,53  | 1,191964 | 2,123056 | 0,033749 | 0,2432589 |
| POLR1A         | 252,75  | 1,81  | 0,853066 | 2,122931 | 0,03376  | 0,2432589 |
| DXO            | 83,14   | 1,92  | 0,905851 | 2,122617 | 0,033786 | 0,2432589 |
| AC005017.1     | 6,79    | 2,09  | 0,982577 | 2,122563 | 0,03379  | 0,2432589 |
| HERPUD1        | 3471,62 | 0,72  | 0,341293 | 2,122369 | 0,033807 | 0,2432589 |
| AC093391.2     | 54,47   | -1,24 | 0,582683 | -2,12231 | 0,033812 | 0,2432589 |
| MYO1G          | 815,37  | -0,84 | 0,396498 | -2,12137 | 0,033891 | 0,2437097 |
| LZIC           | 216,86  | -1,53 | 0,722559 | -2,1211  | 0,033913 | 0,2437097 |
| RFNG           | 145,20  | -1,54 | 0,728314 | -2,1211  | 0,033914 | 0,2437097 |
| PM20D2         | 121,83  | -1,24 | 0,582732 | -2,12083 | 0,033936 | 0,2437413 |
| RP11-35J1.2    | 3,33    | 3,15  | 1,483586 | 2,120778 | 0,033941 | NA        |
| ZFP36          | 4735,19 | 0,54  | 0,252777 | 2,120508 | 0,033963 | 0,2437413 |
| HEATR5A        | 265,44  | 1,39  | 0,654047 | 2,120456 | 0,033968 | 0,2437413 |
| RP11-420L9.4   | 6,37    | -1,72 | 0,811264 | -2,12042 | 0,033971 | 0,2437413 |
| SGTB           | 165,04  | -1,63 | 0,76704  | -2,12027 | 0,033984 | 0,2437413 |
| CTD-2562J15.4  | 1,90    | -2,66 | 1,256909 | -2,11972 | 0,03403  | NA        |
| ACTR3B         | 41,48   | -1,99 | 0,937659 | -2,11971 | 0,034031 | 0,2437858 |
| CPD            | 490,49  | -1,51 | 0,711194 | -2,11968 | 0,034033 | 0,2437858 |
| VDR            | 247,93  | 1,61  | 0,760381 | 2,119632 | 0,034037 | 0,2437858 |
| RP11-367H5.5   | 4,52    | 4,25  | 2,006137 | 2,119571 | 0,034042 | 0,2437858 |
| STX4           | 319,53  | -1,03 | 0,48481  | -2,11932 | 0,034064 | 0,2438367 |
| RP4-669P10.19  | 8,05    | 5,05  | 2,381631 | 2,119177 | 0,034076 | 0,2438367 |
| RP11-429J17.7  | 8,73    | -1,68 | 0,794392 | -2,11851 | 0,034132 | 0,2441102 |
| RP11-510C10.4  | 5,52    | -3,56 | 1,681425 | -2,11826 | 0,034153 | 0,2441102 |
| C2-AS1         | 5,76    | 3,46  | 1,631704 | 2,117993 | 0,034176 | 0,2441102 |
| RP4-548D19.4   | 8,52    | -4,62 | 2,180349 | -2,11788 | 0,034186 | 0,2441102 |
| RP11-464F9.21  | 10,49   | -5,61 | 2,647559 | -2,11787 | 0,034186 | 0,2441102 |
| RP11-730A19.5  | 6,05    | -2,25 | 1,062193 | -2,11779 | 0,034192 | 0,2441102 |
| CIB1           | 1866,88 | 0,51  | 0,242327 | 2,117523 | 0,034215 | 0,2441192 |
| AIMP2          | 289,28  | 1,74  | 0,81939  | 2,11745  | 0,034222 | 0,2441192 |
| HSF4           | 45,54   | 2,97  | 1,402029 | 2,117278 | 0,034236 | 0,2441192 |
| RP11-281A20.3  | 16,69   | -2,18 | 1,029133 | -2,11716 | 0,034246 | 0,2441192 |
| RP11-1036E20.9 | 12,86   | 1,86  | 0,876331 | 2,116846 | 0,034273 | 0,2441263 |
| SRM            | 307,38  | -1,08 | 0,50935  | -2,11684 | 0,034273 | 0,2441263 |
| EOMES          | 49,23   | -4,57 | 2,15866  | -2,11642 | 0,034309 | 0,2442837 |
| SMURF1         | 156,92  | 1,78  | 0,84141  | 2,116183 | 0,034329 | 0,2443366 |

|               |         |       |          |          |          |           |
|---------------|---------|-------|----------|----------|----------|-----------|
| SUMO1         | 963,53  | 0,55  | 0,261241 | 2,115756 | 0,034366 | 0,2443623 |
| RBMS1         | 940,45  | -0,90 | 0,426435 | -2,1157  | 0,03437  | 0,2443623 |
| RP11-562A8.4  | 12,58   | -3,90 | 1,842528 | -2,11561 | 0,034378 | 0,2443623 |
| INSL4         | 11,83   | -2,75 | 1,30052  | -2,11525 | 0,034409 | 0,2443623 |
| ZDHHC24       | 211,07  | 1,27  | 0,600794 | 2,115244 | 0,034409 | 0,2443623 |
| CTB-41I6.2    | 4,04    | 4,63  | 2,190534 | 2,115148 | 0,034417 | 0,2443623 |
| GSN           | 2459,58 | 0,56  | 0,263591 | 2,11506  | 0,034425 | 0,2443623 |
| AC109642.1    | 25,35   | -1,20 | 0,565186 | -2,11458 | 0,034466 | 0,2445588 |
| RP4-647J21.1  | 99,15   | 2,00  | 0,944575 | 2,114425 | 0,034479 | 0,2445604 |
| RPL9P32       | 1,38    | -3,05 | 1,44372  | -2,11397 | 0,034518 | NA        |
| RP11-431H16.2 | 4,86    | 4,34  | 2,051236 | 2,113754 | 0,034536 | 0,2448733 |
| NUP188        | 250,35  | 1,65  | 0,780822 | 2,113084 | 0,034594 | 0,2451863 |
| SLC30A8       | 4,82    | -2,26 | 1,068508 | -2,11138 | 0,03474  | 0,246127  |
| HNMT          | 489,35  | -1,04 | 0,494711 | -2,11109 | 0,034765 | 0,2462127 |
| CAP1          | 4187,67 | 0,50  | 0,235872 | 2,110445 | 0,03482  | 0,2464728 |
| CCR2          | 786,81  | -1,33 | 0,630121 | -2,11035 | 0,034828 | 0,2464728 |
| RP3-394A18.1  | 529,70  | -0,73 | 0,344303 | -2,10976 | 0,034879 | 0,2465834 |
| ZBTB8OS       | 169,50  | -0,95 | 0,449121 | -2,10971 | 0,034883 | 0,2465834 |
| C10orf88      | 55,06   | 1,91  | 0,906158 | 2,109708 | 0,034883 | 0,2465834 |
| RP11-10E18.4  | 5,90    | 4,02  | 1,908012 | 2,109478 | 0,034903 | 0,2466302 |
| CELF2         | 3089,09 | 0,63  | 0,299383 | 2,109127 | 0,034934 | 0,2467039 |
| PF4           | 33,78   | -3,59 | 1,701033 | -2,10905 | 0,03494  | 0,2467039 |
| KDM3B         | 479,78  | 0,99  | 0,470297 | 2,108584 | 0,034981 | 0,2468942 |
| OR4F17        | 20,44   | -0,88 | 0,419408 | -2,10832 | 0,035004 | 0,2469632 |
| WARS2         | 235,74  | 1,91  | 0,907305 | 2,107855 | 0,035044 | 0,2471513 |
| KB-1980E6.2   | 12,45   | 1,79  | 0,849787 | 2,107183 | 0,035102 | 0,2474645 |
| RP4-544H6.2   | 4,99    | -7,12 | 3,377292 | -2,10703 | 0,035115 | 0,2474645 |
| SNX15         | 82,00   | 1,29  | 0,613961 | 2,106653 | 0,035148 | 0,2476039 |
| RP11-337A23.6 | 5,03    | -7,13 | 3,383772 | -2,10644 | 0,035166 | 0,2476399 |
| YIF1B         | 1238,20 | 0,60  | 0,286638 | 2,106166 | 0,03519  | 0,2477141 |
| PPID          | 127,79  | 1,53  | 0,726188 | 2,106003 | 0,035204 | 0,2477201 |
| PRR11         | 151,54  | 1,09  | 0,518152 | 2,105738 | 0,035227 | 0,2477295 |
| ST7L          | 110,68  | 1,40  | 0,662794 | 2,105681 | 0,035232 | 0,2477295 |
| RP11-874J12.2 | 55,42   | -2,85 | 1,354131 | -2,10537 | 0,035259 | 0,2477572 |
| BCAS1         | 11,96   | -2,26 | 1,074058 | -2,10533 | 0,035263 | 0,2477572 |
| OCIAD2        | 46,13   | 1,84  | 0,872275 | 2,104729 | 0,035315 | 0,2480308 |
| RP11-730E6.3  | 10,18   | -5,52 | 2,621379 | -2,10398 | 0,03538  | 0,2483965 |
| AP000477.3    | 6,72    | -2,43 | 1,157245 | -2,10338 | 0,035433 | 0,24867   |
| SLC39A1       | 212,18  | 1,73  | 0,822697 | 2,101098 | 0,035632 | 0,2499773 |
| THOP1         | 74,09   | -2,54 | 1,20692  | -2,10064 | 0,035673 | 0,250134  |
| RP11-78J21.2  | 11,05   | 3,34  | 1,591274 | 2,100313 | 0,035701 | 0,250134  |
| PRDM2         | 604,92  | -1,12 | 0,534857 | -2,1003  | 0,035702 | 0,250134  |
| TRMT12        | 72,61   | -2,70 | 1,286413 | -2,10023 | 0,035708 | 0,250134  |
| PABPC4L       | 2,74    | -6,25 | 2,977255 | -2,09994 | 0,035734 | NA        |
| TENM1         | 20,04   | -5,01 | 2,384406 | -2,09971 | 0,035755 | 0,2503625 |
| SPATS2        | 170,56  | 1,19  | 0,569206 | 2,099163 | 0,035803 | 0,2506044 |
| ABR           | 604,09  | -1,07 | 0,508518 | -2,09876 | 0,035838 | 0,2507613 |
| CTD-2651B20.1 | 3,00    | -2,47 | 1,178    | -2,09858 | 0,035854 | NA        |
| ACVR2B        | 23,06   | -1,70 | 0,809671 | -2,0981  | 0,035896 | 0,2510697 |
| RP11-445N18.7 | 6,50    | -1,40 | 0,668895 | -2,0975  | 0,035949 | 0,2512557 |



|                |         |       |          |          |          |           |
|----------------|---------|-------|----------|----------|----------|-----------|
| RPL32P1        | 200,49  | 1,15  | 0,548751 | 2,097497 | 0,03595  | 0,2512557 |
| CTD-2349P21.3  | 36,71   | -1,87 | 0,892325 | -2,09727 | 0,03597  | 0,2513005 |
| WDR5B          | 37,13   | -1,93 | 0,918621 | -2,09663 | 0,036026 | 0,2515333 |
| CCR4           | 11,55   | -1,47 | 0,701715 | -2,09649 | 0,036039 | 0,2515333 |
| NR4A2          | 3280,13 | 0,77  | 0,369358 | 2,096437 | 0,036043 | 0,2515333 |
| RP11-613D13.5  | 7,56    | 4,49  | 2,141269 | 2,09499  | 0,036172 | 0,252254  |
| COA7           | 168,51  | 1,59  | 0,760212 | 2,094968 | 0,036174 | 0,252254  |
| RP11-56B16.2   | 16,69   | 2,84  | 1,354858 | 2,093984 | 0,036261 | 0,2527703 |
| CHUK           | 191,52  | 1,71  | 0,814655 | 2,0936   | 0,036296 | 0,252914  |
| AF127577.11    | 48,45   | 2,16  | 1,029923 | 2,093157 | 0,036335 | 0,2530943 |
| ALDH18A1       | 16,43   | 2,56  | 1,221972 | 2,092282 | 0,036413 | 0,2535439 |
| KIAA1614       | 13,92   | 5,41  | 2,58833  | 2,091679 | 0,036467 | 0,2538243 |
| IL2RG          | 1072,67 | 0,97  | 0,464648 | 2,090483 | 0,036574 | 0,2543505 |
| RP11-196G18.23 | 10,16   | -3,71 | 1,775672 | -2,09039 | 0,036582 | 0,2543505 |
| ZDHHC22        | 4,73    | -2,83 | 1,352105 | -2,09023 | 0,036597 | 0,2543505 |
| RP11-258C19.5  | 151,53  | -1,17 | 0,55868  | -2,09004 | 0,036615 | 0,2543505 |
| RP3-404F18.5   | 13,38   | 2,90  | 1,389676 | 2,089973 | 0,03662  | 0,2543505 |
| RP11-339B9.1   | 1,07    | -2,02 | 0,966134 | -2,0898  | 0,036636 | NA        |
| AC098820.3     | 37,13   | 1,80  | 0,859992 | 2,089741 | 0,036641 | 0,2543505 |
| TINCR          | 31,06   | -2,25 | 1,078067 | -2,08962 | 0,036652 | 0,2543505 |
| RP11-276H1.2   | 7,19    | 5,47  | 2,616351 | 2,089536 | 0,036659 | 0,2543505 |
| FRG1HP         | 188,94  | -1,16 | 0,557536 | -2,08934 | 0,036677 | 0,2543505 |
| FAM221B        | 12,20   | 2,18  | 1,041815 | 2,089067 | 0,036702 | 0,2543505 |
| C1orf127       | 32,95   | -2,06 | 0,986906 | -2,08902 | 0,036706 | 0,2543505 |
| TUBE1          | 63,40   | -1,47 | 0,703274 | -2,08892 | 0,036715 | 0,2543505 |
| DSP            | 11,78   | -3,64 | 1,744315 | -2,08886 | 0,036721 | 0,2543505 |
| USP11          | 81,81   | -1,64 | 0,785517 | -2,0887  | 0,036735 | 0,2543549 |
| RP11-325F22.4  | 252,13  | -0,75 | 0,359264 | -2,088   | 0,036798 | 0,254625  |
| PSMA3          | 1214,64 | 0,57  | 0,274376 | 2,087963 | 0,036801 | 0,254625  |
| CTD-2366F13.1  | 37,43   | -2,70 | 1,293878 | -2,08741 | 0,036851 | 0,2548722 |
| RP11-88H9.2    | 27,76   | -1,28 | 0,614874 | -2,08718 | 0,036872 | 0,2549271 |
| GPR89B         | 62,84   | -1,87 | 0,895228 | -2,08652 | 0,036931 | 0,255239  |
| AC006196.1     | 4,89    | -7,09 | 3,39782  | -2,08591 | 0,036987 | 0,2553946 |
| RNU5F-1        | 45,79   | -1,33 | 0,638723 | -2,08562 | 0,037013 | 0,2553946 |
| RP11-33B1.2    | 36,04   | -2,13 | 1,019742 | -2,08561 | 0,037014 | 0,2553946 |
| RNU4ATAC       | 56,20   | -1,05 | 0,504644 | -2,08556 | 0,037018 | 0,2553946 |
| RP11-116D17.4  | 29,66   | -1,20 | 0,577318 | -2,08552 | 0,037022 | 0,2553946 |
| RP11-264B17.3  | 11,63   | 4,18  | 2,004063 | 2,084028 | 0,037158 | 0,256144  |
| SENP6          | 737,31  | 0,77  | 0,369254 | 2,084019 | 0,037158 | 0,256144  |
| CARD16         | 1022,91 | -0,46 | 0,220633 | -2,08364 | 0,037193 | 0,2561712 |
| USP1           | 371,50  | 1,12  | 0,53803  | 2,083628 | 0,037194 | 0,2561712 |
| CTD-2301A4.3   | 16,15   | 1,96  | 0,939356 | 2,083474 | 0,037208 | 0,2561712 |
| SHROOM1        | 12,81   | -2,83 | 1,358892 | -2,08329 | 0,037225 | 0,2561712 |
| PPP5C          | 131,35  | 1,50  | 0,721058 | 2,082948 | 0,037256 | 0,2561712 |
| CTD-3105H18.18 | 14,19   | 2,33  | 1,120287 | 2,082936 | 0,037257 | 0,2561712 |
| LINC00337      | 9,41    | -1,13 | 0,544037 | -2,08292 | 0,037259 | 0,2561712 |
| CPSF3          | 464,04  | 1,03  | 0,495152 | 2,082743 | 0,037275 | 0,2561859 |
| RP11-63M22.2   | 111,41  | 1,85  | 0,889544 | 2,082545 | 0,037293 | 0,2562153 |
| RP4-756H11.3   | 49,59   | -0,81 | 0,387414 | -2,08218 | 0,037326 | 0,2563501 |
| ZNF432         | 86,07   | 2,02  | 0,969732 | 2,081729 | 0,037367 | 0,2565258 |

|                |         |       |          |          |          |           |
|----------------|---------|-------|----------|----------|----------|-----------|
| PPP1R37        | 20,89   | -1,54 | 0,740941 | -2,08137 | 0,0374   | 0,2565258 |
| EPGN           | 9,77    | 4,19  | 2,011378 | 2,081321 | 0,037404 | 0,2565258 |
| PKN1           | 700,31  | -0,62 | 0,298658 | -2,0813  | 0,037407 | 0,2565258 |
| CTD-2058B24.2  | 4,48    | -2,95 | 1,419773 | -2,08043 | 0,037486 | 0,2569747 |
| RP11-151A6.6   | 35,40   | -1,72 | 0,82634  | -2,07984 | 0,03754  | 0,2572493 |
| DENND1B        | 635,05  | 1,16  | 0,556324 | 2,079545 | 0,037567 | 0,2572824 |
| RP11-260O18.1  | 5,67    | -3,01 | 1,446561 | -2,07949 | 0,037572 | 0,2572824 |
| TADA1          | 155,18  | 1,62  | 0,778827 | 2,079048 | 0,037613 | 0,2574649 |
| AC005037.3     | 3,41    | 4,27  | 2,054047 | 2,078911 | 0,037626 | NA        |
| PAM            | 28,26   | -2,27 | 1,091616 | -2,07868 | 0,037647 | 0,2576033 |
| RP11-151D14.1  | 6,51    | 2,63  | 1,26614  | 2,078455 | 0,037667 | 0,2576483 |
| RNF175         | 108,93  | -1,46 | 0,701609 | -2,0776  | 0,037747 | 0,2580708 |
| CXCL8          | 1595,18 | 0,94  | 0,452061 | 2,077483 | 0,037757 | 0,2580708 |
| DDR1           | 7,85    | 4,87  | 2,344391 | 2,07721  | 0,037782 | 0,2581479 |
| RP11-406O16.1  | 1,37    | -4,87 | 2,346567 | -2,07714 | 0,037788 | NA        |
| RP11-169K16.9  | 147,35  | -1,22 | 0,589053 | -2,07684 | 0,037817 | 0,2582688 |
| TTC39C         | 467,96  | -1,22 | 0,588616 | -2,07672 | 0,037828 | 0,2582688 |
| RP11-378I6.1   | 11,14   | 2,35  | 1,131376 | 2,076331 | 0,037863 | 0,2584112 |
| CBLL1          | 174,65  | 1,49  | 0,717801 | 2,076192 | 0,037876 | 0,2584112 |
| FAM76A         | 342,22  | -0,84 | 0,406626 | -2,07587 | 0,037906 | 0,2585198 |
| IFT81          | 82,58   | 1,53  | 0,736    | 2,075681 | 0,037923 | 0,2585422 |
| FXD5           | 3068,93 | 0,31  | 0,151207 | 2,075456 | 0,037944 | 0,2585422 |
| RP11-245J9.5   | 21,09   | -1,58 | 0,761119 | -2,07538 | 0,037951 | 0,2585422 |
| ERGIC3         | 1243,48 | 0,62  | 0,29946  | 2,075233 | 0,037965 | 0,2585422 |
| ALDH3A2        | 418,46  | 1,31  | 0,632989 | 2,075072 | 0,03798  | 0,2585492 |
| RP11-690C23.2  | 4,87    | 4,91  | 2,367012 | 2,07478  | 0,038007 | 0,2586284 |
| RP11-705O1.8   | 27,59   | -2,05 | 0,98872  | -2,07454 | 0,038029 | 0,2586284 |
| PAPD7          | 317,39  | 1,40  | 0,675888 | 2,074495 | 0,038033 | 0,2586284 |
| RSAD1          | 193,62  | 1,90  | 0,916906 | 2,074347 | 0,038047 | 0,2586284 |
| SMPDL3B        | 6,01    | -3,21 | 1,54996  | -2,07365 | 0,038112 | 0,2589188 |
| HNRNPA1        | 7524,54 | 0,41  | 0,197363 | 2,073587 | 0,038118 | 0,2589188 |
| BCL11B         | 65,35   | -3,59 | 1,732356 | -2,07299 | 0,038173 | 0,259201  |
| UBR3           | 410,99  | 1,01  | 0,489675 | 2,072511 | 0,038218 | 0,2594097 |
| GPR155         | 340,74  | 1,32  | 0,63739  | 2,071899 | 0,038275 | 0,2595402 |
| RP11-361M10.5  | 43,04   | 2,50  | 1,205648 | 2,071898 | 0,038275 | 0,2595402 |
| INIP           | 297,88  | -1,30 | 0,627077 | -2,07151 | 0,038311 | 0,2595402 |
| KCNAB3         | 34,32   | -1,90 | 0,916751 | -2,07148 | 0,038314 | 0,2595402 |
| CTD-2135D7.5   | 2,54    | 3,95  | 1,904645 | 2,071461 | 0,038316 | NA        |
| SLK            | 646,11  | 1,04  | 0,503128 | 2,071445 | 0,038317 | 0,2595402 |
| RP11-489O18.1  | 16,55   | 1,78  | 0,860275 | 2,071408 | 0,038321 | 0,2595402 |
| CTD-2579N5.1   | 0,71    | -3,60 | 1,738064 | -2,07062 | 0,038394 | NA        |
| RPL9P7         | 8,23    | 1,48  | 0,715996 | 2,070489 | 0,038407 | 0,2599728 |
| RPL13AP5       | 10,47   | -0,85 | 0,411048 | -2,07043 | 0,038413 | 0,2599728 |
| SPAG8          | 28,94   | -4,37 | 2,11011  | -2,0698  | 0,038471 | 0,2601205 |
| BCL2L11        | 189,46  | 1,46  | 0,703857 | 2,069765 | 0,038474 | 0,2601205 |
| RP11-406A9.2   | 5,71    | -6,59 | 3,184733 | -2,06967 | 0,038483 | 0,2601205 |
| KLLN           | 50,94   | -0,73 | 0,353534 | -2,0696  | 0,03849  | 0,2601205 |
| LIG1           | 25,22   | 3,25  | 1,570613 | 2,069179 | 0,038529 | 0,2602896 |
| CTD-2540B15.12 | 0,65    | -3,28 | 1,584401 | -2,06894 | 0,038551 | NA        |
| GATA3          | 1,16    | -3,80 | 1,838004 | -2,06847 | 0,038596 | NA        |

|                |          |       |          |          |          |           |
|----------------|----------|-------|----------|----------|----------|-----------|
| RP11-395I14.2  | 8,72     | -1,95 | 0,944442 | -2,06833 | 0,038609 | 0,2605785 |
| ZNF324B        | 10,37    | -2,80 | 1,355917 | -2,06831 | 0,038611 | 0,2605785 |
| RP11-118B23.6  | 73,93    | 1,54  | 0,742477 | 2,068276 | 0,038614 | 0,2605785 |
| FRG1JP         | 2,88     | -2,58 | 1,248382 | -2,06803 | 0,038637 | NA        |
| MTMR12         | 325,94   | -1,20 | 0,578772 | -2,06748 | 0,038689 | 0,2609898 |
| RP11-724N1.1   | 10,77    | -0,99 | 0,481033 | -2,06695 | 0,038739 | 0,2610016 |
| HS3ST2         | 3,57     | -2,65 | 1,2837   | -2,06693 | 0,038741 | NA        |
| C1orf167       | 4,56     | 4,48  | 2,166795 | 2,066873 | 0,038746 | 0,2610016 |
| TDRP           | 6,63     | 5,41  | 2,615085 | 2,066866 | 0,038747 | 0,2610016 |
| RP11-350J20.5  | 55,77    | -1,22 | 0,592056 | -2,06686 | 0,038748 | 0,2610016 |
| PDZD11         | 185,42   | 1,81  | 0,873948 | 2,066716 | 0,038761 | 0,2610016 |
| RNA5SP282      | 8,01     | 2,97  | 1,4385   | 2,066494 | 0,038782 | 0,261048  |
| SWT1           | 96,30    | 2,49  | 1,203661 | 2,065815 | 0,038846 | 0,2613371 |
| BTG1           | 2813,94  | -0,42 | 0,201291 | -2,06568 | 0,038858 | 0,2613371 |
| RP11-707G18.1  | 84,77    | -1,04 | 0,503736 | -2,06555 | 0,038871 | 0,2613371 |
| RP11-146D12.2  | 4,02     | 4,10  | 1,98518  | 2,065444 | 0,038881 | 0,2613371 |
| GCNT2          | 262,18   | -1,29 | 0,626979 | -2,06507 | 0,038916 | 0,261478  |
| ACSM2A         | 56,94    | -1,19 | 0,577379 | -2,06488 | 0,038934 | 0,2615069 |
| RNU5E-4P       | 6,47     | 2,41  | 1,166913 | 2,064645 | 0,038957 | 0,2615616 |
| CALM2          | 10097,60 | 0,53  | 0,256718 | 2,063279 | 0,039086 | 0,2623364 |
| FGD6           | 110,35   | -1,64 | 0,79498  | -2,06302 | 0,039111 | 0,2624092 |
| AF228730.14    | 15,69    | 2,03  | 0,986118 | 2,062408 | 0,039169 | 0,262703  |
| RP5-1042K10.14 | 4,86     | 4,91  | 2,383537 | 2,061651 | 0,039241 | 0,2629038 |
| RNF113A        | 255,00   | 1,32  | 0,640458 | 2,061532 | 0,039252 | 0,2629038 |
| RP11-117B7.1   | 30,47    | -3,67 | 1,781411 | -2,0615  | 0,039255 | 0,2629038 |
| CPQ            | 366,86   | 1,11  | 0,537644 | 2,0615   | 0,039255 | 0,2629038 |
| RHOXF1-AS1     | 9,14     | 4,01  | 1,943096 | 2,061322 | 0,039272 | 0,2629226 |
| MTCH2          | 851,21   | 0,90  | 0,437213 | 2,060692 | 0,039332 | 0,2632075 |
| SNORD11B       | 3,16     | 4,29  | 2,080333 | 2,060691 | 0,039333 | NA        |
| FOXP1          | 1037,99  | -0,76 | 0,36981  | -2,06058 | 0,039343 | 0,2632075 |
| RAB42          | 4,69     | -2,36 | 1,145712 | -2,06025 | 0,039375 | 0,263326  |
| RP11-178F10.3  | 9,22     | -1,93 | 0,935023 | -2,05985 | 0,039413 | 0,2633863 |
| FCGR2B         | 1989,84  | 1,34  | 0,650386 | 2,059814 | 0,039416 | 0,2633863 |
| HERC2P8        | 19,55    | -1,36 | 0,658743 | -2,05971 | 0,039427 | 0,2633863 |
| CLNK           | 20,70    | -1,33 | 0,644676 | -2,05934 | 0,039462 | 0,2635287 |
| PALD1          | 37,04    | 3,09  | 1,498381 | 2,059039 | 0,039491 | 0,2635373 |
| LLNLF-187D8.1  | 8,55     | -2,14 | 1,041453 | -2,05903 | 0,039492 | 0,2635373 |
| AMOTL1         | 27,28    | 2,90  | 1,410793 | 2,058562 | 0,039536 | 0,2637401 |
| OBFC1          | 313,46   | 1,54  | 0,746142 | 2,057983 | 0,039592 | 0,2639669 |
| BRF2           | 76,62    | 2,91  | 1,41567  | 2,057912 | 0,039599 | 0,2639669 |
| CARM1L         | 11,49    | -1,63 | 0,793206 | -2,05716 | 0,039671 | 0,2643525 |
| EIF2S3         | 2883,65  | 0,52  | 0,25242  | 2,056639 | 0,039721 | 0,2645588 |
| NOL11          | 279,85   | 1,47  | 0,715072 | 2,056545 | 0,03973  | 0,2645588 |
| PPM1F          | 701,31   | 0,68  | 0,332636 | 2,055845 | 0,039797 | 0,2647944 |
| KLF6           | 8722,87  | -0,45 | 0,218005 | -2,05582 | 0,0398   | 0,2647944 |
| RP11-832A4.5   | 51,87    | 2,69  | 1,307746 | 2,055734 | 0,039808 | 0,2647944 |
| RN7SL823P      | 9,85     | -4,49 | 2,184718 | -2,05551 | 0,03983  | 0,2648127 |
| FAXDC2         | 30,37    | -1,89 | 0,91786  | -2,05537 | 0,039843 | 0,2648127 |
| RP11-322M19.1  | 142,32   | 1,23  | 0,597401 | 2,055198 | 0,03986  | 0,2648127 |
| OPA3           | 227,96   | 1,10  | 0,537615 | 2,054971 | 0,039882 | 0,2648127 |

|               |         |       |          |          |          |           |
|---------------|---------|-------|----------|----------|----------|-----------|
| DNASE1        | 107,04  | -1,46 | 0,708299 | -2,05497 | 0,039882 | 0,2648127 |
| UGT1A1        | 35,31   | -1,41 | 0,687656 | -2,05434 | 0,039942 | 0,2651196 |
| CH17-385C13.2 | 63,54   | -1,52 | 0,73988  | -2,05381 | 0,039994 | 0,2652821 |
| C10orf25      | 11,34   | 2,71  | 1,318915 | 2,053683 | 0,040006 | 0,2652821 |
| LINC00526     | 7,30    | 4,91  | 2,390241 | 2,053648 | 0,04001  | 0,2652821 |
| UBE2V1        | 1104,30 | 0,66  | 0,322108 | 2,053223 | 0,040051 | 0,2654609 |
| MLLT11        | 40,19   | 2,04  | 0,992625 | 2,053012 | 0,040071 | 0,2655014 |
| FAM92B        | 9,99    | -2,31 | 1,123607 | -2,05266 | 0,040106 | 0,2656349 |
| HMG1          | 1630,84 | 0,70  | 0,340425 | 2,052363 | 0,040134 | 0,2657295 |
| KMT2D         | 297,98  | -1,17 | 0,568708 | -2,05106 | 0,040262 | 0,2663459 |
| RP11-357F12.1 | 4,21    | 2,16  | 1,053663 | 2,050984 | 0,040268 | 0,2663459 |
| AC034110.1    | 23,18   | -1,17 | 0,568688 | -2,05096 | 0,04027  | 0,2663459 |
| RP11-259K15.2 | 2,48    | -2,29 | 1,116051 | -2,05096 | 0,040271 | NA        |
| RN7SL32P      | 4,38    | -1,92 | 0,935743 | -2,0505  | 0,040316 | 0,2664614 |
| RP11-294J22.7 | 69,08   | 1,79  | 0,873186 | 2,050491 | 0,040317 | 0,2664614 |
| AC073130.1    | 141,05  | -1,51 | 0,739009 | -2,0496  | 0,040404 | 0,2669444 |
| ENOX1         | 2,58    | -1,81 | 0,88301  | -2,04952 | 0,040411 | NA        |
| ZBED6         | 178,17  | 3,33  | 1,624473 | 2,049275 | 0,040435 | 0,267006  |
| RP11-86H7.1   | 48,10   | -1,93 | 0,944289 | -2,04913 | 0,040449 | 0,267006  |
| GNB2          | 1358,12 | 0,47  | 0,227608 | 2,049059 | 0,040456 | 0,267006  |
| SLC1A1        | 2,64    | -6,14 | 2,99601  | -2,04879 | 0,040482 | NA        |
| ZNF790-AS1    | 19,41   | -3,29 | 1,606146 | -2,04833 | 0,040527 | 0,2672832 |
| AP5Z1         | 295,00  | -0,95 | 0,465654 | -2,04819 | 0,040541 | 0,2672832 |
| AC084219.4    | 18,09   | 4,89  | 2,387146 | 2,048099 | 0,04055  | 0,2672832 |
| RP11-334C17.3 | 4,67    | -1,48 | 0,721284 | -2,0479  | 0,04057  | 0,2672832 |
| ZNF254        | 61,79   | 1,68  | 0,821286 | 2,047632 | 0,040596 | 0,2672832 |
| TPRX1         | 33,32   | -1,88 | 0,919585 | -2,04752 | 0,040607 | 0,2672832 |
| BSND          | 16,81   | -2,21 | 1,081274 | -2,04748 | 0,040611 | 0,2672832 |
| RP11-220D10.1 | 4,68    | -4,81 | 2,348605 | -2,04746 | 0,040613 | 0,2672832 |
| COX10         | 141,65  | -1,91 | 0,933936 | -2,04717 | 0,040641 | 0,2672957 |
| NRG1          | 100,13  | -2,78 | 1,359622 | -2,04714 | 0,040644 | 0,2672957 |
| FBXL4         | 147,23  | 1,61  | 0,786035 | 2,046687 | 0,040689 | 0,2674966 |
| FBXO10        | 7,11    | 5,90  | 2,885659 | 2,046015 | 0,040755 | 0,2677808 |
| RSPH3         | 203,04  | 1,61  | 0,788641 | 2,045955 | 0,040761 | 0,2677808 |
| RP11-158H5.2  | 3,26    | 3,74  | 1,830062 | 2,045612 | 0,040795 | NA        |
| ZNF331        | 510,77  | 1,19  | 0,583788 | 2,045343 | 0,040821 | 0,2680816 |
| PYCARD        | 2054,37 | -0,36 | 0,174235 | -2,04513 | 0,040842 | 0,2681269 |
| CH17-172B3.1  | 27,88   | -1,68 | 0,821164 | -2,04474 | 0,040881 | 0,2682813 |
| AC083843.2    | 11,22   | 3,55  | 1,734065 | 2,044596 | 0,040895 | 0,2682813 |
| RPL37A        | 3812,07 | -0,60 | 0,291119 | -2,04445 | 0,040909 | 0,2682813 |
| GTF3C5        | 201,62  | -1,33 | 0,64901  | -2,0439  | 0,040963 | 0,2683336 |
| GTPBP3        | 91,31   | 1,71  | 0,8347   | 2,043847 | 0,040969 | 0,2683336 |
| FRYL          | 891,93  | -0,80 | 0,391859 | -2,04374 | 0,04098  | 0,2683336 |
| BIRC3         | 382,55  | 0,96  | 0,470501 | 2,04365  | 0,040988 | 0,2683336 |
| OIP5-AS1      | 603,60  | -0,95 | 0,46634  | -2,04364 | 0,040989 | 0,2683336 |
| BEX4          | 345,60  | 1,38  | 0,676844 | 2,043322 | 0,041021 | 0,2684443 |
| RTKN2         | 43,02   | -1,44 | 0,703932 | -2,04315 | 0,041038 | 0,2684634 |
| PRF1          | 260,24  | -2,41 | 1,179106 | -2,04285 | 0,041067 | 0,2684751 |
| AC005785.2    | 4,22    | 4,38  | 2,143116 | 2,042837 | 0,041069 | 0,2684751 |
| RP11-310E22.5 | 1,47    | -4,76 | 2,332231 | -2,04261 | 0,041091 | NA        |

|               |         |       |          |          |          |           |
|---------------|---------|-------|----------|----------|----------|-----------|
| RP11-723O4.2  | 14,42   | -2,22 | 1,088324 | -2,04242 | 0,04111  | 0,2686192 |
| TIMELESS      | 85,56   | 2,11  | 1,033949 | 2,042233 | 0,041128 | 0,2686192 |
| NORAD         | 758,34  | -0,77 | 0,379157 | -2,04218 | 0,041134 | 0,2686192 |
| HSPB9         | 4,76    | 1,60  | 0,784488 | 2,041515 | 0,0412   | 0,2689546 |
| RP13-685P2.5  | 15,26   | -2,56 | 1,256782 | -2,04092 | 0,041259 | 0,2692475 |
| GHRL          | 172,74  | 1,63  | 0,7967   | 2,040767 | 0,041274 | 0,2692506 |
| RP11-87C7.3   | 2,56    | -2,41 | 1,181202 | -2,04012 | 0,041339 | NA        |
| OMG           | 17,64   | 2,78  | 1,364803 | 2,039983 | 0,041352 | 0,2694788 |
| RAB20         | 146,40  | 1,93  | 0,946682 | 2,039944 | 0,041356 | 0,2694788 |
| NDUFA11       | 997,44  | -0,46 | 0,226619 | -2,0399  | 0,041361 | 0,2694788 |
| SMG7          | 786,59  | 1,24  | 0,607494 | 2,039833 | 0,041367 | 0,2694788 |
| AC093611.1    | 2,05    | 3,05  | 1,493938 | 2,039649 | 0,041385 | NA        |
| CTD-2319I12.1 | 32,90   | 2,23  | 1,094229 | 2,038915 | 0,041459 | 0,2699306 |
| CTD-2026D20.3 | 41,71   | 1,51  | 0,741538 | 2,038772 | 0,041473 | 0,2699306 |
| GTPBP8        | 151,22  | 1,64  | 0,804447 | 2,038702 | 0,04148  | 0,2699306 |
| LPA           | 2,13    | -5,43 | 2,661471 | -2,03869 | 0,041481 | NA        |
| AC092295.7    | 11,89   | 2,04  | 1,003109 | 2,038477 | 0,041502 | 0,2699821 |
| RNU4-40P      | 5,86    | 2,14  | 1,051451 | 2,038013 | 0,041549 | 0,270052  |
| RFTN1         | 415,55  | 1,19  | 0,586282 | 2,03784  | 0,041566 | 0,270052  |
| RP11-457M11.5 | 12,03   | -2,06 | 1,013033 | -2,03771 | 0,041579 | 0,270052  |
| AARSD1        | 216,34  | 1,27  | 0,622525 | 2,037662 | 0,041584 | 0,270052  |
| NUTF2         | 297,63  | 1,22  | 0,597346 | 2,037536 | 0,041596 | 0,270052  |
| KIAA1551      | 1208,80 | -0,71 | 0,350153 | -2,0375  | 0,0416   | 0,270052  |
| ARPC4         | 5390,09 | -0,37 | 0,183672 | -2,03689 | 0,041661 | 0,2703536 |
| RP11-576M8.2  | 2,84    | 4,15  | 2,037625 | 2,036579 | 0,041692 | NA        |
| LEPROTL1      | 745,27  | 0,94  | 0,460777 | 2,036321 | 0,041718 | 0,2706297 |
| ADGRE2        | 564,62  | -1,02 | 0,499259 | -2,0361  | 0,04174  | 0,2706778 |
| RAD21         | 1206,37 | 0,74  | 0,363013 | 2,03575  | 0,041775 | 0,2708125 |
| PBLD          | 26,33   | 1,48  | 0,726868 | 2,035468 | 0,041804 | 0,2708839 |
| TNPO2         | 131,96  | -1,36 | 0,669216 | -2,03534 | 0,041816 | 0,2708839 |
| THAP1         | 83,64   | 1,99  | 0,976531 | 2,035206 | 0,04183  | 0,2708839 |
| SEC16B        | 12,05   | -3,27 | 1,604879 | -2,03488 | 0,041863 | 0,2709726 |
| MAST4         | 44,45   | 1,74  | 0,853653 | 2,034545 | 0,041897 | 0,2709726 |
| RABGAP1L      | 757,35  | -0,86 | 0,425134 | -2,03444 | 0,041907 | 0,2709726 |
| RP11-467K18.3 | 9,11    | 2,72  | 1,337918 | 2,034409 | 0,04191  | 0,2709726 |
| TADA2B        | 203,16  | -1,68 | 0,825769 | -2,03428 | 0,041923 | 0,2709726 |
| B4GALT6       | 33,65   | 2,26  | 1,113131 | 2,034153 | 0,041936 | 0,2709726 |
| AL022476.2    | 7,82    | -1,81 | 0,891649 | -2,03406 | 0,041946 | 0,2709726 |
| HOMER2        | 295,66  | 1,85  | 0,911663 | 2,033292 | 0,042023 | 0,2713528 |
| LSAMP         | 18,44   | -2,04 | 1,004998 | -2,03319 | 0,042034 | 0,2713528 |
| RP11-621K7.1  | 5,72    | -1,19 | 0,584186 | -2,03229 | 0,042124 | 0,2717918 |
| PTBP3         | 1254,56 | 0,57  | 0,279574 | 2,032224 | 0,042131 | 0,2717918 |
| PPIL4         | 349,08  | 0,91  | 0,449848 | 2,031881 | 0,042166 | 0,2719211 |
| AC108488.4    | 8,20    | 5,67  | 2,789737 | 2,031316 | 0,042223 | 0,2721959 |
| RP4-601P9.2   | 3,10    | -2,54 | 1,248653 | -2,03105 | 0,04225  | NA        |
| CTA-243E7.4   | 40,33   | -0,89 | 0,437929 | -2,03094 | 0,042261 | 0,2723494 |
| ZNF106        | 2113,85 | -0,60 | 0,293883 | -2,03052 | 0,042303 | 0,2724631 |
| AC087859.1    | 56,47   | -1,16 | 0,572197 | -2,03042 | 0,042313 | 0,2724631 |
| GCN1          | 545,67  | -1,61 | 0,79394  | -2,03033 | 0,042323 | 0,2724631 |
| AP000580.1    | 6,79    | -2,88 | 1,41866  | -2,0301  | 0,042346 | 0,2724867 |

|                |          |       |          |          |          |           |
|----------------|----------|-------|----------|----------|----------|-----------|
| CDH12          | 8,85     | -2,44 | 1,20348  | -2,02984 | 0,042373 | 0,2724867 |
| CYP46A1        | 271,41   | -1,11 | 0,548574 | -2,02976 | 0,042381 | 0,2724867 |
| AMZ2P1         | 356,32   | 1,35  | 0,664737 | 2,029718 | 0,042385 | 0,2724867 |
| AC025171.1     | 181,91   | -1,12 | 0,553111 | -2,02917 | 0,042441 | 0,2726316 |
| IER3IP1        | 290,84   | -0,94 | 0,461313 | -2,02916 | 0,042442 | 0,2726316 |
| ZNF652         | 580,77   | 0,81  | 0,400169 | 2,029065 | 0,042452 | 0,2726316 |
| ATP8B4         | 615,01   | 0,96  | 0,472082 | 2,027908 | 0,04257  | 0,2732115 |
| MCOLN1         | 331,45   | -0,88 | 0,434243 | -2,02789 | 0,042571 | 0,2732115 |
| RP11-14N9.2    | 68,65    | -1,03 | 0,51007  | -2,02758 | 0,042603 | 0,2732717 |
| C4orf48        | 200,40   | -1,19 | 0,586917 | -2,0274  | 0,042622 | 0,2732717 |
| WDR34          | 8,38     | 4,65  | 2,294481 | 2,027368 | 0,042625 | 0,2732717 |
| SORD           | 151,91   | 1,95  | 0,961648 | 2,027115 | 0,042651 | 0,2733435 |
| DGKB           | 47,81    | -2,19 | 1,078988 | -2,0268  | 0,042683 | 0,2734572 |
| CTB-111F10.1   | 2,17     | -5,90 | 2,913478 | -2,02605 | 0,04276  | NA        |
| PIK3CB         | 377,33   | 0,96  | 0,475413 | 2,025543 | 0,042812 | 0,2741228 |
| IFIH1          | 333,41   | -1,39 | 0,686486 | -2,0255  | 0,042816 | 0,2741228 |
| RAPGEF6        | 397,26   | -1,12 | 0,554784 | -2,02531 | 0,042835 | 0,2741498 |
| RP11-382F24.6  | 3,35     | -4,73 | 2,335314 | -2,02479 | 0,042889 | NA        |
| AC090286.2     | 5,55     | 4,52  | 2,230697 | 2,024683 | 0,0429   | 0,2743479 |
| NEBL           | 21,08    | -2,25 | 1,109152 | -2,02459 | 0,042909 | 0,2743479 |
| RP11-288L9.4   | 23,06    | 2,04  | 1,008179 | 2,024579 | 0,042911 | 0,2743479 |
| NDUFA1         | 902,82   | -0,61 | 0,302249 | -2,02415 | 0,042955 | 0,2744901 |
| GLMN           | 106,08   | -1,76 | 0,871945 | -2,02408 | 0,042962 | 0,2744901 |
| RP13-942N8.1   | 37,82    | -1,97 | 0,975634 | -2,02371 | 0,043    | 0,2746344 |
| SLC13A4        | 21,18    | 2,06  | 1,018855 | 2,023497 | 0,043022 | 0,2746817 |
| RP5-1172A22.1  | 2,78     | -2,29 | 1,129977 | -2,02296 | 0,043077 | NA        |
| TTC1           | 439,12   | 0,96  | 0,476588 | 2,022743 | 0,0431   | 0,2748162 |
| TMSB4X         | 53194,52 | 0,28  | 0,139443 | 2,022722 | 0,043102 | 0,2748162 |
| CYP3A43        | 9,98     | -2,43 | 1,202205 | -2,02264 | 0,043111 | 0,2748162 |
| AC099057.8     | 16,50    | -1,39 | 0,686604 | -2,02248 | 0,043127 | 0,2748162 |
| RP11-95I16.4   | 8,51     | -1,52 | 0,752391 | -2,0222  | 0,043156 | 0,2748162 |
| SLC22A18AS     | 5,62     | 4,47  | 2,210947 | 2,021968 | 0,04318  | 0,2748162 |
| LILRA2         | 721,13   | 0,86  | 0,426648 | 2,021922 | 0,043184 | 0,2748162 |
| PHF24          | 23,03    | -4,27 | 2,111545 | -2,0219  | 0,043186 | 0,2748162 |
| RP11-1079K10.5 | 7,49     | -1,68 | 0,830736 | -2,02145 | 0,043233 | 0,2748162 |
| ZNF814         | 291,83   | 1,22  | 0,601381 | 2,021328 | 0,043246 | 0,2748162 |
| DEAF1          | 282,01   | -1,55 | 0,764526 | -2,02128 | 0,043251 | 0,2748162 |
| ABCA8          | 9,09     | -1,90 | 0,941499 | -2,02124 | 0,043254 | 0,2748162 |
| BCL2L2         | 54,12    | 2,15  | 1,062771 | 2,021222 | 0,043257 | 0,2748162 |
| TMEM229B       | 173,52   | -1,74 | 0,859563 | -2,02117 | 0,043262 | 0,2748162 |
| SPATA6L        | 142,49   | -1,53 | 0,755721 | -2,02101 | 0,043279 | 0,2748162 |
| PLD4           | 514,50   | 0,80  | 0,397912 | 2,021004 | 0,043279 | 0,2748162 |
| ZNF587         | 112,59   | 1,29  | 0,636065 | 2,020802 | 0,0433   | 0,2748555 |
| BID            | 1889,75  | 0,62  | 0,308517 | 2,020593 | 0,043322 | 0,2748992 |
| RP11-88I18.2   | 43,11    | -2,66 | 1,318126 | -2,02019 | 0,043363 | 0,2750615 |
| DMXL2          | 807,97   | -0,89 | 0,440891 | -2,02006 | 0,043377 | 0,2750615 |
| U73166.2       | 24,24    | -1,74 | 0,862115 | -2,01947 | 0,043438 | 0,2752839 |
| NSUN7          | 7,35     | 5,45  | 2,699309 | 2,019438 | 0,043442 | 0,2752839 |
| CUX1           | 743,47   | 0,98  | 0,487094 | 2,019063 | 0,043481 | 0,2754365 |
| ETV5           | 54,36    | 2,40  | 1,190418 | 2,018853 | 0,043503 | 0,2754814 |

|                |          |       |          |          |          |           |
|----------------|----------|-------|----------|----------|----------|-----------|
| RGS3           | 160,71   | -2,04 | 1,010643 | -2,01837 | 0,043553 | 0,2757048 |
| RP11-1069G10.1 | 100,41   | -1,42 | 0,702972 | -2,01781 | 0,043611 | 0,2759827 |
| LRRK1          | 917,54   | -0,99 | 0,492819 | -2,0175  | 0,043643 | 0,2760911 |
| FZD3           | 55,47    | 1,38  | 0,686002 | 2,017142 | 0,043681 | 0,2762335 |
| COX6C          | 983,75   | -0,49 | 0,242924 | -2,01699 | 0,043697 | 0,2762422 |
| GJD2           | 8,48     | -1,00 | 0,495468 | -2,01565 | 0,043837 | 0,276961  |
| RP11-572M11.1  | 8,21     | 3,95  | 1,959109 | 2,015614 | 0,04384  | 0,276961  |
| CCL28          | 40,56    | -1,46 | 0,725653 | -2,01522 | 0,043881 | 0,2770164 |
| RP11-554E23.2  | 4,07     | -6,86 | 3,401947 | -2,01507 | 0,043897 | 0,2770164 |
| ADIPOR1        | 829,55   | 1,13  | 0,560322 | 2,015031 | 0,043901 | 0,2770164 |
| FAM169B        | 24,25    | 2,14  | 1,064478 | 2,01486  | 0,043919 | 0,2770164 |
| RP11-205M20.3  | 70,65    | -1,21 | 0,598728 | -2,01482 | 0,043924 | 0,2770164 |
| PMCHL1         | 2,45     | -2,42 | 1,200876 | -2,01464 | 0,043942 | NA        |
| CCBE1          | 18,91    | -0,91 | 0,452993 | -2,01328 | 0,044085 | 0,2779389 |
| TFDP1          | 181,51   | 1,18  | 0,585715 | 2,01289  | 0,044126 | 0,278064  |
| RP11-10N16.2   | 4,28     | 3,01  | 1,493884 | 2,012699 | 0,044146 | 0,278064  |
| FOKK1          | 276,79   | -1,54 | 0,762709 | -2,01267 | 0,044149 | 0,278064  |
| RPL15          | 16555,97 | 0,31  | 0,151684 | 2,012473 | 0,04417  | 0,2781    |
| RP11-973N13.4  | 8,89     | 4,62  | 2,297189 | 2,012275 | 0,044191 | 0,2781372 |
| MARCH5         | 297,90   | -1,74 | 0,864944 | -2,01209 | 0,044211 | 0,2781671 |
| ODF3B          | 640,38   | -0,79 | 0,39118  | -2,01126 | 0,044298 | 0,278623  |
| MIR548W        | 7,91     | -3,49 | 1,734467 | -2,01095 | 0,044331 | 0,2786486 |
| TMEM131        | 509,29   | 0,95  | 0,472117 | 2,010937 | 0,044332 | 0,2786486 |
| SNHG4          | 11,23    | -1,98 | 0,983761 | -2,01064 | 0,044364 | 0,2787547 |
| ENPP6          | 19,61    | -1,41 | 0,702856 | -2,0103  | 0,044399 | 0,2788431 |
| AC159540.1     | 197,76   | -0,95 | 0,474806 | -2,0102  | 0,04441  | 0,2788431 |
| CBWD6          | 169,98   | -1,57 | 0,782142 | -2,01008 | 0,044423 | 0,2788431 |
| RP11-1099M24.6 | 79,20    | 1,42  | 0,706045 | 2,009644 | 0,044469 | 0,2790366 |
| ZNF473         | 21,89    | -3,49 | 1,737277 | -2,00933 | 0,044502 | 0,2791529 |
| TRIP12         | 1518,16  | -0,96 | 0,477181 | -2,00914 | 0,044523 | 0,2791849 |
| BLK            | 4,72     | -2,82 | 1,402488 | -2,00835 | 0,044606 | 0,2796162 |
| RIC1           | 465,62   | 1,32  | 0,655787 | 2,0082   | 0,044622 | 0,2796206 |
| RP11-286N3.1   | 20,71    | 2,89  | 1,439572 | 2,007822 | 0,044662 | 0,2797776 |
| TSHZ2          | 5,09     | -1,93 | 0,962228 | -2,00746 | 0,0447   | 0,279876  |
| CLEC4E         | 331,53   | -1,61 | 0,804142 | -2,00737 | 0,04471  | 0,279876  |
| AP003068.23    | 7,79     | -2,01 | 1,001545 | -2,0072  | 0,044728 | 0,279876  |
| RP11-396C23.4  | 4,34     | 4,74  | 2,363071 | 2,007109 | 0,044738 | 0,279876  |
| RP11-564C4.5   | 3,48     | -6,11 | 3,04393  | -2,00666 | 0,044786 | NA        |
| KCTD15         | 117,86   | 1,87  | 0,932416 | 2,006613 | 0,044791 | 0,2801126 |
| GS1-124K5.14   | 89,62    | -1,32 | 0,65586  | -2,00628 | 0,044826 | 0,2802401 |
| RP11-1057B6.1  | 4,95     | 4,36  | 2,173544 | 2,005648 | 0,044894 | 0,2805677 |
| SERP1          | 2254,78  | 0,39  | 0,195245 | 2,005341 | 0,044927 | 0,2806778 |
| SEC61G         | 295,16   | -0,61 | 0,303697 | -2,00498 | 0,044965 | 0,2808257 |
| SLC37A4        | 39,89    | 3,15  | 1,570869 | 2,004425 | 0,045025 | 0,2810024 |
| TUBA8          | 7,25     | 4,99  | 2,487262 | 2,004419 | 0,045025 | 0,2810024 |
| TNKS2          | 659,25   | 0,61  | 0,303963 | 2,004291 | 0,045039 | 0,2810024 |
| RP11-205M3.3   | 17,06    | -2,27 | 1,133283 | -2,00394 | 0,045076 | 0,2811061 |
| ELP4           | 211,43   | -1,45 | 0,725697 | -2,0037  | 0,045103 | 0,2811061 |
| SLC25A43       | 57,62    | 2,23  | 1,111666 | 2,003608 | 0,045112 | 0,2811061 |
| ANKRD40        | 386,47   | 0,67  | 0,336036 | 2,003425 | 0,045132 | 0,2811061 |

|               |         |       |          |          |          |           |
|---------------|---------|-------|----------|----------|----------|-----------|
| HLA-DRB6      | 520,36  | 1,37  | 0,685993 | 2,0033   | 0,045145 | 0,2811061 |
| CGA           | 6,28    | -2,00 | 1,000301 | -2,00329 | 0,045146 | 0,2811061 |
| VENTX         | 400,58  | -1,03 | 0,514065 | -2,003   | 0,045177 | 0,2812055 |
| EBF1          | 5,86    | -1,75 | 0,873711 | -2,00278 | 0,045201 | 0,2812306 |
| UBXN7         | 570,42  | -1,53 | 0,764815 | -2,00261 | 0,045219 | 0,2812306 |
| ICAM1         | 631,83  | 1,27  | 0,634231 | 2,00254  | 0,045227 | 0,2812306 |
| RP11-167N24.3 | 10,80   | -3,38 | 1,686862 | -2,00236 | 0,045246 | 0,2812542 |
| KCNK2         | 1,61    | -2,84 | 1,418835 | -2,002   | 0,045285 | NA        |
| A1BG          | 209,69  | -1,01 | 0,505383 | -2,0019  | 0,045296 | 0,2814216 |
| RP11-502F1.1  | 15,98   | -1,41 | 0,704591 | -2,00175 | 0,045312 | 0,2814216 |
| ADK           | 495,32  | 1,07  | 0,53281  | 2,001552 | 0,045333 | 0,2814216 |
| RHD           | 70,80   | -2,00 | 0,998452 | -2,00155 | 0,045333 | 0,2814216 |
| RP11-670E13.6 | 87,30   | -1,22 | 0,608247 | -2,00103 | 0,045389 | 0,2815916 |
| DNAJB6        | 931,74  | 0,92  | 0,460589 | 2,001016 | 0,045391 | 0,2815916 |
| AC092159.3    | 4,45    | -5,63 | 2,813168 | -2,00079 | 0,045415 | 0,2816497 |
| MEPE          | 4,03    | -6,83 | 3,416279 | -2,00051 | 0,045446 | 0,2817455 |
| RPL12L3       | 1,80    | -2,07 | 1,034154 | -2,00044 | 0,045453 | NA        |
| EIF2B3        | 263,51  | 1,34  | 0,669465 | 1,999807 | 0,045521 | 0,2820947 |
| TTC7B         | 219,84  | -1,06 | 0,528403 | -1,9997  | 0,045532 | 0,2820947 |
| RP11-157F20.1 | 3,23    | 3,73  | 1,867488 | 1,999223 | 0,045584 | NA        |
| ZNF264        | 170,19  | -1,42 | 0,713009 | -1,99831 | 0,045683 | 0,2828492 |
| RP11-613M5.2  | 12,96   | -0,66 | 0,329937 | -1,99815 | 0,0457   | 0,2828492 |
| NRGN          | 69,16   | -1,03 | 0,515411 | -1,99815 | 0,045701 | 0,2828492 |
| CTD-2510L9.1  | 6,82    | -2,26 | 1,129004 | -1,99802 | 0,045715 | 0,2828492 |
| ENPP5         | 0,87    | -2,70 | 1,348924 | -1,99801 | 0,045716 | NA        |
| CTD-3247F14.2 | 72,31   | 2,78  | 1,391501 | 1,997588 | 0,045761 | 0,282879  |
| CTDSP2        | 955,91  | -1,16 | 0,582991 | -1,99758 | 0,045763 | 0,282879  |
| PLA2G4D       | 40,47   | -2,12 | 1,059298 | -1,99755 | 0,045765 | 0,282879  |
| RPS28         | 2653,43 | -0,78 | 0,390505 | -1,99726 | 0,045797 | 0,282948  |
| CLNS1A        | 1314,41 | 0,97  | 0,485375 | 1,99705  | 0,04582  | 0,282948  |
| SLC2A14       | 7,46    | 1,90  | 0,951055 | 1,997027 | 0,045822 | 0,282948  |
| KIFC3         | 48,48   | -1,90 | 0,952111 | -1,99651 | 0,045878 | 0,2831979 |
| MAP2K7        | 73,77   | 1,20  | 0,600087 | 1,996279 | 0,045904 | 0,2832624 |
| C10orf128     | 952,28  | 1,07  | 0,534591 | 1,995825 | 0,045953 | 0,2834729 |
| SCRIB         | 47,92   | -1,80 | 0,90138  | -1,99562 | 0,045975 | 0,2835165 |
| ZDHHC12       | 264,50  | 1,34  | 0,673551 | 1,994926 | 0,046051 | 0,283805  |
| TTC3          | 2089,15 | 0,65  | 0,325377 | 1,994821 | 0,046062 | 0,283805  |
| CTC-241F20.4  | 7,79    | 5,58  | 2,79946  | 1,994772 | 0,046068 | 0,283805  |
| ANKRD13C      | 173,53  | 1,54  | 0,773774 | 1,994407 | 0,046108 | 0,283956  |
| YWHAB         | 6952,29 | 0,39  | 0,195934 | 1,99411  | 0,04614  | 0,2840619 |
| AC139712.4    | 11,52   | 3,04  | 1,523616 | 1,993799 | 0,046174 | 0,2841774 |
| AP003068.9    | 163,75  | -1,21 | 0,604638 | -1,9934  | 0,046218 | 0,2843309 |
| BST1          | 296,99  | -1,41 | 0,707241 | -1,99319 | 0,046241 | 0,2843309 |
| FOCAD         | 171,38  | 1,37  | 0,688844 | 1,993133 | 0,046247 | 0,2843309 |
| RTEL1         | 170,97  | -1,60 | 0,803208 | -1,99301 | 0,04626  | 0,2843309 |
| HEBP2         | 294,16  | -0,71 | 0,357631 | -1,99237 | 0,04633  | 0,2846692 |
| MAGEH1        | 120,18  | -2,60 | 1,307478 | -1,99188 | 0,046384 | 0,2849068 |
| RP3-522P13.2  | 8,08    | 4,05  | 2,03515  | 1,991515 | 0,046424 | 0,2850575 |
| PLEKHA5       | 329,67  | 1,14  | 0,574242 | 1,991307 | 0,046447 | 0,2851033 |
| MYO15B        | 944,93  | -0,63 | 0,314865 | -1,99095 | 0,046486 | 0,2852504 |



|               |          |       |          |          |          |           |
|---------------|----------|-------|----------|----------|----------|-----------|
| RAB37         | 78,26    | -1,91 | 0,957454 | -1,99068 | 0,046516 | 0,2853236 |
| NUP58         | 311,43   | 0,93  | 0,467041 | 1,99051  | 0,046535 | 0,2853236 |
| RP11-129B22.7 | 11,60    | -1,68 | 0,843223 | -1,99028 | 0,04656  | 0,2853236 |
| PDE2A         | 22,49    | 3,35  | 1,683291 | 1,99008  | 0,046582 | 0,2853236 |
| GALR1         | 32,28    | -1,33 | 0,667273 | -1,99002 | 0,046589 | 0,2853236 |
| OR2M3         | 1017,12  | -1,06 | 0,531022 | -1,99001 | 0,04659  | 0,2853236 |
| ITGA6         | 64,45    | -3,47 | 1,745991 | -1,98981 | 0,046612 | 0,2853617 |
| PIAS2         | 456,40   | -1,56 | 0,784981 | -1,98904 | 0,046697 | 0,2857885 |
| ANXA2         | 18876,83 | 0,48  | 0,239227 | 1,988782 | 0,046725 | 0,2858679 |
| CCDC168       | 4,72     | 4,29  | 2,15593  | 1,98856  | 0,04675  | 0,2858791 |
| MAP1LC3A      | 7,58     | 5,50  | 2,767218 | 1,988487 | 0,046758 | 0,2858791 |
| STOML1        | 94,34    | 1,74  | 0,873083 | 1,988217 | 0,046788 | 0,2859287 |
| RP11-81A22.4  | 52,48    | 1,21  | 0,610785 | 1,988135 | 0,046797 | 0,2859287 |
| ZNF507        | 12,35    | -1,70 | 0,856109 | -1,98769 | 0,046846 | 0,2861373 |
| CTD-2284J15.1 | 7,43     | 2,88  | 1,450385 | 1,987545 | 0,046862 | 0,2861396 |
| RP11-119F7.5  | 1,59     | -2,62 | 1,319177 | -1,98724 | 0,046896 | NA        |
| RP11-38L15.3  | 14,05    | 3,44  | 1,729741 | 1,987228 | 0,046897 | 0,2862606 |
| CROCC2        | 1,62     | -5,13 | 2,579452 | -1,98717 | 0,046904 | NA        |
| BCL3          | 151,24   | 1,12  | 0,564991 | 1,986746 | 0,046951 | 0,2864133 |
| PHF8          | 258,20   | -1,43 | 0,722232 | -1,98663 | 0,046964 | 0,2864133 |
| CARD8         | 700,35   | -0,96 | 0,481072 | -1,98659 | 0,046968 | 0,2864133 |
| RNF19A        | 400,49   | -0,98 | 0,490947 | -1,9864  | 0,046989 | 0,2864468 |
| SULT1A1       | 542,54   | -1,35 | 0,679889 | -1,98623 | 0,047008 | 0,2864687 |
| PPP1R14D      | 0,99     | -3,91 | 1,966744 | -1,98619 | 0,047012 | NA        |
| JAZF1         | 220,53   | -1,49 | 0,752888 | -1,98532 | 0,047109 | 0,2869889 |
| TAS2R4        | 3,11     | -1,64 | 0,828452 | -1,98503 | 0,047141 | NA        |
| IL23R         | 6,28     | -2,86 | 1,440381 | -1,9849  | 0,047156 | 0,2871788 |
| VEZF1         | 541,06   | 0,79  | 0,398842 | 1,984563 | 0,047193 | 0,2872509 |
| MICU2         | 259,36   | 0,97  | 0,490516 | 1,984516 | 0,047198 | 0,2872509 |
| RP11-114F10.3 | 1,26     | -2,46 | 1,240005 | -1,98379 | 0,047279 | NA        |
| MIR320A       | 2,06     | -5,84 | 2,941809 | -1,98379 | 0,04728  | NA        |
| XYLT2         | 116,82   | 1,19  | 0,598762 | 1,983708 | 0,047288 | 0,2877043 |
| TCEAL1        | 132,15   | 1,98  | 0,995817 | 1,983352 | 0,047328 | 0,2878522 |
| CTD-2291D10.1 | 1,72     | -2,34 | 1,177601 | -1,98287 | 0,047382 | NA        |
| TONSL         | 76,94    | -1,86 | 0,936107 | -1,98269 | 0,047402 | 0,2882047 |
| FANCB         | 28,06    | -3,32 | 1,674283 | -1,9824  | 0,047435 | 0,2883118 |
| TACC2         | 50,99    | -0,97 | 0,487085 | -1,98207 | 0,047472 | 0,2884426 |
| DCAF16        | 234,68   | -1,56 | 0,784828 | -1,98163 | 0,04752  | 0,2886445 |
| ALAS1         | 177,94   | 1,79  | 0,904947 | 1,980906 | 0,047602 | 0,2890445 |
| FAM208A       | 727,03   | 0,71  | 0,358444 | 1,980611 | 0,047635 | 0,2890669 |
| VWA8          | 114,34   | 2,14  | 1,078202 | 1,980481 | 0,04765  | 0,2890669 |
| RALGPS2       | 120,91   | -1,92 | 0,968655 | -1,98038 | 0,04766  | 0,2890669 |
| CPSF6         | 495,04   | 0,94  | 0,474682 | 1,980252 | 0,047675 | 0,2890669 |
| RP11-154D6.2  | 29,01    | -0,92 | 0,464228 | -1,98003 | 0,0477   | 0,2890669 |
| RP11-58B17.1  | 366,02   | -0,95 | 0,481463 | -1,97984 | 0,047721 | 0,2890669 |
| RSPH9         | 7,19     | 4,30  | 2,17298  | 1,979793 | 0,047727 | 0,2890669 |
| UGCG          | 531,32   | 1,03  | 0,522703 | 1,97956  | 0,047753 | 0,2890669 |
| EHHADH        | 42,02    | 2,00  | 1,010174 | 1,979516 | 0,047758 | 0,2890669 |
| WBP4          | 109,86   | 1,02  | 0,516791 | 1,97949  | 0,047761 | 0,2890669 |
| RP11-345J18.2 | 3,32     | -2,77 | 1,39762  | -1,97927 | 0,047786 | NA        |

|               |          |       |          |          |          |           |
|---------------|----------|-------|----------|----------|----------|-----------|
| BCL9          | 7,54     | 5,31  | 2,685064 | 1,97925  | 0,047788 | 0,2891357 |
| AC015987.1    | 6,03     | 3,19  | 1,61215  | 1,979018 | 0,047814 | 0,2892    |
| SBDSP         | 56,69    | 1,73  | 0,872492 | 1,978755 | 0,047844 | 0,2892854 |
| STAT5B        | 448,08   | -1,14 | 0,577349 | -1,97851 | 0,047871 | 0,2893575 |
| VAMP8         | 2941,50  | -0,39 | 0,195074 | -1,97824 | 0,047902 | 0,2893749 |
| KLHL18        | 437,15   | -1,17 | 0,589809 | -1,97821 | 0,047905 | 0,2893749 |
| RP11-511P7.2  | 10,04    | -1,73 | 0,874565 | -1,97773 | 0,047959 | 0,2895607 |
| RP11-77P6.2   | 43,82    | -3,92 | 1,982789 | -1,97766 | 0,047967 | 0,2895607 |
| ANGPT4        | 9,80     | 1,83  | 0,926706 | 1,977278 | 0,04801  | 0,2895989 |
| RAB21         | 489,48   | 1,08  | 0,54408  | 1,977205 | 0,048018 | 0,2895989 |
| CSNK1G1       | 588,18   | -1,48 | 0,750348 | -1,97708 | 0,048032 | 0,2895989 |
| SELL          | 3439,01  | 0,69  | 0,351451 | 1,976982 | 0,048044 | 0,2895989 |
| CCDC13        | 15,85    | 2,06  | 1,042084 | 1,976916 | 0,048051 | 0,2895989 |
| RP11-296K13.4 | 8,81     | -2,92 | 1,476742 | -1,9766  | 0,048086 | 0,2896404 |
| EHD3          | 7,20     | -2,13 | 1,076164 | -1,97658 | 0,048089 | 0,2896404 |
| SRFBP1        | 145,17   | -0,94 | 0,475385 | -1,97512 | 0,048254 | 0,2905065 |
| CLDND1        | 373,15   | 1,08  | 0,548646 | 1,975035 | 0,048264 | 0,2905065 |
| LINC00550     | 55,56    | -2,04 | 1,030604 | -1,97477 | 0,048294 | 0,2905932 |
| PDIA3P1       | 1,07     | -3,41 | 1,727402 | -1,97426 | 0,048353 | NA        |
| RRNAD1        | 94,87    | -1,68 | 0,8486   | -1,97421 | 0,048358 | 0,290883  |
| MKNK1         | 504,39   | -0,76 | 0,385795 | -1,97386 | 0,048397 | 0,2910249 |
| AP001962.3    | 7,88     | 3,96  | 2,008168 | 1,97346  | 0,048443 | 0,2911957 |
| LRRD1         | 4,26     | -1,54 | 0,780551 | -1,97334 | 0,048457 | 0,2911957 |
| ILDR1         | 10,37    | 3,27  | 1,657121 | 1,973004 | 0,048495 | 0,2913306 |
| PGLS          | 1432,68  | 0,56  | 0,285824 | 1,971441 | 0,048673 | 0,2923079 |
| KCNJ3         | 22,98    | -0,92 | 0,46912  | -1,97102 | 0,048722 | 0,2924878 |
| KCNE4         | 61,82    | -1,23 | 0,625297 | -1,97078 | 0,048749 | 0,2924878 |
| FTH1          | 50801,77 | 0,42  | 0,211714 | 1,970766 | 0,048751 | 0,2924878 |
| PNPLA2        | 279,67   | -0,82 | 0,417726 | -1,97037 | 0,048796 | 0,2926637 |
| RP11-653B10.1 | 12,78    | 2,34  | 1,185276 | 1,970216 | 0,048814 | 0,2926774 |
| GPATCH8       | 388,11   | -0,82 | 0,413773 | -1,97004 | 0,048834 | 0,2927007 |
| UEVLD         | 87,73    | 1,00  | 0,505975 | 1,969907 | 0,048849 | 0,2927007 |
| RAB3GAP2      | 280,50   | -0,98 | 0,498947 | -1,96955 | 0,048891 | 0,2928552 |
| RAB11B        | 75,84    | 0,91  | 0,460676 | 1,969343 | 0,048914 | 0,2928616 |
| ETFA          | 929,40   | 0,87  | 0,443672 | 1,969261 | 0,048923 | 0,2928616 |
| RP3-522P13.1  | 3,33     | 3,21  | 1,629399 | 1,969179 | 0,048933 | NA        |
| RNPC3         | 200,08   | 1,02  | 0,51743  | 1,968975 | 0,048956 | 0,2929643 |
| TMEM241       | 51,33    | 1,65  | 0,838186 | 1,968699 | 0,048988 | 0,2930595 |
| NPFFR1        | 47,54    | 1,21  | 0,613519 | 1,968446 | 0,049017 | 0,2930654 |
| AC004112.5    | 3,84     | -6,74 | 3,423356 | -1,96832 | 0,049031 | 0,2930654 |
| UBA5          | 185,21   | 1,56  | 0,792151 | 1,96828  | 0,049036 | 0,2930654 |
| PDPR          | 859,40   | -0,80 | 0,408996 | -1,96759 | 0,049116 | 0,2933564 |
| KCTD17        | 37,58    | -2,46 | 1,248173 | -1,96758 | 0,049116 | 0,2933564 |
| RP11-293P20.2 | 12,26    | -1,81 | 0,918132 | -1,96715 | 0,049166 | 0,2934794 |
| MYO3B         | 22,68    | -1,81 | 0,917789 | -1,96713 | 0,049168 | 0,2934794 |
| KCNJ2         | 38,00    | -2,43 | 1,23673  | -1,96696 | 0,049187 | 0,2934994 |
| RP1-156L9.1   | 3,84     | -6,74 | 3,427343 | -1,96672 | 0,049215 | 0,2935266 |
| RP11-458D21.5 | 80,32    | -1,35 | 0,685777 | -1,96662 | 0,049227 | 0,2935266 |
| ZNF93         | 29,36    | 1,58  | 0,804224 | 1,966514 | 0,049239 | 0,2935266 |
| RN7SL391P     | 1,10     | -2,76 | 1,404    | -1,96648 | 0,049244 | NA        |

|               |         |       |          |          |          |           |
|---------------|---------|-------|----------|----------|----------|-----------|
| ATL3          | 715,23  | -0,91 | 0,462084 | -1,96605 | 0,049293 | 0,2937214 |
| AC004076.7    | 20,25   | -2,09 | 1,064463 | -1,96596 | 0,049304 | 0,2937214 |
| RP11-489E7.1  | 8,71    | -1,96 | 0,999614 | -1,96558 | 0,049347 | 0,2938857 |
| LMBR1         | 272,41  | 1,56  | 0,795547 | 1,96544  | 0,049363 | 0,2938894 |
| RP11-476B13.2 | 2,08    | -2,74 | 1,39663  | -1,96518 | 0,049393 | NA        |
| NCOA7         | 349,77  | 0,72  | 0,365395 | 1,964626 | 0,049458 | 0,2940999 |
| SLC29A3       | 121,00  | 1,96  | 0,998572 | 1,964586 | 0,049462 | 0,2940999 |
| CBR1          | 612,04  | -1,17 | 0,594041 | -1,96457 | 0,049465 | 0,2940999 |
| ENTPD5        | 96,08   | -2,08 | 1,060885 | -1,96456 | 0,049465 | 0,2940999 |
| RGS2          | 9647,47 | 0,57  | 0,288268 | 1,964452 | 0,049478 | 0,2940999 |
| RP11-245J9.4  | 2,98    | 3,06  | 1,556502 | 1,964226 | 0,049504 | NA        |
| AMZ2          | 477,44  | 0,99  | 0,506244 | 1,964007 | 0,049529 | 0,2943123 |
| MPP3          | 45,58   | 2,44  | 1,244249 | 1,96377  | 0,049557 | 0,2943816 |
| AKT2          | 184,57  | -1,05 | 0,536574 | -1,96286 | 0,049663 | 0,2948728 |
| USP32P3       | 23,66   | 1,44  | 0,733494 | 1,962732 | 0,049677 | 0,2948728 |
| OR51E2        | 8,60    | -1,52 | 0,775575 | -1,96265 | 0,049687 | 0,2948728 |
| SMIM3         | 143,02  | 2,05  | 1,042181 | 1,962425 | 0,049713 | 0,2949332 |
| DACT3-AS1     | 3,51    | 2,80  | 1,425973 | 1,96179  | 0,049787 | NA        |
| POGZ          | 574,51  | 0,96  | 0,491098 | 1,961494 | 0,049821 | 0,295482  |
| ADIPOR2       | 335,02  | -1,19 | 0,609032 | -1,96122 | 0,049853 | 0,2955776 |
| CBWD1         | 578,37  | 0,91  | 0,466117 | 1,961021 | 0,049877 | 0,295621  |
| NCAPH2        | 63,30   | -1,64 | 0,834206 | -1,96085 | 0,049896 | 0,2956424 |
| RP5-848E13.3  | 49,80   | 2,00  | 1,021106 | 1,960422 | 0,049947 | 0,2957766 |
| RP5-1171I10.5 | 146,13  | -0,90 | 0,4614   | -1,96027 | 0,049964 | 0,2957766 |
| DPP8          | 565,72  | -1,11 | 0,568482 | -1,96025 | 0,049966 | 0,2957766 |
| RP3-476K8.3   | 3,76    | 3,98  | 2,028849 | 1,96008  | 0,049986 | 0,295794  |
| RN7SL656P     | 9,73    | 1,77  | 0,901224 | 1,959954 | 0,050001 | 0,295794  |
| RNF146        | 79,44   | 1,88  | 0,960549 | 1,959448 | 0,05006  | 0,2960496 |
| KIAA0825      | 88,33   | 1,62  | 0,82557  | 1,957945 | 0,050236 | 0,2969971 |
| PAK1          | 2200,05 | 0,73  | 0,373709 | 1,957719 | 0,050263 | 0,2970597 |
| DNAJC30       | 57,21   | 1,56  | 0,796293 | 1,957206 | 0,050323 | 0,297321  |
| RP11-33E15.1  | 2,42    | -5,90 | 3,016324 | -1,95715 | 0,05033  | NA        |
| TCTN2         | 28,51   | -1,31 | 0,668009 | -1,95674 | 0,050378 | 0,2975496 |
| RNU4-51P      | 35,91   | 1,96  | 1,001575 | 1,956443 | 0,050413 | 0,2975804 |
| SMG8          | 46,64   | 3,23  | 1,65045  | 1,956425 | 0,050415 | 0,2975804 |
| RP11-552M11.4 | 16,06   | 3,55  | 1,816212 | 1,956256 | 0,050435 | 0,2976037 |
| CTD-2547G23.4 | 32,14   | -1,89 | 0,965889 | -1,95597 | 0,050468 | 0,2977046 |
| RP5-1112F19.2 | 4,48    | -2,29 | 1,170647 | -1,9553  | 0,050548 | 0,2979005 |
| RN7SL199P     | 9,69    | 1,76  | 0,899924 | 1,955292 | 0,050549 | 0,2979005 |
| MED26         | 44,57   | 2,66  | 1,359946 | 1,955285 | 0,050549 | 0,2979005 |
| RBM28         | 386,24  | -1,12 | 0,574426 | -1,95511 | 0,05057  | 0,2979276 |
| RP11-231P20.2 | 27,46   | 1,28  | 0,653772 | 1,954197 | 0,050678 | 0,2983691 |
| NOSTRIN       | 7,73    | -2,17 | 1,111998 | -1,95414 | 0,050685 | 0,2983691 |
| RP11-77P16.4  | 14,47   | 1,95  | 0,995571 | 1,954069 | 0,050693 | 0,2983691 |
| AC140481.2    | 3,03    | -2,30 | 1,178462 | -1,95388 | 0,050716 | NA        |
| CTD-3118D11.2 | 3,43    | 4,39  | 2,249234 | 1,953774 | 0,050728 | NA        |
| RASIP1        | 11,63   | -5,37 | 2,747229 | -1,95368 | 0,050739 | 0,2985457 |
| BMPER         | 15,00   | -1,76 | 0,899277 | -1,95325 | 0,05079  | 0,2987474 |
| RP11-573M3.5  | 8,87    | -2,14 | 1,093653 | -1,95312 | 0,050806 | 0,2987474 |
| AF178030.2    | 21,61   | 2,87  | 1,468011 | 1,952374 | 0,050894 | 0,2991719 |

|               |          |       |          |          |          |           |
|---------------|----------|-------|----------|----------|----------|-----------|
| CCDC158       | 4,59     | -1,70 | 0,872293 | -1,95201 | 0,050938 | 0,2993346 |
| FURIN         | 268,00   | 0,95  | 0,484803 | 1,951669 | 0,050977 | 0,2994746 |
| UAP1          | 201,99   | 1,86  | 0,951214 | 1,951302 | 0,051021 | 0,2996075 |
| RNF151        | 2,41     | -5,89 | 3,017173 | -1,95127 | 0,051025 | NA        |
| POLA1         | 113,87   | -2,06 | 1,054671 | -1,95121 | 0,051032 | 0,2996075 |
| DUSP18        | 138,13   | 1,22  | 0,623325 | 1,950813 | 0,051079 | 0,2997884 |
| CHKB          | 936,73   | -0,58 | 0,298851 | -1,95016 | 0,051156 | 0,3001469 |
| ESCO1         | 320,05   | -1,29 | 0,662505 | -1,94964 | 0,051219 | 0,3003352 |
| ARPC3         | 7201,97  | 0,41  | 0,212516 | 1,949625 | 0,051221 | 0,3003352 |
| SH3BP4        | 253,02   | 1,73  | 0,889769 | 1,949023 | 0,051293 | 0,3006614 |
| LYPD4         | 2,49     | -1,76 | 0,903803 | -1,94895 | 0,051302 | NA        |
| RP11-347H15.3 | 4,99     | 4,96  | 2,543936 | 1,948205 | 0,05139  | 0,3011401 |
| RETN          | 159,27   | -1,27 | 0,652507 | -1,94806 | 0,051408 | 0,3011493 |
| PTRHD1        | 477,73   | 0,56  | 0,286388 | 1,94768  | 0,051453 | 0,301318  |
| CTC-436P18.4  | 87,21    | -1,23 | 0,630457 | -1,94743 | 0,051483 | 0,3013947 |
| PPP1R16B      | 142,83   | 1,96  | 1,006614 | 1,947222 | 0,051508 | 0,3013947 |
| C7orf26       | 90,14    | -1,23 | 0,630884 | -1,94717 | 0,051515 | 0,3013947 |
| CTD-2506J14.1 | 3,23     | 3,56  | 1,83085  | 1,946946 | 0,051541 | NA        |
| C12orf45      | 1463,18  | 0,73  | 0,373341 | 1,946543 | 0,05159  | 0,3017365 |
| CNN3          | 2,51     | 2,98  | 1,532321 | 1,946452 | 0,0516   | NA        |
| RP11-569D9.6  | 3,34     | -5,39 | 2,771137 | -1,94583 | 0,051676 | NA        |
| NR1H4         | 4,08     | -6,86 | 3,528468 | -1,94536 | 0,051732 | 0,3024748 |
| PEX5          | 4,83     | 2,58  | 1,326116 | 1,945167 | 0,051755 | 0,3025134 |
| DCP1A         | 312,65   | 0,94  | 0,483622 | 1,944489 | 0,051837 | 0,3028952 |
| RP11-72O9.4   | 50,55    | -1,08 | 0,555185 | -1,94358 | 0,051947 | 0,3033197 |
| DPM1          | 309,35   | 0,95  | 0,486742 | 1,943411 | 0,051966 | 0,3033197 |
| RP11-135F9.4  | 56,83    | 1,47  | 0,756992 | 1,9434   | 0,051968 | 0,3033197 |
| ANKZF1        | 262,83   | -1,23 | 0,632764 | -1,94335 | 0,051974 | 0,3033197 |
| CTD-2314I6.1  | 16,37    | -7,05 | 3,63033  | -1,942   | 0,052137 | 0,3040471 |
| KIR3DX1       | 48,37    | -1,14 | 0,588587 | -1,94196 | 0,052141 | 0,3040471 |
| PRSS27        | 16,67    | -1,17 | 0,601479 | -1,94191 | 0,052148 | 0,3040471 |
| RPS6          | 13936,71 | 0,31  | 0,157933 | 1,941722 | 0,052171 | 0,3040842 |
| WDR86         | 1,47     | -5,13 | 2,640358 | -1,94151 | 0,052196 | NA        |
| CMTM7         | 1188,77  | -0,70 | 0,359104 | -1,94124 | 0,052229 | 0,3043305 |
| RP11-140I24.2 | 3,21     | -1,80 | 0,925513 | -1,94092 | 0,052268 | NA        |
| CSNK1A1       | 1920,66  | 0,52  | 0,266108 | 1,940863 | 0,052275 | 0,3043687 |
| COX6B1        | 1491,76  | -0,47 | 0,241991 | -1,94085 | 0,052276 | 0,3043687 |
| DCP1B         | 23,55    | 2,51  | 1,291974 | 1,94078  | 0,052285 | 0,3043687 |
| CELA2B        | 10,73    | 6,09  | 3,139288 | 1,940333 | 0,052339 | 0,3044579 |
| CTD-3018O17.3 | 50,11    | -1,44 | 0,740596 | -1,94028 | 0,052345 | 0,3044579 |
| PSMD1         | 449,93   | -0,79 | 0,407837 | -1,9402  | 0,052355 | 0,3044579 |
| REPS1         | 271,29   | 1,25  | 0,645148 | 1,940115 | 0,052366 | 0,3044579 |
| NDUFS4        | 526,21   | 0,78  | 0,403006 | 1,939654 | 0,052422 | 0,3045486 |
| TRIM61        | 6,06     | 3,22  | 1,657863 | 1,939601 | 0,052428 | 0,3045486 |
| CRADD         | 53,69    | 3,03  | 1,562173 | 1,939582 | 0,05243  | 0,3045486 |
| CFAP73        | 7,06     | 5,37  | 2,771573 | 1,939127 | 0,052486 | 0,3047749 |
| NOSIP         | 759,30   | -0,73 | 0,376862 | -1,93896 | 0,052506 | 0,3047854 |
| AC107079.1    | 10,34    | 3,95  | 2,039504 | 1,938786 | 0,052527 | 0,3047854 |
| MTRNR2L8      | 8,68     | -0,81 | 0,419592 | -1,93867 | 0,052541 | 0,3047854 |
| CD68          | 1167,53  | -0,76 | 0,39072  | -1,93857 | 0,052553 | 0,3047854 |

|                |         |       |          |          |          |           |
|----------------|---------|-------|----------|----------|----------|-----------|
| HOMER1         | 22,29   | 2,74  | 1,415175 | 1,938241 | 0,052594 | 0,3049141 |
| MCM3APAS       | 55,83   | 2,21  | 1,138814 | 1,938124 | 0,052608 | 0,3049141 |
| MIER3          | 96,82   | 1,85  | 0,952996 | 1,937937 | 0,052631 | 0,3049511 |
| CTD-2256P15.4  | 1,57    | -3,01 | 1,55086  | -1,93782 | 0,052645 | NA        |
| LA16c-380H5.2  | 0,81    | -3,64 | 1,876812 | -1,93774 | 0,052655 | NA        |
| AC012317.1     | 10,45   | -1,25 | 0,644158 | -1,93737 | 0,0527   | 0,3051272 |
| NUP43          | 90,33   | 1,57  | 0,809218 | 1,937355 | 0,052702 | 0,3051272 |
| B3GNT8         | 34,44   | -4,27 | 2,206048 | -1,93729 | 0,052711 | 0,3051272 |
| RP11-225L12.2  | 69,34   | -1,24 | 0,637614 | -1,93708 | 0,052735 | 0,3051756 |
| LY6G5B         | 34,02   | -1,22 | 0,629238 | -1,93678 | 0,052772 | 0,3052283 |
| GOSR1          | 419,95  | 0,94  | 0,486041 | 1,93674  | 0,052777 | 0,3052283 |
| CTA-373H7.7    | 12,28   | -1,88 | 0,970349 | -1,93635 | 0,052824 | 0,3054064 |
| RP11-122K13.12 | 9,68    | 2,73  | 1,412402 | 1,936074 | 0,052859 | 0,3054374 |
| CXorf23        | 124,46  | -1,19 | 0,616887 | -1,93604 | 0,052863 | 0,3054374 |
| VOPP1          | 911,45  | 0,84  | 0,432689 | 1,935908 | 0,052879 | 0,3054374 |
| SNRPB2         | 431,27  | 0,61  | 0,314923 | 1,935669 | 0,052908 | 0,3054471 |
| CTD-2587M2.1   | 44,06   | -1,35 | 0,698077 | -1,93563 | 0,052914 | 0,3054471 |
| RAB36          | 4,41    | -1,70 | 0,876743 | -1,93548 | 0,052931 | 0,305455  |
| RN7SL567P      | 2,60    | 3,42  | 1,765123 | 1,935435 | 0,052937 | NA        |
| SGSM2          | 281,44  | 1,06  | 0,546328 | 1,934188 | 0,05309  | 0,3062757 |
| PDCD6          | 1198,99 | 0,79  | 0,409767 | 1,934046 | 0,053107 | 0,3062813 |
| DYNLL2         | 70,94   | -1,49 | 0,768387 | -1,93339 | 0,053188 | 0,3066538 |
| DHX34          | 74,65   | -1,33 | 0,685598 | -1,9331  | 0,053223 | 0,3067274 |
| NANOGP1        | 10,60   | -1,65 | 0,855344 | -1,93302 | 0,053234 | 0,3067274 |
| C1orf158       | 17,33   | -1,67 | 0,864343 | -1,93282 | 0,053258 | 0,3067711 |
| RP11-315I20.1  | 34,97   | -1,29 | 0,669827 | -1,93252 | 0,053295 | 0,3068247 |
| ADM            | 25,18   | 2,95  | 1,52512  | 1,932288 | 0,053324 | 0,3068247 |
| HYDIN2         | 8,61    | -4,76 | 2,462419 | -1,93225 | 0,053329 | 0,3068247 |
| PDIA3          | 2084,04 | 0,52  | 0,271508 | 1,9321   | 0,053347 | 0,3068247 |
| TMSB4XP4       | 22,65   | 0,84  | 0,43692  | 1,931961 | 0,053364 | 0,3068247 |
| TRABD2A        | 95,47   | -1,48 | 0,765398 | -1,93175 | 0,053339 | 0,3068247 |
| BFAR           | 388,89  | 1,07  | 0,552259 | 1,9317   | 0,053397 | 0,3068247 |
| AC006262.4     | 13,36   | -3,91 | 2,022218 | -1,93154 | 0,053416 | 0,3068247 |
| RP3-412A9.17   | 153,76  | -0,73 | 0,378471 | -1,93154 | 0,053416 | 0,3068247 |
| IFFO2          | 175,58  | 1,81  | 0,936315 | 1,930788 | 0,053509 | 0,3072651 |
| SYT6           | 2,43    | -5,88 | 3,044494 | -1,93061 | 0,053531 | NA        |
| AC135048.13    | 23,46   | 2,20  | 1,139231 | 1,930172 | 0,053586 | 0,3076073 |
| RP11-128M1.1   | 3,42    | -5,93 | 3,070276 | -1,93012 | 0,053592 | NA        |
| ETV3           | 570,47  | 1,44  | 0,743733 | 1,93004  | 0,053602 | 0,3076073 |
| MATK           | 34,88   | -1,34 | 0,694688 | -1,92954 | 0,053663 | 0,3078655 |
| PIK3R1         | 458,31  | -0,91 | 0,469522 | -1,92918 | 0,053709 | 0,3080307 |
| RP11-749H20.1  | 2,80    | -5,29 | 2,740704 | -1,92905 | 0,053725 | NA        |
| RP11-430C7.4   | 7,60    | 5,55  | 2,879579 | 1,928888 | 0,053745 | 0,3081251 |
| RF00284        | 4,44    | 4,79  | 2,482827 | 1,928559 | 0,053786 | 0,3081251 |
| KLF13          | 442,25  | -0,84 | 0,433937 | -1,92854 | 0,053788 | 0,3081251 |
| RNASEH2A       | 135,27  | 1,32  | 0,686658 | 1,928512 | 0,053791 | 0,3081251 |
| GNAQ           | 1692,52 | 0,60  | 0,313106 | 1,927965 | 0,053859 | 0,3084197 |
| RP11-123O10.3  | 6,21    | -1,89 | 0,982881 | -1,92708 | 0,053969 | 0,3089525 |
| SSTR2          | 73,05   | -0,81 | 0,418889 | -1,92667 | 0,054021 | 0,3090933 |
| NSUN6          | 168,10  | -1,45 | 0,750311 | -1,92662 | 0,054027 | 0,3090933 |

|                |         |       |          |          |          |           |
|----------------|---------|-------|----------|----------|----------|-----------|
| CSTB           | 1404,74 | 0,46  | 0,23798  | 1,925848 | 0,054123 | 0,3093934 |
| RNF222         | 6,79    | -2,08 | 1,082131 | -1,92574 | 0,054137 | 0,3093934 |
| AC008888.7     | 6,83    | -2,45 | 1,271676 | -1,92568 | 0,054144 | 0,3093934 |
| GIGYF2         | 581,22  | 0,75  | 0,391284 | 1,925605 | 0,054154 | 0,3093934 |
| HEATR3         | 265,23  | -1,10 | 0,56914  | -1,92553 | 0,054163 | 0,3093934 |
| ACTR6          | 207,22  | -1,29 | 0,672614 | -1,92525 | 0,054198 | 0,309499  |
| RP6-109B7.4    | 7,33    | 3,04  | 1,577985 | 1,924804 | 0,054254 | 0,3096345 |
| RP11-1012A1.4  | 5,90    | 5,37  | 2,790121 | 1,924798 | 0,054255 | 0,3096345 |
| SNX24          | 26,33   | 4,06  | 2,108539 | 1,924314 | 0,054315 | 0,3098853 |
| SYCP1          | 23,93   | -1,94 | 1,008093 | -1,92409 | 0,054343 | 0,3098995 |
| RP11-126K1.6   | 13,07   | 1,88  | 0,978227 | 1,924028 | 0,054351 | 0,3098995 |
| SPX            | 2,39    | -5,86 | 3,047735 | -1,92379 | 0,054381 | NA        |
| NEK10          | 18,56   | 1,56  | 0,810372 | 1,923374 | 0,054433 | 0,3101831 |
| AC011515.2     | 9,95    | 3,59  | 1,865713 | 1,923317 | 0,05444  | 0,3101831 |
| HOOK1          | 31,16   | -2,83 | 1,471953 | -1,92323 | 0,054451 | 0,3101831 |
| ATP5D          | 1092,83 | -0,75 | 0,387886 | -1,92288 | 0,054495 | 0,3102907 |
| RP11-53B2.6    | 17,97   | -2,81 | 1,4622   | -1,9228  | 0,054505 | 0,3102907 |
| HIBADH         | 77,61   | 2,16  | 1,12376  | 1,922615 | 0,054528 | 0,3102907 |
| PTK2           | 198,25  | -1,08 | 0,559837 | -1,9224  | 0,054556 | 0,3102907 |
| PITPNC1        | 190,11  | -1,68 | 0,872013 | -1,92239 | 0,054556 | 0,3102907 |
| YAE1D1         | 22,75   | 4,04  | 2,100209 | 1,922286 | 0,05457  | 0,3102907 |
| RP11-358L22.2  | 12,91   | -1,15 | 0,598597 | -1,92189 | 0,054619 | 0,3104762 |
| BIN3           | 218,43  | 1,35  | 0,701353 | 1,921536 | 0,054664 | 0,3106373 |
| CNOT8          | 978,78  | 0,74  | 0,386769 | 1,921389 | 0,054683 | 0,310648  |
| MACROD1        | 3,57    | 4,48  | 2,332941 | 1,921338 | 0,054689 | NA        |
| RP11-791G16.2  | 1,29    | -2,57 | 1,340139 | -1,92111 | 0,054718 | NA        |
| C10orf111      | 9,05    | -1,18 | 0,613147 | -1,92045 | 0,054801 | 0,311121  |
| RNU6-60P       | 15,64   | -3,32 | 1,731032 | -1,92019 | 0,054834 | 0,311121  |
| CTD-2510F5.4   | 4,79    | -2,81 | 1,463331 | -1,92008 | 0,054848 | 0,311121  |
| RP5-940J5.6    | 16,98   | -2,10 | 1,094106 | -1,91995 | 0,054864 | 0,311121  |
| HYAL1          | 3,07    | -2,37 | 1,234061 | -1,91995 | 0,054864 | NA        |
| NCKAP1         | 97,10   | 2,29  | 1,191321 | 1,919939 | 0,054866 | 0,311121  |
| CTC-338M12.6   | 6,20    | -1,79 | 0,929779 | -1,91993 | 0,054866 | 0,311121  |
| LZTS1          | 2,93    | -2,35 | 1,225025 | -1,91986 | 0,054875 | NA        |
| ZNF483         | 31,34   | -0,93 | 0,482944 | -1,91953 | 0,054917 | 0,311313  |
| RN7SL418P      | 7,04    | 2,62  | 1,363181 | 1,919387 | 0,054935 | 0,311323  |
| ABHD4          | 45,44   | 2,66  | 1,384712 | 1,918755 | 0,055015 | 0,3115795 |
| AC011288.2     | 16,26   | 1,63  | 0,850707 | 1,918688 | 0,055024 | 0,3115795 |
| STARD4         | 195,32  | -1,58 | 0,821227 | -1,91863 | 0,055031 | 0,3115795 |
| LA16c-360H6.1  | 4,79    | 4,88  | 2,543861 | 1,917884 | 0,055126 | 0,3120216 |
| ADRBK1         | 1101,98 | -0,74 | 0,384717 | -1,91774 | 0,055143 | 0,3120264 |
| PTPN18         | 1849,19 | 0,49  | 0,254468 | 1,917439 | 0,055182 | 0,3120648 |
| ZMIZ1          | 990,74  | 0,82  | 0,42963  | 1,917304 | 0,055199 | 0,3120648 |
| CALCA          | 8,69    | 5,10  | 2,661815 | 1,917295 | 0,0552   | 0,3120648 |
| SCN2A          | 148,14  | -1,04 | 0,542531 | -1,91688 | 0,055253 | 0,3121254 |
| RP11-470M1.2   | 144,88  | -1,26 | 0,659127 | -1,91686 | 0,055256 | 0,3121254 |
| EMC3           | 667,68  | 0,87  | 0,452599 | 1,916814 | 0,055262 | 0,3121254 |
| ACD            | 88,66   | 1,45  | 0,754419 | 1,916672 | 0,05528  | 0,3121326 |
| RP11-374F3.4   | 26,54   | -1,01 | 0,528123 | -1,9165  | 0,055301 | 0,3121582 |
| RP11-467L19.14 | 6,17    | 1,88  | 0,982597 | 1,916293 | 0,055328 | 0,3122153 |

|                |         |       |          |          |          |           |
|----------------|---------|-------|----------|----------|----------|-----------|
| RP11-467L13.7  | 27,42   | 1,61  | 0,841972 | 1,915984 | 0,055367 | 0,3123264 |
| NADK           | 686,00  | -0,85 | 0,443801 | -1,91573 | 0,055399 | 0,3123264 |
| SPATS2L        | 421,24  | 0,92  | 0,479623 | 1,915574 | 0,055419 | 0,3123264 |
| AC135050.5     | 5,25    | -1,38 | 0,720555 | -1,91548 | 0,055431 | 0,3123264 |
| RP11-313P13.4  | 8,85    | 2,79  | 1,455761 | 1,915479 | 0,055431 | 0,3123264 |
| RP11-396N11.1  | 8,07    | 2,70  | 1,409527 | 1,915146 | 0,055474 | 0,3124709 |
| RP11-369J21.12 | 6,45    | 4,73  | 2,470066 | 1,914362 | 0,055574 | 0,312847  |
| RP11-291L22.9  | 24,14   | -1,48 | 0,773    | -1,91411 | 0,055605 | 0,312847  |
| GCHFR          | 183,30  | -1,90 | 0,993868 | -1,91407 | 0,055611 | 0,312847  |
| RP11-667M19.10 | 3,29    | -1,77 | 0,923114 | -1,91403 | 0,055616 | NA        |
| RN7SL600P      | 36,79   | 1,59  | 0,831353 | 1,913995 | 0,055621 | 0,312847  |
| PSPH           | 124,04  | 1,79  | 0,933936 | 1,913924 | 0,05563  | 0,312847  |
| PIGN           | 560,50  | -0,72 | 0,37857  | -1,91369 | 0,05566  | 0,312847  |
| RP11-214N9.1   | 4,56    | 4,82  | 2,517956 | 1,913673 | 0,055662 | 0,312847  |
| RP11-138I1.4   | 973,13  | 0,49  | 0,257374 | 1,913402 | 0,055697 | 0,312847  |
| MYEOV2         | 185,88  | -0,67 | 0,350184 | -1,91339 | 0,055698 | 0,312847  |
| EDDM13         | 8,65    | 2,97  | 1,55424  | 1,913307 | 0,055709 | 0,312847  |
| TRADD          | 280,15  | 1,45  | 0,757303 | 1,913044 | 0,055742 | 0,3129413 |
| CTB-133P21.1   | 4,51    | 4,80  | 2,51133  | 1,912792 | 0,055775 | 0,3130284 |
| GTF3C4         | 156,80  | 1,24  | 0,650915 | 1,912041 | 0,055871 | 0,3134195 |
| RP11-259O2.3   | 47,05   | -0,91 | 0,476157 | -1,91198 | 0,055878 | 0,3134195 |
| NT5M           | 16,68   | 2,14  | 1,118806 | 1,91172  | 0,055912 | 0,3134353 |
| RP11-346C20.5  | 18,67   | -1,33 | 0,694474 | -1,9117  | 0,055915 | 0,3134353 |
| ZBED3          | 50,43   | 2,12  | 1,107137 | 1,910977 | 0,056008 | 0,3138618 |
| HDAC8          | 162,13  | 1,43  | 0,747996 | 1,910513 | 0,056067 | 0,3140529 |
| GADD45GIP1     | 796,99  | -0,71 | 0,371354 | -1,91045 | 0,056076 | 0,3140529 |
| CCDC80         | 168,05  | -0,99 | 0,519461 | -1,91032 | 0,056092 | 0,3140529 |
| HIST2H2BF      | 52,94   | -2,16 | 1,130438 | -1,90946 | 0,056203 | 0,3145792 |
| RP11-86H7.6    | 1,10    | -3,20 | 1,674882 | -1,90913 | 0,056246 | NA        |
| DDT            | 382,48  | -0,48 | 0,251005 | -1,90829 | 0,056354 | 0,3153303 |
| CAMK2G         | 374,49  | 1,15  | 0,600679 | 1,907912 | 0,056403 | 0,3153509 |
| AC063980.3     | 1,87    | -2,24 | 1,175174 | -1,90786 | 0,056409 | NA        |
| BAZ1A          | 1079,09 | -0,70 | 0,36868  | -1,90784 | 0,056412 | 0,3153509 |
| ADAR           | 2161,51 | -0,80 | 0,419681 | -1,90775 | 0,056423 | 0,3153509 |
| PCBD2          | 155,77  | 1,18  | 0,620429 | 1,907732 | 0,056426 | 0,3153509 |
| RP11-213H15.1  | 4,50    | 4,22  | 2,211894 | 1,907224 | 0,056492 | 0,3156235 |
| PDGFRB         | 1,37    | -4,60 | 2,413529 | -1,90719 | 0,056496 | NA        |
| TMEM205        | 947,76  | -0,53 | 0,27857  | -1,90679 | 0,056547 | 0,3157221 |
| ERMN           | 115,77  | 2,11  | 1,105033 | 1,906746 | 0,056553 | 0,3157221 |
| UNC119B        | 41,02   | 2,19  | 1,151087 | 1,906695 | 0,05656  | 0,3157221 |
| PIGR           | 19,22   | -2,04 | 1,06799  | -1,90616 | 0,056629 | 0,3160106 |
| TTLL9          | 16,15   | 2,01  | 1,05657  | 1,905741 | 0,056684 | 0,3161206 |
| CDR2           | 24,63   | 1,64  | 0,859811 | 1,905595 | 0,056703 | 0,3161206 |
| CPM            | 404,58  | -0,98 | 0,516287 | -1,90542 | 0,056725 | 0,3161206 |
| MT-TQ          | 45,24   | -1,02 | 0,535978 | -1,90514 | 0,056761 | 0,3161206 |
| UTP4           | 125,41  | 1,42  | 0,744369 | 1,905072 | 0,056771 | 0,3161206 |
| TIE1           | 5,38    | -2,09 | 1,097678 | -1,90504 | 0,056775 | 0,3161206 |
| GPSM3          | 1723,80 | -0,40 | 0,211494 | -1,90501 | 0,056779 | 0,3161206 |
| RP11-843P14.1  | 9,49    | -2,75 | 1,443029 | -1,9049  | 0,056793 | 0,3161206 |
| ZNF175         | 97,64   | -2,60 | 1,36395  | -1,90466 | 0,056825 | 0,3161206 |

|               |         |       |          |          |          |           |
|---------------|---------|-------|----------|----------|----------|-----------|
| PDK3          | 194,02  | -2,29 | 1,203599 | -1,90461 | 0,05683  | 0,3161206 |
| TBCEL         | 123,53  | 1,83  | 0,95919  | 1,904516 | 0,056843 | 0,3161206 |
| RP11-803D5.1  | 27,92   | 2,15  | 1,12879  | 1,904444 | 0,056852 | 0,3161206 |
| WASHC2A       | 582,10  | -0,97 | 0,509726 | -1,9041  | 0,056898 | 0,3162777 |
| LINC00310     | 33,97   | -1,76 | 0,924866 | -1,90358 | 0,056965 | 0,3164088 |
| IKBKE         | 300,49  | -1,81 | 0,949655 | -1,90353 | 0,056972 | 0,3164088 |
| FAM124B       | 89,34   | -2,56 | 1,3468   | -1,90348 | 0,056978 | 0,3164088 |
| BPESC1        | 3,30    | -1,39 | 0,728886 | -1,90335 | 0,056995 | NA        |
| TKT           | 2608,92 | -0,50 | 0,264316 | -1,90326 | 0,057007 | 0,3164088 |
| BRI3          | 584,13  | -0,77 | 0,405947 | -1,90323 | 0,057011 | 0,3164088 |
| CALM3         | 511,55  | -0,77 | 0,403439 | -1,90313 | 0,057023 | 0,3164088 |
| TSHZ1         | 278,07  | 1,42  | 0,74552  | 1,902972 | 0,057044 | 0,3164303 |
| ANGPTL4       | 1,90    | 2,94  | 1,543884 | 1,902814 | 0,057065 | NA        |
| RIOK1         | 431,39  | 1,30  | 0,684978 | 1,902602 | 0,057092 | 0,3166036 |
| RP11-73E17.2  | 31,86   | 2,28  | 1,196125 | 1,902328 | 0,057128 | 0,3167083 |
| KLRG1         | 95,77   | -1,80 | 0,946643 | -1,9019  | 0,057184 | 0,3169249 |
| RN7SL492P     | 21,18   | -1,61 | 0,847077 | -1,90151 | 0,057235 | 0,3171084 |
| RP11-116D2.1  | 3,38    | -3,02 | 1,587668 | -1,90134 | 0,057258 | NA        |
| AC008280.2    | 1,13    | -4,42 | 2,326564 | -1,90082 | 0,057326 | NA        |
| RBM3          | 3574,10 | 0,66  | 0,346772 | 1,900657 | 0,057347 | 0,317636  |
| MEX3C         | 125,96  | 1,22  | 0,640618 | 1,90044  | 0,057375 | 0,3176995 |
| GDF15         | 6,26    | -2,17 | 1,139976 | -1,90023 | 0,057402 | 0,3177543 |
| TCFL5         | 77,41   | 1,90  | 1,002858 | 1,899563 | 0,05749  | 0,3181471 |
| RPS6KL1       | 40,11   | -1,19 | 0,628826 | -1,8986  | 0,057617 | 0,3186297 |
| UBE2E2        | 400,26  | 1,16  | 0,608394 | 1,898567 | 0,057621 | 0,3186297 |
| CAPN15        | 105,15  | -1,15 | 0,603258 | -1,89851 | 0,057629 | 0,3186297 |
| PCSK5         | 7038,58 | -1,53 | 0,804143 | -1,89814 | 0,057677 | 0,3187999 |
| RP11-362K14.5 | 24,58   | 1,10  | 0,580396 | 1,89794  | 0,057704 | 0,3188544 |
| ERAP2         | 706,55  | -0,96 | 0,506432 | -1,89777 | 0,057727 | 0,3188619 |
| BTN2A2        | 281,10  | -1,27 | 0,667094 | -1,89767 | 0,05774  | 0,3188619 |
| NBPF19        | 3802,49 | -0,53 | 0,278862 | -1,89734 | 0,057783 | 0,3189873 |
| PAPLN         | 110,53  | -1,59 | 0,837861 | -1,89724 | 0,057797 | 0,3189873 |
| ECT2          | 49,96   | -1,84 | 0,970634 | -1,89699 | 0,057829 | 0,319072  |
| NEXMIF        | 11,97   | -2,50 | 1,31896  | -1,89671 | 0,057866 | 0,3191292 |
| CLEC12A       | 1387,03 | -0,88 | 0,465844 | -1,89652 | 0,057891 | 0,3191292 |
| RF00156       | 4,58    | 4,20  | 2,213536 | 1,896422 | 0,057904 | 0,3191292 |
| ANKMY1        | 134,97  | -1,77 | 0,932044 | -1,89639 | 0,057908 | 0,3191292 |
| LRPAP1        | 1163,18 | 1,02  | 0,537797 | 1,895971 | 0,057964 | 0,3192623 |
| SLC25A22      | 41,59   | 2,51  | 1,323479 | 1,895951 | 0,057967 | 0,3192623 |
| RBM44         | 49,77   | -2,01 | 1,059285 | -1,89578 | 0,05799  | 0,3192663 |
| RP11-113I24.1 | 204,64  | -0,80 | 0,419993 | -1,89569 | 0,058002 | 0,3192663 |
| RP11-338E21.3 | 11,03   | -1,86 | 0,983436 | -1,89524 | 0,058061 | 0,3194984 |
| RP11-358L16.4 | 1,82    | -3,63 | 1,918797 | -1,89441 | 0,05817  | NA        |
| NAA40         | 174,45  | 1,33  | 0,704466 | 1,894257 | 0,058191 | 0,3200557 |
| KDM1B         | 285,79  | 1,12  | 0,590521 | 1,894214 | 0,058197 | 0,3200557 |
| SGPP1         | 84,78   | 1,87  | 0,987726 | 1,893738 | 0,05826  | 0,3203035 |
| AGA           | 178,48  | 1,93  | 1,02116  | 1,893615 | 0,058276 | 0,3203035 |
| FAM160B1      | 254,55  | 1,85  | 0,977216 | 1,892847 | 0,058378 | 0,3206472 |
| LRR8B         | 191,97  | -1,41 | 0,744461 | -1,89279 | 0,058386 | 0,3206472 |
| SMC6          | 353,72  | 0,83  | 0,440731 | 1,89263  | 0,058407 | 0,3206472 |



|                |          |       |          |          |          |           |
|----------------|----------|-------|----------|----------|----------|-----------|
| NRG4           | 78,38    | -1,57 | 0,831528 | -1,89263 | 0,058408 | 0,3206472 |
| ERLIN1         | 200,19   | -1,71 | 0,905399 | -1,89238 | 0,05844  | 0,3206528 |
| RP11-85M11.2   | 14,35    | 2,16  | 1,142548 | 1,89236  | 0,058443 | 0,3206528 |
| TCEAL4         | 158,14   | -1,34 | 0,709365 | -1,89207 | 0,058482 | 0,3207698 |
| RP13-270P17.1  | 5,32     | 2,02  | 1,069938 | 1,891776 | 0,058521 | 0,3208901 |
| RBM22          | 500,23   | 0,84  | 0,446571 | 1,89124  | 0,058592 | 0,3211874 |
| RN7SL363P      | 3,22     | 2,70  | 1,427682 | 1,89104  | 0,058619 | NA        |
| CCL3           | 1807,01  | -0,83 | 0,437638 | -1,89087 | 0,058642 | 0,3213211 |
| ZNF547         | 10,63    | 1,93  | 1,023078 | 1,890798 | 0,058651 | 0,3213211 |
| APOBEC3G       | 325,43   | 1,23  | 0,651857 | 1,890154 | 0,058737 | 0,3216498 |
| RP11-344E13.3  | 38,88    | -1,93 | 1,023241 | -1,89009 | 0,058746 | 0,3216498 |
| RFXANK         | 317,11   | -0,80 | 0,423689 | -1,8899  | 0,058771 | 0,321694  |
| PPFIA2         | 1,42     | -4,60 | 2,432918 | -1,88982 | 0,058782 | NA        |
| PYURF          | 1389,78  | 0,76  | 0,400881 | 1,889255 | 0,058858 | 0,3219437 |
| SPINK1         | 4,93     | 4,37  | 2,312834 | 1,888998 | 0,058892 | 0,3219437 |
| NFE2L1         | 168,88   | -1,24 | 0,65777  | -1,88898 | 0,058895 | 0,3219437 |
| GRK4           | 18,50    | -1,90 | 1,005897 | -1,88897 | 0,058896 | 0,3219437 |
| SHCBP1         | 143,54   | -2,13 | 1,129397 | -1,88891 | 0,058903 | 0,3219437 |
| KIF3C          | 1,76     | -2,72 | 1,441564 | -1,88891 | 0,058904 | NA        |
| RP11-1149M10.1 | 0,92     | -3,89 | 2,061507 | -1,88836 | 0,058978 | NA        |
| LA16c-306E5.2  | 2,89     | -5,83 | 3,085086 | -1,8883  | 0,058986 | NA        |
| TIMM8B         | 278,86   | -0,65 | 0,341662 | -1,88815 | 0,059005 | 0,322406  |
| WWC3           | 100,92   | 1,49  | 0,787213 | 1,887055 | 0,059153 | 0,3230246 |
| RP11-196E1.3   | 31,50    | 1,27  | 0,67373  | 1,886933 | 0,059169 | 0,3230246 |
| B4GALT4        | 182,44   | 1,49  | 0,789522 | 1,886924 | 0,059171 | 0,3230246 |
| HIST2H2BE      | 183,94   | 1,51  | 0,801372 | 1,886506 | 0,059227 | 0,3230419 |
| RGS19          | 1085,75  | 0,65  | 0,343331 | 1,886475 | 0,059231 | 0,3230419 |
| ZBTB5          | 113,23   | -1,95 | 1,035851 | -1,88641 | 0,059239 | 0,3230419 |
| EFCAB12        | 38,21    | -1,54 | 0,818379 | -1,88624 | 0,059263 | 0,3230419 |
| MED8           | 372,85   | 1,38  | 0,734173 | 1,88617  | 0,059272 | 0,3230419 |
| GLCCI1         | 90,67    | -2,13 | 1,131985 | -1,88603 | 0,059291 | 0,3230419 |
| ZNF84          | 120,04   | 1,59  | 0,842108 | 1,885998 | 0,059295 | 0,3230419 |
| SNORA37        | 2,47     | -4,26 | 2,259481 | -1,88512 | 0,059414 | NA        |
| DUX4L18        | 1,79     | -4,18 | 2,21782  | -1,88497 | 0,059433 | NA        |
| ARHGDI1B       | 10662,99 | 0,49  | 0,259324 | 1,884731 | 0,059466 | 0,3238783 |
| RP3-426I6.5    | 9,98     | 3,68  | 1,953663 | 1,884364 | 0,059516 | 0,3240174 |
| RPL5           | 11987,69 | 0,40  | 0,212349 | 1,884284 | 0,059527 | 0,3240174 |
| CORIN          | 68,90    | -1,09 | 0,579898 | -1,88336 | 0,059652 | 0,3246046 |
| MIR1290        | 4,78     | -4,15 | 2,203662 | -1,8831  | 0,059686 | 0,3246977 |
| RP11-151A6.5   | 3,37     | 4,35  | 2,308238 | 1,883051 | 0,059693 | NA        |
| MVK            | 30,65    | -2,38 | 1,264658 | -1,8829  | 0,059714 | 0,3247308 |
| KTN1           | 1215,26  | 0,49  | 0,257817 | 1,882758 | 0,059733 | 0,3247308 |
| RP11-109N23.5  | 5,98     | 5,21  | 2,768697 | 1,882592 | 0,059756 | 0,3247308 |
| DIS3L2         | 201,80   | 1,19  | 0,632243 | 1,882543 | 0,059762 | 0,3247308 |
| AC007392.3     | 0,70     | -2,72 | 1,443161 | -1,88219 | 0,05981  | NA        |
| ERVMER34-1     | 4,59     | 1,88  | 0,998489 | 1,882108 | 0,059821 | 0,3248036 |
| RP11-405M12.4  | 36,29    | -2,02 | 1,073035 | -1,88209 | 0,059824 | 0,3248036 |
| TGIF1          | 526,29   | 0,70  | 0,372638 | 1,882058 | 0,059828 | 0,3248036 |
| RP11-10K16.1   | 19,19    | 2,04  | 1,083141 | 1,881812 | 0,059862 | 0,3248905 |
| CCZ1           | 528,01   | -0,72 | 0,380562 | -1,88137 | 0,059922 | 0,3250414 |

|               |          |       |          |          |          |           |
|---------------|----------|-------|----------|----------|----------|-----------|
| RP11-346I3.2  | 7,61     | -1,58 | 0,838967 | -1,88126 | 0,059937 | 0,3250414 |
| APOBEC3D      | 17,69    | -1,52 | 0,808207 | -1,88121 | 0,059943 | 0,3250414 |
| RP3-476K8.4   | 4,65     | 3,01  | 1,601149 | 1,881039 | 0,059967 | 0,3250414 |
| IARS2         | 417,04   | 1,27  | 0,675003 | 1,880891 | 0,059987 | 0,3250414 |
| RP11-10022.1  | 66,87    | 1,07  | 0,57127  | 1,880834 | 0,059995 | 0,3250414 |
| LPAR3         | 16,83    | -1,39 | 0,741279 | -1,88055 | 0,060033 | 0,3250414 |
| U2SURP        | 1056,29  | 0,76  | 0,402297 | 1,880505 | 0,060039 | 0,3250414 |
| FAXC          | 19,35    | -1,35 | 0,717836 | -1,88045 | 0,060047 | 0,3250414 |
| MGAT4C        | 323,49   | -2,46 | 1,30735  | -1,88005 | 0,060101 | 0,3252412 |
| RP11-483E23.3 | 1,86     | -5,69 | 3,027511 | -1,87982 | 0,060132 | NA        |
| AC009303.1    | 31,37    | -1,99 | 1,059175 | -1,87968 | 0,060152 | 0,3253667 |
| CDC27         | 521,31   | -0,91 | 0,483775 | -1,87957 | 0,060166 | 0,3253667 |
| ZBTB3         | 41,43    | -1,27 | 0,676166 | -1,87939 | 0,060192 | 0,3253667 |
| RP11-299H22.1 | 7,43     | -1,95 | 1,036823 | -1,87929 | 0,060205 | 0,3253667 |
| SLC22A16      | 74,98    | -1,85 | 0,984016 | -1,87924 | 0,060212 | 0,3253667 |
| THOC7         | 250,37   | 0,92  | 0,488238 | 1,878789 | 0,060273 | 0,3256057 |
| RP11-145D11.1 | 3,16     | 4,30  | 2,287454 | 1,87875  | 0,060279 | NA        |
| EIF3L         | 4495,52  | 0,49  | 0,263184 | 1,878469 | 0,060317 | 0,3257469 |
| RP11-107E5.4  | 49,24    | -2,32 | 1,235664 | -1,87829 | 0,060342 | 0,3257568 |
| ZBTB8A        | 86,97    | 1,25  | 0,667055 | 1,8782   | 0,060354 | 0,3257568 |
| PA2G4P4       | 5,50     | 2,94  | 1,565637 | 1,877865 | 0,0604   | 0,3259096 |
| MRPL23        | 516,22   | -0,79 | 0,423405 | -1,87762 | 0,060433 | 0,3259972 |
| ERP27         | 45,88    | 1,73  | 0,921669 | 1,877406 | 0,060463 | 0,3260595 |
| TOR1AIP1      | 604,00   | -0,96 | 0,509105 | -1,87672 | 0,060556 | 0,3264687 |
| CDKN1A        | 1715,22  | 0,84  | 0,447009 | 1,87628  | 0,060617 | 0,326702  |
| RP11-95G17.2  | 6,71     | 5,38  | 2,866802 | 1,876123 | 0,060638 | 0,3267238 |
| CHL1          | 1,70     | -4,51 | 2,403745 | -1,87595 | 0,060662 | NA        |
| MIEF1         | 269,38   | 1,19  | 0,634167 | 1,875888 | 0,060671 | 0,3268033 |
| RP11-11N9.2   | 14,90    | 2,34  | 1,247758 | 1,875563 | 0,060715 | 0,3269488 |
| ZNF24         | 762,41   | -0,76 | 0,406793 | -1,87537 | 0,060743 | 0,3269712 |
| ZFYVE28       | 29,75    | -3,50 | 1,86494  | -1,87528 | 0,060755 | 0,3269712 |
| TWSG1         | 89,02    | 1,66  | 0,883718 | 1,874984 | 0,060795 | 0,3270362 |
| ASGR1         | 380,52   | -0,86 | 0,459032 | -1,87493 | 0,060802 | 0,3270362 |
| DDX21         | 1724,26  | 0,51  | 0,273432 | 1,874728 | 0,06083  | 0,3270936 |
| RIC8B         | 93,70    | -1,75 | 0,93221  | -1,87384 | 0,060952 | 0,3276549 |
| SLC25A38      | 253,83   | -1,22 | 0,652516 | -1,87332 | 0,061025 | 0,3279508 |
| RP5-857K21.9  | 23,65    | -0,94 | 0,499762 | -1,87292 | 0,061079 | 0,3281482 |
| OCEL1         | 145,06   | -0,96 | 0,510163 | -1,87236 | 0,061157 | 0,3284699 |
| TMPRSS11BNL   | 11,83    | -1,50 | 0,80234  | -1,87212 | 0,06119  | 0,328471  |
| RP11-652L8.2  | 24,25    | 1,82  | 0,969547 | 1,872104 | 0,061192 | 0,328471  |
| ELK4          | 634,71   | -1,07 | 0,573669 | -1,87187 | 0,061225 | 0,3285538 |
| RP11-597K23.2 | 9,95     | -1,35 | 0,721517 | -1,8716  | 0,061263 | 0,328659  |
| AMICA1        | 11668,39 | 0,47  | 0,248642 | 1,87146  | 0,061281 | 0,3286651 |
| ATP5A1        | 4630,38  | 0,64  | 0,343932 | 1,871142 | 0,061325 | 0,3288069 |
| RP11-561C5.3  | 33,94    | -1,01 | 0,540103 | -1,871   | 0,061345 | 0,3288192 |
| SFT2D1        | 915,64   | 0,84  | 0,450281 | 1,870809 | 0,061372 | 0,3288315 |
| RP11-31L22.5  | 306,37   | -0,69 | 0,369846 | -1,87073 | 0,061383 | 0,3288315 |
| RPL39         | 2611,64  | -0,55 | 0,296303 | -1,87041 | 0,061427 | 0,3288996 |
| AC004237.1    | 23,56    | -0,91 | 0,484466 | -1,87038 | 0,061431 | 0,3288996 |
| ALDOC         | 65,88    | 2,67  | 1,426232 | 1,870183 | 0,061458 | 0,3289509 |

|               |         |       |          |          |          |           |
|---------------|---------|-------|----------|----------|----------|-----------|
| TUSC2         | 144,19  | -0,96 | 0,515314 | -1,86981 | 0,06151  | 0,3291333 |
| EXOC8         | 115,30  | -1,65 | 0,882015 | -1,86955 | 0,061546 | 0,3292291 |
| SLC44A4       | 36,86   | -2,44 | 1,30522  | -1,86906 | 0,061614 | 0,3294639 |
| AP000432.3    | 618,54  | -1,08 | 0,58057  | -1,86856 | 0,061684 | 0,3294639 |
| EEF1A1        | 97,34   | 1,72  | 0,919835 | 1,868467 | 0,061697 | 0,3294639 |
| MAST1         | 5,93    | -1,43 | 0,765824 | -1,86846 | 0,061698 | 0,3294639 |
| BTN3A3        | 348,53  | -1,56 | 0,834848 | -1,86844 | 0,061701 | 0,3294639 |
| RP11-468E2.1  | 94,32   | 4,17  | 2,233233 | 1,868411 | 0,061705 | 0,3294639 |
| RP11-113K21.5 | 76,05   | -1,20 | 0,640998 | -1,86831 | 0,061719 | 0,3294639 |
| RP11-469N6.3  | 2,65    | 3,42  | 1,829762 | 1,868135 | 0,061743 | NA        |
| LA16c-390E6.5 | 252,62  | -1,23 | 0,656284 | -1,86811 | 0,061746 | 0,3294639 |
| CTD-2370N5.3  | 8,94    | 4,39  | 2,347997 | 1,868036 | 0,061757 | 0,3294639 |
| LHFPL5        | 96,06   | -0,93 | 0,497411 | -1,86797 | 0,061767 | 0,3294639 |
| RP4-621N11.2  | 4,35    | -3,32 | 1,775114 | -1,86772 | 0,0618   | 0,3295491 |
| FGFR2         | 9,94    | -1,40 | 0,748004 | -1,86734 | 0,061854 | 0,3297411 |
| SERPINF1      | 281,09  | 1,10  | 0,590312 | 1,866948 | 0,061909 | 0,329938  |
| RP11-44N21.3  | 3,28    | -1,15 | 0,616533 | -1,86684 | 0,061924 | NA        |
| RHOU          | 190,55  | 1,39  | 0,74613  | 1,866765 | 0,061934 | 0,32998   |
| SAC3D1        | 31,44   | -2,19 | 1,172169 | -1,86649 | 0,061973 | 0,3300883 |
| CTD-2568A17.1 | 11,38   | -1,80 | 0,963992 | -1,86632 | 0,061997 | 0,3301241 |
| LRRC37A2      | 504,56  | 1,05  | 0,565405 | 1,865887 | 0,062057 | 0,3302578 |
| CCT7          | 1443,14 | 0,63  | 0,338986 | 1,865858 | 0,062061 | 0,3302578 |
| ELMOD2        | 116,90  | 1,77  | 0,947914 | 1,865757 | 0,062075 | 0,3302578 |
| OTUD7A        | 3,84    | 2,98  | 1,596415 | 1,865448 | 0,062119 | 0,3303253 |
| RIPOR2        | 2116,33 | -0,62 | 0,330092 | -1,86541 | 0,062124 | 0,3303253 |
| RP11-580I16.2 | 3,02    | 4,20  | 2,252623 | 1,865382 | 0,062128 | NA        |
| B3GALNT2      | 178,56  | 1,28  | 0,687766 | 1,865215 | 0,062151 | 0,3303436 |
| AC136290.1    | 29,65   | -2,32 | 1,244747 | -1,86514 | 0,062162 | 0,3303436 |
| OMD           | 19,61   | -3,90 | 2,092785 | -1,8648  | 0,062209 | 0,3304978 |
| ZNF20         | 13,73   | -1,95 | 1,047496 | -1,86378 | 0,062353 | 0,3311673 |
| SKI           | 105,98  | 1,88  | 1,006326 | 1,863331 | 0,062416 | 0,331336  |
| ZNF721        | 184,97  | 1,32  | 0,706194 | 1,863297 | 0,06242  | 0,331336  |
| CTC-250I14.3  | 1,47    | -1,91 | 1,023917 | -1,86311 | 0,062447 | NA        |
| CTB-27N1.2    | 3,36    | 3,79  | 2,03496  | 1,863013 | 0,06246  | NA        |
| CCSER1        | 197,95  | 1,11  | 0,59722  | 1,862595 | 0,062519 | 0,3317661 |
| DCAF7         | 1262,84 | -0,55 | 0,296094 | -1,86231 | 0,06256  | 0,3318667 |
| RP11-44D5.1   | 3,12    | 2,11  | 1,132342 | 1,862243 | 0,062569 | NA        |
| RP11-109G23.3 | 58,85   | -1,53 | 0,819699 | -1,86208 | 0,062591 | 0,3318667 |
| OR52I1        | 20,87   | -1,24 | 0,668289 | -1,86205 | 0,062597 | 0,3318667 |
| RNU6-1284P    | 2,23    | -5,08 | 2,730445 | -1,862   | 0,062603 | NA        |
| FAM83G        | 6,58    | 2,27  | 1,221156 | 1,861954 | 0,06261  | 0,3318667 |
| METTL1        | 91,80   | 2,21  | 1,184844 | 1,861827 | 0,062627 | 0,3318667 |
| RP11-98O2.1   | 2,53    | -2,44 | 1,311851 | -1,86156 | 0,062665 | NA        |
| RN7SL507P     | 4,51    | 2,94  | 1,579075 | 1,861542 | 0,062668 | 0,3319641 |
| CEBPB         | 198,95  | -0,82 | 0,44276  | -1,86144 | 0,062682 | 0,3319641 |
| KCTD18        | 113,06  | -1,15 | 0,616548 | -1,86124 | 0,06271  | 0,3320212 |
| ABL1          | 353,58  | 1,89  | 1,017803 | 1,860605 | 0,0628   | 0,3324024 |
| RP11-284F21.9 | 2,96    | -2,18 | 1,172858 | -1,86046 | 0,062821 | NA        |
| TTC19         | 557,35  | 0,87  | 0,469981 | 1,860272 | 0,062847 | 0,3325417 |
| RP11-533E19.7 | 15,38   | -4,82 | 2,59157  | -1,86017 | 0,062862 | 0,3325417 |

|               |          |       |          |          |          |           |
|---------------|----------|-------|----------|----------|----------|-----------|
| RP11-589P10.5 | 5,64     | 3,18  | 1,7112   | 1,85989  | 0,062901 | 0,3326049 |
| RP5-882O7.5   | 22,82    | -1,19 | 0,63818  | -1,85983 | 0,06291  | 0,3326049 |
| CLEC17A       | 30,07    | 1,91  | 1,029183 | 1,859525 | 0,062953 | 0,3327115 |
| POLR3A        | 274,17   | 1,53  | 0,823011 | 1,859319 | 0,062982 | 0,3327115 |
| CYSLTR2       | 140,89   | 1,83  | 0,984698 | 1,859307 | 0,062984 | 0,3327115 |
| AC018755.18   | 6,22     | 5,27  | 2,833429 | 1,858897 | 0,063042 | 0,3327933 |
| IPO7          | 409,23   | 0,95  | 0,51365  | 1,858822 | 0,063052 | 0,3327933 |
| ARHGAP42      | 3,78     | 4,39  | 2,362934 | 1,858626 | 0,06308  | 0,3327933 |
| ACTG1P9       | 11,97    | -1,81 | 0,975505 | -1,85859 | 0,063085 | 0,3327933 |
| PBX3          | 294,39   | 1,14  | 0,615124 | 1,858465 | 0,063103 | 0,3327933 |
| RPL6          | 10720,18 | 0,29  | 0,154264 | 1,858322 | 0,063123 | 0,3327933 |
| ST20          | 61,32    | -1,38 | 0,744586 | -1,85814 | 0,063149 | 0,3327933 |
| RP11-54O7.1   | 3,82     | -2,06 | 1,108804 | -1,8581  | 0,063155 | 0,3327933 |
| NPIP3         | 689,79   | 0,93  | 0,497906 | 1,858063 | 0,06316  | 0,3327933 |
| RP11-39K24.4  | 32,86    | 1,98  | 1,065383 | 1,857631 | 0,063221 | 0,3330226 |
| OR5T2         | 9,12     | -5,96 | 3,209025 | -1,85725 | 0,063276 | 0,3332132 |
| STX11         | 715,39   | 1,28  | 0,689779 | 1,856365 | 0,063402 | 0,333782  |
| RP4-563E14.1  | 1,86     | 3,51  | 1,89144  | 1,856259 | 0,063417 | NA        |
| UQCC1         | 182,75   | 1,12  | 0,602518 | 1,856191 | 0,063426 | 0,333818  |
| PEA15         | 1016,00  | 0,52  | 0,279861 | 1,855821 | 0,063479 | 0,3340009 |
| ERVFRD-1      | 25,98    | 2,00  | 1,078644 | 1,855333 | 0,063549 | 0,3342728 |
| RP11-651P23.4 | 3,04     | 4,24  | 2,283032 | 1,855274 | 0,063557 | NA        |
| RP11-154D6.1  | 14,00    | 2,19  | 1,178836 | 1,855025 | 0,063593 | 0,3343258 |
| MEIOC         | 28,92    | -1,24 | 0,666738 | -1,85501 | 0,063595 | 0,3343258 |
| PLPPR2        | 241,39   | -1,38 | 0,742208 | -1,85473 | 0,063634 | 0,3344394 |
| FTLP10        | 0,88     | -2,68 | 1,444159 | -1,85447 | 0,063673 | NA        |
| ZNF224        | 192,07   | -1,11 | 0,600804 | -1,85415 | 0,063718 | 0,3347841 |
| AC008072.1    | 21,16    | -2,10 | 1,133819 | -1,85388 | 0,063756 | 0,3348918 |
| ZNF746        | 172,22   | -1,59 | 0,858268 | -1,85371 | 0,06378  | 0,3349214 |
| ABCF2         | 374,94   | -1,35 | 0,729515 | -1,85358 | 0,063799 | 0,3349262 |
| NAE1          | 119,36   | -1,00 | 0,539876 | -1,85316 | 0,063859 | 0,3351462 |
| RER1          | 1204,36  | 0,75  | 0,404521 | 1,852979 | 0,063885 | 0,3351912 |
| DYNC1LI1      | 694,06   | 0,83  | 0,446405 | 1,852691 | 0,063927 | 0,3352142 |
| ZNF697        | 8,62     | 2,89  | 1,561531 | 1,852677 | 0,063929 | 0,3352142 |
| VAV1          | 656,97   | -0,74 | 0,399761 | -1,85257 | 0,063944 | 0,3352142 |
| RP11-287F9.2  | 4,97     | 1,77  | 0,958208 | 1,85237  | 0,063973 | 0,3352709 |
| CTD-2515A14.1 | 7,75     | -2,27 | 1,228298 | -1,85167 | 0,064074 | 0,3357048 |
| RP11-742B18.1 | 1,55     | -3,45 | 1,861842 | -1,85161 | 0,064082 | NA        |
| RP11-826N14.7 | 2,33     | 3,86  | 2,084413 | 1,851441 | 0,064106 | NA        |
| NBEAL1        | 280,59   | -1,39 | 0,749985 | -1,85098 | 0,064173 | 0,3361321 |
| UGDH          | 48,89    | -1,39 | 0,751573 | -1,85067 | 0,064217 | 0,3362668 |
| RP4-794I6.4   | 47,84    | -0,61 | 0,327743 | -1,85033 | 0,064266 | 0,3364309 |
| RP11-484D2.4  | 12,42    | 1,72  | 0,931638 | 1,850021 | 0,064311 | 0,3365677 |
| RP11-15A1.4   | 13,05    | -1,02 | 0,550603 | -1,84963 | 0,064367 | 0,3367698 |
| TRAPPC10      | 382,49   | 0,81  | 0,439994 | 1,849502 | 0,064385 | 0,3367698 |
| RIMS2         | 9,26     | -1,31 | 0,708352 | -1,84872 | 0,064498 | 0,3371781 |
| IFT20         | 416,15   | 0,89  | 0,480245 | 1,848597 | 0,064516 | 0,3371781 |
| UGT1A7        | 10,95    | -1,95 | 1,056052 | -1,84858 | 0,064518 | 0,3371781 |
| COL6A3        | 10,50    | -1,35 | 0,730791 | -1,84836 | 0,06455  | 0,3372518 |
| PRMT7         | 193,83   | -1,33 | 0,717103 | -1,84819 | 0,064575 | 0,3372854 |

|               |         |       |          |          |          |           |
|---------------|---------|-------|----------|----------|----------|-----------|
| CFTR          | 20,40   | -1,65 | 0,891889 | -1,84765 | 0,064653 | 0,3376006 |
| HSBP1         | 964,43  | -0,44 | 0,239237 | -1,84737 | 0,064693 | 0,3377142 |
| ANO7          | 4,46    | -2,86 | 1,549481 | -1,84693 | 0,064757 | 0,3379522 |
| TMEM97        | 200,59  | 1,66  | 0,897156 | 1,846768 | 0,064781 | 0,3379823 |
| RN7SL698P     | 18,35   | 1,73  | 0,935639 | 1,846195 | 0,064864 | 0,3383212 |
| HMGB1P39      | 10,00   | 1,39  | 0,750767 | 1,845832 | 0,064917 | 0,3385016 |
| ISYNA1        | 14,28   | 3,13  | 1,697063 | 1,845459 | 0,064971 | 0,3386534 |
| QSER1         | 375,24  | 1,40  | 0,761307 | 1,845381 | 0,064982 | 0,3386534 |
| RP11-767I20.1 | 3,66    | -2,02 | 1,093066 | -1,84517 | 0,065013 | NA        |
| HIST1H3D      | 1,93    | 3,57  | 1,936777 | 1,84494  | 0,065046 | NA        |
| XKR9          | 10,76   | -1,72 | 0,930754 | -1,84478 | 0,065069 | 0,3388157 |
| LGALS9B       | 5,87    | -3,06 | 1,659541 | -1,84476 | 0,065072 | 0,3388157 |
| HILPDA        | 44,17   | -1,99 | 1,077254 | -1,84476 | 0,065073 | 0,3388157 |
| CHRNA1        | 6,92    | 3,72  | 2,018917 | 1,844593 | 0,065097 | 0,3388157 |
| GRAMD3        | 81,74   | -1,72 | 0,93073  | -1,84454 | 0,065104 | 0,3388157 |
| RP11-637O19.3 | 5,98    | 5,21  | 2,826029 | 1,844299 | 0,06514  | 0,3389044 |
| RAPGEF2       | 464,80  | -1,34 | 0,724792 | -1,844   | 0,065183 | 0,3390344 |
| MAF1          | 712,66  | 0,61  | 0,331456 | 1,843695 | 0,065228 | 0,3391725 |
| RP11-666A8.13 | 16,26   | -2,94 | 1,595209 | -1,8433  | 0,065286 | 0,3393807 |
| CTD-2339F6.1  | 5,22    | -2,70 | 1,464144 | -1,84303 | 0,065325 | 0,3393808 |
| AC053503.12   | 6,05    | -1,35 | 0,733239 | -1,84299 | 0,065331 | 0,3393808 |
| CTD-2373H9.3  | 32,12   | -1,87 | 1,016531 | -1,84292 | 0,065341 | 0,3393808 |
| RNU1-46P      | 2,92    | 2,96  | 1,607146 | 1,842799 | 0,065358 | NA        |
| OR4K16P       | 5,14    | -2,05 | 1,111991 | -1,84268 | 0,065375 | 0,339465  |
| MAP3K7CL      | 48,90   | -1,80 | 0,974758 | -1,84256 | 0,065394 | 0,3394685 |
| P3H4          | 12,07   | -1,58 | 0,857792 | -1,84239 | 0,065418 | 0,3394978 |
| AC096663.1    | 1,29    | 2,33  | 1,263168 | 1,842303 | 0,065431 | NA        |
| SLC25A11      | 835,93  | 0,95  | 0,514379 | 1,841898 | 0,06549  | 0,3397778 |
| MAPKAP1       | 606,39  | -0,84 | 0,453592 | -1,84169 | 0,065521 | 0,3398431 |
| CTC-459F4.2   | 71,55   | 1,85  | 1,005111 | 1,841286 | 0,06558  | 0,3398548 |
| RFFL          | 176,19  | 1,37  | 0,741434 | 1,841037 | 0,065616 | 0,3398548 |
| NAA30         | 192,96  | 1,72  | 0,932052 | 1,84091  | 0,065635 | 0,3398548 |
| RP11-420G6.4  | 119,22  | -1,33 | 0,722964 | -1,84078 | 0,065654 | 0,3398548 |
| CH17-449C21.2 | 93,77   | 1,20  | 0,650522 | 1,84069  | 0,065667 | 0,3398548 |
| ITGB7         | 1233,58 | 0,61  | 0,333845 | 1,840534 | 0,06569  | 0,3398548 |
| ZNF627        | 46,22   | 1,33  | 0,724128 | 1,840499 | 0,065695 | 0,3398548 |
| PYGB          | 319,27  | -0,96 | 0,519195 | -1,84042 | 0,065706 | 0,3398548 |
| ULK4P1        | 71,17   | 1,89  | 1,028745 | 1,840417 | 0,065707 | 0,3398548 |
| AC007386.2    | 16,39   | -1,64 | 0,891557 | -1,84013 | 0,065749 | 0,3398548 |
| NDUFS2        | 1300,86 | 0,80  | 0,434026 | 1,8401   | 0,065754 | 0,3398548 |
| C20orf27      | 946,89  | 0,66  | 0,359414 | 1,84005  | 0,065761 | 0,3398548 |
| PIGK          | 218,92  | 2,03  | 1,101808 | 1,840009 | 0,065767 | 0,3398548 |
| FTHL10        | 11,14   | 0,85  | 0,460862 | 1,83984  | 0,065792 | 0,3398548 |
| KDEL2         | 808,53  | -0,58 | 0,313943 | -1,8398  | 0,065797 | 0,3398548 |
| TLDC1         | 65,05   | 1,82  | 0,991127 | 1,839308 | 0,06587  | 0,3400465 |
| PIWIL2        | 1,29    | -4,07 | 2,215221 | -1,83931 | 0,06587  | NA        |
| VPS9D1        | 167,77  | -1,22 | 0,660978 | -1,83927 | 0,065876 | 0,3400465 |
| DDX39B        | 1263,63 | -0,37 | 0,202034 | -1,83918 | 0,065889 | 0,3400465 |
| USP28         | 159,84  | 1,47  | 0,799928 | 1,838758 | 0,065951 | 0,3402699 |
| RP11-437B10.1 | 157,59  | -0,90 | 0,490789 | -1,83832 | 0,066016 | 0,3404899 |

|               |         |       |          |          |          |           |
|---------------|---------|-------|----------|----------|----------|-----------|
| BTG2          | 1458,82 | 0,54  | 0,292348 | 1,83822  | 0,06603  | 0,3404899 |
| AP000351.12   | 3,70    | -2,20 | 1,198785 | -1,83795 | 0,066069 | NA        |
| ARL16         | 262,34  | -0,87 | 0,472939 | -1,83783 | 0,066087 | 0,3406081 |
| MSL1          | 465,78  | -0,93 | 0,508008 | -1,83782 | 0,066089 | 0,3406081 |
| PLCXD3        | 3,83    | -2,23 | 1,214739 | -1,83695 | 0,066217 | 0,3411711 |
| C11orf65      | 53,65   | -2,87 | 1,561526 | -1,83655 | 0,066277 | 0,3413067 |
| CCDC142       | 74,49   | -1,76 | 0,960584 | -1,83652 | 0,06628  | 0,3413067 |
| CLCA2         | 2,68    | -5,81 | 3,167491 | -1,83557 | 0,066421 | NA        |
| WDFY2         | 2254,01 | 1,22  | 0,664389 | 1,835512 | 0,06643  | 0,3418957 |
| RAN           | 1973,96 | 0,53  | 0,290972 | 1,835403 | 0,066446 | 0,3418957 |
| RP11-143J12.2 | 42,90   | 2,84  | 1,547821 | 1,835379 | 0,06645  | 0,3418957 |
| RP11-240O9.2  | 5,58    | 2,70  | 1,471426 | 1,835203 | 0,066476 | 0,3419348 |
| SPDYE6        | 14,40   | -3,07 | 1,670624 | -1,83492 | 0,066517 | 0,3420557 |
| ZNF446        | 75,62   | 2,44  | 1,331958 | 1,834697 | 0,066551 | 0,3421312 |
| NDUFS5        | 655,09  | -0,58 | 0,314355 | -1,83422 | 0,066622 | 0,3423534 |
| RP11-268I9.2  | 9,67    | 2,91  | 1,588832 | 1,834126 | 0,066635 | 0,3423534 |
| AC131056.3    | 5,39    | -4,06 | 2,213578 | -1,83385 | 0,066676 | 0,3423534 |
| RPLP2         | 5126,16 | -0,61 | 0,331657 | -1,8338  | 0,066683 | 0,3423534 |
| SGO2          | 20,99   | -1,45 | 0,793185 | -1,83376 | 0,066689 | 0,3423534 |
| CIT           | 17,70   | 3,96  | 2,161842 | 1,833662 | 0,066704 | 0,3423534 |
| FAM20B        | 371,17  | 1,61  | 0,880503 | 1,832904 | 0,066817 | 0,3426626 |
| ROPN1         | 5,87    | -5,90 | 3,218669 | -1,83284 | 0,066826 | 0,3426626 |
| RP11-691G17.1 | 419,46  | -0,93 | 0,508987 | -1,83276 | 0,066838 | 0,3426626 |
| ENPP1         | 43,74   | -2,13 | 1,160455 | -1,83276 | 0,066838 | 0,3426626 |
| AC005086.3    | 2,45    | -3,94 | 2,15051  | -1,83246 | 0,066882 | NA        |
| MCCC2         | 415,35  | 1,03  | 0,560577 | 1,832391 | 0,066893 | 0,3428508 |
| RN7SL487P     | 2,32    | -2,56 | 1,3979   | -1,8323  | 0,066907 | NA        |
| CTD-2050B12.1 | 3,03    | -6,40 | 3,491466 | -1,83223 | 0,066918 | NA        |
| NABP2         | 112,58  | -1,30 | 0,709965 | -1,8321  | 0,066937 | 0,3428934 |
| RP13-616I3.1  | 5,05    | -1,73 | 0,94435  | -1,83209 | 0,066938 | 0,3428934 |
| IDS           | 1177,11 | 0,63  | 0,34571  | 1,83076  | 0,067136 | 0,3436618 |
| TIMM50        | 384,80  | -0,77 | 0,42242  | -1,83074 | 0,06714  | 0,3436618 |
| GPX1          | 9754,43 | -0,36 | 0,198006 | -1,83071 | 0,067144 | 0,3436618 |
| MEIS1         | 40,99   | 1,92  | 1,048759 | 1,83022  | 0,067217 | 0,3439295 |
| RP11-352D13.5 | 3,06    | -6,41 | 3,502643 | -1,83004 | 0,067244 | NA        |
| RNLS          | 101,47  | 2,02  | 1,102625 | 1,830035 | 0,067245 | 0,3439295 |
| RP11-779O18.3 | 3,24    | -2,44 | 1,334052 | -1,83002 | 0,067247 | NA        |
| PROCR         | 49,56   | 1,75  | 0,957972 | 1,829892 | 0,067266 | 0,3439295 |
| RP11-13J8.1   | 7,44    | -1,23 | 0,670869 | -1,82948 | 0,067328 | 0,3439295 |
| RP11-384E22.1 | 6,18    | 4,68  | 2,559509 | 1,829461 | 0,067331 | 0,3439295 |
| ZNF461        | 20,19   | -1,72 | 0,941891 | -1,82946 | 0,067331 | 0,3439295 |
| CTD-2653M23.1 | 8,57    | 5,73  | 3,131579 | 1,829405 | 0,067339 | 0,3439295 |
| TMEM233       | 1,29    | -4,05 | 2,214476 | -1,82929 | 0,067356 | NA        |
| RP11-631B21.1 | 47,22   | -1,35 | 0,736367 | -1,8292  | 0,06737  | 0,3439295 |
| ZFP1          | 12,59   | 3,03  | 1,65862  | 1,829154 | 0,067377 | 0,3439295 |
| ARF3          | 991,66  | 0,68  | 0,374007 | 1,829124 | 0,067381 | 0,3439295 |
| RP11-333I13.1 | 5,06    | -1,57 | 0,855846 | -1,82892 | 0,067411 | 0,3439628 |
| TMA7          | 1056,26 | -0,36 | 0,196503 | -1,82883 | 0,067424 | 0,3439628 |
| ZBTB6         | 45,31   | 2,60  | 1,419964 | 1,828181 | 0,067522 | 0,3442542 |
| RP11-680E19.1 | 4,69    | -1,42 | 0,77826  | -1,82815 | 0,067527 | 0,3442542 |

|               |         |       |          |          |          |           |
|---------------|---------|-------|----------|----------|----------|-----------|
| MMP25         | 92,93   | 2,90  | 1,588674 | 1,828083 | 0,067537 | 0,3442542 |
| PLOD3         | 414,18  | -0,74 | 0,40633  | -1,82746 | 0,067631 | 0,3446381 |
| POTEI         | 68,70   | -1,53 | 0,835062 | -1,82689 | 0,067717 | 0,3449819 |
| RP1-12G14.3   | 26,83   | 3,04  | 1,661898 | 1,826455 | 0,067782 | 0,3451542 |
| DNAAF5        | 52,71   | 1,80  | 0,984309 | 1,826414 | 0,067788 | 0,3451542 |
| CLDN9         | 9,04    | 5,23  | 2,863363 | 1,825947 | 0,067858 | 0,345418  |
| RN7SL414P     | 0,49    | -3,21 | 1,760106 | -1,82579 | 0,067882 | NA        |
| CSDE1         | 2625,02 | 0,45  | 0,248786 | 1,825465 | 0,067931 | 0,3456928 |
| RN7SL66P      | 2,25    | -1,82 | 0,994893 | -1,8254  | 0,067941 | NA        |
| EXTL3-AS1     | 42,00   | 1,70  | 0,930026 | 1,825074 | 0,06799  | 0,3458988 |
| CLEC4M        | 4,84    | -1,97 | 1,077522 | -1,82467 | 0,06805  | 0,3461122 |
| SRP14         | 1999,82 | 0,43  | 0,236391 | 1,823587 | 0,068215 | 0,3468519 |
| RP11-44F14.5  | 12,75   | 2,36  | 1,29469  | 1,82324  | 0,068267 | 0,3470241 |
| RP11-182N22.9 | 77,06   | -1,77 | 0,972527 | -1,82303 | 0,0683   | 0,3470943 |
| ADAM32        | 594,67  | -1,03 | 0,566254 | -1,82276 | 0,068339 | 0,3471468 |
| FGFBP2        | 43,26   | -2,65 | 1,454324 | -1,82271 | 0,068347 | 0,3471468 |
| RP11-262N9.3  | 28,81   | 2,28  | 1,25307  | 1,822466 | 0,068384 | 0,347241  |
| RP11-121L10.3 | 0,94    | 2,51  | 1,37589  | 1,822211 | 0,068423 | NA        |
| GPRC5C        | 83,51   | 1,99  | 1,093452 | 1,822175 | 0,068428 | 0,3473349 |
| MPHOSPH8      | 512,62  | -0,64 | 0,348788 | -1,8221  | 0,06844  | 0,3473349 |
| CYP20A1       | 233,70  | 1,14  | 0,628363 | 1,821308 | 0,06856  | 0,3476574 |
| SH3BGRL2      | 51,17   | -6,09 | 3,342454 | -1,82126 | 0,068568 | 0,3476574 |
| TIFA          | 86,37   | -2,18 | 1,194701 | -1,82121 | 0,068575 | 0,3476574 |
| RP11-39K24.13 | 6,21    | 3,20  | 1,757582 | 1,821136 | 0,068586 | 0,3476574 |
| SSFA2         | 680,22  | 1,14  | 0,624554 | 1,821064 | 0,068597 | 0,3476574 |
| RP11-462G12.4 | 1,90    | -1,68 | 0,924052 | -1,82099 | 0,068608 | NA        |
| RP11-44M6.3   | 1,79    | -1,40 | 0,769026 | -1,82074 | 0,068646 | NA        |
| RP4-682C21.5  | 32,83   | -1,61 | 0,8833   | -1,81996 | 0,068766 | 0,348417  |
| RNU2-66P      | 3,09    | 3,66  | 2,011614 | 1,819917 | 0,068772 | NA        |
| NAP1L1        | 3265,28 | 0,42  | 0,232628 | 1,819587 | 0,068822 | 0,3485628 |
| OR4F15        | 4,07    | -2,00 | 1,097728 | -1,81952 | 0,068832 | 0,3485628 |
| RP11-543E8.1  | 29,85   | 2,62  | 1,440619 | 1,819348 | 0,068858 | 0,3485798 |
| ACO11247.2    | 5,66    | -0,96 | 0,529199 | -1,81925 | 0,068873 | 0,3485798 |
| MIR1273H      | 10,38   | 1,56  | 0,856241 | 1,818871 | 0,068931 | 0,3487797 |
| EMX2OS        | 28,32   | 1,61  | 0,885767 | 1,818562 | 0,068978 | 0,3489155 |
| EPPK1         | 1,04    | -2,53 | 1,391174 | -1,81855 | 0,06898  | NA        |
| AC074117.10   | 40,32   | 1,73  | 0,953194 | 1,81845  | 0,068995 | 0,3489155 |
| RP11-954J6.3  | 23,27   | 3,40  | 1,873282 | 1,81737  | 0,06916  | 0,349572  |
| TCF23         | 17,27   | -1,32 | 0,724403 | -1,81733 | 0,069166 | 0,349572  |
| RP11-57I17.4  | 6,06    | -1,39 | 0,765623 | -1,81714 | 0,069196 | 0,349572  |
| KLHL30        | 4,10    | -2,15 | 1,181284 | -1,81705 | 0,06921  | 0,349572  |
| ZNF14         | 51,90   | 2,46  | 1,356395 | 1,816986 | 0,069219 | 0,349572  |
| TET3          | 751,70  | -0,85 | 0,470149 | -1,8163  | 0,069324 | 0,3498159 |
| AP001422.3    | 3,90    | 4,56  | 2,511388 | 1,816295 | 0,069325 | 0,3498159 |
| SOCS3         | 308,53  | 0,95  | 0,524263 | 1,816281 | 0,069327 | 0,3498159 |
| GLTSCR2       | 547,31  | -0,76 | 0,418228 | -1,81615 | 0,069348 | 0,3498159 |
| FSCN1         | 44,75   | 1,67  | 0,921618 | 1,815968 | 0,069375 | 0,3498159 |
| FAM72A        | 63,61   | 1,45  | 0,800315 | 1,815735 | 0,069411 | 0,3498159 |
| RP11-95M15.3  | 10,24   | -1,49 | 0,820955 | -1,81565 | 0,069423 | 0,3498159 |
| C2orf54       | 7,46    | -3,08 | 1,694677 | -1,81558 | 0,069435 | 0,3498159 |

|                |         |       |          |          |          |           |
|----------------|---------|-------|----------|----------|----------|-----------|
| FBXO6          | 481,88  | 0,96  | 0,528833 | 1,815568 | 0,069437 | 0,3498159 |
| PSPN           | 17,37   | -1,34 | 0,73804  | -1,81521 | 0,069492 | 0,3499987 |
| RP11-279N8.3   | 22,20   | 1,35  | 0,745448 | 1,814771 | 0,069559 | 0,3501336 |
| LY6G5C         | 56,72   | 2,04  | 1,124922 | 1,814695 | 0,069571 | 0,3501336 |
| ENPP4          | 192,67  | 1,64  | 0,906021 | 1,814667 | 0,069575 | 0,3501336 |
| RP11-161M6.3   | 3,07    | -6,39 | 3,519674 | -1,81444 | 0,06961  | NA        |
| TATDN1         | 278,88  | 1,36  | 0,751972 | 1,814346 | 0,069624 | 0,3502448 |
| PIK3CG         | 334,14  | 1,40  | 0,77251  | 1,814279 | 0,069635 | 0,3502448 |
| SLC35B4        | 341,29  | -1,53 | 0,843385 | -1,81397 | 0,069682 | 0,350303  |
| SEC11A         | 1304,76 | 0,64  | 0,355155 | 1,813959 | 0,069684 | 0,350303  |
| RP11-314A20.5  | 6,90    | 3,38  | 1,864032 | 1,813525 | 0,069751 | 0,3504694 |
| NME2           | 1608,27 | 0,41  | 0,225072 | 1,813499 | 0,069755 | 0,3504694 |
| MLKL           | 446,49  | -0,97 | 0,53637  | -1,81276 | 0,06987  | 0,3509513 |
| RP11-370I10.12 | 24,37   | -1,33 | 0,735093 | -1,81215 | 0,069963 | 0,351194  |
| USP15          | 2011,53 | -0,38 | 0,207922 | -1,81204 | 0,06998  | 0,351194  |
| C19orf79       | 282,39  | -0,77 | 0,424401 | -1,81204 | 0,06998  | 0,351194  |
| ATG16L1        | 127,51  | 1,46  | 0,804626 | 1,811833 | 0,070012 | 0,351194  |
| OR5H1          | 11,06   | -2,38 | 1,315868 | -1,81183 | 0,070012 | 0,351194  |
| OSGIN2         | 122,31  | 1,66  | 0,915852 | 1,811415 | 0,070077 | 0,3513286 |
| UBE2A          | 585,43  | 1,07  | 0,587949 | 1,811413 | 0,070077 | 0,3513286 |
| ZNF789         | 137,73  | 1,33  | 0,732608 | 1,810594 | 0,070204 | 0,3518694 |
| RP11-142I20.1  | 2,20    | -3,01 | 1,660576 | -1,80998 | 0,070298 | NA        |
| CDH2           | 12,74   | -5,49 | 3,032071 | -1,80995 | 0,070304 | 0,3521924 |
| PAFAH1B3       | 182,25  | 1,23  | 0,677229 | 1,809934 | 0,070306 | 0,3521924 |
| SMG1           | 2104,97 | 0,67  | 0,368849 | 1,80969  | 0,070344 | 0,3522374 |
| TMEM236        | 53,76   | -1,14 | 0,630739 | -1,80962 | 0,070355 | 0,3522374 |
| MOSPD1         | 79,50   | -1,89 | 1,043405 | -1,80942 | 0,070385 | 0,3522374 |
| CTD-2530H13.2  | 77,54   | 1,69  | 0,935308 | 1,809388 | 0,070391 | 0,3522374 |
| FBXO22         | 235,34  | 1,57  | 0,866181 | 1,809077 | 0,070439 | 0,3522983 |
| ARIH2OS        | 117,30  | -1,78 | 0,984529 | -1,80906 | 0,070442 | 0,3522983 |
| MFAP5          | 14,84   | 2,60  | 1,439047 | 1,808836 | 0,070477 | 0,3522983 |
| AC073065.3     | 11,90   | -1,24 | 0,685943 | -1,80882 | 0,070479 | 0,3522983 |
| SLITRK3        | 3,20    | -2,36 | 1,305566 | -1,80857 | 0,070518 | NA        |
| FKBP9L         | 10,71   | -1,26 | 0,699395 | -1,80846 | 0,070535 | 0,3524877 |
| SLC18A2        | 4,92    | -4,03 | 2,226701 | -1,80828 | 0,070563 | 0,3525292 |
| TMEM147        | 1047,52 | 0,62  | 0,342494 | 1,80791  | 0,070621 | 0,352656  |
| C12orf49       | 387,91  | -1,57 | 0,867379 | -1,80787 | 0,070626 | 0,352656  |
| ZNF251         | 30,08   | 2,45  | 1,356461 | 1,807743 | 0,070646 | 0,3526635 |
| RP11-190C22.9  | 2,98    | 3,62  | 2,004878 | 1,807385 | 0,070702 | NA        |
| RPL36A         | 1786,82 | -0,52 | 0,287448 | -1,80737 | 0,070705 | 0,3528618 |
| CEP85          | 114,86  | 1,46  | 0,807297 | 1,806899 | 0,070778 | 0,3530557 |
| GCNT1          | 215,47  | -1,64 | 0,905896 | -1,80687 | 0,070782 | 0,3530557 |
| RP11-1334A24.6 | 1,93    | -5,58 | 3,087953 | -1,80619 | 0,070888 | NA        |
| TMEM160        | 442,56  | -1,02 | 0,566523 | -1,80606 | 0,070909 | 0,3535951 |
| CYCSP40        | 4,87    | 4,91  | 2,72091  | 1,805783 | 0,070952 | 0,3537155 |
| SERF1B         | 41,27   | -1,32 | 0,730809 | -1,80555 | 0,070988 | 0,3537786 |
| SAPCD2         | 78,72   | -3,07 | 1,701536 | -1,80546 | 0,071003 | 0,3537786 |
| RP11-696L21.2  | 2,87    | -6,32 | 3,499063 | -1,805   | 0,071075 | NA        |
| OGFRL1         | 2005,61 | 0,48  | 0,265801 | 1,804888 | 0,071092 | 0,3538838 |
| GABRA1         | 2,72    | -1,94 | 1,073792 | -1,80486 | 0,071096 | NA        |



|                |         |       |          |          |          |           |
|----------------|---------|-------|----------|----------|----------|-----------|
| RP11-473O4.3   | 7,76    | 4,42  | 2,451113 | 1,804701 | 0,071122 | 0,3538838 |
| CYP3A5         | 149,39  | -1,34 | 0,741231 | -1,80469 | 0,071124 | 0,3538838 |
| EZH1           | 388,19  | -0,79 | 0,440146 | -1,80463 | 0,071133 | 0,3538838 |
| RABL6          | 177,12  | -0,90 | 0,499775 | -1,80458 | 0,071114 | 0,3538838 |
| EPHB1          | 36,56   | -2,89 | 1,600295 | -1,80454 | 0,071147 | 0,3538838 |
| YPEL3          | 581,09  | -0,90 | 0,497641 | -1,80447 | 0,071157 | 0,3538838 |
| SLC27A3        | 394,37  | -0,56 | 0,309612 | -1,80429 | 0,071186 | 0,3539345 |
| CHCHD3         | 351,52  | 0,97  | 0,540455 | 1,803961 | 0,071237 | 0,3540935 |
| TOM1L1         | 27,73   | -2,96 | 1,638676 | -1,8037  | 0,071279 | 0,3542045 |
| ARPC1B         | 7883,66 | 0,31  | 0,172524 | 1,803556 | 0,071301 | 0,3542203 |
| RNU1-33P       | 1,94    | -5,58 | 3,094145 | -1,80331 | 0,071339 | NA        |
| PRAM1          | 810,82  | -0,73 | 0,406086 | -1,80307 | 0,071377 | 0,3545022 |
| LZTS2          | 19,18   | -1,96 | 1,088134 | -1,80294 | 0,071398 | 0,354513  |
| SEC16A         | 401,25  | 1,09  | 0,601952 | 1,802745 | 0,071428 | 0,3545678 |
| RP11-894P9.1   | 59,52   | 1,70  | 0,945626 | 1,802625 | 0,071447 | 0,3545678 |
| CTDNEP1        | 700,46  | 0,69  | 0,383052 | 1,802471 | 0,071471 | 0,3545929 |
| RP11-1041F24.1 | 1,94    | 2,96  | 1,641301 | 1,801913 | 0,071559 | NA        |
| PLOD2          | 17,73   | -2,20 | 1,223361 | -1,80187 | 0,071566 | 0,3549013 |
| BBIP1          | 296,40  | -1,35 | 0,751374 | -1,80181 | 0,071576 | 0,3549013 |
| PRR29          | 39,64   | -1,94 | 1,07922  | -1,8016  | 0,071609 | 0,3549013 |
| SLC1A2         | 80,48   | -1,18 | 0,653208 | -1,80159 | 0,07161  | 0,3549013 |
| C8orf74        | 2,00    | -2,74 | 1,523336 | -1,80156 | 0,071615 | NA        |
| COX18          | 103,57  | -1,14 | 0,633801 | -1,80117 | 0,071676 | 0,3551369 |
| RP11-879F14.1  | 5,10    | 2,61  | 1,44846  | 1,800711 | 0,071748 | 0,3553337 |
| FLVCR1-AS1     | 67,30   | -1,79 | 0,995153 | -1,80067 | 0,071754 | 0,3553337 |
| ARHGEF7        | 414,51  | 1,15  | 0,640548 | 1,800526 | 0,071778 | 0,355355  |
| FBXL19         | 1,63    | -5,52 | 3,064814 | -1,8005  | 0,071782 | NA        |
| PRKD2          | 158,58  | -1,30 | 0,72317  | -1,80036 | 0,071805 | 0,3553935 |
| RP11-56B16.5   | 3,73    | 4,53  | 2,51738  | 1,80033  | 0,071809 | NA        |
| PIK3R2         | 122,34  | 1,21  | 0,674394 | 1,800168 | 0,071834 | 0,3554089 |
| AC011747.6     | 4,59    | -1,88 | 1,045881 | -1,80007 | 0,07185  | 0,3554089 |
| RGS16          | 13,43   | -1,16 | 0,644493 | -1,79997 | 0,071865 | 0,3554089 |
| RN7SL624P      | 2,64    | -1,85 | 1,026463 | -1,79982 | 0,07189  | NA        |
| ZNF529         | 114,69  | -1,12 | 0,62071  | -1,79872 | 0,072063 | 0,3562534 |
| NAGPA          | 479,14  | -0,89 | 0,49531  | -1,79865 | 0,072074 | 0,3562534 |
| CDK5RAP3       | 1194,81 | -0,57 | 0,318972 | -1,79841 | 0,072113 | 0,3563488 |
| HELLPAR        | 3937,25 | -0,66 | 0,368084 | -1,79762 | 0,072237 | 0,3568703 |
| TARBP2         | 142,13  | -1,30 | 0,723654 | -1,79744 | 0,072265 | 0,3569144 |
| RNU6-1333P     | 7,99    | 3,03  | 1,68537  | 1,796484 | 0,072418 | 0,3574126 |
| AGPAT3         | 810,57  | 0,73  | 0,404539 | 1,796459 | 0,072421 | 0,3574126 |
| TMEM14B        | 756,48  | 0,48  | 0,26517  | 1,796445 | 0,072424 | 0,3574126 |
| SOST           | 4,63    | -2,62 | 1,456006 | -1,79615 | 0,07247  | 0,3575452 |
| HNRNPA1L2      | 28,31   | 1,91  | 1,062324 | 1,795794 | 0,072527 | 0,357733  |
| RP13-49I15.6   | 3,48    | 4,43  | 2,467785 | 1,795505 | 0,072573 | NA        |
| NPAT           | 216,64  | -1,15 | 0,640224 | -1,7952  | 0,072623 | 0,3581082 |
| CTB-107G13.1   | 3,35    | 3,18  | 1,772336 | 1,795019 | 0,072651 | NA        |
| LAMA4          | 60,89   | -1,01 | 0,563611 | -1,79494 | 0,072663 | 0,3582133 |
| IL10RA         | 2537,75 | 0,48  | 0,269604 | 1,794752 | 0,072693 | 0,3582669 |
| OR6C75         | 65,71   | -1,25 | 0,69586  | -1,79445 | 0,072741 | 0,3584055 |
| RN7SL353P      | 1,47    | -1,95 | 1,088401 | -1,79422 | 0,072778 | NA        |

|               |         |       |          |          |          |           |
|---------------|---------|-------|----------|----------|----------|-----------|
| PLAGL1        | 323,29  | -1,01 | 0,563292 | -1,7934  | 0,07291  | 0,3590783 |
| CIZ1          | 194,29  | -1,12 | 0,623996 | -1,79328 | 0,072928 | 0,3590783 |
| PRR14L        | 772,88  | -1,19 | 0,661757 | -1,7932  | 0,072941 | 0,3590783 |
| CTD-2083E4.6  | 0,99    | -4,15 | 2,31198  | -1,79316 | 0,072947 | NA        |
| DTD1          | 321,13  | 1,21  | 0,672317 | 1,793101 | 0,072957 | 0,3590783 |
| RP11-456D7.1  | 10,17   | -1,33 | 0,739017 | -1,793   | 0,072974 | 0,3590783 |
| RP1-1J6.2     | 7,74    | 2,62  | 1,460842 | 1,792828 | 0,073    | 0,3591153 |
| RP11-439M11.1 | 11,99   | -1,13 | 0,628515 | -1,79253 | 0,073048 | 0,359222  |
| COL18A1       | 19,97   | 2,86  | 1,59332  | 1,792451 | 0,073061 | 0,359222  |
| RP11-521D12.1 | 3,38    | -1,87 | 1,043092 | -1,7921  | 0,073117 | NA        |
| SVIL          | 336,99  | -1,16 | 0,650044 | -1,79198 | 0,073137 | 0,3595006 |
| ZNF596        | 27,12   | 2,00  | 1,117569 | 1,791673 | 0,073185 | 0,3596391 |
| RP11-29G8.3   | 43,51   | -1,67 | 0,933684 | -1,79152 | 0,07321  | 0,3596391 |
| FAM71D        | 3,25    | 3,69  | 2,062544 | 1,791435 | 0,073224 | NA        |
| TOX4          | 613,15  | -0,81 | 0,454335 | -1,79131 | 0,073243 | 0,3596391 |
| RP11-326A13.2 | 13,24   | -0,99 | 0,55299  | -1,79124 | 0,073256 | 0,3596391 |
| SNU13         | 1208,81 | 0,46  | 0,259484 | 1,791017 | 0,073291 | 0,3596391 |
| LTK           | 41,86   | -2,48 | 1,385522 | -1,791   | 0,073294 | 0,3596391 |
| WDR93         | 12,74   | 1,95  | 1,091518 | 1,790778 | 0,073329 | 0,3596391 |
| PDLIM5        | 496,25  | -0,78 | 0,436712 | -1,79075 | 0,073334 | 0,3596391 |
| PLA2G6        | 27,30   | -1,81 | 1,011036 | -1,79071 | 0,07334  | 0,3596391 |
| THOC6         | 311,60  | 1,07  | 0,598217 | 1,790555 | 0,073365 | 0,3596391 |
| LRRC4         | 2,36    | 2,65  | 1,480924 | 1,790498 | 0,073374 | NA        |
| ADAMTS18      | 1,78    | 2,97  | 1,656273 | 1,790488 | 0,073376 | NA        |
| BBC3          | 26,82   | 2,02  | 1,125925 | 1,790475 | 0,073378 | 0,3596391 |
| GALNT8        | 2,37    | -3,20 | 1,787716 | -1,79016 | 0,073428 | NA        |
| C19orf24      | 418,24  | -0,55 | 0,30991  | -1,79    | 0,073453 | 0,359777  |
| DUX4          | 4,24    | -2,71 | 1,512585 | -1,78995 | 0,073463 | 0,359777  |
| SLX4IP        | 121,53  | 1,49  | 0,835196 | 1,789913 | 0,073468 | 0,359777  |
| FKBP14        | 169,44  | -1,69 | 0,943931 | -1,78982 | 0,073483 | 0,359777  |
| RP11-552M6.1  | 4,38    | 3,59  | 2,008612 | 1,789405 | 0,07355  | 0,3599845 |
| EXOC7         | 141,45  | -1,10 | 0,613502 | -1,78931 | 0,073564 | 0,3599845 |
| ITGAM         | 625,07  | -1,20 | 0,668804 | -1,78894 | 0,073625 | 0,3601321 |
| RNU6-1188P    | 4,97    | 4,95  | 2,766375 | 1,788887 | 0,073633 | 0,3601321 |
| C2orf69       | 217,45  | 1,06  | 0,594762 | 1,788752 | 0,073655 | 0,3601435 |
| RP11-368J21.3 | 43,51   | 2,07  | 1,158753 | 1,788504 | 0,073695 | 0,3602302 |
| MRPL37P1      | 202,50  | 1,39  | 0,776175 | 1,788402 | 0,073711 | 0,3602302 |
| SH3D19        | 52,32   | 2,24  | 1,253756 | 1,788182 | 0,073747 | 0,3603009 |
| TRMU          | 292,01  | -1,15 | 0,644594 | -1,78807 | 0,073764 | 0,3603009 |
| TBC1D13       | 95,93   | -1,57 | 0,878482 | -1,78754 | 0,07385  | 0,3606253 |
| GCNT7         | 10,84   | 2,95  | 1,652165 | 1,787227 | 0,073901 | 0,3607782 |
| MIR3175       | 3,51    | 3,85  | 2,15581  | 1,787079 | 0,073925 | NA        |
| CTSK          | 131,97  | -2,00 | 1,120712 | -1,78707 | 0,073927 | 0,3608097 |
| SLC25A48      | 5,07    | -1,43 | 0,802488 | -1,78687 | 0,073959 | 0,3608722 |
| RP11-427P5.3  | 2,61    | 4,02  | 2,251234 | 1,786652 | 0,073994 | NA        |
| BFSP1         | 7,01    | -2,44 | 1,364611 | -1,78636 | 0,074041 | 0,3611775 |
| BRIP1         | 25,05   | -1,22 | 0,684857 | -1,78603 | 0,074094 | 0,3612901 |
| RP11-6N17.10  | 12,64   | -1,40 | 0,784292 | -1,78598 | 0,074103 | 0,3612901 |
| RP11-352G18.2 | 2,94    | -2,43 | 1,360555 | -1,78588 | 0,074119 | NA        |
| SLC10A3       | 40,97   | 2,45  | 1,36981  | 1,78569  | 0,074149 | 0,3614229 |

|               |          |       |          |          |          |           |
|---------------|----------|-------|----------|----------|----------|-----------|
| CHCHD7        | 300,24   | 1,06  | 0,593944 | 1,785321 | 0,074209 | 0,3615207 |
| RP11-40H19.1  | 6,37     | 3,63  | 2,033012 | 1,785159 | 0,074235 | 0,3615207 |
| SNTG2         | 3,18     | 3,11  | 1,740781 | 1,78512  | 0,074242 | NA        |
| PCGF3         | 454,96   | -1,11 | 0,619389 | -1,78509 | 0,074248 | 0,3615207 |
| RP3-337H4.8   | 6,79     | -1,06 | 0,59375  | -1,78502 | 0,074258 | 0,3615207 |
| FPGT-TNNI3K   | 11,06    | 2,33  | 1,304034 | 1,784964 | 0,074267 | 0,3615207 |
| AC002310.12   | 12,10    | -1,15 | 0,646463 | -1,78485 | 0,074286 | 0,3615207 |
| RPS6P20       | 2,08     | -1,97 | 1,103485 | -1,78476 | 0,0743   | NA        |
| HLA-DOB       | 202,90   | 1,54  | 0,864793 | 1,784525 | 0,074338 | 0,3616329 |
| RRN3          | 194,97   | 1,26  | 0,708618 | 1,784465 | 0,074348 | 0,3616329 |
| MMGT1         | 349,11   | 1,09  | 0,612855 | 1,784221 | 0,074388 | 0,3616641 |
| PSMD2         | 1287,44  | 0,64  | 0,358059 | 1,78416  | 0,074398 | 0,3616641 |
| UBXN11        | 715,69   | -0,57 | 0,318836 | -1,78407 | 0,074413 | 0,3616641 |
| MDM2          | 694,25   | -0,82 | 0,462416 | -1,78358 | 0,074491 | 0,3619503 |
| AP1G1         | 791,31   | -1,16 | 0,651651 | -1,7832  | 0,074554 | 0,3621561 |
| ELMO2         | 207,63   | 1,38  | 0,771508 | 1,783085 | 0,074572 | 0,3621561 |
| TNFAIP2       | 3302,46  | -0,41 | 0,227333 | -1,78246 | 0,074674 | 0,3625559 |
| CMP21-97G8.1  | 1,23     | 2,91  | 1,631383 | 1,782176 | 0,07472  | NA        |
| SYNJ1         | 210,86   | 1,17  | 0,658951 | 1,782001 | 0,074749 | 0,3628248 |
| TMEM150B      | 2,57     | -2,26 | 1,2676   | -1,782   | 0,07475  | NA        |
| PLAUR         | 3742,33  | 0,81  | 0,452978 | 1,781686 | 0,0748   | 0,3628892 |
| SYN1          | 6,66     | 4,33  | 2,431733 | 1,78168  | 0,074801 | 0,3628892 |
| RP11-666I19.2 | 1,43     | -5,36 | 3,006635 | -1,78142 | 0,074844 | NA        |
| GATS          | 12,45    | 2,25  | 1,265812 | 1,781025 | 0,074908 | 0,3632304 |
| GTF3C6        | 803,08   | 0,41  | 0,232603 | 1,781005 | 0,074912 | 0,3632304 |
| OSTC          | 1278,03  | 0,56  | 0,314113 | 1,780817 | 0,074942 | 0,3632304 |
| MSMO1         | 64,02    | -1,72 | 0,96437  | -1,78077 | 0,07495  | 0,3632304 |
| NCRNA00106    | 84,49    | 0,77  | 0,431247 | 1,780218 | 0,07504  | 0,3633642 |
| MTPAP         | 626,93   | 0,92  | 0,516136 | 1,780211 | 0,075041 | 0,3633642 |
| ST3GAL3       | 107,71   | -0,87 | 0,488944 | -1,78015 | 0,075052 | 0,3633642 |
| DCAF17        | 82,03    | 1,64  | 0,918548 | 1,780009 | 0,075075 | 0,3633642 |
| RP11-227G15.9 | 13,01    | -1,54 | 0,863852 | -1,77993 | 0,075088 | 0,3633642 |
| SNRPF         | 272,29   | -0,57 | 0,319328 | -1,77989 | 0,075095 | 0,3633642 |
| MRPL18        | 401,30   | 1,22  | 0,685116 | 1,779639 | 0,075135 | 0,3634654 |
| FAM49A        | 1171,01  | 0,64  | 0,359428 | 1,779393 | 0,075175 | 0,363518  |
| CMSS1         | 247,51   | -1,18 | 0,664093 | -1,77926 | 0,075196 | 0,363518  |
| SRGN          | 12492,33 | 0,43  | 0,240341 | 1,779182 | 0,07521  | 0,363518  |
| RP11-390F4.8  | 22,79    | 3,53  | 1,986499 | 1,779096 | 0,075224 | 0,363518  |
| CEP68         | 297,87   | -1,17 | 0,659469 | -1,77884 | 0,075266 | 0,363569  |
| RPL37         | 2296,07  | -0,49 | 0,276233 | -1,7787  | 0,075288 | 0,363569  |
| RP11-100I7.1  | 29,77    | -0,92 | 0,514703 | -1,77867 | 0,075293 | 0,363569  |
| ENDOV         | 152,05   | -0,76 | 0,425912 | -1,7783  | 0,075355 | 0,3637744 |
| RN7SL113P     | 5,56     | -2,36 | 1,330233 | -1,77781 | 0,075435 | 0,3640645 |
| AC092580.4    | 4,11     | -3,45 | 1,938321 | -1,77746 | 0,075492 | 0,3642442 |
| SNORD63B      | 3,22     | 4,32  | 2,433277 | 1,777299 | 0,075519 | NA        |
| SNN           | 387,60   | 0,95  | 0,537038 | 1,777247 | 0,075528 | 0,3643221 |
| CEP44         | 139,66   | 1,55  | 0,873107 | 1,777122 | 0,075548 | 0,3643268 |
| ZNF785        | 93,24    | 1,48  | 0,832095 | 1,777    | 0,075568 | 0,3643291 |
| CTC-338M12.5  | 2,78     | -1,93 | 1,0881   | -1,77696 | 0,075574 | NA        |
| LRRRC37B      | 82,18    | -1,16 | 0,653493 | -1,77666 | 0,075624 | 0,3643996 |

|               |         |       |          |          |          |           |
|---------------|---------|-------|----------|----------|----------|-----------|
| TXNDC17       | 358,90  | -0,53 | 0,298834 | -1,77654 | 0,075644 | 0,3643996 |
| PDLIM1        | 357,39  | 1,61  | 0,904558 | 1,776404 | 0,075666 | 0,3643996 |
| TRIM59        | 192,76  | -1,37 | 0,773851 | -1,77635 | 0,075675 | 0,3643996 |
| SYT14         | 30,44   | 1,48  | 0,83047  | 1,776302 | 0,075683 | 0,3643996 |
| LMOD3         | 6,62    | -2,11 | 1,185863 | -1,77618 | 0,075704 | 0,3643996 |
| SYCP2L        | 17,17   | 2,47  | 1,390189 | 1,776079 | 0,07572  | 0,3643996 |
| RF00100       | 34,92   | -1,28 | 0,718194 | -1,77586 | 0,075755 | 0,3644754 |
| TMEM176A      | 95,71   | -2,82 | 1,590395 | -1,7757  | 0,075782 | 0,3645105 |
| P3H3          | 1,46    | -2,89 | 1,629376 | -1,77496 | 0,075905 | NA        |
| CD59          | 414,79  | 1,20  | 0,67736  | 1,774856 | 0,075922 | 0,3650506 |
| EPM2A         | 187,84  | 1,41  | 0,792133 | 1,774783 | 0,075934 | 0,3650506 |
| HSP90AB2P     | 2,63    | 4,13  | 2,328736 | 1,774645 | 0,075957 | NA        |
| CTB-43P18.3   | 53,45   | 3,55  | 2,000472 | 1,774474 | 0,075985 | 0,3652023 |
| AC013394.2    | 1349,76 | 0,46  | 0,257877 | 1,774344 | 0,076006 | 0,365211  |
| PTGES2-AS1    | 10,12   | 2,21  | 1,248432 | 1,774006 | 0,076062 | 0,3653852 |
| GTF2I         | 868,97  | -0,85 | 0,480672 | -1,7737  | 0,076112 | 0,3655309 |
| SH3BGR        | 2,31    | -3,85 | 2,170909 | -1,7733  | 0,076179 | NA        |
| RP11-6B19.1   | 5,93    | 4,65  | 2,622678 | 1,773006 | 0,076228 | 0,365991  |
| RP11-433J20.1 | 9,15    | 1,48  | 0,835634 | 1,772747 | 0,076271 | 0,3660845 |
| HMGA1         | 349,25  | 0,65  | 0,369142 | 1,772609 | 0,076294 | 0,3660845 |
| BROX          | 598,05  | -0,59 | 0,334537 | -1,77252 | 0,076308 | 0,3660845 |
| TUBGCP5       | 203,02  | -1,31 | 0,740618 | -1,77231 | 0,076343 | 0,3660845 |
| SLC9A4        | 22,70   | -1,02 | 0,577554 | -1,7723  | 0,076345 | 0,3660845 |
| FBXO46        | 41,30   | 1,40  | 0,789252 | 1,771869 | 0,076416 | 0,3663297 |
| SPRYD4        | 70,49   | -1,24 | 0,698954 | -1,7716  | 0,076461 | 0,3664484 |
| PSG2          | 2,76    | -1,86 | 1,050844 | -1,77136 | 0,076502 | NA        |
| RP11-734I18.1 | 2,78    | -3,81 | 2,153109 | -1,77118 | 0,076531 | NA        |
| ABHD2         | 418,66  | 1,31  | 0,740475 | 1,77112  | 0,076541 | 0,36667   |
| RP5-991O23.1  | 2,47    | -3,77 | 2,130439 | -1,77107 | 0,07655  | NA        |
| ADRBK2        | 1148,67 | -0,61 | 0,342073 | -1,77097 | 0,076565 | 0,36667   |
| AC144833.1    | 1,66    | 3,34  | 1,887927 | 1,770968 | 0,076566 | NA        |
| RP11-335O4.3  | 9,48    | -2,87 | 1,622873 | -1,77094 | 0,076571 | 0,36667   |
| SLC2A10       | 1,56    | -1,96 | 1,106425 | -1,77084 | 0,076587 | NA        |
| CD9           | 85,19   | 2,04  | 1,153456 | 1,770745 | 0,076603 | 0,36667   |
| PLAU          | 77,25   | 2,54  | 1,434609 | 1,77073  | 0,076606 | 0,36667   |
| PCDHAC1       | 1,67    | -4,01 | 2,262425 | -1,77039 | 0,076662 | NA        |
| FAM195A       | 188,30  | -1,18 | 0,669081 | -1,77025 | 0,076685 | 0,3669546 |
| RPL38         | 1688,41 | -0,60 | 0,341047 | -1,77014 | 0,076704 | 0,3669546 |
| FEN1          | 30,18   | 2,93  | 1,652919 | 1,769981 | 0,07673  | 0,3669837 |
| TMEM88        | 7,67    | 2,83  | 1,598239 | 1,769694 | 0,076778 | 0,3671181 |
| INSR          | 805,09  | 0,65  | 0,369081 | 1,769516 | 0,076808 | 0,3671655 |
| RP11-252E2.2  | 0,86    | -3,02 | 1,705688 | -1,76952 | 0,076808 | NA        |
| SNRNP48       | 233,43  | 1,36  | 0,768008 | 1,769264 | 0,07685  | 0,3672723 |
| TNS1          | 19,22   | -2,22 | 1,253832 | -1,76887 | 0,076916 | 0,3674919 |
| PTDSS2        | 68,27   | 2,31  | 1,306499 | 1,768535 | 0,076971 | 0,3676647 |
| CTC-461F20.1  | 1,76    | -5,44 | 3,077695 | -1,76794 | 0,07707  | NA        |
| ZBED9         | 3,04    | -1,98 | 1,119683 | -1,76786 | 0,077085 | NA        |
| RP11-881M11.8 | 3,87    | 4,02  | 2,272177 | 1,767709 | 0,07711  | 0,3679828 |
| RP11-14I17.2  | 18,52   | -1,43 | 0,807932 | -1,76766 | 0,077118 | 0,3679828 |
| WDSUB1        | 52,44   | 1,76  | 0,992934 | 1,767606 | 0,077127 | 0,3679828 |



|                |         |       |          |          |          |           |
|----------------|---------|-------|----------|----------|----------|-----------|
| DGCR2          | 154,72  | -2,01 | 1,141903 | -1,75753 | 0,078828 | 0,3720091 |
| RP11-574K11.27 | 1,76    | -5,41 | 3,07754  | -1,75749 | 0,078834 | NA        |
| MAPK8          | 297,51  | 1,35  | 0,765432 | 1,757452 | 0,078841 | 0,3720091 |
| AC004067.5     | 3,25    | 4,33  | 2,462651 | 1,757442 | 0,078843 | NA        |
| GULP1          | 36,28   | -2,83 | 1,612163 | -1,75727 | 0,078871 | 0,3720579 |
| SIGLEC16       | 56,00   | -2,58 | 1,468951 | -1,7562  | 0,079055 | 0,3728289 |
| RP11-115I8.1   | 1,91    | -2,89 | 1,647123 | -1,75608 | 0,079074 | NA        |
| EIF4E3         | 173,80  | -1,71 | 0,971763 | -1,75595 | 0,079096 | 0,3728902 |
| AC012074.2     | 11,16   | -2,31 | 1,316116 | -1,75589 | 0,079108 | 0,3728902 |
| SHC4           | 23,67   | -1,92 | 1,094605 | -1,75567 | 0,079146 | 0,3728902 |
| ORAI3          | 169,59  | -1,31 | 0,745659 | -1,75565 | 0,079148 | 0,3728902 |
| MAPK11P1L      | 1029,63 | 0,65  | 0,367943 | 1,754784 | 0,079296 | 0,3734956 |
| SLC25A42       | 27,23   | -2,61 | 1,485162 | -1,75444 | 0,079355 | 0,3736779 |
| AC006129.3     | 2,32    | 3,25  | 1,849706 | 1,754347 | 0,079371 | NA        |
| SNX3           | 1389,89 | 0,56  | 0,318382 | 1,754068 | 0,079419 | 0,3737962 |
| RP11-417O18.1  | 27,00   | -0,68 | 0,386834 | -1,75406 | 0,07942  | 0,3737962 |
| RP11-248B24.1  | 5,16    | -1,57 | 0,894248 | -1,75386 | 0,079454 | 0,3738027 |
| RN7SL515P      | 4,31    | 3,57  | 2,038073 | 1,753816 | 0,079462 | 0,3738027 |
| SLC48A1        | 133,67  | -1,12 | 0,636422 | -1,7535  | 0,079516 | 0,3738125 |
| RPAP3          | 238,62  | 0,94  | 0,535864 | 1,753418 | 0,07953  | 0,3738125 |
| ZNF852         | 42,61   | -2,93 | 1,671486 | -1,75336 | 0,079541 | 0,3738125 |
| FAM129B        | 51,77   | -1,25 | 0,715587 | -1,75329 | 0,079553 | 0,3738125 |
| ZBP1           | 90,41   | -1,17 | 0,669047 | -1,75322 | 0,079565 | 0,3738125 |
| KIF26B         | 4,25    | -5,82 | 3,319047 | -1,75299 | 0,079604 | 0,3739048 |
| RP11-977B10.2  | 52,51   | 2,57  | 1,464888 | 1,752581 | 0,079674 | 0,3741381 |
| RP11-946L20.2  | 3,62    | -4,20 | 2,398323 | -1,75235 | 0,079713 | NA        |
| RP11-472N13.3  | 2,74    | 3,50  | 1,996337 | 1,751866 | 0,079797 | NA        |
| YBX3           | 1211,99 | -0,55 | 0,316771 | -1,75163 | 0,079838 | 0,3748145 |
| NRBF2          | 204,43  | 0,88  | 0,501577 | 1,751297 | 0,079895 | 0,3749048 |
| UNC45A         | 318,79  | -1,24 | 0,709196 | -1,75128 | 0,079898 | 0,3749048 |
| RP11-814M22.1  | 2,63    | -6,19 | 3,53551  | -1,7511  | 0,079928 | NA        |
| CAMK2D         | 632,77  | -0,89 | 0,508024 | -1,75072 | 0,079994 | 0,375262  |
| RP11-145M9.6   | 4,98    | -2,17 | 1,237499 | -1,75044 | 0,080042 | 0,3753102 |
| RP1-283E3.8    | 97,29   | -1,21 | 0,690102 | -1,75043 | 0,080045 | 0,3753102 |
| RNF135         | 594,67  | -0,81 | 0,463612 | -1,75028 | 0,080069 | 0,3753304 |
| CTD-2583A14.8  | 6,34    | -1,70 | 0,97254  | -1,75003 | 0,080113 | 0,3754027 |
| RPL21          | 5597,27 | -0,29 | 0,168572 | -1,74996 | 0,080125 | 0,3754027 |
| RBL1           | 181,10  | -1,75 | 1,000154 | -1,74967 | 0,080175 | 0,375542  |
| CD40           | 120,83  | 1,56  | 0,891143 | 1,74944  | 0,080215 | 0,3756353 |
| FAM188A        | 179,18  | 1,50  | 0,858932 | 1,749153 | 0,080265 | 0,3757733 |
| RP11-520H14.7  | 0,68    | -3,56 | 2,036646 | -1,74906 | 0,08028  | NA        |
| RP11-531A24.3  | 22,25   | -1,35 | 0,774292 | -1,749   | 0,080291 | 0,3758044 |
| RP11-398C13.6  | 2,77    | 2,93  | 1,677517 | 1,748675 | 0,080347 | NA        |
| MT-TC          | 10,93   | -0,94 | 0,536114 | -1,74864 | 0,080353 | 0,3759971 |
| CTB-131K11.1   | 16,64   | 2,11  | 1,207373 | 1,748501 | 0,080377 | 0,376017  |
| RPL12P1        | 0,75    | -3,01 | 1,719276 | -1,74833 | 0,080408 | NA        |
| USPL1          | 271,57  | 1,23  | 0,704977 | 1,748217 | 0,080427 | 0,3761465 |
| REV1           | 262,16  | 0,98  | 0,56265  | 1,748107 | 0,080445 | 0,3761465 |
| NCOA3          | 1666,77 | 0,44  | 0,252305 | 1,747706 | 0,080515 | 0,3761634 |
| UBE2D2         | 636,94  | 0,56  | 0,319505 | 1,747615 | 0,080531 | 0,3761634 |

|                |          |       |          |          |          |           |
|----------------|----------|-------|----------|----------|----------|-----------|
| NFATC2         | 347,15   | 1,53  | 0,877289 | 1,747614 | 0,080531 | 0,3761634 |
| YLPM1          | 503,19   | 0,95  | 0,544257 | 1,747568 | 0,080539 | 0,3761634 |
| EIF5AL1        | 29,50    | -1,10 | 0,627462 | -1,7475  | 0,08055  | 0,3761634 |
| KLRF1          | 37,55    | -3,00 | 1,715917 | -1,74731 | 0,080583 | 0,3762223 |
| AC103563.2     | 3,90     | -5,59 | 3,198954 | -1,74707 | 0,080625 | 0,3763223 |
| COX19          | 448,36   | -0,71 | 0,407816 | -1,74686 | 0,080662 | 0,3764023 |
| FMO5           | 82,85    | 1,30  | 0,743433 | 1,746709 | 0,080688 | 0,3764282 |
| TTC21B         | 264,06   | 1,30  | 0,744974 | 1,746231 | 0,080771 | 0,376721  |
| FKRP           | 84,45    | -1,04 | 0,597787 | -1,74602 | 0,080807 | 0,3767571 |
| POLR3F         | 146,09   | -1,84 | 1,055454 | -1,74595 | 0,080819 | 0,3767571 |
| RP11-433N2.1   | 2,19     | 2,54  | 1,454371 | 1,745892 | 0,08083  | NA        |
| CD274          | 12,64    | 5,59  | 3,203546 | 1,745808 | 0,080844 | 0,376781  |
| RP1-240K6.5    | 8,28     | -3,80 | 2,179311 | -1,74567 | 0,080869 | 0,3768012 |
| ARL13B         | 70,63    | 1,76  | 1,005972 | 1,745157 | 0,080957 | 0,3770506 |
| PLGLB2         | 15,20    | 3,74  | 2,144887 | 1,744826 | 0,081015 | 0,3770506 |
| ZC3HAV1        | 2064,80  | 0,67  | 0,38419  | 1,744783 | 0,081023 | 0,3770506 |
| AC010883.5     | 11,18    | 2,69  | 1,540253 | 1,744705 | 0,081036 | 0,3770506 |
| PGPEP1         | 255,65   | -1,31 | 0,750116 | -1,74465 | 0,081046 | 0,3770506 |
| RN7SL575P      | 8,40     | 1,41  | 0,809617 | 1,744518 | 0,081069 | 0,3770506 |
| RUSC2          | 47,92    | -3,39 | 1,943947 | -1,74434 | 0,081099 | 0,3770506 |
| VWA5B1         | 127,40   | -0,70 | 0,40038  | -1,74425 | 0,081115 | 0,3770506 |
| RP11-742N3.1   | 93,32    | -0,73 | 0,41831  | -1,74423 | 0,081118 | 0,3770506 |
| SAFB2          | 386,12   | -0,68 | 0,389161 | -1,74419 | 0,081125 | 0,3770506 |
| ITGA5          | 755,30   | 0,86  | 0,49497  | 1,744053 | 0,08115  | 0,3770713 |
| MT-CO1         | 73397,88 | -0,40 | 0,231051 | -1,74379 | 0,081196 | 0,3771206 |
| PRKCA          | 284,52   | 1,04  | 0,596408 | 1,743595 | 0,08123  | 0,3771206 |
| RHOXF2         | 16,95    | 2,14  | 1,225674 | 1,743431 | 0,081258 | 0,3771206 |
| NEGR1          | 256,20   | -1,41 | 0,809189 | -1,7433  | 0,08128  | 0,3771206 |
| PRDX5          | 1488,45  | -0,40 | 0,230031 | -1,74319 | 0,081301 | 0,3771206 |
| CD44           | 4132,00  | 0,49  | 0,278241 | 1,743156 | 0,081306 | 0,3771206 |
| CR1            | 161,83   | -1,76 | 1,007919 | -1,7431  | 0,081315 | 0,3771206 |
| WBP2           | 571,69   | -0,62 | 0,357345 | -1,74306 | 0,081323 | 0,3771206 |
| CISH           | 118,44   | -2,79 | 1,600249 | -1,74274 | 0,08138  | 0,3772909 |
| SEC24D         | 443,96   | 1,19  | 0,683136 | 1,742265 | 0,081462 | 0,3775789 |
| C1RL           | 128,26   | 1,30  | 0,747061 | 1,74206  | 0,081498 | 0,3776513 |
| CBWD3          | 296,98   | -0,79 | 0,454797 | -1,74174 | 0,081554 | 0,3778146 |
| RP11-298E9.3   | 9,46     | 4,96  | 2,849915 | 1,741361 | 0,08162  | 0,377841  |
| RN7SL225P      | 2,74     | -2,35 | 1,348288 | -1,74132 | 0,081627 | NA        |
| DDAH2          | 345,17   | 0,76  | 0,436912 | 1,74131  | 0,081629 | 0,377841  |
| PHC1           | 31,36    | -2,27 | 1,306103 | -1,7412  | 0,081648 | 0,377841  |
| RP11-544M22.13 | 90,72    | 2,77  | 1,58904  | 1,741135 | 0,08166  | 0,377841  |
| HNRNPC         | 3461,42  | 0,39  | 0,22519  | 1,741089 | 0,081668 | 0,377841  |
| DDA1           | 132,47   | 1,14  | 0,653166 | 1,741014 | 0,081681 | 0,377841  |
| TRIM13         | 317,58   | -0,93 | 0,535097 | -1,74062 | 0,08175  | 0,3780667 |
| FLYWCH1        | 215,63   | -1,37 | 0,788002 | -1,74042 | 0,081786 | 0,3781375 |
| RFX5           | 350,32   | 1,08  | 0,618762 | 1,740137 | 0,081835 | 0,3781825 |
| RP11-6O2.2     | 11,50    | -1,77 | 1,020024 | -1,7401  | 0,081841 | 0,3781825 |
| CNOT2          | 842,66   | 0,68  | 0,39313  | 1,740014 | 0,081857 | 0,3781825 |
| CRLF2          | 4,33     | 2,48  | 1,427435 | 1,739547 | 0,081939 | 0,3784674 |
| TNFRSF14       | 1196,85  | -0,80 | 0,459191 | -1,73937 | 0,08197  | 0,3784767 |





|                |         |       |          |          |          |           |
|----------------|---------|-------|----------|----------|----------|-----------|
| DNAJC4         | 519,68  | 0,55  | 0,31806  | 1,731155 | 0,083424 | 0,3812594 |
| MASP2          | 4,87    | 2,00  | 1,155184 | 1,731028 | 0,083447 | 0,3812692 |
| CTD-2528A14.5  | 7,79    | -2,29 | 1,320467 | -1,73076 | 0,083494 | 0,3813564 |
| RASGRP1        | 106,60  | 2,08  | 1,203396 | 1,730691 | 0,083507 | 0,3813564 |
| MOB1B          | 720,27  | 0,75  | 0,436221 | 1,73051  | 0,083539 | 0,381396  |
| FLRT2          | 46,56   | -1,19 | 0,68699  | -1,73041 | 0,083557 | 0,381396  |
| AP001189.4     | 1,67    | -5,33 | 3,082412 | -1,73029 | 0,083578 | NA        |
| DUX4L34        | 0,65    | -3,13 | 1,810162 | -1,73028 | 0,08358  | NA        |
| RUNDC3B        | 21,41   | 1,69  | 0,979676 | 1,729998 | 0,083631 | 0,3816404 |
| VSTM1          | 22,24   | -6,26 | 3,618245 | -1,7298  | 0,083665 | 0,3816914 |
| PRDX1          | 1828,66 | -0,55 | 0,319945 | -1,72961 | 0,0837   | 0,3816914 |
| RP11-761E20.1  | 28,56   | 2,19  | 1,2656   | 1,729591 | 0,083703 | 0,3816914 |
| PPP1R10        | 357,61  | -0,69 | 0,400706 | -1,72925 | 0,083764 | 0,3818746 |
| FCGR1A         | 262,90  | -1,43 | 0,827069 | -1,72874 | 0,083856 | 0,38211   |
| PALM           | 7,51    | -1,37 | 0,794228 | -1,72873 | 0,083857 | 0,38211   |
| FGD3           | 716,85  | -0,93 | 0,539652 | -1,72845 | 0,083908 | 0,3821825 |
| C11orf70       | 7,31    | 1,28  | 0,738522 | 1,728415 | 0,083914 | 0,3821825 |
| SHARPIN        | 185,01  | -1,05 | 0,607924 | -1,72817 | 0,083958 | 0,3822388 |
| RP11-713N11.4  | 6,67    | -3,19 | 1,843798 | -1,72812 | 0,083967 | 0,3822388 |
| MAP3K1         | 1490,96 | -0,61 | 0,354382 | -1,72781 | 0,084022 | 0,3823968 |
| ZNF383         | 176,99  | -1,17 | 0,677439 | -1,72724 | 0,084125 | 0,3826834 |
| ORC1           | 15,56   | -2,34 | 1,356166 | -1,72723 | 0,084127 | 0,3826834 |
| FPR2           | 14,96   | -2,45 | 1,416869 | -1,72706 | 0,084157 | 0,3827266 |
| GNB4           | 846,45  | 0,73  | 0,424964 | 1,726656 | 0,084229 | 0,3828522 |
| SFXN5          | 212,93  | 1,07  | 0,621657 | 1,726618 | 0,084236 | 0,3828522 |
| RP11-484D2.2   | 25,59   | -1,50 | 0,866914 | -1,72656 | 0,084246 | 0,3828522 |
| PDE6B          | 77,62   | -1,75 | 1,015027 | -1,72619 | 0,084314 | 0,3829001 |
| CIAPIN1        | 390,19  | 1,08  | 0,622972 | 1,726063 | 0,084336 | 0,3829001 |
| DNAAF1         | 100,79  | -1,46 | 0,84383  | -1,72604 | 0,084341 | 0,3829001 |
| ACSM3          | 48,33   | -1,19 | 0,690554 | -1,72581 | 0,084381 | 0,3829001 |
| TAS2R64P       | 9,67    | -2,39 | 1,386428 | -1,72572 | 0,084398 | 0,3829001 |
| ABHD14B        | 444,38  | -0,91 | 0,527298 | -1,7257  | 0,084402 | 0,3829001 |
| PVR            | 30,67   | -1,85 | 1,070257 | -1,72568 | 0,084405 | 0,3829001 |
| RNU2-2P        | 25,21   | -1,05 | 0,607761 | -1,72559 | 0,084421 | 0,3829001 |
| RP11-1017G21.3 | 4,48    | 4,80  | 2,78162  | 1,725128 | 0,084504 | 0,3831844 |
| RP13-650J16.1  | 16,44   | 2,47  | 1,431871 | 1,724888 | 0,084548 | 0,3832866 |
| RP11-778D9.4   | 3,52    | -1,41 | 0,818814 | -1,72482 | 0,084559 | NA        |
| NDUFS1         | 542,82  | 1,00  | 0,578725 | 1,724252 | 0,084662 | 0,3837131 |
| MFS12          | 176,71  | 1,02  | 0,592348 | 1,724004 | 0,084707 | 0,3837524 |
| RP4-635E18.8   | 159,35  | 1,49  | 0,864586 | 1,723797 | 0,084744 | 0,3837524 |
| RP11-375F2.2   | 15,60   | -1,20 | 0,698189 | -1,7238  | 0,084745 | 0,3837524 |
| RP11-531A24.5  | 18,28   | 1,10  | 0,63835  | 1,723674 | 0,084767 | 0,3837524 |
| CAMLG          | 312,71  | 0,82  | 0,474876 | 1,723632 | 0,084774 | 0,3837524 |
| CARS           | 368,11  | -0,99 | 0,571581 | -1,72334 | 0,084826 | 0,3837524 |
| ANKRD36B       | 206,14  | 1,43  | 0,828682 | 1,723219 | 0,084849 | 0,3837524 |
| BLOC1S1        | 745,88  | -0,43 | 0,251482 | -1,72318 | 0,084856 | 0,3837524 |
| MTMR9          | 489,76  | 0,99  | 0,571881 | 1,723067 | 0,084876 | 0,3837524 |
| RP3-508I15.18  | 54,39   | -0,93 | 0,541488 | -1,72305 | 0,084879 | 0,3837524 |
| USP34          | 1214,26 | 0,53  | 0,305109 | 1,722948 | 0,084898 | 0,3837524 |
| MCL1           | 4715,74 | 0,44  | 0,254809 | 1,722826 | 0,08492  | 0,383759  |

|               |         |       |          |          |          |           |
|---------------|---------|-------|----------|----------|----------|-----------|
| SH3PXD2A-AS1  | 8,44    | -2,29 | 1,328234 | -1,72256 | 0,084968 | 0,3838839 |
| RP3-446N13.1  | 23,65   | -1,25 | 0,724145 | -1,72225 | 0,085025 | 0,3840464 |
| GINS1         | 24,76   | -1,61 | 0,935509 | -1,72196 | 0,085077 | 0,3840917 |
| RP11-3B7.6    | 0,85    | -2,65 | 1,540726 | -1,72169 | 0,085126 | NA        |
| RP11-1C1.7    | 6,64    | -1,26 | 0,732579 | -1,72153 | 0,085155 | 0,3840917 |
| RP11-872J21.3 | 7,83    | 2,79  | 1,622324 | 1,721515 | 0,085157 | 0,3840917 |
| MAML2         | 84,91   | -1,48 | 0,859919 | -1,72143 | 0,085173 | 0,3840917 |
| IBA57         | 116,00  | 0,84  | 0,486687 | 1,721188 | 0,085217 | 0,3840917 |
| RNF168        | 549,19  | -0,93 | 0,540402 | -1,72098 | 0,085255 | 0,3840917 |
| NAPSA         | 4,34    | -1,56 | 0,904423 | -1,72094 | 0,085262 | 0,3840917 |
| NUDT8         | 15,91   | 3,26  | 1,892664 | 1,720918 | 0,085266 | 0,3840917 |
| LMBRD1        | 541,17  | -0,73 | 0,423572 | -1,72073 | 0,085299 | 0,3840917 |
| MFSD14C       | 507,70  | -0,60 | 0,348832 | -1,7206  | 0,085324 | 0,3840917 |
| C5orf24       | 182,52  | -1,17 | 0,678869 | -1,72045 | 0,085351 | 0,3840917 |
| C12orf29      | 76,16   | -2,47 | 1,43319  | -1,72044 | 0,085353 | 0,3840917 |
| RP5-859M6.1   | 5,75    | -1,72 | 1,00155  | -1,72036 | 0,085368 | 0,3840917 |
| CTD-2008P7.1  | 37,05   | -1,37 | 0,793694 | -1,72011 | 0,085413 | 0,3840917 |
| U47924.31     | 230,26  | -1,05 | 0,610895 | -1,72009 | 0,085416 | 0,3840917 |
| FBXW12        | 15,23   | -1,38 | 0,803886 | -1,72008 | 0,085417 | 0,3840917 |
| NDUFV2        | 1269,88 | 0,61  | 0,353814 | 1,720066 | 0,085421 | 0,3840917 |
| AVPI1         | 199,36  | 2,03  | 1,181992 | 1,720063 | 0,085421 | 0,3840917 |
| SLC26A2       | 111,71  | 1,18  | 0,685481 | 1,720029 | 0,085427 | 0,3840917 |
| RP11-777B9.5  | 2,80    | -1,07 | 0,622125 | -1,71987 | 0,085456 | NA        |
| RP11-289F5.1  | 4,43    | -1,87 | 1,089924 | -1,71975 | 0,085478 | 0,3842048 |
| MFF           | 570,13  | 0,90  | 0,525965 | 1,719664 | 0,085494 | 0,3842048 |
| CTD-2013N17.6 | 7,92    | 2,24  | 1,304004 | 1,719525 | 0,085519 | 0,3842253 |
| CDKN2A        | 3,69    | -3,36 | 1,953638 | -1,71936 | 0,085549 | NA        |
| AC002076.10   | 2,24    | 3,22  | 1,871552 | 1,719114 | 0,085594 | NA        |
| VAV3          | 479,07  | 0,94  | 0,548458 | 1,719098 | 0,085597 | 0,3844497 |
| PTCD2         | 112,34  | 1,52  | 0,882323 | 1,719024 | 0,08561  | 0,3844497 |
| MAP7D1        | 619,11  | -0,70 | 0,406651 | -1,71852 | 0,085701 | 0,3847652 |
| MCM4          | 73,11   | 1,34  | 0,780923 | 1,718166 | 0,085766 | 0,3849659 |
| RP11-544I20.2 | 39,44   | 0,94  | 0,544828 | 1,718008 | 0,085795 | 0,3850025 |
| RP5-928E24.4  | 1,68    | -5,35 | 3,116617 | -1,71772 | 0,085847 | NA        |
| SLFNL1-AS1    | 11,78   | -0,94 | 0,548746 | -1,71754 | 0,085881 | 0,3851833 |
| SNAPC4        | 60,15   | 1,20  | 0,69628  | 1,717439 | 0,085899 | 0,3851833 |
| PLSCR1        | 1632,13 | 0,67  | 0,387598 | 1,717397 | 0,085907 | 0,3851833 |
| OR2J2         | 4,21    | -1,46 | 0,851414 | -1,71733 | 0,085918 | 0,3851833 |
| TMEM176B      | 260,10  | -3,32 | 1,933533 | -1,71708 | 0,085965 | 0,3852986 |
| RP11-331F4.5  | 4,41    | -1,69 | 0,98304  | -1,71663 | 0,086047 | 0,3855139 |
| RP11-24M17.7  | 27,99   | -1,21 | 0,703833 | -1,71659 | 0,086054 | 0,3855139 |
| RP5-1057J7.6  | 4,30    | 3,00  | 1,747632 | 1,716126 | 0,086139 | 0,3857229 |
| DDB1          | 801,34  | 0,56  | 0,327955 | 1,716108 | 0,086142 | 0,3857229 |
| TERF1         | 468,46  | -0,85 | 0,494292 | -1,71562 | 0,086231 | 0,3860286 |
| SLC1A4        | 203,14  | 1,15  | 0,672973 | 1,715421 | 0,086268 | 0,3861003 |
| NACAP1        | 8,73    | -2,09 | 1,218705 | -1,71524 | 0,086302 | 0,3861355 |
| MPEG1         | 4674,74 | 0,34  | 0,197493 | 1,715073 | 0,086332 | 0,3861355 |
| RP11-167P11.3 | 5,56    | 4,60  | 2,683835 | 1,714833 | 0,086376 | 0,3861355 |
| FBXW2         | 446,68  | 1,13  | 0,660486 | 1,714765 | 0,086388 | 0,3861355 |
| CTC-529L17.2  | 19,66   | -6,21 | 3,618875 | -1,71476 | 0,08639  | 0,3861355 |



|                 |         |       |          |          |          |           |
|-----------------|---------|-------|----------|----------|----------|-----------|
| RP11-391H12.6   | 4,13    | -2,85 | 1,673013 | -1,7032  | 0,088531 | 0,3915126 |
| XXbac-B444P24.8 | 1,92    | -2,13 | 1,250394 | -1,70316 | 0,088538 | NA        |
| RP11-84A14.7    | 5,59    | -1,33 | 0,779674 | -1,70296 | 0,088576 | 0,3915126 |
| NARS            | 479,07  | 0,76  | 0,445919 | 1,702846 | 0,088597 | 0,3915126 |
| CEBPA-AS1       | 13,29   | 4,00  | 2,351986 | 1,702797 | 0,088606 | 0,3915126 |
| MAGOH           | 127,29  | 0,88  | 0,514129 | 1,702677 | 0,088628 | 0,3915126 |
| RP1-267L14.6    | 4,54    | 4,81  | 2,824881 | 1,702507 | 0,08866  | 0,3915126 |
| KATNAL1         | 52,73   | -1,59 | 0,936634 | -1,70242 | 0,088677 | 0,3915126 |
| RPS7            | 4380,37 | 0,24  | 0,139763 | 1,702419 | 0,088677 | 0,3915126 |
| RP11-461I.1     | 3,44    | -3,02 | 1,774375 | -1,70115 | 0,088914 | NA        |
| P2RX1           | 379,16  | -0,55 | 0,326132 | -1,70035 | 0,089064 | 0,3930655 |
| DCHS2           | 99,42   | -1,31 | 0,769003 | -1,70032 | 0,089071 | 0,3930655 |
| CRIP1           | 2533,06 | -0,56 | 0,330234 | -1,69966 | 0,089195 | 0,3933739 |
| FOSL1           | 36,26   | 2,08  | 1,222948 | 1,699618 | 0,089203 | 0,3933739 |
| RP11-739N10.1   | 38,28   | -1,72 | 1,013401 | -1,69956 | 0,089214 | 0,3933739 |
| ATAD1           | 290,03  | -1,22 | 0,715312 | -1,69949 | 0,089227 | 0,3933739 |
| FZR1            | 121,88  | 1,78  | 1,047362 | 1,699336 | 0,089256 | 0,3933739 |
| CTD-3211M3.1    | 4,36    | 4,76  | 2,798969 | 1,699274 | 0,089268 | 0,3933739 |
| STARD13         | 14,29   | 3,25  | 1,914156 | 1,699054 | 0,089309 | 0,3934633 |
| TMEM260         | 145,51  | -0,97 | 0,569534 | -1,69868 | 0,089379 | 0,39368   |
| RP11-326K13.4   | 3,72    | 3,94  | 2,318451 | 1,698352 | 0,089441 | NA        |
| IL19            | 6,09    | 2,83  | 1,667723 | 1,698219 | 0,089466 | 0,3938543 |
| NEUROD1         | 9,63    | -0,78 | 0,456795 | -1,69807 | 0,089495 | 0,3938543 |
| OR5AN1          | 68,53   | -1,63 | 0,956983 | -1,69806 | 0,089497 | 0,3938543 |
| AP001372.2      | 141,30  | -1,87 | 1,102471 | -1,69796 | 0,089515 | 0,3938543 |
| ZNF136          | 97,27   | 1,62  | 0,956703 | 1,697886 | 0,089529 | 0,3938543 |
| AP4S1           | 88,78   | 0,96  | 0,563949 | 1,697797 | 0,089546 | 0,3938543 |
| RP11-497D6.4    | 33,23   | -2,16 | 1,27348  | -1,69759 | 0,089586 | 0,3939361 |
| ALG2            | 390,09  | 1,04  | 0,610385 | 1,697296 | 0,089641 | 0,3939834 |
| ZNF765          | 90,79   | 1,22  | 0,718217 | 1,697252 | 0,089649 | 0,3939834 |
| TMEM140         | 50,42   | 1,45  | 0,854373 | 1,697152 | 0,089668 | 0,3939834 |
| EP400           | 417,64  | -0,96 | 0,565269 | -1,69708 | 0,089681 | 0,3939834 |
| TULP4           | 144,45  | -1,23 | 0,725261 | -1,69685 | 0,089726 | 0,3940853 |
| LA16c-429E7.1   | 2,56    | 2,80  | 1,647635 | 1,696712 | 0,089751 | NA        |
| ZNF230          | 29,02   | 1,78  | 1,046622 | 1,696581 | 0,089776 | 0,3941312 |
| AC100830.3      | 21,09   | -1,13 | 0,664026 | -1,69645 | 0,089801 | 0,3941312 |
| TMEM41A         | 210,47  | 0,90  | 0,531844 | 1,696367 | 0,089816 | 0,3941312 |
| GALNT18         | 2,37    | -6,04 | 3,561635 | -1,69637 | 0,089816 | NA        |
| RP11-274B18.2   | 15,60   | -2,01 | 1,182772 | -1,69634 | 0,089821 | 0,3941312 |
| EFCAB3          | 65,05   | 0,94  | 0,552473 | 1,696191 | 0,08985  | 0,3941495 |
| METAP1          | 365,58  | -1,07 | 0,631019 | -1,6961  | 0,089867 | 0,3941495 |
| CYP2R1          | 160,93  | -1,43 | 0,842518 | -1,69589 | 0,089907 | 0,3941565 |
| INPP5B          | 302,28  | -1,15 | 0,679198 | -1,69579 | 0,089925 | 0,3941565 |
| ZNF737          | 13,00   | 1,64  | 0,968837 | 1,695754 | 0,089933 | 0,3941565 |
| ATAD3C          | 16,54   | -1,31 | 0,770805 | -1,69519 | 0,090039 | 0,3944473 |
| RP11-309N17.4   | 20,99   | -0,88 | 0,520355 | -1,69515 | 0,090048 | 0,3944473 |
| CDV3            | 1775,36 | 0,49  | 0,289246 | 1,694958 | 0,090083 | 0,3944473 |
| RP11-867G23.4   | 37,47   | -1,95 | 1,148765 | -1,69496 | 0,090084 | 0,3944473 |
| RP11-422P24.10  | 0,81    | -3,60 | 2,127372 | -1,69449 | 0,090173 | NA        |
| RPS20           | 3260,57 | -0,34 | 0,202586 | -1,6943  | 0,090208 | 0,3949004 |

|                |         |       |          |          |          |           |
|----------------|---------|-------|----------|----------|----------|-----------|
| SLC28A3        | 1,00    | -4,53 | 2,671471 | -1,69412 | 0,090242 | NA        |
| RAB38          | 4,27    | 3,12  | 1,839943 | 1,693542 | 0,090352 | 0,3954375 |
| PEBP1          | 1597,94 | 0,61  | 0,3603   | 1,693276 | 0,090403 | 0,3955157 |
| RP11-258C19.3  | 5,74    | 4,56  | 2,691291 | 1,693225 | 0,090413 | 0,3955157 |
| RP11-96D1.3    | 1,25    | 2,94  | 1,73426  | 1,693203 | 0,090417 | NA        |
| RN7SL402P      | 3,10    | 4,28  | 2,529889 | 1,693044 | 0,090447 | NA        |
| RN7SL652P      | 0,80    | -2,06 | 1,215861 | -1,69286 | 0,090483 | NA        |
| CTD-2396E7.11  | 6,53    | 1,71  | 1,011347 | 1,692569 | 0,090538 | 0,3959243 |
| PPOX           | 106,76  | 1,47  | 0,870198 | 1,692511 | 0,090549 | 0,3959243 |
| PIH1D3         | 2,40    | 2,66  | 1,570069 | 1,692321 | 0,090585 | NA        |
| HINT1          | 2388,74 | 0,34  | 0,199606 | 1,692066 | 0,090633 | 0,3961986 |
| GORAB          | 72,73   | 2,03  | 1,201    | 1,691958 | 0,090654 | 0,3961986 |
| EIF1B-AS1      | 37,01   | -1,99 | 1,176439 | -1,69148 | 0,090744 | 0,3965008 |
| TMEM55A        | 443,04  | 1,38  | 0,81542  | 1,690987 | 0,090839 | 0,3968216 |
| ZNF831         | 15,25   | -3,53 | 2,088488 | -1,6907  | 0,090894 | 0,3968831 |
| FBXO17         | 7,90    | 2,22  | 1,315802 | 1,69056  | 0,090921 | 0,3968831 |
| RP11-81A1.3    | 0,96    | -4,50 | 2,659831 | -1,69053 | 0,090926 | NA        |
| CCDC186        | 483,32  | -1,07 | 0,635588 | -1,69041 | 0,09095  | 0,3968831 |
| RP1-23E21.2    | 4,17    | -1,91 | 1,130333 | -1,69036 | 0,090959 | 0,3968831 |
| AC018642.1     | 18,18   | 1,71  | 1,010569 | 1,690356 | 0,09096  | 0,3968831 |
| PLIN3          | 512,03  | 0,92  | 0,542654 | 1,690233 | 0,090983 | 0,3968922 |
| RP11-96C23.13  | 26,47   | -1,37 | 0,810342 | -1,68861 | 0,091295 | 0,3980571 |
| PAX8-AS1       | 160,60  | 1,56  | 0,925416 | 1,688517 | 0,091312 | 0,3980571 |
| TRIM11         | 210,35  | -1,23 | 0,725949 | -1,6885  | 0,091315 | 0,3980571 |
| G6PC3          | 268,30  | 1,00  | 0,593619 | 1,688294 | 0,091355 | 0,3981276 |
| RRP12          | 294,18  | 0,92  | 0,546837 | 1,688196 | 0,091374 | 0,3981276 |
| ANAPC2         | 10,71   | 2,44  | 1,445193 | 1,688053 | 0,091401 | 0,3981538 |
| RP13-635I23.2  | 5,36    | 2,68  | 1,5862   | 1,687717 | 0,091466 | 0,3983418 |
| GOLGA7B        | 1,73    | -4,76 | 2,821089 | -1,68725 | 0,091555 | NA        |
| RN7SL307P      | 0,97    | -4,56 | 2,705509 | -1,68715 | 0,091575 | NA        |
| TNFSF4         | 1,53    | 3,20  | 1,896225 | 1,687139 | 0,091577 | NA        |
| DHX15          | 998,76  | -0,70 | 0,41532  | -1,68673 | 0,091656 | 0,3990743 |
| RP11-447M4.1   | 21,26   | -1,91 | 1,134869 | -1,68649 | 0,091702 | 0,3990743 |
| RP5-1070A16.1  | 89,03   | -1,09 | 0,64835  | -1,68643 | 0,091713 | 0,3990743 |
| ACOT2          | 48,82   | 1,99  | 1,177951 | 1,686156 | 0,091766 | 0,3990743 |
| TEX2           | 152,94  | 1,62  | 0,958544 | 1,686155 | 0,091766 | 0,3990743 |
| RP11-364P22.2  | 33,59   | -1,51 | 0,896543 | -1,68613 | 0,09177  | 0,3990743 |
| GOT2           | 282,19  | 0,96  | 0,5694   | 1,685981 | 0,091799 | 0,3990743 |
| RP11-507K12.1  | 8,50    | 5,72  | 3,394375 | 1,685951 | 0,091805 | 0,3990743 |
| RP11-23P13.4   | 2,57    | 2,24  | 1,329468 | 1,68563  | 0,091867 | NA        |
| RP11-798G7.5   | 2,27    | 3,81  | 2,2623   | 1,685544 | 0,091884 | NA        |
| RP11-815J21.1  | 4,41    | 2,56  | 1,516985 | 1,685329 | 0,091925 | 0,3993536 |
| FAM133B        | 560,12  | -0,64 | 0,382704 | -1,68527 | 0,091937 | 0,3993536 |
| NME1           | 625,74  | 0,79  | 0,46981  | 1,685213 | 0,091948 | 0,3993536 |
| RP11-350J20.13 | 9,28    | 5,84  | 3,466669 | 1,685128 | 0,091964 | 0,3993536 |
| RP11-727A23.4  | 6,22    | -1,77 | 1,052215 | -1,68504 | 0,091982 | 0,3993536 |
| ULBP2          | 3,63    | 3,90  | 2,314925 | 1,684987 | 0,091991 | NA        |
| ZC3H12A        | 166,03  | 1,21  | 0,718633 | 1,684949 | 0,091998 | 0,3993536 |
| RP5-966M1.6    | 17,90   | 3,36  | 1,996687 | 1,684823 | 0,092023 | 0,399366  |
| CDC42EP2       | 1,91    | -2,15 | 1,274652 | -1,68482 | 0,092023 | NA        |



|               |          |       |          |          |          |           |
|---------------|----------|-------|----------|----------|----------|-----------|
| ZNF610        | 21,42    | 1,98  | 1,184211 | 1,676082 | 0,093722 | 0,4025159 |
| GPD1L         | 147,68   | -1,81 | 1,081802 | -1,6759  | 0,093757 | 0,4025742 |
| AC006011.4    | 17,86    | 1,75  | 1,045622 | 1,67518  | 0,093899 | 0,4030895 |
| RPL18A        | 16029,66 | -0,26 | 0,157418 | -1,67469 | 0,093994 | 0,4032341 |
| TSGA10        | 15,50    | 1,98  | 1,179924 | 1,674691 | 0,093995 | 0,4032341 |
| NUDT16        | 574,73   | 1,01  | 0,601187 | 1,674677 | 0,093998 | 0,4032341 |
| RP11-5L12.1   | 7,01     | 1,70  | 1,017278 | 1,674471 | 0,094038 | 0,4033144 |
| ENTHD2        | 165,51   | -0,97 | 0,580554 | -1,67421 | 0,09409  | 0,4034422 |
| LLNLR-284B4.2 | 3,47     | -1,46 | 0,870146 | -1,67405 | 0,094121 | NA        |
| RNF103        | 179,04   | 1,30  | 0,779576 | 1,673342 | 0,09426  | 0,4040803 |
| NPY6R         | 1,53     | 2,62  | 1,567523 | 1,673208 | 0,094286 | NA        |
| DIABLO        | 448,82   | 1,08  | 0,647911 | 1,672949 | 0,094337 | 0,404286  |
| HNRNP3        | 627,78   | 0,63  | 0,373875 | 1,672759 | 0,094375 | 0,404286  |
| ETAA1         | 83,75    | 1,72  | 1,03029  | 1,672668 | 0,094393 | 0,404286  |
| ETF1          | 1097,15  | 0,69  | 0,4105   | 1,672656 | 0,094395 | 0,404286  |
| AC007491.1    | 3,47     | -3,28 | 1,958625 | -1,67237 | 0,094451 | NA        |
| AC013470.8    | 1,57     | -2,24 | 1,339071 | -1,67225 | 0,094475 | NA        |
| AC092162.1    | 1,09     | -3,70 | 2,212108 | -1,67204 | 0,094517 | NA        |
| CD38          | 314,92   | -1,19 | 0,712591 | -1,67189 | 0,094546 | 0,40484   |
| ARMCX6        | 129,63   | 2,00  | 1,199551 | 1,671092 | 0,094704 | 0,4053944 |
| RP11-255C15.3 | 18,69    | 1,70  | 1,015797 | 1,670942 | 0,094733 | 0,4053944 |
| AC006129.1    | 521,91   | 0,67  | 0,403511 | 1,670903 | 0,094741 | 0,4053944 |
| CUL2          | 283,92   | 1,28  | 0,765232 | 1,670471 | 0,094826 | 0,405666  |
| MYCT1         | 2,86     | -3,92 | 2,344777 | -1,67025 | 0,09487  | NA        |
| EIF2B5        | 359,94   | -1,08 | 0,643772 | -1,67019 | 0,094882 | 0,4058094 |
| RP11-288H12.3 | 50,42    | 2,33  | 1,396832 | 1,66959  | 0,095    | 0,4062247 |
| RN7SL488P     | 3,18     | -1,49 | 0,891213 | -1,66941 | 0,095037 | NA        |
| CTC-484P3.1   | 35,82    | -2,22 | 1,328943 | -1,6693  | 0,095057 | 0,4062398 |
| IBTK          | 611,37   | -0,81 | 0,486395 | -1,66929 | 0,09506  | 0,4062398 |
| RP11-255B23.3 | 80,50    | -0,75 | 0,447717 | -1,66924 | 0,09507  | 0,4062398 |
| RP11-366M4.11 | 29,31    | 2,93  | 1,755278 | 1,669119 | 0,095094 | 0,4062502 |
| RAB28         | 87,07    | 1,45  | 0,866763 | 1,668914 | 0,095134 | 0,4063305 |
| RP11-72I8.1   | 450,92   | 0,82  | 0,489762 | 1,668545 | 0,095208 | 0,4065496 |
| C13orf45      | 1,02     | -4,02 | 2,408797 | -1,66835 | 0,095246 | NA        |
| RP11-519G16.3 | 29,98    | -1,39 | 0,83083  | -1,66823 | 0,09527  | 0,4067227 |
| RP11-8L2.1    | 11,25    | -1,92 | 1,154098 | -1,6677  | 0,095376 | 0,4070825 |
| RP4-736L20.4  | 22,47    | -0,89 | 0,535512 | -1,66725 | 0,095464 | 0,4072279 |
| CHMP1B        | 1704,46  | 0,61  | 0,367631 | 1,66723  | 0,095469 | 0,4072279 |
| ZNF253        | 27,00    | 1,72  | 1,034459 | 1,667081 | 0,095498 | 0,4072279 |
| SEPW1         | 806,04   | -0,51 | 0,306559 | -1,66707 | 0,0955   | 0,4072279 |
| EPB41L3       | 638,68   | 0,92  | 0,549202 | 1,666898 | 0,095535 | 0,4072279 |
| FKBP3         | 407,19   | 0,77  | 0,46317  | 1,666864 | 0,095542 | 0,4072279 |
| FBXO9         | 531,62   | 0,95  | 0,56782  | 1,66653  | 0,095608 | 0,4072919 |
| USP30         | 61,68    | -1,97 | 1,181728 | -1,66651 | 0,095612 | 0,4072919 |
| RP11-456I15.2 | 2,85     | -2,62 | 1,572476 | -1,66632 | 0,09565  | NA        |
| ABCC4         | 100,00   | 1,36  | 0,815266 | 1,666074 | 0,095699 | 0,4072919 |
| RP11-498P14.5 | 7,28     | -1,37 | 0,823233 | -1,66606 | 0,095701 | 0,4072919 |
| PLXNA4        | 9,91     | 2,41  | 1,444948 | 1,666009 | 0,095712 | 0,4072919 |
| BRD9          | 493,89   | -0,77 | 0,463568 | -1,66594 | 0,095725 | 0,4072919 |
| RPL22L1       | 209,17   | -0,85 | 0,512689 | -1,66581 | 0,095751 | 0,4072919 |

|               |         |       |          |          |          |           |
|---------------|---------|-------|----------|----------|----------|-----------|
| RP11-498C9.16 | 3,78    | 4,55  | 2,729693 | 1,665803 | 0,095753 | 0,4072919 |
| SIRT7         | 392,81  | -1,05 | 0,630462 | -1,66576 | 0,095761 | 0,4072919 |
| CTC-548K16.6  | 16,16   | -1,49 | 0,897108 | -1,66555 | 0,095804 | 0,4072919 |
| FAM149B1      | 168,50  | 1,48  | 0,890541 | 1,665504 | 0,095812 | 0,4072919 |
| MIR3153       | 15,68   | 3,13  | 1,881047 | 1,665469 | 0,095819 | 0,4072919 |
| AP001469.7    | 3,85    | -2,61 | 1,565735 | -1,66516 | 0,095881 | 0,4073592 |
| AC005062.2    | 41,22   | 0,71  | 0,429345 | 1,665108 | 0,095891 | 0,4073592 |
| BRMS1L        | 23,25   | 2,05  | 1,232092 | 1,665027 | 0,095907 | 0,4073592 |
| NEDD8         | 1566,62 | -0,41 | 0,245586 | -1,66495 | 0,095923 | 0,4073592 |
| ZBTB40        | 280,58  | -1,08 | 0,650872 | -1,66459 | 0,095994 | 0,4075275 |
| RP13-216E22.5 | 4,62    | -1,77 | 1,060952 | -1,66447 | 0,09602  | 0,4075275 |
| MARCH7        | 676,77  | 0,61  | 0,364562 | 1,664377 | 0,096037 | 0,4075275 |
| BTBD3         | 112,29  | 1,85  | 1,109568 | 1,664313 | 0,09605  | 0,4075275 |
| RP5-916L7.1   | 58,25   | -1,00 | 0,601456 | -1,66419 | 0,096074 | 0,407531  |
| SYT11         | 359,73  | 0,98  | 0,587079 | 1,66409  | 0,096095 | 0,407531  |
| C2orf74       | 107,34  | 1,41  | 0,845908 | 1,663964 | 0,09612  | 0,4075449 |
| CARNMT1       | 126,52  | -1,25 | 0,754263 | -1,6632  | 0,096273 | 0,4080618 |
| TMEM177       | 23,06   | -3,82 | 2,297815 | -1,66313 | 0,096285 | 0,4080618 |
| GRAMD2        | 18,48   | 2,10  | 1,263406 | 1,662652 | 0,096382 | 0,4082866 |
| ADHFE1        | 82,91   | 1,77  | 1,062265 | 1,662651 | 0,096382 | 0,4082866 |
| NCRNA00161    | 23,54   | 1,36  | 0,818093 | 1,662349 | 0,096443 | 0,4084498 |
| RP11-124D2.7  | 7,69    | 1,28  | 0,768571 | 1,662179 | 0,096477 | 0,4085005 |
| ANKRD45       | 26,14   | -1,56 | 0,936777 | -1,66196 | 0,096521 | 0,4085935 |
| LUC7L         | 484,62  | -0,63 | 0,376798 | -1,66139 | 0,096636 | 0,4089873 |
| RP13-714J12.1 | 3,78    | 3,37  | 2,028731 | 1,661047 | 0,096704 | 0,4091528 |
| RP11-110H1.4  | 6,12    | -2,59 | 1,559606 | -1,66089 | 0,096735 | 0,4091528 |
| ABI3BP        | 42,30   | -1,52 | 0,913572 | -1,66086 | 0,096741 | 0,4091528 |
| RP11-161H23.8 | 6,14    | -3,17 | 1,906552 | -1,66063 | 0,096787 | 0,4092559 |
| RP11-453A12.1 | 3,98    | -1,82 | 1,097324 | -1,66038 | 0,096837 | 0,409259  |
| RETSAT        | 16,51   | 1,80  | 1,084091 | 1,660366 | 0,096841 | 0,409259  |
| RP11-522B15.3 | 4,71    | -1,34 | 0,807017 | -1,6603  | 0,096854 | 0,409259  |
| BIRC6         | 1372,36 | -0,65 | 0,392538 | -1,66004 | 0,096906 | 0,4093577 |
| LRCH4         | 449,73  | -0,76 | 0,460346 | -1,65991 | 0,096933 | 0,4093577 |
| TOMM20        | 641,33  | 0,67  | 0,404218 | 1,659857 | 0,096943 | 0,4093577 |
| JAKMIP2       | 19,90   | 1,57  | 0,943873 | 1,659548 | 0,097005 | 0,4095273 |
| RP11-649E7.7  | 1,03    | -2,69 | 1,620326 | -1,65946 | 0,097023 | NA        |
| RP11-468E2.10 | 3,10    | -1,55 | 0,935451 | -1,65942 | 0,097032 | NA        |
| DMTF1         | 828,69  | -0,77 | 0,466863 | -1,6593  | 0,097055 | 0,4096269 |
| FAM13A        | 350,28  | -0,94 | 0,567773 | -1,65921 | 0,097073 | 0,4096269 |
| DPH6          | 144,16  | 1,57  | 0,948864 | 1,6591   | 0,097096 | 0,409629  |
| AC005616.1    | 1,47    | -5,15 | 3,103678 | -1,65908 | 0,0971   | NA        |
| RN7SL440P     | 2,14    | -1,79 | 1,080987 | -1,6588  | 0,097155 | NA        |
| EFHD1         | 7,66    | 2,48  | 1,496312 | 1,65843  | 0,097231 | 0,4099804 |
| RP11-631M6.2  | 121,30  | -1,01 | 0,608097 | -1,65832 | 0,097253 | 0,4099804 |
| AKIRIN1       | 855,83  | 0,55  | 0,334571 | 1,658113 | 0,097295 | 0,4099804 |
| RP11-428G5.7  | 13,42   | -1,13 | 0,683796 | -1,65808 | 0,097302 | 0,4099804 |
| AKAP10        | 375,17  | -0,91 | 0,550504 | -1,65803 | 0,097311 | 0,4099804 |
| RNASE2        | 362,44  | -0,94 | 0,564934 | -1,65803 | 0,097311 | 0,4099804 |
| AC006227.1    | 5,10    | 2,14  | 1,293309 | 1,657693 | 0,09738  | 0,4101757 |
| RN7SL530P     | 2,61    | 2,86  | 1,725213 | 1,657565 | 0,097405 | NA        |





|               |          |       |          |          |          |           |
|---------------|----------|-------|----------|----------|----------|-----------|
| NEXN          | 92,10    | -1,17 | 0,710887 | -1,64944 | 0,099058 | 0,4133169 |
| COG5          | 342,79   | -1,10 | 0,66811  | -1,64868 | 0,099213 | 0,4138563 |
| NME9          | 33,41    | -1,64 | 0,993111 | -1,64859 | 0,099232 | 0,4138563 |
| HAVCR1        | 3,74     | 1,61  | 0,973993 | 1,648486 | 0,099253 | NA        |
| XCL1          | 1,43     | -5,13 | 3,110583 | -1,64829 | 0,099292 | NA        |
| IRAK1BP1      | 75,58    | -0,95 | 0,577124 | -1,64823 | 0,099306 | 0,4138573 |
| KLF4          | 4973,66  | 0,45  | 0,270616 | 1,648212 | 0,099309 | 0,4138573 |
| RP11-314O13.1 | 1,09     | -2,93 | 1,779532 | -1,64818 | 0,099316 | NA        |
| AC006115.7    | 58,83    | -1,21 | 0,732733 | -1,64807 | 0,099338 | 0,4138573 |
| RPS3A         | 24030,41 | 0,30  | 0,184239 | 1,648065 | 0,099339 | 0,4138573 |
| DUSP19        | 8,42     | -1,05 | 0,635069 | -1,64804 | 0,099344 | 0,4138573 |
| EXOSC1        | 514,23   | 0,85  | 0,513728 | 1,647936 | 0,099366 | 0,4138573 |
| CTD-3076M17.1 | 3,63     | -2,41 | 1,462996 | -1,6479  | 0,099373 | NA        |
| TCERG1L       | 0,57     | -3,77 | 2,289193 | -1,64787 | 0,09938  | NA        |
| RP11-27J8.3   | 51,69    | 1,50  | 0,911593 | 1,647562 | 0,099443 | 0,4140677 |
| C8orf86       | 3,16     | 1,78  | 1,080365 | 1,647558 | 0,099443 | NA        |
| RNF216P1      | 95,81    | -1,12 | 0,677852 | -1,64747 | 0,099461 | 0,4140677 |
| ATP5J2        | 478,84   | -0,40 | 0,240703 | -1,64725 | 0,099508 | 0,4141695 |
| C21orf2       | 246,91   | -1,00 | 0,604555 | -1,64679 | 0,099601 | 0,4143847 |
| VSTM4         | 17,81    | -0,82 | 0,496343 | -1,64678 | 0,099604 | 0,4143847 |
| SERPINE2      | 16,49    | -1,67 | 1,014366 | -1,64646 | 0,099669 | 0,41454   |
| LYRM9         | 80,93    | -2,11 | 1,281676 | -1,64638 | 0,099686 | 0,41454   |
| SYNE3         | 457,06   | -0,77 | 0,465107 | -1,64619 | 0,099725 | 0,4146098 |
| RPGRIP1       | 46,57    | -1,69 | 1,02704  | -1,64598 | 0,099768 | 0,4146468 |
| RP11-73M18.8  | 115,26   | 1,95  | 1,183768 | 1,64593  | 0,099778 | 0,4146468 |
| AP001469.9    | 48,84    | -0,99 | 0,600242 | -1,64582 | 0,099801 | 0,4146478 |
| KIAA0430      | 489,73   | 0,75  | 0,455939 | 1,645711 | 0,099823 | 0,4146484 |
| VRK1          | 127,94   | 1,05  | 0,638804 | 1,645464 | 0,099874 | 0,414704  |
| C14orf159     | 540,73   | -0,77 | 0,467524 | -1,64541 | 0,099886 | 0,414704  |
| RP11-598F7.6  | 1,36     | -2,02 | 1,22809  | -1,64523 | 0,099922 | NA        |
| RP5-1100I6.2  | 1,94     | 2,98  | 1,813042 | 1,645213 | 0,099926 | NA        |
| RP11-165E7.1  | 26,24    | -1,12 | 0,678787 | -1,64521 | 0,099926 | 0,414704  |
| RP11-753H16.5 | 1,49     | -4,10 | 2,489322 | -1,64516 | 0,099937 | NA        |
| RN7SL552P     | 5,27     | 3,44  | 2,090265 | 1,644972 | 0,099975 | 0,414704  |
| DHX16         | 241,37   | 1,27  | 0,76989  | 1,644633 | 0,100045 | 0,414704  |
| UTP23         | 207,33   | -1,03 | 0,62803  | -1,64458 | 0,100056 | 0,414704  |
| SUPT7L        | 343,93   | 0,87  | 0,531311 | 1,644545 | 0,100064 | 0,414704  |
| RP11-338N10.1 | 6,38     | -1,42 | 0,864719 | -1,64443 | 0,100088 | 0,414704  |
| IGSF22        | 33,80    | -3,25 | 1,975796 | -1,64416 | 0,100143 | 0,414704  |
| C3orf18       | 23,12    | 2,36  | 1,435443 | 1,643945 | 0,100187 | 0,414704  |
| SMURF2        | 185,50   | 0,97  | 0,589625 | 1,643843 | 0,100209 | 0,414704  |
| NDUFB11       | 967,06   | -0,37 | 0,227142 | -1,64384 | 0,100209 | 0,414704  |
| IL2RB         | 16,09    | -2,05 | 1,248471 | -1,64377 | 0,100224 | 0,414704  |
| MEN1          | 90,35    | 1,58  | 0,960608 | 1,643747 | 0,100228 | 0,414704  |
| CTD-2369P2.8  | 110,23   | -1,68 | 1,023874 | -1,64366 | 0,100247 | 0,414704  |
| PPM1H         | 52,65    | -2,50 | 1,519948 | -1,64357 | 0,100266 | 0,414704  |
| CCS           | 479,79   | -0,64 | 0,392001 | -1,64348 | 0,100284 | 0,414704  |
| MOB2          | 121,81   | 1,37  | 0,832844 | 1,643228 | 0,100336 | 0,414704  |
| RP11-158M2.2  | 12,82    | 2,51  | 1,525905 | 1,643201 | 0,100341 | 0,414704  |
| CTC-426B10.1  | 43,53    | 2,29  | 1,394168 | 1,643193 | 0,100343 | 0,414704  |



|                |         |       |          |          |          |           |
|----------------|---------|-------|----------|----------|----------|-----------|
| IFT140         | 9,51    | 2,97  | 1,81522  | 1,634151 | 0,102227 | 0,418929  |
| RP11-18I14.10  | 174,07  | 1,04  | 0,63353  | 1,63387  | 0,102286 | 0,4189698 |
| KIAA0100       | 579,63  | 0,78  | 0,475659 | 1,633832 | 0,102294 | 0,4189698 |
| PPBP           | 259,91  | -3,06 | 1,871607 | -1,63378 | 0,102305 | 0,4189698 |
| THAP12         | 357,59  | -0,87 | 0,531869 | -1,63352 | 0,102359 | 0,4190173 |
| PPT1           | 5104,79 | 0,54  | 0,3281   | 1,633512 | 0,102361 | 0,4190173 |
| RP11-552M11.8  | 33,97   | -1,39 | 0,848494 | -1,6333  | 0,102406 | 0,4191065 |
| EREG           | 1549,92 | 0,99  | 0,608327 | 1,632258 | 0,102625 | 0,4199122 |
| CTD-2501B8.1   | 1,20    | -3,97 | 2,431208 | -1,6318  | 0,102721 | NA        |
| PHF10          | 589,84  | -1,00 | 0,611274 | -1,63179 | 0,102723 | 0,4202198 |
| ZDHH8P         | 4,41    | 1,96  | 1,203953 | 1,631608 | 0,102762 | 0,4202873 |
| CDHR3          | 8,58    | -1,31 | 0,804011 | -1,63145 | 0,102796 | 0,4203123 |
| HCG18          | 409,93  | -0,76 | 0,464121 | -1,63128 | 0,102832 | 0,4203123 |
| AXL            | 578,43  | 1,31  | 0,803359 | 1,631258 | 0,102836 | 0,4203123 |
| C9orf84        | 6,91    | 2,90  | 1,777538 | 1,631135 | 0,102862 | 0,4203265 |
| AKT1           | 386,08  | 0,75  | 0,461146 | 1,630848 | 0,102922 | 0,4204404 |
| RP11-710F7.3   | 8,33    | 5,69  | 3,488969 | 1,630788 | 0,102935 | 0,4204404 |
| RP11-45A17.2   | 15,04   | -2,88 | 1,764108 | -1,63042 | 0,103013 | 0,420666  |
| RNU6-936P      | 3,35    | 3,80  | 2,328323 | 1,630308 | 0,103036 | NA        |
| SH2D2A         | 3,12    | -3,56 | 2,186122 | -1,63016 | 0,103068 | NA        |
| TP53RK         | 160,27  | -1,24 | 0,758047 | -1,63015 | 0,10307  | 0,4208057 |
| RP11-417L19.6  | 3,33    | 3,79  | 2,322187 | 1,630035 | 0,103094 | NA        |
| RN7SL383P      | 2,11    | -5,87 | 3,603151 | -1,62979 | 0,103146 | NA        |
| GSTO1          | 1782,57 | -0,40 | 0,247332 | -1,62963 | 0,10318  | 0,4208935 |
| BRPF1          | 344,72  | 1,02  | 0,627712 | 1,629582 | 0,10319  | 0,4208935 |
| TXNL1          | 498,07  | 1,15  | 0,704063 | 1,629559 | 0,103195 | 0,4208935 |
| NUDT13         | 57,04   | 2,09  | 1,283206 | 1,629421 | 0,103224 | 0,4208935 |
| RRM1           | 178,28  | 1,29  | 0,791769 | 1,629391 | 0,10323  | 0,4208935 |
| LYRM4          | 369,67  | -0,98 | 0,60175  | -1,62932 | 0,103246 | 0,4208935 |
| RP11-10C24.3   | 5,05    | 2,22  | 1,364106 | 1,6293   | 0,10325  | 0,4208935 |
| RP11-179A16.2  | 1,40    | 3,12  | 1,913203 | 1,629106 | 0,103291 | NA        |
| AC007292.3     | 15,56   | 1,55  | 0,951947 | 1,628721 | 0,103372 | 0,421301  |
| RP11-315A16.1  | 6,97    | -2,82 | 1,729268 | -1,62809 | 0,103507 | 0,4217568 |
| ZNF836         | 29,53   | -1,15 | 0,707248 | -1,62776 | 0,103575 | 0,4219444 |
| MIR210HG       | 5,70    | -1,43 | 0,876119 | -1,62764 | 0,103601 | 0,4219565 |
| SCN1B          | 45,34   | -1,08 | 0,666435 | -1,62733 | 0,103668 | 0,4219827 |
| ZZEF1          | 632,29  | -0,81 | 0,494893 | -1,62712 | 0,103712 | 0,4219827 |
| RP11-158I9.8   | 8,59    | -1,69 | 1,039739 | -1,6269  | 0,103757 | 0,4219827 |
| AC005332.1     | 32,91   | -1,22 | 0,747148 | -1,6269  | 0,103758 | 0,4219827 |
| HMOX2          | 399,06  | 0,98  | 0,603103 | 1,626839 | 0,103771 | 0,4219827 |
| C2orf58        | 61,47   | -1,20 | 0,736692 | -1,62681 | 0,103777 | 0,4219827 |
| AC005775.2     | 5,17    | -1,11 | 0,683186 | -1,62675 | 0,10379  | 0,4219827 |
| RP11-252K23.1  | 1,28    | -2,76 | 1,699486 | -1,62675 | 0,103791 | NA        |
| CCDC114        | 4,48    | -1,64 | 1,008161 | -1,62669 | 0,103802 | 0,4219827 |
| RP11-1102P22.3 | 29,87   | 2,06  | 1,263849 | 1,626649 | 0,103812 | 0,4219827 |
| TYR            | 1,62    | -1,57 | 0,967593 | -1,62629 | 0,103887 | NA        |
| WDR45B         | 305,16  | 0,75  | 0,459075 | 1,62616  | 0,103916 | 0,4222541 |
| SYCP3          | 32,61   | 1,94  | 1,194034 | 1,626062 | 0,103936 | 0,4222541 |
| AC104113.2     | 3,07    | 4,26  | 2,618247 | 1,626053 | 0,103938 | NA        |
| TRMT1          | 294,59  | -0,73 | 0,446684 | -1,62598 | 0,103953 | 0,4222541 |











|                |         |       |          |          |          |           |
|----------------|---------|-------|----------|----------|----------|-----------|
| RILPL1         | 133,93  | -1,10 | 0,690118 | -1,59181 | 0,111428 | 0,4368149 |
| NR1H3          | 48,72   | -1,36 | 0,855746 | -1,59107 | 0,111594 | 0,4373737 |
| RNF123         | 109,55  | 1,45  | 0,908718 | 1,590859 | 0,111641 | 0,4374657 |
| RP11-801G16.2  | 3,21    | 4,32  | 2,716909 | 1,589937 | 0,111849 | NA        |
| RP11-241F15.10 | 0,91    | -3,79 | 2,385561 | -1,58978 | 0,111885 | NA        |
| RP11-366L5.1   | 2,50    | -1,60 | 1,009596 | -1,58951 | 0,111944 | NA        |
| RPL31          | 5931,10 | -0,29 | 0,180422 | -1,58946 | 0,111956 | 0,4384796 |
| RBM47          | 608,12  | -0,54 | 0,341633 | -1,58946 | 0,111958 | 0,4384796 |
| C11orf83       | 187,45  | -0,77 | 0,482643 | -1,5894  | 0,111971 | 0,4384796 |
| RP11-10L12.2   | 7,96    | 3,32  | 2,086429 | 1,588966 | 0,112068 | 0,4387683 |
| NBPF26         | 707,38  | -0,83 | 0,524906 | -1,5884  | 0,112196 | 0,4391039 |
| RP11-91H12.1   | 26,01   | -3,85 | 2,422929 | -1,58824 | 0,112232 | 0,4391039 |
| PLXNB2         | 1176,81 | -0,43 | 0,268736 | -1,58821 | 0,112239 | 0,4391039 |
| RP11-567M16.6  | 28,74   | -2,04 | 1,286741 | -1,58799 | 0,112288 | 0,4391039 |
| RP11-368J21.1  | 639,85  | 0,88  | 0,551119 | 1,587899 | 0,112309 | 0,4391039 |
| APOBEC3A       | 429,72  | -2,09 | 1,314253 | -1,58781 | 0,11233  | 0,4391039 |
| FGF8           | 4,53    | -1,05 | 0,65984  | -1,58768 | 0,112358 | 0,4391039 |
| RP11-823P9.1   | 43,47   | -1,52 | 0,956935 | -1,58767 | 0,11236  | 0,4391039 |
| WDHD1          | 12,52   | 3,11  | 1,957141 | 1,587647 | 0,112366 | 0,4391039 |
| CDCA3          | 10,17   | -1,31 | 0,82292  | -1,5875  | 0,112399 | 0,4391085 |
| ZNF407         | 322,32  | -0,96 | 0,604511 | -1,58743 | 0,112415 | 0,4391085 |
| TBCE           | 137,83  | 1,17  | 0,739045 | 1,586727 | 0,112575 | 0,439641  |
| RP11-577B7.1   | 14,72   | -1,00 | 0,631731 | -1,58644 | 0,112641 | 0,4398066 |
| PPP1R7         | 307,34  | 0,87  | 0,548659 | 1,585964 | 0,112747 | 0,4401315 |
| NUP214         | 904,67  | -0,64 | 0,40664  | -1,58576 | 0,112793 | 0,4401532 |
| NECAP2         | 601,04  | -0,71 | 0,450334 | -1,58573 | 0,1128   | 0,4401532 |
| CCDC88B        | 774,84  | -0,68 | 0,430813 | -1,58551 | 0,11285  | 0,4402543 |
| ELL2           | 103,19  | -1,85 | 1,165405 | -1,58523 | 0,112914 | 0,4404136 |
| SNX32          | 2,49    | 3,89  | 2,456411 | 1,584801 | 0,113011 | NA        |
| GOLIM4         | 524,62  | 0,57  | 0,359649 | 1,584714 | 0,113031 | 0,4407768 |
| LMBR1L         | 95,72   | 0,84  | 0,528937 | 1,584586 | 0,11306  | 0,4407983 |
| RP11-453N18.1  | 58,59   | -0,72 | 0,457402 | -1,58431 | 0,113122 | 0,4409464 |
| ZSCAN21        | 33,03   | 1,96  | 1,240831 | 1,583399 | 0,113331 | 0,4416654 |
| RP5-1112D6.7   | 9,07    | 2,82  | 1,782308 | 1,583296 | 0,113354 | 0,4416654 |
| RP11-165F24.3  | 114,21  | 1,34  | 0,845389 | 1,583151 | 0,113387 | 0,4417012 |
| LRRC45         | 44,49   | 1,99  | 1,25552  | 1,582986 | 0,113425 | 0,4417551 |
| RP11-366H4.3   | 9,96    | -1,77 | 1,117391 | -1,58285 | 0,113455 | 0,4417814 |
| SYT13          | 2,12    | -1,76 | 1,110143 | -1,58272 | 0,113486 | NA        |
| AC022154.7     | 12,71   | -1,16 | 0,734045 | -1,58256 | 0,113523 | 0,4419515 |
| RPS19          | 9418,27 | -0,35 | 0,221267 | -1,58224 | 0,113595 | 0,441989  |
| RP11-761N21.1  | 1,66    | -2,30 | 1,45603  | -1,58221 | 0,113601 | NA        |
| RP11-147L13.2  | 103,14  | 1,01  | 0,638996 | 1,582117 | 0,113623 | 0,441989  |
| RP11-538D16.2  | 185,09  | -0,73 | 0,462508 | -1,5821  | 0,113626 | 0,441989  |
| RWDD2A         | 45,98   | -3,11 | 1,965185 | -1,58186 | 0,113681 | 0,441989  |
| CCDC180        | 89,41   | 1,45  | 0,917668 | 1,581618 | 0,113737 | 0,441989  |
| HEATR6         | 323,64  | 1,03  | 0,651941 | 1,581536 | 0,113756 | 0,441989  |
| RP11-6D1.5     | 1,90    | 2,99  | 1,891937 | 1,581511 | 0,113761 | NA        |
| ZSWIM1         | 41,99   | -0,66 | 0,414373 | -1,58149 | 0,113765 | 0,441989  |
| THOC3          | 116,91  | 1,87  | 1,182114 | 1,581441 | 0,113777 | 0,441989  |
| SLC5A5         | 10,78   | -1,23 | 0,778216 | -1,58143 | 0,113779 | 0,441989  |

|               |         |       |          |          |          |           |
|---------------|---------|-------|----------|----------|----------|-----------|
| RP11-429E11.3 | 3,08    | -1,61 | 1,020992 | -1,58141 | 0,113783 | NA        |
| OR8A1         | 82,76   | 1,04  | 0,659637 | 1,581316 | 0,113806 | 0,441989  |
| PANK3         | 424,27  | 1,17  | 0,742046 | 1,5812   | 0,113832 | 0,441989  |
| TMEM106C      | 95,00   | -2,31 | 1,461611 | -1,58115 | 0,113844 | 0,441989  |
| PRKACB        | 534,87  | 0,95  | 0,60267  | 1,581116 | 0,113851 | 0,441989  |
| SDCCAG3       | 186,80  | -1,15 | 0,725927 | -1,58106 | 0,113865 | 0,441989  |
| PCDH7         | 18,60   | -3,16 | 2,001605 | -1,5808  | 0,113924 | 0,4421274 |
| RN7SKP151     | 1,85    | 3,52  | 2,22954  | 1,580058 | 0,114094 | NA        |
| CSNK1G2       | 496,50  | -0,63 | 0,397898 | -1,58002 | 0,114103 | 0,4427296 |
| ISOC1         | 87,09   | 1,92  | 1,214688 | 1,579894 | 0,114131 | 0,4427461 |
| GPR137B       | 74,34   | 1,85  | 1,169216 | 1,579721 | 0,114171 | 0,4428072 |
| CTD-2194L12.3 | 4,16    | 3,51  | 2,22421  | 1,579514 | 0,114218 | 0,4428427 |
| CRYBB2P1      | 181,34  | -0,96 | 0,608154 | -1,57947 | 0,114227 | 0,4428427 |
| RN7SL38P      | 1,16    | -1,98 | 1,25067  | -1,57943 | 0,114238 | NA        |
| APPL1         | 766,72  | 0,69  | 0,439088 | 1,57898  | 0,114341 | 0,4431895 |
| RP11-142A12.1 | 9,47    | 1,86  | 1,177356 | 1,578641 | 0,114418 | 0,4433981 |
| P2RY11        | 39,13   | -1,21 | 0,766098 | -1,57839 | 0,114477 | 0,4435319 |
| PRELID1       | 3189,51 | 0,40  | 0,253799 | 1,578283 | 0,114501 | 0,4435319 |
| OR2G6         | 58,84   | -1,35 | 0,853315 | -1,57807 | 0,114549 | 0,443563  |
| ZCRB1         | 330,27  | 0,62  | 0,392165 | 1,578041 | 0,114556 | 0,443563  |
| RP11-497G19.7 | 26,60   | 1,32  | 0,839043 | 1,577929 | 0,114582 | 0,4435696 |
| CTD-3193K9.7  | 26,31   | -0,85 | 0,536753 | -1,57725 | 0,114738 | 0,4440834 |
| GPATCH3       | 110,48  | 1,21  | 0,764296 | 1,576967 | 0,114803 | 0,4441483 |
| RP11-323P17.2 | 43,15   | -0,92 | 0,586276 | -1,57682 | 0,114838 | 0,4441483 |
| RP11-130F10.1 | 30,24   | -1,83 | 1,161202 | -1,57674 | 0,114856 | 0,4441483 |
| METTL9        | 1036,84 | -0,59 | 0,375234 | -1,57655 | 0,1149   | 0,4441483 |
| ASTN2         | 75,72   | -0,75 | 0,472655 | -1,57649 | 0,114913 | 0,4441483 |
| LRRC34        | 12,93   | -0,96 | 0,609871 | -1,5764  | 0,114934 | 0,4441483 |
| ATP5I         | 413,18  | -0,57 | 0,362188 | -1,57631 | 0,114954 | 0,4441483 |
| RP1-78B3.1    | 40,45   | -0,66 | 0,415668 | -1,57631 | 0,114955 | 0,4441483 |
| RP11-2E17.1   | 8,47    | 1,96  | 1,246084 | 1,576161 | 0,114989 | 0,4441483 |
| RBM6          | 1315,05 | -0,57 | 0,360724 | -1,57604 | 0,115016 | 0,4441483 |
| MFHAS1        | 169,04  | -1,71 | 1,086151 | -1,57603 | 0,115018 | 0,4441483 |
| PAIP1P1       | 3,02    | 3,63  | 2,304597 | 1,575859 | 0,115058 | NA        |
| NDST3         | 3,50    | -1,62 | 1,027474 | -1,57442 | 0,115391 | NA        |
| CTD-2227I18.1 | 0,80    | -2,69 | 1,708916 | -1,57399 | 0,115489 | NA        |
| CCR1          | 319,93  | 1,09  | 0,693947 | 1,573953 | 0,115498 | 0,4459115 |
| RP11-204E9.1  | 1,48    | -2,36 | 1,498135 | -1,57324 | 0,115662 | NA        |
| SNAPC3        | 168,98  | 1,30  | 0,82878  | 1,57314  | 0,115686 | 0,4465445 |
| AFAP1-AS1     | 7,23    | -1,41 | 0,895597 | -1,57261 | 0,11581  | 0,4468204 |
| SLC6A11       | 1,99    | 2,38  | 1,516179 | 1,57256  | 0,115821 | NA        |
| SYNE1         | 492,47  | -0,90 | 0,572903 | -1,57247 | 0,115841 | 0,4468204 |
| ZNF48         | 20,44   | -2,44 | 1,550608 | -1,57234 | 0,115872 | 0,4468204 |
| GON4L         | 701,91  | 0,58  | 0,367187 | 1,572265 | 0,115889 | 0,4468204 |
| EPHB4         | 15,87   | -1,10 | 0,697718 | -1,57209 | 0,115929 | 0,4468204 |
| LEO1          | 139,15  | 1,08  | 0,689599 | 1,572066 | 0,115935 | 0,4468204 |
| AQP7          | 16,91   | -1,60 | 1,018313 | -1,57204 | 0,115942 | 0,4468204 |
| ATP1B1        | 529,72  | 0,80  | 0,506899 | 1,571935 | 0,115966 | 0,4468204 |
| MLPH          | 22,02   | -1,54 | 0,982875 | -1,5719  | 0,115974 | 0,4468204 |
| GLUDP7        | 5,50    | 3,31  | 2,103605 | 1,57176  | 0,116006 | 0,4468522 |

|                |         |       |          |          |          |           |
|----------------|---------|-------|----------|----------|----------|-----------|
| RP11-629E24.1  | 1,66    | 3,42  | 2,175041 | 1,571719 | 0,116016 | NA        |
| KPNA4          | 748,22  | 0,65  | 0,414093 | 1,571599 | 0,116044 | 0,4468661 |
| NCAPH          | 5,35    | 2,80  | 1,779014 | 1,571455 | 0,116077 | 0,4468661 |
| CENPK          | 50,27   | -0,93 | 0,592299 | -1,57142 | 0,116085 | 0,4468661 |
| RP11-583M2.2   | 8,05    | -0,85 | 0,541845 | -1,57133 | 0,116106 | 0,4468661 |
| RP11-330C7.1   | 5,04    | 4,97  | 3,161293 | 1,57098  | 0,116187 | 0,4469049 |
| LMO2           | 492,40  | -0,64 | 0,409411 | -1,57095 | 0,116194 | 0,4469049 |
| CTD-2008L17.2  | 9,55    | -0,90 | 0,571028 | -1,5709  | 0,116205 | 0,4469049 |
| SLC12A4        | 174,58  | -2,13 | 1,358252 | -1,57087 | 0,116212 | 0,4469049 |
| CTD-2616J11.16 | 1,31    | 3,05  | 1,940225 | 1,570379 | 0,116327 | NA        |
| RP11-1348G14.1 | 2,47    | -1,21 | 0,7721   | -1,57036 | 0,116331 | NA        |
| TM9SF3         | 1050,61 | 0,76  | 0,485532 | 1,570051 | 0,116403 | 0,4470872 |
| GABPB2         | 363,01  | -1,09 | 0,696496 | -1,57004 | 0,116406 | 0,4470872 |
| TMEM159        | 123,05  | -1,05 | 0,667924 | -1,57    | 0,116415 | 0,4470872 |
| FAM174A        | 27,43   | -2,22 | 1,413663 | -1,57    | 0,116415 | 0,4470872 |
| GOLGA3         | 833,21  | -0,83 | 0,530109 | -1,56989 | 0,116441 | 0,4470872 |
| RP11-358D17.2  | 11,62   | -1,14 | 0,725345 | -1,56988 | 0,116444 | 0,4470872 |
| ORAI1          | 361,46  | -0,96 | 0,612282 | -1,56979 | 0,116465 | 0,4470872 |
| HDAC2          | 806,29  | 0,69  | 0,437711 | 1,569536 | 0,116523 | 0,4470872 |
| TRMT10C        | 143,35  | 0,78  | 0,497298 | 1,569529 | 0,116525 | 0,4470872 |
| PHOSPHO2       | 16,36   | 2,05  | 1,309206 | 1,569511 | 0,116529 | 0,4470872 |
| RP11-356C4.4   | 39,84   | -1,52 | 0,965404 | -1,5694  | 0,116554 | 0,4470872 |
| FBXO7          | 1017,28 | 0,58  | 0,370496 | 1,569392 | 0,116557 | 0,4470872 |
| RP11-16P20.3   | 5,04    | -2,40 | 1,528569 | -1,56932 | 0,116574 | 0,4470872 |
| CTC-575I10.1   | 0,79    | -2,45 | 1,562274 | -1,56924 | 0,116591 | NA        |
| ARHGAP21       | 360,01  | 0,93  | 0,593855 | 1,569171 | 0,116608 | 0,4470872 |
| C11orf58       | 1309,51 | 0,48  | 0,306178 | 1,56912  | 0,11662  | 0,4470872 |
| RDH10          | 37,81   | 1,95  | 1,242772 | 1,568709 | 0,116716 | 0,4472379 |
| RPL9P9         | 6405,54 | 0,47  | 0,302656 | 1,56855  | 0,116753 | 0,4472379 |
| RP11-512H23.2  | 6,21    | 5,27  | 3,359697 | 1,568545 | 0,116754 | 0,4472379 |
| MRPL15         | 388,58  | 1,16  | 0,739411 | 1,568539 | 0,116755 | 0,4472379 |
| RP11-108M9.3   | 2,05    | -4,26 | 2,715998 | -1,56838 | 0,116792 | NA        |
| CFB            | 0,85    | -3,67 | 2,341407 | -1,56821 | 0,116831 | NA        |
| RP11-134D3.1   | 7,86    | -1,53 | 0,978246 | -1,5682  | 0,116835 | 0,447368  |
| METTL2A        | 99,87   | 1,26  | 0,80299  | 1,568161 | 0,116844 | 0,447368  |
| PPP2R5D        | 44,88   | -2,29 | 1,460401 | -1,56798 | 0,116885 | 0,447368  |
| IL6ST          | 754,01  | 1,21  | 0,769328 | 1,567981 | 0,116886 | 0,447368  |
| RP11-522H2.3   | 1,23    | -4,91 | 3,13441  | -1,56785 | 0,116916 | NA        |
| BMS1           | 527,04  | 0,82  | 0,524982 | 1,567714 | 0,116948 | 0,4473711 |
| RP11-411D10.1  | 18,75   | -1,68 | 1,071762 | -1,56769 | 0,116953 | 0,4473711 |
| HEXDC-IT1      | 52,17   | -0,75 | 0,477332 | -1,56767 | 0,116959 | 0,4473711 |
| IPO8           | 330,60  | -0,82 | 0,521034 | -1,56746 | 0,117007 | 0,4474627 |
| BLVRB          | 2168,80 | -0,50 | 0,319967 | -1,56729 | 0,117048 | 0,4475291 |
| PELO           | 52,97   | 2,03  | 1,29554  | 1,567063 | 0,1171   | 0,4476361 |
| USO1           | 476,37  | -0,76 | 0,483469 | -1,56681 | 0,117159 | 0,4476785 |
| SDCBP          | 2574,94 | -0,50 | 0,318466 | -1,56665 | 0,117196 | 0,4476785 |
| PTPRD          | 34,01   | -3,51 | 2,241526 | -1,56665 | 0,117197 | 0,4476785 |
| CTC-228N24.3   | 71,13   | -1,52 | 0,970788 | -1,5666  | 0,117207 | 0,4476785 |
| RP11-262D11.2  | 0,93    | -1,63 | 1,041178 | -1,56622 | 0,117298 | NA        |
| UNC119         | 873,38  | 0,62  | 0,397936 | 1,566177 | 0,117307 | 0,4479679 |

|               |         |       |          |          |          |           |
|---------------|---------|-------|----------|----------|----------|-----------|
| RP11-65F13.1  | 15,75   | 2,30  | 1,467525 | 1,566001 | 0,117348 | 0,4480333 |
| UBAP2         | 188,74  | 0,72  | 0,462147 | 1,565887 | 0,117375 | 0,4480434 |
| LRRC4C        | 1,59    | -3,54 | 2,263788 | -1,56559 | 0,117445 | NA        |
| SLC35A1       | 433,66  | -1,06 | 0,679882 | -1,56548 | 0,11747  | 0,4482578 |
| ANKRD50       | 268,74  | -1,06 | 0,675343 | -1,56536 | 0,117499 | 0,4482578 |
| PAAF1         | 248,41  | 1,10  | 0,704243 | 1,565269 | 0,11752  | 0,4482578 |
| TVP23A        | 69,87   | 1,13  | 0,724955 | 1,565236 | 0,117528 | 0,4482578 |
| RP3-402G11.26 | 1,74    | 3,44  | 2,198966 | 1,56515  | 0,117548 | NA        |
| INPP4A        | 873,95  | -0,96 | 0,612266 | -1,56511 | 0,117558 | 0,4482817 |
| UBE3D         | 53,04   | -1,67 | 1,069793 | -1,56466 | 0,117662 | 0,4485845 |
| AC064860.2    | 18,10   | -0,98 | 0,627938 | -1,56453 | 0,117694 | 0,4486148 |
| RP1-90L6.2    | 52,97   | -0,96 | 0,613151 | -1,56421 | 0,117767 | 0,4488039 |
| C10orf53      | 5,05    | -1,67 | 1,066556 | -1,56408 | 0,117799 | 0,4488039 |
| HYAL4         | 4,96    | -1,60 | 1,020382 | -1,56401 | 0,117816 | 0,4488039 |
| RP11-177F15.1 | 0,96    | -2,47 | 1,579017 | -1,56394 | 0,117831 | NA        |
| RNU6-375P     | 1,33    | -3,88 | 2,483221 | -1,56376 | 0,117875 | NA        |
| RP11-353N14.4 | 5,30    | -1,65 | 1,05305  | -1,56369 | 0,117891 | 0,4490001 |
| TMPRSS15      | 0,62    | -3,24 | 2,075404 | -1,56349 | 0,117939 | NA        |
| HAUS5         | 78,70   | 1,62  | 1,037626 | 1,563453 | 0,117946 | 0,4490652 |
| TNFSF12       | 65,26   | -1,50 | 0,959646 | -1,56327 | 0,117989 | 0,4490652 |
| RP11-66A2.2   | 5,29    | -1,61 | 1,032285 | -1,56325 | 0,117994 | 0,4490652 |
| ARHGAP19      | 45,72   | 1,53  | 0,980164 | 1,563203 | 0,118005 | 0,4490652 |
| FKBP1A        | 2530,61 | 0,45  | 0,285975 | 1,562778 | 0,118105 | 0,4493106 |
| MITF          | 96,15   | -1,61 | 1,027963 | -1,56272 | 0,118118 | 0,4493106 |
| RPP30         | 233,59  | 1,02  | 0,650843 | 1,562307 | 0,118216 | 0,4493908 |
| SPIN1         | 264,81  | -1,08 | 0,688468 | -1,56228 | 0,118222 | 0,4493908 |
| NFE2L2        | 1192,28 | 0,77  | 0,491399 | 1,562228 | 0,118234 | 0,4493908 |
| RP11-4L24.4   | 106,43  | -2,40 | 1,537234 | -1,56222 | 0,118235 | 0,4493908 |
| SLC38A3       | 1,35    | 2,44  | 1,563662 | 1,562082 | 0,118269 | NA        |
| CAPNS1        | 1892,41 | -0,42 | 0,268614 | -1,56182 | 0,118331 | 0,4496624 |
| RP11-843B15.4 | 0,77    | -3,09 | 1,981632 | -1,5618  | 0,118335 | NA        |
| PEX13         | 127,79  | 1,46  | 0,931931 | 1,561691 | 0,118361 | 0,4496843 |
| RNASE6        | 3437,92 | 0,57  | 0,368041 | 1,561263 | 0,118462 | 0,4499759 |
| PDZK1         | 3,23    | 4,35  | 2,787855 | 1,561237 | 0,118468 | NA        |
| PDGFA         | 220,25  | -0,69 | 0,439893 | -1,5609  | 0,118547 | 0,4500902 |
| TMTC2         | 108,64  | -1,45 | 0,929945 | -1,56083 | 0,118564 | 0,4500902 |
| RP11-120K18.2 | 12,72   | -1,27 | 0,810536 | -1,56083 | 0,118564 | 0,4500902 |
| PCDHA4        | 198,81  | -0,87 | 0,558495 | -1,56064 | 0,118608 | 0,4501643 |
| CTC-308K20.4  | 0,83    | -2,98 | 1,907194 | -1,56047 | 0,118648 | NA        |
| RN7SL799P     | 0,75    | -2,93 | 1,875915 | -1,56022 | 0,118708 | NA        |
| CYP2A7        | 5,20    | 5,30  | 3,397034 | 1,559646 | 0,118843 | 0,4509654 |
| DTWD2         | 51,06   | 1,46  | 0,938128 | 1,559331 | 0,118918 | 0,451142  |
| SLC16A3       | 153,98  | -0,71 | 0,456906 | -1,55914 | 0,118963 | 0,451142  |
| LRRC3         | 16,51   | -1,17 | 0,75033  | -1,559   | 0,118996 | 0,451142  |
| MDM4          | 3032,69 | 0,48  | 0,308195 | 1,558962 | 0,119005 | 0,451142  |
| RP11-296E23.2 | 28,29   | 1,17  | 0,751738 | 1,558723 | 0,119062 | 0,451142  |
| ECI2          | 404,63  | 1,22  | 0,785569 | 1,558689 | 0,11907  | 0,451142  |
| GYPE          | 5,34    | 2,52  | 1,616323 | 1,55854  | 0,119105 | 0,451142  |
| ITIH4         | 162,60  | -1,01 | 0,64851  | -1,55852 | 0,119111 | 0,451142  |
| EPHX4         | 7,84    | -2,29 | 1,466863 | -1,55848 | 0,11912  | 0,451142  |

|               |          |       |          |          |          |           |
|---------------|----------|-------|----------|----------|----------|-----------|
| BDKRB1        | 4,23     | -1,68 | 1,076893 | -1,55843 | 0,119133 | 0,451142  |
| MT-TP         | 59,87    | -0,90 | 0,578135 | -1,55823 | 0,119178 | 0,4512221 |
| HRG           | 5,12     | -1,66 | 1,064003 | -1,55746 | 0,119362 | 0,4518275 |
| RP11-881M11.4 | 0,75     | -3,73 | 2,396452 | -1,5572  | 0,119422 | NA        |
| BNIPL         | 21,90    | 1,62  | 1,04301  | 1,557197 | 0,119424 | 0,4519685 |
| FBXW9         | 62,24    | -2,33 | 1,497407 | -1,55697 | 0,119478 | 0,4520146 |
| RABEP2        | 98,08    | -1,18 | 0,758586 | -1,55694 | 0,119484 | 0,4520146 |
| RP11-265M18.2 | 106,95   | 0,84  | 0,540513 | 1,556793 | 0,11952  | 0,4520172 |
| RNU6ATAC27P   | 1,00     | -3,29 | 2,116504 | -1,55676 | 0,119529 | NA        |
| SNRPA1        | 650,83   | 0,59  | 0,375849 | 1,556734 | 0,119534 | 0,4520172 |
| WBSCR27       | 0,66     | -3,21 | 2,064812 | -1,5566  | 0,119564 | NA        |
| JAG1          | 42,40    | 1,74  | 1,115925 | 1,556516 | 0,119585 | 0,4521206 |
| PLA2G2F       | 1,41     | -4,36 | 2,802076 | -1,55649 | 0,119592 | NA        |
| ATP8A2        | 2,09     | -2,04 | 1,309827 | -1,55633 | 0,11963  | NA        |
| RN7SL5P       | 1,69     | -2,03 | 1,304748 | -1,55627 | 0,119643 | NA        |
| MAP3K10       | 39,26    | -1,26 | 0,810841 | -1,5562  | 0,11966  | 0,4522929 |
| RP11-509E10.3 | 12,94    | -1,01 | 0,649776 | -1,55612 | 0,11968  | 0,4522929 |
| SAMHD1        | 10417,07 | 0,25  | 0,163236 | 1,555959 | 0,119718 | 0,4523461 |
| SLC22A23      | 26,79    | -3,21 | 2,065161 | -1,55583 | 0,119749 | 0,4523704 |
| MIB2          | 52,41    | -1,39 | 0,896315 | -1,55544 | 0,119842 | 0,4525536 |
| RP11-429G19.2 | 447,43   | -0,94 | 0,602411 | -1,55517 | 0,119906 | 0,4525536 |
| ERC1          | 447,65   | -0,80 | 0,513852 | -1,55516 | 0,119909 | 0,4525536 |
| CDHR1         | 17,28    | -3,74 | 2,402204 | -1,55515 | 0,11991  | 0,4525536 |
| NDUFA3        | 302,60   | -0,39 | 0,251711 | -1,55496 | 0,119955 | 0,4525536 |
| PSEN2         | 92,21    | 2,13  | 1,37043  | 1,554947 | 0,119959 | 0,4525536 |
| RNF114        | 729,45   | 0,79  | 0,509122 | 1,55491  | 0,119967 | 0,4525536 |
| AJ239322.1    | 5,26     | -1,41 | 0,907324 | -1,55466 | 0,120027 | 0,4526657 |
| GIMAP4        | 676,74   | -1,13 | 0,72413  | -1,55458 | 0,120046 | 0,4526657 |
| RP11-218M11.7 | 17,41    | -1,26 | 0,808189 | -1,55386 | 0,120217 | 0,4531306 |
| RP5-1086D14.5 | 3,85     | 3,98  | 2,563021 | 1,553669 | 0,120263 | 0,4531306 |
| RP11-147L13.8 | 2,01     | -1,45 | 0,936065 | -1,55364 | 0,12027  | NA        |
| RP11-314N13.9 | 19,15    | 1,05  | 0,675654 | 1,553628 | 0,120273 | 0,4531306 |
| KLC1          | 802,96   | -0,46 | 0,2939   | -1,5535  | 0,120304 | 0,4531306 |
| RP11-44D19.1  | 51,75    | -0,88 | 0,569201 | -1,55338 | 0,120332 | 0,4531306 |
| CNKSR2        | 170,96   | -0,83 | 0,537332 | -1,55338 | 0,120332 | 0,4531306 |
| PRPF40A       | 1610,49  | 0,57  | 0,368129 | 1,55335  | 0,12034  | 0,4531306 |
| HK2           | 616,52   | 0,82  | 0,529571 | 1,553108 | 0,120397 | 0,4531524 |
| SLC25A10      | 6,95     | 4,95  | 3,187087 | 1,552945 | 0,120436 | 0,4531524 |
| CENPM         | 33,36    | -1,69 | 1,087701 | -1,55294 | 0,120437 | 0,4531524 |
| DTWD1         | 246,33   | -0,89 | 0,570699 | -1,55284 | 0,120462 | 0,4531524 |
| RP11-70L8.5   | 151,20   | -1,12 | 0,718575 | -1,55264 | 0,12051  | 0,4531524 |
| RBL2          | 651,73   | -0,71 | 0,458813 | -1,55259 | 0,120521 | 0,4531524 |
| RP11-17E2.2   | 19,81    | -1,94 | 1,248025 | -1,55227 | 0,120598 | 0,4531524 |
| GATM          | 48,17    | 1,39  | 0,896003 | 1,552264 | 0,120599 | 0,4531524 |
| ZNF629        | 25,01    | -1,96 | 1,261374 | -1,55221 | 0,120612 | 0,4531524 |
| KIFAP3        | 110,02   | 1,53  | 0,982775 | 1,552179 | 0,120619 | 0,4531524 |
| AP4M1         | 51,33    | 1,26  | 0,811102 | 1,552172 | 0,120621 | 0,4531524 |
| VASP          | 728,23   | -0,49 | 0,317083 | -1,5521  | 0,120638 | 0,4531524 |
| ZNF841        | 41,44    | -1,84 | 1,184676 | -1,55197 | 0,12067  | 0,4531815 |
| FBXW11        | 314,70   | 1,38  | 0,88932  | 1,551347 | 0,120819 | 0,4536488 |

|                 |         |       |          |          |          |           |
|-----------------|---------|-------|----------|----------|----------|-----------|
| RN7SL689P       | 3,32    | 1,53  | 0,988233 | 1,550921 | 0,12092  | NA        |
| RN7SL737P       | 2,97    | 4,20  | 2,706279 | 1,550884 | 0,120929 | NA        |
| TSPAN15         | 6,58    | 4,40  | 2,838906 | 1,550764 | 0,120958 | 0,4539977 |
| RP11-506B4.3    | 51,72   | 2,87  | 1,852417 | 1,550678 | 0,120979 | 0,4539977 |
| RP11-345M22.2   | 7,84    | -2,33 | 1,501844 | -1,55061 | 0,120996 | 0,4539977 |
| GUK1            | 2259,93 | -0,37 | 0,239433 | -1,55055 | 0,121009 | 0,4539977 |
| ICT1            | 229,12  | 0,96  | 0,618125 | 1,550212 | 0,121091 | 0,454185  |
| ZNF321P         | 38,17   | 1,37  | 0,881908 | 1,55014  | 0,121108 | 0,454185  |
| MIR3690         | 2,31    | 3,85  | 2,484924 | 1,549482 | 0,121266 | NA        |
| AC123886.2      | 57,43   | 1,29  | 0,830051 | 1,549046 | 0,121371 | 0,454964  |
| SLC35C2         | 363,53  | 0,76  | 0,488409 | 1,548946 | 0,121395 | 0,454964  |
| RN7SL481P       | 8,20    | -2,10 | 1,357927 | -1,54894 | 0,121396 | 0,454964  |
| DNHD1           | 122,92  | 1,48  | 0,954625 | 1,548868 | 0,121413 | 0,454964  |
| ADI1            | 862,11  | 0,78  | 0,502616 | 1,54864  | 0,121468 | 0,4550658 |
| MED10           | 390,29  | 0,85  | 0,54675  | 1,548552 | 0,121489 | 0,4550658 |
| RP11-82O18.2    | 13,92   | 1,60  | 1,03092  | 1,548075 | 0,121604 | 0,455404  |
| CCDC146         | 84,11   | -1,36 | 0,880589 | -1,54752 | 0,121739 | 0,4558168 |
| RP11-153A23.6   | 87,57   | -1,14 | 0,738978 | -1,54731 | 0,121789 | 0,4558416 |
| H2AFY2          | 36,72   | 1,91  | 1,233463 | 1,547259 | 0,121801 | 0,4558416 |
| RP11-212D3.4    | 38,89   | -1,34 | 0,869149 | -1,54718 | 0,121819 | 0,4558416 |
| ZCCHC8          | 296,01  | 0,96  | 0,62047  | 1,546927 | 0,121881 | 0,4559411 |
| PRH1            | 65,02   | 1,46  | 0,94202  | 1,54687  | 0,121895 | 0,4559411 |
| CH507-24F1.2    | 4,10    | 4,73  | 3,057738 | 1,546661 | 0,121945 | 0,455953  |
| NGLY1           | 449,07  | 0,72  | 0,46282  | 1,54662  | 0,121955 | 0,455953  |
| CCNT2           | 458,89  | 0,89  | 0,574233 | 1,546511 | 0,121981 | 0,455953  |
| AC073987.1      | 16,43   | -3,19 | 2,060343 | -1,54636 | 0,122018 | 0,455953  |
| RP11-1109M24.16 | 7,87    | -3,74 | 2,420549 | -1,54635 | 0,12202  | 0,455953  |
| CTD-2144E22.9   | 161,69  | -2,06 | 1,330398 | -1,54618 | 0,122061 | 0,4560117 |
| AARS2           | 55,90   | 1,43  | 0,923333 | 1,545874 | 0,122135 | 0,4561979 |
| RP11-1035H13.2  | 7,84    | 2,04  | 1,320355 | 1,545613 | 0,122198 | 0,4563415 |
| CCDC106         | 1,72    | 3,34  | 2,161903 | 1,545456 | 0,122236 | NA        |
| TYW5            | 114,72  | 1,20  | 0,774446 | 1,545133 | 0,122314 | 0,4566835 |
| RP11-719K4.6    | 13,88   | 1,59  | 1,030458 | 1,544815 | 0,122391 | 0,4568786 |
| EXOC6           | 268,17  | -0,84 | 0,54271  | -1,5446  | 0,122442 | 0,4569784 |
| RP1-102E24.10   | 6,53    | -2,13 | 1,377984 | -1,54434 | 0,122507 | 0,4570241 |
| ZNF517          | 73,91   | -1,73 | 1,11745  | -1,54429 | 0,122519 | 0,4570241 |
| RF00004         | 1288,87 | -0,55 | 0,354861 | -1,54425 | 0,122528 | 0,4570241 |
| ZNF555          | 125,06  | -0,76 | 0,490036 | -1,544   | 0,122588 | 0,4571563 |
| ZNF16           | 93,55   | 1,38  | 0,89616  | 1,543775 | 0,122643 | 0,457269  |
| CTD-3126B10.5   | 2,98    | 4,21  | 2,729901 | 1,543628 | 0,122678 | NA        |
| RP11-484D2.3    | 3,01    | 4,22  | 2,731628 | 1,543048 | 0,122819 | NA        |
| PRPF3           | 345,69  | -0,83 | 0,537482 | -1,54271 | 0,122901 | 0,4580502 |
| AF038458.5      | 3,92    | -1,30 | 0,839506 | -1,54271 | 0,122902 | 0,4580502 |
| TMEM41B         | 174,27  | 1,00  | 0,645602 | 1,542533 | 0,122944 | 0,4581169 |
| NCCRP1          | 7,48    | 1,10  | 0,71081  | 1,542275 | 0,123007 | 0,4582586 |
| DCDC1           | 4,74    | -1,53 | 0,990767 | -1,54217 | 0,123032 | 0,4582587 |
| RP11-258F1.1    | 21,03   | 1,06  | 0,684187 | 1,54207  | 0,123057 | 0,4582606 |
| AC009403.2      | 48,35   | 1,19  | 0,774238 | 1,541482 | 0,123199 | 0,4587003 |
| ATAD2B          | 1191,98 | 0,64  | 0,415795 | 1,541364 | 0,123228 | 0,4587153 |
| RP11-260E18.1   | 1,99    | 3,02  | 1,959139 | 1,54116  | 0,123278 | NA        |

|                  |         |       |          |          |          |           |
|------------------|---------|-------|----------|----------|----------|-----------|
| CH17-260O16.1    | 4,69    | 3,68  | 2,387206 | 1,54114  | 0,123283 | 0,4588272 |
| AC140481.7       | 0,78    | -4,23 | 2,747834 | -1,54101 | 0,123316 | NA        |
| RP11-63B13.1     | 201,95  | -0,93 | 0,605973 | -1,54068 | 0,123394 | 0,4591158 |
| HLA-H            | 68,27   | 0,67  | 0,434766 | 1,540594 | 0,123416 | 0,4591158 |
| RP11-573D15.2    | 11,42   | -1,67 | 1,082056 | -1,54048 | 0,123442 | 0,4591158 |
| FNDC3B           | 572,70  | -0,97 | 0,6318   | -1,54037 | 0,123469 | 0,4591158 |
| MAN2A2           | 361,13  | 1,11  | 0,720535 | 1,540314 | 0,123484 | 0,4591158 |
| RP1-317E23.3     | 1,66    | 2,72  | 1,767469 | 1,540199 | 0,123512 | NA        |
| RPTOR            | 64,67   | 1,69  | 1,096656 | 1,539999 | 0,123561 | 0,4593099 |
| ZSWIM6           | 283,71  | -0,83 | 0,538881 | -1,53961 | 0,123656 | 0,4595723 |
| CTC-429P9.2      | 4,53    | -2,05 | 1,331175 | -1,53946 | 0,123693 | 0,459617  |
| RP11-346C4.3     | 1,20    | 2,88  | 1,868771 | 1,539197 | 0,123756 | NA        |
| NDUFS6           | 608,40  | -0,47 | 0,302434 | -1,53895 | 0,123817 | 0,4599404 |
| TFRC             | 582,55  | 0,78  | 0,503818 | 1,538898 | 0,123829 | 0,4599404 |
| RP11-484D2.5     | 1,85    | 2,93  | 1,904832 | 1,538746 | 0,123866 | NA        |
| ANKRD23          | 18,03   | 2,19  | 1,426308 | 1,538664 | 0,123886 | 0,4600606 |
| BLVRA            | 800,37  | -0,87 | 0,565726 | -1,53842 | 0,123946 | 0,4601901 |
| EIF3F            | 3094,56 | 0,33  | 0,212949 | 1,53828  | 0,12398  | 0,4602256 |
| BRWD3            | 382,77  | 0,79  | 0,514721 | 1,538172 | 0,124006 | 0,4602314 |
| GHRLOS2          | 12,19   | 3,06  | 1,992605 | 1,53796  | 0,124058 | 0,4603322 |
| RP11-104E19.1    | 29,94   | 1,23  | 0,799288 | 1,537778 | 0,124103 | 0,4604053 |
| LLOXNC01-157D4.1 | 50,02   | 1,30  | 0,846722 | 1,537525 | 0,124165 | 0,4605437 |
| COG2             | 214,23  | 1,12  | 0,731355 | 1,537403 | 0,124195 | 0,460562  |
| CMKLR1           | 23,84   | -2,90 | 1,888833 | -1,53675 | 0,124354 | 0,4610523 |
| RP11-316M21.7    | 10,12   | 1,63  | 1,05849  | 1,536661 | 0,124376 | 0,4610523 |
| SLC35A5          | 294,28  | 0,98  | 0,640398 | 1,536439 | 0,124431 | 0,4611625 |
| AC068522.4       | 2,86    | 2,52  | 1,63827  | 1,536396 | 0,124441 | NA        |
| SPAST            | 294,19  | 0,58  | 0,375488 | 1,536284 | 0,124469 | 0,4612074 |
| RN7SKP166        | 4,16    | 4,69  | 3,054608 | 1,536187 | 0,124493 | 0,4612074 |
| AL035610.1       | 63,00   | -1,18 | 0,770437 | -1,53597 | 0,124545 | 0,4613089 |
| RP11-666A8.7     | 19,29   | -0,90 | 0,586666 | -1,53562 | 0,124631 | 0,4615377 |
| RP11-55K22.5     | 2,73    | 2,25  | 1,464553 | 1,535515 | 0,124657 | NA        |
| DDIT4            | 883,35  | 0,89  | 0,57754  | 1,53545  | 0,124673 | 0,4616014 |
| ZNF641           | 351,11  | -0,88 | 0,573098 | -1,53503 | 0,124777 | 0,4617898 |
| COL4A5           | 21,04   | -1,69 | 1,103313 | -1,535   | 0,124783 | 0,4617898 |
| RHOF             | 349,79  | 0,87  | 0,568379 | 1,534855 | 0,124819 | 0,4617898 |
| ZNF34            | 43,78   | -2,06 | 1,341428 | -1,53484 | 0,124823 | 0,4617898 |
| RNY4P34          | 1,72    | 3,43  | 2,231755 | 1,534829 | 0,124826 | NA        |
| RP11-463J10.2    | 33,17   | -1,91 | 1,247204 | -1,53467 | 0,124865 | 0,4617905 |
| RP11-219B4.7     | 3,08    | 3,06  | 1,993137 | 1,534616 | 0,124878 | NA        |
| DNAJC16          | 224,66  | 1,25  | 0,815097 | 1,534288 | 0,124959 | 0,4617905 |
| ZNF568           | 61,97   | 1,08  | 0,705531 | 1,534136 | 0,124996 | 0,4617905 |
| TCEANC           | 22,00   | -1,47 | 0,960793 | -1,53394 | 0,125045 | 0,4617905 |
| ANKDD1B          | 2,93    | -3,81 | 2,484519 | -1,53379 | 0,12508  | NA        |
| RP3-354N19.3     | 6,58    | 4,20  | 2,736162 | 1,53368  | 0,125108 | 0,4617905 |
| RP11-466F5.8     | 46,02   | -1,16 | 0,753269 | -1,53365 | 0,125116 | 0,4617905 |
| C1orf198         | 26,47   | 2,30  | 1,502773 | 1,53352  | 0,125148 | 0,4617905 |
| ZNF788           | 37,88   | -1,19 | 0,773249 | -1,53335 | 0,125189 | 0,4617905 |
| RP5-991C6.4      | 6,36    | -2,94 | 1,917085 | -1,53335 | 0,12519  | 0,4617905 |
| GADD45B          | 2319,43 | 0,62  | 0,404382 | 1,533336 | 0,125193 | 0,4617905 |

|                 |         |       |          |          |          |           |
|-----------------|---------|-------|----------|----------|----------|-----------|
| NUSAP1          | 35,77   | 1,35  | 0,882287 | 1,53329  | 0,125204 | 0,4617905 |
| RBM8A           | 1498,96 | 0,40  | 0,261115 | 1,533186 | 0,12523  | 0,4617905 |
| POMGNT1         | 76,69   | -1,18 | 0,767742 | -1,53317 | 0,125233 | 0,4617905 |
| CUL9            | 164,65  | -0,86 | 0,561381 | -1,53303 | 0,125268 | 0,4617905 |
| AC007880.1      | 3,92    | 4,02  | 2,620967 | 1,533    | 0,125276 | 0,4617905 |
| CKAP4           | 84,86   | -1,27 | 0,83156  | -1,53298 | 0,12528  | 0,4617905 |
| ZNF76           | 113,85  | -1,32 | 0,859957 | -1,53295 | 0,125288 | 0,4617905 |
| AC010746.2      | 140,64  | 1,07  | 0,695838 | 1,532904 | 0,1253   | 0,4617905 |
| APOBEC2         | 22,88   | -2,16 | 1,40642  | -1,53288 | 0,125306 | 0,4617905 |
| AC016712.2      | 2,12    | -1,43 | 0,935371 | -1,53286 | 0,12531  | NA        |
| RP11-571F15.3   | 4,76    | 3,28  | 2,137175 | 1,532803 | 0,125324 | 0,4617905 |
| RDH11           | 305,57  | 1,13  | 0,735926 | 1,532573 | 0,125381 | 0,4617905 |
| USP19           | 201,25  | -0,94 | 0,61182  | -1,5325  | 0,1254   | 0,4617905 |
| APBB3           | 148,44  | -1,24 | 0,809816 | -1,53248 | 0,125403 | 0,4617905 |
| MCPH1           | 187,76  | -0,81 | 0,527934 | -1,53242 | 0,125419 | 0,4617905 |
| CTB-147C22.6    | 1,72    | -5,58 | 3,642832 | -1,53207 | 0,125504 | NA        |
| ZNF557          | 383,49  | -0,71 | 0,465176 | -1,53201 | 0,125519 | 0,4620167 |
| RP11-722P11.8   | 8,04    | -1,64 | 1,070615 | -1,53197 | 0,12553  | 0,4620167 |
| DNAL4           | 27,38   | 1,87  | 1,223952 | 1,53159  | 0,125624 | 0,4620563 |
| RNU6-878P       | 9,65    | 3,81  | 2,490597 | 1,531562 | 0,125631 | 0,4620563 |
| MYO1A           | 16,22   | -2,71 | 1,766408 | -1,53156 | 0,125631 | 0,4620563 |
| PWP2            | 63,09   | 2,35  | 1,536962 | 1,531363 | 0,12568  | 0,4620563 |
| AC021016.6      | 4,56    | -3,02 | 1,969688 | -1,53128 | 0,125701 | 0,4620563 |
| RP11-656G9.3    | 10,90   | -1,56 | 1,020703 | -1,53125 | 0,125708 | 0,4620563 |
| TNFAIP3         | 1629,03 | 0,54  | 0,353674 | 1,531145 | 0,125733 | 0,4620563 |
| SIRT5           | 80,17   | -0,84 | 0,54655  | -1,53112 | 0,12574  | 0,4620563 |
| GART            | 283,09  | -0,99 | 0,643885 | -1,53087 | 0,125801 | 0,4621905 |
| RN7SL455P       | 2,30    | 2,64  | 1,723218 | 1,53078  | 0,125824 | NA        |
| CP              | 30,65   | 2,56  | 1,675759 | 1,530613 | 0,125865 | 0,4623191 |
| CCDC15          | 21,72   | 2,29  | 1,497046 | 1,530488 | 0,125896 | 0,4623191 |
| MRPS23          | 497,07  | 1,12  | 0,732294 | 1,530428 | 0,125911 | 0,4623191 |
| AC021068.1      | 13,32   | 1,76  | 1,150191 | 1,530022 | 0,126011 | 0,4625963 |
| RP11-867G23.3   | 30,91   | -0,64 | 0,415892 | -1,52953 | 0,126134 | 0,4628328 |
| COL1A2          | 24,40   | -1,52 | 0,991167 | -1,52924 | 0,126205 | 0,4628328 |
| PSME4           | 720,78  | 0,81  | 0,532086 | 1,529234 | 0,126206 | 0,4628328 |
| MLEC            | 699,58  | 0,73  | 0,474441 | 1,529199 | 0,126215 | 0,4628328 |
| CTD-2527I21.5   | 16,87   | -1,11 | 0,728164 | -1,52918 | 0,126219 | 0,4628328 |
| SEMA4A          | 969,46  | -0,51 | 0,333232 | -1,52916 | 0,126225 | 0,4628328 |
| FAM227B         | 37,93   | -1,66 | 1,085953 | -1,52878 | 0,126318 | 0,4630842 |
| DSEL            | 11,04   | -0,78 | 0,50963  | -1,52864 | 0,126353 | 0,4631205 |
| RP11-385J1.2    | 8,89    | -3,10 | 2,028153 | -1,52852 | 0,126384 | 0,4631431 |
| FAHD1           | 190,32  | 1,36  | 0,889579 | 1,528301 | 0,126438 | 0,4632484 |
| XXyac-YM21GA2.7 | 2,84    | 2,36  | 1,546222 | 1,527946 | 0,126526 | NA        |
| AL132780.10     | 36,52   | 1,87  | 1,224011 | 1,527582 | 0,126616 | 0,4638109 |
| MIR616          | 15,08   | 2,53  | 1,657654 | 1,526645 | 0,126849 | 0,4645729 |
| TRIB1           | 1229,33 | 0,60  | 0,395987 | 1,526503 | 0,126885 | 0,4646108 |
| PFKL            | 890,66  | -0,47 | 0,306737 | -1,52639 | 0,126912 | 0,4646183 |
| RNU6-226P       | 3,06    | 4,24  | 2,777843 | 1,526178 | 0,126965 | NA        |
| CELF4           | 23,80   | -0,84 | 0,550484 | -1,52613 | 0,126979 | 0,4647724 |
| TMEM106B        | 528,63  | -1,10 | 0,718923 | -1,52562 | 0,127105 | 0,4649654 |



|                 |         |       |          |          |          |           |
|-----------------|---------|-------|----------|----------|----------|-----------|
| LILRA6          | 200,00  | -1,01 | 0,663793 | -1,52561 | 0,127107 | 0,4649654 |
| SLC30A1         | 229,27  | 1,11  | 0,724794 | 1,525473 | 0,127141 | 0,4649654 |
| SLC20A1         | 862,39  | 0,51  | 0,334358 | 1,525449 | 0,127147 | 0,4649654 |
| TUBG2           | 35,63   | -2,44 | 1,596529 | -1,52541 | 0,127156 | 0,4649654 |
| C19orf43        | 441,36  | -0,58 | 0,379223 | -1,52461 | 0,127356 | 0,4654812 |
| GK              | 318,54  | -0,74 | 0,484108 | -1,5246  | 0,127358 | 0,4654812 |
| ZYG11B          | 412,55  | 0,88  | 0,579284 | 1,524546 | 0,127372 | 0,4654812 |
| RP11-454H13.5   | 44,52   | 1,36  | 0,891391 | 1,524079 | 0,127489 | 0,4658152 |
| RP11-70I4.1     | 5,89    | 2,84  | 1,861206 | 1,523772 | 0,127566 | 0,4660039 |
| NLRX1           | 26,06   | 2,24  | 1,467749 | 1,523518 | 0,127629 | 0,4661446 |
| SIGLEC6         | 6,40    | 3,99  | 2,622344 | 1,523295 | 0,127685 | 0,4662568 |
| RP6-109B7.3     | 9,95    | -0,99 | 0,652309 | -1,52271 | 0,127832 | 0,4666408 |
| ARHGAP24        | 228,58  | -1,75 | 1,149818 | -1,52267 | 0,12784  | 0,4666408 |
| SLC35F6         | 366,17  | 0,80  | 0,528055 | 1,522512 | 0,127881 | 0,4666978 |
| PACRG           | 13,58   | -1,64 | 1,077109 | -1,52204 | 0,127999 | 0,4670358 |
| RF00139         | 2,87    | 3,56  | 2,336955 | 1,521749 | 0,128072 | NA        |
| C8orf33         | 338,99  | -0,85 | 0,556282 | -1,52169 | 0,128088 | 0,4672697 |
| RP11-187O7.3    | 2,14    | 3,71  | 2,441268 | 1,521596 | 0,12811  | NA        |
| PECAM1          | 1372,01 | -0,50 | 0,329826 | -1,52148 | 0,12814  | 0,4673672 |
| RP11-211G23.1   | 4,00    | -1,75 | 1,148167 | -1,52121 | 0,128208 | 0,4675233 |
| RP11-446E24.3   | 0,76    | -3,30 | 2,16694  | -1,52115 | 0,128222 | NA        |
| ENO1            | 8569,80 | 0,29  | 0,193225 | 1,520643 | 0,128349 | 0,4679059 |
| STAG3           | 30,18   | 1,63  | 1,072747 | 1,520589 | 0,128363 | 0,4679059 |
| GIMAP8          | 144,79  | -1,74 | 1,145087 | -1,52033 | 0,128427 | 0,4679491 |
| CTA-229A8.5     | 9,90    | 2,61  | 1,713707 | 1,520309 | 0,128433 | 0,4679491 |
| MED20           | 46,45   | -1,76 | 1,157221 | -1,52017 | 0,128469 | 0,4679491 |
| WIPI1           | 134,60  | -0,90 | 0,594921 | -1,52014 | 0,128475 | 0,4679491 |
| MRPL17          | 111,47  | 1,33  | 0,87415  | 1,519908 | 0,128534 | 0,4680262 |
| RP11-114H24.6   | 21,03   | -1,54 | 1,014459 | -1,51986 | 0,128547 | 0,4680262 |
| FMN2            | 2,55    | -2,20 | 1,445157 | -1,51948 | 0,128641 | NA        |
| COL3A1          | 16,15   | -5,50 | 3,616658 | -1,51944 | 0,128651 | 0,4680484 |
| MPV17           | 796,20  | 0,71  | 0,468923 | 1,519436 | 0,128653 | 0,4680484 |
| NOS2P3          | 15,85   | -1,57 | 1,036149 | -1,51942 | 0,128657 | 0,4680484 |
| ZCCHC2          | 471,26  | -1,37 | 0,899324 | -1,5194  | 0,128661 | 0,4680484 |
| TARS            | 425,92  | -0,76 | 0,502499 | -1,51931 | 0,128685 | 0,4680484 |
| RP11-66D17.3    | 16,15   | -0,81 | 0,531199 | -1,51923 | 0,128704 | 0,4680484 |
| CIDECP          | 209,61  | 1,26  | 0,827459 | 1,518943 | 0,128777 | 0,4682224 |
| MIF             | 1115,05 | -0,40 | 0,260398 | -1,51879 | 0,128815 | 0,4682682 |
| RP11-129M16.4   | 8,17    | 2,83  | 1,867205 | 1,518283 | 0,128943 | 0,4684645 |
| F8              | 9,59    | 1,41  | 0,929406 | 1,51815  | 0,128976 | 0,4684645 |
| GOLGA6L22       | 36,51   | -1,26 | 0,832928 | -1,51813 | 0,128981 | 0,4684645 |
| GOLGA6L4        | 14,75   | 2,40  | 1,582535 | 1,518105 | 0,128988 | 0,4684645 |
| PSMB9           | 2455,38 | 0,38  | 0,249219 | 1,517857 | 0,129051 | 0,4684645 |
| LL22NC01-81G9.3 | 5,32    | -1,80 | 1,185412 | -1,51774 | 0,12908  | 0,4684645 |
| GPR161          | 14,23   | 2,10  | 1,381934 | 1,517587 | 0,129118 | 0,4684645 |
| TIMM13          | 748,92  | -0,50 | 0,330818 | -1,51755 | 0,129129 | 0,4684645 |
| CASC4           | 562,84  | 0,61  | 0,399206 | 1,517356 | 0,129177 | 0,4684645 |
| CD151           | 49,75   | -0,74 | 0,484451 | -1,51733 | 0,129183 | 0,4684645 |
| YEATS2          | 319,83  | 0,91  | 0,597238 | 1,51727  | 0,129199 | 0,4684645 |
| EEF1A19         | 5,78    | 0,97  | 0,638963 | 1,517155 | 0,129228 | 0,4684645 |

|               |         |       |          |          |          |           |
|---------------|---------|-------|----------|----------|----------|-----------|
| TMEM269       | 35,18   | -1,08 | 0,7122   | -1,51709 | 0,129244 | 0,4684645 |
| NYNRIN        | 3,83    | 3,38  | 2,229722 | 1,517039 | 0,129257 | 0,4684645 |
| SERGEF        | 78,53   | 1,56  | 1,028131 | 1,516915 | 0,129288 | 0,4684645 |
| SZT2          | 601,71  | -0,67 | 0,441343 | -1,51691 | 0,12929  | 0,4684645 |
| DDX3X         | 4245,05 | 0,29  | 0,191752 | 1,516881 | 0,129297 | 0,4684645 |
| RN7SL397P     | 13,05   | -1,75 | 1,151351 | -1,51677 | 0,129324 | 0,468471  |
| ZNRD1         | 149,94  | 1,22  | 0,80198  | 1,516366 | 0,129427 | 0,4687536 |
| RAE1          | 338,96  | 1,05  | 0,691139 | 1,51551  | 0,129643 | 0,4694456 |
| CD40LG        | 3,37    | -1,62 | 1,069348 | -1,51513 | 0,129739 | NA        |
| AC020594.5    | 2,88    | -4,48 | 2,957618 | -1,51512 | 0,129743 | NA        |
| LCA5L         | 8,04    | 1,76  | 1,160736 | 1,51492  | 0,129793 | 0,469895  |
| CTSC          | 1545,68 | 0,60  | 0,396171 | 1,514732 | 0,12984  | 0,4699766 |
| RP11-423E7.2  | 4,83    | -1,79 | 1,181379 | -1,51436 | 0,129934 | 0,4702246 |
| RNU5D-1       | 44,03   | -0,90 | 0,597327 | -1,51399 | 0,130027 | 0,4704015 |
| RP11-702L6.4  | 23,66   | -1,08 | 0,713183 | -1,51397 | 0,130034 | 0,4704015 |
| CTC-281M20.1  | 4,93    | 2,60  | 1,717707 | 1,513851 | 0,130064 | 0,4704185 |
| RP4-714D9.5   | 98,89   | -1,02 | 0,674458 | -1,5136  | 0,130128 | 0,4705598 |
| PTPRN         | 3,82    | 2,34  | 1,543144 | 1,513299 | 0,130204 | 0,4707421 |
| ANKRD9        | 14,60   | -1,11 | 0,731169 | -1,51319 | 0,130232 | 0,4707523 |
| SELT          | 1302,73 | 0,70  | 0,464666 | 1,512661 | 0,130366 | 0,4711448 |
| RRP36         | 196,34  | -1,03 | 0,67933  | -1,51256 | 0,130391 | 0,4711463 |
| RP3-354J5.2   | 6,39    | 1,41  | 0,931366 | 1,512216 | 0,130479 | 0,4713706 |
| NEK6          | 152,99  | -1,60 | 1,058864 | -1,51205 | 0,130522 | 0,4714349 |
| UCKL1-AS1     | 42,98   | -1,31 | 0,864548 | -1,51194 | 0,130549 | 0,4714424 |
| RN7SL836P     | 0,67    | -2,80 | 1,850266 | -1,51187 | 0,130566 | NA        |
| PDIA6         | 1261,62 | 0,50  | 0,33123  | 1,51161  | 0,130633 | 0,4716535 |
| CA3           | 5,27    | 4,32  | 2,856863 | 1,511084 | 0,130767 | 0,4720376 |
| MARK2         | 145,47  | -1,07 | 0,706681 | -1,51082 | 0,130835 | 0,4720376 |
| RFXAP         | 19,84   | 2,28  | 1,511645 | 1,510693 | 0,130867 | 0,4720376 |
| RP5-857K21.6  | 35,84   | -0,62 | 0,409631 | -1,51069 | 0,130868 | 0,4720376 |
| AZIN1         | 713,23  | -0,85 | 0,56294  | -1,51061 | 0,130889 | 0,4720376 |
| PPIL3         | 316,83  | 1,05  | 0,692171 | 1,510594 | 0,130892 | 0,4720376 |
| ANOS1         | 1,32    | -4,37 | 2,892964 | -1,51039 | 0,130943 | NA        |
| NCOA6         | 405,05  | -0,70 | 0,465005 | -1,51032 | 0,130962 | 0,4721977 |
| RP11-804F13.1 | 0,75    | -2,60 | 1,719758 | -1,51021 | 0,130989 | NA        |
| LRRC47        | 301,65  | -0,85 | 0,563295 | -1,51021 | 0,130989 | 0,4722045 |
| SYVN1         | 132,84  | 1,05  | 0,697306 | 1,510072 | 0,131025 | 0,4722432 |
| CHST15        | 90,41   | -2,24 | 1,485791 | -1,50974 | 0,131109 | 0,4723802 |
| CTC-471J1.8   | 5,88    | -2,46 | 1,62932  | -1,50972 | 0,131114 | 0,4723802 |
| CDCA2         | 3,79    | 4,71  | 3,122058 | 1,50953  | 0,131163 | 0,4724155 |
| RP1-261G23.7  | 0,77    | -3,66 | 2,423931 | -1,5095  | 0,131171 | NA        |
| MTMR8         | 6,19    | 4,79  | 3,17408  | 1,509388 | 0,1312   | 0,4724155 |
| RRAS          | 111,79  | -1,63 | 1,082704 | -1,50932 | 0,131216 | 0,4724155 |
| TOR1AIP2      | 888,35  | -0,48 | 0,319038 | -1,50929 | 0,131225 | 0,4724155 |
| KIAA1755      | 11,13   | 1,89  | 1,253912 | 1,509119 | 0,131268 | 0,4724799 |
| TPT1-AS1      | 170,09  | -0,83 | 0,550251 | -1,50868 | 0,13138  | 0,4727256 |
| MAX           | 453,35  | 0,49  | 0,321645 | 1,508653 | 0,131387 | 0,4727256 |
| PINK1         | 148,99  | -1,37 | 0,905941 | -1,50838 | 0,131458 | 0,4728472 |
| RP11-297K7.2  | 26,80   | -3,65 | 2,418456 | -1,50832 | 0,131472 | 0,4728472 |
| TBRG1         | 619,11  | -0,56 | 0,36955  | -1,50815 | 0,131516 | 0,4729151 |

|               |         |       |          |          |          |           |
|---------------|---------|-------|----------|----------|----------|-----------|
| CTC-33909.1   | 9,48    | -1,00 | 0,661751 | -1,50794 | 0,13157  | 0,473018  |
| PDZD4         | 0,79    | -3,19 | 2,115116 | -1,50748 | 0,131686 | NA        |
| RBBP5         | 222,59  | 0,75  | 0,494332 | 1,507343 | 0,131723 | 0,4734635 |
| RP11-576D8.4  | 9,02    | 1,09  | 0,720831 | 1,507207 | 0,131758 | 0,4734635 |
| DISC1         | 348,78  | -0,76 | 0,503262 | -1,50704 | 0,1318   | 0,4734635 |
| OR9H1P        | 15,96   | -1,09 | 0,725656 | -1,50701 | 0,131807 | 0,4734635 |
| C14orf105     | 4,74    | -1,15 | 0,762488 | -1,50696 | 0,131822 | 0,4734635 |
| CTB-3601.7    | 8,14    | 1,85  | 1,226779 | 1,506667 | 0,131896 | 0,4736392 |
| CTD-2083E4.4  | 26,19   | 1,14  | 0,756988 | 1,506545 | 0,131927 | 0,4736607 |
| RP5-1056H1.2  | 6,37    | -1,06 | 0,705484 | -1,50626 | 0,132    | 0,4738309 |
| PHF23         | 96,78   | -1,19 | 0,78986  | -1,506   | 0,132068 | 0,4738823 |
| HNRNPDL       | 2632,53 | 0,46  | 0,304726 | 1,505863 | 0,132102 | 0,4738823 |
| SHTN1         | 597,51  | 0,55  | 0,362197 | 1,505771 | 0,132126 | 0,4738823 |
| ZNF133        | 167,80  | -1,87 | 1,239317 | -1,50572 | 0,132138 | 0,4738823 |
| AC093838.7    | 37,38   | -1,20 | 0,799177 | -1,50571 | 0,132142 | 0,4738823 |
| PADI4         | 109,66  | -1,69 | 1,120529 | -1,50548 | 0,1322   | 0,473998  |
| DYRK1A        | 819,22  | -0,71 | 0,471152 | -1,50521 | 0,132271 | 0,4740677 |
| C8orf82       | 21,92   | -1,53 | 1,014179 | -1,50519 | 0,132276 | 0,4740677 |
| RSC1A1        | 5,58    | 5,11  | 3,396904 | 1,505081 | 0,132303 | 0,4740677 |
| RPS20P22      | 6,68    | -1,35 | 0,897607 | -1,50501 | 0,132321 | 0,4740677 |
| PA2G4         | 863,08  | 0,62  | 0,412988 | 1,504881 | 0,132355 | 0,4740967 |
| AC105749.1    | 0,48    | -3,41 | 2,264177 | -1,50484 | 0,132365 | NA        |
| AP001595.1    | 9,64    | -2,25 | 1,496058 | -1,50474 | 0,132391 | 0,4741353 |
| FMO6P         | 1,19    | -2,64 | 1,751526 | -1,50454 | 0,132442 | NA        |
| RP11-640L9.2  | 5,81    | -1,68 | 1,115902 | -1,50446 | 0,132464 | 0,4743054 |
| RP11-640N11.2 | 21,95   | -1,36 | 0,902481 | -1,50433 | 0,132496 | 0,4743293 |
| CASP14        | 20,40   | -1,43 | 0,948926 | -1,50398 | 0,132585 | 0,4745573 |
| EGFLAM        | 2,91    | 3,52  | 2,343658 | 1,50397  | 0,132589 | NA        |
| RP11-976B16.1 | 13,20   | -1,32 | 0,875563 | -1,50374 | 0,132647 | 0,4746875 |
| BCAT1         | 435,44  | 1,11  | 0,735035 | 1,503609 | 0,132682 | 0,4747213 |
| SRSF8         | 354,15  | 1,07  | 0,709464 | 1,503304 | 0,132761 | 0,474911  |
| RP11-625I7.1  | 3,70    | 4,52  | 3,00719  | 1,503275 | 0,132768 | NA        |
| RP11-18H7.1   | 124,26  | -0,93 | 0,621903 | -1,50309 | 0,132815 | 0,4749115 |
| RP11-267A15.1 | 5,18    | -1,34 | 0,888558 | -1,50303 | 0,132831 | 0,4749115 |
| CTD-3049M7.1  | 45,95   | -0,98 | 0,653925 | -1,50301 | 0,132837 | 0,4749115 |
| IDO1          | 15,70   | 1,68  | 1,119286 | 1,502841 | 0,13288  | 0,4749405 |
| SGSH          | 474,66  | -0,90 | 0,59618  | -1,50278 | 0,132897 | 0,4749405 |
| CTD-2290P7.1  | 1,60    | -5,48 | 3,643325 | -1,50275 | 0,132903 | NA        |
| GMIP          | 314,80  | -0,76 | 0,503364 | -1,50255 | 0,132955 | 0,4750576 |
| RF01518       | 0,67    | -3,08 | 2,048819 | -1,50246 | 0,132978 | NA        |
| RP11-537H15.3 | 1,13    | -1,71 | 1,135457 | -1,50235 | 0,133008 | NA        |
| RP11-39K24.7  | 4,64    | 4,26  | 2,832933 | 1,502345 | 0,133008 | 0,47508   |
| AVEN          | 13,64   | 2,06  | 1,373465 | 1,50231  | 0,133017 | 0,47508   |
| HYAL2         | 107,99  | 1,97  | 1,313616 | 1,5022   | 0,133045 | 0,47508   |
| ACBD5         | 250,50  | -1,11 | 0,741765 | -1,50213 | 0,133063 | 0,47508   |
| GLYAT         | 48,33   | -1,22 | 0,815548 | -1,50188 | 0,133129 | 0,4751744 |
| TALDO1        | 2693,01 | -0,36 | 0,242672 | -1,50183 | 0,133141 | 0,4751744 |
| AC073869.1    | 0,85    | -4,12 | 2,746841 | -1,50167 | 0,133182 | NA        |
| NPIPA3        | 3,35    | -2,51 | 1,670346 | -1,50154 | 0,133217 | NA        |
| PDP2          | 55,83   | 1,24  | 0,826391 | 1,50118  | 0,133309 | 0,4756615 |

|                    |         |       |          |          |          |           |
|--------------------|---------|-------|----------|----------|----------|-----------|
| RP11-458B24.2      | 245,00  | -0,58 | 0,387082 | -1,50106 | 0,13334  | 0,4756615 |
| HAR1B              | 2,05    | 3,67  | 2,441983 | 1,500855 | 0,133393 | NA        |
| WTIP               | 108,69  | -0,85 | 0,563425 | -1,5008  | 0,133407 | 0,4756615 |
| PMM1               | 350,43  | 1,27  | 0,844597 | 1,500743 | 0,133422 | 0,4756615 |
| SPCS3              | 1155,71 | 0,51  | 0,341937 | 1,500669 | 0,133441 | 0,4756615 |
| SUCO               | 446,39  | 0,85  | 0,569727 | 1,50064  | 0,133449 | 0,4756615 |
| SFT2D2             | 1569,81 | 0,70  | 0,468965 | 1,500538 | 0,133475 | 0,4756615 |
| ZNF200             | 161,73  | -1,46 | 0,96975  | -1,50051 | 0,133482 | 0,4756615 |
| RN7SL73P           | 13,18   | -0,95 | 0,632429 | -1,50038 | 0,133516 | 0,4756927 |
| AC007283.4         | 3,79    | 3,39  | 2,262764 | 1,499846 | 0,133654 | 0,4760235 |
| REEP6              | 4,02    | 4,58  | 3,051005 | 1,499823 | 0,13366  | 0,4760235 |
| RP11-177F11.1      | 1,35    | -1,75 | 1,169682 | -1,49965 | 0,133705 | NA        |
| SPTLC3             | 460,11  | -0,96 | 0,643483 | -1,49963 | 0,133711 | 0,4761138 |
| CTD-2026K11.4      | 8,50    | 3,15  | 2,09868  | 1,499299 | 0,133796 | 0,4762856 |
| SPG21              | 869,20  | 0,54  | 0,362569 | 1,499106 | 0,133846 | 0,4762856 |
| C4orf33            | 305,39  | -0,95 | 0,634403 | -1,49908 | 0,133852 | 0,4762856 |
| NDRG2              | 870,06  | 0,70  | 0,469387 | 1,499046 | 0,133862 | 0,4762856 |
| RP5-1126H10.2      | 0,59    | -2,77 | 1,84493  | -1,49884 | 0,133915 | NA        |
| ACTN4              | 170,60  | 0,82  | 0,546104 | 1,498513 | 0,134    | 0,4766361 |
| CTD-2373N4.5       | 30,69   | 2,74  | 1,831215 | 1,498276 | 0,134062 | 0,4766361 |
| CASK               | 194,30  | 1,02  | 0,683348 | 1,498221 | 0,134076 | 0,4766361 |
| TTLL5              | 151,17  | 1,17  | 0,782513 | 1,498107 | 0,134105 | 0,4766361 |
| RP11-747D18.1      | 1,91    | -1,58 | 1,057084 | -1,49802 | 0,134128 | NA        |
| RP11-87H9.5        | 6,18    | -1,64 | 1,097651 | -1,49795 | 0,134145 | 0,4766361 |
| C12orf60           | 14,40   | -1,44 | 0,964014 | -1,49786 | 0,13417  | 0,4766361 |
| YWHAH              | 706,20  | 0,66  | 0,442315 | 1,497817 | 0,134181 | 0,4766361 |
| FARP2              | 232,66  | 1,23  | 0,819166 | 1,49771  | 0,134209 | 0,4766361 |
| RP1-222E13.10      | 130,05  | 1,51  | 1,010708 | 1,497651 | 0,134224 | 0,4766361 |
| SNX16              | 75,45   | -1,69 | 1,12876  | -1,49758 | 0,134241 | 0,4766361 |
| AL136419.6         | 134,39  | -0,92 | 0,617296 | -1,49758 | 0,134242 | 0,4766361 |
| ZKSCAN1            | 727,48  | -0,77 | 0,515606 | -1,49745 | 0,134275 | 0,4766634 |
| RABGGTB            | 832,05  | 0,50  | 0,332278 | 1,497334 | 0,134306 | 0,4766821 |
| CREG2              | 15,16   | -1,20 | 0,799777 | -1,4968  | 0,134444 | 0,4770811 |
| GPNMB              | 1,68    | -2,12 | 1,41427  | -1,49665 | 0,134485 | NA        |
| RP4-798C17.6       | 15,87   | -0,86 | 0,571824 | -1,49662 | 0,134493 | 0,477162  |
| RP11-57P14.3       | 3,38    | 3,35  | 2,240041 | 1,496577 | 0,134503 | NA        |
| USH2A              | 62,21   | -4,50 | 3,009048 | -1,49651 | 0,134521 | 0,4771705 |
| TSC22D1-AS1        | 3,94    | -1,61 | 1,078923 | -1,49631 | 0,134574 | 0,4771796 |
| SZRD1              | 413,01  | 0,54  | 0,362835 | 1,496303 | 0,134575 | 0,4771796 |
| BCAS3              | 185,49  | -0,71 | 0,474302 | -1,49608 | 0,134633 | 0,477256  |
| PPP2R1B            | 180,92  | 1,53  | 1,025519 | 1,496024 | 0,134647 | 0,477256  |
| SPC24              | 31,77   | -0,78 | 0,523514 | -1,49592 | 0,134675 | 0,4772643 |
| LDOC1L             | 59,99   | 1,51  | 1,011054 | 1,495605 | 0,134757 | 0,4774607 |
| RP11-775G23.1      | 1,31    | -3,44 | 2,300597 | -1,49558 | 0,134763 | NA        |
| LA16c-60D12.2      | 83,27   | -0,78 | 0,52192  | -1,49517 | 0,13487  | 0,4777722 |
| XXbac-BPG296P20.15 | 5,36    | 1,08  | 0,724677 | 1,494871 | 0,134948 | 0,4778522 |
| RP11-567M16.5      | 3,83    | 4,57  | 3,057046 | 1,494827 | 0,13496  | 0,4778522 |
| HIST1H2BC          | 6,55    | 3,26  | 2,18109  | 1,494788 | 0,13497  | 0,4778522 |
| ADAM11             | 3,62    | -3,46 | 2,313332 | -1,49466 | 0,135004 | NA        |
| PAFAH1B1           | 586,01  | -0,60 | 0,400215 | -1,49465 | 0,135005 | 0,4778828 |

|                |         |       |          |          |          |           |
|----------------|---------|-------|----------|----------|----------|-----------|
| SCNN1A         | 12,24   | -1,19 | 0,795001 | -1,49447 | 0,135053 | 0,4778828 |
| TANGO2         | 322,40  | 1,00  | 0,667159 | 1,494313 | 0,135094 | 0,4778828 |
| MIR3180-4      | 26,76   | 1,85  | 1,235789 | 1,494244 | 0,135112 | 0,4778828 |
| PCDHGA1        | 1,99    | 1,67  | 1,118367 | 1,494243 | 0,135112 | NA        |
| ZBTB48         | 287,95  | -0,74 | 0,494487 | -1,49421 | 0,135122 | 0,4778828 |
| FAM120C        | 143,36  | 1,22  | 0,8165   | 1,494099 | 0,13515  | 0,4778828 |
| SLC25A35       | 107,48  | -1,63 | 1,091275 | -1,49407 | 0,135158 | 0,4778828 |
| C7orf31        | 25,40   | -1,94 | 1,295971 | -1,49381 | 0,135225 | 0,4780294 |
| PRKAB1         | 186,52  | 0,93  | 0,622133 | 1,493635 | 0,135271 | 0,4780999 |
| AC091878.1     | 28,10   | -1,10 | 0,736079 | -1,4935  | 0,135307 | 0,4781359 |
| AC012314.20    | 1,42    | 2,49  | 1,668204 | 1,493357 | 0,135344 | NA        |
| HIVEP2         | 275,06  | 1,21  | 0,813044 | 1,493256 | 0,13537  | 0,478239  |
| CITF22-123F2.1 | 4,77    | -1,33 | 0,892977 | -1,4931  | 0,13541  | 0,478239  |
| RP11-104F15.9  | 8,79    | -2,55 | 1,710884 | -1,49309 | 0,135413 | 0,478239  |
| MRPL3          | 623,16  | 0,71  | 0,473215 | 1,492648 | 0,135529 | 0,478558  |
| TNFSF10        | 1207,61 | -0,73 | 0,489603 | -1,4925  | 0,135569 | 0,4786087 |
| RP13-49I15.5   | 5,56    | -1,36 | 0,914073 | -1,49232 | 0,135614 | 0,4786402 |
| PVT1           | 79,67   | 1,51  | 1,012721 | 1,492265 | 0,13563  | 0,4786402 |
| CTC-348L14.1   | 42,62   | -1,74 | 1,16965  | -1,49167 | 0,135786 | 0,4790991 |
| ZFP41          | 6,71    | 2,89  | 1,938309 | 1,491335 | 0,135874 | 0,4792566 |
| CDC42SE2       | 1960,66 | 0,35  | 0,232952 | 1,491214 | 0,135905 | 0,4792566 |
| AC104135.3     | 15,42   | -1,90 | 1,274635 | -1,49121 | 0,135907 | 0,4792566 |
| RP11-80K21.3   | 0,87    | -2,35 | 1,574346 | -1,49115 | 0,135923 | NA        |
| PSD3           | 17,31   | -1,94 | 1,301149 | -1,49092 | 0,135983 | 0,4794326 |
| MELTF          | 3,57    | 3,03  | 2,035189 | 1,4906   | 0,136067 | NA        |
| SLC35A3        | 305,63  | 0,89  | 0,596603 | 1,490392 | 0,136121 | 0,4796378 |
| HHIPL1         | 22,44   | -1,84 | 1,237844 | -1,49026 | 0,136156 | 0,4796378 |
| HPSS           | 478,48  | 0,74  | 0,498551 | 1,49013  | 0,13619  | 0,4796378 |
| ALS2CR11       | 7,26    | -3,86 | 2,587924 | -1,49006 | 0,136208 | 0,4796378 |
| METTL2B        | 177,62  | -1,09 | 0,729695 | -1,49003 | 0,136216 | 0,4796378 |
| PORCN          | 35,17   | -1,79 | 1,204    | -1,48994 | 0,136239 | 0,4796378 |
| GRB10          | 27,93   | -2,39 | 1,601036 | -1,48984 | 0,136267 | 0,4796378 |
| KIF13A         | 228,61  | 1,28  | 0,860999 | 1,489821 | 0,136271 | 0,4796378 |
| C12orf76       | 344,82  | 1,05  | 0,703924 | 1,489813 | 0,136273 | 0,4796378 |
| CD69           | 538,55  | 0,93  | 0,621929 | 1,489648 | 0,136317 | 0,4797004 |
| PDE4DIP        | 604,66  | -0,68 | 0,45342  | -1,48923 | 0,136427 | 0,4799806 |
| ATM            | 1008,43 | -0,53 | 0,355704 | -1,48915 | 0,136448 | 0,4799806 |
| USP20          | 102,27  | -1,47 | 0,987415 | -1,48884 | 0,136529 | 0,4800241 |
| CTC-591M7.1    | 41,87   | -1,46 | 0,978233 | -1,48882 | 0,136535 | 0,4800241 |
| ZNF277         | 177,47  | 0,73  | 0,487907 | 1,488763 | 0,13655  | 0,4800241 |
| GRIA1          | 16,46   | -2,06 | 1,381491 | -1,48865 | 0,13658  | 0,4800241 |
| RP11-108M9.4   | 44,59   | -0,61 | 0,406441 | -1,48861 | 0,13659  | 0,4800241 |
| RP11-403P17.4  | 13,94   | -1,45 | 0,975152 | -1,48799 | 0,136754 | 0,4804577 |
| GTF2IRD2B      | 203,00  | -1,13 | 0,7575   | -1,48795 | 0,136765 | 0,4804577 |
| SPAG9          | 701,43  | 0,72  | 0,480956 | 1,487576 | 0,136863 | 0,480712  |
| RSPH4A         | 5,30    | 4,28  | 2,879278 | 1,487296 | 0,136937 | 0,4807873 |
| LDLRAD2        | 12,41   | 2,04  | 1,369865 | 1,487293 | 0,136937 | 0,4807873 |
| RP11-391A7.1   | 2,62    | -1,80 | 1,207155 | -1,48718 | 0,136966 | NA        |
| SH3BP5L        | 48,74   | 1,96  | 1,319336 | 1,487149 | 0,136976 | 0,4807873 |
| DOT1L          | 167,54  | -0,98 | 0,662249 | -1,4871  | 0,136988 | 0,4807873 |

|                |         |       |          |          |          |           |
|----------------|---------|-------|----------|----------|----------|-----------|
| RP11-426A6.7   | 5,27    | -2,19 | 1,470901 | -1,48667 | 0,137102 | 0,4810988 |
| RP11-274B21.4  | 2,59    | 4,01  | 2,696423 | 1,486394 | 0,137175 | NA        |
| C5AR1          | 39,98   | -1,21 | 0,811954 | -1,48613 | 0,137244 | 0,4815065 |
| ARHGEF40       | 373,09  | -0,87 | 0,587632 | -1,48572 | 0,137352 | 0,4817937 |
| FLOT1          | 858,69  | 0,58  | 0,388038 | 1,485383 | 0,137442 | 0,4818869 |
| RP11-1046B16.3 | 52,85   | -1,52 | 1,025062 | -1,48524 | 0,137482 | 0,4818869 |
| SSSCA1         | 327,26  | -0,73 | 0,49023  | -1,48513 | 0,137509 | 0,4818869 |
| ALG14          | 324,38  | 1,25  | 0,840801 | 1,48496  | 0,137555 | 0,4818869 |
| FGD1           | 5,51    | 5,10  | 3,433615 | 1,484943 | 0,137559 | 0,4818869 |
| GSE1           | 483,12  | 0,62  | 0,418988 | 1,484926 | 0,137563 | 0,4818869 |
| OR2AT4         | 215,48  | -0,58 | 0,392093 | -1,48485 | 0,137584 | 0,4818869 |
| ZNF90          | 21,37   | -1,53 | 1,032052 | -1,48484 | 0,137587 | 0,4818869 |
| GSTCD          | 41,45   | -1,15 | 0,771913 | -1,48474 | 0,137612 | 0,4818869 |
| RP13-467E5.1   | 3,38    | 3,80  | 2,560733 | 1,484084 | 0,137787 | NA        |
| GRINA          | 571,16  | -0,62 | 0,419703 | -1,48398 | 0,137815 | 0,48212   |
| RN7SL847P      | 1,81    | -1,71 | 1,150442 | -1,48392 | 0,137829 | NA        |
| MRPL28         | 573,06  | -0,70 | 0,468401 | -1,48389 | 0,137837 | 0,48212   |
| ME3            | 94,10   | 1,52  | 1,026563 | 1,483858 | 0,137847 | 0,48212   |
| RF00012        | 167,26  | -0,54 | 0,363352 | -1,48379 | 0,137864 | 0,48212   |
| RP11-25K21.4   | 306,18  | 1,28  | 0,861391 | 1,483729 | 0,137881 | 0,48212   |
| RP11-321L2.2   | 12,35   | 1,26  | 0,846817 | 1,483718 | 0,137884 | 0,48212   |
| RP11-69E11.7   | 3,40    | 3,80  | 2,563423 | 1,483701 | 0,137888 | NA        |
| PIM3           | 489,98  | 0,90  | 0,606376 | 1,483641 | 0,137904 | 0,48212   |
| RERE           | 402,72  | 0,68  | 0,460566 | 1,483638 | 0,137905 | 0,48212   |
| RP11-797A18.6  | 55,61   | -1,74 | 1,174562 | -1,48361 | 0,137911 | 0,48212   |
| RP11-720L3.1   | 8,95    | -1,49 | 1,004236 | -1,48332 | 0,13799  | 0,4822802 |
| CTB-151G24.2   | 4,53    | 3,66  | 2,46562  | 1,483246 | 0,138009 | 0,4822802 |
| AP003774.1     | 1,61    | 2,15  | 1,451701 | 1,483027 | 0,138067 | NA        |
| GRM4           | 3,46    | -1,53 | 1,032355 | -1,48294 | 0,138091 | NA        |
| RP11-454F8.2   | 29,73   | 1,16  | 0,784953 | 1,482889 | 0,138104 | 0,4825211 |
| ADARB1         | 242,76  | -2,67 | 1,803036 | -1,48278 | 0,138132 | 0,4825281 |
| XPNPEP1        | 421,06  | 0,74  | 0,497235 | 1,482591 | 0,138183 | 0,4826164 |
| RP11-261C10.5  | 1,95    | 2,35  | 1,585179 | 1,482582 | 0,138185 | NA        |
| ZFYVE1         | 104,43  | 1,59  | 1,074236 | 1,482466 | 0,138216 | 0,4826421 |
| OR5AU1         | 36,17   | -0,86 | 0,580908 | -1,48222 | 0,13828  | 0,482775  |
| DOCK7          | 575,11  | -1,00 | 0,672496 | -1,48187 | 0,138374 | 0,4830122 |
| AC009404.2     | 15,50   | -0,87 | 0,589325 | -1,48152 | 0,138469 | 0,4832503 |
| ZNF628         | 68,44   | -1,95 | 1,314471 | -1,48098 | 0,138611 | 0,4836561 |
| SPRY4          | 2,28    | -1,73 | 1,168393 | -1,48087 | 0,138642 | NA        |
| UBE2Q2P1       | 24,74   | -1,75 | 1,181682 | -1,4808  | 0,13866  | 0,4837387 |
| ARPC1A         | 310,50  | 0,46  | 0,308406 | 1,480589 | 0,138716 | 0,4838421 |
| CUEDC1         | 40,68   | 1,94  | 1,311014 | 1,480383 | 0,138771 | 0,4839021 |
| RP11-23P13.6   | 1,69    | -4,22 | 2,847339 | -1,48036 | 0,138776 | NA        |
| ZFYVE26        | 218,97  | -1,19 | 0,803383 | -1,48033 | 0,138785 | 0,4839021 |
| RPS26P31       | 0,82    | -1,71 | 1,157705 | -1,48027 | 0,1388   | NA        |
| LPAR4          | 4,11    | -0,80 | 0,538421 | -1,47999 | 0,138875 | 0,4839789 |
| UQCRCQ         | 820,50  | -0,36 | 0,242155 | -1,47997 | 0,138881 | 0,4839789 |
| TMEM67         | 40,13   | -0,77 | 0,519821 | -1,47995 | 0,138885 | 0,4839789 |
| CPEB4          | 341,52  | 1,28  | 0,86652  | 1,479776 | 0,138933 | 0,4839887 |
| SORL1          | 1264,30 | -0,66 | 0,447984 | -1,47975 | 0,13894  | 0,4839887 |

|                |         |       |          |          |          |           |
|----------------|---------|-------|----------|----------|----------|-----------|
| CTA-286B10.8   | 0,70    | 2,11  | 1,42337  | 1,479382 | 0,139038 | NA        |
| GZMB           | 131,07  | -1,56 | 1,056388 | -1,4791  | 0,139113 | 0,4845011 |
| EEF1B2         | 5401,29 | 0,28  | 0,188824 | 1,47885  | 0,13918  | 0,4846192 |
| MMADHC         | 605,87  | 0,83  | 0,563181 | 1,478779 | 0,139199 | 0,4846192 |
| RP11-2N5.2     | 3,55    | -1,31 | 0,885153 | -1,47865 | 0,139235 | NA        |
| RP11-1033A18.1 | 1,63    | -1,24 | 0,838072 | -1,47835 | 0,139314 | NA        |
| COG4           | 477,41  | -0,75 | 0,509818 | -1,47813 | 0,139374 | 0,4849817 |
| RP11-219E24.1  | 40,39   | -0,62 | 0,41642  | -1,47807 | 0,13939  | 0,4849817 |
| UBALD1         | 12,37   | -1,04 | 0,703093 | -1,47805 | 0,139396 | 0,4849817 |
| AL121653.4     | 12,76   | -1,17 | 0,791657 | -1,478   | 0,139408 | 0,4849817 |
| AC005921.2     | 3,59    | -1,35 | 0,914195 | -1,47773 | 0,13948  | NA        |
| RGPD6          | 288,68  | 0,73  | 0,491945 | 1,47728  | 0,139601 | 0,4853949 |
| DGCR6L         | 439,02  | -0,81 | 0,547859 | -1,47727 | 0,139604 | 0,4853949 |
| COL15A1        | 4,46    | -1,46 | 0,991357 | -1,4772  | 0,139623 | 0,4853949 |
| ZFHX4          | 26,72   | -2,47 | 1,674609 | -1,47717 | 0,139631 | 0,4853949 |
| PPFIA4         | 28,21   | 2,22  | 1,50588  | 1,476863 | 0,139712 | 0,4854966 |
| SBSPON         | 17,27   | 1,37  | 0,929036 | 1,476836 | 0,13972  | 0,4854966 |
| ZNF577         | 97,47   | 1,01  | 0,68299  | 1,476766 | 0,139738 | 0,4854966 |
| MVP            | 805,10  | -0,63 | 0,429637 | -1,47656 | 0,139793 | 0,4855943 |
| TCF3           | 187,51  | -1,04 | 0,70663  | -1,47645 | 0,139823 | 0,4856102 |
| RP11-662I13.3  | 15,58   | -1,15 | 0,779752 | -1,47622 | 0,139885 | 0,4856538 |
| C19orf53       | 470,55  | -0,46 | 0,314702 | -1,47621 | 0,139888 | 0,4856538 |
| AC016749.2     | 2,15    | 3,13  | 2,12275  | 1,47602  | 0,139938 | NA        |
| RP11-323F24.5  | 133,52  | -0,75 | 0,510211 | -1,47549 | 0,140082 | 0,4862358 |
| RP11-251G23.5  | 24,88   | -1,38 | 0,933327 | -1,47524 | 0,140147 | 0,4863296 |
| PIGV           | 59,21   | -2,21 | 1,496291 | -1,47519 | 0,140161 | 0,4863296 |
| CSAD           | 187,74  | -1,03 | 0,695128 | -1,47489 | 0,140243 | 0,4864921 |
| ANXA13         | 30,73   | -1,23 | 0,830676 | -1,47482 | 0,14026  | 0,4864921 |
| RP11-83A24.2   | 235,86  | -0,76 | 0,51882  | -1,47436 | 0,140385 | 0,4867266 |
| SPINK8         | 5,21    | -4,97 | 3,37336  | -1,47423 | 0,14042  | 0,4867266 |
| RP11-345J4.6   | 4,16    | -2,38 | 1,61769  | -1,47421 | 0,140426 | 0,4867266 |
| MANSC1         | 48,48   | -1,11 | 0,75406  | -1,47414 | 0,140445 | 0,4867266 |
| WNT7A          | 1,45    | -2,19 | 1,482381 | -1,47411 | 0,140453 | NA        |
| RP11-17M16.2   | 11,77   | 2,28  | 1,546259 | 1,474075 | 0,140461 | 0,4867266 |
| PLP2           | 1480,52 | 0,40  | 0,268395 | 1,473977 | 0,140488 | 0,4867266 |
| RP11-339A11.2  | 23,17   | 1,27  | 0,862171 | 1,473891 | 0,140511 | 0,4867266 |
| RP4-809F18.1   | 2,93    | 2,98  | 2,020275 | 1,473879 | 0,140514 | NA        |
| ATP6V1B2       | 1818,93 | 0,43  | 0,293367 | 1,473691 | 0,140565 | 0,4868223 |
| AP000473.6     | 0,40    | -2,95 | 2,004128 | -1,47321 | 0,140695 | NA        |
| SNX17          | 2005,45 | -0,42 | 0,283953 | -1,47299 | 0,140754 | 0,487388  |
| RP11-192H23.8  | 21,45   | 1,27  | 0,863441 | 1,472863 | 0,140788 | 0,487414  |
| RP11-452C13.1  | 2,66    | 3,44  | 2,335263 | 1,472817 | 0,1408   | NA        |
| CTD-3088G3.6   | 9,35    | -1,60 | 1,084156 | -1,47244 | 0,140903 | 0,4877219 |
| RP11-527N22.1  | 2,22    | 1,91  | 1,295788 | 1,472247 | 0,140954 | NA        |
| PAN3           | 650,64  | 0,55  | 0,376001 | 1,472231 | 0,140959 | 0,4878224 |
| RP11-1060G2.2  | 17,13   | 2,00  | 1,361403 | 1,471956 | 0,141033 | 0,4879886 |
| SLC3A1         | 16,48   | 1,39  | 0,942237 | 1,471503 | 0,141155 | 0,4883214 |
| SUPT6H         | 627,57  | 0,61  | 0,414716 | 1,471362 | 0,141193 | 0,4883624 |
| TSPYL2         | 129,52  | 1,32  | 0,89996  | 1,470703 | 0,141371 | 0,4888615 |
| ZCCHC3         | 185,20  | 1,35  | 0,917882 | 1,470634 | 0,14139  | 0,4888615 |

|                |         |       |          |          |          |           |
|----------------|---------|-------|----------|----------|----------|-----------|
| RP11-489P6.1   | 28,04   | 1,01  | 0,687654 | 1,470407 | 0,141452 | 0,4889257 |
| RP11-361D15.2  | 27,76   | 1,40  | 0,951819 | 1,47037  | 0,141461 | 0,4889257 |
| RIPK3          | 169,36  | 1,38  | 0,93594  | 1,470274 | 0,141488 | 0,4889257 |
| DARS           | 671,79  | 0,65  | 0,44223  | 1,469907 | 0,141587 | 0,489178  |
| PIK3IP1        | 258,95  | -1,40 | 0,953767 | -1,46972 | 0,141636 | 0,4892579 |
| CH507-145C22.1 | 2,27    | 3,17  | 2,158868 | 1,46954  | 0,141686 | NA        |
| CTD-2024I7.13  | 72,42   | -1,60 | 1,08936  | -1,46932 | 0,141745 | 0,4895419 |
| RPL17-C18orf32 | 3,61    | 4,49  | 3,054658 | 1,469303 | 0,141751 | NA        |
| PARP4P2        | 0,86    | -2,88 | 1,959298 | -1,46894 | 0,14185  | NA        |
| SCARNA9        | 29,05   | -0,86 | 0,588458 | -1,46891 | 0,141857 | 0,4898084 |
| RP11-763B22.4  | 1,40    | 3,11  | 2,119768 | 1,468803 | 0,141886 | NA        |
| CTSA           | 496,24  | -0,71 | 0,48564  | -1,4687  | 0,141914 | 0,4898084 |
| SMAD7          | 13,73   | 2,29  | 1,562208 | 1,46866  | 0,141925 | 0,4898084 |
| RP11-135F9.3   | 143,66  | 1,12  | 0,760908 | 1,468587 | 0,141945 | 0,4898084 |
| RN7SL683P      | 20,79   | -3,41 | 2,321587 | -1,46839 | 0,142    | 0,4898084 |
| RANGAP1        | 260,27  | -1,07 | 0,73212  | -1,46833 | 0,142015 | 0,4898084 |
| RP4-694B14.5   | 49,52   | -0,95 | 0,650028 | -1,4683  | 0,142024 | 0,4898084 |
| COASY          | 433,10  | 0,70  | 0,4767   | 1,468264 | 0,142033 | 0,4898084 |
| FAM195B        | 500,07  | -0,54 | 0,368515 | -1,46798 | 0,142109 | 0,4899691 |
| RP11-666A8.8   | 5,15    | -1,73 | 1,175927 | -1,46776 | 0,142169 | 0,4899691 |
| RP11-328J2.1   | 8,71    | -2,45 | 1,672586 | -1,46774 | 0,142175 | 0,4899691 |
| GRPEL1         | 631,00  | 0,69  | 0,466764 | 1,467704 | 0,142185 | 0,4899691 |
| SPECC1         | 1051,26 | 0,40  | 0,269374 | 1,467384 | 0,142272 | 0,4900278 |
| CRIM1          | 220,01  | -1,58 | 1,076236 | -1,46729 | 0,142297 | 0,4900278 |
| ACP6           | 120,02  | -1,57 | 1,072955 | -1,46728 | 0,142301 | 0,4900278 |
| PLEKHA3        | 276,77  | -1,09 | 0,740196 | -1,46725 | 0,142307 | 0,4900278 |
| ZMYM3          | 190,05  | -1,47 | 0,999441 | -1,46708 | 0,142355 | 0,4901017 |
| CLK3           | 554,28  | 0,70  | 0,479763 | 1,466979 | 0,142382 | 0,4901037 |
| RP11-643A5.3   | 9,66    | -4,59 | 3,127933 | -1,46673 | 0,142449 | 0,4902464 |
| RP11-463O9.8   | 5,38    | -1,94 | 1,319583 | -1,46655 | 0,142498 | 0,4903225 |
| RP11-6D1.3     | 2,51    | 3,96  | 2,701186 | 1,466521 | 0,142506 | NA        |
| AP000550.1     | 7,21    | 2,03  | 1,384815 | 1,466231 | 0,142585 | 0,4904838 |
| P2RY14         | 137,20  | 1,35  | 0,919    | 1,466094 | 0,142623 | 0,4904838 |
| APBA1          | 31,61   | 1,73  | 1,178532 | 1,465988 | 0,142651 | 0,4904838 |
| WDR12          | 355,82  | -1,04 | 0,711713 | -1,46579 | 0,142705 | 0,4904838 |
| CYP27A1        | 22,61   | -3,29 | 2,245038 | -1,46579 | 0,142706 | 0,4904838 |
| GS1-279B7.2    | 15,25   | -2,45 | 1,669172 | -1,46579 | 0,142707 | 0,4904838 |
| LINC00461      | 0,99    | -2,64 | 1,803999 | -1,46563 | 0,142749 | NA        |
| RNU6-672P      | 1,85    | 2,94  | 2,007463 | 1,465573 | 0,142765 | NA        |
| NEMP2          | 115,93  | -1,35 | 0,922663 | -1,46549 | 0,142787 | 0,4904838 |
| AC073130.3     | 26,91   | -2,44 | 1,667242 | -1,46547 | 0,142792 | 0,4904838 |
| PARP12         | 461,87  | -0,75 | 0,514603 | -1,46541 | 0,142808 | 0,4904838 |
| TXNDC16        | 165,36  | -1,35 | 0,92316  | -1,46541 | 0,142808 | 0,4904838 |
| ZDHHC18        | 269,67  | 0,91  | 0,623219 | 1,465204 | 0,142865 | 0,4905073 |
| ZNF467         | 286,94  | -0,78 | 0,533827 | -1,46519 | 0,142868 | 0,4905073 |
| CD164          | 2126,95 | 0,55  | 0,372987 | 1,465065 | 0,142903 | 0,4905099 |
| ARMC8          | 408,66  | -0,79 | 0,537697 | -1,465   | 0,142921 | 0,4905099 |
| RP11-286O18.1  | 9,41    | 3,03  | 2,067226 | 1,464707 | 0,143001 | 0,4906219 |
| PREX2          | 21,66   | -1,58 | 1,081672 | -1,46466 | 0,143013 | 0,4906219 |
| RAP1B          | 2122,11 | 0,39  | 0,267129 | 1,464589 | 0,143033 | 0,4906219 |



|                |         |       |          |          |          |           |
|----------------|---------|-------|----------|----------|----------|-----------|
| PCDH24         | 1,66    | -5,34 | 3,647447 | -1,46412 | 0,143161 | NA        |
| TNS3           | 368,96  | -0,72 | 0,488542 | -1,46405 | 0,143179 | 0,4910324 |
| TMUB1          | 60,31   | -1,38 | 0,940773 | -1,46394 | 0,14321  | 0,4910459 |
| ZDHHC4         | 260,10  | -0,98 | 0,670934 | -1,46373 | 0,143268 | 0,4910618 |
| ZNF726         | 28,14   | -1,24 | 0,845573 | -1,4636  | 0,143304 | 0,4910618 |
| MIR100HG       | 22,04   | -0,93 | 0,633655 | -1,46355 | 0,143318 | 0,4910618 |
| TGDS           | 101,39  | 1,61  | 1,099802 | 1,463539 | 0,14332  | 0,4910618 |
| RP11-488C13.6  | 0,94    | -4,13 | 2,819853 | -1,46352 | 0,143324 | NA        |
| HACD3          | 222,53  | 1,04  | 0,707901 | 1,463435 | 0,143348 | 0,4910691 |
| CTC-329D1.2    | 3,34    | 4,37  | 2,983243 | 1,463241 | 0,143402 | NA        |
| XKR5           | 8,47    | -0,97 | 0,659933 | -1,46314 | 0,143428 | 0,491189  |
| SRBD1          | 165,50  | 1,09  | 0,743226 | 1,463049 | 0,143454 | 0,491189  |
| FAR1           | 1257,85 | 0,65  | 0,443778 | 1,463018 | 0,143463 | 0,491189  |
| RP13-554M15.2  | 229,69  | 1,51  | 1,035067 | 1,462886 | 0,143499 | 0,491222  |
| RP11-693M3.1   | 19,72   | 1,96  | 1,341106 | 1,462419 | 0,143626 | 0,4914819 |
| CRLF3          | 381,38  | -0,60 | 0,409883 | -1,46242 | 0,143627 | 0,4914819 |
| RP11-484L7.2   | 750,64  | 0,42  | 0,286606 | 1,462085 | 0,143718 | 0,4916361 |
| SGK3           | 558,19  | 0,57  | 0,388724 | 1,462058 | 0,143725 | 0,4916361 |
| SNX29          | 437,66  | 0,81  | 0,554337 | 1,461895 | 0,14377  | 0,4916846 |
| RP11-529E15.1  | 14,14   | -0,91 | 0,624576 | -1,46173 | 0,143816 | 0,4916846 |
| BAG4           | 301,65  | 1,03  | 0,704647 | 1,461717 | 0,143819 | 0,4916846 |
| NFE4           | 13,51   | 1,91  | 1,309879 | 1,461615 | 0,143847 | 0,49169   |
| PRKCH          | 280,48  | -0,93 | 0,633294 | -1,46135 | 0,14392  | 0,4918484 |
| RP11-147L13.14 | 1,94    | 2,96  | 2,028645 | 1,461136 | 0,143978 | NA        |
| SF1            | 1810,53 | 0,31  | 0,210175 | 1,461115 | 0,143984 | 0,4919776 |
| RP11-426D19.1  | 66,96   | -0,84 | 0,574732 | -1,46097 | 0,144022 | 0,4920195 |
| RF00561        | 11,50   | 2,80  | 1,917686 | 1,460756 | 0,144082 | 0,4920866 |
| AC116366.4     | 319,82  | -0,92 | 0,631553 | -1,46071 | 0,144095 | 0,4920866 |
| PLIN5          | 47,20   | -0,75 | 0,510812 | -1,46057 | 0,144132 | 0,492124  |
| FAM111B        | 66,56   | -0,95 | 0,649511 | -1,45996 | 0,144301 | 0,4926081 |
| RP11-632K20.2  | 31,37   | 1,92  | 1,311985 | 1,459727 | 0,144365 | 0,4927379 |
| FAM95B1        | 26,97   | 1,99  | 1,363586 | 1,459424 | 0,144448 | 0,4927973 |
| GIPC1          | 9,46    | -1,30 | 0,89227  | -1,45913 | 0,144529 | 0,4927973 |
| AHRR           | 19,60   | 1,81  | 1,241018 | 1,458995 | 0,144566 | 0,4927973 |
| SPATA7         | 37,99   | -1,52 | 1,044516 | -1,45897 | 0,144574 | 0,4927973 |
| NOP14          | 201,90  | -0,94 | 0,643306 | -1,45894 | 0,14458  | 0,4927973 |
| AC002551.1     | 25,33   | -0,88 | 0,603314 | -1,45894 | 0,144582 | 0,4927973 |
| DTNA           | 243,83  | 0,87  | 0,59774  | 1,458897 | 0,144593 | 0,4927973 |
| PBDC1          | 394,35  | 0,75  | 0,513511 | 1,458893 | 0,144594 | 0,4927973 |
| RP11-613C6.4   | 2,53    | 3,96  | 2,718189 | 1,458595 | 0,144677 | NA        |
| ATG12          | 436,32  | 0,76  | 0,518615 | 1,45852  | 0,144697 | 0,493057  |
| RP11-507J18.5  | 13,89   | -1,56 | 1,072009 | -1,4584  | 0,14473  | 0,4930619 |
| RGMB           | 4,49    | 4,54  | 3,115979 | 1,458282 | 0,144763 | 0,4930619 |
| RP11-474I16.8  | 4,23    | -1,88 | 1,288966 | -1,45823 | 0,144778 | 0,4930619 |
| RP11-445P17.4  | 1,05    | -4,60 | 3,152357 | -1,45814 | 0,144803 | NA        |
| OR51B8P        | 1,43    | -5,31 | 3,644211 | -1,45789 | 0,144872 | NA        |
| RP11-823P9.4   | 11,99   | 1,28  | 0,877734 | 1,45757  | 0,144959 | 0,4935879 |
| CTD-2269F5.1   | 4,15    | 4,16  | 2,851984 | 1,457288 | 0,145037 | 0,4936806 |
| TMEM206        | 278,80  | 1,18  | 0,809103 | 1,457279 | 0,145039 | 0,4936806 |
| AC011718.2     | 0,88    | -2,83 | 1,939687 | -1,4571  | 0,145088 | NA        |

|                    |         |       |          |          |          |           |
|--------------------|---------|-------|----------|----------|----------|-----------|
| NSMCE1             | 641,47  | -0,72 | 0,491937 | -1,45693 | 0,145135 | 0,4938786 |
| AC106782.18        | 21,36   | 1,64  | 1,127654 | 1,456731 | 0,145191 | 0,4938786 |
| BORA               | 29,52   | 2,17  | 1,487526 | 1,456509 | 0,145252 | 0,4938786 |
| LSM1               | 358,15  | -0,51 | 0,35182  | -1,45649 | 0,145258 | 0,4938786 |
| AC027317.2         | 7,25    | -1,08 | 0,741749 | -1,45645 | 0,145269 | 0,4938786 |
| INTS12             | 100,73  | -1,39 | 0,957837 | -1,45639 | 0,145284 | 0,4938786 |
| NF1                | 665,42  | 0,82  | 0,564453 | 1,456322 | 0,145304 | 0,4938786 |
| RP11-480I12.4      | 8,11    | -1,63 | 1,118564 | -1,45622 | 0,145331 | 0,4938786 |
| RP11-205A8.4       | 7,26    | -1,56 | 1,068476 | -1,4562  | 0,145336 | 0,4938786 |
| SOX7               | 6,24    | -1,13 | 0,777569 | -1,45601 | 0,14539  | 0,4938965 |
| LACTB              | 396,10  | -0,75 | 0,516407 | -1,45599 | 0,145395 | 0,4938965 |
| RP1-149A16.3       | 4,42    | -4,89 | 3,362493 | -1,45562 | 0,145497 | 0,4941542 |
| CTC-527H23.3       | 5,67    | 2,79  | 1,917007 | 1,455332 | 0,145577 | 0,494286  |
| PCSK6              | 17,79   | 1,37  | 0,941329 | 1,455289 | 0,145589 | 0,494286  |
| AC002456.2         | 2,35    | 3,86  | 2,651864 | 1,455083 | 0,145646 | NA        |
| RPS29              | 2278,84 | -0,54 | 0,369494 | -1,45494 | 0,145686 | 0,4945236 |
| RP11-42B7.1        | 20,97   | -1,25 | 0,857017 | -1,45478 | 0,14573  | 0,4945674 |
| FAM114A1           | 156,45  | -1,51 | 1,039114 | -1,4547  | 0,145752 | 0,4945674 |
| ARIH1              | 723,05  | 0,95  | 0,653587 | 1,454446 | 0,145823 | 0,4947172 |
| RP11-322D14.2      | 0,66    | -3,96 | 2,720301 | -1,45436 | 0,145845 | NA        |
| KCTD1              | 14,07   | 1,31  | 0,902674 | 1,454346 | 0,14585  | 0,494721  |
| RP11-156P1.3       | 30,75   | 1,73  | 1,186975 | 1,454083 | 0,145923 | 0,4948295 |
| RP3-340H11.2       | 3,78    | 4,55  | 3,12897  | 1,454039 | 0,145935 | 0,4948295 |
| PTPN5              | 5,64    | -3,46 | 2,381701 | -1,45384 | 0,145989 | 0,494922  |
| RP11-574F21.2      | 2,74    | 3,47  | 2,38798  | 1,453735 | 0,14602  | NA        |
| OR52B5P            | 1,57    | 2,31  | 1,585993 | 1,45371  | 0,146027 | NA        |
| RP11-161H23.5      | 518,84  | 0,47  | 0,32463  | 1,453598 | 0,146058 | 0,4950638 |
| NR2E3              | 2,39    | 3,92  | 2,697013 | 1,453579 | 0,146063 | NA        |
| RP11-927P21.5      | 3,23    | 4,33  | 2,97903  | 1,453497 | 0,146086 | NA        |
| MIR143HG           | 37,45   | -0,63 | 0,435783 | -1,45287 | 0,146259 | 0,495657  |
| ATP6V1D            | 292,33  | 0,81  | 0,559381 | 1,451852 | 0,146543 | 0,4963021 |
| UBE2G1             | 524,48  | 0,93  | 0,6383   | 1,451845 | 0,146545 | 0,4963021 |
| NBPF8P             | 579,49  | -0,84 | 0,577526 | -1,45183 | 0,146548 | 0,4963021 |
| AC079776.7         | 5,48    | 5,04  | 3,474751 | 1,451803 | 0,146557 | 0,4963021 |
| BCL9L              | 7,87    | 2,00  | 1,379298 | 1,451683 | 0,14659  | 0,4963073 |
| RP11-81H14.2       | 44,95   | -1,35 | 0,932359 | -1,45143 | 0,14666  | 0,4963073 |
| ZNF358             | 28,81   | -1,49 | 1,026697 | -1,45135 | 0,146681 | 0,4963073 |
| TMX3               | 498,09  | 0,93  | 0,641842 | 1,451326 | 0,146689 | 0,4963073 |
| SLC13A3            | 4,86    | 2,38  | 1,64259  | 1,451308 | 0,146694 | 0,4963073 |
| SLC52A3            | 7,04    | 1,06  | 0,732572 | 1,451222 | 0,146718 | 0,4963073 |
| CA12               | 1,25    | -2,18 | 1,499269 | -1,45115 | 0,146737 | NA        |
| MED1               | 242,59  | 0,87  | 0,596676 | 1,451005 | 0,146778 | 0,4964213 |
| RN7SL14P           | 3,45    | 2,02  | 1,389065 | 1,450868 | 0,146817 | NA        |
| RP5-995J12.2       | 16,73   | -1,84 | 1,271252 | -1,45082 | 0,146831 | 0,4965095 |
| KCNK1              | 3,15    | 4,45  | 3,064298 | 1,450791 | 0,146838 | NA        |
| RP11-223I10.1      | 1,13    | 2,11  | 1,454306 | 1,450219 | 0,146998 | NA        |
| RP3-325F22.3       | 4,27    | -2,66 | 1,836884 | -1,45014 | 0,14702  | 0,4968724 |
| ABC12-49244600F4.4 | 7,06    | -2,12 | 1,463403 | -1,45012 | 0,147025 | 0,4968724 |
| LTB4R2             | 7,24    | 2,60  | 1,792603 | 1,450039 | 0,147048 | 0,4968724 |
| IKZF5              | 199,47  | 1,00  | 0,692361 | 1,449977 | 0,147065 | 0,4968724 |

|               |         |       |          |          |          |           |
|---------------|---------|-------|----------|----------|----------|-----------|
| OR9M1P        | 20,25   | 2,51  | 1,731512 | 1,449951 | 0,147072 | 0,4968724 |
| RP11-4B16.4   | 86,73   | 1,27  | 0,877878 | 1,44967  | 0,147151 | 0,4970205 |
| RCBTB1        | 233,64  | 1,09  | 0,748532 | 1,449586 | 0,147174 | 0,4970205 |
| RP11-424M24.3 | 1,51    | 3,24  | 2,232605 | 1,449577 | 0,147177 | NA        |
| SPCS2         | 530,08  | 0,68  | 0,470053 | 1,449507 | 0,147196 | 0,4970205 |
| ZNF428        | 28,04   | -1,20 | 0,826381 | -1,44919 | 0,147285 | 0,4972311 |
| RP11-401N16.2 | 0,72    | -3,45 | 2,381204 | -1,44909 | 0,147312 | NA        |
| SP140         | 235,07  | 1,08  | 0,74394  | 1,447991 | 0,14762  | 0,4981807 |
| RN7SL472P     | 1,44    | 2,52  | 1,740799 | 1,447859 | 0,147656 | NA        |
| YY1AP1        | 888,79  | 0,83  | 0,57603  | 1,447748 | 0,147688 | 0,4981807 |
| MC1R          | 1,29    | -3,01 | 2,080721 | -1,44768 | 0,147708 | NA        |
| AC005041.9    | 4,37    | -1,84 | 1,274074 | -1,44765 | 0,147715 | 0,4981807 |
| CSAR2         | 139,06  | -0,62 | 0,428585 | -1,44744 | 0,147773 | 0,4981807 |
| RP11-152H18.3 | 1,84    | 3,51  | 2,42433  | 1,447361 | 0,147796 | NA        |
| ZNF664        | 180,41  | -1,15 | 0,796126 | -1,44735 | 0,147799 | 0,4981807 |
| DUSP22        | 915,18  | -0,60 | 0,413722 | -1,44729 | 0,147817 | 0,4981807 |
| HSD3B7        | 36,40   | -1,80 | 1,242029 | -1,44722 | 0,147836 | 0,4981807 |
| ATG4B         | 740,84  | 0,60  | 0,413361 | 1,44721  | 0,147838 | 0,4981807 |
| CTB-50L17.10  | 60,02   | -1,49 | 1,029146 | -1,44713 | 0,14786  | 0,4981807 |
| RP1-278C19.3  | 83,65   | 0,83  | 0,572349 | 1,447065 | 0,147879 | 0,4981807 |
| AC004951.6    | 32,72   | -1,13 | 0,777937 | -1,44705 | 0,147883 | 0,4981807 |
| TKFC          | 174,87  | 1,07  | 0,741599 | 1,447033 | 0,147888 | 0,4981807 |
| FTHL23        | 29,56   | 0,74  | 0,508559 | 1,446923 | 0,147919 | 0,498194  |
| HMMR          | 2,39    | 2,99  | 2,067542 | 1,446707 | 0,147979 | NA        |
| RP11-212I21.4 | 73,21   | -1,42 | 0,984726 | -1,44666 | 0,147992 | 0,4982259 |
| ATF5          | 170,19  | 0,82  | 0,5677   | 1,446508 | 0,148035 | 0,4982259 |
| KDM5A         | 1621,63 | -0,45 | 0,310193 | -1,4465  | 0,148038 | 0,4982259 |
| IRF2BP2       | 1789,37 | 0,55  | 0,378698 | 1,446415 | 0,148061 | 0,4982259 |
| ZFP36L1       | 1148,52 | 0,32  | 0,222853 | 1,446411 | 0,148062 | 0,4982259 |
| AC018816.3    | 1,40    | 3,16  | 2,181924 | 1,446253 | 0,148106 | NA        |
| RP11-309H8.3  | 2,16    | -3,22 | 2,225461 | -1,44624 | 0,14811  | NA        |
| OR2M4         | 39,84   | -1,11 | 0,767193 | -1,44603 | 0,148169 | 0,4984973 |
| RARB          | 0,59    | -3,08 | 2,129398 | -1,44584 | 0,148221 | NA        |
| RP11-537A6.9  | 2,23    | 3,78  | 2,615665 | 1,445619 | 0,148284 | NA        |
| TMEM145       | 14,22   | -1,57 | 1,086325 | -1,44552 | 0,148311 | 0,4987959 |
| ACLY          | 467,46  | 0,62  | 0,426656 | 1,445521 | 0,148312 | 0,4987959 |
| RP11-338L22.2 | 0,82    | -3,47 | 2,398317 | -1,44548 | 0,148323 | NA        |
| RPL7AP11      | 1,24    | -1,59 | 1,097145 | -1,44542 | 0,148341 | NA        |
| OTUD4         | 510,31  | -0,81 | 0,562064 | -1,44541 | 0,148342 | 0,4988087 |
| PHTF1         | 281,96  | 0,91  | 0,631702 | 1,444855 | 0,148499 | 0,4991798 |
| NF2           | 431,07  | 0,76  | 0,528077 | 1,444828 | 0,148506 | 0,4991798 |
| RBP7          | 16,36   | -2,75 | 1,902233 | -1,4445  | 0,148599 | 0,4993804 |
| TRAF4         | 77,10   | 1,18  | 0,816199 | 1,444424 | 0,14862  | 0,4993804 |
| PCDHB13       | 9,43    | -1,53 | 1,05993  | -1,44402 | 0,148732 | 0,4995062 |
| CDK11A        | 238,84  | 0,77  | 0,536411 | 1,444012 | 0,148735 | 0,4995062 |
| PARP8         | 644,84  | -0,70 | 0,483724 | -1,44393 | 0,148758 | 0,4995062 |
| SEPN1         | 420,05  | -0,58 | 0,403571 | -1,44391 | 0,148765 | 0,4995062 |
| RGAG4         | 31,82   | -1,47 | 1,017877 | -1,44357 | 0,14886  | 0,4997357 |
| RNY1P4        | 3,38    | 4,39  | 3,043853 | 1,443442 | 0,148896 | NA        |
| DUSP28        | 153,64  | 1,07  | 0,742181 | 1,443056 | 0,149005 | 0,5000128 |

|                |        |       |          |          |          |           |
|----------------|--------|-------|----------|----------|----------|-----------|
| UBE2M          | 121,75 | -0,54 | 0,374002 | -1,44292 | 0,149042 | 0,5000128 |
| CREB1          | 668,98 | -0,93 | 0,642816 | -1,4429  | 0,149047 | 0,5000128 |
| CTC-510F12.6   | 244,69 | -0,77 | 0,533313 | -1,44283 | 0,14907  | 0,5000128 |
| RUSC1-AS1      | 77,33  | 0,96  | 0,663383 | 1,442801 | 0,149077 | 0,5000128 |
| RN7SL40P       | 5,08   | -1,50 | 1,04186  | -1,4426  | 0,149133 | 0,500111  |
| SETBP1         | 41,83  | 1,97  | 1,36733  | 1,442505 | 0,14916  | 0,5001116 |
| RN7SL666P      | 3,22   | 1,90  | 1,317411 | 1,442424 | 0,149183 | NA        |
| RP11-762H8.3   | 1,75   | 2,25  | 1,561179 | 1,442365 | 0,149199 | NA        |
| RP11-517I24.5  | 32,72  | 0,89  | 0,614249 | 1,442237 | 0,149235 | 0,5002747 |
| AC010761.6     | 5,00   | -1,44 | 0,997623 | -1,44193 | 0,149321 | 0,5004137 |
| CNP            | 603,56 | 0,56  | 0,387459 | 1,4419   | 0,149331 | 0,5004137 |
| DSG2           | 2,47   | 1,41  | 0,97513  | 1,441656 | 0,149399 | NA        |
| P3H1           | 381,23 | -0,84 | 0,580863 | -1,44161 | 0,149414 | 0,5006023 |
| RP11-569A2.2   | 7,76   | -1,83 | 1,267558 | -1,44126 | 0,149512 | 0,5007842 |
| ORC3           | 100,61 | -1,66 | 1,151009 | -1,44122 | 0,149522 | 0,5007842 |
| FAM83C         | 2,61   | -2,05 | 1,425044 | -1,44118 | 0,149533 | NA        |
| CTD-2369P2.10  | 26,46  | -1,19 | 0,828306 | -1,44104 | 0,149573 | 0,5008652 |
| TFEB           | 478,25 | -0,79 | 0,546137 | -1,44089 | 0,149615 | 0,500871  |
| MIR155HG       | 1,63   | 2,75  | 1,908301 | 1,440875 | 0,14962  | NA        |
| FAM98B         | 181,90 | 0,93  | 0,643015 | 1,440689 | 0,149673 | 0,500871  |
| RP13-15E13.1   | 17,93  | -1,18 | 0,82146  | -1,44065 | 0,149683 | 0,500871  |
| DLST           | 113,88 | -1,17 | 0,814461 | -1,4404  | 0,149754 | 0,500871  |
| IL1RL2         | 10,44  | -2,58 | 1,791805 | -1,44037 | 0,149764 | 0,500871  |
| RP11-582H21.1  | 14,48  | 3,31  | 2,296318 | 1,440346 | 0,14977  | 0,500871  |
| RP11-349F21.5  | 8,27   | -1,77 | 1,231858 | -1,44023 | 0,149801 | 0,500871  |
| FAM118B        | 201,38 | 1,07  | 0,740621 | 1,440206 | 0,149809 | 0,500871  |
| RP11-1149O23.3 | 35,95  | -2,04 | 1,418289 | -1,44012 | 0,149834 | 0,500871  |
| LASP1          | 476,88 | 0,53  | 0,366283 | 1,440066 | 0,149849 | 0,500871  |
| MKRN2OS        | 10,12  | -1,29 | 0,895918 | -1,43999 | 0,149871 | 0,500871  |
| TCF20          | 200,77 | -1,00 | 0,696213 | -1,4397  | 0,149951 | 0,5010484 |
| CCDC56         | 529,50 | -0,95 | 0,658685 | -1,43947 | 0,150019 | 0,5011142 |
| IFT88          | 76,20  | -1,02 | 0,708068 | -1,43944 | 0,150025 | 0,5011142 |
| HECTD4         | 371,80 | 0,69  | 0,47706  | 1,439117 | 0,150117 | 0,5012596 |
| RP11-325F22.2  | 65,76  | -1,31 | 0,909037 | -1,43876 | 0,15022  | 0,5012596 |
| SUCLA2         | 237,22 | 0,78  | 0,542993 | 1,43871  | 0,150233 | 0,5012596 |
| RP5-842K24.2   | 24,23  | -1,47 | 1,020155 | -1,43867 | 0,150244 | 0,5012596 |
| RP11-61K9.2    | 7,66   | -1,10 | 0,761936 | -1,43865 | 0,150251 | 0,5012596 |
| RP11-483F11.7  | 2,50   | 3,94  | 2,740693 | 1,438617 | 0,150259 | NA        |
| C16orf89       | 3,99   | -1,30 | 0,90325  | -1,4385  | 0,150291 | 0,5012596 |
| PRRG1          | 5,50   | -1,46 | 1,017578 | -1,43848 | 0,150298 | 0,5012596 |
| RP11-11N9.4    | 76,10  | 1,32  | 0,918539 | 1,438472 | 0,1503   | 0,5012596 |
| FAM83F         | 69,92  | -0,68 | 0,471885 | -1,43834 | 0,150339 | 0,5012596 |
| RP4-539M6.14   | 22,50  | -1,28 | 0,886956 | -1,43832 | 0,150343 | 0,5012596 |
| TNFRSF12A      | 12,25  | 3,88  | 2,697863 | 1,438246 | 0,150364 | 0,5012596 |
| CTB-22K14.1    | 40,91  | 0,73  | 0,505299 | 1,43804  | 0,150423 | 0,5013642 |
| HDDC2          | 145,95 | -1,14 | 0,792073 | -1,43786 | 0,150473 | 0,5014428 |
| RNU5E-6P       | 2,55   | -1,44 | 1,001177 | -1,43765 | 0,150533 | NA        |
| ARHGAP8        | 20,26  | -1,36 | 0,948114 | -1,43749 | 0,15058  | 0,5016258 |
| NUBP1          | 273,37 | 0,86  | 0,59816  | 1,437478 | 0,150582 | 0,5016258 |
| AC097724.3     | 8,20   | -1,13 | 0,784262 | -1,4372  | 0,150662 | 0,5018012 |

|                 |         |       |          |          |          |           |
|-----------------|---------|-------|----------|----------|----------|-----------|
| RP11-375D13.2   | 1,24    | 2,34  | 1,626869 | 1,437152 | 0,150675 | NA        |
| OGDH            | 411,76  | 0,71  | 0,496125 | 1,436876 | 0,150753 | 0,5019695 |
| CYBA            | 2223,01 | -0,35 | 0,241308 | -1,43683 | 0,150766 | 0,5019695 |
| RP11-343J18.1   | 2,58    | 3,99  | 2,77432  | 1,436814 | 0,150771 | NA        |
| ZNF462          | 10,15   | -0,69 | 0,476869 | -1,43672 | 0,150797 | 0,5019827 |
| ZNF57           | 0,92    | -2,81 | 1,956191 | -1,43643 | 0,15088  | NA        |
| COX4I1          | 7375,18 | -0,21 | 0,148639 | -1,43626 | 0,15093  | 0,5023336 |
| AC019185.4      | 0,84    | -2,17 | 1,513592 | -1,43621 | 0,150942 | NA        |
| CTA-212D2.2     | 2,67    | -2,28 | 1,587338 | -1,43617 | 0,150954 | NA        |
| UNKL            | 113,04  | -1,47 | 1,022364 | -1,4361  | 0,150974 | 0,5023915 |
| FADS1           | 288,70  | -0,84 | 0,583705 | -1,43588 | 0,151036 | 0,5025073 |
| BCAT2           | 126,91  | -1,19 | 0,830338 | -1,43562 | 0,15111  | 0,5025954 |
| CTA-276F8.1     | 26,52   | 1,53  | 1,063969 | 1,4356   | 0,151116 | 0,5025954 |
| RIPK2           | 748,14  | 0,79  | 0,550923 | 1,435474 | 0,151152 | 0,5026242 |
| RABGAP1         | 523,22  | -1,03 | 0,720655 | -1,43527 | 0,151209 | 0,5027254 |
| SCARNA5         | 17,61   | -2,12 | 1,475217 | -1,43455 | 0,151417 | 0,5032768 |
| CHMP2B          | 474,72  | 0,67  | 0,47027  | 1,434501 | 0,151429 | 0,5032768 |
| KDEL3           | 2,44    | 3,34  | 2,331875 | 1,434266 | 0,151496 | NA        |
| RP11-452L6.1    | 11,86   | -2,72 | 1,897408 | -1,43404 | 0,151562 | 0,5035897 |
| RNF187          | 162,48  | -0,54 | 0,375567 | -1,43398 | 0,151578 | 0,5035897 |
| SLC7A2          | 0,88    | 2,21  | 1,538975 | 1,433916 | 0,151596 | NA        |
| EIF3H           | 2136,58 | 0,49  | 0,343729 | 1,433826 | 0,151622 | 0,5036418 |
| CDS1            | 50,07   | 1,48  | 1,033096 | 1,433736 | 0,151647 | 0,5036418 |
| AC004878.8      | 0,62    | -3,82 | 2,661762 | -1,43341 | 0,15174  | NA        |
| ZNF235          | 69,29   | 1,85  | 1,294083 | 1,433337 | 0,151762 | 0,5039306 |
| FUT2            | 9,10    | -1,03 | 0,721656 | -1,43317 | 0,151808 | 0,5039374 |
| XXbac-B476C20.9 | 9,81    | 2,46  | 1,71536  | 1,433133 | 0,15182  | 0,5039374 |
| FKBP9           | 31,74   | -0,83 | 0,578533 | -1,43305 | 0,151845 | 0,5039374 |
| RP3-330O12.5    | 6,70    | -0,96 | 0,667619 | -1,43247 | 0,15201  | 0,5042194 |
| SLC12A8         | 62,20   | -1,71 | 1,196602 | -1,43238 | 0,152035 | 0,5042194 |
| FAM126B         | 477,47  | -1,16 | 0,810443 | -1,43231 | 0,152055 | 0,5042194 |
| RP11-26E5.1     | 5,99    | 4,06  | 2,83737  | 1,432295 | 0,15206  | 0,5042194 |
| RAB2A           | 833,14  | 0,44  | 0,305417 | 1,432274 | 0,152065 | 0,5042194 |
| RP11-289H16.1   | 28,91   | 2,02  | 1,408688 | 1,432139 | 0,152104 | 0,5042581 |
| PROX2           | 3,50    | 2,04  | 1,422846 | 1,432049 | 0,15213  | NA        |
| RPS26           | 1132,66 | -0,52 | 0,360968 | -1,4319  | 0,152172 | 0,5043922 |
| APIP            | 240,30  | 0,81  | 0,562922 | 1,431754 | 0,152214 | 0,5044327 |
| ZNF107          | 94,63   | -1,39 | 0,970244 | -1,43167 | 0,152238 | 0,5044327 |
| AF241726.4      | 2,43    | 2,07  | 1,448757 | 1,431535 | 0,152277 | NA        |
| DRAP1           | 549,31  | 0,41  | 0,288238 | 1,431527 | 0,152279 | 0,5044796 |
| FAM63A          | 157,19  | 1,28  | 0,893845 | 1,431383 | 0,152321 | 0,5045263 |
| VPRBP           | 181,25  | -1,28 | 0,897428 | -1,43119 | 0,152375 | 0,504571  |
| NDUFA10         | 1099,34 | 0,48  | 0,336541 | 1,431127 | 0,152394 | 0,504571  |
| RP11-110J1.5    | 15,42   | 3,30  | 2,303801 | 1,431017 | 0,152425 | 0,504571  |
| TYW1B           | 79,62   | -2,05 | 1,43135  | -1,43096 | 0,152443 | 0,504571  |
| FBXL22          | 1,29    | -2,28 | 1,593191 | -1,43092 | 0,152454 | NA        |
| POF1B           | 22,71   | -1,75 | 1,221522 | -1,43064 | 0,152533 | 0,5047799 |
| ADAM33          | 6,15    | -1,47 | 1,024703 | -1,43017 | 0,152669 | 0,5051416 |
| SEPT14          | 16,34   | -1,32 | 0,926065 | -1,42996 | 0,152729 | 0,5052266 |
| TRAPPC3L        | 120,27  | -1,04 | 0,724068 | -1,42989 | 0,152749 | 0,5052266 |

|                |         |       |          |          |          |           |
|----------------|---------|-------|----------|----------|----------|-----------|
| RP11-430H10.2  | 7,36    | -1,59 | 1,114467 | -1,42943 | 0,152882 | 0,5055097 |
| RP11-15G8.1    | 19,50   | -0,88 | 0,61701  | -1,4294  | 0,152889 | 0,5055097 |
| CYP2C19        | 4,52    | 2,27  | 1,585625 | 1,429069 | 0,152984 | 0,5057348 |
| RP1-138B7.5    | 1,66    | 3,35  | 2,34477  | 1,429013 | 0,153    | NA        |
| CEP250         | 385,90  | -1,35 | 0,94225  | -1,42894 | 0,153021 | 0,5057653 |
| LSM6           | 296,43  | 0,48  | 0,333592 | 1,428599 | 0,15312  | 0,5060019 |
| RP11-259P1.1   | 3,21    | 4,31  | 3,018853 | 1,428472 | 0,153156 | NA        |
| ITGA7          | 41,01   | -3,41 | 2,386278 | -1,42832 | 0,153199 | 0,5061732 |
| PIP4K2A        | 1725,12 | 0,40  | 0,276726 | 1,427969 | 0,153301 | 0,5064204 |
| AC062028.1     | 1,42    | -1,78 | 1,244154 | -1,42793 | 0,153313 | NA        |
| RPS2L1         | 0,81    | 1,69  | 1,180742 | 1,427652 | 0,153392 | NA        |
| RP11-120K9.2   | 6,58    | -2,21 | 1,545656 | -1,42729 | 0,153496 | 0,5069742 |
| TBX18          | 1,32    | -5,21 | 3,651313 | -1,42669 | 0,153669 | NA        |
| PPP2R5E        | 567,89  | 0,67  | 0,470706 | 1,426681 | 0,153672 | 0,5074208 |
| ZBTB17         | 200,09  | -0,94 | 0,655477 | -1,42663 | 0,153685 | 0,5074208 |
| IFNAR1         | 543,77  | 0,90  | 0,628125 | 1,426476 | 0,153731 | 0,5074817 |
| LINC00547      | 128,07  | -0,76 | 0,531619 | -1,42612 | 0,153833 | 0,5077289 |
| AC139099.3     | 0,63    | -2,43 | 1,700912 | -1,42582 | 0,153919 | NA        |
| PARP2          | 61,92   | -1,11 | 0,781702 | -1,42582 | 0,15392  | 0,5079238 |
| ENC1           | 139,40  | 1,23  | 0,862235 | 1,425682 | 0,15396  | 0,5079677 |
| LINC00581      | 3,13    | -1,10 | 0,771226 | -1,42555 | 0,153998 | NA        |
| RUSC1          | 117,63  | -1,38 | 0,968848 | -1,42554 | 0,154002 | 0,5080151 |
| RP11-546M21.6  | 3,39    | -1,16 | 0,817289 | -1,42526 | 0,154081 | NA        |
| AC096921.2     | 7,76    | 5,02  | 3,522212 | 1,42521  | 0,154097 | 0,5082372 |
| RP11-65L19.4   | 2,72    | -1,30 | 0,909416 | -1,42511 | 0,154127 | NA        |
| RP11-560A15.3  | 1,35    | 1,86  | 1,302219 | 1,425082 | 0,154133 | NA        |
| TTLL4          | 297,40  | 1,15  | 0,80684  | 1,424573 | 0,154281 | 0,5087545 |
| RP11-544A12.8  | 63,70   | 1,22  | 0,8577   | 1,424135 | 0,154407 | 0,5090823 |
| RPS3AP34       | 11,76   | 3,40  | 2,385239 | 1,423941 | 0,154464 | 0,509177  |
| RP5-1153D9.5   | 3,26    | -1,59 | 1,114678 | -1,42372 | 0,154528 | NA        |
| CTD-2127H9.1   | 24,94   | -2,11 | 1,482526 | -1,42353 | 0,154584 | 0,5094832 |
| OSR2           | 6,00    | 3,87  | 2,721866 | 1,423278 | 0,154655 | 0,509629  |
| LINC00092      | 15,33   | -1,79 | 1,257185 | -1,42314 | 0,154696 | 0,5096714 |
| PRPS1          | 109,32  | -1,14 | 0,801721 | -1,42299 | 0,154738 | 0,5097213 |
| RP11-643M14.1  | 0,83    | -3,14 | 2,203806 | -1,42293 | 0,154756 | NA        |
| PTGER3         | 9,15    | 3,34  | 2,350331 | 1,422862 | 0,154776 | 0,5097563 |
| SLC24A1        | 157,34  | 1,33  | 0,938    | 1,422758 | 0,154806 | 0,5097645 |
| SON            | 2743,38 | -0,33 | 0,2325   | -1,42249 | 0,154884 | 0,5099063 |
| SEMA6D         | 50,47   | -2,35 | 1,651736 | -1,42236 | 0,154923 | 0,5099063 |
| RPS6KA1        | 1145,67 | 0,55  | 0,384044 | 1,422327 | 0,154931 | 0,5099063 |
| CTD-2287O16.1  | 0,90    | 2,50  | 1,757503 | 1,422121 | 0,154991 | NA        |
| NLRC4          | 126,43  | -1,28 | 0,902885 | -1,42198 | 0,155033 | 0,5099617 |
| RP11-374P20.5  | 59,96   | -1,39 | 0,978068 | -1,42196 | 0,155039 | 0,5099617 |
| GTDC1          | 58,34   | 1,24  | 0,874052 | 1,421916 | 0,155051 | 0,5099617 |
| RP11-506N2.1   | 60,47   | -1,31 | 0,922    | -1,42183 | 0,155077 | 0,5099617 |
| KIAA0922       | 686,46  | 0,74  | 0,520573 | 1,421796 | 0,155085 | 0,5099617 |
| CNPY1          | 1,86    | -2,05 | 1,443672 | -1,42168 | 0,155119 | NA        |
| G2E3           | 152,05  | -0,59 | 0,413656 | -1,42131 | 0,155226 | 0,5101761 |
| RP11-783K16.14 | 1,30    | -3,31 | 2,330336 | -1,4213  | 0,155229 | NA        |
| COX6B2         | 24,73   | -0,94 | 0,664573 | -1,42127 | 0,155239 | 0,5101761 |

|               |         |       |          |          |          |           |
|---------------|---------|-------|----------|----------|----------|-----------|
| IMMP1L        | 60,61   | 1,46  | 1,02818  | 1,421241 | 0,155247 | 0,5101761 |
| GAS7          | 696,24  | -0,72 | 0,506615 | -1,42116 | 0,15527  | 0,5101761 |
| EMSY          | 207,60  | 1,04  | 0,729658 | 1,4211   | 0,155288 | 0,5101761 |
| RP11-136H19.1 | 7,42    | 1,54  | 1,085821 | 1,420661 | 0,155415 | 0,5105056 |
| MIIP          | 278,32  | -0,76 | 0,536355 | -1,42043 | 0,155483 | 0,5106379 |
| SERPINF2      | 18,32   | 1,58  | 1,112989 | 1,420114 | 0,155575 | 0,5108481 |
| KIFC2         | 10,33   | 3,26  | 2,297595 | 1,419755 | 0,155679 | 0,5111006 |
| DPEP2         | 315,86  | 0,82  | 0,579999 | 1,419449 | 0,155768 | 0,5112527 |
| KHDC1         | 16,26   | -1,09 | 0,76455  | -1,41925 | 0,155826 | 0,5112527 |
| CTC-241N9.1   | 1,61    | 3,31  | 2,333655 | 1,419179 | 0,155847 | NA        |
| AC104024.1    | 4,82    | -1,20 | 0,847657 | -1,41916 | 0,155852 | 0,5112527 |
| RP11-10E18.6  | 11,39   | -1,76 | 1,23967  | -1,41913 | 0,155862 | 0,5112527 |
| NRXN1         | 263,95  | -1,91 | 1,348898 | -1,41894 | 0,155917 | 0,5112527 |
| RP11-42O15.3  | 5,62    | -1,10 | 0,778478 | -1,4188  | 0,155956 | 0,5112527 |
| AC008985.1    | 29,32   | -1,24 | 0,875478 | -1,41879 | 0,155961 | 0,5112527 |
| ZNF786        | 26,17   | 1,44  | 1,016997 | 1,418786 | 0,155961 | 0,5112527 |
| AC015922.6    | 3,66    | -2,13 | 1,500381 | -1,41874 | 0,155975 | NA        |
| KAT2B         | 300,58  | 1,00  | 0,703585 | 1,418714 | 0,155982 | 0,5112527 |
| RP1-56L9.7    | 17,72   | 1,11  | 0,782972 | 1,418653 | 0,156    | 0,5112527 |
| CTD-2545M3.2  | 33,72   | -0,83 | 0,583546 | -1,41846 | 0,156057 | 0,5112806 |
| PLGRKT        | 136,22  | 1,17  | 0,82199  | 1,418436 | 0,156064 | 0,5112806 |
| CPT1A         | 513,82  | 0,79  | 0,558763 | 1,418316 | 0,156099 | 0,5113055 |
| TAF9B         | 164,63  | -0,82 | 0,577432 | -1,41793 | 0,156211 | 0,5115825 |
| GPKOW         | 94,33   | -1,77 | 1,252058 | -1,41764 | 0,156296 | 0,5116184 |
| ENY2          | 815,23  | -0,37 | 0,261039 | -1,41751 | 0,156334 | 0,5116184 |
| RP11-272L14.3 | 14,54   | 1,59  | 1,123407 | 1,417485 | 0,156341 | 0,5116184 |
| P2RX4         | 470,58  | -0,63 | 0,446491 | -1,41744 | 0,156353 | 0,5116184 |
| RP11-513I15.6 | 630,81  | 1,10  | 0,776492 | 1,417397 | 0,156367 | 0,5116184 |
| ARMC7         | 96,42   | 1,56  | 1,103926 | 1,417329 | 0,156387 | 0,5116184 |
| RP11-419C5.1  | 146,11  | 1,19  | 0,839624 | 1,416776 | 0,156548 | 0,5119911 |
| NDUFA12       | 795,09  | 0,41  | 0,287125 | 1,416751 | 0,156556 | 0,5119911 |
| EIF4H         | 1516,16 | 0,52  | 0,364237 | 1,416565 | 0,15661  | 0,5120791 |
| WFDC3         | 6,98    | -2,27 | 1,601524 | -1,41636 | 0,156671 | 0,5121615 |
| STAT4         | 59,17   | -1,38 | 0,97441  | -1,41605 | 0,156762 | 0,5121615 |
| RP11-29H23.4  | 4,40    | 4,77  | 3,372092 | 1,415978 | 0,156782 | 0,5121615 |
| ABCA7         | 515,51  | -0,58 | 0,408822 | -1,41594 | 0,156794 | 0,5121615 |
| SMIM4         | 64,18   | -0,90 | 0,632225 | -1,4159  | 0,156804 | 0,5121615 |
| SERF1A        | 18,40   | -1,62 | 1,144689 | -1,41583 | 0,156825 | 0,5121615 |
| RP11-182L21.6 | 46,78   | 1,27  | 0,899781 | 1,415821 | 0,156828 | 0,5121615 |
| RP11-778D9.8  | 4,79    | -1,47 | 1,04089  | -1,41565 | 0,156877 | 0,5122331 |
| SCN2B         | 10,25   | -1,26 | 0,892621 | -1,4152  | 0,157009 | 0,5125186 |
| ILKAP         | 436,46  | -0,70 | 0,494051 | -1,41517 | 0,15702  | 0,5125186 |
| RP5-1050D4.3  | 11,65   | -1,08 | 0,761777 | -1,41488 | 0,157104 | 0,5127023 |
| AGK           | 202,61  | -1,40 | 0,986688 | -1,41456 | 0,157196 | 0,5129147 |
| AP000688.11   | 0,81    | -3,45 | 2,43611  | -1,41453 | 0,157207 | NA        |
| RP11-449P15.2 | 48,83   | -1,24 | 0,877212 | -1,41436 | 0,157255 | 0,5129944 |
| RBKS          | 76,69   | -0,94 | 0,666992 | -1,41429 | 0,157276 | 0,5129944 |
| POPDC2        | 5,19    | 2,14  | 1,511505 | 1,413895 | 0,157393 | 0,5132855 |
| CTD-2073O6.1  | 0,48    | -1,93 | 1,363941 | -1,4137  | 0,15745  | NA        |
| CTDSP1        | 699,46  | -0,57 | 0,400605 | -1,41328 | 0,157573 | 0,5136232 |

|               |          |       |          |          |          |           |
|---------------|----------|-------|----------|----------|----------|-----------|
| IER3          | 435,62   | -1,07 | 0,757998 | -1,41327 | 0,157576 | 0,5136232 |
| RP11-550P23.3 | 7,46     | -1,16 | 0,823365 | -1,4131  | 0,157628 | 0,5136232 |
| SNORA12       | 5,32     | -1,29 | 0,910966 | -1,41307 | 0,157634 | 0,5136232 |
| SDF4          | 167,81   | -0,90 | 0,640234 | -1,41307 | 0,157634 | 0,5136232 |
| RP11-251P6.1  | 1,29     | -1,56 | 1,104947 | -1,41292 | 0,15768  | NA        |
| CARHSP1       | 135,30   | -0,93 | 0,658232 | -1,41288 | 0,15769  | 0,5136923 |
| PAQR8         | 196,38   | -1,03 | 0,731946 | -1,41281 | 0,157711 | 0,5136923 |
| CTC-527H23.2  | 1,28     | -5,15 | 3,645331 | -1,41214 | 0,157909 | NA        |
| CMP21-T1230.1 | 5,41     | -1,48 | 1,04881  | -1,41209 | 0,157923 | 0,5142286 |
| IFT27         | 171,16   | 0,80  | 0,565941 | 1,412065 | 0,157931 | 0,5142286 |
| C4orf36       | 1,88     | 2,71  | 1,917981 | 1,411814 | 0,158005 | NA        |
| PLPP7         | 7,98     | -1,32 | 0,935096 | -1,41172 | 0,158034 | 0,5144732 |
| DDHD2         | 154,53   | 1,03  | 0,733052 | 1,411515 | 0,158093 | 0,5145759 |
| PLEKHH3       | 17,56    | 1,45  | 1,030785 | 1,411106 | 0,158213 | 0,5148783 |
| TTYH3         | 146,12   | 0,65  | 0,461865 | 1,410804 | 0,158303 | 0,5149576 |
| RP13-104F24.3 | 188,14   | 1,19  | 0,846809 | 1,410801 | 0,158303 | 0,5149576 |
| RP1-298J18.1  | 4,10     | -0,93 | 0,661004 | -1,41074 | 0,158321 | 0,5149576 |
| MROH7-TTC4    | 0,58     | -2,94 | 2,085405 | -1,41067 | 0,158342 | NA        |
| PRDX4         | 230,41   | -1,14 | 0,808502 | -1,4105  | 0,158391 | 0,515096  |
| POP4          | 391,77   | 0,91  | 0,641978 | 1,410202 | 0,15848  | 0,5152958 |
| EVPL          | 3,77     | -2,34 | 1,661951 | -1,41009 | 0,158515 | 0,5153053 |
| SCAI          | 75,95    | -1,03 | 0,727832 | -1,41    | 0,158538 | 0,5153053 |
| TRIM68        | 5,39     | 1,58  | 1,122776 | 1,409832 | 0,158589 | 0,5153806 |
| RP11-195B3.1  | 1,77     | 3,45  | 2,446969 | 1,409413 | 0,158713 | NA        |
| CTC-543D15.1  | 1,89     | -1,37 | 0,973358 | -1,40933 | 0,158736 | NA        |
| NUGGC         | 38,64    | -0,92 | 0,651959 | -1,40918 | 0,158781 | 0,5159141 |
| RP6-159A1.4   | 267,30   | -1,07 | 0,757506 | -1,40907 | 0,158815 | 0,5159324 |
| ULK2          | 235,83   | -0,99 | 0,70033  | -1,40871 | 0,15892  | 0,5161019 |
| MYL6          | 15134,78 | -0,22 | 0,153348 | -1,40863 | 0,158944 | 0,5161019 |
| KIF14         | 30,74    | -1,39 | 0,988805 | -1,40858 | 0,158959 | 0,5161019 |
| RPL9          | 7166,92  | -0,31 | 0,21761  | -1,40852 | 0,158978 | 0,5161019 |
| LEMD3         | 227,97   | -0,90 | 0,638106 | -1,40817 | 0,159081 | 0,5163459 |
| RP11-16E18.3  | 8,68     | 2,90  | 2,057884 | 1,407733 | 0,15921  | 0,5165259 |
| FKBP6         | 7,07     | -4,42 | 3,140414 | -1,40769 | 0,159222 | 0,5165259 |
| PRKY          | 252,89   | -1,97 | 1,396157 | -1,40747 | 0,159289 | 0,5165259 |
| RP11-293M10.6 | 11,38    | 1,55  | 1,100825 | 1,407385 | 0,159313 | 0,5165259 |
| RP11-626G11.1 | 9,18     | -1,43 | 1,015798 | -1,40733 | 0,159329 | 0,5165259 |
| RP11-266L9.2  | 44,31    | -1,56 | 1,107713 | -1,40726 | 0,159352 | 0,5165259 |
| KLF10         | 1195,92  | 0,49  | 0,349338 | 1,407243 | 0,159355 | 0,5165259 |
| RP1-228H13.2  | 10,67    | 2,04  | 1,452739 | 1,407101 | 0,159398 | 0,5165259 |
| RNU6-469P     | 3,12     | 2,39  | 1,698552 | 1,407044 | 0,159414 | NA        |
| RP4-669L17.8  | 2,92     | 4,18  | 2,971878 | 1,406965 | 0,159438 | NA        |
| FLI1          | 511,59   | 0,60  | 0,424086 | 1,406791 | 0,159489 | 0,5165259 |
| ZFR           | 1051,68  | 0,71  | 0,501891 | 1,406736 | 0,159506 | 0,5165259 |
| C9orf147      | 70,10    | 1,21  | 0,861147 | 1,4067   | 0,159516 | 0,5165259 |
| RP11-930O11.2 | 15,15    | -2,27 | 1,612704 | -1,40665 | 0,159532 | 0,5165259 |
| RP11-302M6.5  | 4,37     | 4,76  | 3,385453 | 1,406601 | 0,159546 | 0,5165259 |
| NPAP1         | 58,61    | -0,70 | 0,501039 | -1,40653 | 0,159566 | 0,5165259 |
| VPS13A        | 253,38   | -1,11 | 0,786962 | -1,40652 | 0,159569 | 0,5165259 |
| DDRGK1        | 264,92   | -0,72 | 0,510335 | -1,40639 | 0,159608 | 0,5165259 |



|               |         |       |          |          |          |           |
|---------------|---------|-------|----------|----------|----------|-----------|
| RP11-637O19.2 | 3,13    | 1,45  | 1,031357 | 1,406206 | 0,159663 | NA        |
| LIF           | 2,28    | 3,82  | 2,716194 | 1,406134 | 0,159684 | NA        |
| ATG9A         | 275,68  | -1,24 | 0,881792 | -1,4061  | 0,159694 | 0,5165259 |
| RP5-1049G16.4 | 5,19    | 3,85  | 2,736207 | 1,405989 | 0,159727 | 0,5165259 |
| RBM14         | 357,44  | -0,62 | 0,442006 | -1,40591 | 0,159752 | 0,5165259 |
| OSBPL1A       | 190,88  | -1,00 | 0,711256 | -1,40585 | 0,15977  | 0,5165259 |
| RP11-305O6.4  | 22,67   | 1,61  | 1,147291 | 1,405634 | 0,159833 | 0,5165259 |
| FAM181B       | 10,29   | 1,65  | 1,173002 | 1,405565 | 0,159853 | 0,5165259 |
| RP11-806J6.1  | 3,76    | 2,12  | 1,508635 | 1,405429 | 0,159894 | NA        |
| IQCC          | 9,76    | -0,92 | 0,656695 | -1,40542 | 0,159896 | 0,5165259 |
| RP11-73M11.3  | 4,52    | -1,36 | 0,965693 | -1,40542 | 0,159897 | 0,5165259 |
| DUS2          | 135,64  | -1,36 | 0,965589 | -1,40529 | 0,159934 | 0,5165259 |
| RP11-165M1.1  | 17,82   | 1,40  | 0,999755 | 1,405231 | 0,159952 | 0,5165259 |
| SEPHS1        | 182,13  | 1,10  | 0,77941  | 1,405133 | 0,159982 | 0,5165259 |
| STXBP2        | 922,21  | -0,46 | 0,330267 | -1,40491 | 0,160047 | 0,5165259 |
| B3GNTL1       | 144,32  | 1,00  | 0,709934 | 1,404907 | 0,160049 | 0,5165259 |
| RN7SL791P     | 9,36    | 2,21  | 1,569895 | 1,40484  | 0,160069 | 0,5165259 |
| AC010127.5    | 19,00   | 3,01  | 2,142226 | 1,404838 | 0,16007  | 0,5165259 |
| PPP1R16A      | 103,01  | 1,13  | 0,804585 | 1,404831 | 0,160071 | 0,5165259 |
| PRR26         | 5,42    | -2,63 | 1,87205  | -1,40479 | 0,160085 | 0,5165259 |
| RP11-305L7.7  | 24,96   | -1,21 | 0,859319 | -1,40475 | 0,160095 | 0,5165259 |
| IMPA1         | 87,01   | 1,15  | 0,821572 | 1,404684 | 0,160115 | 0,5165259 |
| AL591893.1    | 91,76   | -0,90 | 0,641488 | -1,40456 | 0,160152 | 0,5165259 |
| EFNA4         | 42,80   | -2,42 | 1,722813 | -1,40452 | 0,160163 | 0,5165259 |
| MOB3C         | 49,36   | 1,91  | 1,358661 | 1,404369 | 0,160209 | 0,5165549 |
| RP11-2B6.2    | 25,48   | 2,69  | 1,914448 | 1,404302 | 0,160229 | 0,5165549 |
| RP5-916O11.2  | 12,81   | -1,67 | 1,192147 | -1,40421 | 0,160256 | 0,5165549 |
| PPIAP9        | 1,22    | 2,23  | 1,591537 | 1,40401  | 0,160316 | NA        |
| HSPA12B       | 4,93    | 4,36  | 3,102456 | 1,40394  | 0,160337 | 0,5167232 |
| RP4-569M23.4  | 6,01    | 5,23  | 3,722202 | 1,403851 | 0,160363 | 0,5167232 |
| AC114730.2    | 1,65    | 2,12  | 1,511624 | 1,403661 | 0,16042  | NA        |
| TRAIP         | 2,22    | 3,82  | 2,72267  | 1,403365 | 0,160508 | NA        |
| C19orf70      | 586,12  | -0,45 | 0,322038 | -1,40332 | 0,16052  | 0,5167828 |
| LIPG          | 115,05  | -0,75 | 0,531228 | -1,40327 | 0,160535 | 0,5167828 |
| NAGK          | 2018,06 | -0,37 | 0,262648 | -1,40316 | 0,16057  | 0,5167828 |
| TMEM209       | 73,52   | 0,94  | 0,672765 | 1,40315  | 0,160572 | 0,5167828 |
| ZNF174        | 16,26   | 2,43  | 1,734955 | 1,403069 | 0,160596 | 0,5167828 |
| CTD-3222D19.4 | 20,83   | -1,46 | 1,039353 | -1,40304 | 0,160604 | 0,5167828 |
| SLC2A13       | 21,66   | 1,56  | 1,114787 | 1,403018 | 0,160612 | 0,5167828 |
| BTN3A1        | 535,70  | -0,83 | 0,59154  | -1,40301 | 0,160613 | 0,5167828 |
| DGAT1         | 636,91  | -0,66 | 0,472915 | -1,40295 | 0,160632 | 0,5167828 |
| RP5-857K21.11 | 54,47   | -0,55 | 0,393168 | -1,40275 | 0,160691 | 0,5168839 |
| CCDC191       | 56,97   | -1,34 | 0,952412 | -1,40265 | 0,16072  | 0,5168869 |
| FAM46C        | 90,44   | 1,64  | 1,168997 | 1,402297 | 0,160827 | 0,5169888 |
| TIPARP        | 754,65  | 0,92  | 0,654197 | 1,402283 | 0,160831 | 0,5169888 |
| TARDBP        | 1106,78 | -0,47 | 0,334675 | -1,40227 | 0,160835 | 0,5169888 |
| RP11-23J9.5   | 4,88    | -3,13 | 2,22936  | -1,40214 | 0,160874 | 0,5170239 |
| CTB-55O6.12   | 146,77  | -1,29 | 0,92271  | -1,40204 | 0,160904 | 0,5170322 |
| CGREF1        | 1,13    | -2,43 | 1,731394 | -1,40172 | 0,160998 | NA        |
| SNX1          | 721,78  | -0,67 | 0,475722 | -1,40171 | 0,161002 | 0,5172588 |

|               |         |       |          |          |          |           |
|---------------|---------|-------|----------|----------|----------|-----------|
| CCPG1         | 482,98  | -0,65 | 0,460836 | -1,40161 | 0,161032 | 0,5172638 |
| ARL4A         | 863,36  | 0,64  | 0,456202 | 1,401352 | 0,161109 | 0,5174229 |
| IL6R          | 2127,93 | 0,33  | 0,236321 | 1,401158 | 0,161167 | 0,5174576 |
| RP11-546D6.3  | 24,43   | -2,37 | 1,689701 | -1,40113 | 0,161175 | 0,5174576 |
| C11orf68      | 81,85   | 1,52  | 1,081637 | 1,400989 | 0,161217 | 0,5175033 |
| LRRFIP2       | 435,33  | -0,68 | 0,485527 | -1,40055 | 0,161347 | 0,5178313 |
| RP11-118B22.2 | 11,85   | 1,71  | 1,219298 | 1,40029  | 0,161427 | 0,517996  |
| RP11-160C18.2 | 1,92    | -3,25 | 2,319699 | -1,40028 | 0,161429 | NA        |
| RP11-178L8.8  | 1,34    | 3,05  | 2,181102 | 1,400016 | 0,161509 | NA        |
| FUK           | 90,51   | -0,91 | 0,649728 | -1,40002 | 0,161509 | 0,517996  |
| SNAI1         | 65,77   | 1,98  | 1,41333  | 1,399823 | 0,161566 | 0,517996  |
| KRI1          | 222,59  | -0,72 | 0,516147 | -1,39976 | 0,161585 | 0,517996  |
| DNAJC25       | 93,79   | 1,10  | 0,785027 | 1,3997   | 0,161603 | 0,517996  |
| RP11-546O6.4  | 27,63   | -1,44 | 1,030428 | -1,39967 | 0,161612 | 0,517996  |
| RP1-101G11.3  | 24,32   | -0,88 | 0,632264 | -1,39966 | 0,161616 | 0,517996  |
| CLYBL         | 34,50   | -2,08 | 1,487168 | -1,39958 | 0,16164  | 0,517996  |
| RP11-269F19.2 | 1,61    | 3,30  | 2,354984 | 1,399533 | 0,161653 | NA        |
| MUC6          | 27,08   | -2,97 | 2,12525  | -1,39948 | 0,16167  | 0,517996  |
| CYP2D7P1      | 36,21   | 2,13  | 1,519971 | 1,399453 | 0,161677 | 0,517996  |
| FBLIM1        | 21,32   | -1,25 | 0,895289 | -1,39935 | 0,161707 | 0,518004  |
| DLGAP1        | 27,90   | -1,39 | 0,990048 | -1,39915 | 0,161768 | 0,5181084 |
| PLIN4         | 2,99    | 4,21  | 3,009946 | 1,399122 | 0,161777 | NA        |
| JAGN1         | 233,83  | 1,10  | 0,788717 | 1,398228 | 0,162045 | 0,5187566 |
| ZDHHC20       | 422,34  | -0,94 | 0,669329 | -1,39819 | 0,162056 | 0,5187566 |
| MAPK9         | 201,12  | -1,29 | 0,922472 | -1,39801 | 0,16211  | 0,5187566 |
| DHRS9         | 213,89  | 1,54  | 1,099305 | 1,397986 | 0,162117 | 0,5187566 |
| ARL5B         | 472,82  | 0,90  | 0,642746 | 1,39798  | 0,162119 | 0,5187566 |
| RP1-301L19.1  | 1,20    | -5,10 | 3,649217 | -1,39796 | 0,162125 | NA        |
| RP11-513O17.3 | 2,68    | -1,82 | 1,300255 | -1,39793 | 0,162136 | NA        |
| GDPD3         | 16,14   | -1,83 | 1,309932 | -1,39782 | 0,162166 | 0,5187566 |
| CTC-205M6.2   | 35,71   | 1,57  | 1,124662 | 1,397779 | 0,162179 | 0,5187566 |
| LTBP4         | 106,05  | 1,00  | 0,718158 | 1,397459 | 0,162276 | 0,5187566 |
| HNRNPAB       | 247,06  | 0,75  | 0,539658 | 1,397178 | 0,16236  | 0,5187566 |
| NANOGP4       | 7,28    | 3,65  | 2,613314 | 1,39711  | 0,162381 | 0,5187566 |
| CTB-43P18.1   | 101,28  | -1,01 | 0,721441 | -1,39709 | 0,162388 | 0,5187566 |
| CTD-2313J17.1 | 12,15   | 1,77  | 1,264807 | 1,397085 | 0,162388 | 0,5187566 |
| NPM1          | 3917,55 | 0,37  | 0,265598 | 1,396703 | 0,162503 | 0,5187566 |
| NDUFC1        | 278,95  | -0,56 | 0,402261 | -1,3967  | 0,162503 | 0,5187566 |
| NUP160        | 256,18  | 0,91  | 0,655052 | 1,39666  | 0,162516 | 0,5187566 |
| PRKCDBP       | 120,05  | -1,58 | 1,133334 | -1,39666 | 0,162516 | 0,5187566 |
| ATP10D        | 284,96  | 0,83  | 0,592173 | 1,396605 | 0,162532 | 0,5187566 |
| CTA-797E19.1  | 30,44   | 2,84  | 2,030629 | 1,396568 | 0,162544 | 0,5187566 |
| POLR1C        | 334,20  | 1,09  | 0,779035 | 1,396567 | 0,162544 | 0,5187566 |
| TMEM87B       | 213,45  | -0,91 | 0,652544 | -1,39656 | 0,162547 | 0,5187566 |
| GDPD1         | 42,79   | 1,37  | 0,978997 | 1,396527 | 0,162556 | 0,5187566 |
| RP11-863P13.3 | 40,80   | 0,99  | 0,708061 | 1,396396 | 0,162595 | 0,5187939 |
| PEX5L         | 5,10    | -1,84 | 1,316281 | -1,39627 | 0,162633 | 0,5188246 |
| ATP6V0D1      | 2619,58 | -0,42 | 0,299322 | -1,39617 | 0,162664 | 0,5188357 |
| RNF165        | 8,25    | -1,23 | 0,882127 | -1,39599 | 0,162719 | 0,5189201 |
| RP11-225N10.1 | 9,77    | -1,94 | 1,387324 | -1,39585 | 0,162761 | 0,5189663 |

|               |          |       |          |          |          |           |
|---------------|----------|-------|----------|----------|----------|-----------|
| RP11-876K22.2 | 3,96     | -4,25 | 3,043677 | -1,39572 | 0,1628   | 0,5190014 |
| RP5-1044O17.1 | 22,48    | -0,78 | 0,561124 | -1,39544 | 0,162883 | 0,5191565 |
| RP11-212P7.1  | 0,87     | 2,43  | 1,738949 | 1,395371 | 0,162904 | NA        |
| DCAF11        | 515,36   | -0,66 | 0,473789 | -1,39537 | 0,162904 | 0,5191565 |
| CTD-2267D19.3 | 2,95     | 4,19  | 3,006442 | 1,395212 | 0,162952 | NA        |
| RPS27A        | 5812,55  | -0,28 | 0,199443 | -1,3952  | 0,162957 | 0,5191891 |
| RP11-687F6.5  | 2,86     | -1,84 | 1,320433 | -1,39515 | 0,16297  | NA        |
| AC074366.3    | 15,79    | 0,97  | 0,697679 | 1,395151 | 0,16297  | 0,5191891 |
| RSF1          | 847,96   | -0,56 | 0,403618 | -1,39477 | 0,163085 | 0,5193941 |
| RP11-722G7.1  | 9,04     | -1,12 | 0,80454  | -1,39475 | 0,163091 | 0,5193941 |
| RP11-56N19.5  | 3,20     | -1,26 | 0,900036 | -1,39457 | 0,163145 | NA        |
| TRIM39        | 124,47   | 1,21  | 0,867514 | 1,39451  | 0,163164 | 0,5195377 |
| ARHGEF18      | 130,36   | -1,18 | 0,843594 | -1,39441 | 0,163194 | 0,5195455 |
| RP11-124A7.2  | 1,57     | -1,78 | 1,277032 | -1,39406 | 0,1633   | NA        |
| DSTN          | 359,16   | 0,69  | 0,492539 | 1,394048 | 0,163303 | 0,5196893 |
| RP11-348A11.5 | 20,09    | -3,10 | 2,226134 | -1,394   | 0,163318 | 0,5196893 |
| AAED1         | 309,45   | 0,95  | 0,678018 | 1,393982 | 0,163323 | 0,5196893 |
| RN7SL774P     | 5,65     | 1,33  | 0,954076 | 1,393855 | 0,163361 | 0,5197227 |
| ATP6V0A4      | 1,14     | -3,56 | 2,556603 | -1,39367 | 0,163418 | NA        |
| NFKBIA        | 14027,17 | 0,40  | 0,287719 | 1,393665 | 0,163419 | 0,5198167 |
| CTC-467M3.1   | 2,83     | -2,85 | 2,042795 | -1,39363 | 0,163429 | NA        |
| AC083875.2    | 1,38     | -4,55 | 3,261871 | -1,39356 | 0,16345  | NA        |
| PMS2L1        | 56,67    | -1,54 | 1,103354 | -1,39339 | 0,163502 | 0,5199058 |
| COPS4         | 424,31   | -0,97 | 0,693254 | -1,39324 | 0,163546 | 0,5199058 |
| RP11-112L7.1  | 6,97     | -1,03 | 0,738044 | -1,39314 | 0,163577 | 0,5199058 |
| RP11-32P22.1  | 2,05     | 3,66  | 2,630251 | 1,393055 | 0,163603 | NA        |
| RPL26         | 3403,97  | -0,25 | 0,181779 | -1,39299 | 0,163622 | 0,5199058 |
| RP5-898J17.1  | 7,67     | -2,27 | 1,628016 | -1,39297 | 0,16363  | 0,5199058 |
| SPDYE3        | 14,68    | 1,31  | 0,941765 | 1,392933 | 0,16364  | 0,5199058 |
| MEST          | 18,70    | -1,92 | 1,376488 | -1,39293 | 0,163642 | 0,5199058 |
| POM121L9P     | 2,06     | -3,42 | 2,459361 | -1,39245 | 0,163787 | NA        |
| GLT1D1        | 14,84    | -2,35 | 1,68576  | -1,39235 | 0,163816 | 0,5203676 |
| RTN4RL2       | 3,03     | 4,10  | 2,946845 | 1,392289 | 0,163835 | NA        |
| RTFDC1        | 964,94   | 0,58  | 0,419734 | 1,39204  | 0,16391  | 0,5204404 |
| MGC2752       | 13,06    | -2,04 | 1,468257 | -1,39196 | 0,163935 | 0,5204404 |
| PRELID3B      | 496,08   | 0,64  | 0,460994 | 1,391939 | 0,163941 | 0,5204404 |
| ZDHHC23       | 4,11     | 3,43  | 2,465676 | 1,391907 | 0,163951 | 0,5204404 |
| GALNT1        | 801,91   | 0,68  | 0,485955 | 1,391672 | 0,164022 | 0,5204881 |
| IZUMO2        | 4,20     | -1,28 | 0,92102  | -1,3916  | 0,164043 | 0,5204881 |
| AK3           | 152,88   | -1,11 | 0,79428  | -1,39158 | 0,16405  | 0,5204881 |
| RP5-828H9.3   | 3,50     | -2,00 | 1,439678 | -1,39144 | 0,164091 | NA        |
| AP003419.16   | 21,93    | -1,22 | 0,88035  | -1,3914  | 0,164105 | 0,5205564 |
| SNRPD1        | 636,36   | -0,47 | 0,336067 | -1,39127 | 0,164143 | 0,5205564 |
| RP11-219A15.1 | 6,41     | -2,86 | 2,05587  | -1,39123 | 0,164155 | 0,5205564 |
| HIST1H2BH     | 2,09     | 3,70  | 2,657721 | 1,391157 | 0,164178 | NA        |
| ALDH1B1       | 29,85    | 1,19  | 0,857656 | 1,390946 | 0,164242 | 0,520699  |
| NSF           | 451,12   | 0,83  | 0,598924 | 1,390815 | 0,164282 | 0,520699  |
| RP11-659E9.2  | 5,57     | -1,00 | 0,719461 | -1,39081 | 0,164284 | 0,520699  |
| NDUFAF1       | 126,85   | 1,47  | 1,057603 | 1,39061  | 0,164344 | 0,5207226 |
| NAP1L5        | 3,94     | 2,48  | 1,785263 | 1,390598 | 0,164347 | 0,5207226 |

|                |         |       |          |          |          |           |
|----------------|---------|-------|----------|----------|----------|-----------|
| FBXO16         | 10,68   | -1,33 | 0,959171 | -1,3901  | 0,164498 | 0,5210646 |
| CLLU1          | 6,66    | 1,67  | 1,199738 | 1,390058 | 0,164511 | 0,5210646 |
| MAPK8IP2       | 9,14    | -0,93 | 0,667794 | -1,38996 | 0,164541 | 0,5210711 |
| CTA-392E5.1    | 0,91    | -4,48 | 3,221479 | -1,38981 | 0,164587 | NA        |
| MARVELD1       | 364,29  | -0,74 | 0,530498 | -1,38968 | 0,164625 | 0,5211288 |
| RP11-804N13.1  | 1,80    | 2,88  | 2,073801 | 1,38966  | 0,164632 | NA        |
| MMAA           | 67,39   | 1,78  | 1,281679 | 1,389627 | 0,164642 | 0,5211288 |
| PDIA5          | 35,51   | 1,56  | 1,125084 | 1,389622 | 0,164644 | 0,5211288 |
| KIZ            | 119,10  | 1,53  | 1,104431 | 1,389199 | 0,164772 | 0,5213768 |
| STK17B         | 5229,85 | 0,31  | 0,223037 | 1,38918  | 0,164778 | 0,5213768 |
| UBR4           | 1023,58 | -0,45 | 0,327371 | -1,38906 | 0,164814 | 0,5214028 |
| RPLP1P11       | 1,52    | 3,24  | 2,333343 | 1,388747 | 0,16491  | NA        |
| XRCC4          | 101,43  | -1,17 | 0,845637 | -1,38862 | 0,164948 | 0,5217358 |
| SMIM22         | 6,64    | -1,40 | 1,006692 | -1,38832 | 0,16504  | 0,5218722 |
| PCDH9          | 56,41   | -0,91 | 0,657476 | -1,38825 | 0,16506  | 0,5218722 |
| CCDC81         | 6,58    | -1,09 | 0,787151 | -1,38818 | 0,165083 | 0,5218722 |
| CTD-2258A20.5  | 0,71    | -3,80 | 2,734519 | -1,38816 | 0,16509  | NA        |
| CTC-564N23.2   | 2,61    | 3,43  | 2,471393 | 1,388083 | 0,165112 | NA        |
| CTB-50L17.9    | 2,46    | -2,68 | 1,930862 | -1,38807 | 0,165115 | NA        |
| CCND2          | 760,25  | -0,95 | 0,682607 | -1,38778 | 0,165205 | 0,5218722 |
| HMG20B         | 230,59  | -0,73 | 0,526817 | -1,38774 | 0,165215 | 0,5218722 |
| CTD-2553L13.5  | 41,71   | 1,00  | 0,719653 | 1,387741 | 0,165216 | 0,5218722 |
| AC116366.7     | 60,85   | 2,35  | 1,69561  | 1,387704 | 0,165227 | 0,5218722 |
| UHRF1BP1       | 273,76  | -1,15 | 0,831401 | -1,38756 | 0,16527  | 0,5218722 |
| LAMC1          | 2,49    | 3,84  | 2,768322 | 1,387558 | 0,165272 | NA        |
| NDN            | 11,46   | 2,46  | 1,770639 | 1,387528 | 0,165281 | 0,5218722 |
| CTC-490E21.14  | 15,51   | -1,56 | 1,125971 | -1,38745 | 0,165304 | 0,5218722 |
| IQGAP1         | 3983,89 | -0,28 | 0,204778 | -1,3874  | 0,165319 | 0,5218722 |
| ATPAF1         | 192,79  | 1,22  | 0,882027 | 1,387375 | 0,165327 | 0,5218722 |
| RP5-1069C8.2   | 189,38  | -0,84 | 0,604174 | -1,38718 | 0,165385 | 0,521967  |
| RP11-255M2.3   | 14,51   | -1,75 | 1,263348 | -1,38696 | 0,165454 | 0,5220318 |
| TNFAIP1        | 51,94   | 1,43  | 1,03446  | 1,386933 | 0,165462 | 0,5220318 |
| CTD-2547E10.2  | 682,07  | 0,68  | 0,489872 | 1,386764 | 0,165514 | 0,5221061 |
| ARHGAP19-SLIT1 | 45,27   | -2,41 | 1,741211 | -1,38665 | 0,165549 | 0,5221293 |
| RNU6-20P       | 0,65    | -2,69 | 1,941515 | -1,38659 | 0,165568 | NA        |
| FOXN1          | 1,16    | -5,06 | 3,64908  | -1,3865  | 0,165596 | NA        |
| B3GNT4         | 9,23    | 2,65  | 1,908233 | 1,386383 | 0,16563  | 0,5222157 |
| YBX1           | 3192,00 | 0,22  | 0,158429 | 1,386374 | 0,165633 | 0,5222157 |
| LINC01176      | 61,31   | -1,74 | 1,251728 | -1,38622 | 0,165679 | 0,5222725 |
| SPAM1          | 0,92    | -4,42 | 3,186638 | -1,38608 | 0,165722 | NA        |
| CHI3L2         | 32,02   | 1,11  | 0,8031   | 1,385724 | 0,165831 | 0,5225321 |
| RN7SL310P      | 1,09    | 2,78  | 2,006449 | 1,385702 | 0,165838 | NA        |
| SNORD104       | 8,05    | -0,86 | 0,623752 | -1,38565 | 0,165853 | 0,5225321 |
| KLHL32         | 11,02   | -3,75 | 2,706719 | -1,38559 | 0,165871 | 0,5225321 |
| MAGEA10        | 13,54   | -1,52 | 1,100569 | -1,38558 | 0,165874 | 0,5225321 |
| METTL7A        | 399,83  | -0,48 | 0,34437  | -1,38549 | 0,165901 | 0,5225321 |
| PDZD8          | 434,50  | 0,94  | 0,677556 | 1,38532  | 0,165955 | 0,5226109 |
| SHOC2          | 574,20  | -0,53 | 0,382193 | -1,38521 | 0,165987 | 0,5226247 |
| PKD1           | 55,52   | -1,37 | 0,989743 | -1,38487 | 0,166093 | 0,5228711 |
| RN7SL523P      | 0,78    | 2,29  | 1,652707 | 1,384724 | 0,166137 | NA        |

|               |         |       |          |          |          |           |
|---------------|---------|-------|----------|----------|----------|-----------|
| RP1-40E16.2   | 4,90    | -0,98 | 0,706527 | -1,3846  | 0,166174 | 0,5230368 |
| CSE1L         | 226,97  | 0,82  | 0,594168 | 1,384488 | 0,166209 | 0,5230581 |
| MAEL          | 2,37    | -1,98 | 1,432661 | -1,38445 | 0,166222 | NA        |
| AC107081.5    | 19,74   | 1,41  | 1,020203 | 1,384387 | 0,16624  | 0,5230674 |
| SLC5A3        | 217,38  | -1,32 | 0,953957 | -1,38409 | 0,16633  | 0,5231632 |
| CD6           | 73,32   | -0,90 | 0,648124 | -1,38402 | 0,166351 | 0,5231632 |
| ZGPAT         | 249,48  | 1,15  | 0,828929 | 1,383982 | 0,166364 | 0,5231632 |
| CTD-3037G24.4 | 8,87    | -2,29 | 1,657182 | -1,38392 | 0,166383 | 0,5231632 |
| RP11-246A10.1 | 16,71   | 1,36  | 0,984254 | 1,383713 | 0,166446 | 0,5232289 |
| RP11-80H18.3  | 94,94   | 1,42  | 1,027852 | 1,383642 | 0,166468 | 0,5232289 |
| IL16          | 977,12  | 0,64  | 0,465605 | 1,383501 | 0,166511 | 0,5232289 |
| RP11-163O17.1 | 553,86  | 0,61  | 0,439067 | 1,383484 | 0,166516 | 0,5232289 |
| TRAPPC5       | 1859,26 | -0,33 | 0,236656 | -1,38319 | 0,166607 | 0,5232456 |
| SLC36A3       | 2,49    | 1,53  | 1,106689 | 1,383145 | 0,16662  | NA        |
| ITIH5         | 35,74   | -1,03 | 0,745453 | -1,38314 | 0,166623 | 0,5232456 |
| MCAT          | 162,75  | 1,52  | 1,098412 | 1,383124 | 0,166627 | 0,5232456 |
| PRELP         | 19,50   | -0,98 | 0,707833 | -1,3831  | 0,166634 | 0,5232456 |
| RNU1-13P      | 3,69    | 2,83  | 2,04906  | 1,382826 | 0,166718 | NA        |
| RP11-671J11.7 | 9,74    | -1,06 | 0,764983 | -1,38258 | 0,166793 | 0,5236531 |
| AC004878.2    | 7,90    | -1,53 | 1,109158 | -1,38249 | 0,16682  | 0,5236531 |
| CCDC71        | 5,06    | 4,39  | 3,173461 | 1,382164 | 0,166921 | 0,5238815 |
| RP11-67B16.1  | 3,57    | 1,76  | 1,274111 | 1,38198  | 0,166978 | NA        |
| ZNF485        | 12,50   | 1,89  | 1,365424 | 1,381909 | 0,166999 | 0,5240387 |
| ATP10B        | 19,55   | -0,94 | 0,6817   | -1,3818  | 0,167032 | 0,5240511 |
| PTPN1         | 601,06  | 0,64  | 0,460981 | 1,38151  | 0,167122 | 0,5242468 |
| MIR4637       | 3,59    | 3,88  | 2,809385 | 1,381479 | 0,167132 | NA        |
| RNU6-298P     | 0,87    | -2,54 | 1,837645 | -1,38136 | 0,167167 | NA        |
| RP13-452N2.1  | 18,20   | -1,06 | 0,766628 | -1,38133 | 0,167176 | 0,5242842 |
| AUNIP         | 6,02    | -1,25 | 0,901761 | -1,3812  | 0,167218 | 0,5242842 |
| H2AFZ         | 2216,21 | 0,43  | 0,309899 | 1,381196 | 0,167219 | 0,5242842 |
| AC144530.1    | 9,53    | 1,39  | 1,003168 | 1,380887 | 0,167314 | 0,5244439 |
| LILRB5        | 8,49    | 1,17  | 0,849312 | 1,380847 | 0,167326 | 0,5244439 |
| RN7SL296P     | 1,36    | -1,90 | 1,375538 | -1,38077 | 0,167351 | NA        |
| OTUD1         | 836,46  | 0,63  | 0,45638  | 1,38051  | 0,16743  | 0,5246804 |
| RP11-51F16.1  | 59,06   | 1,11  | 0,807532 | 1,380077 | 0,167563 | 0,5250099 |
| MMEL1         | 3,44    | 3,55  | 2,573268 | 1,380059 | 0,167568 | NA        |
| MRTO4         | 199,75  | 0,91  | 0,66312  | 1,379826 | 0,16764  | 0,5251128 |
| RP5-892K4.1   | 17,65   | -0,98 | 0,708911 | -1,37979 | 0,167652 | 0,5251128 |
| RP11-579D7.2  | 0,74    | -2,97 | 2,151382 | -1,37955 | 0,167726 | NA        |
| RP11-168O16.1 | 4,17    | 1,72  | 1,249527 | 1,379232 | 0,167823 | 0,5255602 |
| OR5BA1P       | 8,58    | -1,26 | 0,916384 | -1,37858 | 0,168023 | 0,5260346 |
| MIR326        | 4,07    | -2,49 | 1,809318 | -1,37846 | 0,168062 | 0,5260346 |
| WDR25         | 78,56   | -1,39 | 1,011667 | -1,37818 | 0,168148 | 0,5260346 |
| RP11-624G17.3 | 3,72    | 2,42  | 1,753919 | 1,378171 | 0,168151 | NA        |
| RNU2-1        | 128,24  | -0,55 | 0,396792 | -1,37812 | 0,168166 | 0,5260346 |
| CTD-2012K14.6 | 2,66    | 3,50  | 2,539529 | 1,378091 | 0,168175 | NA        |
| RP11-734K2.4  | 29,12   | -1,25 | 0,906039 | -1,37798 | 0,16821  | 0,5260346 |
| SPRTN         | 94,02   | -1,16 | 0,843007 | -1,37798 | 0,168211 | 0,5260346 |
| BECN1         | 703,04  | 0,82  | 0,597061 | 1,377934 | 0,168224 | 0,5260346 |
| HNRPA1L-2     | 1,33    | 1,83  | 1,326111 | 1,377914 | 0,16823  | NA        |

|               |         |       |          |          |          |           |
|---------------|---------|-------|----------|----------|----------|-----------|
| TMEM69        | 244,54  | 1,27  | 0,918791 | 1,377739 | 0,168284 | 0,5260346 |
| RPL39P26      | 3,88    | 4,60  | 3,335623 | 1,37769  | 0,168299 | 0,5260346 |
| INPP4B        | 58,74   | -1,67 | 1,215254 | -1,37769 | 0,1683   | 0,5260346 |
| RP11-946L16.1 | 2,82    | 4,12  | 2,99369  | 1,377559 | 0,16834  | NA        |
| KCNIP4-IT1    | 31,81   | -0,94 | 0,684036 | -1,37751 | 0,168355 | 0,5260346 |
| RP11-627G18.4 | 3,41    | 2,06  | 1,497953 | 1,377414 | 0,168384 | NA        |
| CTNBL1        | 460,06  | 0,61  | 0,443732 | 1,377326 | 0,168412 | 0,5260346 |
| RP11-612B6.2  | 2,01    | 3,66  | 2,653791 | 1,377315 | 0,168415 | NA        |
| PSMD4         | 1559,36 | -0,33 | 0,241528 | -1,37728 | 0,168425 | 0,5260346 |
| RP11-749H20.4 | 1,89    | 2,92  | 2,117989 | 1,377262 | 0,168431 | NA        |
| RP11-461G12.2 | 1,81    | 2,87  | 2,083934 | 1,377186 | 0,168455 | NA        |
| ZNF425        | 27,10   | -1,16 | 0,842391 | -1,37711 | 0,168478 | 0,5260346 |
| WHAMMP2       | 97,94   | 0,91  | 0,659414 | 1,377103 | 0,16848  | 0,5260346 |
| NDRG3         | 216,90  | 1,02  | 0,739415 | 1,376917 | 0,168538 | 0,5260346 |
| NPFF          | 7,19    | -2,40 | 1,740429 | -1,37689 | 0,168545 | 0,5260346 |
| RP11-147C23.1 | 1,17    | -5,02 | 3,646679 | -1,37677 | 0,168582 | NA        |
| MRAP2         | 4,72    | 1,97  | 1,433948 | 1,376619 | 0,16863  | 0,5260346 |
| MIR1537       | 7,49    | 2,70  | 1,961592 | 1,376523 | 0,16866  | 0,5260346 |
| RP11-488C13.5 | 122,43  | 0,92  | 0,66931  | 1,376488 | 0,168671 | 0,5260346 |
| CACNA1D       | 10,66   | -1,22 | 0,888268 | -1,37647 | 0,168676 | 0,5260346 |
| ACADM         | 441,06  | -0,74 | 0,534263 | -1,3764  | 0,168697 | 0,5260346 |
| RP4-655J12.4  | 9,43    | 2,01  | 1,461033 | 1,37635  | 0,168713 | 0,5260346 |
| RP11-875O11.1 | 6,85    | -1,51 | 1,096392 | -1,37624 | 0,168749 | 0,5260346 |
| AC093415.4    | 4,80    | 1,46  | 1,063397 | 1,37618  | 0,168766 | 0,5260346 |
| RPL35A        | 1810,00 | -0,32 | 0,234791 | -1,37615 | 0,168776 | 0,5260346 |
| ZNF763        | 64,89   | 1,59  | 1,157493 | 1,376019 | 0,168816 | 0,5260346 |
| SMIM13        | 66,20   | -1,31 | 0,952752 | -1,37593 | 0,168844 | 0,5260346 |
| AC108463.2    | 1,98    | 3,62  | 2,631519 | 1,375912 | 0,168849 | NA        |
| SPINT1        | 579,03  | 0,57  | 0,417885 | 1,375871 | 0,168861 | 0,5260346 |
| AC016907.3    | 118,87  | -0,63 | 0,460887 | -1,37577 | 0,168892 | 0,5260346 |
| MOG           | 9,07    | -1,69 | 1,227307 | -1,37572 | 0,168908 | 0,5260346 |
| RPS15A        | 2206,54 | -0,32 | 0,234297 | -1,3757  | 0,168913 | 0,5260346 |
| MRPS24        | 708,96  | 0,48  | 0,346725 | 1,375613 | 0,168942 | 0,5260346 |
| RP11-57A19.2  | 20,30   | -0,76 | 0,550908 | -1,3756  | 0,168946 | 0,5260346 |
| PUM2          | 908,46  | 0,53  | 0,38351  | 1,375538 | 0,168965 | 0,5260346 |
| ADCK2         | 157,87  | -1,26 | 0,914821 | -1,37545 | 0,168993 | 0,5260346 |
| SDHA          | 457,66  | 0,53  | 0,384684 | 1,375349 | 0,169023 | 0,5260419 |
| RN7SL50P      | 2,85    | -2,50 | 1,818431 | -1,37529 | 0,169042 | NA        |
| RP11-684B2.4  | 0,75    | -2,05 | 1,493931 | -1,3752  | 0,169071 | NA        |
| C16orf54      | 747,25  | 0,66  | 0,476511 | 1,374954 | 0,169146 | 0,5263352 |
| MECOM         | 91,27   | -1,04 | 0,755351 | -1,37435 | 0,169334 | 0,5268081 |
| AC006994.2    | 2,11    | 3,35  | 2,433928 | 1,374343 | 0,169335 | NA        |
| RP11-796A5.4  | 7,51    | -1,96 | 1,426459 | -1,37426 | 0,169361 | 0,5268081 |
| PCDH12        | 31,44   | -2,72 | 1,978048 | -1,37413 | 0,169401 | 0,5268081 |
| NPC2          | 2903,03 | -0,34 | 0,244349 | -1,3741  | 0,169411 | 0,5268081 |
| LRRC37A16P    | 9,05    | 1,59  | 1,156395 | 1,37388  | 0,169479 | 0,5269313 |
| CLASP2        | 826,68  | 0,65  | 0,471557 | 1,373683 | 0,16954  | 0,5270334 |
| RP11-295M3.2  | 1,04    | 2,66  | 1,93594  | 1,373681 | 0,169541 | NA        |
| ZBED5         | 410,51  | 0,84  | 0,615051 | 1,373394 | 0,16963  | 0,5272246 |
| EFCAB11       | 119,75  | -1,27 | 0,928408 | -1,37311 | 0,169719 | 0,5273632 |

|               |          |       |          |          |          |           |
|---------------|----------|-------|----------|----------|----------|-----------|
| RPS11         | 10680,76 | -0,26 | 0,190231 | -1,37307 | 0,169731 | 0,5273632 |
| ART4          | 1,20     | -2,27 | 1,650581 | -1,37286 | 0,169795 | NA        |
| GPM6B         | 12,27    | 1,31  | 0,952488 | 1,372673 | 0,169854 | 0,5276562 |
| KHDRBS2       | 6,90     | 3,21  | 2,335943 | 1,372439 | 0,169927 | 0,5277312 |
| LA16c-306A4.2 | 5,42     | -1,31 | 0,955094 | -1,37235 | 0,169954 | 0,5277312 |
| ZBED3-AS1     | 151,43   | -0,85 | 0,622414 | -1,37232 | 0,169963 | 0,5277312 |
| RP11-170N16.3 | 8,20     | -1,52 | 1,106712 | -1,37215 | 0,170016 | 0,5278069 |
| RP5-821D11.7  | 65,07    | -1,33 | 0,967668 | -1,3719  | 0,170093 | 0,5279097 |
| CTD-2015G9.2  | 5,35     | -1,48 | 1,075408 | -1,37177 | 0,170134 | 0,5279097 |
| AC004696.2    | 120,64   | 1,11  | 0,812247 | 1,371773 | 0,170134 | 0,5279097 |
| EPOR          | 71,93    | -1,68 | 1,222564 | -1,37147 | 0,170228 | 0,5280722 |
| ARL8B         | 1037,88  | 0,48  | 0,348907 | 1,371422 | 0,170243 | 0,5280722 |
| MROH6         | 123,83   | -0,82 | 0,597565 | -1,3705  | 0,17053  | 0,5286619 |
| IL1R1         | 236,81   | -1,76 | 1,282225 | -1,37037 | 0,170572 | 0,5286619 |
| F5            | 159,59   | -2,63 | 1,918954 | -1,37036 | 0,170575 | 0,5286619 |
| WBSCR16       | 141,81   | -1,02 | 0,742153 | -1,37031 | 0,17059  | 0,5286619 |
| CFI           | 58,18    | 1,20  | 0,87395  | 1,370285 | 0,170598 | 0,5286619 |
| TMEM9B        | 670,07   | 0,61  | 0,446968 | 1,370266 | 0,170604 | 0,5286619 |
| EGFL6         | 1,13     | -5,00 | 3,648464 | -1,37015 | 0,170641 | NA        |
| VPS35         | 1392,82  | -0,48 | 0,348675 | -1,37011 | 0,170654 | 0,5287281 |
| MS4A4A        | 253,41   | -0,76 | 0,554999 | -1,36955 | 0,170826 | 0,5291749 |
| PLEKHD1       | 76,10    | -1,17 | 0,852586 | -1,36943 | 0,170866 | 0,5292095 |
| MED29         | 331,17   | 0,46  | 0,338924 | 1,369241 | 0,170924 | 0,529288  |
| ATXN10        | 1019,55  | 0,63  | 0,459248 | 1,369163 | 0,170948 | 0,529288  |
| RN7SL132P     | 4,98     | 1,67  | 1,217072 | 1,368811 | 0,171058 | 0,5295409 |
| RAPGEF1       | 719,15   | 0,63  | 0,4578   | 1,368634 | 0,171114 | 0,5296241 |
| CCDC151       | 10,07    | -1,86 | 1,3621   | -1,3684  | 0,171188 | 0,5297664 |
| RP11-111M22.2 | 82,33    | -1,29 | 0,944365 | -1,36821 | 0,171248 | 0,5298542 |
| ZNF266        | 439,28   | -0,69 | 0,505575 | -1,36812 | 0,171273 | 0,5298542 |
| CSF3R         | 1883,14  | -0,32 | 0,230801 | -1,36785 | 0,171358 | 0,5300071 |
| ARMC10        | 238,83   | 0,82  | 0,600793 | 1,367783 | 0,17138  | 0,5300071 |
| DOCK2         | 1393,90  | 0,42  | 0,308179 | 1,367591 | 0,17144  | 0,5301057 |
| EEF1DP3       | 27,21    | -2,61 | 1,909021 | -1,36738 | 0,171508 | 0,5302262 |
| DCTN2         | 830,89   | -0,63 | 0,459807 | -1,36728 | 0,171538 | 0,5302313 |
| AC009495.3    | 1,62     | 3,33  | 2,436834 | 1,367235 | 0,171552 | NA        |
| RP11-202K23.1 | 20,76    | -2,14 | 1,567577 | -1,36696 | 0,171636 | 0,5304478 |
| SH3PXD2A      | 68,28    | 1,24  | 0,907123 | 1,36657  | 0,17176  | 0,5307333 |
| RP11-364F11.1 | 10,19    | -3,66 | 2,677479 | -1,3664  | 0,171814 | 0,5307333 |
| RP11-413E1.4  | 5,45     | 2,94  | 2,152321 | 1,366317 | 0,17184  | 0,5307333 |
| RP11-266L9.4  | 9,63     | 4,84  | 3,539833 | 1,366275 | 0,171853 | 0,5307333 |
| SOD2          | 1980,62  | -0,71 | 0,516686 | -1,36622 | 0,171871 | 0,5307333 |
| FAM118A       | 1055,42  | -0,73 | 0,535478 | -1,36602 | 0,171932 | 0,5307579 |
| RP11-9J18.1   | 28,99    | -1,56 | 1,143041 | -1,36601 | 0,171936 | 0,5307579 |
| RSPH10B2      | 3,01     | 1,46  | 1,070992 | 1,365654 | 0,172048 | NA        |
| RP4-706A16.3  | 1,46     | -1,86 | 1,361846 | -1,36549 | 0,172098 | NA        |
| CTB-129P6.7   | 57,87    | -0,63 | 0,459112 | -1,36547 | 0,172104 | 0,5311874 |
| RP11-718D19.1 | 30,77    | 0,84  | 0,613129 | 1,365353 | 0,172142 | 0,5312167 |
| HMBOX1        | 421,65   | 0,85  | 0,623829 | 1,365218 | 0,172185 | 0,5312594 |
| TCEAL9        | 0,51     | -3,19 | 2,339274 | -1,36508 | 0,172228 | NA        |
| EXOSC3        | 194,55   | -0,99 | 0,725708 | -1,36507 | 0,17223  | 0,5313123 |

|                  |         |       |          |          |          |           |
|------------------|---------|-------|----------|----------|----------|-----------|
| CLRN1            | 1,00    | -2,26 | 1,654387 | -1,36502 | 0,172247 | NA        |
| XXbac-BPG55C20.5 | 79,28   | 1,62  | 1,188495 | 1,364755 | 0,17233  | 0,5315005 |
| RAB22A           | 434,47  | -0,89 | 0,652415 | -1,36466 | 0,172361 | 0,5315005 |
| RP3-425P12.1     | 13,80   | -2,04 | 1,496444 | -1,36459 | 0,172383 | 0,5315005 |
| DPYSL2           | 2482,23 | 0,40  | 0,289654 | 1,36446  | 0,172423 | 0,5315005 |
| RP11-131M11.3    | 23,85   | -1,05 | 0,769936 | -1,36442 | 0,172434 | 0,5315005 |
| PCYT2            | 209,56  | -1,22 | 0,890974 | -1,36424 | 0,172493 | 0,5315925 |
| BOLL             | 1,82    | -1,58 | 1,160904 | -1,36386 | 0,172612 | NA        |
| RP11-51J9.5      | 69,66   | -0,67 | 0,493069 | -1,36373 | 0,172652 | 0,5319541 |
| TTLL2            | 1,21    | -2,60 | 1,906208 | -1,36362 | 0,172686 | NA        |
| SPDYE2B          | 7,67    | 2,02  | 1,483044 | 1,363566 | 0,172704 | 0,5319541 |
| RP11-154D17.1    | 13,18   | -1,80 | 1,31815  | -1,36353 | 0,172716 | 0,5319541 |
| OR55B1P          | 13,22   | 2,05  | 1,502763 | 1,363502 | 0,172724 | 0,5319541 |
| INE1             | 5,50    | -1,00 | 0,73026  | -1,36327 | 0,172799 | 0,532095  |
| RP11-749H20.3    | 46,76   | -0,82 | 0,600643 | -1,36306 | 0,172864 | 0,5321641 |
| TEX15            | 2,66    | 4,08  | 2,996404 | 1,36303  | 0,172873 | NA        |
| MTMR6            | 584,56  | 0,81  | 0,595473 | 1,363014 | 0,172878 | 0,5321641 |
| RP11-478C19.2    | 2,62    | 4,02  | 2,952443 | 1,362949 | 0,172899 | NA        |
| LRP5             | 13,34   | -3,22 | 2,362169 | -1,36276 | 0,172957 | 0,532318  |
| RP11-244H3.1     | 2,71    | 4,07  | 2,988698 | 1,362567 | 0,173019 | NA        |
| UNC80            | 64,82   | -1,05 | 0,771613 | -1,36253 | 0,173029 | 0,5324532 |
| OR1J1            | 0,61    | -2,26 | 1,661956 | -1,3624  | 0,173071 | NA        |
| ZBTB49           | 32,65   | -2,13 | 1,566958 | -1,36237 | 0,173081 | 0,5325235 |
| FAM20A           | 17,66   | -1,72 | 1,263136 | -1,36204 | 0,173187 | 0,5327613 |
| CD86             | 2516,02 | 0,42  | 0,306431 | 1,361861 | 0,173242 | 0,5328193 |
| CPOX             | 111,79  | -1,59 | 1,165717 | -1,36172 | 0,173286 | 0,5328193 |
| RP11-571I18.5    | 4,46    | -2,14 | 1,573265 | -1,3617  | 0,173292 | 0,5328193 |
| ADAP2            | 526,28  | -0,70 | 0,513326 | -1,36157 | 0,173334 | 0,5328536 |
| CBWD5            | 611,91  | -0,43 | 0,318124 | -1,36149 | 0,17336  | 0,5328536 |
| NKIRAS1          | 53,02   | 1,30  | 0,955279 | 1,361271 | 0,173428 | 0,5329746 |
| OR8J3            | 0,89    | -1,91 | 1,402524 | -1,3612  | 0,17345  | NA        |
| RP11-300J18.3    | 2,36    | -2,59 | 1,905921 | -1,36092 | 0,17354  | NA        |
| RPS8             | 5063,54 | -0,32 | 0,233855 | -1,36084 | 0,173563 | 0,5332169 |
| ISG15            | 3929,15 | -0,96 | 0,707029 | -1,36084 | 0,173564 | 0,5332169 |
| CATSPERB         | 13,18   | 0,96  | 0,702022 | 1,360528 | 0,173663 | 0,5334321 |
| EEF2K            | 162,52  | 1,09  | 0,798002 | 1,360355 | 0,173718 | 0,5334899 |
| MTMR10           | 484,66  | 1,03  | 0,760198 | 1,360263 | 0,173747 | 0,5334899 |
| ZNF682           | 23,35   | 1,73  | 1,271232 | 1,36011  | 0,173795 | 0,5334899 |
| SLC31A1          | 405,24  | -0,59 | 0,435573 | -1,36011 | 0,173796 | 0,5334899 |
| XPO4             | 206,95  | 1,05  | 0,775558 | 1,359671 | 0,173934 | 0,5338242 |
| ATP2A1           | 0,87    | -3,74 | 2,747597 | -1,35939 | 0,174023 | NA        |
| ANXA2P2          | 31,28   | 0,55  | 0,405666 | 1,359149 | 0,174099 | 0,5341356 |
| TSEN2            | 98,81   | -1,25 | 0,917028 | -1,35912 | 0,174107 | 0,5341356 |
| APP              | 114,80  | -0,80 | 0,592074 | -1,35891 | 0,174174 | 0,5341356 |
| FAM198B          | 286,13  | -1,11 | 0,81482  | -1,35886 | 0,17419  | 0,5341356 |
| RYR2             | 30,52   | -3,43 | 2,523564 | -1,35883 | 0,174201 | 0,5341356 |
| C9orf69          | 134,42  | -1,28 | 0,943745 | -1,35867 | 0,174253 | 0,5341356 |
| TMEM35           | 3,99    | 1,63  | 1,200237 | 1,358652 | 0,174257 | 0,5341356 |
| SIT1             | 6,62    | 2,18  | 1,603995 | 1,358626 | 0,174265 | 0,5341356 |
| TVP23C           | 24,46   | 1,25  | 0,91783  | 1,358395 | 0,174338 | 0,5342719 |



|               |        |       |          |          |          |           |
|---------------|--------|-------|----------|----------|----------|-----------|
| MESDC1        | 106,63 | 0,81  | 0,598031 | 1,358094 | 0,174434 | 0,5344593 |
| REXO1         | 31,20  | -1,36 | 0,997929 | -1,35798 | 0,174471 | 0,5344593 |
| BATF2         | 0,78   | -3,75 | 2,76297  | -1,3579  | 0,174494 | NA        |
| DEGS2         | 15,22  | 2,92  | 2,151998 | 1,357821 | 0,174521 | 0,5344593 |
| MED4          | 379,06 | 0,73  | 0,53483  | 1,357803 | 0,174526 | 0,5344593 |
| RP4-761J14.10 | 12,74  | -1,83 | 1,345125 | -1,3577  | 0,17456  | 0,5344593 |
| AC092535.3    | 6,42   | 2,89  | 2,128861 | 1,357644 | 0,174577 | 0,5344593 |
| AANAT         | 4,15   | 1,62  | 1,19601  | 1,357569 | 0,174601 | 0,5344593 |
| AC093620.5    | 1,29   | -4,38 | 3,229241 | -1,35747 | 0,174631 | NA        |
| RP11-691H4.3  | 42,42  | -2,47 | 1,816405 | -1,35725 | 0,174701 | 0,5345198 |
| ACADS         | 137,29 | 1,40  | 1,031898 | 1,357217 | 0,174712 | 0,5345198 |
| AC005523.2    | 131,02 | 0,73  | 0,534564 | 1,357192 | 0,17472  | 0,5345198 |
| PMEPA1        | 10,62  | 2,17  | 1,59621  | 1,357088 | 0,174753 | 0,5345198 |
| RP11-124N14.4 | 377,54 | -0,63 | 0,462697 | -1,35703 | 0,174773 | 0,5345198 |
| RP11-403P17.6 | 10,28  | 1,66  | 1,223613 | 1,356964 | 0,174793 | 0,5345198 |
| LYNX1         | 1,18   | -2,86 | 2,110867 | -1,35687 | 0,174823 | NA        |
| AC007277.3    | 0,84   | -2,06 | 1,515233 | -1,35684 | 0,174833 | NA        |
| RP11-474P2.5  | 6,98   | 1,45  | 1,069589 | 1,356449 | 0,174956 | 0,5348507 |
| RBM23         | 649,64 | -0,50 | 0,36682  | -1,35637 | 0,174982 | 0,5348507 |
| SLC6A16       | 10,36  | -1,99 | 1,468598 | -1,35635 | 0,174987 | 0,5348507 |
| ANXA3         | 4,63   | 1,44  | 1,05984  | 1,355821 | 0,175156 | 0,5352792 |
| RP1-199J3.5   | 2,76   | 3,51  | 2,590964 | 1,355748 | 0,175179 | NA        |
| RP11-490O6.2  | 35,56  | -1,24 | 0,917806 | -1,35573 | 0,175186 | 0,5352818 |
| PHF6          | 254,83 | 0,88  | 0,646945 | 1,355599 | 0,175227 | 0,5352997 |
| LHX4          | 3,52   | 2,51  | 1,850351 | 1,355571 | 0,175236 | NA        |
| RN7SL275P     | 5,28   | -0,97 | 0,718079 | -1,35553 | 0,17525  | 0,5352997 |
| EPS15L1       | 246,35 | 0,83  | 0,611491 | 1,355438 | 0,175278 | 0,5352997 |
| HMGXB3        | 330,57 | -0,75 | 0,552584 | -1,35527 | 0,17533  | 0,535372  |
| TLCD2         | 31,68  | -0,58 | 0,428861 | -1,35516 | 0,175368 | 0,5353992 |
| RP11-159H22.2 | 2,02   | 3,05  | 2,251709 | 1,355065 | 0,175397 | NA        |
| ABHD14A-ACY1  | 7,25   | 2,04  | 1,505817 | 1,354881 | 0,175456 | 0,5354094 |
| TLR8          | 438,98 | -1,03 | 0,7638   | -1,35481 | 0,175477 | 0,5354094 |
| RP3-402G11.25 | 45,11  | 1,55  | 1,145373 | 1,354782 | 0,175487 | 0,5354094 |
| MTFP1         | 179,71 | -1,14 | 0,842816 | -1,35472 | 0,175508 | 0,5354094 |
| FAM20C        | 278,00 | 1,10  | 0,812829 | 1,354693 | 0,175515 | 0,5354094 |
| GOLT1B        | 382,11 | 0,93  | 0,688132 | 1,353843 | 0,175786 | 0,5358692 |
| BSPRY         | 18,37  | 1,56  | 1,154524 | 1,353839 | 0,175788 | 0,5358692 |
| VN1R5         | 2,56   | -3,29 | 2,431507 | -1,35367 | 0,175841 | NA        |
| CDH12P2       | 10,70  | -2,09 | 1,540419 | -1,35365 | 0,17585  | 0,5358692 |
| ABHD17B       | 71,45  | 1,01  | 0,746202 | 1,35363  | 0,175854 | 0,5358692 |
| CHTF18        | 30,06  | -2,17 | 1,602054 | -1,35359 | 0,175867 | 0,5358692 |
| RXRA          | 576,63 | -0,66 | 0,490278 | -1,35359 | 0,175867 | 0,5358692 |
| AC073283.7    | 40,75  | 1,69  | 1,252052 | 1,353503 | 0,175895 | 0,5358692 |
| STK38L        | 578,19 | 0,70  | 0,520858 | 1,353448 | 0,175912 | 0,5358692 |
| INTS9         | 212,59 | -1,20 | 0,882979 | -1,3534  | 0,175929 | 0,5358692 |
| CTD-2186M15.3 | 13,75  | 2,21  | 1,629548 | 1,353318 | 0,175954 | 0,5358692 |
| RP11-221J22.1 | 2,57   | 4,00  | 2,956762 | 1,353282 | 0,175966 | NA        |
| MICA          | 119,70 | -1,13 | 0,833518 | -1,35295 | 0,17607  | 0,5361361 |
| SLC44A5       | 2,25   | -1,06 | 0,781413 | -1,35255 | 0,176199 | NA        |
| SNORD27       | 0,64   | -2,50 | 1,846223 | -1,35245 | 0,176231 | NA        |

|               |         |       |          |          |          |           |
|---------------|---------|-------|----------|----------|----------|-----------|
| LHFP          | 112,62  | 1,56  | 1,152783 | 1,35235  | 0,176263 | 0,5366358 |
| ERCC5         | 556,96  | 0,52  | 0,388069 | 1,352167 | 0,176322 | 0,5367259 |
| SAMD11        | 0,56    | -3,26 | 2,408025 | -1,35202 | 0,17637  | NA        |
| USP13         | 280,73  | 1,31  | 0,971034 | 1,351984 | 0,17638  | 0,536816  |
| RP11-534L6.5  | 1,43    | 2,53  | 1,871145 | 1,351822 | 0,176432 | NA        |
| RP4-671O14.7  | 198,11  | -0,81 | 0,602859 | -1,35172 | 0,176466 | 0,5368625 |
| CTA-150C2.16  | 12,06   | 1,03  | 0,763956 | 1,351532 | 0,176525 | 0,5368625 |
| IQCF1         | 1,10    | -1,76 | 1,301273 | -1,35152 | 0,176528 | NA        |
| TMTC3         | 102,46  | -1,14 | 0,845473 | -1,3515  | 0,176535 | 0,5368625 |
| FRRS1         | 48,27   | -1,12 | 0,829392 | -1,35146 | 0,176548 | 0,5368625 |
| LLGL2         | 92,08   | -1,52 | 1,124815 | -1,35143 | 0,176559 | 0,5368625 |
| RP11-723J4.3  | 6,73    | -1,24 | 0,916257 | -1,35138 | 0,176575 | 0,5368625 |
| TINF2         | 487,36  | -0,58 | 0,427804 | -1,35131 | 0,176598 | 0,5368625 |
| RP11-283I3.6  | 32,24   | -1,27 | 0,936342 | -1,3512  | 0,176632 | 0,5368788 |
| PSMB10        | 2968,21 | -0,26 | 0,191821 | -1,35106 | 0,176677 | 0,5369165 |
| SYT10         | 3,78    | 3,27  | 2,418921 | 1,35098  | 0,176702 | 0,5369165 |
| SLC5A1        | 4,99    | 2,38  | 1,764707 | 1,350745 | 0,176777 | 0,5370426 |
| RP5-832C2.8   | 1,49    | -3,98 | 2,950332 | -1,3505  | 0,176857 | NA        |
| CRTAP         | 1385,55 | 0,56  | 0,413767 | 1,350402 | 0,176887 | 0,5370426 |
| TMEM203       | 202,67  | -1,02 | 0,751749 | -1,35039 | 0,17689  | 0,5370426 |
| MCM7          | 390,39  | -0,90 | 0,664247 | -1,35038 | 0,176893 | 0,5370426 |
| RP1-149C7.1   | 3,33    | -1,62 | 1,196509 | -1,35033 | 0,17691  | NA        |
| SLC35E2       | 149,51  | -0,72 | 0,535675 | -1,35019 | 0,176955 | 0,5370426 |
| GLIPR1L2      | 23,51   | -1,38 | 1,023612 | -1,35012 | 0,176977 | 0,5370426 |
| ARHGAP31      | 460,29  | 0,81  | 0,599222 | 1,350094 | 0,176986 | 0,5370426 |
| GTF2H1        | 187,07  | -1,04 | 0,772292 | -1,35005 | 0,176999 | 0,5370426 |
| CEMP1         | 41,45   | -1,78 | 1,318801 | -1,35004 | 0,177003 | 0,5370426 |
| RP11-571M6.7  | 93,30   | -1,08 | 0,800004 | -1,34955 | 0,17716  | 0,5374321 |
| PARP4         | 882,57  | 0,60  | 0,444376 | 1,349433 | 0,177198 | 0,537458  |
| CTD-2012J19.3 | 2,93    | 2,56  | 1,894958 | 1,349305 | 0,177239 | NA        |
| TASP1         | 92,84   | 1,32  | 0,975898 | 1,349273 | 0,177249 | 0,5375262 |
| PTGER4        | 1627,96 | 0,60  | 0,448242 | 1,348869 | 0,177379 | 0,5377964 |
| CLCN1         | 20,02   | -2,82 | 2,093228 | -1,34877 | 0,177411 | 0,5377964 |
| UBTFL5        | 13,58   | -4,29 | 3,183724 | -1,34867 | 0,177443 | 0,5377964 |
| RNF213        | 4257,95 | -0,52 | 0,388278 | -1,34864 | 0,177454 | 0,5377964 |
| RP1-197B17.5  | 14,79   | 1,88  | 1,393719 | 1,34848  | 0,177504 | 0,5378395 |
| GGPS1         | 168,91  | -1,04 | 0,773339 | -1,34841 | 0,177526 | 0,5378395 |
| RP11-85G21.3  | 0,65    | -2,86 | 2,122058 | -1,34839 | 0,177532 | NA        |
| CAMK1D        | 527,36  | 0,59  | 0,435975 | 1,348075 | 0,177634 | 0,5378673 |
| CTD-2326C4.1  | 15,22   | 1,00  | 0,738806 | 1,34805  | 0,177642 | 0,5378673 |
| CD209         | 46,89   | -1,29 | 0,957783 | -1,34802 | 0,177652 | 0,5378673 |
| RAB11A        | 1091,21 | 0,60  | 0,445575 | 1,347946 | 0,177676 | 0,5378673 |
| WAPL          | 977,52  | 0,54  | 0,397503 | 1,347933 | 0,17768  | 0,5378673 |
| SNORD13       | 8,10    | -0,89 | 0,657846 | -1,34759 | 0,177791 | 0,5378971 |
| PLEKHH2       | 19,67   | -1,02 | 0,760459 | -1,34756 | 0,177801 | 0,5378971 |
| HARS2         | 236,48  | 1,29  | 0,955228 | 1,347515 | 0,177814 | 0,5378971 |
| RP11-185E15.1 | 5,21    | 5,02  | 3,722492 | 1,347495 | 0,177821 | 0,5378971 |
| RP11-678G14.4 | 6,44    | 1,44  | 1,072064 | 1,347454 | 0,177834 | 0,5378971 |
| DNMT3A        | 128,18  | -1,09 | 0,811369 | -1,34701 | 0,177976 | 0,5382398 |
| MBNL1-AS1     | 80,98   | 1,17  | 0,871308 | 1,346912 | 0,178009 | 0,5382494 |

|               |         |       |          |          |          |           |
|---------------|---------|-------|----------|----------|----------|-----------|
| EIF3E         | 3470,33 | 0,37  | 0,271629 | 1,346655 | 0,178091 | 0,5384126 |
| RP11-173B14.5 | 7,29    | -2,86 | 2,124529 | -1,34643 | 0,178165 | 0,5385474 |
| RP5-1198O20.5 | 4,84    | 1,68  | 1,246725 | 1,346044 | 0,178288 | 0,5388328 |
| C12orf10      | 391,78  | -0,64 | 0,47357  | -1,34589 | 0,178338 | 0,5388944 |
| RP11-216B9.7  | 11,61   | -2,04 | 1,517371 | -1,34567 | 0,178409 | 0,538978  |
| PRSS8         | 10,47   | -1,24 | 0,920461 | -1,34563 | 0,178423 | 0,538978  |
| CTD-2384A14.1 | 0,86    | -2,43 | 1,805248 | -1,34552 | 0,178459 | NA        |
| CDK16         | 145,91  | -0,75 | 0,555091 | -1,34536 | 0,178507 | 0,5391447 |
| GPR3          | 26,97   | 2,19  | 1,625982 | 1,345153 | 0,178576 | 0,5391851 |
| RP11-77A13.1  | 20,60   | 2,53  | 1,880371 | 1,345144 | 0,178579 | 0,5391851 |
| ZNF613        | 6,35    | 1,84  | 1,365718 | 1,344865 | 0,178669 | 0,5393127 |
| YPEL2         | 358,20  | -0,81 | 0,600621 | -1,34483 | 0,17868  | 0,5393127 |
| MRPL51        | 693,36  | -0,42 | 0,311891 | -1,34474 | 0,178708 | 0,5393127 |
| PLXDC1        | 39,38   | -1,08 | 0,805225 | -1,34448 | 0,178794 | 0,5394836 |
| UBE2T         | 4,36    | 3,60  | 2,675836 | 1,344183 | 0,178889 | 0,5396841 |
| HLA-G         | 2,69    | -1,05 | 0,782102 | -1,34407 | 0,178926 | NA        |
| LRRC8C        | 693,18  | -1,04 | 0,777207 | -1,34396 | 0,178962 | 0,5398164 |
| RP11-571O6.2  | 24,79   | -0,68 | 0,509332 | -1,34372 | 0,179038 | 0,5399572 |
| ZNF439        | 79,26   | -0,78 | 0,578997 | -1,34334 | 0,179162 | 0,5402392 |
| RP11-598F7.4  | 2,57    | 2,07  | 1,542018 | 1,343276 | 0,179183 | NA        |
| AC009404.5    | 3,51    | 2,80  | 2,087403 | 1,343263 | 0,179187 | NA        |
| KCNMB4        | 21,83   | 1,60  | 1,189198 | 1,343249 | 0,179191 | 0,5402392 |
| RP11-39N8.2   | 50,70   | -1,32 | 0,981985 | -1,34316 | 0,17922  | 0,5402392 |
| ACO2          | 711,64  | -0,72 | 0,533202 | -1,34292 | 0,179298 | 0,5402392 |
| IFRD2         | 203,03  | -0,94 | 0,696304 | -1,34284 | 0,179323 | 0,5402392 |
| CSMD2         | 19,29   | 2,05  | 1,528366 | 1,342824 | 0,179329 | 0,5402392 |
| HCG14         | 8,79    | 3,08  | 2,290632 | 1,342793 | 0,179339 | 0,5402392 |
| RP11-382J24.2 | 12,26   | -3,41 | 2,536441 | -1,34272 | 0,179363 | 0,5402392 |
| RP11-773H22.4 | 2,41    | 3,33  | 2,477821 | 1,342702 | 0,179368 | NA        |
| ATP2A2        | 310,08  | -0,79 | 0,58835  | -1,34237 | 0,179475 | 0,540488  |
| AL133249.1    | 1,20    | 2,26  | 1,684224 | 1,342207 | 0,179529 | NA        |
| GAK           | 819,29  | -0,56 | 0,419736 | -1,34212 | 0,179557 | 0,5405087 |
| RP11-589M4.1  | 12,31   | -2,79 | 2,080851 | -1,34209 | 0,179566 | 0,5405087 |
| HEATR5B       | 640,61  | 0,60  | 0,444196 | 1,341995 | 0,179597 | 0,5405087 |
| RN7SL338P     | 1,80    | -1,66 | 1,235623 | -1,34196 | 0,179608 | NA        |
| RP11-595B24.1 | 3,11    | -1,72 | 1,281088 | -1,34175 | 0,179678 | NA        |
| EIF3G         | 1409,96 | 0,34  | 0,250993 | 1,341685 | 0,179698 | 0,5405087 |
| RNASE1        | 133,27  | -1,69 | 1,261654 | -1,34163 | 0,179716 | 0,5405087 |
| KCNH3         | 24,59   | -2,92 | 2,176953 | -1,34152 | 0,17975  | 0,5405087 |
| YRDC          | 170,58  | 0,99  | 0,740065 | 1,341498 | 0,179759 | 0,5405087 |
| AKR1A1        | 1533,68 | -0,40 | 0,301815 | -1,34147 | 0,179768 | 0,5405087 |
| MIR5194       | 3,77    | 4,55  | 3,390654 | 1,341457 | 0,179772 | 0,5405087 |
| NSUN5         | 207,90  | -1,18 | 0,882619 | -1,34146 | 0,179773 | 0,5405087 |
| SERPINB5      | 1,19    | -2,53 | 1,88882  | -1,34138 | 0,179796 | NA        |
| RP11-58H15.4  | 2,61    | 4,01  | 2,99041  | 1,341355 | 0,179805 | NA        |
| RP13-143G15.4 | 48,82   | -1,49 | 1,108723 | -1,34103 | 0,179912 | 0,5408397 |
| RP11-214O1.1  | 3,68    | -0,79 | 0,587268 | -1,3409  | 0,179952 | NA        |
| CTD-3184A7.4  | 102,84  | -1,10 | 0,817993 | -1,34066 | 0,180031 | 0,5410387 |
| JUND          | 759,17  | -0,66 | 0,494663 | -1,34064 | 0,180036 | 0,5410387 |
| RP5-914P20.5  | 13,01   | 2,24  | 1,670057 | 1,340372 | 0,180124 | 0,5412167 |

|               |         |       |          |          |          |           |
|---------------|---------|-------|----------|----------|----------|-----------|
| NUDT17        | 53,14   | 1,90  | 1,420565 | 1,340109 | 0,18021  | 0,5413863 |
| CEBPZ         | 453,10  | -0,83 | 0,619932 | -1,33989 | 0,180283 | 0,5415176 |
| HAS1          | 0,83    | -3,81 | 2,844649 | -1,33981 | 0,180306 | NA        |
| EIF3LP2       | 0,85    | -1,52 | 1,132597 | -1,33981 | 0,180308 | NA        |
| PPM1G         | 841,72  | 0,49  | 0,366612 | 1,339536 | 0,180396 | 0,541771  |
| BAX           | 88,63   | -0,90 | 0,669193 | -1,33912 | 0,180531 | 0,5420512 |
| TUBGCP4       | 174,89  | 0,93  | 0,692221 | 1,33907  | 0,180548 | 0,5420512 |
| TPPP3         | 207,40  | 1,16  | 0,863632 | 1,338877 | 0,180611 | 0,5421047 |
| RP11-703M24.5 | 11,57   | -1,07 | 0,798632 | -1,33884 | 0,180624 | 0,5421047 |
| CTD-2339L15.3 | 2,49    | 1,84  | 1,372742 | 1,33881  | 0,180632 | NA        |
| TRA2A         | 1528,25 | 0,43  | 0,317805 | 1,338637 | 0,180689 | 0,5422119 |
| CYB5D1        | 55,97   | 1,93  | 1,445531 | 1,338204 | 0,18083  | 0,5424821 |
| CHRFAM7A      | 76,61   | 2,00  | 1,49291  | 1,338182 | 0,180837 | 0,5424821 |
| CTD-2013M15.1 | 2,39    | 2,14  | 1,596515 | 1,338022 | 0,180889 | NA        |
| RP11-234K19.2 | 11,26   | 2,26  | 1,687127 | 1,337931 | 0,180919 | 0,54264   |
| ERP29         | 1132,67 | 0,42  | 0,316995 | 1,337372 | 0,181101 | 0,5429575 |
| HDHD3         | 83,45   | -1,84 | 1,377394 | -1,33737 | 0,181102 | 0,5429575 |
| BCR           | 233,17  | 1,11  | 0,83314  | 1,337338 | 0,181112 | 0,5429575 |
| RP11-431M3.1  | 13,18   | -2,71 | 2,023732 | -1,33703 | 0,181214 | 0,5431742 |
| CTD-2306A12.1 | 2,70    | 4,06  | 3,033359 | 1,337005 | 0,181221 | NA        |
| TMEM169       | 3,71    | -1,31 | 0,979755 | -1,33688 | 0,181262 | NA        |
| ADGRE5        | 2745,89 | -0,44 | 0,332642 | -1,33684 | 0,181275 | 0,5432154 |
| TM6SF1        | 146,65  | 1,35  | 1,00947  | 1,3368   | 0,181288 | 0,5432154 |
| AC007193.8    | 1,28    | -1,56 | 1,165516 | -1,33679 | 0,18129  | NA        |
| SLC16A5       | 82,87   | 1,25  | 0,935947 | 1,336707 | 0,181318 | 0,5432154 |
| RPL31P52      | 2,72    | 4,07  | 3,046244 | 1,336678 | 0,181328 | NA        |
| TAF10         | 214,57  | -0,47 | 0,354714 | -1,33663 | 0,181344 | 0,5432154 |
| WDR13         | 497,00  | -0,81 | 0,604023 | -1,33653 | 0,181375 | 0,5432195 |
| RP11-114G22.1 | 12,48   | 1,30  | 0,972388 | 1,336284 | 0,181457 | 0,5433195 |
| CITF22-49E9.3 | 5,97    | 4,64  | 3,475923 | 1,336216 | 0,181479 | 0,5433195 |
| DFNB59        | 12,71   | 2,26  | 1,689324 | 1,336163 | 0,181496 | 0,5433195 |
| HUS1          | 260,47  | -0,95 | 0,709324 | -1,33604 | 0,181537 | 0,5433233 |
| RP11-744N12.2 | 27,50   | -1,52 | 1,140182 | -1,33598 | 0,181556 | 0,5433233 |
| RP11-323N12.5 | 11,99   | -2,32 | 1,734109 | -1,33579 | 0,181617 | 0,543358  |
| MMS19         | 234,55  | -0,70 | 0,523841 | -1,33574 | 0,181635 | 0,543358  |
| CXXC1         | 401,16  | 0,83  | 0,621131 | 1,335495 | 0,181714 | 0,543358  |
| NUP205        | 236,49  | 0,74  | 0,553863 | 1,335464 | 0,181724 | 0,543358  |
| SMARCD3       | 182,39  | -0,92 | 0,685956 | -1,33545 | 0,181729 | 0,543358  |
| WDR48         | 486,48  | 0,69  | 0,51739  | 1,335409 | 0,181742 | 0,543358  |
| RP11-15G16.1  | 2,27    | -1,79 | 1,337149 | -1,33538 | 0,181753 | NA        |
| EIF2A         | 775,31  | -0,61 | 0,458383 | -1,3352  | 0,18181  | 0,5434735 |
| RPL7AP31      | 19,64   | -4,82 | 3,612236 | -1,33507 | 0,181854 | 0,5435161 |
| AC016739.2    | 3,23    | -0,82 | 0,615104 | -1,3348  | 0,181941 | NA        |
| RP11-486I11.2 | 47,28   | -2,58 | 1,930556 | -1,33472 | 0,181969 | 0,5437468 |
| FGR           | 3472,84 | -0,26 | 0,192794 | -1,33461 | 0,182004 | 0,5437468 |
| RPL23         | 5181,85 | -0,32 | 0,237635 | -1,33457 | 0,182019 | 0,5437468 |
| LA16c-431H6.7 | 2,48    | 1,80  | 1,350539 | 1,334429 | 0,182063 | NA        |
| PBOV1         | 4,25    | -1,18 | 0,885709 | -1,33441 | 0,18207  | 0,5438136 |
| GCM1          | 3,61    | -1,15 | 0,862927 | -1,33402 | 0,182196 | NA        |
| KCNK6         | 1006,77 | 0,33  | 0,24995  | 1,333965 | 0,182215 | 0,5441603 |

|               |         |       |          |          |          |           |
|---------------|---------|-------|----------|----------|----------|-----------|
| RP11-78J21.6  | 5,36    | -2,98 | 2,235581 | -1,33386 | 0,18225  | 0,5441767 |
| RNU6-807P     | 2,38    | 3,89  | 2,917781 | 1,333753 | 0,182285 | NA        |
| FOXK2         | 539,03  | 0,89  | 0,665394 | 1,333576 | 0,182343 | 0,544366  |
| HTRA4         | 58,96   | -0,98 | 0,73697  | -1,3334  | 0,1824   | 0,5443715 |
| RP11-5G9.6    | 0,97    | -3,33 | 2,494044 | -1,33336 | 0,182414 | NA        |
| RN7SL154P     | 0,74    | -2,81 | 2,110986 | -1,33329 | 0,182435 | NA        |
| RP4-739H11.4  | 21,00   | -2,21 | 1,65716  | -1,33319 | 0,182469 | 0,5443715 |
| TRIM33        | 728,58  | 0,73  | 0,549772 | 1,333046 | 0,182517 | 0,5443715 |
| RP11-344P13.1 | 13,78   | 2,73  | 2,049473 | 1,333041 | 0,182518 | 0,5443715 |
| RP11-383J24.5 | 148,74  | -1,35 | 1,011777 | -1,333   | 0,182532 | 0,5443715 |
| KBTBD4        | 4,10    | 3,27  | 2,450434 | 1,332955 | 0,182547 | 0,5443715 |
| ARHGEF1       | 810,45  | -0,48 | 0,357712 | -1,33288 | 0,182571 | 0,5443715 |
| LINC01127     | 4,58    | -1,75 | 1,309956 | -1,33286 | 0,182579 | 0,5443715 |
| RP4-668E10.4  | 2,97    | 3,08  | 2,312553 | 1,332797 | 0,182599 | NA        |
| AC004782.1    | 49,73   | 1,88  | 1,409722 | 1,332453 | 0,182711 | 0,5446384 |
| HBEGF         | 1826,37 | 0,55  | 0,412882 | 1,332406 | 0,182727 | 0,5446384 |
| SAAL1         | 147,22  | -1,20 | 0,901417 | -1,33225 | 0,182778 | 0,5447048 |
| FOXO4         | 6,88    | 2,42  | 1,817824 | 1,332064 | 0,182839 | 0,544799  |
| BET1          | 167,28  | -1,01 | 0,758698 | -1,33178 | 0,182932 | 0,5449252 |
| DSCAM         | 12,56   | -3,69 | 2,767801 | -1,33176 | 0,18294  | 0,5449252 |
| BDH2          | 44,79   | 1,96  | 1,47092  | 1,331385 | 0,183062 | 0,5450608 |
| RP11-670E13.3 | 14,48   | 2,31  | 1,738505 | 1,331342 | 0,183077 | 0,5450608 |
| CTD-2377D24.6 | 5,41    | 1,36  | 1,022776 | 1,331322 | 0,183083 | 0,5450608 |
| RP11-268G12.1 | 2,57    | -1,14 | 0,859839 | -1,33132 | 0,183084 | NA        |
| RNA5-8SN3     | 26,72   | -0,79 | 0,595426 | -1,33124 | 0,183111 | 0,5450608 |
| SPDL1         | 33,81   | 1,96  | 1,473421 | 1,331117 | 0,183151 | 0,5450608 |
| RP11-70F11.8  | 2,80    | -1,57 | 1,180716 | -1,3311  | 0,183156 | NA        |
| RN7SL351P     | 25,25   | -0,86 | 0,646322 | -1,33108 | 0,183162 | 0,5450608 |
| SCAND1        | 1484,87 | -0,39 | 0,29552  | -1,33088 | 0,183227 | 0,5451684 |
| RP11-443A13.5 | 74,24   | -0,94 | 0,707362 | -1,33072 | 0,18328  | 0,5452385 |
| AC007326.11   | 134,35  | 0,73  | 0,549363 | 1,330596 | 0,183322 | 0,5452765 |
| MSR1          | 263,39  | -0,61 | 0,45588  | -1,32973 | 0,183607 | 0,546036  |
| RP3-425C14.5  | 27,28   | -0,97 | 0,732291 | -1,3294  | 0,183716 | 0,5462738 |
| RP11-82L2.1   | 122,49  | -0,85 | 0,63803  | -1,32903 | 0,183837 | 0,5464715 |
| RPA4          | 11,00   | 2,12  | 1,596078 | 1,329021 | 0,183841 | 0,5464715 |
| RDX           | 207,68  | -0,79 | 0,596233 | -1,32893 | 0,183872 | 0,5464773 |
| RP11-196D18.3 | 2,33    | -1,40 | 1,052528 | -1,32846 | 0,184027 | NA        |
| CHID1         | 415,80  | 0,95  | 0,711389 | 1,328399 | 0,184046 | 0,5468418 |
| RP1-69M21.2   | 12,41   | -1,67 | 1,258332 | -1,32838 | 0,184054 | 0,5468418 |
| RP3-329A5.8   | 4,58    | 1,21  | 0,907335 | 1,328222 | 0,184105 | 0,5468913 |
| TAC3          | 2,14    | 3,70  | 2,78361  | 1,328199 | 0,184112 | NA        |
| PPIAP2        | 2,45    | 3,32  | 2,496335 | 1,328134 | 0,184134 | NA        |
| RP11-160N1.10 | 1,95    | 3,58  | 2,699744 | 1,327887 | 0,184216 | NA        |
| EEA1          | 550,65  | -0,58 | 0,433434 | -1,32783 | 0,184234 | 0,5468913 |
| RP11-231E4.4  | 173,62  | -1,21 | 0,913644 | -1,32776 | 0,184259 | 0,5468913 |
| AC018890.6    | 1,03    | -3,02 | 2,273514 | -1,3277  | 0,184276 | NA        |
| RP4-657E11.10 | 1,86    | 3,52  | 2,651995 | 1,327674 | 0,184286 | NA        |
| CTU2          | 39,45   | 1,61  | 1,21313  | 1,327669 | 0,184288 | 0,5468913 |
| NFATC3        | 502,92  | -0,83 | 0,622327 | -1,32758 | 0,184316 | 0,5468913 |
| ZNF322        | 56,54   | 1,79  | 1,350184 | 1,327554 | 0,184326 | 0,5468913 |

|                |         |       |          |          |          |           |
|----------------|---------|-------|----------|----------|----------|-----------|
| ADAMTS20       | 3,52    | 3,75  | 2,824385 | 1,327543 | 0,184329 | NA        |
| RP11-841O20.2  | 12,17   | 2,21  | 1,663724 | 1,327472 | 0,184353 | 0,5468913 |
| C4orf47        | 5,09    | 3,75  | 2,82563  | 1,327437 | 0,184364 | 0,5468913 |
| AC073128.10    | 0,68    | -3,60 | 2,712457 | -1,32738 | 0,184382 | NA        |
| RPLP1P6        | 3,93    | -3,68 | 2,771165 | -1,32716 | 0,184457 | 0,5468913 |
| IMPACT         | 350,14  | 1,05  | 0,791936 | 1,327151 | 0,184459 | 0,5468913 |
| STS            | 92,96   | -1,84 | 1,386179 | -1,32702 | 0,184502 | 0,5468913 |
| ZNF492         | 5,83    | 1,59  | 1,195151 | 1,326984 | 0,184514 | 0,5468913 |
| MIPEP          | 63,51   | 2,01  | 1,518516 | 1,326952 | 0,184524 | 0,5468913 |
| RNA5-8SN4      | 13,31   | -0,82 | 0,619701 | -1,32692 | 0,184535 | 0,5468913 |
| GPBAR1         | 472,21  | -1,02 | 0,771057 | -1,32689 | 0,184545 | 0,5468913 |
| NCL            | 2904,72 | 0,36  | 0,272676 | 1,326848 | 0,184559 | 0,5468913 |
| COL9A2         | 169,32  | 0,75  | 0,562031 | 1,326793 | 0,184577 | 0,5468913 |
| RP11-144F15.1  | 3,52    | 4,45  | 3,350592 | 1,326746 | 0,184593 | NA        |
| FAM103A1       | 235,91  | 1,00  | 0,752927 | 1,326602 | 0,18464  | 0,5468913 |
| ANKRD33B       | 3,04    | 3,69  | 2,782933 | 1,326596 | 0,184642 | NA        |
| RP11-369L4.1   | 0,81    | -1,96 | 1,478992 | -1,32654 | 0,184659 | NA        |
| PSMC4          | 880,23  | 0,67  | 0,503418 | 1,326473 | 0,184683 | 0,5468913 |
| GSDMB          | 137,62  | -1,18 | 0,892216 | -1,32644 | 0,184694 | 0,5468913 |
| RP11-109I13.2  | 11,20   | 1,17  | 0,884968 | 1,326363 | 0,18472  | 0,5468913 |
| RPS25          | 3772,56 | -0,22 | 0,167382 | -1,32631 | 0,184736 | 0,5468913 |
| EIF4A3         | 1215,68 | 0,48  | 0,3601   | 1,326256 | 0,184755 | 0,5468913 |
| TEN1           | 318,64  | -0,70 | 0,525209 | -1,32615 | 0,184789 | 0,5468913 |
| GIMAP1         | 186,96  | -1,11 | 0,836776 | -1,3261  | 0,184805 | 0,5468913 |
| AC087294.2     | 2,99    | 3,35  | 2,522938 | 1,32597  | 0,18485  | NA        |
| RNU6-539P      | 1,86    | 3,53  | 2,662135 | 1,325822 | 0,184899 | NA        |
| FAM43A         | 66,01   | -1,42 | 1,069729 | -1,32573 | 0,184928 | 0,5471662 |
| LRMP           | 803,70  | 0,72  | 0,544961 | 1,325587 | 0,184976 | 0,5472231 |
| ZNF835         | 13,09   | -0,68 | 0,514224 | -1,32531 | 0,185067 | 0,5473502 |
| ZNF32          | 181,77  | 1,44  | 1,08511  | 1,32528  | 0,185078 | 0,5473502 |
| RP11-51M18.1   | 1,99    | 3,02  | 2,280018 | 1,32526  | 0,185085 | NA        |
| MAGEF1         | 193,97  | 1,33  | 1,002865 | 1,325121 | 0,185131 | 0,5474197 |
| SNORD12C       | 20,96   | 1,77  | 1,336745 | 1,32466  | 0,185284 | 0,5477849 |
| RP11-1415C14.3 | 32,15   | -2,35 | 1,773695 | -1,32455 | 0,185321 | 0,547808  |
| PLCB3          | 53,61   | 1,13  | 0,857102 | 1,324072 | 0,185479 | 0,5481557 |
| AC005618.6     | 4,81    | 1,82  | 1,378293 | 1,323888 | 0,18554  | 0,5481557 |
| KMT2A          | 864,52  | -0,53 | 0,400725 | -1,32385 | 0,185553 | 0,5481557 |
| SLC25A17       | 83,49   | 1,36  | 1,030808 | 1,323838 | 0,185557 | 0,5481557 |
| RP1-239B22.5   | 14,05   | 1,55  | 1,174452 | 1,323518 | 0,185663 | 0,548383  |
| FGFR4          | 0,64    | -3,65 | 2,761658 | -1,32347 | 0,18568  | NA        |
| CELP           | 11,82   | 1,51  | 1,13906  | 1,323282 | 0,185742 | 0,5484167 |
| SLC35G2        | 5,12    | -1,16 | 0,874018 | -1,32327 | 0,185745 | 0,5484167 |
| NGDN           | 538,83  | 0,68  | 0,510124 | 1,323217 | 0,185763 | 0,5484167 |
| AC092338.5     | 7,07    | 2,03  | 1,534687 | 1,322909 | 0,185866 | 0,5486321 |
| RP11-124K4.1   | 1,18    | 2,22  | 1,678312 | 1,322646 | 0,185953 | NA        |
| C2orf49        | 75,21   | -1,04 | 0,786639 | -1,32258 | 0,185975 | 0,548868  |
| PDPK1          | 458,68  | -0,62 | 0,466558 | -1,32242 | 0,186027 | 0,5489349 |
| CTD-2333M24.1  | 2,08    | 1,91  | 1,446742 | 1,322357 | 0,186049 | NA        |
| CTA-125H2.1    | 5,79    | -0,91 | 0,689019 | -1,32219 | 0,186105 | 0,5490784 |
| CDC16          | 400,36  | 0,74  | 0,557854 | 1,322001 | 0,186168 | 0,5490866 |

|                   |         |       |          |          |          |           |
|-------------------|---------|-------|----------|----------|----------|-----------|
| TGFBR3            | 85,26   | -1,80 | 1,361453 | -1,32196 | 0,186183 | 0,5490866 |
| XXbac-BPG254F23.5 | 126,95  | 1,23  | 0,933891 | 1,321915 | 0,186197 | 0,5490866 |
| RP5-849H19.3      | 4,69    | 1,70  | 1,28795  | 1,321599 | 0,186302 | 0,5493098 |
| RN7SL366P         | 0,98    | -3,75 | 2,836982 | -1,32112 | 0,186461 | NA        |
| RN7SL145P         | 14,72   | -1,23 | 0,931149 | -1,32108 | 0,186474 | 0,5495428 |
| KLHL12            | 191,58  | 1,12  | 0,850341 | 1,321083 | 0,186474 | 0,5495428 |
| ZNF397            | 155,94  | -0,90 | 0,684101 | -1,32108 | 0,186476 | 0,5495428 |
| RP13-638C3.3      | 3,59    | 4,48  | 3,391993 | 1,321015 | 0,186496 | NA        |
| OSBP2             | 17,63   | -2,03 | 1,538041 | -1,32099 | 0,186505 | 0,5495428 |
| RP11-18E13.1      | 1,13    | 2,22  | 1,679683 | 1,320797 | 0,186569 | NA        |
| NSUN4             | 513,30  | 0,81  | 0,610139 | 1,320794 | 0,18657  | 0,5495428 |
| CYP4B1            | 1,81    | -1,17 | 0,884082 | -1,32079 | 0,186572 | NA        |
| RNU5A-1           | 40,24   | -1,01 | 0,761228 | -1,32072 | 0,186596 | 0,5495428 |
| RP11-121E16.1     | 0,97    | -3,75 | 2,842226 | -1,32065 | 0,186617 | NA        |
| MBLAC2            | 6,36    | 2,28  | 1,72905  | 1,320625 | 0,186626 | 0,5495428 |
| RP5-1198O20.4     | 32,05   | -0,87 | 0,662302 | -1,32039 | 0,186704 | 0,5495428 |
| MMS22L            | 360,13  | -0,86 | 0,652242 | -1,32038 | 0,186707 | 0,5495428 |
| RP4-737E23.2      | 2,10    | 3,73  | 2,82172  | 1,32035  | 0,186718 | NA        |
| RP11-755F10.1     | 2,54    | 3,97  | 3,009548 | 1,320272 | 0,186744 | NA        |
| TP53I13           | 297,35  | 0,91  | 0,685854 | 1,320269 | 0,186745 | 0,5495428 |
| C4orf17           | 42,73   | -1,43 | 1,080137 | -1,32026 | 0,186749 | 0,5495428 |
| CTC-523E23.3      | 25,80   | 1,99  | 1,506967 | 1,32021  | 0,186765 | 0,5495428 |
| ADCY3             | 133,72  | 1,40  | 1,064161 | 1,320176 | 0,186776 | 0,5495428 |
| SGMS2             | 303,95  | -0,97 | 0,731949 | -1,32012 | 0,186794 | 0,5495428 |
| CARD9             | 365,09  | -0,67 | 0,507987 | -1,31996 | 0,186849 | 0,5495833 |
| RP13-259N13.2     | 3,74    | 1,27  | 0,964514 | 1,319914 | 0,186864 | NA        |
| RNA5-8S5          | 13,35   | -0,82 | 0,618648 | -1,3199  | 0,186867 | 0,5495833 |
| PPIAP11           | 0,89    | -1,66 | 1,261318 | -1,31911 | 0,187134 | NA        |
| RP5-855D21.1      | 5,83    | 3,16  | 2,395844 | 1,319075 | 0,187144 | 0,5502852 |
| RP11-478K7.2      | 0,61    | -3,12 | 2,366643 | -1,31904 | 0,187157 | NA        |
| EEF2              | 2233,66 | -0,41 | 0,308859 | -1,31901 | 0,187165 | 0,5502852 |
| WNT4              | 8,57    | 1,86  | 1,413056 | 1,318749 | 0,187253 | 0,5504568 |
| RP11-19G24.3      | 1,26    | 2,87  | 2,174088 | 1,31826  | 0,187417 | NA        |
| LRSAM1            | 147,98  | -0,84 | 0,637485 | -1,31813 | 0,187461 | 0,5509809 |
| DPM3              | 68,27   | -0,66 | 0,498465 | -1,31783 | 0,187562 | 0,5510857 |
| TF                | 251,65  | -0,66 | 0,502818 | -1,31772 | 0,187596 | 0,5510857 |
| INO80C            | 217,53  | -0,70 | 0,534122 | -1,31763 | 0,187626 | 0,5510857 |
| TIMM22            | 166,41  | 1,19  | 0,900649 | 1,317567 | 0,187649 | 0,5510857 |
| MPO               | 8,01    | -3,34 | 2,534052 | -1,31738 | 0,18771  | 0,5510857 |
| THG1L             | 254,52  | 1,04  | 0,786485 | 1,317327 | 0,187729 | 0,5510857 |
| SOX4              | 222,15  | -0,80 | 0,607153 | -1,31732 | 0,187732 | 0,5510857 |
| ZNF79             | 6,33    | 3,17  | 2,403976 | 1,317176 | 0,18778  | 0,5510857 |
| KLHL26            | 25,79   | -1,12 | 0,84879  | -1,31716 | 0,187786 | 0,5510857 |
| WWOX              | 127,90  | -0,73 | 0,554301 | -1,31714 | 0,187793 | 0,5510857 |
| ARHGEF6           | 1070,85 | 0,35  | 0,265682 | 1,316929 | 0,187862 | 0,5510955 |
| ECD               | 126,52  | 0,81  | 0,617527 | 1,316899 | 0,187873 | 0,5510955 |
| RP11-437J2.3      | 35,06   | 1,05  | 0,794144 | 1,316786 | 0,18791  | 0,5510955 |
| UBN2              | 298,92  | -0,64 | 0,484647 | -1,31671 | 0,187937 | 0,5510955 |
| SUMO2             | 2069,22 | 0,23  | 0,175838 | 1,316685 | 0,187944 | 0,5510955 |
| MYBL2             | 2,03    | -1,55 | 1,178665 | -1,31655 | 0,187988 | NA        |

|               |         |       |          |          |          |           |
|---------------|---------|-------|----------|----------|----------|-----------|
| AF001548.5    | 23,15   | -2,23 | 1,69678  | -1,31645 | 0,188024 | 0,5512312 |
| PSMB2         | 940,92  | 0,60  | 0,455599 | 1,316371 | 0,18805  | 0,5512312 |
| RP11-667K14.5 | 16,84   | -1,38 | 1,049117 | -1,31616 | 0,188121 | 0,5512862 |
| RP11-212D19.4 | 1,75    | 3,43  | 2,605385 | 1,316084 | 0,188146 | NA        |
| TMEM217       | 1,97    | 2,37  | 1,800763 | 1,316073 | 0,188149 | NA        |
| HLA-DRB5      | 5474,59 | 0,82  | 0,62103  | 1,316057 | 0,188155 | 0,5512862 |
| CTD-2531D15.5 | 11,33   | 2,14  | 1,625196 | 1,315999 | 0,188174 | 0,5512862 |
| RP3-335E1.1   | 4,81    | 4,90  | 3,722674 | 1,315961 | 0,188187 | 0,5512862 |
| CHST14        | 71,13   | 1,60  | 1,213627 | 1,315646 | 0,188293 | 0,5515096 |
| EVA1B         | 44,99   | -1,25 | 0,951554 | -1,31545 | 0,188359 | 0,5516153 |
| AC046143.7    | 33,70   | -1,71 | 1,298417 | -1,31528 | 0,188416 | 0,5516402 |
| SDR42E1       | 5,29    | -1,41 | 1,071863 | -1,31522 | 0,188435 | 0,5516402 |
| NELL1         | 22,57   | -2,34 | 1,780602 | -1,31515 | 0,18846  | 0,5516402 |
| ADTB1L1       | 0,70    | -2,88 | 2,18956  | -1,31512 | 0,188469 | NA        |
| AC006378.2    | 0,72    | 2,12  | 1,61093  | 1,315077 | 0,188484 | NA        |
| GABRE         | 19,66   | -1,18 | 0,898726 | -1,31504 | 0,188497 | 0,5516402 |
| STXBP4        | 95,40   | -1,42 | 1,080509 | -1,31498 | 0,188515 | 0,5516402 |
| OR4N2         | 18,73   | -4,75 | 3,61276  | -1,31459 | 0,188646 | 0,5517834 |
| TFE3          | 207,99  | -0,71 | 0,539873 | -1,31453 | 0,188668 | 0,5517834 |
| SETD1B        | 386,06  | 0,58  | 0,438504 | 1,314496 | 0,188679 | 0,5517834 |
| AMER2         | 18,92   | -1,77 | 1,347529 | -1,31442 | 0,188706 | 0,5517834 |
| RP11-274H24.2 | 105,51  | -0,68 | 0,518433 | -1,3144  | 0,188713 | 0,5517834 |
| RP11-524C21.2 | 0,70    | -3,63 | 2,761772 | -1,31423 | 0,18877  | NA        |
| H1FX          | 396,12  | -0,68 | 0,514848 | -1,31419 | 0,188781 | 0,5518981 |
| RP11-374M1.2  | 5,94    | 1,58  | 1,205471 | 1,314016 | 0,188841 | 0,5519844 |
| RP4-549L20.3  | 1,20    | 2,30  | 1,75012  | 1,313892 | 0,188883 | NA        |
| RP11-3A3.1    | 12,35   | -1,02 | 0,776525 | -1,31363 | 0,188971 | 0,552279  |
| DROSHA        | 184,31  | -0,86 | 0,656216 | -1,31342 | 0,18904  | 0,5523946 |
| MED27         | 256,14  | 1,11  | 0,847371 | 1,313196 | 0,189117 | 0,5525091 |
| RP11-442N1.2  | 12,66   | -0,94 | 0,717487 | -1,31303 | 0,189174 | 0,5525091 |
| ZNF417        | 62,90   | -1,58 | 1,20519  | -1,31281 | 0,189247 | 0,5525091 |
| CTD-2651B20.7 | 5,71    | 3,18  | 2,42123  | 1,312724 | 0,189276 | 0,5525091 |
| OR14J1        | 119,97  | -0,64 | 0,491111 | -1,31269 | 0,189287 | 0,5525091 |
| RP11-305N23.1 | 4,59    | -1,80 | 1,374608 | -1,31265 | 0,189302 | 0,5525091 |
| GLRA3         | 18,90   | 1,41  | 1,075856 | 1,312632 | 0,189307 | 0,5525091 |
| H2AFJ         | 532,37  | -0,52 | 0,395918 | -1,3126  | 0,189317 | 0,5525091 |
| PPP1R1C       | 2,13    | 1,49  | 1,132366 | 1,312589 | 0,189322 | NA        |
| RP11-387D10.3 | 8,51    | 1,13  | 0,857409 | 1,312294 | 0,189421 | 0,5527256 |
| RN7SL375P     | 0,84    | -2,61 | 1,987384 | -1,31217 | 0,189463 | NA        |
| CTA-228A9.4   | 191,07  | -0,44 | 0,337813 | -1,31196 | 0,189534 | 0,5529692 |
| ANG           | 72,68   | -1,75 | 1,332663 | -1,31171 | 0,189617 | 0,5531235 |
| AC005606.14   | 2,53    | 3,97  | 3,025715 | 1,311496 | 0,18969  | NA        |
| RP11-662J14.2 | 2,98    | 1,51  | 1,147891 | 1,311445 | 0,189707 | NA        |
| FOLR3         | 1,89    | -3,90 | 2,977668 | -1,31142 | 0,189716 | NA        |
| HINT2         | 345,61  | 0,65  | 0,494994 | 1,311409 | 0,189719 | 0,5532515 |
| RP4-664K17.2  | 7,99    | -0,96 | 0,730544 | -1,31136 | 0,189738 | 0,5532515 |
| SESN2         | 171,16  | 1,28  | 0,978789 | 1,311278 | 0,189764 | 0,5532515 |
| TTF1          | 126,91  | -1,04 | 0,795642 | -1,31123 | 0,18978  | 0,5532515 |
| RP11-361L15.3 | 2,00    | -2,82 | 2,149742 | -1,3111  | 0,189823 | NA        |
| RP5-844F9.1   | 9,72    | -3,08 | 2,352903 | -1,31096 | 0,189872 | 0,5534346 |



|               |         |       |          |          |          |           |
|---------------|---------|-------|----------|----------|----------|-----------|
| SNX8          | 312,90  | 0,86  | 0,658738 | 1,310709 | 0,189956 | 0,5534837 |
| NIPSNAP3B     | 56,57   | 1,38  | 1,050262 | 1,310681 | 0,189966 | 0,5534837 |
| CTD-2203K17.1 | 3,87    | 3,44  | 2,622669 | 1,31058  | 0,19     | 0,5534837 |
| C19orf73      | 5,46    | 4,51  | 3,43752  | 1,310555 | 0,190008 | 0,5534837 |
| RN7SL395P     | 0,54    | -2,47 | 1,882767 | -1,31054 | 0,190013 | NA        |
| RNA5SP455     | 2,28    | 3,82  | 2,916621 | 1,31046  | 0,19004  | NA        |
| MED16         | 193,13  | -0,70 | 0,531298 | -1,31042 | 0,190053 | 0,5534837 |
| SEMA4C        | 7,77    | -0,95 | 0,724921 | -1,31014 | 0,19015  | 0,5534837 |
| AC079779.4    | 3,93    | -0,85 | 0,646779 | -1,31012 | 0,190157 | 0,5534837 |
| MAP3K2        | 1483,94 | -0,58 | 0,440247 | -1,31008 | 0,190169 | 0,5534837 |
| GNPDA1        | 298,43  | -1,15 | 0,878621 | -1,31007 | 0,190172 | 0,5534837 |
| HIVEP1        | 173,75  | 0,89  | 0,682173 | 1,310027 | 0,190187 | 0,5534837 |
| RP3-333A15.2  | 22,94   | -1,75 | 1,334395 | -1,30983 | 0,190252 | 0,5535888 |
| TTK           | 4,66    | 3,60  | 2,745324 | 1,309525 | 0,190357 | 0,5538051 |
| MEGF9         | 871,42  | -0,44 | 0,334233 | -1,30913 | 0,19049  | 0,5540541 |
| UACA          | 65,33   | -1,16 | 0,884857 | -1,3091  | 0,190502 | 0,5540541 |
| MFSD11        | 215,08  | 0,76  | 0,577409 | 1,308957 | 0,190549 | 0,5541051 |
| RASAL1        | 2,90    | -1,13 | 0,861824 | -1,30891 | 0,190565 | NA        |
| AP001065.2    | 0,96    | -4,78 | 3,650803 | -1,30888 | 0,190574 | NA        |
| CTSL          | 112,99  | -1,48 | 1,129765 | -1,30884 | 0,190588 | 0,5541312 |
| CLDN14        | 2,01    | -2,62 | 2,003575 | -1,30877 | 0,190612 | NA        |
| MRPS17        | 134,21  | 0,85  | 0,650792 | 1,308701 | 0,190636 | 0,554184  |
| RP11-803D5.5  | 2,34    | 2,19  | 1,673651 | 1,308694 | 0,190638 | NA        |
| RN7SL294P     | 0,80    | -3,14 | 2,401361 | -1,30845 | 0,190722 | NA        |
| AP2S1         | 1923,56 | 0,24  | 0,185492 | 1,308214 | 0,190801 | 0,5544862 |
| CYP4A22       | 3,89    | -2,71 | 2,068729 | -1,30806 | 0,190852 | 0,5544862 |
| CYB5R3        | 428,61  | 0,69  | 0,52964  | 1,308057 | 0,190854 | 0,5544862 |
| NECTIN4       | 5,08    | 1,62  | 1,241973 | 1,308043 | 0,190859 | 0,5544862 |
| GPR4          | 7,59    | -1,54 | 1,176951 | -1,3077  | 0,190977 | 0,5547418 |
| RP11-114M1.2  | 3,26    | -1,55 | 1,18424  | -1,30755 | 0,191027 | NA        |
| RP11-792A8.5  | 2,11    | 2,47  | 1,890492 | 1,307387 | 0,191081 | NA        |
| RP5-857K21.7  | 3,14    | -0,90 | 0,687012 | -1,30702 | 0,191207 | NA        |
| HID1          | 2,59    | -2,08 | 1,589316 | -1,30701 | 0,19121  | NA        |
| CASP4         | 1633,58 | 0,41  | 0,311721 | 1,306947 | 0,191231 | 0,5553934 |
| COL6A1        | 1,00    | -4,77 | 3,648869 | -1,30694 | 0,191232 | NA        |
| F8A3          | 3,35    | 3,18  | 2,437142 | 1,306856 | 0,191262 | NA        |
| NFASC         | 7,42    | -1,05 | 0,8033   | -1,30633 | 0,191442 | 0,5559113 |
| DEF6          | 513,21  | 0,58  | 0,44372  | 1,306246 | 0,191469 | 0,5559113 |
| DPY30         | 209,22  | 0,69  | 0,526427 | 1,306117 | 0,191513 | 0,5559521 |
| RP11-96H17.1  | 1,37    | 2,44  | 1,86742  | 1,305998 | 0,191553 | NA        |
| MPV17L2       | 130,52  | 1,18  | 0,906123 | 1,305995 | 0,191554 | 0,5559582 |
| FABP5         | 372,04  | -0,68 | 0,518625 | -1,30593 | 0,191575 | 0,5559582 |
| MORC1         | 3,11    | 3,73  | 2,860725 | 1,305565 | 0,191701 | NA        |
| SLC44A2       | 123,25  | -1,22 | 0,931111 | -1,30538 | 0,191763 | 0,5563644 |
| ABT1          | 305,23  | 0,91  | 0,695584 | 1,305348 | 0,191775 | 0,5563644 |
| C14orf132     | 1,92    | -1,38 | 1,053419 | -1,3053  | 0,19179  | NA        |
| ZNF252P       | 98,07   | 0,89  | 0,684519 | 1,304925 | 0,191918 | 0,5566766 |
| NMRK1         | 120,27  | 1,30  | 0,994758 | 1,304856 | 0,191942 | 0,5566766 |
| FRG2          | 0,77    | -2,12 | 1,622842 | -1,30472 | 0,19199  | NA        |
| AC009961.5    | 3,61    | 3,32  | 2,541468 | 1,304552 | 0,192045 | NA        |

|                |          |       |          |          |          |           |
|----------------|----------|-------|----------|----------|----------|-----------|
| RP11-617D20.1  | 52,00    | -1,13 | 0,868679 | -1,30451 | 0,192061 | 0,5569349 |
| IL7            | 55,19    | 1,89  | 1,451221 | 1,304393 | 0,1921   | 0,5569604 |
| CASS4          | 239,38   | 0,91  | 0,695567 | 1,304278 | 0,192139 | 0,5569872 |
| RN7SL801P      | 3,29     | -1,78 | 1,363235 | -1,304   | 0,192234 | NA        |
| PNPLA6         | 858,12   | -0,46 | 0,352792 | -1,30385 | 0,192284 | 0,5573214 |
| CTD-2514C3.1   | 6,62     | 3,40  | 2,61001  | 1,303746 | 0,19232  | 0,5573394 |
| IQCD           | 2,99     | 3,58  | 2,746688 | 1,303419 | 0,192432 | NA        |
| AP5B1          | 64,81    | -1,34 | 1,028798 | -1,30315 | 0,192524 | 0,5578435 |
| RP11-344B2.3   | 1,38     | -1,59 | 1,22175  | -1,30307 | 0,192551 | NA        |
| RP11-496N17.2  | 250,47   | -0,93 | 0,714579 | -1,30301 | 0,192573 | 0,5578976 |
| CH17-472G23.2  | 37,43    | -0,93 | 0,713139 | -1,30268 | 0,192683 | 0,5581293 |
| SURF1          | 611,59   | -0,54 | 0,413646 | -1,30256 | 0,192725 | 0,5581634 |
| AC004988.1     | 1,33     | 1,78  | 1,363532 | 1,302488 | 0,192749 | NA        |
| MIR576         | 3,36     | 4,38  | 3,366042 | 1,302461 | 0,192759 | NA        |
| ABCG1          | 49,94    | -1,05 | 0,808538 | -1,30237 | 0,19279  | 0,5582654 |
| CTD-2311M21.3  | 3,68     | 1,44  | 1,102256 | 1,302035 | 0,192904 | NA        |
| NDUFB8         | 1513,71  | 0,28  | 0,21557  | 1,301956 | 0,192932 | 0,5585314 |
| MED11          | 256,90   | 0,60  | 0,463641 | 1,301926 | 0,192942 | 0,5585314 |
| TECR           | 459,10   | 0,55  | 0,421922 | 1,30181  | 0,192981 | 0,5585595 |
| CD72           | 159,11   | 1,26  | 0,965522 | 1,301603 | 0,193052 | 0,5586768 |
| RP5-900K19.2   | 21,74    | 2,17  | 1,667193 | 1,301345 | 0,19314  | 0,5588455 |
| ZZZ3           | 411,79   | 0,97  | 0,743718 | 1,30119  | 0,193194 | 0,5589125 |
| MAFF           | 202,10   | 0,87  | 0,66579  | 1,300909 | 0,19329  | 0,5591032 |
| RPS14          | 11924,34 | -0,32 | 0,242197 | -1,30078 | 0,193334 | 0,5591457 |
| AC007875.2     | 0,77     | -2,58 | 1,982125 | -1,30057 | 0,193407 | NA        |
| SH2D6          | 34,04    | -0,78 | 0,599441 | -1,30017 | 0,193543 | 0,5596631 |
| RP5-961K14.2   | 7,53     | -0,83 | 0,639568 | -1,30005 | 0,193585 | 0,5596764 |
| PTPN11         | 544,69   | -0,59 | 0,453061 | -1,29998 | 0,193608 | 0,5596764 |
| NAALAD2        | 5,23     | 2,22  | 1,706633 | 1,299857 | 0,19365  | 0,5597105 |
| RND3           | 1,11     | -2,66 | 2,049524 | -1,29977 | 0,193681 | NA        |
| SUSD3          | 132,87   | 1,34  | 1,029906 | 1,299681 | 0,19371  | 0,559798  |
| RNU6-638P      | 3,89     | 3,41  | 2,627394 | 1,299466 | 0,193784 | 0,5599242 |
| RP11-426J5.3   | 1,76     | 2,24  | 1,725604 | 1,299276 | 0,193849 | NA        |
| RP11-136I14.5  | 2,53     | 2,76  | 2,12127  | 1,29917  | 0,193885 | NA        |
| TCEANC2        | 183,12   | 0,76  | 0,583172 | 1,298615 | 0,194076 | 0,5606349 |
| SNORA23        | 0,56     | -2,77 | 2,132877 | -1,2985  | 0,194115 | NA        |
| NOTO           | 37,72    | 1,32  | 1,018506 | 1,298489 | 0,19412  | 0,5606349 |
| CD101          | 258,70   | 0,80  | 0,616301 | 1,298486 | 0,19412  | 0,5606349 |
| FYTTD1         | 508,02   | -0,61 | 0,470354 | -1,29815 | 0,194237 | 0,5608859 |
| AC022311.1     | 2,97     | -1,90 | 1,46613  | -1,29809 | 0,194256 | NA        |
| MASP1          | 9,16     | -1,02 | 0,783886 | -1,29769 | 0,194395 | 0,5612361 |
| TXLNG          | 140,87   | 1,10  | 0,848321 | 1,297617 | 0,194419 | 0,5612361 |
| MKRN3          | 5,85     | -1,09 | 0,837258 | -1,29749 | 0,194461 | 0,5612706 |
| RP11-304L19.13 | 8,06     | 1,25  | 0,964408 | 1,297286 | 0,194533 | 0,5613585 |
| POLI           | 151,60   | 0,88  | 0,681508 | 1,29723  | 0,194552 | 0,5613585 |
| RP11-727A23.11 | 3,38     | 4,39  | 3,383575 | 1,296852 | 0,194682 | NA        |
| RP11-613F22.5  | 3,42     | 4,41  | 3,401379 | 1,296373 | 0,194847 | NA        |
| OSBPL8         | 1201,55  | 0,41  | 0,313954 | 1,296368 | 0,194849 | 0,5621273 |
| RP11-449K6.4   | 0,82     | -2,50 | 1,927671 | -1,29608 | 0,194946 | NA        |
| RP11-57A19.7   | 9,66     | -0,92 | 0,710543 | -1,29604 | 0,194962 | 0,5621701 |

|                |        |       |          |          |          |           |
|----------------|--------|-------|----------|----------|----------|-----------|
| C5orf51        | 307,14 | 1,14  | 0,878733 | 1,29593  | 0,195    | 0,5621701 |
| C6orf123       | 6,36   | -0,89 | 0,685317 | -1,29581 | 0,195041 | 0,5621701 |
| ASB4           | 77,54  | -0,87 | 0,668198 | -1,29577 | 0,195053 | 0,5621701 |
| RN7SL851P      | 1,12   | -3,00 | 2,315075 | -1,29575 | 0,195061 | NA        |
| AC114788.2     | 0,87   | 1,77  | 1,36591  | 1,295656 | 0,195094 | NA        |
| SNX33          | 57,19  | 1,69  | 1,30797  | 1,295631 | 0,195103 | 0,5621701 |
| XRN1           | 684,92 | 0,46  | 0,354396 | 1,295592 | 0,195116 | 0,5621701 |
| AC007383.4     | 5,37   | 4,47  | 3,451024 | 1,295576 | 0,195122 | 0,5621701 |
| AEN            | 274,47 | 0,95  | 0,73392  | 1,295444 | 0,195167 | 0,5621701 |
| SLFN11         | 421,94 | -0,88 | 0,676439 | -1,29542 | 0,195176 | 0,5621701 |
| SHISA4         | 4,50   | 4,82  | 3,722874 | 1,295393 | 0,195185 | 0,5621701 |
| ZNF404         | 17,37  | 2,05  | 1,586262 | 1,295361 | 0,195196 | 0,5621701 |
| RP11-958J22.1  | 19,06  | -1,06 | 0,819708 | -1,29522 | 0,195246 | 0,5622257 |
| CC2D2A         | 142,01 | 1,11  | 0,855007 | 1,295002 | 0,195319 | 0,5622257 |
| RF00096        | 6,57   | -2,21 | 1,70925  | -1,295   | 0,19532  | 0,5622257 |
| RP11-857B24.1  | 5,71   | 4,55  | 3,513642 | 1,294954 | 0,195336 | 0,5622257 |
| RP11-562L8.1   | 0,50   | -1,97 | 1,522685 | -1,29491 | 0,195352 | NA        |
| SMIM15         | 189,50 | -0,83 | 0,637306 | -1,2947  | 0,195424 | 0,5623915 |
| RP1-190J20.2   | 0,85   | 2,37  | 1,834372 | 1,294606 | 0,195456 | NA        |
| BMP4           | 1,34   | 2,74  | 2,115    | 1,294592 | 0,195461 | NA        |
| RP11-372K14.2  | 10,94  | 2,32  | 1,792019 | 1,294487 | 0,195497 | 0,5625153 |
| ARIH2          | 710,11 | 0,63  | 0,489983 | 1,294276 | 0,19557  | 0,5625209 |
| P2RX5-TAX1BP3  | 83,11  | -0,77 | 0,598599 | -1,29425 | 0,195577 | 0,5625209 |
| CHMP3          | 824,47 | -0,61 | 0,472928 | -1,29422 | 0,19559  | 0,5625209 |
| RN7SKP292      | 1,66   | 3,37  | 2,601514 | 1,293754 | 0,19575  | NA        |
| MKS1           | 47,40  | 1,46  | 1,130512 | 1,293682 | 0,195775 | 0,5629676 |
| RP11-613D13.10 | 8,42   | 1,79  | 1,383961 | 1,293344 | 0,195892 | 0,5631851 |
| BEST2          | 4,32   | -1,36 | 1,052267 | -1,29325 | 0,195926 | 0,5631851 |
| RN7SL655P      | 15,44  | -1,08 | 0,834598 | -1,29315 | 0,19596  | 0,5631851 |
| ZWINT          | 3,26   | 2,50  | 1,931247 | 1,293049 | 0,195994 | NA        |
| RN7SL587P      | 29,80  | 0,95  | 0,734982 | 1,293049 | 0,195994 | 0,5631851 |
| MICU3          | 4,83   | 4,81  | 3,723245 | 1,292974 | 0,19602  | 0,5631851 |
| RP11-406H23.2  | 2,30   | 3,25  | 2,513734 | 1,292971 | 0,196021 | NA        |
| MEI1           | 95,64  | 1,13  | 0,87027  | 1,292938 | 0,196033 | 0,5631851 |
| RP5-1112D6.4   | 27,40  | -1,67 | 1,295548 | -1,29255 | 0,196168 | 0,563487  |
| MPZL1          | 231,90 | 0,92  | 0,70988  | 1,292077 | 0,19633  | 0,5637631 |
| RP4-798A10.7   | 20,59  | -2,22 | 1,718955 | -1,29207 | 0,196333 | 0,5637631 |
| CTD-2349P21.9  | 5,60   | 2,58  | 1,999942 | 1,291958 | 0,196372 | 0,5637631 |
| CXXC5          | 206,99 | -0,58 | 0,450711 | -1,29192 | 0,196385 | 0,5637631 |
| RP11-102.1     | 2,01   | -2,86 | 2,213884 | -1,2917  | 0,19646  | NA        |
| WEE2           | 0,97   | -4,71 | 3,647212 | -1,29166 | 0,196473 | NA        |
| RP11-713N11.6  | 13,41  | 1,90  | 1,470307 | 1,291509 | 0,196527 | 0,5640769 |
| CLEC2D         | 504,12 | -0,75 | 0,580858 | -1,29142 | 0,196558 | 0,5640769 |
| MAS1           | 37,40  | -0,68 | 0,526045 | -1,29129 | 0,196603 | 0,5640769 |
| KCMF1          | 456,45 | 0,63  | 0,489899 | 1,291228 | 0,196625 | 0,5640769 |
| RP11-355I22.3  | 2,79   | -1,91 | 1,482537 | -1,2912  | 0,196633 | NA        |
| RP4-598G3.1    | 18,52  | 2,37  | 1,832035 | 1,291115 | 0,196664 | 0,5640769 |
| RP11-3P9.1     | 32,70  | 2,97  | 2,303616 | 1,291017 | 0,196698 | 0,5640769 |
| CRYL1          | 442,90 | 1,13  | 0,876378 | 1,290959 | 0,196718 | 0,5640769 |
| TFSM           | 107,98 | 1,24  | 0,963591 | 1,290746 | 0,196792 | 0,5640769 |

|               |         |       |          |          |          |           |
|---------------|---------|-------|----------|----------|----------|-----------|
| ACO09264.1    | 28,45   | 0,94  | 0,725528 | 1,290737 | 0,196795 | 0,5640769 |
| H2AFY         | 3376,89 | 0,19  | 0,149294 | 1,290729 | 0,196798 | 0,5640769 |
| RN7SL751P     | 0,96    | 1,97  | 1,524327 | 1,290719 | 0,196801 | NA        |
| RN7SL445P     | 0,54    | -3,02 | 2,340161 | -1,29063 | 0,196833 | NA        |
| TAPBP         | 2990,91 | 0,21  | 0,16528  | 1,29034  | 0,196933 | 0,5643563 |
| AK9           | 85,28   | 0,87  | 0,674516 | 1,290266 | 0,196958 | 0,5643563 |
| C21orf58      | 12,60   | -1,02 | 0,790663 | -1,29019 | 0,196986 | 0,5643563 |
| PRR12         | 14,75   | 1,77  | 1,370561 | 1,290024 | 0,197042 | 0,5644304 |
| TARID         | 5,71    | -1,56 | 1,207832 | -1,28993 | 0,197075 | 0,5644363 |
| ZNF7          | 249,16  | -0,76 | 0,587203 | -1,28973 | 0,197144 | 0,5645461 |
| RP11-481J2.2  | 1,71    | 2,19  | 1,701634 | 1,289702 | 0,197154 | NA        |
| U91319.1      | 2,10    | 2,48  | 1,92687  | 1,289628 | 0,19718  | NA        |
| MCM3AP        | 750,24  | -0,62 | 0,4825   | -1,28927 | 0,197305 | 0,5648191 |
| OPRK1         | 3,75    | -1,61 | 1,251627 | -1,28922 | 0,197321 | NA        |
| CTNNB1        | 1266,38 | 0,34  | 0,260532 | 1,289212 | 0,197324 | 0,5648191 |
| LINCO0921     | 58,88   | 1,33  | 1,03426  | 1,289138 | 0,19735  | 0,5648191 |
| RP11-1C8.5    | 18,25   | -0,66 | 0,515011 | -1,28904 | 0,197383 | 0,5648191 |
| MAU2          | 321,76  | 0,68  | 0,527917 | 1,289021 | 0,197391 | 0,5648191 |
| EGFL8         | 7,08    | -1,50 | 1,160261 | -1,28893 | 0,197423 | 0,5648194 |
| RP11-34P13.10 | 110,33  | -0,65 | 0,505371 | -1,28877 | 0,197478 | 0,5648194 |
| RP11-367B6.2  | 18,18   | -1,62 | 1,253525 | -1,28876 | 0,197482 | 0,5648194 |
| MYSM1         | 456,74  | 0,70  | 0,545281 | 1,288516 | 0,197566 | 0,5648205 |
| WDR55         | 328,95  | 0,76  | 0,587746 | 1,2885   | 0,197572 | 0,5648205 |
| ACO07228.5    | 9,41    | -0,96 | 0,744305 | -1,2885  | 0,197573 | 0,5648205 |
| HP1BP3        | 1116,49 | -0,40 | 0,309885 | -1,2881  | 0,197711 | 0,5650587 |
| MAP3K13       | 242,21  | 0,78  | 0,603894 | 1,288029 | 0,197736 | 0,5650587 |
| RP11-634H22.1 | 11,21   | 1,73  | 1,342901 | 1,287995 | 0,197748 | 0,5650587 |
| CTD-2224J9.9  | 1,29    | 2,97  | 2,304672 | 1,287802 | 0,197815 | NA        |
| FBXO31        | 51,17   | -1,92 | 1,489434 | -1,28756 | 0,1979   | 0,5653904 |
| MRPL47        | 216,29  | 0,91  | 0,70945  | 1,287487 | 0,197925 | 0,5653904 |
| S100A7A       | 1,64    | -3,86 | 3,001706 | -1,28747 | 0,197931 | NA        |
| C3            | 20,79   | 0,86  | 0,668578 | 1,287325 | 0,197981 | 0,5654154 |
| GPSM2         | 93,57   | -0,69 | 0,535754 | -1,28722 | 0,198017 | 0,5654154 |
| ACO97495.2    | 4,01    | -3,97 | 3,082604 | -1,2872  | 0,198025 | 0,5654154 |
| PRPF39        | 167,35  | 0,97  | 0,750829 | 1,287067 | 0,198071 | 0,5654614 |
| ISPD          | 16,25   | -1,35 | 1,046823 | -1,28683 | 0,198154 | 0,5654622 |
| PDE6G         | 84,73   | -1,60 | 1,244544 | -1,28681 | 0,19816  | 0,5654622 |
| DNTTIP2       | 1325,90 | -0,53 | 0,415115 | -1,28674 | 0,198185 | 0,5654622 |
| RP13-314C10.5 | 5,15    | -1,49 | 1,156996 | -1,28672 | 0,198193 | 0,5654622 |
| B4GALNT3      | 11,33   | -3,06 | 2,376476 | -1,28661 | 0,198232 | 0,5654861 |
| DHRS4L2       | 365,20  | -0,47 | 0,369062 | -1,28621 | 0,198368 | 0,5657896 |
| KIF9          | 125,80  | -1,07 | 0,832709 | -1,2861  | 0,198408 | 0,5658167 |
| RP11-820I16.4 | 2,43    | -3,15 | 2,445726 | -1,28599 | 0,198448 | NA        |
| SERPINB1      | 1799,57 | -0,33 | 0,257919 | -1,28596 | 0,198456 | 0,5658671 |
| RP13-858C7.1  | 9,20    | 1,64  | 1,272752 | 1,285666 | 0,19856  | 0,5660746 |
| EIF4A1        | 9996,65 | 0,24  | 0,185279 | 1,28533  | 0,198677 | 0,566237  |
| CTA-384D8.35  | 81,69   | 1,19  | 0,927018 | 1,285251 | 0,198705 | 0,566237  |
| CLCF1         | 1,86    | 3,47  | 2,701424 | 1,285245 | 0,198707 | NA        |
| FKBP2         | 333,65  | -0,43 | 0,333915 | -1,28524 | 0,198708 | 0,566237  |
| SH3KBP1       | 1380,14 | 0,46  | 0,358605 | 1,285148 | 0,19874  | 0,5662428 |

|                |         |       |          |          |          |           |
|----------------|---------|-------|----------|----------|----------|-----------|
| CTC-421K24.1   | 1,82    | 2,91  | 2,26396  | 1,284863 | 0,19884  | NA        |
| USP45          | 61,88   | 1,05  | 0,820355 | 1,284805 | 0,198861 | 0,5663549 |
| CDH8           | 57,23   | -1,51 | 1,178453 | -1,28479 | 0,198867 | 0,5663549 |
| ZRANB2         | 520,79  | 0,40  | 0,313363 | 1,284762 | 0,198876 | 0,5663549 |
| TCF25          | 1276,37 | -0,40 | 0,312032 | -1,28469 | 0,198902 | 0,5663549 |
| FDXR           | 13,55   | 2,26  | 1,756876 | 1,28438  | 0,199009 | 0,5665742 |
| RP11-307P5.2   | 4,79    | -1,39 | 1,080193 | -1,28423 | 0,19906  | 0,5665804 |
| CDK5RAP2       | 295,47  | -0,75 | 0,587192 | -1,28419 | 0,199074 | 0,5665804 |
| RP11-102N12.3  | 71,36   | 0,91  | 0,707339 | 1,284113 | 0,199103 | 0,5665804 |
| LINC00677      | 2,90    | -3,56 | 2,773694 | -1,28389 | 0,19918  | NA        |
| RP11-390D11.1  | 2,48    | -2,30 | 1,794425 | -1,28379 | 0,199216 | NA        |
| ARL11          | 120,14  | -1,15 | 0,895422 | -1,28375 | 0,199229 | 0,5667857 |
| FLT3LG         | 41,90   | -1,06 | 0,82756  | -1,28367 | 0,199259 | 0,5667857 |
| COL28A1        | 8,02    | -1,20 | 0,934129 | -1,28365 | 0,199266 | 0,5667857 |
| RP11-18H21.2   | 0,81    | -2,81 | 2,187902 | -1,28364 | 0,199268 | NA        |
| PCDHB2         | 0,61    | -1,68 | 1,310151 | -1,28292 | 0,199522 | NA        |
| MYO1H          | 1,81    | -4,51 | 3,517507 | -1,28267 | 0,199609 | NA        |
| ORMDL2         | 389,46  | -0,50 | 0,388773 | -1,28259 | 0,199635 | 0,5677496 |
| C10orf71       | 1,09    | 2,98  | 2,322044 | 1,28233  | 0,199727 | NA        |
| AC093726.6     | 119,87  | 0,97  | 0,756428 | 1,282101 | 0,199807 | 0,5680691 |
| HELZ2          | 81,86   | -0,96 | 0,747767 | -1,2821  | 0,199809 | 0,5680691 |
| EFCAB7         | 31,44   | -2,26 | 1,763588 | -1,28187 | 0,199887 | 0,5682055 |
| RP11-67A1.4    | 1,26    | 2,95  | 2,303171 | 1,281797 | 0,199914 | NA        |
| RP11-94H18.1   | 0,71    | -4,10 | 3,201789 | -1,28175 | 0,199929 | NA        |
| RP11-305O6.3   | 10,53   | -1,47 | 1,148975 | -1,28167 | 0,199959 | 0,5683209 |
| FBXO15         | 710,91  | -0,72 | 0,565517 | -1,28104 | 0,200181 | 0,5687835 |
| ZNF302         | 187,50  | -0,56 | 0,433513 | -1,28103 | 0,200182 | 0,5687835 |
| RP11-838N2.5   | 2,56    | 2,15  | 1,682026 | 1,281004 | 0,200192 | NA        |
| LYST           | 2142,76 | -0,41 | 0,318087 | -1,28028 | 0,200447 | 0,5693147 |
| RP1-67K17.4    | 30,46   | -1,23 | 0,962691 | -1,28027 | 0,200452 | 0,5693147 |
| MAP1LC3B       | 1206,46 | 0,46  | 0,358342 | 1,280221 | 0,200467 | 0,5693147 |
| AP001628.6     | 3,15    | 4,28  | 3,341994 | 1,280176 | 0,200483 | NA        |
| PTDSS1         | 744,36  | 0,60  | 0,466658 | 1,280075 | 0,200519 | 0,5693147 |
| NPB            | 4,72    | -4,00 | 3,124409 | -1,28006 | 0,200522 | 0,5693147 |
| RP1-34B20.21   | 36,52   | 1,35  | 1,05346  | 1,279867 | 0,200592 | 0,5693653 |
| RP11-799D4.4   | 16,29   | -1,20 | 0,934508 | -1,27981 | 0,200613 | 0,5693653 |
| RP11-1082L8.3  | 2,20    | 3,75  | 2,930429 | 1,279517 | 0,200715 | NA        |
| CMIP           | 316,89  | -0,78 | 0,610255 | -1,27951 | 0,200717 | 0,5693653 |
| C1orf52        | 293,54  | -0,94 | 0,733081 | -1,27944 | 0,200743 | 0,5693653 |
| AC093323.3     | 68,36   | -1,60 | 1,25082  | -1,27931 | 0,200788 | 0,5693653 |
| SEPT9          | 709,97  | 0,61  | 0,477756 | 1,279293 | 0,200794 | 0,5693653 |
| NIPA2          | 483,93  | 0,80  | 0,623165 | 1,279244 | 0,200811 | 0,5693653 |
| AQP11          | 22,79   | 2,41  | 1,88211  | 1,279244 | 0,200811 | 0,5693653 |
| AC083884.8     | 117,59  | -1,00 | 0,78363  | -1,2792  | 0,200825 | 0,5693653 |
| PANK4          | 51,13   | -1,47 | 1,148215 | -1,27913 | 0,200852 | 0,5693653 |
| SPNS1          | 786,19  | -0,50 | 0,389928 | -1,27906 | 0,200877 | 0,5693653 |
| RN7SL350P      | 0,78    | -3,05 | 2,382944 | -1,279   | 0,200898 | NA        |
| USHBP1         | 10,67   | -0,93 | 0,725241 | -1,27889 | 0,200937 | 0,5693834 |
| COPS2          | 442,69  | 0,76  | 0,593784 | 1,278865 | 0,200944 | 0,5693834 |
| RP11-422P24.11 | 1,24    | 2,96  | 2,316871 | 1,278713 | 0,200998 | NA        |

|               |         |       |          |          |          |           |
|---------------|---------|-------|----------|----------|----------|-----------|
| CDK12         | 435,30  | 0,70  | 0,547941 | 1,278637 | 0,201025 | 0,5694109 |
| CTC-539A10.7  | 4,33    | -1,12 | 0,873077 | -1,27863 | 0,201029 | 0,5694109 |
| FAM184A       | 25,77   | -4,47 | 3,492646 | -1,27858 | 0,201046 | 0,5694109 |
| SYNRG         | 240,05  | -0,72 | 0,559601 | -1,27822 | 0,201173 | 0,569542  |
| SPDYE2        | 51,12   | -1,11 | 0,872015 | -1,27818 | 0,201186 | 0,569542  |
| IPP           | 16,79   | -1,30 | 1,018781 | -1,27818 | 0,201188 | 0,569542  |
| MAP4K1        | 1103,72 | 0,36  | 0,27992  | 1,278098 | 0,201215 | 0,569542  |
| PCDHGB6       | 5,17    | 1,12  | 0,876471 | 1,277878 | 0,201292 | 0,5696752 |
| SEC61A2       | 52,59   | 1,61  | 1,261916 | 1,277621 | 0,201383 | 0,5698222 |
| RP5-947P14.1  | 37,66   | 0,94  | 0,737105 | 1,277555 | 0,201407 | 0,5698222 |
| RP11-294O2.1  | 29,46   | -0,66 | 0,52031  | -1,27738 | 0,201468 | 0,5698222 |
| FIRRE         | 66,71   | -0,94 | 0,7353   | -1,27729 | 0,201501 | 0,5698222 |
| TNKS1BP1      | 2,07    | 3,81  | 2,987088 | 1,276977 | 0,20161  | NA        |
| AC027269.2    | 16,69   | -0,99 | 0,771754 | -1,27685 | 0,201656 | 0,5698222 |
| PDLIM2        | 401,46  | -0,60 | 0,468452 | -1,27681 | 0,20167  | 0,5698222 |
| TTC13         | 217,71  | 1,09  | 0,852644 | 1,276769 | 0,201684 | 0,5698222 |
| AC096669.3    | 36,45   | -1,68 | 1,312024 | -1,27674 | 0,201694 | 0,5698222 |
| LA16c-358B7.3 | 39,52   | -1,24 | 0,970769 | -1,27673 | 0,201697 | 0,5698222 |
| FAM186A       | 26,65   | -1,18 | 0,923472 | -1,27672 | 0,2017   | 0,5698222 |
| AHNAK         | 5291,20 | -0,34 | 0,26291  | -1,27669 | 0,201711 | 0,5698222 |
| RP5-1000K24.2 | 38,04   | 1,20  | 0,936033 | 1,27669  | 0,201712 | 0,5698222 |
| CGGBP1        | 757,51  | -0,68 | 0,5331   | -1,27635 | 0,201831 | 0,5700711 |
| RP11-151N17.2 | 89,08   | 1,02  | 0,80005  | 1,276258 | 0,201864 | 0,5700796 |
| GLTPD2        | 3,18    | 4,31  | 3,375794 | 1,276051 | 0,201937 | NA        |
| RP11-295D4.3  | 48,63   | 1,28  | 1,000656 | 1,275804 | 0,202025 | 0,5704465 |
| KIAA1210      | 2,42    | 1,34  | 1,047807 | 1,275782 | 0,202033 | NA        |
| RP11-379I19.3 | 10,63   | 2,00  | 1,56572  | 1,275634 | 0,202085 | 0,5705296 |
| GAD2          | 0,71    | -4,15 | 3,256895 | -1,27561 | 0,202093 | NA        |
| OR2C3         | 10,94   | 1,33  | 1,041433 | 1,275428 | 0,202158 | 0,5706483 |
| VPS13B        | 605,33  | 0,66  | 0,516914 | 1,275234 | 0,202227 | 0,5707562 |
| PEX11G        | 33,64   | -1,39 | 1,087194 | -1,27503 | 0,2023   | 0,57077   |
| FAN1          | 49,38   | 1,81  | 1,418715 | 1,274936 | 0,202332 | 0,57077   |
| GEMIN7        | 317,91  | 0,65  | 0,513404 | 1,274863 | 0,202358 | 0,57077   |
| RP11-452H21.1 | 2,25    | 3,81  | 2,986954 | 1,274809 | 0,202377 | NA        |
| ZNF888        | 28,82   | 1,10  | 0,865139 | 1,274767 | 0,202392 | 0,57077   |
| PPIA          | 8311,16 | 0,24  | 0,186657 | 1,274724 | 0,202407 | 0,57077   |
| HACD4         | 1633,04 | -0,39 | 0,307005 | -1,2747  | 0,202415 | 0,57077   |
| PTPRS         | 14,17   | -0,95 | 0,74494  | -1,27441 | 0,202519 | 0,5709756 |
| SMOC1         | 2,95    | -2,42 | 1,899488 | -1,27428 | 0,202563 | NA        |
| LINC01012     | 17,86   | -0,99 | 0,776947 | -1,27418 | 0,202598 | 0,5711113 |
| CNOT7         | 1296,69 | 0,66  | 0,515743 | 1,274074 | 0,202637 | 0,5711358 |
| RP11-129K20.2 | 0,71    | -4,10 | 3,21607  | -1,27395 | 0,20268  | NA        |
| CEBPZOS       | 223,83  | 0,50  | 0,394733 | 1,273875 | 0,202708 | 0,5711839 |
| GYG2          | 1,34    | 2,40  | 1,886498 | 1,273875 | 0,202708 | NA        |
| ACSL5         | 736,05  | 0,86  | 0,676775 | 1,273775 | 0,202743 | 0,5711839 |
| PSMB6         | 2200,32 | 0,35  | 0,274096 | 1,273766 | 0,202746 | 0,5711839 |
| PHOSPHO1      | 3,72    | 4,03  | 3,164501 | 1,273745 | 0,202754 | NA        |
| ARHGAP17      | 708,36  | 0,42  | 0,326674 | 1,273638 | 0,202792 | 0,5712247 |
| AC002075.4    | 1,70    | -0,99 | 0,780371 | -1,27348 | 0,202847 | NA        |
| RP11-166O4.3  | 175,01  | 1,22  | 0,955487 | 1,273188 | 0,202951 | 0,5715875 |

|                |         |       |          |          |          |           |
|----------------|---------|-------|----------|----------|----------|-----------|
| RP3-382I10.7   | 2,98    | 2,54  | 1,998602 | 1,273158 | 0,202962 | NA        |
| CTD-2373J6.2   | 0,88    | -4,65 | 3,651545 | -1,27268 | 0,203132 | NA        |
| RP5-908M14.10  | 16,13   | 1,51  | 1,188835 | 1,272488 | 0,2032   | 0,5722006 |
| GDF9           | 2,57    | 3,85  | 3,023429 | 1,27236  | 0,203245 | NA        |
| EME1           | 6,35    | 2,72  | 2,135089 | 1,272226 | 0,203293 | 0,5723751 |
| AC074141.3     | 15,81   | -1,35 | 1,060481 | -1,27214 | 0,203323 | 0,5723751 |
| RP4-591N18.2   | 45,67   | 0,59  | 0,460925 | 1,271824 | 0,203436 | 0,5726048 |
| PHF19          | 167,51  | 1,01  | 0,793659 | 1,271456 | 0,203566 | 0,5728865 |
| TMED3          | 854,83  | -0,61 | 0,479476 | -1,27132 | 0,203617 | 0,572936  |
| ALG12          | 33,07   | 2,19  | 1,722502 | 1,271234 | 0,203646 | 0,572936  |
| MED14          | 320,49  | 0,92  | 0,727705 | 1,270991 | 0,203732 | 0,5730919 |
| CSPP1          | 262,92  | -0,92 | 0,720633 | -1,27085 | 0,203782 | 0,5731469 |
| WTAP           | 1419,34 | 0,40  | 0,312071 | 1,270734 | 0,203823 | 0,5731758 |
| CTD-3236F5.1   | 12,74   | -2,12 | 1,668174 | -1,27044 | 0,203928 | 0,5732749 |
| NREP           | 616,28  | 0,54  | 0,426006 | 1,270332 | 0,203967 | 0,5732749 |
| GYG1           | 431,86  | -0,67 | 0,523607 | -1,27018 | 0,204019 | 0,5732749 |
| AC009506.1     | 24,64   | 2,04  | 1,606932 | 1,270082 | 0,204055 | 0,5732749 |
| RP11-120K19.3  | 39,62   | -2,33 | 1,836023 | -1,27001 | 0,204081 | 0,5732749 |
| AC093642.1     | 14,07   | -1,62 | 1,277602 | -1,26993 | 0,20411  | 0,5732749 |
| RPL32P26       | 4,25    | 4,73  | 3,722977 | 1,269899 | 0,20412  | 0,5732749 |
| CYP2B7P1       | 6,20    | -1,07 | 0,841158 | -1,26986 | 0,204133 | 0,5732749 |
| CTD-2547E10.4  | 11,43   | 0,96  | 0,759234 | 1,269784 | 0,204161 | 0,5732749 |
| TMEM53         | 32,90   | 1,34  | 1,051955 | 1,26977  | 0,204167 | 0,5732749 |
| RP11-1275H24.3 | 1,91    | 2,96  | 2,334731 | 1,269614 | 0,204222 | NA        |
| PTK7           | 40,93   | -0,96 | 0,755181 | -1,2695  | 0,204263 | 0,5734591 |
| RP11-517B11.7  | 3,28    | 4,35  | 3,426834 | 1,269492 | 0,204266 | NA        |
| RP11-16M8.2    | 20,66   | -2,91 | 2,289016 | -1,26922 | 0,204364 | 0,5736214 |
| RP11-15A1.7    | 18,65   | -2,39 | 1,88332  | -1,26908 | 0,204411 | 0,5736214 |
| RP11-744K17.1  | 17,80   | -1,69 | 1,333888 | -1,26908 | 0,204413 | 0,5736214 |
| AC009495.2     | 20,40   | -1,79 | 1,413621 | -1,26881 | 0,204508 | 0,5738013 |
| ABHD16A        | 331,86  | 0,66  | 0,516708 | 1,268538 | 0,204606 | 0,5739497 |
| CTD-2587H24.14 | 8,74    | -1,07 | 0,843778 | -1,26849 | 0,204623 | 0,5739497 |
| CSTF3          | 139,76  | -0,56 | 0,445206 | -1,26837 | 0,204665 | 0,5739824 |
| RN7SL123P      | 3,07    | -1,17 | 0,925371 | -1,26825 | 0,204707 | NA        |
| RP11-335K5.2   | 15,17   | -1,02 | 0,808087 | -1,26821 | 0,204723 | 0,5740575 |
| RP11-214F16.2  | 3,54    | -1,29 | 1,016315 | -1,26797 | 0,204807 | NA        |
| AC019118.2     | 3,53    | 2,06  | 1,628101 | 1,267899 | 0,204834 | NA        |
| MBD6           | 248,84  | -0,77 | 0,610618 | -1,26767 | 0,204916 | 0,5744557 |
| AC004510.3     | 9,81    | -2,02 | 1,592171 | -1,26764 | 0,204927 | 0,5744557 |
| ZNHIT1         | 930,42  | -0,31 | 0,244241 | -1,26734 | 0,205032 | 0,5746651 |
| RP11-65F13.2   | 3,61    | -1,31 | 1,030456 | -1,26726 | 0,205061 | NA        |
| RP11-411A19.5  | 21,71   | 0,86  | 0,680015 | 1,267168 | 0,205095 | 0,5747549 |
| C11orf31       | 1613,14 | -0,33 | 0,263651 | -1,26703 | 0,205145 | 0,5748068 |
| RP4-761J14.8   | 185,63  | 1,16  | 0,919528 | 1,266931 | 0,20518  | 0,5748185 |
| CTD-3193O13.12 | 3,52    | -1,22 | 0,960769 | -1,26679 | 0,205232 | NA        |
| PPP4R2         | 342,64  | 0,60  | 0,47683  | 1,266734 | 0,205251 | 0,5749303 |
| TP63           | 3,97    | 1,93  | 1,521109 | 1,266198 | 0,205442 | 0,5753801 |
| PKN3           | 1,34    | -3,39 | 2,675019 | -1,26602 | 0,205505 | NA        |
| NUFIP1         | 70,85   | 1,17  | 0,922485 | 1,265692 | 0,205623 | 0,5758008 |
| RP11-661A12.12 | 8,04    | -0,85 | 0,671989 | -1,2655  | 0,205692 | 0,5758287 |

|               |         |       |          |          |          |           |
|---------------|---------|-------|----------|----------|----------|-----------|
| SAMD3         | 32,07   | -1,42 | 1,121122 | -1,26542 | 0,20572  | 0,5758287 |
| CTC-444N24.11 | 193,01  | -0,60 | 0,471205 | -1,26513 | 0,205825 | 0,5758287 |
| ENDOG         | 35,76   | -1,70 | 1,342294 | -1,26511 | 0,205833 | 0,5758287 |
| RP11-615I2.1  | 1,05    | -2,35 | 1,859956 | -1,26503 | 0,205859 | NA        |
| DRAM1         | 167,47  | 0,75  | 0,592959 | 1,265026 | 0,205862 | 0,5758287 |
| AD000684.2    | 12,99   | -1,71 | 1,351905 | -1,26489 | 0,205909 | 0,5758287 |
| RP11-445F6.2  | 0,53    | -3,08 | 2,437999 | -1,26484 | 0,205928 | NA        |
| RNF39         | 2,16    | 3,75  | 2,963091 | 1,264804 | 0,205941 | NA        |
| SEC23IP       | 523,50  | -0,99 | 0,784221 | -1,26477 | 0,205954 | 0,5758287 |
| ADIPOQ        | 6,94    | -1,22 | 0,966652 | -1,26473 | 0,20597  | 0,5758287 |
| ZNF639        | 215,37  | -1,06 | 0,841168 | -1,2647  | 0,205979 | 0,5758287 |
| SLC4A8        | 117,56  | 0,95  | 0,749865 | 1,264609 | 0,206012 | 0,5758287 |
| ADGRG4        | 12,57   | -2,66 | 2,101584 | -1,26457 | 0,206027 | 0,5758287 |
| RP3-449O17.1  | 62,93   | -0,76 | 0,599787 | -1,26456 | 0,206029 | 0,5758287 |
| FCRL5         | 262,24  | -0,66 | 0,525822 | -1,26454 | 0,206036 | 0,5758287 |
| CCND3         | 1935,77 | -0,31 | 0,246946 | -1,26436 | 0,206101 | 0,5759256 |
| GJC1          | 38,14   | -0,59 | 0,462755 | -1,26426 | 0,206135 | 0,5759334 |
| KLC4          | 40,50   | -0,86 | 0,683515 | -1,26416 | 0,206173 | 0,5759525 |
| IGHMBP2       | 78,68   | 1,01  | 0,798602 | 1,263735 | 0,206325 | 0,5762883 |
| MATN1         | 5,98    | -1,75 | 1,382465 | -1,26362 | 0,206367 | 0,5762883 |
| DNTTIP1       | 412,25  | -0,67 | 0,530189 | -1,26348 | 0,206418 | 0,5762883 |
| RP11-242P2.2  | 14,29   | 0,81  | 0,643069 | 1,2634   | 0,206445 | 0,5762883 |
| ORC6          | 209,38  | -0,52 | 0,407644 | -1,26337 | 0,206456 | 0,5762883 |
| RN7SL134P     | 0,72    | -2,04 | 1,615738 | -1,26331 | 0,206478 | NA        |
| ARAP2         | 388,06  | -0,81 | 0,641068 | -1,26323 | 0,206505 | 0,5762883 |
| FPR1          | 1585,49 | -0,66 | 0,521136 | -1,2632  | 0,206517 | 0,5762883 |
| FHOD1         | 509,52  | -0,55 | 0,43365  | -1,26313 | 0,206541 | 0,5762883 |
| RP11-497H16.9 | 34,01   | 1,40  | 1,105148 | 1,263027 | 0,20658  | 0,5763103 |
| FAAH          | 87,53   | -1,09 | 0,862916 | -1,26276 | 0,206674 | 0,5763386 |
| OR8H1         | 6,83    | 1,26  | 0,994692 | 1,262736 | 0,206684 | 0,5763386 |
| RP6-91H8.3    | 184,27  | 0,88  | 0,694063 | 1,262682 | 0,206703 | 0,5763386 |
| URGCP         | 279,67  | -1,00 | 0,793953 | -1,26265 | 0,206714 | 0,5763386 |
| RP11-867G2.5  | 3,12    | 4,27  | 3,383895 | 1,262648 | 0,206716 | NA        |
| EPG5          | 278,40  | 0,75  | 0,592423 | 1,262458 | 0,206784 | 0,5763803 |
| RP11-130C19.3 | 5,06    | -1,09 | 0,866322 | -1,26228 | 0,206847 | 0,5763803 |
| RP11-234A1.1  | 5,05    | -1,07 | 0,849541 | -1,26227 | 0,20685  | 0,5763803 |
| SEC61B        | 946,75  | 0,24  | 0,192568 | 1,262268 | 0,206853 | 0,5763803 |
| FBXO33        | 409,96  | -0,73 | 0,576167 | -1,26209 | 0,206917 | 0,5764747 |
| GRM3          | 2,22    | -1,19 | 0,943489 | -1,262   | 0,206948 | NA        |
| AC012513.6    | 6,47    | -0,88 | 0,698772 | -1,26182 | 0,207012 | 0,576651  |
| SNRPG         | 516,46  | -0,43 | 0,339366 | -1,26174 | 0,207043 | 0,576651  |
| AC067945.4    | 0,48    | -3,48 | 2,758903 | -1,26171 | 0,207053 | NA        |
| PIK3R3        | 28,04   | 1,32  | 1,048297 | 1,261534 | 0,207117 | 0,5767129 |
| RP11-478H13.2 | 12,25   | -1,81 | 1,434613 | -1,26151 | 0,207127 | 0,5767129 |
| RP11-527H14.2 | 2,47    | -1,32 | 1,049403 | -1,26134 | 0,207185 | NA        |
| LRIG2         | 295,09  | 0,75  | 0,593384 | 1,261335 | 0,207188 | 0,5767974 |
| APLP1         | 3,25    | 1,46  | 1,158906 | 1,261315 | 0,207196 | NA        |
| AC105053.4    | 3,08    | 4,26  | 3,376321 | 1,261127 | 0,207263 | NA        |
| RP11-5K23.3   | 2,18    | 3,75  | 2,969702 | 1,261096 | 0,207274 | NA        |
| C1orf35       | 251,58  | -0,59 | 0,469161 | -1,26108 | 0,207281 | 0,5769408 |



|                |         |       |          |          |          |           |
|----------------|---------|-------|----------|----------|----------|-----------|
| GPR132         | 114,13  | 1,01  | 0,800521 | 1,26102  | 0,207302 | 0,5769408 |
| MAT2A          | 2796,58 | 0,51  | 0,402081 | 1,260783 | 0,207387 | 0,5769644 |
| TCEA2          | 52,72   | -1,34 | 1,062946 | -1,26077 | 0,20739  | 0,5769644 |
| LRRC38         | 1,22    | 2,92  | 2,315775 | 1,26072  | 0,20741  | NA        |
| TRRAP          | 331,61  | -0,81 | 0,639515 | -1,26071 | 0,207413 | 0,5769644 |
| GOLGA8B        | 236,22  | -0,85 | 0,671469 | -1,26065 | 0,207434 | 0,5769644 |
| LIAS           | 186,87  | -0,70 | 0,553188 | -1,26036 | 0,207538 | 0,5771677 |
| CTSB           | 3102,39 | -0,35 | 0,278431 | -1,25994 | 0,207692 | 0,5773099 |
| GS1-114I9.1    | 54,33   | -2,02 | 1,603683 | -1,2599  | 0,207706 | 0,5773099 |
| SPOCD1         | 8,16    | 1,21  | 0,961531 | 1,25986  | 0,20772  | 0,5773099 |
| MOK            | 90,60   | 0,86  | 0,683792 | 1,259836 | 0,207729 | 0,5773099 |
| RP11-542P2.2   | 21,64   | 0,94  | 0,748707 | 1,259791 | 0,207745 | 0,5773099 |
| RN7SL316P      | 1,13    | 2,82  | 2,240119 | 1,259631 | 0,207803 | NA        |
| RP11-154C3.2   | 1,11    | -1,79 | 1,421724 | -1,25952 | 0,207841 | NA        |
| RNU6-1069P     | 3,24    | 1,66  | 1,316685 | 1,259435 | 0,207873 | NA        |
| RN7SL231P      | 1,13    | 2,82  | 2,240035 | 1,259415 | 0,20788  | NA        |
| ACAT1          | 408,14  | -0,50 | 0,39906  | -1,25912 | 0,207986 | 0,5778931 |
| RN7SL15P       | 0,63    | -2,70 | 2,145689 | -1,25905 | 0,208013 | NA        |
| AC005037.7     | 1,10    | 2,79  | 2,214637 | 1,259041 | 0,208016 | NA        |
| RP11-29H23.1   | 18,37   | -2,04 | 1,623132 | -1,25876 | 0,208116 | 0,5781077 |
| MEIKIN         | 4,63    | 2,66  | 2,112325 | 1,258738 | 0,208125 | 0,5781077 |
| AP000318.2     | 2,01    | -1,48 | 1,178347 | -1,25866 | 0,208153 | NA        |
| RP11-76C10.3   | 15,74   | 0,88  | 0,698538 | 1,258646 | 0,208158 | 0,5781139 |
| CTD-2231E14.5  | 3,25    | -1,72 | 1,365974 | -1,25842 | 0,20824  | NA        |
| FAM104A        | 308,29  | -0,86 | 0,684812 | -1,25836 | 0,208262 | 0,5783143 |
| RP11-392O17.1  | 23,82   | -0,57 | 0,449121 | -1,25826 | 0,208297 | 0,5783267 |
| CATSPER1       | 110,58  | -1,05 | 0,835916 | -1,2579  | 0,208427 | 0,5784889 |
| RP3-466P17.3   | 49,52   | -1,04 | 0,828903 | -1,25789 | 0,208432 | 0,5784889 |
| RAX2           | 6,63    | -1,46 | 1,162977 | -1,25781 | 0,208461 | 0,5784889 |
| PBX4           | 1,37    | -3,26 | 2,590332 | -1,25774 | 0,208486 | NA        |
| HIST1H3A       | 37,19   | -1,80 | 1,432108 | -1,25763 | 0,208524 | 0,5784889 |
| RP11-702L15.4  | 3,04    | 2,25  | 1,786749 | 1,257632 | 0,208525 | NA        |
| AC007365.3     | 20,62   | 1,63  | 1,294063 | 1,257355 | 0,208625 | 0,5784889 |
| TRIP4          | 117,66  | 0,89  | 0,705138 | 1,257312 | 0,208641 | 0,5784889 |
| ZNF169         | 63,35   | 0,87  | 0,690687 | 1,257265 | 0,208658 | 0,5784889 |
| ANAPC5         | 1504,24 | -0,31 | 0,247128 | -1,25725 | 0,208663 | 0,5784889 |
| TBKBP1         | 45,47   | 1,67  | 1,330827 | 1,257196 | 0,208683 | 0,5784889 |
| RP11-225B17.2  | 2,46    | -1,25 | 0,996303 | -1,25716 | 0,208697 | NA        |
| RP11-336K24.12 | 8,51    | 1,39  | 1,105097 | 1,257145 | 0,208701 | 0,5784889 |
| RP5-1057J7.7   | 28,61   | -0,74 | 0,590357 | -1,25709 | 0,20872  | 0,5784889 |
| CYB5B          | 295,08  | 0,85  | 0,679823 | 1,257069 | 0,208729 | 0,5784889 |
| CTD-2003C8.2   | 1,00    | 2,62  | 2,082879 | 1,256733 | 0,20885  | NA        |
| ZBTB41         | 122,77  | 1,29  | 1,025128 | 1,256639 | 0,208884 | 0,5788342 |
| RP11-180I4.2   | 4,13    | 4,68  | 3,723065 | 1,256402 | 0,20897  | 0,5789569 |
| NUPL2          | 314,50  | 0,71  | 0,565588 | 1,256345 | 0,208991 | 0,5789569 |
| RP11-586L23.1  | 3,22    | -1,55 | 1,232456 | -1,25633 | 0,208998 | NA        |
| RP1-86D1.5     | 1,53    | 1,99  | 1,582552 | 1,25627  | 0,209018 | NA        |
| ZNF486         | 22,12   | -0,73 | 0,583158 | -1,25595 | 0,209135 | 0,5792687 |
| CTC-499B15.8   | 1,20    | -2,64 | 2,100907 | -1,25593 | 0,209143 | NA        |
| AC003092.1     | 2,19    | 2,56  | 2,039034 | 1,255917 | 0,209146 | NA        |

|                |         |       |          |          |          |           |
|----------------|---------|-------|----------|----------|----------|-----------|
| CTD-2282P23.2  | 0,94    | 2,54  | 2,020664 | 1,255868 | 0,209164 | NA        |
| RP11-96K19.2   | 27,32   | 1,78  | 1,416374 | 1,25578  | 0,209196 | 0,5793523 |
| RP11-1047D15.2 | 3,36    | -1,54 | 1,222974 | -1,25577 | 0,2092   | NA        |
| RP11-558N14.1  | 5,24    | -1,13 | 0,900117 | -1,25537 | 0,209346 | 0,579681  |
| AMPD3          | 111,89  | -0,93 | 0,741248 | -1,25506 | 0,209455 | 0,5798116 |
| MNT            | 209,71  | -0,70 | 0,558783 | -1,25493 | 0,209503 | 0,5798116 |
| AC137499.2     | 13,45   | -3,79 | 3,019005 | -1,25487 | 0,209526 | 0,5798116 |
| RP11-888D10.3  | 2,37    | -2,42 | 1,926351 | -1,25485 | 0,209534 | NA        |
| DYNAP          | 57,47   | 0,95  | 0,757959 | 1,254814 | 0,209546 | 0,5798116 |
| TTLL1          | 17,40   | 1,61  | 1,285649 | 1,254807 | 0,209549 | 0,5798116 |
| RPL35          | 2098,35 | -0,36 | 0,284681 | -1,25462 | 0,209618 | 0,5799174 |
| C1QL3          | 5,05    | 3,91  | 3,119298 | 1,254207 | 0,209767 | 0,5802396 |
| KAZN           | 9,50    | -1,36 | 1,088366 | -1,25408 | 0,209814 | 0,5802396 |
| ZNF738         | 67,49   | 0,97  | 0,769707 | 1,253964 | 0,209855 | 0,5802396 |
| HCG9           | 5,05    | 2,65  | 2,115492 | 1,253895 | 0,20988  | 0,5802396 |
| MDH1B          | 2,46    | -3,42 | 2,723782 | -1,25382 | 0,209906 | NA        |
| MRPL9          | 293,09  | 0,61  | 0,488133 | 1,253735 | 0,209938 | 0,5802396 |
| RP11-473I1.5   | 5,77    | 2,58  | 2,058739 | 1,253677 | 0,209959 | 0,5802396 |
| RPS24          | 4169,87 | -0,24 | 0,190542 | -1,25364 | 0,209973 | 0,5802396 |
| ATG10          | 161,93  | 0,72  | 0,576059 | 1,253585 | 0,209993 | 0,5802396 |
| RSL24D1        | 895,80  | -0,40 | 0,319683 | -1,25352 | 0,210015 | 0,5802396 |
| RP11-178H8.2   | 5,33    | -1,03 | 0,818461 | -1,25336 | 0,210074 | 0,5803148 |
| NIPAL4         | 1,67    | 2,78  | 2,221572 | 1,253057 | 0,210185 | NA        |
| CPNE3          | 1298,54 | 0,82  | 0,650905 | 1,252946 | 0,210225 | 0,5806479 |
| PACRGL         | 89,38   | -1,16 | 0,926492 | -1,25274 | 0,210299 | 0,580657  |
| LHPP           | 131,39  | 0,86  | 0,688935 | 1,252695 | 0,210317 | 0,580657  |
| NSUN5P2        | 148,04  | -0,65 | 0,517774 | -1,25258 | 0,210359 | 0,580657  |
| RP11-6B6.3     | 5,75    | 1,68  | 1,339056 | 1,252518 | 0,210381 | 0,580657  |
| ST3GAL5        | 647,01  | -0,64 | 0,507158 | -1,25251 | 0,210385 | 0,580657  |
| CENPO          | 47,97   | 1,47  | 1,172022 | 1,252143 | 0,210518 | 0,5808245 |
| RP11-196G11.3  | 6,68    | -1,14 | 0,906484 | -1,2521  | 0,210533 | 0,5808245 |
| ARAP1          | 1416,97 | -0,53 | 0,422044 | -1,25208 | 0,210539 | 0,5808245 |
| PLA2G15        | 164,18  | -0,90 | 0,71561  | -1,25198 | 0,210576 | 0,5808398 |
| PRKG2          | 3,00    | -1,81 | 1,448966 | -1,25164 | 0,2107   | NA        |
| PDE1B          | 48,04   | -0,82 | 0,65686  | -1,25158 | 0,210723 | 0,5810229 |
| GALNTL5        | 7,95    | -1,68 | 1,340636 | -1,25156 | 0,210729 | 0,5810229 |
| NOTCH4         | 64,87   | -1,16 | 0,92843  | -1,25154 | 0,210736 | 0,5810229 |
| SDF2L1         | 397,11  | 0,69  | 0,54912  | 1,251398 | 0,210789 | 0,5810839 |
| RPLPOP2        | 18,85   | -0,85 | 0,679025 | -1,2512  | 0,210863 | 0,5811996 |
| KAT5           | 244,69  | -0,96 | 0,768493 | -1,251   | 0,210935 | 0,5812335 |
| ARL2           | 409,56  | 0,42  | 0,337435 | 1,250972 | 0,210945 | 0,5812335 |
| LINS1          | 218,69  | -1,06 | 0,843502 | -1,25088 | 0,210979 | 0,5812335 |
| CTD-2532N20.1  | 4,42    | 3,58  | 2,863899 | 1,250821 | 0,211    | 0,5812335 |
| MAP7D2         | 2,92    | 3,46  | 2,764908 | 1,250811 | 0,211003 | NA        |
| AC009478.1     | 0,67    | -4,02 | 3,216094 | -1,25067 | 0,211056 | NA        |
| RP11-10J21.2   | 4,44    | -1,35 | 1,082926 | -1,2506  | 0,211082 | 0,5812557 |
| CCDC149        | 193,91  | -1,31 | 1,050564 | -1,25059 | 0,211084 | 0,5812557 |
| OSCP1          | 2,88    | 2,98  | 2,385727 | 1,250544 | 0,211101 | NA        |
| TAF13          | 168,73  | 0,55  | 0,441335 | 1,250542 | 0,211102 | 0,5812557 |
| GDNF-AS1       | 1,12    | 2,10  | 1,678263 | 1,250199 | 0,211227 | NA        |

|               |         |       |          |          |          |           |
|---------------|---------|-------|----------|----------|----------|-----------|
| SUPT3H        | 45,74   | -1,05 | 0,836486 | -1,25016 | 0,211241 | 0,581492  |
| RP11-136F16.1 | 9,81    | 1,11  | 0,885905 | 1,250136 | 0,21125  | 0,581492  |
| GLB1          | 1259,25 | 0,60  | 0,479352 | 1,249965 | 0,211312 | 0,5815779 |
| RP11-707O23.1 | 0,86    | -2,45 | 1,963391 | -1,24996 | 0,211313 | NA        |
| SUFU          | 122,99  | 1,32  | 1,057263 | 1,249877 | 0,211345 | 0,581579  |
| GTF2IRD1      | 14,48   | 0,74  | 0,589057 | 1,249793 | 0,211375 | 0,581579  |
| RP11-82L7.4   | 7,61    | -2,47 | 1,978102 | -1,24964 | 0,211432 | 0,5816354 |
| R3HCC1L       | 233,10  | 0,98  | 0,783065 | 1,249566 | 0,211458 | 0,5816354 |
| AC093038.1    | 1,40    | 2,47  | 1,974709 | 1,249451 | 0,2115   | NA        |
| BNIP2         | 1662,67 | -0,41 | 0,325418 | -1,24925 | 0,211575 | 0,581779  |
| SNAP29        | 352,03  | 0,66  | 0,527397 | 1,249138 | 0,211615 | 0,581779  |
| DNALI1        | 3,34    | 3,92  | 3,136565 | 1,249122 | 0,21162  | NA        |
| AC004797.1    | 1,02    | -4,08 | 3,266535 | -1,24911 | 0,211626 | NA        |
| RNASE9        | 0,94    | -4,56 | 3,65165  | -1,24903 | 0,211656 | NA        |
| RP11-471B22.3 | 27,96   | -1,03 | 0,823291 | -1,24901 | 0,211663 | 0,581779  |
| RP11-443B7.1  | 7,69    | 1,69  | 1,352676 | 1,248949 | 0,211684 | 0,581779  |
| DDX10         | 361,58  | -0,69 | 0,551088 | -1,24895 | 0,211685 | 0,581779  |
| GCSH          | 36,97   | 1,18  | 0,94321  | 1,248908 | 0,211699 | 0,581779  |
| PNMAL1        | 6,66    | 0,83  | 0,665908 | 1,248824 | 0,211729 | 0,581779  |
| RP13-923O23.6 | 2,11    | -2,07 | 1,658678 | -1,24873 | 0,211762 | NA        |
| RNU4-1        | 3,34    | -1,84 | 1,472922 | -1,24865 | 0,211793 | NA        |
| ACTR3         | 3016,58 | 0,44  | 0,351038 | 1,248636 | 0,211798 | 0,5818664 |
| NUP88         | 212,92  | 0,72  | 0,580377 | 1,248566 | 0,211824 | 0,5818664 |
| RP11-583F2.2  | 17,47   | 1,11  | 0,892882 | 1,248362 | 0,211899 | 0,5818963 |
| LIMCH1        | 72,50   | 1,47  | 1,179332 | 1,24836  | 0,211899 | 0,5818963 |
| CTTN          | 5,08    | -1,20 | 0,960095 | -1,24828 | 0,211928 | 0,5818963 |
| RP11-419L4.1  | 4,39    | -3,56 | 2,854996 | -1,24819 | 0,211963 | 0,5819011 |
| SUPT5H        | 786,00  | -0,50 | 0,397691 | -1,2481  | 0,211993 | 0,5819011 |
| RN7SL798P     | 7,80    | -1,81 | 1,452694 | -1,24789 | 0,21207  | 0,5819872 |
| RP11-195F19.9 | 6,03    | 1,88  | 1,507388 | 1,247695 | 0,212143 | 0,5819872 |
| RP11-370I10.2 | 19,24   | -1,57 | 1,260984 | -1,24767 | 0,212152 | 0,5819872 |
| PRKDC         | 1051,58 | 0,46  | 0,368074 | 1,247658 | 0,212157 | 0,5819872 |
| LA16c-OS12.2  | 3,33    | -1,67 | 1,33584  | -1,2476  | 0,212179 | NA        |
| RP11-170K4.2  | 4,23    | -1,27 | 1,015047 | -1,24759 | 0,212181 | 0,5819872 |
| EIF4G2        | 4208,00 | 0,19  | 0,155379 | 1,247021 | 0,21239  | 0,5823516 |
| MARCO         | 80,22   | -1,59 | 1,275432 | -1,24698 | 0,212406 | 0,5823516 |
| AFF2          | 14,20   | -1,86 | 1,492939 | -1,24697 | 0,212407 | 0,5823516 |
| RP1-197B17.3  | 2,16    | 3,76  | 3,013599 | 1,246791 | 0,212474 | NA        |
| RP11-363G15.2 | 1,05    | -1,67 | 1,336765 | -1,24667 | 0,21252  | NA        |
| MCM2          | 23,02   | 1,96  | 1,569498 | 1,246665 | 0,21252  | 0,5824056 |
| FAM182A       | 47,91   | -2,50 | 2,00164  | -1,24666 | 0,212523 | 0,5824056 |
| ZBTB20        | 856,72  | -0,83 | 0,662818 | -1,24661 | 0,212539 | 0,5824056 |
| TCTE1         | 5,73    | 1,02  | 0,821235 | 1,246578 | 0,212552 | 0,5824056 |
| AC074338.4    | 2,23    | -2,78 | 2,231645 | -1,24647 | 0,212593 | NA        |
| MRGBP         | 65,09   | 1,24  | 0,994046 | 1,245934 | 0,212789 | 0,5827813 |
| MXRA7         | 99,39   | -1,10 | 0,884037 | -1,24584 | 0,212822 | 0,5827813 |
| MCC           | 11,02   | -0,83 | 0,665761 | -1,24579 | 0,212843 | 0,5827813 |
| KCNJ6         | 73,94   | -0,60 | 0,485419 | -1,24578 | 0,212844 | 0,5827813 |
| ST3GAL6       | 454,47  | 0,61  | 0,489661 | 1,245756 | 0,212854 | 0,5827813 |
| RAB24         | 1505,17 | -0,42 | 0,334345 | -1,24569 | 0,212877 | 0,5827813 |

|               |        |       |          |          |          |           |
|---------------|--------|-------|----------|----------|----------|-----------|
| RP11-74E22.3  | 2,92   | 4,17  | 3,349513 | 1,245684 | 0,21288  | NA        |
| C7orf60       | 122,60 | -1,21 | 0,970721 | -1,24553 | 0,212936 | 0,5828571 |
| RNU6-1099P    | 2,01   | 3,65  | 2,92835  | 1,245389 | 0,212989 | NA        |
| METTL14       | 135,70 | 0,78  | 0,622871 | 1,24521  | 0,213054 | 0,5830947 |
| RN7SL291P     | 3,27   | -2,75 | 2,206725 | -1,2452  | 0,213059 | NA        |
| PUS1          | 155,90 | 1,10  | 0,884722 | 1,244984 | 0,213138 | 0,5832362 |
| STX5          | 174,40 | -0,90 | 0,722872 | -1,24489 | 0,213173 | 0,5832488 |
| RNF223        | 2,88   | 1,75  | 1,407652 | 1,244703 | 0,213241 | NA        |
| MYOF          | 787,34 | 0,82  | 0,656691 | 1,244696 | 0,213244 | 0,5833549 |
| RP11-848D3.2  | 20,00  | -1,06 | 0,854089 | -1,24442 | 0,213345 | 0,5835463 |
| ANKS3         | 62,15  | 1,27  | 1,021276 | 1,244187 | 0,213431 | 0,5836166 |
| RP13-188A5.1  | 10,55  | 1,75  | 1,404155 | 1,244134 | 0,21345  | 0,5836166 |
| RP11-304L19.5 | 11,41  | -1,29 | 1,033884 | -1,24409 | 0,213465 | 0,5836166 |
| GOLGA8H       | 1,06   | -2,58 | 2,075628 | -1,2438  | 0,213574 | NA        |
| CRYBG2        | 30,25  | -3,15 | 2,529    | -1,24378 | 0,213581 | 0,5838366 |
| NXT2          | 106,01 | 1,29  | 1,037459 | 1,243706 | 0,213608 | 0,5838366 |
| NEK4          | 107,88 | 1,26  | 1,011976 | 1,243497 | 0,213685 | 0,5839607 |
| INTS6         | 536,21 | -0,57 | 0,459881 | -1,24333 | 0,213746 | 0,5839991 |
| RP11-1072N2.3 | 4,55   | -2,37 | 1,903187 | -1,24329 | 0,213762 | 0,5839991 |
| ST8SIA6       | 9,16   | -1,23 | 0,985993 | -1,2432  | 0,213793 | 0,5839991 |
| OR3A3         | 5,02   | -1,13 | 0,907053 | -1,24306 | 0,213845 | 0,5840562 |
| RP1-85F18.6   | 1,57   | 3,28  | 2,636504 | 1,242933 | 0,213893 | NA        |
| AC073236.2    | 3,58   | 4,63  | 3,725082 | 1,242888 | 0,213909 | NA        |
| GPR12         | 1,86   | -1,34 | 1,079567 | -1,24273 | 0,213967 | NA        |
| RTCB          | 687,63 | 0,62  | 0,497119 | 1,242604 | 0,214014 | 0,5844304 |
| RAB9B         | 0,78   | -3,53 | 2,844333 | -1,24259 | 0,21402  | NA        |
| CRTC3         | 231,69 | 0,80  | 0,641541 | 1,242404 | 0,214088 | 0,5845358 |
| SNX13         | 420,97 | 0,56  | 0,453668 | 1,242329 | 0,214115 | 0,5845358 |
| CTD-2002J20.1 | 4,30   | 3,56  | 2,86263  | 1,242118 | 0,214193 | 0,5846421 |
| RP11-646I6.3  | 55,43  | 0,79  | 0,637126 | 1,242053 | 0,214217 | 0,5846421 |
| RP11-235D19.4 | 2,04   | 3,65  | 2,937571 | 1,241738 | 0,214333 | NA        |
| LINC00266-1   | 0,86   | -4,53 | 3,648643 | -1,24173 | 0,214335 | NA        |
| SESN3         | 247,87 | -1,14 | 0,918576 | -1,24155 | 0,214402 | 0,585005  |
| CTC-529I10.2  | 17,47  | 1,35  | 1,090859 | 1,241523 | 0,214413 | 0,585005  |
| RNA5SP68      | 2,13   | 3,72  | 2,998541 | 1,241347 | 0,214478 | NA        |
| KCNQ5         | 4,00   | 3,57  | 2,880082 | 1,241177 | 0,21454  | 0,5851381 |
| SNORA55       | 0,41   | -2,02 | 1,627326 | -1,24118 | 0,21454  | NA        |
| RP11-728F11.4 | 13,20  | -1,34 | 1,079771 | -1,24117 | 0,214542 | 0,5851381 |
| RP11-42L13.1  | 7,34   | -1,65 | 1,329008 | -1,24113 | 0,214556 | 0,5851381 |
| FIBP          | 890,53 | 0,42  | 0,337707 | 1,240983 | 0,214612 | 0,5852008 |
| R3HDML        | 0,65   | -3,03 | 2,438742 | -1,24091 | 0,214638 | NA        |
| LYSMD1        | 10,45  | 1,35  | 1,088307 | 1,240903 | 0,214642 | 0,5852008 |
| CSTL1         | 0,75   | -1,55 | 1,252205 | -1,24059 | 0,214756 | NA        |
| RP11-848P1.9  | 49,33  | -0,98 | 0,792446 | -1,24053 | 0,21478  | 0,5854925 |
| AC027612.6    | 27,40  | 1,50  | 1,208407 | 1,240305 | 0,214863 | 0,5856215 |
| ACSL3         | 266,14 | 0,69  | 0,553302 | 1,24023  | 0,214891 | 0,5856215 |
| APTX          | 281,39 | 0,82  | 0,659628 | 1,239701 | 0,215086 | 0,5860686 |
| PTGES         | 13,61  | -1,03 | 0,830783 | -1,23953 | 0,21515  | 0,5861559 |
| RP11-384P7.7  | 7,30   | -1,23 | 0,993665 | -1,23922 | 0,215263 | 0,5862688 |
| RP1-34B21.6   | 56,85  | 1,24  | 0,999151 | 1,239164 | 0,215285 | 0,5862688 |

|               |         |       |          |          |          |           |
|---------------|---------|-------|----------|----------|----------|-----------|
| ANKLE2        | 684,37  | -0,54 | 0,432201 | -1,23916 | 0,215286 | 0,5862688 |
| ZKSCAN7       | 3,06    | -1,47 | 1,185088 | -1,23915 | 0,215291 | NA        |
| TTC8          | 153,39  | 1,27  | 1,025139 | 1,23882  | 0,215412 | 0,5865277 |
| CTD-2021A8.3  | 2,06    | 2,45  | 1,977696 | 1,238794 | 0,215422 | NA        |
| ST6GALNAC4    | 67,48   | 1,18  | 0,948728 | 1,238689 | 0,215461 | 0,5865735 |
| PUS7L         | 604,46  | 0,88  | 0,709867 | 1,238381 | 0,215575 | 0,5866849 |
| RPS21         | 1055,79 | -0,47 | 0,380432 | -1,23834 | 0,21559  | 0,5866849 |
| KCTD5         | 158,63  | 1,12  | 0,907157 | 1,238324 | 0,215596 | 0,5866849 |
| COX7C         | 1042,07 | -0,32 | 0,260789 | -1,23814 | 0,215664 | 0,5867335 |
| PRRG3         | 28,99   | -0,46 | 0,374835 | -1,23811 | 0,215677 | 0,5867335 |
| KCNE1         | 43,77   | -0,88 | 0,710414 | -1,23798 | 0,215724 | 0,5867413 |
| RC3H1         | 876,91  | -0,71 | 0,576379 | -1,23793 | 0,215743 | 0,5867413 |
| FUBP3         | 197,01  | -0,81 | 0,656219 | -1,23751 | 0,215897 | 0,5868936 |
| C17orf64      | 3,89    | 4,61  | 3,723477 | 1,237442 | 0,215923 | 0,5868936 |
| ZNF813        | 46,21   | -1,16 | 0,933956 | -1,23737 | 0,21595  | 0,5868936 |
| FAM184B       | 15,55   | -1,12 | 0,904326 | -1,23732 | 0,215967 | 0,5868936 |
| SNRNP35       | 189,40  | -0,52 | 0,421458 | -1,23731 | 0,215972 | 0,5868936 |
| RP3-510L9.1   | 7,43    | 2,07  | 1,670363 | 1,237255 | 0,215992 | 0,5868936 |
| MAN2C1        | 729,39  | -0,34 | 0,271492 | -1,23718 | 0,21602  | 0,5868936 |
| AC012442.5    | 1,18    | 2,88  | 2,326518 | 1,236973 | 0,216097 | NA        |
| RP11-138I1.2  | 13,42   | -2,22 | 1,797385 | -1,23696 | 0,216101 | 0,587014  |
| RP11-468B6.3  | 4,73    | 4,28  | 3,463768 | 1,236871 | 0,216135 | 0,587014  |
| RP11-775C24.3 | 21,20   | -0,95 | 0,76558  | -1,23681 | 0,216159 | 0,587014  |
| AGPAT6        | 806,45  | 0,64  | 0,520239 | 1,236673 | 0,216208 | 0,5870631 |
| AC005062.3    | 7,35    | -0,69 | 0,555466 | -1,23656 | 0,216249 | 0,5870661 |
| RP11-403P17.3 | 15,44   | 1,01  | 0,815653 | 1,236501 | 0,216273 | 0,5870661 |
| ZCCHC6        | 758,44  | -0,63 | 0,510483 | -1,23633 | 0,216337 | 0,5871415 |
| THUMPD2       | 128,46  | 0,93  | 0,75284  | 1,236183 | 0,216391 | 0,5871415 |
| FBXO5         | 78,05   | 1,52  | 1,228518 | 1,236171 | 0,216395 | 0,5871415 |
| RNU11         | 12,65   | -1,12 | 0,909344 | -1,23605 | 0,216439 | 0,5871739 |
| RP11-16B13.1  | 3,01    | -3,40 | 2,749807 | -1,236   | 0,216457 | NA        |
| RP11-378J18.6 | 0,92    | -3,16 | 2,558496 | -1,23573 | 0,216557 | NA        |
| TUFM          | 1733,32 | 0,41  | 0,330914 | 1,235632 | 0,216595 | 0,5874898 |
| TNFRSF13B     | 5,33    | 1,31  | 1,056271 | 1,235571 | 0,216618 | 0,5874898 |
| MT-TA         | 12,53   | -0,68 | 0,546836 | -1,23548 | 0,216651 | 0,5874942 |
| MRPL35        | 187,82  | 1,11  | 0,896238 | 1,235212 | 0,216752 | 0,5876137 |
| PTX3          | 78,68   | 1,64  | 1,329967 | 1,235153 | 0,216773 | 0,5876137 |
| RP11-522L3.4  | 0,82    | -4,01 | 3,247389 | -1,23513 | 0,216783 | NA        |
| ICK           | 66,05   | -0,88 | 0,70907  | -1,23511 | 0,21679  | 0,5876137 |
| ABLIM3        | 0,81    | -4,51 | 3,652645 | -1,23504 | 0,216816 | NA        |
| CCDC17        | 31,94   | 2,14  | 1,735346 | 1,234882 | 0,216874 | 0,5877565 |
| ZFP57         | 3,58    | 3,00  | 2,429232 | 1,234871 | 0,216878 | NA        |
| AP001505.10   | 9,75    | 1,37  | 1,106242 | 1,23469  | 0,216946 | 0,5878275 |
| ADAT3         | 28,03   | 2,28  | 1,849203 | 1,234587 | 0,216984 | 0,5878275 |
| RP11-359N11.2 | 6,93    | -1,99 | 1,611061 | -1,23456 | 0,216995 | 0,5878275 |
| RP4-753D10.5  | 3,25    | -1,13 | 0,91713  | -1,23451 | 0,217011 | NA        |
| RP11-1191J2.5 | 11,99   | -3,39 | 2,747517 | -1,23415 | 0,217148 | 0,5881298 |
| OTOF          | 20,13   | -2,42 | 1,964452 | -1,23402 | 0,217196 | 0,5881298 |
| CDKN2AIP      | 70,44   | 1,62  | 1,316817 | 1,234003 | 0,217202 | 0,5881298 |
| USMG5         | 328,39  | -0,37 | 0,302602 | -1,23392 | 0,217233 | 0,5881298 |

|                |         |       |          |          |          |           |
|----------------|---------|-------|----------|----------|----------|-----------|
| PPP1R12A       | 1329,84 | -0,37 | 0,30183  | -1,23381 | 0,217274 | 0,5881544 |
| GPR34          | 15,54   | 2,15  | 1,745834 | 1,23371  | 0,217311 | 0,5881684 |
| RP11-506B6.6   | 1,78    | 2,82  | 2,282075 | 1,233706 | 0,217313 | NA        |
| CCDC144B       | 735,15  | -0,59 | 0,476232 | -1,23358 | 0,21736  | 0,5881818 |
| RP11-1072C15.6 | 11,68   | -0,71 | 0,572661 | -1,23344 | 0,217412 | 0,5881818 |
| PES1           | 81,37   | 0,87  | 0,707698 | 1,233354 | 0,217444 | 0,5881818 |
| RP11-303E16.8  | 5,89    | 1,71  | 1,382557 | 1,233314 | 0,217459 | 0,5881818 |
| RP11-863H1.1   | 43,75   | -1,37 | 1,107876 | -1,23323 | 0,21749  | 0,5881818 |
| ARFRP1         | 350,44  | -0,95 | 0,772686 | -1,23319 | 0,217506 | 0,5881818 |
| DNAJC6         | 0,75    | -2,02 | 1,634879 | -1,23312 | 0,21753  | NA        |
| C6orf227       | 22,66   | -0,66 | 0,53837  | -1,23304 | 0,21756  | 0,5882433 |
| CD8B           | 4,26    | -3,27 | 2,649453 | -1,23294 | 0,217597 | 0,5882579 |
| TOMM22         | 1073,65 | 0,41  | 0,332518 | 1,232661 | 0,217702 | 0,5884576 |
| CFAP57         | 2,92    | 2,33  | 1,894079 | 1,232439 | 0,217785 | NA        |
| LIN52          | 78,94   | -0,93 | 0,752317 | -1,23243 | 0,217787 | 0,5886018 |
| SPARCL1        | 2,33    | 2,05  | 1,662691 | 1,23243  | 0,217788 | NA        |
| RP11-53A1.3    | 3,49    | -1,50 | 1,215148 | -1,23238 | 0,217809 | NA        |
| KRT80          | 1,55    | -1,98 | 1,603274 | -1,23236 | 0,217814 | NA        |
| RP11-175G14.2  | 14,08   | -3,74 | 3,034007 | -1,23231 | 0,217834 | 0,5886426 |
| CTD-3110H11.3  | 202,50  | -0,57 | 0,461381 | -1,23217 | 0,217884 | 0,5886926 |
| RP11-239L20.6  | 3,69    | 3,91  | 3,173183 | 1,232103 | 0,217911 | NA        |
| FAM78A         | 129,79  | 0,93  | 0,753221 | 1,231974 | 0,217959 | 0,5887805 |
| RNF217         | 195,00  | -0,90 | 0,728296 | -1,23192 | 0,21798  | 0,5887805 |
| MND1           | 5,15    | 2,48  | 2,015295 | 1,231641 | 0,218083 | 0,5889731 |
| TMEM104        | 174,88  | 0,84  | 0,682764 | 1,231451 | 0,218154 | 0,5889743 |
| CNTN4          | 4,99    | -1,53 | 1,24098  | -1,23131 | 0,218206 | 0,5889743 |
| EHBP1L1        | 426,50  | -0,87 | 0,70306  | -1,23127 | 0,21822  | 0,5889743 |
| TMEM262        | 3,86    | 4,58  | 3,72325  | 1,231169 | 0,21826  | 0,5889743 |
| RP11-961A15.1  | 22,62   | -0,87 | 0,705041 | -1,23116 | 0,218262 | 0,5889743 |
| CTC-436K13.1   | 5,75    | -2,99 | 2,42477  | -1,23113 | 0,218273 | 0,5889743 |
| AC053503.6     | 1,70    | -1,64 | 1,328974 | -1,23107 | 0,218296 | NA        |
| ADSSL1         | 20,82   | -1,21 | 0,984973 | -1,23098 | 0,218329 | 0,5890394 |
| RP11-100L22.1  | 5,86    | -2,94 | 2,38567  | -1,23059 | 0,218478 | 0,5893551 |
| TSPAN4         | 297,61  | -0,84 | 0,68499  | -1,23047 | 0,218522 | 0,5893896 |
| RP11-288L9.1   | 2,45    | -3,42 | 2,780617 | -1,23038 | 0,218555 | NA        |
| BX470102.3     | 3,21    | 3,73  | 3,029392 | 1,230344 | 0,218568 | NA        |
| AC005546.2     | 1,21    | 2,25  | 1,827561 | 1,230259 | 0,2186   | NA        |
| RNU6-1003P     | 2,08    | 3,09  | 2,508007 | 1,230101 | 0,218659 | NA        |
| CTD-2270F17.1  | 1,33    | -2,24 | 1,818306 | -1,23004 | 0,218682 | NA        |
| RP6-91H8.1     | 3,21    | -1,44 | 1,174561 | -1,22974 | 0,218793 | NA        |
| TOMM70         | 186,50  | 0,95  | 0,773005 | 1,229674 | 0,218819 | 0,5900296 |
| AC007386.4     | 15,85   | 1,37  | 1,111803 | 1,229587 | 0,218852 | 0,5900296 |
| AC109828.1     | 8,02    | -1,04 | 0,848549 | -1,22958 | 0,218855 | 0,5900296 |
| RP11-123C21.2  | 52,93   | 1,35  | 1,100126 | 1,229393 | 0,218924 | 0,5901319 |
| AC006000.5     | 35,12   | -1,03 | 0,836026 | -1,22924 | 0,218983 | 0,5902037 |
| HIST3H2BB      | 39,64   | -0,65 | 0,528923 | -1,22915 | 0,219017 | 0,5902101 |
| RAB23          | 2,32    | 3,81  | 3,103262 | 1,229055 | 0,219051 | NA        |
| SMYD3          | 91,76   | -1,31 | 1,066181 | -1,22905 | 0,219052 | 0,5902193 |
| RP11-1281K21.6 | 2,14    | 3,72  | 3,028291 | 1,228651 | 0,219203 | NA        |
| IKBIP          | 188,03  | 0,81  | 0,659872 | 1,228525 | 0,21925  | 0,5906172 |

|                |         |       |          |          |          |           |
|----------------|---------|-------|----------|----------|----------|-----------|
| AC007099.1     | 12,83   | -1,17 | 0,948697 | -1,22849 | 0,219263 | 0,5906172 |
| CSNK1E         | 281,48  | -0,59 | 0,481385 | -1,22832 | 0,219327 | 0,5906566 |
| TMEM194A       | 54,45   | -2,04 | 1,663315 | -1,22823 | 0,21936  | 0,5906566 |
| RP11-21I4.1    | 11,50   | -1,36 | 1,105163 | -1,22815 | 0,219389 | 0,5906566 |
| OR8B9P         | 28,05   | -0,57 | 0,464485 | -1,22811 | 0,219405 | 0,5906566 |
| MROH1          | 223,10  | -0,71 | 0,579399 | -1,2279  | 0,219484 | 0,5906822 |
| COQ7           | 336,50  | -0,67 | 0,544544 | -1,22785 | 0,219503 | 0,5906822 |
| AP006621.5     | 27,15   | -1,53 | 1,248557 | -1,22779 | 0,219525 | 0,5906822 |
| S100Z          | 120,67  | -0,75 | 0,608317 | -1,22772 | 0,219553 | 0,5906822 |
| PRELID2        | 75,15   | -1,20 | 0,978443 | -1,22766 | 0,219573 | 0,5906822 |
| TMEM189-UBE2V1 | 2,47    | 2,31  | 1,883567 | 1,227612 | 0,219593 | NA        |
| RP11-10G12.1   | 0,62    | -1,93 | 1,569301 | -1,22751 | 0,219631 | NA        |
| SRPX2          | 10,23   | -1,32 | 1,076808 | -1,22747 | 0,219645 | 0,5907889 |
| RN7SL664P      | 0,91    | 2,49  | 2,027329 | 1,22712  | 0,219778 | NA        |
| RP11-298E9.5   | 0,80    | -4,48 | 3,651127 | -1,22705 | 0,219804 | NA        |
| RP11-514P8.12  | 113,37  | 0,68  | 0,551455 | 1,226928 | 0,21985  | 0,591255  |
| NXPE3          | 397,93  | 0,80  | 0,654552 | 1,226843 | 0,219882 | 0,591256  |
| RP11-307L3.2   | 0,53    | -2,39 | 1,944719 | -1,22665 | 0,219955 | NA        |
| RBFOX1         | 8,15    | -1,49 | 1,215126 | -1,22624 | 0,220107 | 0,5916225 |
| FXN            | 328,35  | 0,68  | 0,557483 | 1,226245 | 0,220107 | 0,5916225 |
| CTD-2643I7.5   | 21,62   | -1,01 | 0,824188 | -1,22623 | 0,220113 | 0,5916225 |
| WASH4P         | 1,32    | 2,43  | 1,984105 | 1,226013 | 0,220194 | NA        |
| KMT2B          | 261,02  | -0,91 | 0,745081 | -1,22596 | 0,220212 | 0,5917409 |
| GCH1           | 207,81  | 0,86  | 0,704999 | 1,225831 | 0,220262 | 0,5917409 |
| ADPGK          | 1447,29 | 0,41  | 0,337211 | 1,225797 | 0,220275 | 0,5917409 |
| PAX8           | 28,33   | 2,38  | 1,944936 | 1,225676 | 0,220321 | 0,5917409 |
| RP11-164C12.2  | 29,33   | -1,30 | 1,059471 | -1,22564 | 0,220333 | 0,5917409 |
| GRM6           | 14,52   | -0,78 | 0,632867 | -1,2256  | 0,220348 | 0,5917409 |
| RP11-39K24.11  | 12,66   | 2,14  | 1,744691 | 1,225199 | 0,2205   | 0,5919454 |
| DZIP1L         | 42,79   | -2,22 | 1,810582 | -1,22519 | 0,220503 | 0,5919454 |
| NBPF3          | 38,12   | -1,23 | 1,004841 | -1,22512 | 0,220529 | 0,5919454 |
| CCDC62         | 14,84   | 1,58  | 1,288791 | 1,225062 | 0,220552 | 0,5919454 |
| CTD-2619J13.16 | 4,07    | -1,61 | 1,317296 | -1,22486 | 0,220628 | 0,5920073 |
| RP11-380N8.4   | 14,18   | -1,89 | 1,544251 | -1,22474 | 0,220674 | 0,5920073 |
| GPR33          | 2,87    | 4,15  | 3,387614 | 1,224735 | 0,220675 | NA        |
| ADAMTS4        | 55,63   | -0,58 | 0,475137 | -1,22469 | 0,22069  | 0,5920073 |
| AC013448.1     | 10,77   | -0,99 | 0,805539 | -1,22454 | 0,22075  | 0,5920073 |
| RP11-131P10.2  | 7,29    | -1,77 | 1,44532  | -1,22451 | 0,22076  | 0,5920073 |
| OR10J1         | 7,51    | -0,95 | 0,772141 | -1,22449 | 0,220766 | 0,5920073 |
| SCN3A          | 6,59    | 2,42  | 1,972859 | 1,22436  | 0,220816 | 0,5920575 |
| CTB-175E5.4    | 85,91   | 0,99  | 0,812668 | 1,224215 | 0,220871 | 0,5920769 |
| TOMM7          | 564,44  | -0,42 | 0,345762 | -1,22417 | 0,220887 | 0,5920769 |
| DIO2           | 1,34    | 2,34  | 1,91446  | 1,223905 | 0,220988 | NA        |
| TRAPPC8        | 457,14  | -0,57 | 0,462929 | -1,22385 | 0,221008 | 0,5922557 |
| SNX10          | 735,96  | -0,48 | 0,391598 | -1,22379 | 0,22103  | 0,5922557 |
| RP11-632K20.7  | 253,18  | -0,65 | 0,534862 | -1,22374 | 0,221049 | 0,5922557 |
| CTD-2015H6.2   | 0,77    | -3,45 | 2,817904 | -1,22362 | 0,221097 | NA        |
| AC010145.4     | 1,43    | 3,14  | 2,566917 | 1,223613 | 0,221098 | NA        |
| DICER1         | 1006,30 | -0,51 | 0,413585 | -1,22347 | 0,221153 | 0,5924482 |
| RP11-380N8.7   | 2,85    | 4,13  | 3,37957  | 1,22346  | 0,221156 | NA        |

|               |         |       |          |          |          |           |
|---------------|---------|-------|----------|----------|----------|-----------|
| TCEA1P        | 3,92    | -2,02 | 1,652003 | -1,22297 | 0,221343 | 0,592857  |
| RP11-513G19.1 | 14,61   | 1,15  | 0,9439   | 1,222862 | 0,221382 | 0,592857  |
| RP11-26J3.3   | 146,26  | -0,93 | 0,763055 | -1,22278 | 0,221415 | 0,592857  |
| USP31         | 19,62   | 1,33  | 1,08999  | 1,222726 | 0,221433 | 0,592857  |
| PCAT1         | 54,73   | -0,96 | 0,785683 | -1,22245 | 0,221539 | 0,5929632 |
| KLHDC10       | 319,03  | 0,74  | 0,607051 | 1,222425 | 0,221547 | 0,5929632 |
| CSNK1G2-AS1   | 12,74   | 1,57  | 1,280541 | 1,222368 | 0,221568 | 0,5929632 |
| DYDC1         | 0,75    | -2,38 | 1,946841 | -1,22213 | 0,221658 | NA        |
| EFCAB6        | 23,69   | 1,35  | 1,107835 | 1,222089 | 0,221674 | 0,5931606 |
| AC018693.7    | 0,66    | -3,40 | 2,781498 | -1,22181 | 0,221781 | NA        |
| FAM66E        | 17,60   | -2,79 | 2,28318  | -1,22145 | 0,221914 | 0,5933439 |
| AC002429.5    | 18,82   | -1,40 | 1,147536 | -1,22144 | 0,221919 | 0,5933439 |
| PMS2P6        | 2,65    | 4,04  | 3,306263 | 1,221435 | 0,221921 | NA        |
| FTSJ1         | 113,79  | 1,05  | 0,859496 | 1,221386 | 0,22194  | 0,5933439 |
| RP11-452L6.5  | 46,78   | -1,40 | 1,143351 | -1,22136 | 0,221949 | 0,5933439 |
| FST           | 0,82    | -2,07 | 1,691452 | -1,22126 | 0,221988 | NA        |
| DNER          | 2,39    | 3,07  | 2,516114 | 1,221254 | 0,22199  | NA        |
| RPSAP57       | 0,79    | -4,46 | 3,651365 | -1,22124 | 0,221996 | NA        |
| NMUR1         | 14,80   | -0,90 | 0,737047 | -1,2212  | 0,222011 | 0,5933439 |
| RP11-111F5.4  | 8,00    | 1,56  | 1,278256 | 1,221189 | 0,222014 | 0,5933439 |
| UBAP1         | 191,83  | 0,82  | 0,670209 | 1,22118  | 0,222018 | 0,5933439 |
| AR            | 10,38   | -1,25 | 1,020023 | -1,22113 | 0,222038 | 0,5933439 |
| ABTB1         | 362,05  | -0,63 | 0,513368 | -1,22099 | 0,222088 | 0,5933439 |
| BPHL          | 55,43   | 1,01  | 0,824568 | 1,220984 | 0,222092 | 0,5933439 |
| RP11-170J3.2  | 34,80   | -1,73 | 1,4168   | -1,22098 | 0,222094 | 0,5933439 |
| VNN2          | 69,44   | -1,24 | 1,014573 | -1,22081 | 0,222157 | 0,5933439 |
| AC009237.11   | 5,53    | 4,54  | 3,72239  | 1,220718 | 0,222193 | 0,5933439 |
| ELAC2         | 215,43  | -0,84 | 0,685642 | -1,22069 | 0,222205 | 0,5933439 |
| USP49         | 104,90  | -0,79 | 0,646777 | -1,22064 | 0,222221 | 0,5933439 |
| MINK1         | 158,41  | 0,75  | 0,612009 | 1,220344 | 0,222334 | 0,5934093 |
| DNAJC24       | 66,97   | -0,83 | 0,680896 | -1,22031 | 0,222346 | 0,5934093 |
| AC005488.13   | 8,38    | -2,04 | 1,673465 | -1,22019 | 0,222391 | 0,5934093 |
| CHURC1-FNTB   | 25,78   | -1,15 | 0,94038  | -1,22019 | 0,222394 | 0,5934093 |
| RP11-80P20.3  | 77,48   | -0,66 | 0,542537 | -1,22016 | 0,222405 | 0,5934093 |
| TIGD5         | 30,28   | 1,21  | 0,991659 | 1,220052 | 0,222445 | 0,5934093 |
| NFATC1        | 132,55  | 1,07  | 0,880023 | 1,21999  | 0,222469 | 0,5934093 |
| DIO1          | 3,19    | 4,20  | 3,44624  | 1,219933 | 0,22249  | NA        |
| VPS13C        | 2152,13 | 0,30  | 0,246561 | 1,219822 | 0,222532 | 0,5934943 |
| AC068490.1    | 3,14    | 1,56  | 1,281218 | 1,2198   | 0,222541 | NA        |
| POLR2G        | 1279,13 | 0,34  | 0,276656 | 1,218922 | 0,222874 | 0,5940915 |
| RP5-1125A11.4 | 10,49   | -1,75 | 1,433057 | -1,21892 | 0,222875 | 0,5940915 |
| COPE          | 1419,64 | 0,36  | 0,293889 | 1,218903 | 0,222881 | 0,5940915 |
| NPDC1         | 18,81   | -2,81 | 2,301371 | -1,21889 | 0,222888 | 0,5940915 |
| CALML4        | 88,26   | -1,23 | 1,012275 | -1,21881 | 0,222916 | 0,5940915 |
| RP11-165J3.5  | 0,79    | -4,45 | 3,651326 | -1,21876 | 0,222936 | NA        |
| ATXN7L3       | 114,47  | -0,78 | 0,640086 | -1,21847 | 0,223046 | 0,5941718 |
| PARP14        | 3057,62 | -0,43 | 0,351734 | -1,21846 | 0,223048 | 0,5941718 |
| RP11-586K12.1 | 48,31   | -1,70 | 1,398905 | -1,21828 | 0,223118 | 0,5941718 |
| LAGE3         | 109,94  | -0,50 | 0,413107 | -1,21824 | 0,223133 | 0,5941718 |
| DNMT3B        | 9,90    | -2,24 | 1,836058 | -1,21814 | 0,223173 | 0,5941718 |



|                |         |       |          |          |          |           |
|----------------|---------|-------|----------|----------|----------|-----------|
| MKRN2          | 151,85  | 1,44  | 1,180219 | 1,218078 | 0,223194 | 0,5941718 |
| RP11-361L15.5  | 22,86   | -0,52 | 0,423613 | -1,21801 | 0,223219 | 0,5941718 |
| RP11-153I24.4  | 5,09    | -2,07 | 1,69583  | -1,21797 | 0,223235 | 0,5941718 |
| HHEX           | 356,34  | 0,66  | 0,544197 | 1,217936 | 0,223248 | 0,5941718 |
| RP11-513G11.3  | 0,72    | -2,17 | 1,778652 | -1,21783 | 0,223288 | NA        |
| A2ML1          | 32,65   | -1,01 | 0,825993 | -1,2178  | 0,223299 | 0,5941718 |
| TUBB2A         | 55,56   | 2,45  | 2,010563 | 1,217759 | 0,223316 | 0,5941718 |
| RP11-793H13.11 | 22,34   | -2,00 | 1,644985 | -1,21772 | 0,223329 | 0,5941718 |
| ITGB8          | 18,24   | -0,84 | 0,692101 | -1,21756 | 0,223392 | 0,5941809 |
| VAT1           | 90,81   | -1,00 | 0,825154 | -1,21755 | 0,223397 | 0,5941809 |
| CCNE2          | 2,55    | -3,33 | 2,731642 | -1,21743 | 0,223443 | NA        |
| TNFRSF10B      | 532,63  | 0,69  | 0,569144 | 1,217392 | 0,223455 | 0,5942509 |
| OR6R2P         | 0,46    | -2,24 | 1,84015  | -1,2172  | 0,223528 | NA        |
| AP3B1          | 539,70  | 0,64  | 0,526971 | 1,216895 | 0,223644 | 0,5945365 |
| SLIT2          | 4,31    | 4,21  | 3,462662 | 1,216773 | 0,22369  | 0,5945365 |
| KLHL11         | 2,05    | 3,66  | 3,007234 | 1,216693 | 0,223721 | NA        |
| SCP2           | 938,56  | 0,51  | 0,423137 | 1,216631 | 0,223745 | 0,5945365 |
| CNTNAP2        | 116,81  | -0,86 | 0,706154 | -1,21662 | 0,223748 | 0,5945365 |
| RP11-420A21.1  | 3,72    | 4,53  | 3,723348 | 1,216575 | 0,223766 | NA        |
| CTD-2553L13.10 | 26,15   | -2,36 | 1,940319 | -1,21648 | 0,223803 | 0,5945365 |
| RP4-620F22.3   | 26,81   | -1,21 | 0,997506 | -1,2164  | 0,223831 | 0,5945365 |
| FAM229A        | 34,92   | 1,64  | 1,345404 | 1,216399 | 0,223833 | 0,5945365 |
| CA5BP          | 309,36  | -0,64 | 0,523953 | -1,21621 | 0,223905 | 0,5945365 |
| AC092066.1     | 26,96   | -0,84 | 0,688147 | -1,21619 | 0,223912 | 0,5945365 |
| LEKR1          | 214,41  | -0,80 | 0,661275 | -1,21613 | 0,223937 | 0,5945365 |
| CTD-2017C7.1   | 8,88    | 1,29  | 1,059466 | 1,216083 | 0,223953 | 0,5945365 |
| RP1-228P16.8   | 2,68    | 4,05  | 3,331594 | 1,215971 | 0,223996 | NA        |
| GPR82          | 39,43   | -1,47 | 1,2082   | -1,21592 | 0,224016 | 0,5945365 |
| ASPH           | 375,17  | -0,78 | 0,637664 | -1,2159  | 0,224022 | 0,5945365 |
| POLR3GL        | 306,49  | -0,64 | 0,52881  | -1,2159  | 0,224024 | 0,5945365 |
| CTD-3032J10.3  | 13,75   | 1,33  | 1,092136 | 1,215841 | 0,224046 | 0,5945365 |
| ZNF770         | 156,85  | 1,18  | 0,970563 | 1,215767 | 0,224074 | 0,5945365 |
| RP11-503E24.2  | 2,13    | 3,72  | 3,056392 | 1,215696 | 0,224101 | NA        |
| ADRB2          | 240,71  | -1,01 | 0,83242  | -1,21563 | 0,224125 | 0,5945882 |
| GTPBP2         | 244,37  | 0,43  | 0,356317 | 1,215403 | 0,224213 | 0,5947355 |
| RP11-731D1.4   | 1,11    | 2,78  | 2,289775 | 1,21514  | 0,224313 | NA        |
| RP1-32B1.4     | 2,85    | 1,31  | 1,079216 | 1,214673 | 0,224491 | NA        |
| SMAGP          | 80,90   | -0,83 | 0,6812   | -1,21466 | 0,224494 | 0,5953175 |
| RSRC2          | 1113,18 | 0,39  | 0,31716  | 1,214647 | 0,224501 | 0,5953175 |
| BCL7A          | 110,28  | 0,70  | 0,577614 | 1,214576 | 0,224528 | 0,5953175 |
| CTU1           | 1,02    | -3,07 | 2,52541  | -1,21452 | 0,224547 | NA        |
| IGSF11         | 3,11    | -2,21 | 1,819535 | -1,21433 | 0,224622 | NA        |
| RP11-387A1.6   | 2,18    | 1,48  | 1,215954 | 1,214329 | 0,224622 | NA        |
| LMO7           | 106,57  | 0,89  | 0,734503 | 1,21432  | 0,224626 | 0,5954914 |
| RP11-148G20.1  | 1,03    | 2,69  | 2,218922 | 1,214239 | 0,224656 | NA        |
| RP11-848P1.4   | 175,09  | -0,58 | 0,476716 | -1,21418 | 0,224679 | 0,5955132 |
| MYBPC3         | 20,66   | 1,30  | 1,07416  | 1,214131 | 0,224698 | 0,5955132 |
| RP11-231P20.5  | 1,10    | 2,77  | 2,281314 | 1,21373  | 0,224851 | NA        |
| B3GNT5         | 329,61  | 0,81  | 0,664223 | 1,213708 | 0,224859 | 0,5958561 |
| CYP4V2         | 143,94  | 1,01  | 0,835717 | 1,213508 | 0,224936 | 0,5959738 |

|               |         |       |          |          |          |           |
|---------------|---------|-------|----------|----------|----------|-----------|
| ABAT          | 104,72  | 0,86  | 0,704684 | 1,213334 | 0,225002 | 0,5960648 |
| RP11-849I19.2 | 103,28  | -1,07 | 0,880395 | -1,21308 | 0,225099 | 0,5961922 |
| CTD-2135D7.4  | 5,00    | -2,02 | 1,663225 | -1,21304 | 0,225114 | 0,5961922 |
| PITX2         | 0,55    | -3,93 | 3,239192 | -1,21299 | 0,225135 | NA        |
| S100A11       | 2517,85 | -0,25 | 0,205518 | -1,21288 | 0,225176 | 0,59627   |
| RP11-269F19.9 | 2,66    | 4,05  | 3,340402 | 1,212839 | 0,225191 | NA        |
| RP11-47I22.3  | 106,94  | -0,65 | 0,534652 | -1,21257 | 0,225295 | 0,5963972 |
| PHGDH         | 24,91   | 0,77  | 0,636063 | 1,212556 | 0,2253   | 0,5963972 |
| RP11-617D20.2 | 2,21    | -1,42 | 1,173313 | -1,21245 | 0,225339 | NA        |
| MYT1          | 5,09    | 3,84  | 3,163443 | 1,212444 | 0,225342 | 0,5963972 |
| MIR548AJ2     | 20,28   | -1,74 | 1,432153 | -1,21235 | 0,225379 | 0,5963972 |
| RB1CC1        | 640,79  | 0,55  | 0,449579 | 1,212253 | 0,225415 | 0,5963972 |
| HNRNPF        | 1068,45 | 0,47  | 0,391393 | 1,212252 | 0,225416 | 0,5963972 |
| ZNF761        | 103,58  | -1,00 | 0,826058 | -1,21196 | 0,225528 | 0,5965261 |
| ESRRA         | 71,23   | 1,18  | 0,974445 | 1,211957 | 0,225529 | 0,5965261 |
| AJ011931.1    | 5,54    | 4,51  | 3,722389 | 1,21128  | 0,225788 | 0,5970729 |
| PIP5K1C       | 116,87  | 0,93  | 0,766277 | 1,211233 | 0,225806 | 0,5970729 |
| CFAP206       | 8,52    | 1,67  | 1,37925  | 1,211166 | 0,225832 | 0,5970729 |
| HDAC11        | 3,57    | 2,16  | 1,783158 | 1,210847 | 0,225954 | NA        |
| ZNF215        | 6,61    | -1,18 | 0,974945 | -1,21082 | 0,225965 | 0,5972376 |
| STX17         | 210,91  | -0,75 | 0,622406 | -1,21074 | 0,225996 | 0,5972376 |
| SPAG16        | 134,64  | 1,17  | 0,969072 | 1,210707 | 0,226008 | 0,5972376 |
| RP1-178F15.4  | 1,59    | -1,70 | 1,407962 | -1,21056 | 0,226064 | NA        |
| PYGM          | 23,54   | -0,96 | 0,794676 | -1,21049 | 0,226089 | 0,5972376 |
| RP4-612B15.3  | 0,45    | -2,86 | 2,36636  | -1,21036 | 0,22614  | NA        |
| NEK9          | 527,47  | 0,69  | 0,572966 | 1,210358 | 0,226142 | 0,5972376 |
| LAIR1         | 260,49  | -0,82 | 0,680425 | -1,21023 | 0,22619  | 0,5972376 |
| POLR3D        | 125,60  | 1,16  | 0,957291 | 1,21021  | 0,226198 | 0,5972376 |
| A2M           | 92,87   | -1,17 | 0,968101 | -1,21018 | 0,226212 | 0,5972376 |
| F2RL2         | 102,82  | 0,91  | 0,755672 | 1,210172 | 0,226213 | 0,5972376 |
| CTD-2020K17.1 | 83,42   | 0,66  | 0,545955 | 1,210166 | 0,226215 | 0,5972376 |
| TAS2R10       | 2,06    | 3,67  | 3,033933 | 1,209846 | 0,226338 | NA        |
| SPAG11B       | 2,04    | 3,59  | 2,96564  | 1,20983  | 0,226344 | NA        |
| PPARD         | 66,86   | -1,01 | 0,833031 | -1,2098  | 0,226357 | 0,5975263 |
| LINC00934     | 1,63    | -1,16 | 0,957264 | -1,20965 | 0,226413 | NA        |
| SH3GLB1       | 816,36  | 0,40  | 0,327683 | 1,209312 | 0,226543 | 0,5976367 |
| DBF4          | 151,89  | 0,88  | 0,730262 | 1,20931  | 0,226544 | 0,5976367 |
| CTC-548K16.1  | 6,88    | 0,99  | 0,815859 | 1,209303 | 0,226546 | 0,5976367 |
| NME5          | 2,47    | 3,31  | 2,739033 | 1,2093   | 0,226548 | NA        |
| RP11-759A24.2 | 1,88    | -1,40 | 1,156627 | -1,20926 | 0,226563 | NA        |
| RP11-156E8.1  | 42,90   | -0,98 | 0,806397 | -1,20921 | 0,226583 | 0,5976367 |
| ATP5L         | 2546,46 | -0,22 | 0,178467 | -1,20916 | 0,226602 | 0,5976367 |
| MIR548AA2     | 4,96    | 1,70  | 1,408247 | 1,209103 | 0,226623 | 0,5976367 |
| MIR548D2      | 4,96    | 1,70  | 1,408247 | 1,209103 | 0,226623 | 0,5976367 |
| RP11-846F4.12 | 0,98    | -1,54 | 1,274656 | -1,20891 | 0,226697 | NA        |
| RP11-84C10.2  | 6,27    | -1,71 | 1,411922 | -1,20886 | 0,226718 | 0,5978022 |
| CTD-2547L24.4 | 1,44    | -1,68 | 1,387465 | -1,2086  | 0,226818 | NA        |
| AC013472.3    | 5,49    | -1,34 | 1,105612 | -1,20827 | 0,226943 | 0,5982605 |
| AC087069.1    | 4,22    | 3,13  | 2,592758 | 1,208229 | 0,226959 | 0,5982605 |
| RN7SL535P     | 1,80    | -2,70 | 2,234119 | -1,20808 | 0,227015 | NA        |

|                  |         |       |          |          |          |           |
|------------------|---------|-------|----------|----------|----------|-----------|
| FAM160B2         | 126,91  | -0,85 | 0,702225 | -1,20805 | 0,227027 | 0,5982605 |
| RP4-564F22.5     | 14,98   | -1,27 | 1,049167 | -1,20801 | 0,227044 | 0,5982605 |
| RP11-179A16.1    | 3,86    | 1,65  | 1,367514 | 1,207986 | 0,227053 | 0,5982605 |
| CIDEB            | 551,76  | 0,59  | 0,486666 | 1,207755 | 0,227142 | 0,5984096 |
| RPL35AP3         | 1,59    | -2,13 | 1,762745 | -1,20771 | 0,227158 | NA        |
| SMIM6            | 2,07    | 3,69  | 3,055802 | 1,207663 | 0,227177 | NA        |
| XXyac-YX60D10.1  | 0,52    | -2,84 | 2,348883 | -1,20766 | 0,227177 | NA        |
| GUCD1            | 222,38  | -0,83 | 0,685987 | -1,2076  | 0,227203 | 0,5984452 |
| GALNT3           | 250,61  | 0,92  | 0,763913 | 1,207553 | 0,227219 | 0,5984452 |
| RP11-867G23.12   | 0,72    | -2,43 | 2,010004 | -1,20736 | 0,227294 | NA        |
| XX-FW81066F1.2   | 1,96    | 3,60  | 2,984008 | 1,207348 | 0,227298 | NA        |
| CIDEC            | 0,84    | -4,01 | 3,320519 | -1,20729 | 0,22732  | NA        |
| C3orf67          | 2,35    | -1,08 | 0,898189 | -1,20718 | 0,227361 | NA        |
| RP11-758P17.2    | 1,88    | 2,95  | 2,442668 | 1,20714  | 0,227378 | NA        |
| RP11-231G15.2    | 2,09    | -1,54 | 1,272704 | -1,20698 | 0,227442 | NA        |
| RP11-136K14.2    | 8,46    | -2,06 | 1,710672 | -1,2069  | 0,22747  | 0,5989434 |
| GGT6             | 13,47   | -0,66 | 0,545821 | -1,20689 | 0,227473 | 0,5989434 |
| AC002044.1       | 22,50   | -1,23 | 1,015672 | -1,20663 | 0,227574 | 0,5991258 |
| AC097635.2       | 0,76    | -4,41 | 3,651973 | -1,2065  | 0,227626 | NA        |
| KCNQ3            | 1,03    | -2,23 | 1,847018 | -1,20645 | 0,227643 | NA        |
| MFAP3            | 55,58   | 1,76  | 1,462117 | 1,206233 | 0,227728 | 0,5994449 |
| XXyac-YR21IF11.1 | 29,72   | -1,13 | 0,940788 | -1,20613 | 0,227768 | 0,5994559 |
| HSD17B2          | 153,15  | 0,55  | 0,455222 | 1,206055 | 0,227796 | 0,5994559 |
| ATIC             | 313,14  | 0,62  | 0,512332 | 1,205881 | 0,227863 | 0,5995357 |
| SP1              | 661,17  | -0,59 | 0,485573 | -1,20581 | 0,227891 | 0,5995357 |
| HOXA7            | 3,07    | 3,73  | 3,096532 | 1,205699 | 0,227933 | NA        |
| TMEM63A          | 346,22  | -0,85 | 0,705767 | -1,2057  | 0,227934 | 0,5995629 |
| RP11-280F2.2     | 11,77   | -0,96 | 0,792782 | -1,20561 | 0,22797  | 0,5995722 |
| RP11-476H20.1    | 14,26   | -1,24 | 1,028846 | -1,20533 | 0,228078 | 0,5997721 |
| OR8D1            | 15,84   | -1,78 | 1,474781 | -1,20519 | 0,22813  | 0,5998235 |
| ATP11B           | 388,02  | -0,60 | 0,501083 | -1,20509 | 0,22817  | 0,5998419 |
| RP11-536I6.1     | 24,24   | -1,21 | 1,003805 | -1,20501 | 0,228201 | 0,5998419 |
| YDJC             | 253,73  | 1,06  | 0,875711 | 1,204808 | 0,228278 | 0,599958  |
| C6orf226         | 62,74   | -1,06 | 0,87642  | -1,20468 | 0,228328 | 0,6000061 |
| ZNF845           | 51,80   | 1,04  | 0,860183 | 1,204413 | 0,22843  | 0,6001504 |
| KIAA1462         | 8,83    | 1,68  | 1,393254 | 1,204368 | 0,228447 | 0,6001504 |
| RP11-82O19.2     | 8,63    | -3,27 | 2,719555 | -1,20418 | 0,228521 | 0,6002598 |
| HKR1             | 83,99   | 0,84  | 0,700521 | 1,204057 | 0,228567 | 0,6002959 |
| ZBTB18           | 229,42  | 0,52  | 0,434249 | 1,203832 | 0,228655 | 0,6003867 |
| RP11-433J8.1     | 10,27   | -1,43 | 1,191453 | -1,2038  | 0,228666 | 0,6003867 |
| RP4-813D12.3     | 1,53    | -1,49 | 1,24014  | -1,20376 | 0,228683 | NA        |
| C15orf58         | 153,08  | 0,88  | 0,72762  | 1,203632 | 0,228732 | 0,6004364 |
| AC005086.4       | 5,91    | -1,01 | 0,840579 | -1,20359 | 0,22875  | 0,6004364 |
| STT3B            | 1062,82 | 0,47  | 0,387008 | 1,203458 | 0,228799 | 0,6004802 |
| NFKBID           | 482,54  | 0,65  | 0,543762 | 1,202939 | 0,229    | 0,6007594 |
| AC004041.2       | 2,01    | 3,03  | 2,520007 | 1,202909 | 0,229012 | NA        |
| SEPT1            | 38,85   | -1,15 | 0,954059 | -1,2028  | 0,229055 | 0,6007594 |
| USP4             | 989,36  | 0,49  | 0,404151 | 1,202785 | 0,22906  | 0,6007594 |
| DNAJB14          | 794,20  | 0,52  | 0,435397 | 1,202767 | 0,229066 | 0,6007594 |
| EAF2             | 381,58  | 0,76  | 0,630354 | 1,202766 | 0,229067 | 0,6007594 |

|                |         |       |          |          |          |           |
|----------------|---------|-------|----------|----------|----------|-----------|
| CTD-2280E9.1   | 0,83    | -2,70 | 2,243807 | -1,20272 | 0,229085 | NA        |
| CACNB3         | 24,68   | -0,97 | 0,805569 | -1,20268 | 0,2291   | 0,6007608 |
| EPM2AIP1       | 493,58  | 0,71  | 0,586524 | 1,202382 | 0,229216 | 0,6008318 |
| PCYT1A         | 514,93  | -0,71 | 0,591935 | -1,20238 | 0,229217 | 0,6008318 |
| OR5A1          | 79,73   | -0,68 | 0,567086 | -1,20236 | 0,229224 | 0,6008318 |
| RN7SL478P      | 1,17    | 2,84  | 2,365386 | 1,202026 | 0,229354 | NA        |
| PHACTR4        | 483,30  | -0,71 | 0,588462 | -1,20175 | 0,229461 | 0,6013667 |
| RNU6-494P      | 3,58    | 4,47  | 3,723493 | 1,20171  | 0,229476 | NA        |
| ZNF468         | 120,33  | 0,87  | 0,723233 | 1,201668 | 0,229492 | 0,6013667 |
| USP41          | 2,45    | 4,05  | 3,366825 | 1,201631 | 0,229507 | NA        |
| CDC14A         | 174,80  | 0,91  | 0,758164 | 1,201097 | 0,229714 | 0,6018489 |
| RP5-1039K5.16  | 14,47   | -1,21 | 1,004547 | -1,20103 | 0,229741 | 0,6018489 |
| RP6-91H8.5     | 65,16   | -0,51 | 0,422947 | -1,20052 | 0,229938 | 0,6022792 |
| KLHL15         | 315,24  | 0,86  | 0,719918 | 1,200351 | 0,230003 | 0,6023237 |
| OSBPL10        | 103,62  | -0,89 | 0,739055 | -1,20027 | 0,230034 | 0,6023237 |
| STK16          | 73,69   | -1,96 | 1,6366   | -1,20023 | 0,230052 | 0,6023237 |
| NIPAL3         | 260,07  | 0,76  | 0,63704  | 1,199932 | 0,230166 | 0,6024967 |
| CDKN2D         | 329,46  | 0,81  | 0,672776 | 1,199813 | 0,230212 | 0,6024967 |
| RP11-582H21.2  | 9,74    | -2,40 | 1,9976   | -1,19981 | 0,230215 | 0,6024967 |
| CEACAM4        | 313,21  | 0,96  | 0,798887 | 1,19925  | 0,230431 | 0,602977  |
| RP11-54A4.2    | 3,20    | 3,72  | 3,099906 | 1,199174 | 0,23046  | NA        |
| C12orf54       | 0,69    | -3,41 | 2,845806 | -1,19913 | 0,230476 | NA        |
| KMT5B          | 425,51  | -0,63 | 0,524954 | -1,1991  | 0,230488 | 0,603041  |
| TRMT13         | 130,99  | -1,05 | 0,871752 | -1,19901 | 0,230522 | 0,6030466 |
| ILF3           | 1187,76 | 0,35  | 0,294312 | 1,198826 | 0,230595 | 0,6031533 |
| RP11-865I6.2   | 2,69    | 1,38  | 1,150963 | 1,198503 | 0,230721 | NA        |
| RP11-440K22.1  | 0,65    | -2,37 | 1,978529 | -1,19842 | 0,230754 | NA        |
| RP11-150O12.4  | 0,78    | -2,40 | 2,001113 | -1,19838 | 0,23077  | NA        |
| RP11-761N21.2  | 9,81    | -0,56 | 0,464131 | -1,19825 | 0,230821 | 0,6036592 |
| CTD-2349P21.6  | 3,29    | 1,64  | 1,371835 | 1,198005 | 0,230915 | NA        |
| PAIP1          | 266,90  | -0,56 | 0,469691 | -1,19768 | 0,231041 | 0,6041059 |
| IDH3B          | 1055,97 | 0,59  | 0,49437  | 1,197596 | 0,231074 | 0,6041059 |
| IGKV3-11       | 2,97    | -1,49 | 1,247881 | -1,1976  | 0,231075 | NA        |
| ZER1           | 225,81  | -1,11 | 0,927118 | -1,19742 | 0,231142 | 0,6041059 |
| ABCC9          | 94,04   | -0,78 | 0,647658 | -1,1974  | 0,231152 | 0,6041059 |
| CTNNA2         | 154,17  | -1,80 | 1,500906 | -1,19739 | 0,231155 | 0,6041059 |
| DUX4L50        | 6,56    | -2,15 | 1,797252 | -1,19727 | 0,2312   | 0,6041387 |
| COX20          | 238,64  | 0,81  | 0,673887 | 1,197139 | 0,231252 | 0,6041919 |
| RP11-1228E12.2 | 1,81    | 3,48  | 2,911356 | 1,197027 | 0,231296 | NA        |
| RP11-794P6.1   | 5,73    | -1,17 | 0,976088 | -1,197   | 0,231305 | 0,6042261 |
| GAPDHP72       | 5,58    | 1,29  | 1,078152 | 1,196939 | 0,23133  | 0,6042261 |
| LOXL2          | 28,00   | 1,06  | 0,884517 | 1,196818 | 0,231378 | 0,6042644 |
| RP11-65J3.2    | 1,47    | 2,56  | 2,142    | 1,196705 | 0,231422 | NA        |
| ESR1           | 23,14   | -1,79 | 1,495683 | -1,1966  | 0,231461 | 0,6043986 |
| RP11-308B16.1  | 2,05    | 2,44  | 2,037376 | 1,196403 | 0,231539 | NA        |
| P2RY13         | 679,38  | 0,75  | 0,62434  | 1,196361 | 0,231556 | 0,6044423 |
| AFF4           | 614,79  | 0,60  | 0,502262 | 1,196348 | 0,231561 | 0,6044423 |
| DNAJC9-AS1     | 32,58   | 1,86  | 1,555135 | 1,19631  | 0,231576 | 0,6044423 |
| RP11-632K20.6  | 1,10    | -3,96 | 3,309409 | -1,19614 | 0,23164  | NA        |
| RP11-174N3.4   | 3,52    | -0,89 | 0,746799 | -1,19606 | 0,231671 | NA        |

|               |         |       |          |          |          |           |
|---------------|---------|-------|----------|----------|----------|-----------|
| ANLN          | 25,63   | -1,73 | 1,443744 | -1,19605 | 0,231677 | 0,6046216 |
| GNA13         | 1293,28 | 0,55  | 0,459632 | 1,195539 | 0,231876 | 0,6050575 |
| AC105253.1    | 17,45   | -1,57 | 1,313907 | -1,19544 | 0,231914 | 0,6050584 |
| RP11-115K3.2  | 0,50    | -2,89 | 2,41391  | -1,19543 | 0,23192  | NA        |
| CSRP1         | 569,43  | 0,73  | 0,614022 | 1,19537  | 0,231943 | 0,6050584 |
| RN7SL122P     | 8,45    | 1,53  | 1,282237 | 1,195266 | 0,231983 | 0,6050584 |
| CNTD1         | 4,06    | 1,93  | 1,613713 | 1,195054 | 0,232066 | 0,6050584 |
| AC084117.3    | 4,94    | 3,01  | 2,51867  | 1,195044 | 0,23207  | 0,6050584 |
| RP11-789C2.1  | 3,97    | 1,86  | 1,553721 | 1,195039 | 0,232072 | 0,6050584 |
| RP11-163G10.3 | 0,72    | 1,54  | 1,286447 | 1,194963 | 0,232101 | NA        |
| FGFR10P2      | 383,79  | -0,61 | 0,510726 | -1,19464 | 0,232226 | 0,6053762 |
| FBXW4         | 323,28  | 0,96  | 0,804113 | 1,194494 | 0,232285 | 0,6054439 |
| SYNGR2        | 4455,99 | 0,23  | 0,195328 | 1,194186 | 0,232405 | 0,605673  |
| RN7SL173P     | 10,16   | -0,97 | 0,80992  | -1,19382 | 0,232549 | 0,6059626 |
| RP11-370K11.1 | 2,98    | 3,64  | 3,045151 | 1,193811 | 0,232552 | NA        |
| RP1-59D14.8   | 4,28    | -3,37 | 2,824179 | -1,19372 | 0,232589 | 0,605982  |
| RP11-107F6.3  | 7,97    | -0,79 | 0,66023  | -1,19363 | 0,232622 | 0,6059835 |
| SREBF1        | 98,75   | -0,92 | 0,774148 | -1,19348 | 0,232682 | 0,6060542 |
| RP11-326C3.13 | 1,64    | 2,74  | 2,297628 | 1,193428 | 0,232702 | NA        |
| RNF152        | 26,92   | -1,18 | 0,987881 | -1,19319 | 0,232794 | 0,6062063 |
| RP11-318E3.4  | 2,60    | 4,01  | 3,360654 | 1,193167 | 0,232804 | NA        |
| COX7A2L       | 1389,95 | 0,40  | 0,335825 | 1,19311  | 0,232826 | 0,6062063 |
| SMCR8         | 119,74  | 0,58  | 0,490277 | 1,19306  | 0,232846 | 0,6062063 |
| ITPRIPL2      | 193,64  | 0,61  | 0,507407 | 1,192927 | 0,232898 | 0,6062063 |
| RP3-427A4.2   | 5,99    | -1,56 | 1,30659  | -1,19287 | 0,23292  | 0,6062063 |
| OR2T7         | 5,25    | 1,33  | 1,117726 | 1,192831 | 0,232936 | 0,6062063 |
| CDH9          | 1,59    | -2,01 | 1,681733 | -1,19276 | 0,232964 | NA        |
| WDR72         | 4,49    | -1,08 | 0,902716 | -1,19252 | 0,233058 | 0,6063326 |
| DAGLB         | 542,66  | 0,63  | 0,531383 | 1,192423 | 0,233096 | 0,6063326 |
| PPP3CC        | 210,27  | 0,90  | 0,757624 | 1,192381 | 0,233112 | 0,6063326 |
| EXOSC9        | 443,56  | 0,79  | 0,664    | 1,192374 | 0,233115 | 0,6063326 |
| SPRED1        | 112,91  | 1,32  | 1,107853 | 1,192149 | 0,233203 | 0,6064771 |
| KIAA0125      | 45,19   | -1,99 | 1,673699 | -1,19186 | 0,233316 | 0,6065213 |
| RP11-2J18.1   | 17,32   | -1,16 | 0,971273 | -1,19184 | 0,233325 | 0,6065213 |
| AC083864.3    | 4,11    | -1,50 | 1,258419 | -1,19177 | 0,23335  | 0,6065213 |
| NCBP3         | 497,90  | -0,61 | 0,514969 | -1,19165 | 0,233398 | 0,6065213 |
| CHIT1         | 2,16    | -2,40 | 2,015035 | -1,19158 | 0,233427 | NA        |
| C9orf85       | 133,47  | -1,00 | 0,838497 | -1,19158 | 0,233427 | 0,6065213 |
| CTB-83J4.2    | 10,46   | 2,85  | 2,390708 | 1,191558 | 0,233435 | 0,6065213 |
| SARAF         | 3357,31 | 0,31  | 0,261399 | 1,191519 | 0,23345  | 0,6065213 |
| C9orf172      | 2,40    | 3,29  | 2,763924 | 1,191428 | 0,233486 | NA        |
| MIF-AS1       | 3,13    | 2,18  | 1,828732 | 1,191401 | 0,233496 | NA        |
| RP1-43E13.2   | 4,92    | 3,35  | 2,810946 | 1,191122 | 0,233606 | 0,6065213 |
| GABPA         | 277,67  | 0,85  | 0,71016  | 1,191055 | 0,233632 | 0,6065213 |
| PPP1R32       | 40,70   | -1,50 | 1,259829 | -1,191   | 0,233654 | 0,6065213 |
| RN7SL465P     | 21,93   | -0,85 | 0,712127 | -1,19091 | 0,233689 | 0,6065213 |
| CTD-3064H18.4 | 6,49    | -1,62 | 1,358268 | -1,19089 | 0,233695 | 0,6065213 |
| XRCC5         | 2307,80 | -0,41 | 0,346739 | -1,19088 | 0,233702 | 0,6065213 |
| RP11-53B2.5   | 3,55    | 2,45  | 2,055229 | 1,190874 | 0,233703 | NA        |
| SNORD13E      | 16,13   | -1,02 | 0,85595  | -1,19078 | 0,233742 | 0,6065213 |

|                |         |       |          |          |          |           |
|----------------|---------|-------|----------|----------|----------|-----------|
| RP11-316M1.12  | 39,14   | -2,04 | 1,717198 | -1,19064 | 0,233795 | 0,6065213 |
| WISP2          | 14,18   | -0,79 | 0,659726 | -1,19058 | 0,233818 | 0,6065213 |
| DPP7           | 644,20  | -0,50 | 0,422776 | -1,19053 | 0,233837 | 0,6065213 |
| FAM160A2       | 227,72  | -0,66 | 0,556077 | -1,19042 | 0,233882 | 0,6065213 |
| GOLGA6L9       | 12,84   | 1,61  | 1,354028 | 1,190404 | 0,233888 | 0,6065213 |
| RP11-392P7.3   | 54,50   | 1,22  | 1,027549 | 1,190335 | 0,233915 | 0,6065213 |
| NEURL1         | 15,90   | 0,90  | 0,753626 | 1,190278 | 0,233937 | 0,6065213 |
| NAALADL2       | 43,44   | -1,27 | 1,065108 | -1,19025 | 0,23395  | 0,6065213 |
| RP11-342M1.3   | 5,12    | 1,19  | 0,997309 | 1,190196 | 0,23397  | 0,6065213 |
| CTD-2535L24.2  | 0,73    | -4,35 | 3,652683 | -1,19017 | 0,233979 | NA        |
| ZC3H12D        | 135,88  | -0,98 | 0,827182 | -1,18995 | 0,234065 | 0,6065343 |
| GLDC           | 12,89   | -0,96 | 0,805441 | -1,18989 | 0,234091 | 0,6065343 |
| TAS2R31        | 2,42    | 3,30  | 2,774923 | 1,189847 | 0,234107 | NA        |
| RP11-676J12.4  | 13,74   | -1,08 | 0,904095 | -1,18972 | 0,234156 | 0,6065343 |
| TMEM218        | 300,95  | -0,93 | 0,78463  | -1,18964 | 0,234187 | 0,6065343 |
| PIN1           | 400,51  | -0,64 | 0,536218 | -1,18964 | 0,234187 | 0,6065343 |
| FBXO18         | 379,52  | -0,51 | 0,425446 | -1,1896  | 0,234203 | 0,6065343 |
| PAF1           | 263,31  | -0,81 | 0,678202 | -1,18946 | 0,234259 | 0,6065343 |
| RP11-344N10.5  | 27,56   | -0,72 | 0,608646 | -1,18936 | 0,234298 | 0,6065343 |
| RP11-96D1.10   | 56,77   | -1,59 | 1,333261 | -1,18928 | 0,23433  | 0,6065343 |
| RP11-158G18.1  | 7,28    | 1,83  | 1,539774 | 1,189245 | 0,234343 | 0,6065343 |
| RP1-274L7.4    | 12,45   | -1,15 | 0,968327 | -1,18916 | 0,234375 | 0,6065343 |
| CTD-2012K14.5  | 54,43   | -0,54 | 0,450715 | -1,18913 | 0,234388 | 0,6065343 |
| RP11-337C18.8  | 29,23   | 1,71  | 1,435111 | 1,189105 | 0,234398 | 0,6065343 |
| RP11-752G15.8  | 3,39    | 1,45  | 1,215838 | 1,189104 | 0,234399 | NA        |
| RP13-580B18.1  | 2,00    | 3,62  | 3,041737 | 1,188975 | 0,23445  | NA        |
| RP11-53B2.4    | 11,25   | 1,46  | 1,228713 | 1,188926 | 0,234469 | 0,6065612 |
| AC087886.1     | 16,89   | 1,39  | 1,169964 | 1,188913 | 0,234474 | 0,6065612 |
| RBM12          | 271,80  | 0,84  | 0,710135 | 1,18858  | 0,234605 | 0,6067564 |
| SCARB2         | 857,61  | -0,56 | 0,473255 | -1,18852 | 0,23463  | 0,6067564 |
| PSMG2          | 560,42  | 0,56  | 0,467728 | 1,188473 | 0,234647 | 0,6067564 |
| POMT1          | 106,97  | -0,84 | 0,706307 | -1,18833 | 0,234704 | 0,6068181 |
| USP2           | 1,69    | 3,50  | 2,942459 | 1,188317 | 0,234709 | NA        |
| RP11-387H17.6  | 7,13    | -1,15 | 0,96436  | -1,18815 | 0,234774 | 0,6069157 |
| TMEM56         | 1,32    | -1,69 | 1,418633 | -1,18814 | 0,23478  | NA        |
| RP11-181E22.4  | 7,43    | -1,93 | 1,62127  | -1,18804 | 0,234816 | 0,6069325 |
| TBC1D14        | 427,84  | 0,81  | 0,682843 | 1,187968 | 0,234846 | 0,6069325 |
| AC011816.4     | 2,13    | -0,98 | 0,826306 | -1,1879  | 0,234872 | NA        |
| RP11-810P12.5  | 6,03    | -3,46 | 2,913405 | -1,18759 | 0,234993 | 0,6071479 |
| RP11-542M13.3  | 7,63    | 2,54  | 2,142218 | 1,187551 | 0,23501  | 0,6071479 |
| C1orf105       | 4,51    | -3,07 | 2,589171 | -1,18751 | 0,235027 | 0,6071479 |
| MPZL3          | 210,67  | -1,00 | 0,838462 | -1,18735 | 0,23509  | 0,6071552 |
| CPSF7          | 238,46  | 0,75  | 0,632634 | 1,187227 | 0,235138 | 0,6071552 |
| MSRB3          | 29,33   | -1,21 | 1,02198  | -1,18722 | 0,23514  | 0,6071552 |
| CFAP58         | 3,76    | 4,42  | 3,723283 | 1,187099 | 0,235189 | 0,6071552 |
| RP11-386G11.10 | 1052,70 | 0,66  | 0,552123 | 1,1869   | 0,235267 | 0,6071552 |
| CNIH4          | 304,15  | 0,68  | 0,576827 | 1,186845 | 0,235289 | 0,6071552 |
| ALPK3          | 1,95    | 3,47  | 2,927452 | 1,186839 | 0,235291 | NA        |
| RPL36AL        | 1147,71 | -0,27 | 0,227093 | -1,18683 | 0,235295 | 0,6071552 |
| ACBD7          | 14,90   | -1,12 | 0,939671 | -1,18678 | 0,235315 | 0,6071552 |

|                |         |       |          |          |          |           |
|----------------|---------|-------|----------|----------|----------|-----------|
| NIPAL2         | 336,47  | -0,95 | 0,803993 | -1,18676 | 0,235324 | 0,6071552 |
| ZBTB46         | 86,74   | -1,23 | 1,03342  | -1,18639 | 0,235469 | 0,6074467 |
| KB-1552D7.2    | 8,66    | 1,38  | 1,161423 | 1,186291 | 0,235508 | 0,6074612 |
| MIR4434        | 2,88    | 3,57  | 3,010247 | 1,186267 | 0,235517 | NA        |
| NRSN2          | 3,25    | 3,65  | 3,080017 | 1,186243 | 0,235526 | NA        |
| AC127904.2     | 44,44   | -0,80 | 0,674748 | -1,18608 | 0,235591 | 0,607569  |
| RP11-977G19.11 | 5,54    | 1,32  | 1,11599  | 1,185958 | 0,235639 | 0,607569  |
| B3GALT6        | 173,93  | 1,04  | 0,880582 | 1,185937 | 0,235647 | 0,607569  |
| RN7SL615P      | 6,63    | 1,71  | 1,442028 | 1,185845 | 0,235684 | 0,6075786 |
| CETN3          | 68,80   | 1,48  | 1,246864 | 1,185557 | 0,235797 | 0,6077871 |
| RP11-217B7.3   | 3,44    | 4,41  | 3,723608 | 1,185449 | 0,23584  | NA        |
| RP11-12G12.6   | 1,35    | 3,07  | 2,587013 | 1,18532  | 0,235891 | NA        |
| CARD11         | 33,25   | -1,81 | 1,529484 | -1,18507 | 0,235988 | 0,6080766 |
| MYLK           | 105,87  | -0,79 | 0,669281 | -1,18507 | 0,235988 | 0,6080766 |
| RP5-1039K5.12  | 8,38    | 1,16  | 0,98231  | 1,185025 | 0,236008 | 0,6080766 |
| MRPL24         | 368,91  | -0,72 | 0,604542 | -1,18491 | 0,236052 | 0,608108  |
| AMZ1           | 80,19   | 1,30  | 1,095592 | 1,184704 | 0,236134 | 0,6081956 |
| PIGB           | 147,32  | 0,63  | 0,534158 | 1,1845   | 0,236215 | 0,6081956 |
| CTD-3025N20.3  | 0,91    | -3,88 | 3,274952 | -1,18441 | 0,23625  | NA        |
| BAG6           | 804,45  | -0,34 | 0,288468 | -1,18441 | 0,23625  | 0,6081956 |
| RP11-166O4.6   | 52,97   | -0,89 | 0,749558 | -1,18439 | 0,23626  | 0,6081956 |
| LY75           | 502,88  | 0,65  | 0,545158 | 1,184287 | 0,2363   | 0,6081956 |
| CDK6           | 426,05  | 0,84  | 0,711029 | 1,184257 | 0,236311 | 0,6081956 |
| TACC3          | 367,06  | -0,54 | 0,456663 | -1,18425 | 0,236315 | 0,6081956 |
| AC092301.3     | 1,25    | -1,84 | 1,552459 | -1,18411 | 0,236369 | NA        |
| CTD-2116F7.1   | 22,26   | 0,86  | 0,728035 | 1,183796 | 0,236494 | 0,6084487 |
| JHDM1D-AS1     | 192,58  | -0,78 | 0,661312 | -1,1837  | 0,236533 | 0,6084487 |
| GIMAP6         | 109,00  | -1,30 | 1,099713 | -1,18362 | 0,236562 | 0,6084487 |
| ZFP14          | 165,14  | -1,15 | 0,973342 | -1,18355 | 0,23659  | 0,6084487 |
| RP11-104C4.2   | 0,61    | -3,84 | 3,245713 | -1,18333 | 0,236679 | NA        |
| TUBA1C         | 712,71  | 0,48  | 0,402762 | 1,1833   | 0,23669  | 0,6084487 |
| ABCD4          | 132,72  | -0,79 | 0,666937 | -1,18328 | 0,236696 | 0,6084487 |
| RP11-664D7.4   | 49,79   | -1,12 | 0,944653 | -1,18312 | 0,236761 | 0,6084487 |
| ZNF740         | 40,27   | -1,03 | 0,873726 | -1,1831  | 0,23677  | 0,6084487 |
| FGL2           | 5258,70 | 0,24  | 0,206261 | 1,183024 | 0,2368   | 0,6084487 |
| RP11-585F1.6   | 1,33    | 3,06  | 2,588592 | 1,182936 | 0,236834 | NA        |
| RP1-68D18.2    | 12,78   | -1,23 | 1,037387 | -1,1829  | 0,236847 | 0,6084487 |
| KLC3           | 37,47   | -0,51 | 0,434159 | -1,18288 | 0,236859 | 0,6084487 |
| RP11-760N9.1   | 241,31  | -0,53 | 0,444867 | -1,18286 | 0,236865 | 0,6084487 |
| RP11-106M3.2   | 9,65    | 1,47  | 1,241424 | 1,182796 | 0,23689  | 0,6084487 |
| TP53BP1        | 212,66  | -0,75 | 0,637441 | -1,18276 | 0,236904 | 0,6084487 |
| RP11-864I4.1   | 49,51   | -1,72 | 1,453882 | -1,18276 | 0,236904 | 0,6084487 |
| SPRYD7         | 78,36   | -1,15 | 0,975363 | -1,18266 | 0,236942 | 0,608463  |
| RNU6-890P      | 1,20    | -2,04 | 1,72846  | -1,18242 | 0,23704  | NA        |
| SAA1           | 0,72    | -4,32 | 3,653625 | -1,18233 | 0,237074 | NA        |
| ATL2           | 176,18  | 0,77  | 0,652989 | 1,182325 | 0,237077 | 0,6087234 |
| RP11-536C10.3  | 2,65    | 2,18  | 1,847583 | 1,182205 | 0,237124 | NA        |
| RNU6-652P      | 2,41    | 3,91  | 3,308862 | 1,181996 | 0,237207 | NA        |
| SEMA6A         | 151,24  | -1,56 | 1,317048 | -1,18135 | 0,237465 | 0,6096353 |
| AC009120.3     | 6,60    | -2,54 | 2,151991 | -1,18117 | 0,237535 | 0,6097317 |

|                |         |       |          |          |          |           |
|----------------|---------|-------|----------|----------|----------|-----------|
| GPC5-AS1       | 1,06    | 2,70  | 2,290236 | 1,181086 | 0,237569 | NA        |
| RP11-178L8.9   | 4,64    | 2,17  | 1,833649 | 1,181004 | 0,237601 | 0,6097372 |
| PAPD5          | 602,86  | -0,57 | 0,479652 | -1,18092 | 0,237635 | 0,6097372 |
| RP5-828K20.2   | 40,31   | -0,56 | 0,47125  | -1,18092 | 0,237635 | 0,6097372 |
| LAMTOR1        | 2027,40 | 0,23  | 0,191989 | 1,180732 | 0,237709 | 0,6097817 |
| B3GAT2         | 11,77   | -1,03 | 0,869922 | -1,18071 | 0,237718 | 0,6097817 |
| TECRL          | 37,47   | -0,85 | 0,718278 | -1,18055 | 0,237781 | 0,6098218 |
| UMODL1         | 0,89    | -4,32 | 3,656141 | -1,18052 | 0,237792 | NA        |
| ATXN7          | 238,06  | 0,70  | 0,592396 | 1,180505 | 0,237799 | 0,6098218 |
| LA16c-444G7.2  | 1,10    | 2,78  | 2,350727 | 1,180488 | 0,237806 | NA        |
| RP11-383I23.2  | 59,30   | -1,00 | 0,850677 | -1,18007 | 0,23797  | 0,6101765 |
| AP001626.2     | 4,69    | 1,44  | 1,217781 | 1,179942 | 0,238023 | 0,6101843 |
| TSSC4          | 149,66  | -0,85 | 0,717245 | -1,17975 | 0,2381   | 0,6101843 |
| RP11-904M10.1  | 5,73    | 2,75  | 2,328148 | 1,179737 | 0,238105 | 0,6101843 |
| CTD-2561B21.7  | 7,86    | -1,45 | 1,232827 | -1,17961 | 0,238156 | 0,6101843 |
| SEMA4B         | 51,01   | 0,76  | 0,643468 | 1,1796   | 0,23816  | 0,6101843 |
| RP11-174G6.1   | 7,70    | 1,07  | 0,908451 | 1,179572 | 0,23817  | 0,6101843 |
| RP11-901H12.1  | 4,10    | 2,03  | 1,720877 | 1,179413 | 0,238234 | 0,6102632 |
| SLC16A14       | 1,86    | -2,74 | 2,32517  | -1,1794  | 0,238239 | NA        |
| RP11-148K1.10  | 4,64    | -1,35 | 1,147812 | -1,17928 | 0,238287 | 0,6103153 |
| HECW1          | 5,67    | -1,79 | 1,52184  | -1,17874 | 0,2385   | 0,6105836 |
| C16orf58       | 84,40   | 1,28  | 1,086657 | 1,17872  | 0,23851  | 0,6105836 |
| FAM86DP        | 11,97   | -1,12 | 0,94661  | -1,17872 | 0,238511 | 0,6105836 |
| WASHC3         | 486,66  | 0,58  | 0,49212  | 1,17864  | 0,238542 | 0,6105836 |
| RP1-179N16.6   | 18,30   | -0,61 | 0,516483 | -1,1786  | 0,238556 | 0,6105836 |
| LRRC57         | 257,03  | 0,71  | 0,599283 | 1,178504 | 0,238596 | 0,6106013 |
| PHKB           | 606,84  | 0,60  | 0,50671  | 1,178255 | 0,238695 | 0,6107043 |
| RP11-673E1.1   | 53,28   | -0,62 | 0,52727  | -1,17821 | 0,238712 | 0,6107043 |
| SMYD2          | 115,93  | -1,08 | 0,915234 | -1,17811 | 0,238754 | 0,6107043 |
| MIR137HG       | 19,64   | 0,74  | 0,631003 | 1,178074 | 0,238767 | 0,6107043 |
| AP2B1          | 547,86  | 0,67  | 0,567972 | 1,177937 | 0,238822 | 0,6107603 |
| ZMIZ2          | 426,27  | 0,60  | 0,506112 | 1,177817 | 0,23887  | 0,6107988 |
| RP11-51P8.1    | 1,16    | -1,53 | 1,3025   | -1,17767 | 0,238929 | NA        |
| PDCD11         | 198,27  | -0,79 | 0,670588 | -1,17766 | 0,238932 | 0,6108368 |
| SLC9A9         | 167,60  | -0,91 | 0,775731 | -1,17761 | 0,238954 | 0,6108368 |
| RP11-356M20.3  | 3,58    | -1,00 | 0,851798 | -1,17754 | 0,238979 | NA        |
| OR4D9          | 86,37   | -0,61 | 0,518793 | -1,17753 | 0,238983 | 0,6108368 |
| RP3-468B3.3    | 45,73   | -0,96 | 0,814944 | -1,17741 | 0,239033 | 0,610881  |
| KCNK3          | 13,41   | -0,76 | 0,641906 | -1,17719 | 0,23912  | 0,6109263 |
| AC007064.24    | 18,64   | 1,83  | 1,553621 | 1,177127 | 0,239145 | 0,6109263 |
| OR2A3P         | 9,16    | 1,85  | 1,57149  | 1,177115 | 0,239149 | 0,6109263 |
| CDIP1          | 191,83  | 1,01  | 0,85786  | 1,176944 | 0,239218 | 0,6109507 |
| RP11-1042B17.3 | 136,33  | -0,63 | 0,53948  | -1,17693 | 0,239225 | 0,6109507 |
| RPS17          | 3538,48 | -0,27 | 0,233502 | -1,17667 | 0,239329 | 0,6110566 |
| ZFH3           | 508,37  | -0,67 | 0,571686 | -1,17662 | 0,239349 | 0,6110566 |
| RGR            | 39,32   | -0,89 | 0,757119 | -1,17646 | 0,239413 | 0,6110566 |
| AC012314.19    | 16,56   | -1,67 | 1,420465 | -1,17637 | 0,239448 | 0,6110566 |
| EXOSC6         | 439,46  | -0,43 | 0,365123 | -1,17628 | 0,239482 | 0,6110566 |
| SH3GL1         | 126,76  | -0,59 | 0,50446  | -1,17628 | 0,239484 | 0,6110566 |
| SENP5          | 231,67  | -0,61 | 0,520219 | -1,1762  | 0,239515 | 0,6110566 |



|               |         |       |          |          |          |           |
|---------------|---------|-------|----------|----------|----------|-----------|
| TACSTD2       | 2,27    | 2,59  | 2,203899 | 1,176193 | 0,239518 | NA        |
| AKAP17A       | 348,41  | 0,44  | 0,370471 | 1,176165 | 0,239529 | 0,6110566 |
| PKD1P5        | 1,14    | -3,03 | 2,57552  | -1,17605 | 0,239573 | NA        |
| CCR9          | 4,01    | 4,04  | 3,434966 | 1,175658 | 0,239731 | 0,6113897 |
| CCDC181       | 6,43    | 3,82  | 3,25028  | 1,175597 | 0,239756 | 0,6113897 |
| C8orf41       | 113,29  | -0,70 | 0,598397 | -1,17559 | 0,239758 | 0,6113897 |
| ZNF365        | 10,06   | -1,66 | 1,40915  | -1,17518 | 0,239921 | 0,6117206 |
| RN7SL403P     | 1,09    | -1,46 | 1,242677 | -1,17516 | 0,239932 | NA        |
| LUZP1         | 416,30  | 0,61  | 0,519698 | 1,174576 | 0,240164 | 0,6122574 |
| RP1-71L16.1   | 1,87    | 3,54  | 3,0117   | 1,174534 | 0,240181 | NA        |
| TMED6         | 3,37    | 4,37  | 3,723666 | 1,174285 | 0,240281 | NA        |
| TRIM26        | 317,64  | 0,62  | 0,527709 | 1,174208 | 0,240312 | 0,6125495 |
| RP11-126K1.8  | 21,05   | -0,96 | 0,81828  | -1,17409 | 0,240359 | 0,6125668 |
| OR4K17        | 26,89   | -1,00 | 0,855486 | -1,17403 | 0,240384 | 0,6125668 |
| RP11-374F3.5  | 3,68    | -1,78 | 1,518383 | -1,17397 | 0,240406 | NA        |
| PWRN2         | 1,55    | -3,59 | 3,057691 | -1,17391 | 0,240432 | NA        |
| HES2          | 9,57    | -0,97 | 0,822643 | -1,17323 | 0,240704 | 0,6132224 |
| SSR2          | 2158,97 | 0,34  | 0,292709 | 1,173186 | 0,240721 | 0,6132224 |
| FRA10AC1      | 141,02  | 0,84  | 0,717328 | 1,17307  | 0,240768 | 0,6132224 |
| RP11-714L20.1 | 4,44    | -1,30 | 1,110216 | -1,17293 | 0,240825 | 0,6132224 |
| RP11-583F2.6  | 1,67    | 3,38  | 2,881432 | 1,172908 | 0,240833 | NA        |
| TPR           | 1251,24 | 0,57  | 0,487617 | 1,172897 | 0,240837 | 0,6132224 |
| AATF          | 386,45  | -0,54 | 0,463773 | -1,17289 | 0,240839 | 0,6132224 |
| IQCF3         | 43,11   | -0,88 | 0,751027 | -1,17277 | 0,240889 | 0,6132649 |
| CNTROB        | 126,67  | 0,89  | 0,758257 | 1,172647 | 0,240938 | 0,6133045 |
| VTN           | 2,50    | 4,00  | 3,410343 | 1,172624 | 0,240947 | NA        |
| AF127577.10   | 22,60   | 2,17  | 1,854244 | 1,172548 | 0,240977 | 0,6133215 |
| RNU6-79P      | 0,61    | -3,24 | 2,766833 | -1,17219 | 0,241122 | NA        |
| MIR570        | 7,32    | -2,70 | 2,304495 | -1,17211 | 0,241152 | 0,6136488 |
| COA6          | 158,79  | -0,68 | 0,581695 | -1,17206 | 0,241172 | 0,6136488 |
| LSM7          | 564,23  | -0,35 | 0,300131 | -1,17186 | 0,241254 | 0,613773  |
| STK31         | 10,50   | -1,00 | 0,853861 | -1,17168 | 0,241325 | 0,613872  |
| NSMCE3        | 149,61  | 0,94  | 0,802868 | 1,171474 | 0,241408 | 0,6139984 |
| VTRNA1-1      | 2,27    | -1,44 | 1,226307 | -1,17133 | 0,241464 | NA        |
| RN7SL246P     | 16,71   | -1,78 | 1,516211 | -1,17122 | 0,241509 | 0,6141559 |
| KCNV1         | 60,10   | -0,70 | 0,60113  | -1,17116 | 0,241536 | 0,6141559 |
| AC091633.3    | 2,65    | 3,64  | 3,10531  | 1,171063 | 0,241573 | NA        |
| ZNF135        | 2,79    | 1,46  | 1,249771 | 1,17103  | 0,241587 | NA        |
| ARL3          | 139,22  | 0,86  | 0,732831 | 1,170768 | 0,241692 | 0,6144681 |
| POU6F1        | 19,22   | 1,22  | 1,043255 | 1,170648 | 0,24174  | 0,6145069 |
| AC004166.5    | 1,34    | 3,04  | 2,592858 | 1,170606 | 0,241757 | NA        |
| AC009166.7    | 8,73    | -1,23 | 1,050665 | -1,17049 | 0,241806 | 0,6145835 |
| SQRDL         | 1087,76 | 0,51  | 0,434683 | 1,170372 | 0,241851 | 0,6145835 |
| RP11-34E5.2   | 3,93    | 4,01  | 3,424776 | 1,170327 | 0,241869 | 0,6145835 |
| NANS          | 850,78  | 0,39  | 0,33276  | 1,169784 | 0,242088 | 0,6149036 |
| MAN1C1        | 104,35  | 1,09  | 0,929566 | 1,169645 | 0,242144 | 0,6149036 |
| ERC2          | 15,87   | -2,67 | 2,28659  | -1,16958 | 0,242171 | 0,6149036 |
| RP4-758J18.2  | 10,50   | 1,83  | 1,566007 | 1,169544 | 0,242184 | 0,6149036 |
| MOCOS         | 34,11   | 1,23  | 1,052764 | 1,169469 | 0,242215 | 0,6149036 |
| ATP5G2        | 3618,97 | 0,19  | 0,166029 | 1,169342 | 0,242266 | 0,6149036 |

|                |         |       |          |          |          |           |
|----------------|---------|-------|----------|----------|----------|-----------|
| ACTR5          | 153,84  | 1,02  | 0,87615  | 1,169321 | 0,242274 | 0,6149036 |
| SLC35C1        | 113,86  | 1,18  | 1,012294 | 1,169287 | 0,242288 | 0,6149036 |
| AC008079.10    | 147,71  | -0,48 | 0,410705 | -1,16928 | 0,242293 | 0,6149036 |
| CCDC116        | 0,60    | -3,80 | 3,24685  | -1,1692  | 0,242322 | NA        |
| RP11-81A1.4    | 8,13    | -0,93 | 0,798612 | -1,16915 | 0,242343 | 0,6149466 |
| HIST2H3D       | 14,02   | 2,86  | 2,446122 | 1,168723 | 0,242515 | 0,6152997 |
| CTD-3116E22.7  | 2,78    | 1,40  | 1,199034 | 1,168629 | 0,242553 | NA        |
| C19orf45       | 11,30   | -1,53 | 1,312001 | -1,1684  | 0,242647 | 0,6155515 |
| RP11-30L15.6   | 1,01    | 2,67  | 2,28266  | 1,168191 | 0,24273  | NA        |
| TMEM128        | 252,69  | 0,96  | 0,820573 | 1,168121 | 0,242758 | 0,6156198 |
| RP11-506H20.1  | 5,50    | -1,50 | 1,283538 | -1,16808 | 0,242775 | 0,6156198 |
| DDX19A         | 233,37  | -0,53 | 0,450532 | -1,16806 | 0,242782 | 0,6156198 |
| RP11-826N14.6  | 10,93   | -1,37 | 1,169005 | -1,168   | 0,242807 | 0,6156198 |
| AC027125.2     | 18,02   | -1,02 | 0,873211 | -1,16792 | 0,24284  | 0,615621  |
| RP11-70C1.3    | 3,65    | -3,31 | 2,83615  | -1,16789 | 0,242851 | NA        |
| AP000487.6     | 3,23    | 1,65  | 1,413711 | 1,167877 | 0,242856 | NA        |
| RP11-728G15.1  | 2,31    | 1,72  | 1,47664  | 1,167478 | 0,243018 | NA        |
| RP11-658F2.2   | 4,65    | 1,12  | 0,958467 | 1,167478 | 0,243018 | 0,6158836 |
| PI4KAP1        | 168,20  | 1,16  | 0,995439 | 1,167333 | 0,243076 | 0,6158836 |
| FAM49B         | 2705,98 | 0,31  | 0,262071 | 1,167298 | 0,24309  | 0,6158836 |
| RP11-48B3.4    | 1,73    | 2,83  | 2,428069 | 1,167257 | 0,243107 | NA        |
| DDX20          | 68,67   | 1,20  | 1,026275 | 1,167167 | 0,243143 | 0,6158836 |
| BLOC1S5        | 244,13  | 0,80  | 0,6886   | 1,167155 | 0,243148 | 0,6158836 |
| ZFPL1          | 107,12  | -0,95 | 0,813991 | -1,1671  | 0,243168 | 0,6158836 |
| IRF2           | 201,17  | -0,39 | 0,337645 | -1,16709 | 0,243176 | 0,6158836 |
| MAPK8IP3       | 200,51  | 0,85  | 0,728249 | 1,166794 | 0,243294 | 0,6160337 |
| NUP85          | 196,55  | 0,58  | 0,496965 | 1,166693 | 0,243334 | 0,6160337 |
| RP11-339B21.11 | 13,17   | 2,60  | 2,224993 | 1,166678 | 0,24334  | 0,6160337 |
| KIAA2012       | 26,52   | 0,77  | 0,661939 | 1,166612 | 0,243367 | 0,6160337 |
| TSPAN10        | 35,02   | -0,75 | 0,646734 | -1,1665  | 0,243411 | 0,6160613 |
| RP11-188P20.3  | 1,42    | -3,47 | 2,971375 | -1,16643 | 0,243439 | NA        |
| RP11-400F1.1   | 2,36    | -1,07 | 0,920274 | -1,16629 | 0,243497 | NA        |
| RP11-159F24.2  | 18,16   | -1,26 | 1,08077  | -1,16628 | 0,243502 | 0,6162068 |
| KCNMB3         | 71,78   | -1,36 | 1,163895 | -1,16604 | 0,243599 | 0,616296  |
| PDE3B          | 182,80  | -0,98 | 0,838299 | -1,16602 | 0,243606 | 0,616296  |
| WDR62          | 13,19   | -0,84 | 0,71993  | -1,16592 | 0,243648 | 0,616296  |
| HLA-C          | 3314,64 | -0,25 | 0,217861 | -1,16586 | 0,24367  | 0,616296  |
| FAM201A        | 1,72    | 1,74  | 1,489921 | 1,165628 | 0,243765 | NA        |
| TANK           | 877,85  | -0,45 | 0,386895 | -1,16554 | 0,2438   | 0,6165418 |
| RP11-281O15.7  | 3,26    | 4,34  | 3,723776 | 1,165531 | 0,243804 | NA        |
| TGFBR1         | 563,38  | 0,86  | 0,7417   | 1,16543  | 0,243845 | 0,6165687 |
| ERF            | 2,56    | -2,01 | 1,723867 | -1,16541 | 0,243855 | NA        |
| C19orf40       | 43,87   | -0,70 | 0,601071 | -1,16525 | 0,243917 | 0,6165687 |
| RP11-474D14.2  | 1,10    | -3,84 | 3,295381 | -1,16525 | 0,24392  | NA        |
| SORBS3         | 112,30  | -0,82 | 0,706244 | -1,16523 | 0,243926 | 0,6165687 |
| LRP1B          | 65,79   | 1,36  | 1,171216 | 1,165126 | 0,243968 | 0,6165687 |
| FAM110A        | 234,88  | 0,70  | 0,598759 | 1,165106 | 0,243976 | 0,6165687 |
| UHRF2          | 283,98  | -0,72 | 0,616709 | -1,1649  | 0,244058 | 0,6166392 |
| CTC-441N14.2   | 17,23   | -0,95 | 0,81484  | -1,16487 | 0,24407  | 0,6166392 |
| CTD-2201G3.1   | 8,20    | -2,70 | 2,314064 | -1,16464 | 0,244167 | 0,6167103 |

|                |         |       |          |          |          |           |
|----------------|---------|-------|----------|----------|----------|-----------|
| FAM65A         | 526,46  | 0,81  | 0,699465 | 1,164586 | 0,244187 | 0,6167103 |
| C3orf38        | 285,46  | -0,88 | 0,757811 | -1,16456 | 0,244198 | 0,6167103 |
| RP11-3K24.1    | 9,79    | -2,18 | 1,873088 | -1,16435 | 0,244284 | 0,6167689 |
| KCNC2          | 4,19    | -1,64 | 1,404661 | -1,16434 | 0,244288 | 0,6167689 |
| HECTD2         | 11,49   | 1,64  | 1,408005 | 1,164236 | 0,244328 | 0,6167884 |
| GKAP1          | 6,24    | -1,42 | 1,216723 | -1,16411 | 0,24438  | 0,6168227 |
| ADSL           | 745,61  | 0,54  | 0,462626 | 1,164039 | 0,244408 | 0,6168227 |
| SAT2           | 593,78  | -0,41 | 0,348439 | -1,16391 | 0,24446  | 0,6168684 |
| ANKRD27        | 147,86  | 0,94  | 0,80676  | 1,163713 | 0,24454  | 0,6169005 |
| AC002550.5     | 1,71    | 3,41  | 2,933951 | 1,163663 | 0,24456  | NA        |
| FAM185A        | 25,24   | -1,31 | 1,128048 | -1,16357 | 0,244598 | 0,6169005 |
| RAP2B          | 1821,00 | 0,42  | 0,359273 | 1,163471 | 0,244638 | 0,6169005 |
| RP11-403E24.1  | 0,68    | -4,25 | 3,653808 | -1,16343 | 0,244656 | NA        |
| GAREM1         | 76,86   | -1,65 | 1,414992 | -1,16342 | 0,244658 | 0,6169005 |
| DLGAP3         | 10,18   | -1,15 | 0,989201 | -1,16339 | 0,244673 | 0,6169005 |
| DCDC2          | 3,83    | -1,50 | 1,28875  | -1,16337 | 0,244679 | 0,6169005 |
| GTF2F1         | 342,01  | -0,68 | 0,584762 | -1,16331 | 0,244704 | 0,6169005 |
| TACR1          | 3,02    | 4,33  | 3,724775 | 1,163196 | 0,24475  | NA        |
| THRIL          | 53,84   | 2,24  | 1,929254 | 1,16295  | 0,24485  | 0,6171833 |
| AC010150.1     | 2,80    | 3,55  | 3,056521 | 1,162616 | 0,244985 | NA        |
| KTN1-AS1       | 13,05   | -1,46 | 1,254663 | -1,16261 | 0,244989 | 0,6172464 |
| MCM6           | 129,27  | -1,13 | 0,970822 | -1,1625  | 0,245032 | 0,6172464 |
| AC004549.6     | 6,33    | -2,63 | 2,261388 | -1,16242 | 0,245065 | 0,6172464 |
| MRPS14         | 268,41  | -0,85 | 0,729543 | -1,16236 | 0,245091 | 0,6172464 |
| ZNF283         | 60,04   | 1,14  | 0,980978 | 1,162315 | 0,245107 | 0,6172464 |
| C16orf96       | 3,24    | 4,33  | 3,723818 | 1,162278 | 0,245123 | NA        |
| FAM209B        | 6,66    | -2,09 | 1,797997 | -1,16222 | 0,245146 | 0,6172464 |
| CIRBP          | 1011,88 | -0,37 | 0,318655 | -1,16217 | 0,245166 | 0,6172464 |
| RBX1           | 653,77  | -0,31 | 0,266093 | -1,16213 | 0,245184 | 0,6172464 |
| C12orf50       | 78,74   | -0,57 | 0,490326 | -1,1621  | 0,245193 | 0,6172464 |
| RP11-104C4.6   | 7,41    | -3,17 | 2,731826 | -1,16203 | 0,245224 | 0,6172464 |
| OR2A5          | 53,14   | -0,92 | 0,792745 | -1,16199 | 0,24524  | 0,6172464 |
| APOOL          | 332,81  | -0,69 | 0,597684 | -1,1619  | 0,245274 | 0,61725   |
| S1PR1          | 7,78    | 2,46  | 2,118788 | 1,161807 | 0,245314 | 0,6172626 |
| RPS6KC1        | 335,31  | 0,70  | 0,601672 | 1,161729 | 0,245346 | 0,6172626 |
| RP11-210M15.2  | 18,64   | -1,19 | 1,024777 | -1,16157 | 0,245411 | 0,6173435 |
| BOLA2          | 59,18   | -0,65 | 0,5564   | -1,16128 | 0,245527 | 0,6175519 |
| DNM2           | 559,95  | 0,61  | 0,525706 | 1,161076 | 0,245611 | 0,617668  |
| RREB1          | 484,00  | 0,45  | 0,387969 | 1,161006 | 0,24564  | 0,617668  |
| RP11-473J6.1   | 3,27    | -1,15 | 0,992207 | -1,16091 | 0,24568  | NA        |
| CCDC126        | 63,02   | 0,98  | 0,843479 | 1,160807 | 0,24572  | 0,617722  |
| KLHL42         | 143,04  | 0,98  | 0,847177 | 1,160789 | 0,245728 | 0,617722  |
| ZNF600         | 49,30   | 1,09  | 0,942211 | 1,160599 | 0,245805 | 0,6178335 |
| UBE4B          | 235,61  | 0,76  | 0,657655 | 1,160355 | 0,245904 | 0,6179533 |
| CTD-2517M22.14 | 5,57    | -1,64 | 1,410887 | -1,16032 | 0,245919 | 0,6179533 |
| RP11-465N4.4   | 2,37    | 3,87  | 3,336914 | 1,160155 | 0,245986 | NA        |
| RP11-522I20.3  | 3,90    | -1,70 | 1,4638   | -1,16013 | 0,245996 | 0,6180038 |
| RP4-710H13.2   | 2,39    | 3,89  | 3,351707 | 1,160019 | 0,246041 | NA        |
| CTD-2609K8.3   | 4,16    | 2,08  | 1,792629 | 1,159998 | 0,246049 | 0,6180038 |
| NOS3           | 17,36   | 1,32  | 1,137124 | 1,159961 | 0,246065 | 0,6180038 |

|                |         |       |          |          |          |           |
|----------------|---------|-------|----------|----------|----------|-----------|
| GPR174         | 11,37   | -1,23 | 1,060739 | -1,15993 | 0,246076 | 0,6180038 |
| MLF2           | 847,18  | 0,39  | 0,334662 | 1,159861 | 0,246105 | 0,6180038 |
| ZCCHC17        | 372,27  | 0,60  | 0,517252 | 1,159645 | 0,246193 | 0,6181413 |
| KLHL17         | 77,80   | -1,38 | 1,187497 | -1,15949 | 0,246258 | 0,6182204 |
| PLAA           | 252,99  | -0,90 | 0,775116 | -1,15921 | 0,246369 | 0,6184147 |
| RP11-608O8.2   | 1,67    | 3,37  | 2,910058 | 1,159212 | 0,24637  | NA        |
| RP11-378J18.8  | 33,38   | 1,12  | 0,962756 | 1,158871 | 0,246509 | 0,6186832 |
| CTB-31N19.3    | 122,48  | 0,91  | 0,786129 | 1,158672 | 0,24659  | 0,6188034 |
| RP11-177H2.2   | 3,22    | 4,31  | 3,72385  | 1,158554 | 0,246638 | NA        |
| RP4-583P15.15  | 2,25    | 3,84  | 3,317117 | 1,158339 | 0,246726 | NA        |
| RP11-722M1.1   | 13,80   | -2,54 | 2,196556 | -1,15817 | 0,246795 | 0,6192339 |
| RP11-530C5.2   | 37,13   | -0,92 | 0,791456 | -1,15773 | 0,246974 | 0,6193089 |
| VSIG4          | 286,81  | -1,11 | 0,961995 | -1,15768 | 0,246996 | 0,6193089 |
| MIR597         | 0,68    | -4,23 | 3,653865 | -1,15765 | 0,247006 | NA        |
| CASP9          | 262,06  | 0,98  | 0,846036 | 1,157626 | 0,247017 | 0,6193089 |
| RP11-501O2.5   | 1,04    | 2,71  | 2,341902 | 1,157518 | 0,247061 | NA        |
| RP11-115J16.1  | 25,04   | -1,65 | 1,422081 | -1,15741 | 0,247103 | 0,6193089 |
| RP11-621L6.2   | 8,12    | -0,78 | 0,673337 | -1,15731 | 0,247145 | 0,6193089 |
| PCBP2-OT1      | 5,43    | -1,40 | 1,208395 | -1,1573  | 0,247148 | 0,6193089 |
| RP11-413H22.2  | 2,15    | -2,62 | 2,259741 | -1,1573  | 0,247149 | NA        |
| KB-1732A1.1    | 14,43   | 1,68  | 1,453074 | 1,157286 | 0,247155 | 0,6193089 |
| ARSA           | 221,56  | -0,78 | 0,676119 | -1,15728 | 0,24716  | 0,6193089 |
| CSNK2A1        | 891,28  | 0,42  | 0,366577 | 1,157166 | 0,247205 | 0,6193089 |
| RP11-89M22.3   | 0,67    | -2,29 | 1,976152 | -1,15716 | 0,247205 | NA        |
| RP11-426L16.8  | 9,60    | -1,33 | 1,145387 | -1,15713 | 0,247218 | 0,6193089 |
| FAM13C         | 5,13    | 2,61  | 2,251897 | 1,157103 | 0,24723  | 0,6193089 |
| B3GALNT1       | 15,58   | -1,37 | 1,186735 | -1,15701 | 0,247268 | 0,6193089 |
| RP11-586K12.11 | 7,29    | -1,58 | 1,369696 | -1,15693 | 0,247301 | 0,6193089 |
| FAM104B        | 91,38   | 1,09  | 0,946294 | 1,156903 | 0,247312 | 0,6193089 |
| PUS7           | 52,86   | 1,23  | 1,061342 | 1,156771 | 0,247366 | 0,6193089 |
| AC016722.1     | 12,90   | 0,81  | 0,69953  | 1,156742 | 0,247378 | 0,6193089 |
| RP11-737O24.5  | 53,22   | 1,14  | 0,98622  | 1,156594 | 0,247438 | 0,6193089 |
| PRAG1          | 45,72   | -1,58 | 1,363118 | -1,1565  | 0,247476 | 0,6193089 |
| MYOM1          | 41,63   | -0,92 | 0,798603 | -1,15648 | 0,247484 | 0,6193089 |
| BICD2          | 618,93  | 0,54  | 0,467339 | 1,156466 | 0,247491 | 0,6193089 |
| RP3-460G2.2    | 17,44   | 1,66  | 1,439124 | 1,156345 | 0,24754  | 0,6193493 |
| RP11-198P15.1  | 0,66    | -3,32 | 2,867519 | -1,15628 | 0,247569 | NA        |
| CIPC           | 68,39   | 1,04  | 0,899954 | 1,15616  | 0,247616 | 0,6194551 |
| RP11-326A19.5  | 1,64    | 3,34  | 2,891003 | 1,156146 | 0,247621 | NA        |
| RP11-23D24.2   | 5,96    | 1,90  | 1,646984 | 1,156012 | 0,247676 | 0,6195237 |
| OLR1           | 106,38  | 0,91  | 0,790471 | 1,155884 | 0,247728 | 0,619571  |
| RP3-509I19.11  | 0,84    | -2,07 | 1,791194 | -1,1557  | 0,247804 | NA        |
| SSX2IP         | 93,87   | 1,45  | 1,254512 | 1,155686 | 0,24781  | 0,6196909 |
| RP11-687F6.4   | 2,58    | 1,43  | 1,233634 | 1,155507 | 0,247883 | NA        |
| FOXL1          | 0,69    | -4,24 | 3,666861 | -1,15529 | 0,24797  | NA        |
| EID1           | 2521,95 | 0,34  | 0,289993 | 1,155238 | 0,247993 | 0,6200161 |
| AP000442.4     | 2,14    | -1,18 | 1,018265 | -1,1551  | 0,248051 | NA        |
| RP11-58D2.1    | 22,01   | -1,17 | 1,015561 | -1,15509 | 0,248054 | 0,6200161 |
| AC006978.6     | 502,56  | 0,68  | 0,584864 | 1,155084 | 0,248056 | 0,6200161 |
| RP11-1B20.1    | 0,64    | -1,99 | 1,723973 | -1,15503 | 0,248079 | NA        |

|                   |        |       |          |          |          |           |
|-------------------|--------|-------|----------|----------|----------|-----------|
| SIDT1             | 105,56 | 0,62  | 0,53943  | 1,154971 | 0,248102 | 0,6200161 |
| IGDCC3            | 1,64   | 1,58  | 1,371245 | 1,154811 | 0,248168 | NA        |
| ASTN1             | 2,11   | 3,19  | 2,766527 | 1,154785 | 0,248179 | NA        |
| RP11-661A12.5     | 4,21   | 3,56  | 3,084592 | 1,154783 | 0,248179 | 0,6200161 |
| RP11-701H24.9     | 7,62   | -3,43 | 2,97294  | -1,15475 | 0,248191 | 0,6200161 |
| TMEM259           | 345,15 | -0,73 | 0,628796 | -1,15471 | 0,24821  | 0,6200161 |
| RNU1-16P          | 5,53   | 2,55  | 2,212004 | 1,15467  | 0,248226 | 0,6200161 |
| RP11-16C1.2       | 25,03  | 1,16  | 1,002105 | 1,154636 | 0,24824  | 0,6200161 |
| FAP               | 0,85   | -4,22 | 3,656656 | -1,15454 | 0,248278 | NA        |
| CYTH3             | 39,51  | 1,21  | 1,046402 | 1,154537 | 0,24828  | 0,620034  |
| C3orf70           | 12,78  | -0,82 | 0,708154 | -1,15438 | 0,248343 | 0,6200872 |
| OR2AG1            | 21,44  | -0,97 | 0,839368 | -1,15432 | 0,248368 | 0,6200872 |
| YAF2              | 231,63 | 0,66  | 0,57469  | 1,154228 | 0,248407 | 0,6201005 |
| WFS1              | 2,34   | -2,95 | 2,553737 | -1,15409 | 0,248463 | NA        |
| RP11-1348G14.5    | 5,94   | -0,98 | 0,850501 | -1,15397 | 0,248514 | 0,6202854 |
| MIR6087           | 0,58   | -1,55 | 1,343999 | -1,15389 | 0,248544 | NA        |
| SMIM8             | 83,70  | -1,05 | 0,910407 | -1,15388 | 0,248549 | 0,620288  |
| CCDC22            | 187,75 | -0,81 | 0,703918 | -1,15366 | 0,248639 | 0,6203764 |
| HDAC9             | 964,41 | 0,54  | 0,472091 | 1,153614 | 0,248659 | 0,6203764 |
| SYS1              | 308,82 | -0,87 | 0,757142 | -1,15344 | 0,248728 | 0,6203764 |
| RP11-343C2.12     | 54,36  | -1,09 | 0,947359 | -1,15336 | 0,248764 | 0,6203764 |
| ARL8A             | 68,72  | 0,61  | 0,525831 | 1,153309 | 0,248783 | 0,6203764 |
| OR7E38P           | 39,27  | -1,37 | 1,184744 | -1,15331 | 0,248784 | 0,6203764 |
| NOA1              | 218,67 | -0,76 | 0,655178 | -1,15307 | 0,24888  | 0,6204529 |
| RP11-690D19.3     | 55,32  | 0,95  | 0,821438 | 1,15307  | 0,248881 | 0,6204529 |
| C5orf42           | 269,11 | 0,81  | 0,701369 | 1,152788 | 0,248998 | 0,6205993 |
| PLEKHJ1           | 747,51 | -0,31 | 0,268057 | -1,15276 | 0,249007 | 0,6205993 |
| NME6              | 357,88 | 0,83  | 0,722152 | 1,152554 | 0,249094 | 0,6207047 |
| FUNDC2            | 897,16 | 0,53  | 0,462818 | 1,152499 | 0,249116 | 0,6207047 |
| RN7SL819P         | 3,37   | -1,32 | 1,149699 | -1,15247 | 0,249129 | NA        |
| ANKRD19           | 37,37  | -1,54 | 1,338093 | -1,15238 | 0,249166 | 0,6207472 |
| CCDC183           | 2,10   | -2,42 | 2,100585 | -1,15231 | 0,249193 | NA        |
| UPF1              | 278,16 | 0,75  | 0,654245 | 1,152207 | 0,249236 | 0,6208381 |
| RP11-711C17.2     | 7,12   | -2,26 | 1,963034 | -1,15208 | 0,249289 | 0,6208871 |
| PCDHGC3           | 6,10   | -2,36 | 2,047051 | -1,15197 | 0,249333 | 0,6209138 |
| CTC-559E9.1       | 19,79  | -1,28 | 1,111869 | -1,15186 | 0,24938  | 0,6209474 |
| LL22NC03-N95F10.1 | 0,57   | -3,73 | 3,242114 | -1,15178 | 0,249413 | NA        |
| ANKRD20A1         | 25,86  | 1,54  | 1,333614 | 1,151186 | 0,249656 | 0,6214011 |
| CTC-459F4.1       | 15,19  | 1,41  | 1,226003 | 1,151183 | 0,249657 | 0,6214011 |
| RP3-332O11.2      | 4,70   | -1,48 | 1,289438 | -1,15117 | 0,249663 | 0,6214011 |
| TBL3              | 223,06 | 1,08  | 0,940058 | 1,15098  | 0,249741 | 0,6214314 |
| STAT5A            | 797,20 | 0,48  | 0,413933 | 1,150977 | 0,249742 | 0,6214314 |
| RP11-664I21.5     | 3,35   | 1,68  | 1,462234 | 1,15094  | 0,249757 | NA        |
| RP11-264E18.1     | 1,09   | -2,97 | 2,583888 | -1,15089 | 0,249776 | NA        |
| ZG16              | 1,98   | -1,28 | 1,111665 | -1,15067 | 0,249869 | NA        |
| DDX51             | 119,38 | 0,89  | 0,770436 | 1,150463 | 0,249953 | 0,6218752 |
| RP11-888D10.4     | 17,26  | 1,85  | 1,608918 | 1,15024  | 0,250045 | 0,6219552 |
| RP13-104F24.2     | 202,55 | 0,50  | 0,436423 | 1,150222 | 0,250052 | 0,6219552 |
| TGM2              | 43,11  | 0,87  | 0,758953 | 1,150058 | 0,25012  | 0,6220403 |
| RN7SL667P         | 7,62   | -0,85 | 0,742299 | -1,14991 | 0,25018  | 0,6220991 |

|                |         |       |          |          |          |           |
|----------------|---------|-------|----------|----------|----------|-----------|
| ATP2C1         | 307,86  | 0,91  | 0,787243 | 1,149828 | 0,250215 | 0,6220991 |
| ERMAP          | 178,37  | 0,91  | 0,792785 | 1,149757 | 0,250244 | 0,6220991 |
| RP11-511H23.1  | 0,64    | -1,67 | 1,45419  | -1,14971 | 0,250265 | NA        |
| GALNT10        | 252,77  | -0,71 | 0,617769 | -1,14956 | 0,250327 | 0,6222227 |
| SEMA3B         | 1,41    | 2,50  | 2,172314 | 1,149379 | 0,2504   | NA        |
| RP11-1379J22.2 | 4,03    | 2,32  | 2,014561 | 1,149303 | 0,250431 | 0,6223347 |
| RP11-54F2.9    | 23,37   | -1,11 | 0,964489 | -1,14926 | 0,250447 | 0,6223347 |
| RPL24          | 2263,88 | 0,21  | 0,184661 | 1,149132 | 0,250502 | 0,6223347 |
| FAM35A         | 165,66  | -0,77 | 0,670038 | -1,14912 | 0,250506 | 0,6223347 |
| KCNK10         | 34,88   | -0,81 | 0,703446 | -1,14886 | 0,250613 | 0,6225167 |
| TRIM44         | 980,15  | 0,54  | 0,471719 | 1,148415 | 0,250797 | 0,622822  |
| ZNF670         | 7,78    | 1,78  | 1,553147 | 1,148385 | 0,25081  | 0,622822  |
| PML            | 391,61  | 0,54  | 0,468466 | 1,148321 | 0,250836 | 0,622822  |
| RF02124        | 1,69    | -1,52 | 1,327019 | -1,14831 | 0,25084  | NA        |
| RAP2C          | 296,54  | -0,64 | 0,555077 | -1,14814 | 0,250911 | 0,6229251 |
| PSMD11         | 776,31  | -0,39 | 0,343238 | -1,14796 | 0,250984 | 0,6230227 |
| FRMD8          | 257,56  | 0,91  | 0,792207 | 1,147806 | 0,251048 | 0,6230227 |
| QTRT1          | 124,07  | -0,73 | 0,638861 | -1,14778 | 0,251058 | 0,6230227 |
| RP11-1072C15.4 | 3,12    | 4,27  | 3,723943 | 1,147742 | 0,251075 | NA        |
| GPR83          | 26,94   | -0,99 | 0,859803 | -1,14772 | 0,251084 | 0,6230227 |
| RP13-890H12.2  | 4,24    | 3,54  | 3,085332 | 1,147379 | 0,251225 | 0,6232882 |
| RP11-429J17.8  | 19,50   | -0,76 | 0,666616 | -1,14678 | 0,251471 | 0,6237937 |
| RPP25          | 7,88    | 1,77  | 1,5461   | 1,146724 | 0,251496 | 0,6237937 |
| RP11-43N22.1   | 2,42    | 3,90  | 3,405508 | 1,146644 | 0,251529 | NA        |
| KLHL23         | 7,37    | -0,85 | 0,738844 | -1,14661 | 0,251543 | 0,6238288 |
| PTPRH          | 4,00    | -1,13 | 0,984106 | -1,14624 | 0,251694 | 0,6241192 |
| FBLN5          | 1,46    | 2,19  | 1,906576 | 1,146175 | 0,251723 | NA        |
| PDGFC          | 132,53  | -1,25 | 1,094565 | -1,14583 | 0,251866 | 0,6244616 |
| RP11-145G20.1  | 21,22   | -0,75 | 0,656047 | -1,14572 | 0,251911 | 0,6244921 |
| RMI1           | 141,52  | 1,20  | 1,044285 | 1,145431 | 0,252031 | 0,624623  |
| RP11-154J22.1  | 24,14   | -0,81 | 0,708445 | -1,14543 | 0,252031 | 0,624623  |
| AC003664.1     | 1,38    | 1,86  | 1,625009 | 1,145389 | 0,252048 | NA        |
| CDK11B         | 215,38  | 0,57  | 0,493555 | 1,145146 | 0,252149 | 0,6248302 |
| OR1M1          | 19,49   | -0,63 | 0,548303 | -1,14506 | 0,252184 | 0,6248354 |
| RP11-517A5.5   | 51,55   | -1,53 | 1,333561 | -1,14485 | 0,25227  | 0,6249649 |
| RP1-240K6.3    | 0,56    | -3,72 | 3,25269  | -1,14468 | 0,252342 | NA        |
| RP11-315O6.1   | 0,65    | -3,74 | 3,271351 | -1,14436 | 0,252473 | NA        |
| CNPPD1         | 568,54  | 0,46  | 0,40452  | 1,144255 | 0,252518 | 0,6253344 |
| LIN9           | 3,77    | 2,45  | 2,138534 | 1,144233 | 0,252527 | 0,6253344 |
| MBTPS1         | 383,76  | -0,41 | 0,360608 | -1,14415 | 0,252562 | 0,6253344 |
| RP11-147L13.15 | 66,85   | -0,55 | 0,48403  | -1,14409 | 0,252587 | 0,6253344 |
| RP11-305E17.6  | 2,31    | 3,85  | 3,363981 | 1,144028 | 0,252612 | NA        |
| DLGAP4         | 199,57  | -0,72 | 0,626804 | -1,144   | 0,252622 | 0,6253344 |
| ARRDC1         | 785,90  | 0,44  | 0,381265 | 1,14399  | 0,252628 | 0,6253344 |
| RUBCN          | 297,65  | -0,60 | 0,527636 | -1,14393 | 0,252655 | 0,6253344 |
| RN7SL767P      | 0,58    | -3,76 | 3,284496 | -1,14383 | 0,252695 | NA        |
| AC131180.3     | 3,71    | -1,46 | 1,278011 | -1,14377 | 0,25272  | NA        |
| RP11-63A11.1   | 1,70    | -1,30 | 1,136889 | -1,14364 | 0,252775 | NA        |
| RP11-712L6.5   | 4,86    | -2,78 | 2,431651 | -1,14359 | 0,252794 | 0,6255966 |
| RBBP6          | 1128,89 | 0,46  | 0,399823 | 1,143444 | 0,252854 | 0,625662  |

|                    |         |       |          |          |          |           |
|--------------------|---------|-------|----------|----------|----------|-----------|
| CTD-2562G15.2      | 3,11    | 4,26  | 3,723951 | 1,14332  | 0,252906 | NA        |
| RP11-318G21.4      | 6,70    | -1,02 | 0,895279 | -1,14325 | 0,252936 | 0,6256689 |
| ATF6B              | 319,40  | 0,73  | 0,6428   | 1,143227 | 0,252944 | 0,6256689 |
| LRRC16A            | 103,13  | -0,70 | 0,608855 | -1,14319 | 0,252958 | 0,6256689 |
| MRPL44             | 211,65  | -1,01 | 0,884613 | -1,14299 | 0,253044 | 0,6257455 |
| ZNF74              | 32,05   | -1,01 | 0,883046 | -1,14296 | 0,253056 | 0,6257455 |
| SFRP4              | 4,23    | 2,77  | 2,420277 | 1,142819 | 0,253114 | 0,6258052 |
| RN7SL591P          | 1,24    | 2,94  | 2,569572 | 1,142746 | 0,253144 | NA        |
| EPS8               | 415,85  | -0,82 | 0,714737 | -1,14261 | 0,253199 | 0,6258902 |
| LINC00539          | 27,82   | -2,39 | 2,091558 | -1,14257 | 0,253216 | 0,6258902 |
| RP11-2C24.9        | 174,37  | 0,77  | 0,672168 | 1,142484 | 0,253253 | 0,6258993 |
| STAB2              | 2,85    | 3,54  | 3,099619 | 1,142388 | 0,253293 | NA        |
| RP5-1180D12.1      | 4,26    | 1,09  | 0,958513 | 1,142349 | 0,253309 | 0,6259546 |
| SHE                | 8,04    | -0,75 | 0,65715  | -1,14225 | 0,25335  | 0,6259737 |
| AC064846.1         | 174,86  | -0,64 | 0,563581 | -1,14178 | 0,253547 | 0,6263774 |
| CALR               | 1834,74 | -0,44 | 0,389675 | -1,14159 | 0,253624 | 0,626483  |
| SLC17A9            | 170,59  | 0,67  | 0,588767 | 1,141428 | 0,253692 | 0,6265678 |
| RP11-775C24.5      | 3,07    | 4,25  | 3,723998 | 1,141389 | 0,253708 | NA        |
| RP1-197B17.7       | 7,35    | -1,71 | 1,495929 | -1,14119 | 0,253792 | 0,6267313 |
| SULT1B1            | 224,05  | 0,72  | 0,631683 | 1,140933 | 0,253898 | 0,6268816 |
| PIH1D1             | 496,42  | -0,47 | 0,415748 | -1,14082 | 0,253945 | 0,6268816 |
| TCEAL3             | 36,60   | 1,11  | 0,972065 | 1,140799 | 0,253954 | 0,6268816 |
| XXbac-BPG248L24.12 | 19,34   | 1,09  | 0,958714 | 1,140701 | 0,253994 | 0,6268987 |
| POLE4              | 412,96  | -0,47 | 0,408429 | -1,14038 | 0,25413  | 0,6271499 |
| CORO1B             | 184,81  | 0,61  | 0,539174 | 1,140212 | 0,254198 | 0,6272348 |
| RP5-1189D6.1       | 2,17    | 3,76  | 3,301439 | 1,139899 | 0,254329 | NA        |
| RP11-680A11.5      | 35,55   | -0,77 | 0,678403 | -1,13975 | 0,254392 | 0,6275166 |
| RP11-770J1.4       | 11,58   | -0,76 | 0,664832 | -1,13973 | 0,254397 | 0,6275166 |
| RP11-1110F20.1     | 0,79    | -2,51 | 2,206356 | -1,13973 | 0,254398 | NA        |
| RP11-277A4.4       | 4,87    | -0,98 | 0,861125 | -1,13969 | 0,254414 | 0,6275166 |
| RHOT1              | 396,45  | 0,59  | 0,513623 | 1,139615 | 0,254447 | 0,6275166 |
| CTD-2177J2.2       | 0,73    | -1,65 | 1,451153 | -1,13945 | 0,254513 | NA        |
| MRPL4              | 189,59  | 0,57  | 0,501222 | 1,139425 | 0,254526 | 0,6276055 |
| GUSB               | 536,99  | 0,61  | 0,534853 | 1,139366 | 0,25455  | 0,6276055 |
| RN7SL423P          | 0,42    | -1,91 | 1,678055 | -1,13918 | 0,254626 | NA        |
| NSFL1C             | 559,90  | 0,55  | 0,483181 | 1,139183 | 0,254627 | 0,6277108 |
| SGCB               | 3,29    | 1,59  | 1,39287  | 1,139176 | 0,25463  | NA        |
| PPM1B              | 495,61  | 0,62  | 0,54402  | 1,139071 | 0,254674 | 0,6277429 |
| SRF                | 378,42  | 0,49  | 0,431594 | 1,13892  | 0,254736 | 0,6277703 |
| SCN8A              | 30,56   | -2,35 | 2,067479 | -1,13884 | 0,25477  | 0,6277703 |
| ASAH2B             | 8,05    | -1,11 | 0,97115  | -1,1388  | 0,254786 | 0,6277703 |
| CTC-444N24.6       | 1,67    | 3,38  | 2,96369  | 1,138797 | 0,254788 | NA        |
| C2CD4A             | 4,45    | -0,97 | 0,854322 | -1,1385  | 0,254912 | 0,6279971 |
| APITD1-CORT        | 0,71    | 2,21  | 1,942175 | 1,13833  | 0,254983 | NA        |
| RIMKLA             | 5,23    | 1,30  | 1,138758 | 1,138317 | 0,254988 | 0,6281017 |
| RP11-297B17.3      | 0,96    | -1,47 | 1,294358 | -1,13827 | 0,255009 | NA        |
| RP11-982M15.8      | 28,71   | -0,59 | 0,518351 | -1,13818 | 0,255043 | 0,628119  |
| AC003991.3         | 118,71  | -0,54 | 0,478448 | -1,13814 | 0,255063 | 0,628119  |
| OR7E128P           | 3,38    | 2,73  | 2,401224 | 1,138035 | 0,255106 | NA        |
| CTD-3076O17.2      | 24,58   | 0,59  | 0,519931 | 1,137958 | 0,255138 | 0,628119  |

|                   |         |       |          |          |          |           |
|-------------------|---------|-------|----------|----------|----------|-----------|
| AC007050.9        | 13,09   | 1,21  | 1,063365 | 1,137954 | 0,25514  | 0,628119  |
| ANKRD18B          | 49,55   | -1,88 | 1,654059 | -1,13789 | 0,255165 | 0,628119  |
| GDI1              | 149,90  | -0,46 | 0,40194  | -1,13782 | 0,255198 | 0,628119  |
| MLF1              | 29,06   | -1,54 | 1,349918 | -1,13754 | 0,255311 | 0,6282288 |
| THOC5             | 284,85  | 0,96  | 0,843221 | 1,137529 | 0,255317 | 0,6282288 |
| GDPD2             | 6,32    | 1,78  | 1,566335 | 1,137386 | 0,255377 | 0,6282288 |
| FAM217B           | 326,49  | -0,78 | 0,6831   | -1,13739 | 0,255377 | 0,6282288 |
| RP11-1094M14.14   | 2,53    | -1,28 | 1,124864 | -1,13735 | 0,255393 | NA        |
| AC005162.4        | 16,04   | 1,43  | 1,25661  | 1,137232 | 0,255441 | 0,6282849 |
| RP3-347M6.1       | 3,87    | 0,84  | 0,740221 | 1,137169 | 0,255468 | 0,6282849 |
| FBXO34            | 163,54  | 0,92  | 0,806818 | 1,136881 | 0,255588 | 0,6284981 |
| MYPOP             | 32,48   | 0,98  | 0,861706 | 1,136635 | 0,255691 | 0,6286682 |
| RP11-144O23.22    | 1,78    | -2,51 | 2,207878 | -1,13661 | 0,2557   | NA        |
| RP1-163M9.8       | 1,10    | -1,94 | 1,709365 | -1,13661 | 0,255701 | NA        |
| ALS2CR12          | 18,41   | -1,21 | 1,064526 | -1,13655 | 0,255725 | 0,6286694 |
| NVL               | 133,88  | -0,44 | 0,39149  | -1,13638 | 0,255797 | 0,6286818 |
| AF121898.1        | 4,09    | -1,06 | 0,935471 | -1,13633 | 0,255817 | 0,6286818 |
| RNU6-7            | 1,26    | 2,29  | 2,014979 | 1,136157 | 0,255891 | NA        |
| RNU6-8            | 1,26    | 2,29  | 2,014979 | 1,136157 | 0,255891 | NA        |
| PDCD2             | 391,75  | 0,70  | 0,613046 | 1,13615  | 0,255894 | 0,6286818 |
| SEPSECS-AS1       | 498,68  | -0,59 | 0,520316 | -1,13604 | 0,25594  | 0,6286818 |
| EMILIN3           | 0,64    | -4,15 | 3,655152 | -1,136   | 0,255955 | NA        |
| RP11-213P13.1     | 0,64    | -4,15 | 3,655424 | -1,13596 | 0,255975 | NA        |
| RP11-266J6.2      | 1,59    | 3,31  | 2,91049  | 1,13592  | 0,25599  | NA        |
| SPDYE5            | 21,17   | -1,08 | 0,950714 | -1,13586 | 0,256016 | 0,6286818 |
| HIPK4             | 0,64    | -4,15 | 3,655172 | -1,13572 | 0,256072 | NA        |
| TBK1              | 335,71  | 0,52  | 0,461847 | 1,135717 | 0,256075 | 0,6286818 |
| RP11-455P21.2     | 0,64    | -3,68 | 3,243907 | -1,13565 | 0,256104 | NA        |
| CTA-113A6.2       | 12,86   | 1,20  | 1,06082  | 1,135543 | 0,256148 | 0,6286818 |
| RP11-352D13.6     | 21,79   | -1,33 | 1,172723 | -1,13552 | 0,256156 | 0,6286818 |
| XXbac-BPG252P9.10 | 39,35   | -1,83 | 1,615455 | -1,13547 | 0,256178 | 0,6286818 |
| ANXA7             | 734,37  | 0,43  | 0,376265 | 1,135451 | 0,256186 | 0,6286818 |
| SPPL2A            | 507,42  | 0,67  | 0,588148 | 1,135257 | 0,256268 | 0,6286818 |
| SYT16             | 24,45   | 0,79  | 0,693077 | 1,135093 | 0,256336 | 0,6286818 |
| ARHGEF38          | 22,92   | -1,47 | 1,296503 | -1,13509 | 0,256337 | 0,6286818 |
| RP11-144G16.1     | 0,64    | -4,15 | 3,655065 | -1,13499 | 0,256381 | NA        |
| RPS5              | 8111,16 | 0,20  | 0,179473 | 1,134974 | 0,256386 | 0,6286818 |
| RP11-143J12.3     | 31,91   | 1,17  | 1,029258 | 1,134972 | 0,256387 | 0,6286818 |
| RP11-481A20.11    | 32,71   | -1,44 | 1,271189 | -1,13494 | 0,256401 | 0,6286818 |
| RP11-315D16.2     | 47,02   | 1,48  | 1,302353 | 1,134861 | 0,256433 | 0,6286818 |
| TAOK3             | 1508,46 | 0,40  | 0,354898 | 1,134779 | 0,256468 | 0,6286818 |
| VDAC3             | 1195,55 | 0,57  | 0,504174 | 1,134715 | 0,256495 | 0,6286818 |
| TMEM266           | 30,33   | -0,72 | 0,63156  | -1,13469 | 0,256507 | 0,6286818 |
| LPGAT1            | 988,67  | -0,60 | 0,529716 | -1,13455 | 0,256562 | 0,6286818 |
| TFAP2E            | 4,29    | -3,61 | 3,186233 | -1,13455 | 0,256564 | 0,6286818 |
| CTA-345G4.1       | 31,38   | -2,59 | 2,282887 | -1,13454 | 0,256569 | 0,6286818 |
| RP11-19E18.2      | 3,94    | -3,63 | 3,195518 | -1,13451 | 0,256581 | 0,6286818 |
| MTIF3             | 320,25  | 0,63  | 0,551872 | 1,134463 | 0,256601 | 0,6286818 |
| POU2F1            | 361,14  | -1,05 | 0,923481 | -1,13437 | 0,256641 | 0,6286818 |
| EFL1              | 126,33  | -0,86 | 0,760894 | -1,13432 | 0,25666  | 0,6286818 |



|               |         |       |          |          |          |           |
|---------------|---------|-------|----------|----------|----------|-----------|
| HRH2          | 451,79  | -0,60 | 0,526098 | -1,13428 | 0,256677 | 0,6286818 |
| MAATS1        | 1,96    | 1,78  | 1,571589 | 1,134281 | 0,256677 | NA        |
| AC008073.7    | 1,44    | -1,70 | 1,503119 | -1,13412 | 0,256744 | NA        |
| SS18L2        | 355,43  | 0,58  | 0,514512 | 1,133935 | 0,256822 | 0,6289548 |
| SDS           | 59,07   | -0,94 | 0,829486 | -1,1338  | 0,256879 | 0,6289651 |
| NAP1L2        | 0,64    | -4,14 | 3,655234 | -1,13379 | 0,256883 | NA        |
| TBC1D29       | 6,11    | -2,61 | 2,301465 | -1,13355 | 0,256985 | 0,6289651 |
| AC000095.12   | 37,97   | -0,68 | 0,597215 | -1,13352 | 0,256995 | 0,6289651 |
| AC005027.4    | 29,69   | 0,98  | 0,868595 | 1,133397 | 0,257047 | 0,6289651 |
| PER1          | 1697,74 | -0,45 | 0,399125 | -1,13339 | 0,257049 | 0,6289651 |
| NTNG2         | 19,40   | -1,33 | 1,174881 | -1,13339 | 0,257049 | 0,6289651 |
| CTTNBP2NL     | 276,10  | 0,73  | 0,644853 | 1,133347 | 0,257069 | 0,6289651 |
| AC003051.1    | 5,69    | -1,04 | 0,918977 | -1,13328 | 0,257096 | 0,6289651 |
| RP11-567F11.2 | 4,53    | -3,63 | 3,20784  | -1,13286 | 0,257273 | 0,629292  |
| TNFRSF4       | 0,64    | -4,14 | 3,655701 | -1,13284 | 0,257281 | NA        |
| ZBTB7B        | 41,44   | -0,90 | 0,791212 | -1,13279 | 0,257303 | 0,629292  |
| STYX          | 349,38  | 0,75  | 0,65821  | 1,132721 | 0,257332 | 0,629292  |
| RP11-292F9.1  | 3,03    | 1,20  | 1,060713 | 1,132567 | 0,257396 | NA        |
| RP11-407P18.1 | 1,73    | 2,20  | 1,946345 | 1,132561 | 0,257399 | NA        |
| MXD3          | 103,92  | 1,06  | 0,934942 | 1,132396 | 0,257468 | 0,6295425 |
| EGLN1         | 393,37  | -0,74 | 0,655645 | -1,13213 | 0,257578 | 0,629648  |
| SLC50A1       | 326,71  | -0,53 | 0,471165 | -1,13213 | 0,257579 | 0,629648  |
| TAZ           | 434,48  | -0,50 | 0,440489 | -1,13185 | 0,257699 | 0,6297842 |
| KCTD21        | 50,36   | -0,91 | 0,801163 | -1,13184 | 0,257702 | 0,6297842 |
| DVL1          | 50,30   | -0,99 | 0,874995 | -1,13173 | 0,257747 | 0,6298124 |
| RP11-751H17.1 | 2,82    | -1,24 | 1,095819 | -1,1317  | 0,257759 | NA        |
| OR2A12        | 1,02    | -1,82 | 1,607272 | -1,13139 | 0,257891 | NA        |
| CTH           | 13,66   | -1,09 | 0,966449 | -1,13098 | 0,258063 | 0,6305008 |
| OR4F5         | 0,56    | -3,13 | 2,76855  | -1,13072 | 0,258172 | NA        |
| KIAA0087      | 1,09    | -1,24 | 1,101086 | -1,13067 | 0,258193 | NA        |
| RP11-413G22.2 | 7,38    | -2,60 | 2,29718  | -1,13065 | 0,258202 | 0,6307566 |
| C1orf146      | 5,76    | -1,16 | 1,025271 | -1,13049 | 0,258271 | 0,630844  |
| RP11-252A24.2 | 42,99   | -0,72 | 0,640033 | -1,13027 | 0,258362 | 0,6309837 |
| RP11-100I17.2 | 32,25   | -1,62 | 1,433042 | -1,13016 | 0,25841  | 0,6309938 |
| TTC31         | 234,68  | 0,92  | 0,816245 | 1,130065 | 0,258449 | 0,6309938 |
| CLK2          | 403,16  | -0,68 | 0,60313  | -1,13002 | 0,258468 | 0,6309938 |
| RPUSD2        | 87,33   | -1,38 | 1,220906 | -1,1298  | 0,25856  | 0,6311347 |
| RP11-280K24.1 | 0,63    | -4,13 | 3,65539  | -1,12966 | 0,258619 | NA        |
| FIS1          | 927,25  | -0,36 | 0,318173 | -1,12963 | 0,258632 | 0,6311943 |
| YIPF4         | 741,82  | 0,65  | 0,57145  | 1,129481 | 0,258695 | 0,6311943 |
| RP11-154H17.1 | 18,93   | 1,34  | 1,182248 | 1,129423 | 0,25872  | 0,6311943 |
| CTD-2561J22.4 | 18,06   | 0,97  | 0,860357 | 1,129421 | 0,25872  | 0,6311943 |
| PAK7          | 1,43    | -2,48 | 2,193891 | -1,129   | 0,258896 | NA        |
| NHP2          | 929,55  | 0,26  | 0,234188 | 1,128965 | 0,258913 | 0,631554  |
| CNST          | 274,68  | 0,84  | 0,742626 | 1,128911 | 0,258935 | 0,631554  |
| MYO9A         | 481,83  | -0,65 | 0,574792 | -1,12881 | 0,258978 | 0,6315739 |
| IMMP2L        | 58,34   | 1,25  | 1,106995 | 1,128648 | 0,259046 | 0,6315941 |
| HIST1H4E      | 60,63   | -1,26 | 1,114978 | -1,12852 | 0,259102 | 0,6315941 |
| AC000068.9    | 5,28    | -1,96 | 1,737274 | -1,12848 | 0,259117 | 0,6315941 |
| BPTF          | 1612,21 | -0,44 | 0,387995 | -1,12847 | 0,259122 | 0,6315941 |

|               |          |       |          |          |          |           |
|---------------|----------|-------|----------|----------|----------|-----------|
| RNU2-28P      | 8,08     | -2,13 | 1,890018 | -1,12828 | 0,259202 | 0,6317075 |
| RP11-30K9.4   | 3,71     | -1,36 | 1,203457 | -1,12806 | 0,259295 | NA        |
| RP11-244H3.5  | 28,60    | -1,25 | 1,111503 | -1,128   | 0,25932  | 0,6318064 |
| ITGA1         | 35,29    | 0,79  | 0,702715 | 1,127982 | 0,259327 | 0,6318064 |
| CTD-2303H24.2 | 229,40   | -0,75 | 0,661849 | -1,12794 | 0,259345 | 0,6318064 |
| RP11-716O23.2 | 0,48     | -1,71 | 1,514997 | -1,12781 | 0,259401 | NA        |
| PMFBP1        | 27,63    | 2,20  | 1,950099 | 1,127789 | 0,259409 | 0,6318297 |
| NIT2          | 433,12   | 0,69  | 0,611111 | 1,127713 | 0,259441 | 0,6318297 |
| SNRK          | 380,74   | 0,60  | 0,530786 | 1,127678 | 0,259456 | 0,6318297 |
| MIR548AA1     | 3,39     | 1,55  | 1,378447 | 1,127568 | 0,259502 | NA        |
| MIR548D1      | 3,39     | 1,55  | 1,378447 | 1,127568 | 0,259502 | NA        |
| BRAF          | 399,82   | 0,57  | 0,501434 | 1,127439 | 0,259557 | 0,6318762 |
| RP11-173A16.1 | 8,28     | 2,47  | 2,190397 | 1,12742  | 0,259565 | 0,6318762 |
| ZNF620        | 38,19    | 1,00  | 0,890513 | 1,127391 | 0,259577 | 0,6318762 |
| ZNF354A       | 116,58   | 0,75  | 0,669067 | 1,127231 | 0,259645 | 0,6319189 |
| FAM124A       | 14,38    | -0,79 | 0,702397 | -1,12719 | 0,259662 | 0,6319189 |
| PPIEL         | 75,92    | 0,89  | 0,792709 | 1,126972 | 0,259754 | 0,6319887 |
| LINC00670     | 170,32   | -0,63 | 0,560092 | -1,12695 | 0,259764 | 0,6319887 |
| FABP3         | 2,23     | 3,80  | 3,370424 | 1,126924 | 0,259775 | NA        |
| FRMD1         | 3,42     | -1,21 | 1,075442 | -1,12679 | 0,259833 | NA        |
| RP11-181D10.2 | 5,69     | -1,60 | 1,418847 | -1,12676 | 0,259844 | 0,6319887 |
| WIZ-89927D4.1 | 14,19    | 1,72  | 1,525676 | 1,126682 | 0,259877 | 0,6319887 |
| SMAD2         | 1197,19  | -0,79 | 0,699305 | -1,12653 | 0,259943 | 0,6319887 |
| RP11-317C20.9 | 12,17    | -1,20 | 1,064513 | -1,12651 | 0,259949 | 0,6319887 |
| SNORA33       | 22,15    | 1,80  | 1,60186  | 1,126488 | 0,259959 | 0,6319887 |
| TST           | 318,29   | -0,90 | 0,795076 | -1,12645 | 0,259974 | 0,6319887 |
| GUCY1B3       | 3,76     | 2,20  | 1,950738 | 1,126399 | 0,259997 | 0,6319887 |
| ARFIP2        | 258,39   | 0,95  | 0,841784 | 1,126257 | 0,260057 | 0,6320515 |
| BHLHE41       | 0,42     | -2,35 | 2,082792 | -1,12619 | 0,260084 | NA        |
| APOBEC3C      | 760,60   | 0,36  | 0,321498 | 1,12615  | 0,260102 | 0,6320795 |
| LPCAT3        | 137,23   | -0,96 | 0,85489  | -1,12586 | 0,260225 | 0,6322941 |
| GRN           | 11035,41 | -0,22 | 0,197601 | -1,12578 | 0,260258 | 0,6322941 |
| EGLN2         | 502,00   | -0,54 | 0,478508 | -1,12549 | 0,260383 | 0,6323023 |
| SCARNA23      | 2,93     | 4,19  | 3,72417  | 1,125478 | 0,260386 | NA        |
| RP11-727A23.5 | 53,44    | -1,05 | 0,933864 | -1,12541 | 0,260415 | 0,6323023 |
| CXCL14        | 18,14    | -0,51 | 0,45702  | -1,12535 | 0,260443 | 0,6323023 |
| CASP2         | 520,01   | 0,49  | 0,439168 | 1,125336 | 0,260447 | 0,6323023 |
| ZCCHC14       | 63,31    | -1,04 | 0,924272 | -1,12531 | 0,260457 | 0,6323023 |
| CCT8          | 1743,68  | 0,52  | 0,466043 | 1,125291 | 0,260466 | 0,6323023 |
| RP1-71H19.2   | 2,95     | 4,19  | 3,724146 | 1,125177 | 0,260514 | NA        |
| ENOSF1        | 104,52   | 0,90  | 0,79992  | 1,125177 | 0,260514 | 0,6323368 |
| RP11-109D9.3  | 0,94     | -2,36 | 2,095835 | -1,12503 | 0,260578 | NA        |
| RNU6-1016P    | 7,65     | 1,11  | 0,982523 | 1,124901 | 0,260631 | 0,6325382 |
| BMPR1B        | 2,95     | -0,78 | 0,690545 | -1,12488 | 0,26064  | NA        |
| AC007403.3    | 1,40     | 1,86  | 1,656102 | 1,124835 | 0,260659 | NA        |
| RP11-31F15.1  | 235,57   | 0,80  | 0,714696 | 1,124744 | 0,260698 | 0,6326174 |
| RP11-519C12.1 | 7,07     | 2,45  | 2,17493  | 1,124492 | 0,260804 | 0,6327938 |
| CYB561D1      | 121,56   | -0,95 | 0,845757 | -1,12433 | 0,260874 | 0,6328345 |
| RP11-417F21.1 | 65,27    | 1,65  | 1,472015 | 1,124233 | 0,260914 | 0,6328345 |
| U91328.19     | 55,43    | -0,83 | 0,741155 | -1,12421 | 0,260923 | 0,6328345 |

|               |         |       |          |          |          |           |
|---------------|---------|-------|----------|----------|----------|-----------|
| UBAP2L        | 565,10  | 0,51  | 0,452195 | 1,1239   | 0,261055 | 0,6330279 |
| OPRM1         | 22,05   | 0,88  | 0,782049 | 1,123804 | 0,261096 | 0,6330279 |
| HSP90AB4P     | 50,60   | -1,46 | 1,300967 | -1,12373 | 0,261127 | 0,6330279 |
| RP11-627D16.1 | 7,05    | -2,60 | 2,3173   | -1,1237  | 0,261139 | 0,6330279 |
| FRMPD2L2      | 2,16    | 3,75  | 3,333459 | 1,123669 | 0,261153 | NA        |
| LIPE          | 9,64    | 1,23  | 1,092043 | 1,123615 | 0,261177 | 0,6330368 |
| RP11-324H6.6  | 9,16    | -2,06 | 1,83375  | -1,1233  | 0,26131  | 0,6332786 |
| ZNF543        | 9,47    | 1,07  | 0,951633 | 1,123149 | 0,261374 | 0,6333511 |
| RP11-631M6.3  | 103,24  | 0,89  | 0,79644  | 1,122922 | 0,26147  | 0,6334233 |
| LILRA5        | 709,23  | -0,51 | 0,451518 | -1,12288 | 0,261487 | 0,6334233 |
| DNAJC10       | 967,73  | 0,44  | 0,389745 | 1,122838 | 0,261506 | 0,6334233 |
| CLCN3         | 284,53  | 0,57  | 0,510597 | 1,122731 | 0,261552 | 0,6334508 |
| FAM86B1       | 2,87    | 1,83  | 1,633365 | 1,12252  | 0,261641 | NA        |
| RP11-359K18.4 | 24,47   | 1,56  | 1,393437 | 1,122369 | 0,261706 | 0,6334915 |
| SFMBT2        | 691,48  | 1,02  | 0,911195 | 1,122332 | 0,261721 | 0,6334915 |
| USP32P2       | 105,50  | 0,96  | 0,853479 | 1,122332 | 0,261721 | 0,6334915 |
| RP11-725D20.1 | 2,08    | -1,09 | 0,968507 | -1,12232 | 0,261728 | NA        |
| PHF13         | 11,24   | -2,48 | 2,208007 | -1,1223  | 0,261734 | 0,6334915 |
| RP11-273G15.2 | 31,39   | -1,04 | 0,929703 | -1,12229 | 0,261739 | 0,6334915 |
| CCNA2         | 3,18    | 2,28  | 2,036413 | 1,121947 | 0,261885 | NA        |
| RP11-126O1.5  | 29,23   | 2,35  | 2,096094 | 1,121832 | 0,261934 | 0,6337032 |
| TAF11         | 312,75  | 0,64  | 0,572756 | 1,121793 | 0,26195  | 0,6337032 |
| CTD-2201E18.5 | 9,16    | -0,94 | 0,841641 | -1,12178 | 0,261956 | 0,6337032 |
| RP11-525G12.1 | 4,40    | 4,18  | 3,722932 | 1,121765 | 0,261962 | 0,6337032 |
| LTBP1         | 0,62    | -2,28 | 2,03607  | -1,12163 | 0,262019 | NA        |
| OR2L3         | 34,74   | -1,24 | 1,104446 | -1,12157 | 0,262044 | 0,6337219 |
| GNRH1         | 21,83   | -1,78 | 1,586077 | -1,12156 | 0,262048 | 0,6337219 |
| RP11-333E13.4 | 6,06    | 0,97  | 0,863993 | 1,121506 | 0,262072 | 0,6337219 |
| RP11-442G21.1 | 0,62    | -4,10 | 3,655803 | -1,12144 | 0,262101 | NA        |
| C9orf139      | 130,36  | -1,29 | 1,150848 | -1,12133 | 0,262146 | 0,6338184 |
| RN7SL498P     | 1,61    | -1,69 | 1,511352 | -1,12115 | 0,262223 | NA        |
| RP1-20N2.8    | 33,60   | 1,34  | 1,197126 | 1,121129 | 0,262233 | 0,6338778 |
| RN7SL665P     | 4,55    | 2,14  | 1,908605 | 1,121115 | 0,262239 | 0,6338778 |
| CCDC170       | 186,50  | 0,78  | 0,691563 | 1,120875 | 0,262341 | 0,6340425 |
| GOLGA8J       | 0,68    | -1,96 | 1,75222  | -1,12086 | 0,262349 | NA        |
| OR7A5         | 31,38   | -1,23 | 1,09879  | -1,12066 | 0,262432 | 0,6341    |
| SERPING1      | 118,63  | -1,29 | 1,14896  | -1,12066 | 0,262433 | 0,6341    |
| RF00493       | 2,36    | -2,19 | 1,955868 | -1,12045 | 0,262521 | NA        |
| SSH3          | 21,99   | -1,25 | 1,115036 | -1,12038 | 0,262551 | 0,6343011 |
| AURKAPS1      | 3,70    | -2,43 | 2,164494 | -1,12038 | 0,262551 | NA        |
| ZC3H18        | 247,87  | -0,72 | 0,646561 | -1,12026 | 0,262602 | 0,6343419 |
| RP5-966M1.2   | 0,66    | -3,64 | 3,252498 | -1,12014 | 0,262656 | NA        |
| ABCB6         | 5,53    | -2,46 | 2,195282 | -1,12005 | 0,262694 | 0,6344834 |
| SPG20         | 284,60  | -0,53 | 0,46973  | -1,11988 | 0,262766 | 0,6345441 |
| AC009948.5    | 184,91  | 0,69  | 0,612262 | 1,119804 | 0,262797 | 0,6345441 |
| RP6-201G10.2  | 2,89    | 4,17  | 3,724217 | 1,119775 | 0,262809 | NA        |
| RIMS3         | 6,35    | 2,11  | 1,882208 | 1,119733 | 0,262828 | 0,6345441 |
| RP11-686F15.2 | 0,62    | -4,09 | 3,656203 | -1,11966 | 0,262857 | NA        |
| ID2           | 7044,86 | 0,30  | 0,267985 | 1,119629 | 0,262872 | 0,6345441 |
| SEZ6          | 17,58   | 1,20  | 1,069353 | 1,119587 | 0,26289  | 0,6345441 |

|               |         |       |          |          |          |           |
|---------------|---------|-------|----------|----------|----------|-----------|
| CTC-277H1.7   | 11,18   | -1,06 | 0,945939 | -1,11945 | 0,26295  | 0,6346065 |
| GPR162        | 81,51   | 0,89  | 0,794427 | 1,119011 | 0,263135 | 0,6349084 |
| CAMP          | 14,57   | -2,56 | 2,284384 | -1,11896 | 0,263157 | 0,6349084 |
| PHF20         | 969,95  | 0,52  | 0,46293  | 1,118913 | 0,263177 | 0,6349084 |
| RNA5SP37      | 2,90    | 4,17  | 3,724215 | 1,118771 | 0,263238 | NA        |
| EFHB          | 22,08   | 1,35  | 1,207423 | 1,118754 | 0,263245 | 0,6349893 |
| FAM107A       | 3,41    | -0,84 | 0,74868  | -1,11872 | 0,263258 | NA        |
| ORM2          | 23,39   | 1,30  | 1,159305 | 1,118599 | 0,263311 | 0,635067  |
| RP11-394B2.5  | 22,46   | -2,32 | 2,072565 | -1,11799 | 0,26357  | 0,6355783 |
| CTC-497E21.4  | 17,06   | -0,74 | 0,660518 | -1,1179  | 0,263609 | 0,6355783 |
| ADGRA3        | 76,31   | 1,36  | 1,217322 | 1,11774  | 0,263678 | 0,6355783 |
| RP5-903G2.2   | 0,55    | -3,63 | 3,248695 | -1,11774 | 0,263678 | NA        |
| RNU6-1026P    | 12,98   | -3,09 | 2,765097 | -1,11772 | 0,263688 | 0,6355783 |
| BAK1          | 222,96  | 0,98  | 0,873283 | 1,117666 | 0,263709 | 0,6355783 |
| RP11-202P11.1 | 1,74    | -2,08 | 1,860539 | -1,11754 | 0,263762 | NA        |
| ANKUB1        | 8,18    | -0,84 | 0,750781 | -1,11753 | 0,263768 | 0,6355783 |
| CASP7         | 111,09  | -1,21 | 1,080354 | -1,11752 | 0,263773 | 0,6355783 |
| PPM1L         | 125,03  | -0,87 | 0,779682 | -1,11741 | 0,263817 | 0,6355783 |
| RP11-269F21.3 | 6,44    | -1,62 | 1,450734 | -1,11738 | 0,263831 | 0,6355783 |
| RP11-126O1.6  | 2,10    | 3,70  | 3,310709 | 1,117091 | 0,263955 | NA        |
| PRG2          | 2,19    | 3,76  | 3,36859  | 1,117086 | 0,263958 | NA        |
| BUD13         | 129,74  | -0,80 | 0,719451 | -1,11653 | 0,264197 | 0,6363779 |
| SPTAN1        | 415,95  | -0,53 | 0,478572 | -1,11644 | 0,264232 | 0,6363812 |
| CUTC          | 409,76  | 0,93  | 0,833188 | 1,116268 | 0,264308 | 0,6364797 |
| RP11-343B5.1  | 1,69    | 2,19  | 1,965248 | 1,116189 | 0,264341 | NA        |
| RP11-626G11.5 | 1,84    | 2,14  | 1,920021 | 1,116147 | 0,264359 | NA        |
| EBNA1BP2      | 331,38  | 0,71  | 0,635839 | 1,115657 | 0,264569 | 0,6370263 |
| MYH11         | 86,96   | -1,04 | 0,930589 | -1,11548 | 0,264643 | 0,6370448 |
| RP11-950C14.7 | 13,09   | -2,45 | 2,197775 | -1,11548 | 0,264645 | 0,6370448 |
| RP11-343N15.2 | 3,06    | 2,51  | 2,253044 | 1,115242 | 0,264747 | NA        |
| NCOA2         | 792,53  | -0,82 | 0,73294  | -1,115   | 0,264851 | 0,637351  |
| PHF3          | 892,67  | -0,52 | 0,466759 | -1,11499 | 0,264853 | 0,637351  |
| DLEU1         | 118,21  | -0,88 | 0,788555 | -1,11494 | 0,264875 | 0,637351  |
| SYNCRIP       | 1457,97 | 0,42  | 0,376146 | 1,114738 | 0,264963 | 0,6374798 |
| TMEM245       | 295,29  | 0,70  | 0,631222 | 1,114612 | 0,265017 | 0,637527  |
| RNU6-199P     | 1,31    | 2,41  | 2,158852 | 1,114598 | 0,265023 | NA        |
| CLEC4GP1      | 0,73    | -4,07 | 3,654512 | -1,11457 | 0,265036 | NA        |
| ARHGAP26      | 1672,35 | -0,46 | 0,413781 | -1,11434 | 0,265135 | 0,6377172 |
| FGF13         | 478,96  | -0,92 | 0,824111 | -1,11427 | 0,265164 | 0,6377172 |
| CTD-3137H5.5  | 3,94    | -2,90 | 2,607424 | -1,11398 | 0,265286 | 0,6379268 |
| CHRNB1        | 66,13   | -0,83 | 0,741322 | -1,11378 | 0,265375 | 0,638023  |
| HAL           | 17,43   | -1,36 | 1,225391 | -1,11373 | 0,265394 | 0,638023  |
| RP11-464F9.22 | 0,90    | 1,82  | 1,630891 | 1,113654 | 0,265428 | NA        |
| ZNF714        | 145,31  | 0,78  | 0,699658 | 1,11344  | 0,26552  | 0,6382418 |
| AC110926.4    | 5,17    | -1,05 | 0,941752 | -1,1133  | 0,265578 | 0,6383009 |
| MYH9          | 2345,29 | -0,50 | 0,450212 | -1,11313 | 0,265652 | 0,6383943 |
| PDXK          | 505,30  | -0,77 | 0,688611 | -1,1127  | 0,265838 | 0,6387605 |
| CCER2         | 2,21    | 3,06  | 2,746517 | 1,11251  | 0,265919 | NA        |
| APEH          | 641,52  | -0,42 | 0,378632 | -1,11218 | 0,266059 | 0,6392075 |
| AC013474.4    | 2,63    | 1,27  | 1,142942 | 1,112166 | 0,266067 | NA        |

|                    |         |       |          |          |          |           |
|--------------------|---------|-------|----------|----------|----------|-----------|
| RP11-157B13.7      | 3,45    | -1,26 | 1,133104 | -1,11198 | 0,266145 | NA        |
| CDK14              | 117,13  | 1,24  | 1,118771 | 1,111945 | 0,266162 | 0,6393727 |
| CCT3               | 1381,38 | 0,41  | 0,365247 | 1,111733 | 0,266253 | 0,6395085 |
| TDG                | 260,83  | 0,65  | 0,588984 | 1,111434 | 0,266382 | 0,6396609 |
| SLC2A8             | 49,98   | -0,81 | 0,729593 | -1,11143 | 0,266385 | 0,6396609 |
| RP11-1260E13.4     | 0,67    | -4,07 | 3,665436 | -1,11141 | 0,26639  | NA        |
| XXbac-BPG300A18.13 | 3,33    | -2,34 | 2,102175 | -1,11127 | 0,266452 | NA        |
| ZCCHC4             | 86,70   | -1,05 | 0,945362 | -1,11117 | 0,266495 | 0,6398432 |
| POSTN              | 0,62    | -3,61 | 3,250456 | -1,11101 | 0,266563 | NA        |
| C14orf64           | 30,47   | -0,75 | 0,678006 | -1,11099 | 0,266573 | 0,639946  |
| RP11-328C8.2       | 2,04    | 3,66  | 3,297603 | 1,110871 | 0,266624 | NA        |
| RP11-380P13.2      | 1,78    | -1,58 | 1,426504 | -1,11084 | 0,266638 | NA        |
| CTD-2337I7.1       | 1,52    | -1,90 | 1,708312 | -1,11065 | 0,266719 | NA        |
| RP11-130L8.1       | 0,77    | -2,50 | 2,24779  | -1,11064 | 0,266723 | NA        |
| RP11-426L16.3      | 0,60    | -4,06 | 3,656582 | -1,11053 | 0,266769 | NA        |
| RN7SL200P          | 3,86    | 2,64  | 2,377811 | 1,110472 | 0,266796 | 0,6402701 |
| SYNPO2L            | 14,53   | -0,55 | 0,495876 | -1,11045 | 0,266807 | 0,6402701 |
| CTA-722E9.1        | 54,94   | -1,61 | 1,44857  | -1,11042 | 0,266816 | 0,6402701 |
| ZFP92              | 8,26    | -0,76 | 0,685418 | -1,11036 | 0,266845 | 0,6402701 |
| AP000253.1         | 8,75    | -1,03 | 0,930185 | -1,11014 | 0,26694  | 0,6404152 |
| ST7OT1             | 0,60    | -4,06 | 3,656478 | -1,10988 | 0,26705  | NA        |
| ROM1               | 2,93    | 3,81  | 3,431649 | 1,109846 | 0,267065 | NA        |
| ONECUT3            | 19,81   | -0,52 | 0,464963 | -1,10977 | 0,2671   | 0,6406474 |
| RP3-400N23.9       | 20,86   | -0,48 | 0,430447 | -1,10975 | 0,267106 | 0,6406474 |
| ANXA9              | 11,09   | -1,75 | 1,580465 | -1,10961 | 0,267167 | 0,6407108 |
| PPP2R2B            | 135,59  | -1,42 | 1,277783 | -1,10945 | 0,267237 | 0,6407628 |
| GCDH               | 164,82  | 0,76  | 0,687962 | 1,109401 | 0,267257 | 0,6407628 |
| CTD-3074O7.5       | 8,80    | 1,41  | 1,275088 | 1,109168 | 0,267358 | 0,6409209 |
| CTA-256D12.11      | 1,30    | -2,94 | 2,650489 | -1,10911 | 0,267383 | NA        |
| USE1               | 266,31  | -0,57 | 0,510585 | -1,1089  | 0,267473 | 0,641116  |
| SLC30A6            | 69,57   | 1,07  | 0,967325 | 1,10873  | 0,267547 | 0,6412092 |
| LRRC28             | 133,52  | -0,99 | 0,891864 | -1,10854 | 0,26763  | 0,6412197 |
| RP11-457M11.7      | 5,01    | 1,41  | 1,272668 | 1,108485 | 0,267653 | 0,6412197 |
| IL12B              | 4,26    | 0,89  | 0,805662 | 1,10848  | 0,267654 | 0,6412197 |
| SPIN4              | 17,39   | -1,43 | 1,290156 | -1,10833 | 0,267718 | 0,6412883 |
| RP11-66N11.8       | 34,66   | -1,17 | 1,055997 | -1,10811 | 0,267814 | 0,6414376 |
| CYB561             | 37,96   | 0,94  | 0,845878 | 1,107895 | 0,267907 | 0,6414488 |
| CCDC6              | 1008,09 | 0,43  | 0,38401  | 1,107882 | 0,267913 | 0,6414488 |
| STRBP              | 77,36   | -1,17 | 1,057636 | -1,10786 | 0,267923 | 0,6414488 |
| RAB1B              | 390,47  | 0,41  | 0,370437 | 1,107568 | 0,268049 | 0,6415979 |
| RP11-131H24.5      | 4,52    | -0,82 | 0,742592 | -1,10754 | 0,26806  | 0,6415979 |
| ZNF2               | 23,07   | -1,23 | 1,114441 | -1,10748 | 0,268088 | 0,6415979 |
| CTD-2528A14.1      | 2,48    | 3,35  | 3,02553  | 1,107413 | 0,268116 | NA        |
| RP11-690I21.2      | 2,21    | 3,77  | 3,403113 | 1,107296 | 0,268166 | NA        |
| RP11-58E21.1       | 9,18    | -0,98 | 0,886111 | -1,10724 | 0,268192 | 0,6416681 |
| TAF12              | 336,00  | -0,87 | 0,783615 | -1,10715 | 0,26823  | 0,6416681 |
| CRHR2              | 2,54    | 2,37  | 2,143336 | 1,107132 | 0,268237 | NA        |
| RN7SL180P          | 6,32    | -1,57 | 1,416303 | -1,10712 | 0,268242 | 0,6416681 |
| ZFAND1             | 175,23  | 0,89  | 0,801316 | 1,107089 | 0,268256 | 0,6416681 |
| RP4-646B12.2       | 0,66    | -1,56 | 1,40904  | -1,10707 | 0,268262 | NA        |

|                |         |       |          |          |          |           |
|----------------|---------|-------|----------|----------|----------|-----------|
| RP11-388C12.8  | 7,16    | -1,10 | 0,99772  | -1,10695 | 0,268316 | 0,6417023 |
| F2RL1          | 3,28    | -1,38 | 1,249132 | -1,10693 | 0,268324 | NA        |
| CLN5           | 573,22  | -0,43 | 0,39246  | -1,1069  | 0,268339 | 0,6417023 |
| SNORD91A       | 0,92    | 2,47  | 2,235562 | 1,10683  | 0,268367 | NA        |
| AHCYL1         | 632,02  | -0,43 | 0,384761 | -1,10596 | 0,268743 | 0,6425873 |
| AC011893.3     | 0,50    | -1,88 | 1,701013 | -1,10588 | 0,268778 | NA        |
| RP11-262H14.7  | 1,57    | 2,67  | 2,411147 | 1,105623 | 0,26889  | NA        |
| RP11-334E15.1  | 141,18  | -0,67 | 0,607796 | -1,10556 | 0,268917 | 0,6429192 |
| RP11-144G7.2   | 1,14    | 2,21  | 1,999535 | 1,105285 | 0,269036 | NA        |
| VWCE           | 2,69    | -1,10 | 0,997618 | -1,1052  | 0,269075 | NA        |
| TXNDC11        | 360,29  | 0,58  | 0,525929 | 1,105195 | 0,269075 | 0,6432155 |
| LA16c-381G6.1  | 0,95    | 2,55  | 2,305896 | 1,105069 | 0,26913  | NA        |
| TRMT44         | 126,58  | 0,84  | 0,76152  | 1,104896 | 0,269205 | 0,643334  |
| RHNO1          | 90,84   | 0,84  | 0,761743 | 1,104788 | 0,269251 | 0,643334  |
| CCT8P1         | 4,49    | 2,74  | 2,479244 | 1,104777 | 0,269256 | 0,643334  |
| l29074.5       | 14,54   | 1,26  | 1,142012 | 1,104761 | 0,269263 | 0,643334  |
| TFAP2A-AS2     | 0,56    | -1,47 | 1,329672 | -1,10474 | 0,269274 | NA        |
| SNORD20        | 1,81    | 2,89  | 2,617081 | 1,104697 | 0,269291 | NA        |
| RP11-467L20.10 | 2,74    | 3,06  | 2,77194  | 1,104649 | 0,269312 | NA        |
| AKAP12         | 5,07    | 1,78  | 1,612816 | 1,104369 | 0,269433 | 0,6436343 |
| TMTC4          | 137,43  | -1,19 | 1,081633 | -1,10431 | 0,269458 | 0,6436343 |
| TM2D3          | 412,95  | -0,71 | 0,644898 | -1,10423 | 0,269493 | 0,6436348 |
| PHF5A          | 193,07  | 0,92  | 0,831152 | 1,104105 | 0,269548 | 0,6436833 |
| RP11-411K7.1   | 1,53    | -1,34 | 1,215071 | -1,10405 | 0,26957  | NA        |
| DHRS13         | 2,83    | 4,11  | 3,72435  | 1,103873 | 0,269648 | NA        |
| RP11-555K12.3  | 5,90    | 2,24  | 2,029905 | 1,10364  | 0,269749 | 0,6440821 |
| TMEM199        | 234,78  | -0,82 | 0,746502 | -1,10348 | 0,269819 | 0,6440901 |
| ARHGEF10L      | 227,49  | -0,64 | 0,577819 | -1,10347 | 0,269822 | 0,6440901 |
| GHRHR          | 0,58    | -4,04 | 3,662891 | -1,10329 | 0,2699   | NA        |
| LENG8          | 313,27  | 0,49  | 0,442117 | 1,103132 | 0,26997  | 0,6443604 |
| DCDC2C         | 0,58    | -4,03 | 3,657904 | -1,10304 | 0,27001  | NA        |
| MYOT           | 1,50    | 3,29  | 2,984076 | 1,103015 | 0,27002  | NA        |
| LL22NC03-2H8.4 | 0,67    | -3,14 | 2,846556 | -1,103   | 0,270028 | NA        |
| ZNF780B        | 146,52  | -0,95 | 0,859276 | -1,10284 | 0,270098 | 0,6445747 |
| RP11-304F15.3  | 0,71    | -1,79 | 1,619718 | -1,10281 | 0,270111 | NA        |
| SALL3          | 0,61    | -3,61 | 3,269481 | -1,10278 | 0,270125 | NA        |
| RP11-526A4.1   | 10,82   | -1,04 | 0,942698 | -1,10277 | 0,270129 | 0,6445747 |
| RFX6           | 2,59    | 4,11  | 3,725009 | 1,102647 | 0,27018  | NA        |
| CTC-250P20.2   | 1,53    | 3,25  | 2,948125 | 1,102643 | 0,270182 | NA        |
| RP11-762H8.2   | 87,78   | -0,58 | 0,530503 | -1,10261 | 0,270198 | 0,6446574 |
| RP11-578F21.12 | 28,99   | 0,83  | 0,755566 | 1,10204  | 0,270444 | 0,6451619 |
| KLHDC7B        | 68,38   | -1,83 | 1,661035 | -1,10176 | 0,270566 | 0,6452925 |
| FAM83D         | 28,61   | 1,08  | 0,981211 | 1,101754 | 0,270569 | 0,6452925 |
| RP11-713M15.1  | 11,42   | -1,85 | 1,683767 | -1,10157 | 0,270647 | 0,6453392 |
| MX2            | 1822,25 | -0,50 | 0,454037 | -1,10153 | 0,270666 | 0,6453392 |
| MZT2A          | 97,87   | 0,73  | 0,666728 | 1,10147  | 0,270692 | 0,6453392 |
| RP11-341D18.5  | 0,59    | -4,03 | 3,656929 | -1,10137 | 0,270737 | NA        |
| RP11-849H4.2   | 35,39   | -0,95 | 0,86259  | -1,10124 | 0,270793 | 0,6454785 |
| RAB3IP         | 306,58  | -0,99 | 0,894779 | -1,10118 | 0,27082  | 0,6454785 |
| RP11-727A23.10 | 112,84  | -0,77 | 0,700698 | -1,10108 | 0,270861 | 0,645494  |

|                   |         |       |          |          |          |           |
|-------------------|---------|-------|----------|----------|----------|-----------|
| EDA               | 2,81    | 1,83  | 1,663256 | 1,100923 | 0,27093  | NA        |
| CH507-9B2.4       | 0,59    | -4,03 | 3,656769 | -1,10084 | 0,270964 | NA        |
| MT-TL2            | 1,43    | -1,31 | 1,190875 | -1,10073 | 0,271016 | NA        |
| ZNHIT2            | 62,10   | -1,58 | 1,439722 | -1,10071 | 0,271021 | 0,6457658 |
| CERS6             | 406,96  | -0,72 | 0,651679 | -1,1006  | 0,271069 | 0,6457658 |
| GTF2H5            | 165,10  | -0,44 | 0,404164 | -1,10058 | 0,271079 | 0,6457658 |
| ZNF292            | 1424,34 | 0,34  | 0,312371 | 1,100305 | 0,271199 | 0,6459688 |
| ZNF12             | 135,36  | 0,97  | 0,882482 | 1,100044 | 0,271313 | 0,6461571 |
| UBTD1             | 36,84   | -1,52 | 1,381303 | -1,09995 | 0,271355 | 0,646175  |
| CDCA4             | 92,44   | 1,36  | 1,234753 | 1,099795 | 0,271421 | 0,6462499 |
| AC006539.3        | 0,59    | -4,02 | 3,656995 | -1,09975 | 0,271442 | NA        |
| RP11-389J22.1     | 0,59    | -4,02 | 3,656995 | -1,09975 | 0,271442 | NA        |
| RP6-191P20.4      | 23,84   | -0,69 | 0,62951  | -1,09965 | 0,271483 | 0,6463137 |
| GABRQ             | 0,59    | -4,02 | 3,657004 | -1,09949 | 0,271554 | NA        |
| CTB-63M22.1       | 1,92    | -1,49 | 1,358186 | -1,09947 | 0,271561 | NA        |
| RN7SL197P         | 1,52    | 2,63  | 2,396178 | 1,099403 | 0,271592 | NA        |
| MAP2K5            | 314,80  | 0,55  | 0,503779 | 1,099384 | 0,271601 | 0,6464866 |
| NR2C2             | 261,95  | 0,64  | 0,579869 | 1,099328 | 0,271625 | 0,6464866 |
| ADPRHL1           | 3,32    | -0,98 | 0,892878 | -1,09922 | 0,271671 | NA        |
| RP11-667M19.6     | 0,94    | -1,66 | 1,508836 | -1,09908 | 0,271733 | NA        |
| RP11-474G23.3     | 16,04   | 0,95  | 0,865545 | 1,099045 | 0,271749 | 0,6466219 |
| CTB-181H17.1      | 9,66    | -0,75 | 0,677993 | -1,09902 | 0,271759 | 0,6466219 |
| TROVE2            | 664,91  | -0,44 | 0,397338 | -1,09896 | 0,271786 | 0,6466219 |
| FZD2              | 222,18  | -0,86 | 0,784626 | -1,09887 | 0,271823 | 0,6466261 |
| GLI2              | 1,30    | 2,35  | 2,139792 | 1,098855 | 0,271831 | NA        |
| AC004016.2        | 2,75    | 4,09  | 3,724417 | 1,098791 | 0,271859 | NA        |
| SPIN3             | 39,52   | 0,79  | 0,714639 | 1,098743 | 0,27188  | 0,64668   |
| DRG2              | 349,31  | -0,59 | 0,534857 | -1,09859 | 0,271947 | 0,6467557 |
| EDC3              | 96,78   | 0,80  | 0,732434 | 1,098343 | 0,272055 | 0,64693   |
| RP11-67K19.3      | 55,67   | -0,96 | 0,876265 | -1,09816 | 0,272134 | 0,6470198 |
| LIN7C             | 175,62  | 0,70  | 0,635117 | 1,097905 | 0,272246 | 0,6470198 |
| TULP1             | 1,59    | 2,67  | 2,431916 | 1,097869 | 0,272262 | NA        |
| RYBP              | 483,02  | 0,46  | 0,417252 | 1,097834 | 0,272277 | 0,6470198 |
| SAFB              | 575,33  | 0,52  | 0,475701 | 1,097832 | 0,272278 | 0,6470198 |
| SCHLAP1           | 12,41   | 1,16  | 1,05238  | 1,097741 | 0,272318 | 0,6470198 |
| IL10RB            | 892,53  | -0,52 | 0,471856 | -1,09764 | 0,272361 | 0,6470198 |
| RAD17             | 135,52  | -0,81 | 0,740726 | -1,09759 | 0,272385 | 0,6470198 |
| RP11-90L1.8       | 58,77   | -0,64 | 0,587005 | -1,09756 | 0,272398 | 0,6470198 |
| RP11-77K12.9      | 1,48    | -1,35 | 1,229447 | -1,09748 | 0,27243  | NA        |
| RP11-108O10.2     | 15,48   | 0,76  | 0,692733 | 1,097413 | 0,272461 | 0,6470198 |
| PLEKHG7           | 1,95    | -2,43 | 2,21248  | -1,09741 | 0,272461 | NA        |
| WDR89             | 100,01  | 1,15  | 1,044886 | 1,097399 | 0,272467 | 0,6470198 |
| NFX1              | 422,31  | 0,56  | 0,51414  | 1,09738  | 0,272475 | 0,6470198 |
| RP11-538C21.2     | 8,04    | 1,56  | 1,421484 | 1,097189 | 0,272559 | 0,6470464 |
| IDH1              | 268,68  | 0,75  | 0,683762 | 1,097167 | 0,272568 | 0,6470464 |
| RP11-1060J15.7    | 17,30   | 1,28  | 1,165021 | 1,097116 | 0,272591 | 0,6470464 |
| XXbac-BPG294E21.9 | 2,94    | 2,05  | 1,871389 | 1,096901 | 0,272685 | NA        |
| DCLK3             | 2,35    | -3,21 | 2,931006 | -1,09689 | 0,272691 | NA        |
| RP11-159F24.3     | 9,12    | 1,80  | 1,63852  | 1,096734 | 0,272758 | 0,6470665 |
| RP11-297A16.4     | 2,94    | -2,52 | 2,301703 | -1,09668 | 0,272782 | NA        |

|                 |          |       |          |          |          |           |
|-----------------|----------|-------|----------|----------|----------|-----------|
| METTL21B        | 52,78    | 0,98  | 0,892805 | 1,096626 | 0,272805 | 0,6470665 |
| CC2D1A          | 174,93   | -0,69 | 0,633743 | -1,09656 | 0,272832 | 0,6470665 |
| C3orf62         | 206,20   | -0,51 | 0,465545 | -1,09653 | 0,272849 | 0,6470665 |
| CTD-219704.1    | 0,62     | 1,94  | 1,767028 | 1,09652  | 0,272851 | NA        |
| NPTXR           | 19,24    | -1,21 | 1,103276 | -1,09651 | 0,272855 | 0,6470665 |
| ALS2CR10        | 26,32    | -0,71 | 0,645338 | -1,0965  | 0,272859 | 0,6470665 |
| GABRD           | 16,17    | 0,80  | 0,733746 | 1,096489 | 0,272865 | 0,6470665 |
| SMAD3           | 384,13   | 0,85  | 0,778909 | 1,09646  | 0,272877 | 0,6470665 |
| RP11-135J2.3    | 2,55     | 3,40  | 3,100554 | 1,096408 | 0,2729   | NA        |
| AC092214.10     | 65,65    | -1,37 | 1,251382 | -1,09631 | 0,272942 | 0,6470742 |
| SKIDA1          | 14,21    | 1,06  | 0,968291 | 1,096294 | 0,27295  | 0,6470742 |
| CTD-3032J10.2   | 3,53     | 1,68  | 1,535477 | 1,096161 | 0,273008 | NA        |
| CDC42BPA        | 81,77    | 1,54  | 1,40619  | 1,095779 | 0,273176 | 0,6474371 |
| RP11-87M18.2    | 21,51    | -1,46 | 1,335057 | -1,09578 | 0,273176 | 0,6474371 |
| RP11-256L6.5    | 6,71     | 0,98  | 0,895505 | 1,095668 | 0,273224 | 0,6474371 |
| NUP37           | 85,94    | 0,84  | 0,771183 | 1,095608 | 0,27325  | 0,6474371 |
| POU6F2          | 2,48     | 2,60  | 2,374959 | 1,095594 | 0,273257 | NA        |
| CALB1           | 8,91     | 1,72  | 1,572784 | 1,09548  | 0,273306 | 0,6474371 |
| RP11-69L16.5    | 7,03     | -0,46 | 0,418489 | -1,09547 | 0,273312 | 0,6474371 |
| RIF1            | 605,52   | 0,52  | 0,476546 | 1,095367 | 0,273356 | 0,6474589 |
| RP11-775J23.2   | 1,88     | 2,95  | 2,693307 | 1,095299 | 0,273386 | NA        |
| MIR4677         | 0,58     | -4,01 | 3,657217 | -1,09524 | 0,273411 | NA        |
| TFR2            | 10,26    | 1,11  | 1,017098 | 1,095118 | 0,273465 | 0,6476346 |
| XXbac-B135H6.18 | 2,73     | 4,08  | 3,72445  | 1,095109 | 0,273469 | NA        |
| NR2C2AP         | 37,69    | -1,93 | 1,761374 | -1,09497 | 0,273528 | 0,6476632 |
| ZBTB44          | 530,95   | -0,74 | 0,674096 | -1,09491 | 0,273555 | 0,6476632 |
| RPUSD1          | 91,76    | 1,15  | 1,050483 | 1,094852 | 0,273582 | 0,6476632 |
| DHX58           | 222,63   | -0,87 | 0,796141 | -1,09472 | 0,273641 | 0,6476848 |
| PPP1R26         | 37,94    | 1,29  | 1,180552 | 1,094653 | 0,273669 | 0,6476848 |
| RN7SL143P       | 2,91     | 2,53  | 2,312411 | 1,094595 | 0,273694 | NA        |
| OSCAR           | 308,33   | 0,61  | 0,553174 | 1,094351 | 0,273801 | 0,6476848 |
| HVCN1           | 330,21   | -0,59 | 0,539127 | -1,09434 | 0,273806 | 0,6476848 |
| KCNN3           | 5,48     | 1,38  | 1,257269 | 1,094297 | 0,273825 | 0,6476848 |
| CTB-139P11.2    | 30,44    | -0,79 | 0,726439 | -1,09426 | 0,273841 | 0,6476848 |
| AP001271.2      | 44,43    | 0,99  | 0,903704 | 1,094219 | 0,273859 | 0,6476848 |
| RP11-105N13.2   | 6,33     | 0,96  | 0,879427 | 1,094196 | 0,273869 | 0,6476848 |
| AC004957.5      | 0,57     | -4,00 | 3,657252 | -1,09384 | 0,274025 | NA        |
| UBE4A           | 646,78   | -0,57 | 0,518907 | -1,09381 | 0,274037 | 0,647925  |
| SEPT6           | 868,77   | -0,39 | 0,356699 | -1,09381 | 0,27404  | 0,647925  |
| RP11-212P7.2    | 96,87    | 0,51  | 0,463652 | 1,093499 | 0,274175 | 0,6480499 |
| RP4-620E11.8    | 2,25     | 2,17  | 1,982541 | 1,093498 | 0,274175 | NA        |
| BBS2            | 173,21   | 1,06  | 0,971704 | 1,093479 | 0,274184 | 0,6480499 |
| RP11-488P3.1    | 1,33     | -1,98 | 1,809408 | -1,09346 | 0,274193 | NA        |
| CCDC129         | 13,34    | -1,58 | 1,44122  | -1,09341 | 0,274214 | 0,6480499 |
| SNRPD2          | 1260,31  | -0,27 | 0,249001 | -1,09337 | 0,274233 | 0,6480499 |
| CTD-2300H10.2   | 0,47     | -1,88 | 1,717785 | -1,09319 | 0,274309 | NA        |
| RP11-679C8.2    | 10,76    | -0,90 | 0,82312  | -1,0931  | 0,274348 | 0,6482398 |
| COTL1           | 15237,50 | 0,14  | 0,131851 | 1,09294  | 0,27442  | 0,6483285 |
| AD000090.2      | 42,85    | 0,75  | 0,685048 | 1,092819 | 0,274473 | 0,6483715 |
| RP1-148H17.1    | 1,51     | 3,21  | 2,93945  | 1,09278  | 0,274491 | NA        |



|               |         |       |          |          |          |           |
|---------------|---------|-------|----------|----------|----------|-----------|
| ALCAM         | 839,40  | 0,57  | 0,518564 | 1,092725 | 0,274515 | 0,6483872 |
| FGF2          | 0,57    | -1,44 | 1,31939  | -1,09253 | 0,274599 | NA        |
| DENND5A       | 571,64  | -0,55 | 0,505875 | -1,09245 | 0,274637 | 0,6485708 |
| ALMS1P        | 0,89    | -2,88 | 2,636856 | -1,09237 | 0,274668 | NA        |
| DALRD3        | 185,67  | -0,65 | 0,599587 | -1,09237 | 0,274669 | 0,6485708 |
| RNU4-80P      | 1,27    | -2,62 | 2,395779 | -1,09232 | 0,274691 | NA        |
| RP11-333J10.2 | 2,02    | 3,64  | 3,328203 | 1,092247 | 0,274725 | NA        |
| RP11-792A8.4  | 37,69   | -0,82 | 0,753007 | -1,09225 | 0,274725 | 0,6485708 |
| MAP4K4        | 552,88  | -0,82 | 0,750838 | -1,09223 | 0,274732 | 0,6485708 |
| LINC00314     | 5,61    | -0,99 | 0,90879  | -1,09202 | 0,274825 | 0,6487073 |
| RP11-15F12.1  | 2,70    | 4,07  | 3,724488 | 1,091953 | 0,274854 | NA        |
| RP11-347I19.7 | 13,52   | 2,04  | 1,869104 | 1,091928 | 0,274865 | 0,6487201 |
| DNAJC9        | 244,14  | 1,02  | 0,931674 | 1,091683 | 0,274972 | 0,6488126 |
| CCNJ          | 103,21  | -0,96 | 0,879477 | -1,09165 | 0,274985 | 0,6488126 |
| CSGALNACT1    | 45,67   | -0,88 | 0,804419 | -1,0916  | 0,275009 | 0,6488126 |
| CLEC5A        | 3,86    | 3,43  | 3,13821  | 1,091441 | 0,275079 | 0,6488895 |
| CD200R1       | 184,97  | 0,98  | 0,900793 | 1,091368 | 0,275111 | 0,6488895 |
| RP11-565F19.3 | 1,10    | 2,77  | 2,54072  | 1,091344 | 0,275121 | NA        |
| RP11-193E15.4 | 0,78    | -1,29 | 1,185157 | -1,09133 | 0,275126 | NA        |
| RP11-351A11.1 | 0,57    | -3,99 | 3,657384 | -1,09132 | 0,275134 | NA        |
| RP11-455O6.9  | 2,14    | 2,06  | 1,888592 | 1,090984 | 0,27528  | NA        |
| WBP1          | 292,62  | 0,62  | 0,572753 | 1,090976 | 0,275283 | 0,6492136 |
| RP11-344B5.2  | 0,84    | 2,41  | 2,208051 | 1,090748 | 0,275384 | NA        |
| INVS          | 63,28   | -1,16 | 1,068186 | -1,09062 | 0,275438 | 0,6494004 |
| NUDT16P1      | 167,28  | -0,90 | 0,827983 | -1,09058 | 0,275457 | 0,6494004 |
| FHAD1         | 3,51    | -1,12 | 1,027989 | -1,09056 | 0,275466 | NA        |
| NFAT5         | 286,49  | 0,52  | 0,479554 | 1,090498 | 0,275494 | 0,6494004 |
| ANKRD18A      | 10,05   | -1,55 | 1,418285 | -1,09048 | 0,275502 | 0,6494004 |
| RP11-666A20.4 | 4,45    | -0,81 | 0,746755 | -1,09033 | 0,275566 | 0,6494067 |
| PCBD1         | 119,31  | 0,66  | 0,603983 | 1,090315 | 0,275575 | 0,6494067 |
| FGF13-AS1     | 3,53    | -1,54 | 1,413564 | -1,09027 | 0,275593 | NA        |
| MYCBP2        | 1882,03 | 0,39  | 0,356729 | 1,090111 | 0,275664 | 0,6494855 |
| PPP1R15A      | 1814,70 | 0,33  | 0,301935 | 1,09008  | 0,275678 | 0,6494855 |
| RNASET2       | 3569,17 | 0,26  | 0,241933 | 1,08997  | 0,275726 | 0,6495176 |
| CTD-2022H16.3 | 0,52    | -3,10 | 2,843143 | -1,08979 | 0,275804 | NA        |
| RNA5SP465     | 1,48    | 3,19  | 2,931224 | 1,089761 | 0,275818 | NA        |
| PRMT5         | 154,23  | 0,90  | 0,829359 | 1,089753 | 0,275822 | 0,6496584 |
| ST8SIA5       | 33,87   | -0,67 | 0,619431 | -1,08968 | 0,275856 | 0,6496584 |
| PDE4C         | 19,43   | -0,50 | 0,463519 | -1,08947 | 0,275947 | 0,6497915 |
| RP4-794H19.2  | 13,64   | -2,46 | 2,261981 | -1,08929 | 0,276024 | 0,6498201 |
| ZNF559        | 219,20  | -1,19 | 1,092666 | -1,08928 | 0,276029 | 0,6498201 |
| MYOG          | 1,09    | -1,14 | 1,045301 | -1,08923 | 0,276052 | NA        |
| RP4-680D5.9   | 1,09    | 2,76  | 2,537265 | 1,089198 | 0,276066 | NA        |
| NECAB1        | 3,41    | 1,57  | 1,443308 | 1,089038 | 0,276137 | NA        |
| AC006132.1    | 2,04    | 2,38  | 2,185582 | 1,089032 | 0,27614  | NA        |
| COLQ          | 4,99    | 2,22  | 2,038957 | 1,089003 | 0,276153 | 0,6499467 |
| RPS6P21       | 18,89   | -3,93 | 3,610525 | -1,08899 | 0,276159 | 0,6499467 |
| CTD-2081K17.2 | 3,16    | 1,38  | 1,27076  | 1,088971 | 0,276167 | NA        |
| COPB1         | 1079,06 | 0,44  | 0,404748 | 1,088923 | 0,276188 | 0,6499467 |
| SNORA27       | 0,51    | -3,53 | 3,246443 | -1,08884 | 0,276222 | NA        |

|               |         |       |          |          |          |           |
|---------------|---------|-------|----------|----------|----------|-----------|
| RP11-83M16.5  | 0,69    | 2,09  | 1,924155 | 1,088694 | 0,276289 | NA        |
| MED22         | 141,37  | -0,90 | 0,830878 | -1,08858 | 0,276338 | 0,6501734 |
| ALKBH1        | 62,52   | -1,51 | 1,386348 | -1,08853 | 0,276361 | 0,6501734 |
| RP11-128N14.4 | 0,97    | -2,28 | 2,090369 | -1,08846 | 0,276391 | NA        |
| NCKIPSD       | 57,49   | 1,25  | 1,14496  | 1,08843  | 0,276405 | 0,6501734 |
| RP11-374N7.2  | 90,75   | -0,61 | 0,563244 | -1,08839 | 0,276424 | 0,6501734 |
| RP11-764D10.2 | 9,75    | -1,45 | 1,329738 | -1,08819 | 0,27651  | 0,6502596 |
| GALNT13       | 3,49    | -2,82 | 2,593564 | -1,08815 | 0,276528 | NA        |
| OR4K13        | 7,12    | -1,03 | 0,947253 | -1,08815 | 0,276531 | 0,6502596 |
| RP11-240M16.1 | 1,94    | 3,61  | 3,321137 | 1,08814  | 0,276533 | NA        |
| SNX11         | 255,50  | -0,97 | 0,894682 | -1,08779 | 0,276688 | 0,6504793 |
| CTD-2019O4.1  | 4,69    | -2,24 | 2,061037 | -1,08778 | 0,276694 | 0,6504793 |
| TARSL2        | 44,22   | -0,80 | 0,734209 | -1,08769 | 0,276732 | 0,6504853 |
| RN7SL783P     | 0,65    | -2,38 | 2,191505 | -1,08751 | 0,27681  | NA        |
| RP11-313P13.3 | 11,89   | 2,17  | 1,998167 | 1,087485 | 0,276822 | 0,6505511 |
| PPIAL4G       | 31,85   | -0,61 | 0,556789 | -1,08747 | 0,27683  | 0,6505511 |
| AC129929.5    | 1,49    | 3,19  | 2,936848 | 1,08738  | 0,276869 | NA        |
| SP100         | 1557,61 | -0,27 | 0,246118 | -1,08718 | 0,276956 | 0,6507672 |
| RP11-968A15.2 | 2,39    | 2,72  | 2,506487 | 1,0871   | 0,276992 | NA        |
| CCAR1         | 944,68  | -0,42 | 0,386445 | -1,08705 | 0,277015 | 0,6508222 |
| RP11-4F22.3   | 0,89    | -1,65 | 1,52093  | -1,08703 | 0,277025 | NA        |
| RP11-290D2.5  | 2,75    | -3,04 | 2,798144 | -1,08692 | 0,277074 | NA        |
| MPP6          | 42,46   | 1,14  | 1,050755 | 1,086806 | 0,277122 | 0,6508681 |
| ASF1A         | 221,05  | 0,91  | 0,840179 | 1,086753 | 0,277146 | 0,6508681 |
| ZNF579        | 17,25   | 0,90  | 0,830887 | 1,086702 | 0,277168 | 0,6508681 |
| AC008277.1    | 6,14    | 2,23  | 2,052484 | 1,086689 | 0,277174 | 0,6508681 |
| AC006995.8    | 2,98    | 1,66  | 1,526297 | 1,086599 | 0,277214 | NA        |
| GS1-124K5.4   | 23,08   | -1,35 | 1,247026 | -1,08637 | 0,277315 | 0,6511166 |
| RNY1P11       | 0,66    | -1,49 | 1,371265 | -1,08631 | 0,277341 | NA        |
| LYPLA1        | 962,23  | 0,31  | 0,289026 | 1,086163 | 0,277407 | 0,651249  |
| RN7SKP266     | 47,84   | 1,57  | 1,445632 | 1,086085 | 0,277442 | 0,651249  |
| MFSD4B        | 81,27   | 1,08  | 0,996492 | 1,085869 | 0,277537 | 0,6513904 |
| AC012358.8    | 100,25  | 0,49  | 0,452893 | 1,085698 | 0,277613 | 0,6514861 |
| PLXDC2        | 1410,79 | -0,41 | 0,376322 | -1,08551 | 0,277695 | 0,6515911 |
| SEMA5A        | 9,45    | 0,66  | 0,60804  | 1,085199 | 0,277834 | 0,6515911 |
| TERF2IP       | 842,00  | 0,47  | 0,4297   | 1,085185 | 0,27784  | 0,6515911 |
| AP1G2         | 694,71  | -0,44 | 0,40245  | -1,08518 | 0,277842 | 0,6515911 |
| RP11-686D22.4 | 23,01   | -1,55 | 1,42872  | -1,08514 | 0,277859 | 0,6515911 |
| SCARNA3       | 23,19   | -2,26 | 2,085302 | -1,08512 | 0,277867 | 0,6515911 |
| RP11-216B9.8  | 9,74    | -0,89 | 0,824652 | -1,08483 | 0,277998 | 0,6518148 |
| MLLT10        | 409,38  | 0,66  | 0,608549 | 1,084719 | 0,278046 | 0,6518457 |
| RP11-413N19.2 | 1,65    | 1,61  | 1,485685 | 1,0846   | 0,278099 | NA        |
| RP11-161H23.9 | 1,10    | 2,12  | 1,957865 | 1,084485 | 0,27815  | NA        |
| ACAT2         | 115,62  | 1,24  | 1,145038 | 1,084451 | 0,278165 | 0,6519778 |
| VWA5B2        | 0,65    | -3,61 | 3,324973 | -1,08441 | 0,278182 | NA        |
| CXCL2         | 279,73  | 1,00  | 0,92579  | 1,084319 | 0,278223 | 0,6519778 |
| AC091969.1    | 1,43    | 1,99  | 1,837146 | 1,0843   | 0,278232 | NA        |
| SMG9          | 408,69  | -0,65 | 0,594982 | -1,08414 | 0,278302 | 0,6519778 |
| CLEC18A       | 26,38   | -1,48 | 1,364779 | -1,08407 | 0,278332 | 0,6519778 |
| ZNF83         | 150,22  | 0,63  | 0,579313 | 1,083987 | 0,27837  | 0,6519778 |

|               |         |       |          |          |          |           |
|---------------|---------|-------|----------|----------|----------|-----------|
| DGKE          | 246,13  | 0,91  | 0,841703 | 1,083983 | 0,278372 | 0,6519778 |
| RP11-58H15.1  | 51,65   | 1,30  | 1,203983 | 1,083873 | 0,278421 | 0,6519778 |
| RNU6-977P     | 2,51    | -2,78 | 2,56269  | -1,08368 | 0,278509 | NA        |
| CTD-3239E11.2 | 1,44    | 1,93  | 1,777036 | 1,083675 | 0,278509 | NA        |
| CTD-2647E9.3  | 24,13   | -1,33 | 1,224415 | -1,08364 | 0,278525 | 0,6519778 |
| PTK6          | 38,47   | 1,20  | 1,110622 | 1,083628 | 0,27853  | 0,6519778 |
| ZNF37A        | 374,55  | -0,49 | 0,453707 | -1,0836  | 0,278543 | 0,6519778 |
| RP11-1072A3.2 | 5,44    | -1,81 | 1,671714 | -1,08357 | 0,278557 | 0,6519778 |
| RP11-495P10.1 | 31,74   | -1,33 | 1,225837 | -1,08356 | 0,278562 | 0,6519778 |
| GS1-174L6.4   | 2,01    | -1,27 | 1,168775 | -1,08354 | 0,278567 | NA        |
| TSTD2         | 129,85  | 0,81  | 0,745302 | 1,083512 | 0,278581 | 0,6519778 |
| AC092675.3    | 14,63   | -3,09 | 2,851215 | -1,08328 | 0,278683 | 0,6519778 |
| CTC-276H5.1   | 16,03   | -2,18 | 2,013439 | -1,08328 | 0,278684 | 0,6519778 |
| C6orf89       | 705,67  | 0,72  | 0,664532 | 1,083275 | 0,278686 | 0,6519778 |
| PDCL          | 88,05   | -1,11 | 1,020517 | -1,08325 | 0,278698 | 0,6519778 |
| ITPKB         | 197,09  | -0,73 | 0,67835  | -1,08303 | 0,278795 | 0,6520503 |
| TMOD2         | 170,34  | -0,70 | 0,642435 | -1,08296 | 0,278826 | 0,6520503 |
| CTC-788C1.1   | 1,53    | -0,92 | 0,850143 | -1,0829  | 0,278853 | NA        |
| CDC42EP3      | 848,29  | 0,46  | 0,422347 | 1,082875 | 0,278864 | 0,6520503 |
| ETFB          | 763,51  | 0,37  | 0,339139 | 1,082863 | 0,278869 | 0,6520503 |
| NDUFAF6       | 140,92  | 0,74  | 0,683654 | 1,082778 | 0,278907 | 0,6520562 |
| CMC4          | 125,46  | 1,35  | 1,244825 | 1,082644 | 0,278967 | 0,65211   |
| RP11-101E3.5  | 0,56    | -3,96 | 3,657762 | -1,08257 | 0,279    | NA        |
| PCAT14        | 138,10  | 0,57  | 0,525736 | 1,082543 | 0,279011 | 0,65211   |
| RP11-206L10.2 | 173,45  | -0,57 | 0,526581 | -1,08249 | 0,279035 | 0,65211   |
| AC007250.4    | 15,04   | -1,51 | 1,397152 | -1,08235 | 0,279096 | 0,6521693 |
| ATP6V1F       | 1486,62 | 0,28  | 0,262486 | 1,082131 | 0,279194 | 0,6522662 |
| HIST2H2AC     | 72,65   | -0,60 | 0,550208 | -1,0821  | 0,279207 | 0,6522662 |
| AC064874.2    | 2,60    | -0,78 | 0,720567 | -1,0821  | 0,279209 | NA        |
| RP11-162O12.2 | 0,53    | -3,08 | 2,849347 | -1,08206 | 0,279225 | NA        |
| AC023797.1    | 1,08    | 2,76  | 2,554237 | 1,081909 | 0,279293 | NA        |
| CXorf40B      | 279,69  | 0,77  | 0,716269 | 1,081802 | 0,279341 | 0,6524737 |
| CD207         | 4,79    | 2,27  | 2,098767 | 1,081745 | 0,279366 | 0,6524737 |
| SLC25A46      | 265,59  | -0,75 | 0,692285 | -1,08156 | 0,27945  | 0,6525234 |
| C14orf1       | 127,71  | 0,98  | 0,904418 | 1,081474 | 0,279487 | 0,6525234 |
| TMEM256       | 169,61  | -0,48 | 0,439501 | -1,08142 | 0,279511 | 0,6525234 |
| RP11-241F15.1 | 7,58    | -3,20 | 2,956934 | -1,08138 | 0,279528 | 0,6525234 |
| RP5-899E9.1   | 1,96    | 3,61  | 3,342587 | 1,081224 | 0,279597 | NA        |
| CTB-89H12.4   | 945,47  | 0,37  | 0,342985 | 1,08114  | 0,279635 | 0,6526615 |
| FGFBP3        | 4,44    | -2,93 | 2,706618 | -1,08109 | 0,279657 | 0,6526615 |
| RP11-317M11.1 | 1,24    | -2,15 | 1,985662 | -1,08077 | 0,279798 | NA        |
| RP11-1085N6.3 | 3,45    | 1,37  | 1,267653 | 1,08075  | 0,279808 | NA        |
| RP11-382J12.1 | 35,97   | -0,73 | 0,677015 | -1,08066 | 0,27985  | 0,6528257 |
| RP11-12A20.7  | 16,40   | 1,10  | 1,017894 | 1,080654 | 0,279851 | 0,6528257 |
| C1orf21       | 35,40   | -1,54 | 1,428066 | -1,08062 | 0,279866 | 0,6528257 |
| AF127936.7    | 10,01   | -1,29 | 1,196869 | -1,08062 | 0,279868 | 0,6528257 |
| HEATR4        | 15,78   | 1,44  | 1,336878 | 1,080341 | 0,27999  | 0,6530302 |
| CTGF          | 1,25    | 2,32  | 2,151148 | 1,080261 | 0,280026 | NA        |
| C19orf25      | 86,71   | -0,82 | 0,759083 | -1,08014 | 0,280081 | 0,6531472 |
| RP11-218M22.1 | 13,43   | -1,56 | 1,443822 | -1,08007 | 0,280111 | 0,6531472 |

|               |         |       |          |          |          |           |
|---------------|---------|-------|----------|----------|----------|-----------|
| RGS20         | 1,91    | 3,61  | 3,343983 | 1,079985 | 0,280149 | NA        |
| EIF3B         | 1268,30 | -0,44 | 0,409188 | -1,0799  | 0,280187 | 0,6532286 |
| KLHDC4        | 152,52  | 0,90  | 0,832816 | 1,079743 | 0,280257 | 0,6532286 |
| ELF5          | 3,62    | -1,08 | 0,995722 | -1,07974 | 0,280258 | NA        |
| TBC1D5        | 754,65  | 0,62  | 0,577118 | 1,079696 | 0,280278 | 0,6532286 |
| PSMD10        | 395,97  | -0,76 | 0,700539 | -1,07962 | 0,280309 | 0,6532286 |
| CTD-2515O10.6 | 154,48  | -1,05 | 0,972586 | -1,07955 | 0,280342 | 0,6532286 |
| FAAP100       | 388,97  | -0,65 | 0,600478 | -1,07952 | 0,280356 | 0,6532286 |
| RP11-335E6.2  | 15,79   | -0,77 | 0,711292 | -1,07936 | 0,280425 | 0,6533074 |
| CTC-273B12.5  | 0,55    | -3,95 | 3,662513 | -1,07935 | 0,280434 | NA        |
| PARP6         | 388,69  | -0,44 | 0,411418 | -1,07911 | 0,280541 | 0,6533151 |
| DCN           | 29,20   | -0,90 | 0,830591 | -1,07909 | 0,280546 | 0,6533151 |
| HMGCS1        | 332,95  | 0,61  | 0,565669 | 1,079041 | 0,28057  | 0,6533151 |
| GTF2E1        | 65,80   | -1,24 | 1,152993 | -1,07898 | 0,280598 | 0,6533151 |
| SDC3          | 101,37  | -0,46 | 0,430835 | -1,07895 | 0,280609 | 0,6533151 |
| RP5-842K16.2  | 1,33    | -2,87 | 2,663995 | -1,07885 | 0,280653 | NA        |
| AC015978.3    | 1,97    | 2,40  | 2,220744 | 1,078836 | 0,280661 | NA        |
| COMMD4        | 572,34  | -0,49 | 0,453261 | -1,07875 | 0,280699 | 0,6533151 |
| RP11-94H18.3  | 3,58    | 1,74  | 1,60935  | 1,078654 | 0,280742 | NA        |
| SMCHD1        | 1264,58 | -0,32 | 0,29502  | -1,07865 | 0,280745 | 0,6533151 |
| SCARA3        | 1,27    | -2,91 | 2,699136 | -1,07856 | 0,280785 | NA        |
| FKBP11        | 116,94  | 0,81  | 0,748946 | 1,078551 | 0,280788 | 0,6533151 |
| ZNF296        | 40,61   | -1,01 | 0,938772 | -1,07845 | 0,280832 | 0,6533151 |
| AC113189.5    | 6,70    | -1,90 | 1,763984 | -1,07839 | 0,280861 | 0,6533151 |
| RP5-968D22.3  | 24,29   | -1,37 | 1,274294 | -1,07836 | 0,280873 | 0,6533151 |
| TMEM161B      | 161,38  | 0,80  | 0,739691 | 1,07834  | 0,280882 | 0,6533151 |
| AC003006.7    | 0,56    | -3,94 | 3,65776  | -1,0783  | 0,2809   | NA        |
| RP11-616L12.1 | 5,47    | 1,40  | 1,295712 | 1,078262 | 0,280917 | 0,6533151 |
| TMEM99        | 19,42   | -2,38 | 2,203801 | -1,07825 | 0,28092  | 0,6533151 |
| DEPDC5        | 331,03  | 0,61  | 0,563213 | 1,078072 | 0,281002 | 0,6534227 |
| RP11-817O13.2 | 1,39    | -1,32 | 1,224158 | -1,07803 | 0,281019 | NA        |
| CLEC1B        | 108,62  | -0,98 | 0,907605 | -1,07795 | 0,281056 | 0,6534685 |
| RP11-392B6.1  | 20,18   | -1,56 | 1,445685 | -1,07787 | 0,281094 | 0,6534739 |
| AC012363.13   | 0,48    | -1,82 | 1,686    | -1,07778 | 0,281132 | NA        |
| TGIF2         | 221,49  | 0,82  | 0,757276 | 1,07775  | 0,281145 | 0,6535119 |
| AC026188.1    | 1,64    | 1,62  | 1,506761 | 1,077662 | 0,281185 | NA        |
| LPIN1         | 512,96  | 0,54  | 0,502752 | 1,077565 | 0,281228 | 0,653575  |
| SMG6          | 142,07  | -0,78 | 0,725231 | -1,07753 | 0,281243 | 0,653575  |
| SLC19A2       | 68,38   | -1,11 | 1,034597 | -1,07745 | 0,28128  | 0,653579  |
| CTC-205M6.3   | 209,33  | -0,80 | 0,738912 | -1,07733 | 0,281332 | 0,6536181 |
| RP11-350G8.7  | 0,43    | -3,03 | 2,809939 | -1,07724 | 0,281373 | NA        |
| MIRLET7I      | 0,90    | -2,79 | 2,592127 | -1,07716 | 0,28141  | NA        |
| TIAL1         | 759,35  | 0,33  | 0,30971  | 1,077141 | 0,281417 | 0,6537357 |
| NLRP7         | 0,38    | -1,78 | 1,653609 | -1,07701 | 0,281478 | NA        |
| SNORA32       | 0,52    | -1,81 | 1,679143 | -1,07697 | 0,281492 | NA        |
| AC099344.4    | 0,97    | -2,47 | 2,296512 | -1,07693 | 0,281513 | NA        |
| STARD5        | 94,43   | 1,07  | 0,993499 | 1,076832 | 0,281555 | 0,6539248 |
| RP11-88E10.4  | 24,13   | 0,98  | 0,907346 | 1,076701 | 0,281614 | 0,6539248 |
| RP11-70F11.6  | 28,47   | -0,73 | 0,682062 | -1,07661 | 0,281653 | 0,6539248 |
| RP11-231E4.2  | 10,74   | 1,09  | 1,014817 | 1,076579 | 0,281669 | 0,6539248 |

|               |         |       |          |          |          |           |
|---------------|---------|-------|----------|----------|----------|-----------|
| SLC43A3       | 670,26  | -0,41 | 0,37953  | -1,07656 | 0,281675 | 0,6539248 |
| RP11-15B17.4  | 0,55    | -3,94 | 3,657636 | -1,07647 | 0,281717 | NA        |
| ZNF764        | 40,27   | 1,17  | 1,090084 | 1,076432 | 0,281734 | 0,6539248 |
| DCPS          | 277,25  | 0,74  | 0,68928  | 1,076364 | 0,281764 | 0,6539248 |
| OAS3          | 831,23  | 0,80  | 0,747038 | 1,07633  | 0,28178  | 0,6539248 |
| RP11-573G6.10 | 0,74    | -3,56 | 3,306106 | -1,07592 | 0,281962 | NA        |
| RP11-215A21.2 | 1,69    | -0,78 | 0,722359 | -1,0759  | 0,281973 | NA        |
| CDK18         | 40,31   | -1,01 | 0,935863 | -1,07589 | 0,281976 | 0,6542933 |
| AC116035.1    | 3,93    | -1,41 | 1,315238 | -1,07577 | 0,282029 | 0,6542933 |
| RP4-737A23.2  | 4,38    | 1,17  | 1,087847 | 1,075739 | 0,282044 | 0,6542933 |
| RP11-486M23.1 | 1,87    | 3,54  | 3,294147 | 1,075149 | 0,282308 | NA        |
| LINC00960     | 27,59   | -0,94 | 0,873141 | -1,07514 | 0,282311 | 0,6548298 |
| AHR           | 2130,57 | 0,62  | 0,578991 | 1,075    | 0,282375 | 0,6548972 |
| LRRC16B       | 1,31    | -1,93 | 1,798687 | -1,07484 | 0,282447 | NA        |
| ZNF441        | 94,79   | -1,08 | 1,006915 | -1,07481 | 0,28246  | 0,6550126 |
| STON2         | 91,80   | 0,91  | 0,850634 | 1,074462 | 0,282616 | 0,6552923 |
| AC114812.9    | 1,92    | 3,57  | 3,322709 | 1,074352 | 0,282665 | NA        |
| SYNJ2         | 80,87   | 0,90  | 0,834431 | 1,074341 | 0,28267  | 0,6553181 |
| ODC1          | 556,72  | -0,73 | 0,674873 | -1,07428 | 0,282697 | 0,6553181 |
| RP11-59H1.4   | 0,55    | -3,93 | 3,658073 | -1,0741  | 0,282776 | NA        |
| CCDC71L       | 40,50   | 1,21  | 1,127072 | 1,074061 | 0,282795 | 0,6554639 |
| CTD-2135D7.3  | 1,08    | -1,51 | 1,404737 | -1,0739  | 0,282869 | NA        |
| RP11-89K21.2  | 0,55    | -3,93 | 3,658147 | -1,07384 | 0,282892 | NA        |
| AC092192.1    | 1,18    | -2,60 | 2,420354 | -1,07373 | 0,282946 | NA        |
| SNORA53       | 0,64    | -2,15 | 2,001074 | -1,07367 | 0,282969 | NA        |
| SCUBE2        | 22,62   | 1,08  | 1,008366 | 1,073607 | 0,282999 | 0,6557305 |
| NCBP1         | 383,31  | 0,54  | 0,505617 | 1,073556 | 0,283022 | 0,6557305 |
| LPIN3         | 40,28   | -0,68 | 0,634097 | -1,07348 | 0,283056 | 0,6557305 |
| SEPT8         | 58,80   | -1,41 | 1,316473 | -1,07345 | 0,28307  | 0,6557305 |
| RP11-532N4.2  | 7,94    | 1,45  | 1,348942 | 1,073411 | 0,283087 | 0,6557305 |
| PROX1         | 17,60   | 1,24  | 1,154636 | 1,073297 | 0,283138 | 0,6557676 |
| MATR3         | 1904,73 | 0,36  | 0,33246  | 1,073108 | 0,283223 | 0,6558825 |
| RP11-768G7.2  | 0,63    | -2,40 | 2,239648 | -1,073   | 0,283272 | NA        |
| RP11-1100L3.8 | 1133,29 | 0,49  | 0,460469 | 1,072922 | 0,283306 | 0,6559939 |
| ZNF860        | 0,81    | -1,83 | 1,708652 | -1,0729  | 0,283318 | NA        |
| RP11-27I1.2   | 187,69  | -0,71 | 0,661645 | -1,07278 | 0,283371 | 0,6560613 |
| RP11-8J9.4    | 3,09    | 3,66  | 3,415715 | 1,072614 | 0,283445 | NA        |
| RP13-395E19.3 | 28,89   | 1,35  | 1,254467 | 1,07254  | 0,283478 | 0,6562277 |
| AC012370.2    | 2,57    | 3,99  | 3,724697 | 1,07252  | 0,283486 | NA        |
| RP11-174G17.3 | 0,91    | -3,62 | 3,374838 | -1,07236 | 0,283559 | NA        |
| RP11-124M17.1 | 7,60    | -2,21 | 2,059837 | -1,07235 | 0,283561 | 0,6562779 |
| GNL3          | 490,19  | 0,60  | 0,556379 | 1,072275 | 0,283597 | 0,6562779 |
| RP11-665C16.5 | 3,85    | 3,99  | 3,723292 | 1,072219 | 0,283622 | 0,6562779 |
| MRPL53        | 253,55  | -0,33 | 0,3058   | -1,07218 | 0,28364  | 0,6562779 |
| DHX37         | 75,65   | -0,87 | 0,808682 | -1,07185 | 0,283789 | 0,6563377 |
| CNTNAP1       | 24,24   | 0,95  | 0,884899 | 1,071736 | 0,283839 | 0,6563377 |
| CEP89         | 153,49  | 0,78  | 0,727592 | 1,071646 | 0,283879 | 0,6563377 |
| RP11-902B17.1 | 45,81   | -0,74 | 0,688585 | -1,07156 | 0,283916 | 0,6563377 |
| RP11-434C1.1  | 42,79   | -1,32 | 1,228597 | -1,07155 | 0,283924 | 0,6563377 |
| TTC27         | 70,82   | -1,25 | 1,163774 | -1,07152 | 0,283936 | 0,6563377 |

|               |         |       |          |          |          |           |
|---------------|---------|-------|----------|----------|----------|-----------|
| AC004057.1    | 314,50  | -0,43 | 0,400291 | -1,0715  | 0,283945 | 0,6563377 |
| LGALS1        | 6189,83 | -0,25 | 0,237326 | -1,07149 | 0,283949 | 0,6563377 |
| ZNF234        | 59,86   | 1,02  | 0,954001 | 1,071344 | 0,284015 | 0,6564098 |
| AC007464.1    | 35,59   | 1,41  | 1,314757 | 1,071186 | 0,284086 | 0,6564921 |
| RNU6-233P     | 1,54    | 2,64  | 2,463491 | 1,070908 | 0,284211 | NA        |
| ANKRD7        | 2,69    | -1,45 | 1,351862 | -1,07053 | 0,284379 | NA        |
| RIPK1         | 289,66  | -0,56 | 0,523863 | -1,07026 | 0,284503 | 0,6572686 |
| WRNIP1        | 266,25  | 0,87  | 0,81506  | 1,070084 | 0,284581 | 0,6572686 |
| RP3-370M22.6  | 51,37   | -0,51 | 0,476862 | -1,07006 | 0,284594 | 0,6572686 |
| OR10A2        | 5,03    | -0,78 | 0,732478 | -1,07    | 0,284618 | 0,6572686 |
| AC021218.2    | 0,85    | -3,57 | 3,340271 | -1,06999 | 0,284625 | NA        |
| TWF1          | 249,46  | -0,78 | 0,730734 | -1,06998 | 0,284628 | 0,6572686 |
| SIRT1         | 362,28  | 0,58  | 0,539774 | 1,069937 | 0,284648 | 0,6572686 |
| RP11-326C3.14 | 19,68   | -1,54 | 1,443433 | -1,06986 | 0,28468  | 0,6572686 |
| GPR65         | 618,87  | -0,52 | 0,483066 | -1,06981 | 0,284705 | 0,6572686 |
| RP11-278A23.4 | 0,54    | -3,91 | 3,658364 | -1,06963 | 0,284784 | NA        |
| CTD-2260A17.1 | 27,72   | 1,43  | 1,337309 | 1,069607 | 0,284796 | 0,6573418 |
| AC078937.4    | 13,01   | -0,91 | 0,851689 | -1,06958 | 0,284807 | 0,6573418 |
| AC122136.1    | 3,19    | 2,58  | 2,41136  | 1,069478 | 0,284854 | NA        |
| C6orf59       | 15,32   | -1,75 | 1,637952 | -1,06929 | 0,284937 | 0,6575165 |
| RPL15P3       | 14,38   | 0,50  | 0,471573 | 1,069258 | 0,284953 | 0,6575165 |
| GSK3A         | 44,89   | -0,80 | 0,744374 | -1,0691  | 0,285027 | 0,6576044 |
| CEP70         | 6,11    | 1,87  | 1,749634 | 1,068873 | 0,285127 | 0,6576775 |
| KCNJ5         | 36,15   | -0,72 | 0,67318  | -1,06887 | 0,285129 | 0,6576775 |
| RP11-481J13.1 | 1,56    | -1,51 | 1,416131 | -1,06884 | 0,285143 | NA        |
| MYO19         | 161,62  | 0,76  | 0,713922 | 1,068552 | 0,285271 | 0,6579243 |
| KNG1          | 3,70    | 3,43  | 3,208324 | 1,068161 | 0,285448 | NA        |
| MGAT5         | 146,75  | 0,84  | 0,782968 | 1,068145 | 0,285455 | 0,6582431 |
| ZNF783        | 151,56  | -1,03 | 0,962173 | -1,06809 | 0,28548  | 0,6582431 |
| HHIP          | 12,62   | 1,10  | 1,031129 | 1,068002 | 0,28552  | 0,6582517 |
| AC005022.1    | 3,72    | -2,04 | 1,914469 | -1,06793 | 0,285552 | NA        |
| HEXA          | 1390,40 | 0,30  | 0,279375 | 1,067879 | 0,285575 | 0,6582983 |
| ZNF512B       | 32,62   | 1,76  | 1,653167 | 1,067592 | 0,285704 | 0,6585147 |
| CMPK1         | 618,80  | -0,46 | 0,433381 | -1,06744 | 0,285774 | 0,6585938 |
| EPHA2         | 6,47    | -2,14 | 2,001538 | -1,06735 | 0,285812 | 0,6585987 |
| RN7SL57P      | 2,52    | 3,98  | 3,724784 | 1,06734  | 0,285819 | NA        |
| ARL17B        | 215,35  | 0,57  | 0,530172 | 1,067103 | 0,285925 | 0,6587096 |
| RAD50         | 440,05  | 0,57  | 0,534027 | 1,067091 | 0,285931 | 0,6587096 |
| AKAP8L        | 110,62  | 0,90  | 0,839089 | 1,067005 | 0,28597  | 0,6587179 |
| ILK           | 1198,43 | -0,40 | 0,377904 | -1,06678 | 0,286072 | 0,6588726 |
| CTD-2600O9.1  | 7,42    | 1,09  | 1,020267 | 1,066519 | 0,286189 | 0,6590513 |
| GLYR1         | 312,62  | 0,54  | 0,502241 | 1,066449 | 0,286221 | 0,6590513 |
| VASH1         | 268,82  | 0,80  | 0,747323 | 1,066288 | 0,286293 | 0,6591203 |
| C9orf78       | 731,50  | 0,37  | 0,348604 | 1,066226 | 0,286321 | 0,6591203 |
| RP11-114F3.4  | 0,65    | -2,63 | 2,468545 | -1,06597 | 0,286437 | NA        |
| RP5-884C9.2   | 0,49    | -3,49 | 3,271537 | -1,06585 | 0,28649  | NA        |
| CNNM3         | 50,33   | -1,32 | 1,240753 | -1,06581 | 0,28651  | 0,6594066 |
| ELMSAN1       | 973,29  | 0,36  | 0,333436 | 1,065794 | 0,286517 | 0,6594066 |
| RP11-554D13.1 | 0,52    | -2,56 | 2,400363 | -1,06575 | 0,286535 | NA        |
| IGHG4         | 2,39    | 2,96  | 2,780074 | 1,065557 | 0,286624 | NA        |

|                |         |       |          |          |          |           |
|----------------|---------|-------|----------|----------|----------|-----------|
| NOP16          | 341,12  | -0,72 | 0,67186  | -1,06554 | 0,286633 | 0,6595073 |
| CLMN           | 284,74  | -0,73 | 0,683321 | -1,06549 | 0,286655 | 0,6595073 |
| RP11-810P12.7  | 105,73  | -0,88 | 0,826174 | -1,06522 | 0,286778 | 0,6595073 |
| RBM48          | 144,47  | -0,90 | 0,842594 | -1,06521 | 0,286782 | 0,6595073 |
| RASGEF1A       | 43,41   | 1,17  | 1,102391 | 1,065159 | 0,286804 | 0,6595073 |
| SMOX           | 78,09   | 1,37  | 1,290167 | 1,06512  | 0,286822 | 0,6595073 |
| CDC73          | 515,30  | 0,60  | 0,562256 | 1,065114 | 0,286825 | 0,6595073 |
| C1orf123       | 451,96  | 0,68  | 0,634399 | 1,064998 | 0,286877 | 0,6595073 |
| NCOR1          | 1776,07 | 0,28  | 0,259386 | 1,064847 | 0,286945 | 0,6595073 |
| RP11-140L24.3  | 1,85    | 2,93  | 2,748367 | 1,064735 | 0,286996 | NA        |
| GPLD1          | 16,81   | -0,64 | 0,603216 | -1,06467 | 0,287025 | 0,6595073 |
| RIIAD1         | 0,54    | -3,90 | 3,659003 | -1,06466 | 0,287028 | NA        |
| XXcos-LUCA16.1 | 35,29   | 1,30  | 1,218698 | 1,064648 | 0,287035 | 0,6595073 |
| DAAM1          | 467,04  | -0,70 | 0,660082 | -1,06462 | 0,287048 | 0,6595073 |
| RP11-88I21.2   | 9,29    | 0,99  | 0,926079 | 1,064615 | 0,28705  | 0,6595073 |
| MRPL54         | 619,59  | -0,31 | 0,290646 | -1,06456 | 0,287075 | 0,6595073 |
| AIP            | 1251,26 | 0,44  | 0,409745 | 1,064522 | 0,287092 | 0,6595073 |
| RP11-215P8.3   | 1,37    | 1,86  | 1,746656 | 1,064264 | 0,287209 | NA        |
| RP11-468D11.1  | 0,54    | -3,89 | 3,659114 | -1,06419 | 0,287245 | NA        |
| RP11-757G14.1  | 8,61    | 1,48  | 1,393423 | 1,063838 | 0,287402 | 0,6601378 |
| FOXA1          | 1,14    | -3,89 | 3,655249 | -1,06357 | 0,287526 | NA        |
| KIF20B         | 134,77  | 0,74  | 0,694307 | 1,063483 | 0,287563 | 0,6601648 |
| RPL17          | 8575,80 | -0,17 | 0,159368 | -1,06348 | 0,287565 | 0,6601648 |
| TP53I11        | 33,61   | 1,40  | 1,311923 | 1,063465 | 0,287571 | 0,6601648 |
| MRRF           | 432,26  | 0,69  | 0,647456 | 1,063398 | 0,287602 | 0,6601648 |
| RP11-34P1.1    | 1,34    | 1,78  | 1,672564 | 1,063379 | 0,28761  | NA        |
| PPIL6          | 12,30   | -0,85 | 0,801914 | -1,06334 | 0,287629 | 0,6601648 |
| RP4-732G19.2   | 0,53    | -3,89 | 3,659155 | -1,06324 | 0,287671 | NA        |
| FTX            | 719,64  | -0,54 | 0,50737  | -1,06322 | 0,287681 | 0,6601648 |
| ATP6V0C        | 394,17  | -0,30 | 0,280103 | -1,06312 | 0,287727 | 0,6601648 |
| RNASE10        | 2,99    | -1,81 | 1,698345 | -1,06312 | 0,287727 | NA        |
| BOP1           | 141,07  | -0,92 | 0,868337 | -1,06311 | 0,287733 | 0,6601648 |
| CD79B          | 147,83  | -1,09 | 1,024959 | -1,06304 | 0,287763 | 0,6601648 |
| PPAT           | 39,36   | -0,99 | 0,933571 | -1,06298 | 0,287789 | 0,6601648 |
| KIAA1370       | 263,16  | 0,85  | 0,799887 | 1,062951 | 0,287804 | 0,6601648 |
| RP11-706O15.5  | 1,04    | 2,69  | 2,528145 | 1,062894 | 0,28783  | NA        |
| RP13-52K8.1    | 0,53    | -3,89 | 3,659109 | -1,0628  | 0,287872 | NA        |
| H1FOO          | 0,53    | -3,89 | 3,65951  | -1,06268 | 0,287927 | NA        |
| TUBA4A         | 302,02  | -0,90 | 0,850199 | -1,06256 | 0,28798  | 0,6604859 |
| MEMO1          | 598,11  | 0,56  | 0,525761 | 1,062483 | 0,288016 | 0,6604884 |
| AEBP1          | 1,06    | -1,71 | 1,61124  | -1,06246 | 0,288029 | NA        |
| SPPL2B         | 111,50  | 0,89  | 0,833977 | 1,06232  | 0,28809  | 0,6605766 |
| MAP2K1         | 859,36  | 0,46  | 0,434542 | 1,062224 | 0,288134 | 0,6605961 |
| MIR7843        | 0,53    | -3,89 | 3,659106 | -1,06216 | 0,288164 | NA        |
| AGAP9          | 224,09  | -0,94 | 0,884119 | -1,06214 | 0,288173 | 0,6606028 |
| CTD-2526A2.4   | 0,79    | -1,32 | 1,242118 | -1,062   | 0,288234 | NA        |
| CTD-2165H16.1  | 6,10    | 0,55  | 0,517427 | 1,061913 | 0,288275 | 0,6606855 |
| PIGZ           | 24,67   | 1,71  | 1,606422 | 1,061823 | 0,288316 | 0,6606855 |
| RP11-307C12.12 | 17,07   | -1,52 | 1,433262 | -1,0618  | 0,288329 | 0,6606855 |
| TBX6           | 6,09    | -1,12 | 1,05352  | -1,06175 | 0,288351 | 0,6606855 |

|                |         |       |          |          |          |           |
|----------------|---------|-------|----------|----------|----------|-----------|
| RP11-309M23.1  | 0,53    | -3,88 | 3,659165 | -1,06163 | 0,288405 | NA        |
| CFHR1          | 1,55    | -1,32 | 1,246471 | -1,06155 | 0,28844  | NA        |
| CYP2AC1P       | 0,63    | -3,88 | 3,65693  | -1,06151 | 0,288459 | NA        |
| BET1L          | 213,12  | -0,72 | 0,678475 | -1,06124 | 0,288581 | 0,661131  |
| DCAF15         | 35,79   | -0,94 | 0,885782 | -1,06102 | 0,288683 | 0,6612239 |
| RP11-677M14.8  | 7,08    | 1,70  | 1,599752 | 1,060995 | 0,288692 | 0,6612239 |
| LAP3           | 1897,55 | 0,34  | 0,319009 | 1,060805 | 0,288778 | 0,6612279 |
| NDUFA4         | 1903,45 | -0,32 | 0,304959 | -1,06078 | 0,288789 | 0,6612279 |
| DOCK1          | 128,34  | -1,52 | 1,42914  | -1,06076 | 0,288801 | 0,6612279 |
| RP11-353H3.1   | 3,50    | -0,67 | 0,631738 | -1,06062 | 0,28886  | NA        |
| RP11-93L9.1    | 56,64   | -0,84 | 0,79258  | -1,06059 | 0,288875 | 0,6613171 |
| RP11-555E18.2  | 2,26    | -3,28 | 3,089879 | -1,06037 | 0,288977 | NA        |
| RPS6KB2        | 156,64  | 0,78  | 0,735209 | 1,060333 | 0,288993 | 0,6615057 |
| RP11-416A17.6  | 105,94  | 1,19  | 1,122159 | 1,060019 | 0,289136 | 0,6615773 |
| CTD-2143L24.1  | 43,59   | -1,37 | 1,290564 | -1,05996 | 0,289163 | 0,6615773 |
| C9orf152       | 2,33    | -1,21 | 1,141616 | -1,05991 | 0,289187 | NA        |
| ANPEP          | 369,07  | 0,87  | 0,821748 | 1,059902 | 0,289189 | 0,6615773 |
| CTD-2545M3.8   | 43,71   | -1,67 | 1,574879 | -1,05983 | 0,289221 | 0,6615773 |
| KHSRP          | 80,14   | 0,71  | 0,674474 | 1,059816 | 0,289228 | 0,6615773 |
| CHD3           | 667,85  | -0,55 | 0,514532 | -1,0598  | 0,289238 | 0,6615773 |
| CTC-543D15.8   | 1,03    | 2,07  | 1,95273  | 1,059775 | 0,289247 | NA        |
| RP11-182I10.2  | 1,87    | 3,54  | 3,337494 | 1,059757 | 0,289255 | NA        |
| GATB           | 180,33  | -0,99 | 0,932183 | -1,0596  | 0,289329 | 0,661627  |
| CTC-304I17.6   | 26,05   | -0,74 | 0,694535 | -1,05959 | 0,289331 | 0,661627  |
| GALE           | 115,76  | 0,92  | 0,868774 | 1,059482 | 0,28938  | 0,661659  |
| RP11-292E2.2   | 1,80    | -2,95 | 2,779955 | -1,05941 | 0,289414 | NA        |
| CDCA7          | 35,44   | 1,33  | 1,255095 | 1,059313 | 0,289457 | 0,6616838 |
| SAV1           | 116,35  | 1,03  | 0,976044 | 1,059302 | 0,289462 | 0,6616838 |
| RP11-800A3.3   | 2,84    | 2,97  | 2,801306 | 1,059287 | 0,289469 | NA        |
| OR52K3P        | 18,27   | -2,33 | 2,198837 | -1,05916 | 0,289525 | 0,6617459 |
| FAM138E        | 7,08    | -1,35 | 1,277972 | -1,05895 | 0,289625 | 0,6618119 |
| OR1A1          | 94,65   | -0,67 | 0,631497 | -1,05882 | 0,289682 | 0,6618119 |
| RP3-333A15.1   | 2,73    | 1,27  | 1,196676 | 1,058799 | 0,289691 | NA        |
| APBB1IP        | 760,91  | -0,53 | 0,496352 | -1,05876 | 0,289709 | 0,6618119 |
| RP5-888M10.2   | 3,02    | 3,63  | 3,432342 | 1,05872  | 0,289727 | NA        |
| ZNF285         | 11,16   | -0,95 | 0,893751 | -1,05867 | 0,289752 | 0,6618119 |
| ABALON         | 1,32    | 3,04  | 2,873734 | 1,058631 | 0,289768 | NA        |
| RP3-322G13.5   | 2,41    | 2,68  | 2,534874 | 1,058584 | 0,289789 | NA        |
| MAML3          | 356,62  | 0,64  | 0,608531 | 1,058584 | 0,289789 | 0,6618119 |
| CTD-2649C14.2  | 25,80   | -0,45 | 0,42881  | -1,05849 | 0,289831 | 0,6618119 |
| RP11-395L14.11 | 9,72    | 2,08  | 1,964564 | 1,05842  | 0,289864 | 0,6618119 |
| TRERF1         | 199,37  | 0,58  | 0,54429  | 1,058322 | 0,289908 | 0,6618119 |
| MARS           | 597,06  | 0,43  | 0,404306 | 1,058321 | 0,289909 | 0,6618119 |
| ZNF284         | 55,01   | -0,95 | 0,901698 | -1,05822 | 0,289954 | 0,6618119 |
| RP11-331G2.7   | 1,84    | -1,85 | 1,750288 | -1,05814 | 0,289992 | NA        |
| ARSE           | 9,77    | 1,63  | 1,545021 | 1,058092 | 0,290014 | 0,6618119 |
| RP11-473M20.5  | 4,10    | 1,36  | 1,284896 | 1,058069 | 0,290024 | 0,6618119 |
| RP11-463I20.3  | 7,62    | -2,53 | 2,391601 | -1,05801 | 0,290052 | 0,6618119 |
| GRM1           | 4,41    | 1,76  | 1,658862 | 1,058008 | 0,290052 | 0,6618119 |
| NPC1L1         | 2,72    | -3,00 | 2,833616 | -1,05793 | 0,290086 | NA        |



|                |        |       |          |          |          |           |
|----------------|--------|-------|----------|----------|----------|-----------|
| OR51B5         | 3,34   | -1,03 | 0,97045  | -1,05786 | 0,290121 | NA        |
| APOO           | 79,40  | 1,00  | 0,942247 | 1,057782 | 0,290155 | 0,6618242 |
| EEF1B4         | 10,61  | 0,80  | 0,758842 | 1,057767 | 0,290162 | 0,6618242 |
| MIR2116        | 2,46   | 3,94  | 3,724901 | 1,057678 | 0,290202 | NA        |
| AC073043.1     | 17,75  | -0,94 | 0,892383 | -1,05768 | 0,290203 | 0,6618242 |
| RP11-294N21.3  | 0,53   | -3,87 | 3,659323 | -1,05758 | 0,290247 | NA        |
| RP11-306O13.1  | 87,30  | -0,40 | 0,376874 | -1,05756 | 0,290257 | 0,6618242 |
| ZNF138         | 53,93  | 1,37  | 1,295704 | 1,057546 | 0,290262 | 0,6618242 |
| CTC-281F24.3   | 13,04  | -0,64 | 0,606236 | -1,05753 | 0,290271 | 0,6618242 |
| ZC3H7B         | 48,85  | 0,75  | 0,712031 | 1,057357 | 0,290349 | 0,6618963 |
| RN7SL48P       | 15,63  | -0,70 | 0,665464 | -1,0573  | 0,290373 | 0,6618963 |
| SLC25A16       | 209,11 | -0,86 | 0,815244 | -1,05708 | 0,290476 | 0,6620496 |
| THAP10         | 2,46   | 3,94  | 3,724904 | 1,057033 | 0,290497 | NA        |
| MRPL19         | 173,30 | -0,83 | 0,781364 | -1,05693 | 0,290543 | 0,6621208 |
| ZNF776         | 59,02  | -0,70 | 0,660308 | -1,05671 | 0,290644 | 0,6622135 |
| MSH6           | 264,58 | 0,45  | 0,424721 | 1,056651 | 0,290671 | 0,6622135 |
| RP11-806O11.1  | 2,50   | 1,92  | 1,820449 | 1,056588 | 0,2907   | NA        |
| UBE2J1         | 687,21 | 0,50  | 0,471922 | 1,056534 | 0,290725 | 0,6622135 |
| HGS            | 310,19 | -0,60 | 0,567139 | -1,05653 | 0,290726 | 0,6622135 |
| CTD-2336O2.3   | 3,00   | -2,10 | 1,984387 | -1,05651 | 0,290735 | NA        |
| TBL2           | 83,16  | -0,85 | 0,804696 | -1,05635 | 0,290807 | 0,6623156 |
| CTC-250I14.6   | 0,80   | 2,36  | 2,236756 | 1,056309 | 0,290827 | NA        |
| RP1-155D22.2   | 0,52   | -3,86 | 3,659415 | -1,05592 | 0,291003 | NA        |
| RNF7           | 678,85 | 0,37  | 0,351894 | 1,055766 | 0,291075 | 0,662778  |
| RNU4-72P       | 2,81   | 1,38  | 1,309016 | 1,055753 | 0,291081 | NA        |
| RNU2-58P       | 7,37   | -1,76 | 1,66262  | -1,05567 | 0,291118 | 0,662778  |
| OTUD6A         | 7,32   | 1,10  | 1,038189 | 1,055618 | 0,291143 | 0,662778  |
| AC004019.13    | 12,73  | -0,70 | 0,663025 | -1,0556  | 0,291152 | 0,662778  |
| OR7E25P        | 52,33  | -0,54 | 0,515674 | -1,0555  | 0,291198 | 0,6628018 |
| SCARNA16       | 0,72   | -2,33 | 2,205875 | -1,05546 | 0,291215 | NA        |
| RP11-295D4.5   | 2,08   | -1,70 | 1,614054 | -1,05545 | 0,291222 | NA        |
| DUOX1          | 14,94  | -1,38 | 1,312073 | -1,05525 | 0,29131  | 0,6628352 |
| GTF2E2         | 219,55 | -0,80 | 0,756163 | -1,05524 | 0,291317 | 0,6628352 |
| ECSIT          | 380,35 | -0,60 | 0,568076 | -1,05523 | 0,29132  | 0,6628352 |
| HERC2P2        | 132,44 | 0,96  | 0,91417  | 1,055039 | 0,291408 | 0,662954  |
| MUT            | 137,88 | 1,14  | 1,077874 | 1,054893 | 0,291474 | 0,6630242 |
| ADAM17         | 281,98 | 0,59  | 0,555437 | 1,054629 | 0,291595 | 0,6632109 |
| RN7SL822P      | 1,51   | 2,60  | 2,464175 | 1,054526 | 0,291642 | NA        |
| RP13-122B23.13 | 151,24 | -1,01 | 0,960734 | -1,0545  | 0,291654 | 0,6632109 |
| THRB           | 63,24  | -1,82 | 1,728539 | -1,05448 | 0,291663 | 0,6632109 |
| ASMTL          | 271,13 | 0,84  | 0,796442 | 1,054377 | 0,29171  | 0,6632371 |
| TLE6           | 0,73   | -3,86 | 3,657152 | -1,05435 | 0,291722 | NA        |
| BRI3BP         | 569,19 | 0,43  | 0,410802 | 1,054225 | 0,29178  | 0,6633143 |
| RP11-418I22.2  | 0,47   | -3,43 | 3,25856  | -1,05403 | 0,29187  | NA        |
| RNU6-268P      | 3,40   | 1,25  | 1,181235 | 1,054013 | 0,291877 | NA        |
| NSD3           | 698,40 | -0,48 | 0,458403 | -1,0539  | 0,291929 | 0,663508  |
| RPP21          | 136,22 | -0,49 | 0,467547 | -1,05388 | 0,291936 | 0,663508  |
| C1orf229       | 3,26   | -0,94 | 0,894966 | -1,0536  | 0,292065 | NA        |
| RP11-438L7.1   | 67,68  | -0,58 | 0,552881 | -1,05357 | 0,292078 | 0,6636672 |
| ZNF649         | 45,96  | 1,14  | 1,079053 | 1,053574 | 0,292078 | 0,6636672 |

|               |         |       |          |          |          |           |
|---------------|---------|-------|----------|----------|----------|-----------|
| ME2           | 845,75  | -0,47 | 0,448898 | -1,05331 | 0,292198 | 0,6636741 |
| CELSR2        | 15,49   | -1,95 | 1,855002 | -1,05322 | 0,29224  | 0,6636741 |
| CTD-2175M1.1  | 10,62   | -2,08 | 1,974412 | -1,05316 | 0,292267 | 0,6636741 |
| MBD1          | 184,18  | 0,73  | 0,696196 | 1,05311  | 0,292291 | 0,6636741 |
| PPIL2         | 296,35  | 0,69  | 0,659727 | 1,053077 | 0,292306 | 0,6636741 |
| SUSD1         | 245,03  | 0,64  | 0,610185 | 1,052992 | 0,292345 | 0,6636741 |
| RP11-321N4.4  | 16,07   | -1,22 | 1,155359 | -1,05298 | 0,292351 | 0,6636741 |
| RP11-347C12.1 | 86,03   | 0,42  | 0,40019  | 1,052945 | 0,292366 | 0,6636741 |
| OR13I1P       | 3,51    | -1,10 | 1,048723 | -1,05285 | 0,292411 | NA        |
| AGAP1         | 1,29    | 2,25  | 2,138033 | 1,052789 | 0,292438 | NA        |
| AC016737.1    | 0,52    | -3,85 | 3,659549 | -1,05263 | 0,292512 | NA        |
| PCNT          | 541,82  | 0,75  | 0,709627 | 1,052544 | 0,29255  | 0,6640107 |
| NPIPA5        | 23,35   | 1,26  | 1,194562 | 1,052449 | 0,292594 | 0,6640284 |
| VPS4A         | 385,76  | 0,43  | 0,407825 | 1,052291 | 0,292666 | 0,6641118 |
| NDUFC2        | 864,91  | 0,23  | 0,218955 | 1,05208  | 0,292763 | 0,6642505 |
| RP11-35J10.7  | 9,62    | -1,65 | 1,56865  | -1,05191 | 0,29284  | 0,6642675 |
| RP11-145J3.3  | 7,84    | -2,70 | 2,565086 | -1,05183 | 0,292876 | 0,6642675 |
| RP11-293F5.2  | 13,12   | -0,57 | 0,543598 | -1,05178 | 0,2929   | 0,6642675 |
| PACS1         | 276,50  | -0,68 | 0,645007 | -1,05175 | 0,292913 | 0,6642675 |
| AC156455.1    | 2,15    | 1,76  | 1,669748 | 1,051543 | 0,293009 | NA        |
| ZNF787        | 31,73   | 1,00  | 0,953169 | 1,051434 | 0,293059 | 0,6644799 |
| IGSF5         | 4,85    | -2,36 | 2,242783 | -1,05134 | 0,293103 | 0,6644799 |
| MSANTD3       | 31,39   | -1,11 | 1,056322 | -1,05131 | 0,293114 | 0,6644799 |
| FASTKD1       | 211,66  | -0,68 | 0,646434 | -1,05121 | 0,293164 | 0,6644952 |
| AC006946.16   | 31,76   | -1,07 | 1,014029 | -1,05112 | 0,293204 | 0,6644952 |
| AP000892.6    | 145,80  | -1,03 | 0,979963 | -1,05107 | 0,293228 | 0,6644952 |
| RNU6-957P     | 1,30    | 3,02  | 2,876725 | 1,05094  | 0,293286 | NA        |
| ZFPM2         | 6,12    | 1,27  | 1,208968 | 1,050701 | 0,293396 | 0,6647949 |
| RP11-730G20.1 | 2,33    | 2,22  | 2,116227 | 1,050663 | 0,293413 | NA        |
| RP5-994D16.9  | 1,84    | 3,50  | 3,33515  | 1,05053  | 0,293475 | NA        |
| RP6-65G23.1   | 2,64    | -1,29 | 1,232208 | -1,05045 | 0,293512 | NA        |
| EIF4B         | 3335,34 | 0,33  | 0,312912 | 1,050394 | 0,293537 | 0,6649804 |
| RP11-734K23.9 | 32,87   | 0,82  | 0,778828 | 1,050367 | 0,293549 | 0,6649804 |
| RP11-348N5.7  | 1,20    | 2,26  | 2,156146 | 1,050254 | 0,293601 | NA        |
| FOXP4         | 19,66   | -1,10 | 1,046536 | -1,05025 | 0,293603 | 0,6650211 |
| RP11-104N10.1 | 3,87    | 1,75  | 1,667264 | 1,050077 | 0,293683 | 0,6651209 |
| MED13         | 764,41  | -0,59 | 0,558472 | -1,04993 | 0,293749 | 0,6651888 |
| CACNA1B       | 9,49    | 1,92  | 1,825172 | 1,049827 | 0,293798 | 0,6651895 |
| RP11-29013.1  | 0,42    | -2,95 | 2,809347 | -1,04981 | 0,293807 | NA        |
| SHANK2        | 3,66    | -1,50 | 1,426208 | -1,04976 | 0,293828 | NA        |
| CWC15         | 651,65  | -0,47 | 0,451457 | -1,04971 | 0,293851 | 0,6651895 |
| UFSP2         | 116,39  | 1,13  | 1,076287 | 1,049662 | 0,293873 | 0,6651895 |
| EMC8          | 213,84  | 0,67  | 0,637472 | 1,049622 | 0,293892 | 0,6651895 |
| EFCAB2        | 170,45  | 0,72  | 0,68757  | 1,049411 | 0,293989 | 0,6653289 |
| MC5R          | 1,94    | 1,38  | 1,311911 | 1,049346 | 0,294019 | NA        |
| TESC          | 192,71  | -0,96 | 0,918419 | -1,04928 | 0,29405  | 0,6653849 |
| SMARCD2       | 313,23  | 0,62  | 0,593886 | 1,049115 | 0,294125 | 0,6653995 |
| SPATA20       | 182,53  | 0,87  | 0,833146 | 1,04911  | 0,294128 | 0,6653995 |
| CTB-119C2.1   | 3,78    | 2,53  | 2,41162  | 1,048948 | 0,294202 | 0,6654868 |
| RP11-301L8.2  | 1,03    | 2,69  | 2,566045 | 1,048862 | 0,294242 | NA        |

|                  |          |       |          |          |          |           |
|------------------|----------|-------|----------|----------|----------|-----------|
| RP5-1139I1.1     | 12,66    | -0,69 | 0,657995 | -1,04879 | 0,294276 | 0,66557   |
| CBS              | 6,29     | -1,13 | 1,08205  | -1,04859 | 0,294366 | 0,66557   |
| RPL13            | 20114,07 | -0,20 | 0,188552 | -1,04834 | 0,294483 | 0,66557   |
| CTC-459F4.6      | 0,52     | -3,84 | 3,659781 | -1,04826 | 0,294517 | NA        |
| SNX22            | 34,80    | -0,73 | 0,69275  | -1,04822 | 0,294536 | 0,66557   |
| SEC23A           | 179,34   | -0,66 | 0,633849 | -1,04821 | 0,29454  | 0,66557   |
| SNHG15           | 1076,96  | 0,43  | 0,410432 | 1,048197 | 0,294548 | 0,66557   |
| PLCL1            | 3,07     | 1,31  | 1,250857 | 1,048093 | 0,294596 | NA        |
| GP2              | 4,71     | -1,05 | 1,005854 | -1,04809 | 0,294597 | 0,66557   |
| RP11-74N20.1     | 24,07    | -0,93 | 0,884826 | -1,04807 | 0,294606 | 0,66557   |
| UBE2E1           | 224,68   | -0,46 | 0,441422 | -1,04805 | 0,294613 | 0,66557   |
| RP11-227L6.1     | 5,58     | -0,82 | 0,779586 | -1,04805 | 0,294616 | 0,66557   |
| WNK4             | 2,63     | -1,15 | 1,093454 | -1,04801 | 0,294632 | NA        |
| RP11-345J4.1     | 0,49     | -3,44 | 3,285367 | -1,04798 | 0,294649 | NA        |
| RALBP1           | 396,59   | -0,56 | 0,533063 | -1,04797 | 0,29465  | 0,66557   |
| LRRN4            | 1,82     | 3,49  | 3,332244 | 1,047947 | 0,294663 | NA        |
| MT-TS1           | 116,55   | -0,40 | 0,381887 | -1,04794 | 0,294668 | 0,66557   |
| CTA-228A9.3      | 25,82    | -0,84 | 0,80195  | -1,04785 | 0,294709 | 0,6655821 |
| PMF1             | 538,04   | 0,41  | 0,394985 | 1,047598 | 0,294824 | 0,6657603 |
| RP11-138P22.1    | 1,09     | -1,38 | 1,321954 | -1,04755 | 0,294846 | NA        |
| TNRC6B           | 1443,44  | -0,42 | 0,401716 | -1,0475  | 0,294871 | 0,6657856 |
| P2RY8            | 373,22   | -0,59 | 0,56003  | -1,04733 | 0,294949 | 0,6658805 |
| CTB-159G17.3     | 1,62     | -1,50 | 1,432315 | -1,04717 | 0,295023 | NA        |
| RP11-313I2.11    | 4,33     | -1,35 | 1,291336 | -1,04709 | 0,295057 | 0,6659774 |
| CTD-2552B11.4    | 89,69    | 0,94  | 0,894849 | 1,047079 | 0,295063 | 0,6659774 |
| DIRAS2           | 2,32     | -1,35 | 1,285142 | -1,047   | 0,295099 | NA        |
| NCRNA00277       | 2,34     | 3,90  | 3,725465 | 1,046777 | 0,295202 | NA        |
| RP11-341J3.1     | 86,56    | -0,49 | 0,46495  | -1,04676 | 0,295208 | 0,6662234 |
| RP11-358L22.3    | 23,21    | 0,73  | 0,699655 | 1,046638 | 0,295266 | 0,6662273 |
| RF00591          | 0,51     | -3,83 | 3,661314 | -1,04661 | 0,295279 | NA        |
| RP11-779O18.1    | 20,86    | -1,80 | 1,720734 | -1,04654 | 0,295313 | 0,6662273 |
| IKZF1            | 851,41   | 0,43  | 0,406373 | 1,046513 | 0,295324 | 0,6662273 |
| RP11-298A18.1    | 1,91     | 3,57  | 3,407042 | 1,046503 | 0,295329 | NA        |
| RP11-632C17__A.1 | 0,83     | -1,82 | 1,736237 | -1,0465  | 0,295332 | NA        |
| RP11-523O18.7    | 4,84     | 1,34  | 1,281801 | 1,046397 | 0,295378 | 0,6662273 |
| TIAF1            | 63,15    | 0,80  | 0,768164 | 1,046345 | 0,295402 | 0,6662273 |
| NUFIP2           | 1125,58  | 0,48  | 0,460911 | 1,046296 | 0,295425 | 0,6662273 |
| RP11-478J18.1    | 131,44   | -0,79 | 0,752153 | -1,04607 | 0,295527 | 0,6662961 |
| RP11-84A19.2     | 37,10    | -0,36 | 0,345489 | -1,04605 | 0,295536 | 0,6662961 |
| MVD              | 72,52    | -0,79 | 0,757455 | -1,04587 | 0,295621 | 0,6662961 |
| RP11-665J16.1    | 2,39     | 3,90  | 3,725037 | 1,045862 | 0,295625 | NA        |
| PSMD14           | 460,58   | 0,91  | 0,865683 | 1,045851 | 0,29563  | 0,6662961 |
| TRIM72           | 61,20    | -0,63 | 0,606305 | -1,04584 | 0,295634 | 0,6662961 |
| OR52N1           | 2,43     | -1,18 | 1,125826 | -1,04577 | 0,295669 | NA        |
| GOLPH3L          | 60,47    | 0,97  | 0,923473 | 1,045666 | 0,295715 | 0,6662976 |
| RNPEP            | 905,86   | -0,37 | 0,352826 | -1,04564 | 0,295729 | 0,6662976 |
| RAB3A            | 18,96    | 1,27  | 1,217057 | 1,045568 | 0,295761 | 0,6662976 |
| CTC-525D6.1      | 29,47    | -0,97 | 0,923968 | -1,04553 | 0,295778 | 0,6662976 |
| TMEM8A           | 189,39   | -0,78 | 0,749147 | -1,04538 | 0,29585  | 0,6663779 |
| FAM84A           | 32,52    | -3,77 | 3,608826 | -1,045   | 0,296025 | 0,6666918 |

|                |         |       |          |          |          |           |
|----------------|---------|-------|----------|----------|----------|-----------|
| RP5-967N21.7   | 1,86    | 3,53  | 3,38198  | 1,044936 | 0,296053 | NA        |
| LIPM           | 2,38    | 3,89  | 3,725043 | 1,044721 | 0,296152 | NA        |
| RP11-776A13.1  | 14,45   | -0,66 | 0,635185 | -1,04464 | 0,296188 | 0,6669461 |
| NKX6-2         | 4,51    | -1,29 | 1,230766 | -1,0446  | 0,296209 | 0,6669461 |
| RP11-426C22.5  | 245,87  | 0,69  | 0,657984 | 1,044512 | 0,296249 | 0,6669538 |
| CMC1           | 168,26  | -0,66 | 0,631676 | -1,04443 | 0,296286 | 0,6669573 |
| UPK3BL         | 461,22  | -0,50 | 0,474647 | -1,04435 | 0,296324 | 0,6669588 |
| CTA-339C12.1   | 10,29   | 1,71  | 1,639255 | 1,044265 | 0,296363 | 0,6669588 |
| RRAGA          | 271,56  | 0,88  | 0,84403  | 1,044197 | 0,296394 | 0,6669588 |
| GDA            | 11,16   | 1,01  | 0,967311 | 1,043939 | 0,296513 | 0,6670566 |
| AC131097.4     | 0,51    | -3,82 | 3,660449 | -1,0439  | 0,296531 | NA        |
| RP11-529F4.1   | 1,74    | 3,43  | 3,281444 | 1,043758 | 0,296598 | NA        |
| CTD-2521M24.4  | 21,92   | -0,56 | 0,539312 | -1,04373 | 0,296611 | 0,6670566 |
| ACSS1          | 510,53  | 0,43  | 0,412783 | 1,043702 | 0,296623 | 0,6670566 |
| AC002472.15    | 16,72   | -1,09 | 1,044075 | -1,04369 | 0,296629 | 0,6670566 |
| RP11-799O21.2  | 1,81    | 3,48  | 3,33575  | 1,043647 | 0,296649 | NA        |
| RP3-424M6.4    | 23,77   | 1,03  | 0,988059 | 1,043623 | 0,29666  | 0,6670566 |
| IGF2BP1        | 14,13   | 1,02  | 0,976598 | 1,043568 | 0,296685 | 0,6670566 |
| CREB3L2        | 486,80  | 0,64  | 0,611129 | 1,04354  | 0,296698 | 0,6670566 |
| CMTR1          | 129,47  | -0,89 | 0,851934 | -1,04348 | 0,296725 | 0,6670566 |
| PUS10          | 118,34  | -0,92 | 0,886578 | -1,04319 | 0,296862 | 0,6672208 |
| PRPS2          | 445,53  | -0,98 | 0,939354 | -1,04311 | 0,296898 | 0,6672208 |
| RP11-20G6.2    | 10,59   | -0,95 | 0,914203 | -1,04307 | 0,296916 | 0,6672208 |
| RP11-67H24.3   | 147,85  | -2,07 | 1,989183 | -1,04287 | 0,297008 | 0,6672208 |
| RF00598        | 2,81    | 3,54  | 3,393874 | 1,042792 | 0,297044 | NA        |
| RP11-315A16.3  | 4,01    | -1,61 | 1,547519 | -1,04277 | 0,297057 | 0,6672208 |
| RP11-396O20.1  | 5,10    | -3,76 | 3,604744 | -1,04275 | 0,297066 | 0,6672208 |
| RP11-290D2.6   | 3,87    | -1,62 | 1,551019 | -1,04274 | 0,29707  | 0,6672208 |
| RP11-326C3.12  | 20,39   | -0,68 | 0,653136 | -1,04263 | 0,297119 | 0,6672208 |
| PKD1P6         | 54,64   | 0,89  | 0,858053 | 1,042622 | 0,297123 | 0,6672208 |
| CLIC4          | 178,21  | 0,79  | 0,756016 | 1,042551 | 0,297156 | 0,6672208 |
| CDC25C         | 0,57    | -2,25 | 2,15762  | -1,04252 | 0,297169 | NA        |
| PADI6          | 23,40   | -1,85 | 1,774499 | -1,04236 | 0,297244 | 0,6673363 |
| WNT9A          | 4,30    | -1,38 | 1,320727 | -1,04227 | 0,297284 | 0,6673451 |
| RAB44          | 56,76   | -1,43 | 1,370749 | -1,04212 | 0,297355 | 0,6673451 |
| INPP5E         | 77,28   | -1,15 | 1,104898 | -1,04212 | 0,297355 | 0,6673451 |
| PDCL3          | 425,74  | 0,52  | 0,500809 | 1,041996 | 0,297414 | 0,6673958 |
| URB1           | 94,02   | 0,89  | 0,855795 | 1,041839 | 0,297486 | 0,6674786 |
| RP11-277I20.3  | 0,38    | -3,38 | 3,24033  | -1,04173 | 0,297536 | NA        |
| AP000892.4     | 8,35    | -1,23 | 1,182111 | -1,04144 | 0,297672 | 0,667748  |
| CXorf21        | 657,58  | 0,67  | 0,643668 | 1,041374 | 0,297702 | 0,667748  |
| SDHC           | 351,16  | 0,68  | 0,655649 | 1,041321 | 0,297727 | 0,667748  |
| RP1-102G20.5   | 10,92   | 2,38  | 2,289178 | 1,041271 | 0,29775  | 0,667748  |
| RP11-883G14.1  | 0,58    | -2,97 | 2,854836 | -1,04095 | 0,297898 | NA        |
| TMA16          | 158,35  | -0,52 | 0,494946 | -1,04089 | 0,297928 | 0,6680058 |
| RP11-439L18.1  | 1,37    | 3,11  | 2,987526 | 1,040879 | 0,297932 | NA        |
| RP11-20E24.1   | 5,99    | -2,05 | 1,968201 | -1,0408  | 0,297967 | 0,6680058 |
| SIGLEC10       | 168,10  | -0,65 | 0,628199 | -1,04079 | 0,297973 | 0,6680058 |
| RP11-1286E23.1 | 1,56    | -3,17 | 3,047454 | -1,04074 | 0,297995 | NA        |
| C1orf43        | 1108,15 | 0,42  | 0,399717 | 1,04062  | 0,298052 | 0,6680321 |

|                |          |       |          |          |          |           |
|----------------|----------|-------|----------|----------|----------|-----------|
| EEF1A1P5       | 108,61   | 0,33  | 0,314628 | 1,040611 | 0,298056 | 0,6680321 |
| MIR5480        | 2,36     | 3,88  | 3,725094 | 1,040407 | 0,298151 | NA        |
| SNAPC2         | 82,75    | 1,04  | 0,998482 | 1,040372 | 0,298167 | 0,6682001 |
| DNASE1L2       | 2,39     | 3,87  | 3,725019 | 1,04021  | 0,298242 | NA        |
| RP11-454L9.2   | 1,68     | -2,83 | 2,718194 | -1,04006 | 0,29831  | NA        |
| NAIF1          | 53,93    | -1,24 | 1,195299 | -1,04004 | 0,298323 | 0,6684693 |
| RP4-695O20.1   | 23,26    | 0,66  | 0,638715 | 1,039941 | 0,298367 | 0,6684881 |
| ARMCX4         | 79,05    | -0,86 | 0,831437 | -1,03972 | 0,298469 | 0,6685253 |
| OSGEP          | 887,83   | 0,40  | 0,387575 | 1,039705 | 0,298477 | 0,6685253 |
| MPLKIP         | 431,58   | 0,66  | 0,630923 | 1,039673 | 0,298492 | 0,6685253 |
| RP11-759A24.1  | 1,23     | -1,22 | 1,177702 | -1,03959 | 0,298532 | NA        |
| VPS37A         | 192,52   | 0,99  | 0,955736 | 1,039538 | 0,298555 | 0,6685857 |
| RNA5SP199      | 0,50     | -3,80 | 3,660402 | -1,0393  | 0,298665 | NA        |
| MPP2           | 1,04     | -3,51 | 3,374781 | -1,0391  | 0,298759 | NA        |
| AC004453.8     | 1,30     | 1,75  | 1,681013 | 1,039055 | 0,298779 | NA        |
| OXCT1          | 127,58   | 0,93  | 0,898093 | 1,038896 | 0,298853 | 0,6691732 |
| CHURC1         | 735,03   | 0,40  | 0,381451 | 1,038656 | 0,298965 | 0,6692185 |
| CCDC97         | 97,49    | -0,93 | 0,898545 | -1,03849 | 0,299042 | 0,6692185 |
| SESTD1         | 352,45   | -0,78 | 0,746651 | -1,03847 | 0,299052 | 0,6692185 |
| RN7SL368P      | 87,40    | -0,86 | 0,827603 | -1,03846 | 0,299057 | 0,6692185 |
| ATF1           | 131,95   | 0,72  | 0,692211 | 1,038413 | 0,299078 | 0,6692185 |
| TIAM1          | 360,25   | -0,57 | 0,550683 | -1,03824 | 0,299157 | 0,6692185 |
| RP11-125B21.2  | 3,35     | -1,16 | 1,121419 | -1,03822 | 0,299167 | NA        |
| SAP30L         | 156,29   | -0,89 | 0,859407 | -1,03822 | 0,299168 | 0,6692185 |
| RPS18          | 13059,78 | -0,19 | 0,184329 | -1,03818 | 0,299185 | 0,6692185 |
| GGT1           | 68,73    | -0,93 | 0,893697 | -1,03816 | 0,299197 | 0,6692185 |
| AC007161.5     | 1,24     | 3,02  | 2,907295 | 1,038136 | 0,299207 | NA        |
| VPS25          | 668,01   | 0,61  | 0,590725 | 1,0378   | 0,299363 | 0,6695101 |
| RP11-455F5.6   | 3,10     | -0,82 | 0,791569 | -1,03779 | 0,299368 | NA        |
| FAM120A        | 1519,59  | -0,18 | 0,174672 | -1,03751 | 0,299498 | 0,6697303 |
| RPS15AP18      | 0,74     | -3,42 | 3,295406 | -1,03745 | 0,299526 | NA        |
| HSPA5          | 2405,07  | 0,46  | 0,439968 | 1,037272 | 0,299609 | 0,6698988 |
| RNA5SP281      | 5,65     | -1,96 | 1,894019 | -1,03714 | 0,299673 | 0,6699428 |
| RP11-1399P15.1 | 3,33     | 3,19  | 3,075909 | 1,037059 | 0,299709 | NA        |
| LIN37          | 23,10    | -1,62 | 1,559488 | -1,03704 | 0,299717 | 0,6699428 |
| POMP           | 1081,04  | -0,33 | 0,317198 | -1,037   | 0,299737 | 0,6699428 |
| RSPH10B        | 2,33     | 1,01  | 0,970734 | 1,036874 | 0,299795 | NA        |
| DHRX           | 288,96   | 0,57  | 0,554277 | 1,036786 | 0,299836 | 0,6700829 |
| AC010761.14    | 1,45     | -1,63 | 1,567916 | -1,03666 | 0,299895 | NA        |
| MMD            | 137,71   | 0,80  | 0,77457  | 1,036552 | 0,299945 | 0,6701541 |
| RP11-493E12.2  | 18,16    | 1,21  | 1,171114 | 1,036394 | 0,300018 | 0,6701541 |
| RP13-131K19.2  | 5,28     | -2,56 | 2,466104 | -1,03637 | 0,30003  | 0,6701541 |
| SMCO4          | 390,80   | -0,47 | 0,456852 | -1,03631 | 0,300059 | 0,6701541 |
| MAT2B          | 721,60   | -0,57 | 0,545787 | -1,03625 | 0,300085 | 0,6701541 |
| RP11-357H14.17 | 10,44    | -0,52 | 0,505807 | -1,03625 | 0,300086 | 0,6701541 |
| ZNF70          | 21,35    | -0,48 | 0,46093  | -1,03611 | 0,30015  | 0,6701541 |
| AC073257.1     | 31,69    | -0,76 | 0,730673 | -1,03608 | 0,300167 | 0,6701541 |
| SCO1           | 342,59   | -0,74 | 0,713963 | -1,03602 | 0,300192 | 0,6701541 |
| RNU7-30P       | 2,33     | 3,86  | 3,725165 | 1,03571  | 0,300338 | NA        |
| SLC35G5        | 2,31     | 1,53  | 1,475442 | 1,035512 | 0,30043  | NA        |

|                |         |       |          |          |          |           |
|----------------|---------|-------|----------|----------|----------|-----------|
| GPR173         | 4,73    | -1,63 | 1,573174 | -1,03549 | 0,30044  | 0,6706287 |
| SEC14L6        | 20,06   | -0,55 | 0,534057 | -1,03524 | 0,300555 | 0,6708047 |
| DNM1L          | 793,59  | 0,42  | 0,406004 | 1,035121 | 0,300612 | 0,6708519 |
| RP11-711K1.8   | 2,01    | -2,20 | 2,128533 | -1,035   | 0,300671 | NA        |
| AC021107.3     | 1,08    | -1,29 | 1,245324 | -1,03496 | 0,300689 | NA        |
| RP11-461A8.1   | 1,84    | -1,70 | 1,63945  | -1,03494 | 0,300696 | NA        |
| RP11-665C16.1  | 21,51   | 1,77  | 1,710147 | 1,034833 | 0,300747 | 0,6710716 |
| ATP5O          | 2423,50 | 0,21  | 0,203321 | 1,034689 | 0,300814 | 0,671141  |
| RP11-1055B8.1  | 12,69   | -1,40 | 1,354142 | -1,03461 | 0,300853 | 0,6711479 |
| ABC8           | 197,30  | -0,61 | 0,591999 | -1,03435 | 0,300974 | 0,6712663 |
| FXYD6          | 33,05   | -1,52 | 1,473448 | -1,03434 | 0,300978 | 0,6712663 |
| RP5-1010E17.2  | 2,43    | -0,91 | 0,875747 | -1,0343  | 0,300996 | NA        |
| RN7SL326P      | 1,28    | -1,45 | 1,403819 | -1,03425 | 0,301017 | NA        |
| RP11-930P14.2  | 21,28   | 0,87  | 0,837996 | 1,03418  | 0,301052 | 0,6713496 |
| SIPA1L3        | 99,11   | -0,84 | 0,815258 | -1,0341  | 0,30109  | 0,6713544 |
| MIR3682        | 2,33    | 3,85  | 3,725198 | 1,034027 | 0,301124 | NA        |
| MLN            | 0,49    | -3,79 | 3,662314 | -1,03387 | 0,301196 | NA        |
| RP11-673D15.7  | 9,32    | -2,05 | 1,981519 | -1,03362 | 0,301314 | 0,6717338 |
| SLC8A3         | 0,33    | -2,85 | 2,76099  | -1,0336  | 0,301324 | NA        |
| NMT1           | 215,61  | -0,52 | 0,501644 | -1,03355 | 0,301347 | 0,6717338 |
| HTATSF1        | 363,03  | 0,76  | 0,732527 | 1,033503 | 0,301369 | 0,6717338 |
| CTD-2587H24.10 | 2,32    | 3,85  | 3,725199 | 1,033473 | 0,301383 | NA        |
| RP11-513M16.7  | 1,22    | 2,93  | 2,832198 | 1,033442 | 0,301397 | NA        |
| RP11-611D20.2  | 10,62   | -2,69 | 2,60053  | -1,03301 | 0,3016   | 0,6721686 |
| PLEKHH1        | 10,81   | 1,17  | 1,134087 | 1,032875 | 0,301662 | 0,6722274 |
| CDC42          | 6030,14 | 0,27  | 0,260528 | 1,032628 | 0,301778 | 0,6723497 |
| RP11-40A8.3    | 27,49   | -1,22 | 1,179022 | -1,0326  | 0,301789 | 0,6723497 |
| SYCE2          | 1,18    | 2,66  | 2,573714 | 1,032525 | 0,301826 | NA        |
| RP11-246E12.2  | 17,45   | -0,84 | 0,814426 | -1,03237 | 0,301897 | 0,6724247 |
| RAD51L3-RFFL   | 0,49    | -3,78 | 3,664096 | -1,03227 | 0,301946 | NA        |
| DDX23          | 347,85  | 0,76  | 0,739246 | 1,032225 | 0,301967 | 0,6724247 |
| SDK2           | 41,22   | -1,56 | 1,512548 | -1,0322  | 0,301978 | 0,6724247 |
| RPL19P21       | 0,69    | -1,42 | 1,379292 | -1,03219 | 0,301983 | NA        |
| NDUFA5         | 377,89  | -0,47 | 0,450778 | -1,03216 | 0,301995 | 0,6724247 |
| RP11-304F15.4  | 5,20    | 0,70  | 0,68123  | 1,032146 | 0,302004 | 0,6724247 |
| FOPNL          | 167,74  | -0,71 | 0,685764 | -1,03205 | 0,302047 | 0,6724413 |
| KLK15          | 0,49    | -3,78 | 3,660867 | -1,03192 | 0,302111 | NA        |
| NNAT           | 0,69    | -1,82 | 1,765184 | -1,03183 | 0,302153 | NA        |
| ZNF3           | 119,18  | 0,66  | 0,639674 | 1,031815 | 0,302159 | 0,6726091 |
| HMCN2          | 1,65    | -1,77 | 1,712609 | -1,03177 | 0,30218  | NA        |
| ALOX5AP        | 716,47  | 0,49  | 0,47048  | 1,031724 | 0,302202 | 0,6726237 |
| RP1-102H19.7   | 1,12    | 1,53  | 1,485076 | 1,031589 | 0,302265 | NA        |
| CPXM2          | 1,40    | -1,67 | 1,617547 | -1,03159 | 0,302265 | NA        |
| CTD-2600H12.2  | 125,15  | 0,80  | 0,773547 | 1,031559 | 0,302279 | 0,6727153 |
| RP11-371I20.2  | 29,04   | -0,57 | 0,555508 | -1,03132 | 0,302389 | 0,6727728 |
| SLC27A5        | 184,42  | -0,89 | 0,860987 | -1,03131 | 0,302396 | 0,6727728 |
| RP11-166O4.5   | 12,47   | -0,79 | 0,7681   | -1,03127 | 0,302413 | 0,6727728 |
| GDNF           | 3,05    | -1,12 | 1,08941  | -1,03102 | 0,302529 | NA        |
| CTD-2538G9.5   | 1,00    | 2,02  | 1,956348 | 1,030912 | 0,302582 | NA        |
| RP11-675P14.2  | 2,96    | 1,45  | 1,403008 | 1,030911 | 0,302582 | NA        |

|               |          |       |          |          |          |           |
|---------------|----------|-------|----------|----------|----------|-----------|
| LYZ           | 75355,54 | 0,22  | 0,208931 | 1,030861 | 0,302606 | 0,6731214 |
| FAM228B       | 375,63   | -0,48 | 0,46748  | -1,03078 | 0,302644 | 0,6731246 |
| CCL4          | 292,01   | -1,33 | 1,286386 | -1,03047 | 0,302788 | 0,6733234 |
| RP11-550P17.1 | 2,29     | 3,84  | 3,725223 | 1,030445 | 0,302801 | NA        |
| RP11-393B14.1 | 42,53    | 1,27  | 1,233215 | 1,030436 | 0,302806 | 0,6733234 |
| AC073254.1    | 11,45    | 0,93  | 0,899201 | 1,030054 | 0,302985 | 0,6736417 |
| NKAPL         | 0,40     | -2,89 | 2,80357  | -1,02969 | 0,303157 | NA        |
| ZMYND15       | 10,18    | 1,97  | 1,917624 | 1,029642 | 0,303178 | 0,673991  |
| RP11-187O7.1  | 0,64     | -2,28 | 2,216248 | -1,02958 | 0,303208 | NA        |
| C14orf80      | 45,41    | 1,10  | 1,072801 | 1,029405 | 0,30329  | 0,674158  |
| IFNK          | 1,02     | 2,65  | 2,579962 | 1,02897  | 0,303494 | NA        |
| ADH1A         | 0,49     | -3,77 | 3,660259 | -1,02878 | 0,303584 | NA        |
| PRR5-ARHGAP8  | 0,76     | -1,32 | 1,28149  | -1,02864 | 0,30365  | NA        |
| RP11-107O13.1 | 2,36     | 2,66  | 2,581823 | 1,028471 | 0,303729 | NA        |
| MST1L         | 0,81     | -3,50 | 3,403611 | -1,02801 | 0,303947 | NA        |
| EMD           | 63,59    | 0,69  | 0,669467 | 1,027964 | 0,303967 | 0,6755821 |
| AC007389.3    | 6,75     | -0,75 | 0,726873 | -1,02771 | 0,304085 | 0,6757073 |
| YY2           | 9,10     | 1,67  | 1,627503 | 1,027666 | 0,304107 | 0,6757073 |
| RP11-307E17.8 | 13,96    | 1,24  | 1,207361 | 1,027613 | 0,304132 | 0,6757073 |
| MIR6775       | 1,66     | 3,36  | 3,27372  | 1,027255 | 0,3043   | NA        |
| SEC31B        | 331,29   | 0,58  | 0,567135 | 1,027128 | 0,30436  | 0,6761286 |
| RNU2-17P      | 0,49     | -3,76 | 3,660551 | -1,02712 | 0,304364 | NA        |
| ACP7          | 8,91     | -0,97 | 0,94645  | -1,02706 | 0,304394 | 0,6761286 |
| FAM216A       | 46,24    | -0,94 | 0,916891 | -1,02684 | 0,304494 | 0,6762693 |
| APOL3         | 296,26   | -0,63 | 0,609261 | -1,02673 | 0,304546 | 0,6762769 |
| NME4          | 141,58   | 0,73  | 0,712393 | 1,026683 | 0,30457  | 0,6762769 |
| RP13-210D15.8 | 1,30     | 2,99  | 2,914908 | 1,026176 | 0,304809 | NA        |
| TXNDC12       | 656,63   | 0,45  | 0,43878  | 1,026019 | 0,304882 | 0,6768901 |
| RP11-538P18.1 | 21,88    | -1,90 | 1,847609 | -1,02591 | 0,304936 | 0,6769281 |
| RP4-580N22.2  | 2,27     | 3,82  | 3,725357 | 1,025818 | 0,304977 | NA        |
| HRNR          | 0,59     | -2,57 | 2,507212 | -1,02575 | 0,30501  | NA        |
| GARS          | 452,80   | -0,46 | 0,449595 | -1,02566 | 0,305052 | 0,677022  |
| AC004985.13   | 42,85    | 0,81  | 0,794007 | 1,025611 | 0,305075 | 0,677022  |
| RP11-203P23.1 | 14,13    | -2,38 | 2,32385  | -1,02558 | 0,305087 | 0,677022  |
| CITF22-49D8.1 | 0,76     | -1,90 | 1,848887 | -1,02558 | 0,305089 | NA        |
| CHST5         | 18,32    | -0,61 | 0,599099 | -1,02541 | 0,305171 | 0,6770492 |
| RP5-915N17.11 | 10,79    | 0,89  | 0,864632 | 1,025404 | 0,305173 | 0,6770492 |
| TFAP4         | 69,88    | -0,59 | 0,573495 | -1,02527 | 0,305238 | 0,6771141 |
| TET1          | 2,26     | -1,37 | 1,334593 | -1,02504 | 0,305345 | NA        |
| CRTC1         | 63,61    | 0,89  | 0,86701  | 1,025003 | 0,305362 | 0,6773075 |
| CLSTN2        | 7,79     | -0,94 | 0,912514 | -1,02482 | 0,305449 | 0,6773592 |
| SLC25A25      | 62,57    | 1,26  | 1,233082 | 1,024799 | 0,305458 | 0,6773592 |
| RP11-375N15.1 | 0,57     | -3,75 | 3,659027 | -1,02478 | 0,305465 | NA        |
| HDAC6         | 234,00   | 0,48  | 0,468956 | 1,02451  | 0,305594 | 0,6774057 |
| TVP23B        | 146,35   | -0,93 | 0,902998 | -1,02446 | 0,305618 | 0,6774057 |
| STAM          | 184,05   | -0,90 | 0,881452 | -1,02441 | 0,305641 | 0,6774057 |
| SGCG          | 0,57     | -3,75 | 3,65905  | -1,02437 | 0,305662 | NA        |
| RPA2          | 496,01   | 0,54  | 0,530223 | 1,024342 | 0,305674 | 0,6774057 |
| EAPP          | 527,42   | -0,36 | 0,354772 | -1,0243  | 0,305695 | 0,6774057 |
| RP6-74O6.6    | 0,45     | -3,35 | 3,271412 | -1,02421 | 0,305736 | NA        |

|                |         |       |          |          |          |           |
|----------------|---------|-------|----------|----------|----------|-----------|
| GOLGA6C        | 0,37    | -3,35 | 3,270627 | -1,02419 | 0,305746 | NA        |
| ELF1           | 1723,51 | 0,32  | 0,312052 | 1,02411  | 0,305783 | 0,6774057 |
| LEPR           | 61,91   | -0,96 | 0,939723 | -1,02406 | 0,305806 | 0,6774057 |
| RP11-227G15.10 | 14,35   | 0,76  | 0,73853  | 1,024056 | 0,305809 | 0,6774057 |
| WDR77          | 575,58  | 0,78  | 0,761966 | 1,024042 | 0,305816 | 0,6774057 |
| RP11-231C14.4  | 1285,21 | 0,30  | 0,293761 | 1,023984 | 0,305843 | 0,6774057 |
| KY             | 1,48    | -1,10 | 1,072815 | -1,02393 | 0,30587  | NA        |
| RP11-886H22.1  | 0,49    | -3,75 | 3,661571 | -1,02372 | 0,305967 | NA        |
| RP11-386J22.3  | 58,25   | 0,64  | 0,628161 | 1,023677 | 0,305988 | 0,6775251 |
| ZNF780A        | 241,97  | -0,77 | 0,750434 | -1,02366 | 0,305998 | 0,6775251 |
| RNPEPL1        | 477,18  | 0,53  | 0,522298 | 1,023638 | 0,306006 | 0,6775251 |
| SLC25A31       | 0,57    | -3,75 | 3,659084 | -1,0235  | 0,306071 | NA        |
| CCT6P1         | 26,29   | 1,17  | 1,145824 | 1,023375 | 0,30613  | 0,6776983 |
| GPN1           | 343,82  | -0,79 | 0,771159 | -1,02332 | 0,306157 | 0,6776983 |
| NUF2           | 0,90    | -1,61 | 1,572309 | -1,02325 | 0,306191 | NA        |
| RNF180         | 80,94   | -0,66 | 0,643678 | -1,02285 | 0,306377 | 0,678031  |
| UNG            | 31,05   | 1,49  | 1,460746 | 1,022797 | 0,306404 | 0,678031  |
| SIMC1          | 142,26  | -0,57 | 0,553995 | -1,02277 | 0,306417 | 0,678031  |
| CDCA8          | 3,41    | 3,81  | 3,723677 | 1,022659 | 0,306469 | NA        |
| RP11-834C11.7  | 0,74    | -1,56 | 1,528091 | -1,02258 | 0,306505 | NA        |
| MCF2L          | 7,08    | -0,79 | 0,774416 | -1,02256 | 0,306516 | 0,6781604 |
| AC111200.10    | 2,18    | 3,14  | 3,075406 | 1,022522 | 0,306534 | NA        |
| PWRN1          | 18,26   | -0,99 | 0,965864 | -1,02249 | 0,306548 | 0,6781604 |
| APOA1          | 1,26    | 2,97  | 2,90722  | 1,022434 | 0,306576 | NA        |
| RP11-823P9.3   | 1,58    | 2,04  | 1,997337 | 1,022375 | 0,306603 | NA        |
| IPO11          | 134,01  | 1,09  | 1,061462 | 1,022205 | 0,306684 | 0,6783349 |
| PRADC1         | 94,29   | -1,30 | 1,268474 | -1,02217 | 0,3067   | 0,6783349 |
| RN7SL524P      | 3,42    | -0,81 | 0,793249 | -1,02216 | 0,306703 | NA        |
| C6orf62        | 2858,67 | 0,44  | 0,431795 | 1,021954 | 0,306803 | 0,6784817 |
| RP11-946P6.4   | 2,23    | -2,02 | 1,979295 | -1,02178 | 0,306887 | NA        |
| AL022344.2     | 0,48    | -3,74 | 3,661357 | -1,02171 | 0,306919 | NA        |
| RP11-19O2.2    | 1,53    | -1,84 | 1,802197 | -1,02164 | 0,306951 | NA        |
| VIMP           | 355,56  | 0,48  | 0,467755 | 1,021402 | 0,307064 | 0,6789283 |
| CHKA           | 460,86  | 0,50  | 0,493996 | 1,021351 | 0,307088 | 0,6789283 |
| ITPRIPL1       | 20,84   | -0,96 | 0,94021  | -1,02125 | 0,307135 | 0,6789283 |
| FBRS           | 144,45  | 0,48  | 0,468778 | 1,021219 | 0,307151 | 0,6789283 |
| CTD-2081C10.1  | 0,48    | -3,74 | 3,661895 | -1,02116 | 0,307176 | NA        |
| CD22           | 59,26   | 0,81  | 0,796278 | 1,020929 | 0,307288 | 0,6791516 |
| RP3-522P13.4   | 2,72    | 3,48  | 3,411752 | 1,020895 | 0,307304 | NA        |
| RN7SL401P      | 1,26    | 2,94  | 2,884434 | 1,020756 | 0,30737  | NA        |
| AC005264.2     | 34,51   | 1,21  | 1,185928 | 1,020536 | 0,307474 | 0,6794821 |
| RP11-716O23.1  | 0,48    | -3,74 | 3,661657 | -1,02048 | 0,3075   | NA        |
| DPF2           | 252,60  | -0,49 | 0,481879 | -1,02035 | 0,307561 | 0,6795931 |
| FN1            | 20,75   | 1,27  | 1,246727 | 1,020253 | 0,307609 | 0,6796175 |
| KCNK17         | 7,38    | 1,29  | 1,263189 | 1,020016 | 0,307721 | 0,6797176 |
| RP11-661D19.3  | 2,11    | -2,13 | 2,085945 | -1,01995 | 0,307752 | NA        |
| FNBP1          | 1594,35 | 0,31  | 0,301405 | 1,019936 | 0,307759 | 0,6797176 |
| SAMSN1         | 1105,79 | 0,50  | 0,491036 | 1,019925 | 0,307764 | 0,6797176 |
| RP11-731K22.1  | 8,17    | -0,74 | 0,724265 | -1,01985 | 0,3078   | 0,6797176 |
| ADH6           | 1,06    | -1,17 | 1,142674 | -1,01971 | 0,307866 | NA        |



|                |        |       |          |          |          |           |
|----------------|--------|-------|----------|----------|----------|-----------|
| GPRIN3         | 735,53 | 0,58  | 0,57275  | 1,019598 | 0,307919 | 0,6798995 |
| RP11-1094M14.8 | 0,56   | -3,73 | 3,659311 | -1,01945 | 0,30799  | NA        |
| RP11-65L3.4    | 1,58   | 2,08  | 2,040601 | 1,019417 | 0,308005 | NA        |
| RP11-531F16.3  | 9,26   | -1,07 | 1,054271 | -1,01932 | 0,308049 | 0,6801056 |
| RP5-1071N3.1   | 2,84   | 2,94  | 2,881587 | 1,019186 | 0,308115 | NA        |
| DCD            | 1,36   | -0,99 | 0,97252  | -1,01913 | 0,308143 | NA        |
| HSP90B2P       | 0,40   | -2,82 | 2,769341 | -1,01912 | 0,308148 | NA        |
| FANCE          | 14,81  | 1,23  | 1,211633 | 1,018952 | 0,308226 | 0,6803758 |
| RP11-24C3.2    | 2,53   | -1,34 | 1,314341 | -1,01894 | 0,308232 | NA        |
| RP11-239E10.3  | 5,98   | 1,03  | 1,013882 | 1,018913 | 0,308244 | 0,6803758 |
| RP11-48B14.1   | 0,71   | 2,08  | 2,03908  | 1,018874 | 0,308263 | NA        |
| AMPH           | 5,84   | -1,30 | 1,277808 | -1,01882 | 0,308286 | 0,6803877 |
| KCNK7          | 1,29   | -3,73 | 3,656312 | -1,01881 | 0,308295 | NA        |
| RP11-116D17.3  | 6,91   | 0,78  | 0,765437 | 1,018566 | 0,308409 | 0,680521  |
| RN7SL658P      | 0,69   | 1,36  | 1,335697 | 1,018564 | 0,30841  | NA        |
| TCF7L2         | 84,77  | -1,38 | 1,351981 | -1,01854 | 0,30842  | 0,680521  |
| RP11-383H13.1  | 6,40   | 1,43  | 1,404485 | 1,0184   | 0,308488 | 0,6805899 |
| CTC-210G5.1    | 1,10   | -2,44 | 2,397324 | -1,0182  | 0,308583 | NA        |
| UBTF           | 280,31 | -0,54 | 0,52655  | -1,01798 | 0,30869  | 0,6807908 |
| DDR2           | 109,76 | -3,17 | 3,116923 | -1,01791 | 0,308723 | 0,6807908 |
| PCA3           | 79,40  | 1,00  | 0,985198 | 1,017813 | 0,308767 | 0,6807908 |
| RP11-521B24.3  | 7,63   | -0,71 | 0,697452 | -1,01774 | 0,308802 | 0,6807908 |
| BACE2          | 2,77   | 1,75  | 1,715056 | 1,017616 | 0,308861 | NA        |
| TMEM64         | 89,74  | 0,98  | 0,96609  | 1,017605 | 0,308866 | 0,6807908 |
| MYO5C          | 44,26  | 1,23  | 1,204275 | 1,017496 | 0,308918 | 0,6807908 |
| ICA1L          | 211,48 | -0,53 | 0,517386 | -1,01748 | 0,308926 | 0,6807908 |
| FBXO21         | 197,09 | -0,65 | 0,634634 | -1,01747 | 0,30893  | 0,6807908 |
| IMPDH2         | 513,85 | 0,50  | 0,493986 | 1,017386 | 0,30897  | 0,6807908 |
| MYCBPAP        | 32,31  | -0,73 | 0,721016 | -1,01729 | 0,309014 | 0,6807908 |
| CALD1          | 23,82  | -1,02 | 1,003962 | -1,01726 | 0,309029 | 0,6807908 |
| LRRC58         | 609,61 | -0,46 | 0,449438 | -1,01721 | 0,309052 | 0,6807908 |
| XKR8           | 80,33  | 0,93  | 0,913543 | 1,017208 | 0,309055 | 0,6807908 |
| TRPM2          | 267,01 | -0,60 | 0,587369 | -1,0171  | 0,309106 | 0,6808232 |
| OR4N3P         | 0,48   | -3,72 | 3,661876 | -1,0171  | 0,309106 | NA        |
| AC002539.1     | 0,62   | -2,94 | 2,895182 | -1,01695 | 0,309179 | NA        |
| CTD-2313J23.1  | 74,01  | -0,64 | 0,625616 | -1,01678 | 0,309259 | 0,6810793 |
| MUC16          | 27,44  | -2,05 | 2,02038  | -1,01663 | 0,309328 | 0,6811253 |
| C5orf15        | 332,83 | -0,53 | 0,520441 | -1,01652 | 0,309381 | 0,6811253 |
| RP11-416O18.1  | 21,35  | -0,76 | 0,747844 | -1,0165  | 0,309389 | 0,6811253 |
| RP11-493P1.2   | 1,23   | 2,94  | 2,890121 | 1,016445 | 0,309417 | NA        |
| LSM14B         | 10,56  | -0,82 | 0,80217  | -1,01632 | 0,309478 | 0,6811315 |
| ATXN1L         | 175,29 | -0,88 | 0,868042 | -1,01628 | 0,309498 | 0,6811315 |
| PADI2          | 216,51 | 0,48  | 0,475087 | 1,016267 | 0,309502 | 0,6811315 |
| ARGFXP1        | 1,23   | 1,70  | 1,668501 | 1,016241 | 0,309515 | NA        |
| RP11-977G19.14 | 0,80   | 2,28  | 2,239201 | 1,016223 | 0,309523 | NA        |
| RP11-62E14.2   | 0,47   | -2,90 | 2,855001 | -1,01618 | 0,309544 | NA        |
| KIRREL3-AS2    | 0,50   | -2,82 | 2,774719 | -1,01618 | 0,309545 | NA        |
| RP5-1065J22.8  | 23,51  | 0,96  | 0,941287 | 1,01586  | 0,309696 | 0,681478  |
| COLEC10        | 7,44   | -2,24 | 2,201988 | -1,01573 | 0,309756 | 0,6815292 |
| LTN1           | 523,96 | -0,74 | 0,728884 | -1,01553 | 0,309855 | 0,6816068 |

|                |          |       |          |          |          |           |
|----------------|----------|-------|----------|----------|----------|-----------|
| MALAT1         | 61730,57 | -0,17 | 0,168348 | -1,01551 | 0,309865 | 0,6816068 |
| CR848007.2     | 2,28     | 2,58  | 2,53948  | 1,015495 | 0,30987  | NA        |
| ENDOD1         | 176,13   | -1,07 | 1,051737 | -1,01536 | 0,309936 | 0,681608  |
| RP4-616B8.5    | 4,97     | -0,91 | 0,899859 | -1,01532 | 0,309952 | 0,681608  |
| MAGEB10        | 6,94     | 1,17  | 1,14915  | 1,015274 | 0,309975 | 0,681608  |
| RP11-410K21.2  | 2,35     | 1,82  | 1,789936 | 1,015273 | 0,309976 | NA        |
| CCDC137        | 124,99   | -0,94 | 0,931048 | -1,01486 | 0,310171 | 0,6819588 |
| RP11-346D14.1  | 359,03   | -0,45 | 0,446901 | -1,0147  | 0,310246 | 0,6820239 |
| RP1-62D2.3     | 0,47     | -2,89 | 2,845297 | -1,01467 | 0,310261 | NA        |
| HOPX           | 52,47    | -0,79 | 0,778849 | -1,01463 | 0,310283 | 0,6820239 |
| TMEM135        | 33,52    | -0,74 | 0,733735 | -1,01457 | 0,310311 | 0,6820239 |
| RP11-129B9.2   | 0,47     | -3,72 | 3,661989 | -1,01449 | 0,310349 | NA        |
| LINC00493      | 381,07   | -0,30 | 0,292118 | -1,01449 | 0,310351 | 0,6820324 |
| MIR4308        | 2,20     | 3,78  | 3,725439 | 1,014203 | 0,310486 | NA        |
| RNA5SP128      | 2,20     | 3,78  | 3,72544  | 1,014086 | 0,310542 | NA        |
| CTC-359M8.1    | 2,43     | -2,88 | 2,843865 | -1,01389 | 0,310635 | NA        |
| POLR2F         | 274,78   | -0,36 | 0,351041 | -1,01382 | 0,31067  | 0,6825467 |
| CFAP45         | 2,85     | 2,26  | 2,227927 | 1,013806 | 0,310675 | NA        |
| MSL2           | 328,26   | -0,73 | 0,717888 | -1,01374 | 0,310706 | 0,6825467 |
| DYSF           | 21,43    | -2,56 | 2,529494 | -1,01365 | 0,310751 | 0,6825467 |
| RP11-823E8.3   | 2,20     | 3,78  | 3,725442 | 1,013591 | 0,310778 | NA        |
| RNA5SP483      | 0,47     | -3,71 | 3,662032 | -1,01352 | 0,310811 | NA        |
| EMC7           | 350,41   | 0,50  | 0,493667 | 1,013367 | 0,310885 | 0,6825467 |
| RP11-231C14.7  | 80,29    | 0,73  | 0,721182 | 1,013235 | 0,310948 | 0,6825467 |
| CTA-313A17.2   | 2,56     | 3,42  | 3,376322 | 1,013225 | 0,310953 | NA        |
| HIPK3          | 1596,73  | -0,44 | 0,436546 | -1,0132  | 0,310964 | 0,6825467 |
| MKL1           | 717,65   | 0,38  | 0,371202 | 1,013151 | 0,310988 | 0,6825467 |
| STEAP3         | 58,15    | 1,52  | 1,499265 | 1,013115 | 0,311005 | 0,6825467 |
| CEP85L         | 558,38   | 0,61  | 0,600563 | 1,012908 | 0,311104 | 0,6825467 |
| RP11-255G12.5  | 0,87     | -3,44 | 3,392914 | -1,0129  | 0,311109 | NA        |
| RP11-1280N14.3 | 2,21     | 3,77  | 3,725445 | 1,012883 | 0,311116 | NA        |
| ATP13A4        | 1,32     | 2,93  | 2,892007 | 1,012843 | 0,311135 | NA        |
| CDK9           | 271,48   | 0,62  | 0,616257 | 1,012784 | 0,311164 | 0,6825467 |
| TCERG1         | 951,29   | 0,33  | 0,329288 | 1,01273  | 0,311189 | 0,6825467 |
| FPGT           | 103,90   | -1,29 | 1,274525 | -1,01262 | 0,311239 | 0,6825467 |
| RP11-426C22.10 | 153,44   | -0,90 | 0,89215  | -1,01256 | 0,311271 | 0,6825467 |
| NINJ2          | 188,04   | -1,10 | 1,090646 | -1,01255 | 0,311275 | 0,6825467 |
| RP11-269M20.3  | 3,88     | 1,09  | 1,074628 | 1,012452 | 0,311322 | 0,6825467 |
| GOLGA8K        | 3,62     | 1,91  | 1,884309 | 1,012452 | 0,311322 | NA        |
| SOX6           | 139,57   | -1,69 | 1,673381 | -1,01242 | 0,311336 | 0,6825467 |
| GLUDP3         | 13,18    | 0,73  | 0,719557 | 1,01241  | 0,311342 | 0,6825467 |
| TUBB3          | 7,15     | -1,29 | 1,273157 | -1,01241 | 0,311344 | 0,6825467 |
| TMEM35B        | 360,72   | -1,02 | 1,005476 | -1,01237 | 0,31136  | 0,6825467 |
| MRLN           | 14,14    | 0,81  | 0,80386  | 1,012345 | 0,311373 | 0,6825467 |
| AK6            | 123,21   | 1,02  | 1,009582 | 1,01229  | 0,3114   | 0,6825467 |
| THADA          | 485,35   | 0,66  | 0,655358 | 1,012278 | 0,311405 | 0,6825467 |
| TTC14          | 368,17   | 0,54  | 0,538331 | 1,012188 | 0,311448 | 0,6825467 |
| RHOA           | 5286,84  | 0,20  | 0,196827 | 1,012148 | 0,311467 | 0,6825467 |
| TRBJ1-2        | 0,47     | -3,71 | 3,662238 | -1,01213 | 0,311474 | NA        |
| CTD-2293H3.2   | 0,55     | -3,70 | 3,659621 | -1,01211 | 0,311484 | NA        |

|                |         |       |          |          |          |           |
|----------------|---------|-------|----------|----------|----------|-----------|
| GOLGA8R        | 12,45   | 0,91  | 0,896485 | 1,012074 | 0,311502 | 0,6825467 |
| CTC-268N12.3   | 3,26    | -1,21 | 1,197917 | -1,01204 | 0,311517 | NA        |
| RP11-227G15.11 | 0,81    | -1,50 | 1,480747 | -1,01202 | 0,31153  | NA        |
| UBXN4          | 1204,31 | 0,37  | 0,361352 | 1,011955 | 0,31156  | 0,6825917 |
| MIR337         | 0,47    | -3,71 | 3,662258 | -1,01177 | 0,311646 | NA        |
| DNAH8          | 2,23    | 3,77  | 3,725321 | 1,011739 | 0,311663 | NA        |
| CTD-2035E11.5  | 38,03   | -1,50 | 1,478769 | -1,01162 | 0,311718 | 0,6827953 |
| RP11-532L16.1  | 0,60    | -1,40 | 1,380218 | -1,01162 | 0,311722 | NA        |
| ZNF781         | 10,59   | -1,08 | 1,067956 | -1,01156 | 0,31175  | 0,6827953 |
| TUG1           | 1107,26 | 0,57  | 0,566327 | 1,01153  | 0,311763 | 0,6827953 |
| AC006518.7     | 1,23    | 2,93  | 2,894    | 1,011167 | 0,311936 | NA        |
| ERICH6         | 1,09    | -2,38 | 2,357133 | -1,01113 | 0,311956 | NA        |
| RASL10A        | 9,83    | -1,28 | 1,263429 | -1,01099 | 0,312021 | 0,6831294 |
| ZSCAN10        | 6,08    | 1,38  | 1,36178  | 1,010971 | 0,31203  | 0,6831294 |
| ATP5H          | 1003,59 | -0,22 | 0,218598 | -1,01097 | 0,312031 | 0,6831294 |
| TRIOBP         | 382,61  | -0,67 | 0,6581   | -1,01087 | 0,31208  | 0,6831294 |
| LONP2          | 840,13  | 0,44  | 0,438377 | 1,010828 | 0,312099 | 0,6831294 |
| RP11-671J11.2  | 15,40   | -1,62 | 1,601123 | -1,01073 | 0,312148 | 0,6831556 |
| RP11-170L3.7   | 1,70    | 3,38  | 3,346901 | 1,010706 | 0,312157 | NA        |
| RP11-61L14.6   | 0,47    | -3,70 | 3,661945 | -1,01067 | 0,312175 | NA        |
| RP4-630C24.3   | 0,73    | -2,27 | 2,251062 | -1,01004 | 0,312475 | NA        |
| PAEP           | 2,21    | -1,40 | 1,385883 | -1,00989 | 0,312547 | NA        |
| ZMYM4          | 304,71  | 0,59  | 0,584601 | 1,009806 | 0,312588 | 0,6837465 |
| AL133243.4     | 54,07   | -0,79 | 0,784081 | -1,00979 | 0,312596 | 0,6837465 |
| RP11-941F15.1  | 9,49    | -0,65 | 0,646483 | -1,00968 | 0,312648 | 0,6837465 |
| AC079325.8     | 26,87   | -1,00 | 0,98619  | -1,00964 | 0,312666 | 0,6837465 |
| RP11-240L7.5   | 61,67   | -0,65 | 0,640936 | -1,0095  | 0,312734 | 0,6837465 |
| EXT1           | 185,40  | -1,23 | 1,219326 | -1,0095  | 0,312734 | 0,6837465 |
| RP1-313I6.12   | 43,22   | -0,77 | 0,762002 | -1,00949 | 0,31274  | 0,6837465 |
| MRPL13         | 415,96  | 0,50  | 0,496732 | 1,009454 | 0,312757 | 0,6837465 |
| IAH1           | 938,83  | 0,42  | 0,420184 | 1,009375 | 0,312795 | 0,6837465 |
| VTA1           | 502,16  | 0,88  | 0,868782 | 1,009354 | 0,312805 | 0,6837465 |
| WISP3          | 7,85    | -0,81 | 0,797775 | -1,00932 | 0,312822 | 0,6837465 |
| PDCD1          | 1,28    | 2,94  | 2,911821 | 1,009273 | 0,312844 | NA        |
| RRP7A          | 580,42  | -0,50 | 0,49519  | -1,00923 | 0,312862 | 0,6837544 |
| RP11-638L3.3   | 5,85    | -1,45 | 1,436167 | -1,009   | 0,312977 | 0,6838202 |
| MMRN2          | 26,65   | 1,16  | 1,1485   | 1,008895 | 0,313025 | 0,6838202 |
| CRCP           | 234,07  | 0,53  | 0,529572 | 1,008891 | 0,313027 | 0,6838202 |
| STRC           | 25,50   | 0,68  | 0,678188 | 1,008865 | 0,313039 | 0,6838202 |
| RP11-304L19.8  | 1,52    | 2,63  | 2,609277 | 1,008805 | 0,313068 | NA        |
| RP4-539M6.22   | 2,18    | 3,76  | 3,725496 | 1,00877  | 0,313085 | NA        |
| OR10J2P        | 2,18    | 3,76  | 3,725502 | 1,008727 | 0,313105 | NA        |
| RP4-534N18.2   | 11,42   | -1,21 | 1,19553  | -1,00867 | 0,313131 | 0,6838609 |
| SAG            | 35,75   | -0,55 | 0,542586 | -1,00862 | 0,313158 | 0,6838609 |
| RAB17          | 3,14    | 1,03  | 1,021409 | 1,008517 | 0,313206 | NA        |
| RP11-1100L3.7  | 148,04  | 0,54  | 0,53408  | 1,008484 | 0,313222 | 0,6838609 |
| RP1-290I10.7   | 9,09    | -0,72 | 0,716267 | -1,00844 | 0,313241 | 0,6838609 |
| RP11-49I4.3    | 4,55    | 1,44  | 1,424903 | 1,008443 | 0,313242 | 0,6838609 |
| DAD1           | 962,66  | -0,25 | 0,250522 | -1,00829 | 0,313314 | 0,6839378 |
| KLHL36         | 343,25  | -0,63 | 0,624881 | -1,00815 | 0,313384 | 0,6839864 |

|               |         |       |          |          |          |           |
|---------------|---------|-------|----------|----------|----------|-----------|
| HSP90AB1      | 5382,73 | 0,23  | 0,232169 | 1,008094 | 0,31341  | 0,6839864 |
| CRAT          | 152,69  | -1,06 | 1,052412 | -1,00789 | 0,313506 | 0,6840508 |
| FRMD4A        | 25,58   | -0,87 | 0,868043 | -1,00788 | 0,313513 | 0,6840508 |
| RNVU1-19      | 19,96   | -0,66 | 0,659017 | -1,00772 | 0,313589 | 0,6841116 |
| PAQR3         | 78,35   | 0,95  | 0,945718 | 1,007668 | 0,313614 | 0,6841116 |
| ZNF595        | 81,05   | -1,28 | 1,273549 | -1,00758 | 0,313656 | 0,6841224 |
| RP11-353N14.2 | 1,91    | 1,78  | 1,76662  | 1,007519 | 0,313685 | NA        |
| MROH8         | 5,05    | 1,03  | 1,017819 | 1,007435 | 0,313726 | 0,6841954 |
| RP11-231P20.6 | 1,49    | -1,16 | 1,146578 | -1,00735 | 0,313767 | NA        |
| MTFR1L        | 572,53  | 0,51  | 0,50203  | 1,007183 | 0,313847 | 0,6843785 |
| LTBP2         | 2,95    | -2,88 | 2,861281 | -1,00691 | 0,31398  | NA        |
| AFG3L2        | 433,80  | 0,49  | 0,48807  | 1,006788 | 0,314036 | 0,684506  |
| RP1-111D6.5   | 4,41    | -1,01 | 0,999066 | -1,00666 | 0,314097 | 0,684506  |
| ABHD15        | 120,49  | 0,80  | 0,797807 | 1,006659 | 0,314099 | 0,684506  |
| POLR2J        | 607,53  | -0,27 | 0,271362 | -1,00665 | 0,314105 | 0,684506  |
| OR8G1         | 18,59   | -0,93 | 0,924762 | -1,00663 | 0,31411  | 0,684506  |
| ORMDL1        | 643,25  | -0,52 | 0,513787 | -1,00657 | 0,314144 | 0,684506  |
| FRMD4B        | 495,25  | 0,38  | 0,380155 | 1,006479 | 0,314185 | 0,684506  |
| SUN1          | 262,16  | 0,78  | 0,770211 | 1,006449 | 0,314199 | 0,684506  |
| RN7SL653P     | 0,84    | -2,55 | 2,528868 | -1,00644 | 0,314202 | NA        |
| NCRNA00051    | 0,79    | -2,00 | 1,987883 | -1,00636 | 0,314241 | NA        |
| PBX1          | 77,45   | -0,88 | 0,874751 | -1,0063  | 0,31427  | 0,6845784 |
| RDH12         | 1,83    | 1,86  | 1,850544 | 1,006019 | 0,314407 | NA        |
| RAB4B-EGLN2   | 1,23    | 2,94  | 2,923914 | 1,005808 | 0,314508 | NA        |
| UBE2G2        | 1390,18 | 0,35  | 0,347691 | 1,005559 | 0,314628 | 0,6852789 |
| TLN1          | 1106,70 | -0,35 | 0,345054 | -1,00521 | 0,314795 | 0,6853868 |
| RP11-347H15.4 | 3,25    | -1,72 | 1,714013 | -1,00518 | 0,314811 | NA        |
| LAS1L         | 184,94  | 0,78  | 0,773235 | 1,005094 | 0,314852 | 0,6853868 |
| SHKBP1        | 1059,72 | -0,37 | 0,367087 | -1,00509 | 0,314855 | 0,6853868 |
| GMEB1         | 205,27  | 0,59  | 0,582312 | 1,005035 | 0,31488  | 0,6853868 |
| PSMC1         | 735,46  | 0,41  | 0,407352 | 1,005006 | 0,314894 | 0,6853868 |
| TOR2A         | 521,63  | 0,64  | 0,640302 | 1,004973 | 0,31491  | 0,6853868 |
| SCG3          | 4,04    | -1,56 | 1,550595 | -1,00492 | 0,314935 | 0,6853868 |
| RP11-666G4.1  | 3,39    | -1,23 | 1,22411  | -1,00485 | 0,314967 | NA        |
| TJP1          | 73,21   | 0,76  | 0,760342 | 1,004777 | 0,315004 | 0,6854564 |
| RP11-337N6.2  | 27,38   | -0,95 | 0,941707 | -1,00467 | 0,315057 | 0,6854904 |
| GALNTL6       | 2,33    | 3,07  | 3,056074 | 1,004646 | 0,315067 | NA        |
| RP11-567M21.3 | 5,47    | -0,84 | 0,840704 | -1,00456 | 0,315108 | 0,6855216 |
| RABEPK        | 298,13  | -0,83 | 0,828509 | -1,0043  | 0,315232 | 0,6856378 |
| RP11-378E13.3 | 17,84   | -0,66 | 0,658044 | -1,0043  | 0,315235 | 0,6856378 |
| CDK20         | 0,61    | -3,67 | 3,659004 | -1,00419 | 0,315287 | NA        |
| MIR181A1HG    | 239,67  | 0,64  | 0,637265 | 1,004152 | 0,315305 | 0,6856773 |
| STIM2         | 516,41  | -0,54 | 0,540932 | -1,00411 | 0,315327 | 0,6856773 |
| RP11-165H20.1 | 2,46    | -1,46 | 1,45886  | -1,00397 | 0,315394 | NA        |
| PALLD         | 46,23   | -0,83 | 0,829901 | -1,00396 | 0,315399 | 0,6856966 |
| BDH1          | 54,49   | 0,95  | 0,942385 | 1,003936 | 0,315409 | 0,6856966 |
| RP11-204M4.2  | 8,36    | -1,86 | 1,849059 | -1,00385 | 0,315449 | 0,6857019 |
| PPFIA1        | 541,50  | -0,62 | 0,613219 | -1,00369 | 0,315526 | 0,6857897 |
| NRBP2         | 7,14    | -1,38 | 1,372814 | -1,00352 | 0,315611 | 0,6858795 |
| MARK3         | 830,99  | -0,32 | 0,316193 | -1,00346 | 0,315641 | 0,6858795 |

|               |         |       |          |          |          |           |
|---------------|---------|-------|----------|----------|----------|-----------|
| LINC00200     | 2,06    | 3,74  | 3,726005 | 1,003454 | 0,315642 | NA        |
| ELN           | 25,78   | -0,49 | 0,489009 | -1,00328 | 0,315724 | 0,6859788 |
| CD164L2       | 0,94    | -2,64 | 2,634317 | -1,00324 | 0,315746 | NA        |
| AFG3L1P       | 321,95  | -0,59 | 0,584165 | -1,00317 | 0,315779 | 0,6860193 |
| IGHV1OR15-1   | 0,46    | -3,67 | 3,662751 | -1,00311 | 0,315806 | NA        |
| RP11-294C11.4 | 0,46    | -3,67 | 3,662751 | -1,00311 | 0,315806 | NA        |
| CLDN11        | 11,96   | -0,56 | 0,560662 | -1,00295 | 0,315885 | 0,6861692 |
| RP13-20L14.10 | 2,14    | 3,74  | 3,725592 | 1,002819 | 0,315948 | NA        |
| AP000654.4    | 10,26   | 1,14  | 1,13884  | 1,002761 | 0,315976 | 0,6862366 |
| P2RY12        | 10,24   | 1,65  | 1,647764 | 1,002733 | 0,31599  | 0,6862366 |
| FBXO3         | 230,64  | -0,77 | 0,767971 | -1,00263 | 0,316038 | 0,6862612 |
| PRDX3         | 1353,14 | 0,50  | 0,494414 | 1,002539 | 0,316083 | 0,6862794 |
| FITM1         | 1,68    | 2,73  | 2,721348 | 1,002357 | 0,316171 | NA        |
| RP11-266K4.8  | 2,32    | 2,69  | 2,683631 | 1,002329 | 0,316185 | NA        |
| MAP7D3        | 119,45  | -0,73 | 0,724946 | -1,00225 | 0,316224 | 0,6864892 |
| IMPG2         | 10,19   | 1,20  | 1,194001 | 1,002186 | 0,316254 | 0,6864892 |
| APOL6         | 857,17  | -0,35 | 0,344423 | -1,00197 | 0,316357 | 0,686556  |
| AC023115.2    | 8,88    | -1,12 | 1,120446 | -1,00194 | 0,316373 | 0,686556  |
| RP11-804A23.4 | 7,30    | -1,53 | 1,523361 | -1,00189 | 0,316395 | 0,686556  |
| LIN28A        | 15,00   | 1,06  | 1,059215 | 1,001735 | 0,316472 | 0,686642  |
| H3F3C         | 1,98    | 1,00  | 0,997063 | 1,00167  | 0,316503 | NA        |
| ATG7          | 497,32  | -0,37 | 0,368837 | -1,00161 | 0,31653  | 0,6866896 |
| AC007317.1    | 0,46    | -3,67 | 3,66248  | -1,0011  | 0,316777 | NA        |
| COP55         | 803,28  | 0,46  | 0,459904 | 1,001099 | 0,316779 | 0,687109  |
| RP11-38O23.5  | 2,15    | 3,73  | 3,72558  | 1,00108  | 0,316788 | NA        |
| CCT6A         | 1814,75 | 0,35  | 0,348894 | 1,00104  | 0,316807 | 0,687109  |
| HSPA1B        | 124,26  | 0,86  | 0,859663 | 1,000945 | 0,316853 | 0,687109  |
| RP11-552C15.1 | 25,43   | -1,94 | 1,935115 | -1,00091 | 0,316872 | 0,687109  |
| RN7SL11P      | 3,18    | 2,03  | 2,029605 | 1,000822 | 0,316913 | NA        |
| GNRHR2        | 133,14  | -0,73 | 0,726922 | -1,0007  | 0,316974 | 0,6871181 |
| ARFIP1        | 167,52  | -0,62 | 0,617515 | -1,00066 | 0,316993 | 0,6871181 |
| PHLDA2        | 289,89  | 0,69  | 0,690683 | 1,000585 | 0,317028 | 0,6871181 |
| ZNF519        | 59,13   | 0,69  | 0,686264 | 1,000549 | 0,317045 | 0,6871181 |
| SRSF7         | 2512,24 | 0,32  | 0,323869 | 1,000452 | 0,317092 | 0,6871181 |
| ARHGEF19      | 32,76   | -1,65 | 1,652731 | -1,00032 | 0,317155 | 0,6871181 |
| RN7SL25P      | 5,83    | 1,14  | 1,136664 | 1,000231 | 0,317198 | 0,6871181 |
| COG3          | 243,04  | 0,56  | 0,558749 | 1,000222 | 0,317203 | 0,6871181 |
| MRPL42        | 592,64  | -0,65 | 0,647221 | -1,00014 | 0,317243 | 0,6871181 |
| RN7SL230P     | 6,66    | 1,91  | 1,909328 | 0,999962 | 0,317329 | 0,6871181 |
| EIF5          | 3624,72 | 0,26  | 0,262992 | 0,999901 | 0,317358 | 0,6871181 |
| DGKD          | 739,22  | -0,59 | 0,593651 | -0,99989 | 0,317365 | 0,6871181 |
| UBE3A         | 860,99  | 0,56  | 0,563832 | 0,999841 | 0,317388 | 0,6871181 |
| RP11-255N4.3  | 0,90    | -1,36 | 1,35635  | -0,9998  | 0,317405 | NA        |
| CCT4          | 924,16  | 0,34  | 0,339017 | 0,999776 | 0,317419 | 0,6871181 |
| POP1          | 78,06   | 1,25  | 1,246798 | 0,99968  | 0,317465 | 0,6871181 |
| RP11-2711.4   | 16,94   | -1,92 | 1,917788 | -0,99968 | 0,317467 | 0,6871181 |
| RP11-253E3.1  | 3,37    | -0,63 | 0,633313 | -0,99933 | 0,317633 | NA        |
| ASPN          | 7,73    | 1,35  | 1,349643 | 0,999226 | 0,317685 | 0,6872722 |
| RP11-16L9.1   | 0,83    | -1,89 | 1,887622 | -0,99919 | 0,317704 | NA        |
| RP4-610L12.1  | 3,86    | 1,84  | 1,845888 | 0,999139 | 0,317727 | 0,6872722 |

|                 |         |       |          |          |          |           |
|-----------------|---------|-------|----------|----------|----------|-----------|
| RP11-51J9.4     | 9,93    | -0,96 | 0,957934 | -0,99912 | 0,317737 | 0,6872722 |
| ADGRF5          | 0,90    | -3,35 | 3,35446  | -0,99904 | 0,317776 | NA        |
| RP11-33D13.2    | 2,01    | -0,90 | 0,897039 | -0,99903 | 0,317779 | NA        |
| MUM1            | 145,04  | -0,96 | 0,965161 | -0,99894 | 0,317823 | 0,6872722 |
| SLC23A1         | 5,30    | 2,30  | 2,297546 | 0,998905 | 0,317841 | 0,6872722 |
| RP11-112J3.16   | 0,45    | -2,46 | 2,460464 | -0,9989  | 0,317843 | NA        |
| RP11-603J24.6   | 2,60    | -2,84 | 2,847528 | -0,99883 | 0,317875 | NA        |
| LLPH            | 643,20  | -0,44 | 0,443792 | -0,99882 | 0,317884 | 0,6872722 |
| AC009948.3      | 122,56  | -0,74 | 0,736748 | -0,99881 | 0,317887 | 0,6872722 |
| EFTUD2          | 767,14  | -0,44 | 0,443525 | -0,9988  | 0,317893 | 0,6872722 |
| SEPT13          | 208,06  | 0,59  | 0,59027  | 0,998718 | 0,317931 | 0,6872722 |
| SLC51A          | 27,21   | -0,88 | 0,880003 | -0,99868 | 0,317948 | 0,6872722 |
| TRAV6           | 0,45    | -3,66 | 3,662601 | -0,99868 | 0,317949 | NA        |
| CH507-528H12.1  | 189,18  | -0,88 | 0,882742 | -0,99861 | 0,317986 | 0,6872722 |
| SBNO1           | 777,00  | -0,51 | 0,510202 | -0,99859 | 0,317994 | 0,6872722 |
| RP11-165N12.2   | 80,68   | -0,70 | 0,705204 | -0,99854 | 0,318018 | 0,6872722 |
| RHOQ            | 675,18  | -0,48 | 0,485184 | -0,9984  | 0,318086 | 0,687313  |
| RP11-500C12.1   | 73,49   | 1,50  | 1,506739 | 0,998348 | 0,318111 | 0,687313  |
| RP11-397E7.4    | 2,50    | 3,38  | 3,382571 | 0,998272 | 0,318147 | NA        |
| PSMC5           | 870,93  | 0,35  | 0,349224 | 0,998148 | 0,318207 | 0,6874011 |
| KANSL2          | 304,93  | 0,75  | 0,75216  | 0,998045 | 0,318257 | 0,6874011 |
| FMO4            | 15,00   | -2,65 | 2,651898 | -0,99801 | 0,318274 | 0,6874011 |
| PHACTR2         | 896,79  | 0,44  | 0,445159 | 0,99788  | 0,318337 | 0,6874011 |
| CH507-513H4.1   | 189,28  | -0,88 | 0,882238 | -0,99787 | 0,318343 | 0,6874011 |
| TEP1            | 421,58  | -0,68 | 0,683469 | -0,99781 | 0,318373 | 0,6874011 |
| RP1-142L7.5     | 1,62    | -1,61 | 1,614221 | -0,99761 | 0,318471 | NA        |
| MCF2L2          | 68,45   | 0,75  | 0,748505 | 0,997551 | 0,318497 | 0,687518  |
| HMGB3           | 78,10   | 0,90  | 0,901492 | 0,997542 | 0,318501 | 0,687518  |
| CTC-575D19.1    | 1,28    | -0,99 | 0,994897 | -0,99749 | 0,318525 | NA        |
| HARS            | 298,95  | 0,68  | 0,678478 | 0,997454 | 0,318544 | 0,6875303 |
| POLDIP3         | 545,14  | -0,54 | 0,539883 | -0,99731 | 0,318612 | 0,6875929 |
| RP11-293I14.2   | 2,12    | 3,72  | 3,725646 | 0,997216 | 0,31866  | NA        |
| OR9Q1           | 0,73    | -1,80 | 1,806957 | -0,99721 | 0,318662 | NA        |
| KIF5B           | 1347,88 | 0,33  | 0,334429 | 0,997179 | 0,318677 | 0,6875929 |
| RP11-55J15.1    | 4,96    | -3,61 | 3,619551 | -0,99717 | 0,318684 | 0,6875929 |
| SLC9A2          | 2,28    | 3,40  | 3,406047 | 0,997024 | 0,318753 | NA        |
| RP11-862L9.3    | 2,01    | 1,88  | 1,890667 | 0,996716 | 0,318902 | NA        |
| LL22NC03-63E9.3 | 20,45   | 1,08  | 1,083134 | 0,996702 | 0,318909 | 0,6879661 |
| PI4K2B          | 57,51   | -0,89 | 0,897804 | -0,99666 | 0,318931 | 0,6879661 |
| RP11-360F5.1    | 30,55   | 1,69  | 1,697922 | 0,996524 | 0,318996 | 0,6879731 |
| RP11-73G16.1    | 11,59   | -0,56 | 0,559453 | -0,9965  | 0,319008 | 0,6879731 |
| TBC1D3P5        | 3,17    | 3,11  | 3,122939 | 0,996449 | 0,319032 | NA        |
| AC105935.1      | 1,33    | 1,28  | 1,285026 | 0,996419 | 0,319047 | NA        |
| RP1-71H24.1     | 5,96    | 0,78  | 0,786654 | 0,996404 | 0,319054 | 0,6879924 |
| RP11-253M7.4    | 0,95    | -1,24 | 1,24686  | -0,99637 | 0,31907  | NA        |
| RP11-338C15.3   | 1,56    | 3,29  | 3,29784  | 0,996344 | 0,319083 | NA        |
| NRAP            | 34,53   | -3,59 | 3,608552 | -0,99624 | 0,319134 | 0,6880848 |
| RP11-266K4.12   | 1,60    | 3,30  | 3,315667 | 0,99612  | 0,319192 | NA        |
| WDR45           | 572,10  | 0,37  | 0,370887 | 0,995986 | 0,319257 | 0,6881906 |
| CACNA2D4        | 198,11  | -1,02 | 1,019512 | -0,99599 | 0,319257 | 0,6881906 |

|               |        |       |          |          |          |           |
|---------------|--------|-------|----------|----------|----------|-----------|
| ZSWIM8-AS1    | 1,97   | 1,91  | 1,916416 | 0,995837 | 0,319329 | NA        |
| FAM219A       | 18,44  | 1,06  | 1,063018 | 0,995643 | 0,319424 | 0,6884284 |
| MLC1          | 2,14   | -1,92 | 1,930199 | -0,99559 | 0,319447 | NA        |
| TCP11L1       | 131,44 | -1,14 | 1,14606  | -0,99556 | 0,319466 | 0,6884284 |
| PGM2          | 276,40 | 0,81  | 0,813399 | 0,995531 | 0,319478 | 0,6884284 |
| RP11-16C1.3   | 1,56   | 2,66  | 2,674526 | 0,995358 | 0,319562 | NA        |
| PARD3         | 2,90   | -2,36 | 2,375667 | -0,9953  | 0,319592 | NA        |
| RNU6-606P     | 2,10   | 3,71  | 3,725698 | 0,995235 | 0,319622 | NA        |
| AC006129.2    | 42,41  | -0,88 | 0,882932 | -0,99501 | 0,319731 | 0,6888938 |
| RP11-458B24.1 | 0,45   | -3,64 | 3,66281  | -0,99493 | 0,31977  | NA        |
| ADCK1         | 64,85  | 1,16  | 1,164665 | 0,994928 | 0,319771 | 0,6889006 |
| RP11-820K3.3  | 3,89   | -1,16 | 1,165834 | -0,99481 | 0,319831 | 0,6889064 |
| XPR1          | 246,31 | 0,81  | 0,817641 | 0,9947   | 0,319882 | 0,6889064 |
| ANXA11        | 820,32 | -0,28 | 0,28144  | -0,99469 | 0,319885 | 0,6889064 |
| RP11-473I1.6  | 7,46   | -0,86 | 0,866979 | -0,9946  | 0,319932 | 0,6889278 |
| RNU6-595P     | 18,25  | -1,79 | 1,801381 | -0,9944  | 0,320029 | 0,6890558 |
| RP11-834C11.3 | 6,95   | 1,01  | 1,017384 | 0,994154 | 0,320148 | 0,6891505 |
| SERPINB9      | 490,78 | 0,60  | 0,601447 | 0,994104 | 0,320172 | 0,6891505 |
| AC007743.1    | 76,88  | 0,42  | 0,425819 | 0,994081 | 0,320184 | 0,6891505 |
| DLX4          | 3,85   | 1,92  | 1,929624 | 0,993892 | 0,320275 | 0,689268  |
| OSBPL6        | 20,84  | -0,95 | 0,957063 | -0,99373 | 0,320356 | 0,6893515 |
| RP11-262K1.1  | 0,45   | -3,64 | 3,663315 | -0,99361 | 0,320411 | NA        |
| NDRG1         | 422,60 | 0,47  | 0,473251 | 0,993573 | 0,320431 | 0,6893515 |
| AC007246.3    | 85,15  | 0,47  | 0,475706 | 0,993533 | 0,32045  | 0,6893515 |
| IFT46         | 9,61   | 1,25  | 1,263024 | 0,993483 | 0,320474 | 0,6893515 |
| IGSF8         | 158,78 | 0,98  | 0,990616 | 0,993432 | 0,320499 | 0,6893515 |
| C10orf95      | 0,56   | -3,27 | 3,29564  | -0,99326 | 0,320584 | NA        |
| RN7SL677P     | 1,15   | 2,83  | 2,852867 | 0,99321  | 0,320607 | NA        |
| HMGNS         | 56,93  | -1,26 | 1,266393 | -0,99316 | 0,320633 | 0,689509  |
| PLEKHM1P      | 244,77 | -0,46 | 0,466433 | -0,99313 | 0,320647 | 0,689509  |
| MECR          | 148,26 | -0,81 | 0,819205 | -0,99287 | 0,320773 | 0,6895153 |
| RP11-867O8.5  | 8,51   | -0,78 | 0,781087 | -0,99276 | 0,320828 | 0,6895153 |
| MTND2P12      | 6,39   | 1,30  | 1,309364 | 0,99275  | 0,320832 | 0,6895153 |
| ZBTB24        | 171,84 | -0,70 | 0,708607 | -0,99272 | 0,320846 | 0,6895153 |
| COA5          | 204,25 | 0,40  | 0,402869 | 0,992675 | 0,320868 | 0,6895153 |
| AC092296.1    | 75,69  | -0,85 | 0,859376 | -0,99267 | 0,320872 | 0,6895153 |
| COMMD5        | 386,27 | 0,55  | 0,55194  | 0,992586 | 0,320912 | 0,6895212 |
| F3            | 6,56   | 1,36  | 1,372031 | 0,992506 | 0,320951 | 0,6895254 |
| RP11-529E10.7 | 2,48   | -1,11 | 1,117058 | -0,99228 | 0,321063 | NA        |
| AC140076.1    | 24,79  | 1,95  | 1,964639 | 0,992236 | 0,321082 | 0,6895408 |
| RP11-316C10.1 | 3,14   | 3,11  | 3,132957 | 0,992183 | 0,321108 | NA        |
| RP11-803F22.1 | 0,62   | -2,18 | 2,198707 | -0,99218 | 0,321109 | NA        |
| TRIML2        | 31,43  | -0,77 | 0,780518 | -0,99218 | 0,321112 | 0,6895408 |
| RP11-419I17.1 | 329,14 | -0,40 | 0,404715 | -0,99214 | 0,321129 | 0,6895408 |
| ZDHHC15       | 76,50  | -0,65 | 0,655658 | -0,99211 | 0,321143 | 0,6895408 |
| CTB-152G17.6  | 77,62  | -0,59 | 0,594789 | -0,99211 | 0,321143 | 0,6895408 |
| RP13-20L14.1  | 8,17   | 0,87  | 0,877623 | 0,992027 | 0,321184 | 0,6895494 |
| TNK2          | 361,62 | -0,49 | 0,491268 | -0,99191 | 0,321239 | 0,6895881 |
| RP11-12L8.1   | 0,75   | -2,87 | 2,88996  | -0,99189 | 0,321252 | NA        |
| RP5-991G20.1  | 3,34   | 2,38  | 2,395596 | 0,991817 | 0,321287 | NA        |

|               |         |       |          |          |          |           |
|---------------|---------|-------|----------|----------|----------|-----------|
| RP11-665C16.6 | 2,08    | -1,66 | 1,676367 | -0,99179 | 0,321301 | NA        |
| RP11-110H10.2 | 108,23  | -0,57 | 0,572556 | -0,99177 | 0,321311 | 0,6896183 |
| POLR1D        | 1081,16 | -0,37 | 0,377164 | -0,9917  | 0,321343 | 0,6896183 |
| RP11-403N16.4 | 8,38    | -2,07 | 2,08543  | -0,99155 | 0,321419 | 0,6896183 |
| UTP11         | 341,23  | 0,65  | 0,65844  | 0,991426 | 0,321478 | 0,6896183 |
| RAB11FIP1     | 1795,22 | 0,31  | 0,311789 | 0,991385 | 0,321497 | 0,6896183 |
| PREPL         | 126,40  | -0,65 | 0,654376 | -0,99138 | 0,321499 | 0,6896183 |
| KIF23         | 18,27   | 0,83  | 0,839182 | 0,99129  | 0,321544 | 0,6896183 |
| RP11-524F11.2 | 4,71    | -0,94 | 0,952184 | -0,99128 | 0,32155  | 0,6896183 |
| AC007275.1    | 3,13    | 1,22  | 1,229685 | 0,991241 | 0,321568 | NA        |
| RP11-99H20.1  | 2,03    | 3,69  | 3,725897 | 0,991082 | 0,321645 | NA        |
| SKP2          | 122,75  | 0,84  | 0,848213 | 0,991079 | 0,321647 | 0,6897471 |
| RP11-290O12.1 | 0,76    | -1,39 | 1,406454 | -0,99102 | 0,321676 | NA        |
| HDAC10        | 30,58   | 1,07  | 1,081987 | 0,990657 | 0,321853 | 0,6899198 |
| PLD3          | 954,68  | -0,32 | 0,321796 | -0,99064 | 0,321863 | 0,6899198 |
| RN7SL55P      | 0,45    | -3,63 | 3,663035 | -0,99063 | 0,321866 | NA        |
| FOXRED1       | 147,46  | -0,85 | 0,854747 | -0,99057 | 0,321898 | 0,6899198 |
| RP5-1021I20.4 | 50,34   | 0,99  | 0,998612 | 0,99049  | 0,321934 | 0,6899198 |
| RP11-713P17.3 | 6,44    | -0,91 | 0,915205 | -0,99048 | 0,32194  | 0,6899198 |
| MGA           | 642,63  | -0,72 | 0,728689 | -0,99042 | 0,321969 | 0,6899198 |
| COL9A1        | 4,16    | 1,10  | 1,114495 | 0,990382 | 0,321987 | 0,6899198 |
| EPN2          | 21,22   | 0,64  | 0,641866 | 0,990236 | 0,322059 | 0,6899931 |
| RP11-23J9.4   | 2,10    | 3,69  | 3,725715 | 0,990043 | 0,322153 | NA        |
| IFNGR1        | 2128,18 | 0,40  | 0,403194 | 0,989927 | 0,32221  | 0,6901997 |
| UQCRC1        | 2566,67 | -0,22 | 0,221042 | -0,98976 | 0,32229  | 0,6901997 |
| SLC4A1AP      | 404,70  | -0,42 | 0,422915 | -0,98974 | 0,322301 | 0,6901997 |
| ZNF844        | 86,99   | -0,45 | 0,459616 | -0,9897  | 0,322321 | 0,6901997 |
| TAC4          | 46,98   | -0,86 | 0,870103 | -0,98966 | 0,322341 | 0,6901997 |
| CSRNP1        | 788,28  | 0,48  | 0,485764 | 0,989578 | 0,32238  | 0,6902059 |
| CTC-527H23.1  | 0,44    | -3,63 | 3,663664 | -0,98957 | 0,322386 | NA        |
| RN7SL505P     | 1,04    | -1,89 | 1,909894 | -0,98954 | 0,322399 | NA        |
| FABP2         | 117,42  | -0,48 | 0,486079 | -0,98945 | 0,322444 | 0,6902624 |
| IGHG3         | 3,36    | 1,88  | 1,897085 | 0,989405 | 0,322465 | NA        |
| RD3           | 8,50    | -0,67 | 0,672336 | -0,98935 | 0,322493 | 0,6902878 |
| POLR2J2       | 63,64   | -0,75 | 0,756651 | -0,98911 | 0,322607 | 0,6903062 |
| GOLGA7        | 375,03  | -0,58 | 0,585542 | -0,98906 | 0,322633 | 0,6903062 |
| RP3-496C20.1  | 9,50    | 1,26  | 1,278001 | 0,989026 | 0,32265  | 0,6903062 |
| AC017048.4    | 0,63    | -3,62 | 3,658819 | -0,989   | 0,322662 | NA        |
| FEM1B         | 533,79  | -0,83 | 0,843995 | -0,98898 | 0,322671 | 0,6903062 |
| CTD-2194F12.1 | 6,84    | -0,81 | 0,818975 | -0,98895 | 0,322688 | 0,6903062 |
| TBC1D3        | 2,09    | 3,68  | 3,725763 | 0,988878 | 0,322723 | NA        |
| KCNA2         | 6,40    | -1,65 | 1,667537 | -0,98884 | 0,32274  | 0,6903062 |
| POLD2         | 182,99  | 0,46  | 0,460464 | 0,988799 | 0,322761 | 0,6903062 |
| AKAP9         | 2276,30 | -0,34 | 0,348053 | -0,98862 | 0,322849 | 0,6904151 |
| CTC-472C24.1  | 2,09    | 3,68  | 3,725755 | 0,988477 | 0,322919 | NA        |
| RP11-756D7.2  | 5,80    | -1,31 | 1,323959 | -0,98841 | 0,322953 | 0,6905183 |
| MED28         | 757,74  | 0,48  | 0,480881 | 0,988369 | 0,322972 | 0,6905183 |
| HIST1H2AD     | 7,82    | 2,40  | 2,430774 | 0,988212 | 0,323049 | 0,6905683 |
| AC112217.2    | 15,28   | 0,73  | 0,739204 | 0,98817  | 0,323069 | 0,6905683 |
| OAT           | 387,44  | -0,82 | 0,82756  | -0,98807 | 0,323118 | 0,6905683 |



|               |         |       |          |          |          |           |
|---------------|---------|-------|----------|----------|----------|-----------|
| ARHGAP33      | 3,13    | 1,95  | 1,97681  | 0,987951 | 0,323177 | NA        |
| CHST10        | 7,80    | -1,65 | 1,675193 | -0,98784 | 0,323229 | 0,6905683 |
| CCDC153       | 34,73   | -0,73 | 0,74195  | -0,9878  | 0,32325  | 0,6905683 |
| MMP14         | 1,60    | 2,40  | 2,433678 | 0,987743 | 0,323278 | NA        |
| HAT1          | 340,67  | 0,76  | 0,771809 | 0,98769  | 0,323304 | 0,6905683 |
| MTAP          | 533,36  | 0,61  | 0,620911 | 0,987668 | 0,323315 | 0,6905683 |
| SLC9A6        | 113,41  | 0,76  | 0,772532 | 0,987633 | 0,323333 | 0,6905683 |
| AC006273.4    | 12,49   | 1,03  | 1,045027 | 0,987614 | 0,323342 | 0,6905683 |
| RP11-318C24.2 | 18,58   | 1,26  | 1,275266 | 0,987564 | 0,323366 | 0,6905683 |
| RP11-42F12.1  | 9,33    | -0,70 | 0,708614 | -0,98718 | 0,323552 | 0,6908858 |
| RP11-451N19.1 | 2,07    | 3,68  | 3,725796 | 0,987094 | 0,323596 | NA        |
| TEKT3         | 0,99    | 2,60  | 2,632107 | 0,986951 | 0,323666 | NA        |
| GPX8          | 4,27    | -0,97 | 0,987045 | -0,98693 | 0,323678 | 0,6910748 |
| INTS6L        | 191,21  | -0,71 | 0,719173 | -0,98675 | 0,323767 | 0,6911054 |
| VBP1          | 366,17  | 0,61  | 0,619562 | 0,986716 | 0,323782 | 0,6911054 |
| DEDD2         | 140,42  | -0,73 | 0,742865 | -0,98665 | 0,323814 | 0,6911054 |
| SRPX          | 2,96    | 3,67  | 3,724255 | 0,986528 | 0,323874 | NA        |
| HMGXB4        | 245,42  | 0,55  | 0,558908 | 0,986522 | 0,323877 | 0,6911054 |
| HAMP          | 35,84   | -0,73 | 0,735413 | -0,98652 | 0,323878 | 0,6911054 |
| MIR548Q       | 1,95    | 2,99  | 3,034683 | 0,986461 | 0,323907 | NA        |
| RP11-177C12.1 | 1,51    | 3,23  | 3,273601 | 0,98644  | 0,323917 | NA        |
| NRIP2         | 42,74   | 1,32  | 1,341212 | 0,986231 | 0,32402  | 0,6912447 |
| RP5-1180E21.5 | 58,28   | -0,63 | 0,634389 | -0,9862  | 0,324037 | 0,6912447 |
| RP11-317N8.5  | 2,64    | -1,10 | 1,112175 | -0,9862  | 0,324037 | NA        |
| ATF7IP2       | 189,80  | 0,70  | 0,708426 | 0,986102 | 0,324083 | 0,6912447 |
| PSMC3         | 648,86  | -0,51 | 0,519328 | -0,98604 | 0,324114 | 0,6912447 |
| HNRNPH2       | 684,01  | 0,47  | 0,477631 | 0,986008 | 0,324129 | 0,6912447 |
| BBS7          | 24,50   | -1,52 | 1,536995 | -0,98575 | 0,324258 | 0,6914398 |
| RP11-44F14.1  | 87,44   | -0,70 | 0,709884 | -0,98548 | 0,32439  | 0,6914641 |
| RP11-466F5.10 | 4,67    | 1,48  | 1,498784 | 0,985442 | 0,324407 | 0,6914641 |
| MAMDC4        | 25,12   | -1,41 | 1,430211 | -0,98539 | 0,324433 | 0,6914641 |
| CBLN3         | 15,10   | -1,73 | 1,752677 | -0,98535 | 0,32445  | 0,6914641 |
| SNRNP25       | 321,11  | 0,58  | 0,590395 | 0,985144 | 0,324553 | 0,6914641 |
| METAP1D       | 38,20   | -1,86 | 1,892495 | -0,98509 | 0,324581 | 0,6914641 |
| KCTD20        | 691,30  | 0,41  | 0,413658 | 0,985006 | 0,324621 | 0,6914641 |
| TAS2R30       | 12,82   | 1,30  | 1,323711 | 0,98499  | 0,324629 | 0,6914641 |
| RN7SKP149     | 3,81    | -2,01 | 2,044197 | -0,98495 | 0,324648 | 0,6914641 |
| RP11-556O5.7  | 26,45   | -0,97 | 0,98537  | -0,9849  | 0,324673 | 0,6914641 |
| HPS6          | 21,66   | -1,46 | 1,477705 | -0,98489 | 0,324678 | 0,6914641 |
| RP11-134F2.8  | 31,50   | -0,88 | 0,890614 | -0,98479 | 0,324729 | 0,6914836 |
| SRSF4         | 1136,09 | 0,37  | 0,371908 | 0,984706 | 0,324769 | 0,6914836 |
| RP11-319G9.3  | 53,64   | -0,93 | 0,945576 | -0,98465 | 0,324798 | 0,6914836 |
| CTA-211A9.5   | 118,61  | 0,99  | 1,005524 | 0,984465 | 0,324887 | 0,6915928 |
| TMED5         | 620,83  | 0,46  | 0,465474 | 0,98433  | 0,324953 | 0,6916304 |
| AC011526.1    | 21,25   | 1,38  | 1,404552 | 0,984253 | 0,324991 | 0,6916304 |
| CASC10        | 4,06    | 1,08  | 1,094155 | 0,984149 | 0,325042 | 0,6916304 |
| CD46          | 1022,12 | 0,30  | 0,301085 | 0,984127 | 0,325053 | 0,6916304 |
| OSBPL11       | 387,95  | -0,36 | 0,36307  | -0,98399 | 0,325122 | 0,6916977 |
| AF127577.8    | 1,91    | -1,29 | 1,313472 | -0,98396 | 0,325137 | NA        |
| HIST1H2BPS2   | 0,54    | -3,60 | 3,661609 | -0,98366 | 0,325284 | NA        |

|               |          |       |          |          |          |           |
|---------------|----------|-------|----------|----------|----------|-----------|
| SLC38A6       | 85,34    | -0,75 | 0,767065 | -0,98351 | 0,325359 | 0,6920744 |
| U2AF2         | 54,72    | 0,85  | 0,865902 | 0,983427 | 0,325397 | 0,6920744 |
| AHCYL2        | 295,97   | 0,93  | 0,947678 | 0,9834   | 0,325411 | 0,6920744 |
| COMMD1        | 406,64   | -0,36 | 0,36303  | -0,98316 | 0,325531 | 0,6921842 |
| SIK3          | 532,67   | -0,46 | 0,467758 | -0,98314 | 0,325537 | 0,6921842 |
| ZNF92         | 120,19   | -0,61 | 0,624822 | -0,98293 | 0,325644 | 0,6923321 |
| RPLP0         | 15141,83 | 0,17  | 0,169613 | 0,982836 | 0,325688 | 0,6923351 |
| RP11-222A11.1 | 46,73    | 0,81  | 0,82401  | 0,982773 | 0,325719 | 0,6923351 |
| CHI3L1        | 3,01     | 1,15  | 1,173207 | 0,982717 | 0,325747 | NA        |
| PLRG1         | 227,04   | 0,77  | 0,781374 | 0,982634 | 0,325787 | 0,6923758 |
| RP1-272E8.1   | 12,30    | -1,24 | 1,2589   | -0,98258 | 0,325813 | 0,6923758 |
| RP11-532F6.3  | 2,08     | 2,48  | 2,526591 | 0,982551 | 0,325828 | NA        |
| ANXA2R        | 220,81   | -0,68 | 0,696019 | -0,98247 | 0,325866 | 0,6924097 |
| SPDYE1        | 6,53     | 0,90  | 0,916643 | 0,982328 | 0,325938 | 0,6924428 |
| FAM197Y3      | 0,48     | 1,54  | 1,568956 | 0,982266 | 0,325969 | NA        |
| I3MBTL3       | 90,91    | 0,88  | 0,900342 | 0,982251 | 0,325976 | 0,6924428 |
| RP11-797D24.4 | 0,44     | -3,60 | 3,664127 | -0,98223 | 0,325987 | NA        |
| RIN2          | 477,48   | -0,65 | 0,66231  | -0,98217 | 0,326018 | 0,6924428 |
| POLN          | 19,22    | -0,70 | 0,716782 | -0,98214 | 0,326031 | 0,6924428 |
| RP11-173A16.2 | 1,09     | 2,78  | 2,826446 | 0,9821   | 0,326051 | NA        |
| RP11-814P5.1  | 4,69     | 1,15  | 1,166956 | 0,982059 | 0,326071 | 0,692449  |
| PC            | 40,39    | -1,53 | 1,555661 | -0,98178 | 0,32621  | 0,692536  |
| DENND4A       | 977,04   | -0,53 | 0,541943 | -0,98173 | 0,326234 | 0,692536  |
| ARVCF         | 3,81     | 3,44  | 3,50772  | 0,981702 | 0,326247 | 0,692536  |
| MDM1          | 91,47    | 1,03  | 1,048316 | 0,981674 | 0,326261 | 0,692536  |
| FBXL17        | 148,20   | -0,81 | 0,829704 | -0,98157 | 0,326313 | 0,6925677 |
| AC013403.9    | 1,29     | -1,93 | 1,961438 | -0,98143 | 0,326378 | NA        |
| RP11-367F23.1 | 1,52     | 3,23  | 3,286676 | 0,981408 | 0,326392 | NA        |
| FBXW8         | 71,23    | 1,03  | 1,054543 | 0,981375 | 0,326408 | 0,692681  |
| ZNF385A       | 187,47   | 0,42  | 0,427642 | 0,981276 | 0,326456 | 0,692681  |
| RP11-171L9.1  | 1,25     | 2,34  | 2,384426 | 0,981106 | 0,32654  | NA        |
| RP11-108M12.1 | 0,73     | -1,53 | 1,555121 | -0,9808  | 0,32669  | NA        |
| CTC-265F19.2  | 15,04    | -0,69 | 0,703652 | -0,9808  | 0,32669  | 0,692681  |
| RP11-309L24.4 | 2,50     | 2,75  | 2,80524  | 0,980651 | 0,326765 | NA        |
| RN7SL34P      | 1,26     | 2,37  | 2,417918 | 0,980519 | 0,32683  | NA        |
| ADAMTS8       | 0,65     | -2,17 | 2,216597 | -0,98051 | 0,326835 | NA        |
| DHRS2         | 14,68    | -1,01 | 1,03041  | -0,9805  | 0,326838 | 0,692681  |
| FAM227A       | 45,92    | -0,56 | 0,575928 | -0,98044 | 0,326867 | 0,692681  |
| KANSL1        | 1007,76  | 0,38  | 0,389606 | 0,980393 | 0,326892 | 0,692681  |
| TRAPPC11      | 423,64   | -0,55 | 0,556067 | -0,98028 | 0,326949 | 0,692681  |
| KIAA0195      | 419,88   | -0,59 | 0,60169  | -0,98015 | 0,32701  | 0,692681  |
| RP11-69C13.1  | 14,43    | -0,98 | 0,996376 | -0,98015 | 0,327014 | 0,692681  |
| AC016734.3    | 57,53    | -0,99 | 1,006018 | -0,98005 | 0,327059 | 0,692681  |
| PIGU          | 136,18   | 0,83  | 0,850297 | 0,98001  | 0,327081 | 0,692681  |
| CSTF2T        | 97,89    | -0,95 | 0,968875 | -0,98    | 0,327087 | 0,692681  |
| SMTN          | 17,66    | 1,33  | 1,354766 | 0,979998 | 0,327087 | 0,692681  |
| RP11-707F2.2  | 0,43     | -3,59 | 3,664229 | -0,97997 | 0,327103 | NA        |
| RP11-304M2.2  | 10,59    | -1,58 | 1,608465 | -0,97993 | 0,327119 | 0,692681  |
| FIGNL1        | 8,33     | 1,86  | 1,901582 | 0,979913 | 0,327129 | 0,692681  |
| FAM193B       | 353,80   | -0,53 | 0,541242 | -0,97991 | 0,327131 | 0,692681  |

|               |         |       |          |          |          |           |
|---------------|---------|-------|----------|----------|----------|-----------|
| BMPR2         | 370,49  | 0,63  | 0,644033 | 0,979898 | 0,327137 | 0,692681  |
| RNU6-574P     | 1,12    | 2,80  | 2,862388 | 0,979808 | 0,327181 | NA        |
| CTC-260E6.3   | 22,71   | 0,95  | 0,974328 | 0,979731 | 0,327219 | 0,692681  |
| CTA-481E9.4   | 38,07   | -0,86 | 0,882106 | -0,97966 | 0,327253 | 0,692681  |
| ARID5B        | 269,08  | -0,81 | 0,825734 | -0,97963 | 0,327267 | 0,692681  |
| RP1-265C24.9  | 51,39   | -0,54 | 0,554758 | -0,97954 | 0,327315 | 0,692681  |
| AP000997.3    | 14,73   | -0,99 | 1,007449 | -0,97949 | 0,327337 | 0,692681  |
| CTC-277H1.6   | 9,21    | -0,78 | 0,800428 | -0,97946 | 0,327352 | 0,692681  |
| ZNF22         | 318,93  | 0,66  | 0,672628 | 0,979461 | 0,327352 | 0,692681  |
| RP11-597A11.5 | 1,19    | -1,10 | 1,118092 | -0,97945 | 0,327357 | NA        |
| RP13-270P17.2 | 35,44   | 1,65  | 1,68386  | 0,979366 | 0,327399 | 0,692681  |
| RP11-390B4.5  | 12,65   | -0,93 | 0,948987 | -0,97937 | 0,327399 | 0,692681  |
| RP11-131L23.1 | 16,67   | -1,21 | 1,237814 | -0,97927 | 0,327448 | 0,692681  |
| AC006296.3    | 34,15   | -0,82 | 0,837719 | -0,97924 | 0,327459 | 0,692681  |
| FITM2         | 20,47   | 0,90  | 0,914528 | 0,979193 | 0,327485 | 0,692681  |
| RP11-45A17.4  | 13,40   | 0,86  | 0,876761 | 0,979172 | 0,327495 | 0,692681  |
| CD52          | 2197,29 | -0,33 | 0,336845 | -0,97912 | 0,32752  | 0,692681  |
| ZNF436        | 5,07    | 1,87  | 1,911394 | 0,978909 | 0,327625 | 0,6927236 |
| RP11-95D17.1  | 60,21   | 0,84  | 0,857573 | 0,97889  | 0,327634 | 0,6927236 |
| C6orf106      | 463,43  | 0,55  | 0,564082 | 0,978854 | 0,327652 | 0,6927236 |
| LDHAL6B       | 0,67    | -2,44 | 2,487854 | -0,97885 | 0,327652 | NA        |
| CTD-2507G9.1  | 7,25    | -1,14 | 1,167355 | -0,97872 | 0,327718 | 0,6927562 |
| HNF1A         | 1,28    | 2,35  | 2,402465 | 0,978564 | 0,327795 | NA        |
| MGEA5         | 1853,79 | -0,30 | 0,31133  | -0,97856 | 0,327797 | 0,6927562 |
| CAPS2         | 54,06   | -0,82 | 0,836406 | -0,97853 | 0,327815 | 0,6927562 |
| RP1-267D11.6  | 8,91    | 1,59  | 1,629065 | 0,978522 | 0,327816 | 0,6927562 |
| TRMO          | 259,47  | -0,76 | 0,780356 | -0,97844 | 0,327856 | 0,692762  |
| AC009120.4    | 39,74   | -0,75 | 0,765533 | -0,97836 | 0,327894 | 0,6927632 |
| GPBP1L1       | 571,01  | 0,54  | 0,548272 | 0,978263 | 0,327944 | 0,6927904 |
| RP11-87C12.5  | 1,09    | 2,77  | 2,83096  | 0,978183 | 0,327984 | NA        |
| LDB3          | 13,54   | -0,62 | 0,632372 | -0,9781  | 0,328025 | 0,692882  |
| SLC9A3R2      | 3,34    | 1,26  | 1,292051 | 0,977926 | 0,328111 | NA        |
| RP11-463D19.1 | 0,74    | -2,87 | 2,940761 | -0,97759 | 0,328279 | NA        |
| PRR3          | 207,28  | -0,95 | 0,974207 | -0,9775  | 0,328324 | 0,6934342 |
| AC005300.5    | 1,29    | 2,39  | 2,439985 | 0,977474 | 0,328335 | NA        |
| MMACHC        | 34,55   | -0,66 | 0,676905 | -0,9773  | 0,328418 | 0,6935177 |
| EIF2AK4       | 1028,72 | 0,33  | 0,336738 | 0,977115 | 0,328512 | 0,6935177 |
| RP11-627K11.6 | 21,12   | 0,74  | 0,754869 | 0,97697  | 0,328584 | 0,6935177 |
| NPEPPS        | 771,22  | -0,34 | 0,351243 | -0,97694 | 0,328598 | 0,6935177 |
| RP11-497G19.2 | 0,43    | -3,58 | 3,664679 | -0,97693 | 0,328605 | NA        |
| MAP9          | 7,16    | 2,45  | 2,512369 | 0,976908 | 0,328615 | 0,6935177 |
| MEAF6         | 382,47  | 0,56  | 0,570569 | 0,976895 | 0,328621 | 0,6935177 |
| LINC00324     | 167,33  | 0,89  | 0,913294 | 0,976889 | 0,328624 | 0,6935177 |
| ZNF471        | 393,15  | -0,39 | 0,394895 | -0,97667 | 0,328733 | 0,6935979 |
| RP11-244N9.4  | 19,12   | -1,20 | 1,227564 | -0,97666 | 0,328737 | 0,6935979 |
| RP11-317B3.2  | 0,51    | -3,58 | 3,661878 | -0,9766  | 0,328768 | NA        |
| ARHGAP22      | 61,60   | -0,73 | 0,742693 | -0,9763  | 0,328916 | 0,6938246 |
| AC006460.2    | 3,86    | 1,68  | 1,717613 | 0,976294 | 0,328919 | 0,6938246 |
| MT1F          | 9,38    | -1,71 | 1,749033 | -0,97605 | 0,329042 | 0,6940049 |
| LA16c-306E5.1 | 0,43    | -3,58 | 3,664677 | -0,97602 | 0,329053 | NA        |

|                |         |       |          |          |          |           |
|----------------|---------|-------|----------|----------|----------|-----------|
| CEACAMP3       | 1,31    | 2,40  | 2,45476  | 0,975934 | 0,329097 | NA        |
| SNAI3          | 107,83  | 0,88  | 0,901819 | 0,975837 | 0,329145 | 0,6941344 |
| IGKC           | 109,23  | -0,78 | 0,797783 | -0,97577 | 0,329177 | 0,6941344 |
| AP001046.5     | 2,00    | 3,64  | 3,725957 | 0,975726 | 0,3292   | NA        |
| RP11-546K22.3  | 2,36    | 3,29  | 3,370786 | 0,975672 | 0,329227 | NA        |
| RP11-184E9.1   | 12,55   | -1,21 | 1,236209 | -0,97555 | 0,329285 | 0,694246  |
| PIP4K2C        | 67,68   | -1,24 | 1,266614 | -0,97551 | 0,329305 | 0,694246  |
| GPR32          | 0,95    | 2,55  | 2,618742 | 0,975341 | 0,329391 | NA        |
| RN7SL577P      | 1,62    | -1,29 | 1,324422 | -0,97532 | 0,329402 | NA        |
| IQCK           | 16,81   | -0,97 | 0,99942  | -0,9753  | 0,329411 | 0,6943898 |
| RNU2-41P       | 1,49    | 2,60  | 2,662168 | 0,97514  | 0,329491 | NA        |
| RP11-139H14.5  | 4,32    | 1,84  | 1,888395 | 0,975005 | 0,329558 | 0,6946216 |
| RP11-226M10.3  | 2,02    | -1,33 | 1,360942 | -0,97493 | 0,329597 | NA        |
| GUSBP2         | 41,46   | -0,80 | 0,817222 | -0,97486 | 0,329629 | 0,6946932 |
| AC024168.2     | 1,48    | 2,59  | 2,661977 | 0,974779 | 0,32967  | NA        |
| CTSH           | 4088,00 | 0,26  | 0,267863 | 0,974481 | 0,329818 | 0,6947954 |
| MIR3180-2      | 7,87    | -1,56 | 1,603582 | -0,9744  | 0,329856 | 0,6947954 |
| MIR3180-3      | 7,87    | -1,56 | 1,603582 | -0,9744  | 0,329856 | 0,6947954 |
| PHACTR3        | 59,09   | -0,91 | 0,935627 | -0,9744  | 0,329857 | 0,6947954 |
| RP11-996F15.2  | 8,36    | -1,51 | 1,553096 | -0,97439 | 0,329864 | 0,6947954 |
| POTEE          | 1,99    | 3,63  | 3,726164 | 0,974268 | 0,329924 | NA        |
| CTD-3138B18.5  | 24,08   | -1,25 | 1,278889 | -0,97424 | 0,329939 | 0,6948731 |
| AC104532.4     | 2,82    | 1,22  | 1,249527 | 0,97412  | 0,329997 | NA        |
| GPX4           | 2130,10 | -0,25 | 0,252101 | -0,97409 | 0,330012 | 0,6948747 |
| AC010761.13    | 38,70   | -1,69 | 1,734183 | -0,97409 | 0,330014 | 0,6948747 |
| ANKRD37        | 51,59   | 1,07  | 1,093853 | 0,973928 | 0,330092 | 0,6949233 |
| CTD-2033D15.3  | 6,98    | -2,50 | 2,57091  | -0,97379 | 0,330163 | 0,6949233 |
| TRIM8          | 476,77  | -0,37 | 0,379387 | -0,97376 | 0,330177 | 0,6949233 |
| TAOK1          | 1379,18 | 0,54  | 0,557319 | 0,973712 | 0,3302   | 0,6949233 |
| AC005944.2     | 79,28   | -0,57 | 0,587371 | -0,97366 | 0,330224 | 0,6949233 |
| RP11-25I15.2   | 1,94    | -1,05 | 1,082154 | -0,97356 | 0,330276 | NA        |
| SLFN12         | 309,19  | -0,74 | 0,760498 | -0,9735  | 0,330304 | 0,6950134 |
| PAPPA2         | 3,23    | -2,86 | 2,933947 | -0,97345 | 0,33033  | NA        |
| RP11-63M22.1   | 9,90    | 0,92  | 0,945862 | 0,973418 | 0,330346 | 0,6950221 |
| RP11-1070N10.6 | 2,33    | 1,82  | 1,869838 | 0,973339 | 0,330385 | NA        |
| CYP21A1P       | 4,22    | 1,43  | 1,472177 | 0,973254 | 0,330427 | 0,6951146 |
| DENND6B        | 139,65  | -0,80 | 0,821698 | -0,97306 | 0,330526 | 0,6952438 |
| OXR1           | 499,29  | 0,52  | 0,533805 | 0,972911 | 0,330597 | 0,6953159 |
| RP1-69B10.3    | 1,98    | 3,62  | 3,726009 | 0,972875 | 0,330615 | NA        |
| COQ9           | 147,51  | -0,88 | 0,900998 | -0,97283 | 0,330637 | 0,6953204 |
| RP1-92O14.6    | 1,15    | 2,84  | 2,919246 | 0,972742 | 0,330681 | NA        |
| RP11-22B23.1   | 3,70    | -1,47 | 1,510805 | -0,97265 | 0,330728 | NA        |
| ARPIN          | 192,71  | -0,63 | 0,652374 | -0,97239 | 0,330856 | 0,6957018 |
| RP11-219G17.4  | 3,65    | -0,85 | 0,873066 | -0,97221 | 0,330947 | NA        |
| AC010240.2     | 7,09    | 1,41  | 1,446649 | 0,972189 | 0,330957 | 0,6958354 |
| RP11-133O22.6  | 1,53    | 3,25  | 3,339205 | 0,972042 | 0,331029 | NA        |
| RP4-790G17.7   | 8,55    | -0,83 | 0,850408 | -0,97198 | 0,331059 | 0,6959731 |
| SCN9A          | 89,07   | 0,70  | 0,716677 | 0,971877 | 0,331112 | 0,6959845 |
| RP4-738P15.6   | 52,04   | -0,53 | 0,541439 | -0,97176 | 0,331169 | 0,6959845 |
| RPAIN          | 480,77  | 0,50  | 0,515858 | 0,971729 | 0,331185 | 0,6959845 |

|                |         |       |          |          |          |           |
|----------------|---------|-------|----------|----------|----------|-----------|
| ZDHHC11        | 1,56    | 2,13  | 2,192083 | 0,971714 | 0,331193 | NA        |
| UROD           | 757,58  | 0,50  | 0,517504 | 0,97167  | 0,331215 | 0,6959845 |
| GALNT6         | 399,58  | -0,64 | 0,659533 | -0,97148 | 0,331307 | 0,6961005 |
| RNU6-1024P     | 1,65    | -1,41 | 1,451933 | -0,97146 | 0,33132  | NA        |
| CTD-2104P17.2  | 0,52    | -3,56 | 3,662553 | -0,97132 | 0,33139  | NA        |
| GTF2H2B        | 60,68   | 0,89  | 0,913339 | 0,971203 | 0,331447 | 0,6963159 |
| ANKRD13B       | 2,81    | -1,90 | 1,953249 | -0,97114 | 0,331478 | NA        |
| EVL            | 636,07  | 0,37  | 0,381535 | 0,970952 | 0,331572 | 0,6965004 |
| RP11-1134I14.2 | 0,71    | 2,14  | 2,201792 | 0,970935 | 0,331581 | NA        |
| RN7SL172P      | 14,31   | -0,82 | 0,840487 | -0,97087 | 0,331612 | 0,6965007 |
| CTC-525D6.3    | 14,08   | 1,55  | 1,596519 | 0,970801 | 0,331647 | 0,6965007 |
| bP-2120IH5.1   | 17,25   | -1,28 | 1,317372 | -0,97067 | 0,331713 | 0,6965594 |
| APOB           | 1,31    | 2,37  | 2,444701 | 0,970603 | 0,331746 | NA        |
| RP11-277I20.2  | 8,41    | 1,67  | 1,718664 | 0,970533 | 0,331781 | 0,6966239 |
| MDN1           | 459,73  | 0,61  | 0,628576 | 0,970446 | 0,331824 | 0,6966361 |
| PPP2R4         | 219,82  | 0,44  | 0,452592 | 0,970264 | 0,331915 | 0,6967337 |
| NCRNA00114     | 13,79   | 0,89  | 0,92063  | 0,970202 | 0,331946 | 0,6967337 |
| GGNBP2         | 1332,58 | 0,35  | 0,35778  | 0,970018 | 0,332037 | 0,6967468 |
| TRIP13         | 2,79    | 1,39  | 1,433353 | 0,97001  | 0,332041 | NA        |
| RP11-3P22.2    | 2,62    | -3,46 | 3,562381 | -0,96997 | 0,332061 | NA        |
| AC017076.4     | 26,37   | -0,74 | 0,763929 | -0,96994 | 0,332074 | 0,6967468 |
| MIR3975        | 16,75   | -1,68 | 1,730163 | -0,96991 | 0,332091 | 0,6967468 |
| RP11-293M10.4  | 3,66    | 3,33  | 3,433172 | 0,969894 | 0,332099 | NA        |
| BUB3           | 755,02  | -0,43 | 0,447865 | -0,96987 | 0,332112 | 0,6967468 |
| RN7SL508P      | 0,42    | -3,55 | 3,665247 | -0,96987 | 0,332113 | NA        |
| RP11-669C19.1  | 24,71   | -0,92 | 0,946532 | -0,96981 | 0,332139 | 0,6967468 |
| RP11-460B17.1  | 0,42    | -3,55 | 3,665298 | -0,96977 | 0,33216  | NA        |
| TTF2           | 223,22  | -0,76 | 0,783698 | -0,96962 | 0,332235 | 0,6967799 |
| UQCR10         | 802,65  | -0,32 | 0,326592 | -0,96956 | 0,332265 | 0,6967799 |
| RP11-337N6.1   | 2,94    | -2,13 | 2,198288 | -0,96955 | 0,332269 | NA        |
| KLHL29         | 9,29    | 1,36  | 1,406436 | 0,969464 | 0,332314 | 0,6967799 |
| CASC5          | 53,95   | 1,14  | 1,176581 | 0,969412 | 0,33234  | 0,6967799 |
| AC096579.14    | 32,82   | 0,86  | 0,891177 | 0,969407 | 0,332342 | 0,6967799 |
| RP11-38O23.4   | 7,19    | -0,84 | 0,865619 | -0,96927 | 0,332411 | 0,6968065 |
| RP11-359E19.2  | 1,77    | 2,24  | 2,309315 | 0,969262 | 0,332414 | NA        |
| RP11-560J1.2   | 1,08    | 2,75  | 2,841002 | 0,969214 | 0,332438 | NA        |
| ARF1           | 3202,29 | 0,22  | 0,224965 | 0,96916  | 0,332465 | 0,6968065 |
| SLC44A3        | 0,50    | -3,55 | 3,661324 | -0,9691  | 0,332494 | NA        |
| GCA            | 803,60  | 0,49  | 0,507685 | 0,96904  | 0,332525 | 0,6968065 |
| RP11-361L15.4  | 5,72    | -1,39 | 1,434688 | -0,96901 | 0,332539 | 0,6968065 |
| AIMP1          | 406,06  | 0,36  | 0,373529 | 0,969006 | 0,332542 | 0,6968065 |
| RP11-532F6.2   | 1,51    | 2,59  | 2,671252 | 0,968898 | 0,332596 | NA        |
| L3HYPDH        | 121,18  | -0,81 | 0,837329 | -0,96874 | 0,332674 | 0,6969961 |
| RP11-192H23.5  | 1,85    | -1,39 | 1,430709 | -0,96872 | 0,332685 | NA        |
| MRPL1          | 128,22  | 0,51  | 0,525109 | 0,968675 | 0,332707 | 0,6969961 |
| RN7SL865P      | 0,75    | -1,63 | 1,678007 | -0,96866 | 0,332716 | NA        |
| RP11-805F19.5  | 0,85    | -2,48 | 2,555891 | -0,9685  | 0,332792 | NA        |
| RP5-1107A17.3  | 1,25    | -1,03 | 1,06573  | -0,96811 | 0,33299  | NA        |
| RP11-7F17.5    | 5,39    | -0,59 | 0,614351 | -0,96802 | 0,333033 | 0,6975428 |
| DCLRE1C        | 380,04  | 0,59  | 0,612523 | 0,968002 | 0,333043 | 0,6975428 |

|               |        |       |          |          |          |           |
|---------------|--------|-------|----------|----------|----------|-----------|
| MTUS2         | 0,94   | -1,83 | 1,889639 | -0,96789 | 0,333098 | NA        |
| GNL3L         | 86,19  | 0,92  | 0,951194 | 0,96785  | 0,33312  | 0,6975876 |
| MIR24-2       | 0,78   | -2,21 | 2,278761 | -0,96777 | 0,333158 | NA        |
| LARP1         | 811,10 | 0,54  | 0,559998 | 0,967769 | 0,33316  | 0,6975876 |
| C1orf159      | 61,99  | -0,91 | 0,94308  | -0,96773 | 0,333177 | 0,6975876 |
| RP11-27H1.1   | 3,13   | 3,09  | 3,191828 | 0,967693 | 0,333198 | NA        |
| TMCO6         | 41,32  | -1,01 | 1,043272 | -0,96762 | 0,333235 | 0,6976294 |
| RP11-238O13.1 | 0,42   | -3,55 | 3,665248 | -0,96749 | 0,3333   | NA        |
| NELFE         | 626,81 | -0,57 | 0,591692 | -0,96741 | 0,333338 | 0,6977668 |
| ARL6IP1       | 992,25 | 0,36  | 0,376517 | 0,967129 | 0,33348  | 0,6979848 |
| CTC-232P5.4   | 0,50   | -3,54 | 3,662545 | -0,96699 | 0,333547 | NA        |
| TPD52         | 29,05  | 0,90  | 0,927444 | 0,966975 | 0,333557 | 0,6980675 |
| RP11-613D13.2 | 0,81   | 1,66  | 1,721131 | 0,966877 | 0,333605 | NA        |
| CTA-384D8.34  | 22,06  | -0,63 | 0,656053 | -0,96681 | 0,333641 | 0,6981661 |
| DCHS1         | 3,53   | 2,44  | 2,518734 | 0,966761 | 0,333664 | NA        |
| RP11-139E19.3 | 1,13   | 2,80  | 2,893123 | 0,966667 | 0,33371  | NA        |
| RP11-311F12.1 | 2,37   | 1,52  | 1,57318  | 0,966659 | 0,333714 | NA        |
| RP11-905F6.1  | 45,14  | -0,62 | 0,639707 | -0,96645 | 0,333817 | 0,6981955 |
| FAM122C       | 125,96 | -0,84 | 0,870237 | -0,96643 | 0,333828 | 0,6981955 |
| ETHE1         | 941,18 | 0,48  | 0,495662 | 0,966325 | 0,333882 | 0,6981955 |
| RP11-216B9.6  | 11,48  | -1,21 | 1,255356 | -0,96632 | 0,333884 | 0,6981955 |
| SCRN2         | 114,67 | -1,08 | 1,113976 | -0,9663  | 0,333896 | 0,6981955 |
| RP5-967N21.12 | 5,22   | 1,95  | 2,019407 | 0,966255 | 0,333917 | 0,6981955 |
| RP13-511M20.1 | 180,19 | 0,58  | 0,603476 | 0,966252 | 0,333918 | 0,6981955 |
| RP4-635E18.9  | 7,02   | 1,88  | 1,950075 | 0,965945 | 0,334072 | 0,6983299 |
| C14orf178     | 7,09   | 0,77  | 0,796206 | 0,965919 | 0,334084 | 0,6983299 |
| LEAP2         | 18,59  | 1,17  | 1,209162 | 0,965872 | 0,334108 | 0,6983299 |
| CTD-3193K9.4  | 0,42   | -3,54 | 3,664954 | -0,96571 | 0,334187 | NA        |
| SCCPDH        | 36,28  | 1,19  | 1,233761 | 0,965692 | 0,334199 | 0,6983299 |
| AP003068.22   | 5,32   | -1,03 | 1,067356 | -0,96568 | 0,334206 | 0,6983299 |
| CLDN22        | 0,42   | -3,54 | 3,665508 | -0,96557 | 0,33426  | NA        |
| MAPK3         | 156,75 | -0,74 | 0,763247 | -0,96553 | 0,334279 | 0,6983299 |
| RNF6          | 256,74 | 0,71  | 0,735467 | 0,96552  | 0,334285 | 0,6983299 |
| TSPAN2        | 6,26   | -1,59 | 1,646774 | -0,96543 | 0,334331 | 0,6983299 |
| RAB35         | 46,47  | 1,05  | 1,08514  | 0,965375 | 0,334357 | 0,6983299 |
| R3HDM4        | 319,15 | -0,34 | 0,35349  | -0,96537 | 0,334358 | 0,6983299 |
| AC004540.5    | 1,44   | 3,20  | 3,313121 | 0,96512  | 0,334485 | NA        |
| ZFX2          | 2,35   | 2,90  | 3,003121 | 0,965064 | 0,334513 | NA        |
| CHST9-AS1     | 3,31   | -1,12 | 1,160749 | -0,96504 | 0,334525 | NA        |
| RN7SL283P     | 0,57   | -1,87 | 1,937705 | -0,96499 | 0,33455  | NA        |
| FCHO2         | 72,69  | 0,67  | 0,693057 | 0,964926 | 0,334582 | 0,6986591 |
| BTBD2         | 191,00 | 0,50  | 0,523273 | 0,964909 | 0,33459  | 0,6986591 |
| STYXL1        | 240,45 | 0,63  | 0,656975 | 0,964826 | 0,334632 | 0,6986682 |
| TRBV5-1       | 0,42   | -3,54 | 3,665035 | -0,96474 | 0,334674 | NA        |
| FANCD2OS      | 3,43   | -1,02 | 1,058426 | -0,96465 | 0,33472  | NA        |
| YWHAG         | 298,04 | -0,48 | 0,494546 | -0,96464 | 0,334724 | 0,6986947 |
| RP11-350G8.5  | 12,99  | 0,90  | 0,936843 | 0,964451 | 0,33482  | 0,6986947 |
| CTA-992D9.11  | 11,75  | -0,86 | 0,886769 | -0,96443 | 0,334829 | 0,6986947 |
| SYT8          | 1,48   | 1,33  | 1,37739  | 0,964393 | 0,334849 | NA        |
| RP11-14I2.2   | 0,42   | -3,54 | 3,665606 | -0,96438 | 0,334854 | NA        |

|               |         |       |          |          |          |           |
|---------------|---------|-------|----------|----------|----------|-----------|
| IPO5          | 481,00  | 0,58  | 0,599258 | 0,964284 | 0,334903 | 0,6986947 |
| RP11-297A16.2 | 1,78    | 2,12  | 2,196981 | 0,96423  | 0,33493  | NA        |
| CTC-308K20.1  | 41,50   | -1,14 | 1,178903 | -0,96423 | 0,334931 | 0,6986947 |
| SLC35G1       | 22,73   | -0,96 | 0,990978 | -0,96421 | 0,33494  | 0,6986947 |
| CTD-2574D22.4 | 7,06    | 1,25  | 1,293776 | 0,964158 | 0,334967 | 0,6986947 |
| C21orf59      | 300,16  | 0,49  | 0,509057 | 0,964152 | 0,33497  | 0,6986947 |
| AACS          | 205,45  | -0,54 | 0,564815 | -0,96409 | 0,335    | 0,6986947 |
| RNF185        | 117,90  | -0,96 | 1,00027  | -0,96405 | 0,33502  | 0,6986947 |
| EXD2          | 72,33   | -1,01 | 1,050609 | -0,96389 | 0,335099 | 0,6987808 |
| RP11-342K6.4  | 2,03    | -1,42 | 1,473105 | -0,96376 | 0,335169 | NA        |
| GPR179        | 0,42    | -3,53 | 3,663137 | -0,96354 | 0,335277 | NA        |
| AC005017.2    | 0,49    | -3,53 | 3,662375 | -0,96351 | 0,335294 | NA        |
| IGKV3D-15     | 0,55    | 1,80  | 1,867472 | 0,963411 | 0,335342 | NA        |
| NPTN          | 625,46  | 0,54  | 0,565522 | 0,963362 | 0,335366 | 0,6992586 |
| TMEM87A       | 894,12  | -0,36 | 0,373659 | -0,96295 | 0,335573 | 0,6996115 |
| RP11-564A8.4  | 1,59    | -0,94 | 0,979378 | -0,96265 | 0,335725 | NA        |
| RECQL5        | 159,30  | 0,96  | 0,999697 | 0,962626 | 0,335735 | 0,6998712 |
| RP11-378J18.9 | 4,88    | -1,26 | 1,314343 | -0,96233 | 0,335883 | 0,7000633 |
| RP11-582E3.6  | 84,70   | 0,74  | 0,769099 | 0,962293 | 0,335902 | 0,7000633 |
| RP11-361H10.5 | 48,31   | -0,81 | 0,837583 | -0,96207 | 0,336017 | 0,7002229 |
| AC108868.4    | 1,58    | 1,38  | 1,431684 | 0,962045 | 0,336027 | NA        |
| RP4-561L24.3  | 1,52    | 2,62  | 2,720893 | 0,961673 | 0,336214 | NA        |
| DNAJC11       | 107,52  | -0,80 | 0,831215 | -0,96165 | 0,336223 | 0,7005537 |
| RP11-171I2.4  | 1,94    | 3,58  | 3,726155 | 0,96165  | 0,336226 | NA        |
| C19orf10      | 1025,24 | -0,37 | 0,385289 | -0,9616  | 0,336251 | 0,7005537 |
| CTC-523E23.5  | 6,73    | -0,80 | 0,82827  | -0,96152 | 0,33629  | 0,700558  |
| ZMAT3         | 234,70  | 0,75  | 0,780364 | 0,961297 | 0,336403 | 0,7006592 |
| LRGUK         | 3,80    | 3,58  | 3,724742 | 0,961274 | 0,336414 | 0,7006592 |
| PRPF38B       | 1628,54 | 0,25  | 0,261268 | 0,961078 | 0,336513 | 0,7007866 |
| RP11-295G24.5 | 0,86    | 2,41  | 2,504228 | 0,961051 | 0,336527 | NA        |
| RP11-402B2.1  | 0,41    | -3,52 | 3,665817 | -0,96098 | 0,336563 | NA        |
| GADD45A       | 58,33   | 0,83  | 0,86458  | 0,960925 | 0,33659  | 0,700809  |
| RP11-443G13.3 | 1,92    | 3,58  | 3,726267 | 0,960916 | 0,336594 | NA        |
| RIOK2         | 182,59  | 0,84  | 0,878635 | 0,960891 | 0,336607 | 0,700809  |
| RP11-115P16.3 | 13,96   | -1,71 | 1,774753 | -0,96083 | 0,336637 | 0,700809  |
| C16orf86      | 14,87   | -1,26 | 1,310627 | -0,96062 | 0,336743 | 0,7009422 |
| RN7SKP195     | 0,58    | -3,52 | 3,660123 | -0,96053 | 0,336786 | NA        |
| EGF           | 0,47    | -3,11 | 3,239782 | -0,96049 | 0,336808 | NA        |
| CTD-2036A2.1  | 4,08    | -0,78 | 0,815641 | -0,96037 | 0,336871 | 0,7009422 |
| RP11-32K4.1   | 16,87   | -1,16 | 1,203813 | -0,96026 | 0,336922 | 0,7009422 |
| TMEM230       | 912,28  | 0,57  | 0,591813 | 0,960245 | 0,336932 | 0,7009422 |
| EAF1          | 445,67  | 0,60  | 0,627787 | 0,960242 | 0,336934 | 0,7009422 |
| GTSE1         | 27,37   | 0,71  | 0,735171 | 0,960211 | 0,336949 | 0,7009422 |
| TIGD1L        | 154,45  | 0,59  | 0,619393 | 0,96018  | 0,336965 | 0,7009422 |
| RP11-480I12.2 | 0,73    | -1,99 | 2,069823 | -0,9601  | 0,337005 | NA        |
| RNMT          | 355,33  | -0,33 | 0,344673 | -0,95995 | 0,337078 | 0,7011    |
| GPR18         | 100,79  | 0,75  | 0,784507 | 0,959213 | 0,337451 | 0,7017975 |
| RP11-395N6.2  | 1,92    | 3,57  | 3,726212 | 0,959107 | 0,337505 | NA        |
| PLA2G16       | 57,41   | -0,78 | 0,815594 | -0,95894 | 0,337588 | 0,7020038 |
| RP11-404F10.1 | 1,15    | 2,22  | 2,315906 | 0,958937 | 0,33759  | NA        |

|               |         |       |          |          |          |           |
|---------------|---------|-------|----------|----------|----------|-----------|
| RAB3B         | 36,85   | -0,64 | 0,670004 | -0,95874 | 0,337692 | 0,7021406 |
| LINC00205     | 33,05   | -1,06 | 1,108654 | -0,95864 | 0,337742 | 0,70216   |
| RNU4-20P      | 0,51    | -3,51 | 3,663195 | -0,95862 | 0,337748 | NA        |
| ATP5SL        | 307,43  | -0,66 | 0,692532 | -0,95857 | 0,337777 | 0,70216   |
| TBC1D21       | 0,63    | -3,51 | 3,660839 | -0,95856 | 0,337783 | NA        |
| FABP5L3       | 1,41    | -1,41 | 1,471673 | -0,95845 | 0,337837 | NA        |
| RP11-753G20.1 | 7,92    | -0,40 | 0,419754 | -0,95842 | 0,337849 | 0,7022331 |
| TMCC1         | 164,22  | 0,73  | 0,760239 | 0,958293 | 0,337915 | 0,7022911 |
| AL163953.3    | 13,95   | 0,79  | 0,824334 | 0,958155 | 0,337985 | 0,7023022 |
| ZHX3          | 74,14   | -0,99 | 1,030326 | -0,95813 | 0,337996 | 0,7023022 |
| RP5-905H7.11  | 0,41    | -3,51 | 3,66422  | -0,95787 | 0,338128 | NA        |
| RP11-295P22.1 | 0,41    | -3,51 | 3,666013 | -0,95786 | 0,338133 | NA        |
| RP3-446N13.3  | 66,69   | -0,86 | 0,893699 | -0,95771 | 0,338207 | 0,7026607 |
| NOMO3         | 81,65   | -0,64 | 0,670333 | -0,95764 | 0,338244 | 0,7026607 |
| AC005086.2    | 0,75    | -1,32 | 1,373355 | -0,95755 | 0,338291 | NA        |
| RP11-138H11.1 | 1,90    | 3,57  | 3,726232 | 0,957432 | 0,338349 | NA        |
| TRIM58        | 23,45   | 0,92  | 0,957842 | 0,95712  | 0,338507 | 0,7031057 |
| CDH24         | 2,03    | -3,01 | 3,140987 | -0,95708 | 0,338525 | NA        |
| TVP23C-CDRT4  | 0,88    | 2,30  | 2,40692  | 0,957059 | 0,338537 | NA        |
| RP11-579O24.3 | 17,79   | -0,65 | 0,676275 | -0,95704 | 0,338545 | 0,7031057 |
| ADGRF3        | 4,70    | 1,88  | 1,961409 | 0,956985 | 0,338575 | 0,7031057 |
| RP11-415D17.3 | 5,42    | -0,70 | 0,726407 | -0,95692 | 0,338609 | 0,7031057 |
| RN7SL714P     | 1,56    | -0,92 | 0,958211 | -0,95678 | 0,338677 | NA        |
| GLIDR         | 39,40   | -1,28 | 1,33825  | -0,95678 | 0,338679 | 0,7031716 |
| NNMT          | 1,99    | 1,14  | 1,195037 | 0,956644 | 0,338747 | NA        |
| RP11-80H5.9   | 31,24   | -0,83 | 0,863667 | -0,9566  | 0,338767 | 0,7032769 |
| RP11-794M8.1  | 25,36   | -0,61 | 0,633974 | -0,95617 | 0,338989 | 0,703483  |
| BRWD1-IT2     | 1,43    | 2,55  | 2,661968 | 0,956116 | 0,339014 | NA        |
| TXNIP         | 6448,96 | -0,36 | 0,375577 | -0,95607 | 0,339035 | 0,703483  |
| MRPL45        | 308,03  | 0,66  | 0,69544  | 0,956024 | 0,33906  | 0,703483  |
| RP11-732M18.4 | 11,82   | 0,90  | 0,940905 | 0,955907 | 0,339119 | 0,703483  |
| ZNF430        | 262,39  | 0,54  | 0,56357  | 0,955897 | 0,339124 | 0,703483  |
| PLEKHM1       | 196,13  | -0,46 | 0,479333 | -0,95583 | 0,339156 | 0,703483  |
| LAT2          | 1165,56 | 0,34  | 0,356625 | 0,955816 | 0,339165 | 0,703483  |
| RAB39A        | 33,41   | 1,38  | 1,447973 | 0,955763 | 0,339192 | 0,703483  |
| GPS2          | 391,24  | 0,38  | 0,393124 | 0,955733 | 0,339207 | 0,703483  |
| LRRN2         | 2,53    | 1,22  | 1,278346 | 0,955669 | 0,339239 | NA        |
| RNU4-9P       | 0,51    | -3,50 | 3,663272 | -0,9556  | 0,339277 | NA        |
| AC004538.3    | 10,18   | -1,31 | 1,365929 | -0,95553 | 0,33931  | 0,7036184 |
| PRPF6         | 474,72  | -0,59 | 0,612491 | -0,95533 | 0,339409 | 0,7037441 |
| GBP3          | 270,25  | -0,60 | 0,630104 | -0,95514 | 0,339507 | 0,7038473 |
| NASP          | 530,73  | 0,35  | 0,368776 | 0,954889 | 0,339634 | 0,7038473 |
| RP4-753P9.3   | 10,10   | 1,86  | 1,94794  | 0,954872 | 0,339642 | 0,7038473 |
| ATRNL1        | 13,09   | 2,48  | 2,592598 | 0,954847 | 0,339655 | 0,7038473 |
| MOCS3         | 55,15   | 1,00  | 1,046257 | 0,954677 | 0,339741 | 0,7038473 |
| SCARB1        | 186,55  | -0,77 | 0,806085 | -0,95463 | 0,339766 | 0,7038473 |
| RP11-739P1.3  | 18,90   | -0,42 | 0,441658 | -0,9546  | 0,339782 | 0,7038473 |
| WDR49         | 93,04   | 0,90  | 0,94622  | 0,954477 | 0,339842 | 0,7038473 |
| AC140134.2    | 15,09   | -1,14 | 1,194459 | -0,95445 | 0,339854 | 0,7038473 |
| RP11-974F13.3 | 15,09   | -1,14 | 1,194459 | -0,95445 | 0,339854 | 0,7038473 |



|               |         |       |          |          |          |           |
|---------------|---------|-------|----------|----------|----------|-----------|
| NR4A1         | 1999,01 | 0,44  | 0,455994 | 0,954393 | 0,339885 | 0,7038473 |
| RP11-22N19.2  | 167,26  | 0,73  | 0,761354 | 0,954339 | 0,339912 | 0,7038473 |
| TMED8         | 338,34  | -0,53 | 0,554448 | -0,95426 | 0,339954 | 0,7038561 |
| RP11-199F11.1 | 0,88    | 1,80  | 1,889215 | 0,954223 | 0,339971 | NA        |
| RP4-547N15.3  | 7,25    | -0,81 | 0,848868 | -0,9541  | 0,340035 | 0,703907  |
| DAW1          | 2,93    | -1,19 | 1,250822 | -0,9541  | 0,340035 | NA        |
| DDX11         | 159,93  | -0,55 | 0,575963 | -0,95406 | 0,340055 | 0,703907  |
| BANP          | 313,86  | 0,53  | 0,56037  | 0,953863 | 0,340153 | 0,7040325 |
| RP11-728E14.3 | 3,84    | 1,10  | 1,156787 | 0,953589 | 0,340292 | 0,7042411 |
| RP11-278H7.1  | 7,22    | 2,71  | 2,841908 | 0,953514 | 0,34033  | 0,7042416 |
| RP4-673D20.6  | 0,53    | -2,71 | 2,847638 | -0,95337 | 0,340401 | NA        |
| RP11-206M11.7 | 0,56    | -1,82 | 1,910269 | -0,95333 | 0,340425 | NA        |
| GDF6          | 1,70    | -1,53 | 1,606621 | -0,95333 | 0,340425 | NA        |
| AC104782.3    | 15,54   | -0,95 | 0,99579  | -0,9533  | 0,340436 | 0,7043199 |
| MKLN1         | 816,71  | 0,50  | 0,527721 | 0,95329  | 0,340443 | 0,7043199 |
| DMWD          | 33,82   | -0,56 | 0,584366 | -0,9532  | 0,340487 | 0,7043325 |
| AP000459.7    | 29,28   | 0,90  | 0,946677 | 0,952844 | 0,340669 | 0,7045809 |
| NOX4          | 14,39   | -0,62 | 0,652177 | -0,95282 | 0,340683 | 0,7045809 |
| SYNJ2BP-COX16 | 20,90   | 1,28  | 1,340569 | 0,952546 | 0,34082  | 0,7047092 |
| CUX2          | 5,34    | 2,05  | 2,153947 | 0,952523 | 0,340832 | 0,7047092 |
| GCLC          | 377,08  | 0,58  | 0,605054 | 0,95247  | 0,340859 | 0,7047092 |
| L3MBTL2       | 171,72  | 0,70  | 0,73202  | 0,952266 | 0,340962 | 0,7048444 |
| AB019438.55   | 55,29   | 0,70  | 0,738778 | 0,952176 | 0,341008 | 0,7048606 |
| RP5-1057J7.8  | 1,80    | 1,30  | 1,363301 | 0,952048 | 0,341073 | NA        |
| CEP192        | 346,75  | -0,48 | 0,504858 | -0,95203 | 0,341083 | 0,7048626 |
| BOLA1         | 89,17   | -1,31 | 1,378599 | -0,95199 | 0,341101 | 0,7048626 |
| PEX16         | 552,19  | 0,67  | 0,700522 | 0,95195  | 0,341122 | 0,7048626 |
| CELA1         | 1,42    | 3,13  | 3,290355 | 0,951909 | 0,341143 | NA        |
| RPL9P30       | 1,38    | 3,11  | 3,26341  | 0,951721 | 0,341238 | NA        |
| CD2AP         | 354,66  | 0,69  | 0,720075 | 0,951711 | 0,341243 | 0,7050342 |
| NKAP          | 304,22  | 0,34  | 0,361023 | 0,95161  | 0,341295 | 0,7050624 |
| KIAA0408      | 1,23    | -1,31 | 1,381676 | -0,95147 | 0,341365 | NA        |
| MCTP1         | 680,55  | 0,27  | 0,28689  | 0,951457 | 0,341372 | 0,7051283 |
| RF01233       | 1,64    | 2,12  | 2,227813 | 0,95141  | 0,341396 | NA        |
| AF131216.8    | 4,85    | -1,41 | 1,483357 | -0,9514  | 0,341403 | 0,7051283 |
| SPACA4        | 0,55    | -3,48 | 3,661144 | -0,95133 | 0,341438 | NA        |
| UBE2Z         | 618,37  | 0,44  | 0,459678 | 0,951193 | 0,341506 | 0,7052639 |
| SC22CB-1E7.1  | 1,38    | 2,49  | 2,620815 | 0,951067 | 0,34157  | NA        |
| ATXN8OS       | 6,90    | -1,05 | 1,103205 | -0,95098 | 0,341613 | 0,7054067 |
| RP11-45L9.1   | 0,50    | -3,11 | 3,270166 | -0,95095 | 0,341628 | NA        |
| ADPRM         | 62,91   | 1,22  | 1,280671 | 0,9509   | 0,341655 | 0,7054145 |
| TXNDC15       | 198,65  | 0,59  | 0,62017  | 0,950568 | 0,341824 | 0,7055715 |
| PAOX          | 59,65   | -1,03 | 1,078482 | -0,95051 | 0,341856 | 0,7055715 |
| CPNE7         | 1,53    | 3,16  | 3,319934 | 0,950396 | 0,341911 | NA        |
| CTB-50L17.16  | 2,56    | 1,40  | 1,475697 | 0,950355 | 0,341932 | NA        |
| ZNF846        | 87,42   | 0,70  | 0,737491 | 0,950312 | 0,341954 | 0,7055715 |
| RP11-314D7.2  | 130,70  | -0,55 | 0,577709 | -0,95027 | 0,341974 | 0,7055715 |
| BAG5          | 513,76  | -0,67 | 0,707844 | -0,95011 | 0,342058 | 0,7055715 |
| SMAP1         | 437,32  | 0,66  | 0,690664 | 0,950004 | 0,34211  | 0,7055715 |
| RP11-730A19.6 | 11,41   | -0,46 | 0,488607 | -0,94991 | 0,342158 | 0,7055715 |

|               |          |       |          |          |          |           |
|---------------|----------|-------|----------|----------|----------|-----------|
| NMD3          | 329,15   | 0,63  | 0,660693 | 0,949877 | 0,342175 | 0,7055715 |
| PFKP          | 129,86   | -0,76 | 0,801202 | -0,94982 | 0,342203 | 0,7055715 |
| RP11-342I1.2  | 3,95     | -1,81 | 1,90774  | -0,94982 | 0,342203 | 0,7055715 |
| NCAPD2        | 144,58   | 0,76  | 0,795955 | 0,949817 | 0,342205 | 0,7055715 |
| U2AF1L4       | 562,47   | 0,41  | 0,432176 | 0,949786 | 0,342221 | 0,7055715 |
| CDC5L         | 680,02   | -0,43 | 0,452053 | -0,94978 | 0,342224 | 0,7055715 |
| CTB-31O20.2   | 202,87   | 0,78  | 0,823393 | 0,949663 | 0,342283 | 0,7055989 |
| RP11-34P13.9  | 29,29    | -1,45 | 1,526279 | -0,9496  | 0,342313 | 0,7055989 |
| AC005562.1    | 102,17   | 0,92  | 0,97074  | 0,949506 | 0,342363 | 0,7056237 |
| RGCC          | 371,60   | 0,57  | 0,59703  | 0,949392 | 0,342421 | 0,7056657 |
| RP5-890E16.4  | 0,47     | -3,17 | 3,335256 | -0,94909 | 0,342576 | NA        |
| RP11-169E6.4  | 4,15     | -0,98 | 1,029184 | -0,94901 | 0,342616 | 0,7059813 |
| RP11-330H6.6  | 5,20     | -0,70 | 0,738348 | -0,94892 | 0,342661 | 0,7059813 |
| C11orf21      | 407,11   | -0,46 | 0,481354 | -0,94887 | 0,342688 | 0,7059813 |
| TMIE          | 2,25     | -2,71 | 2,858539 | -0,94886 | 0,34269  | NA        |
| RAB3GAP1      | 347,39   | 0,44  | 0,461921 | 0,948777 | 0,342734 | 0,7059968 |
| CTC-366B18.2  | 7,90     | -1,64 | 1,731664 | -0,94863 | 0,342811 | 0,7060166 |
| AC068831.15   | 161,83   | -0,58 | 0,613867 | -0,9486  | 0,342827 | 0,7060166 |
| HADH          | 308,58   | 0,57  | 0,602701 | 0,948331 | 0,342961 | 0,7060166 |
| SLC35E4       | 45,32    | 0,72  | 0,761227 | 0,948317 | 0,342968 | 0,7060166 |
| RP11-887P2.6  | 0,93     | 1,87  | 1,976149 | 0,948209 | 0,343023 | NA        |
| MLH1          | 314,47   | 0,63  | 0,669431 | 0,948131 | 0,343063 | 0,7060166 |
| ALMS1         | 269,03   | 0,74  | 0,782677 | 0,948126 | 0,343065 | 0,7060166 |
| AC018442.1    | 1,86     | 3,53  | 3,726377 | 0,948126 | 0,343065 | NA        |
| DNAJB2        | 57,92    | -0,96 | 1,008281 | -0,94812 | 0,343069 | 0,7060166 |
| C19orf38      | 543,08   | -0,47 | 0,49361  | -0,9481  | 0,343077 | 0,7060166 |
| C16orf88      | 227,29   | 0,78  | 0,819025 | 0,948087 | 0,343085 | 0,7060166 |
| AC141586.5    | 109,26   | 0,51  | 0,542862 | 0,947948 | 0,343156 | 0,7060608 |
| RP11-313J2.1  | 15,42    | -0,57 | 0,597916 | -0,9479  | 0,343182 | 0,7060608 |
| AC008746.11   | 15,47    | -0,80 | 0,84743  | -0,94781 | 0,343224 | 0,7060693 |
| PAK6          | 5,58     | -0,84 | 0,88746  | -0,94764 | 0,343314 | 0,7060705 |
| RPL7          | 20604,76 | 0,20  | 0,215559 | 0,94763  | 0,343318 | 0,7060705 |
| RP13-941N14.1 | 1,86     | 3,53  | 3,726387 | 0,947525 | 0,343371 | NA        |
| SPATA2        | 44,59    | -0,90 | 0,947312 | -0,94752 | 0,343374 | 0,7060705 |
| THOC1         | 339,26   | -0,55 | 0,576236 | -0,94751 | 0,343377 | 0,7060705 |
| RP11-680C21.1 | 7,50     | -0,81 | 0,855161 | -0,94733 | 0,343471 | 0,706186  |
| RP11-470H9.1  | 0,40     | -3,47 | 3,666683 | -0,94725 | 0,343512 | NA        |
| CD300LG       | 4,60     | -1,16 | 1,220714 | -0,94714 | 0,343568 | 0,7063076 |
| RP11-571L19.8 | 0,46     | -3,14 | 3,312933 | -0,94694 | 0,343667 | NA        |
| RP11-682B13.2 | 1,96     | 1,97  | 2,076396 | 0,946846 | 0,343717 | NA        |
| RBM12B        | 128,18   | -0,92 | 0,966661 | -0,94662 | 0,343835 | 0,7067773 |
| TOP1MT        | 273,34   | 0,52  | 0,544234 | 0,946527 | 0,34388  | 0,706792  |
| CDKL5         | 113,92   | -0,52 | 0,554704 | -0,9464  | 0,343944 | 0,7068452 |
| PELP1         | 65,14    | 0,82  | 0,862709 | 0,946109 | 0,344093 | 0,7070745 |
| PTPN14        | 46,84    | -0,44 | 0,46528  | -0,94603 | 0,344135 | 0,7070818 |
| RP13-36G14.2  | 1,11     | 2,77  | 2,92932  | 0,946009 | 0,344144 | NA        |
| NPRL2         | 286,17   | -0,70 | 0,737418 | -0,94591 | 0,344195 | 0,7071283 |
| RNA5SP195     | 1,86     | 3,52  | 3,726389 | 0,945704 | 0,3443   | NA        |
| TNFRSF9       | 109,90   | -0,57 | 0,605439 | -0,94561 | 0,344345 | 0,7072225 |
| RP11-561O23.9 | 36,38    | 0,74  | 0,783732 | 0,945575 | 0,344365 | 0,7072225 |

|                    |        |       |          |          |          |           |
|--------------------|--------|-------|----------|----------|----------|-----------|
| CTD-2538G9.6       | 4,32   | -1,23 | 1,299155 | -0,94554 | 0,344381 | 0,7072225 |
| RAB40C             | 93,77  | -1,17 | 1,239888 | -0,94546 | 0,344427 | 0,7072225 |
| DQX1               | 1,79   | 3,52  | 3,726696 | 0,945448 | 0,344443 | NA        |
| SLC36A1            | 186,38 | -0,94 | 0,995629 | -0,94545 | 0,344431 | 0,7072225 |
| RP11-550E22.3      | 77,80  | -0,50 | 0,533322 | -0,94537 | 0,344472 | 0,7072274 |
| BPNT1              | 90,90  | 0,81  | 0,85619  | 0,945284 | 0,344514 | 0,7072365 |
| MANEA              | 71,14  | 0,87  | 0,91536  | 0,945187 | 0,344564 | 0,7072599 |
| ITGBL1             | 2,41   | 1,65  | 1,747923 | 0,94498  | 0,344669 | NA        |
| ABC12-49244600F4.3 | 85,79  | -0,79 | 0,839733 | -0,94486 | 0,344732 | 0,7075281 |
| CFAP52             | 2,25   | -1,26 | 1,333938 | -0,94469 | 0,344815 | NA        |
| KDM4B              | 196,84 | 0,61  | 0,646526 | 0,944612 | 0,344857 | 0,7076071 |
| PGP                | 117,02 | 0,83  | 0,880297 | 0,944554 | 0,344887 | 0,7076071 |
| RP11-800A18.3      | 13,03  | 0,87  | 0,918119 | 0,944476 | 0,344926 | 0,7076071 |
| PINLYP             | 19,58  | -0,65 | 0,684518 | -0,94441 | 0,344958 | 0,7076071 |
| RP11-44M6.1        | 12,15  | -0,66 | 0,700221 | -0,9444  | 0,344965 | 0,7076071 |
| EXOC3L2            | 4,88   | -0,81 | 0,85693  | -0,94431 | 0,345009 | 0,7076071 |
| IZUMO4             | 1,69   | 3,19  | 3,373249 | 0,944304 | 0,345014 | NA        |
| XXyac-YRM2039.3    | 30,08  | 0,96  | 1,015763 | 0,94426  | 0,345037 | 0,7076071 |
| FAM102A            | 52,37  | -1,31 | 1,391989 | -0,94418 | 0,345076 | 0,7076089 |
| STIP1              | 442,75 | -0,66 | 0,698332 | -0,9439  | 0,345222 | 0,7078304 |
| OR8H2              | 0,97   | -1,66 | 1,760615 | -0,94378 | 0,345284 | NA        |
| RPS12P26           | 1,04   | 2,71  | 2,867204 | 0,943628 | 0,34536  | NA        |
| IGHV3-16           | 1,39   | 3,09  | 3,272998 | 0,943583 | 0,345383 | NA        |
| RP4-814D15.2       | 54,81  | -0,87 | 0,926618 | -0,94351 | 0,34542  | 0,7081592 |
| RP11-496H1.1       | 0,54   | 1,78  | 1,883269 | 0,943428 | 0,345462 | NA        |
| EEF1A12            | 2,37   | 0,84  | 0,895736 | 0,943211 | 0,345573 | NA        |
| ADAMTS17           | 3,36   | -1,08 | 1,148988 | -0,9432  | 0,34558  | NA        |
| ZNF526             | 78,32  | -0,76 | 0,801904 | -0,94317 | 0,345593 | 0,7083977 |
| F2RL3              | 29,42  | -0,61 | 0,647222 | -0,94313 | 0,345613 | 0,7083977 |
| RP11-672L10.2      | 0,95   | 1,94  | 2,053603 | 0,942958 | 0,345703 | NA        |
| FBXL2              | 52,51  | -0,78 | 0,823441 | -0,9429  | 0,34573  | 0,7085605 |
| RP11-513C4.1       | 0,93   | 1,91  | 2,021205 | 0,942856 | 0,345755 | NA        |
| PSMC2              | 646,10 | 0,52  | 0,552637 | 0,942772 | 0,345797 | 0,7085641 |
| TPD52L1            | 57,63  | -0,51 | 0,544554 | -0,94275 | 0,345808 | 0,7085641 |
| SLX1B-SULT1A4      | 64,84  | 0,71  | 0,750999 | 0,942675 | 0,345847 | 0,7085659 |
| RP11-24J19.1       | 17,11  | 1,12  | 1,188126 | 0,942549 | 0,345912 | 0,70862   |
| RP3-333H23.8       | 3,31   | 1,36  | 1,442578 | 0,942494 | 0,34594  | NA        |
| RN7SL45P           | 5,68   | -1,28 | 1,35353  | -0,94247 | 0,345951 | 0,7086226 |
| RP11-182J1.12      | 0,67   | 2,04  | 2,167755 | 0,942351 | 0,346013 | NA        |
| RNU4ATAC11P        | 1,50   | -1,89 | 2,007821 | -0,94231 | 0,346034 | NA        |
| RP11-290O12.2      | 0,49   | -3,45 | 3,664111 | -0,94224 | 0,346067 | NA        |
| RN7SL399P          | 0,50   | -2,06 | 2,19076  | -0,94223 | 0,346074 | NA        |
| RP11-762L8.6       | 4,62   | 2,24  | 2,374029 | 0,942094 | 0,346145 | 0,7089411 |
| RP4-641G12.3       | 0,49   | -3,09 | 3,276243 | -0,94208 | 0,346151 | NA        |
| LIMK1              | 135,20 | -0,54 | 0,571352 | -0,942   | 0,346191 | 0,7089571 |
| RP11-649A18.5      | 3,09   | 1,27  | 1,351091 | 0,941599 | 0,346398 | NA        |
| RN7SL517P          | 3,34   | -1,73 | 1,841297 | -0,94141 | 0,346497 | NA        |
| RP11-361D14.2      | 0,47   | -3,45 | 3,664379 | -0,9414  | 0,3465   | NA        |
| FAM134C            | 151,21 | 0,67  | 0,716982 | 0,941303 | 0,34655  | 0,7094441 |
| DSTNP2             | 15,13  | -0,92 | 0,981325 | -0,9413  | 0,346551 | 0,7094441 |

|               |         |       |          |          |          |           |
|---------------|---------|-------|----------|----------|----------|-----------|
| PLEC          | 1446,56 | -0,31 | 0,327486 | -0,94127 | 0,346565 | 0,7094441 |
| CEP112        | 32,99   | -0,87 | 0,927514 | -0,94124 | 0,346581 | 0,7094441 |
| CTD-3046C4.1  | 1,88    | 3,51  | 3,726419 | 0,941074 | 0,346667 | NA        |
| WDR82         | 428,70  | -0,46 | 0,484516 | -0,94095 | 0,34673  | 0,7096005 |
| DNAJC7        | 802,40  | 0,32  | 0,34354  | 0,940944 | 0,346734 | 0,7096005 |
| MRPL57        | 397,46  | -0,34 | 0,365344 | -0,94065 | 0,346883 | 0,7097234 |
| RP11-205K6.3  | 1,83    | 3,50  | 3,726496 | 0,940559 | 0,346931 | NA        |
| KRTCAP3       | 7,62    | -2,40 | 2,550033 | -0,94047 | 0,346974 | 0,7097234 |
| RP11-573D15.9 | 29,83   | -1,24 | 1,315332 | -0,94042 | 0,347003 | 0,7097234 |
| POLG2         | 98,25   | -0,53 | 0,558435 | -0,94035 | 0,347036 | 0,7097234 |
| MLLT3         | 149,75  | -0,94 | 1,00392  | -0,94032 | 0,347054 | 0,7097234 |
| RHOG          | 2627,91 | 0,25  | 0,267763 | 0,940309 | 0,347059 | 0,7097234 |
| FAM212B       | 25,10   | -0,60 | 0,639785 | -0,94026 | 0,347083 | 0,7097234 |
| RP5-882O7.1   | 4,58    | -2,10 | 2,232178 | -0,94023 | 0,347099 | 0,7097234 |
| RP11-263G22.1 | 1,66    | 2,76  | 2,938919 | 0,940148 | 0,347142 | NA        |
| MTL5          | 3,45    | 1,28  | 1,366522 | 0,940114 | 0,347159 | NA        |
| USF3          | 252,12  | 0,53  | 0,561421 | 0,939966 | 0,347235 | 0,7098518 |
| STK33         | 128,40  | -0,57 | 0,607852 | -0,93996 | 0,347238 | 0,7098518 |
| ASAP1         | 1162,61 | 0,49  | 0,525706 | 0,93986  | 0,347289 | 0,7098789 |
| HIST2H2AA4    | 1056,70 | -0,24 | 0,257708 | -0,93975 | 0,347344 | 0,7099135 |
| RP11-480I12.5 | 1,53    | 1,30  | 1,388459 | 0,939606 | 0,34742  | NA        |
| RP11-605P22.1 | 2,29    | -3,36 | 3,571463 | -0,93947 | 0,34749  | NA        |
| RP11-325I22.3 | 1,94    | -2,09 | 2,231101 | -0,939   | 0,347732 | NA        |
| RP11-12M9.3   | 0,71    | -1,28 | 1,364777 | -0,93898 | 0,347741 | NA        |
| RP11-480C16.1 | 54,59   | -0,70 | 0,748053 | -0,93876 | 0,347855 | 0,7105618 |
| RGL4          | 5,48    | 1,76  | 1,874403 | 0,938751 | 0,347859 | 0,7105618 |
| RP11-318G8.4  | 3,82    | -1,02 | 1,083157 | -0,93864 | 0,347918 | 0,7105618 |
| AJ003147.11   | 15,12   | -0,97 | 1,033579 | -0,93857 | 0,347952 | 0,7105618 |
| ADRB1         | 7,08    | -0,92 | 0,979042 | -0,93857 | 0,347954 | 0,7105618 |
| CTC-453G23.7  | 27,33   | -0,69 | 0,733118 | -0,93856 | 0,347956 | 0,7105618 |
| CIR1          | 310,53  | -0,37 | 0,38983  | -0,93855 | 0,347964 | 0,7105618 |
| SLX1A         | 577,46  | -0,40 | 0,427035 | -0,93854 | 0,347967 | 0,7105618 |
| DYNLL1        | 880,65  | 0,24  | 0,259012 | 0,938292 | 0,348095 | 0,7106989 |
| SPOPL         | 753,92  | 0,49  | 0,522416 | 0,93826  | 0,348111 | 0,7106989 |
| EIF4EBP2      | 1239,89 | 0,30  | 0,317054 | 0,938125 | 0,34818  | 0,7107348 |
| NADSYN1       | 662,40  | -0,38 | 0,409921 | -0,93808 | 0,348205 | 0,7107348 |
| FIGLA         | 1,81    | 3,50  | 3,726556 | 0,938035 | 0,348227 | NA        |
| AIPL1         | 3,14    | -0,82 | 0,878742 | -0,93801 | 0,348238 | NA        |
| RP1-29C18.8   | 68,14   | -1,22 | 1,296521 | -0,93791 | 0,348289 | 0,7108291 |
| CTD-2521M24.6 | 6,05    | -0,93 | 0,990265 | -0,93758 | 0,348462 | 0,7111039 |
| UPF3B         | 220,72  | 0,47  | 0,501137 | 0,937497 | 0,348503 | 0,7111096 |
| RP5-1010E17.1 | 0,40    | -2,28 | 2,430235 | -0,93733 | 0,348591 | NA        |
| RP11-776H12.1 | 117,70  | -0,87 | 0,930637 | -0,93731 | 0,348597 | 0,7111743 |
| RHBDD1        | 153,49  | 0,89  | 0,944512 | 0,937287 | 0,348611 | 0,7111743 |
| RP11-127B20.2 | 1,65    | 2,12  | 2,263035 | 0,937197 | 0,348657 | NA        |
| RP1-229K20.5  | 10,49   | -3,39 | 3,612379 | -0,93709 | 0,34871  | 0,7112987 |
| RP11-484H12.6 | 1,33    | 2,42  | 2,580007 | 0,936938 | 0,34879  | NA        |
| RN7SL141P     | 6,82    | -2,62 | 2,794808 | -0,93691 | 0,348805 | 0,7114129 |
| FAUP1         | 3,74    | -0,62 | 0,66008  | -0,9368  | 0,348864 | NA        |
| P3H2          | 61,75   | 1,19  | 1,272076 | 0,936741 | 0,348892 | 0,7114734 |

|               |          |       |          |          |          |           |
|---------------|----------|-------|----------|----------|----------|-----------|
| IGLV1-51      | 3,64     | -1,11 | 1,187927 | -0,93666 | 0,348931 | NA        |
| SEC14L2       | 6,35     | -1,49 | 1,593209 | -0,93658 | 0,348975 | 0,7114734 |
| GINS4         | 57,28    | -0,82 | 0,870844 | -0,93653 | 0,349002 | 0,7114734 |
| ASB13         | 130,86   | -0,86 | 0,917013 | -0,93653 | 0,349002 | 0,7114734 |
| CLTCL1        | 6,34     | -2,11 | 2,251981 | -0,93647 | 0,34903  | 0,7114734 |
| AC005538.2    | 0,49     | -2,32 | 2,473509 | -0,93645 | 0,349044 | NA        |
| SMKR1         | 0,39     | -3,43 | 3,666755 | -0,93639 | 0,349071 | NA        |
| MT-TI         | 1,88     | -1,24 | 1,323372 | -0,93639 | 0,349073 | NA        |
| RP11-706O15.1 | 142,58   | -0,48 | 0,514165 | -0,93632 | 0,349111 | 0,7114734 |
| FLG2          | 3,50     | -0,90 | 0,958816 | -0,93631 | 0,349116 | NA        |
| NOLC1         | 574,11   | -0,42 | 0,446657 | -0,93627 | 0,349133 | 0,7114734 |
| LPPR3         | 1,72     | 3,49  | 3,727046 | 0,936203 | 0,349169 | NA        |
| RN7SL236P     | 1,23     | 2,28  | 2,438637 | 0,936167 | 0,349187 | NA        |
| RP11-697E2.12 | 0,39     | -3,43 | 3,667405 | -0,93613 | 0,349207 | NA        |
| RP11-619I22.1 | 7,17     | -1,28 | 1,365403 | -0,9361  | 0,349222 | 0,7114734 |
| CHMP4C        | 3,32     | 1,18  | 1,259168 | 0,936079 | 0,349232 | NA        |
| HYI           | 27,38    | 1,12  | 1,195065 | 0,936042 | 0,349252 | 0,7114734 |
| STOM          | 547,53   | -0,49 | 0,524097 | -0,936   | 0,349275 | 0,7114734 |
| RPL13P2       | 0,93     | -1,08 | 1,152616 | -0,93592 | 0,349312 | NA        |
| SLCO1B3       | 1,89     | 3,49  | 3,726536 | 0,935914 | 0,349317 | NA        |
| RAD21-AS1     | 105,07   | -0,69 | 0,736636 | -0,93586 | 0,349347 | 0,7114734 |
| AC022173.2    | 1,81     | 3,49  | 3,726538 | 0,935686 | 0,349435 | NA        |
| RP11-621L6.3  | 0,46     | -3,12 | 3,335865 | -0,93567 | 0,349442 | NA        |
| KIF21B        | 44,74    | 0,96  | 1,026537 | 0,935491 | 0,349536 | 0,7114734 |
| RP11-330L19.1 | 1,17     | -1,25 | 1,338322 | -0,93544 | 0,34956  | NA        |
| KIAA1841      | 114,77   | 0,59  | 0,630776 | 0,935402 | 0,349581 | 0,7114734 |
| TRMT6         | 515,74   | 0,45  | 0,477801 | 0,935382 | 0,349591 | 0,7114734 |
| C11orf73      | 518,44   | -0,38 | 0,406434 | -0,93533 | 0,349617 | 0,7114734 |
| IL4I1         | 91,19    | -1,11 | 1,187194 | -0,93527 | 0,349651 | 0,7114734 |
| DDX50         | 278,32   | -0,40 | 0,428171 | -0,93508 | 0,349749 | 0,7114734 |
| BEND5         | 10,67    | 1,90  | 2,036189 | 0,935038 | 0,349769 | 0,7114734 |
| RP11-162G9.1  | 8,01     | -0,90 | 0,95724  | -0,93501 | 0,349782 | 0,7114734 |
| DUSP1         | 13887,48 | 0,28  | 0,301221 | 0,935012 | 0,349782 | 0,7114734 |
| ATG14         | 155,68   | 0,55  | 0,591081 | 0,93477  | 0,349907 | 0,7114734 |
| RP11-434D9.1  | 0,34     | -2,62 | 2,799698 | -0,93475 | 0,349919 | NA        |
| PLA2G4B       | 148,26   | -0,54 | 0,581298 | -0,93475 | 0,349919 | 0,7114734 |
| CTB-40H15.4   | 0,81     | 2,34  | 2,501621 | 0,934667 | 0,34996  | NA        |
| RP1-59D14.9   | 40,25    | -0,24 | 0,256025 | -0,93457 | 0,35001  | 0,7114734 |
| RP11-118A1.2  | 40,25    | -0,24 | 0,256025 | -0,93457 | 0,35001  | 0,7114734 |
| RP11-294N21.2 | 40,25    | -0,24 | 0,256025 | -0,93457 | 0,35001  | 0,7114734 |
| CYP51A1       | 434,10   | 0,43  | 0,457903 | 0,934565 | 0,350012 | 0,7114734 |
| LIPA          | 630,48   | 0,50  | 0,531597 | 0,934415 | 0,35009  | 0,7114734 |
| API5          | 626,28   | -0,56 | 0,594709 | -0,93441 | 0,350093 | 0,7114734 |
| RP11-73M11.2  | 106,87   | -1,04 | 1,109889 | -0,93436 | 0,350118 | 0,7114734 |
| CCDC136       | 4,50     | 2,07  | 2,217386 | 0,934344 | 0,350126 | 0,7114734 |
| L3MBTL4       | 18,93    | 1,01  | 1,084861 | 0,934338 | 0,35013  | 0,7114734 |
| RP11-421F16.3 | 47,19    | 0,71  | 0,757847 | 0,93433  | 0,350134 | 0,7114734 |
| CFAP161       | 1,71     | 3,48  | 3,727055 | 0,934294 | 0,350152 | NA        |
| TDRD12        | 12,64    | -0,85 | 0,914073 | -0,93422 | 0,350191 | 0,7114734 |
| CTC-559E9.5   | 4,42     | -1,81 | 1,938603 | -0,93422 | 0,350192 | 0,7114734 |

|                 |         |       |          |          |          |           |
|-----------------|---------|-------|----------|----------|----------|-----------|
| CREBRF          | 572,46  | 0,52  | 0,556826 | 0,934187 | 0,350208 | 0,7114734 |
| PTMAP1          | 1,38    | 3,10  | 3,315371 | 0,934152 | 0,350225 | NA        |
| GABBR2          | 9,21    | -0,59 | 0,632709 | -0,93414 | 0,350233 | 0,7114734 |
| RP11-509E17.1   | 22,65   | -0,81 | 0,862788 | -0,9341  | 0,350254 | 0,7114734 |
| ZFP36L2         | 3344,07 | -0,24 | 0,259337 | -0,93389 | 0,350358 | 0,7114734 |
| TSPAN6          | 11,19   | -0,77 | 0,829751 | -0,93389 | 0,350359 | 0,7114734 |
| OR2T10          | 2,80    | -2,68 | 2,866591 | -0,93389 | 0,350362 | NA        |
| RCS1            | 899,15  | -0,32 | 0,344287 | -0,93388 | 0,350364 | 0,7114734 |
| RP11-416N2.4    | 8,37    | -0,95 | 1,020095 | -0,9335  | 0,350563 | 0,7117124 |
| TMPRSS6         | 1,39    | 3,10  | 3,323166 | 0,933435 | 0,350595 | NA        |
| RP11-240G22.5   | 39,31   | -0,89 | 0,955909 | -0,93336 | 0,350632 | 0,7117124 |
| SWSAP1          | 166,06  | -0,78 | 0,84087  | -0,93331 | 0,350661 | 0,7117124 |
| G3BP2           | 873,15  | -0,39 | 0,415271 | -0,93326 | 0,350684 | 0,7117124 |
| DDO             | 10,52   | -1,48 | 1,590657 | -0,93322 | 0,350704 | 0,7117124 |
| ZBTB10          | 284,05  | 0,57  | 0,614778 | 0,933198 | 0,350718 | 0,7117124 |
| IFI6            | 1695,96 | -0,68 | 0,732089 | -0,93314 | 0,350749 | 0,7117124 |
| DCAF4L1         | 1,81    | -1,46 | 1,568942 | -0,93291 | 0,350867 | NA        |
| FAM172A         | 206,21  | 0,67  | 0,718462 | 0,932837 | 0,350904 | 0,7119494 |
| RP11-1281K21.1  | 0,38    | -3,42 | 3,668247 | -0,93271 | 0,350968 | NA        |
| MIR3180-1       | 8,70    | -1,32 | 1,419443 | -0,93257 | 0,351039 | 0,7121458 |
| RPL29P19        | 1,21    | 1,08  | 1,162664 | 0,932377 | 0,351142 | NA        |
| CCM2            | 614,90  | -0,51 | 0,551865 | -0,93234 | 0,351163 | 0,7123181 |
| RP11-461A8.5    | 0,67    | 2,01  | 2,158292 | 0,932282 | 0,351191 | NA        |
| PLEKHM2         | 591,63  | 0,43  | 0,456967 | 0,931988 | 0,351343 | 0,7126055 |
| RP11-133M8.1    | 0,91    | -2,40 | 2,576123 | -0,9318  | 0,351438 | NA        |
| RN7SL663P       | 0,82    | 2,33  | 2,503809 | 0,931775 | 0,351453 | NA        |
| MIR6862-1       | 0,87    | -2,74 | 2,936722 | -0,93174 | 0,35147  | NA        |
| MIR6862-2       | 0,87    | -2,74 | 2,936722 | -0,93174 | 0,35147  | NA        |
| LSM2            | 286,12  | 0,46  | 0,497623 | 0,9317   | 0,351492 | 0,7127687 |
| XXYac-YX155B6.5 | 9,08    | -0,71 | 0,761603 | -0,93168 | 0,3515   | 0,7127687 |
| RP11-318M2.2    | 16,65   | -0,60 | 0,642813 | -0,93138 | 0,351656 | 0,71292   |
| CTD-2619J13.17  | 14,66   | 0,80  | 0,854908 | 0,931264 | 0,351717 | 0,71292   |
| POLH            | 32,08   | -0,97 | 1,043502 | -0,93113 | 0,351784 | 0,71292   |
| TRANK1          | 162,52  | -0,63 | 0,678938 | -0,93113 | 0,351784 | 0,71292   |
| RP11-466I1.1    | 0,46    | -3,41 | 3,664658 | -0,93106 | 0,351823 | NA        |
| NPIP5           | 2699,54 | -0,22 | 0,239135 | -0,93103 | 0,351836 | 0,71292   |
| RP11-77G23.5    | 15,70   | -0,47 | 0,502379 | -0,93103 | 0,351837 | 0,71292   |
| DMAP1           | 482,07  | -0,59 | 0,634125 | -0,93102 | 0,351843 | 0,71292   |
| AC007240.1      | 2,16    | -1,06 | 1,136024 | -0,93089 | 0,35191  | NA        |
| RFPL1-AS1       | 28,21   | 0,74  | 0,794783 | 0,930842 | 0,351935 | 0,71303   |
| ZSWIM3          | 0,37    | -3,08 | 3,310638 | -0,93079 | 0,351961 | NA        |
| PRR33           | 2,38    | 1,29  | 1,385737 | 0,930656 | 0,352031 | NA        |
| RP11-655H13.2   | 1,79    | 3,47  | 3,726604 | 0,930635 | 0,352042 | NA        |
| CCDC159         | 159,13  | -0,49 | 0,527158 | -0,93061 | 0,352053 | 0,7131914 |
| ADAM5           | 2,72    | -2,02 | 2,169548 | -0,93057 | 0,352074 | NA        |
| DNAJC15         | 685,36  | 0,34  | 0,360334 | 0,930499 | 0,352113 | 0,7132306 |
| TMC4            | 15,89   | -1,55 | 1,664648 | -0,93033 | 0,352199 | 0,7132306 |
| LINC00271       | 39,98   | -0,61 | 0,655539 | -0,93029 | 0,352221 | 0,7132306 |
| FBXL15          | 644,36  | -0,53 | 0,56594  | -0,93028 | 0,352226 | 0,7132306 |
| RP11-843A23.1   | 3,59    | 1,86  | 2,001022 | 0,93024  | 0,352247 | NA        |

|                |         |       |          |          |          |           |
|----------------|---------|-------|----------|----------|----------|-----------|
| AADAT          | 3,02    | 1,09  | 1,173334 | 0,930155 | 0,352291 | NA        |
| RAB6A          | 493,42  | -0,40 | 0,434928 | -0,92979 | 0,352482 | 0,7136713 |
| RP11-540A21.2  | 1,92    | 1,75  | 1,884736 | 0,929634 | 0,352561 | NA        |
| PPP1R2         | 913,83  | 0,30  | 0,324551 | 0,929458 | 0,352652 | 0,7139379 |
| IQCA1          | 2,67    | 3,26  | 3,509633 | 0,929406 | 0,352679 | NA        |
| CTD-2033D15.2  | 6,09    | 2,89  | 3,113318 | 0,929296 | 0,352736 | 0,7140294 |
| PHF2           | 108,79  | 0,80  | 0,858184 | 0,929114 | 0,35283  | 0,7140635 |
| RP11-411B6.6   | 80,26   | 0,41  | 0,443911 | 0,929017 | 0,35288  | 0,7140635 |
| RP11-889L3.1   | 1,24    | -0,93 | 0,997871 | -0,92901 | 0,352886 | NA        |
| RP11-85I21.1   | 10,81   | 0,97  | 1,04163  | 0,928996 | 0,352891 | 0,7140635 |
| RNU6-107P      | 12,20   | 2,26  | 2,431314 | 0,928968 | 0,352906 | 0,7140635 |
| RP6-109B7.2    | 3,75    | -1,62 | 1,748873 | -0,92892 | 0,352933 | NA        |
| RP11-553P9.3   | 0,69    | -1,23 | 1,327565 | -0,92878 | 0,353004 | NA        |
| MALSU1         | 280,60  | 0,57  | 0,609513 | 0,928669 | 0,353061 | 0,7142065 |
| ADRA2B         | 12,29   | 2,37  | 2,554663 | 0,928644 | 0,353074 | 0,7142065 |
| RP3-322G13.7   | 17,63   | 2,13  | 2,298871 | 0,92853  | 0,353133 | 0,7142065 |
| POLE2          | 8,75    | 1,86  | 2,000044 | 0,928512 | 0,353142 | 0,7142065 |
| RP11-575C20.1  | 1,78    | 3,46  | 3,72668  | 0,928405 | 0,353198 | NA        |
| RP11-569G13.2  | 46,59   | -0,46 | 0,491184 | -0,92839 | 0,353207 | 0,7142065 |
| RP11-304L19.3  | 6,88    | -0,94 | 1,014737 | -0,92839 | 0,353207 | 0,7142065 |
| CHRM5          | 19,33   | -0,76 | 0,818931 | -0,92829 | 0,353259 | 0,7142347 |
| RP4-560B9.2    | 2,06    | 0,86  | 0,930721 | 0,928151 | 0,353329 | NA        |
| RP5-1024G6.5   | 0,68    | -2,70 | 2,906821 | -0,92809 | 0,353361 | NA        |
| RP11-509E10.1  | 13,68   | -1,03 | 1,108337 | -0,92802 | 0,353397 | 0,7144166 |
| RNA5SP442      | 0,38    | -3,40 | 3,668474 | -0,92797 | 0,353421 | NA        |
| B3GAT3         | 222,35  | -0,65 | 0,699333 | -0,92796 | 0,353426 | 0,7144166 |
| RP3-348I23.3   | 1,78    | 3,46  | 3,726654 | 0,927888 | 0,353466 | NA        |
| RP11-356K23.2  | 5,46    | 1,12  | 1,211129 | 0,927861 | 0,35348  | 0,7144477 |
| IER2           | 3320,01 | 0,23  | 0,246748 | 0,927769 | 0,353527 | 0,7144664 |
| RP11-527J8.1   | 1,76    | 3,46  | 3,726683 | 0,927754 | 0,353535 | NA        |
| CTD-2583A14.11 | 21,65   | -1,30 | 1,404155 | -0,92752 | 0,353657 | 0,7146512 |
| MAPKBP1        | 57,15   | 0,77  | 0,825202 | 0,927417 | 0,35371  | 0,7146798 |
| RP11-298O21.5  | 2,11    | -1,95 | 2,097311 | -0,9274  | 0,353718 | NA        |
| CABLES1        | 2,21    | -2,01 | 2,167555 | -0,9274  | 0,35372  | NA        |
| TAB3           | 271,07  | 0,57  | 0,610657 | 0,927301 | 0,35377  | 0,714724  |
| ATF7IP         | 983,83  | 0,36  | 0,385623 | 0,92705  | 0,353901 | 0,7148492 |
| RP11-258C19.6  | 7,89    | -1,51 | 1,627002 | -0,92699 | 0,353931 | 0,7148492 |
| YWHAQ          | 1395,64 | 0,32  | 0,344259 | 0,926908 | 0,353974 | 0,7148492 |
| METTL10        | 130,99  | 0,73  | 0,791101 | 0,926795 | 0,354033 | 0,7148492 |
| CTRC           | 23,41   | 1,05  | 1,131344 | 0,926755 | 0,354054 | 0,7148492 |
| NRN1           | 8,03    | -1,19 | 1,282196 | -0,92674 | 0,354063 | 0,7148492 |
| POLR1B         | 85,69   | 0,81  | 0,877625 | 0,92653  | 0,354171 | 0,7149695 |
| GTF2IP1        | 446,94  | 0,54  | 0,582161 | 0,926392 | 0,354242 | 0,7149695 |
| RP11-629N8.4   | 2,46    | -1,16 | 1,251163 | -0,92633 | 0,354273 | NA        |
| UBXN2A         | 183,71  | -0,55 | 0,592155 | -0,92627 | 0,354305 | 0,7149695 |
| MAGED2         | 193,28  | -0,82 | 0,882151 | -0,92623 | 0,354326 | 0,7149695 |
| RP11-362I1.1   | 0,91    | 1,90  | 2,049219 | 0,92623  | 0,354326 | NA        |
| RP11-475O6.1   | 3,69    | -0,78 | 0,847257 | -0,92622 | 0,354331 | NA        |
| RP11-108M21.1  | 32,30   | 0,80  | 0,86505  | 0,926182 | 0,354351 | 0,7149695 |
| PELI1          | 358,32  | -0,62 | 0,671352 | -0,92609 | 0,3544   | 0,7149695 |

|                |         |       |          |          |          |           |
|----------------|---------|-------|----------|----------|----------|-----------|
| RP11-489P20.1  | 0,70    | 1,43  | 1,54466  | 0,926055 | 0,354417 | NA        |
| CTD-2278I10.4  | 11,23   | -1,69 | 1,829396 | -0,92603 | 0,354428 | 0,7149695 |
| TMEM191C       | 64,22   | -0,96 | 1,034208 | -0,92603 | 0,354443 | 0,7149695 |
| RN7SL790P      | 1,90    | 1,42  | 1,529059 | 0,925917 | 0,354489 | NA        |
| PDS5A          | 1086,69 | 0,41  | 0,439212 | 0,925896 | 0,3545   | 0,714972  |
| RAB11FIP3      | 39,46   | 1,16  | 1,252941 | 0,92582  | 0,35454  | 0,714972  |
| ACO15849.16    | 84,12   | 0,92  | 0,991486 | 0,925806 | 0,354547 | 0,714972  |
| MAPK14         | 934,89  | -0,35 | 0,373058 | -0,92573 | 0,354585 | 0,714972  |
| TMEM208        | 693,36  | -0,38 | 0,405943 | -0,92556 | 0,354673 | 0,714972  |
| PSRC1          | 36,23   | 1,27  | 1,368569 | 0,925496 | 0,354708 | 0,714972  |
| AIF1L          | 1,83    | 3,45  | 3,727482 | 0,925485 | 0,354714 | NA        |
| ACO16735.2     | 9,85    | 1,16  | 1,257825 | 0,925423 | 0,354746 | 0,714972  |
| DVL3           | 223,63  | 0,52  | 0,560782 | 0,925386 | 0,354765 | 0,714972  |
| CNGA1          | 1,36    | -1,54 | 1,662258 | -0,92537 | 0,354776 | NA        |
| RP11-141M1.4   | 22,08   | 0,94  | 1,018354 | 0,925217 | 0,354853 | 0,714972  |
| RP11-93O7.5    | 16,21   | -0,90 | 0,97347  | -0,92516 | 0,354884 | 0,714972  |
| CDHR4          | 1,27    | -1,51 | 1,632168 | -0,92515 | 0,354887 | NA        |
| PFDN4          | 107,68  | -0,43 | 0,463507 | -0,9251  | 0,354911 | 0,714972  |
| FAM3A          | 196,25  | -0,65 | 0,703957 | -0,92509 | 0,354919 | 0,714972  |
| CTD-2001C12.1  | 21,03   | -1,27 | 1,373132 | -0,925   | 0,354964 | 0,714972  |
| CLECL1         | 111,87  | 0,76  | 0,825219 | 0,924987 | 0,354973 | 0,714972  |
| FCN1           | 6654,88 | -0,25 | 0,273426 | -0,92492 | 0,35501  | 0,714972  |
| CNPY3          | 3224,36 | 0,22  | 0,242077 | 0,924846 | 0,355046 | 0,714972  |
| ACO05330.2     | 3,22    | 1,93  | 2,088599 | 0,924833 | 0,355053 | NA        |
| GAS2L3         | 93,68   | -0,87 | 0,94344  | -0,9247  | 0,355123 | 0,7150243 |
| RP4-604K5.3    | 46,53   | 0,98  | 1,061688 | 0,924649 | 0,355149 | 0,7150243 |
| RP11-34P13.8   | 15,17   | -2,26 | 2,444918 | -0,92441 | 0,355274 | 0,7151987 |
| CTC-559E9.8    | 0,80    | 2,28  | 2,463459 | 0,924377 | 0,35529  | NA        |
| FOXJ2          | 336,75  | 0,62  | 0,674692 | 0,924151 | 0,355407 | 0,7153907 |
| RP11-174G6.5   | 89,34   | -0,68 | 0,730608 | -0,92408 | 0,355447 | 0,7153922 |
| GDAP1          | 81,73   | -1,42 | 1,539663 | -0,92379 | 0,355597 | 0,7155759 |
| CLASP1         | 245,37  | 0,58  | 0,628204 | 0,923721 | 0,355631 | 0,7155759 |
| ACO26166.1     | 0,47    | -3,09 | 3,340359 | -0,92361 | 0,355688 | NA        |
| PAH            | 3,47    | 1,97  | 2,133495 | 0,923599 | 0,355695 | NA        |
| WI2-85898F10.1 | 75,75   | -0,35 | 0,381043 | -0,92358 | 0,355704 | 0,7155759 |
| STEAP2         | 10,48   | 0,87  | 0,942452 | 0,923578 | 0,355706 | 0,7155759 |
| RP11-749H20.6  | 15,26   | -1,04 | 1,121079 | -0,92353 | 0,35573  | 0,7155759 |
| TRMT1L         | 156,56  | -0,82 | 0,883897 | -0,92338 | 0,355811 | 0,715606  |
| TOMM20L        | 1,76    | 3,44  | 3,726837 | 0,923367 | 0,355816 | NA        |
| NRXN3          | 7,14    | 1,12  | 1,217664 | 0,923351 | 0,355825 | 0,715606  |
| RP11-554F20.1  | 2,48    | 2,16  | 2,336367 | 0,923233 | 0,355886 | NA        |
| RP1-29C18.10   | 3,80    | 1,77  | 1,917798 | 0,923182 | 0,355912 | 0,715606  |
| RP11-467D6.1   | 30,51   | 0,97  | 1,053287 | 0,923161 | 0,355924 | 0,715606  |
| AC126118.1     | 4,77    | 2,91  | 3,154866 | 0,923134 | 0,355938 | 0,715606  |
| SFTPD-AS1      | 123,15  | -0,39 | 0,426503 | -0,92299 | 0,356012 | 0,7156198 |
| RNF38          | 317,56  | 0,56  | 0,6085   | 0,922966 | 0,356025 | 0,7156198 |
| GP1BA          | 0,57    | 1,79  | 1,942145 | 0,922931 | 0,356043 | NA        |
| KIAA0226L      | 13,62   | -0,96 | 1,038927 | -0,92287 | 0,356077 | 0,7156198 |
| OXER1          | 68,57   | -1,44 | 1,560295 | -0,92282 | 0,356102 | 0,7156198 |
| RP11-188C12.2  | 35,60   | 1,22  | 1,319282 | 0,922752 | 0,356137 | 0,7156198 |



|                |         |       |          |          |          |           |
|----------------|---------|-------|----------|----------|----------|-----------|
| RP11-57H14.3   | 1,51    | -1,84 | 1,994689 | -0,92274 | 0,356145 | NA        |
| AC005077.7     | 0,52    | -3,38 | 3,662454 | -0,92266 | 0,356185 | NA        |
| FER            | 337,86  | 0,52  | 0,559782 | 0,9226   | 0,356216 | 0,7157012 |
| FAM222A        | 0,47    | -3,38 | 3,662611 | -0,92233 | 0,356357 | NA        |
| RP11-793H13.8  | 9,90    | -1,69 | 1,83602  | -0,92224 | 0,356403 | 0,7159804 |
| HMGB2          | 1286,35 | -0,40 | 0,433191 | -0,92219 | 0,356432 | 0,7159804 |
| POGK           | 454,08  | 0,55  | 0,598006 | 0,922002 | 0,356528 | 0,7160962 |
| RNU7-45P       | 1,44    | 1,88  | 2,03551  | 0,921954 | 0,356552 | NA        |
| STBD1          | 1,73    | 3,44  | 3,7268   | 0,921935 | 0,356563 | NA        |
| SPAG7          | 966,27  | 0,35  | 0,375366 | 0,921758 | 0,356655 | 0,7162745 |
| HPSE2          | 0,84    | -3,12 | 3,386208 | -0,92137 | 0,356855 | NA        |
| KCP            | 32,57   | 0,80  | 0,864266 | 0,921363 | 0,356861 | 0,7166104 |
| RP11-685N10.1  | 1,76    | 3,43  | 3,726728 | 0,921125 | 0,356985 | NA        |
| U52112.12      | 10,12   | 0,86  | 0,935989 | 0,921117 | 0,356989 | 0,716791  |
| RN7SL297P      | 0,81    | 2,30  | 2,502085 | 0,921094 | 0,357002 | NA        |
| CTC-30107.4    | 1,55    | -1,43 | 1,547342 | -0,92097 | 0,357067 | NA        |
| AC105396.3     | 0,96    | 2,59  | 2,809737 | 0,920697 | 0,357209 | NA        |
| RP1-111C20.5   | 1,74    | 3,43  | 3,726794 | 0,920485 | 0,357319 | NA        |
| COG7           | 77,71   | 0,72  | 0,778112 | 0,920363 | 0,357383 | 0,7174275 |
| C7orf65        | 2,33    | 1,25  | 1,356085 | 0,920361 | 0,357384 | NA        |
| SLC30A10       | 5,67    | -1,52 | 1,651799 | -0,92033 | 0,357401 | 0,7174275 |
| LY6E           | 1429,23 | -0,50 | 0,548416 | -0,92029 | 0,357422 | 0,7174275 |
| RNU1-67P       | 3,16    | -1,64 | 1,781803 | -0,92005 | 0,357546 | NA        |
| NXNL2          | 165,68  | -0,76 | 0,831484 | -0,91997 | 0,357588 | 0,7176842 |
| AC016894.1     | 2,47    | 2,15  | 2,336128 | 0,919917 | 0,357616 | NA        |
| RP11-219E7.1   | 16,50   | 1,52  | 1,649994 | 0,919868 | 0,357642 | 0,7177142 |
| ATG4A          | 120,81  | 0,85  | 0,925812 | 0,919775 | 0,35769  | 0,7177335 |
| GTF2H2C        | 129,84  | 0,62  | 0,678069 | 0,919698 | 0,357731 | 0,7177377 |
| ZNF552         | 89,21   | -0,83 | 0,897301 | -0,91956 | 0,357803 | 0,7178051 |
| ATP5G1         | 625,87  | 0,29  | 0,314854 | 0,919388 | 0,357893 | 0,7178515 |
| S100A10        | 6792,09 | 0,20  | 0,213853 | 0,91932  | 0,357928 | 0,7178515 |
| MDP1           | 192,77  | 0,53  | 0,572991 | 0,919294 | 0,357942 | 0,7178515 |
| RN7SL526P      | 5,06    | -0,96 | 1,04838  | -0,91919 | 0,357998 | 0,7178861 |
| PEX12          | 0,64    | -3,01 | 3,275567 | -0,91916 | 0,358013 | NA        |
| RP11-356J5.4   | 1,30    | 3,01  | 3,276002 | 0,91901  | 0,358091 | NA        |
| GSS            | 329,62  | 0,49  | 0,531153 | 0,918878 | 0,35816  | 0,7179232 |
| RP11-398E10.1  | 20,69   | 0,68  | 0,737574 | 0,91883  | 0,358184 | 0,7179232 |
| AC002543.2     | 28,87   | 1,08  | 1,177493 | 0,918798 | 0,358201 | 0,7179232 |
| TBC1D7         | 558,35  | 0,55  | 0,593562 | 0,91879  | 0,358205 | 0,7179232 |
| HSPB1          | 93,67   | -0,31 | 0,334561 | -0,91878 | 0,358209 | 0,7179232 |
| RP11-266C7.3   | 1,38    | -1,20 | 1,306826 | -0,91875 | 0,358228 | NA        |
| RN7SL416P      | 0,73    | -2,65 | 2,881544 | -0,91868 | 0,358261 | NA        |
| RRAGC          | 385,27  | 0,47  | 0,510872 | 0,918534 | 0,358339 | 0,7181064 |
| RP11-288E14.2  | 0,53    | -1,16 | 1,26814  | -0,91851 | 0,35835  | NA        |
| CCL22          | 16,83   | -0,71 | 0,774453 | -0,91837 | 0,358423 | 0,7181963 |
| ZNF638         | 910,86  | 0,30  | 0,331891 | 0,918295 | 0,358464 | 0,7182024 |
| RP11-286N22.14 | 3,83    | -2,10 | 2,284713 | -0,91819 | 0,358518 | 0,7182317 |
| AP000240.4     | 8,07    | 1,47  | 1,600213 | 0,918118 | 0,358557 | 0,7182333 |
| CTD-2619J13.23 | 1,72    | 3,42  | 3,726877 | 0,918018 | 0,358609 | NA        |
| RP11-144A16.3  | 1,54    | -1,00 | 1,087556 | -0,91802 | 0,358611 | NA        |

|                |         |       |          |          |          |           |
|----------------|---------|-------|----------|----------|----------|-----------|
| RP11-521C20.4  | 46,69   | 1,00  | 1,085336 | 0,917857 | 0,358694 | 0,7183782 |
| RP11-533E19.5  | 16,19   | 0,93  | 1,018168 | 0,917833 | 0,358706 | 0,7183782 |
| GRIP2          | 0,63    | -3,09 | 3,368708 | -0,9177  | 0,358777 | NA        |
| TSPYL4         | 142,76  | 0,54  | 0,587714 | 0,917238 | 0,359018 | 0,7188394 |
| XX-FW83563B9.5 | 49,38   | -0,85 | 0,930811 | -0,91718 | 0,359048 | 0,7188394 |
| CTD-2015H6.3   | 7,17    | 1,11  | 1,205238 | 0,917157 | 0,35906  | 0,7188394 |
| AC003005.2     | 3,38    | -1,29 | 1,401451 | -0,91714 | 0,359067 | NA        |
| FOXRED2        | 53,62   | 0,71  | 0,779251 | 0,917041 | 0,359121 | 0,7188394 |
| FBXO8          | 92,12   | -1,02 | 1,113088 | -0,91702 | 0,35913  | 0,7188394 |
| RP1-90L6.3     | 1,86    | 2,33  | 2,538317 | 0,916867 | 0,359212 | NA        |
| WWP2           | 346,42  | -0,48 | 0,519089 | -0,91675 | 0,359271 | 0,7190449 |
| RP11-170N11.1  | 6,80    | 1,14  | 1,238939 | 0,916552 | 0,359378 | 0,7191802 |
| RP11-106D4.2   | 6,22    | 0,77  | 0,842926 | 0,916416 | 0,359449 | 0,7192458 |
| RP5-884M6.1    | 28,18   | -1,09 | 1,191633 | -0,91632 | 0,359498 | 0,7192659 |
| RP11-487I9.2   | 61,88   | 0,78  | 0,849457 | 0,916233 | 0,359545 | 0,7192827 |
| RP11-180P8.3   | 0,37    | -3,36 | 3,669433 | -0,91609 | 0,359619 | NA        |
| AC009133.17    | 84,74   | -0,61 | 0,661174 | -0,91608 | 0,359624 | 0,7193137 |
| BCYRN1         | 12,37   | -0,57 | 0,62495  | -0,91592 | 0,35971  | 0,7193137 |
| PRKCB          | 2252,52 | -0,44 | 0,483654 | -0,91591 | 0,359714 | 0,7193137 |
| CTD-2235C13.1  | 3,26    | -2,39 | 2,608634 | -0,91585 | 0,359747 | NA        |
| FHL2           | 17,51   | -0,92 | 1,008953 | -0,91581 | 0,359766 | 0,7193137 |
| RP11-4B16.3    | 0,67    | -3,35 | 3,658073 | -0,91581 | 0,359767 | NA        |
| RP3-465N24.7   | 24,87   | 0,63  | 0,685095 | 0,915799 | 0,359773 | 0,7193137 |
| RP11-392A14.8  | 2,19    | 1,82  | 1,992065 | 0,915644 | 0,359854 | NA        |
| AGAP4          | 196,38  | 0,65  | 0,709849 | 0,915595 | 0,359879 | 0,7193137 |
| NCRNA00167     | 14,45   | -1,42 | 1,552235 | -0,91559 | 0,359882 | 0,7193137 |
| C19orf59       | 110,06  | -1,27 | 1,390829 | -0,91552 | 0,359916 | 0,7193137 |
| ANKRD34A       | 1,01    | 2,60  | 2,842674 | 0,915477 | 0,359941 | NA        |
| ARHGAP9        | 1472,24 | -0,29 | 0,311488 | -0,9154  | 0,35998  | 0,7193137 |
| RP11-128A6.2   | 1,10    | 1,49  | 1,631407 | 0,915387 | 0,359988 | NA        |
| C1QTNF12       | 14,78   | -1,94 | 2,120944 | -0,91536 | 0,360002 | 0,7193137 |
| RAPSN          | 10,19   | -1,62 | 1,767056 | -0,91533 | 0,360019 | 0,7193137 |
| RP11-1151B14.3 | 19,66   | -0,91 | 0,994135 | -0,91517 | 0,360104 | 0,7193137 |
| AP000295.7     | 160,18  | 0,51  | 0,558904 | 0,91495  | 0,360218 | 0,7193137 |
| CDK5R1         | 5,53    | -1,52 | 1,656746 | -0,91494 | 0,360225 | 0,7193137 |
| OR10G3         | 50,22   | -0,48 | 0,51975  | -0,91486 | 0,360267 | 0,7193137 |
| RP1-138B7.4    | 1,71    | 3,41  | 3,726886 | 0,914794 | 0,3603   | NA        |
| GSTP1          | 9424,65 | 0,16  | 0,170027 | 0,914736 | 0,36033  | 0,7193137 |
| AHSA1          | 378,73  | 0,48  | 0,523281 | 0,914703 | 0,360348 | 0,7193137 |
| URM1           | 202,82  | 0,44  | 0,480621 | 0,914593 | 0,360406 | 0,7193137 |
| ADAM9          | 262,53  | -0,51 | 0,560503 | -0,91458 | 0,360412 | 0,7193137 |
| ANKRD29        | 0,50    | 1,43  | 1,564909 | 0,914577 | 0,360414 | NA        |
| FLII           | 1327,93 | 0,36  | 0,398997 | 0,914541 | 0,360433 | 0,7193137 |
| SLITRK4        | 85,80   | -0,95 | 1,03919  | -0,9144  | 0,360507 | 0,7193137 |
| MFSD10         | 340,17  | 0,62  | 0,677866 | 0,914345 | 0,360536 | 0,7193137 |
| TOR1A          | 440,66  | -0,47 | 0,515478 | -0,91431 | 0,360556 | 0,7193137 |
| RP11-172F10.1  | 4,30    | -0,97 | 1,062664 | -0,91423 | 0,360595 | 0,7193137 |
| RP11-288I21.1  | 14,48   | -1,16 | 1,267739 | -0,91416 | 0,360632 | 0,7193137 |
| ABHD6          | 71,43   | 0,73  | 0,798238 | 0,914144 | 0,360641 | 0,7193137 |
| SDE2           | 222,66  | 0,60  | 0,658139 | 0,914142 | 0,360642 | 0,7193137 |

|                |         |       |          |          |          |           |
|----------------|---------|-------|----------|----------|----------|-----------|
| TMEM130        | 16,48   | -0,67 | 0,73243  | -0,91414 | 0,360643 | 0,7193137 |
| MIR6877        | 0,53    | -3,35 | 3,663466 | -0,91392 | 0,360758 | NA        |
| TARBP1         | 524,35  | -0,54 | 0,595379 | -0,91392 | 0,36076  | 0,7194706 |
| RP11-349A22.5  | 970,12  | -0,25 | 0,271299 | -0,91378 | 0,360834 | 0,7195414 |
| RP11-544L8_B.4 | 0,88    | 1,83  | 2,003021 | 0,913561 | 0,360948 | NA        |
| IGF1R          | 60,71   | -0,98 | 1,077074 | -0,91349 | 0,360984 | 0,719763  |
| PSMB5          | 502,60  | -0,56 | 0,617802 | -0,91338 | 0,361041 | 0,7197988 |
| RP11-447M12.2  | 1,31    | 2,41  | 2,643972 | 0,913279 | 0,361096 | NA        |
| GORASP1        | 263,17  | 0,61  | 0,671656 | 0,913218 | 0,361128 | 0,7198954 |
| CTC-265F19.3   | 1,26    | 2,34  | 2,560046 | 0,913093 | 0,361193 | NA        |
| MT-TW          | 1,22    | -1,17 | 1,276706 | -0,91301 | 0,361239 | NA        |
| RP3-508I15.22  | 3,62    | 1,19  | 1,302828 | 0,912975 | 0,361256 | NA        |
| RP11-352M15.2  | 190,18  | 0,62  | 0,683764 | 0,912818 | 0,361338 | 0,7201129 |
| ACVR1C         | 3,42    | 2,61  | 2,860239 | 0,912797 | 0,361349 | NA        |
| CD2            | 436,94  | -0,41 | 0,453553 | -0,91274 | 0,361377 | 0,7201129 |
| CBLB           | 147,21  | 0,62  | 0,679758 | 0,912664 | 0,361419 | 0,7201129 |
| RP11-1090M7.1  | 13,58   | 0,73  | 0,800069 | 0,912634 | 0,361435 | 0,7201129 |
| CTD-3203P2.2   | 57,02   | 0,87  | 0,952542 | 0,912532 | 0,361489 | 0,7201129 |
| CSRP2          | 114,95  | -0,86 | 0,944585 | -0,91239 | 0,361564 | 0,7201129 |
| LINC00338      | 33,79   | -0,59 | 0,645612 | -0,91238 | 0,361567 | 0,7201129 |
| INTS4P1        | 13,23   | -1,20 | 1,3185   | -0,91232 | 0,361602 | 0,7201129 |
| PJA2           | 1004,00 | 0,38  | 0,417355 | 0,912279 | 0,361622 | 0,7201129 |
| ENTPD6         | 597,38  | 0,55  | 0,597574 | 0,91225  | 0,361637 | 0,7201129 |
| RERGL          | 1,64    | 3,40  | 3,727667 | 0,912166 | 0,361681 | NA        |
| RP3-466P17.1   | 4,93    | 2,23  | 2,444138 | 0,912088 | 0,361722 | 0,7201129 |
| OR9Q2          | 1,84    | -2,07 | 2,265871 | -0,91209 | 0,361724 | NA        |
| RP11-703C10.1  | 0,70    | -2,35 | 2,574581 | -0,91208 | 0,361726 | NA        |
| RP11-151I11.3  | 0,41    | -2,99 | 3,28384  | -0,91201 | 0,361763 | NA        |
| HMGA2          | 13,54   | 0,87  | 0,949799 | 0,912001 | 0,361768 | 0,7201129 |
| SAMD4A         | 155,38  | -0,78 | 0,857275 | -0,91199 | 0,361774 | 0,7201129 |
| RP11-328G15.2  | 4,81    | 1,02  | 1,123613 | 0,911981 | 0,361779 | 0,7201129 |
| AC012593.1     | 8,16    | -0,94 | 1,027063 | -0,91177 | 0,361888 | 0,7202522 |
| RP11-235E17.3  | 1,64    | -1,22 | 1,342606 | -0,91175 | 0,3619   | NA        |
| DAPK1          | 435,56  | -0,66 | 0,718974 | -0,91167 | 0,361943 | 0,7202858 |
| LENG1          | 141,54  | -0,65 | 0,714691 | -0,91145 | 0,362061 | 0,7204317 |
| RP11-631N16.4  | 6,27    | -1,47 | 1,615026 | -0,91138 | 0,362094 | 0,7204317 |
| RP11-725G5.3   | 0,37    | -3,34 | 3,669636 | -0,91122 | 0,362179 | NA        |
| AC012309.5     | 4,09    | -1,94 | 2,124576 | -0,91116 | 0,36221  | 0,7205851 |
| RLIM           | 676,28  | 0,50  | 0,545414 | 0,911038 | 0,362276 | 0,7205931 |
| RP11-54D18.1   | 1,10    | 1,51  | 1,652918 | 0,910928 | 0,362333 | NA        |
| RP11-18M11.2   | 5,38    | 1,72  | 1,885339 | 0,910889 | 0,362354 | 0,7205931 |
| RP11-445O16.3  | 14,79   | -0,83 | 0,91003  | -0,9108  | 0,3624   | 0,7205931 |
| RP11-557H15.3  | 1,28    | 2,68  | 2,937422 | 0,910751 | 0,362427 | NA        |
| RP11-732A21.2  | 7,08    | -1,02 | 1,124776 | -0,91062 | 0,362497 | 0,7205931 |
| RP11-583F2.1   | 16,51   | 0,95  | 1,039412 | 0,910559 | 0,362528 | 0,7205931 |
| VENTXP4        | 7,92    | 0,75  | 0,822409 | 0,910538 | 0,362539 | 0,7205931 |
| RP13-507I23.1  | 17,21   | -0,79 | 0,873101 | -0,91049 | 0,362566 | 0,7205931 |
| CTC-304I17.5   | 8,58    | -2,56 | 2,814108 | -0,91045 | 0,362583 | 0,7205931 |
| RP11-100G15.6  | 0,63    | -2,05 | 2,252454 | -0,91028 | 0,362673 | NA        |
| RP11-486M3.2   | 1,70    | 3,39  | 3,72696  | 0,910282 | 0,362674 | NA        |

|               |         |       |          |          |          |           |
|---------------|---------|-------|----------|----------|----------|-----------|
| NUCKS1        | 583,06  | 0,30  | 0,327295 | 0,910181 | 0,362727 | 0,7205931 |
| RP11-807H22.7 | 11,14   | -1,33 | 1,456265 | -0,91012 | 0,362758 | 0,7205931 |
| SLAIN1        | 8,80    | -1,27 | 1,391227 | -0,9101  | 0,362769 | 0,7205931 |
| RP11-563J2.3  | 5,55    | 0,96  | 1,057636 | 0,910074 | 0,362784 | 0,7205931 |
| KANK2         | 18,68   | -0,77 | 0,845151 | -0,91003 | 0,362806 | 0,7205931 |
| GS1-124K5.12  | 301,79  | -0,38 | 0,419941 | -0,90997 | 0,36284  | 0,7205931 |
| NTAN1         | 156,54  | -0,75 | 0,825522 | -0,90996 | 0,362843 | 0,7205931 |
| CLSTN3        | 8,43    | -0,98 | 1,07407  | -0,90989 | 0,362879 | 0,7205931 |
| ZCCHC9        | 191,34  | 0,73  | 0,807539 | 0,909799 | 0,362929 | 0,7205931 |
| TRIM3         | 57,45   | -1,13 | 1,243303 | -0,90973 | 0,362965 | 0,7205931 |
| RP11-493L12.4 | 3,19    | -2,01 | 2,214604 | -0,90957 | 0,363047 | NA        |
| AC069277.2    | 7,52    | -0,94 | 1,033686 | -0,90956 | 0,363054 | 0,7205931 |
| DKK3          | 0,40    | -2,99 | 3,291702 | -0,90947 | 0,363103 | NA        |
| CD28          | 15,27   | -0,77 | 0,842891 | -0,90946 | 0,363107 | 0,7205931 |
| NLE1          | 146,70  | 0,99  | 1,088811 | 0,909446 | 0,363115 | 0,7205931 |
| PTBP1         | 1036,25 | -0,24 | 0,261559 | -0,90942 | 0,363126 | 0,7205931 |
| CTC-425O23.2  | 1,01    | -1,94 | 2,133685 | -0,9094  | 0,363137 | NA        |
| RP11-695J4.2  | 1,20    | 2,21  | 2,428603 | 0,909385 | 0,363147 | NA        |
| RP11-350G24.2 | 0,78    | 1,63  | 1,793164 | 0,909354 | 0,363163 | NA        |
| C11orf57      | 128,17  | 0,56  | 0,613576 | 0,909346 | 0,363168 | 0,7205931 |
| PRKCE         | 182,40  | -0,46 | 0,505578 | -0,90919 | 0,363252 | 0,7205931 |
| NBR1          | 486,06  | -0,49 | 0,542643 | -0,90912 | 0,363284 | 0,7205931 |
| RP11-391M1.3  | 62,65   | -0,78 | 0,85438  | -0,90911 | 0,363292 | 0,7205931 |
| CDKAL1        | 150,70  | -0,53 | 0,581595 | -0,9091  | 0,363296 | 0,7205931 |
| EVI2B         | 2333,09 | 0,21  | 0,228612 | 0,909065 | 0,363316 | 0,7205931 |
| FDX1          | 317,51  | 0,46  | 0,501793 | 0,909025 | 0,363337 | 0,7205931 |
| NR5A1         | 1,73    | 3,39  | 3,72775  | 0,908818 | 0,363446 | NA        |
| RP11-10J21.6  | 1,69    | 3,39  | 3,726987 | 0,908807 | 0,363452 | NA        |
| KDM4D         | 2,21    | 3,09  | 3,399855 | 0,908798 | 0,363457 | NA        |
| NT5DC2        | 236,30  | 0,74  | 0,813477 | 0,90866  | 0,363529 | 0,7208696 |
| ANKS4B        | 9,94    | 0,61  | 0,67253  | 0,908614 | 0,363554 | 0,7208696 |
| CPNE9         | 2,85    | 2,13  | 2,347281 | 0,908554 | 0,363586 | NA        |
| GPR35         | 294,89  | 0,81  | 0,895673 | 0,908533 | 0,363597 | 0,7208778 |
| TPTE2P6       | 9,45    | 1,49  | 1,637286 | 0,908341 | 0,363698 | 0,7210024 |
| GPER1         | 40,79   | -1,48 | 1,634312 | -0,90818 | 0,363782 | 0,7210714 |
| RP3-340N1.2   | 18,77   | 1,11  | 1,222787 | 0,908128 | 0,363811 | 0,7210714 |
| CCSER2        | 341,23  | -0,47 | 0,5212   | -0,90783 | 0,363966 | 0,7211866 |
| RP11-693J15.5 | 14,88   | -0,65 | 0,715418 | -0,90779 | 0,363988 | 0,7211866 |
| RBMS2         | 174,73  | 0,66  | 0,732398 | 0,907744 | 0,364013 | 0,7211866 |
| RN7SL718P     | 17,42   | 0,78  | 0,857562 | 0,90768  | 0,364047 | 0,7211866 |
| WASHC4        | 902,20  | -0,33 | 0,368584 | -0,90765 | 0,364063 | 0,7211866 |
| MEA1          | 644,69  | 0,41  | 0,454977 | 0,907399 | 0,364196 | 0,7213153 |
| RFX1          | 87,55   | -0,68 | 0,752532 | -0,90738 | 0,364205 | 0,7213153 |
| SETD1A        | 161,48  | -0,68 | 0,749946 | -0,90728 | 0,364261 | 0,7213483 |
| SULT1A3       | 826,87  | -0,38 | 0,414491 | -0,90717 | 0,364316 | 0,7213651 |
| ELFN1         | 1,95    | 1,76  | 1,936716 | 0,907121 | 0,364343 | NA        |
| TMEM167A      | 1046,58 | 0,38  | 0,419243 | 0,907044 | 0,364383 | 0,7213651 |
| RP5-890E16.2  | 11,46   | -0,98 | 1,083199 | -0,90701 | 0,364399 | 0,7213651 |
| OR8B8         | 6,42    | -0,77 | 0,845181 | -0,90697 | 0,364424 | 0,7213651 |
| CEP95         | 299,98  | 0,60  | 0,664529 | 0,906825 | 0,364499 | 0,7214361 |

|               |         |       |          |          |          |           |
|---------------|---------|-------|----------|----------|----------|-----------|
| SSR4          | 2523,95 | -0,21 | 0,232124 | -0,90675 | 0,364538 | 0,7214361 |
| AC074008.4    | 1,33    | 1,19  | 1,308622 | 0,906605 | 0,364616 | NA        |
| MGST1         | 344,18  | -0,65 | 0,716807 | -0,90656 | 0,364638 | 0,7215588 |
| RN7SKP190     | 1,67    | 3,38  | 3,727085 | 0,906347 | 0,364752 | NA        |
| RP11-324P9.1  | 1,59    | -1,57 | 1,726956 | -0,90632 | 0,364766 | NA        |
| FAM161B       | 117,82  | 0,80  | 0,886376 | 0,905936 | 0,36497  | 0,7221211 |
| ZNF518A       | 551,34  | -0,45 | 0,492119 | -0,90588 | 0,365    | 0,7221211 |
| KB-1572G7.2   | 40,26   | -1,29 | 1,424667 | -0,90574 | 0,365075 | 0,7221925 |
| SF3B1         | 4079,58 | -0,32 | 0,349724 | -0,90566 | 0,365116 | 0,7221961 |
| SIX4          | 2,20    | 0,98  | 1,082388 | 0,905361 | 0,365274 | NA        |
| CARD14        | 6,29    | -0,69 | 0,759997 | -0,9053  | 0,365304 | 0,7224924 |
| AC097721.2    | 19,81   | -1,19 | 1,310543 | -0,90522 | 0,365346 | 0,7224987 |
| ZNF550        | 33,26   | 1,08  | 1,196736 | 0,905097 | 0,365414 | 0,7225554 |
| CTD-2525I3.5  | 0,78    | 2,27  | 2,506092 | 0,905092 | 0,365417 | NA        |
| ELF2          | 498,67  | -0,35 | 0,384135 | -0,90499 | 0,36547  | 0,7225897 |
| STPG2         | 1,21    | 2,98  | 3,29059  | 0,904857 | 0,365541 | NA        |
| CD99          | 2221,05 | -0,23 | 0,253674 | -0,90473 | 0,365611 | 0,722737  |
| MAP4          | 695,79  | -0,46 | 0,504494 | -0,90463 | 0,36566  | 0,722737  |
| PKMYT1        | 13,85   | 1,28  | 1,416764 | 0,904616 | 0,365669 | 0,722737  |
| RP4-601P9.1   | 2,74    | 1,25  | 1,379961 | 0,904503 | 0,365729 | NA        |
| NEFM          | 2,50    | 3,37  | 3,724907 | 0,904471 | 0,365746 | NA        |
| TMEM106A      | 259,55  | -0,64 | 0,704916 | -0,90445 | 0,365758 | 0,722737  |
| AC016995.3    | 2,28    | -1,39 | 1,534421 | -0,90443 | 0,365765 | NA        |
| BRD1          | 164,26  | -0,63 | 0,697751 | -0,9044  | 0,365782 | 0,722737  |
| ZNF333        | 436,73  | -0,32 | 0,354008 | -0,90439 | 0,36579  | 0,722737  |
| CFAP36        | 110,14  | 0,63  | 0,694883 | 0,904253 | 0,365861 | 0,722737  |
| EPHX2         | 8,29    | 1,05  | 1,166308 | 0,904209 | 0,365885 | 0,722737  |
| RP11-24M17.4  | 11,99   | 1,23  | 1,365251 | 0,904191 | 0,365894 | 0,722737  |
| RP11-561B11.2 | 10,80   | -2,77 | 3,06305  | -0,90399 | 0,365999 | 0,7228672 |
| RP11-326K13.3 | 11,75   | -0,76 | 0,841549 | -0,90374 | 0,366134 | 0,7230583 |
| RPL10P15      | 1,45    | 1,00  | 1,108417 | 0,903551 | 0,366234 | NA        |
| SLC22A5       | 112,73  | 0,97  | 1,069779 | 0,903501 | 0,36626  | 0,72323   |
| RP11-44F14.8  | 2,06    | 1,75  | 1,940868 | 0,903377 | 0,366326 | NA        |
| OR10V3P       | 2,39    | -0,91 | 1,006863 | -0,90337 | 0,366329 | NA        |
| RP4-781K5.6   | 1,16    | -1,52 | 1,684109 | -0,90327 | 0,366381 | NA        |
| CHD4          | 1097,01 | 0,17  | 0,182719 | 0,903244 | 0,366397 | 0,723358  |
| BAD           | 272,72  | -0,49 | 0,545559 | -0,90323 | 0,366403 | 0,723358  |
| CTD-2576D5.1  | 12,91   | -0,98 | 1,080446 | -0,90286 | 0,3666   | 0,7236037 |
| METTL6        | 102,70  | 0,67  | 0,746374 | 0,902851 | 0,366605 | 0,7236037 |
| RP11-693N9.2  | 27,55   | -1,04 | 1,149871 | -0,9027  | 0,366683 | 0,7236293 |
| RP11-730K11.1 | 4,72    | -1,23 | 1,360447 | -0,90268 | 0,366696 | 0,7236293 |
| ABHD12B       | 12,09   | -1,07 | 1,180777 | -0,90259 | 0,366743 | 0,7236368 |
| CTC-559E9.4   | 1,81    | -1,11 | 1,230907 | -0,90251 | 0,366788 | NA        |
| GSTZ1         | 244,78  | 0,83  | 0,924029 | 0,902409 | 0,36684  | 0,7236368 |
| PGBD5         | 9,18    | -0,55 | 0,605228 | -0,90238 | 0,366856 | 0,7236368 |
| GAB2          | 313,63  | 0,65  | 0,718995 | 0,90232  | 0,366887 | 0,7236368 |
| RP11-143A12.3 | 6,75    | 1,23  | 1,366252 | 0,902306 | 0,366894 | 0,7236368 |
| AC010096.1    | 1,28    | -0,94 | 1,039071 | -0,90214 | 0,366981 | NA        |
| AC026202.3    | 25,33   | 1,22  | 1,353985 | 0,902049 | 0,367031 | 0,7237278 |
| MOV10L1       | 1,07    | 1,34  | 1,480483 | 0,902023 | 0,367045 | NA        |

|                |         |       |          |          |          |           |
|----------------|---------|-------|----------|----------|----------|-----------|
| RP5-1142A6.9   | 9,18    | -1,20 | 1,326905 | -0,90202 | 0,367047 | 0,7237278 |
| APEX1          | 1303,22 | 0,27  | 0,294211 | 0,901856 | 0,367134 | 0,7237278 |
| ADRB3          | 5,66    | -0,64 | 0,712645 | -0,90181 | 0,367157 | 0,7237278 |
| MAP2K2         | 610,56  | -0,34 | 0,377677 | -0,90181 | 0,367158 | 0,7237278 |
| RP11-219B4.3   | 4,25    | 2,11  | 2,336953 | 0,901745 | 0,367192 | 0,7237278 |
| TEX13C         | 0,66    | -3,30 | 3,66174  | -0,90168 | 0,367225 | NA        |
| PDE1A          | 7,09    | 1,16  | 1,283763 | 0,901647 | 0,367245 | 0,7237278 |
| PTCD1          | 115,38  | -0,63 | 0,698149 | -0,90163 | 0,367252 | 0,7237278 |
| HMGB1L1        | 0,63    | -1,10 | 1,214989 | -0,90141 | 0,367369 | NA        |
| CTB-92J24.2    | 3,96    | -1,09 | 1,212433 | -0,9014  | 0,367378 | 0,7237623 |
| VEZT           | 229,02  | 0,55  | 0,606831 | 0,901392 | 0,36738  | 0,7237623 |
| PRNP           | 625,48  | 0,41  | 0,450348 | 0,901381 | 0,367386 | 0,7237623 |
| RP11-196G18.24 | 1,21    | 2,30  | 2,554426 | 0,901236 | 0,367463 | NA        |
| PSMB1          | 3365,04 | 0,20  | 0,220798 | 0,901174 | 0,367496 | 0,7238515 |
| EMC1           | 337,96  | -0,56 | 0,619684 | -0,90114 | 0,367513 | 0,7238515 |
| UCHL3          | 378,42  | 0,36  | 0,395683 | 0,901076 | 0,367548 | 0,7238515 |
| CTD-2125J1.1   | 1,08    | 2,11  | 2,344427 | 0,901043 | 0,367566 | NA        |
| PPA2           | 851,19  | 0,36  | 0,401754 | 0,900801 | 0,367694 | 0,7240635 |
| VSIG10         | 51,19   | 0,62  | 0,687751 | 0,900717 | 0,367739 | 0,7240744 |
| RP11-473M20.7  | 42,20   | -0,76 | 0,84077  | -0,90032 | 0,367949 | 0,7242974 |
| PROSC          | 588,66  | 0,57  | 0,63778  | 0,900265 | 0,367979 | 0,7242974 |
| RP11-275B7.1   | 1,65    | 3,36  | 3,727146 | 0,900221 | 0,368003 | NA        |
| RP5-1142A6.10  | 7,55    | -1,42 | 1,579746 | -0,90021 | 0,368009 | 0,7242974 |
| C19orf76       | 38,67   | 1,63  | 1,805793 | 0,900106 | 0,368064 | 0,7242974 |
| TRAPPC6A       | 474,64  | 0,42  | 0,466781 | 0,900093 | 0,368071 | 0,7242974 |
| TAS2R19        | 1,52    | 2,62  | 2,90789  | 0,899993 | 0,368124 | NA        |
| KB-1742H10.3   | 24,23   | -1,09 | 1,21592  | -0,89991 | 0,36817  | 0,7242974 |
| TMPRSS5        | 1,71    | 3,35  | 3,726828 | 0,899888 | 0,36818  | NA        |
| RNF14          | 349,42  | -0,88 | 0,97257  | -0,89987 | 0,368191 | 0,7242974 |
| TMEM126A       | 160,86  | 0,57  | 0,634363 | 0,899719 | 0,36827  | 0,7242974 |
| MUCL1          | 0,53    | -3,30 | 3,66472  | -0,8997  | 0,368281 | NA        |
| SLC26A6        | 163,13  | -0,69 | 0,770322 | -0,89963 | 0,36832  | 0,7242974 |
| AP003419.11    | 93,74   | -0,91 | 1,0126   | -0,89958 | 0,368343 | 0,7242974 |
| ADGRG1         | 23,19   | -0,74 | 0,827141 | -0,89958 | 0,368344 | 0,7242974 |
| SMDT1          | 731,68  | 0,26  | 0,291704 | 0,899572 | 0,368348 | 0,7242974 |
| ARFGAP3        | 475,46  | -0,35 | 0,393453 | -0,89955 | 0,368358 | 0,7242974 |
| RP11-507K2.3   | 1,70    | -1,20 | 1,329681 | -0,89942 | 0,368428 | NA        |
| CTC-554D6.1    | 1,65    | 3,35  | 3,72715  | 0,899344 | 0,368469 | NA        |
| CENPE          | 31,07   | 1,06  | 1,180399 | 0,899276 | 0,368505 | 0,7243517 |
| RP11-886P16.6  | 2,01    | 1,06  | 1,182195 | 0,899275 | 0,368506 | NA        |
| PRR27          | 1,60    | -0,79 | 0,881669 | -0,89927 | 0,368511 | NA        |
| RP1-111D6.3    | 4,04    | -1,07 | 1,191773 | -0,89923 | 0,368531 | 0,7243517 |
| ZNF18          | 36,28   | -0,91 | 1,00726  | -0,89922 | 0,368537 | 0,7243517 |
| RP11-172H24.4  | 25,69   | 0,63  | 0,69641  | 0,899209 | 0,368541 | 0,7243517 |
| ST20-MTHFS     | 2,68    | -1,77 | 1,974236 | -0,89906 | 0,36862  | NA        |
| RP1-56J10.8    | 13,82   | 0,47  | 0,518739 | 0,89903  | 0,368636 | 0,7244156 |
| FAM126A        | 657,36  | 0,65  | 0,718574 | 0,89894  | 0,368685 | 0,7244156 |
| PEX6           | 109,70  | 0,65  | 0,718894 | 0,898929 | 0,368691 | 0,7244156 |
| KB-1208A12.3   | 30,55   | 0,77  | 0,856378 | 0,898802 | 0,368758 | 0,7244716 |
| NUP62          | 701,17  | -0,35 | 0,384702 | -0,89872 | 0,3688   | 0,7244779 |

|               |         |       |          |          |          |           |
|---------------|---------|-------|----------|----------|----------|-----------|
| DDX60         | 315,78  | -0,76 | 0,847608 | -0,89851 | 0,368916 | 0,724628  |
| PRRC2B        | 438,81  | 0,52  | 0,575539 | 0,898231 | 0,369062 | 0,7248227 |
| RP11-2A4.1    | 0,92    | 2,52  | 2,805088 | 0,898086 | 0,369139 | NA        |
| RP11-597D13.2 | 0,35    | -3,30 | 3,671316 | -0,89807 | 0,36915  | NA        |
| EP300         | 1226,59 | -0,47 | 0,518402 | -0,89801 | 0,369181 | 0,7248227 |
| PEX19         | 169,05  | 0,63  | 0,701009 | 0,897973 | 0,3692   | 0,7248227 |
| PMF1-BGLAP    | 23,70   | 1,00  | 1,116148 | 0,897967 | 0,369203 | 0,7248227 |
| IFNGR2        | 787,41  | -0,40 | 0,446914 | -0,89795 | 0,36921  | 0,7248227 |
| BRIX1         | 202,91  | -0,72 | 0,79958  | -0,89787 | 0,369254 | 0,7248336 |
| RP11-575M22.1 | 0,87    | 1,80  | 2,000473 | 0,897796 | 0,369294 | NA        |
| TCP1          | 774,11  | 0,39  | 0,439053 | 0,897735 | 0,369327 | 0,7249    |
| SURF6         | 167,84  | 0,67  | 0,743571 | 0,897447 | 0,36948  | 0,7251246 |
| ZNF511        | 370,44  | 0,57  | 0,637277 | 0,89734  | 0,369537 | 0,7251603 |
| AL157902.3    | 1,66    | 3,34  | 3,72712  | 0,897327 | 0,369544 | NA        |
| MIR708        | 1,63    | 3,34  | 3,727225 | 0,897223 | 0,3696   | NA        |
| CTC-429L19.3  | 0,73    | 1,52  | 1,695649 | 0,896996 | 0,369721 | NA        |
| RP11-17A1.3   | 11,61   | 0,92  | 1,02111  | 0,896584 | 0,369941 | 0,7258751 |
| NHLH1         | 1,64    | 3,34  | 3,727223 | 0,896475 | 0,369999 | NA        |
| AC129778.2    | 28,36   | 1,19  | 1,323985 | 0,896402 | 0,370038 | 0,7258757 |
| NOP10         | 455,13  | -0,34 | 0,38104  | -0,89634 | 0,370072 | 0,7258757 |
| RP11-254F19.3 | 2,36    | -0,99 | 1,110025 | -0,89628 | 0,370104 | NA        |
| CTB-129P6.4   | 1,49    | -2,75 | 3,073609 | -0,89625 | 0,37012  | NA        |
| HIP1          | 667,70  | 0,44  | 0,487588 | 0,896225 | 0,370133 | 0,7258757 |
| HSD17B4       | 432,43  | -0,55 | 0,617395 | -0,89617 | 0,37016  | 0,7258757 |
| UTS2B         | 69,77   | -0,94 | 1,04805  | -0,89615 | 0,370172 | 0,7258757 |
| INGX          | 11,95   | -1,12 | 1,248053 | -0,89615 | 0,370175 | 0,7258757 |
| LCLAT1        | 345,15  | -0,34 | 0,379047 | -0,89599 | 0,370259 | 0,7259002 |
| SRGAP2        | 900,85  | 0,31  | 0,351218 | 0,895976 | 0,370266 | 0,7259002 |
| RP1-33E13.1   | 2,67    | 3,34  | 3,724877 | 0,895821 | 0,370349 | NA        |
| ZNF429        | 78,06   | -0,80 | 0,888113 | -0,89575 | 0,370387 | 0,7260026 |
| BAHCC1        | 31,12   | -1,17 | 1,303987 | -0,89573 | 0,370396 | 0,7260026 |
| SS18          | 444,74  | -0,47 | 0,523018 | -0,89564 | 0,370443 | 0,7260051 |
| PPP5D1        | 157,34  | -0,46 | 0,518377 | -0,89558 | 0,370475 | 0,7260051 |
| LRFN3         | 2,25    | -1,38 | 1,542248 | -0,89542 | 0,370563 | NA        |
| RN7SL378P     | 1,43    | -1,66 | 1,853132 | -0,89538 | 0,370584 | NA        |
| RIC8A         | 286,18  | 0,73  | 0,820076 | 0,895353 | 0,370598 | 0,7261695 |
| RP11-126O22.4 | 1,62    | 3,34  | 3,727214 | 0,89534  | 0,370606 | NA        |
| RP3-337H4.9   | 0,77    | 2,22  | 2,483069 | 0,89531  | 0,370621 | NA        |
| SAMD4B        | 253,70  | -0,42 | 0,467726 | -0,89508 | 0,370745 | 0,7263241 |
| RP11-180M15.6 | 27,14   | -0,86 | 0,955923 | -0,89505 | 0,37076  | 0,7263241 |
| ARSK          | 19,83   | 1,12  | 1,254933 | 0,894872 | 0,370856 | 0,7263241 |
| SCRN1         | 605,16  | -0,52 | 0,583565 | -0,89483 | 0,370879 | 0,7263241 |
| RWDD3         | 105,24  | -0,62 | 0,696999 | -0,89473 | 0,370932 | 0,7263241 |
| ANKDD1A       | 38,03   | -0,88 | 0,988599 | -0,89457 | 0,371017 | 0,7263241 |
| PCF11         | 759,15  | -0,41 | 0,461592 | -0,89456 | 0,371023 | 0,7263241 |
| SEC13         | 986,99  | 0,30  | 0,331482 | 0,894516 | 0,371046 | 0,7263241 |
| PRR4          | 3,58    | 2,36  | 2,634464 | 0,894472 | 0,371069 | NA        |
| MUC12         | 13,33   | -1,84 | 2,052291 | -0,89444 | 0,371086 | 0,7263241 |
| TMEM154       | 661,95  | 0,48  | 0,536903 | 0,894376 | 0,371121 | 0,7263241 |
| FUOM          | 268,05  | 0,45  | 0,504573 | 0,894367 | 0,371126 | 0,7263241 |

|               |         |       |          |          |          |           |
|---------------|---------|-------|----------|----------|----------|-----------|
| RTN4          | 2465,76 | -0,21 | 0,231026 | -0,89433 | 0,371146 | 0,7263241 |
| C22orf42      | 0,38    | -2,43 | 2,71264  | -0,89432 | 0,371151 | NA        |
| SIGLEC1       | 1533,86 | -0,90 | 1,001201 | -0,89413 | 0,371253 | 0,7264128 |
| TMEM237       | 47,64   | 1,40  | 1,568131 | 0,894099 | 0,371269 | 0,7264128 |
| AC010492.2    | 1,25    | 2,96  | 3,313682 | 0,894075 | 0,371282 | NA        |
| RN7SL464P     | 0,34    | -2,14 | 2,397243 | -0,89401 | 0,371319 | NA        |
| ACVRL1        | 72,53   | -1,05 | 1,17312  | -0,89397 | 0,371337 | 0,7264685 |
| APOL2         | 289,20  | -0,52 | 0,585816 | -0,89387 | 0,371392 | 0,7264995 |
| FBF1          | 14,28   | 1,63  | 1,821034 | 0,89356  | 0,371557 | 0,7264995 |
| ASL           | 405,66  | -0,50 | 0,55958  | -0,89352 | 0,371579 | 0,7264995 |
| LEMD2         | 176,44  | 0,88  | 0,988876 | 0,893496 | 0,371591 | 0,7264995 |
| RP11-303E16.7 | 6,37    | -1,13 | 1,269772 | -0,89349 | 0,371593 | 0,7264995 |
| DESI2         | 210,75  | -0,57 | 0,638381 | -0,89339 | 0,37165  | 0,7264995 |
| PNLDC1        | 1,64    | 2,24  | 2,50368  | 0,893356 | 0,371667 | NA        |
| SNORD36C      | 0,70    | 2,15  | 2,403383 | 0,893309 | 0,371692 | NA        |
| ZNF506        | 133,46  | -0,57 | 0,633262 | -0,89322 | 0,371739 | 0,7264995 |
| GSTA4         | 21,93   | -1,21 | 1,350045 | -0,8932  | 0,371751 | 0,7264995 |
| CREG1         | 666,48  | -0,46 | 0,509471 | -0,89318 | 0,371762 | 0,7264995 |
| C17orf97      | 5,38    | -1,76 | 1,968706 | -0,89311 | 0,371798 | 0,7264995 |
| LSM10         | 746,76  | -0,54 | 0,605411 | -0,89309 | 0,371811 | 0,7264995 |
| RP11-133K1.9  | 31,69   | -0,66 | 0,740548 | -0,89307 | 0,371821 | 0,7264995 |
| AC005578.3    | 2,18    | 1,54  | 1,728308 | 0,892669 | 0,372035 | NA        |
| NANOS3        | 0,35    | -3,28 | 3,673459 | -0,89259 | 0,372079 | NA        |
| ALKBH6        | 130,88  | -0,72 | 0,80363  | -0,89258 | 0,37208  | 0,7269296 |
| AGAP6         | 313,02  | -0,69 | 0,777553 | -0,89218 | 0,372296 | 0,7271888 |
| CTD-2561B21.5 | 5,65    | 1,06  | 1,191219 | 0,892072 | 0,372355 | 0,7271888 |
| DNAH2         | 24,30   | -0,59 | 0,661991 | -0,89205 | 0,372365 | 0,7271888 |
| ARL10         | 106,09  | -0,73 | 0,813843 | -0,89204 | 0,372369 | 0,7271888 |
| CTC-490G23.2  | 2,27    | -1,91 | 2,142343 | -0,8919  | 0,372447 | NA        |
| NSMCE4A       | 288,62  | 0,71  | 0,791146 | 0,891878 | 0,372458 | 0,7272186 |
| ZMAT2         | 279,06  | -0,42 | 0,468543 | -0,89187 | 0,372463 | 0,7272186 |
| ZNF480        | 291,05  | 0,42  | 0,468947 | 0,891722 | 0,372542 | 0,7272975 |
| PDE10A        | 8,16    | -1,32 | 1,479811 | -0,89141 | 0,372709 | 0,7275469 |
| NRDC          | 1506,48 | -0,28 | 0,310692 | -0,89126 | 0,372788 | 0,7276242 |
| HSPB11        | 112,23  | 0,60  | 0,675518 | 0,891086 | 0,372883 | 0,7276692 |
| RBM27         | 323,77  | 0,57  | 0,642192 | 0,891075 | 0,372889 | 0,7276692 |
| RP11-456H18.2 | 0,93    | 2,49  | 2,798599 | 0,891049 | 0,372903 | NA        |
| RP11-318K15.2 | 50,81   | -0,67 | 0,748004 | -0,89097 | 0,372945 | 0,7277032 |
| EIF3K         | 3043,76 | 0,18  | 0,200501 | 0,890707 | 0,373086 | 0,7278411 |
| SLC20A2       | 198,61  | -0,62 | 0,700792 | -0,89063 | 0,373129 | 0,7278411 |
| C11orf49      | 226,67  | -0,43 | 0,477465 | -0,89062 | 0,373134 | 0,7278411 |
| KRT8P12       | 43,04   | -1,46 | 1,634386 | -0,89045 | 0,373224 | 0,7278411 |
| PPP1R15B      | 1004,03 | -0,37 | 0,410856 | -0,89044 | 0,37323  | 0,7278411 |
| C16orf13      | 517,86  | 0,33  | 0,365663 | 0,890401 | 0,373251 | 0,7278411 |
| ADAT2         | 286,91  | 0,57  | 0,644809 | 0,890198 | 0,373359 | 0,7279098 |
| OR10AC1P      | 1,71    | -1,36 | 1,523768 | -0,8901  | 0,373413 | NA        |
| RP11-51J9.6   | 0,75    | 2,21  | 2,482454 | 0,890065 | 0,373431 | NA        |
| PQLC3         | 926,93  | -0,45 | 0,509729 | -0,89004 | 0,373442 | 0,7279098 |
| AC145676.2    | 0,58    | -3,01 | 3,379146 | -0,89001 | 0,373459 | NA        |
| CNDP2         | 1389,17 | 0,29  | 0,322951 | 0,889992 | 0,37347  | 0,7279098 |



|                |          |       |          |          |          |           |
|----------------|----------|-------|----------|----------|----------|-----------|
| COPB2          | 1075,61  | 0,46  | 0,513805 | 0,889907 | 0,373516 | 0,7279098 |
| BNC1           | 1,62     | 3,32  | 3,727348 | 0,889827 | 0,373559 | NA        |
| APELA          | 12,73    | -0,70 | 0,791812 | -0,88981 | 0,37357  | 0,7279098 |
| SDHAP3         | 0,94     | 2,53  | 2,840027 | 0,889794 | 0,373577 | NA        |
| EHF            | 2,35     | -2,01 | 2,254874 | -0,88973 | 0,373611 | NA        |
| HTR2A          | 5,50     | -0,97 | 1,087362 | -0,88972 | 0,373615 | 0,7279098 |
| RP11-118B23.7  | 10,67    | 1,38  | 1,547455 | 0,889705 | 0,373625 | 0,7279098 |
| ZNF274         | 175,16   | -0,76 | 0,856545 | -0,88963 | 0,373666 | 0,7279098 |
| ABHD3          | 171,03   | 0,81  | 0,914356 | 0,889617 | 0,373672 | 0,7279098 |
| KIAA0895L      | 60,68    | -0,76 | 0,85491  | -0,88961 | 0,373677 | 0,7279098 |
| HNRNPA3        | 1721,30  | 0,24  | 0,273355 | 0,889298 | 0,373843 | 0,7280528 |
| RP13-444H2.1   | 28,64    | -0,90 | 1,010727 | -0,88928 | 0,373855 | 0,7280528 |
| C17orf58       | 32,57    | -1,29 | 1,451139 | -0,88925 | 0,37387  | 0,7280528 |
| RP11-342D14.1  | 6,11     | -0,91 | 1,028972 | -0,88918 | 0,373907 | 0,7280528 |
| C6orf203       | 105,35   | 0,51  | 0,575939 | 0,889056 | 0,373973 | 0,728105  |
| CTA-360L10.1   | 34,48    | 0,75  | 0,84753  | 0,888949 | 0,374031 | 0,7281408 |
| RP11-1246C19.1 | 4,07     | 0,89  | 1,006116 | 0,888874 | 0,374071 | 0,7281428 |
| RN7SL583P      | 1,61     | 3,31  | 3,727332 | 0,888809 | 0,374106 | NA        |
| LAG3           | 3,70     | -2,10 | 2,360967 | -0,8888  | 0,374108 | NA        |
| FOXD2          | 1,20     | -1,98 | 2,225616 | -0,88871 | 0,374158 | NA        |
| TMEM57         | 137,98   | -0,65 | 0,735413 | -0,88857 | 0,374236 | 0,7282364 |
| PTK2B          | 665,38   | 0,35  | 0,396692 | 0,888557 | 0,374241 | 0,7282364 |
| HNRNPH1        | 8170,08  | 0,20  | 0,227873 | 0,888521 | 0,37426  | 0,7282364 |
| GBF1           | 252,87   | 0,45  | 0,502893 | 0,888475 | 0,374285 | 0,7282364 |
| ATCAY          | 15,48    | -0,75 | 0,845769 | -0,88839 | 0,374333 | 0,7282364 |
| EPHA1          | 13,70    | 0,71  | 0,800949 | 0,888348 | 0,374354 | 0,7282364 |
| AZU1           | 3,61     | -1,79 | 2,016272 | -0,88832 | 0,374371 | NA        |
| RNU7-181P      | 6,14     | 1,06  | 1,196345 | 0,888168 | 0,37445  | 0,7282882 |
| HADHA          | 2337,15  | 0,27  | 0,30113  | 0,888147 | 0,374461 | 0,7282882 |
| RP11-78A19.3   | 366,97   | 0,49  | 0,553401 | 0,88798  | 0,374551 | 0,7282882 |
| C17orf100      | 24,71    | -1,41 | 1,585728 | -0,88769 | 0,374705 | 0,7282882 |
| DSE            | 813,28   | -0,43 | 0,483275 | -0,88767 | 0,374719 | 0,7282882 |
| AP3S1          | 654,23   | 0,48  | 0,542628 | 0,887635 | 0,374737 | 0,7282882 |
| RP11-550I24.2  | 14,95    | -0,98 | 1,107111 | -0,88756 | 0,374779 | 0,7282882 |
| RPS4X          | 12350,00 | 0,19  | 0,208926 | 0,88753  | 0,374794 | 0,7282882 |
| GPR108         | 424,46   | 0,40  | 0,451218 | 0,887481 | 0,37482  | 0,7282882 |
| RP11-321G3.1   | 21,38    | 1,02  | 1,154842 | 0,887471 | 0,374825 | 0,7282882 |
| RP11-354P11.4  | 15,21    | -0,70 | 0,792346 | -0,88743 | 0,374849 | 0,7282882 |
| MAZ            | 449,83   | -0,39 | 0,444659 | -0,88741 | 0,374858 | 0,7282882 |
| CTA-221G9.12   | 9,77     | -0,73 | 0,818806 | -0,88735 | 0,374889 | 0,7282882 |
| AC004980.7     | 64,83    | -0,89 | 1,000461 | -0,88728 | 0,374929 | 0,7282884 |
| NOS1           | 62,10    | -0,40 | 0,449846 | -0,88716 | 0,374995 | 0,7283414 |
| ARID1B         | 917,68   | 0,29  | 0,32702  | 0,886919 | 0,375123 | 0,7283868 |
| PIK3CD         | 940,58   | -0,34 | 0,378493 | -0,88688 | 0,375144 | 0,7283868 |
| RPL29          | 7279,45  | -0,17 | 0,193527 | -0,88674 | 0,375218 | 0,7283868 |
| DHX36          | 677,61   | -0,44 | 0,496219 | -0,88674 | 0,37522  | 0,7283868 |
| MYC            | 15,89    | -0,99 | 1,112653 | -0,88665 | 0,37527  | 0,7283868 |
| RP11-1415C14.4 | 5,56     | 1,95  | 2,193922 | 0,886643 | 0,375271 | 0,7283868 |
| AC012358.4     | 7,85     | -2,31 | 2,608415 | -0,88655 | 0,375319 | 0,7283868 |
| PTAR1          | 556,40   | 0,63  | 0,712262 | 0,886531 | 0,375332 | 0,7283868 |

|               |         |       |          |          |          |           |
|---------------|---------|-------|----------|----------|----------|-----------|
| RP11-85A1.3   | 29,58   | 1,62  | 1,832497 | 0,886378 | 0,375414 | 0,7284709 |
| RNU6-917P     | 1,20    | -2,72 | 3,067633 | -0,88636 | 0,375425 | NA        |
| AC017006.3    | 3,33    | 0,95  | 1,071403 | 0,886282 | 0,375466 | NA        |
| RP11-388M20.6 | 5,04    | -1,80 | 2,036671 | -0,88602 | 0,375608 | 0,7287711 |
| TMEM121       | 1,24    | 2,95  | 3,331096 | 0,885981 | 0,375628 | NA        |
| RP11-354E11.2 | 5,71    | 0,83  | 0,935191 | 0,885842 | 0,375703 | 0,7287731 |
| TPM2          | 25,63   | -1,01 | 1,142377 | -0,88582 | 0,375714 | 0,7287731 |
| RP11-197N18.2 | 2,88    | 1,57  | 1,768329 | 0,88582  | 0,375715 | NA        |
| AICDA         | 15,47   | -0,46 | 0,514976 | -0,8858  | 0,375727 | 0,7287731 |
| CTD-2311B13.1 | 3,56    | -3,21 | 3,622685 | -0,88574 | 0,375759 | NA        |
| RP11-145E17.3 | 1,78    | 1,35  | 1,52286  | 0,885535 | 0,375868 | NA        |
| TTC9C         | 128,22  | -0,84 | 0,951229 | -0,88534 | 0,375974 | 0,7291765 |
| AC068831.6    | 22,81   | -0,55 | 0,621402 | -0,88525 | 0,376023 | 0,7291954 |
| OS9           | 873,04  | 0,32  | 0,356876 | 0,885147 | 0,376077 | 0,7292251 |
| DPH1          | 129,30  | 0,78  | 0,876992 | 0,885073 | 0,376117 | 0,7292271 |
| TCAIM         | 184,74  | 0,58  | 0,65079  | 0,884947 | 0,376185 | 0,7292832 |
| AC073046.25   | 1,58    | 3,30  | 3,727448 | 0,884804 | 0,376262 | NA        |
| WDR18         | 308,54  | -0,45 | 0,503506 | -0,88464 | 0,376349 | 0,7294332 |
| DOC2B         | 11,93   | -0,81 | 0,910085 | -0,88462 | 0,376362 | 0,7294332 |
| WIPI2         | 555,71  | -0,38 | 0,426149 | -0,88451 | 0,376422 | 0,7294332 |
| AQP9          | 6,57    | -1,43 | 1,618259 | -0,88444 | 0,376456 | 0,7294332 |
| RUFY4         | 72,16   | 1,26  | 1,420099 | 0,88444  | 0,376459 | 0,7294332 |
| RP11-462D18.2 | 0,41    | -3,24 | 3,668233 | -0,88441 | 0,376474 | NA        |
| RP11-90J19.1  | 92,52   | -0,73 | 0,825869 | -0,88425 | 0,376562 | 0,7294747 |
| EFCAB5        | 63,55   | -0,66 | 0,743263 | -0,88421 | 0,376581 | 0,7294747 |
| RP4-583P15.16 | 1,58    | 3,30  | 3,727466 | 0,884209 | 0,376583 | NA        |
| RP11-325K4.3  | 9,48    | 1,42  | 1,60192  | 0,884182 | 0,376598 | 0,7294747 |
| CENPN         | 81,59   | 0,83  | 0,94167  | 0,884056 | 0,376666 | 0,7295025 |
| RMDN1         | 388,90  | 0,58  | 0,660902 | 0,883902 | 0,376749 | 0,7295025 |
| G3BP1         | 907,86  | -0,42 | 0,473292 | -0,88385 | 0,376775 | 0,7295025 |
| RP11-525K10.3 | 0,69    | -1,45 | 1,640616 | -0,88384 | 0,376785 | NA        |
| C11orf45      | 10,72   | 2,20  | 2,494328 | 0,883802 | 0,376803 | 0,7295025 |
| RP11-864I4.3  | 7,65    | -0,92 | 1,046146 | -0,88375 | 0,376829 | 0,7295025 |
| RP11-215N21.1 | 10,86   | 0,80  | 0,910442 | 0,88372  | 0,376848 | 0,7295025 |
| AC064847.3    | 0,48    | -2,97 | 3,362812 | -0,88367 | 0,376873 | NA        |
| RP4-681N20.5  | 0,60    | 1,92  | 2,167503 | 0,883556 | 0,376936 | NA        |
| RP11-89C3.4   | 1,58    | 3,29  | 3,727522 | 0,883507 | 0,376962 | NA        |
| RIMBP3C       | 2,00    | 3,01  | 3,40972  | 0,883462 | 0,376987 | NA        |
| RP11-181K12.2 | 0,63    | -2,24 | 2,535041 | -0,88334 | 0,377054 | NA        |
| AC002310.7    | 11,15   | 1,11  | 1,251924 | 0,883268 | 0,377092 | 0,7298989 |
| RP11-518D3.1  | 19,23   | 1,02  | 1,15404  | 0,883086 | 0,37719  | 0,7300126 |
| RP11-622L21.1 | 0,47    | -3,24 | 3,665802 | -0,88303 | 0,377219 | NA        |
| ARHGAP11B     | 16,56   | 1,42  | 1,609765 | 0,882947 | 0,377265 | 0,7300821 |
| AC005822.1    | 0,74    | 2,22  | 2,519657 | 0,88284  | 0,377323 | NA        |
| TRIM31        | 4,10    | 1,32  | 1,496463 | 0,882592 | 0,377457 | 0,7303781 |
| RP11-510H23.1 | 24,93   | -0,99 | 1,120282 | -0,88249 | 0,377512 | 0,7304082 |
| RP4-684O24.5  | 1,58    | 3,29  | 3,727484 | 0,88245  | 0,377534 | NA        |
| TBXAS1        | 1138,22 | -0,41 | 0,460603 | -0,88233 | 0,377599 | 0,7304227 |
| MRPS34        | 591,10  | -0,32 | 0,363088 | -0,88232 | 0,377602 | 0,7304227 |
| CTD-2095E4.5  | 1,68    | 2,13  | 2,414798 | 0,882317 | 0,377605 | NA        |

|                |          |       |          |          |          |           |
|----------------|----------|-------|----------|----------|----------|-----------|
| SPG11          | 884,95   | -0,35 | 0,3913   | -0,88226 | 0,377637 | 0,7304227 |
| RP11-437L7.2   | 36,49    | -0,53 | 0,606235 | -0,88205 | 0,377749 | 0,7305632 |
| CTD-2199O4.7   | 1,48     | 2,60  | 2,943341 | 0,881995 | 0,37778  | NA        |
| CTC-499J9.1    | 5,09     | 1,79  | 2,028314 | 0,881781 | 0,377895 | 0,7307578 |
| CTD-2192J16.15 | 25,28    | -0,44 | 0,496066 | -0,88172 | 0,377928 | 0,7307578 |
| CTC-518B2.12   | 0,90     | 2,49  | 2,828446 | 0,881607 | 0,37799  | NA        |
| RP11-68I3.5    | 5,05     | -2,18 | 2,469555 | -0,88152 | 0,378038 | 0,730872  |
| RP11-10B2.3    | 1,65     | -0,92 | 1,04807  | -0,88148 | 0,378058 | NA        |
| RPL10          | 22407,16 | 0,13  | 0,148302 | 0,881446 | 0,378077 | 0,730872  |
| RP11-47A8.5    | 6,84     | -1,85 | 2,103668 | -0,88139 | 0,378105 | 0,730872  |
| CTD-3099C6.9   | 35,49    | 0,73  | 0,833085 | 0,881256 | 0,378179 | 0,7309394 |
| KCNH7          | 2,38     | 3,28  | 3,725167 | 0,881162 | 0,37823  | NA        |
| FCHO1          | 269,16   | 0,37  | 0,420895 | 0,881024 | 0,378305 | 0,730959  |
| RP11-399K21.12 | 116,58   | 0,58  | 0,65805  | 0,881005 | 0,378315 | 0,730959  |
| RP11-304M2.3   | 2,83     | -2,82 | 3,197105 | -0,88098 | 0,378329 | NA        |
| TLL2           | 12,51    | -0,86 | 0,977218 | -0,88093 | 0,378356 | 0,730959  |
| C1orf54        | 83,13    | 0,49  | 0,554457 | 0,880901 | 0,378371 | 0,730959  |
| DDX59          | 175,32   | 0,59  | 0,671641 | 0,88084  | 0,378404 | 0,730959  |
| RP11-382B18.1  | 395,37   | -0,31 | 0,352612 | -0,8808  | 0,378425 | 0,730959  |
| RPL7A          | 8570,27  | 0,15  | 0,169019 | 0,880629 | 0,378519 | 0,7310638 |
| EFCAB1         | 1,57     | 3,28  | 3,727882 | 0,880572 | 0,378549 | NA        |
| IL2RA          | 7,42     | 0,76  | 0,861018 | 0,880556 | 0,378558 | 0,7310649 |
| AC016292.1     | 1,86     | -1,79 | 2,029653 | -0,88043 | 0,378625 | NA        |
| DDX46          | 745,77   | 0,23  | 0,256769 | 0,880417 | 0,378634 | 0,7311342 |
| HELLS          | 54,52    | -0,81 | 0,915285 | -0,8802  | 0,37875  | 0,7312106 |
| RP4-717I23.3   | 364,14   | 0,44  | 0,502822 | 0,880142 | 0,378783 | 0,7312106 |
| MIR602         | 1,56     | 3,28  | 3,727532 | 0,880118 | 0,378795 | NA        |
| PTGIR          | 134,46   | -0,79 | 0,897098 | -0,8801  | 0,378807 | 0,7312106 |
| RP11-165F24.2  | 1,55     | 3,28  | 3,727598 | 0,88001  | 0,378854 | NA        |
| AASDHPPT       | 283,13   | 0,56  | 0,639237 | 0,879996 | 0,378861 | 0,7312106 |
| FCRL3          | 26,29    | -1,21 | 1,370741 | -0,87996 | 0,378883 | 0,7312106 |
| QRSL1          | 193,69   | -0,63 | 0,721492 | -0,87991 | 0,378909 | 0,7312106 |
| ADAM15         | 366,77   | -0,33 | 0,372378 | -0,87983 | 0,378953 | 0,7312144 |
| AC073046.4     | 20,45    | -1,70 | 1,932942 | -0,87973 | 0,379007 | 0,7312144 |
| GABPB1-AS1     | 739,13   | 0,53  | 0,604365 | 0,879687 | 0,379029 | 0,7312144 |
| AD001527.7     | 8,93     | -0,72 | 0,816968 | -0,87959 | 0,379081 | 0,7312399 |
| CTC-499B15.5   | 94,97    | -0,68 | 0,770161 | -0,87948 | 0,379142 | 0,7312808 |
| RP11-157D23.1  | 1,56     | 3,28  | 3,727546 | 0,879332 | 0,379221 | NA        |
| CTB-134H23.3   | 8,42     | 0,98  | 1,112925 | 0,879306 | 0,379236 | 0,7313856 |
| CCDC73         | 14,81    | -1,46 | 1,656294 | -0,87919 | 0,379297 | 0,731393  |
| RP11-246E14.1  | 0,43     | -3,23 | 3,669251 | -0,87917 | 0,37931  | NA        |
| NSUN2          | 430,00   | 0,60  | 0,685854 | 0,879154 | 0,379318 | 0,731393  |
| PERP           | 4,48     | -2,25 | 2,560482 | -0,87906 | 0,379369 | 0,7314155 |
| ZSCAN4         | 2,77     | -0,96 | 1,088014 | -0,87888 | 0,379464 | NA        |
| RP11-255L13.1  | 1,21     | 1,09  | 1,240313 | 0,878813 | 0,379503 | NA        |
| RP11-3G20.2    | 2,37     | 1,51  | 1,722878 | 0,878801 | 0,379509 | NA        |
| FRG1B          | 12,01    | 1,28  | 1,457088 | 0,878638 | 0,379597 | 0,7316578 |
| ZFYVE16        | 646,57   | 0,51  | 0,577572 | 0,878624 | 0,379605 | 0,7316578 |
| RP11-21L23.2   | 4,68     | -0,74 | 0,841271 | -0,87856 | 0,379641 | 0,7316578 |
| PPP3CA         | 873,36   | -0,25 | 0,288574 | -0,87854 | 0,379652 | 0,7316578 |

|                  |         |       |          |          |          |           |
|------------------|---------|-------|----------|----------|----------|-----------|
| WNT7B            | 1,37    | -1,37 | 1,558646 | -0,87837 | 0,379741 | NA        |
| BAIAP2-AS1       | 156,27  | 0,56  | 0,635131 | 0,878305 | 0,379778 | 0,7317728 |
| TLK2             | 352,52  | 0,44  | 0,505206 | 0,878181 | 0,379846 | 0,7317728 |
| GPATCH1          | 68,56   | -0,84 | 0,958252 | -0,87817 | 0,379853 | 0,7317728 |
| ANKRD39          | 97,33   | 0,81  | 0,918562 | 0,877909 | 0,379993 | 0,7317728 |
| NAB2             | 136,54  | 1,05  | 1,199886 | 0,877829 | 0,380037 | 0,7317728 |
| RAB34            | 622,27  | -0,42 | 0,483732 | -0,87776 | 0,380073 | 0,7317728 |
| ZNF117           | 122,88  | 0,54  | 0,619127 | 0,877756 | 0,380076 | 0,7317728 |
| PDE4A            | 418,52  | -0,53 | 0,601803 | -0,87768 | 0,380116 | 0,7317728 |
| ANKFY1           | 576,09  | -0,52 | 0,587709 | -0,87767 | 0,380122 | 0,7317728 |
| RP11-395I6.3     | 17,39   | -1,69 | 1,928458 | -0,87766 | 0,380126 | 0,7317728 |
| RP11-1020A11.2   | 58,73   | 0,73  | 0,831367 | 0,87763  | 0,380144 | 0,7317728 |
| AC093106.7       | 2,23    | 1,01  | 1,14593  | 0,877597 | 0,380163 | NA        |
| RP5-872K7.7      | 1,58    | 3,27  | 3,727889 | 0,877448 | 0,380243 | NA        |
| CTC-378H22.1     | 28,16   | -1,39 | 1,58712  | -0,87741 | 0,380266 | 0,7317856 |
| TRBV9            | 11,09   | -3,17 | 3,611761 | -0,8774  | 0,380268 | 0,7317856 |
| RP1-155D22.1     | 0,40    | -3,22 | 3,669315 | -0,87735 | 0,380298 | NA        |
| RP11-25K21.1     | 6,73    | 1,10  | 1,256291 | 0,877252 | 0,38035  | 0,7317856 |
| VPS51            | 648,13  | -0,40 | 0,460191 | -0,87707 | 0,380448 | 0,7317856 |
| ZNF597           | 43,82   | 1,36  | 1,545583 | 0,877048 | 0,380461 | 0,7317856 |
| ZNF784           | 31,82   | -1,04 | 1,180445 | -0,87703 | 0,380469 | 0,7317856 |
| UCA1             | 47,21   | -0,71 | 0,811394 | -0,87702 | 0,380476 | 0,7317856 |
| CTD-2270P14.2    | 53,43   | -0,90 | 1,022892 | -0,87701 | 0,380481 | 0,7317856 |
| CASQ1            | 2,43    | -1,59 | 1,812965 | -0,877   | 0,380488 | NA        |
| HMHA1            | 1468,77 | -0,34 | 0,392045 | -0,87697 | 0,380505 | 0,7317856 |
| CTB-47B11.3      | 42,12   | 0,31  | 0,354343 | 0,876674 | 0,380664 | 0,732015  |
| RP11-54G14.1     | 17,64   | -0,83 | 0,94927  | -0,87645 | 0,380784 | 0,7321718 |
| RP11-692N5.2     | 1,02    | -1,84 | 2,095016 | -0,87645 | 0,380785 | NA        |
| AP005530.1       | 0,62    | -1,43 | 1,628195 | -0,87642 | 0,380804 | NA        |
| VWA3A            | 2,26    | -2,25 | 2,572716 | -0,87625 | 0,380893 | NA        |
| TAF9             | 612,68  | 0,52  | 0,589193 | 0,87624  | 0,380899 | 0,7323097 |
| RP11-147I3.1     | 40,67   | 0,80  | 0,908663 | 0,876175 | 0,380935 | 0,7323097 |
| RP11-262A12.1    | 0,33    | -3,22 | 3,672906 | -0,87616 | 0,380945 | NA        |
| CASC2            | 1,59    | -2,25 | 2,571959 | -0,87604 | 0,381009 | NA        |
| MID1IP1          | 41,27   | -0,54 | 0,612611 | -0,87596 | 0,381054 | 0,7324621 |
| HIST1H2AL        | 12,76   | -1,49 | 1,696109 | -0,87578 | 0,381147 | 0,7325137 |
| AC005307.1       | 2,85    | 1,40  | 1,60038  | 0,875763 | 0,381159 | NA        |
| OSBPL9           | 356,83  | 0,51  | 0,579352 | 0,875763 | 0,381159 | 0,7325137 |
| LL22NC03-N64E9.1 | 1,54    | 3,26  | 3,727601 | 0,875751 | 0,381165 | NA        |
| RP11-111L24.3    | 0,40    | -3,21 | 3,669418 | -0,87549 | 0,381309 | NA        |
| PPP2R5B          | 35,82   | 0,99  | 1,131429 | 0,875461 | 0,381323 | 0,7327069 |
| AC011737.2       | 3,58    | 1,33  | 1,518361 | 0,875424 | 0,381343 | NA        |
| TRPV3            | 13,05   | -0,56 | 0,637712 | -0,87537 | 0,381371 | 0,7327069 |
| CTD-2228K2.5     | 96,43   | -1,03 | 1,180863 | -0,87536 | 0,381378 | 0,7327069 |
| C3orf49          | 3,23    | -1,02 | 1,165137 | -0,87532 | 0,381402 | NA        |
| RN7SL578P        | 0,75    | 2,17  | 2,476285 | 0,875313 | 0,381404 | NA        |
| RP11-686D22.10   | 0,40    | -3,21 | 3,669481 | -0,8753  | 0,381412 | NA        |
| AK4              | 52,18   | -1,33 | 1,515823 | -0,87516 | 0,381488 | 0,7327825 |
| IDO2             | 7,16    | -0,72 | 0,818741 | -0,87512 | 0,381508 | 0,7327825 |
| RN7SL18P         | 7,06    | -1,00 | 1,137345 | -0,87507 | 0,381535 | 0,7327825 |

|               |        |       |          |          |          |           |
|---------------|--------|-------|----------|----------|----------|-----------|
| ACVR1B        | 56,13  | -0,84 | 0,961671 | -0,87479 | 0,381686 | 0,7328395 |
| BCS1L         | 190,73 | 0,74  | 0,851602 | 0,874742 | 0,381714 | 0,7328395 |
| TRAF6         | 135,89 | 0,96  | 1,099382 | 0,874735 | 0,381718 | 0,7328395 |
| ZNF335        | 316,29 | -0,36 | 0,413672 | -0,87468 | 0,381747 | 0,7328395 |
| PPP4C         | 824,87 | -0,30 | 0,339785 | -0,87461 | 0,381788 | 0,7328395 |
| SLC12A5       | 2,23   | -1,64 | 1,878021 | -0,87452 | 0,381835 | NA        |
| MBD4          | 380,36 | 0,41  | 0,463343 | 0,874513 | 0,381839 | 0,7328395 |
| RP11-736K20.4 | 28,29  | -0,50 | 0,574605 | -0,87447 | 0,38186  | 0,7328395 |
| PCDH11Y       | 5,23   | -0,83 | 0,943482 | -0,87444 | 0,38188  | 0,7328395 |
| CTD-2353F22.1 | 11,08  | -1,61 | 1,835992 | -0,8743  | 0,381957 | 0,7329122 |
| PLA2G2C       | 24,12  | -1,29 | 1,474485 | -0,8742  | 0,382011 | 0,7329388 |
| RP11-354M20.3 | 1,98   | -2,46 | 2,8132   | -0,87419 | 0,382013 | NA        |
| NCOA1         | 782,04 | -0,51 | 0,588784 | -0,87411 | 0,38206  | 0,7329574 |
| RN7SL840P     | 3,08   | 1,11  | 1,272079 | 0,874081 | 0,382074 | NA        |
| CMBL          | 9,01   | 0,61  | 0,703033 | 0,873998 | 0,38212  | 0,7329966 |
| ZNF816        | 3,59   | -0,89 | 1,020409 | -0,87396 | 0,382138 | NA        |
| CLRN1OS       | 1,98   | -0,85 | 0,971411 | -0,87387 | 0,38219  | NA        |
| XRRA1         | 200,97 | -0,56 | 0,646487 | -0,87384 | 0,382207 | 0,7330507 |
| RP11-65M17.3  | 13,58  | -2,09 | 2,397584 | -0,87379 | 0,382234 | 0,7330507 |
| SRP68         | 343,72 | -0,60 | 0,681496 | -0,87364 | 0,382313 | 0,7330507 |
| RP11-665C16.4 | 1,90   | 2,34  | 2,678957 | 0,873611 | 0,38233  | NA        |
| RP11-38J22.1  | 1,54   | 3,26  | 3,72765  | 0,87348  | 0,382402 | NA        |
| SFT2D3        | 70,39  | -2,47 | 2,823063 | -0,87343 | 0,382427 | 0,7330507 |
| NFIA          | 65,61  | -0,93 | 1,059115 | -0,87338 | 0,382455 | 0,7330507 |
| TICAM1        | 61,67  | -0,89 | 1,016741 | -0,87335 | 0,382473 | 0,7330507 |
| DPP3          | 186,91 | -0,74 | 0,850771 | -0,87322 | 0,382544 | 0,7330507 |
| AC016736.2    | 3,23   | 1,37  | 1,565835 | 0,873204 | 0,382552 | NA        |
| SLC27A4       | 80,16  | -0,90 | 1,03595  | -0,87316 | 0,382577 | 0,7330507 |
| ACP1          | 539,31 | 0,46  | 0,531418 | 0,873154 | 0,382579 | 0,7330507 |
| ANGPTL3       | 1,06   | 2,77  | 3,16793  | 0,873149 | 0,382582 | NA        |
| LA16c-385E7.1 | 14,10  | -0,72 | 0,82478  | -0,87305 | 0,382637 | 0,7330507 |
| CBFB          | 366,32 | 0,46  | 0,530082 | 0,872967 | 0,382681 | 0,7330507 |
| BEND4         | 4,98   | 3,24  | 3,708096 | 0,87294  | 0,382696 | 0,7330507 |
| RHBDL2        | 9,70   | -0,58 | 0,660066 | -0,87291 | 0,382711 | 0,7330507 |
| RNU7-49P      | 0,57   | -1,71 | 1,959785 | -0,87291 | 0,382712 | NA        |
| RP1-7G5.6     | 4,14   | -1,11 | 1,272842 | -0,8729  | 0,382716 | 0,7330507 |
| TRAF2         | 76,52  | -0,64 | 0,737907 | -0,87286 | 0,382739 | 0,7330507 |
| ATG4C         | 356,11 | -0,71 | 0,816197 | -0,87273 | 0,382812 | 0,7330575 |
| OVCA2         | 461,89 | -0,62 | 0,710484 | -0,87256 | 0,382904 | 0,7330575 |
| NLK           | 145,27 | 0,96  | 1,0981   | 0,872511 | 0,38293  | 0,7330575 |
| NIFK          | 288,48 | -0,51 | 0,582939 | -0,87251 | 0,382933 | 0,7330575 |
| OR7E59P       | 0,83   | -1,37 | 1,570688 | -0,87241 | 0,382985 | NA        |
| RP11-648O15.1 | 2,07   | -1,29 | 1,474991 | -0,87236 | 0,383013 | NA        |
| DCTN1         | 312,88 | -0,40 | 0,456284 | -0,87231 | 0,38304  | 0,7330575 |
| ZNF736        | 97,16  | 0,63  | 0,725265 | 0,872175 | 0,383113 | 0,7330575 |
| SERINC5       | 703,96 | -0,36 | 0,413855 | -0,8721  | 0,383155 | 0,7330575 |
| AC003102.3    | 40,95  | -0,49 | 0,559314 | -0,87208 | 0,383167 | 0,7330575 |
| KIF22         | 273,42 | -0,33 | 0,38034  | -0,87207 | 0,383169 | 0,7330575 |
| PRPSAP1       | 249,40 | 0,63  | 0,71701  | 0,872065 | 0,383173 | 0,7330575 |
| RP11-267A15.3 | 1,16   | -3,05 | 3,495275 | -0,87206 | 0,383174 | NA        |

|               |         |       |          |          |          |           |
|---------------|---------|-------|----------|----------|----------|-----------|
| LINC00506     | 266,82  | 0,35  | 0,399257 | 0,871989 | 0,383214 | 0,7330575 |
| EGOT          | 4,04    | 1,64  | 1,878125 | 0,87198  | 0,383219 | 0,7330575 |
| BBS1          | 53,21   | -0,82 | 0,945512 | -0,87192 | 0,383255 | 0,7330575 |
| RP11-587P21.3 | 1,12    | 2,79  | 3,20268  | 0,871858 | 0,383286 | NA        |
| RP11-83A16.1  | 0,40    | -2,93 | 3,355496 | -0,87176 | 0,383342 | NA        |
| RP11-462G12.1 | 4,72    | 1,95  | 2,235253 | 0,871337 | 0,38357  | 0,7335858 |
| CTD-2349P21.7 | 1,37    | -1,42 | 1,626375 | -0,8713  | 0,383588 | NA        |
| DARS2         | 91,80   | -1,03 | 1,183203 | -0,87124 | 0,383623 | 0,7336121 |
| CABYR         | 7,01    | -1,00 | 1,14246  | -0,87116 | 0,383667 | 0,73362   |
| FSCN2         | 0,64    | -2,91 | 3,346198 | -0,87103 | 0,383735 | NA        |
| RP11-348P10.1 | 0,92    | -3,18 | 3,656696 | -0,87089 | 0,383815 | NA        |
| RP11-981G7.1  | 34,89   | 0,96  | 1,097987 | 0,870512 | 0,384021 | 0,7341306 |
| TLN2          | 16,12   | 1,63  | 1,867013 | 0,870393 | 0,384086 | 0,7341306 |
| RP11-107E5.3  | 737,96  | -0,43 | 0,493553 | -0,87035 | 0,384111 | 0,7341306 |
| E2F6          | 89,73   | 0,95  | 1,096542 | 0,870338 | 0,384116 | 0,7341306 |
| DOK6          | 6,98    | -1,01 | 1,155425 | -0,87031 | 0,384131 | 0,7341306 |
| USP17L22      | 0,33    | -3,20 | 3,673852 | -0,87029 | 0,384143 | NA        |
| AL109761.5    | 0,48    | -2,92 | 3,355291 | -0,87019 | 0,384195 | NA        |
| AC003989.3    | 4,37    | 2,23  | 2,565446 | 0,870162 | 0,384212 | 0,7342097 |
| RP11-64C1.1   | 0,85    | -2,68 | 3,079043 | -0,87    | 0,384299 | NA        |
| GBA2          | 264,81  | 0,59  | 0,678004 | 0,869951 | 0,384327 | 0,7343453 |
| SUPT4H1       | 733,81  | -0,34 | 0,39338  | -0,86989 | 0,384362 | 0,7343453 |
| IGLC2         | 60,45   | -0,90 | 1,030814 | -0,86957 | 0,384535 | 0,7345392 |
| LIPC          | 14,18   | 0,94  | 1,07911  | 0,869557 | 0,384542 | 0,7345392 |
| HDAC1         | 478,78  | -0,47 | 0,536676 | -0,86938 | 0,384641 | 0,7346512 |
| PTPRF         | 2,51    | -1,08 | 1,245818 | -0,86933 | 0,384667 | NA        |
| SYNGR1        | 375,94  | -0,51 | 0,584623 | -0,8693  | 0,384685 | 0,73466   |
| HDGF          | 426,62  | -0,29 | 0,331368 | -0,86922 | 0,384728 | 0,7346674 |
| C5orf45       | 437,22  | 0,48  | 0,550477 | 0,869017 | 0,384838 | 0,7347792 |
| KPTN          | 56,95   | 1,17  | 1,342702 | 0,868966 | 0,384866 | 0,7347792 |
| RP11-343J3.2  | 1,38    | -1,26 | 1,447529 | -0,86885 | 0,384928 | NA        |
| JADE1         | 367,85  | 0,58  | 0,668088 | 0,868779 | 0,384968 | 0,7348643 |
| RP11-20I23.6  | 25,42   | -0,58 | 0,662451 | -0,86874 | 0,384989 | 0,7348643 |
| RP11-28G8.1   | 29,99   | 0,95  | 1,089989 | 0,868605 | 0,385063 | 0,7349307 |
| DYNC2H1       | 42,76   | 1,09  | 1,258685 | 0,86818  | 0,385296 | 0,7352988 |
| WDR43         | 785,90  | -0,41 | 0,469026 | -0,868   | 0,385394 | 0,7354116 |
| RP1-140C12.2  | 4,43    | -0,80 | 0,918467 | -0,86783 | 0,385487 | 0,7354852 |
| SIKE1         | 275,18  | 0,69  | 0,800698 | 0,867785 | 0,385512 | 0,7354852 |
| RP11-351M8.1  | 0,70    | 2,08  | 2,395814 | 0,867697 | 0,38556  | NA        |
| TFB1M         | 70,64   | 0,82  | 0,941087 | 0,867566 | 0,385632 | 0,7356385 |
| RP11-135J2.2  | 17,74   | 1,34  | 1,548375 | 0,867482 | 0,385678 | 0,735651  |
| RP11-704M14.1 | 0,34    | -3,18 | 3,667778 | -0,86728 | 0,385788 | NA        |
| RP11-497K21.1 | 5,19    | -0,92 | 1,057738 | -0,86722 | 0,385821 | 0,735849  |
| RP11-762H8.1  | 1,52    | 3,23  | 3,727704 | 0,867215 | 0,385824 | NA        |
| CD53          | 4472,67 | 0,24  | 0,279666 | 0,867083 | 0,385897 | 0,7359091 |
| HCG27         | 3,02    | 1,61  | 1,8621   | 0,866988 | 0,385949 | NA        |
| AC008268.3    | 133,90  | -0,45 | 0,524396 | -0,86692 | 0,385985 | 0,7359091 |
| RP11-452H21.2 | 8,11    | 1,03  | 1,185763 | 0,866893 | 0,386001 | 0,7359091 |
| RBAK          | 165,18  | 0,71  | 0,818567 | 0,866874 | 0,386011 | 0,7359091 |
| PP2D1         | 1,17    | 2,86  | 3,294723 | 0,866607 | 0,386157 | NA        |

|               |         |       |          |          |          |           |
|---------------|---------|-------|----------|----------|----------|-----------|
| MTF2          | 733,39  | 0,34  | 0,393124 | 0,866563 | 0,386182 | 0,736159  |
| CEACAM22P     | 8,22    | -0,72 | 0,833316 | -0,86647 | 0,386235 | 0,7361846 |
| RN7SL162P     | 1,03    | 2,00  | 2,313813 | 0,86644  | 0,386249 | NA        |
| SRCAP         | 114,97  | 0,59  | 0,678977 | 0,866378 | 0,386283 | 0,7362006 |
| AC079922.3    | 1,90    | -1,65 | 1,904982 | -0,86627 | 0,386345 | NA        |
| PNCK          | 4,71    | 1,28  | 1,475194 | 0,866265 | 0,386345 | 0,7362433 |
| SMCO1         | 1,06    | -2,32 | 2,67871  | -0,86614 | 0,386414 | NA        |
| STK26         | 157,56  | -0,52 | 0,599834 | -0,86603 | 0,386475 | 0,736417  |
| RP11-674J14.3 | 2,42    | 2,69  | 3,105489 | 0,866017 | 0,386481 | NA        |
| METAP2        | 502,25  | -0,32 | 0,364624 | -0,86593 | 0,38653  | 0,7364465 |
| RP11-454H19.2 | 1,01    | 2,01  | 2,318466 | 0,865909 | 0,38654  | NA        |
| RN7SL386P     | 0,90    | 2,45  | 2,83157  | 0,865862 | 0,386566 | NA        |
| UBR5          | 894,73  | -0,36 | 0,411102 | -0,86581 | 0,386597 | 0,7364956 |
| AP000347.4    | 1,92    | 2,36  | 2,728237 | 0,865631 | 0,386693 | NA        |
| ADAM3A        | 9,61    | -1,07 | 1,236567 | -0,86562 | 0,386696 | 0,7364956 |
| E4F1          | 219,04  | -0,63 | 0,723109 | -0,86559 | 0,386714 | 0,7364956 |
| TSHR          | 141,49  | -0,57 | 0,656376 | -0,86559 | 0,386715 | 0,7364956 |
| RP5-1074L1.4  | 1,25    | 1,72  | 1,986955 | 0,865522 | 0,386753 | NA        |
| RP11-473O4.1  | 1,99    | 2,39  | 2,759288 | 0,865313 | 0,386867 | NA        |
| SLC35B3       | 149,01  | -1,02 | 1,183668 | -0,86529 | 0,386879 | 0,7367325 |
| RP11-544A12.5 | 1,19    | 1,63  | 1,880477 | 0,86516  | 0,386951 | NA        |
| SP3           | 725,98  | 0,43  | 0,496326 | 0,865147 | 0,386958 | 0,7368089 |
| SCARNA10      | 2,47    | -2,04 | 2,359824 | -0,86506 | 0,387005 | NA        |
| SAR1B         | 577,28  | -0,47 | 0,542751 | -0,86505 | 0,387012 | 0,7368356 |
| RMI2          | 1,73    | 2,64  | 3,046653 | 0,864955 | 0,387063 | NA        |
| RP11-532F12.7 | 10,19   | -0,67 | 0,771628 | -0,86481 | 0,387146 | 0,7369923 |
| EEF1D         | 4669,49 | -0,18 | 0,213694 | -0,86475 | 0,387173 | 0,7369923 |
| RN7SL186P     | 0,90    | 2,45  | 2,831637 | 0,864743 | 0,38718  | NA        |
| NFE2L3        | 206,88  | 0,54  | 0,619124 | 0,864492 | 0,387317 | 0,737191  |
| RP11-471L13.3 | 1,85    | 2,94  | 3,407402 | 0,864288 | 0,38743  | NA        |
| RP11-96O20.1  | 11,30   | -0,74 | 0,861669 | -0,86428 | 0,387432 | 0,7372614 |
| PIK3C2B       | 66,64   | -0,91 | 1,056068 | -0,86428 | 0,387434 | 0,7372614 |
| DMRT1         | 2,97    | 1,09  | 1,261723 | 0,86424  | 0,387456 | NA        |
| SIRT4         | 1,45    | 3,22  | 3,728307 | 0,864232 | 0,38746  | NA        |
| RABEP1        | 533,54  | -0,42 | 0,487487 | -0,86415 | 0,387508 | 0,7373277 |
| MAP3K15       | 18,20   | 0,80  | 0,922417 | 0,863954 | 0,387613 | 0,7374525 |
| RP11-897M7.3  | 28,09   | -0,75 | 0,866233 | -0,86374 | 0,387733 | 0,7376048 |
| ARHGEF15      | 1,02    | -1,27 | 1,475562 | -0,86373 | 0,387734 | NA        |
| RP11-543N17.2 | 0,98    | -2,62 | 3,036358 | -0,8636  | 0,387806 | NA        |
| AC005253.2    | 5,62    | -0,99 | 1,143085 | -0,86347 | 0,38788  | 0,7376107 |
| RP1-68D18.4   | 87,72   | -0,65 | 0,757369 | -0,86326 | 0,387996 | 0,7376107 |
| ZPBP2         | 18,37   | -1,26 | 1,459083 | -0,86325 | 0,387999 | 0,7376107 |
| PCM1          | 1283,99 | 0,33  | 0,382202 | 0,863245 | 0,388003 | 0,7376107 |
| FBXO41        | 182,96  | 0,75  | 0,871857 | 0,863244 | 0,388003 | 0,7376107 |
| SULT1C2       | 20,54   | 0,78  | 0,906741 | 0,863201 | 0,388027 | 0,7376107 |
| PRDM11        | 19,67   | 1,03  | 1,191182 | 0,863197 | 0,388029 | 0,7376107 |
| AC063976.7    | 9,65    | -0,76 | 0,878021 | -0,86311 | 0,388075 | 0,7376107 |
| CH17-264B6.4  | 1,51    | 3,22  | 3,727843 | 0,863058 | 0,388105 | NA        |
| PIGH          | 121,08  | 0,54  | 0,630458 | 0,862972 | 0,388153 | 0,7376107 |
| LINC00470     | 5,30    | 0,99  | 1,151769 | 0,86296  | 0,388159 | 0,7376107 |

|               |         |       |          |          |          |           |
|---------------|---------|-------|----------|----------|----------|-----------|
| PDE8A         | 168,19  | 0,55  | 0,636605 | 0,862937 | 0,388172 | 0,7376107 |
| DDB2          | 325,55  | -0,53 | 0,613626 | -0,86276 | 0,388272 | 0,7377078 |
| RP11-809017.1 | 51,91   | 0,85  | 0,987024 | 0,862699 | 0,388303 | 0,7377078 |
| TMEM17        | 1,90    | 0,91  | 1,056025 | 0,862591 | 0,388363 | NA        |
| SLC38A11      | 1,29    | 2,53  | 2,927952 | 0,862544 | 0,388388 | NA        |
| AC010894.5    | 1,49    | 3,22  | 3,727839 | 0,862462 | 0,388433 | NA        |
| NKX3-1        | 43,34   | -1,00 | 1,164692 | -0,86233 | 0,388507 | 0,7380206 |
| RNU6-315P     | 1,50    | 3,21  | 3,727943 | 0,862204 | 0,388575 | NA        |
| RP11-297N6.4  | 7,48    | 1,04  | 1,200995 | 0,862161 | 0,388599 | 0,7381058 |
| FAM193A       | 340,56  | -0,47 | 0,543579 | -0,86205 | 0,38866  | 0,7381058 |
| IRS2          | 389,10  | -0,61 | 0,705394 | -0,86198 | 0,388697 | 0,7381058 |
| THTPA         | 44,13   | -2,00 | 2,317392 | -0,86182 | 0,388784 | 0,7381058 |
| RP11-107N7.1  | 4,61    | 1,13  | 1,309941 | 0,861761 | 0,388819 | 0,7381058 |
| IL18BP        | 158,37  | 0,57  | 0,661459 | 0,861716 | 0,388844 | 0,7381058 |
| NPW           | 1,49    | 3,21  | 3,728074 | 0,86166  | 0,388874 | NA        |
| ATP6AP1       | 1937,43 | 0,22  | 0,260379 | 0,861507 | 0,388959 | 0,7381058 |
| RP11-516C1.1  | 0,87    | 2,43  | 2,819493 | 0,861468 | 0,38898  | NA        |
| CWF19L2       | 149,85  | -0,64 | 0,748112 | -0,86135 | 0,389045 | 0,7381058 |
| ZNF879        | 6,33    | -1,11 | 1,283191 | -0,86131 | 0,389069 | 0,7381058 |
| AP000487.5    | 23,41   | 0,53  | 0,615849 | 0,861233 | 0,38911  | 0,7381058 |
| HUNK          | 25,54   | -0,54 | 0,629448 | -0,86123 | 0,38911  | 0,7381058 |
| PARG          | 146,13  | 0,62  | 0,718654 | 0,861221 | 0,389116 | 0,7381058 |
| SLC4A2        | 201,95  | -0,41 | 0,473736 | -0,86119 | 0,389131 | 0,7381058 |
| GAGE1         | 20,36   | -1,02 | 1,183451 | -0,86119 | 0,389136 | 0,7381058 |
| LCOR          | 1146,28 | 0,40  | 0,462658 | 0,861119 | 0,389172 | 0,7381058 |
| RP3-467L1.6   | 3,16    | 2,20  | 2,551909 | 0,861081 | 0,389193 | NA        |
| RP11-627K11.7 | 19,85   | 1,40  | 1,630022 | 0,861021 | 0,389226 | 0,7381058 |
| UFD1L         | 727,87  | 0,39  | 0,454625 | 0,861007 | 0,389234 | 0,7381058 |
| PNISR         | 2089,05 | -0,14 | 0,156841 | -0,86094 | 0,389274 | 0,7381058 |
| ARRDC3-AS1    | 46,67   | 0,61  | 0,711327 | 0,860877 | 0,389306 | 0,7381058 |
| COL27A1       | 11,59   | 0,64  | 0,73967  | 0,86077  | 0,389365 | 0,7381207 |
| WDR54         | 219,28  | -0,70 | 0,810123 | -0,86072 | 0,389393 | 0,7381207 |
| RP4-635A23.2  | 1,69    | 0,88  | 1,025818 | 0,860711 | 0,389397 | NA        |
| RP11-229O3.1  | 1,10    | 1,52  | 1,768771 | 0,860685 | 0,389412 | NA        |
| RP4-594A5.1   | 0,68    | 2,07  | 2,410288 | 0,860664 | 0,389423 | NA        |
| GPATCH2       | 235,13  | 0,57  | 0,662756 | 0,860562 | 0,38948  | 0,7382008 |
| RN7SL140P     | 1,12    | 2,79  | 3,245815 | 0,86051  | 0,389508 | NA        |
| PGM3          | 97,15   | 0,87  | 1,007211 | 0,860498 | 0,389514 | 0,7382008 |
| SLC25A51      | 62,65   | -0,80 | 0,929794 | -0,86041 | 0,389564 | 0,7382199 |
| RP11-996F15.6 | 1,49    | 3,21  | 3,727869 | 0,860405 | 0,389566 | NA        |
| PIP5K1A       | 86,74   | 0,38  | 0,447469 | 0,860227 | 0,389664 | 0,7383148 |
| CTD-2175A23.1 | 2,47    | 2,02  | 2,34806  | 0,860172 | 0,389694 | NA        |
| COX10-AS1     | 151,65  | 0,37  | 0,435576 | 0,86009  | 0,389739 | 0,7383148 |
| RPL18         | 9681,55 | -0,16 | 0,188774 | -0,86005 | 0,389759 | 0,7383148 |
| RNU5A-8P      | 1,48    | 3,21  | 3,727919 | 0,860034 | 0,38977  | NA        |
| RP11-127I20.8 | 27,50   | 1,14  | 1,328158 | 0,860029 | 0,389773 | 0,7383148 |
| RP11-411K7.4  | 3,63    | -0,90 | 1,048019 | -0,85973 | 0,389937 | NA        |
| FN3KRP        | 117,34  | 1,09  | 1,265165 | 0,859714 | 0,389947 | 0,7383988 |
| RP11-436I9.6  | 0,32    | -3,16 | 3,674768 | -0,85951 | 0,390061 | NA        |
| SETD9         | 90,83   | 1,09  | 1,27294  | 0,859492 | 0,390069 | 0,7383988 |



|               |         |       |          |          |          |           |
|---------------|---------|-------|----------|----------|----------|-----------|
| VPS18         | 119,18  | 0,71  | 0,826215 | 0,859471 | 0,390081 | 0,7383988 |
| ASH1L         | 1075,09 | -0,36 | 0,41651  | -0,85945 | 0,390094 | 0,7383988 |
| RP11-24B13.2  | 7,25    | -0,89 | 1,032573 | -0,85942 | 0,390108 | 0,7383988 |
| TM7SF3        | 406,32  | -0,55 | 0,639274 | -0,8594  | 0,390117 | 0,7383988 |
| RCE1          | 124,55  | 0,91  | 1,060982 | 0,859346 | 0,39015  | 0,7383988 |
| BMF           | 328,73  | -0,41 | 0,479439 | -0,85922 | 0,390217 | 0,7383988 |
| GEMIN8        | 187,59  | 0,96  | 1,114023 | 0,859212 | 0,390224 | 0,7383988 |
| CTD-2636A23.2 | 34,40   | -0,83 | 0,963968 | -0,85914 | 0,390266 | 0,7383988 |
| RP11-444I9.2  | 6,86    | -1,76 | 2,044445 | -0,85909 | 0,390294 | 0,7383988 |
| CYP4A11       | 25,85   | -1,21 | 1,411589 | -0,85908 | 0,390294 | 0,7383988 |
| RGS14         | 557,85  | 0,37  | 0,431762 | 0,858761 | 0,390472 | 0,7386613 |
| RP11-582J16.5 | 24,65   | 1,45  | 1,693025 | 0,858679 | 0,390518 | 0,7386726 |
| CTA-796E4.4   | 1,47    | 3,20  | 3,727921 | 0,858654 | 0,390531 | NA        |
| TTL10         | 1,24    | 1,52  | 1,772415 | 0,858524 | 0,390603 | NA        |
| RP11-757O6.2  | 0,83    | -2,86 | 3,329646 | -0,85834 | 0,390706 | NA        |
| MT2A          | 402,46  | -0,57 | 0,667558 | -0,85834 | 0,390706 | 0,7389167 |
| OPRD1         | 50,70   | -0,46 | 0,539543 | -0,85827 | 0,390743 | 0,7389167 |
| HDLBP         | 907,89  | -0,32 | 0,368819 | -0,8582  | 0,390781 | 0,7389167 |
| TRIM60        | 7,31    | -0,82 | 0,959248 | -0,85816 | 0,390806 | 0,7389167 |
| AC096669.1    | 2,83    | 1,34  | 1,565705 | 0,85801  | 0,390887 | NA        |
| IGFLR1        | 1939,89 | 0,23  | 0,267725 | 0,857842 | 0,39098  | 0,7390743 |
| RABL2B        | 149,16  | 0,57  | 0,661038 | 0,857797 | 0,391004 | 0,7390743 |
| ZNHIT3        | 579,51  | -0,52 | 0,60669  | -0,85777 | 0,391021 | 0,7390743 |
| SPP2          | 12,97   | 0,71  | 0,828086 | 0,857716 | 0,391049 | 0,7390743 |
| RP11-1D12.1   | 3,39    | 1,53  | 1,788253 | 0,857713 | 0,391051 | NA        |
| HIST1H2AC     | 68,94   | -1,18 | 1,378274 | -0,85758 | 0,391122 | 0,7390743 |
| RP11-641A6.2  | 4,88    | 1,29  | 1,499367 | 0,857457 | 0,391192 | 0,7390743 |
| RAB31         | 3680,37 | -0,26 | 0,307063 | -0,85742 | 0,391215 | 0,7390743 |
| AC012065.6    | 0,32    | -3,15 | 3,674864 | -0,85732 | 0,391269 | NA        |
| MTSS1         | 284,63  | -0,68 | 0,795653 | -0,85731 | 0,391274 | 0,7390743 |
| RP5-1077I2.3  | 0,32    | -3,15 | 3,674939 | -0,85729 | 0,391287 | NA        |
| RELT          | 726,53  | 0,37  | 0,431828 | 0,857208 | 0,39133  | 0,7390743 |
| ACP5          | 14,86   | 1,40  | 1,637613 | 0,857091 | 0,391395 | 0,7390743 |
| AC004593.3    | 13,54   | 1,27  | 1,485208 | 0,857088 | 0,391396 | 0,7390743 |
| CH507-9B2.9   | 143,66  | 0,69  | 0,806817 | 0,857024 | 0,391432 | 0,7390743 |
| ZNF615        | 25,11   | 0,69  | 0,807331 | 0,857024 | 0,391432 | 0,7390743 |
| AL355093.2    | 7,89    | -2,41 | 2,814247 | -0,857   | 0,391445 | 0,7390743 |
| AP001630.5    | 2,76    | 2,13  | 2,485835 | 0,8566   | 0,391666 | NA        |
| CTD-2342N23.3 | 3,79    | 2,95  | 3,448479 | 0,856585 | 0,391674 | 0,7394314 |
| LPXN          | 1588,50 | 0,29  | 0,33417  | 0,856373 | 0,391791 | 0,7395777 |
| RP1-100J12.1  | 5,85    | 1,46  | 1,701913 | 0,856204 | 0,391885 | 0,7396796 |
| AC024592.12   | 44,98   | 0,62  | 0,728157 | 0,855975 | 0,392012 | 0,7398434 |
| SETX          | 1840,89 | -0,35 | 0,406258 | -0,85588 | 0,392062 | 0,7398632 |
| AC079005.2    | 1,47    | 3,19  | 3,727964 | 0,855858 | 0,392076 | NA        |
| RP11-626G3.1  | 18,80   | -0,56 | 0,651063 | -0,85576 | 0,392132 | 0,7399214 |
| FAM60A        | 510,62  | 0,41  | 0,477054 | 0,855573 | 0,392234 | 0,7400377 |
| ATP8A1        | 169,58  | 0,61  | 0,709839 | 0,855243 | 0,392417 | 0,7401708 |
| RP11-283G6.4  | 1,08    | 2,75  | 3,219916 | 0,855165 | 0,39246  | NA        |
| CTA-992D9.8   | 41,63   | -0,56 | 0,649232 | -0,85508 | 0,392506 | 0,7401708 |
| METTL12       | 54,65   | -0,53 | 0,625629 | -0,85505 | 0,392522 | 0,7401708 |

|               |         |       |          |          |          |           |
|---------------|---------|-------|----------|----------|----------|-----------|
| RP11-863P13.4 | 64,06   | 1,19  | 1,391912 | 0,855047 | 0,392525 | 0,7401708 |
| RP5-1181K21.4 | 5,12    | -0,69 | 0,806431 | -0,85505 | 0,392526 | 0,7401708 |
| RP11-298P3.4  | 0,83    | 2,38  | 2,787214 | 0,85503  | 0,392535 | NA        |
| RP11-1096D5.1 | 38,65   | -0,85 | 0,996214 | -0,85499 | 0,392556 | 0,7401708 |
| RP11-259K5.2  | 22,88   | 0,70  | 0,821264 | 0,854943 | 0,392583 | 0,7401708 |
| FAM219B       | 240,65  | -0,45 | 0,531572 | -0,85476 | 0,392684 | 0,7402119 |
| RP4-549L20.2  | 4,17    | -1,44 | 1,684173 | -0,8547  | 0,392719 | 0,7402119 |
| IGHA1         | 44,25   | -0,61 | 0,708874 | -0,85469 | 0,392724 | 0,7402119 |
| SHC1          | 301,60  | -0,50 | 0,581971 | -0,85439 | 0,392891 | 0,7404321 |
| COX11         | 157,03  | -0,57 | 0,666533 | -0,85433 | 0,392921 | 0,7404321 |
| AC068831.18   | 165,52  | 0,58  | 0,673179 | 0,854165 | 0,393014 | 0,7404692 |
| ZNF384        | 25,72   | 1,02  | 1,189256 | 0,854154 | 0,39302  | 0,7404692 |
| GHC-857G6.7   | 1,27    | -1,12 | 1,315869 | -0,85411 | 0,393042 | NA        |
| RP11-504I13.2 | 27,26   | 1,20  | 1,407435 | 0,853985 | 0,393113 | 0,7405131 |
| IL3           | 1,05    | -2,30 | 2,694951 | -0,85398 | 0,393117 | NA        |
| GOLGA6B       | 0,33    | -3,13 | 3,668986 | -0,85397 | 0,393123 | NA        |
| RP11-536O18.2 | 2,48    | -0,89 | 1,037478 | -0,85391 | 0,393156 | NA        |
| C5orf66       | 89,44   | -0,71 | 0,832476 | -0,8539  | 0,393158 | 0,7405131 |
| KCNH5         | 9,95    | -1,00 | 1,166422 | -0,8539  | 0,393163 | 0,7405131 |
| C8orf58       | 58,46   | -1,44 | 1,68275  | -0,85381 | 0,393211 | 0,7405288 |
| OLMALINC      | 774,51  | -0,37 | 0,435239 | -0,85373 | 0,393257 | 0,7405416 |
| LINC01451     | 0,31    | -3,14 | 3,684305 | -0,85358 | 0,393338 | NA        |
| EFHD2         | 1226,41 | -0,26 | 0,302588 | -0,85357 | 0,393343 | 0,7406286 |
| RP11-6L6.4    | 1,48    | 3,18  | 3,727965 | 0,853402 | 0,393437 | NA        |
| RFX8          | 1,34    | 3,18  | 3,728769 | 0,853298 | 0,393494 | NA        |
| CUL4B         | 397,05  | 0,56  | 0,654889 | 0,853134 | 0,393585 | 0,7409606 |
| PEF1          | 532,51  | 0,70  | 0,822787 | 0,853108 | 0,393599 | 0,7409606 |
| KIAA1715      | 336,38  | -0,69 | 0,805618 | -0,85298 | 0,393673 | 0,7410238 |
| AC092798.3    | 13,53   | -1,70 | 1,997609 | -0,85285 | 0,393743 | 0,7410812 |
| AF131216.6    | 85,44   | 0,86  | 1,009337 | 0,852744 | 0,393801 | 0,7411157 |
| KIF24         | 1,10    | 2,79  | 3,266645 | 0,85263  | 0,393865 | NA        |
| CACNB2        | 45,52   | -0,88 | 1,036774 | -0,8526  | 0,39388  | 0,7411899 |
| RP11-41O4.1   | 6,90    | -1,15 | 1,34387  | -0,85217 | 0,394117 | 0,7415141 |
| KRT7          | 1,55    | 3,17  | 3,715117 | 0,852164 | 0,394123 | NA        |
| ZNF81         | 124,43  | -0,90 | 1,053388 | -0,8521  | 0,394157 | 0,7415141 |
| PLA2G7        | 93,22   | 0,89  | 1,039713 | 0,852075 | 0,394172 | 0,7415141 |
| SLC35A4       | 559,74  | 0,46  | 0,538736 | 0,851867 | 0,394288 | 0,7416569 |
| RP11-430M15.1 | 0,32    | -2,81 | 3,293476 | -0,85171 | 0,394377 | NA        |
| COL20A1       | 4,31    | -1,53 | 1,794214 | -0,85164 | 0,394414 | 0,7417474 |
| LINC00327     | 6,38    | 1,74  | 2,044449 | 0,851497 | 0,394493 | 0,7417474 |
| NDUFA9        | 880,98  | -0,40 | 0,474854 | -0,85147 | 0,39451  | 0,7417474 |
| NDUFA2        | 615,89  | -0,24 | 0,285167 | -0,85146 | 0,394516 | 0,7417474 |
| ALG8          | 193,33  | -0,51 | 0,601441 | -0,85142 | 0,394535 | 0,7417474 |
| NPIPP1        | 48,69   | 0,65  | 0,757737 | 0,851292 | 0,394607 | 0,7417548 |
| CLOCK         | 186,22  | 0,70  | 0,825323 | 0,85127  | 0,394619 | 0,7417548 |
| AC097468.7    | 0,63    | -1,90 | 2,227955 | -0,85121 | 0,394654 | NA        |
| RP11-212F11.1 | 1,07    | 2,74  | 3,215099 | 0,851196 | 0,39466  | NA        |
| ZNF148        | 378,73  | -0,50 | 0,588631 | -0,85117 | 0,394677 | 0,7417894 |
| RP11-392M9.2  | 1,45    | 3,17  | 3,728062 | 0,851065 | 0,394733 | NA        |
| RP11-701H24.5 | 5,55    | -2,56 | 3,006376 | -0,85096 | 0,39479  | 0,7419261 |

|                |        |       |          |          |          |           |
|----------------|--------|-------|----------|----------|----------|-----------|
| LRRN4CL        | 2,66   | -1,01 | 1,189364 | -0,85094 | 0,3948   | NA        |
| MRPS5          | 635,95 | -0,34 | 0,398335 | -0,85069 | 0,394939 | 0,7421318 |
| BHMT           | 8,44   | 1,17  | 1,376072 | 0,850477 | 0,39506  | 0,7422615 |
| AL109763.2     | 9,31   | -1,43 | 1,679638 | -0,85039 | 0,395107 | 0,7422615 |
| RNU6-151P      | 1,44   | 3,17  | 3,728088 | 0,850269 | 0,395176 | NA        |
| MAK16          | 111,11 | 0,81  | 0,952296 | 0,850255 | 0,395183 | 0,7422615 |
| AC004156.3     | 44,09  | -0,51 | 0,605282 | -0,85023 | 0,395196 | 0,7422615 |
| GPR75          | 1,87   | -1,79 | 2,103052 | -0,85022 | 0,395203 | NA        |
| NLRP2          | 28,85  | -0,50 | 0,59385  | -0,85014 | 0,395249 | 0,7422615 |
| RP11-667K14.4  | 29,06  | -1,13 | 1,325194 | -0,85011 | 0,395262 | 0,7422615 |
| SAP30          | 125,16 | -0,61 | 0,714832 | -0,85004 | 0,395304 | 0,7422615 |
| ERI1           | 86,98  | 0,81  | 0,953301 | 0,849996 | 0,395328 | 0,7422615 |
| RP11-354K1.2   | 1,01   | -1,15 | 1,354016 | -0,84967 | 0,395507 | NA        |
| TTC21A         | 95,29  | -0,65 | 0,767867 | -0,84964 | 0,395527 | 0,7424744 |
| ZNF30          | 5,26   | 2,52  | 2,966858 | 0,849477 | 0,395616 | 0,7424744 |
| SPHK1          | 46,73  | -0,99 | 1,168167 | -0,84947 | 0,395618 | 0,7424744 |
| CPNE2          | 104,45 | 0,80  | 0,941036 | 0,849421 | 0,395647 | 0,7424744 |
| RP4-740C4.7    | 12,27  | -1,24 | 1,456313 | -0,84939 | 0,395666 | 0,7424744 |
| TLR1           | 319,63 | 0,61  | 0,716051 | 0,849356 | 0,395683 | 0,7424744 |
| AC005351.1     | 1,46   | 3,17  | 3,72811  | 0,849319 | 0,395704 | NA        |
| RN7SL127P      | 14,18  | -0,92 | 1,078654 | -0,84919 | 0,395774 | 0,7424744 |
| RP5-838N20.6   | 1,08   | 2,75  | 3,235873 | 0,849193 | 0,395774 | NA        |
| U47924.32      | 1,41   | -1,72 | 2,030682 | -0,84901 | 0,395873 | NA        |
| AC002553.4     | 1,84   | 2,92  | 3,444933 | 0,848877 | 0,39595  | NA        |
| CTD-3110H11.1  | 18,58  | -1,23 | 1,447832 | -0,84888 | 0,39595  | 0,7424744 |
| LMOD2          | 1,13   | 2,19  | 2,583501 | 0,84882  | 0,395982 | NA        |
| RP11-229P13.22 | 3,59   | -0,89 | 1,044152 | -0,84876 | 0,396017 | NA        |
| RP11-106J23.1  | 0,70   | -2,53 | 2,984668 | -0,84868 | 0,39606  | NA        |
| TMEM239        | 1,30   | -1,22 | 1,432231 | -0,84863 | 0,396088 | NA        |
| CORO7          | 911,60 | -0,35 | 0,41208  | -0,84861 | 0,396098 | 0,7424744 |
| RP11-854K16.1  | 3,43   | 1,49  | 1,753442 | 0,848593 | 0,396108 | NA        |
| ARSB           | 442,51 | 0,53  | 0,62925  | 0,848545 | 0,396134 | 0,7424744 |
| GGA3           | 391,09 | -0,40 | 0,468575 | -0,84852 | 0,396149 | 0,7424744 |
| TMEM25         | 5,32   | -0,83 | 0,978611 | -0,84823 | 0,396312 | 0,7424744 |
| ZNF528         | 51,34  | -0,64 | 0,757308 | -0,84819 | 0,396334 | 0,7424744 |
| URAD           | 1,12   | 2,79  | 3,290912 | 0,848183 | 0,396336 | NA        |
| RP11-1197K16.2 | 0,88   | 1,73  | 2,037119 | 0,848179 | 0,396338 | NA        |
| PDCD4          | 698,66 | 0,29  | 0,342971 | 0,847983 | 0,396448 | 0,7424744 |
| RNF181         | 636,53 | -0,24 | 0,281897 | -0,84791 | 0,396486 | 0,7424744 |
| CEP131         | 48,44  | -1,02 | 1,199766 | -0,84788 | 0,396505 | 0,7424744 |
| BTG3           | 136,94 | -0,80 | 0,946279 | -0,84784 | 0,396526 | 0,7424744 |
| MFSD8          | 244,61 | 0,56  | 0,664123 | 0,847837 | 0,396529 | 0,7424744 |
| ERBB2          | 49,12  | -0,64 | 0,750097 | -0,84783 | 0,396532 | 0,7424744 |
| CTD-2006C1.2   | 166,88 | -0,60 | 0,70584  | -0,84769 | 0,396608 | 0,7424744 |
| FCRLB          | 1,37   | 2,51  | 2,964348 | 0,847673 | 0,39662  | NA        |
| RP11-96B5.3    | 5,22   | 0,63  | 0,742315 | 0,847649 | 0,396633 | 0,7424744 |
| MYCNOS         | 18,63  | -0,66 | 0,777365 | -0,84752 | 0,396706 | 0,7424744 |
| RNU4-47P       | 1,41   | 2,53  | 2,984225 | 0,847486 | 0,396724 | NA        |
| GTF3C2         | 331,99 | -0,46 | 0,537483 | -0,84736 | 0,396794 | 0,7424744 |
| TMEM132B       | 11,60  | 0,93  | 1,093245 | 0,847355 | 0,396797 | 0,7424744 |

|                  |         |       |          |          |          |           |
|------------------|---------|-------|----------|----------|----------|-----------|
| CROCCP2          | 206,11  | -0,58 | 0,680087 | -0,84722 | 0,396872 | 0,7424744 |
| PSG4             | 9,64    | -2,16 | 2,549605 | -0,8472  | 0,396884 | 0,7424744 |
| CTD-2022B6.1     | 2,25    | 1,51  | 1,783317 | 0,847185 | 0,396892 | NA        |
| ZFP42            | 20,32   | -0,48 | 0,56451  | -0,84716 | 0,396905 | 0,7424744 |
| RP11-792D21.2    | 6,52    | 0,93  | 1,099817 | 0,847158 | 0,396907 | 0,7424744 |
| RP11-1H15.2      | 6,80    | -1,35 | 1,599071 | -0,84711 | 0,396933 | 0,7424744 |
| ADCY4            | 64,77   | -0,96 | 1,136786 | -0,84705 | 0,396968 | 0,7424744 |
| TTC12            | 14,66   | 1,42  | 1,671117 | 0,846966 | 0,397014 | 0,7424744 |
| CCNJL            | 61,46   | -0,68 | 0,801297 | -0,84696 | 0,397019 | 0,7424744 |
| NAPG             | 324,46  | 0,32  | 0,381099 | 0,846926 | 0,397036 | 0,7424744 |
| RP11-799B12.2    | 0,31    | -2,38 | 2,806119 | -0,8469  | 0,397053 | NA        |
| SMPD1            | 185,51  | -0,75 | 0,882765 | -0,84685 | 0,397078 | 0,7424744 |
| CTB-102L5.7      | 12,02   | 0,60  | 0,704849 | 0,84682  | 0,397095 | 0,7424744 |
| RP11-345K9.2     | 12,82   | -0,64 | 0,752543 | -0,84681 | 0,397102 | 0,7424744 |
| RP11-298J23.10   | 41,83   | 0,86  | 1,013911 | 0,846783 | 0,397116 | 0,7424744 |
| RAB1A            | 1282,95 | 0,35  | 0,414978 | 0,84675  | 0,397135 | 0,7424744 |
| GOLM1            | 17,49   | -1,04 | 1,223049 | -0,84672 | 0,397149 | 0,7424744 |
| C8orf17          | 4,82    | -0,81 | 0,96244  | -0,84666 | 0,397187 | 0,7424744 |
| CPT1B            | 249,10  | 0,60  | 0,708564 | 0,846638 | 0,397197 | 0,7424744 |
| MTF1             | 229,16  | -0,50 | 0,59402  | -0,84664 | 0,397198 | 0,7424744 |
| ZNF569           | 42,51   | 0,86  | 1,015837 | 0,846604 | 0,397216 | 0,7424744 |
| PTRH2            | 167,31  | -0,64 | 0,754232 | -0,84657 | 0,397233 | 0,7424744 |
| ZNF44            | 218,02  | -0,46 | 0,548998 | -0,84654 | 0,397252 | 0,7424744 |
| RP11-91I20.3     | 31,73   | -0,59 | 0,691425 | -0,8465  | 0,397277 | 0,7424744 |
| RP11-686D22.8    | 43,37   | 1,48  | 1,744916 | 0,846339 | 0,397364 | 0,7425626 |
| RP11-43F13.3     | 62,42   | -0,57 | 0,67721  | -0,84609 | 0,3975   | 0,7427433 |
| IGFBP2           | 3,06    | -0,99 | 1,176095 | -0,84599 | 0,39756  | NA        |
| RP11-694I15.7    | 1,44    | 3,15  | 3,728188 | 0,845986 | 0,397561 | NA        |
| C18orf32         | 604,76  | -0,38 | 0,445504 | -0,84593 | 0,397589 | 0,7428344 |
| RP11-552M11.2    | 0,31    | -3,11 | 3,675669 | -0,84575 | 0,397692 | NA        |
| CKAP2            | 183,62  | -0,55 | 0,644947 | -0,84566 | 0,397745 | 0,7428817 |
| POLR2J4          | 28,84   | 1,09  | 1,286324 | 0,845612 | 0,397769 | 0,7428817 |
| RP11-468E2.9     | 1,00    | 2,15  | 2,537881 | 0,845605 | 0,397773 | NA        |
| NPHP1            | 14,57   | 0,65  | 0,763638 | 0,845603 | 0,397774 | 0,7428817 |
| PAPOLA           | 1926,38 | 0,30  | 0,359573 | 0,845547 | 0,397806 | 0,7428817 |
| UNC13B           | 6,69    | -1,50 | 1,778513 | -0,84552 | 0,397821 | 0,7428817 |
| AMDHD1           | 4,18    | -1,34 | 1,588046 | -0,8454  | 0,397888 | 0,7428817 |
| AC079988.3       | 6,36    | -1,16 | 1,366733 | -0,84539 | 0,397894 | 0,7428817 |
| LLOXNC01-237H1.2 | 1,15    | 2,79  | 3,303949 | 0,845325 | 0,39793  | NA        |
| RP11-450K4.1     | 4,34    | -1,89 | 2,2364   | -0,84514 | 0,398032 | 0,7429913 |
| PELI2            | 449,26  | -0,45 | 0,537212 | -0,84514 | 0,398032 | 0,7429913 |
| C1GALT1          | 503,85  | 0,53  | 0,629136 | 0,845052 | 0,398082 | 0,743009  |
| CTD-2017C7.2     | 11,08   | 1,26  | 1,490758 | 0,844745 | 0,398253 | 0,7431098 |
| MDC1             | 134,04  | -1,17 | 1,384359 | -0,84471 | 0,398275 | 0,7431098 |
| OPN3             | 254,53  | 0,77  | 0,915351 | 0,844656 | 0,398303 | 0,7431098 |
| CTD-3035D6.2     | 0,88    | -1,59 | 1,888253 | -0,84462 | 0,398324 | NA        |
| C6orf141         | 71,24   | 0,40  | 0,472648 | 0,844566 | 0,398353 | 0,7431098 |
| ARHGAP27         | 708,10  | 0,32  | 0,381891 | 0,844544 | 0,398366 | 0,7431098 |
| AF129408.14      | 3,88    | -1,33 | 1,574688 | -0,84449 | 0,398398 | 0,7431098 |
| STARD9           | 121,17  | -0,54 | 0,635826 | -0,84438 | 0,398455 | 0,7431098 |

|                |         |       |          |          |          |           |
|----------------|---------|-------|----------|----------|----------|-----------|
| RP11-916L7.1   | 6,32    | -0,89 | 1,056322 | -0,84438 | 0,398455 | 0,7431098 |
| CTD-2547L24.3  | 18,66   | -0,95 | 1,124897 | -0,84427 | 0,39852  | 0,7431565 |
| IDE            | 313,99  | -0,52 | 0,621175 | -0,84402 | 0,398659 | 0,7432509 |
| CBX1           | 115,83  | -0,58 | 0,684402 | -0,84399 | 0,398677 | 0,7432509 |
| FASTKD2        | 395,27  | -0,55 | 0,65434  | -0,84394 | 0,398702 | 0,7432509 |
| MS4A7          | 1075,90 | -0,41 | 0,488335 | -0,84389 | 0,398731 | 0,7432509 |
| RP11-1017G21.4 | 1,07    | 2,72  | 3,225852 | 0,843864 | 0,398745 | NA        |
| RNF139         | 661,24  | 0,41  | 0,4816   | 0,843792 | 0,398786 | 0,7432791 |
| MKRN9P         | 1,66    | 1,16  | 1,372737 | 0,843763 | 0,398802 | NA        |
| RP5-832C2.5    | 98,26   | -0,66 | 0,788001 | -0,84369 | 0,398843 | 0,7433112 |
| CTD-2147F2.2   | 1,10    | 1,50  | 1,782612 | 0,843611 | 0,398887 | NA        |
| CYP4F8         | 35,00   | -0,43 | 0,50541  | -0,84355 | 0,398921 | 0,7433162 |
| RP11-195E11.2  | 3,22    | 1,12  | 1,332291 | 0,84346  | 0,398971 | NA        |
| LGALS9         | 1435,67 | 0,26  | 0,303081 | 0,843455 | 0,398974 | 0,7433162 |
| MBD2           | 539,31  | -0,48 | 0,571867 | -0,84345 | 0,398975 | 0,7433162 |
| ZNF561         | 109,07  | 0,71  | 0,840781 | 0,84337  | 0,399021 | 0,7433162 |
| C14orf37       | 28,62   | -0,77 | 0,909621 | -0,84333 | 0,399046 | 0,7433162 |
| RP11-417B4.4   | 5,57    | 2,07  | 2,454154 | 0,843113 | 0,399165 | 0,7434645 |
| TNS2           | 2,79    | -0,89 | 1,055367 | -0,84305 | 0,399198 | NA        |
| RNF219-AS1     | 2,88    | -2,31 | 2,736476 | -0,843   | 0,39923  | NA        |
| RNU6-628P      | 0,81    | 2,34  | 2,777565 | 0,842936 | 0,399264 | NA        |
| SORT1          | 496,95  | -0,31 | 0,365352 | -0,8429  | 0,399282 | 0,7435988 |
| EIF2AK2        | 1366,89 | 0,52  | 0,619895 | 0,842832 | 0,399323 | 0,7435988 |
| TMEM116        | 91,61   | -0,62 | 0,740573 | -0,84277 | 0,399357 | 0,7435988 |
| CYFIP1         | 465,74  | 0,40  | 0,480042 | 0,842672 | 0,399412 | 0,7436264 |
| MAPKAPK5       | 279,05  | 0,61  | 0,72919  | 0,842487 | 0,399515 | 0,7436533 |
| RNY1P12        | 1,35    | 1,82  | 2,158951 | 0,842407 | 0,39956  | NA        |
| CTD-2647L4.5   | 12,52   | 0,91  | 1,084701 | 0,842375 | 0,399578 | 0,7436533 |
| BAP1           | 453,19  | -0,30 | 0,353413 | -0,84234 | 0,399598 | 0,7436533 |
| NFS1           | 121,19  | 0,66  | 0,780365 | 0,842257 | 0,399644 | 0,7436533 |
| THSD7B         | 4,33    | 2,72  | 3,232966 | 0,842217 | 0,399666 | 0,7436533 |
| SMCR5          | 14,09   | 0,74  | 0,881331 | 0,842157 | 0,3997   | 0,7436533 |
| HPCAL1         | 340,66  | 0,49  | 0,583874 | 0,842146 | 0,399706 | 0,7436533 |
| RP11-338C15.5  | 1,18    | 2,25  | 2,675502 | 0,841972 | 0,399803 | NA        |
| FPGS           | 506,53  | 0,40  | 0,478611 | 0,841971 | 0,399804 | 0,7437613 |
| ATP5J2P6       | 1,43    | 3,14  | 3,728173 | 0,841902 | 0,399843 | NA        |
| RN7SL420P      | 0,82    | 2,36  | 2,807577 | 0,841879 | 0,399856 | NA        |
| PTPN20         | 16,65   | -1,62 | 1,918846 | -0,84182 | 0,39989  | 0,7438468 |
| CTB-180A7.6    | 1,43    | 3,14  | 3,728257 | 0,841773 | 0,399915 | NA        |
| SPRY3          | 20,71   | -1,05 | 1,248375 | -0,84172 | 0,399943 | 0,7438706 |
| AP000692.10    | 1,56    | 2,07  | 2,455373 | 0,841503 | 0,400066 | NA        |
| SLC30A5        | 224,26  | 0,50  | 0,590813 | 0,841371 | 0,40014  | 0,7441625 |
| UTP14A         | 183,11  | -0,71 | 0,848674 | -0,8412  | 0,400236 | 0,7441817 |
| RN7SL385P      | 1,06    | 2,72  | 3,233217 | 0,841176 | 0,400249 | NA        |
| SOCS1          | 13,22   | -1,80 | 2,13419  | -0,84112 | 0,400281 | 0,7441817 |
| TRPC1          | 0,48    | -2,07 | 2,464726 | -0,84108 | 0,400305 | NA        |
| KIAA1429       | 400,12  | 0,49  | 0,587092 | 0,841059 | 0,400315 | 0,7441817 |
| RP11-20B24.2   | 5,61    | -0,88 | 1,050911 | -0,84105 | 0,400319 | 0,7441817 |
| RP11-484O2.1   | 130,98  | -0,34 | 0,408719 | -0,841   | 0,40035  | 0,7441817 |
| RP11-716H6.1   | 1,70    | 1,28  | 1,519785 | 0,840994 | 0,400351 | NA        |

|                |        |       |          |          |          |           |
|----------------|--------|-------|----------|----------|----------|-----------|
| RP11-51B13.2   | 192,42 | 0,46  | 0,545142 | 0,840925 | 0,40039  | 0,7441817 |
| RP1-310O13.7   | 1,49   | -0,88 | 1,050143 | -0,8409  | 0,400406 | NA        |
| CD84           | 360,53 | 0,51  | 0,607481 | 0,840787 | 0,400467 | 0,7442234 |
| RP11-95M15.1   | 10,32  | 1,24  | 1,474615 | 0,840742 | 0,400493 | 0,7442234 |
| MSI2           | 257,92 | -0,64 | 0,759403 | -0,84039 | 0,40069  | 0,7443662 |
| RP11-5G9.5     | 1,38   | -1,64 | 1,954657 | -0,84038 | 0,400696 | NA        |
| GRIPAP1        | 477,73 | -0,39 | 0,460032 | -0,84037 | 0,400702 | 0,7443662 |
| AC002480.6     | 33,25  | 0,37  | 0,443804 | 0,840335 | 0,40072  | 0,7443662 |
| TMEM191B       | 9,50   | -1,40 | 1,666456 | -0,84032 | 0,400729 | 0,7443662 |
| RFC3           | 41,51  | 0,91  | 1,084433 | 0,840222 | 0,400784 | 0,7443929 |
| RP11-963H4.3   | 0,31   | -3,09 | 3,672668 | -0,84012 | 0,400842 | NA        |
| IRAK4          | 559,70 | 0,53  | 0,634615 | 0,840031 | 0,400891 | 0,744467  |
| BCORP1         | 5,52   | -0,96 | 1,147713 | -0,84    | 0,400911 | 0,744467  |
| KB-1254G8.1    | 2,24   | -2,38 | 2,828813 | -0,83992 | 0,400956 | NA        |
| AP000962.1     | 8,80   | 0,98  | 1,165454 | 0,839869 | 0,400982 | 0,744467  |
| GFI1B          | 15,49  | 0,51  | 0,609266 | 0,839865 | 0,400984 | 0,744467  |
| FRG1EP         | 0,83   | -2,25 | 2,678552 | -0,83979 | 0,401028 | NA        |
| RP11-173M11.6  | 1,39   | 2,47  | 2,94115  | 0,839775 | 0,401034 | NA        |
| RP11-667K14.13 | 3,91   | -2,46 | 2,924506 | -0,83977 | 0,401038 | 0,7444931 |
| CTD-2353F22.2  | 0,48   | -2,40 | 2,854261 | -0,83955 | 0,401162 | NA        |
| OR13G1         | 0,31   | -3,08 | 3,671015 | -0,83945 | 0,401218 | NA        |
| MTA2           | 112,30 | -0,41 | 0,483347 | -0,83932 | 0,401291 | 0,7448882 |
| TTC38          | 102,11 | -0,73 | 0,865931 | -0,83914 | 0,401389 | 0,7449782 |
| ABCA4          | 0,79   | -2,57 | 3,068577 | -0,83914 | 0,401392 | NA        |
| CHFR           | 487,22 | 0,32  | 0,385605 | 0,839075 | 0,401427 | 0,7449782 |
| PCDHA9         | 6,87   | 0,82  | 0,977678 | 0,839018 | 0,401459 | 0,7449782 |
| RASSF7         | 115,38 | 0,78  | 0,932837 | 0,838862 | 0,401547 | 0,7450656 |
| EGR4           | 1,40   | 3,13  | 3,728343 | 0,838702 | 0,401637 | NA        |
| RP11-415F23.4  | 4,09   | 1,72  | 2,055888 | 0,838655 | 0,401663 | 0,7452073 |
| RNF212B        | 2,25   | -2,02 | 2,408632 | -0,83857 | 0,401712 | NA        |
| RIOX2          | 144,33 | -0,62 | 0,7396   | -0,83848 | 0,401758 | 0,74531   |
| STX1A          | 1,44   | 3,13  | 3,728754 | 0,838419 | 0,401795 | NA        |
| RP11-308D13.2  | 3,57   | 1,13  | 1,350619 | 0,838292 | 0,401867 | NA        |
| RN7SL555P      | 1,03   | -1,61 | 1,917223 | -0,83829 | 0,401871 | NA        |
| RP11-443B20.1  | 1,86   | 2,30  | 2,747874 | 0,83821  | 0,401913 | NA        |
| LHFPL3-AS2     | 3,86   | -0,95 | 1,137447 | -0,83817 | 0,401935 | 0,7455314 |
| RABGGTA        | 356,49 | 0,37  | 0,438357 | 0,838125 | 0,40196  | 0,7455314 |
| BARX2          | 4,04   | -0,94 | 1,126062 | -0,83806 | 0,401998 | 0,7455314 |
| RP11-512M8.3   | 1,73   | 2,80  | 3,343257 | 0,837974 | 0,402045 | NA        |
| RP11-211N8.2   | 1,24   | 2,72  | 3,251297 | 0,837973 | 0,402046 | NA        |
| SUGT1          | 605,63 | 0,43  | 0,514582 | 0,837908 | 0,402082 | 0,745606  |
| RP11-705C15.3  | 50,84  | -0,85 | 1,018718 | -0,83783 | 0,402128 | 0,745606  |
| CCDC43         | 205,83 | 0,54  | 0,642043 | 0,837773 | 0,402158 | 0,745606  |
| RN7SL333P      | 1,70   | 2,79  | 3,334634 | 0,837667 | 0,402218 | NA        |
| TSSC1          | 355,21 | 0,62  | 0,736555 | 0,837666 | 0,402218 | 0,7456425 |
| C9orf114       | 173,23 | -0,69 | 0,825796 | -0,83752 | 0,402299 | 0,7457185 |
| AC010984.3     | 0,86   | 2,39  | 2,852424 | 0,837173 | 0,402495 | NA        |
| MIR5190        | 1,71   | 2,79  | 3,338665 | 0,837091 | 0,402542 | NA        |
| SCEL           | 6,44   | -2,78 | 3,323959 | -0,83696 | 0,402616 | 0,7461825 |
| TAF3           | 183,93 | -0,45 | 0,542013 | -0,83693 | 0,40263  | 0,7461825 |

|                |         |       |          |          |          |           |
|----------------|---------|-------|----------|----------|----------|-----------|
| SLC1A6         | 57,43   | -0,47 | 0,564343 | -0,83684 | 0,402682 | 0,7461952 |
| MPP5           | 161,60  | -0,77 | 0,92212  | -0,83678 | 0,402717 | 0,7461952 |
| TRIB2          | 184,52  | -0,75 | 0,893777 | -0,83642 | 0,402918 | 0,7464362 |
| C11orf84       | 4,34    | 1,01  | 1,201924 | 0,836405 | 0,402927 | 0,7464362 |
| HOXB2          | 31,84   | 1,07  | 1,277815 | 0,836204 | 0,40304  | 0,7465713 |
| ODF3           | 1,28    | 2,45  | 2,929838 | 0,83615  | 0,403071 | NA        |
| SPOCK1         | 5,46    | -1,88 | 2,243392 | -0,83606 | 0,403122 | 0,7465963 |
| CEBPD          | 1035,14 | -0,29 | 0,345138 | -0,83598 | 0,403164 | 0,7465963 |
| MTG1           | 391,97  | -0,54 | 0,641948 | -0,83597 | 0,403174 | 0,7465963 |
| NBL1           | 1,41    | 3,12  | 3,7292   | 0,835773 | 0,403283 | NA        |
| SPAAR          | 4,52    | 1,11  | 1,331642 | 0,83577  | 0,403284 | 0,7466799 |
| KLHL6          | 200,26  | -0,40 | 0,475673 | -0,8357  | 0,403324 | 0,7466799 |
| XPA            | 264,99  | 0,40  | 0,47869  | 0,835672 | 0,40334  | 0,7466799 |
| RXFP2          | 0,30    | -3,07 | 3,678143 | -0,8355  | 0,403435 | NA        |
| CLCN2          | 30,13   | 0,66  | 0,786872 | 0,835472 | 0,403452 | 0,7467814 |
| MMP7           | 34,16   | -0,71 | 0,855639 | -0,83543 | 0,403475 | 0,7467814 |
| RP11-104J23.1  | 0,37    | -3,08 | 3,687676 | -0,8354  | 0,403493 | NA        |
| HES6           | 1,12    | 2,75  | 3,293441 | 0,83512  | 0,40365  | NA        |
| OSMR           | 34,37   | -0,81 | 0,973611 | -0,83484 | 0,403806 | 0,7470395 |
| AGBL1          | 6,66    | -0,85 | 1,012861 | -0,83484 | 0,40381  | 0,7470395 |
| CTD-2020K17.3  | 1,94    | 1,56  | 1,873823 | 0,834809 | 0,403825 | NA        |
| APC2           | 3,16    | -0,99 | 1,185166 | -0,83478 | 0,40384  | NA        |
| ETV2           | 1,18    | -1,69 | 2,025856 | -0,83476 | 0,403855 | NA        |
| TCF12          | 350,10  | 0,49  | 0,590351 | 0,83475  | 0,403858 | 0,7470395 |
| DUS3L          | 281,00  | 0,52  | 0,620912 | 0,834738 | 0,403865 | 0,7470395 |
| GRSF1          | 1006,71 | -0,32 | 0,383403 | -0,83468 | 0,403896 | 0,7470395 |
| COLEC12        | 53,23   | -0,59 | 0,701872 | -0,83468 | 0,4039   | 0,7470395 |
| ZNF566         | 65,60   | 0,66  | 0,790179 | 0,834642 | 0,403919 | 0,7470395 |
| RP11-738E22.1  | 1,39    | 3,11  | 3,7284   | 0,834536 | 0,403979 | NA        |
| RP11-706P11.2  | 3,56    | 2,15  | 2,57344  | 0,834502 | 0,403998 | NA        |
| ZC3H8          | 140,53  | -0,63 | 0,758132 | -0,8345  | 0,403999 | 0,7470395 |
| EFEMP2         | 27,74   | -1,34 | 1,602485 | -0,83449 | 0,404006 | 0,7470395 |
| FADS2          | 50,96   | 0,82  | 0,987757 | 0,834471 | 0,404016 | 0,7470395 |
| CYP4F3LP       | 6,75    | -1,78 | 2,136829 | -0,8343  | 0,404112 | 0,7470937 |
| GS1-122H1.2    | 9,06    | 0,75  | 0,89784  | 0,834273 | 0,404127 | 0,7470937 |
| RP11-338N10.2  | 3,40    | 1,03  | 1,237865 | 0,834256 | 0,404137 | NA        |
| UBQLN2         | 228,08  | 0,57  | 0,679887 | 0,834205 | 0,404165 | 0,7470937 |
| PLEKHA2        | 504,66  | 0,29  | 0,353016 | 0,834125 | 0,404211 | 0,7471028 |
| VN2R19P        | 2,13    | 3,11  | 3,725748 | 0,833968 | 0,404299 | NA        |
| HIGD2A         | 1716,70 | -0,21 | 0,253197 | -0,83383 | 0,404378 | 0,7472893 |
| SLF2           | 419,20  | 0,47  | 0,569417 | 0,833803 | 0,404392 | 0,7472893 |
| CH507-210P18.4 | 1,39    | 3,11  | 3,728391 | 0,833734 | 0,404431 | NA        |
| RP11-317G6.1   | 0,83    | 2,35  | 2,816924 | 0,833544 | 0,404538 | NA        |
| RP11-520M5.5   | 54,53   | -0,98 | 1,176314 | -0,8335  | 0,404562 | 0,7475012 |
| RP11-739B23.1  | 5,56    | 0,83  | 0,99779  | 0,833457 | 0,404587 | 0,7475012 |
| RNA5SP378      | 0,77    | 2,26  | 2,717334 | 0,833205 | 0,404729 | NA        |
| AC093690.1     | 20,96   | -0,96 | 1,146367 | -0,83311 | 0,40478  | 0,7476699 |
| CH17-264B6.1   | 9,18    | -1,25 | 1,501565 | -0,83298 | 0,404855 | 0,7476699 |
| ZNF185         | 33,48   | -1,28 | 1,534759 | -0,83296 | 0,404868 | 0,7476699 |
| RP11-493K19.3  | 105,06  | 0,68  | 0,819616 | 0,832922 | 0,404889 | 0,7476699 |

|                |         |       |          |          |          |           |
|----------------|---------|-------|----------|----------|----------|-----------|
| RN7SL444P      | 2,29    | -1,09 | 1,314124 | -0,83287 | 0,404919 | NA        |
| RP4-614O4.5    | 225,08  | -0,42 | 0,507864 | -0,83286 | 0,404924 | 0,7476699 |
| ELAC1          | 75,17   | -1,05 | 1,260145 | -0,83284 | 0,404937 | 0,7476699 |
| NSA2           | 460,54  | -0,30 | 0,363986 | -0,8328  | 0,404959 | 0,7476699 |
| RP11-34P13.18  | 22,83   | 0,49  | 0,593865 | 0,832535 | 0,405107 | 0,7478318 |
| PRDM6          | 30,26   | -1,34 | 1,603727 | -0,8325  | 0,405127 | 0,7478318 |
| CEP78          | 226,24  | -0,49 | 0,585125 | -0,83241 | 0,405176 | 0,7478331 |
| CTA-221G9.11   | 7,62    | -0,76 | 0,914098 | -0,83236 | 0,405209 | 0,7478331 |
| CCDC85B        | 341,91  | -0,38 | 0,455239 | -0,83211 | 0,405347 | 0,7479102 |
| SOGA1          | 141,48  | 0,69  | 0,834291 | 0,832091 | 0,405358 | 0,7479102 |
| RP11-599B13.10 | 1,38    | 3,10  | 3,728458 | 0,83207  | 0,405369 | NA        |
| PRELID3A       | 9,00    | 0,77  | 0,928755 | 0,832067 | 0,405371 | 0,7479102 |
| RFPL3S         | 2,04    | -2,13 | 2,561227 | -0,83191 | 0,405461 | NA        |
| RP11-452J21.2  | 1,38    | 3,10  | 3,728449 | 0,831866 | 0,405485 | NA        |
| SLC9A3R1       | 356,42  | -0,53 | 0,63758  | -0,83183 | 0,405505 | 0,7480731 |
| INO80E         | 43,71   | -0,73 | 0,873057 | -0,83177 | 0,40554  | 0,7480731 |
| RP3-398D13.3   | 29,78   | -0,77 | 0,9269   | -0,83169 | 0,405586 | 0,7480847 |
| RP11-337A23.3  | 1,02    | 2,66  | 3,201434 | 0,831592 | 0,405639 | NA        |
| RPL24P2        | 0,91    | -0,98 | 1,176648 | -0,83153 | 0,405673 | NA        |
| DPPA4          | 16,88   | -0,45 | 0,546825 | -0,83141 | 0,40574  | 0,7481917 |
| RP11-158K1.3   | 33,41   | -0,44 | 0,5349   | -0,83128 | 0,405815 | 0,7481917 |
| ADRA1A         | 3,57    | -0,72 | 0,871    | -0,83124 | 0,405838 | NA        |
| RP11-76I7.1    | 10,48   | -0,67 | 0,810799 | -0,83118 | 0,405871 | 0,7481917 |
| LIMS1          | 1052,10 | 0,37  | 0,440289 | 0,831162 | 0,405882 | 0,7481917 |
| RP11-479H16.1  | 14,64   | -1,40 | 1,681083 | -0,83116 | 0,405883 | 0,7481917 |
| TMED10         | 1627,43 | 0,27  | 0,329976 | 0,831104 | 0,405915 | 0,7481917 |
| RP11-508N22.2  | 18,45   | 0,76  | 0,908587 | 0,831043 | 0,405949 | 0,7481917 |
| RP11-218E20.3  | 34,74   | -0,57 | 0,680263 | -0,83101 | 0,405966 | 0,7481917 |
| RFPL4AL1       | 1,02    | -1,79 | 2,150522 | -0,83089 | 0,406035 | NA        |
| CTD-2283N19.1  | 5,61    | 0,90  | 1,086383 | 0,830851 | 0,406058 | 0,7482675 |
| WDR78          | 76,90   | -0,86 | 1,03318  | -0,8308  | 0,406087 | 0,7482675 |
| NAT10          | 247,76  | 0,40  | 0,482438 | 0,830727 | 0,406128 | 0,7482679 |
| RP11-809N8.4   | 6,19    | 1,03  | 1,245319 | 0,830614 | 0,406191 | 0,748311  |
| RP11-542G1.3   | 1,60    | 2,05  | 2,467492 | 0,830547 | 0,40623  | NA        |
| ZDHHC13        | 184,87  | 0,90  | 1,079461 | 0,830313 | 0,406362 | 0,748435  |
| SLC12A2        | 311,41  | -0,64 | 0,776747 | -0,83022 | 0,406415 | 0,748435  |
| YWHAE          | 2992,08 | 0,17  | 0,205317 | 0,830206 | 0,406422 | 0,748435  |
| EMC2           | 113,54  | 0,66  | 0,79456  | 0,83016  | 0,406448 | 0,748435  |
| KDM1A          | 475,25  | 0,55  | 0,657966 | 0,830139 | 0,40646  | 0,748435  |
| RP11-378A13.2  | 2,22    | -1,48 | 1,783188 | -0,83014 | 0,406462 | NA        |
| IFIT3          | 723,18  | -0,74 | 0,893724 | -0,82988 | 0,406609 | 0,7486345 |
| DGCR11         | 12,78   | -1,03 | 1,24146  | -0,82964 | 0,406741 | 0,7488051 |
| MBLAC1         | 1,38    | -1,42 | 1,716074 | -0,8295  | 0,406824 | NA        |
| AC104777.2     | 0,47    | -2,78 | 3,348881 | -0,82939 | 0,406885 | NA        |
| CAT            | 1122,82 | 0,32  | 0,38145  | 0,82933  | 0,406918 | 0,7489829 |
| PTPN7          | 302,95  | -0,38 | 0,460866 | -0,82931 | 0,406932 | 0,7489829 |
| RP11-1250I15.2 | 1,38    | 3,09  | 3,728508 | 0,8293   | 0,406935 | NA        |
| AC124944.2     | 13,14   | -1,14 | 1,370881 | -0,82925 | 0,406966 | 0,7489829 |
| VPS50          | 217,14  | -0,59 | 0,717204 | -0,82919 | 0,406999 | 0,7489829 |
| AQP6           | 0,85    | -1,14 | 1,370077 | -0,82914 | 0,407027 | NA        |



|               |          |       |          |          |          |           |
|---------------|----------|-------|----------|----------|----------|-----------|
| RP11-649E7.5  | 162,56   | -1,07 | 1,295831 | -0,82906 | 0,40707  | 0,7489938 |
| ZNF232        | 4,41     | -1,44 | 1,738099 | -0,82903 | 0,407086 | 0,7489938 |
| SNORA77       | 0,53     | 1,74  | 2,093869 | 0,828988 | 0,407111 | NA        |
| CTD-3195I5.3  | 2,79     | -0,86 | 1,042429 | -0,82896 | 0,407127 | NA        |
| ITGAE         | 396,87   | -0,34 | 0,416008 | -0,8289  | 0,407161 | 0,7490593 |
| RP11-356M20.1 | 88,02    | 0,84  | 1,015745 | 0,828367 | 0,407463 | 0,7495397 |
| RP11-697H9.3  | 5,52     | 0,90  | 1,088458 | 0,827673 | 0,407856 | 0,7499367 |
| LMNB1         | 139,84   | 0,79  | 0,958858 | 0,827651 | 0,407868 | 0,7499367 |
| COPS3         | 722,83   | 0,33  | 0,403085 | 0,827627 | 0,407882 | 0,7499367 |
| FBXO11        | 700,28   | 0,37  | 0,443493 | 0,827588 | 0,407904 | 0,7499367 |
| RALGPS1       | 45,48    | -0,84 | 1,017262 | -0,82757 | 0,407917 | 0,7499367 |
| ADH1B         | 3,84     | -0,96 | 1,156203 | -0,82756 | 0,40792  | 0,7499367 |
| AC002398.13   | 0,84     | 1,67  | 2,016342 | 0,827446 | 0,407984 | NA        |
| RP11-126O22.8 | 1,38     | 3,08  | 3,728552 | 0,827153 | 0,40815  | NA        |
| RP11-164H13.1 | 9,15     | -0,70 | 0,849709 | -0,82708 | 0,408192 | 0,7502972 |
| TIPRL         | 420,93   | 0,51  | 0,622027 | 0,826986 | 0,408245 | 0,7502972 |
| PDPK2P        | 44,29    | -0,69 | 0,839019 | -0,82696 | 0,40826  | 0,7502972 |
| RP11-766F14.2 | 0,46     | -2,34 | 2,825997 | -0,82696 | 0,408262 | NA        |
| RP11-20I23.8  | 64,27    | -0,85 | 1,026899 | -0,82693 | 0,408278 | 0,7502972 |
| KLRC4-KLRK1   | 24,49    | -2,66 | 3,214796 | -0,82686 | 0,408319 | 0,7502984 |
| TPT1          | 11478,31 | -0,14 | 0,164071 | -0,82669 | 0,408414 | 0,7503984 |
| RN7SL795P     | 0,57     | -3,03 | 3,667238 | -0,82664 | 0,40844  | NA        |
| AC010761.10   | 6,36     | 0,84  | 1,015915 | 0,826581 | 0,408475 | 0,7504153 |
| RP3-399L15.3  | 58,42    | 0,89  | 1,072255 | 0,82653  | 0,408503 | 0,7504153 |
| CTD-2537I9.13 | 4,83     | -0,89 | 1,072726 | -0,82645 | 0,408547 | 0,7504188 |
| RNA5SP494     | 21,60    | 1,20  | 1,446251 | 0,826385 | 0,408586 | 0,7504188 |
| SNORD59A      | 1,36     | 3,08  | 3,72859  | 0,826349 | 0,408606 | NA        |
| RP11-423G4.8  | 0,50     | -2,34 | 2,832415 | -0,82634 | 0,408611 | NA        |
| BUD31         | 1005,70  | -0,27 | 0,330862 | -0,82619 | 0,408696 | 0,750547  |
| TRPC2         | 83,09    | -1,30 | 1,578776 | -0,82609 | 0,408752 | 0,7505752 |
| RN7SL811P     | 0,93     | -1,61 | 1,946664 | -0,82602 | 0,408793 | NA        |
| ZNF460        | 111,47   | 0,98  | 1,182428 | 0,825881 | 0,408871 | 0,7506797 |
| RBM42         | 115,69   | 0,51  | 0,615616 | 0,825788 | 0,408924 | 0,7506797 |
| FAM3B         | 30,21    | 1,24  | 1,497118 | 0,825778 | 0,40893  | 0,7506797 |
| FAM215A       | 1,07     | 2,74  | 3,317876 | 0,825756 | 0,408942 | NA        |
| RN7SL809P     | 2,27     | 2,07  | 2,50149  | 0,82565  | 0,409003 | NA        |
| EPB41L2       | 307,99   | -0,37 | 0,446531 | -0,82558 | 0,409043 | 0,7507904 |
| TMEM51        | 49,67    | -1,09 | 1,317063 | -0,82553 | 0,409071 | 0,7507904 |
| CTD-2012I17.1 | 2,09     | 3,08  | 3,725911 | 0,825441 | 0,409121 | NA        |
| RP11-522B15.4 | 6,72     | -1,18 | 1,430764 | -0,82529 | 0,409206 | 0,7509639 |
| ALDH3B1       | 364,56   | -0,43 | 0,517525 | -0,82509 | 0,409318 | 0,7510364 |
| VIL1          | 23,00    | -1,21 | 1,469862 | -0,82507 | 0,409331 | 0,7510364 |
| SNTB2         | 119,31   | -0,71 | 0,866321 | -0,82501 | 0,409366 | 0,7510364 |
| RP11-467I20.6 | 1,21     | -1,11 | 1,348909 | -0,82471 | 0,409534 | NA        |
| RHBDD2        | 559,82   | -0,45 | 0,542423 | -0,82459 | 0,409605 | 0,7513522 |
| TMEM191A      | 56,96    | -0,58 | 0,699264 | -0,82456 | 0,409619 | 0,7513522 |
| FAM129C       | 75,46    | -0,39 | 0,47475  | -0,82424 | 0,409801 | 0,7515216 |
| RP11-544A12.4 | 47,66    | 0,47  | 0,572156 | 0,824219 | 0,409815 | 0,7515216 |
| WDR7          | 411,68   | -0,51 | 0,620992 | -0,82419 | 0,409833 | 0,7515216 |
| BAG1          | 650,43   | 0,30  | 0,363653 | 0,824102 | 0,409882 | 0,7515374 |

|                    |         |       |          |          |          |           |
|--------------------|---------|-------|----------|----------|----------|-----------|
| RP11-1070N10.3     | 0,42    | -2,78 | 3,372294 | -0,82396 | 0,409961 | NA        |
| RP11-231G3.1       | 0,97    | -1,46 | 1,774738 | -0,82396 | 0,409962 | NA        |
| RP11-893F2.18      | 0,79    | -3,01 | 3,659185 | -0,82394 | 0,409973 | NA        |
| ADAMTSL5           | 4,10    | 0,87  | 1,052842 | 0,823723 | 0,410097 | 0,751711  |
| RP11-483K5.3       | 6,14    | -1,88 | 2,276572 | -0,82368 | 0,410122 | 0,751711  |
| CTD-2313I10.1      | 4,37    | -0,89 | 1,086603 | -0,82366 | 0,410134 | 0,751711  |
| ISOC2              | 258,26  | -0,69 | 0,83987  | -0,82365 | 0,410138 | 0,751711  |
| RP11-367F23.2      | 0,47    | -2,35 | 2,84882  | -0,82349 | 0,410232 | NA        |
| SNX7               | 15,36   | 2,67  | 3,247224 | 0,82345  | 0,410252 | 0,7518455 |
| PROC               | 2,30    | -1,31 | 1,587925 | -0,82335 | 0,410308 | NA        |
| OR2A14             | 1,01    | 2,64  | 3,209638 | 0,82332  | 0,410326 | NA        |
| ITPR3              | 1,13    | -1,41 | 1,711525 | -0,82327 | 0,410353 | NA        |
| DDX27              | 635,66  | -0,35 | 0,427953 | -0,82318 | 0,410407 | 0,7520564 |
| RP11-470E16.1      | 0,81    | 2,31  | 2,803481 | 0,822957 | 0,410532 | NA        |
| GPR63              | 27,85   | -0,63 | 0,771486 | -0,82293 | 0,410546 | 0,7522366 |
| SPDYE16            | 19,58   | -0,69 | 0,841159 | -0,82275 | 0,41065  | 0,7522952 |
| STRIP1             | 250,90  | -0,68 | 0,824011 | -0,82273 | 0,410659 | 0,7522952 |
| RP11-553A10.1      | 0,92    | 1,87  | 2,269682 | 0,822551 | 0,410763 | NA        |
| AP5S1              | 70,69   | 0,73  | 0,888758 | 0,822422 | 0,410837 | 0,7523828 |
| RP11-697N18.2      | 1,34    | 3,06  | 3,722356 | 0,822358 | 0,410873 | NA        |
| SFXN3              | 236,53  | 0,34  | 0,41244  | 0,822355 | 0,410875 | 0,7523828 |
| CTA-747E2.10       | 0,53    | -1,81 | 2,198127 | -0,82232 | 0,410896 | NA        |
| ENO3               | 28,69   | -0,68 | 0,82138  | -0,82231 | 0,410899 | 0,7523828 |
| RN7SL255P          | 6,05    | 1,42  | 1,725918 | 0,822295 | 0,410909 | 0,7523828 |
| SH3GL1P3           | 1,69    | 2,77  | 3,369331 | 0,822252 | 0,410934 | NA        |
| LRRC43             | 0,77    | 1,86  | 2,257204 | 0,822224 | 0,410949 | NA        |
| NUDCD3             | 484,16  | 0,61  | 0,741991 | 0,822099 | 0,41102  | 0,7523828 |
| RP11-492D6.3       | 7,46    | -0,61 | 0,741471 | -0,82209 | 0,411025 | 0,7523828 |
| CA5B               | 368,22  | 0,60  | 0,727404 | 0,822072 | 0,411036 | 0,7523828 |
| RP11-338K17.5      | 1,31    | -1,07 | 1,297593 | -0,82199 | 0,411084 | NA        |
| TM2D2              | 171,23  | -0,68 | 0,824324 | -0,82188 | 0,411147 | 0,7523828 |
| SCAPER             | 388,21  | -0,53 | 0,644561 | -0,82178 | 0,411202 | 0,7523828 |
| CTD-2035E11.4      | 1,34    | 2,46  | 2,988996 | 0,821756 | 0,411216 | NA        |
| CSF2RB             | 383,99  | 0,53  | 0,646275 | 0,821726 | 0,411233 | 0,7523828 |
| FADS6              | 18,46   | -0,70 | 0,850445 | -0,8217  | 0,411249 | 0,7523828 |
| AC027612.3         | 17,79   | -0,87 | 1,055047 | -0,82169 | 0,411253 | 0,7523828 |
| CD37               | 1927,74 | 0,23  | 0,278604 | 0,821658 | 0,411271 | 0,7523828 |
| FAU                | 5441,41 | -0,18 | 0,216235 | -0,82166 | 0,411273 | 0,7523828 |
| ABC14-1080714F14.1 | 1,26    | -1,81 | 2,200073 | -0,82148 | 0,411375 | NA        |
| LMX1B              | 4,39    | 0,64  | 0,780882 | 0,821422 | 0,411406 | 0,7524676 |
| KDM6A              | 479,26  | -0,39 | 0,47739  | -0,82131 | 0,411467 | 0,7524676 |
| RP11-89K10.2       | 1,34    | 3,06  | 3,728712 | 0,82114  | 0,411567 | NA        |
| CTB-360I.2         | 0,50    | -1,79 | 2,183145 | -0,82111 | 0,411581 | NA        |
| CYB5RL             | 77,96   | -0,39 | 0,473522 | -0,82103 | 0,411628 | 0,7524676 |
| ALDH7A1            | 134,40  | -0,61 | 0,747628 | -0,82096 | 0,411666 | 0,7524676 |
| RP11-552D8.1       | 0,62    | -2,13 | 2,592664 | -0,82095 | 0,411677 | NA        |
| GAS2L1             | 70,18   | -0,72 | 0,872413 | -0,82093 | 0,411685 | 0,7524676 |
| NR3C1              | 1342,54 | -0,35 | 0,427187 | -0,82091 | 0,411697 | 0,7524676 |
| RP11-536C10.6      | 2,64    | 1,37  | 1,668221 | 0,820874 | 0,411718 | NA        |
| RP11-820I16.3      | 25,08   | -0,48 | 0,579384 | -0,82079 | 0,411768 | 0,7524676 |

|                |         |       |          |          |          |           |
|----------------|---------|-------|----------|----------|----------|-----------|
| TULP2          | 32,03   | -1,19 | 1,454396 | -0,82073 | 0,411801 | 0,7524676 |
| ZNF77          | 29,96   | 0,91  | 1,105338 | 0,820723 | 0,411804 | 0,7524676 |
| AP000240.5     | 13,17   | -0,92 | 1,122534 | -0,82072 | 0,411808 | 0,7524676 |
| CTD-2561B21.11 | 1,06    | 2,68  | 3,26597  | 0,820635 | 0,411854 | NA        |
| MYLPF          | 9,60    | 0,79  | 0,96671  | 0,820546 | 0,411905 | 0,7524676 |
| RP11-141B14.1  | 6,88    | 1,06  | 1,296996 | 0,82052  | 0,41192  | 0,7524676 |
| SP140L         | 317,26  | 0,39  | 0,475387 | 0,820507 | 0,411927 | 0,7524676 |
| PYCR2          | 104,56  | 0,50  | 0,60724  | 0,820497 | 0,411933 | 0,7524676 |
| RP11-49K24.6   | 16,28   | 1,02  | 1,242984 | 0,820478 | 0,411944 | 0,7524676 |
| FIGNL2         | 1,34    | -2,06 | 2,508307 | -0,82044 | 0,411963 | NA        |
| WDR66          | 122,78  | -0,32 | 0,386272 | -0,82044 | 0,411966 | 0,7524676 |
| CMB9-94B1.2    | 1,34    | 3,06  | 3,728747 | 0,820245 | 0,412076 | NA        |
| RP11-126H7.3   | 8,43    | -0,56 | 0,678554 | -0,82015 | 0,41213  | 0,7524963 |
| MPND           | 109,90  | -0,60 | 0,736833 | -0,82014 | 0,412136 | 0,7524963 |
| UBE3C          | 503,17  | 0,49  | 0,601003 | 0,820136 | 0,412139 | 0,7524963 |
| RAP2A          | 470,40  | 0,48  | 0,585435 | 0,820088 | 0,412166 | 0,7524963 |
| ROBO3          | 138,31  | -0,64 | 0,776953 | -0,82006 | 0,412184 | 0,7524963 |
| RN7SL138P      | 14,09   | -0,99 | 1,21347  | -0,81987 | 0,412291 | 0,7524988 |
| RN7SL608P      | 8,70    | -1,15 | 1,403289 | -0,81986 | 0,412294 | 0,7524988 |
| PCDH11X        | 27,13   | 0,36  | 0,443345 | 0,819782 | 0,41234  | 0,7524988 |
| AC005754.8     | 9,05    | -0,51 | 0,622871 | -0,81977 | 0,412347 | 0,7524988 |
| RP11-654D12.3  | 2,69    | -1,43 | 1,750147 | -0,8197  | 0,412385 | NA        |
| RP11-415C15.1  | 0,60    | -2,09 | 2,554832 | -0,81956 | 0,412468 | NA        |
| AC016629.8     | 76,74   | -0,47 | 0,576732 | -0,81956 | 0,41247  | 0,7526481 |
| CTD-2521M24.13 | 3,03    | -0,83 | 1,016092 | -0,8195  | 0,412499 | NA        |
| RP1-30M3.5     | 20,95   | 1,33  | 1,621295 | 0,819461 | 0,412524 | 0,7526727 |
| RP11-502I4.3   | 1,22    | -1,11 | 1,352431 | -0,8193  | 0,412614 | NA        |
| REPS2          | 216,92  | -0,57 | 0,692963 | -0,81926 | 0,412636 | 0,752803  |
| ERGIC1         | 255,35  | 0,58  | 0,707865 | 0,819146 | 0,412703 | 0,7528082 |
| TAL1           | 7,68    | 0,97  | 1,179408 | 0,819118 | 0,412719 | 0,7528082 |
| RP11-175P8.1   | 23,28   | 0,99  | 1,210001 | 0,81896  | 0,412809 | 0,7528441 |
| RP11-352B15.1  | 16,12   | -1,71 | 2,092043 | -0,81893 | 0,412826 | 0,7528441 |
| TGIF2P1        | 1,33    | 3,05  | 3,728767 | 0,818794 | 0,412904 | NA        |
| ZSCAN9         | 136,89  | 0,77  | 0,934749 | 0,818794 | 0,412904 | 0,7528441 |
| RP11-146F11.5  | 5,25    | -0,88 | 1,075133 | -0,81878 | 0,412909 | 0,7528441 |
| TIMP1          | 3329,30 | -0,18 | 0,221759 | -0,81864 | 0,412992 | 0,7528441 |
| RP11-360N9.3   | 30,44   | 0,73  | 0,895217 | 0,818633 | 0,412996 | 0,7528441 |
| RP11-661O13.1  | 2,03    | 1,72  | 2,106711 | 0,818597 | 0,413016 | NA        |
| RP1-253P7.4    | 22,19   | 0,48  | 0,588642 | 0,818587 | 0,413022 | 0,7528441 |
| ZNF433         | 70,52   | -0,86 | 1,049511 | -0,81847 | 0,41309  | 0,7528931 |
| CTD-2369P2.5   | 1,29    | 2,38  | 2,909577 | 0,818437 | 0,413108 | NA        |
| AZGP1          | 2,09    | -0,99 | 1,20727  | -0,81836 | 0,413151 | NA        |
| CD34           | 5,39    | -0,75 | 0,910879 | -0,81827 | 0,413203 | 0,7529784 |
| DNMBP          | 68,53   | 0,99  | 1,206974 | 0,818233 | 0,413224 | 0,7529784 |
| RP11-403C10.2  | 1,43    | 3,05  | 3,728033 | 0,818204 | 0,413241 | NA        |
| CARS2          | 584,55  | 0,37  | 0,448331 | 0,818174 | 0,413258 | 0,7529784 |
| RP4-663N10.1   | 1,11    | -1,51 | 1,850118 | -0,81803 | 0,41334  | NA        |
| RP11-382E15.1  | 0,90    | -0,98 | 1,202435 | -0,81796 | 0,413378 | NA        |
| SHH            | 5,36    | -0,44 | 0,542702 | -0,81794 | 0,413392 | 0,7530219 |
| FOXP2          | 1456,66 | 0,35  | 0,422026 | 0,817899 | 0,413415 | 0,7530219 |

|                |         |       |          |          |          |           |
|----------------|---------|-------|----------|----------|----------|-----------|
| XYLT1          | 655,72  | -0,76 | 0,927316 | -0,81789 | 0,413421 | 0,7530219 |
| SEC14L4        | 11,63   | 0,89  | 1,089202 | 0,817832 | 0,413453 | 0,7530219 |
| AC092431.3     | 8,80    | -1,22 | 1,486175 | -0,81778 | 0,413484 | 0,7530219 |
| RP11-264L1.4   | 1,34    | 3,05  | 3,728731 | 0,817767 | 0,41349  | NA        |
| CTC-498J12.1   | 0,98    | 2,62  | 3,204494 | 0,817735 | 0,413509 | NA        |
| ABCA3          | 7,40    | -1,32 | 1,615011 | -0,8177  | 0,41353  | 0,7530309 |
| RP11-757F18.5  | 0,35    | -3,00 | 3,674864 | -0,81758 | 0,413598 | NA        |
| TEX261         | 299,91  | -0,41 | 0,504153 | -0,81752 | 0,413634 | 0,7530946 |
| MVB12B         | 274,94  | -0,85 | 1,040655 | -0,8175  | 0,413645 | 0,7530946 |
| RP11-20B24.6   | 2,72    | -0,93 | 1,13264  | -0,81742 | 0,413687 | NA        |
| RAB29          | 421,19  | 0,43  | 0,527258 | 0,817326 | 0,413742 | 0,753141  |
| RRP1           | 188,59  | -0,48 | 0,587858 | -0,81731 | 0,413752 | 0,753141  |
| RP11-436K8.1   | 45,03   | -0,72 | 0,875301 | -0,81714 | 0,413847 | 0,7531853 |
| RP11-392E22.6  | 15,14   | -0,92 | 1,129241 | -0,81712 | 0,413857 | 0,7531853 |
| RNU7-75P       | 0,52    | -1,44 | 1,766612 | -0,81696 | 0,413953 | NA        |
| TGOLN2         | 2304,35 | -0,19 | 0,231636 | -0,81691 | 0,413981 | 0,753283  |
| UPP2           | 4,10    | 2,08  | 2,551202 | 0,816855 | 0,414011 | 0,753283  |
| HNRNPUL1       | 619,16  | 0,33  | 0,406765 | 0,816818 | 0,414032 | 0,753283  |
| ABTB2          | 3,74    | 1,55  | 1,902729 | 0,816729 | 0,414083 | NA        |
| KBTBD3         | 28,54   | -1,05 | 1,291404 | -0,81665 | 0,414129 | 0,7533378 |
| PRSS57         | 0,29    | -3,00 | 3,67863  | -0,81662 | 0,414143 | NA        |
| SLC35A2        | 105,75  | 0,74  | 0,909794 | 0,816623 | 0,414144 | 0,7533378 |
| RIT1           | 422,89  | 0,43  | 0,530991 | 0,816553 | 0,414184 | 0,7533378 |
| RRH            | 0,29    | -3,00 | 3,679052 | -0,8164  | 0,414273 | NA        |
| WLS            | 0,54    | -2,69 | 3,296918 | -0,81632 | 0,414316 | NA        |
| RP1-102G20.4   | 2,01    | 3,04  | 3,726076 | 0,816291 | 0,414334 | NA        |
| SERPINI1       | 1,34    | 2,40  | 2,946172 | 0,816173 | 0,414401 | NA        |
| PPP4R1         | 487,18  | -0,41 | 0,497993 | -0,81606 | 0,414463 | 0,753717  |
| BOD1L1         | 1329,43 | 0,35  | 0,432274 | 0,815912 | 0,41455  | 0,753717  |
| RBM20          | 4,36    | -0,76 | 0,92679  | -0,81588 | 0,414566 | 0,753717  |
| OR2T33         | 10,03   | -0,86 | 1,059458 | -0,81585 | 0,414584 | 0,753717  |
| RP11-195B17.1  | 2,02    | 2,44  | 2,987289 | 0,815765 | 0,414634 | NA        |
| CTA-217C2.1    | 84,33   | -0,82 | 1,005181 | -0,81575 | 0,414642 | 0,753717  |
| TRMT10B        | 118,75  | -0,54 | 0,656413 | -0,81571 | 0,414668 | 0,753717  |
| DDX55          | 149,17  | 0,60  | 0,734782 | 0,815693 | 0,414676 | 0,753717  |
| RN7SL322P      | 4,25    | 1,32  | 1,620196 | 0,815621 | 0,414717 | 0,7537179 |
| DLGAP5         | 0,79    | -1,21 | 1,488559 | -0,81558 | 0,414738 | NA        |
| RP11-479G22.8  | 3,62    | 2,13  | 2,614738 | 0,815555 | 0,414755 | NA        |
| SALRNA1        | 9,54    | -0,66 | 0,806601 | -0,81549 | 0,414793 | 0,7537785 |
| CTA-984G1.5    | 2,27    | -0,86 | 1,049267 | -0,81544 | 0,414821 | NA        |
| USP35          | 18,16   | -1,62 | 1,985001 | -0,81542 | 0,414831 | 0,7537785 |
| CTD-2192J16.26 | 1,86    | 1,28  | 1,571484 | 0,815101 | 0,415015 | NA        |
| CORO2A         | 40,02   | -0,70 | 0,863896 | -0,81492 | 0,415119 | 0,7542273 |
| RP11-168J18.4  | 1,13    | -2,24 | 2,74401  | -0,81491 | 0,415122 | NA        |
| BMS1P4         | 41,93   | -1,14 | 1,402669 | -0,81484 | 0,415166 | 0,7542399 |
| CELA2A         | 4,73    | -0,85 | 1,043846 | -0,8147  | 0,415243 | 0,7542645 |
| MIR4298        | 0,64    | 1,98  | 2,425299 | 0,814692 | 0,415248 | NA        |
| MARCH9         | 87,30   | -0,64 | 0,786745 | -0,81465 | 0,415272 | 0,7542645 |
| LARS2          | 31,00   | 0,91  | 1,1131   | 0,814571 | 0,415318 | 0,7542645 |
| SSBP4          | 369,94  | -0,44 | 0,534952 | -0,81448 | 0,41537  | 0,7542645 |

|               |         |       |          |          |          |           |
|---------------|---------|-------|----------|----------|----------|-----------|
| PDK1          | 261,32  | 0,73  | 0,901937 | 0,814458 | 0,415383 | 0,7542645 |
| RP11-20L24.1  | 0,72    | -2,98 | 3,661995 | -0,81442 | 0,415407 | NA        |
| RNU6-430P     | 21,98   | 1,19  | 1,456687 | 0,8143   | 0,415473 | 0,7543554 |
| AC005276.1    | 2,13    | -1,06 | 1,307053 | -0,81426 | 0,415498 | NA        |
| PUSL1         | 106,14  | 1,00  | 1,227362 | 0,81418  | 0,415542 | 0,7544068 |
| DCAF10        | 342,18  | -0,54 | 0,661914 | -0,81398 | 0,415659 | 0,7545448 |
| CTD-2313F11.3 | 0,81    | -1,16 | 1,420796 | -0,81395 | 0,415675 | NA        |
| NUDT14        | 215,99  | 0,49  | 0,606445 | 0,813856 | 0,415727 | 0,754596  |
| TMEM219       | 2386,94 | -0,19 | 0,231357 | -0,81369 | 0,415821 | 0,7545981 |
| CTD-2292M16.8 | 15,32   | -0,75 | 0,917432 | -0,81365 | 0,415845 | 0,7545981 |
| C20orf144     | 15,88   | -1,06 | 1,302011 | -0,81363 | 0,415858 | 0,7545981 |
| RF00212       | 1,32    | 3,03  | 3,728897 | 0,813612 | 0,415867 | NA        |
| MICAL2        | 651,87  | 0,41  | 0,502765 | 0,813549 | 0,415904 | 0,7545981 |
| GINS3         | 52,76   | 0,75  | 0,92473  | 0,8135   | 0,415931 | 0,7545981 |
| CLDN7         | 0,79    | 2,28  | 2,798658 | 0,813488 | 0,415938 | NA        |
| ZRANB3        | 118,41  | -0,89 | 1,095495 | -0,81329 | 0,416053 | 0,7547372 |
| GPR81         | 31,70   | -0,49 | 0,600685 | -0,81322 | 0,416089 | 0,7547372 |
| AC004383.4    | 1,61    | 2,17  | 2,665852 | 0,813193 | 0,416108 | NA        |
| RP11-124O11.1 | 1,33    | 3,03  | 3,728861 | 0,813135 | 0,416141 | NA        |
| FAM188B       | 10,04   | 0,87  | 1,071365 | 0,81303  | 0,416201 | 0,7548659 |
| RP11-552F3.13 | 0,45    | -2,73 | 3,355238 | -0,81289 | 0,416281 | NA        |
| RP5-855D21.2  | 0,36    | -2,99 | 3,675255 | -0,81269 | 0,416394 | NA        |
| RN7SL690P     | 1,98    | -1,02 | 1,258306 | -0,81267 | 0,416409 | NA        |
| ACOX3         | 47,25   | -0,94 | 1,153419 | -0,81244 | 0,416542 | 0,7551791 |
| RP3-410C9.1   | 98,22   | -0,60 | 0,744221 | -0,81233 | 0,416601 | 0,7551791 |
| RP11-490K7.4  | 41,56   | -0,85 | 1,046886 | -0,81221 | 0,416671 | 0,7551791 |
| RP11-103C3.1  | 49,74   | -0,57 | 0,703547 | -0,81216 | 0,416699 | 0,7551791 |
| FNTB          | 151,06  | -1,06 | 1,299954 | -0,81206 | 0,416756 | 0,7551791 |
| MRI1          | 50,38   | 0,61  | 0,753723 | 0,812041 | 0,416768 | 0,7551791 |
| SEPT3         | 7,86    | 1,18  | 1,452089 | 0,811919 | 0,416838 | 0,7551791 |
| PLA2G2D       | 8,38    | -0,66 | 0,809901 | -0,81187 | 0,416867 | 0,7551791 |
| CTD-2060L22.1 | 0,76    | 2,25  | 2,776007 | 0,811762 | 0,416928 | NA        |
| RNU5B-1       | 7,01    | -0,89 | 1,094441 | -0,81174 | 0,416943 | 0,7551791 |
| SPEG          | 25,79   | -1,22 | 1,500229 | -0,81172 | 0,41695  | 0,7551791 |
| AC008063.5    | 5,51    | -0,84 | 1,039858 | -0,81169 | 0,41697  | 0,7551791 |
| RP11-188C12.3 | 14,11   | 0,56  | 0,692309 | 0,811591 | 0,417026 | 0,7551791 |
| RN7SL388P     | 8,99    | 0,72  | 0,88798  | 0,811544 | 0,417053 | 0,7551791 |
| CHD2          | 1386,68 | -0,21 | 0,257775 | -0,81154 | 0,417055 | 0,7551791 |
| RN7SL290P     | 0,79    | 2,28  | 2,807846 | 0,8115   | 0,417079 | NA        |
| LMO4          | 197,69  | 0,44  | 0,545452 | 0,811479 | 0,417091 | 0,7551791 |
| RP13-580F15.2 | 7,25    | 1,31  | 1,616103 | 0,811476 | 0,417093 | 0,7551791 |
| CTD-2154I11.2 | 12,85   | 0,81  | 0,992481 | 0,811433 | 0,417117 | 0,7551791 |
| AK8           | 1,44    | -2,22 | 2,734012 | -0,81138 | 0,417149 | NA        |
| AC012354.6    | 0,46    | -1,75 | 2,161277 | -0,81124 | 0,417226 | NA        |
| RP11-54O7.17  | 1,31    | 3,03  | 3,728929 | 0,811238 | 0,417229 | NA        |
| RP11-38M8.1   | 6,33    | 1,38  | 1,702482 | 0,811223 | 0,417237 | 0,7551791 |
| FAM13B        | 415,30  | -0,47 | 0,57855  | -0,81121 | 0,417246 | 0,7551791 |
| SNHG6         | 249,42  | -0,32 | 0,398862 | -0,8112  | 0,417252 | 0,7551791 |
| RP11-48G14.2  | 5,81    | 1,95  | 2,403563 | 0,811183 | 0,41726  | 0,7551791 |
| GRK5          | 48,83   | 0,82  | 1,006811 | 0,81117  | 0,417268 | 0,7551791 |

|               |         |       |          |          |          |           |
|---------------|---------|-------|----------|----------|----------|-----------|
| RP11-712C19.2 | 22,82   | -0,44 | 0,540551 | -0,8111  | 0,417307 | 0,7551791 |
| TAOK2         | 75,37   | -0,87 | 1,068646 | -0,81093 | 0,417406 | 0,7552323 |
| RP13-20L14.4  | 6,70    | 0,86  | 1,055443 | 0,81091  | 0,417418 | 0,7552323 |
| RP11-498C9.4  | 0,62    | -2,76 | 3,400989 | -0,81089 | 0,417426 | NA        |
| RN7SL381P     | 1,31    | 2,40  | 2,964336 | 0,81084  | 0,417458 | NA        |
| KLK2          | 8,94    | -0,83 | 1,02042  | -0,81073 | 0,41752  | 0,7553443 |
| OR2AP1        | 1,25    | 1,14  | 1,407343 | 0,810702 | 0,417537 | NA        |
| RP11-576N17.5 | 0,77    | -1,38 | 1,69975  | -0,81057 | 0,417611 | NA        |
| LGALS3BP      | 252,37  | -0,73 | 0,906507 | -0,81054 | 0,417631 | 0,7553443 |
| ACTG2         | 7,66    | 1,12  | 1,383032 | 0,81052  | 0,417641 | 0,7553443 |
| CNOT1         | 674,49  | -0,24 | 0,292716 | -0,81052 | 0,417642 | 0,7553443 |
| AC096582.7    | 14,24   | -0,83 | 1,028063 | -0,8104  | 0,417708 | 0,7553907 |
| AC004063.1    | 1,86    | -1,12 | 1,383864 | -0,81028 | 0,417778 | NA        |
| SNHG9         | 73,96   | -0,41 | 0,511461 | -0,81009 | 0,417886 | 0,7556393 |
| ABHD1         | 20,81   | 1,01  | 1,249192 | 0,809809 | 0,41805  | 0,7558616 |
| RP1-130G2.1   | 0,28    | -2,98 | 3,67951  | -0,8097  | 0,418113 | NA        |
| RP11-181E10.3 | 30,73   | 0,68  | 0,839215 | 0,809694 | 0,418116 | 0,755908  |
| RP11-977G19.5 | 34,81   | -0,40 | 0,488125 | -0,80952 | 0,418217 | 0,7560164 |
| RP11-67C2.2   | 1,31    | 3,02  | 3,728897 | 0,809475 | 0,418242 | NA        |
| RP11-507C10.5 | 5,26    | 1,27  | 1,567065 | 0,809379 | 0,418297 | 0,7560881 |
| RP3-486I3.5   | 0,64    | -2,38 | 2,938123 | -0,80928 | 0,418356 | NA        |
| RNU6-118P     | 22,36   | 0,79  | 0,978304 | 0,809213 | 0,418393 | 0,7561874 |
| MPHOSPH6      | 266,48  | 0,53  | 0,659577 | 0,809109 | 0,418452 | 0,756222  |
| CDK2          | 23,05   | 0,90  | 1,111447 | 0,809014 | 0,418507 | 0,756248  |
| RP11-18B3.2   | 0,34    | -2,97 | 3,675653 | -0,80899 | 0,418519 | NA        |
| CH507-254M2.2 | 1,48    | -2,03 | 2,515215 | -0,80891 | 0,418567 | NA        |
| MPC1          | 515,45  | 0,29  | 0,362625 | 0,808688 | 0,418695 | 0,7565129 |
| AL133493.2    | 148,90  | -0,54 | 0,673417 | -0,80854 | 0,418777 | 0,7565891 |
| RP11-10C24.1  | 1,31    | 3,01  | 3,728913 | 0,808285 | 0,418927 | NA        |
| RP11-542M13.6 | 14,62   | -0,97 | 1,195693 | -0,80828 | 0,418931 | 0,7565916 |
| RN7SL693P     | 1,26    | -1,12 | 1,384678 | -0,80823 | 0,418956 | NA        |
| RP11-670P16.3 | 31,04   | -0,60 | 0,743783 | -0,80819 | 0,418979 | 0,7565916 |
| AC098817.1    | 1,32    | 3,01  | 3,729    | 0,808162 | 0,418997 | NA        |
| AC009505.2    | 9,56    | -1,28 | 1,581331 | -0,80809 | 0,41904  | 0,7565916 |
| LETMD1        | 415,87  | 0,48  | 0,588256 | 0,808072 | 0,419049 | 0,7565916 |
| TRIM25        | 1150,72 | -0,31 | 0,383452 | -0,80798 | 0,419101 | 0,7565916 |
| bP-2189O9.2   | 6,17    | 1,23  | 1,519592 | 0,807872 | 0,419164 | 0,7565916 |
| MIR22HG       | 239,58  | 0,53  | 0,658795 | 0,807861 | 0,419171 | 0,7565916 |
| SDR16C6P      | 4,94    | -0,76 | 0,93591  | -0,80786 | 0,419172 | 0,7565916 |
| AC092652.1    | 43,69   | -0,87 | 1,082636 | -0,80784 | 0,419183 | 0,7565916 |
| SF3A3         | 639,50  | 0,34  | 0,418098 | 0,807835 | 0,419185 | 0,7565916 |
| FXR1          | 492,68  | 0,41  | 0,50186  | 0,807653 | 0,41929  | 0,7566605 |
| SRRM1         | 1340,96 | 0,21  | 0,26241  | 0,807589 | 0,419327 | 0,7566605 |
| AP000704.5    | 7,27    | -0,98 | 1,21711  | -0,80756 | 0,419346 | 0,7566605 |
| CYP27B1       | 1,16    | 1,89  | 2,344215 | 0,807483 | 0,419388 | NA        |
| AC069282.4    | 0,51    | 1,68  | 2,086568 | 0,807462 | 0,4194   | NA        |
| EZH2          | 246,44  | -0,50 | 0,624035 | -0,80744 | 0,419412 | 0,7567066 |
| RNY3          | 1,71    | -0,92 | 1,140125 | -0,80722 | 0,419542 | NA        |
| FAM198A       | 0,80    | 2,27  | 2,806689 | 0,807193 | 0,419556 | NA        |
| EMG1          | 519,11  | -0,47 | 0,579455 | -0,80717 | 0,419567 | 0,7567763 |

|               |         |       |          |          |          |           |
|---------------|---------|-------|----------|----------|----------|-----------|
| DENND4B       | 1038,43 | 0,31  | 0,38864  | 0,807153 | 0,419579 | 0,7567763 |
| CCDC169       | 168,88  | -0,55 | 0,679013 | -0,80711 | 0,419604 | 0,7567763 |
| AC064853.3    | 6,75    | -0,55 | 0,683197 | -0,80709 | 0,419613 | 0,7567763 |
| BST2          | 2234,91 | -0,21 | 0,259138 | -0,80702 | 0,419658 | 0,7567796 |
| AC006042.6    | 1,31    | 3,01  | 3,728961 | 0,807009 | 0,419661 | NA        |
| ADAMTSL2      | 0,50    | -1,27 | 1,57815  | -0,80699 | 0,419671 | NA        |
| MUSTN1        | 22,48   | 1,23  | 1,5262   | 0,806948 | 0,419696 | 0,7567796 |
| MCTS1         | 382,36  | -0,34 | 0,425378 | -0,80668 | 0,419849 | 0,7569529 |
| RP11-805J14.5 | 6,78    | 1,31  | 1,628912 | 0,806629 | 0,41988  | 0,7569529 |
| TDRD7         | 189,35  | -0,61 | 0,756717 | -0,8065  | 0,419953 | 0,7569529 |
| MCM5          | 327,97  | 0,43  | 0,538385 | 0,806499 | 0,419955 | 0,7569529 |
| CTC-338M12.4  | 20,09   | 1,42  | 1,757257 | 0,806356 | 0,420038 | 0,7569911 |
| TFPI          | 308,17  | -0,38 | 0,466143 | -0,8063  | 0,42007  | 0,7569911 |
| SRPK2         | 521,09  | -0,42 | 0,52645  | -0,8062  | 0,42013  | 0,7569911 |
| CLEC11A       | 70,57   | -0,68 | 0,846705 | -0,80603 | 0,420226 | 0,7569911 |
| P2RY1         | 51,61   | 0,56  | 0,69561  | 0,80601  | 0,420237 | 0,7569911 |
| AC093495.4    | 72,01   | -0,82 | 1,015375 | -0,806   | 0,420245 | 0,7569911 |
| ERAL1         | 256,47  | 0,57  | 0,711274 | 0,805866 | 0,42032  | 0,7569911 |
| CTA-292E10.6  | 22,73   | -0,87 | 1,076856 | -0,80586 | 0,420326 | 0,7569911 |
| TRIM17        | 1,99    | 3,00  | 3,726547 | 0,805844 | 0,420333 | NA        |
| TBCC          | 284,23  | 0,66  | 0,813759 | 0,805827 | 0,420343 | 0,7569911 |
| GADD45G       | 0,49    | -2,73 | 3,386595 | -0,8057  | 0,420418 | NA        |
| AC003973.3    | 7,09    | 1,26  | 1,560592 | 0,80549  | 0,420537 | 0,7572223 |
| AC015969.3    | 16,75   | 0,67  | 0,829136 | 0,805431 | 0,420571 | 0,7572223 |
| SUZ12         | 363,97  | -0,35 | 0,438496 | -0,80517 | 0,420723 | 0,7572223 |
| RSPH1         | 1,19    | -1,25 | 1,557031 | -0,80515 | 0,420731 | NA        |
| SCLY          | 110,84  | -0,53 | 0,658028 | -0,80506 | 0,420784 | 0,7572223 |
| RRP15         | 251,62  | 0,65  | 0,805126 | 0,804996 | 0,420822 | 0,7572223 |
| IRAK3         | 1175,06 | -0,43 | 0,529529 | -0,80498 | 0,42083  | 0,7572223 |
| CDH18         | 7,24    | 0,92  | 1,138678 | 0,80496  | 0,420843 | 0,7572223 |
| RP11-284P20.4 | 0,31    | -2,67 | 3,315383 | -0,80486 | 0,420899 | NA        |
| IRF7          | 506,32  | -0,40 | 0,500893 | -0,80483 | 0,420918 | 0,7572223 |
| RFK           | 307,54  | 0,64  | 0,791568 | 0,804805 | 0,420932 | 0,7572223 |
| CCDC138       | 32,64   | -0,75 | 0,928512 | -0,80473 | 0,420977 | 0,7572223 |
| DEK           | 1736,63 | -0,19 | 0,238661 | -0,80471 | 0,420987 | 0,7572223 |
| CXCR3         | 5,34    | 0,93  | 1,149544 | 0,804678 | 0,421005 | 0,7572223 |
| DEPTOR        | 229,33  | 0,80  | 0,989757 | 0,80467  | 0,42101  | 0,7572223 |
| CDK2AP1       | 464,10  | 0,38  | 0,468678 | 0,804617 | 0,421041 | 0,7572223 |
| RP11-844P9.3  | 1,30    | 3,00  | 3,728089 | 0,804577 | 0,421064 | NA        |
| CTD-2576D5.4  | 1,28    | 3,00  | 3,729064 | 0,804566 | 0,42107  | NA        |
| UBE2C         | 1,91    | 1,40  | 1,734789 | 0,804276 | 0,421237 | NA        |
| MARK4         | 45,92   | -0,53 | 0,659837 | -0,80413 | 0,42132  | 0,7576158 |
| RP11-626K17.3 | 9,19    | -0,86 | 1,065784 | -0,80386 | 0,421478 | 0,7576158 |
| SRL           | 1,21    | -1,26 | 1,567593 | -0,80385 | 0,421486 | NA        |
| COPZ1         | 1343,95 | 0,29  | 0,366289 | 0,803814 | 0,421504 | 0,7576158 |
| RORB          | 6,80    | 0,81  | 1,009957 | 0,803804 | 0,42151  | 0,7576158 |
| RP11-758P17.3 | 11,18   | -1,30 | 1,615355 | -0,80371 | 0,421565 | 0,7576158 |
| SLC19A1       | 173,70  | -0,73 | 0,908538 | -0,80369 | 0,421578 | 0,7576158 |
| PHB           | 1023,38 | 0,40  | 0,502486 | 0,803665 | 0,421591 | 0,7576158 |
| UQCRC2        | 1228,70 | -0,31 | 0,38575  | -0,8036  | 0,421626 | 0,7576158 |

|                 |         |       |          |          |          |           |
|-----------------|---------|-------|----------|----------|----------|-----------|
| PAX5            | 22,69   | 0,58  | 0,722661 | 0,803603 | 0,421626 | 0,7576158 |
| PGA3            | 2,01    | -1,25 | 1,55024  | -0,80355 | 0,421657 | NA        |
| TMEM179B        | 1385,53 | 0,31  | 0,380661 | 0,803487 | 0,421693 | 0,7576635 |
| TNFRSF21        | 223,29  | 0,76  | 0,946409 | 0,803346 | 0,421775 | 0,7577298 |
| CD160           | 12,45   | -0,55 | 0,679716 | -0,80328 | 0,421812 | 0,7577298 |
| RP5-1057B20.3   | 3,44    | -0,61 | 0,760085 | -0,80322 | 0,421849 | NA        |
| NCRNA00113      | 17,03   | -1,07 | 1,330411 | -0,80316 | 0,421883 | 0,7577852 |
| SMTNL1          | 1,28    | 2,99  | 3,729101 | 0,803064 | 0,421938 | NA        |
| RP11-818C3.1    | 0,28    | -2,96 | 3,681091 | -0,80301 | 0,421969 | NA        |
| CH17-189H20.1   | 227,07  | -0,44 | 0,553287 | -0,80296 | 0,421999 | 0,7578506 |
| KDEL1           | 477,90  | -0,26 | 0,318376 | -0,80292 | 0,422024 | 0,7578506 |
| PARGP1          | 29,14   | -0,71 | 0,889429 | -0,80288 | 0,422047 | 0,7578506 |
| RPS3AP5         | 13,12   | 0,31  | 0,386498 | 0,802813 | 0,422083 | 0,7578506 |
| ASAH2           | 1,40    | 2,69  | 3,351536 | 0,802669 | 0,422166 | NA        |
| RP11-108M9.6    | 7,05    | -1,28 | 1,600062 | -0,80254 | 0,422238 | 0,758057  |
| RP11-268G13.1   | 5,29    | 1,01  | 1,25407  | 0,802462 | 0,422286 | 0,7580584 |
| RP11-885B4.4    | 0,59    | -1,60 | 1,990748 | -0,80238 | 0,422334 | NA        |
| C1D             | 249,61  | -0,32 | 0,395253 | -0,80225 | 0,422409 | 0,7580584 |
| C11orf71        | 104,78  | -0,76 | 0,943775 | -0,80224 | 0,422417 | 0,7580584 |
| UPP1            | 779,20  | -0,41 | 0,509033 | -0,8022  | 0,422435 | 0,7580584 |
| HPS3            | 468,92  | -0,48 | 0,598114 | -0,80208 | 0,422506 | 0,7580584 |
| TTC4            | 180,05  | -0,81 | 1,01122  | -0,80207 | 0,422511 | 0,7580584 |
| RP11-727F15.12  | 7,59    | -1,76 | 2,191725 | -0,80205 | 0,422524 | 0,7580584 |
| ABC7-481722F1.2 | 0,34    | -2,95 | 3,675638 | -0,80201 | 0,422545 | NA        |
| RP11-196G11.6   | 26,78   | 0,51  | 0,640323 | 0,801944 | 0,422586 | 0,758095  |
| MT1G            | 1,30    | 2,42  | 3,016789 | 0,801868 | 0,422629 | NA        |
| NOL9            | 312,45  | -0,63 | 0,788289 | -0,80173 | 0,422711 | 0,7582043 |
| MRPL43          | 455,84  | -0,38 | 0,469403 | -0,8017  | 0,422728 | 0,7582043 |
| PTTG1           | 102,31  | 0,69  | 0,863967 | 0,801483 | 0,422852 | 0,7583349 |
| CUTA            | 844,22  | -0,24 | 0,301358 | -0,80143 | 0,422882 | 0,7583349 |
| RP11-326F20.5   | 1,06    | 2,08  | 2,600884 | 0,801279 | 0,42297  | NA        |
| PHB2            | 1182,91 | 0,20  | 0,248566 | 0,801249 | 0,422988 | 0,7584312 |
| RP11-494M8.4    | 4,57    | 1,03  | 1,290817 | 0,801137 | 0,423052 | 0,7584312 |
| UVSSA           | 388,05  | -0,31 | 0,389741 | -0,80113 | 0,423058 | 0,7584312 |
| RP11-26J3.4     | 0,99    | 2,62  | 3,268157 | 0,800861 | 0,423212 | NA        |
| PTGER2          | 161,39  | -0,82 | 1,024815 | -0,80084 | 0,423222 | 0,7586519 |
| CTD-2008P7.9    | 3,03    | -1,38 | 1,729417 | -0,80062 | 0,423353 | NA        |
| ITGB4           | 0,63    | 1,71  | 2,139056 | 0,800554 | 0,42339  | NA        |
| C8orf51         | 10,95   | 0,59  | 0,731051 | 0,80044  | 0,423456 | 0,7589974 |
| RNU6-593P       | 1,27    | 2,98  | 3,729162 | 0,800331 | 0,423519 | NA        |
| RP11-87E22.2    | 18,46   | 0,38  | 0,475163 | 0,800248 | 0,423567 | 0,759124  |
| FMR1            | 310,84  | 0,41  | 0,508728 | 0,800144 | 0,423627 | 0,759159  |
| MIR8066         | 1,28    | 2,98  | 3,729165 | 0,800116 | 0,423644 | NA        |
| ZNF653          | 1,31    | 2,98  | 3,729449 | 0,799963 | 0,423732 | NA        |
| FBXO25          | 440,89  | 0,59  | 0,734229 | 0,799963 | 0,423732 | 0,7592736 |
| RP11-64K7.1     | 0,44    | -1,40 | 1,756112 | -0,7999  | 0,423768 | NA        |
| C17orf67        | 9,65    | 1,18  | 1,479332 | 0,799828 | 0,42381  | 0,7593403 |
| RP11-885B4.1    | 1,29    | 2,98  | 3,72899  | 0,799782 | 0,423837 | NA        |
| CTSV            | 53,45   | -0,72 | 0,896194 | -0,79971 | 0,423881 | 0,7593936 |
| ZFP69           | 18,52   | 1,42  | 1,777353 | 0,799592 | 0,423947 | 0,759439  |



|               |         |       |          |          |          |           |
|---------------|---------|-------|----------|----------|----------|-----------|
| RP13-16H11.6  | 0,28    | -2,94 | 3,680353 | -0,79956 | 0,423968 | NA        |
| TNFAIP8       | 779,37  | 0,38  | 0,474007 | 0,799363 | 0,42408  | 0,7596042 |
| AP002954.3    | 6,76    | -0,79 | 0,983122 | -0,79923 | 0,424159 | 0,7596475 |
| EFR3A         | 575,26  | -0,33 | 0,408906 | -0,79918 | 0,424186 | 0,7596475 |
| AC073842.19   | 0,72    | -1,48 | 1,851913 | -0,79907 | 0,42425  | NA        |
| RP11-75C10.6  | 7,07    | -1,12 | 1,397181 | -0,79905 | 0,424262 | 0,7596534 |
| IL21R         | 26,16   | -0,44 | 0,546481 | -0,79898 | 0,424302 | 0,7596534 |
| DCAF13        | 631,43  | -0,62 | 0,776115 | -0,79889 | 0,424356 | 0,7596534 |
| FBXW5         | 874,53  | -0,39 | 0,487009 | -0,79882 | 0,424394 | 0,7596534 |
| NOM1          | 256,28  | -0,69 | 0,861896 | -0,79875 | 0,424433 | 0,7596534 |
| RP11-949J7.8  | 1,42    | 2,98  | 3,730039 | 0,798753 | 0,424434 | NA        |
| IRF8          | 1350,85 | 0,34  | 0,425831 | 0,798752 | 0,424434 | 0,7596534 |
| RP11-475J5.4  | 1,26    | 2,98  | 3,729158 | 0,79867  | 0,424482 | NA        |
| PTENP1-AS     | 1,60    | -1,27 | 1,593125 | -0,79851 | 0,424573 | NA        |
| GLRX5         | 110,94  | -0,53 | 0,661523 | -0,7984  | 0,424639 | 0,7598745 |
| AC007192.4    | 0,94    | 2,54  | 3,182305 | 0,798384 | 0,424647 | NA        |
| RP11-9L18.3   | 30,40   | -0,65 | 0,809827 | -0,79833 | 0,424676 | 0,7598745 |
| IFT22         | 54,35   | -0,54 | 0,68169  | -0,79833 | 0,42468  | 0,7598745 |
| C6orf229      | 3,11    | 1,90  | 2,386739 | 0,79809  | 0,424818 | NA        |
| MRPL2         | 192,57  | 0,38  | 0,478185 | 0,798058 | 0,424837 | 0,7600738 |
| CTD-2313N18.5 | 20,79   | -0,85 | 1,066112 | -0,798   | 0,424873 | 0,7600738 |
| RNA5SP20      | 1,27    | 2,98  | 3,729227 | 0,797933 | 0,42491  | NA        |
| AC008694.2    | 1,13    | 1,08  | 1,348794 | 0,797922 | 0,424916 | NA        |
| AP001053.11   | 179,59  | -0,59 | 0,744495 | -0,79779 | 0,42499  | 0,7601695 |
| LBX2          | 0,53    | -1,76 | 2,208391 | -0,79774 | 0,425022 | NA        |
| CYP17A1       | 4,12    | -0,72 | 0,902134 | -0,79772 | 0,425035 | 0,7601695 |
| MFAP1         | 119,84  | -0,84 | 1,05545  | -0,79767 | 0,425063 | 0,7601695 |
| CTD-2319I12.4 | 1,92    | 2,97  | 3,726359 | 0,79762  | 0,425091 | NA        |
| RP1-266L20.9  | 14,48   | 0,51  | 0,635384 | 0,797571 | 0,42512  | 0,7601695 |
| ZNF189        | 114,40  | 1,06  | 1,329908 | 0,797551 | 0,425131 | 0,7601695 |
| C12orf77      | 11,34   | -0,50 | 0,621449 | -0,7974  | 0,42522  | 0,7602226 |
| RP11-620J15.3 | 29,01   | -0,81 | 1,012194 | -0,79735 | 0,425248 | 0,7602226 |
| CTA-398F10.1  | 86,67   | -0,33 | 0,417267 | -0,79726 | 0,425297 | 0,7602226 |
| C5orf55       | 28,80   | 1,32  | 1,653512 | 0,79713  | 0,425376 | 0,7602226 |
| H1FO          | 163,27  | -0,67 | 0,840537 | -0,79712 | 0,42538  | 0,7602226 |
| RP11-445N18.2 | 8,76    | 1,01  | 1,269146 | 0,797078 | 0,425406 | 0,7602226 |
| COG8          | 56,94   | -0,68 | 0,853101 | -0,79695 | 0,425481 | 0,7602834 |
| AC068831.10   | 39,64   | -0,58 | 0,731407 | -0,79679 | 0,425572 | 0,7603734 |
| CTD-2083E4.5  | 0,34    | -2,27 | 2,849352 | -0,79679 | 0,425574 | NA        |
| RP1-234P15.4  | 19,03   | -1,70 | 2,12792  | -0,79671 | 0,425622 | 0,7603899 |
| GPR61         | 1,49    | 2,67  | 3,355173 | 0,796618 | 0,425673 | NA        |
| RP11-55K13.1  | 12,46   | -0,65 | 0,815198 | -0,7966  | 0,425683 | 0,7604258 |
| AC069513.4    | 0,93    | -1,69 | 2,125084 | -0,7966  | 0,425685 | NA        |
| SIRPG         | 1,12    | -1,34 | 1,686604 | -0,79656 | 0,425709 | NA        |
| RP11-197O15.1 | 35,06   | -0,87 | 1,087886 | -0,79652 | 0,425733 | 0,7604413 |
| COMTD1        | 104,05  | -0,80 | 1,010748 | -0,79639 | 0,425804 | 0,7604961 |
| AC104113.3    | 0,27    | -2,93 | 3,681209 | -0,79631 | 0,425853 | NA        |
| ITPR2         | 790,77  | -0,47 | 0,588025 | -0,79628 | 0,425872 | 0,7605436 |
| TKTL1         | 1,24    | 2,97  | 3,730083 | 0,796234 | 0,425896 | NA        |
| HAUS8         | 118,10  | -0,76 | 0,9518   | -0,79618 | 0,425926 | 0,7605676 |

|                  |         |       |          |          |          |           |
|------------------|---------|-------|----------|----------|----------|-----------|
| LINC-ROR         | 16,39   | 0,54  | 0,677768 | 0,796103 | 0,425972 | 0,7605766 |
| CTD-2147F2.1     | 2,13    | -0,85 | 1,064243 | -0,79599 | 0,426038 | NA        |
| RP4-675G8.3      | 1,19    | -1,56 | 1,96436  | -0,79587 | 0,426109 | NA        |
| LINC00896        | 1,28    | 2,97  | 3,729028 | 0,795801 | 0,426148 | NA        |
| SLC39A10         | 235,85  | 0,41  | 0,512271 | 0,795762 | 0,42617  | 0,7608189 |
| CCNI2            | 51,48   | -1,27 | 1,599214 | -0,79573 | 0,426189 | 0,7608189 |
| TMEM225B         | 1,78    | -1,22 | 1,529058 | -0,79568 | 0,426217 | NA        |
| RP11-1348G14.4   | 25,03   | -0,49 | 0,612125 | -0,79561 | 0,426259 | 0,7608189 |
| RP11-644F5.10    | 97,03   | 0,48  | 0,607997 | 0,795589 | 0,426271 | 0,7608189 |
| LL09NC01-139C3.1 | 1,52    | 2,63  | 3,309301 | 0,795398 | 0,426382 | NA        |
| SLC25A36         | 793,12  | 0,35  | 0,444924 | 0,795357 | 0,426406 | 0,7609395 |
| SART1            | 121,52  | -0,55 | 0,688427 | -0,79529 | 0,426444 | 0,7609395 |
| RP11-310J24.3    | 4,44    | 1,40  | 1,757252 | 0,795259 | 0,426463 | 0,7609395 |
| EIF4ENIF1        | 256,99  | -0,50 | 0,633018 | -0,79509 | 0,426562 | 0,7609395 |
| ATP2A3           | 113,99  | -0,58 | 0,728899 | -0,79502 | 0,426605 | 0,7609395 |
| JMJD6            | 540,23  | 0,43  | 0,535994 | 0,794988 | 0,426621 | 0,7609395 |
| ALKBH3           | 201,77  | -0,67 | 0,837179 | -0,79498 | 0,426625 | 0,7609395 |
| AC005363.9       | 2,00    | -1,17 | 1,477524 | -0,7949  | 0,426672 | NA        |
| ZNF317           | 158,79  | -0,56 | 0,702456 | -0,79487 | 0,426688 | 0,7609779 |
| CPB1             | 3,13    | -1,41 | 1,779986 | -0,79478 | 0,426744 | NA        |
| RAB32            | 856,31  | 0,35  | 0,43678  | 0,794744 | 0,426762 | 0,7610385 |
| AC007241.4       | 2,24    | 1,23  | 1,546123 | 0,794721 | 0,426776 | NA        |
| DGKQ             | 185,80  | -0,77 | 0,971587 | -0,79466 | 0,426811 | 0,7610517 |
| AC084193.1       | 1,27    | 2,96  | 3,72932  | 0,794602 | 0,426845 | NA        |
| DAB2             | 250,57  | 0,56  | 0,705944 | 0,794572 | 0,426862 | 0,7610709 |
| RP11-295P9.12    | 0,81    | -1,04 | 1,307609 | -0,79454 | 0,426881 | NA        |
| RP11-1089B7.1    | 0,49    | -1,39 | 1,752329 | -0,79452 | 0,426892 | NA        |
| AC008937.3       | 1,25    | 2,96  | 3,728839 | 0,794451 | 0,426933 | NA        |
| CTD-2531D15.4    | 1,25    | 2,96  | 3,729311 | 0,794391 | 0,426968 | NA        |
| CTD-2311B13.7    | 128,86  | -0,71 | 0,895366 | -0,79437 | 0,426983 | 0,7611801 |
| RP11-61J19.5     | 47,27   | -0,89 | 1,11889  | -0,79433 | 0,427005 | 0,7611801 |
| CHRNE            | 21,74   | -1,40 | 1,767729 | -0,79406 | 0,427161 | 0,7613113 |
| RP11-463O12.5    | 282,09  | -0,49 | 0,615406 | -0,79404 | 0,42717  | 0,7613113 |
| KLHDC3           | 393,98  | 0,55  | 0,687034 | 0,793896 | 0,427256 | 0,7613113 |
| RP11-124N19.3    | 0,72    | -1,63 | 2,057106 | -0,79388 | 0,427267 | NA        |
| RP11-248J18.2    | 0,79    | 2,26  | 2,845747 | 0,793873 | 0,427269 | NA        |
| HMG2             | 3489,75 | 0,19  | 0,243372 | 0,793805 | 0,427309 | 0,7613113 |
| RP11-175K6.1     | 8,36    | -0,74 | 0,928311 | -0,7937  | 0,427368 | 0,7613113 |
| RP5-886K2.3      | 14,24   | -1,36 | 1,716615 | -0,79368 | 0,427379 | 0,7613113 |
| PRSS16           | 11,76   | 1,15  | 1,444911 | 0,79366  | 0,427393 | 0,7613113 |
| NUP210           | 1193,58 | 0,27  | 0,341084 | 0,793638 | 0,427406 | 0,7613113 |
| RP11-727M10.1    | 1,24    | 2,96  | 3,729312 | 0,793629 | 0,427412 | NA        |
| MRPS7            | 719,94  | 0,33  | 0,419468 | 0,793564 | 0,427449 | 0,7613147 |
| MIRLET7BHG       | 32,18   | -0,91 | 1,142265 | -0,79334 | 0,427577 | 0,76147   |
| RP11-610P16.1    | 1,25    | 2,96  | 3,72931  | 0,793263 | 0,427625 | NA        |
| PRDM4            | 202,95  | 0,69  | 0,865506 | 0,793248 | 0,427633 | 0,7614964 |
| CES2             | 206,54  | 0,54  | 0,682705 | 0,793168 | 0,42768  | 0,7615066 |
| RP11-681L8.1     | 1,66    | 1,31  | 1,650163 | 0,793104 | 0,427717 | NA        |
| AC023347.1       | 1,31    | -1,07 | 1,350505 | -0,7931  | 0,427717 | NA        |
| ZNF827           | 4,46    | -1,36 | 1,72061  | -0,79292 | 0,427824 | 0,7616902 |

|               |         |       |          |          |          |           |
|---------------|---------|-------|----------|----------|----------|-----------|
| RP11-802023.3 | 32,27   | -1,41 | 1,783647 | -0,79255 | 0,428039 | 0,7619622 |
| TBC1D8        | 252,75  | -0,45 | 0,568806 | -0,79252 | 0,428059 | 0,7619622 |
| FLOT2         | 1819,20 | 0,17  | 0,213458 | 0,792351 | 0,428156 | 0,7620033 |
| GREM1         | 95,04   | -0,48 | 0,602059 | -0,79226 | 0,428207 | 0,7620033 |
| AC011747.3    | 1,24    | 2,95  | 3,729328 | 0,792253 | 0,428213 | NA        |
| RP11-548H18.2 | 10,84   | -0,95 | 1,195488 | -0,79224 | 0,428222 | 0,7620033 |
| RP11-417L19.2 | 22,31   | 0,50  | 0,628321 | 0,792198 | 0,428245 | 0,7620033 |
| MIR8078       | 0,41    | -2,27 | 2,871348 | -0,79216 | 0,428265 | NA        |
| RP11-415I12.3 | 2,36    | 1,12  | 1,411903 | 0,79211  | 0,428296 | NA        |
| RP1-281H8.3   | 0,21    | -2,21 | 2,791056 | -0,79211 | 0,428298 | NA        |
| EBPL          | 150,16  | -0,61 | 0,775882 | -0,79204 | 0,42834  | 0,762098  |
| INTS14        | 191,23  | -0,72 | 0,913927 | -0,79196 | 0,428384 | 0,7621047 |
| AC025750.5    | 0,44    | -1,39 | 1,755762 | -0,79173 | 0,428521 | NA        |
| RP5-898I4.1   | 11,40   | -0,61 | 0,76612  | -0,79168 | 0,428547 | 0,7622228 |
| CTD-2036P10.5 | 1,25    | 2,95  | 3,729322 | 0,791583 | 0,428604 | NA        |
| AC061992.2    | 18,84   | -1,60 | 2,019813 | -0,79153 | 0,428635 | 0,7622228 |
| CTD-2651B20.5 | 4,11    | 0,91  | 1,155292 | 0,791506 | 0,428649 | 0,7622228 |
| HCRTR1        | 1,21    | 2,28  | 2,880079 | 0,79144  | 0,428687 | NA        |
| RP5-881P19.7  | 15,34   | 0,79  | 0,992557 | 0,791399 | 0,428711 | 0,7622228 |
| RP11-293P20.4 | 8,87    | -1,84 | 2,326618 | -0,79131 | 0,428763 | 0,7622228 |
| CRB2          | 3,83    | 1,53  | 1,934955 | 0,791236 | 0,428806 | 0,7622228 |
| SARS2         | 86,78   | 0,71  | 0,892887 | 0,791234 | 0,428807 | 0,7622228 |
| SLC25A32      | 179,52  | 0,65  | 0,825472 | 0,791214 | 0,428819 | 0,7622228 |
| CBY1          | 26,01   | 0,91  | 1,151657 | 0,791183 | 0,428837 | 0,7622228 |
| TMX1          | 647,58  | -0,36 | 0,455545 | -0,79114 | 0,42886  | 0,7622228 |
| JMJD4         | 69,02   | -0,97 | 1,2244   | -0,79106 | 0,428906 | 0,7622313 |
| RP11-434C1.3  | 1,90    | 2,95  | 3,726412 | 0,791052 | 0,428914 | NA        |
| RP11-157H10.4 | 1,06    | -1,56 | 1,974372 | -0,79093 | 0,428985 | NA        |
| POU5F2        | 121,96  | 0,46  | 0,576181 | 0,790912 | 0,428996 | 0,7623173 |
| ERN1          | 179,13  | 0,58  | 0,733615 | 0,79084  | 0,429038 | 0,7623191 |
| TRIM14        | 419,69  | -0,41 | 0,514605 | -0,79077 | 0,429081 | 0,7623231 |
| RP11-4L24.3   | 33,21   | -0,90 | 1,139897 | -0,7906  | 0,429176 | 0,7623553 |
| SYNE4         | 7,80    | 0,93  | 1,170527 | 0,790594 | 0,429181 | 0,7623553 |
| FAM66D        | 0,74    | -2,72 | 3,443154 | -0,79054 | 0,429212 | NA        |
| AC106900.6    | 0,88    | -2,76 | 3,497249 | -0,79052 | 0,429226 | NA        |
| SET           | 3854,26 | 0,18  | 0,222531 | 0,790481 | 0,429247 | 0,7624    |
| CTD-3216D2.5  | 5,95    | -0,86 | 1,088839 | -0,79039 | 0,429301 | 0,7624238 |
| RASL10B       | 9,63    | -0,65 | 0,826614 | -0,79014 | 0,429446 | 0,7624996 |
| KCTD13        | 46,14   | -0,69 | 0,871585 | -0,79008 | 0,429479 | 0,7624996 |
| RP11-780O17.1 | 16,15   | -0,91 | 1,152975 | -0,79008 | 0,429482 | 0,7624996 |
| KIAA1967      | 175,65  | 0,63  | 0,800369 | 0,790034 | 0,429508 | 0,7624996 |
| RP11-803B1.8  | 23,00   | 0,85  | 1,080039 | 0,789892 | 0,429591 | 0,7625744 |
| FCN3          | 0,27    | -2,91 | 3,682283 | -0,78986 | 0,42961  | NA        |
| TSPYL3        | 35,60   | 0,63  | 0,792339 | 0,789776 | 0,429659 | 0,7626215 |
| RP11-114H20.1 | 1,26    | 2,32  | 2,936115 | 0,789743 | 0,429678 | NA        |
| RP11-363G10.2 | 1,26    | 2,32  | 2,936115 | 0,789743 | 0,429678 | NA        |
| NCRNA00111    | 1,23    | 2,95  | 3,729469 | 0,789727 | 0,429687 | NA        |
| KIAA0355      | 183,25  | -0,57 | 0,723307 | -0,78953 | 0,4298   | 0,7627369 |
| AP001412.1    | 7,94    | 2,08  | 2,632539 | 0,789524 | 0,429806 | 0,7627369 |
| SNORA68B      | 1,24    | -1,58 | 2,004346 | -0,78939 | 0,429883 | NA        |

|               |         |       |          |          |          |           |
|---------------|---------|-------|----------|----------|----------|-----------|
| RP11-46H11.12 | 1,23    | 2,94  | 3,729401 | 0,78912  | 0,430042 | NA        |
| DTX3L         | 727,11  | -0,33 | 0,420076 | -0,78905 | 0,430081 | 0,7630943 |
| ACAA2         | 652,36  | -0,53 | 0,671004 | -0,78902 | 0,4301   | 0,7630943 |
| CHD5          | 0,36    | -1,48 | 1,880775 | -0,789   | 0,430113 | NA        |
| XCR1          | 6,68    | -1,13 | 1,4322   | -0,78895 | 0,430141 | 0,7630943 |
| AP001464.4    | 1,24    | 2,31  | 2,922643 | 0,788934 | 0,430151 | NA        |
| CDK5RAP1      | 487,80  | -0,41 | 0,513601 | -0,78883 | 0,430214 | 0,7630943 |
| RP4-617C6.1   | 49,11   | -0,61 | 0,776844 | -0,7888  | 0,430227 | 0,7630943 |
| RP11-598P12.1 | 0,57    | -2,69 | 3,412124 | -0,78879 | 0,430237 | NA        |
| RP11-473O4.5  | 0,64    | -2,67 | 3,383072 | -0,78875 | 0,43026  | NA        |
| CTD-2293H3.1  | 8,40    | 0,90  | 1,142333 | 0,788731 | 0,430269 | 0,7630943 |
| RP11-301G19.1 | 1,24    | 2,94  | 3,729444 | 0,78871  | 0,430281 | NA        |
| RPL32P3       | 75,12   | -0,54 | 0,690199 | -0,78864 | 0,430321 | 0,7630943 |
| DR1           | 816,28  | -0,44 | 0,556384 | -0,78862 | 0,430335 | 0,7630943 |
| SSX6          | 1,27    | 2,94  | 3,72917  | 0,788552 | 0,430374 | NA        |
| RP11-77I22.3  | 6,59    | 1,20  | 1,524597 | 0,788515 | 0,430395 | 0,7631282 |
| RP11-195C7.1  | 1,46    | 1,94  | 2,464009 | 0,788268 | 0,43054  | NA        |
| RP4-605O3.4   | 19,71   | -0,59 | 0,753414 | -0,78827 | 0,43054  | 0,7631868 |
| TCOF1         | 926,03  | 0,39  | 0,494425 | 0,788257 | 0,430546 | 0,7631868 |
| CTD-3022L24.1 | 4,75    | -1,17 | 1,489132 | -0,78825 | 0,430551 | 0,7631868 |
| SDHAF1        | 244,61  | 0,57  | 0,723807 | 0,788101 | 0,430637 | 0,7632604 |
| OR10H5        | 62,68   | -0,23 | 0,295227 | -0,7879  | 0,430757 | 0,7632604 |
| ZNF257        | 9,44    | 0,98  | 1,242753 | 0,787882 | 0,430766 | 0,7632604 |
| CPN2          | 17,23   | -0,59 | 0,750532 | -0,78781 | 0,430807 | 0,7632604 |
| RP11-758M2.1  | 23,92   | -0,61 | 0,773551 | -0,78773 | 0,430852 | 0,7632604 |
| TMEM232       | 58,74   | -0,93 | 1,184305 | -0,78766 | 0,430898 | 0,7632604 |
| RP11-777B9.4  | 4,22    | -0,95 | 1,210521 | -0,7876  | 0,430933 | 0,7632604 |
| RNU2-59P      | 5,49    | -1,29 | 1,634673 | -0,78759 | 0,430939 | 0,7632604 |
| GRIN2C        | 1,75    | -1,83 | 2,318154 | -0,78758 | 0,430942 | NA        |
| KIAA0930      | 1008,78 | 0,29  | 0,37239  | 0,787484 | 0,430998 | 0,7632604 |
| STX2          | 167,36  | -0,58 | 0,732129 | -0,78741 | 0,43104  | 0,7632604 |
| LRRC37BP1     | 221,05  | -0,50 | 0,631644 | -0,78741 | 0,431044 | 0,7632604 |
| PI4KA         | 509,81  | 0,43  | 0,548469 | 0,787333 | 0,431087 | 0,7632637 |
| GS1-166A23.2  | 3,06    | 1,86  | 2,361531 | 0,787155 | 0,431191 | NA        |
| COL14A1       | 5,75    | -1,32 | 1,673421 | -0,78704 | 0,431261 | 0,7632745 |
| TP53AIP1      | 1,11    | -1,43 | 1,821114 | -0,78704 | 0,431261 | NA        |
| STK19         | 285,02  | -0,52 | 0,658799 | -0,78701 | 0,431275 | 0,7632745 |
| AC002115.7    | 9,70    | -0,83 | 1,058069 | -0,78701 | 0,431277 | 0,7632745 |
| RECQL4        | 6,13    | -1,76 | 2,236335 | -0,78698 | 0,431294 | 0,7632745 |
| CTA-243E7.3   | 10,54   | -0,56 | 0,710649 | -0,78697 | 0,431298 | 0,7632745 |
| SNORD53B      | 0,34    | -2,64 | 3,355767 | -0,78686 | 0,431361 | NA        |
| UBE2J2        | 552,27  | -0,47 | 0,6009   | -0,78681 | 0,431391 | 0,7633454 |
| DHX40         | 244,99  | -0,58 | 0,735409 | -0,78676 | 0,43142  | 0,7633454 |
| RP11-927P21.2 | 10,87   | -0,87 | 1,108873 | -0,7866  | 0,431518 | 0,7634454 |
| CTD-2140G10.2 | 1,71    | 2,14  | 2,725125 | 0,786498 | 0,431576 | NA        |
| RP11-575I8.1  | 0,54    | -2,62 | 3,333357 | -0,78647 | 0,431593 | NA        |
| CTD-3131K8.3  | 0,50    | -1,55 | 1,966104 | -0,78621 | 0,431747 | NA        |
| RP11-514P8.10 | 111,38  | -0,47 | 0,594265 | -0,78619 | 0,431754 | 0,7637626 |
| ARPC5L        | 268,94  | 0,47  | 0,592369 | 0,786074 | 0,431824 | 0,7637626 |
| GRXCR1        | 0,66    | -2,66 | 3,386189 | -0,78604 | 0,431842 | NA        |

|                  |         |       |          |          |          |           |
|------------------|---------|-------|----------|----------|----------|-----------|
| AC003075.4       | 61,20   | -0,96 | 1,223789 | -0,78604 | 0,431845 | 0,7637626 |
| RP11-117F22.2    | 0,31    | -1,90 | 2,421338 | -0,78602 | 0,431853 | NA        |
| RP11-65G9.1      | 22,76   | -1,25 | 1,586425 | -0,78597 | 0,431883 | 0,7637626 |
| RP11-252C15.1    | 8,81    | -1,74 | 2,218209 | -0,78594 | 0,431903 | 0,7637626 |
| RP11-190A12.9    | 25,09   | 1,53  | 1,950264 | 0,785767 | 0,432004 | 0,7638699 |
| AC007969.5       | 5,73    | -0,47 | 0,599312 | -0,78557 | 0,432119 | 0,7639569 |
| RP11-35G9.3      | 145,82  | -0,66 | 0,843796 | -0,78554 | 0,432136 | 0,7639569 |
| ZNF114           | 8,94    | -0,83 | 1,057059 | -0,78543 | 0,432202 | 0,7640015 |
| PLXNC1           | 871,81  | 0,28  | 0,360402 | 0,785263 | 0,432299 | 0,7641008 |
| TOR1B            | 168,56  | 0,69  | 0,878613 | 0,785113 | 0,432388 | 0,7641846 |
| AC008753.4       | 1,23    | 2,93  | 3,729489 | 0,784951 | 0,432482 | NA        |
| RP3-468K18.6     | 1,22    | 2,93  | 3,729527 | 0,784948 | 0,432484 | NA        |
| RP11-506O24.2    | 2,08    | -1,55 | 1,975945 | -0,78491 | 0,432506 | NA        |
| MME              | 14,81   | -1,26 | 1,611461 | -0,7848  | 0,432572 | 0,7642919 |
| AC083899.1       | 4,98    | -0,59 | 0,752918 | -0,78477 | 0,432591 | 0,7642919 |
| CTD-2117L12.1    | 21,09   | 0,61  | 0,782848 | 0,784747 | 0,432602 | 0,7642919 |
| RP11-401O9.3     | 43,32   | 0,36  | 0,457001 | 0,784729 | 0,432613 | 0,7642919 |
| RNU6-225P        | 1,00    | -1,16 | 1,483498 | -0,78469 | 0,432637 | NA        |
| RP11-357N13.2    | 2,67    | 2,04  | 2,599914 | 0,784634 | 0,432668 | NA        |
| RP11-787I22.3    | 0,27    | -2,89 | 3,682541 | -0,78462 | 0,432676 | NA        |
| ATG13            | 392,53  | -0,30 | 0,378323 | -0,78461 | 0,432683 | 0,7643428 |
| RP11-454P7.1     | 1,23    | 2,93  | 3,729509 | 0,784539 | 0,432724 | NA        |
| RP1-232P20.1     | 1,31    | 2,93  | 3,72895  | 0,784529 | 0,43273  | NA        |
| SKINT1L          | 2,18    | 1,34  | 1,708863 | 0,784522 | 0,432734 | NA        |
| LEPROT           | 696,07  | -0,42 | 0,537377 | -0,78449 | 0,432752 | 0,764393  |
| CTC-293G12.1     | 0,72    | 2,14  | 2,73294  | 0,784462 | 0,432769 | NA        |
| CCDC9            | 136,80  | -0,48 | 0,609729 | -0,78427 | 0,43288  | 0,7644225 |
| CTD-2267D19.1    | 1,63    | 2,10  | 2,684247 | 0,784191 | 0,432928 | NA        |
| LINC00216        | 51,12   | -0,83 | 1,064366 | -0,78414 | 0,432958 | 0,7644225 |
| RP4-771M4.3      | 3,48    | -0,94 | 1,20408  | -0,78414 | 0,43296  | NA        |
| CD300LF          | 565,17  | -0,47 | 0,603913 | -0,78409 | 0,432989 | 0,7644225 |
| PDXP             | 209,32  | 0,75  | 0,952027 | 0,784068 | 0,433    | 0,7644225 |
| PLCB2            | 2064,33 | -0,19 | 0,240513 | -0,78406 | 0,433007 | 0,7644225 |
| CTD-3185P2.1     | 28,47   | -1,49 | 1,899359 | -0,78404 | 0,433015 | 0,7644225 |
| RP11-373D17.1    | 1,15    | -1,83 | 2,329675 | -0,78399 | 0,433047 | NA        |
| XXbac-BPG308K3.5 | 1,56    | -0,90 | 1,14469  | -0,7839  | 0,433098 | NA        |
| RP11-380I10.1    | 0,48    | -1,24 | 1,576954 | -0,7837  | 0,433216 | NA        |
| RP11-461O7.1     | 25,86   | -0,53 | 0,671191 | -0,78365 | 0,433247 | 0,7647589 |
| USP46            | 131,31  | 0,56  | 0,708774 | 0,7833   | 0,433451 | 0,7648775 |
| AC006262.6       | 16,61   | 0,54  | 0,68593  | 0,783235 | 0,433489 | 0,7648775 |
| CTB-46B19.2      | 33,79   | -0,57 | 0,733079 | -0,78322 | 0,433499 | 0,7648775 |
| RP4-536B24.3     | 5,87    | 0,95  | 1,210776 | 0,78321  | 0,433504 | 0,7648775 |
| CYP2A6           | 0,86    | -2,72 | 3,476842 | -0,78321 | 0,433505 | NA        |
| MIR3137          | 1,20    | 2,91  | 3,712431 | 0,78318  | 0,433521 | NA        |
| KIF2A            | 189,78  | 0,35  | 0,45014  | 0,783066 | 0,433588 | 0,7648775 |
| UBXN6            | 408,06  | -0,43 | 0,549725 | -0,78294 | 0,43366  | 0,7648775 |
| RP11-95P2.1      | 12,95   | -0,89 | 1,132788 | -0,78293 | 0,43367  | 0,7648775 |
| RP11-229P13.2    | 15,20   | 0,49  | 0,627343 | 0,782903 | 0,433684 | 0,7648775 |
| ABHD11           | 99,67   | 0,72  | 0,925855 | 0,782903 | 0,433684 | 0,7648775 |
| RN7SL419P        | 0,54    | -1,73 | 2,203629 | -0,7829  | 0,433685 | NA        |

|                |        |       |          |          |          |           |
|----------------|--------|-------|----------|----------|----------|-----------|
| CX3CR1         | 624,91 | -0,55 | 0,696924 | -0,78276 | 0,433767 | 0,764886  |
| MICAL3         | 75,27  | -0,74 | 0,949153 | -0,78275 | 0,433775 | 0,764886  |
| RP11-1017G21.6 | 2,82   | -0,97 | 1,239832 | -0,78272 | 0,43379  | NA        |
| BRCC3          | 380,79 | 0,48  | 0,611577 | 0,782685 | 0,433812 | 0,764886  |
| RP11-363E7.4   | 1,95   | 1,68  | 2,148294 | 0,782631 | 0,433844 | NA        |
| DRG1           | 281,67 | 0,50  | 0,643745 | 0,782492 | 0,433925 | 0,7650128 |
| CTD-2309M13.1  | 5,42   | 0,46  | 0,587657 | 0,782332 | 0,434019 | 0,7651062 |
| AC007326.10    | 3,11   | 1,35  | 1,727837 | 0,782331 | 0,43402  | NA        |
| MIER1          | 530,11 | 0,27  | 0,345861 | 0,782235 | 0,434077 | 0,7651344 |
| CACNG3         | 0,75   | 2,19  | 2,799213 | 0,78218  | 0,434109 | NA        |
| PKHD1          | 26,95  | -0,70 | 0,89501  | -0,78199 | 0,434222 | 0,7652481 |
| NDUFB2         | 831,18 | -0,16 | 0,207682 | -0,78199 | 0,434223 | 0,7652481 |
| CCDC144C       | 106,17 | 0,51  | 0,655852 | 0,781691 | 0,434396 | 0,7654765 |
| RP3-522J7.7    | 17,24  | -0,49 | 0,620565 | -0,78162 | 0,434435 | 0,7654765 |
| RP11-300D11.2  | 0,26   | -2,88 | 3,682176 | -0,78151 | 0,4345   | NA        |
| RP1-40E16.12   | 23,30  | -1,62 | 2,069451 | -0,78148 | 0,43452  | 0,7655202 |
| RP11-59H7.4    | 8,09   | 0,88  | 1,124002 | 0,781442 | 0,434542 | 0,7655202 |
| RP11-594N15.2  | 0,92   | 2,26  | 2,887736 | 0,781343 | 0,434601 | NA        |
| KCNA1          | 0,60   | 1,89  | 2,420732 | 0,78134  | 0,434603 | NA        |
| CTD-2659N19.10 | 0,52   | -2,24 | 2,871435 | -0,78129 | 0,434629 | NA        |
| GMPPB          | 211,79 | 0,60  | 0,764009 | 0,781238 | 0,434663 | 0,7656255 |
| SSRP1          | 752,20 | -0,38 | 0,480684 | -0,78116 | 0,434707 | 0,7656255 |
| RP1-303A1.2    | 0,81   | -2,40 | 3,066553 | -0,78115 | 0,434714 | NA        |
| ZNF100         | 149,56 | -0,46 | 0,593404 | -0,78113 | 0,434725 | 0,7656255 |
| RPL31P49       | 0,49   | -1,36 | 1,747435 | -0,78108 | 0,434755 | NA        |
| MINOS1-NBL1    | 1,22   | 2,91  | 3,729598 | 0,781058 | 0,434768 | NA        |
| RFTN2          | 9,33   | -0,51 | 0,648756 | -0,78085 | 0,434894 | 0,7657563 |
| UBE2K          | 563,35 | 0,40  | 0,505894 | 0,780815 | 0,434911 | 0,7657563 |
| NUDC           | 784,19 | 0,33  | 0,421857 | 0,780795 | 0,434923 | 0,7657563 |
| RP11-538I12.3  | 0,82   | -2,08 | 2,664915 | -0,78075 | 0,434949 | NA        |
| RP11-115J23.1  | 27,06  | -0,81 | 1,040551 | -0,78066 | 0,435005 | 0,7658276 |
| DSN1           | 110,21 | 0,66  | 0,844613 | 0,780347 | 0,435186 | 0,7660746 |
| ABCA10         | 5,18   | -1,87 | 2,396108 | -0,7802  | 0,435274 | 0,7661564 |
| NPIP8          | 0,51   | 1,60  | 2,050557 | 0,780066 | 0,435352 | NA        |
| RP11-14N7.2    | 2,81   | -1,03 | 1,320316 | -0,78002 | 0,435379 | NA        |
| PHOX2B         | 0,27   | -2,87 | 3,676368 | -0,77992 | 0,435436 | NA        |
| HSPA1A         | 205,04 | -0,55 | 0,699741 | -0,77991 | 0,435447 | 0,7663876 |
| OR2H4P         | 1,20   | 2,91  | 3,729799 | 0,779889 | 0,435457 | NA        |
| AUTS2          | 126,87 | 0,66  | 0,844176 | 0,779743 | 0,435542 | 0,7664836 |
| RP5-837J1.4    | 0,33   | -2,58 | 3,313194 | -0,77959 | 0,435635 | NA        |
| RWDD2B         | 82,00  | 0,49  | 0,633396 | 0,7794   | 0,435744 | 0,7666257 |
| ZNF212         | 94,38  | 0,77  | 0,987088 | 0,779304 | 0,435801 | 0,7666257 |
| AC073052.1     | 4,24   | 1,39  | 1,78416  | 0,77929  | 0,435809 | 0,7666257 |
| CD70           | 1,18   | 2,32  | 2,978154 | 0,779216 | 0,435852 | NA        |
| GALT           | 231,05 | 0,63  | 0,807275 | 0,779201 | 0,435861 | 0,7666257 |
| RNF216         | 578,10 | 0,42  | 0,539486 | 0,779134 | 0,435901 | 0,7666257 |
| DNAJC28        | 3,27   | 0,81  | 1,044446 | 0,779122 | 0,435908 | NA        |
| ATP6V0A1       | 753,83 | -0,34 | 0,440054 | -0,77904 | 0,435956 | 0,7666257 |
| SLC45A4        | 58,17  | -1,01 | 1,296392 | -0,77902 | 0,435968 | 0,7666257 |
| RP11-214J9.1   | 0,26   | -2,87 | 3,683031 | -0,77902 | 0,435969 | NA        |

|                |         |       |          |          |          |           |
|----------------|---------|-------|----------|----------|----------|-----------|
| RP11-347H15.5  | 0,41    | -2,59 | 3,330568 | -0,77894 | 0,436012 | NA        |
| RP11-267M23.3  | 16,37   | -0,58 | 0,750215 | -0,77894 | 0,436016 | 0,7666257 |
| AKR1B15        | 25,67   | -0,58 | 0,739343 | -0,77894 | 0,436017 | 0,7666257 |
| ARMCX3         | 162,65  | 0,64  | 0,822104 | 0,778906 | 0,436035 | 0,7666257 |
| ASTL           | 29,69   | 1,27  | 1,628923 | 0,778833 | 0,436078 | 0,7666291 |
| IDH3G          | 921,46  | 0,36  | 0,457255 | 0,77872  | 0,436145 | 0,7666429 |
| STMN3          | 28,75   | 1,18  | 1,519691 | 0,778627 | 0,436199 | 0,7666429 |
| CTD-2368P22.1  | 47,63   | -0,50 | 0,638578 | -0,77861 | 0,43621  | 0,7666429 |
| RN7SL743P      | 2,05    | -1,03 | 1,328865 | -0,77852 | 0,436263 | NA        |
| SULF2          | 1424,47 | 0,28  | 0,363923 | 0,778437 | 0,436311 | 0,7666944 |
| SENP1          | 95,04   | -0,64 | 0,820085 | -0,77842 | 0,436321 | 0,7666944 |
| SNORA36A       | 1,25    | -1,41 | 1,814819 | -0,7783  | 0,436392 | NA        |
| LINC00624      | 34,42   | -1,14 | 1,464281 | -0,7782  | 0,43645  | 0,7667856 |
| RPS10-NUDT3    | 257,21  | -1,08 | 1,394033 | -0,77815 | 0,436478 | 0,7667856 |
| RP11-299H22.5  | 49,19   | -0,72 | 0,924908 | -0,77808 | 0,436522 | 0,7667856 |
| CCDC82         | 443,08  | -0,47 | 0,598935 | -0,77796 | 0,436593 | 0,7667856 |
| VPS37C         | 96,77   | -0,52 | 0,666009 | -0,77791 | 0,436619 | 0,7667856 |
| RASA4B         | 278,67  | -0,34 | 0,441333 | -0,77791 | 0,436621 | 0,7667856 |
| ARL4D          | 1,20    | 2,90  | 3,729685 | 0,777877 | 0,436642 | NA        |
| ARHGAP44       | 9,88    | -0,78 | 1,008761 | -0,77779 | 0,43669  | 0,7668188 |
| CTD-3051L14.15 | 12,01   | -0,95 | 1,21742  | -0,77769 | 0,43675  | 0,7668188 |
| GPSM1          | 4,48    | 2,06  | 2,644853 | 0,777658 | 0,436771 | 0,7668188 |
| WNK2           | 1,73    | -1,02 | 1,317429 | -0,7776  | 0,436805 | NA        |
| RP4-791M13.3   | 3,66    | 1,35  | 1,734129 | 0,777599 | 0,436806 | NA        |
| AC018462.3     | 6,17    | 2,07  | 2,667982 | 0,777579 | 0,436817 | 0,7668188 |
| RAP1A          | 965,88  | 0,24  | 0,314508 | 0,777531 | 0,436846 | 0,7668188 |
| PGLYRP4        | 1,20    | 2,90  | 3,729859 | 0,777353 | 0,436951 | NA        |
| CTD-2061E19.6  | 1,10    | -1,23 | 1,586396 | -0,77733 | 0,436963 | NA        |
| CTD-3092A11.1  | 62,99   | -0,67 | 0,856396 | -0,77724 | 0,437019 | 0,767051  |
| AC000120.7     | 27,37   | -0,77 | 0,988878 | -0,77705 | 0,437132 | 0,7671263 |
| SFXN4          | 155,41  | -0,64 | 0,819223 | -0,77702 | 0,437144 | 0,7671263 |
| RP11-7M10.2    | 0,56    | 1,83  | 2,351393 | 0,776939 | 0,437195 | NA        |
| RP11-358M11.2  | 43,66   | -0,72 | 0,930853 | -0,77694 | 0,437197 | 0,7671364 |
| AL022344.5     | 55,11   | -0,51 | 0,662043 | -0,77687 | 0,437234 | 0,7671364 |
| FHL1           | 15,86   | -1,18 | 1,515051 | -0,7768  | 0,437274 | 0,7671364 |
| NOVA2          | 7,28    | 0,97  | 1,25122  | 0,776611 | 0,437388 | 0,7672153 |
| CTC-428G20.1   | 1,19    | 2,90  | 3,729703 | 0,77659  | 0,437401 | NA        |
| CHST13         | 49,65   | -1,07 | 1,373729 | -0,77659 | 0,437401 | 0,7672153 |
| SKP1           | 2721,44 | 0,20  | 0,262951 | 0,776413 | 0,437505 | 0,7673253 |
| IGKV1-17       | 0,82    | -1,48 | 1,900884 | -0,7764  | 0,437513 | NA        |
| RPH3AL         | 32,72   | -0,77 | 0,992001 | -0,77601 | 0,43774  | 0,767659  |
| RP4-703E10.1   | 6,24    | -1,48 | 1,907593 | -0,77595 | 0,437778 | 0,767659  |
| RP11-236F9.4   | 1,21    | 2,89  | 3,729691 | 0,775946 | 0,437781 | NA        |
| RPE            | 313,64  | -0,60 | 0,775248 | -0,77584 | 0,437845 | 0,7677031 |
| CORO1A         | 3583,07 | 0,23  | 0,291724 | 0,775662 | 0,437949 | 0,7678136 |
| MUC20          | 43,74   | -0,76 | 0,983306 | -0,77558 | 0,437996 | 0,7678233 |
| RN7SL198P      | 2,40    | 1,33  | 1,717479 | 0,775506 | 0,438041 | NA        |
| RN7SL12P       | 1,43    | 1,47  | 1,891979 | 0,775475 | 0,438059 | NA        |
| TP53I3         | 175,21  | 0,71  | 0,915747 | 0,775397 | 0,438105 | 0,7678824 |
| CANX           | 2551,55 | 0,22  | 0,280794 | 0,775386 | 0,438112 | 0,7678824 |

|                 |        |       |          |          |          |           |
|-----------------|--------|-------|----------|----------|----------|-----------|
| PTMS            | 11,18  | 0,70  | 0,899615 | 0,775194 | 0,438225 | 0,7680082 |
| RP11-199O14.1   | 2,00   | -1,00 | 1,287961 | -0,77508 | 0,438294 | NA        |
| RP3-324O17.8    | 1,53   | 1,59  | 2,056647 | 0,775059 | 0,438305 | NA        |
| CTC-499B15.6    | 6,97   | -0,85 | 1,103095 | -0,77496 | 0,438365 | 0,7681725 |
| RP11-398A8.2    | 1,18   | 2,89  | 3,729769 | 0,774876 | 0,438413 | NA        |
| AC002055.4      | 97,43  | 0,62  | 0,794138 | 0,774867 | 0,438418 | 0,7681725 |
| RP11-287D1.3    | 0,71   | 2,15  | 2,781008 | 0,774733 | 0,438497 | NA        |
| SLC18B1         | 294,05 | 0,53  | 0,681477 | 0,7747   | 0,438517 | 0,7681725 |
| ANKRD20A4       | 35,78  | 1,21  | 1,563422 | 0,774654 | 0,438544 | 0,7681725 |
| C14orf28        | 21,03  | 1,12  | 1,444205 | 0,774616 | 0,438566 | 0,7681725 |
| TNFRSF10A       | 118,74 | 0,79  | 1,016648 | 0,774557 | 0,438602 | 0,7681725 |
| RP11-330H6.5    | 0,75   | 1,47  | 1,903416 | 0,774538 | 0,438613 | NA        |
| SMIM18          | 11,68  | 1,29  | 1,665362 | 0,774417 | 0,438684 | 0,7681725 |
| AP000230.1      | 28,41  | -0,53 | 0,682117 | -0,77441 | 0,438689 | 0,7681725 |
| ST3GAL2         | 164,47 | -0,55 | 0,712465 | -0,77433 | 0,438737 | 0,7681725 |
| RP11-370I10.11  | 8,54   | 1,23  | 1,592836 | 0,774308 | 0,438749 | 0,7681725 |
| CHRNA10         | 6,16   | 1,47  | 1,894394 | 0,774267 | 0,438773 | 0,7681725 |
| RP4-635A23.6    | 159,04 | -0,70 | 0,898    | -0,77399 | 0,438937 | 0,7682676 |
| RP11-428O18.3   | 0,92   | 2,51  | 3,241462 | 0,773979 | 0,438943 | NA        |
| XXbac-B461K10.4 | 41,20  | -1,37 | 1,772268 | -0,77391 | 0,438982 | 0,7682676 |
| CTD-2081K17.1   | 2,48   | -2,07 | 2,677969 | -0,77389 | 0,438997 | NA        |
| ADGB            | 52,77  | 1,01  | 1,302964 | 0,773866 | 0,43901  | 0,7682676 |
| RP11-574K11.8   | 13,76  | -1,77 | 2,291254 | -0,77386 | 0,439014 | 0,7682676 |
| RNF207          | 8,95   | 0,64  | 0,821456 | 0,773826 | 0,439034 | 0,7682676 |
| ITPR1           | 673,90 | 0,48  | 0,614376 | 0,773572 | 0,439184 | 0,7683734 |
| CTD-2528L19.6   | 1,98   | 1,48  | 1,914067 | 0,773538 | 0,439204 | NA        |
| GLI4            | 53,36  | 0,70  | 0,906845 | 0,773529 | 0,439209 | 0,7683734 |
| NECAB2          | 1,21   | 2,89  | 3,730402 | 0,773467 | 0,439246 | NA        |
| MS4A10          | 8,25   | -0,58 | 0,754646 | -0,77339 | 0,439292 | 0,7683734 |
| LINC00568       | 3,41   | 0,80  | 1,031003 | 0,773385 | 0,439295 | NA        |
| ZNRF1           | 40,03  | -1,03 | 1,332092 | -0,77337 | 0,439304 | 0,7683734 |
| SLC17A5         | 182,95 | -0,71 | 0,918507 | -0,7733  | 0,439347 | 0,7683734 |
| NDNF            | 0,22   | -2,13 | 2,755533 | -0,77328 | 0,439356 | NA        |
| RP11-414B7.1    | 14,90  | -1,44 | 1,863984 | -0,77326 | 0,43937  | 0,7683734 |
| GK5             | 203,21 | -0,41 | 0,529611 | -0,77324 | 0,439383 | 0,7683734 |
| ARMCX1          | 78,58  | -0,99 | 1,284078 | -0,77312 | 0,43945  | 0,7684185 |
| AKNAD1          | 0,95   | -1,19 | 1,544489 | -0,77305 | 0,439494 | NA        |
| NCLN            | 180,05 | -0,39 | 0,502073 | -0,77297 | 0,439537 | 0,7684987 |
| CTB-55B8.1      | 0,44   | 1,41  | 1,826167 | 0,772747 | 0,439672 | NA        |
| COX15           | 325,80 | 0,55  | 0,717403 | 0,772689 | 0,439706 | 0,7686543 |
| RP11-478G16.1   | 4,68   | -0,94 | 1,221583 | -0,77268 | 0,439709 | 0,7686543 |
| RN7SL842P       | 5,25   | -0,79 | 1,021251 | -0,77252 | 0,439807 | 0,7687136 |
| PLD1            | 64,85  | -0,65 | 0,844838 | -0,77249 | 0,439826 | 0,7687136 |
| SPACA5          | 1,19   | 2,88  | 3,729752 | 0,772487 | 0,439826 | NA        |
| MIR573          | 1,19   | 2,88  | 3,729794 | 0,772396 | 0,43988  | NA        |
| RP11-80B9.1     | 0,92   | 2,48  | 3,207524 | 0,772367 | 0,439897 | NA        |
| UGGT1           | 608,46 | -0,55 | 0,714033 | -0,77235 | 0,439904 | 0,768765  |
| IDI2            | 1,19   | 2,88  | 3,729822 | 0,772314 | 0,439928 | NA        |
| RP11-701H24.2   | 1,88   | 1,76  | 2,284424 | 0,77231  | 0,439931 | NA        |
| CTD-2007L18.5   | 0,44   | -2,84 | 3,670887 | -0,7723  | 0,439935 | NA        |



|               |         |       |          |          |          |           |
|---------------|---------|-------|----------|----------|----------|-----------|
| CBX8          | 2,25    | 1,92  | 2,483114 | 0,772284 | 0,439946 | NA        |
| RGN           | 0,82    | -1,20 | 1,557301 | -0,77225 | 0,439968 | NA        |
| PSMA6         | 2652,94 | 0,22  | 0,284426 | 0,772245 | 0,439969 | 0,768765  |
| IZUMO1        | 19,01   | -0,60 | 0,772171 | -0,77219 | 0,440001 | 0,768765  |
| RP11-255H23.2 | 0,89    | 1,82  | 2,355063 | 0,772187 | 0,440004 | NA        |
| NPSR1-AS1     | 20,67   | -0,49 | 0,638484 | -0,7721  | 0,440058 | 0,768765  |
| MAOB          | 14,07   | 1,42  | 1,842218 | 0,772034 | 0,440094 | 0,768765  |
| USP22         | 1004,34 | 0,27  | 0,345235 | 0,772019 | 0,440103 | 0,768765  |
| CCDC39        | 6,07    | -1,41 | 1,823664 | -0,77195 | 0,440146 | 0,7687674 |
| ATP5EP2       | 0,77    | -1,80 | 2,335052 | -0,77194 | 0,440147 | NA        |
| RP11-218C14.5 | 1,19    | 2,88  | 3,729827 | 0,771935 | 0,440153 | NA        |
| CTD-2666L21.1 | 0,30    | -2,53 | 3,277639 | -0,77177 | 0,440253 | NA        |
| IQGAP3        | 4,27    | -1,21 | 1,562453 | -0,77172 | 0,44028  | 0,7688585 |
| GSTM3         | 19,39   | -0,63 | 0,812416 | -0,77172 | 0,440281 | 0,7688585 |
| RN7SL556P     | 1,24    | -1,18 | 1,527508 | -0,77156 | 0,440377 | NA        |
| RP4-657D16.3  | 54,98   | 1,14  | 1,476019 | 0,771527 | 0,440395 | 0,7689855 |
| AC000095.10   | 1,22    | 2,30  | 2,978759 | 0,771456 | 0,440437 | NA        |
| SEMA6B        | 19,46   | 0,51  | 0,661595 | 0,77141  | 0,440464 | 0,7690348 |
| EIF4E2        | 777,68  | 0,32  | 0,419169 | 0,771306 | 0,440526 | 0,7690701 |
| RP11-34F20.4  | 1,26    | 2,33  | 3,016921 | 0,771045 | 0,44068  | NA        |
| NIM1K         | 16,72   | -0,63 | 0,822639 | -0,77103 | 0,440689 | 0,7692827 |
| TAS1R3        | 1,04    | -2,38 | 3,088812 | -0,77101 | 0,440703 | NA        |
| RN7SL570P     | 1,47    | 1,34  | 1,740059 | 0,771002 | 0,440706 | NA        |
| CTD-2643K12.1 | 0,82    | 1,03  | 1,340641 | 0,770948 | 0,440738 | NA        |
| FAM107B       | 338,66  | -0,39 | 0,509273 | -0,77091 | 0,440759 | 0,7693325 |
| LENG9         | 31,03   | -1,19 | 1,548858 | -0,77075 | 0,440858 | 0,7694331 |
| C1QTNF2       | 2,47    | -0,63 | 0,816265 | -0,77066 | 0,44091  | NA        |
| RP11-91J3.1   | 0,26    | -2,84 | 3,684153 | -0,77059 | 0,440947 | NA        |
| RP11-134E15.2 | 1,18    | 2,23  | 2,890068 | 0,770569 | 0,440963 | NA        |
| GNAS-AS1      | 5,65    | -0,68 | 0,881703 | -0,77047 | 0,441024 | 0,7696509 |
| FSTL4         | 0,67    | 1,57  | 2,043107 | 0,770179 | 0,441194 | NA        |
| LAMP3         | 13,05   | 0,69  | 0,892783 | 0,770163 | 0,441203 | 0,7698075 |
| AC074289.1    | 80,34   | -0,72 | 0,934363 | -0,77016 | 0,441206 | 0,7698075 |
| CDC42EP4      | 34,78   | 0,95  | 1,232886 | 0,770105 | 0,441238 | 0,7698075 |
| RP11-11H9.1   | 1,19    | 2,87  | 3,729719 | 0,77002  | 0,441288 | NA        |
| RP4-621B10.8  | 2,62    | -0,97 | 1,265047 | -0,76976 | 0,441444 | NA        |
| RP11-69J7.1   | 1,18    | 2,87  | 3,729876 | 0,769663 | 0,4415   | NA        |
| LINC00299     | 45,21   | -1,12 | 1,457226 | -0,76962 | 0,441524 | 0,7701726 |
| MIR5690       | 21,61   | -1,27 | 1,644075 | -0,76961 | 0,44153  | 0,7701726 |
| HELZ          | 1131,85 | -0,41 | 0,531827 | -0,76939 | 0,441661 | 0,7702939 |
| WDR24         | 41,19   | -0,98 | 1,28009  | -0,76936 | 0,441682 | 0,7702939 |
| ZNF221        | 1,64    | 0,97  | 1,258121 | 0,769331 | 0,441697 | NA        |
| CHMP5         | 708,54  | -0,50 | 0,653245 | -0,76924 | 0,441751 | 0,770342  |
| FAM160A1      | 60,17   | -1,06 | 1,380949 | -0,76912 | 0,441824 | 0,7703458 |
| SLC25A20      | 291,20  | 0,69  | 0,900251 | 0,769096 | 0,441836 | 0,7703458 |
| NOTCH1        | 140,17  | 0,57  | 0,744763 | 0,768916 | 0,441943 | 0,7704578 |
| CEACAM5       | 0,91    | -1,01 | 1,309353 | -0,76885 | 0,441982 | NA        |
| RP11-384G23.1 | 16,85   | -1,03 | 1,333442 | -0,76885 | 0,441983 | 0,7704578 |
| RP11-539L10.5 | 2,64    | -0,94 | 1,227486 | -0,76874 | 0,442047 | NA        |
| C5orf28       | 29,73   | 0,62  | 0,810832 | 0,768617 | 0,442121 | 0,7706008 |

|                |         |       |          |          |          |           |
|----------------|---------|-------|----------|----------|----------|-----------|
| RP4-669P10.18  | 42,88   | 0,44  | 0,574453 | 0,768517 | 0,44218  | 0,7706008 |
| RPS3AP39       | 0,58    | -1,04 | 1,355559 | -0,7685  | 0,442188 | NA        |
| TMEM50A        | 1113,67 | -0,36 | 0,462728 | -0,7685  | 0,442189 | 0,7706008 |
| EYA1           | 38,89   | -0,40 | 0,519054 | -0,76838 | 0,442263 | 0,7706567 |
| RP11-527B17.2  | 0,89    | 2,46  | 3,208469 | 0,768203 | 0,442366 | NA        |
| TIMD4          | 1,14    | 2,87  | 3,730393 | 0,768099 | 0,442428 | NA        |
| LRTM1          | 18,19   | -0,48 | 0,626016 | -0,76809 | 0,442435 | 0,7708844 |
| RP11-139H15.6  | 0,70    | 2,13  | 2,776104 | 0,768075 | 0,442443 | NA        |
| ATR            | 402,80  | -0,51 | 0,668318 | -0,76799 | 0,442494 | 0,7709151 |
| AP002381.2     | 1,64    | 2,13  | 2,776251 | 0,767885 | 0,442555 | NA        |
| RPS9           | 9967,23 | 0,16  | 0,207529 | 0,767803 | 0,442604 | 0,7710265 |
| AC074286.1     | 97,39   | -0,64 | 0,82756  | -0,76773 | 0,442649 | 0,7710265 |
| RP11-817O13.9  | 0,26    | -2,83 | 3,684154 | -0,76773 | 0,442651 | NA        |
| RTEL1-TNFRSF6B | 1,17    | 2,86  | 3,729947 | 0,767708 | 0,442661 | NA        |
| C22orf39       | 242,70  | 0,51  | 0,662039 | 0,767672 | 0,442682 | 0,7710265 |
| AC017060.1     | 23,34   | -0,58 | 0,749881 | -0,76736 | 0,442865 | 0,7712724 |
| OSR1           | 0,42    | -2,58 | 3,362157 | -0,76735 | 0,442872 | NA        |
| ALG9           | 99,62   | -0,51 | 0,670174 | -0,76726 | 0,442927 | 0,7713011 |
| RP11-367J11.3  | 8,51    | -0,50 | 0,647609 | -0,76714 | 0,443001 | 0,7713011 |
| FAM110D        | 18,49   | 0,65  | 0,849136 | 0,767127 | 0,443006 | 0,7713011 |
| RP11-474P2.6   | 0,76    | -1,58 | 2,060854 | -0,76695 | 0,443112 | NA        |
| DOCK10         | 1029,80 | 0,37  | 0,479445 | 0,766939 | 0,443118 | 0,7713848 |
| ZNF826P        | 25,91   | -0,67 | 0,875892 | -0,76678 | 0,443213 | 0,7713848 |
| RP11-322E11.2  | 148,62  | -0,41 | 0,530033 | -0,76671 | 0,443253 | 0,7713848 |
| RP11-81K2.1    | 0,55    | 1,80  | 2,35003  | 0,766565 | 0,44334  | NA        |
| RP11-59O6.3    | 12,78   | 1,32  | 1,722271 | 0,76654  | 0,443355 | 0,7713848 |
| RP11-84A14.4   | 6,68    | -0,76 | 0,993108 | -0,76653 | 0,443363 | 0,7713848 |
| YARS           | 593,16  | -0,25 | 0,330468 | -0,76648 | 0,443392 | 0,7713848 |
| LINC00668      | 23,51   | -0,64 | 0,832708 | -0,76642 | 0,443426 | 0,7713848 |
| NMNAT3         | 565,84  | 0,37  | 0,488238 | 0,766335 | 0,443477 | 0,7713848 |
| PRC1           | 70,06   | -0,67 | 0,879363 | -0,76632 | 0,443483 | 0,7713848 |
| RN7SL623P      | 4,11    | -1,12 | 1,462    | -0,76624 | 0,443536 | 0,7713848 |
| RP11-181D18.2  | 4,00    | -0,72 | 0,94304  | -0,76619 | 0,443564 | 0,7713848 |
| RP11-736K20.1  | 1,18    | 2,86  | 3,72997  | 0,766168 | 0,443576 | NA        |
| RP1-315G1.3    | 0,61    | -2,25 | 2,938227 | -0,76615 | 0,443588 | NA        |
| CHMP1B2P       | 33,01   | 0,90  | 1,176107 | 0,766133 | 0,443597 | 0,7713848 |
| DTNBP1         | 205,44  | -0,55 | 0,723673 | -0,76611 | 0,443609 | 0,7713848 |
| RP11-335I12.4  | 18,01   | -1,79 | 2,331054 | -0,76607 | 0,443634 | 0,7713848 |
| RP5-894A10.5   | 1,24    | 2,86  | 3,72963  | 0,766052 | 0,443645 | NA        |
| UBTFL6         | 22,90   | -2,76 | 3,60896  | -0,76597 | 0,443697 | 0,7714208 |
| RNU6-960P      | 1,17    | 2,86  | 3,72997  | 0,765853 | 0,443764 | NA        |
| ETV7           | 21,12   | -1,21 | 1,576814 | -0,76581 | 0,44379  | 0,7714816 |
| SAMD1          | 80,99   | -0,54 | 0,706174 | -0,76577 | 0,443814 | 0,7714816 |
| RP5-836N17.4   | 21,59   | -1,96 | 2,555852 | -0,76546 | 0,443998 | 0,7716822 |
| CTD-2561B21.8  | 30,94   | -0,60 | 0,789889 | -0,76539 | 0,444042 | 0,7716822 |
| UBE2F-SCLY     | 4,35    | 1,80  | 2,352463 | 0,765365 | 0,444054 | 0,7716822 |
| PNLIP          | 0,26    | -2,83 | 3,693504 | -0,7653  | 0,444092 | NA        |
| MYL5           | 81,61   | 0,74  | 0,972873 | 0,76517  | 0,444171 | 0,7718123 |
| WDR83OS        | 1891,97 | -0,15 | 0,195314 | -0,76494 | 0,444307 | 0,7719721 |
| CTD-3014M21.4  | 252,21  | 0,24  | 0,317348 | 0,764864 | 0,444353 | 0,7719721 |

|                |        |       |          |          |          |           |
|----------------|--------|-------|----------|----------|----------|-----------|
| RP11-732A19.8  | 1,15   | 2,84  | 3,708065 | 0,764845 | 0,444364 | NA        |
| CTD-2517M22.16 | 0,91   | 2,47  | 3,229394 | 0,764836 | 0,444369 | NA        |
| RP11-480I12.3  | 1,77   | 2,85  | 3,726831 | 0,764771 | 0,444408 | NA        |
| SARNP          | 525,58 | -0,30 | 0,397393 | -0,76477 | 0,444409 | 0,7719721 |
| CTD-2510F5.6   | 18,46  | -1,25 | 1,632098 | -0,76474 | 0,444429 | 0,7719721 |
| LINC01080      | 0,69   | 2,11  | 2,761063 | 0,764578 | 0,444523 | NA        |
| ADAM29         | 11,86  | -0,53 | 0,692162 | -0,76454 | 0,444544 | 0,7719786 |
| RP3-348I23.2   | 1,18   | 2,85  | 3,729964 | 0,764478 | 0,444582 | NA        |
| RP11-1024P17.1 | 11,40  | -1,12 | 1,462861 | -0,76447 | 0,44459  | 0,7719786 |
| C6orf47        | 35,87  | 1,11  | 1,447969 | 0,764435 | 0,444608 | 0,7719786 |
| AC001226.2     | 2,52   | 0,63  | 0,824339 | 0,764428 | 0,444612 | NA        |
| AC015922.5     | 1,16   | 2,85  | 3,730146 | 0,76442  | 0,444617 | NA        |
| CTD-2525I3.3   | 10,52  | 1,44  | 1,882594 | 0,764394 | 0,444633 | 0,7719786 |
| AC007191.4     | 13,15  | -0,67 | 0,881312 | -0,76432 | 0,444677 | 0,7719786 |
| RGPD5          | 541,60 | 0,31  | 0,403088 | 0,764312 | 0,444681 | 0,7719786 |
| RP11-295B17.6  | 0,88   | 2,45  | 3,211065 | 0,764188 | 0,444755 | NA        |
| GAB3           | 689,17 | 0,43  | 0,567806 | 0,764181 | 0,444759 | 0,7719887 |
| PCDHGA6        | 18,39  | -0,50 | 0,651072 | -0,76416 | 0,44477  | 0,7719887 |
| AC006039.4     | 62,28  | -0,49 | 0,635372 | -0,76405 | 0,444839 | 0,7720364 |
| ERICH3         | 0,62   | -1,94 | 2,536436 | -0,76388 | 0,444941 | NA        |
| KIF1A          | 6,30   | 1,74  | 2,274409 | 0,763855 | 0,444954 | 0,772163  |
| ADAMTS9        | 20,98  | -1,00 | 1,308045 | -0,76371 | 0,445043 | 0,7722175 |
| LMF1           | 64,35  | -0,91 | 1,189268 | -0,76361 | 0,445099 | 0,7722175 |
| HABP4          | 27,83  | -1,00 | 1,315676 | -0,76359 | 0,445109 | 0,7722175 |
| CTD-2010I16.2  | 1,21   | -1,53 | 2,009269 | -0,76345 | 0,445193 | NA        |
| GLIPR1L1       | 0,90   | 2,47  | 3,229552 | 0,763317 | 0,445274 | NA        |
| RP11-477I4.4   | 1,53   | -1,75 | 2,295403 | -0,76327 | 0,445302 | NA        |
| ZNF217         | 571,22 | 0,47  | 0,616083 | 0,763146 | 0,445376 | 0,7726088 |
| CTD-2232E5.2   | 0,35   | -1,89 | 2,472641 | -0,76314 | 0,445382 | NA        |
| RP11-479F13.1  | 1,16   | 2,84  | 3,716219 | 0,763104 | 0,445401 | NA        |
| SLC46A2        | 62,78  | 1,18  | 1,551386 | 0,762925 | 0,445508 | 0,77265   |
| DNAH3          | 28,54  | -0,87 | 1,143394 | -0,76291 | 0,445515 | 0,77265   |
| ECT2L          | 19,03  | -0,83 | 1,088926 | -0,7629  | 0,445525 | 0,77265   |
| RP11-467C18.1  | 1,17   | 2,85  | 3,730111 | 0,76289  | 0,445529 | NA        |
| FOXB1          | 1,14   | -1,59 | 2,080693 | -0,76289 | 0,445529 | NA        |
| KLHL10         | 1,16   | 2,85  | 3,730235 | 0,76278  | 0,445595 | NA        |
| RP11-189E14.4  | 10,41  | 0,70  | 0,921762 | 0,762666 | 0,445662 | 0,7728165 |
| RP11-324H7.1   | 1,26   | -0,86 | 1,122933 | -0,76242 | 0,44581  | NA        |
| RPL35AP32      | 37,98  | -1,14 | 1,490977 | -0,76223 | 0,44592  | 0,7731283 |
| RP11-727F15.9  | 34,92  | -0,64 | 0,840697 | -0,76223 | 0,445925 | 0,7731283 |
| RP4-777O23.2   | 0,85   | 2,41  | 3,167419 | 0,762146 | 0,445973 | NA        |
| SEPT7L         | 17,59  | -1,25 | 1,643435 | -0,76202 | 0,446048 | 0,773214  |
| RP11-241F15.3  | 14,02  | -1,87 | 2,460543 | -0,762   | 0,446058 | 0,773214  |
| RP11-204M4.1   | 1,15   | 2,84  | 3,730128 | 0,761829 | 0,446162 | NA        |
| RP11-168P6.1   | 91,24  | -0,58 | 0,766716 | -0,76168 | 0,446251 | 0,7734152 |
| RP11-572C21.1  | 5,08   | 0,71  | 0,93456  | 0,76167  | 0,446257 | 0,7734152 |
| RP11-265D19.6  | 1,16   | 2,84  | 3,730094 | 0,761392 | 0,446423 | NA        |
| CNKSR3         | 75,03  | -0,42 | 0,554082 | -0,76133 | 0,446458 | 0,773654  |
| FARSA          | 286,80 | -0,59 | 0,77238  | -0,7613  | 0,446478 | 0,773654  |
| RP11-466P24.6  | 0,55   | 1,78  | 2,342902 | 0,76111  | 0,446591 | NA        |

|                  |         |       |          |          |          |           |
|------------------|---------|-------|----------|----------|----------|-----------|
| FLCN             | 136,70  | -0,48 | 0,626845 | -0,76107 | 0,446615 | 0,7736757 |
| WDPCP            | 234,86  | -0,32 | 0,419906 | -0,76106 | 0,446619 | 0,7736757 |
| SRGAP2B          | 841,28  | -0,30 | 0,399275 | -0,76097 | 0,446678 | 0,7736757 |
| RP11-467J12.4    | 8,38    | -0,52 | 0,678904 | -0,76092 | 0,446705 | 0,7736757 |
| GDPD4            | 1,21    | 2,84  | 3,729539 | 0,760914 | 0,446708 | NA        |
| RN7SL431P        | 1,85    | -1,49 | 1,963199 | -0,76089 | 0,446723 | NA        |
| RP11-49K4.1      | 1,38    | -1,25 | 1,637082 | -0,76085 | 0,446745 | NA        |
| RP11-331F4.4     | 0,43    | -1,49 | 1,959994 | -0,76069 | 0,446844 | NA        |
| MRAS             | 164,47  | -0,60 | 0,79488  | -0,76065 | 0,446869 | 0,7736757 |
| CDK5             | 285,31  | 0,63  | 0,830049 | 0,76058  | 0,446908 | 0,7736757 |
| LAMTOR5          | 707,54  | -0,31 | 0,408829 | -0,76052 | 0,446942 | 0,7736757 |
| CTA-223H9.9      | 4,71    | -1,56 | 2,053864 | -0,76051 | 0,446949 | 0,7736757 |
| CTD-2095E4.4     | 48,33   | 0,75  | 0,987429 | 0,760475 | 0,44697  | 0,7736757 |
| CSRP2BP          | 86,05   | -0,84 | 1,104569 | -0,76046 | 0,446982 | 0,7736757 |
| CLK4             | 406,37  | -0,51 | 0,66832  | -0,76045 | 0,446983 | 0,7736757 |
| RP11-638I2.8     | 0,85    | 2,41  | 3,168129 | 0,760359 | 0,44704  | NA        |
| SLC2A4           | 5,96    | -0,60 | 0,789436 | -0,7603  | 0,447074 | 0,7736757 |
| ADCK3            | 351,91  | 0,57  | 0,751624 | 0,760263 | 0,447097 | 0,7736757 |
| CTD-2313N18.2    | 2,21    | -1,09 | 1,439052 | -0,76021 | 0,447127 | NA        |
| C1orf56          | 970,62  | -0,44 | 0,582795 | -0,7602  | 0,447135 | 0,7736757 |
| MSANTD2          | 66,73   | -0,73 | 0,955424 | -0,76016 | 0,447159 | 0,7736757 |
| SCO2             | 1337,28 | -0,75 | 0,986294 | -0,76012 | 0,447181 | 0,7736757 |
| RP11-133K1.6     | 9,01    | 0,70  | 0,915781 | 0,760096 | 0,447197 | 0,7736757 |
| ACAP2            | 1560,86 | -0,28 | 0,362139 | -0,75973 | 0,447417 | 0,7739841 |
| XXyac-YX65C7_A.2 | 0,56    | -2,59 | 3,406893 | -0,75949 | 0,447561 | NA        |
| HOXB3            | 17,77   | -0,95 | 1,251563 | -0,75948 | 0,447567 | 0,7741713 |
| DUSP10           | 91,33   | 0,75  | 0,981947 | 0,759315 | 0,447664 | 0,7742668 |
| CTD-2340D6.2     | 1,15    | 2,83  | 3,730138 | 0,759306 | 0,44767  | NA        |
| OR7D4            | 16,55   | -0,62 | 0,822447 | -0,75904 | 0,447827 | 0,7744768 |
| RP11-347C12.11   | 1,16    | 2,83  | 3,730147 | 0,758883 | 0,447922 | NA        |
| SLAIN2           | 367,04  | -0,50 | 0,659379 | -0,75885 | 0,447944 | 0,7744861 |
| NEUROG2          | 1,47    | 2,56  | 3,37772  | 0,758807 | 0,447968 | NA        |
| CTB-75G16.1      | 25,45   | -2,74 | 3,608725 | -0,75877 | 0,447987 | 0,7744861 |
| IRF2BP1          | 36,03   | 0,77  | 1,017988 | 0,758705 | 0,448029 | 0,7744861 |
| BLZF1            | 202,75  | -0,56 | 0,744147 | -0,75853 | 0,448137 | 0,7744861 |
| FAM156A          | 449,02  | 0,45  | 0,5952   | 0,758514 | 0,448143 | 0,7744861 |
| RRAGB            | 129,27  | -0,78 | 1,022635 | -0,75844 | 0,448188 | 0,7744861 |
| RP1-80B9.2       | 234,20  | -0,46 | 0,61158  | -0,7584  | 0,448214 | 0,7744861 |
| RP11-715N9.2     | 1,16    | 2,83  | 3,730086 | 0,758338 | 0,448248 | NA        |
| EARS2            | 39,45   | 0,65  | 0,859654 | 0,758332 | 0,448252 | 0,7744861 |
| RP11-864N7.4     | 5,75    | -0,75 | 0,990837 | -0,75832 | 0,448259 | 0,7744861 |
| RP11-52A20.2     | 5,48    | 1,30  | 1,717732 | 0,75829  | 0,448277 | 0,7744861 |
| CXorf40A         | 328,31  | 0,55  | 0,719107 | 0,758268 | 0,44829  | 0,7744861 |
| RN7SL596P        | 1,65    | -0,93 | 1,225549 | -0,75808 | 0,448402 | NA        |
| SEPT12           | 0,81    | -1,02 | 1,348068 | -0,75801 | 0,448443 | NA        |
| PSME2            | 3045,31 | -0,20 | 0,26347  | -0,75782 | 0,448562 | 0,7748275 |
| MIGA1            | 179,11  | 0,53  | 0,70416  | 0,757799 | 0,448571 | 0,7748275 |
| RP11-386G11.8    | 1,02    | -1,35 | 1,779913 | -0,75774 | 0,448604 | NA        |
| GALNT11          | 215,50  | 0,47  | 0,616519 | 0,757661 | 0,448654 | 0,7748981 |
| CTD-2256P15.1    | 1,15    | 2,83  | 3,730167 | 0,75765  | 0,448661 | NA        |

|                |         |       |          |          |          |           |
|----------------|---------|-------|----------|----------|----------|-----------|
| CTC-512J14.5   | 1,14    | 2,83  | 3,730153 | 0,757624 | 0,448676 | NA        |
| PPP2CA         | 1430,62 | 0,33  | 0,437535 | 0,7575   | 0,44875  | 0,7748981 |
| RP11-739L10.1  | 17,08   | 1,15  | 1,514827 | 0,757479 | 0,448763 | 0,7748981 |
| EME2           | 210,28  | -0,51 | 0,671747 | -0,75745 | 0,448779 | 0,7748981 |
| RP11-592N21.1  | 2,55    | 0,63  | 0,832396 | 0,757429 | 0,448793 | NA        |
| RP11-347C12.8  | 1,13    | 2,81  | 3,710673 | 0,757377 | 0,448824 | NA        |
| PNRC1          | 1336,88 | -0,20 | 0,25808  | -0,75725 | 0,448902 | 0,7749333 |
| RP11-133L14.2  | 1,13    | 2,82  | 3,730202 | 0,757212 | 0,448923 | NA        |
| ERCC1          | 730,03  | 0,35  | 0,461778 | 0,75711  | 0,448984 | 0,7749333 |
| RALGAPA1       | 356,17  | -0,51 | 0,671017 | -0,75708 | 0,449002 | 0,7749333 |
| ARRDC4         | 253,99  | -0,53 | 0,697173 | -0,75687 | 0,44913  | 0,7749333 |
| RN7SL670P      | 8,18    | 0,82  | 1,080884 | 0,756829 | 0,449152 | 0,7749333 |
| CYLD           | 1385,12 | 0,29  | 0,381343 | 0,756797 | 0,449172 | 0,7749333 |
| EPB41L4A-AS1   | 369,81  | 0,35  | 0,465567 | 0,756789 | 0,449176 | 0,7749333 |
| CTC-459M5.2    | 20,63   | -1,55 | 2,05104  | -0,75673 | 0,449214 | 0,7749333 |
| LINC01138      | 60,32   | -0,54 | 0,718267 | -0,75669 | 0,449233 | 0,7749333 |
| FAM96B         | 617,14  | 0,22  | 0,295954 | 0,756602 | 0,449288 | 0,7749333 |
| ABCC1          | 369,95  | -0,46 | 0,603933 | -0,75657 | 0,44931  | 0,7749333 |
| NINJ1          | 828,03  | 0,51  | 0,678562 | 0,756471 | 0,449367 | 0,7749333 |
| NBN            | 592,98  | 0,40  | 0,522898 | 0,756448 | 0,449381 | 0,7749333 |
| CXorf31        | 0,70    | 2,10  | 2,772134 | 0,756405 | 0,449407 | NA        |
| C5orf60        | 9,68    | 0,79  | 1,040701 | 0,756322 | 0,449456 | 0,7749333 |
| POGLUT1        | 427,48  | 0,39  | 0,510942 | 0,756299 | 0,44947  | 0,7749333 |
| RNA5SP450      | 18,28   | -0,80 | 1,059151 | -0,7563  | 0,449471 | 0,7749333 |
| GP6            | 12,69   | 0,81  | 1,065738 | 0,756237 | 0,449507 | 0,7749333 |
| EVC2           | 1,87    | 2,31  | 3,050419 | 0,756077 | 0,449603 | NA        |
| GLT8D1         | 130,64  | 0,64  | 0,843055 | 0,755976 | 0,449664 | 0,775035  |
| TDRD5          | 1,14    | 2,82  | 3,730452 | 0,755857 | 0,449735 | NA        |
| FAM117B        | 256,92  | 0,43  | 0,574085 | 0,755816 | 0,44976  | 0,775035  |
| AC004980.9     | 12,30   | -0,84 | 1,117018 | -0,7558  | 0,449769 | 0,775035  |
| RP11-155D18.13 | 9,39    | -0,43 | 0,570468 | -0,75579 | 0,449775 | 0,775035  |
| RP11-21K12.3   | 0,52    | 1,58  | 2,084366 | 0,755771 | 0,449786 | NA        |
| CTD-2210P24.1  | 0,67    | -1,38 | 1,828875 | -0,75571 | 0,449823 | NA        |
| RP11-314A20.2  | 0,85    | 2,40  | 3,175624 | 0,755535 | 0,449928 | NA        |
| SKA1           | 29,82   | -0,48 | 0,634283 | -0,75542 | 0,449998 | 0,775035  |
| AC009120.11    | 32,75   | -0,45 | 0,596712 | -0,7554  | 0,45001  | 0,775035  |
| RP11-498C9.15  | 34,32   | -0,57 | 0,753131 | -0,75539 | 0,450014 | 0,775035  |
| ASCC1          | 322,95  | 0,35  | 0,468948 | 0,755326 | 0,450053 | 0,775035  |
| ANP32E         | 764,51  | -0,24 | 0,313626 | -0,75521 | 0,450123 | 0,775035  |
| C7orf73        | 837,46  | 0,23  | 0,298038 | 0,755196 | 0,450131 | 0,775035  |
| RP11-732A19.9  | 1,13    | 2,82  | 3,730247 | 0,755021 | 0,450237 | NA        |
| RP11-385E5.5   | 7,28    | -0,72 | 0,947551 | -0,75484 | 0,450347 | 0,775035  |
| CTC-479C5.10   | 58,88   | -1,28 | 1,700108 | -0,75482 | 0,450355 | 0,775035  |
| CTD-2006C1.13  | 14,50   | -0,88 | 1,159984 | -0,75481 | 0,450361 | 0,775035  |
| RP11-617F23.1  | 141,61  | 0,46  | 0,608066 | 0,754787 | 0,450377 | 0,775035  |
| RP11-473I1.9   | 377,48  | -1,61 | 2,128551 | -0,75476 | 0,450395 | 0,775035  |
| RP11-521O16.2  | 17,71   | 0,51  | 0,674868 | 0,754732 | 0,45041  | 0,775035  |
| ZFAND4         | 56,99   | 0,89  | 1,180429 | 0,754629 | 0,450472 | 0,775035  |
| IPO13          | 239,94  | -0,71 | 0,942987 | -0,75453 | 0,450528 | 0,775035  |
| LATS1          | 366,83  | -0,53 | 0,697171 | -0,75453 | 0,450528 | 0,775035  |

|                |         |       |          |          |          |           |
|----------------|---------|-------|----------|----------|----------|-----------|
| RP11-709D24.5  | 14,02   | -0,45 | 0,590678 | -0,75451 | 0,450543 | 0,775035  |
| ASPG           | 0,66    | -1,75 | 2,324536 | -0,75445 | 0,450576 | NA        |
| GALNT5         | 26,88   | 0,92  | 1,218689 | 0,754416 | 0,450599 | 0,775035  |
| RP11-422P24.12 | 9,10    | -0,45 | 0,594926 | -0,7544  | 0,450608 | 0,775035  |
| PHLDA3         | 2,03    | -0,86 | 1,140003 | -0,75436 | 0,450634 | NA        |
| RP11-64P12.2   | 83,99   | -0,77 | 1,026753 | -0,75436 | 0,450636 | 0,775035  |
| RP11-372E1.4   | 5,11    | -0,60 | 0,790117 | -0,75435 | 0,450637 | 0,775035  |
| CR1L           | 1,14    | 2,81  | 3,730493 | 0,754295 | 0,450672 | NA        |
| RP11-792A8.2   | 22,60   | -0,77 | 1,020579 | -0,75426 | 0,450692 | 0,775035  |
| SPDYE8P        | 7,08    | -1,23 | 1,62858  | -0,75423 | 0,450709 | 0,775035  |
| PSD            | 28,61   | -0,53 | 0,700795 | -0,75419 | 0,450733 | 0,775035  |
| ZNF320         | 33,72   | 0,65  | 0,865714 | 0,754184 | 0,450739 | 0,775035  |
| SERBP1         | 2200,08 | -0,20 | 0,271237 | -0,75412 | 0,450774 | 0,775035  |
| TMEM221        | 3,49    | -0,82 | 1,091431 | -0,75399 | 0,450853 | NA        |
| RP3-323M4.2    | 0,25    | -2,78 | 3,685922 | -0,75386 | 0,450931 | NA        |
| MOGS           | 78,67   | -0,61 | 0,80339  | -0,75378 | 0,45098  | 0,7752593 |
| CTD-2383I20.1  | 21,63   | -0,70 | 0,929193 | -0,75377 | 0,450988 | 0,7752593 |
| RHBDF2         | 276,89  | -0,31 | 0,408484 | -0,75367 | 0,451045 | 0,7752865 |
| RP11-110G21.2  | 19,88   | 0,81  | 1,070703 | 0,753582 | 0,4511   | 0,7753057 |
| C4BPA          | 0,89    | 1,73  | 2,291231 | 0,753507 | 0,451145 | NA        |
| IGKV2-30       | 0,71    | 1,47  | 1,955688 | 0,753498 | 0,45115  | NA        |
| OR6Y1          | 76,03   | -0,56 | 0,740044 | -0,75348 | 0,451159 | 0,7753057 |
| RNU6-1010P     | 1,13    | 2,81  | 3,730307 | 0,753429 | 0,451192 | NA        |
| CTD-2119F7.2   | 25,28   | 0,28  | 0,370134 | 0,753382 | 0,451221 | 0,7753057 |
| LRRCC1         | 124,21  | 0,65  | 0,868965 | 0,753377 | 0,451223 | 0,7753057 |
| RP11-378I13.1  | 0,38    | -1,85 | 2,45344  | -0,75322 | 0,451315 | NA        |
| DCAF4          | 78,09   | 0,65  | 0,867235 | 0,753078 | 0,451403 | 0,7753455 |
| MROH2A         | 4,13    | 2,40  | 3,185318 | 0,753077 | 0,451403 | 0,7753455 |
| RP11-40C6.3    | 8,60    | 1,03  | 1,368935 | 0,753006 | 0,451446 | 0,7753455 |
| RPN1           | 1533,75 | -0,24 | 0,317925 | -0,75293 | 0,451493 | 0,7753455 |
| BANCR          | 6,44    | 1,36  | 1,801376 | 0,752907 | 0,451506 | 0,7753455 |
| MTHFD2L        | 173,99  | -0,40 | 0,532698 | -0,75289 | 0,451516 | 0,7753455 |
| REEP5          | 2150,18 | 0,28  | 0,368601 | 0,752853 | 0,451538 | 0,7753455 |
| CHAMP1         | 71,39   | -0,51 | 0,676074 | -0,75262 | 0,451681 | 0,7754963 |
| MICB           | 45,26   | 0,65  | 0,861687 | 0,752568 | 0,451709 | 0,7754963 |
| GLP1R          | 1,13    | 2,17  | 2,881588 | 0,752394 | 0,451814 | NA        |
| RPL10P1        | 1,08    | 0,99  | 1,313789 | 0,752371 | 0,451828 | NA        |
| C4orf19        | 93,94   | -0,63 | 0,838647 | -0,7522  | 0,451933 | 0,7758087 |
| SERPINB11      | 1,38    | 1,18  | 1,573201 | 0,752161 | 0,451954 | NA        |
| RP11-16E23.5   | 0,85    | 2,39  | 3,177982 | 0,752035 | 0,45203  | NA        |
| RP11-118H17.1  | 0,69    | 2,07  | 2,758239 | 0,752017 | 0,452041 | NA        |
| STAG3L3        | 218,51  | -0,35 | 0,470873 | -0,75184 | 0,452145 | 0,7761007 |
| RP11-317F20.3  | 12,94   | -1,18 | 1,565232 | -0,75166 | 0,452255 | 0,7761861 |
| RPS16P5        | 1,78    | 2,27  | 3,016128 | 0,751625 | 0,452277 | NA        |
| RP4-728D4.2    | 53,90   | -1,10 | 1,461937 | -0,75158 | 0,452304 | 0,7761861 |
| RP11-15B24.5   | 24,04   | -0,79 | 1,054957 | -0,75155 | 0,45232  | 0,7761861 |
| RP11-108P20.3  | 1,13    | 2,80  | 3,730358 | 0,751541 | 0,452327 | NA        |
| ITGB3          | 0,23    | -2,06 | 2,74639  | -0,75153 | 0,452336 | NA        |
| ZNF669         | 74,74   | -0,80 | 1,063484 | -0,75137 | 0,452431 | 0,7762456 |
| SCRN3          | 111,57  | -0,71 | 0,949245 | -0,75133 | 0,452456 | 0,7762456 |

|                |          |       |          |          |          |           |
|----------------|----------|-------|----------|----------|----------|-----------|
| RP1-20B21.4    | 70,13    | -0,30 | 0,393844 | -0,75123 | 0,452512 | 0,7762456 |
| NCALD          | 102,90   | 0,62  | 0,82305  | 0,751218 | 0,452521 | 0,7762456 |
| ASB1           | 115,52   | 0,79  | 1,045641 | 0,75105  | 0,452623 | 0,7763423 |
| RP11-73B2.6    | 1,13     | 2,78  | 3,699897 | 0,750987 | 0,452661 | NA        |
| AC005752.10    | 1,92     | 0,75  | 0,996006 | 0,750961 | 0,452676 | NA        |
| RP11-703G6.1   | 104,53   | -0,26 | 0,343825 | -0,75096 | 0,452676 | 0,7763423 |
| AC007349.5     | 3,71     | 2,07  | 2,755433 | 0,750948 | 0,452684 | NA        |
| CTD-2014B16.4  | 0,66     | -1,06 | 1,416907 | -0,75093 | 0,452695 | NA        |
| BRDT           | 6,68     | 1,08  | 1,436709 | 0,750917 | 0,452703 | 0,7763423 |
| MICAL1         | 1219,21  | -0,19 | 0,249767 | -0,75077 | 0,452792 | 0,7764228 |
| RP11-345M22.3  | 0,70     | 1,50  | 1,998128 | 0,750741 | 0,452808 | NA        |
| FXR2           | 97,87    | -0,69 | 0,918344 | -0,75062 | 0,452879 | 0,7765012 |
| ACTR10         | 297,91   | 0,50  | 0,661157 | 0,75018  | 0,453147 | 0,7768884 |
| RP13-516M14.8  | 68,83    | -0,63 | 0,840048 | -0,74987 | 0,453331 | 0,7771334 |
| AC007192.6     | 57,02    | -0,52 | 0,689429 | -0,74977 | 0,453395 | 0,777171  |
| RNU6-387P      | 1,10     | 2,78  | 3,70791  | 0,749747 | 0,453407 | NA        |
| RAD51C         | 173,92   | 0,47  | 0,625745 | 0,749349 | 0,453647 | 0,7774947 |
| PRRC2A         | 287,42   | 0,20  | 0,266203 | 0,749261 | 0,4537   | 0,7774947 |
| RP11-400F19.12 | 2,44     | 1,77  | 2,360708 | 0,749243 | 0,453711 | NA        |
| SCAF1          | 53,55    | 0,66  | 0,879183 | 0,749236 | 0,453715 | 0,7774947 |
| RP11-767N6.7   | 0,84     | 1,69  | 2,26109  | 0,749114 | 0,453788 | NA        |
| AC012307.3     | 73,38    | 0,53  | 0,702895 | 0,749102 | 0,453795 | 0,7774947 |
| TMC2           | 89,16    | -0,47 | 0,623829 | -0,74908 | 0,45381  | 0,7774947 |
| ZNF267         | 325,39   | 0,47  | 0,621401 | 0,749038 | 0,453835 | 0,7774947 |
| NFYC           | 561,17   | 0,42  | 0,563067 | 0,748713 | 0,45403  | 0,7777578 |
| RP11-96D1.9    | 0,68     | -2,74 | 3,661632 | -0,74857 | 0,454113 | NA        |
| RPL13A         | 24187,16 | -0,10 | 0,139957 | -0,74841 | 0,454213 | 0,7779989 |
| PITPNA         | 517,19   | -0,41 | 0,55025  | -0,74826 | 0,454302 | 0,7780804 |
| RPL13AP3       | 0,88     | -1,07 | 1,427538 | -0,74823 | 0,454322 | NA        |
| PDCD10         | 357,93   | -0,41 | 0,55058  | -0,74809 | 0,454408 | 0,77815   |
| KLK10          | 3,51     | -0,66 | 0,886991 | -0,74806 | 0,454425 | NA        |
| CKS1B          | 151,95   | -0,67 | 0,897722 | -0,74806 | 0,454426 | 0,77815   |
| CTD-3118D7.1   | 1,30     | -1,28 | 1,713028 | -0,74798 | 0,454474 | NA        |
| RN7SL688P      | 0,39     | -2,52 | 3,370514 | -0,74796 | 0,454484 | NA        |
| AC008592.8     | 4,40     | -0,80 | 1,06457  | -0,74795 | 0,454488 | 0,7781845 |
| AC005522.7     | 1,41     | 2,51  | 3,351721 | 0,74767  | 0,454659 | NA        |
| KCTD16         | 0,37     | -1,60 | 2,145594 | -0,74763 | 0,454686 | NA        |
| RPUSD3         | 210,25   | 0,47  | 0,634362 | 0,747492 | 0,454767 | 0,7784058 |
| TADA3          | 542,85   | 0,38  | 0,506499 | 0,747454 | 0,45479  | 0,7784058 |
| CTB-31020.6    | 1,12     | 2,79  | 3,730356 | 0,747452 | 0,454791 | NA        |
| PCGF6          | 30,79    | 0,74  | 0,987045 | 0,747446 | 0,454795 | 0,7784058 |
| RSG1           | 0,54     | 1,75  | 2,340703 | 0,74742  | 0,45481  | NA        |
| UBE2E3         | 251,71   | -0,45 | 0,596217 | -0,74737 | 0,454839 | 0,7784058 |
| RN7SL346P      | 1,68     | 1,70  | 2,277047 | 0,747294 | 0,454886 | NA        |
| STAP2          | 11,83    | 0,61  | 0,822775 | 0,747213 | 0,454935 | 0,7784058 |
| CTDSPL2        | 233,63   | -0,36 | 0,485795 | -0,74714 | 0,454979 | 0,7784058 |
| RP11-85K15.2   | 0,93     | -1,32 | 1,768051 | -0,7471  | 0,455002 | NA        |
| UTP3           | 128,35   | 0,54  | 0,72935  | 0,747003 | 0,455062 | 0,7784058 |
| CYLC2          | 4,56     | -1,35 | 1,811363 | -0,74698 | 0,455073 | 0,7784058 |
| HUWE1          | 598,35   | 0,35  | 0,475093 | 0,746926 | 0,455108 | 0,7784058 |

|               |        |       |          |          |          |           |
|---------------|--------|-------|----------|----------|----------|-----------|
| PTGS1         | 518,26 | -0,47 | 0,631055 | -0,74689 | 0,455133 | 0,7784058 |
| GZF1          | 415,79 | -0,56 | 0,750721 | -0,74682 | 0,45517  | 0,7784058 |
| HCN1          | 9,46   | -0,39 | 0,528557 | -0,74682 | 0,45517  | 0,7784058 |
| POR           | 633,17 | -0,33 | 0,443713 | -0,74681 | 0,455176 | 0,7784058 |
| RBM17         | 510,97 | 0,30  | 0,404438 | 0,746752 | 0,455213 | 0,7784058 |
| APOF          | 9,64   | 0,82  | 1,092706 | 0,746699 | 0,455245 | 0,7784058 |
| LUZP6         | 6,61   | 1,06  | 1,421852 | 0,746591 | 0,45531  | 0,7784462 |
| CTD-2324F15.2 | 9,75   | 0,76  | 1,013024 | 0,746371 | 0,455443 | 0,7784721 |
| AC004448.5    | 6,60   | 0,66  | 0,88162  | 0,746305 | 0,455483 | 0,7784721 |
| RP11-796I2.2  | 75,02  | -0,59 | 0,785609 | -0,74624 | 0,45552  | 0,7784721 |
| RP4-706G24.1  | 7,56   | -1,27 | 1,697263 | -0,74624 | 0,455523 | 0,7784721 |
| MKL2          | 116,73 | 0,57  | 0,770254 | 0,746168 | 0,455566 | 0,7784721 |
| AC013463.2    | 11,06  | -0,91 | 1,216042 | -0,74615 | 0,455577 | 0,7784721 |
| FUT3          | 3,18   | 1,26  | 1,68282  | 0,746103 | 0,455605 | NA        |
| ST6GALNAC3    | 8,21   | 1,51  | 2,020743 | 0,745991 | 0,455673 | 0,7785653 |
| POFUT1        | 113,86 | -0,63 | 0,847542 | -0,74585 | 0,45576  | 0,778642  |
| AC005740.5    | 1,02   | 1,44  | 1,935999 | 0,745757 | 0,455814 | NA        |
| OR6M1         | 0,54   | 1,77  | 2,376306 | 0,745658 | 0,455874 | NA        |
| RN7SL733P     | 1,88   | -1,43 | 1,921553 | -0,74558 | 0,455924 | NA        |
| SAP25         | 41,31  | -0,55 | 0,738424 | -0,74554 | 0,455943 | 0,7788843 |
| ZSCAN5A       | 33,49  | 0,79  | 1,054248 | 0,74544  | 0,456005 | 0,7789187 |
| L29074.1      | 5,34   | 0,43  | 0,574444 | 0,745307 | 0,456086 | 0,7789563 |
| SNIP1         | 228,43 | -0,53 | 0,707862 | -0,7451  | 0,45621  | 0,7789563 |
| GTF3C3        | 172,81 | -0,40 | 0,530437 | -0,74508 | 0,456224 | 0,7789563 |
| CCDC59        | 325,44 | 0,30  | 0,397461 | 0,745071 | 0,456229 | 0,7789563 |
| RP11-293G6.1  | 41,32  | -0,75 | 1,008545 | -0,74506 | 0,456237 | 0,7789563 |
| AC122129.3    | 1,11   | 2,77  | 3,723475 | 0,74488  | 0,456344 | NA        |
| ACOD1         | 0,84   | -2,60 | 3,48739  | -0,74483 | 0,456372 | NA        |
| ACAP1         | 522,77 | 0,31  | 0,414045 | 0,744731 | 0,456434 | 0,7792217 |
| C7orf50       | 770,15 | 0,31  | 0,418274 | 0,74454  | 0,45655  | 0,7792649 |
| CTC-451P13.1  | 4,76   | 0,50  | 0,669738 | 0,744525 | 0,456559 | 0,7792649 |
| RP11-73M18.6  | 0,76   | 1,57  | 2,108616 | 0,744485 | 0,456583 | NA        |
| B3GNT2        | 180,25 | 0,77  | 1,037667 | 0,744374 | 0,45665  | 0,7792649 |
| RP11-158C6.4  | 86,02  | -0,43 | 0,576574 | -0,74436 | 0,456659 | 0,7792649 |
| MLXIPL        | 8,77   | -0,55 | 0,742621 | -0,74434 | 0,456669 | 0,7792649 |
| CACNB1        | 17,81  | -1,18 | 1,579657 | -0,74422 | 0,456743 | 0,7793058 |
| GABRG1        | 1,12   | 2,78  | 3,730539 | 0,744206 | 0,456752 | NA        |
| ACTR3C        | 18,14  | 0,72  | 0,964897 | 0,744085 | 0,456825 | 0,7793058 |
| PSMG3         | 362,54 | 0,49  | 0,656848 | 0,74406  | 0,45684  | 0,7793058 |
| METTL23       | 299,35 | -0,51 | 0,692065 | -0,74398 | 0,456891 | 0,7793058 |
| CRTAM         | 40,06  | -0,79 | 1,055789 | -0,74396 | 0,456902 | 0,7793058 |
| RNU6-12P      | 0,82   | 2,35  | 3,159838 | 0,743936 | 0,456915 | NA        |
| RNU6-13P      | 0,82   | 2,35  | 3,159838 | 0,743936 | 0,456915 | NA        |
| RNU6-32P      | 0,82   | 2,35  | 3,159838 | 0,743936 | 0,456915 | NA        |
| RP11-748C4.1  | 37,96  | 0,76  | 1,022065 | 0,743885 | 0,456946 | 0,7793085 |
| RP11-756P10.3 | 0,54   | 1,77  | 2,373913 | 0,743824 | 0,456983 | NA        |
| BBS5          | 4,65   | -0,99 | 1,326651 | -0,74381 | 0,456992 | 0,7793158 |
| RP11-428J1.5  | 3,44   | -1,37 | 1,848672 | -0,74376 | 0,457025 | NA        |
| HAS2          | 1,44   | -0,89 | 1,200853 | -0,74373 | 0,45704  | NA        |
| TM9SF1        | 227,65 | -0,51 | 0,6911   | -0,74329 | 0,457304 | 0,7797759 |



|                |         |       |          |          |          |           |
|----------------|---------|-------|----------|----------|----------|-----------|
| ZNF91          | 188,38  | 0,40  | 0,538325 | 0,743188 | 0,457368 | 0,779814  |
| CAMK1G         | 0,35    | -2,74 | 3,681268 | -0,74307 | 0,45744  | NA        |
| CCDC189        | 56,44   | -1,09 | 1,473303 | -0,74301 | 0,457473 | 0,7798831 |
| RP11-197K6.1   | 22,95   | 0,85  | 1,148938 | 0,742982 | 0,457492 | 0,7798831 |
| RP11-423P10.2  | 262,52  | -0,32 | 0,430071 | -0,74289 | 0,457549 | 0,7799086 |
| RP11-242D8.3   | 1,14    | 1,61  | 2,163649 | 0,742812 | 0,457595 | NA        |
| RP11-39K24.8   | 3,43    | 1,29  | 1,741141 | 0,742613 | 0,457716 | NA        |
| RP11-2K6.1     | 0,64    | 1,34  | 1,800803 | 0,742569 | 0,457743 | NA        |
| AC068491.1     | 227,37  | -0,35 | 0,465149 | -0,74257 | 0,457743 | 0,7801036 |
| ZNF891         | 119,13  | -0,35 | 0,468129 | -0,74256 | 0,457747 | 0,7801036 |
| AC073869.17    | 0,24    | -2,74 | 3,687366 | -0,7425  | 0,457786 | NA        |
| G6PC           | 9,55    | -0,81 | 1,08717  | -0,74228 | 0,45792  | 0,7803258 |
| C9orf40        | 1,13    | -1,50 | 2,021413 | -0,74219 | 0,457973 | NA        |
| LA16c-349E10.1 | 14,34   | -0,90 | 1,215138 | -0,74211 | 0,458019 | 0,7804231 |
| CAAP1          | 116,46  | 0,52  | 0,702332 | 0,741921 | 0,458135 | 0,7805495 |
| SNRPA          | 320,08  | 0,28  | 0,377267 | 0,741846 | 0,458181 | 0,7805563 |
| RP5-890O3.9    | 0,61    | -1,95 | 2,62572  | -0,74178 | 0,458221 | NA        |
| RP1-128O3.4    | 1,11    | 1,51  | 2,039939 | 0,741751 | 0,458238 | NA        |
| CTB-151G24.1   | 8,07    | 1,07  | 1,446078 | 0,741646 | 0,458302 | 0,780649  |
| RN7SL371P      | 2,56    | -0,84 | 1,12776  | -0,74162 | 0,458318 | NA        |
| ZNF503         | 67,53   | 0,45  | 0,60903  | 0,741617 | 0,458319 | 0,780649  |
| ELMOD1         | 2,19    | -0,74 | 0,997094 | -0,74158 | 0,458344 | NA        |
| SHF            | 29,93   | 1,00  | 1,353488 | 0,741493 | 0,458395 | 0,780706  |
| AP005019.4     | 0,87    | 2,40  | 3,23706  | 0,74144  | 0,458427 | NA        |
| RP11-101C21.1  | 31,97   | -0,91 | 1,230592 | -0,74141 | 0,458447 | 0,7807245 |
| MRPS18A        | 627,16  | -0,50 | 0,676408 | -0,74118 | 0,458583 | 0,7808446 |
| IL12RB1        | 115,24  | -0,47 | 0,627576 | -0,74115 | 0,458602 | 0,7808446 |
| RN7SL789P      | 1,25    | 1,19  | 1,601106 | 0,741034 | 0,458673 | NA        |
| RP11-789C17.1  | 0,96    | -2,61 | 3,525626 | -0,74099 | 0,458699 | NA        |
| RMRP           | 3,21    | -0,87 | 1,178718 | -0,74094 | 0,458728 | NA        |
| RP4-545K15.5   | 0,29    | -2,73 | 3,683014 | -0,74084 | 0,458788 | NA        |
| GBAP1          | 39,14   | -1,42 | 1,91813  | -0,74084 | 0,458792 | 0,7810693 |
| CTD-2298J14.2  | 17,08   | -0,81 | 1,100202 | -0,74075 | 0,458848 | 0,7810693 |
| RP11-559M23.1  | 4,37    | 2,29  | 3,093712 | 0,740726 | 0,45886  | 0,7810693 |
| RP11-676J12.7  | 3,16    | 1,05  | 1,417025 | 0,740699 | 0,458876 | NA        |
| SRPK3          | 4,78    | -0,91 | 1,228692 | -0,74063 | 0,458919 | 0,7810981 |
| CTB-12A17.3    | 5,27    | -1,08 | 1,459576 | -0,74054 | 0,45897  | 0,7811145 |
| RP11-71G12.1   | 3,98    | 0,77  | 1,042847 | 0,740278 | 0,459131 | 0,7813169 |
| VRK3           | 422,25  | -0,44 | 0,59378  | -0,74019 | 0,459183 | 0,7813342 |
| DNAI1          | 1,07    | 2,76  | 3,731304 | 0,739917 | 0,45935  | NA        |
| AC018633.4     | 24,58   | -0,63 | 0,857687 | -0,73989 | 0,459368 | 0,7814633 |
| ADGRE4P        | 25,48   | 1,41  | 1,908223 | 0,739728 | 0,459465 | 0,7814633 |
| GTF3A          | 1466,43 | -0,25 | 0,3369   | -0,7397  | 0,45948  | 0,7814633 |
| ANKRD26        | 201,01  | 0,52  | 0,701301 | 0,739664 | 0,459504 | 0,7814633 |
| UFL1           | 418,49  | 0,35  | 0,472128 | 0,739661 | 0,459505 | 0,7814633 |
| RP11-722C17.1  | 2,52    | 0,52  | 0,704742 | 0,739614 | 0,459534 | NA        |
| DDX39A         | 994,88  | 0,22  | 0,29757  | 0,739592 | 0,459547 | 0,7814633 |
| ASXL2          | 504,85  | 0,42  | 0,572166 | 0,739546 | 0,459576 | 0,7814633 |
| KIAA0556       | 92,81   | 0,66  | 0,886018 | 0,739513 | 0,459595 | 0,7814633 |
| MAVS           | 334,09  | 0,33  | 0,445201 | 0,739386 | 0,459673 | 0,7815232 |

|                     |         |       |          |          |          |           |
|---------------------|---------|-------|----------|----------|----------|-----------|
| ZNF527              | 27,09   | -0,57 | 0,765199 | -0,73932 | 0,459715 | 0,7815246 |
| HCG4P5              | 0,69    | 1,48  | 2,00906  | 0,739139 | 0,459822 | NA        |
| CHEK2               | 111,96  | -0,51 | 0,686836 | -0,73897 | 0,459924 | 0,7818072 |
| SMNDC1              | 377,64  | 0,47  | 0,631085 | 0,738701 | 0,460089 | 0,7820162 |
| AP000240.6          | 12,30   | -1,31 | 1,772307 | -0,73855 | 0,460182 | 0,782103  |
| RP11-182E7.1        | 4,49    | -0,96 | 1,301133 | -0,73847 | 0,460232 | 0,7821164 |
| ALAD                | 156,46  | 0,59  | 0,795448 | 0,738285 | 0,460341 | 0,7822313 |
| C10orf31            | 136,50  | 0,50  | 0,681864 | 0,738121 | 0,460441 | 0,7823288 |
| PXDN                | 1,59    | 1,57  | 2,132986 | 0,73807  | 0,460472 | NA        |
| SEMA4G              | 0,53    | -2,71 | 3,672564 | -0,738   | 0,460512 | NA        |
| AC073333.8          | 0,69    | 2,06  | 2,794736 | 0,737946 | 0,460548 | NA        |
| RN7SL49P            | 1,79    | 1,13  | 1,525217 | 0,737892 | 0,46058  | NA        |
| ABC13-47488600E17.1 | 0,78    | -1,39 | 1,883932 | -0,73777 | 0,460657 | NA        |
| HNF4A               | 7,76    | -0,46 | 0,620372 | -0,73775 | 0,460668 | 0,7825605 |
| RP11-142A23.1       | 16,98   | 0,99  | 1,344195 | 0,737616 | 0,460748 | 0,7825605 |
| SLC41A3             | 58,67   | 0,54  | 0,73061  | 0,737586 | 0,460766 | 0,7825605 |
| RP11-23F23.1        | 0,58    | 1,79  | 2,429532 | 0,737578 | 0,460771 | NA        |
| EHMT1               | 512,30  | 0,41  | 0,561549 | 0,737523 | 0,460804 | 0,7825605 |
| CTD-3022G6.1        | 5,11    | 1,60  | 2,173208 | 0,737497 | 0,46082  | 0,7825605 |
| PSMC6               | 615,83  | -0,31 | 0,425256 | -0,73748 | 0,46083  | 0,7825605 |
| PFN2                | 16,49   | -1,01 | 1,368636 | -0,73736 | 0,460906 | 0,7825909 |
| MIR5095             | 0,95    | 1,28  | 1,740757 | 0,737349 | 0,46091  | NA        |
| ELP5                | 308,59  | -0,69 | 0,934418 | -0,73731 | 0,460932 | 0,7825909 |
| FBXO43              | 3,46    | 0,75  | 1,021294 | 0,737312 | 0,460932 | NA        |
| SRSF1               | 910,12  | -0,32 | 0,439409 | -0,73711 | 0,461057 | 0,7827005 |
| RP11-31L22.3        | 0,24    | -2,72 | 3,688073 | -0,73709 | 0,461066 | NA        |
| RRBP1               | 366,64  | 0,40  | 0,541808 | 0,737069 | 0,46108  | 0,7827005 |
| RP11-244H3.4        | 47,39   | -1,07 | 1,449101 | -0,737   | 0,461125 | 0,7827043 |
| RP11-1299A16.3      | 10,02   | -1,36 | 1,846978 | -0,73692 | 0,461171 | 0,7827121 |
| ZSCAN22             | 17,79   | -0,79 | 1,07759  | -0,73663 | 0,461347 | 0,7829399 |
| RP1-206D15.6        | 3,18    | 1,91  | 2,59103  | 0,736503 | 0,461425 | NA        |
| TPRA1               | 328,46  | 0,46  | 0,62034  | 0,736469 | 0,461445 | 0,7829448 |
| CTD-2540L5.3        | 1,07    | 2,75  | 3,730741 | 0,736454 | 0,461454 | NA        |
| RP11-364B6.2        | 0,55    | 1,79  | 2,435958 | 0,736422 | 0,461474 | NA        |
| RBAKDN              | 1,08    | 2,75  | 3,730721 | 0,736415 | 0,461478 | NA        |
| XXbac-BPG296P20.14  | 9,19    | -1,08 | 1,460834 | -0,73639 | 0,461496 | 0,7829448 |
| CTC-444N24.7        | 14,43   | 0,93  | 1,257599 | 0,736362 | 0,46151  | 0,7829448 |
| RP11-295D4.1        | 10,66   | -0,80 | 1,08901  | -0,73635 | 0,461519 | 0,7829448 |
| RP11-629E24.2       | 4,29    | 2,06  | 2,799623 | 0,736104 | 0,461668 | 0,7830274 |
| MYO9B               | 1254,06 | -0,30 | 0,402149 | -0,73607 | 0,461686 | 0,7830274 |
| RP11-588H7.1        | 6,66    | 0,67  | 0,905774 | 0,736061 | 0,461694 | 0,7830274 |
| RP11-402J7.2        | 0,26    | -2,06 | 2,801137 | -0,73598 | 0,461745 | NA        |
| GDF5OS              | 7,05    | -0,79 | 1,070782 | -0,73591 | 0,461784 | 0,783109  |
| RP13-297E16.4       | 14,60   | 0,84  | 1,142548 | 0,735805 | 0,461849 | 0,7831418 |
| SF3B2               | 1492,39 | -0,17 | 0,231022 | -0,73571 | 0,461906 | 0,7831418 |
| RP11-799P8.1        | 0,69    | -2,56 | 3,473578 | -0,73564 | 0,461953 | NA        |
| RP11-454P7.3        | 1,09    | 2,74  | 3,730781 | 0,735612 | 0,461967 | NA        |
| SSX5                | 6,11    | 1,04  | 1,413232 | 0,735558 | 0,462    | 0,7831418 |
| LRRC20              | 8,91    | 1,58  | 2,149657 | 0,735537 | 0,462013 | 0,7831418 |
| NXF1                | 1713,87 | -0,23 | 0,316254 | -0,73554 | 0,462014 | 0,7831418 |

|                |         |       |          |          |          |           |
|----------------|---------|-------|----------|----------|----------|-----------|
| HIST1H2AB      | 1,07    | 2,74  | 3,730762 | 0,735513 | 0,462027 | NA        |
| TAP1           | 1120,81 | -0,24 | 0,321359 | -0,73546 | 0,462056 | 0,7831429 |
| PARP1          | 750,86  | 0,28  | 0,387214 | 0,735312 | 0,462149 | 0,7831735 |
| MPDU1          | 427,39  | 0,44  | 0,604883 | 0,735277 | 0,462171 | 0,7831735 |
| AP000265.1     | 2,85    | 0,74  | 1,00826  | 0,735197 | 0,46222  | NA        |
| LDLR           | 316,95  | -0,30 | 0,41298  | -0,73517 | 0,462236 | 0,7831735 |
| DFFB           | 85,52   | 0,58  | 0,785973 | 0,735159 | 0,462243 | 0,7831735 |
| CH507-236L23.3 | 2,72    | -1,52 | 2,070325 | -0,73513 | 0,462259 | NA        |
| CH507-338C24.3 | 2,72    | -1,52 | 2,070325 | -0,73513 | 0,462259 | NA        |
| CH507-39O4.3   | 2,72    | -1,52 | 2,070325 | -0,73513 | 0,462259 | NA        |
| CTC-448F2.7    | 118,36  | -0,47 | 0,637238 | -0,73503 | 0,462321 | 0,7832351 |
| RP11-108P2.1   | 0,65    | 2,00  | 2,714647 | 0,73494  | 0,462376 | NA        |
| AC097500.2     | 7,16    | -1,18 | 1,603465 | -0,73488 | 0,462412 | 0,7832544 |
| RP11-124B7.1   | 9,28    | -0,48 | 0,655066 | -0,73486 | 0,462424 | 0,7832544 |
| RP11-168J18.6  | 0,52    | 1,72  | 2,340858 | 0,734796 | 0,462464 | NA        |
| RP11-144G6.12  | 96,34   | -0,76 | 1,03264  | -0,73479 | 0,462467 | 0,7832544 |
| RBP5           | 4,58    | -1,98 | 2,70121  | -0,73473 | 0,462501 | 0,7832544 |
| DGCR8          | 149,56  | 0,49  | 0,668193 | 0,734537 | 0,462621 | 0,7833298 |
| RPS6KA5        | 559,31  | 0,50  | 0,676689 | 0,734413 | 0,462697 | 0,7833298 |
| RAP1GAP2       | 176,35  | 0,60  | 0,811169 | 0,734402 | 0,462704 | 0,7833298 |
| ATG101         | 341,96  | -0,47 | 0,645573 | -0,73434 | 0,462739 | 0,7833298 |
| SHCBP1L        | 0,76    | -1,40 | 1,900009 | -0,73434 | 0,462744 | NA        |
| CAMTA2         | 175,28  | -0,59 | 0,809863 | -0,73432 | 0,462756 | 0,7833298 |
| CH17-118O6.6   | 0,86    | -1,95 | 2,652888 | -0,73423 | 0,462811 | NA        |
| RP11-204C23.1  | 0,68    | -0,97 | 1,321892 | -0,73394 | 0,462987 | NA        |
| RBM7           | 388,31  | -0,51 | 0,692172 | -0,73387 | 0,463026 | 0,7836492 |
| RP11-1376P16.1 | 14,48   | 0,55  | 0,747549 | 0,733836 | 0,463049 | 0,7836492 |
| RP11-235G24.1  | 1,06    | 2,74  | 3,730914 | 0,73382  | 0,463058 | NA        |
| SEC22B         | 721,14  | -0,32 | 0,43091  | -0,73374 | 0,463106 | 0,7836492 |
| ZNF703         | 119,64  | -0,50 | 0,685633 | -0,73354 | 0,463227 | 0,7836492 |
| RP11-75L1.2    | 49,86   | -1,06 | 1,449705 | -0,73353 | 0,463235 | 0,7836492 |
| RP11-179A10.2  | 1,31    | -0,64 | 0,878999 | -0,73353 | 0,463236 | NA        |
| AC138430.4     | 9,93    | -0,67 | 0,91887  | -0,73353 | 0,463237 | 0,7836492 |
| CFAP74         | 23,38   | -0,38 | 0,518636 | -0,73352 | 0,46324  | 0,7836492 |
| AC002066.1     | 0,63    | 2,01  | 2,735358 | 0,733507 | 0,463249 | NA        |
| PTCD3          | 635,43  | 0,43  | 0,580937 | 0,733439 | 0,463291 | 0,7836646 |
| ANAPC13        | 506,90  | 0,43  | 0,588173 | 0,733222 | 0,463423 | 0,7838169 |
| IGSF6          | 3244,25 | -0,16 | 0,213084 | -0,73314 | 0,463476 | 0,7838352 |
| RP11-67A1.2    | 2,20    | -1,09 | 1,486527 | -0,73307 | 0,463514 | NA        |
| CTA-293F17.1   | 1,06    | 2,72  | 3,71481  | 0,733022 | 0,463545 | NA        |
| RASAL2         | 69,91   | -0,79 | 1,076108 | -0,73297 | 0,463576 | 0,7839329 |
| RP11-379B18.5  | 44,68   | -0,47 | 0,63501  | -0,73288 | 0,463629 | 0,783952  |
| LAMB3          | 7,81    | -1,51 | 2,059752 | -0,73281 | 0,463671 | 0,783952  |
| OTUD3          | 145,80  | -0,75 | 1,017987 | -0,73268 | 0,463756 | 0,7839878 |
| NOTCH2         | 1895,22 | -0,28 | 0,377453 | -0,73259 | 0,463809 | 0,7839878 |
| GHDC           | 81,38   | 0,47  | 0,643953 | 0,732411 | 0,463918 | 0,7839878 |
| BMP7           | 4,07    | 0,92  | 1,260444 | 0,732406 | 0,463921 | 0,7839878 |
| AC006262.5     | 7,27    | -0,68 | 0,928085 | -0,73237 | 0,463943 | 0,7839878 |
| RP11-849F2.5   | 23,30   | -1,23 | 1,680098 | -0,73231 | 0,463979 | 0,7839878 |
| B4GALNT2       | 172,81  | -0,43 | 0,593467 | -0,73223 | 0,464029 | 0,7839878 |

|                  |         |       |          |          |          |           |
|------------------|---------|-------|----------|----------|----------|-----------|
| CTD-2245F17.3    | 56,13   | 0,83  | 1,139048 | 0,73218  | 0,464059 | 0,7839878 |
| CLK1             | 2522,67 | 0,18  | 0,246992 | 0,732158 | 0,464072 | 0,7839878 |
| ZIM3             | 1,25    | -0,81 | 1,111723 | -0,73206 | 0,464132 | NA        |
| TBC1D3H          | 1,11    | 2,12  | 2,901748 | 0,731957 | 0,464195 | NA        |
| RP11-61O11.1     | 3,34    | -0,92 | 1,259817 | -0,73188 | 0,464244 | NA        |
| POP7             | 197,27  | 0,57  | 0,777771 | 0,731851 | 0,464259 | 0,7842331 |
| IFI44            | 1750,15 | -0,52 | 0,713992 | -0,73176 | 0,464314 | 0,7842343 |
| WDR81            | 358,36  | 0,50  | 0,686453 | 0,731712 | 0,464344 | 0,7842343 |
| SURF4            | 728,00  | -0,32 | 0,436424 | -0,73153 | 0,464456 | 0,7843518 |
| RP11-506F3.1     | 0,79    | 2,30  | 3,144115 | 0,731416 | 0,464525 | NA        |
| DOCK11           | 847,78  | 0,29  | 0,39332  | 0,731397 | 0,464537 | 0,784417  |
| SIRT3            | 131,38  | 0,80  | 1,089222 | 0,731293 | 0,4646   | 0,7844533 |
| LINGO2           | 0,23    | -2,70 | 3,689073 | -0,73127 | 0,464614 | NA        |
| RP11-61K12.2     | 0,20    | -2,04 | 2,784322 | -0,73124 | 0,464635 | NA        |
| PREP             | 176,05  | -0,56 | 0,77182  | -0,73106 | 0,464743 | 0,7846113 |
| RP11-383F6.1     | 8,61    | 0,83  | 1,132023 | 0,730993 | 0,464783 | 0,7846113 |
| RP13-46G5.4      | 2,21    | 1,23  | 1,683682 | 0,730882 | 0,464851 | NA        |
| CNOT3            | 45,35   | -0,54 | 0,740591 | -0,73086 | 0,464863 | 0,7846113 |
| ZNF75D           | 109,65  | 0,73  | 0,993659 | 0,730863 | 0,464863 | 0,7846113 |
| MIR7851          | 1,89    | -0,72 | 0,987556 | -0,73076 | 0,464928 | NA        |
| RP3-323N1.2      | 100,54  | 0,88  | 1,199362 | 0,730692 | 0,464967 | 0,7847164 |
| RP11-432J24.3    | 0,63    | 1,98  | 2,707138 | 0,730581 | 0,465035 | NA        |
| AC068718.1       | 0,61    | 1,24  | 1,700422 | 0,730493 | 0,465089 | NA        |
| TBXA2R           | 8,37    | -0,57 | 0,774876 | -0,73049 | 0,465092 | 0,7848402 |
| RP5-1063M23.2    | 1,07    | 2,73  | 3,730904 | 0,730456 | 0,465112 | NA        |
| GBP2             | 622,94  | -0,38 | 0,523451 | -0,73041 | 0,465142 | 0,7848402 |
| RP5-1103G7.10    | 4,55    | -0,59 | 0,809994 | -0,73036 | 0,465173 | 0,7848402 |
| CLDN18           | 2,40    | 1,22  | 1,677262 | 0,73032  | 0,465195 | NA        |
| SLC35E1          | 546,50  | -0,37 | 0,506305 | -0,7303  | 0,465209 | 0,7848402 |
| SNHG5            | 1082,59 | 0,24  | 0,322072 | 0,730211 | 0,465261 | 0,784857  |
| MT1E             | 7,95    | -1,23 | 1,684036 | -0,73002 | 0,465379 | 0,7849615 |
| LLOXNC01-116E7.2 | 0,86    | -1,39 | 1,897472 | -0,72995 | 0,465421 | NA        |
| GPN2             | 237,96  | 0,77  | 1,050444 | 0,729938 | 0,465428 | 0,7849615 |
| RP1-155G6.4      | 3,36    | 0,90  | 1,236353 | 0,729917 | 0,465441 | NA        |
| FLNA             | 2622,71 | -0,14 | 0,191022 | -0,72987 | 0,465472 | 0,7849615 |
| SEC24C           | 163,20  | -0,70 | 0,952877 | -0,72983 | 0,465492 | 0,7849615 |
| KCNE3            | 270,52  | -0,47 | 0,642867 | -0,72966 | 0,465598 | 0,7849824 |
| AC011380.8       | 4,30    | -1,17 | 1,598097 | -0,72959 | 0,465639 | 0,7849824 |
| C14orf23         | 55,84   | -0,68 | 0,928704 | -0,72956 | 0,465659 | 0,7849824 |
| RP11-641D5.1     | 5,27    | -1,28 | 1,755503 | -0,72954 | 0,465673 | 0,7849824 |
| SUGCT            | 0,50    | -2,50 | 3,425815 | -0,72953 | 0,465676 | NA        |
| CYHR1            | 455,22  | -0,38 | 0,517516 | -0,72943 | 0,465739 | 0,7850225 |
| HN1L             | 68,31   | 0,67  | 0,919226 | 0,729241 | 0,465855 | 0,7851203 |
| RN7SL786P        | 0,91    | -0,90 | 1,233835 | -0,72923 | 0,465858 | NA        |
| ZC3HAV1L         | 7,44    | 0,57  | 0,784434 | 0,729103 | 0,465939 | 0,7851203 |
| NHS              | 54,45   | -0,86 | 1,181304 | -0,72908 | 0,465954 | 0,7851203 |
| RPP14            | 186,48  | -0,44 | 0,60449  | -0,72904 | 0,465975 | 0,7851203 |
| AL121652.3       | 1,06    | 2,72  | 3,73093  | 0,729013 | 0,465994 | NA        |
| AFAP1            | 15,15   | 0,56  | 0,771024 | 0,728989 | 0,466008 | 0,7851203 |
| RP11-342K6.2     | 2,64    | -1,03 | 1,409396 | -0,72878 | 0,466135 | NA        |

|                |         |       |          |          |          |           |
|----------------|---------|-------|----------|----------|----------|-----------|
| RP11-5106.1    | 1,21    | -0,72 | 0,994815 | -0,72878 | 0,466139 | NA        |
| DBI            | 1532,44 | 0,19  | 0,262557 | 0,728758 | 0,46615  | 0,7852816 |
| RP11-39201.4   | 1,07    | 2,72  | 3,730838 | 0,728757 | 0,46615  | NA        |
| YTHDF2         | 741,80  | 0,27  | 0,368521 | 0,728695 | 0,466188 | 0,7852816 |
| RP11-326A13.3  | 1,06    | 2,71  | 3,722757 | 0,728661 | 0,466209 | NA        |
| CBWD2          | 582,98  | -0,25 | 0,345479 | -0,72814 | 0,466527 | 0,7857512 |
| TGFBI          | 2008,03 | 0,20  | 0,277798 | 0,72808  | 0,466564 | 0,7857512 |
| SLC36A4        | 158,97  | -0,52 | 0,720378 | -0,72803 | 0,466594 | 0,7857512 |
| IGHV3-30       | 0,43    | -1,57 | 2,159355 | -0,72797 | 0,466631 | NA        |
| CTD-3116E22.8  | 0,64    | 1,99  | 2,731131 | 0,727971 | 0,466631 | NA        |
| GBGT1          | 65,02   | -0,78 | 1,077231 | -0,72793 | 0,466655 | 0,7857631 |
| RP11-838N2.4   | 53,17   | -0,54 | 0,741898 | -0,72788 | 0,466685 | 0,7857631 |
| NPR3           | 15,57   | -0,79 | 1,081289 | -0,72773 | 0,46678  | 0,7857919 |
| TRPM4          | 101,10  | -0,56 | 0,763835 | -0,72772 | 0,466787 | 0,7857919 |
| RP11-707P20.1  | 0,55    | -1,88 | 2,581742 | -0,72755 | 0,466889 | NA        |
| SERAC1         | 107,55  | 0,46  | 0,637186 | 0,727544 | 0,466893 | 0,7858988 |
| CTD-2527I21.14 | 7,78    | -0,61 | 0,841026 | -0,72742 | 0,46697  | 0,7859582 |
| EMC9           | 58,54   | 0,86  | 1,189336 | 0,727258 | 0,467068 | 0,7860519 |
| CTA-747E2.11   | 7,63    | -0,48 | 0,654813 | -0,72712 | 0,467152 | 0,7861223 |
| RP11-319G9.1   | 3,01    | 1,86  | 2,551425 | 0,727094 | 0,467168 | NA        |
| ZNF318         | 482,69  | -0,58 | 0,804237 | -0,72702 | 0,467213 | 0,7861533 |
| MRFAP1         | 1492,19 | 0,29  | 0,392287 | 0,726913 | 0,467279 | 0,7861933 |
| GPR19          | 3,10    | 2,11  | 2,904365 | 0,726845 | 0,467321 | NA        |
| MMP11          | 1,27    | 1,62  | 2,224654 | 0,726766 | 0,467369 | NA        |
| RP11-315A17.1  | 1,92    | 0,97  | 1,335394 | 0,726758 | 0,467374 | NA        |
| MIR1285-1      | 0,62    | 1,96  | 2,691016 | 0,726628 | 0,467454 | NA        |
| SMN2           | 303,23  | 0,33  | 0,452265 | 0,726543 | 0,467506 | 0,786504  |
| FASLG          | 7,32    | 0,90  | 1,244144 | 0,726411 | 0,467587 | 0,7865694 |
| DNM1P46        | 17,25   | -0,63 | 0,866569 | -0,72623 | 0,467696 | 0,7866806 |
| PIGC           | 162,63  | 0,52  | 0,716516 | 0,726165 | 0,467738 | 0,7866806 |
| RP11-571M6.17  | 0,77    | -1,65 | 2,279054 | -0,72603 | 0,46782  | NA        |
| RP11-557L19.1  | 9,69    | 1,14  | 1,571689 | 0,725983 | 0,467849 | 0,7866917 |
| NUCB1          | 215,38  | -0,41 | 0,562488 | -0,72591 | 0,467892 | 0,7866917 |
| HN1            | 655,63  | -0,30 | 0,417225 | -0,72588 | 0,467911 | 0,7866917 |
| CTD-2320J21.1  | 1,07    | 2,71  | 3,730877 | 0,725845 | 0,467934 | NA        |
| AC136289.1     | 5,45    | -0,60 | 0,829601 | -0,72582 | 0,467947 | 0,7866917 |
| KRT26          | 0,82    | -1,51 | 2,07898  | -0,72581 | 0,467955 | NA        |
| GIT2           | 1062,89 | 0,29  | 0,397337 | 0,725809 | 0,467956 | 0,7866917 |
| RP5-945F2.2    | 1,05    | 2,71  | 3,730953 | 0,725787 | 0,46797  | NA        |
| RP3-466I7.1    | 0,77    | -2,20 | 3,0363   | -0,72568 | 0,468034 | NA        |
| NT5DC1         | 358,67  | 0,64  | 0,88288  | 0,725536 | 0,468124 | 0,786895  |
| RP11-493G17.4  | 1,05    | 2,70  | 3,718959 | 0,725498 | 0,468147 | NA        |
| EBLN2          | 140,25  | -0,72 | 0,995867 | -0,72543 | 0,468187 | 0,786895  |
| AC024560.3     | 112,85  | -0,51 | 0,702953 | -0,72541 | 0,468204 | 0,786895  |
| RP11-138I1.3   | 9,20    | -0,64 | 0,878246 | -0,72532 | 0,468256 | 0,7869126 |
| RP11-669M16.2  | 0,53    | -1,09 | 1,501778 | -0,72529 | 0,468276 | NA        |
| AC034228.4     | 1,04    | 2,71  | 3,731051 | 0,725159 | 0,468355 | NA        |
| MIR497HG       | 16,40   | -0,76 | 1,048196 | -0,7251  | 0,468392 | 0,7870701 |
| CLDN23         | 0,87    | 1,81  | 2,491178 | 0,725021 | 0,468439 | NA        |
| BEGAIN         | 9,79    | -1,15 | 1,588569 | -0,725   | 0,468452 | 0,7870986 |

|                |          |       |          |          |          |           |
|----------------|----------|-------|----------|----------|----------|-----------|
| CTA-215D11.6   | 12,07    | -0,56 | 0,778991 | -0,7248  | 0,468575 | 0,7872355 |
| RP11-1149O23.1 | 0,67     | -0,96 | 1,319204 | -0,72472 | 0,468627 | NA        |
| NME3           | 450,65   | -0,38 | 0,528411 | -0,72456 | 0,468722 | 0,7874109 |
| RP1-137K2.2    | 1,07     | 2,70  | 3,730944 | 0,72447  | 0,468777 | NA        |
| BCO2           | 51,36    | 0,72  | 0,998841 | 0,724345 | 0,468854 | 0,7874531 |
| GOLGA5         | 196,79   | -0,55 | 0,755629 | -0,72433 | 0,468864 | 0,7874531 |
| CRIP1          | 119,93   | -0,61 | 0,848629 | -0,72431 | 0,468874 | 0,7874531 |
| RP11-392P7.2   | 3,79     | -0,48 | 0,658792 | -0,72423 | 0,468925 | 0,7874666 |
| CTD-3222D19.11 | 1,33     | -1,43 | 1,974623 | -0,72417 | 0,468963 | NA        |
| RP11-495K9.2   | 0,70     | -2,65 | 3,662706 | -0,72415 | 0,468974 | NA        |
| ALDH1L1        | 15,65    | 0,86  | 1,186323 | 0,723894 | 0,469131 | 0,7877183 |
| MIR644A        | 16,05    | 1,36  | 1,875484 | 0,723797 | 0,469191 | 0,7877183 |
| COIL           | 142,73   | -0,42 | 0,582643 | -0,72374 | 0,469225 | 0,7877183 |
| AC011933.2     | 21,61    | -0,73 | 1,005641 | -0,72368 | 0,469263 | 0,7877183 |
| UPK1A          | 2,08     | -0,78 | 1,078801 | -0,72363 | 0,469295 | NA        |
| ELMO1          | 964,56   | 0,29  | 0,402071 | 0,723495 | 0,469376 | 0,7877183 |
| ARSG           | 172,45   | -0,31 | 0,430429 | -0,72347 | 0,469388 | 0,7877183 |
| ZBTB34         | 87,00    | -0,70 | 0,968376 | -0,7234  | 0,469432 | 0,7877183 |
| GAA            | 737,19   | 0,30  | 0,418872 | 0,723403 | 0,469432 | 0,7877183 |
| CTB-50L17.14   | 15,11    | 0,69  | 0,958698 | 0,723357 | 0,46946  | 0,7877183 |
| AC126365.4     | 3,70     | 0,63  | 0,864203 | 0,723349 | 0,469465 | NA        |
| RP11-57H12.5   | 0,47     | -2,08 | 2,879394 | -0,72327 | 0,469512 | NA        |
| RP11-207C11.2  | 0,51     | -1,17 | 1,622916 | -0,72327 | 0,469514 | NA        |
| FAM46A         | 907,17   | 0,40  | 0,552866 | 0,723231 | 0,469538 | 0,7877183 |
| MLXIP          | 938,81   | -0,27 | 0,375446 | -0,72323 | 0,46954  | 0,7877183 |
| RN7SL65P       | 1,06     | 2,70  | 3,731068 | 0,723129 | 0,469601 | NA        |
| RN7SL685P      | 0,75     | -1,71 | 2,360517 | -0,72306 | 0,469642 | NA        |
| ACOXL          | 13,32    | 0,54  | 0,744727 | 0,723048 | 0,469651 | 0,7878323 |
| AP000560.3     | 40,15    | -0,63 | 0,86759  | -0,72282 | 0,469791 | 0,7879469 |
| SAT1           | 18310,40 | 0,17  | 0,234429 | 0,722799 | 0,469804 | 0,7879469 |
| RP11-814E24.3  | 1,05     | 2,70  | 3,731129 | 0,722378 | 0,470062 | NA        |
| CRNKL1         | 156,01   | 0,50  | 0,694035 | 0,722354 | 0,470077 | 0,7881266 |
| RN7SL731P      | 5,11     | -1,00 | 1,386247 | -0,72214 | 0,470207 | 0,7881266 |
| IGKJ1          | 0,70     | 1,45  | 2,012559 | 0,722069 | 0,470252 | NA        |
| PON3           | 4,22     | 1,60  | 2,219244 | 0,722015 | 0,470285 | 0,7881266 |
| SMIM11A        | 22,02    | -1,00 | 1,384872 | -0,72201 | 0,470287 | 0,7881266 |
| KHDRBS1        | 1132,07  | -0,18 | 0,249929 | -0,72192 | 0,470345 | 0,7881266 |
| AP006621.8     | 0,84     | -1,92 | 2,664399 | -0,72189 | 0,470362 | NA        |
| RPL30          | 4662,13  | -0,11 | 0,153415 | -0,72181 | 0,470412 | 0,7881266 |
| RQCD1          | 1103,85  | 0,33  | 0,458793 | 0,721797 | 0,470419 | 0,7881266 |
| CLIC1          | 8766,97  | 0,14  | 0,188558 | 0,721752 | 0,470447 | 0,7881266 |
| PGAP1          | 56,81    | 0,81  | 1,127095 | 0,721663 | 0,470502 | 0,7881266 |
| PRDM5          | 60,18    | -0,44 | 0,607185 | -0,72166 | 0,470504 | 0,7881266 |
| TMEM71         | 451,67   | 0,40  | 0,55494  | 0,721636 | 0,470518 | 0,7881266 |
| PSMD6          | 664,24   | 0,44  | 0,603516 | 0,72159  | 0,470547 | 0,7881266 |
| COPS7B         | 118,39   | -0,52 | 0,72356  | -0,72156 | 0,470564 | 0,7881266 |
| CH507-254M2.4  | 0,65     | 1,99  | 2,75194  | 0,721434 | 0,470643 | NA        |
| ZNF689         | 78,62    | -0,85 | 1,179648 | -0,72132 | 0,470715 | 0,7881266 |
| RP11-139E24.1  | 33,89    | -0,58 | 0,807193 | -0,72132 | 0,470716 | 0,7881266 |
| AC073464.10    | 32,35    | -0,89 | 1,227171 | -0,72129 | 0,470733 | 0,7881266 |

|               |         |       |          |          |          |           |
|---------------|---------|-------|----------|----------|----------|-----------|
| GABRG3        | 5,32    | -0,82 | 1,142441 | -0,72127 | 0,470743 | 0,7881266 |
| RP11-758H9.2  | 48,54   | -0,93 | 1,289451 | -0,72127 | 0,470745 | 0,7881266 |
| CD58          | 601,20  | -0,39 | 0,544772 | -0,72126 | 0,470752 | 0,7881266 |
| RP11-16P20.4  | 1,38    | -0,86 | 1,190996 | -0,72125 | 0,470754 | NA        |
| CTD-2296D1.5  | 10,88   | -0,54 | 0,750422 | -0,72108 | 0,470858 | 0,7881266 |
| DDX11L2       | 1,41    | 1,92  | 2,655871 | 0,721067 | 0,470868 | NA        |
| SPN           | 263,97  | -0,35 | 0,483179 | -0,72106 | 0,470872 | 0,7881266 |
| HSP90AA1      | 6424,07 | 0,16  | 0,217411 | 0,720999 | 0,47091  | 0,7881266 |
| RP11-122C9.1  | 7,59    | 0,56  | 0,778716 | 0,720973 | 0,470926 | 0,7881266 |
| TEN1-CDK3     | 20,21   | -0,53 | 0,739652 | -0,72096 | 0,470935 | 0,7881266 |
| NDUFB10       | 1119,21 | -0,16 | 0,227166 | -0,7209  | 0,47097  | 0,7881266 |
| TOGARAM2      | 77,77   | 0,37  | 0,520059 | 0,720722 | 0,471081 | 0,7882341 |
| LRRC36        | 14,39   | 0,74  | 1,02024  | 0,720597 | 0,471158 | 0,7882341 |
| RPF2          | 291,14  | -0,58 | 0,808497 | -0,72059 | 0,471161 | 0,7882341 |
| LIPH          | 9,21    | -0,94 | 1,301425 | -0,72045 | 0,471246 | 0,7882459 |
| RP1-292L20.3  | 0,80    | 2,29  | 3,181084 | 0,720452 | 0,471247 | NA        |
| GPS1          | 658,95  | -0,24 | 0,338737 | -0,72044 | 0,471253 | 0,7882459 |
| RP11-475I24.3 | 1,04    | 2,69  | 3,731131 | 0,720138 | 0,47144  | NA        |
| EIF4G3        | 862,90  | 0,40  | 0,548658 | 0,720112 | 0,471456 | 0,7882609 |
| CHCHD2        | 2859,53 | 0,18  | 0,245177 | 0,720063 | 0,471486 | 0,7882609 |
| ZBTB32        | 0,76    | -2,15 | 2,980069 | -0,72003 | 0,471504 | NA        |
| CTC-329H14.4  | 44,93   | -0,70 | 0,96526  | -0,72002 | 0,471516 | 0,7882609 |
| JMJD1C        | 2520,22 | 0,20  | 0,272106 | 0,719992 | 0,47153  | 0,7882609 |
| RP11-123O10.1 | 9,25    | 1,10  | 1,52936  | 0,719986 | 0,471534 | 0,7882609 |
| MAN1A2        | 643,50  | 0,38  | 0,527164 | 0,719974 | 0,471541 | 0,7882609 |
| RELL1         | 104,98  | 0,58  | 0,80555  | 0,719909 | 0,471581 | 0,7882609 |
| RP11-622O11.4 | 1,10    | 1,55  | 2,152264 | 0,719904 | 0,471584 | NA        |
| ZNF286B       | 32,71   | -0,56 | 0,777458 | -0,71988 | 0,471601 | 0,7882609 |
| FAM180B       | 2,24    | -0,89 | 1,239158 | -0,7198  | 0,471645 | NA        |
| RP11-401L13.2 | 0,23    | -2,66 | 3,690745 | -0,71971 | 0,471703 | NA        |
| PCOLCE2       | 0,92    | 1,82  | 2,527781 | 0,719484 | 0,471842 | NA        |
| EXOSC7        | 428,44  | -0,50 | 0,700734 | -0,71944 | 0,471872 | 0,7886421 |
| EIF3D         | 2229,57 | 0,25  | 0,348071 | 0,719341 | 0,471931 | 0,7886421 |
| PRDM16        | 4,55    | 0,76  | 1,051298 | 0,71926  | 0,471981 | 0,7886421 |
| ACO25918.2    | 0,44    | 1,50  | 2,079538 | 0,719236 | 0,471996 | NA        |
| COL10A1       | 1,83    | 1,47  | 2,043133 | 0,719235 | 0,471996 | NA        |
| ARHGEF3       | 169,44  | 0,52  | 0,728435 | 0,719231 | 0,471998 | 0,7886421 |
| ICOS          | 1,60    | -2,04 | 2,834866 | -0,71912 | 0,472064 | NA        |
| RP11-199F11.2 | 1,32    | -0,78 | 1,08612  | -0,71912 | 0,472069 | NA        |
| RP11-479O17.9 | 1,04    | 2,68  | 3,731211 | 0,719115 | 0,47207  | NA        |
| ZSWIM8        | 265,84  | 0,32  | 0,45165  | 0,719091 | 0,472085 | 0,7887159 |
| RP11-134L10.1 | 1,32    | 2,39  | 3,328555 | 0,718948 | 0,472173 | NA        |
| SULT1A4       | 406,65  | -0,66 | 0,924325 | -0,71894 | 0,472175 | 0,7887227 |
| PAXB1P1       | 474,67  | -0,38 | 0,534892 | -0,71888 | 0,472216 | 0,7887227 |
| ANKRD17       | 682,50  | -0,34 | 0,467899 | -0,71877 | 0,472285 | 0,7887227 |
| SC5D          | 139,03  | 0,75  | 1,040975 | 0,71859  | 0,472393 | 0,7887227 |
| RP11-162D16.2 | 23,38   | -0,73 | 1,01882  | -0,71852 | 0,472436 | 0,7887227 |
| RP11-660M5.1  | 16,62   | 1,38  | 1,920929 | 0,718371 | 0,472529 | 0,7887227 |
| LONRF1        | 196,53  | 0,53  | 0,744323 | 0,718369 | 0,47253  | 0,7887227 |
| SASH3         | 866,29  | 0,36  | 0,507532 | 0,718359 | 0,472536 | 0,7887227 |

|                 |          |       |          |          |          |           |
|-----------------|----------|-------|----------|----------|----------|-----------|
| CTD-2049O4.1    | 2,21     | -0,76 | 1,057503 | -0,71831 | 0,472567 | NA        |
| ZNF540          | 11,42    | -0,65 | 0,906178 | -0,71828 | 0,472582 | 0,7887227 |
| ZFP82           | 53,49    | 0,47  | 0,658491 | 0,718251 | 0,472603 | 0,7887227 |
| ELAVL1          | 423,90   | -0,30 | 0,419582 | -0,71822 | 0,472623 | 0,7887227 |
| EPRS            | 850,51   | 0,38  | 0,532042 | 0,718214 | 0,472625 | 0,7887227 |
| ZNF202          | 37,93    | -1,03 | 1,440997 | -0,71819 | 0,47264  | 0,7887227 |
| AC132008.1      | 1,04     | 2,68  | 3,731238 | 0,718061 | 0,472719 | NA        |
| RP11-218F10.3   | 15,39    | 0,83  | 1,150032 | 0,717996 | 0,47276  | 0,7888018 |
| VMP1            | 1504,79  | -0,24 | 0,32751  | -0,71798 | 0,472772 | 0,7888018 |
| GLRA2           | 0,93     | -1,66 | 2,314175 | -0,71785 | 0,472849 | NA        |
| PDE12           | 238,76   | -0,44 | 0,609423 | -0,71774 | 0,47292  | 0,7889455 |
| RP11-390M11.1   | 3,93     | -0,78 | 1,083264 | -0,7177  | 0,472943 | 0,7889455 |
| RN7SL91P        | 2,46     | -1,06 | 1,483973 | -0,71766 | 0,472967 | NA        |
| IGLV3-21        | 1,39     | 1,43  | 1,991483 | 0,71762  | 0,472992 | NA        |
| ALPI            | 0,23     | -2,65 | 3,693478 | -0,71757 | 0,473024 | NA        |
| HEMGN           | 15,83    | 0,58  | 0,811205 | 0,717567 | 0,473024 | 0,7890068 |
| CTD-3032J10.4   | 1,64     | -1,05 | 1,458432 | -0,71752 | 0,473055 | NA        |
| CDC20           | 1,78     | 2,00  | 2,783715 | 0,717485 | 0,473075 | NA        |
| AKNA            | 1192,28  | 0,28  | 0,389359 | 0,717448 | 0,473098 | 0,7890068 |
| GBP1            | 879,56   | 0,30  | 0,422264 | 0,717433 | 0,473107 | 0,7890068 |
| SYNGAP1         | 1,20     | 1,11  | 1,545032 | 0,717323 | 0,473175 | NA        |
| GRID2IP         | 0,88     | -2,53 | 3,52376  | -0,71731 | 0,473182 | NA        |
| PHPT1           | 681,98   | -0,21 | 0,293844 | -0,71729 | 0,473197 | 0,789056  |
| POU5F1P3        | 1,03     | 2,68  | 3,731249 | 0,717272 | 0,473206 | NA        |
| PRIMPOL         | 77,62    | 0,76  | 1,054168 | 0,717247 | 0,473222 | 0,789056  |
| RP11-132M7.3    | 2,00     | -1,19 | 1,653278 | -0,71724 | 0,473224 | NA        |
| SMIM16          | 2,01     | 0,85  | 1,182839 | 0,717232 | 0,473231 | NA        |
| RP1-41C23.1     | 1,34     | 0,95  | 1,328956 | 0,717038 | 0,473351 | NA        |
| AC021224.1      | 0,69     | -1,30 | 1,811578 | -0,71704 | 0,473351 | NA        |
| COMMD6          | 497,02   | -0,19 | 0,259778 | -0,71701 | 0,473368 | 0,7891434 |
| SIRPA           | 941,46   | 0,27  | 0,375171 | 0,716999 | 0,473375 | 0,7891434 |
| RP11-231E4.5    | 4,47     | 1,56  | 2,172    | 0,716956 | 0,473401 | 0,7891434 |
| HIST1H4F        | 1,25     | 2,35  | 3,281971 | 0,716948 | 0,473406 | NA        |
| RP11-550A5.2    | 26,56    | 0,72  | 1,011384 | 0,716801 | 0,473497 | 0,7892317 |
| GCSAML-AS1      | 1,00     | 2,65  | 3,691196 | 0,7168   | 0,473497 | NA        |
| AC072062.1      | 175,32   | -0,43 | 0,59827  | -0,71671 | 0,473555 | 0,7892592 |
| AC001226.7      | 0,31     | -2,41 | 3,362481 | -0,71665 | 0,473592 | NA        |
| RP11-467L19.6   | 1,03     | 2,67  | 3,731276 | 0,716625 | 0,473606 | NA        |
| CCNK            | 309,46   | -0,37 | 0,519434 | -0,71661 | 0,473614 | 0,7892851 |
| AC137932.6      | 2,91     | 1,55  | 2,156861 | 0,7164   | 0,473744 | NA        |
| RP11-266I3.1    | 4,26     | -0,66 | 0,924511 | -0,7164  | 0,473746 | 0,7893455 |
| SCNN1G          | 7,51     | 0,64  | 0,899583 | 0,716284 | 0,473816 | 0,7893455 |
| XXbac-B135H6.15 | 31,59    | -1,03 | 1,435979 | -0,71625 | 0,473839 | 0,7893455 |
| CCDC27          | 4,09     | -0,63 | 0,88259  | -0,71623 | 0,473852 | 0,7893455 |
| PIP5KL1         | 7,15     | 0,69  | 0,960285 | 0,71621  | 0,473862 | 0,7893455 |
| RP11-72M14.1    | 88,41    | -0,75 | 1,043196 | -0,71611 | 0,473926 | 0,7893822 |
| U91328.21       | 6,67     | 1,01  | 1,405188 | 0,715994 | 0,473995 | 0,789389  |
| IFI30           | 16819,90 | 0,14  | 0,192687 | 0,715945 | 0,474025 | 0,789389  |
| SCML1           | 130,61   | -0,52 | 0,732381 | -0,71579 | 0,474124 | 0,789389  |
| RP4-777D9.2     | 10,94    | -0,73 | 1,021033 | -0,71571 | 0,474171 | 0,789389  |



|               |         |       |          |          |          |           |
|---------------|---------|-------|----------|----------|----------|-----------|
| RP11-630A13.4 | 26,93   | 0,30  | 0,422865 | 0,715698 | 0,474178 | 0,789389  |
| HSD17B8       | 71,28   | 0,97  | 1,354865 | 0,715682 | 0,474188 | 0,789389  |
| RP11-157E16.1 | 1,03    | -1,74 | 2,426851 | -0,71563 | 0,47422  | NA        |
| RP11-221J22.2 | 15,01   | -1,20 | 1,675904 | -0,71562 | 0,474228 | 0,789389  |
| FBRSL1        | 116,26  | 0,46  | 0,646038 | 0,715549 | 0,47427  | 0,789389  |
| RP11-568J23.4 | 0,96    | -1,16 | 1,615486 | -0,71548 | 0,47431  | NA        |
| RNU4-2        | 9,52    | -0,44 | 0,620088 | -0,71545 | 0,474332 | 0,7894224 |
| ELF3          | 69,31   | 0,69  | 0,966752 | 0,715318 | 0,474413 | 0,7894858 |
| ZNF320S2      | 1,62    | 2,13  | 2,979309 | 0,71531  | 0,474417 | NA        |
| RP11-3P17.3   | 1,25    | 1,68  | 2,355727 | 0,715239 | 0,474462 | NA        |
| HCK           | 2239,04 | 0,18  | 0,257331 | 0,715114 | 0,474538 | 0,7896015 |
| NDE1          | 194,40  | -0,42 | 0,5849   | -0,71507 | 0,474567 | 0,7896015 |
| AC087430.1    | 15,12   | 0,71  | 0,98718  | 0,714905 | 0,474668 | 0,7896576 |
| CDKN2B        | 2,73    | 2,45  | 3,423593 | 0,714869 | 0,47469  | NA        |
| C12orf79      | 56,65   | -0,57 | 0,796667 | -0,71485 | 0,474703 | 0,7896576 |
| ZNF334        | 8,57    | 1,18  | 1,648817 | 0,714807 | 0,474728 | 0,7896576 |
| TYRO3P        | 1,24    | -1,96 | 2,737145 | -0,71467 | 0,474816 | NA        |
| RP11-281P23.2 | 1,39    | -1,81 | 2,526265 | -0,71457 | 0,474874 | NA        |
| AAR2          | 335,44  | 0,53  | 0,744512 | 0,714361 | 0,475004 | 0,789964  |
| KDM2B         | 554,69  | 0,37  | 0,52082  | 0,714354 | 0,475008 | 0,789964  |
| RP11-278C7.3  | 2,66    | -0,75 | 1,055458 | -0,71435 | 0,475013 | NA        |
| ST3GAL1       | 352,40  | -0,40 | 0,561905 | -0,71426 | 0,475069 | 0,789964  |
| KLRC1         | 7,95    | -0,78 | 1,086136 | -0,71423 | 0,475082 | 0,789964  |
| RP1-168L15.5  | 33,38   | 0,54  | 0,751444 | 0,714051 | 0,475196 | 0,7900071 |
| TNFSF13       | 1244,52 | 0,45  | 0,625845 | 0,714049 | 0,475197 | 0,7900071 |
| RP4-669L17.4  | 40,31   | -0,45 | 0,635684 | -0,71394 | 0,475262 | 0,7900071 |
| HLA-J         | 18,74   | -0,42 | 0,594133 | -0,7139  | 0,475289 | 0,7900071 |
| PNMA1         | 80,91   | -1,31 | 1,835235 | -0,71381 | 0,475346 | 0,7900071 |
| RP11-483I13.6 | 5,68    | 1,07  | 1,501256 | 0,71372  | 0,4754   | 0,7900071 |
| RP11-182L21.5 | 97,76   | 0,61  | 0,85155  | 0,713578 | 0,475488 | 0,7900071 |
| ZHX1-C8orf76  | 38,68   | -1,16 | 1,63112  | -0,71353 | 0,475519 | 0,7900071 |
| RP11-1143G9.5 | 49,97   | -0,54 | 0,761023 | -0,71347 | 0,475555 | 0,7900071 |
| AC007879.5    | 42,54   | -0,53 | 0,749587 | -0,71345 | 0,475569 | 0,7900071 |
| ICE1          | 548,54  | -0,41 | 0,581548 | -0,71344 | 0,475575 | 0,7900071 |
| RP11-290L1.3  | 0,99    | 2,63  | 3,684899 | 0,713377 | 0,475613 | NA        |
| RP1-297M16.2  | 0,77    | 1,60  | 2,243048 | 0,713298 | 0,475661 | NA        |
| RP11-297C4.1  | 2,53    | -0,79 | 1,106108 | -0,71328 | 0,475673 | NA        |
| BCL2A1        | 563,89  | 0,42  | 0,59461  | 0,713211 | 0,475715 | 0,7900474 |
| GLCE          | 185,26  | 0,73  | 1,027108 | 0,713203 | 0,47572  | 0,7900474 |
| C12orf61      | 19,77   | -0,92 | 1,288291 | -0,71318 | 0,475734 | 0,7900474 |
| OR10H1        | 25,08   | -0,49 | 0,692378 | -0,71312 | 0,475769 | 0,7900474 |
| ZNF625        | 14,15   | 0,71  | 0,994311 | 0,713016 | 0,475836 | 0,7900867 |
| RP5-943J3.1   | 1,02    | 2,66  | 3,731392 | 0,712878 | 0,475921 | NA        |
| SLC16A6       | 98,18   | -0,51 | 0,714969 | -0,71284 | 0,475946 | 0,790112  |
| FES           | 1646,75 | 0,27  | 0,382783 | 0,712806 | 0,475966 | 0,790112  |
| MUTYH         | 55,64   | 0,63  | 0,882333 | 0,712786 | 0,475978 | 0,790112  |
| AC012363.12   | 1,88    | 1,28  | 1,799888 | 0,712705 | 0,476028 | NA        |
| PNLIPRP3      | 1,03    | 2,66  | 3,731394 | 0,712667 | 0,476052 | NA        |
| RP11-884K10.7 | 18,59   | 0,94  | 1,316403 | 0,712582 | 0,476105 | 0,7901347 |
| SLC22A18      | 223,13  | -0,46 | 0,641295 | -0,71254 | 0,476132 | 0,7901347 |

|                |         |       |          |          |          |           |
|----------------|---------|-------|----------|----------|----------|-----------|
| ZNF695         | 57,96   | -0,97 | 1,359744 | -0,71249 | 0,476161 | 0,7901347 |
| CKAP2L         | 15,12   | 0,93  | 1,300276 | 0,71244  | 0,476192 | 0,7901347 |
| PQLC2          | 151,59  | 0,60  | 0,845013 | 0,712329 | 0,476261 | 0,7901347 |
| CTD-3128G10.6  | 3,24    | -0,99 | 1,386335 | -0,71226 | 0,476302 | NA        |
| RP11-337C18.10 | 0,81    | -2,18 | 3,056125 | -0,71222 | 0,476327 | NA        |
| PPP1R21        | 332,96  | -0,46 | 0,651053 | -0,71221 | 0,476338 | 0,7901347 |
| RP11-485M7.1   | 1,02    | 2,04  | 2,871236 | 0,712204 | 0,476339 | NA        |
| RP11-347C12.3  | 42,16   | 0,64  | 0,896733 | 0,712182 | 0,476352 | 0,7901347 |
| RP11-290F5.1   | 12,74   | 1,05  | 1,467844 | 0,712142 | 0,476377 | 0,7901347 |
| RP11-567J20.2  | 4,39    | -0,98 | 1,370858 | -0,71211 | 0,476399 | 0,7901347 |
| CH17-258A22.4  | 46,04   | 0,63  | 0,878296 | 0,711989 | 0,476472 | 0,7901347 |
| MPST           | 511,92  | 0,35  | 0,496593 | 0,711985 | 0,476474 | 0,7901347 |
| MRPS21         | 551,44  | -0,26 | 0,360782 | -0,71194 | 0,476502 | 0,7901347 |
| NAT14          | 15,50   | -1,41 | 1,983619 | -0,71186 | 0,47655  | 0,7901442 |
| PIGL           | 131,04  | -0,69 | 0,974087 | -0,71169 | 0,476655 | 0,7902486 |
| RPS12P21       | 1,00    | 2,64  | 3,707714 | 0,71168  | 0,476663 | NA        |
| SENP2          | 234,29  | -0,46 | 0,650428 | -0,71145 | 0,476803 | 0,790423  |
| RP11-394O4.3   | 1,36    | -1,18 | 1,662553 | -0,71135 | 0,476865 | NA        |
| NECTIN2        | 41,58   | -0,70 | 0,982196 | -0,71135 | 0,476867 | 0,7904584 |
| SLC39A11       | 711,91  | 0,35  | 0,486742 | 0,711216 | 0,476951 | 0,7905271 |
| OR4E2          | 3,25    | -0,95 | 1,339382 | -0,71117 | 0,47698  | NA        |
| RP11-304C12.5  | 2,23    | 1,80  | 2,534503 | 0,711078 | 0,477036 | NA        |
| BCLAF1         | 2701,64 | 0,12  | 0,174129 | 0,71106  | 0,477047 | 0,7905941 |
| AC009120.6     | 127,87  | 0,65  | 0,917215 | 0,710939 | 0,477122 | 0,7905941 |
| THYN1          | 335,55  | -0,43 | 0,598246 | -0,71084 | 0,477186 | 0,7905941 |
| SDR42E2        | 15,09   | -0,75 | 1,059574 | -0,71083 | 0,477192 | 0,7905941 |
| INTS3          | 328,08  | -0,42 | 0,591835 | -0,71081 | 0,477204 | 0,7905941 |
| RP11-1057N3.2  | 1,54    | 2,65  | 3,728021 | 0,710802 | 0,477207 | NA        |
| RP11-492E3.2   | 5,07    | -0,82 | 1,148631 | -0,71071 | 0,477267 | 0,7906282 |
| CTD-2319I12.2  | 30,45   | -0,58 | 0,819065 | -0,71063 | 0,477313 | 0,7906345 |
| RP11-145P16.2  | 78,43   | -0,33 | 0,468454 | -0,71047 | 0,477411 | 0,790655  |
| MLLT1          | 131,34  | -0,59 | 0,833971 | -0,71041 | 0,477448 | 0,790655  |
| SIVA1          | 844,55  | -0,28 | 0,388723 | -0,71041 | 0,477453 | 0,790655  |
| ZNF295-AS1     | 0,99    | 2,63  | 3,705564 | 0,710398 | 0,477457 | NA        |
| Z69666.2       | 4,88    | 0,71  | 0,994575 | 0,710283 | 0,477528 | 0,79071   |
| CTD-3064M3.7   | 1,66    | 2,13  | 3,005352 | 0,710262 | 0,477541 | NA        |
| MNS1           | 3,51    | -1,30 | 1,825595 | -0,7102  | 0,477578 | NA        |
| CCDC64B        | 1,22    | -1,30 | 1,82479  | -0,71019 | 0,477588 | NA        |
| KLF7           | 342,44  | 0,68  | 0,953314 | 0,71018  | 0,477592 | 0,7907274 |
| UAP1L1         | 154,36  | 0,70  | 0,980913 | 0,710129 | 0,477624 | 0,7907274 |
| SCAMP5         | 4,40    | -0,76 | 1,064538 | -0,70986 | 0,477794 | 0,7908468 |
| SLC25A12       | 63,93   | 0,75  | 1,051206 | 0,709836 | 0,477806 | 0,7908468 |
| FBLN2          | 75,49   | 0,84  | 1,180031 | 0,709807 | 0,477824 | 0,7908468 |
| CNNM1          | 0,55    | 1,06  | 1,490435 | 0,70979  | 0,477834 | NA        |
| MRPL50         | 98,85   | -0,87 | 1,223696 | -0,7097  | 0,477889 | 0,7908843 |
| AC073133.1     | 1,18    | 1,00  | 1,41366  | 0,709648 | 0,477922 | NA        |
| ARHGAP35       | 246,13  | 0,58  | 0,810866 | 0,709599 | 0,477953 | 0,7909194 |
| NR1I3          | 16,80   | -0,40 | 0,565173 | -0,70941 | 0,478071 | 0,7910445 |
| ANKS1B         | 93,39   | -0,41 | 0,579939 | -0,70931 | 0,47813  | 0,791073  |
| RP11-548H3.1   | 1,26    | 2,36  | 3,325945 | 0,709121 | 0,478249 | NA        |

|                |         |       |          |          |          |           |
|----------------|---------|-------|----------|----------|----------|-----------|
| AC005154.7     | 11,14   | -1,36 | 1,913064 | -0,70908 | 0,478274 | 0,7912408 |
| SPP1           | 2,31    | -1,71 | 2,409848 | -0,70904 | 0,478299 | NA        |
| HCAR2          | 242,65  | -0,79 | 1,108476 | -0,70901 | 0,47832  | 0,7912456 |
| FCGR2A         | 1679,82 | 0,27  | 0,3789   | 0,708899 | 0,478387 | 0,7912864 |
| CTD-2340E1.2   | 0,98    | -1,03 | 1,451712 | -0,70887 | 0,478403 | NA        |
| PLEKHA6        | 15,95   | 0,83  | 1,1676   | 0,708793 | 0,478453 | 0,7913249 |
| ATMIN          | 417,87  | 0,59  | 0,838278 | 0,708647 | 0,478543 | 0,7913861 |
| RP11-446N19.1  | 9,21    | -0,75 | 1,052998 | -0,7086  | 0,478575 | 0,7913861 |
| RP11-75C10.9   | 0,61    | 1,95  | 2,746387 | 0,708566 | 0,478594 | NA        |
| CACNB4         | 66,78   | 0,35  | 0,498832 | 0,708324 | 0,478744 | 0,7914162 |
| TRGC2          | 11,65   | -1,80 | 2,543525 | -0,70832 | 0,478749 | 0,7914162 |
| SAP18          | 1304,68 | 0,18  | 0,251946 | 0,708296 | 0,478762 | 0,7914162 |
| RP11-617F23.2  | 46,72   | 0,62  | 0,874229 | 0,708293 | 0,478763 | 0,7914162 |
| CTD-2537I9.16  | 1,00    | 2,64  | 3,7315   | 0,708218 | 0,47881  | NA        |
| TMEM186        | 16,69   | 0,74  | 1,043389 | 0,708185 | 0,47883  | 0,791457  |
| RP11-433M22.1  | 1,27    | -1,46 | 2,058226 | -0,70816 | 0,478847 | NA        |
| GYS1           | 291,96  | 0,49  | 0,686896 | 0,708026 | 0,478929 | 0,7915495 |
| WDR33          | 700,17  | 0,48  | 0,682482 | 0,707956 | 0,478973 | 0,7915514 |
| GNGT1          | 0,53    | -2,03 | 2,866143 | -0,70784 | 0,479046 | NA        |
| MAGEC1         | 0,23    | -2,61 | 3,682167 | -0,70779 | 0,479074 | NA        |
| RP11-454F8.4   | 5,35    | -0,73 | 1,028358 | -0,7077  | 0,47913  | 0,7916795 |
| LDLRAP1        | 100,48  | 0,72  | 1,020172 | 0,707694 | 0,479135 | 0,7916795 |
| RNVU1-2        | 0,30    | -2,61 | 3,687179 | -0,70759 | 0,479201 | NA        |
| RP5-1165K10.2  | 0,59    | 1,88  | 2,663587 | 0,707495 | 0,479259 | NA        |
| C2orf15        | 9,89    | -0,61 | 0,858854 | -0,70742 | 0,479307 | 0,7916904 |
| AC000068.5     | 37,67   | -0,92 | 1,293917 | -0,7074  | 0,479315 | 0,7916904 |
| RP11-542C10.1  | 0,72    | -1,19 | 1,681019 | -0,70736 | 0,479342 | NA        |
| AC073263.4     | 1,72    | 2,16  | 3,060556 | 0,707265 | 0,479402 | NA        |
| CPT2           | 161,87  | 0,44  | 0,621024 | 0,707237 | 0,479419 | 0,7916904 |
| TIMM9          | 207,68  | 0,46  | 0,64991  | 0,707187 | 0,479451 | 0,7916904 |
| ZNF821         | 11,88   | -0,94 | 1,323059 | -0,70703 | 0,479546 | 0,7916904 |
| RP11-91K8.1    | 6,66    | -0,96 | 1,360532 | -0,70702 | 0,479553 | 0,7916904 |
| C2CD2L         | 227,85  | 0,35  | 0,501179 | 0,706857 | 0,479655 | 0,7916904 |
| FCHSD1         | 117,11  | 0,46  | 0,65656  | 0,706855 | 0,479656 | 0,7916904 |
| RP11-723D22.3  | 5,70    | 0,51  | 0,718356 | 0,706842 | 0,479665 | 0,7916904 |
| CNOT6          | 407,41  | 0,42  | 0,600005 | 0,706816 | 0,479681 | 0,7916904 |
| LMAN1          | 324,95  | 0,53  | 0,748269 | 0,706779 | 0,479704 | 0,7916904 |
| SH2D3A         | 47,37   | -0,36 | 0,509981 | -0,70672 | 0,47974  | 0,7916904 |
| RP11-2H8.4     | 95,23   | -0,69 | 0,970471 | -0,70667 | 0,47977  | 0,7916904 |
| AC009499.1     | 2,59    | 0,84  | 1,182374 | 0,706642 | 0,479789 | NA        |
| RP11-206L10.11 | 205,25  | 0,78  | 1,106972 | 0,706558 | 0,479841 | 0,7916904 |
| RP11-134P9.1   | 21,39   | 0,81  | 1,147963 | 0,706496 | 0,47988  | 0,7916904 |
| NMI            | 707,39  | 0,29  | 0,415872 | 0,706471 | 0,479896 | 0,7916904 |
| OR4K8P         | 1,01    | 2,64  | 3,731552 | 0,706393 | 0,479944 | NA        |
| SLC44A1        | 451,98  | 0,42  | 0,597641 | 0,706369 | 0,479958 | 0,7916904 |
| MEIS3          | 5,12    | 0,88  | 1,245171 | 0,706361 | 0,479964 | 0,7916904 |
| RBM4B          | 98,47   | -0,62 | 0,880039 | -0,70635 | 0,47997  | 0,7916904 |
| TOM1           | 440,02  | -0,32 | 0,458303 | -0,70631 | 0,479993 | 0,7916904 |
| AC004987.7     | 29,66   | -0,77 | 1,094442 | -0,70616 | 0,48009  | 0,7917799 |
| SERINC1        | 906,27  | -0,30 | 0,427201 | -0,70604 | 0,480164 | 0,7918326 |

|               |         |       |          |          |          |           |
|---------------|---------|-------|----------|----------|----------|-----------|
| RP11-1055B8.2 | 2,03    | 1,58  | 2,234575 | 0,706032 | 0,480168 | NA        |
| CTD-2196E14.9 | 29,65   | -0,56 | 0,791994 | -0,70581 | 0,480305 | 0,7919251 |
| THAP11        | 177,72  | 0,60  | 0,85648  | 0,705811 | 0,480305 | 0,7919251 |
| NPAP1P2       | 0,79    | -1,21 | 1,714896 | -0,70568 | 0,480386 | NA        |
| RPS26P8       | 1,01    | 2,05  | 2,905831 | 0,705609 | 0,480431 | NA        |
| TBC1D10C      | 254,67  | 0,47  | 0,67264  | 0,705602 | 0,480436 | 0,7919402 |
| DRC3          | 41,99   | 0,60  | 0,850494 | 0,705542 | 0,480473 | 0,7919402 |
| AC005616.2    | 6,05    | -0,75 | 1,056292 | -0,70552 | 0,480484 | 0,7919402 |
| TMEM14EP      | 37,01   | 0,83  | 1,179665 | 0,705523 | 0,480485 | 0,7919402 |
| SAMD5         | 8,13    | -0,43 | 0,610706 | -0,70534 | 0,480596 | 0,7919915 |
| ATP9A         | 4,50    | -0,90 | 1,271253 | -0,70533 | 0,480605 | 0,7919915 |
| ZNF767        | 174,43  | -0,68 | 0,967489 | -0,70521 | 0,480679 | 0,7919915 |
| CCDC12        | 874,34  | -0,22 | 0,311547 | -0,7052  | 0,480686 | 0,7919915 |
| INTS13        | 86,13   | -0,72 | 1,019849 | -0,70511 | 0,480739 | 0,7920084 |
| RP11-259K5.3  | 14,25   | 0,94  | 1,327021 | 0,705045 | 0,480782 | 0,7920092 |
| GREM2         | 2,90    | 1,04  | 1,471012 | 0,704884 | 0,480882 | NA        |
| RP5-1068E13.3 | 96,21   | 0,41  | 0,584164 | 0,704704 | 0,480994 | 0,7922272 |
| BACE1         | 20,66   | 0,82  | 1,162413 | 0,704696 | 0,481    | 0,7922272 |
| USP17L6P      | 0,22    | -2,60 | 3,692435 | -0,70469 | 0,481003 | NA        |
| RN7SL356P     | 0,65    | -1,44 | 2,044643 | -0,70468 | 0,481012 | NA        |
| KCNH8         | 1,05    | 2,09  | 2,966788 | 0,70453  | 0,481103 | NA        |
| CRABP2        | 0,59    | 1,87  | 2,649138 | 0,704467 | 0,481142 | NA        |
| RP5-849H19.2  | 0,72    | -2,48 | 3,521827 | -0,70437 | 0,481203 | NA        |
| CCDC74A       | 1,21    | 1,24  | 1,753756 | 0,704335 | 0,481224 | NA        |
| CYCS          | 1327,33 | 0,27  | 0,384687 | 0,704322 | 0,481232 | 0,7924977 |
| CPLX4         | 1,73    | -0,92 | 1,300182 | -0,70426 | 0,481272 | NA        |
| CATSPERD      | 4,43    | -1,64 | 2,326772 | -0,70423 | 0,481291 | 0,7924977 |
| GOLGA8T       | 1,02    | 2,63  | 3,732093 | 0,704217 | 0,481298 | NA        |
| RP11-91P24.5  | 10,73   | -0,84 | 1,187995 | -0,70419 | 0,481313 | 0,7924977 |
| ACADL         | 1,52    | -1,17 | 1,65506  | -0,70415 | 0,481338 | NA        |
| FBN3          | 5,17    | -1,81 | 2,572705 | -0,70415 | 0,481342 | 0,7924977 |
| NANOS1        | 4,02    | 0,60  | 0,855725 | 0,704066 | 0,481391 | 0,7924977 |
| KLK7          | 2,31    | 0,71  | 1,013006 | 0,704046 | 0,481404 | NA        |
| RP1-74B13.2   | 10,79   | -0,56 | 0,793704 | -0,70402 | 0,481422 | 0,7924977 |
| IFITM3        | 3718,93 | -0,40 | 0,571866 | -0,70392 | 0,481484 | 0,7924977 |
| AC018647.3    | 2,22    | -1,13 | 1,612157 | -0,7039  | 0,481498 | NA        |
| POLDIP2       | 340,15  | 0,46  | 0,654454 | 0,703777 | 0,481572 | 0,7924977 |
| RP11-314B1.1  | 18,04   | -0,98 | 1,394762 | -0,70376 | 0,481582 | 0,7924977 |
| RP11-3B12.1   | 106,42  | -0,50 | 0,717042 | -0,70375 | 0,48159  | 0,7924977 |
| RP11-90D4.5   | 2,01    | -1,10 | 1,560322 | -0,70373 | 0,481599 | NA        |
| MIR4477A      | 0,75    | 2,23  | 3,16619  | 0,703627 | 0,481665 | NA        |
| TLE2          | 2,29    | 0,98  | 1,392865 | 0,703531 | 0,481725 | NA        |
| RP11-632K5.5  | 5,22    | -0,71 | 1,006347 | -0,70343 | 0,481787 | 0,7926849 |
| CDC123        | 579,84  | 0,43  | 0,608404 | 0,703383 | 0,481817 | 0,7926849 |
| GIMAP5        | 77,92   | -1,15 | 1,630937 | -0,70323 | 0,481915 | 0,7926849 |
| XX-CR54.1     | 13,47   | 0,98  | 1,386902 | 0,703198 | 0,481932 | 0,7926849 |
| RIOX1         | 37,20   | 0,72  | 1,029453 | 0,703188 | 0,481939 | 0,7926849 |
| SRSF9         | 686,26  | 0,32  | 0,457971 | 0,703155 | 0,481959 | 0,7926849 |
| AMT           | 90,22   | -0,65 | 0,9183   | -0,70298 | 0,482071 | 0,7927988 |
| RP11-723P16.2 | 0,99    | 2,62  | 3,731678 | 0,702951 | 0,482086 | NA        |

|               |         |       |          |          |          |           |
|---------------|---------|-------|----------|----------|----------|-----------|
| CSF1          | 0,50    | 1,64  | 2,334409 | 0,702902 | 0,482117 | NA        |
| CYTH4         | 784,33  | -0,31 | 0,444932 | -0,70286 | 0,482146 | 0,7928518 |
| SIGLEC14      | 283,25  | 0,33  | 0,475305 | 0,702655 | 0,482271 | 0,7929263 |
| GTF2A2        | 719,12  | 0,29  | 0,406344 | 0,702646 | 0,482276 | 0,7929263 |
| CTB-27N1.1    | 0,51    | -2,57 | 3,664641 | -0,70258 | 0,482316 | NA        |
| RP11-392P7.1  | 0,43    | 1,45  | 2,070083 | 0,70258  | 0,482317 | NA        |
| RP11-231D20.1 | 0,98    | 1,37  | 1,949437 | 0,702541 | 0,482342 | NA        |
| ZNF385B       | 2,65    | 1,94  | 2,760677 | 0,702509 | 0,482362 | NA        |
| RP11-608O21.1 | 1,01    | 1,41  | 2,013653 | 0,702492 | 0,482372 | NA        |
| QSOX2         | 66,34   | 0,72  | 1,020642 | 0,70236  | 0,482454 | 0,7931489 |
| AC114730.7    | 0,53    | -1,77 | 2,517577 | -0,70234 | 0,482464 | NA        |
| IL17RD        | 6,93    | -0,61 | 0,872465 | -0,70219 | 0,482559 | 0,7931978 |
| RP11-356D23.3 | 24,33   | -1,00 | 1,424029 | -0,70212 | 0,482607 | 0,7931978 |
| RP4-723E3.1   | 49,53   | -0,73 | 1,033498 | -0,70211 | 0,482612 | 0,7931978 |
| MAGIX         | 27,75   | 0,74  | 1,056284 | 0,701943 | 0,482715 | 0,7932966 |
| JAKMIP2-AS1   | 0,54    | 1,66  | 2,360987 | 0,701672 | 0,482884 | NA        |
| LINC01374     | 0,98    | 2,61  | 3,719092 | 0,701627 | 0,482912 | NA        |
| RPL3P2        | 0,82    | 0,94  | 1,344804 | 0,701624 | 0,482914 | NA        |
| ZBED6CL       | 0,87    | 1,80  | 2,572077 | 0,701511 | 0,482984 | NA        |
| RF00015       | 2,18    | -1,21 | 1,725493 | -0,7015  | 0,482991 | NA        |
| CCNL2         | 1023,72 | -0,26 | 0,367358 | -0,70149 | 0,482998 | 0,7936882 |
| DHRS4         | 367,62  | 0,39  | 0,551993 | 0,701424 | 0,483039 | 0,7936882 |
| RP11-334E6.10 | 1,53    | -1,00 | 1,430473 | -0,70132 | 0,483102 | NA        |
| TM4SF19       | 1,42    | -0,80 | 1,147039 | -0,70129 | 0,483123 | NA        |
| RP11-27K13.3  | 1,03    | 2,62  | 3,731173 | 0,701192 | 0,483183 | NA        |
| CTB-66B24.1   | 0,86    | -1,88 | 2,683668 | -0,70116 | 0,483206 | NA        |
| L1TD1         | 2,48    | 1,16  | 1,652815 | 0,701123 | 0,483226 | NA        |
| TSKU          | 39,64   | -0,73 | 1,042606 | -0,7011  | 0,483237 | 0,7938973 |
| GPR21         | 5,64    | 1,00  | 1,419674 | 0,701083 | 0,483251 | 0,7938973 |
| C7orf25       | 1,21    | 2,05  | 2,928185 | 0,700961 | 0,483327 | NA        |
| RP11-126L15.4 | 0,22    | -2,59 | 3,692805 | -0,70071 | 0,483484 | NA        |
| MTRF1         | 85,42   | 0,60  | 0,860564 | 0,700534 | 0,483594 | 0,7943693 |
| MPP7          | 414,18  | -0,38 | 0,541294 | -0,70049 | 0,483624 | 0,7943693 |
| AC104820.2    | 132,82  | 0,63  | 0,892623 | 0,700399 | 0,483678 | 0,7943884 |
| RP11-574E24.3 | 2,41    | -1,69 | 2,41792  | -0,70034 | 0,483714 | NA        |
| AC092159.2    | 18,23   | -0,58 | 0,832764 | -0,70016 | 0,48383  | 0,7945672 |
| RP11-30M20.2  | 0,23    | -2,34 | 3,336397 | -0,70014 | 0,48384  | NA        |
| RP11-545I5.3  | 279,60  | -0,29 | 0,412512 | -0,70004 | 0,483905 | 0,7945853 |
| ALG5          | 299,66  | 0,55  | 0,79071  | 0,699948 | 0,48396  | 0,7945853 |
| MIR4481       | 0,96    | 2,58  | 3,692735 | 0,699943 | 0,483963 | NA        |
| RP11-367G18.2 | 1,28    | -0,91 | 1,293544 | -0,69988 | 0,484002 | NA        |
| RP11-879F14.3 | 0,97    | 2,61  | 3,731823 | 0,69984  | 0,484027 | NA        |
| RP1-138O17.1  | 27,28   | -0,59 | 0,842526 | -0,69982 | 0,484038 | 0,7945853 |
| BTRC          | 123,14  | 0,59  | 0,838203 | 0,699799 | 0,484053 | 0,7945853 |
| RP11-184M15.2 | 6,09    | 0,86  | 1,231028 | 0,699797 | 0,484054 | 0,7945853 |
| RBPMS         | 14,99   | 0,96  | 1,370433 | 0,699709 | 0,484109 | 0,7946051 |
| ATP8B1        | 88,33   | 0,43  | 0,608768 | 0,699526 | 0,484223 | 0,7947223 |
| PUDP          | 242,41  | 0,63  | 0,903362 | 0,699434 | 0,484281 | 0,7947466 |
| RP11-798K23.1 | 0,99    | 2,61  | 3,731803 | 0,699386 | 0,484311 | NA        |
| SOD1          | 1206,45 | -0,21 | 0,306191 | -0,69931 | 0,484358 | 0,7948039 |

|               |         |       |          |          |          |           |
|---------------|---------|-------|----------|----------|----------|-----------|
| UBQLNL        | 0,55    | -2,57 | 3,674897 | -0,6993  | 0,484365 | NA        |
| RP11-415F23.3 | 0,78    | 2,24  | 3,202527 | 0,699266 | 0,484386 | NA        |
| RP11-486O13.4 | 0,75    | 2,21  | 3,156136 | 0,699178 | 0,484441 | NA        |
| SCN4B         | 5,36    | 1,67  | 2,392582 | 0,699122 | 0,484476 | 0,7949264 |
| TTC37         | 506,38  | -0,31 | 0,444373 | -0,69896 | 0,484577 | 0,7950217 |
| STAR          | 2,70    | -0,81 | 1,165061 | -0,69887 | 0,484632 | NA        |
| TEAD3         | 1,72    | -1,62 | 2,318626 | -0,69876 | 0,484702 | NA        |
| COPS7A        | 270,90  | 0,44  | 0,625868 | 0,698629 | 0,484784 | 0,7952801 |
| LCN15         | 21,42   | -0,72 | 1,025063 | -0,69857 | 0,48482  | 0,7952801 |
| PTCSC3        | 66,63   | -0,45 | 0,639847 | -0,69847 | 0,484886 | 0,7953192 |
| PIGG          | 305,03  | -0,36 | 0,511885 | -0,69832 | 0,484974 | 0,7953369 |
| Z95114.8      | 2,44    | 1,16  | 1,662418 | 0,698275 | 0,485005 | NA        |
| RP11-393I2.2  | 0,98    | 2,61  | 3,731767 | 0,69827  | 0,485008 | NA        |
| ODZ4          | 262,40  | 0,77  | 1,099389 | 0,698208 | 0,485047 | 0,7953369 |
| RPL12         | 3785,29 | -0,14 | 0,198753 | -0,69813 | 0,485093 | 0,7953369 |
| SH3GLB2       | 79,50   | 0,38  | 0,549339 | 0,698132 | 0,485095 | 0,7953369 |
| METTL4        | 94,09   | -0,76 | 1,081571 | -0,69811 | 0,485111 | 0,7953369 |
| OR4P4         | 10,90   | 0,66  | 0,945173 | 0,697927 | 0,485223 | 0,7954398 |
| ITCH          | 490,23  | 0,45  | 0,64777  | 0,697869 | 0,485259 | 0,7954398 |
| RNVU1-4       | 59,99   | -0,54 | 0,77928  | -0,69779 | 0,485309 | 0,7954522 |
| RP11-60H5.1   | 1,00    | -1,69 | 2,424081 | -0,69763 | 0,48541  | NA        |
| HCG4P11       | 0,41    | 1,42  | 2,031097 | 0,697624 | 0,485413 | NA        |
| PREB          | 288,39  | -0,64 | 0,916577 | -0,69749 | 0,485495 | 0,7956166 |
| BOC           | 8,56    | -0,82 | 1,182483 | -0,69749 | 0,485495 | 0,7956166 |
| RP11-360K13.1 | 0,35    | -1,99 | 2,849231 | -0,69748 | 0,485503 | NA        |
| RP11-1113N2.2 | 0,73    | -2,45 | 3,516939 | -0,69731 | 0,485606 | NA        |
| SLC51B        | 2,00    | 2,42  | 3,469931 | 0,697308 | 0,48561  | NA        |
| ANK3          | 30,35   | -0,53 | 0,757279 | -0,6972  | 0,485678 | 0,7957154 |
| AC010642.1    | 0,97    | 2,60  | 3,731836 | 0,697167 | 0,485698 | NA        |
| NKIRAS2       | 660,20  | 0,36  | 0,521296 | 0,697112 | 0,485733 | 0,7957154 |
| MIR511        | 0,94    | 2,56  | 3,67271  | 0,697084 | 0,48575  | NA        |
| C1orf122      | 83,16   | -0,60 | 0,856973 | -0,69701 | 0,485799 | 0,7957154 |
| AC007349.7    | 1,47    | 2,60  | 3,728249 | 0,696995 | 0,485806 | NA        |
| RP11-596C23.2 | 99,37   | 0,67  | 0,954877 | 0,696987 | 0,485811 | 0,7957154 |
| LLNLR-222A1.1 | 84,90   | 0,52  | 0,747418 | 0,696986 | 0,485812 | 0,7957154 |
| AC195454.1    | 12,39   | -1,22 | 1,752298 | -0,69694 | 0,485839 | 0,7957154 |
| MRPL46        | 142,40  | -0,69 | 0,990125 | -0,69692 | 0,485855 | 0,7957154 |
| RP11-946P6.6  | 2,65    | 2,14  | 3,067943 | 0,696772 | 0,485945 | NA        |
| PRAMEF18      | 0,50    | -2,02 | 2,905449 | -0,69672 | 0,48598  | NA        |
| MTRNR2L10     | 1,48    | -1,25 | 1,792457 | -0,69671 | 0,485982 | NA        |
| RP11-461C13.1 | 1,50    | -1,94 | 2,790077 | -0,69661 | 0,486045 | NA        |
| AC010733.8    | 9,12    | 1,73  | 2,486602 | 0,696491 | 0,486121 | 0,7960817 |
| RP11-148B6.2  | 0,61    | -1,59 | 2,28027  | -0,69633 | 0,48622  | NA        |
| ICMT          | 198,36  | 0,49  | 0,700589 | 0,69622  | 0,486291 | 0,79629   |
| RP11-493E3.3  | 17,47   | -0,41 | 0,595634 | -0,69603 | 0,486411 | 0,796416  |
| RP11-154C3.1  | 0,44    | 1,40  | 2,010793 | 0,695985 | 0,486438 | NA        |
| RP11-540O11.4 | 1,04    | 2,02  | 2,903304 | 0,695982 | 0,48644  | NA        |
| DSTYK         | 421,95  | -0,30 | 0,425436 | -0,69595 | 0,486459 | 0,7964246 |
| RP11-629N8.3  | 1,21    | 1,66  | 2,386999 | 0,695942 | 0,486465 | NA        |
| DNM1P34       | 1,23    | 2,30  | 3,298138 | 0,695879 | 0,486505 | NA        |

|               |         |       |          |          |          |           |
|---------------|---------|-------|----------|----------|----------|-----------|
| RP11-115D19.2 | 0,98    | 2,60  | 3,731832 | 0,695842 | 0,486528 | NA        |
| RN7SL775P     | 3,13    | -0,73 | 1,052526 | -0,69579 | 0,486558 | NA        |
| RN7SL60P      | 2,26    | -0,62 | 0,890236 | -0,69571 | 0,486612 | NA        |
| CTD-2342J14.6 | 10,31   | -0,70 | 1,010514 | -0,69566 | 0,486644 | 0,7966365 |
| RP11-227G15.2 | 2,35    | 1,47  | 2,113007 | 0,695625 | 0,486663 | NA        |
| FBXO44        | 44,22   | -0,53 | 0,759094 | -0,69559 | 0,486687 | 0,7966365 |
| CUEDC2        | 758,59  | -0,34 | 0,494522 | -0,69554 | 0,486717 | 0,7966365 |
| RP13-614K11.1 | 3,06    | 0,92  | 1,321675 | 0,695513 | 0,486734 | NA        |
| ASS1          | 1,90    | 1,40  | 2,015641 | 0,695455 | 0,486771 | NA        |
| RP11-227D13.4 | 0,75    | 2,22  | 3,186905 | 0,69545  | 0,486773 | NA        |
| RNU6-911P     | 0,63    | -2,55 | 3,664769 | -0,6954  | 0,486803 | NA        |
| RP11-166P13.3 | 4,08    | 0,90  | 1,29329  | 0,695386 | 0,486814 | 0,7967246 |
| ESPL1         | 14,49   | 0,72  | 1,031078 | 0,695199 | 0,48693  | 0,7968459 |
| RP11-498P14.3 | 0,99    | -1,49 | 2,142633 | -0,69492 | 0,487106 | NA        |
| GPR55         | 13,32   | -1,88 | 2,699005 | -0,69485 | 0,487151 | 0,796996  |
| ZNF182        | 48,12   | -0,83 | 1,198216 | -0,69483 | 0,487159 | 0,796996  |
| C15orf62      | 2,36    | 2,17  | 3,125157 | 0,694766 | 0,487202 | NA        |
| RP11-245J9.9  | 155,29  | 0,49  | 0,70803  | 0,694753 | 0,48721  | 0,796996  |
| AC015849.19   | 10,22   | 0,63  | 0,903299 | 0,694731 | 0,487224 | 0,796996  |
| GLRX          | 1719,13 | 0,22  | 0,323428 | 0,694711 | 0,487236 | 0,796996  |
| FRMPD3        | 2,15    | -1,01 | 1,458436 | -0,69471 | 0,487238 | NA        |
| OR2M2         | 0,27    | -2,56 | 3,690499 | -0,69452 | 0,487355 | NA        |
| RF00416       | 2,26    | 2,59  | 3,725619 | 0,694356 | 0,487459 | NA        |
| COL1A2-AS1    | 0,76    | 1,54  | 2,215483 | 0,694346 | 0,487465 | NA        |
| RIOK3         | 532,37  | 0,27  | 0,384229 | 0,694269 | 0,487513 | 0,797379  |
| AL121656.4    | 0,97    | 2,59  | 3,732641 | 0,694083 | 0,48763  | NA        |
| TMEM78        | 20,81   | -0,45 | 0,655492 | -0,69399 | 0,487688 | 0,7975399 |
| AKR1B1        | 671,40  | 0,40  | 0,577963 | 0,693921 | 0,487732 | 0,7975399 |
| UBE2Q2        | 340,66  | 0,34  | 0,484162 | 0,693907 | 0,48774  | 0,7975399 |
| RNU7-84P      | 0,96    | 2,59  | 3,731962 | 0,693779 | 0,487821 | NA        |
| SEPHS2        | 375,19  | -0,45 | 0,654423 | -0,69364 | 0,48791  | 0,7975953 |
| TEX21P        | 4,61    | 0,74  | 1,072466 | 0,693623 | 0,487919 | 0,7975953 |
| AAMP          | 602,25  | 0,32  | 0,459361 | 0,693593 | 0,487938 | 0,7975953 |
| MEGF11        | 3,27    | -1,59 | 2,29442  | -0,69359 | 0,487942 | NA        |
| RP11-184D12.1 | 1,51    | -0,79 | 1,137671 | -0,69358 | 0,487944 | NA        |
| TBC1D24       | 42,05   | -0,60 | 0,859497 | -0,69358 | 0,487946 | 0,7975953 |
| MAMLD1        | 1,69    | 2,33  | 3,36739  | 0,693376 | 0,488073 | NA        |
| UBR7          | 124,17  | -0,68 | 0,975567 | -0,69335 | 0,488093 | 0,7975979 |
| IGFL4         | 55,11   | 0,58  | 0,840236 | 0,693314 | 0,488113 | 0,7975979 |
| TAF4B         | 63,89   | -0,62 | 0,900682 | -0,69321 | 0,488177 | 0,7975979 |
| RP3-510O8.4   | 0,41    | 1,43  | 2,065806 | 0,693087 | 0,488255 | NA        |
| RNU6-1153P    | 3,04    | 1,30  | 1,881584 | 0,69308  | 0,488259 | NA        |
| PRPF4         | 236,57  | 0,45  | 0,651104 | 0,693045 | 0,488281 | 0,7975979 |
| ANKRD30BP     | 0,21    | -2,56 | 3,694521 | -0,69302 | 0,488296 | NA        |
| TREML3P       | 0,99    | 2,58  | 3,72458  | 0,693006 | 0,488305 | NA        |
| RP11-452L6.6  | 13,08   | -0,58 | 0,839904 | -0,69298 | 0,488321 | 0,7975979 |
| CTA-246H3.11  | 0,25    | -1,95 | 2,81575  | -0,6929  | 0,488372 | NA        |
| TRAFD1        | 316,24  | -0,51 | 0,739717 | -0,69285 | 0,488407 | 0,7975979 |
| RP11-63P12.6  | 77,69   | -0,78 | 1,121251 | -0,69282 | 0,48842  | 0,7975979 |
| MPC2          | 482,05  | 0,44  | 0,639502 | 0,692782 | 0,488446 | 0,7975979 |

|                 |         |       |          |          |          |           |
|-----------------|---------|-------|----------|----------|----------|-----------|
| JUN             | 1011,82 | -0,30 | 0,437247 | -0,69276 | 0,488462 | 0,7975979 |
| LRP1            | 652,85  | -0,35 | 0,50279  | -0,69269 | 0,488504 | 0,7975979 |
| AGRN            | 6,57    | -0,57 | 0,823142 | -0,69261 | 0,488556 | 0,7975979 |
| FAM102B         | 592,34  | 0,29  | 0,424252 | 0,692586 | 0,48857  | 0,7975979 |
| DAPK3           | 3,23    | 1,79  | 2,583186 | 0,69253  | 0,488605 | NA        |
| TOM1L2          | 93,89   | -0,71 | 1,023517 | -0,69246 | 0,488646 | 0,7975979 |
| RP11-218M22.2   | 3,87    | 1,08  | 1,565162 | 0,69245  | 0,488655 | 0,7975979 |
| CH507-39O4.1    | 0,73    | 2,18  | 3,155206 | 0,692356 | 0,488714 | NA        |
| RHOC            | 1119,14 | 0,21  | 0,299126 | 0,692303 | 0,488747 | 0,7975979 |
| SUGP2           | 852,07  | -0,22 | 0,321363 | -0,69227 | 0,488766 | 0,7975979 |
| PTBP2           | 231,33  | -0,51 | 0,733267 | -0,69226 | 0,488771 | 0,7975979 |
| TMED9           | 514,12  | 0,38  | 0,541788 | 0,692226 | 0,488795 | 0,7975979 |
| ANKHD1-EIF4EBP3 | 309,93  | -0,65 | 0,94042  | -0,69217 | 0,488832 | 0,7975979 |
| MAPK10          | 357,49  | -0,33 | 0,476658 | -0,69211 | 0,48887  | 0,7975979 |
| NDUFAF2         | 105,69  | -0,44 | 0,629707 | -0,69211 | 0,488871 | 0,7975979 |
| RAC3            | 0,97    | 2,58  | 3,73189  | 0,692058 | 0,488901 | NA        |
| RP11-253I19.3   | 1,48    | -1,17 | 1,694916 | -0,69202 | 0,488926 | NA        |
| KIAA0586        | 134,00  | 0,41  | 0,596655 | 0,692015 | 0,488928 | 0,7975979 |
| C7orf55         | 91,57   | -0,40 | 0,578442 | -0,69196 | 0,48896  | 0,7975979 |
| RP11-56P2.2     | 2,26    | 1,78  | 2,576432 | 0,691898 | 0,489001 | NA        |
| KDM4C           | 467,84  | 0,40  | 0,581993 | 0,691849 | 0,489032 | 0,7975979 |
| CAMTA1          | 147,47  | -0,24 | 0,344895 | -0,6918  | 0,48906  | 0,7975979 |
| RP11-123K19.1   | 6,57    | 0,81  | 1,170906 | 0,691672 | 0,489143 | 0,7975979 |
| HIPK1           | 756,58  | 0,29  | 0,418453 | 0,691633 | 0,489168 | 0,7975979 |
| RP11-68I3.4     | 0,98    | -1,53 | 2,211053 | -0,69155 | 0,489223 | NA        |
| BRAT1           | 397,99  | -0,41 | 0,5926   | -0,69152 | 0,489236 | 0,7975979 |
| CTD-2595P9.2    | 19,73   | 0,60  | 0,864307 | 0,691432 | 0,489294 | 0,7975979 |
| BRICD5          | 57,10   | -0,88 | 1,266172 | -0,69142 | 0,489299 | 0,7975979 |
| RLF             | 402,51  | -0,44 | 0,640437 | -0,6914  | 0,489314 | 0,7975979 |
| RPS3AP26        | 11,06   | 0,29  | 0,423883 | 0,691392 | 0,489319 | 0,7975979 |
| HYDIN           | 32,40   | -0,75 | 1,080309 | -0,69131 | 0,489368 | 0,7976076 |
| RP11-429H9.4    | 0,21    | -2,56 | 3,699364 | -0,69123 | 0,489421 | NA        |
| SNHG12          | 188,40  | -0,42 | 0,601906 | -0,6912  | 0,489438 | 0,7976269 |
| TLE3            | 982,55  | -0,31 | 0,448673 | -0,69116 | 0,489466 | 0,7976269 |
| RP4-737E23.6    | 1,22    | 2,31  | 3,336728 | 0,691086 | 0,489511 | NA        |
| IGKV3-15        | 2,18    | -0,98 | 1,416379 | -0,69104 | 0,489539 | NA        |
| MIR3908         | 1,90    | -1,02 | 1,477576 | -0,69103 | 0,489549 | NA        |
| C8orf77         | 6,79    | 0,78  | 1,134029 | 0,690954 | 0,489595 | 0,7976741 |
| KCNQ1           | 230,43  | 0,38  | 0,552875 | 0,690938 | 0,489605 | 0,7976741 |
| RP11-321E8.5    | 0,96    | 2,58  | 3,73203  | 0,690887 | 0,489637 | NA        |
| RAPGEFL1        | 24,61   | 0,77  | 1,10859  | 0,690857 | 0,489655 | 0,7976741 |
| POMK            | 34,47   | -0,76 | 1,106923 | -0,69084 | 0,489666 | 0,7976741 |
| TEFM            | 59,90   | 0,62  | 0,900764 | 0,690632 | 0,489797 | 0,7978013 |
| KCNMB1          | 178,00  | -0,40 | 0,575159 | -0,69056 | 0,489842 | 0,7978013 |
| RP11-191G24.1   | 0,93    | 2,56  | 3,704963 | 0,690544 | 0,489852 | NA        |
| EMX2            | 13,94   | -0,57 | 0,826142 | -0,69045 | 0,489913 | 0,7978013 |
| TXN             | 789,59  | -0,14 | 0,203151 | -0,69044 | 0,489916 | 0,7978013 |
| RP11-6O2.3      | 2,33    | -0,59 | 0,856389 | -0,6904  | 0,489943 | NA        |
| RPL7L1          | 661,56  | -0,34 | 0,489251 | -0,69036 | 0,48997  | 0,7978193 |
| HCG4B           | 0,75    | 1,54  | 2,235942 | 0,690309 | 0,49     | NA        |



|               |         |       |          |          |          |           |
|---------------|---------|-------|----------|----------|----------|-----------|
| RP11-17H4.2   | 0,96    | 2,56  | 3,712673 | 0,69024  | 0,490044 | NA        |
| RP3-404F18.2  | 1,31    | -1,22 | 1,767987 | -0,69019 | 0,490073 | NA        |
| ANKRD65       | 1,43    | 1,90  | 2,746377 | 0,690191 | 0,490074 | NA        |
| RP11-468N14.1 | 0,21    | -2,55 | 3,694792 | -0,69015 | 0,4901   | NA        |
| CTD-2196E14.3 | 6,27    | -1,15 | 1,668142 | -0,69011 | 0,490126 | 0,7980047 |
| FAM149A       | 3,02    | 1,08  | 1,563664 | 0,690007 | 0,49019  | NA        |
| RN7SL711P     | 4,01    | -0,81 | 1,169158 | -0,68995 | 0,490226 | 0,798023  |
| PPEF2         | 29,63   | 0,82  | 1,194695 | 0,689895 | 0,49026  | 0,798023  |
| RP11-1105G2.3 | 50,32   | -0,83 | 1,202977 | -0,68989 | 0,490266 | 0,798023  |
| RP11-84C13.2  | 0,21    | -2,55 | 3,694835 | -0,6897  | 0,490383 | NA        |
| RP11-685B13.2 | 0,96    | 2,57  | 3,731984 | 0,689625 | 0,49043  | NA        |
| RP11-191L17.1 | 39,70   | -0,74 | 1,074338 | -0,68954 | 0,490486 | 0,7982449 |
| RP11-6F2.6    | 23,88   | -1,06 | 1,530418 | -0,68953 | 0,490488 | 0,7982449 |
| AC100748.2    | 3,08    | 1,61  | 2,333723 | 0,689297 | 0,490637 | NA        |
| MUC5B         | 0,99    | 2,57  | 3,732335 | 0,689249 | 0,490667 | NA        |
| RP4-773N10.4  | 3,21    | -1,33 | 1,936289 | -0,68924 | 0,490674 | NA        |
| SNORA14A      | 0,74    | 2,18  | 3,157702 | 0,689178 | 0,490711 | NA        |
| BCL2          | 186,13  | -0,47 | 0,678449 | -0,68916 | 0,490725 | 0,798523  |
| XRN2          | 1364,52 | 0,19  | 0,276824 | 0,689124 | 0,490745 | 0,798523  |
| SLC6A13       | 0,33    | -2,54 | 3,693293 | -0,68901 | 0,490818 | NA        |
| RP11-397E7.6  | 20,50   | 0,63  | 0,91461  | 0,688921 | 0,490873 | 0,7986613 |
| CH17-437K3.1  | 2,01    | -1,11 | 1,611218 | -0,68889 | 0,490891 | NA        |
| NCOA4         | 2143,67 | 0,25  | 0,357347 | 0,688829 | 0,490931 | 0,7986856 |
| MESDC2        | 388,47  | 0,35  | 0,512355 | 0,688716 | 0,491002 | 0,7987318 |
| AC005682.5    | 0,92    | 2,57  | 3,732754 | 0,688635 | 0,491053 | NA        |
| CTD-3057O21.1 | 0,95    | 2,57  | 3,732093 | 0,688628 | 0,491058 | NA        |
| TRDN          | 0,71    | -1,65 | 2,398634 | -0,68847 | 0,491154 | NA        |
| RP11-404O13.4 | 6,96    | 1,69  | 2,452727 | 0,688341 | 0,491238 | 0,7989867 |
| IGLC1         | 7,88    | 0,57  | 0,821939 | 0,688288 | 0,491272 | 0,7989867 |
| THBS4         | 45,53   | -0,98 | 1,419076 | -0,68826 | 0,491288 | 0,7989867 |
| SLC2A9        | 142,86  | -0,58 | 0,838035 | -0,68817 | 0,491345 | 0,7989909 |
| CHEK1         | 41,82   | 0,56  | 0,817426 | 0,688111 | 0,491383 | 0,7989909 |
| CGRRF1        | 81,30   | -0,98 | 1,420239 | -0,68805 | 0,491419 | 0,7989909 |
| IGKV3D-20     | 2,59    | -1,49 | 2,161865 | -0,68802 | 0,491441 | NA        |
| IGHG1         | 12,51   | -0,61 | 0,893613 | -0,68782 | 0,491569 | 0,7991485 |
| RP11-69C17.3  | 0,76    | -1,00 | 1,45261  | -0,6878  | 0,491581 | NA        |
| AC109631.1    | 1,48    | 2,56  | 3,7283   | 0,687771 | 0,491597 | NA        |
| PCK1          | 6,22    | 0,70  | 1,012068 | 0,687673 | 0,491659 | 0,7991485 |
| PID1          | 1244,06 | -0,29 | 0,422695 | -0,68761 | 0,491697 | 0,7991485 |
| GFM1          | 323,87  | -0,41 | 0,592137 | -0,68757 | 0,491723 | 0,7991485 |
| FAM168A       | 441,49  | -0,34 | 0,493221 | -0,68756 | 0,491731 | 0,7991485 |
| RN7SKP246     | 0,75    | -2,06 | 2,992077 | -0,6875  | 0,491767 | NA        |
| RP1-79C4.1    | 25,66   | -0,80 | 1,163453 | -0,68749 | 0,491774 | 0,7991485 |
| RP11-208G20.1 | 0,49    | 1,62  | 2,356945 | 0,687221 | 0,491944 | NA        |
| DDX49         | 444,47  | -0,41 | 0,598758 | -0,68715 | 0,491987 | 0,7994246 |
| C1orf210      | 2,55    | -0,97 | 1,408411 | -0,68715 | 0,491988 | NA        |
| ZNF668        | 39,77   | 0,93  | 1,348869 | 0,687063 | 0,492043 | 0,7994466 |
| RP11-299J3.6  | 0,94    | 2,55  | 3,710427 | 0,687021 | 0,492069 | NA        |
| SPINK4        | 0,73    | 2,18  | 3,17027  | 0,68686  | 0,492171 | NA        |
| TROAP         | 17,71   | 0,68  | 0,989276 | 0,686775 | 0,492224 | 0,7996182 |

|                 |         |       |          |          |          |           |
|-----------------|---------|-------|----------|----------|----------|-----------|
| RP11-417N10.4   | 4,53    | -1,45 | 2,112077 | -0,68676 | 0,492235 | 0,7996182 |
| KB-1410C5.3     | 24,96   | -0,36 | 0,524245 | -0,68668 | 0,492283 | 0,7996264 |
| RP6-24A23.7     | 2,08    | -0,84 | 1,224413 | -0,68659 | 0,492341 | NA        |
| DOCK8           | 2462,02 | 0,21  | 0,307576 | 0,686491 | 0,492404 | 0,7997312 |
| DUSP16          | 77,89   | 0,74  | 1,079014 | 0,686444 | 0,492433 | 0,7997312 |
| ZNF853          | 0,45    | -2,36 | 3,437124 | -0,68638 | 0,492473 | NA        |
| CTB-50L17.8     | 34,44   | -0,38 | 0,546682 | -0,68631 | 0,492516 | 0,7997966 |
| VNN3            | 60,29   | -0,57 | 0,837372 | -0,68621 | 0,49258  | 0,7998299 |
| SMC2            | 146,60  | 0,53  | 0,772148 | 0,686097 | 0,492652 | 0,7998414 |
| RP11-342C20.3   | 12,21   | -0,50 | 0,72509  | -0,68606 | 0,492673 | 0,7998414 |
| CCDC88C         | 301,06  | 0,43  | 0,629778 | 0,685964 | 0,492736 | 0,7998736 |
| DUSP12          | 271,42  | -0,36 | 0,523193 | -0,68584 | 0,492815 | 0,7999329 |
| RP11-525G13.2   | 0,94    | 2,56  | 3,732362 | 0,685807 | 0,492835 | NA        |
| DPY19L1         | 185,49  | -0,72 | 1,046155 | -0,68573 | 0,492885 | 0,7999766 |
| RN7SL19P        | 1,17    | -2,14 | 3,120065 | -0,68562 | 0,49295  | NA        |
| RP11-12M9.4     | 0,52    | 1,03  | 1,497622 | 0,685613 | 0,492957 | NA        |
| DUSP14          | 0,72    | 2,16  | 3,157265 | 0,685607 | 0,492961 | NA        |
| RP11-345P4.10   | 3,16    | 1,94  | 2,828413 | 0,685584 | 0,492976 | NA        |
| MTHFS           | 139,34  | -0,60 | 0,872369 | -0,68553 | 0,493008 | 0,8001067 |
| RP11-463I20.1   | 52,48   | 0,87  | 1,266532 | 0,685424 | 0,493077 | 0,8001474 |
| CARNS1          | 2,66    | 0,91  | 1,333674 | 0,685269 | 0,493174 | NA        |
| MAP3K9          | 8,21    | -0,49 | 0,715706 | -0,68524 | 0,493192 | 0,8002655 |
| SNAPC5          | 223,38  | 0,53  | 0,774069 | 0,685147 | 0,493251 | 0,8002914 |
| LRRC23          | 40,80   | -0,73 | 1,070706 | -0,68499 | 0,493349 | 0,80033   |
| C3orf58         | 620,43  | 0,28  | 0,404807 | 0,684914 | 0,493398 | 0,80033   |
| MTA3            | 74,26   | -0,72 | 1,048683 | -0,6849  | 0,493404 | 0,80033   |
| RP11-75I2.3     | 0,21    | -2,53 | 3,695486 | -0,6848  | 0,493471 | NA        |
| PKM             | 2525,71 | 0,11  | 0,15467  | 0,684778 | 0,493484 | 0,8003895 |
| CTD-3065B20.1   | 0,67    | -1,58 | 2,303032 | -0,68458 | 0,493608 | NA        |
| RP11-140H17.2   | 0,94    | 2,55  | 3,719918 | 0,684552 | 0,493626 | NA        |
| RP11-278C7.1    | 2,84    | 1,23  | 1,799748 | 0,684344 | 0,493758 | NA        |
| DGKA            | 285,31  | -0,24 | 0,348725 | -0,68425 | 0,49382  | 0,8008647 |
| MIR3198-1       | 1,65    | 0,78  | 1,133351 | 0,683947 | 0,494009 | NA        |
| AC010524.4      | 1,41    | -1,30 | 1,906596 | -0,68393 | 0,49402  | NA        |
| AP000692.9      | 37,06   | -0,53 | 0,778357 | -0,68383 | 0,494083 | 0,8010174 |
| PPP2R3C         | 587,72  | -0,22 | 0,318471 | -0,68383 | 0,494084 | 0,8010174 |
| RAC2            | 1933,89 | 0,22  | 0,328101 | 0,683793 | 0,494106 | 0,8010174 |
| RP11-264B14.2   | 9,97    | -0,36 | 0,524188 | -0,68374 | 0,494139 | 0,8010174 |
| TTPA            | 7,66    | -0,89 | 1,304645 | -0,68371 | 0,494157 | 0,8010174 |
| RP11-365P13.4   | 82,90   | 0,49  | 0,71287  | 0,683661 | 0,494189 | 0,8010174 |
| RP11-758M4.4    | 9,93    | 0,50  | 0,732567 | 0,683619 | 0,494215 | 0,8010174 |
| LL22NC03-27C5.1 | 2,08    | 0,82  | 1,193026 | 0,683463 | 0,494314 | NA        |
| SLC9A1          | 67,92   | 0,77  | 1,125093 | 0,683274 | 0,494434 | 0,8013015 |
| RP11-98J23.1    | 17,26   | 0,76  | 1,110311 | 0,683186 | 0,494489 | 0,8013218 |
| ZNF233          | 27,28   | -0,70 | 1,020008 | -0,68307 | 0,494563 | 0,801372  |
| GABRR2          | 0,85    | 2,55  | 3,733279 | 0,683021 | 0,494593 | NA        |
| RP11-386M24.4   | 0,73    | 2,19  | 3,203454 | 0,682772 | 0,494751 | NA        |
| PRRG2           | 6,55    | 1,44  | 2,115939 | 0,682707 | 0,494792 | 0,8015265 |
| RP11-293K19.1   | 1,43    | 2,55  | 3,728472 | 0,682703 | 0,494795 | NA        |
| CTD-2270L9.2    | 10,71   | 0,57  | 0,828691 | 0,682628 | 0,494842 | 0,8015265 |

|               |         |       |          |          |          |           |
|---------------|---------|-------|----------|----------|----------|-----------|
| CTB-3601.4    | 0,53    | -0,95 | 1,392689 | -0,68256 | 0,494884 | NA        |
| CALCRL        | 107,83  | 0,43  | 0,635566 | 0,68241  | 0,49498  | 0,8015265 |
| WASF1         | 0,93    | 1,71  | 2,500135 | 0,682369 | 0,495006 | NA        |
| RP11-156K13.3 | 3,18    | 1,96  | 2,867642 | 0,682308 | 0,495044 | NA        |
| DNMT1         | 602,34  | 0,23  | 0,329928 | 0,682295 | 0,495053 | 0,8015265 |
| CCDC86        | 69,50   | 0,87  | 1,27662  | 0,682282 | 0,495061 | 0,8015265 |
| DNAJC2        | 446,43  | 0,33  | 0,487228 | 0,682242 | 0,495086 | 0,8015265 |
| RP11-773D16.1 | 504,36  | -0,35 | 0,509481 | -0,68221 | 0,495107 | 0,8015265 |
| TRAF3         | 228,08  | -0,60 | 0,879733 | -0,6822  | 0,49511  | 0,8015265 |
| MIR933        | 1,19    | -2,17 | 3,181367 | -0,68213 | 0,495155 | NA        |
| FER1L4        | 16,13   | -0,40 | 0,587346 | -0,68212 | 0,495166 | 0,8015265 |
| KRT10         | 120,04  | 0,29  | 0,423629 | 0,682082 | 0,495187 | 0,8015265 |
| BRD2          | 1021,89 | -0,20 | 0,29806  | -0,68207 | 0,495192 | 0,8015265 |
| MLH3          | 164,09  | -0,66 | 0,973127 | -0,68203 | 0,495219 | 0,8015265 |
| RASSF1        | 1070,61 | 0,23  | 0,33373  | 0,682032 | 0,495219 | 0,8015265 |
| RP11-131K5.2  | 69,78   | 0,43  | 0,62532  | 0,6819   | 0,495302 | 0,8015913 |
| MIR27A        | 2,14    | -1,35 | 1,978547 | -0,6819  | 0,495304 | NA        |
| HIST1H4D      | 0,93    | 2,53  | 3,707633 | 0,681725 | 0,495413 | NA        |
| C3orf27       | 3,08    | 0,98  | 1,438338 | 0,681651 | 0,495459 | NA        |
| ZXDC          | 276,93  | -0,51 | 0,742586 | -0,68153 | 0,495535 | 0,8017641 |
| RP11-514O12.4 | 6,23    | -1,25 | 1,837342 | -0,68153 | 0,495536 | 0,8017641 |
| RP11-69L16.4  | 0,98    | 1,95  | 2,862417 | 0,681514 | 0,495546 | NA        |
| CTSS          | 8482,46 | -0,16 | 0,233861 | -0,68149 | 0,495559 | 0,8017641 |
| BIVM          | 64,93   | -0,69 | 1,014138 | -0,68146 | 0,495581 | 0,8017641 |
| KIAA0753      | 78,85   | 0,66  | 0,966327 | 0,681321 | 0,495668 | 0,8018351 |
| RN7SL426P     | 1,53    | 1,33  | 1,953649 | 0,68123  | 0,495726 | NA        |
| RP11-676J15.1 | 0,97    | 1,96  | 2,871973 | 0,681219 | 0,495733 | NA        |
| AC013399.3    | 1,44    | -1,29 | 1,899527 | -0,68116 | 0,495772 | NA        |
| TMSB15B       | 19,67   | 0,85  | 1,248896 | 0,680967 | 0,495892 | 0,8020989 |
| MCEE          | 57,76   | -0,57 | 0,834768 | -0,68093 | 0,495917 | 0,8020989 |
| CLPS          | 0,93    | 2,54  | 3,732374 | 0,680879 | 0,495948 | NA        |
| CCDC60        | 1,28    | 0,91  | 1,337268 | 0,680859 | 0,495961 | NA        |
| ZNF354C       | 19,94   | 1,16  | 1,708639 | 0,680815 | 0,495989 | 0,8021442 |
| RP11-49K24.8  | 2,20    | -1,98 | 2,904962 | -0,68075 | 0,496029 | NA        |
| ABCC2         | 10,51   | 1,07  | 1,56889  | 0,680629 | 0,496106 | 0,8022648 |
| CMTM5         | 0,77    | -2,50 | 3,670054 | -0,68044 | 0,496224 | NA        |
| RP11-211N11.5 | 0,94    | 2,54  | 3,732338 | 0,680427 | 0,496234 | NA        |
| RP11-883A18.3 | 21,26   | -0,55 | 0,803787 | -0,68042 | 0,496239 | 0,8023022 |
| ZNF141        | 100,86  | 0,49  | 0,717006 | 0,680385 | 0,496261 | 0,8023022 |
| ERCC6L        | 11,37   | 0,92  | 1,358648 | 0,680348 | 0,496284 | 0,8023022 |
| RP11-661A12.4 | 0,91    | 2,51  | 3,68776  | 0,680314 | 0,496306 | NA        |
| RP11-295K2.3  | 0,93    | 2,54  | 3,732371 | 0,68023  | 0,496359 | NA        |
| APOH          | 0,62    | 1,90  | 2,787288 | 0,680224 | 0,496363 | NA        |
| CTD-3088G3.8  | 24,48   | 0,49  | 0,721037 | 0,680216 | 0,496368 | 0,8023022 |
| NOS1AP        | 0,66    | -1,72 | 2,524089 | -0,68021 | 0,496372 | NA        |
| SNHG16        | 533,10  | -0,35 | 0,517971 | -0,6802  | 0,496375 | 0,8023022 |
| NEK2          | 6,90    | -0,45 | 0,66398  | -0,68018 | 0,496388 | 0,8023022 |
| AP001172.2    | 0,56    | 1,83  | 2,696377 | 0,679987 | 0,496513 | NA        |
| VN1R2         | 2,41    | -0,80 | 1,173439 | -0,67998 | 0,496516 | NA        |
| MKNK2         | 735,02  | -0,28 | 0,415198 | -0,67991 | 0,49656  | 0,8024372 |

|                |         |       |          |          |          |           |
|----------------|---------|-------|----------|----------|----------|-----------|
| SIGLEC15       | 13,61   | 0,50  | 0,739394 | 0,67989  | 0,496574 | 0,8024372 |
| RP11-214C8.2   | 31,39   | -0,35 | 0,512866 | -0,67984 | 0,496609 | 0,8024372 |
| PIGX           | 128,02  | 0,56  | 0,817559 | 0,679779 | 0,496644 | 0,8024372 |
| RP11-20I23.5   | 30,78   | -0,69 | 1,009863 | -0,6797  | 0,496696 | 0,8024513 |
| RP11-561I11.3  | 0,54    | 1,59  | 2,343099 | 0,679672 | 0,496712 | NA        |
| RP11-650L12.1  | 0,51    | -1,52 | 2,243412 | -0,67963 | 0,496742 | NA        |
| RP11-77P19.1   | 1,93    | 2,36  | 3,471414 | 0,679581 | 0,49677  | NA        |
| RP5-1092A3.4   | 42,38   | 0,48  | 0,700152 | 0,679553 | 0,496787 | 0,8025291 |
| ZSWIM4         | 53,27   | -0,65 | 0,953568 | -0,67932 | 0,496933 | 0,8026949 |
| RP11-460E7.8   | 1,60    | -1,72 | 2,537799 | -0,67932 | 0,496933 | NA        |
| SCFD2          | 226,45  | 0,63  | 0,925787 | 0,679057 | 0,497102 | 0,802741  |
| RANBP1         | 542,27  | 0,29  | 0,420113 | 0,679038 | 0,497114 | 0,802741  |
| NOTCH2NL       | 1558,86 | -0,26 | 0,387296 | -0,67894 | 0,497179 | 0,802741  |
| RGL1           | 274,89  | 0,62  | 0,919675 | 0,678924 | 0,497186 | 0,802741  |
| SUN2           | 335,45  | 0,39  | 0,577633 | 0,678852 | 0,497232 | 0,802741  |
| RP11-254A24.2  | 7,82    | -1,16 | 1,702742 | -0,67885 | 0,497235 | 0,802741  |
| LRRC75B        | 33,64   | -1,51 | 2,229506 | -0,6788  | 0,497264 | 0,802741  |
| AC009965.2     | 2,92    | -0,96 | 1,41608  | -0,67876 | 0,497288 | NA        |
| RP1-45I4.2     | 1,19    | 2,26  | 3,324872 | 0,678696 | 0,497331 | NA        |
| PIGQ           | 131,49  | 0,57  | 0,833487 | 0,678664 | 0,497351 | 0,8028064 |
| AC079325.6     | 204,16  | 0,66  | 0,971828 | 0,678601 | 0,49739  | 0,8028064 |
| RPL7P47        | 1,03    | 0,80  | 1,173317 | 0,678516 | 0,497445 | NA        |
| AC012456.3     | 0,40    | -1,69 | 2,485228 | -0,67845 | 0,497484 | NA        |
| RP11-114M11.2  | 2,15    | -1,34 | 1,967981 | -0,67842 | 0,497504 | NA        |
| AC004158.2     | 63,61   | 0,53  | 0,774057 | 0,678379 | 0,497531 | 0,8029065 |
| RBMS3          | 30,04   | 0,68  | 1,006485 | 0,678367 | 0,497539 | 0,8029065 |
| RP11-553A21.3  | 5,75    | -0,68 | 0,996255 | -0,67829 | 0,497589 | 0,8029175 |
| RNA5SP479      | 0,93    | 2,53  | 3,732412 | 0,678229 | 0,497627 | NA        |
| RP11-347C12.12 | 0,44    | -1,96 | 2,89373  | -0,67806 | 0,497735 | NA        |
| PIWIL1         | 1,01    | -1,16 | 1,705725 | -0,67805 | 0,497741 | NA        |
| RP5-994D16.12  | 24,41   | -0,95 | 1,401906 | -0,67799 | 0,497779 | 0,8031541 |
| LRRC9          | 0,96    | 2,50  | 3,688174 | 0,677978 | 0,497786 | NA        |
| C17orf53       | 0,77    | -1,81 | 2,662726 | -0,67798 | 0,497787 | NA        |
| HCCS           | 301,76  | -0,50 | 0,743933 | -0,67787 | 0,497852 | 0,8032033 |
| RP11-714M23.2  | 1,94    | 1,01  | 1,494834 | 0,677718 | 0,497951 | NA        |
| PYGO2          | 105,45  | 0,61  | 0,907351 | 0,677682 | 0,497973 | 0,8032598 |
| RP11-678G15.1  | 56,91   | 0,70  | 1,027346 | 0,677682 | 0,497974 | 0,8032598 |
| ADAMTS19       | 0,59    | -2,49 | 3,667645 | -0,67767 | 0,497982 | NA        |
| RP11-277P12.9  | 0,81    | -1,32 | 1,940851 | -0,67765 | 0,497995 | NA        |
| ELP6           | 171,97  | 0,48  | 0,704512 | 0,677518 | 0,498078 | 0,8033067 |
| ACACA          | 139,25  | -0,51 | 0,753093 | -0,6775  | 0,498089 | 0,8033067 |
| TSKS           | 1,05    | 2,24  | 3,313532 | 0,677472 | 0,498107 | NA        |
| RP11-242F24.2  | 6,08    | 0,53  | 0,780144 | 0,677321 | 0,498202 | 0,8033925 |
| SALL4          | 28,87   | 0,69  | 1,022268 | 0,67728  | 0,498229 | 0,8033925 |
| RN7SL797P      | 2,77    | -0,91 | 1,351722 | -0,6768  | 0,498531 | NA        |
| AF064858.10    | 0,93    | 2,53  | 3,73246  | 0,676514 | 0,498714 | NA        |
| PTPRM          | 35,54   | 0,51  | 0,760615 | 0,676466 | 0,498745 | 0,8041549 |
| CTD-2555A7.2   | 1,98    | 1,57  | 2,314521 | 0,676362 | 0,498811 | NA        |
| LDHAL6A        | 18,08   | -0,63 | 0,926494 | -0,67619 | 0,498923 | 0,804357  |
| RP5-1042K10.10 | 24,67   | -0,72 | 1,057911 | -0,67604 | 0,499015 | 0,804357  |

|                    |         |       |          |          |          |           |
|--------------------|---------|-------|----------|----------|----------|-----------|
| RSRC1              | 385,25  | -0,35 | 0,523662 | -0,67597 | 0,499058 | 0,804357  |
| RP11-133M8.3       | 0,87    | 1,73  | 2,565396 | 0,675948 | 0,499073 | NA        |
| AC137934.1         | 35,47   | 0,66  | 0,97211  | 0,675939 | 0,499079 | 0,804357  |
| XXbac-BPG170G13.33 | 29,88   | 0,65  | 0,962135 | 0,675865 | 0,499126 | 0,804357  |
| RP11-329B9.1       | 7,98    | -0,59 | 0,880167 | -0,67586 | 0,499129 | 0,804357  |
| BX255923.3         | 2,49    | 1,45  | 2,14427  | 0,675714 | 0,499223 | NA        |
| CYP24A1            | 0,22    | -2,25 | 3,324976 | -0,67556 | 0,499319 | NA        |
| bP-21264C1.2       | 28,46   | -0,65 | 0,967451 | -0,67543 | 0,499401 | 0,8047256 |
| AKAP7              | 36,08   | 0,53  | 0,791081 | 0,675168 | 0,499569 | 0,8047727 |
| C8orf44            | 44,81   | 0,66  | 0,973663 | 0,675147 | 0,499583 | 0,8047727 |
| TCTEX1D2           | 25,56   | 0,68  | 1,00994  | 0,675059 | 0,499638 | 0,8047727 |
| RP11-8003.1        | 0,94    | -1,83 | 2,713903 | -0,67504 | 0,499653 | NA        |
| N4BP2              | 412,62  | 0,32  | 0,476536 | 0,675034 | 0,499654 | 0,8047727 |
| FAM90A1            | 3,28    | -1,13 | 1,678899 | -0,6749  | 0,499739 | NA        |
| SCARNA22           | 11,29   | -0,44 | 0,649187 | -0,67489 | 0,499745 | 0,8047727 |
| MCAM               | 34,40   | -0,52 | 0,77363  | -0,67484 | 0,499777 | 0,8047727 |
| EXOSC2             | 190,41  | 0,40  | 0,585796 | 0,674779 | 0,499816 | 0,8047727 |
| CMC2               | 485,25  | 0,34  | 0,502744 | 0,67469  | 0,499873 | 0,8047727 |
| RP11-848P1.2       | 30,53   | -0,50 | 0,740195 | -0,67467 | 0,499883 | 0,8047727 |
| SOHLH2             | 12,69   | -1,29 | 1,90947  | -0,67463 | 0,49991  | 0,8047727 |
| ACAA1              | 1465,00 | 0,21  | 0,304737 | 0,674534 | 0,499972 | 0,8047727 |
| AGBL5              | 50,25   | -0,83 | 1,228268 | -0,67452 | 0,499979 | 0,8047727 |
| MIR193BHG          | 52,29   | -0,35 | 0,520443 | -0,6745  | 0,499993 | 0,8047727 |
| RP11-93121.3       | 0,64    | -1,78 | 2,643961 | -0,67448 | 0,500006 | NA        |
| FGD5P1             | 1,99    | -0,74 | 1,091307 | -0,67445 | 0,500024 | NA        |
| UXS1               | 130,44  | -0,55 | 0,820645 | -0,67419 | 0,50019  | 0,8048417 |
| DENND5B            | 102,23  | 0,63  | 0,930499 | 0,674177 | 0,500199 | 0,8048417 |
| SFTA2              | 0,32    | -2,48 | 3,683322 | -0,67404 | 0,500289 | NA        |
| FUT7               | 6,52    | -1,76 | 2,613818 | -0,67403 | 0,500294 | 0,8048417 |
| TANC2              | 68,47   | -0,54 | 0,795585 | -0,674   | 0,500312 | 0,8048417 |
| AP000640.2         | 32,09   | -0,52 | 0,76423  | -0,674   | 0,500314 | 0,8048417 |
| ZNF749             | 40,39   | -0,92 | 1,372453 | -0,67396 | 0,500337 | 0,8048417 |
| FBL                | 494,24  | -0,25 | 0,375588 | -0,67396 | 0,500339 | 0,8048417 |
| RP11-111J6.2       | 0,99    | 1,96  | 2,915756 | 0,673913 | 0,500367 | NA        |
| RP11-390F4.10      | 0,92    | 2,51  | 3,73255  | 0,67376  | 0,500464 | NA        |
| AC018804.6         | 1,17    | 2,23  | 3,303355 | 0,673727 | 0,500485 | NA        |
| SLC45A3            | 0,25    | -1,90 | 2,814509 | -0,67368 | 0,500517 | NA        |
| RP11-1280N14.4     | 1,42    | 2,51  | 3,728542 | 0,673623 | 0,500551 | NA        |
| RP11-203F10.6      | 1,30    | -0,63 | 0,937121 | -0,67356 | 0,500592 | NA        |
| STK3               | 277,71  | -0,41 | 0,609337 | -0,67342 | 0,500677 | 0,8051559 |
| FAM196A            | 5,56    | 1,41  | 2,088652 | 0,673389 | 0,5007   | 0,8051559 |
| MBP                | 1109,10 | 0,22  | 0,333161 | 0,673384 | 0,500703 | 0,8051559 |
| LDAH               | 131,42  | -0,73 | 1,084338 | -0,67335 | 0,500724 | 0,8051559 |
| WWTR1              | 17,83   | -0,66 | 0,974528 | -0,67331 | 0,50075  | 0,8051559 |
| MIR4256            | 1,40    | 2,51  | 3,728582 | 0,673104 | 0,500881 | NA        |
| RP11-33B1.1        | 123,66  | -0,53 | 0,786357 | -0,67294 | 0,500984 | 0,8054121 |
| FGFRL1             | 10,61   | -0,71 | 1,057216 | -0,67292 | 0,500996 | 0,8054121 |
| FGF11              | 11,30   | 0,64  | 0,95148  | 0,672579 | 0,501215 | 0,8055418 |
| NUDT9              | 171,52  | -0,40 | 0,595324 | -0,67241 | 0,50132  | 0,8055418 |
| RPS2P45            | 10,35   | -0,56 | 0,828422 | -0,67237 | 0,501347 | 0,8055418 |

|               |         |       |          |          |          |           |
|---------------|---------|-------|----------|----------|----------|-----------|
| NUDCD1        | 120,72  | 0,59  | 0,87637  | 0,672296 | 0,501395 | 0,8055418 |
| RAB2B         | 155,29  | 0,53  | 0,792499 | 0,672287 | 0,501401 | 0,8055418 |
| RP3-467K16.2  | 1,28    | 0,69  | 1,024055 | 0,67225  | 0,501425 | NA        |
| DLAT          | 148,20  | -0,56 | 0,839293 | -0,67222 | 0,501443 | 0,8055418 |
| RP11-63A11.2  | 4,66    | 0,97  | 1,447107 | 0,672197 | 0,501458 | 0,8055418 |
| RP11-378A12.1 | 8,34    | -1,06 | 1,576148 | -0,67216 | 0,501481 | 0,8055418 |
| SDC4          | 34,20   | 0,80  | 1,183971 | 0,672153 | 0,501486 | 0,8055418 |
| RP11-299H21.1 | 5,92    | -1,32 | 1,966437 | -0,67211 | 0,501515 | 0,8055418 |
| MRPS18B       | 490,93  | 0,36  | 0,541052 | 0,672048 | 0,501553 | 0,8055418 |
| C2orf80       | 2,77    | -0,75 | 1,110371 | -0,67198 | 0,501596 | NA        |
| MRFAP1L1      | 376,88  | -0,44 | 0,658591 | -0,67196 | 0,50161  | 0,8055634 |
| RP11-769O8.3  | 6,47    | 0,53  | 0,7951   | 0,671879 | 0,501661 | 0,8055751 |
| TLR6          | 432,27  | 0,54  | 0,811357 | 0,671713 | 0,501766 | 0,8056251 |
| LRRC2         | 30,72   | -0,46 | 0,681648 | -0,67169 | 0,501778 | 0,8056251 |
| MAB21L2       | 2,25    | 1,48  | 2,205358 | 0,671624 | 0,501823 | NA        |
| RIBC2         | 3,10    | 1,33  | 1,98409  | 0,671452 | 0,501932 | NA        |
| PDHX          | 134,17  | -0,52 | 0,777676 | -0,67143 | 0,501948 | 0,8058285 |
| TREM1         | 593,65  | -0,29 | 0,424844 | -0,67135 | 0,501996 | 0,8058352 |
| SF3B5         | 1278,52 | -0,19 | 0,280674 | -0,67124 | 0,502066 | 0,805878  |
| RP11-386D6.2  | 0,27    | -2,27 | 3,379771 | -0,67112 | 0,502142 | NA        |
| PAICS         | 259,14  | 0,51  | 0,763485 | 0,671059 | 0,502183 | 0,8059372 |
| CEP170P1      | 8,94    | -0,83 | 1,238816 | -0,67105 | 0,502189 | 0,8059372 |
| CLEC2B        | 718,45  | 0,20  | 0,292325 | 0,670955 | 0,502249 | 0,8059412 |
| SLC4A4        | 35,18   | -2,25 | 3,346977 | -0,67091 | 0,502278 | 0,8059412 |
| RP11-1029F8.1 | 0,91    | 2,50  | 3,732635 | 0,670774 | 0,502365 | NA        |
| RP11-503N18.5 | 17,57   | 0,60  | 0,892217 | 0,670563 | 0,502499 | 0,8060296 |
| C1orf131      | 122,84  | 0,39  | 0,578295 | 0,670552 | 0,502506 | 0,8060296 |
| TMEM263       | 65,75   | -0,68 | 1,013167 | -0,67051 | 0,502536 | 0,8060296 |
| RP11-525K18.2 | 0,91    | 2,50  | 3,732691 | 0,670492 | 0,502544 | NA        |
| ACO73218.2    | 4,38    | -0,86 | 1,275801 | -0,67046 | 0,502565 | 0,8060296 |
| RP11-5407.2   | 5,30    | 0,64  | 0,960962 | 0,670388 | 0,502611 | 0,8060296 |
| RP11-830F9.5  | 0,94    | -2,03 | 3,032922 | -0,67038 | 0,502613 | NA        |
| SNORD94       | 1,13    | 2,19  | 3,271808 | 0,670369 | 0,502623 | NA        |
| CFAP20        | 242,14  | -0,66 | 0,978567 | -0,67033 | 0,502645 | 0,8060296 |
| FZD4          | 19,03   | -0,51 | 0,754606 | -0,67022 | 0,50272  | 0,8060296 |
| PCNX1         | 572,68  | 0,29  | 0,436273 | 0,670166 | 0,502752 | 0,8060296 |
| CCNYL2        | 18,77   | -0,88 | 1,310413 | -0,67016 | 0,502754 | 0,8060296 |
| RP11-248E9.6  | 0,61    | -2,00 | 2,988253 | -0,67015 | 0,502764 | NA        |
| BTN3A2        | 469,65  | -0,42 | 0,62353  | -0,67014 | 0,502767 | 0,8060296 |
| RP11-356J5.12 | 47,13   | -0,53 | 0,795166 | -0,67003 | 0,50284  | 0,806078  |
| RN7SKP80      | 0,90    | 2,49  | 3,712253 | 0,669849 | 0,502954 | NA        |
| RP11-632K21.6 | 0,20    | -2,48 | 3,697308 | -0,66984 | 0,50296  | NA        |
| SPRN          | 7,53    | -1,65 | 2,466778 | -0,66983 | 0,502968 | 0,8061632 |
| MEGF6         | 1,55    | 1,70  | 2,541246 | 0,669827 | 0,502968 | NA        |
| FUT11         | 138,88  | -0,46 | 0,691976 | -0,66973 | 0,503028 | 0,8061632 |
| SHMT2         | 423,31  | 0,31  | 0,462923 | 0,669699 | 0,50305  | 0,8061632 |
| ATP1A4        | 11,95   | 0,49  | 0,727638 | 0,669672 | 0,503067 | 0,8061632 |
| RNU6-805P     | 4,14    | -2,42 | 3,618651 | -0,66946 | 0,503205 | 0,8063148 |
| FCGR1C        | 3,57    | -1,20 | 1,796463 | -0,66938 | 0,50325  | NA        |
| RP11-575L16.1 | 0,95    | 1,94  | 2,898921 | 0,669383 | 0,503251 | NA        |

|               |         |       |          |          |          |           |
|---------------|---------|-------|----------|----------|----------|-----------|
| FAM174B       | 45,28   | -0,62 | 0,931665 | -0,66928 | 0,503318 | 0,8064266 |
| RP11-501J20.2 | 22,40   | 1,27  | 1,895892 | 0,669106 | 0,503428 | 0,8064764 |
| RP11-417O11.5 | 0,51    | 0,94  | 1,409158 | 0,669052 | 0,503462 | NA        |
| RP11-568A7.4  | 22,61   | 0,80  | 1,200823 | 0,66905  | 0,503463 | 0,8064764 |
| CTD-3162L10.1 | 12,55   | -1,28 | 1,908272 | -0,66892 | 0,503544 | 0,8064764 |
| SEZ6L         | 330,92  | -0,61 | 0,91527  | -0,6689  | 0,503562 | 0,8064764 |
| AGPS          | 371,47  | -0,37 | 0,554239 | -0,66889 | 0,503566 | 0,8064764 |
| RPL10P14      | 0,58    | 1,85  | 2,76874  | 0,668801 | 0,503623 | NA        |
| CHRN2         | 0,55    | -2,45 | 3,668132 | -0,6684  | 0,503876 | NA        |
| CES1P1        | 1,71    | 0,85  | 1,271413 | 0,668349 | 0,503911 | NA        |
| RP3-486I3.4   | 6,73    | 0,47  | 0,702688 | 0,668323 | 0,503928 | 0,8069868 |
| CTC-342M10.2  | 14,65   | 1,29  | 1,931841 | 0,668191 | 0,504011 | 0,8070439 |
| FAM230B       | 5,07    | -1,69 | 2,528671 | -0,66807 | 0,504087 | 0,8070439 |
| FKBP8         | 60,25   | -0,38 | 0,573976 | -0,66803 | 0,504111 | 0,8070439 |
| TMEM164       | 421,01  | -0,35 | 0,523307 | -0,668   | 0,504137 | 0,8070439 |
| VILL          | 62,21   | 0,87  | 1,306784 | 0,667695 | 0,504328 | 0,8072672 |
| KIAA1143      | 292,61  | 0,37  | 0,554802 | 0,667588 | 0,504397 | 0,8072672 |
| RAB4B         | 604,43  | 0,28  | 0,424532 | 0,667573 | 0,504406 | 0,8072672 |
| C15orf54      | 0,95    | 1,90  | 2,849822 | 0,667483 | 0,504463 | NA        |
| RPS10         | 3966,59 | -0,16 | 0,246184 | -0,66731 | 0,504573 | 0,8073994 |
| RP11-219A15.5 | 4,82    | 0,66  | 0,987287 | 0,667209 | 0,504639 | 0,8073994 |
| SRSF11        | 2495,12 | 0,19  | 0,291361 | 0,667189 | 0,504652 | 0,8073994 |
| CCDC94        | 219,80  | -0,50 | 0,751398 | -0,66717 | 0,504663 | 0,8073994 |
| OVOS          | 7,93    | -0,76 | 1,134229 | -0,66697 | 0,504793 | 0,8074773 |
| SLX1A-SULT1A3 | 125,37  | 0,34  | 0,50412  | 0,666921 | 0,504823 | 0,8074773 |
| RP11-709A23.2 | 1,02    | -1,82 | 2,735928 | -0,66691 | 0,504831 | NA        |
| SLC37A2       | 126,76  | -0,60 | 0,896602 | -0,66689 | 0,504845 | 0,8074773 |
| PCDHA5        | 4,62    | -0,69 | 1,034    | -0,66682 | 0,504885 | 0,8074773 |
| RP11-102C24.1 | 0,90    | 2,49  | 3,732771 | 0,666802 | 0,504898 | NA        |
| ZMYM5         | 303,39  | 0,56  | 0,840272 | 0,666742 | 0,504937 | 0,8074911 |
| RP11-203B7.2  | 1,37    | 2,49  | 3,728704 | 0,666704 | 0,504961 | NA        |
| DHRS7         | 721,39  | 0,33  | 0,497196 | 0,66659  | 0,505034 | 0,8075767 |
| RNU6-341P     | 0,90    | 2,49  | 3,732782 | 0,666585 | 0,505037 | NA        |
| RP11-145D11.2 | 0,98    | 1,95  | 2,929741 | 0,6665   | 0,505092 | NA        |
| C16orf87      | 182,21  | -0,44 | 0,664493 | -0,66637 | 0,505177 | 0,8077363 |
| AC007787.2    | 0,92    | 2,49  | 3,732792 | 0,666296 | 0,505222 | NA        |
| RP11-566H8.3  | 1,38    | 2,48  | 3,72874  | 0,666201 | 0,505283 | NA        |
| RP11-341D18.3 | 10,81   | 0,89  | 1,332046 | 0,666166 | 0,505305 | 0,8078259 |
| MAB21L3       | 11,75   | 0,56  | 0,841966 | 0,666059 | 0,505374 | 0,8078259 |
| CITED4        | 11,01   | 0,89  | 1,330144 | 0,66594  | 0,505449 | 0,8078259 |
| AC010240.1    | 11,69   | -1,14 | 1,713792 | -0,66594 | 0,505451 | 0,8078259 |
| RNASEH2B      | 846,96  | 0,22  | 0,335382 | 0,665896 | 0,505477 | 0,8078259 |
| CRX           | 14,74   | 0,45  | 0,669866 | 0,665871 | 0,505494 | 0,8078259 |
| UGT8          | 4,65    | -1,01 | 1,523188 | -0,66579 | 0,505543 | 0,8078355 |
| KCNE5         | 2,80    | 1,53  | 2,291322 | 0,665726 | 0,505586 | NA        |
| DTX1          | 0,44    | -2,45 | 3,683905 | -0,66563 | 0,505646 | NA        |
| GLMP          | 199,58  | -0,51 | 0,765204 | -0,66561 | 0,505659 | 0,8078852 |
| AP2A1         | 243,80  | 0,37  | 0,561126 | 0,665609 | 0,505661 | 0,8078852 |
| RP11-10L7.1   | 0,95    | 1,93  | 2,899373 | 0,665522 | 0,505717 | NA        |
| PATE2         | 6,14    | 0,76  | 1,144897 | 0,665244 | 0,505894 | 0,8081079 |

|               |         |       |          |          |          |           |
|---------------|---------|-------|----------|----------|----------|-----------|
| IER5          | 1019,87 | 0,23  | 0,350814 | 0,665221 | 0,505909 | 0,8081079 |
| SS18L1        | 145,53  | 0,50  | 0,750213 | 0,665158 | 0,50595  | 0,8081079 |
| INPP5K        | 479,36  | -0,34 | 0,506358 | -0,66512 | 0,505974 | 0,8081079 |
| RP11-129B22.1 | 1,01    | -0,91 | 1,368127 | -0,66507 | 0,506005 | NA        |
| PDXDC2P       | 81,22   | -0,46 | 0,689099 | -0,66489 | 0,506121 | 0,8082725 |
| LYRM1         | 110,35  | -0,51 | 0,7733   | -0,66479 | 0,506184 | 0,8083035 |
| RP11-517H2.7  | 0,64    | 1,32  | 1,981105 | 0,664762 | 0,506203 | NA        |
| COL23A1       | 0,23    | -1,85 | 2,788786 | -0,66459 | 0,506312 | NA        |
| RP11-637N19.1 | 13,42   | -0,63 | 0,946897 | -0,66447 | 0,506389 | 0,8085622 |
| RP11-305K5.1  | 1,57    | 1,52  | 2,289994 | 0,664412 | 0,506427 | NA        |
| GTF2IRD2P     | 11,67   | 1,30  | 1,952582 | 0,664366 | 0,506456 | 0,8085998 |
| PHLPP2        | 132,07  | 0,39  | 0,590385 | 0,664059 | 0,506652 | 0,8088441 |
| ADIRF         | 0,90    | 2,48  | 3,732823 | 0,664    | 0,50669  | NA        |
| RP11-735G4.1  | 1,36    | 1,25  | 1,875439 | 0,663999 | 0,506691 | NA        |
| CYP2F1        | 1,33    | 1,09  | 1,644318 | 0,66394  | 0,506728 | NA        |
| RP11-171I2.2  | 0,95    | 1,93  | 2,900594 | 0,663812 | 0,50681  | NA        |
| RP11-514P8.2  | 0,88    | 2,46  | 3,70515  | 0,663785 | 0,506828 | NA        |
| TMEM9         | 241,53  | 0,63  | 0,94795  | 0,663749 | 0,506851 | 0,8090388 |
| ISY1          | 580,41  | 0,36  | 0,535984 | 0,663609 | 0,506941 | 0,8090388 |
| ANTXR2        | 860,01  | -0,31 | 0,470928 | -0,66359 | 0,506954 | 0,8090388 |
| HSPA8         | 5594,24 | 0,21  | 0,311195 | 0,663511 | 0,507003 | 0,8090388 |
| RN7SL70P      | 8,94    | 0,78  | 1,17332  | 0,663421 | 0,507061 | 0,8090388 |
| ALDH4A1       | 61,04   | -0,91 | 1,368776 | -0,66341 | 0,507068 | 0,8090388 |
| CUL5          | 760,94  | 0,33  | 0,499506 | 0,663363 | 0,507098 | 0,8090388 |
| CREBL2        | 332,15  | 0,41  | 0,624354 | 0,663318 | 0,507127 | 0,8090388 |
| ATG2A         | 219,87  | -0,43 | 0,646516 | -0,66326 | 0,507166 | 0,8090388 |
| UGT2B7        | 0,69    | -1,09 | 1,650348 | -0,66315 | 0,507234 | NA        |
| RP11-749I16.3 | 5,96    | 0,63  | 0,953001 | 0,663038 | 0,507306 | 0,8091753 |
| RP11-91H12.3  | 0,90    | 2,47  | 3,732718 | 0,662924 | 0,507379 | NA        |
| HSH2D         | 441,47  | -0,34 | 0,51366  | -0,66281 | 0,507454 | 0,8091753 |
| IRX2          | 0,20    | -2,45 | 3,6981   | -0,66279 | 0,507465 | NA        |
| CCDC77        | 59,79   | -0,36 | 0,539046 | -0,66276 | 0,507484 | 0,8091753 |
| RP11-151A6.4  | 1,69    | 1,64  | 2,474966 | 0,662741 | 0,507496 | NA        |
| RPGRIP1L      | 39,42   | -0,56 | 0,842999 | -0,66267 | 0,507545 | 0,8091753 |
| ZDHHC2        | 243,38  | 0,33  | 0,504276 | 0,662651 | 0,507554 | 0,8091753 |
| RP11-325N19.3 | 14,12   | -0,64 | 0,969694 | -0,66262 | 0,507572 | 0,8091753 |
| EVI2A         | 1261,38 | -0,28 | 0,424889 | -0,66261 | 0,507582 | 0,8091753 |
| APBA3         | 137,78  | -0,65 | 0,984786 | -0,66258 | 0,507599 | 0,8091753 |
| ANKRD49       | 46,05   | 0,34  | 0,520408 | 0,662367 | 0,507736 | 0,8092546 |
| RN7SL544P     | 1,40    | 0,99  | 1,494243 | 0,66224  | 0,507817 | NA        |
| RN7SL763P     | 1,40    | 0,99  | 1,494243 | 0,66224  | 0,507817 | NA        |
| ABHD13        | 360,51  | 0,52  | 0,786156 | 0,662239 | 0,507818 | 0,8092546 |
| RP11-468E2.2  | 2,13    | 1,98  | 2,995744 | 0,662188 | 0,507851 | NA        |
| RP4-604G5.1   | 0,90    | 2,47  | 3,7329   | 0,662119 | 0,507895 | NA        |
| LIX1L         | 252,54  | -0,36 | 0,548828 | -0,66201 | 0,507964 | 0,8092546 |
| SLC12A9       | 325,85  | -0,39 | 0,593121 | -0,66193 | 0,508013 | 0,8092546 |
| MTX2          | 159,39  | -0,66 | 0,999721 | -0,66193 | 0,508018 | 0,8092546 |
| RP11-276H1.1  | 3,36    | -1,63 | 2,468333 | -0,66192 | 0,508021 | NA        |
| OTUD6B        | 159,74  | 0,56  | 0,849484 | 0,661851 | 0,508067 | 0,8092546 |
| TRMT11        | 116,24  | -0,67 | 1,019026 | -0,66181 | 0,508091 | 0,8092546 |



|                |         |       |          |          |          |           |
|----------------|---------|-------|----------|----------|----------|-----------|
| WDR11          | 550,12  | -0,37 | 0,559278 | -0,66174 | 0,508139 | 0,8092546 |
| GYPB           | 7,58    | 1,45  | 2,19477  | 0,661653 | 0,508194 | 0,8092546 |
| EIF4E          | 764,93  | 0,25  | 0,380855 | 0,661642 | 0,508201 | 0,8092546 |
| RP11-2E17.2    | 6,56    | 0,52  | 0,780305 | 0,661595 | 0,508231 | 0,8092546 |
| FBN1           | 6,15    | 0,91  | 1,375727 | 0,661589 | 0,508234 | 0,8092546 |
| PPAN           | 22,89   | -0,69 | 1,044612 | -0,66158 | 0,50824  | 0,8092546 |
| EIF2B4         | 501,55  | -0,37 | 0,555795 | -0,66155 | 0,508258 | 0,8092546 |
| RP11-477L16.2  | 0,90    | 2,47  | 3,732919 | 0,661469 | 0,508312 | NA        |
| NAAA           | 771,42  | 0,26  | 0,387453 | 0,661426 | 0,508339 | 0,8093078 |
| USP50          | 1,13    | 2,22  | 3,351738 | 0,661409 | 0,50835  | NA        |
| FH             | 452,83  | 0,48  | 0,73116  | 0,661307 | 0,508416 | 0,8093078 |
| RAB33B         | 83,31   | -0,58 | 0,875845 | -0,66126 | 0,508445 | 0,8093078 |
| RP1-125I3.2    | 20,58   | -1,01 | 1,532245 | -0,66116 | 0,508508 | 0,8093078 |
| CTD-2192J16.17 | 17,54   | -0,85 | 1,28642  | -0,66116 | 0,508509 | 0,8093078 |
| GATM-AS1       | 9,17    | 0,57  | 0,867216 | 0,661062 | 0,508572 | 0,8093395 |
| GOLPH3         | 510,59  | -0,36 | 0,545954 | -0,66084 | 0,508717 | 0,8095    |
| KLC2           | 19,48   | -1,10 | 1,662756 | -0,66042 | 0,508984 | 0,8097353 |
| CNIH1          | 705,57  | -0,39 | 0,595003 | -0,66036 | 0,509025 | 0,8097353 |
| RP11-320N21.1  | 4,70    | -2,39 | 3,617013 | -0,66034 | 0,509037 | 0,8097353 |
| AC017035.2     | 6,46    | 1,05  | 1,586211 | 0,660335 | 0,509039 | 0,8097353 |
| DYNC1H1        | 2061,59 | -0,20 | 0,298184 | -0,66025 | 0,509096 | 0,8097573 |
| RCC1           | 22,96   | -0,86 | 1,306277 | -0,66013 | 0,509173 | 0,8098102 |
| RP11-515B12.1  | 1,06    | 1,44  | 2,183067 | 0,660053 | 0,50922  | NA        |
| CTA-481E9.3    | 0,84    | 1,68  | 2,550793 | 0,660008 | 0,509249 | NA        |
| ALKBH2         | 58,26   | -0,66 | 1,005879 | -0,65992 | 0,509308 | 0,8098935 |
| ZNF157         | 4,80    | -0,64 | 0,962606 | -0,65991 | 0,509312 | 0,8098935 |
| RNF25          | 67,78   | -1,04 | 1,571621 | -0,65953 | 0,509558 | 0,8101868 |
| ARNTL          | 245,36  | -0,35 | 0,533981 | -0,65949 | 0,509584 | 0,8101868 |
| CTD-3020H12.4  | 1,75    | 0,74  | 1,128092 | 0,65948  | 0,509588 | NA        |
| INSL3          | 10,38   | -1,27 | 1,927712 | -0,65942 | 0,509627 | 0,8101868 |
| AC135966.1     | 0,66    | 2,05  | 3,105708 | 0,659318 | 0,509691 | NA        |
| AC025335.1     | 17,70   | -0,60 | 0,917594 | -0,65919 | 0,509772 | 0,8103479 |
| SULT6B1        | 1,66    | 2,46  | 3,728232 | 0,659186 | 0,509776 | NA        |
| AC104695.3     | 3,72    | 0,76  | 1,149984 | 0,659108 | 0,509827 | NA        |
| RP11-349N19.2  | 0,78    | 0,99  | 1,507628 | 0,659077 | 0,509847 | NA        |
| NEURL1B        | 0,61    | 2,09  | 3,164333 | 0,65907  | 0,509851 | NA        |
| CAB39L         | 31,71   | 1,11  | 1,683483 | 0,658984 | 0,509906 | 0,8104809 |
| SYTL4          | 20,24   | -0,51 | 0,771993 | -0,65893 | 0,509943 | 0,8104809 |
| AL133243.3     | 0,87    | 2,45  | 3,713658 | 0,658653 | 0,510118 | NA        |
| ZNF337         | 103,60  | 0,97  | 1,469742 | 0,658614 | 0,510143 | 0,8107303 |
| RP11-31K23.2   | 0,55    | -1,07 | 1,622772 | -0,65849 | 0,510222 | NA        |
| RN7SL300P      | 1,82    | -1,13 | 1,709727 | -0,65833 | 0,510329 | NA        |
| APOL1          | 81,34   | -0,57 | 0,864264 | -0,65823 | 0,510389 | 0,8109933 |
| ESD            | 1024,29 | 0,29  | 0,439053 | 0,658206 | 0,510406 | 0,8109933 |
| CTD-2568A17.8  | 1,11    | 2,17  | 3,300041 | 0,658176 | 0,510425 | NA        |
| MORF4L1        | 1669,49 | 0,14  | 0,213332 | 0,658153 | 0,51044  | 0,8109933 |
| S100A5         | 1,20    | 2,16  | 3,289337 | 0,658089 | 0,510481 | NA        |
| MIR744         | 3,39    | 2,27  | 3,455993 | 0,657844 | 0,510638 | NA        |
| RP4-669K10.3   | 0,55    | -2,27 | 3,451452 | -0,65771 | 0,510727 | NA        |
| TRAPPC12       | 346,02  | -0,27 | 0,41082  | -0,65769 | 0,510734 | 0,8113046 |

|               |         |       |          |          |          |           |
|---------------|---------|-------|----------|----------|----------|-----------|
| RIPPLY3       | 7,45    | -0,50 | 0,765056 | -0,65767 | 0,510751 | 0,8113046 |
| TMEM123       | 2356,51 | 0,25  | 0,375803 | 0,657645 | 0,510767 | 0,8113046 |
| RP11-66B24.4  | 3,75    | 0,91  | 1,38981  | 0,657613 | 0,510787 | NA        |
| RP11-265P11.2 | 2,30    | -2,17 | 3,306112 | -0,65737 | 0,510943 | NA        |
| PREX1         | 1255,61 | 0,22  | 0,334871 | 0,657285 | 0,510998 | 0,8113725 |
| PCNX3         | 223,45  | 0,52  | 0,788978 | 0,657283 | 0,510999 | 0,8113725 |
| RP11-817O13.8 | 1,03    | 1,38  | 2,09453  | 0,657277 | 0,511003 | NA        |
| ZNF66         | 24,93   | -0,43 | 0,65442  | -0,65726 | 0,511016 | 0,8113725 |
| LSM8          | 474,51  | 0,22  | 0,341137 | 0,657195 | 0,511056 | 0,8113725 |
| AC073343.13   | 14,19   | 0,69  | 1,054097 | 0,657174 | 0,511069 | 0,8113725 |
| PIF1          | 11,11   | 0,71  | 1,082753 | 0,657141 | 0,51109  | 0,8113725 |
| POU5F1P5      | 0,19    | -2,43 | 3,699859 | -0,65707 | 0,511135 | NA        |
| FGFR1         | 14,08   | -0,63 | 0,954784 | -0,65705 | 0,511152 | 0,8113725 |
| HOXB-AS1      | 10,29   | 0,94  | 1,430069 | 0,657035 | 0,511158 | 0,8113725 |
| RP11-456N14.2 | 0,96    | -1,82 | 2,768988 | -0,65699 | 0,51119  | NA        |
| MAPK12        | 5,25    | -0,62 | 0,937471 | -0,65692 | 0,511234 | 0,8114188 |
| LGALS8        | 979,90  | -0,29 | 0,436786 | -0,65683 | 0,511291 | 0,8114188 |
| GDE1          | 361,99  | -0,40 | 0,601737 | -0,65679 | 0,511318 | 0,8114188 |
| CTD-2034I4.2  | 0,66    | 2,06  | 3,129367 | 0,656705 | 0,51137  | NA        |
| CTD-2054N24.2 | 6,96    | -0,57 | 0,871878 | -0,65669 | 0,511379 | 0,8114456 |
| CTD-2331H12.7 | 1,23    | -1,64 | 2,490463 | -0,65657 | 0,511459 | NA        |
| RP11-178C3.3  | 0,61    | -2,30 | 3,498028 | -0,65653 | 0,511484 | NA        |
| QRICH2        | 0,29    | -2,20 | 3,347061 | -0,65646 | 0,511528 | NA        |
| RP11-586K2.1  | 2,62    | -0,58 | 0,882335 | -0,65615 | 0,51173  | NA        |
| ARID3B        | 145,21  | -0,50 | 0,763924 | -0,65613 | 0,511741 | 0,8118731 |
| PCGF2         | 0,23    | -2,42 | 3,689997 | -0,65613 | 0,511743 | NA        |
| RP11-179G8.2  | 2,92    | -0,98 | 1,493874 | -0,65611 | 0,51175  | NA        |
| RP11-230F18.5 | 4,01    | -0,63 | 0,959519 | -0,65609 | 0,511769 | 0,8118731 |
| KRT73         | 0,90    | 2,45  | 3,733364 | 0,656037 | 0,5118   | NA        |
| RP11-379K17.9 | 0,27    | -2,42 | 3,694418 | -0,65603 | 0,511805 | NA        |
| RP11-17P16.1  | 12,00   | 0,43  | 0,65678  | 0,655947 | 0,511858 | 0,8118731 |
| RP11-546J1.1  | 13,12   | 0,96  | 1,459544 | 0,655946 | 0,511859 | 0,8118731 |
| TMEM65        | 229,99  | 0,31  | 0,470992 | 0,655935 | 0,511866 | 0,8118731 |
| REXO2         | 101,76  | 0,45  | 0,684935 | 0,655792 | 0,511958 | 0,8118932 |
| GSAP          | 690,21  | 0,35  | 0,539224 | 0,655779 | 0,511966 | 0,8118932 |
| WNK3          | 2,62    | -0,66 | 1,013677 | -0,65574 | 0,51199  | NA        |
| RP11-169L17.3 | 20,77   | 0,53  | 0,813582 | 0,65564  | 0,512056 | 0,8119664 |
| RN7SL96P      | 2,70    | 0,65  | 0,985651 | 0,655421 | 0,512197 | NA        |
| BTBD11        | 111,74  | 0,62  | 0,948849 | 0,655366 | 0,512232 | 0,8121743 |
| PRR22         | 2,37    | 1,80  | 2,745877 | 0,655341 | 0,512249 | NA        |
| RP11-334C17.5 | 114,66  | -0,55 | 0,842504 | -0,6553  | 0,512274 | 0,8121743 |
| CDK8          | 125,62  | -0,70 | 1,067609 | -0,65522 | 0,512329 | 0,8121917 |
| DDX1          | 441,76  | -0,43 | 0,659564 | -0,655   | 0,512465 | 0,8123374 |
| WHAMM         | 264,36  | 0,40  | 0,609802 | 0,654883 | 0,512543 | 0,8123687 |
| PRDM7         | 31,50   | -0,61 | 0,927363 | -0,65483 | 0,51258  | 0,8123687 |
| ZNF563        | 30,60   | 0,67  | 1,021245 | 0,654761 | 0,512621 | 0,8123687 |
| SCN5A         | 6,76    | 1,36  | 2,082854 | 0,654703 | 0,512659 | 0,8123687 |
| RP11-435F17.1 | 0,79    | 0,96  | 1,473538 | 0,654642 | 0,512698 | NA        |
| PEX1          | 174,66  | 0,50  | 0,759893 | 0,654556 | 0,512753 | 0,812449  |
| SCARNA12      | 0,69    | -1,72 | 2,628744 | -0,65449 | 0,512799 | NA        |

|                |         |       |          |          |          |           |
|----------------|---------|-------|----------|----------|----------|-----------|
| RP11-428G5.5   | 0,19    | -2,42 | 3,700203 | -0,65443 | 0,512837 | NA        |
| UCHL1          | 0,60    | -1,09 | 1,659244 | -0,65437 | 0,512871 | NA        |
| PIK3AP1        | 947,47  | 0,29  | 0,438972 | 0,654323 | 0,512904 | 0,8125914 |
| IGKV1-39       | 2,34    | -1,41 | 2,154353 | -0,65431 | 0,512911 | NA        |
| RP11-409K20.6  | 0,88    | 2,44  | 3,73307  | 0,654308 | 0,512913 | NA        |
| ST3GAL4-AS1    | 50,66   | -0,52 | 0,79825  | -0,65428 | 0,512931 | 0,8125914 |
| ANKRD20A19P    | 27,61   | -0,50 | 0,771156 | -0,65421 | 0,512975 | 0,8125919 |
| CHMP2A         | 1432,63 | -0,18 | 0,279369 | -0,65411 | 0,513039 | 0,8126242 |
| RP11-600F24.2  | 0,82    | -1,40 | 2,134846 | -0,65403 | 0,513094 | NA        |
| AC087501.1     | 5,66    | 1,12  | 1,706663 | 0,653968 | 0,513133 | 0,812704  |
| TCF24          | 0,89    | 1,24  | 1,89355  | 0,653902 | 0,513175 | NA        |
| RP11-717H13.1  | 6,53    | 0,64  | 0,979462 | 0,653729 | 0,513287 | 0,8128627 |
| GDPD5          | 99,13   | -0,60 | 0,916911 | -0,65363 | 0,513353 | 0,8128627 |
| RN7SL376P      | 3,90    | 0,55  | 0,842054 | 0,653609 | 0,513364 | 0,8128627 |
| RP4-712E4.4    | 113,58  | -0,41 | 0,622779 | -0,65352 | 0,51342  | 0,8128827 |
| RP11-23E10.3   | 3,95    | -0,61 | 0,930735 | -0,65344 | 0,513473 | 0,8128968 |
| GPR1           | 5,85    | -0,60 | 0,922644 | -0,65329 | 0,513571 | 0,8129587 |
| INTS4          | 226,81  | -0,45 | 0,692178 | -0,65323 | 0,513609 | 0,8129587 |
| LRP8           | 113,81  | 0,51  | 0,776573 | 0,653176 | 0,513643 | 0,8129587 |
| LRBA           | 363,46  | 0,41  | 0,626045 | 0,652987 | 0,513765 | 0,8129935 |
| RP11-380M21.3  | 0,19    | -2,42 | 3,699081 | -0,65297 | 0,513778 | NA        |
| AC010091.1     | 0,20    | -2,41 | 3,698068 | -0,65296 | 0,51378  | NA        |
| RP11-1275H24.1 | 4,04    | -0,45 | 0,692185 | -0,65295 | 0,513786 | 0,8129935 |
| PATE4          | 10,12   | 0,56  | 0,854451 | 0,652931 | 0,513801 | 0,8129935 |
| DERL1          | 680,69  | -0,45 | 0,692549 | -0,65285 | 0,51385  | 0,8129935 |
| ZNF71          | 45,08   | -0,52 | 0,7931   | -0,6528  | 0,513884 | 0,8129935 |
| RP11-329J18.2  | 0,53    | 1,74  | 2,664502 | 0,652792 | 0,51389  | NA        |
| RP11-264L1.1   | 9,05    | -0,67 | 1,027101 | -0,65272 | 0,513939 | 0,8130125 |
| CNTNAP3        | 14,72   | -0,42 | 0,647121 | -0,65256 | 0,514042 | 0,8130621 |
| FAM207A        | 45,42   | -0,61 | 0,928354 | -0,65253 | 0,514061 | 0,8130621 |
| LRRK2          | 808,92  | -0,22 | 0,343271 | -0,65246 | 0,514102 | 0,8130621 |
| RP11-477B16.3  | 0,19    | -2,41 | 3,700805 | -0,65224 | 0,514248 | NA        |
| OR52J3         | 0,19    | -2,41 | 3,700639 | -0,65223 | 0,514252 | NA        |
| RP11-324L3.1   | 0,71    | 1,49  | 2,28957  | 0,652099 | 0,514338 | NA        |
| CTSW           | 185,43  | -0,53 | 0,813344 | -0,6521  | 0,51434  | 0,8133233 |
| SPATA33        | 50,27   | -0,55 | 0,836676 | -0,65207 | 0,514354 | 0,8133233 |
| ATP2C2         | 2,88    | 1,22  | 1,876768 | 0,652073 | 0,514354 | NA        |
| PHF11          | 489,22  | -0,32 | 0,484041 | -0,65197 | 0,514419 | 0,8133567 |
| RP11-609L23.1  | 10,71   | -0,95 | 1,462957 | -0,65189 | 0,514469 | 0,8133666 |
| ZNF572         | 0,86    | 2,43  | 3,733262 | 0,651825 | 0,514514 | NA        |
| RP1-224A6.3    | 3,46    | 1,82  | 2,788252 | 0,651704 | 0,514592 | NA        |
| LINC00340      | 31,74   | -0,41 | 0,625754 | -0,65164 | 0,514635 | 0,8134372 |
| RP11-883G14.4  | 30,10   | -0,72 | 1,097615 | -0,65161 | 0,514652 | 0,8134372 |
| MAPKAPK2       | 276,18  | -0,31 | 0,469528 | -0,65153 | 0,514707 | 0,8134372 |
| GNGT2          | 108,92  | -0,53 | 0,809938 | -0,65152 | 0,514708 | 0,8134372 |
| AGTPBP1        | 907,73  | 0,24  | 0,367235 | 0,651487 | 0,514732 | 0,8134372 |
| NKAIN3         | 0,90    | 2,43  | 3,732581 | 0,651339 | 0,514828 | NA        |
| STAP1          | 81,23   | -1,09 | 1,671961 | -0,65133 | 0,514836 | 0,8135319 |
| FAM210B        | 183,22  | -0,58 | 0,889721 | -0,65121 | 0,514908 | 0,8135429 |
| PLAGL2         | 144,03  | 0,62  | 0,947749 | 0,651161 | 0,514943 | 0,8135429 |

|                |         |       |          |          |          |           |
|----------------|---------|-------|----------|----------|----------|-----------|
| AC007285.6     | 0,51    | -2,24 | 3,433064 | -0,65109 | 0,514986 | NA        |
| HJURP          | 7,44    | 0,80  | 1,224981 | 0,651051 | 0,515013 | 0,8135429 |
| ZNF300         | 3,98    | 1,11  | 1,710384 | 0,651044 | 0,515018 | 0,8135429 |
| RP11-1008C21.2 | 32,47   | -0,72 | 1,103228 | -0,65091 | 0,515105 | 0,8136111 |
| MAOA           | 0,26    | -2,19 | 3,364317 | -0,65083 | 0,515155 | NA        |
| LINC00596      | 6,89    | -0,87 | 1,332825 | -0,65053 | 0,515351 | 0,8138593 |
| USP25          | 528,00  | 0,32  | 0,499627 | 0,650477 | 0,515384 | 0,8138593 |
| GPR107         | 401,70  | -0,56 | 0,868208 | -0,65021 | 0,515558 | 0,8138593 |
| TADA2A         | 109,15  | 0,41  | 0,633693 | 0,650177 | 0,515578 | 0,8138593 |
| NAA15          | 544,19  | -0,35 | 0,544771 | -0,65016 | 0,515586 | 0,8138593 |
| ARRDC5         | 54,71   | 0,74  | 1,133063 | 0,650136 | 0,515604 | 0,8138593 |
| RP11-691H4.4   | 27,78   | -0,71 | 1,096156 | -0,65012 | 0,515616 | 0,8138593 |
| IGHV3OR16-15   | 0,87    | 2,40  | 3,697654 | 0,650087 | 0,515636 | NA        |
| KEAP1          | 127,51  | -0,52 | 0,793143 | -0,65004 | 0,515667 | 0,8138593 |
| RP3-442L6.4    | 47,81   | -0,44 | 0,671311 | -0,65004 | 0,515669 | 0,8138593 |
| RP11-64C12.2   | 0,86    | 2,43  | 3,733297 | 0,650027 | 0,515675 | NA        |
| VASN           | 9,48    | 0,94  | 1,45233  | 0,649989 | 0,515699 | 0,8138593 |
| ZNF619         | 31,00   | -0,61 | 0,936755 | -0,64991 | 0,515752 | 0,813873  |
| SLC6A12        | 14,40   | 0,78  | 1,199974 | 0,649768 | 0,515842 | 0,8138809 |
| LSS            | 37,70   | -0,60 | 0,924102 | -0,64971 | 0,515877 | 0,8138809 |
| ADGRF1         | 68,23   | -0,38 | 0,580661 | -0,64964 | 0,515928 | 0,8138809 |
| COX5A          | 1509,76 | 0,17  | 0,257207 | 0,649422 | 0,516066 | 0,8138809 |
| EIF2AK1        | 758,40  | 0,21  | 0,328662 | 0,649404 | 0,516077 | 0,8138809 |
| RNY3P14        | 1,29    | -0,71 | 1,088262 | -0,64936 | 0,516104 | NA        |
| TRIM24         | 260,74  | 0,44  | 0,676304 | 0,649353 | 0,51611  | 0,8138809 |
| LAMA2          | 6,42    | -1,47 | 2,258596 | -0,64929 | 0,516154 | 0,8138809 |
| AC007308.7     | 1,78    | -1,24 | 1,913149 | -0,64928 | 0,516156 | NA        |
| ARID4B         | 1286,14 | -0,24 | 0,371897 | -0,64923 | 0,516191 | 0,8138809 |
| C1orf141       | 6,78    | 0,91  | 1,397744 | 0,649108 | 0,516268 | 0,8138809 |
| CAPN2          | 2773,35 | -0,17 | 0,255954 | -0,6491  | 0,516276 | 0,8138809 |
| PSMD7          | 1318,62 | -0,28 | 0,42483  | -0,64909 | 0,516278 | 0,8138809 |
| RP11-87H9.4    | 39,09   | 0,69  | 1,06536  | 0,649088 | 0,516282 | 0,8138809 |
| TNFRSF6B       | 31,63   | 1,11  | 1,710028 | 0,648925 | 0,516387 | 0,8139038 |
| HSPE1          | 382,36  | -0,16 | 0,250825 | -0,6489  | 0,516404 | 0,8139038 |
| TNFSF14        | 75,01   | -0,84 | 1,294757 | -0,64886 | 0,516428 | 0,8139038 |
| KB-1047C11.2   | 0,66    | 1,45  | 2,231294 | 0,648763 | 0,516492 | NA        |
| SNX20          | 912,70  | 0,31  | 0,474739 | 0,6487   | 0,516532 | 0,8139999 |
| GLOD4          | 355,66  | 0,38  | 0,593316 | 0,648258 | 0,516818 | 0,8143812 |
| ZBTB14         | 138,05  | 0,60  | 0,931705 | 0,647841 | 0,517088 | 0,8147376 |
| C17orf107      | 60,02   | 0,69  | 1,058926 | 0,647596 | 0,517246 | 0,8149182 |
| SNORA22        | 0,86    | 2,42  | 3,733389 | 0,647588 | 0,517252 | NA        |
| RP11-720L2.4   | 1,77    | -1,13 | 1,737495 | -0,64753 | 0,51729  | NA        |
| TMEM110-MUSTN1 | 56,28   | -0,84 | 1,298086 | -0,6475  | 0,51731  | 0,8149489 |
| FAM111A        | 973,35  | -0,30 | 0,464822 | -0,64738 | 0,517387 | 0,8150013 |
| CDCA5          | 0,57    | -1,43 | 2,206907 | -0,64731 | 0,517431 | NA        |
| USP48          | 698,50  | 0,33  | 0,504682 | 0,647293 | 0,517442 | 0,81502   |
| AC017116.8     | 35,40   | 0,48  | 0,735332 | 0,647224 | 0,517487 | 0,8150211 |
| RP4-612B18.1   | 1,10    | -0,69 | 1,060432 | -0,647   | 0,517634 | NA        |
| EFR3B          | 20,97   | -0,45 | 0,688784 | -0,64689 | 0,517701 | 0,815165  |
| RP11-90L9.4    | 9,44    | -0,59 | 0,916768 | -0,64685 | 0,51773  | 0,815165  |

|                |         |       |          |          |          |           |
|----------------|---------|-------|----------|----------|----------|-----------|
| GTPBP10        | 213,64  | -0,56 | 0,86829  | -0,64682 | 0,51775  | 0,815165  |
| TNPO3          | 202,47  | -0,43 | 0,664836 | -0,64667 | 0,517843 | 0,815165  |
| RP11-126O1.4   | 39,45   | 0,59  | 0,905547 | 0,646661 | 0,517851 | 0,815165  |
| HSD17B7        | 142,14  | -0,42 | 0,65093  | -0,64658 | 0,517905 | 0,815165  |
| FLVCR1         | 317,46  | -0,53 | 0,812182 | -0,64657 | 0,517907 | 0,815165  |
| GNB1           | 1474,66 | 0,20  | 0,307508 | 0,646541 | 0,517929 | 0,815165  |
| RP11-341D18.2  | 0,50    | -1,92 | 2,974283 | -0,64647 | 0,517975 | NA        |
| RP11-48B3.3    | 25,92   | -0,36 | 0,556933 | -0,64632 | 0,518075 | 0,8153265 |
| RP11-93G5.1    | 124,96  | 0,38  | 0,594107 | 0,646162 | 0,518175 | 0,8153303 |
| RP11-383M4.6   | 32,29   | -0,41 | 0,634301 | -0,64607 | 0,518234 | 0,8153303 |
| MED24          | 201,33  | -0,31 | 0,48422  | -0,64603 | 0,518262 | 0,8153303 |
| SLX1B          | 264,91  | -0,39 | 0,607171 | -0,64593 | 0,518328 | 0,8153303 |
| RP11-165D7.5   | 0,85    | 2,41  | 3,733458 | 0,645883 | 0,518355 | NA        |
| RP11-1217F2.15 | 0,19    | -2,39 | 3,701326 | -0,64586 | 0,518368 | NA        |
| AC006014.6     | 24,05   | 0,76  | 1,171157 | 0,645858 | 0,518371 | 0,8153303 |
| RP11-422J8.1   | 28,09   | 1,04  | 1,605018 | 0,645845 | 0,51838  | 0,8153303 |
| RP11-30L3.2    | 12,32   | 1,07  | 1,663512 | 0,645838 | 0,518384 | 0,8153303 |
| RP5-862P8.1    | 1,24    | 1,70  | 2,629359 | 0,645829 | 0,51839  | NA        |
| SULT1A2        | 1,85    | 0,78  | 1,202728 | 0,645722 | 0,51846  | NA        |
| RP11-1H15.1    | 0,85    | 2,41  | 3,733454 | 0,64572  | 0,518461 | NA        |
| IL27RA         | 250,38  | 0,31  | 0,485516 | 0,645694 | 0,518477 | 0,8154076 |
| BMP6           | 0,92    | 1,86  | 2,875593 | 0,645611 | 0,518531 | NA        |
| DMTN           | 0,51    | -1,62 | 2,507165 | -0,6456  | 0,518536 | NA        |
| DYNC1I1        | 2,45    | 0,91  | 1,411599 | 0,645575 | 0,518555 | NA        |
| TIMM10B        | 298,59  | -0,50 | 0,777993 | -0,64549 | 0,518611 | 0,8154928 |
| RP11-14C22.4   | 15,66   | -1,27 | 1,971484 | -0,64548 | 0,518619 | 0,8154928 |
| RP11-420K14.6  | 2,43    | 1,21  | 1,881703 | 0,645464 | 0,518627 | NA        |
| RP11-363K21.1  | 80,39   | 0,72  | 1,115423 | 0,645335 | 0,51871  | 0,8155088 |
| AC010731.3     | 0,19    | -2,39 | 3,701406 | -0,64523 | 0,51878  | NA        |
| RP11-112L6.3   | 3,74    | 1,01  | 1,560739 | 0,645204 | 0,518795 | NA        |
| ADCY2          | 61,73   | -0,47 | 0,735391 | -0,64515 | 0,51883  | 0,8155088 |
| OR2F1          | 16,53   | 0,66  | 1,019075 | 0,64511  | 0,518856 | 0,8155088 |
| SMIM7          | 603,82  | 0,20  | 0,317278 | 0,645021 | 0,518913 | 0,8155088 |
| DAPP1          | 1251,50 | 0,24  | 0,368074 | 0,644897 | 0,518994 | 0,8155088 |
| ANXA4          | 713,49  | 0,35  | 0,545242 | 0,644873 | 0,51901  | 0,8155088 |
| STK35          | 115,57  | 0,54  | 0,831112 | 0,644777 | 0,519072 | 0,8155088 |
| RP11-390E23.6  | 64,47   | -0,84 | 1,310396 | -0,64477 | 0,519077 | 0,8155088 |
| RP11-396C23.2  | 0,46    | -1,87 | 2,908    | -0,64477 | 0,519078 | NA        |
| DDI2           | 311,09  | -0,34 | 0,526444 | -0,64469 | 0,51913  | 0,8155088 |
| RP11-257I14.1  | 5,33    | -0,71 | 1,098527 | -0,64467 | 0,51914  | 0,8155088 |
| PDE4D          | 153,64  | -0,59 | 0,911303 | -0,64463 | 0,519167 | 0,8155088 |
| EEF1AKMT1      | 75,15   | -0,86 | 1,336285 | -0,64458 | 0,519196 | 0,8155088 |
| COPS6          | 788,64  | -0,28 | 0,438116 | -0,64457 | 0,519206 | 0,8155088 |
| RP11-715F3.2   | 4,83    | 0,97  | 1,508995 | 0,644513 | 0,519243 | 0,8155088 |
| RP11-74E22.5   | 0,86    | -1,96 | 3,041687 | -0,64438 | 0,519332 | NA        |
| VN1R84P        | 0,19    | -2,38 | 3,701654 | -0,64427 | 0,519399 | NA        |
| RP1-76C18.1    | 14,52   | -0,40 | 0,627877 | -0,64426 | 0,519406 | 0,8156291 |
| HMG20A         | 210,83  | 0,62  | 0,955933 | 0,644259 | 0,519407 | 0,8156291 |
| RP5-1039K5.17  | 4,96    | 0,64  | 0,998749 | 0,643977 | 0,51959  | 0,8156533 |
| PMS1           | 125,58  | 0,51  | 0,795245 | 0,643942 | 0,519613 | 0,8156533 |

|                   |         |       |          |          |          |           |
|-------------------|---------|-------|----------|----------|----------|-----------|
| RP1-111C20.4      | 258,42  | 0,32  | 0,489548 | 0,643853 | 0,519671 | 0,8156533 |
| TMEM18            | 190,82  | -0,35 | 0,548458 | -0,64383 | 0,519685 | 0,8156533 |
| WRN               | 173,04  | -0,39 | 0,603433 | -0,64381 | 0,5197   | 0,8156533 |
| LYAR              | 213,16  | -0,49 | 0,754485 | -0,64381 | 0,519702 | 0,8156533 |
| NDST1             | 182,04  | -0,67 | 1,033193 | -0,64373 | 0,519748 | 0,8156533 |
| SNORA11F          | 6,21    | 1,32  | 2,054707 | 0,643695 | 0,519773 | 0,8156533 |
| XXbac-BPG254F23.7 | 1,62    | 1,15  | 1,779097 | 0,643671 | 0,519789 | NA        |
| LAMC3             | 5,34    | 0,94  | 1,460788 | 0,64357  | 0,519854 | 0,8157045 |
| RP11-710M11.1     | 0,86    | 2,40  | 3,733475 | 0,643442 | 0,519937 | NA        |
| GFRA2             | 54,88   | 0,69  | 1,070103 | 0,643401 | 0,519964 | 0,8157045 |
| CTA-384D8.28      | 1066,82 | -0,75 | 1,165116 | -0,64338 | 0,519978 | 0,8157045 |
| RP11-391L3.1      | 0,81    | 1,61  | 2,502361 | 0,643366 | 0,519986 | NA        |
| ATP6V1E1          | 599,92  | 0,27  | 0,426285 | 0,643335 | 0,520007 | 0,8157045 |
| TCEAL8            | 266,54  | -0,45 | 0,699906 | -0,64329 | 0,520033 | 0,8157045 |
| RP11-309M7.1      | 1,30    | -1,02 | 1,589507 | -0,64303 | 0,520202 | NA        |
| KB-1183D5.13      | 6,36    | 0,96  | 1,496948 | 0,643026 | 0,520207 | 0,8157045 |
| RBMS2P1           | 0,86    | 2,40  | 3,733534 | 0,642961 | 0,520249 | NA        |
| CALCOCO2          | 837,37  | 0,33  | 0,507075 | 0,642908 | 0,520284 | 0,8157045 |
| RP11-257K9.2      | 0,90    | 1,85  | 2,883918 | 0,642908 | 0,520284 | NA        |
| AC109326.1        | 72,16   | -0,45 | 0,70115  | -0,64285 | 0,520321 | 0,8157045 |
| RP11-184F3.1      | 0,70    | 0,87  | 1,355858 | 0,642832 | 0,520333 | NA        |
| C7orf13           | 0,79    | -1,59 | 2,466243 | -0,64279 | 0,520361 | NA        |
| RP1-101K10.6      | 41,99   | -0,93 | 1,453996 | -0,64277 | 0,520372 | 0,8157045 |
| RP11-711K1.7      | 12,32   | -1,35 | 2,107384 | -0,64276 | 0,520378 | 0,8157045 |
| RP5-965G21.3      | 20,04   | -0,52 | 0,807498 | -0,64275 | 0,520385 | 0,8157045 |
| TSC22D3           | 5799,72 | -0,19 | 0,294252 | -0,64275 | 0,520385 | 0,8157045 |
| SNORD6            | 0,83    | 2,38  | 3,699029 | 0,642627 | 0,520466 | NA        |
| MOB1A             | 2270,75 | 0,20  | 0,308295 | 0,642574 | 0,5205   | 0,8157045 |
| COPRS             | 118,00  | -0,67 | 1,039219 | -0,64256 | 0,520507 | 0,8157045 |
| MED7              | 77,60   | 0,62  | 0,963413 | 0,642545 | 0,520519 | 0,8157045 |
| HOTAIRM1          | 219,79  | -0,26 | 0,407541 | -0,64254 | 0,52052  | 0,8157045 |
| RP11-297C4.2      | 2,73    | -0,96 | 1,497715 | -0,64251 | 0,52054  | NA        |
| ZNF271P           | 115,73  | 0,46  | 0,718761 | 0,642408 | 0,520608 | 0,8157045 |
| GGCT              | 236,32  | 0,47  | 0,732318 | 0,642381 | 0,520626 | 0,8157045 |
| RP11-47I22.4      | 0,85    | 2,40  | 3,733578 | 0,642364 | 0,520637 | NA        |
| RP11-414K1.3      | 4,90    | 0,81  | 1,262897 | 0,642361 | 0,520639 | 0,8157045 |
| SLC16A9           | 0,85    | -1,39 | 2,160605 | -0,6423  | 0,520678 | NA        |
| RP11-717F1.1      | 0,84    | 2,40  | 3,733554 | 0,642214 | 0,520734 | NA        |
| AC092835.2        | 0,76    | 1,58  | 2,466617 | 0,642194 | 0,520747 | NA        |
| RP11-16C1.1       | 0,84    | 2,40  | 3,733606 | 0,641937 | 0,520914 | NA        |
| IMPDH1            | 735,53  | -0,30 | 0,462558 | -0,64188 | 0,520949 | 0,8161218 |
| RP11-282A11.3     | 0,85    | 2,40  | 3,733519 | 0,641833 | 0,520982 | NA        |
| AC142528.1        | 1,09    | 2,11  | 3,283708 | 0,641822 | 0,520989 | NA        |
| NCAN              | 0,19    | -2,37 | 3,691347 | -0,6418  | 0,521004 | NA        |
| MCOLN3            | 91,98   | -0,37 | 0,5752   | -0,64169 | 0,521074 | 0,8162485 |
| AC007383.5        | 1,23    | 1,67  | 2,600406 | 0,641359 | 0,52129  | NA        |
| RP11-165D6.1      | 0,84    | 2,39  | 3,733642 | 0,641292 | 0,521333 | NA        |
| OR2AG2            | 6,47    | -0,52 | 0,809987 | -0,64127 | 0,521349 | 0,8162711 |
| USP18             | 112,69  | 0,95  | 1,482198 | 0,641247 | 0,521362 | 0,8162711 |
| GABARAPL2         | 1167,01 | 0,25  | 0,397024 | 0,641245 | 0,521364 | 0,8162711 |

|                |         |       |          |          |          |           |
|----------------|---------|-------|----------|----------|----------|-----------|
| RCVRN          | 10,25   | -0,90 | 1,396213 | -0,64123 | 0,521375 | 0,8162711 |
| RP13-753N3.1   | 10,57   | -0,86 | 1,343436 | -0,64123 | 0,521376 | 0,8162711 |
| NLGN3          | 6,71    | -0,87 | 1,359649 | -0,6412  | 0,521393 | 0,8162711 |
| RP11-770G2.2   | 4,54    | -1,79 | 2,790776 | -0,6412  | 0,521396 | 0,8162711 |
| RP11-181L23.10 | 0,85    | 2,39  | 3,733612 | 0,641039 | 0,521497 | NA        |
| IGHE           | 1,60    | -1,12 | 1,747761 | -0,64093 | 0,521568 | NA        |
| SLC16A1        | 126,32  | -0,56 | 0,866847 | -0,6409  | 0,521585 | 0,8164988 |
| MARVELD2       | 14,39   | -0,48 | 0,754508 | -0,64079 | 0,521659 | 0,8165459 |
| GPATCH11       | 208,40  | 0,38  | 0,593025 | 0,640539 | 0,521822 | 0,8167051 |
| E2F4           | 513,74  | -0,24 | 0,378124 | -0,64038 | 0,521928 | 0,8167051 |
| SNORD43        | 1,30    | -1,79 | 2,799862 | -0,64034 | 0,521952 | NA        |
| RNU4-62P       | 9,76    | -0,72 | 1,132015 | -0,64031 | 0,521968 | 0,8167051 |
| SLC25A37       | 958,33  | 0,31  | 0,478198 | 0,640251 | 0,52201  | 0,8167051 |
| BTBD8          | 21,33   | -0,96 | 1,497862 | -0,64023 | 0,522022 | 0,8167051 |
| GABRG2         | 62,07   | -0,35 | 0,550932 | -0,64023 | 0,522024 | 0,8167051 |
| CRTC2          | 265,45  | -0,32 | 0,500344 | -0,64015 | 0,522074 | 0,816714  |
| RP11-1007O24.2 | 10,02   | -0,56 | 0,868874 | -0,64001 | 0,522167 | 0,816714  |
| PICALM         | 1333,27 | -0,21 | 0,329772 | -0,63999 | 0,522177 | 0,816714  |
| NUDT15         | 56,38   | -0,55 | 0,859194 | -0,63994 | 0,522212 | 0,816714  |
| PLVAP          | 1,11    | -1,58 | 2,464487 | -0,63989 | 0,522243 | NA        |
| RNU6ATAC39P    | 15,13   | -0,90 | 1,404257 | -0,63987 | 0,52226  | 0,816714  |
| RP11-622O11.2  | 55,60   | -0,96 | 1,498724 | -0,63981 | 0,522293 | 0,816714  |
| RP11-759A9.1   | 0,54    | 1,70  | 2,651069 | 0,639711 | 0,522361 | NA        |
| RP4-705D16.3   | 8,21    | 0,59  | 0,914546 | 0,639704 | 0,522365 | 0,8167582 |
| RP11-10L12.4   | 0,49    | -2,35 | 3,676931 | -0,63966 | 0,522393 | NA        |
| HIST3H2A       | 123,81  | -0,82 | 1,285114 | -0,63958 | 0,522443 | 0,8168114 |
| TRIM39-RPP21   | 0,83    | 2,37  | 3,699166 | 0,639576 | 0,522448 | NA        |
| CTA-212A2.2    | 54,50   | -0,30 | 0,468821 | -0,63948 | 0,522512 | 0,8168223 |
| IGLV2-8        | 1,13    | 1,49  | 2,333102 | 0,639469 | 0,522518 | NA        |
| CTD-2371O3.3   | 22,40   | -0,94 | 1,465168 | -0,63944 | 0,522538 | 0,8168223 |
| RP11-477N3.1   | 0,83    | 2,39  | 3,733713 | 0,639392 | 0,522568 | NA        |
| HIRIP3         | 66,48   | -0,89 | 1,39502  | -0,63927 | 0,522649 | 0,8169212 |
| RF01225        | 1,92    | 1,94  | 3,033844 | 0,639197 | 0,522695 | NA        |
| GAS5           | 935,21  | -0,16 | 0,248324 | -0,6392  | 0,522696 | 0,8169212 |
| WAC            | 1819,08 | 0,18  | 0,289154 | 0,639124 | 0,522742 | 0,8169212 |
| RP11-624L4.1   | 182,18  | -0,35 | 0,543993 | -0,63907 | 0,522777 | 0,8169212 |
| RP11-831F12.2  | 1,95    | -0,92 | 1,437652 | -0,63905 | 0,522794 | NA        |
| RP11-271K11.5  | 5,79    | -1,42 | 2,216988 | -0,63895 | 0,522858 | 0,8169787 |
| SARS           | 652,47  | 0,33  | 0,511766 | 0,638852 | 0,522919 | 0,8169937 |
| RP11-415K20.2  | 6,62    | -1,29 | 2,015923 | -0,6388  | 0,522955 | 0,8169937 |
| CLDN19         | 1,16    | 0,85  | 1,334512 | 0,638644 | 0,523055 | NA        |
| RP11-4B14.3    | 18,63   | -0,63 | 0,981994 | -0,63859 | 0,52309  | 0,8171153 |
| SPAG4          | 6,28    | 0,95  | 1,489288 | 0,638479 | 0,523162 | 0,8171153 |
| ZFAND3         | 124,46  | -0,45 | 0,701427 | -0,63847 | 0,523165 | 0,8171153 |
| RP11-122G18.12 | 44,16   | -0,58 | 0,901727 | -0,63828 | 0,523291 | 0,8172448 |
| TELO2          | 71,40   | -0,65 | 1,021408 | -0,63812 | 0,523396 | 0,8173055 |
| POLG           | 379,83  | 0,30  | 0,469988 | 0,638059 | 0,523435 | 0,8173055 |
| RP11-788M5.4   | 3,63    | -0,83 | 1,293497 | -0,63803 | 0,523454 | NA        |
| RP11-501M7.2   | 4,21    | 1,55  | 2,436821 | 0,638018 | 0,523462 | 0,8173055 |
| ZNF876P        | 6,38    | 0,48  | 0,75713  | 0,637889 | 0,523546 | 0,8173673 |

|               |        |       |          |          |          |           |
|---------------|--------|-------|----------|----------|----------|-----------|
| AC012360.4    | 0,85   | 2,38  | 3,733654 | 0,637789 | 0,523611 | NA        |
| FAM69B        | 0,83   | 2,36  | 3,694353 | 0,637714 | 0,52366  | NA        |
| MS4A3         | 0,85   | 2,38  | 3,733644 | 0,637651 | 0,523701 | NA        |
| AC008697.1    | 41,48  | -1,17 | 1,832029 | -0,63761 | 0,523729 | 0,8175848 |
| RP11-689J19.2 | 0,84   | 2,38  | 3,733708 | 0,637582 | 0,523746 | NA        |
| UBP1          | 427,95 | 0,28  | 0,440669 | 0,637384 | 0,523875 | 0,8176751 |
| EMC10         | 301,04 | -0,37 | 0,577923 | -0,63728 | 0,523942 | 0,8176751 |
| RP11-50D9.3   | 2,34   | 0,84  | 1,322283 | 0,637264 | 0,523953 | NA        |
| MIR1273G      | 1,97   | 1,01  | 1,58286  | 0,637261 | 0,523955 | NA        |
| HIST1H1A      | 0,83   | 2,38  | 3,733705 | 0,637184 | 0,524005 | NA        |
| RP11-429P3.8  | 28,77  | -0,39 | 0,618396 | -0,63711 | 0,524052 | 0,8176751 |
| RP13-968A2.1  | 57,91  | -0,32 | 0,502163 | -0,63711 | 0,524055 | 0,8176751 |
| CWC27         | 273,05 | 0,39  | 0,607255 | 0,637065 | 0,524083 | 0,8176751 |
| RP11-231E6.1  | 24,98  | -0,54 | 0,849605 | -0,63705 | 0,524091 | 0,8176751 |
| CTA-407F11.7  | 25,82  | -0,79 | 1,237732 | -0,63705 | 0,524094 | 0,8176751 |
| RP11-565F19.2 | 41,24  | -0,81 | 1,277454 | -0,63679 | 0,524259 | 0,8177937 |
| C1R           | 8,33   | -0,65 | 1,020719 | -0,63673 | 0,5243   | 0,8177937 |
| LCMT2         | 38,07  | -0,44 | 0,692434 | -0,63673 | 0,524302 | 0,8177937 |
| RP11-392P7.6  | 11,79  | -1,41 | 2,217632 | -0,63652 | 0,524439 | 0,8178887 |
| NAT6          | 61,07  | -0,69 | 1,077685 | -0,6365  | 0,524451 | 0,8178887 |
| RP11-223P11.3 | 1,67   | 1,60  | 2,515363 | 0,63645  | 0,524483 | NA        |
| RP11-472I20.4 | 3,23   | -0,62 | 0,981495 | -0,63643 | 0,524494 | NA        |
| RN7SL502P     | 0,74   | 1,56  | 2,457395 | 0,636426 | 0,524499 | NA        |
| NAA60         | 228,88 | 0,33  | 0,514802 | 0,636387 | 0,524524 | 0,817908  |
| MIOS          | 364,00 | -0,49 | 0,762682 | -0,63635 | 0,524551 | 0,817908  |
| FASN          | 55,72  | -0,62 | 0,969096 | -0,63626 | 0,524609 | 0,81793   |
| SNORA1B       | 0,99   | -1,71 | 2,685865 | -0,63621 | 0,524637 | NA        |
| RP11-375I20.6 | 0,87   | 1,81  | 2,83833  | 0,636174 | 0,524663 | NA        |
| RP11-708B6.2  | 0,85   | 2,38  | 3,734101 | 0,636092 | 0,524717 | NA        |
| AC011406.2    | 0,84   | 2,37  | 3,733729 | 0,636069 | 0,524731 | NA        |
| RP11-266L9.5  | 5,07   | -1,28 | 2,006567 | -0,63595 | 0,524808 | 0,8181717 |
| MON1B         | 458,52 | -0,41 | 0,650781 | -0,63572 | 0,524958 | 0,8181861 |
| RF00334       | 0,83   | 2,37  | 3,733771 | 0,635683 | 0,524983 | NA        |
| RP11-651P23.6 | 0,84   | 2,37  | 3,733781 | 0,635667 | 0,524993 | NA        |
| CIAO1         | 737,14 | 0,38  | 0,596992 | 0,635564 | 0,52506  | 0,8181861 |
| RP11-507B12.2 | 13,48  | 0,59  | 0,929539 | 0,635535 | 0,52508  | 0,8181861 |
| FAM151A       | 0,84   | 2,37  | 3,733804 | 0,63545  | 0,525135 | NA        |
| KRAS          | 616,91 | 0,34  | 0,53036  | 0,635428 | 0,525149 | 0,8181861 |
| GBP4          | 483,98 | 0,31  | 0,483091 | 0,635416 | 0,525157 | 0,8181861 |
| RAI14         | 3,94   | -0,64 | 1,002089 | -0,63535 | 0,525202 | 0,8181861 |
| TMEM183A      | 627,69 | -0,29 | 0,462349 | -0,63529 | 0,525241 | 0,8181861 |
| ISCA1         | 190,32 | 0,41  | 0,646015 | 0,635221 | 0,525285 | 0,8181861 |
| SLC25A14      | 90,63  | 0,82  | 1,290754 | 0,635212 | 0,52529  | 0,8181861 |
| RP11-341A22.2 | 10,32  | 0,55  | 0,863074 | 0,63509  | 0,52537  | 0,8181861 |
| RP11-326I11.3 | 18,77  | -0,62 | 0,981089 | -0,63497 | 0,525447 | 0,8181861 |
| C9orf131      | 4,69   | -1,90 | 2,994144 | -0,63495 | 0,52546  | 0,8181861 |
| CTA-204B4.2   | 25,48  | 0,41  | 0,645173 | 0,634914 | 0,525484 | 0,8181861 |
| RP4-749H3.1   | 4,37   | 0,81  | 1,278183 | 0,634823 | 0,525544 | 0,8181861 |
| AC012668.1    | 1,83   | 0,80  | 1,268009 | 0,634725 | 0,525608 | NA        |
| PTS           | 275,25 | -0,37 | 0,583277 | -0,63462 | 0,525678 | 0,8181861 |



|                |         |       |          |          |          |           |
|----------------|---------|-------|----------|----------|----------|-----------|
| RP11-7F17.8    | 42,24   | -0,49 | 0,777682 | -0,6346  | 0,525691 | 0,8181861 |
| SUDS3          | 207,03  | 0,36  | 0,565645 | 0,634496 | 0,525757 | 0,8181861 |
| RP5-1017O19.1  | 43,18   | 1,34  | 2,113796 | 0,634465 | 0,525778 | 0,8181861 |
| RAB13          | 193,77  | 0,45  | 0,712346 | 0,634438 | 0,525795 | 0,8181861 |
| RP11-83B20.3   | 21,43   | 1,07  | 1,693279 | 0,634404 | 0,525817 | 0,8181861 |
| AP3D1          | 748,97  | 0,28  | 0,440765 | 0,634344 | 0,525856 | 0,8181861 |
| RP4-547C10.1   | 3,96    | 0,62  | 0,97955  | 0,634221 | 0,525936 | 0,8181861 |
| KMT5C          | 10,32   | -0,74 | 1,164214 | -0,63419 | 0,525954 | 0,8181861 |
| DSC1           | 0,22    | -1,80 | 2,833415 | -0,63418 | 0,525966 | NA        |
| RP11-735B13.2  | 11,74   | 0,47  | 0,733639 | 0,634174 | 0,525968 | 0,8181861 |
| RP11-792A8.3   | 34,77   | -1,10 | 1,735709 | -0,63416 | 0,525977 | 0,8181861 |
| RP11-492I21.1  | 2,52    | 1,08  | 1,706111 | 0,634128 | 0,525997 | NA        |
| RP11-219E7.3   | 0,72    | 1,99  | 3,134996 | 0,634125 | 0,526    | NA        |
| PTOV1          | 312,28  | -0,32 | 0,499525 | -0,6341  | 0,526017 | 0,8181861 |
| STYK1          | 12,11   | -1,71 | 2,696273 | -0,63407 | 0,526034 | 0,8181861 |
| CTD-2530H12.1  | 0,92    | 1,82  | 2,87006  | 0,633998 | 0,526082 | NA        |
| MECP2          | 376,01  | -0,44 | 0,691132 | -0,63399 | 0,526089 | 0,8181861 |
| RP11-147G7.3   | 32,69   | 0,68  | 1,074744 | 0,633981 | 0,526093 | 0,8181861 |
| ZNF101         | 149,58  | -0,44 | 0,690856 | -0,63386 | 0,52617  | 0,818224  |
| PSENE1         | 442,92  | 0,22  | 0,344859 | 0,633809 | 0,526205 | 0,818224  |
| RP11-415F23.2  | 1,04    | 2,06  | 3,253348 | 0,63372  | 0,526264 | NA        |
| RP11-90C4.1    | 186,35  | -0,48 | 0,762679 | -0,63359 | 0,526349 | 0,8182607 |
| PI4KAP2        | 128,18  | -0,56 | 0,881902 | -0,6335  | 0,526407 | 0,8182607 |
| TLR2           | 1613,25 | -0,26 | 0,416875 | -0,63348 | 0,526423 | 0,8182607 |
| KIAA1958       | 172,41  | 0,64  | 1,010036 | 0,633402 | 0,526471 | 0,8182607 |
| GFPT2          | 0,18    | -2,34 | 3,698686 | -0,63339 | 0,526478 | NA        |
| ITGA4          | 1994,98 | -0,20 | 0,320961 | -0,63339 | 0,526482 | 0,8182607 |
| CTC-435M10.3   | 172,76  | -0,66 | 1,038259 | -0,63337 | 0,526493 | 0,8182607 |
| RNU6-531P      | 0,81    | -2,22 | 3,504263 | -0,63334 | 0,52651  | NA        |
| RP11-161M6.4   | 12,54   | -0,79 | 1,245247 | -0,6332  | 0,526605 | 0,818366  |
| CTB-55O6.10    | 7,90    | -1,50 | 2,37032  | -0,63309 | 0,526676 | 0,8184081 |
| MAP2K4         | 202,20  | 0,49  | 0,778849 | 0,632848 | 0,526833 | 0,8185518 |
| RP11-236P2.2   | 16,30   | 0,75  | 1,179913 | 0,632777 | 0,526879 | 0,8185518 |
| RP11-323P17.1  | 13,26   | -0,65 | 1,032368 | -0,63275 | 0,5269   | 0,8185518 |
| LINC00612      | 0,45    | -2,16 | 3,4199   | -0,63269 | 0,526937 | NA        |
| ASRGL1         | 126,10  | -0,45 | 0,707867 | -0,63267 | 0,52695  | 0,8185551 |
| RNU2-45P       | 0,72    | -1,32 | 2,090582 | -0,63267 | 0,526952 | NA        |
| RP11-110I1.12  | 2,68    | -1,04 | 1,651795 | -0,63259 | 0,527003 | NA        |
| RP11-108O10.4  | 0,49    | -1,41 | 2,230677 | -0,63258 | 0,527005 | NA        |
| FAM217A        | 1,69    | 2,36  | 3,733902 | 0,632574 | 0,527012 | NA        |
| RN7SL752P      | 7,45    | 0,78  | 1,232225 | 0,632564 | 0,527018 | 0,8185551 |
| OR5A2          | 109,61  | -0,40 | 0,627885 | -0,63254 | 0,527034 | 0,8185551 |
| HIST1H2BI      | 0,83    | 2,36  | 3,733871 | 0,632385 | 0,527135 | NA        |
| SULT1E1        | 1,56    | 1,21  | 1,919966 | 0,632301 | 0,52719  | NA        |
| NLRP3          | 1571,15 | 0,28  | 0,445359 | 0,632219 | 0,527243 | 0,818759  |
| RP11-278J6.1   | 0,85    | 1,77  | 2,796614 | 0,632212 | 0,527248 | NA        |
| CNOT4          | 229,69  | -0,31 | 0,49823  | -0,6322  | 0,527253 | 0,818759  |
| RP11-142L1.1   | 1,57    | 1,54  | 2,436841 | 0,632141 | 0,527295 | NA        |
| BATF3          | 347,84  | -0,29 | 0,464235 | -0,6321  | 0,527322 | 0,8187885 |
| RP11-1070N10.4 | 0,88    | 2,03  | 3,212555 | 0,631944 | 0,527424 | NA        |

|                |        |       |          |          |          |           |
|----------------|--------|-------|----------|----------|----------|-----------|
| RNU1-134P      | 3,43   | -0,85 | 1,3464   | -0,63185 | 0,527483 | NA        |
| ALG3           | 425,54 | 0,40  | 0,634949 | 0,63179  | 0,527524 | 0,8187885 |
| RP11-436D10.3  | 0,87   | 1,80  | 2,845545 | 0,631739 | 0,527557 | NA        |
| RP11-24J23.2   | 98,68  | 0,36  | 0,57607  | 0,631705 | 0,52758  | 0,8187885 |
| RP11-523L20.2  | 7,68   | -0,69 | 1,087343 | -0,63165 | 0,527618 | 0,8187885 |
| SREK1IP1       | 212,63 | -0,29 | 0,452043 | -0,63163 | 0,52763  | 0,8187885 |
| WRAP53         | 97,62  | -0,81 | 1,275435 | -0,63161 | 0,52764  | 0,8187885 |
| DGCR14         | 115,26 | -0,70 | 1,103146 | -0,63156 | 0,527674 | 0,8187885 |
| AC006547.13    | 68,62  | -0,51 | 0,800526 | -0,63156 | 0,527675 | 0,8187885 |
| RAB5B          | 274,40 | 0,34  | 0,535439 | 0,631536 | 0,52769  | 0,8187885 |
| RP11-374A4.1   | 0,72   | -1,65 | 2,615753 | -0,63153 | 0,527697 | NA        |
| PDHA1          | 546,28 | -0,30 | 0,475053 | -0,63149 | 0,527719 | 0,8187885 |
| SEC24A         | 206,71 | -0,53 | 0,832156 | -0,63143 | 0,527757 | 0,8187885 |
| RP11-615I2.6   | 57,03  | -0,33 | 0,527698 | -0,63121 | 0,527903 | 0,818849  |
| MEPCE          | 441,96 | -0,29 | 0,465133 | -0,63118 | 0,527923 | 0,818849  |
| SLC15A3        | 945,71 | -0,21 | 0,335187 | -0,63117 | 0,527928 | 0,818849  |
| SERHL          | 0,29   | -2,14 | 3,391093 | -0,63117 | 0,527931 | NA        |
| RP4-809F4.1    | 0,82   | 2,36  | 3,733915 | 0,631142 | 0,527947 | NA        |
| RP11-165N19.2  | 0,43   | 1,44  | 2,280602 | 0,631073 | 0,527993 | NA        |
| SIGIRR         | 439,20 | -0,30 | 0,483055 | -0,63099 | 0,528049 | 0,81889   |
| RP11-113K21.6  | 27,52  | 0,39  | 0,611272 | 0,630986 | 0,52805  | 0,81889   |
| RP13-228J13.8  | 0,83   | 2,36  | 3,733948 | 0,630971 | 0,528059 | NA        |
| CTD-2270L9.3   | 19,34  | -0,40 | 0,639977 | -0,63087 | 0,528124 | 0,81889   |
| RP1-18D14.3    | 88,89  | -0,43 | 0,675718 | -0,63085 | 0,528136 | 0,81889   |
| GAPT           | 882,31 | 0,38  | 0,606269 | 0,630796 | 0,528174 | 0,81889   |
| FRMD5          | 0,59   | 1,49  | 2,361836 | 0,630769 | 0,528192 | NA        |
| RP11-561O23.8  | 0,81   | 2,32  | 3,682606 | 0,630702 | 0,528235 | NA        |
| SIRPD          | 6,79   | 0,93  | 1,479843 | 0,630685 | 0,528246 | 0,8188908 |
| OXTR           | 33,43  | 0,76  | 1,210303 | 0,63066  | 0,528263 | 0,8188908 |
| GCC2           | 562,23 | 0,29  | 0,45992  | 0,630542 | 0,52834  | 0,8189427 |
| MUC19          | 9,93   | -0,69 | 1,089394 | -0,63041 | 0,528424 | 0,8190045 |
| RP11-719J20.1  | 0,82   | 2,35  | 3,734041 | 0,630395 | 0,528436 | NA        |
| RPL21P122      | 1,24   | -1,04 | 1,642715 | -0,63036 | 0,528458 | NA        |
| RP11-636O21.1  | 1,20   | -1,02 | 1,62396  | -0,62997 | 0,528715 | NA        |
| KIAA0319       | 3,08   | -0,83 | 1,320144 | -0,62987 | 0,528781 | NA        |
| FRRS1L         | 95,76  | -0,35 | 0,562585 | -0,62983 | 0,528808 | 0,8194655 |
| CTC-774J1.2    | 14,41  | 0,66  | 1,048986 | 0,629762 | 0,52885  | 0,8194655 |
| ZNF25          | 79,25  | 0,57  | 0,899101 | 0,629733 | 0,52887  | 0,8194655 |
| ARHGAP10       | 202,86 | 0,38  | 0,61046  | 0,629601 | 0,528956 | 0,8194655 |
| DNAJB4         | 73,26  | 0,66  | 1,053737 | 0,629517 | 0,529011 | 0,8194655 |
| RP11-152P17.2  | 1,78   | 0,88  | 1,396734 | 0,6295   | 0,529022 | NA        |
| AC113617.1     | 31,12  | -0,77 | 1,218853 | -0,62949 | 0,529029 | 0,8194655 |
| KIAA0368       | 626,69 | 0,33  | 0,525384 | 0,629437 | 0,529063 | 0,8194655 |
| ZNF585B        | 33,67  | 0,59  | 0,944125 | 0,62942  | 0,529074 | 0,8194655 |
| RP11-181F12.1  | 1,15   | 1,09  | 1,732659 | 0,629395 | 0,52909  | NA        |
| CTD-2192J16.20 | 8,68   | -1,20 | 1,911053 | -0,62935 | 0,529122 | 0,8194717 |
| C6orf132       | 21,38  | 0,47  | 0,747227 | 0,629247 | 0,529187 | 0,8195048 |
| GALNT12        | 2,73   | 1,25  | 1,992433 | 0,629242 | 0,529191 | NA        |
| MIR4705        | 0,83   | 2,35  | 3,734055 | 0,629026 | 0,529332 | NA        |
| RP11-440L14.4  | 8,49   | -1,27 | 2,013031 | -0,62899 | 0,529355 | 0,8196304 |

|                |         |       |          |          |          |           |
|----------------|---------|-------|----------|----------|----------|-----------|
| ANKIB1         | 492,66  | -0,38 | 0,60885  | -0,62899 | 0,529357 | 0,8196304 |
| KDM5B          | 215,81  | 0,42  | 0,668858 | 0,628836 | 0,529456 | 0,8197027 |
| ARRDC2         | 1035,75 | 0,25  | 0,397882 | 0,628766 | 0,529502 | 0,8197027 |
| RP11-555K2.3   | 3,67    | 2,32  | 3,68371  | 0,628756 | 0,529509 | NA        |
| NDUFA6         | 590,46  | 0,25  | 0,397239 | 0,628616 | 0,529601 | 0,8197027 |
| RP4-617A9.4    | 9,42    | -1,15 | 1,832928 | -0,62859 | 0,529618 | 0,8197027 |
| RP5-931K24.3   | 72,33   | -0,61 | 0,965899 | -0,62857 | 0,529631 | 0,8197027 |
| RP11-262H14.4  | 18,90   | -0,79 | 1,257817 | -0,62851 | 0,529668 | 0,8197027 |
| SEPT2          | 1686,40 | 0,23  | 0,36123  | 0,628408 | 0,529736 | 0,8197411 |
| AC105760.2     | 15,37   | -0,68 | 1,07826  | -0,62824 | 0,529849 | 0,8197483 |
| VN1R82P        | 0,79    | 2,31  | 3,679416 | 0,628155 | 0,529902 | NA        |
| XRCC3          | 10,94   | -0,90 | 1,438938 | -0,62815 | 0,529905 | 0,8197483 |
| CTD-2540B15.13 | 2,80    | -1,02 | 1,615998 | -0,62811 | 0,52993  | NA        |
| RNA5SP123      | 0,80    | 2,32  | 3,695744 | 0,62811  | 0,529932 | NA        |
| CRIP2          | 52,75   | 0,92  | 1,458564 | 0,628091 | 0,529944 | 0,8197483 |
| CENPC          | 278,48  | 0,27  | 0,427405 | 0,628062 | 0,529963 | 0,8197483 |
| RN7SL766P      | 0,43    | -1,10 | 1,743822 | -0,62803 | 0,529983 | NA        |
| RN7SL181P      | 6,78    | -0,91 | 1,448201 | -0,62801 | 0,53     | 0,8197483 |
| RP11-203B9.4   | 40,04   | 0,43  | 0,67981  | 0,627994 | 0,530008 | 0,8197483 |
| AC011742.4     | 0,82    | 2,34  | 3,734052 | 0,627955 | 0,530033 | NA        |
| RP11-102G14.1  | 3,76    | 0,61  | 0,964369 | 0,627928 | 0,530051 | 0,8197483 |
| RN7SL726P      | 2,91    | -0,45 | 0,714728 | -0,62787 | 0,530088 | NA        |
| CTC-359D24.3   | 10,44   | 1,08  | 1,722804 | 0,627863 | 0,530094 | 0,8197483 |
| DLX6           | 2,97    | 0,56  | 0,894156 | 0,627839 | 0,530109 | NA        |
| HSD17B10       | 1281,36 | -0,23 | 0,362334 | -0,62776 | 0,530158 | 0,8197797 |
| NELFA          | 101,72  | -0,37 | 0,591779 | -0,62765 | 0,530231 | 0,8198241 |
| RP11-486A14.1  | 2,07    | -0,90 | 1,426237 | -0,62765 | 0,530236 | NA        |
| FKBP1C         | 1,47    | 0,59  | 0,937484 | 0,627398 | 0,530399 | NA        |
| RP11-103H7.1   | 0,50    | 1,68  | 2,680785 | 0,627396 | 0,5304   | NA        |
| RP11-24M17.5   | 0,83    | 2,34  | 3,734466 | 0,627358 | 0,530425 | NA        |
| RP11-504P24.2  | 46,07   | 0,34  | 0,53778  | 0,627289 | 0,53047  | 0,8201257 |
| DSG4           | 0,80    | -2,30 | 3,659626 | -0,62716 | 0,530553 | NA        |
| SLC39A7        | 24,14   | -0,89 | 1,424236 | -0,6271  | 0,530591 | 0,820245  |
| RN7SL74P       | 0,80    | 2,32  | 3,698264 | 0,627001 | 0,530658 | NA        |
| TXNRD2         | 359,22  | -0,41 | 0,646195 | -0,62693 | 0,530707 | 0,8203556 |
| TDP2           | 151,74  | 0,58  | 0,918067 | 0,626559 | 0,530948 | 0,8206604 |
| KATNAL2        | 34,15   | -0,56 | 0,899136 | -0,62642 | 0,531041 | 0,8207262 |
| RP3-342P20.2   | 0,31    | -2,10 | 3,352248 | -0,62638 | 0,531065 | NA        |
| PWP1           | 638,04  | 0,28  | 0,453948 | 0,626341 | 0,531091 | 0,8207262 |
| RP11-396K3.1   | 339,63  | 0,66  | 1,057711 | 0,62629  | 0,531125 | 0,8207262 |
| RP11-35G9.5    | 46,10   | -0,51 | 0,808562 | -0,62623 | 0,531167 | 0,8207262 |
| RP11-14I17.3   | 2,49    | -1,10 | 1,762861 | -0,62608 | 0,531261 | NA        |
| CTD-2651B20.4  | 3,21    | 1,04  | 1,657526 | 0,62595  | 0,531348 | NA        |
| RN7SL144P      | 0,63    | 1,96  | 3,139221 | 0,625908 | 0,531375 | NA        |
| GTF2IRD2       | 96,37   | -0,35 | 0,559157 | -0,62584 | 0,531421 | 0,8209873 |
| RP11-629O1.2   | 26,08   | -0,89 | 1,415969 | -0,62578 | 0,531461 | 0,8209873 |
| CCDC51         | 51,49   | 0,75  | 1,193962 | 0,625766 | 0,531468 | 0,8209873 |
| APH1B          | 98,69   | 0,65  | 1,042596 | 0,625619 | 0,531565 | 0,8210516 |
| ARFGEF1        | 887,01  | 0,33  | 0,535351 | 0,625504 | 0,53164  | 0,8210516 |
| LINC00528      | 110,23  | 0,54  | 0,861754 | 0,625501 | 0,531642 | 0,8210516 |

|                     |          |       |          |          |          |           |
|---------------------|----------|-------|----------|----------|----------|-----------|
| DRAXIN              | 24,05    | -0,35 | 0,558894 | -0,62529 | 0,531781 | 0,821109  |
| REEP3               | 286,74   | 0,40  | 0,644793 | 0,625227 | 0,531822 | 0,821109  |
| RP11-463J7.2        | 3,72     | -1,33 | 2,12194  | -0,62514 | 0,531882 | NA        |
| B3GNT7              | 185,39   | 0,57  | 0,908749 | 0,625134 | 0,531883 | 0,821109  |
| PHKG2               | 776,76   | -0,29 | 0,456483 | -0,625   | 0,531969 | 0,821109  |
| COMMD10             | 334,40   | 0,51  | 0,818656 | 0,624993 | 0,531975 | 0,821109  |
| C9orf66             | 135,25   | -0,50 | 0,805652 | -0,62498 | 0,531985 | 0,821109  |
| QARS                | 1387,29  | 0,19  | 0,29687  | 0,624973 | 0,531989 | 0,821109  |
| RNU6-142P           | 0,82     | 2,33  | 3,734165 | 0,624933 | 0,532015 | NA        |
| NPIPA1              | 188,45   | 0,31  | 0,489399 | 0,624801 | 0,532102 | 0,8211832 |
| CH507-9B2.8         | 0,81     | 2,33  | 3,734223 | 0,624743 | 0,53214  | NA        |
| PLPP6               | 8,09     | 1,07  | 1,719266 | 0,624706 | 0,532164 | 0,8211832 |
| ADAMTS1             | 4,70     | -0,68 | 1,087025 | -0,6247  | 0,532169 | 0,8211832 |
| FAM120B             | 280,31   | 0,42  | 0,666361 | 0,624604 | 0,532231 | 0,8212109 |
| RP11-270M14.1       | 4,84     | -0,59 | 0,950289 | -0,62453 | 0,53228  | 0,8212186 |
| RP11-196I2.1        | 3,71     | -1,13 | 1,815611 | -0,62428 | 0,532445 | NA        |
| VAX1                | 0,62     | 1,94  | 3,110796 | 0,624277 | 0,532446 | NA        |
| S1PR4               | 332,41   | 0,45  | 0,728195 | 0,624171 | 0,532515 | 0,8213944 |
| RP11-12A20.6        | 4,11     | 0,74  | 1,183467 | 0,624124 | 0,532546 | 0,8213944 |
| ZNF33A              | 549,54   | 0,29  | 0,469907 | 0,624103 | 0,53256  | 0,8213944 |
| ZNF771              | 3,28     | -0,74 | 1,184813 | -0,62409 | 0,532567 | NA        |
| RP11-981P6.1        | 99,16    | 0,46  | 0,73124  | 0,623992 | 0,532633 | 0,8213944 |
| RNH1                | 2801,03  | 0,16  | 0,249209 | 0,623952 | 0,532659 | 0,8213944 |
| RP1-65J11.5         | 14,42    | -0,44 | 0,707196 | -0,62395 | 0,532659 | 0,8213944 |
| RP11-275F13.3       | 0,40     | -1,57 | 2,520112 | -0,62384 | 0,532732 | NA        |
| RP11-624J12.1       | 7,67     | -1,01 | 1,623515 | -0,62371 | 0,532818 | 0,8214624 |
| C1QTNF4             | 6,63     | -1,71 | 2,749019 | -0,62367 | 0,532843 | 0,8214624 |
| XXbac-BPGBPG55C20.4 | 0,31     | -2,11 | 3,377216 | -0,62365 | 0,532856 | NA        |
| TOGARAM1            | 167,56   | 0,37  | 0,590774 | 0,623637 | 0,532866 | 0,8214624 |
| C12orf42            | 22,90    | -1,40 | 2,248518 | -0,6236  | 0,532892 | 0,8214624 |
| PDCD5               | 269,45   | -0,29 | 0,462923 | -0,62351 | 0,532949 | 0,8214624 |
| RP5-1068H6.6        | 1,04     | 2,03  | 3,26339  | 0,623509 | 0,53295  | NA        |
| C1orf200            | 6,44     | -1,61 | 2,585056 | -0,62348 | 0,532968 | 0,8214624 |
| C1QTNF1             | 20,63    | -0,73 | 1,175001 | -0,62327 | 0,533107 | 0,8215798 |
| RP5-1009E24.8       | 1,04     | 1,44  | 2,307735 | 0,623242 | 0,533126 | NA        |
| PMS2                | 41,57    | 0,61  | 0,978976 | 0,623171 | 0,533172 | 0,8215798 |
| FUT4                | 63,10    | -0,49 | 0,791734 | -0,62316 | 0,533177 | 0,8215798 |
| RP11-272L13.4       | 1,25     | 2,32  | 3,729683 | 0,62306  | 0,533245 | NA        |
| RP11-69C17.1        | 4,67     | 0,88  | 1,405088 | 0,622924 | 0,533334 | 0,8216967 |
| GOLGA8N             | 113,10   | -0,35 | 0,560713 | -0,62289 | 0,533358 | 0,8216967 |
| LINC00582           | 63,58    | 0,44  | 0,712633 | 0,622847 | 0,533385 | 0,8216967 |
| RN7SL509P           | 0,91     | -0,92 | 1,483608 | -0,62272 | 0,533466 | NA        |
| LAPTM5              | 10719,06 | -0,12 | 0,198977 | -0,6226  | 0,533548 | 0,8218799 |
| RP11-263K4.5        | 5,51     | 0,52  | 0,833971 | 0,622457 | 0,533641 | 0,8219225 |
| RP11-529G21.2       | 1,89     | -1,15 | 1,840638 | -0,62245 | 0,533648 | NA        |
| NDUFS3              | 967,43   | -0,20 | 0,323432 | -0,62237 | 0,5337   | 0,8219225 |
| XXyac-YX155B6.7     | 0,65     | 1,97  | 3,165071 | 0,622337 | 0,53372  | NA        |
| AMFR                | 416,86   | -0,31 | 0,505233 | -0,62232 | 0,533732 | 0,8219225 |
| CTC-575N7.1         | 0,79     | -2,28 | 3,67093  | -0,62221 | 0,533801 | NA        |
| AL353662.3          | 4,06     | 0,66  | 1,065168 | 0,622198 | 0,533812 | 0,8219225 |

|                |         |       |          |          |          |           |
|----------------|---------|-------|----------|----------|----------|-----------|
| VMA21          | 492,34  | -0,27 | 0,436502 | -0,62217 | 0,533831 | 0,8219225 |
| AC138517.6     | 5,12    | 0,68  | 1,096532 | 0,622074 | 0,533893 | 0,8219225 |
| RP11-1035H13.3 | 26,45   | -1,25 | 2,013244 | -0,62196 | 0,533966 | 0,8219225 |
| ACTA2          | 44,15   | 0,56  | 0,904794 | 0,621935 | 0,533985 | 0,8219225 |
| AC005307.5     | 0,69    | -0,89 | 1,427008 | -0,62188 | 0,53402  | NA        |
| RALA           | 485,85  | 0,30  | 0,474534 | 0,621863 | 0,534032 | 0,8219225 |
| CTD-2315E11.1  | 24,11   | 0,32  | 0,510421 | 0,621834 | 0,534051 | 0,8219225 |
| C9orf16        | 332,73  | -0,23 | 0,375365 | -0,62182 | 0,534062 | 0,8219225 |
| RP11-597D13.10 | 1,66    | -1,63 | 2,620483 | -0,62173 | 0,534117 | NA        |
| AC124914.3     | 0,79    | 2,29  | 3,690986 | 0,621666 | 0,534162 | NA        |
| PITPNM3        | 11,90   | 0,69  | 1,116288 | 0,621621 | 0,534191 | 0,8220534 |
| RP11-689C9.1   | 1,41    | -1,32 | 2,117075 | -0,62151 | 0,534267 | NA        |
| RP11-764K9.1   | 32,58   | 0,75  | 1,20031  | 0,621504 | 0,534268 | 0,8221035 |
| TTYH2          | 147,08  | 0,50  | 0,811938 | 0,621338 | 0,534377 | 0,8221679 |
| AC002398.11    | 1,46    | 2,32  | 3,729016 | 0,621315 | 0,534393 | NA        |
| ADAM7          | 14,15   | -1,98 | 3,192595 | -0,62125 | 0,534438 | 0,8221679 |
| SOCS5          | 51,61   | 0,62  | 0,992261 | 0,621185 | 0,534478 | 0,8221679 |
| PLAC4          | 26,45   | 0,77  | 1,245939 | 0,621172 | 0,534486 | 0,8221679 |
| MTMR14         | 1259,88 | 0,26  | 0,425544 | 0,621101 | 0,534533 | 0,8221716 |
| HERC2P3        | 41,12   | -0,52 | 0,845416 | -0,62088 | 0,534681 | 0,8222267 |
| WDR20          | 127,49  | 0,41  | 0,664769 | 0,620825 | 0,534715 | 0,8222267 |
| SLC7A6OS       | 222,19  | 0,64  | 1,030446 | 0,620809 | 0,534726 | 0,8222267 |
| TCF7           | 47,82   | -0,67 | 1,075435 | -0,62078 | 0,534746 | 0,8222267 |
| IGKV1-9        | 0,80    | -1,07 | 1,718681 | -0,62076 | 0,534758 | NA        |
| RP11-90D4.3    | 18,60   | 1,00  | 1,608228 | 0,620596 | 0,534865 | 0,8223028 |
| MEGF8          | 35,68   | 0,52  | 0,832047 | 0,620537 | 0,534904 | 0,8223028 |
| RP11-50D16.4   | 8,40    | 0,80  | 1,282843 | 0,620501 | 0,534928 | 0,8223028 |
| RP11-5N19.3    | 0,79    | 2,31  | 3,727598 | 0,620424 | 0,534979 | NA        |
| DDX60L         | 920,11  | -0,31 | 0,500671 | -0,62026 | 0,53509  | 0,8224314 |
| RN7SL364P      | 4,46    | -1,05 | 1,69747  | -0,62024 | 0,5351   | 0,8224314 |
| TRIM34         | 396,37  | -0,40 | 0,639542 | -0,62002 | 0,535246 | 0,8225884 |
| GLB1L          | 28,92   | 0,46  | 0,736077 | 0,619844 | 0,535361 | 0,8226966 |
| RP11-589M4.3   | 1,49    | -1,19 | 1,917116 | -0,61966 | 0,535481 | NA        |
| LINC00689      | 3,48    | -0,66 | 1,058632 | -0,61965 | 0,535488 | NA        |
| SLC4A5         | 37,64   | -0,73 | 1,17919  | -0,61963 | 0,535501 | 0,8228094 |
| FAT3           | 6,29    | 0,53  | 0,85624  | 0,619598 | 0,535523 | 0,8228094 |
| PRCC           | 221,61  | 0,43  | 0,697087 | 0,619445 | 0,535623 | 0,822896  |
| RN7SL251P      | 0,18    | -2,29 | 3,705299 | -0,61929 | 0,535723 | NA        |
| RP11-286E11.1  | 19,87   | -1,02 | 1,65324  | -0,61928 | 0,535732 | 0,8229945 |
| NBPF25P        | 27,53   | -0,35 | 0,572195 | -0,61902 | 0,535901 | 0,8231874 |
| TMEM175        | 205,62  | 0,39  | 0,632445 | 0,618896 | 0,535985 | 0,8231953 |
| AP001625.4     | 0,37    | -2,28 | 3,682521 | -0,61886 | 0,536009 | NA        |
| MED6           | 330,85  | -0,33 | 0,54065  | -0,61883 | 0,536027 | 0,8231953 |
| RP11-357C3.3   | 101,99  | 0,71  | 1,143883 | 0,618813 | 0,536039 | 0,8231953 |
| RP1-225E12.3   | 0,80    | 2,31  | 3,734512 | 0,61862  | 0,536167 | NA        |
| RNU6-613P      | 0,60    | 1,91  | 3,092378 | 0,618609 | 0,536174 | NA        |
| PPFIBP2        | 113,53  | -0,48 | 0,769759 | -0,61859 | 0,53619  | 0,8233584 |
| ATAT1          | 39,74   | 0,87  | 1,407242 | 0,618401 | 0,536311 | 0,8234549 |
| AC092415.1     | 16,55   | -0,68 | 1,105925 | -0,6183  | 0,536378 | 0,8234549 |
| SCRG1          | 94,47   | 0,53  | 0,86273  | 0,618221 | 0,53643  | 0,8234549 |

|                 |         |       |          |          |          |           |
|-----------------|---------|-------|----------|----------|----------|-----------|
| KCTD12          | 1981,33 | -0,21 | 0,332784 | -0,61822 | 0,536431 | 0,8234549 |
| YARS2           | 182,13  | -0,56 | 0,906025 | -0,61815 | 0,536474 | 0,8234549 |
| OR8D4           | 4,73    | 0,63  | 1,015362 | 0,618085 | 0,53652  | 0,823457  |
| AL022345.7      | 0,79    | 2,31  | 3,734446 | 0,617907 | 0,536636 | NA        |
| TBC1D15         | 347,81  | 0,35  | 0,571276 | 0,617873 | 0,536659 | 0,8235438 |
| RN7SL357P       | 0,80    | -0,99 | 1,597942 | -0,61782 | 0,536693 | NA        |
| CTD-2354A18.1   | 4,08    | 1,27  | 2,06028  | 0,617804 | 0,536704 | 0,8235438 |
| AC009506.2      | 6,23    | 1,52  | 2,461514 | 0,617797 | 0,536709 | 0,8235438 |
| RP1-131F15.3    | 0,68    | 1,35  | 2,180851 | 0,617604 | 0,536836 | NA        |
| LRFN4           | 12,22   | -0,89 | 1,43516  | -0,61747 | 0,536922 | 0,8236551 |
| REBNP           | 15,54   | 0,52  | 0,846855 | 0,61732  | 0,537024 | 0,8236551 |
| RP11-354E23.4   | 6,34    | -1,02 | 1,656733 | -0,61732 | 0,537026 | 0,8236551 |
| AC007040.6      | 0,52    | -1,82 | 2,953331 | -0,61729 | 0,537045 | NA        |
| RP11-272L13.1   | 56,41   | 0,76  | 1,234632 | 0,617285 | 0,537047 | 0,8236551 |
| CH17-302M23.1   | 3,94    | 0,59  | 0,950251 | 0,617279 | 0,537051 | 0,8236551 |
| AC004053.1      | 4,87    | 0,47  | 0,753381 | 0,617278 | 0,537051 | 0,8236551 |
| RP11-575L7.4    | 17,55   | 0,49  | 0,798615 | 0,617217 | 0,537091 | 0,8236551 |
| AC008592.3      | 4,54    | 1,32  | 2,140243 | 0,616836 | 0,537343 | 0,8239734 |
| FLNC            | 1,68    | -1,58 | 2,556027 | -0,61676 | 0,537395 | NA        |
| MAN2B1          | 867,05  | -0,27 | 0,441362 | -0,61667 | 0,537449 | 0,8240683 |
| CADM2           | 0,53    | -1,20 | 1,941003 | -0,61649 | 0,53757  | NA        |
| ABCC3           | 60,32   | -0,53 | 0,862581 | -0,61644 | 0,537605 | 0,8242395 |
| CYP3A7-CYP3A51P | 0,77    | 2,26  | 3,665172 | 0,616344 | 0,537668 | NA        |
| RAC1            | 2395,77 | -0,17 | 0,273594 | -0,61632 | 0,53768  | 0,824281  |
| DHX30           | 454,40  | 0,28  | 0,452159 | 0,616249 | 0,53773  | 0,824281  |
| PFDN6           | 28,81   | 0,48  | 0,774221 | 0,616156 | 0,537791 | 0,824281  |
| AC115115.3      | 0,77    | 2,26  | 3,674597 | 0,616155 | 0,537792 | NA        |
| RP11-133K1.12   | 100,65  | 0,53  | 0,865713 | 0,616129 | 0,53781  | 0,824281  |
| CTD-2619J13.19  | 34,67   | 0,27  | 0,440215 | 0,616014 | 0,537886 | 0,8243295 |
| OAZ3            | 29,77   | -0,69 | 1,126372 | -0,61592 | 0,537948 | 0,8243576 |
| RP11-410L14.2   | 8,93    | 0,54  | 0,876451 | 0,615762 | 0,538052 | 0,8243718 |
| RP11-348P10.2   | 2,65    | 1,30  | 2,117473 | 0,615699 | 0,538093 | NA        |
| FCER2           | 5,15    | 0,97  | 1,583236 | 0,615671 | 0,538112 | 0,8243718 |
| CCDC174         | 168,47  | 0,43  | 0,701736 | 0,61565  | 0,538126 | 0,8243718 |
| RP11-568J23.2   | 7,19    | 0,68  | 1,111347 | 0,615636 | 0,538135 | 0,8243718 |
| ADGRG7          | 6,58    | 1,71  | 2,778698 | 0,615517 | 0,538213 | 0,8244243 |
| RP11-762H8.4    | 2,86    | -1,20 | 1,954935 | -0,61545 | 0,538259 | NA        |
| CCL15           | 0,52    | 1,05  | 1,700192 | 0,615397 | 0,538292 | NA        |
| XPO7            | 358,40  | 0,45  | 0,732596 | 0,615351 | 0,538323 | 0,8245183 |
| SGPL1           | 418,74  | 0,44  | 0,720662 | 0,61529  | 0,538363 | 0,8245183 |
| AC106873.4      | 1,01    | 2,00  | 3,25081  | 0,615269 | 0,538377 | NA        |
| MREG            | 0,56    | -1,07 | 1,735721 | -0,61522 | 0,538409 | NA        |
| CTD-2145A24.5   | 4,52    | 1,73  | 2,807536 | 0,615178 | 0,538437 | 0,8245191 |
| RP11-29A19.2    | 1,73    | -0,64 | 1,039114 | -0,61512 | 0,538476 | NA        |
| RBBP7           | 679,47  | 0,33  | 0,53543  | 0,615107 | 0,538484 | 0,8245191 |
| PTPN23          | 167,10  | -0,59 | 0,966166 | -0,61509 | 0,538497 | 0,8245191 |
| RP11-461L13.5   | 0,79    | 2,30  | 3,73454  | 0,615041 | 0,538527 | NA        |
| AC011139.1      | 7,21    | -0,26 | 0,425888 | -0,61496 | 0,538584 | 0,8245843 |
| CECR1           | 2655,03 | 0,17  | 0,283468 | 0,614867 | 0,538642 | 0,8245896 |
| RP11-204M4.4    | 8,74    | -1,12 | 1,817964 | -0,61482 | 0,538676 | 0,8245896 |

|               |         |       |          |          |          |           |
|---------------|---------|-------|----------|----------|----------|-----------|
| NSG1          | 11,16   | 0,74  | 1,208323 | 0,614701 | 0,538752 | 0,8246384 |
| AC064834.1    | 1,77    | -0,85 | 1,38013  | -0,61463 | 0,538799 | NA        |
| PCDHB9        | 2,51    | 0,68  | 1,098238 | 0,614624 | 0,538803 | NA        |
| RP1-72A23.3   | 1,22    | 0,70  | 1,140177 | 0,614597 | 0,538821 | NA        |
| SLC26A1       | 0,87    | 2,29  | 3,734871 | 0,614473 | 0,538903 | NA        |
| RP11-134G8.6  | 44,26   | 0,54  | 0,875371 | 0,61423  | 0,539064 | 0,8249795 |
| SLC5A6        | 132,61  | 0,52  | 0,848627 | 0,61422  | 0,53907  | 0,8249795 |
| SEC61A1       | 1034,95 | -0,19 | 0,301609 | -0,61416 | 0,539108 | 0,8249795 |
| RP11-9M16.2   | 0,61    | 1,92  | 3,12775  | 0,61415  | 0,539116 | NA        |
| AC006129.4    | 19,12   | 0,90  | 1,469716 | 0,613887 | 0,53929  | 0,8251908 |
| RP11-123J14.2 | 0,79    | 2,29  | 3,734589 | 0,613827 | 0,539329 | NA        |
| RP3-402G11.28 | 0,78    | 2,26  | 3,674932 | 0,613767 | 0,539369 | NA        |
| ZNF709        | 3,41    | 1,14  | 1,86206  | 0,613732 | 0,539392 | NA        |
| RP11-81K13.1  | 0,87    | 1,75  | 2,851499 | 0,613717 | 0,539402 | NA        |
| DLG4          | 7,58    | -0,77 | 1,26069  | -0,61372 | 0,539403 | 0,8252961 |
| RP11-496B10.7 | 2,69    | -1,14 | 1,857528 | -0,61347 | 0,539567 | NA        |
| AC104134.2    | 6,84    | -1,27 | 2,076235 | -0,61343 | 0,539594 | 0,8254962 |
| RP11-49I11.1  | 0,77    | 2,26  | 3,68149  | 0,613341 | 0,539651 | NA        |
| HLA-E         | 7396,13 | -0,12 | 0,190305 | -0,61332 | 0,539663 | 0,8254962 |
| RP11-448A19.1 | 55,38   | -0,36 | 0,587383 | -0,61332 | 0,539667 | 0,8254962 |
| RP11-85O21.5  | 1,10    | -1,34 | 2,186767 | -0,6133  | 0,539676 | NA        |
| RP11-285G1.15 | 0,41    | -1,15 | 1,87429  | -0,61325 | 0,539713 | NA        |
| INTS7         | 207,36  | -0,56 | 0,918281 | -0,6131  | 0,539812 | 0,8256493 |
| RNU1-87P      | 0,78    | 2,26  | 3,688719 | 0,613063 | 0,539834 | NA        |
| RP11-468E2.5  | 7,39    | 0,95  | 1,554643 | 0,612951 | 0,539908 | 0,8257217 |
| MTIF2         | 278,77  | 0,25  | 0,413306 | 0,612892 | 0,539948 | 0,8257217 |
| RP5-875O13.7  | 14,54   | -1,95 | 3,181261 | -0,61277 | 0,540028 | 0,8257429 |
| FAM76B        | 238,10  | -0,34 | 0,557455 | -0,61274 | 0,54005  | 0,8257429 |
| TRIM62        | 71,79   | -0,85 | 1,388961 | -0,6125  | 0,540204 | 0,8258899 |
| AP000475.2    | 5,94    | 0,79  | 1,282556 | 0,612457 | 0,540235 | 0,8258899 |
| CTA-276O3.4   | 0,35    | 1,23  | 2,00186  | 0,612358 | 0,540301 | NA        |
| CTD-2314B22.2 | 0,59    | 1,90  | 3,098111 | 0,61235  | 0,540306 | NA        |
| MCF2          | 5,51    | 1,59  | 2,594173 | 0,612321 | 0,540325 | 0,8259597 |
| RP11-122K13.7 | 0,76    | 2,25  | 3,680869 | 0,612174 | 0,540423 | NA        |
| ZSWIM5        | 0,81    | 2,28  | 3,734235 | 0,611744 | 0,540707 | NA        |
| RP5-1166F10.1 | 0,70    | -2,24 | 3,664025 | -0,61171 | 0,540733 | NA        |
| TRPC4AP       | 727,49  | 0,27  | 0,434678 | 0,611702 | 0,540735 | 0,8264368 |
| RP11-1072A3.3 | 9,12    | 0,97  | 1,580864 | 0,611687 | 0,540745 | 0,8264368 |
| RP11-642A1.1  | 43,98   | -0,58 | 0,942717 | -0,61165 | 0,540771 | 0,8264368 |
| KIF1BP        | 57,16   | 0,58  | 0,95467  | 0,611551 | 0,540835 | 0,8264664 |
| RP11-478P10.1 | 71,33   | -0,52 | 0,842883 | -0,61148 | 0,540882 | 0,8264707 |
| MED25         | 98,25   | -0,38 | 0,629417 | -0,61135 | 0,540969 | 0,8265146 |
| PLAT          | 14,05   | 0,92  | 1,501767 | 0,611277 | 0,541016 | 0,8265146 |
| RP11-356C4.3  | 5,79    | 0,46  | 0,756249 | 0,611197 | 0,541069 | 0,8265146 |
| SCARNA13      | 0,79    | 2,28  | 3,734566 | 0,611165 | 0,541091 | NA        |
| CTA-286B10.7  | 4,27    | -0,81 | 1,320386 | -0,61113 | 0,541111 | 0,8265146 |
| RP11-158L12.6 | 16,85   | -0,33 | 0,544477 | -0,6111  | 0,541133 | 0,8265146 |
| RNU1-103P     | 2,39    | 1,88  | 3,076883 | 0,610991 | 0,541206 | NA        |
| FAM117A       | 62,60   | -0,60 | 0,981513 | -0,61097 | 0,541217 | 0,8265748 |
| SLA           | 970,52  | -0,30 | 0,485748 | -0,61088 | 0,541277 | 0,8265763 |

|                |          |       |          |          |          |           |
|----------------|----------|-------|----------|----------|----------|-----------|
| RP11-322E11.5  | 2,29     | -0,65 | 1,066473 | -0,61075 | 0,541366 | NA        |
| RP4-742C19.13  | 5,37     | -0,54 | 0,885282 | -0,61061 | 0,541461 | 0,8265763 |
| SQLE           | 170,51   | 0,46  | 0,761416 | 0,610604 | 0,541462 | 0,8265763 |
| CDH12P1        | 5,43     | -1,02 | 1,669969 | -0,61053 | 0,54151  | 0,8265763 |
| CDH12P3        | 5,43     | -1,02 | 1,669969 | -0,61053 | 0,54151  | 0,8265763 |
| RNU4-86P       | 5,79     | -0,47 | 0,768645 | -0,61053 | 0,541512 | 0,8265763 |
| RP11-142C4.6   | 6,08     | -1,47 | 2,408419 | -0,61048 | 0,541541 | 0,8265763 |
| DCTD           | 418,43   | 0,44  | 0,72879  | 0,610356 | 0,541626 | 0,8265763 |
| SPIDR          | 598,35   | -0,31 | 0,503832 | -0,61032 | 0,54165  | 0,8265763 |
| RP1-256G22.2   | 0,17     | -2,26 | 3,707498 | -0,61022 | 0,541715 | NA        |
| RPA1           | 408,16   | 0,38  | 0,630329 | 0,610216 | 0,541719 | 0,8265763 |
| MSANTD1        | 7,95     | -0,45 | 0,741112 | -0,61017 | 0,541748 | 0,8265763 |
| RP11-463D19.2  | 5,23     | -1,72 | 2,818489 | -0,61013 | 0,541775 | 0,8265763 |
| MT1X           | 87,67    | -0,46 | 0,753518 | -0,6101  | 0,541795 | 0,8265763 |
| AC073264.6     | 3,89     | -1,40 | 2,292131 | -0,60999 | 0,541871 | 0,8266099 |
| DAXX           | 174,58   | 0,48  | 0,785583 | 0,609933 | 0,541906 | 0,8266099 |
| LINC00997      | 1,05     | -1,04 | 1,710878 | -0,60974 | 0,542036 | NA        |
| SLC4A1         | 6,46     | 0,55  | 0,905157 | 0,609694 | 0,542065 | 0,8267843 |
| MCM10          | 1,30     | 0,74  | 1,219945 | 0,609592 | 0,542132 | NA        |
| UTP20          | 198,75   | -0,42 | 0,685576 | -0,60954 | 0,542169 | 0,8268759 |
| RP11-1149M10.2 | 5,45     | 0,74  | 1,214749 | 0,609342 | 0,542298 | 0,8270042 |
| RP11-126O22.1  | 1,20     | 2,27  | 3,730016 | 0,609315 | 0,542316 | NA        |
| RP11-434H14.1  | 113,38   | -0,36 | 0,59032  | -0,60907 | 0,542479 | 0,8272125 |
| RP11-74E22.8   | 1,27     | 0,64  | 1,052101 | 0,609016 | 0,542514 | NA        |
| RN7SL510P      | 1,08     | -1,11 | 1,823768 | -0,60897 | 0,542544 | NA        |
| CDH26          | 3,19     | 0,98  | 1,610829 | 0,608853 | 0,542622 | NA        |
| MAP3K4         | 437,40   | 0,38  | 0,628612 | 0,608741 | 0,542696 | 0,8273489 |
| POLQ           | 28,50    | -0,67 | 1,099624 | -0,60874 | 0,542697 | 0,8273489 |
| RF00191        | 0,77     | 2,24  | 3,684078 | 0,608703 | 0,542722 | NA        |
| ARHGAP30       | 1551,25  | -0,20 | 0,322456 | -0,60868 | 0,542736 | 0,8273489 |
| DPCD           | 133,11   | 0,54  | 0,891174 | 0,608606 | 0,542786 | 0,8273489 |
| CTA-963H5.5    | 22,11    | -0,96 | 1,572894 | -0,6086  | 0,542791 | 0,8273489 |
| CASP10         | 258,49   | 0,35  | 0,576906 | 0,608482 | 0,542868 | 0,8273985 |
| RPS15AP24      | 0,78     | 2,27  | 3,734775 | 0,608459 | 0,542883 | NA        |
| RP11-311P8.2   | 0,74     | 2,21  | 3,630954 | 0,608399 | 0,542923 | NA        |
| ZNF843         | 5,82     | -0,45 | 0,739543 | -0,60839 | 0,542929 | 0,8274249 |
| FUNDC1         | 107,36   | 0,71  | 1,164023 | 0,608148 | 0,543089 | 0,8274829 |
| C12orf40       | 0,32     | -2,06 | 3,381177 | -0,60815 | 0,543091 | NA        |
| WDR6           | 367,78   | 0,42  | 0,683037 | 0,608126 | 0,543104 | 0,8274829 |
| RPGR           | 179,15   | 0,46  | 0,760221 | 0,608106 | 0,543117 | 0,8274829 |
| RP11-547D24.1  | 7,99     | -0,58 | 0,948445 | -0,60803 | 0,543167 | 0,8274829 |
| RP11-134P9.3   | 5,17     | 1,04  | 1,717771 | 0,607996 | 0,54319  | 0,8274829 |
| NWD1           | 12,28    | -0,43 | 0,71513  | -0,60784 | 0,543296 | 0,8275208 |
| MIR7-3HG       | 6,50     | -0,59 | 0,972207 | -0,60782 | 0,543304 | 0,8275208 |
| DGCR12         | 0,75     | 2,22  | 3,654491 | 0,607818 | 0,543308 | NA        |
| AL022341.3     | 1,31     | 1,79  | 2,938418 | 0,607772 | 0,543339 | NA        |
| FOSB           | 14443,27 | 0,15  | 0,240284 | 0,607758 | 0,543348 | 0,8275208 |
| RP11-292D4.3   | 0,79     | 2,27  | 3,73482  | 0,607633 | 0,543431 | NA        |
| EIF3J          | 283,19   | 0,33  | 0,537297 | 0,607621 | 0,543439 | 0,8275915 |
| MRPS27         | 403,09   | 0,44  | 0,727117 | 0,607487 | 0,543528 | 0,8276585 |



|                |         |       |          |          |          |           |
|----------------|---------|-------|----------|----------|----------|-----------|
| FERMT3         | 1064,12 | -0,17 | 0,287345 | -0,60735 | 0,543617 | 0,827727  |
| SMARCC1        | 919,22  | -0,25 | 0,406759 | -0,60721 | 0,543709 | 0,8277501 |
| AUP1           | 901,04  | 0,22  | 0,36676  | 0,607195 | 0,543721 | 0,8277501 |
| CH17-80A12.1   | 4,10    | 0,63  | 1,040891 | 0,607074 | 0,543802 | 0,8277981 |
| NEMF           | 1211,53 | 0,26  | 0,426242 | 0,607014 | 0,543842 | 0,8277981 |
| RP11-20B24.7   | 0,73    | 1,54  | 2,530397 | 0,606904 | 0,543914 | NA        |
| RP11-520P18.1  | 0,78    | 2,27  | 3,734805 | 0,606805 | 0,54398  | NA        |
| GRAPL          | 0,75    | 2,23  | 3,674133 | 0,606796 | 0,543986 | NA        |
| ZC3HC1         | 124,65  | 0,53  | 0,881574 | 0,606764 | 0,544008 | 0,8279832 |
| RP11-981G7.2   | 0,79    | 2,27  | 3,734891 | 0,606755 | 0,544013 | NA        |
| RP11-527H14.4  | 1,96    | 1,67  | 2,758602 | 0,606711 | 0,544042 | NA        |
| B3GALT1        | 25,72   | 0,39  | 0,638563 | 0,606648 | 0,544084 | 0,8280317 |
| AP000350.6     | 0,77    | 2,24  | 3,692899 | 0,606608 | 0,544111 | NA        |
| RP11-677O4.2   | 0,54    | 1,05  | 1,735316 | 0,606423 | 0,544234 | NA        |
| RP11-46D6.1    | 1,42    | -1,06 | 1,755519 | -0,6064  | 0,544252 | NA        |
| AC073934.6     | 1,16    | 2,26  | 3,730271 | 0,606191 | 0,544388 | NA        |
| MCCC1          | 292,21  | -0,46 | 0,766407 | -0,60614 | 0,544425 | 0,8283343 |
| CDH11          | 2,41    | 1,19  | 1,966981 | 0,606111 | 0,544441 | NA        |
| SCGB3A1        | 17,75   | 0,72  | 1,186892 | 0,605996 | 0,544517 | 0,8283343 |
| RP11-379H18.1  | 86,15   | -0,44 | 0,722612 | -0,60598 | 0,544526 | 0,8283343 |
| GPR141         | 76,22   | -0,61 | 1,006538 | -0,60597 | 0,544537 | 0,8283343 |
| ID3            | 146,32  | -0,43 | 0,71309  | -0,60594 | 0,544552 | 0,8283343 |
| RBM19          | 274,05  | -0,38 | 0,620391 | -0,60589 | 0,544585 | 0,8283343 |
| ITGB1          | 960,38  | 0,20  | 0,327881 | 0,605819 | 0,544635 | 0,8283343 |
| RP5-1021I20.5  | 49,49   | 0,35  | 0,570639 | 0,60581  | 0,544641 | 0,8283343 |
| RP11-1018N14.2 | 9,02    | 0,43  | 0,710962 | 0,605745 | 0,544684 | 0,8283343 |
| DNAH14         | 13,96   | -0,62 | 1,022798 | -0,60555 | 0,544814 | 0,8284645 |
| UGT2B4         | 1,10    | -0,87 | 1,441305 | -0,60545 | 0,544878 | NA        |
| AC093642.3     | 98,32   | -0,42 | 0,693242 | -0,6053  | 0,54498  | 0,8286487 |
| RP11-380L11.4  | 2,98    | 0,89  | 1,466133 | 0,605079 | 0,545127 | NA        |
| AL162151.1     | 6,53    | -1,01 | 1,66735  | -0,60508 | 0,545129 | 0,8288082 |
| RP3-340N1.5    | 0,77    | 2,26  | 3,734941 | 0,604848 | 0,54528  | NA        |
| PAN2           | 217,71  | -0,57 | 0,94721  | -0,60481 | 0,545305 | 0,8289554 |
| GM2A           | 398,46  | -0,23 | 0,38467  | -0,6048  | 0,545315 | 0,8289554 |
| SEC14L3        | 2,24    | 0,93  | 1,532486 | 0,604529 | 0,545492 | NA        |
| RP11-91P17.1   | 5,09    | 0,84  | 1,381596 | 0,604482 | 0,545523 | 0,829168  |
| UBE2D1         | 552,00  | 0,36  | 0,595098 | 0,604451 | 0,545544 | 0,829168  |
| POMGNT2        | 65,19   | 1,15  | 1,894768 | 0,604346 | 0,545614 | 0,8291891 |
| RP11-151N17.1  | 3,75    | -0,92 | 1,528453 | -0,6043  | 0,545644 | NA        |
| CTD-3222D19.12 | 11,51   | 0,40  | 0,663824 | 0,604296 | 0,545647 | 0,8291891 |
| ZNF124         | 312,92  | 0,43  | 0,708021 | 0,604153 | 0,545742 | 0,8292652 |
| RP11-223E19.1  | 0,66    | -1,00 | 1,660057 | -0,60406 | 0,545806 | NA        |
| RP5-998N21.7   | 4,75    | 1,40  | 2,319996 | 0,604023 | 0,545829 | 0,8293295 |
| DLX6-AS1       | 46,32   | -0,63 | 1,044673 | -0,60378 | 0,545989 | 0,8295059 |
| RP5-837O21.5   | 2,59    | -0,72 | 1,195866 | -0,60355 | 0,546142 | NA        |
| RNU6-234P      | 0,78    | 2,25  | 3,735018 | 0,603542 | 0,546148 | NA        |
| CLSPN          | 41,00   | -0,66 | 1,088444 | -0,60347 | 0,546196 | 0,829752  |
| SLC38A10       | 446,06  | -0,27 | 0,443279 | -0,6034  | 0,546245 | 0,8297595 |
| RP11-315H15.1  | 0,85    | -1,15 | 1,910403 | -0,60332 | 0,546297 | NA        |
| RP11-21M24.2   | 10,20   | 0,70  | 1,159732 | 0,603256 | 0,546339 | 0,8297599 |

|               |          |       |          |          |          |           |
|---------------|----------|-------|----------|----------|----------|-----------|
| MTERF4        | 165,53   | 0,39  | 0,6487   | 0,603255 | 0,546339 | 0,8297599 |
| RP11-890B15.2 | 9,27     | 0,46  | 0,762165 | 0,603194 | 0,546379 | 0,8297599 |
| AMER3         | 2,83     | -1,00 | 1,658046 | -0,60288 | 0,546589 | NA        |
| CTD-2116N20.1 | 3,97     | -1,37 | 2,272053 | -0,6027  | 0,546705 | 0,8300226 |
| FCHSD2        | 554,11   | 0,33  | 0,55208  | 0,602657 | 0,546737 | 0,8300226 |
| RP11-439C15.6 | 0,58     | 1,84  | 3,057196 | 0,602639 | 0,546749 | NA        |
| RN7SL483P     | 1,95     | -0,86 | 1,428253 | -0,60257 | 0,546797 | NA        |
| RP11-298I3.5  | 87,70    | 0,69  | 1,144364 | 0,602558 | 0,546803 | 0,8300226 |
| DUX4L19       | 6,11     | -1,33 | 2,21496  | -0,60254 | 0,546817 | 0,8300226 |
| CTC-504A5.1   | 0,78     | 2,25  | 3,734864 | 0,60247  | 0,546861 | NA        |
| KCTD7         | 62,31    | 0,47  | 0,776771 | 0,602267 | 0,546997 | 0,8300226 |
| CTC-558O19.1  | 0,76     | 2,25  | 3,735028 | 0,602253 | 0,547006 | NA        |
| RP4-734P14.4  | 0,77     | 2,25  | 3,734961 | 0,602205 | 0,547038 | NA        |
| RP11-674E16.5 | 4,47     | -0,83 | 1,374335 | -0,60216 | 0,54707  | 0,8300226 |
| SGMS1         | 154,56   | -0,46 | 0,758241 | -0,60213 | 0,547087 | 0,8300226 |
| RCAN3         | 235,66   | 0,41  | 0,688404 | 0,602083 | 0,547119 | 0,8300226 |
| RP11-651L5.3  | 27,23    | -0,46 | 0,758971 | -0,60207 | 0,547126 | 0,8300226 |
| RP4-534N18.4  | 17,55    | -0,43 | 0,720356 | -0,60203 | 0,547152 | 0,8300226 |
| STX18         | 230,74   | -0,43 | 0,720804 | -0,60203 | 0,547153 | 0,8300226 |
| DRAM2         | 842,07   | -0,31 | 0,513421 | -0,60199 | 0,547179 | 0,8300226 |
| CDAN1         | 36,21    | -0,57 | 0,944017 | -0,60199 | 0,54718  | 0,8300226 |
| IL17RE        | 12,45    | -0,60 | 0,99807  | -0,60198 | 0,547187 | 0,8300226 |
| AC108004.3    | 0,17     | -2,23 | 3,699291 | -0,60192 | 0,547227 | NA        |
| MIR548X2      | 1,97     | 2,02  | 3,351568 | 0,601919 | 0,547228 | NA        |
| RNU6-1190P    | 0,76     | 2,25  | 3,735154 | 0,601893 | 0,547246 | NA        |
| PSKH1         | 50,13    | -0,75 | 1,243098 | -0,60189 | 0,547249 | 0,8300226 |
| CTD-2588E21.1 | 0,39     | -1,72 | 2,850616 | -0,60187 | 0,547258 | NA        |
| AC090505.4    | 8,34     | 0,74  | 1,228654 | 0,601678 | 0,547388 | 0,8300226 |
| TTC32         | 140,75   | 0,58  | 0,957086 | 0,601644 | 0,547411 | 0,8300226 |
| TM7SF2        | 45,54    | 0,86  | 1,436611 | 0,601637 | 0,547416 | 0,8300226 |
| LA16c-4G1.3   | 12,91    | -0,44 | 0,738157 | -0,60157 | 0,547461 | 0,8300226 |
| PARN          | 255,85   | 0,30  | 0,493739 | 0,601476 | 0,547523 | 0,8300226 |
| ING1          | 234,20   | -0,48 | 0,791432 | -0,60146 | 0,547534 | 0,8300226 |
| ENOPH1        | 253,99   | 0,42  | 0,706624 | 0,601449 | 0,547541 | 0,8300226 |
| RPL8          | 11878,71 | 0,11  | 0,176901 | 0,601393 | 0,547578 | 0,8300226 |
| AP000609.2    | 1,40     | 0,94  | 1,555581 | 0,601317 | 0,547629 | NA        |
| POLE3         | 450,30   | -0,34 | 0,568656 | -0,60128 | 0,547653 | 0,8300328 |
| NDUFV1        | 1452,14  | -0,20 | 0,338159 | -0,60125 | 0,547674 | 0,8300328 |
| RN7SL332P     | 0,57     | -1,40 | 2,325033 | -0,60114 | 0,54775  | NA        |
| PENK          | 0,79     | 2,24  | 3,73471  | 0,601096 | 0,547776 | NA        |
| RP11-231E19.1 | 31,18    | 0,71  | 1,184434 | 0,600976 | 0,547856 | 0,8301753 |
| XPOT          | 305,71   | 0,38  | 0,639446 | 0,600973 | 0,547858 | 0,8301753 |
| NRL           | 0,44     | -2,03 | 3,372721 | -0,60094 | 0,547882 | NA        |
| RP11-452D21.1 | 0,74     | 2,21  | 3,672326 | 0,600913 | 0,547898 | NA        |
| RN7SL118P     | 20,03    | -1,12 | 1,861    | -0,60085 | 0,547938 | 0,8302297 |
| RP11-196G4.2  | 0,96     | -0,71 | 1,189181 | -0,6008  | 0,547973 | NA        |
| SGIP1         | 6,81     | -0,87 | 1,44309  | -0,60077 | 0,547992 | 0,8302437 |
| RP5-862P8.2   | 158,92   | 0,66  | 1,101269 | 0,60068  | 0,548053 | 0,8302684 |
| FAM25G        | 0,72     | 2,17  | 3,62098  | 0,600613 | 0,548098 | NA        |
| RN7SL398P     | 13,55    | 0,56  | 0,930436 | 0,600458 | 0,548201 | 0,8304247 |

|                |         |       |          |          |          |           |
|----------------|---------|-------|----------|----------|----------|-----------|
| RP11-746B8.1   | 1,01    | 1,41  | 2,356642 | 0,600415 | 0,54823  | NA        |
| RP11-316M21.6  | 0,88    | -0,77 | 1,281445 | -0,60037 | 0,548262 | NA        |
| RP11-285E9.5   | 4,54    | -1,27 | 2,113869 | -0,60013 | 0,548418 | 0,8306729 |
| CTD-2201E18.3  | 275,52  | -0,32 | 0,539643 | -0,60002 | 0,548494 | 0,8306729 |
| RP11-746L20.1  | 0,73    | 2,20  | 3,663243 | 0,599996 | 0,548509 | NA        |
| MIR320B2       | 0,75    | 2,24  | 3,735102 | 0,599974 | 0,548523 | NA        |
| AC114776.3     | 33,12   | -0,40 | 0,668271 | -0,59991 | 0,548564 | 0,8306729 |
| RP11-20G6.1    | 0,77    | 2,24  | 3,735097 | 0,599864 | 0,548597 | NA        |
| FAAH2          | 0,88    | 1,93  | 3,216667 | 0,59982  | 0,548626 | NA        |
| RP11-274B21.12 | 0,58    | 1,85  | 3,087838 | 0,599781 | 0,548652 | NA        |
| RP11-380O24.1  | 13,52   | -0,98 | 1,639791 | -0,59976 | 0,548668 | 0,8306729 |
| CLCN6          | 266,72  | 0,37  | 0,619416 | 0,599743 | 0,548678 | 0,8306729 |
| IDH3A          | 559,78  | 0,28  | 0,464711 | 0,599708 | 0,548701 | 0,8306729 |
| TMEM181        | 234,58  | -0,31 | 0,518005 | -0,59965 | 0,548737 | 0,8306729 |
| MYH14          | 10,47   | 0,68  | 1,133065 | 0,599595 | 0,548776 | 0,8306729 |
| DMBT1P1        | 11,21   | -0,81 | 1,352681 | -0,59954 | 0,548811 | 0,8306729 |
| RP11-96D1.8    | 54,93   | 0,62  | 1,039246 | 0,599543 | 0,548811 | 0,8306729 |
| XRCC2          | 146,75  | -0,38 | 0,633172 | -0,59947 | 0,548862 | 0,8306822 |
| SPCS1          | 1093,74 | -0,22 | 0,373638 | -0,5992  | 0,54904  | 0,830835  |
| RP3-335N17.2   | 54,55   | -0,57 | 0,958433 | -0,59917 | 0,549059 | 0,830835  |
| PIK3R5         | 502,29  | 0,34  | 0,569518 | 0,599102 | 0,549105 | 0,830835  |
| RN7SL33P       | 2,02    | -0,86 | 1,442043 | -0,59906 | 0,549133 | NA        |
| RP11-178L8.3   | 23,20   | -0,33 | 0,558682 | -0,59901 | 0,549166 | 0,830835  |
| CTNNBIP1       | 231,48  | -0,42 | 0,701797 | -0,59898 | 0,549186 | 0,830835  |
| ERICH6B        | 1,00    | 1,76  | 2,932294 | 0,598947 | 0,549208 | NA        |
| RP11-290F20.1  | 1,06    | 1,42  | 2,371816 | 0,598805 | 0,549303 | NA        |
| RP11-656E20.5  | 0,90    | -1,17 | 1,945974 | -0,59868 | 0,549384 | NA        |
| RP11-686D22.7  | 67,60   | -0,95 | 1,593415 | -0,59861 | 0,549436 | 0,8310411 |
| TMEM132A       | 31,45   | -0,44 | 0,728934 | -0,59854 | 0,549477 | 0,8310411 |
| CLDN10         | 7,28    | -1,30 | 2,171871 | -0,59854 | 0,549481 | 0,8310411 |
| SLC25A15       | 18,05   | -2,16 | 3,609644 | -0,59851 | 0,549501 | 0,8310411 |
| RP11-53O19.2   | 1,14    | -1,19 | 1,987187 | -0,59811 | 0,549765 | NA        |
| NISCH          | 615,82  | -0,24 | 0,394041 | -0,59806 | 0,549802 | 0,8314292 |
| RP11-275F13.1  | 2,05    | 0,88  | 1,475128 | 0,597924 | 0,549891 | NA        |
| AC010547.9     | 0,75    | 2,23  | 3,735179 | 0,597798 | 0,549975 | NA        |
| ERICD          | 0,75    | 2,23  | 3,735201 | 0,597549 | 0,550141 | NA        |
| PDF            | 25,65   | 1,02  | 1,700118 | 0,597514 | 0,550164 | 0,8316251 |
| GALM           | 152,00  | 0,42  | 0,696437 | 0,597474 | 0,550191 | 0,8316251 |
| HBP1           | 616,25  | 0,29  | 0,481386 | 0,597439 | 0,550214 | 0,8316251 |
| RBBP8          | 114,02  | -0,42 | 0,698602 | -0,59744 | 0,550216 | 0,8316251 |
| TBCB           | 1406,25 | 0,15  | 0,250576 | 0,597417 | 0,550229 | 0,8316251 |
| RP11-739P6.1   | 1,13    | -0,88 | 1,468944 | -0,5974  | 0,550237 | NA        |
| CEP162         | 151,11  | -0,54 | 0,897361 | -0,5974  | 0,550238 | 0,8316251 |
| AC012507.3     | 32,59   | -0,86 | 1,435293 | -0,59739 | 0,550245 | 0,8316251 |
| RP11-310A13.1  | 1,52    | 2,00  | 3,343231 | 0,597358 | 0,550269 | NA        |
| CTD-2173L22.4  | 1,07    | 1,44  | 2,41161  | 0,597283 | 0,550318 | NA        |
| MLIP           | 1,84    | -0,92 | 1,544915 | -0,59728 | 0,550321 | NA        |
| CLPTM1L        | 431,22  | 0,35  | 0,583013 | 0,597178 | 0,550388 | 0,8317738 |
| MIR425         | 0,72    | 2,17  | 3,628325 | 0,597149 | 0,550408 | NA        |
| CHD9           | 827,45  | 0,25  | 0,420135 | 0,597112 | 0,550433 | 0,8317738 |

|                |         |       |          |          |          |           |
|----------------|---------|-------|----------|----------|----------|-----------|
| CTC-457E21.3   | 0,66    | 1,08  | 1,811665 | 0,597101 | 0,55044  | NA        |
| SGK2           | 1,06    | 2,23  | 3,731602 | 0,59708  | 0,550454 | NA        |
| CCDC26         | 183,28  | 0,28  | 0,464383 | 0,596953 | 0,550539 | 0,8317902 |
| RP11-53B2.3    | 134,05  | -0,49 | 0,821784 | -0,5969  | 0,550576 | 0,8317902 |
| AC011551.3     | 3,76    | -0,77 | 1,297604 | -0,59689 | 0,550578 | 0,8317902 |
| RN7SL459P      | 1,75    | 1,61  | 2,698887 | 0,596742 | 0,55068  | NA        |
| RP11-326K13.5  | 1,27    | 1,74  | 2,923421 | 0,596687 | 0,550716 | NA        |
| RP11-1023L17.1 | 207,64  | -0,38 | 0,629176 | -0,5962  | 0,55104  | 0,8323579 |
| GJA1           | 4,60    | -0,75 | 1,254691 | -0,5962  | 0,551043 | 0,8323579 |
| RNA5P319       | 0,77    | 2,23  | 3,735345 | 0,596182 | 0,551054 | NA        |
| RP11-110I1.13  | 9,52    | -1,25 | 2,092337 | -0,59608 | 0,551125 | 0,832414  |
| KLHL4          | 1,33    | -1,34 | 2,243878 | -0,59602 | 0,551163 | NA        |
| MIR4727        | 0,75    | 2,23  | 3,73526  | 0,595844 | 0,551279 | NA        |
| NHSL2          | 317,49  | -0,38 | 0,64186  | -0,59573 | 0,551358 | 0,8326529 |
| ASB18          | 37,60   | 0,54  | 0,898953 | 0,595705 | 0,551372 | 0,8326529 |
| RP13-158L7.1   | 5,27    | -0,72 | 1,211265 | -0,59554 | 0,551483 | 0,8327189 |
| DZIP3          | 107,81  | 0,65  | 1,085109 | 0,595456 | 0,551539 | 0,8327189 |
| EPS15          | 662,07  | 0,29  | 0,489113 | 0,595382 | 0,551588 | 0,8327189 |
| DNAJB5-AS1     | 13,18   | -0,84 | 1,411986 | -0,59537 | 0,551595 | 0,8327189 |
| RGS10          | 887,34  | 0,18  | 0,296564 | 0,595142 | 0,551749 | 0,832834  |
| RP11-723O4.9   | 1,49    | 2,00  | 3,356038 | 0,595136 | 0,551752 | NA        |
| TSNAX          | 483,89  | 0,26  | 0,442621 | 0,595103 | 0,551774 | 0,832834  |
| RP11-453E17.1  | 44,59   | -0,51 | 0,8632   | -0,595   | 0,551842 | 0,832834  |
| RP1-267L14.3   | 5,06    | 0,74  | 1,245824 | 0,59499  | 0,55185  | 0,832834  |
| GINM1          | 274,52  | 0,38  | 0,641356 | 0,594913 | 0,551902 | 0,832844  |
| ARL6IP6        | 168,19  | 0,53  | 0,896091 | 0,594806 | 0,551973 | 0,8328577 |
| POTEA          | 0,74    | 2,22  | 3,735257 | 0,594772 | 0,551996 | NA        |
| RP11-660M18.2  | 5,69    | -0,42 | 0,708363 | -0,59477 | 0,552    | 0,8328577 |
| WI2-87327B8.2  | 0,48    | -2,19 | 3,681821 | -0,5945  | 0,552177 | NA        |
| RNU1-106P      | 9,28    | -1,25 | 2,102108 | -0,5945  | 0,552178 | 0,8328636 |
| AC046143.5     | 59,00   | -0,72 | 1,21037  | -0,59447 | 0,5522   | 0,8328636 |
| UQCRH          | 1065,11 | -0,13 | 0,22443  | -0,59441 | 0,552235 | 0,8328636 |
| RN7SL282P      | 2,20    | 0,88  | 1,48318  | 0,594372 | 0,552263 | NA        |
| SLFNL1         | 0,81    | -2,09 | 3,519737 | -0,59431 | 0,552305 | NA        |
| AC006538.1     | 19,74   | 0,67  | 1,131052 | 0,594308 | 0,552306 | 0,8328636 |
| GPR37L1        | 11,06   | -0,47 | 0,79124  | -0,59427 | 0,55233  | 0,8328636 |
| RP11-71L14.4   | 13,86   | 0,33  | 0,562675 | 0,594234 | 0,552355 | 0,8328636 |
| ECM2           | 3,07    | 1,54  | 2,58761  | 0,594225 | 0,552362 | NA        |
| RP11-81H14.1   | 3,39    | 0,71  | 1,189428 | 0,594083 | 0,552456 | NA        |
| ALG6           | 194,89  | -0,55 | 0,924488 | -0,59399 | 0,552518 | 0,8328636 |
| ATF2           | 286,56  | -0,38 | 0,634093 | -0,59388 | 0,552594 | 0,8328636 |
| PRKAR2A        | 671,89  | -0,24 | 0,395886 | -0,59387 | 0,552599 | 0,8328636 |
| MYH10          | 118,88  | 0,66  | 1,116799 | 0,593825 | 0,552629 | 0,8328636 |
| RP3-428L16.2   | 4,56    | 1,22  | 2,049539 | 0,593822 | 0,552631 | 0,8328636 |
| PAK4           | 43,55   | -0,53 | 0,897472 | -0,59382 | 0,552631 | 0,8328636 |
| RP11-90B9.3    | 4,77    | -0,95 | 1,600073 | -0,5938  | 0,552646 | 0,8328636 |
| RP11-545D19.1  | 0,74    | 2,20  | 3,699858 | 0,593778 | 0,55266  | NA        |
| ZNF398         | 70,69   | 0,74  | 1,253235 | 0,593714 | 0,552703 | 0,8328636 |
| ZDHC16         | 125,05  | 0,66  | 1,114463 | 0,593707 | 0,552708 | 0,8328636 |
| MXI1           | 115,42  | -0,48 | 0,811117 | -0,59369 | 0,552721 | 0,8328636 |

|                |         |       |          |          |          |           |
|----------------|---------|-------|----------|----------|----------|-----------|
| RN7SL110P      | 0,58    | -0,97 | 1,639395 | -0,59354 | 0,552818 | NA        |
| PRR19          | 16,83   | -0,51 | 0,858526 | -0,59344 | 0,552887 | 0,8330189 |
| SACM1L         | 333,62  | 0,37  | 0,627331 | 0,593369 | 0,552935 | 0,8330189 |
| AC006486.10    | 9,63    | -0,49 | 0,834133 | -0,59333 | 0,552963 | 0,8330189 |
| RP11-10017.3   | 0,59    | 1,86  | 3,127026 | 0,593249 | 0,553015 | NA        |
| SLC31A2        | 934,98  | 0,29  | 0,488429 | 0,593202 | 0,553046 | 0,8330189 |
| CEP104         | 177,38  | 0,43  | 0,725202 | 0,5932   | 0,553048 | 0,8330189 |
| NPIPA2         | 2,34    | 1,07  | 1,803218 | 0,593161 | 0,553073 | NA        |
| GATAD2A        | 329,60  | -0,36 | 0,60385  | -0,59312 | 0,5531   | 0,8330311 |
| CTD-2195M18.1  | 2,33    | -0,77 | 1,297794 | -0,59303 | 0,553158 | NA        |
| RPS7P1         | 1,24    | 0,69  | 1,163161 | 0,593029 | 0,553161 | NA        |
| ARMCX5         | 33,98   | 0,71  | 1,19084  | 0,593024 | 0,553165 | 0,8330607 |
| FGF5           | 5,47    | 0,48  | 0,801907 | 0,592817 | 0,553303 | 0,8331945 |
| TUBB4B         | 1290,20 | 0,26  | 0,431467 | 0,592639 | 0,553422 | 0,8331945 |
| LYSMD3         | 85,28   | 0,50  | 0,850916 | 0,592627 | 0,553431 | 0,8331945 |
| RP11-31F15.2   | 35,15   | 0,47  | 0,785071 | 0,592624 | 0,553433 | 0,8331945 |
| RP13-991F5.4   | 0,79    | 1,67  | 2,822713 | 0,59247  | 0,553536 | NA        |
| PCMTD1         | 564,29  | 0,29  | 0,49387  | 0,59228  | 0,553663 | 0,8333763 |
| FBXL5          | 1125,66 | -0,18 | 0,301983 | -0,59226 | 0,553678 | 0,8333763 |
| RP11-416H1.2   | 6,28    | 0,40  | 0,681748 | 0,592178 | 0,553732 | 0,8333763 |
| NSMF           | 322,45  | 0,28  | 0,478997 | 0,592151 | 0,553749 | 0,8333763 |
| RP11-324O2.3   | 50,57   | 0,61  | 1,029482 | 0,592109 | 0,553778 | 0,8333763 |
| PSMA8          | 1,28    | -1,88 | 3,180734 | -0,59208 | 0,5538   | NA        |
| RP11-631M6.1   | 0,94    | -0,98 | 1,647078 | -0,59207 | 0,553804 | NA        |
| RNU6-422P      | 0,16    | -2,20 | 3,710727 | -0,59196 | 0,553876 | NA        |
| ABCE1          | 492,42  | -0,30 | 0,508332 | -0,59187 | 0,553937 | 0,8335489 |
| TMEM198B       | 132,79  | 0,36  | 0,600726 | 0,591798 | 0,553986 | 0,8335552 |
| RP11-169D4.1   | 66,07   | -0,41 | 0,688643 | -0,59167 | 0,554068 | 0,8336116 |
| OXSRI          | 624,31  | 0,36  | 0,604346 | 0,591509 | 0,554179 | 0,833711  |
| TSPAN13        | 5,09    | 0,65  | 1,102251 | 0,591364 | 0,554277 | 0,8337904 |
| SH3BP5         | 355,43  | 0,34  | 0,577314 | 0,59121  | 0,55438  | 0,8338457 |
| AC011525.4     | 0,76    | 2,21  | 3,735456 | 0,591189 | 0,554394 | NA        |
| OR2A9P         | 24,00   | -0,75 | 1,275271 | -0,59117 | 0,554403 | 0,8338457 |
| RP11-148B6.1   | 15,99   | -0,62 | 1,057594 | -0,59088 | 0,554603 | 0,834079  |
| SMC1A          | 1113,86 | -0,30 | 0,50898  | -0,59065 | 0,554756 | 0,8341229 |
| RP11-206L10.17 | 5,07    | -0,77 | 1,299075 | -0,59064 | 0,554761 | 0,8341229 |
| SNRPC          | 1140,84 | 0,17  | 0,292417 | 0,590632 | 0,554767 | 0,8341229 |
| MYEF2          | 124,27  | -0,22 | 0,367062 | -0,59056 | 0,554815 | 0,8341274 |
| SOX2           | 1,02    | -1,42 | 2,40493  | -0,59055 | 0,554819 | NA        |
| MIR760         | 0,74    | 2,21  | 3,735456 | 0,590471 | 0,554875 | NA        |
| C6orf223       | 2,21    | 1,34  | 2,276718 | 0,590406 | 0,554919 | NA        |
| SNAP23         | 593,29  | -0,26 | 0,442614 | -0,5904  | 0,554919 | 0,8342172 |
| AC008850.3     | 1,07    | -1,30 | 2,208882 | -0,59034 | 0,554965 | NA        |
| RNU6-204P      | 0,73    | 2,17  | 3,68424  | 0,590217 | 0,555045 | NA        |
| RARRES2P4      | 0,74    | 2,20  | 3,735511 | 0,590181 | 0,555069 | NA        |
| TRIM66         | 107,59  | 0,52  | 0,889288 | 0,59018  | 0,55507  | 0,8343766 |
| RP11-329B9.3   | 2,08    | 2,05  | 3,466254 | 0,590165 | 0,55508  | NA        |
| RP5-1029F21.3  | 0,56    | 1,80  | 3,058807 | 0,589977 | 0,555206 | NA        |
| CTD-2076M15.1  | 11,32   | -0,59 | 1,00138  | -0,58997 | 0,555212 | 0,8344521 |
| RP11-180M15.4  | 0,79    | 1,66  | 2,810761 | 0,589951 | 0,555223 | NA        |

|                |         |       |          |          |          |           |
|----------------|---------|-------|----------|----------|----------|-----------|
| RP11-33A14.1   | 7,76    | -0,95 | 1,614059 | -0,58993 | 0,555237 | 0,8344521 |
| RP1-71L16.2    | 27,21   | -0,55 | 0,926324 | -0,5899  | 0,555255 | 0,8344521 |
| RP11-547C5.2   | 2,35    | -0,95 | 1,614274 | -0,58969 | 0,555399 | NA        |
| ACSS2          | 260,39  | 0,25  | 0,417653 | 0,589651 | 0,555424 | 0,8346345 |
| CACNA1F        | 8,00    | -0,64 | 1,084529 | -0,58959 | 0,555466 | 0,8346345 |
| OR10AF1P       | 0,17    | -2,19 | 3,712423 | -0,58952 | 0,555514 | NA        |
| FAM72C         | 8,94    | -1,42 | 2,416076 | -0,58951 | 0,555519 | 0,834646  |
| SNAP25-AS1     | 1,47    | -0,86 | 1,461787 | -0,5895  | 0,555525 | NA        |
| FGF18          | 0,70    | 1,48  | 2,509534 | 0,589247 | 0,555696 | NA        |
| GABARAPL1      | 494,67  | -0,34 | 0,57945  | -0,58924 | 0,555702 | 0,8346965 |
| PABPC1L        | 95,13   | -0,53 | 0,89304  | -0,5892  | 0,555728 | 0,8346965 |
| PPRC1          | 279,67  | -0,43 | 0,725316 | -0,5892  | 0,55573  | 0,8346965 |
| NUMB           | 836,90  | -0,19 | 0,315784 | -0,58919 | 0,555732 | 0,8346965 |
| CTD-2619J13.3  | 0,74    | 2,20  | 3,735434 | 0,589124 | 0,555778 | NA        |
| RP11-322M19.4  | 1,54    | 1,43  | 2,421459 | 0,589038 | 0,555835 | NA        |
| RP11-318A15.7  | 0,72    | 2,15  | 3,64603  | 0,588905 | 0,555925 | NA        |
| CCDC40         | 15,22   | 0,56  | 0,943161 | 0,588822 | 0,555981 | 0,8350036 |
| RP11-245J9.6   | 4,71    | 1,09  | 1,857721 | 0,58866  | 0,556089 | 0,835099  |
| CTR9           | 484,13  | -0,37 | 0,631046 | -0,58859 | 0,556138 | 0,8351046 |
| RP11-548O1.3   | 0,16    | -2,18 | 3,707748 | -0,58858 | 0,556145 | NA        |
| RNU6ATAC9P     | 0,73    | 2,20  | 3,735545 | 0,588382 | 0,556276 | NA        |
| RP11-405M12.2  | 17,80   | -0,43 | 0,729077 | -0,58828 | 0,556341 | 0,8353423 |
| ZNF165         | 15,80   | 0,91  | 1,550858 | 0,588146 | 0,556435 | 0,8354151 |
| TOLLIP         | 371,41  | 0,39  | 0,658788 | 0,58803  | 0,556512 | 0,8354641 |
| CTD-2319I12.10 | 1,46    | -1,04 | 1,765254 | -0,58802 | 0,556516 | NA        |
| GFRAL          | 0,63    | -1,20 | 2,043999 | -0,58801 | 0,556525 | NA        |
| TGFB2-OT1      | 0,74    | 2,18  | 3,69994  | 0,587967 | 0,556555 | NA        |
| ATXN3          | 539,80  | 0,29  | 0,497084 | 0,587888 | 0,556607 | 0,8355397 |
| RP11-379B18.6  | 0,73    | -2,07 | 3,514644 | -0,58766 | 0,556763 | NA        |
| RPS12P31       | 0,74    | 2,19  | 3,735514 | 0,587519 | 0,556855 | NA        |
| RP11-17A4.1    | 0,69    | 1,46  | 2,486446 | 0,587443 | 0,556906 | NA        |
| RP11-1136G11.6 | 0,65    | 0,76  | 1,295121 | 0,587422 | 0,55692  | NA        |
| TRAF7          | 235,67  | 0,40  | 0,674197 | 0,587316 | 0,556991 | 0,8360487 |
| APOC1P1        | 3,80    | -0,51 | 0,865089 | -0,58722 | 0,557053 | 0,8360743 |
| RP11-141C7.3   | 0,73    | 2,19  | 3,735589 | 0,587206 | 0,557065 | NA        |
| VAV2           | 76,10   | -0,60 | 1,018396 | -0,58711 | 0,557131 | 0,8360998 |
| RP11-45A17.3   | 6,30    | -0,98 | 1,66738  | -0,58704 | 0,557178 | 0,8360998 |
| DENND3         | 975,96  | 0,29  | 0,495949 | 0,586959 | 0,557231 | 0,8360998 |
| RP4-583P15.10  | 4,30    | -1,45 | 2,471591 | -0,58693 | 0,55725  | 0,8360998 |
| AP1M2          | 12,05   | -0,63 | 1,074917 | -0,58676 | 0,557366 | 0,8361359 |
| HIST1H3J       | 0,68    | -2,15 | 3,668891 | -0,58676 | 0,557368 | NA        |
| AC013267.2     | 234,13  | -0,67 | 1,139125 | -0,58672 | 0,557389 | 0,8361359 |
| MAF            | 34,62   | -0,63 | 1,065691 | -0,58669 | 0,557409 | 0,8361359 |
| RP11-30L15.4   | 0,67    | 1,41  | 2,4018   | 0,586531 | 0,557519 | NA        |
| EHD4           | 230,20  | 0,32  | 0,53904  | 0,5865   | 0,55754  | 0,8361571 |
| AC012370.3     | 5,76    | -0,49 | 0,836512 | -0,58649 | 0,557545 | 0,8361571 |
| EXOC2          | 203,50  | -0,37 | 0,622536 | -0,58647 | 0,557558 | 0,8361571 |
| RP11-159H20.1  | 0,85    | -0,93 | 1,578898 | -0,58637 | 0,557627 | NA        |
| GRB2           | 3876,26 | 0,11  | 0,19596  | 0,586337 | 0,557649 | 0,8362259 |
| PF4V1          | 0,16    | -2,18 | 3,710716 | -0,58628 | 0,557687 | NA        |

|                |         |       |          |          |          |           |
|----------------|---------|-------|----------|----------|----------|-----------|
| CTC-73602.1    | 1,71    | 1,33  | 2,2728   | 0,586211 | 0,557734 | NA        |
| SOBP           | 1,28    | 1,42  | 2,416424 | 0,586168 | 0,557762 | NA        |
| EPPIN          | 48,79   | -0,52 | 0,892877 | -0,58611 | 0,557805 | 0,8363924 |
| SNORD42A       | 1,30    | -0,61 | 1,049375 | -0,58595 | 0,55791  | NA        |
| OR2T6          | 5,40    | -1,63 | 2,787152 | -0,58578 | 0,558025 | 0,8365545 |
| MAP3K20-AS1    | 15,54   | 0,76  | 1,300243 | 0,58574  | 0,558051 | 0,8365545 |
| PRR23C         | 4,47    | -0,70 | 1,188185 | -0,58569 | 0,558087 | 0,8365545 |
| FTCDNL1        | 64,98   | -0,62 | 1,066228 | -0,58568 | 0,558093 | 0,8365545 |
| MIR54802       | 0,72    | -1,34 | 2,284988 | -0,58567 | 0,558096 | NA        |
| RP11-340I6.13  | 13,77   | 0,53  | 0,902407 | 0,585539 | 0,558185 | 0,8366256 |
| ZNF670-ZNF695  | 41,13   | -0,40 | 0,683968 | -0,58542 | 0,558268 | 0,8366822 |
| RP11-689P11.2  | 0,67    | -0,83 | 1,414767 | -0,58531 | 0,558338 | NA        |
| AP000337.3     | 2,36    | 1,19  | 2,040649 | 0,585301 | 0,558346 | NA        |
| ERCC6L2        | 271,24  | -0,50 | 0,85463  | -0,58518 | 0,558426 | 0,8368251 |
| DNAAF2         | 115,53  | -0,53 | 0,91364  | -0,58514 | 0,558453 | 0,8368251 |
| PRAMEF1        | 1,10    | 1,39  | 2,383871 | 0,585114 | 0,558471 | NA        |
| RP11-357H14.16 | 0,56    | -0,82 | 1,394732 | -0,58478 | 0,558697 | NA        |
| RP11-504P24.3  | 105,15  | 0,44  | 0,756571 | 0,584764 | 0,558706 | 0,8371372 |
| CSK            | 1569,69 | 0,15  | 0,258296 | 0,584687 | 0,558758 | 0,8371473 |
| RP5-1182A14.8  | 0,58    | -0,82 | 1,395906 | -0,58448 | 0,558896 | NA        |
| RP11-340L3.1   | 19,08   | -0,44 | 0,744541 | -0,58447 | 0,558906 | 0,837301  |
| AC008440.5     | 0,36    | 1,33  | 2,275038 | 0,584382 | 0,558963 | NA        |
| RP11-119D9.1   | 113,32  | -0,52 | 0,88572  | -0,58434 | 0,558992 | 0,8373633 |
| RP11-589N15.1  | 0,72    | 2,18  | 3,735708 | 0,584311 | 0,559011 | NA        |
| AC010129.1     | 0,40    | 1,31  | 2,247521 | 0,584189 | 0,559093 | NA        |
| ZNF208         | 8,07    | 0,79  | 1,344205 | 0,584133 | 0,559131 | 0,8374022 |
| BABAM1         | 417,86  | -0,28 | 0,473481 | -0,58411 | 0,559148 | 0,8374022 |
| CFLAR          | 2125,12 | 0,23  | 0,395105 | 0,584062 | 0,559179 | 0,8374022 |
| TMEM60         | 128,03  | -0,64 | 1,099382 | -0,58403 | 0,559198 | 0,8374022 |
| NAA20          | 594,78  | 0,30  | 0,518527 | 0,583868 | 0,559309 | 0,8375004 |
| RP5-1073F15.1  | 1,23    | 1,68  | 2,883517 | 0,583767 | 0,559377 | NA        |
| CTD-2311M21.2  | 101,17  | -0,43 | 0,737623 | -0,58374 | 0,559396 | 0,8375442 |
| RP11-212I21.5  | 0,73    | 2,18  | 3,735736 | 0,583675 | 0,559439 | NA        |
| SLC7A11        | 28,22   | 0,58  | 1,000594 | 0,583625 | 0,559473 | 0,8375442 |
| AC016747.2     | 534,68  | 0,31  | 0,530447 | 0,583624 | 0,559473 | 0,8375442 |
| MGRN1          | 176,06  | -0,34 | 0,584214 | -0,58348 | 0,559569 | 0,8376206 |
| EYS            | 55,83   | -0,50 | 0,859104 | -0,58336 | 0,559652 | 0,8376771 |
| NUBP2          | 369,63  | 0,40  | 0,680655 | 0,583175 | 0,559775 | 0,8377571 |
| RP11-193H5.8   | 0,37    | 1,32  | 2,265396 | 0,583159 | 0,559786 | NA        |
| RP11-124N2.1   | 0,57    | 1,81  | 3,106913 | 0,583106 | 0,559822 | NA        |
| AREL1          | 318,39  | 0,34  | 0,575135 | 0,583094 | 0,55983  | 0,8377571 |
| ZNF281         | 225,97  | -0,44 | 0,746191 | -0,58308 | 0,559841 | 0,8377571 |
| WFDC8          | 0,67    | -0,98 | 1,689336 | -0,583   | 0,559894 | NA        |
| C14orf156      | 228,30  | -0,18 | 0,301904 | -0,58296 | 0,55992  | 0,8378085 |
| RP13-317D12.3  | 5,52    | 0,60  | 1,037183 | 0,582891 | 0,559967 | 0,8378112 |
| AC053545.3     | 1,72    | 2,17  | 3,727298 | 0,582845 | 0,559998 | NA        |
| TIMM10         | 299,29  | -0,25 | 0,42516  | -0,58271 | 0,560086 | 0,8378966 |
| RP11-404H14.1  | 4,39    | -0,79 | 1,355088 | -0,58267 | 0,560114 | 0,8378966 |
| BTD            | 69,44   | 0,59  | 1,009741 | 0,58252  | 0,560217 | 0,8379829 |
| RNA5P527       | 0,59    | 1,85  | 3,167926 | 0,582471 | 0,56025  | NA        |

|                |         |       |          |          |          |           |
|----------------|---------|-------|----------|----------|----------|-----------|
| UQCFS1         | 2090,81 | 0,19  | 0,33109  | 0,582372 | 0,560316 | 0,8380532 |
| LMLN           | 91,56   | -0,58 | 0,999406 | -0,58232 | 0,560354 | 0,8380532 |
| RP11-113J24.4  | 0,56    | 1,79  | 3,077008 | 0,582307 | 0,56036  | NA        |
| NCK2           | 62,50   | 0,56  | 0,967487 | 0,582122 | 0,560485 | 0,8381817 |
| RP1-93H18.7    | 0,74    | 2,17  | 3,735774 | 0,582068 | 0,560521 | NA        |
| EVI5L          | 12,39   | -0,61 | 1,046174 | -0,58188 | 0,560647 | 0,8383203 |
| RP11-262H14.3  | 27,37   | -1,47 | 2,534095 | -0,58177 | 0,560724 | 0,8383203 |
| RP11-307A17.2  | 37,24   | -0,35 | 0,598985 | -0,58172 | 0,560753 | 0,8383203 |
| RP11-966I7.3   | 1,95    | -0,61 | 1,042745 | -0,58172 | 0,560757 | NA        |
| APOA2          | 6,41    | -0,55 | 0,94412  | -0,58172 | 0,560758 | 0,8383203 |
| RP11-218M11.1  | 1,50    | 1,99  | 3,416786 | 0,581601 | 0,560836 | NA        |
| RP11-97O12.5   | 37,52   | -0,64 | 1,100326 | -0,58157 | 0,560858 | 0,8384031 |
| AC005301.9     | 45,57   | 0,50  | 0,861154 | 0,581473 | 0,560921 | 0,8384304 |
| ARL17A         | 206,05  | -0,24 | 0,404315 | -0,58133 | 0,561018 | 0,8384678 |
| RHOT2          | 551,79  | -0,23 | 0,402525 | -0,5813  | 0,561037 | 0,8384678 |
| PHYH           | 57,98   | 0,51  | 0,881037 | 0,581126 | 0,561156 | 0,8385205 |
| ZDHC21         | 94,09   | -0,55 | 0,941779 | -0,58102 | 0,561224 | 0,8385205 |
| RP11-775J23.1  | 0,70    | 2,13  | 3,660456 | 0,581016 | 0,56123  | NA        |
| AP000437.3     | 47,74   | 0,50  | 0,864151 | 0,581008 | 0,561235 | 0,8385205 |
| RP11-346A3.2   | 1,17    | -0,98 | 1,682071 | -0,58096 | 0,561267 | NA        |
| PRSS55         | 1,50    | 0,90  | 1,550232 | 0,580952 | 0,561273 | NA        |
| TIPIN          | 19,87   | 0,71  | 1,220959 | 0,580943 | 0,561279 | 0,8385205 |
| ZNF131         | 312,18  | -0,28 | 0,490511 | -0,58089 | 0,561314 | 0,8385205 |
| ZMYM2          | 730,75  | 0,29  | 0,502902 | 0,580803 | 0,561373 | 0,8385205 |
| RNVU1-3        | 15,44   | -0,70 | 1,201945 | -0,58077 | 0,561393 | 0,8385205 |
| RP11-457P14.4  | 2,67    | -0,71 | 1,218363 | -0,58072 | 0,561427 | NA        |
| RP11-403P17.5  | 0,72    | 2,17  | 3,73596  | 0,580717 | 0,561431 | NA        |
| PER2           | 179,99  | 0,39  | 0,668485 | 0,580684 | 0,561454 | 0,8385205 |
| SNCAIP         | 4,13    | -0,73 | 1,25913  | -0,58065 | 0,561477 | 0,8385205 |
| RP11-468E2.12  | 0,27    | -1,24 | 2,139957 | -0,58061 | 0,561505 | NA        |
| RP11-36C20.1   | 1,09    | -0,64 | 1,107884 | -0,58054 | 0,56155  | NA        |
| MIR4477B       | 0,69    | 2,11  | 3,637411 | 0,580502 | 0,561576 | NA        |
| RP11-115H13.1  | 6,99    | -0,47 | 0,809622 | -0,58049 | 0,561585 | 0,8386053 |
| STRA6          | 4,34    | -0,55 | 0,953104 | -0,58039 | 0,561651 | 0,8386053 |
| PLCL2          | 357,75  | -0,38 | 0,662871 | -0,58036 | 0,56167  | 0,8386053 |
| SNTB1          | 184,94  | -0,57 | 0,982423 | -0,58022 | 0,561765 | 0,8386811 |
| AC010138.3     | 0,84    | 1,10  | 1,902057 | 0,580107 | 0,561842 | NA        |
| METTL7B        | 3,36    | 1,47  | 2,528612 | 0,580103 | 0,561845 | NA        |
| NID2           | 15,08   | -1,40 | 2,41913  | -0,58009 | 0,561852 | 0,8387439 |
| RP11-69H7.3    | 1,31    | -1,15 | 1,983304 | -0,58008 | 0,561863 | NA        |
| PTTG2          | 0,55    | 1,81  | 3,114979 | 0,580033 | 0,561893 | NA        |
| ADCY9          | 85,87   | -0,57 | 0,983861 | -0,58002 | 0,561903 | 0,8387521 |
| PERM1          | 0,95    | -1,60 | 2,754041 | -0,57999 | 0,561919 | NA        |
| RP11-158I13.2  | 5,51    | -1,97 | 3,404602 | -0,57994 | 0,561952 | 0,8387575 |
| CBL            | 916,01  | 0,25  | 0,43508  | 0,579835 | 0,562026 | 0,8388006 |
| RP11-709D24.8  | 0,27    | -2,14 | 3,699735 | -0,57963 | 0,562165 | NA        |
| RP11-1038A11.2 | 15,95   | -0,66 | 1,131618 | -0,57962 | 0,562168 | 0,8389452 |
| ZNF705C        | 1,12    | 2,16  | 3,730842 | 0,579448 | 0,562287 | NA        |
| RP5-1085F17.4  | 7,02    | 1,50  | 2,585178 | 0,579439 | 0,562293 | 0,8390653 |
| AC106873.2     | 1,13    | 2,16  | 3,730763 | 0,579341 | 0,562359 | NA        |



|               |         |       |          |          |          |           |
|---------------|---------|-------|----------|----------|----------|-----------|
| RPL23AP84     | 0,72    | 2,16  | 3,735873 | 0,579311 | 0,562379 | NA        |
| TUBD1         | 39,27   | -0,49 | 0,838165 | -0,5793  | 0,562383 | 0,8391326 |
| KDELC1        | 1,97    | 1,52  | 2,626968 | 0,579296 | 0,56239  | NA        |
| MRPS26        | 317,36  | 0,44  | 0,752066 | 0,579198 | 0,562456 | 0,839173  |
| PDHA1P1       | 0,16    | -2,15 | 3,713938 | -0,57917 | 0,562475 | NA        |
| ENGASE        | 203,73  | -0,34 | 0,593921 | -0,57909 | 0,562529 | 0,8392154 |
| RP11-705O3.1  | 20,18   | -0,48 | 0,834798 | -0,57886 | 0,562683 | 0,8393342 |
| EBP           | 952,00  | -0,24 | 0,406906 | -0,57884 | 0,562699 | 0,8393342 |
| RP11-562A8.3  | 0,16    | -2,15 | 3,713906 | -0,57872 | 0,562779 | NA        |
| RP11-401M16.7 | 16,86   | -0,52 | 0,903731 | -0,57866 | 0,562821 | 0,8394334 |
| RP11-50D9.4   | 0,72    | 2,16  | 3,735931 | 0,57865  | 0,562825 | NA        |
| FILIP1L       | 204,24  | 0,62  | 1,073166 | 0,578587 | 0,562868 | 0,8394334 |
| CAPRIN2       | 133,03  | -0,53 | 0,908328 | -0,57854 | 0,562901 | 0,8394334 |
| AC111200.2    | 9,92    | -0,36 | 0,629235 | -0,57845 | 0,562962 | 0,8394574 |
| ZC3H3         | 75,93   | 0,49  | 0,851182 | 0,578291 | 0,563068 | 0,8395166 |
| RP11-754I20.3 | 0,71    | 2,16  | 3,735942 | 0,578286 | 0,563071 | NA        |
| RP11-403I13.8 | 66,65   | -0,49 | 0,844282 | -0,57819 | 0,563134 | 0,8395166 |
| CH507-396I9.3 | 0,70    | 2,13  | 3,685887 | 0,578135 | 0,563173 | NA        |
| MAP3K11       | 659,21  | -0,24 | 0,418509 | -0,57812 | 0,563183 | 0,8395166 |
| ATOH8         | 2,65    | 2,14  | 3,696734 | 0,578093 | 0,563201 | NA        |
| AC034193.5    | 6,26    | -0,54 | 0,928566 | -0,578   | 0,563262 | 0,8395166 |
| DNMT3L        | 0,71    | 2,11  | 3,651272 | 0,577893 | 0,563337 | NA        |
| LPO           | 12,55   | 0,46  | 0,790227 | 0,577883 | 0,563343 | 0,8395166 |
| RP11-342K2.1  | 41,37   | 0,51  | 0,881471 | 0,577726 | 0,563449 | 0,8395166 |
| ASNA1         | 174,02  | 0,35  | 0,610836 | 0,577717 | 0,563455 | 0,8395166 |
| HNRNPU        | 5214,41 | -0,12 | 0,199608 | -0,5777  | 0,563467 | 0,8395166 |
| RPL39L        | 21,34   | -0,70 | 1,214218 | -0,57767 | 0,563487 | 0,8395166 |
| RNU6-94P      | 4,15    | -0,85 | 1,472594 | -0,57766 | 0,563495 | 0,8395166 |
| WDTC1         | 92,49   | -0,31 | 0,538245 | -0,57765 | 0,563498 | 0,8395166 |
| VGLL3         | 91,28   | -0,32 | 0,562378 | -0,57756 | 0,563561 | 0,8395426 |
| CTB-78F1.1    | 1,66    | 0,93  | 1,604542 | 0,577525 | 0,563585 | NA        |
| CMTM1         | 0,43    | 1,29  | 2,24135  | 0,577461 | 0,563628 | NA        |
| DBR1          | 126,89  | -0,61 | 1,050925 | -0,57745 | 0,563633 | 0,8395461 |
| RP11-419I17.2 | 3,14    | -0,78 | 1,352212 | -0,57743 | 0,563646 | NA        |
| RP11-553L6.5  | 3,04    | -2,09 | 3,622747 | -0,57743 | 0,56365  | NA        |
| RPS2P5        | 279,75  | 0,25  | 0,425209 | 0,577424 | 0,563653 | 0,8395461 |
| RP1-273N12.4  | 0,51    | -1,03 | 1,783229 | -0,57716 | 0,563829 | NA        |
| VIPAS39       | 154,59  | -0,58 | 1,001184 | -0,57716 | 0,563829 | 0,8397086 |
| VPS29         | 1495,65 | 0,18  | 0,31929  | 0,57711  | 0,563865 | 0,8397086 |
| ADA           | 188,01  | -0,49 | 0,842447 | -0,57706 | 0,563898 | 0,8397086 |
| UBE2V2        | 403,81  | 0,37  | 0,64429  | 0,576989 | 0,563947 | 0,839714  |
| RNA5SP219     | 2,55    | 1,43  | 2,480899 | 0,57697  | 0,56396  | NA        |
| ZC3H6         | 190,03  | 0,37  | 0,649978 | 0,576901 | 0,564006 | 0,839736  |
| RP11-131M11.2 | 0,90    | 1,87  | 3,244838 | 0,57688  | 0,56402  | NA        |
| C1GALT1C1     | 222,79  | -0,63 | 1,08426  | -0,57678 | 0,564085 | 0,8397861 |
| RP11-91P24.6  | 2,88    | -1,15 | 1,991448 | -0,57677 | 0,564094 | NA        |
| NEUROG3       | 0,71    | 2,12  | 3,671847 | 0,576745 | 0,564112 | NA        |
| VHL           | 238,80  | -0,30 | 0,524429 | -0,57664 | 0,564182 | 0,8398378 |
| RPTN          | 0,16    | -2,14 | 3,714215 | -0,57656 | 0,564238 | NA        |
| ECM1          | 2,81    | 1,49  | 2,583432 | 0,576522 | 0,564262 | NA        |

|                |         |       |          |          |          |           |
|----------------|---------|-------|----------|----------|----------|-----------|
| RP11-216L13.19 | 8,74    | 0,58  | 1,012597 | 0,576411 | 0,564337 | 0,8398378 |
| RP11-294O2.2   | 19,05   | 0,36  | 0,621348 | 0,576406 | 0,56434  | 0,8398378 |
| SNORA15B-1     | 0,70    | 2,15  | 3,736153 | 0,576406 | 0,564341 | NA        |
| SNORA15B-2     | 0,70    | 2,15  | 3,736153 | 0,576406 | 0,564341 | NA        |
| SNX4           | 460,30  | -0,45 | 0,77508  | -0,57641 | 0,564341 | 0,8398378 |
| MFSD2A         | 114,95  | -0,54 | 0,942126 | -0,5764  | 0,564346 | 0,8398378 |
| MVB12A         | 143,95  | -0,39 | 0,674376 | -0,57632 | 0,564398 | 0,8398481 |
| ODF3L1         | 1,62    | -1,66 | 2,876999 | -0,57612 | 0,564531 | NA        |
| GLUD1          | 818,42  | -0,27 | 0,468546 | -0,57609 | 0,564557 | 0,8400173 |
| SCARA5         | 0,54    | 1,12  | 1,951848 | 0,576041 | 0,564587 | NA        |
| RP11-452I5.2   | 0,55    | 1,77  | 3,071021 | 0,576024 | 0,564599 | NA        |
| RP11-79H23.3   | 5,85    | 0,82  | 1,421636 | 0,575948 | 0,564651 | 0,84009   |
| CTA-305I2.1    | 27,72   | 0,71  | 1,229336 | 0,575853 | 0,564715 | 0,8401183 |
| GUCY1A2        | 0,58    | 1,00  | 1,73338  | 0,575821 | 0,564736 | NA        |
| SOX5           | 11,97   | 0,58  | 0,999705 | 0,575559 | 0,564913 | 0,8403463 |
| CTD-3065B20.3  | 4,88    | 1,38  | 2,394817 | 0,575437 | 0,564996 | 0,8404022 |
| RP11-472K22.2  | 27,62   | 0,35  | 0,604177 | 0,57518  | 0,56517  | 0,840529  |
| RP4-640H8.2    | 7,13    | 0,47  | 0,809958 | 0,575177 | 0,565172 | 0,840529  |
| OR6C6          | 0,89    | -0,64 | 1,119757 | -0,57505 | 0,565255 | NA        |
| GGACT          | 8,98    | -1,22 | 2,12536  | -0,57503 | 0,565269 | 0,8405484 |
| TIMM23B        | 241,66  | 0,44  | 0,760083 | 0,574985 | 0,565302 | 0,8405484 |
| NUBPL          | 185,38  | 0,31  | 0,54757  | 0,57492  | 0,565345 | 0,8405484 |
| BRSK1          | 0,14    | -1,92 | 3,333496 | -0,57488 | 0,565376 | NA        |
| BCL2L13        | 313,57  | -0,34 | 0,593568 | -0,57487 | 0,565378 | 0,8405484 |
| RTCA           | 151,82  | -0,44 | 0,773539 | -0,57471 | 0,565487 | 0,8405484 |
| TPCN1          | 582,31  | 0,26  | 0,45906  | 0,574705 | 0,565491 | 0,8405484 |
| SLFN13         | 90,03   | 0,47  | 0,810245 | 0,57469  | 0,565501 | 0,8405484 |
| CTD-2013N17.4  | 0,71    | -0,90 | 1,571171 | -0,57459 | 0,565566 | NA        |
| MIR4530        | 0,66    | 1,39  | 2,417142 | 0,574574 | 0,565579 | NA        |
| SPC25          | 7,94    | 0,73  | 1,275424 | 0,574476 | 0,565646 | 0,8406951 |
| LSM11          | 34,50   | 0,45  | 0,780097 | 0,574411 | 0,56569  | 0,8406951 |
| PEX11A         | 17,78   | -0,63 | 1,099554 | -0,57398 | 0,565982 | 0,840891  |
| B4GALT2        | 11,97   | -1,68 | 2,919587 | -0,57383 | 0,566086 | 0,840891  |
| RP5-836N10.1   | 60,99   | 0,38  | 0,656648 | 0,573815 | 0,566093 | 0,840891  |
| SLC41A2        | 163,13  | 0,53  | 0,928835 | 0,573807 | 0,566098 | 0,840891  |
| RP11-131L12.4  | 30,31   | 0,71  | 1,244663 | 0,573793 | 0,566108 | 0,840891  |
| KIF1B          | 376,40  | 0,34  | 0,597596 | 0,573754 | 0,566134 | 0,840891  |
| RP4-756H11.5   | 12,39   | -0,75 | 1,315342 | -0,57375 | 0,566138 | 0,840891  |
| GAPVD1         | 639,91  | 0,28  | 0,491032 | 0,57363  | 0,566218 | 0,8409084 |
| RPS3AP49       | 1,82    | -0,47 | 0,813335 | -0,5736  | 0,566238 | NA        |
| RP11-112L6.5   | 63,37   | 0,30  | 0,521083 | 0,573597 | 0,56624  | 0,8409084 |
| CNTRL          | 934,52  | -0,24 | 0,420607 | -0,57346 | 0,566333 | 0,8409783 |
| CCDC117        | 220,05  | 0,41  | 0,722348 | 0,57308  | 0,566591 | 0,8411729 |
| AP000688.14    | 12,42   | 1,08  | 1,886531 | 0,573072 | 0,566596 | 0,8411729 |
| LACE1          | 92,50   | 0,60  | 1,043981 | 0,572972 | 0,566664 | 0,8411729 |
| MRE11A         | 352,72  | -0,28 | 0,49038  | -0,57289 | 0,566721 | 0,8411729 |
| ADD3-AS1       | 102,16  | 0,61  | 1,056516 | 0,572737 | 0,566823 | 0,8411729 |
| IGLV3-10       | 2,77    | -1,01 | 1,759202 | -0,57267 | 0,566868 | NA        |
| RPS23          | 5044,32 | -0,11 | 0,184627 | -0,57261 | 0,566906 | 0,8411729 |
| RP11-380G5.2   | 15,11   | 0,74  | 1,300799 | 0,572609 | 0,566909 | 0,8411729 |

|               |         |       |          |          |          |           |
|---------------|---------|-------|----------|----------|----------|-----------|
| AC002472.11   | 12,04   | -0,60 | 1,051131 | -0,57261 | 0,566911 | 0,8411729 |
| SIAH1         | 207,66  | -0,45 | 0,794315 | -0,57258 | 0,566931 | 0,8411729 |
| MESP2         | 0,59    | 1,38  | 2,415558 | 0,572552 | 0,566948 | NA        |
| RP5-1086K13.1 | 74,97   | -0,93 | 1,626044 | -0,57252 | 0,566971 | 0,8411729 |
| LINC00692     | 0,37    | 1,29  | 2,260369 | 0,572482 | 0,566995 | NA        |
| AC064834.3    | 1,98    | 1,27  | 2,221807 | 0,572475 | 0,567    | NA        |
| AC097467.2    | 8,16    | -0,68 | 1,193324 | -0,57245 | 0,567018 | 0,8411729 |
| RP11-118E18.1 | 0,70    | 2,14  | 3,736189 | 0,572431 | 0,56703  | NA        |
| AC064852.4    | 6,86    | 1,34  | 2,334337 | 0,572425 | 0,567034 | 0,8411729 |
| CDC23         | 77,08   | -0,43 | 0,757146 | -0,57238 | 0,567066 | 0,8411729 |
| RP11-85B7.4   | 0,71    | 2,14  | 3,736139 | 0,572319 | 0,567106 | NA        |
| RP5-858L17.1  | 5,37    | 1,06  | 1,846692 | 0,572305 | 0,567115 | 0,8411729 |
| C11orf63      | 91,66   | -0,49 | 0,856522 | -0,57225 | 0,567151 | 0,8411729 |
| AC022431.3    | 7,36    | -0,49 | 0,861383 | -0,57218 | 0,567201 | 0,8411729 |
| POMT2         | 64,53   | 0,47  | 0,814164 | 0,572132 | 0,567232 | 0,8411729 |
| GEMIN2        | 61,47   | 0,42  | 0,735583 | 0,571981 | 0,567335 | 0,8412577 |
| AC007679.1    | 0,68    | 0,83  | 1,459329 | 0,571689 | 0,567532 | NA        |
| RPL7P41       | 2,09    | -0,66 | 1,151905 | -0,57128 | 0,567809 | NA        |
| OR6K1P        | 4,52    | 0,64  | 1,12654  | 0,571256 | 0,567826 | 0,8417928 |
| OXT           | 1,43    | 1,93  | 3,384951 | 0,571144 | 0,567902 | NA        |
| KLF9          | 620,12  | 0,27  | 0,472124 | 0,571131 | 0,567911 | 0,8417928 |
| TNFAIP8L3     | 7,54    | 0,48  | 0,847681 | 0,571128 | 0,567913 | 0,8417928 |
| CTC-450M9.1   | 0,67    | 1,41  | 2,471257 | 0,571104 | 0,567929 | NA        |
| RP11-438N16.1 | 48,69   | -0,38 | 0,659086 | -0,57107 | 0,567951 | 0,8417928 |
| ZNF280C       | 59,86   | -0,66 | 1,154612 | -0,57106 | 0,567962 | 0,8417928 |
| TRIM2         | 66,08   | 0,74  | 1,304273 | 0,571048 | 0,567967 | 0,8417928 |
| RP11-585K6.1  | 0,54    | 1,76  | 3,080389 | 0,570964 | 0,568024 | NA        |
| UNK           | 62,22   | 0,66  | 1,153031 | 0,570927 | 0,568049 | 0,8418479 |
| RP11-445O3.1  | 0,81    | 1,65  | 2,888781 | 0,570877 | 0,568083 | NA        |
| RNU6V         | 0,70    | 2,13  | 3,736233 | 0,570877 | 0,568083 | NA        |
| FAM220A       | 98,88   | -0,78 | 1,373942 | -0,57086 | 0,568095 | 0,8418479 |
| RNF4          | 450,40  | 0,30  | 0,532322 | 0,570711 | 0,568196 | 0,841904  |
| COQ2          | 147,93  | 0,49  | 0,862598 | 0,570671 | 0,568223 | 0,841904  |
| APOD          | 2,23    | 0,93  | 1,631057 | 0,570567 | 0,568293 | NA        |
| RP11-56H2.2   | 0,16    | -2,12 | 3,715257 | -0,57056 | 0,568296 | NA        |
| GOSR2         | 358,78  | 0,41  | 0,718137 | 0,570376 | 0,568423 | 0,8421333 |
| AC125238.3    | 0,67    | 2,06  | 3,620312 | 0,57024  | 0,568515 | NA        |
| ZNF772        | 13,62   | -0,62 | 1,090656 | -0,57022 | 0,568529 | 0,8421364 |
| NOC2L         | 205,87  | -0,29 | 0,510932 | -0,57021 | 0,568536 | 0,8421364 |
| CTD-2311B13.5 | 0,16    | -2,12 | 3,715319 | -0,57016 | 0,568573 | NA        |
| SETD2         | 1479,32 | -0,20 | 0,350953 | -0,57009 | 0,568618 | 0,8421364 |
| IRGM          | 3,86    | 0,70  | 1,233476 | 0,57007  | 0,56863  | 0,8421364 |
| PRSS23        | 120,04  | 0,29  | 0,50932  | 0,570039 | 0,568651 | 0,8421364 |
| SLC8A1        | 1194,84 | -0,22 | 0,3937   | -0,56995 | 0,568713 | 0,842161  |
| TDRD9         | 13,84   | -0,78 | 1,365206 | -0,56978 | 0,568824 | 0,8422573 |
| ZYX           | 2076,45 | 0,16  | 0,276469 | 0,569528 | 0,568998 | 0,8423787 |
| TICAM2        | 159,48  | -0,61 | 1,074509 | -0,5694  | 0,569083 | 0,8423787 |
| RP11-245C17.2 | 6,55    | -0,59 | 1,041197 | -0,56939 | 0,569094 | 0,8423787 |
| RHOBTB1       | 77,43   | -1,55 | 2,714456 | -0,56936 | 0,56911  | 0,8423787 |
| ZYG11A        | 12,67   | -0,44 | 0,7658   | -0,56933 | 0,569132 | 0,8423787 |

|                |         |       |          |          |          |           |
|----------------|---------|-------|----------|----------|----------|-----------|
| HIST1H1E       | 287,25  | 0,31  | 0,546191 | 0,569242 | 0,569192 | 0,8424003 |
| KRT23          | 0,20    | -2,11 | 3,701952 | -0,56919 | 0,569229 | NA        |
| CCDC125        | 290,72  | 0,29  | 0,50388  | 0,569089 | 0,569296 | 0,8424603 |
| AC000059.1     | 49,11   | 0,66  | 1,153913 | 0,569049 | 0,569323 | 0,8424603 |
| RP11-43P5.1    | 2,60    | 0,66  | 1,167206 | 0,568971 | 0,569376 | NA        |
| CTD-2270P14.5  | 3,04    | -0,66 | 1,162612 | -0,56891 | 0,569418 | NA        |
| LOC440461      | 3,84    | -1,44 | 2,525454 | -0,56885 | 0,56946  | 0,8425967 |
| CTD-2199O4.1   | 2,65    | -0,72 | 1,261434 | -0,56879 | 0,569501 | NA        |
| PGRMC2         | 136,64  | -0,49 | 0,856656 | -0,56861 | 0,569624 | 0,8427717 |
| TYRP1          | 0,16    | -2,11 | 3,711676 | -0,56855 | 0,56966  | NA        |
| SLC37A3        | 71,95   | -0,46 | 0,803617 | -0,56839 | 0,569767 | 0,8429169 |
| RP13-635I23.4  | 1,47    | -1,46 | 2,56412  | -0,56833 | 0,569808 | NA        |
| KCNJ12         | 1,36    | 1,21  | 2,134028 | 0,568299 | 0,569832 | NA        |
| RP11-568N6.1   | 9,59    | -0,59 | 1,038034 | -0,56827 | 0,56985  | 0,8429718 |
| PSG1           | 2,44    | -0,98 | 1,727711 | -0,56821 | 0,569891 | NA        |
| OGG1           | 138,53  | -0,60 | 1,05194  | -0,56815 | 0,569935 | 0,8430301 |
| RP1-224A6.9    | 1,08    | -1,79 | 3,159239 | -0,56811 | 0,56996  | NA        |
| OOEP           | 0,53    | 1,74  | 3,064258 | 0,568095 | 0,56997  | NA        |
| RP11-861A13.3  | 0,79    | 1,62  | 2,84399  | 0,56802  | 0,570022 | NA        |
| RNU7-28P       | 0,77    | 1,61  | 2,831251 | 0,567955 | 0,570066 | NA        |
| HCLS1          | 3418,41 | 0,12  | 0,20846  | 0,567947 | 0,570071 | 0,8431646 |
| CTC-505O3.3    | 3,95    | -0,76 | 1,3309   | -0,56782 | 0,570154 | 0,8432205 |
| RP13-923O23.7  | 52,20   | -0,35 | 0,619086 | -0,56742 | 0,570426 | 0,8434443 |
| AP000347.2     | 170,59  | -0,42 | 0,744013 | -0,56742 | 0,570427 | 0,8434443 |
| ST13           | 897,65  | 0,27  | 0,47104  | 0,567335 | 0,570487 | 0,8434443 |
| RP11-459F6.3   | 0,70    | 2,12  | 3,736417 | 0,567324 | 0,570494 | NA        |
| RP11-284P20.2  | 12,24   | -0,38 | 0,663821 | -0,56727 | 0,570528 | 0,8434443 |
| RHEBP1         | 6,28    | 1,29  | 2,27149  | 0,567258 | 0,570539 | 0,8434443 |
| GGCX           | 329,73  | -0,26 | 0,450383 | -0,5672  | 0,570577 | 0,8434443 |
| RP3-339A18.6   | 2,78    | -0,64 | 1,119722 | -0,56714 | 0,570617 | NA        |
| ILF2           | 1622,07 | 0,19  | 0,329622 | 0,56713  | 0,570626 | 0,8434488 |
| RP11-66N24.4   | 157,13  | -0,44 | 0,780785 | -0,56706 | 0,570674 | 0,8434536 |
| RP11-505C13.1  | 1,80    | -1,25 | 2,20418  | -0,56697 | 0,570734 | NA        |
| HAS2AS         | 0,31    | 1,00  | 1,766294 | 0,566861 | 0,570809 | NA        |
| AC112255.1     | 0,47    | 0,88  | 1,553848 | 0,566852 | 0,570814 | NA        |
| ZNF805         | 51,94   | 0,83  | 1,468116 | 0,566797 | 0,570852 | 0,8435831 |
| C17orf51       | 12,87   | 0,75  | 1,32017  | 0,566796 | 0,570853 | 0,8435831 |
| RP11-126O22.10 | 0,71    | 2,12  | 3,736344 | 0,566728 | 0,570899 | NA        |
| GUCY2F         | 0,67    | 2,06  | 3,640145 | 0,56653  | 0,571034 | NA        |
| AC073551.1     | 1,25    | 1,69  | 2,974964 | 0,566481 | 0,571067 | NA        |
| LIMS3          | 11,37   | 0,65  | 1,142118 | 0,566446 | 0,57109  | 0,8438122 |
| RP5-998N21.4   | 0,68    | 2,08  | 3,671344 | 0,566401 | 0,571121 | NA        |
| AC007318.5     | 1,61    | 0,70  | 1,232086 | 0,566399 | 0,571123 | NA        |
| CD180          | 547,57  | -0,38 | 0,672334 | -0,56638 | 0,571136 | 0,8438122 |
| MON1A          | 154,62  | 0,58  | 1,022391 | 0,566368 | 0,571144 | 0,8438122 |
| DPY19L3        | 134,09  | 0,37  | 0,661126 | 0,566185 | 0,571268 | 0,8439287 |
| COQ10A         | 26,11   | 0,39  | 0,684967 | 0,566111 | 0,571318 | 0,8439364 |
| RN7SL190P      | 2,13    | 0,56  | 0,986855 | 0,565994 | 0,571398 | NA        |
| RN7SL147P      | 4,04    | -0,63 | 1,116041 | -0,56594 | 0,571436 | 0,8439388 |
| AC007950.2     | 3,03    | 0,96  | 1,694923 | 0,565865 | 0,571485 | NA        |

|                |         |       |          |          |          |           |
|----------------|---------|-------|----------|----------|----------|-----------|
| IFIT1          | 481,77  | -0,73 | 1,289038 | -0,56581 | 0,57152  | 0,8439388 |
| ARRDC3         | 783,92  | 0,33  | 0,581284 | 0,565802 | 0,571529 | 0,8439388 |
| PRR5           | 6,50    | -0,52 | 0,926374 | -0,56576 | 0,57156  | 0,8439388 |
| ZNF675         | 181,95  | 0,45  | 0,788575 | 0,565694 | 0,571602 | 0,8439388 |
| RPL15P20       | 0,64    | 0,74  | 1,307886 | 0,565692 | 0,571603 | NA        |
| LANCL1         | 184,88  | -0,60 | 1,066199 | -0,56565 | 0,571632 | 0,8439388 |
| RP11-671J11.5  | 172,78  | -0,31 | 0,549865 | -0,56562 | 0,571651 | 0,8439388 |
| NLRP11         | 8,25    | -0,57 | 1,005446 | -0,56557 | 0,571683 | 0,8439388 |
| NDUFS7         | 1475,53 | 0,17  | 0,296522 | 0,565444 | 0,571772 | 0,8439436 |
| IGLL5          | 3,95    | -0,64 | 1,13763  | -0,56536 | 0,571831 | 0,8439436 |
| BEX3           | 18,99   | 1,01  | 1,777946 | 0,565264 | 0,571895 | 0,8439436 |
| RP11-113C12.1  | 0,50    | -1,27 | 2,244062 | -0,56522 | 0,571921 | NA        |
| EXOSC4         | 208,93  | 0,51  | 0,902447 | 0,565196 | 0,571941 | 0,8439436 |
| MED12L         | 46,62   | -0,59 | 1,036222 | -0,56519 | 0,571945 | 0,8439436 |
| RP11-461G12.3  | 1,23    | -1,44 | 2,545519 | -0,56507 | 0,572025 | NA        |
| RP11-261E12.2  | 0,54    | 1,76  | 3,116047 | 0,564948 | 0,572109 | NA        |
| ZNF354B        | 40,15   | 0,40  | 0,709449 | 0,564947 | 0,57211  | 0,8439436 |
| RP11-455P21.3  | 1,68    | -1,22 | 2,158071 | -0,56495 | 0,57211  | NA        |
| SLC30A4        | 84,91   | -0,40 | 0,704179 | -0,56494 | 0,572113 | 0,8439436 |
| RP11-274G22.1  | 24,12   | 0,49  | 0,859335 | 0,56489  | 0,572148 | 0,8439436 |
| SMPD4          | 177,00  | 0,40  | 0,700051 | 0,564886 | 0,572151 | 0,8439436 |
| RNU6-415P      | 5,20    | 1,43  | 2,538021 | 0,564865 | 0,572165 | 0,8439436 |
| SURF2          | 154,03  | 0,41  | 0,732977 | 0,564822 | 0,572195 | 0,8439436 |
| AC018809.6     | 2,39    | 0,67  | 1,193056 | 0,56481  | 0,572203 | NA        |
| AP000479.1     | 0,24    | -1,90 | 3,370254 | -0,56477 | 0,572228 | NA        |
| BSCL2          | 322,94  | -0,28 | 0,50437  | -0,56477 | 0,57223  | 0,8439436 |
| RP1-2705.3     | 3,60    | -0,72 | 1,278991 | -0,56466 | 0,572307 | NA        |
| AC009950.2     | 102,49  | -0,46 | 0,809253 | -0,56463 | 0,572323 | 0,8439824 |
| MPZ            | 1,57    | 1,68  | 2,98129  | 0,564607 | 0,572341 | NA        |
| NSFP1          | 6,52    | 1,77  | 3,133881 | 0,564598 | 0,572348 | 0,8439824 |
| GJD4           | 3,18    | 0,69  | 1,224704 | 0,564593 | 0,572351 | NA        |
| AF003626.1     | 0,54    | 1,75  | 3,099909 | 0,564535 | 0,57239  | NA        |
| MIR4469        | 0,67    | -2,07 | 3,667705 | -0,56451 | 0,572409 | NA        |
| RP11-57P19.1   | 4,15    | 0,53  | 0,945743 | 0,564329 | 0,57253  | 0,8440167 |
| RP1-187B23.1   | 10,62   | 0,67  | 1,195183 | 0,564327 | 0,572532 | 0,8440167 |
| AIRN           | 0,67    | -1,30 | 2,309637 | -0,56424 | 0,572592 | NA        |
| RF01241        | 4,25    | 0,61  | 1,077171 | 0,564197 | 0,57262  | 0,8440167 |
| NAA16          | 164,91  | -0,43 | 0,759217 | -0,56417 | 0,572636 | 0,8440167 |
| RP11-1103G16.1 | 14,59   | -0,46 | 0,80978  | -0,56417 | 0,572639 | 0,8440167 |
| OPRL1          | 41,18   | 0,51  | 0,896166 | 0,564163 | 0,572643 | 0,8440167 |
| NOP56          | 477,09  | -0,28 | 0,493329 | -0,56404 | 0,572725 | 0,8440711 |
| RP11-378E13.4  | 1,10    | -1,12 | 1,9869   | -0,56388 | 0,572832 | NA        |
| ADAMTS6        | 0,35    | -1,43 | 2,54375  | -0,56377 | 0,572909 | NA        |
| PPM1K          | 527,38  | 0,43  | 0,75656  | 0,563712 | 0,57295  | 0,8442483 |
| RP3-473L9.3    | 0,84    | -1,24 | 2,191117 | -0,56371 | 0,572951 | NA        |
| ITM2B          | 3610,25 | 0,19  | 0,339586 | 0,563663 | 0,572983 | 0,8442483 |
| C2CD3          | 145,95  | -0,29 | 0,522106 | -0,56361 | 0,573022 | 0,8442483 |
| TBC1D22B       | 56,05   | 0,66  | 1,175496 | 0,563599 | 0,573027 | 0,8442483 |
| FNDC9          | 0,99    | 2,10  | 3,732108 | 0,563397 | 0,573164 | NA        |
| ITFG2          | 206,66  | -0,47 | 0,839495 | -0,56333 | 0,573212 | 0,8443906 |

|                 |         |       |          |          |          |           |
|-----------------|---------|-------|----------|----------|----------|-----------|
| RP11-277P12.20  | 18,05   | -0,64 | 1,130913 | -0,56332 | 0,573217 | 0,8443906 |
| FOXO1           | 0,65    | 2,03  | 3,609256 | 0,56329  | 0,573237 | NA        |
| RN7SL657P       | 2,37    | -0,69 | 1,23145  | -0,56326 | 0,573259 | NA        |
| TGFB3           | 9,59    | -1,02 | 1,815932 | -0,56326 | 0,57326  | 0,8443906 |
| PRPF18          | 245,42  | 0,46  | 0,822089 | 0,56309  | 0,573374 | 0,8444917 |
| CTD-2542C24.2   | 0,93    | -0,83 | 1,474718 | -0,56302 | 0,573421 | NA        |
| RP5-973M2.2     | 0,71    | 2,10  | 3,73656  | 0,562943 | 0,573474 | NA        |
| OR7A17          | 8,04    | -0,51 | 0,907943 | -0,56282 | 0,57356  | 0,844625  |
| FAM9B           | 20,73   | 0,47  | 0,826903 | 0,562815 | 0,573561 | 0,844625  |
| MIR99AHG        | 95,95   | 0,42  | 0,737631 | 0,562692 | 0,573645 | 0,844625  |
| RP11-1016B18.1  | 4,17    | -0,44 | 0,781012 | -0,56267 | 0,573661 | 0,844625  |
| DPP9            | 210,92  | 0,24  | 0,430931 | 0,562624 | 0,573691 | 0,844625  |
| CTD-2017D11.2   | 52,88   | 0,58  | 1,037245 | 0,562555 | 0,573738 | 0,8446269 |
| AIFM3           | 104,00  | 0,61  | 1,089091 | 0,562303 | 0,573909 | 0,8447731 |
| CTD-2562J17.6   | 502,12  | 0,30  | 0,534399 | 0,562276 | 0,573928 | 0,8447731 |
| SPATA1          | 28,71   | 0,52  | 0,919276 | 0,562148 | 0,574015 | 0,8448349 |
| HIST1H2AK       | 0,75    | 1,56  | 2,783866 | 0,56202  | 0,574102 | NA        |
| DNAJC12         | 1,29    | -1,08 | 1,929652 | -0,562   | 0,574115 | NA        |
| GABRB3          | 37,43   | -0,42 | 0,739266 | -0,56197 | 0,57414  | 0,844889  |
| RP11-391L3.4    | 24,25   | 0,67  | 1,195569 | 0,561928 | 0,574165 | 0,844889  |
| VIP             | 0,15    | -2,09 | 3,716604 | -0,56188 | 0,574199 | NA        |
| CENPW           | 37,81   | 0,67  | 1,197146 | 0,561832 | 0,57423  | 0,844889  |
| BAZ2B           | 1715,07 | -0,16 | 0,278621 | -0,56183 | 0,574234 | 0,844889  |
| KCNT2           | 3,56    | 2,06  | 3,665015 | 0,561717 | 0,574309 | NA        |
| AC026150.5      | 38,36   | 0,31  | 0,560815 | 0,561675 | 0,574337 | 0,8449742 |
| HOOK3           | 1093,07 | 0,25  | 0,439381 | 0,561464 | 0,574481 | 0,8451148 |
| CIC             | 93,49   | 0,39  | 0,694999 | 0,561384 | 0,574536 | 0,8451148 |
| FUT8            | 43,95   | -0,49 | 0,880466 | -0,56129 | 0,574597 | 0,8451148 |
| CTBP2           | 834,59  | -0,36 | 0,6449   | -0,56122 | 0,574648 | 0,8451148 |
| RP11-640M9.1    | 87,11   | -0,32 | 0,5698   | -0,5612  | 0,574664 | 0,8451148 |
| RP11-244B22.10  | 31,27   | -0,68 | 1,206908 | -0,56114 | 0,574705 | 0,8451148 |
| RP11-973H7.5    | 1,28    | 1,23  | 2,185306 | 0,561128 | 0,57471  | NA        |
| FAM175A         | 193,09  | 0,35  | 0,628973 | 0,561026 | 0,57478  | 0,8451578 |
| XXyac-YR38GF2.1 | 2,48    | -0,83 | 1,478126 | -0,56096 | 0,574824 | NA        |
| OTULIN          | 419,19  | 0,33  | 0,594555 | 0,560958 | 0,574826 | 0,8451592 |
| SH2D4A          | 3,48    | 0,65  | 1,150716 | 0,560871 | 0,574885 | NA        |
| RP11-299P2.1    | 0,15    | -2,08 | 3,716571 | -0,56073 | 0,574984 | NA        |
| CST7            | 412,30  | 0,34  | 0,605477 | 0,560665 | 0,575026 | 0,8453858 |
| RN7SL800P       | 1,07    | 2,09  | 3,731336 | 0,560398 | 0,575208 | NA        |
| UBE3B           | 269,19  | 0,37  | 0,665492 | 0,560373 | 0,575225 | 0,8455701 |
| KPNA3           | 380,98  | 0,33  | 0,583458 | 0,560348 | 0,575242 | 0,8455701 |
| IDSP1           | 10,20   | -0,92 | 1,633699 | -0,56012 | 0,575395 | 0,8457274 |
| CGB2            | 3,61    | 1,74  | 3,10739  | 0,560117 | 0,575399 | NA        |
| RP11-115H15.1   | 0,67    | 2,05  | 3,66059  | 0,560101 | 0,575411 | NA        |
| ANAPC4          | 342,15  | 0,31  | 0,552031 | 0,559968 | 0,575501 | 0,845817  |
| AC026191.1      | 0,70    | 2,09  | 3,736636 | 0,559892 | 0,575553 | NA        |
| SLC39A3         | 242,30  | -0,35 | 0,622496 | -0,55978 | 0,575627 | 0,8459322 |
| RP13-638C3.4    | 3,99    | 2,05  | 3,665368 | 0,55972  | 0,57567  | 0,8459322 |
| HIST1H2BJ       | 0,60    | -1,27 | 2,264068 | -0,55969 | 0,575694 | NA        |
| RP11-849N15.3   | 0,68    | 2,04  | 3,65098  | 0,559595 | 0,575756 | NA        |

|               |         |       |          |          |          |           |
|---------------|---------|-------|----------|----------|----------|-----------|
| GAPDHP44      | 0,40    | -1,10 | 1,968739 | -0,55957 | 0,575771 | NA        |
| CD163         | 1657,10 | -0,24 | 0,423894 | -0,55957 | 0,575776 | 0,8460202 |
| RBM41         | 145,14  | -0,37 | 0,665846 | -0,55948 | 0,575834 | 0,8460276 |
| TEPP          | 1,83    | -0,76 | 1,350927 | -0,5594  | 0,57589  | NA        |
| CENPI         | 27,33   | -0,36 | 0,640526 | -0,55937 | 0,575907 | 0,8460276 |
| NECAP1        | 619,08  | 0,27  | 0,489493 | 0,559279 | 0,575971 | 0,8460276 |
| PITRM1        | 401,26  | -0,30 | 0,528775 | -0,55924 | 0,575995 | 0,8460276 |
| RPRD1A        | 262,60  | -0,38 | 0,683256 | -0,55923 | 0,576008 | 0,8460276 |
| ZSCAN12       | 31,07   | -0,58 | 1,036404 | -0,55909 | 0,576104 | 0,8461009 |
| MAP1S         | 51,62   | -0,34 | 0,60309  | -0,55901 | 0,576156 | 0,8461107 |
| FZD1          | 159,80  | 0,46  | 0,824384 | 0,558853 | 0,576262 | 0,8461733 |
| RP4-633I8.3   | 1,14    | -1,76 | 3,143693 | -0,55873 | 0,576346 | NA        |
| RP11-783K16.5 | 1,03    | 2,08  | 3,731569 | 0,558682 | 0,576379 | NA        |
| RP11-298J20.3 | 12,75   | -0,30 | 0,545235 | -0,55867 | 0,57639  | 0,8461733 |
| CEP152        | 207,37  | 0,36  | 0,648246 | 0,55865  | 0,5764   | 0,8461733 |
| RAB9A         | 118,33  | -0,56 | 1,008673 | -0,55859 | 0,576439 | 0,8461733 |
| RP11-373J16.2 | 0,15    | -2,08 | 3,718573 | -0,55857 | 0,576453 | NA        |
| RP11-83B20.1  | 8,00    | -0,45 | 0,80783  | -0,55857 | 0,576457 | 0,8461733 |
| RP1-224A6.6   | 10,81   | -0,49 | 0,879931 | -0,55852 | 0,576491 | 0,8461733 |
| NDUFAF7       | 139,75  | -0,45 | 0,802077 | -0,55848 | 0,576517 | 0,8461733 |
| CTC-523E23.4  | 1,66    | 1,42  | 2,539516 | 0,558238 | 0,576682 | NA        |
| DHFRL1        | 27,35   | -0,50 | 0,903595 | -0,55812 | 0,57676  | 0,8464123 |
| NRP2          | 12,25   | 0,61  | 1,099109 | 0,55798  | 0,576858 | 0,8464123 |
| RP11-205M5.3  | 319,39  | 0,66  | 1,181995 | 0,557974 | 0,576862 | 0,8464123 |
| DCC           | 2,50    | 1,08  | 1,928888 | 0,557921 | 0,576898 | NA        |
| HIST1H1C      | 174,26  | 0,30  | 0,536384 | 0,557862 | 0,576939 | 0,8464123 |
| PATL1         | 175,89  | -0,41 | 0,727801 | -0,55785 | 0,576949 | 0,8464123 |
| RP11-159D12.5 | 16,96   | -0,68 | 1,227768 | -0,55776 | 0,577008 | 0,8464123 |
| AP000679.2    | 6,38    | -0,70 | 1,263023 | -0,55776 | 0,577011 | 0,8464123 |
| RP11-332H14.1 | 1,25    | -1,55 | 2,78617  | -0,55773 | 0,577026 | NA        |
| ASPHD2        | 289,50  | 0,43  | 0,762634 | 0,557708 | 0,577043 | 0,8464123 |
| GAS5-AS1      | 0,86    | 1,79  | 3,203863 | 0,557689 | 0,577057 | NA        |
| RP11-254B13.4 | 13,35   | 0,72  | 1,298593 | 0,557636 | 0,577093 | 0,8464178 |
| RNF122        | 14,64   | -0,43 | 0,764756 | -0,55756 | 0,577144 | 0,8464263 |
| KB-1608C10.2  | 3,28    | -0,62 | 1,104763 | -0,55748 | 0,577198 | NA        |
| POLM          | 171,71  | -0,39 | 0,693026 | -0,55743 | 0,577232 | 0,8464893 |
| CTD-3222D19.9 | 1,43    | 1,88  | 3,374207 | 0,557388 | 0,577262 | NA        |
| YJEFN3        | 37,01   | -1,06 | 1,903717 | -0,55714 | 0,57743  | 0,846713  |
| SNORA2B       | 0,41    | -1,08 | 1,931987 | -0,55711 | 0,577451 | NA        |
| RP11-267I18.1 | 0,70    | 2,08  | 3,736921 | 0,557016 | 0,577517 | NA        |
| RPL26P35      | 0,68    | 2,05  | 3,680965 | 0,556984 | 0,577539 | NA        |
| Z83001.1      | 16,23   | 0,62  | 1,111454 | 0,556883 | 0,577607 | 0,8469058 |
| RP11-516J2.1  | 1,46    | -0,88 | 1,573446 | -0,55674 | 0,577704 | NA        |
| ANKS1A        | 169,44  | -0,45 | 0,810123 | -0,55671 | 0,577727 | 0,8470145 |
| SSB           | 860,06  | 0,17  | 0,308051 | 0,556619 | 0,577788 | 0,847037  |
| PRKAR2B       | 244,67  | -0,34 | 0,616194 | -0,55644 | 0,57791  | 0,8471316 |
| MAPK8IP1      | 8,86    | 1,09  | 1,956833 | 0,556391 | 0,577944 | 0,8471316 |
| RP5-894A10.6  | 1,56    | 2,07  | 3,727918 | 0,556377 | 0,577953 | NA        |
| OR7A19P       | 0,56    | -1,00 | 1,800154 | -0,55633 | 0,577985 | NA        |
| FOXL2NB       | 31,85   | -0,39 | 0,698551 | -0,55626 | 0,578032 | 0,8471341 |

|               |         |       |          |          |          |           |
|---------------|---------|-------|----------|----------|----------|-----------|
| MIR7976       | 0,86    | 1,78  | 3,205404 | 0,556201 | 0,578073 | NA        |
| IL11RA        | 103,58  | -0,51 | 0,916262 | -0,55614 | 0,578117 | 0,8471341 |
| CTB-25B13.12  | 12,77   | -0,51 | 0,922976 | -0,55613 | 0,578125 | 0,8471341 |
| RP11-566K11.6 | 57,31   | 0,61  | 1,091655 | 0,556122 | 0,578127 | 0,8471341 |
| FTCD          | 0,39    | -2,07 | 3,719025 | -0,55592 | 0,578267 | NA        |
| P2RX7         | 838,31  | -0,33 | 0,591568 | -0,55591 | 0,578274 | 0,847206  |
| RP11-274J7.3  | 0,69    | 2,08  | 3,736861 | 0,555828 | 0,578328 | NA        |
| IFI35         | 677,05  | 0,30  | 0,541848 | 0,555792 | 0,578353 | 0,847206  |
| RP13-582O9.5  | 27,83   | -0,62 | 1,118478 | -0,55579 | 0,578356 | 0,847206  |
| TSGA10IP      | 0,96    | -2,01 | 3,621665 | -0,55576 | 0,578377 | NA        |
| ZNF343        | 15,85   | -0,83 | 1,498131 | -0,55573 | 0,578395 | 0,847206  |
| AC090616.2    | 5,15    | 0,94  | 1,697313 | 0,55566  | 0,578443 | 0,847206  |
| BCKDHB        | 102,18  | 0,47  | 0,838127 | 0,555643 | 0,578455 | 0,847206  |
| CTD-2562J15.6 | 25,47   | -0,53 | 0,961154 | -0,55553 | 0,57853  | 0,847206  |
| CTD-2265O21.8 | 3,91    | -1,04 | 1,871547 | -0,55552 | 0,578541 | 0,847206  |
| RN7SL168P     | 1,14    | 1,59  | 2,870442 | 0,555511 | 0,578545 | NA        |
| CCKBR         | 0,15    | -2,06 | 3,717643 | -0,55545 | 0,578585 | NA        |
| SLC5A2        | 8,63    | -0,76 | 1,370915 | -0,55531 | 0,578684 | 0,8472572 |
| DERL3         | 1,93    | 0,54  | 0,968365 | 0,555252 | 0,578722 | NA        |
| C10orf40      | 14,20   | 0,40  | 0,717534 | 0,555234 | 0,578734 | 0,8472572 |
| ESYT1         | 1080,07 | 0,35  | 0,625926 | 0,555202 | 0,578757 | 0,8472572 |
| NTPCR         | 230,16  | 0,44  | 0,784479 | 0,5552   | 0,578758 | 0,8472572 |
| PEX11B        | 134,90  | -0,49 | 0,876159 | -0,555   | 0,578896 | 0,8473926 |
| RP1-34L19.1   | 3,14    | 0,57  | 1,035944 | 0,554923 | 0,578947 | NA        |
| ZBTB9         | 3,77    | 1,52  | 2,744072 | 0,55486  | 0,57899  | 0,8474637 |
| ABCG2         | 0,63    | -1,58 | 2,845197 | -0,55481 | 0,579026 | NA        |
| SSC4D         | 0,63    | 1,75  | 3,150831 | 0,554665 | 0,579124 | NA        |
| RP11-252I14.1 | 0,30    | -1,59 | 2,873439 | -0,55458 | 0,579183 | NA        |
| ZNF791        | 366,98  | 0,27  | 0,486881 | 0,554569 | 0,57919  | 0,8476521 |
| HIBCH         | 160,05  | -0,34 | 0,621181 | -0,55454 | 0,57921  | 0,8476521 |
| KLHL31        | 0,96    | 1,56  | 2,810655 | 0,554446 | 0,579273 | NA        |
| CDCA7L        | 100,72  | 0,59  | 1,069746 | 0,554441 | 0,579277 | 0,8476838 |
| FSHR          | 0,48    | -1,71 | 3,07696  | -0,55434 | 0,579346 | NA        |
| RP13-991F5.2  | 8,41    | 0,45  | 0,81907  | 0,5543   | 0,579374 | 0,8477249 |
| MED13L        | 1134,06 | 0,30  | 0,550019 | 0,554267 | 0,579396 | 0,8477249 |
| RP11-420L9.2  | 0,67    | 2,07  | 3,736957 | 0,554164 | 0,579467 | NA        |
| MRPS31        | 183,68  | -0,35 | 0,633856 | -0,554   | 0,579579 | 0,8478668 |
| RP11-549K20.1 | 45,56   | -0,46 | 0,82632  | -0,55392 | 0,579631 | 0,8478668 |
| CYB561D2      | 497,12  | -0,30 | 0,545804 | -0,55386 | 0,579674 | 0,8478668 |
| TMEM79        | 40,47   | -0,99 | 1,779325 | -0,55384 | 0,579689 | 0,8478668 |
| RN7SL764P     | 0,52    | 1,71  | 3,094871 | 0,553779 | 0,57973  | NA        |
| SLC9B1        | 15,03   | 0,44  | 0,794308 | 0,553763 | 0,579741 | 0,8478668 |
| CD36          | 2979,11 | -0,27 | 0,481923 | -0,55371 | 0,579774 | 0,8478668 |
| RP11-885N19.7 | 8,81    | -0,93 | 1,674487 | -0,55363 | 0,579831 | 0,8478668 |
| KHK           | 15,47   | -0,97 | 1,759436 | -0,55344 | 0,57996  | 0,8478668 |
| TTC41P        | 16,06   | 1,08  | 1,95908  | 0,553404 | 0,579987 | 0,8478668 |
| SASH1         | 22,99   | -1,12 | 2,019663 | -0,55335 | 0,580026 | 0,8478668 |
| FANCA         | 40,95   | -0,61 | 1,104183 | -0,55324 | 0,580097 | 0,8478668 |
| MPG           | 444,05  | 0,25  | 0,451117 | 0,553111 | 0,580187 | 0,8478668 |
| RP11-113K21.4 | 0,69    | 2,07  | 3,736823 | 0,553078 | 0,58021  | NA        |



|                  |        |       |          |          |          |           |
|------------------|--------|-------|----------|----------|----------|-----------|
| RP11-554J4.1     | 22,89  | -0,83 | 1,507856 | -0,55308 | 0,580211 | 0,8478668 |
| RP11-413N10.3    | 12,11  | -0,36 | 0,654822 | -0,55305 | 0,580231 | 0,8478668 |
| RP11-498C9.13    | 0,50   | -2,04 | 3,681918 | -0,55304 | 0,580239 | NA        |
| AKR1D1           | 8,52   | 0,60  | 1,088891 | 0,553033 | 0,580241 | 0,8478668 |
| USP36            | 420,22 | -0,25 | 0,450291 | -0,55299 | 0,580267 | 0,8478668 |
| RP1-224A6.4      | 158,45 | 0,37  | 0,673261 | 0,552988 | 0,580272 | 0,8478668 |
| FCRL2            | 17,52  | -0,39 | 0,697898 | -0,55287 | 0,580355 | 0,8478668 |
| MZF1             | 102,39 | -0,44 | 0,794331 | -0,55281 | 0,580396 | 0,8478668 |
| MCRS1            | 443,45 | -0,30 | 0,542525 | -0,55279 | 0,580405 | 0,8478668 |
| PTPRZ1           | 14,71  | -0,62 | 1,123264 | -0,5527  | 0,58047  | 0,8478873 |
| SLC22A4          | 166,71 | -0,69 | 1,254713 | -0,55262 | 0,580521 | 0,8478873 |
| RP11-798M19.3    | 0,34   | -1,38 | 2,495274 | -0,5526  | 0,580539 | NA        |
| CTD-2562J17.7    | 7,84   | 0,57  | 1,029445 | 0,552491 | 0,580612 | 0,8478873 |
| MIR6797          | 1,70   | 1,45  | 2,631016 | 0,552476 | 0,580622 | NA        |
| ITFG1            | 319,63 | -0,34 | 0,624486 | -0,55237 | 0,580694 | 0,8478873 |
| TRHDE            | 36,45  | -0,84 | 1,517602 | -0,55235 | 0,580706 | 0,8478873 |
| ZNF142           | 89,77  | 0,60  | 1,094689 | 0,552312 | 0,580734 | 0,8478873 |
| RP11-540B6.3     | 0,65   | 2,01  | 3,648183 | 0,552302 | 0,580742 | NA        |
| AC008753.6       | 11,25  | -0,58 | 1,057068 | -0,55227 | 0,580762 | 0,8478873 |
| GALNT4           | 151,87 | 0,58  | 1,056138 | 0,552241 | 0,580783 | 0,8478873 |
| RP3-395M20.9     | 5,45   | 2,01  | 3,648824 | 0,552174 | 0,580829 | 0,8478874 |
| C1orf213         | 0,96   | 1,72  | 3,124691 | 0,552035 | 0,580925 | NA        |
| RP11-78J21.3     | 7,56   | 1,12  | 2,029517 | 0,552028 | 0,580929 | 0,8479673 |
| GTPBP6           | 316,59 | -0,30 | 0,540806 | -0,55194 | 0,580987 | 0,8479852 |
| ERRFI1           | 0,54   | 1,70  | 3,08307  | 0,551905 | 0,581014 | NA        |
| TTLL12           | 104,01 | -0,55 | 0,990018 | -0,55178 | 0,581101 | 0,8480841 |
| CTC-303L1.1      | 0,64   | 2,00  | 3,615741 | 0,551774 | 0,581103 | NA        |
| RP11-178L8.7     | 1,03   | 2,06  | 3,731665 | 0,551774 | 0,581103 | NA        |
| CITF22-1A6.3     | 38,76  | 0,59  | 1,065    | 0,551701 | 0,581153 | 0,8480943 |
| FOXF1            | 0,68   | 2,06  | 3,737044 | 0,551617 | 0,58121  | NA        |
| SOX12            | 13,71  | -0,59 | 1,076491 | -0,55158 | 0,581234 | 0,8481299 |
| CTC-493P15.2     | 0,67   | 2,04  | 3,699524 | 0,551555 | 0,581254 | NA        |
| RN7SKP224        | 8,42   | 0,47  | 0,852572 | 0,551532 | 0,581269 | 0,8481299 |
| ALPP             | 1,31   | -0,94 | 1,696803 | -0,55152 | 0,581277 | NA        |
| RF00108          | 0,68   | 2,06  | 3,736789 | 0,551399 | 0,58136  | NA        |
| RP11-404F10.6    | 0,66   | 2,06  | 3,737073 | 0,551327 | 0,58141  | NA        |
| ETNK1            | 834,00 | -0,30 | 0,537606 | -0,55124 | 0,581467 | 0,8483528 |
| RNU6-208P        | 0,15   | -2,05 | 3,718812 | -0,5512  | 0,581496 | NA        |
| TBC1D26          | 2,30   | 1,91  | 3,462749 | 0,551162 | 0,581523 | NA        |
| CTD-2302E22.6    | 4,49   | -1,09 | 1,981491 | -0,55114 | 0,581536 | 0,8483862 |
| XXbac-BPG55C20.7 | 72,05  | 0,54  | 0,981714 | 0,550988 | 0,581642 | 0,8484745 |
| LRRC42           | 64,62  | 0,78  | 1,421751 | 0,550809 | 0,581765 | 0,8484759 |
| RP11-702H23.6    | 23,75  | -0,72 | 1,306398 | -0,55081 | 0,581765 | 0,8484759 |
| AP000304.12      | 1,48   | -1,38 | 2,512479 | -0,55079 | 0,581775 | NA        |
| AGGF1            | 259,40 | 0,38  | 0,68239  | 0,550787 | 0,581779 | 0,8484759 |
| TEKT4            | 0,59   | 1,17  | 2,119282 | 0,550781 | 0,581784 | NA        |
| CTD-2284O10.1    | 1,58   | 0,56  | 1,014571 | 0,550777 | 0,581787 | NA        |
| AC010879.1       | 0,47   | -1,24 | 2,250198 | -0,55063 | 0,581885 | NA        |
| STXBP1           | 26,84  | -0,51 | 0,919484 | -0,55062 | 0,581895 | 0,8485778 |
| RP11-254N18.1    | 0,43   | 1,48  | 2,681827 | 0,550474 | 0,581994 | NA        |

|                |        |       |          |          |          |           |
|----------------|--------|-------|----------|----------|----------|-----------|
| RARG           | 103,19 | 0,53  | 0,97101  | 0,550451 | 0,58201  | 0,8486797 |
| MYRF           | 2,92   | 1,70  | 3,088409 | 0,550327 | 0,582095 | NA        |
| RN7SL635P      | 0,89   | 1,78  | 3,235195 | 0,550219 | 0,582169 | NA        |
| RP11-546M4.3   | 1,05   | 2,05  | 3,731608 | 0,550118 | 0,582239 | NA        |
| CTB-88F18.5    | 9,65   | 0,49  | 0,890508 | 0,550104 | 0,582248 | 0,8488976 |
| RP4-614C10.2   | 25,42  | -0,83 | 1,513144 | -0,5501  | 0,582251 | 0,8488976 |
| AC093509.2     | 0,15   | -2,05 | 3,719222 | -0,54996 | 0,582347 | NA        |
| WNT5B          | 0,70   | -1,39 | 2,526632 | -0,54985 | 0,58242  | NA        |
| LRR1           | 78,23  | 0,49  | 0,897142 | 0,54975  | 0,582491 | 0,8491621 |
| LINC00482      | 9,33   | -0,60 | 1,097954 | -0,5497  | 0,582524 | 0,8491621 |
| FAM183B        | 0,53   | 1,72  | 3,127301 | 0,549572 | 0,582613 | NA        |
| ARHGAP25       | 273,29 | -0,32 | 0,588479 | -0,54957 | 0,582615 | 0,849228  |
| CH507-3904.2   | 0,67   | 2,05  | 3,737214 | 0,549495 | 0,582666 | NA        |
| CTD-2206N4.4   | 21,45  | 0,49  | 0,892146 | 0,549393 | 0,582736 | 0,8493377 |
| AC098824.5     | 1,32   | 1,81  | 3,294316 | 0,549214 | 0,582858 | NA        |
| RP11-744K17.8  | 1,36   | -1,56 | 2,839257 | -0,5492  | 0,582869 | NA        |
| RP11-434P11.1  | 15,88  | -0,44 | 0,793008 | -0,54916 | 0,582893 | 0,8494661 |
| RP5-1090P18.1  | 23,50  | 0,52  | 0,951018 | 0,549119 | 0,582924 | 0,8494661 |
| ZNRF2          | 118,41 | 0,37  | 0,669361 | 0,549065 | 0,582961 | 0,8494661 |
| ACTRT1         | 0,68   | 2,05  | 3,737143 | 0,548945 | 0,583043 | NA        |
| RP11-410E4.1   | 0,44   | 1,42  | 2,592656 | 0,548921 | 0,58306  | NA        |
| MRPS33         | 188,88 | -0,30 | 0,541733 | -0,54883 | 0,58312  | 0,8496312 |
| RNU4-25P       | 0,66   | 2,05  | 3,737189 | 0,548798 | 0,583144 | NA        |
| HIST1H2BD      | 74,45  | 0,68  | 1,236493 | 0,54873  | 0,583191 | 0,8496545 |
| INPP5F         | 236,40 | 0,38  | 0,683665 | 0,548677 | 0,583227 | 0,8496545 |
| AC007016.3     | 1,02   | 2,05  | 3,731807 | 0,548621 | 0,583265 | NA        |
| RNU1-59P       | 0,56   | 1,73  | 3,149526 | 0,548252 | 0,583519 | NA        |
| RP4-756H11.2   | 0,74   | -0,78 | 1,427549 | -0,54825 | 0,58352  | NA        |
| RP11-476H16.1  | 6,61   | -0,70 | 1,269016 | -0,54825 | 0,583521 | 0,8500161 |
| CXorf36        | 47,66  | -0,57 | 1,037059 | -0,54817 | 0,583575 | 0,8500279 |
| CH17-262A2.1   | 0,86   | 1,80  | 3,288483 | 0,548068 | 0,583645 | NA        |
| RP11-68D16.2   | 0,68   | 2,05  | 3,737226 | 0,548064 | 0,583648 | NA        |
| INTS2          | 105,86 | 0,33  | 0,595837 | 0,547997 | 0,583694 | 0,8500887 |
| MIR601         | 10,36  | 1,16  | 2,110619 | 0,547977 | 0,583708 | 0,8500887 |
| RP11-267M23.4  | 3,17   | -0,63 | 1,152575 | -0,54782 | 0,583818 | NA        |
| POU5F1B        | 5,15   | -0,54 | 0,982192 | -0,5478  | 0,583826 | 0,850109  |
| TRIT1          | 309,44 | 0,45  | 0,816069 | 0,547763 | 0,583855 | 0,850109  |
| RP11-185C18.4  | 4,47   | -1,14 | 2,086781 | -0,54776 | 0,583859 | 0,850109  |
| PHRF1          | 190,40 | -0,44 | 0,795747 | -0,54758 | 0,583979 | 0,8502168 |
| RP3-443C4.2    | 0,39   | -2,02 | 3,686928 | -0,54755 | 0,583998 | NA        |
| RNU1-94P       | 0,67   | 2,05  | 3,73722  | 0,547532 | 0,584013 | NA        |
| MIR1539        | 0,64   | 2,01  | 3,664304 | 0,547511 | 0,584028 | NA        |
| RP3-325F22.5   | 15,28  | -0,35 | 0,637536 | -0,54744 | 0,584079 | 0,850267  |
| INSL6          | 115,94 | 0,36  | 0,655604 | 0,547399 | 0,584104 | 0,850267  |
| LPCAT2         | 547,94 | 0,29  | 0,538885 | 0,54717  | 0,584262 | 0,8504296 |
| RP11-191A15.4  | 0,53   | -2,01 | 3,676019 | -0,54689 | 0,584457 | NA        |
| DUSP7          | 293,07 | -0,42 | 0,759586 | -0,5468  | 0,584516 | 0,8507246 |
| RP11-108K14.12 | 1,18   | 1,59  | 2,902971 | 0,54671  | 0,584578 | NA        |
| MCUR1          | 222,46 | -0,34 | 0,628576 | -0,54667 | 0,584603 | 0,8507246 |
| MTATP6P2       | 1,00   | -0,70 | 1,286181 | -0,54664 | 0,584625 | NA        |

|                |        |       |          |          |          |           |
|----------------|--------|-------|----------|----------|----------|-----------|
| AC129492.6     | 0,64   | 2,00  | 3,653764 | 0,546591 | 0,58466  | NA        |
| NUDT21         | 529,12 | 0,29  | 0,536205 | 0,546516 | 0,584711 | 0,8507246 |
| RP11-140I24.1  | 126,12 | -0,29 | 0,521733 | -0,54651 | 0,584714 | 0,8507246 |
| KBTBD6         | 29,40  | 0,49  | 0,890836 | 0,546511 | 0,584715 | 0,8507246 |
| AC010971.1     | 1,48   | 1,08  | 1,984558 | 0,546471 | 0,584742 | NA        |
| AJ006998.2     | 32,29  | -0,52 | 0,951456 | -0,54645 | 0,584755 | 0,8507246 |
| KCNMB3L        | 1,46   | 2,04  | 3,728903 | 0,5462   | 0,584928 | NA        |
| RP11-351J23.1  | 0,67   | 2,04  | 3,73728  | 0,546191 | 0,584935 | NA        |
| VEPH1          | 1,54   | -1,42 | 2,605158 | -0,54618 | 0,584943 | NA        |
| SNHG7          | 69,82  | -0,35 | 0,633166 | -0,54613 | 0,584978 | 0,8507246 |
| USP10          | 802,03 | 0,24  | 0,444492 | 0,546123 | 0,584981 | 0,8507246 |
| LNPEP          | 977,59 | 0,25  | 0,4569   | 0,546071 | 0,585017 | 0,8507246 |
| TAF1L          | 2,15   | -0,95 | 1,733175 | -0,54603 | 0,585048 | NA        |
| AC008060.7     | 0,56   | 1,69  | 3,100803 | 0,546014 | 0,585056 | NA        |
| SBF1           | 97,24  | 0,41  | 0,746807 | 0,545999 | 0,585066 | 0,8507246 |
| CTD-2620I22.3  | 3,78   | 0,47  | 0,862231 | 0,54599  | 0,585073 | 0,8507246 |
| SHOX           | 12,59  | -0,33 | 0,602137 | -0,54597 | 0,585088 | 0,8507246 |
| RP11-438E5.1   | 9,88   | 0,69  | 1,256224 | 0,545927 | 0,585116 | 0,8507246 |
| MSRB2          | 59,70  | -0,38 | 0,696087 | -0,5459  | 0,585137 | 0,8507246 |
| SPATA5         | 61,65  | 0,37  | 0,672555 | 0,545783 | 0,585215 | 0,8507246 |
| RP11-338I21.1  | 12,67  | -0,49 | 0,892202 | -0,54578 | 0,585218 | 0,8507246 |
| CCL4L2         | 221,19 | -0,67 | 1,2251   | -0,54574 | 0,585242 | 0,8507246 |
| RP11-328P23.4  | 0,52   | -1,11 | 2,030574 | -0,54569 | 0,585279 | NA        |
| MAP1A          | 0,85   | -0,77 | 1,417868 | -0,54554 | 0,585382 | NA        |
| RP11-573J24.1  | 2,05   | -1,45 | 2,652092 | -0,54548 | 0,585426 | NA        |
| LILRA4         | 19,55  | 0,50  | 0,915956 | 0,545382 | 0,585491 | 0,8508925 |
| DRICH1         | 0,22   | -2,02 | 3,705645 | -0,54533 | 0,58553  | NA        |
| SEC23B         | 480,53 | 0,26  | 0,485812 | 0,545313 | 0,585538 | 0,8508925 |
| ANKRD54        | 135,84 | -0,33 | 0,599418 | -0,54531 | 0,58554  | 0,8508925 |
| RP11-308D16.2  | 23,44  | -0,50 | 0,911175 | -0,54527 | 0,585569 | 0,8508925 |
| LNX2           | 62,79  | -0,56 | 1,019035 | -0,5452  | 0,585616 | 0,8508925 |
| RP11-76N11.2   | 0,81   | -2,00 | 3,66136  | -0,54506 | 0,58571  | NA        |
| CTC-518P12.6   | 13,93  | -0,87 | 1,593084 | -0,54506 | 0,585712 | 0,8508925 |
| KRBA2          | 9,20   | 0,59  | 1,081265 | 0,545028 | 0,585734 | 0,8508925 |
| NCRNA00168     | 0,67   | 2,04  | 3,737302 | 0,544995 | 0,585757 | NA        |
| RP4-718J7.4    | 0,64   | 2,00  | 3,66688  | 0,54497  | 0,585774 | NA        |
| RP11-436I9.2   | 17,11  | 0,83  | 1,524181 | 0,544955 | 0,585784 | 0,8508925 |
| RP11-1060J15.5 | 0,13   | -1,83 | 3,360661 | -0,54491 | 0,585814 | NA        |
| RN7SL784P      | 6,80   | -0,64 | 1,179816 | -0,54489 | 0,585831 | 0,8508925 |
| AC144652.1     | 57,12  | 0,63  | 1,162701 | 0,544873 | 0,585841 | 0,8508925 |
| RP11-542M13.1  | 1,04   | 2,03  | 3,731754 | 0,544872 | 0,585841 | NA        |
| RP11-40H20.4   | 1,17   | -1,09 | 2,006172 | -0,54469 | 0,585968 | NA        |
| CCDC58         | 68,87  | -0,41 | 0,746758 | -0,54464 | 0,586004 | 0,8508925 |
| RGP1           | 80,67  | -0,48 | 0,873115 | -0,54462 | 0,586017 | 0,8508925 |
| SNORD3E        | 0,50   | 1,69  | 3,106111 | 0,544509 | 0,586091 | NA        |
| MFSD7          | 9,43   | -0,62 | 1,140619 | -0,54449 | 0,586107 | 0,8508925 |
| TRIM32         | 2,40   | 2,01  | 3,694788 | 0,544472 | 0,586116 | NA        |
| AP000240.9     | 12,71  | -0,74 | 1,360297 | -0,54447 | 0,586118 | 0,8508925 |
| AP005901.1     | 15,22  | -0,62 | 1,140887 | -0,54447 | 0,586119 | 0,8508925 |
| GATSL3         | 29,21  | -0,59 | 1,082166 | -0,54442 | 0,586153 | 0,8508925 |

|                |         |       |          |          |          |           |
|----------------|---------|-------|----------|----------|----------|-----------|
| PIPOX          | 15,51   | 0,54  | 0,999345 | 0,544381 | 0,586179 | 0,8508925 |
| ZNF445         | 437,93  | 0,39  | 0,723301 | 0,544322 | 0,58622  | 0,8508925 |
| MSI1           | 2,11    | 0,61  | 1,125504 | 0,54425  | 0,58627  | NA        |
| RP11-556N4.1   | 32,22   | 0,49  | 0,899368 | 0,54423  | 0,586283 | 0,8508925 |
| AC016712.1     | 6,58    | -0,36 | 0,661803 | -0,54414 | 0,586346 | 0,8508925 |
| ULK4P2         | 16,34   | 0,66  | 1,20888  | 0,544137 | 0,586347 | 0,8508925 |
| SNX30          | 1062,45 | -0,24 | 0,437598 | -0,54411 | 0,586363 | 0,8508925 |
| RP11-522L3.1   | 2,04    | -1,29 | 2,365812 | -0,54406 | 0,586403 | NA        |
| RP3-470L22.1   | 2,03    | -1,80 | 3,299717 | -0,54402 | 0,586424 | NA        |
| AC002059.10    | 1,57    | 1,62  | 2,979602 | 0,544019 | 0,586429 | NA        |
| RP11-344P13.6  | 0,64    | 1,98  | 3,648852 | 0,543982 | 0,586454 | NA        |
| SPAG6          | 17,92   | -1,96 | 3,609743 | -0,54396 | 0,586467 | 0,8509771 |
| CH507-338C24.1 | 29,21   | 0,61  | 1,118883 | 0,543713 | 0,586639 | 0,851021  |
| ACKR2          | 15,22   | 0,35  | 0,652311 | 0,543713 | 0,586639 | 0,851021  |
| SRPK1          | 346,80  | -0,39 | 0,718173 | -0,5436  | 0,586717 | 0,851021  |
| RP11-54B9.2    | 0,68    | -0,77 | 1,415959 | -0,54358 | 0,586728 | NA        |
| UBE2I          | 655,97  | 0,19  | 0,343586 | 0,543509 | 0,586779 | 0,851021  |
| RP11-484D18.2  | 0,55    | 1,69  | 3,100689 | 0,54349  | 0,586793 | NA        |
| SETMAR         | 48,39   | -0,43 | 0,789222 | -0,54347 | 0,586807 | 0,851021  |
| CXorf18        | 1,33    | 1,22  | 2,253969 | 0,543427 | 0,586836 | NA        |
| LRRC59         | 358,26  | 0,34  | 0,617139 | 0,543408 | 0,586849 | 0,851021  |
| DTX2           | 202,32  | -0,41 | 0,745819 | -0,54341 | 0,58685  | 0,851021  |
| MIR3155A       | 0,66    | 2,03  | 3,737401 | 0,543366 | 0,586878 | NA        |
| RNY4P3         | 0,25    | -1,83 | 3,370268 | -0,54335 | 0,586892 | NA        |
| SNX21          | 20,61   | -0,50 | 0,922087 | -0,54334 | 0,586895 | 0,851021  |
| NBPF20         | 227,16  | 0,30  | 0,543113 | 0,543285 | 0,586934 | 0,851021  |
| RP11-343H5.4   | 10,79   | 0,81  | 1,487708 | 0,543183 | 0,587004 | 0,851021  |
| SVBP           | 169,35  | 0,30  | 0,56154  | 0,543117 | 0,587049 | 0,851021  |
| PRR7           | 15,76   | -0,99 | 1,820675 | -0,54311 | 0,587057 | 0,851021  |
| HNRPA1P3       | 2,16    | 0,64  | 1,183238 | 0,543063 | 0,587087 | NA        |
| RAD23A         | 674,22  | 0,17  | 0,306957 | 0,543054 | 0,587092 | 0,851021  |
| RP11-438P9.2   | 0,67    | 2,03  | 3,737381 | 0,543054 | 0,587093 | NA        |
| AC007952.5     | 5,46    | -0,59 | 1,083477 | -0,54289 | 0,587204 | 0,8510796 |
| HIST2H4B       | 195,67  | -0,47 | 0,87266  | -0,54286 | 0,587224 | 0,8510796 |
| CECR4          | 0,64    | 2,03  | 3,738321 | 0,542776 | 0,587284 | NA        |
| TMPRSS7        | 1,82    | 0,87  | 1,593858 | 0,542743 | 0,587307 | NA        |
| AC010907.3     | 5,57    | 0,27  | 0,499542 | 0,542668 | 0,587358 | 0,851097  |
| PUS3           | 69,77   | -0,63 | 1,167604 | -0,54265 | 0,587367 | 0,851097  |
| FCGR2C         | 496,56  | 0,32  | 0,59229  | 0,54261  | 0,587398 | 0,851097  |
| FERMT2         | 3,88    | -0,58 | 1,07345  | -0,54258 | 0,587419 | 0,851097  |
| RP4-639J15.3   | 5,40    | 0,47  | 0,870526 | 0,542436 | 0,587518 | 0,8511655 |
| RP11-278A23.1  | 0,73    | 1,52  | 2,794576 | 0,542261 | 0,587639 | NA        |
| IP6K2          | 446,92  | 0,24  | 0,435775 | 0,542172 | 0,5877   | 0,8511655 |
| KANK1          | 18,87   | 0,37  | 0,676364 | 0,542167 | 0,587703 | 0,8511655 |
| ZNF524         | 249,86  | -0,38 | 0,693136 | -0,54216 | 0,587709 | 0,8511655 |
| GOLGA2B        | 101,03  | 0,45  | 0,838886 | 0,542145 | 0,587719 | 0,8511655 |
| DCXR           | 1012,58 | -0,20 | 0,369003 | -0,54211 | 0,587741 | 0,8511655 |
| CLEC4F         | 87,52   | -1,57 | 2,899891 | -0,54201 | 0,587814 | 0,8512046 |
| OR14L1P        | 23,53   | 0,75  | 1,390707 | 0,541915 | 0,587877 | 0,8512231 |
| BORCS5         | 299,26  | -0,47 | 0,872122 | -0,54186 | 0,587918 | 0,8512231 |

|                 |         |       |          |          |          |           |
|-----------------|---------|-------|----------|----------|----------|-----------|
| OR4F13P         | 0,77    | -1,06 | 1,951446 | -0,54178 | 0,58797  | NA        |
| ZNF440          | 71,64   | 0,32  | 0,592275 | 0,541779 | 0,587971 | 0,8512334 |
| AOX3P           | 8,76    | -1,86 | 3,433122 | -0,54166 | 0,588052 | 0,8512522 |
| ATP6V1H         | 322,80  | -0,31 | 0,581311 | -0,54158 | 0,58811  | 0,8512522 |
| SSH2            | 1009,13 | -0,29 | 0,538844 | -0,54154 | 0,588138 | 0,8512522 |
| TWF2            | 1170,54 | -0,15 | 0,277319 | -0,54149 | 0,588167 | 0,8512522 |
| RP11-357K6.1    | 1,46    | -1,77 | 3,274427 | -0,54149 | 0,588168 | NA        |
| HCFC1R1         | 108,29  | 0,22  | 0,410111 | 0,541361 | 0,588259 | 0,8512895 |
| PGS1            | 260,93  | 0,25  | 0,46452  | 0,541181 | 0,588383 | 0,8512895 |
| SPSB3           | 431,10  | -0,26 | 0,487255 | -0,54117 | 0,588391 | 0,8512895 |
| CTD-2542L18.1   | 16,80   | 0,28  | 0,519646 | 0,541115 | 0,588428 | 0,8512895 |
| YY1             | 1319,23 | 0,21  | 0,381063 | 0,541004 | 0,588505 | 0,8512895 |
| RP11-115D7.3    | 0,67    | 2,02  | 3,737374 | 0,540966 | 0,588531 | NA        |
| RP11-295G20.2   | 16,18   | 0,59  | 1,083338 | 0,540962 | 0,588534 | 0,8512895 |
| CYP4F3          | 26,56   | 0,59  | 1,081927 | 0,54093  | 0,588556 | 0,8512895 |
| RP11-10J18.3    | 0,66    | 2,02  | 3,737499 | 0,540887 | 0,588585 | NA        |
| WI2-80269A6.1   | 0,62    | 1,95  | 3,605926 | 0,540832 | 0,588624 | NA        |
| AP000936.4      | 0,50    | 1,65  | 3,047839 | 0,540826 | 0,588628 | NA        |
| TNFRSF13C       | 14,56   | 0,50  | 0,925689 | 0,540816 | 0,588634 | 0,8512895 |
| RP11-217E22.2   | 48,17   | -0,33 | 0,616651 | -0,54079 | 0,588652 | 0,8512895 |
| DRC1            | 0,67    | 2,02  | 3,736758 | 0,540747 | 0,588682 | NA        |
| SUPV3L1         | 177,66  | 0,38  | 0,698202 | 0,540688 | 0,588723 | 0,8512895 |
| TWISTNB         | 370,51  | 0,32  | 0,582874 | 0,540686 | 0,588724 | 0,8512895 |
| ZNF280B         | 9,86    | -0,30 | 0,545817 | -0,54066 | 0,588742 | 0,8512895 |
| RP11-506M12.1   | 3,35    | 0,57  | 1,047903 | 0,540652 | 0,588748 | NA        |
| UFM1            | 494,12  | -0,27 | 0,49199  | -0,54047 | 0,588873 | 0,8513778 |
| RP11-930P14.1   | 4,67    | -0,54 | 0,994583 | -0,54043 | 0,5889   | 0,8513778 |
| RP11-295P9.3    | 110,78  | 0,39  | 0,726602 | 0,540372 | 0,58894  | 0,8513778 |
| XXYL1           | 163,29  | -0,50 | 0,927514 | -0,54018 | 0,589073 | 0,8515043 |
| IL6             | 1,02    | 2,02  | 3,732016 | 0,540152 | 0,589093 | NA        |
| GLB1L3          | 77,25   | -0,28 | 0,509689 | -0,54005 | 0,58916  | 0,8515162 |
| DNAL1           | 146,71  | 0,48  | 0,897366 | 0,540004 | 0,589194 | 0,8515162 |
| AKAP8           | 600,50  | 0,23  | 0,429196 | 0,539968 | 0,589219 | 0,8515162 |
| CTC-358I24.1    | 57,71   | -0,60 | 1,117085 | -0,53989 | 0,58927  | 0,8515232 |
| COX14           | 319,40  | 0,22  | 0,408529 | 0,539755 | 0,589366 | 0,8515468 |
| LA16c-313D11.12 | 7,31    | -0,36 | 0,675358 | -0,53974 | 0,589377 | 0,8515468 |
| RP11-64D24.2    | 1,00    | 2,01  | 3,732011 | 0,53973  | 0,589383 | NA        |
| AP000662.4      | 69,74   | 0,50  | 0,922255 | 0,539653 | 0,589436 | 0,8515657 |
| PQBP1           | 647,86  | 0,15  | 0,285705 | 0,539574 | 0,589491 | 0,8515787 |
| UBE2H           | 392,36  | -0,43 | 0,798059 | -0,5394  | 0,589609 | 0,8516833 |
| NDUFB5          | 1088,20 | 0,18  | 0,334801 | 0,539322 | 0,589665 | 0,8516975 |
| RN7SL148P       | 5,39    | -0,86 | 1,599116 | -0,53919 | 0,589756 | 0,8517027 |
| RP4-535B20.4    | 38,04   | 0,61  | 1,138688 | 0,539184 | 0,58976  | 0,8517027 |
| TUBBP5          | 0,76    | 1,97  | 3,650114 | 0,539058 | 0,589847 | NA        |
| TMED4           | 836,67  | 0,23  | 0,425995 | 0,538991 | 0,589893 | 0,8518287 |
| FAM153C         | 16,58   | -0,64 | 1,196686 | -0,53883 | 0,590006 | 0,851833  |
| TBC1D32         | 119,81  | 0,24  | 0,438412 | 0,538754 | 0,590057 | 0,851833  |
| HADHB           | 1262,27 | 0,22  | 0,402971 | 0,538753 | 0,590058 | 0,851833  |
| HDAC7           | 233,55  | -0,43 | 0,804954 | -0,53872 | 0,590079 | 0,851833  |
| MIR3146         | 0,87    | 1,77  | 3,284145 | 0,538704 | 0,590091 | NA        |

|                |         |       |          |          |          |           |
|----------------|---------|-------|----------|----------|----------|-----------|
| KCNJ18         | 0,15    | -2,00 | 3,721903 | -0,53859 | 0,590172 | NA        |
| AP1S1          | 64,72   | -0,58 | 1,069206 | -0,53853 | 0,590211 | 0,8518935 |
| CTC-251D13.1   | 34,87   | 0,50  | 0,925704 | 0,538528 | 0,590213 | 0,8518935 |
| RP11-308B16.2  | 1,40    | 0,99  | 1,831209 | 0,538453 | 0,590264 | NA        |
| EXOC6B         | 78,47   | -0,63 | 1,174292 | -0,53838 | 0,590314 | 0,8519094 |
| RP11-58C22.2   | 6,55    | -0,54 | 1,006092 | -0,53838 | 0,590316 | 0,8519094 |
| TMEM220        | 39,42   | -0,47 | 0,880237 | -0,53831 | 0,590361 | 0,8519094 |
| RNU6-126P      | 1,00    | 2,01  | 3,73204  | 0,538279 | 0,590384 | NA        |
| RP11-401I19.2  | 0,45    | -1,58 | 2,932776 | -0,53828 | 0,590384 | NA        |
| MYL10          | 3,20    | 0,92  | 1,709605 | 0,538278 | 0,590385 | NA        |
| GMNN           | 91,63   | 0,66  | 1,232083 | 0,538222 | 0,590424 | 0,8519277 |
| FAM129A        | 663,15  | 0,21  | 0,386489 | 0,538103 | 0,590506 | 0,8519277 |
| RP11-22B23.3   | 11,04   | 1,06  | 1,96602  | 0,538095 | 0,590511 | 0,8519277 |
| AC073387.2     | 0,66    | 2,01  | 3,737567 | 0,538077 | 0,590524 | NA        |
| TPM1           | 165,46  | -0,39 | 0,715972 | -0,53801 | 0,590568 | 0,8519431 |
| RP11-81A22.5   | 0,14    | -2,00 | 3,723427 | -0,53791 | 0,59064  | NA        |
| CXCL1          | 0,63    | 1,96  | 3,637242 | 0,537869 | 0,590667 | NA        |
| RP11-309N24.1  | 10,17   | 0,45  | 0,841491 | 0,537739 | 0,590757 | 0,8521508 |
| RP11-342M3.5   | 3,22    | -0,83 | 1,548535 | -0,53746 | 0,590949 | NA        |
| RN7SL625P      | 0,90    | 1,23  | 2,282483 | 0,537298 | 0,591062 | NA        |
| RP11-229A12.4  | 0,64    | 1,98  | 3,687708 | 0,537221 | 0,591115 | NA        |
| RP11-32B5.7    | 0,14    | -2,00 | 3,722053 | -0,53716 | 0,59116  | NA        |
| NUP107         | 274,05  | 0,44  | 0,821141 | 0,53704  | 0,59124  | 0,8525795 |
| HLA-W          | 0,45    | -1,18 | 2,205585 | -0,53699 | 0,591271 | NA        |
| AC009413.2     | 0,48    | 0,92  | 1,708089 | 0,536963 | 0,591293 | NA        |
| C20orf100      | 1,00    | 1,56  | 2,907601 | 0,536961 | 0,591295 | NA        |
| NLRP10         | 0,20    | -1,99 | 3,714342 | -0,53689 | 0,591341 | NA        |
| GCFC2          | 196,68  | 0,48  | 0,894874 | 0,536865 | 0,591361 | 0,8525795 |
| HIVEP3         | 184,59  | 0,41  | 0,757588 | 0,536807 | 0,591401 | 0,8525795 |
| RP5-966M1.7    | 0,86    | 1,76  | 3,284377 | 0,536748 | 0,591442 | NA        |
| EPB41L1        | 2,04    | -1,60 | 2,983495 | -0,53674 | 0,591446 | NA        |
| JMJD1C-AS1     | 0,63    | 1,95  | 3,626796 | 0,536671 | 0,591495 | NA        |
| INAFM2         | 133,56  | 0,41  | 0,765847 | 0,536631 | 0,591523 | 0,8525795 |
| IGF2           | 0,70    | -0,75 | 1,390968 | -0,53662 | 0,591529 | NA        |
| SLC38A5        | 42,17   | -1,09 | 2,030348 | -0,53662 | 0,591532 | 0,8525795 |
| TBL1XR1        | 1374,50 | 0,24  | 0,453769 | 0,536556 | 0,591574 | 0,8525795 |
| VPS37B         | 168,78  | -0,41 | 0,76661  | -0,53654 | 0,591586 | 0,8525795 |
| RP1-62O9.3     | 32,66   | 0,41  | 0,763132 | 0,536511 | 0,591606 | 0,8525795 |
| RP11-298E9.6   | 1,87    | -0,60 | 1,12515  | -0,53642 | 0,591667 | NA        |
| ARF6           | 1290,86 | 0,15  | 0,273751 | 0,536382 | 0,591694 | 0,8525795 |
| RNASE4         | 148,26  | 0,62  | 1,164375 | 0,536325 | 0,591734 | 0,8525795 |
| WASH3P         | 185,29  | 0,25  | 0,466904 | 0,536307 | 0,591746 | 0,8525795 |
| XXbac-B33L19.6 | 2,68    | -1,46 | 2,723061 | -0,53631 | 0,591747 | NA        |
| RP11-398J10.1  | 8,45    | -0,53 | 0,986698 | -0,53624 | 0,591793 | 0,8525795 |
| VN1R83P        | 0,49    | 1,65  | 3,080396 | 0,536213 | 0,591811 | NA        |
| ARGFXP2        | 24,33   | -0,59 | 1,09218  | -0,53619 | 0,591826 | 0,8525795 |
| RASL11B        | 0,50    | 1,65  | 3,083502 | 0,536163 | 0,591846 | NA        |
| D2HGDH         | 22,99   | 0,53  | 0,98113  | 0,536161 | 0,591848 | 0,8525795 |
| RN7SL610P      | 4,36    | -0,61 | 1,1406   | -0,53615 | 0,591855 | 0,8525795 |
| RP11-301G19.2  | 0,14    | -2,00 | 3,72238  | -0,53611 | 0,591882 | NA        |

|                |        |       |          |          |          |           |
|----------------|--------|-------|----------|----------|----------|-----------|
| CREBBP         | 994,99 | -0,33 | 0,609143 | -0,53609 | 0,591893 | 0,8525795 |
| ZNF10          | 102,48 | 0,65  | 1,205972 | 0,536037 | 0,591933 | 0,8525795 |
| KLRK1          | 133,85 | -0,55 | 1,028072 | -0,53602 | 0,591944 | 0,8525795 |
| SRXN1          | 63,10  | 0,62  | 1,152733 | 0,535965 | 0,591983 | 0,8525795 |
| VNN1           | 86,30  | -0,63 | 1,183529 | -0,53595 | 0,591995 | 0,8525795 |
| RN7SL47P       | 7,70   | -0,48 | 0,887244 | -0,53592 | 0,592017 | 0,8525795 |
| LIX1           | 12,13  | 0,53  | 0,988705 | 0,535814 | 0,592087 | 0,8526009 |
| RP11-692N5.1   | 0,64   | 2,00  | 3,737726 | 0,535797 | 0,592099 | NA        |
| RICTOR         | 695,23 | 0,27  | 0,497651 | 0,535582 | 0,592247 | 0,8526009 |
| COX16          | 436,34 | -0,19 | 0,355159 | -0,53557 | 0,592255 | 0,8526009 |
| FAM186B        | 0,60   | 1,40  | 2,616459 | 0,535539 | 0,592277 | NA        |
| RP11-182J1.3   | 6,55   | 0,87  | 1,62714  | 0,535429 | 0,592353 | 0,8526009 |
| RP11-417F21.2  | 1,63   | 0,86  | 1,597927 | 0,535408 | 0,592368 | NA        |
| RP11-166B2.1   | 14,50  | 0,43  | 0,81092  | 0,535355 | 0,592405 | 0,8526009 |
| SNORA58        | 0,61   | 1,94  | 3,617007 | 0,535257 | 0,592472 | NA        |
| RP4-598P13.1   | 39,30  | 0,24  | 0,448964 | 0,535152 | 0,592544 | 0,8526009 |
| CCDC120        | 4,36   | -0,46 | 0,851039 | -0,53515 | 0,592545 | 0,8526009 |
| OR7G2          | 10,94  | -0,43 | 0,798911 | -0,53508 | 0,592593 | 0,8526009 |
| RP11-323F5.2   | 47,41  | -0,72 | 1,351096 | -0,53499 | 0,592655 | 0,8526009 |
| RP11-365P13.3  | 15,84  | 0,68  | 1,272021 | 0,534981 | 0,592663 | 0,8526009 |
| MED17          | 380,38 | -0,26 | 0,481152 | -0,53494 | 0,592689 | 0,8526009 |
| VRK2           | 391,24 | 0,35  | 0,660796 | 0,534871 | 0,592739 | 0,8526009 |
| RNF111         | 224,58 | -0,35 | 0,650557 | -0,53484 | 0,592764 | 0,8526009 |
| RP11-302F12.10 | 0,78   | -0,77 | 1,43596  | -0,53481 | 0,592778 | NA        |
| PNO1           | 207,81 | 0,34  | 0,63757  | 0,534721 | 0,592843 | 0,8526009 |
| POLD4          | 659,79 | -0,14 | 0,260637 | -0,53468 | 0,592873 | 0,8526009 |
| CTA-85E5.10    | 4,69   | -1,06 | 1,986517 | -0,53462 | 0,592916 | 0,8526009 |
| C6orf1         | 453,30 | 0,23  | 0,42591  | 0,534595 | 0,59293  | 0,8526009 |
| ABCB10         | 149,35 | -0,37 | 0,693142 | -0,5345  | 0,592994 | 0,8526009 |
| SFI1           | 153,42 | -0,27 | 0,513247 | -0,53444 | 0,593039 | 0,8526009 |
| GPR180         | 63,11  | 0,69  | 1,294666 | 0,534323 | 0,593118 | 0,8526009 |
| PAX1           | 8,90   | 1,23  | 2,305127 | 0,534254 | 0,593166 | 0,8526009 |
| NR2C1          | 310,16 | 0,32  | 0,594177 | 0,534131 | 0,593251 | 0,8526009 |
| TMEM214        | 118,70 | 0,42  | 0,783533 | 0,534104 | 0,59327  | 0,8526009 |
| RP3-331H24.7   | 20,55  | -1,00 | 1,866564 | -0,53409 | 0,593282 | 0,8526009 |
| COQ4           | 347,41 | 0,34  | 0,63266  | 0,534038 | 0,593315 | 0,8526009 |
| AC018470.3     | 0,61   | -0,76 | 1,42106  | -0,53402 | 0,593329 | NA        |
| RP11-143E21.7  | 8,23   | 0,58  | 1,090807 | 0,534    | 0,593342 | 0,8526009 |
| HMBS           | 285,77 | -0,46 | 0,854615 | -0,5339  | 0,593414 | 0,8526009 |
| RNU6-413P      | 1,27   | -1,95 | 3,64515  | -0,53384 | 0,593452 | NA        |
| SULF1          | 8,18   | -1,01 | 1,886695 | -0,53381 | 0,593472 | 0,8526009 |
| RP11-154H23.1  | 66,74  | 0,65  | 1,216846 | 0,533643 | 0,593589 | 0,8526009 |
| IREB2          | 879,21 | -0,22 | 0,40599  | -0,53364 | 0,593593 | 0,8526009 |
| APOL4          | 45,17  | 0,38  | 0,705958 | 0,533632 | 0,593596 | 0,8526009 |
| CTD-3051D23.1  | 1,14   | -1,11 | 2,083689 | -0,53361 | 0,593612 | NA        |
| COG6           | 116,25 | -0,46 | 0,862589 | -0,53353 | 0,593666 | 0,8526009 |
| ERP44          | 938,75 | 0,23  | 0,424175 | 0,533527 | 0,593668 | 0,8526009 |
| RN7SL497P      | 0,65   | 1,99  | 3,737956 | 0,533519 | 0,593675 | NA        |
| RP11-180M15.7  | 52,16  | 0,58  | 1,085866 | 0,533466 | 0,593711 | 0,8526009 |
| RP11-554D15.3  | 0,63   | 1,99  | 3,737915 | 0,533449 | 0,593723 | NA        |

|                     |         |       |          |          |          |           |
|---------------------|---------|-------|----------|----------|----------|-----------|
| UNC45B              | 2,73    | 0,56  | 1,045728 | 0,533396 | 0,593759 | NA        |
| RP11-553L6.2        | 10,60   | -0,76 | 1,425831 | -0,53337 | 0,593774 | 0,8526009 |
| CEACAMP10           | 15,44   | -1,48 | 2,770124 | -0,53325 | 0,59386  | 0,8526009 |
| EIF5AP3             | 0,65    | 1,99  | 3,737881 | 0,533245 | 0,593864 | NA        |
| VAMP7               | 277,11  | 0,40  | 0,745312 | 0,533221 | 0,593881 | 0,8526009 |
| ZNF576              | 54,05   | -0,64 | 1,194941 | -0,53321 | 0,593886 | 0,8526009 |
| AC003665.1          | 26,60   | 0,72  | 1,350173 | 0,533204 | 0,593893 | 0,8526009 |
| RP11-508P1.2        | 2,17    | -1,14 | 2,129985 | -0,53311 | 0,593956 | NA        |
| RP11-37N22.1        | 10,63   | 0,38  | 0,707299 | 0,533007 | 0,594029 | 0,8526009 |
| USP44               | 6,11    | -1,19 | 2,225462 | -0,53297 | 0,594053 | 0,8526009 |
| TMPRSS4             | 9,49    | -0,51 | 0,953358 | -0,53293 | 0,594083 | 0,8526009 |
| TAMM41              | 258,14  | 0,48  | 0,893098 | 0,532905 | 0,5941   | 0,8526009 |
| MOAP1               | 357,69  | 0,43  | 0,807514 | 0,532891 | 0,594109 | 0,8526009 |
| RP11-168F9.2        | 9,34    | -1,51 | 2,830297 | -0,53286 | 0,594134 | 0,8526009 |
| AGPAT2              | 266,59  | -0,37 | 0,698522 | -0,5328  | 0,594173 | 0,8526009 |
| CPS1                | 4,71    | -0,45 | 0,842517 | -0,53278 | 0,594186 | 0,8526009 |
| CTD-2547L16.3       | 3,93    | -0,52 | 0,974617 | -0,53248 | 0,594392 | 0,8528313 |
| SIN3B               | 200,47  | -0,28 | 0,516993 | -0,53239 | 0,594456 | 0,8528577 |
| RP11-165J3.6        | 1,56    | 1,30  | 2,443663 | 0,532269 | 0,59454  | NA        |
| DUS1L               | 270,41  | 0,23  | 0,440374 | 0,532224 | 0,594571 | 0,8529559 |
| RP11-482M8.1        | 0,66    | 1,94  | 3,653722 | 0,532171 | 0,594608 | NA        |
| RP11-855A2.2        | 41,23   | -0,58 | 1,088779 | -0,53205 | 0,594688 | 0,8530592 |
| SNHG14              | 142,37  | -0,37 | 0,704646 | -0,53193 | 0,594775 | 0,853117  |
| RP11-98D18.17       | 1,83    | 1,08  | 2,022488 | 0,531928 | 0,594776 | NA        |
| RP11-477E3.2        | 0,64    | 1,99  | 3,737833 | 0,5319   | 0,594795 | NA        |
| RP11-76I14.1        | 3,71    | 0,59  | 1,117411 | 0,531645 | 0,594972 | NA        |
| RP11-359G22.2       | 1,31    | -1,71 | 3,207349 | -0,53159 | 0,595008 | NA        |
| RP11-57K17.1        | 6,42    | 1,00  | 1,885533 | 0,531589 | 0,59501  | 0,8533844 |
| CH507-254M2.1       | 0,61    | 1,92  | 3,607309 | 0,531552 | 0,595037 | NA        |
| RP11-447D11.2       | 53,91   | -0,60 | 1,120934 | -0,53153 | 0,595053 | 0,8533844 |
| CFAP54              | 70,41   | -0,42 | 0,795251 | -0,53146 | 0,595099 | 0,8533848 |
| RP11-463O9.9        | 0,66    | -1,43 | 2,684646 | -0,53144 | 0,595113 | NA        |
| XXbac-BPGBPG55C20.2 | 61,42   | -0,56 | 1,055323 | -0,53136 | 0,595167 | 0,8534172 |
| HSD11B1L            | 34,86   | 0,52  | 0,988268 | 0,531179 | 0,595295 | 0,8535338 |
| SCAF4               | 374,99  | 0,36  | 0,670218 | 0,530944 | 0,595458 | 0,8537021 |
| RNFT2               | 36,09   | 0,28  | 0,526188 | 0,530864 | 0,595513 | 0,8537153 |
| RP5-908M14.9        | 10,50   | -1,28 | 2,419443 | -0,53069 | 0,595635 | 0,8537715 |
| CEP57               | 246,70  | 0,31  | 0,592272 | 0,530675 | 0,595644 | 0,8537715 |
| RP11-73M18.7        | 16,71   | -0,76 | 1,440889 | -0,53059 | 0,5957   | 0,8537733 |
| RNU6-130P           | 2,19    | -1,16 | 2,191237 | -0,53055 | 0,595732 | NA        |
| RP11-168J19.2       | 1,23    | 0,70  | 1,325062 | 0,530525 | 0,595748 | NA        |
| AC008984.2          | 11,56   | 0,64  | 1,213534 | 0,530522 | 0,59575  | 0,8537733 |
| HHLA3               | 2,82    | -0,75 | 1,414964 | -0,53049 | 0,595773 | NA        |
| RN7SL415P           | 0,22    | -1,79 | 3,382209 | -0,53048 | 0,595778 | NA        |
| TNPO1               | 539,44  | -0,30 | 0,570428 | -0,53047 | 0,595783 | 0,8537733 |
| IGKV1-33            | 5,14    | -0,48 | 0,904955 | -0,53039 | 0,595841 | 0,8537911 |
| IST1                | 1313,42 | 0,21  | 0,399447 | 0,530306 | 0,5959   | 0,8538099 |
| AC097495.3          | 1,53    | 1,01  | 1,905495 | 0,530255 | 0,595935 | NA        |
| CHRNA3              | 1,24    | 1,30  | 2,455599 | 0,530188 | 0,595982 | NA        |
| RN7SL201P           | 0,55    | 1,13  | 2,131882 | 0,530114 | 0,596033 | NA        |



|               |         |       |          |          |          |           |
|---------------|---------|-------|----------|----------|----------|-----------|
| PNPLA7        | 24,44   | -0,99 | 1,872352 | -0,5301  | 0,596045 | 0,8539123 |
| DCUN1D3       | 72,35   | 0,35  | 0,660897 | 0,53007  | 0,596063 | 0,8539123 |
| TGM7          | 0,65    | 1,98  | 3,738015 | 0,530036 | 0,596087 | NA        |
| AL163953.1    | 2,09    | -0,52 | 0,974222 | -0,52986 | 0,596212 | NA        |
| FMNL1         | 1142,22 | 0,13  | 0,252638 | 0,529564 | 0,596414 | 0,8543489 |
| RN7SL566P     | 1,32    | -0,67 | 1,270146 | -0,52953 | 0,59644  | NA        |
| SYNPO         | 14,61   | 0,62  | 1,16767  | 0,529468 | 0,596481 | 0,8543786 |
| AC007773.2    | 2,43    | 0,86  | 1,631395 | 0,529467 | 0,596481 | NA        |
| IRF6          | 0,72    | 1,51  | 2,859532 | 0,529381 | 0,596541 | NA        |
| RP11-26608.1  | 20,62   | -0,56 | 1,053416 | -0,52927 | 0,596619 | 0,8544678 |
| PTPRA         | 363,59  | -0,37 | 0,696141 | -0,52925 | 0,596635 | 0,8544678 |
| CRISP3        | 0,20    | -1,96 | 3,703037 | -0,52921 | 0,596662 | NA        |
| RP11-576E20.1 | 4,81    | -1,12 | 2,112389 | -0,52912 | 0,596725 | 0,8545317 |
| RP11-661A12.7 | 1,00    | 0,76  | 1,436092 | 0,529083 | 0,596748 | NA        |
| AC004941.3    | 10,73   | 0,37  | 0,691868 | 0,529002 | 0,596804 | 0,8545785 |
| SNORA74C-1    | 0,63    | 1,98  | 3,738061 | 0,528975 | 0,596823 | NA        |
| RP11-454E5.4  | 25,09   | -0,34 | 0,642536 | -0,52892 | 0,596862 | 0,8545958 |
| RP1-67M12.2   | 0,65    | 1,98  | 3,738062 | 0,528801 | 0,596944 | NA        |
| FAM138B       | 0,60    | 1,92  | 3,632015 | 0,528772 | 0,596964 | NA        |
| AC013267.4    | 0,65    | 1,98  | 3,738072 | 0,528756 | 0,596974 | NA        |
| CBX3          | 769,93  | 0,21  | 0,400762 | 0,528609 | 0,597077 | 0,854772  |
| RP11-34P13.13 | 74,92   | -0,33 | 0,619006 | -0,52861 | 0,597077 | 0,854772  |
| AMPD1         | 0,31    | -1,97 | 3,731032 | -0,52849 | 0,597156 | NA        |
| STARD10       | 45,41   | -0,35 | 0,661143 | -0,52844 | 0,597192 | 0,8548294 |
| CTD-2410N18.3 | 0,46    | -1,82 | 3,452414 | -0,52842 | 0,59721  | NA        |
| NICN1         | 45,68   | -0,52 | 0,989852 | -0,52837 | 0,597241 | 0,8548294 |
| PSMD8         | 1230,10 | -0,20 | 0,3708   | -0,52828 | 0,597303 | 0,8548294 |
| PUM3          | 343,78  | -0,35 | 0,671057 | -0,52827 | 0,597313 | 0,8548294 |
| CITED2        | 90,68   | 0,40  | 0,762902 | 0,52822  | 0,597347 | 0,8548294 |
| C17orf98      | 0,14    | -1,97 | 3,723963 | -0,52796 | 0,597527 | NA        |
| CTC-458G6.4   | 0,14    | -1,97 | 3,723565 | -0,52792 | 0,597554 | NA        |
| CHMP1A        | 310,76  | -0,27 | 0,503734 | -0,52787 | 0,597587 | 0,8550587 |
| C1QC          | 0,96    | -1,65 | 3,132972 | -0,52787 | 0,597593 | NA        |
| A1BG-AS1      | 91,84   | 0,74  | 1,407658 | 0,527857 | 0,597599 | 0,8550587 |
| TRAPPC2L      | 406,58  | -0,25 | 0,472793 | -0,52771 | 0,597702 | 0,8550754 |
| CTB-13F3.1    | 4,70    | 0,54  | 1,031969 | 0,527666 | 0,597731 | 0,8550754 |
| GS1-251I9.4   | 142,82  | 0,35  | 0,670433 | 0,527641 | 0,597749 | 0,8550754 |
| RP5-1136A10.1 | 0,69    | -1,60 | 3,038546 | -0,52759 | 0,597781 | NA        |
| HSPA13        | 106,42  | -0,47 | 0,892902 | -0,52737 | 0,597938 | 0,8552812 |
| AC006160.5    | 0,84    | -1,16 | 2,197107 | -0,52734 | 0,597958 | NA        |
| PWWP2B        | 159,11  | 0,51  | 0,960085 | 0,527284 | 0,597997 | 0,8552987 |
| CH507-9B2.3   | 539,82  | -0,22 | 0,4167   | -0,52708 | 0,598138 | 0,8554213 |
| MRPS36P4      | 0,63    | 1,97  | 3,738018 | 0,527068 | 0,598146 | NA        |
| RP3-471M13.2  | 1,01    | 1,97  | 3,732177 | 0,527067 | 0,598147 | NA        |
| RP11-644F5.11 | 0,50    | 1,62  | 3,064515 | 0,527063 | 0,59815  | NA        |
| DLEC1         | 40,06   | 0,64  | 1,209928 | 0,527028 | 0,598174 | 0,8554213 |
| RP11-472N19.3 | 0,14    | -1,96 | 3,723859 | -0,52697 | 0,598211 | NA        |
| RFT1          | 238,82  | 0,51  | 0,966011 | 0,526876 | 0,59828  | 0,8555062 |
| DYNC1I2       | 534,97  | -0,27 | 0,504928 | -0,52681 | 0,598328 | 0,8555094 |
| RP11-381E24.1 | 1,53    | 1,47  | 2,793574 | 0,526726 | 0,598384 | NA        |

|               |         |       |          |          |          |           |
|---------------|---------|-------|----------|----------|----------|-----------|
| AC005532.5    | 16,00   | 0,63  | 1,19833  | 0,526691 | 0,598408 | 0,8555582 |
| FOXS1         | 0,64    | 1,97  | 3,738155 | 0,526682 | 0,598415 | NA        |
| IGKV2D-36     | 0,64    | 1,97  | 3,738155 | 0,526682 | 0,598415 | NA        |
| AC004744.3    | 0,60    | 1,91  | 3,628374 | 0,526557 | 0,598501 | NA        |
| CHIC1         | 5,56    | 0,88  | 1,668168 | 0,526545 | 0,59851  | 0,855635  |
| RP5-1096D14.2 | 0,64    | 1,97  | 3,738126 | 0,526522 | 0,598526 | NA        |
| RP11-141M1.3  | 0,17    | -1,77 | 3,354492 | -0,52649 | 0,598551 | NA        |
| GS1-519E5.1   | 3,04    | -0,48 | 0,910687 | -0,52648 | 0,598553 | NA        |
| HCG11         | 140,19  | 0,36  | 0,687848 | 0,526482 | 0,598554 | 0,855635  |
| CITF22-24E5.1 | 0,64    | 1,97  | 3,738174 | 0,526269 | 0,598701 | NA        |
| PDIA4         | 325,72  | -0,32 | 0,60989  | -0,52608 | 0,598831 | 0,8559653 |
| C11orf74      | 67,87   | 0,65  | 1,233759 | 0,525915 | 0,598947 | 0,8560448 |
| RP3-522D1.1   | 0,63    | 1,97  | 3,738002 | 0,525875 | 0,598975 | NA        |
| RP11-212I21.2 | 52,18   | 0,65  | 1,240956 | 0,52587  | 0,598978 | 0,8560448 |
| SRP72         | 1102,78 | 0,19  | 0,357034 | 0,525689 | 0,599104 | 0,8561394 |
| RP11-517H2.8  | 0,30    | -1,77 | 3,369836 | -0,52565 | 0,599132 | NA        |
| SLC37A1       | 167,72  | -0,52 | 0,98831  | -0,52564 | 0,599136 | 0,8561394 |
| TRIM73        | 64,31   | -0,44 | 0,839895 | -0,52552 | 0,599222 | 0,8561962 |
| RP11-122K13.8 | 0,63    | 1,96  | 3,738138 | 0,525487 | 0,599245 | NA        |
| TRAPPC3       | 296,32  | 0,32  | 0,603097 | 0,525417 | 0,599294 | 0,8562323 |
| RNY1P15       | 0,63    | 1,96  | 3,738207 | 0,525354 | 0,599337 | NA        |
| SH3D21        | 2,35    | 1,33  | 2,537095 | 0,525345 | 0,599344 | NA        |
| RPAP1         | 140,73  | 0,45  | 0,861356 | 0,525229 | 0,599424 | 0,8563528 |
| RNU1-85P      | 0,47    | 1,60  | 3,049552 | 0,525205 | 0,59944  | NA        |
| CTD-2215E18.3 | 0,14    | -1,96 | 3,724187 | -0,52516 | 0,599469 | NA        |
| SPANXN1       | 0,19    | -1,95 | 3,716683 | -0,5251  | 0,599513 | NA        |
| RP11-159D12.2 | 103,18  | -0,60 | 1,13515  | -0,52509 | 0,599523 | 0,8563709 |
| RP11-408H1.3  | 101,07  | 0,33  | 0,633454 | 0,525078 | 0,599529 | 0,8563709 |
| C2orf82       | 1,57    | -1,25 | 2,387198 | -0,52492 | 0,599635 | NA        |
| ZNF518B       | 154,53  | 0,41  | 0,778066 | 0,524896 | 0,599655 | 0,8564374 |
| OAS2          | 1195,09 | -0,33 | 0,630509 | -0,52477 | 0,599746 | 0,8564374 |
| CUL4A         | 497,51  | -0,33 | 0,627703 | -0,52476 | 0,59975  | 0,8564374 |
| ZBTB43        | 556,65  | -0,32 | 0,614023 | -0,52473 | 0,599774 | 0,8564374 |
| RP11-462G2.1  | 0,58    | -1,08 | 2,055687 | -0,52468 | 0,599804 | NA        |
| HOGA1         | 10,47   | -0,56 | 1,073298 | -0,52466 | 0,599818 | 0,8564374 |
| RP11-138H8.6  | 3,91    | -0,60 | 1,146145 | -0,52461 | 0,599851 | 0,8564374 |
| CTD-3220F14.3 | 21,01   | -0,51 | 0,978221 | -0,52436 | 0,60003  | 0,856599  |
| RP11-179G5.4  | 1,15    | 1,54  | 2,943891 | 0,524325 | 0,600052 | NA        |
| CCDC25        | 229,12  | -0,31 | 0,583663 | -0,52428 | 0,600082 | 0,856599  |
| RP11-41E15.1  | 2,12    | -0,70 | 1,339146 | -0,52425 | 0,600101 | NA        |
| ZNF225        | 116,44  | -0,37 | 0,701557 | -0,52422 | 0,600128 | 0,856599  |
| TBPL1         | 133,97  | 0,44  | 0,845427 | 0,524187 | 0,600149 | 0,856599  |
| MMP16         | 2,94    | -1,33 | 2,541078 | -0,52405 | 0,600245 | NA        |
| GNG4          | 11,73   | -0,44 | 0,837495 | -0,52403 | 0,600258 | 0,8566897 |
| RP11-1129I3.1 | 0,62    | 1,96  | 3,738099 | 0,523894 | 0,600352 | NA        |
| CTB-13H5.1    | 9,79    | 0,23  | 0,430039 | 0,523837 | 0,600392 | 0,8568144 |
| RF02114       | 0,62    | 1,96  | 3,738274 | 0,52383  | 0,600397 | NA        |
| RNU6-374P     | 0,64    | 1,96  | 3,738279 | 0,523793 | 0,600422 | NA        |
| RP11-67L14.1  | 32,21   | -0,54 | 1,036063 | -0,52368 | 0,600498 | 0,8568654 |
| AP000708.1    | 80,92   | -0,32 | 0,610369 | -0,52365 | 0,60052  | 0,8568654 |

|                 |        |       |          |          |          |           |
|-----------------|--------|-------|----------|----------|----------|-----------|
| RP11-798G7.6    | 56,61  | -0,54 | 1,039272 | -0,52351 | 0,60062  | 0,8569427 |
| MIR302C         | 0,64   | 1,96  | 3,738292 | 0,523468 | 0,600648 | NA        |
| CTD-2291D10.4   | 0,60   | 1,91  | 3,645534 | 0,523379 | 0,600711 | NA        |
| RP11-475J5.5    | 0,98   | 1,95  | 3,732373 | 0,523328 | 0,600746 | NA        |
| CTD-2630F21.1   | 2,12   | -0,97 | 1,850754 | -0,52329 | 0,600774 | NA        |
| MEX3D           | 0,31   | -1,31 | 2,499127 | -0,52325 | 0,600798 | NA        |
| SPTB            | 12,88  | -0,53 | 1,014599 | -0,52324 | 0,600811 | 0,857149  |
| RN7SL107P       | 2,30   | 0,85  | 1,615471 | 0,52311  | 0,600897 | NA        |
| RN7SL413P       | 0,62   | 1,96  | 3,738316 | 0,522965 | 0,600998 | NA        |
| RP11-553N16.1   | 1,09   | -0,74 | 1,411734 | -0,52295 | 0,601008 | NA        |
| SIL1            | 394,65 | 0,31  | 0,590998 | 0,522786 | 0,601123 | 0,8574441 |
| RP11-95M15.2    | 0,60   | 1,89  | 3,611787 | 0,522776 | 0,60113  | NA        |
| FAS             | 176,99 | -0,39 | 0,742511 | -0,52265 | 0,601216 | 0,8574441 |
| UQCRB           | 839,40 | -0,15 | 0,286571 | -0,52256 | 0,601284 | 0,8574441 |
| RP11-618K13.2   | 5,58   | -1,05 | 2,014623 | -0,52254 | 0,601292 | 0,8574441 |
| LAMTOR3         | 489,53 | 0,31  | 0,592636 | 0,522533 | 0,601299 | 0,8574441 |
| RP11-277B15.2   | 12,34  | -0,80 | 1,534165 | -0,52241 | 0,601387 | 0,8574441 |
| EHD2            | 21,09  | 0,79  | 1,521706 | 0,522391 | 0,601398 | 0,8574441 |
| PCDH10          | 3,88   | -0,38 | 0,734863 | -0,52234 | 0,601434 | 0,8574441 |
| TXNDC9          | 190,98 | 0,50  | 0,965096 | 0,522305 | 0,601458 | 0,8574441 |
| RP11-140L24.4   | 0,80   | 1,04  | 1,988153 | 0,522286 | 0,601471 | NA        |
| BISPR           | 163,16 | 0,38  | 0,72109  | 0,522276 | 0,601478 | 0,8574441 |
| AC005197.2      | 0,98   | 0,81  | 1,542606 | 0,522088 | 0,601609 | NA        |
| RBM5-AS1        | 6,58   | -0,52 | 0,993343 | -0,52204 | 0,601643 | 0,8575971 |
| RP11-613D13.8   | 0,65   | 1,29  | 2,471369 | 0,522034 | 0,601647 | NA        |
| RP11-488L18.8   | 0,47   | -1,54 | 2,953682 | -0,52203 | 0,601647 | NA        |
| RP11-410N8.3    | 0,63   | 1,95  | 3,738366 | 0,522019 | 0,601657 | NA        |
| RP11-497H17.1   | 4,07   | 1,49  | 2,863107 | 0,521989 | 0,601678 | 0,8575971 |
| JMJD7-PLA2G4B   | 25,92  | 0,68  | 1,294991 | 0,521889 | 0,601748 | 0,857603  |
| ZNF319          | 10,75  | -0,57 | 1,100011 | -0,52182 | 0,601793 | 0,857603  |
| DTD2            | 130,12 | 0,45  | 0,86033  | 0,521785 | 0,60182  | 0,857603  |
| RP11-738E22.3   | 0,49   | -1,17 | 2,234084 | -0,52174 | 0,601851 | NA        |
| RP11-301O19.1   | 9,26   | -1,47 | 2,811264 | -0,52169 | 0,601886 | 0,8576307 |
| CDKN1B          | 350,90 | 0,27  | 0,523878 | 0,521573 | 0,601968 | 0,8576373 |
| RP5-867C24.4    | 26,05  | -0,63 | 1,21169  | -0,52154 | 0,601994 | 0,8576373 |
| CTD-2410N18.4   | 50,99  | 0,37  | 0,705194 | 0,521485 | 0,602029 | 0,8576373 |
| MAK             | 15,68  | 0,59  | 1,137621 | 0,521376 | 0,602105 | 0,8576555 |
| CDADC1          | 97,73  | 0,48  | 0,916106 | 0,521335 | 0,602134 | 0,8576555 |
| RP11-18H21.3    | 0,59   | 1,89  | 3,622987 | 0,521295 | 0,602161 | NA        |
| PPM1N           | 66,61  | -0,38 | 0,721578 | -0,52124 | 0,602203 | 0,8576607 |
| NT5C            | 283,04 | -0,26 | 0,506788 | -0,5212  | 0,602229 | 0,8576607 |
| PNOC            | 0,51   | -0,94 | 1,807137 | -0,52101 | 0,60236  | NA        |
| C2orf76         | 59,31  | 0,46  | 0,885353 | 0,520983 | 0,602379 | 0,8577543 |
| STMN4           | 11,67  | -0,61 | 1,165463 | -0,52095 | 0,602403 | 0,8577543 |
| ATP6V1G2-DDX39B | 91,62  | 1,87  | 3,580822 | 0,520904 | 0,602433 | 0,8577543 |
| AC009228.1      | 0,85   | 1,67  | 3,204902 | 0,520873 | 0,602455 | NA        |
| RPS10P16        | 3,06   | 1,33  | 2,555585 | 0,520848 | 0,602473 | NA        |
| LINC00923       | 31,31  | -0,51 | 0,986404 | -0,52072 | 0,602561 | 0,8578706 |
| CTC-303L1.2     | 0,59   | 1,88  | 3,609965 | 0,520697 | 0,602578 | NA        |
| AC018816.2      | 0,66   | 1,44  | 2,756688 | 0,520619 | 0,602632 | NA        |

|               |         |       |          |          |          |           |
|---------------|---------|-------|----------|----------|----------|-----------|
| TMEM45A       | 351,08  | -0,24 | 0,469144 | -0,5206  | 0,602644 | 0,8579226 |
| DAP3          | 993,77  | -0,20 | 0,376426 | -0,52053 | 0,602695 | 0,8579297 |
| AC010733.5    | 19,23   | 0,60  | 1,144035 | 0,520394 | 0,602789 | 0,857936  |
| RP11-16E23.4  | 187,61  | 0,43  | 0,821563 | 0,520364 | 0,60281  | 0,857936  |
| SNORA36B      | 0,14    | -1,94 | 3,725427 | -0,52035 | 0,60282  | NA        |
| RP11-458D21.1 | 3,85    | 0,83  | 1,592499 | 0,520324 | 0,602838 | 0,857936  |
| RNF31         | 215,06  | -0,31 | 0,603575 | -0,52012 | 0,602981 | 0,8580394 |
| RP11-75A9.3   | 0,62    | 1,94  | 3,738468 | 0,520089 | 0,603001 | NA        |
| HPYR1         | 0,63    | 1,94  | 3,738437 | 0,520077 | 0,60301  | NA        |
| AC008132.10   | 0,40    | -1,72 | 3,305337 | -0,51998 | 0,603078 | NA        |
| SNAP47        | 110,88  | 0,59  | 1,140004 | 0,519964 | 0,603089 | 0,8580394 |
| RP11-359J14.2 | 1,00    | 1,34  | 2,575302 | 0,51996  | 0,603092 | NA        |
| RP11-805L22.3 | 2,03    | 0,97  | 1,865566 | 0,519909 | 0,603127 | NA        |
| RP4-530I15.9  | 3,38    | 0,89  | 1,710708 | 0,5199   | 0,603133 | NA        |
| TERF2         | 156,74  | 0,40  | 0,766552 | 0,519881 | 0,603146 | 0,8580394 |
| RN7SL740P     | 4,31    | 0,62  | 1,195366 | 0,519834 | 0,603179 | 0,8580394 |
| TCHP          | 199,43  | -0,36 | 0,688999 | -0,51982 | 0,603187 | 0,8580394 |
| RP11-968A15.8 | 1,36    | 0,78  | 1,49138  | 0,519747 | 0,60324  | NA        |
| MUS81         | 65,34   | -0,43 | 0,823962 | -0,51962 | 0,603325 | 0,8580394 |
| CTD-3065B20.2 | 16,77   | -1,24 | 2,381971 | -0,51961 | 0,603338 | 0,8580394 |
| PSAT1         | 18,94   | -1,23 | 2,36211  | -0,5196  | 0,603345 | 0,8580394 |
| ARSF          | 1,80    | -0,74 | 1,429353 | -0,51958 | 0,603354 | NA        |
| TEKT4P2       | 23,17   | 0,70  | 1,341009 | 0,519573 | 0,603361 | 0,8580394 |
| C11orf24      | 80,71   | 0,35  | 0,669933 | 0,519558 | 0,603372 | 0,8580394 |
| RPL10AP6      | 0,92    | 0,69  | 1,334948 | 0,519546 | 0,60338  | NA        |
| RP11-330O11.2 | 6,41    | -1,12 | 2,153783 | -0,5194  | 0,603483 | 0,8581319 |
| RP11-325E5.3  | 0,62    | 1,94  | 3,738491 | 0,519373 | 0,603501 | NA        |
| NFKB2         | 165,08  | -0,30 | 0,585463 | -0,5193  | 0,603548 | 0,8581595 |
| RP5-968P14.2  | 1,71    | 1,31  | 2,518358 | 0,519241 | 0,603593 | NA        |
| CEP290        | 195,88  | -0,32 | 0,615524 | -0,51915 | 0,603654 | 0,8582443 |
| VAMP1         | 71,65   | -0,52 | 0,993545 | -0,51907 | 0,603713 | 0,8582626 |
| NCRNA00184    | 0,70    | 1,44  | 2,770722 | 0,518997 | 0,603763 | NA        |
| ECI1          | 224,98  | -0,35 | 0,677856 | -0,51898 | 0,603777 | 0,858267  |
| CTA-254O6.1   | 3,70    | 0,74  | 1,430177 | 0,518954 | 0,603792 | NA        |
| FKBP10        | 0,86    | 1,11  | 2,142283 | 0,518922 | 0,603815 | NA        |
| RP11-331G2.6  | 17,11   | -0,37 | 0,7043   | -0,51889 | 0,60384  | 0,858267  |
| ATP6V0B       | 6267,76 | -0,11 | 0,214316 | -0,51887 | 0,603855 | 0,858267  |
| PPP6R2        | 327,95  | -0,36 | 0,692692 | -0,5187  | 0,60397  | 0,8583119 |
| CTD-2192D1.1  | 56,73   | -0,39 | 0,746781 | -0,51869 | 0,603978 | 0,8583119 |
| RP11-439A17.4 | 4,04    | 1,30  | 2,498854 | 0,518555 | 0,604071 | 0,8583215 |
| RP11-103G8.2  | 25,90   | -0,39 | 0,751829 | -0,51855 | 0,604077 | 0,8583215 |
| CRELD2        | 257,19  | -0,44 | 0,844601 | -0,51838 | 0,604192 | 0,8583671 |
| RP11-1000B6.3 | 73,62   | -0,32 | 0,616994 | -0,51836 | 0,604205 | 0,8583671 |
| WDR17         | 37,39   | 0,52  | 0,995    | 0,518301 | 0,604248 | 0,8583671 |
| KLF15         | 2,31    | -0,43 | 0,832402 | -0,51816 | 0,604345 | NA        |
| RP11-760M1.3  | 18,79   | -0,40 | 0,767229 | -0,51806 | 0,604416 | 0,8585015 |
| RP11-527D7.1  | 0,61    | 1,94  | 3,738635 | 0,518036 | 0,604433 | NA        |
| HSPA4         | 449,12  | 0,29  | 0,552839 | 0,518034 | 0,604435 | 0,8585015 |
| PCDHGA11      | 0,81    | 1,91  | 3,679324 | 0,518031 | 0,604437 | NA        |
| RP1-241P17.3  | 0,49    | 0,89  | 1,725551 | 0,517957 | 0,604488 | NA        |

|                 |          |       |          |          |          |           |
|-----------------|----------|-------|----------|----------|----------|-----------|
| RP11-791J7.2    | 7,04     | 0,48  | 0,924844 | 0,517894 | 0,604532 | 0,8585365 |
| ST6GAL2         | 8,99     | 0,35  | 0,667979 | 0,517866 | 0,604552 | 0,8585365 |
| PDRG1           | 149,99   | 0,59  | 1,133181 | 0,51779  | 0,604605 | 0,8585459 |
| RN7SL561P       | 3,12     | 0,64  | 1,232764 | 0,517709 | 0,604661 | NA        |
| DOCK5           | 1720,41  | 0,18  | 0,352242 | 0,517629 | 0,604717 | 0,8585857 |
| CABP4           | 36,99    | -0,32 | 0,611862 | -0,5176  | 0,604737 | 0,8585857 |
| RP11-643G5.6    | 0,63     | 1,94  | 3,738544 | 0,517597 | 0,604739 | NA        |
| ISG20L2         | 239,48   | 0,30  | 0,576026 | 0,517552 | 0,604771 | 0,8585857 |
| RP4-779E11.3    | 0,61     | 1,93  | 3,738582 | 0,517441 | 0,604849 | NA        |
| RP11-578F5.1    | 0,95     | -0,60 | 1,164638 | -0,5174  | 0,604876 | NA        |
| RP11-473P24.2   | 1,89     | -0,54 | 1,04754  | -0,51737 | 0,604896 | NA        |
| RP1-89D4.1      | 0,86     | -0,71 | 1,368513 | -0,5173  | 0,60495  | NA        |
| RP5-951N9.1     | 34,06    | -1,21 | 2,341951 | -0,51728 | 0,604961 | 0,8586609 |
| FAM32A          | 905,85   | -0,25 | 0,481148 | -0,51728 | 0,604963 | 0,8586609 |
| RNF41           | 519,10   | -0,38 | 0,736512 | -0,51727 | 0,604966 | 0,8586609 |
| RP3-405J10.3    | 18,23    | 0,34  | 0,655422 | 0,517211 | 0,605009 | 0,8586609 |
| RP5-981O7.2     | 0,62     | 1,93  | 3,738611 | 0,517125 | 0,605069 | NA        |
| RP11-477J21.7   | 51,15    | -0,51 | 0,993925 | -0,51704 | 0,605129 | 0,8587136 |
| C17orf105       | 41,42    | 0,28  | 0,536643 | 0,516984 | 0,605167 | 0,8587136 |
| SPATC1L         | 60,86    | -0,63 | 1,222854 | -0,51696 | 0,605184 | 0,8587136 |
| RP11-362K14.7   | 0,61     | 1,93  | 3,738597 | 0,516932 | 0,605204 | NA        |
| SNORD92         | 0,63     | 1,93  | 3,738695 | 0,516901 | 0,605225 | NA        |
| AGFG2           | 5,82     | -0,52 | 1,013288 | -0,51684 | 0,60527  | 0,8587696 |
| AC009299.3      | 0,64     | 1,37  | 2,655206 | 0,516785 | 0,605307 | NA        |
| DUX4L28         | 0,61     | 1,88  | 3,645438 | 0,516746 | 0,605334 | NA        |
| AC011524.2      | 0,62     | 1,88  | 3,644238 | 0,516716 | 0,605354 | NA        |
| RN7SL128P       | 3,43     | -0,80 | 1,549072 | -0,51669 | 0,605373 | NA        |
| RP11-982M15.7   | 7,69     | -0,61 | 1,171657 | -0,51668 | 0,605381 | 0,8588611 |
| DPYD            | 1076,40  | 0,19  | 0,361754 | 0,516511 | 0,605498 | 0,8588887 |
| C9orf142        | 576,67   | 0,21  | 0,410263 | 0,516417 | 0,605563 | 0,8588887 |
| RP1-5O6.7       | 29,55    | -1,14 | 2,200509 | -0,51639 | 0,605584 | 0,8588887 |
| LL22NC03-79E2.1 | 45,16    | 0,34  | 0,66711  | 0,516378 | 0,60559  | 0,8588887 |
| CTD-2384B11.2   | 0,26     | -1,73 | 3,347298 | -0,51632 | 0,605634 | NA        |
| FCF1            | 126,39   | -0,36 | 0,689714 | -0,51626 | 0,605674 | 0,8588887 |
| PPP1R2P1        | 0,61     | 1,93  | 3,738556 | 0,516241 | 0,605686 | NA        |
| OR2L5           | 0,98     | 1,33  | 2,5707   | 0,516212 | 0,605706 | NA        |
| REXO4           | 63,24    | 0,43  | 0,82512  | 0,516178 | 0,60573  | 0,8588887 |
| KIR3DP1         | 0,61     | 1,93  | 3,73857  | 0,516174 | 0,605733 | NA        |
| RP11-540K16.1   | 13,21    | -0,98 | 1,889953 | -0,51616 | 0,605741 | 0,8588887 |
| CTRL            | 37,84    | -0,49 | 0,94215  | -0,51607 | 0,605805 | 0,8588887 |
| PGC             | 0,59     | 1,89  | 3,666527 | 0,516057 | 0,605814 | NA        |
| RPL19           | 11852,92 | 0,06  | 0,123626 | 0,516056 | 0,605815 | 0,8588887 |
| CASR            | 45,66    | -0,26 | 0,49704  | -0,51588 | 0,605935 | 0,8589927 |
| DNAJC8          | 1194,10  | -0,17 | 0,33289  | -0,51565 | 0,606102 | 0,8591636 |
| RP11-535C21.3   | 1,42     | 1,92  | 3,728793 | 0,515627 | 0,606115 | NA        |
| TSR3            | 226,70   | -0,41 | 0,803973 | -0,51553 | 0,606184 | 0,8592147 |
| RNU6-288P       | 0,22     | -1,91 | 3,710708 | -0,51549 | 0,60621  | NA        |
| AC004951.5      | 0,59     | 1,89  | 3,665762 | 0,515442 | 0,606244 | NA        |
| MSH5            | 52,39    | 0,35  | 0,670515 | 0,515391 | 0,60628  | 0,8592596 |
| ZNF451          | 698,96   | 0,30  | 0,575947 | 0,515335 | 0,606319 | 0,8592596 |

|               |         |       |          |          |          |           |
|---------------|---------|-------|----------|----------|----------|-----------|
| RP11-190D6.1  | 0,39    | -0,83 | 1,614418 | -0,51528 | 0,606358 | NA        |
| CTB-189B5.3   | 1,59    | -0,62 | 1,202008 | -0,51528 | 0,606636 | NA        |
| RN7SL387P     | 3,11    | -0,60 | 1,15892  | -0,51527 | 0,606367 | NA        |
| PPP1CA        | 2628,83 | 0,15  | 0,293396 | 0,515257 | 0,606373 | 0,8592596 |
| CLUH          | 85,17   | -0,64 | 1,24689  | -0,51521 | 0,606405 | 0,8592596 |
| EEPD1         | 127,45  | -0,53 | 1,026941 | -0,51515 | 0,606447 | 0,8592596 |
| TPRG1L        | 227,57  | -0,34 | 0,669328 | -0,51501 | 0,606547 | 0,8593362 |
| RPL12P8       | 1,96    | -0,45 | 0,867111 | -0,51489 | 0,606628 | NA        |
| ZNF839        | 170,82  | 0,40  | 0,770558 | 0,514877 | 0,606639 | 0,8593872 |
| AP003025.2    | 1,82    | -0,54 | 1,054425 | -0,51485 | 0,606659 | NA        |
| RP11-15L13.4  | 0,49    | 1,60  | 3,112708 | 0,514829 | 0,606672 | NA        |
| TIMM8A        | 93,68   | 0,55  | 1,073529 | 0,514809 | 0,606686 | 0,8593872 |
| RP11-475N22.4 | 1,53    | 1,38  | 2,686057 | 0,514805 | 0,606689 | NA        |
| RP11-153M7.5  | 0,95    | 1,92  | 3,732849 | 0,514702 | 0,606761 | NA        |
| ACO1          | 131,02  | 0,54  | 1,052408 | 0,514614 | 0,606823 | 0,8593872 |
| PRUNE         | 117,38  | 0,63  | 1,217823 | 0,514612 | 0,606824 | 0,8593872 |
| ZNF213        | 56,64   | 0,48  | 0,927148 | 0,514564 | 0,606858 | 0,8593872 |
| SLC11A2       | 280,65  | -0,21 | 0,409358 | -0,51456 | 0,60686  | 0,8593872 |
| AC098820.4    | 0,57    | 1,84  | 3,584814 | 0,514527 | 0,606884 | NA        |
| TMED1         | 246,80  | 0,41  | 0,788799 | 0,514353 | 0,607005 | 0,8595277 |
| TBC1D3P2      | 0,60    | 1,86  | 3,623437 | 0,514172 | 0,607132 | NA        |
| RP11-128N14.5 | 6,67    | -0,73 | 1,41034  | -0,51416 | 0,607139 | 0,8596363 |
| RP11-179F17.5 | 4,35    | -0,80 | 1,551645 | -0,51411 | 0,607174 | 0,8596363 |
| TPBG          | 0,23    | -1,73 | 3,357688 | -0,51405 | 0,60722  | NA        |
| RP1-20208.2   | 0,50    | 0,97  | 1,887168 | 0,513927 | 0,607303 | NA        |
| CTD-2325P2.3  | 1,45    | 1,92  | 3,72861  | 0,513914 | 0,607312 | NA        |
| MIR505        | 0,60    | 1,92  | 3,738754 | 0,513797 | 0,607394 | NA        |
| FOXN3         | 1133,90 | -0,21 | 0,416403 | -0,5138  | 0,607395 | 0,8598555 |
| PRKCD         | 871,29  | -0,17 | 0,324804 | -0,5137  | 0,607462 | 0,8598555 |
| RP11-105C19.1 | 1,15    | -0,72 | 1,3995   | -0,51367 | 0,607486 | NA        |
| PYCR1         | 12,26   | 0,65  | 1,258732 | 0,513631 | 0,60751  | 0,8598555 |
| AC103563.4    | 0,60    | 1,88  | 3,65344  | 0,51361  | 0,607524 | NA        |
| GPHN          | 24,69   | -0,40 | 0,774855 | -0,51341 | 0,607665 | 0,8598555 |
| PSORS1C3      | 0,62    | 1,92  | 3,738772 | 0,5134   | 0,607671 | NA        |
| AC092431.2    | 1,71    | -0,80 | 1,56445  | -0,51338 | 0,607687 | NA        |
| REEP4         | 385,20  | 0,29  | 0,562443 | 0,513354 | 0,607704 | 0,8598555 |
| METRN         | 5,09    | 0,95  | 1,849823 | 0,513351 | 0,607706 | 0,8598555 |
| FAM192A       | 715,80  | -0,19 | 0,378066 | -0,51335 | 0,607707 | 0,8598555 |
| FAM171B       | 5,08    | 0,36  | 0,695454 | 0,513323 | 0,607725 | 0,8598555 |
| RP11-98L5.2   | 5,56    | -0,47 | 0,917967 | -0,51329 | 0,607745 | 0,8598555 |
| LURAP1        | 8,62    | 0,42  | 0,82563  | 0,513109 | 0,607875 | 0,859974  |
| RP11-119H12.2 | 1,69    | 0,46  | 0,888313 | 0,51309  | 0,607888 | NA        |
| AGAP14P       | 2,42    | -1,13 | 2,212203 | -0,51306 | 0,607911 | NA        |
| RP3-395P12.2  | 7,96    | -0,58 | 1,127727 | -0,51298 | 0,607965 | 0,8600257 |
| PAQR7         | 324,14  | 0,27  | 0,525962 | 0,512924 | 0,608004 | 0,8600257 |
| OR1S2         | 0,60    | 1,88  | 3,670905 | 0,512924 | 0,608004 | NA        |
| SATB1         | 838,50  | 0,30  | 0,586177 | 0,512856 | 0,608052 | 0,8600281 |
| RP11-214O1.2  | 3,74    | 1,33  | 2,588648 | 0,512827 | 0,608072 | NA        |
| RP11-122C21.1 | 1,59    | -1,18 | 2,301134 | -0,51268 | 0,608174 | NA        |
| PHYHD1        | 5,19    | 0,57  | 1,115009 | 0,512671 | 0,608181 | 0,8601107 |

|               |         |       |          |          |          |           |
|---------------|---------|-------|----------|----------|----------|-----------|
| OXSM          | 23,72   | 0,61  | 1,180388 | 0,512619 | 0,608218 | 0,8601107 |
| PRKAB2        | 95,03   | -0,43 | 0,836675 | -0,51257 | 0,608249 | 0,8601107 |
| RP11-383C5.3  | 7,35    | -0,53 | 1,041733 | -0,51249 | 0,608305 | 0,8601156 |
| AC005324.6    | 1,57    | -1,16 | 2,264232 | -0,51247 | 0,608319 | NA        |
| RP5-1073O3.7  | 152,65  | -0,44 | 0,852339 | -0,51239 | 0,608376 | 0,8601156 |
| ARF5          | 3571,29 | 0,14  | 0,278759 | 0,512371 | 0,608391 | 0,8601156 |
| FBLN7         | 2,16    | -0,56 | 1,090036 | -0,5123  | 0,608438 | NA        |
| RP11-271K21.7 | 2,12    | 1,07  | 2,095135 | 0,512277 | 0,608457 | NA        |
| AL845154.2    | 0,43    | -1,30 | 2,542938 | -0,51218 | 0,608523 | NA        |
| OCM           | 0,19    | -1,90 | 3,717976 | -0,51205 | 0,608616 | NA        |
| PCYT1B        | 2,73    | -0,42 | 0,829342 | -0,51188 | 0,608734 | NA        |
| EIF3A         | 3011,10 | 0,14  | 0,269949 | 0,511838 | 0,608764 | 0,8605645 |
| PPP2R5A       | 490,32  | -0,29 | 0,558007 | -0,51179 | 0,608801 | 0,8605645 |
| SMYD4         | 174,99  | -0,40 | 0,791236 | -0,51165 | 0,608894 | 0,8605819 |
| AC005235.1    | 31,26   | 0,42  | 0,828467 | 0,511635 | 0,608906 | 0,8605819 |
| RP1-184J9.2   | 0,61    | 1,91  | 3,738732 | 0,511583 | 0,608943 | NA        |
| IL1A          | 4,04    | 1,35  | 2,646646 | 0,511567 | 0,608954 | 0,8605845 |
| EEF1A2        | 8,53    | -0,43 | 0,83144  | -0,51144 | 0,609042 | 0,8606157 |
| NSD2          | 333,43  | -0,31 | 0,603343 | -0,51136 | 0,609099 | 0,8606157 |
| ANKRD20A3     | 63,97   | -0,49 | 0,968001 | -0,51134 | 0,609115 | 0,8606157 |
| RP3-391O22.3  | 0,59    | 1,88  | 3,667955 | 0,511306 | 0,609137 | NA        |
| MIR23A        | 1,89    | -1,01 | 1,968452 | -0,51128 | 0,609153 | NA        |
| RP11-763B22.7 | 0,78    | 1,63  | 3,195246 | 0,511212 | 0,609202 | NA        |
| CD244         | 392,85  | -0,32 | 0,617813 | -0,51119 | 0,609219 | 0,8606236 |
| RP11-666A8.1  | 0,47    | 1,58  | 3,082539 | 0,511175 | 0,609229 | NA        |
| KIAA1328      | 221,87  | 0,24  | 0,474105 | 0,511151 | 0,609245 | 0,8606236 |
| PATZ1         | 102,99  | -0,38 | 0,747245 | -0,51113 | 0,60926  | 0,8606236 |
| RP11-905K4.1  | 0,13    | -1,91 | 3,730346 | -0,51102 | 0,609339 | NA        |
| RP11-77K12.3  | 2,28    | 1,17  | 2,297918 | 0,510997 | 0,609353 | NA        |
| AC005786.7    | 50,42   | -0,38 | 0,747824 | -0,51098 | 0,609363 | 0,8607047 |
| C21orf81      | 3,35    | -0,83 | 1,62214  | -0,51094 | 0,609394 | NA        |
| ADCY5         | 28,49   | -1,84 | 3,608402 | -0,51087 | 0,60944  | 0,8607169 |
| RP1-92O14.3   | 0,60    | 1,91  | 3,738876 | 0,510849 | 0,609457 | NA        |
| CFAP69        | 261,91  | -0,22 | 0,422062 | -0,51084 | 0,609464 | 0,8607169 |
| RP4-593M8.1   | 1,74    | -1,08 | 2,116945 | -0,5108  | 0,609492 | NA        |
| AURKC         | 0,64    | 1,91  | 3,737697 | 0,510762 | 0,609518 | NA        |
| ACYP1         | 38,12   | 0,72  | 1,400319 | 0,510748 | 0,609527 | 0,8607403 |
| AC007879.2    | 3,93    | 1,87  | 3,66372  | 0,510638 | 0,609605 | 0,8607533 |
| RP11-267J23.4 | 0,55    | -0,78 | 1,522077 | -0,51063 | 0,609608 | NA        |
| AURKAIP1      | 736,85  | -0,18 | 0,355881 | -0,51055 | 0,609665 | 0,8607533 |
| EXTL3         | 308,17  | 0,32  | 0,636489 | 0,510486 | 0,609711 | 0,8607533 |
| RP11-2C24.3   | 46,66   | 0,39  | 0,766932 | 0,510471 | 0,609721 | 0,8607533 |
| RP3-337D23.3  | 2,83    | -0,48 | 0,949491 | -0,51035 | 0,609807 | NA        |
| MIR5188       | 0,60    | 1,91  | 3,738917 | 0,510242 | 0,609882 | NA        |
| IL9RP4        | 0,17    | -1,71 | 3,356225 | -0,51012 | 0,609968 | NA        |
| CTD-3116E22.4 | 21,96   | -0,80 | 1,568383 | -0,51009 | 0,60999  | 0,8609546 |
| RP11-159F24.1 | 197,62  | -0,24 | 0,474676 | -0,51007 | 0,61     | 0,8609546 |
| C1QA          | 97,99   | -0,66 | 1,286029 | -0,51007 | 0,610003 | 0,8609546 |
| C12orf56      | 0,60    | 1,91  | 3,738885 | 0,509921 | 0,610107 | NA        |
| AP3B2         | 111,17  | -0,23 | 0,444533 | -0,5098  | 0,610192 | 0,861156  |

|                      |        |       |          |          |          |           |
|----------------------|--------|-------|----------|----------|----------|-----------|
| LINC01132            | 0,40   | -1,57 | 3,07438  | -0,50965 | 0,610293 | NA        |
| VPS26B               | 289,52 | 0,31  | 0,609569 | 0,509617 | 0,61032  | 0,8611567 |
| IGHV1-24             | 0,62   | -1,18 | 2,308485 | -0,50957 | 0,610351 | NA        |
| TMEM119              | 15,83  | -0,32 | 0,633828 | -0,50957 | 0,610352 | 0,8611567 |
| PCDHA10              | 18,96  | -0,34 | 0,666307 | -0,50947 | 0,610425 | 0,8611567 |
| RPL12P11             | 0,92   | 1,90  | 3,732923 | 0,509302 | 0,61054  | NA        |
| SFN                  | 1,50   | -0,88 | 1,735873 | -0,50929 | 0,610548 | NA        |
| HIPK2                | 393,23 | 0,30  | 0,595047 | 0,50923  | 0,610591 | 0,8611567 |
| NUS1                 | 479,07 | -0,37 | 0,725122 | -0,50922 | 0,610597 | 0,8611567 |
| TMEM30A              | 624,83 | 0,25  | 0,497718 | 0,509201 | 0,610611 | 0,8611567 |
| RP11-242F24.1        | 8,99   | 0,37  | 0,724629 | 0,5092   | 0,610612 | 0,8611567 |
| LINC00273            | 47,67  | 0,63  | 1,239002 | 0,509163 | 0,610638 | 0,8611567 |
| PLCG1                | 12,15  | -0,83 | 1,633206 | -0,50914 | 0,610652 | 0,8611567 |
| RP11-863K10.7        | 27,68  | 0,50  | 0,989809 | 0,509138 | 0,610655 | 0,8611567 |
| SIRT6                | 71,65  | -0,54 | 1,067733 | -0,509   | 0,610753 | 0,8612119 |
| RP11-567C20.5        | 14,03  | -0,49 | 0,954283 | -0,50895 | 0,610787 | 0,8612119 |
| CTA-292E10.8         | 0,36   | 1,34  | 2,63451  | 0,508911 | 0,610815 | NA        |
| FAM98A               | 89,24  | -0,53 | 1,034096 | -0,50868 | 0,610978 | 0,8613031 |
| RP13-158L7.3         | 1,40   | 0,55  | 1,083714 | 0,508674 | 0,610981 | NA        |
| DUX4L26              | 0,67   | -1,36 | 2,673964 | -0,50866 | 0,610988 | NA        |
| POC5                 | 66,87  | -0,58 | 1,137644 | -0,50864 | 0,611003 | 0,8613031 |
| ZNF99                | 6,71   | -0,27 | 0,538927 | -0,50862 | 0,611022 | 0,8613031 |
| CAB39                | 894,17 | 0,23  | 0,460618 | 0,508594 | 0,611037 | 0,8613031 |
| LINC00637            | 1,12   | 0,94  | 1,851176 | 0,508501 | 0,611102 | NA        |
| PRMT8                | 0,50   | -1,01 | 1,97891  | -0,50825 | 0,611128 | NA        |
| LCMT1                | 198,73 | 0,38  | 0,740695 | 0,508225 | 0,611296 | 0,8616027 |
| TOP3B                | 143,57 | -0,45 | 0,888199 | -0,5081  | 0,611381 | 0,8616571 |
| GOLGA8F              | 2,87   | -1,57 | 3,096759 | -0,50797 | 0,611475 | NA        |
| SNRPE                | 573,53 | -0,14 | 0,270303 | -0,50794 | 0,611498 | 0,8617092 |
| FAM3C                | 81,51  | 0,40  | 0,788252 | 0,507871 | 0,611544 | 0,8617092 |
| ZNF556               | 33,43  | -0,27 | 0,523635 | -0,50785 | 0,611556 | 0,8617092 |
| RP11-522D2.1         | 0,63   | -1,87 | 3,682594 | -0,50758 | 0,611751 | NA        |
| RP11-244F12.2        | 7,42   | -0,56 | 1,109501 | -0,50742 | 0,611861 | 0,8618595 |
| STAG3L5P-PVRIG2P-PIL | 66,61  | 0,44  | 0,864146 | 0,507387 | 0,611883 | 0,8618595 |
| RP11-806H10.4        | 1,06   | 0,97  | 1,915957 | 0,507382 | 0,611887 | NA        |
| ACTA1                | 2,63   | 0,38  | 0,754898 | 0,507335 | 0,61192  | NA        |
| PPIP5K1              | 91,49  | -0,50 | 0,989645 | -0,50726 | 0,611971 | 0,8618595 |
| RP4-784A16.5         | 10,02  | -0,88 | 1,735096 | -0,50725 | 0,611979 | 0,8618595 |
| EBF2                 | 0,58   | -0,77 | 1,51401  | -0,50722 | 0,612001 | NA        |
| AC007319.1           | 0,65   | 1,38  | 2,718368 | 0,507161 | 0,612042 | NA        |
| ARAP3                | 26,96  | -0,79 | 1,566536 | -0,50714 | 0,612056 | 0,8618595 |
| TCP10L               | 0,92   | -1,38 | 2,723485 | -0,50707 | 0,612106 | NA        |
| MYO10                | 88,89  | 0,41  | 0,813279 | 0,507066 | 0,612109 | 0,8618595 |
| MIR4802              | 0,93   | 1,89  | 3,732976 | 0,507052 | 0,612118 | NA        |
| CTC-428G20.4         | 0,17   | -1,44 | 2,835547 | -0,50698 | 0,612167 | NA        |
| RP11-138N21.1        | 8,00   | 0,73  | 1,438368 | 0,506952 | 0,612188 | 0,8618595 |
| RP11-865A20.1        | 11,97  | 0,72  | 1,423702 | 0,506946 | 0,612192 | 0,8618595 |
| MYLK4                | 14,34  | -0,66 | 1,292222 | -0,50694 | 0,6122   | 0,8618595 |
| AP001347.6           | 29,93  | -0,79 | 1,549647 | -0,5069  | 0,612222 | 0,8618595 |
| ATXN2                | 486,31 | -0,24 | 0,473207 | -0,50684 | 0,612269 | 0,8618595 |



|               |         |       |          |          |          |           |
|---------------|---------|-------|----------|----------|----------|-----------|
| RP11-395F4.1  | 3,79    | 0,91  | 1,787161 | 0,506815 | 0,612284 | 0,8618595 |
| RP11-167P22.3 | 0,92    | 1,89  | 3,732976 | 0,506725 | 0,612348 | NA        |
| GLUD2         | 0,49    | 0,86  | 1,701111 | 0,506678 | 0,61238  | NA        |
| NUTM2E        | 0,43    | -1,87 | 3,688138 | -0,50668 | 0,612381 | NA        |
| PCED1B        | 34,35   | 0,57  | 1,11968  | 0,506606 | 0,612431 | 0,8618595 |
| ANP32AP1      | 5,80    | -0,95 | 1,877557 | -0,50661 | 0,612432 | 0,8618595 |
| CDKN2AIPNL    | 123,27  | -0,39 | 0,767697 | -0,50651 | 0,6125   | 0,8618595 |
| INAFM1        | 76,94   | -0,48 | 0,943586 | -0,50633 | 0,612625 | 0,8618595 |
| RP11-316K19.3 | 0,45    | 1,54  | 3,039748 | 0,506314 | 0,612637 | NA        |
| FAM213B       | 13,53   | 0,61  | 1,196067 | 0,506312 | 0,612637 | 0,8618595 |
| SNORD69       | 0,75    | -1,57 | 3,093907 | -0,50631 | 0,612642 | NA        |
| ZNF710        | 114,11  | 0,28  | 0,560891 | 0,506277 | 0,612662 | 0,8618595 |
| RP11-711D18.2 | 0,60    | 1,89  | 3,739134 | 0,506266 | 0,61267  | NA        |
| RP11-577H5.2  | 0,56    | 1,82  | 3,595898 | 0,506213 | 0,612707 | NA        |
| DNAJA2        | 506,08  | 0,27  | 0,532746 | 0,506202 | 0,612715 | 0,8618595 |
| HLA-K         | 4,57    | 0,61  | 1,21171  | 0,506152 | 0,61275  | 0,8618595 |
| SAMD9         | 595,44  | -0,32 | 0,641156 | -0,50615 | 0,612752 | 0,8618595 |
| MRPS11        | 649,58  | 0,26  | 0,50526  | 0,506122 | 0,612771 | 0,8618595 |
| PPHLN1        | 1209,22 | -0,13 | 0,261139 | -0,50609 | 0,612792 | 0,8618595 |
| RP11-4O1.2    | 41,79   | -0,45 | 0,888609 | -0,50609 | 0,612793 | 0,8618595 |
| RP11-385F5.2  | 0,94    | 1,89  | 3,732912 | 0,506083 | 0,612799 | NA        |
| TRIM22        | 1617,29 | -0,21 | 0,42114  | -0,50605 | 0,612821 | 0,8618595 |
| RP11-313P13.5 | 0,92    | 1,89  | 3,733022 | 0,506023 | 0,61284  | NA        |
| RP11-777J24.1 | 1,83    | 0,58  | 1,145284 | 0,505856 | 0,612957 | NA        |
| RP11-973H7.3  | 17,97   | -0,46 | 0,915754 | -0,50584 | 0,612968 | 0,8619377 |
| FHL3          | 246,04  | -0,36 | 0,704012 | -0,50584 | 0,612969 | 0,8619377 |
| AC009487.6    | 0,57    | 1,82  | 3,605643 | 0,505801 | 0,612996 | NA        |
| AC104667.3    | 0,57    | 1,07  | 2,120783 | 0,505756 | 0,613028 | NA        |
| AP000275.65   | 6,83    | -1,19 | 2,348238 | -0,50565 | 0,613101 | 0,8620097 |
| RSBN1L        | 385,45  | 0,33  | 0,644338 | 0,505634 | 0,613113 | 0,8620097 |
| RNU6-1310P    | 0,61    | 1,89  | 3,739114 | 0,505607 | 0,613132 | NA        |
| WBP11P1       | 0,78    | 1,62  | 3,205682 | 0,505527 | 0,613189 | NA        |
| CTD-2213F21.3 | 0,60    | 1,89  | 3,739066 | 0,505492 | 0,613213 | NA        |
| CD33          | 1479,80 | -0,13 | 0,251935 | -0,5054  | 0,613279 | 0,8620982 |
| KB-1042C11.5  | 4,77    | -0,86 | 1,702734 | -0,5054  | 0,613281 | 0,8620982 |
| TIMP2         | 795,63  | -0,16 | 0,320833 | -0,50535 | 0,613315 | 0,8620982 |
| RP11-5K16.2   | 0,93    | -1,40 | 2,779192 | -0,50532 | 0,613331 | NA        |
| RP11-688I9.5  | 44,31   | -0,42 | 0,830565 | -0,50528 | 0,613365 | 0,8621023 |
| TMPRSS3       | 2,92    | -0,61 | 1,198922 | -0,50527 | 0,61337  | NA        |
| SLC25A21      | 11,41   | -0,41 | 0,809588 | -0,5051  | 0,613485 | 0,8621849 |
| CMTM8         | 1,13    | 0,86  | 1,711749 | 0,505011 | 0,613551 | NA        |
| CTD-2006K23.2 | 0,95    | 1,30  | 2,576922 | 0,505003 | 0,613556 | NA        |
| ASZ1          | 11,30   | -0,48 | 0,95877  | -0,505   | 0,613558 | 0,8621849 |
| ZPR1          | 561,70  | 0,29  | 0,56818  | 0,504901 | 0,613628 | 0,8621849 |
| RBM25         | 2460,43 | 0,15  | 0,29771  | 0,504859 | 0,613658 | 0,8621849 |
| LY86          | 2591,03 | 0,14  | 0,268025 | 0,504846 | 0,613667 | 0,8621849 |
| ZFP28         | 14,03   | 0,87  | 1,719002 | 0,504783 | 0,613711 | 0,8621849 |
| AC098831.4    | 0,98    | 1,43  | 2,841941 | 0,504746 | 0,613737 | NA        |
| ATP5L2        | 13,48   | -0,57 | 1,120844 | -0,50473 | 0,613748 | 0,8621849 |
| EPC2          | 142,59  | -0,47 | 0,934247 | -0,50458 | 0,613851 | 0,8622173 |

|               |         |       |          |          |          |           |
|---------------|---------|-------|----------|----------|----------|-----------|
| CD5           | 42,82   | 0,66  | 1,315968 | 0,504566 | 0,613864 | 0,8622173 |
| AC007292.6    | 6,08    | 0,54  | 1,073457 | 0,504457 | 0,61394  | 0,8622603 |
| CACNA1S       | 0,57    | 1,84  | 3,657321 | 0,504418 | 0,613968 | NA        |
| RP11-511H9.3  | 5,82    | -0,77 | 1,525182 | -0,5043  | 0,614051 | 0,8622934 |
| SLC39A13      | 80,28   | -0,50 | 1,000318 | -0,50429 | 0,614057 | 0,8622934 |
| POM121        | 248,14  | -0,34 | 0,680034 | -0,50422 | 0,614106 | 0,8622981 |
| GUF1          | 274,62  | -0,34 | 0,665054 | -0,504   | 0,614262 | 0,8624    |
| BRE           | 460,04  | 0,26  | 0,513311 | 0,503885 | 0,614342 | 0,8624    |
| PCDHGA5       | 7,48    | -0,51 | 1,006156 | -0,50383 | 0,614383 | 0,8624    |
| MARCH2        | 153,18  | -0,26 | 0,519647 | -0,50381 | 0,614395 | 0,8624    |
| CRLF1         | 10,88   | -1,14 | 2,271908 | -0,50379 | 0,614411 | 0,8624    |
| DPYSL3        | 0,89    | 1,83  | 3,637552 | 0,503752 | 0,614436 | NA        |
| SPEN          | 1571,30 | 0,27  | 0,542162 | 0,503605 | 0,614539 | 0,862507  |
| RP11-75A9.2   | 0,81    | -0,54 | 1,071101 | -0,5036  | 0,614544 | NA        |
| SNAI2         | 1,95    | 1,28  | 2,53907  | 0,503569 | 0,614564 | NA        |
| SP2           | 116,84  | -0,40 | 0,787485 | -0,50353 | 0,614588 | 0,862507  |
| RP11-299G20.5 | 7,22    | -0,66 | 1,30998  | -0,50339 | 0,614691 | 0,862507  |
| AKAP6         | 18,88   | 0,60  | 1,196358 | 0,503332 | 0,614731 | 0,862507  |
| MED18         | 75,53   | -0,52 | 1,040148 | -0,50332 | 0,614741 | 0,862507  |
| DENND1A       | 617,57  | 0,23  | 0,455889 | 0,503283 | 0,614765 | 0,862507  |
| CYBRD1        | 217,40  | -0,34 | 0,66654  | -0,50317 | 0,614843 | 0,8625506 |
| RP5-1092A11.5 | 0,71    | -1,57 | 3,116697 | -0,50314 | 0,614864 | NA        |
| RP11-239A17.1 | 0,61    | 1,88  | 3,739226 | 0,503033 | 0,614941 | NA        |
| EVI5          | 597,05  | 0,26  | 0,5232   | 0,502898 | 0,615036 | 0,8627162 |
| RP11-12J10.3  | 4,08    | 0,93  | 1,851104 | 0,502853 | 0,615068 | 0,8627162 |
| ZKSCAN5       | 145,16  | 0,45  | 0,888046 | 0,502743 | 0,615145 | 0,8627162 |
| CEP295NL      | 9,42    | 0,94  | 1,8643   | 0,502741 | 0,615146 | 0,8627162 |
| RP11-375H19.2 | 2,04    | 0,55  | 1,096452 | 0,502662 | 0,615202 | NA        |
| RP3-369A17.4  | 0,91    | 1,88  | 3,73197  | 0,502604 | 0,615243 | NA        |
| AP000766.2    | 1,22    | 1,67  | 3,324777 | 0,502589 | 0,615253 | NA        |
| CBX7          | 22,88   | -0,49 | 0,969821 | -0,50248 | 0,615332 | 0,8629114 |
| PRICKLE2      | 101,82  | 0,36  | 0,709859 | 0,5024   | 0,615386 | 0,8629229 |
| RNU6-454P     | 0,60    | 1,88  | 3,739215 | 0,502318 | 0,615444 | NA        |
| CTD-3080P12.3 | 2,95    | 0,68  | 1,350587 | 0,502253 | 0,61549  | NA        |
| RP11-609D21.3 | 294,12  | -0,86 | 1,704543 | -0,50218 | 0,615541 | 0,862949  |
| SESN1         | 160,01  | 0,52  | 1,036684 | 0,50217  | 0,615548 | 0,862949  |
| RP11-500M8.7  | 54,13   | 0,84  | 1,673493 | 0,502055 | 0,615629 | 0,862949  |
| RP11-100L22.2 | 7,19    | -0,59 | 1,178535 | -0,50196 | 0,615699 | 0,862949  |
| BNIP3         | 81,84   | -0,49 | 0,978772 | -0,50183 | 0,61579  | 0,862949  |
| RP11-345J4.8  | 125,19  | 0,40  | 0,804708 | 0,501792 | 0,615814 | 0,862949  |
| ZFP3          | 36,17   | 0,49  | 0,97235  | 0,501789 | 0,615816 | 0,862949  |
| RP11-539L10.3 | 13,20   | -0,44 | 0,882185 | -0,50179 | 0,615817 | 0,862949  |
| SMIM20        | 144,88  | 0,40  | 0,805973 | 0,50178  | 0,615822 | 0,862949  |
| RP4-675C20.4  | 1,49    | 0,95  | 1,891026 | 0,501763 | 0,615834 | NA        |
| IMPA2         | 429,31  | 0,23  | 0,460509 | 0,501686 | 0,615889 | 0,8629769 |
| RP11-158L12.4 | 8,72    | 0,58  | 1,156126 | 0,501494 | 0,616024 | 0,8631014 |
| RP11-7N10.1   | 0,55    | -1,04 | 2,065048 | -0,50149 | 0,616029 | NA        |
| RP11-26L16.1  | 2,07    | 0,66  | 1,319191 | 0,501323 | 0,616144 | NA        |
| RP11-536P6.3  | 2,04    | -0,77 | 1,542597 | -0,50131 | 0,616151 | NA        |
| WRB           | 120,95  | -0,61 | 1,226553 | -0,50127 | 0,616181 | 0,8632565 |

|               |         |       |          |          |          |           |
|---------------|---------|-------|----------|----------|----------|-----------|
| OR14A2        | 0,13    | -1,87 | 3,727295 | -0,50122 | 0,616215 | NA        |
| RP11-613E4.1  | 0,60    | 1,87  | 3,739341 | 0,501034 | 0,616347 | NA        |
| RP11-104O19.2 | 0,73    | 0,86  | 1,726837 | 0,500901 | 0,616441 | NA        |
| DPPA3         | 0,98    | -1,12 | 2,246085 | -0,50082 | 0,616496 | NA        |
| RP11-379F4.6  | 2,15    | -0,57 | 1,140194 | -0,50082 | 0,616498 | NA        |
| LRRC69        | 45,00   | -0,43 | 0,857227 | -0,50082 | 0,616498 | 0,8635934 |
| FAF2          | 330,11  | -0,30 | 0,594167 | -0,50079 | 0,616521 | 0,8635934 |
| RP11-490N5.2  | 1,25    | 1,68  | 3,362562 | 0,500775 | 0,616529 | NA        |
| RP11-312B8.1  | 1,18    | 1,20  | 2,389437 | 0,500742 | 0,616553 | NA        |
| TMOD1         | 13,79   | 0,88  | 1,748906 | 0,500678 | 0,616598 | 0,8635934 |
| CSTF2         | 104,84  | -0,60 | 1,197963 | -0,50064 | 0,616624 | 0,8635934 |
| RP11-774O3.3  | 10,37   | 1,22  | 2,427893 | 0,500599 | 0,616654 | 0,8635934 |
| MSRB1         | 950,42  | -0,21 | 0,422555 | -0,50053 | 0,616703 | 0,8635982 |
| RP11-457D2.3  | 0,58    | 1,87  | 3,739481 | 0,500248 | 0,6169   | NA        |
| RP11-373E16.4 | 6,12    | 0,79  | 1,580762 | 0,500162 | 0,616961 | 0,8638368 |
| INTS5         | 87,29   | 0,77  | 1,53049  | 0,500154 | 0,616967 | 0,8638368 |
| CHD1          | 2120,88 | 0,21  | 0,419288 | 0,499909 | 0,617139 | 0,8639615 |
| IPPK          | 71,07   | -0,63 | 1,267094 | -0,4999  | 0,617149 | 0,8639615 |
| LINC-PINT     | 505,36  | 0,27  | 0,545694 | 0,499702 | 0,617285 | 0,8640111 |
| RP11-400N13.2 | 38,14   | 0,46  | 0,911344 | 0,499655 | 0,617318 | 0,8640111 |
| FZD5          | 7,59    | 0,64  | 1,285257 | 0,499648 | 0,617323 | 0,8640111 |
| RP11-359K18.3 | 0,39    | -1,71 | 3,422528 | -0,49958 | 0,617373 | NA        |
| HS2ST1        | 146,95  | -0,44 | 0,886338 | -0,49943 | 0,617473 | 0,8640956 |
| AP000279.69   | 49,15   | 0,46  | 0,921777 | 0,499287 | 0,617577 | 0,8640956 |
| PXT1          | 3,69    | 1,27  | 2,543754 | 0,499206 | 0,617634 | NA        |
| ATAD2         | 144,38  | 0,32  | 0,640018 | 0,499116 | 0,617698 | 0,8640956 |
| ANXA8         | 13,89   | -0,87 | 1,752511 | -0,49909 | 0,617719 | 0,8640956 |
| NSDHL         | 91,71   | -0,59 | 1,191234 | -0,49909 | 0,617719 | 0,8640956 |
| RP11-481J2.1  | 4,61    | -0,63 | 1,268612 | -0,49899 | 0,617788 | 0,8640956 |
| CLCN5         | 625,10  | 0,40  | 0,800849 | 0,498964 | 0,617805 | 0,8640956 |
| PNMA3         | 0,26    | -1,44 | 2,880253 | -0,49892 | 0,617836 | NA        |
| RP11-789C7.1  | 10,71   | -0,75 | 1,496691 | -0,49892 | 0,617838 | 0,8640956 |
| RP11-158D2.2  | 75,69   | -0,45 | 0,897818 | -0,49885 | 0,617883 | 0,8640956 |
| ACYP2         | 199,20  | 0,28  | 0,559775 | 0,498833 | 0,617897 | 0,8640956 |
| RP11-846C15.2 | 1,81    | 0,95  | 1,90728  | 0,498793 | 0,617925 | NA        |
| C21orf33      | 102,36  | 0,51  | 1,029367 | 0,498779 | 0,617935 | 0,8640956 |
| AC133109.1    | 1,97    | 0,88  | 1,758656 | 0,498684 | 0,618002 | NA        |
| MGAT4A        | 355,52  | 0,38  | 0,75426  | 0,498638 | 0,618035 | 0,8640956 |
| C3orf66       | 12,79   | -0,42 | 0,847285 | -0,49857 | 0,618082 | 0,8640956 |
| MIR3661       | 0,59    | 1,83  | 3,666858 | 0,498535 | 0,618107 | NA        |
| ZNF587B       | 23,29   | 0,43  | 0,85581  | 0,498512 | 0,618123 | 0,8640956 |
| SIN3A         | 448,82  | 0,29  | 0,579937 | 0,498456 | 0,618163 | 0,8640956 |
| TRDMT1        | 314,90  | 0,37  | 0,751309 | 0,498427 | 0,618183 | 0,8640956 |
| PLEKHA1       | 359,60  | -0,34 | 0,686609 | -0,49837 | 0,618223 | 0,8640956 |
| CDC42EP1      | 10,11   | 0,67  | 1,351648 | 0,498357 | 0,618232 | 0,8640956 |
| CTC-510F12.3  | 11,98   | 0,35  | 0,709    | 0,498181 | 0,618357 | 0,8640956 |
| TRAPPC13      | 191,03  | -0,44 | 0,877029 | -0,49816 | 0,618372 | 0,8640956 |
| TYW3          | 377,84  | -0,20 | 0,404915 | -0,49815 | 0,618378 | 0,8640956 |
| OR2V2         | 17,01   | 0,34  | 0,690739 | 0,498112 | 0,618405 | 0,8640956 |
| AP001462.6    | 1,64    | 0,95  | 1,900689 | 0,498076 | 0,61843  | NA        |

|               |         |       |          |          |          |           |
|---------------|---------|-------|----------|----------|----------|-----------|
| TGM5          | 4,61    | -0,41 | 0,814406 | -0,49793 | 0,618535 | 0,8642112 |
| RP11-474N24.2 | 46,54   | -0,73 | 1,473912 | -0,4978  | 0,618623 | 0,8642169 |
| EMILIN2       | 1740,32 | -0,18 | 0,363592 | -0,49776 | 0,618655 | 0,8642169 |
| RP5-1139I1.2  | 6,84    | 0,65  | 1,311188 | 0,497725 | 0,618678 | 0,8642169 |
| AC092484.1    | 0,26    | -1,41 | 2,835573 | -0,49771 | 0,618688 | NA        |
| CCDC92        | 107,63  | -0,43 | 0,86658  | -0,49758 | 0,618778 | 0,8642368 |
| PET117        | 118,67  | -0,48 | 0,956823 | -0,49756 | 0,618791 | 0,8642368 |
| AC004069.2    | 52,02   | 0,52  | 1,037062 | 0,497488 | 0,618845 | 0,8642368 |
| FBXO28        | 180,90  | -0,55 | 1,097757 | -0,49735 | 0,618941 | 0,8642368 |
| ADGRV1        | 111,77  | 0,40  | 0,794832 | 0,497336 | 0,618952 | 0,8642368 |
| RP11-344N17.8 | 1,65    | -1,05 | 2,111888 | -0,49723 | 0,619028 | NA        |
| RP11-297C4.6  | 4,04    | 0,84  | 1,684033 | 0,497196 | 0,619051 | 0,8642368 |
| DBET          | 9,70    | -0,85 | 1,701046 | -0,49718 | 0,619063 | 0,8642368 |
| CTIF          | 46,62   | 0,60  | 1,198623 | 0,497177 | 0,619064 | 0,8642368 |
| TNNC2         | 0,58    | 1,86  | 3,739527 | 0,497174 | 0,619066 | NA        |
| AF127577.13   | 37,42   | 0,51  | 1,021957 | 0,497051 | 0,619153 | 0,8642965 |
| AC121253.1    | 86,85   | 0,17  | 0,336144 | 0,496739 | 0,619373 | 0,8645209 |
| BBS10         | 23,28   | -0,73 | 1,470164 | -0,49669 | 0,619407 | 0,8645209 |
| MIR5708       | 0,76    | 0,91  | 1,838002 | 0,496635 | 0,619447 | NA        |
| SPG7          | 882,45  | -0,13 | 0,261189 | -0,4966  | 0,619469 | 0,8645428 |
| RP11-696D21.2 | 0,59    | 1,18  | 2,372053 | 0,496471 | 0,619562 | NA        |
| CTC-305D20.1  | 0,48    | -0,98 | 1,976695 | -0,49646 | 0,619568 | NA        |
| ATG9B         | 13,40   | -0,81 | 1,622399 | -0,49645 | 0,61958  | 0,8646101 |
| EIF5A         | 1618,91 | -0,20 | 0,394609 | -0,49626 | 0,619711 | 0,8646101 |
| AL109767.1    | 0,50    | -1,83 | 3,694671 | -0,49622 | 0,61974  | NA        |
| DCTN3         | 775,73  | -0,18 | 0,362194 | -0,49617 | 0,619775 | 0,8646101 |
| CCDC167       | 102,17  | -0,41 | 0,824347 | -0,49617 | 0,619777 | 0,8646101 |
| OR7E84P       | 0,46    | -1,10 | 2,211734 | -0,49612 | 0,619809 | NA        |
| TYRO3         | 78,10   | 0,28  | 0,564171 | 0,496075 | 0,619842 | 0,8646101 |
| RP11-568G20.1 | 8,13    | -0,32 | 0,64028  | -0,49603 | 0,619874 | 0,8646101 |
| CMB9-22P13.1  | 16,76   | -0,47 | 0,94613  | -0,49602 | 0,619879 | 0,8646101 |
| RNU6-218P     | 0,58    | 1,85  | 3,739566 | 0,496019 | 0,619881 | NA        |
| RP11-487E13.1 | 163,80  | 0,20  | 0,40127  | 0,496008 | 0,619889 | 0,8646101 |
| NDUFA8        | 345,73  | 0,34  | 0,686441 | 0,495886 | 0,619975 | 0,8646649 |
| CTC-459F4.3   | 70,31   | -0,49 | 0,995314 | -0,49574 | 0,620078 | 0,8647435 |
| AC010982.1    | 0,74    | 1,58  | 3,194387 | 0,495694 | 0,620111 | NA        |
| DAG1          | 28,54   | -0,38 | 0,776191 | -0,49559 | 0,620183 | 0,8648252 |
| GEN1          | 215,76  | 0,47  | 0,941666 | 0,495488 | 0,620256 | 0,8648626 |
| AC005326.2    | 0,71    | -1,82 | 3,682987 | -0,49548 | 0,620263 | NA        |
| SMC5          | 642,12  | -0,27 | 0,543676 | -0,49541 | 0,62031  | 0,8648737 |
| RNA5SP389     | 0,57    | 1,85  | 3,739594 | 0,495361 | 0,620346 | NA        |
| ZNF728        | 0,29    | -1,64 | 3,304772 | -0,49516 | 0,620487 | NA        |
| ELMOD3        | 341,20  | -0,36 | 0,729124 | -0,49512 | 0,620514 | 0,8649875 |
| EFHC1         | 359,52  | -0,29 | 0,590231 | -0,49499 | 0,620606 | 0,8649875 |
| RP11-381K20.2 | 4,94    | 1,44  | 2,90419  | 0,494975 | 0,620618 | 0,8649875 |
| RP11-380B4.3  | 10,00   | 0,43  | 0,871413 | 0,49482  | 0,620727 | 0,8649875 |
| RP11-271C24.3 | 31,95   | 0,59  | 1,192645 | 0,494737 | 0,620786 | 0,8649875 |
| FNDC7         | 0,81    | 1,61  | 3,250625 | 0,494722 | 0,620797 | NA        |
| ST14          | 461,76  | 0,27  | 0,551722 | 0,494713 | 0,620803 | 0,8649875 |
| PFN1P6        | 0,58    | 1,85  | 3,739628 | 0,494703 | 0,620809 | NA        |

|                |         |       |          |          |          |           |
|----------------|---------|-------|----------|----------|----------|-----------|
| YIPF2          | 200,81  | -0,39 | 0,789117 | -0,49464 | 0,620851 | 0,8649875 |
| ENKUR          | 1,53    | 1,84  | 3,727785 | 0,494638 | 0,620856 | NA        |
| TATDN3         | 194,75  | 0,34  | 0,695272 | 0,494614 | 0,620873 | 0,8649875 |
| FHDC1          | 11,85   | 0,31  | 0,628219 | 0,49453  | 0,620932 | 0,8649875 |
| FARP1          | 79,74   | 0,24  | 0,483922 | 0,494526 | 0,620935 | 0,8649875 |
| RAD52          | 149,87  | -0,38 | 0,770984 | -0,4945  | 0,62095  | 0,8649875 |
| RECK           | 66,96   | -0,47 | 0,955224 | -0,4945  | 0,62095  | 0,8649875 |
| COMMD2         | 439,29  | 0,32  | 0,654217 | 0,494304 | 0,621091 | 0,8651199 |
| RP11-1140I5.1  | 1,60    | -0,71 | 1,443572 | -0,49421 | 0,621161 | NA        |
| RP11-1033H12.1 | 0,59    | 1,85  | 3,739546 | 0,494103 | 0,621233 | NA        |
| ZNF862         | 100,78  | -0,48 | 0,966033 | -0,49409 | 0,621242 | 0,8651424 |
| CERS4          | 102,44  | -0,63 | 1,277573 | -0,49409 | 0,621244 | 0,8651424 |
| P2RY2          | 46,65   | -0,99 | 2,005294 | -0,49405 | 0,62127  | 0,8651424 |
| RP11-384J4.2   | 7,60    | 0,59  | 1,194429 | 0,494018 | 0,621294 | 0,8651424 |
| LVRN           | 0,98    | -1,81 | 3,654571 | -0,49399 | 0,621311 | NA        |
| RP11-101P17.5  | 1,00    | 1,30  | 2,623654 | 0,493894 | 0,621381 | NA        |
| RP11-752G15.3  | 8,81    | -0,51 | 1,028615 | -0,49388 | 0,621389 | 0,8652103 |
| FAH            | 203,58  | 0,35  | 0,713093 | 0,493763 | 0,621474 | 0,8652635 |
| SAMM50         | 673,96  | -0,23 | 0,465117 | -0,49361 | 0,621583 | 0,8653509 |
| AC004870.3     | 0,57    | 1,85  | 3,739938 | 0,493581 | 0,621602 | NA        |
| RP11-849F2.7   | 0,89    | -0,78 | 1,571662 | -0,49353 | 0,621635 | NA        |
| KAT8           | 378,83  | 0,23  | 0,466007 | 0,493431 | 0,621708 | 0,8653649 |
| CTA-363E6.7    | 5,39    | -0,96 | 1,937974 | -0,49341 | 0,621721 | 0,8653649 |
| TFIP11         | 264,22  | 0,32  | 0,652115 | 0,493397 | 0,621732 | 0,8653649 |
| RNY3P2         | 0,24    | -1,83 | 3,715077 | -0,49334 | 0,621774 | NA        |
| RP11-277E18.2  | 0,59    | 1,84  | 3,739576 | 0,493331 | 0,621779 | NA        |
| RP11-120K19.4  | 0,88    | 1,84  | 3,733729 | 0,493272 | 0,62182  | NA        |
| FKBP1B         | 14,52   | 0,87  | 1,767407 | 0,49322  | 0,621857 | 0,865371  |
| DUOX2          | 3,98    | -0,46 | 0,92794  | -0,49321 | 0,621865 | 0,865371  |
| STX10          | 915,19  | -0,14 | 0,288966 | -0,49319 | 0,621876 | 0,865371  |
| SRP68P3        | 0,90    | 1,84  | 3,733569 | 0,493149 | 0,621907 | NA        |
| MIR181A2HG     | 0,42    | 1,49  | 3,013544 | 0,49309  | 0,621949 | NA        |
| PLEKHG6        | 3,10    | 0,81  | 1,650713 | 0,493007 | 0,622008 | NA        |
| SYPL2          | 0,59    | 1,84  | 3,739685 | 0,492967 | 0,622036 | NA        |
| RP11-420L9.5   | 5,28    | 0,86  | 1,752475 | 0,492962 | 0,622039 | 0,8655331 |
| RP11-364B14.2  | 0,59    | 1,84  | 3,739658 | 0,492929 | 0,622063 | NA        |
| RP11-645C24.2  | 461,40  | 0,27  | 0,540972 | 0,492873 | 0,622102 | 0,8655557 |
| RPL3L          | 22,84   | -0,35 | 0,707631 | -0,49268 | 0,622237 | 0,8656782 |
| AL449209.1     | 93,28   | 0,51  | 1,027404 | 0,492527 | 0,622347 | 0,8657204 |
| RP11-459O1.1   | 0,77    | 1,60  | 3,240134 | 0,492505 | 0,622363 | NA        |
| ZNFX1          | 659,18  | 0,17  | 0,347222 | 0,49245  | 0,622401 | 0,8657204 |
| SLC35E3        | 343,43  | 0,27  | 0,551386 | 0,492384 | 0,622448 | 0,8657204 |
| DCAKD          | 98,18   | 0,32  | 0,644807 | 0,492338 | 0,62248  | 0,8657204 |
| MGAT5B         | 2,59    | 1,13  | 2,29978  | 0,492299 | 0,622508 | NA        |
| RP11-37B2.1    | 75,56   | -0,45 | 0,922188 | -0,49216 | 0,622606 | 0,8657204 |
| CASP1          | 3290,72 | 0,14  | 0,277281 | 0,492156 | 0,622609 | 0,8657204 |
| PEX14          | 10,05   | 0,56  | 1,143084 | 0,492154 | 0,62261  | 0,8657204 |
| CMTM6          | 2657,76 | 0,14  | 0,275144 | 0,492113 | 0,622639 | 0,8657204 |
| LA16c-312E8.4  | 0,90    | 1,84  | 3,733428 | 0,492091 | 0,622655 | NA        |
| CTC-428H11.2   | 28,80   | 0,56  | 1,13191  | 0,492035 | 0,622695 | 0,8657329 |

|                |         |       |          |          |          |           |
|----------------|---------|-------|----------|----------|----------|-----------|
| RP11-282K24.1  | 2,33    | 0,39  | 0,79157  | 0,491975 | 0,622737 | NA        |
| ZNF774         | 42,11   | -0,25 | 0,509214 | -0,49165 | 0,622969 | 0,8660157 |
| ZNF605         | 99,09   | -0,45 | 0,921077 | -0,49162 | 0,622991 | 0,8660157 |
| RP11-290F24.3  | 0,55    | 1,78  | 3,610812 | 0,491591 | 0,623008 | NA        |
| DDN            | 0,23    | -1,65 | 3,359189 | -0,49152 | 0,623057 | NA        |
| CHODL          | 2,96    | 1,37  | 2,781817 | 0,491511 | 0,623065 | NA        |
| CERCAM         | 12,56   | -0,54 | 1,097179 | -0,49149 | 0,623077 | 0,8660704 |
| AC116609.1     | 0,19    | -1,66 | 3,37536  | -0,49149 | 0,623078 | NA        |
| EFCAB8         | 1,79    | 1,66  | 3,385532 | 0,491411 | 0,623136 | NA        |
| ATP5B          | 6820,27 | 0,09  | 0,18196  | 0,491391 | 0,62315  | 0,8661067 |
| RP11-618G20.2  | 22,42   | -0,57 | 1,15507  | -0,49116 | 0,623312 | 0,8662146 |
| KAT2A          | 462,34  | -0,24 | 0,487466 | -0,49115 | 0,623321 | 0,8662146 |
| RNU5E-1        | 10,16   | -0,53 | 1,083224 | -0,49107 | 0,623376 | 0,8662264 |
| RP1-140J1.4    | 0,59    | -0,66 | 1,348022 | -0,49103 | 0,623403 | NA        |
| RP5-865N13.1   | 2,50    | 0,78  | 1,596888 | 0,491029 | 0,623406 | NA        |
| RNF43          | 4,80    | -0,47 | 0,962599 | -0,491   | 0,623424 | 0,8662281 |
| RP11-112J1.1   | 0,56    | -0,83 | 1,684515 | -0,49097 | 0,623445 | NA        |
| RP11-462G8.3   | 0,26    | -1,67 | 3,394128 | -0,49097 | 0,62345  | NA        |
| GFPT1          | 257,28  | 0,26  | 0,52361  | 0,490858 | 0,623527 | 0,8662428 |
| AGMAT          | 8,51    | -0,33 | 0,663919 | -0,49086 | 0,623527 | 0,8662428 |
| RP11-758M4.1   | 15,73   | -0,58 | 1,171871 | -0,49069 | 0,623643 | 0,866339  |
| NUB1           | 471,11  | 0,23  | 0,478599 | 0,490618 | 0,623696 | 0,8663485 |
| MTRNR2L1       | 10,62   | -0,39 | 0,795553 | -0,49048 | 0,623797 | 0,8664239 |
| OR2T11         | 0,38    | -0,96 | 1,951221 | -0,49045 | 0,623815 | NA        |
| RP11-707M1.1   | 0,57    | 1,83  | 3,739778 | 0,49044  | 0,623823 | NA        |
| AHCY           | 574,93  | -0,30 | 0,617262 | -0,4904  | 0,623852 | 0,8664357 |
| RP11-257O5.2   | 0,30    | -1,41 | 2,874698 | -0,49021 | 0,623988 | NA        |
| HEG1           | 106,98  | -0,58 | 1,185133 | -0,4902  | 0,623992 | 0,8665651 |
| SETD7          | 397,05  | 0,33  | 0,664966 | 0,489954 | 0,624167 | 0,8667133 |
| RP11-36B6.2    | 200,13  | -0,31 | 0,636625 | -0,48992 | 0,624193 | 0,8667133 |
| RP13-43E11.1   | 2,68    | -0,86 | 1,762164 | -0,48985 | 0,624237 | NA        |
| AC139099.4     | 0,55    | 1,79  | 3,649122 | 0,489613 | 0,624408 | NA        |
| FAM214B        | 350,36  | 0,18  | 0,37629  | 0,489534 | 0,624464 | 0,8667133 |
| RP11-124N14.3  | 74,02   | 0,40  | 0,807699 | 0,489499 | 0,624488 | 0,8667133 |
| PWWP2A         | 218,66  | 0,31  | 0,633159 | 0,489462 | 0,624514 | 0,8667133 |
| RP11-808N1.1   | 1,18    | 1,15  | 2,348049 | 0,489438 | 0,624532 | NA        |
| HIST1H4C       | 326,62  | -0,17 | 0,349184 | -0,48943 | 0,624534 | 0,8667133 |
| RP11-317N12.1  | 33,93   | 0,31  | 0,641626 | 0,48932  | 0,624615 | 0,8667133 |
| CTD-3099C6.11  | 9,02    | -0,50 | 1,022213 | -0,4893  | 0,624627 | 0,8667133 |
| PPIL1          | 111,93  | -0,58 | 1,183801 | -0,4893  | 0,624632 | 0,8667133 |
| RP11-88N11.1   | 7,84    | -0,57 | 1,162318 | -0,48927 | 0,62465  | 0,8667133 |
| AC100802.3     | 6,63    | -0,73 | 1,490273 | -0,48927 | 0,624652 | 0,8667133 |
| RP13-516M14.10 | 29,57   | -0,50 | 1,024707 | -0,48926 | 0,624658 | 0,8667133 |
| FSIP1          | 0,83    | 1,81  | 3,704252 | 0,489039 | 0,624814 | NA        |
| CYB5R1         | 271,53  | 0,40  | 0,817471 | 0,488642 | 0,625095 | 0,8672557 |
| RUFY3          | 732,03  | 0,19  | 0,380548 | 0,488558 | 0,625155 | 0,8672738 |
| FAM32B         | 0,57    | 1,83  | 3,739816 | 0,488532 | 0,625173 | NA        |
| NAF1           | 248,52  | -0,40 | 0,819465 | -0,48844 | 0,625238 | 0,8672837 |
| RP11-500G22.5  | 9,71    | -0,45 | 0,915402 | -0,48842 | 0,625255 | 0,8672837 |
| ZNF420         | 51,14   | -0,52 | 1,055611 | -0,48828 | 0,625351 | 0,867294  |

|                |         |       |          |          |          |           |
|----------------|---------|-------|----------|----------|----------|-----------|
| NAP1L6         | 4,39    | 0,60  | 1,233068 | 0,488274 | 0,625356 | 0,867294  |
| MSX1           | 3,58    | -0,55 | 1,126583 | -0,4882  | 0,625405 | NA        |
| RP11-161H23.10 | 0,54    | 1,76  | 3,608815 | 0,488126 | 0,62546  | NA        |
| ASAP3          | 20,40   | 0,36  | 0,73746  | 0,488038 | 0,625523 | 0,8673857 |
| RP11-595O22.1  | 4,17    | 0,53  | 1,083862 | 0,487985 | 0,625561 | 0,8673857 |
| AC145110.1     | 35,94   | -0,35 | 0,710126 | -0,48798 | 0,625562 | 0,8673857 |
| AGR3           | 0,59    | 1,82  | 3,739417 | 0,487924 | 0,625604 | NA        |
| RP11-558F24.4  | 9,64    | 0,47  | 0,960589 | 0,487812 | 0,625683 | 0,8674889 |
| PGRMC1         | 328,73  | 0,28  | 0,568444 | 0,487598 | 0,625834 | 0,8676342 |
| RP11-794A8.1   | 0,56    | 1,82  | 3,73993  | 0,487467 | 0,625928 | NA        |
| ACCSL          | 0,59    | 1,82  | 3,739894 | 0,487424 | 0,625958 | NA        |
| TPSB2          | 0,66    | -1,14 | 2,346693 | -0,48726 | 0,626073 | NA        |
| STK11IP        | 383,74  | -0,22 | 0,45662  | -0,48726 | 0,626074 | 0,8679015 |
| RP11-91J3.3    | 0,89    | 1,82  | 3,733494 | 0,487235 | 0,626092 | NA        |
| NES            | 0,81    | -1,76 | 3,613089 | -0,48719 | 0,626126 | NA        |
| RP11-756J15.2  | 0,57    | 1,82  | 3,7399   | 0,487183 | 0,626129 | NA        |
| CTB-113I20.2   | 1,74    | -0,62 | 1,270067 | -0,48718 | 0,626134 | NA        |
| RP11-753H16.3  | 2,54    | 1,11  | 2,287542 | 0,487117 | 0,626176 | NA        |
| RNU6-958P      | 0,53    | 1,74  | 3,580016 | 0,487069 | 0,62621  | NA        |
| SEC11C         | 464,04  | 0,22  | 0,458285 | 0,48705  | 0,626223 | 0,8680433 |
| IL10           | 0,60    | 1,75  | 3,593804 | 0,487047 | 0,626225 | NA        |
| CACNG1         | 0,58    | 1,82  | 3,739889 | 0,486836 | 0,626374 | NA        |
| SIGLEC17P      | 26,28   | -0,82 | 1,692486 | -0,48679 | 0,626404 | 0,86822   |
| PDE6D          | 290,10  | 0,38  | 0,782409 | 0,486738 | 0,626444 | 0,86822   |
| NEXN-AS1       | 3,60    | -0,45 | 0,926775 | -0,48671 | 0,626464 | NA        |
| WNT10B         | 0,71    | -1,80 | 3,700095 | -0,48669 | 0,626481 | NA        |
| RGS18          | 525,01  | -0,21 | 0,42321  | -0,48666 | 0,626496 | 0,8682281 |
| RP11-274H24.1  | 0,79    | -0,68 | 1,394385 | -0,48662 | 0,626524 | NA        |
| RP11-162A12.3  | 0,57    | 1,82  | 3,73995  | 0,486475 | 0,62663  | NA        |
| NDUFB9         | 1100,54 | -0,14 | 0,281788 | -0,48647 | 0,626636 | 0,8682952 |
| UGGT2          | 148,78  | -0,34 | 0,699496 | -0,48646 | 0,626638 | 0,8682952 |
| TBC1D3G        | 0,76    | 1,56  | 3,212513 | 0,486168 | 0,626848 | NA        |
| PHLPP1         | 123,75  | 0,33  | 0,673832 | 0,486161 | 0,626853 | 0,8684869 |
| NDUFAF4        | 176,58  | 0,40  | 0,830895 | 0,486134 | 0,626872 | 0,8684869 |
| CTD-2616J11.10 | 0,87    | 1,14  | 2,33917  | 0,486023 | 0,626951 | NA        |
| CTB-1121.1     | 1,65    | 0,78  | 1,595544 | 0,486002 | 0,626966 | NA        |
| TMCO3          | 220,78  | -0,30 | 0,615846 | -0,48594 | 0,627009 | 0,8684869 |
| CRLS1          | 289,15  | -0,34 | 0,706089 | -0,48592 | 0,627023 | 0,8684869 |
| RP11-489E7.4   | 59,85   | -0,36 | 0,732524 | -0,4859  | 0,627037 | 0,8684869 |
| RP4-564F22.2   | 405,48  | -0,25 | 0,52434  | -0,48587 | 0,627056 | 0,8684869 |
| C10orf82       | 4,17    | -0,47 | 0,975189 | -0,4858  | 0,627112 | 0,8684949 |
| GOLGA4         | 1027,47 | -0,19 | 0,388913 | -0,48573 | 0,627156 | 0,8684949 |
| TP53TG5        | 0,38    | -1,79 | 3,690689 | -0,48558 | 0,627265 | NA        |
| MFSD13A        | 69,76   | 0,34  | 0,700619 | 0,485497 | 0,627324 | 0,8686631 |
| RP11-54C4.3    | 0,65    | 1,34  | 2,767984 | 0,485478 | 0,627338 | NA        |
| GPRASP1        | 3,68    | 1,27  | 2,610189 | 0,485462 | 0,627349 | NA        |
| GRK6           | 433,91  | -0,31 | 0,62993  | -0,48536 | 0,627421 | 0,8687261 |
| OR52E4         | 15,15   | -0,47 | 0,961975 | -0,4853  | 0,627463 | 0,8687261 |
| RP11-267M23.1  | 8,56    | -0,64 | 1,328235 | -0,48518 | 0,627549 | 0,868781  |
| EIF2S2P3       | 0,63    | -0,83 | 1,703457 | -0,48501 | 0,627666 | NA        |

|               |         |       |          |          |          |           |
|---------------|---------|-------|----------|----------|----------|-----------|
| RN7SL20P      | 0,26    | -1,80 | 3,716991 | -0,48494 | 0,627722 | NA        |
| GNPTAB        | 608,49  | -0,22 | 0,459488 | -0,48491 | 0,627738 | 0,8688741 |
| CTB-96E2.7    | 33,14   | -0,78 | 1,612927 | -0,48485 | 0,627785 | 0,8688741 |
| NPIPB9        | 23,74   | -0,55 | 1,140985 | -0,48482 | 0,627807 | 0,8688741 |
| TMEM2         | 308,61  | -0,37 | 0,768604 | -0,48479 | 0,627824 | 0,8688741 |
| RGS9          | 40,28   | 0,40  | 0,832092 | 0,484756 | 0,62785  | 0,8688741 |
| RP11-712P20.2 | 2,26    | 1,06  | 2,191594 | 0,48475  | 0,627854 | NA        |
| RP11-455F5.5  | 1,29    | -1,54 | 3,169076 | -0,48474 | 0,627864 | NA        |
| TSC22D4       | 152,09  | -0,29 | 0,606502 | -0,4844  | 0,628102 | 0,8691504 |
| MRPS18C       | 285,70  | 0,23  | 0,478368 | 0,484343 | 0,628143 | 0,8691504 |
| TTC24         | 0,35    | -1,81 | 3,72765  | -0,48432 | 0,628158 | NA        |
| RP11-322L20.1 | 3,57    | 0,51  | 1,056754 | 0,4843   | 0,628173 | NA        |
| RP3-401D24.1  | 0,57    | 1,81  | 3,739982 | 0,484247 | 0,62821  | NA        |
| RP1-28O10.1   | 0,88    | 1,81  | 3,733643 | 0,484238 | 0,628217 | NA        |
| RP11-835E18.2 | 283,15  | -0,35 | 0,733035 | -0,48423 | 0,628224 | 0,8691984 |
| AC006116.15   | 1,34    | -0,90 | 1,857563 | -0,48418 | 0,62826  | NA        |
| ROCK1P1       | 135,08  | 0,52  | 1,070934 | 0,483885 | 0,628467 | 0,86947   |
| ODF2L         | 262,95  | -0,28 | 0,569984 | -0,48368 | 0,628612 | 0,8695426 |
| CHSY1         | 203,12  | -0,33 | 0,674343 | -0,48368 | 0,628613 | 0,8695426 |
| CCR10         | 0,57    | -1,12 | 2,323713 | -0,48367 | 0,628624 | NA        |
| MSLN          | 2,09    | 1,21  | 2,493422 | 0,483647 | 0,628636 | NA        |
| RILP          | 100,90  | -0,50 | 1,038206 | -0,48352 | 0,62873  | 0,8695729 |
| TBX19         | 87,52   | -0,58 | 1,194314 | -0,48347 | 0,628759 | 0,8695729 |
| PSME1         | 4297,18 | -0,10 | 0,214188 | -0,48345 | 0,628775 | 0,8695729 |
| RP11-676F20.4 | 1,92    | 0,74  | 1,530078 | 0,483351 | 0,628846 | NA        |
| RNU6-101P     | 0,79    | -1,31 | 2,715782 | -0,48312 | 0,629012 | NA        |
| RNF141        | 468,77  | -0,30 | 0,621048 | -0,48311 | 0,629015 | 0,8698398 |
| RP11-513I7.2  | 0,57    | 1,81  | 3,740013 | 0,482957 | 0,629126 | NA        |
| ZNF263        | 265,30  | 0,36  | 0,751877 | 0,482923 | 0,62915  | 0,8699622 |
| C9orf72       | 1168,21 | 0,15  | 0,308683 | 0,482856 | 0,629198 | 0,8699632 |
| RP11-973F15.1 | 0,91    | 1,80  | 3,733572 | 0,4828   | 0,629238 | NA        |
| RP3-497J21.1  | 1,56    | 1,63  | 3,366172 | 0,482763 | 0,629264 | NA        |
| Z84723.1      | 0,47    | 1,47  | 3,046254 | 0,482641 | 0,629351 | NA        |
| AC017116.11   | 2,70    | 1,77  | 3,678365 | 0,482538 | 0,629424 | NA        |
| RC3H2         | 485,19  | 0,30  | 0,628334 | 0,482533 | 0,629427 | 0,8701863 |
| RP11-2B6.3    | 0,52    | -1,68 | 3,483912 | -0,48249 | 0,629458 | NA        |
| MTMR2         | 90,64   | 0,68  | 1,406991 | 0,482465 | 0,629476 | 0,8701863 |
| SLC39A5       | 6,36    | -0,50 | 1,038257 | -0,48243 | 0,629499 | 0,8701863 |
| RP11-398A8.1  | 0,53    | 1,75  | 3,623774 | 0,482307 | 0,629588 | NA        |
| RHOJ          | 6,55    | 0,45  | 0,931124 | 0,482275 | 0,62961  | 0,8702748 |
| SKIV2L        | 188,14  | -0,41 | 0,845324 | -0,48218 | 0,629678 | 0,8703043 |
| CDKN1C        | 7,14    | -0,82 | 1,6923   | -0,48203 | 0,629786 | 0,8703535 |
| RP11-380M21.2 | 0,98    | -0,59 | 1,223977 | -0,48199 | 0,629815 | NA        |
| RP11-417E7.2  | 0,68    | 1,35  | 2,792695 | 0,481936 | 0,629851 | NA        |
| RN7SL826P     | 0,93    | 0,71  | 1,46889  | 0,481921 | 0,629862 | NA        |
| L34079.4      | 0,59    | -1,47 | 3,052478 | -0,4819  | 0,629877 | NA        |
| PHLDA1        | 122,74  | -0,48 | 1,001107 | -0,48188 | 0,629888 | 0,8703535 |
| SDCBP2        | 0,81    | 0,97  | 2,00402  | 0,48186  | 0,629905 | NA        |
| RF02188       | 0,55    | 1,80  | 3,74011  | 0,481848 | 0,629914 | NA        |
| SFXN2         | 156,16  | -0,34 | 0,699778 | -0,48184 | 0,629918 | 0,8703535 |



|               |         |       |          |          |          |           |
|---------------|---------|-------|----------|----------|----------|-----------|
| ZNF207        | 1755,81 | 0,18  | 0,368558 | 0,481841 | 0,629919 | 0,8703535 |
| LRRC27        | 94,86   | 0,49  | 1,021564 | 0,4818   | 0,629948 | 0,8703535 |
| RP11-434D12.1 | 5,33    | -0,99 | 2,061847 | -0,48165 | 0,630051 | 0,870375  |
| RP11-264L1.2  | 25,84   | 0,42  | 0,871717 | 0,481642 | 0,63006  | 0,870375  |
| RP11-31I22.3  | 0,48    | -0,97 | 2,007866 | -0,48161 | 0,630082 | NA        |
| ASNSD1        | 191,56  | 0,31  | 0,645672 | 0,481551 | 0,630125 | 0,870375  |
| TMOD4         | 7,85    | 1,09  | 2,258955 | 0,481515 | 0,630151 | 0,870375  |
| PSG11         | 0,49    | -1,67 | 3,478243 | -0,48148 | 0,630174 | NA        |
| AC008753.2    | 0,55    | 1,80  | 3,740144 | 0,481365 | 0,630257 | NA        |
| RP11-46O21.2  | 66,69   | 0,32  | 0,659779 | 0,481288 | 0,630311 | 0,8704836 |
| GLE1          | 260,12  | -0,40 | 0,823386 | -0,48127 | 0,630323 | 0,8704836 |
| AF130342.1    | 0,79    | -1,73 | 3,603738 | -0,48126 | 0,630334 | NA        |
| UBA52P8       | 0,52    | 1,72  | 3,571917 | 0,481079 | 0,63046  | NA        |
| XBP1          | 873,14  | 0,21  | 0,430945 | 0,481028 | 0,630497 | 0,8706481 |
| RP11-473O4.4  | 17,31   | 0,43  | 0,88459  | 0,480922 | 0,630572 | 0,8706481 |
| ERBB3         | 42,50   | -0,42 | 0,882508 | -0,48091 | 0,630582 | 0,8706481 |
| RP5-1091E12.1 | 19,15   | 0,51  | 1,061318 | 0,480738 | 0,630703 | 0,870703  |
| ANKRD36       | 413,64  | -0,32 | 0,665223 | -0,48072 | 0,630716 | 0,870703  |
| SATL1         | 20,01   | 0,22  | 0,465509 | 0,480597 | 0,630803 | 0,8707062 |
| WDR73         | 228,05  | 0,31  | 0,655491 | 0,48052  | 0,630858 | 0,8707062 |
| ATP8B3        | 42,54   | -0,35 | 0,734211 | -0,48043 | 0,630918 | 0,8707062 |
| RP11-350J20.4 | 0,61    | -1,68 | 3,495481 | -0,48043 | 0,630924 | NA        |
| DNAJB7        | 20,26   | -0,43 | 0,89612  | -0,48042 | 0,630926 | 0,8707062 |
| INTS10        | 374,19  | 0,24  | 0,50142  | 0,480326 | 0,630996 | 0,8707062 |
| EFCAB4B       | 117,56  | -0,49 | 1,019233 | -0,48029 | 0,631021 | 0,8707062 |
| RP11-815J21.2 | 8,88    | 1,69  | 3,513701 | 0,480227 | 0,631066 | 0,8707062 |
| RP11-338E21.2 | 5,78    | 0,63  | 1,309481 | 0,480059 | 0,631185 | 0,8707062 |
| ZNF195        | 143,74  | -0,37 | 0,772005 | -0,48001 | 0,631222 | 0,8707062 |
| ARL6          | 2,61    | -0,94 | 1,966406 | -0,4799  | 0,631299 | NA        |
| PPP2R2D       | 305,67  | 0,28  | 0,573536 | 0,479883 | 0,631311 | 0,8707062 |
| CSPG4P10      | 0,55    | 1,75  | 3,644576 | 0,479874 | 0,631317 | NA        |
| RP11-210M15.3 | 3,08    | -0,66 | 1,381944 | -0,47987 | 0,631318 | NA        |
| RP11-443F4.1  | 13,66   | 0,43  | 0,89735  | 0,479776 | 0,631387 | 0,8707062 |
| ACOT7         | 26,72   | -0,56 | 1,159719 | -0,47977 | 0,631393 | 0,8707062 |
| RP11-448G15.3 | 39,95   | -0,71 | 1,481085 | -0,47973 | 0,63142  | 0,8707062 |
| MDH1          | 1068,42 | 0,17  | 0,350508 | 0,479714 | 0,631431 | 0,8707062 |
| SCOC          | 123,63  | 0,44  | 0,92093  | 0,479681 | 0,631455 | 0,8707062 |
| PLPP5         | 184,85  | -0,26 | 0,548462 | -0,47966 | 0,631467 | 0,8707062 |
| RP11-327F22.4 | 0,55    | 1,79  | 3,740119 | 0,47951  | 0,631576 | NA        |
| OR9K1P        | 12,81   | -0,37 | 0,766837 | -0,47949 | 0,631591 | 0,8708124 |
| MFSD2B        | 3,51    | -0,66 | 1,375693 | -0,47939 | 0,631661 | NA        |
| RP11-360L9.7  | 0,48    | 1,71  | 3,572614 | 0,479325 | 0,631707 | NA        |
| MIR7845       | 6,06    | 0,75  | 1,564269 | 0,479303 | 0,631723 | 0,8709089 |
| RN7SL125P     | 2,62    | 0,64  | 1,339724 | 0,47919  | 0,631804 | NA        |
| MORC2         | 130,26  | 0,52  | 1,094121 | 0,479186 | 0,631806 | 0,8709089 |
| RP11-384C4.3  | 0,87    | 1,79  | 3,733943 | 0,479106 | 0,631863 | NA        |
| GOLGA6L1      | 1,62    | -1,38 | 2,879528 | -0,47889 | 0,632019 | NA        |
| FAM167A       | 5,65    | 0,55  | 1,157356 | 0,478885 | 0,632021 | 0,8709089 |
| AC002303.5    | 3,10    | 0,49  | 1,023358 | 0,478852 | 0,632044 | NA        |
| HINT3         | 242,99  | -0,36 | 0,742331 | -0,47885 | 0,632045 | 0,8709089 |

|                |         |       |          |          |          |           |
|----------------|---------|-------|----------|----------|----------|-----------|
| PPP1R3F        | 4,53    | 0,64  | 1,34133  | 0,478825 | 0,632063 | 0,8709089 |
| RP11-91P24.1   | 12,21   | 0,83  | 1,728409 | 0,478777 | 0,632097 | 0,8709089 |
| PDE7A          | 527,79  | -0,27 | 0,574378 | -0,47877 | 0,632102 | 0,8709089 |
| CHST9          | 7,63    | -0,60 | 1,258747 | -0,47875 | 0,632113 | 0,8709089 |
| CSMD3          | 70,80   | -0,44 | 0,91598  | -0,47871 | 0,632145 | 0,8709089 |
| RP1-66N13.3    | 2,11    | 0,96  | 2,005333 | 0,478692 | 0,632158 | NA        |
| CNTN1          | 8,32    | -0,56 | 1,172009 | -0,47866 | 0,632184 | 0,8709089 |
| SPR            | 26,56   | 0,90  | 1,890711 | 0,478655 | 0,632184 | 0,8709089 |
| C1orf186       | 2,85    | -0,58 | 1,211508 | -0,47858 | 0,632235 | NA        |
| MIR555         | 2,02    | 1,15  | 2,392815 | 0,478573 | 0,632243 | NA        |
| GMPS           | 425,88  | -0,34 | 0,709728 | -0,47854 | 0,632267 | 0,8709089 |
| TBP            | 168,29  | -0,35 | 0,728655 | -0,47854 | 0,632269 | 0,8709089 |
| TIMM21         | 125,67  | 0,42  | 0,887935 | 0,478439 | 0,632338 | 0,8709393 |
| NANP           | 50,46   | 0,47  | 0,991181 | 0,478364 | 0,632391 | 0,870948  |
| RP11-21B23.3   | 5,78    | 0,57  | 1,189485 | 0,478137 | 0,632552 | 0,8709946 |
| SOCS7          | 76,95   | -0,43 | 0,897203 | -0,47801 | 0,632644 | 0,8709946 |
| RN7SL248P      | 0,81    | -0,95 | 1,995259 | -0,47799 | 0,632657 | NA        |
| RN7SL453P      | 0,81    | -0,95 | 1,995259 | -0,47799 | 0,632657 | NA        |
| FUT9           | 6,58    | -0,44 | 0,918824 | -0,47798 | 0,632662 | 0,8709946 |
| RP11-1055B8.4  | 12,82   | -0,61 | 1,271611 | -0,47797 | 0,632672 | 0,8709946 |
| FDPS           | 657,14  | 0,20  | 0,426521 | 0,477934 | 0,632697 | 0,8709946 |
| ALKBH8         | 116,83  | 0,61  | 1,270587 | 0,477922 | 0,632706 | 0,8709946 |
| RP11-329J18.5  | 2,28    | 0,97  | 2,03172  | 0,477896 | 0,632724 | NA        |
| DLK2           | 1,32    | 0,99  | 2,070324 | 0,477744 | 0,632833 | NA        |
| TNFRSF11A      | 26,20   | 0,67  | 1,392917 | 0,477549 | 0,632971 | 0,871268  |
| C8orf76        | 172,28  | 0,33  | 0,682661 | 0,477511 | 0,632998 | 0,871268  |
| RP11-263K4.3   | 1,70    | 0,50  | 1,044242 | 0,477479 | 0,633021 | NA        |
| RP11-484M3.4   | 0,71    | 1,53  | 3,200534 | 0,477396 | 0,63308  | NA        |
| AC007126.1     | 71,53   | -0,28 | 0,578468 | -0,4774  | 0,63308  | 0,8713166 |
| RNU6-540P      | 1,43    | -1,74 | 3,640761 | -0,47736 | 0,633104 | NA        |
| ZNF564         | 74,37   | -0,38 | 0,788346 | -0,47726 | 0,633174 | 0,8713482 |
| RP13-735L24.1  | 1,63    | 0,78  | 1,631186 | 0,47724  | 0,633191 | NA        |
| PIP5K2B        | 231,69  | 0,44  | 0,927674 | 0,477232 | 0,633197 | 0,8713482 |
| LMF2           | 158,50  | -0,33 | 0,694838 | -0,47716 | 0,633251 | 0,8713584 |
| CACNG4         | 0,55    | 1,78  | 3,740317 | 0,477153 | 0,633253 | NA        |
| RP11-310I9.1   | 0,76    | -1,30 | 2,721701 | -0,47692 | 0,633421 | NA        |
| SEPSECS        | 186,32  | 0,45  | 0,94919  | 0,476884 | 0,633445 | 0,8714327 |
| LIPT2          | 4,07    | 0,83  | 1,731913 | 0,476883 | 0,633445 | 0,8714327 |
| CALCOCO1       | 189,69  | -0,26 | 0,54288  | -0,47688 | 0,633446 | 0,8714327 |
| TMC6           | 677,39  | -0,23 | 0,476416 | -0,47678 | 0,633516 | 0,8714655 |
| GIP            | 0,56    | 1,78  | 3,740258 | 0,476722 | 0,63356  | NA        |
| HERC2P9        | 143,51  | 0,32  | 0,668164 | 0,476658 | 0,633606 | 0,871524  |
| RPL39P38       | 1,26    | 1,27  | 2,654957 | 0,476495 | 0,633722 | NA        |
| CACNA2D1       | 1,77    | 1,45  | 3,053514 | 0,476463 | 0,633745 | NA        |
| WI2-85898F10.2 | 0,58    | -1,24 | 2,60513  | -0,47629 | 0,633866 | NA        |
| RP11-397E7.3   | 45,37   | 0,45  | 0,941038 | 0,476259 | 0,63389  | 0,8716952 |
| MAP3K5         | 484,15  | -0,18 | 0,385445 | -0,47612 | 0,633987 | 0,8716952 |
| MYH7B          | 18,72   | -0,41 | 0,860248 | -0,47611 | 0,633997 | 0,8716952 |
| WNK1           | 1166,88 | -0,26 | 0,539668 | -0,47604 | 0,634047 | 0,8716952 |
| RP11-303E16.10 | 4,51    | 0,68  | 1,423596 | 0,475911 | 0,634138 | 0,8716952 |

|                   |          |       |          |          |          |           |
|-------------------|----------|-------|----------|----------|----------|-----------|
| AC098971.2        | 6,53     | 0,48  | 1,004303 | 0,475909 | 0,634139 | 0,8716952 |
| ARPC4-TTLL3       | 58,24    | 0,44  | 0,927395 | 0,475903 | 0,634144 | 0,8716952 |
| RP11-500G10.1     | 62,27    | 0,57  | 1,198082 | 0,475864 | 0,634171 | 0,8716952 |
| TNNI1             | 2,96     | 0,86  | 1,806001 | 0,475833 | 0,634193 | NA        |
| RP11-142G1.3      | 20,68    | -0,37 | 0,779173 | -0,47577 | 0,634242 | 0,8716952 |
| DCLK1             | 6,44     | 0,46  | 0,975607 | 0,475754 | 0,63425  | 0,8716952 |
| MASTL             | 127,60   | 0,55  | 1,16615  | 0,475734 | 0,634264 | 0,8716952 |
| RP1-60N8.1        | 0,29     | -1,62 | 3,399589 | -0,4757  | 0,634287 | NA        |
| C10orf76          | 287,02   | 0,35  | 0,733906 | 0,475654 | 0,634321 | 0,8716952 |
| RXRB              | 328,65   | -0,24 | 0,500263 | -0,47563 | 0,634339 | 0,8716952 |
| LOC283404         | 0,42     | -1,64 | 3,439871 | -0,47549 | 0,634438 | NA        |
| NPPA              | 0,52     | 1,73  | 3,639218 | 0,475373 | 0,634521 | NA        |
| CTD-2017D11.1     | 79,21    | -0,35 | 0,728685 | -0,47535 | 0,634537 | 0,8718954 |
| RP11-245G13.2     | 3,62     | -1,61 | 3,381885 | -0,47528 | 0,634587 | NA        |
| CTC-429P9.5       | 5,78     | 0,61  | 1,29399  | 0,475264 | 0,634599 | 0,8718954 |
| RP11-230G5.2      | 5,23     | -1,01 | 2,13033  | -0,47523 | 0,634626 | 0,8718954 |
| RP11-151A6.3      | 0,76     | 0,90  | 1,88385  | 0,475152 | 0,634679 | NA        |
| SH3RF1            | 315,35   | 0,47  | 0,996467 | 0,475151 | 0,634679 | 0,8719048 |
| P2RX2             | 0,62     | 1,78  | 3,740837 | 0,475085 | 0,634726 | NA        |
| UBE2B             | 1035,99  | -0,15 | 0,306781 | -0,47508 | 0,63473  | 0,8719105 |
| RN7SL541P         | 2,13     | -0,54 | 1,127685 | -0,47493 | 0,634836 | NA        |
| RP11-286B14.2     | 3,70     | 0,73  | 1,542482 | 0,474926 | 0,63484  | NA        |
| TRIAP1            | 289,04   | -0,43 | 0,913566 | -0,47491 | 0,634849 | 0,8719943 |
| CTD-2341D24.1     | 0,56     | 1,78  | 3,740328 | 0,474822 | 0,634914 | NA        |
| MPHOSPH9          | 205,75   | -0,18 | 0,386449 | -0,47468 | 0,635014 | 0,8719943 |
| EIF3C             | 2283,18  | 0,13  | 0,271133 | 0,474675 | 0,635019 | 0,8719943 |
| UXT               | 539,94   | 0,13  | 0,279472 | 0,474657 | 0,635031 | 0,8719943 |
| RPSA              | 10415,27 | 0,10  | 0,214764 | 0,474614 | 0,635062 | 0,8719943 |
| RP11-517O13.3     | 0,41     | 1,46  | 3,084767 | 0,47461  | 0,635065 | NA        |
| AC017104.2        | 40,56    | 0,45  | 0,957713 | 0,474599 | 0,635072 | 0,8719943 |
| XXbac-BPG181M17.6 | 0,90     | 1,20  | 2,522    | 0,474505 | 0,63514  | NA        |
| HOXA1             | 0,41     | 1,42  | 2,998959 | 0,474442 | 0,635185 | NA        |
| PRSS21            | 0,36     | 1,24  | 2,605945 | 0,474251 | 0,635321 | NA        |
| PDE7B             | 86,23    | 0,36  | 0,763902 | 0,474145 | 0,635397 | 0,8722161 |
| PEX10             | 48,67    | -0,85 | 1,78942  | -0,47414 | 0,635401 | 0,8722161 |
| RP11-139E19.1     | 55,97    | 0,52  | 1,104325 | 0,474116 | 0,635417 | 0,8722161 |
| AC022819.3        | 8,21     | -0,30 | 0,62946  | -0,47411 | 0,635422 | 0,8722161 |
| AC006509.8        | 0,54     | 1,77  | 3,740465 | 0,474067 | 0,635452 | NA        |
| RP11-1109M24.13   | 2,56     | -0,69 | 1,453599 | -0,47388 | 0,635587 | NA        |
| REXO1L2P          | 0,56     | 1,70  | 3,580953 | 0,473736 | 0,635688 | NA        |
| RADIL             | 5,11     | -0,55 | 1,152898 | -0,47373 | 0,635692 | 0,8723626 |
| KIF4A             | 0,59     | 1,14  | 2,415059 | 0,473703 | 0,635712 | NA        |
| ZNF687            | 52,87    | 0,43  | 0,917344 | 0,473679 | 0,635729 | 0,8723626 |
| RP11-77K12.10     | 0,50     | -1,20 | 2,532466 | -0,47368 | 0,635731 | NA        |
| RP11-844P9.5      | 4,96     | -0,43 | 0,913969 | -0,47364 | 0,635755 | 0,8723626 |
| PAPD4             | 458,29   | 0,22  | 0,456259 | 0,473608 | 0,63578  | 0,8723626 |
| FPR3              | 295,20   | -0,42 | 0,884637 | -0,47357 | 0,635805 | 0,8723626 |
| FAM175B           | 212,34   | -0,42 | 0,895971 | -0,47357 | 0,63581  | 0,8723626 |
| RN7SL149P         | 3,23     | 0,58  | 1,216869 | 0,473472 | 0,635877 | NA        |
| RNF44             | 224,65   | 0,20  | 0,422697 | 0,473355 | 0,63596  | 0,872435  |

|                |         |       |          |          |          |           |
|----------------|---------|-------|----------|----------|----------|-----------|
| SENP3          | 16,47   | -0,71 | 1,505914 | -0,47322 | 0,636059 | 0,872435  |
| RP11-562A8.5   | 3,50    | 0,87  | 1,83555  | 0,473213 | 0,636061 | NA        |
| AC092316.1     | 11,70   | -0,59 | 1,236528 | -0,47319 | 0,636079 | 0,872435  |
| RP11-689P11.3  | 5,15    | 0,57  | 1,199816 | 0,473167 | 0,636094 | 0,872435  |
| RP11-387D10.4  | 0,66    | -1,71 | 3,605572 | -0,47313 | 0,636122 | NA        |
| AP000281.1     | 1,13    | -0,45 | 0,958875 | -0,47311 | 0,636137 | NA        |
| CTD-2090I13.4  | 0,48    | 0,88  | 1,858697 | 0,473093 | 0,636147 | NA        |
| VCP            | 1655,37 | -0,16 | 0,34529  | -0,47308 | 0,636153 | 0,872435  |
| FTHL20         | 0,86    | 0,58  | 1,234854 | 0,47308  | 0,636156 | NA        |
| RP11-862P13.1  | 1,48    | 0,98  | 2,069299 | 0,47308  | 0,636156 | NA        |
| RP11-147L13.13 | 25,61   | 0,58  | 1,216221 | 0,473038 | 0,636186 | 0,872435  |
| DDX18P5        | 0,12    | -1,77 | 3,734165 | -0,47302 | 0,636201 | NA        |
| YOD1           | 245,47  | -0,43 | 0,903246 | -0,47296 | 0,636241 | 0,872435  |
| RP11-435I10.4  | 48,67   | -0,41 | 0,857984 | -0,47294 | 0,636253 | 0,872435  |
| PMS2L4         | 12,69   | 0,63  | 1,327667 | 0,4729   | 0,636284 | 0,872435  |
| MSTO1          | 101,57  | -0,39 | 0,816357 | -0,47277 | 0,636375 | 0,8724351 |
| RP4-671O14.5   | 35,81   | -0,35 | 0,738527 | -0,47275 | 0,636391 | 0,8724351 |
| CH507-236L23.2 | 0,56    | -1,41 | 2,986478 | -0,47271 | 0,636419 | NA        |
| CH507-338C24.2 | 0,56    | -1,41 | 2,986478 | -0,47271 | 0,636419 | NA        |
| WSB2           | 382,68  | 0,24  | 0,500358 | 0,472699 | 0,636428 | 0,8724351 |
| RP11-476C8.2   | 0,54    | 1,77  | 3,740478 | 0,472654 | 0,63646  | NA        |
| RP4-733M16.2   | 0,96    | -0,92 | 1,948606 | -0,47264 | 0,636471 | NA        |
| ZCCHC10        | 124,92  | -0,30 | 0,633582 | -0,47264 | 0,636472 | 0,8724351 |
| PPP1R14BP3     | 0,55    | 1,71  | 3,611693 | 0,472524 | 0,636553 | NA        |
| MGAT1          | 1786,10 | -0,15 | 0,312605 | -0,47245 | 0,636604 | 0,8725501 |
| LOXL3          | 86,08   | -0,65 | 1,371682 | -0,47239 | 0,63665  | 0,8725501 |
| AC090627.1     | 5,05    | -1,21 | 2,565176 | -0,47223 | 0,636764 | 0,8726428 |
| RP11-262H14.13 | 0,56    | 1,77  | 3,740532 | 0,471909 | 0,636991 | NA        |
| RP11-293A21.1  | 0,91    | -1,48 | 3,141191 | -0,47184 | 0,637042 | NA        |
| AC034220.3     | 20,83   | 0,47  | 0,987644 | 0,471785 | 0,63708  | 0,8728823 |
| MFSD14B        | 412,86  | 0,27  | 0,570065 | 0,471774 | 0,637088 | 0,8728823 |
| RP11-391L3.3   | 97,58   | -0,41 | 0,859188 | -0,47171 | 0,637133 | 0,8728823 |
| TREML2         | 26,24   | -0,63 | 1,325487 | -0,47163 | 0,637188 | 0,8728823 |
| ZC3H7A         | 500,93  | -0,21 | 0,450705 | -0,4716  | 0,637213 | 0,8728823 |
| AC011753.5     | 6,09    | -0,50 | 1,067573 | -0,47155 | 0,637248 | 0,8728823 |
| TPO            | 1,57    | -0,68 | 1,437828 | -0,47151 | 0,63728  | NA        |
| NBPF9          | 973,93  | 0,14  | 0,299631 | 0,471467 | 0,637307 | 0,8728823 |
| RP11-690J15.1  | 3,75    | 1,20  | 2,54587  | 0,47145  | 0,637319 | NA        |
| RN7SL636P      | 1,42    | -1,11 | 2,359965 | -0,47142 | 0,637342 | NA        |
| RP11-250B2.6   | 0,53    | 1,76  | 3,740582 | 0,471339 | 0,637399 | NA        |
| ZFYVE9         | 0,12    | -1,75 | 3,713607 | -0,47129 | 0,637432 | NA        |
| ZNF329         | 52,85   | 0,25  | 0,528321 | 0,471168 | 0,637521 | 0,8728823 |
| RP11-99A14.1   | 3,52    | -0,45 | 0,94664  | -0,47115 | 0,637535 | NA        |
| TRAM2          | 57,69   | -0,46 | 0,972682 | -0,4711  | 0,637567 | 0,8728823 |
| FGD4           | 896,68  | -0,20 | 0,414468 | -0,47107 | 0,637591 | 0,8728823 |
| RP1-265C24.8   | 17,93   | 0,90  | 1,913624 | 0,471057 | 0,6376   | 0,8728823 |
| RP11-1084A12.1 | 0,51    | 1,68  | 3,575916 | 0,471055 | 0,637602 | NA        |
| RP11-492M23.2  | 0,47    | -0,72 | 1,520112 | -0,471   | 0,637638 | NA        |
| RNF138         | 512,93  | 0,19  | 0,396986 | 0,470999 | 0,637641 | 0,8728823 |
| ST6GALNAC6     | 101,89  | 0,57  | 1,220395 | 0,470937 | 0,637686 | 0,8728823 |

|               |         |       |          |          |          |           |
|---------------|---------|-------|----------|----------|----------|-----------|
| AP000997.2    | 18,33   | 1,03  | 2,187762 | 0,470901 | 0,637712 | 0,8728823 |
| TDGF1         | 6,70    | -0,59 | 1,263122 | -0,47085 | 0,637749 | 0,8728823 |
| PNKD          | 253,92  | 0,22  | 0,466032 | 0,470804 | 0,63778  | 0,8728823 |
| AP001187.9    | 48,42   | 0,31  | 0,649793 | 0,470799 | 0,637784 | 0,8728823 |
| SLC25A24      | 247,12  | -0,26 | 0,553952 | -0,47074 | 0,637829 | 0,8728823 |
| RP11-465I4.2  | 7,64    | 0,41  | 0,872799 | 0,470734 | 0,63783  | 0,8728823 |
| RP1-37M3.8    | 0,53    | 1,76  | 3,740568 | 0,470654 | 0,637888 | NA        |
| RP4-778K6.2   | 0,41    | 1,43  | 3,033944 | 0,470602 | 0,637925 | NA        |
| RP11-717F1.2  | 18,59   | 0,66  | 1,408621 | 0,470533 | 0,637974 | 0,8729891 |
| GEMIN6        | 122,40  | 0,37  | 0,791951 | 0,47043  | 0,638048 | 0,8729891 |
| POLR2B        | 801,20  | 0,20  | 0,415104 | 0,470378 | 0,638085 | 0,8729891 |
| OR56A4        | 10,79   | 0,39  | 0,834544 | 0,470316 | 0,638129 | 0,8729891 |
| PBRM1         | 821,02  | 0,21  | 0,440102 | 0,470297 | 0,638143 | 0,8729891 |
| CDC42BPG      | 0,86    | -1,57 | 3,347681 | -0,47024 | 0,638185 | NA        |
| SCIN          | 58,93   | -0,35 | 0,750302 | -0,47019 | 0,638216 | 0,8730248 |
| KCND3         | 2,18    | 0,51  | 1,077009 | 0,470098 | 0,638285 | NA        |
| RN7SL607P     | 0,56    | 1,00  | 2,132244 | 0,470078 | 0,638299 | NA        |
| SLC27A1       | 261,57  | 0,26  | 0,55875  | 0,470077 | 0,6383   | 0,8730757 |
| POU3F3        | 0,53    | 1,76  | 3,740629 | 0,470061 | 0,638311 | NA        |
| MIDN          | 294,10  | -0,21 | 0,44995  | -0,46973 | 0,638549 | 0,8732837 |
| RP11-717K11.2 | 4,05    | 1,44  | 3,064752 | 0,469678 | 0,638585 | 0,8732837 |
| GMDS          | 141,63  | 0,36  | 0,76451  | 0,469667 | 0,638593 | 0,8732837 |
| CTA-481E9.2   | 0,71    | 1,49  | 3,173314 | 0,469502 | 0,638711 | NA        |
| CROCCP3       | 24,54   | 0,40  | 0,85616  | 0,469419 | 0,63877  | 0,8734614 |
| CPSF4         | 160,27  | -0,34 | 0,731335 | -0,46913 | 0,63898  | 0,873597  |
| RP11-62C7.2   | 0,33    | -1,74 | 3,713009 | -0,46911 | 0,638994 | NA        |
| CHMP7         | 242,29  | -0,30 | 0,647892 | -0,46909 | 0,639002 | 0,873597  |
| PGBD2         | 115,62  | -0,34 | 0,718112 | -0,46907 | 0,639022 | 0,873597  |
| RP11-182I10.3 | 65,96   | -0,32 | 0,683225 | -0,46896 | 0,639098 | 0,873597  |
| SSUH2         | 1,01    | -0,93 | 1,983364 | -0,46896 | 0,639098 | NA        |
| CKAP5         | 487,04  | -0,36 | 0,757835 | -0,46894 | 0,639111 | 0,873597  |
| AC006547.8    | 0,53    | 1,75  | 3,740626 | 0,468887 | 0,63915  | NA        |
| TULP3         | 48,94   | -0,71 | 1,524532 | -0,46886 | 0,639171 | 0,873597  |
| RP11-80I3.1   | 0,65    | 1,28  | 2,728639 | 0,468848 | 0,639178 | NA        |
| SCNN1D        | 7,80    | 0,98  | 2,083265 | 0,468821 | 0,639198 | 0,873597  |
| SMC1B         | 20,19   | -0,89 | 1,889625 | -0,46875 | 0,639249 | 0,8736027 |
| RP3-407E4.4   | 1,75    | 1,74  | 3,714829 | 0,46866  | 0,639312 | NA        |
| AC104534.2    | 5,41    | 0,40  | 0,850712 | 0,468583 | 0,639368 | 0,873661  |
| RP11-114B7.6  | 3,03    | -0,60 | 1,288702 | -0,46853 | 0,639405 | NA        |
| RP11-475A13.1 | 19,22   | 0,39  | 0,823877 | 0,468511 | 0,639419 | 0,873661  |
| DNAJC3        | 1219,65 | 0,17  | 0,353109 | 0,468415 | 0,639488 | 0,873661  |
| SLC19A3       | 56,48   | -0,33 | 0,704882 | -0,46839 | 0,639505 | 0,873661  |
| TRABD         | 831,67  | 0,14  | 0,296649 | 0,468361 | 0,639526 | 0,873661  |
| RP11-505P4.7  | 2,87    | 0,53  | 1,139138 | 0,468359 | 0,639528 | NA        |
| CEND1         | 0,41    | -1,60 | 3,411192 | -0,46792 | 0,639843 | NA        |
| OR4G1P        | 0,49    | -1,18 | 2,518124 | -0,46789 | 0,639863 | NA        |
| TMEM204       | 10,48   | -0,91 | 1,939262 | -0,46785 | 0,639895 | 0,8740732 |
| SUGT1P3       | 24,68   | -0,49 | 1,04052  | -0,46781 | 0,639922 | 0,8740732 |
| SNORD70       | 0,59    | 1,11  | 2,380112 | 0,467747 | 0,639966 | NA        |
| ANKRD10       | 1180,35 | -0,17 | 0,359722 | -0,46771 | 0,639989 | 0,874078  |

|               |         |       |          |          |          |           |
|---------------|---------|-------|----------|----------|----------|-----------|
| PLEKHN1       | 0,88    | -1,09 | 2,330862 | -0,46769 | 0,640005 | NA        |
| MPV17L        | 280,34  | -0,15 | 0,330365 | -0,46767 | 0,64002  | 0,874078  |
| AC024592.9    | 1,90    | -0,62 | 1,336084 | -0,46767 | 0,640024 | NA        |
| CITF22-92A6.1 | 0,96    | -0,70 | 1,494154 | -0,46758 | 0,640087 | NA        |
| RP11-785H5.2  | 0,52    | 1,70  | 3,643188 | 0,467573 | 0,64009  | NA        |
| SLC25A44      | 381,05  | -0,37 | 0,798277 | -0,4673  | 0,640287 | 0,8743097 |
| SMIM24        | 1,33    | 1,55  | 3,310966 | 0,467244 | 0,640325 | NA        |
| C6orf120      | 161,73  | -0,44 | 0,938853 | -0,46724 | 0,640326 | 0,8743097 |
| MEF2D         | 249,01  | 0,27  | 0,582588 | 0,467237 | 0,64033  | 0,8743097 |
| CTC-492K19.4  | 0,72    | -1,43 | 3,067729 | -0,46723 | 0,640335 | NA        |
| CDC42SE1      | 1576,34 | 0,16  | 0,339276 | 0,467137 | 0,640402 | 0,8743387 |
| TFF2          | 2,00    | 0,76  | 1,623884 | 0,466925 | 0,640554 | NA        |
| RP11-627G23.1 | 1,48    | -0,50 | 1,064368 | -0,46692 | 0,640555 | NA        |
| GNA12         | 553,93  | 0,31  | 0,674667 | 0,466819 | 0,64063  | 0,8743387 |
| RP11-127B20.3 | 32,53   | -0,70 | 1,501613 | -0,46681 | 0,640636 | 0,8743387 |
| C14orf179     | 104,84  | -0,42 | 0,892998 | -0,46673 | 0,640694 | 0,8743387 |
| SECTM1        | 66,83   | 0,43  | 0,925515 | 0,466726 | 0,640696 | 0,8743387 |
| NAPB          | 37,94   | 0,41  | 0,872845 | 0,466722 | 0,640698 | 0,8743387 |
| AC159540.2    | 18,91   | -0,88 | 1,885037 | -0,46669 | 0,640724 | 0,8743387 |
| RP11-91P24.7  | 0,64    | 1,29  | 2,756689 | 0,466645 | 0,640754 | NA        |
| CTA-315H11.2  | 17,22   | -0,26 | 0,565664 | -0,46659 | 0,640796 | 0,8743387 |
| AGFG1         | 838,65  | -0,33 | 0,716836 | -0,46649 | 0,640861 | 0,8743387 |
| DCUN1D2       | 110,40  | -0,45 | 0,968721 | -0,46644 | 0,640902 | 0,8743387 |
| RN7SKP290     | 1,52    | 1,10  | 2,366105 | 0,466371 | 0,64095  | NA        |
| RPL7AP34      | 0,55    | 1,13  | 2,420207 | 0,466332 | 0,640978 | NA        |
| AC005037.8    | 0,52    | 1,74  | 3,740749 | 0,466314 | 0,64099  | NA        |
| RP11-15K19.2  | 0,53    | 1,74  | 3,740761 | 0,466294 | 0,641005 | NA        |
| RP4-738P15.1  | 0,51    | 1,67  | 3,574038 | 0,466292 | 0,641007 | NA        |
| RP11-386G11.5 | 130,64  | 0,29  | 0,625819 | 0,466286 | 0,641011 | 0,8743387 |
| RP5-1055C14.7 | 3,29    | -0,82 | 1,749014 | -0,46627 | 0,64102  | NA        |
| SLC18A1       | 5,16    | 0,75  | 1,609719 | 0,466257 | 0,641032 | 0,8743387 |
| AF064858.8    | 26,92   | -0,73 | 1,569362 | -0,46625 | 0,641038 | 0,8743387 |
| RP11-433C9.2  | 15,44   | 0,35  | 0,744797 | 0,466172 | 0,641093 | 0,8743387 |
| IKBKAP        | 287,73  | -0,41 | 0,876999 | -0,46615 | 0,64111  | 0,8743387 |
| INPP5D        | 1118,63 | 0,15  | 0,31903  | 0,466142 | 0,641114 | 0,8743387 |
| RP11-829H16.5 | 0,39    | 1,41  | 3,017404 | 0,466116 | 0,641132 | NA        |
| LMO3          | 4,32    | -0,49 | 1,041025 | -0,46606 | 0,641171 | 0,8743387 |
| AC007163.3    | 38,44   | 0,69  | 1,485018 | 0,466007 | 0,641211 | 0,8743387 |
| RPL23A        | 8566,37 | -0,08 | 0,179797 | -0,46596 | 0,641244 | 0,8743387 |
| OR52N5        | 1,90    | 0,90  | 1,935456 | 0,465952 | 0,64125  | NA        |
| RP11-2C24.7   | 1,86    | 1,01  | 2,158876 | 0,465783 | 0,641371 | NA        |
| KDM4A         | 142,07  | -0,41 | 0,877183 | -0,46575 | 0,641398 | 0,8744584 |
| RP11-89K21.1  | 0,40    | -0,75 | 1,614871 | -0,46567 | 0,641448 | NA        |
| PFAS          | 70,04   | 0,29  | 0,618462 | 0,465664 | 0,641456 | 0,8744584 |
| ZNF268        | 514,76  | -0,46 | 0,992935 | -0,46559 | 0,641508 | 0,8744584 |
| OASL          | 285,29  | 0,44  | 0,936938 | 0,465559 | 0,641531 | 0,8744584 |
| CCDC187       | 0,56    | 1,25  | 2,682045 | 0,465514 | 0,641563 | NA        |
| SLC25A26      | 357,00  | -0,38 | 0,82296  | -0,46551 | 0,641567 | 0,8744584 |
| WDR87         | 1,45    | -0,79 | 1,70134  | -0,46546 | 0,641602 | NA        |
| SLC25A13      | 244,77  | 0,34  | 0,732079 | 0,465194 | 0,641793 | 0,8746546 |

|                |        |       |          |          |          |           |
|----------------|--------|-------|----------|----------|----------|-----------|
| RP11-402J6.1   | 0,92   | 1,18  | 2,536993 | 0,465133 | 0,641836 | NA        |
| HENMT1         | 126,30 | -0,45 | 0,974679 | -0,46512 | 0,641849 | 0,8746546 |
| RP11-389G6.4   | 0,78   | -0,90 | 1,931524 | -0,46509 | 0,641864 | NA        |
| TTC30A         | 5,98   | -0,92 | 1,970517 | -0,46508 | 0,641871 | 0,8746546 |
| AIM2           | 14,81  | 0,69  | 1,479503 | 0,465045 | 0,641899 | 0,8746546 |
| CYP2T3P        | 0,53   | 1,74  | 3,740833 | 0,464989 | 0,641939 | NA        |
| ZNF512         | 248,90 | -0,46 | 0,994388 | -0,46492 | 0,641986 | 0,8746591 |
| RINL           | 40,90  | -0,29 | 0,627155 | -0,46491 | 0,641996 | 0,8746591 |
| RP1-315G1.4    | 2,79   | 0,64  | 1,372917 | 0,464504 | 0,642287 | NA        |
| THAP4          | 64,20  | 0,43  | 0,921277 | 0,464455 | 0,642322 | 0,8746893 |
| RP11-20I23.7   | 10,25  | -0,33 | 0,705667 | -0,46444 | 0,642334 | 0,8746893 |
| HYPK           | 92,98  | 0,30  | 0,654123 | 0,464414 | 0,642351 | 0,8746893 |
| NEU1           | 537,86 | 0,21  | 0,45067  | 0,464384 | 0,642372 | 0,8746893 |
| RP11-464F9.1   | 7,73   | -0,86 | 1,848191 | -0,46433 | 0,642414 | 0,8746893 |
| RP11-737O24.1  | 0,51   | 1,67  | 3,599908 | 0,46431  | 0,642426 | NA        |
| C16orf46       | 1,63   | 1,37  | 2,954282 | 0,464289 | 0,642441 | NA        |
| RP11-305D15.6  | 20,89  | -1,01 | 2,183542 | -0,46428 | 0,64245  | 0,8746893 |
| RP11-415C15.2  | 5,57   | -0,50 | 1,075938 | -0,46426 | 0,642459 | 0,8746893 |
| PQLC1          | 330,39 | -0,29 | 0,618925 | -0,46426 | 0,642465 | 0,8746893 |
| RNF19B         | 321,46 | 0,28  | 0,60626  | 0,464242 | 0,642474 | 0,8746893 |
| AC104135.4     | 1,10   | -1,14 | 2,450269 | -0,46417 | 0,642524 | NA        |
| RP11-405M12.3  | 0,50   | 1,68  | 3,615138 | 0,464146 | 0,642543 | NA        |
| RN7SL237P      | 1,16   | 1,02  | 2,189901 | 0,464142 | 0,642546 | NA        |
| ANAPC16        | 790,97 | 0,22  | 0,4678   | 0,464136 | 0,64255  | 0,8746893 |
| ETF1P1         | 0,54   | 1,74  | 3,740769 | 0,464061 | 0,642604 | NA        |
| XXbac-B33L19.4 | 5,38   | -1,31 | 2,819336 | -0,46404 | 0,64262  | 0,8746893 |
| RP11-420K14.8  | 0,12   | -1,73 | 3,738978 | -0,46403 | 0,64263  | NA        |
| DDX47          | 396,64 | 0,32  | 0,682293 | 0,463959 | 0,642677 | 0,8746893 |
| VSIG2          | 27,29  | -0,50 | 1,084922 | -0,46394 | 0,642694 | 0,8746893 |
| INHBC          | 0,12   | -1,73 | 3,736516 | -0,46393 | 0,642698 | NA        |
| RP5-1112D6.8   | 41,74  | 0,32  | 0,680151 | 0,463902 | 0,642718 | 0,8746893 |
| NCAPG2         | 26,74  | 0,55  | 1,176995 | 0,463894 | 0,642724 | 0,8746893 |
| CPE            | 0,86   | -1,46 | 3,14842  | -0,46383 | 0,642767 | NA        |
| RNU6-928P      | 0,53   | 1,73  | 3,740855 | 0,463687 | 0,642872 | NA        |
| RP11-165H4.1   | 0,12   | -1,73 | 3,736797 | -0,46354 | 0,642976 | NA        |
| UBA2           | 500,06 | 0,25  | 0,545274 | 0,463523 | 0,642989 | 0,8749354 |
| RP11-426C22.8  | 70,10  | -0,65 | 1,410741 | -0,46351 | 0,642999 | 0,8749354 |
| RP11-597A11.2  | 0,12   | -1,73 | 3,73679  | -0,46347 | 0,643025 | NA        |
| ISLR2          | 4,06   | 0,42  | 0,910414 | 0,463394 | 0,643082 | 0,8749849 |
| CTD-2189E23.1  | 0,51   | 1,67  | 3,611687 | 0,463374 | 0,643096 | NA        |
| ATP13A5        | 0,23   | -1,13 | 2,435762 | -0,46328 | 0,643167 | NA        |
| RNU6-1111P     | 0,50   | 1,68  | 3,628031 | 0,463246 | 0,643188 | NA        |
| TNFRSF19       | 7,93   | 0,91  | 1,969193 | 0,463108 | 0,643287 | 0,8751031 |
| RP5-1092A3.5   | 3,08   | -1,42 | 3,059003 | -0,46307 | 0,643311 | NA        |
| USB1           | 396,68 | -0,24 | 0,514057 | -0,46301 | 0,643356 | 0,8751031 |
| RP11-44M6.7    | 102,20 | -0,47 | 1,017973 | -0,46298 | 0,643377 | 0,8751031 |
| C21orf74       | 10,30  | -0,72 | 1,5485   | -0,46296 | 0,64339  | 0,8751031 |
| AC013402.2     | 38,51  | -0,20 | 0,436503 | -0,46294 | 0,643404 | 0,8751031 |
| RP4-781K5.4    | 4,05   | 0,80  | 1,738058 | 0,462849 | 0,643473 | 0,8751321 |
| RHBDD3         | 40,00  | 0,54  | 1,168045 | 0,462709 | 0,643573 | 0,8751368 |

|                    |         |       |          |          |          |           |
|--------------------|---------|-------|----------|----------|----------|-----------|
| RP11-468E2.4       | 247,55  | -0,34 | 0,730158 | -0,46261 | 0,643646 | 0,8751368 |
| RP11-386I14.4      | 147,19  | 0,15  | 0,328191 | 0,462519 | 0,643709 | 0,8751368 |
| RPS2P46            | 6,01    | 0,26  | 0,560151 | 0,462507 | 0,643718 | 0,8751368 |
| AC009133.15        | 0,12    | -1,73 | 3,735206 | -0,46247 | 0,643744 | NA        |
| RP11-1086F11.1     | 17,67   | 0,45  | 0,971854 | 0,462403 | 0,643792 | 0,8751368 |
| RP5-967N21.11      | 12,61   | 0,57  | 1,229133 | 0,462343 | 0,643836 | 0,8751368 |
| TMIGD2             | 2,16    | 0,77  | 1,658688 | 0,462342 | 0,643836 | NA        |
| DUXAP7             | 3,58    | 0,53  | 1,140134 | 0,46234  | 0,643837 | NA        |
| AC004066.1         | 4,48    | -0,26 | 0,55461  | -0,46228 | 0,643877 | 0,8751368 |
| RP11-703H8.7       | 1,30    | 0,75  | 1,62176  | 0,462268 | 0,643889 | NA        |
| AC006277.2         | 4,96    | -1,09 | 2,365858 | -0,46225 | 0,643904 | 0,8751368 |
| DHRS4-AS1          | 141,23  | -0,33 | 0,712989 | -0,46219 | 0,643944 | 0,8751368 |
| IP6K1              | 257,46  | -0,39 | 0,852285 | -0,46215 | 0,643971 | 0,8751368 |
| FXD3               | 9,42    | 0,45  | 0,964413 | 0,462123 | 0,643993 | 0,8751368 |
| GSDMC              | 1,31    | -0,59 | 1,271123 | -0,4619  | 0,644156 | NA        |
| THBS3              | 74,19   | -0,50 | 1,088046 | -0,46175 | 0,644258 | 0,8753983 |
| LIPN               | 3,67    | 0,89  | 1,92674  | 0,461754 | 0,644258 | NA        |
| XXbac-BPG299F13.17 | 38,55   | 0,36  | 0,769291 | 0,461723 | 0,64428  | 0,8753983 |
| RP11-523O18.5      | 44,45   | -0,41 | 0,877897 | -0,46154 | 0,644413 | 0,8755156 |
| RP11-490D19.8      | 1,18    | 1,20  | 2,608128 | 0,461513 | 0,644431 | NA        |
| RP11-344N10.2      | 0,52    | 1,73  | 3,740883 | 0,461425 | 0,644493 | NA        |
| ASPRV1             | 0,65    | 1,30  | 2,818734 | 0,461422 | 0,644496 | NA        |
| SLC38A9            | 133,75  | 0,30  | 0,657147 | 0,461375 | 0,644529 | 0,8755765 |
| KCNC4              | 166,28  | -0,47 | 1,011768 | -0,46129 | 0,644591 | 0,8755765 |
| FBXL12             | 135,86  | -0,40 | 0,866226 | -0,46125 | 0,644621 | 0,8755765 |
| RP11-6F2.4         | 29,07   | 0,51  | 1,097514 | 0,461212 | 0,644646 | 0,8755765 |
| CYP7B1             | 0,53    | 1,67  | 3,616776 | 0,461204 | 0,644652 | NA        |
| NPHS1              | 1,97    | 0,92  | 2,004724 | 0,461181 | 0,644669 | NA        |
| OR10A3             | 6,62    | 0,42  | 0,915022 | 0,461038 | 0,644771 | 0,875661  |
| SCN3B              | 39,30   | 0,37  | 0,810843 | 0,460989 | 0,644807 | 0,875661  |
| RNA5SP371          | 0,53    | 1,11  | 2,402714 | 0,460809 | 0,644935 | NA        |
| NEDD1              | 178,99  | -0,48 | 1,041652 | -0,46076 | 0,644972 | 0,875661  |
| VPS26A             | 380,14  | -0,21 | 0,464935 | -0,46075 | 0,644978 | 0,875661  |
| STOML2             | 478,99  | 0,34  | 0,731689 | 0,46074  | 0,644985 | 0,875661  |
| RP11-486B10.4      | 0,53    | 1,65  | 3,576822 | 0,460665 | 0,645039 | NA        |
| RP11-100L22.3      | 6,27    | -0,68 | 1,465619 | -0,46066 | 0,645043 | 0,875661  |
| TMEM161A           | 59,42   | 0,46  | 1,002634 | 0,460639 | 0,645058 | 0,875661  |
| CCDC130            | 326,11  | -0,25 | 0,551165 | -0,4606  | 0,645085 | 0,875661  |
| CTC-510F12.2       | 1,56    | -0,56 | 1,226002 | -0,46039 | 0,645235 | NA        |
| RP11-84G21.1       | 0,72    | -0,89 | 1,924995 | -0,46036 | 0,645256 | NA        |
| RBM15              | 136,43  | 0,35  | 0,754197 | 0,460276 | 0,645318 | 0,8759133 |
| MAP2               | 5,26    | -1,45 | 3,150765 | -0,46017 | 0,645396 | 0,8759547 |
| RP4-620E11.4       | 0,48    | 1,64  | 3,557402 | 0,459941 | 0,645559 | NA        |
| RP11-643A5.2       | 1,37    | 0,67  | 1,453452 | 0,459927 | 0,645569 | NA        |
| H3F3A              | 4771,60 | 0,06  | 0,121887 | 0,459819 | 0,645646 | 0,8762309 |
| CTB-96E2.3         | 0,43    | -1,58 | 3,429901 | -0,45978 | 0,645674 | NA        |
| HAS3               | 0,97    | 1,31  | 2,860349 | 0,459706 | 0,645727 | NA        |
| RP11-55K22.2       | 0,46    | -1,16 | 2,531542 | -0,45949 | 0,645883 | NA        |
| RP1-229K20.9       | 1,48    | 1,55  | 3,365553 | 0,459488 | 0,645884 | NA        |
| KCNN4              | 211,03  | -0,36 | 0,782114 | -0,45948 | 0,645889 | 0,8763133 |



|                   |        |       |          |          |          |           |
|-------------------|--------|-------|----------|----------|----------|-----------|
| TGFBR2            | 855,31 | 0,26  | 0,563467 | 0,459456 | 0,645907 | 0,8763133 |
| AC010886.2        | 2,27   | 0,65  | 1,409159 | 0,459317 | 0,646007 | NA        |
| ENSA              | 444,55 | -0,23 | 0,500156 | -0,45931 | 0,646015 | 0,8763133 |
| C1QTNF6           | 45,64  | 0,48  | 1,050766 | 0,459288 | 0,646027 | 0,8763133 |
| RN7SL329P         | 13,01  | -0,66 | 1,433925 | -0,45926 | 0,646051 | 0,8763133 |
| BMS1P2            | 65,65  | 0,33  | 0,723366 | 0,459225 | 0,646072 | 0,8763133 |
| RN7SL863P         | 1,53   | -0,82 | 1,78749  | -0,4592  | 0,646089 | NA        |
| CA1               | 5,67   | 0,63  | 1,374463 | 0,459068 | 0,646185 | 0,8763133 |
| CTD-2538C1.3      | 15,90  | -0,82 | 1,777665 | -0,45899 | 0,646245 | 0,8763133 |
| RP4-644L1.2       | 0,11   | -1,72 | 3,737491 | -0,45894 | 0,646277 | NA        |
| YIPF7             | 0,63   | 1,43  | 3,110277 | 0,4589   | 0,646306 | NA        |
| RP11-481J8.3      | 18,39  | -0,40 | 0,861283 | -0,45889 | 0,646311 | 0,8763133 |
| RP11-894J14.5     | 0,40   | -1,00 | 2,174462 | -0,45887 | 0,646326 | NA        |
| RP11-100N21.1     | 1,84   | -0,39 | 0,839246 | -0,45882 | 0,646361 | NA        |
| BACE1-AS          | 11,21  | 0,96  | 2,090704 | 0,458801 | 0,646377 | 0,8763133 |
| RP11-307O13.1     | 1,13   | 1,53  | 3,342503 | 0,458771 | 0,646399 | NA        |
| RP11-395B7.2      | 1,41   | -0,47 | 1,019116 | -0,45873 | 0,646428 | NA        |
| RP1-249I4.2       | 0,11   | -1,71 | 3,735475 | -0,45868 | 0,646463 | NA        |
| PLEKHS1           | 1,31   | -0,57 | 1,243826 | -0,45866 | 0,646475 | NA        |
| ATG4D             | 106,87 | -0,53 | 1,156135 | -0,45865 | 0,646482 | 0,8763133 |
| RP3-453C12.15     | 4,36   | 0,58  | 1,263018 | 0,458573 | 0,646541 | 0,8763133 |
| XXbac-BPG249D20.9 | 2,12   | -1,00 | 2,175371 | -0,45842 | 0,646648 | NA        |
| RP11-355F16.1     | 5,15   | -0,74 | 1,620621 | -0,45837 | 0,646684 | 0,8763133 |
| OR4E1             | 5,90   | 0,59  | 1,293605 | 0,458306 | 0,646733 | 0,8763133 |
| RP11-572C15.5     | 6,48   | -0,42 | 0,916107 | -0,45829 | 0,646743 | 0,8763133 |
| ZNF345            | 51,83  | -0,50 | 1,086815 | -0,45828 | 0,646748 | 0,8763133 |
| MAP3K3            | 949,06 | 0,19  | 0,407629 | 0,458263 | 0,646763 | 0,8763133 |
| TTC22             | 5,21   | -0,39 | 0,86019  | -0,45811 | 0,646876 | 0,8763133 |
| RP11-327F22.1     | 66,54  | -0,35 | 0,768571 | -0,45809 | 0,64689  | 0,8763133 |
| SDCCAG8           | 515,99 | -0,20 | 0,432258 | -0,45808 | 0,646893 | 0,8763133 |
| MRPL12            | 598,31 | 0,16  | 0,347574 | 0,458016 | 0,646941 | 0,8763133 |
| RP11-109G10.1     | 44,42  | 0,59  | 1,298545 | 0,458008 | 0,646947 | 0,8763133 |
| RP11-557C18.3     | 0,69   | 1,48  | 3,227128 | 0,458005 | 0,646949 | NA        |
| ANKRD22           | 67,21  | -0,46 | 1,003502 | -0,458   | 0,646953 | 0,8763133 |
| RP11-398K22.12    | 30,74  | -0,28 | 0,605391 | -0,45798 | 0,646964 | 0,8763133 |
| CDKL1             | 41,07  | -0,42 | 0,925706 | -0,45797 | 0,646972 | 0,8763133 |
| ANAPC15           | 473,50 | 0,15  | 0,337827 | 0,457921 | 0,647009 | 0,8763133 |
| LATS2             | 201,36 | 0,34  | 0,747083 | 0,457902 | 0,647023 | 0,8763133 |
| RP11-67H24.2      | 3,88   | 1,18  | 2,568122 | 0,457898 | 0,647026 | 0,8763133 |
| RP1-86C11.7       | 1,91   | -0,90 | 1,959624 | -0,45784 | 0,64707  | NA        |
| RP11-168P8.2      | 0,49   | 1,64  | 3,580885 | 0,457831 | 0,647074 | NA        |
| BSG               | 632,05 | -0,17 | 0,367426 | -0,45774 | 0,647142 | 0,8763492 |
| ATP6V1A           | 909,44 | -0,17 | 0,376981 | -0,45773 | 0,647147 | 0,8763492 |
| TRIM21            | 113,77 | 0,40  | 0,873643 | 0,457463 | 0,647338 | 0,8765448 |
| PPP1R9B           | 254,05 | 0,17  | 0,380276 | 0,457371 | 0,647404 | 0,8765708 |
| RP1-168L15.6      | 3,53   | -0,62 | 1,361326 | -0,45736 | 0,647409 | NA        |
| RP11-631M21.7     | 0,59   | 1,71  | 3,74107  | 0,457322 | 0,647439 | NA        |
| PCDHGA8           | 38,50  | -0,27 | 0,599663 | -0,45727 | 0,647479 | 0,8766083 |
| MKNK1-AS1         | 0,50   | 0,86  | 1,871904 | 0,457164 | 0,647553 | NA        |
| AKR7A2            | 735,41 | -0,25 | 0,541547 | -0,45713 | 0,647576 | 0,8766385 |

|               |         |       |          |          |          |           |
|---------------|---------|-------|----------|----------|----------|-----------|
| RP11-277P12.6 | 9,05    | -1,65 | 3,612195 | -0,45705 | 0,647634 | 0,8766385 |
| ACER1         | 2,59    | -0,70 | 1,523895 | -0,45704 | 0,647639 | NA        |
| MBD5          | 358,62  | 0,29  | 0,635057 | 0,457039 | 0,647643 | 0,8766385 |
| RP11-637C24.2 | 1,78    | -1,11 | 2,437936 | -0,45702 | 0,647654 | NA        |
| SNORA59B      | 0,43    | 1,40  | 3,073397 | 0,456997 | 0,647673 | NA        |
| RP11-119F19.5 | 3,44    | -0,77 | 1,689599 | -0,45697 | 0,647694 | NA        |
| C17orf101     | 273,42  | 0,31  | 0,672294 | 0,456855 | 0,647775 | 0,8766992 |
| ADPRH         | 161,35  | 0,36  | 0,784314 | 0,456846 | 0,647782 | 0,8766992 |
| RP11-733C7.2  | 23,14   | -0,42 | 0,925504 | -0,45671 | 0,647879 | 0,876766  |
| CTD-2021A8.2  | 0,38    | 1,37  | 2,989437 | 0,456704 | 0,647884 | NA        |
| BTK           | 620,77  | 0,27  | 0,589105 | 0,456643 | 0,647927 | 0,876766  |
| RP11-456P18.2 | 0,68    | 1,44  | 3,159377 | 0,45663  | 0,647937 | NA        |
| RP11-495P10.5 | 0,44    | -1,68 | 3,688789 | -0,45662 | 0,647942 | NA        |
| RP11-533K9.4  | 10,59   | -1,65 | 3,611374 | -0,45658 | 0,647973 | 0,876766  |
| RP11-287D1.2  | 2,61    | -0,62 | 1,361763 | -0,45654 | 0,648001 | NA        |
| RP4-667H12.3  | 0,45    | 0,85  | 1,869114 | 0,45646  | 0,648059 | NA        |
| RP11-313A24.1 | 1,22    | -1,66 | 3,647343 | -0,45642 | 0,648085 | NA        |
| ZC3H11B       | 0,71    | -0,72 | 1,584847 | -0,45629 | 0,648179 | NA        |
| RNU6-481P     | 0,20    | -1,70 | 3,722724 | -0,45627 | 0,648193 | NA        |
| CTB-85P21.1   | 0,52    | 1,71  | 3,741172 | 0,456234 | 0,648222 | NA        |
| DIP2C         | 9,86    | -1,12 | 2,455381 | -0,45616 | 0,648277 | 0,8771133 |
| RP11-276H19.2 | 2,61    | -0,77 | 1,690871 | -0,45614 | 0,648288 | NA        |
| RP11-505F3.4  | 0,94    | -0,47 | 1,031954 | -0,45611 | 0,64831  | NA        |
| RP11-642L11.1 | 1,33    | -0,73 | 1,610087 | -0,4561  | 0,64832  | NA        |
| RPL13P4       | 0,83    | 1,70  | 3,73466  | 0,456055 | 0,648351 | NA        |
| RP11-298A10.3 | 5,37    | 0,86  | 1,896063 | 0,455979 | 0,648405 | 0,8771741 |
| DNAJB12       | 431,13  | -0,17 | 0,381584 | -0,45596 | 0,648416 | 0,8771741 |
| PAM16         | 118,86  | -0,26 | 0,568509 | -0,45586 | 0,648493 | 0,8772144 |
| RP11-73M7.9   | 2,91    | 0,68  | 1,502564 | 0,45557  | 0,648699 | NA        |
| TRIM64B       | 0,53    | 1,70  | 3,74117  | 0,455561 | 0,648706 | NA        |
| DIRC3         | 1,05    | 1,52  | 3,32804  | 0,455521 | 0,648735 | NA        |
| CTD-2317K6.1  | 0,51    | 1,70  | 3,741163 | 0,455502 | 0,648748 | NA        |
| DGKG          | 170,86  | -0,45 | 0,992818 | -0,45545 | 0,648788 | 0,8774871 |
| RP11-19P22.8  | 36,60   | -0,42 | 0,91223  | -0,45545 | 0,648789 | 0,8774871 |
| CTD-3065J16.6 | 0,58    | -1,04 | 2,281539 | -0,45534 | 0,648867 | NA        |
| EIF4G1        | 947,45  | -0,17 | 0,370363 | -0,45531 | 0,648887 | 0,8775558 |
| NUDT5         | 650,14  | -0,26 | 0,569966 | -0,45524 | 0,648937 | 0,8775598 |
| DNAH6         | 14,28   | 0,59  | 1,289491 | 0,455102 | 0,649036 | 0,8775701 |
| RP11-25L19.1  | 16,15   | -0,22 | 0,491925 | -0,4551  | 0,649039 | 0,8775701 |
| RP11-118B18.2 | 2,43    | -0,59 | 1,302564 | -0,45502 | 0,649095 | NA        |
| POFUT2        | 68,62   | -0,48 | 1,050305 | -0,45498 | 0,649124 | 0,8776217 |
| RN7SKP287     | 0,51    | 1,70  | 3,741135 | 0,454929 | 0,64916  | NA        |
| RPL29P25      | 6,67    | -0,55 | 1,214212 | -0,45486 | 0,649212 | 0,8776666 |
| RP1-261D10.2  | 3,51    | 1,07  | 2,344083 | 0,454832 | 0,64923  | NA        |
| CTC-471F3.5   | 1,82    | 1,12  | 2,460417 | 0,454813 | 0,649244 | NA        |
| MARCH1        | 1766,21 | 0,19  | 0,407575 | 0,454765 | 0,649278 | 0,8776666 |
| IGHD          | 10,55   | -0,90 | 1,978101 | -0,45472 | 0,649314 | 0,8776666 |
| RP11-225N10.3 | 1,29    | -1,14 | 2,511859 | -0,45468 | 0,649339 | NA        |
| AC023590.1    | 10,53   | -0,50 | 1,101993 | -0,45467 | 0,649346 | 0,8776666 |
| RP11-543F8.2  | 2,30    | -0,66 | 1,447194 | -0,45444 | 0,649513 | NA        |

|                |         |       |          |          |          |           |
|----------------|---------|-------|----------|----------|----------|-----------|
| MORN1          | 20,27   | -0,49 | 1,072218 | -0,45425 | 0,649646 | 0,8779814 |
| RP4-694B14.8   | 0,11    | -1,70 | 3,737836 | -0,45425 | 0,649651 | NA        |
| HK1            | 740,46  | -0,18 | 0,395481 | -0,45419 | 0,649695 | 0,8779814 |
| SF3A3P1        | 0,59    | 1,70  | 3,741203 | 0,454155 | 0,649717 | NA        |
| RP5-1041C10.3  | 5,14    | 0,48  | 1,053628 | 0,454142 | 0,649727 | 0,8779814 |
| RP11-153K16.2  | 0,60    | -0,69 | 1,527531 | -0,45414 | 0,64973  | NA        |
| RN7SL78P       | 0,51    | 1,70  | 3,741189 | 0,454117 | 0,649745 | NA        |
| TAGAP          | 783,47  | 0,17  | 0,367008 | 0,454085 | 0,649768 | 0,8779814 |
| RP11-57G22.3   | 14,95   | -0,29 | 0,63596  | -0,45393 | 0,649879 | 0,8780684 |
| S1PR2          | 46,28   | 0,32  | 0,709978 | 0,453723 | 0,650028 | 0,878206  |
| RP11-93P10.2   | 41,79   | -0,55 | 1,21521  | -0,45355 | 0,650155 | 0,8782561 |
| ERO1A          | 581,03  | -0,23 | 0,497082 | -0,45352 | 0,650171 | 0,8782561 |
| AC100830.4     | 1,47    | 1,52  | 3,350615 | 0,453453 | 0,650223 | NA        |
| RP11-216B9.9   | 21,28   | 0,30  | 0,668286 | 0,453417 | 0,650248 | 0,8782561 |
| RP11-401E5.2   | 0,32    | 1,19  | 2,62468  | 0,453353 | 0,650294 | NA        |
| EDF1           | 1198,72 | -0,10 | 0,222065 | -0,4533  | 0,650332 | 0,8782561 |
| RP11-94I2.4    | 0,81    | 1,69  | 3,735057 | 0,453237 | 0,650378 | NA        |
| CTD-2503I6.1   | 2,09    | -0,82 | 1,81217  | -0,45304 | 0,650523 | NA        |
| SLC46A1        | 106,52  | -0,45 | 1,003739 | -0,45302 | 0,650536 | 0,8782561 |
| ARID5A         | 404,93  | 0,22  | 0,478273 | 0,453008 | 0,650543 | 0,8782561 |
| AC130469.2     | 1,03    | 0,87  | 1,925276 | 0,452982 | 0,650561 | NA        |
| LSM3           | 372,85  | -0,12 | 0,269661 | -0,45286 | 0,65065  | 0,8782561 |
| ATP1A1         | 1295,36 | 0,16  | 0,344775 | 0,452812 | 0,650684 | 0,8782561 |
| PSMA1          | 2147,07 | 0,11  | 0,237938 | 0,452807 | 0,650688 | 0,8782561 |
| GANC           | 561,14  | -0,30 | 0,660419 | -0,45274 | 0,650735 | 0,8782561 |
| RP11-196G18.22 | 25,17   | 0,53  | 1,174301 | 0,452702 | 0,650763 | 0,8782561 |
| RP11-138A9.1   | 222,88  | 0,31  | 0,674209 | 0,452466 | 0,650934 | 0,8782561 |
| RP6-1107.2     | 0,91    | -0,75 | 1,652473 | -0,45246 | 0,650937 | NA        |
| RP4-580N22.1   | 9,98    | -0,45 | 1,004232 | -0,45246 | 0,650939 | 0,8782561 |
| NMRAL1         | 257,18  | 0,25  | 0,555955 | 0,452446 | 0,650947 | 0,8782561 |
| RNU1-122P      | 1,50    | 0,61  | 1,354392 | 0,452444 | 0,650949 | NA        |
| SNRPN          | 277,81  | 0,35  | 0,784098 | 0,45238  | 0,650995 | 0,8782561 |
| C15orf38-AP3S2 | 111,25  | 0,66  | 1,469783 | 0,45238  | 0,650996 | 0,8782561 |
| SYT2           | 5,05    | 0,35  | 0,775027 | 0,452363 | 0,651007 | 0,8782561 |
| RP11-452K12.6  | 8,40    | 0,70  | 1,544058 | 0,45226  | 0,651081 | 0,8782561 |
| ACSF3          | 385,99  | 0,30  | 0,662085 | 0,45223  | 0,651103 | 0,8782561 |
| OVGP1          | 10,50   | -0,72 | 1,595291 | -0,45212 | 0,651181 | 0,8782561 |
| RP11-47G4.2    | 5,95    | -0,86 | 1,895245 | -0,4521  | 0,6512   | 0,8782561 |
| RP11-49I11.4   | 0,50    | 1,69  | 3,741394 | 0,452055 | 0,65123  | NA        |
| RP11-16B9.1    | 37,91   | 0,51  | 1,126589 | 0,45205  | 0,651233 | 0,8782561 |
| AC092620.2     | 82,60   | 0,39  | 0,855081 | 0,452038 | 0,651242 | 0,8782561 |
| RP11-387D10.2  | 4,87    | 0,51  | 1,11946  | 0,452036 | 0,651243 | 0,8782561 |
| ING5           | 212,65  | 0,30  | 0,663436 | 0,452033 | 0,651245 | 0,8782561 |
| AC074367.1     | 1,30    | 1,34  | 2,960579 | 0,45178  | 0,651427 | NA        |
| RN7SL279P      | 3,57    | -0,60 | 1,325627 | -0,45175 | 0,651446 | NA        |
| ARPC5          | 4068,54 | -0,10 | 0,211203 | -0,4517  | 0,651486 | 0,8783999 |
| RARS           | 565,85  | -0,20 | 0,450726 | -0,45163 | 0,651536 | 0,8783999 |
| RAB8A          | 736,91  | 0,20  | 0,447199 | 0,451621 | 0,651542 | 0,8783999 |
| PNPO           | 134,84  | 0,32  | 0,705287 | 0,451551 | 0,651592 | 0,8783999 |
| TNS4           | 20,05   | -0,31 | 0,68221  | -0,45152 | 0,651614 | 0,8783999 |

|                |         |       |          |          |          |           |
|----------------|---------|-------|----------|----------|----------|-----------|
| CARD6          | 68,16   | -0,38 | 0,83576  | -0,45147 | 0,651651 | 0,8783999 |
| RP11-355N15.1  | 3,26    | -0,37 | 0,822758 | -0,45147 | 0,651652 | NA        |
| MN1            | 37,56   | -0,89 | 1,973246 | -0,45136 | 0,651728 | 0,8783999 |
| PNPLA5         | 4,53    | 0,65  | 1,431498 | 0,451326 | 0,651755 | 0,8783999 |
| SDF2           | 331,83  | 0,36  | 0,794746 | 0,451295 | 0,651777 | 0,8783999 |
| RN7SL278P      | 2,53    | -0,44 | 0,980743 | -0,45119 | 0,651856 | NA        |
| RP11-550E22.4  | 1,67    | -1,19 | 2,628404 | -0,45113 | 0,651897 | NA        |
| RAB15          | 1,95    | -0,68 | 1,505246 | -0,45102 | 0,651978 | NA        |
| RP11-574K11.28 | 6,87    | 0,45  | 0,998739 | 0,450961 | 0,652018 | 0,8786608 |
| CDS2           | 515,29  | 0,24  | 0,523076 | 0,450855 | 0,652094 | 0,8787002 |
| RP11-504G3.1   | 69,35   | 0,55  | 1,216831 | 0,450729 | 0,652185 | 0,8787023 |
| HDAC5          | 421,02  | -0,26 | 0,569127 | -0,45072 | 0,65219  | 0,8787023 |
| DDX28          | 97,55   | 0,54  | 1,206919 | 0,450647 | 0,652244 | 0,87871   |
| RP11-1250I15.1 | 3,56    | 0,72  | 1,599733 | 0,450618 | 0,652265 | NA        |
| IKBKG          | 187,39  | -0,32 | 0,711674 | -0,45058 | 0,65229  | 0,87871   |
| RPL3P1         | 0,33    | 0,98  | 2,185618 | 0,45052  | 0,652336 | NA        |
| SGSM1          | 12,16   | -0,27 | 0,604843 | -0,4505  | 0,65235  | 0,8787266 |
| SAMD7          | 0,43    | -0,81 | 1,788321 | -0,4504  | 0,652423 | NA        |
| RP11-1057B8.2  | 0,51    | 1,68  | 3,74135  | 0,450368 | 0,652445 | NA        |
| CSTF1          | 185,48  | 0,48  | 1,075178 | 0,450288 | 0,652503 | 0,8788691 |
| AC005224.2     | 1,86    | 0,82  | 1,82188  | 0,450084 | 0,65265  | NA        |
| ECHS1          | 1191,84 | -0,21 | 0,467076 | -0,44994 | 0,652755 | 0,8789577 |
| RP11-243E13.1  | 8,87    | -0,30 | 0,674334 | -0,44992 | 0,652766 | 0,8789577 |
| RP11-347P5.1   | 313,94  | 0,20  | 0,443842 | 0,449905 | 0,652779 | 0,8789577 |
| SLC22A11       | 13,67   | 0,61  | 1,354368 | 0,449865 | 0,652808 | 0,8789577 |
| CTC-359M8.3    | 0,62    | 1,22  | 2,702423 | 0,44985  | 0,652818 | NA        |
| FAM90A24P      | 1,06    | -0,99 | 2,207089 | -0,44973 | 0,652903 | NA        |
| SMS            | 467,83  | 0,26  | 0,585167 | 0,449688 | 0,652936 | 0,8789577 |
| FAM136A        | 345,75  | -0,28 | 0,61477  | -0,44968 | 0,652939 | 0,8789577 |
| AC005498.3     | 0,52    | 1,68  | 3,74097  | 0,449681 | 0,65294  | NA        |
| NCOR2          | 329,77  | -0,22 | 0,496536 | -0,44966 | 0,652954 | 0,8789577 |
| ECHDC1         | 566,13  | 0,19  | 0,414553 | 0,449627 | 0,65298  | 0,8789577 |
| CEP164         | 183,85  | 0,27  | 0,590695 | 0,449607 | 0,652994 | 0,8789577 |
| RP1-12G14.7    | 1,56    | 0,76  | 1,682532 | 0,449543 | 0,65304  | NA        |
| RP11-1124B17.1 | 0,33    | -0,87 | 1,939543 | -0,44952 | 0,653053 | NA        |
| RP11-774D14.1  | 1,67    | -1,06 | 2,358327 | -0,4495  | 0,653073 | NA        |
| CTD-2207O23.3  | 104,48  | -1,22 | 2,704897 | -0,44948 | 0,653084 | 0,8790152 |
| RP11-281O15.8  | 1,14    | -0,63 | 1,411045 | -0,44938 | 0,653157 | NA        |
| SNHG11         | 81,86   | 0,43  | 0,95341  | 0,449371 | 0,653164 | 0,8790593 |
| RP11-702F3.3   | 0,81    | -0,87 | 1,946513 | -0,44929 | 0,65322  | NA        |
| DGUOK          | 805,14  | -0,14 | 0,303193 | -0,44923 | 0,653265 | 0,8791036 |
| COG1           | 68,75   | -0,36 | 0,811957 | -0,44919 | 0,653291 | 0,8791036 |
| CTB-176F20.3   | 2,76    | 0,48  | 1,058212 | 0,449098 | 0,653361 | NA        |
| LONP1          | 289,12  | 0,32  | 0,713666 | 0,449068 | 0,653383 | 0,8791631 |
| CTD-2545G14.2  | 0,47    | 1,61  | 3,594889 | 0,448809 | 0,653569 | NA        |
| RP11-468E2.11  | 93,60   | -0,25 | 0,547859 | -0,44878 | 0,65359  | 0,8792538 |
| ZNF680         | 26,58   | 0,37  | 0,829964 | 0,448779 | 0,653591 | 0,8792538 |
| RP11-359C24.1  | 12,56   | -0,48 | 1,061012 | -0,44878 | 0,653592 | 0,8792538 |
| RN7SL306P      | 0,85    | -1,08 | 2,405705 | -0,44877 | 0,653596 | NA        |
| SLC34A2        | 31,41   | 0,37  | 0,832931 | 0,44864  | 0,653691 | 0,8793238 |

|                |         |       |          |          |          |           |
|----------------|---------|-------|----------|----------|----------|-----------|
| RP11-603K19.2  | 0,97    | -0,62 | 1,373518 | -0,44856 | 0,653748 | NA        |
| SIAH2          | 295,43  | -0,33 | 0,741741 | -0,44838 | 0,65388  | 0,8795145 |
| TMEM261        | 155,36  | -0,25 | 0,549063 | -0,4483  | 0,65394  | 0,8795258 |
| IFITM2         | 2795,84 | -0,20 | 0,444082 | -0,44823 | 0,653989 | 0,8795258 |
| AC091178.1     | 0,70    | -0,78 | 1,736834 | -0,44816 | 0,654036 | NA        |
| GID4           | 54,79   | 0,39  | 0,87749  | 0,448149 | 0,654046 | 0,8795258 |
| FAM78B         | 1,81    | -0,67 | 1,49218  | -0,44809 | 0,654089 | NA        |
| CDYL           | 214,63  | 0,22  | 0,500142 | 0,448031 | 0,65413  | 0,8795258 |
| TNNT2          | 16,05   | -0,42 | 0,929626 | -0,448   | 0,654157 | 0,8795258 |
| INPP1          | 119,74  | -0,46 | 1,032873 | -0,44793 | 0,654202 | 0,8795258 |
| TLR7           | 268,25  | -0,34 | 0,766487 | -0,44787 | 0,654247 | 0,8795258 |
| SLC9A3         | 0,11    | -1,67 | 3,736384 | -0,44784 | 0,654267 | NA        |
| MAN2B2         | 182,54  | -0,27 | 0,593251 | -0,44784 | 0,654267 | 0,8795258 |
| RP11-507M3.1   | 14,40   | 0,47  | 1,044316 | 0,44767  | 0,654391 | 0,8796291 |
| CTC-436P18.3   | 16,27   | -0,38 | 0,856512 | -0,44752 | 0,654502 | 0,8797144 |
| DYNLRB1        | 412,59  | -0,18 | 0,403663 | -0,44744 | 0,654554 | 0,879721  |
| COL4A3         | 2,65    | -1,02 | 2,28443  | -0,44729 | 0,654665 | NA        |
| RP5-1102E8.2   | 0,46    | 0,82  | 1,842113 | 0,447285 | 0,65467  | NA        |
| CASZ1          | 41,64   | -0,58 | 1,301564 | -0,44728 | 0,65467  | 0,8798134 |
| AC005519.4     | 2,68    | -0,65 | 1,443174 | -0,44711 | 0,654793 | NA        |
| RP11-330C7.3   | 20,44   | 0,70  | 1,556993 | 0,447008 | 0,654869 | 0,8799357 |
| RP11-182B22.2  | 4,62    | 1,58  | 3,528779 | 0,446994 | 0,654879 | 0,8799357 |
| RP11-927P21.12 | 0,79    | 1,66  | 3,719226 | 0,446983 | 0,654888 | NA        |
| RP11-690G19.4  | 3,74    | 0,54  | 1,20752  | 0,44685  | 0,654983 | NA        |
| RN7SL692P      | 0,11    | -1,67 | 3,738459 | -0,44683 | 0,654999 | NA        |
| RP11-39E3.6    | 6,88    | 0,46  | 1,03666  | 0,446762 | 0,655047 | 0,8799357 |
| NR1H2          | 732,90  | 0,13  | 0,299207 | 0,446752 | 0,655054 | 0,8799357 |
| AF213884.2     | 11,45   | 0,61  | 1,375405 | 0,446708 | 0,655086 | 0,8799357 |
| ACTN1          | 358,56  | 0,27  | 0,603364 | 0,446665 | 0,655117 | 0,8799357 |
| RP13-20L14.6   | 14,78   | -0,79 | 1,764588 | -0,44666 | 0,655119 | 0,8799357 |
| RP11-356I2.4   | 171,89  | 0,28  | 0,618967 | 0,446584 | 0,655175 | 0,8799357 |
| RP13-270P17.3  | 51,13   | -0,60 | 1,348202 | -0,44657 | 0,655187 | 0,8799357 |
| SLC22A13       | 0,51    | 1,67  | 3,740956 | 0,446568 | 0,655187 | NA        |
| RP11-443B7.2   | 0,50    | 1,67  | 3,741463 | 0,446538 | 0,655209 | NA        |
| BCL2L2-PABPN1  | 32,48   | -0,78 | 1,745336 | -0,4464  | 0,655309 | 0,8799618 |
| RP11-513O17.2  | 6,55    | -0,60 | 1,35108  | -0,44637 | 0,655331 | 0,8799618 |
| GBE1           | 161,77  | 0,35  | 0,779006 | 0,446345 | 0,655348 | 0,8799618 |
| OSTCL          | 0,50    | 1,67  | 3,741239 | 0,446308 | 0,655375 | NA        |
| GTF2A1L        | 2,73    | -1,48 | 3,325993 | -0,4463  | 0,655382 | NA        |
| RP11-505K9.4   | 2,33    | -0,80 | 1,785104 | -0,44598 | 0,655612 | NA        |
| TCN1           | 0,20    | -1,67 | 3,740698 | -0,44593 | 0,655651 | NA        |
| IGFBP7         | 358,34  | 0,24  | 0,531315 | 0,445911 | 0,655661 | 0,8802083 |
| FNBP4          | 953,23  | 0,15  | 0,342522 | 0,445833 | 0,655718 | 0,8802083 |
| FCGRT          | 5019,66 | 0,09  | 0,20064  | 0,445829 | 0,655721 | 0,8802083 |
| RP3-415N12.1   | 7,72    | 0,96  | 2,162299 | 0,445829 | 0,655721 | 0,8802083 |
| TIGD7          | 3,36    | -1,01 | 2,267765 | -0,44581 | 0,655733 | NA        |
| HACE1          | 71,19   | -0,33 | 0,733286 | -0,4457  | 0,655817 | 0,8802222 |
| ATP6V0E1       | 2300,54 | 0,12  | 0,270796 | 0,445684 | 0,655826 | 0,8802222 |
| CH17-118O6.2   | 27,71   | 0,48  | 1,079668 | 0,445616 | 0,655875 | 0,880224  |
| SNORA66        | 1,76    | 0,72  | 1,609451 | 0,445586 | 0,655897 | NA        |

|                  |         |       |          |          |          |           |
|------------------|---------|-------|----------|----------|----------|-----------|
| RP13-16H11.1     | 1,89    | -0,96 | 2,155676 | -0,44556 | 0,655914 | NA        |
| RP11-98D18.9     | 9,14    | 0,39  | 0,879264 | 0,445544 | 0,655926 | 0,8802301 |
| RP11-620J15.1    | 0,28    | -1,28 | 2,875242 | -0,44543 | 0,656009 | NA        |
| RHAG             | 4,32    | 0,40  | 0,89184  | 0,44538  | 0,656045 | 0,8802305 |
| RP11-307C12.13   | 12,57   | -0,80 | 1,803398 | -0,44535 | 0,656068 | 0,8802305 |
| MAP1B            | 9,03    | 0,66  | 1,477817 | 0,445348 | 0,656069 | 0,8802305 |
| RP11-654C22.2    | 1,58    | -1,19 | 2,673204 | -0,44507 | 0,656268 | NA        |
| ADAMTSL4-AS1     | 37,32   | -0,27 | 0,614551 | -0,44499 | 0,656329 | 0,8804233 |
| TLCD1            | 6,20    | 0,41  | 0,930187 | 0,444953 | 0,656354 | 0,8804233 |
| WSB1             | 2539,38 | -0,16 | 0,358745 | -0,44483 | 0,656446 | 0,8804233 |
| UCKL1            | 267,98  | 0,31  | 0,685963 | 0,444822 | 0,656448 | 0,8804233 |
| RP3-488M23.3     | 6,89    | -1,16 | 2,616337 | -0,44479 | 0,656469 | 0,8804233 |
| ZNF276           | 432,72  | -0,25 | 0,561799 | -0,44469 | 0,656542 | 0,8804233 |
| PLCD3            | 33,34   | -0,25 | 0,558744 | -0,44469 | 0,656544 | 0,8804233 |
| INO80B-WBP1      | 0,51    | 1,66  | 3,741413 | 0,444616 | 0,656597 | NA        |
| ACAD9            | 79,33   | 0,38  | 0,848829 | 0,444521 | 0,656666 | 0,8805235 |
| DLEU2            | 99,87   | -0,33 | 0,749887 | -0,44443 | 0,656733 | 0,8805497 |
| RP11-393K10.1    | 0,49    | 1,66  | 3,741573 | 0,444369 | 0,656776 | NA        |
| CYSTM1           | 438,41  | 0,25  | 0,571488 | 0,444273 | 0,656845 | 0,8806185 |
| RN7SL750P        | 1,92    | 0,82  | 1,856363 | 0,444255 | 0,656858 | NA        |
| SNX2             | 1608,11 | 0,13  | 0,303352 | 0,444199 | 0,656899 | 0,8806185 |
| AP3M1            | 331,25  | 0,31  | 0,704289 | 0,444162 | 0,656926 | 0,8806185 |
| CTC-463N11.3     | 0,80    | 1,66  | 3,735122 | 0,444138 | 0,656943 | NA        |
| NCS1             | 1,21    | 1,66  | 3,729274 | 0,444131 | 0,656948 | NA        |
| RPL34P21         | 0,11    | -1,66 | 3,7387   | -0,44401 | 0,657037 | NA        |
| IFLTD1           | 5,44    | 0,49  | 1,113152 | 0,443972 | 0,657062 | 0,8807383 |
| RP11-34E5.4      | 0,99    | -1,62 | 3,645414 | -0,44376 | 0,657215 | NA        |
| FAM26E           | 2,22    | -0,82 | 1,848473 | -0,44375 | 0,657222 | NA        |
| SH3GL3           | 4,02    | -0,78 | 1,763265 | -0,44374 | 0,657231 | 0,8808403 |
| LL22NC03-80A10.6 | 141,80  | -0,34 | 0,759873 | -0,44374 | 0,657233 | 0,8808403 |
| RP11-361D15.1    | 55,43   | 0,49  | 1,109682 | 0,44367  | 0,657281 | 0,8808406 |
| C1orf100         | 0,50    | 1,66  | 3,74194  | 0,443611 | 0,657324 | NA        |
| UBE2V1P1         | 1,67    | 1,32  | 2,970782 | 0,443544 | 0,657373 | NA        |
| RP11-397P13.7    | 1,27    | -0,99 | 2,24029  | -0,44352 | 0,657392 | NA        |
| SNORD15B         | 0,47    | 1,61  | 3,624431 | 0,443499 | 0,657405 | NA        |
| RP11-204M4.3     | 4,82    | -0,47 | 1,070392 | -0,44349 | 0,657408 | 0,8809473 |
| AC005534.8       | 0,51    | 1,05  | 2,36658  | 0,443493 | 0,657409 | NA        |
| AC005954.4       | 2,62    | 0,49  | 1,098989 | 0,443447 | 0,657443 | NA        |
| AC010884.1       | 0,79    | 1,66  | 3,735214 | 0,443445 | 0,657444 | NA        |
| NR2F1            | 2,12    | 0,71  | 1,594287 | 0,443372 | 0,657496 | NA        |
| RP11-548K12.4    | 0,81    | 1,66  | 3,735011 | 0,443366 | 0,657501 | NA        |
| C21orf62-AS1     | 7,57    | -0,42 | 0,943433 | -0,44323 | 0,6576   | 0,8810684 |
| ARHGEF2          | 286,76  | -0,18 | 0,411627 | -0,44322 | 0,657609 | 0,8810684 |
| RP11-730N24.1    | 0,50    | 1,66  | 3,74162  | 0,443107 | 0,657688 | NA        |
| RP11-678K21.2    | 2,83    | -0,54 | 1,226271 | -0,44296 | 0,657794 | NA        |
| FRAT1            | 82,87   | -0,29 | 0,649726 | -0,44295 | 0,657801 | 0,8810684 |
| SOS1             | 370,68  | -0,27 | 0,620578 | -0,44292 | 0,657823 | 0,8810684 |
| CTD-2553L13.9    | 6,81    | 0,67  | 1,502882 | 0,442817 | 0,657898 | 0,8810684 |
| RAB18            | 444,68  | -0,28 | 0,6422   | -0,44281 | 0,657904 | 0,8810684 |
| RP11-304L19.11   | 16,89   | 0,27  | 0,620042 | 0,442794 | 0,657915 | 0,8810684 |

|                  |         |       |          |          |          |           |
|------------------|---------|-------|----------|----------|----------|-----------|
| GNB1L            | 143,23  | -0,57 | 1,289429 | -0,44276 | 0,657936 | 0,8810684 |
| ANKRD24          | 1,76    | -1,30 | 2,940833 | -0,44275 | 0,657948 | NA        |
| DAP              | 730,56  | 0,25  | 0,556108 | 0,442722 | 0,657967 | 0,8810684 |
| LHFPL2           | 25,29   | -0,42 | 0,954465 | -0,44272 | 0,657972 | 0,8810684 |
| RP11-474O21.5    | 0,59    | -1,58 | 3,567642 | -0,4426  | 0,658055 | NA        |
| RP11-655G22.1    | 2,38    | -0,53 | 1,200049 | -0,44257 | 0,658075 | NA        |
| FANCL            | 158,92  | 0,23  | 0,514773 | 0,442546 | 0,658094 | 0,8811685 |
| CTD-2184C24.2    | 6,39    | -0,63 | 1,426382 | -0,44245 | 0,658163 | 0,8811978 |
| CTD-2545H1.2     | 1,70    | -0,56 | 1,263996 | -0,44235 | 0,658236 | NA        |
| LGALSL           | 3,50    | 0,64  | 1,435806 | 0,442279 | 0,658287 | NA        |
| CTB-118N6.3      | 0,68    | -1,20 | 2,707052 | -0,4418  | 0,658631 | NA        |
| RPS27AP1         | 0,70    | -0,76 | 1,719092 | -0,44175 | 0,658671 | NA        |
| DHFRP1           | 0,49    | 1,65  | 3,741636 | 0,441683 | 0,658719 | NA        |
| RP11-439C15.4    | 0,26    | 0,97  | 2,202157 | 0,441636 | 0,658752 | NA        |
| NOXRED1          | 0,80    | 0,92  | 2,09237  | 0,441604 | 0,658775 | NA        |
| AC097662.2       | 0,92    | -0,50 | 1,127172 | -0,44146 | 0,658881 | NA        |
| RP11-531F16.4    | 8,30    | -0,68 | 1,537245 | -0,44139 | 0,65893  | 0,8821606 |
| RP11-214K3.19    | 2,28    | 1,14  | 2,585196 | 0,441387 | 0,658933 | NA        |
| HNRNPD           | 1605,92 | -0,09 | 0,203425 | -0,44124 | 0,659042 | 0,8822482 |
| SQSTM1           | 943,58  | 0,16  | 0,35335  | 0,440859 | 0,659315 | 0,8825045 |
| UTP14C           | 133,63  | 0,35  | 0,80307  | 0,440803 | 0,659356 | 0,8825045 |
| LL22NC03-23C6.13 | 0,87    | 1,03  | 2,337878 | 0,440706 | 0,659426 | NA        |
| RP11-1198D22.1   | 0,49    | 1,65  | 3,741682 | 0,440683 | 0,659442 | NA        |
| VSIR             | 3629,35 | -0,11 | 0,246839 | -0,44059 | 0,659507 | 0,8825045 |
| C12orf48         | 48,85   | -0,47 | 1,077824 | -0,44058 | 0,659514 | 0,8825045 |
| ZNF699           | 30,34   | 0,62  | 1,416085 | 0,440557 | 0,659534 | 0,8825045 |
| LYSMD4           | 32,97   | -0,62 | 1,405577 | -0,44051 | 0,659569 | 0,8825045 |
| CTD-2135J3.2     | 30,19   | 0,55  | 1,258851 | 0,440482 | 0,659588 | 0,8825045 |
| AC009245.3       | 1,31    | -0,52 | 1,184549 | -0,44046 | 0,659606 | NA        |
| C15orf57         | 325,75  | 0,28  | 0,625311 | 0,440447 | 0,659613 | 0,8825045 |
| DNAJC13          | 754,16  | -0,26 | 0,582048 | -0,44033 | 0,659698 | 0,8825536 |
| TMEM44           | 14,71   | -0,62 | 1,405882 | -0,44023 | 0,659773 | 0,882582  |
| CORO6            | 0,49    | 1,65  | 3,741355 | 0,440222 | 0,659776 | NA        |
| PRDM10           | 49,72   | -0,54 | 1,222301 | -0,44016 | 0,65982  | 0,882582  |
| KCNAB2           | 639,91  | -0,17 | 0,391949 | -0,4401  | 0,659863 | 0,882582  |
| RP11-798G7.3     | 232,82  | -0,32 | 0,728513 | -0,44004 | 0,659909 | 0,882582  |
| RP11-783K16.13   | 0,48    | 1,59  | 3,619267 | 0,439984 | 0,659949 | NA        |
| SSNA1            | 410,24  | -0,18 | 0,411303 | -0,43981 | 0,660076 | 0,8827073 |
| TESK1            | 165,24  | -0,49 | 1,119214 | -0,43978 | 0,660097 | 0,8827073 |
| RP1-228H13.5     | 12,95   | -0,79 | 1,802375 | -0,43968 | 0,660167 | 0,8827373 |
| RP1-121G13.3     | 0,79    | 1,63  | 3,699086 | 0,439533 | 0,660275 | NA        |
| RP11-697E2.7     | 0,49    | 1,64  | 3,741727 | 0,439502 | 0,660298 | NA        |
| JRKL             | 42,92   | 0,60  | 1,373662 | 0,439458 | 0,66033  | 0,8827518 |
| ZNF408           | 14,69   | -0,74 | 1,673785 | -0,43936 | 0,660399 | 0,8827518 |
| CLEC1A           | 26,38   | -0,42 | 0,960428 | -0,43934 | 0,660418 | 0,8827518 |
| RP11-286E11.2    | 14,75   | -0,41 | 0,927644 | -0,43923 | 0,660493 | 0,8827518 |
| PHIP             | 1490,22 | -0,14 | 0,310118 | -0,4392  | 0,660513 | 0,8827518 |
| RP11-850A17.1    | 11,80   | -0,48 | 1,088251 | -0,4392  | 0,660518 | 0,8827518 |
| AC019201.1       | 67,77   | 0,34  | 0,774233 | 0,439193 | 0,660522 | 0,8827518 |
| RP11-295D4.4     | 4,34    | 0,43  | 0,987706 | 0,439144 | 0,660557 | 0,8827518 |

|               |          |       |          |          |          |           |
|---------------|----------|-------|----------|----------|----------|-----------|
| PABPN1        | 526,52   | -0,19 | 0,428131 | -0,43899 | 0,660666 | 0,8828334 |
| HPN           | 3,48     | 0,58  | 1,31799  | 0,438992 | 0,660667 | NA        |
| CTB-138E5.1   | 0,50     | 1,64  | 3,741742 | 0,438946 | 0,660701 | NA        |
| SPESP1        | 3,64     | 1,53  | 3,487374 | 0,438829 | 0,660785 | NA        |
| RP11-23E10.2  | 0,90     | 1,12  | 2,555679 | 0,438638 | 0,660924 | NA        |
| PGM1          | 193,14   | -0,42 | 0,9473   | -0,43861 | 0,660946 | 0,8831437 |
| MXRA8         | 0,49     | 1,64  | 3,741691 | 0,438423 | 0,66108  | NA        |
| NDUFAF3       | 541,07   | -0,20 | 0,45048  | -0,43828 | 0,661183 | 0,8833977 |
| AC104534.3    | 0,49     | 1,64  | 3,741423 | 0,438106 | 0,661309 | NA        |
| NEAT1         | 12685,33 | -0,11 | 0,253528 | -0,43808 | 0,661326 | 0,8835246 |
| APPBP2        | 254,60   | -0,30 | 0,681405 | -0,43794 | 0,661426 | 0,8835443 |
| AP006222.1    | 297,24   | -0,46 | 1,061312 | -0,43792 | 0,661442 | 0,8835443 |
| RP11-517C16.2 | 4,71     | 1,51  | 3,439274 | 0,437783 | 0,661543 | 0,8835443 |
| XAF1          | 1638,21  | -0,27 | 0,627379 | -0,43762 | 0,66166  | 0,8835443 |
| RP4-680D5.2   | 8,51     | 0,50  | 1,140409 | 0,437613 | 0,661667 | 0,8835443 |
| LIPJ          | 1,20     | 1,45  | 3,308514 | 0,437597 | 0,661679 | NA        |
| KB-1995A5.5   | 13,61    | -0,30 | 0,678943 | -0,43756 | 0,661702 | 0,8835443 |
| CTD-3075F15.1 | 8,61     | -0,73 | 1,660539 | -0,43755 | 0,661716 | 0,8835443 |
| TCAM1P        | 5,94     | -0,36 | 0,812908 | -0,43754 | 0,66172  | 0,8835443 |
| RP11-600P18.4 | 0,50     | 1,64  | 3,741854 | 0,437405 | 0,661817 | NA        |
| RAET1E        | 4,86     | -0,51 | 1,164879 | -0,4372  | 0,661967 | 0,8837441 |
| HIRA          | 130,53   | 0,56  | 1,287654 | 0,437143 | 0,662008 | 0,8837441 |
| ZFPM1         | 32,09    | 0,32  | 0,737565 | 0,437136 | 0,662012 | 0,8837441 |
| PTPN4         | 142,38   | -0,34 | 0,771971 | -0,43703 | 0,66209  | 0,8837836 |
| TTC7A         | 623,25   | -0,19 | 0,436962 | -0,43656 | 0,66243  | 0,8840867 |
| POLR3C        | 383,09   | -0,30 | 0,689394 | -0,43653 | 0,662449 | 0,8840867 |
| RP11-628J14.1 | 9,09     | -0,19 | 0,430405 | -0,43652 | 0,662462 | 0,8840867 |
| TEX35         | 65,91    | -0,34 | 0,780919 | -0,43637 | 0,66257  | 0,8840867 |
| RP11-438L19.1 | 0,49     | 1,63  | 3,741853 | 0,436357 | 0,662577 | NA        |
| RP11-556I13.2 | 1,00     | -0,66 | 1,502986 | -0,43634 | 0,662588 | NA        |
| C17orf63      | 124,76   | -0,40 | 0,917875 | -0,43631 | 0,662608 | 0,8840867 |
| RN7SL408P     | 0,54     | 1,05  | 2,412672 | 0,436236 | 0,662665 | NA        |
| CTA-243E7.1   | 91,27    | -0,23 | 0,529445 | -0,43622 | 0,66268  | 0,8840867 |
| AL773604.8    | 18,68    | 0,64  | 1,463549 | 0,43619  | 0,662699 | 0,8840867 |
| CCDC144NL     | 29,50    | -1,08 | 2,476318 | -0,43614 | 0,662739 | 0,8840867 |
| RN7SL100P     | 3,42     | 0,53  | 1,216109 | 0,436128 | 0,662744 | NA        |
| TAF6          | 53,25    | -0,31 | 0,703793 | -0,43596 | 0,662865 | 0,8840867 |
| CTC-429P9.1   | 15,57    | -0,37 | 0,859126 | -0,43596 | 0,662867 | 0,8840867 |
| ERBIN         | 1304,02  | 0,14  | 0,326741 | 0,435835 | 0,662956 | 0,8840867 |
| FAM89B        | 300,70   | -0,23 | 0,533179 | -0,43574 | 0,663024 | 0,8840867 |
| P4HTM         | 94,32    | -0,42 | 0,955266 | -0,43574 | 0,663029 | 0,8840867 |
| HYMAI         | 3,68     | -1,00 | 2,284215 | -0,43568 | 0,663067 | NA        |
| CCDC18        | 202,48   | -0,27 | 0,630821 | -0,43568 | 0,663069 | 0,8840867 |
| TMEM19        | 388,32   | 0,34  | 0,779899 | 0,435678 | 0,66307  | 0,8840867 |
| MRPS2         | 241,07   | 0,28  | 0,634084 | 0,435638 | 0,663099 | 0,8840867 |
| SLC52A2       | 124,12   | -0,39 | 0,896338 | -0,4356  | 0,663124 | 0,8840867 |
| AC004702.2    | 2,04     | -0,73 | 1,681424 | -0,43545 | 0,663238 | NA        |
| KB-1615E4.1   | 0,45     | 1,56  | 3,585561 | 0,435412 | 0,663263 | NA        |
| MURC          | 0,63     | 0,63  | 1,449971 | 0,435393 | 0,663277 | NA        |
| NOP2          | 187,16   | 0,29  | 0,66224  | 0,435327 | 0,663325 | 0,8842773 |



|               |         |       |          |          |          |           |
|---------------|---------|-------|----------|----------|----------|-----------|
| RP11-713M6.2  | 0,66    | 1,36  | 3,126594 | 0,435297 | 0,663347 | NA        |
| TLE4          | 523,60  | -0,23 | 0,533108 | -0,43528 | 0,663362 | 0,8842773 |
| ADAMTS13      | 1,46    | 1,29  | 2,974828 | 0,435219 | 0,663403 | NA        |
| PVRIG         | 6,48    | -0,63 | 1,436796 | -0,43507 | 0,663511 | 0,8844116 |
| RP11-260N14.1 | 0,26    | 0,96  | 2,196955 | 0,434787 | 0,663717 | NA        |
| CEP170        | 790,74  | 0,16  | 0,367095 | 0,434752 | 0,663742 | 0,8846569 |
| RP11-102M11.2 | 17,65   | -0,46 | 1,069641 | -0,43468 | 0,663792 | 0,8846602 |
| RP11-932O9.10 | 0,56    | 1,03  | 2,377536 | 0,434636 | 0,663827 | NA        |
| LGALS3        | 2209,25 | -0,14 | 0,323613 | -0,43459 | 0,663863 | 0,8846907 |
| TCTN1         | 87,06   | -0,28 | 0,638774 | -0,43452 | 0,663912 | 0,8846933 |
| RN7SL850P     | 1,13    | -0,68 | 1,571799 | -0,4345  | 0,663927 | NA        |
| AC093724.1    | 1,85    | 0,95  | 2,188562 | 0,434456 | 0,663958 | NA        |
| PCDHGB8P      | 1,44    | -0,41 | 0,947904 | -0,43442 | 0,663981 | NA        |
| PPARG         | 2,60    | -0,44 | 1,004396 | -0,43441 | 0,663988 | NA        |
| RP5-827C21.6  | 0,97    | -1,38 | 3,176137 | -0,43437 | 0,664016 | NA        |
| ARX           | 1,08    | -0,74 | 1,711682 | -0,43436 | 0,664028 | NA        |
| RP11-989E6.10 | 95,87   | -0,35 | 0,795175 | -0,43435 | 0,664033 | 0,8847647 |
| KPNA6         | 729,53  | -0,22 | 0,515328 | -0,43431 | 0,664061 | 0,8847647 |
| CTD-2555O16.2 | 0,47    | 1,62  | 3,741875 | 0,434265 | 0,664096 | NA        |
| BCRP3         | 0,55    | 1,03  | 2,372745 | 0,434246 | 0,66411  | NA        |
| DDX4          | 15,48   | -1,57 | 3,610076 | -0,43416 | 0,66417  | 0,8848323 |
| QRICH1        | 402,15  | 0,22  | 0,503938 | 0,434053 | 0,66425  | 0,8848323 |
| C12orf66      | 117,78  | -0,51 | 1,170947 | -0,43405 | 0,664254 | 0,8848323 |
| LLNLR-285B5.1 | 0,79    | 1,62  | 3,735578 | 0,433748 | 0,664471 | NA        |
| MZT2B         | 154,93  | -0,22 | 0,516371 | -0,43367 | 0,664528 | 0,8851337 |
| DYRK3         | 4,19    | 1,05  | 2,425476 | 0,433581 | 0,664593 | 0,885156  |
| C1orf143      | 0,86    | 1,10  | 2,545994 | 0,433487 | 0,664661 | NA        |
| RF02104       | 1,24    | 1,26  | 2,91153  | 0,433455 | 0,664684 | NA        |
| RN7SL713P     | 0,56    | 0,93  | 2,140068 | 0,433441 | 0,664695 | NA        |
| ATAD3A        | 63,47   | -0,43 | 0,986159 | -0,43343 | 0,664702 | 0,8852316 |
| SCARNA7       | 0,83    | 1,10  | 2,529244 | 0,433382 | 0,664737 | NA        |
| STIL          | 54,25   | -0,37 | 0,852954 | -0,43337 | 0,664744 | 0,8852316 |
| RP4-665J23.4  | 14,13   | 0,37  | 0,86077  | 0,43324  | 0,664841 | 0,8852962 |
| RP11-554E23.4 | 0,18    | -1,46 | 3,374121 | -0,43321 | 0,664861 | NA        |
| KB-1572G7.1   | 89,85   | 0,33  | 0,761561 | 0,433061 | 0,66497  | 0,8853603 |
| MYADM         | 1464,43 | 0,14  | 0,324558 | 0,432999 | 0,665016 | 0,8853603 |
| SYT1          | 2,60    | -0,98 | 2,270821 | -0,43298 | 0,665029 | NA        |
| RUNX2         | 423,16  | 0,24  | 0,564952 | 0,432951 | 0,665051 | 0,8853603 |
| IMMT          | 588,94  | -0,16 | 0,367883 | -0,43285 | 0,665126 | 0,8853603 |
| AC002519.8    | 58,61   | -0,36 | 0,830753 | -0,43279 | 0,665169 | 0,8853603 |
| TMEM185B      | 18,60   | 0,58  | 1,351099 | 0,432781 | 0,665174 | 0,8853603 |
| DRD1          | 0,47    | 1,62  | 3,742015 | 0,432648 | 0,66527  | NA        |
| RP11-351M16.1 | 0,45    | 1,56  | 3,596507 | 0,432614 | 0,665295 | NA        |
| RP3-406A7.7   | 0,50    | 1,62  | 3,741998 | 0,432594 | 0,66531  | NA        |
| CTD-2260A17.2 | 1,71    | 0,89  | 2,053096 | 0,432509 | 0,665372 | NA        |
| DNAJB1        | 457,40  | -0,28 | 0,63744  | -0,43245 | 0,665411 | 0,8856126 |
| RN7SL254P     | 1,50    | -0,92 | 2,119371 | -0,43218 | 0,665608 | NA        |
| CAGE1         | 21,99   | 0,54  | 1,251028 | 0,432139 | 0,66564  | 0,8857669 |
| SLC30A3       | 11,46   | -0,39 | 0,913024 | -0,43213 | 0,665645 | 0,8857669 |
| MOSPD2        | 284,59  | -0,32 | 0,748898 | -0,4321  | 0,66567  | 0,8857669 |

|                  |         |       |          |          |          |           |
|------------------|---------|-------|----------|----------|----------|-----------|
| RP1-506.4        | 0,65    | 1,35  | 3,127987 | 0,432086 | 0,665679 | NA        |
| AC073610.5       | 0,57    | -1,30 | 3,001361 | -0,43208 | 0,665684 | NA        |
| RP11-1101K5.1    | 0,49    | 1,62  | 3,741994 | 0,431939 | 0,665786 | NA        |
| RP11-531A24.7    | 0,48    | 1,62  | 3,742003 | 0,431909 | 0,665808 | NA        |
| MED12            | 95,49   | 0,32  | 0,734446 | 0,431865 | 0,66584  | 0,8859092 |
| ITGB2            | 4918,23 | 0,10  | 0,234    | 0,431719 | 0,665946 | 0,8859092 |
| CHGB             | 8,03    | -0,51 | 1,189751 | -0,43159 | 0,666038 | 0,8859092 |
| UNC5A            | 5,09    | 1,52  | 3,526288 | 0,431571 | 0,666053 | 0,8859092 |
| XXbac-BPG308K3.6 | 12,23   | 0,50  | 1,165804 | 0,431539 | 0,666076 | 0,8859092 |
| POLL             | 225,46  | -0,33 | 0,762441 | -0,43146 | 0,666134 | 0,8859092 |
| TBC1D25          | 101,60  | 0,32  | 0,750408 | 0,431426 | 0,666159 | 0,8859092 |
| HSD17B11         | 788,34  | 0,21  | 0,4843   | 0,431388 | 0,666186 | 0,8859092 |
| CTC-244M17.1     | 4,77    | -0,47 | 1,099396 | -0,43136 | 0,666206 | 0,8859092 |
| STOX2            | 0,70    | 0,87  | 2,01645  | 0,43108  | 0,66641  | NA        |
| SLC12A7          | 699,08  | 0,19  | 0,450879 | 0,430944 | 0,666509 | 0,8862491 |
| CRB3             | 0,67    | 0,77  | 1,798482 | 0,430906 | 0,666537 | NA        |
| AP1S3            | 109,21  | -0,32 | 0,75292  | -0,43071 | 0,666676 | 0,8864084 |
| AC006552.1       | 17,67   | 0,43  | 0,996234 | 0,430449 | 0,666869 | 0,8864906 |
| RINT1            | 86,51   | 0,32  | 0,753489 | 0,430414 | 0,666895 | 0,8864906 |
| CLDN15           | 56,04   | 0,45  | 1,044124 | 0,430413 | 0,666895 | 0,8864906 |
| LA16c-366D3.1    | 1,37    | -1,40 | 3,260366 | -0,43036 | 0,666933 | NA        |
| FRK              | 391,19  | -0,22 | 0,508924 | -0,43032 | 0,666965 | 0,8864906 |
| RP11-488L18.4    | 154,30  | -0,31 | 0,72987  | -0,4303  | 0,666976 | 0,8864906 |
| AC007383.3       | 15,54   | -0,65 | 1,506719 | -0,43011 | 0,667119 | 0,8866167 |
| MAGI2            | 75,59   | 0,29  | 0,677241 | 0,429981 | 0,66721  | 0,8866558 |
| CPHL1            | 0,86    | 0,78  | 1,813392 | 0,429878 | 0,667284 | NA        |
| SYNC             | 8,01    | -1,36 | 3,156462 | -0,42985 | 0,667302 | 0,8866558 |
| ADORA2A          | 8,90    | -1,09 | 2,530517 | -0,4298  | 0,66734  | 0,8866558 |
| ELP2             | 767,46  | 0,23  | 0,539383 | 0,429744 | 0,667382 | 0,8866558 |
| JDP2             | 337,66  | 0,32  | 0,737601 | 0,429737 | 0,667387 | 0,8866558 |
| RP11-147K21.1    | 0,19    | -1,45 | 3,381615 | -0,42969 | 0,667425 | NA        |
| RP11-680F20.6    | 0,49    | 1,61  | 3,741964 | 0,429658 | 0,667444 | NA        |
| ATP7A            | 124,47  | 0,30  | 0,695931 | 0,429614 | 0,667476 | 0,8867119 |
| WASH7P           | 1,97    | 0,87  | 2,019023 | 0,429595 | 0,66749  | NA        |
| RP11-1149O23.4   | 14,10   | 0,69  | 1,608086 | 0,429413 | 0,667623 | 0,8867207 |
| RP11-21F16.1     | 70,43   | 0,42  | 0,972263 | 0,429397 | 0,667634 | 0,8867207 |
| RP11-1078H9.5    | 7,08    | 0,53  | 1,232142 | 0,429392 | 0,667638 | 0,8867207 |
| RP11-9E17.1      | 0,64    | 1,21  | 2,812055 | 0,429347 | 0,667671 | NA        |
| RP11-474D1.2     | 11,40   | 0,33  | 0,773186 | 0,429293 | 0,66771  | 0,8867207 |
| HERC6            | 152,17  | 0,44  | 1,017512 | 0,429235 | 0,667752 | 0,8867207 |
| RP11-12J10.4     | 0,84    | 1,08  | 2,525539 | 0,429231 | 0,667755 | NA        |
| ZFP90            | 129,39  | -0,36 | 0,845589 | -0,42914 | 0,667822 | 0,8867207 |
| SPPL3            | 545,59  | 0,18  | 0,422508 | 0,429063 | 0,667877 | 0,8867207 |
| ASPCR1           | 138,30  | 0,24  | 0,560111 | 0,429039 | 0,667895 | 0,8867207 |
| RP4-583P15.11    | 9,19    | 0,44  | 1,028793 | 0,429008 | 0,667918 | 0,8867207 |
| RP11-370F5.4     | 4,65    | -0,62 | 1,434668 | -0,42895 | 0,66796  | 0,8867207 |
| NCSTN            | 586,38  | -0,19 | 0,451715 | -0,42881 | 0,66806  | 0,8867883 |
| RP11-215H22.1    | 0,47    | 1,60  | 3,742169 | 0,428763 | 0,668096 | NA        |
| RP11-166O4.1     | 19,06   | -0,43 | 0,995836 | -0,42875 | 0,668106 | 0,8867883 |
| RP4-814D15.1     | 0,93    | -1,57 | 3,663637 | -0,42868 | 0,668154 | NA        |

|               |        |       |          |          |          |           |
|---------------|--------|-------|----------|----------|----------|-----------|
| CTD-2557P19.4 | 1,18   | 1,60  | 3,73061  | 0,428594 | 0,668219 | NA        |
| DNAJB5        | 81,82  | 0,46  | 1,082043 | 0,42854  | 0,668258 | 0,8868477 |
| SNORD118      | 2,31   | -0,60 | 1,409118 | -0,42852 | 0,668272 | NA        |
| RNU2-32P      | 0,47   | 1,60  | 3,742178 | 0,428474 | 0,668306 | NA        |
| MOB4          | 441,87 | 0,20  | 0,470724 | 0,428382 | 0,668373 | 0,8868477 |
| PLSCR4        | 0,90   | -1,17 | 2,722076 | -0,42837 | 0,668382 | NA        |
| RP1-273G13.3  | 3,34   | -0,82 | 1,914422 | -0,42834 | 0,668405 | NA        |
| ASAP2         | 13,96  | -0,64 | 1,499381 | -0,42829 | 0,66844  | 0,8868477 |
| SH3TC2        | 20,98  | -0,51 | 1,185114 | -0,42828 | 0,668448 | 0,8868477 |
| RP11-512M8.12 | 0,74   | -0,90 | 2,110668 | -0,42828 | 0,668448 | NA        |
| SRRT          | 347,86 | -0,20 | 0,465659 | -0,4282  | 0,668507 | 0,8868477 |
| STAT3         | 877,73 | 0,13  | 0,301694 | 0,428142 | 0,668548 | 0,8868477 |
| IARS          | 498,62 | -0,30 | 0,702319 | -0,42813 | 0,668556 | 0,8868477 |
| RP11-750H9.7  | 9,10   | 0,33  | 0,764516 | 0,428113 | 0,668569 | 0,8868477 |
| MRPS35        | 479,23 | 0,14  | 0,325432 | 0,428098 | 0,66858  | 0,8868477 |
| RP11-438H8.8  | 0,57   | 1,60  | 3,742198 | 0,42807  | 0,6686   | NA        |
| AC079896.1    | 1,14   | 1,60  | 3,730901 | 0,42805  | 0,668615 | NA        |
| ZMYND19       | 56,06  | -0,57 | 1,328076 | -0,428   | 0,668652 | 0,8868564 |
| CTB-94B10.2   | 2,07   | 0,87  | 2,038312 | 0,427984 | 0,668663 | NA        |
| RP11-115C21.2 | 30,52  | 0,30  | 0,706912 | 0,427949 | 0,668688 | 0,8868564 |
| RP11-242C19.2 | 9,99   | 0,57  | 1,343075 | 0,427849 | 0,668761 | 0,8868564 |
| PLN           | 14,22  | -0,49 | 1,156241 | -0,42774 | 0,668838 | 0,8868564 |
| GRAMD4        | 156,46 | 0,25  | 0,594738 | 0,427689 | 0,668878 | 0,8868564 |
| KLHL5         | 478,67 | 0,27  | 0,63185  | 0,427555 | 0,668975 | 0,8868564 |
| RP1-296G17.3  | 4,19   | 0,27  | 0,627377 | 0,427502 | 0,669014 | 0,8868564 |
| RP11-611E13.2 | 94,27  | -0,32 | 0,741524 | -0,42744 | 0,669056 | 0,8868564 |
| RP11-128B16.5 | 0,47   | 1,53  | 3,582269 | 0,427442 | 0,669057 | NA        |
| RP3-475N16.1  | 76,62  | 0,23  | 0,544164 | 0,42737  | 0,66911  | 0,8868564 |
| RP4-616B8.6   | 0,47   | 1,60  | 3,742243 | 0,427348 | 0,669126 | NA        |
| RP3-468B3.2   | 45,38  | 0,25  | 0,594445 | 0,427331 | 0,669138 | 0,8868564 |
| HTN3          | 17,55  | 0,30  | 0,69673  | 0,427329 | 0,66914  | 0,8868564 |
| AL049757.3    | 0,66   | -0,54 | 1,273915 | -0,42724 | 0,669203 | NA        |
| RP11-19N8.4   | 0,22   | -1,04 | 2,43203  | -0,42723 | 0,669213 | NA        |
| DACT3         | 40,12  | -0,18 | 0,414962 | -0,42722 | 0,669218 | 0,8868564 |
| CTD-3220F14.2 | 1,72   | 0,89  | 2,085578 | 0,427177 | 0,66925  | NA        |
| AC017071.1    | 0,46   | 1,60  | 3,742216 | 0,427176 | 0,669251 | NA        |
| BOLA3         | 58,57  | -0,32 | 0,745244 | -0,42713 | 0,669287 | 0,8868564 |
| RGS6          | 2,65   | 0,89  | 2,090968 | 0,427105 | 0,669303 | NA        |
| LIN7B         | 52,59  | -0,48 | 1,116476 | -0,42703 | 0,669357 | 0,8868564 |
| NUMA1         | 829,80 | -0,22 | 0,524531 | -0,42693 | 0,669431 | 0,8868564 |
| RP11-40F6.2   | 0,72   | 0,89  | 2,094753 | 0,426853 | 0,669487 | NA        |
| TIMP3         | 0,47   | 1,60  | 3,742247 | 0,426799 | 0,669526 | NA        |
| ZNF883        | 8,53   | 0,36  | 0,836383 | 0,426698 | 0,6696   | 0,8868564 |
| NABP1         | 815,43 | -0,24 | 0,564392 | -0,42669 | 0,669606 | 0,8868564 |
| SENP8         | 11,56  | 0,51  | 1,203594 | 0,426688 | 0,669607 | 0,8868564 |
| NAXD          | 102,72 | 0,45  | 1,058913 | 0,426673 | 0,669617 | 0,8868564 |
| BCAS4         | 86,64  | 0,29  | 0,684949 | 0,426627 | 0,669651 | 0,8868564 |
| RP11-400N9.1  | 22,63  | -0,40 | 0,93964  | -0,42656 | 0,669697 | 0,8868564 |
| PFN4          | 2,48   | 0,86  | 2,026911 | 0,426538 | 0,669716 | NA        |
| TRMT5         | 73,45  | 0,43  | 1,005965 | 0,426535 | 0,669718 | 0,8868564 |

|               |        |       |          |          |          |           |
|---------------|--------|-------|----------|----------|----------|-----------|
| RP11-452D2.2  | 5,99   | -0,39 | 0,916349 | -0,42653 | 0,669723 | 0,8868564 |
| C1orf109      | 49,24  | -0,39 | 0,916252 | -0,4265  | 0,669743 | 0,8868564 |
| CCDC61        | 8,32   | -0,55 | 1,290315 | -0,4264  | 0,669816 | 0,8868564 |
| MIB1          | 175,23 | 0,38  | 0,890508 | 0,426387 | 0,669826 | 0,8868564 |
| C7orf61       | 0,52   | 1,60  | 3,742125 | 0,426336 | 0,669863 | NA        |
| RP11-115E19.1 | 0,37   | -0,96 | 2,250205 | -0,42629 | 0,669898 | NA        |
| RASA1         | 337,33 | 0,21  | 0,501499 | 0,426197 | 0,669964 | 0,8869766 |
| RNA5SP278     | 0,47   | 1,59  | 3,742248 | 0,426152 | 0,669997 | NA        |
| AC002044.4    | 1,73   | 0,74  | 1,744896 | 0,425898 | 0,670182 | NA        |
| NLRC3         | 26,48  | -0,41 | 0,968787 | -0,42576 | 0,670286 | 0,8872495 |
| KLHL8         | 239,26 | -0,24 | 0,552388 | -0,42575 | 0,670293 | 0,8872495 |
| PEG3          | 2,08   | 0,85  | 2,000617 | 0,425688 | 0,670335 | NA        |
| RP11-18A15.1  | 6,52   | -0,43 | 1,007446 | -0,42567 | 0,670349 | 0,8872495 |
| CTB-131B5.2   | 48,31  | 0,25  | 0,586373 | 0,425653 | 0,670361 | 0,8872495 |
| RP4-570O12.3  | 3,09   | -0,41 | 0,958231 | -0,42565 | 0,670365 | NA        |
| CYP1B1        | 23,17  | 0,74  | 1,74053  | 0,425583 | 0,670412 | 0,8872536 |
| TNFRSF18      | 0,24   | -1,20 | 2,821613 | -0,42551 | 0,670467 | NA        |
| RN7SL274P     | 3,75   | 0,78  | 1,830699 | 0,425498 | 0,670474 | NA        |
| RP11-449K6.5  | 0,47   | 1,59  | 3,742296 | 0,425409 | 0,670539 | NA        |
| NUP153        | 274,80 | -0,20 | 0,46809  | -0,42539 | 0,670555 | 0,88738   |
| RP11-321A17.3 | 0,47   | 1,59  | 3,742346 | 0,425382 | 0,670558 | NA        |
| RP11-345J4.5  | 471,98 | -0,19 | 0,453333 | -0,42523 | 0,670668 | 0,8874664 |
| RP11-767C1.2  | 0,47   | 1,59  | 3,742218 | 0,425207 | 0,670686 | NA        |
| RBM10         | 378,37 | 0,18  | 0,414701 | 0,425163 | 0,670718 | 0,8874697 |
| AC016629.3    | 0,71   | 1,59  | 3,741517 | 0,425122 | 0,670747 | NA        |
| RP11-767L7.2  | 0,47   | 1,59  | 3,742285 | 0,425096 | 0,670767 | NA        |
| PPP1R8        | 181,27 | -0,25 | 0,578661 | -0,42495 | 0,670873 | 0,8876118 |
| RP11-203H2.1  | 15,53  | -0,41 | 0,970298 | -0,42473 | 0,671031 | 0,8876643 |
| DMRTC1        | 0,60   | -0,60 | 1,407445 | -0,42468 | 0,67107  | NA        |
| CHD8          | 612,57 | 0,20  | 0,467141 | 0,424676 | 0,671073 | 0,8876643 |
| AP002856.7    | 0,47   | 1,59  | 3,742325 | 0,424572 | 0,671149 | NA        |
| RP11-79D8.2   | 4,02   | 0,68  | 1,611964 | 0,424448 | 0,671239 | 0,8876643 |
| RP11-159D12.8 | 85,94  | -0,35 | 0,823146 | -0,42441 | 0,671265 | 0,8876643 |
| RP11-494G9.1  | 10,92  | 0,44  | 1,028956 | 0,424325 | 0,671329 | 0,8876643 |
| INPP5A        | 43,38  | 0,51  | 1,20477  | 0,424315 | 0,671336 | 0,8876643 |
| RP1-245G19.2  | 0,75   | 1,59  | 3,736091 | 0,424265 | 0,671373 | NA        |
| CLPTM1        | 131,44 | -0,21 | 0,486103 | -0,42422 | 0,671403 | 0,8876643 |
| SHB           | 4,88   | -1,30 | 3,06748  | -0,42422 | 0,671404 | 0,8876643 |
| PCCA          | 274,48 | 0,32  | 0,747935 | 0,424202 | 0,671419 | 0,8876643 |
| RP11-269F21.1 | 10,38  | -0,66 | 1,560221 | -0,42419 | 0,671427 | 0,8876643 |
| TSTA3         | 126,64 | 0,38  | 0,906221 | 0,424133 | 0,671469 | 0,8876643 |
| AF001548.3    | 11,66  | -0,31 | 0,725927 | -0,42411 | 0,671485 | 0,8876643 |
| RP11-950K24.2 | 0,47   | 1,59  | 3,742333 | 0,424051 | 0,671529 | NA        |
| AC018634.9    | 9,52   | -1,15 | 2,705045 | -0,42383 | 0,671687 | 0,8878675 |
| TTC36         | 0,46   | 1,59  | 3,742404 | 0,423699 | 0,671785 | NA        |
| RP11-452H21.4 | 22,37  | -0,39 | 0,916323 | -0,42365 | 0,671818 | 0,887945  |
| RP11-718D19.2 | 27,94  | -0,24 | 0,560828 | -0,42362 | 0,671841 | 0,887945  |
| UNGP1         | 1,98   | -0,37 | 0,86874  | -0,42352 | 0,671918 | NA        |
| IAPP          | 1,31   | 0,72  | 1,69457  | 0,423481 | 0,671945 | NA        |
| RP5-1166F10.2 | 7,90   | -0,56 | 1,32451  | -0,42303 | 0,672271 | 0,8881389 |

|               |         |       |          |          |          |           |
|---------------|---------|-------|----------|----------|----------|-----------|
| RP11-368P15.3 | 46,27   | -0,40 | 0,943348 | -0,423   | 0,672297 | 0,8881389 |
| LSM4          | 1267,50 | 0,11  | 0,268089 | 0,422986 | 0,672305 | 0,8881389 |
| ING4          | 273,64  | -0,32 | 0,760895 | -0,42298 | 0,672309 | 0,8881389 |
| RP11-68I3.11  | 7,86    | -0,47 | 1,116561 | -0,42295 | 0,672333 | 0,8881389 |
| RP11-77H9.1   | 6,18    | -0,44 | 1,032129 | -0,42291 | 0,672361 | 0,8881389 |
| ZCW PW1       | 148,65  | -0,40 | 0,955021 | -0,42288 | 0,672381 | 0,8881389 |
| ALS2          | 117,31  | -0,38 | 0,903631 | -0,42288 | 0,672385 | 0,8881389 |
| RN7SL761P     | 0,46    | 1,58  | 3,742427 | 0,422845 | 0,672408 | NA        |
| SRRD          | 126,42  | 0,43  | 1,020044 | 0,422822 | 0,672425 | 0,8881389 |
| WASL          | 147,31  | 0,32  | 0,757242 | 0,422767 | 0,672465 | 0,8881389 |
| AC024168.1    | 0,47    | 1,58  | 3,742419 | 0,422645 | 0,672555 | NA        |
| NDFIP1        | 625,67  | 0,15  | 0,358505 | 0,42257  | 0,672609 | 0,8882661 |
| WIZ           | 72,33   | -0,34 | 0,799323 | -0,42247 | 0,672682 | 0,8882998 |
| RP11-191A15.2 | 0,83    | 1,08  | 2,555108 | 0,422436 | 0,672707 | NA        |
| RP11-66N24.7  | 7,14    | -0,30 | 0,701278 | -0,4223  | 0,672806 | 0,8883853 |
| LEP           | 1,79    | -0,51 | 1,201593 | -0,42229 | 0,672817 | NA        |
| CCL3L3        | 767,34  | 0,36  | 0,856438 | 0,422246 | 0,672845 | 0,8883853 |
| CH17-340M24.3 | 30,79   | -0,47 | 1,112104 | -0,42214 | 0,672924 | 0,8883853 |
| PCMTD2        | 499,94  | 0,26  | 0,60985  | 0,422081 | 0,672966 | 0,8883853 |
| RP3-467K16.4  | 24,41   | 0,34  | 0,800209 | 0,422054 | 0,672986 | 0,8883853 |
| RNA5SP294     | 0,45    | 1,58  | 3,742441 | 0,421858 | 0,673129 | NA        |
| CTA-941F9.10  | 165,62  | -0,19 | 0,45808  | -0,42159 | 0,673321 | 0,8887066 |
| ABHD5         | 369,85  | -0,30 | 0,713408 | -0,42159 | 0,673325 | 0,8887066 |
| RP11-455F5.4  | 5,66    | 0,48  | 1,142981 | 0,421514 | 0,673379 | 0,8887157 |
| CTC-526N19.1  | 5,29    | 0,59  | 1,40522  | 0,421387 | 0,673472 | 0,8887753 |
| AF121898.3    | 19,22   | -0,42 | 0,996882 | -0,42122 | 0,673592 | 0,8888172 |
| WDYHV1        | 96,04   | -0,49 | 1,17405  | -0,42121 | 0,6736   | 0,8888172 |
| SNORA38       | 0,46    | 1,58  | 3,742407 | 0,421167 | 0,673633 | NA        |
| RP5-1021I20.6 | 0,91    | 1,20  | 2,856675 | 0,421064 | 0,673708 | NA        |
| EIF4A1P12     | 0,35    | 1,29  | 3,06221  | 0,421036 | 0,673729 | NA        |
| SYK           | 2886,70 | 0,12  | 0,276564 | 0,420951 | 0,673791 | 0,8888914 |
| PPP6R3        | 804,59  | -0,17 | 0,407663 | -0,42093 | 0,673805 | 0,8888914 |
| RUNDC1        | 145,23  | 0,32  | 0,756317 | 0,420888 | 0,673837 | 0,8888914 |
| RP11-874J12.1 | 20,47   | -0,42 | 0,99199  | -0,42087 | 0,673847 | 0,8888914 |
| RP11-351I24.3 | 0,24    | -1,57 | 3,721343 | -0,4208  | 0,673903 | NA        |
| ZNF578        | 7,43    | -0,37 | 0,868133 | -0,42074 | 0,673941 | 0,8889078 |
| PPP1R35       | 37,26   | -0,36 | 0,846314 | -0,42071 | 0,673969 | 0,8889078 |
| BOLA2B        | 82,03   | -0,23 | 0,557283 | -0,42066 | 0,674003 | 0,8889078 |
| FAM200A       | 17,90   | -0,61 | 1,454793 | -0,42037 | 0,674217 | 0,8890293 |
| TMEM42        | 245,04  | 0,35  | 0,835132 | 0,420221 | 0,674324 | 0,8890293 |
| RF00019       | 477,07  | 0,12  | 0,280853 | 0,420173 | 0,674359 | 0,8890293 |
| C3orf17       | 389,37  | -0,29 | 0,68129  | -0,42017 | 0,67436  | 0,8890293 |
| RP11-218L14.4 | 85,47   | 0,45  | 1,070321 | 0,420145 | 0,67438  | 0,8890293 |
| NFIX          | 28,70   | 0,49  | 1,157964 | 0,420142 | 0,674382 | 0,8890293 |
| PRLHR         | 2,48    | 0,60  | 1,430745 | 0,420056 | 0,674445 | NA        |
| HEXIM2        | 23,64   | -0,64 | 1,514252 | -0,42001 | 0,674478 | 0,8890653 |
| PLS3          | 4,68    | -0,60 | 1,438336 | -0,41994 | 0,674529 | 0,8890653 |
| ASH2L         | 222,58  | 0,26  | 0,627939 | 0,419903 | 0,674556 | 0,8890653 |
| SMIM14        | 690,24  | 0,25  | 0,593453 | 0,419833 | 0,674607 | 0,8890653 |
| DTYMK         | 116,44  | 0,29  | 0,680665 | 0,419778 | 0,674648 | 0,8890653 |

|               |         |       |          |          |          |           |
|---------------|---------|-------|----------|----------|----------|-----------|
| RSPO1         | 1,34    | 0,43  | 1,032654 | 0,419689 | 0,674713 | NA        |
| RP11-449H3.3  | 102,67  | 0,48  | 1,132194 | 0,419658 | 0,674736 | 0,889118  |
| RP11-437J2.4  | 1,67    | 0,64  | 1,53274  | 0,419634 | 0,674753 | NA        |
| RP4-756G23.5  | 2,41    | -0,51 | 1,217475 | -0,41961 | 0,674768 | NA        |
| DRGX          | 0,15    | -1,57 | 3,744946 | -0,41948 | 0,674869 | NA        |
| RPS19BP1      | 609,56  | -0,15 | 0,358115 | -0,41942 | 0,674906 | 0,889277  |
| RP11-122G18.9 | 0,54    | 1,50  | 3,576997 | 0,419382 | 0,674937 | NA        |
| RP11-362F19.1 | 5,63    | -0,72 | 1,727022 | -0,41935 | 0,674964 | 0,889277  |
| RP11-674E16.4 | 3,34    | 0,65  | 1,538754 | 0,419337 | 0,67497  | NA        |
| RN7SL234P     | 6,32    | -0,40 | 0,96221  | -0,4193  | 0,675    | 0,889277  |
| RP5-874C20.8  | 0,46    | 1,57  | 3,742506 | 0,418954 | 0,67525  | NA        |
| RP11-305A4.3  | 9,05    | -0,41 | 0,969327 | -0,4189  | 0,675286 | 0,889505  |
| LAMP2         | 1108,89 | 0,15  | 0,348911 | 0,418803 | 0,67536  | 0,889505  |
| RP11-548K12.1 | 1,35    | 0,73  | 1,753954 | 0,418799 | 0,675363 | NA        |
| CNIH3         | 31,95   | 0,38  | 0,914525 | 0,418741 | 0,675406 | 0,889505  |
| LIPT1         | 18,36   | -0,37 | 0,872802 | -0,4187  | 0,675436 | 0,889505  |
| NHLRC2        | 196,45  | -0,29 | 0,694196 | -0,41865 | 0,675469 | 0,889505  |
| USF1          | 246,85  | 0,20  | 0,473302 | 0,418618 | 0,675496 | 0,889505  |
| GS1-279B7.1   | 1,90    | -0,76 | 1,806766 | -0,41862 | 0,675497 | NA        |
| TTY15         | 70,64   | 0,51  | 1,22284  | 0,418601 | 0,675507 | 0,889505  |
| RP11-381O6.1  | 0,69    | -1,12 | 2,665315 | -0,41853 | 0,675559 | NA        |
| CDC34         | 72,01   | -0,37 | 0,887885 | -0,41851 | 0,675574 | 0,8895292 |
| RP1-298J18.3  | 5,91    | -0,54 | 1,279185 | -0,4184  | 0,675651 | 0,8895568 |
| TRBJ2-3       | 0,69    | -0,88 | 2,101422 | -0,41838 | 0,675667 | NA        |
| RP11-727A23.1 | 0,51    | 1,49  | 3,555305 | 0,418375 | 0,675673 | NA        |
| NUDT2         | 190,99  | -0,39 | 0,923547 | -0,41822 | 0,675789 | 0,8895568 |
| RP11-177G23.2 | 1,93    | -0,59 | 1,417219 | -0,41821 | 0,675792 | NA        |
| CHTF8         | 108,35  | 0,37  | 0,882235 | 0,41813  | 0,675852 | 0,8895568 |
| RP11-403A21.2 | 1,01    | 1,39  | 3,327739 | 0,418109 | 0,675868 | NA        |
| BCORL1        | 46,22   | 0,52  | 1,242016 | 0,418101 | 0,675873 | 0,8895568 |
| MGST2         | 566,70  | 0,17  | 0,408286 | 0,418084 | 0,675885 | 0,8895568 |
| AC005606.15   | 11,90   | -0,41 | 0,985645 | -0,41799 | 0,675958 | 0,8895568 |
| DNAJA3        | 137,64  | 0,28  | 0,676712 | 0,417982 | 0,67596  | 0,8895568 |
| KCNJ16        | 8,68    | 0,52  | 1,236562 | 0,417959 | 0,675977 | 0,8895568 |
| RP11-197P3.4  | 0,47    | -0,86 | 2,057871 | -0,41779 | 0,676103 | NA        |
| RP11-22C11.2  | 6,46    | 0,30  | 0,723721 | 0,417727 | 0,676147 | 0,8897175 |
| RN7SL650P     | 2,60    | 0,87  | 2,07915  | 0,417663 | 0,676194 | NA        |
| BCAP29        | 398,96  | -0,30 | 0,706602 | -0,41749 | 0,676318 | 0,8898801 |
| RP11-576D8.2  | 5,23    | -0,42 | 1,01759  | -0,41739 | 0,676395 | 0,8899133 |
| RP3-323P24.3  | 0,45    | 1,56  | 3,742574 | 0,417312 | 0,67645  | NA        |
| RUFY1         | 265,88  | 0,22  | 0,52619  | 0,417275 | 0,676477 | 0,8899133 |
| RP11-734K21.5 | 4,39    | -0,44 | 1,047744 | -0,41723 | 0,676513 | 0,8899133 |
| HAUS1         | 161,13  | -0,21 | 0,510432 | -0,41715 | 0,676568 | 0,8899133 |
| GHRLOS        | 14,05   | 0,60  | 1,449083 | 0,417131 | 0,676583 | 0,8899133 |
| TECPR1        | 254,58  | -0,27 | 0,647696 | -0,41696 | 0,676706 | 0,8899836 |
| C18orf21      | 126,24  | -0,32 | 0,770449 | -0,41693 | 0,676732 | 0,8899836 |
| CTD-2026K11.6 | 1,79    | -0,42 | 0,99643  | -0,41681 | 0,676818 | NA        |
| OR10AE1P      | 2,68    | -0,81 | 1,954962 | -0,41678 | 0,676843 | NA        |
| AC100830.5    | 0,45    | 1,56  | 3,74258  | 0,416762 | 0,676853 | NA        |
| POM121B       | 1,51    | -1,07 | 2,567643 | -0,41676 | 0,676856 | NA        |

|                  |         |       |          |          |          |           |
|------------------|---------|-------|----------|----------|----------|-----------|
| SELPLG           | 1585,20 | 0,12  | 0,297831 | 0,416705 | 0,676894 | 0,8900772 |
| RP11-386I8.5     | 24,44   | 0,21  | 0,494849 | 0,41666  | 0,676927 | 0,8900772 |
| SERPINE1         | 17,89   | -0,37 | 0,891493 | -0,41663 | 0,676947 | 0,8900772 |
| PCDHB14          | 2,58    | 0,55  | 1,322716 | 0,416588 | 0,67698  | NA        |
| FAM169A          | 0,47    | 1,56  | 3,741302 | 0,416439 | 0,677088 | NA        |
| RP11-817I4.1     | 0,88    | -1,02 | 2,441229 | -0,41632 | 0,677172 | NA        |
| KLHL28           | 221,12  | 0,36  | 0,870528 | 0,41628  | 0,677205 | 0,8901829 |
| TOMM6            | 990,46  | 0,10  | 0,24102  | 0,416275 | 0,677209 | 0,8901829 |
| PDGFRA           | 1,89    | 0,47  | 1,131538 | 0,416256 | 0,677223 | NA        |
| TMEM105          | 11,04   | -0,46 | 1,116521 | -0,41612 | 0,677323 | 0,8901829 |
| RP11-512C24.3    | 3,10    | -1,26 | 3,027854 | -0,41612 | 0,677323 | NA        |
| RP11-818O24.2    | 0,63    | 1,31  | 3,146598 | 0,416065 | 0,677363 | NA        |
| RP11-512N4.2     | 1,00    | 1,37  | 3,284724 | 0,416051 | 0,677373 | NA        |
| RP11-228M15.3    | 4,96    | -0,62 | 1,480699 | -0,41599 | 0,677419 | 0,8901829 |
| SSX9             | 0,45    | 1,56  | 3,742674 | 0,415984 | 0,677421 | NA        |
| RP11-5407.3      | 0,16    | -1,55 | 3,735058 | -0,41593 | 0,677464 | NA        |
| XXbac-BPG250I8.4 | 68,86   | -0,38 | 0,90827  | -0,41591 | 0,677474 | 0,8901829 |
| GPR160           | 118,42  | 0,31  | 0,749633 | 0,4159   | 0,677483 | 0,8901829 |
| PKNOX1           | 97,93   | -0,26 | 0,624472 | -0,41588 | 0,677499 | 0,8901829 |
| CTGLF10P         | 5,39    | 0,48  | 1,14758  | 0,415865 | 0,677509 | 0,8901829 |
| AC114812.8       | 5,42    | 0,53  | 1,262997 | 0,41582  | 0,677541 | 0,8901829 |
| OSBP             | 538,73  | 0,31  | 0,738542 | 0,415764 | 0,677583 | 0,8901829 |
| KBTBD12          | 2,94    | -0,34 | 0,820778 | -0,41569 | 0,677639 | NA        |
| KLHL24           | 576,36  | -0,23 | 0,559553 | -0,41568 | 0,677641 | 0,8901829 |
| C4orf32          | 355,91  | -0,15 | 0,363075 | -0,41567 | 0,677648 | 0,8901829 |
| PCDHB16          | 15,14   | 0,38  | 0,907902 | 0,415673 | 0,677649 | 0,8901829 |
| ABCC5            | 266,03  | -0,39 | 0,936699 | -0,41561 | 0,677697 | 0,8901829 |
| AF131215.1       | 0,14    | -1,55 | 3,735767 | -0,41554 | 0,677744 | NA        |
| AGPAT4           | 108,51  | 0,45  | 1,078443 | 0,415382 | 0,677862 | 0,8902955 |
| RP11-756H6.1     | 4,25    | -0,53 | 1,281518 | -0,41536 | 0,677878 | 0,8902955 |
| WNT6             | 0,44    | 1,49  | 3,577493 | 0,415337 | 0,677895 | NA        |
| C1orf50          | 142,73  | 0,44  | 1,048488 | 0,415284 | 0,677934 | 0,8903055 |
| RP11-759F5.1     | 0,45    | 1,55  | 3,742686 | 0,415258 | 0,677953 | NA        |
| MRPL55           | 613,45  | -0,14 | 0,339178 | -0,41521 | 0,677986 | 0,890311  |
| RP11-10C8.2      | 1,15    | -0,92 | 2,223411 | -0,41521 | 0,67799  | NA        |
| JPH3             | 0,26    | -1,42 | 3,429725 | -0,41518 | 0,678009 | NA        |
| RNU7-169P        | 0,45    | 1,55  | 3,742711 | 0,415128 | 0,678048 | NA        |
| RP11-300D11.3    | 0,45    | 1,55  | 3,742669 | 0,414973 | 0,678161 | NA        |
| SEC62            | 450,74  | -0,17 | 0,406701 | -0,41492 | 0,6782   | 0,8905246 |
| AC079248.1       | 0,50    | 0,98  | 2,370872 | 0,414907 | 0,67821  | NA        |
| FAM64A           | 5,44    | -0,43 | 1,031136 | -0,41486 | 0,678244 | 0,8905246 |
| RN7SL716P        | 1,88    | -0,57 | 1,36865  | -0,41483 | 0,678269 | NA        |
| RP11-95J11.1     | 0,73    | 1,53  | 3,689987 | 0,414824 | 0,678271 | NA        |
| AKAP5            | 22,84   | 0,37  | 0,888511 | 0,414777 | 0,678305 | 0,8905419 |
| RP11-632K5.3     | 1,26    | -0,52 | 1,243792 | -0,41461 | 0,678427 | NA        |
| RP11-552F3.9     | 1,71    | 0,49  | 1,176637 | 0,414561 | 0,678464 | NA        |
| PNRC2            | 978,21  | 0,19  | 0,464707 | 0,414452 | 0,678543 | 0,8907885 |
| PRPF31           | 370,93  | -0,22 | 0,526261 | -0,41437 | 0,678603 | 0,8907885 |
| CFHR3            | 4,83    | 0,77  | 1,866535 | 0,414324 | 0,678637 | 0,8907885 |
| IGLV6-57         | 0,67    | 0,73  | 1,761609 | 0,414268 | 0,678678 | NA        |

|                |         |       |          |          |          |           |
|----------------|---------|-------|----------|----------|----------|-----------|
| RP11-263C24.1  | 21,98   | 0,45  | 1,079632 | 0,41425  | 0,678691 | 0,8907967 |
| RP11-324E6.6   | 29,58   | -0,39 | 0,950601 | -0,41408 | 0,678818 | 0,8909004 |
| RP11-401F24.4  | 2,63    | 0,41  | 0,992206 | 0,41407  | 0,678823 | NA        |
| RP11-106M3.1   | 0,69    | -0,88 | 2,125731 | -0,41406 | 0,678831 | NA        |
| RN7SKP95       | 3,75    | -0,67 | 1,623608 | -0,41402 | 0,678857 | NA        |
| RPL9P33        | 0,52    | 1,55  | 3,742734 | 0,413933 | 0,678923 | NA        |
| MIR648         | 0,15    | -1,55 | 3,737968 | -0,41392 | 0,67893  | NA        |
| CTA-113A6.1    | 62,42   | 0,33  | 0,80603  | 0,413719 | 0,67908  | 0,8911053 |
| TNFAIP8L1      | 69,56   | 0,24  | 0,57069  | 0,413703 | 0,679092 | 0,8911053 |
| RP11-354M1.2   | 0,78    | -0,90 | 2,179626 | -0,41369 | 0,679103 | NA        |
| ZNF500         | 68,51   | 0,33  | 0,796731 | 0,413668 | 0,679118 | 0,8911053 |
| SPNS2          | 0,86    | 1,53  | 3,70953  | 0,41362  | 0,679153 | NA        |
| KCNC1          | 5,10    | -0,56 | 1,363401 | -0,41345 | 0,679278 | 0,8912087 |
| SIPA1          | 769,49  | -0,19 | 0,460422 | -0,41343 | 0,679292 | 0,8912087 |
| RP4-717I23.2   | 0,45    | 1,55  | 3,742779 | 0,413421 | 0,679298 | NA        |
| PRMT9          | 103,86  | 0,31  | 0,740292 | 0,413189 | 0,679468 | 0,8913771 |
| RP11-706C16.8  | 5,53    | 0,31  | 0,75262  | 0,413099 | 0,679534 | 0,8914005 |
| RP11-501O2.3   | 1,41    | -1,19 | 2,880378 | -0,41305 | 0,679571 | NA        |
| CH17-195P21.1  | 0,43    | -1,41 | 3,403679 | -0,41303 | 0,679581 | NA        |
| ZNF223         | 6,69    | 0,64  | 1,551768 | 0,41278  | 0,679768 | 0,8915215 |
| AQP3           | 0,94    | 0,96  | 2,324311 | 0,412758 | 0,679784 | NA        |
| DBNL           | 1504,80 | -0,16 | 0,377783 | -0,41273 | 0,679801 | 0,8915215 |
| PIAS4          | 83,47   | -0,40 | 0,959932 | -0,41265 | 0,679863 | 0,8915215 |
| LRRC49         | 21,13   | 0,31  | 0,7431   | 0,412616 | 0,679888 | 0,8915215 |
| AC000032.2     | 0,47    | 1,54  | 3,742812 | 0,412554 | 0,679934 | NA        |
| AP000487.4     | 5,55    | 0,45  | 1,098893 | 0,412533 | 0,679949 | 0,8915215 |
| RNU6-1248P     | 0,45    | 1,54  | 3,742824 | 0,412499 | 0,679974 | NA        |
| RP11-401E9.3   | 0,49    | 1,00  | 2,421052 | 0,412464 | 0,679999 | NA        |
| ADAL           | 92,45   | -0,40 | 0,979185 | -0,41242 | 0,680033 | 0,8915215 |
| TWINK          | 29,61   | -0,69 | 1,671832 | -0,41229 | 0,68013  | 0,8915215 |
| RP13-476E20.1  | 0,71    | 1,53  | 3,721902 | 0,412145 | 0,680233 | NA        |
| RP4-647C14.3   | 25,08   | 0,44  | 1,057454 | 0,412082 | 0,680279 | 0,8915215 |
| RP11-802E16.3  | 101,52  | -0,22 | 0,541476 | -0,41208 | 0,680283 | 0,8915215 |
| TTC33          | 14,08   | -0,42 | 1,015335 | -0,41207 | 0,680285 | 0,8915215 |
| R3HDM2         | 504,87  | 0,22  | 0,525418 | 0,412064 | 0,680293 | 0,8915215 |
| AC000123.4     | 8,52    | 1,02  | 2,466308 | 0,412063 | 0,680293 | 0,8915215 |
| MFN1           | 224,69  | -0,26 | 0,638412 | -0,41199 | 0,680344 | 0,8915215 |
| RP13-210D15.10 | 0,14    | -1,54 | 3,736107 | -0,41194 | 0,680385 | NA        |
| LINC00595      | 7,11    | 0,66  | 1,59143  | 0,411897 | 0,680415 | 0,8915215 |
| SLC35B2        | 198,92  | 0,35  | 0,852094 | 0,411862 | 0,680441 | 0,8915215 |
| SMARCA4        | 532,99  | -0,15 | 0,37134  | -0,41186 | 0,680441 | 0,8915215 |
| CTD-2251F13.1  | 53,57   | -0,25 | 0,617798 | -0,41186 | 0,680441 | 0,8915215 |
| RP11-657O9.1   | 0,81    | 1,02  | 2,472036 | 0,411665 | 0,680585 | NA        |
| RP11-465B22.6  | 1,25    | -0,54 | 1,322541 | -0,41161 | 0,680627 | NA        |
| RP11-157L3.11  | 14,90   | -0,36 | 0,881363 | -0,41153 | 0,680684 | 0,8917101 |
| HLA-DRB9       | 13,56   | 0,56  | 1,356688 | 0,411451 | 0,680742 | 0,8917101 |
| RP11-609N14.1  | 28,67   | -0,31 | 0,753481 | -0,41132 | 0,680841 | 0,8917101 |
| RP11-44K6.4    | 5,42    | -0,37 | 0,910474 | -0,41128 | 0,68087  | 0,8917101 |
| RP11-346E8.1   | 0,64    | 1,30  | 3,160051 | 0,411263 | 0,680879 | NA        |
| RP3-400N23.6   | 0,44    | 1,54  | 3,742782 | 0,411254 | 0,680887 | NA        |



|                |         |       |          |          |          |           |
|----------------|---------|-------|----------|----------|----------|-----------|
| RP11-295I5.4   | 0,45    | 1,54  | 3,74279  | 0,411223 | 0,680909 | NA        |
| RP11-411B10.7  | 18,37   | 0,25  | 0,611748 | 0,411221 | 0,68091  | 0,8917101 |
| RP11-477B16.5  | 0,49    | -0,74 | 1,808302 | -0,41115 | 0,680962 | NA        |
| RFC1           | 397,50  | -0,15 | 0,371074 | -0,41113 | 0,680976 | 0,8917101 |
| ZFYVE19        | 255,05  | 0,34  | 0,835594 | 0,411129 | 0,680978 | 0,8917101 |
| MED30          | 281,89  | -0,30 | 0,719352 | -0,41111 | 0,680989 | 0,8917101 |
| MYL12B         | 3767,62 | 0,10  | 0,248395 | 0,411077 | 0,681016 | 0,8917101 |
| HCP5           | 214,87  | -0,32 | 0,788299 | -0,41099 | 0,68108  | 0,8917306 |
| ACSM4          | 0,45    | 1,54  | 3,742601 | 0,41092  | 0,681132 | NA        |
| MUC15          | 4,00    | -0,68 | 1,653032 | -0,41091 | 0,681136 | 0,8917414 |
| ACO66593.1     | 0,42    | 1,47  | 3,571795 | 0,410854 | 0,68118  | NA        |
| PRKAR1A        | 1370,12 | 0,10  | 0,239857 | 0,410746 | 0,681259 | 0,8917962 |
| CTC-265F19.1   | 19,12   | -0,27 | 0,655451 | -0,41073 | 0,681274 | 0,8917962 |
| RP11-664I21.6  | 0,45    | 1,54  | 3,742852 | 0,410712 | 0,681283 | NA        |
| RP11-213G21.1  | 0,60    | -0,58 | 1,404713 | -0,41067 | 0,681315 | NA        |
| RP1-80N2.3     | 3,67    | 0,34  | 0,838293 | 0,410588 | 0,681375 | NA        |
| HSP90B1        | 3897,34 | -0,10 | 0,25028  | -0,41057 | 0,681389 | 0,8918813 |
| RCN1           | 224,26  | -0,22 | 0,537383 | -0,41051 | 0,681435 | 0,8918813 |
| GLP2R          | 2,15    | -1,23 | 3,005475 | -0,41036 | 0,681543 | NA        |
| RMDN2          | 82,82   | 0,55  | 1,332321 | 0,410356 | 0,681545 | 0,8919628 |
| LDLRAD1        | 6,60    | 0,54  | 1,314825 | 0,41029  | 0,681593 | 0,8919631 |
| RN7SL565P      | 1,13    | 0,58  | 1,41626  | 0,410279 | 0,681601 | NA        |
| RN7SL722P      | 1,13    | 0,58  | 1,41626  | 0,410279 | 0,681601 | NA        |
| OR2A25         | 1,69    | -0,65 | 1,582816 | -0,41027 | 0,681609 | NA        |
| RP11-462L8.1   | 0,55    | 0,97  | 2,358826 | 0,410266 | 0,681611 | NA        |
| RP11-776B3.1   | 0,81    | 1,04  | 2,538105 | 0,410258 | 0,681617 | NA        |
| RP11-1250I15.3 | 20,18   | -0,40 | 0,965638 | -0,41022 | 0,681641 | 0,8919631 |
| MIR6761        | 0,44    | 1,54  | 3,742906 | 0,410155 | 0,681692 | NA        |
| RPL23AP24      | 0,56    | 1,11  | 2,702409 | 0,410059 | 0,681762 | NA        |
| AP001626.1     | 26,11   | -0,41 | 0,998656 | -0,41003 | 0,681781 | 0,8920742 |
| POMC           | 127,18  | -0,36 | 0,886006 | -0,40992 | 0,681867 | 0,8920742 |
| RP11-408P14.1  | 28,20   | -0,17 | 0,426928 | -0,40988 | 0,681896 | 0,8920742 |
| VWDE           | 0,91    | 1,35  | 3,293259 | 0,409854 | 0,681913 | NA        |
| TRIM28         | 657,28  | 0,12  | 0,30091  | 0,409792 | 0,681958 | 0,8920742 |
| RFWD2          | 512,27  | -0,21 | 0,518652 | -0,40974 | 0,681996 | 0,8920742 |
| ENAM           | 10,84   | -0,51 | 1,255757 | -0,40972 | 0,682014 | 0,8920742 |
| YPEL4          | 0,76    | 1,53  | 3,736161 | 0,409672 | 0,682046 | NA        |
| SNX12          | 119,29  | 0,35  | 0,864574 | 0,409624 | 0,682082 | 0,8921005 |
| RP11-1E4.1     | 4,13    | 0,52  | 1,279949 | 0,409321 | 0,682304 | 0,892329  |
| CTA-282F2.3    | 2,27    | 0,80  | 1,961869 | 0,409314 | 0,682309 | NA        |
| CTD-2218G20.1  | 0,67    | 0,69  | 1,688009 | 0,409262 | 0,682348 | NA        |
| SNORA7A        | 0,53    | 0,98  | 2,394458 | 0,409251 | 0,682356 | NA        |
| KARSP3         | 0,63    | -0,85 | 2,087592 | -0,40924 | 0,682362 | NA        |
| CD3E           | 17,09   | -0,72 | 1,770329 | -0,4091  | 0,682468 | 0,8924219 |
| CH17-353B19.1  | 23,10   | 0,44  | 1,080768 | 0,409093 | 0,682471 | 0,8924219 |
| RP11-388M20.1  | 16,47   | 0,53  | 1,306323 | 0,40902  | 0,682525 | 0,8924292 |
| ACO79753.4     | 2,94    | -0,53 | 1,289283 | -0,40893 | 0,682589 | NA        |
| FSD1           | 2,41    | -0,50 | 1,221847 | -0,40886 | 0,682643 | NA        |
| MIR3128        | 30,71   | -0,43 | 1,041346 | -0,40885 | 0,68265  | 0,8925008 |
| ZFAND2A        | 269,88  | 0,18  | 0,447388 | 0,408815 | 0,682676 | 0,8925008 |

|               |         |       |          |          |          |           |
|---------------|---------|-------|----------|----------|----------|-----------|
| AC005037.4    | 0,98    | 1,32  | 3,22904  | 0,40878  | 0,682701 | NA        |
| RP3-461F17.3  | 88,39   | -0,27 | 0,671069 | -0,40872 | 0,682747 | 0,8925312 |
| RP1-168P16.3  | 81,78   | 0,33  | 0,815922 | 0,4085   | 0,682907 | 0,8926542 |
| TSR2          | 199,95  | 0,33  | 0,802919 | 0,408459 | 0,682937 | 0,8926542 |
| RP11-819C21.1 | 83,33   | -0,40 | 0,982621 | -0,40833 | 0,68303  | 0,8927127 |
| RN7SL321P     | 0,89    | 1,19  | 2,923588 | 0,408218 | 0,683114 | NA        |
| FARSB         | 291,16  | 0,27  | 0,65346  | 0,408164 | 0,683153 | 0,8927281 |
| DNAJC1        | 219,67  | -0,20 | 0,498372 | -0,40812 | 0,683183 | 0,8927281 |
| MORN4         | 8,36    | -0,39 | 0,952606 | -0,40812 | 0,683185 | 0,8927281 |
| RP11-849H4.4  | 11,85   | -0,40 | 0,972768 | -0,40792 | 0,683332 | 0,8928423 |
| SIGLEC5       | 85,78   | 0,35  | 0,852393 | 0,407841 | 0,68339  | 0,8928423 |
| INSIG2        | 183,21  | -0,40 | 0,982394 | -0,40773 | 0,683473 | 0,8928423 |
| WDR31         | 18,33   | -0,27 | 0,666613 | -0,40763 | 0,683546 | 0,8928423 |
| RP11-545A16.4 | 9,56    | 0,54  | 1,329633 | 0,407583 | 0,68358  | 0,8928423 |
| MICU1         | 232,68  | 0,18  | 0,451827 | 0,407551 | 0,683603 | 0,8928423 |
| AIFM1         | 282,74  | 0,30  | 0,733724 | 0,407544 | 0,683609 | 0,8928423 |
| RP11-672L10.4 | 0,45    | 1,52  | 3,743036 | 0,407386 | 0,683725 | NA        |
| RP11-610P19.2 | 15,45   | -0,21 | 0,514087 | -0,40728 | 0,683805 | 0,8929502 |
| RHOH          | 36,81   | 0,35  | 0,858155 | 0,407269 | 0,683811 | 0,8929502 |
| RASSF8        | 15,24   | -0,32 | 0,792394 | -0,40721 | 0,683854 | 0,8929502 |
| RN7SL499P     | 0,86    | 1,06  | 2,599757 | 0,40718  | 0,683876 | NA        |
| MTHFSD        | 85,64   | 0,54  | 1,336543 | 0,40717  | 0,683883 | 0,8929502 |
| RP11-90P13.1  | 3,17    | 0,87  | 2,139985 | 0,407069 | 0,683957 | NA        |
| CNTNAP3B      | 34,98   | -0,50 | 1,216739 | -0,40696 | 0,684035 | 0,8930851 |
| RP3-388N13.2  | 0,42    | 0,76  | 1,857732 | 0,406909 | 0,684075 | NA        |
| MEG9          | 0,18    | -1,52 | 3,74526  | -0,40688 | 0,684093 | NA        |
| SLF1          | 137,34  | 0,30  | 0,748231 | 0,406872 | 0,684102 | 0,8931108 |
| MIR4796       | 0,44    | 1,52  | 3,743074 | 0,406787 | 0,684165 | NA        |
| RN7SL4P       | 5,56    | -0,95 | 2,329017 | -0,40678 | 0,684169 | 0,8931352 |
| CTC-246B18.10 | 4,51    | 0,39  | 0,955807 | 0,406698 | 0,68423  | 0,8931519 |
| MYBPC2        | 13,43   | -1,10 | 2,700452 | -0,40658 | 0,684315 | 0,8932003 |
| RP11-567M16.1 | 2,00    | -0,53 | 1,291649 | -0,40657 | 0,684326 | NA        |
| R3HDM1        | 287,84  | -0,20 | 0,500403 | -0,40627 | 0,684542 | 0,8933536 |
| OFD1          | 346,55  | 0,25  | 0,613643 | 0,406233 | 0,684572 | 0,8933536 |
| PLB1          | 357,69  | 0,34  | 0,837672 | 0,406226 | 0,684576 | 0,8933536 |
| DNM1P38       | 0,44    | 1,52  | 3,7431   | 0,40601  | 0,684735 | NA        |
| RN7SL638P     | 0,99    | -0,63 | 1,542939 | -0,40574 | 0,684933 | NA        |
| RP11-677M14.7 | 59,67   | -0,23 | 0,573659 | -0,4057  | 0,684963 | 0,8937414 |
| COQ6          | 88,80   | 0,32  | 0,786946 | 0,405691 | 0,68497  | 0,8937414 |
| SFTPA2        | 0,10    | -1,52 | 3,741478 | -0,40568 | 0,684977 | NA        |
| RP11-407N17.5 | 49,41   | -0,66 | 1,63647  | -0,40558 | 0,685052 | 0,8937861 |
| PAK1IP1       | 418,00  | 0,25  | 0,612275 | 0,405385 | 0,685194 | 0,8939093 |
| OR6D1P        | 17,02   | -0,29 | 0,709564 | -0,40531 | 0,685251 | 0,893921  |
| RP11-474L11.5 | 0,97    | 1,31  | 3,238828 | 0,405283 | 0,685269 | NA        |
| BLOC1S6       | 1409,85 | 0,10  | 0,25425  | 0,405191 | 0,685337 | 0,8939308 |
| SV2B          | 10,27   | 0,37  | 0,915254 | 0,405144 | 0,685371 | 0,8939308 |
| EYA3          | 450,06  | 0,29  | 0,719669 | 0,405037 | 0,68545  | 0,8939308 |
| RP6-99M1.2    | 65,64   | 0,49  | 1,203011 | 0,405033 | 0,685453 | 0,8939308 |
| RP11-216M21.1 | 17,44   | 0,65  | 1,614782 | 0,404944 | 0,685519 | 0,8939308 |
| RP11-726G1.2  | 40,72   | 0,36  | 0,880031 | 0,404905 | 0,685547 | 0,8939308 |

|                 |         |       |          |          |          |           |
|-----------------|---------|-------|----------|----------|----------|-----------|
| SPECC1L-ADORA2A | 2,50    | -0,88 | 2,170964 | -0,40486 | 0,685578 | NA        |
| CEP76           | 36,13   | 0,38  | 0,947282 | 0,404773 | 0,685644 | 0,8939947 |
| RP11-20I23.3    | 0,43    | 1,52  | 3,743137 | 0,404755 | 0,685658 | NA        |
| RP11-697K23.3   | 2,66    | -0,50 | 1,242936 | -0,40472 | 0,685686 | NA        |
| GNMT            | 44,93   | 0,61  | 1,508946 | 0,404602 | 0,68577  | 0,8940961 |
| RP11-1148L6.8   | 4,92    | -0,91 | 2,242849 | -0,40446 | 0,685874 | 0,8941461 |
| SNORA80B        | 37,36   | -0,54 | 1,345653 | -0,40442 | 0,685904 | 0,8941461 |
| RP11-10A14.4    | 0,69    | -1,06 | 2,619382 | -0,40437 | 0,685937 | NA        |
| RP11-35J6.1     | 1,98    | -0,98 | 2,419145 | -0,40436 | 0,685947 | NA        |
| MIR8086         | 6,26    | -0,39 | 0,954781 | -0,40424 | 0,68604  | 0,8942596 |
| RP5-1022P6.5    | 3,69    | 0,64  | 1,586826 | 0,404169 | 0,686089 | NA        |
| RP11-313P22.1   | 0,81    | -1,46 | 3,613939 | -0,404   | 0,686215 | NA        |
| RP11-729I10.2   | 1,19    | -0,64 | 1,579651 | -0,40396 | 0,686239 | NA        |
| RP11-498C9.2    | 0,57    | 1,08  | 2,675934 | 0,403907 | 0,686281 | NA        |
| RP11-659P15.1   | 51,63   | -0,34 | 0,837744 | -0,40381 | 0,686354 | 0,8945794 |
| SKAP2           | 1111,90 | 0,15  | 0,378698 | 0,403707 | 0,686428 | 0,8945794 |
| RP11-436D23.1   | 10,37   | -0,45 | 1,125007 | -0,40369 | 0,68644  | 0,8945794 |
| FKTN            | 74,48   | -0,39 | 0,961096 | -0,40364 | 0,686477 | 0,8945794 |
| RP11-351O1.3    | 0,44    | 1,51  | 3,743152 | 0,403603 | 0,686505 | NA        |
| PMEL            | 1,06    | -1,28 | 3,181802 | -0,4036  | 0,686509 | NA        |
| CTC-445B21.1    | 0,86    | -0,66 | 1,627056 | -0,40341 | 0,686643 | NA        |
| RMDN3           | 131,34  | 0,38  | 0,944228 | 0,40325  | 0,686764 | 0,8947326 |
| RP11-507K2.6    | 7,02    | 0,42  | 1,031914 | 0,403248 | 0,686766 | 0,8947326 |
| ROBO1           | 13,86   | 0,40  | 0,991328 | 0,403229 | 0,68678  | 0,8947326 |
| FAM122A         | 154,50  | -0,49 | 1,205194 | -0,40318 | 0,686814 | 0,8947326 |
| CTD-2329K10.1   | 6,20    | 0,50  | 1,230947 | 0,403154 | 0,686835 | 0,8947326 |
| SATB2           | 23,74   | -0,54 | 1,331629 | -0,40302 | 0,686936 | 0,8948014 |
| RP11-346C20.4   | 0,94    | 1,17  | 2,910123 | 0,402904 | 0,687019 | NA        |
| AC008592.4      | 0,60    | 1,11  | 2,746452 | 0,402878 | 0,687038 | NA        |
| ZBED4           | 162,34  | 0,36  | 0,885821 | 0,402763 | 0,687122 | 0,8949447 |
| C21orf91        | 230,27  | -0,31 | 0,779511 | -0,40274 | 0,687142 | 0,8949447 |
| TAPT1           | 278,20  | 0,30  | 0,746797 | 0,402505 | 0,687313 | 0,8951038 |
| PRKAG3          | 0,17    | -1,51 | 3,746082 | -0,40245 | 0,687356 | NA        |
| CTD-2154B17.4   | 1,16    | 1,06  | 2,639835 | 0,402413 | 0,68738  | NA        |
| DDX18P1         | 0,54    | 1,11  | 2,747484 | 0,402339 | 0,687434 | NA        |
| RP11-184A2.3    | 1,13    | 1,50  | 3,731416 | 0,402291 | 0,68747  | NA        |
| CTC-454M9.1     | 23,40   | -0,65 | 1,610699 | -0,40224 | 0,687508 | 0,8952959 |
| PSMD13          | 1516,77 | 0,13  | 0,331234 | 0,402156 | 0,687569 | 0,8953125 |
| RN7SL580P       | 0,37    | 1,01  | 2,509455 | 0,402029 | 0,687663 | NA        |
| NRAS            | 317,28  | 0,20  | 0,489102 | 0,402016 | 0,687672 | 0,8953535 |
| FAM225A         | 26,62   | -0,73 | 1,821967 | -0,40198 | 0,687697 | 0,8953535 |
| CTC-436K13.3    | 9,84    | -0,46 | 1,15636  | -0,40189 | 0,687768 | 0,895383  |
| TGFB11          | 16,39   | -0,24 | 0,596414 | -0,40144 | 0,688098 | 0,8954809 |
| HECTD3          | 180,04  | -0,32 | 0,80001  | -0,40142 | 0,688107 | 0,8954809 |
| AP001258.4      | 19,95   | 0,42  | 1,042661 | 0,401406 | 0,688121 | 0,8954809 |
| OLFML2B         | 0,44    | 1,50  | 3,742388 | 0,401344 | 0,688167 | NA        |
| RP5-848E13.5    | 0,43    | 1,50  | 3,743265 | 0,401317 | 0,688187 | NA        |
| RP5-1166H10.2   | 9,05    | 0,49  | 1,226669 | 0,401226 | 0,688254 | 0,8954809 |
| TBL1X           | 819,21  | -0,22 | 0,55944  | -0,40111 | 0,688337 | 0,8954809 |
| NAA10           | 468,57  | -0,19 | 0,465652 | -0,40109 | 0,688354 | 0,8954809 |

|               |         |       |          |          |          |           |
|---------------|---------|-------|----------|----------|----------|-----------|
| SLC26A11      | 42,41   | 0,39  | 0,961344 | 0,401059 | 0,688376 | 0,8954809 |
| TCAF1         | 137,82  | 0,28  | 0,701819 | 0,401058 | 0,688377 | 0,8954809 |
| PRMT2         | 1359,94 | -0,18 | 0,441955 | -0,40104 | 0,688388 | 0,8954809 |
| GLUL          | 1181,14 | 0,20  | 0,503689 | 0,400993 | 0,688426 | 0,8954809 |
| DOK5          | 0,24    | -1,34 | 3,346339 | -0,40096 | 0,688451 | NA        |
| CLN8          | 406,65  | -0,23 | 0,565929 | -0,40096 | 0,688451 | 0,8954809 |
| SULT2A1       | 7,16    | -0,30 | 0,740668 | -0,40093 | 0,688469 | 0,8954809 |
| PTMA          | 9093,99 | 0,07  | 0,162712 | 0,400885 | 0,688505 | 0,8954809 |
| RP11-408H20.3 | 1,78    | 1,48  | 3,700518 | 0,400862 | 0,688522 | NA        |
| KLF8          | 144,87  | -0,32 | 0,806004 | -0,40081 | 0,688563 | 0,8954809 |
| RNF126        | 198,98  | -0,19 | 0,480603 | -0,4008  | 0,688565 | 0,8954809 |
| RP11-496D24.1 | 0,62    | -0,53 | 1,331032 | -0,40078 | 0,688579 | NA        |
| RP11-492A12.2 | 0,43    | 1,50  | 3,743254 | 0,400535 | 0,688763 | NA        |
| DPY19L2P2     | 30,16   | -0,31 | 0,778442 | -0,40043 | 0,688841 | 0,8957767 |
| RP5-90108.3   | 0,43    | 1,50  | 3,74325  | 0,40036  | 0,688891 | NA        |
| RASGRP4       | 180,20  | -0,19 | 0,475561 | -0,40026 | 0,688966 | 0,8958179 |
| RP5-1107A17.4 | 10,58   | 0,32  | 0,81203  | 0,400211 | 0,689001 | 0,8958179 |
| HGH1          | 28,31   | -0,52 | 1,303267 | -0,40011 | 0,689078 | 0,8958179 |
| COL12A1       | 0,46    | 1,03  | 2,574753 | 0,400096 | 0,689086 | NA        |
| SAR1A         | 1351,78 | 0,12  | 0,295956 | 0,400044 | 0,689124 | 0,8958179 |
| YIF1A         | 549,50  | 0,14  | 0,350861 | 0,400034 | 0,689132 | 0,8958179 |
| NUPR1         | 65,66   | -0,24 | 0,604806 | -0,39997 | 0,689176 | 0,8958179 |
| C20orf203     | 0,80    | 1,49  | 3,730497 | 0,399934 | 0,689205 | NA        |
| MIR302D       | 0,48    | 1,42  | 3,545278 | 0,399815 | 0,689293 | NA        |
| AP001059.7    | 9,46    | -0,39 | 0,969323 | -0,39979 | 0,689309 | 0,8958179 |
| RP11-5P18.1   | 0,41    | 1,44  | 3,603822 | 0,399762 | 0,689332 | NA        |
| PRKCG         | 4,91    | -1,36 | 3,414461 | -0,39975 | 0,68934  | 0,8958179 |
| MSN           | 3196,41 | 0,10  | 0,244076 | 0,399747 | 0,689343 | 0,8958179 |
| ARHGAP32      | 235,26  | -0,41 | 1,036142 | -0,39968 | 0,689389 | 0,8958179 |
| KB-1460A1.3   | 0,93    | -0,55 | 1,377482 | -0,39968 | 0,689396 | NA        |
| IFITM1        | 2311,80 | -0,34 | 0,862218 | -0,39967 | 0,689402 | 0,8958179 |
| KXD1          | 587,30  | 0,15  | 0,366843 | 0,399565 | 0,689477 | 0,8958531 |
| GOPC          | 303,40  | -0,24 | 0,591476 | -0,39935 | 0,689633 | 0,8959938 |
| CTD-2647L4.1  | 0,30    | -1,49 | 3,726111 | -0,39922 | 0,689735 | NA        |
| RNU7-103P     | 0,42    | 1,49  | 3,743351 | 0,39918  | 0,689761 | NA        |
| NBPF10        | 1687,35 | 0,12  | 0,296783 | 0,399175 | 0,689765 | 0,8960109 |
| KRASP1        | 0,41    | 1,43  | 3,580032 | 0,399161 | 0,689775 | NA        |
| ANKRD44       | 2605,45 | 0,14  | 0,360477 | 0,399124 | 0,689802 | 0,8960109 |
| KLHL3         | 52,92   | 0,50  | 1,262863 | 0,399095 | 0,689823 | 0,8960109 |
| LA16c-380H5.1 | 18,21   | 0,27  | 0,668368 | 0,399073 | 0,689839 | 0,8960109 |
| RP11-458K10.3 | 1,78    | 0,74  | 1,843832 | 0,399018 | 0,68988  | NA        |
| LPIN2         | 443,71  | -0,25 | 0,618538 | -0,3989  | 0,689967 | 0,8961141 |
| RPL10AP2      | 0,61    | 0,60  | 1,503102 | 0,398846 | 0,690007 | NA        |
| RP11-284M14.1 | 0,43    | 1,49  | 3,743706 | 0,398838 | 0,690012 | NA        |
| RP3-395M20.12 | 2,04    | 0,69  | 1,735384 | 0,39855  | 0,690225 | NA        |
| GABRA5        | 0,36    | -1,47 | 3,698361 | -0,3985  | 0,690263 | NA        |
| RP11-687E1.2  | 1,01    | -1,12 | 2,807283 | -0,39848 | 0,690279 | NA        |
| RNU6-282P     | 0,43    | 1,49  | 3,743387 | 0,398413 | 0,690325 | NA        |
| RP11-216P6.2  | 0,43    | 1,49  | 3,743393 | 0,398261 | 0,690438 | NA        |
| CTSE          | 1,97    | 0,69  | 1,72549  | 0,398193 | 0,690488 | NA        |

|                |         |       |          |          |          |           |
|----------------|---------|-------|----------|----------|----------|-----------|
| CTD-2349P21.12 | 2,78    | -0,65 | 1,64007  | -0,39818 | 0,690494 | NA        |
| ARNT2          | 10,16   | -0,50 | 1,267963 | -0,39816 | 0,690511 | 0,8967576 |
| IFNLR1         | 0,82    | -0,68 | 1,715905 | -0,39787 | 0,690724 | NA        |
| BAIAP2L1       | 16,42   | 0,47  | 1,179298 | 0,397723 | 0,690834 | 0,8970982 |
| WDR47          | 97,06   | 0,27  | 0,669818 | 0,397676 | 0,690869 | 0,8970982 |
| ASIC4          | 7,95    | 0,23  | 0,57248  | 0,397609 | 0,690918 | 0,8970991 |
| DPEP3          | 2,26    | -0,88 | 2,212286 | -0,39757 | 0,690949 | NA        |
| C15orf61       | 170,98  | 0,27  | 0,674258 | 0,397534 | 0,690974 | 0,8971082 |
| RP11-290F5.2   | 3,99    | -0,50 | 1,270217 | -0,39742 | 0,691058 | 0,8971082 |
| VTI1A          | 300,68  | -0,20 | 0,510283 | -0,39739 | 0,691076 | 0,8971082 |
| RP11-4K3_A.5   | 0,31    | -1,37 | 3,446107 | -0,39736 | 0,691105 | NA        |
| RN7SL835P      | 2,29    | 0,49  | 1,236897 | 0,397332 | 0,691123 | NA        |
| ABO19441.29    | 0,77    | -0,56 | 1,403204 | -0,3973  | 0,691148 | NA        |
| RP11-9M16.3    | 0,42    | 1,49  | 3,743432 | 0,397264 | 0,691173 | NA        |
| RBM4           | 1001,26 | -0,16 | 0,401255 | -0,39723 | 0,6912   | 0,8971082 |
| MYLK3          | 166,68  | -0,22 | 0,555369 | -0,39706 | 0,69132  | 0,8971082 |
| MPP1           | 524,26  | 0,17  | 0,418128 | 0,396994 | 0,691372 | 0,8971082 |
| CTC-463A16.1   | 6,19    | -0,43 | 1,071562 | -0,39695 | 0,691405 | 0,8971082 |
| RP11-197N18.8  | 44,92   | -0,32 | 0,805217 | -0,39688 | 0,691452 | 0,8971082 |
| ZNF184         | 103,19  | -0,61 | 1,535427 | -0,39688 | 0,691457 | 0,8971082 |
| RP11-762I7.5   | 8,99    | -0,82 | 2,074761 | -0,39688 | 0,691458 | 0,8971082 |
| SLA2           | 7,50    | -0,29 | 0,742746 | -0,39682 | 0,6915   | 0,8971082 |
| AC011322.4     | 2,11    | -0,44 | 1,109721 | -0,39681 | 0,691508 | NA        |
| RP11-744N12.3  | 7,93    | -0,44 | 1,104538 | -0,39678 | 0,69153  | 0,8971082 |
| RP11-384B12.3  | 0,41    | 1,41  | 3,556349 | 0,39671  | 0,691581 | NA        |
| RP11-534P6.1   | 24,42   | 0,31  | 0,769975 | 0,39666  | 0,691618 | 0,8971082 |
| TP53           | 450,81  | 0,14  | 0,344238 | 0,39663  | 0,69164  | 0,8971082 |
| PDXDC1         | 433,36  | 0,17  | 0,43306  | 0,396619 | 0,691648 | 0,8971082 |
| B9D1           | 1,23    | 1,05  | 2,635224 | 0,396571 | 0,691684 | NA        |
| SOX13          | 25,80   | 0,24  | 0,611976 | 0,396525 | 0,691718 | 0,8971353 |
| SSX4           | 0,72    | 1,47  | 3,702767 | 0,396513 | 0,691727 | NA        |
| UBIAD1         | 177,33  | 0,29  | 0,743879 | 0,396412 | 0,691801 | 0,8971811 |
| OPLAH          | 1,38    | -1,13 | 2,850407 | -0,39625 | 0,691919 | NA        |
| RP11-155G14.5  | 0,71    | 1,47  | 3,700409 | 0,39617  | 0,69198  | NA        |
| RNU4-49P       | 0,42    | 1,48  | 3,743504 | 0,396081 | 0,692045 | NA        |
| CTC-425O23.5   | 40,03   | -0,21 | 0,5384   | -0,39601 | 0,692096 | 0,8975009 |
| SPRY1          | 1,55    | -0,77 | 1,935653 | -0,39594 | 0,692152 | NA        |
| TYW1           | 140,97  | -0,26 | 0,664043 | -0,39575 | 0,692288 | 0,8976868 |
| EID2B          | 22,69   | 0,37  | 0,927697 | 0,395668 | 0,69235  | 0,8977052 |
| MIR1273D       | 1,72    | -0,84 | 2,122888 | -0,39564 | 0,692374 | NA        |
| DMRTC1B        | 0,57    | -0,55 | 1,398876 | -0,3956  | 0,692398 | NA        |
| CLEC4G         | 74,76   | 0,74  | 1,868374 | 0,395594 | 0,692405 | 0,8977134 |
| RP11-442A13.1  | 0,42    | 0,65  | 1,655682 | 0,395556 | 0,692433 | NA        |
| IQCE           | 95,80   | -0,32 | 0,820629 | -0,39548 | 0,692485 | 0,8977557 |
| AC007405.8     | 0,39    | 1,41  | 3,560909 | 0,39535  | 0,692585 | NA        |
| PNPLA3         | 2,60    | 0,49  | 1,231848 | 0,395277 | 0,692639 | NA        |
| RP11-532F12.5  | 3,88    | 0,66  | 1,662992 | 0,395262 | 0,69265  | 0,8978603 |
| RNF20          | 426,58  | 0,28  | 0,711809 | 0,395235 | 0,692669 | 0,8978603 |
| RP11-93B14.6   | 0,42    | 1,48  | 3,743527 | 0,395213 | 0,692686 | NA        |
| RP11-351M16.4  | 3,08    | -0,69 | 1,739222 | -0,39519 | 0,692705 | NA        |

|               |          |       |          |          |          |           |
|---------------|----------|-------|----------|----------|----------|-----------|
| RP11-57H12.3  | 80,73    | -0,16 | 0,412728 | -0,39512 | 0,692756 | 0,8978603 |
| CUL7          | 90,14    | 0,43  | 1,086682 | 0,395113 | 0,692759 | 0,8978603 |
| RP11-141J13.5 | 0,86     | -0,62 | 1,557238 | -0,395   | 0,692841 | NA        |
| ZNF501        | 10,84    | 0,52  | 1,308621 | 0,394982 | 0,692856 | 0,8979231 |
| C19orf18      | 0,29     | -1,13 | 2,865347 | -0,39492 | 0,692902 | NA        |
| RP11-90B9.2   | 0,47     | 0,94  | 2,383841 | 0,394674 | 0,693084 | NA        |
| DZANK1        | 40,48    | 0,36  | 0,903031 | 0,394634 | 0,693113 | 0,8981347 |
| RP1-172I22.1  | 0,42     | 1,48  | 3,743544 | 0,394629 | 0,693116 | NA        |
| RNU6ATAC24P   | 4,65     | 0,87  | 2,195172 | 0,394571 | 0,693159 | 0,8981347 |
| OR5B17        | 0,42     | 1,48  | 3,743522 | 0,394566 | 0,693163 | NA        |
| UBAC2         | 760,64   | 0,17  | 0,436828 | 0,394535 | 0,693186 | 0,8981347 |
| RN7SKP187     | 0,40     | 1,41  | 3,574148 | 0,394456 | 0,693244 | NA        |
| TJP2          | 68,19    | 0,32  | 0,822518 | 0,394403 | 0,693283 | 0,8981347 |
| LMAN2         | 1306,79  | -0,16 | 0,412048 | -0,39439 | 0,693295 | 0,8981347 |
| RN7SL204P     | 11,70    | -0,30 | 0,74891  | -0,39436 | 0,693317 | 0,8981347 |
| RP11-572P18.1 | 2453,52  | -0,06 | 0,16053  | -0,39417 | 0,693453 | 0,8981347 |
| OAZ1          | 18049,82 | -0,06 | 0,157603 | -0,39416 | 0,693465 | 0,8981347 |
| TMUB2         | 425,82   | 0,19  | 0,485675 | 0,394096 | 0,69351  | 0,8981347 |
| SH3YL1        | 126,07   | 0,31  | 0,780999 | 0,394074 | 0,693526 | 0,8981347 |
| KAT6A         | 527,91   | 0,24  | 0,602477 | 0,394011 | 0,693573 | 0,8981347 |
| ABI3          | 706,57   | -0,17 | 0,420776 | -0,39387 | 0,693678 | 0,8981347 |
| RP11-87G24.2  | 8,82     | -0,35 | 0,887739 | -0,39386 | 0,693684 | 0,8981347 |
| NOMO1         | 196,08   | -0,28 | 0,698461 | -0,39385 | 0,693695 | 0,8981347 |
| RP6-109B7.5   | 0,60     | -1,45 | 3,680399 | -0,39384 | 0,693698 | NA        |
| RP11-121A8.1  | 39,97    | 0,69  | 1,756497 | 0,393672 | 0,693823 | 0,8981777 |
| DMPK          | 13,38    | 0,48  | 1,209829 | 0,393647 | 0,693842 | 0,8981777 |
| RP11-563N4.1  | 3,99     | 0,47  | 1,185208 | 0,393546 | 0,693916 | 0,8981777 |
| RP11-392A22.1 | 0,72     | 1,45  | 3,68724  | 0,393542 | 0,693919 | NA        |
| ACSL1         | 739,69   | 0,32  | 0,804619 | 0,393525 | 0,693932 | 0,8981777 |
| NOP58         | 823,02   | 0,15  | 0,375585 | 0,393474 | 0,69397  | 0,8981777 |
| RDH8          | 1,10     | 0,55  | 1,389803 | 0,393457 | 0,693982 | NA        |
| LINC01246     | 0,53     | 0,92  | 2,342599 | 0,393297 | 0,6941   | NA        |
| RN7SL435P     | 1,29     | -0,68 | 1,724666 | -0,39327 | 0,694116 | NA        |
| AC079767.4    | 0,42     | 1,47  | 3,743635 | 0,393261 | 0,694127 | NA        |
| RP11-26J3.1   | 3,74     | 0,38  | 0,963339 | 0,392899 | 0,694394 | NA        |
| MIR342        | 0,42     | 1,47  | 3,743595 | 0,392851 | 0,69443  | NA        |
| PYY2          | 0,42     | 1,47  | 3,743597 | 0,392806 | 0,694463 | NA        |
| FIG4          | 336,83   | 0,28  | 0,716712 | 0,392765 | 0,694493 | 0,8987259 |
| RP11-30J20.1  | 1,31     | -1,27 | 3,237    | -0,39276 | 0,694496 | NA        |
| OTOGL         | 9,31     | -0,92 | 2,344738 | -0,39272 | 0,694525 | 0,8987259 |
| SLC16A12      | 4,01     | -0,44 | 1,1309   | -0,39267 | 0,694566 | 0,8987259 |
| RP11-43F13.1  | 19,03    | -0,36 | 0,923125 | -0,39259 | 0,694621 | 0,8987259 |
| FEM1C         | 233,53   | 0,28  | 0,706909 | 0,392373 | 0,694783 | 0,8987259 |
| CECR5         | 332,02   | 0,30  | 0,777182 | 0,392362 | 0,694791 | 0,8987259 |
| STX12         | 433,83   | -0,15 | 0,394725 | -0,39235 | 0,694801 | 0,8987259 |
| RP11-438P9.1  | 0,41     | 1,47  | 3,743612 | 0,392296 | 0,694839 | NA        |
| RP11-114H23.3 | 1,36     | -0,53 | 1,340448 | -0,39223 | 0,694891 | NA        |
| FREM3         | 0,09     | -1,47 | 3,741838 | -0,39221 | 0,6949   | NA        |
| AP001476.2    | 2,50     | -0,44 | 1,119694 | -0,39221 | 0,694906 | NA        |
| TPP2          | 659,54   | 0,17  | 0,437674 | 0,392205 | 0,694906 | 0,8987259 |

|               |         |       |          |          |          |           |
|---------------|---------|-------|----------|----------|----------|-----------|
| TNIP1         | 619,59  | -0,14 | 0,363537 | -0,39215 | 0,694949 | 0,8987259 |
| CTB-79E8.3    | 0,72    | -0,70 | 1,77287  | -0,39215 | 0,69495  | NA        |
| MORC4         | 134,27  | -0,19 | 0,477714 | -0,39213 | 0,69496  | 0,8987259 |
| IPO9          | 579,10  | 0,24  | 0,615409 | 0,392121 | 0,694969 | 0,8987259 |
| CLCC1         | 146,59  | -0,28 | 0,708423 | -0,39212 | 0,694973 | 0,8987259 |
| COL6A4P2      | 2,20    | 1,08  | 2,757672 | 0,392056 | 0,695017 | NA        |
| PPT2-EGFL8    | 3,04    | -0,48 | 1,231281 | -0,39202 | 0,69504  | NA        |
| RN7SL382P     | 19,68   | -0,57 | 1,466286 | -0,39197 | 0,69508  | 0,8988014 |
| PGM5P4-AS1    | 4,21    | -0,37 | 0,939578 | -0,39187 | 0,695151 | 0,8988014 |
| RP11-244N20.7 | 1,20    | -1,26 | 3,21828  | -0,39187 | 0,695154 | NA        |
| CARM1         | 73,91   | -0,40 | 1,013882 | -0,39181 | 0,695201 | 0,8988014 |
| PKIA          | 0,52    | -1,02 | 2,603367 | -0,39179 | 0,695213 | NA        |
| AF042090.2    | 3,09    | -0,47 | 1,189416 | -0,39178 | 0,695219 | NA        |
| PLCE1         | 45,29   | 0,22  | 0,559564 | 0,391731 | 0,695257 | 0,8988014 |
| OLIG1         | 0,32    | -1,46 | 3,738175 | -0,39172 | 0,695267 | NA        |
| RP5-1091N2.9  | 94,17   | 0,31  | 0,803848 | 0,39171  | 0,695273 | 0,8988014 |
| KCTD2         | 156,86  | -0,44 | 1,121209 | -0,39146 | 0,69546  | 0,8988517 |
| RGS13         | 45,63   | 0,46  | 1,16645  | 0,391407 | 0,695496 | 0,8988517 |
| PALM2-AKAP2   | 0,43    | 1,46  | 3,743644 | 0,391328 | 0,695555 | NA        |
| HCG25         | 49,32   | 0,31  | 0,793701 | 0,39132  | 0,695561 | 0,8988517 |
| AC062029.1    | 29,02   | -0,64 | 1,624831 | -0,39131 | 0,695568 | 0,8988517 |
| OR10AH1P      | 18,76   | -0,29 | 0,748802 | -0,39128 | 0,695591 | 0,8988517 |
| AC083822.1    | 0,42    | 1,46  | 3,743694 | 0,391277 | 0,695592 | NA        |
| CCR5          | 124,30  | -0,37 | 0,952967 | -0,39126 | 0,695602 | 0,8988517 |
| ZHX2          | 58,26   | -0,51 | 1,30297  | -0,39116 | 0,695682 | 0,8988873 |
| RNF144A       | 29,46   | 0,58  | 1,474619 | 0,391097 | 0,695726 | 0,8988873 |
| AP000347.3    | 0,42    | 1,46  | 3,743748 | 0,391051 | 0,695759 | NA        |
| CH17-55D9.1   | 8,58    | 0,24  | 0,622048 | 0,390995 | 0,695801 | 0,8989223 |
| RPL32P29      | 40,22   | -0,33 | 0,843033 | -0,39087 | 0,69589  | 0,8989355 |
| C12orf57      | 156,48  | -0,22 | 0,5521   | -0,39085 | 0,695908 | 0,8989355 |
| RP13-58209.7  | 0,42    | 1,46  | 3,743689 | 0,390835 | 0,695919 | NA        |
| RP11-319G9.4  | 0,42    | 1,46  | 3,743667 | 0,390785 | 0,695956 | NA        |
| PARP9         | 1060,89 | -0,24 | 0,609259 | -0,39074 | 0,695989 | 0,8989774 |
| EIF5AP2       | 1,10    | 0,70  | 1,796268 | 0,3907   | 0,696019 | NA        |
| NAMPTL        | 37,81   | 0,36  | 0,930317 | 0,390642 | 0,696062 | 0,8990097 |
| RP11-182J1.5  | 1,72    | 0,76  | 1,945523 | 0,390633 | 0,696069 | NA        |
| AMBP          | 0,15    | -1,46 | 3,747779 | -0,3906  | 0,696089 | NA        |
| RP11-65N13.6  | 0,28    | 0,85  | 2,166562 | 0,39051  | 0,69616  | NA        |
| RP11-245P10.8 | 0,73    | 0,85  | 2,185018 | 0,39044  | 0,696211 | NA        |
| OR2A20P       | 3,61    | 1,43  | 3,650916 | 0,390434 | 0,696216 | NA        |
| TRG-AS1       | 256,79  | -0,28 | 0,72338  | -0,39039 | 0,696249 | 0,899158  |
| AC010525.4    | 1,65    | -0,51 | 1,310613 | -0,39034 | 0,696284 | NA        |
| RP11-566K19.6 | 0,79    | 1,06  | 2,71996  | 0,390228 | 0,696368 | NA        |
| NOL12         | 470,71  | 0,19  | 0,488021 | 0,390176 | 0,696407 | 0,899158  |
| CRBN          | 695,45  | -0,18 | 0,473822 | -0,39015 | 0,696429 | 0,899158  |
| NOL4L         | 152,78  | 0,35  | 0,89725  | 0,39012  | 0,696448 | 0,899158  |
| CTD-2524L6.3  | 0,65    | -0,92 | 2,348676 | -0,39009 | 0,696472 | NA        |
| ESPN          | 0,72    | -0,93 | 2,371564 | -0,39007 | 0,696483 | NA        |
| NUDT4         | 341,32  | -0,21 | 0,534748 | -0,39005 | 0,6965   | 0,899158  |
| EML3          | 158,89  | 0,26  | 0,667352 | 0,390024 | 0,696519 | 0,899158  |

|                |         |       |          |          |          |           |
|----------------|---------|-------|----------|----------|----------|-----------|
| RP11-680G24.6  | 1,58    | 1,18  | 3,032275 | 0,38995  | 0,696574 | NA        |
| MTX1           | 635,63  | 0,22  | 0,573615 | 0,38986  | 0,69664  | 0,899158  |
| RP11-763E3.1   | 0,41    | 1,46  | 3,743801 | 0,389844 | 0,696652 | NA        |
| LAPTM4B        | 2,42    | -0,44 | 1,1299   | -0,38981 | 0,696674 | NA        |
| FBXL19-AS1     | 18,54   | 0,26  | 0,670843 | 0,389814 | 0,696674 | 0,899158  |
| SNAPIN         | 265,85  | 0,25  | 0,642177 | 0,389798 | 0,696686 | 0,899158  |
| C8orf31        | 19,39   | -0,38 | 0,97387  | -0,38978 | 0,6967   | 0,899158  |
| RP5-1007M22.2  | 40,73   | -0,40 | 1,035994 | -0,38975 | 0,696722 | 0,899158  |
| AFTPH          | 823,81  | 0,12  | 0,316104 | 0,389689 | 0,696767 | 0,899158  |
| PLEKHM3        | 129,32  | -0,26 | 0,677354 | -0,38964 | 0,696805 | 0,899158  |
| RP11-569G13.1  | 0,45    | 0,71  | 1,830899 | 0,389605 | 0,696829 | NA        |
| RP11-35015.2   | 0,42    | 1,39  | 3,55838  | 0,389511 | 0,696898 | NA        |
| RN7SL592P      | 5,22    | 0,29  | 0,754631 | 0,389291 | 0,697061 | 0,8994051 |
| RP11-181C21.5  | 9,58    | -0,74 | 1,90899  | -0,38921 | 0,697124 | 0,8994051 |
| TRAPPC9        | 209,35  | 0,28  | 0,723449 | 0,389128 | 0,697181 | 0,8994051 |
| AFMID          | 271,92  | 0,23  | 0,596059 | 0,388987 | 0,697286 | 0,8994051 |
| RN7SL317P      | 7,32    | -0,38 | 0,983819 | -0,38894 | 0,697321 | 0,8994051 |
| RAB11FIP5      | 1,67    | 0,83  | 2,131911 | 0,388932 | 0,697326 | NA        |
| NFKBIL1        | 15,89   | 0,60  | 1,549066 | 0,3889   | 0,69735  | 0,8994051 |
| AC008062.1     | 9,22    | -0,64 | 1,635664 | -0,38883 | 0,6974   | 0,8994051 |
| TYK2           | 1094,04 | 0,11  | 0,273056 | 0,388798 | 0,697426 | 0,8994051 |
| RP11-362K2.2   | 6,81    | 0,48  | 1,237624 | 0,38879  | 0,697432 | 0,8994051 |
| KB-1991G8.1    | 0,21    | -1,32 | 3,399782 | -0,38874 | 0,697465 | NA        |
| TLK1           | 564,91  | 0,18  | 0,467339 | 0,3885   | 0,697646 | 0,8994591 |
| RP11-474B16.1  | 3,24    | 0,72  | 1,85556  | 0,388492 | 0,697652 | NA        |
| CDK13          | 819,00  | 0,10  | 0,253794 | 0,388448 | 0,697685 | 0,8994591 |
| AC016683.5     | 0,42    | 1,45  | 3,743833 | 0,388339 | 0,697765 | NA        |
| RP11-57A19.5   | 2,36    | 0,90  | 2,315212 | 0,388311 | 0,697786 | NA        |
| TSPAN32        | 500,28  | 0,18  | 0,468279 | 0,388292 | 0,6978   | 0,8994591 |
| C10orf105      | 0,61    | 1,24  | 3,185161 | 0,388274 | 0,697813 | NA        |
| FTSJ3          | 122,17  | 0,27  | 0,687015 | 0,3882   | 0,697868 | 0,8994591 |
| BCKDK          | 671,58  | -0,18 | 0,472578 | -0,38816 | 0,697895 | 0,8994591 |
| RP11-10N23.2   | 4,47    | 0,45  | 1,160784 | 0,388158 | 0,697899 | 0,8994591 |
| CTD-2527I21.11 | 1,85    | 0,52  | 1,333753 | 0,388155 | 0,697901 | NA        |
| ZNF197         | 132,62  | -0,34 | 0,87607  | -0,38813 | 0,697916 | 0,8994591 |
| BCLAF1P2       | 0,39    | -1,13 | 2,90206  | -0,38811 | 0,697931 | NA        |
| RP11-588H23.3  | 65,63   | -0,29 | 0,746123 | -0,3881  | 0,697944 | 0,8994591 |
| H2AFV          | 707,53  | 0,14  | 0,372038 | 0,388073 | 0,697962 | 0,8994591 |
| MAPK1          | 798,08  | 0,19  | 0,488947 | 0,388041 | 0,697986 | 0,8994591 |
| AP000648.5     | 69,91   | 0,46  | 1,188309 | 0,387989 | 0,698024 | 0,8994591 |
| RP11-348A11.4  | 28,14   | 0,23  | 0,600394 | 0,387885 | 0,698101 | 0,8994591 |
| TOR4A          | 53,73   | 0,29  | 0,752292 | 0,387839 | 0,698135 | 0,8994591 |
| LA16c-316G12.2 | 14,56   | 0,30  | 0,775218 | 0,38776  | 0,698194 | 0,8994591 |
| CTC-550B14.6   | 0,68    | 1,43  | 3,677034 | 0,38771  | 0,698231 | NA        |
| RP1-47M23.3    | 2,08    | -0,96 | 2,470602 | -0,3877  | 0,698236 | NA        |
| ASXL1          | 334,20  | -0,21 | 0,532169 | -0,38769 | 0,698245 | 0,8994591 |
| EOGT           | 88,77   | 0,41  | 1,069334 | 0,387648 | 0,698276 | 0,8994591 |
| FMO3           | 7,80    | 0,65  | 1,664984 | 0,387622 | 0,698295 | 0,8994591 |
| RP11-514D23.1  | 0,58    | -0,90 | 2,32778  | -0,38753 | 0,698366 | NA        |
| IQCJ-SCHIP1    | 8,62    | 0,45  | 1,171112 | 0,387471 | 0,698407 | 0,8995398 |



|               |         |       |          |          |          |           |
|---------------|---------|-------|----------|----------|----------|-----------|
| RP11-356M20.2 | 0,39    | 1,37  | 3,54174  | 0,387436 | 0,698434 | NA        |
| HLF           | 2,30    | 0,80  | 2,052454 | 0,387426 | 0,698441 | NA        |
| SNUPN         | 152,78  | 0,28  | 0,729099 | 0,387407 | 0,698455 | 0,8995398 |
| FAM8A1        | 125,25  | -0,35 | 0,912967 | -0,38734 | 0,698506 | 0,8995438 |
| RP3-508I15.21 | 30,23   | -0,53 | 1,369224 | -0,38725 | 0,698568 | 0,8995565 |
| GCLM          | 71,50   | 0,38  | 0,985203 | 0,387186 | 0,698618 | 0,8995565 |
| RNU6-1239P    | 0,53    | 1,45  | 3,743831 | 0,387071 | 0,698703 | NA        |
| RNU6-1268P    | 0,53    | 1,45  | 3,743831 | 0,387071 | 0,698703 | NA        |
| RNU6-816P     | 0,53    | 1,45  | 3,743831 | 0,387071 | 0,698703 | NA        |
| EDC4          | 184,94  | -0,35 | 0,891416 | -0,38704 | 0,698724 | 0,8995565 |
| RP11-110I1.6  | 14,40   | -0,49 | 1,270823 | -0,38702 | 0,698739 | 0,8995565 |
| SOCS4         | 151,91  | 0,21  | 0,554321 | 0,386974 | 0,698776 | 0,8995565 |
| RP4-550H1.7   | 0,41    | 1,45  | 3,743848 | 0,386948 | 0,698795 | NA        |
| RP11-420K14.7 | 0,41    | 0,65  | 1,674644 | 0,386944 | 0,698798 | NA        |
| CTD-3083F21.1 | 14,09   | 0,82  | 2,120686 | 0,386932 | 0,698806 | 0,8995565 |
| RP11-551L14.4 | 47,77   | -0,26 | 0,670849 | -0,3868  | 0,698901 | 0,8995807 |
| WDR76         | 16,15   | -0,36 | 0,937001 | -0,38678 | 0,698922 | 0,8995807 |
| RP11-475A13.2 | 13,27   | -0,44 | 1,142174 | -0,38655 | 0,699086 | 0,8996695 |
| EIF2S2        | 755,62  | -0,15 | 0,390893 | -0,38655 | 0,699087 | 0,8996695 |
| RP1-37E16.13  | 0,41    | 1,36  | 3,524349 | 0,386545 | 0,699093 | NA        |
| CTB-91J4.1    | 0,94    | -0,95 | 2,466579 | -0,38653 | 0,699101 | NA        |
| RFC4          | 38,50   | 0,48  | 1,239549 | 0,386427 | 0,69918  | 0,8997269 |
| RP11-483P21.2 | 3,91    | 0,41  | 1,053318 | 0,386301 | 0,699274 | 0,8997733 |
| RP11-624J6.2  | 2,34    | -0,40 | 1,037791 | -0,3863  | 0,699278 | NA        |
| EFNA3         | 0,31    | 1,15  | 2,973966 | 0,386228 | 0,699328 | NA        |
| HTR7          | 85,40   | 0,43  | 1,125009 | 0,386183 | 0,699361 | 0,8997733 |
| AC106801.1    | 3,67    | 0,50  | 1,283905 | 0,386177 | 0,699366 | NA        |
| TP53BP2       | 387,62  | 0,25  | 0,638286 | 0,386144 | 0,69939  | 0,8997733 |
| CTD-2311B13.9 | 14,74   | -0,21 | 0,552278 | -0,38612 | 0,69941  | 0,8997733 |
| ADGRA2        | 0,49    | 1,39  | 3,59729  | 0,386061 | 0,699452 | NA        |
| ABCD2         | 1,45    | -1,01 | 2,612831 | -0,386   | 0,699494 | NA        |
| BATF          | 116,45  | -0,33 | 0,84478  | -0,38599 | 0,699504 | 0,8997921 |
| RP11-203I2.2  | 5,92    | -0,66 | 1,718652 | -0,38592 | 0,699557 | 0,8997921 |
| TMEM98        | 10,92   | -0,36 | 0,934246 | -0,38589 | 0,69958  | 0,8997921 |
| GDAP1L1       | 1,86    | 0,78  | 2,029498 | 0,385773 | 0,699664 | NA        |
| WASHC2C       | 651,69  | -0,19 | 0,492304 | -0,38577 | 0,699669 | 0,8997921 |
| RP11-297D21.4 | 20,56   | 0,31  | 0,809757 | 0,385653 | 0,699753 | 0,8997921 |
| A4GALT        | 6,32    | 0,36  | 0,92936  | 0,385635 | 0,699767 | 0,8997921 |
| PRR13         | 2566,25 | 0,08  | 0,195269 | 0,385607 | 0,699788 | 0,8997921 |
| CTC-222D7.1   | 0,41    | 1,44  | 3,743939 | 0,385569 | 0,699816 | NA        |
| RP11-805F19.3 | 15,35   | 0,41  | 1,062843 | 0,385542 | 0,699836 | 0,8997921 |
| RP11-143M1.2  | 4,25    | -0,36 | 0,937616 | -0,38546 | 0,699893 | 0,8997921 |
| HERC2         | 440,65  | 0,25  | 0,647699 | 0,385411 | 0,699933 | 0,8997921 |
| RPS27L        | 347,62  | -0,13 | 0,328468 | -0,38538 | 0,699957 | 0,8997921 |
| RP11-537P22.2 | 0,84    | -0,94 | 2,450669 | -0,38522 | 0,700076 | NA        |
| PHF20L1       | 839,21  | -0,18 | 0,464237 | -0,38514 | 0,700132 | 0,8999554 |
| CTD-3137H5.1  | 0,38    | 1,35  | 3,515817 | 0,385122 | 0,700147 | NA        |
| RP5-1101C3.1  | 4,50    | -1,02 | 2,650928 | -0,38508 | 0,700181 | 0,8999569 |
| CA11          | 14,61   | -0,35 | 0,919486 | -0,38479 | 0,700392 | 0,900165  |
| RP11-495K9.3  | 0,41    | 1,44  | 3,743967 | 0,38477  | 0,700408 | NA        |

|               |         |       |          |          |          |           |
|---------------|---------|-------|----------|----------|----------|-----------|
| AC073326.3    | 0,41    | 1,44  | 3,743978 | 0,384714 | 0,700449 | NA        |
| RP11-90P5.2   | 0,52    | -1,35 | 3,503245 | -0,38469 | 0,700466 | NA        |
| CTC-343N3.1   | 0,80    | -1,06 | 2,753046 | -0,38467 | 0,70048  | NA        |
| RP11-214K3.23 | 0,41    | 1,44  | 3,743917 | 0,384664 | 0,700487 | NA        |
| RP4-669P10.20 | 3,10    | 0,81  | 2,102066 | 0,384494 | 0,700612 | NA        |
| CYB5R2        | 33,99   | -0,32 | 0,821051 | -0,38432 | 0,700742 | 0,9004044 |
| RP11-159L20.1 | 0,59    | 1,21  | 3,150741 | 0,3843   | 0,700756 | NA        |
| CTD-2515C13.2 | 1,86    | 0,84  | 2,173739 | 0,384236 | 0,700804 | NA        |
| AJ271736.8    | 0,41    | 1,44  | 3,744091 | 0,384208 | 0,700824 | NA        |
| CDC26         | 406,08  | 0,18  | 0,468198 | 0,384167 | 0,700855 | 0,9004044 |
| MGST3         | 439,25  | -0,13 | 0,329602 | -0,38414 | 0,700872 | 0,9004044 |
| RP11-399D6.2  | 53,96   | -0,26 | 0,670248 | -0,3841  | 0,700904 | 0,9004044 |
| RP11-472B18.1 | 0,52    | 1,04  | 2,713534 | 0,384075 | 0,700923 | NA        |
| RP11-169E6.1  | 4,73    | 0,99  | 2,568345 | 0,384022 | 0,700962 | 0,9004044 |
| JMJD8         | 396,28  | 0,23  | 0,592115 | 0,384009 | 0,700972 | 0,9004044 |
| RNU6-920P     | 3,10    | -0,75 | 1,957577 | -0,38397 | 0,700997 | NA        |
| ZNF513        | 77,48   | -0,54 | 1,418377 | -0,3839  | 0,70105  | 0,9004044 |
| ZNF273        | 42,01   | -0,19 | 0,50156  | -0,38382 | 0,701109 | 0,9004044 |
| PSMB4         | 3559,17 | 0,10  | 0,269888 | 0,383803 | 0,701124 | 0,9004044 |
| CTA-384D8.36  | 106,37  | -0,25 | 0,661304 | -0,38376 | 0,701156 | 0,9004044 |
| C10orf11      | 388,95  | 0,19  | 0,49144  | 0,383715 | 0,70119  | 0,9004044 |
| MIR548AP      | 0,37    | 1,36  | 3,535864 | 0,383689 | 0,701209 | NA        |
| SPATA31A7     | 9,07    | 0,38  | 0,979781 | 0,38368  | 0,701216 | 0,9004044 |
| CCNB1IP1      | 304,08  | -0,23 | 0,6021   | -0,38355 | 0,701311 | 0,9004044 |
| KCTD9         | 193,50  | 0,22  | 0,578256 | 0,383491 | 0,701356 | 0,9004044 |
| RP11-73K9.2   | 0,37    | 1,35  | 3,51943  | 0,383487 | 0,701359 | NA        |
| RP11-124N3.2  | 2,49    | -1,29 | 3,368823 | -0,38347 | 0,701374 | NA        |
| IGSF9         | 22,97   | -0,40 | 1,033695 | -0,38343 | 0,701399 | 0,9004044 |
| ABCA1         | 237,45  | 0,40  | 1,030257 | 0,383405 | 0,70142  | 0,9004044 |
| MIP           | 1,44    | -0,89 | 2,328678 | -0,38333 | 0,701472 | NA        |
| CENPH         | 13,84   | 0,27  | 0,710013 | 0,383164 | 0,701598 | 0,9004044 |
| EI24          | 395,19  | 0,18  | 0,470645 | 0,383157 | 0,701603 | 0,9004044 |
| CTC-444N24.8  | 33,16   | 0,53  | 1,381611 | 0,38315  | 0,701609 | 0,9004044 |
| TRIO          | 620,58  | -0,16 | 0,428026 | -0,38311 | 0,701636 | 0,9004044 |
| C20orf196     | 67,13   | 0,37  | 0,976547 | 0,383105 | 0,701642 | 0,9004044 |
| PPP1R12C      | 219,46  | -0,22 | 0,578183 | -0,38306 | 0,701676 | 0,9004044 |
| RBFA          | 124,59  | 0,28  | 0,731455 | 0,383039 | 0,701691 | 0,9004044 |
| AC022182.1    | 9,32    | -0,50 | 1,293604 | -0,38293 | 0,70177  | 0,9004295 |
| NUDT7         | 17,95   | 0,61  | 1,587676 | 0,382882 | 0,701807 | 0,9004295 |
| CARD17        | 2,38    | 0,93  | 2,431956 | 0,382661 | 0,701971 | NA        |
| RP11-230C9.4  | 0,45    | 1,43  | 3,74407  | 0,382493 | 0,702095 | NA        |
| PYM1          | 271,00  | 0,19  | 0,491557 | 0,382403 | 0,702162 | 0,9006915 |
| HHLA1         | 18,65   | -0,40 | 1,054681 | -0,3824  | 0,702167 | 0,9006915 |
| PPDPF         | 16,36   | -0,26 | 0,670292 | -0,38239 | 0,702171 | 0,9006915 |
| YKT6          | 303,07  | 0,18  | 0,467109 | 0,382343 | 0,702207 | 0,9006915 |
| TUBGCP6       | 301,39  | 0,23  | 0,603692 | 0,38228  | 0,702254 | 0,9006915 |
| EPHA3         | 3,23    | 0,50  | 1,29615  | 0,382146 | 0,702353 | NA        |
| CGNL1         | 16,64   | -0,50 | 1,303387 | -0,3819  | 0,702532 | 0,9009359 |
| AC005009.2    | 0,69    | 1,43  | 3,737617 | 0,381832 | 0,702586 | NA        |
| CD81          | 395,77  | 0,20  | 0,524581 | 0,381772 | 0,70263  | 0,9009359 |

|               |         |       |          |          |          |           |
|---------------|---------|-------|----------|----------|----------|-----------|
| TEX10         | 333,67  | -0,23 | 0,591982 | -0,38177 | 0,702633 | 0,9009359 |
| PLCXD1        | 166,15  | -0,26 | 0,693131 | -0,38176 | 0,702638 | 0,9009359 |
| AC093375.1    | 6,00    | 0,57  | 1,484531 | 0,381656 | 0,702717 | 0,9009748 |
| CX3CL1        | 5,55    | -0,36 | 0,944865 | -0,38156 | 0,702785 | 0,9010005 |
| RP11-165N19.4 | 0,40    | 1,43  | 3,744122 | 0,38152  | 0,702818 | NA        |
| CAPN7         | 281,21  | 0,22  | 0,56654  | 0,381324 | 0,702962 | 0,9010758 |
| DUSP5         | 296,04  | 0,31  | 0,819288 | 0,381217 | 0,703042 | 0,9010758 |
| AP001465.5    | 0,43    | -1,42 | 3,714651 | -0,3812  | 0,703054 | NA        |
| NUDT16L1      | 307,36  | 0,37  | 0,964699 | 0,381197 | 0,703057 | 0,9010758 |
| AC017104.6    | 0,13    | -1,43 | 3,745746 | -0,38118 | 0,703067 | NA        |
| RP11-452C8.1  | 44,07   | -0,24 | 0,634658 | -0,38107 | 0,703148 | 0,9010758 |
| DUSP23        | 1001,70 | 0,09  | 0,225555 | 0,381065 | 0,703155 | 0,9010758 |
| HLA-V         | 47,16   | -0,40 | 1,052549 | -0,38106 | 0,703159 | 0,9010758 |
| NRIP1         | 953,57  | 0,21  | 0,558026 | 0,380953 | 0,703238 | 0,9010758 |
| ZEB2-AS1      | 97,16   | -0,31 | 0,812083 | -0,38094 | 0,703246 | 0,9010758 |
| AC139452.2    | 0,41    | -0,99 | 2,609301 | -0,38086 | 0,70331  | NA        |
| CTD-2357A8.2  | 3,88    | 0,66  | 1,727432 | 0,380781 | 0,703366 | 0,9010758 |
| KIAA1161      | 102,40  | -0,25 | 0,656886 | -0,38076 | 0,703383 | 0,9010758 |
| NLRP1         | 1319,34 | 0,13  | 0,352209 | 0,380721 | 0,70341  | 0,9010758 |
| RP11-24N18.1  | 16,01   | -0,24 | 0,625717 | -0,38069 | 0,703435 | 0,9010758 |
| RP11-293M10.5 | 50,75   | -0,38 | 1,007129 | -0,38064 | 0,703474 | 0,9010758 |
| LRRTM2        | 31,55   | -0,36 | 0,937535 | -0,38055 | 0,703534 | 0,9010906 |
| USP53         | 126,25  | -0,25 | 0,66103  | -0,3804  | 0,703648 | 0,901175  |
| IPMK          | 231,25  | -0,21 | 0,545721 | -0,38027 | 0,703747 | 0,9011846 |
| TRIB3         | 33,28   | -0,55 | 1,4554   | -0,38023 | 0,703777 | 0,9011846 |
| RP11-578F21.3 | 1,04    | -1,23 | 3,227643 | -0,38021 | 0,703788 | NA        |
| HBA2          | 14,34   | -0,46 | 1,210509 | -0,38008 | 0,703887 | 0,9011846 |
| ABCD3         | 175,53  | 0,27  | 0,712213 | 0,380069 | 0,703894 | 0,9011846 |
| ADGRE3        | 20,58   | -0,61 | 1,617629 | -0,38006 | 0,703898 | 0,9011846 |
| RP11-659G9.3  | 1,06    | 0,54  | 1,423575 | 0,379994 | 0,70395  | NA        |
| RPL17P33      | 1,77    | 0,34  | 0,897131 | 0,379918 | 0,704006 | NA        |
| MEG8          | 5,50    | -0,44 | 1,165703 | -0,37991 | 0,704012 | 0,9012493 |
| TM4SF1        | 0,40    | 1,42  | 3,744216 | 0,379852 | 0,704055 | NA        |
| SIGMAR1       | 244,05  | -0,32 | 0,838084 | -0,37979 | 0,704103 | 0,9012493 |
| HSF1          | 201,56  | 0,21  | 0,556781 | 0,37976  | 0,704124 | 0,9012493 |
| RP11-167N5.5  | 5,49    | -0,36 | 0,947147 | -0,37974 | 0,704142 | 0,9012493 |
| AC002400.1    | 0,40    | 1,42  | 3,744167 | 0,379609 | 0,704236 | NA        |
| CTC-455F18.1  | 5,19    | 0,45  | 1,172969 | 0,379555 | 0,704276 | 0,9013584 |
| RN7SL135P     | 1,78    | 1,15  | 3,042996 | 0,379356 | 0,704423 | NA        |
| BCAP31        | 1320,51 | -0,11 | 0,283851 | -0,37934 | 0,704438 | 0,9013592 |
| AC098828.2    | 20,06   | -0,27 | 0,705918 | -0,37925 | 0,704504 | 0,9013592 |
| PIWIL3        | 0,80    | -0,55 | 1,451587 | -0,3792  | 0,704538 | NA        |
| GSPT2         | 85,79   | 0,43  | 1,146721 | 0,379081 | 0,704628 | 0,9013592 |
| NFXL1         | 90,23   | -0,39 | 1,02599  | -0,37907 | 0,704636 | 0,9013592 |
| SRSF10        | 1190,63 | 0,15  | 0,384809 | 0,378992 | 0,704694 | 0,9013592 |
| POLR2H        | 331,29  | -0,21 | 0,541009 | -0,37895 | 0,704723 | 0,9013592 |
| RNY3P13       | 0,37    | 1,35  | 3,557641 | 0,378944 | 0,70473  | NA        |
| RP11-313D6.4  | 19,56   | -0,25 | 0,665676 | -0,37894 | 0,704733 | 0,9013592 |
| RP11-587D21.1 | 0,42    | 1,42  | 3,744251 | 0,378938 | 0,704734 | NA        |
| ZNF19         | 35,33   | -0,25 | 0,667735 | -0,37893 | 0,70474  | 0,9013592 |

|               |        |       |          |          |          |           |
|---------------|--------|-------|----------|----------|----------|-----------|
| SCARF2        | 8,94   | 0,68  | 1,785832 | 0,378877 | 0,704779 | 0,9013592 |
| FAM47E-STBD1  | 2,63   | -0,38 | 1,004518 | -0,37887 | 0,704783 | NA        |
| RP11-333A23.4 | 28,29  | -0,28 | 0,745863 | -0,37885 | 0,704796 | 0,9013592 |
| KIF19         | 2,62   | -0,56 | 1,470618 | -0,37884 | 0,704804 | NA        |
| RP11-599B13.6 | 5,06   | -0,86 | 2,258674 | -0,37883 | 0,70481  | 0,9013592 |
| P4HA2         | 50,30  | -0,36 | 0,962925 | -0,37877 | 0,704858 | 0,9013592 |
| LLNLR-271C9.1 | 1,35   | -1,24 | 3,26723  | -0,37855 | 0,70502  | NA        |
| RP13-16H11.5  | 0,77   | -1,38 | 3,643965 | -0,37852 | 0,705045 | NA        |
| AC073641.2    | 0,50   | -0,97 | 2,556956 | -0,37852 | 0,705047 | NA        |
| NOVA1         | 24,50  | -0,38 | 1,009503 | -0,37846 | 0,705086 | 0,9015896 |
| RP11-181K12.1 | 13,77  | 0,26  | 0,69498  | 0,378396 | 0,705136 | 0,9015914 |
| AL691477.1    | 0,46   | 0,89  | 2,340628 | 0,378377 | 0,70515  | NA        |
| TPK1          | 430,73 | 0,21  | 0,558703 | 0,378269 | 0,70523  | 0,9016501 |
| CGN           | 1,80   | -0,69 | 1,832423 | -0,37816 | 0,705313 | NA        |
| CTD-2619J13.8 | 9,31   | 0,56  | 1,470628 | 0,37811  | 0,705349 | 0,9017394 |
| RP11-117F22.1 | 0,40   | 1,42  | 3,744225 | 0,378096 | 0,705359 | NA        |
| CASQ2         | 5,23   | 0,65  | 1,723562 | 0,377983 | 0,705443 | 0,9017983 |
| DDX43         | 7,87   | 0,69  | 1,836824 | 0,377892 | 0,705511 | 0,9018229 |
| TMED7         | 441,97 | -0,19 | 0,492148 | -0,37779 | 0,705589 | 0,9018235 |
| CATSPER2P1    | 57,19  | -0,26 | 0,690563 | -0,37776 | 0,705611 | 0,9018235 |
| WT1           | 0,40   | 1,34  | 3,549703 | 0,377665 | 0,70568  | NA        |
| PIK3C2A       | 481,64 | 0,21  | 0,550494 | 0,377643 | 0,705696 | 0,9018235 |
| MON2          | 545,35 | -0,16 | 0,434492 | -0,37762 | 0,705714 | 0,9018235 |
| NMNAT1        | 71,75  | -0,24 | 0,629696 | -0,37751 | 0,705793 | 0,9018235 |
| RP11-65D17.1  | 13,55  | 0,48  | 1,268168 | 0,3775   | 0,705802 | 0,9018235 |
| RP11-296E7.1  | 0,49   | 1,41  | 3,744273 | 0,377232 | 0,706001 | NA        |
| RP1-65P5.5    | 0,61   | -1,40 | 3,7006   | -0,37721 | 0,706018 | NA        |
| MIR186        | 1,20   | -0,64 | 1,709949 | -0,37703 | 0,706153 | NA        |
| CTD-2286N8.1  | 3,49   | -0,72 | 1,921369 | -0,37686 | 0,706279 | NA        |
| EIF1AD        | 267,45 | -0,23 | 0,613473 | -0,37659 | 0,706476 | 0,9026222 |
| RP11-505P4.6  | 0,49   | -0,76 | 2,01329  | -0,37659 | 0,706482 | NA        |
| C20orf200     | 2,04   | 0,59  | 1,561964 | 0,376528 | 0,706524 | NA        |
| EFCAB9        | 0,40   | 1,41  | 3,74435  | 0,376514 | 0,706534 | NA        |
| LRRC40        | 121,81 | 0,34  | 0,89492  | 0,376353 | 0,706655 | 0,9027539 |
| C6orf54       | 4,38   | -0,41 | 1,089493 | -0,3763  | 0,706693 | 0,9027539 |
| AP001062.8    | 1,47   | 1,00  | 2,662637 | 0,376298 | 0,706696 | NA        |
| EPHB3         | 79,95  | -0,46 | 1,229956 | -0,37626 | 0,706725 | 0,9027539 |
| BGLAP         | 2,66   | -0,99 | 2,642704 | -0,37622 | 0,706752 | NA        |
| TMEM248       | 555,51 | -0,22 | 0,581278 | -0,37614 | 0,706816 | 0,9027874 |
| RP11-536K7.3  | 33,47  | -0,29 | 0,778941 | -0,37609 | 0,706848 | 0,9027874 |
| SLC13A1       | 0,52   | 0,70  | 1,861229 | 0,376053 | 0,706877 | NA        |
| APLNR         | 0,14   | -1,41 | 3,747609 | -0,37597 | 0,706942 | NA        |
| ZRANB1        | 258,45 | -0,27 | 0,72687  | -0,37585 | 0,707027 | 0,902954  |
| PDSS2         | 117,25 | 0,38  | 1,008835 | 0,37569  | 0,707147 | 0,9029974 |
| B4GALT5       | 175,75 | 0,25  | 0,678173 | 0,375676 | 0,707158 | 0,9029974 |
| FCRLA         | 13,10  | -0,87 | 2,325627 | -0,37547 | 0,707313 | 0,9030935 |
| AP000705.7    | 16,37  | -0,24 | 0,63741  | -0,37544 | 0,70733  | 0,9030935 |
| RP11-767L7.1  | 0,33   | 1,11  | 2,962706 | 0,37539  | 0,707371 | NA        |
| DOK4          | 0,39   | 1,34  | 3,566676 | 0,375303 | 0,707435 | NA        |
| OR2B11        | 65,80  | -0,28 | 0,749015 | -0,37528 | 0,70745  | 0,903185  |

|                |         |       |          |          |          |           |
|----------------|---------|-------|----------|----------|----------|-----------|
| EML4           | 404,46  | -0,20 | 0,526213 | -0,37505 | 0,707625 | 0,9032387 |
| ZCCHC11        | 300,09  | -0,26 | 0,686607 | -0,375   | 0,707664 | 0,9032387 |
| CCNT1          | 485,57  | 0,32  | 0,856378 | 0,374947 | 0,7077   | 0,9032387 |
| ACOX1          | 299,66  | 0,28  | 0,743115 | 0,374915 | 0,707723 | 0,9032387 |
| RP4-545L17.11  | 0,93    | 1,23  | 3,269271 | 0,37488  | 0,70775  | NA        |
| HARBI1         | 64,21   | 0,31  | 0,835412 | 0,374762 | 0,707837 | 0,9032387 |
| ELL            | 153,16  | 0,40  | 1,065128 | 0,374698 | 0,707885 | 0,9032387 |
| RP5-1022I14.1  | 31,38   | 0,31  | 0,817646 | 0,37467  | 0,707906 | 0,9032387 |
| RP11-383J24.1  | 0,92    | -0,82 | 2,1963   | -0,37467 | 0,707907 | NA        |
| MAPKAPK3       | 737,86  | 0,17  | 0,461014 | 0,374624 | 0,70794  | 0,9032387 |
| RP11-320N21.2  | 4,82    | 0,47  | 1,252648 | 0,374607 | 0,707953 | 0,9032387 |
| TFPT           | 148,81  | -0,19 | 0,514722 | -0,37447 | 0,708053 | 0,9032387 |
| RAD54L2        | 206,93  | 0,19  | 0,497487 | 0,374471 | 0,708054 | 0,9032387 |
| CTB-102L5.8    | 5,34    | -0,27 | 0,715134 | -0,37439 | 0,708116 | 0,9032387 |
| PRR14          | 133,33  | -0,22 | 0,597705 | -0,37437 | 0,708129 | 0,9032387 |
| TSIX           | 1055,37 | -0,18 | 0,482659 | -0,37431 | 0,708172 | 0,9032387 |
| ATXN1          | 507,42  | -0,31 | 0,836757 | -0,37414 | 0,7083   | 0,9032438 |
| KCNG4          | 9,29    | 0,28  | 0,742091 | 0,374116 | 0,708318 | 0,9032438 |
| CTC-369A16.2   | 7,44    | -0,34 | 0,896516 | -0,37406 | 0,70836  | 0,9032438 |
| LZTR1          | 286,48  | 0,27  | 0,726593 | 0,374046 | 0,70837  | 0,9032438 |
| SSX4B          | 0,68    | 1,38  | 3,688424 | 0,373975 | 0,708423 | NA        |
| CDC37L1        | 97,80   | -0,32 | 0,865761 | -0,37387 | 0,708504 | 0,903269  |
| PCDHB1         | 28,73   | -0,23 | 0,60994  | -0,37386 | 0,708512 | 0,903269  |
| PTRH1          | 129,95  | -0,31 | 0,838917 | -0,37382 | 0,708536 | 0,903269  |
| RP11-102N12.2  | 1,49    | 0,98  | 2,612572 | 0,373787 | 0,708563 | NA        |
| AC068610.3     | 2,72    | -0,82 | 2,200489 | -0,37366 | 0,70866  | NA        |
| NSUN5P1        | 186,15  | -0,23 | 0,613949 | -0,37362 | 0,708688 | 0,9033824 |
| MAFK           | 53,11   | -0,29 | 0,765451 | -0,37357 | 0,708722 | 0,9033824 |
| RN7SL828P      | 3,58    | -0,48 | 1,286012 | -0,37349 | 0,708787 | NA        |
| RP11-351I21.11 | 0,54    | -0,85 | 2,280256 | -0,37344 | 0,70882  | NA        |
| GNL2           | 543,42  | 0,17  | 0,451887 | 0,3734   | 0,708851 | 0,9034848 |
| RP11-123O1.1   | 0,68    | 0,83  | 2,234192 | 0,373295 | 0,708929 | NA        |
| CTD-2561B21.4  | 0,64    | -1,33 | 3,569407 | -0,37321 | 0,708996 | NA        |
| ZFAS1          | 628,11  | -0,10 | 0,258711 | -0,37316 | 0,709027 | 0,903521  |
| APBB1          | 6,03    | -0,71 | 1,903563 | -0,37314 | 0,709048 | 0,903521  |
| AC079305.11    | 1,29    | -1,21 | 3,235953 | -0,37309 | 0,709082 | NA        |
| AC011558.5     | 148,90  | 0,17  | 0,458863 | 0,373086 | 0,709084 | 0,903521  |
| LINC01232      | 173,87  | -0,24 | 0,651719 | -0,37296 | 0,709175 | 0,903521  |
| SCART1         | 31,74   | -0,26 | 0,709596 | -0,37294 | 0,709193 | 0,903521  |
| ZNF621         | 412,76  | 0,22  | 0,586811 | 0,37289  | 0,70923  | 0,903521  |
| RNU6-645P      | 45,10   | -0,34 | 0,899676 | -0,37288 | 0,709237 | 0,903521  |
| BLACE          | 5,94    | 0,39  | 1,036067 | 0,37284  | 0,709268 | 0,903521  |
| FBXO4          | 64,88   | -0,40 | 1,063944 | -0,3726  | 0,709446 | 0,9035449 |
| IRX5           | 0,40    | 1,39  | 3,744144 | 0,372443 | 0,709563 | NA        |
| RTTN           | 386,61  | -0,23 | 0,61907  | -0,37241 | 0,70959  | 0,9035449 |
| KIAA0391       | 241,29  | -0,27 | 0,729385 | -0,37241 | 0,70959  | 0,9035449 |
| LIMD1-AS1      | 25,60   | -0,51 | 1,361744 | -0,37238 | 0,709611 | 0,9035449 |
| PNN            | 1275,87 | 0,10  | 0,274741 | 0,372369 | 0,709618 | 0,9035449 |
| PCDHB11        | 19,35   | -0,24 | 0,641755 | -0,37236 | 0,709625 | 0,9035449 |
| AL133245.2     | 33,69   | -0,35 | 0,937047 | -0,37232 | 0,709653 | 0,9035449 |

|                |         |       |          |          |          |           |
|----------------|---------|-------|----------|----------|----------|-----------|
| SP110          | 1881,45 | 0,12  | 0,334906 | 0,372293 | 0,709675 | 0,9035449 |
| RNA5SP216      | 1,07    | 0,62  | 1,652456 | 0,372211 | 0,709736 | NA        |
| PIR            | 24,07   | -0,25 | 0,660509 | -0,37209 | 0,709829 | 0,9036793 |
| TMEM143        | 14,24   | -0,43 | 1,159142 | -0,37196 | 0,709919 | 0,9036997 |
| PYGL           | 429,85  | 0,19  | 0,507425 | 0,371934 | 0,709942 | 0,9036997 |
| CTC-425F1.2    | 1,12    | 1,09  | 2,936777 | 0,371745 | 0,710083 | NA        |
| ADGRG6         | 62,88   | -0,53 | 1,433939 | -0,37172 | 0,710099 | 0,9037352 |
| RP11-697E22.1  | 8,76    | 0,67  | 1,812335 | 0,371664 | 0,710143 | 0,9037352 |
| SEC14L1        | 509,35  | -0,20 | 0,547493 | -0,37166 | 0,710148 | 0,9037352 |
| GRHL2          | 16,01   | -0,78 | 2,090593 | -0,37164 | 0,710164 | 0,9037352 |
| SLC24A2        | 34,68   | -0,18 | 0,485552 | -0,37133 | 0,710393 | 0,9039643 |
| AP000959.2     | 1,95    | -1,09 | 2,948629 | -0,37128 | 0,710428 | NA        |
| MRPL32         | 334,47  | -0,26 | 0,702061 | -0,37126 | 0,710446 | 0,9039695 |
| CTB-31020.3    | 26,30   | -0,31 | 0,828118 | -0,37097 | 0,710658 | 0,9041706 |
| TMEM127        | 612,77  | 0,19  | 0,509035 | 0,370915 | 0,710701 | 0,9041706 |
| RP3-474I12.6   | 1,00    | 1,38  | 3,73239  | 0,370867 | 0,710737 | NA        |
| CWH43          | 0,55    | 1,16  | 3,123728 | 0,370864 | 0,710739 | NA        |
| RSL1D1         | 1752,13 | -0,13 | 0,359699 | -0,37084 | 0,710759 | 0,904182  |
| RP11-379K17.12 | 51,23   | 0,63  | 1,703316 | 0,370575 | 0,710954 | 0,9043686 |
| SLC43A2        | 544,98  | -0,22 | 0,591218 | -0,37044 | 0,711055 | 0,9044359 |
| RP11-31L22.2   | 0,39    | 1,39  | 3,744638 | 0,370287 | 0,711168 | NA        |
| RN7SL174P      | 0,52    | 0,99  | 2,673124 | 0,370107 | 0,711303 | NA        |
| RP1-102G20.2   | 3,54    | 0,55  | 1,49598  | 0,369985 | 0,711394 | NA        |
| RP11-138C24.1  | 14,98   | -0,70 | 1,889356 | -0,36994 | 0,711429 | 0,904807  |
| ISCA2          | 428,25  | -0,22 | 0,596835 | -0,36992 | 0,711444 | 0,904807  |
| RP11-578O24.2  | 0,40    | 1,39  | 3,744657 | 0,369896 | 0,71146  | NA        |
| RP11-63A1.1    | 0,55    | -1,11 | 2,996065 | -0,36983 | 0,711507 | NA        |
| RF01877        | 0,37    | 1,30  | 3,515313 | 0,369805 | 0,711528 | NA        |
| ZEB1           | 61,28   | -0,37 | 0,999368 | -0,36979 | 0,711542 | 0,904807  |
| WDR59          | 182,92  | -0,21 | 0,559308 | -0,36975 | 0,711569 | 0,904807  |
| NSMCE2         | 136,28  | -0,22 | 0,593616 | -0,3697  | 0,711608 | 0,904807  |
| RP4-657D16.6   | 10,54   | 0,50  | 1,345674 | 0,369656 | 0,711639 | 0,904807  |
| C16orf72       | 1086,73 | -0,15 | 0,403703 | -0,36951 | 0,711749 | 0,9048229 |
| RAB11FIP4      | 295,32  | -0,28 | 0,757462 | -0,3694  | 0,711831 | 0,9048229 |
| NIPSNAP1       | 155,45  | 0,30  | 0,82038  | 0,369382 | 0,711843 | 0,9048229 |
| CAMK1          | 356,72  | -0,15 | 0,406554 | -0,36938 | 0,711846 | 0,9048229 |
| AC106870.2     | 1,42    | 0,59  | 1,608898 | 0,369189 | 0,711987 | NA        |
| RP11-21J18.1   | 0,83    | 0,81  | 2,192231 | 0,369126 | 0,712034 | NA        |
| COMT           | 1668,51 | 0,10  | 0,278243 | 0,369122 | 0,712037 | 0,905004  |
| RP5-1004I9.1   | 1,04    | 0,85  | 2,30254  | 0,368988 | 0,712137 | NA        |
| GPRIN1         | 0,69    | 1,38  | 3,738287 | 0,368965 | 0,712154 | NA        |
| RLN2           | 0,12    | -1,38 | 3,748196 | -0,36888 | 0,712217 | NA        |
| RP11-306G20.1  | 16,25   | 0,34  | 0,917122 | 0,368839 | 0,712248 | 0,9051554 |
| GNL1           | 259,62  | 0,35  | 0,936705 | 0,368831 | 0,712253 | 0,9051554 |
| AC004854.4     | 8,58    | -0,37 | 1,009439 | -0,36869 | 0,712358 | 0,9052265 |
| RP11-830F9.7   | 2,46    | -0,88 | 2,394369 | -0,3686  | 0,712427 | NA        |
| RP11-106E7.1   | 1,56    | 1,10  | 2,971394 | 0,36858  | 0,712441 | NA        |
| RP11-669I1.1   | 2,18    | 0,45  | 1,211921 | 0,36835  | 0,712612 | NA        |
| ZMYM6          | 469,99  | 0,13  | 0,362045 | 0,368297 | 0,712652 | 0,9053783 |
| NPM3           | 82,67   | 0,47  | 1,286792 | 0,368255 | 0,712683 | 0,9053783 |

|               |         |       |          |          |          |           |
|---------------|---------|-------|----------|----------|----------|-----------|
| RP11-6D1.6    | 12,74   | 0,37  | 0,994647 | 0,368239 | 0,712695 | 0,9053783 |
| RP11-3D4.3    | 6,30    | 0,41  | 1,104346 | 0,36815  | 0,712762 | 0,9053783 |
| PLS1          | 5,85    | -0,51 | 1,377005 | -0,36813 | 0,712773 | 0,9053783 |
| PTCHD3        | 4,61    | -0,67 | 1,820487 | -0,36811 | 0,71279  | 0,9053783 |
| RP11-163M18.1 | 8,51    | -0,38 | 1,026643 | -0,36807 | 0,712818 | 0,9053783 |
| RP5-899B16.1  | 11,76   | 0,36  | 0,988751 | 0,367904 | 0,712945 | 0,9054111 |
| HSPA6         | 288,29  | -0,22 | 0,602426 | -0,36786 | 0,712978 | 0,9054111 |
| LGALS2        | 1550,00 | 0,12  | 0,322829 | 0,367843 | 0,71299  | 0,9054111 |
| RP4-752I6.1   | 3,53    | -0,51 | 1,383529 | -0,36779 | 0,71303  | NA        |
| RP11-266L9.1  | 3,82    | -0,32 | 0,857216 | -0,3677  | 0,713096 | 0,9054708 |
| ZNF542        | 51,27   | 0,25  | 0,686648 | 0,36765  | 0,713134 | 0,9054708 |
| RP11-666O2.2  | 9,77    | -0,42 | 1,156302 | -0,36744 | 0,71329  | 0,9056067 |
| RP11-18C24.6  | 1,69    | 1,00  | 2,728308 | 0,367428 | 0,7133   | NA        |
| C6orf208      | 1,94    | -0,46 | 1,248465 | -0,3674  | 0,713321 | NA        |
| GRIN2D        | 0,94    | 1,20  | 3,267877 | 0,367347 | 0,71336  | NA        |
| TMEM74B       | 1,03    | 0,66  | 1,788671 | 0,367334 | 0,71337  | NA        |
| RP4-697P8.3   | 0,59    | 1,15  | 3,127731 | 0,367281 | 0,713409 | NA        |
| PPP1R27       | 1,15    | 0,69  | 1,866389 | 0,367245 | 0,713436 | NA        |
| RP11-284E20.1 | 11,15   | -0,24 | 0,646732 | -0,36697 | 0,713642 | 0,9059652 |
| RP11-316A16.1 | 3,93    | -0,39 | 1,072241 | -0,36693 | 0,71367  | 0,9059652 |
| EDN1          | 0,38    | 1,37  | 3,744699 | 0,36691  | 0,713686 | NA        |
| DYNLT3        | 94,95   | 0,27  | 0,741265 | 0,366798 | 0,71377  | 0,9060303 |
| IGHV3-21      | 0,46    | -1,08 | 2,947496 | -0,36675 | 0,713807 | NA        |
| RANBP10       | 69,65   | 0,40  | 1,09311  | 0,366728 | 0,713822 | 0,9060348 |
| PHC2          | 358,58  | 0,17  | 0,467564 | 0,366644 | 0,713885 | 0,906044  |
| CNFN          | 5,63    | 0,56  | 1,53258  | 0,366588 | 0,713927 | 0,906044  |
| RP11-1148L6.9 | 2,90    | 0,72  | 1,97003  | 0,366506 | 0,713987 | NA        |
| KLF16         | 45,79   | -0,27 | 0,724924 | -0,36645 | 0,714029 | 0,9060884 |
| CTC-524C5.2   | 51,08   | 0,30  | 0,824187 | 0,36641  | 0,714059 | 0,9060884 |
| CTD-2265O21.7 | 0,38    | 1,37  | 3,74467  | 0,366311 | 0,714133 | NA        |
| FAM86HP       | 1,26    | 1,07  | 2,92053  | 0,3663   | 0,714141 | NA        |
| FAM72B        | 21,03   | 0,49  | 1,347436 | 0,36624  | 0,714186 | 0,9061547 |
| RP5-1056L3.1  | 0,38    | 1,37  | 3,744775 | 0,366239 | 0,714186 | NA        |
| RP11-556O5.6  | 1,25    | -0,63 | 1,7109   | -0,36624 | 0,714188 | NA        |
| SIAE          | 128,54  | 0,29  | 0,804511 | 0,36621  | 0,714209 | 0,9061547 |
| AC013439.4    | 0,76    | -0,88 | 2,39985  | -0,36605 | 0,714325 | NA        |
| OTOA          | 30,40   | -0,37 | 1,004041 | -0,36605 | 0,714326 | 0,9061981 |
| RP11-410D17.2 | 8,85    | -0,65 | 1,775103 | -0,36599 | 0,71437  | 0,9061981 |
| RNY1P16       | 11,66   | 0,45  | 1,236526 | 0,365968 | 0,714389 | 0,9061981 |
| RP4-662A9.2   | 0,97    | -0,90 | 2,464194 | -0,36593 | 0,714416 | NA        |
| RP11-253M7.1  | 3,42    | -0,67 | 1,824649 | -0,36566 | 0,714619 | NA        |
| AC027763.2    | 73,41   | 0,31  | 0,847851 | 0,365577 | 0,714681 | 0,9063676 |
| RP11-752D24.2 | 1,65    | -0,86 | 2,362971 | -0,36557 | 0,714689 | NA        |
| C8orf37       | 4,34    | -0,34 | 0,917773 | -0,36556 | 0,71469  | 0,9063676 |
| RNU6-877P     | 0,38    | 1,37  | 3,744765 | 0,365544 | 0,714705 | NA        |
| SLC22A9       | 6,72    | 0,33  | 0,893118 | 0,365514 | 0,714727 | 0,9063676 |
| GSTK1         | 1912,12 | -0,12 | 0,333076 | -0,36547 | 0,714762 | 0,9063676 |
| RP11-458F8.4  | 5,09    | -0,62 | 1,708327 | -0,36543 | 0,714789 | 0,9063676 |
| TRMT2A        | 288,33  | -0,26 | 0,711014 | -0,36532 | 0,714869 | 0,9063676 |
| TAF7L         | 0,70    | 1,34  | 3,668334 | 0,365287 | 0,714897 | NA        |

|                |         |       |          |          |          |           |
|----------------|---------|-------|----------|----------|----------|-----------|
| GUCY2C         | 15,56   | -0,78 | 2,13159  | -0,36527 | 0,714912 | 0,9063676 |
| RP11-810P8.1   | 25,16   | -0,43 | 1,165762 | -0,36527 | 0,714912 | 0,9063676 |
| CTB-158D10.3   | 0,38    | 1,37  | 3,744774 | 0,365254 | 0,714922 | NA        |
| ELK1           | 67,36   | 0,35  | 0,967256 | 0,365068 | 0,715061 | 0,906477  |
| PKD1L2         | 30,87   | -0,22 | 0,601875 | -0,36502 | 0,715096 | 0,906477  |
| FHOD3          | 0,78    | -1,34 | 3,668752 | -0,36493 | 0,715163 | NA        |
| RP11-1A16.1    | 7,63    | 0,61  | 1,66442  | 0,364904 | 0,715183 | 0,9064774 |
| COL1A1         | 2,97    | 0,44  | 1,214744 | 0,364892 | 0,715192 | NA        |
| OR1C1          | 6,52    | -0,40 | 1,101367 | -0,36482 | 0,715249 | 0,9064774 |
| RP11-333J10.3  | 10,78   | -0,43 | 1,180723 | -0,36478 | 0,715278 | 0,9064774 |
| TAF8           | 280,40  | -0,22 | 0,596362 | -0,36473 | 0,715314 | 0,9064774 |
| RP11-78F17.1   | 15,07   | -0,47 | 1,275289 | -0,36469 | 0,71534  | 0,9064774 |
| CCIN           | 0,36    | 1,31  | 3,585239 | 0,364554 | 0,715445 | NA        |
| TMEM210        | 3,90    | -0,42 | 1,157726 | -0,36454 | 0,715457 | 0,9065024 |
| RP11-59D5__B.2 | 7,05    | -0,41 | 1,127846 | -0,36453 | 0,715463 | 0,9065024 |
| OR2A1          | 6,62    | 0,50  | 1,380345 | 0,364472 | 0,715506 | 0,9065024 |
| OLFM1          | 104,57  | 0,36  | 0,986803 | 0,364366 | 0,715584 | 0,906517  |
| AC087163.2     | 0,67    | 1,35  | 3,713257 | 0,364328 | 0,715613 | NA        |
| RP11-196G11.2  | 13,15   | 0,35  | 0,950291 | 0,3643   | 0,715634 | 0,906517  |
| TOP3A          | 280,10  | 0,26  | 0,721302 | 0,364218 | 0,715696 | 0,906517  |
| TRAM1          | 1254,51 | 0,14  | 0,387145 | 0,364195 | 0,715712 | 0,906517  |
| TNFSF13B       | 2104,53 | 0,09  | 0,257188 | 0,36409  | 0,715791 | 0,9065551 |
| RP11-43N5.1    | 0,37    | 1,36  | 3,744822 | 0,364016 | 0,715846 | NA        |
| UBL4A          | 64,72   | -0,40 | 1,105488 | -0,36397 | 0,715879 | 0,9065845 |
| EIF1B          | 388,52  | -0,15 | 0,41608  | -0,36393 | 0,715912 | 0,9065845 |
| DACH2          | 1,84    | -0,55 | 1,517135 | -0,36384 | 0,715978 | NA        |
| RP11-451G4.2   | 1,83    | -0,50 | 1,387734 | -0,36383 | 0,715982 | NA        |
| MRPS12         | 716,07  | -0,11 | 0,309456 | -0,3638  | 0,716006 | 0,9066419 |
| CTBP1-AS1      | 62,45   | -0,28 | 0,770445 | -0,36373 | 0,716059 | 0,9066477 |
| BAIAP2L2       | 0,38    | 1,36  | 3,744278 | 0,363689 | 0,71609  | NA        |
| RNU7-110P      | 0,39    | 1,36  | 3,744836 | 0,36356  | 0,716187 | NA        |
| POLR3K         | 192,84  | 0,25  | 0,674745 | 0,363557 | 0,716189 | 0,9067497 |
| AC099552.3     | 0,31    | 1,08  | 2,975656 | 0,363356 | 0,716339 | NA        |
| RP11-745A24.1  | 1,20    | 1,22  | 3,345173 | 0,363331 | 0,716358 | NA        |
| SLC25A45       | 149,59  | -0,14 | 0,393735 | -0,36331 | 0,716376 | 0,9069251 |
| RN7SL203P      | 0,71    | 0,81  | 2,219288 | 0,363293 | 0,716386 | NA        |
| AP000240.7     | 0,64    | -1,29 | 3,548214 | -0,36326 | 0,716413 | NA        |
| RN7SL405P      | 39,84   | 0,15  | 0,410748 | 0,363107 | 0,716525 | 0,9070459 |
| EPS15L2        | 19,64   | -0,54 | 1,498364 | -0,36305 | 0,716569 | 0,9070459 |
| HIST1H4B       | 0,35    | 1,28  | 3,527912 | 0,362998 | 0,716606 | NA        |
| EPHA8          | 0,17    | -1,36 | 3,747037 | -0,36299 | 0,716615 | NA        |
| HBQ1           | 0,38    | 1,36  | 3,744881 | 0,362979 | 0,716621 | NA        |
| RP11-240E2.2   | 0,44    | -0,73 | 2,003548 | -0,36293 | 0,716659 | NA        |
| TECPR2         | 121,59  | 0,40  | 1,094512 | 0,362907 | 0,716675 | 0,9071181 |
| RARA           | 204,39  | 0,22  | 0,593986 | 0,362756 | 0,716787 | 0,9071407 |
| RP11-755B10.3  | 7,84    | -0,26 | 0,706291 | -0,36275 | 0,71679  | 0,9071407 |
| JAKMIP3        | 1,13    | -0,92 | 2,545915 | -0,36273 | 0,71681  | NA        |
| GINS2          | 2,79    | -0,43 | 1,198817 | -0,36271 | 0,716819 | NA        |
| DSCR9          | 0,42    | 1,36  | 3,744039 | 0,362553 | 0,716939 | NA        |
| KCTD11         | 0,42    | 1,27  | 3,505906 | 0,362488 | 0,716987 | NA        |



|                |         |       |          |          |          |           |
|----------------|---------|-------|----------|----------|----------|-----------|
| GPATCH2L       | 950,36  | -0,19 | 0,517337 | -0,36242 | 0,717039 | 0,907268  |
| RP1-130E4.3    | 0,37    | 1,36  | 3,744876 | 0,36237  | 0,717076 | NA        |
| STK25          | 445,15  | 0,18  | 0,510199 | 0,362358 | 0,717084 | 0,907268  |
| AC010468.1     | 3,50    | -0,23 | 0,642782 | -0,36233 | 0,717108 | NA        |
| OR56A1         | 79,34   | -0,27 | 0,758764 | -0,36231 | 0,717123 | 0,907268  |
| CTD-2118P12.1  | 11,68   | -0,32 | 0,880844 | -0,36221 | 0,717195 | 0,907268  |
| SFTA3          | 2,02    | -0,50 | 1,38465  | -0,36219 | 0,717214 | NA        |
| RBSN           | 325,73  | 0,30  | 0,832141 | 0,362159 | 0,717233 | 0,907268  |
| ANGPT2         | 61,41   | 0,31  | 0,851931 | 0,362158 | 0,717234 | 0,907268  |
| CLIP1          | 790,72  | 0,11  | 0,302454 | 0,362105 | 0,717274 | 0,907268  |
| MGME1          | 86,44   | 0,33  | 0,914861 | 0,362096 | 0,717281 | 0,907268  |
| CCRL2          | 31,02   | -0,50 | 1,377961 | -0,36171 | 0,717569 | 0,9074797 |
| RP11-165M6.1   | 11,07   | 0,56  | 1,553017 | 0,361679 | 0,717592 | 0,9074797 |
| RP11-121G22.3  | 19,78   | 0,31  | 0,870342 | 0,361676 | 0,717594 | 0,9074797 |
| CTA-392C11.2   | 0,37    | 1,35  | 3,744955 | 0,361605 | 0,717647 | NA        |
| CD47           | 1674,56 | 0,14  | 0,401029 | 0,361495 | 0,717729 | 0,9075687 |
| DYX1C1         | 5,97    | -0,36 | 1,005387 | -0,36143 | 0,717778 | 0,9075687 |
| AL035209.2     | 78,78   | -0,30 | 0,840083 | -0,36139 | 0,717811 | 0,9075687 |
| NALCN          | 14,22   | -0,32 | 0,873717 | -0,36132 | 0,717861 | 0,90757   |
| GNAO1          | 1,78    | 0,66  | 1,8292   | 0,36125  | 0,717912 | NA        |
| KIAA1109       | 1079,44 | -0,15 | 0,42652  | -0,36123 | 0,717928 | 0,9075869 |
| RNU6-90P       | 0,64    | 1,33  | 3,671321 | 0,361198 | 0,717951 | NA        |
| RP11-296A18.3  | 92,13   | -0,21 | 0,571198 | -0,36113 | 0,718    | 0,9075869 |
| CHRA1          | 332,05  | -0,19 | 0,527216 | -0,3611  | 0,718026 | 0,9075869 |
| CHRNA5         | 4,80    | -0,36 | 1,003853 | -0,36104 | 0,718069 | 0,9075869 |
| C10orf91       | 1,33    | 1,22  | 3,368275 | 0,360987 | 0,718109 | NA        |
| RP11-169K17.2  | 0,37    | 1,35  | 3,744954 | 0,360948 | 0,718138 | NA        |
| KB-226F1.2     | 2,82    | 0,66  | 1,827905 | 0,360942 | 0,718142 | NA        |
| LRRC73         | 0,67    | 1,34  | 3,70397  | 0,360856 | 0,718207 | NA        |
| RP11-517I3.2   | 14,63   | -0,34 | 0,943491 | -0,36085 | 0,718213 | 0,9077071 |
| RN7SL121P      | 4,25    | -0,47 | 1,305156 | -0,36063 | 0,718378 | 0,9078367 |
| RP11-733O18.1  | 0,10    | -1,35 | 3,748196 | -0,3606  | 0,718397 | NA        |
| ATF4           | 4321,52 | 0,09  | 0,253841 | 0,36058  | 0,718413 | 0,9078367 |
| ZNF426         | 205,70  | 0,20  | 0,558092 | 0,360459 | 0,718504 | 0,9078515 |
| RP11-1334A24.5 | 7,29    | -0,34 | 0,953807 | -0,36043 | 0,718523 | 0,9078515 |
| RP11-674C21.9  | 0,56    | 1,12  | 3,095526 | 0,360423 | 0,718531 | NA        |
| RP11-15E18.5   | 3,23    | 1,23  | 3,426048 | 0,360353 | 0,718583 | NA        |
| CARD19         | 615,92  | 0,13  | 0,353618 | 0,36029  | 0,71863  | 0,9079133 |
| RP11-319G5.1   | 0,73    | -0,64 | 1,78257  | -0,36028 | 0,718636 | NA        |
| PURA           | 247,88  | -0,25 | 0,683625 | -0,36024 | 0,718669 | 0,9079133 |
| RP11-368N21.5  | 2,75    | -0,43 | 1,186875 | -0,36005 | 0,718811 | NA        |
| SORBS2         | 6,52    | -0,30 | 0,838513 | -0,35994 | 0,718892 | 0,9080963 |
| HYAL3          | 25,77   | 0,67  | 1,864739 | 0,359851 | 0,718959 | 0,9080963 |
| GOLGA2         | 175,97  | -0,22 | 0,613192 | -0,35985 | 0,71896  | 0,9080963 |
| PPP2CB         | 200,96  | -0,19 | 0,530204 | -0,35978 | 0,719014 | 0,9081023 |
| AC005863.1     | 6,10    | -0,33 | 0,909871 | -0,35966 | 0,719099 | 0,9081482 |
| IGHGP          | 1,17    | 0,98  | 2,720119 | 0,359582 | 0,71916  | NA        |
| CCDC36         | 8,34    | -0,57 | 1,596067 | -0,35953 | 0,719202 | 0,9081696 |
| ZNF28          | 93,86   | 0,33  | 0,925161 | 0,35939  | 0,719303 | 0,9081696 |
| ZNF606         | 19,88   | 0,35  | 0,968897 | 0,35938  | 0,719311 | 0,9081696 |

|                |         |       |          |          |          |           |
|----------------|---------|-------|----------|----------|----------|-----------|
| CEP19          | 23,22   | 0,29  | 0,796756 | 0,359347 | 0,719335 | 0,9081696 |
| DIRC2          | 120,54  | 0,38  | 1,055624 | 0,359314 | 0,71936  | 0,9081696 |
| RP3-414A15.2   | 1,62    | 0,73  | 2,024584 | 0,359193 | 0,71945  | NA        |
| ITPA           | 756,39  | -0,12 | 0,334898 | -0,35916 | 0,719475 | 0,9082067 |
| AC007792.1     | 0,22    | -0,87 | 2,436067 | -0,35914 | 0,719488 | NA        |
| CNPY4          | 6,51    | 0,35  | 0,971485 | 0,359131 | 0,719497 | 0,9082067 |
| RAD51D         | 149,88  | -0,22 | 0,611944 | -0,35894 | 0,719644 | 0,9082067 |
| HNRNPL         | 735,13  | -0,13 | 0,358032 | -0,35891 | 0,719663 | 0,9082067 |
| TXNL4A         | 512,09  | -0,15 | 0,421993 | -0,35888 | 0,719686 | 0,9082067 |
| TMBIM1         | 611,44  | -0,17 | 0,48556  | -0,35883 | 0,719725 | 0,9082067 |
| OR7E110P       | 0,37    | 1,34  | 3,745111 | 0,358771 | 0,719767 | NA        |
| AC066692.4     | 60,65   | -0,75 | 2,094985 | -0,35872 | 0,719805 | 0,9082067 |
| CTD-2540F13.2  | 6,03    | 0,24  | 0,664674 | 0,358718 | 0,719806 | 0,9082067 |
| RP11-10N23.4   | 4,12    | -0,99 | 2,760212 | -0,35869 | 0,719829 | 0,9082067 |
| ZMYND12        | 0,40    | 1,34  | 3,744216 | 0,358526 | 0,71995  | NA        |
| MIR8485        | 5,06    | 0,42  | 1,16586  | 0,358442 | 0,720013 | 0,9083379 |
| RP11-1212A22.4 | 118,66  | 0,18  | 0,501033 | 0,358363 | 0,720072 | 0,9083379 |
| CLTA           | 1290,35 | -0,14 | 0,390812 | -0,35835 | 0,720079 | 0,9083379 |
| C7orf71        | 0,15    | -1,02 | 2,843846 | -0,35828 | 0,720131 | NA        |
| CDK4           | 318,52  | 0,25  | 0,707892 | 0,358248 | 0,720158 | 0,9083592 |
| RP11-611O2.5   | 34,49   | -0,38 | 1,070815 | -0,3582  | 0,720194 | 0,9083592 |
| OR6C66P        | 6,32    | 0,69  | 1,932049 | 0,357964 | 0,72037  | 0,90852   |
| SNURF          | 0,42    | 1,34  | 3,744653 | 0,357827 | 0,720473 | NA        |
| TBC1D16        | 26,12   | 0,50  | 1,390893 | 0,357716 | 0,720556 | 0,9085356 |
| HLA-L          | 123,55  | 0,23  | 0,632584 | 0,357707 | 0,720563 | 0,9085356 |
| CTC-360P9.4    | 14,12   | -0,62 | 1,744338 | -0,3577  | 0,720571 | 0,9085356 |
| RP3-454G6.2    | 5,61    | -0,46 | 1,281312 | -0,35765 | 0,720609 | 0,9085356 |
| PDK2           | 93,80   | -0,42 | 1,166742 | -0,35762 | 0,720627 | 0,9085356 |
| RP11-680F20.4  | 3,13    | -0,42 | 1,172776 | -0,3575  | 0,720718 | NA        |
| RP11-90K6.1    | 0,73    | -0,62 | 1,733493 | -0,35744 | 0,720765 | NA        |
| RP4-590F24.2   | 7,24    | 0,41  | 1,15589  | 0,35731  | 0,72086  | 0,9087205 |
| RP11-345J4.3   | 23,02   | 0,45  | 1,266307 | 0,357276 | 0,720886 | 0,9087205 |
| MRPL40         | 355,53  | 0,25  | 0,712282 | 0,357224 | 0,720924 | 0,9087205 |
| RP11-10A14.3   | 5,59    | -0,41 | 1,1606   | -0,35716 | 0,720969 | 0,9087205 |
| RP11-104L21.3  | 1,23    | -0,82 | 2,304316 | -0,35705 | 0,721055 | NA        |
| TMEM184C       | 358,47  | 0,26  | 0,730298 | 0,356984 | 0,721104 | 0,9088291 |
| LLNLF-176F2.1  | 0,34    | 1,26  | 3,542283 | 0,356932 | 0,721143 | NA        |
| ART3           | 5,28    | -0,30 | 0,829446 | -0,35691 | 0,721159 | 0,908837  |
| RP11-203M5.2   | 1,38    | -0,75 | 2,088785 | -0,35681 | 0,721236 | NA        |
| DVL2           | 24,66   | 0,28  | 0,77369  | 0,356797 | 0,721244 | 0,9088817 |
| KLHL13         | 0,16    | -0,86 | 2,409532 | -0,35676 | 0,721273 | NA        |
| AC004166.6     | 0,34    | 1,25  | 3,517307 | 0,356738 | 0,721288 | NA        |
| RP11-449H11.1  | 5,62    | -0,44 | 1,239003 | -0,35667 | 0,721339 | 0,9088817 |
| KIAA1024       | 0,11    | -1,34 | 3,748196 | -0,35667 | 0,72134  | NA        |
| PPP2R2C        | 12,21   | -0,32 | 0,887515 | -0,35667 | 0,721341 | 0,9088817 |
| RP11-89F3.2    | 0,39    | 1,24  | 3,481843 | 0,356632 | 0,721368 | NA        |
| ZNF799         | 15,10   | 0,48  | 1,350808 | 0,356538 | 0,721438 | 0,9088834 |
| PCTP           | 230,62  | 0,28  | 0,799014 | 0,356535 | 0,72144  | 0,9088834 |
| ZAR1L          | 1,20    | -0,91 | 2,542606 | -0,35652 | 0,721453 | NA        |
| MX1            | 2097,40 | -0,21 | 0,599743 | -0,3563  | 0,721614 | 0,9090416 |

|                   |          |       |          |          |          |           |
|-------------------|----------|-------|----------|----------|----------|-----------|
| RP11-26M5.2       | 0,37     | 1,33  | 3,745057 | 0,356126 | 0,721746 | NA        |
| U62631.5          | 3,40     | -0,34 | 0,952838 | -0,35607 | 0,72179  | NA        |
| RP11-454H13.6     | 0,28     | 1,05  | 2,955338 | 0,356019 | 0,721826 | NA        |
| LINC00346         | 67,25    | -0,21 | 0,589606 | -0,35599 | 0,721846 | 0,9092161 |
| CTD-2037K23.2     | 82,86    | -0,39 | 1,102201 | -0,35595 | 0,72188  | 0,9092161 |
| CLN3              | 790,18   | 0,10  | 0,292265 | 0,355921 | 0,7219   | 0,9092161 |
| MIR27B            | 0,38     | 1,33  | 3,745153 | 0,355851 | 0,721952 | NA        |
| RP11-361A21.3     | 0,36     | 1,27  | 3,571352 | 0,355742 | 0,722033 | NA        |
| FTH1P15           | 11,99    | 0,16  | 0,443769 | 0,355658 | 0,722097 | 0,9093997 |
| VPS53             | 392,33   | -0,18 | 0,493644 | -0,3556  | 0,722143 | 0,9093997 |
| RP11-556H2.1      | 8,56     | 0,28  | 0,781318 | 0,355512 | 0,722206 | 0,9094173 |
| RP11-632K21.7     | 0,37     | 1,33  | 3,745171 | 0,355436 | 0,722263 | NA        |
| RP11-370P15.2     | 0,11     | -1,33 | 3,748196 | -0,35536 | 0,722318 | NA        |
| RPL11             | 8154,34  | -0,05 | 0,145881 | -0,35536 | 0,722319 | 0,9094613 |
| RP11-746M1.1      | 92,24    | -0,12 | 0,346362 | -0,35534 | 0,722339 | 0,9094613 |
| RP11-429B14.1     | 3,42     | 0,46  | 1,303578 | 0,355286 | 0,722375 | NA        |
| CCDC192           | 0,70     | -1,12 | 3,143299 | -0,35519 | 0,722444 | NA        |
| OSBPL3            | 414,06   | 0,20  | 0,551696 | 0,35516  | 0,72247  | 0,9095176 |
| PLBD2             | 301,26   | 0,21  | 0,595086 | 0,355145 | 0,722481 | 0,9095176 |
| AC144450.2        | 39,33    | -0,29 | 0,815022 | -0,35496 | 0,722617 | 0,9096266 |
| C16orf62          | 215,18   | 0,23  | 0,65216  | 0,354856 | 0,722698 | 0,9096666 |
| RP11-206L10.9     | 92,67    | -0,18 | 0,500754 | -0,35479 | 0,722746 | 0,9096666 |
| WFDC5             | 0,11     | -1,33 | 3,748196 | -0,35477 | 0,722759 | NA        |
| XXbac-BPG181M17.4 | 4,91     | -0,72 | 2,037528 | -0,35463 | 0,722864 | 0,9096952 |
| RP11-52J3.2       | 70,03    | 0,43  | 1,199809 | 0,35463  | 0,722867 | 0,9096952 |
| STK17A            | 210,65   | -0,24 | 0,676044 | -0,35443 | 0,723013 | 0,9098182 |
| RPL41P2           | 0,78     | -0,47 | 1,338221 | -0,35443 | 0,723019 | NA        |
| RPL4              | 14061,62 | 0,06  | 0,16196  | 0,354203 | 0,723187 | 0,9098764 |
| RALGAPB           | 314,83   | 0,20  | 0,552583 | 0,354188 | 0,723198 | 0,9098764 |
| OR7E94P           | 18,43    | 0,28  | 0,794396 | 0,354177 | 0,723206 | 0,9098764 |
| ZFP2              | 0,65     | -0,73 | 2,074438 | -0,35407 | 0,723289 | NA        |
| PART1             | 10,45    | 0,30  | 0,850992 | 0,354039 | 0,72331  | 0,9099207 |
| ZNF469            | 65,66    | 0,37  | 1,045501 | 0,353999 | 0,723339 | 0,9099207 |
| DNAJB11           | 662,27   | 0,22  | 0,607952 | 0,353911 | 0,723405 | 0,9099371 |
| OR7E100P          | 0,36     | 1,33  | 3,745235 | 0,353867 | 0,723439 | NA        |
| TRGV3             | 0,18     | -0,87 | 2,447644 | -0,35386 | 0,723447 | NA        |
| AC018755.16       | 0,10     | -1,33 | 3,748196 | -0,3538  | 0,72349  | NA        |
| ATP5S             | 361,27   | -0,22 | 0,626969 | -0,35379 | 0,723496 | 0,9099371 |
| CTD-2270L9.4      | 24,33    | -0,54 | 1,513661 | -0,35378 | 0,723503 | 0,9099371 |
| OR5BB1P           | 0,11     | -1,33 | 3,748196 | -0,35371 | 0,723557 | NA        |
| DIS3              | 469,91   | -0,18 | 0,518002 | -0,3537  | 0,723564 | 0,9099371 |
| METTL17           | 416,26   | -0,20 | 0,573262 | -0,35366 | 0,723597 | 0,9099371 |
| RP11-509J21.2     | 1,42     | -0,92 | 2,589629 | -0,3536  | 0,723637 | NA        |
| GPR171            | 10,99    | 0,56  | 1,588404 | 0,353574 | 0,723658 | 0,909953  |
| RP3-388N13.3      | 1,51     | 0,63  | 1,77801  | 0,353534 | 0,723688 | NA        |
| RP11-275H4.1      | 0,10     | -1,33 | 3,748196 | -0,35353 | 0,723692 | NA        |
| RP4-587D13.2      | 0,08     | -1,33 | 3,748196 | -0,35351 | 0,723708 | NA        |
| SAGE1             | 2,17     | -1,19 | 3,377311 | -0,35348 | 0,723725 | NA        |
| RNU6-181P         | 0,42     | 1,32  | 3,745258 | 0,353343 | 0,723831 | NA        |
| RP11-261N11.14    | 0,44     | 0,85  | 2,3918   | 0,353312 | 0,723855 | NA        |

|               |         |       |          |          |          |           |
|---------------|---------|-------|----------|----------|----------|-----------|
| RP11-323F24.3 | 0,08    | -1,32 | 3,748196 | -0,35324 | 0,723912 | NA        |
| RN7SL344P     | 0,91    | -0,71 | 2,024014 | -0,35323 | 0,723917 | NA        |
| KIR3DL1       | 0,09    | -1,32 | 3,748196 | -0,35318 | 0,723956 | NA        |
| CEACAM8       | 2,92    | -0,31 | 0,889574 | -0,35313 | 0,723994 | NA        |
| CXCR5         | 68,23   | 0,49  | 1,386947 | 0,353124 | 0,723996 | 0,9101957 |
| NCRNA00115    | 35,36   | 0,38  | 1,085779 | 0,353049 | 0,724051 | 0,9101957 |
| RP11-790I12.2 | 0,11    | -1,32 | 3,748196 | -0,35303 | 0,724063 | NA        |
| EPHA4         | 24,63   | -0,28 | 0,779306 | -0,35298 | 0,724101 | 0,9101957 |
| RP11-334J6.7  | 327,39  | -0,29 | 0,818386 | -0,35298 | 0,724105 | 0,9101957 |
| RP11-316M24.1 | 48,29   | -0,26 | 0,748635 | -0,35293 | 0,724139 | 0,9101957 |
| FAM178B       | 5,35    | 0,33  | 0,930147 | 0,352849 | 0,724202 | 0,9101957 |
| TMC1          | 7,23    | -0,40 | 1,140559 | -0,35284 | 0,724211 | 0,9101957 |
| HNRNPA0       | 486,72  | -0,17 | 0,480608 | -0,35279 | 0,724244 | 0,9101957 |
| RP11-448G4.2  | 0,37    | 1,32  | 3,745313 | 0,352757 | 0,724271 | NA        |
| CLDN16        | 1,56    | 0,52  | 1,480434 | 0,352754 | 0,724273 | NA        |
| APOC4         | 0,44    | 0,72  | 2,028924 | 0,3527   | 0,724313 | NA        |
| DAZAP1        | 232,17  | -0,16 | 0,449249 | -0,3527  | 0,724316 | 0,9101957 |
| RP5-1049N15.2 | 0,11    | -1,32 | 3,748196 | -0,35263 | 0,724367 | NA        |
| SLC10A1       | 5,33    | -0,77 | 2,195792 | -0,35262 | 0,72437  | 0,9101957 |
| AC004009.2    | 0,15    | -1,00 | 2,844029 | -0,35261 | 0,724381 | NA        |
| RP11-15B17.1  | 0,11    | -1,32 | 3,748196 | -0,35256 | 0,724421 | NA        |
| SPTA1         | 0,07    | -1,32 | 3,732635 | -0,35253 | 0,724443 | NA        |
| EEF1A1P7      | 1,42    | 0,40  | 1,140143 | 0,352466 | 0,724489 | NA        |
| TCF21         | 14,33   | 0,27  | 0,754713 | 0,352457 | 0,724495 | 0,9101957 |
| ZFAT          | 86,76   | -0,35 | 0,991476 | -0,35243 | 0,724513 | 0,9101957 |
| NOCT          | 79,28   | -0,26 | 0,743588 | -0,35237 | 0,724561 | 0,9101957 |
| MYBPH         | 0,08    | -1,32 | 3,748196 | -0,35235 | 0,724575 | NA        |
| AC012506.4    | 0,69    | -0,56 | 1,588483 | -0,35235 | 0,724578 | NA        |
| RP1-37N7.1    | 11,73   | -0,44 | 1,247254 | -0,35234 | 0,724583 | 0,9101957 |
| SNRPB         | 1993,10 | 0,11  | 0,301238 | 0,352337 | 0,724585 | 0,9101957 |
| RP11-422P24.9 | 0,34    | 1,25  | 3,550892 | 0,352319 | 0,724599 | NA        |
| RP11-1000B6.5 | 3,14    | -0,64 | 1,830686 | -0,35228 | 0,724626 | NA        |
| RP5-862P8.3   | 0,36    | 1,32  | 3,745302 | 0,352253 | 0,724649 | NA        |
| RP11-340A13.1 | 0,17    | -1,32 | 3,746917 | -0,35216 | 0,724715 | NA        |
| RP11-351N5.1  | 6,60    | -0,34 | 0,975589 | -0,35212 | 0,724752 | 0,9103135 |
| PCCB          | 375,71  | -0,22 | 0,630548 | -0,35208 | 0,724777 | 0,9103135 |
| RP11-56D16.8  | 0,11    | -1,32 | 3,748196 | -0,35202 | 0,72482  | NA        |
| ZNF219        | 12,56   | -0,46 | 1,317573 | -0,35201 | 0,72483  | 0,9103187 |
| RNY4P6        | 0,36    | 1,32  | 3,745317 | 0,351993 | 0,724843 | NA        |
| SH3RF2        | 0,87    | 0,83  | 2,359943 | 0,351971 | 0,72486  | NA        |
| RP4-816N1.6   | 2,21    | -0,83 | 2,36887  | -0,35193 | 0,724889 | NA        |
| FLRT3         | 0,08    | -1,31 | 3,73749  | -0,35178 | 0,725001 | NA        |
| FAM209A       | 11,58   | -0,76 | 2,163871 | -0,35172 | 0,725045 | 0,9105276 |
| RP11-119D9.5  | 0,11    | -1,32 | 3,748196 | -0,35171 | 0,725052 | NA        |
| RYKP1         | 0,97    | 1,31  | 3,733041 | 0,351665 | 0,72509  | NA        |
| RNU2-18P      | 0,46    | 0,95  | 2,706554 | 0,351561 | 0,725167 | NA        |
| ALKBH5        | 527,81  | 0,17  | 0,487753 | 0,351375 | 0,725307 | 0,9107947 |
| DIRAS1        | 0,36    | 1,32  | 3,745316 | 0,35136  | 0,725318 | NA        |
| RP11-36D19.4  | 0,08    | -1,32 | 3,748196 | -0,35116 | 0,725468 | NA        |
| GRK7          | 3,72    | -0,32 | 0,919347 | -0,35109 | 0,725522 | NA        |

|                |         |       |          |          |          |           |
|----------------|---------|-------|----------|----------|----------|-----------|
| AC007238.1     | 0,08    | -1,32 | 3,748196 | -0,35106 | 0,725545 | NA        |
| CTC-232P5.1    | 2,98    | 0,74  | 2,115741 | 0,351048 | 0,725552 | NA        |
| ZNF355P        | 0,08    | -1,32 | 3,748196 | -0,35101 | 0,72558  | NA        |
| BEST4          | 0,09    | -1,32 | 3,748196 | -0,35091 | 0,725657 | NA        |
| RP11-57407.1   | 0,08    | -1,31 | 3,748196 | -0,35081 | 0,725728 | NA        |
| RP3-395M20.8   | 18,85   | -0,48 | 1,355682 | -0,35076 | 0,725766 | 0,9111246 |
| SLC39A9        | 259,75  | -0,23 | 0,669302 | -0,3507  | 0,725813 | 0,9111246 |
| HMCE5          | 219,48  | 0,35  | 0,987306 | 0,350665 | 0,72584  | 0,9111246 |
| RP11-77M5.1    | 13,02   | 0,52  | 1,484641 | 0,35066  | 0,725843 | 0,9111246 |
| RP11-455J20.2  | 10,28   | -0,27 | 0,781793 | -0,35065 | 0,725853 | 0,9111246 |
| LLNLR-245B6.1  | 69,73   | 0,23  | 0,647023 | 0,350633 | 0,725863 | 0,9111246 |
| RPRM           | 0,14    | -1,18 | 3,367604 | -0,35059 | 0,725899 | NA        |
| RP11-466C23.5  | 0,08    | -1,31 | 3,748196 | -0,35047 | 0,725989 | NA        |
| ABCC10         | 116,04  | -0,33 | 0,93555  | -0,35044 | 0,726006 | 0,9112423 |
| RP11-834C11.8  | 0,08    | -1,31 | 3,748196 | -0,35035 | 0,726074 | NA        |
| MAPK11         | 0,36    | 1,31  | 3,745221 | 0,350319 | 0,7261   | NA        |
| FEZ1           | 2,43    | -0,38 | 1,088091 | -0,35031 | 0,726107 | NA        |
| RP11-258F1.2   | 0,61    | 1,10  | 3,133471 | 0,350301 | 0,726113 | NA        |
| RP13-122B23.12 | 0,36    | 1,31  | 3,745364 | 0,350284 | 0,726125 | NA        |
| ZNF580         | 132,27  | -0,19 | 0,549172 | -0,35027 | 0,726133 | 0,911314  |
| LYPLA2         | 358,01  | -0,20 | 0,579976 | -0,3502  | 0,726187 | 0,911314  |
| HAUS7          | 152,02  | -0,27 | 0,777122 | -0,35012 | 0,726249 | 0,911314  |
| C11orf72       | 32,15   | 0,28  | 0,793451 | 0,350065 | 0,72629  | 0,911314  |
| RP11-697N18.1  | 0,11    | -1,31 | 3,748196 | -0,35003 | 0,726314 | NA        |
| CTB-134H23.2   | 1,59    | -0,70 | 2,001476 | -0,35003 | 0,726318 | NA        |
| USP6           | 31,32   | 0,33  | 0,955062 | 0,349997 | 0,726341 | 0,911314  |
| AC020550.7     | 0,10    | -1,31 | 3,748196 | -0,34998 | 0,726351 | NA        |
| MALL           | 6,63    | -0,26 | 0,734492 | -0,34998 | 0,726357 | 0,911314  |
| RNU4-87P       | 0,08    | -1,31 | 3,748196 | -0,34988 | 0,726427 | NA        |
| RP11-795J1.1   | 0,11    | -1,31 | 3,748196 | -0,34983 | 0,726463 | NA        |
| RP11-978P4.2   | 0,10    | -1,31 | 3,748196 | -0,34983 | 0,726468 | NA        |
| TAS2R43        | 0,36    | 1,31  | 3,745367 | 0,349826 | 0,726469 | NA        |
| PPP3CB         | 303,65  | -0,23 | 0,654135 | -0,34964 | 0,726606 | 0,9114222 |
| RP11-705C15.5  | 6,02    | -0,76 | 2,182327 | -0,34962 | 0,726628 | 0,9114222 |
| RP11-471M2.3   | 16,22   | -0,48 | 1,364026 | -0,34957 | 0,726658 | 0,9114222 |
| RP11-701P16.4  | 0,38    | 1,31  | 3,745468 | 0,349472 | 0,726735 | NA        |
| RBMXL1         | 244,25  | -0,27 | 0,758998 | -0,34945 | 0,72675  | 0,9114222 |
| CCNDBP1        | 870,88  | 0,20  | 0,560007 | 0,349376 | 0,726807 | 0,9114222 |
| AC021188.4     | 0,10    | -1,31 | 3,748196 | -0,34931 | 0,726854 | NA        |
| RN7SKP3        | 0,35    | 1,24  | 3,543761 | 0,349272 | 0,726885 | NA        |
| PGF            | 3,78    | 0,39  | 1,111638 | 0,349271 | 0,726886 | 0,9114222 |
| CCDC134        | 23,88   | -0,61 | 1,743377 | -0,34926 | 0,726891 | 0,9114222 |
| AC009542.2     | 5,91    | 0,85  | 2,420081 | 0,349251 | 0,726901 | 0,9114222 |
| MEF2A          | 1033,07 | -0,11 | 0,30204  | -0,34923 | 0,72692  | 0,9114222 |
| ZNF341         | 62,84   | -0,37 | 1,065711 | -0,34921 | 0,726933 | 0,9114222 |
| RP11-637O11.2  | 0,59    | 0,56  | 1,615884 | 0,349056 | 0,727048 | NA        |
| CFH            | 7,98    | -0,81 | 2,328117 | -0,34904 | 0,727057 | 0,9114326 |
| VIPR1          | 235,84  | -0,26 | 0,733567 | -0,34899 | 0,727098 | 0,9114326 |
| RP11-267N12.3  | 0,52    | 0,81  | 2,319219 | 0,348983 | 0,727102 | NA        |
| RN7SL734P      | 1,83    | -0,51 | 1,466603 | -0,34896 | 0,727119 | NA        |

|               |         |       |          |          |          |           |
|---------------|---------|-------|----------|----------|----------|-----------|
| CCDC28B       | 105,67  | -0,28 | 0,792381 | -0,3489  | 0,727165 | 0,9114326 |
| AC140725.4    | 0,12    | -1,18 | 3,382424 | -0,34887 | 0,727189 | NA        |
| CTD-2184D3.6  | 13,16   | -0,42 | 1,19105  | -0,34886 | 0,727193 | 0,9114326 |
| ITIH1         | 2,45    | 0,64  | 1,837265 | 0,348845 | 0,727205 | NA        |
| RP11-179K3.2  | 3,16    | 0,29  | 0,820945 | 0,34883  | 0,727217 | NA        |
| TOP2B         | 876,32  | 0,13  | 0,366228 | 0,348808 | 0,727233 | 0,9114326 |
| RP11-281A20.2 | 10,03   | 0,43  | 1,245302 | 0,348805 | 0,727236 | 0,9114326 |
| MIR5000       | 0,36    | 1,31  | 3,745411 | 0,348787 | 0,727249 | NA        |
| CTD-2066L21.3 | 1,59    | 0,47  | 1,334953 | 0,348508 | 0,727459 | NA        |
| ZNF678        | 101,58  | -0,37 | 1,049464 | -0,34846 | 0,727494 | 0,9116956 |
| RNU6-862P     | 0,36    | 1,31  | 3,745454 | 0,348452 | 0,727501 | NA        |
| RP11-761I4.4  | 3,09    | 0,73  | 2,086161 | 0,348403 | 0,727538 | NA        |
| VWA2          | 0,39    | 0,64  | 1,844603 | 0,348336 | 0,727588 | NA        |
| RP3-441A12.1  | 0,10    | -1,31 | 3,748196 | -0,34831 | 0,727608 | NA        |
| RP11-111A22.1 | 4,73    | -0,37 | 1,058957 | -0,34829 | 0,727623 | 0,9117185 |
| RP1-102G20.3  | 52,62   | -0,19 | 0,555935 | -0,34828 | 0,727629 | 0,9117185 |
| RPL23AP53     | 16,31   | 0,37  | 1,055107 | 0,34824  | 0,72766  | 0,9117185 |
| CYP2C9        | 13,37   | 0,32  | 0,910288 | 0,348075 | 0,727784 | 0,9118127 |
| PSMF1         | 809,90  | 0,18  | 0,52136  | 0,347959 | 0,727871 | 0,911827  |
| RP11-756A22.7 | 26,99   | 0,48  | 1,382028 | 0,347929 | 0,727893 | 0,911827  |
| PIN4          | 126,31  | 0,17  | 0,494486 | 0,347588 | 0,728149 | 0,911982  |
| RN7SL89P      | 0,56    | 0,84  | 2,411876 | 0,347588 | 0,72815  | NA        |
| SCYL1         | 259,67  | -0,20 | 0,565774 | -0,34757 | 0,728163 | 0,911982  |
| NT5C2         | 249,22  | 0,18  | 0,517139 | 0,347569 | 0,728164 | 0,911982  |
| RP11-793J2.1  | 0,13    | -1,17 | 3,37237  | -0,34753 | 0,728195 | NA        |
| RALB          | 453,73  | -0,17 | 0,477829 | -0,34737 | 0,728316 | 0,9120446 |
| NPIP15        | 35,09   | 0,37  | 1,063925 | 0,347314 | 0,728355 | 0,9120446 |
| YIPF3         | 714,14  | -0,15 | 0,424707 | -0,34726 | 0,728395 | 0,9120446 |
| ZDBF2         | 6,13    | 0,44  | 1,262635 | 0,347241 | 0,72841  | 0,9120446 |
| RF00275       | 0,07    | -1,30 | 3,748196 | -0,34713 | 0,728493 | NA        |
| RP11-445O3.3  | 47,64   | -0,31 | 0,882857 | -0,34702 | 0,728575 | 0,9121895 |
| AC005077.8    | 1,06    | 1,02  | 2,93288  | 0,346823 | 0,728725 | NA        |
| AC096775.2    | 0,10    | -1,30 | 3,748196 | -0,34681 | 0,728734 | NA        |
| HNRNPM        | 1213,51 | 0,11  | 0,326218 | 0,346769 | 0,728765 | 0,9123449 |
| TMEM243       | 352,38  | 0,21  | 0,596096 | 0,346719 | 0,728802 | 0,9123449 |
| MACF1         | 2145,19 | 0,13  | 0,363507 | 0,346642 | 0,72886  | 0,9123449 |
| CTD-2288F12.1 | 1,09    | -0,62 | 1,790219 | -0,34661 | 0,728886 | NA        |
| MAP2K3        | 1229,49 | -0,12 | 0,355439 | -0,3466  | 0,728895 | 0,9123449 |
| RP11-76P2.3   | 0,07    | -1,30 | 3,747976 | -0,34657 | 0,728918 | NA        |
| SMG5          | 358,81  | 0,27  | 0,771451 | 0,346464 | 0,728994 | 0,9123822 |
| SPSB2         | 25,53   | -0,47 | 1,358804 | -0,34643 | 0,729023 | 0,9123822 |
| KB-1125A3.10  | 0,10    | -1,30 | 3,748196 | -0,34639 | 0,729053 | NA        |
| RNU11-2P      | 0,55    | 1,09  | 3,1493   | 0,346356 | 0,729075 | NA        |
| TNIP2         | 154,59  | -0,25 | 0,731317 | -0,34631 | 0,729112 | 0,912409  |
| ACOT8         | 195,76  | 0,31  | 0,901685 | 0,346266 | 0,729143 | 0,912409  |
| AC022210.2    | 2,19    | 0,32  | 0,938556 | 0,346206 | 0,729188 | NA        |
| ZNF880        | 68,99   | 0,27  | 0,76596  | 0,346174 | 0,729212 | 0,9124241 |
| CCDC79        | 5,77    | -0,39 | 1,112723 | -0,34612 | 0,729253 | 0,9124241 |
| AC099850.1    | 1,96    | -0,69 | 1,981986 | -0,34611 | 0,729261 | NA        |
| RNF34         | 265,45  | 0,24  | 0,697315 | 0,345948 | 0,729382 | 0,9125245 |

|                |         |       |          |          |          |           |
|----------------|---------|-------|----------|----------|----------|-----------|
| LIMS4          | 0,32    | 0,85  | 2,469036 | 0,345938 | 0,729389 | NA        |
| REV3L          | 1043,05 | -0,22 | 0,638092 | -0,34584 | 0,729466 | 0,9125686 |
| RP11-395I14.3  | 0,13    | -1,17 | 3,378103 | -0,34582 | 0,72948  | NA        |
| CCDC96         | 2,65    | 1,04  | 3,015204 | 0,345661 | 0,729598 | NA        |
| AC013791.10    | 1,12    | -1,11 | 3,207006 | -0,34565 | 0,729606 | NA        |
| AC104794.5     | 15,94   | 0,33  | 0,945342 | 0,345614 | 0,729633 | 0,9126682 |
| SNORA70G       | 25,02   | -0,43 | 1,247353 | -0,3456  | 0,729644 | 0,9126682 |
| RNU6-253P      | 0,35    | 1,29  | 3,74556  | 0,345492 | 0,729725 | NA        |
| TPRN           | 24,86   | 0,40  | 1,15538  | 0,345283 | 0,729882 | 0,9128334 |
| FADS3          | 105,50  | 0,31  | 0,888942 | 0,345256 | 0,729902 | 0,9128334 |
| ZNF75A         | 350,57  | 0,22  | 0,632559 | 0,345204 | 0,729941 | 0,9128334 |
| SNRNP70        | 78,76   | -0,26 | 0,749625 | -0,34516 | 0,729972 | 0,9128334 |
| CTD-2302E22.4  | 0,27    | -1,01 | 2,917854 | -0,34511 | 0,73001  | NA        |
| MB21D1         | 94,40   | -0,25 | 0,718488 | -0,34501 | 0,730086 | 0,9128407 |
| FOXI3          | 0,93    | 0,55  | 1,600564 | 0,344986 | 0,730105 | NA        |
| RP11-567M16.3  | 0,35    | 1,29  | 3,745549 | 0,34498  | 0,730109 | NA        |
| ABCD1          | 105,66  | -0,24 | 0,702222 | -0,34489 | 0,730174 | 0,9128407 |
| VPS16          | 438,16  | -0,15 | 0,427071 | -0,34489 | 0,730181 | 0,9128407 |
| NBPF12         | 413,64  | 0,18  | 0,514255 | 0,344848 | 0,730209 | 0,9128407 |
| RP11-628J14.2  | 0,07    | -1,29 | 3,748196 | -0,3448  | 0,730242 | NA        |
| ABI1           | 894,39  | 0,15  | 0,44753  | 0,344758 | 0,730276 | 0,9128407 |
| CMTR2          | 138,27  | -0,21 | 0,60802  | -0,34474 | 0,730286 | 0,9128407 |
| AC105053.3     | 23,91   | -0,27 | 0,779653 | -0,34458 | 0,730413 | 0,9128407 |
| MOCS2          | 144,41  | 0,27  | 0,780179 | 0,344565 | 0,730422 | 0,9128407 |
| RP1-29C18.9    | 71,60   | 0,25  | 0,734981 | 0,344538 | 0,730441 | 0,9128407 |
| CES1           | 729,01  | -0,13 | 0,382679 | -0,34444 | 0,730513 | 0,9128407 |
| GIPC2          | 0,73    | 0,87  | 2,529744 | 0,344393 | 0,730551 | NA        |
| STARD3NL       | 336,87  | 0,21  | 0,606956 | 0,344317 | 0,730608 | 0,9128407 |
| SYN2           | 0,16    | -0,98 | 2,839183 | -0,34431 | 0,730611 | NA        |
| RP11-587H10.1  | 0,35    | 1,29  | 3,745604 | 0,344306 | 0,730616 | NA        |
| RNU6-235P      | 0,35    | 1,29  | 3,745605 | 0,344289 | 0,730629 | NA        |
| ABC7           | 396,86  | 0,23  | 0,673872 | 0,344283 | 0,730633 | 0,9128407 |
| SNORA70B       | 0,33    | 1,21  | 3,514463 | 0,344282 | 0,730634 | NA        |
| SRRM4          | 10,43   | -0,32 | 0,917249 | -0,34428 | 0,730636 | 0,9128407 |
| RP11-571E6.3   | 5,30    | -0,52 | 1,498528 | -0,34413 | 0,730746 | 0,9128407 |
| CTD-2192J16.22 | 564,02  | 0,13  | 0,388025 | 0,344063 | 0,730799 | 0,9128407 |
| EIF2S1         | 791,66  | 0,22  | 0,646405 | 0,343976 | 0,730864 | 0,9128407 |
| AMN1           | 46,69   | -0,26 | 0,759539 | -0,34396 | 0,730875 | 0,9128407 |
| ATP6V1C1       | 468,92  | -0,23 | 0,676175 | -0,3439  | 0,73092  | 0,9128407 |
| RP11-681O4.1   | 0,92    | -0,84 | 2,428774 | -0,34389 | 0,730925 | NA        |
| RP11-85I17.2   | 18,30   | -0,24 | 0,704879 | -0,34385 | 0,73096  | 0,9128407 |
| RP11-249M12.2  | 3,74    | -0,43 | 1,236621 | -0,34384 | 0,730965 | NA        |
| RP11-324C10.1  | 14,13   | 0,26  | 0,761772 | 0,343834 | 0,730971 | 0,9128407 |
| RP1-137F1.3    | 0,15    | -1,16 | 3,359404 | -0,34382 | 0,730985 | NA        |
| AC098973.2     | 1,01    | 0,60  | 1,736573 | 0,343813 | 0,730987 | NA        |
| SYAP1          | 762,53  | 0,11  | 0,329808 | 0,343717 | 0,731059 | 0,9128407 |
| RP11-413E1.2   | 0,72    | 0,84  | 2,441362 | 0,343627 | 0,731127 | NA        |
| MED14OS        | 25,94   | 0,40  | 1,154692 | 0,343603 | 0,731145 | 0,9128407 |
| DKC1           | 484,98  | -0,19 | 0,556499 | -0,34354 | 0,731195 | 0,9128407 |
| CD4            | 1883,93 | 0,13  | 0,372619 | 0,343507 | 0,731217 | 0,9128407 |

|                |         |       |          |          |          |           |
|----------------|---------|-------|----------|----------|----------|-----------|
| RP11-31L22.4   | 0,61    | 1,26  | 3,658434 | 0,343506 | 0,731218 | NA        |
| AC090937.2     | 534,29  | -0,15 | 0,428427 | -0,34344 | 0,731267 | 0,9128407 |
| CTBP1-AS       | 1,32    | 0,65  | 1,878897 | 0,343407 | 0,731293 | NA        |
| RP11-284E5.1   | 197,95  | 0,16  | 0,451426 | 0,343394 | 0,731302 | 0,9128407 |
| SF3B3          | 612,66  | -0,16 | 0,461871 | -0,34333 | 0,731349 | 0,9128407 |
| RP11-276H1.3   | 9,51    | -0,23 | 0,661906 | -0,34328 | 0,731389 | 0,9128407 |
| PLLP           | 157,18  | 0,27  | 0,799733 | 0,343262 | 0,731401 | 0,9128407 |
| RP11-474B12.1  | 0,33    | 1,22  | 3,54269  | 0,343248 | 0,731412 | NA        |
| IL12A          | 0,54    | 1,07  | 3,110928 | 0,343248 | 0,731412 | NA        |
| AMPD2          | 2080,18 | 0,14  | 0,400199 | 0,34318  | 0,731463 | 0,9128567 |
| RP11-680B3.2   | 7,12    | -0,27 | 0,798865 | -0,34311 | 0,731514 | 0,9128598 |
| RP11-83B20.6   | 0,19    | -0,84 | 2,446943 | -0,34291 | 0,731667 | NA        |
| RP11-316O14.1  | 1,88    | -0,91 | 2,668242 | -0,34284 | 0,731718 | NA        |
| LRP2BP         | 15,38   | 0,28  | 0,815116 | 0,34283  | 0,731726 | 0,913063  |
| AC004112.4     | 0,35    | 1,28  | 3,745456 | 0,342801 | 0,731748 | NA        |
| EXT2           | 202,82  | 0,29  | 0,85963  | 0,342702 | 0,731822 | 0,9131214 |
| AC099548.6     | 0,69    | -1,23 | 3,595507 | -0,34248 | 0,731993 | NA        |
| RP11-320P7.1   | 1,62    | -0,64 | 1,883186 | -0,34246 | 0,732007 | NA        |
| RF00157        | 0,08    | -1,28 | 3,748196 | -0,3424  | 0,732051 | NA        |
| RP11-83J16.1   | 0,52    | 1,08  | 3,154616 | 0,342372 | 0,732071 | NA        |
| ZNF530         | 42,06   | 0,37  | 1,068264 | 0,342341 | 0,732094 | 0,9132456 |
| RP11-369G6.3   | 4,30    | -0,30 | 0,877562 | -0,34232 | 0,732112 | 0,9132456 |
| RAET1K         | 0,58    | 1,07  | 3,123833 | 0,34228  | 0,73214  | NA        |
| YEATS4         | 91,48   | 0,31  | 0,908021 | 0,342215 | 0,732189 | 0,9132456 |
| AC009961.3     | 41,71   | -0,27 | 0,783054 | -0,34206 | 0,732307 | 0,9132456 |
| CTD-2325M2.1   | 16,67   | 0,27  | 0,800897 | 0,34203  | 0,732328 | 0,9132456 |
| RP11-556N21.1  | 1,97    | -0,61 | 1,797716 | -0,342   | 0,732349 | NA        |
| AMIGO2         | 7,00    | -0,64 | 1,872998 | -0,34197 | 0,732373 | 0,9132456 |
| RCHY1          | 147,60  | 0,31  | 0,898881 | 0,341916 | 0,732414 | 0,9132456 |
| RP11-285G1.9   | 0,07    | -1,28 | 3,748196 | -0,34174 | 0,732549 | NA        |
| RN7SL604P      | 1,72    | -0,56 | 1,629146 | -0,34174 | 0,73255  | NA        |
| RFLNB          | 132,71  | -0,29 | 0,842635 | -0,34164 | 0,732623 | 0,9132456 |
| SCARNA17       | 5,15    | -0,54 | 1,572141 | -0,34158 | 0,732665 | 0,9132456 |
| PRODH          | 13,04   | 0,40  | 1,163727 | 0,341558 | 0,732684 | 0,9132456 |
| ACE            | 16,35   | -0,36 | 1,061213 | -0,3415  | 0,732724 | 0,9132456 |
| NDUFAF5        | 278,99  | -0,33 | 0,95801  | -0,34143 | 0,732779 | 0,9132456 |
| PNPLA8         | 772,27  | -0,17 | 0,503075 | -0,34138 | 0,732818 | 0,9132456 |
| AMDHD2         | 16,21   | 0,48  | 1,406201 | 0,341366 | 0,732828 | 0,9132456 |
| CTD-2583A14.10 | 4,47    | 0,87  | 2,536942 | 0,341328 | 0,732856 | 0,9132456 |
| PLPP1          | 13,60   | 0,43  | 1,251425 | 0,341104 | 0,733026 | 0,9132456 |
| OAS1           | 1082,57 | 0,21  | 0,626343 | 0,340941 | 0,733148 | 0,9132456 |
| TMEM185A       | 78,70   | -0,29 | 0,851626 | -0,34092 | 0,733163 | 0,9132456 |
| CDIPT          | 337,23  | -0,28 | 0,812621 | -0,34091 | 0,733169 | 0,9132456 |
| PTGES2         | 161,99  | 0,32  | 0,94226  | 0,340773 | 0,733274 | 0,9132456 |
| RP11-1018N14.1 | 8,10    | 0,24  | 0,696999 | 0,340736 | 0,733302 | 0,9132456 |
| RP1-221C16.8   | 15,08   | -0,30 | 0,883192 | -0,34073 | 0,733306 | 0,9132456 |
| NBDY           | 528,06  | -0,16 | 0,456396 | -0,34072 | 0,733315 | 0,9132456 |
| FGF7           | 16,77   | -0,81 | 2,367243 | -0,3407  | 0,733329 | 0,9132456 |
| IL31RA         | 5,81    | -0,79 | 2,333394 | -0,3406  | 0,733405 | 0,9132456 |
| SNRNP27        | 277,27  | -0,22 | 0,64979  | -0,34045 | 0,733516 | 0,9132456 |



|                |         |       |          |          |          |           |
|----------------|---------|-------|----------|----------|----------|-----------|
| RF00622        | 0,54    | -1,26 | 3,689725 | -0,34044 | 0,733525 | NA        |
| RP5-1043L3.1   | 10,64   | -0,32 | 0,941499 | -0,34042 | 0,733541 | 0,9132456 |
| CDH4           | 4,33    | -0,48 | 1,424095 | -0,3404  | 0,733552 | 0,9132456 |
| CTC-268N12.2   | 0,75    | 0,95  | 2,80217  | 0,340343 | 0,733598 | NA        |
| LL22NC03-2H8.5 | 711,64  | -0,21 | 0,612214 | -0,34034 | 0,733601 | 0,9132456 |
| AKTIP          | 25,23   | 0,34  | 0,998341 | 0,34033  | 0,733608 | 0,9132456 |
| RNU1-91P       | 0,47    | -1,26 | 3,696289 | -0,34026 | 0,733658 | NA        |
| TRO            | 0,27    | -1,27 | 3,745051 | -0,34023 | 0,733683 | NA        |
| AC093826.2     | 5,14    | 0,63  | 1,837041 | 0,340228 | 0,733685 | 0,9132456 |
| KRIT1          | 189,56  | -0,17 | 0,510999 | -0,3402  | 0,733702 | 0,9132456 |
| AP1AR          | 118,01  | -0,18 | 0,534863 | -0,3402  | 0,733707 | 0,9132456 |
| ZNF782         | 23,05   | -0,33 | 0,982321 | -0,34016 | 0,733735 | 0,9132456 |
| LYPLAL1        | 178,41  | -0,26 | 0,760302 | -0,34014 | 0,733747 | 0,9132456 |
| ERMARD         | 180,83  | -0,30 | 0,892493 | -0,34009 | 0,733792 | 0,9132456 |
| CCDC66         | 146,89  | 0,23  | 0,673554 | 0,340043 | 0,733824 | 0,9132456 |
| CACTIN         | 59,19   | -0,28 | 0,835838 | -0,33998 | 0,73387  | 0,9132456 |
| QKI            | 2046,76 | 0,08  | 0,233812 | 0,339962 | 0,733885 | 0,9132456 |
| NAGA           | 986,61  | -0,17 | 0,503789 | -0,33996 | 0,733885 | 0,9132456 |
| RP11-674P19.2  | 1,57    | -0,59 | 1,746559 | -0,33984 | 0,73398  | NA        |
| CTSO           | 248,13  | 0,23  | 0,686896 | 0,339782 | 0,73402  | 0,9132976 |
| WASHC5         | 248,74  | -0,25 | 0,721701 | -0,33978 | 0,734025 | 0,9132976 |
| RF00090        | 1,04    | -1,10 | 3,238846 | -0,33936 | 0,734339 | NA        |
| OR2L2          | 15,30   | -0,18 | 0,539864 | -0,33932 | 0,73437  | 0,9136156 |
| MIR6077        | 0,29    | 1,00  | 2,938421 | 0,339271 | 0,734406 | NA        |
| CTD-2651B20.3  | 10,69   | -0,38 | 1,115658 | -0,33925 | 0,734423 | 0,9136156 |
| HSPA2          | 4,19    | -0,32 | 0,940524 | -0,33924 | 0,734428 | 0,9136156 |
| CLCN7          | 248,21  | -0,29 | 0,862559 | -0,33908 | 0,734548 | 0,9137042 |
| RP1-8B1.4      | 0,41    | 0,78  | 2,308975 | 0,339045 | 0,734576 | NA        |
| LRRC41         | 326,04  | -0,16 | 0,470806 | -0,33895 | 0,734649 | 0,9137677 |
| RP11-179B2.2   | 2,28    | -0,47 | 1,386095 | -0,33894 | 0,734651 | NA        |
| CTD-2540L5.4   | 0,28    | 1,01  | 2,995006 | 0,338888 | 0,734694 | NA        |
| BBS12          | 1,04    | 1,10  | 3,246733 | 0,338844 | 0,734727 | NA        |
| TTLL11-IT1     | 0,54    | 1,27  | 3,745788 | 0,338728 | 0,734814 | NA        |
| SCGB3A2        | 22,72   | -0,34 | 1,007891 | -0,33862 | 0,734899 | 0,9139802 |
| RP11-419C5.2   | 4,96    | 0,49  | 1,457953 | 0,33858  | 0,734926 | 0,9139802 |
| GFAP           | 33,20   | 0,23  | 0,670603 | 0,338526 | 0,734967 | 0,9139802 |
| RP11-584P21.2  | 14,77   | -0,44 | 1,295629 | -0,33843 | 0,735042 | 0,9139949 |
| DHX57          | 261,42  | 0,17  | 0,492873 | 0,33838  | 0,735077 | 0,9139949 |
| KAT6B          | 385,82  | -0,19 | 0,573166 | -0,33831 | 0,73513  | 0,9139995 |
| HBM            | 0,08    | -1,27 | 3,748196 | -0,3383  | 0,735138 | NA        |
| INCENP         | 3,48    | -0,52 | 1,536209 | -0,3382  | 0,735213 | NA        |
| RP11-977G19.10 | 2,64    | -0,83 | 2,459631 | -0,33813 | 0,735264 | NA        |
| BHLHB9         | 3,71    | 0,28  | 0,841556 | 0,337984 | 0,735376 | NA        |
| C8orf49        | 27,46   | -0,20 | 0,57741  | -0,33797 | 0,735388 | 0,9142601 |
| HOXB6          | 1,92    | 0,63  | 1,855214 | 0,337949 | 0,735402 | NA        |
| KRTCAP2        | 544,01  | -0,09 | 0,261652 | -0,33784 | 0,73548  | 0,9143132 |
| KB-1980E6.3    | 0,68    | -0,49 | 1,450749 | -0,33767 | 0,735614 | NA        |
| RP11-463I20.4  | 3,47    | 0,49  | 1,447909 | 0,337539 | 0,73571  | NA        |
| HOXA-AS4       | 3,19    | 0,56  | 1,649428 | 0,337297 | 0,735893 | NA        |
| RP11-74C1.4    | 3,67    | 0,77  | 2,297043 | 0,337201 | 0,735966 | NA        |

|               |         |       |          |          |          |           |
|---------------|---------|-------|----------|----------|----------|-----------|
| RP11-265B8.5  | 0,71    | 0,84  | 2,478487 | 0,336984 | 0,736129 | NA        |
| UBLCP1        | 289,98  | 0,18  | 0,545775 | 0,336947 | 0,736157 | 0,9149783 |
| CYTOR         | 519,52  | 0,11  | 0,316074 | 0,33692  | 0,736177 | 0,9149783 |
| RP11-368I7.6  | 15,70   | -0,32 | 0,946462 | -0,33689 | 0,736201 | 0,9149783 |
| ABL2          | 310,34  | 0,23  | 0,684264 | 0,336874 | 0,736212 | 0,9149783 |
| RNU6-466P     | 0,52    | 1,26  | 3,745861 | 0,336739 | 0,736314 | NA        |
| HIST1H2BB     | 0,36    | 1,26  | 3,745866 | 0,336549 | 0,736457 | NA        |
| NDOR1         | 18,33   | -0,35 | 1,047983 | -0,33654 | 0,736462 | 0,9152274 |
| RP11-439A17.5 | 0,34    | 1,26  | 3,745919 | 0,33646  | 0,736524 | NA        |
| ARL6IP5       | 2382,92 | -0,10 | 0,29483  | -0,33631 | 0,736635 | 0,9152427 |
| DCAF8         | 642,74  | -0,14 | 0,420677 | -0,3363  | 0,736645 | 0,9152427 |
| AC116366.5    | 0,89    | 1,25  | 3,727323 | 0,336255 | 0,736678 | NA        |
| LRRC19        | 24,52   | -0,33 | 0,981525 | -0,33623 | 0,736698 | 0,9152427 |
| RN7SKP181     | 10,57   | -0,33 | 0,984377 | -0,33617 | 0,736741 | 0,9152427 |
| CTD-2374C24.1 | 0,84    | -1,24 | 3,678133 | -0,33607 | 0,736818 | NA        |
| PMM2          | 223,22  | -0,20 | 0,594944 | -0,33604 | 0,736843 | 0,9152427 |
| RP11-390B4.3  | 21,55   | 0,73  | 2,16537  | 0,336036 | 0,736844 | 0,9152427 |
| RP5-920G3.3   | 0,46    | 1,26  | 3,745925 | 0,336006 | 0,736866 | NA        |
| STIM1         | 321,64  | -0,19 | 0,579637 | -0,33601 | 0,736867 | 0,9152427 |
| TM9SF2        | 1386,12 | 0,13  | 0,374054 | 0,335963 | 0,736899 | 0,9152427 |
| RP11-314M24.1 | 2,52    | 0,59  | 1,762719 | 0,335953 | 0,736906 | NA        |
| RP13-204A15.3 | 0,49    | 1,26  | 3,745885 | 0,335941 | 0,736915 | NA        |
| AASS          | 9,64    | 0,65  | 1,925398 | 0,335928 | 0,736925 | 0,9152427 |
| SPATA24       | 5,53    | -0,81 | 2,404714 | -0,33586 | 0,736975 | 0,9152427 |
| C1orf220      | 22,77   | -0,34 | 1,022532 | -0,33581 | 0,737015 | 0,9152427 |
| RP11-19C24.1  | 0,50    | 1,26  | 3,745924 | 0,335787 | 0,737032 | NA        |
| PSMA7         | 3912,04 | 0,07  | 0,217014 | 0,335658 | 0,737129 | 0,9152956 |
| BORCS7-ASMT   | 5,79    | -0,72 | 2,156613 | -0,33562 | 0,737156 | 0,9152956 |
| RP11-85L21.5  | 0,36    | 1,26  | 3,745894 | 0,335621 | 0,737157 | NA        |
| PCP2          | 0,20    | -1,13 | 3,368638 | -0,33555 | 0,737208 | NA        |
| ADCY7         | 564,21  | -0,16 | 0,473548 | -0,33553 | 0,737225 | 0,9153205 |
| RP11-216N14.5 | 0,08    | -1,26 | 3,748196 | -0,33553 | 0,737226 | NA        |
| GNA15         | 187,66  | 0,22  | 0,660423 | 0,335092 | 0,737556 | 0,9156192 |
| RP11-99H8.1   | 5,60    | -0,28 | 0,827869 | -0,33506 | 0,737582 | 0,9156192 |
| ZNF718        | 40,42   | 0,41  | 1,237167 | 0,334947 | 0,737665 | 0,9156192 |
| RFWD3         | 109,75  | -0,25 | 0,734958 | -0,33493 | 0,737675 | 0,9156192 |
| RN7SL392P     | 2,12    | 0,54  | 1,608296 | 0,334853 | 0,737736 | NA        |
| MGAT2         | 55,15   | 0,70  | 2,078818 | 0,334843 | 0,737744 | 0,9156192 |
| RP11-320L11.2 | 0,26    | -1,14 | 3,416274 | -0,33481 | 0,737772 | NA        |
| RP11-493E3.1  | 0,92    | 1,25  | 3,733513 | 0,334796 | 0,737779 | NA        |
| PSMB8         | 3240,73 | -0,08 | 0,244833 | -0,33479 | 0,737787 | 0,9156192 |
| B3GALT4       | 80,21   | -0,40 | 1,205002 | -0,33475 | 0,737814 | 0,9156192 |
| CACNA1E       | 3,70    | -0,60 | 1,785051 | -0,33469 | 0,737861 | NA        |
| RP11-492I2.1  | 0,52    | -0,61 | 1,834133 | -0,33467 | 0,737876 | NA        |
| ZNF431        | 208,95  | 0,19  | 0,560613 | 0,33464  | 0,737896 | 0,9156192 |
| CYB5D2        | 34,33   | 0,31  | 0,915053 | 0,334624 | 0,737909 | 0,9156192 |
| RP11-60E8.3   | 0,34    | 1,25  | 3,745985 | 0,334559 | 0,737958 | NA        |
| JAK3          | 1312,61 | 0,11  | 0,329216 | 0,334534 | 0,737976 | 0,9156291 |
| PNMA6A        | 0,59    | 1,22  | 3,652786 | 0,334513 | 0,737993 | NA        |
| TMEM265       | 158,79  | -0,34 | 1,02989  | -0,33448 | 0,738015 | 0,9156291 |

|                  |         |       |          |          |          |           |
|------------------|---------|-------|----------|----------|----------|-----------|
| NFRKB            | 253,95  | -0,34 | 1,018232 | -0,33435 | 0,738113 | 0,9156883 |
| AC133785.1       | 0,65    | 0,60  | 1,805073 | 0,334114 | 0,738294 | NA        |
| AMD1             | 1090,86 | 0,18  | 0,529693 | 0,334094 | 0,738309 | 0,9156883 |
| RP11-574K11.24   | 151,65  | 0,25  | 0,76185  | 0,334086 | 0,738315 | 0,9156883 |
| TBC1D10A         | 139,93  | 0,25  | 0,74482  | 0,334079 | 0,73832  | 0,9156883 |
| XXbac-B562F10.10 | 15,82   | -0,91 | 2,723919 | -0,33403 | 0,73836  | 0,9156883 |
| RP11-822E23.8    | 2,34    | 0,83  | 2,492035 | 0,334014 | 0,738369 | NA        |
| PPME1            | 143,91  | -0,29 | 0,86261  | -0,334   | 0,73838  | 0,9156883 |
| NOC4L            | 170,25  | -0,21 | 0,614431 | -0,3339  | 0,738457 | 0,9156883 |
| GAN              | 139,84  | 0,22  | 0,669334 | 0,333872 | 0,738476 | 0,9156883 |
| NAB1             | 225,27  | -0,24 | 0,73221  | -0,33375 | 0,738571 | 0,9156883 |
| RP11-331G2.8     | 49,55   | -0,32 | 0,969046 | -0,33373 | 0,738582 | 0,9156883 |
| AC147651.4       | 69,76   | -0,44 | 1,314288 | -0,3337  | 0,738604 | 0,9156883 |
| CCL20            | 0,62    | -0,71 | 2,122059 | -0,33364 | 0,738652 | NA        |
| CTD-2540B15.9    | 1,00    | 0,85  | 2,549773 | 0,333603 | 0,73868  | NA        |
| RP11-134F2.7     | 0,33    | 1,25  | 3,745913 | 0,333565 | 0,738708 | NA        |
| SLAMF6           | 10,04   | -0,34 | 1,005767 | -0,33355 | 0,738722 | 0,915741  |
| RNU7-10P         | 1,20    | 0,77  | 2,310979 | 0,333469 | 0,73878  | NA        |
| LCTL             | 5,54    | -0,30 | 0,907321 | -0,33339 | 0,738841 | 0,915741  |
| METRNL           | 1309,99 | 0,15  | 0,442368 | 0,333353 | 0,738868 | 0,915741  |
| IRF9             | 527,59  | -0,13 | 0,394282 | -0,33335 | 0,738871 | 0,915741  |
| CTD-2021K4.1     | 385,99  | 0,19  | 0,556379 | 0,333297 | 0,73891  | 0,915741  |
| MORN2            | 24,46   | 0,58  | 1,746781 | 0,333211 | 0,738975 | 0,915741  |
| AC011816.3       | 0,34    | 1,25  | 3,745912 | 0,333204 | 0,73898  | NA        |
| SERTAD1          | 558,05  | 0,21  | 0,625056 | 0,33314  | 0,739028 | 0,915741  |
| ESF1             | 244,16  | 0,23  | 0,690472 | 0,333124 | 0,739041 | 0,915741  |
| RP5-1175C6.1     | 3,52    | -0,49 | 1,482416 | -0,33306 | 0,739092 | NA        |
| TNNI2            | 153,74  | 0,30  | 0,909865 | 0,333048 | 0,739098 | 0,9157513 |
| AC010967.2       | 0,52    | 1,25  | 3,745973 | 0,333031 | 0,739111 | NA        |
| RP11-589O3.1     | 0,58    | 0,58  | 1,741742 | 0,333023 | 0,739117 | NA        |
| TNFSF12-TNFSF13  | 263,60  | -0,73 | 2,194209 | -0,33291 | 0,739203 | 0,9158202 |
| RP11-7F17.3      | 1,95    | -0,38 | 1,149416 | -0,33287 | 0,73923  | NA        |
| RP11-414P19.1    | 0,59    | 1,23  | 3,685739 | 0,332717 | 0,739348 | NA        |
| TTC25            | 41,52   | -0,48 | 1,433444 | -0,33268 | 0,739375 | 0,915972  |
| RP11-190C22.1    | 0,53    | -0,61 | 1,826345 | -0,33262 | 0,739418 | NA        |
| RP11-68E19.2     | 4,96    | 0,36  | 1,074426 | 0,332404 | 0,739584 | 0,916149  |
| SPATA21          | 16,24   | -0,39 | 1,18488  | -0,33236 | 0,739616 | 0,916149  |
| RP11-142G7.1     | 1,82    | 0,37  | 1,113214 | 0,332308 | 0,739656 | NA        |
| ERVW-1           | 475,16  | -0,26 | 0,780371 | -0,33222 | 0,739724 | 0,9162216 |
| RP11-515O17.2    | 0,69    | 0,59  | 1,784852 | 0,33208  | 0,739829 | NA        |
| TEX14            | 56,08   | -0,28 | 0,840029 | -0,33204 | 0,739863 | 0,9162756 |
| RP11-439K3.3     | 12,17   | 0,36  | 1,075144 | 0,332031 | 0,739866 | 0,9162756 |
| FAM47E           | 102,89  | -0,25 | 0,766962 | -0,33192 | 0,739952 | 0,9163213 |
| CTD-2085J24.3    | 3,02    | 0,60  | 1,797473 | 0,331852 | 0,740001 | NA        |
| RP11-345I18.4    | 0,33    | 1,24  | 3,746055 | 0,331835 | 0,740014 | NA        |
| RP11-558M24.1    | 0,34    | 1,24  | 3,746015 | 0,331696 | 0,740118 | NA        |
| RP11-475I24.8    | 0,46    | 1,24  | 3,746019 | 0,331653 | 0,740151 | NA        |
| TRPM6            | 8,26    | 0,26  | 0,794194 | 0,33164  | 0,740161 | 0,916438  |
| RP11-638F5.2     | 12,16   | -0,26 | 0,774233 | -0,33162 | 0,740176 | 0,916438  |
| EGR2             | 482,83  | -0,25 | 0,759384 | -0,3316  | 0,740194 | 0,916438  |

|                |         |       |          |          |          |           |
|----------------|---------|-------|----------|----------|----------|-----------|
| AMMECR1L       | 133,39  | 0,28  | 0,850627 | 0,331202 | 0,740492 | 0,9167457 |
| RP11-230L22.4  | 0,41    | -0,99 | 2,986943 | -0,33108 | 0,740584 | NA        |
| CTB-92J24.3    | 5,94    | -0,50 | 1,50999  | -0,33101 | 0,740638 | 0,9168183 |
| TMEM170B       | 591,97  | 0,15  | 0,443742 | 0,330994 | 0,740649 | 0,9168183 |
| BBS9           | 53,83   | -0,40 | 1,207068 | -0,33092 | 0,740702 | 0,9168231 |
| YIPF5          | 272,90  | -0,23 | 0,688507 | -0,33086 | 0,740753 | 0,916825  |
| RP11-521I2.3   | 6,97    | 0,90  | 2,719907 | 0,33058  | 0,740962 | 0,9169787 |
| TTLL3          | 413,31  | -0,16 | 0,488476 | -0,33056 | 0,740976 | 0,9169787 |
| RP11-5C23.2    | 0,83    | 1,06  | 3,196843 | 0,330529 | 0,741    | NA        |
| RP11-422N19.3  | 3,78    | 0,78  | 2,371808 | 0,330446 | 0,741063 | 0,9170257 |
| ANKRD36C       | 393,97  | -0,20 | 0,610594 | -0,3303  | 0,741175 | 0,9170263 |
| COMMD8         | 461,16  | 0,20  | 0,617231 | 0,330279 | 0,741189 | 0,9170263 |
| TRIQQ          | 108,93  | -0,29 | 0,885155 | -0,33025 | 0,741212 | 0,9170263 |
| CTD-2525I3.6   | 5,18    | 0,36  | 1,089127 | 0,330148 | 0,741288 | 0,9170605 |
| RRAS2          | 2,22    | -0,58 | 1,757976 | -0,33012 | 0,741312 | NA        |
| CTD-2522E6.4   | 0,33    | 1,24  | 3,746037 | 0,330026 | 0,74138  | NA        |
| RP11-44F14.2   | 57,42   | 0,19  | 0,561882 | 0,329976 | 0,741418 | 0,9171595 |
| AC000078.5     | 0,33    | 1,24  | 3,746068 | 0,329944 | 0,741442 | NA        |
| AC010976.2     | 21,85   | -0,22 | 0,675938 | -0,32975 | 0,74159  | 0,9172197 |
| TSEN34         | 488,99  | -0,18 | 0,556789 | -0,32974 | 0,741595 | 0,9172197 |
| RP11-239H6.2   | 0,34    | 1,24  | 3,746087 | 0,329694 | 0,741631 | NA        |
| PPM1M          | 254,17  | -0,24 | 0,740177 | -0,32968 | 0,741643 | 0,9172197 |
| GAS6-AS2       | 4,97    | -0,36 | 1,096512 | -0,32965 | 0,741664 | 0,9172197 |
| SMCR2          | 2,75    | 1,21  | 3,658701 | 0,329616 | 0,74169  | NA        |
| OIT3           | 0,34    | 1,23  | 3,745812 | 0,329349 | 0,741892 | NA        |
| C15orf39       | 785,16  | 0,14  | 0,42986  | 0,329338 | 0,741901 | 0,9173742 |
| HACD2          | 384,21  | -0,19 | 0,580447 | -0,32932 | 0,741917 | 0,9173742 |
| SMIM2-AS1      | 7,67    | -0,36 | 1,082939 | -0,32922 | 0,741993 | 0,9173742 |
| RP4-568F9.6    | 80,17   | -0,23 | 0,7068   | -0,32916 | 0,742038 | 0,9173742 |
| P2RY6          | 368,76  | -0,28 | 0,852795 | -0,3291  | 0,742083 | 0,9173742 |
| CMPK2          | 289,99  | -0,32 | 0,978717 | -0,32909 | 0,742084 | 0,9173742 |
| SLC2A3         | 2081,95 | -0,12 | 0,365605 | -0,32896 | 0,742184 | 0,9173842 |
| MARC1          | 108,89  | 0,38  | 1,158559 | 0,328936 | 0,742204 | 0,9173842 |
| AC010980.2     | 18,43   | -0,36 | 1,08433  | -0,32889 | 0,742241 | 0,9173842 |
| RP11-630D6.5   | 6,58    | 0,30  | 0,920593 | 0,32877  | 0,74233  | 0,9174337 |
| MIR491         | 0,91    | 1,23  | 3,731816 | 0,328696 | 0,742385 | NA        |
| ANXA10         | 0,60    | 1,23  | 3,740115 | 0,328663 | 0,742411 | NA        |
| CCDC8          | 15,42   | 0,33  | 0,991049 | 0,328457 | 0,742566 | 0,9175805 |
| CH17-268I9.2   | 8,31    | 0,25  | 0,762551 | 0,328443 | 0,742577 | 0,9175805 |
| RSPH14         | 5,67    | -0,73 | 2,221597 | -0,32841 | 0,742605 | 0,9175805 |
| OR7E117P       | 0,40    | -0,99 | 3,019297 | -0,32839 | 0,742617 | NA        |
| GAR1           | 47,01   | -0,31 | 0,954949 | -0,32835 | 0,742646 | 0,9175805 |
| RP11-542C16.2  | 2,40    | -0,51 | 1,538989 | -0,32816 | 0,742794 | NA        |
| KIF15          | 5,64    | 0,65  | 1,969233 | 0,328135 | 0,74281  | 0,9175888 |
| RP11-159D12.10 | 16,04   | -0,27 | 0,814326 | -0,32813 | 0,742816 | 0,9175888 |
| PMVK           | 161,01  | -0,27 | 0,823569 | -0,32811 | 0,742831 | 0,9175888 |
| SH3TC1         | 911,14  | -0,15 | 0,451577 | -0,32804 | 0,742885 | 0,9175888 |
| ENTPD4         | 382,48  | 0,24  | 0,726467 | 0,328016 | 0,742899 | 0,9175888 |
| AC090018.3     | 2,42    | 0,75  | 2,272335 | 0,327965 | 0,742938 | NA        |
| RP11-147N17.1  | 0,07    | -1,23 | 3,748196 | -0,32796 | 0,742943 | NA        |

|                |         |       |          |          |          |           |
|----------------|---------|-------|----------|----------|----------|-----------|
| TMEM150C       | 3,54    | 0,41  | 1,237213 | 0,327956 | 0,742945 | NA        |
| RDH16          | 69,16   | -0,14 | 0,427189 | -0,32793 | 0,742966 | 0,9176101 |
| CXorf25        | 0,34    | 1,23  | 3,745723 | 0,327757 | 0,743096 | NA        |
| STXBP3         | 555,44  | 0,18  | 0,535062 | 0,327732 | 0,743114 | 0,9176867 |
| CRK            | 463,65  | 0,17  | 0,51641  | 0,327716 | 0,743126 | 0,9176867 |
| RP1-142L7.9    | 0,33    | 1,23  | 3,746142 | 0,327582 | 0,743228 | NA        |
| C9orf37        | 86,73   | -0,31 | 0,942038 | -0,32754 | 0,743259 | 0,9177889 |
| ACBD4          | 21,34   | 0,27  | 0,809589 | 0,32746  | 0,74332  | 0,9178043 |
| TBC1D2         | 110,19  | 0,39  | 1,176583 | 0,327298 | 0,743443 | 0,9178942 |
| GPR26          | 0,77    | 0,91  | 2,776031 | 0,327295 | 0,743445 | NA        |
| RP11-375N15.2  | 0,31    | -1,22 | 3,717468 | -0,32726 | 0,743475 | NA        |
| NTRK1          | 0,48    | -0,85 | 2,60963  | -0,32717 | 0,743536 | NA        |
| RP11-369K16.1  | 0,22    | 0,70  | 2,151514 | 0,326981 | 0,743682 | NA        |
| RP1-313L4.3    | 2,74    | -0,54 | 1,650034 | -0,32697 | 0,743688 | NA        |
| SIGLEC7        | 244,02  | 0,24  | 0,741462 | 0,326826 | 0,7438   | 0,9182217 |
| SYNPR          | 34,67   | -0,35 | 1,062246 | -0,32682 | 0,743806 | 0,9182217 |
| RP11-497H16.7  | 94,33   | 0,28  | 0,864079 | 0,326599 | 0,743972 | 0,918238  |
| LAMTOR2        | 949,72  | 0,08  | 0,242956 | 0,326591 | 0,743978 | 0,918238  |
| PMS2CL         | 90,98   | -0,21 | 0,658153 | -0,32655 | 0,744005 | 0,918238  |
| CECR7          | 31,04   | -0,31 | 0,951669 | -0,32654 | 0,744017 | 0,918238  |
| TSEN54         | 118,60  | 0,28  | 0,847832 | 0,326377 | 0,744139 | 0,9183274 |
| RNU5F-6P       | 2,69    | -0,75 | 2,287921 | -0,32626 | 0,744229 | NA        |
| VPS28          | 1370,87 | -0,09 | 0,268846 | -0,32622 | 0,744261 | 0,9184167 |
| RP11-206L10.4  | 12,11   | -0,44 | 1,343748 | -0,32613 | 0,744326 | 0,918429  |
| MAPRE3         | 9,13    | 0,52  | 1,58202  | 0,326073 | 0,744369 | 0,918429  |
| RP11-268G12.3  | 1,11    | 0,85  | 2,618032 | 0,325915 | 0,744488 | NA        |
| RP11-234K19.1  | 0,33    | 1,22  | 3,746196 | 0,325819 | 0,744561 | NA        |
| CTD-2010I22.2  | 5,66    | -0,27 | 0,842781 | -0,32574 | 0,744619 | 0,9186535 |
| RP11-274A11.3  | 0,33    | 1,22  | 3,746216 | 0,325715 | 0,74464  | NA        |
| METTL21A       | 226,41  | -0,23 | 0,694406 | -0,32565 | 0,744691 | 0,9186535 |
| NAGLU          | 197,82  | -0,29 | 0,88247  | -0,32548 | 0,744819 | 0,9186535 |
| GTPBP1         | 315,32  | 0,21  | 0,639324 | 0,325421 | 0,744862 | 0,9186535 |
| LMNB2          | 68,51   | -0,35 | 1,083111 | -0,32533 | 0,744929 | 0,9186535 |
| SMARCE1        | 912,44  | 0,15  | 0,46084  | 0,325265 | 0,74498  | 0,9186535 |
| AC093484.4     | 0,33    | -1,21 | 3,72549  | -0,32522 | 0,745012 | NA        |
| RP11-363N22.3  | 10,64   | -0,27 | 0,820434 | -0,32521 | 0,745026 | 0,9186535 |
| TTI1           | 83,72   | 0,31  | 0,963654 | 0,325178 | 0,745046 | 0,9186535 |
| ZP1            | 0,49    | 1,22  | 3,741942 | 0,325067 | 0,74513  | NA        |
| RP11-160H22.3  | 52,90   | -0,42 | 1,282482 | -0,32505 | 0,745139 | 0,9186535 |
| HTRA2          | 83,04   | 0,36  | 1,107919 | 0,325033 | 0,745156 | 0,9186535 |
| POU4F2         | 0,37    | 0,67  | 2,049513 | 0,324957 | 0,745214 | NA        |
| ID1            | 681,81  | -0,20 | 0,611011 | -0,32493 | 0,745236 | 0,9186535 |
| MAP4K2         | 122,95  | 0,24  | 0,727404 | 0,324883 | 0,74527  | 0,9186535 |
| MIR4518        | 0,32    | 1,22  | 3,74623  | 0,324822 | 0,745316 | NA        |
| OR6M2P         | 20,89   | -0,60 | 1,84909  | -0,32471 | 0,745403 | 0,9186535 |
| FBXW7          | 617,87  | -0,16 | 0,486795 | -0,3247  | 0,745409 | 0,9186535 |
| WRAP73         | 319,38  | -0,28 | 0,858522 | -0,32469 | 0,745415 | 0,9186535 |
| UBE2R2         | 907,44  | -0,12 | 0,381007 | -0,32469 | 0,745417 | 0,9186535 |
| RP11-1078H9.6  | 3,76    | -0,37 | 1,133578 | -0,32469 | 0,745419 | NA        |
| RP11-1102P22.2 | 125,71  | -0,25 | 0,771801 | -0,32449 | 0,745569 | 0,9186535 |

|               |         |       |          |          |          |           |
|---------------|---------|-------|----------|----------|----------|-----------|
| MIR5087       | 0,84    | 1,04  | 3,209844 | 0,324444 | 0,745602 | NA        |
| CTC-207P7.1   | 3,91    | -0,54 | 1,662792 | -0,32444 | 0,745603 | 0,9186535 |
| TIMMDC1       | 487,16  | 0,18  | 0,540889 | 0,324346 | 0,745676 | 0,9186535 |
| METTL5        | 259,49  | -0,28 | 0,858243 | -0,32434 | 0,745682 | 0,9186535 |
| RANBP17       | 72,70   | -0,23 | 0,724593 | -0,32431 | 0,745704 | 0,9186535 |
| RP11-520H14.6 | 1,10    | -0,59 | 1,808954 | -0,32429 | 0,745719 | NA        |
| RPS3AP47      | 2,58    | -0,29 | 0,906143 | -0,32428 | 0,745724 | NA        |
| CYP2W1        | 0,50    | 0,75  | 2,324582 | 0,324253 | 0,745747 | NA        |
| FBXL18        | 40,12   | 0,18  | 0,56321  | 0,324185 | 0,745798 | 0,9186535 |
| BORCS7        | 608,45  | -0,19 | 0,589495 | -0,32417 | 0,745806 | 0,9186535 |
| RP11-809F4.4  | 0,32    | 1,21  | 3,746249 | 0,324103 | 0,74586  | NA        |
| C16orf74      | 178,99  | 0,21  | 0,638664 | 0,32405  | 0,7459   | 0,9186535 |
| RP11-59E19.4  | 2,36    | 0,62  | 1,928162 | 0,324034 | 0,745912 | NA        |
| EIF5B         | 563,09  | -0,15 | 0,466933 | -0,32401 | 0,745927 | 0,9186535 |
| SLC22A2       | 7,01    | 0,59  | 1,809497 | 0,32398  | 0,745953 | 0,9186535 |
| RP11-681N23.1 | 0,57    | 0,49  | 1,52174  | 0,323978 | 0,745955 | NA        |
| CLTB          | 392,78  | 0,17  | 0,516985 | 0,323967 | 0,745963 | 0,9186535 |
| RP5-823G15.5  | 0,53    | 1,00  | 3,097265 | 0,323945 | 0,74598  | NA        |
| PSMC3IP       | 0,28    | -1,09 | 3,372084 | -0,32393 | 0,74599  | NA        |
| RDH13         | 116,42  | -0,20 | 0,617978 | -0,32389 | 0,74602  | 0,9186535 |
| AC093590.1    | 5,49    | -0,58 | 1,780972 | -0,32382 | 0,746072 | 0,9186535 |
| GOLGA8A       | 211,31  | 0,27  | 0,832896 | 0,323819 | 0,746075 | 0,9186535 |
| RN7SL597P     | 6,49    | -0,49 | 1,51522  | -0,32374 | 0,746131 | 0,9186535 |
| CADPS2        | 0,35    | -0,82 | 2,523141 | -0,32371 | 0,746154 | NA        |
| AC124997.1    | 0,79    | -0,66 | 2,026452 | -0,32368 | 0,746177 | NA        |
| MTBP          | 40,48   | -0,26 | 0,789271 | -0,32365 | 0,746206 | 0,9186535 |
| RP11-1236K1.5 | 0,32    | 1,21  | 3,746202 | 0,323593 | 0,746246 | NA        |
| RP11-608B3.1  | 9,61    | 0,40  | 1,241202 | 0,323578 | 0,746257 | 0,9186535 |
| TTC30B        | 12,54   | 0,55  | 1,695577 | 0,323533 | 0,746292 | 0,9186535 |
| PLEKHO1       | 1576,89 | -0,11 | 0,3371   | -0,32348 | 0,746332 | 0,9186535 |
| RRS1          | 45,71   | 0,32  | 0,99673  | 0,323438 | 0,746364 | 0,9186535 |
| AC092171.4    | 19,76   | -0,27 | 0,836795 | -0,32342 | 0,746378 | 0,9186535 |
| RP11-13P5.1   | 7,73    | 0,61  | 1,879336 | 0,323273 | 0,746489 | 0,9187287 |
| RP11-178C10.2 | 33,24   | -0,55 | 1,692992 | -0,32297 | 0,746717 | 0,918745  |
| SEL1L3        | 244,31  | -0,23 | 0,705712 | -0,32297 | 0,74672  | 0,918745  |
| CDH17         | 6,67    | 0,29  | 0,912269 | 0,32293  | 0,746748 | 0,918745  |
| RP11-642N14.1 | 3,78    | 0,69  | 2,125688 | 0,322917 | 0,746758 | 0,918745  |
| RP3-355L5.2   | 0,45    | 0,88  | 2,715326 | 0,32283  | 0,746824 | NA        |
| RP1-37N7.3    | 2,65    | 0,62  | 1,913012 | 0,322824 | 0,746828 | NA        |
| NUP93         | 404,82  | 0,14  | 0,446296 | 0,322814 | 0,746836 | 0,918745  |
| AHI1          | 115,18  | 0,23  | 0,71775  | 0,322809 | 0,74684  | 0,918745  |
| RP11-329N15.3 | 34,99   | 0,29  | 0,903406 | 0,322776 | 0,746865 | 0,918745  |
| MAGI1-IT1     | 12,48   | 0,31  | 0,951382 | 0,322734 | 0,746897 | 0,918745  |
| SIGLEC20P     | 0,32    | 1,21  | 3,746277 | 0,322733 | 0,746897 | NA        |
| DEPDC7        | 20,35   | 0,56  | 1,73868  | 0,322629 | 0,746976 | 0,9187578 |
| SCD           | 131,18  | 0,28  | 0,88335  | 0,322589 | 0,747006 | 0,9187578 |
| RP11-117N2.2  | 0,91    | 1,20  | 3,734038 | 0,322552 | 0,747034 | NA        |
| AC123788.3    | 9,51    | -0,27 | 0,843296 | -0,32251 | 0,747063 | 0,918767  |
| RP11-157H4.1  | 0,51    | 1,01  | 3,14352  | 0,322367 | 0,747175 | NA        |
| AC005537.2    | 60,99   | 0,40  | 1,240219 | 0,322286 | 0,747236 | 0,9188819 |

|               |         |       |          |          |          |           |
|---------------|---------|-------|----------|----------|----------|-----------|
| MRPL38        | 258,47  | 0,17  | 0,527818 | 0,322261 | 0,747255 | 0,9188819 |
| CTD-2666L21.2 | 0,33    | 1,21  | 3,746246 | 0,322148 | 0,747341 | NA        |
| RP11-127B16.1 | 7,55    | 0,49  | 1,508113 | 0,322011 | 0,747444 | 0,9190538 |
| SART3         | 294,88  | -0,25 | 0,779472 | -0,32195 | 0,747494 | 0,9190541 |
| TRGV2         | 0,43    | -1,10 | 3,410026 | -0,32193 | 0,747507 | NA        |
| RP11-18B3.3   | 1,96    | 0,96  | 2,976769 | 0,321839 | 0,747575 | NA        |
| ARHGEF4       | 10,17   | -0,19 | 0,59036  | -0,32183 | 0,747584 | 0,9191044 |
| AC010907.2    | 1,81    | -0,76 | 2,348007 | -0,32174 | 0,747652 | NA        |
| C18orf54      | 6,91    | -0,60 | 1,853802 | -0,32157 | 0,74778  | 0,9192844 |
| PDAP1         | 233,44  | -0,15 | 0,461673 | -0,32141 | 0,7479   | 0,9193709 |
| RP4-751H13.5  | 0,32    | 1,20  | 3,746309 | 0,321383 | 0,74792  | NA        |
| RNU2-68P      | 0,71    | 0,78  | 2,4337   | 0,321365 | 0,747934 | NA        |
| CHRNA         | 0,20    | -0,69 | 2,155647 | -0,32121 | 0,748055 | NA        |
| RP11-298O21.3 | 5,93    | -0,84 | 2,620625 | -0,32109 | 0,748143 | 0,919523  |
| DPH5          | 120,89  | -0,23 | 0,716421 | -0,32108 | 0,74815  | 0,919523  |
| RP11-428C6.2  | 7,29    | -0,54 | 1,669879 | -0,32099 | 0,748221 | 0,919523  |
| RP1-93I3.1    | 19,99   | 0,32  | 0,99375  | 0,320985 | 0,748221 | 0,919523  |
| RNU6-198P     | 2,23    | 1,08  | 3,367747 | 0,320888 | 0,748295 | NA        |
| HEXDC         | 327,63  | 0,18  | 0,560842 | 0,320863 | 0,748314 | 0,9195763 |
| RP11-143K11.7 | 0,30    | 1,13  | 3,515756 | 0,320824 | 0,748343 | NA        |
| ITGB1BP1      | 647,56  | 0,14  | 0,425698 | 0,320618 | 0,7485   | 0,919664  |
| RP11-526D8.7  | 5,57    | -0,53 | 1,647173 | -0,32061 | 0,748509 | 0,919664  |
| RP5-971N18.3  | 30,69   | -0,33 | 1,031989 | -0,32057 | 0,748534 | 0,919664  |
| WWP1          | 226,25  | 0,21  | 0,660897 | 0,320478 | 0,748606 | 0,9196916 |
| RP11-425M5.7  | 0,59    | 1,17  | 3,640508 | 0,320409 | 0,748658 | NA        |
| BMP3          | 0,87    | 0,53  | 1,65692  | 0,320335 | 0,748715 | NA        |
| PACS2         | 450,00  | -0,15 | 0,466575 | -0,32022 | 0,748803 | 0,9198727 |
| AL109761.3    | 0,21    | -1,20 | 3,746276 | -0,32022 | 0,748804 | NA        |
| TUBB          | 940,05  | -0,14 | 0,433625 | -0,32006 | 0,74892  | 0,9199007 |
| TRIM41        | 124,54  | -0,15 | 0,455374 | -0,32006 | 0,748924 | 0,9199007 |
| RN7SKP16      | 1,07    | -0,90 | 2,809001 | -0,32003 | 0,748947 | NA        |
| RN7SL622P     | 1,23    | -0,45 | 1,395019 | -0,31998 | 0,748981 | NA        |
| AP001258.5    | 0,32    | 1,20  | 3,74632  | 0,319968 | 0,748993 | NA        |
| IGLV3-25      | 1,19    | 0,75  | 2,346677 | 0,319959 | 0,749    | NA        |
| CTD-2574D22.3 | 50,82   | -0,23 | 0,703842 | -0,31989 | 0,749052 | 0,9199974 |
| RP11-628M2.1  | 8,01    | 0,52  | 1,632    | 0,319633 | 0,749246 | 0,9200318 |
| AGO3          | 487,22  | -0,17 | 0,5451   | -0,31963 | 0,749252 | 0,9200318 |
| GIMAP2        | 368,73  | 0,22  | 0,677785 | 0,319617 | 0,749259 | 0,9200318 |
| RP11-397A16.3 | 15,06   | -0,62 | 1,930512 | -0,31959 | 0,749278 | 0,9200318 |
| CTC-512J14.4  | 0,76    | -0,43 | 1,335738 | -0,31952 | 0,749336 | NA        |
| RP11-296A18.5 | 5,91    | 0,41  | 1,298033 | 0,319471 | 0,749369 | 0,9200826 |
| SMO           | 0,42    | 0,85  | 2,658688 | 0,319408 | 0,749417 | NA        |
| BCL10         | 424,32  | 0,13  | 0,409985 | 0,319293 | 0,749504 | 0,9201876 |
| MIR6891       | 1,52    | -0,43 | 1,356651 | -0,31924 | 0,749542 | NA        |
| RP11-108K1.2  | 0,65    | -1,14 | 3,570929 | -0,31922 | 0,749561 | NA        |
| RP11-848G14.2 | 19,29   | 0,41  | 1,278852 | 0,319186 | 0,749586 | 0,9202271 |
| RNU6-125P     | 2,53    | 0,72  | 2,243828 | 0,318983 | 0,74974  | NA        |
| RP11-444E17.6 | 11,90   | -0,46 | 1,454197 | -0,31896 | 0,74976  | 0,9203198 |
| GLIPR2        | 1910,65 | -0,06 | 0,201697 | -0,31896 | 0,74976  | 0,9203198 |
| FTH1P7        | 1,45    | 0,32  | 1,013149 | 0,31892  | 0,749787 | NA        |

|               |         |       |          |          |          |           |
|---------------|---------|-------|----------|----------|----------|-----------|
| OR1I1         | 105,24  | -0,16 | 0,508805 | -0,31881 | 0,749874 | 0,9203983 |
| RP5-951N9.2   | 1,18    | 0,50  | 1,557999 | 0,31879  | 0,749886 | NA        |
| P2RX6         | 0,68    | 0,70  | 2,197983 | 0,318666 | 0,74998  | NA        |
| ETS2          | 1166,23 | -0,14 | 0,440447 | -0,31866 | 0,749986 | 0,9204363 |
| IVNS1ABP      | 2012,67 | 0,11  | 0,353263 | 0,318635 | 0,750003 | 0,9204363 |
| C1QTNF3-AMACR | 0,38    | 1,19  | 3,746408 | 0,318571 | 0,750052 | NA        |
| CTB-96E2.6    | 7,68    | 0,31  | 0,98418  | 0,318387 | 0,750191 | 0,920606  |
| RP11-511P7.5  | 20,74   | -0,45 | 1,41394  | -0,31826 | 0,750289 | 0,9206653 |
| RP11-384M15.3 | 3,61    | -0,42 | 1,314807 | -0,31818 | 0,75035  | NA        |
| MPP4          | 26,81   | -0,34 | 1,071385 | -0,31807 | 0,750433 | 0,9207052 |
| SLTM          | 1198,90 | -0,11 | 0,332638 | -0,31806 | 0,750438 | 0,9207052 |
| PLSCR3        | 165,47  | 0,19  | 0,592155 | 0,31798  | 0,7505   | 0,9207052 |
| ZXDA          | 0,91    | 0,72  | 2,265747 | 0,317916 | 0,750548 | NA        |
| H6PD          | 177,57  | 0,23  | 0,72764  | 0,317903 | 0,750558 | 0,9207052 |
| COMMD3        | 663,62  | 0,15  | 0,470745 | 0,317889 | 0,750569 | 0,9207052 |
| RP11-286H15.1 | 3,72    | 0,33  | 1,051726 | 0,317885 | 0,750572 | NA        |
| E2F3          | 308,41  | 0,18  | 0,561685 | 0,317758 | 0,750668 | 0,9207663 |
| RP11-274B21.1 | 14,69   | 0,45  | 1,429632 | 0,317541 | 0,750833 | 0,920908  |
| PRICKLE1      | 10,48   | -0,35 | 1,099069 | -0,31743 | 0,750914 | 0,9209462 |
| CTD-2313J17.5 | 17,91   | -0,24 | 0,7546   | -0,31735 | 0,750982 | 0,9209501 |
| AC017035.1    | 0,84    | -0,69 | 2,172724 | -0,31732 | 0,751002 | NA        |
| DNAH7         | 36,48   | -0,31 | 0,981904 | -0,31728 | 0,751035 | 0,9209501 |
| TBR1          | 4,73    | -0,38 | 1,196682 | -0,31723 | 0,751066 | 0,9209501 |
| RP11-190C22.8 | 0,79    | 1,02  | 3,220058 | 0,31715  | 0,75113  | NA        |
| RP11-459J23.1 | 0,40    | 0,64  | 2,007184 | 0,317098 | 0,751169 | NA        |
| BANF1         | 1064,22 | 0,09  | 0,28361  | 0,317045 | 0,751209 | 0,9210654 |
| IGLV2-23      | 0,54    | -0,65 | 2,037106 | -0,317   | 0,751244 | NA        |
| ALOX12        | 4,79    | 0,56  | 1,780808 | 0,316972 | 0,751265 | 0,9210733 |
| RP11-701H24.6 | 3,12    | 0,59  | 1,845834 | 0,316958 | 0,751275 | NA        |
| CTD-2313F11.2 | 15,46   | -0,48 | 1,514943 | -0,31672 | 0,751457 | 0,9212477 |
| RN7SL518P     | 0,31    | 1,19  | 3,746491 | 0,316652 | 0,751507 | NA        |
| RP11-253A20.1 | 6,61    | 0,84  | 2,641584 | 0,316651 | 0,751508 | 0,9212502 |
| RP11-402K9.2  | 0,83    | 0,41  | 1,299607 | 0,316588 | 0,751556 | NA        |
| RPRD1B        | 307,80  | 0,22  | 0,685297 | 0,31644  | 0,751669 | 0,9213116 |
| RNF24         | 686,06  | -0,20 | 0,621225 | -0,3164  | 0,751701 | 0,9213116 |
| COPA          | 1094,04 | 0,16  | 0,513003 | 0,316365 | 0,751725 | 0,9213116 |
| RP1-45C12.1   | 12,17   | -0,74 | 2,33923  | -0,31628 | 0,751787 | 0,9213116 |
| CCNG2         | 153,44  | 0,26  | 0,822578 | 0,316259 | 0,751806 | 0,9213116 |
| RP11-769N22.1 | 7,50    | 0,31  | 0,972352 | 0,316001 | 0,752002 | 0,9214313 |
| NCRNA00093    | 17,74   | -0,25 | 0,796582 | -0,316   | 0,752003 | 0,9214313 |
| RP1-257I20.14 | 11,76   | 0,63  | 1,996938 | 0,315917 | 0,752066 | 0,9214477 |
| LXN           | 14,69   | -0,35 | 1,117587 | -0,31585 | 0,752116 | 0,9214481 |
| RPN2          | 1879,59 | 0,10  | 0,318468 | 0,315747 | 0,752195 | 0,9214844 |
| RP3-468O1.4   | 7,95    | -0,35 | 1,117848 | -0,3156  | 0,752305 | 0,9215584 |
| ALOX15        | 1,33    | -0,68 | 2,143652 | -0,31558 | 0,752325 | NA        |
| CAPS          | 165,54  | 0,24  | 0,758373 | 0,31544  | 0,752428 | 0,9216482 |
| LA16c-358B7.4 | 6,52    | -0,24 | 0,747501 | -0,31531 | 0,752528 | 0,9217111 |
| TLR9          | 0,31    | 1,18  | 3,74648  | 0,315307 | 0,752529 | NA        |
| MAGEA4        | 0,32    | 1,11  | 3,505588 | 0,315244 | 0,752577 | NA        |
| RP11-395N21.2 | 2,90    | 0,49  | 1,553306 | 0,315215 | 0,752599 | NA        |



|                |        |       |          |          |          |           |
|----------------|--------|-------|----------|----------|----------|-----------|
| IGLON5         | 14,64  | 0,37  | 1,166605 | 0,315095 | 0,752689 | 0,9218475 |
| HES1           | 6,93   | 0,61  | 1,942622 | 0,3149   | 0,752838 | 0,9219667 |
| HNF1A-AS1      | 21,27  | 0,18  | 0,568575 | 0,314837 | 0,752886 | 0,9219667 |
| LANCL2         | 154,07 | 0,27  | 0,865516 | 0,314693 | 0,752995 | 0,9220396 |
| KB-1592A4.15   | 2,40   | 0,66  | 2,097453 | 0,314647 | 0,75303  | NA        |
| TRIM35         | 62,99  | 0,36  | 1,155357 | 0,314576 | 0,753084 | 0,9220879 |
| TAF1A          | 9,57   | 0,40  | 1,275554 | 0,314495 | 0,753145 | 0,9221022 |
| RP1-206D15.5   | 0,90   | 1,17  | 3,734313 | 0,314303 | 0,753291 | NA        |
| RP11-276M12.1  | 1,40   | -0,51 | 1,619801 | -0,3143  | 0,753296 | NA        |
| GMCL1          | 185,17 | 0,21  | 0,657494 | 0,314228 | 0,753348 | 0,9222223 |
| GNB5           | 203,91 | 0,25  | 0,790338 | 0,314197 | 0,753371 | 0,9222223 |
| MLX            | 596,93 | -0,18 | 0,574748 | -0,3141  | 0,753441 | 0,9222223 |
| HIST1H2AM      | 32,91  | 0,56  | 1,767239 | 0,314105 | 0,753441 | 0,9222223 |
| PLCH2          | 0,88   | 0,65  | 2,074623 | 0,314098 | 0,753447 | NA        |
| AC018832.1     | 0,84   | 1,01  | 3,211617 | 0,314026 | 0,753501 | NA        |
| KCND1          | 0,49   | 0,97  | 3,096838 | 0,313923 | 0,753579 | NA        |
| RP11-12A16.2   | 0,49   | 0,98  | 3,111372 | 0,313818 | 0,753659 | NA        |
| RP11-325E5.1   | 1,23   | 0,76  | 2,416157 | 0,313812 | 0,753664 | NA        |
| AC012454.4     | 1,40   | 0,38  | 1,207197 | 0,313779 | 0,753689 | NA        |
| MIR5692C2      | 0,90   | 1,17  | 3,734301 | 0,313724 | 0,75373  | NA        |
| RP11-147L13.11 | 219,42 | -0,22 | 0,708516 | -0,31362 | 0,753812 | 0,9225818 |
| ETNK2          | 10,35  | 0,48  | 1,517025 | 0,313587 | 0,753834 | 0,9225818 |
| CTD-3179P9.2   | 0,16   | -1,18 | 3,748196 | -0,31357 | 0,753846 | NA        |
| HTATSF1P2      | 0,32   | 1,17  | 3,746577 | 0,313385 | 0,753989 | NA        |
| FASTKD3        | 24,44  | 0,35  | 1,106592 | 0,313364 | 0,754004 | 0,9226031 |
| RHOB           | 609,26 | -0,15 | 0,466604 | -0,31331 | 0,754041 | 0,9226031 |
| EFNB3          | 0,13   | -1,17 | 3,748196 | -0,31329 | 0,754059 | NA        |
| IGHV4-61       | 0,52   | 0,97  | 3,099215 | 0,313285 | 0,754064 | NA        |
| PRKCSH         | 134,19 | -0,11 | 0,366616 | -0,31325 | 0,754087 | 0,9226031 |
| LDHD           | 0,11   | -1,17 | 3,748196 | -0,31321 | 0,754123 | NA        |
| CTD-2339L15.1  | 24,76  | -0,24 | 0,758768 | -0,31315 | 0,754168 | 0,9226031 |
| RP11-426C22.7  | 10,33  | -0,72 | 2,284296 | -0,31313 | 0,754181 | 0,9226031 |
| PHF1           | 121,65 | -0,38 | 1,228608 | -0,31312 | 0,754193 | 0,9226031 |
| WIPF2          | 354,24 | -0,18 | 0,577854 | -0,3131  | 0,754202 | 0,9226031 |
| RP4-701O16.5   | 5,93   | -0,30 | 0,972788 | -0,31298 | 0,754294 | 0,9226031 |
| ARHGAP1        | 989,49 | 0,09  | 0,286387 | 0,312977 | 0,754298 | 0,9226031 |
| RP11-50D9.1    | 2,26   | -0,25 | 0,798596 | -0,3126  | 0,754581 | NA        |
| TMEM107        | 354,52 | -0,16 | 0,515636 | -0,31258 | 0,754598 | 0,9228862 |
| RP4-673D20.3   | 1,75   | 0,58  | 1,863223 | 0,312559 | 0,754616 | NA        |
| DDX24          | 546,59 | -0,11 | 0,340625 | -0,31254 | 0,754629 | 0,9228862 |
| STX1B          | 2,87   | -0,43 | 1,367283 | -0,31248 | 0,754673 | NA        |
| MYL9           | 3,52   | 0,79  | 2,530912 | 0,312436 | 0,754709 | NA        |
| RP11-732A19.5  | 0,14   | -1,17 | 3,748196 | -0,31236 | 0,75477  | NA        |
| TMEM8B         | 397,20 | -0,18 | 0,591608 | -0,31229 | 0,754823 | 0,9229717 |
| RP11-677M14.3  | 0,80   | -0,68 | 2,189209 | -0,31225 | 0,754851 | NA        |
| DDX58          | 316,45 | 0,22  | 0,700502 | 0,312153 | 0,754925 | 0,9229717 |
| SLC8B1         | 228,41 | 0,22  | 0,711846 | 0,312142 | 0,754932 | 0,9229717 |
| RP11-184M15.1  | 0,82   | -1,15 | 3,671677 | -0,31208 | 0,75498  | NA        |
| FAM73B         | 76,09  | -0,28 | 0,900039 | -0,312   | 0,755037 | 0,9229717 |
| RP11-53I6.2    | 68,63  | 0,42  | 1,360894 | 0,311972 | 0,755062 | 0,9229717 |

|               |         |       |          |          |          |           |
|---------------|---------|-------|----------|----------|----------|-----------|
| DIP2B         | 669,32  | 0,20  | 0,629559 | 0,311944 | 0,755083 | 0,9229717 |
| ZMPSTE24      | 270,91  | -0,16 | 0,498066 | -0,31189 | 0,755127 | 0,9229717 |
| AC009960.8    | 5,75    | -0,22 | 0,707046 | -0,31186 | 0,755146 | 0,9229717 |
| RP11-347E10.1 | 1,19    | 0,72  | 2,301967 | 0,311784 | 0,755205 | NA        |
| PTGR1         | 54,63   | -0,34 | 1,077185 | -0,31177 | 0,755217 | 0,9229717 |
| SYN3          | 20,24   | 0,36  | 1,142027 | 0,311685 | 0,75528  | 0,9229717 |
| AC094020.1    | 3,70    | 0,79  | 2,523162 | 0,311677 | 0,755286 | NA        |
| SNORD99       | 25,03   | -0,37 | 1,178724 | -0,31166 | 0,755295 | 0,9229717 |
| RP11-24F11.2  | 30,06   | 0,34  | 1,088232 | 0,311652 | 0,755305 | 0,9229717 |
| NT5CP1        | 0,11    | -1,17 | 3,748196 | -0,31163 | 0,755319 | NA        |
| MFSD5         | 232,47  | -0,30 | 0,969293 | -0,3116  | 0,755344 | 0,9229717 |
| RP11-77K12.1  | 0,31    | 0,90  | 2,879764 | 0,31156  | 0,755375 | NA        |
| RP11-403I13.9 | 0,31    | 1,17  | 3,746555 | 0,311499 | 0,755422 | NA        |
| LONRF3        | 26,54   | 0,35  | 1,119015 | 0,311373 | 0,755517 | 0,9231168 |
| MIR548F2      | 0,14    | -1,17 | 3,748196 | -0,31136 | 0,755525 | NA        |
| RP11-225H22.4 | 0,13    | -1,17 | 3,748196 | -0,31133 | 0,755548 | NA        |
| PLEKHG3       | 73,95   | 0,36  | 1,149187 | 0,31119  | 0,755656 | 0,9231168 |
| RTN4IP1       | 98,08   | -0,38 | 1,208793 | -0,31113 | 0,7557   | 0,9231168 |
| REEP2         | 11,11   | -0,28 | 0,914128 | -0,31112 | 0,755707 | 0,9231168 |
| DMXL1         | 465,24  | 0,13  | 0,409148 | 0,311119 | 0,75571  | 0,9231168 |
| RP11-269G24.3 | 1,21    | -0,67 | 2,158918 | -0,31106 | 0,755757 | NA        |
| MMAB          | 118,73  | -0,32 | 1,031815 | -0,3109  | 0,755874 | 0,9232558 |
| RN7SL98P      | 0,85    | 0,59  | 1,904691 | 0,31087  | 0,755899 | NA        |
| RP11-543P15.1 | 0,55    | 0,47  | 1,511767 | 0,310751 | 0,75599  | NA        |
| RF01210       | 19,29   | -0,31 | 0,997415 | -0,31073 | 0,756007 | 0,9233581 |
| OR6K3         | 10,58   | -0,24 | 0,764383 | -0,31062 | 0,756092 | 0,9234012 |
| RP11-21N7.6   | 0,40    | -0,81 | 2,622055 | -0,31055 | 0,75614  | NA        |
| RP13-753N3.3  | 0,10    | -1,16 | 3,748196 | -0,31054 | 0,756149 | NA        |
| DIAPH2        | 421,11  | 0,14  | 0,447044 | 0,310497 | 0,756183 | 0,9234298 |
| RP11-110I1.11 | 12,71   | 0,38  | 1,232546 | 0,310455 | 0,756215 | 0,9234298 |
| RP13-198D9.4  | 0,62    | 0,56  | 1,801565 | 0,31045  | 0,756219 | NA        |
| RP11-112L6.2  | 0,14    | -1,16 | 3,748196 | -0,31044 | 0,756227 | NA        |
| RP11-85G18.4  | 0,47    | -0,97 | 3,129882 | -0,31027 | 0,756359 | NA        |
| RP1-167A14.2  | 2,19    | 0,76  | 2,454929 | 0,310082 | 0,756499 | NA        |
| ZNF708        | 96,06   | -0,26 | 0,848874 | -0,30983 | 0,756689 | 0,923948  |
| RP11-272L13.2 | 0,14    | -1,16 | 3,748196 | -0,30973 | 0,756765 | NA        |
| SNRNP200      | 1311,26 | 0,12  | 0,373273 | 0,309675 | 0,756808 | 0,9240269 |
| SETD6         | 108,83  | -0,23 | 0,741358 | -0,30962 | 0,756853 | 0,9240269 |
| AC000041.8    | 0,12    | -1,16 | 3,748196 | -0,30952 | 0,756929 | NA        |
| ABHD12        | 294,88  | -0,17 | 0,534418 | -0,30946 | 0,756974 | 0,9240648 |
| RCC2          | 1847,94 | 0,10  | 0,323124 | 0,309445 | 0,756983 | 0,9240648 |
| ARSJ          | 9,29    | -0,37 | 1,197348 | -0,30931 | 0,757083 | 0,9241265 |
| AC011330.13   | 1,16    | 0,92  | 2,991052 | 0,309001 | 0,757321 | NA        |
| RP11-379D21.3 | 0,19    | -0,88 | 2,855356 | -0,30894 | 0,75737  | NA        |
| RP11-640I15.1 | 0,97    | -0,87 | 2,822195 | -0,30887 | 0,757424 | NA        |
| PACSIN2       | 327,29  | -0,18 | 0,594652 | -0,30885 | 0,757433 | 0,9244362 |
| GLA           | 311,99  | 0,21  | 0,687521 | 0,308849 | 0,757436 | 0,9244362 |
| TIMM17B       | 605,26  | -0,11 | 0,341583 | -0,30875 | 0,757514 | 0,9244395 |
| RF00026       | 12,09   | 0,46  | 1,500009 | 0,308715 | 0,757539 | 0,9244395 |
| CDRT1         | 0,50    | 0,96  | 3,103686 | 0,308711 | 0,757541 | NA        |

|                  |         |       |          |          |          |           |
|------------------|---------|-------|----------|----------|----------|-----------|
| RP11-539G18.3    | 25,88   | 0,23  | 0,748414 | 0,308478 | 0,757719 | 0,924555  |
| RP11-502I4.1     | 41,47   | 0,28  | 0,920864 | 0,30846  | 0,757733 | 0,924555  |
| AP002884.2       | 0,18    | -1,04 | 3,371993 | -0,30834 | 0,757822 | NA        |
| SYT12            | 17,95   | -0,24 | 0,768269 | -0,30826 | 0,757886 | 0,9246405 |
| RAD54L           | 5,92    | 0,70  | 2,26566  | 0,308237 | 0,757902 | 0,9246405 |
| RP13-479F17.2    | 0,52    | -1,09 | 3,534181 | -0,30819 | 0,757939 | NA        |
| NANOG            | 38,46   | -0,19 | 0,632383 | -0,30816 | 0,757963 | 0,9246433 |
| ADCK5            | 98,80   | 0,36  | 1,158748 | 0,308103 | 0,758004 | 0,9246433 |
| RP4-751H13.6     | 0,66    | 0,63  | 2,045017 | 0,308057 | 0,758039 | NA        |
| ARL6IP4          | 2021,26 | 0,09  | 0,290139 | 0,308019 | 0,758068 | 0,9246606 |
| RP11-766N7.4     | 0,21    | -0,88 | 2,855085 | -0,30801 | 0,758074 | NA        |
| PRPSAP2          | 186,67  | -0,22 | 0,721149 | -0,30795 | 0,758124 | 0,9246685 |
| SMARCA5          | 914,28  | 0,12  | 0,395156 | 0,307817 | 0,758222 | 0,9246959 |
| RP11-631N16.2    | 80,41   | -0,36 | 1,17238  | -0,30779 | 0,758246 | 0,9246959 |
| AF129075.5       | 2,42    | 0,76  | 2,485621 | 0,307704 | 0,758308 | NA        |
| LL09NC01-251B2.3 | 13,44   | 0,19  | 0,62829  | 0,307517 | 0,75845  | 0,9248232 |
| ANXA6            | 519,07  | 0,14  | 0,468176 | 0,307511 | 0,758455 | 0,9248232 |
| RP5-837J1.6      | 0,13    | -1,15 | 3,748196 | -0,30746 | 0,75849  | NA        |
| SCML2            | 14,63   | -0,54 | 1,754939 | -0,30745 | 0,758504 | 0,9248232 |
| RP11-422P22.1    | 0,30    | 1,15  | 3,746701 | 0,307411 | 0,758531 | NA        |
| CDC37            | 486,26  | -0,11 | 0,36703  | -0,30739 | 0,758549 | 0,9248232 |
| RP11-44N11.3     | 0,87    | 1,14  | 3,718523 | 0,307373 | 0,758559 | NA        |
| TNN              | 0,67    | 1,14  | 3,703974 | 0,307362 | 0,758568 | NA        |
| RP11-159F24.4    | 3,66    | 0,21  | 0,698095 | 0,307281 | 0,75863  | NA        |
| RP5-1021I20.2    | 31,07   | -0,29 | 0,930299 | -0,30725 | 0,758654 | 0,9248644 |
| TBC1D17          | 58,17   | 0,26  | 0,858389 | 0,307156 | 0,758725 | 0,9248644 |
| SERTAD2          | 524,71  | 0,15  | 0,480601 | 0,307101 | 0,758766 | 0,9248644 |
| RP11-365N19.2    | 2,03    | 0,53  | 1,724441 | 0,307063 | 0,758796 | NA        |
| EMB              | 796,69  | 0,14  | 0,440166 | 0,307058 | 0,758799 | 0,9248644 |
| Z99756.1         | 2,67    | 0,39  | 1,279373 | 0,306997 | 0,758846 | NA        |
| AC079354.3       | 17,24   | -0,18 | 0,599675 | -0,30695 | 0,758878 | 0,9248644 |
| BEST3            | 19,17   | -0,44 | 1,438686 | -0,30692 | 0,758903 | 0,9248644 |
| ZNF702P          | 17,71   | 0,30  | 0,982784 | 0,306885 | 0,758931 | 0,9248644 |
| ATP10A           | 185,40  | 0,18  | 0,602897 | 0,306785 | 0,759007 | 0,9248967 |
| CTD-2026K11.3    | 1,57    | 0,53  | 1,724185 | 0,306668 | 0,759096 | NA        |
| C3orf52          | 0,58    | 0,62  | 2,029313 | 0,30664  | 0,759117 | NA        |
| OR13K1P          | 3,98    | 0,59  | 1,915342 | 0,306525 | 0,759205 | 0,924989  |
| RP11-61A14.4     | 16,59   | -0,19 | 0,62523  | -0,30649 | 0,759228 | 0,924989  |
| RP4-791M13.5     | 0,30    | 1,15  | 3,746711 | 0,306393 | 0,759305 | NA        |
| RP11-434D2.3     | 15,60   | 0,69  | 2,244752 | 0,306289 | 0,759384 | 0,924989  |
| RP11-161M6.2     | 17,43   | 0,41  | 1,33341  | 0,30627  | 0,759399 | 0,924989  |
| RP11-96D1.11     | 76,69   | 0,43  | 1,398295 | 0,306215 | 0,759441 | 0,924989  |
| CD2BP2           | 228,99  | 0,26  | 0,859014 | 0,306125 | 0,759509 | 0,924989  |
| RP11-186B7.4     | 555,57  | -0,13 | 0,439507 | -0,30606 | 0,759562 | 0,924989  |
| PPIH             | 142,97  | 0,29  | 0,950993 | 0,305924 | 0,759663 | 0,924989  |
| ITSN1            | 153,77  | -0,22 | 0,712202 | -0,30589 | 0,759689 | 0,924989  |
| HSPA4L           | 51,53   | -0,26 | 0,862737 | -0,30584 | 0,759723 | 0,924989  |
| SBF2             | 461,16  | 0,17  | 0,559779 | 0,305798 | 0,759758 | 0,924989  |
| BCAS2            | 412,91  | -0,20 | 0,652571 | -0,30577 | 0,759777 | 0,924989  |
| AC003973.6       | 10,18   | -0,20 | 0,653055 | -0,30569 | 0,759843 | 0,924989  |

|                |          |       |          |          |          |           |
|----------------|----------|-------|----------|----------|----------|-----------|
| APEX2          | 106,84   | -0,22 | 0,731324 | -0,30568 | 0,759847 | 0,924989  |
| PARL           | 691,93   | -0,13 | 0,426528 | -0,30566 | 0,759863 | 0,924989  |
| FAM87B         | 2,92     | -0,84 | 2,742714 | -0,30563 | 0,759889 | NA        |
| RP1-122P22.2   | 5,85     | 0,54  | 1,76941  | 0,305501 | 0,759985 | 0,924989  |
| RPL14          | 2895,34  | 0,06  | 0,198973 | 0,30549  | 0,759993 | 0,924989  |
| DMRTC2         | 0,19     | -1,03 | 3,369692 | -0,30544 | 0,760031 | NA        |
| GFER           | 64,38    | -0,38 | 1,231873 | -0,30542 | 0,760043 | 0,924989  |
| RP4-758J24.6   | 34,66    | 0,18  | 0,605638 | 0,305411 | 0,760053 | 0,924989  |
| KIF18B         | 8,92     | 0,24  | 0,790592 | 0,30538  | 0,760077 | 0,924989  |
| RP11-1028N23.2 | 2,81     | 0,59  | 1,920957 | 0,305285 | 0,760149 | NA        |
| Z84723.2       | 0,50     | 0,94  | 3,095512 | 0,305219 | 0,7602   | NA        |
| RACK1          | 13404,63 | -0,05 | 0,150275 | -0,30521 | 0,760208 | 0,9250884 |
| GLUDP8         | 0,30     | 1,14  | 3,746734 | 0,30518  | 0,760229 | NA        |
| RN7SL814P      | 4,58     | 0,24  | 0,786306 | 0,305091 | 0,760297 | 0,9251109 |
| OSBPL7         | 90,00    | -0,31 | 1,03192  | -0,30499 | 0,760374 | 0,9251109 |
| ST6GALNAC1     | 9,62     | -0,66 | 2,169235 | -0,30499 | 0,760376 | 0,9251109 |
| RP11-373E16.5  | 20,54    | -0,22 | 0,729544 | -0,30483 | 0,760493 | 0,9251933 |
| CTD-3105H18.14 | 2,95     | 0,59  | 1,936885 | 0,304827 | 0,760498 | NA        |
| RNA5SP207      | 5,57     | -0,53 | 1,733928 | -0,30475 | 0,760554 | 0,9252067 |
| AP003774.6     | 82,60    | -0,25 | 0,804765 | -0,30468 | 0,76061  | 0,9252145 |
| CLEC4D         | 54,28    | 0,41  | 1,332831 | 0,304578 | 0,760688 | 0,9252482 |
| NTHL1          | 90,27    | -0,34 | 1,124145 | -0,30447 | 0,760773 | 0,9252918 |
| RP1-111B22.2   | 1,56     | 0,30  | 1,001778 | 0,304412 | 0,760814 | NA        |
| CTB-113D17.1   | 124,74   | -0,23 | 0,755252 | -0,30431 | 0,760888 | 0,9253227 |
| CEPT1          | 238,24   | -0,22 | 0,730491 | -0,3043  | 0,760898 | 0,9253227 |
| RP11-507D14.4  | 0,30     | 1,14  | 3,746769 | 0,304043 | 0,761095 | NA        |
| RP11-428O18.6  | 16,60    | -0,18 | 0,602872 | -0,30397 | 0,761148 | 0,9255655 |
| PALM2          | 1,05     | -0,69 | 2,270295 | -0,30397 | 0,761155 | NA        |
| EIF2S3L        | 1,01     | -0,50 | 1,646095 | -0,30382 | 0,761264 | NA        |
| MED15P9        | 2,30     | 0,45  | 1,468491 | 0,303774 | 0,7613   | NA        |
| CTB-193M12.5   | 76,87    | 0,31  | 1,022867 | 0,303728 | 0,761335 | 0,9256254 |
| GSTO2          | 75,98    | -0,13 | 0,442721 | -0,30372 | 0,761341 | 0,9256254 |
| RP11-627K11.3  | 24,00    | -0,64 | 2,111167 | -0,30371 | 0,761346 | 0,9256254 |
| OR7E162P       | 1,54     | 0,81  | 2,668185 | 0,303659 | 0,761388 | NA        |
| RP11-338K17.8  | 2,46     | -0,31 | 1,009251 | -0,30357 | 0,761459 | NA        |
| RP11-702H23.4  | 0,82     | -0,75 | 2,47043  | -0,30348 | 0,761523 | NA        |
| HEXB           | 1750,95  | -0,10 | 0,331167 | -0,30343 | 0,761564 | 0,9257418 |
| AP000640.9     | 11,89    | 0,44  | 1,440684 | 0,303399 | 0,761586 | 0,9257418 |
| TM9SF4         | 336,09   | 0,20  | 0,646047 | 0,303392 | 0,761591 | 0,9257418 |
| PDZK1P1        | 3,51     | -0,66 | 2,191751 | -0,30331 | 0,761653 | NA        |
| RP11-485G7.4   | 0,77     | 0,47  | 1,563158 | 0,30324  | 0,761707 | NA        |
| RP13-152O15.2  | 0,30     | 1,06  | 3,503865 | 0,303194 | 0,761742 | NA        |
| ARHGAP15       | 903,03   | 0,10  | 0,329787 | 0,303025 | 0,761871 | 0,9259958 |
| AC099535.3     | 1,83     | 0,81  | 2,689569 | 0,303007 | 0,761885 | NA        |
| UTP6           | 500,38   | -0,16 | 0,537378 | -0,30299 | 0,7619   | 0,9259958 |
| RP11-94A24.1   | 0,12     | -1,14 | 3,748196 | -0,30294 | 0,761935 | NA        |
| CTD-2509G16.4  | 0,81     | 0,41  | 1,363159 | 0,302922 | 0,761949 | NA        |
| RP11-360L9.4   | 1,47     | 0,72  | 2,366825 | 0,302729 | 0,762096 | NA        |
| CPNE8          | 400,19   | 0,19  | 0,623846 | 0,302679 | 0,762135 | 0,9262153 |
| RP5-1024N4.6   | 3,14     | -0,45 | 1,476388 | -0,30255 | 0,762233 | NA        |

|               |         |       |          |          |          |           |
|---------------|---------|-------|----------|----------|----------|-----------|
| TRIM27        | 559,33  | -0,20 | 0,658132 | -0,30253 | 0,762247 | 0,9262153 |
| RPL6P27       | 5,45    | -0,15 | 0,501081 | -0,30251 | 0,76226  | 0,9262153 |
| MIR6719       | 0,29    | 1,13  | 3,746793 | 0,30246  | 0,762302 | NA        |
| SPATA6        | 83,98   | 0,27  | 0,899656 | 0,302445 | 0,762313 | 0,9262153 |
| FAM65C        | 41,22   | 0,37  | 1,238376 | 0,302424 | 0,762329 | 0,9262153 |
| OR56B2P       | 0,28    | -0,73 | 2,419522 | -0,3023  | 0,762426 | NA        |
| NDUFB4        | 372,36  | -0,08 | 0,253156 | -0,30217 | 0,762525 | 0,9263678 |
| INO80D        | 809,90  | -0,18 | 0,602235 | -0,30213 | 0,762554 | 0,9263678 |
| MIR4459       | 0,14    | -1,03 | 3,397079 | -0,30209 | 0,76258  | NA        |
| RN7SL202P     | 0,30    | 0,87  | 2,895522 | 0,30204  | 0,762622 | NA        |
| RP11-367G12.1 | 0,17    | -1,02 | 3,375079 | -0,30201 | 0,762642 | NA        |
| CTB-167G5.6   | 5,24    | -0,33 | 1,104122 | -0,30195 | 0,762693 | 0,9264758 |
| PAX4          | 1,57    | 0,66  | 2,175407 | 0,301804 | 0,762802 | NA        |
| AC015688.3    | 0,29    | 1,13  | 3,746835 | 0,301707 | 0,762876 | NA        |
| RN7SL709P     | 3,55    | 0,35  | 1,159991 | 0,301704 | 0,762878 | NA        |
| ZNF677        | 89,52   | -0,20 | 0,668436 | -0,30159 | 0,762967 | 0,9267486 |
| GPI           | 871,48  | 0,14  | 0,457665 | 0,30135  | 0,763148 | 0,9269074 |
| IGKV3D-11     | 0,57    | -0,70 | 2,32946  | -0,30123 | 0,763242 | NA        |
| TFCP2L1       | 97,44   | -0,57 | 1,906269 | -0,30121 | 0,763251 | 0,9269726 |
| GALK2         | 152,45  | -0,22 | 0,744757 | -0,30114 | 0,763304 | 0,926976  |
| IQUB          | 0,56    | 0,93  | 3,084251 | 0,30111  | 0,763331 | NA        |
| PPWD1         | 214,00  | -0,20 | 0,649334 | -0,30089 | 0,7635   | 0,9270621 |
| RP11-1148O4.2 | 1,90    | 0,72  | 2,396778 | 0,300872 | 0,763512 | NA        |
| AC018816.4    | 33,77   | 0,18  | 0,603647 | 0,300814 | 0,763556 | 0,9270621 |
| DPH3          | 310,66  | 0,19  | 0,625723 | 0,300771 | 0,763589 | 0,9270621 |
| INSC          | 1,06    | 0,59  | 1,959104 | 0,30067  | 0,763666 | NA        |
| CENPU         | 17,04   | -0,42 | 1,401285 | -0,30061 | 0,763712 | 0,9270621 |
| EDARADD       | 0,75    | -0,33 | 1,106582 | -0,3006  | 0,763717 | NA        |
| C3orf80       | 0,77    | 1,13  | 3,746672 | 0,300533 | 0,763771 | NA        |
| FAM155A       | 4,44    | -0,30 | 0,99156  | -0,30052 | 0,763777 | 0,9270621 |
| SNORA3B       | 22,89   | -0,24 | 0,798521 | -0,30052 | 0,763781 | 0,9270621 |
| PCNX2         | 190,68  | -0,15 | 0,511566 | -0,30046 | 0,763829 | 0,9270621 |
| TMEM86B       | 67,08   | -0,29 | 0,949842 | -0,30043 | 0,763846 | 0,9270621 |
| SVIP          | 85,76   | -0,27 | 0,909503 | -0,30043 | 0,763847 | 0,9270621 |
| AC008993.2    | 16,05   | 0,29  | 0,954433 | 0,300398 | 0,763873 | 0,9270621 |
| CCHCR1        | 66,14   | -0,27 | 0,89428  | -0,30027 | 0,76397  | 0,9271186 |
| APAF1         | 1031,56 | -0,10 | 0,323586 | -0,30001 | 0,764166 | 0,9272665 |
| DNP1          | 364,65  | 0,16  | 0,532263 | 0,299934 | 0,764227 | 0,9272665 |
| RP11-554D14.6 | 21,10   | 0,23  | 0,763583 | 0,299916 | 0,764241 | 0,9272665 |
| RP11-530N7.2  | 0,29    | 1,12  | 3,74683  | 0,299813 | 0,76432  | NA        |
| DNAJC19       | 149,92  | 0,17  | 0,577115 | 0,299732 | 0,764382 | 0,9273283 |
| RP11-55L3.1   | 5,97    | -0,40 | 1,320643 | -0,2997  | 0,764405 | 0,9273283 |
| CTD-2308B18.3 | 0,63    | 1,12  | 3,74121  | 0,29969  | 0,764413 | NA        |
| RASA2         | 427,93  | -0,18 | 0,5916   | -0,29965 | 0,764442 | 0,9273283 |
| RP11-159J3.1  | 2,14    | -0,47 | 1,559897 | -0,29957 | 0,764506 | NA        |
| CTD-2048F20.1 | 0,53    | 1,09  | 3,627137 | 0,29951  | 0,764551 | NA        |
| AC068134.10   | 21,37   | 0,62  | 2,056281 | 0,299485 | 0,76457  | 0,927424  |
| AC079781.9    | 0,79    | 0,96  | 3,219523 | 0,299477 | 0,764576 | NA        |
| CYP4F24P      | 0,58    | 1,12  | 3,741181 | 0,299388 | 0,764644 | NA        |
| RN7SL266P     | 0,14    | -1,02 | 3,393472 | -0,29937 | 0,764659 | NA        |

|               |         |       |          |          |          |           |
|---------------|---------|-------|----------|----------|----------|-----------|
| CSNK1D        | 656,59  | 0,10  | 0,339175 | 0,299349 | 0,764674 | 0,9274894 |
| RP11-614F17.2 | 0,53    | 0,93  | 3,095236 | 0,299348 | 0,764675 | NA        |
| AC013400.2    | 54,95   | 0,31  | 1,045497 | 0,299148 | 0,764827 | 0,9276084 |
| AB015752.3    | 0,46    | 0,68  | 2,284758 | 0,299031 | 0,764916 | NA        |
| CTD-2303B20.1 | 7,61    | -0,49 | 1,653479 | -0,29903 | 0,764917 | 0,9276084 |
| C11orf76      | 22,59   | 0,23  | 0,760257 | 0,298948 | 0,76498  | 0,9276084 |
| PPARGC1B      | 283,28  | -0,20 | 0,659079 | -0,2989  | 0,765016 | 0,9276084 |
| CHPF2         | 141,60  | 0,24  | 0,793352 | 0,298856 | 0,76505  | 0,9276084 |
| SPATA32       | 0,29    | 1,12  | 3,746782 | 0,298828 | 0,765071 | NA        |
| PLCXD2        | 155,46  | 0,40  | 1,348494 | 0,298828 | 0,765071 | 0,9276084 |
| SLC6A1        | 51,31   | 0,21  | 0,693144 | 0,298749 | 0,765131 | 0,9276208 |
| AC006328.1    | 3,69    | -0,57 | 1,903296 | -0,2987  | 0,765167 | NA        |
| RP5-1037N22.2 | 1,79    | 0,46  | 1,534606 | 0,298689 | 0,765177 | NA        |
| AC144831.1    | 68,76   | -0,32 | 1,061758 | -0,29865 | 0,765204 | 0,9276486 |
| TAT           | 2,69    | -0,35 | 1,181512 | -0,29838 | 0,765412 | NA        |
| NCDN          | 42,12   | -0,35 | 1,187467 | -0,29835 | 0,765438 | 0,927827  |
| IL24          | 9,15    | 0,53  | 1,763094 | 0,298313 | 0,765464 | 0,927827  |
| AGAP3         | 320,53  | -0,16 | 0,541919 | -0,29827 | 0,765501 | 0,927827  |
| RP11-330M2.4  | 0,28    | 0,86  | 2,89724  | 0,298261 | 0,765504 | NA        |
| ZNF491        | 0,35    | 1,03  | 3,470243 | 0,298178 | 0,765568 | NA        |
| RP11-486M23.3 | 2,01    | 0,55  | 1,84698  | 0,298069 | 0,765651 | NA        |
| AMH           | 0,17    | -1,12 | 3,748196 | -0,298   | 0,7657   | NA        |
| RP11-65D24.1  | 0,59    | 0,48  | 1,618653 | 0,29798  | 0,765719 | NA        |
| BIRC5         | 12,16   | 0,33  | 1,122004 | 0,297767 | 0,765881 | 0,9282274 |
| CTC-490E21.10 | 0,71    | 0,84  | 2,805803 | 0,297757 | 0,765889 | NA        |
| RP11-202G11.2 | 0,66    | -0,47 | 1,585055 | -0,29775 | 0,765897 | NA        |
| RP11-83N9.5   | 0,29    | 1,11  | 3,746694 | 0,297572 | 0,766029 | NA        |
| MFSD3         | 63,57   | 0,38  | 1,262016 | 0,297541 | 0,766054 | 0,9283762 |
| CLPX          | 415,57  | 0,15  | 0,519582 | 0,297426 | 0,766141 | 0,9284213 |
| JAM2          | 12,72   | 0,32  | 1,060439 | 0,297294 | 0,766242 | 0,9284829 |
| CALHM2        | 525,73  | -0,21 | 0,709288 | -0,29723 | 0,766292 | 0,9284829 |
| GRM8          | 2,06    | 1,02  | 3,443176 | 0,297142 | 0,766358 | NA        |
| NEK1          | 189,34  | 0,22  | 0,735888 | 0,297112 | 0,766381 | 0,9285011 |
| FOXM1         | 36,96   | -0,26 | 0,864551 | -0,29706 | 0,766423 | 0,9285011 |
| KIAA2013      | 436,45  | 0,16  | 0,538978 | 0,297013 | 0,766456 | 0,9285011 |
| PANX2         | 2,37    | 0,68  | 2,28849  | 0,296969 | 0,76649  | NA        |
| MORC3         | 381,31  | 0,17  | 0,574863 | 0,296895 | 0,766547 | 0,9285067 |
| RP11-530I19.3 | 5,92    | 0,40  | 1,353464 | 0,296802 | 0,766618 | 0,9285067 |
| SYT5          | 26,56   | -0,18 | 0,612956 | -0,29672 | 0,766678 | 0,9285067 |
| EGR1          | 1634,24 | 0,15  | 0,505816 | 0,296689 | 0,766704 | 0,9285067 |
| SCFD1         | 851,61  | -0,10 | 0,320419 | -0,29668 | 0,76671  | 0,9285067 |
| GTPBP4        | 654,89  | 0,15  | 0,511451 | 0,296608 | 0,766766 | 0,9285136 |
| HSD17B3       | 0,06    | -1,11 | 3,745401 | -0,29649 | 0,766856 | NA        |
| TYMS          | 6,11    | 0,44  | 1,46927  | 0,29641  | 0,766917 | 0,9285906 |
| HSDL2         | 272,51  | 0,21  | 0,723902 | 0,296345 | 0,766966 | 0,9285906 |
| CEP63         | 321,76  | 0,17  | 0,565409 | 0,296156 | 0,767111 | 0,9285906 |
| AC114730.5    | 4,39    | -0,43 | 1,454753 | -0,29612 | 0,76714  | 0,9285906 |
| UQCC2         | 125,87  | 0,11  | 0,372973 | 0,296101 | 0,767153 | 0,9285906 |
| CTD-2561J22.5 | 54,74   | -0,20 | 0,66216  | -0,29606 | 0,767188 | 0,9285906 |
| SETD3         | 308,59  | 0,17  | 0,586581 | 0,296018 | 0,767216 | 0,9285906 |

|                   |         |       |          |          |          |           |
|-------------------|---------|-------|----------|----------|----------|-----------|
| CRY2              | 194,63  | 0,25  | 0,861408 | 0,295911 | 0,767298 | 0,9285906 |
| RP11-848G14.5     | 431,40  | 0,20  | 0,672372 | 0,295876 | 0,767325 | 0,9285906 |
| CCL23             | 0,41    | 1,04  | 3,514203 | 0,295834 | 0,767357 | NA        |
| FGD2              | 1823,70 | 0,08  | 0,267016 | 0,295822 | 0,767366 | 0,9285906 |
| SETD4             | 164,04  | -0,27 | 0,913431 | -0,29575 | 0,767423 | 0,9285906 |
| TAF6L             | 18,28   | 0,47  | 1,594456 | 0,29574  | 0,767429 | 0,9285906 |
| TERC              | 0,32    | 1,02  | 3,451665 | 0,295711 | 0,767451 | NA        |
| RP11-403B2.7      | 0,46    | -0,61 | 2,049498 | -0,29569 | 0,767464 | NA        |
| ULBP1             | 20,97   | 0,48  | 1,621832 | 0,295645 | 0,767501 | 0,928618  |
| RP11-16N10.2      | 12,13   | -0,26 | 0,863263 | -0,29555 | 0,767573 | 0,9286447 |
| RP11-571M6.15     | 0,29    | 1,11  | 3,745969 | 0,295515 | 0,7676   | NA        |
| RP11-473M20.11    | 0,84    | 0,55  | 1,852331 | 0,295397 | 0,767691 | NA        |
| RCN3              | 185,42  | -0,17 | 0,591929 | -0,29537 | 0,767711 | 0,9287515 |
| RP11-284N8.3      | 15,19   | -0,43 | 1,447776 | -0,29529 | 0,767775 | 0,9287684 |
| RP11-370B11.4     | 1,77    | 0,49  | 1,647199 | 0,295247 | 0,767805 | NA        |
| RP5-905H16.2      | 25,79   | 0,24  | 0,822549 | 0,295188 | 0,76785  | 0,928775  |
| C22orf46          | 23,04   | -0,28 | 0,947652 | -0,29515 | 0,76788  | 0,928775  |
| C9orf116          | 0,29    | 1,11  | 3,74686  | 0,295059 | 0,767949 | NA        |
| MAGOHB            | 117,82  | 0,24  | 0,808019 | 0,29498  | 0,768009 | 0,928868  |
| IDNK              | 142,55  | 0,30  | 1,027717 | 0,294917 | 0,768057 | 0,928868  |
| ZNF394            | 581,95  | 0,15  | 0,512208 | 0,294733 | 0,768198 | 0,9289514 |
| XXbac-BPG246D15.9 | 2,52    | 1,08  | 3,659246 | 0,294702 | 0,768222 | NA        |
| HINFP             | 224,80  | 0,16  | 0,535396 | 0,294696 | 0,768226 | 0,9289514 |
| HAGH              | 347,26  | -0,17 | 0,588235 | -0,29457 | 0,768319 | 0,9290033 |
| AC016734.2        | 2,05    | 0,27  | 0,908867 | 0,294365 | 0,768479 | NA        |
| RPS6KA2           | 97,87   | 0,30  | 1,021348 | 0,294213 | 0,768595 | 0,9292769 |
| C5                | 75,28   | -0,34 | 1,145488 | -0,29406 | 0,768715 | 0,9293363 |
| NP1PB7            | 0,44    | 1,03  | 3,505561 | 0,294027 | 0,768737 | NA        |
| TM2D1             | 339,98  | -0,14 | 0,480003 | -0,29402 | 0,768744 | 0,9293363 |
| RPS13             | 7316,47 | -0,04 | 0,148873 | -0,29386 | 0,768868 | 0,9293787 |
| STX8              | 357,21  | 0,08  | 0,268605 | 0,293841 | 0,768879 | 0,9293787 |
| AC008065.1        | 0,16    | -0,99 | 3,382335 | -0,2938  | 0,768913 | NA        |
| AC074093.1        | 55,68   | 0,29  | 1,004207 | 0,293689 | 0,768995 | 0,9294513 |
| RP11-722A15.2     | 14,57   | -0,35 | 1,201605 | -0,29363 | 0,769039 | 0,9294513 |
| SUSD2             | 0,81    | 0,94  | 3,217444 | 0,29358  | 0,769079 | NA        |
| ASCL2             | 22,78   | -0,26 | 0,901515 | -0,29348 | 0,769153 | 0,9294568 |
| RP11-152L20.3     | 3,47    | 0,83  | 2,816573 | 0,293461 | 0,76917  | NA        |
| CWF19L1           | 233,17  | 0,16  | 0,548648 | 0,293455 | 0,769174 | 0,9294568 |
| STRN3             | 260,80  | -0,13 | 0,449085 | -0,29343 | 0,769194 | 0,9294568 |
| RP5-973N23.4      | 1,63    | 0,36  | 1,234928 | 0,293302 | 0,769291 | NA        |
| RP11-380D23.1     | 0,41    | 1,03  | 3,518316 | 0,293238 | 0,76934  | NA        |
| ST7               | 146,03  | -0,28 | 0,94052  | -0,29323 | 0,769347 | 0,9294956 |
| NPHP3-AS1         | 9,57    | -0,46 | 1,572144 | -0,2932  | 0,769372 | 0,9294956 |
| SLC41A1           | 0,64    | 0,56  | 1,915445 | 0,293155 | 0,769404 | NA        |
| RPL22             | 2149,18 | -0,07 | 0,241585 | -0,29315 | 0,769406 | 0,9294956 |
| APH1A             | 470,28  | 0,19  | 0,663122 | 0,293056 | 0,769479 | 0,9294956 |
| RP11-449L23.2     | 13,41   | -0,24 | 0,80765  | -0,29303 | 0,769501 | 0,9294956 |
| ZNF790            | 34,36   | 0,35  | 1,197331 | 0,292988 | 0,769532 | 0,9294956 |
| ADGRE1            | 66,43   | -0,29 | 1,00123  | -0,29293 | 0,769575 | 0,9294956 |
| HOXA3             | 0,57    | 1,00  | 3,426064 | 0,292922 | 0,769582 | NA        |

|                |         |       |          |          |          |           |
|----------------|---------|-------|----------|----------|----------|-----------|
| AC007040.8     | 0,68    | -0,69 | 2,34181  | -0,29276 | 0,769703 | NA        |
| CCDC102B       | 18,32   | 0,52  | 1,789974 | 0,2926   | 0,769828 | 0,9297406 |
| GRIN3A         | 0,42    | 0,77  | 2,640496 | 0,292589 | 0,769836 | NA        |
| RP11-176N18.2  | 0,31    | 0,85  | 2,896154 | 0,292516 | 0,769892 | NA        |
| C20orf24       | 1171,84 | -0,09 | 0,302433 | -0,29245 | 0,769946 | 0,9298221 |
| RP11-303E16.3  | 1,82    | 0,47  | 1,604807 | 0,292123 | 0,770192 | NA        |
| RP11-1376P16.2 | 1,01    | 0,61  | 2,080202 | 0,292048 | 0,77025  | NA        |
| RP11-547D23.1  | 0,57    | 1,06  | 3,616523 | 0,292027 | 0,770266 | NA        |
| RP11-735B13.1  | 1,14    | -0,44 | 1,505898 | -0,29202 | 0,770274 | NA        |
| STRN           | 166,72  | 0,24  | 0,826159 | 0,291962 | 0,770316 | 0,930164  |
| SCLT1          | 558,64  | 0,11  | 0,382248 | 0,291942 | 0,770331 | 0,930164  |
| SUSD6          | 761,74  | -0,16 | 0,53109  | -0,29188 | 0,770379 | 0,930164  |
| OR5D3P         | 0,83    | 1,09  | 3,735107 | 0,291877 | 0,77038  | NA        |
| KIAA0114       | 172,80  | -0,23 | 0,798569 | -0,29174 | 0,770487 | 0,9302343 |
| SMAD5OS        | 0,30    | 1,02  | 3,488362 | 0,291679 | 0,770532 | NA        |
| RP11-668G10.2  | 0,52    | 1,06  | 3,62228  | 0,291671 | 0,770538 | NA        |
| CTC-523E23.13  | 4,62    | 0,28  | 0,947574 | 0,29159  | 0,7706   | 0,9303105 |
| RP11-820K3.2   | 2,15    | -0,44 | 1,492231 | -0,29155 | 0,770628 | NA        |
| SLCO3A1        | 472,65  | -0,13 | 0,46085  | -0,29147 | 0,770691 | 0,9303315 |
| RP5-1113E3.3   | 5,01    | -0,42 | 1,442546 | -0,29144 | 0,770718 | 0,9303315 |
| ASIP           | 0,23    | -0,72 | 2,465855 | -0,29143 | 0,770722 | NA        |
| SIPA1L2        | 169,41  | -0,25 | 0,861264 | -0,29133 | 0,770798 | 0,9303687 |
| CTD-2369P2.12  | 174,87  | 0,17  | 0,597463 | 0,291224 | 0,77088  | 0,930407  |
| TNNI3K         | 0,07    | -1,09 | 3,745662 | -0,29114 | 0,770948 | NA        |
| RP11-44F21.3   | 0,33    | 1,09  | 3,746693 | 0,291066 | 0,771001 | NA        |
| RP11-320M16.1  | 0,91    | -0,35 | 1,208733 | -0,29103 | 0,77103  | NA        |
| MROH2B         | 0,27    | -0,97 | 3,324027 | -0,29097 | 0,771073 | NA        |
| RN7SL602P      | 2,77    | -0,35 | 1,212812 | -0,29095 | 0,771092 | NA        |
| POP5           | 313,08  | 0,17  | 0,581637 | 0,290598 | 0,771359 | 0,9308859 |
| RP11-534G20.3  | 106,91  | -0,30 | 1,018501 | -0,29057 | 0,771377 | 0,9308859 |
| MANEAL         | 1,01    | -0,93 | 3,188896 | -0,29051 | 0,771426 | NA        |
| RP11-131J3.1   | 2,42    | -0,39 | 1,351695 | -0,2905  | 0,771434 | NA        |
| PTPN21         | 0,74    | 0,83  | 2,845254 | 0,29046  | 0,771464 | NA        |
| MRPS28         | 301,35  | 0,13  | 0,447901 | 0,29045  | 0,771472 | 0,9309403 |
| PECR           | 25,23   | 0,24  | 0,821248 | 0,290289 | 0,771595 | 0,9310257 |
| OR7D2          | 57,53   | -0,28 | 0,957929 | -0,29023 | 0,771643 | 0,9310257 |
| ULK1           | 180,06  | -0,19 | 0,654997 | -0,29013 | 0,771719 | 0,931057  |
| AC010900.1     | 0,35    | -0,87 | 3,000964 | -0,29007 | 0,771761 | NA        |
| NRN1L          | 2,28    | 0,80  | 2,746869 | 0,290018 | 0,771803 | NA        |
| GPR137C        | 167,13  | -0,27 | 0,932179 | -0,28984 | 0,771937 | 0,9312586 |
| CTC-325J23.2   | 2,23    | 0,41  | 1,425919 | 0,289799 | 0,77197  | NA        |
| BGN            | 3,37    | 0,49  | 1,697424 | 0,28979  | 0,771977 | NA        |
| UPK3A          | 241,53  | 0,15  | 0,531593 | 0,289778 | 0,771986 | 0,9312586 |
| RBMV2FP        | 1,14    | 0,36  | 1,233766 | 0,289771 | 0,771992 | NA        |
| CTB-36O1.6     | 1,20    | -0,40 | 1,395289 | -0,28976 | 0,771998 | NA        |
| RP11-285E18.1  | 0,46    | 0,89  | 3,057796 | 0,289622 | 0,772106 | NA        |
| RP5-999L4.2    | 16,79   | -0,41 | 1,431656 | -0,28957 | 0,772142 | 0,9313861 |
| CEP295         | 128,41  | -0,20 | 0,686818 | -0,28929 | 0,772361 | 0,9315898 |
| PHYKPL         | 801,79  | 0,11  | 0,397501 | 0,289148 | 0,772468 | 0,9315929 |
| LLNLR-304A6.1  | 16,10   | -0,19 | 0,656852 | -0,2891  | 0,772507 | 0,9315929 |



|                |         |       |          |          |          |           |
|----------------|---------|-------|----------|----------|----------|-----------|
| AC004158.3     | 8,44    | -0,25 | 0,869993 | -0,28909 | 0,772514 | 0,9315929 |
| GRAMD1C        | 10,45   | -0,38 | 1,321493 | -0,28879 | 0,772744 | 0,9317826 |
| RAB12          | 89,55   | -0,19 | 0,64195  | -0,28875 | 0,772771 | 0,9317826 |
| RP4-677H15.4   | 0,35    | -0,85 | 2,945835 | -0,28872 | 0,772796 | NA        |
| RP11-893F2.14  | 0,95    | -0,92 | 3,201625 | -0,28851 | 0,77296  | NA        |
| ATP6AP2        | 1882,67 | 0,10  | 0,33186  | 0,288476 | 0,772982 | 0,9319279 |
| MS4A6A         | 7751,48 | -0,07 | 0,252007 | -0,28846 | 0,772992 | 0,9319279 |
| AC138035.2     | 2,38    | 0,48  | 1,648494 | 0,288365 | 0,773068 | NA        |
| RP4-789D17.5   | 1,82    | 0,76  | 2,631279 | 0,288299 | 0,773118 | NA        |
| SERINC3        | 1265,69 | -0,14 | 0,46982  | -0,28822 | 0,77318  | 0,9319296 |
| SPTBN1         | 271,72  | -0,18 | 0,623372 | -0,28821 | 0,773184 | 0,9319296 |
| LRRC8D         | 261,81  | 0,20  | 0,69491  | 0,288211 | 0,773185 | 0,9319296 |
| RP11-501E14.1  | 7,01    | 0,33  | 1,138265 | 0,2882   | 0,773193 | 0,9319296 |
| RP11-517O13.1  | 1,17    | -0,36 | 1,235754 | -0,28818 | 0,77321  | NA        |
| SAMD13         | 1,10    | 0,64  | 2,226213 | 0,287962 | 0,773376 | NA        |
| RP11-817J15.2  | 0,55    | -0,68 | 2,347766 | -0,28788 | 0,77344  | NA        |
| HNRNPUL2       | 181,09  | -0,22 | 0,774264 | -0,28786 | 0,773455 | 0,9321557 |
| KIAA1147       | 170,85  | -0,25 | 0,873372 | -0,28777 | 0,773519 | 0,9321557 |
| MIA-RAB4B      | 38,62   | -0,23 | 0,793935 | -0,28772 | 0,773559 | 0,9321557 |
| HIF1A          | 2229,41 | 0,10  | 0,337585 | 0,287693 | 0,773582 | 0,9321557 |
| TUBA3D         | 0,28    | 1,08  | 3,746686 | 0,287641 | 0,773621 | NA        |
| JTB            | 1845,07 | 0,08  | 0,288895 | 0,287601 | 0,773652 | 0,9321803 |
| C19orf12       | 149,66  | -0,29 | 1,004117 | -0,28732 | 0,773866 | 0,9323176 |
| WNT9B          | 5,68    | -0,23 | 0,804406 | -0,28726 | 0,773916 | 0,9323176 |
| RP11-14C10.6   | 2,62    | -0,31 | 1,094866 | -0,28718 | 0,773978 | NA        |
| AC096591.1     | 0,57    | 0,47  | 1,631165 | 0,287156 | 0,773993 | NA        |
| GMEB2          | 130,46  | -0,25 | 0,874371 | -0,28714 | 0,774005 | 0,9323176 |
| CHKB-CPT1B     | 23,86   | 0,42  | 1,446755 | 0,287096 | 0,774039 | 0,9323176 |
| RP11-494O16.4  | 15,89   | 0,21  | 0,723138 | 0,287094 | 0,77404  | 0,9323176 |
| SUGP1          | 136,02  | -0,22 | 0,752594 | -0,28706 | 0,774067 | 0,9323176 |
| MYO5A          | 1219,34 | -0,13 | 0,468922 | -0,2868  | 0,774265 | 0,9324961 |
| SNORD11        | 13,70   | -0,31 | 1,095241 | -0,28673 | 0,774316 | 0,9324969 |
| RP11-178C3.2   | 42,76   | 0,26  | 0,897668 | 0,286647 | 0,774382 | 0,9325126 |
| ACTL10         | 0,25    | 0,83  | 2,906668 | 0,286622 | 0,774402 | NA        |
| HERC3          | 498,58  | 0,19  | 0,676676 | 0,286586 | 0,774429 | 0,9325126 |
| TNFRSF11B      | 0,69    | -0,40 | 1,410816 | -0,28642 | 0,774554 | NA        |
| RP11-23N2.1    | 1,03    | 0,52  | 1,827587 | 0,286341 | 0,774617 | NA        |
| RP3-521E19.2   | 0,42    | 0,77  | 2,689676 | 0,286258 | 0,77468  | NA        |
| RP11-676B18.1  | 2,72    | 0,29  | 0,998948 | 0,286249 | 0,774687 | NA        |
| MTMR3          | 182,02  | -0,19 | 0,674265 | -0,28619 | 0,774733 | 0,9327776 |
| RP11-381P6.1   | 1,41    | -0,55 | 1,923535 | -0,28617 | 0,774744 | NA        |
| RP11-147L13.12 | 40,44   | 0,21  | 0,738736 | 0,286168 | 0,774749 | 0,9327776 |
| RP1-85F18.4    | 1,30    | -0,93 | 3,236632 | -0,28615 | 0,77476  | NA        |
| RP11-109E10.1  | 0,65    | -0,41 | 1,429341 | -0,28612 | 0,774786 | NA        |
| MEG3           | 13,52   | -0,22 | 0,777374 | -0,28605 | 0,774843 | 0,9328294 |
| RP11-116G8.4   | 1,90    | -0,38 | 1,336036 | -0,28597 | 0,774899 | NA        |
| MDS2           | 9,08    | -0,25 | 0,868253 | -0,28596 | 0,774911 | 0,9328382 |
| ATF4P3         | 3,78    | 0,38  | 1,338535 | 0,285906 | 0,77495  | 0,9328382 |
| RIMBP3B        | 1,47    | -1,04 | 3,643759 | -0,28588 | 0,774967 | NA        |
| GHR            | 10,99   | 0,14  | 0,5048   | 0,285827 | 0,775011 | 0,932851  |

|               |        |       |          |          |          |           |
|---------------|--------|-------|----------|----------|----------|-----------|
| RP11-373D23.2 | 140,17 | 0,12  | 0,411819 | 0,285761 | 0,775062 | 0,9328516 |
| BVES          | 28,05  | 0,26  | 0,927465 | 0,285679 | 0,775124 | 0,9328665 |
| AC007970.1    | 0,39   | -0,72 | 2,528859 | -0,28567 | 0,775133 | NA        |
| RP11-128B16.4 | 7,34   | -0,34 | 1,173816 | -0,28557 | 0,775208 | 0,9329068 |
| KB-1205A7.1   | 0,28   | 0,99  | 3,483152 | 0,285467 | 0,775286 | NA        |
| RP11-118H4.1  | 2,25   | 0,23  | 0,806103 | 0,285447 | 0,775302 | NA        |
| SMAD6         | 8,89   | 0,56  | 1,971046 | 0,285438 | 0,775309 | 0,9329149 |
| RP11-429A20.3 | 6,74   | -0,25 | 0,890687 | -0,28543 | 0,775315 | 0,9329149 |
| MAPRE2        | 564,47 | -0,17 | 0,607089 | -0,28529 | 0,775422 | 0,9329831 |
| ASNSP1        | 0,55   | 1,03  | 3,623293 | 0,285233 | 0,775466 | NA        |
| TOPORS        | 390,42 | -0,23 | 0,823501 | -0,28509 | 0,775578 | 0,9331107 |
| RP3-417G15.1  | 0,54   | 0,40  | 1,418999 | 0,284888 | 0,77573  | NA        |
| GALNT9        | 1,32   | -0,34 | 1,195573 | -0,28475 | 0,775833 | NA        |
| RP11-483I13.2 | 2,46   | -0,36 | 1,275823 | -0,28472 | 0,775861 | NA        |
| RNU6-892P     | 1,09   | -0,80 | 2,802768 | -0,28463 | 0,775926 | NA        |
| ZFP30         | 20,53  | -0,29 | 1,002917 | -0,28445 | 0,776068 | 0,9335466 |
| RP11-626G11.4 | 0,29   | 0,70  | 2,445989 | 0,284436 | 0,776076 | NA        |
| PRAF2         | 53,77  | 0,23  | 0,813511 | 0,284344 | 0,776146 | 0,9335466 |
| IFI27L1       | 32,39  | 0,39  | 1,359275 | 0,284262 | 0,77621  | 0,9335466 |
| MTHFR         | 513,52 | 0,13  | 0,461594 | 0,284184 | 0,77627  | 0,9335466 |
| RP11-381O7.3  | 6,00   | -0,38 | 1,352599 | -0,28414 | 0,776302 | 0,9335466 |
| C1orf157      | 0,53   | 1,04  | 3,658196 | 0,284114 | 0,776323 | NA        |
| RP11-463O12.3 | 0,54   | -0,75 | 2,651334 | -0,284   | 0,776407 | NA        |
| AC022182.3    | 29,27  | 0,29  | 1,005632 | 0,283991 | 0,776418 | 0,9335466 |
| ZFP91         | 659,58 | 0,09  | 0,32742  | 0,283978 | 0,776427 | 0,9335466 |
| ICOSLG        | 194,49 | 0,18  | 0,627833 | 0,283967 | 0,776435 | 0,9335466 |
| DENND2D       | 90,29  | 0,29  | 1,022171 | 0,283903 | 0,776485 | 0,9335466 |
| ERVK3-1       | 526,85 | -0,16 | 0,562792 | -0,28382 | 0,776551 | 0,9335466 |
| RNU6-512P     | 0,53   | 1,06  | 3,741878 | 0,283813 | 0,776554 | NA        |
| CTC-425F1.4   | 9,23   | 0,27  | 0,944929 | 0,283762 | 0,776593 | 0,9335466 |
| NRROS         | 237,55 | -0,13 | 0,449704 | -0,28373 | 0,776619 | 0,9335466 |
| C3orf33       | 19,41  | 0,33  | 1,148434 | 0,283697 | 0,776643 | 0,9335466 |
| SOWAHC        | 8,50   | 0,23  | 0,809021 | 0,283574 | 0,776737 | 0,9335466 |
| HAUS3         | 179,35 | -0,20 | 0,709479 | -0,28345 | 0,776831 | 0,9335466 |
| RP4-816N1.7   | 0,71   | 0,79  | 2,782373 | 0,283441 | 0,776839 | NA        |
| RYR3          | 29,51  | -0,22 | 0,760572 | -0,28336 | 0,776903 | 0,9335466 |
| RELA          | 496,72 | 0,11  | 0,400122 | 0,283315 | 0,776935 | 0,9335466 |
| RP11-398J13.1 | 57,28  | -0,36 | 1,271906 | -0,2833  | 0,776947 | 0,9335466 |
| RP11-117D22.2 | 84,43  | -0,29 | 1,013125 | -0,28326 | 0,776976 | 0,9335466 |
| PUF60         | 878,87 | 0,14  | 0,490956 | 0,283187 | 0,777033 | 0,9335466 |
| AC007228.11   | 1,99   | -0,53 | 1,858554 | -0,28319 | 0,777034 | NA        |
| IL33          | 13,44  | -0,34 | 1,21025  | -0,28318 | 0,777037 | 0,9335466 |
| CPTP          | 13,95  | -0,48 | 1,679084 | -0,28315 | 0,77706  | 0,9335466 |
| KIAA1586      | 94,86  | 0,26  | 0,909804 | 0,283064 | 0,777128 | 0,9335466 |
| EDRF1         | 243,67 | -0,18 | 0,636892 | -0,28301 | 0,777173 | 0,9335466 |
| RP11-329B9.4  | 0,54   | -1,01 | 3,579245 | -0,28296 | 0,777209 | NA        |
| RP3-324O17.5  | 5,52   | 0,36  | 1,273762 | 0,282938 | 0,777224 | 0,9335466 |
| RP11-178A10.1 | 5,45   | -0,39 | 1,3773   | -0,28287 | 0,777275 | 0,9335466 |
| RP11-356N1.1  | 0,61   | -0,76 | 2,690959 | -0,28284 | 0,777301 | NA        |
| GDF7          | 1,38   | 0,50  | 1,755888 | 0,282828 | 0,777309 | NA        |

|                |        |       |          |          |          |           |
|----------------|--------|-------|----------|----------|----------|-----------|
| RNA5SP85       | 0,27   | 1,06  | 3,747236 | 0,282783 | 0,777343 | NA        |
| MRPL14         | 634,55 | -0,14 | 0,511619 | -0,28271 | 0,777399 | 0,9335466 |
| FAM127B        | 86,68  | -0,30 | 1,077074 | -0,28268 | 0,777425 | 0,9335466 |
| RP5-1174N9.2   | 7,78   | -0,20 | 0,704737 | -0,28267 | 0,777432 | 0,9335466 |
| PCDHGA9        | 3,27   | 0,45  | 1,606184 | 0,282515 | 0,777549 | NA        |
| ZMYND11        | 185,61 | 0,18  | 0,652972 | 0,282502 | 0,777559 | 0,9335466 |
| RP11-159J3.4   | 2,90   | 0,70  | 2,490637 | 0,282452 | 0,777597 | NA        |
| DDX41          | 211,20 | -0,17 | 0,594883 | -0,28245 | 0,777602 | 0,9335466 |
| OR4K2          | 5,79   | 0,31  | 1,108262 | 0,282403 | 0,777634 | 0,9335466 |
| SLC35B1        | 415,99 | 0,16  | 0,565472 | 0,282302 | 0,777712 | 0,9335466 |
| RP11-432N13.3  | 0,83   | -0,90 | 3,195332 | -0,28224 | 0,777761 | NA        |
| MTL1           | 14,92  | -0,55 | 1,938638 | -0,28223 | 0,777767 | 0,9335466 |
| RP11-483G21.3  | 9,15   | -0,44 | 1,552603 | -0,28222 | 0,777773 | 0,9335466 |
| CABIN1         | 239,45 | -0,11 | 0,374809 | -0,28219 | 0,777802 | 0,9335466 |
| FUT6           | 2,06   | 0,38  | 1,337252 | 0,28216  | 0,777821 | NA        |
| FANCD2         | 227,82 | 0,21  | 0,736485 | 0,282158 | 0,777823 | 0,9335466 |
| KMT5A          | 296,05 | -0,12 | 0,414369 | -0,28213 | 0,777847 | 0,9335466 |
| LRP11          | 3,27   | 0,66  | 2,339896 | 0,282116 | 0,777855 | NA        |
| RP11-211N8.8   | 0,58   | -1,00 | 3,546884 | -0,28205 | 0,777904 | NA        |
| CBX2           | 0,28   | 1,06  | 3,746258 | 0,282025 | 0,777924 | NA        |
| LRRC56         | 4,75   | -0,25 | 0,886462 | -0,28201 | 0,777934 | 0,9335818 |
| SENP3-EIF4A1   | 3,33   | 0,43  | 1,516714 | 0,281942 | 0,777988 | NA        |
| ZBTB45         | 57,67  | -0,36 | 1,285822 | -0,2819  | 0,778019 | 0,9335818 |
| SPTBN2         | 0,64   | -0,95 | 3,381863 | -0,28186 | 0,778053 | NA        |
| ARMT1          | 211,45 | 0,25  | 0,891731 | 0,28185  | 0,778058 | 0,9335818 |
| AZI2           | 287,15 | -0,19 | 0,664961 | -0,2818  | 0,7781   | 0,9335818 |
| ANKLE1         | 101,88 | -0,13 | 0,449673 | -0,28172 | 0,778162 | 0,9335818 |
| TMPRSS11GP     | 0,93   | 1,02  | 3,619833 | 0,281702 | 0,778172 | NA        |
| ZNF724P        | 18,89  | -0,23 | 0,810045 | -0,28167 | 0,7782   | 0,9335818 |
| AP000476.1     | 112,16 | 0,19  | 0,657151 | 0,28163  | 0,778227 | 0,9335818 |
| DDX6           | 611,70 | -0,10 | 0,360273 | -0,2815  | 0,778325 | 0,9336386 |
| KL             | 1,40   | 1,04  | 3,694554 | 0,28148  | 0,778343 | NA        |
| GJB7           | 2,26   | 0,44  | 1,564411 | 0,281323 | 0,778463 | NA        |
| ATRIP          | 63,14  | 0,34  | 1,213892 | 0,281312 | 0,778471 | 0,9336695 |
| HSCB           | 139,63 | -0,18 | 0,626062 | -0,2813  | 0,77848  | 0,9336695 |
| RP11-75C9.2    | 0,56   | 0,89  | 3,147859 | 0,2812   | 0,778557 | NA        |
| RP11-1080G15.1 | 0,68   | 0,71  | 2,517929 | 0,281049 | 0,778672 | NA        |
| RP11-702F3.1   | 24,76  | 0,26  | 0,935801 | 0,281043 | 0,778677 | 0,9336695 |
| RP11-752G15.7  | 4,40   | 0,24  | 0,859297 | 0,281017 | 0,778698 | 0,9336695 |
| C5orf58        | 57,00  | -0,29 | 1,037667 | -0,28101 | 0,778706 | 0,9336695 |
| CSNK1G3        | 249,95 | -0,16 | 0,586965 | -0,28093 | 0,778762 | 0,9336695 |
| RP11-154H23.4  | 14,35  | -0,43 | 1,524191 | -0,2808  | 0,778867 | 0,9336695 |
| NFIL3          | 495,98 | -0,17 | 0,602668 | -0,28075 | 0,778902 | 0,9336695 |
| RP11-59C5.3    | 1,17   | -0,57 | 2,040962 | -0,28064 | 0,778986 | NA        |
| AC005306.3     | 19,78  | -0,29 | 1,023089 | -0,28061 | 0,779009 | 0,9336695 |
| ARSD           | 505,87 | 0,14  | 0,506504 | 0,280545 | 0,779059 | 0,9336695 |
| GJA10          | 0,53   | 1,03  | 3,654934 | 0,280497 | 0,779096 | NA        |
| CTD-3035D6.1   | 9,14   | 0,18  | 0,639277 | 0,280473 | 0,779115 | 0,9336695 |
| ZNF585A        | 191,82 | -0,19 | 0,679383 | -0,28038 | 0,779183 | 0,9336695 |
| CH17-76K2.6    | 46,13  | -0,18 | 0,63389  | -0,28038 | 0,779189 | 0,9336695 |

|                |         |       |          |          |          |           |
|----------------|---------|-------|----------|----------|----------|-----------|
| ATF6           | 604,12  | -0,15 | 0,517694 | -0,28036 | 0,779203 | 0,9336695 |
| RP11-624A21.1  | 206,45  | -0,10 | 0,368761 | -0,2803  | 0,77925  | 0,9336695 |
| C4orf45        | 9,50    | -0,80 | 2,865691 | -0,28028 | 0,779261 | 0,9336695 |
| DPH3B          | 0,45    | 0,86  | 3,05327  | 0,280243 | 0,779291 | NA        |
| TGS1           | 169,31  | -0,20 | 0,72334  | -0,28017 | 0,77935  | 0,9336695 |
| TCP11L2        | 179,97  | 0,22  | 0,785373 | 0,280116 | 0,779389 | 0,9336695 |
| MTPN           | 3153,40 | 0,07  | 0,246845 | 0,280075 | 0,77942  | 0,9336695 |
| SLC16A8        | 0,36    | 1,05  | 3,747005 | 0,279902 | 0,779553 | NA        |
| JUNB           | 6792,86 | 0,07  | 0,234986 | 0,279858 | 0,779586 | 0,9336695 |
| ACBD6          | 310,65  | -0,15 | 0,53803  | -0,27982 | 0,779613 | 0,9336695 |
| ZNF674         | 45,89   | 0,17  | 0,596249 | 0,279795 | 0,779635 | 0,9336695 |
| CTC-360G5.9    | 27,40   | 0,24  | 0,87404  | 0,279775 | 0,77965  | 0,9336695 |
| CTA-212A2.3    | 267,52  | -0,11 | 0,396837 | -0,27974 | 0,779675 | 0,9336695 |
| RP5-826L7.1    | 10,96   | 0,34  | 1,203341 | 0,279741 | 0,779676 | 0,9336695 |
| SRI            | 878,04  | -0,14 | 0,484931 | -0,27972 | 0,779695 | 0,9336695 |
| TMBIM6         | 4923,12 | 0,08  | 0,278501 | 0,279682 | 0,779722 | 0,9336695 |
| UBBP4          | 3,07    | 0,20  | 0,701529 | 0,279668 | 0,779732 | NA        |
| RP11-426C22.1  | 137,77  | 0,30  | 1,073912 | 0,279582 | 0,779798 | 0,9336695 |
| ZWILCH         | 63,72   | 0,37  | 1,324048 | 0,279537 | 0,779833 | 0,9336695 |
| RP11-180C16.1  | 80,97   | -0,68 | 2,422688 | -0,27951 | 0,779856 | 0,9336695 |
| RP11-10N23.5   | 0,42    | -0,57 | 2,022293 | -0,27949 | 0,779869 | NA        |
| ATXN7L3B       | 671,70  | 0,11  | 0,378218 | 0,279432 | 0,779913 | 0,9336779 |
| RP11-163O19.16 | 0,56    | 1,02  | 3,65513  | 0,279314 | 0,780004 | NA        |
| RP11-650L12.2  | 5,39    | 0,37  | 1,330925 | 0,279286 | 0,780025 | 0,9336849 |
| CYP4F2         | 0,34    | 1,05  | 3,746189 | 0,279253 | 0,780051 | NA        |
| CAMK2N1        | 4,50    | 0,32  | 1,160883 | 0,279239 | 0,780061 | 0,9336849 |
| SLC22A1        | 0,40    | 0,96  | 3,428315 | 0,279234 | 0,780065 | NA        |
| TMC8           | 416,32  | -0,12 | 0,446496 | -0,27918 | 0,780107 | 0,9336849 |
| KIAA1522       | 78,71   | -0,29 | 1,040971 | -0,27916 | 0,78012  | 0,9336849 |
| SCAANT1        | 10,97   | -0,69 | 2,479185 | -0,2789  | 0,780324 | 0,9337806 |
| RP11-527H14.6  | 7,06    | -0,60 | 2,155431 | -0,27888 | 0,78034  | 0,9337806 |
| CHAD           | 0,31    | 0,95  | 3,423044 | 0,278868 | 0,780346 | NA        |
| PRX            | 1,98    | -0,52 | 1,865128 | -0,27882 | 0,780387 | NA        |
| RP11-400L8.2   | 10,53   | -0,49 | 1,757833 | -0,27879 | 0,780408 | 0,9337806 |
| AC012146.7     | 30,86   | 0,26  | 0,916604 | 0,278762 | 0,780428 | 0,9337806 |
| RF00586        | 0,53    | 1,04  | 3,742068 | 0,278733 | 0,78045  | NA        |
| EEF2KMT        | 63,55   | -0,38 | 1,346837 | -0,27873 | 0,780451 | 0,9337806 |
| RP11-807G9.2   | 3,81    | -0,35 | 1,258845 | -0,27847 | 0,780653 | 0,9339479 |
| RP1-198K11.5   | 1,70    | 0,82  | 2,962268 | 0,278427 | 0,780685 | NA        |
| RP11-480N24.6  | 0,58    | 0,42  | 1,521743 | 0,27837  | 0,780728 | NA        |
| RP11-215I23.4  | 164,25  | -0,13 | 0,465034 | -0,27836 | 0,780735 | 0,9339479 |
| RP11-526F14.1  | 38,57   | -0,23 | 0,815702 | -0,27833 | 0,780756 | 0,9339479 |
| SNORA74D       | 1,12    | -0,57 | 2,039166 | -0,27833 | 0,780763 | NA        |
| OR10K2         | 0,64    | 0,56  | 2,00083  | 0,278302 | 0,78078  | NA        |
| SCYL2          | 473,66  | 0,15  | 0,547351 | 0,278288 | 0,780792 | 0,9339479 |
| RP11-176F3.9   | 0,50    | 1,02  | 3,65624  | 0,278216 | 0,780846 | NA        |
| CTD-2562G15.3  | 0,38    | -1,03 | 3,715002 | -0,27819 | 0,780864 | NA        |
| TNF            | 124,75  | -0,22 | 0,783255 | -0,27811 | 0,780926 | 0,9340493 |
| RP11-84E24.3   | 1,65    | 0,34  | 1,232924 | 0,278076 | 0,780954 | NA        |
| INCA1          | 2,07    | 0,62  | 2,238248 | 0,277921 | 0,781073 | NA        |

|                    |         |       |          |          |          |           |
|--------------------|---------|-------|----------|----------|----------|-----------|
| CEACAM3            | 4,62    | -0,67 | 2,40615  | -0,27792 | 0,781077 | 0,9341695 |
| LRRC18             | 7,32    | -0,51 | 1,848275 | -0,27781 | 0,781162 | 0,9342109 |
| MXD1               | 1249,77 | 0,13  | 0,454405 | 0,27751  | 0,781388 | 0,9343719 |
| CTC-482H14.5       | 1,97    | 0,39  | 1,421612 | 0,277508 | 0,78139  | NA        |
| GET4               | 478,73  | 0,17  | 0,596969 | 0,277421 | 0,781457 | 0,9343719 |
| TMEM132D           | 0,23    | -1,04 | 3,748196 | -0,27739 | 0,781479 | NA        |
| ARMC2              | 17,35   | -0,44 | 1,594135 | -0,27731 | 0,781541 | 0,9343719 |
| TYSND1             | 124,48  | -0,22 | 0,782916 | -0,2773  | 0,78155  | 0,9343719 |
| KIF16B             | 181,78  | 0,21  | 0,761638 | 0,277207 | 0,781621 | 0,9343719 |
| ZC3H10             | 62,14   | 0,26  | 0,928435 | 0,277018 | 0,781766 | 0,9343719 |
| RP11-73M7.10       | 352,83  | 0,13  | 0,477715 | 0,277013 | 0,78177  | 0,9343719 |
| HECA               | 662,62  | 0,12  | 0,441516 | 0,276946 | 0,781821 | 0,9343719 |
| SP7                | 0,65    | 1,02  | 3,679866 | 0,276896 | 0,78186  | NA        |
| AP000689.8         | 114,10  | 0,12  | 0,44195  | 0,276891 | 0,781864 | 0,9343719 |
| TAF15              | 73,62   | 0,19  | 0,691282 | 0,27686  | 0,781887 | 0,9343719 |
| TREX1              | 815,51  | 0,14  | 0,500346 | 0,276759 | 0,781965 | 0,9343719 |
| NSL1               | 255,03  | -0,21 | 0,744569 | -0,27675 | 0,781974 | 0,9343719 |
| GAREM2             | 11,46   | -0,16 | 0,57534  | -0,27673 | 0,781987 | 0,9343719 |
| RN7SL166P          | 3,67    | -0,44 | 1,575721 | -0,27658 | 0,782102 | NA        |
| LRCH1              | 148,01  | -0,26 | 0,936639 | -0,27658 | 0,782102 | 0,9343719 |
| RP4-734C18.1       | 0,50    | 1,04  | 3,742543 | 0,276557 | 0,78212  | NA        |
| ZNF865             | 4,03    | 0,39  | 1,415356 | 0,276553 | 0,782123 | 0,9343719 |
| PRIM2              | 67,60   | -0,22 | 0,811371 | -0,27652 | 0,782146 | 0,9343719 |
| ABC7-42404400C24.1 | 15,47   | -0,52 | 1,866251 | -0,2765  | 0,782165 | 0,9343719 |
| C3AR1              | 247,16  | -0,32 | 1,17125  | -0,27645 | 0,782201 | 0,9343719 |
| UMAD1              | 65,83   | 0,33  | 1,195592 | 0,276304 | 0,782314 | 0,9343979 |
| IRAK1              | 415,99  | -0,15 | 0,525057 | -0,27629 | 0,782323 | 0,9343979 |
| AC004893.10        | 0,42    | 1,04  | 3,747324 | 0,276218 | 0,782381 | NA        |
| ELOVL6             | 16,75   | -0,19 | 0,675932 | -0,27619 | 0,782404 | 0,9344124 |
| RP11-10L12.6       | 5,89    | 0,66  | 2,404174 | 0,276093 | 0,782477 | 0,9344124 |
| RP11-252M21.4      | 15,22   | 0,20  | 0,712571 | 0,276081 | 0,782486 | 0,9344124 |
| RP5-1115A15.2      | 0,28    | 1,03  | 3,747377 | 0,275946 | 0,782589 | NA        |
| ALG10B             | 107,31  | -0,19 | 0,684937 | -0,27591 | 0,782621 | 0,9345137 |
| CPA6               | 0,18    | -0,93 | 3,379875 | -0,2759  | 0,782624 | NA        |
| RP11-16F15.1       | 0,30    | -0,60 | 2,164738 | -0,27587 | 0,782649 | NA        |
| OXA1L              | 1684,89 | 0,09  | 0,32438  | 0,275651 | 0,782816 | 0,9346277 |
| PMAIP1             | 1501,72 | -0,09 | 0,34341  | -0,27565 | 0,782817 | 0,9346277 |
| BTBD1              | 392,98  | -0,12 | 0,430375 | -0,27558 | 0,782873 | 0,9346348 |
| C9orf47            | 0,24    | 0,80  | 2,894846 | 0,275557 | 0,782888 | NA        |
| RASSF4             | 2622,83 | -0,09 | 0,315696 | -0,27536 | 0,783039 | 0,9347729 |
| AC006947.1         | 2,84    | 0,43  | 1,554401 | 0,27532  | 0,78307  | NA        |
| DNM1P51            | 7,69    | -0,32 | 1,146022 | -0,27526 | 0,783113 | 0,9348019 |
| RSPRY1             | 462,58  | -0,15 | 0,556599 | -0,27511 | 0,783234 | 0,9348861 |
| IVL                | 0,21    | -1,03 | 3,748196 | -0,27505 | 0,783277 | NA        |
| TEX264             | 674,58  | -0,11 | 0,412039 | -0,27497 | 0,783342 | 0,934954  |
| RP4-565E6.1        | 21,09   | 0,25  | 0,921736 | 0,274902 | 0,783391 | 0,934954  |
| DHCR24             | 89,81   | -0,38 | 1,391609 | -0,27476 | 0,783503 | 0,9350271 |
| RP11-139H15.5      | 0,62    | 0,53  | 1,926406 | 0,274739 | 0,783517 | NA        |
| LA16c-306E5.3      | 0,28    | 1,03  | 3,747424 | 0,274712 | 0,783537 | NA        |
| RP1-34L19.2        | 0,51    | 1,00  | 3,64372  | 0,274685 | 0,783558 | NA        |

|                |         |       |          |          |          |           |
|----------------|---------|-------|----------|----------|----------|-----------|
| TTC9B          | 1,15    | 0,92  | 3,342663 | 0,274589 | 0,783632 | NA        |
| HGD            | 0,62    | 1,00  | 3,639243 | 0,274543 | 0,783667 | NA        |
| SLC47A2        | 1,48    | 0,47  | 1,696849 | 0,274477 | 0,783718 | NA        |
| RP11-320G10.1  | 0,26    | 1,03  | 3,747372 | 0,27443  | 0,783754 | NA        |
| RP11-1166P10.6 | 0,62    | -0,98 | 3,589366 | -0,2742  | 0,783934 | NA        |
| MTOR           | 359,10  | 0,24  | 0,873911 | 0,274059 | 0,784039 | 0,935577  |
| RP1-102E24.8   | 1,38    | -0,49 | 1,782909 | -0,27406 | 0,784039 | NA        |
| RP11-775H9.1   | 0,15    | -1,03 | 3,748196 | -0,27395 | 0,784122 | NA        |
| AC133644.2     | 12,95   | -0,48 | 1,736502 | -0,27392 | 0,784147 | 0,935577  |
| PPP1R14B       | 57,73   | -0,14 | 0,513033 | -0,27382 | 0,784219 | 0,935577  |
| GABRP          | 21,64   | -0,29 | 1,074728 | -0,27378 | 0,784253 | 0,935577  |
| CIRBP-AS1      | 33,84   | 0,29  | 1,064325 | 0,273772 | 0,78426  | 0,935577  |
| ADM2           | 3,59    | 0,40  | 1,459924 | 0,273743 | 0,784282 | NA        |
| ARHGEF35       | 0,68    | -0,98 | 3,586308 | -0,2737  | 0,784318 | NA        |
| RP11-271C24.2  | 0,31    | 1,03  | 3,747357 | 0,273686 | 0,784326 | NA        |
| ROGDI          | 386,28  | 0,12  | 0,441797 | 0,273681 | 0,78433  | 0,935577  |
| ZNF140         | 60,86   | 0,30  | 1,101972 | 0,27367  | 0,784338 | 0,935577  |
| RP5-997K18.1   | 0,14    | -1,03 | 3,748196 | -0,27361 | 0,784381 | NA        |
| RP5-965G21.6   | 2,95    | 0,76  | 2,774224 | 0,273528 | 0,784447 | NA        |
| DHX32          | 116,64  | -0,31 | 1,138894 | -0,2734  | 0,784542 | 0,935577  |
| ABCF3          | 290,48  | -0,23 | 0,843134 | -0,27334 | 0,784593 | 0,935577  |
| RP11-322M19.2  | 60,29   | -0,26 | 0,960276 | -0,27326 | 0,78465  | 0,935577  |
| BLOC1S2        | 649,84  | -0,14 | 0,509486 | -0,27323 | 0,784679 | 0,935577  |
| PBX2           | 129,61  | 0,15  | 0,551253 | 0,273145 | 0,784742 | 0,935577  |
| RP11-93G23.2   | 85,09   | -0,20 | 0,740411 | -0,27314 | 0,784743 | 0,935577  |
| RP11-481C4.2   | 34,62   | 0,21  | 0,780203 | 0,273142 | 0,784744 | 0,935577  |
| RP11-258F22.1  | 10,58   | -0,20 | 0,731194 | -0,27313 | 0,784752 | 0,935577  |
| GAMT           | 59,80   | 0,28  | 1,028425 | 0,27311  | 0,784768 | 0,935577  |
| RP11-303E16.2  | 2,32    | 0,32  | 1,189303 | 0,273091 | 0,784784 | NA        |
| RP11-227G15.12 | 16,02   | -0,28 | 1,007851 | -0,27302 | 0,78484  | 0,9355864 |
| NNT            | 738,90  | -0,16 | 0,602295 | -0,27297 | 0,784877 | 0,9355864 |
| RP11-291L19.1  | 0,45    | -0,61 | 2,236853 | -0,27294 | 0,784902 | NA        |
| FFAR3          | 0,94    | -0,76 | 2,772309 | -0,27293 | 0,78491  | NA        |
| KIRREL3-AS3    | 0,56    | 0,99  | 3,62931  | 0,272765 | 0,785034 | NA        |
| RP11-434D11.1  | 5,30    | -0,23 | 0,846844 | -0,27276 | 0,785036 | 0,9356313 |
| RP11-398F12.1  | 28,79   | -0,30 | 1,09898  | -0,27271 | 0,785074 | 0,9356313 |
| RP11-305I9.3   | 10,19   | -0,96 | 3,505609 | -0,27266 | 0,785117 | 0,9356313 |
| RF02271        | 10,03   | 0,30  | 1,108944 | 0,272654 | 0,785119 | 0,9356313 |
| CBX6           | 838,18  | 0,12  | 0,458235 | 0,272593 | 0,785166 | 0,9356313 |
| AC005363.11    | 1,31    | -0,89 | 3,256285 | -0,27251 | 0,785233 | NA        |
| OSGEPL1        | 101,98  | -0,31 | 1,144831 | -0,27248 | 0,785252 | 0,9356441 |
| AL133245.1     | 0,84    | -0,76 | 2,777392 | -0,27248 | 0,785254 | NA        |
| RPL30P13       | 0,37    | 1,02  | 3,747385 | 0,272441 | 0,785283 | NA        |
| USP3           | 1756,26 | 0,09  | 0,318992 | 0,272403 | 0,785312 | 0,9356441 |
| CTD-2536I1.1   | 23,96   | -0,30 | 1,096703 | -0,27227 | 0,785412 | 0,9356441 |
| C14orf119      | 784,05  | -0,23 | 0,844489 | -0,27218 | 0,785483 | 0,9356441 |
| RP3-340I3.1    | 2,74    | 0,36  | 1,34044  | 0,272074 | 0,785565 | NA        |
| RP1-224A6.8    | 13,53   | 0,49  | 1,791084 | 0,272054 | 0,785581 | 0,9356441 |
| EXOSC10        | 286,02  | 0,09  | 0,316211 | 0,27205  | 0,785583 | 0,9356441 |
| RP11-616K22.1  | 1,73    | 0,66  | 2,43392  | 0,271974 | 0,785642 | NA        |

|               |         |       |          |          |          |           |
|---------------|---------|-------|----------|----------|----------|-----------|
| SLC25A30      | 125,84  | 0,17  | 0,624978 | 0,271909 | 0,785692 | 0,9356441 |
| SCAP          | 416,87  | -0,14 | 0,528221 | -0,27189 | 0,785703 | 0,9356441 |
| MAPRE1        | 861,85  | -0,13 | 0,475109 | -0,27176 | 0,785805 | 0,9356441 |
| RP11-464D20.6 | 10,73   | 0,25  | 0,925153 | 0,271761 | 0,785806 | 0,9356441 |
| RP11-478K15.6 | 1,07    | -0,87 | 3,198192 | -0,27174 | 0,785819 | NA        |
| DHCR7         | 14,06   | 0,40  | 1,48033  | 0,271738 | 0,785824 | 0,9356441 |
| UBE2O         | 111,15  | 0,20  | 0,720679 | 0,271699 | 0,785853 | 0,9356441 |
| PPP2R1A       | 1094,86 | 0,07  | 0,247444 | 0,271678 | 0,78587  | 0,9356441 |
| RP11-12K11.2  | 4,99    | -0,55 | 2,007684 | -0,27158 | 0,785945 | 0,9356441 |
| OSTN          | 0,18    | -0,79 | 2,899055 | -0,27157 | 0,785953 | NA        |
| SDHAF2        | 321,86  | -0,15 | 0,554671 | -0,27155 | 0,785967 | 0,9356441 |
| NLGN2         | 1,57    | 0,73  | 2,690261 | 0,271546 | 0,785971 | NA        |
| AC144449.1    | 0,43    | -0,95 | 3,50466  | -0,27141 | 0,786073 | NA        |
| POLR2E        | 897,23  | -0,10 | 0,350549 | -0,27134 | 0,786131 | 0,9356441 |
| VGLL4         | 157,30  | -0,18 | 0,648757 | -0,27126 | 0,786189 | 0,9356441 |
| OGT           | 1955,65 | -0,11 | 0,404803 | -0,27124 | 0,78621  | 0,9356441 |
| CCDC109B      | 884,92  | 0,13  | 0,473965 | 0,271222 | 0,78622  | 0,9356441 |
| METTL13       | 147,14  | 0,27  | 0,989977 | 0,271192 | 0,786244 | 0,9356441 |
| AD000864.6    | 79,12   | -0,18 | 0,666063 | -0,27119 | 0,786248 | 0,9356441 |
| AC079807.2    | 2,60    | 0,67  | 2,466904 | 0,271119 | 0,7863   | NA        |
| DNLZ          | 65,69   | -0,33 | 1,223137 | -0,27108 | 0,786327 | 0,9356441 |
| ERLIN2        | 290,68  | 0,15  | 0,565574 | 0,271075 | 0,786333 | 0,9356441 |
| CTD-2527I21.7 | 4,61    | -0,28 | 1,024465 | -0,27085 | 0,786508 | 0,9357918 |
| RP11-379F4.4  | 0,45    | 0,56  | 2,073088 | 0,270773 | 0,786565 | NA        |
| RP11-93B10.3  | 0,82    | 1,00  | 3,70462  | 0,27069  | 0,786629 | NA        |
| ZNF654        | 196,56  | 0,21  | 0,766285 | 0,270656 | 0,786656 | 0,9359078 |
| NR6A1         | 119,21  | -0,25 | 0,933797 | -0,27048 | 0,786792 | 0,9359756 |
| FBXL20        | 638,63  | 0,18  | 0,66457  | 0,270451 | 0,786813 | 0,9359756 |
| RP11-32B5.1   | 0,28    | -0,59 | 2,169209 | -0,27041 | 0,786842 | NA        |
| RP11-450H6.3  | 1,93    | -0,65 | 2,392689 | -0,27038 | 0,78687  | NA        |
| GPR176        | 0,09    | -1,01 | 3,748196 | -0,27028 | 0,786944 | NA        |
| BORCS8        | 239,27  | -0,17 | 0,637254 | -0,27028 | 0,786944 | 0,9360715 |
| CYSLTR1       | 488,43  | 0,12  | 0,46134  | 0,270058 | 0,787116 | 0,9361477 |
| LARS          | 834,31  | -0,09 | 0,336645 | -0,26999 | 0,787168 | 0,9361477 |
| MYCBP         | 503,17  | 0,17  | 0,614461 | 0,269969 | 0,787184 | 0,9361477 |
| SLC22A14      | 0,14    | -1,01 | 3,748196 | -0,26993 | 0,787214 | NA        |
| RP11-385H1.1  | 7,61    | 0,26  | 0,945828 | 0,269929 | 0,787215 | 0,9361477 |
| AC007349.6    | 0,57    | 0,48  | 1,764122 | 0,269859 | 0,787269 | NA        |
| AC013271.7    | 4,05    | -0,19 | 0,714807 | -0,26983 | 0,787294 | 0,9361477 |
| SLC7A14       | 48,29   | 0,18  | 0,654848 | 0,269805 | 0,78731  | 0,9361477 |
| RP11-707F2.1  | 0,78    | 0,50  | 1,845109 | 0,269656 | 0,787425 | NA        |
| AJUBA         | 5,24    | -0,36 | 1,334901 | -0,26951 | 0,787541 | 0,9362567 |
| RP4-668G5.1   | 9,33    | -0,31 | 1,150819 | -0,26945 | 0,787582 | 0,9362567 |
| RP11-108M12.3 | 7,73    | -0,33 | 1,222261 | -0,26939 | 0,787626 | 0,9362567 |
| RP11-15J10.1  | 27,13   | -0,54 | 2,017795 | -0,26939 | 0,787627 | 0,9362567 |
| RF01979       | 1,39    | -0,47 | 1,727731 | -0,26939 | 0,78763  | NA        |
| SNHG8         | 475,43  | -0,09 | 0,341972 | -0,26936 | 0,787653 | 0,9362567 |
| MYO1E         | 339,88  | 0,19  | 0,723378 | 0,269288 | 0,787708 | 0,9362624 |
| MDGA2         | 4,43    | -0,45 | 1,689884 | -0,26919 | 0,787787 | 0,9362957 |
| RP11-299H22.7 | 0,84    | 0,60  | 2,213148 | 0,269107 | 0,787847 | NA        |

|                |         |       |          |          |          |           |
|----------------|---------|-------|----------|----------|----------|-----------|
| ARHGEF10       | 27,59   | 0,16  | 0,597813 | 0,269105 | 0,787849 | 0,9363096 |
| RP11-488L18.10 | 231,77  | 0,13  | 0,49368  | 0,268891 | 0,788013 | 0,936372  |
| RP11-347J14.7  | 3,31    | 0,21  | 0,789276 | 0,268887 | 0,788016 | NA        |
| RP11-307C18.1  | 0,49    | 0,98  | 3,650882 | 0,268855 | 0,788041 | NA        |
| RNF220         | 255,42  | 0,10  | 0,356018 | 0,26875  | 0,788122 | 0,936372  |
| NTMT1          | 292,60  | 0,15  | 0,559461 | 0,26875  | 0,788122 | 0,936372  |
| MED15          | 916,83  | -0,10 | 0,371508 | -0,26871 | 0,788151 | 0,936372  |
| RP11-1058B10.1 | 4,60    | 0,46  | 1,693769 | 0,268664 | 0,788188 | 0,936372  |
| GPBP1          | 1061,02 | 0,08  | 0,295298 | 0,268644 | 0,788203 | 0,936372  |
| RPL21P119      | 1,04    | 0,41  | 1,516023 | 0,268614 | 0,788227 | NA        |
| SMIM9          | 0,26    | 1,01  | 3,746805 | 0,26848  | 0,78833  | NA        |
| RP11-881L2.1   | 7,10    | 0,24  | 0,87966  | 0,268446 | 0,788356 | 0,9364092 |
| CH17-264L24.1  | 50,73   | 0,19  | 0,697241 | 0,26842  | 0,788376 | 0,9364092 |
| TPX2           | 5,77    | -0,36 | 1,333541 | -0,26841 | 0,788386 | 0,9364092 |
| RP1-122K4.3    | 2,78    | 0,31  | 1,151778 | 0,268405 | 0,788387 | NA        |
| AC018766.5     | 2,01    | 0,72  | 2,681673 | 0,268306 | 0,788464 | NA        |
| RNU6-482P      | 3,29    | -0,49 | 1,819467 | -0,26822 | 0,788527 | NA        |
| PITPNM1        | 272,88  | 0,17  | 0,640205 | 0,26818  | 0,788561 | 0,9365573 |
| ZNF589         | 200,97  | -0,20 | 0,733491 | -0,26808 | 0,788641 | 0,9365925 |
| ZNF32OS1       | 0,93    | 0,76  | 2,826866 | 0,268036 | 0,788672 | NA        |
| LYRM5          | 149,69  | 0,31  | 1,147369 | 0,267927 | 0,788756 | 0,9366695 |
| RP11-528D24.3  | 2,34    | -0,35 | 1,29489  | -0,2677  | 0,788929 | NA        |
| AC058791.1     | 259,50  | 0,20  | 0,754617 | 0,267662 | 0,788959 | 0,9367949 |
| RPA3           | 149,79  | 0,13  | 0,468539 | 0,267616 | 0,788995 | 0,9367949 |
| FASTK          | 307,07  | -0,20 | 0,730836 | -0,26759 | 0,789012 | 0,9367949 |
| RP11-637A17.2  | 2,24    | -0,45 | 1,673534 | -0,26758 | 0,789022 | NA        |
| RP11-111F5.3   | 0,46    | 0,70  | 2,618516 | 0,267422 | 0,789144 | NA        |
| ESAM           | 10,68   | 0,29  | 1,091618 | 0,267256 | 0,789272 | 0,9370436 |
| TRBV7-3        | 0,25    | 0,93  | 3,496991 | 0,267232 | 0,78929  | NA        |
| AC067945.2     | 0,82    | 0,50  | 1,876019 | 0,267228 | 0,789293 | NA        |
| AC069257.8     | 0,28    | 0,78  | 2,910761 | 0,267178 | 0,789332 | NA        |
| RP11-500M8.4   | 42,81   | -0,24 | 0,905408 | -0,26711 | 0,789387 | 0,9370748 |
| CPED1          | 284,37  | 0,16  | 0,611342 | 0,267091 | 0,789399 | 0,9370748 |
| CAPN13         | 1,82    | -0,46 | 1,705731 | -0,26706 | 0,789423 | NA        |
| RN7SL146P      | 3,03    | 0,72  | 2,681478 | 0,267056 | 0,789426 | NA        |
| RALGAPA2       | 311,54  | 0,18  | 0,655735 | 0,26701  | 0,789461 | 0,9370888 |
| TAGLN          | 94,74   | -0,27 | 0,993264 | -0,26694 | 0,789513 | 0,9370903 |
| MIR5192        | 0,46    | -0,95 | 3,545496 | -0,26682 | 0,78961  | NA        |
| MADD           | 703,72  | 0,15  | 0,560015 | 0,266761 | 0,789653 | 0,9371674 |
| LLNLR-470E3.1  | 172,73  | -0,14 | 0,51926  | -0,26673 | 0,789679 | 0,9371674 |
| ACE2           | 0,50    | 0,80  | 2,986766 | 0,26668  | 0,789715 | NA        |
| IRGQ           | 307,57  | 0,18  | 0,685693 | 0,26666  | 0,789731 | 0,9371699 |
| FAM41C         | 10,15   | 0,47  | 1,756538 | 0,266563 | 0,789805 | 0,9371981 |
| RP11-471M2.2   | 0,75    | -0,98 | 3,680557 | -0,26654 | 0,789822 | NA        |
| CTD-2207A17.1  | 1,30    | 0,58  | 2,193986 | 0,266486 | 0,789865 | NA        |
| RP11-611O2.1   | 2,44    | -0,39 | 1,451734 | -0,26647 | 0,789876 | NA        |
| SRC            | 61,03   | 0,27  | 1,022647 | 0,266421 | 0,789915 | 0,9372351 |
| MYADML         | 3,93    | -0,26 | 0,988374 | -0,26639 | 0,789937 | 0,9372351 |
| GS1-124K5.10   | 0,48    | 0,96  | 3,594538 | 0,266385 | 0,789942 | NA        |
| KEL            | 1,60    | 0,31  | 1,1769   | 0,266345 | 0,789974 | NA        |



|                |         |       |          |          |          |           |
|----------------|---------|-------|----------|----------|----------|-----------|
| RP11-632K20.8  | 0,37    | 0,61  | 2,275075 | 0,266344 | 0,789974 | NA        |
| VWC2           | 4,80    | 0,30  | 1,144819 | 0,266077 | 0,79018  | 0,937463  |
| TNPO1P1        | 26,43   | -0,55 | 2,063159 | -0,26596 | 0,790266 | 0,9375059 |
| RP11-516C1.2   | 1,10    | 0,99  | 3,716851 | 0,265931 | 0,790293 | NA        |
| TMEM200B       | 3,55    | 0,67  | 2,52411  | 0,265832 | 0,790368 | NA        |
| PEPD           | 407,09  | -0,15 | 0,56348  | -0,26577 | 0,790416 | 0,9375107 |
| CNOT6L         | 614,30  | 0,17  | 0,638503 | 0,265668 | 0,790495 | 0,9375107 |
| CTC-513N18.7   | 0,26    | 1,00  | 3,747484 | 0,265636 | 0,790519 | NA        |
| THAP2          | 130,55  | 0,24  | 0,894744 | 0,265579 | 0,790564 | 0,9375107 |
| RP11-579E24.1  | 8,31    | 0,20  | 0,738433 | 0,265524 | 0,790606 | 0,9375107 |
| DRC7           | 0,56    | -0,71 | 2,670167 | -0,26551 | 0,790617 | NA        |
| USP16          | 784,73  | 0,09  | 0,341271 | 0,265497 | 0,790627 | 0,9375107 |
| FOXO1          | 345,61  | 0,22  | 0,813518 | 0,265455 | 0,790659 | 0,9375107 |
| ZNF525         | 33,13   | -0,18 | 0,682281 | -0,2654  | 0,790704 | 0,9375107 |
| KLHL33         | 20,56   | -0,17 | 0,657704 | -0,26536 | 0,790731 | 0,9375107 |
| CALU           | 493,95  | 0,18  | 0,681169 | 0,265324 | 0,79076  | 0,9375107 |
| PARK2          | 8,06    | -0,24 | 0,919426 | -0,26531 | 0,790774 | 0,9375107 |
| RP5-1068E13.7  | 0,65    | 0,66  | 2,479913 | 0,265026 | 0,79099  | NA        |
| ESYT3          | 6,61    | 0,28  | 1,04825  | 0,264948 | 0,79105  | 0,9377775 |
| AC006116.17    | 29,60   | 0,35  | 1,325521 | 0,264776 | 0,791182 | 0,9378084 |
| RAP1GDS1       | 646,75  | -0,15 | 0,558153 | -0,26468 | 0,791257 | 0,9378084 |
| KCNH1          | 20,47   | 0,22  | 0,848022 | 0,264666 | 0,791267 | 0,9378084 |
| ADAM10         | 1054,68 | -0,12 | 0,440196 | -0,26464 | 0,791285 | 0,9378084 |
| RP11-244E17.1  | 0,37    | 0,60  | 2,264358 | 0,264641 | 0,791286 | NA        |
| CENPT          | 112,73  | 0,19  | 0,73277  | 0,264587 | 0,791328 | 0,9378084 |
| SMAD4          | 419,56  | -0,19 | 0,729663 | -0,26449 | 0,791402 | 0,9378361 |
| UGT3A1         | 0,52    | 0,96  | 3,635896 | 0,264381 | 0,791486 | NA        |
| SH3BGRL        | 2471,06 | 0,09  | 0,348829 | 0,264246 | 0,79159  | 0,938     |
| RP11-18F14.4   | 1,07    | -0,68 | 2,562164 | -0,26423 | 0,791603 | NA        |
| RP11-219B4.5   | 3,60    | -0,28 | 1,049915 | -0,26418 | 0,79164  | NA        |
| CTB-193M12.3   | 3,24    | -0,23 | 0,872813 | -0,26417 | 0,79165  | NA        |
| RP11-92A5.2    | 0,68    | 0,53  | 2,004093 | 0,264155 | 0,791661 | NA        |
| KIAA0232       | 497,82  | -0,22 | 0,84112  | -0,26414 | 0,791669 | 0,938033  |
| B3GLCT         | 10,14   | 0,50  | 1,907763 | 0,263816 | 0,791922 | 0,9381109 |
| RP11-425D10.10 | 90,23   | -0,34 | 1,278571 | -0,26375 | 0,79197  | 0,9381109 |
| CTC-340A15.2   | 34,42   | 0,17  | 0,655161 | 0,263675 | 0,79203  | 0,9381109 |
| CREB3L4        | 43,02   | -0,35 | 1,331426 | -0,26364 | 0,792054 | 0,9381109 |
| SYCE1L         | 1,23    | -0,58 | 2,216531 | -0,2636  | 0,792091 | NA        |
| DEC1           | 111,21  | 0,13  | 0,505833 | 0,263593 | 0,792093 | 0,9381109 |
| ANKRD34C       | 0,31    | 0,99  | 3,747526 | 0,26348  | 0,792181 | NA        |
| KIFC1          | 10,62   | -0,37 | 1,393867 | -0,26346 | 0,792196 | 0,9381109 |
| TNFSF8         | 177,91  | -0,25 | 0,941874 | -0,26338 | 0,792257 | 0,9381109 |
| RASD1          | 42,74   | 0,34  | 1,294548 | 0,263188 | 0,792406 | 0,9381109 |
| OPA1           | 645,12  | -0,13 | 0,480059 | -0,26318 | 0,792414 | 0,9381109 |
| MAEA           | 349,82  | -0,15 | 0,557928 | -0,26315 | 0,792436 | 0,9381109 |
| AP001057.1     | 23,75   | 0,27  | 1,012093 | 0,263093 | 0,792479 | 0,9381109 |
| CHST11         | 340,65  | -0,20 | 0,773146 | -0,26298 | 0,792563 | 0,9381109 |
| CYTH2          | 240,73  | 0,17  | 0,65664  | 0,262942 | 0,792595 | 0,9381109 |
| ZFP62          | 109,80  | -0,37 | 1,397339 | -0,26292 | 0,792609 | 0,9381109 |
| GRHPR          | 676,37  | 0,13  | 0,483716 | 0,262865 | 0,792655 | 0,9381109 |

|                |         |       |          |          |          |           |
|----------------|---------|-------|----------|----------|----------|-----------|
| RP11-274B21.11 | 1,72    | 0,79  | 3,005233 | 0,262851 | 0,792666 | NA        |
| RP11-803D5.4   | 15,97   | -0,55 | 2,106149 | -0,26284 | 0,792673 | 0,9381109 |
| MAGI3          | 44,46   | -0,46 | 1,745679 | -0,26283 | 0,792685 | 0,9381109 |
| BOD1           | 98,84   | -0,23 | 0,868234 | -0,26282 | 0,792687 | 0,9381109 |
| CTD-2561J22.2  | 1,21    | -0,48 | 1,817123 | -0,26273 | 0,792759 | NA        |
| RP11-1006G14.4 | 51,46   | -0,33 | 1,274728 | -0,26267 | 0,792806 | 0,9381109 |
| DIAPH1         | 2597,49 | 0,08  | 0,285611 | 0,262631 | 0,792835 | 0,9381109 |
| XXyac-R12DG2.3 | 0,27    | -0,88 | 3,35346  | -0,26261 | 0,792851 | NA        |
| RN7SL473P      | 81,24   | -0,33 | 1,262413 | -0,26255 | 0,792898 | 0,9381109 |
| TBC1D1         | 671,63  | -0,10 | 0,369894 | -0,26254 | 0,792909 | 0,9381109 |
| FUBP1          | 636,08  | 0,11  | 0,432445 | 0,262514 | 0,792925 | 0,9381109 |
| RP11-60I3.5    | 25,80   | 0,54  | 2,065783 | 0,262382 | 0,793027 | 0,9381109 |
| RP11-498D10.3  | 6,54    | -0,29 | 1,0978   | -0,26236 | 0,793046 | 0,9381109 |
| C8orf88        | 0,21    | -0,89 | 3,382291 | -0,26233 | 0,793065 | NA        |
| ZNF706         | 820,67  | -0,08 | 0,311885 | -0,26231 | 0,793085 | 0,9381109 |
| RP11-29A1.2    | 0,62    | -0,97 | 3,690052 | -0,26228 | 0,793109 | NA        |
| RP11-109A6.5   | 0,24    | -0,88 | 3,364987 | -0,26225 | 0,793131 | NA        |
| ERICH1         | 281,32  | 0,10  | 0,385685 | 0,262245 | 0,793132 | 0,9381109 |
| KIF17          | 25,71   | -0,42 | 1,607363 | -0,26223 | 0,793146 | 0,9381109 |
| CTB-360I.5     | 31,25   | -0,23 | 0,8637   | -0,26203 | 0,793298 | 0,9381184 |
| RP11-85F14.5   | 9,40    | -0,36 | 1,371314 | -0,26201 | 0,79331  | 0,9381184 |
| RP11-772C9.1   | 14,57   | 0,16  | 0,604947 | 0,261898 | 0,7934   | 0,9381184 |
| RP11-18M17.2   | 29,00   | -0,32 | 1,229334 | -0,2619  | 0,7934   | 0,9381184 |
| ADGRD1         | 153,58  | -0,25 | 0,94052  | -0,26189 | 0,793405 | 0,9381184 |
| ACSBG1         | 26,16   | 0,22  | 0,832056 | 0,26179  | 0,793484 | 0,9381521 |
| RP11-196G18.3  | 0,23    | -0,88 | 3,375917 | -0,26178 | 0,793492 | NA        |
| DUX4L17        | 1,07    | -0,85 | 3,253642 | -0,2617  | 0,793551 | NA        |
| AC017002.1     | 9,78    | -0,43 | 1,643336 | -0,26169 | 0,793561 | 0,9381839 |
| FLT1           | 37,45   | 0,21  | 0,817411 | 0,261547 | 0,793671 | 0,9382544 |
| RP11-231D20.2  | 7,07    | -0,36 | 1,360387 | -0,26138 | 0,793798 | 0,9383453 |
| ETFDH          | 264,84  | -0,21 | 0,785254 | -0,2613  | 0,793863 | 0,9383627 |
| ZNF112         | 0,29    | 0,80  | 3,075912 | 0,26105  | 0,794054 | NA        |
| C20orf96       | 59,65   | 0,31  | 1,179809 | 0,261016 | 0,79408  | 0,9385315 |
| DAB1           | 0,29    | 0,73  | 2,813337 | 0,260923 | 0,794152 | NA        |
| XAB2           | 149,32  | 0,22  | 0,824668 | 0,260923 | 0,794152 | 0,9385315 |
| RP11-248J18.3  | 16,06   | -0,34 | 1,306669 | -0,26092 | 0,794158 | 0,9385315 |
| RP5-906C1.1    | 2,24    | 0,37  | 1,408795 | 0,260835 | 0,794219 | NA        |
| CCDC38         | 20,58   | 0,13  | 0,515189 | 0,260806 | 0,794242 | 0,9385379 |
| TCN2           | 168,50  | -0,27 | 1,02941  | -0,26073 | 0,794301 | 0,9385379 |
| ATXN2L         | 271,28  | -0,18 | 0,685817 | -0,26071 | 0,794318 | 0,9385379 |
| SERPINB6       | 1636,98 | 0,09  | 0,353079 | 0,260647 | 0,794365 | 0,9385379 |
| RP11-366M4.7   | 2,12    | -0,24 | 0,936969 | -0,2606  | 0,794398 | NA        |
| PCSK7          | 720,96  | 0,10  | 0,390311 | 0,260577 | 0,794419 | 0,938542  |
| RP4-543J19.8   | 24,84   | -0,22 | 0,850955 | -0,26038 | 0,794574 | 0,9385683 |
| RP11-166B2.3   | 27,07   | -0,19 | 0,734782 | -0,26037 | 0,794579 | 0,9385683 |
| AC004166.7     | 77,15   | 0,19  | 0,739523 | 0,260352 | 0,794592 | 0,9385683 |
| LA16c-59E1.2   | 0,49    | 0,94  | 3,616021 | 0,2603   | 0,794632 | NA        |
| RP11-235E17.4  | 0,49    | 0,94  | 3,613811 | 0,260245 | 0,794674 | NA        |
| CREB3          | 222,05  | 0,21  | 0,805436 | 0,259962 | 0,794893 | 0,9388141 |
| KLHL9          | 226,83  | 0,19  | 0,731051 | 0,259951 | 0,794901 | 0,9388141 |

|                |         |       |          |          |          |           |
|----------------|---------|-------|----------|----------|----------|-----------|
| RP11-399C16.3  | 3,60    | 0,36  | 1,36874  | 0,259836 | 0,794991 | NA        |
| UBL3           | 460,66  | 0,13  | 0,517709 | 0,259775 | 0,795037 | 0,93883   |
| RCAN1          | 142,24  | -0,22 | 0,850753 | -0,25974 | 0,795065 | 0,93883   |
| TAB1           | 78,13   | 0,23  | 0,900328 | 0,259731 | 0,795071 | 0,93883   |
| CTD-2574D22.2  | 3,99    | -0,23 | 0,874352 | -0,25967 | 0,795117 | 0,93883   |
| SNORD117       | 0,57    | -0,54 | 2,078922 | -0,25961 | 0,795162 | NA        |
| IFI16          | 2010,75 | 0,07  | 0,272252 | 0,259599 | 0,795173 | 0,9388352 |
| PROM2          | 16,86   | -0,20 | 0,757422 | -0,25954 | 0,795222 | 0,9388352 |
| SNX6           | 761,98  | -0,13 | 0,483135 | -0,25944 | 0,795298 | 0,9388649 |
| RNU2-36P       | 0,57    | 0,46  | 1,773216 | 0,259377 | 0,795345 | NA        |
| RP11-325K4.2   | 30,81   | 0,43  | 1,66841  | 0,259124 | 0,79554  | 0,9390432 |
| WDR53          | 48,76   | 0,43  | 1,649583 | 0,258915 | 0,795701 | 0,9390432 |
| CRHR1          | 0,13    | -0,97 | 3,744295 | -0,25889 | 0,795717 | NA        |
| SYT15          | 65,50   | 0,20  | 0,753323 | 0,258884 | 0,795725 | 0,9390432 |
| PLEKHF2        | 161,24  | 0,17  | 0,653149 | 0,258766 | 0,795816 | 0,9390432 |
| ZNF26          | 406,54  | -0,13 | 0,521223 | -0,25871 | 0,79586  | 0,9390432 |
| RP11-415I12.6  | 1,23    | 0,24  | 0,94128  | 0,258661 | 0,795897 | NA        |
| GPX6           | 0,15    | -0,88 | 3,391398 | -0,2586  | 0,795945 | NA        |
| TSNARE1        | 44,75   | 0,45  | 1,738264 | 0,258542 | 0,795989 | 0,9390432 |
| LLNLR-268E12.1 | 0,72    | 0,82  | 3,159248 | 0,258458 | 0,796053 | NA        |
| RP11-434P11.2  | 4,14    | 0,89  | 3,462646 | 0,258401 | 0,796097 | 0,9390432 |
| PGBD4          | 127,24  | 0,17  | 0,64766  | 0,258259 | 0,796207 | 0,9390432 |
| COPG1          | 308,18  | -0,19 | 0,739193 | -0,25826 | 0,796209 | 0,9390432 |
| NPRL3          | 218,41  | 0,18  | 0,695741 | 0,25824  | 0,796222 | 0,9390432 |
| RP11-96O20.4   | 0,24    | 0,97  | 3,7476   | 0,258239 | 0,796223 | NA        |
| RP11-43D4.2    | 156,82  | 0,20  | 0,779127 | 0,258156 | 0,796287 | 0,9390432 |
| STAG2          | 1320,50 | 0,11  | 0,412171 | 0,258071 | 0,796352 | 0,9390432 |
| NXNL1          | 3,28    | -0,39 | 1,521244 | -0,25801 | 0,7964   | NA        |
| CHM            | 277,32  | 0,19  | 0,746752 | 0,257984 | 0,796419 | 0,9390432 |
| RNU6-1285P     | 0,72    | -0,94 | 3,640713 | -0,25796 | 0,79644  | NA        |
| DMD            | 36,98   | 0,19  | 0,73921  | 0,25783  | 0,796538 | 0,9390432 |
| ADGRD2         | 8,91    | -0,15 | 0,577907 | -0,25781 | 0,796552 | 0,9390432 |
| ACRBP          | 136,71  | -0,24 | 0,923572 | -0,25781 | 0,796552 | 0,9390432 |
| GNG2           | 554,26  | -0,10 | 0,405278 | -0,2578  | 0,796558 | 0,9390432 |
| IGLV5-37       | 0,79    | -0,61 | 2,368037 | -0,25775 | 0,796603 | NA        |
| TAF1           | 438,01  | -0,17 | 0,644251 | -0,25774 | 0,796607 | 0,9390432 |
| HIST1H2AE      | 11,09   | 0,43  | 1,651303 | 0,257719 | 0,796624 | 0,9390432 |
| SIRT2          | 499,79  | 0,10  | 0,376692 | 0,257628 | 0,796694 | 0,9390432 |
| C21orf131      | 3,29    | 0,59  | 2,306937 | 0,25751  | 0,796785 | NA        |
| TP73-AS1       | 37,30   | 0,23  | 0,897494 | 0,257494 | 0,796797 | 0,9390432 |
| RN7SL285P      | 28,60   | 0,29  | 1,125541 | 0,257488 | 0,796802 | 0,9390432 |
| FREM1          | 0,34    | -0,85 | 3,292593 | -0,25731 | 0,796938 | NA        |
| RP11-182J23.1  | 27,74   | 0,23  | 0,90552  | 0,257308 | 0,796941 | 0,9390432 |
| YIPF1          | 344,17  | 0,16  | 0,60242  | 0,2573   | 0,796947 | 0,9390432 |
| NIF3L1         | 73,37   | -0,31 | 1,21782  | -0,25714 | 0,797073 | 0,9390432 |
| RP11-306O1.2   | 4,47    | 0,27  | 1,06553  | 0,257029 | 0,797156 | 0,9390432 |
| ALS2CL         | 57,45   | 0,34  | 1,335955 | 0,25697  | 0,797202 | 0,9390432 |
| RP11-183G22.1  | 1,25    | 0,34  | 1,340446 | 0,256878 | 0,797273 | NA        |
| SPATA2L        | 53,10   | 0,37  | 1,454282 | 0,256855 | 0,797291 | 0,9390432 |
| WDR61          | 586,63  | 0,12  | 0,480291 | 0,256814 | 0,797323 | 0,9390432 |

|               |         |       |          |          |          |           |
|---------------|---------|-------|----------|----------|----------|-----------|
| KANSL1L       | 131,04  | 0,19  | 0,73624  | 0,256792 | 0,797339 | 0,9390432 |
| RP11-65L3.3   | 48,79   | -0,26 | 1,024492 | -0,25678 | 0,797348 | 0,9390432 |
| HIST1H4I      | 24,47   | 0,31  | 1,198926 | 0,25674  | 0,797379 | 0,9390432 |
| MIR548C       | 16,18   | 0,20  | 0,780121 | 0,256717 | 0,797397 | 0,9390432 |
| MIR548Z       | 16,18   | 0,20  | 0,780121 | 0,256717 | 0,797397 | 0,9390432 |
| CLTC          | 1545,95 | 0,09  | 0,362601 | 0,256702 | 0,797409 | 0,9390432 |
| SNAPC1        | 115,59  | 0,18  | 0,708254 | 0,256647 | 0,797451 | 0,9390432 |
| PLEKHG4       | 20,46   | -0,24 | 0,928345 | -0,25664 | 0,797458 | 0,9390432 |
| NAV3          | 72,81   | -0,18 | 0,684146 | -0,25663 | 0,797468 | 0,9390432 |
| RHCE          | 0,43    | -0,76 | 2,950134 | -0,25661 | 0,797481 | NA        |
| ZNF385C       | 45,58   | 0,21  | 0,828576 | 0,256588 | 0,797497 | 0,9390432 |
| ELOF1         | 522,38  | -0,12 | 0,460677 | -0,25653 | 0,79754  | 0,9390432 |
| RP11-92G12.3  | 6,12    | 0,18  | 0,683733 | 0,256513 | 0,797555 | 0,9390432 |
| ZNF616        | 21,55   | -0,29 | 1,116475 | -0,2565  | 0,797568 | 0,9390432 |
| RP11-687M24.3 | 2,63    | 0,32  | 1,231725 | 0,256255 | 0,797754 | NA        |
| RABL3         | 135,24  | 0,19  | 0,757131 | 0,256188 | 0,797805 | 0,9392628 |
| RF00425       | 1,53    | -0,84 | 3,291258 | -0,25617 | 0,797822 | NA        |
| RP11-540O11.1 | 1,02    | -0,51 | 2,00435  | -0,25616 | 0,797828 | NA        |
| RP11-325L7.2  | 0,95    | -0,58 | 2,250166 | -0,25594 | 0,797995 | NA        |
| DCAF4L2       | 1,91    | -0,51 | 1,985841 | -0,25582 | 0,798086 | NA        |
| RP11-385D13.3 | 26,70   | -0,17 | 0,655711 | -0,25579 | 0,79811  | 0,9395233 |
| PAGR1         | 245,32  | -0,14 | 0,533762 | -0,25575 | 0,798142 | 0,9395233 |
| FAR2          | 67,68   | 0,32  | 1,263529 | 0,255706 | 0,798178 | 0,9395233 |
| TNFSF11       | 0,23    | 0,96  | 3,747364 | 0,255664 | 0,79821  | NA        |
| CERS3         | 0,54    | 0,89  | 3,469916 | 0,255484 | 0,798349 | NA        |
| SIGLEC8       | 24,98   | -0,18 | 0,723452 | -0,25547 | 0,79836  | 0,9395782 |
| HACL1         | 139,80  | -0,22 | 0,864579 | -0,25542 | 0,798395 | 0,9395782 |
| AOAH          | 2523,61 | 0,06  | 0,252486 | 0,255389 | 0,798423 | 0,9395782 |
| ZDHHC5        | 268,73  | 0,14  | 0,5395   | 0,255294 | 0,798496 | 0,9395782 |
| FXYD7         | 0,58    | 0,79  | 3,108253 | 0,25528  | 0,798507 | NA        |
| RP11-173M1.4  | 5,46    | -0,24 | 0,945894 | -0,25527 | 0,798516 | 0,9395782 |
| KMT2C         | 3005,20 | 0,11  | 0,428762 | 0,25513  | 0,798623 | 0,9395782 |
| CTD-3099C6.7  | 10,30   | -0,48 | 1,865232 | -0,2551  | 0,798645 | 0,9395782 |
| C1orf64       | 13,54   | -0,26 | 1,024341 | -0,25508 | 0,798665 | 0,9395782 |
| RP11-378A13.1 | 31,18   | 0,21  | 0,827367 | 0,255018 | 0,798709 | 0,9395782 |
| ULK4          | 57,79   | 0,26  | 1,026742 | 0,254954 | 0,798759 | 0,9395782 |
| UBA6          | 577,32  | -0,09 | 0,34925  | -0,25493 | 0,79878  | 0,9395782 |
| HDAC3         | 1259,86 | -0,09 | 0,361622 | -0,25477 | 0,798902 | 0,9396624 |
| RP4-753D5.4   | 3,22    | 0,18  | 0,714336 | 0,254666 | 0,798981 | NA        |
| U52111.14     | 0,57    | -0,42 | 1,661378 | -0,25457 | 0,799055 | NA        |
| RN7SL16P      | 3,23    | -0,48 | 1,879384 | -0,25453 | 0,799086 | NA        |
| RP11-278C7.5  | 0,77    | -0,50 | 1,979566 | -0,25451 | 0,799098 | NA        |
| RP11-29H23.5  | 0,22    | -0,73 | 2,87217  | -0,2545  | 0,799108 | NA        |
| LCP2          | 1099,95 | 0,11  | 0,416086 | 0,254374 | 0,799206 | 0,939803  |
| RP11-544M22.1 | 47,10   | -0,21 | 0,829906 | -0,2543  | 0,799263 | 0,939803  |
| HEATR9        | 0,09    | -0,88 | 3,441164 | -0,2543  | 0,799265 | NA        |
| ZSCAN30       | 143,63  | -0,14 | 0,541283 | -0,25427 | 0,799285 | 0,939803  |
| SDHAF4        | 22,84   | -0,22 | 0,851804 | -0,2542  | 0,799344 | 0,939803  |
| GBP6          | 85,25   | -0,17 | 0,673715 | -0,25413 | 0,799394 | 0,939803  |
| RP1-151F17.1  | 2,78    | -0,76 | 2,9894   | -0,25409 | 0,799429 | NA        |

|                |         |       |          |          |          |           |
|----------------|---------|-------|----------|----------|----------|-----------|
| RP11-399K21.6  | 0,62    | 0,37  | 1,461183 | 0,254023 | 0,799478 | NA        |
| NUP155         | 255,43  | 0,17  | 0,66833  | 0,253975 | 0,799515 | 0,939803  |
| ATXN7L2        | 40,69   | -0,40 | 1,561434 | -0,25395 | 0,799534 | 0,939803  |
| RP11-1391J7.1  | 7,31    | -0,20 | 0,790231 | -0,25392 | 0,799557 | 0,939803  |
| IMP3           | 745,58  | 0,09  | 0,343512 | 0,253909 | 0,799566 | 0,939803  |
| GPT2           | 25,23   | -0,24 | 0,96217  | -0,25389 | 0,799577 | 0,939803  |
| TMEM115        | 110,86  | -0,23 | 0,915229 | -0,25384 | 0,799618 | 0,939803  |
| FDX1L          | 41,23   | -0,34 | 1,33225  | -0,25383 | 0,799628 | 0,939803  |
| PBK            | 0,49    | 0,88  | 3,482277 | 0,253799 | 0,799651 | NA        |
| RP11-456O19.2  | 6,28    | -0,67 | 2,659745 | -0,25376 | 0,79968  | 0,9398046 |
| LYRM2          | 493,10  | -0,17 | 0,660344 | -0,25364 | 0,79977  | 0,9398396 |
| AC006042.8     | 2,07    | 0,77  | 3,031007 | 0,253629 | 0,799782 | NA        |
| RP11-525J21.1  | 6,10    | -0,32 | 1,256718 | -0,25359 | 0,799811 | 0,9398396 |
| AC009312.1     | 3,38    | -0,37 | 1,470853 | -0,25352 | 0,799868 | NA        |
| HSD17B12       | 308,14  | -0,14 | 0,566072 | -0,2534  | 0,799962 | 0,939901  |
| RARS2          | 184,51  | -0,17 | 0,666821 | -0,25331 | 0,800032 | 0,939901  |
| HAUS4          | 383,35  | 0,14  | 0,559626 | 0,253289 | 0,800045 | 0,939901  |
| RP11-255G21.1  | 3,16    | 0,42  | 1,672735 | 0,253285 | 0,800048 | NA        |
| CACNA1G        | 13,22   | -0,20 | 0,791066 | -0,25326 | 0,800065 | 0,939901  |
| MOB3A          | 920,55  | -0,10 | 0,381496 | -0,25316 | 0,800144 | 0,939932  |
| RP11-255C15.1  | 39,31   | -0,33 | 1,309974 | -0,2531  | 0,800193 | 0,939932  |
| PON1           | 0,52    | 0,92  | 3,638006 | 0,253055 | 0,800225 | NA        |
| RP11-399E6.4   | 0,54    | -0,94 | 3,698655 | -0,25305 | 0,800228 | NA        |
| LRRC37A        | 112,83  | -0,19 | 0,73805  | -0,25294 | 0,800311 | 0,9399684 |
| RP11-100M12.2  | 2,42    | -0,51 | 2,029917 | -0,25294 | 0,800318 | NA        |
| KRBOX4         | 181,36  | -0,24 | 0,951702 | -0,25289 | 0,800357 | 0,9399684 |
| STAC2          | 6,68    | -0,21 | 0,833139 | -0,25286 | 0,800375 | 0,9399684 |
| LDLRAD4        | 508,35  | 0,13  | 0,505257 | 0,252784 | 0,800435 | 0,9399794 |
| RP11-615J4.3   | 2,08    | -0,84 | 3,333052 | -0,25278 | 0,800442 | NA        |
| ALG1           | 161,93  | 0,24  | 0,950727 | 0,252703 | 0,800498 | 0,9399941 |
| RP4-613B23.1   | 3,40    | 0,30  | 1,19893  | 0,252648 | 0,800541 | NA        |
| RP11-383G6.4   | 2,12    | -0,38 | 1,524393 | -0,2524  | 0,800733 | NA        |
| TRAPPC4        | 242,08  | -0,16 | 0,640003 | -0,25235 | 0,800773 | 0,9400832 |
| RP11-21M7.1    | 5,00    | -0,32 | 1,278002 | -0,25233 | 0,80079  | 0,9400832 |
| FUS            | 872,48  | -0,08 | 0,327243 | -0,25229 | 0,800819 | 0,9400832 |
| EIF2B2         | 192,42  | 0,23  | 0,911145 | 0,25227  | 0,800833 | 0,9400832 |
| ZNF622         | 369,42  | -0,21 | 0,824689 | -0,25223 | 0,800862 | 0,9400832 |
| EIF6           | 2125,96 | -0,07 | 0,268857 | -0,25212 | 0,800951 | 0,9400832 |
| ARMC6          | 274,91  | 0,16  | 0,624011 | 0,252088 | 0,800973 | 0,9400832 |
| MTMR4          | 265,34  | -0,22 | 0,859936 | -0,25207 | 0,800984 | 0,9400832 |
| RP11-1080G15.2 | 0,72    | 0,81  | 3,218089 | 0,252023 | 0,801023 | NA        |
| CLSTN1         | 239,43  | -0,17 | 0,667189 | -0,25196 | 0,801073 | 0,9400832 |
| ANKRD62        | 2,46    | -0,34 | 1,352111 | -0,25172 | 0,80126  | NA        |
| OR2H2          | 16,42   | 0,31  | 1,248823 | 0,251713 | 0,801263 | 0,9400832 |
| AC005077.12    | 43,39   | -0,19 | 0,766444 | -0,25168 | 0,801292 | 0,9400832 |
| RP11-323H21.3  | 3,00    | -0,24 | 0,966001 | -0,25164 | 0,801317 | NA        |
| BTLA           | 4,58    | 0,28  | 1,126249 | 0,251604 | 0,801347 | 0,9400832 |
| MFNG           | 549,81  | 0,16  | 0,619977 | 0,251559 | 0,801382 | 0,9400832 |
| PTPN13         | 28,49   | 0,43  | 1,700301 | 0,251556 | 0,801384 | 0,9400832 |
| RP13-15M17.1   | 24,04   | 0,47  | 1,849555 | 0,251492 | 0,801434 | 0,9400832 |

|               |         |       |          |          |          |           |
|---------------|---------|-------|----------|----------|----------|-----------|
| ZNF282        | 120,71  | 0,32  | 1,278731 | 0,251451 | 0,801466 | 0,9400832 |
| NDUFB6        | 375,65  | -0,10 | 0,41751  | -0,2514  | 0,801506 | 0,9400832 |
| NAXE          | 334,59  | -0,18 | 0,728055 | -0,25132 | 0,801564 | 0,9400832 |
| RP3-399J4.4   | 22,68   | -0,44 | 1,737139 | -0,25125 | 0,801623 | 0,9400832 |
| AC074019.2    | 1,08    | 0,37  | 1,47773  | 0,251192 | 0,801666 | NA        |
| CTD-2514K5.4  | 106,40  | -0,14 | 0,570175 | -0,25119 | 0,801666 | 0,9400832 |
| PTPRE         | 2419,33 | 0,06  | 0,234878 | 0,251117 | 0,801724 | 0,9400832 |
| RP11-350G13.1 | 1,69    | -0,25 | 1,002076 | -0,25109 | 0,801743 | NA        |
| SCAMP1        | 259,46  | 0,19  | 0,742023 | 0,251021 | 0,801798 | 0,9400832 |
| TBCCD1        | 178,26  | 0,17  | 0,68956  | 0,251009 | 0,801807 | 0,9400832 |
| C19orf44      | 24,03   | -0,24 | 0,969076 | -0,25098 | 0,801828 | 0,9400832 |
| RP11-480C22.1 | 1,55    | 0,42  | 1,658095 | 0,250935 | 0,801865 | NA        |
| NKAIN2        | 0,15    | -0,84 | 3,353928 | -0,25093 | 0,801868 | NA        |
| NFKBIZ        | 3323,45 | 0,07  | 0,296051 | 0,250913 | 0,801882 | 0,9400832 |
| AC062020.2    | 4,16    | -0,79 | 3,147555 | -0,25083 | 0,801949 | 0,9400832 |
| ZNF800        | 468,99  | -0,12 | 0,460863 | -0,25082 | 0,801953 | 0,9400832 |
| CAPZA2        | 2042,57 | -0,10 | 0,388046 | -0,25077 | 0,801991 | 0,9400832 |
| AC090421.1    | 45,12   | -0,32 | 1,286639 | -0,25071 | 0,802039 | 0,9400832 |
| RN7SL553P     | 2,87    | 0,43  | 1,703097 | 0,250658 | 0,802079 | NA        |
| RNU6-1053P    | 3,68    | 0,57  | 2,293663 | 0,250653 | 0,802082 | NA        |
| PHF21A        | 400,45  | -0,15 | 0,600666 | -0,25058 | 0,80214  | 0,9401422 |
| RNU2-65P      | 2,41    | 0,34  | 1,365632 | 0,250529 | 0,802178 | NA        |
| MFAP2         | 0,10    | -0,85 | 3,409277 | -0,25049 | 0,802207 | NA        |
| C16orf95      | 30,73   | 0,30  | 1,183524 | 0,250489 | 0,802209 | 0,9401638 |
| RP11-367G6.1  | 0,37    | -0,56 | 2,247586 | -0,25048 | 0,802216 | NA        |
| RP11-658F2.8  | 142,57  | 0,19  | 0,741055 | 0,250265 | 0,802382 | 0,9403073 |
| FIP1L1        | 287,77  | -0,14 | 0,565759 | -0,25012 | 0,802491 | 0,9403691 |
| RP11-302M6.3  | 1,98    | -0,84 | 3,341144 | -0,25006 | 0,80254  | NA        |
| RP11-39K24.2  | 0,52    | -0,67 | 2,694376 | -0,25001 | 0,802577 | NA        |
| LINC00294     | 123,63  | -0,22 | 0,897936 | -0,24997 | 0,802614 | 0,9403691 |
| RP11-4B16.1   | 47,94   | 0,26  | 1,023316 | 0,249906 | 0,80266  | 0,9403691 |
| ATP6V1E2      | 70,39   | -0,35 | 1,393672 | -0,24989 | 0,802672 | 0,9403691 |
| HIST1H4J      | 65,26   | 0,20  | 0,81197  | 0,24987  | 0,802688 | 0,9403691 |
| LGALS17A      | 0,81    | -0,40 | 1,60911  | -0,2498  | 0,802742 | NA        |
| ALOX15B       | 22,64   | 0,31  | 1,24046  | 0,249615 | 0,802885 | 0,9404491 |
| GUSBP4        | 16,77   | 0,37  | 1,491529 | 0,249597 | 0,802899 | 0,9404491 |
| RN7SL288P     | 18,41   | 0,24  | 0,950661 | 0,249586 | 0,802907 | 0,9404491 |
| P4HB          | 1193,94 | 0,07  | 0,290405 | 0,249453 | 0,80301  | 0,9404526 |
| FAM161A       | 51,32   | 0,21  | 0,85257  | 0,249451 | 0,803012 | 0,9404526 |
| RNA5SP149     | 0,51    | 0,90  | 3,591117 | 0,249435 | 0,803025 | NA        |
| LRR3B         | 0,46    | 0,93  | 3,743821 | 0,249325 | 0,80311  | NA        |
| RP11-638I2.2  | 32,69   | 0,11  | 0,455635 | 0,249316 | 0,803116 | 0,9404852 |
| C2orf91       | 33,33   | 0,16  | 0,648673 | 0,249181 | 0,803221 | 0,9404852 |
| MRPS10        | 256,30  | 0,11  | 0,446256 | 0,249101 | 0,803283 | 0,9404852 |
| RP4-545K15.3  | 58,14   | -0,25 | 1,008271 | -0,24909 | 0,80329  | 0,9404852 |
| C18orf8       | 159,40  | -0,22 | 0,86969  | -0,24909 | 0,803292 | 0,9404852 |
| AF238380.5    | 0,79    | 0,93  | 3,721016 | 0,248977 | 0,803379 | NA        |
| RN7SL862P     | 0,26    | 0,85  | 3,427906 | 0,248944 | 0,803404 | NA        |
| LMX1A         | 0,08    | -0,93 | 3,748196 | -0,24881 | 0,803511 | NA        |
| CTA-268H5.14  | 9,09    | -0,79 | 3,163815 | -0,24879 | 0,803527 | 0,9407008 |

|               |         |       |          |          |          |           |
|---------------|---------|-------|----------|----------|----------|-----------|
| AC072062.3    | 3,51    | 0,41  | 1,658482 | 0,248783 | 0,803529 | NA        |
| ZNF155        | 2,86    | 0,86  | 3,478054 | 0,248491 | 0,803754 | NA        |
| CRELD1        | 60,17   | 0,29  | 1,182028 | 0,248476 | 0,803766 | 0,9409221 |
| CTC-270D5.1   | 0,62    | -0,53 | 2,116392 | -0,24825 | 0,803938 | NA        |
| BBOF1         | 2,97    | -0,43 | 1,739622 | -0,24818 | 0,803997 | NA        |
| XPNPEP2       | 0,79    | 0,92  | 3,710521 | 0,248063 | 0,804085 | NA        |
| RP11-586D19.2 | 8,32    | 0,28  | 1,144346 | 0,248049 | 0,804097 | 0,9411987 |
| RIMBP3        | 9,09    | 0,72  | 2,916349 | 0,248009 | 0,804128 | 0,9411987 |
| ABRA          | 23,18   | 0,25  | 1,027326 | 0,247974 | 0,804155 | 0,9411987 |
| RP11-443F16.1 | 0,53    | 0,89  | 3,589432 | 0,247889 | 0,80422  | NA        |
| RP11-159F24.6 | 0,38    | -0,64 | 2,591268 | -0,24762 | 0,804426 | NA        |
| AC133965.1    | 2,64    | -0,40 | 1,620571 | -0,24762 | 0,804428 | NA        |
| Z69720.3      | 0,54    | 0,48  | 1,935713 | 0,247323 | 0,804658 | NA        |
| VPS35P1       | 0,39    | 0,65  | 2,620868 | 0,247279 | 0,804692 | NA        |
| CTD-2003C8.1  | 108,66  | -0,26 | 1,04393  | -0,24715 | 0,80479  | 0,9418593 |
| MB            | 0,34    | 0,93  | 3,747361 | 0,24713  | 0,804808 | NA        |
| NOC3L         | 179,57  | 0,17  | 0,670666 | 0,247069 | 0,804855 | 0,9418593 |
| CCDC148       | 5,11    | 0,28  | 1,146801 | 0,24697  | 0,804932 | 0,9418593 |
| NAPA          | 834,71  | 0,09  | 0,347657 | 0,246856 | 0,805019 | 0,9418593 |
| ASB2          | 54,60   | -0,34 | 1,389458 | -0,24685 | 0,805021 | 0,9418593 |
| FAM127A       | 134,62  | -0,15 | 0,627867 | -0,24681 | 0,805057 | 0,9418593 |
| RUVBL2        | 419,63  | -0,15 | 0,594269 | -0,24675 | 0,805105 | 0,9418593 |
| LA16c-390H2.4 | 21,83   | 0,19  | 0,751111 | 0,246677 | 0,805158 | 0,9418593 |
| GDF11         | 25,71   | 0,26  | 1,046777 | 0,246656 | 0,805175 | 0,9418593 |
| RP5-965G21.5  | 0,22    | 0,92  | 3,747797 | 0,246554 | 0,805253 | NA        |
| SLC35F1       | 1,24    | -0,40 | 1,613761 | -0,24652 | 0,805282 | NA        |
| RF00190       | 0,37    | 0,65  | 2,648333 | 0,24648  | 0,80531  | NA        |
| AC092669.3    | 232,54  | -0,08 | 0,321417 | -0,24641 | 0,805361 | 0,9419793 |
| PPCDC         | 182,97  | -0,19 | 0,75339  | -0,24639 | 0,805378 | 0,9419793 |
| CTC-444N24.13 | 0,78    | 0,92  | 3,73687  | 0,246357 | 0,805406 | NA        |
| FAM27C        | 4,66    | -0,69 | 2,794689 | -0,2463  | 0,805447 | 0,9420001 |
| AC016700.5    | 1,12    | -0,63 | 2,544913 | -0,24627 | 0,805476 | NA        |
| ANAPC7        | 240,50  | 0,17  | 0,709195 | 0,246173 | 0,805548 | 0,9420061 |
| RAB27A        | 452,39  | -0,14 | 0,549652 | -0,24615 | 0,805565 | 0,9420061 |
| SUMF2         | 417,62  | 0,08  | 0,320108 | 0,246101 | 0,805604 | 0,9420061 |
| LINC00654     | 4,85    | 0,34  | 1,395451 | 0,245991 | 0,805689 | 0,9420464 |
| ANGEL2        | 323,44  | 0,12  | 0,496845 | 0,245852 | 0,805797 | 0,9421131 |
| GUCY2D        | 6,29    | 0,35  | 1,418443 | 0,245749 | 0,805876 | 0,9421311 |
| RBM38         | 129,70  | 0,26  | 1,063784 | 0,245685 | 0,805926 | 0,9421311 |
| LRRC75A-AS1   | 4606,41 | 0,05  | 0,212215 | 0,245636 | 0,805964 | 0,9421311 |
| RN7SL762P     | 0,42    | 0,75  | 3,070422 | 0,245589 | 0,806    | NA        |
| FAM131A       | 77,66   | -0,24 | 0,988818 | -0,2455  | 0,806073 | 0,9421989 |
| CTB-96E2.10   | 1,22    | 0,81  | 3,297656 | 0,245467 | 0,806095 | NA        |
| PHC3          | 602,27  | -0,15 | 0,62794  | -0,24539 | 0,806152 | 0,9422324 |
| SMARCD1       | 217,92  | -0,18 | 0,726685 | -0,24522 | 0,80629  | 0,9422916 |
| NEURL3        | 1,48    | -0,42 | 1,69541  | -0,24521 | 0,806291 | NA        |
| NAV1          | 731,09  | 0,09  | 0,355526 | 0,245197 | 0,806304 | 0,9422916 |
| SNORD38A      | 0,92    | -0,29 | 1,164465 | -0,24517 | 0,806324 | NA        |
| RP11-10022.2  | 33,79   | 0,27  | 1,095844 | 0,245061 | 0,806409 | 0,9423289 |
| RP11-264B17.2 | 7,16    | -0,23 | 0,94464  | -0,24503 | 0,806437 | 0,9423289 |

|               |         |       |          |          |          |           |
|---------------|---------|-------|----------|----------|----------|-----------|
| RP4-597N16.4  | 0,31    | 0,85  | 3,452718 | 0,244975 | 0,806476 | NA        |
| GLT25D1       | 1849,70 | 0,07  | 0,27331  | 0,244697 | 0,806691 | 0,9425549 |
| DHX33         | 105,74  | 0,17  | 0,706051 | 0,244578 | 0,806783 | 0,9425549 |
| DIMT1         | 399,57  | -0,14 | 0,55735  | -0,24453 | 0,80682  | 0,9425549 |
| CTD-2006H14.2 | 1,50    | 0,43  | 1,764018 | 0,244478 | 0,80686  | NA        |
| SORBS1        | 82,74   | -0,32 | 1,290377 | -0,24442 | 0,806907 | 0,9425549 |
| RWDD1         | 347,19  | 0,11  | 0,45409  | 0,244411 | 0,806913 | 0,9425549 |
| RP11-98I9.4   | 8,79    | -0,42 | 1,733694 | -0,24438 | 0,806934 | 0,9425549 |
| HOXA6         | 0,28    | 0,70  | 2,870045 | 0,244246 | 0,80704  | NA        |
| DDX54         | 268,42  | 0,18  | 0,726044 | 0,244244 | 0,807042 | 0,9425666 |
| GRIK2         | 24,27   | -0,28 | 1,134175 | -0,24424 | 0,807046 | 0,9425666 |
| RBP2          | 0,26    | -0,92 | 3,748196 | -0,24422 | 0,807059 | NA        |
| MRPL16        | 901,63  | 0,14  | 0,55489  | 0,244148 | 0,807117 | 0,9425902 |
| PLK3          | 359,90  | 0,15  | 0,619184 | 0,244005 | 0,807227 | 0,9426413 |
| BTNL9         | 17,16   | -0,13 | 0,523217 | -0,24393 | 0,807282 | 0,9426413 |
| RNA5SP39      | 10,80   | 0,46  | 1,887743 | 0,243895 | 0,807312 | 0,9426413 |
| RP11-75C10.7  | 0,47    | 0,91  | 3,743455 | 0,243876 | 0,807327 | NA        |
| PRRT3         | 2,57    | -0,33 | 1,359859 | -0,24384 | 0,807352 | NA        |
| RNU6-97P      | 2,32    | 0,61  | 2,491497 | 0,243824 | 0,807367 | NA        |
| FAM234A       | 207,86  | -0,15 | 0,634347 | -0,24376 | 0,80742  | 0,9426766 |
| PICK1         | 57,09   | -0,21 | 0,844326 | -0,24365 | 0,807502 | 0,9426766 |
| RP11-856B14.1 | 33,91   | -0,27 | 1,100288 | -0,24363 | 0,807517 | 0,9426766 |
| CTA-125H2.2   | 2,89    | 0,67  | 2,735764 | 0,243623 | 0,807523 | NA        |
| SCHIP1        | 72,27   | -0,22 | 0,908048 | -0,24359 | 0,807545 | 0,9426766 |
| RP11-503P10.1 | 0,19    | 0,70  | 2,883694 | 0,243558 | 0,807573 | NA        |
| RP11-430B1.2  | 2,38    | 0,56  | 2,312308 | 0,243524 | 0,807599 | NA        |
| MIR4420       | 1,83    | -0,89 | 3,637893 | -0,24346 | 0,807649 | NA        |
| HS3ST3A1      | 0,12    | -0,69 | 2,847133 | -0,24345 | 0,807657 | NA        |
| RP11-308B5.2  | 6,04    | 0,20  | 0,831862 | 0,243443 | 0,807662 | 0,942754  |
| RP11-79E3.3   | 0,17    | -0,70 | 2,86417  | -0,24343 | 0,807674 | NA        |
| RP1-45N11.1   | 2,03    | -0,42 | 1,718989 | -0,24335 | 0,807735 | NA        |
| SPAG5         | 64,37   | 0,28  | 1,158279 | 0,243338 | 0,807744 | 0,9427696 |
| RP11-11M20.2  | 0,60    | -0,90 | 3,715324 | -0,24331 | 0,807768 | NA        |
| KLHL20        | 174,27  | -0,19 | 0,762998 | -0,24325 | 0,807815 | 0,9427696 |
| IGFN1         | 0,25    | -0,70 | 2,879024 | -0,24323 | 0,807828 | NA        |
| TMEM173       | 856,94  | -0,13 | 0,522424 | -0,24318 | 0,80787  | 0,9427696 |
| CLDND2        | 5,48    | -0,29 | 1,176831 | -0,24311 | 0,807919 | 0,9427696 |
| AXIN1         | 142,57  | 0,18  | 0,746276 | 0,243099 | 0,807929 | 0,9427696 |
| RP11-466F5.6  | 3,42    | 0,49  | 2,026381 | 0,243072 | 0,807949 | NA        |
| FNTA          | 1679,45 | 0,08  | 0,348647 | 0,242962 | 0,808035 | 0,9428341 |
| RP11-489P6.2  | 0,75    | -0,59 | 2,426045 | -0,24285 | 0,808123 | NA        |
| EXOC3L1       | 42,54   | 0,49  | 1,999728 | 0,242772 | 0,808182 | 0,942865  |
| CCDC14        | 360,91  | -0,20 | 0,803825 | -0,24277 | 0,808186 | 0,942865  |
| RP1-130L23.1  | 8,97    | 0,34  | 1,40239  | 0,242706 | 0,808233 | 0,942865  |
| NT5C3B        | 223,19  | -0,20 | 0,810387 | -0,24267 | 0,808264 | 0,942865  |
| GABRA4        | 2,32    | 0,36  | 1,470994 | 0,242628 | 0,808294 | NA        |
| ATP13A1       | 467,33  | 0,10  | 0,418966 | 0,242538 | 0,808364 | 0,942922  |
| BZW1L1        | 40,20   | -0,46 | 1,906637 | -0,24241 | 0,808461 | 0,942976  |
| RP11-315J22.1 | 0,95    | -0,27 | 1,109256 | -0,24235 | 0,808511 | NA        |
| IL1RAP        | 262,15  | 0,12  | 0,495351 | 0,242292 | 0,808554 | 0,9430254 |



|               |          |       |          |          |          |           |
|---------------|----------|-------|----------|----------|----------|-----------|
| DYDC2         | 10,64    | 0,30  | 1,236408 | 0,24216  | 0,808656 | 0,9430323 |
| CYP2G1P       | 0,10     | -0,91 | 3,748196 | -0,24216 | 0,808659 | NA        |
| TBC1D10B      | 345,39   | 0,16  | 0,6787   | 0,242154 | 0,808661 | 0,9430323 |
| RP11-697H9.2  | 0,24     | 0,84  | 3,452031 | 0,24214  | 0,808672 | NA        |
| RP11-302B13.5 | 0,45     | 0,87  | 3,607645 | 0,24194  | 0,808827 | NA        |
| ARMC5         | 32,41    | 0,37  | 1,520622 | 0,241903 | 0,808856 | 0,943181  |
| RALYL         | 7,84     | 0,21  | 0,873697 | 0,241858 | 0,80889  | 0,943181  |
| RP11-267J23.1 | 2,09     | 0,22  | 0,91795  | 0,241729 | 0,80899  | NA        |
| RNU1-130P     | 10,64    | -0,29 | 1,186232 | -0,2417  | 0,809011 | 0,9432627 |
| CTD-2308N23.5 | 2,47     | -0,31 | 1,295693 | -0,24163 | 0,80907  | NA        |
| RP11-443P15.2 | 0,05     | -0,90 | 3,738369 | -0,24162 | 0,809075 | NA        |
| CTD-3222D19.5 | 1,11     | -0,69 | 2,838599 | -0,24158 | 0,809106 | NA        |
| RP11-398A8.3  | 170,88   | 0,18  | 0,749532 | 0,241558 | 0,809123 | 0,943304  |
| GLRX3         | 596,46   | 0,08  | 0,328434 | 0,241457 | 0,809201 | 0,943304  |
| SPRED3        | 24,44    | 0,22  | 0,902803 | 0,241419 | 0,80923  | 0,943304  |
| AC084018.1    | 47,93    | 0,23  | 0,945586 | 0,241384 | 0,809257 | 0,943304  |
| RP11-245M24.1 | 12,35    | 0,19  | 0,791535 | 0,241326 | 0,809302 | 0,943304  |
| ST18          | 80,36    | -0,22 | 0,927152 | -0,24126 | 0,80935  | 0,943304  |
| AC092155.4    | 0,22     | 0,90  | 3,747921 | 0,241195 | 0,809404 | NA        |
| RNU1-77P      | 0,22     | 0,84  | 3,482285 | 0,241034 | 0,809529 | NA        |
| CNTN2         | 7,14     | -0,18 | 0,744664 | -0,24096 | 0,809583 | 0,9435052 |
| EXOC3         | 457,84   | 0,10  | 0,427123 | 0,240911 | 0,809624 | 0,9435052 |
| RP11-261C10.4 | 0,89     | 0,90  | 3,725086 | 0,240846 | 0,809674 | NA        |
| RP11-151I11.2 | 1,53     | 0,59  | 2,445893 | 0,240719 | 0,809773 | NA        |
| ICAM4         | 42,62    | 0,39  | 1,639913 | 0,240454 | 0,809978 | 0,9438453 |
| RAI1          | 68,41    | -0,21 | 0,863476 | -0,24037 | 0,810041 | 0,9438453 |
| AP000282.2    | 0,28     | -0,90 | 3,748196 | -0,24034 | 0,810064 | NA        |
| NAT1          | 42,51    | -0,37 | 1,525366 | -0,24026 | 0,810127 | 0,9438453 |
| GLRA1         | 5,88     | -0,27 | 1,114913 | -0,24023 | 0,81015  | 0,9438453 |
| JOSD1         | 501,93   | 0,16  | 0,652086 | 0,240176 | 0,810194 | 0,9438453 |
| RNF26         | 105,21   | 0,27  | 1,141999 | 0,240141 | 0,810221 | 0,9438453 |
| RP11-135A24.2 | 3,05     | -0,50 | 2,07888  | -0,2401  | 0,810249 | NA        |
| RP4-800J21.3  | 1,34     | 0,35  | 1,450815 | 0,239896 | 0,810411 | NA        |
| MROH9         | 0,30     | 0,83  | 3,44859  | 0,239868 | 0,810432 | NA        |
| ABCG5         | 4,02     | -0,40 | 1,669852 | -0,23985 | 0,810447 | 0,9440497 |
| RP11-678K21.3 | 1,75     | -0,41 | 1,691671 | -0,23975 | 0,810521 | NA        |
| RP11-278C7.4  | 3,82     | -0,39 | 1,634169 | -0,23972 | 0,810544 | 0,9440732 |
| BAHD1         | 95,55    | -0,29 | 1,207608 | -0,23969 | 0,810568 | 0,9440732 |
| EXOSC8        | 156,30   | 0,14  | 0,568343 | 0,239402 | 0,810794 | 0,9442765 |
| RHOQP1        | 0,64     | -0,87 | 3,642553 | -0,23928 | 0,81089  | NA        |
| DEPDC4        | 8,77     | 0,24  | 1,005679 | 0,239264 | 0,810901 | 0,9443308 |
| CYP3A7        | 0,04     | -0,89 | 3,736427 | -0,23925 | 0,810908 | NA        |
| SLC2A4RG      | 30,51    | 0,25  | 1,050299 | 0,239211 | 0,810942 | 0,9443308 |
| SUOX          | 72,89    | 0,20  | 0,830905 | 0,239085 | 0,81104  | 0,9443857 |
| AKIRIN2       | 737,23   | -0,11 | 0,47959  | -0,23879 | 0,811265 | 0,9445885 |
| PTER          | 226,31   | 0,23  | 0,97769  | 0,238634 | 0,811389 | 0,9446225 |
| ZNF829        | 50,49    | -0,19 | 0,794756 | -0,23846 | 0,811523 | 0,9446225 |
| PSMA5         | 1471,51  | 0,07  | 0,280493 | 0,238369 | 0,811595 | 0,9446225 |
| GAPDH         | 19946,81 | 0,05  | 0,203812 | 0,238345 | 0,811613 | 0,9446225 |
| RP11-613M10.9 | 1,04     | 0,62  | 2,600343 | 0,238295 | 0,811652 | NA        |

|               |        |       |          |          |          |           |
|---------------|--------|-------|----------|----------|----------|-----------|
| ZMAT5         | 286,16 | -0,18 | 0,740413 | -0,23829 | 0,811659 | 0,9446225 |
| AC003104.1    | 1,47   | -0,69 | 2,876666 | -0,23828 | 0,811661 | NA        |
| TUT1          | 75,70  | 0,30  | 1,240378 | 0,238212 | 0,811716 | 0,9446225 |
| RP11-116N8.2  | 11,87  | 0,32  | 1,323609 | 0,238139 | 0,811773 | 0,9446225 |
| RNA5SP190     | 1,20   | -0,87 | 3,653804 | -0,23807 | 0,811826 | NA        |
| DOLPP1        | 37,84  | -0,38 | 1,591314 | -0,23803 | 0,811862 | 0,9446225 |
| GUSBP3        | 105,88 | -0,14 | 0,586458 | -0,23802 | 0,811862 | 0,9446225 |
| SOX11         | 10,69  | 0,19  | 0,781258 | 0,238021 | 0,811865 | 0,9446225 |
| RP5-1139B12.2 | 0,77   | 0,89  | 3,737256 | 0,237969 | 0,811905 | NA        |
| RP11-498C9.17 | 7,32   | -0,16 | 0,676099 | -0,23796 | 0,811912 | 0,9446225 |
| CTD-2586B10.1 | 0,21   | 0,89  | 3,747945 | 0,237901 | 0,811958 | NA        |
| PFKFB4        | 104,99 | -0,27 | 1,11457  | -0,2379  | 0,81196  | 0,9446225 |
| C4orf27       | 143,17 | 0,14  | 0,59547  | 0,237888 | 0,811968 | 0,9446225 |
| IL27          | 11,51  | 0,26  | 1,100844 | 0,237841 | 0,812005 | 0,9446225 |
| RP3-331H24.6  | 3,69   | -0,28 | 1,181227 | -0,23782 | 0,812021 | NA        |
| RP11-798K3.3  | 1,62   | 0,46  | 1,941893 | 0,237701 | 0,812113 | NA        |
| IL3RA         | 198,16 | -0,16 | 0,656648 | -0,23763 | 0,81217  | 0,94469   |
| ZNF347        | 233,74 | 0,19  | 0,819684 | 0,237627 | 0,812171 | 0,94469   |
| ZNF546        | 58,66  | 0,21  | 0,872659 | 0,237564 | 0,812219 | 0,94469   |
| CTD-3187F8.15 | 0,81   | -0,75 | 3,162991 | -0,23751 | 0,812261 | NA        |
| ZNF532        | 281,46 | -0,17 | 0,706659 | -0,2375  | 0,812266 | 0,94469   |
| RP11-293B20.1 | 3,01   | 0,33  | 1,36993  | 0,237442 | 0,812314 | NA        |
| RP11-414H23.2 | 0,72   | -0,33 | 1,402656 | -0,23744 | 0,812318 | NA        |
| OCIAD1        | 768,20 | 0,08  | 0,34062  | 0,237426 | 0,812327 | 0,9447016 |
| RP5-1121E10.2 | 2,16   | 0,32  | 1,350103 | 0,237357 | 0,81238  | NA        |
| RP11-371B4.2  | 3,96   | 0,24  | 1,021776 | 0,237294 | 0,812429 | 0,9447232 |
| REPIN1        | 303,95 | 0,11  | 0,452592 | 0,237271 | 0,812447 | 0,9447232 |
| RP11-66B24.2  | 5,98   | -0,21 | 0,86598  | -0,23718 | 0,812517 | 0,9447377 |
| KCNIP2        | 1,08   | 0,56  | 2,341337 | 0,237178 | 0,812518 | NA        |
| NPIPBA        | 817,35 | 0,09  | 0,381785 | 0,237084 | 0,812592 | 0,9447377 |
| RP11-543P15.3 | 4,62   | 0,37  | 1,570741 | 0,237058 | 0,812611 | 0,9447377 |
| CTD-2330K9.3  | 0,51   | -0,85 | 3,576332 | -0,23692 | 0,812716 | NA        |
| RP11-382A20.4 | 4,79   | -0,29 | 1,217037 | -0,23692 | 0,812719 | 0,9448032 |
| RP11-2C23.1   | 0,21   | 0,89  | 3,747951 | 0,236882 | 0,812748 | NA        |
| RP11-15E18.1  | 2,01   | -0,41 | 1,723532 | -0,23676 | 0,812846 | NA        |
| S100A2        | 1,09   | 0,88  | 3,705796 | 0,236663 | 0,812918 | NA        |
| RP13-554M15.7 | 10,99  | 0,25  | 1,047948 | 0,236649 | 0,812929 | 0,9449885 |
| AC002467.7    | 30,96  | -0,47 | 2,003503 | -0,23655 | 0,813004 | 0,9450174 |
| C9orf43       | 0,44   | -0,88 | 3,710475 | -0,23655 | 0,813009 | NA        |
| CTD-2006K23.1 | 269,72 | 0,22  | 0,914084 | 0,236386 | 0,813133 | 0,9451075 |
| RP11-477D19.2 | 23,57  | -0,21 | 0,908266 | -0,23627 | 0,813223 | 0,9451132 |
| ADAP1         | 350,02 | 0,14  | 0,580026 | 0,236249 | 0,813239 | 0,9451132 |
| RP11-220I1.5  | 1,80   | 0,53  | 2,259132 | 0,236192 | 0,813283 | NA        |
| USP47         | 875,22 | 0,09  | 0,388324 | 0,23616  | 0,813309 | 0,9451348 |
| CTD-2537I9.18 | 2,68   | -0,37 | 1,555408 | -0,23613 | 0,813332 | NA        |
| DDX52         | 313,46 | 0,13  | 0,536399 | 0,235792 | 0,813594 | 0,9453016 |
| EMP2          | 132,63 | -0,15 | 0,6213   | -0,23576 | 0,813619 | 0,9453016 |
| ZNF160        | 247,61 | 0,12  | 0,494083 | 0,235753 | 0,813624 | 0,9453016 |
| RN7SL646P     | 2,61   | 0,54  | 2,275013 | 0,235666 | 0,813691 | NA        |
| RP11-474D1.1  | 7,75   | 0,21  | 0,89221  | 0,23566  | 0,813696 | 0,9453016 |

|               |         |       |          |          |          |           |
|---------------|---------|-------|----------|----------|----------|-----------|
| HOXB4         | 0,97    | -0,59 | 2,512717 | -0,23556 | 0,81377  | NA        |
| AC095067.1    | 11,05   | 0,42  | 1,787881 | 0,235525 | 0,813802 | 0,9453016 |
| RP11-20024.4  | 1,55    | -0,32 | 1,378594 | -0,23543 | 0,813872 | NA        |
| NBPF11        | 173,97  | -0,17 | 0,731784 | -0,23539 | 0,813904 | 0,9453016 |
| WASF2         | 2087,77 | -0,08 | 0,339514 | -0,23538 | 0,813918 | 0,9453016 |
| KB-431C1.4    | 78,18   | -0,14 | 0,594616 | -0,23537 | 0,813924 | 0,9453016 |
| DGKZ          | 378,07  | -0,11 | 0,477799 | -0,23534 | 0,813942 | 0,9453016 |
| AC069513.3    | 530,31  | -0,09 | 0,398242 | -0,23532 | 0,813964 | 0,9453016 |
| MARCH8        | 184,86  | 0,13  | 0,541078 | 0,235255 | 0,814011 | 0,9453016 |
| RNF215        | 46,97   | -0,25 | 1,045686 | -0,2351  | 0,814134 | 0,9453073 |
| RP4-566L20.1  | 1,14    | -0,86 | 3,657153 | -0,23505 | 0,81417  | NA        |
| RAB3D         | 248,41  | -0,15 | 0,61762  | -0,23503 | 0,814188 | 0,9453073 |
| SCAF8         | 333,96  | -0,15 | 0,629392 | -0,23496 | 0,814241 | 0,9453073 |
| SPAG1         | 42,70   | -0,23 | 0,999476 | -0,23492 | 0,814273 | 0,9453073 |
| SDK1          | 0,18    | -0,66 | 2,822572 | -0,23484 | 0,81433  | NA        |
| CTD-2256P15.2 | 43,59   | -0,44 | 1,868963 | -0,23483 | 0,814342 | 0,9453073 |
| SERPINB8      | 410,43  | -0,13 | 0,565257 | -0,23478 | 0,814383 | 0,9453073 |
| AC073479.1    | 6,82    | -0,25 | 1,06788  | -0,23477 | 0,814389 | 0,9453073 |
| CTB-52I2.4    | 1,14    | 0,56  | 2,38003  | 0,234736 | 0,814414 | NA        |
| TRPM3         | 42,50   | 0,22  | 0,953162 | 0,234725 | 0,814423 | 0,9453073 |
| GNAI2         | 3365,65 | 0,05  | 0,227127 | 0,234627 | 0,814498 | 0,9453326 |
| AP001055.6    | 43,75   | -0,31 | 1,302631 | -0,23457 | 0,814546 | 0,9453326 |
| AC005954.3    | 10,23   | -0,23 | 0,998387 | -0,23446 | 0,814625 | 0,9453652 |
| HNRNPR        | 1024,90 | 0,08  | 0,354649 | 0,234386 | 0,814686 | 0,9453746 |
| RMND5B        | 169,47  | 0,19  | 0,81069  | 0,234309 | 0,814745 | 0,9453746 |
| DCAF5         | 358,93  | -0,12 | 0,511369 | -0,23426 | 0,814785 | 0,9453746 |
| CHAC2         | 1,55    | 0,46  | 1,984375 | 0,234198 | 0,814831 | NA        |
| MCM9          | 220,04  | 0,17  | 0,746168 | 0,23405  | 0,814946 | 0,9455026 |
| MPI           | 227,27  | 0,18  | 0,782442 | 0,233819 | 0,815126 | 0,9456214 |
| AC092933.4    | 1,32    | -0,34 | 1,442391 | -0,23372 | 0,815199 | NA        |
| PILRB         | 389,68  | -0,15 | 0,638452 | -0,23372 | 0,8152   | 0,9456214 |
| RP11-570L15.1 | 25,91   | 0,32  | 1,352356 | 0,233687 | 0,815228 | 0,9456214 |
| RP11-464O2.2  | 4,28    | -0,41 | 1,759649 | -0,2336  | 0,815296 | 0,9456214 |
| RP11-431N15.2 | 9,32    | 0,31  | 1,315416 | 0,23359  | 0,815303 | 0,9456214 |
| RN7SL302P     | 0,24    | -0,87 | 3,748196 | -0,23337 | 0,815474 | NA        |
| RP11-662M24.1 | 1,20    | 0,27  | 1,171761 | 0,233367 | 0,815476 | NA        |
| SYNM          | 0,38    | 0,72  | 3,072407 | 0,233337 | 0,815499 | NA        |
| CTC-439O9.1   | 12,08   | 0,27  | 1,169437 | 0,233282 | 0,815542 | 0,945777  |
| ADIRF-AS1     | 67,96   | 0,24  | 1,047    | 0,233239 | 0,815576 | 0,945777  |
| WDR64         | 0,15    | -0,78 | 3,344419 | -0,23319 | 0,815614 | NA        |
| ERV3-1        | 92,02   | 0,17  | 0,723942 | 0,23317  | 0,815629 | 0,945777  |
| UCK1          | 194,89  | 0,22  | 0,925687 | 0,233156 | 0,815641 | 0,945777  |
| CUZD1         | 14,13   | -0,70 | 3,001931 | -0,23306 | 0,815718 | 0,9458074 |
| UHRF1         | 24,59   | 0,19  | 0,815749 | 0,232968 | 0,815786 | 0,9458278 |
| RP11-556O5.4  | 0,21    | 0,67  | 2,893319 | 0,232842 | 0,815884 | NA        |
| RP11-353N4.6  | 1,46    | 0,63  | 2,727671 | 0,232716 | 0,815982 | NA        |
| TMPO          | 459,77  | 0,11  | 0,461782 | 0,232702 | 0,815993 | 0,9459229 |
| RP11-74J13.8  | 40,31   | -0,20 | 0,839113 | -0,2327  | 0,815998 | 0,9459229 |
| RSAD2         | 415,61  | -0,26 | 1,10964  | -0,23263 | 0,81605  | 0,9459229 |
| FIZ1          | 60,62   | 0,25  | 1,062026 | 0,232555 | 0,816107 | 0,9459229 |

|                  |         |       |          |          |          |           |
|------------------|---------|-------|----------|----------|----------|-----------|
| RP11-46H11.3     | 28,16   | -0,17 | 0,742912 | -0,23254 | 0,816122 | 0,9459229 |
| G6PC2            | 2,89    | 0,28  | 1,215113 | 0,232399 | 0,816228 | NA        |
| C12orf4          | 126,13  | -0,20 | 0,863498 | -0,23236 | 0,816258 | 0,9460217 |
| RP11-127O4.3     | 1,41    | -0,40 | 1,711295 | -0,23235 | 0,816267 | NA        |
| SEC14L5          | 9,19    | 0,23  | 0,995029 | 0,232281 | 0,81632  | 0,9460338 |
| RP5-1029F21.4    | 6,67    | 0,19  | 0,830718 | 0,232133 | 0,816434 | 0,946071  |
| ANAPC1           | 284,08  | -0,14 | 0,609981 | -0,23211 | 0,816453 | 0,946071  |
| CTD-2650P22.2    | 0,84    | -0,65 | 2,786477 | -0,23184 | 0,816659 | NA        |
| RN7SL7P          | 5,47    | 0,48  | 2,05674  | 0,231836 | 0,816666 | 0,946185  |
| ZNF396           | 13,52   | -0,18 | 0,780514 | -0,2318  | 0,816696 | 0,946185  |
| MUC22            | 0,39    | -0,86 | 3,721216 | -0,23175 | 0,816729 | NA        |
| RP11-753C18.12   | 8,23    | 0,28  | 1,208971 | 0,231609 | 0,816841 | 0,946185  |
| ZNHIT6           | 182,86  | -0,16 | 0,685522 | -0,23149 | 0,816932 | 0,946185  |
| AC005786.6       | 8,18    | 0,13  | 0,583199 | 0,231427 | 0,816983 | 0,946185  |
| RASSF6           | 19,00   | 0,24  | 1,051296 | 0,231416 | 0,816992 | 0,946185  |
| MLST8            | 250,39  | 0,11  | 0,48703  | 0,2314   | 0,817004 | 0,946185  |
| RP11-73B2.4      | 1,42    | 0,41  | 1,761    | 0,231395 | 0,817008 | NA        |
| RP5-905H7.8      | 1,42    | 0,41  | 1,761    | 0,231395 | 0,817008 | NA        |
| RP11-407N17.4    | 6,84    | -0,61 | 2,624722 | -0,23133 | 0,817059 | 0,946185  |
| ZFR2             | 11,50   | 0,23  | 0,996994 | 0,231315 | 0,81707  | 0,946185  |
| RN7SL753P        | 0,20    | -0,87 | 3,748196 | -0,2313  | 0,817083 | NA        |
| RP11-157L3.4     | 0,31    | -0,45 | 1,949739 | -0,23129 | 0,817086 | NA        |
| PDLIM7           | 106,01  | -0,23 | 0,987675 | -0,23127 | 0,817103 | 0,946185  |
| NECAB3           | 39,01   | -0,40 | 1,729838 | -0,2312  | 0,817161 | 0,946185  |
| CANT1            | 141,57  | -0,15 | 0,638007 | -0,23113 | 0,817211 | 0,946185  |
| CHP2             | 39,48   | 0,19  | 0,822711 | 0,231131 | 0,817213 | 0,946185  |
| PRPF8            | 1312,29 | -0,07 | 0,285639 | -0,23106 | 0,817271 | 0,9461925 |
| RP11-227P3.1     | 4,19    | -0,22 | 0,933201 | -0,23099 | 0,817321 | 0,9461925 |
| NOD1             | 87,57   | 0,21  | 0,927575 | 0,2309   | 0,817392 | 0,9462161 |
| CTD-2081C10.5    | 1,02    | -0,57 | 2,463489 | -0,23089 | 0,817401 | NA        |
| GPC1             | 0,34    | -0,79 | 3,43864  | -0,23066 | 0,817579 | NA        |
| AF131216.5       | 8,01    | -0,24 | 1,033738 | -0,23058 | 0,817644 | 0,9463517 |
| AC069257.4       | 18,06   | 0,14  | 0,620654 | 0,230552 | 0,817663 | 0,9463517 |
| LIG3             | 250,58  | -0,21 | 0,917938 | -0,23034 | 0,817826 | 0,9463517 |
| PMS2L2           | 36,86   | -0,26 | 1,119458 | -0,23031 | 0,817848 | 0,9463517 |
| SPATA13          | 332,11  | 0,15  | 0,66815  | 0,230284 | 0,817871 | 0,9463517 |
| COL17A1          | 4,97    | -0,47 | 2,0225   | -0,23026 | 0,81789  | 0,9463517 |
| MMP24            | 8,04    | 0,22  | 0,944626 | 0,230259 | 0,81789  | 0,9463517 |
| RP11-546B15.1    | 8,97    | 0,48  | 2,069033 | 0,230186 | 0,817947 | 0,9463517 |
| LPAR2            | 376,86  | -0,13 | 0,585471 | -0,23011 | 0,818002 | 0,9463517 |
| NEK8             | 15,20   | -0,20 | 0,872509 | -0,23009 | 0,818018 | 0,9463517 |
| ERO1B            | 173,73  | -0,16 | 0,704215 | -0,22997 | 0,818113 | 0,9463524 |
| PRRC1            | 422,52  | -0,16 | 0,675199 | -0,22996 | 0,818121 | 0,9463524 |
| RP11-1157N2__B.2 | 0,29    | -0,57 | 2,487595 | -0,22992 | 0,818157 | NA        |
| RN7SL817P        | 4,12    | -0,25 | 1,081867 | -0,22983 | 0,818223 | 0,9463529 |
| C2orf68          | 455,81  | -0,08 | 0,366097 | -0,22981 | 0,818238 | 0,9463529 |
| LRRC46           | 1,97    | 0,58  | 2,508149 | 0,229777 | 0,818265 | NA        |
| ZNF541           | 0,37    | 0,86  | 3,747336 | 0,229737 | 0,818296 | NA        |
| ABCC8            | 2,60    | 0,27  | 1,174833 | 0,229733 | 0,818299 | NA        |
| APOE             | 4,03    | -0,22 | 0,977806 | -0,2296  | 0,818402 | 0,9463529 |

|               |         |       |          |          |          |           |
|---------------|---------|-------|----------|----------|----------|-----------|
| CTD-2130013.1 | 0,14    | -0,65 | 2,831362 | -0,22952 | 0,818464 | NA        |
| ARHGEF17      | 22,32   | -0,46 | 1,983819 | -0,22952 | 0,818466 | 0,9463529 |
| HAPLN3        | 30,24   | -0,36 | 1,551742 | -0,22949 | 0,818487 | 0,9463529 |
| MIR7111       | 1,20    | -0,65 | 2,819064 | -0,22944 | 0,818526 | NA        |
| C1orf101      | 3,93    | -0,37 | 1,607699 | -0,22944 | 0,818527 | 0,9463529 |
| ENOX2         | 133,50  | -0,18 | 0,789369 | -0,22943 | 0,818534 | 0,9463529 |
| RP4-765C7.2   | 2,18    | 0,35  | 1,508605 | 0,229311 | 0,818627 | NA        |
| RAB41         | 1,45    | -0,67 | 2,906949 | -0,2293  | 0,818635 | NA        |
| LRRC17        | 0,05    | -0,86 | 3,748196 | -0,22928 | 0,818649 | NA        |
| ZNF324        | 39,68   | 0,22  | 0,959719 | 0,229283 | 0,818649 | 0,9463529 |
| PURB          | 433,85  | 0,12  | 0,543882 | 0,229271 | 0,818658 | 0,9463529 |
| RP11-506B4.4  | 30,67   | -0,42 | 1,836234 | -0,22922 | 0,818697 | 0,9463529 |
| STAT6         | 1770,96 | -0,06 | 0,243577 | -0,2292  | 0,818714 | 0,9463529 |
| RP11-452K12.3 | 0,19    | 0,56  | 2,44544  | 0,2291   | 0,818791 | NA        |
| SIPA1L1       | 416,03  | 0,14  | 0,597694 | 0,229068 | 0,818816 | 0,9463529 |
| WASH2P        | 64,15   | 0,17  | 0,723861 | 0,229052 | 0,818829 | 0,9463529 |
| DUSP3         | 729,94  | 0,08  | 0,33518  | 0,229046 | 0,818833 | 0,9463529 |
| PDE6H         | 0,27    | 0,86  | 3,74805  | 0,229004 | 0,818866 | NA        |
| VSIG1         | 3,61    | -0,24 | 1,061887 | -0,22897 | 0,818893 | NA        |
| RP11-547D13.1 | 10,18   | 0,20  | 0,893885 | 0,228894 | 0,818951 | 0,9464305 |
| RP11-11N6.1   | 0,29    | 0,86  | 3,748052 | 0,228774 | 0,819045 | NA        |
| APRT          | 2351,25 | 0,05  | 0,206988 | 0,228702 | 0,8191   | 0,946476  |
| RP11-247A12.2 | 15,96   | 0,18  | 0,801484 | 0,228639 | 0,819149 | 0,946476  |
| THAP6         | 67,88   | 0,14  | 0,620313 | 0,22845  | 0,819296 | 0,946476  |
| SDC1          | 0,05    | -0,86 | 3,748196 | -0,22845 | 0,8193   | NA        |
| LINC00364     | 0,22    | 0,86  | 3,748054 | 0,228407 | 0,81933  | NA        |
| MB21D2        | 34,19   | 0,30  | 1,313519 | 0,228389 | 0,819344 | 0,946476  |
| TPH2          | 171,51  | -0,13 | 0,585201 | -0,22835 | 0,819371 | 0,946476  |
| RP5-837M10.3  | 2,89    | 0,69  | 3,020005 | 0,228313 | 0,819403 | NA        |
| HRAS          | 115,52  | -0,24 | 1,031151 | -0,2283  | 0,819412 | 0,946476  |
| RP5-867C24.1  | 45,43   | -0,40 | 1,748302 | -0,22828 | 0,819432 | 0,946476  |
| CCDC34        | 4,03    | 0,34  | 1,50286  | 0,228255 | 0,819448 | 0,946476  |
| RP11-718O11.1 | 15,17   | 0,22  | 0,942699 | 0,228238 | 0,819461 | 0,946476  |
| RP11-50B3.4   | 0,25    | 0,86  | 3,748056 | 0,228227 | 0,81947  | NA        |
| UBOX5         | 112,54  | 0,19  | 0,821911 | 0,228189 | 0,819499 | 0,946476  |
| AC007948.1    | 0,36    | 0,86  | 3,748056 | 0,228155 | 0,819526 | NA        |
| LRRC14        | 206,50  | 0,25  | 1,076274 | 0,228055 | 0,819604 | 0,9465381 |
| RNU6-786P     | 2,20    | 0,52  | 2,278848 | 0,22796  | 0,819677 | NA        |
| RP11-448G4.3  | 0,21    | 0,85  | 3,748058 | 0,227955 | 0,819681 | NA        |
| FAM90A17      | 0,26    | 0,85  | 3,748058 | 0,227944 | 0,81969  | NA        |
| RP11-791I24.4 | 6,40    | -0,35 | 1,52475  | -0,22783 | 0,819778 | 0,9465858 |
| INE2          | 0,26    | 0,85  | 3,748059 | 0,227815 | 0,81979  | NA        |
| RP11-390D11.2 | 0,22    | 0,85  | 3,748033 | 0,227808 | 0,819795 | NA        |
| PRKX          | 875,38  | -0,09 | 0,415393 | -0,22774 | 0,819846 | 0,9465858 |
| RP4-773A18.10 | 42,81   | -0,24 | 1,067229 | -0,22771 | 0,819869 | 0,9465858 |
| ABO           | 100,23  | -0,17 | 0,759616 | -0,22766 | 0,819913 | 0,9465858 |
| GMPR          | 48,98   | -0,37 | 1,635343 | -0,22761 | 0,819946 | 0,9465858 |
| AP001469.5    | 0,75    | 0,41  | 1,818855 | 0,227568 | 0,819982 | NA        |
| AC006538.8    | 0,21    | 0,85  | 3,74806  | 0,227553 | 0,819994 | NA        |
| CTC-204F22.1  | 10,01   | -0,18 | 0,772835 | -0,22745 | 0,820074 | 0,9465858 |

|                |         |       |          |          |          |           |
|----------------|---------|-------|----------|----------|----------|-----------|
| ZNF565         | 1,24    | 0,30  | 1,301886 | 0,227439 | 0,820082 | NA        |
| GSPT1          | 528,90  | -0,11 | 0,50505  | -0,22742 | 0,820094 | 0,9465858 |
| AC005785.5     | 9,06    | -0,25 | 1,118911 | -0,2274  | 0,820116 | 0,9465858 |
| AC105402.3     | 0,27    | 0,85  | 3,748033 | 0,227391 | 0,820119 | NA        |
| RP11-31E22.1   | 1,75    | 0,25  | 1,081267 | 0,227339 | 0,82016  | NA        |
| RRM2B          | 427,56  | 0,16  | 0,709812 | 0,227326 | 0,82017  | 0,9465858 |
| CTD-2012K14.7  | 0,36    | 0,85  | 3,748023 | 0,227295 | 0,820194 | NA        |
| KREMEN1        | 20,30   | 0,16  | 0,706475 | 0,227287 | 0,8202   | 0,9465858 |
| NCRNA00105     | 40,65   | -0,18 | 0,776382 | -0,22728 | 0,820205 | 0,9465858 |
| RP11-104O19.4  | 0,20    | 0,85  | 3,74806  | 0,22728  | 0,820206 | NA        |
| CTB-40H15.2    | 0,30    | 0,85  | 3,748062 | 0,227255 | 0,820225 | NA        |
| RP11-286O1.1   | 0,37    | 0,85  | 3,748064 | 0,226976 | 0,820442 | NA        |
| GLS            | 941,01  | -0,08 | 0,349507 | -0,22695 | 0,820465 | 0,9468231 |
| RP11-50I19.2   | 3,25    | 0,28  | 1,242779 | 0,226921 | 0,820485 | NA        |
| RN7SL165P      | 0,77    | -0,44 | 1,931281 | -0,22686 | 0,82053  | NA        |
| TMEM168        | 313,16  | -0,21 | 0,905604 | -0,22686 | 0,820533 | 0,9468231 |
| RP11-574K11.29 | 12,00   | 0,46  | 2,011245 | 0,226754 | 0,820615 | 0,9468231 |
| RP11-217B7.2   | 0,26    | 0,85  | 3,748066 | 0,226707 | 0,820652 | NA        |
| RP11-314J18.6  | 0,18    | 0,55  | 2,448254 | 0,226647 | 0,820698 | NA        |
| RP13-128O4.3   | 6,72    | -0,36 | 1,601264 | -0,22663 | 0,820709 | 0,9468231 |
| WASH6P         | 260,30  | -0,13 | 0,58466  | -0,22659 | 0,820742 | 0,9468231 |
| RP11-932O9.9   | 131,58  | 0,11  | 0,474705 | 0,226516 | 0,8208   | 0,9468231 |
| NCF4           | 691,97  | 0,11  | 0,497269 | 0,2265   | 0,820813 | 0,9468231 |
| RP11-445P17.8  | 1,17    | 0,66  | 2,935219 | 0,226469 | 0,820837 | NA        |
| CTC-471J1.9    | 1,19    | -0,37 | 1,615941 | -0,22646 | 0,820842 | NA        |
| CCDC30         | 205,25  | 0,17  | 0,757466 | 0,226364 | 0,820918 | 0,9468231 |
| ZMAT1          | 272,25  | 0,16  | 0,696065 | 0,226352 | 0,820928 | 0,9468231 |
| KB-1410C5.5    | 1,02    | -0,52 | 2,292409 | -0,22634 | 0,820933 | NA        |
| MYO1C          | 84,00   | -0,21 | 0,924426 | -0,22634 | 0,820935 | 0,9468231 |
| HMG2P28        | 0,43    | 0,81  | 3,579858 | 0,226336 | 0,82094  | NA        |
| FAM53C         | 292,23  | 0,12  | 0,526787 | 0,226297 | 0,82097  | 0,9468231 |
| NLRP4          | 0,22    | 0,85  | 3,748004 | 0,226293 | 0,820974 | NA        |
| PPCS           | 535,84  | -0,09 | 0,402352 | -0,22616 | 0,82108  | 0,9468907 |
| RP11-340B18.1  | 3,81    | -0,35 | 1,542242 | -0,22609 | 0,821133 | 0,9468939 |
| RP11-490K7.1   | 0,20    | 0,55  | 2,443084 | 0,226019 | 0,821186 | NA        |
| RP11-555K12.1  | 0,60    | 0,56  | 2,496752 | 0,226016 | 0,821189 | NA        |
| NEK3           | 267,81  | 0,15  | 0,661709 | 0,225897 | 0,821281 | 0,9469108 |
| DPM2           | 534,99  | 0,13  | 0,558298 | 0,22585  | 0,821318 | 0,9469108 |
| RP11-855A2.3   | 4,46    | -0,20 | 0,901615 | -0,22582 | 0,821344 | 0,9469108 |
| DAND5          | 10,09   | 0,14  | 0,61441  | 0,225807 | 0,821352 | 0,9469108 |
| RP11-74M11.2   | 0,34    | 0,85  | 3,748074 | 0,225629 | 0,82149  | NA        |
| LRRC10         | 6,01    | 0,31  | 1,362011 | 0,225594 | 0,821517 | 0,9469921 |
| RP11-103J8.1   | 0,30    | -0,76 | 3,37288  | -0,22553 | 0,821568 | NA        |
| EEF1AKMT4      | 107,64  | -0,33 | 1,445057 | -0,22553 | 0,821568 | 0,9469921 |
| CCBL1          | 22,43   | -0,24 | 1,053856 | -0,22552 | 0,821575 | 0,9469921 |
| RP11-58H20.3   | 0,07    | -0,85 | 3,748196 | -0,22547 | 0,821614 | NA        |
| RP1-13D10.3    | 0,77    | -0,83 | 3,671133 | -0,22546 | 0,821625 | NA        |
| CXorf29        | 4,28    | 0,26  | 1,16539  | 0,225444 | 0,821634 | 0,9470017 |
| RP11-88G17.6   | 3,97    | -0,17 | 0,767693 | -0,2253  | 0,821749 | 0,9470751 |
| NDUFS8         | 1229,53 | 0,05  | 0,215438 | 0,225166 | 0,82185  | 0,9470934 |

|                |           |       |          |          |          |           |
|----------------|-----------|-------|----------|----------|----------|-----------|
| RP11-153I24.5  | 8,59      | 0,19  | 0,855552 | 0,225145 | 0,821866 | 0,9470934 |
| TGFB1          | 107,39    | -0,17 | 0,751979 | -0,22507 | 0,821924 | 0,9470948 |
| AC091801.1     | 13,06     | 0,19  | 0,856587 | 0,225013 | 0,821969 | 0,9470948 |
| FAM171A1       | 0,21      | 0,84  | 3,747402 | 0,225006 | 0,821975 | NA        |
| PPP1R18        | 570,67    | 0,09  | 0,399613 | 0,224901 | 0,822057 | 0,9471366 |
| MT-TT          | 5,57      | -0,18 | 0,804752 | -0,22467 | 0,822239 | 0,9472884 |
| ZDHHC7         | 545,55    | 0,09  | 0,389455 | 0,224563 | 0,82232  | 0,9472891 |
| EPSTI1         | 1347,00   | -0,13 | 0,561562 | -0,22453 | 0,822346 | 0,9472891 |
| CCDC90B        | 437,92    | -0,08 | 0,356659 | -0,22447 | 0,822393 | 0,9472891 |
| KPNB1          | 827,38    | -0,08 | 0,344326 | -0,22435 | 0,822484 | 0,9473358 |
| RNU2-70P       | 0,55      | -0,46 | 2,05237  | -0,22428 | 0,822538 | NA        |
| RN7SL684P      | 0,43      | 0,84  | 3,744388 | 0,224242 | 0,822569 | NA        |
| TOMM40         | 115,22    | 0,15  | 0,654153 | 0,224196 | 0,822605 | 0,9473891 |
| RP11-58E21.3   | 257,94    | 0,13  | 0,575886 | 0,224161 | 0,822632 | 0,9473891 |
| SERTAD3        | 88,77     | 0,15  | 0,685768 | 0,224092 | 0,822686 | 0,9473926 |
| CREB5          | 988,27    | -0,16 | 0,702299 | -0,22395 | 0,822798 | 0,9474632 |
| RP11-626H12.3  | 0,20      | 0,84  | 3,747253 | 0,223794 | 0,822918 | NA        |
| RP11-274B21.9  | 4,84      | -0,36 | 1,602012 | -0,22365 | 0,823027 | 0,9475588 |
| ALKBH7         | 576,56    | -0,07 | 0,302094 | -0,22363 | 0,823042 | 0,9475588 |
| CNGB1          | 26,87     | -0,18 | 0,784585 | -0,22361 | 0,823058 | 0,9475588 |
| RAB14          | 782,90    | -0,09 | 0,420973 | -0,22358 | 0,823085 | 0,9475588 |
| RP11-1023P17.2 | 2,81      | 0,57  | 2,529339 | 0,223533 | 0,823121 | NA        |
| LRRC25         | 610,59    | -0,11 | 0,474289 | -0,22344 | 0,82319  | 0,9476209 |
| RP11-373E16.3  | 2,37      | -0,32 | 1,44029  | -0,22324 | 0,823348 | NA        |
| RP11-47I22.2   | 1,62      | -0,34 | 1,544042 | -0,22323 | 0,823357 | NA        |
| HSPBP1         | 136,90    | -0,20 | 0,875991 | -0,22319 | 0,823388 | 0,9477903 |
| HEXIM1         | 297,57    | 0,12  | 0,530734 | 0,22312  | 0,823442 | 0,9477935 |
| HAND2-AS1      | 105,91    | -0,15 | 0,658713 | -0,22292 | 0,823598 | 0,9479108 |
| PRKAG1         | 347,29    | 0,09  | 0,41781  | 0,222859 | 0,823646 | 0,9479108 |
| C7orf49        | 207,20    | 0,19  | 0,853405 | 0,222692 | 0,823775 | 0,9479686 |
| RP11-270M14.4  | 0,06      | -0,83 | 3,748196 | -0,22266 | 0,8238   | NA        |
| GAD1           | 0,19      | 0,68  | 3,06454  | 0,22263  | 0,823824 | NA        |
| PRKG1          | 8,95      | 0,27  | 1,215138 | 0,222607 | 0,823841 | 0,9479686 |
| GIGYF1         | 196,32    | 0,09  | 0,414315 | 0,222598 | 0,823849 | 0,9479686 |
| TEKT5          | 7,13      | -0,66 | 2,951559 | -0,22234 | 0,824046 | 0,9481373 |
| LIMD2          | 1215,19   | -0,06 | 0,257859 | -0,22215 | 0,824199 | 0,9481493 |
| CEP97          | 110,67    | -0,19 | 0,872519 | -0,22213 | 0,824211 | 0,9481493 |
| KALRN          | 210,38    | -0,31 | 1,397136 | -0,22213 | 0,824215 | 0,9481493 |
| CH507-513H4.4  | 229190,84 | -0,05 | 0,225872 | -0,22207 | 0,824261 | 0,9481493 |
| RP11-379C10.1  | 3,38      | -0,31 | 1,380377 | -0,22202 | 0,824302 | NA        |
| CH507-513H4.3  | 229190,54 | -0,05 | 0,225867 | -0,22198 | 0,824328 | 0,9481687 |
| ORC2           | 107,78    | -0,11 | 0,473496 | -0,2218  | 0,824466 | 0,9482174 |
| NOXA1          | 96,55     | -0,23 | 1,017403 | -0,2218  | 0,824473 | 0,9482174 |
| SLC35D2        | 111,40    | 0,17  | 0,787591 | 0,221705 | 0,824544 | 0,9482405 |
| EFCAB13        | 32,57     | -0,22 | 1,01023  | -0,22159 | 0,824631 | 0,9482621 |
| CH507-513H4.6  | 229203,51 | -0,05 | 0,225888 | -0,22149 | 0,824714 | 0,9482621 |
| CTC-471J1.2    | 1,89      | -0,33 | 1,506564 | -0,22139 | 0,824786 | NA        |
| ERH            | 217,75    | 0,09  | 0,399086 | 0,221389 | 0,82479  | 0,9482621 |
| RP11-6N17.2    | 30,46     | 0,12  | 0,56198  | 0,221382 | 0,824795 | 0,9482621 |
| RP11-327E2.5   | 17,65     | 0,20  | 0,924637 | 0,221327 | 0,824838 | 0,9482621 |

|               |         |       |          |          |          |           |
|---------------|---------|-------|----------|----------|----------|-----------|
| SPACA6        | 10,91   | -0,20 | 0,914946 | -0,22126 | 0,82489  | 0,9482621 |
| ORC4          | 761,11  | -0,14 | 0,655105 | -0,22122 | 0,824919 | 0,9482621 |
| EXOSC5        | 435,38  | -0,14 | 0,638845 | -0,22115 | 0,824977 | 0,9482694 |
| RP11-219A15.4 | 1,08    | 0,52  | 2,373511 | 0,221136 | 0,824987 | NA        |
| RN7SL43P      | 0,92    | 0,50  | 2,279255 | 0,220967 | 0,825118 | NA        |
| RP11-349F21.2 | 7,97    | 0,20  | 0,924358 | 0,220821 | 0,825232 | 0,9485045 |
| TMEM148       | 2,96    | 0,23  | 1,056778 | 0,220789 | 0,825257 | NA        |
| FAM71E1       | 0,24    | 0,83  | 3,748108 | 0,220701 | 0,825325 | NA        |
| RP11-1000B6.7 | 47,66   | -0,33 | 1,488813 | -0,22064 | 0,82537  | 0,948604  |
| RN7SL308P     | 3,21    | 0,36  | 1,652203 | 0,220635 | 0,825377 | NA        |
| DCK           | 249,49  | -0,11 | 0,51672  | -0,22048 | 0,825499 | 0,94866   |
| RP11-252I13.2 | 0,45    | 0,83  | 3,744381 | 0,220459 | 0,825513 | NA        |
| ADAM22        | 9,88    | 0,36  | 1,654493 | 0,220312 | 0,825628 | 0,94866   |
| CTD-2036P10.3 | 152,92  | -0,31 | 1,414741 | -0,22031 | 0,825632 | 0,94866   |
| CTD-2530N21.4 | 0,55    | -0,80 | 3,626856 | -0,2203  | 0,825637 | NA        |
| CTC-470E21.2  | 0,05    | -0,83 | 3,748196 | -0,22018 | 0,825733 | NA        |
| AURKB         | 29,60   | -0,32 | 1,459192 | -0,22017 | 0,82574  | 0,94866   |
| LSG1          | 343,75  | -0,16 | 0,736818 | -0,22011 | 0,825782 | 0,94866   |
| NFIC          | 106,78  | 0,15  | 0,667965 | 0,219909 | 0,825942 | 0,94866   |
| RNF13         | 1462,81 | -0,09 | 0,409647 | -0,21989 | 0,825959 | 0,94866   |
| DHRS12        | 76,74   | -0,24 | 1,073909 | -0,21986 | 0,825981 | 0,94866   |
| MYCBP2-AS1    | 87,16   | -0,16 | 0,748359 | -0,21984 | 0,825993 | 0,94866   |
| RP5-1129J21.3 | 19,55   | 0,25  | 1,117611 | 0,219822 | 0,82601  | 0,94866   |
| AC005593.2    | 29,36   | 0,37  | 1,693434 | 0,219804 | 0,826024 | 0,94866   |
| CATSPER2      | 78,21   | -0,17 | 0,761247 | -0,2198  | 0,82603  | 0,94866   |
| LLNLR-263F3.1 | 10,25   | 0,19  | 0,87314  | 0,219666 | 0,826131 | 0,9487142 |
| RP5-864K19.6  | 3,74    | 0,62  | 2,805672 | 0,219638 | 0,826153 | NA        |
| LINC00467     | 56,92   | -0,17 | 0,786284 | -0,2196  | 0,826184 | 0,9487142 |
| NEDD8-MDP1    | 0,20    | 0,82  | 3,747807 | 0,219512 | 0,826251 | NA        |
| CTC-378H22.2  | 11,53   | -0,35 | 1,582023 | -0,21951 | 0,826256 | 0,9487142 |
| TMEM220-AS1   | 2,18    | 0,53  | 2,411995 | 0,219493 | 0,826266 | NA        |
| INF2          | 269,30  | -0,11 | 0,50893  | -0,21938 | 0,826356 | 0,9487142 |
| RASGRF2       | 7,19    | -0,42 | 1,909953 | -0,21934 | 0,826384 | 0,9487142 |
| CTB-164N12.1  | 0,06    | -0,82 | 3,748196 | -0,21932 | 0,826403 | NA        |
| WHAMML1       | 74,72   | -0,11 | 0,488127 | -0,21923 | 0,826471 | 0,9487142 |
| TMEM223       | 391,70  | -0,15 | 0,662395 | -0,21918 | 0,826512 | 0,9487142 |
| AC005154.6    | 696,42  | -0,10 | 0,451534 | -0,21914 | 0,826544 | 0,9487142 |
| OR11A1        | 18,23   | 0,24  | 1,092341 | 0,219084 | 0,826585 | 0,9487142 |
| RP11-446H18.3 | 1,59    | 0,58  | 2,652125 | 0,218982 | 0,826664 | NA        |
| AC008533.1    | 8,94    | -0,36 | 1,644053 | -0,21888 | 0,826744 | 0,9487142 |
| RASEF         | 45,87   | 0,10  | 0,468726 | 0,218879 | 0,826744 | 0,9487142 |
| BMP8B         | 44,26   | -0,17 | 0,787166 | -0,21884 | 0,826774 | 0,9487142 |
| TP53TG1       | 73,49   | 0,17  | 0,777006 | 0,218817 | 0,826792 | 0,9487142 |
| WDR91         | 267,02  | 0,23  | 1,03218  | 0,218522 | 0,827022 | 0,9487142 |
| MDK           | 4,20    | 0,39  | 1,795377 | 0,21851  | 0,827032 | 0,9487142 |
| RP11-40C6.2   | 0,53    | 0,43  | 1,967453 | 0,218436 | 0,827089 | NA        |
| NEIL2         | 86,80   | -0,29 | 1,339967 | -0,2184  | 0,827119 | 0,9487142 |
| AL133243.1    | 102,37  | -0,24 | 1,078784 | -0,21839 | 0,827124 | 0,9487142 |
| TNFAIP8L2     | 990,32  | 0,12  | 0,553982 | 0,218352 | 0,827155 | 0,9487142 |
| RPL23AP79     | 174,36  | -0,13 | 0,579796 | -0,21824 | 0,827238 | 0,9487142 |



|                |          |       |          |          |          |           |
|----------------|----------|-------|----------|----------|----------|-----------|
| LA16c-60D12.1  | 87,41    | -0,15 | 0,709527 | -0,21821 | 0,827262 | 0,9487142 |
| SRA1           | 1317,60  | 0,09  | 0,427937 | 0,218208 | 0,827267 | 0,9487142 |
| RP11-166P13.4  | 24,22    | 0,20  | 0,920669 | 0,21819  | 0,827281 | 0,9487142 |
| SUCLG2         | 181,67   | 0,15  | 0,693326 | 0,218169 | 0,827297 | 0,9487142 |
| CEBPA          | 174,06   | 0,17  | 0,798759 | 0,218096 | 0,827355 | 0,9487142 |
| RP11-76N22.2   | 11,91    | -0,21 | 0,9472   | -0,21809 | 0,827359 | 0,9487142 |
| B2M            | 99772,29 | 0,04  | 0,202713 | 0,218033 | 0,827403 | 0,9487142 |
| EIF2AK3        | 108,12   | -0,22 | 1,017121 | -0,2179  | 0,827503 | 0,9487354 |
| RP11-254I22.3  | 0,66     | 0,70  | 3,229311 | 0,217877 | 0,827525 | NA        |
| PRKRA          | 403,34   | -0,14 | 0,637565 | -0,21779 | 0,827593 | 0,9487354 |
| RNF212         | 9,81     | -0,33 | 1,499327 | -0,21777 | 0,827606 | 0,9487354 |
| CASP16P        | 8,15     | 0,20  | 0,899069 | 0,217748 | 0,827626 | 0,9487354 |
| AC136007.2     | 853,08   | 0,07  | 0,302223 | 0,217642 | 0,827708 | 0,9487358 |
| RP5-1189B24.3  | 0,19     | 0,82  | 3,748023 | 0,217568 | 0,827765 | NA        |
| C17orf62       | 1387,47  | 0,09  | 0,404518 | 0,217518 | 0,827805 | 0,9487358 |
| RAB26          | 1,45     | -0,25 | 1,157035 | -0,21747 | 0,827843 | NA        |
| RP11-718B12.2  | 0,41     | 0,78  | 3,594916 | 0,217439 | 0,827866 | NA        |
| RPS3P2         | 0,37     | 0,67  | 3,066118 | 0,217392 | 0,827903 | NA        |
| GGA1           | 312,85   | -0,10 | 0,474909 | -0,21736 | 0,827932 | 0,9487358 |
| CISD2          | 228,50   | -0,14 | 0,640417 | -0,21733 | 0,827952 | 0,9487358 |
| AEBP2          | 240,23   | 0,10  | 0,482047 | 0,2173   | 0,827975 | 0,9487358 |
| RP11-727F15.14 | 33,64    | -0,31 | 1,441801 | -0,21729 | 0,82798  | 0,9487358 |
| RBM14-RBM4     | 185,07   | -0,24 | 1,095513 | -0,21727 | 0,828001 | 0,9487358 |
| BEX5           | 0,23     | 0,81  | 3,748124 | 0,217251 | 0,828013 | NA        |
| RP11-288C18.1  | 24,48    | -0,29 | 1,3163   | -0,21722 | 0,828034 | 0,9487358 |
| BPIFA4P        | 0,19     | 0,81  | 3,748082 | 0,217205 | 0,828049 | NA        |
| RNU7-56P       | 0,43     | 0,78  | 3,578444 | 0,217052 | 0,828168 | NA        |
| SEPT11         | 487,57   | 0,17  | 0,765402 | 0,217027 | 0,828188 | 0,9487752 |
| CXXC4          | 0,51     | -0,58 | 2,662707 | -0,21697 | 0,82823  | NA        |
| CHAT           | 3,84     | 0,36  | 1,657094 | 0,216961 | 0,828239 | 0,9487752 |
| LINC00189      | 4,10     | -0,31 | 1,408975 | -0,21692 | 0,828268 | 0,9487752 |
| RN7SL697P      | 4,73     | -0,31 | 1,419469 | -0,21692 | 0,828272 | 0,9487752 |
| CD82           | 34,77    | -0,26 | 1,19521  | -0,21684 | 0,828334 | 0,9487755 |
| DNASE1L1       | 197,30   | -0,19 | 0,857176 | -0,21671 | 0,828431 | 0,9487755 |
| SPECC1L        | 195,75   | -0,19 | 0,87485  | -0,21663 | 0,828494 | 0,9487755 |
| PIKFYVE        | 519,60   | 0,12  | 0,54935  | 0,216629 | 0,828497 | 0,9487755 |
| RP11-318C24.1  | 2,12     | -0,23 | 1,040971 | -0,21661 | 0,828511 | NA        |
| ZDHHC6         | 370,54   | -0,15 | 0,702631 | -0,21655 | 0,828557 | 0,9487755 |
| CENPS          | 3,45     | 0,56  | 2,606977 | 0,216552 | 0,828558 | NA        |
| RWDD4          | 125,62   | -0,11 | 0,516844 | -0,21647 | 0,828623 | 0,9487755 |
| C2CD5          | 289,76   | -0,12 | 0,55658  | -0,21645 | 0,828634 | 0,9487755 |
| RP11-731I19.1  | 0,49     | -0,56 | 2,600781 | -0,21631 | 0,828744 | NA        |
| ZFC3H1         | 947,69   | 0,10  | 0,467042 | 0,216292 | 0,82876  | 0,9487755 |
| BTF3L4         | 579,87   | -0,11 | 0,514939 | -0,21628 | 0,82877  | 0,9487755 |
| THAP7-AS1      | 10,24    | 0,36  | 1,667161 | 0,216263 | 0,828783 | 0,9487755 |
| CSF1R          | 1664,78  | 0,06  | 0,278075 | 0,216161 | 0,828862 | 0,9488083 |
| METTL22        | 217,17   | -0,16 | 0,756002 | -0,21608 | 0,828927 | 0,9488247 |
| TBCK           | 265,11   | 0,13  | 0,603673 | 0,215987 | 0,828998 | 0,9488279 |
| RP11-156P1.2   | 11,02    | -0,25 | 1,140435 | -0,21594 | 0,829034 | 0,9488279 |
| AHCTF1         | 318,92   | -0,16 | 0,734059 | -0,21588 | 0,829083 | 0,9488279 |

|                 |         |       |          |          |          |           |
|-----------------|---------|-------|----------|----------|----------|-----------|
| UNC50           | 196,08  | 0,15  | 0,712816 | 0,215704 | 0,829219 | 0,9489245 |
| RP11-96K19.5    | 2,10    | -0,58 | 2,684095 | -0,21552 | 0,829362 | NA        |
| MIR581          | 0,88    | 0,71  | 3,283092 | 0,215433 | 0,82943  | NA        |
| RP4-633I8.2     | 2,48    | 0,30  | 1,385106 | 0,215406 | 0,829451 | NA        |
| CDK10           | 334,79  | -0,11 | 0,522405 | -0,21532 | 0,82952  | 0,9490673 |
| CPAMD8          | 24,91   | -0,20 | 0,909077 | -0,21515 | 0,829654 | 0,9490673 |
| RP5-1063M23.3   | 23,24   | 0,19  | 0,892245 | 0,2151   | 0,829689 | 0,9490673 |
| RP11-933H2.4    | 13,06   | -0,21 | 0,990566 | -0,21505 | 0,829727 | 0,9490673 |
| BAZ1B           | 466,63  | -0,09 | 0,422379 | -0,21503 | 0,829747 | 0,9490673 |
| KCNJ13          | 77,49   | 0,33  | 1,537496 | 0,214982 | 0,829781 | 0,9490673 |
| CSRN2           | 57,79   | -0,25 | 1,158085 | -0,21494 | 0,829811 | 0,9490673 |
| AC093415.2      | 129,29  | 0,13  | 0,614724 | 0,214905 | 0,829841 | 0,9490673 |
| RP11-849N15.5   | 7,16    | 0,20  | 0,915653 | 0,214899 | 0,829846 | 0,9490673 |
| EIF4EBP3        | 150,10  | 0,14  | 0,650446 | 0,214889 | 0,829854 | 0,9490673 |
| CTC-366B18.4    | 12,36   | -0,35 | 1,626578 | -0,2147  | 0,830002 | 0,9491251 |
| RP11-144I2.1    | 10,51   | 0,21  | 0,977751 | 0,214694 | 0,830006 | 0,9491251 |
| AC002116.7      | 1,63    | -0,64 | 2,959969 | -0,21453 | 0,830132 | NA        |
| RP11-379B18.8   | 160,14  | -0,12 | 0,54613  | -0,21453 | 0,830135 | 0,9492138 |
| RP11-886P16.10  | 0,43    | 0,77  | 3,582495 | 0,214301 | 0,830312 | NA        |
| AC110299.1      | 0,79    | -0,68 | 3,169699 | -0,2143  | 0,830314 | NA        |
| RNU6-11P        | 0,42    | 0,78  | 3,619468 | 0,214199 | 0,830392 | NA        |
| RNU6-37P        | 0,42    | 0,78  | 3,619468 | 0,214199 | 0,830392 | NA        |
| TXLNA           | 335,28  | 0,14  | 0,631983 | 0,214196 | 0,830394 | 0,9493981 |
| SAMD14          | 8,31    | -0,54 | 2,501276 | -0,21419 | 0,830398 | 0,9493981 |
| HPGDS           | 0,24    | 0,74  | 3,469068 | 0,214102 | 0,830467 | NA        |
| AC009429.1      | 0,42    | 0,77  | 3,614827 | 0,21407  | 0,830493 | NA        |
| RPL23AP2        | 4,31    | 0,14  | 0,674232 | 0,213926 | 0,830605 | 0,9495228 |
| ASPA            | 134,74  | 0,09  | 0,401012 | 0,21392  | 0,830609 | 0,9495228 |
| MRPL34          | 556,80  | 0,10  | 0,479862 | 0,213785 | 0,830714 | 0,9495847 |
| CTD-2026K11.2   | 2,92    | -0,28 | 1,318314 | -0,21343 | 0,830995 | NA        |
| RP11-61K9.3     | 40,36   | -0,37 | 1,749187 | -0,21342 | 0,831001 | 0,9498545 |
| RP4-803J11.2    | 1,99    | 0,72  | 3,359214 | 0,213213 | 0,831161 | NA        |
| LRP10           | 317,55  | -0,11 | 0,518019 | -0,21317 | 0,831193 | 0,9500149 |
| GNPNAT1         | 48,68   | 0,21  | 0,965632 | 0,213106 | 0,831245 | 0,9500158 |
| GBA3            | 0,54    | 0,80  | 3,742233 | 0,213078 | 0,831266 | NA        |
| SHMT1           | 127,35  | -0,25 | 1,190885 | -0,21303 | 0,831303 | 0,9500236 |
| RP11-181G12.2   | 0,21    | 0,80  | 3,747913 | 0,213008 | 0,831321 | NA        |
| ASCC2           | 469,98  | -0,13 | 0,600786 | -0,21293 | 0,831381 | 0,9500546 |
| RP11-499F3.2    | 3,17    | -0,42 | 1,969186 | -0,21263 | 0,831616 | NA        |
| RP11-54A9.1     | 0,74    | -0,58 | 2,718933 | -0,21241 | 0,831791 | NA        |
| XXbac-BPG27H4.8 | 2,21    | 0,42  | 1,985685 | 0,212377 | 0,831813 | NA        |
| CTD-2047H16.2   | 1,24    | 0,40  | 1,90331  | 0,212366 | 0,831822 | NA        |
| PMCHL2          | 0,63    | 0,46  | 2,187191 | 0,212278 | 0,83189  | NA        |
| NUCB2           | 185,82  | -0,14 | 0,655575 | -0,21226 | 0,831902 | 0,9504662 |
| SLC22A25        | 49,61   | -0,16 | 0,751838 | -0,21225 | 0,831911 | 0,9504662 |
| RP1-102K2.6     | 1,92    | 0,30  | 1,393045 | 0,212114 | 0,832018 | NA        |
| DBP             | 128,32  | -0,14 | 0,670024 | -0,21204 | 0,832077 | 0,9504662 |
| RF00091         | 0,79    | 0,48  | 2,277844 | 0,211943 | 0,832152 | NA        |
| CEP350          | 1505,45 | 0,08  | 0,356733 | 0,211929 | 0,832162 | 0,9504662 |
| ZNF367          | 2,41    | 0,45  | 2,119616 | 0,211892 | 0,832192 | NA        |

|                |         |       |          |          |          |           |
|----------------|---------|-------|----------|----------|----------|-----------|
| B3GALT5        | 10,06   | -0,22 | 1,034161 | -0,21188 | 0,832204 | 0,9504662 |
| CROCC          | 96,35   | 0,18  | 0,859712 | 0,211867 | 0,832211 | 0,9504662 |
| MIR645         | 3,81    | 0,59  | 2,771716 | 0,21182  | 0,832248 | 0,9504662 |
| TJAP1          | 243,47  | -0,13 | 0,629846 | -0,2118  | 0,832261 | 0,9504662 |
| CTD-3092A11.2  | 49,78   | 0,14  | 0,647421 | 0,211789 | 0,832271 | 0,9504662 |
| ARFGAP2        | 826,35  | 0,09  | 0,448258 | 0,21175  | 0,832302 | 0,9504662 |
| PPIAL4E        | 32,74   | 0,17  | 0,813562 | 0,211749 | 0,832303 | 0,9504662 |
| AP000472.3     | 0,56    | -0,57 | 2,704686 | -0,21169 | 0,832347 | NA        |
| BLOC1S4        | 38,24   | 0,19  | 0,918884 | 0,211673 | 0,832362 | 0,9504759 |
| PQLC2L         | 0,06    | -0,79 | 3,748196 | -0,21151 | 0,832489 | NA        |
| AC007563.5     | 3,23    | -0,23 | 1,068875 | -0,21142 | 0,832562 | NA        |
| RP11-68I3.2    | 0,62    | 0,38  | 1,809847 | 0,21134  | 0,832622 | NA        |
| TBC1D12        | 149,73  | 0,14  | 0,663684 | 0,211234 | 0,832704 | 0,9507348 |
| KIR2DS4        | 1,70    | -0,71 | 3,352203 | -0,21121 | 0,832721 | NA        |
| RP11-228B15.4  | 9,25    | -0,18 | 0,848887 | -0,21121 | 0,832726 | 0,9507348 |
| CRKL           | 234,24  | 0,14  | 0,648202 | 0,211185 | 0,832743 | 0,9507348 |
| HSD17B1        | 22,19   | -0,20 | 0,926076 | -0,21108 | 0,832822 | 0,9507667 |
| P2RX5          | 46,33   | 0,29  | 1,395998 | 0,210842 | 0,833011 | 0,9509244 |
| BMP1           | 21,45   | 0,23  | 1,07527  | 0,210707 | 0,833116 | 0,9509865 |
| RBMX           | 1266,66 | 0,08  | 0,387168 | 0,210626 | 0,833179 | 0,9509995 |
| ADGRB1         | 0,53    | -0,76 | 3,618814 | -0,21049 | 0,833282 | NA        |
| CHRNA2         | 14,14   | 0,23  | 1,077281 | 0,210488 | 0,833287 | 0,9510648 |
| RP11-465L10.10 | 0,17    | 0,73  | 3,445351 | 0,21045  | 0,833316 | NA        |
| NOL7           | 548,01  | -0,08 | 0,400165 | -0,21038 | 0,833373 | 0,951105  |
| BCOR           | 224,45  | -0,14 | 0,683478 | -0,21031 | 0,833426 | 0,9511072 |
| NPHP4          | 18,22   | 0,25  | 1,17475  | 0,210166 | 0,833538 | 0,9511137 |
| AP000344.3     | 4,71    | -0,48 | 2,298168 | -0,21015 | 0,833554 | 0,9511137 |
| CC2D1B         | 135,39  | 0,20  | 0,936265 | 0,210105 | 0,833586 | 0,9511137 |
| CNDP1          | 13,28   | 0,18  | 0,874759 | 0,20996  | 0,833699 | 0,9511849 |
| RP5-1157M23.2  | 0,48    | 0,64  | 3,033909 | 0,209841 | 0,833792 | NA        |
| DTX3           | 0,51    | -0,56 | 2,68929  | -0,2098  | 0,833823 | NA        |
| DACH1          | 11,89   | -0,33 | 1,567743 | -0,20967 | 0,833926 | 0,9513802 |
| PIEZO2         | 22,38   | -0,28 | 1,323488 | -0,20956 | 0,834012 | 0,9513802 |
| PEMT           | 209,61  | -0,15 | 0,725487 | -0,20953 | 0,834038 | 0,9513802 |
| RP11-355B11.2  | 37,92   | 0,19  | 0,897588 | 0,209462 | 0,834088 | 0,9513802 |
| C17orf89       | 259,51  | 0,08  | 0,368676 | 0,209409 | 0,834129 | 0,9513802 |
| GS1-57L11.1    | 0,78    | 0,42  | 2,018365 | 0,209391 | 0,834143 | NA        |
| RP11-349G13.1  | 12,04   | 0,60  | 2,868409 | 0,2093   | 0,834214 | 0,9513802 |
| RP11-323J4.1   | 11,50   | -0,12 | 0,559506 | -0,20921 | 0,834282 | 0,9513802 |
| RP11-44K6.3    | 4,67    | 0,18  | 0,870669 | 0,209101 | 0,834369 | 0,9513802 |
| RP11-44N11.1   | 61,73   | 0,19  | 0,900808 | 0,2091   | 0,83437  | 0,9513802 |
| ZBTB1          | 365,28  | -0,11 | 0,512202 | -0,20909 | 0,834382 | 0,9513802 |
| STX3           | 360,57  | 0,12  | 0,564384 | 0,208935 | 0,834499 | 0,9514438 |
| C2orf19        | 5,38    | 0,30  | 1,459128 | 0,208869 | 0,83455  | 0,9514438 |
| RP11-88H10.1   | 0,79    | -0,33 | 1,575324 | -0,20885 | 0,834566 | NA        |
| TTC9           | 5,32    | -0,38 | 1,822516 | -0,20882 | 0,834591 | 0,9514438 |
| FAM3C2         | 1,49    | -0,68 | 3,261667 | -0,20871 | 0,834678 | NA        |
| AC009495.4     | 0,66    | 0,66  | 3,175255 | 0,208702 | 0,834681 | NA        |
| LCN2           | 0,84    | -0,77 | 3,67499  | -0,20864 | 0,834727 | NA        |
| RP11-103G8.4   | 2,81    | -0,35 | 1,679479 | -0,20853 | 0,834812 | NA        |

|               |         |       |          |          |          |           |
|---------------|---------|-------|----------|----------|----------|-----------|
| RP11-479O16.1 | 7,20    | 0,18  | 0,881532 | 0,208352 | 0,834954 | 0,9517992 |
| ARHGAP20      | 0,21    | 0,72  | 3,469568 | 0,208297 | 0,834997 | NA        |
| RP3-333H23.9  | 1,70    | -0,28 | 1,364016 | -0,20818 | 0,835085 | NA        |
| RP11-430C17.1 | 0,98    | -0,38 | 1,812757 | -0,20818 | 0,835088 | NA        |
| TBC1D3B       | 1,81    | 0,53  | 2,525998 | 0,208153 | 0,835109 | NA        |
| RNU6-4P       | 3,56    | -0,15 | 0,711589 | -0,20808 | 0,835166 | NA        |
| RNU6-5P       | 3,56    | -0,15 | 0,711589 | -0,20808 | 0,835166 | NA        |
| RNU6-1        | 3,56    | -0,15 | 0,711589 | -0,20808 | 0,835166 | NA        |
| RNU6-2        | 3,56    | -0,15 | 0,711589 | -0,20808 | 0,835166 | NA        |
| RNU6-3P       | 3,56    | -0,15 | 0,711589 | -0,20808 | 0,835166 | NA        |
| RNU6-9        | 3,56    | -0,15 | 0,711589 | -0,20808 | 0,835166 | NA        |
| RNU6-6P       | 3,56    | -0,15 | 0,711589 | -0,20808 | 0,835166 | NA        |
| TPPP2         | 0,04    | -0,78 | 3,748196 | -0,20789 | 0,835317 | NA        |
| DSG3          | 4,35    | -0,29 | 1,374439 | -0,20776 | 0,835414 | 0,9520412 |
| RP13-516M14.1 | 78,04   | -0,21 | 0,99193  | -0,20775 | 0,835422 | 0,9520412 |
| MAN2A1        | 839,64  | -0,11 | 0,542397 | -0,20768 | 0,835482 | 0,9520412 |
| RNF11         | 248,27  | 0,13  | 0,606382 | 0,207572 | 0,835563 | 0,9520412 |
| RP11-256I9.2  | 5,63    | -0,30 | 1,454468 | -0,20753 | 0,835597 | 0,9520412 |
| RP11-412P11.1 | 2,60    | 0,22  | 1,054838 | 0,207527 | 0,835599 | NA        |
| SPATA17       | 56,82   | -0,15 | 0,723664 | -0,20741 | 0,835686 | 0,9520412 |
| U47924.6      | 5,27    | -0,20 | 0,976392 | -0,20739 | 0,835703 | 0,9520412 |
| CTD-2050N2.1  | 12,52   | 0,22  | 1,06486  | 0,207384 | 0,83571  | 0,9520412 |
| AB019437.56   | 0,27    | 0,70  | 3,394846 | 0,207354 | 0,835733 | NA        |
| CTGLF12P      | 6,85    | 0,31  | 1,473389 | 0,20735  | 0,835736 | 0,9520412 |
| CT55          | 0,41    | 0,63  | 3,019329 | 0,20735  | 0,835737 | NA        |
| AC006960.7    | 9,69    | -0,29 | 1,392255 | -0,20725 | 0,835818 | 0,9520412 |
| ZNF558        | 116,12  | -0,18 | 0,872168 | -0,20721 | 0,835842 | 0,9520412 |
| COMP          | 2,58    | 0,26  | 1,251168 | 0,20721  | 0,835846 | NA        |
| IFRD1         | 1227,42 | -0,07 | 0,357184 | -0,20719 | 0,835859 | 0,9520412 |
| LTA           | 0,23    | 0,71  | 3,411877 | 0,207166 | 0,83588  | NA        |
| PPIAL         | 2,07    | -0,15 | 0,725145 | -0,2071  | 0,835933 | NA        |
| RP11-247C2.2  | 7,21    | -0,15 | 0,73653  | -0,20704 | 0,835975 | 0,9520412 |
| RP4-576H24.2  | 4,48    | 0,51  | 2,45082  | 0,207029 | 0,835988 | 0,9520412 |
| RP5-1028K7.2  | 0,06    | -0,78 | 3,748196 | -0,20699 | 0,836016 | NA        |
| NPIP6         | 14,11   | -0,31 | 1,481326 | -0,20698 | 0,836026 | 0,9520412 |
| RP11-640N20.4 | 44,51   | -0,18 | 0,892346 | -0,20697 | 0,836031 | 0,9520412 |
| ANKS6         | 24,44   | 0,18  | 0,866608 | 0,206961 | 0,83604  | 0,9520412 |
| SNX27         | 724,14  | -0,09 | 0,419766 | -0,20681 | 0,836159 | 0,9520412 |
| RP11-25I15.3  | 8,05    | 0,29  | 1,393058 | 0,206778 | 0,836183 | 0,9520412 |
| IGL3          | 0,34    | -0,45 | 2,185644 | -0,20672 | 0,836225 | NA        |
| RP11-17A19.1  | 13,01   | 0,17  | 0,842849 | 0,20671  | 0,836236 | 0,9520412 |
| RN7SKP127     | 1,75    | 0,51  | 2,480499 | 0,206698 | 0,836246 | NA        |
| AC018755.24   | 30,76   | -0,14 | 0,659805 | -0,20666 | 0,836274 | 0,9520412 |
| STARD3        | 360,32  | 0,15  | 0,719188 | 0,206639 | 0,836292 | 0,9520412 |
| MIR3188       | 1,33    | 0,29  | 1,384793 | 0,206573 | 0,836343 | NA        |
| CTD-2245O6.1  | 0,25    | 0,70  | 3,403116 | 0,206539 | 0,83637  | NA        |
| LBHD1         | 131,83  | 0,21  | 1,001506 | 0,206494 | 0,836405 | 0,9521121 |
| SLC26A3       | 0,18    | 0,77  | 3,74743  | 0,206447 | 0,836442 | NA        |
| RP3-431P23.5  | 0,42    | 0,62  | 2,982951 | 0,206342 | 0,836524 | NA        |
| RP4-569M23.5  | 3,42    | 0,21  | 1,002399 | 0,206341 | 0,836525 | NA        |

|               |         |       |          |          |          |           |
|---------------|---------|-------|----------|----------|----------|-----------|
| N4BP2L2-IT2   | 67,30   | -0,35 | 1,679448 | -0,20632 | 0,836541 | 0,9521855 |
| CTD-2017F17.2 | 11,56   | -0,25 | 1,196213 | -0,20628 | 0,836572 | 0,9521855 |
| MIR142        | 0,72    | 0,37  | 1,80884  | 0,205986 | 0,836801 | NA        |
| DESI1         | 287,16  | -0,15 | 0,733669 | -0,20591 | 0,836864 | 0,9524311 |
| RP11-168G16.1 | 16,05   | 0,32  | 1,56635  | 0,205716 | 0,837013 | 0,9524311 |
| AC073346.2    | 248,61  | 0,13  | 0,632675 | 0,205609 | 0,837096 | 0,9524311 |
| NAA50         | 598,21  | -0,10 | 0,510673 | -0,20561 | 0,837099 | 0,9524311 |
| ZSCAN16       | 22,96   | 0,31  | 1,517016 | 0,205574 | 0,837124 | 0,9524311 |
| RP11-492D6.1  | 2,67    | -0,42 | 2,020908 | -0,20556 | 0,837136 | NA        |
| RP5-1053E7.1  | 0,24    | 0,70  | 3,408677 | 0,20551  | 0,837174 | NA        |
| WDR74         | 422,81  | -0,10 | 0,463617 | -0,20544 | 0,837231 | 0,9524311 |
| IQCG          | 91,78   | -0,18 | 0,878076 | -0,20542 | 0,837241 | 0,9524311 |
| RP11-211G3.3  | 10,02   | 0,50  | 2,421372 | 0,205415 | 0,837248 | 0,9524311 |
| RP11-504I13.3 | 20,18   | -0,22 | 1,061939 | -0,20531 | 0,837333 | 0,9524311 |
| BTBD6         | 164,01  | -0,21 | 1,030804 | -0,2053  | 0,837336 | 0,9524311 |
| EBAG9         | 101,81  | -0,17 | 0,83703  | -0,20526 | 0,837366 | 0,9524311 |
| NOX1          | 0,75    | 0,56  | 2,731435 | 0,205253 | 0,837374 | NA        |
| CTC-454I21.3  | 1,48    | -0,34 | 1,638513 | -0,20517 | 0,837437 | NA        |
| RP11-798G7.4  | 0,25    | 0,70  | 3,403408 | 0,205129 | 0,837472 | NA        |
| RP11-995C19.2 | 0,25    | 0,70  | 3,403408 | 0,205129 | 0,837472 | NA        |
| AK2           | 1283,69 | 0,08  | 0,383371 | 0,205049 | 0,837534 | 0,9524311 |
| RP11-649G15.2 | 20,00   | -0,45 | 2,17313  | -0,20502 | 0,837553 | 0,9524311 |
| LINC00649     | 74,61   | 0,16  | 0,798096 | 0,204997 | 0,837574 | 0,9524311 |
| RP11-173B14.4 | 1,70    | -0,41 | 1,999898 | -0,20497 | 0,837597 | NA        |
| RP11-115H15.2 | 23,48   | 0,12  | 0,608131 | 0,204956 | 0,837606 | 0,9524311 |
| ABCA5         | 87,57   | 0,12  | 0,585636 | 0,204955 | 0,837607 | 0,9524311 |
| RP11-92G19.2  | 0,80    | 0,51  | 2,511442 | 0,204895 | 0,837654 | NA        |
| AC093838.4    | 109,79  | -0,20 | 0,95577  | -0,20485 | 0,837687 | 0,9524641 |
| KRT9          | 0,06    | -0,77 | 3,748196 | -0,20477 | 0,837749 | NA        |
| OR51E1        | 0,06    | -0,77 | 3,748196 | -0,20474 | 0,837775 | NA        |
| MIR1273A      | 3,38    | -0,23 | 1,145984 | -0,20469 | 0,837816 | NA        |
| SPHK2         | 59,19   | -0,21 | 1,01146  | -0,20463 | 0,837858 | 0,9525479 |
| ARHGEF26      | 25,10   | 0,10  | 0,464315 | 0,204627 | 0,837863 | 0,9525479 |
| RP11-89N17.4  | 0,39    | 0,63  | 3,064865 | 0,204513 | 0,837952 | NA        |
| RP11-423H2.1  | 96,25   | -0,20 | 0,972109 | -0,20427 | 0,838144 | 0,952732  |
| RPS20P33      | 7,36    | 0,47  | 2,289174 | 0,204127 | 0,838255 | 0,952732  |
| CH17-431G21.1 | 0,72    | -0,74 | 3,629602 | -0,20411 | 0,838268 | NA        |
| AC020951.1    | 43,77   | 0,26  | 1,257107 | 0,204049 | 0,838315 | 0,952732  |
| ZNF559-ZNF177 | 8,97    | -0,39 | 1,898926 | -0,20394 | 0,838403 | 0,952732  |
| RP4-569D19.5  | 3,88    | 0,22  | 1,059685 | 0,203904 | 0,838428 | 0,952732  |
| RP11-118B18.1 | 35,19   | 0,20  | 0,978492 | 0,203831 | 0,838486 | 0,952732  |
| RP11-166N6.3  | 1,08    | 0,43  | 2,099674 | 0,203756 | 0,838544 | NA        |
| RP11-383G10.3 | 3,01    | 0,21  | 1,009114 | 0,203745 | 0,838553 | NA        |
| PLEKHB2       | 1827,58 | 0,06  | 0,29547  | 0,203729 | 0,838565 | 0,952732  |
| MNAT1         | 105,69  | 0,15  | 0,754154 | 0,203728 | 0,838566 | 0,952732  |
| AC012360.6    | 3,93    | -0,29 | 1,404107 | -0,20368 | 0,838607 | 0,952732  |
| SRSF6         | 2088,78 | 0,05  | 0,257892 | 0,203655 | 0,838623 | 0,952732  |
| RP11-247L20.4 | 0,21    | 0,70  | 3,422241 | 0,203622 | 0,838649 | NA        |
| HM13          | 983,79  | 0,05  | 0,269744 | 0,20362  | 0,83865  | 0,952732  |
| GATC          | 128,08  | -0,15 | 0,713263 | -0,2036  | 0,838668 | 0,952732  |

|               |         |       |          |          |          |           |
|---------------|---------|-------|----------|----------|----------|-----------|
| SRD5A3        | 118,01  | -0,20 | 0,989485 | -0,20357 | 0,838691 | 0,952732  |
| DHX8          | 558,53  | 0,15  | 0,734952 | 0,203464 | 0,838772 | 0,9527662 |
| KIAA0040      | 247,81  | 0,13  | 0,636422 | 0,203391 | 0,83883  | 0,9527731 |
| IL36B         | 0,04    | -0,76 | 3,748196 | -0,20332 | 0,838883 | NA        |
| RP11-263I1.1  | 0,97    | 0,76  | 3,720013 | 0,20322  | 0,838963 | NA        |
| MAFA          | 0,22    | 0,71  | 3,483971 | 0,203207 | 0,838973 | NA        |
| AMOTL2        | 0,44    | -0,76 | 3,748196 | -0,20312 | 0,839044 | NA        |
| AC093673.5    | 194,79  | -0,17 | 0,823175 | -0,20301 | 0,839129 | 0,9529237 |
| RP5-907D15.2  | 0,74    | 0,73  | 3,614999 | 0,202958 | 0,839168 | NA        |
| ZNF667        | 43,22   | -0,12 | 0,608777 | -0,20296 | 0,83917  | 0,9529237 |
| FAM204A       | 689,37  | 0,09  | 0,44771  | 0,202953 | 0,839171 | 0,9529237 |
| PSMG1         | 175,57  | -0,18 | 0,886542 | -0,20288 | 0,83923  | 0,9529237 |
| RAB10         | 821,29  | -0,10 | 0,471047 | -0,20282 | 0,839279 | 0,9529237 |
| RP11-182J1.9  | 7,42    | -0,25 | 1,254012 | -0,20281 | 0,839283 | 0,9529237 |
| OSER1         | 849,55  | 0,09  | 0,460397 | 0,202715 | 0,839357 | 0,9529237 |
| RP11-524F11.3 | 59,72   | -0,10 | 0,507354 | -0,2027  | 0,839372 | 0,9529237 |
| RP4-646N3.3   | 1,43    | 0,39  | 1,938208 | 0,202589 | 0,839456 | NA        |
| ZNF503-AS2    | 0,19    | -0,76 | 3,748196 | -0,20256 | 0,839482 | NA        |
| TSPAN17       | 114,31  | -0,09 | 0,440477 | -0,20252 | 0,839511 | 0,9530231 |
| RP11-404F10.2 | 42,84   | 0,14  | 0,710727 | 0,202452 | 0,839563 | 0,9530245 |
| SNORA71B      | 0,17    | -0,68 | 3,349522 | -0,20238 | 0,83962  | NA        |
| RP11-207N4.2  | 34,64   | -0,23 | 1,152519 | -0,20234 | 0,839651 | 0,9530666 |
| RN7SL191P     | 3,67    | -0,30 | 1,467153 | -0,20227 | 0,839709 | NA        |
| RNY1P9        | 0,50    | -0,46 | 2,292374 | -0,20222 | 0,839746 | NA        |
| AGER          | 230,91  | -0,12 | 0,572556 | -0,20206 | 0,839874 | 0,9531526 |
| CTC-483L24.2  | 234,81  | -0,11 | 0,541324 | -0,20204 | 0,839882 | 0,9531526 |
| HDAC4         | 391,67  | -0,14 | 0,706285 | -0,202   | 0,839915 | 0,9531526 |
| MOGAT3        | 33,88   | 0,10  | 0,511197 | 0,20198  | 0,839932 | 0,9531526 |
| GS1-306C12.1  | 7,40    | -0,16 | 0,811573 | -0,20191 | 0,83999  | 0,9531604 |
| ZPLD1         | 1,09    | -0,45 | 2,213146 | -0,20189 | 0,840007 | NA        |
| RP11-350G24.1 | 1,17    | -0,34 | 1,672873 | -0,20171 | 0,840143 | NA        |
| RELB          | 184,68  | 0,14  | 0,695077 | 0,201687 | 0,840162 | 0,9532071 |
| C1orf233      | 55,26   | -0,27 | 1,316157 | -0,20167 | 0,840174 | 0,9532071 |
| AP003039.3    | 0,06    | -0,76 | 3,748196 | -0,20167 | 0,840178 | NA        |
| RP11-295H24.4 | 0,43    | -0,61 | 3,026211 | -0,20166 | 0,840185 | NA        |
| TAS2R5        | 0,41    | 0,76  | 3,745183 | 0,201624 | 0,84021  | NA        |
| SH2B1         | 109,79  | 0,14  | 0,672374 | 0,201607 | 0,840224 | 0,9532071 |
| SIRPB1        | 287,41  | -0,15 | 0,725562 | -0,20153 | 0,840285 | 0,9532071 |
| FAM208B       | 402,76  | -0,10 | 0,488302 | -0,20153 | 0,840288 | 0,9532071 |
| AL133247.3    | 0,06    | -0,76 | 3,748196 | -0,20147 | 0,840333 | NA        |
| EXOC4         | 473,61  | -0,11 | 0,558311 | -0,20138 | 0,840402 | 0,9532578 |
| RP11-241F15.7 | 0,06    | -0,75 | 3,748196 | -0,20136 | 0,840418 | NA        |
| PSMB7         | 1576,43 | 0,05  | 0,250147 | 0,201336 | 0,840436 | 0,9532578 |
| CTC-351M12.1  | 25,06   | -0,16 | 0,80296  | -0,20127 | 0,840486 | 0,9532578 |
| HHIPL2        | 0,47    | 0,75  | 3,747514 | 0,200913 | 0,840767 | NA        |
| RP11-268P4.6  | 19,55   | 0,25  | 1,266478 | 0,200865 | 0,840804 | 0,9535605 |
| DLL3          | 0,04    | -0,75 | 3,748196 | -0,20079 | 0,840864 | NA        |
| RP4-715N11.2  | 2,16    | 0,29  | 1,426231 | 0,200595 | 0,841015 | NA        |
| RP11-207F8.1  | 0,05    | -0,75 | 3,748196 | -0,20054 | 0,841062 | NA        |
| FAM109A       | 280,60  | -0,15 | 0,730215 | -0,2005  | 0,841086 | 0,9537332 |

|                |         |       |          |          |          |           |
|----------------|---------|-------|----------|----------|----------|-----------|
| MIR548AZ       | 9,91    | -0,50 | 2,469597 | -0,20049 | 0,841099 | 0,9537332 |
| IGFL2          | 27,99   | 0,16  | 0,801466 | 0,200474 | 0,84111  | 0,9537332 |
| Z84812.4       | 0,21    | 0,69  | 3,44435  | 0,200353 | 0,841205 | NA        |
| BEND2          | 7,55    | 0,21  | 1,071738 | 0,200301 | 0,841246 | 0,9538286 |
| BCL2L15        | 9,38    | 0,17  | 0,844285 | 0,200221 | 0,841307 | 0,9538406 |
| RP11-432I5.4   | 1,93    | 0,30  | 1,48388  | 0,200115 | 0,841391 | NA        |
| AC123023.1     | 2,01    | 0,21  | 1,048173 | 0,200057 | 0,841436 | NA        |
| STRN4          | 340,03  | 0,13  | 0,640544 | 0,199962 | 0,84151  | 0,9540124 |
| RP4-730K3.3    | 0,50    | -0,72 | 3,581448 | -0,19995 | 0,841516 | NA        |
| RP11-550E18.1  | 0,04    | -0,75 | 3,748196 | -0,19987 | 0,841579 | NA        |
| NCR1           | 2,04    | -0,27 | 1,338609 | -0,19987 | 0,841582 | NA        |
| NUTM1          | 0,04    | -0,75 | 3,748196 | -0,19982 | 0,841618 | NA        |
| ZC2HC1B        | 0,05    | -0,75 | 3,748196 | -0,19978 | 0,841651 | NA        |
| FAM177A1       | 266,42  | 0,10  | 0,484909 | 0,199732 | 0,84169  | 0,9540199 |
| FRG1           | 289,26  | -0,09 | 0,453624 | -0,19972 | 0,841699 | 0,9540199 |
| HNRNPA2B1      | 4020,46 | 0,03  | 0,170544 | 0,199689 | 0,841724 | 0,9540199 |
| CRY1           | 41,83   | 0,25  | 1,243436 | 0,199656 | 0,84175  | 0,9540199 |
| SMU1           | 829,34  | -0,08 | 0,378649 | -0,19963 | 0,841773 | 0,9540199 |
| RF00443        | 0,05    | -0,75 | 3,748196 | -0,1995  | 0,841874 | NA        |
| CTC-431G16.2   | 0,96    | -0,36 | 1,788492 | -0,19948 | 0,841885 | NA        |
| RP11-154F14.2  | 0,88    | -0,64 | 3,196713 | -0,19944 | 0,84192  | NA        |
| RP11-22P6.2    | 1,78    | -0,28 | 1,426456 | -0,19944 | 0,841921 | NA        |
| BORCS6         | 94,79   | 0,26  | 1,283243 | 0,199365 | 0,841977 | 0,9541533 |
| RP11-34C15.1   | 9,33    | 0,39  | 1,950749 | 0,199338 | 0,841999 | 0,9541533 |
| JADRR          | 3,37    | 0,21  | 1,045519 | 0,19931  | 0,842021 | NA        |
| CTD-2196E14.6  | 13,64   | 0,18  | 0,88425  | 0,199247 | 0,84207  | 0,9541533 |
| TBC1D2B        | 443,38  | 0,13  | 0,662895 | 0,199213 | 0,842096 | 0,9541533 |
| CTD-2134A5.4   | 3,29    | -0,19 | 0,95588  | -0,19916 | 0,842135 | NA        |
| RP11-408A13.1  | 0,05    | -0,75 | 3,748196 | -0,19911 | 0,842174 | NA        |
| RP11-91A15.2   | 0,05    | -0,75 | 3,748196 | -0,19904 | 0,842229 | NA        |
| RP1-93H18.4    | 0,05    | -0,75 | 3,748196 | -0,19901 | 0,842257 | NA        |
| PLXNA3         | 94,28   | -0,17 | 0,875968 | -0,199   | 0,842264 | 0,9542857 |
| RP11-339A7.1   | 0,83    | -0,24 | 1,193683 | -0,19897 | 0,842282 | NA        |
| RP4-647C14.2   | 3,04    | -0,26 | 1,30726  | -0,19893 | 0,842315 | NA        |
| RP11-648M2.2   | 1,16    | 0,65  | 3,263811 | 0,19884  | 0,842388 | NA        |
| RP11-96D1.6    | 0,04    | -0,75 | 3,748196 | -0,19883 | 0,842398 | NA        |
| TRGV8          | 0,04    | -0,74 | 3,748196 | -0,19873 | 0,842476 | NA        |
| RP1-197J16.2   | 0,04    | -0,74 | 3,748196 | -0,19871 | 0,84249  | NA        |
| AC012322.1     | 0,49    | -0,41 | 2,039809 | -0,19867 | 0,842519 | NA        |
| ERCC3          | 316,03  | -0,12 | 0,590821 | -0,19864 | 0,842546 | 0,9544985 |
| PISD           | 314,02  | -0,13 | 0,657579 | -0,19863 | 0,842555 | 0,9544985 |
| CTD-2331D11.4  | 0,92    | -0,50 | 2,51137  | -0,19856 | 0,842611 | NA        |
| RP11-561O23.5  | 1,24    | -0,36 | 1,809862 | -0,19854 | 0,842619 | NA        |
| RP5-1033H22.2  | 1,29    | 0,35  | 1,744286 | 0,198511 | 0,842645 | NA        |
| RP11-1060J15.3 | 0,04    | -0,74 | 3,748196 | -0,19843 | 0,842709 | NA        |
| RP11-87P13.2   | 0,05    | -0,74 | 3,748196 | -0,19837 | 0,842759 | NA        |
| ZNF717         | 116,63  | 0,20  | 1,017209 | 0,198336 | 0,842782 | 0,9546467 |
| SCYL3          | 108,96  | 0,12  | 0,614886 | 0,198303 | 0,842808 | 0,9546467 |
| RAB27B         | 0,46    | -0,65 | 3,298737 | -0,19829 | 0,84282  | NA        |
| CCT8L2         | 0,05    | -0,74 | 3,748196 | -0,19827 | 0,842833 | NA        |

|                |        |       |          |          |          |           |
|----------------|--------|-------|----------|----------|----------|-----------|
| ADAMTS16       | 5,28   | 0,31  | 1,587912 | 0,198263 | 0,842839 | 0,9546467 |
| OR5L1          | 0,05   | -0,74 | 3,748196 | -0,19824 | 0,842858 | NA        |
| DEFB127        | 0,05   | -0,74 | 3,748196 | -0,19823 | 0,842869 | NA        |
| ZSWIM5P1       | 0,04   | -0,74 | 3,748196 | -0,19812 | 0,842955 | NA        |
| AGRP           | 0,04   | -0,74 | 3,748196 | -0,19804 | 0,843017 | NA        |
| UBN1           | 280,19 | 0,13  | 0,661758 | 0,198027 | 0,843024 | 0,9547803 |
| SEPT4          | 50,05  | -0,19 | 0,94695  | -0,19793 | 0,843098 | 0,9547803 |
| PAG1           | 609,11 | 0,10  | 0,506126 | 0,197915 | 0,843111 | 0,9547803 |
| RP1-221C16.7   | 0,05   | -0,74 | 3,748196 | -0,19788 | 0,843141 | NA        |
| HSFX1          | 0,05   | -0,74 | 3,748196 | -0,19781 | 0,843194 | NA        |
| RP11-79L9.2    | 2,83   | 0,42  | 2,136142 | 0,197745 | 0,843244 | NA        |
| RP11-195C7.3   | 0,05   | -0,74 | 3,748196 | -0,19774 | 0,843245 | NA        |
| RP1-92C4.1     | 0,05   | -0,74 | 3,748196 | -0,19773 | 0,843253 | NA        |
| RP11-396O20.2  | 0,05   | -0,74 | 3,748196 | -0,19763 | 0,843331 | NA        |
| RP11-467L19.7  | 0,05   | -0,74 | 3,748196 | -0,19759 | 0,843366 | NA        |
| RP11-1195F20.7 | 0,05   | -0,74 | 3,748196 | -0,19756 | 0,843386 | NA        |
| RP5-1159O4.2   | 0,05   | -0,74 | 3,748196 | -0,19756 | 0,843391 | NA        |
| PPP1R3E        | 125,17 | 0,19  | 0,979592 | 0,197558 | 0,843391 | 0,9550391 |
| ZAN            | 0,04   | -0,74 | 3,748196 | -0,19756 | 0,843392 | NA        |
| CTD-2544L4.1   | 0,05   | -0,74 | 3,748196 | -0,19753 | 0,843411 | NA        |
| RN7SL155P      | 1,23   | 0,35  | 1,761038 | 0,19753  | 0,843413 | NA        |
| RP11-261B23.2  | 0,04   | -0,74 | 3,748196 | -0,19752 | 0,843418 | NA        |
| RP13-75G22.1   | 0,05   | -0,74 | 3,748196 | -0,19751 | 0,843427 | NA        |
| RP11-134K13.2  | 0,05   | -0,74 | 3,748196 | -0,19749 | 0,843446 | NA        |
| LARP4P         | 0,05   | -0,74 | 3,748196 | -0,19747 | 0,843458 | NA        |
| CTC-339D2.1    | 0,04   | -0,74 | 3,748196 | -0,19746 | 0,843467 | NA        |
| RP1-111C20.3   | 44,47  | 0,16  | 0,823211 | 0,197436 | 0,843487 | 0,9550892 |
| RP11-426K3.1   | 0,04   | -0,74 | 3,748196 | -0,19742 | 0,843498 | NA        |
| CRYM           | 0,69   | 0,49  | 2,467917 | 0,197404 | 0,843512 | NA        |
| DGAT2L6        | 0,05   | -0,74 | 3,748196 | -0,19738 | 0,843528 | NA        |
| CHERP          | 198,04 | -0,16 | 0,821158 | -0,19735 | 0,843554 | 0,9551067 |
| SMIM10L2A      | 0,05   | -0,74 | 3,748196 | -0,1973  | 0,843594 | NA        |
| RP11-24M17.6   | 0,04   | -0,74 | 3,748196 | -0,1972  | 0,843669 | NA        |
| RP11-461A8.4   | 0,04   | -0,74 | 3,748196 | -0,19716 | 0,843705 | NA        |
| PNMA5          | 0,04   | -0,74 | 3,748196 | -0,19715 | 0,843714 | NA        |
| RP11-370I10.10 | 0,04   | -0,74 | 3,748196 | -0,19715 | 0,843714 | NA        |
| RP11-1007O24.3 | 27,70  | 0,20  | 1,025818 | 0,197141 | 0,843717 | 0,9552335 |
| AC010975.2     | 0,05   | -0,74 | 3,748196 | -0,19713 | 0,843723 | NA        |
| RP11-606E8.2   | 1,39   | 0,65  | 3,299701 | 0,197126 | 0,843729 | NA        |
| RP11-152H18.4  | 0,05   | -0,74 | 3,748196 | -0,1971  | 0,843751 | NA        |
| RP11-70D24.2   | 0,04   | -0,74 | 3,748196 | -0,19707 | 0,843775 | NA        |
| RP11-407G23.2  | 0,04   | -0,74 | 3,748196 | -0,19702 | 0,843815 | NA        |
| NKAIN4         | 0,09   | -0,74 | 3,748196 | -0,19691 | 0,8439   | NA        |
| RP11-573E11.2  | 18,10  | -0,22 | 1,098644 | -0,19688 | 0,843925 | 0,9554106 |
| CTD-2373J19.1  | 0,05   | -0,74 | 3,748196 | -0,19679 | 0,84399  | NA        |
| RP11-241F15.5  | 0,05   | -0,74 | 3,748196 | -0,19675 | 0,844023 | NA        |
| ZNF648         | 0,04   | -0,74 | 3,748196 | -0,19674 | 0,844029 | NA        |
| RPS15AP5       | 0,04   | -0,74 | 3,748196 | -0,19673 | 0,844038 | NA        |
| CCDC105        | 0,05   | -0,74 | 3,748196 | -0,19667 | 0,844086 | NA        |
| CTC-575C13.3   | 0,05   | -0,74 | 3,748196 | -0,19665 | 0,8441   | NA        |



|               |         |       |          |          |          |           |
|---------------|---------|-------|----------|----------|----------|-----------|
| RP11-641C17.3 | 0,04    | -0,74 | 3,748196 | -0,19664 | 0,844107 | NA        |
| RP11-389C8.1  | 0,05    | -0,74 | 3,748196 | -0,19659 | 0,844145 | NA        |
| IMPDH1P11     | 0,04    | -0,74 | 3,748196 | -0,19659 | 0,844146 | NA        |
| MBD3          | 731,20  | -0,12 | 0,611517 | -0,19659 | 0,844148 | 0,9555522 |
| CREB3L1       | 7,88    | 0,14  | 0,701316 | 0,196585 | 0,844152 | 0,9555522 |
| RP11-324E6.10 | 0,05    | -0,74 | 3,748196 | -0,19653 | 0,844193 | NA        |
| IGSF3         | 2,72    | 0,50  | 2,537826 | 0,19652  | 0,844203 | NA        |
| RP5-1158E12.2 | 0,04    | -0,74 | 3,748196 | -0,1965  | 0,844222 | NA        |
| ADAMTS12      | 0,80    | -0,44 | 2,216707 | -0,19648 | 0,844234 | NA        |
| CTNNA3        | 0,03    | -0,73 | 3,739025 | -0,19647 | 0,844245 | NA        |
| AC005041.11   | 0,05    | -0,74 | 3,748196 | -0,19642 | 0,84428  | NA        |
| CTC-209H22.2  | 0,04    | -0,74 | 3,748196 | -0,1964  | 0,844294 | NA        |
| CAPNS2        | 0,04    | -0,74 | 3,748196 | -0,19638 | 0,844314 | NA        |
| RP11-318E3.9  | 0,56    | 0,53  | 2,713985 | 0,19636  | 0,844329 | NA        |
| BCL7B         | 424,16  | 0,12  | 0,630867 | 0,196349 | 0,844337 | 0,9556756 |
| TAS2R50       | 0,05    | -0,74 | 3,748196 | -0,19635 | 0,844337 | NA        |
| RP11-1P8.7    | 0,05    | -0,74 | 3,748196 | -0,19634 | 0,844342 | NA        |
| SMARCA2       | 1364,18 | 0,08  | 0,384966 | 0,196314 | 0,844364 | 0,9556756 |
| RP11-678G14.2 | 19,89   | -0,22 | 1,11322  | -0,19624 | 0,844426 | 0,9556873 |
| SNORA15       | 0,04    | -0,74 | 3,748196 | -0,19621 | 0,844449 | NA        |
| RP11-815K11.1 | 0,04    | -0,74 | 3,748196 | -0,19618 | 0,844466 | NA        |
| CTB-161M19.2  | 0,04    | -0,74 | 3,748196 | -0,19616 | 0,844483 | NA        |
| RP11-333H9.6  | 0,05    | -0,74 | 3,748196 | -0,19616 | 0,844488 | NA        |
| RP11-285C1.2  | 0,05    | -0,74 | 3,748196 | -0,19612 | 0,844518 | NA        |
| RP11-391J2.3  | 7,16    | 0,14  | 0,738695 | 0,196107 | 0,844527 | 0,9556891 |
| RP11-76I23.7  | 0,05    | -0,73 | 3,748196 | -0,19605 | 0,844569 | NA        |
| OR10A5        | 0,05    | -0,73 | 3,748196 | -0,196   | 0,844609 | NA        |
| CTD-2061E9.1  | 0,05    | -0,73 | 3,748196 | -0,19599 | 0,844617 | NA        |
| RP11-534L20.5 | 0,70    | -0,72 | 3,664847 | -0,19598 | 0,844626 | NA        |
| RP11-321A17.5 | 0,05    | -0,73 | 3,748196 | -0,19596 | 0,844641 | NA        |
| RP11-44F21.5  | 0,19    | 0,73  | 3,748196 | 0,195952 | 0,844648 | NA        |
| USP8P         | 0,04    | -0,73 | 3,748196 | -0,19591 | 0,844678 | NA        |
| TRAJ20        | 0,05    | -0,73 | 3,748196 | -0,19591 | 0,844683 | NA        |
| CYP27C1       | 39,62   | 0,17  | 0,875703 | 0,195888 | 0,844698 | 0,9556891 |
| RP4-583P15.14 | 8,19    | -0,27 | 1,359058 | -0,19571 | 0,84484  | 0,9556891 |
| AC012494.1    | 0,05    | -0,73 | 3,748196 | -0,19568 | 0,844863 | NA        |
| INO80B        | 28,95   | -0,21 | 1,048478 | -0,19566 | 0,844878 | 0,9556891 |
| RP11-426J22.1 | 22,68   | 0,22  | 1,115258 | 0,195649 | 0,844885 | 0,9556891 |
| MRPL36        | 137,23  | -0,13 | 0,644448 | -0,19561 | 0,844917 | 0,9556891 |
| RNU2-63P      | 85,65   | -0,11 | 0,571399 | -0,19559 | 0,844931 | 0,9556891 |
| NDC1          | 125,62  | -0,19 | 0,951577 | -0,19557 | 0,84495  | 0,9556891 |
| RP11-27M15.1  | 14,69   | 0,20  | 0,997323 | 0,195565 | 0,84495  | 0,9556891 |
| AF196972.9    | 0,04    | -0,73 | 3,748196 | -0,19554 | 0,844968 | NA        |
| LGALS9C       | 0,69    | 0,42  | 2,14607  | 0,195476 | 0,84502  | NA        |
| AC009133.22   | 0,05    | -0,73 | 3,748196 | -0,19545 | 0,84504  | NA        |
| MGAT4B        | 239,54  | -0,16 | 0,819347 | -0,19538 | 0,845094 | 0,9556891 |
| RP11-79P5.9   | 0,05    | -0,73 | 3,748196 | -0,19536 | 0,845113 | NA        |
| KIF27         | 41,51   | 0,22  | 1,112094 | 0,195339 | 0,845128 | 0,9556891 |
| RP11-65C6.1   | 0,04    | -0,73 | 3,748196 | -0,19526 | 0,84519  | NA        |
| SULT1C4       | 17,21   | -0,23 | 1,176077 | -0,19525 | 0,845198 | 0,9556891 |

|               |        |       |          |          |          |           |
|---------------|--------|-------|----------|----------|----------|-----------|
| GLRX2         | 217,49 | 0,12  | 0,619619 | 0,195204 | 0,845233 | 0,9556891 |
| ANAPC10       | 143,63 | -0,15 | 0,747951 | -0,19516 | 0,845268 | 0,9556891 |
| SNORA50A      | 0,04   | -0,73 | 3,748196 | -0,19513 | 0,845294 | NA        |
| ATP23         | 49,41  | 0,28  | 1,415508 | 0,195119 | 0,8453   | 0,9556891 |
| ZBTB21        | 368,59 | 0,13  | 0,670303 | 0,195112 | 0,845305 | 0,9556891 |
| TUBB4A        | 0,93   | -0,50 | 2,548147 | -0,19509 | 0,845325 | NA        |
| SLC47A1       | 28,63  | -0,11 | 0,572908 | -0,19508 | 0,845334 | 0,9556891 |
| RP11-64K12.9  | 1,01   | 0,45  | 2,299247 | 0,195053 | 0,845351 | NA        |
| SLC5A8        | 4,28   | -0,54 | 2,768897 | -0,19499 | 0,845398 | 0,9556891 |
| ALG13         | 358,83 | 0,09  | 0,446138 | 0,194951 | 0,845431 | 0,9556891 |
| AC008132.14   | 0,05   | -0,73 | 3,748196 | -0,19494 | 0,845438 | NA        |
| APLF          | 51,45  | 0,18  | 0,937736 | 0,194903 | 0,845469 | 0,9556891 |
| RP11-66B24.3  | 0,05   | -0,73 | 3,748196 | -0,19489 | 0,845476 | NA        |
| STAMBP        | 114,88 | -0,16 | 0,833871 | -0,19486 | 0,845506 | 0,9556891 |
| DUX4L16       | 0,04   | -0,73 | 3,748196 | -0,19472 | 0,845612 | NA        |
| SCPEP1        | 658,50 | -0,09 | 0,439768 | -0,19463 | 0,84568  | 0,9558274 |
| APOA4         | 0,04   | -0,73 | 3,748196 | -0,19459 | 0,845716 | NA        |
| RP13-635I23.3 | 0,05   | -0,73 | 3,748196 | -0,19455 | 0,845741 | NA        |
| RPL27P12      | 0,04   | -0,73 | 3,748196 | -0,19455 | 0,845742 | NA        |
| RP11-495P10.6 | 0,04   | -0,73 | 3,748196 | -0,19449 | 0,845788 | NA        |
| RP11-243J16.7 | 0,04   | -0,73 | 3,748196 | -0,19449 | 0,845791 | NA        |
| RP11-214K3.25 | 0,04   | -0,73 | 3,748196 | -0,19448 | 0,845801 | NA        |
| FMO10P        | 0,04   | -0,73 | 3,748196 | -0,19441 | 0,845856 | NA        |
| C2orf47       | 189,63 | -0,19 | 0,953132 | -0,1944  | 0,845865 | 0,9559217 |
| RORC          | 16,91  | -0,18 | 0,946151 | -0,1944  | 0,845866 | 0,9559217 |
| GS1-256O22.5  | 1,04   | 0,64  | 3,276784 | 0,194388 | 0,845872 | NA        |
| RP11-705O24.4 | 0,94   | -0,39 | 1,98233  | -0,1943  | 0,84594  | NA        |
| AC013429.5    | 0,05   | -0,73 | 3,748196 | -0,19428 | 0,845956 | NA        |
| ZNF614        | 47,80  | 0,15  | 0,790896 | 0,194212 | 0,84601  | 0,9559697 |
| AC091814.3    | 38,03  | -0,17 | 0,850308 | -0,19421 | 0,846011 | 0,9559697 |
| RP11-144J4.3  | 0,05   | -0,73 | 3,748196 | -0,19415 | 0,846056 | NA        |
| RP11-275B14.1 | 0,04   | -0,73 | 3,748196 | -0,19414 | 0,846066 | NA        |
| MYOZ3         | 6,07   | 0,26  | 1,318218 | 0,194092 | 0,846104 | 0,9559931 |
| RP11-79E3.1   | 0,05   | -0,73 | 3,748196 | -0,19407 | 0,846121 | NA        |
| TMEM45B       | 19,13  | 0,12  | 0,638723 | 0,194052 | 0,846135 | 0,9559931 |
| RP11-477G18.2 | 0,80   | -0,61 | 3,167041 | -0,19405 | 0,846136 | NA        |
| RNU6-879P     | 0,04   | -0,73 | 3,748196 | -0,19405 | 0,846136 | NA        |
| AC007879.7    | 0,04   | -0,73 | 3,748196 | -0,19399 | 0,846185 | NA        |
| AES           | 473,99 | 0,06  | 0,319731 | 0,193875 | 0,846274 | 0,956092  |
| RNU7-73P      | 1,22   | -0,37 | 1,932853 | -0,19383 | 0,846312 | NA        |
| MIR4760       | 0,04   | -0,73 | 3,748196 | -0,19381 | 0,846323 | NA        |
| AADACL3       | 1,04   | -0,49 | 2,521418 | -0,19377 | 0,846354 | NA        |
| CTC-325J23.3  | 0,04   | -0,73 | 3,748196 | -0,19371 | 0,846406 | NA        |
| RP11-461F16.3 | 0,05   | -0,73 | 3,748196 | -0,19359 | 0,846495 | NA        |
| RP11-663N22.1 | 11,70  | 0,30  | 1,553428 | 0,193576 | 0,846508 | 0,9562984 |
| RAD51B        | 75,83  | 0,19  | 0,985948 | 0,193438 | 0,846616 | 0,9563624 |
| AC000095.8    | 0,04   | -0,72 | 3,748196 | -0,19342 | 0,846627 | NA        |
| RP11-818O24.3 | 0,19   | 0,72  | 3,747792 | 0,193361 | 0,846676 | NA        |
| RF00024       | 0,49   | -0,69 | 3,570658 | -0,19334 | 0,846693 | NA        |
| RP11-369F10.2 | 0,05   | -0,72 | 3,748196 | -0,19322 | 0,846788 | NA        |

|                  |         |       |          |          |          |           |
|------------------|---------|-------|----------|----------|----------|-----------|
| FGF22            | 0,72    | -0,26 | 1,320992 | -0,19314 | 0,846852 | NA        |
| HTR3A            | 0,04    | -0,72 | 3,748196 | -0,19311 | 0,846874 | NA        |
| PHLDB1           | 44,49   | 0,16  | 0,82218  | 0,193069 | 0,846905 | 0,9565756 |
| TMLHE            | 158,99  | 0,17  | 0,869103 | 0,193066 | 0,846907 | 0,9565756 |
| C2orf42          | 32,20   | 0,27  | 1,399943 | 0,192929 | 0,847014 | 0,9565815 |
| HYOU1            | 158,39  | 0,13  | 0,68455  | 0,192928 | 0,847016 | 0,9565815 |
| RP11-474G23.2    | 31,24   | 0,33  | 1,736587 | 0,192768 | 0,847141 | 0,9566467 |
| TRPM1            | 3,23    | 0,21  | 1,075973 | 0,192766 | 0,847142 | NA        |
| RP11-651P23.2    | 0,04    | -0,72 | 3,748196 | -0,19274 | 0,847166 | NA        |
| RP4-612J11.1     | 0,73    | -0,42 | 2,190526 | -0,1927  | 0,847193 | NA        |
| STK11            | 161,70  | -0,14 | 0,742436 | -0,19268 | 0,847209 | 0,9566467 |
| RP11-458J1.1     | 7,02    | 0,21  | 1,100274 | 0,192657 | 0,847227 | 0,9566467 |
| RP3-455J7.1      | 0,04    | -0,72 | 3,748196 | -0,19261 | 0,847265 | NA        |
| C6orf58          | 0,70    | 0,72  | 3,74804  | 0,192609 | 0,847265 | NA        |
| RP11-442G21.2    | 0,80    | -0,38 | 1,989101 | -0,19256 | 0,847304 | NA        |
| RP11-360L9.8     | 62,71   | -0,15 | 0,791222 | -0,19256 | 0,847307 | 0,9566788 |
| FBP1             | 1013,54 | 0,09  | 0,450836 | 0,19221  | 0,847578 | 0,9569262 |
| AF124730.4       | 0,05    | -0,72 | 3,748196 | -0,1922  | 0,847589 | NA        |
| CISD1            | 164,58  | -0,10 | 0,524227 | -0,19209 | 0,847675 | 0,9569291 |
| RP11-779O18.2    | 4,44    | -0,55 | 2,86869  | -0,19208 | 0,847683 | 0,9569291 |
| RNU6-925P        | 0,38    | 0,69  | 3,577189 | 0,192072 | 0,847686 | NA        |
| MIR876           | 0,04    | -0,72 | 3,748196 | -0,19204 | 0,847714 | NA        |
| RP11-445L13__B.1 | 0,04    | -0,72 | 3,748196 | -0,19192 | 0,847806 | NA        |
| RP11-16L6.2      | 0,04    | -0,72 | 3,748196 | -0,19191 | 0,84781  | NA        |
| CTD-2571L23.8    | 1,08    | -0,25 | 1,294876 | -0,1919  | 0,847824 | NA        |
| RP11-366O17.4    | 0,04    | -0,72 | 3,748196 | -0,19183 | 0,847874 | NA        |
| RP4-599G15.7     | 1,70    | 0,51  | 2,681796 | 0,191741 | 0,847945 | NA        |
| ASB10            | 0,03    | -0,72 | 3,748196 | -0,19171 | 0,847966 | NA        |
| RP11-109J4.1     | 0,05    | -0,72 | 3,748196 | -0,19164 | 0,848028 | NA        |
| RP11-328N19.1    | 1,99    | 0,34  | 1,797397 | 0,191609 | 0,848049 | NA        |
| LA16c-3G11.5     | 25,22   | -0,66 | 3,435292 | -0,1916  | 0,848056 | 0,9572922 |
| RP11-70D24.1     | 10,99   | 0,18  | 0,964904 | 0,19148  | 0,84815  | 0,957304  |
| SEC63            | 735,12  | -0,07 | 0,37686  | -0,19145 | 0,84817  | 0,957304  |
| RP4-725K1.1      | 0,04    | -0,72 | 3,748196 | -0,19139 | 0,848221 | NA        |
| TRIM4            | 328,14  | 0,11  | 0,567933 | 0,191336 | 0,848262 | 0,95735   |
| CTB-12O2.1       | 31,43   | -0,31 | 1,636321 | -0,19115 | 0,84841  | 0,9573525 |
| KCNA7            | 24,01   | 0,14  | 0,752217 | 0,191144 | 0,848413 | 0,9573525 |
| FOXP3            | 0,15    | -0,72 | 3,748196 | -0,19114 | 0,848417 | NA        |
| RP11-272G22.1    | 0,40    | 0,72  | 3,748196 | 0,191134 | 0,84842  | NA        |
| C15orf40         | 261,99  | -0,12 | 0,602001 | -0,19106 | 0,84848  | 0,9573525 |
| FMR1-AS1         | 5,83    | 0,25  | 1,318304 | 0,191019 | 0,848511 | 0,9573525 |
| JPX              | 308,16  | -0,12 | 0,640681 | -0,191   | 0,848529 | 0,9573525 |
| EPN1             | 192,90  | -0,13 | 0,67938  | -0,19094 | 0,848573 | 0,9573525 |
| RP11-796E2.4     | 106,98  | 0,18  | 0,961023 | 0,190762 | 0,848712 | 0,9574518 |
| RP11-499F19.3    | 0,04    | -0,71 | 3,748196 | -0,19073 | 0,848738 | NA        |
| PCNA             | 224,50  | -0,17 | 0,865598 | -0,19069 | 0,848768 | 0,9574567 |
| RP11-407G23.5    | 9,24    | -0,13 | 0,673123 | -0,19056 | 0,848867 | 0,9575099 |
| RAVER1           | 17,55   | -0,21 | 1,125075 | -0,19045 | 0,848958 | 0,9575102 |
| LMBRD2           | 83,52   | -0,14 | 0,714179 | -0,19043 | 0,84897  | 0,9575102 |
| RP1-111D6.1      | 0,04    | -0,71 | 3,748196 | -0,19041 | 0,84899  | NA        |

|               |         |       |          |          |          |           |
|---------------|---------|-------|----------|----------|----------|-----------|
| RP11-110G21.1 | 8,93    | 0,19  | 1,01114  | 0,190193 | 0,849158 | 0,9576423 |
| RNF128        | 0,04    | -0,71 | 3,748196 | -0,19019 | 0,849159 | NA        |
| AC079807.4    | 25,25   | 0,19  | 0,980406 | 0,190152 | 0,84919  | 0,9576423 |
| MCOLN2        | 294,76  | -0,13 | 0,671259 | -0,19004 | 0,849275 | 0,95768   |
| RAB43P1       | 0,04    | -0,71 | 3,748196 | -0,18991 | 0,849381 | NA        |
| RP11-219I21.2 | 10,91   | 0,19  | 0,995231 | 0,189829 | 0,849443 | 0,9578117 |
| AP003068.18   | 18,74   | -0,11 | 0,5782   | -0,18968 | 0,849561 | 0,9578309 |
| CCZ1B         | 273,99  | 0,10  | 0,51041  | 0,189676 | 0,849563 | 0,9578309 |
| AHSP          | 0,05    | -0,71 | 3,748196 | -0,18961 | 0,849616 | NA        |
| RP11-63P12.7  | 5,31    | -0,19 | 0,985934 | -0,18947 | 0,849725 | 0,9579548 |
| GCAT          | 0,54    | -0,33 | 1,728168 | -0,18941 | 0,849768 | NA        |
| RP3-468K18.5  | 0,04    | -0,71 | 3,748196 | -0,18932 | 0,84984  | NA        |
| CTC-209H22.3  | 0,04    | -0,71 | 3,748196 | -0,18931 | 0,849846 | NA        |
| CAD           | 152,33  | 0,18  | 0,959927 | 0,18925  | 0,849897 | 0,9580905 |
| RP11-315H15.3 | 1,43    | 0,56  | 2,949875 | 0,189113 | 0,850004 | NA        |
| AC108463.1    | 0,35    | 0,71  | 3,748196 | 0,189099 | 0,850015 | NA        |
| TTC5          | 326,24  | -0,17 | 0,884933 | -0,18904 | 0,850063 | 0,9581503 |
| RP5-851M4.1   | 10,19   | 0,35  | 1,850125 | 0,188944 | 0,850137 | 0,9581503 |
| AC110781.3    | 0,54    | -0,49 | 2,613686 | -0,18894 | 0,850141 | NA        |
| CEP41         | 143,09  | -0,17 | 0,914488 | -0,18893 | 0,850149 | 0,9581503 |
| DDIT3         | 424,98  | -0,12 | 0,657218 | -0,18892 | 0,850156 | 0,9581503 |
| RP11-94B19.6  | 0,04    | -0,71 | 3,748196 | -0,18886 | 0,8502   | NA        |
| IFT80         | 98,60   | -0,14 | 0,727712 | -0,18873 | 0,850304 | 0,9582055 |
| NINL          | 0,45    | 0,47  | 2,517375 | 0,188671 | 0,850351 | NA        |
| POLD1         | 61,01   | -0,24 | 1,249672 | -0,18865 | 0,85037  | 0,9582055 |
| RP11-900F13.3 | 1,14    | 0,49  | 2,583571 | 0,18864  | 0,850375 | NA        |
| RP11-556O9.2  | 0,04    | -0,71 | 3,748196 | -0,1886  | 0,850409 | NA        |
| RNU6-1275P    | 0,39    | 0,67  | 3,575986 | 0,188594 | 0,850411 | NA        |
| TSPAN11       | 0,71    | -0,68 | 3,601621 | -0,18858 | 0,85042  | NA        |
| RP11-87N24.2  | 4,37    | 0,21  | 1,087985 | 0,188581 | 0,850421 | 0,9582055 |
| RP11-144A16.8 | 0,89    | -0,25 | 1,333238 | -0,18852 | 0,85047  | NA        |
| ASAH1         | 1985,02 | 0,07  | 0,347369 | 0,188514 | 0,850474 | 0,9582055 |
| CTD-2583P5.1  | 16,59   | -0,35 | 1,831826 | -0,1885  | 0,850488 | 0,9582055 |
| WDR88         | 0,22    | 0,64  | 3,411743 | 0,188461 | 0,850515 | NA        |
| CPSF1         | 293,74  | -0,10 | 0,52321  | -0,18845 | 0,850524 | 0,9582055 |
| AC091814.2    | 1,89    | 0,51  | 2,683378 | 0,188431 | 0,850539 | NA        |
| RP11-56G10.2  | 42,27   | 0,09  | 0,485652 | 0,188397 | 0,850565 | 0,9582055 |
| RPS9P1        | 0,79    | -0,25 | 1,325194 | -0,18839 | 0,850567 | NA        |
| FLVCR2        | 198,47  | 0,12  | 0,645551 | 0,188276 | 0,85066  | 0,9582549 |
| AC016722.2    | 0,56    | 0,67  | 3,564906 | 0,188254 | 0,850678 | NA        |
| CCL2          | 0,24    | 0,71  | 3,748196 | 0,188248 | 0,850683 | NA        |
| SCN10A        | 0,05    | -0,71 | 3,748196 | -0,18814 | 0,850768 | NA        |
| RP11-445O3.2  | 1,23    | 0,37  | 1,968172 | 0,188134 | 0,850771 | NA        |
| RP11-569A11.1 | 0,04    | -0,71 | 3,748196 | -0,18811 | 0,850791 | NA        |
| SNORA80D      | 0,35    | 0,71  | 3,748196 | 0,188098 | 0,8508   | NA        |
| ARR3          | 0,41    | -0,59 | 3,12531  | -0,18803 | 0,850857 | NA        |
| RN7SL812P     | 0,17    | 0,70  | 3,748196 | 0,187948 | 0,850918 | NA        |
| RP11-425A6.5  | 2,75    | 0,21  | 1,122251 | 0,187875 | 0,850975 | NA        |
| MIR181B1      | 0,21    | 0,70  | 3,748196 | 0,187737 | 0,851083 | NA        |
| ELDR          | 0,32    | 0,70  | 3,748196 | 0,187731 | 0,851088 | NA        |

|               |         |       |          |          |          |           |
|---------------|---------|-------|----------|----------|----------|-----------|
| NSUN3         | 125,09  | 0,14  | 0,746604 | 0,187717 | 0,851098 | 0,9586899 |
| A4GNT         | 0,26    | 0,70  | 3,748196 | 0,187705 | 0,851108 | NA        |
| CTA-229A8.6   | 0,27    | 0,70  | 3,748196 | 0,187675 | 0,851132 | NA        |
| HIST2H3A      | 0,23    | 0,70  | 3,748196 | 0,187622 | 0,851173 | NA        |
| HIST2H3C      | 0,23    | 0,70  | 3,748196 | 0,187622 | 0,851173 | NA        |
| AC007248.6    | 0,20    | 0,70  | 3,748196 | 0,187612 | 0,851181 | NA        |
| RP11-706D8.2  | 1,48    | -0,18 | 0,956056 | -0,18759 | 0,851197 | NA        |
| HAPLN1        | 0,50    | 0,52  | 2,759835 | 0,187583 | 0,851203 | NA        |
| RP11-382A20.6 | 1,60    | -0,36 | 1,928405 | -0,1875  | 0,851266 | NA        |
| KB-176G8.1    | 2,15    | 0,22  | 1,186552 | 0,187402 | 0,851345 | NA        |
| RP11-809N8.2  | 63,44   | 0,27  | 1,446682 | 0,187374 | 0,851367 | 0,9588481 |
| PARD6A        | 14,46   | -0,35 | 1,891531 | -0,18735 | 0,851386 | 0,9588481 |
| DNAH1         | 180,30  | 0,16  | 0,830187 | 0,187341 | 0,851393 | 0,9588481 |
| TRIM53B       | 0,32    | 0,70  | 3,748196 | 0,187293 | 0,851431 | NA        |
| RPL23P2       | 0,23    | 0,70  | 3,748196 | 0,187236 | 0,851476 | NA        |
| RNU2-31P      | 0,03    | -0,70 | 3,748196 | -0,18721 | 0,851496 | NA        |
| CNKSR1        | 1,08    | -0,34 | 1,805664 | -0,18709 | 0,851587 | NA        |
| RNU6-548P     | 0,35    | 0,70  | 3,748196 | 0,187054 | 0,851619 | NA        |
| RP11-595B24.2 | 2,54    | 0,33  | 1,750647 | 0,187031 | 0,851636 | NA        |
| AC007254.3    | 433,85  | -0,08 | 0,447694 | -0,187   | 0,85166  | 0,9590088 |
| ASB8          | 490,22  | 0,12  | 0,629706 | 0,186962 | 0,851691 | 0,9590088 |
| CTD-2270P14.1 | 327,36  | 0,18  | 0,987522 | 0,186953 | 0,851698 | 0,9590088 |
| RP11-329J18.3 | 23,02   | -0,23 | 1,204926 | -0,1869  | 0,851742 | 0,9590088 |
| RP11-314A20.1 | 1,11    | -0,20 | 1,05953  | -0,18688 | 0,851753 | NA        |
| AC110619.2    | 0,12    | -0,54 | 2,870133 | -0,18674 | 0,851867 | NA        |
| MINOS1        | 399,68  | 0,05  | 0,242833 | 0,186663 | 0,851925 | 0,9591119 |
| RP11-245J9.8  | 53,21   | -0,15 | 0,785148 | -0,18665 | 0,851937 | 0,9591119 |
| RP11-397J20.1 | 0,23    | 0,70  | 3,748196 | 0,186634 | 0,851947 | NA        |
| ZC3H15        | 1052,89 | 0,07  | 0,353308 | 0,186327 | 0,852188 | 0,9593159 |
| AC099048.1    | 0,32    | 0,70  | 3,748196 | 0,18623  | 0,852265 | NA        |
| RN7SKP26      | 3,36    | 0,64  | 3,414816 | 0,18618  | 0,852304 | NA        |
| MLLT4         | 149,66  | 0,16  | 0,845372 | 0,186134 | 0,852339 | 0,9593159 |
| RP11-864I4.4  | 2,24    | 0,28  | 1,48485  | 0,186055 | 0,852402 | NA        |
| RP11-500C11.3 | 16,51   | -0,46 | 2,493985 | -0,18602 | 0,852426 | 0,9593159 |
| LPAR5         | 6,88    | -0,28 | 1,515261 | -0,18592 | 0,852505 | 0,9593159 |
| SYP           | 8,90    | -0,15 | 0,781187 | -0,18588 | 0,852537 | 0,9593159 |
| RP11-645C24.5 | 1,40    | 0,56  | 3,01393  | 0,185881 | 0,852538 | NA        |
| PTGES3L       | 17,23   | -0,14 | 0,767967 | -0,18584 | 0,852568 | 0,9593159 |
| RP11-235E17.2 | 2,55    | 0,23  | 1,222157 | 0,185819 | 0,852587 | NA        |
| HDC           | 0,51    | -0,56 | 3,027115 | -0,18581 | 0,852592 | NA        |
| MIR6514       | 1,18    | 0,35  | 1,904382 | 0,18581  | 0,852594 | NA        |
| AAGAB         | 155,17  | -0,16 | 0,886208 | -0,18579 | 0,852606 | 0,9593159 |
| RN7SL778P     | 2,73    | -0,31 | 1,684725 | -0,18576 | 0,852634 | NA        |
| TBC1D8B       | 106,67  | -0,10 | 0,51276  | -0,18571 | 0,852672 | 0,9593159 |
| RP11-946L20.4 | 41,39   | -0,14 | 0,734839 | -0,18565 | 0,852715 | 0,9593159 |
| RP11-266K4.9  | 9,45    | 0,27  | 1,452468 | 0,185598 | 0,85276  | 0,9593159 |
| DHX9          | 901,56  | 0,09  | 0,468174 | 0,185574 | 0,852779 | 0,9593159 |
| SYF2          | 506,56  | -0,09 | 0,470868 | -0,18555 | 0,852794 | 0,9593159 |
| PODNL1        | 24,38   | -0,14 | 0,766331 | -0,18553 | 0,852815 | 0,9593159 |
| RPF1          | 267,11  | -0,11 | 0,594309 | -0,18545 | 0,852879 | 0,9593159 |

|               |         |       |          |          |          |           |
|---------------|---------|-------|----------|----------|----------|-----------|
| RP11-649A18.3 | 16,38   | 0,13  | 0,708941 | 0,185431 | 0,852891 | 0,9593159 |
| RP11-22P6.3   | 0,31    | 0,69  | 3,748196 | 0,185361 | 0,852946 | NA        |
| RP11-1114I9.1 | 1,19    | 0,68  | 3,697015 | 0,185282 | 0,853008 | NA        |
| CEP55         | 0,85    | 0,38  | 2,040572 | 0,185273 | 0,853015 | NA        |
| RN7SL411P     | 0,78    | -0,30 | 1,62955  | -0,18525 | 0,85303  | NA        |
| B3GALT2       | 25,19   | 0,29  | 1,567927 | 0,185231 | 0,853048 | 0,9594342 |
| OR10A6        | 25,19   | -0,21 | 1,157985 | -0,18503 | 0,853208 | 0,9594478 |
| RND2          | 7,01    | -0,15 | 0,807606 | -0,18495 | 0,853269 | 0,9594478 |
| OR10K1        | 20,07   | 0,13  | 0,67781  | 0,184935 | 0,85328  | 0,9594478 |
| RP11-81A1.6   | 83,42   | -0,10 | 0,561191 | -0,18493 | 0,853282 | 0,9594478 |
| PARP3         | 55,46   | -0,26 | 1,428166 | -0,18476 | 0,853419 | 0,9594478 |
| CLEC16A       | 151,16  | -0,16 | 0,850031 | -0,18475 | 0,853426 | 0,9594478 |
| RP11-115O13.1 | 0,04    | -0,69 | 3,748196 | -0,18471 | 0,853459 | NA        |
| RP11-34C15.2  | 5,78    | 0,23  | 1,253089 | 0,184644 | 0,853509 | 0,9594478 |
| HMOX1         | 180,62  | 0,18  | 0,959572 | 0,184607 | 0,853537 | 0,9594478 |
| RP11-429B14.3 | 7,26    | -0,22 | 1,210752 | -0,1846  | 0,853546 | 0,9594478 |
| CLEC19A       | 40,37   | -0,13 | 0,69712  | -0,18454 | 0,853586 | 0,9594478 |
| RP11-556I14.1 | 0,23    | 0,69  | 3,748196 | 0,184464 | 0,85365  | NA        |
| CLEC3B        | 5,91    | -0,48 | 2,610219 | -0,18442 | 0,85368  | 0,9594478 |
| ELL3          | 12,59   | 0,30  | 1,610335 | 0,184366 | 0,853726 | 0,9594478 |
| PRKAA1        | 229,47  | 0,08  | 0,456542 | 0,18436  | 0,853731 | 0,9594478 |
| RP11-791G16.6 | 3,34    | 0,35  | 1,903055 | 0,184146 | 0,853899 | NA        |
| RP11-392O17.2 | 8,89    | 0,12  | 0,625385 | 0,183955 | 0,854049 | 0,9597471 |
| RP11-20I23.10 | 20,59   | -0,13 | 0,720154 | -0,18386 | 0,854122 | 0,9597713 |
| RP11-791N19.1 | 1,03    | -0,46 | 2,528238 | -0,1838  | 0,854174 | NA        |
| PIK3C2G       | 2,40    | -0,44 | 2,410571 | -0,18379 | 0,854176 | NA        |
| PXK           | 349,18  | 0,11  | 0,579679 | 0,183708 | 0,854242 | 0,9598023 |
| CTCFL         | 78,49   | -0,09 | 0,501726 | -0,1837  | 0,854252 | 0,9598023 |
| ZNF692        | 82,12   | 0,19  | 1,016325 | 0,183497 | 0,854408 | 0,9598408 |
| FANCM         | 49,48   | 0,27  | 1,463049 | 0,183482 | 0,85442  | 0,9598408 |
| AC092024.2    | 6,16    | -0,21 | 1,155798 | -0,18343 | 0,854458 | 0,9598408 |
| KIN           | 357,27  | -0,12 | 0,667698 | -0,18337 | 0,854504 | 0,9598408 |
| FAM50B        | 4,68    | 0,42  | 2,290481 | 0,183323 | 0,854545 | 0,9598408 |
| RP11-625H11.2 | 2,49    | -0,30 | 1,643092 | -0,18321 | 0,854634 | NA        |
| RP3-467D16.3  | 21,59   | -0,22 | 1,182789 | -0,183   | 0,854794 | 0,9599328 |
| HSD17B13      | 13,49   | 0,11  | 0,618503 | 0,182945 | 0,854842 | 0,9599328 |
| SPIN2A        | 0,25    | -0,61 | 3,343206 | -0,18291 | 0,854867 | NA        |
| SMAP2         | 2261,32 | -0,06 | 0,30408  | -0,1829  | 0,854873 | 0,9599328 |
| STRADA        | 285,28  | -0,09 | 0,517622 | -0,18287 | 0,854902 | 0,9599328 |
| STX19         | 0,93    | 0,68  | 3,719477 | 0,18286  | 0,854908 | NA        |
| SLC6A4        | 5,30    | -0,17 | 0,940829 | -0,18281 | 0,854947 | 0,9599328 |
| AC011380.9    | 1,09    | 0,60  | 3,281675 | 0,182792 | 0,854962 | NA        |
| RP11-386I8.6  | 1,60    | 0,31  | 1,680995 | 0,182782 | 0,854969 | NA        |
| CTD-2531D15.1 | 0,38    | 0,68  | 3,745845 | 0,182768 | 0,85498  | NA        |
| AC026150.6    | 4,57    | -0,43 | 2,374913 | -0,18274 | 0,855001 | 0,9599328 |
| ACAD8         | 126,72  | -0,19 | 1,035542 | -0,18271 | 0,855029 | 0,9599328 |
| CCDC69        | 595,43  | -0,05 | 0,297779 | -0,18269 | 0,855039 | 0,9599328 |
| ZNF701        | 123,63  | -0,15 | 0,796483 | -0,18253 | 0,855165 | 0,9600159 |
| IRF3          | 325,95  | -0,09 | 0,476513 | -0,18244 | 0,855235 | 0,9600362 |
| RNA5SP383     | 4,59    | -0,30 | 1,651766 | -0,18237 | 0,855292 | 0,9600389 |

|                |         |       |          |          |          |           |
|----------------|---------|-------|----------|----------|----------|-----------|
| CHRN4          | 7,62    | 0,16  | 0,88938  | 0,182273 | 0,855369 | 0,9600389 |
| ELMO3          | 3,80    | 0,27  | 1,481293 | 0,182243 | 0,855392 | 0,9600389 |
| RP11-998D10.1  | 1,45    | 0,42  | 2,320433 | 0,182184 | 0,855438 | NA        |
| RP11-259F4.1   | 1,70    | 0,37  | 2,031102 | 0,182127 | 0,855483 | NA        |
| ELP3           | 245,00  | 0,15  | 0,84223  | 0,182103 | 0,855502 | 0,9601043 |
| RP11-278H7.5   | 0,55    | 0,32  | 1,732032 | 0,181895 | 0,855665 | NA        |
| RP11-2I17.1    | 8,84    | 0,15  | 0,805696 | 0,181886 | 0,855672 | 0,9602375 |
| AC104655.2     | 1,17    | -0,52 | 2,878813 | -0,18179 | 0,855747 | NA        |
| THAP8          | 23,18   | -0,37 | 2,009133 | -0,18167 | 0,855839 | 0,9603675 |
| HLTF           | 145,79  | -0,15 | 0,830397 | -0,1816  | 0,855896 | 0,9603731 |
| KIAA1211L      | 0,13    | -0,52 | 2,886178 | -0,18152 | 0,85596  | NA        |
| TPCN2          | 339,64  | -0,10 | 0,577568 | -0,18144 | 0,856019 | 0,9604126 |
| ETNPPL         | 0,77    | 0,28  | 1,55058  | 0,181416 | 0,856041 | NA        |
| AC138744.2     | 0,65    | 0,68  | 3,739834 | 0,18141  | 0,856046 | NA        |
| SLC25A53       | 77,66   | -0,13 | 0,74003  | -0,18137 | 0,856075 | 0,9604126 |
| RP11-369K17.1  | 1,60    | -0,54 | 2,957056 | -0,18133 | 0,856108 | NA        |
| TBC1D23        | 236,16  | -0,11 | 0,610583 | -0,18132 | 0,856119 | 0,9604126 |
| USP21          | 122,37  | 0,12  | 0,648997 | 0,181255 | 0,856167 | 0,9604126 |
| PGM5           | 76,03   | -0,24 | 1,318922 | -0,18117 | 0,856237 | 0,9604126 |
| ATP6V1G1       | 1516,77 | 0,05  | 0,293626 | 0,181161 | 0,856241 | 0,9604126 |
| RP11-457D13.3  | 0,37    | 0,68  | 3,746    | 0,180865 | 0,856473 | NA        |
| AF064858.6     | 7,59    | 0,38  | 2,105247 | 0,180822 | 0,856507 | 0,9606226 |
| COX6A1         | 1061,46 | -0,04 | 0,20136  | -0,18079 | 0,856532 | 0,9606226 |
| PPP2R2A        | 337,96  | 0,08  | 0,438075 | 0,180682 | 0,856617 | 0,9606611 |
| DPYSL5         | 12,59   | -0,20 | 1,095843 | -0,18058 | 0,856694 | 0,9606892 |
| GS1-124K5.2    | 6,68    | -0,22 | 1,218983 | -0,18044 | 0,856811 | 0,9607623 |
| RP11-93B14.4   | 0,38    | 0,64  | 3,574179 | 0,180363 | 0,856867 | NA        |
| STK32C         | 147,85  | -0,16 | 0,872483 | -0,18021 | 0,856989 | 0,9609043 |
| DHPS           | 386,12  | 0,09  | 0,47612  | 0,179968 | 0,857178 | 0,9610114 |
| ST7-OT4        | 16,03   | -0,26 | 1,41823  | -0,17995 | 0,857188 | 0,9610114 |
| RP11-343L5.2   | 0,81    | 0,51  | 2,843235 | 0,179857 | 0,857265 | NA        |
| MIRLET7DHG     | 12,85   | 0,33  | 1,816657 | 0,179806 | 0,857305 | 0,9610372 |
| C2orf50        | 4,81    | 0,18  | 1,0007   | 0,17979  | 0,857317 | 0,9610372 |
| RP11-473M20.16 | 6,79    | -0,10 | 0,546941 | -0,17972 | 0,857369 | 0,9610372 |
| CCDC173        | 7,23    | -0,41 | 2,261371 | -0,17966 | 0,857418 | 0,9610372 |
| CTC-479C5.12   | 46,99   | -0,12 | 0,647615 | -0,17945 | 0,857584 | 0,9611512 |
| TCF4           | 674,83  | -0,12 | 0,665872 | -0,17934 | 0,857669 | 0,9611512 |
| DNA2           | 27,25   | -0,19 | 1,067508 | -0,1793  | 0,8577   | 0,9611512 |
| CCNI           | 5143,97 | 0,03  | 0,194773 | 0,179269 | 0,857726 | 0,9611512 |
| AC126544.4     | 166,14  | 0,13  | 0,750864 | 0,179134 | 0,857832 | 0,9611935 |
| FAT2           | 0,23    | -0,50 | 2,812658 | -0,179   | 0,857935 | NA        |
| FDFT1          | 715,57  | 0,08  | 0,447007 | 0,178875 | 0,858036 | 0,9611935 |
| CTD-2201I18.1  | 5,48    | 0,34  | 1,880754 | 0,178871 | 0,858039 | 0,9611935 |
| RBM5           | 1158,55 | -0,07 | 0,368729 | -0,17886 | 0,858045 | 0,9611935 |
| RP11-252A24.3  | 3,00    | -0,22 | 1,235329 | -0,17884 | 0,858061 | NA        |
| RP11-256L11.1  | 1,12    | 0,22  | 1,224242 | 0,17883  | 0,858071 | NA        |
| MRPS16         | 463,90  | -0,07 | 0,386524 | -0,17883 | 0,858072 | 0,9611935 |
| DENND2A        | 23,36   | -0,15 | 0,814976 | -0,17875 | 0,858137 | 0,9611935 |
| SLC25A40       | 212,32  | 0,13  | 0,708115 | 0,178742 | 0,858141 | 0,9611935 |
| SAP30BP        | 539,61  | -0,08 | 0,456906 | -0,1787  | 0,858177 | 0,9611935 |

|                |         |       |          |          |          |           |
|----------------|---------|-------|----------|----------|----------|-----------|
| AC002519.6     | 0,11    | -0,67 | 3,748196 | -0,17867 | 0,858196 | NA        |
| SLC25A33       | 202,89  | 0,12  | 0,67383  | 0,17857  | 0,858276 | 0,9612457 |
| RTF1           | 371,56  | -0,09 | 0,530208 | -0,1785  | 0,858327 | 0,9612457 |
| RP11-767N6.2   | 10,46   | -0,52 | 2,942068 | -0,17839 | 0,858419 | 0,96125   |
| RP11-274B21.14 | 168,43  | 0,13  | 0,753925 | 0,178368 | 0,858434 | 0,96125   |
| RP11-21K12.2   | 57,64   | 0,21  | 1,169904 | 0,178211 | 0,858557 | 0,9613298 |
| OXGR1          | 2,44    | 0,34  | 1,883525 | 0,178154 | 0,858602 | NA        |
| TSC1           | 360,13  | -0,10 | 0,587949 | -0,17805 | 0,858682 | 0,9613464 |
| NUP50          | 402,91  | 0,10  | 0,549264 | 0,177996 | 0,858726 | 0,9613464 |
| MC2R           | 17,96   | 0,16  | 0,875536 | 0,177995 | 0,858727 | 0,9613464 |
| POTEH          | 3,21    | -0,23 | 1,301783 | -0,17798 | 0,858739 | NA        |
| GPC3           | 0,18    | -0,67 | 3,748196 | -0,17778 | 0,858897 | NA        |
| ADAMTSL4       | 251,97  | 0,09  | 0,523179 | 0,177622 | 0,85902  | 0,9616163 |
| RP11-370A5.1   | 0,65    | 0,66  | 3,7401   | 0,17756  | 0,859069 | NA        |
| RP11-518K17.3  | 0,71    | -0,21 | 1,206267 | -0,17755 | 0,859077 | NA        |
| RN7SL841P      | 0,68    | -0,28 | 1,594712 | -0,17752 | 0,859103 | NA        |
| MRPS9          | 420,21  | -0,13 | 0,718077 | -0,17742 | 0,859182 | 0,9616255 |
| AL138479.3     | 5,34    | 0,17  | 0,973245 | 0,177363 | 0,859223 | 0,9616255 |
| XX-BC751M15.1  | 1,05    | 0,50  | 2,830469 | 0,177345 | 0,859238 | NA        |
| KCTD10         | 183,95  | -0,16 | 0,87529  | -0,17732 | 0,859258 | 0,9616255 |
| SHISA5         | 838,96  | -0,06 | 0,337689 | -0,1773  | 0,859276 | 0,9616255 |
| PIM1           | 148,45  | -0,13 | 0,758168 | -0,17728 | 0,859286 | 0,9616255 |
| RP11-501E24.3  | 1,00    | 0,45  | 2,534362 | 0,17712  | 0,859414 | NA        |
| AC010127.3     | 29,89   | 0,18  | 1,014636 | 0,177111 | 0,859421 | 0,961653  |
| C12orf72       | 35,43   | -0,13 | 0,708721 | -0,17708 | 0,859449 | 0,961653  |
| ATP6V0D2       | 11,06   | -0,14 | 0,811636 | -0,17705 | 0,859471 | 0,961653  |
| RP11-175D17.3  | 0,53    | -0,64 | 3,61896  | -0,17704 | 0,859481 | NA        |
| RP11-316M21.8  | 2,92    | 0,20  | 1,104287 | 0,176976 | 0,859527 | NA        |
| NKAPP1         | 27,73   | -0,22 | 1,246373 | -0,17695 | 0,85955  | 0,961653  |
| RP11-56L13.3   | 4,32    | 0,32  | 1,837265 | 0,176818 | 0,859651 | 0,961653  |
| RNF166         | 577,61  | -0,07 | 0,368218 | -0,17682 | 0,859652 | 0,961653  |
| COPS8          | 469,02  | -0,12 | 0,656277 | -0,17678 | 0,859682 | 0,961653  |
| RNY4P7         | 1,96    | -0,33 | 1,852413 | -0,17664 | 0,85979  | NA        |
| FTSJ2          | 274,32  | 0,12  | 0,703141 | 0,176635 | 0,859795 | 0,961653  |
| RF00402        | 85,89   | 0,16  | 0,894228 | 0,176553 | 0,85986  | 0,961653  |
| AC006987.4     | 6,66    | -0,55 | 3,129891 | -0,17641 | 0,859972 | 0,961653  |
| RP11-30K9.6    | 19,25   | -0,14 | 0,778419 | -0,17637 | 0,860002 | 0,961653  |
| TAF4           | 68,20   | 0,16  | 0,903496 | 0,176353 | 0,860016 | 0,961653  |
| CTC-503J8.8    | 0,52    | 0,42  | 2,354996 | 0,176315 | 0,860047 | NA        |
| FBXO40         | 13,58   | 0,15  | 0,878645 | 0,176293 | 0,860064 | 0,961653  |
| LDHB           | 2141,11 | 0,05  | 0,264109 | 0,176255 | 0,860094 | 0,961653  |
| RP11-166N17.3  | 1,95    | 0,29  | 1,624566 | 0,176244 | 0,860102 | NA        |
| CTDP1          | 183,59  | -0,10 | 0,586816 | -0,17622 | 0,860122 | 0,961653  |
| RP11-729L2.2   | 0,75    | 0,49  | 2,767032 | 0,176103 | 0,860213 | NA        |
| RP11-447J13.3  | 21,18   | -0,12 | 0,697314 | -0,17605 | 0,860252 | 0,961653  |
| RP11-423H2.3   | 5,76    | 0,14  | 0,794765 | 0,175979 | 0,86031  | 0,961653  |
| RP11-382A20.5  | 46,02   | -0,13 | 0,738172 | -0,17587 | 0,860394 | 0,961653  |
| CAND1          | 560,58  | 0,10  | 0,552998 | 0,175869 | 0,860397 | 0,961653  |
| MTUS1          | 1,93    | 0,28  | 1,614879 | 0,175834 | 0,860425 | NA        |
| SLC25A28       | 585,21  | -0,09 | 0,491734 | -0,17574 | 0,860499 | 0,961653  |



|               |         |       |          |          |          |           |
|---------------|---------|-------|----------|----------|----------|-----------|
| RP11-681H18.2 | 153,31  | 0,21  | 1,19479  | 0,17571  | 0,860522 | 0,961653  |
| IL17RC        | 77,59   | 0,21  | 1,204569 | 0,175701 | 0,860529 | 0,961653  |
| PIGO          | 103,15  | -0,15 | 0,86709  | -0,17569 | 0,860538 | 0,961653  |
| TESPA1        | 251,23  | -0,15 | 0,842807 | -0,17567 | 0,860551 | 0,961653  |
| ACTR2         | 4485,45 | 0,04  | 0,246643 | 0,175486 | 0,860698 | 0,9617038 |
| RNU4-34P      | 1,77    | -0,20 | 1,120843 | -0,17547 | 0,860713 | NA        |
| CD79A         | 26,30   | -0,31 | 1,768378 | -0,17544 | 0,860733 | 0,9617038 |
| VAPB          | 172,93  | 0,15  | 0,88217  | 0,175417 | 0,860752 | 0,9617038 |
| CTC-429P9.3   | 145,74  | -0,14 | 0,77272  | -0,17506 | 0,86103  | 0,9619151 |
| RPL26P19      | 0,73    | 0,24  | 1,380542 | 0,175023 | 0,861061 | NA        |
| LAMB1         | 9,93    | -0,17 | 0,974217 | -0,17502 | 0,861063 | 0,9619151 |
| RP11-96O20.3  | 0,55    | -0,53 | 3,04995  | -0,17499 | 0,861085 | NA        |
| RAB43         | 12,34   | 0,41  | 2,360194 | 0,174979 | 0,861096 | 0,9619151 |
| CDHR5         | 0,03    | -0,66 | 3,748196 | -0,17486 | 0,861192 | NA        |
| RP4-681N20.1  | 11,76   | -0,10 | 0,587997 | -0,17476 | 0,861265 | 0,9620461 |
| PDZRN4        | 0,71    | -0,65 | 3,7141   | -0,17475 | 0,861277 | NA        |
| THAP3         | 279,98  | 0,14  | 0,792911 | 0,174637 | 0,861365 | 0,9620995 |
| TRPV2         | 625,43  | -0,08 | 0,448016 | -0,17456 | 0,861428 | 0,9621128 |
| RP11-95C14.1  | 2,62    | 0,19  | 1,112725 | 0,17451  | 0,861464 | NA        |
| FAM180A       | 1,69    | -0,29 | 1,674089 | -0,17447 | 0,861497 | NA        |
| RP11-809N15.3 | 5,83    | 0,15  | 0,868255 | 0,17443  | 0,861527 | 0,9621654 |
| RP11-160H22.5 | 8,90    | -0,16 | 0,924512 | -0,17427 | 0,861656 | 0,9622363 |
| SETDB1        | 410,38  | -0,11 | 0,61255  | -0,17422 | 0,861694 | 0,9622363 |
| GLO1          | 603,43  | -0,10 | 0,549974 | -0,17413 | 0,861766 | 0,9622591 |
| RANBP9        | 385,47  | 0,12  | 0,689271 | 0,17402  | 0,86185  | 0,9622683 |
| SKIV2L2       | 358,37  | -0,13 | 0,721129 | -0,17398 | 0,861878 | 0,9622683 |
| OR10Z1        | 1,17    | 0,38  | 2,183446 | 0,173931 | 0,86192  | NA        |
| RP11-815M8.1  | 1,88    | -0,47 | 2,690726 | -0,17387 | 0,861966 | NA        |
| RP3-433F14.3  | 20,19   | 0,16  | 0,941532 | 0,173733 | 0,862075 | 0,9624311 |
| RP11-298I3.1  | 0,90    | -0,48 | 2,772566 | -0,17373 | 0,86208  | NA        |
| DMBT1         | 0,08    | -0,65 | 3,748196 | -0,17366 | 0,862136 | NA        |
| PAFAH2        | 79,27   | -0,13 | 0,736951 | -0,17355 | 0,86222  | 0,9625344 |
| RP3-465N24.8  | 0,55    | 0,63  | 3,612656 | 0,173331 | 0,862391 | NA        |
| TARS2         | 166,91  | 0,11  | 0,634725 | 0,173319 | 0,862401 | 0,9626399 |
| DCUN1D5       | 109,96  | 0,16  | 0,909327 | 0,173297 | 0,862418 | 0,9626399 |
| RP11-814P23.1 | 250,92  | 0,07  | 0,3804   | 0,173019 | 0,862637 | 0,9627075 |
| WARS          | 2649,34 | 0,06  | 0,336132 | 0,172997 | 0,862654 | 0,9627075 |
| RP11-319E12.2 | 3,76    | -0,25 | 1,417075 | -0,17293 | 0,862708 | NA        |
| VEGFB         | 65,37   | -0,13 | 0,780004 | -0,17292 | 0,862717 | 0,9627075 |
| CTD-3051D23.4 | 5,57    | 0,18  | 1,034812 | 0,172913 | 0,86272  | 0,9627075 |
| RP11-276H19.1 | 2,20    | 0,26  | 1,512275 | 0,172907 | 0,862724 | NA        |
| SUCLG1        | 1045,17 | -0,07 | 0,418383 | -0,17289 | 0,862737 | 0,9627075 |
| RP1-118J21.28 | 1,26    | 0,34  | 1,952597 | 0,172843 | 0,862775 | NA        |
| NLN           | 167,56  | 0,11  | 0,630373 | 0,172819 | 0,862793 | 0,9627127 |
| RP11-554D20.2 | 7,36    | 0,26  | 1,516031 | 0,172656 | 0,862922 | 0,9627985 |
| RN7SL503P     | 2,72    | 0,21  | 1,194162 | 0,172194 | 0,863285 | NA        |
| DPRXP4        | 6,04    | 0,33  | 1,920167 | 0,172185 | 0,863292 | 0,9631532 |
| MYH2          | 0,04    | -0,65 | 3,748196 | -0,17218 | 0,863296 | NA        |
| SLC6A14       | 1,82    | -0,34 | 1,985851 | -0,17214 | 0,863326 | NA        |
| RP11-208N14.5 | 8,84    | 0,17  | 1,013743 | 0,172066 | 0,863386 | 0,9631588 |

|                |         |       |          |          |          |           |
|----------------|---------|-------|----------|----------|----------|-----------|
| CTD-2008A1.2   | 12,17   | 0,22  | 1,306269 | 0,172047 | 0,8634   | 0,9631588 |
| SLC26A5        | 0,50    | -0,60 | 3,506499 | -0,17202 | 0,863418 | NA        |
| FAM71F2        | 99,34   | 0,12  | 0,695337 | 0,171912 | 0,863507 | 0,963176  |
| MTX3           | 97,52   | 0,17  | 1,008718 | 0,171896 | 0,863519 | 0,963176  |
| RP3-412A9.11   | 54,49   | -0,25 | 1,446945 | -0,17182 | 0,863579 | 0,9631846 |
| HNRNPK         | 1956,02 | 0,04  | 0,254996 | 0,171486 | 0,863841 | 0,9633676 |
| CTA-268H5.12   | 0,28    | -0,59 | 3,436321 | -0,17148 | 0,863847 | NA        |
| RP11-813I20.3  | 5,78    | 0,28  | 1,661999 | 0,171399 | 0,86391  | 0,9633676 |
| ATP11A         | 565,38  | -0,08 | 0,48925  | -0,17139 | 0,863919 | 0,9633676 |
| CTD-2555K7.2   | 4,20    | -0,26 | 1,506948 | -0,17135 | 0,86395  | 0,9633676 |
| P4HA3          | 20,18   | -0,30 | 1,733877 | -0,1712  | 0,864063 | 0,9634359 |
| RP11-266A24.1  | 0,37    | 0,64  | 3,746295 | 0,171016 | 0,864211 | NA        |
| FAM182B        | 0,08    | -0,64 | 3,748196 | -0,17101 | 0,864219 | NA        |
| RP11-540B6.6   | 76,65   | -0,23 | 1,320634 | -0,17097 | 0,864251 | 0,9635731 |
| RP11-814E24.2  | 1,14    | -0,63 | 3,660633 | -0,17094 | 0,864271 | NA        |
| TMEM184A       | 29,24   | -0,16 | 0,935133 | -0,17089 | 0,864308 | 0,9635731 |
| RP11-705C15.2  | 326,90  | 0,15  | 0,881141 | 0,170754 | 0,864417 | 0,9635731 |
| NUDT12         | 13,32   | -0,40 | 2,360295 | -0,17068 | 0,864472 | 0,9635731 |
| HFE            | 81,99   | 0,17  | 0,99132  | 0,170681 | 0,864475 | 0,9635731 |
| RP11-197L7.3   | 6,32    | -0,13 | 0,789038 | -0,17065 | 0,864497 | 0,9635731 |
| NKD2           | 0,02    | -0,64 | 3,748196 | -0,1705  | 0,864621 | NA        |
| LDB1           | 116,31  | 0,13  | 0,755571 | 0,170423 | 0,864677 | 0,9636881 |
| USP9Y          | 10,89   | -0,17 | 1,009126 | -0,17039 | 0,864704 | 0,9636881 |
| AC005592.2     | 0,36    | 0,61  | 3,595604 | 0,170248 | 0,864815 | NA        |
| TSPAN31        | 311,95  | 0,15  | 0,858729 | 0,170173 | 0,864874 | 0,9638146 |
| RP11-408A13.4  | 2,06    | 0,46  | 2,730551 | 0,170072 | 0,864954 | NA        |
| LRRC8E         | 6,15    | 0,15  | 0,898343 | 0,170066 | 0,864958 | 0,9638146 |
| SMPD3          | 24,97   | 0,17  | 1,006144 | 0,170048 | 0,864972 | 0,9638146 |
| H3F3AP1        | 0,36    | 0,61  | 3,616627 | 0,16988  | 0,865105 | NA        |
| RP11-265F19.1  | 2,95    | 0,36  | 2,132886 | 0,169732 | 0,865221 | NA        |
| POM121L7       | 88,73   | -0,14 | 0,796875 | -0,16971 | 0,865241 | 0,9638196 |
| CXorf38        | 479,95  | 0,10  | 0,563465 | 0,169666 | 0,865273 | 0,9638196 |
| RP11-436I24.1  | 18,56   | 0,24  | 1,406862 | 0,169641 | 0,865293 | 0,9638196 |
| RP11-146F11.1  | 2,40    | 0,34  | 2,007133 | 0,169625 | 0,865305 | NA        |
| CMTM2          | 3,51    | 0,52  | 3,093841 | 0,169584 | 0,865337 | NA        |
| TMEM216        | 132,65  | -0,20 | 1,177878 | -0,16953 | 0,86538  | 0,9638196 |
| SLC5A4         | 4,17    | -0,47 | 2,766089 | -0,16938 | 0,865497 | 0,9638196 |
| RP11-422P24.13 | 1,28    | 0,35  | 2,080564 | 0,169359 | 0,865515 | NA        |
| RP11-264J9.1   | 33,68   | 0,22  | 1,280871 | 0,169354 | 0,865518 | 0,9638196 |
| RP11-983P16.2  | 7,69    | -0,18 | 1,068324 | -0,16933 | 0,865534 | 0,9638196 |
| AP4B1          | 298,99  | -0,12 | 0,735912 | -0,16933 | 0,865537 | 0,9638196 |
| EXOC1          | 372,73  | -0,10 | 0,576666 | -0,16933 | 0,865538 | 0,9638196 |
| ZBTB2          | 66,50   | 0,17  | 1,033101 | 0,169225 | 0,86562  | 0,9638196 |
| RBFOX3         | 14,79   | 0,13  | 0,778636 | 0,169085 | 0,86573  | 0,9638196 |
| DPH7           | 165,48  | -0,15 | 0,903944 | -0,16908 | 0,865734 | 0,9638196 |
| AC007001.4     | 0,63    | -0,36 | 2,12064  | -0,16905 | 0,865759 | NA        |
| RP11-166O4.4   | 0,48    | -0,63 | 3,717015 | -0,169   | 0,865794 | NA        |
| AC104451.2     | 8,77    | 0,26  | 1,538916 | 0,168979 | 0,865813 | 0,9638196 |
| CLGN           | 0,20    | 0,57  | 3,38682  | 0,168797 | 0,865956 | NA        |
| RP11-390K5.6   | 0,53    | 0,41  | 2,41034  | 0,168796 | 0,865957 | NA        |

|                |         |       |          |          |          |           |
|----------------|---------|-------|----------|----------|----------|-----------|
| RP11-566D24.2  | 4,19    | 0,47  | 2,780747 | 0,168778 | 0,865972 | 0,9638196 |
| SPINK9         | 11,17   | -0,13 | 0,789562 | -0,16876 | 0,865985 | 0,9638196 |
| TMEM91         | 75,48   | -0,19 | 1,138387 | -0,16873 | 0,866011 | 0,9638196 |
| EPHX3          | 0,63    | 0,62  | 3,692634 | 0,168718 | 0,866018 | NA        |
| R3HCC1         | 199,47  | -0,15 | 0,862189 | -0,1687  | 0,86603  | 0,9638196 |
| TNRC6A         | 320,42  | 0,08  | 0,491599 | 0,168683 | 0,866046 | 0,9638196 |
| THUMPD3        | 258,16  | -0,11 | 0,662515 | -0,16867 | 0,866059 | 0,9638196 |
| FBXL8          | 33,51   | -0,16 | 0,939359 | -0,16866 | 0,86606  | 0,9638196 |
| CTD-2351A16.1  | 22,63   | 0,10  | 0,603175 | 0,168632 | 0,866086 | 0,9638196 |
| FBXO42         | 276,37  | 0,11  | 0,67506  | 0,168593 | 0,866117 | 0,9638196 |
| FBXL3          | 307,87  | -0,13 | 0,785344 | -0,16839 | 0,866274 | 0,9638733 |
| RP11-363G2.5   | 14,40   | 0,18  | 1,048057 | 0,16839  | 0,866276 | 0,9638733 |
| RP11-477N12.5  | 16,00   | 0,20  | 1,210408 | 0,168334 | 0,86632  | 0,9638733 |
| FBXW10         | 3,76    | 0,14  | 0,819128 | 0,168112 | 0,866495 | NA        |
| RP11-1281K21.8 | 1,86    | 0,35  | 2,060436 | 0,168057 | 0,866538 | NA        |
| TRIM38         | 1342,97 | -0,04 | 0,245436 | -0,16802 | 0,866571 | 0,9640229 |
| NR2E1          | 4,34    | 0,17  | 1,003852 | 0,167956 | 0,866618 | 0,9640229 |
| ZSCAN2         | 30,31   | 0,18  | 1,059864 | 0,167894 | 0,866667 | 0,9640229 |
| NENF           | 141,60  | 0,11  | 0,642518 | 0,167886 | 0,866673 | 0,9640229 |
| SMIM19         | 268,64  | 0,14  | 0,812322 | 0,167818 | 0,866727 | 0,9640229 |
| LYG1           | 11,56   | 0,37  | 2,200772 | 0,167768 | 0,866766 | 0,9640229 |
| RN7SKP247      | 1,19    | -0,25 | 1,477153 | -0,16753 | 0,86695  | NA        |
| ADAM18         | 0,65    | -0,51 | 3,041097 | -0,16751 | 0,866973 | NA        |
| RP11-120M18.2  | 8,57    | -0,19 | 1,143999 | -0,1675  | 0,866976 | 0,9641528 |
| ARRB2          | 815,01  | 0,04  | 0,25983  | 0,167463 | 0,867006 | 0,9641528 |
| ZNF490         | 61,17   | -0,10 | 0,588968 | -0,16742 | 0,867038 | 0,9641528 |
| RP11-566H8.2   | 1,05    | -0,31 | 1,850423 | -0,16728 | 0,867152 | NA        |
| TOB2           | 303,11  | -0,11 | 0,651851 | -0,16724 | 0,867181 | 0,9642543 |
| RASSF1-AS1     | 28,94   | 0,25  | 1,503927 | 0,167144 | 0,867257 | 0,964281  |
| CCDC122        | 314,62  | -0,07 | 0,428836 | -0,16704 | 0,867339 | 0,96429   |
| RP11-164J13.1  | 17,47   | -0,32 | 1,943691 | -0,167   | 0,867369 | 0,96429   |
| AP003774.5     | 0,13    | -0,63 | 3,748196 | -0,16697 | 0,867394 | NA        |
| RP11-166B2.5   | 1,36    | -0,38 | 2,273417 | -0,1669  | 0,867445 | NA        |
| AP1S2          | 4273,56 | 0,04  | 0,250699 | 0,16686  | 0,86748  | 0,9643434 |
| RP11-534C12.1  | 0,19    | 0,57  | 3,403453 | 0,166786 | 0,867539 | NA        |
| CTD-2501B8.5   | 0,38    | -0,30 | 1,780242 | -0,1667  | 0,867609 | NA        |
| DENND6A        | 249,92  | -0,12 | 0,730979 | -0,16666 | 0,867634 | 0,9643434 |
| PSTK           | 70,45   | 0,21  | 1,277985 | 0,166645 | 0,867649 | 0,9643434 |
| RP11-1038A11.1 | 43,33   | 0,19  | 1,12584  | 0,166644 | 0,86765  | 0,9643434 |
| GATAD1         | 475,14  | 0,08  | 0,506717 | 0,166611 | 0,867676 | 0,9643434 |
| RP5-1085F17.3  | 87,15   | 0,16  | 0,982929 | 0,166506 | 0,867759 | 0,964378  |
| RP11-77K12.5   | 4,05    | 0,33  | 1,973422 | 0,166329 | 0,867898 | 0,9644603 |
| RP11-5C23.3    | 44,78   | -0,12 | 0,729252 | -0,16628 | 0,867937 | 0,9644603 |
| AKR1B10        | 1,33    | -0,20 | 1,231262 | -0,16627 | 0,867948 | NA        |
| AJ006995.3     | 0,83    | 0,27  | 1,596785 | 0,166159 | 0,868032 | NA        |
| TMX2           | 497,65  | 0,09  | 0,551569 | 0,166079 | 0,868095 | 0,9645607 |
| RNU2-24P       | 0,90    | -0,46 | 2,760415 | -0,16608 | 0,868097 | NA        |
| TPST2          | 374,88  | -0,12 | 0,708513 | -0,16592 | 0,868216 | 0,9645607 |
| RNU2-14P       | 0,26    | 0,56  | 3,359199 | 0,165923 | 0,868217 | NA        |
| RP11-278L15.2  | 18,70   | -0,34 | 2,066253 | -0,16588 | 0,868253 | 0,9645607 |

|                |         |       |          |          |          |           |
|----------------|---------|-------|----------|----------|----------|-----------|
| PDCD7          | 147,41  | -0,13 | 0,760289 | -0,16582 | 0,868295 | 0,9645607 |
| RP11-243M5.3   | 4,23    | 0,18  | 1,056549 | 0,165823 | 0,868296 | 0,9645607 |
| TESK2          | 57,20   | 0,17  | 1,029304 | 0,165739 | 0,868362 | 0,9645607 |
| SBDS           | 524,37  | 0,09  | 0,516854 | 0,165704 | 0,86839  | 0,9645607 |
| LILRB2         | 681,61  | 0,05  | 0,300617 | 0,165611 | 0,868463 | 0,9645729 |
| RF00494        | 0,42    | -0,50 | 2,995618 | -0,16558 | 0,868485 | NA        |
| PAQR6          | 1,06    | -0,31 | 1,857627 | -0,16558 | 0,86849  | NA        |
| SLC30A9        | 627,13  | -0,11 | 0,652235 | -0,16555 | 0,868513 | 0,9645729 |
| RP11-326A13.1  | 1,40    | 0,32  | 1,96071  | 0,165536 | 0,868522 | NA        |
| RP11-756J15.3  | 7,14    | -0,20 | 1,21711  | -0,16549 | 0,868556 | 0,9645729 |
| RP3-508I15.16  | 0,17    | 0,56  | 3,414955 | 0,165394 | 0,868634 | NA        |
| C15orf59       | 10,15   | -0,10 | 0,597356 | -0,16531 | 0,868697 | 0,9646346 |
| JOSD2          | 242,19  | -0,11 | 0,645357 | -0,16526 | 0,86874  | 0,9646346 |
| FAM210A        | 239,03  | -0,13 | 0,779762 | -0,16522 | 0,868767 | 0,9646346 |
| OR10G4         | 16,82   | -0,16 | 0,959117 | -0,16511 | 0,868854 | 0,9646369 |
| RPS6KA6        | 60,59   | -0,10 | 0,59078  | -0,16502 | 0,868931 | 0,9646369 |
| PLA2G10        | 4,08    | -0,21 | 1,267778 | -0,16499 | 0,868955 | 0,9646369 |
| DYNLT1         | 942,67  | -0,05 | 0,319082 | -0,16493 | 0,868995 | 0,9646369 |
| RP11-654A16.3  | 4,10    | 0,52  | 3,141814 | 0,164817 | 0,869088 | 0,9646369 |
| RP11-474D1.3   | 3,79    | 0,17  | 1,021085 | 0,164808 | 0,869095 | 0,9646369 |
| TRIM9          | 1,25    | 0,62  | 3,748196 | 0,164803 | 0,869099 | NA        |
| RP11-583F2.3   | 0,18    | 0,56  | 3,409977 | 0,16479  | 0,869109 | NA        |
| MILR1          | 232,95  | -0,11 | 0,648198 | -0,16476 | 0,869132 | 0,9646369 |
| BRD7P1         | 0,18    | 0,56  | 3,409689 | 0,164749 | 0,869142 | NA        |
| RP11-135D11.2  | 3,44    | 0,25  | 1,544658 | 0,164615 | 0,869247 | NA        |
| RP11-90L20.2   | 0,19    | 0,56  | 3,388807 | 0,164557 | 0,869293 | NA        |
| CTC-384G19.1   | 9,09    | -0,18 | 1,068733 | -0,16453 | 0,869312 | 0,964755  |
| CYP2D6         | 2,38    | -0,37 | 2,225563 | -0,16451 | 0,869332 | NA        |
| C5orf17        | 40,85   | 0,13  | 0,789027 | 0,164494 | 0,869343 | 0,964755  |
| RP5-1050D4.4   | 1,83    | 0,49  | 2,994134 | 0,164473 | 0,869359 | NA        |
| AC105921.2     | 0,17    | 0,56  | 3,399647 | 0,164358 | 0,869449 | NA        |
| ABLIM2         | 0,30    | 0,60  | 3,637286 | 0,164298 | 0,869497 | NA        |
| RGL3           | 2,77    | 0,20  | 1,213804 | 0,164265 | 0,869522 | NA        |
| CSNK2A2        | 445,30  | -0,09 | 0,528052 | -0,16426 | 0,869528 | 0,9649035 |
| RP3-428A13.2   | 5,37    | 0,22  | 1,341231 | 0,164094 | 0,869657 | 0,9649548 |
| KLHL35         | 10,31   | -0,12 | 0,747295 | -0,16407 | 0,869678 | 0,9649548 |
| DDX19B         | 277,67  | 0,11  | 0,681572 | 0,163905 | 0,869806 | 0,9649967 |
| NSMAF          | 558,84  | 0,09  | 0,538808 | 0,163888 | 0,86982  | 0,9649967 |
| AOC4           | 0,18    | 0,56  | 3,411474 | 0,163571 | 0,870069 | NA        |
| DCUN1D1        | 510,25  | 0,08  | 0,496115 | 0,163524 | 0,870106 | 0,9652291 |
| RP11-320G24.1  | 11,10   | -0,10 | 0,627817 | -0,16335 | 0,87024  | 0,9652291 |
| PRG4           | 37,07   | -0,29 | 1,75439  | -0,16326 | 0,870313 | 0,9652291 |
| RP11-256P1.1   | 39,90   | 0,10  | 0,603053 | 0,163256 | 0,870317 | 0,9652291 |
| CD55           | 1525,82 | -0,06 | 0,358165 | -0,16325 | 0,870319 | 0,9652291 |
| RP11-85K15.3   | 35,02   | 0,12  | 0,719569 | 0,163142 | 0,870407 | 0,9652291 |
| SLC46A3        | 211,23  | 0,14  | 0,86233  | 0,163126 | 0,870419 | 0,9652291 |
| RP11-1136J12.1 | 0,71    | -0,51 | 3,107887 | -0,1631  | 0,870439 | NA        |
| MED21          | 133,12  | -0,16 | 0,95723  | -0,16309 | 0,870444 | 0,9652291 |
| RP13-554M15.5  | 1,40    | 0,47  | 2,911164 | 0,163063 | 0,870468 | NA        |
| C21orf119      | 85,46   | -0,23 | 1,416128 | -0,163   | 0,870518 | 0,9652534 |

|                |         |       |          |          |          |           |
|----------------|---------|-------|----------|----------|----------|-----------|
| ZNF454         | 0,79    | -0,28 | 1,707902 | -0,16282 | 0,870664 | NA        |
| STARD8         | 139,20  | -0,11 | 0,693167 | -0,16277 | 0,870703 | 0,9653233 |
| USF2           | 516,07  | 0,05  | 0,337266 | 0,162737 | 0,870725 | 0,9653233 |
| TP53INP1       | 138,55  | -0,13 | 0,823708 | -0,16265 | 0,870794 | 0,9653233 |
| TMEM126B       | 316,62  | 0,12  | 0,710049 | 0,162456 | 0,870947 | 0,9653233 |
| RP11-110H1.8   | 3,25    | -0,19 | 1,159609 | -0,16244 | 0,870957 | NA        |
| ZNF611         | 113,39  | -0,09 | 0,563381 | -0,16242 | 0,870979 | 0,9653233 |
| RP11-646E18.2  | 0,77    | 0,26  | 1,585555 | 0,162412 | 0,870981 | NA        |
| ATP6V0E2       | 126,97  | -0,18 | 1,111578 | -0,16234 | 0,87104  | 0,9653233 |
| RP11-5O24.1    | 15,54   | -0,08 | 0,504141 | -0,16233 | 0,871049 | 0,9653233 |
| AQP10          | 0,19    | 0,61  | 3,748196 | 0,162286 | 0,871081 | NA        |
| RP5-1187M17.7  | 6,89    | -0,22 | 1,369435 | -0,16227 | 0,871096 | 0,9653233 |
| RP11-799B12.1  | 58,41   | 0,12  | 0,727024 | 0,162151 | 0,871187 | 0,9653233 |
| ADAM12         | 21,87   | -0,25 | 1,535318 | -0,16207 | 0,871247 | 0,9653233 |
| RP1-101D8.1    | 10,80   | 0,09  | 0,578115 | 0,162051 | 0,871266 | 0,9653233 |
| SKIL           | 500,92  | -0,11 | 0,68042  | -0,16194 | 0,871354 | 0,9653233 |
| NDUFB3         | 353,06  | 0,05  | 0,327599 | 0,161915 | 0,871373 | 0,9653233 |
| CFP            | 3588,51 | -0,04 | 0,269084 | -0,16179 | 0,871467 | 0,9653233 |
| TTL            | 438,41  | -0,10 | 0,612892 | -0,16178 | 0,87148  | 0,9653233 |
| RP11-16E12.2   | 0,14    | -0,54 | 3,363641 | -0,16176 | 0,871495 | NA        |
| CTD-2329C7.2   | 18,30   | -0,16 | 1,009027 | -0,16174 | 0,871511 | 0,9653233 |
| RP11-559N14.5  | 10,67   | 0,15  | 0,901609 | 0,161637 | 0,871592 | 0,9653233 |
| ALOX5          | 815,54  | 0,07  | 0,409982 | 0,161627 | 0,8716   | 0,9653233 |
| ACAD11         | 149,82  | 0,15  | 0,904355 | 0,161623 | 0,871603 | 0,9653233 |
| OR7E140P       | 0,43    | -0,49 | 3,028048 | -0,16161 | 0,87161  | NA        |
| MYPN           | 4,79    | -0,21 | 1,291738 | -0,1616  | 0,871619 | 0,9653233 |
| POLR3G         | 33,12   | 0,28  | 1,733286 | 0,161497 | 0,871702 | 0,9653584 |
| RP4-686C3.7    | 1,03    | -0,31 | 1,935952 | -0,16143 | 0,871753 | NA        |
| CTB-161M19.3   | 1,60    | -0,17 | 1,046135 | -0,16143 | 0,871754 | NA        |
| RP4-614C15.2   | 7,52    | -0,19 | 1,146843 | -0,16141 | 0,871773 | 0,9653787 |
| ALG1L2         | 3,94    | -0,27 | 1,671179 | -0,16134 | 0,871824 | 0,9653787 |
| NAT16          | 2,39    | 0,16  | 0,980539 | 0,161307 | 0,871851 | NA        |
| RP11-488C13.7  | 6,20    | -0,37 | 2,314497 | -0,16099 | 0,872103 | 0,9653909 |
| RP11-574K11.31 | 46,54   | -0,31 | 1,918913 | -0,16095 | 0,872129 | 0,9653909 |
| HMGCR          | 434,91  | -0,12 | 0,742907 | -0,16095 | 0,872131 | 0,9653909 |
| RP11-313D6.3   | 0,55    | 0,44  | 2,722053 | 0,160831 | 0,872226 | NA        |
| PIGS           | 720,81  | -0,08 | 0,504052 | -0,16082 | 0,872237 | 0,9653909 |
| ANKRD11        | 1568,53 | -0,06 | 0,403048 | -0,16081 | 0,872246 | 0,9653909 |
| RP1-283E3.4    | 3,52    | -0,36 | 2,236238 | -0,16076 | 0,872282 | NA        |
| RN7SL468P      | 0,18    | 0,55  | 3,409771 | 0,160665 | 0,872357 | NA        |
| RP11-217F17.1  | 0,09    | -0,60 | 3,748196 | -0,16059 | 0,872416 | NA        |
| OLFML1         | 4,96    | 0,14  | 0,883284 | 0,160539 | 0,872457 | 0,9653909 |
| ANKRD20A5P     | 42,63   | -0,19 | 1,203639 | -0,16043 | 0,87254  | 0,9653909 |
| AC142119.1     | 5,24    | -0,12 | 0,753487 | -0,16042 | 0,872552 | 0,9653909 |
| CTD-2011F17.2  | 13,58   | 0,14  | 0,87902  | 0,160339 | 0,872614 | 0,9653909 |
| ELK3           | 385,15  | -0,06 | 0,394939 | -0,16032 | 0,872628 | 0,9653909 |
| RN7SL284P      | 10,31   | 0,14  | 0,895056 | 0,160315 | 0,872633 | 0,9653909 |
| AC011747.7     | 11,29   | 0,25  | 1,591356 | 0,160207 | 0,872718 | 0,9653909 |
| RP11-321E2.8   | 0,11    | -0,60 | 3,748196 | -0,1602  | 0,872725 | NA        |
| RP11-432M8.5   | 0,11    | -0,60 | 3,748196 | -0,1602  | 0,872725 | NA        |

|                |         |       |          |          |          |           |
|----------------|---------|-------|----------|----------|----------|-----------|
| SYDE1          | 0,16    | 0,60  | 3,747535 | 0,160077 | 0,872821 | NA        |
| TBC1D30        | 8,43    | 0,22  | 1,393193 | 0,160025 | 0,872862 | 0,9653909 |
| ANKK1          | 3,03    | 0,15  | 0,912824 | 0,159904 | 0,872957 | NA        |
| PTPN6          | 3137,40 | -0,03 | 0,177049 | -0,15989 | 0,872969 | 0,9653909 |
| IQSEC2         | 110,28  | -0,13 | 0,843517 | -0,15987 | 0,872986 | 0,9653909 |
| DYM            | 378,42  | -0,11 | 0,674399 | -0,15985 | 0,873003 | 0,9653909 |
| RP11-334E6.2   | 0,10    | -0,60 | 3,748196 | -0,15983 | 0,873018 | NA        |
| ZNF815P        | 22,48   | -0,27 | 1,69763  | -0,15982 | 0,873019 | 0,9653909 |
| DEF8           | 342,50  | -0,10 | 0,645685 | -0,15977 | 0,873062 | 0,9653909 |
| RNF8           | 160,48  | 0,12  | 0,739616 | 0,159689 | 0,873126 | 0,9653909 |
| ARID2          | 371,42  | 0,08  | 0,481345 | 0,159673 | 0,873138 | 0,9653909 |
| OR5BR1P        | 0,10    | -0,60 | 3,748196 | -0,15966 | 0,873146 | NA        |
| ORAOV1         | 108,34  | -0,14 | 0,888134 | -0,15966 | 0,873149 | 0,9653909 |
| RP11-17A4.2    | 57,75   | 0,09  | 0,570043 | 0,15965  | 0,873157 | 0,9653909 |
| RP11-629G13.1  | 3,21    | -0,14 | 0,900299 | -0,15963 | 0,873175 | NA        |
| KRT18P51       | 0,08    | -0,60 | 3,748196 | -0,15959 | 0,873201 | NA        |
| STAG3L5P       | 37,99   | -0,10 | 0,596985 | -0,15959 | 0,873208 | 0,9653909 |
| RP11-44F14.6   | 8,05    | 0,18  | 1,131045 | 0,159558 | 0,87323  | 0,9653909 |
| RN7SL303P      | 0,53    | -0,37 | 2,342768 | -0,15951 | 0,873264 | NA        |
| RP5-836J3.1    | 0,17    | 0,55  | 3,419223 | 0,159444 | 0,873319 | NA        |
| RP11-93O14.2   | 8,31    | 0,14  | 0,899867 | 0,159411 | 0,873345 | 0,9653909 |
| SLCO5A1        | 3,80    | 0,15  | 0,937588 | 0,159365 | 0,873381 | 0,9653909 |
| CTC-457L16.1   | 0,07    | -0,60 | 3,748196 | -0,15928 | 0,87345  | NA        |
| PRPF19         | 65,25   | -0,10 | 0,645849 | -0,15927 | 0,873458 | 0,9653909 |
| RP11-468O2.1   | 0,07    | -0,60 | 3,748196 | -0,15926 | 0,873464 | NA        |
| PLD2           | 187,73  | -0,09 | 0,593294 | -0,15923 | 0,873487 | 0,9653909 |
| RP11-645C24.3  | 169,23  | -0,09 | 0,564605 | -0,15921 | 0,873502 | 0,9653909 |
| ZNF676         | 0,11    | -0,60 | 3,748196 | -0,1592  | 0,873511 | NA        |
| RP5-977B1.7    | 1,72    | -0,21 | 1,345679 | -0,15919 | 0,87352  | NA        |
| PODXL2         | 0,08    | -0,60 | 3,748196 | -0,15915 | 0,873553 | NA        |
| RP11-393I23.4  | 0,10    | -0,60 | 3,748196 | -0,15914 | 0,87356  | NA        |
| PPIE           | 511,03  | -0,09 | 0,574609 | -0,15914 | 0,873562 | 0,9653909 |
| RP11-230C9.3   | 0,10    | -0,60 | 3,748196 | -0,15911 | 0,873578 | NA        |
| AC008982.2     | 51,70   | -0,08 | 0,479998 | -0,15909 | 0,873598 | 0,9653909 |
| RP11-109P14.10 | 18,74   | -0,16 | 0,994433 | -0,15909 | 0,873601 | 0,9653909 |
| AC002985.3     | 0,62    | 0,35  | 2,221317 | 0,159073 | 0,873611 | NA        |
| EN2            | 0,09    | -0,60 | 3,748196 | -0,15907 | 0,873612 | NA        |
| ARAF           | 495,73  | 0,06  | 0,376853 | 0,159072 | 0,873612 | 0,9653909 |
| RP11-449H15.3  | 0,11    | -0,60 | 3,748196 | -0,15903 | 0,873646 | NA        |
| RP11-402L1.1   | 0,07    | -0,60 | 3,748196 | -0,15899 | 0,873676 | NA        |
| NT5DC4         | 0,24    | 0,45  | 2,815542 | 0,158944 | 0,873713 | NA        |
| RP11-466L22.1  | 0,08    | -0,60 | 3,748196 | -0,15894 | 0,873716 | NA        |
| MIR5692A1      | 0,08    | -0,60 | 3,748196 | -0,15893 | 0,873722 | NA        |
| SLCO1B1        | 0,09    | -0,60 | 3,748196 | -0,15893 | 0,873723 | NA        |
| XKR7           | 0,06    | -0,60 | 3,748196 | -0,15882 | 0,873811 | NA        |
| RP11-318A15.2  | 0,09    | -0,60 | 3,748196 | -0,15881 | 0,873819 | NA        |
| CTD-2587H19.3  | 8,01    | 0,15  | 0,928581 | 0,158808 | 0,87382  | 0,9653909 |
| RP11-1008C21.1 | 30,97   | -0,34 | 2,115077 | -0,15878 | 0,873841 | 0,9653909 |
| PDCD1LG2       | 0,09    | -0,60 | 3,748196 | -0,15877 | 0,873852 | NA        |
| RP11-57H12.2   | 1,77    | -0,53 | 3,316263 | -0,15873 | 0,873884 | NA        |

|                |        |       |          |          |          |           |
|----------------|--------|-------|----------|----------|----------|-----------|
| AMIGO3         | 4,69   | 0,38  | 2,381767 | 0,158699 | 0,873906 | 0,9653909 |
| RP4-682C21.2   | 0,07   | -0,59 | 3,748196 | -0,15869 | 0,873917 | NA        |
| UPF3AP2        | 0,50   | 0,29  | 1,799022 | 0,158677 | 0,873923 | NA        |
| CAPN6          | 0,08   | -0,59 | 3,748196 | -0,15867 | 0,873925 | NA        |
| C1orf174       | 184,06 | -0,12 | 0,725214 | -0,15865 | 0,873943 | 0,9653909 |
| BPGM           | 141,05 | 0,19  | 1,227839 | 0,158626 | 0,873963 | 0,9653909 |
| SCARF1         | 37,73  | -0,16 | 1,035073 | -0,1586  | 0,873983 | 0,9653909 |
| RP11-289C17.2  | 0,09   | -0,59 | 3,748196 | -0,15858 | 0,874001 | NA        |
| SNORD83A       | 0,23   | -0,59 | 3,748196 | -0,15855 | 0,874025 | NA        |
| ANKRD61        | 0,08   | -0,59 | 3,748196 | -0,15852 | 0,874046 | NA        |
| RN7SL649P      | 0,10   | -0,59 | 3,748196 | -0,15845 | 0,874105 | NA        |
| RP4-773A18.2   | 0,10   | -0,59 | 3,748196 | -0,15842 | 0,874129 | NA        |
| MICALL1        | 130,95 | 0,14  | 0,864321 | 0,158397 | 0,874144 | 0,9653909 |
| AC093802.1     | 21,10  | -0,15 | 0,940438 | -0,15839 | 0,87415  | 0,9653909 |
| SPATA31D3      | 0,09   | -0,59 | 3,748196 | -0,15838 | 0,874158 | NA        |
| SLC1A5         | 542,18 | 0,09  | 0,577662 | 0,158339 | 0,874189 | 0,9653909 |
| OR7E10P        | 0,08   | -0,59 | 3,748196 | -0,1583  | 0,874217 | NA        |
| RP11-213G2.3   | 18,51  | 0,22  | 1,400245 | 0,158296 | 0,874223 | 0,9653909 |
| RP4-529N6.2    | 0,07   | -0,59 | 3,748196 | -0,15826 | 0,874249 | NA        |
| BCAM           | 10,99  | -0,13 | 0,798686 | -0,15825 | 0,874257 | 0,9653909 |
| CACNA1A        | 269,53 | -0,08 | 0,481197 | -0,15825 | 0,874257 | 0,9653909 |
| RP4-552O12.2   | 59,87  | -0,12 | 0,744937 | -0,15825 | 0,87426  | 0,9653909 |
| PODN           | 0,80   | -0,28 | 1,785087 | -0,15825 | 0,874262 | NA        |
| TMEM62         | 298,91 | -0,09 | 0,565659 | -0,15823 | 0,874274 | 0,9653909 |
| CTD-2376I20.1  | 0,07   | -0,59 | 3,748196 | -0,15822 | 0,874281 | NA        |
| SCARNA18       | 0,09   | -0,59 | 3,748196 | -0,15821 | 0,874294 | NA        |
| AC105921.5     | 0,08   | -0,59 | 3,748196 | -0,15816 | 0,874332 | NA        |
| AC005176.2     | 0,87   | -0,23 | 1,462061 | -0,15809 | 0,874385 | NA        |
| RNU6-117P      | 0,10   | -0,59 | 3,748196 | -0,15808 | 0,874397 | NA        |
| ZIC5           | 0,10   | -0,59 | 3,748196 | -0,15804 | 0,874426 | NA        |
| RP11-73M18.10  | 13,85  | -0,24 | 1,543164 | -0,15802 | 0,874441 | 0,9654532 |
| UBE2F          | 690,81 | 0,08  | 0,480275 | 0,157913 | 0,874525 | 0,9654532 |
| CTC-344H19.4   | 8,70   | 0,16  | 1,007107 | 0,157873 | 0,874557 | 0,9654532 |
| AC083864.4     | 0,07   | -0,59 | 3,748196 | -0,15783 | 0,874589 | NA        |
| RP1-178F10.1   | 0,07   | -0,59 | 3,748196 | -0,15775 | 0,874654 | NA        |
| RP11-317B17.4  | 0,09   | -0,59 | 3,748196 | -0,15774 | 0,87466  | NA        |
| RP11-271K21.12 | 13,96  | -0,09 | 0,58576  | -0,15773 | 0,874669 | 0,9654532 |
| KLHDC2         | 191,77 | 0,13  | 0,838649 | 0,157727 | 0,874672 | 0,9654532 |
| NUDT3          | 667,28 | -0,08 | 0,489039 | -0,15773 | 0,874672 | 0,9654532 |
| GYS2           | 0,10   | -0,59 | 3,748196 | -0,1577  | 0,874697 | NA        |
| GATAD2B        | 271,13 | 0,08  | 0,507601 | 0,157687 | 0,874703 | 0,9654532 |
| CMB9-52H4.1    | 0,09   | -0,59 | 3,748196 | -0,15767 | 0,87472  | NA        |
| RP11-497H16.5  | 0,11   | -0,59 | 3,748196 | -0,15765 | 0,874732 | NA        |
| GTF2B          | 344,29 | 0,11  | 0,677507 | 0,157633 | 0,874746 | 0,9654532 |
| CTD-2145A24.4  | 0,09   | -0,59 | 3,748196 | -0,15745 | 0,874893 | NA        |
| CTC-529P8.1    | 0,57   | 0,42  | 2,657647 | 0,157442 | 0,874897 | NA        |
| RP11-34P13.15  | 27,01  | 0,16  | 1,021011 | 0,15744  | 0,874898 | 0,9654638 |
| REST           | 778,46 | 0,09  | 0,55003  | 0,157425 | 0,87491  | 0,9654638 |
| RP11-783L4.1   | 0,08   | -0,59 | 3,748196 | -0,15739 | 0,874938 | NA        |
| RP11-57J16.1   | 8,31   | -0,25 | 1,569977 | -0,15737 | 0,874955 | 0,9654638 |

|                    |         |       |          |          |          |           |
|--------------------|---------|-------|----------|----------|----------|-----------|
| RP11-56P9.5        | 0,08    | -0,59 | 3,748196 | -0,15732 | 0,874994 | NA        |
| RN7SKP193          | 4,07    | -0,13 | 0,833425 | -0,15728 | 0,875028 | 0,9654638 |
| DDX17              | 2954,22 | 0,05  | 0,300707 | 0,157253 | 0,875045 | 0,9654638 |
| MAST3              | 277,72  | -0,11 | 0,668864 | -0,15719 | 0,875093 | 0,9654638 |
| PSD4               | 218,85  | -0,09 | 0,552876 | -0,15716 | 0,875119 | 0,9654638 |
| NOTCH3             | 4,33    | -0,13 | 0,827372 | -0,15707 | 0,875192 | 0,9654872 |
| RN7SL159P          | 0,09    | -0,59 | 3,748196 | -0,15707 | 0,875192 | NA        |
| MAGEC3             | 0,03    | -0,59 | 3,748196 | -0,15687 | 0,87535  | NA        |
| CTC-459I6.1        | 0,08    | -0,59 | 3,748196 | -0,15679 | 0,875409 | NA        |
| PI4K2A             | 255,89  | -0,10 | 0,655952 | -0,15671 | 0,875473 | 0,9655342 |
| CTD-3001H11.2      | 0,07    | -0,59 | 3,748196 | -0,15669 | 0,87549  | NA        |
| RP11-161I19.3      | 0,07    | -0,59 | 3,748196 | -0,15668 | 0,875494 | NA        |
| RP11-739N20.3      | 18,32   | 0,27  | 1,711435 | 0,15668  | 0,875497 | 0,9655342 |
| ABC7-42389800N19.1 | 122,49  | 0,11  | 0,733588 | 0,156631 | 0,875536 | 0,9655342 |
| OTOP1              | 0,10    | -0,59 | 3,748196 | -0,15657 | 0,875588 | NA        |
| ZSCAN18            | 62,93   | 0,14  | 0,870472 | 0,156498 | 0,87564  | 0,9655342 |
| RP11-358B23.5      | 0,10    | -0,59 | 3,748196 | -0,15648 | 0,875657 | NA        |
| ZNF581             | 449,63  | -0,08 | 0,538745 | -0,15646 | 0,875673 | 0,9655342 |
| RP11-689D3.4       | 26,77   | -0,33 | 2,126172 | -0,15633 | 0,87577  | 0,9655342 |
| NR1I2              | 0,21    | 0,45  | 2,851595 | 0,156309 | 0,875789 | NA        |
| RP5-1024G6.2       | 20,46   | 0,17  | 1,095178 | 0,156289 | 0,875805 | 0,9655342 |
| GNRH2              | 0,48    | -0,54 | 3,48342  | -0,15626 | 0,875831 | NA        |
| RP11-182J1.13      | 0,10    | -0,59 | 3,748196 | -0,15621 | 0,875864 | NA        |
| SLU7               | 879,46  | 0,06  | 0,386263 | 0,156202 | 0,875874 | 0,9655342 |
| RP11-540O11.6      | 0,08    | -0,59 | 3,748196 | -0,1562  | 0,875876 | NA        |
| RP13-884E18.2      | 0,08    | -0,59 | 3,748196 | -0,15617 | 0,8759   | NA        |
| POTEF              | 0,31    | 0,59  | 3,746977 | 0,156156 | 0,87591  | NA        |
| DDIAS              | 32,77   | -0,16 | 1,040624 | -0,15614 | 0,87592  | 0,9655342 |
| ITGA10             | 24,11   | -0,15 | 0,967521 | -0,1561  | 0,875951 | 0,9655342 |
| CTD-3096M3.2       | 1,53    | -0,57 | 3,647263 | -0,1561  | 0,875958 | NA        |
| ARHGEF12           | 79,24   | 0,09  | 0,563593 | 0,156044 | 0,875998 | 0,9655342 |
| RP11-330L19.2      | 1,00    | -0,22 | 1,434923 | -0,15594 | 0,87608  | NA        |
| RP11-737O24.2      | 18,02   | 0,31  | 1,993703 | 0,155882 | 0,876126 | 0,9655342 |
| KCNJ10             | 4,51    | 0,18  | 1,14919  | 0,155868 | 0,876137 | 0,9655342 |
| CTD-2235C13.2      | 3,82    | -0,31 | 1,969584 | -0,15586 | 0,876141 | 0,9655342 |
| PDE6C              | 19,11   | -0,28 | 1,79756  | -0,15585 | 0,876152 | 0,9655342 |
| TSN                | 647,95  | -0,10 | 0,6277   | -0,15582 | 0,876177 | 0,9655342 |
| GPR22              | 65,65   | 0,18  | 1,172878 | 0,155769 | 0,876215 | 0,9655342 |
| GAS6               | 382,14  | 0,06  | 0,3947   | 0,155734 | 0,876243 | 0,9655342 |
| DBF4B              | 32,47   | -0,08 | 0,488108 | -0,15573 | 0,876248 | 0,9655342 |
| RP11-1C1.5         | 0,08    | -0,58 | 3,748196 | -0,15566 | 0,876301 | NA        |
| GAS6-AS1           | 39,31   | -0,16 | 1,050039 | -0,15561 | 0,876341 | 0,9655342 |
| LINC00632          | 3,39    | 0,22  | 1,409478 | 0,155603 | 0,876346 | NA        |
| RSU1               | 894,39  | -0,09 | 0,570813 | -0,15549 | 0,876433 | 0,9655342 |
| RP11-545E17.3      | 29,22   | -0,19 | 1,248342 | -0,15543 | 0,876481 | 0,9655342 |
| NFATC2IP           | 602,01  | 0,06  | 0,38791  | 0,155409 | 0,876499 | 0,9655342 |
| RP11-443N24.3      | 3,33    | 0,21  | 1,326024 | 0,155395 | 0,87651  | NA        |
| RAPH1              | 187,69  | 0,23  | 1,505642 | 0,155319 | 0,87657  | 0,9655342 |
| MGAM               | 13,85   | 0,41  | 2,665057 | 0,155279 | 0,876602 | 0,9655342 |
| ANGPTL6            | 0,06    | -0,58 | 3,748196 | -0,15521 | 0,876658 | NA        |



|                  |         |       |          |          |          |           |
|------------------|---------|-------|----------|----------|----------|-----------|
| BIRC2            | 533,64  | 0,06  | 0,412884 | 0,155165 | 0,876692 | 0,9655342 |
| LLGL1            | 6,05    | -0,19 | 1,236707 | -0,15516 | 0,876693 | 0,9655342 |
| CTC-338M12.3     | 31,65   | 0,13  | 0,835002 | 0,155137 | 0,876713 | 0,9655342 |
| NFKBIE           | 592,24  | -0,10 | 0,639798 | -0,1551  | 0,876739 | 0,9655342 |
| CYP2D8P1         | 0,08    | -0,58 | 3,748196 | -0,15509 | 0,876749 | NA        |
| RP5-968D22.1     | 0,09    | -0,58 | 3,748196 | -0,15508 | 0,876756 | NA        |
| RP11-271B5.1     | 1,96    | -0,12 | 0,784092 | -0,15507 | 0,876765 | NA        |
| RP11-73K9.3      | 0,08    | -0,58 | 3,748196 | -0,15507 | 0,876767 | NA        |
| FAM173B          | 85,93   | -0,17 | 1,113726 | -0,15488 | 0,876919 | 0,9656747 |
| MIR3173          | 1,00    | -0,35 | 2,240114 | -0,15487 | 0,876921 | NA        |
| SH2B2            | 1,89    | 0,37  | 2,367663 | 0,15483  | 0,876955 | NA        |
| RP5-1160K1.1     | 0,55    | -0,21 | 1,37137  | -0,15477 | 0,877    | NA        |
| PPM1E            | 0,43    | -0,45 | 2,914216 | -0,15472 | 0,877039 | NA        |
| RNF40            | 268,88  | 0,08  | 0,515145 | 0,15471  | 0,87705  | 0,9656777 |
| RP4-765A10.1     | 1,45    | -0,32 | 2,037746 | -0,15462 | 0,877124 | NA        |
| NPHP3            | 237,32  | -0,10 | 0,621619 | -0,15453 | 0,87719  | 0,9656777 |
| AF131215.9       | 4,69    | 0,13  | 0,832491 | 0,154526 | 0,877195 | 0,9656777 |
| VPS11            | 311,62  | 0,09  | 0,612366 | 0,154465 | 0,877243 | 0,9656777 |
| TLR10            | 216,83  | 0,15  | 0,971364 | 0,154437 | 0,877265 | 0,9656777 |
| RP11-85F14.1     | 0,07    | -0,58 | 3,748196 | -0,15444 | 0,877266 | NA        |
| CTD-2179L22.1    | 45,52   | 0,15  | 0,958123 | 0,154432 | 0,877269 | 0,9656777 |
| TMPRSS11B        | 22,30   | 0,13  | 0,872057 | 0,154356 | 0,877329 | 0,9656777 |
| CTB-25B13.5      | 11,98   | 0,24  | 1,579825 | 0,154346 | 0,877337 | 0,9656777 |
| LYRM7            | 286,12  | 0,10  | 0,651955 | 0,154242 | 0,877419 | 0,9657113 |
| RP11-397A16.2    | 0,10    | -0,58 | 3,748196 | -0,15422 | 0,877433 | NA        |
| MIR191           | 0,62    | 0,56  | 3,648164 | 0,154203 | 0,87745  | NA        |
| RP11-657K20.2    | 0,03    | -0,58 | 3,748196 | -0,15418 | 0,877467 | NA        |
| GPR68            | 0,65    | 0,41  | 2,656881 | 0,154162 | 0,877482 | NA        |
| ASB6             | 235,91  | 0,14  | 0,907306 | 0,154065 | 0,877559 | 0,9657619 |
| RP11-1143G9.4    | 9462,89 | -0,23 | 1,500777 | -0,15405 | 0,877569 | 0,9657619 |
| RP11-80F22.8     | 0,09    | -0,58 | 3,748196 | -0,15404 | 0,877575 | NA        |
| DOPEY2           | 308,04  | 0,10  | 0,639386 | 0,15394  | 0,877657 | 0,9657784 |
| CTD-2270P14.3    | 6,20    | 0,17  | 1,099944 | 0,153788 | 0,877777 | 0,9657784 |
| RP11-1003J3.1    | 0,07    | -0,58 | 3,748196 | -0,15379 | 0,877779 | NA        |
| AIFM2            | 10,11   | 0,19  | 1,237078 | 0,153778 | 0,877785 | 0,9657784 |
| HMGB1            | 4153,62 | 0,02  | 0,141439 | 0,153727 | 0,877825 | 0,9657784 |
| HEATR1           | 295,46  | -0,11 | 0,740723 | -0,1537  | 0,877843 | 0,9657784 |
| RP11-641J8.2     | 0,09    | -0,58 | 3,748196 | -0,15366 | 0,877874 | NA        |
| RP11-442N24__B.1 | 1,50    | -0,33 | 2,126752 | -0,15364 | 0,877895 | NA        |
| SLC25A18         | 1,43    | -0,51 | 3,343992 | -0,15363 | 0,877899 | NA        |
| PLEKHO2          | 359,86  | -0,09 | 0,585749 | -0,15359 | 0,877933 | 0,9658193 |
| PNKP             | 113,32  | 0,13  | 0,832235 | 0,153497 | 0,878007 | 0,9658436 |
| RAB7B            | 0,90    | 0,34  | 2,246321 | 0,153435 | 0,878056 | NA        |
| ANKRD55          | 1,79    | -0,26 | 1,715083 | -0,15341 | 0,878076 | NA        |
| RP11-32K4.2      | 0,08    | -0,57 | 3,748196 | -0,15329 | 0,878166 | NA        |
| WDR41            | 575,68  | 0,11  | 0,69738  | 0,153286 | 0,878173 | 0,9659607 |
| RP11-460N1.1     | 2,15    | 0,46  | 3,004898 | 0,153233 | 0,878215 | NA        |
| TMEM43           | 505,84  | 0,08  | 0,5031   | 0,153099 | 0,87832  | 0,9659607 |
| HPRT1            | 418,70  | -0,12 | 0,796981 | -0,15309 | 0,878325 | 0,9659607 |
| CDH15            | 2,74    | 0,26  | 1,693966 | 0,153069 | 0,878344 | NA        |

|                |         |       |          |          |          |           |
|----------------|---------|-------|----------|----------|----------|-----------|
| IRF1           | 1195,25 | 0,05  | 0,353647 | 0,153036 | 0,87837  | 0,9659607 |
| BBX            | 1111,07 | 0,05  | 0,341309 | 0,153033 | 0,878373 | 0,9659607 |
| RP11-495K9.5   | 1,02    | -0,50 | 3,262079 | -0,15279 | 0,878564 | NA        |
| RP11-256I9.1   | 0,55    | -0,29 | 1,869113 | -0,15275 | 0,878598 | NA        |
| RN7SL703P      | 4,38    | 0,23  | 1,479358 | 0,152739 | 0,878604 | 0,9661372 |
| RP11-92F20.1   | 0,09    | -0,57 | 3,748196 | -0,15258 | 0,878728 | NA        |
| RP11-230F18.6  | 0,10    | -0,57 | 3,748196 | -0,15254 | 0,878764 | NA        |
| RIN3           | 845,07  | 0,06  | 0,411393 | 0,152373 | 0,878893 | 0,9661372 |
| CTB-1144G6.6   | 3,79    | 0,17  | 1,123705 | 0,152339 | 0,87892  | 0,9661372 |
| ASNS           | 90,04   | 0,15  | 0,971662 | 0,152272 | 0,878972 | 0,9661372 |
| ZNF414         | 39,74   | 0,10  | 0,647636 | 0,152236 | 0,879001 | 0,9661372 |
| AC002075.3     | 0,08    | -0,57 | 3,748196 | -0,15213 | 0,879084 | NA        |
| CTD-2031P19.3  | 9,64    | 0,13  | 0,822361 | 0,152123 | 0,87909  | 0,9661372 |
| RP11-431M7.3   | 6,45    | -0,14 | 0,935289 | -0,15212 | 0,879096 | 0,9661372 |
| C8G            | 0,67    | -0,42 | 2,771311 | -0,15212 | 0,879096 | NA        |
| CTD-2049J23.2  | 32,78   | 0,10  | 0,684838 | 0,152112 | 0,879098 | 0,9661372 |
| DHX38          | 573,31  | 0,07  | 0,478963 | 0,152108 | 0,879102 | 0,9661372 |
| RP11-555J4.3   | 46,98   | -0,12 | 0,767338 | -0,15208 | 0,879124 | 0,9661372 |
| RP11-3P17.5    | 1,13    | -0,16 | 1,04953  | -0,15208 | 0,879126 | NA        |
| BRD8           | 96,52   | 0,11  | 0,742006 | 0,152066 | 0,879135 | 0,9661372 |
| RNU6-762P      | 0,34    | 0,57  | 3,746733 | 0,152047 | 0,87915  | NA        |
| CHMP6          | 268,15  | 0,13  | 0,831093 | 0,152039 | 0,879156 | 0,9661372 |
| NBPF1          | 282,94  | -0,10 | 0,651457 | -0,15185 | 0,879302 | 0,9662023 |
| FGF1           | 3,74    | 0,47  | 3,12105  | 0,151841 | 0,879312 | NA        |
| HS1BP3         | 86,32   | -0,14 | 0,909425 | -0,15183 | 0,87932  | 0,9662023 |
| DENND2C        | 28,42   | -0,10 | 0,629298 | -0,15177 | 0,879371 | 0,9662023 |
| TAF1C          | 187,99  | 0,14  | 0,918514 | 0,1516   | 0,879502 | 0,9662373 |
| LCN12          | 11,99   | 0,15  | 0,970727 | 0,151594 | 0,879507 | 0,9662373 |
| RP11-635I10.1  | 0,08    | -0,57 | 3,748196 | -0,15138 | 0,879673 | NA        |
| HSPE1-MOB4     | 80,10   | 0,26  | 1,737825 | 0,151331 | 0,879715 | 0,9664085 |
| TMEM5          | 237,02  | -0,06 | 0,426202 | -0,15122 | 0,879803 | 0,9664488 |
| HPS1           | 1001,29 | -0,05 | 0,331897 | -0,15107 | 0,879922 | 0,966491  |
| CHP1           | 2626,53 | 0,05  | 0,335278 | 0,151038 | 0,879946 | 0,966491  |
| RP11-91K9.1    | 2,04    | 0,19  | 1,23863  | 0,15101  | 0,879968 | NA        |
| RP11-428B4.2   | 0,21    | 0,57  | 3,748196 | 0,150949 | 0,880016 | NA        |
| RP11-130L8.2   | 0,36    | -0,54 | 3,563774 | -0,15094 | 0,880023 | NA        |
| NAALADL1       | 40,06   | -0,27 | 1,783427 | -0,15077 | 0,880156 | 0,9666646 |
| RP11-1064E11.1 | 0,67    | -0,41 | 2,713147 | -0,15073 | 0,880191 | NA        |
| RP5-901A4.1    | 0,50    | -0,53 | 3,5276   | -0,15072 | 0,880198 | NA        |
| MIR1299        | 0,44    | -0,44 | 2,944333 | -0,15062 | 0,880275 | NA        |
| FEM1A          | 80,54   | 0,09  | 0,569929 | 0,150586 | 0,880302 | 0,9667423 |
| MAD2L1BP       | 167,37  | -0,13 | 0,871401 | -0,15051 | 0,880365 | 0,9667423 |
| AC022007.4     | 0,15    | 0,56  | 3,748196 | 0,150491 | 0,880378 | NA        |
| EHD1           | 134,48  | -0,12 | 0,81318  | -0,15047 | 0,88039  | 0,9667423 |
| IL15RA         | 29,02   | 0,22  | 1,484258 | 0,15041  | 0,880441 | 0,9667423 |
| AC016708.2     | 1,36    | 0,14  | 0,92865  | 0,150397 | 0,880451 | NA        |
| RP11-72I2.1    | 0,14    | 0,56  | 3,748196 | 0,150368 | 0,880474 | NA        |
| RP11-1E1.1     | 0,08    | -0,56 | 3,748196 | -0,15035 | 0,880491 | NA        |
| LRRTM4         | 9,55    | -0,16 | 1,063677 | -0,15032 | 0,880515 | 0,9667423 |
| ZKSCAN8        | 109,73  | -0,11 | 0,700672 | -0,15029 | 0,880538 | 0,9667423 |

|                 |         |       |          |          |          |           |
|-----------------|---------|-------|----------|----------|----------|-----------|
| TMEM30B         | 2,68    | -0,25 | 1,662304 | -0,15021 | 0,8806   | NA        |
| RN7SL250P       | 0,16    | 0,56  | 3,748196 | 0,15019  | 0,880615 | NA        |
| AC006994.1      | 0,20    | 0,56  | 3,748196 | 0,150174 | 0,880628 | NA        |
| RNU6-188P       | 0,20    | 0,56  | 3,748196 | 0,150169 | 0,880631 | NA        |
| PLXNA2          | 36,18   | -0,27 | 1,765818 | -0,15016 | 0,88064  | 0,9667709 |
| CTB-120L21.1    | 0,18    | 0,56  | 3,748196 | 0,150056 | 0,88072  | NA        |
| KCNU1           | 0,02    | -0,56 | 3,746493 | -0,15003 | 0,88074  | NA        |
| RP11-331F9.4    | 4,47    | -0,29 | 1,962286 | -0,15    | 0,880766 | 0,9667709 |
| TACC1           | 2031,98 | -0,05 | 0,314881 | -0,14997 | 0,880786 | 0,9667709 |
| RP11-464D20.2   | 0,08    | -0,56 | 3,748196 | -0,14997 | 0,880791 | NA        |
| CH507-9B2.5     | 75,22   | -0,19 | 1,28273  | -0,14989 | 0,880849 | 0,9667709 |
| RNF182          | 0,16    | 0,56  | 3,748196 | 0,149886 | 0,880854 | NA        |
| XX-FW83128A1.2  | 0,08    | -0,56 | 3,748196 | -0,14984 | 0,880888 | NA        |
| RP11-731N10.1   | 0,13    | 0,56  | 3,748196 | 0,149771 | 0,880945 | NA        |
| GUCY1B2         | 5,09    | -0,34 | 2,239046 | -0,14975 | 0,880959 | 0,9667709 |
| RP11-274J7.2    | 5,93    | 0,19  | 1,293148 | 0,149744 | 0,880967 | 0,9667709 |
| IGLV1-40        | 4,86    | -0,23 | 1,529855 | -0,14967 | 0,881024 | 0,9667709 |
| KBTBD8          | 339,88  | 0,15  | 0,980217 | 0,149663 | 0,881031 | 0,9667709 |
| AC020626.1      | 0,17    | 0,56  | 3,748196 | 0,149644 | 0,881046 | NA        |
| RP11-395A13.2   | 33,96   | -0,14 | 0,930067 | -0,14964 | 0,881047 | 0,9667709 |
| MIR941-1        | 0,29    | 0,56  | 3,748196 | 0,149634 | 0,881054 | NA        |
| RNA5SP25        | 0,22    | 0,56  | 3,748196 | 0,149621 | 0,881063 | NA        |
| RP11-146I2.1    | 8,04    | 0,17  | 1,117238 | 0,149576 | 0,8811   | 0,9667709 |
| RP5-896L10.1    | 0,67    | 0,56  | 3,724119 | 0,149534 | 0,881133 | NA        |
| MMP17           | 38,42   | -0,14 | 0,945557 | -0,14951 | 0,881148 | 0,9667709 |
| ECHDC2          | 207,06  | 0,09  | 0,597094 | 0,149464 | 0,881188 | 0,9667709 |
| EPS8L2          | 0,43    | 0,44  | 2,914373 | 0,149427 | 0,881217 | NA        |
| FZD7            | 0,20    | 0,56  | 3,748196 | 0,149411 | 0,881229 | NA        |
| RP11-567C2.1    | 0,18    | 0,56  | 3,748196 | 0,14939  | 0,881246 | NA        |
| RP11-240A16.1   | 0,26    | 0,56  | 3,748196 | 0,14937  | 0,881262 | NA        |
| UBR2            | 757,88  | -0,07 | 0,474953 | -0,14936 | 0,88127  | 0,9668039 |
| MIR6876         | 0,18    | 0,56  | 3,748196 | 0,149303 | 0,881315 | NA        |
| PROB1           | 0,21    | 0,56  | 3,748196 | 0,1493   | 0,881317 | NA        |
| OR6C7P          | 0,29    | 0,56  | 3,748196 | 0,149287 | 0,881327 | NA        |
| RP11-19E18.1    | 0,15    | 0,56  | 3,748196 | 0,149264 | 0,881345 | NA        |
| RPS29P20        | 0,27    | 0,56  | 3,748196 | 0,149216 | 0,881383 | NA        |
| MDFIC           | 295,53  | -0,10 | 0,637456 | -0,14919 | 0,881404 | 0,9668935 |
| XXbac-B135H6.19 | 0,18    | 0,56  | 3,748196 | 0,149165 | 0,881423 | NA        |
| GBA             | 177,46  | 0,09  | 0,610682 | 0,149121 | 0,881459 | 0,9668968 |
| RP1-315G1.1     | 0,19    | 0,56  | 3,748196 | 0,14899  | 0,881561 | NA        |
| CTAGE9          | 0,26    | 0,56  | 3,748196 | 0,148944 | 0,881598 | NA        |
| LIME1           | 13,17   | -0,14 | 0,922164 | -0,14893 | 0,881608 | 0,9669545 |
| SELO            | 543,01  | 0,07  | 0,494915 | 0,148922 | 0,881615 | 0,9669545 |
| RP11-342F21.1   | 0,27    | 0,56  | 3,748196 | 0,148921 | 0,881616 | NA        |
| CTD-3148I10.9   | 0,31    | 0,56  | 3,748196 | 0,148896 | 0,881636 | NA        |
| CTB-5506.13     | 4,02    | -0,34 | 2,315599 | -0,14885 | 0,881669 | 0,9669571 |
| OR7E23P         | 0,28    | 0,56  | 3,748196 | 0,148822 | 0,881694 | NA        |
| TRIM6-TRIM34    | 0,26    | 0,56  | 3,748196 | 0,148798 | 0,881713 | NA        |
| RP11-368P15.2   | 0,29    | 0,56  | 3,748196 | 0,148765 | 0,881739 | NA        |
| RP11-441F2.5    | 0,27    | 0,56  | 3,748196 | 0,148743 | 0,881756 | NA        |

|                  |         |       |          |          |          |           |
|------------------|---------|-------|----------|----------|----------|-----------|
| AGGF1P2          | 0,27    | 0,56  | 3,748196 | 0,148717 | 0,881777 | NA        |
| SERHL2           | 5,23    | 0,17  | 1,171174 | 0,1487   | 0,881791 | 0,9669747 |
| CTD-2194L12.2    | 1,51    | 0,22  | 1,459781 | 0,148682 | 0,881805 | NA        |
| PCSK6-AS1        | 0,65    | -0,26 | 1,740037 | -0,14852 | 0,881933 | NA        |
| CATSPERG         | 44,83   | 0,12  | 0,776069 | 0,148496 | 0,881951 | 0,9669747 |
| ERI3             | 295,16  | -0,06 | 0,4336   | -0,14847 | 0,881969 | 0,9669747 |
| RN7SL525P        | 1,05    | 0,26  | 1,720267 | 0,148416 | 0,882015 | NA        |
| RP5-1052I5.1     | 42,90   | 0,18  | 1,203652 | 0,14838  | 0,882043 | 0,9669747 |
| RP11-269G24.4    | 0,25    | 0,56  | 3,748196 | 0,148301 | 0,882105 | NA        |
| MFSD6            | 177,49  | -0,14 | 0,936631 | -0,14829 | 0,882114 | 0,9669747 |
| KCNK12           | 0,07    | -0,56 | 3,748196 | -0,14829 | 0,882115 | NA        |
| POLR1E           | 92,35   | -0,15 | 1,029432 | -0,14828 | 0,882119 | 0,9669747 |
| MIR4512          | 0,32    | 0,44  | 2,980185 | 0,148254 | 0,882142 | NA        |
| RP11-278A16.1    | 0,92    | -0,20 | 1,350801 | -0,14824 | 0,882151 | NA        |
| RP11-411B10.4    | 0,44    | -0,45 | 3,010145 | -0,1482  | 0,882183 | NA        |
| CTD-2371O3.2     | 3,67    | -0,19 | 1,301319 | -0,14817 | 0,882208 | NA        |
| RTN3             | 1072,65 | 0,06  | 0,390313 | 0,148133 | 0,882237 | 0,9669747 |
| GC               | 0,03    | -0,56 | 3,748196 | -0,14811 | 0,882255 | NA        |
| CLDN20           | 0,26    | 0,56  | 3,748196 | 0,148104 | 0,882261 | NA        |
| XXbac-BPG32J3.18 | 0,48    | -0,55 | 3,722226 | -0,14809 | 0,882269 | NA        |
| CHCHD4           | 115,95  | -0,17 | 1,163789 | -0,14806 | 0,882298 | 0,9669747 |
| CTB-99A3.1       | 28,12   | -0,13 | 0,911701 | -0,14802 | 0,882324 | 0,9669747 |
| USP32P1          | 170,02  | -0,09 | 0,59383  | -0,148   | 0,882339 | 0,9669747 |
| FAM199X          | 151,39  | -0,13 | 0,862765 | -0,14787 | 0,882443 | 0,9669747 |
| RP11-708J19.2    | 0,83    | -0,33 | 2,213412 | -0,14778 | 0,882517 | NA        |
| CDH19            | 6,62    | -0,16 | 1,053478 | -0,14768 | 0,882597 | 0,9669747 |
| RP11-4104.2      | 11,89   | -0,15 | 1,025666 | -0,14759 | 0,882664 | 0,9669747 |
| BCCIP            | 385,58  | 0,08  | 0,519954 | 0,147583 | 0,882672 | 0,9669747 |
| CTD-2231E14.8    | 141,18  | -0,12 | 0,842799 | -0,14757 | 0,882681 | 0,9669747 |
| CHD1L            | 699,70  | 0,08  | 0,526167 | 0,147538 | 0,882707 | 0,9669747 |
| SIGLEC9          | 471,78  | -0,10 | 0,674102 | -0,14753 | 0,88271  | 0,9669747 |
| RNF169           | 164,73  | 0,16  | 1,070794 | 0,147521 | 0,882721 | 0,9669747 |
| RP11-561B11.6    | 19,43   | 0,14  | 0,935932 | 0,147483 | 0,882751 | 0,9669747 |
| AC007899.3       | 1,41    | -0,38 | 2,591582 | -0,14747 | 0,882758 | NA        |
| RP11-398A8.5     | 0,28    | 0,55  | 3,748196 | 0,147469 | 0,882761 | NA        |
| MROH7            | 63,59   | 0,12  | 0,785758 | 0,147434 | 0,88279  | 0,9669747 |
| SNF8             | 504,52  | -0,07 | 0,453318 | -0,1474  | 0,882814 | 0,9669747 |
| RP11-589N15.2    | 0,27    | -0,43 | 2,926704 | -0,14739 | 0,882821 | NA        |
| KAT7             | 533,96  | -0,09 | 0,643493 | -0,14738 | 0,882829 | 0,9669747 |
| RP11-824M15.3    | 0,16    | 0,42  | 2,839297 | 0,147289 | 0,882904 | NA        |
| RP11-701H24.7    | 0,81    | 0,36  | 2,475876 | 0,147254 | 0,882932 | NA        |
| KHNYN            | 218,21  | -0,12 | 0,792985 | -0,14722 | 0,882957 | 0,9670435 |
| CTD-2506P8.5     | 0,25    | 0,55  | 3,748196 | 0,147215 | 0,882962 | NA        |
| RP11-566K11.7    | 0,18    | 0,42  | 2,831803 | 0,147159 | 0,883006 | NA        |
| MIR3159          | 4,17    | -0,15 | 1,052308 | -0,14712 | 0,88304  | 0,9670435 |
| BLNK             | 169,06  | 0,12  | 0,845096 | 0,147034 | 0,883106 | 0,9670435 |
| CD48             | 2902,79 | 0,05  | 0,342129 | 0,146966 | 0,883159 | 0,9670435 |
| PLOD1            | 353,41  | -0,07 | 0,50752  | -0,14684 | 0,883255 | 0,9670435 |
| PRORS1P          | 15,35   | 0,20  | 1,342697 | 0,146802 | 0,883288 | 0,9670435 |
| NUDT22           | 449,73  | 0,08  | 0,551946 | 0,146758 | 0,883323 | 0,9670435 |

|               |        |       |          |          |          |           |
|---------------|--------|-------|----------|----------|----------|-----------|
| RP5-1073O3.5  | 12,93  | -0,11 | 0,774508 | -0,14672 | 0,883351 | 0,9670435 |
| ABCB4         | 63,18  | -0,18 | 1,255006 | -0,14667 | 0,883392 | 0,9670435 |
| ADO           | 241,11 | -0,10 | 0,674677 | -0,14658 | 0,883467 | 0,9670435 |
| RP11-745L13.2 | 28,99  | 0,17  | 1,184494 | 0,146538 | 0,883496 | 0,9670435 |
| VPS39         | 498,62 | 0,08  | 0,535061 | 0,146514 | 0,883516 | 0,9670435 |
| CXCL9         | 0,16   | 0,42  | 2,841272 | 0,14647  | 0,88355  | NA        |
| VPS33B        | 113,73 | -0,12 | 0,841444 | -0,14641 | 0,883599 | 0,9670783 |
| HIST1H3E      | 1,01   | -0,21 | 1,415952 | -0,14639 | 0,883613 | NA        |
| RP11-343J24.1 | 1,74   | -0,18 | 1,224137 | -0,1463  | 0,883688 | NA        |
| CEP120        | 160,77 | -0,13 | 0,907343 | -0,14616 | 0,883799 | 0,9672349 |
| RP11-484L7.1  | 23,70  | -0,10 | 0,693315 | -0,1461  | 0,883846 | 0,9672349 |
| RP11-42I10.1  | 1,39   | 0,21  | 1,470728 | 0,145992 | 0,883928 | NA        |
| ALDH16A1      | 405,83 | 0,11  | 0,752751 | 0,14598  | 0,883937 | 0,9672775 |
| RP11-60E8.4   | 1,46   | -0,42 | 2,880434 | -0,14581 | 0,884072 | NA        |
| RP11-346I3.4  | 2,30   | 0,23  | 1,557362 | 0,145776 | 0,884098 | NA        |
| ZFP91-CNTF    | 33,61  | -0,53 | 3,608631 | -0,14574 | 0,884123 | 0,9673875 |
| RF00413       | 8,47   | 0,16  | 1,126491 | 0,145689 | 0,884167 | 0,9673875 |
| RN7SL559P     | 4,58   | -0,21 | 1,462041 | -0,14559 | 0,884241 | 0,9673875 |
| CASC1         | 5,09   | 0,28  | 1,908092 | 0,145537 | 0,884287 | 0,9673875 |
| CRYZL1        | 314,38 | -0,08 | 0,54566  | -0,14548 | 0,884328 | 0,9673875 |
| KCNJ2-AS1     | 0,45   | 0,43  | 2,962201 | 0,14543  | 0,884372 | NA        |
| RP11-90E5.1   | 2,88   | 0,14  | 0,930108 | 0,145426 | 0,884374 | NA        |
| CD1A          | 76,79  | -0,20 | 1,359547 | -0,14542 | 0,884382 | 0,9673875 |
| TTBK1         | 4,67   | -0,26 | 1,756201 | -0,14535 | 0,884436 | 0,9673875 |
| TSHB          | 0,07   | -0,54 | 3,748196 | -0,14529 | 0,884479 | NA        |
| PRKCI         | 270,40 | 0,11  | 0,737575 | 0,14527  | 0,884498 | 0,9673875 |
| CTD-2345M20.1 | 0,13   | 0,42  | 2,858123 | 0,14526  | 0,884506 | NA        |
| DDX18         | 510,85 | -0,06 | 0,40209  | -0,14526 | 0,884506 | 0,9673875 |
| RP11-156L14.1 | 1,53   | -0,18 | 1,247365 | -0,14506 | 0,884664 | NA        |
| NFYA          | 210,06 | 0,13  | 0,885187 | 0,145055 | 0,884667 | 0,9675072 |
| RP11-615I2.2  | 2,14   | 0,18  | 1,272969 | 0,145037 | 0,884682 | NA        |
| TUFMP1        | 0,13   | 0,41  | 2,858757 | 0,144974 | 0,884732 | NA        |
| CFHR4         | 1,08   | -0,48 | 3,278785 | -0,14491 | 0,88478  | NA        |
| MOB3B         | 368,75 | -0,10 | 0,692015 | -0,14483 | 0,884843 | 0,9676424 |
| RP11-626H12.2 | 13,87  | 0,12  | 0,810772 | 0,144701 | 0,884947 | 0,9676996 |
| RP11-815J4.6  | 0,26   | 0,54  | 3,748196 | 0,144658 | 0,884981 | NA        |
| PKD2L2        | 25,69  | -0,07 | 0,451246 | -0,14453 | 0,88508  | 0,9677878 |
| RP11-456K23.1 | 34,34  | -0,16 | 1,089562 | -0,14436 | 0,885217 | 0,9678811 |
| C9orf64       | 91,07  | 0,12  | 0,843839 | 0,144282 | 0,885278 | 0,9678904 |
| AL133168.2    | 0,58   | 0,43  | 3,011027 | 0,14404  | 0,885469 | NA        |
| CTD-2611K5.5  | 1,01   | -0,41 | 2,815756 | -0,14397 | 0,885528 | NA        |
| POLR3H        | 263,73 | 0,10  | 0,719647 | 0,143936 | 0,885551 | 0,967999  |
| KNSTRN        | 42,65  | 0,15  | 1,058195 | 0,143794 | 0,885663 | 0,967999  |
| RP11-798L4.1  | 2,48   | -0,20 | 1,374018 | -0,14378 | 0,885671 | NA        |
| OLFML2A       | 12,75  | 0,14  | 0,981481 | 0,143778 | 0,885676 | 0,967999  |
| AC074182.1    | 0,19   | 0,41  | 2,826262 | 0,143736 | 0,885709 | NA        |
| HIST1H1D      | 79,56  | 0,11  | 0,798166 | 0,143672 | 0,88576  | 0,967999  |
| CTD-2313J17.6 | 4,83   | 0,16  | 1,123502 | 0,143664 | 0,885766 | 0,967999  |
| CTNND1        | 675,77 | -0,07 | 0,493797 | -0,14363 | 0,885795 | 0,967999  |
| SIGLEC12      | 5,44   | -0,41 | 2,834492 | -0,14361 | 0,885812 | 0,967999  |

|               |         |       |          |          |          |           |
|---------------|---------|-------|----------|----------|----------|-----------|
| RP11-209M4.1  | 4,16    | 0,12  | 0,854634 | 0,143559 | 0,885849 | 0,967999  |
| MFSD4A        | 16,96   | -0,16 | 1,142049 | -0,14354 | 0,885863 | 0,967999  |
| RPL36AP45     | 1,68    | 0,17  | 1,18393  | 0,143463 | 0,885925 | NA        |
| ZC3H13        | 819,02  | 0,06  | 0,403435 | 0,143442 | 0,885941 | 0,967999  |
| RP11-196N14.1 | 208,85  | 0,15  | 1,020841 | 0,143432 | 0,885949 | 0,967999  |
| UCHL5         | 357,30  | -0,07 | 0,52087  | -0,14334 | 0,886018 | 0,9680173 |
| RP11-38M15.10 | 0,48    | -0,43 | 2,987806 | -0,14328 | 0,886069 | NA        |
| GMPR2         | 371,07  | 0,09  | 0,657406 | 0,14314  | 0,88618  | 0,9681373 |
| SLC35F3       | 1,84    | -0,32 | 2,218226 | -0,14306 | 0,886245 | NA        |
| FBXL6         | 120,93  | -0,13 | 0,912483 | -0,14299 | 0,886301 | 0,9681696 |
| RLBP1         | 0,12    | 0,54  | 3,747231 | 0,142984 | 0,886303 | NA        |
| MBOAT7        | 1004,45 | 0,05  | 0,376132 | 0,142954 | 0,886327 | 0,9681696 |
| NCOA5         | 157,94  | 0,13  | 0,909299 | 0,142904 | 0,886366 | 0,9681696 |
| KLHL14        | 0,53    | 0,31  | 2,174623 | 0,142854 | 0,886405 | NA        |
| RP11-81A1.2   | 30,05   | 0,11  | 0,791701 | 0,142631 | 0,886582 | 0,9682365 |
| ING3          | 565,58  | -0,09 | 0,627351 | -0,14258 | 0,886619 | 0,9682365 |
| PPIB          | 3996,92 | 0,04  | 0,266204 | 0,142541 | 0,886652 | 0,9682365 |
| CCDC93        | 350,76  | 0,10  | 0,726687 | 0,142442 | 0,886731 | 0,9682365 |
| CTD-2340E1.3  | 0,84    | -0,33 | 2,285559 | -0,14238 | 0,886777 | NA        |
| SNORD14A      | 38,40   | 0,16  | 1,142415 | 0,142349 | 0,886805 | 0,9682365 |
| RP13-25N22.1  | 1,88    | 0,27  | 1,880715 | 0,142342 | 0,88681  | NA        |
| ACOT12        | 0,13    | -0,53 | 3,748196 | -0,14229 | 0,886849 | NA        |
| PODXL         | 5,71    | -0,20 | 1,371959 | -0,14224 | 0,886889 | 0,9682365 |
| PLPP2         | 30,76   | 0,08  | 0,545934 | 0,142224 | 0,886903 | 0,9682365 |
| TRPS1         | 671,35  | -0,08 | 0,571172 | -0,14222 | 0,886905 | 0,9682365 |
| RP11-56B16.4  | 1,46    | -0,33 | 2,353364 | -0,1422  | 0,886922 | NA        |
| RP11-810D13.1 | 1,21    | -0,30 | 2,09428  | -0,1421  | 0,887003 | NA        |
| LCAT          | 57,38   | -0,13 | 0,902789 | -0,14208 | 0,887017 | 0,9682365 |
| RYR1          | 63,93   | 0,14  | 1,001697 | 0,142056 | 0,887036 | 0,9682365 |
| PRDM12        | 2,35    | -0,32 | 2,239292 | -0,14198 | 0,887098 | NA        |
| RP11-138H8.2  | 2,12    | 0,16  | 1,140497 | 0,141965 | 0,887107 | NA        |
| RP11-667K14.9 | 4,26    | -0,44 | 3,073951 | -0,14192 | 0,887143 | 0,9682365 |
| CTC-559E9.6   | 6,35    | 0,20  | 1,41362  | 0,141903 | 0,887156 | 0,9682365 |
| RP11-365F18.3 | 3,79    | -0,15 | 1,068921 | -0,1419  | 0,887161 | 0,9682365 |
| CCDC107       | 316,37  | -0,07 | 0,499929 | -0,14187 | 0,887186 | 0,9682365 |
| CD300LD       | 10,93   | -0,09 | 0,653985 | -0,14177 | 0,887262 | 0,9682365 |
| RP11-251B9.1  | 3,40    | 0,16  | 1,10184  | 0,141731 | 0,887293 | NA        |
| RP11-556O15.1 | 0,94    | 0,36  | 2,527609 | 0,141707 | 0,887311 | NA        |
| AC010524.2    | 10,86   | 0,13  | 0,948287 | 0,141682 | 0,887331 | 0,9682365 |
| FAM234B       | 41,66   | -0,13 | 0,888837 | -0,14168 | 0,887335 | 0,9682365 |
| RP11-10N23.6  | 0,53    | 0,33  | 2,362629 | 0,141673 | 0,887338 | NA        |
| IGLV2-14      | 1,52    | 0,27  | 1,888295 | 0,14165  | 0,887356 | NA        |
| RP11-340F14.6 | 38,50   | 0,20  | 1,439216 | 0,141563 | 0,887425 | 0,9682365 |
| RP11-489G11.3 | 10,82   | -0,20 | 1,43462  | -0,14155 | 0,887434 | 0,9682365 |
| SEPT14P21     | 0,90    | 0,40  | 2,836046 | 0,141541 | 0,887442 | NA        |
| FAF1          | 403,06  | 0,10  | 0,678677 | 0,141509 | 0,887468 | 0,9682365 |
| AARS          | 114,33  | -0,10 | 0,685888 | -0,14135 | 0,887591 | 0,9683146 |
| GNA14         | 0,22    | 0,53  | 3,748196 | 0,141302 | 0,887631 | NA        |
| RP11-662B19.2 | 1,58    | 0,28  | 1,990957 | 0,141258 | 0,887666 | NA        |
| GPRC5D        | 0,32    | -0,48 | 3,417688 | -0,14124 | 0,887677 | NA        |

|               |         |       |          |          |          |           |
|---------------|---------|-------|----------|----------|----------|-----------|
| RP11-36B6.1   | 19,05   | -0,16 | 1,146721 | -0,14099 | 0,887881 | 0,9685467 |
| PSEN1         | 801,73  | -0,06 | 0,418676 | -0,14086 | 0,887977 | 0,9685467 |
| RP11-346L1.2  | 1,27    | -0,20 | 1,410764 | -0,14085 | 0,887988 | NA        |
| RRP8          | 259,95  | 0,12  | 0,866038 | 0,140734 | 0,88808  | 0,9685467 |
| RP11-146N23.4 | 1,11    | -0,32 | 2,279186 | -0,14056 | 0,888219 | NA        |
| RP11-572M11.4 | 17,11   | -0,16 | 1,10634  | -0,14053 | 0,88824  | 0,9685467 |
| CHCHD1        | 145,31  | 0,09  | 0,670356 | 0,140353 | 0,888381 | 0,9685467 |
| ANKAR         | 80,06   | 0,17  | 1,221241 | 0,140245 | 0,888466 | 0,9685467 |
| RP11-430C1.1  | 33,59   | 0,12  | 0,888123 | 0,140245 | 0,888466 | 0,9685467 |
| RP11-64D24.4  | 8,86    | 0,10  | 0,705092 | 0,14022  | 0,888486 | 0,9685467 |
| RP11-109N23.4 | 0,37    | 0,49  | 3,523676 | 0,140183 | 0,888516 | NA        |
| RNASEK        | 3544,67 | 0,02  | 0,175244 | 0,140153 | 0,888539 | 0,9685467 |
| SLMAP         | 380,44  | -0,08 | 0,580372 | -0,1401  | 0,888579 | 0,9685467 |
| PCNX4         | 463,17  | 0,11  | 0,791115 | 0,140081 | 0,888596 | 0,9685467 |
| CDC20B        | 7,79    | 0,11  | 0,764614 | 0,140071 | 0,888604 | 0,9685467 |
| WDR27         | 156,41  | 0,12  | 0,892546 | 0,139827 | 0,888797 | 0,9685467 |
| AL133243.2    | 230,61  | -0,10 | 0,707255 | -0,13975 | 0,888858 | 0,9685467 |
| ZNF707        | 15,09   | 0,13  | 0,924261 | 0,139738 | 0,888867 | 0,9685467 |
| AC079305.10   | 32,37   | -0,15 | 1,09311  | -0,1397  | 0,888893 | 0,9685467 |
| RP11-358B23.6 | 20,03   | 0,14  | 0,989319 | 0,139678 | 0,888915 | 0,9685467 |
| ADGRL1        | 39,12   | 0,18  | 1,284236 | 0,139635 | 0,888949 | 0,9685467 |
| RP11-452F19.3 | 38,52   | 0,16  | 1,179731 | 0,139576 | 0,888995 | 0,9685467 |
| RP11-448G4.4  | 1,18    | 0,41  | 2,92609  | 0,139549 | 0,889017 | NA        |
| RNU6-190P     | 17,43   | -0,27 | 1,967927 | -0,13951 | 0,889049 | 0,9685467 |
| C2orf16       | 1,11    | -0,45 | 3,263792 | -0,13939 | 0,889142 | NA        |
| CTB-167B5.1   | 0,78    | -0,25 | 1,763298 | -0,13933 | 0,889186 | NA        |
| ADAT1         | 209,33  | -0,09 | 0,662007 | -0,13933 | 0,889191 | 0,9685467 |
| RP11-192H23.4 | 17,42   | 0,10  | 0,68547  | 0,139321 | 0,889197 | 0,9685467 |
| GIT1          | 400,53  | 0,05  | 0,374746 | 0,13931  | 0,889205 | 0,9685467 |
| N4BP2L2       | 1634,74 | -0,04 | 0,298333 | -0,13925 | 0,889252 | 0,9685467 |
| RP11-330A4.1  | 5,37    | 0,28  | 1,983472 | 0,139137 | 0,889342 | 0,9685467 |
| RP11-36D19.9  | 11,82   | -0,17 | 1,207112 | -0,13907 | 0,889394 | 0,9685467 |
| CTD-3126B10.2 | 7,17    | -0,12 | 0,849836 | -0,13895 | 0,889486 | 0,9685467 |
| C16orf91      | 147,21  | 0,16  | 1,132629 | 0,138873 | 0,889551 | 0,9685467 |
| TMEM242       | 176,50  | 0,11  | 0,814833 | 0,138853 | 0,889567 | 0,9685467 |
| RP11-753A21.1 | 7,12    | 0,18  | 1,287568 | 0,13885  | 0,889569 | 0,9685467 |
| HCFC1         | 503,34  | -0,06 | 0,421907 | -0,13883 | 0,889585 | 0,9685467 |
| PTGIS         | 18,71   | 0,08  | 0,57331  | 0,138817 | 0,889595 | 0,9685467 |
| FAM181A-AS1   | 2,03    | 0,21  | 1,51038  | 0,138798 | 0,88961  | NA        |
| RP11-503P21.4 | 73,43   | 0,09  | 0,629932 | 0,13878  | 0,889624 | 0,9685467 |
| P2RX3         | 2,75    | -0,16 | 1,123048 | -0,13872 | 0,889671 | NA        |
| ZNF850        | 48,69   | -0,12 | 0,84807  | -0,13871 | 0,889679 | 0,9685467 |
| PILRA         | 900,16  | -0,05 | 0,326654 | -0,13868 | 0,8897   | 0,9685467 |
| NFYB          | 232,30  | 0,12  | 0,850664 | 0,138654 | 0,889724 | 0,9685467 |
| CTB-43E15.4   | 6,76    | -0,11 | 0,77697  | -0,13865 | 0,88973  | 0,9685467 |
| RP11-456N14.4 | 2,18    | -0,15 | 1,074964 | -0,13853 | 0,889822 | NA        |
| NPEPL1        | 404,59  | 0,07  | 0,538549 | 0,138479 | 0,889862 | 0,9686248 |
| CLUL1         | 0,83    | 0,22  | 1,611805 | 0,138445 | 0,889889 | NA        |
| RP11-85P9.3   | 2,21    | -0,18 | 1,308462 | -0,13835 | 0,889962 | NA        |
| TUBG1         | 23,56   | 0,13  | 0,94701  | 0,138347 | 0,889966 | 0,9686248 |

|               |          |       |          |          |          |           |
|---------------|----------|-------|----------|----------|----------|-----------|
| AC104600.1    | 2,31     | -0,22 | 1,573313 | -0,13832 | 0,889989 | NA        |
| NELFB         | 51,46    | 0,12  | 0,902285 | 0,138264 | 0,890032 | 0,9686248 |
| DENR          | 581,34   | 0,07  | 0,539735 | 0,138214 | 0,890071 | 0,9686248 |
| DCTN4         | 436,13   | -0,08 | 0,583569 | -0,13809 | 0,890172 | 0,9686248 |
| PPP3R1        | 146,74   | -0,12 | 0,894393 | -0,13799 | 0,890252 | 0,9686248 |
| NBAS          | 332,01   | 0,06  | 0,444364 | 0,13798  | 0,890256 | 0,9686248 |
| LIMA1         | 115,08   | -0,14 | 1,021477 | -0,13796 | 0,890275 | 0,9686248 |
| RP11-102L12.2 | 16,73    | 0,15  | 1,114584 | 0,13792  | 0,890304 | 0,9686248 |
| USP42         | 164,31   | 0,10  | 0,733218 | 0,137846 | 0,890362 | 0,9686248 |
| RN7SL531P     | 2,05     | 0,16  | 1,197101 | 0,137816 | 0,890386 | NA        |
| RP11-479J7.1  | 1,55     | 0,30  | 2,18871  | 0,137729 | 0,890454 | NA        |
| PYCR1         | 6,17     | -0,41 | 2,961986 | -0,13768 | 0,890494 | 0,9686248 |
| FOXH1         | 163,33   | 0,07  | 0,474611 | 0,137676 | 0,890496 | 0,9686248 |
| NCK1          | 298,25   | -0,08 | 0,616577 | -0,13767 | 0,890501 | 0,9686248 |
| ITK           | 154,81   | 0,10  | 0,719639 | 0,137625 | 0,890537 | 0,9686248 |
| RPS2          | 11145,76 | -0,02 | 0,164159 | -0,13757 | 0,890583 | 0,9686248 |
| RP11-418B12.1 | 0,55     | 0,33  | 2,388563 | 0,137531 | 0,890611 | NA        |
| MIA2          | 381,81   | 0,05  | 0,341552 | 0,137345 | 0,890758 | 0,9686507 |
| XIST          | 6014,65  | -0,12 | 0,839855 | -0,13733 | 0,890771 | 0,9686507 |
| TTC23         | 5,77     | 0,21  | 1,542039 | 0,137297 | 0,890796 | 0,9686507 |
| CTB-159G17.4  | 1,13     | -0,22 | 1,582462 | -0,13728 | 0,890807 | NA        |
| RP11-967K21.1 | 5,61     | 0,19  | 1,394077 | 0,137268 | 0,890819 | 0,9686507 |
| RP11-72M17.1  | 10,56    | 0,19  | 1,374809 | 0,137207 | 0,890867 | 0,9686507 |
| ANP32A        | 932,08   | -0,05 | 0,346337 | -0,13703 | 0,891003 | 0,9687046 |
| RP11-5C23.1   | 6,33     | 0,33  | 2,417267 | 0,136953 | 0,891068 | 0,9687046 |
| RP11-91I20.1  | 6,66     | 0,17  | 1,215453 | 0,13685  | 0,891149 | 0,9687046 |
| ZBED1         | 449,97   | -0,07 | 0,498059 | -0,13676 | 0,89122  | 0,9687046 |
| LRP4          | 0,29     | 0,45  | 3,282714 | 0,136754 | 0,891225 | NA        |
| TRPV1         | 17,86    | -0,14 | 1,057723 | -0,13673 | 0,891246 | 0,9687046 |
| RP4-702J19.1  | 0,49     | 0,33  | 2,384873 | 0,136693 | 0,891274 | NA        |
| RN7SL213P     | 0,89     | -0,34 | 2,46333  | -0,13669 | 0,891279 | NA        |
| CHST2         | 255,24   | 0,11  | 0,799856 | 0,136675 | 0,891287 | 0,9687046 |
| MED19         | 104,85   | 0,10  | 0,723321 | 0,136631 | 0,891322 | 0,9687046 |
| SMARCD1       | 101,75   | 0,12  | 0,848506 | 0,136535 | 0,891399 | 0,9687046 |
| AP000344.4    | 0,58     | -0,37 | 2,697568 | -0,13653 | 0,891404 | NA        |
| CWC25         | 548,31   | 0,06  | 0,463971 | 0,136525 | 0,891406 | 0,9687046 |
| ZNF696        | 10,83    | -0,19 | 1,35987  | -0,13649 | 0,891437 | 0,9687046 |
| RBM34         | 234,06   | 0,06  | 0,461142 | 0,136311 | 0,891575 | 0,9687388 |
| ZNF609        | 347,46   | -0,09 | 0,624003 | -0,13628 | 0,891597 | 0,9687388 |
| RP11-12A2.1   | 13,39    | 0,32  | 2,33393  | 0,136248 | 0,891625 | 0,9687388 |
| RP11-345I18.3 | 0,74     | 0,23  | 1,709224 | 0,136062 | 0,891772 | NA        |
| SSX1          | 2,29     | 0,29  | 2,099473 | 0,136048 | 0,891783 | NA        |
| FAM24B        | 19,38    | 0,22  | 1,63754  | 0,136015 | 0,89181  | 0,9688572 |
| TSPYL6        | 0,56     | 0,37  | 2,708811 | 0,135956 | 0,891856 | NA        |
| RP11-805L22.2 | 2,74     | -0,18 | 1,354511 | -0,13594 | 0,891871 | NA        |
| MTG2          | 134,23   | -0,11 | 0,819583 | -0,13592 | 0,891881 | 0,9688572 |
| AC116366.6    | 83,59    | 0,10  | 0,722887 | 0,135913 | 0,89189  | 0,9688572 |
| RP11-158M9.1  | 0,17     | 0,38  | 2,833174 | 0,135628 | 0,892116 | NA        |
| ZNF286A       | 123,02   | 0,12  | 0,878751 | 0,135579 | 0,892154 | 0,9690278 |
| AC097374.2    | 98,58    | 0,16  | 1,157307 | 0,135557 | 0,892172 | 0,9690278 |



|                |        |       |          |          |          |           |
|----------------|--------|-------|----------|----------|----------|-----------|
| LTV1           | 474,81 | 0,09  | 0,672743 | 0,135516 | 0,892204 | 0,9690278 |
| KNDC1          | 0,66   | -0,40 | 2,959397 | -0,13545 | 0,892258 | NA        |
| RP11-701P16.1  | 29,77  | -0,27 | 2,000215 | -0,13541 | 0,892285 | 0,9690364 |
| CCND1          | 0,67   | 0,22  | 1,637667 | 0,135306 | 0,89237  | NA        |
| FAM53B         | 218,53 | 0,08  | 0,599394 | 0,135295 | 0,892378 | 0,9690364 |
| TSEN15         | 388,12 | 0,06  | 0,463817 | 0,135201 | 0,892453 | 0,9690364 |
| PAPSS2         | 233,34 | -0,13 | 0,936102 | -0,13517 | 0,89248  | 0,9690364 |
| AP3M2          | 91,85  | -0,19 | 1,373811 | -0,13515 | 0,89249  | 0,9690364 |
| CFAP47         | 7,45   | -0,36 | 2,654495 | -0,13506 | 0,892562 | 0,9690364 |
| GALNT7         | 301,45 | 0,09  | 0,637166 | 0,135045 | 0,892576 | 0,9690364 |
| TRIM54         | 0,21   | 0,51  | 3,748196 | 0,135007 | 0,892607 | NA        |
| MSH3           | 275,28 | -0,09 | 0,664659 | -0,1349  | 0,892693 | 0,9690738 |
| CEACAM21       | 21,36  | 0,30  | 2,20345  | 0,13487  | 0,892715 | 0,9690738 |
| COL5A3         | 0,99   | -0,38 | 2,815484 | -0,13459 | 0,892936 | NA        |
| AC008132.15    | 0,14   | -0,45 | 3,369233 | -0,13456 | 0,892963 | NA        |
| GSG1           | 26,22  | -0,12 | 0,885756 | -0,13445 | 0,89305  | 0,9693776 |
| RP11-611O2.3   | 13,74  | 0,24  | 1,805017 | 0,134384 | 0,893099 | 0,9693776 |
| CCSAP          | 304,89 | 0,10  | 0,773016 | 0,134206 | 0,89324  | 0,9694739 |
| RP11-550P17.5  | 0,14   | -0,45 | 3,368078 | -0,13419 | 0,893253 | NA        |
| RP11-113C12.2  | 0,15   | -0,45 | 3,356889 | -0,13409 | 0,893329 | NA        |
| NRG2           | 0,14   | 0,50  | 3,748196 | 0,134046 | 0,893366 | NA        |
| VANGL2         | 1,42   | -0,39 | 2,886103 | -0,13394 | 0,893451 | NA        |
| RASA3          | 90,37  | 0,13  | 0,939048 | 0,133934 | 0,893454 | 0,9696445 |
| SLC23A2        | 287,72 | 0,09  | 0,663773 | 0,133843 | 0,893527 | 0,9696445 |
| TMPRSS11F      | 0,15   | -0,45 | 3,361814 | -0,13384 | 0,893528 | NA        |
| RP11-204L24.2  | 0,14   | -0,45 | 3,370597 | -0,13383 | 0,89354  | NA        |
| RP11-173P15.10 | 1,43   | -0,44 | 3,300473 | -0,1338  | 0,89356  | NA        |
| STARD6         | 0,62   | -0,42 | 3,126654 | -0,1338  | 0,89356  | NA        |
| AC068610.5     | 0,10   | -0,46 | 3,414022 | -0,13379 | 0,893569 | NA        |
| SLC25A1        | 379,26 | 0,10  | 0,724862 | 0,133783 | 0,893575 | 0,9696445 |
| CTD-2047H16.3  | 30,47  | -0,08 | 0,583463 | -0,13374 | 0,893611 | 0,9696445 |
| ZFAND6         | 755,15 | 0,05  | 0,390705 | 0,133655 | 0,893676 | 0,9696445 |
| TOMM5          | 462,11 | 0,04  | 0,286523 | 0,133612 | 0,893709 | 0,9696445 |
| FN3K           | 10,69  | -0,10 | 0,781984 | -0,1335  | 0,893794 | 0,96968   |
| SLIT3          | 32,58  | -0,13 | 1,009801 | -0,13333 | 0,893932 | 0,9697729 |
| RP11-464C19.3  | 2,25   | 0,18  | 1,33597  | 0,133202 | 0,894034 | NA        |
| CTD-2233K9.1   | 39,20  | -0,12 | 0,877416 | -0,13307 | 0,894139 | 0,9699405 |
| RP11-327L3.5   | 0,53   | -0,20 | 1,467987 | -0,13291 | 0,894264 | NA        |
| OR2V1          | 17,21  | 0,16  | 1,200592 | 0,132754 | 0,894388 | 0,9701545 |
| EED            | 175,63 | -0,09 | 0,698073 | -0,13264 | 0,894476 | 0,9701692 |
| RP11-323P14.2  | 15,69  | 0,11  | 0,841094 | 0,132605 | 0,894506 | 0,9701692 |
| ZIC3           | 0,45   | -0,29 | 2,221332 | -0,13256 | 0,894543 | NA        |
| KCNJ1          | 10,29  | 0,28  | 2,140923 | 0,132333 | 0,894721 | 0,9703455 |
| RP3-357D13.1   | 0,10   | -0,45 | 3,425077 | -0,13233 | 0,894725 | NA        |
| XX-C2158C6.3   | 3,18   | 0,40  | 3,050083 | 0,132291 | 0,894754 | NA        |
| SH2D1B         | 5,33   | 0,30  | 2,275226 | 0,132186 | 0,894837 | 0,9704143 |
| CASP6          | 53,72  | 0,12  | 0,942922 | 0,132121 | 0,894888 | 0,9704143 |
| SNORA75        | 0,56   | -0,26 | 1,933548 | -0,13193 | 0,895038 | NA        |
| RP11-5809.2    | 19,68  | 0,10  | 0,727385 | 0,131898 | 0,895065 | 0,9705199 |
| HSBP1L1        | 24,72  | -0,11 | 0,829037 | -0,13186 | 0,895095 | 0,9705199 |

|               |        |       |          |          |          |           |
|---------------|--------|-------|----------|----------|----------|-----------|
| FAM69A        | 83,25  | 0,15  | 1,162996 | 0,131742 | 0,895189 | 0,9705199 |
| PDGFB         | 0,68   | 0,42  | 3,155276 | 0,131736 | 0,895193 | NA        |
| SLC15A2       | 270,99 | -0,10 | 0,787217 | -0,13172 | 0,895205 | 0,9705199 |
| SSTR3         | 0,13   | -0,45 | 3,379883 | -0,13171 | 0,895215 | NA        |
| DOK2          | 667,38 | 0,06  | 0,431328 | 0,131623 | 0,895282 | 0,9705199 |
| EEFSEC        | 151,98 | -0,11 | 0,82945  | -0,1316  | 0,895299 | 0,9705199 |
| RP11-483E23.8 | 2,11   | -0,15 | 1,166776 | -0,13148 | 0,895395 | NA        |
| IGFBP3        | 0,61   | -0,21 | 1,585292 | -0,13146 | 0,895409 | NA        |
| RP11-46H11.11 | 68,30  | 0,13  | 0,953923 | 0,131332 | 0,895513 | 0,9706954 |
| RP11-110H1.9  | 0,13   | -0,44 | 3,374949 | -0,13131 | 0,895529 | NA        |
| RFX2          | 117,75 | 0,11  | 0,834461 | 0,131205 | 0,895613 | 0,9707477 |
| RP1-99E18.2   | 0,11   | -0,45 | 3,398411 | -0,13119 | 0,895622 | NA        |
| RP11-849F2.4  | 0,12   | -0,44 | 3,385348 | -0,13111 | 0,89569  | NA        |
| HTR5A         | 0,48   | -0,35 | 2,651573 | -0,1311  | 0,895697 | NA        |
| NHSL1         | 83,86  | 0,15  | 1,141444 | 0,131026 | 0,895755 | 0,9708446 |
| RP11-702L15.1 | 0,12   | -0,44 | 3,387707 | -0,13098 | 0,895791 | NA        |
| AS3MT         | 11,16  | -0,18 | 1,363394 | -0,13092 | 0,895836 | 0,9708766 |
| AP1B1         | 613,45 | 0,05  | 0,400537 | 0,130824 | 0,895915 | 0,9709048 |
| RP11-751A18.1 | 0,13   | -0,44 | 3,378065 | -0,13082 | 0,895922 | NA        |
| CCT5P1        | 0,13   | -0,44 | 3,377548 | -0,13075 | 0,895976 | NA        |
| AC008565.1    | 1,69   | 0,19  | 1,423597 | 0,130735 | 0,895985 | NA        |
| RP11-16E18.4  | 17,67  | 0,20  | 1,567629 | 0,130688 | 0,896022 | 0,9709203 |
| RP3-487J7.2   | 79,36  | -0,12 | 0,882886 | -0,13056 | 0,896125 | 0,9709203 |
| CTC-550B14.7  | 21,44  | -0,07 | 0,566806 | -0,13051 | 0,896163 | 0,9709203 |
| PAFAH1B2      | 850,14 | -0,05 | 0,345127 | -0,13043 | 0,896226 | 0,9709203 |
| UBQLN4        | 182,88 | 0,10  | 0,796426 | 0,130425 | 0,89623  | 0,9709203 |
| EHBP1         | 157,72 | 0,10  | 0,753141 | 0,13041  | 0,896242 | 0,9709203 |
| LINC01241     | 0,02   | -0,49 | 3,747759 | -0,13035 | 0,896291 | NA        |
| STPG1         | 63,46  | -0,08 | 0,587978 | -0,13017 | 0,896431 | 0,971063  |
| BANK1         | 227,76 | -0,10 | 0,763116 | -0,13011 | 0,896478 | 0,971063  |
| RP11-311B18.1 | 3,80   | 0,27  | 2,099122 | 0,129903 | 0,896643 | 0,9711491 |
| RP11-395G23.3 | 31,78  | 0,21  | 1,641642 | 0,129866 | 0,896673 | 0,9711491 |
| RELN          | 1,23   | 0,26  | 2,036376 | 0,129836 | 0,896697 | NA        |
| RNU6-509P     | 0,11   | -0,44 | 3,409568 | -0,12982 | 0,896711 | NA        |
| NR3C2         | 9,07   | 0,24  | 1,811181 | 0,129812 | 0,896715 | 0,9711491 |
| OARD1         | 287,24 | -0,10 | 0,792841 | -0,12975 | 0,896767 | 0,9711491 |
| AC068831.16   | 1,03   | 0,18  | 1,36948  | 0,129723 | 0,896786 | NA        |
| KCNT1         | 2,33   | 0,13  | 0,998596 | 0,129673 | 0,896825 | NA        |
| RN7SL660P     | 1,26   | -0,16 | 1,24787  | -0,12965 | 0,896844 | NA        |
| RN7SL271P     | 2,71   | -0,29 | 2,200999 | -0,12957 | 0,896907 | NA        |
| TMEM255A      | 19,68  | 0,29  | 2,22416  | 0,129562 | 0,896913 | 0,9711557 |
| RP5-1042I8.7  | 102,08 | 0,07  | 0,539939 | 0,129548 | 0,896924 | 0,9711557 |
| AKAP11        | 432,87 | 0,08  | 0,595135 | 0,12952  | 0,896946 | 0,9711557 |
| AP000609.5    | 10,79  | -0,16 | 1,260818 | -0,12948 | 0,896981 | 0,9711557 |
| MIR5695       | 0,10   | -0,44 | 3,415826 | -0,12944 | 0,897008 | NA        |
| SERPINE3      | 0,35   | 0,39  | 3,02527  | 0,129345 | 0,897085 | NA        |
| DOK1          | 138,78 | -0,13 | 1,038376 | -0,12934 | 0,897087 | 0,9711695 |
| RP11-25C19.3  | 20,13  | 0,17  | 1,327907 | 0,129327 | 0,897099 | 0,9711695 |
| TPTE2         | 0,48   | 0,46  | 3,551157 | 0,12931  | 0,897113 | NA        |
| RP11-673C5.1  | 215,78 | 0,02  | 0,172371 | 0,129228 | 0,897177 | 0,9711983 |

|               |        |       |          |          |          |           |
|---------------|--------|-------|----------|----------|----------|-----------|
| RP13-870H17.3 | 0,19   | 0,48  | 3,747569 | 0,129101 | 0,897278 | NA        |
| RP11-15H20.6  | 95,45  | 0,08  | 0,643762 | 0,129079 | 0,897295 | 0,9712333 |
| TTLL11        | 7,98   | -0,21 | 1,631023 | -0,12905 | 0,897314 | 0,9712333 |
| RN7SL220P     | 0,14   | -0,43 | 3,36909  | -0,12905 | 0,897322 | NA        |
| AC073410.1    | 1,47   | 0,34  | 2,64886  | 0,129045 | 0,897322 | NA        |
| ZNF330        | 330,19 | -0,08 | 0,587332 | -0,12894 | 0,897409 | 0,9712357 |
| RP11-326N17.2 | 107,99 | -0,06 | 0,439349 | -0,12892 | 0,897421 | 0,9712357 |
| ELAVL2        | 2,87   | -0,13 | 1,022397 | -0,12882 | 0,897498 | NA        |
| CASP3         | 175,81 | -0,10 | 0,794956 | -0,12868 | 0,897613 | 0,9713517 |
| AC091062.2    | 7,50   | 0,17  | 1,290252 | 0,128653 | 0,897632 | 0,9713517 |
| LHX9          | 0,11   | -0,44 | 3,396717 | -0,12854 | 0,897721 | NA        |
| RP11-535A19.1 | 0,13   | -0,43 | 3,372945 | -0,12849 | 0,897764 | NA        |
| DBNDD2        | 101,76 | 0,16  | 1,235835 | 0,128419 | 0,897818 | 0,9714956 |
| RP11-503G7.1  | 0,95   | -0,36 | 2,796007 | -0,12841 | 0,897822 | NA        |
| CMP21-97G8.2  | 2,80   | -0,17 | 1,341105 | -0,1284  | 0,897832 | NA        |
| SLC29A1       | 21,38  | -0,22 | 1,703112 | -0,12833 | 0,897885 | 0,9715121 |
| SECISBP2      | 786,31 | 0,06  | 0,474972 | 0,128196 | 0,897994 | 0,971573  |
| CASP5         | 0,48   | 0,45  | 3,489844 | 0,12807  | 0,898094 | NA        |
| GCC1          | 44,34  | -0,15 | 1,135092 | -0,12806 | 0,898104 | 0,9716362 |
| GPR87         | 0,18   | -0,36 | 2,828729 | -0,12791 | 0,898224 | NA        |
| AP000235.2    | 1,37   | -0,28 | 2,206393 | -0,12783 | 0,898286 | NA        |
| ALG11         | 187,02 | 0,08  | 0,60864  | 0,127688 | 0,898396 | 0,9717913 |
| FUT1          | 48,07  | 0,11  | 0,837285 | 0,127684 | 0,898399 | 0,9717913 |
| LRPPRC        | 860,47 | -0,07 | 0,57746  | -0,12768 | 0,898404 | 0,9717913 |
| RP11-173D3.1  | 2,27   | 0,24  | 1,852575 | 0,127641 | 0,898433 | NA        |
| CTD-2081C10.7 | 1,06   | -0,47 | 3,667245 | -0,12762 | 0,898447 | NA        |
| OR5B2         | 2,26   | -0,32 | 2,510521 | -0,1276  | 0,898469 | NA        |
| LYPD6B        | 0,02   | -0,48 | 3,746816 | -0,12759 | 0,898475 | NA        |
| NANOGB        | 4,56   | 0,18  | 1,375126 | 0,12742  | 0,898608 | 0,9719553 |
| RP11-332L18.4 | 0,56   | -0,18 | 1,380633 | -0,1274  | 0,898627 | NA        |
| LGI4          | 2,95   | 0,39  | 3,090917 | 0,127362 | 0,898654 | NA        |
| GALK1         | 227,81 | 0,08  | 0,610191 | 0,127228 | 0,89876  | 0,9719769 |
| IQSEC1        | 646,17 | -0,05 | 0,390918 | -0,1272  | 0,898781 | 0,9719769 |
| RP11-299J3.8  | 68,39  | 0,08  | 0,658489 | 0,127194 | 0,898787 | 0,9719769 |
| RNGTT         | 280,23 | -0,10 | 0,77573  | -0,12713 | 0,898837 | 0,9719769 |
| NPHP3-ACAD11  | 8,28   | 0,37  | 2,905202 | 0,127011 | 0,898932 | 0,9719867 |
| WDFY3         | 594,17 | -0,10 | 0,765345 | -0,12692 | 0,899002 | 0,9719867 |
| TIMM44        | 156,86 | -0,09 | 0,741778 | -0,12692 | 0,899003 | 0,9719867 |
| ARFGAP1       | 483,58 | -0,10 | 0,777231 | -0,12676 | 0,899129 | 0,9720662 |
| RP11-245J24.1 | 0,19   | 0,43  | 3,36214  | 0,126508 | 0,89933  | NA        |
| RP4-669K10.8  | 40,13  | -0,08 | 0,622346 | -0,12643 | 0,899388 | 0,9722298 |
| MCMBP         | 505,99 | -0,07 | 0,555491 | -0,12642 | 0,899396 | 0,9722298 |
| CTD-2135D7.2  | 5,35   | 0,19  | 1,505659 | 0,126373 | 0,899437 | 0,9722298 |
| DSCC1         | 0,42   | -0,31 | 2,484436 | -0,12634 | 0,899466 | NA        |
| OLFML3        | 1,54   | 0,25  | 1,958784 | 0,126264 | 0,899523 | NA        |
| MAGEA13P      | 0,32   | 0,47  | 3,747236 | 0,126259 | 0,899527 | NA        |
| RP11-204J18.3 | 7,89   | 0,09  | 0,749212 | 0,126053 | 0,89969  | 0,9723747 |
| RP11-78O7.2   | 27,61  | 0,25  | 1,986081 | 0,126045 | 0,899697 | 0,9723747 |
| POLR2I        | 179,40 | 0,04  | 0,333148 | 0,12594  | 0,89978  | 0,9723747 |
| CTB-118N6.2   | 7,00   | 0,27  | 2,11898  | 0,12594  | 0,89978  | 0,9723747 |

|               |        |       |          |          |          |           |
|---------------|--------|-------|----------|----------|----------|-----------|
| RP11-507P23.3 | 0,58   | -0,34 | 2,677409 | -0,12566 | 0,900005 | NA        |
| SOX30         | 1,25   | -0,32 | 2,553175 | -0,12565 | 0,900001 | NA        |
| NDC80         | 7,40   | -0,15 | 1,187859 | -0,12557 | 0,900007 | 0,9725979 |
| AC009005.2    | 14,82  | 0,20  | 1,592602 | 0,125547 | 0,900091 | 0,9725979 |
| RP1-7G5.5     | 0,44   | -0,34 | 2,67732  | -0,12544 | 0,900175 | NA        |
| AL355480.3    | 0,57   | 0,22  | 1,76203  | 0,125404 | 0,900204 | NA        |
| OTX1          | 0,13   | 0,47  | 3,748196 | 0,125309 | 0,900279 | NA        |
| TMF1          | 680,00 | 0,08  | 0,613487 | 0,125222 | 0,900348 | 0,9727288 |
| RP11-265D17.2 | 8,90   | 0,30  | 2,388438 | 0,125187 | 0,900376 | 0,9727288 |
| STT3A         | 329,09 | 0,07  | 0,588621 | 0,125137 | 0,900415 | 0,9727288 |
| PIDD1         | 73,90  | -0,11 | 0,907757 | -0,12513 | 0,900421 | 0,9727288 |
| AC007566.10   | 13,90  | 0,22  | 1,755254 | 0,125039 | 0,900493 | 0,9727342 |
| BTBD18        | 2,38   | 0,38  | 3,067324 | 0,12501  | 0,900516 | NA        |
| RPS20P35      | 0,15   | -0,42 | 3,358644 | -0,12497 | 0,900551 | NA        |
| RP11-634B7.4  | 4,13   | 0,16  | 1,293679 | 0,124958 | 0,900556 | 0,9727342 |
| THAP5         | 151,81 | -0,08 | 0,601602 | -0,12486 | 0,900635 | 0,9727342 |
| ZBTB26        | 14,37  | 0,18  | 1,413695 | 0,12482  | 0,900666 | 0,9727342 |
| RP11-56B16.1  | 2,40   | -0,38 | 3,047367 | -0,12479 | 0,900687 | NA        |
| RP11-87L10.1  | 20,66  | -0,19 | 1,530002 | -0,12479 | 0,900688 | 0,9727342 |
| SHPRH         | 532,33 | -0,08 | 0,674674 | -0,12467 | 0,900786 | 0,9727737 |
| BIRC6-AS2     | 21,92  | 0,14  | 1,153759 | 0,124615 | 0,900829 | 0,9727737 |
| RP11-168E14.1 | 0,40   | -0,45 | 3,589191 | -0,12446 | 0,900952 | NA        |
| RP13-130D24.1 | 4,57   | -0,12 | 0,947078 | -0,12445 | 0,900957 | 0,9728001 |
| ISY1-RAB43    | 4,77   | -0,17 | 1,351049 | -0,12445 | 0,900958 | 0,9728001 |
| RP11-22H5.2   | 7,07   | -0,12 | 0,961974 | -0,12435 | 0,901041 | 0,9728331 |
| CDH22         | 0,82   | -0,46 | 3,684471 | -0,12428 | 0,901093 | NA        |
| RN7SL732P     | 1,82   | 0,18  | 1,436618 | 0,124238 | 0,901127 | NA        |
| NR1D2         | 236,96 | 0,10  | 0,777608 | 0,124203 | 0,901154 | 0,9728995 |
| FBXO45        | 174,05 | -0,10 | 0,826207 | -0,12401 | 0,901306 | 0,9729761 |
| PGAP2         | 93,55  | -0,13 | 1,02905  | -0,12397 | 0,90134  | 0,9729761 |
| TRAPPC2       | 220,06 | -0,06 | 0,484869 | -0,12389 | 0,901406 | 0,9729761 |
| LY9           | 170,76 | -0,13 | 1,063526 | -0,12385 | 0,901435 | 0,9729761 |
| TAX1BP3       | 277,51 | -0,09 | 0,727145 | -0,12375 | 0,90151  | 0,9730015 |
| LRRC55        | 11,93  | -0,19 | 1,511236 | -0,12365 | 0,901595 | 0,9730325 |
| C14orf93      | 74,54  | 0,14  | 1,141398 | 0,123585 | 0,901644 | 0,9730325 |
| RN7SL617P     | 1,10   | -0,27 | 2,156781 | -0,12357 | 0,901652 | NA        |
| HSPA14        | 260,85 | -0,09 | 0,719535 | -0,12345 | 0,90175  | 0,973078  |
| TAS1R1        | 0,60   | 0,30  | 2,415223 | 0,123448 | 0,901752 | NA        |
| RP11-22P4.2   | 0,17   | 0,42  | 3,377731 | 0,123376 | 0,901809 | NA        |
| LA16c-431H6.6 | 16,33  | -0,12 | 0,988941 | -0,12337 | 0,901812 | 0,973078  |
| SRP19         | 432,69 | 0,05  | 0,438324 | 0,123334 | 0,901843 | 0,973078  |
| FAM154B       | 6,97   | -0,13 | 1,019913 | -0,12326 | 0,901903 | 0,9730864 |
| FAM92A1       | 36,33  | 0,14  | 1,112547 | 0,123178 | 0,901966 | 0,9730982 |
| RP1-300G12.2  | 0,79   | 0,27  | 2,172299 | 0,123152 | 0,901987 | NA        |
| KAZALD1       | 0,15   | 0,46  | 3,748196 | 0,123103 | 0,902025 | NA        |
| CBFA2T2       | 226,44 | 0,08  | 0,677948 | 0,122984 | 0,90212  | 0,973193  |
| AC008268.2    | 0,13   | -0,46 | 3,748196 | -0,12284 | 0,902235 | NA        |
| SNHG1         | 503,27 | -0,08 | 0,660883 | -0,12281 | 0,902258 | 0,973193  |
| RP11-80F22.4  | 0,11   | -0,42 | 3,396198 | -0,12277 | 0,902291 | NA        |
| CTD-2651B20.6 | 4,51   | 0,19  | 1,556907 | 0,122747 | 0,902308 | 0,973193  |

|                |         |       |          |          |          |           |
|----------------|---------|-------|----------|----------|----------|-----------|
| RP5-882C2.2    | 71,28   | -0,08 | 0,614246 | -0,12273 | 0,902318 | 0,973193  |
| AC010149.2     | 65,70   | 0,11  | 0,893553 | 0,122674 | 0,902365 | 0,973193  |
| RP11-797A18.5  | 20,86   | -0,17 | 1,414956 | -0,12267 | 0,902368 | 0,973193  |
| RNU6-1034P     | 0,60    | -0,45 | 3,709413 | -0,12263 | 0,902397 | NA        |
| CCDC171        | 169,27  | 0,11  | 0,878414 | 0,122436 | 0,902554 | 0,973337  |
| CTD-2501M5.1   | 3,51    | -0,22 | 1,836926 | -0,12236 | 0,902614 | NA        |
| CTD-3064C13.1  | 10,08   | -0,14 | 1,175833 | -0,12229 | 0,90267  | 0,9733887 |
| NID1           | 89,00   | -0,14 | 1,183026 | -0,12224 | 0,902706 | 0,9733887 |
| BCL6B          | 0,11    | 0,35  | 2,878393 | 0,122211 | 0,902732 | NA        |
| RP11-327J17.3  | 2,18    | -0,23 | 1,894614 | -0,12221 | 0,902735 | NA        |
| TCTA           | 212,80  | -0,11 | 0,929429 | -0,12211 | 0,902814 | 0,9734489 |
| ATAD3B         | 148,70  | -0,11 | 0,875679 | -0,12204 | 0,902868 | 0,9734508 |
| RN7SL771P      | 0,56    | 0,29  | 2,383266 | 0,121995 | 0,902903 | NA        |
| LIMD1          | 339,17  | -0,09 | 0,72405  | -0,12197 | 0,902926 | 0,9734565 |
| RP11-536I6.2   | 2,36    | -0,23 | 1,91655  | -0,12181 | 0,903047 | NA        |
| AC019109.1     | 2,01    | -0,15 | 1,217484 | -0,12171 | 0,903129 | NA        |
| CTD-2105E13.16 | 0,14    | 0,41  | 3,39748  | 0,121703 | 0,903134 | NA        |
| AP000997.1     | 0,11    | -0,41 | 3,399218 | -0,12159 | 0,903222 | NA        |
| BLCAP          | 593,51  | 0,07  | 0,557802 | 0,12159  | 0,903223 | 0,9736522 |
| AC138969.4     | 123,72  | 0,05  | 0,379395 | 0,121536 | 0,903266 | 0,9736522 |
| TUBB2B         | 0,14    | -0,46 | 3,748196 | -0,12148 | 0,903311 | NA        |
| TAF5L          | 80,30   | 0,11  | 0,895288 | 0,121462 | 0,903325 | 0,9736522 |
| ZFX            | 975,62  | 0,07  | 0,573594 | 0,121406 | 0,903369 | 0,9736522 |
| FAM90A12       | 0,16    | -0,45 | 3,748196 | -0,12134 | 0,903423 | NA        |
| THSD4          | 36,84   | -0,13 | 1,044678 | -0,12117 | 0,903557 | 0,9736522 |
| KATNB1         | 100,03  | -0,13 | 1,107366 | -0,12112 | 0,903598 | 0,9736522 |
| RP11-157K17.5  | 22,99   | -0,17 | 1,426233 | -0,12108 | 0,903629 | 0,9736522 |
| RP11-325F22.3  | 51,35   | 0,08  | 0,690897 | 0,121052 | 0,90365  | 0,9736522 |
| CD300A         | 1034,73 | 0,04  | 0,359585 | 0,121034 | 0,903664 | 0,9736522 |
| ASB15          | 6,69    | 0,33  | 2,733657 | 0,121012 | 0,903681 | 0,9736522 |
| TIA1           | 547,73  | 0,06  | 0,492049 | 0,12101  | 0,903683 | 0,9736522 |
| CARD10         | 1,13    | -0,24 | 1,951508 | -0,12099 | 0,903701 | NA        |
| CTC-512J14.7   | 0,76    | 0,17  | 1,442326 | 0,120983 | 0,903704 | NA        |
| CHRD1          | 4,96    | -0,15 | 1,246686 | -0,12083 | 0,903823 | 0,9736673 |
| RP11-575H3.1   | 0,10    | -0,45 | 3,748196 | -0,12083 | 0,903829 | NA        |
| PPIG           | 977,88  | -0,04 | 0,334408 | -0,12077 | 0,903871 | 0,9736673 |
| UPF3A          | 289,51  | 0,05  | 0,453433 | 0,120617 | 0,903995 | 0,9736673 |
| KCNMA1         | 4,78    | -0,16 | 1,365853 | -0,12059 | 0,904013 | 0,9736673 |
| MAD1L1         | 412,09  | -0,07 | 0,54042  | -0,12058 | 0,904022 | 0,9736673 |
| RP11-651P23.5  | 7,46    | -0,16 | 1,329958 | -0,12054 | 0,904059 | 0,9736673 |
| MIR4440        | 0,11    | -0,45 | 3,748196 | -0,1204  | 0,904166 | NA        |
| RP11-701P16.2  | 168,88  | 0,09  | 0,784446 | 0,120398 | 0,904168 | 0,9736673 |
| RP11-629O1.4   | 1,19    | 0,40  | 3,293814 | 0,120362 | 0,904197 | NA        |
| AL353898.2     | 14,52   | 0,14  | 1,130348 | 0,120335 | 0,904218 | 0,9736673 |
| RP11-90P5.5    | 32,49   | 0,07  | 0,573982 | 0,120318 | 0,904231 | 0,9736673 |
| GPR135         | 25,42   | 0,16  | 1,368592 | 0,120286 | 0,904256 | 0,9736673 |
| RP11-700H6.2   | 2,96    | -0,17 | 1,392522 | -0,12027 | 0,904267 | NA        |
| AC074391.1     | 1,11    | 0,30  | 2,500115 | 0,120224 | 0,904306 | NA        |
| bP-21201H5.2   | 43,23   | 0,29  | 2,385249 | 0,120221 | 0,904308 | 0,9736673 |
| KIAA0319L      | 677,59  | -0,07 | 0,553162 | -0,1202  | 0,904325 | 0,9736673 |

|               |         |       |          |          |          |           |
|---------------|---------|-------|----------|----------|----------|-----------|
| RN7SL493P     | 0,14    | -0,45 | 3,748196 | -0,12018 | 0,904344 | NA        |
| AP000442.1    | 0,16    | -0,41 | 3,380874 | -0,12015 | 0,904365 | NA        |
| RP11-139H14.3 | 3,82    | -0,17 | 1,444192 | -0,1201  | 0,904405 | 0,9736965 |
| RN7SL560P     | 0,69    | 0,17  | 1,40897  | 0,120067 | 0,90443  | NA        |
| RP11-252A4.2  | 1,34    | 0,40  | 3,320769 | 0,119982 | 0,904497 | NA        |
| AF277315.18   | 15,74   | 0,16  | 1,317103 | 0,119976 | 0,904502 | 0,973745  |
| RP5-1057I20.2 | 0,16    | 0,45  | 3,748196 | 0,119913 | 0,904552 | NA        |
| GP5           | 0,95    | -0,17 | 1,422454 | -0,11987 | 0,904582 | NA        |
| NXF4          | 0,09    | -0,45 | 3,748196 | -0,11976 | 0,904675 | NA        |
| FOXC1         | 0,43    | -0,45 | 3,748196 | -0,1197  | 0,904724 | NA        |
| AL022344.4    | 0,51    | 0,25  | 2,102282 | 0,119648 | 0,904762 | NA        |
| MRPS36        | 136,08  | 0,07  | 0,570118 | 0,11964  | 0,904769 | 0,973745  |
| HCP5B         | 0,16    | -0,45 | 3,748196 | -0,11963 | 0,904773 | NA        |
| PRKRIP1       | 242,03  | 0,07  | 0,594532 | 0,119522 | 0,904862 | 0,973745  |
| RP11-15E18.4  | 0,13    | -0,45 | 3,748196 | -0,1195  | 0,90488  | NA        |
| RP11-181C3.1  | 8,84    | -0,13 | 1,082568 | -0,11946 | 0,904913 | 0,973745  |
| PABPC3        | 1,37    | 0,13  | 1,092207 | 0,119448 | 0,90492  | NA        |
| TSPAN33       | 673,99  | -0,07 | 0,617215 | -0,11944 | 0,904923 | 0,973745  |
| DNAJB9        | 341,30  | -0,07 | 0,591482 | -0,11941 | 0,904953 | 0,973745  |
| CTD-3006G17.2 | 1,81    | -0,19 | 1,610235 | -0,11936 | 0,904988 | NA        |
| PRR25         | 0,17    | -0,45 | 3,748196 | -0,11925 | 0,905076 | NA        |
| NIPAL1        | 22,32   | -0,12 | 0,979337 | -0,11924 | 0,905084 | 0,973745  |
| EPT1          | 273,24  | 0,14  | 1,215819 | 0,119227 | 0,905096 | 0,973745  |
| RP1-59D14.5   | 0,82    | 0,29  | 2,469394 | 0,119203 | 0,905115 | NA        |
| METTL3        | 277,77  | 0,07  | 0,567134 | 0,119121 | 0,90518  | 0,973745  |
| LYNX1-SLURP2  | 0,11    | -0,45 | 3,748196 | -0,11909 | 0,9052   | NA        |
| RP11-120I21.2 | 12,39   | -0,11 | 0,949041 | -0,11907 | 0,905224 | 0,973745  |
| TRIP10        | 70,67   | -0,11 | 0,889003 | -0,11894 | 0,905323 | 0,973745  |
| TRMT61A       | 61,55   | 0,13  | 1,077463 | 0,118919 | 0,905339 | 0,973745  |
| SCARNA6       | 0,10    | -0,45 | 3,748196 | -0,11886 | 0,905387 | NA        |
| FRG1GP        | 0,88    | 0,20  | 1,6423   | 0,118847 | 0,905396 | NA        |
| CAST          | 2277,01 | -0,02 | 0,1981   | -0,11878 | 0,905446 | 0,973745  |
| LA16c-380H5.6 | 8,33    | 0,14  | 1,207004 | 0,118741 | 0,90548  | 0,973745  |
| GPR137        | 34,70   | 0,11  | 0,904366 | 0,118657 | 0,905547 | 0,973745  |
| ACSM6         | 16,15   | 0,16  | 1,31927  | 0,118624 | 0,905573 | 0,973745  |
| GPR42         | 0,30    | 0,44  | 3,747475 | 0,118613 | 0,905582 | NA        |
| ZNF672        | 236,12  | 0,06  | 0,49376  | 0,118607 | 0,905587 | 0,973745  |
| RP11-307L14.1 | 0,53    | 0,43  | 3,622006 | 0,118577 | 0,90561  | NA        |
| RP11-326L2.1  | 14,00   | 0,18  | 1,492128 | 0,118562 | 0,905622 | 0,973745  |
| MFN2          | 289,11  | 0,08  | 0,675519 | 0,118546 | 0,905635 | 0,973745  |
| FMNL2         | 58,90   | -0,13 | 1,059355 | -0,1185  | 0,905669 | 0,973745  |
| CPEB3         | 114,98  | -0,10 | 0,814649 | -0,11849 | 0,905675 | 0,973745  |
| HIC2          | 108,49  | -0,10 | 0,821036 | -0,11841 | 0,905745 | 0,973745  |
| TRAP1         | 315,55  | 0,05  | 0,454417 | 0,118396 | 0,905754 | 0,973745  |
| RP11-521B24.5 | 8,12    | -0,09 | 0,784413 | -0,11832 | 0,905818 | 0,973745  |
| RP11-46C24.7  | 6,96    | -0,15 | 1,264904 | -0,11831 | 0,90582  | 0,973745  |
| ANKRD46       | 52,62   | -0,16 | 1,322773 | -0,11831 | 0,905825 | 0,973745  |
| RP11-255A11.2 | 0,92    | -0,20 | 1,672544 | -0,11828 | 0,905846 | NA        |
| IDI1          | 782,31  | 0,07  | 0,56891  | 0,118257 | 0,905864 | 0,973745  |
| PPP1CC        | 981,39  | -0,05 | 0,415416 | -0,11819 | 0,905915 | 0,973745  |

|                |         |       |          |          |          |           |
|----------------|---------|-------|----------|----------|----------|-----------|
| KHDRBS3        | 1,68    | 0,28  | 2,363881 | 0,118013 | 0,906057 | NA        |
| SHISA9         | 65,72   | -0,08 | 0,655809 | -0,11787 | 0,906171 | 0,9738356 |
| FAM151B        | 72,40   | 0,07  | 0,602325 | 0,117858 | 0,90618  | 0,9738356 |
| RASSF9         | 10,64   | -0,09 | 0,802258 | -0,11781 | 0,906221 | 0,9738356 |
| RN7SL150P      | 1,21    | -0,20 | 1,695895 | -0,11779 | 0,906234 | NA        |
| TSPYL1         | 604,63  | -0,05 | 0,394466 | -0,11765 | 0,906345 | 0,9738356 |
| UBA3           | 701,38  | 0,06  | 0,53457  | 0,117619 | 0,906369 | 0,9738356 |
| PTPN3          | 66,51   | 0,09  | 0,732126 | 0,117605 | 0,90638  | 0,9738356 |
| ZNF747         | 122,55  | -0,10 | 0,860951 | -0,11757 | 0,90641  | 0,9738356 |
| TBC1D9         | 987,71  | -0,07 | 0,573659 | -0,11756 | 0,906418 | 0,9738356 |
| FBXL16         | 1,86    | -0,29 | 2,457315 | -0,11754 | 0,906436 | NA        |
| KCNS3          | 0,61    | 0,44  | 3,746138 | 0,117488 | 0,906473 | NA        |
| RP4-646N3.1    | 0,15    | -0,44 | 3,748196 | -0,11735 | 0,906581 | NA        |
| RP11-344G13.1  | 5,69    | -0,19 | 1,597173 | -0,11722 | 0,906684 | 0,973911  |
| AC012065.5     | 0,11    | -0,44 | 3,748196 | -0,11718 | 0,906716 | NA        |
| RN7SL815P      | 5,01    | -0,26 | 2,249964 | -0,11717 | 0,906724 | 0,973911  |
| RN7SL674P      | 1,98    | 0,19  | 1,633374 | 0,117126 | 0,90676  | NA        |
| FAM86C2P       | 7,21    | -0,20 | 1,735724 | -0,11711 | 0,906774 | 0,973911  |
| ZMYND8         | 468,54  | -0,07 | 0,617993 | -0,11704 | 0,906825 | 0,973911  |
| WBP2NL         | 16,78   | -0,11 | 0,953121 | -0,11698 | 0,906874 | 0,973911  |
| IFT74          | 145,00  | 0,08  | 0,669212 | 0,116964 | 0,906889 | 0,973911  |
| SGTA           | 345,37  | 0,05  | 0,445903 | 0,116962 | 0,90689  | 0,973911  |
| RP11-112J3.15  | 0,59    | -0,43 | 3,709835 | -0,11688 | 0,906952 | NA        |
| ACVR1          | 84,12   | 0,13  | 1,151093 | 0,116881 | 0,906954 | 0,973911  |
| KB-1125A3.12   | 79,50   | -0,05 | 0,39238  | -0,11683 | 0,906991 | 0,973911  |
| RP11-1182P23.5 | 0,15    | -0,44 | 3,748196 | -0,11682 | 0,907004 | NA        |
| PRND           | 4,88    | -0,09 | 0,797002 | -0,11681 | 0,907012 | 0,973911  |
| RP11-304C12.3  | 0,49    | 0,41  | 3,47828  | 0,116774 | 0,907039 | NA        |
| SREK1          | 1568,73 | -0,04 | 0,353999 | -0,11671 | 0,907089 | 0,9739136 |
| ARL2BP         | 622,46  | -0,05 | 0,469965 | -0,11667 | 0,907119 | 0,9739136 |
| CCNE1          | 11,93   | 0,24  | 2,03669  | 0,116579 | 0,907193 | 0,9739373 |
| TNXB           | 0,48    | -0,26 | 2,211156 | -0,11656 | 0,907205 | NA        |
| LARP7          | 522,80  | -0,05 | 0,457784 | -0,11635 | 0,907377 | 0,9740778 |
| AC009236.1     | 0,92    | -0,19 | 1,661967 | -0,11634 | 0,907384 | NA        |
| SLC24A3        | 1,64    | -0,39 | 3,361883 | -0,11622 | 0,90748  | NA        |
| RP11-166A12.1  | 0,10    | 0,44  | 3,748088 | 0,11615  | 0,907534 | NA        |
| RP11-115P16.4  | 3,77    | -0,12 | 1,025663 | -0,1161  | 0,907576 | 0,9741147 |
| RP13-487K5.1   | 0,72    | 0,24  | 2,041582 | 0,11608  | 0,907589 | NA        |
| CD7            | 6,67    | 0,14  | 1,176885 | 0,116031 | 0,907628 | 0,9741147 |
| DOCK6          | 12,03   | -0,14 | 1,19957  | -0,11596 | 0,907682 | 0,9741147 |
| L3MBTL1        | 59,74   | 0,09  | 0,750431 | 0,115943 | 0,907698 | 0,9741147 |
| RP11-131M11.4  | 23,97   | -0,08 | 0,730263 | -0,11591 | 0,907723 | 0,9741147 |
| PRH1-PRR4      | 28,23   | -0,18 | 1,544264 | -0,11591 | 0,907725 | 0,9741147 |
| GS1-124K5.13   | 37,53   | 0,12  | 1,071212 | 0,115667 | 0,907917 | 0,9742162 |
| CTB-157D17.1   | 23,25   | -0,13 | 1,155517 | -0,11566 | 0,907924 | 0,9742162 |
| TRIM49D1       | 0,14    | 0,43  | 3,748196 | 0,115629 | 0,907946 | NA        |
| RP11-316M21.5  | 0,49    | 0,31  | 2,686884 | 0,115599 | 0,907971 | NA        |
| SNORD89        | 1,47    | -0,18 | 1,527607 | -0,11557 | 0,907992 | NA        |
| CTD-2194A8.2   | 0,05    | -0,43 | 3,748196 | -0,11556 | 0,908001 | NA        |
| RP13-726E6.1   | 2,39    | -0,35 | 3,060236 | -0,11549 | 0,908056 | NA        |

|               |         |       |          |          |          |           |
|---------------|---------|-------|----------|----------|----------|-----------|
| CTD-2308N23.2 | 0,99    | 0,16  | 1,369951 | 0,115383 | 0,908142 | NA        |
| PCGF1         | 69,07   | 0,07  | 0,622332 | 0,11538  | 0,908144 | 0,9743624 |
| NPC1          | 222,56  | 0,08  | 0,732233 | 0,115353 | 0,908165 | 0,9743624 |
| GORASP2       | 473,08  | 0,07  | 0,585004 | 0,11524  | 0,908255 | 0,974402  |
| COL5A2        | 0,09    | -0,43 | 3,748196 | -0,1151  | 0,908363 | NA        |
| FAM166A       | 10,93   | 0,26  | 2,238653 | 0,115101 | 0,908365 | 0,9744646 |
| ITGB1P1       | 56,95   | 0,24  | 2,092368 | 0,11502  | 0,908429 | 0,9744768 |
| PLEK2         | 0,17    | 0,43  | 3,748196 | 0,114957 | 0,908479 | NA        |
| DUSP11        | 309,32  | -0,09 | 0,784854 | -0,11494 | 0,908496 | 0,9744927 |
| MOV10         | 255,41  | -0,07 | 0,56912  | -0,11482 | 0,908587 | 0,9745338 |
| RNF2          | 280,38  | -0,07 | 0,59997  | -0,11475 | 0,908642 | 0,9745368 |
| MSRA          | 266,51  | -0,05 | 0,416168 | -0,11459 | 0,908769 | 0,9746162 |
| RP11-320P7.2  | 0,16    | -0,43 | 3,748196 | -0,11447 | 0,908862 | NA        |
| AF146191.4    | 5,22    | 0,19  | 1,656355 | 0,11439  | 0,908929 | 0,9746474 |
| LYPD5         | 10,59   | 0,07  | 0,579622 | 0,114364 | 0,908949 | 0,9746474 |
| STX16-NPEPL1  | 4,74    | 0,23  | 2,000691 | 0,114252 | 0,909038 | 0,9746474 |
| NCF2          | 2853,53 | 0,04  | 0,33642  | 0,114235 | 0,909051 | 0,9746474 |
| RHOBTB2       | 45,57   | 0,18  | 1,560925 | 0,11416  | 0,909111 | 0,9746474 |
| MBTD1         | 211,75  | -0,08 | 0,720656 | -0,11416 | 0,909112 | 0,9746474 |
| PRRX1         | 0,17    | -0,32 | 2,832475 | -0,11411 | 0,909148 | NA        |
| AC016909.1    | 2,24    | 0,28  | 2,442704 | 0,114022 | 0,90922  | NA        |
| RP11-333E1.2  | 3,22    | 0,29  | 2,530759 | 0,11401  | 0,90923  | NA        |
| AC005251.3    | 0,59    | -0,18 | 1,60694  | -0,114   | 0,909239 | NA        |
| RP11-553K8.3  | 27,43   | -0,17 | 1,458712 | -0,11393 | 0,90929  | 0,9747318 |
| SCAF11        | 2588,94 | 0,02  | 0,210272 | 0,113927 | 0,909296 | 0,9747318 |
| GID8          | 582,71  | 0,05  | 0,45477  | 0,113794 | 0,909401 | 0,9747891 |
| RP5-940J5.8   | 6,99    | -0,11 | 0,980584 | -0,11353 | 0,909614 | 0,9748247 |
| WDR19         | 173,71  | -0,08 | 0,717579 | -0,11348 | 0,909649 | 0,9748247 |
| RP11-807C20.2 | 36,99   | -0,14 | 1,19624  | -0,11346 | 0,909662 | 0,9748247 |
| UBA1          | 1245,05 | 0,03  | 0,28049  | 0,113436 | 0,909685 | 0,9748247 |
| TCEA1         | 814,01  | -0,04 | 0,325999 | -0,11342 | 0,909697 | 0,9748247 |
| RN7SL620P     | 0,34    | 0,29  | 2,516852 | 0,113383 | 0,909727 | NA        |
| RP11-844P9.6  | 0,02    | -0,42 | 3,748196 | -0,11324 | 0,909844 | NA        |
| RP11-108M9.1  | 0,13    | 0,42  | 3,748196 | 0,113052 | 0,909989 | NA        |
| RP13-638C3.2  | 0,16    | -0,42 | 3,748196 | -0,113   | 0,91003  | NA        |
| RP1-76B20.11  | 1,46    | -0,37 | 3,288615 | -0,113   | 0,910034 | NA        |
| RP11-465N4.5  | 0,30    | -0,29 | 2,56992  | -0,11286 | 0,910144 | NA        |
| ASB11         | 1,72    | 0,15  | 1,327634 | 0,112855 | 0,910146 | NA        |
| TRNP1         | 3,81    | 0,24  | 2,154408 | 0,112821 | 0,910172 | 0,9752343 |
| RP11-213H15.3 | 117,21  | 0,13  | 1,191104 | 0,112807 | 0,910184 | 0,9752343 |
| ZNF316        | 26,54   | 0,15  | 1,331543 | 0,112712 | 0,910259 | 0,9752584 |
| RP11-159G9.4  | 0,15    | -0,42 | 3,748196 | -0,11269 | 0,910276 | NA        |
| HAGLR         | 0,08    | -0,42 | 3,748196 | -0,11267 | 0,910294 | NA        |
| AC000111.6    | 0,15    | 0,42  | 3,748196 | 0,112659 | 0,910301 | NA        |
| RP11-475D10.4 | 5,04    | -0,10 | 0,908278 | -0,11263 | 0,910328 | 0,9752762 |
| AP1M1         | 669,30  | 0,07  | 0,603559 | 0,112411 | 0,910497 | 0,9753134 |
| RP11-932O9.8  | 0,14    | 0,42  | 3,748196 | 0,112262 | 0,910616 | NA        |
| RP3-425C14.4  | 108,60  | -0,11 | 0,937267 | -0,11221 | 0,910653 | 0,9753134 |
| IFIT5         | 157,80  | 0,11  | 0,975365 | 0,112166 | 0,910692 | 0,9753134 |
| TTC28-AS1     | 69,81   | -0,08 | 0,738294 | -0,11213 | 0,910723 | 0,9753134 |



|               |         |       |          |          |          |           |
|---------------|---------|-------|----------|----------|----------|-----------|
| AC015849.15   | 4,69    | -0,13 | 1,191014 | -0,11211 | 0,91074  | 0,9753134 |
| CAPZA1        | 5292,61 | -0,03 | 0,233001 | -0,1121  | 0,910744 | 0,9753134 |
| RBM33         | 960,16  | -0,05 | 0,418469 | -0,11201 | 0,910813 | 0,9753134 |
| CTD-2260A17.3 | 0,17    | 0,42  | 3,748196 | 0,111978 | 0,910841 | NA        |
| MAGED1        | 130,47  | -0,09 | 0,846246 | -0,11185 | 0,910944 | 0,9753134 |
| KRCC1         | 294,41  | 0,09  | 0,777924 | 0,111825 | 0,910962 | 0,9753134 |
| RP1-69E11.3   | 0,24    | 0,42  | 3,748196 | 0,111781 | 0,910997 | NA        |
| TRNAU1AP      | 330,45  | 0,07  | 0,63535  | 0,111724 | 0,911042 | 0,9753134 |
| RP11-780K2.1  | 0,13    | -0,42 | 3,748196 | -0,11164 | 0,911108 | NA        |
| ALDH3B2       | 0,09    | -0,38 | 3,44213  | -0,11159 | 0,911151 | NA        |
| TRA2B         | 2202,72 | 0,03  | 0,231937 | 0,111582 | 0,911155 | 0,9753134 |
| ZNF8          | 140,32  | 0,07  | 0,605623 | 0,111561 | 0,911172 | 0,9753134 |
| XDH           | 24,42   | -0,10 | 0,869455 | -0,11155 | 0,911178 | 0,9753134 |
| ABCA2         | 28,74   | -0,15 | 1,343893 | -0,11154 | 0,911186 | 0,9753134 |
| SARDH         | 3,55    | 0,11  | 0,956561 | 0,111538 | 0,91119  | NA        |
| DDX31         | 89,23   | -0,13 | 1,122575 | -0,11152 | 0,911201 | 0,9753134 |
| CAMKMT        | 36,32   | -0,08 | 0,732584 | -0,11152 | 0,911204 | 0,9753134 |
| C22orf34      | 61,37   | -0,14 | 1,212488 | -0,1114  | 0,911303 | 0,9753134 |
| PSMB3         | 3185,07 | -0,02 | 0,185026 | -0,11134 | 0,911344 | 0,9753134 |
| RP11-752G15.9 | 10,10   | 0,17  | 1,498128 | 0,111325 | 0,911358 | 0,9753134 |
| CTB-45I8.1    | 0,85    | -0,22 | 2,018656 | -0,11127 | 0,911402 | NA        |
| RF00602       | 0,18    | 0,42  | 3,748196 | 0,111261 | 0,911409 | NA        |
| MANSC4        | 0,15    | 0,42  | 3,748196 | 0,111249 | 0,911419 | NA        |
| FYN           | 1248,42 | -0,03 | 0,261439 | -0,11105 | 0,911575 | 0,9754672 |
| MIR2278       | 0,17    | 0,42  | 3,748196 | 0,111011 | 0,911608 | NA        |
| MICALL2       | 7,57    | 0,21  | 1,896822 | 0,110972 | 0,911639 | 0,9754672 |
| PIPSL         | 4,10    | -0,15 | 1,36883  | -0,11095 | 0,911659 | 0,9754672 |
| RP11-438N5.2  | 0,12    | 0,42  | 3,748196 | 0,110898 | 0,911697 | NA        |
| RP11-161M6.6  | 0,15    | 0,42  | 3,748196 | 0,110846 | 0,911739 | NA        |
| RNU6-1019P    | 0,11    | 0,42  | 3,748196 | 0,110842 | 0,911742 | NA        |
| RP11-536N17.1 | 0,17    | 0,42  | 3,748196 | 0,110829 | 0,911752 | NA        |
| RP11-763F8.1  | 0,14    | 0,42  | 3,748196 | 0,110776 | 0,911794 | NA        |
| FAM127C       | 0,11    | 0,42  | 3,748196 | 0,110748 | 0,911816 | NA        |
| ALX4          | 0,12    | 0,42  | 3,748196 | 0,110743 | 0,91182  | NA        |
| ACPT          | 0,16    | 0,42  | 3,748196 | 0,110739 | 0,911823 | NA        |
| ACIN1         | 772,98  | 0,05  | 0,422638 | 0,110726 | 0,911834 | 0,9755549 |
| RP11-63K6.1   | 0,17    | 0,42  | 3,748196 | 0,11072  | 0,911838 | NA        |
| RSRP1         | 1665,14 | -0,03 | 0,29891  | -0,11071 | 0,911846 | 0,9755549 |
| RP11-218M11.3 | 0,11    | 0,41  | 3,748196 | 0,1107   | 0,911854 | NA        |
| RP13-503K1.1  | 0,21    | 0,41  | 3,748196 | 0,110587 | 0,911944 | NA        |
| AC092839.4    | 2,34    | -0,33 | 2,982798 | -0,11057 | 0,911955 | NA        |
| RF00411       | 0,17    | 0,41  | 3,748196 | 0,11057  | 0,911957 | NA        |
| RP11-22L13.1  | 0,22    | 0,41  | 3,748196 | 0,110506 | 0,912008 | NA        |
| RP11-697H9.5  | 0,11    | 0,41  | 3,748196 | 0,110485 | 0,912025 | NA        |
| RP5-899B16.2  | 0,11    | 0,41  | 3,748196 | 0,110472 | 0,912035 | NA        |
| TMEM101       | 353,11  | 0,09  | 0,806979 | 0,110423 | 0,912074 | 0,9757119 |
| LIMS1-AS1     | 0,11    | 0,41  | 3,748196 | 0,110419 | 0,912077 | NA        |
| RP3-442M11.1  | 0,16    | 0,41  | 3,748196 | 0,110418 | 0,912078 | NA        |
| FAM83A        | 3,73    | -0,17 | 1,570245 | -0,1104  | 0,91209  | NA        |
| PSPC1         | 543,91  | 0,05  | 0,408295 | 0,110393 | 0,912098 | 0,9757119 |

|               |         |       |          |          |          |           |
|---------------|---------|-------|----------|----------|----------|-----------|
| AC107982.4    | 0,14    | 0,41  | 3,748196 | 0,110392 | 0,912098 | NA        |
| ACHE          | 1,07    | 0,35  | 3,203162 | 0,11036  | 0,912124 | NA        |
| EPX           | 0,15    | 0,41  | 3,748196 | 0,11034  | 0,91214  | NA        |
| RP11-626K17.5 | 0,16    | 0,41  | 3,748196 | 0,110339 | 0,912141 | NA        |
| RP11-875O11.5 | 0,15    | 0,41  | 3,748196 | 0,110327 | 0,91215  | NA        |
| RP11-57H14.5  | 0,15    | 0,41  | 3,748196 | 0,110324 | 0,912152 | NA        |
| RP11-264I13.2 | 7,83    | 0,11  | 0,97586  | 0,110279 | 0,912188 | 0,9757523 |
| RXFP1         | 0,18    | 0,41  | 3,74664  | 0,110219 | 0,912236 | NA        |
| RN7SL52P      | 0,87    | 0,16  | 1,430986 | 0,110216 | 0,912238 | NA        |
| RP3-368A4.3   | 0,19    | 0,41  | 3,748196 | 0,11019  | 0,912259 | NA        |
| CTD-2311B13.2 | 0,17    | 0,41  | 3,748196 | 0,110189 | 0,912259 | NA        |
| RNA5SP428     | 0,24    | 0,41  | 3,748196 | 0,110179 | 0,912268 | NA        |
| AC013267.1    | 0,16    | 0,41  | 3,748196 | 0,11015  | 0,91229  | NA        |
| RP11-26L20.3  | 0,42    | -0,41 | 3,735192 | -0,11009 | 0,912337 | NA        |
| RP11-432M8.22 | 0,16    | 0,41  | 3,748196 | 0,110071 | 0,912353 | NA        |
| BMX           | 0,02    | -0,41 | 3,748196 | -0,10999 | 0,91242  | NA        |
| NAP1L3        | 0,59    | 0,40  | 3,615436 | 0,109965 | 0,912437 | NA        |
| RP11-401P9.7  | 24,92   | -0,12 | 1,046368 | -0,10996 | 0,912439 | 0,9758263 |
| CTD-2309H9.3  | 1,83    | -0,13 | 1,187329 | -0,10995 | 0,912452 | NA        |
| RP11-184I16.4 | 11,49   | -0,13 | 1,176872 | -0,10993 | 0,912464 | 0,9758263 |
| LINC00304     | 12,71   | -0,11 | 1,046402 | -0,10987 | 0,91251  | 0,9758263 |
| DMGDH         | 8,39    | 0,14  | 1,27528  | 0,109852 | 0,912527 | 0,9758263 |
| AC005067.4    | 0,56    | 0,41  | 3,74267  | 0,109787 | 0,912578 | NA        |
| NUDT18        | 74,25   | -0,16 | 1,452272 | -0,10969 | 0,912657 | 0,9758263 |
| FAM122B       | 246,37  | 0,09  | 0,853745 | 0,10966  | 0,912679 | 0,9758263 |
| RP11-164P12.5 | 0,30    | 0,28  | 2,520072 | 0,109605 | 0,912723 | NA        |
| RPS18P12      | 0,74    | 0,17  | 1,514851 | 0,109589 | 0,912735 | NA        |
| RP11-333E1.1  | 58,15   | 0,08  | 0,694802 | 0,109581 | 0,912742 | 0,9758263 |
| RNU6-310P     | 0,47    | 0,26  | 2,367044 | 0,109485 | 0,912818 | NA        |
| CTA-29F11.1   | 345,55  | -0,07 | 0,651601 | -0,10943 | 0,912864 | 0,9758263 |
| LHX1          | 0,10    | -0,41 | 3,748196 | -0,10942 | 0,912867 | NA        |
| ZDHHC8        | 65,90   | 0,09  | 0,780052 | 0,109417 | 0,912872 | 0,9758263 |
| RP11-418J17.1 | 97,87   | -0,09 | 0,798974 | -0,10941 | 0,912878 | 0,9758263 |
| CTD-2031P19.5 | 0,21    | 0,41  | 3,748196 | 0,109409 | 0,912878 | NA        |
| ADGRL3        | 4,07    | -0,29 | 2,661911 | -0,1094  | 0,912888 | 0,9758263 |
| LCT           | 0,33    | -0,41 | 3,748196 | -0,10935 | 0,912923 | NA        |
| ARL5C         | 0,79    | -0,20 | 1,800423 | -0,10934 | 0,912933 | NA        |
| GCC2-AS1      | 15,89   | 0,18  | 1,654396 | 0,109316 | 0,912952 | 0,9758263 |
| THOC2         | 1124,15 | 0,03  | 0,29275  | 0,109199 | 0,913044 | 0,9758263 |
| RP11-340I6.7  | 4,93    | -0,16 | 1,448833 | -0,10917 | 0,913069 | 0,9758263 |
| LRCH3         | 248,73  | -0,05 | 0,501918 | -0,10914 | 0,913094 | 0,9758263 |
| PSMG4         | 143,08  | -0,05 | 0,446513 | -0,10913 | 0,913097 | 0,9758263 |
| RP11-507K13.6 | 0,11    | 0,41  | 3,748196 | 0,109087 | 0,913133 | NA        |
| MAPT          | 6,19    | 0,11  | 0,965884 | 0,108935 | 0,913254 | 0,9758481 |
| SSU72         | 1256,17 | -0,04 | 0,364281 | -0,10889 | 0,913293 | 0,9758481 |
| RP11-514P8.11 | 30,74   | -0,23 | 2,097134 | -0,10886 | 0,913315 | 0,9758481 |
| RP11-178H8.7  | 0,20    | -0,31 | 2,822537 | -0,10885 | 0,913318 | NA        |
| NOL6          | 94,69   | -0,10 | 0,955127 | -0,10884 | 0,913327 | 0,9758481 |
| RN7SL735P     | 0,23    | 0,41  | 3,748196 | 0,108727 | 0,913419 | NA        |
| PIGP          | 199,16  | 0,08  | 0,717659 | 0,108687 | 0,913451 | 0,975878  |

|               |        |       |          |          |          |           |
|---------------|--------|-------|----------|----------|----------|-----------|
| RP11-243M5.2  | 2,63   | 0,16  | 1,485404 | 0,108536 | 0,913571 | NA        |
| AC006004.1    | 11,87  | -0,12 | 1,143636 | -0,10843 | 0,913653 | 0,975878  |
| BIK           | 64,02  | 0,16  | 1,47138  | 0,108431 | 0,913654 | 0,975878  |
| CTD-2013N17.7 | 20,70  | -0,07 | 0,661189 | -0,10842 | 0,913661 | 0,975878  |
| RP11-542H15.1 | 56,19  | -0,10 | 0,909958 | -0,10834 | 0,913727 | 0,975878  |
| CTC-242N15.1  | 239,74 | 0,04  | 0,408223 | 0,108336 | 0,913729 | 0,975878  |
| RP11-390F4.3  | 23,22  | -0,07 | 0,682917 | -0,10822 | 0,91382  | 0,975878  |
| RP1-45P21.3   | 22,50  | 0,15  | 1,421873 | 0,108186 | 0,913848 | 0,975878  |
| RP4-680D5.3   | 0,15   | -0,31 | 2,847267 | -0,10817 | 0,913861 | NA        |
| AP001816.1    | 18,37  | 0,19  | 1,766852 | 0,108125 | 0,913897 | 0,975878  |
| IL1RAPL1      | 0,31   | 0,27  | 2,502681 | 0,108121 | 0,913899 | NA        |
| AP2A2         | 217,80 | 0,06  | 0,549973 | 0,108071 | 0,913939 | 0,975878  |
| KB-1396H2.2   | 0,17   | -0,31 | 2,836477 | -0,10807 | 0,91394  | NA        |
| AP001442.2    | 13,56  | 0,09  | 0,836554 | 0,10803  | 0,913972 | 0,975878  |
| RP11-91G21.1  | 11,87  | 0,29  | 2,690205 | 0,10795  | 0,914035 | 0,975878  |
| USP5          | 126,62 | 0,07  | 0,626481 | 0,107948 | 0,914037 | 0,975878  |
| RP11-70C1.1   | 14,57  | 0,14  | 1,268787 | 0,107825 | 0,914135 | 0,975927  |
| RP11-568G11.4 | 0,14   | 0,40  | 3,748196 | 0,107765 | 0,914182 | NA        |
| RP11-354K4.1  | 3,60   | 0,13  | 1,195579 | 0,107716 | 0,914221 | NA        |
| RP11-843B15.2 | 7,23   | 0,15  | 1,419243 | 0,107696 | 0,914236 | 0,9759327 |
| SLC15A4       | 181,63 | -0,07 | 0,656615 | -0,10769 | 0,914245 | 0,9759327 |
| SMPD2         | 87,94  | -0,09 | 0,803479 | -0,10762 | 0,914301 | 0,9759358 |
| SIGLECL1      | 0,17   | 0,40  | 3,747795 | 0,107596 | 0,914316 | NA        |
| FOXD2-AS1     | 0,51   | 0,34  | 3,126329 | 0,107575 | 0,914333 | NA        |
| RP11-447H19.1 | 0,14   | -0,31 | 2,852544 | -0,10739 | 0,914483 | NA        |
| RP11-473C18.3 | 0,14   | 0,40  | 3,748196 | 0,107336 | 0,914522 | NA        |
| RTP4          | 55,76  | 0,20  | 1,894671 | 0,107326 | 0,91453  | 0,9760938 |
| CLPB          | 529,94 | -0,08 | 0,714334 | -0,1073  | 0,914553 | 0,9760938 |
| RP5-1103G7.4  | 1,55   | -0,29 | 2,713965 | -0,10728 | 0,914568 | NA        |
| STC1          | 1,95   | 0,10  | 0,967582 | 0,107269 | 0,914576 | NA        |
| RN7SL700P     | 0,51   | 0,39  | 3,654458 | 0,107251 | 0,91459  | NA        |
| CHRD2         | 0,07   | -0,37 | 3,491767 | -0,10715 | 0,91467  | NA        |
| RNA5P146      | 0,81   | -0,34 | 3,175592 | -0,10705 | 0,914745 | NA        |
| RP11-346L13.3 | 0,16   | 0,36  | 3,380073 | 0,107013 | 0,914779 | NA        |
| RP11-162A12.2 | 0,91   | -0,17 | 1,621545 | -0,10693 | 0,914848 | NA        |
| RP11-787D18.2 | 1,53   | -0,28 | 2,642696 | -0,10672 | 0,915012 | NA        |
| CTD-2007H13.3 | 3,14   | 0,16  | 1,502704 | 0,106627 | 0,915085 | NA        |
| RP11-16F15.2  | 0,76   | -0,13 | 1,238315 | -0,10661 | 0,915102 | NA        |
| DIXDC1        | 28,57  | -0,10 | 0,908712 | -0,10653 | 0,915159 | 0,9764521 |
| MRPL10        | 330,34 | 0,07  | 0,699321 | 0,106493 | 0,915191 | 0,9764521 |
| IFNAR2        | 317,50 | -0,07 | 0,637279 | -0,10647 | 0,915212 | 0,9764521 |
| RP11-1398P2.1 | 45,63  | -0,18 | 1,687061 | -0,10644 | 0,915236 | 0,9764521 |
| RP11-345J4.4  | 9,17   | -0,16 | 1,532642 | -0,10643 | 0,915241 | 0,9764521 |
| RP11-347C12.4 | 9,17   | -0,16 | 1,532642 | -0,10643 | 0,915241 | 0,9764521 |
| TAF7          | 933,16 | -0,04 | 0,397749 | -0,10635 | 0,915303 | 0,9764521 |
| CHN2          | 519,00 | -0,05 | 0,482123 | -0,1063  | 0,915346 | 0,9764521 |
| RP1-179N16.3  | 97,14  | -0,13 | 1,230939 | -0,10622 | 0,915405 | 0,9764521 |
| RIN1          | 52,72  | 0,09  | 0,86169  | 0,106145 | 0,915467 | 0,9764521 |
| PSTPIP2       | 535,72 | -0,05 | 0,454306 | -0,10613 | 0,915478 | 0,9764521 |
| RP11-430B1.1  | 1,31   | -0,17 | 1,648335 | -0,10609 | 0,915514 | NA        |

|               |        |       |          |          |          |           |
|---------------|--------|-------|----------|----------|----------|-----------|
| RN7SL39P      | 0,17   | -0,30 | 2,833833 | -0,10606 | 0,915531 | NA        |
| RN7SL156P     | 6,69   | 0,08  | 0,750343 | 0,10604  | 0,915551 | 0,9764521 |
| F8A1          | 194,02 | 0,06  | 0,528673 | 0,106014 | 0,915571 | 0,9764521 |
| CDC6          | 18,84  | 0,14  | 1,326275 | 0,10562  | 0,915884 | 0,9767189 |
| NME8          | 126,67 | -0,08 | 0,720465 | -0,10556 | 0,915932 | 0,9767189 |
| CC2D2B        | 92,53  | 0,08  | 0,795745 | 0,1055   | 0,915979 | 0,9767189 |
| CLCA3P        | 0,88   | 0,39  | 3,711372 | 0,10543  | 0,916034 | NA        |
| HPS4          | 242,65 | -0,06 | 0,605674 | -0,1054  | 0,916062 | 0,976751  |
| RP1-46F2.3    | 3,11   | -0,16 | 1,524097 | -0,10524 | 0,916185 | NA        |
| LBR           | 986,60 | 0,04  | 0,366933 | 0,105179 | 0,916233 | 0,9768713 |
| PRDM9         | 4,83   | 0,13  | 1,221958 | 0,105121 | 0,91628  | 0,9768713 |
| ZNF493        | 150,74 | -0,06 | 0,560044 | -0,10497 | 0,916398 | 0,9769411 |
| CWC22         | 385,12 | -0,07 | 0,659987 | -0,10489 | 0,916463 | 0,9769548 |
| FAM223A       | 15,57  | 0,14  | 1,315101 | 0,104773 | 0,916556 | 0,976998  |
| RP11-127L20.6 | 2,06   | 0,26  | 2,444222 | 0,104752 | 0,916573 | NA        |
| QPCT          | 272,96 | 0,09  | 0,907626 | 0,104535 | 0,916745 | 0,9770112 |
| DNAH10OS      | 20,24  | 0,08  | 0,787259 | 0,104482 | 0,916787 | 0,9770112 |
| CCDC160       | 11,02  | -0,13 | 1,209028 | -0,10442 | 0,916835 | 0,9770112 |
| CTD-2336O2.1  | 99,04  | -0,06 | 0,593251 | -0,10442 | 0,91684  | 0,9770112 |
| RP11-81H3.2   | 27,14  | 0,12  | 1,136545 | 0,104407 | 0,916846 | 0,9770112 |
| ZC3H4         | 304,46 | -0,06 | 0,539418 | -0,10433 | 0,916905 | 0,9770112 |
| RP11-65E22.2  | 0,82   | -0,25 | 2,414462 | -0,10428 | 0,916944 | NA        |
| CDH1          | 35,71  | 0,06  | 0,613033 | 0,104239 | 0,91698  | 0,9770112 |
| RP11-107I14.4 | 7,19   | -0,10 | 0,964401 | -0,1042  | 0,917008 | 0,9770112 |
| MTURN         | 180,99 | -0,11 | 1,01687  | -0,10414 | 0,917062 | 0,9770112 |
| ASB3          | 234,60 | -0,05 | 0,502987 | -0,10399 | 0,917177 | 0,9770112 |
| SPEF2         | 61,82  | 0,09  | 0,899277 | 0,103986 | 0,917181 | 0,9770112 |
| LCA5          | 8,16   | 0,27  | 2,611245 | 0,103907 | 0,917243 | 0,9770112 |
| FAM167A-AS1   | 0,89   | 0,19  | 1,868407 | 0,103902 | 0,917247 | NA        |
| PRPF40B       | 5,46   | 0,18  | 1,749733 | 0,103897 | 0,917251 | 0,9770112 |
| MRPL27        | 439,86 | -0,07 | 0,632574 | -0,10352 | 0,917552 | 0,9771419 |
| KALP          | 0,21   | -0,35 | 3,351394 | -0,10351 | 0,917558 | NA        |
| PRICKLE3      | 20,64  | -0,09 | 0,884752 | -0,1035  | 0,917564 | 0,9771419 |
| RP11-162G10.5 | 59,30  | -0,12 | 1,203802 | -0,1035  | 0,917566 | 0,9771419 |
| GNG10         | 384,18 | -0,07 | 0,688378 | -0,10348 | 0,917584 | 0,9771419 |
| CNTN5         | 0,01   | -0,39 | 3,740623 | -0,10342 | 0,91763  | NA        |
| C7orf43       | 85,63  | 0,07  | 0,680652 | 0,103381 | 0,917661 | 0,9771682 |
| RP13-16H11.8  | 12,36  | -0,09 | 0,883308 | -0,10319 | 0,917815 | 0,9772766 |
| RN7SL361P     | 1,08   | 0,17  | 1,616371 | 0,103136 | 0,917855 | NA        |
| RP11-441O15.3 | 1,56   | -0,13 | 1,251225 | -0,10308 | 0,917897 | NA        |
| RP11-473M20.9 | 192,27 | -0,08 | 0,808191 | -0,10304 | 0,917928 | 0,9773408 |
| KCNJ11        | 2,64   | -0,13 | 1,231383 | -0,10299 | 0,917974 | NA        |
| EDEM2         | 351,00 | 0,07  | 0,695355 | 0,10295  | 0,918003 | 0,9773644 |
| GNAL          | 26,59  | -0,12 | 1,175217 | -0,10281 | 0,918113 | 0,9774253 |
| CTD-2382E5.6  | 0,53   | 0,37  | 3,617407 | 0,102811 | 0,918113 | NA        |
| SLC24A5       | 0,33   | 0,39  | 3,748196 | 0,102773 | 0,918143 | NA        |
| RP5-1024N4.2  | 32,59  | -0,10 | 0,957718 | -0,10268 | 0,918216 | 0,9774641 |
| SELENBP1      | 4,64   | 0,12  | 1,207434 | 0,102613 | 0,91827  | 0,9774641 |
| RP3-403A15.5  | 6,95   | 0,16  | 1,597992 | 0,102567 | 0,918307 | 0,9774641 |
| RP11-148B18.1 | 2,75   | 0,14  | 1,346117 | 0,102534 | 0,918333 | NA        |

|                |        |       |          |          |          |           |
|----------------|--------|-------|----------|----------|----------|-----------|
| LINC01230      | 1,16   | 0,25  | 2,395666 | 0,102531 | 0,918335 | NA        |
| RP11-527E14.1  | 3,48   | -0,28 | 2,777282 | -0,10231 | 0,918514 | NA        |
| RF02217        | 0,70   | 0,22  | 2,165136 | 0,102295 | 0,918523 | NA        |
| USP24          | 835,54 | -0,05 | 0,515859 | -0,10221 | 0,918587 | 0,9776912 |
| AC092684.1     | 7,97   | 0,21  | 2,060888 | 0,102166 | 0,918625 | 0,9776912 |
| RP11-26N15.2   | 0,66   | -0,25 | 2,403535 | -0,10214 | 0,918646 | NA        |
| CTSF           | 3,01   | -0,26 | 2,561356 | -0,1021  | 0,918678 | NA        |
| RP11-357N13.1  | 0,32   | -0,30 | 2,974598 | -0,10198 | 0,91877  | NA        |
| PRPH2          | 3,97   | -0,35 | 3,444893 | -0,10183 | 0,918893 | 0,9777053 |
| RP11-160H22.1  | 7,64   | 0,10  | 0,988998 | 0,101802 | 0,918914 | 0,9777053 |
| ABHD10         | 242,21 | 0,07  | 0,68636  | 0,101795 | 0,91892  | 0,9777053 |
| ALYREF         | 139,01 | -0,07 | 0,664558 | -0,10177 | 0,918942 | 0,9777053 |
| BAZ2A          | 631,76 | 0,05  | 0,467675 | 0,101762 | 0,918945 | 0,9777053 |
| TAPBPL         | 309,17 | -0,05 | 0,515925 | -0,10175 | 0,918954 | 0,9777053 |
| PFKM           | 57,63  | -0,08 | 0,794896 | -0,10166 | 0,91903  | 0,9777304 |
| RP11-44N12.2   | 0,76   | -0,19 | 1,82757  | -0,10159 | 0,91908  | NA        |
| TPRKB          | 243,14 | 0,06  | 0,575587 | 0,101453 | 0,919191 | 0,9777886 |
| SUV39H1        | 5,85   | -0,16 | 1,616529 | -0,10145 | 0,919192 | 0,9777886 |
| SNORA20        | 1,43   | -0,13 | 1,263541 | -0,10141 | 0,919225 | NA        |
| DCP2           | 989,93 | 0,06  | 0,577131 | 0,101388 | 0,919242 | 0,9777886 |
| DDX53          | 1,62   | 0,25  | 2,426689 | 0,101297 | 0,919314 | NA        |
| RP11-1212A22.1 | 17,62  | -0,25 | 2,484233 | -0,10129 | 0,919317 | 0,9777927 |
| RP5-1121H13.3  | 0,49   | -0,21 | 2,081455 | -0,10127 | 0,919334 | NA        |
| TSR1           | 371,29 | 0,06  | 0,641003 | 0,101251 | 0,919351 | 0,9777927 |
| RP11-686D22.3  | 0,35   | 0,29  | 2,91158  | 0,101246 | 0,919355 | NA        |
| AC007131.1     | 1,08   | -0,21 | 2,069407 | -0,10123 | 0,919365 | NA        |
| RP11-1127D7.1  | 0,59   | -0,21 | 2,103745 | -0,10118 | 0,919405 | NA        |
| ZNF705D        | 0,13   | 0,38  | 3,748196 | 0,101159 | 0,919424 | NA        |
| IER5L          | 7,83   | -0,15 | 1,485053 | -0,10099 | 0,919557 | 0,9778385 |
| STK40          | 360,23 | -0,05 | 0,483209 | -0,10097 | 0,919572 | 0,9778385 |
| ETV1           | 2,24   | -0,17 | 1,709122 | -0,10082 | 0,91969  | NA        |
| GSR            | 299,95 | -0,06 | 0,569516 | -0,10079 | 0,919715 | 0,9778385 |
| RP11-43D4.3    | 49,51  | -0,07 | 0,717943 | -0,10077 | 0,919731 | 0,9778385 |
| SCARNA2        | 2,40   | 0,21  | 2,091183 | 0,100767 | 0,919736 | NA        |
| NAP1L4         | 763,07 | -0,04 | 0,380404 | -0,10072 | 0,919775 | 0,9778385 |
| JMY            | 255,49 | -0,06 | 0,645085 | -0,10066 | 0,919822 | 0,9778385 |
| RTN2           | 4,63   | 0,13  | 1,309335 | 0,100549 | 0,919908 | 0,9778385 |
| AC006946.15    | 0,18   | 0,38  | 3,748196 | 0,100537 | 0,919918 | NA        |
| CTC-513N18.6   | 3,28   | 0,15  | 1,469986 | 0,100498 | 0,919949 | NA        |
| NTSR1          | 0,33   | 0,38  | 3,74809  | 0,100487 | 0,919957 | NA        |
| LINC00261      | 1,67   | 0,17  | 1,736626 | 0,100358 | 0,92006  | NA        |
| RP11-386I23.1  | 77,73  | -0,08 | 0,809582 | -0,10035 | 0,920065 | 0,9778385 |
| TMEM167B       | 484,61 | 0,04  | 0,38574  | 0,100304 | 0,920103 | 0,9778385 |
| RP5-1125A11.1  | 78,95  | -0,09 | 0,916409 | -0,10022 | 0,920171 | 0,9778385 |
| MIEN1          | 713,56 | 0,04  | 0,362585 | 0,100136 | 0,920237 | 0,9778385 |
| C10orf55       | 31,35  | 0,10  | 1,022529 | 0,100103 | 0,920263 | 0,9778385 |
| RP11-519G16.2  | 1,24   | 0,21  | 2,098592 | 0,100095 | 0,920269 | NA        |
| MYO7A          | 9,17   | -0,12 | 1,17301  | -0,09998 | 0,92036  | 0,9778385 |
| URI1           | 437,69 | -0,06 | 0,589577 | -0,09996 | 0,92038  | 0,9778385 |
| RP4-613B23.4   | 0,37   | -0,35 | 3,518433 | -0,09985 | 0,920464 | NA        |

|                |         |       |          |          |          |           |
|----------------|---------|-------|----------|----------|----------|-----------|
| HS3ST3B1       | 5,97    | 0,08  | 0,833308 | 0,099836 | 0,920475 | 0,9778385 |
| RP1-177P22.1   | 8,37    | 0,16  | 1,649194 | 0,099739 | 0,920551 | 0,9778385 |
| AC092597.3     | 1,68    | -0,20 | 1,987506 | -0,09973 | 0,920556 | NA        |
| RP11-506M13.3  | 26,90   | 0,09  | 0,889525 | 0,099693 | 0,920588 | 0,9778385 |
| RP5-968J1.1    | 1,02    | -0,28 | 2,849208 | -0,09962 | 0,920643 | NA        |
| SSBP3          | 256,28  | -0,04 | 0,421356 | -0,09958 | 0,920679 | 0,9778385 |
| NOMO2          | 317,28  | -0,06 | 0,569464 | -0,09955 | 0,920702 | 0,9778385 |
| COMMD7         | 787,06  | -0,05 | 0,527936 | -0,09955 | 0,920705 | 0,9778385 |
| AC093381.2     | 2,40    | -0,20 | 1,99503  | -0,09947 | 0,920763 | NA        |
| RP11-314P15.2  | 2,67    | 0,27  | 2,727505 | 0,099426 | 0,9208   | NA        |
| WBP1L          | 604,98  | 0,06  | 0,565092 | 0,099364 | 0,920849 | 0,9778385 |
| RP13-228J13.5  | 6,29    | 0,12  | 1,257884 | 0,099358 | 0,920854 | 0,9778385 |
| TNFRSF17       | 1,26    | -0,14 | 1,364557 | -0,09936 | 0,920855 | NA        |
| PHKG1          | 15,50   | -0,11 | 1,108102 | -0,0993  | 0,920903 | 0,9778385 |
| CTC-573N18.1   | 12,96   | -0,16 | 1,587071 | -0,09928 | 0,920916 | 0,9778385 |
| RN7SL336P      | 13,74   | 0,18  | 1,840891 | 0,099267 | 0,920926 | 0,9778385 |
| AC062017.1     | 5,10    | 0,18  | 1,788892 | 0,099257 | 0,920935 | 0,9778385 |
| ASF1B          | 1,20    | -0,19 | 1,901541 | -0,09924 | 0,920944 | NA        |
| RP5-1171I10.4  | 87,00   | 0,07  | 0,732538 | 0,099191 | 0,920986 | 0,9778385 |
| GNA11          | 40,07   | -0,10 | 1,05238  | -0,09916 | 0,921008 | 0,9778385 |
| SLC2A1         | 234,47  | 0,07  | 0,702347 | 0,099094 | 0,921064 | 0,9778385 |
| HTR3B          | 12,64   | -0,07 | 0,736599 | -0,09909 | 0,921065 | 0,9778385 |
| C20orf194      | 394,64  | 0,05  | 0,466472 | 0,099081 | 0,921074 | 0,9778385 |
| ZFAND2B        | 363,73  | 0,05  | 0,476116 | 0,099045 | 0,921103 | 0,9778385 |
| STKLD1         | 20,96   | 0,06  | 0,566491 | 0,099012 | 0,921129 | 0,9778385 |
| RP11-727F15.11 | 0,69    | 0,31  | 3,15615  | 0,098923 | 0,921199 | NA        |
| GLTSCR1L       | 194,65  | -0,08 | 0,771037 | -0,09882 | 0,92128  | 0,977943  |
| ERCC6          | 225,41  | -0,08 | 0,770818 | -0,09868 | 0,921395 | 0,977943  |
| USP14          | 471,13  | 0,05  | 0,463092 | 0,098618 | 0,921441 | 0,977943  |
| MBIP           | 146,42  | -0,09 | 0,957383 | -0,09857 | 0,921482 | 0,977943  |
| METTL15        | 109,56  | -0,07 | 0,759052 | -0,09856 | 0,92149  | 0,977943  |
| SNHG10         | 39,53   | -0,10 | 1,030637 | -0,09827 | 0,921722 | 0,9780016 |
| AC005355.2     | 3,87    | -0,08 | 0,834266 | -0,09823 | 0,921749 | 0,9780016 |
| CTD-3128G10.7  | 0,92    | -0,17 | 1,742955 | -0,09817 | 0,921797 | NA        |
| EMP1           | 441,55  | -0,05 | 0,514441 | -0,09817 | 0,921801 | 0,9780016 |
| DNAH17         | 87,78   | -0,12 | 1,221732 | -0,09814 | 0,921818 | 0,9780016 |
| DENND1C        | 139,13  | -0,08 | 0,810636 | -0,09811 | 0,921844 | 0,9780016 |
| PANK2          | 343,13  | -0,05 | 0,540858 | -0,09809 | 0,92186  | 0,9780016 |
| RN7SL277P      | 0,43    | -0,25 | 2,583089 | -0,09801 | 0,921927 | NA        |
| SERPINB13      | 0,43    | -0,29 | 2,948536 | -0,09787 | 0,922032 | NA        |
| RP11-168O22.1  | 1,07    | 0,19  | 1,950358 | 0,097846 | 0,922055 | NA        |
| CTD-2290C23.1  | 2,90    | 0,08  | 0,799386 | 0,097841 | 0,922059 | NA        |
| RP11-12A16.3   | 26,64   | 0,08  | 0,821191 | 0,097757 | 0,922126 | 0,9780317 |
| EML1           | 23,59   | 0,07  | 0,676129 | 0,09772  | 0,922154 | 0,9780317 |
| ADAMTSL3       | 98,73   | -0,06 | 0,568647 | -0,09768 | 0,922183 | 0,9780317 |
| MAGT1          | 509,91  | -0,04 | 0,414079 | -0,09767 | 0,922193 | 0,9780317 |
| RP11-12C17.3   | 29,94   | 0,07  | 0,676562 | 0,097602 | 0,922249 | 0,9780317 |
| USP7           | 1154,51 | -0,03 | 0,357634 | -0,09754 | 0,922296 | 0,9780317 |
| FNDC3A         | 327,65  | 0,05  | 0,540685 | 0,097538 | 0,922299 | 0,9780317 |
| MERTK          | 21,32   | -0,23 | 2,370089 | -0,09738 | 0,922428 | 0,9780317 |

|                 |         |       |          |          |          |           |
|-----------------|---------|-------|----------|----------|----------|-----------|
| CTD-2152M20.2   | 4,46    | -0,27 | 2,787952 | -0,09737 | 0,922431 | 0,9780317 |
| FAM91A1         | 532,60  | 0,04  | 0,429659 | 0,097339 | 0,922457 | 0,9780317 |
| TFDP2           | 298,00  | -0,07 | 0,728297 | -0,09733 | 0,922467 | 0,9780317 |
| APOBEC3B        | 26,28   | 0,17  | 1,73724  | 0,097183 | 0,922581 | 0,9780859 |
| ATN1            | 46,86   | -0,08 | 0,808003 | -0,09706 | 0,92268  | 0,9780859 |
| NQO1            | 36,75   | -0,18 | 1,854744 | -0,09696 | 0,922758 | 0,9780859 |
| PFDN2           | 296,28  | 0,03  | 0,346222 | 0,096957 | 0,922761 | 0,9780859 |
| FAT1            | 3,97    | 0,09  | 0,956421 | 0,096925 | 0,922786 | 0,9780859 |
| RN7SL606P       | 1,93    | -0,15 | 1,596637 | -0,09687 | 0,922827 | NA        |
| AC009967.3      | 5,88    | -0,10 | 1,020933 | -0,0968  | 0,922886 | 0,9780859 |
| ESRG            | 46,69   | 0,10  | 1,076612 | 0,096705 | 0,922961 | 0,9780859 |
| NPTX2           | 0,07    | -0,36 | 3,748196 | -0,0967  | 0,922963 | NA        |
| C19orf54        | 79,04   | -0,08 | 0,784409 | -0,09668 | 0,922981 | 0,9780859 |
| PPP1R12B        | 284,15  | 0,08  | 0,843548 | 0,096666 | 0,922991 | 0,9780859 |
| RTN4R           | 0,11    | 0,36  | 3,747916 | 0,096622 | 0,923027 | NA        |
| RP11-750B16.1   | 1,18    | -0,11 | 1,118511 | -0,09651 | 0,923118 | NA        |
| RP5-1050D4.5    | 1,56    | -0,29 | 2,970398 | -0,09644 | 0,923169 | NA        |
| RP11-558O12.3   | 2,85    | -0,22 | 2,302467 | -0,09644 | 0,923173 | NA        |
| PKP2            | 100,65  | 0,08  | 0,857514 | 0,096231 | 0,923337 | 0,978357  |
| RNASEK-C17orf49 | 77,07   | 0,08  | 0,854975 | 0,096212 | 0,923352 | 0,978357  |
| RP11-978I15.10  | 0,46    | 0,20  | 2,116223 | 0,095968 | 0,923546 | NA        |
| RN7SL804P       | 0,99    | 0,16  | 1,675311 | 0,095911 | 0,923591 | NA        |
| BPIFB1          | 5,52    | -0,10 | 1,007453 | -0,0958  | 0,923679 | 0,9786477 |
| RP11-480I12.10  | 0,46    | -0,36 | 3,731393 | -0,09569 | 0,923765 | NA        |
| RP11-439L12.1   | 0,54    | -0,16 | 1,709981 | -0,09564 | 0,923806 | NA        |
| RP11-863P13.1   | 10,59   | -0,17 | 1,790455 | -0,09561 | 0,923828 | 0,9787475 |
| DOC2A           | 30,45   | 0,10  | 1,016051 | 0,095475 | 0,923938 | 0,9787475 |
| GDAP2           | 486,08  | 0,06  | 0,621208 | 0,095458 | 0,923951 | 0,9787475 |
| RP11-193F5.2    | 0,33    | -0,29 | 2,998481 | -0,09544 | 0,923966 | NA        |
| PPP2R5C         | 1507,81 | -0,04 | 0,385356 | -0,09534 | 0,924047 | 0,9787475 |
| CAPRIN1         | 924,68  | -0,04 | 0,457726 | -0,09531 | 0,924071 | 0,9787475 |
| VPS72           | 177,28  | 0,08  | 0,872268 | 0,095246 | 0,924119 | 0,9787475 |
| LINC01452       | 2,72    | -0,08 | 0,833622 | -0,09522 | 0,92414  | NA        |
| RP11-359E3.4    | 13,88   | 0,09  | 0,899764 | 0,095218 | 0,924142 | 0,9787475 |
| VRTN            | 2,47    | 0,10  | 1,029086 | 0,095122 | 0,924218 | NA        |
| TPM3            | 6592,84 | -0,02 | 0,182055 | -0,09501 | 0,924311 | 0,9788494 |
| CTC-564N23.6    | 18,01   | 0,24  | 2,522157 | 0,094964 | 0,924343 | 0,9788494 |
| C16orf59        | 0,25    | -0,33 | 3,428028 | -0,09495 | 0,924355 | NA        |
| MGC14436        | 1,40    | -0,21 | 2,18169  | -0,09495 | 0,924358 | NA        |
| P4HA1           | 414,03  | 0,05  | 0,535765 | 0,094769 | 0,924498 | 0,9789577 |
| TSNAX-DISC1     | 0,33    | -0,28 | 2,956443 | -0,0947  | 0,924552 | NA        |
| ZNRF3           | 5,57    | 0,11  | 1,166153 | 0,094575 | 0,924652 | 0,9790652 |
| DECR2           | 8,56    | 0,08  | 0,886922 | 0,094485 | 0,924724 | 0,9790856 |
| RP11-87M1.1     | 1,07    | 0,12  | 1,324157 | 0,09432  | 0,924855 | NA        |
| NOL8            | 515,68  | -0,05 | 0,575885 | -0,09429 | 0,92488  | 0,9791629 |
| CAPN8           | 9,40    | 0,19  | 2,019743 | 0,094223 | 0,924932 | 0,9791629 |
| RP11-231I16.1   | 36,82   | 0,14  | 1,529232 | 0,094194 | 0,924955 | 0,9791629 |
| KCNIP3          | 3,17    | -0,22 | 2,361828 | -0,09415 | 0,92499  | NA        |
| IGKV3-20        | 2,25    | 0,12  | 1,275996 | 0,094149 | 0,924991 | NA        |
| RP11-455G16.1   | 17,33   | -0,09 | 0,916625 | -0,09408 | 0,925049 | 0,9791886 |

|                |         |       |          |          |          |           |
|----------------|---------|-------|----------|----------|----------|-----------|
| RP11-428J1.4   | 2,41    | 0,16  | 1,754191 | 0,094036 | 0,925081 | NA        |
| PLEKHA8        | 85,79   | 0,10  | 1,071714 | 0,093982 | 0,925123 | 0,9791886 |
| OVCH2          | 0,47    | 0,22  | 2,378281 | 0,093897 | 0,925191 | NA        |
| CLDN12         | 8,52    | 0,07  | 0,784494 | 0,093895 | 0,925192 | 0,9791886 |
| TOMM40L        | 206,20  | -0,09 | 0,985963 | -0,09385 | 0,925227 | 0,9791886 |
| LINC00269      | 14,85   | 0,08  | 0,880686 | 0,093832 | 0,925242 | 0,9791886 |
| SDPR           | 72,80   | 0,11  | 1,149323 | 0,093755 | 0,925304 | 0,9791978 |
| PHF14          | 419,97  | -0,06 | 0,656612 | -0,09356 | 0,925455 | 0,9792699 |
| MRPL22         | 318,22  | 0,04  | 0,414218 | 0,093537 | 0,925477 | 0,9792699 |
| EYA4           | 0,31    | -0,24 | 2,539384 | -0,09348 | 0,925525 | NA        |
| MIR1268A       | 0,82    | 0,23  | 2,453545 | 0,093472 | 0,925529 | NA        |
| RP11-426L16.10 | 0,95    | 0,22  | 2,325574 | 0,093453 | 0,925544 | NA        |
| SYTL1          | 468,74  | -0,04 | 0,395977 | -0,09321 | 0,925739 | 0,9793724 |
| ZNF442         | 17,41   | -0,07 | 0,753185 | -0,0932  | 0,925741 | 0,9793724 |
| MTERF3         | 71,55   | -0,10 | 1,054524 | -0,0932  | 0,925741 | 0,9793724 |
| RP5-997D16.2   | 1,93    | -0,34 | 3,641702 | -0,09319 | 0,925749 | NA        |
| ARHGDIG        | 1,48    | -0,14 | 1,481915 | -0,09319 | 0,925757 | NA        |
| SAMMSON        | 34,78   | 0,07  | 0,751005 | 0,093134 | 0,925797 | 0,9793724 |
| AKT1S1         | 67,88   | -0,06 | 0,596951 | -0,09302 | 0,925886 | 0,9793724 |
| CCL17          | 0,19    | -0,31 | 3,362342 | -0,09302 | 0,925888 | NA        |
| ZNF444         | 92,49   | -0,09 | 0,983616 | -0,09296 | 0,925935 | 0,9793724 |
| MUC21          | 6,14    | -0,14 | 1,477301 | -0,09294 | 0,925949 | 0,9793724 |
| FCRL6          | 25,77   | 0,13  | 1,347939 | 0,092834 | 0,926036 | 0,9793724 |
| CTD-2547L16.1  | 30,74   | 0,09  | 1,005526 | 0,092744 | 0,926107 | 0,9793724 |
| RNASE3         | 8,63    | -0,20 | 2,173827 | -0,09272 | 0,926126 | 0,9793724 |
| CTD-2643K12.3  | 0,05    | 0,35  | 3,748191 | 0,092655 | 0,926177 | NA        |
| BRD3           | 655,41  | -0,05 | 0,487906 | -0,09264 | 0,926186 | 0,9793724 |
| ACTBP6         | 0,66    | -0,29 | 3,106388 | -0,09263 | 0,926197 | NA        |
| RP3-477M7.4    | 0,75    | -0,15 | 1,628605 | -0,09251 | 0,926294 | NA        |
| CTC-325H20.4   | 9,86    | -0,09 | 0,946563 | -0,09239 | 0,926385 | 0,9793724 |
| CTB-37A13.1    | 30,40   | -0,17 | 1,789146 | -0,09235 | 0,926418 | 0,9793724 |
| BSN            | 0,73    | -0,20 | 2,185625 | -0,09234 | 0,926426 | NA        |
| RP1-56K13.2    | 9,95    | -0,09 | 1,002297 | -0,09229 | 0,926466 | 0,9793724 |
| DNAJA1         | 1683,07 | -0,03 | 0,354771 | -0,09224 | 0,926508 | 0,9793724 |
| RP11-344N10.3  | 6,21    | 0,11  | 1,173661 | 0,092235 | 0,926511 | 0,9793724 |
| OR51L1         | 31,81   | 0,14  | 1,469924 | 0,092202 | 0,926537 | 0,9793724 |
| AC068286.1     | 12,78   | -0,10 | 1,031583 | -0,0922  | 0,926538 | 0,9793724 |
| OSTM1          | 365,55  | 0,04  | 0,384404 | 0,092156 | 0,926574 | 0,9793724 |
| EIF3I          | 1384,87 | 0,03  | 0,379964 | 0,092015 | 0,926686 | 0,9794348 |
| RP11-420A23.1  | 3,65    | -0,21 | 2,323164 | -0,09193 | 0,926752 | NA        |
| OR7E126P       | 1,00    | -0,26 | 2,793031 | -0,0919  | 0,926778 | NA        |
| CPSF2          | 745,45  | 0,05  | 0,544798 | 0,09184  | 0,926825 | 0,9795256 |
| KCNJ15         | 12,30   | 0,08  | 0,82725  | 0,091775 | 0,926877 | 0,9795256 |
| ACP2           | 54,49   | 0,10  | 1,125838 | 0,091682 | 0,926951 | 0,9795478 |
| PTAFR          | 1475,59 | 0,04  | 0,445848 | 0,09155  | 0,927056 | 0,979603  |
| RP11-453E17.3  | 0,19    | -0,31 | 3,359548 | -0,09145 | 0,927137 | NA        |
| AC105344.2     | 0,12    | 0,34  | 3,748196 | 0,091435 | 0,927147 | NA        |
| CTD-2306M5.1   | 12,26   | 0,07  | 0,754683 | 0,091413 | 0,927164 | 0,9796195 |
| MRPL21         | 286,53  | 0,03  | 0,36155  | 0,091298 | 0,927256 | 0,9796195 |
| RP11-183M13.1  | 41,48   | 0,06  | 0,683356 | 0,091244 | 0,927298 | 0,9796195 |



|                   |         |       |          |          |          |           |
|-------------------|---------|-------|----------|----------|----------|-----------|
| HMGCL             | 258,10  | 0,06  | 0,635082 | 0,091187 | 0,927344 | 0,9796195 |
| PCNP              | 544,02  | 0,05  | 0,493897 | 0,091185 | 0,927345 | 0,9796195 |
| AC009299.4        | 68,55   | -0,12 | 1,364487 | -0,09104 | 0,927463 | 0,9796195 |
| FRG1CP            | 75,38   | -0,08 | 0,929485 | -0,09103 | 0,927465 | 0,9796195 |
| CTC-457L16.2      | 0,14    | -0,31 | 3,392484 | -0,09103 | 0,927473 | NA        |
| RP11-244O19.1     | 1,72    | -0,27 | 2,97708  | -0,091   | 0,927493 | NA        |
| RNA5SP498         | 3,81    | 0,09  | 1,011922 | 0,090948 | 0,927534 | 0,9796195 |
| SMUG1             | 145,83  | -0,06 | 0,706863 | -0,09093 | 0,927545 | 0,9796195 |
| LLNLF-158E9.1     | 31,15   | 0,10  | 1,08447  | 0,09084  | 0,92762  | 0,9796429 |
| RP11-565A3.1      | 1,14    | 0,33  | 3,685206 | 0,090794 | 0,927657 | NA        |
| SLC28A2           | 60,66   | -0,10 | 1,087779 | -0,09066 | 0,927763 | 0,9796935 |
| RP11-570L14.1     | 12,18   | -0,09 | 0,942999 | -0,09065 | 0,927773 | 0,9796935 |
| C21orf37          | 1,74    | -0,14 | 1,58079  | -0,09062 | 0,927793 | NA        |
| AL356017.3        | 148,88  | 0,05  | 0,569858 | 0,090567 | 0,927836 | 0,9797045 |
| RP11-781P6.1      | 0,77    | 0,34  | 3,722995 | 0,090475 | 0,92791  | NA        |
| IL11              | 3,96    | -0,09 | 0,957631 | -0,09041 | 0,92796  | 0,97978   |
| RP11-927P21.1     | 15,09   | 0,11  | 1,16878  | 0,090217 | 0,928114 | 0,9798871 |
| RP5-937E21.8      | 2,35    | 0,25  | 2,756694 | 0,090117 | 0,928194 | NA        |
| LL22NC03-86G7.1   | 151,56  | 0,03  | 0,361104 | 0,089893 | 0,928372 | 0,9799916 |
| XXbac-BPG181B23.4 | 7,91    | -0,07 | 0,806112 | -0,08987 | 0,928393 | 0,9799916 |
| PDE5A             | 56,63   | 0,11  | 1,205609 | 0,089863 | 0,928396 | 0,9799916 |
| RNU6-701P         | 0,99    | 0,33  | 3,696651 | 0,089799 | 0,928447 | NA        |
| JMJD7             | 75,57   | 0,13  | 1,440505 | 0,089664 | 0,928554 | 0,9799916 |
| ATP11C            | 133,94  | 0,07  | 0,793142 | 0,089563 | 0,928634 | 0,9799916 |
| MPRIP             | 279,28  | 0,05  | 0,589599 | 0,089541 | 0,928652 | 0,9799916 |
| SAP130            | 144,97  | 0,09  | 0,995317 | 0,08952  | 0,928669 | 0,9799916 |
| BZW1              | 1819,11 | -0,03 | 0,387867 | -0,08951 | 0,928678 | 0,9799916 |
| RP11-542G1.1      | 2,00    | -0,14 | 1,570825 | -0,08948 | 0,928697 | NA        |
| RP3-477O4.14      | 75,26   | -0,06 | 0,718806 | -0,08944 | 0,928731 | 0,9799916 |
| PRDX2             | 639,91  | -0,05 | 0,608139 | -0,08943 | 0,92874  | 0,9799916 |
| RIBC1             | 0,17    | -0,30 | 3,40091  | -0,08926 | 0,928877 | NA        |
| P2RX6P            | 0,49    | 0,19  | 2,111308 | 0,089255 | 0,928879 | NA        |
| RN7SL744P         | 8,04    | -0,11 | 1,251964 | -0,08894 | 0,929131 | 0,9803483 |
| CTD-2014D20.1     | 0,42    | -0,16 | 1,809351 | -0,08893 | 0,929141 | NA        |
| RNU12             | 221,11  | -0,05 | 0,510858 | -0,0888  | 0,929244 | 0,9803946 |
| RPIA              | 150,79  | -0,06 | 0,691525 | -0,08867 | 0,929347 | 0,9803946 |
| RAB40B            | 23,46   | 0,11  | 1,249042 | 0,08846  | 0,929511 | 0,9803946 |
| CTD-2555O16.4     | 10,18   | -0,09 | 1,070143 | -0,08837 | 0,929585 | 0,9803946 |
| RPS11P5           | 1,85    | -0,11 | 1,267544 | -0,0883  | 0,929635 | NA        |
| CCDC175           | 11,16   | 0,12  | 1,327384 | 0,088302 | 0,929636 | 0,9803946 |
| RP3-508I15.10     | 2,06    | -0,09 | 0,993179 | -0,08826 | 0,929672 | NA        |
| RP11-176H8.1      | 18,47   | 0,08  | 0,961834 | 0,088253 | 0,929676 | 0,9803946 |
| RYK               | 206,84  | -0,09 | 1,008684 | -0,08825 | 0,929676 | 0,9803946 |
| RN7SL215P         | 0,15    | -0,30 | 3,386921 | -0,08822 | 0,929699 | NA        |
| CXorf56           | 138,36  | 0,07  | 0,766385 | 0,088219 | 0,929703 | 0,9803946 |
| CTD-2385L22.2     | 7,78    | -0,08 | 0,895663 | -0,08815 | 0,929756 | 0,9803946 |
| RP11-259N19.1     | 8,89    | -0,09 | 0,989544 | -0,08811 | 0,929787 | 0,9803946 |
| VPS52             | 159,11  | -0,08 | 0,862671 | -0,08807 | 0,929819 | 0,9803946 |
| FEZ2              | 339,52  | -0,04 | 0,411395 | -0,08806 | 0,929825 | 0,9803946 |
| HERPUD2           | 255,19  | -0,05 | 0,531224 | -0,08802 | 0,92986  | 0,9803946 |

|               |        |       |          |          |          |           |
|---------------|--------|-------|----------|----------|----------|-----------|
| CALCB         | 3,05   | 0,20  | 2,328632 | 0,08802  | 0,929861 | NA        |
| RP11-574M7.1  | 53,65  | -0,16 | 1,801153 | -0,08791 | 0,929951 | 0,9804009 |
| RBM26         | 557,52 | -0,05 | 0,528409 | -0,08788 | 0,929976 | 0,9804009 |
| CTCF          | 449,07 | -0,04 | 0,419088 | -0,08781 | 0,930024 | 0,9804009 |
| NFKBIB        | 86,04  | -0,06 | 0,723645 | -0,0877  | 0,930118 | 0,9804447 |
| KRT78         | 0,01   | -0,33 | 3,738633 | -0,0876  | 0,930197 | NA        |
| FCGBP         | 157,42 | -0,12 | 1,32581  | -0,08753 | 0,930247 | 0,9805209 |
| RP1-313I6.1   | 0,64   | -0,32 | 3,658876 | -0,08744 | 0,930325 | NA        |
| OR7E122P      | 99,91  | 0,09  | 0,999271 | 0,08742  | 0,930338 | 0,9805209 |
| RP11-638I2.6  | 41,04  | -0,06 | 0,717438 | -0,08741 | 0,930349 | 0,9805209 |
| RP11-124N3.3  | 0,52   | 0,20  | 2,317182 | 0,087149 | 0,930553 | NA        |
| CCDC7         | 71,94  | 0,09  | 0,983602 | 0,087034 | 0,930644 | 0,9807385 |
| ONECUT1       | 1,00   | -0,20 | 2,249319 | -0,08698 | 0,930689 | NA        |
| RNF219        | 128,08 | 0,09  | 1,033544 | 0,086899 | 0,930752 | 0,9807385 |
| PIK3R4        | 177,33 | 0,08  | 0,887821 | 0,086895 | 0,930755 | 0,9807385 |
| CTBS          | 519,89 | -0,05 | 0,616652 | -0,08688 | 0,930766 | 0,9807385 |
| RP11-77K12.4  | 6,21   | 0,08  | 0,87739  | 0,086753 | 0,930868 | 0,9807907 |
| RP11-438B23.2 | 2,32   | -0,09 | 1,072115 | -0,08664 | 0,930955 | NA        |
| GLI3          | 3,09   | -0,21 | 2,371522 | -0,08657 | 0,93101  | NA        |
| RF00045       | 1,34   | 0,29  | 3,313839 | 0,086557 | 0,931024 | NA        |
| IGFL3         | 9,14   | -0,20 | 2,311834 | -0,08638 | 0,931166 | 0,981049  |
| GRHL3         | 0,07   | 0,32  | 3,747937 | 0,086258 | 0,931261 | NA        |
| ARHGEF37      | 20,86  | 0,15  | 1,68379  | 0,086185 | 0,931319 | 0,981155  |
| RP11-756J15.1 | 39,79  | -0,07 | 0,871747 | -0,08595 | 0,931507 | 0,9811703 |
| STK39         | 76,27  | 0,07  | 0,845385 | 0,085843 | 0,931591 | 0,9811703 |
| KB-1471A8.1   | 13,53  | -0,05 | 0,528678 | -0,08576 | 0,931657 | 0,9811703 |
| VCPIP1        | 531,86 | 0,05  | 0,534032 | 0,085741 | 0,931673 | 0,9811703 |
| C11orf98      | 267,78 | -0,05 | 0,600597 | -0,08573 | 0,931679 | 0,9811703 |
| CTD-2301A4.5  | 0,16   | -0,29 | 3,383091 | -0,0857  | 0,931701 | NA        |
| SLC29A2       | 10,15  | 0,16  | 1,896787 | 0,085622 | 0,931767 | 0,9811703 |
| MRPL41        | 333,06 | -0,04 | 0,422109 | -0,08557 | 0,931811 | 0,9811703 |
| KCTD9P1       | 2,65   | 0,11  | 1,333798 | 0,085546 | 0,931827 | NA        |
| LRRC37A3      | 98,63  | -0,05 | 0,624162 | -0,08551 | 0,931852 | 0,9811703 |
| RP11-254F7.2  | 166,26 | 0,08  | 0,975734 | 0,085492 | 0,93187  | 0,9811703 |
| RN7SL111P     | 1,23   | -0,15 | 1,787112 | -0,08544 | 0,931908 | NA        |
| FKBP15        | 762,25 | -0,04 | 0,513195 | -0,08541 | 0,931938 | 0,9811703 |
| SCIMP         | 911,75 | -0,03 | 0,382062 | -0,08535 | 0,93198  | 0,9811703 |
| AC016697.3    | 2,30   | -0,13 | 1,480961 | -0,08533 | 0,932    | NA        |
| C16orf70      | 388,61 | -0,04 | 0,472677 | -0,08529 | 0,93203  | 0,9811703 |
| RP11-76E17.3  | 22,21  | -0,18 | 2,064189 | -0,08526 | 0,932052 | 0,9811703 |
| SEL1L         | 828,48 | 0,04  | 0,527148 | 0,085202 | 0,932101 | 0,9811703 |
| FAM216B       | 1,77   | 0,17  | 1,997135 | 0,085158 | 0,932136 | NA        |
| AC005339.2    | 6,67   | 0,11  | 1,318886 | 0,085127 | 0,932161 | 0,9811703 |
| BORCS8-MEF2B  | 11,37  | -0,13 | 1,534494 | -0,08511 | 0,932178 | 0,9811703 |
| ERI2          | 26,41  | 0,08  | 0,921701 | 0,085039 | 0,932231 | 0,9811705 |
| WDR37         | 381,23 | 0,06  | 0,668869 | 0,084969 | 0,932286 | 0,9811737 |
| RP11-45K10.2  | 0,53   | -0,26 | 3,114049 | -0,08493 | 0,932318 | NA        |
| BPIFB9P       | 0,58   | -0,26 | 3,084579 | -0,0849  | 0,932343 | NA        |
| CENPA         | 0,25   | 0,25  | 2,928101 | 0,084816 | 0,932408 | NA        |
| GTF2A1        | 272,78 | -0,06 | 0,752877 | -0,0848  | 0,93242  | 0,9812168 |

|                 |         |       |          |          |          |           |
|-----------------|---------|-------|----------|----------|----------|-----------|
| RP11-708J19.1   | 17,63   | 0,11  | 1,295825 | 0,084784 | 0,932433 | 0,9812168 |
| RP11-505K9.1    | 4,89    | 0,18  | 2,150873 | 0,084642 | 0,932546 | 0,9812808 |
| TMEM11          | 333,14  | 0,06  | 0,755238 | 0,08437  | 0,932762 | 0,9813675 |
| RP11-299G20.2   | 8,19    | -0,08 | 1,005044 | -0,08437 | 0,932762 | 0,9813675 |
| TSPAN19         | 20,88   | 0,06  | 0,768025 | 0,084339 | 0,932787 | 0,9813675 |
| GPD2            | 271,61  | -0,08 | 0,956943 | -0,08426 | 0,932853 | 0,9813814 |
| RNFT1           | 226,64  | 0,06  | 0,718591 | 0,08413  | 0,932953 | 0,981431  |
| TMEM165         | 587,80  | 0,03  | 0,392246 | 0,083957 | 0,933091 | 0,981471  |
| RP11-187A9.3    | 6,29    | -0,09 | 1,042957 | -0,08391 | 0,933131 | 0,981471  |
| OR9G1           | 2,71    | -0,24 | 2,802622 | -0,08386 | 0,93317  | NA        |
| RP11-275E10.1   | 0,44    | -0,31 | 3,747711 | -0,08376 | 0,933251 | NA        |
| FAM110C         | 5,77    | -0,12 | 1,447935 | -0,08369 | 0,933303 | 0,981471  |
| FUT10           | 64,45   | 0,08  | 1,013774 | 0,08362  | 0,933359 | 0,981471  |
| IRF2BPL         | 68,24   | -0,05 | 0,596555 | -0,08359 | 0,933386 | 0,981471  |
| SLC29A4         | 43,52   | 0,05  | 0,551921 | 0,083472 | 0,933476 | 0,981471  |
| USP12           | 227,34  | -0,07 | 0,844779 | -0,08345 | 0,933494 | 0,981471  |
| C1orf115        | 0,48    | 0,20  | 2,382691 | 0,083448 | 0,933495 | NA        |
| RPL21P123       | 11,96   | -0,12 | 1,466815 | -0,08343 | 0,933508 | 0,981471  |
| MIR1972-1       | 0,48    | 0,22  | 2,655439 | 0,083426 | 0,933513 | NA        |
| MIR1972-2       | 0,48    | 0,22  | 2,655439 | 0,083426 | 0,933513 | NA        |
| BSDC1           | 277,52  | -0,05 | 0,541308 | -0,0834  | 0,933531 | 0,981471  |
| RP13-216E22.4   | 10,41   | -0,08 | 0,926336 | -0,08335 | 0,93357  | 0,981471  |
| RMND1           | 119,65  | 0,07  | 0,839772 | 0,083287 | 0,933623 | 0,981471  |
| RFC5            | 23,87   | -0,09 | 1,028454 | -0,08323 | 0,933667 | 0,981471  |
| RP11-3B7.1      | 1,53    | 0,13  | 1,505086 | 0,083209 | 0,933686 | NA        |
| SLC2A6          | 345,00  | 0,05  | 0,597966 | 0,083206 | 0,933687 | 0,981471  |
| RANGRF          | 214,00  | -0,05 | 0,584875 | -0,08315 | 0,93373  | 0,981471  |
| AC002044.3      | 3,06    | -0,15 | 1,746494 | -0,08307 | 0,933797 | NA        |
| XRCC1           | 130,30  | -0,08 | 0,927376 | -0,083   | 0,933854 | 0,981491  |
| C19orf33        | 28,33   | -0,08 | 0,940229 | -0,08295 | 0,933894 | 0,981491  |
| FCER1G          | 6354,42 | -0,01 | 0,174166 | -0,08293 | 0,933907 | 0,981491  |
| RP11-443N24.2   | 1,57    | -0,15 | 1,86404  | -0,08278 | 0,934028 | NA        |
| C4orf3          | 924,82  | -0,02 | 0,296475 | -0,08273 | 0,934063 | 0,9815995 |
| EXD3            | 102,69  | -0,07 | 0,817058 | -0,08265 | 0,934131 | 0,9816019 |
| MAFG            | 245,57  | 0,07  | 0,796203 | 0,082553 | 0,934207 | 0,9816019 |
| EIF1AX          | 1201,39 | -0,03 | 0,380754 | -0,08253 | 0,934223 | 0,9816019 |
| TMEM59          | 1676,26 | 0,03  | 0,38702  | 0,08245  | 0,934289 | 0,9816154 |
| IGLV2-11        | 0,51    | 0,22  | 2,659902 | 0,082435 | 0,934301 | NA        |
| CCDC154         | 39,98   | -0,13 | 1,635214 | -0,08224 | 0,934457 | 0,9817363 |
| RP11-99J16__A.2 | 0,95    | 0,27  | 3,239067 | 0,082212 | 0,934478 | NA        |
| LETM1           | 310,83  | -0,04 | 0,470896 | -0,08199 | 0,934655 | 0,9818894 |
| AD000091.2      | 1,80    | -0,09 | 1,157304 | -0,08184 | 0,934777 | NA        |
| COX17           | 180,63  | -0,02 | 0,297365 | -0,08175 | 0,934845 | 0,9819603 |
| RP11-769O8.1    | 8,87    | 0,07  | 0,804571 | 0,081667 | 0,934912 | 0,9819603 |
| RP1-257C22.2    | 1,78    | -0,20 | 2,397707 | -0,08166 | 0,934914 | NA        |
| ACTR1B          | 411,34  | -0,05 | 0,57748  | -0,08165 | 0,934927 | 0,9819603 |
| HELB            | 341,19  | -0,06 | 0,739511 | -0,08164 | 0,934936 | 0,9819603 |
| RP11-2P5.4      | 21,51   | -0,08 | 0,963511 | -0,08155 | 0,935002 | 0,9819603 |
| RNF144B         | 1269,59 | 0,05  | 0,658088 | 0,081502 | 0,935042 | 0,9819603 |
| PDGFD           | 2,74    | 0,23  | 2,78977  | 0,081462 | 0,935074 | NA        |

|                |         |       |          |          |          |           |
|----------------|---------|-------|----------|----------|----------|-----------|
| HTT            | 1191,59 | -0,05 | 0,598757 | -0,08144 | 0,935092 | 0,9819603 |
| DRP2           | 0,13    | 0,31  | 3,748196 | 0,081374 | 0,935144 | NA        |
| CTD-3149D2.3   | 6,26    | -0,06 | 0,726512 | -0,08128 | 0,935222 | 0,9820414 |
| CTC-558O2.1    | 1,43    | 0,16  | 2,009554 | 0,081212 | 0,935274 | NA        |
| MTMR9L         | 1,34    | -0,12 | 1,450204 | -0,0811  | 0,935364 | NA        |
| RP11-210K20.2  | 0,96    | -0,12 | 1,518646 | -0,08102 | 0,935427 | NA        |
| RP11-329A14.1  | 0,49    | 0,30  | 3,743802 | 0,080955 | 0,935478 | NA        |
| ZDHHC3         | 300,63  | 0,05  | 0,597345 | 0,080759 | 0,935634 | 0,9821238 |
| RP11-279N8.1   | 8,21    | -0,12 | 1,495198 | -0,08076 | 0,935635 | 0,9821238 |
| RP11-229P13.25 | 0,30    | 0,30  | 3,748032 | 0,080741 | 0,935648 | NA        |
| RP11-422P15.3  | 9,87    | 0,15  | 1,829087 | 0,080729 | 0,935658 | 0,9821238 |
| AC008691.1     | 4,08    | 0,08  | 0,959224 | 0,080715 | 0,935668 | 0,9821238 |
| KCTD3          | 95,55   | 0,07  | 0,878284 | 0,080711 | 0,935672 | 0,9821238 |
| CORO1C         | 1013,38 | 0,04  | 0,441721 | 0,080548 | 0,935802 | 0,9821238 |
| RP11-343P16.1  | 0,35    | -0,21 | 2,648803 | -0,08046 | 0,935871 | NA        |
| COL4A3BP       | 1075,26 | -0,04 | 0,454948 | -0,08044 | 0,935889 | 0,9821238 |
| RP11-169K16.8  | 1,18    | -0,11 | 1,378754 | -0,08043 | 0,935892 | NA        |
| RP11-54D18.3   | 2,18    | 0,10  | 1,289074 | 0,080432 | 0,935894 | NA        |
| RP13-614K11.2  | 0,51    | -0,25 | 3,09175  | -0,08039 | 0,935925 | NA        |
| MIR5692B       | 0,13    | -0,30 | 3,748196 | -0,08038 | 0,935938 | NA        |
| RP11-617J18.1  | 5,53    | -0,08 | 0,934053 | -0,08034 | 0,935969 | 0,9821238 |
| LY75-CD302     | 170,43  | -0,18 | 2,292618 | -0,08031 | 0,93599  | 0,9821238 |
| RP2            | 270,98  | 0,04  | 0,559229 | 0,080214 | 0,936067 | 0,9821238 |
| POLA2          | 258,84  | -0,07 | 0,834361 | -0,0802  | 0,936082 | 0,9821238 |
| RN7SL619P      | 14,70   | -0,11 | 1,317654 | -0,08018 | 0,936095 | 0,9821238 |
| RP11-67L2.2    | 110,10  | 0,08  | 0,947571 | 0,080173 | 0,9361   | 0,9821238 |
| AC010969.1     | 0,14    | 0,27  | 3,362768 | 0,080132 | 0,936132 | NA        |
| AC003973.4     | 0,81    | -0,12 | 1,506998 | -0,08013 | 0,936135 | NA        |
| PKD2           | 236,56  | -0,05 | 0,677286 | -0,0801  | 0,936156 | 0,9821238 |
| CYP7A1         | 0,14    | 0,27  | 3,362593 | 0,080083 | 0,936171 | NA        |
| INTS8          | 339,64  | 0,06  | 0,794572 | 0,080009 | 0,93623  | 0,9821238 |
| FRMD6-AS1      | 12,80   | 0,10  | 1,234837 | 0,08     | 0,936237 | 0,9821238 |
| AC115522.3     | 1,18    | 0,12  | 1,490743 | 0,079966 | 0,936264 | NA        |
| AC010082.2     | 14,28   | -0,08 | 0,941856 | -0,07989 | 0,936327 | 0,9821238 |
| INPPL1         | 316,09  | -0,03 | 0,383411 | -0,07978 | 0,936414 | 0,9821238 |
| ASCC3          | 444,63  | -0,04 | 0,515346 | -0,07977 | 0,936424 | 0,9821238 |
| RNF125         | 374,25  | -0,04 | 0,473833 | -0,07974 | 0,936444 | 0,9821238 |
| AP000688.15    | 12,94   | -0,06 | 0,806613 | -0,07973 | 0,936454 | 0,9821238 |
| PROSER2        | 8,25    | -0,18 | 2,271391 | -0,07972 | 0,936462 | 0,9821238 |
| RP11-543A18.1  | 0,16    | -0,30 | 3,748196 | -0,07969 | 0,936483 | NA        |
| AP000962.2     | 1,86    | -0,12 | 1,468133 | -0,07968 | 0,936493 | NA        |
| RP5-1068E13.4  | 0,10    | 0,27  | 3,41139  | 0,079663 | 0,936505 | NA        |
| RP11-307N16.5  | 0,13    | 0,27  | 3,37442  | 0,079584 | 0,936568 | NA        |
| U2AF1L5        | 898,81  | 0,03  | 0,372487 | 0,079503 | 0,936633 | 0,9822378 |
| BMP5           | 0,11    | 0,27  | 3,400351 | 0,079496 | 0,936638 | NA        |
| ORMDL3         | 32,67   | -0,09 | 1,074032 | -0,07945 | 0,936676 | 0,9822378 |
| RN7SL618P      | 2,72    | 0,10  | 1,290072 | 0,079416 | 0,936702 | NA        |
| RP11-367G6.2   | 0,31    | 0,28  | 3,492545 | 0,079357 | 0,936748 | NA        |
| CTD-2510L9.2   | 25,64   | 0,14  | 1,72542  | 0,079186 | 0,936885 | 0,9824013 |
| S100A1         | 0,88    | 0,30  | 3,748178 | 0,079175 | 0,936893 | NA        |

|                 |        |       |          |          |          |           |
|-----------------|--------|-------|----------|----------|----------|-----------|
| RP11-605B16.1   | 0,13   | 0,27  | 3,381267 | 0,079103 | 0,936951 | NA        |
| CHAF1A          | 100,83 | 0,07  | 0,897039 | 0,079024 | 0,937014 | 0,9824718 |
| ERAP1           | 487,36 | -0,04 | 0,557346 | -0,07894 | 0,937077 | 0,9824718 |
| RPL7AP10        | 0,15   | -0,30 | 3,748196 | -0,07883 | 0,937166 | NA        |
| TAF1B           | 237,95 | -0,06 | 0,702386 | -0,07879 | 0,937196 | 0,9824718 |
| MS4A14          | 189,86 | 0,07  | 0,949493 | 0,078793 | 0,937197 | 0,9824718 |
| ZNF766          | 194,68 | 0,06  | 0,700222 | 0,078769 | 0,937216 | 0,9824718 |
| SLC39A4         | 116,35 | -0,06 | 0,715692 | -0,07857 | 0,937377 | 0,9825803 |
| RP11-473C18.7   | 1,11   | 0,20  | 2,578293 | 0,078477 | 0,937449 | NA        |
| CBR4            | 178,36 | -0,04 | 0,560317 | -0,07847 | 0,937455 | 0,9825803 |
| RP11-768B22.2   | 7,08   | 0,15  | 1,861554 | 0,07844  | 0,937478 | 0,9825803 |
| RN7SL708P       | 1,10   | 0,19  | 2,367033 | 0,078391 | 0,937517 | NA        |
| RP11-356I2.1    | 2,33   | 0,15  | 1,946286 | 0,078344 | 0,937555 | NA        |
| RCBTB2          | 523,26 | -0,05 | 0,64506  | -0,07819 | 0,93768  | 0,9827118 |
| MTRF1L          | 155,11 | -0,06 | 0,722017 | -0,07815 | 0,937709 | 0,9827118 |
| RN7SKP163       | 0,09   | 0,27  | 3,427678 | 0,078078 | 0,937766 | NA        |
| ZCWPW2          | 26,18  | 0,11  | 1,371542 | 0,078067 | 0,937775 | 0,9827249 |
| ALOX12P2        | 23,49  | -0,09 | 1,153019 | -0,07797 | 0,937854 | 0,9827522 |
| RN7SL482P       | 0,10   | 0,27  | 3,418233 | 0,077944 | 0,937873 | NA        |
| RP11-433P17.2   | 0,12   | 0,26  | 3,385803 | 0,077942 | 0,937874 | NA        |
| LL21NC02-1C16.2 | 84,78  | -0,07 | 0,84329  | -0,07771 | 0,938062 | 0,9828317 |
| KBTBD11         | 73,52  | -0,08 | 1,005818 | -0,07769 | 0,938076 | 0,9828317 |
| NEDD4L          | 218,25 | -0,09 | 1,155569 | -0,07761 | 0,938135 | 0,9828317 |
| POLR2K          | 287,17 | -0,05 | 0,677177 | -0,07761 | 0,938141 | 0,9828317 |
| RP11-481F24.3   | 0,78   | 0,12  | 1,520631 | 0,077542 | 0,938192 | NA        |
| RP11-409I10.2   | 2,01   | 0,28  | 3,65078  | 0,077512 | 0,938217 | NA        |
| RN7SL28P        | 0,12   | 0,26  | 3,393779 | 0,077473 | 0,938247 | NA        |
| AC016722.3      | 6,52   | 0,07  | 0,88729  | 0,077402 | 0,938304 | 0,9829166 |
| PGM2L1          | 56,52  | 0,07  | 0,951924 | 0,077372 | 0,938327 | 0,9829166 |
| RP13-638C3.5    | 2,35   | 0,16  | 2,022366 | 0,077303 | 0,938382 | NA        |
| RASGRP3         | 80,74  | 0,07  | 0,920991 | 0,077175 | 0,938484 | 0,9830257 |
| RP11-181B18.1   | 0,13   | 0,29  | 3,748196 | 0,077164 | 0,938493 | NA        |
| RP11-122L4.2    | 0,68   | -0,24 | 3,064823 | -0,07692 | 0,93869  | NA        |
| OR52U1P         | 0,13   | -0,29 | 3,748196 | -0,07689 | 0,938713 | NA        |
| TSGA13          | 2,55   | -0,12 | 1,559206 | -0,07683 | 0,938756 | NA        |
| CASP8           | 445,74 | 0,04  | 0,507006 | 0,076821 | 0,938766 | 0,9831237 |
| ODF2            | 152,62 | -0,04 | 0,553415 | -0,07676 | 0,938813 | 0,9831237 |
| PCK2            | 147,50 | -0,06 | 0,837309 | -0,0767  | 0,938865 | 0,9831237 |
| RP11-266L9.8    | 4,36   | 0,17  | 2,280835 | 0,076651 | 0,938901 | 0,9831237 |
| RP11-153K11.3   | 0,10   | 0,26  | 3,423092 | 0,076651 | 0,938902 | NA        |
| CCT6B           | 79,42  | 0,09  | 1,12568  | 0,07661  | 0,938934 | 0,9831237 |
| HAX1            | 468,83 | -0,05 | 0,695793 | -0,07657 | 0,938968 | 0,9831237 |
| APOBR           | 554,17 | 0,04  | 0,476356 | 0,076482 | 0,939035 | 0,9831237 |
| NKD1            | 26,37  | 0,08  | 1,079102 | 0,07638  | 0,939117 | 0,9831237 |
| AGAP5           | 105,84 | 0,09  | 1,181456 | 0,076361 | 0,939132 | 0,9831237 |
| RP11-282O18.3   | 20,25  | -0,06 | 0,816295 | -0,07633 | 0,939154 | 0,9831237 |
| SPI1            | 138,24 | 0,04  | 0,494845 | 0,076327 | 0,939159 | 0,9831237 |
| PIM2            | 265,13 | 0,04  | 0,552399 | 0,076218 | 0,939246 | 0,983159  |
| MRS2            | 355,04 | 0,05  | 0,70235  | 0,075929 | 0,939476 | 0,9833436 |
| RECQL           | 384,30 | -0,06 | 0,75725  | -0,07582 | 0,939559 | 0,9833436 |

|               |         |       |          |          |          |           |
|---------------|---------|-------|----------|----------|----------|-----------|
| SCGB1A1       | 0,16    | -0,28 | 3,748196 | -0,0758  | 0,939577 | NA        |
| CTD-2542C24.5 | 11,96   | 0,07  | 0,929969 | 0,075797 | 0,939581 | 0,9833436 |
| SLC30A7       | 392,08  | 0,05  | 0,71482  | 0,075698 | 0,939659 | 0,9833702 |
| DUXAP10       | 97,32   | -0,10 | 1,302257 | -0,07552 | 0,939802 | 0,9834646 |
| RP11-462P6.1  | 5,48    | -0,15 | 2,047683 | -0,07541 | 0,939888 | 0,9834992 |
| DLD           | 594,22  | -0,04 | 0,58038  | -0,07532 | 0,939962 | 0,9835211 |
| LARP6         | 3,64    | -0,10 | 1,311329 | -0,07513 | 0,940114 | NA        |
| RP5-884G6.2   | 0,47    | 0,24  | 3,141904 | 0,075094 | 0,94014  | NA        |
| PABPN1L       | 0,25    | -0,25 | 3,362919 | -0,07506 | 0,94017  | NA        |
| RP11-862G15.1 | 20,69   | -0,11 | 1,459212 | -0,07501 | 0,94021  | 0,9836942 |
| FAM153B       | 4,93    | -0,09 | 1,168993 | -0,07498 | 0,940233 | 0,9836942 |
| AC007364.1    | 0,22    | -0,18 | 2,437908 | -0,07492 | 0,940279 | NA        |
| IL8RBP        | 31,87   | 0,10  | 1,290278 | 0,074909 | 0,940287 | 0,9836959 |
| KRTAP5-11     | 1,14    | 0,22  | 2,930492 | 0,074906 | 0,940289 | NA        |
| NOX5          | 28,81   | -0,06 | 0,833546 | -0,07482 | 0,940358 | 0,9837149 |
| RP11-566E18.1 | 0,30    | 0,28  | 3,748041 | 0,074785 | 0,940386 | NA        |
| AC007036.4    | 0,41    | -0,15 | 1,995013 | -0,07477 | 0,940394 | NA        |
| AF230666.2    | 3,69    | -0,12 | 1,602231 | -0,07476 | 0,940406 | NA        |
| CTD-2035E11.3 | 23,56   | 0,05  | 0,618864 | 0,07465  | 0,940493 | 0,9838005 |
| POC1B         | 332,05  | -0,05 | 0,704556 | -0,07455 | 0,940572 | 0,9838141 |
| CTD-2162K18.3 | 1,76    | 0,13  | 1,788117 | 0,074547 | 0,940575 | NA        |
| OR56B1        | 0,32    | 0,28  | 3,748055 | 0,074531 | 0,940588 | NA        |
| RNA5SP387     | 1,49    | 0,19  | 2,605744 | 0,074487 | 0,940623 | NA        |
| RP11-16E12.1  | 72,33   | 0,06  | 0,83514  | 0,074452 | 0,940651 | 0,9838141 |
| PROS1         | 15,32   | -0,08 | 1,115283 | -0,0744  | 0,940689 | 0,9838141 |
| MAPK6         | 200,29  | 0,06  | 0,779249 | 0,074368 | 0,940718 | 0,9838141 |
| CTA-14H9.7    | 28,89   | 0,06  | 0,805239 | 0,074279 | 0,940788 | 0,9838325 |
| CTD-2086O20.1 | 1,61    | 0,20  | 2,699871 | 0,074277 | 0,94079  | NA        |
| AC084149.2    | 0,65    | 0,17  | 2,240088 | 0,074043 | 0,940976 | NA        |
| OR5H14        | 22,50   | 0,05  | 0,662047 | 0,073901 | 0,941089 | 0,9840242 |
| RP11-90D11.1  | 5,64    | 0,12  | 1,588188 | 0,073882 | 0,941104 | 0,9840242 |
| ZNF391        | 4,02    | 0,10  | 1,372125 | 0,073835 | 0,941142 | 0,9840242 |
| RP11-320C15.1 | 0,18    | 0,28  | 3,748196 | 0,073735 | 0,941221 | NA        |
| ASMT          | 0,61    | -0,23 | 3,142262 | -0,07373 | 0,941226 | NA        |
| RP4-781K5.5   | 21,37   | -0,15 | 2,025796 | -0,0737  | 0,941247 | 0,9840242 |
| ZNF514        | 191,42  | 0,09  | 1,170772 | 0,073702 | 0,941247 | 0,9840242 |
| OR52A1        | 15,70   | -0,05 | 0,646977 | -0,07365 | 0,941289 | 0,9840242 |
| RP11-114H21.2 | 2,21    | -0,10 | 1,408103 | -0,07361 | 0,941321 | NA        |
| NTN5          | 1,31    | -0,09 | 1,252644 | -0,0736  | 0,941328 | NA        |
| RNU6-810P     | 0,19    | 0,28  | 3,748196 | 0,073591 | 0,941336 | NA        |
| RP11-288K12.1 | 1,80    | -0,19 | 2,616408 | -0,07352 | 0,941395 | NA        |
| MFSD1         | 2291,23 | -0,02 | 0,335537 | -0,07351 | 0,941399 | 0,9840842 |
| AC108868.5    | 0,10    | 0,28  | 3,748196 | 0,073483 | 0,941422 | NA        |
| ZNF33B        | 196,55  | -0,06 | 0,781585 | -0,07343 | 0,941465 | 0,9840979 |
| SNCA          | 157,83  | 0,06  | 0,872026 | 0,073277 | 0,941586 | 0,9841391 |
| PRRC2C        | 2272,64 | -0,02 | 0,29859  | -0,07324 | 0,941612 | 0,9841391 |
| SERPINA10     | 80,85   | 0,05  | 0,689878 | 0,07318  | 0,941663 | 0,9841391 |
| RP11-498M5.2  | 0,11    | 0,27  | 3,748196 | 0,07311  | 0,941718 | NA        |
| RP4-612C19.2  | 0,11    | 0,27  | 3,748196 | 0,073077 | 0,941744 | NA        |
| TAF1D         | 493,56  | 0,03  | 0,352077 | 0,073013 | 0,941795 | 0,9842219 |

|               |        |       |          |          |          |           |
|---------------|--------|-------|----------|----------|----------|-----------|
| RP11-460G11.2 | 0,31   | -0,19 | 2,639842 | -0,07298 | 0,941821 | NA        |
| DNAJB13       | 8,12   | 0,06  | 0,848341 | 0,07286  | 0,941918 | 0,9842845 |
| MUC5AC        | 1,88   | -0,22 | 3,040735 | -0,07286 | 0,941921 | NA        |
| RP11-411G9.2  | 0,11   | 0,27  | 3,748196 | 0,072837 | 0,941936 | NA        |
| RIPK4         | 0,18   | 0,27  | 3,748196 | 0,072735 | 0,942017 | NA        |
| ZBTB8B        | 65,34  | 0,05  | 0,653617 | 0,072722 | 0,942027 | 0,9842845 |
| HIGD1C        | 0,12   | 0,27  | 3,748196 | 0,07264  | 0,942093 | NA        |
| NUDT19P4      | 0,13   | 0,27  | 3,748196 | 0,072607 | 0,942119 | NA        |
| RP11-636O21.2 | 30,86  | 0,05  | 0,665805 | 0,072574 | 0,942145 | 0,9842845 |
| ISCU          | 565,54 | -0,03 | 0,480425 | -0,07256 | 0,942153 | 0,9842845 |
| PPP6C         | 562,27 | -0,04 | 0,50374  | -0,07255 | 0,942161 | 0,9842845 |
| AC004538.2    | 0,10   | 0,27  | 3,748196 | 0,072544 | 0,942169 | NA        |
| NEDD9         | 495,95 | 0,04  | 0,566051 | 0,072539 | 0,942173 | 0,9842845 |
| MIR4505       | 0,12   | 0,27  | 3,748196 | 0,072535 | 0,942176 | NA        |
| RP11-781E19.1 | 0,15   | 0,27  | 3,748196 | 0,072531 | 0,94218  | NA        |
| SLC7A9        | 3,31   | -0,08 | 1,095976 | -0,07243 | 0,942261 | NA        |
| EPOP          | 0,13   | 0,27  | 3,748196 | 0,072407 | 0,942278 | NA        |
| MAMDC2        | 0,10   | 0,27  | 3,748196 | 0,072353 | 0,942321 | NA        |
| AC009227.3    | 0,11   | 0,27  | 3,748196 | 0,072342 | 0,94233  | NA        |
| PIBF1         | 121,11 | 0,06  | 0,771651 | 0,072338 | 0,942333 | 0,9842928 |
| RP11-644K8.1  | 0,11   | 0,27  | 3,748196 | 0,072335 | 0,942335 | NA        |
| RP11-710C12.1 | 0,09   | 0,27  | 3,748196 | 0,072316 | 0,942351 | NA        |
| RP11-736I10.9 | 0,13   | 0,27  | 3,748196 | 0,072306 | 0,942359 | NA        |
| OSBPL2        | 372,75 | 0,05  | 0,678142 | 0,072304 | 0,94236  | 0,9842928 |
| MIR4482       | 24,77  | -0,15 | 2,040083 | -0,07228 | 0,942376 | 0,9842928 |
| RP11-466A17.1 | 0,08   | 0,27  | 3,748196 | 0,072269 | 0,942388 | NA        |
| DFFA          | 320,13 | 0,06  | 0,767484 | 0,072263 | 0,942392 | 0,9842928 |
| CTD-2184D3.5  | 0,11   | 0,27  | 3,748196 | 0,072228 | 0,942421 | NA        |
| RP11-700H6.1  | 0,10   | 0,27  | 3,748196 | 0,072226 | 0,942422 | NA        |
| TRBJ2-2P      | 1,15   | 0,27  | 3,683437 | 0,072222 | 0,942425 | NA        |
| GPR153        | 0,16   | 0,27  | 3,748196 | 0,072195 | 0,942447 | NA        |
| RP11-37C7.3   | 0,11   | 0,27  | 3,748196 | 0,072173 | 0,942464 | NA        |
| RP11-12A1.1   | 0,19   | -0,27 | 3,748196 | -0,07217 | 0,94247  | NA        |
| RN7SL806P     | 4,12   | -0,06 | 0,820103 | -0,07216 | 0,942472 | 0,9843208 |
| RP1-39G22.4   | 0,12   | 0,27  | 3,748196 | 0,07215  | 0,942482 | NA        |
| RP11-393H10.4 | 0,16   | -0,27 | 3,748196 | -0,07213 | 0,9425   | NA        |
| LRFN2         | 0,17   | 0,27  | 3,748196 | 0,072086 | 0,942533 | NA        |
| HOXA-AS2      | 0,72   | 0,20  | 2,773848 | 0,072078 | 0,94254  | NA        |
| RP5-1069P2.4  | 11,00  | -0,10 | 1,398597 | -0,07206 | 0,942557 | 0,9843426 |
| RN7SKP69      | 0,10   | 0,27  | 3,748196 | 0,072055 | 0,942558 | NA        |
| C20orf173     | 0,08   | 0,27  | 3,748196 | 0,072034 | 0,942575 | NA        |
| RP11-293K20.3 | 0,13   | 0,27  | 3,748196 | 0,072028 | 0,94258  | NA        |
| RP11-209D14.4 | 1,40   | -0,08 | 1,093014 | -0,07201 | 0,942595 | NA        |
| FAM163A       | 2,30   | 0,13  | 1,821034 | 0,072006 | 0,942597 | NA        |
| POLR2J3       | 434,59 | -0,03 | 0,382357 | -0,072   | 0,942599 | 0,9843426 |
| RP4-735C1.4   | 0,08   | 0,27  | 3,748196 | 0,071934 | 0,942655 | NA        |
| AC090960.1    | 0,09   | 0,27  | 3,748196 | 0,071891 | 0,942688 | NA        |
| RP11-350A18.1 | 49,58  | -0,04 | 0,598427 | -0,07181 | 0,942752 | 0,9843655 |
| RP11-450H5.1  | 0,12   | 0,27  | 3,748196 | 0,071795 | 0,942765 | NA        |
| RP11-3L21.2   | 0,16   | 0,27  | 3,748196 | 0,071758 | 0,942794 | NA        |

|               |         |       |          |          |          |           |
|---------------|---------|-------|----------|----------|----------|-----------|
| RP11-661A12.9 | 0,13    | 0,27  | 3,748196 | 0,071757 | 0,942795 | NA        |
| RP11-6N17.6   | 22,56   | -0,08 | 1,125721 | -0,07174 | 0,942806 | 0,9843655 |
| PLA2G12A      | 164,88  | 0,06  | 0,785065 | 0,071687 | 0,942851 | 0,9843655 |
| KRR1          | 328,16  | 0,06  | 0,799314 | 0,071654 | 0,942878 | 0,9843655 |
| DENND4C       | 475,26  | -0,04 | 0,555005 | -0,07164 | 0,942885 | 0,9843655 |
| RP3-393P12.1  | 0,13    | 0,27  | 3,748196 | 0,071617 | 0,942907 | NA        |
| RP11-158M2.5  | 0,09    | 0,27  | 3,748196 | 0,071585 | 0,942932 | NA        |
| CRYZ          | 60,45   | -0,11 | 1,532252 | -0,07153 | 0,942975 | 0,9844041 |
| CTA-85E5.8    | 0,13    | 0,27  | 3,748196 | 0,071485 | 0,943012 | NA        |
| FTHL25        | 0,13    | 0,27  | 3,748196 | 0,07148  | 0,943015 | NA        |
| SLC9B1P3      | 0,17    | 0,27  | 3,748196 | 0,071471 | 0,943023 | NA        |
| RP11-92K15.3  | 0,14    | 0,27  | 3,748196 | 0,071464 | 0,943028 | NA        |
| AC083843.3    | 1,01    | -0,26 | 3,674913 | -0,07142 | 0,943067 | NA        |
| HOXC4         | 0,45    | 0,21  | 2,905622 | 0,071414 | 0,943068 | NA        |
| RP11-45M22.5  | 0,17    | 0,27  | 3,748196 | 0,071405 | 0,943075 | NA        |
| CCDC58P1      | 0,09    | 0,27  | 3,748196 | 0,071388 | 0,943089 | NA        |
| AC131097.3    | 2,95    | 0,09  | 1,219661 | 0,071319 | 0,943144 | NA        |
| RP11-82O2.1   | 0,33    | 0,27  | 3,748058 | 0,071315 | 0,943147 | NA        |
| RP11-122L9.1  | 4,02    | 0,08  | 1,172827 | 0,071279 | 0,943175 | 0,9845581 |
| RP11-10E18.5  | 9,73    | 0,08  | 1,111009 | 0,071206 | 0,943234 | 0,9845636 |
| RP11-195B21.3 | 0,08    | 0,27  | 3,748196 | 0,071167 | 0,943265 | NA        |
| RNY1P14       | 0,13    | 0,27  | 3,748196 | 0,0711   | 0,943318 | NA        |
| RP4-622L5.2   | 0,15    | 0,27  | 3,748196 | 0,071013 | 0,943388 | NA        |
| RP1-102K2.9   | 5,21    | 0,09  | 1,238097 | 0,071005 | 0,943393 | 0,9846487 |
| RP4-784A16.3  | 0,11    | 0,27  | 3,748196 | 0,070983 | 0,943411 | NA        |
| RP11-295P22.2 | 0,11    | 0,27  | 3,748196 | 0,070916 | 0,943465 | NA        |
| RP11-210L7.3  | 0,17    | 0,27  | 3,748196 | 0,070874 | 0,943498 | NA        |
| DENND6A-AS1   | 0,16    | 0,27  | 3,748196 | 0,070862 | 0,943507 | NA        |
| CTC-543D15.3  | 0,16    | 0,27  | 3,748196 | 0,070861 | 0,943509 | NA        |
| RNA5SP155     | 0,11    | 0,27  | 3,748196 | 0,070859 | 0,94351  | NA        |
| RP11-523H20.5 | 67,63   | -0,04 | 0,526436 | -0,07077 | 0,943579 | 0,9846487 |
| RP3-322L4.2   | 0,15    | 0,27  | 3,748196 | 0,070772 | 0,943579 | NA        |
| CCDC127       | 56,44   | 0,08  | 1,064328 | 0,070724 | 0,943617 | 0,9846487 |
| AC004562.1    | 0,15    | 0,27  | 3,748196 | 0,070717 | 0,943623 | NA        |
| RP11-8L8.2    | 141,57  | -0,06 | 0,905595 | -0,07063 | 0,943696 | 0,9846487 |
| RP11-491H9.3  | 0,14    | 0,26  | 3,748196 | 0,070618 | 0,943702 | NA        |
| RP11-333A23.1 | 0,12    | 0,26  | 3,748196 | 0,070599 | 0,943717 | NA        |
| RP11-324J13.1 | 0,11    | 0,26  | 3,748196 | 0,070581 | 0,943731 | NA        |
| CCDC115       | 266,77  | 0,06  | 0,802182 | 0,070568 | 0,943742 | 0,9846487 |
| RPL12P37      | 0,13    | 0,26  | 3,748196 | 0,07054  | 0,943764 | NA        |
| SGF29         | 152,34  | -0,06 | 0,828374 | -0,07049 | 0,943801 | 0,9846487 |
| KATNA1        | 157,35  | -0,05 | 0,661438 | -0,07048 | 0,943813 | 0,9846487 |
| RP11-932O9.7  | 8,51    | -0,13 | 1,910646 | -0,07045 | 0,943838 | 0,9846487 |
| RP11-337A23.5 | 0,09    | 0,26  | 3,748196 | 0,070441 | 0,943842 | NA        |
| BARD1         | 298,83  | 0,04  | 0,627871 | 0,070379 | 0,943892 | 0,9846487 |
| TMEM136       | 7,81    | -0,06 | 0,884711 | -0,07036 | 0,943909 | 0,9846487 |
| MISP          | 1,15    | -0,09 | 1,27851  | -0,07033 | 0,943933 | NA        |
| TGFB2         | 5,74    | 0,17  | 2,467571 | 0,070314 | 0,943944 | 0,9846487 |
| ZBTB4         | 196,73  | -0,05 | 0,751449 | -0,0703  | 0,943952 | 0,9846487 |
| NIN           | 1263,73 | 0,03  | 0,376656 | 0,070186 | 0,944045 | 0,9846487 |



|               |        |       |          |          |          |           |
|---------------|--------|-------|----------|----------|----------|-----------|
| CETN2         | 122,67 | -0,07 | 0,967406 | -0,07015 | 0,944073 | 0,9846487 |
| RP11-250H24.2 | 0,17   | 0,26  | 3,748196 | 0,070139 | 0,944083 | NA        |
| GNAI1         | 57,60  | -0,06 | 0,849972 | -0,07011 | 0,944109 | 0,9846487 |
| TFCP2         | 297,98 | 0,04  | 0,617438 | 0,069937 | 0,944244 | 0,9846763 |
| RP11-175P13.3 | 2,10   | 0,08  | 1,108919 | 0,069883 | 0,944287 | NA        |
| EPHB6         | 77,95  | -0,07 | 1,014127 | -0,06987 | 0,944294 | 0,9846763 |
| C9orf91       | 231,06 | -0,05 | 0,723881 | -0,06987 | 0,944294 | 0,9846763 |
| SWAP70        | 567,71 | -0,03 | 0,457311 | -0,0698  | 0,944356 | 0,9846851 |
| RP11-217B1.2  | 0,11   | 0,26  | 3,748196 | 0,069748 | 0,944394 | NA        |
| RP11-845C23.2 | 15,08  | 0,05  | 0,64982  | 0,069719 | 0,944417 | 0,984694  |
| COQ10B        | 406,09 | 0,05  | 0,737039 | 0,069561 | 0,944543 | 0,9847703 |
| RP11-1609.2   | 0,83   | 0,14  | 2,037599 | 0,069484 | 0,944604 | NA        |
| RP11-85B7.5   | 0,09   | 0,26  | 3,748196 | 0,069445 | 0,944635 | NA        |
| VN1R1         | 1,73   | -0,15 | 2,226144 | -0,06937 | 0,944698 | NA        |
| RP11-956J14.3 | 0,11   | 0,26  | 3,748196 | 0,06931  | 0,944743 | NA        |
| CTD-2639E6.4  | 0,84   | 0,17  | 2,483538 | 0,069253 | 0,944788 | NA        |
| BTN2A1        | 333,83 | 0,05  | 0,764961 | 0,069098 | 0,944912 | 0,9850134 |
| SSC5D         | 6,04   | 0,07  | 0,996636 | 0,069074 | 0,944931 | 0,9850134 |
| RP11-305E6.4  | 25,79  | -0,05 | 0,667924 | -0,06907 | 0,944935 | 0,9850134 |
| RNY1          | 1,71   | 0,14  | 2,051885 | 0,069037 | 0,94496  | NA        |
| FAM230A       | 4,92   | -0,11 | 1,628472 | -0,06886 | 0,945104 | 0,9851343 |
| FER1L5        | 10,55  | 0,04  | 0,583789 | 0,068745 | 0,945192 | 0,9851503 |
| RP11-583F2.5  | 13,76  | -0,06 | 0,924815 | -0,06857 | 0,945331 | 0,9851503 |
| DNAJA4        | 97,47  | 0,07  | 1,043618 | 0,068565 | 0,945336 | 0,9851503 |
| RP3-414A15.12 | 15,86  | 0,06  | 0,924786 | 0,068533 | 0,945361 | 0,9851503 |
| MUC17         | 2,71   | -0,14 | 1,993501 | -0,06853 | 0,945366 | NA        |
| CRAMP1        | 87,75  | -0,07 | 1,000652 | -0,06849 | 0,945392 | 0,9851503 |
| ADNP2         | 188,65 | 0,05  | 0,788908 | 0,068436 | 0,945439 | 0,9851503 |
| CAMKK2        | 311,22 | 0,04  | 0,563696 | 0,068371 | 0,94549  | 0,9851503 |
| COX7B2        | 0,63   | 0,17  | 2,446935 | 0,068305 | 0,945543 | NA        |
| RN7SL748P     | 0,26   | 0,15  | 2,173284 | 0,068213 | 0,945616 | NA        |
| RP11-404O13.5 | 103,06 | -0,04 | 0,657506 | -0,0681  | 0,945706 | 0,98529   |
| PYROXD1       | 275,26 | -0,04 | 0,65715  | -0,06807 | 0,94573  | 0,98529   |
| RNU6-866P     | 3,77   | -0,07 | 1,002482 | -0,06783 | 0,945923 | 0,9854362 |
| RP11-549B18.2 | 1,57   | 0,12  | 1,734959 | 0,067807 | 0,945939 | NA        |
| TEX12         | 0,14   | 0,25  | 3,748196 | 0,067767 | 0,945971 | NA        |
| FAM45A        | 481,16 | -0,03 | 0,509448 | -0,06762 | 0,946089 | 0,9855534 |
| RP5-1021I20.1 | 0,16   | -0,19 | 2,871923 | -0,06753 | 0,946159 | NA        |
| STX6          | 309,30 | -0,04 | 0,625905 | -0,06742 | 0,946247 | 0,9855709 |
| UQCRHL        | 9,69   | -0,05 | 0,740804 | -0,06736 | 0,946298 | 0,9855709 |
| CNPY2         | 874,97 | -0,02 | 0,334274 | -0,06732 | 0,946329 | 0,9855709 |
| RP11-434H6.7  | 14,03  | 0,08  | 1,200655 | 0,067285 | 0,946355 | 0,9855709 |
| MOSPD3        | 107,59 | 0,06  | 0,963777 | 0,067265 | 0,946371 | 0,9855709 |
| PIWIL4        | 41,99  | 0,13  | 1,88962  | 0,067151 | 0,946462 | 0,9855765 |
| HP            | 29,01  | -0,09 | 1,334286 | -0,06713 | 0,946482 | 0,9855765 |
| LINC01597     | 6,49   | 0,12  | 1,83579  | 0,067056 | 0,946537 | 0,9855792 |
| RP11-452N17.1 | 0,88   | -0,25 | 3,687575 | -0,06699 | 0,946586 | NA        |
| NGRN          | 330,24 | -0,05 | 0,681768 | -0,06695 | 0,946624 | 0,9856142 |
| DMBX1         | 4,19   | 0,05  | 0,804893 | 0,066819 | 0,946726 | 0,9856555 |
| COL4A1        | 0,89   | 0,25  | 3,747686 | 0,066806 | 0,946736 | NA        |

|                |         |       |          |          |          |           |
|----------------|---------|-------|----------|----------|----------|-----------|
| FAAP20         | 248,84  | -0,03 | 0,411559 | -0,06676 | 0,946776 | 0,9856555 |
| RNF121         | 67,85   | 0,07  | 0,99256  | 0,066697 | 0,946823 | 0,9856555 |
| RP11-138E2.1   | 2,45    | -0,11 | 1,663007 | -0,06663 | 0,946878 | NA        |
| PFN1P4         | 9,58    | 0,11  | 1,674872 | 0,066528 | 0,946958 | 0,9857206 |
| RP11-356C4.5   | 7,59    | 0,17  | 2,629826 | 0,066375 | 0,94708  | 0,9857206 |
| RP11-64I5.1    | 10,82   | 0,10  | 1,435569 | 0,066344 | 0,947104 | 0,9857206 |
| RP11-736N17.10 | 0,85    | -0,12 | 1,753128 | -0,06631 | 0,947131 | NA        |
| AC007347.2     | 1,57    | -0,07 | 1,049916 | -0,06629 | 0,947149 | NA        |
| RP3-420J14.1   | 14,08   | 0,04  | 0,607323 | 0,066233 | 0,947192 | 0,9857206 |
| CTB-89H12.1    | 29,07   | 0,10  | 1,529009 | 0,066233 | 0,947193 | 0,9857206 |
| DPRXP3         | 0,66    | -0,21 | 3,143313 | -0,0662  | 0,947222 | NA        |
| RP11-493L12.2  | 210,66  | -0,03 | 0,432471 | -0,06619 | 0,947227 | 0,9857206 |
| SIRPB2         | 310,84  | -0,04 | 0,581931 | -0,06614 | 0,947263 | 0,9857206 |
| RP11-686O6.2   | 0,66    | 0,21  | 3,193662 | 0,066087 | 0,947309 | NA        |
| PLA2G4A        | 69,80   | 0,07  | 1,068988 | 0,066086 | 0,947309 | 0,9857206 |
| RP11-326I11.4  | 0,08    | 0,25  | 3,748196 | 0,06608  | 0,947314 | NA        |
| C1orf168       | 35,39   | 0,05  | 0,688957 | 0,065845 | 0,947501 | 0,9857687 |
| TRIM16L        | 21,17   | 0,06  | 0,909596 | 0,065827 | 0,947516 | 0,9857687 |
| SPOP           | 1212,64 | -0,03 | 0,445039 | -0,06582 | 0,947524 | 0,9857687 |
| HBD            | 0,56    | -0,18 | 2,709962 | -0,06578 | 0,947551 | NA        |
| RP11-335E6.3   | 1,46    | -0,10 | 1,558165 | -0,06574 | 0,947585 | NA        |
| RP11-982M15.2  | 166,45  | -0,05 | 0,72646  | -0,06573 | 0,947596 | 0,9857687 |
| SFTPB          | 19,40   | 0,05  | 0,715136 | 0,065696 | 0,94762  | 0,9857687 |
| CTC-573M9.1    | 1,87    | -0,08 | 1,179088 | -0,0656  | 0,947695 | NA        |
| PSME3          | 493,62  | 0,05  | 0,716805 | 0,065519 | 0,947761 | 0,9858601 |
| RP4-798C17.7   | 0,37    | 0,25  | 3,748196 | 0,065442 | 0,947822 | NA        |
| RP13-638C3.6   | 4,08    | 0,11  | 1,673505 | 0,065279 | 0,947952 | 0,9860032 |
| RP11-353N4.5   | 15,76   | -0,11 | 1,701311 | -0,06505 | 0,948137 | 0,9861404 |
| IGKV1D-39      | 1,43    | -0,11 | 1,76232  | -0,06483 | 0,948306 | NA        |
| CES3           | 2,45    | 0,10  | 1,54635  | 0,064819 | 0,948318 | NA        |
| STMND1         | 10,47   | 0,05  | 0,721807 | 0,064748 | 0,948374 | 0,9862886 |
| PCDH17         | 1,38    | 0,08  | 1,249886 | 0,06471  | 0,948405 | NA        |
| RP11-226E21.4  | 48,67   | -0,06 | 0,867972 | -0,06467 | 0,948437 | 0,9862886 |
| C19orf35       | 84,54   | 0,03  | 0,516587 | 0,064668 | 0,948438 | 0,9862886 |
| C1orf74        | 5,60    | -0,09 | 1,405753 | -0,06442 | 0,948638 | 0,9863635 |
| CH507-42P11.1  | 5,14    | 0,09  | 1,408121 | 0,064378 | 0,948669 | 0,9863635 |
| H2BFS          | 5,14    | 0,09  | 1,408121 | 0,064378 | 0,948669 | 0,9863635 |
| CTD-2589M5.5   | 0,23    | 0,24  | 3,748081 | 0,064317 | 0,948718 | NA        |
| AC009158.1     | 1,45    | 0,09  | 1,352537 | 0,064128 | 0,948868 | NA        |
| BBS4           | 64,45   | 0,08  | 1,276775 | 0,064069 | 0,948915 | 0,986512  |
| RP11-818F20.1  | 4,18    | 0,06  | 0,996731 | 0,064009 | 0,948963 | 0,986512  |
| ISG20          | 619,88  | -0,04 | 0,686084 | -0,064   | 0,948971 | 0,986512  |
| C6orf163       | 2,06    | 0,15  | 2,279475 | 0,063903 | 0,949048 | NA        |
| RP11-474P2.7   | 3,09    | 0,16  | 2,54013  | 0,06383  | 0,949106 | NA        |
| AP000280.66    | 1,38    | -0,19 | 2,907945 | -0,06383 | 0,949109 | NA        |
| RP11-480A16.2  | 14,87   | -0,06 | 0,927975 | -0,06382 | 0,949117 | 0,9865438 |
| TRAK1          | 617,08  | -0,04 | 0,699126 | -0,0638  | 0,949128 | 0,9865438 |
| RN7SKP177      | 6,35    | 0,05  | 0,809421 | 0,063651 | 0,949248 | 0,9865438 |
| PRPF4B         | 676,92  | 0,02  | 0,272517 | 0,063644 | 0,949254 | 0,9865438 |
| MITD1          | 246,32  | -0,04 | 0,577723 | -0,06363 | 0,949267 | 0,9865438 |

|                |         |       |          |          |          |           |
|----------------|---------|-------|----------|----------|----------|-----------|
| RPL24P4        | 0,56    | -0,09 | 1,397307 | -0,0636  | 0,949285 | NA        |
| IFI44L         | 2580,81 | -0,07 | 1,101918 | -0,06333 | 0,949506 | 0,986731  |
| MESTIT1        | 4,44    | -0,05 | 0,856637 | -0,06327 | 0,949553 | 0,986731  |
| AC004967.7     | 1,92    | -0,07 | 1,169612 | -0,06326 | 0,949557 | NA        |
| RP11-2E11.9    | 0,45    | 0,15  | 2,375083 | 0,063226 | 0,949587 | NA        |
| AC144450.1     | 0,49    | -0,19 | 3,088002 | -0,06309 | 0,949695 | NA        |
| FKBP5          | 1747,38 | 0,04  | 0,565861 | 0,063026 | 0,949746 | 0,9868766 |
| AC068499.10    | 1,85    | -0,08 | 1,271353 | -0,063   | 0,949768 | NA        |
| RP11-13N13.5   | 11,88   | -0,05 | 0,730415 | -0,06275 | 0,949968 | 0,9870518 |
| MARK1          | 0,28    | -0,24 | 3,748196 | -0,06272 | 0,949987 | NA        |
| GGH            | 8,33    | -0,08 | 1,207828 | -0,0626  | 0,950085 | 0,9870736 |
| KMT2E          | 1932,73 | 0,02  | 0,306343 | 0,062551 | 0,950124 | 0,9870736 |
| RIMKLB         | 61,27   | 0,07  | 1,159463 | 0,062521 | 0,950148 | 0,9870736 |
| RP11-356K23.1  | 48,66   | 0,06  | 0,97464  | 0,06242  | 0,950228 | 0,9871019 |
| TLX1           | 0,06    | 0,23  | 3,747108 | 0,062039 | 0,950532 | NA        |
| RP11-64C12.1   | 12,97   | -0,04 | 0,717889 | -0,062   | 0,950561 | 0,9872908 |
| DIP2A          | 347,39  | 0,03  | 0,404148 | 0,062001 | 0,950562 | 0,9872908 |
| RN7SL868P      | 1,01    | -0,18 | 2,861894 | -0,06192 | 0,950627 | NA        |
| RP11-486L19.2  | 17,53   | -0,03 | 0,546774 | -0,06191 | 0,950633 | 0,9872908 |
| RN7SL543P      | 7,91    | -0,08 | 1,245275 | -0,06191 | 0,950634 | 0,9872908 |
| DRD4           | 1,17    | 0,12  | 1,870654 | 0,061903 | 0,95064  | NA        |
| DND1P1         | 0,47    | -0,23 | 3,735062 | -0,06188 | 0,950659 | NA        |
| CRYBA1         | 13,42   | -0,17 | 2,73926  | -0,06186 | 0,950675 | 0,9872908 |
| RP11-360N9.2   | 15,63   | 0,04  | 0,711866 | 0,061728 | 0,95078  | 0,9873442 |
| RP5-843L14.1   | 1,59    | -0,13 | 2,039567 | -0,06169 | 0,950811 | NA        |
| GLB1L2         | 2,74    | -0,09 | 1,410606 | -0,06163 | 0,950861 | NA        |
| PADI1          | 0,15    | -0,23 | 3,748196 | -0,06159 | 0,950893 | NA        |
| PIK3C3         | 607,33  | -0,05 | 0,784096 | -0,06152 | 0,950944 | 0,9874597 |
| RP11-370I10.6  | 2,52    | 0,10  | 1,58002  | 0,061329 | 0,951097 | NA        |
| ID4            | 1,97    | -0,21 | 3,345503 | -0,06132 | 0,951105 | NA        |
| PDLIM4         | 0,05    | 0,23  | 3,747312 | 0,061221 | 0,951183 | NA        |
| RP11-395I6.2   | 6,01    | -0,10 | 1,708788 | -0,06122 | 0,951186 | 0,9876559 |
| PNP            | 859,63  | -0,03 | 0,504029 | -0,06114 | 0,951244 | 0,987661  |
| RP11-270C12.3  | 1,05    | 0,08  | 1,383848 | 0,06109  | 0,951288 | NA        |
| RP11-1223D19.1 | 0,57    | -0,13 | 2,111017 | -0,06096 | 0,95139  | NA        |
| ZP2            | 0,88    | 0,15  | 2,504391 | 0,060922 | 0,951422 | NA        |
| NIP7           | 213,97  | 0,05  | 0,769971 | 0,060906 | 0,951434 | 0,9877155 |
| TLDC2          | 52,12   | 0,08  | 1,313031 | 0,060878 | 0,951456 | 0,9877155 |
| RP11-137O10.1  | 1,22    | 0,08  | 1,258887 | 0,060872 | 0,951461 | NA        |
| CA14           | 33,10   | 0,06  | 1,030895 | 0,0608   | 0,951518 | 0,9877155 |
| SYTL3          | 227,47  | 0,05  | 0,815411 | 0,060796 | 0,951522 | 0,9877155 |
| RNA5SP263      | 0,92    | -0,22 | 3,683676 | -0,06074 | 0,951566 | NA        |
| KIAA2026       | 575,95  | -0,03 | 0,558493 | -0,06071 | 0,951587 | 0,9877155 |
| TRAF3IP1       | 50,70   | -0,06 | 0,984663 | -0,0605  | 0,951754 | 0,9877155 |
| STAT1          | 1824,51 | 0,03  | 0,466623 | 0,060468 | 0,951783 | 0,9877155 |
| EMBP1          | 1,08    | 0,11  | 1,824061 | 0,060376 | 0,951856 | NA        |
| RP11-760D2.5   | 9,05    | 0,08  | 1,330981 | 0,060367 | 0,951863 | 0,9877155 |
| PTH2R          | 0,31    | -0,20 | 3,348461 | -0,0603  | 0,951914 | NA        |
| NIT1           | 195,80  | -0,05 | 0,875158 | -0,06026 | 0,951946 | 0,9877155 |
| RP11-804M7.1   | 4,94    | -0,05 | 0,754005 | -0,06024 | 0,951962 | 0,9877155 |

|                  |         |       |          |          |          |           |
|------------------|---------|-------|----------|----------|----------|-----------|
| RNU6-476P        | 9,29    | -0,11 | 1,773695 | -0,06015 | 0,95204  | 0,9877155 |
| RP11-425I13.3    | 5,06    | -0,11 | 1,78136  | -0,06009 | 0,952081 | 0,9877155 |
| RP11-142L16.2    | 64,70   | -0,11 | 1,789506 | -0,06005 | 0,952117 | 0,9877155 |
| TMED11P          | 0,29    | -0,20 | 3,317258 | -0,06    | 0,952157 | NA        |
| NUTM2G           | 4,11    | -0,17 | 2,794137 | -0,05997 | 0,95218  | 0,9877155 |
| NAIP             | 1695,18 | 0,03  | 0,446705 | 0,059936 | 0,952207 | 0,9877155 |
| RPSAP58          | 6,04    | -0,04 | 0,644044 | -0,05988 | 0,95225  | 0,9877155 |
| AC009120.10      | 13,85   | -0,03 | 0,552497 | -0,05983 | 0,952289 | 0,9877155 |
| RF00322          | 9,62    | 0,09  | 1,528989 | 0,059803 | 0,952313 | 0,9877155 |
| RP11-310N16.1    | 2,08    | -0,08 | 1,310598 | -0,05978 | 0,95233  | NA        |
| XXyac-YR21IF11.3 | 28,87   | -0,04 | 0,739774 | -0,05977 | 0,952343 | 0,9877155 |
| RP11-542M13.2    | 4,43    | 0,07  | 1,153259 | 0,059745 | 0,952358 | 0,9877155 |
| TEKT1            | 0,62    | 0,22  | 3,748196 | 0,059739 | 0,952363 | NA        |
| RP11-756A22.5    | 0,57    | -0,09 | 1,480108 | -0,05969 | 0,952405 | NA        |
| CTD-2050E21.1    | 7,23    | -0,06 | 1,051035 | -0,05941 | 0,952624 | 0,9878586 |
| AKR7L            | 25,03   | -0,03 | 0,541389 | -0,0594  | 0,952637 | 0,9878586 |
| PTP4A2P1         | 0,26    | 0,13  | 2,173054 | 0,059385 | 0,952646 | NA        |
| RBM43            | 72,18   | -0,04 | 0,684086 | -0,05926 | 0,952747 | 0,9878586 |
| TENM3            | 0,09    | 0,22  | 3,645661 | 0,059244 | 0,952758 | NA        |
| ZNF808           | 56,20   | -0,06 | 0,978496 | -0,05922 | 0,952779 | 0,9878586 |
| MRPL11           | 686,95  | -0,02 | 0,403512 | -0,0592  | 0,952793 | 0,9878586 |
| RP11-254F7.3     | 50,83   | -0,04 | 0,697251 | -0,05917 | 0,952815 | 0,9878586 |
| RP11-1094M14.5   | 1,62    | 0,13  | 2,148328 | 0,05911  | 0,952865 | NA        |
| MTRNR2L4         | 9,35    | 0,05  | 0,813984 | 0,059102 | 0,952871 | 0,9878616 |
| RP1-40G4P.1      | 0,89    | 0,07  | 1,186186 | 0,059048 | 0,952914 | NA        |
| RNU6-946P        | 28,43   | -0,05 | 0,889168 | -0,059   | 0,952948 | 0,9878869 |
| MIR7705          | 0,66    | 0,11  | 1,790474 | 0,058983 | 0,952966 | NA        |
| THSD1            | 0,23    | -0,17 | 2,841628 | -0,05896 | 0,952983 | NA        |
| RP1-30M3.6       | 0,72    | -0,10 | 1,775896 | -0,05889 | 0,953038 | NA        |
| PLCD1            | 64,90   | 0,07  | 1,23721  | 0,058863 | 0,953061 | 0,9878997 |
| FANCI            | 42,65   | 0,04  | 0,710414 | 0,058845 | 0,953076 | 0,9878997 |
| RP11-324I22.4    | 42,91   | 0,03  | 0,558311 | 0,058789 | 0,95312  | 0,9878997 |
| RP11-213G2.1     | 1,70    | -0,17 | 2,936003 | -0,05877 | 0,953134 | NA        |
| DTX2P1           | 0,24    | 0,13  | 2,177155 | 0,058724 | 0,953172 | NA        |
| PSG9             | 0,54    | 0,22  | 3,736731 | 0,058718 | 0,953177 | NA        |
| NUTM2B           | 1,86    | -0,12 | 2,038052 | -0,05861 | 0,953262 | NA        |
| SAMD9L           | 971,38  | -0,03 | 0,556907 | -0,05859 | 0,953278 | 0,9880081 |
| RP11-77P3.1      | 0,25    | 0,13  | 2,175546 | 0,058534 | 0,953324 | NA        |
| NARF             | 878,14  | -0,02 | 0,3524   | -0,05842 | 0,953412 | 0,9880901 |
| SKA2             | 216,34  | 0,03  | 0,456527 | 0,058358 | 0,953463 | 0,9880901 |
| AC009502.4       | 44,96   | -0,05 | 0,882906 | -0,05825 | 0,953547 | 0,9881222 |
| AC012457.2       | 1,46    | 0,11  | 1,971844 | 0,058171 | 0,953612 | NA        |
| CHD6             | 443,68  | -0,02 | 0,310224 | -0,05813 | 0,953648 | 0,9881433 |
| RP11-7F17.1      | 0,22    | -0,14 | 2,436513 | -0,05809 | 0,953678 | NA        |
| RN7SL126P        | 1,86    | 0,08  | 1,376407 | 0,058039 | 0,953718 | NA        |
| RP11-553K8.5     | 85,65   | -0,05 | 0,927967 | -0,05795 | 0,953785 | 0,9881433 |
| RP11-434D9.2     | 5,43    | 0,05  | 0,902987 | 0,057932 | 0,953803 | 0,9881433 |
| ARL5A            | 518,20  | 0,04  | 0,632808 | 0,057861 | 0,95386  | 0,9881433 |
| RABIF            | 180,16  | 0,04  | 0,707787 | 0,057851 | 0,953868 | 0,9881433 |
| RP11-875O11.2    | 0,79    | 0,14  | 2,489782 | 0,057809 | 0,953901 | NA        |

|                   |         |       |          |          |          |           |
|-------------------|---------|-------|----------|----------|----------|-----------|
| AC003029.1        | 235,67  | -0,04 | 0,623392 | -0,05779 | 0,953913 | 0,9881433 |
| FOXO3             | 498,01  | 0,03  | 0,48654  | 0,057668 | 0,954013 | 0,9881433 |
| ULK3              | 199,36  | 0,06  | 0,994686 | 0,057641 | 0,954035 | 0,9881433 |
| ZC2HC1A           | 80,41   | -0,07 | 1,149958 | -0,05763 | 0,954046 | 0,9881433 |
| RP11-327L3.4      | 0,22    | -0,16 | 2,845229 | -0,05755 | 0,954109 | NA        |
| RP11-327O17.2     | 0,31    | -0,17 | 3,023757 | -0,05748 | 0,954165 | NA        |
| AC012314.8        | 29,93   | 0,05  | 0,818481 | 0,057465 | 0,954175 | 0,9882218 |
| RP11-93K22.13     | 0,36    | -0,15 | 2,628181 | -0,05742 | 0,954213 | NA        |
| RPP25L            | 219,61  | -0,04 | 0,678784 | -0,05733 | 0,95428  | 0,9882218 |
| USP29             | 13,70   | 0,03  | 0,538674 | 0,057317 | 0,954292 | 0,9882218 |
| GAL3ST1           | 0,67    | -0,09 | 1,525555 | -0,05728 | 0,95432  | NA        |
| TLE1              | 71,02   | 0,09  | 1,498083 | 0,057265 | 0,954334 | 0,9882218 |
| RP11-797A18.3     | 0,45    | 0,21  | 3,744842 | 0,057259 | 0,954339 | NA        |
| CTA-212A2.1       | 3,73    | 0,16  | 2,779225 | 0,057213 | 0,954376 | NA        |
| ASB9              | 2,77    | 0,11  | 1,960743 | 0,057026 | 0,954525 | NA        |
| RP11-880O3.1      | 1,05    | 0,06  | 1,060305 | 0,056954 | 0,954582 | NA        |
| RP11-13E5.2       | 1,75    | -0,13 | 2,198653 | -0,05693 | 0,954601 | NA        |
| DNAJC17           | 240,22  | 0,04  | 0,664379 | 0,056886 | 0,954636 | 0,988461  |
| HCG23             | 229,85  | -0,03 | 0,614543 | -0,05684 | 0,954673 | 0,988461  |
| RP11-59H7.3       | 0,20    | -0,14 | 2,441568 | -0,0568  | 0,954707 | NA        |
| TPD52L2           | 877,82  | 0,03  | 0,502327 | 0,056756 | 0,95474  | 0,988461  |
| DOCK3             | 0,89    | 0,16  | 2,868627 | 0,056748 | 0,954746 | NA        |
| AC100793.2        | 14,10   | -0,06 | 1,085106 | -0,05671 | 0,954777 | 0,988461  |
| RP11-803P9.1      | 1,25    | 0,15  | 2,617198 | 0,056683 | 0,954798 | NA        |
| HIST1H1B          | 10,23   | 0,08  | 1,482342 | 0,056636 | 0,954835 | 0,9884655 |
| AC124789.1        | 1,17    | 0,08  | 1,40007  | 0,056565 | 0,954892 | NA        |
| DBN1              | 10,02   | 0,04  | 0,680164 | 0,056473 | 0,954965 | 0,9885456 |
| EPAS1             | 0,36    | 0,17  | 3,02505  | 0,05629  | 0,955111 | NA        |
| AC098617.1        | 0,17    | -0,16 | 2,865358 | -0,05628 | 0,955116 | NA        |
| RP11-17G12.2      | 1,64    | -0,09 | 1,54458  | -0,05626 | 0,955137 | NA        |
| RP11-171I2.5      | 4,15    | 0,12  | 2,193049 | 0,056221 | 0,955166 | 0,9885966 |
| RP11-442J21.2     | 3,68    | 0,08  | 1,468419 | 0,056179 | 0,955199 | NA        |
| MADCAM1           | 0,27    | 0,21  | 3,748126 | 0,056071 | 0,955286 | NA        |
| EIF4A2            | 2825,27 | -0,01 | 0,262782 | -0,05598 | 0,955358 | 0,9885966 |
| RP11-152N13.5     | 0,40    | -0,20 | 3,515819 | -0,0559  | 0,955421 | NA        |
| RP3-508I15.9      | 22,87   | -0,04 | 0,71686  | -0,05582 | 0,955484 | 0,9885966 |
| RP4-724E16.2      | 24,25   | -0,06 | 1,054625 | -0,05575 | 0,955544 | 0,9885966 |
| RP11-665G4.1      | 5,49    | -0,09 | 1,655416 | -0,05574 | 0,955547 | 0,9885966 |
| RP11-605F22.2     | 0,28    | 0,12  | 2,169637 | 0,05573  | 0,955557 | NA        |
| KLRC3             | 13,76   | 0,18  | 3,299249 | 0,055666 | 0,955608 | 0,9885966 |
| ARHGEF9           | 169,32  | -0,04 | 0,775279 | -0,05567 | 0,955608 | 0,9885966 |
| HLX               | 321,95  | -0,04 | 0,740324 | -0,05565 | 0,955621 | 0,9885966 |
| RGS11             | 0,46    | 0,11  | 1,895679 | 0,055635 | 0,955632 | NA        |
| CAPN1             | 731,93  | -0,02 | 0,361506 | -0,05558 | 0,955673 | 0,9885966 |
| RP11-206L10.8     | 7,05    | -0,08 | 1,405545 | -0,05548 | 0,955754 | 0,9885966 |
| AC079742.4        | 1,89    | 0,13  | 2,418263 | 0,055474 | 0,95576  | NA        |
| CTD-3131K8.2      | 62,26   | 0,04  | 0,66627  | 0,055431 | 0,955795 | 0,9885966 |
| TMCC3             | 147,87  | -0,05 | 0,973443 | -0,05543 | 0,955799 | 0,9885966 |
| XXbac-BPG246D15.8 | 1091,27 | -0,02 | 0,378581 | -0,05542 | 0,955804 | 0,9885966 |
| NLGN4Y            | 2,62    | 0,06  | 1,160455 | 0,055402 | 0,955818 | NA        |

|                   |         |       |          |          |          |           |
|-------------------|---------|-------|----------|----------|----------|-----------|
| RP9P              | 30,92   | 0,07  | 1,187762 | 0,055365 | 0,955848 | 0,9885966 |
| RP11-756H20.1     | 11,47   | 0,08  | 1,386707 | 0,055315 | 0,955887 | 0,9885966 |
| SNX9              | 233,54  | 0,04  | 0,731389 | 0,055241 | 0,955947 | 0,9885966 |
| RN7SL105P         | 5,48    | 0,07  | 1,180898 | 0,055162 | 0,956009 | 0,9885966 |
| KCNC3             | 2,49    | 0,08  | 1,503861 | 0,055125 | 0,956039 | NA        |
| GRM5              | 0,70    | -0,19 | 3,454714 | -0,0551  | 0,95606  | NA        |
| CTC1              | 160,22  | 0,05  | 0,868839 | 0,055081 | 0,956074 | 0,9885966 |
| RP11-274E7.2      | 1,13    | 0,06  | 1,032838 | 0,05508  | 0,956075 | NA        |
| MBNL3             | 351,41  | -0,05 | 0,866209 | -0,05506 | 0,956091 | 0,9885966 |
| C11orf44          | 0,61    | -0,10 | 1,741289 | -0,05503 | 0,956114 | NA        |
| RP11-149I23.3     | 0,11    | 0,21  | 3,748196 | 0,055021 | 0,956122 | NA        |
| DNAJC5B           | 4,48    | 0,08  | 1,407467 | 0,055014 | 0,956127 | 0,9885966 |
| UGT2A1            | 0,74    | 0,10  | 1,745829 | 0,054991 | 0,956146 | NA        |
| GSTM1             | 162,64  | 0,07  | 1,258319 | 0,054919 | 0,956203 | 0,9885966 |
| RNU6-611P         | 2,22    | -0,11 | 2,035179 | -0,05491 | 0,956211 | NA        |
| MID1              | 11,99   | 0,10  | 1,845961 | 0,054807 | 0,956292 | 0,9885966 |
| CASKIN1           | 0,30    | 0,21  | 3,748196 | 0,054761 | 0,956329 | NA        |
| XXbac-BPG116M5.14 | 3,31    | 0,07  | 1,23863  | 0,054717 | 0,956364 | NA        |
| XXbac-BPG116M5.16 | 3,31    | 0,07  | 1,23863  | 0,054717 | 0,956364 | NA        |
| RP11-390P2.4      | 82,06   | 0,07  | 1,216291 | 0,054717 | 0,956364 | 0,9885966 |
| SLC25A23          | 4,51    | 0,09  | 1,701713 | 0,05447  | 0,95656  | 0,9885966 |
| ATP5J             | 526,58  | 0,01  | 0,2225   | 0,054404 | 0,956614 | 0,9885966 |
| RP11-944C7.1      | 4,06    | -0,06 | 1,184829 | -0,05432 | 0,956679 | 0,9885966 |
| CUL1              | 1033,77 | -0,02 | 0,444045 | -0,0543  | 0,956697 | 0,9885966 |
| PFN1P8            | 21,27   | -0,07 | 1,28117  | -0,05428 | 0,95671  | 0,9885966 |
| PIEZO1            | 675,93  | 0,02  | 0,353455 | 0,05427  | 0,95672  | 0,9885966 |
| RN7SKP230         | 8,67    | 0,06  | 1,191766 | 0,054163 | 0,956805 | 0,9885966 |
| CTC-484M2.1       | 3,07    | -0,06 | 1,074718 | -0,05409 | 0,956865 | NA        |
| SEMA4D            | 840,70  | 0,04  | 0,741749 | 0,054058 | 0,956889 | 0,9885966 |
| RNU6-993P         | 0,47    | 0,20  | 3,613264 | 0,054025 | 0,956915 | NA        |
| RP11-114J13.1     | 1,09    | -0,12 | 2,250644 | -0,05401 | 0,956924 | NA        |
| RIMS1             | 5,32    | -0,10 | 1,795102 | -0,05397 | 0,956955 | 0,9885966 |
| CHRM2             | 3,59    | 0,08  | 1,469055 | 0,053968 | 0,956961 | NA        |
| IPCEF1            | 477,93  | -0,04 | 0,65115  | -0,05388 | 0,957028 | 0,9885966 |
| MAN1B1-AS1        | 45,42   | -0,05 | 0,841515 | -0,05386 | 0,957047 | 0,9885966 |
| ZFP37             | 11,98   | 0,05  | 0,980772 | 0,053831 | 0,95707  | 0,9885966 |
| HIST1H2AH         | 0,49    | -0,17 | 3,086807 | -0,05381 | 0,957087 | NA        |
| PROSER3           | 63,31   | -0,04 | 0,77581  | -0,05377 | 0,957116 | 0,9885966 |
| CD93              | 843,85  | -0,02 | 0,366269 | -0,05366 | 0,957209 | 0,9885966 |
| CAHM              | 22,20   | -0,05 | 0,9672   | -0,0536  | 0,957258 | 0,9885966 |
| KB-1507C5.4       | 9,14    | 0,07  | 1,285827 | 0,05353  | 0,957309 | 0,9885966 |
| MAN1B1            | 344,50  | -0,03 | 0,498895 | -0,05352 | 0,957319 | 0,9885966 |
| RP11-25D3.1       | 5,12    | 0,06  | 1,134294 | 0,053505 | 0,957329 | 0,9885966 |
| LTA4H             | 1569,76 | 0,02  | 0,453979 | 0,053445 | 0,957378 | 0,9885966 |
| RP11-466A19.1     | 4,09    | 0,04  | 0,793032 | 0,053414 | 0,957402 | 0,9885966 |
| RPPH1             | 112,47  | -0,03 | 0,490264 | -0,05341 | 0,957403 | 0,9885966 |
| ATAD5             | 90,82   | 0,05  | 0,846187 | 0,053409 | 0,957406 | 0,9885966 |
| NOXO1             | 0,77    | 0,09  | 1,741674 | 0,053335 | 0,957465 | NA        |
| MYOCD             | 0,02    | -0,20 | 3,745003 | -0,05323 | 0,957546 | NA        |
| AC007193.6        | 1,70    | 0,11  | 2,045967 | 0,053177 | 0,957591 | NA        |

|                |         |       |          |          |          |           |
|----------------|---------|-------|----------|----------|----------|-----------|
| PJA1           | 21,26   | -0,10 | 1,913966 | -0,05303 | 0,957706 | 0,9888517 |
| RP3-406P24.5   | 22,03   | 0,05  | 0,870388 | 0,052827 | 0,95787  | 0,9889663 |
| HRC            | 0,71    | -0,12 | 2,194345 | -0,05276 | 0,957924 | NA        |
| LRRC8A         | 209,86  | 0,06  | 1,137186 | 0,052639 | 0,95802  | 0,9890026 |
| RP11-794P6.2   | 0,12    | -0,20 | 3,746538 | -0,05264 | 0,958023 | NA        |
| ICA1           | 32,45   | 0,04  | 0,81982  | 0,052596 | 0,958053 | 0,9890026 |
| RP11-613F22.8  | 12,39   | -0,03 | 0,627108 | -0,05258 | 0,958065 | 0,9890026 |
| MTO1           | 427,15  | 0,04  | 0,671171 | 0,052421 | 0,958193 | 0,9890698 |
| RP11-519G16.5  | 1,39    | -0,08 | 1,574333 | -0,05231 | 0,958284 | NA        |
| PAIP2B         | 47,74   | -0,04 | 0,838355 | -0,0523  | 0,958287 | 0,9890698 |
| RP11-861E23.2  | 43,78   | -0,03 | 0,597038 | -0,0523  | 0,958289 | 0,9890698 |
| DYRK4          | 168,27  | -0,05 | 0,955401 | -0,0522  | 0,95837  | 0,9890986 |
| RP11-175P13.2  | 0,48    | 0,12  | 2,297227 | 0,052168 | 0,958395 | NA        |
| TXNDC2         | 0,22    | 0,20  | 3,748196 | 0,052044 | 0,958494 | NA        |
| RP11-844G16.1  | 0,50    | -0,19 | 3,732924 | -0,05201 | 0,95852  | NA        |
| RP11-111H13.1  | 0,60    | 0,16  | 3,094521 | 0,05189  | 0,958616 | NA        |
| TUBB6          | 474,61  | 0,02  | 0,447347 | 0,051826 | 0,958667 | 0,98935   |
| SSX2           | 0,45    | 0,14  | 2,708729 | 0,051818 | 0,958674 | NA        |
| CTB-158E9.1    | 0,11    | 0,19  | 3,747656 | 0,05171  | 0,95876  | NA        |
| RP11-505E24.2  | 2,43    | 0,07  | 1,355964 | 0,051709 | 0,958761 | NA        |
| CABP5          | 0,21    | -0,15 | 2,849325 | -0,05168 | 0,958783 | NA        |
| SNORA25        | 0,72    | 0,11  | 2,071288 | 0,051666 | 0,958795 | NA        |
| SDHB           | 1447,72 | -0,02 | 0,312944 | -0,05162 | 0,958829 | 0,9893899 |
| RP4-545C24.1   | 6,22    | -0,07 | 1,384389 | -0,05161 | 0,958837 | 0,9893899 |
| C1orf216       | 30,61   | -0,04 | 0,734657 | -0,05158 | 0,958865 | 0,9893899 |
| GPR158         | 4,00    | -0,07 | 1,421871 | -0,05144 | 0,958972 | 0,9893943 |
| ERGIC2         | 313,79  | 0,03  | 0,635342 | 0,051439 | 0,958976 | 0,9893943 |
| RP3-425C14.6   | 0,26    | 0,13  | 2,486152 | 0,051353 | 0,959045 | NA        |
| AC005082.12    | 0,66    | 0,19  | 3,656125 | 0,051351 | 0,959046 | NA        |
| SLC16A7        | 282,91  | 0,03  | 0,603364 | 0,051208 | 0,95916  | 0,9894864 |
| RPL23AP1       | 3,98    | 0,10  | 1,959371 | 0,051193 | 0,959172 | 0,9894864 |
| ZNF646         | 124,64  | 0,07  | 1,385893 | 0,05096  | 0,959358 | 0,9895973 |
| MXD4           | 275,85  | -0,03 | 0,514339 | -0,05092 | 0,959385 | 0,9895973 |
| RDH5           | 21,60   | -0,06 | 1,245425 | -0,05067 | 0,95959  | 0,9897534 |
| COL26A1        | 0,66    | -0,09 | 1,801975 | -0,05053 | 0,9597   | NA        |
| RP11-137L10.6  | 89,07   | 0,05  | 0,922326 | 0,050384 | 0,959816 | 0,9899304 |
| MAP3K12        | 32,84   | -0,05 | 1,023315 | -0,05032 | 0,959868 | 0,9899304 |
| RP11-799O21.1  | 9,86    | 0,07  | 1,455754 | 0,050031 | 0,960098 | 0,9900725 |
| KDM3A          | 438,57  | -0,03 | 0,659485 | -0,05001 | 0,960112 | 0,9900725 |
| RP11-138I18.2  | 2,75    | -0,07 | 1,345154 | -0,04992 | 0,960189 | NA        |
| BNIP3L         | 1501,91 | 0,02  | 0,461287 | 0,04981  | 0,960274 | 0,9900813 |
| ITGAL          | 864,11  | -0,02 | 0,393332 | -0,04977 | 0,960304 | 0,9900813 |
| RN7SL542P      | 0,66    | -0,16 | 3,141978 | -0,04968 | 0,960375 | NA        |
| AC016689.1     | 7,24    | 0,07  | 1,496169 | 0,049679 | 0,960378 | 0,9900813 |
| RN7SKP30       | 3,36    | 0,11  | 2,134555 | 0,049612 | 0,960432 | NA        |
| RP11-798G7.8   | 52,25   | -0,05 | 0,980039 | -0,04961 | 0,960432 | 0,9900813 |
| EDEM3          | 443,53  | -0,03 | 0,610713 | -0,04956 | 0,960472 | 0,9900813 |
| ICAM3          | 1145,13 | -0,01 | 0,290214 | -0,04953 | 0,960493 | 0,9900813 |
| WIPF1          | 943,67  | -0,02 | 0,370098 | -0,04951 | 0,960515 | 0,9900813 |
| RP11-473M20.14 | 23,84   | 0,04  | 0,714838 | 0,049468 | 0,960546 | 0,9900813 |

|               |        |       |          |          |          |           |
|---------------|--------|-------|----------|----------|----------|-----------|
| IL15          | 283,50 | -0,04 | 0,810691 | -0,0494  | 0,9606   | 0,9900819 |
| SMURF2P1      | 0,46   | 0,12  | 2,339843 | 0,049338 | 0,96065  | NA        |
| TMEM56-RWDD3  | 0,70   | 0,18  | 3,58584  | 0,049329 | 0,960657 | NA        |
| TEC           | 210,96 | -0,04 | 0,853667 | -0,04928 | 0,960696 | 0,990126  |
| DIO3OS        | 1,35   | -0,17 | 3,366662 | -0,04909 | 0,960845 | NA        |
| GS1-393G12.12 | 0,79   | 0,12  | 2,497964 | 0,048981 | 0,960934 | NA        |
| PLCD4         | 21,07  | -0,05 | 0,948721 | -0,04894 | 0,960969 | 0,990294  |
| RP11-174O3.3  | 0,26   | -0,18 | 3,748196 | -0,04887 | 0,961024 | NA        |
| N4BP1         | 465,64 | 0,03  | 0,629892 | 0,048862 | 0,961029 | 0,990294  |
| CD80          | 0,10   | 0,18  | 3,748196 | 0,048862 | 0,961029 | NA        |
| RP11-756P10.6 | 9,09   | 0,09  | 1,819492 | 0,048818 | 0,961064 | 0,990294  |
| NEURL4        | 48,49  | 0,07  | 1,369553 | 0,048741 | 0,961125 | 0,990294  |
| RP13-585F24.1 | 0,89   | 0,07  | 1,36143  | 0,048733 | 0,961132 | NA        |
| RP11-163D8.1  | 0,83   | 0,16  | 3,226438 | 0,048689 | 0,961167 | NA        |
| RP11-732A19.1 | 0,28   | -0,16 | 3,361958 | -0,04868 | 0,961172 | NA        |
| C17orf75      | 108,37 | 0,05  | 1,016036 | 0,048673 | 0,96118  | 0,990294  |
| SLC6A9        | 0,16   | 0,18  | 3,748196 | 0,048609 | 0,961231 | NA        |
| CTB-54D4.1    | 2,85   | 0,06  | 1,232402 | 0,048576 | 0,961257 | NA        |
| CLPP          | 235,27 | -0,02 | 0,416285 | -0,04857 | 0,961265 | 0,990294  |
| SNORA11B      | 2,74   | 0,11  | 2,295938 | 0,048558 | 0,961271 | NA        |
| LOX           | 1,38   | 0,13  | 2,624874 | 0,048547 | 0,961281 | NA        |
| HSPBAP1       | 240,71 | 0,03  | 0,550939 | 0,04849  | 0,961326 | 0,990294  |
| SFSWAP        | 542,82 | 0,02  | 0,428974 | 0,048488 | 0,961327 | 0,990294  |
| SUMF1         | 448,61 | -0,03 | 0,535001 | -0,04847 | 0,961338 | 0,990294  |
| RP1-214M20.2  | 0,40   | -0,11 | 2,281908 | -0,04833 | 0,961454 | NA        |
| DPAGT1        | 225,29 | 0,04  | 0,885755 | 0,048215 | 0,961545 | 0,9904348 |
| AC007050.17   | 4,24   | 0,11  | 2,207026 | 0,048169 | 0,961582 | 0,9904348 |
| RP11-505E24.3 | 0,28   | -0,16 | 3,365051 | -0,04803 | 0,961691 | NA        |
| CDC42BPB      | 277,80 | 0,04  | 0,836429 | 0,047923 | 0,961777 | 0,9904352 |
| RP11-75C9.1   | 11,30  | -0,05 | 0,983459 | -0,04792 | 0,961782 | 0,9904352 |
| RP11-572M11.3 | 0,93   | -0,10 | 2,033003 | -0,04791 | 0,961789 | NA        |
| ITGAV         | 154,97 | 0,05  | 1,055716 | 0,047842 | 0,961842 | 0,9904352 |
| MLLT10P1      | 2,06   | -0,14 | 2,949619 | -0,04782 | 0,961861 | NA        |
| RHEB          | 444,25 | 0,03  | 0,699802 | 0,047791 | 0,961883 | 0,9904352 |
| KRBA1         | 12,40  | 0,09  | 1,926068 | 0,047785 | 0,961887 | 0,9904352 |
| RP11-1077A2.1 | 14,17  | 0,02  | 0,497579 | 0,047768 | 0,961901 | 0,9904352 |
| RP5-1148A21.3 | 0,24   | -0,16 | 3,382284 | -0,04766 | 0,961984 | NA        |
| RP11-669N7.2  | 0,60   | -0,15 | 3,109566 | -0,04764 | 0,962001 | NA        |
| SLCO4C1       | 52,46  | -0,03 | 0,656162 | -0,04761 | 0,962024 | 0,9905065 |
| TTY10         | 0,06   | 0,18  | 3,748196 | 0,047503 | 0,962112 | NA        |
| AC037445.1    | 0,32   | 0,17  | 3,579857 | 0,047444 | 0,96216  | NA        |
| CTD-2142D14.1 | 0,31   | 0,12  | 2,473258 | 0,047413 | 0,962184 | NA        |
| RP11-290F24.6 | 0,21   | -0,16 | 3,381543 | -0,04733 | 0,962251 | NA        |
| RP5-1096D14.6 | 2,33   | -0,04 | 0,931094 | -0,0473  | 0,962272 | NA        |
| AC023481.1    | 0,28   | 0,12  | 2,480116 | 0,04728  | 0,96229  | NA        |
| GJC3          | 3,41   | 0,15  | 3,102548 | 0,047263 | 0,962304 | NA        |
| TMEM52B       | 125,08 | 0,03  | 0,618417 | 0,047174 | 0,962374 | 0,9907872 |
| SPATA4        | 28,18  | 0,04  | 0,79617  | 0,047129 | 0,96241  | 0,9907872 |
| AC140481.1    | 44,50  | 0,07  | 1,560003 | 0,047037 | 0,962483 | 0,9907872 |
| RP11-98J23.2  | 6,17   | -0,12 | 2,53843  | -0,047   | 0,962515 | 0,9907872 |



|                |         |       |          |          |          |           |
|----------------|---------|-------|----------|----------|----------|-----------|
| RN7SKP248      | 0,32    | 0,14  | 2,884717 | 0,046943 | 0,962559 | NA        |
| FAM153A        | 9,05    | 0,07  | 1,445217 | 0,046938 | 0,962563 | 0,9907872 |
| MTERF1         | 96,87   | 0,04  | 0,941265 | 0,046749 | 0,962713 | 0,9908391 |
| SPATA31A1      | 0,09    | 0,17  | 3,748196 | 0,046656 | 0,962787 | NA        |
| LFNG           | 219,92  | -0,03 | 0,54933  | -0,04665 | 0,96279  | 0,9908391 |
| RP11-277P12.10 | 1,47    | -0,08 | 1,79119  | -0,04665 | 0,962796 | NA        |
| CH507-513H4.5  | 3335,04 | -0,01 | 0,217118 | -0,04662 | 0,962818 | 0,9908391 |
| ARPP19         | 584,61  | -0,02 | 0,532712 | -0,04661 | 0,962826 | 0,9908391 |
| ZNF438         | 64,40   | 0,06  | 1,342015 | 0,046495 | 0,962916 | 0,9908764 |
| RP11-473D24.1  | 1,72    | -0,10 | 2,21194  | -0,04644 | 0,96296  | NA        |
| ZFP64          | 90,98   | 0,03  | 0,745892 | 0,046268 | 0,963097 | 0,9910081 |
| CLCN4          | 41,64   | 0,08  | 1,801946 | 0,046185 | 0,963162 | 0,9910138 |
| RP11-98G7.1    | 2,04    | 0,16  | 3,374007 | 0,046109 | 0,963223 | NA        |
| MPPE1          | 361,95  | 0,03  | 0,59354  | 0,046057 | 0,963265 | 0,9910138 |
| RP11-103J17.2  | 0,10    | 0,17  | 3,747739 | 0,046046 | 0,963274 | NA        |
| PIAS3          | 192,62  | -0,05 | 1,189283 | -0,04589 | 0,963398 | 0,9910138 |
| NLRP5          | 0,39    | 0,15  | 3,322466 | 0,045864 | 0,963419 | NA        |
| RP11-297C4.3   | 11,91   | -0,04 | 0,912604 | -0,04583 | 0,963445 | 0,9910138 |
| RP11-284F21.10 | 1,75    | 0,12  | 2,623819 | 0,045804 | 0,963466 | NA        |
| HCFC2          | 104,31  | 0,05  | 1,174608 | 0,045743 | 0,963515 | 0,9910138 |
| AP000356.2     | 8,53    | 0,04  | 0,789698 | 0,045712 | 0,96354  | 0,9910138 |
| RPS4XP22       | 2,95    | 0,05  | 0,993661 | 0,045701 | 0,963549 | NA        |
| BAALC          | 0,51    | -0,11 | 2,363774 | -0,0457  | 0,963551 | NA        |
| AF011889.5     | 48,10   | -0,06 | 1,388278 | -0,04569 | 0,963556 | 0,9910138 |
| DYRK1B         | 13,54   | -0,06 | 1,264809 | -0,04565 | 0,963592 | 0,9910138 |
| C12orf43       | 117,90  | 0,02  | 0,542441 | 0,045616 | 0,963616 | 0,9910138 |
| DEPDC1B        | 6,03    | -0,08 | 1,82187  | -0,04558 | 0,963641 | 0,9910138 |
| TEKT2          | 3,59    | 0,04  | 0,943186 | 0,045548 | 0,963671 | NA        |
| SEPT10         | 1,77    | -0,10 | 2,194675 | -0,04552 | 0,963693 | NA        |
| RP11-340P19.1  | 7,01    | 0,09  | 1,874353 | 0,045498 | 0,96371  | 0,9910138 |
| LA16c-360H6.3  | 0,18    | -0,16 | 3,409217 | -0,04547 | 0,96373  | NA        |
| DHX29          | 405,33  | 0,03  | 0,575568 | 0,045459 | 0,963742 | 0,9910138 |
| WFDC11         | 26,12   | 0,04  | 0,873631 | 0,045319 | 0,963853 | 0,9910738 |
| COX7B          | 772,15  | 0,01  | 0,262549 | 0,045207 | 0,963942 | 0,9910794 |
| AC007040.11    | 13,33   | 0,05  | 1,049504 | 0,04517  | 0,963972 | 0,9910794 |
| TDRD3          | 161,12  | 0,03  | 0,632944 | 0,045111 | 0,964018 | 0,9910794 |
| BEND3          | 36,92   | 0,05  | 1,0839   | 0,0449   | 0,964187 | 0,9911198 |
| RP11-520F9.2   | 10,52   | -0,04 | 0,996143 | -0,04489 | 0,964192 | 0,9911198 |
| NDUFC2-KCTD14  | 104,45  | 0,04  | 0,861251 | 0,044859 | 0,96422  | 0,9911198 |
| RNU6-789P      | 0,58    | -0,11 | 2,378861 | -0,04484 | 0,964233 | NA        |
| FBXO38         | 338,68  | 0,03  | 0,731178 | 0,044795 | 0,964271 | 0,9911198 |
| RP11-363L24.3  | 1,97    | -0,11 | 2,407173 | -0,04475 | 0,964308 | NA        |
| FLYWCH2        | 84,36   | -0,04 | 0,9093   | -0,04465 | 0,96439  | 0,9911809 |
| CTD-2313F11.1  | 10,12   | -0,06 | 1,263247 | -0,04459 | 0,964437 | 0,9911809 |
| AC074183.3     | 3,18    | -0,04 | 1,005383 | -0,04458 | 0,964442 | NA        |
| HMGB1P8        | 5,39    | -0,04 | 0,836082 | -0,04441 | 0,964574 | 0,9912041 |
| CDC25A         | 3,74    | 0,13  | 2,910125 | 0,044276 | 0,964685 | NA        |
| C2orf61        | 0,75    | -0,07 | 1,646771 | -0,04417 | 0,964768 | NA        |
| IGLV3-9        | 1,49    | -0,12 | 2,616504 | -0,04417 | 0,964769 | NA        |
| AC022007.5     | 11,99   | -0,05 | 1,033308 | -0,04414 | 0,964797 | 0,9912041 |

|               |         |       |          |          |          |           |
|---------------|---------|-------|----------|----------|----------|-----------|
| FAM200B       | 148,27  | -0,03 | 0,613905 | -0,04409 | 0,96483  | 0,9912041 |
| FHIT          | 103,59  | 0,04  | 0,936417 | 0,044083 | 0,964838 | 0,9912041 |
| WDR90         | 45,73   | -0,03 | 0,659866 | -0,04408 | 0,964842 | 0,9912041 |
| CREBZF        | 188,66  | 0,03  | 0,639059 | 0,043959 | 0,964937 | 0,9912041 |
| RP11-138C9.1  | 8,66    | 0,04  | 1,004231 | 0,043912 | 0,964975 | 0,9912041 |
| AC068489.1    | 0,10    | 0,16  | 3,748196 | 0,043888 | 0,964994 | NA        |
| AE000658.31   | 5,76    | -0,06 | 1,286785 | -0,04381 | 0,965059 | 0,9912041 |
| VAMP3         | 780,43  | 0,02  | 0,509182 | 0,043806 | 0,965059 | 0,9912041 |
| RP11-455B3.1  | 0,49    | 0,09  | 1,993482 | 0,043793 | 0,965069 | NA        |
| ZC3H12C       | 19,46   | -0,05 | 1,148168 | -0,04376 | 0,965094 | 0,9912041 |
| RN7SL217P     | 1,01    | 0,07  | 1,707786 | 0,043749 | 0,965104 | NA        |
| RP11-757G1.6  | 33,30   | -0,05 | 1,251455 | -0,04374 | 0,965115 | 0,9912041 |
| CTD-2516F10.2 | 36,37   | 0,04  | 0,850018 | 0,043716 | 0,965131 | 0,9912041 |
| DPY19L2P1     | 24,53   | 0,07  | 1,592278 | 0,043689 | 0,965152 | 0,9912041 |
| RP11-431K24.1 | 22,65   | -0,03 | 0,782936 | -0,04353 | 0,965281 | 0,991282  |
| RP11-475C16.1 | 3,97    | -0,04 | 0,852294 | -0,04343 | 0,965355 | 0,9913036 |
| RP11-119B16.2 | 6,75    | 0,06  | 1,317775 | 0,043342 | 0,965429 | 0,9913129 |
| RASGEF1B      | 1319,25 | 0,02  | 0,459961 | 0,043262 | 0,965493 | 0,9913129 |
| AC145343.2    | 3,18    | 0,06  | 1,396723 | 0,043118 | 0,965607 | NA        |
| PKD1L1        | 3,18    | 0,12  | 2,691231 | 0,043117 | 0,965608 | NA        |
| NUP133        | 267,17  | 0,03  | 0,692018 | 0,043085 | 0,965634 | 0,9913129 |
| HEMK1         | 351,23  | -0,03 | 0,785803 | -0,04298 | 0,965715 | 0,9913129 |
| C1S           | 40,61   | -0,03 | 0,637994 | -0,04287 | 0,965805 | 0,9913129 |
| RN7SL81P      | 0,19    | -0,15 | 3,390381 | -0,04281 | 0,965852 | NA        |
| RN7SL76P      | 7,29    | 0,05  | 1,254995 | 0,042786 | 0,965872 | 0,9913129 |
| CEACAM6       | 0,12    | 0,16  | 3,747517 | 0,042758 | 0,965895 | NA        |
| AC010093.1    | 18,23   | 0,06  | 1,431074 | 0,042717 | 0,965927 | 0,9913129 |
| RPL21P5       | 0,27    | 0,15  | 3,44206  | 0,042711 | 0,965932 | NA        |
| CNBD2         | 107,34  | -0,04 | 0,994439 | -0,04269 | 0,965952 | 0,9913129 |
| RP11-400F19.6 | 15,90   | 0,08  | 1,978613 | 0,042661 | 0,965972 | 0,9913129 |
| SF3A2         | 11,03   | -0,04 | 0,85656  | -0,04264 | 0,96599  | 0,9913129 |
| TMCO4         | 103,54  | -0,04 | 0,910568 | -0,0426  | 0,96602  | 0,9913129 |
| RP11-194N12.2 | 5,53    | 0,04  | 1,054687 | 0,042575 | 0,96604  | 0,9913129 |
| PDCD6IP       | 902,90  | -0,02 | 0,454207 | -0,04247 | 0,966121 | 0,9913129 |
| RP11-864J10.4 | 15,42   | 0,08  | 1,946819 | 0,042329 | 0,966236 | 0,9913129 |
| AF254983.5    | 13,56   | -0,07 | 1,624385 | -0,04233 | 0,966237 | 0,9913129 |
| SLC2A11       | 75,85   | -0,03 | 0,752293 | -0,04226 | 0,966294 | 0,9913129 |
| SFMBT1        | 31,87   | -0,06 | 1,394405 | -0,04224 | 0,966308 | 0,9913129 |
| RP11-461F11.2 | 30,38   | -0,03 | 0,65448  | -0,04221 | 0,966328 | 0,9913129 |
| CYTH1         | 1300,66 | 0,01  | 0,344408 | 0,042153 | 0,966377 | 0,9913129 |
| RP11-706F1.1  | 1,04    | -0,06 | 1,437079 | -0,0421  | 0,966421 | NA        |
| OBSL1         | 11,39   | 0,03  | 0,731573 | 0,041961 | 0,96653  | 0,9913529 |
| RP5-1120P11.4 | 0,28    | 0,12  | 2,91777  | 0,041865 | 0,966606 | NA        |
| RP11-215P8.4  | 10,71   | 0,06  | 1,393171 | 0,041856 | 0,966613 | 0,9913529 |
| ANO1          | 0,22    | -0,16 | 3,745217 | -0,04184 | 0,966628 | NA        |
| NCKAP5L       | 116,04  | -0,03 | 0,602879 | -0,04167 | 0,966761 | 0,9913529 |
| SULT1C2P1     | 7,92    | -0,04 | 0,874763 | -0,04159 | 0,966823 | 0,9913529 |
| CAMSAP3       | 0,66    | 0,15  | 3,664488 | 0,041583 | 0,966831 | NA        |
| RP11-502L5.2  | 0,19    | -0,16 | 3,748196 | -0,04155 | 0,966859 | NA        |
| BRMS1         | 482,62  | -0,02 | 0,429811 | -0,04151 | 0,966889 | 0,9913529 |

|                |         |       |          |          |          |           |
|----------------|---------|-------|----------|----------|----------|-----------|
| ERLEC1         | 257,08  | 0,02  | 0,528802 | 0,041493 | 0,966903 | 0,9913529 |
| RP11-354K4.2   | 0,61    | 0,11  | 2,761409 | 0,041477 | 0,966916 | NA        |
| RNF115         | 352,08  | 0,02  | 0,530694 | 0,041452 | 0,966935 | 0,9913529 |
| RP11-604N13.1  | 8,77    | -0,03 | 0,657357 | -0,04144 | 0,966942 | 0,9913529 |
| GS1-484O17.5   | 9,40    | 0,04  | 1,066765 | 0,041422 | 0,966959 | 0,9913529 |
| RP3-439I14.1   | 5,41    | 0,05  | 1,183043 | 0,04139  | 0,966985 | 0,9913529 |
| RP11-498C9.3   | 27,00   | 0,03  | 0,749209 | 0,041369 | 0,967002 | 0,9913529 |
| ZNF658         | 6,42    | 0,07  | 1,690065 | 0,041281 | 0,967071 | 0,9913695 |
| RP4-796I8.1    | 0,71    | 0,15  | 3,727721 | 0,041117 | 0,967203 | NA        |
| PAIP2          | 1412,38 | 0,01  | 0,351532 | 0,041109 | 0,967209 | 0,9914562 |
| HBG2           | 1,37    | 0,11  | 2,635299 | 0,04109  | 0,967224 | NA        |
| KBTBD2         | 567,06  | -0,03 | 0,694462 | -0,04094 | 0,967341 | 0,991537  |
| RP5-855F14.1   | 0,56    | 0,07  | 1,589021 | 0,040919 | 0,96736  | NA        |
| RP11-109A6.2   | 0,65    | 0,07  | 1,64128  | 0,040915 | 0,967364 | NA        |
| GMFB           | 496,51  | -0,02 | 0,605785 | -0,04085 | 0,967417 | 0,9915437 |
| HIGD1B         | 0,58    | -0,13 | 3,134246 | -0,04081 | 0,967449 | NA        |
| RP1-272L16.1   | 0,22    | -0,14 | 3,389844 | -0,04075 | 0,967493 | NA        |
| TEX30          | 92,18   | 0,05  | 1,321783 | 0,040748 | 0,967496 | 0,9915437 |
| AC108676.1     | 45,06   | -0,02 | 0,529301 | -0,04073 | 0,967508 | 0,9915437 |
| HSPA12A        | 79,60   | 0,03  | 0,645511 | 0,040582 | 0,967629 | 0,9915855 |
| BCL7C          | 143,60  | 0,03  | 0,6489   | 0,040498 | 0,967696 | 0,9915855 |
| SLCO1A2        | 4,07    | -0,05 | 1,253432 | -0,04048 | 0,967709 | 0,9915855 |
| RP11-856B14.10 | 3,60    | -0,03 | 0,72395  | -0,04044 | 0,967745 | NA        |
| RP13-44L19.2   | 11,09   | -0,07 | 1,671119 | -0,04041 | 0,96777  | 0,991594  |
| YBEY           | 71,56   | -0,04 | 0,938474 | -0,04032 | 0,967837 | 0,9916084 |
| RP11-332J15.3  | 1,86    | -0,09 | 2,240711 | -0,0402  | 0,967932 | NA        |
| RN7SL861P      | 0,21    | 0,14  | 3,467148 | 0,040176 | 0,967953 | NA        |
| CYP4F43P       | 1,20    | 0,05  | 1,252256 | 0,040134 | 0,967986 | NA        |
| KIF20A         | 0,70    | 0,08  | 2,104303 | 0,040101 | 0,968012 | NA        |
| FAM83E         | 3,49    | 0,04  | 1,057994 | 0,039986 | 0,968105 | NA        |
| RP11-727F15.13 | 0,26    | -0,15 | 3,748196 | -0,03986 | 0,968208 | NA        |
| ICE2           | 264,85  | -0,02 | 0,554554 | -0,03983 | 0,968229 | 0,9918165 |
| SLC3A2         | 1038,77 | -0,02 | 0,461201 | -0,03983 | 0,96823  | 0,9918165 |
| MYLIP          | 684,04  | -0,02 | 0,430874 | -0,03982 | 0,968238 | 0,9918165 |
| RP11-373N22.3  | 9,23    | -0,06 | 1,453024 | -0,03977 | 0,968275 | 0,9918165 |
| YTHDC2         | 526,77  | -0,02 | 0,463547 | -0,03973 | 0,96831  | 0,9918165 |
| LUM            | 0,19    | 0,15  | 3,748196 | 0,039727 | 0,96831  | NA        |
| RP11-424N24.2  | 0,37    | -0,14 | 3,537583 | -0,03971 | 0,968323 | NA        |
| RP3-508I15.14  | 4,68    | -0,07 | 1,75159  | -0,03966 | 0,96836  | 0,9918165 |
| CTD-2033A16.3  | 10,42   | 0,07  | 1,817038 | 0,039536 | 0,968463 | 0,991835  |
| VASH2          | 10,71   | -0,03 | 0,818815 | -0,03943 | 0,96855  | 0,991835  |
| RP11-286N22.6  | 56,39   | -0,03 | 0,879105 | -0,03942 | 0,968556 | 0,991835  |
| PAUPAR         | 27,51   | -0,05 | 1,282685 | -0,03937 | 0,968592 | 0,991835  |
| AMY2B          | 134,37  | 0,03  | 0,649364 | 0,03916  | 0,968763 | 0,9918859 |
| CD99L2         | 133,92  | -0,05 | 1,150972 | -0,03915 | 0,968772 | 0,9918859 |
| RN7SL546P      | 14,47   | -0,04 | 0,927732 | -0,03911 | 0,968801 | 0,9918859 |
| RP11-386B13.3  | 2,72    | 0,05  | 1,376451 | 0,039095 | 0,968815 | NA        |
| PRKACA         | 288,41  | -0,01 | 0,335405 | -0,03889 | 0,968981 | 0,9919834 |
| POU2F3         | 4,57    | 0,03  | 0,832843 | 0,038858 | 0,969003 | 0,9919834 |
| RNU6-998P      | 1,51    | -0,11 | 2,91851  | -0,03882 | 0,969035 | NA        |

|               |        |       |          |          |          |           |
|---------------|--------|-------|----------|----------|----------|-----------|
| MROH5         | 0,98   | -0,12 | 3,20112  | -0,03879 | 0,969056 | NA        |
| RHCG          | 0,87   | 0,14  | 3,701984 | 0,038768 | 0,969076 | NA        |
| RP1-122P22.4  | 1,29   | -0,08 | 2,110589 | -0,03876 | 0,969081 | NA        |
| AC012123.1    | 0,58   | -0,07 | 1,770109 | -0,03872 | 0,96911  | NA        |
| CAPN12        | 43,48  | -0,04 | 1,075809 | -0,03872 | 0,969111 | 0,9920394 |
| RP11-233H19.2 | 7,67   | 0,03  | 0,885275 | 0,038596 | 0,969212 | 0,9920882 |
| SNORD17       | 3,12   | 0,08  | 2,014157 | 0,038485 | 0,969301 | NA        |
| RP11-402K9.1  | 7,23   | -0,03 | 0,810047 | -0,03848 | 0,969303 | 0,9921269 |
| GNB3          | 0,07   | 0,14  | 3,748196 | 0,038472 | 0,969312 | NA        |
| PLEKHB1       | 0,28   | 0,14  | 3,743634 | 0,038289 | 0,969457 | NA        |
| IMP4          | 555,10 | 0,02  | 0,581004 | 0,038256 | 0,969484 | 0,992246  |
| GPC5          | 0,02   | -0,14 | 3,748121 | -0,03823 | 0,969505 | NA        |
| RNU6-177P     | 0,55   | -0,14 | 3,615281 | -0,03813 | 0,969587 | NA        |
| KCNK9         | 0,02   | -0,14 | 3,748196 | -0,03803 | 0,969665 | NA        |
| LGR6          | 0,61   | -0,09 | 2,38665  | -0,03795 | 0,969725 | NA        |
| SDHAP1        | 116,31 | 0,03  | 0,857963 | 0,037953 | 0,969725 | 0,992246  |
| BRD4          | 698,89 | 0,02  | 0,505597 | 0,037874 | 0,969788 | 0,992246  |
| AC010733.4    | 5,57   | -0,05 | 1,391239 | -0,03782 | 0,969829 | 0,992246  |
| SRP54         | 294,75 | -0,02 | 0,417042 | -0,0378  | 0,969847 | 0,992246  |
| ZBTB11        | 575,18 | -0,02 | 0,415226 | -0,03772 | 0,969911 | 0,992246  |
| SFR1          | 66,74  | -0,03 | 0,865637 | -0,0377  | 0,969928 | 0,992246  |
| RP11-295I5.3  | 2,73   | -0,11 | 2,797893 | -0,03755 | 0,97005  | NA        |
| RP11-214K3.24 | 8,69   | 0,04  | 1,012132 | 0,037417 | 0,970153 | 0,992246  |
| LINC00473     | 2,02   | -0,11 | 3,004808 | -0,03735 | 0,970207 | NA        |
| ASIC3         | 2,50   | -0,10 | 2,722822 | -0,03734 | 0,970211 | NA        |
| BZW2          | 776,24 | 0,02  | 0,505986 | 0,037333 | 0,970219 | 0,992246  |
| CTD-3193O13.1 | 0,43   | 0,14  | 3,745821 | 0,037243 | 0,970291 | NA        |
| SEH1L         | 408,33 | 0,02  | 0,466357 | 0,037222 | 0,970308 | 0,992246  |
| RF00072       | 0,11   | 0,14  | 3,748196 | 0,037215 | 0,970313 | NA        |
| RP4-760C5.5   | 31,28  | 0,04  | 0,980576 | 0,037177 | 0,970344 | 0,992246  |
| RP11-692C24.2 | 10,01  | 0,05  | 1,214158 | 0,037157 | 0,97036  | 0,992246  |
| CARF          | 64,48  | -0,03 | 0,87064  | -0,03705 | 0,970442 | 0,992246  |
| DBT           | 202,63 | -0,03 | 0,773998 | -0,03705 | 0,970442 | 0,992246  |
| QDPR          | 286,86 | 0,04  | 0,975817 | 0,037035 | 0,970457 | 0,992246  |
| GTF2H2        | 95,74  | 0,03  | 0,6901   | 0,037017 | 0,970471 | 0,992246  |
| OR6U2P        | 9,29   | -0,03 | 0,851573 | -0,03697 | 0,970513 | 0,992246  |
| CPT1C         | 27,52  | 0,03  | 0,776494 | 0,036962 | 0,970515 | 0,992246  |
| RP3-364I1.3   | 1,23   | -0,04 | 0,999594 | -0,03687 | 0,970589 | NA        |
| RP11-96H19.1  | 21,82  | 0,06  | 1,557301 | 0,036829 | 0,970622 | 0,992246  |
| RP11-177B4.1  | 8,16   | 0,03  | 0,763405 | 0,03669  | 0,970732 | 0,992246  |
| ARID4A        | 657,11 | 0,02  | 0,473163 | 0,036626 | 0,970783 | 0,992246  |
| PDPN          | 7,64   | -0,02 | 0,663296 | -0,03661 | 0,970795 | 0,992246  |
| RP11-388P9.2  | 0,28   | -0,13 | 3,671707 | -0,03656 | 0,970837 | NA        |
| LONRF2        | 8,65   | -0,03 | 0,829822 | -0,03655 | 0,970842 | 0,992246  |
| TMEM192       | 449,33 | 0,03  | 0,749406 | 0,036489 | 0,970892 | 0,992246  |
| CCDC28A       | 325,13 | -0,03 | 0,736848 | -0,03642 | 0,970947 | 0,992246  |
| CTA-363E6.3   | 7,54   | -0,03 | 0,90518  | -0,03642 | 0,970949 | 0,992246  |
| RP11-96O20.2  | 4,76   | -0,04 | 1,053882 | -0,03641 | 0,970953 | 0,992246  |
| MLLT6         | 218,04 | -0,02 | 0,636579 | -0,03634 | 0,971008 | 0,992246  |
| OR1S1         | 0,53   | 0,11  | 3,073402 | 0,03632  | 0,971027 | NA        |

|                |         |       |          |          |          |           |
|----------------|---------|-------|----------|----------|----------|-----------|
| AC002451.3     | 7,18    | -0,05 | 1,420143 | -0,03623 | 0,971098 | 0,992246  |
| TMEFF2         | 0,69    | 0,11  | 3,066264 | 0,036216 | 0,971111 | NA        |
| LTBR           | 614,71  | 0,02  | 0,51623  | 0,036186 | 0,971134 | 0,992246  |
| PTRF           | 13,02   | -0,02 | 0,526805 | -0,03618 | 0,971136 | 0,992246  |
| RP1-140K8.5    | 24,82   | 0,04  | 0,980994 | 0,036149 | 0,971164 | 0,992246  |
| STK38          | 644,97  | -0,01 | 0,402245 | -0,03613 | 0,97118  | 0,992246  |
| CTD-2349P21.10 | 1,63    | 0,05  | 1,337193 | 0,036119 | 0,971188 | NA        |
| CH17-118O6.3   | 0,06    | 0,14  | 3,748196 | 0,036094 | 0,971207 | NA        |
| WDR46          | 353,36  | -0,02 | 0,487048 | -0,03598 | 0,971296 | 0,9923103 |
| LRRC2-AS1      | 0,39    | 0,12  | 3,410998 | 0,035845 | 0,971406 | NA        |
| CTA-298G8.2    | 0,08    | 0,13  | 3,748196 | 0,035804 | 0,971438 | NA        |
| RP11-597D13.7  | 3,32    | -0,03 | 0,966651 | -0,0358  | 0,97144  | NA        |
| RP11-106M7.1   | 21,83   | 0,02  | 0,676464 | 0,035697 | 0,971524 | 0,9924626 |
| RP11-175P19.2  | 0,05    | 0,13  | 3,748196 | 0,035669 | 0,971546 | NA        |
| RP11-344P13.4  | 0,09    | 0,13  | 3,748196 | 0,035662 | 0,971552 | NA        |
| PHKA2          | 258,83  | -0,02 | 0,615586 | -0,03561 | 0,97159  | 0,9924626 |
| CPA4           | 2,46    | 0,04  | 1,098659 | 0,035569 | 0,971626 | NA        |
| MEFV           | 250,58  | 0,01  | 0,413511 | 0,035538 | 0,971651 | 0,9924626 |
| DCTN6          | 255,34  | -0,02 | 0,615488 | -0,03553 | 0,971658 | 0,9924626 |
| MIR1254-1      | 3,13    | 0,06  | 1,644001 | 0,035524 | 0,971662 | NA        |
| RNU6-402P      | 0,12    | 0,13  | 3,748196 | 0,03544  | 0,971729 | NA        |
| RP3-395M20.2   | 0,23    | 0,13  | 3,748196 | 0,035379 | 0,971778 | NA        |
| RP11-507J18.2  | 0,89    | -0,07 | 1,849347 | -0,03534 | 0,97181  | NA        |
| CROT           | 107,85  | -0,03 | 0,878054 | -0,0353  | 0,971841 | 0,9925439 |
| CDRT4          | 5,66    | -0,06 | 1,645884 | -0,03529 | 0,971845 | 0,9925439 |
| RP11-579D7.1   | 0,08    | 0,13  | 3,748196 | 0,035231 | 0,971895 | NA        |
| RP11-410A13.1  | 1,34    | 0,09  | 2,582501 | 0,035203 | 0,971918 | NA        |
| CTC-529I10.1   | 15,87   | -0,04 | 0,998674 | -0,03514 | 0,971967 | 0,9926113 |
| RP11-312H15.2  | 0,06    | 0,13  | 3,748196 | 0,03513  | 0,971976 | NA        |
| RP11-386G11.3  | 0,07    | 0,13  | 3,748196 | 0,035038 | 0,97205  | NA        |
| WNT1           | 0,07    | 0,13  | 3,748196 | 0,035016 | 0,972067 | NA        |
| RNU6-272P      | 2,21    | 0,12  | 3,374165 | 0,035009 | 0,972073 | NA        |
| PAX6           | 31,33   | 0,02  | 0,713077 | 0,034986 | 0,972091 | 0,9926113 |
| ADORA1         | 0,07    | 0,13  | 3,748196 | 0,034954 | 0,972117 | NA        |
| RP11-77H9.8    | 0,45    | 0,13  | 3,745756 | 0,034815 | 0,972228 | NA        |
| RP11-63E9.1    | 16,77   | -0,06 | 1,674244 | -0,03481 | 0,972229 | 0,9926113 |
| RP11-556I14.2  | 0,08    | 0,13  | 3,748196 | 0,034745 | 0,972283 | NA        |
| RNU1-56P       | 0,08    | 0,13  | 3,748196 | 0,034735 | 0,972291 | NA        |
| RP4-803A2.1    | 0,10    | 0,13  | 3,748196 | 0,034693 | 0,972325 | NA        |
| RP5-933K21.3   | 0,09    | 0,13  | 3,748196 | 0,034669 | 0,972344 | NA        |
| RP4-644F6.3    | 56,91   | -0,02 | 0,641969 | -0,03467 | 0,972347 | 0,9926113 |
| SPTLC2         | 2017,78 | 0,02  | 0,516143 | 0,034635 | 0,97237  | 0,9926113 |
| OR10Y1P        | 0,08    | 0,13  | 3,748196 | 0,034635 | 0,972371 | NA        |
| DGKH           | 119,72  | -0,02 | 0,721935 | -0,03463 | 0,972376 | 0,9926113 |
| CTA-440B3.1    | 0,07    | 0,13  | 3,748196 | 0,034614 | 0,972387 | NA        |
| GSTM2          | 230,72  | 0,02  | 0,64118  | 0,034572 | 0,972421 | 0,9926113 |
| USP32          | 348,50  | -0,02 | 0,579009 | -0,03455 | 0,972436 | 0,9926113 |
| LYSMD2         | 377,18  | 0,02  | 0,631811 | 0,034537 | 0,972449 | 0,9926113 |
| RP11-234K24.3  | 4,17    | -0,04 | 1,143922 | -0,03453 | 0,972451 | 0,9926113 |
| RP11-436M15.1  | 0,06    | 0,13  | 3,748196 | 0,034532 | 0,972453 | NA        |

|               |        |       |          |          |          |           |
|---------------|--------|-------|----------|----------|----------|-----------|
| OR10J8P       | 0,12   | 0,13  | 3,748196 | 0,034519 | 0,972463 | NA        |
| RP11-439E19.9 | 2,36   | 0,05  | 1,36104  | 0,034507 | 0,972473 | NA        |
| CTD-3179P9.1  | 0,10   | 0,13  | 3,748196 | 0,034499 | 0,972479 | NA        |
| RP11-66H6.4   | 0,07   | 0,13  | 3,748196 | 0,03448  | 0,972495 | NA        |
| CTA-972D3.2   | 9,59   | -0,03 | 0,993458 | -0,03448 | 0,972498 | 0,9926113 |
| RP11-158M2.3  | 0,08   | 0,13  | 3,748196 | 0,034442 | 0,972525 | NA        |
| CTC-506B8.1   | 0,07   | 0,13  | 3,748196 | 0,034403 | 0,972556 | NA        |
| SLC34A3       | 0,06   | 0,13  | 3,748196 | 0,034392 | 0,972564 | NA        |
| VAC14         | 273,46 | -0,02 | 0,683696 | -0,03435 | 0,972598 | 0,992659  |
| RP1-97J1.2    | 0,08   | 0,13  | 3,748196 | 0,034313 | 0,972627 | NA        |
| AF015720.3    | 0,07   | 0,13  | 3,748196 | 0,034287 | 0,972648 | NA        |
| TOP3B2        | 0,09   | 0,13  | 3,748196 | 0,034282 | 0,972652 | NA        |
| VAMP4         | 165,44 | -0,03 | 0,91084  | -0,03425 | 0,972676 | 0,9926848 |
| RP11-4M23.4   | 0,06   | 0,13  | 3,748196 | 0,034232 | 0,972692 | NA        |
| PRH2          | 0,06   | 0,13  | 3,748196 | 0,034224 | 0,972698 | NA        |
| AC104654.2    | 0,10   | 0,13  | 3,748196 | 0,034207 | 0,972712 | NA        |
| RP11-16P13.1  | 0,06   | 0,13  | 3,748196 | 0,034196 | 0,972721 | NA        |
| RN7SL582P     | 3,45   | 0,06  | 1,676787 | 0,034192 | 0,972724 | NA        |
| RP11-627H22.3 | 0,08   | 0,13  | 3,748196 | 0,034173 | 0,97274  | NA        |
| CTD-2375G15.1 | 0,07   | 0,13  | 3,748196 | 0,034171 | 0,972741 | NA        |
| RP11-170M17.1 | 0,08   | 0,13  | 3,748196 | 0,034162 | 0,972748 | NA        |
| AC002472.8    | 0,06   | 0,13  | 3,748196 | 0,034161 | 0,972748 | NA        |
| AC007790.4    | 2,87   | 0,06  | 1,847739 | 0,034142 | 0,972764 | NA        |
| RNA5SP308     | 0,11   | 0,13  | 3,748196 | 0,034134 | 0,97277  | NA        |
| RP1-20C7.6    | 1,49   | 0,09  | 2,64968  | 0,034011 | 0,972869 | NA        |
| FAM187B       | 0,08   | 0,13  | 3,748196 | 0,033991 | 0,972884 | NA        |
| HTATIP2       | 355,13 | -0,03 | 0,872388 | -0,03397 | 0,972905 | 0,9927594 |
| CTB-5E10.3    | 6,44   | -0,04 | 1,049687 | -0,03396 | 0,972907 | 0,9927594 |
| SV2A          | 13,77  | -0,03 | 0,737221 | -0,03396 | 0,97291  | 0,9927594 |
| CTC-512J14.6  | 0,07   | 0,13  | 3,748196 | 0,033951 | 0,972916 | NA        |
| KPNA7         | 0,08   | 0,13  | 3,748196 | 0,0339   | 0,972957 | NA        |
| RP11-363E7.3  | 0,06   | 0,13  | 3,748196 | 0,033889 | 0,972966 | NA        |
| RP11-325L7.1  | 0,09   | 0,13  | 3,748196 | 0,033876 | 0,972976 | NA        |
| RP11-438D8.4  | 1,17   | -0,07 | 2,075245 | -0,03387 | 0,97298  | NA        |
| AC007256.5    | 0,07   | 0,13  | 3,748196 | 0,03387  | 0,972981 | NA        |
| RP11-367N14.3 | 0,08   | 0,13  | 3,748196 | 0,033869 | 0,972981 | NA        |
| RP11-383B4.4  | 0,07   | 0,13  | 3,748196 | 0,033866 | 0,972984 | NA        |
| KIAA0895      | 2,87   | 0,06  | 1,747756 | 0,033863 | 0,972986 | NA        |
| RASD2         | 0,25   | 0,13  | 3,748196 | 0,03386  | 0,972989 | NA        |
| AC006026.12   | 0,06   | 0,13  | 3,748196 | 0,033845 | 0,973001 | NA        |
| RP11-117D22.1 | 0,11   | 0,13  | 3,748196 | 0,033845 | 0,973001 | NA        |
| RP11-164N3.3  | 0,05   | 0,13  | 3,748196 | 0,033845 | 0,973001 | NA        |
| CTC-297N7.1   | 0,08   | 0,13  | 3,748196 | 0,033842 | 0,973003 | NA        |
| IGHV4-28      | 0,10   | 0,13  | 3,748196 | 0,033841 | 0,973004 | NA        |
| RP11-243J18.3 | 0,07   | 0,13  | 3,748196 | 0,033813 | 0,973027 | NA        |
| AF131215.4    | 0,06   | 0,13  | 3,748196 | 0,033811 | 0,973028 | NA        |
| AC013437.4    | 0,06   | 0,13  | 3,748196 | 0,033806 | 0,973032 | NA        |
| AE000658.25   | 0,09   | 0,13  | 3,748196 | 0,033799 | 0,973038 | NA        |
| RHO           | 0,12   | 0,13  | 3,748196 | 0,033797 | 0,973039 | NA        |
| IGKV1-16      | 0,10   | 0,13  | 3,748196 | 0,033782 | 0,973051 | NA        |

|                |        |       |          |          |          |           |
|----------------|--------|-------|----------|----------|----------|-----------|
| RP11-47J17.2   | 0,72   | 0,06  | 1,63998  | 0,033754 | 0,973073 | NA        |
| RP11-532F6.4   | 0,07   | 0,13  | 3,748196 | 0,03375  | 0,973077 | NA        |
| PKD1L3         | 0,11   | 0,13  | 3,748196 | 0,033745 | 0,973081 | NA        |
| RP13-582O9.6   | 0,11   | 0,13  | 3,748196 | 0,033722 | 0,973099 | NA        |
| TBC1D3E        | 0,07   | 0,13  | 3,748196 | 0,033706 | 0,973112 | NA        |
| CTC-559E9.9    | 0,07   | 0,13  | 3,748196 | 0,033693 | 0,973122 | NA        |
| RNA5SP283      | 0,07   | 0,13  | 3,748196 | 0,033689 | 0,973125 | NA        |
| CENPJ          | 55,05  | -0,05 | 1,504986 | -0,03366 | 0,973151 | 0,9929518 |
| RP11-889L3.3   | 0,09   | 0,13  | 3,748196 | 0,033654 | 0,973153 | NA        |
| RP13-137A17.4  | 0,12   | 0,13  | 3,748196 | 0,03365  | 0,973156 | NA        |
| RNU7-79P       | 0,07   | 0,13  | 3,748196 | 0,033645 | 0,97316  | NA        |
| RP4-635A23.3   | 0,06   | 0,13  | 3,748196 | 0,033644 | 0,973161 | NA        |
| AC093627.7     | 0,12   | 0,13  | 3,748196 | 0,033626 | 0,973175 | NA        |
| RP4-798A17.5   | 0,07   | 0,13  | 3,748196 | 0,033598 | 0,973198 | NA        |
| ADAM1A         | 0,06   | 0,13  | 3,748196 | 0,033591 | 0,973204 | NA        |
| CTC-137K3.1    | 0,11   | 0,13  | 3,748196 | 0,033579 | 0,973213 | NA        |
| RP11-90K18.1   | 0,06   | 0,13  | 3,748196 | 0,033567 | 0,973222 | NA        |
| RP11-414H17.5  | 0,09   | 0,13  | 3,748196 | 0,033561 | 0,973228 | NA        |
| RP11-126O22.11 | 0,11   | 0,13  | 3,748196 | 0,033543 | 0,973242 | NA        |
| RP11-1084J3.3  | 0,05   | 0,13  | 3,748196 | 0,033539 | 0,973244 | NA        |
| RP3-418A9.3    | 0,08   | 0,13  | 3,748196 | 0,033524 | 0,973256 | NA        |
| ALX1           | 0,08   | 0,13  | 3,748196 | 0,033511 | 0,973267 | NA        |
| RP11-863P13.5  | 0,08   | 0,13  | 3,748196 | 0,033506 | 0,973271 | NA        |
| CXCL11         | 0,08   | 0,13  | 3,748196 | 0,033503 | 0,973274 | NA        |
| SNORA31        | 27,03  | -0,03 | 0,81094  | -0,0335  | 0,973274 | 0,9929982 |
| CERKL          | 906,17 | 0,01  | 0,309344 | 0,033465 | 0,973304 | 0,9929982 |
| HRASLS2        | 0,07   | 0,13  | 3,748196 | 0,033464 | 0,973305 | NA        |
| RP11-133N21.7  | 0,08   | 0,13  | 3,748196 | 0,033447 | 0,973318 | NA        |
| OR2W6P         | 0,08   | 0,13  | 3,748196 | 0,033446 | 0,973319 | NA        |
| RP11-201O14.1  | 0,07   | 0,13  | 3,748196 | 0,033438 | 0,973325 | NA        |
| AC105461.1     | 0,08   | 0,13  | 3,748196 | 0,03343  | 0,973331 | NA        |
| AC090044.1     | 1,06   | -0,05 | 1,51303  | -0,0334  | 0,973354 | NA        |
| RPL5P30        | 0,09   | 0,13  | 3,748196 | 0,033388 | 0,973366 | NA        |
| RP11-309I15.2  | 0,11   | 0,13  | 3,748196 | 0,033355 | 0,973392 | NA        |
| AP001432.11    | 0,08   | 0,12  | 3,748196 | 0,033349 | 0,973396 | NA        |
| AC094019.4     | 0,05   | 0,12  | 3,748196 | 0,033334 | 0,973408 | NA        |
| RP5-940J5.3    | 0,09   | 0,12  | 3,748196 | 0,03327  | 0,973459 | NA        |
| CTD-2542C24.14 | 0,09   | 0,12  | 3,748196 | 0,03326  | 0,973467 | NA        |
| AC016831.3     | 0,05   | 0,12  | 3,748196 | 0,033259 | 0,973468 | NA        |
| RP11-533E19.2  | 0,05   | 0,12  | 3,748196 | 0,033235 | 0,973488 | NA        |
| RP11-769N19.2  | 0,08   | 0,12  | 3,748196 | 0,033229 | 0,973492 | NA        |
| RP11-492D6.2   | 0,11   | 0,12  | 3,748196 | 0,033229 | 0,973492 | NA        |
| RP11-43P8.2    | 0,05   | 0,12  | 3,748196 | 0,033201 | 0,973514 | NA        |
| RPL15P1        | 0,07   | 0,12  | 3,748196 | 0,0332   | 0,973515 | NA        |
| AC007919.19    | 0,11   | 0,12  | 3,748196 | 0,033163 | 0,973545 | NA        |
| RP11-126O22.3  | 0,09   | 0,12  | 3,748196 | 0,033151 | 0,973554 | NA        |
| RP11-97E23.3   | 0,09   | 0,12  | 3,748196 | 0,033117 | 0,973581 | NA        |
| RP11-802F5.1   | 0,08   | 0,12  | 3,748196 | 0,033102 | 0,973593 | NA        |
| TRAV39         | 0,06   | 0,12  | 3,748196 | 0,033096 | 0,973598 | NA        |
| CTC-539A10.4   | 300,05 | 0,02  | 0,56623  | 0,033071 | 0,973618 | 0,9931731 |

|                |         |       |          |          |          |           |
|----------------|---------|-------|----------|----------|----------|-----------|
| RP11-119K6.6   | 0,09    | 0,12  | 3,748196 | 0,033055 | 0,97363  | NA        |
| AP000688.29    | 41,45   | -0,02 | 0,755287 | -0,03305 | 0,973632 | 0,9931731 |
| CTHRC1         | 0,14    | 0,12  | 3,748196 | 0,033052 | 0,973633 | NA        |
| POLB           | 177,09  | 0,02  | 0,543438 | 0,033049 | 0,973635 | 0,9931731 |
| RN7SL151P      | 0,07    | 0,12  | 3,748196 | 0,033048 | 0,973636 | NA        |
| RP11-117N4.1   | 0,08    | 0,12  | 3,748196 | 0,03302  | 0,973659 | NA        |
| RP11-385F5.4   | 0,08    | 0,12  | 3,748196 | 0,033008 | 0,973668 | NA        |
| CTD-2252P21.1  | 0,07    | 0,12  | 3,748196 | 0,032959 | 0,973707 | NA        |
| RP11-561N12.7  | 0,07    | 0,12  | 3,748196 | 0,032959 | 0,973707 | NA        |
| RP3-481F12.4   | 0,09    | 0,12  | 3,748196 | 0,032955 | 0,97371  | NA        |
| C10orf113      | 0,06    | 0,12  | 3,748196 | 0,032866 | 0,973781 | NA        |
| CTD-3148I10.15 | 0,06    | 0,12  | 3,748196 | 0,032862 | 0,973785 | NA        |
| RP11-265N6.1   | 39,69   | 0,03  | 0,934572 | 0,03286  | 0,973786 | 0,9932729 |
| AC090516.1     | 0,10    | 0,12  | 3,748196 | 0,032853 | 0,973792 | NA        |
| AC107218.2     | 0,12    | 0,12  | 3,748196 | 0,032822 | 0,973816 | NA        |
| RN7SKP173      | 0,08    | 0,12  | 3,748196 | 0,032817 | 0,973821 | NA        |
| RP11-934B9.3   | 0,11    | 0,12  | 3,748196 | 0,03279  | 0,973842 | NA        |
| AC006077.3     | 2,51    | -0,05 | 1,438174 | -0,03278 | 0,973853 | NA        |
| CTB-76P12.1    | 0,11    | 0,12  | 3,748196 | 0,032731 | 0,973889 | NA        |
| SRGAP1         | 321,55  | -0,03 | 1,002855 | -0,03271 | 0,973909 | 0,9932857 |
| RP11-431M3.2   | 0,11    | 0,12  | 3,748196 | 0,032704 | 0,973911 | NA        |
| AP001065.6     | 0,09    | 0,12  | 3,748196 | 0,032696 | 0,973917 | NA        |
| RP5-1065J22.2  | 0,06    | 0,12  | 3,748196 | 0,032664 | 0,973942 | NA        |
| RP11-734E19.1  | 0,09    | 0,12  | 3,748196 | 0,032615 | 0,973982 | NA        |
| RP11-38G5.4    | 0,08    | 0,12  | 3,748196 | 0,032601 | 0,973993 | NA        |
| ZGLP1          | 60,87   | -0,04 | 1,128577 | -0,0326  | 0,973996 | 0,9932857 |
| RP11-530N7.3   | 0,08    | 0,12  | 3,748196 | 0,032583 | 0,974007 | NA        |
| SLC22A7        | 0,01    | -0,12 | 3,74775  | -0,03257 | 0,974017 | NA        |
| RP1-231P7P.1   | 0,08    | 0,12  | 3,748196 | 0,032518 | 0,974059 | NA        |
| RP5-1096D14.3  | 0,07    | 0,12  | 3,748196 | 0,0325   | 0,974073 | NA        |
| CEP57L1        | 60,85   | -0,03 | 0,920504 | -0,03248 | 0,974086 | 0,9932857 |
| ZFAND5         | 3483,74 | -0,01 | 0,275796 | -0,03245 | 0,97411  | 0,9932857 |
| ZNF516         | 423,42  | -0,02 | 0,583145 | -0,03244 | 0,974119 | 0,9932857 |
| RP11-266K4.14  | 4,67    | -0,04 | 1,30063  | -0,03244 | 0,974119 | 0,9932857 |
| RP11-447H19.3  | 0,08    | 0,12  | 3,748196 | 0,03243  | 0,97413  | NA        |
| RP11-10J21.4   | 0,08    | 0,12  | 3,748196 | 0,032382 | 0,974167 | NA        |
| RP11-301H24.3  | 0,11    | 0,12  | 3,748196 | 0,032369 | 0,974178 | NA        |
| CTC-241F20.3   | 70,93   | 0,03  | 0,940192 | 0,032347 | 0,974195 | 0,9933088 |
| RF00599        | 0,09    | 0,12  | 3,748196 | 0,032255 | 0,974269 | NA        |
| RP11-335I12.2  | 0,06    | 0,12  | 3,748196 | 0,03224  | 0,97428  | NA        |
| RP11-864N7.2   | 0,52    | 0,08  | 2,334485 | 0,03223  | 0,974289 | NA        |
| RP11-548L20.1  | 0,08    | 0,12  | 3,748196 | 0,032223 | 0,974294 | NA        |
| RP11-770J1.7   | 0,05    | 0,12  | 3,748196 | 0,032207 | 0,974307 | NA        |
| SRCIN1         | 13,93   | 0,04  | 1,354983 | 0,032201 | 0,974312 | 0,9933437 |
| CCNC           | 363,52  | 0,02  | 0,652168 | 0,03217  | 0,974336 | 0,9933437 |
| RP11-407G23.7  | 0,08    | 0,12  | 3,748196 | 0,03215  | 0,974352 | NA        |
| AC091493.2     | 0,09    | 0,12  | 3,748196 | 0,032127 | 0,974371 | NA        |
| RP5-1028K7.3   | 0,11    | 0,12  | 3,748196 | 0,0321   | 0,974392 | NA        |
| TMEM102        | 21,19   | -0,05 | 1,559875 | -0,03208 | 0,974405 | 0,9933591 |
| TRPM5          | 0,51    | -0,11 | 3,56058  | -0,03196 | 0,974507 | NA        |



|               |        |       |          |          |          |           |
|---------------|--------|-------|----------|----------|----------|-----------|
| CTD-2339M3.1  | 0,09   | 0,12  | 3,748196 | 0,031949 | 0,974513 | NA        |
| RP11-480I12.9 | 3,31   | -0,04 | 1,292711 | -0,03191 | 0,974547 | NA        |
| RP11-855A2.1  | 34,59  | 0,02  | 0,66333  | 0,03187  | 0,974576 | 0,9933993 |
| RP1-111D6.4   | 0,11   | 0,12  | 3,748196 | 0,031841 | 0,974599 | NA        |
| KIAA1549      | 29,22  | 0,03  | 0,80164  | 0,031817 | 0,974618 | 0,9933993 |
| RP11-757A13.1 | 0,12   | 0,12  | 3,748196 | 0,031785 | 0,974644 | NA        |
| RP5-902P8.12  | 6,63   | -0,03 | 0,99205  | -0,03171 | 0,9747   | 0,9933993 |
| RP11-126O22.6 | 0,06   | 0,12  | 3,748196 | 0,031632 | 0,974766 | NA        |
| CHGA          | 0,09   | 0,12  | 3,748196 | 0,031598 | 0,974792 | NA        |
| RP11-485M7.2  | 5,23   | -0,06 | 1,878522 | -0,03159 | 0,974798 | 0,9933993 |
| RP11-1055B8.3 | 0,05   | 0,12  | 3,748196 | 0,031552 | 0,97483  | NA        |
| PRKD3         | 527,17 | -0,02 | 0,638383 | -0,03151 | 0,974859 | 0,9933993 |
| CTD-2162K18.4 | 4,65   | 0,03  | 0,990791 | 0,031482 | 0,974885 | 0,9933993 |
| NCBP2         | 426,45 | 0,02  | 0,568844 | 0,031475 | 0,974891 | 0,9933993 |
| RP11-179A7.2  | 0,06   | 0,12  | 3,748196 | 0,031373 | 0,974972 | NA        |
| UBE2Q1        | 359,06 | 0,02  | 0,633381 | 0,031347 | 0,974993 | 0,9933993 |
| CTC-510F12.4  | 30,30  | -0,05 | 1,697711 | -0,03132 | 0,975011 | 0,9933993 |
| RP11-284A20.3 | 1,04   | 0,08  | 2,576342 | 0,03131  | 0,975022 | NA        |
| RP11-1H8.5    | 100,50 | 0,02  | 0,620598 | 0,031297 | 0,975033 | 0,9933993 |
| CTC-296K1.3   | 1,39   | 0,07  | 2,362118 | 0,031258 | 0,975064 | NA        |
| DBIL5P        | 0,04   | 0,12  | 3,747888 | 0,03124  | 0,975078 | NA        |
| RP11-421L21.3 | 25,34  | -0,05 | 1,562306 | -0,03121 | 0,975099 | 0,9933993 |
| UNC5CL        | 11,03  | 0,08  | 2,493157 | 0,031153 | 0,975147 | 0,9933993 |
| ADH5          | 418,08 | -0,02 | 0,608463 | -0,03112 | 0,975177 | 0,9933993 |
| FRMPD1        | 1,47   | 0,04  | 1,419923 | 0,031096 | 0,975193 | NA        |
| AC068533.7    | 26,57  | -0,05 | 1,483858 | -0,03103 | 0,975242 | 0,9933993 |
| TBC1D4        | 206,55 | 0,03  | 0,880294 | 0,03103  | 0,975245 | 0,9933993 |
| RP1-172N19.2  | 0,11   | 0,12  | 3,748196 | 0,031022 | 0,975252 | NA        |
| AP000343.2    | 0,09   | 0,12  | 3,748196 | 0,030979 | 0,975286 | NA        |
| RBAK-RBAKDN   | 0,07   | 0,12  | 3,748196 | 0,030954 | 0,975306 | NA        |
| SMARCB1       | 271,50 | -0,02 | 0,51518  | -0,0309  | 0,975348 | 0,9934494 |
| RP11-901L6.1  | 1,47   | 0,04  | 1,219521 | 0,030811 | 0,97542  | NA        |
| LINC01348     | 15,52  | 0,03  | 1,0656   | 0,030803 | 0,975426 | 0,9934749 |
| RP11-303E16.5 | 0,42   | -0,06 | 1,813163 | -0,03071 | 0,975502 | NA        |
| COL6A4P1      | 0,28   | -0,11 | 3,618325 | -0,0307  | 0,975513 | NA        |
| RP11-597G23.1 | 5,72   | -0,03 | 1,086244 | -0,03055 | 0,97563  | 0,9935035 |
| RP11-81N13.1  | 4,98   | 0,03  | 0,94894  | 0,030544 | 0,975634 | 0,9935035 |
| SDHAF3        | 139,13 | -0,03 | 1,008341 | -0,03052 | 0,975653 | 0,9935035 |
| RP11-158H5.8  | 0,44   | 0,09  | 3,067073 | 0,030506 | 0,975663 | NA        |
| DNPEP         | 543,56 | 0,01  | 0,433046 | 0,0305   | 0,975668 | 0,9935035 |
| RP11-234B24.6 | 0,57   | 0,09  | 3,074001 | 0,030476 | 0,975688 | NA        |
| RN7SL477P     | 1,79   | 0,05  | 1,612426 | 0,030397 | 0,975751 | NA        |
| RN7SL827P     | 3,01   | 0,04  | 1,433068 | 0,030311 | 0,975819 | NA        |
| RP11-405K6.1  | 0,07   | 0,11  | 3,748196 | 0,030204 | 0,975904 | NA        |
| CTD-2340D6.1  | 7,59   | 0,02  | 0,725289 | 0,0302   | 0,975908 | 0,9936932 |
| HNRNPA1P6     | 0,41   | -0,07 | 2,344984 | -0,03019 | 0,975919 | NA        |
| RN7SL58P      | 1,20   | -0,06 | 2,057613 | -0,03018 | 0,975921 | NA        |
| RRP1B         | 167,95 | 0,02  | 0,606852 | 0,030126 | 0,975967 | 0,9936989 |
| RP11-253E3.3  | 2,36   | 0,03  | 1,005554 | 0,030062 | 0,976018 | NA        |
| PCBP4         | 0,60   | -0,07 | 2,429756 | -0,03005 | 0,976026 | NA        |

|                |         |       |          |          |          |           |
|----------------|---------|-------|----------|----------|----------|-----------|
| TINAGL1        | 16,48   | -0,02 | 0,773411 | -0,02989 | 0,976155 | 0,9937769 |
| TIGD1          | 700,36  | 0,01  | 0,270334 | 0,02986  | 0,976179 | 0,9937769 |
| HIST2H3PS2     | 0,07    | 0,11  | 3,748196 | 0,029809 | 0,97622  | NA        |
| RP11-298D21.1  | 0,18    | -0,08 | 2,827041 | -0,02977 | 0,97625  | NA        |
| RPL27A         | 7529,86 | 0,01  | 0,284353 | 0,029763 | 0,976256 | 0,9937769 |
| RFX3           | 395,05  | -0,03 | 0,916223 | -0,02976 | 0,976257 | 0,9937769 |
| AC009095.4     | 0,63    | 0,07  | 2,44892  | 0,02949  | 0,976474 | NA        |
| KIAA0141       | 494,33  | 0,01  | 0,327301 | 0,029425 | 0,976525 | 0,9938752 |
| YTHDF3         | 643,32  | 0,02  | 0,585265 | 0,029411 | 0,976537 | 0,9938752 |
| KLK11          | 4,52    | -0,02 | 0,704758 | -0,02936 | 0,976578 | 0,9938752 |
| RP1-249H1.4    | 39,24   | -0,03 | 0,943042 | -0,02928 | 0,976645 | 0,9938752 |
| RP11-242D8.1   | 550,77  | -0,01 | 0,500723 | -0,02927 | 0,97665  | 0,9938752 |
| C11orf80       | 31,90   | -0,04 | 1,258194 | -0,02924 | 0,976674 | 0,9938752 |
| AC068057.2     | 0,03    | -0,11 | 3,748196 | -0,02907 | 0,976809 | NA        |
| RP4-591C20.9   | 21,85   | -0,05 | 1,738299 | -0,02894 | 0,976913 | 0,9940066 |
| RP11-565J7.3   | 1,82    | -0,02 | 0,860775 | -0,02889 | 0,976952 | NA        |
| YME1L1         | 874,45  | -0,01 | 0,210766 | -0,02887 | 0,97697  | 0,9940066 |
| BCL2L12        | 25,61   | -0,04 | 1,276479 | -0,02879 | 0,977036 | 0,9940066 |
| PRPF38A        | 524,68  | 0,02  | 0,629325 | 0,028752 | 0,977063 | 0,9940066 |
| RP11-43P5.3    | 0,59    | 0,10  | 3,62886  | 0,028711 | 0,977095 | NA        |
| TMEM120B       | 95,44   | 0,02  | 0,757636 | 0,028676 | 0,977123 | 0,9940066 |
| RP11-837J7.4   | 23,19   | 0,06  | 1,926331 | 0,028618 | 0,977169 | 0,9940066 |
| RP11-380G5.3   | 106,65  | 0,03  | 0,923997 | 0,028542 | 0,97723  | 0,9940066 |
| ALDH8A1        | 12,40   | -0,03 | 0,967819 | -0,02854 | 0,977231 | 0,9940066 |
| RP11-574K11.32 | 213,37  | -0,03 | 0,966618 | -0,02845 | 0,977305 | 0,9940184 |
| UTP15          | 149,75  | -0,03 | 1,072984 | -0,02826 | 0,977456 | 0,9940184 |
| HSPH1          | 470,69  | 0,02  | 0,567043 | 0,02825  | 0,977463 | 0,9940184 |
| SND1           | 610,87  | 0,01  | 0,45566  | 0,028201 | 0,977502 | 0,9940184 |
| REC8           | 181,71  | 0,02  | 0,705976 | 0,028192 | 0,977509 | 0,9940184 |
| RP11-1H8.2     | 0,50    | 0,06  | 2,311591 | 0,027987 | 0,977673 | NA        |
| RP5-1012F16.1  | 1,46    | 0,04  | 1,446782 | 0,027976 | 0,977682 | NA        |
| ANKEF1         | 101,00  | 0,02  | 0,712374 | 0,02785  | 0,977781 | 0,9942105 |
| NCRNA00102     | 1,30    | -0,04 | 1,500777 | -0,02782 | 0,977802 | NA        |
| AC018890.1     | 444,31  | 0,01  | 0,303    | 0,027767 | 0,977848 | 0,9942105 |
| NCEH1          | 226,34  | -0,02 | 0,776852 | -0,02775 | 0,977858 | 0,9942105 |
| RP11-558A11.1  | 0,44    | 0,10  | 3,599478 | 0,027676 | 0,97792  | NA        |
| RN7SL270P      | 0,47    | 0,07  | 2,620297 | 0,027652 | 0,97794  | NA        |
| FBXO39         | 0,06    | 0,10  | 3,748196 | 0,027634 | 0,977954 | NA        |
| RP11-128A6.1   | 1,85    | 0,07  | 2,662314 | 0,027605 | 0,977977 | NA        |
| RP11-805I24.1  | 9,02    | -0,02 | 0,847266 | -0,02753 | 0,978037 | 0,9942198 |
| AC022816.2     | 1,35    | 0,05  | 1,823469 | 0,027517 | 0,978047 | NA        |
| POMZP3         | 58,94   | 0,03  | 1,06006  | 0,027382 | 0,978155 | 0,9942198 |
| AC079776.3     | 9,49    | -0,02 | 0,671112 | -0,02738 | 0,978158 | 0,9942198 |
| RP11-195F19.5  | 12,19   | -0,04 | 1,441292 | -0,02735 | 0,978182 | 0,9942198 |
| IL9R           | 0,32    | 0,10  | 3,746584 | 0,027243 | 0,978266 | NA        |
| MIR548E        | 0,35    | -0,10 | 3,592335 | -0,02718 | 0,978317 | NA        |
| SFTPD          | 0,05    | 0,10  | 3,748196 | 0,027179 | 0,978317 | NA        |
| LPAR6          | 548,55  | 0,01  | 0,381013 | 0,027179 | 0,978317 | 0,9942198 |
| ACOT6          | 0,09    | 0,10  | 3,748196 | 0,027148 | 0,978341 | NA        |
| RP11-355O1.11  | 1,45    | 0,03  | 1,118872 | 0,027095 | 0,978384 | NA        |

|               |         |       |          |          |          |           |
|---------------|---------|-------|----------|----------|----------|-----------|
| IFFO1         | 396,25  | 0,02  | 0,684088 | 0,027055 | 0,978416 | 0,9942198 |
| RP11-314N14.1 | 2,57    | -0,06 | 2,093697 | -0,02704 | 0,978425 | NA        |
| CTBP1         | 450,28  | -0,01 | 0,351425 | -0,02703 | 0,978434 | 0,9942198 |
| FRG1DP        | 4,14    | 0,04  | 1,341506 | 0,027    | 0,978459 | 0,9942198 |
| RP11-403I13.5 | 14,94   | -0,05 | 1,730891 | -0,02687 | 0,978562 | 0,9942198 |
| SNX5          | 993,03  | -0,01 | 0,484801 | -0,02686 | 0,978575 | 0,9942198 |
| TDRD6         | 31,28   | -0,06 | 2,074089 | -0,02682 | 0,978601 | 0,9942198 |
| RP11-981G7.6  | 4,95    | 0,07  | 2,466006 | 0,026762 | 0,978649 | 0,9942198 |
| RP11-101C11.1 | 0,27    | -0,10 | 3,746286 | -0,02674 | 0,978667 | NA        |
| LTB4R         | 422,66  | 0,01  | 0,425046 | 0,026708 | 0,978692 | 0,9942198 |
| SUSD5         | 6,38    | 0,04  | 1,501921 | 0,026682 | 0,978713 | 0,9942198 |
| RP11-40020.4  | 7,10    | 0,07  | 2,619059 | 0,02668  | 0,978715 | 0,9942198 |
| CEP135        | 198,72  | 0,01  | 0,512327 | 0,026638 | 0,978749 | 0,9942198 |
| TMEM55B       | 304,47  | -0,01 | 0,541271 | -0,02657 | 0,978806 | 0,9942198 |
| RP11-45P15.4  | 3,47    | 0,07  | 2,79752  | 0,026534 | 0,978831 | NA        |
| RP11-454P21.1 | 9,39    | -0,06 | 2,328132 | -0,02648 | 0,978875 | 0,9942198 |
| ZNF180        | 39,98   | -0,02 | 0,912792 | -0,02647 | 0,978883 | 0,9942198 |
| RP11-624L12.1 | 1,49    | -0,03 | 1,107824 | -0,02639 | 0,978944 | NA        |
| TUBB8         | 0,02    | -0,10 | 3,748196 | -0,02634 | 0,978985 | NA        |
| RP11-341G5.3  | 0,64    | -0,08 | 3,050112 | -0,02633 | 0,978995 | NA        |
| MIA3          | 477,68  | -0,01 | 0,517581 | -0,02612 | 0,979164 | 0,9942687 |
| BEST1         | 1971,72 | 0,01  | 0,213409 | 0,026115 | 0,979166 | 0,9942687 |
| CABP1         | 14,20   | -0,03 | 0,965398 | -0,0261  | 0,979177 | 0,9942687 |
| RP11-629B11.5 | 2,27    | -0,06 | 2,48943  | -0,02605 | 0,979216 | NA        |
| CTD-2023J5.1  | 0,40    | -0,06 | 2,279082 | -0,02603 | 0,979232 | NA        |
| RP3-340B19.5  | 53,10   | -0,05 | 1,738571 | -0,02598 | 0,979274 | 0,9942687 |
| GLULP5        | 49,61   | 0,02  | 0,950062 | 0,025736 | 0,979468 | 0,9942687 |
| SYNJ2BP       | 409,63  | -0,02 | 0,769757 | -0,02565 | 0,979537 | 0,9942687 |
| SEP15         | 1219,01 | 0,01  | 0,36894  | 0,025621 | 0,97956  | 0,9942687 |
| RP11-554O1.1  | 0,69    | -0,04 | 1,547461 | -0,0256  | 0,979577 | NA        |
| HEBP1         | 168,73  | -0,02 | 0,873964 | -0,02559 | 0,979584 | 0,9942687 |
| RP4-671O14.6  | 171,02  | 0,01  | 0,542418 | 0,025492 | 0,979662 | 0,9942687 |
| PIGA          | 99,32   | 0,02  | 0,973811 | 0,025472 | 0,979678 | 0,9942687 |
| MYO15A        | 54,51   | -0,02 | 0,629733 | -0,02525 | 0,979853 | 0,9942687 |
| CDC7          | 40,16   | 0,04  | 1,605793 | 0,025252 | 0,979854 | 0,9942687 |
| LRAT          | 14,48   | 0,02  | 0,811702 | 0,025208 | 0,979889 | 0,9942687 |
| RP1-292B18.3  | 0,96    | -0,04 | 1,50391  | -0,02519 | 0,979904 | NA        |
| DNAJC25-GNG10 | 120,53  | -0,03 | 1,281947 | -0,02519 | 0,979905 | 0,9942687 |
| IFIT2         | 456,72  | 0,02  | 0,929734 | 0,025166 | 0,979922 | 0,9942687 |
| MAMSTR        | 0,08    | 0,09  | 3,748196 | 0,025159 | 0,979928 | NA        |
| RN7SL678P     | 0,83    | 0,09  | 3,702937 | 0,025135 | 0,979947 | NA        |
| AGO4          | 928,65  | 0,01  | 0,538267 | 0,02503  | 0,980031 | 0,9942687 |
| RP11-275N1.1  | 0,37    | -0,09 | 3,552325 | -0,02488 | 0,98015  | NA        |
| RP11-445H22.4 | 0,06    | 0,09  | 3,748196 | 0,024805 | 0,980211 | NA        |
| RP11-164A7.1  | 324,67  | -0,01 | 0,454447 | -0,02473 | 0,980267 | 0,9942687 |
| CTC-420A11.2  | 2,36    | 0,03  | 1,290069 | 0,024719 | 0,980279 | NA        |
| AHDC1         | 33,48   | 0,02  | 0,655395 | 0,024685 | 0,980306 | 0,9942687 |
| RP11-7D5.2    | 0,59    | 0,04  | 1,602473 | 0,024662 | 0,980325 | NA        |
| SNTA1         | 2,24    | 0,08  | 3,430996 | 0,024638 | 0,980344 | NA        |
| RP11-532M24.1 | 1,15    | -0,07 | 2,890024 | -0,02459 | 0,980382 | NA        |

|               |          |       |          |          |          |           |
|---------------|----------|-------|----------|----------|----------|-----------|
| IKBKB         | 565,62   | 0,01  | 0,469394 | 0,024555 | 0,98041  | 0,9942687 |
| GFOD1         | 77,05    | -0,02 | 0,733799 | -0,02455 | 0,980414 | 0,9942687 |
| OR2T12        | 26,96    | 0,02  | 0,747047 | 0,024493 | 0,980459 | 0,9942687 |
| RP11-399019.9 | 0,45     | 0,07  | 2,658026 | 0,024475 | 0,980474 | NA        |
| EIF4EBP1      | 1112,36  | 0,01  | 0,288746 | 0,024459 | 0,980487 | 0,9942687 |
| MRPS6         | 473,97   | -0,01 | 0,60992  | -0,02445 | 0,980497 | 0,9942687 |
| NRBP1         | 711,73   | -0,01 | 0,336041 | -0,02438 | 0,980547 | 0,9942687 |
| HIST1H2BK     | 30,28    | -0,04 | 1,453047 | -0,02437 | 0,980555 | 0,9942687 |
| PLA2R1        | 22,71    | 0,02  | 0,762976 | 0,024333 | 0,980587 | 0,9942687 |
| PCGEM1        | 0,99     | 0,06  | 2,529946 | 0,024281 | 0,980628 | NA        |
| VLDLR         | 25,99    | -0,02 | 0,722303 | -0,02423 | 0,980665 | 0,9942687 |
| AC002116.8    | 13,12    | -0,05 | 1,994493 | -0,02422 | 0,980674 | 0,9942687 |
| CLEC9A        | 7,46     | 0,03  | 1,074824 | 0,024161 | 0,980724 | 0,9942687 |
| MTERFD3       | 21,55    | 0,04  | 1,503807 | 0,024153 | 0,98073  | 0,9942687 |
| SLC30A2       | 38,36    | -0,01 | 0,480807 | -0,02413 | 0,980747 | 0,9942687 |
| TCHH          | 7,87     | -0,08 | 3,188365 | -0,0241  | 0,980776 | 0,9942687 |
| SPICE1        | 94,38    | 0,03  | 1,273874 | 0,024095 | 0,980777 | 0,9942687 |
| DUX4L9        | 1,11     | -0,09 | 3,674455 | -0,02409 | 0,980784 | NA        |
| ASB16         | 3,23     | 0,03  | 1,370079 | 0,024027 | 0,980831 | NA        |
| CA5A          | 91,23    | -0,01 | 0,517349 | -0,02402 | 0,980838 | 0,9942687 |
| RP11-752G15.6 | 25,93    | 0,03  | 1,397268 | 0,023978 | 0,98087  | 0,9942687 |
| GPATCH4       | 234,66   | 0,02  | 0,640659 | 0,023973 | 0,980874 | 0,9942687 |
| DOCK4         | 35,50    | -0,03 | 1,258045 | -0,02386 | 0,980963 | 0,9942687 |
| RPL7AP3       | 0,41     | 0,08  | 3,553732 | 0,023819 | 0,980997 | NA        |
| AK5           | 41,26    | 0,02  | 1,038316 | 0,023759 | 0,981045 | 0,9942687 |
| SFXN1         | 127,86   | -0,02 | 0,717429 | -0,02376 | 0,981047 | 0,9942687 |
| RP11-203M5.7  | 6,18     | 0,04  | 1,622939 | 0,023674 | 0,981113 | 0,9942687 |
| GOLGB1        | 1674,37  | 0,01  | 0,440365 | 0,023604 | 0,981169 | 0,9942687 |
| RP11-588L15.2 | 23,60    | 0,05  | 1,955292 | 0,023535 | 0,981224 | 0,9942687 |
| RP11-298C2.1  | 46,65    | 0,03  | 1,125752 | 0,023373 | 0,981353 | 0,9942687 |
| SH3BGR13      | 20743,81 | 0,00  | 0,172052 | -0,02335 | 0,98137  | 0,9942687 |
| RP11-110L15.1 | 40,79    | -0,02 | 0,665058 | -0,02334 | 0,981381 | 0,9942687 |
| RP11-152D8.1  | 4,72     | -0,03 | 1,092746 | -0,02332 | 0,981397 | 0,9942687 |
| RP11-21N3.1   | 692,97   | -0,01 | 0,529822 | -0,02326 | 0,981443 | 0,9942687 |
| RP11-542B15.1 | 3,19     | 0,02  | 0,894856 | 0,023255 | 0,981447 | NA        |
| AC104135.2    | 2,25     | -0,02 | 0,923695 | -0,0231  | 0,981569 | NA        |
| RPS4XP17      | 0,42     | -0,04 | 1,669502 | -0,0231  | 0,981573 | NA        |
| NLRP8         | 1,67     | 0,03  | 1,233846 | 0,023026 | 0,98163  | NA        |
| OR2T2         | 0,09     | 0,09  | 3,748196 | 0,022999 | 0,981651 | NA        |
| SGCZ          | 0,03     | -0,09 | 3,748196 | -0,02299 | 0,981656 | NA        |
| NACAD         | 0,30     | 0,07  | 3,115727 | 0,022853 | 0,981768 | NA        |
| RP11-586D19.1 | 9,10     | -0,01 | 0,633764 | -0,02274 | 0,98186  | 0,9945957 |
| RP11-863P13.2 | 8,74     | 0,03  | 1,389979 | 0,022653 | 0,981927 | 0,9945957 |
| WIF1          | 0,01     | -0,08 | 3,748085 | -0,02262 | 0,981951 | NA        |
| ATG5          | 418,16   | -0,02 | 0,705658 | -0,02261 | 0,981965 | 0,9945957 |
| RP11-10E18.2  | 1,79     | 0,06  | 2,681326 | 0,022596 | 0,981973 | NA        |
| RP1-309F20.3  | 0,04     | -0,08 | 3,748196 | -0,02256 | 0,982005 | NA        |
| AC007276.5    | 10,50    | 0,04  | 1,756231 | 0,022534 | 0,982022 | 0,9945957 |
| RP1-225E12.2  | 56,06    | -0,01 | 0,658692 | -0,02252 | 0,982033 | 0,9945957 |
| PTMAP5        | 1,01     | 0,03  | 1,335116 | 0,02248  | 0,982065 | NA        |

|               |         |       |          |          |          |           |
|---------------|---------|-------|----------|----------|----------|-----------|
| KANK3         | 1,92    | 0,03  | 1,345356 | 0,022474 | 0,98207  | NA        |
| RP11-66B24.7  | 6,19    | -0,02 | 0,880879 | -0,02244 | 0,982098 | 0,9946072 |
| RP11-12O16.1  | 7,76    | 0,04  | 1,86765  | 0,022301 | 0,982207 | 0,9946642 |
| ATP9B         | 552,80  | 0,01  | 0,541624 | 0,022112 | 0,982359 | 0,9947451 |
| LRRC1         | 9,27    | 0,02  | 1,076731 | 0,022067 | 0,982394 | 0,9947451 |
| CTB-113P19.3  | 1,02    | 0,06  | 2,877908 | 0,021964 | 0,982477 | NA        |
| CTD-2021H9.3  | 0,50    | 0,06  | 2,638097 | 0,021919 | 0,982512 | NA        |
| RP11-757G14.4 | 10,09   | 0,03  | 1,160019 | 0,021886 | 0,982539 | 0,994798  |
| DNAJC21       | 437,30  | 0,01  | 0,621689 | 0,021868 | 0,982554 | 0,994798  |
| RP5-1051H14.1 | 3,68    | 0,04  | 1,605885 | 0,021847 | 0,98257  | NA        |
| RP11-795F19.5 | 0,33    | 0,08  | 3,465715 | 0,021826 | 0,982586 | NA        |
| DIAPH3        | 3,36    | -0,03 | 1,188412 | -0,0218  | 0,982607 | NA        |
| ITPK1-AS1     | 29,96   | 0,02  | 0,922629 | 0,021742 | 0,982654 | 0,9948453 |
| PCMT1         | 761,07  | 0,01  | 0,453433 | 0,021604 | 0,982763 | 0,9948568 |
| MTHFD1        | 289,68  | -0,01 | 0,625443 | -0,02151 | 0,982836 | 0,9948568 |
| SGSM3         | 188,72  | -0,02 | 0,726858 | -0,02151 | 0,982841 | 0,9948568 |
| KRT77         | 0,10    | 0,08  | 3,748196 | 0,021446 | 0,98289  | NA        |
| AC010504.2    | 1,64    | -0,04 | 1,973778 | -0,02144 | 0,982898 | NA        |
| CLIP2         | 103,08  | -0,02 | 0,718347 | -0,02142 | 0,982914 | 0,9948568 |
| AKT3          | 128,57  | -0,02 | 0,912294 | -0,02139 | 0,982932 | 0,9948568 |
| RP11-315E17.1 | 0,50    | 0,05  | 2,271063 | 0,021332 | 0,982981 | NA        |
| OTX2          | 0,04    | -0,08 | 3,748196 | -0,02132 | 0,982993 | NA        |
| YPEL1         | 51,90   | 0,02  | 1,063603 | 0,021141 | 0,983133 | 0,9949227 |
| APC           | 457,68  | -0,01 | 0,708954 | -0,02114 | 0,983134 | 0,9949227 |
| ARNT          | 357,24  | 0,01  | 0,710067 | 0,021057 | 0,9832   | 0,9949227 |
| SNORD46       | 0,90    | -0,04 | 2,087044 | -0,02106 | 0,983201 | NA        |
| IGHV5-51      | 2,17    | 0,04  | 1,831675 | 0,021038 | 0,983216 | NA        |
| RP11-848P1.5  | 1,16    | 0,04  | 1,839075 | 0,021035 | 0,983218 | NA        |
| FAM98C        | 152,21  | -0,01 | 0,714399 | -0,02098 | 0,983259 | 0,9949227 |
| AC006042.7    | 3,07    | -0,04 | 2,005603 | -0,02097 | 0,98327  | NA        |
| RP11-8P17.1   | 0,05    | -0,08 | 3,747872 | -0,02092 | 0,983306 | NA        |
| DNAH11        | 29,03   | 0,02  | 0,728333 | 0,020909 | 0,983318 | 0,9949227 |
| AL096869.5    | 0,04    | -0,08 | 3,748196 | -0,02086 | 0,983354 | NA        |
| EXOC3L4       | 1,37    | 0,03  | 1,371131 | 0,020835 | 0,983377 | NA        |
| CLEC4C        | 5,08    | 0,02  | 0,876347 | 0,020833 | 0,983379 | 0,9949227 |
| TMEM141       | 163,46  | -0,01 | 0,539143 | -0,02082 | 0,98339  | 0,9949227 |
| LBH           | 23,03   | -0,03 | 1,216571 | -0,02076 | 0,983437 | 0,9949227 |
| GNPTG         | 688,37  | 0,01  | 0,407027 | 0,020634 | 0,983538 | 0,9949227 |
| NPAS3         | 6,85    | 0,04  | 1,801291 | 0,02053  | 0,98362  | 0,9949227 |
| LINC00710     | 0,02    | -0,08 | 3,748196 | -0,0205  | 0,983648 | NA        |
| DEGS1         | 595,97  | 0,01  | 0,6244   | 0,020403 | 0,983722 | 0,9949227 |
| IGHV4-39      | 0,56    | -0,04 | 1,911203 | -0,02039 | 0,983731 | NA        |
| USP43         | 21,49   | -0,05 | 2,420106 | -0,02038 | 0,983743 | 0,9949227 |
| SCAMP3        | 625,85  | 0,01  | 0,564774 | 0,020351 | 0,983764 | 0,9949227 |
| CAPN5         | 3,90    | -0,02 | 0,893733 | -0,02034 | 0,983776 | 0,9949227 |
| CDT1          | 18,77   | 0,02  | 1,091999 | 0,020306 | 0,9838   | 0,9949227 |
| OR2A7         | 0,05    | 0,08  | 3,748196 | 0,020292 | 0,983811 | NA        |
| CTD-2033A16.1 | 1,45    | 0,03  | 1,365579 | 0,020106 | 0,983959 | NA        |
| AC007040.5    | 5,90    | -0,03 | 1,405098 | -0,01987 | 0,984146 | 0,9952017 |
| BACH1         | 1076,11 | -0,01 | 0,370117 | -0,01983 | 0,984183 | 0,9952017 |

|               |         |       |          |          |          |           |
|---------------|---------|-------|----------|----------|----------|-----------|
| RP11-295B17.5 | 0,84    | 0,06  | 3,17286  | 0,019794 | 0,984208 | NA        |
| CTNND2        | 0,14    | 0,07  | 3,747774 | 0,019588 | 0,984372 | NA        |
| CHORDC1       | 261,68  | -0,01 | 0,591145 | -0,01948 | 0,984459 | 0,9953954 |
| IBA57-AS1     | 2,70    | 0,03  | 1,742621 | 0,019467 | 0,984469 | NA        |
| FRS3          | 12,24   | 0,02  | 0,815762 | 0,019362 | 0,984553 | 0,9953954 |
| GHITM         | 2091,54 | -0,01 | 0,409483 | -0,01934 | 0,984566 | 0,9953954 |
| TMED7-TICAM2  | 48,79   | 0,02  | 1,237128 | 0,019269 | 0,984627 | 0,9953954 |
| TSPAN16       | 5,90    | 0,04  | 1,930247 | 0,019199 | 0,984682 | 0,9953954 |
| DPYSL4        | 1,77    | -0,06 | 3,005929 | -0,0192  | 0,984683 | NA        |
| RP11-492M23.1 | 22,96   | -0,02 | 0,800963 | -0,01914 | 0,98473  | 0,9953954 |
| OAZ2          | 690,69  | 0,01  | 0,675723 | 0,019116 | 0,984749 | 0,9953954 |
| RP11-52B19.10 | 2,86    | -0,02 | 0,868683 | -0,01905 | 0,984801 | NA        |
| RP11-151E14.1 | 10,48   | -0,04 | 1,997614 | -0,01905 | 0,984805 | 0,9953981 |
| C22orf15      | 0,04    | -0,07 | 3,748196 | -0,01897 | 0,984866 | NA        |
| AC084031.1    | 0,70    | -0,04 | 2,173479 | -0,01883 | 0,984977 | NA        |
| HAUS6         | 127,73  | -0,01 | 0,729257 | -0,01882 | 0,984983 | 0,9954059 |
| CTRB1         | 0,90    | 0,03  | 1,461791 | 0,018813 | 0,984991 | NA        |
| THRA          | 7,88    | -0,03 | 1,621208 | -0,01874 | 0,985048 | 0,9954059 |
| CTC-429C10.4  | 13,84   | 0,03  | 1,818552 | 0,018631 | 0,985135 | 0,9954059 |
| TSC22D2       | 423,41  | -0,01 | 0,684795 | -0,01863 | 0,985139 | 0,9954059 |
| RAP1GAP       | 0,37    | 0,06  | 3,291559 | 0,018622 | 0,985143 | NA        |
| AC068491.4    | 4,43    | -0,02 | 1,073418 | -0,01861 | 0,985152 | 0,9954059 |
| ZEB1-AS1      | 3,74    | 0,03  | 1,638031 | 0,018519 | 0,985225 | NA        |
| SYBU          | 0,63    | 0,03  | 1,584162 | 0,018453 | 0,985278 | NA        |
| TBC1D19       | 4,41    | 0,03  | 1,475414 | 0,018427 | 0,985298 | 0,9954059 |
| SRP9          | 1495,49 | -0,01 | 0,356337 | -0,01842 | 0,985305 | 0,9954059 |
| CDH13         | 16,78   | -0,01 | 0,694352 | -0,01841 | 0,985312 | 0,9954059 |
| OXNAD1        | 221,28  | -0,02 | 0,857992 | -0,01834 | 0,985368 | 0,9954059 |
| TNFRSF10D     | 218,32  | 0,02  | 0,833805 | 0,018337 | 0,98537  | 0,9954059 |
| LETM2         | 105,07  | 0,01  | 0,611929 | 0,018298 | 0,985401 | 0,9954059 |
| PXDNL         | 0,04    | -0,07 | 3,748196 | -0,01829 | 0,985406 | NA        |
| RP11-365K22.1 | 1,33    | -0,02 | 1,232515 | -0,01823 | 0,985456 | NA        |
| RP11-809H16.5 | 3,24    | 0,02  | 1,121491 | 0,01802  | 0,985623 | NA        |
| PLEKHA4       | 22,64   | 0,02  | 1,041928 | 0,018013 | 0,985629 | 0,9955817 |
| RP11-38C17.1  | 0,52    | 0,05  | 3,026267 | 0,01784  | 0,985766 | NA        |
| SLC17A7       | 15,07   | -0,02 | 0,937356 | -0,01777 | 0,98582  | 0,995681  |
| PLIN2         | 510,12  | -0,01 | 0,617683 | -0,01769 | 0,985882 | 0,995681  |
| RP1-55C23.7   | 0,43    | 0,05  | 3,032855 | 0,017685 | 0,98589  | NA        |
| CCDC84        | 251,52  | 0,01  | 0,437154 | 0,017651 | 0,985918 | 0,995681  |
| RNU7-77P      | 2,88    | 0,03  | 1,927425 | 0,017591 | 0,985965 | NA        |
| RP11-567F11.1 | 5,35    | 0,05  | 2,857552 | 0,017556 | 0,985993 | 0,995681  |
| AL161668.5    | 2,24    | 0,03  | 1,566693 | 0,017504 | 0,986034 | NA        |
| RN7SL810P     | 1,62    | -0,02 | 1,40574  | -0,01739 | 0,986128 | NA        |
| RP11-731J8.2  | 5,55    | -0,01 | 0,83881  | -0,01736 | 0,986147 | 0,995681  |
| CUL3          | 601,71  | -0,01 | 0,417792 | -0,01726 | 0,986228 | 0,995681  |
| EPHB2         | 38,74   | 0,02  | 1,323818 | 0,017201 | 0,986276 | 0,995681  |
| RP11-519M16.1 | 8,37    | 0,03  | 1,862044 | 0,017168 | 0,986302 | 0,995681  |
| RP11-116D17.2 | 33,88   | -0,02 | 0,923498 | -0,01712 | 0,986343 | 0,995681  |
| ARCN1         | 896,96  | 0,01  | 0,496525 | 0,017118 | 0,986343 | 0,995681  |
| ZNF592        | 363,64  | 0,01  | 0,568491 | 0,017099 | 0,986358 | 0,995681  |

|                |         |       |          |          |          |           |
|----------------|---------|-------|----------|----------|----------|-----------|
| AP001597.1     | 119,06  | 0,01  | 0,559769 | 0,017085 | 0,986369 | 0,995681  |
| AWAT1          | 0,02    | -0,06 | 3,748196 | -0,01699 | 0,986447 | NA        |
| SNTG1          | 10,82   | -0,02 | 0,894476 | -0,01696 | 0,986467 | 0,9957253 |
| AC083949.1     | 0,66    | -0,03 | 1,663991 | -0,01669 | 0,986686 | NA        |
| ZRSR2          | 311,74  | 0,01  | 0,590301 | 0,016681 | 0,986691 | 0,9958862 |
| RP11-216F19.1  | 11,88   | -0,02 | 0,922917 | -0,01663 | 0,986733 | 0,9958862 |
| RP11-606M12.1  | 2,09    | 0,03  | 1,776681 | 0,016594 | 0,98676  | NA        |
| TCTEX1D1       | 0,02    | -0,06 | 3,748196 | -0,01639 | 0,986922 | NA        |
| GGNBP1         | 18,87   | 0,02  | 1,404768 | 0,016218 | 0,987061 | 0,9960993 |
| RSBN1          | 263,71  | -0,01 | 0,424222 | -0,01618 | 0,98709  | 0,9960993 |
| ORAI2          | 559,64  | 0,01  | 0,523556 | 0,016097 | 0,987157 | 0,9960993 |
| M6PR           | 1901,39 | 0,00  | 0,195807 | 0,016075 | 0,987174 | 0,9960993 |
| CHRNA7         | 132,41  | -0,02 | 1,023609 | -0,01599 | 0,987239 | 0,9960993 |
| CTD-2192J16.21 | 11,41   | -0,01 | 0,660517 | -0,01595 | 0,987273 | 0,9960993 |
| RP11-459E5.1   | 0,08    | 0,06  | 3,748196 | 0,015948 | 0,987276 | NA        |
| AC106862.1     | 0,82    | -0,06 | 3,699658 | -0,01584 | 0,987362 | NA        |
| GCKR           | 13,51   | -0,01 | 0,742097 | -0,01574 | 0,987445 | 0,9960993 |
| GALC           | 198,94  | 0,01  | 0,529805 | 0,015727 | 0,987452 | 0,9960993 |
| RP11-112L6.4   | 1,31    | -0,03 | 1,927431 | -0,01567 | 0,9875   | NA        |
| ACACB          | 252,66  | 0,01  | 0,382064 | 0,015657 | 0,987508 | 0,9960993 |
| TOE1           | 163,25  | -0,01 | 0,863373 | -0,01564 | 0,987519 | 0,9960993 |
| PALB2          | 37,00   | 0,02  | 1,018733 | 0,015508 | 0,987627 | 0,9960993 |
| TXLNB          | 1,70    | -0,03 | 1,707845 | -0,01548 | 0,987651 | NA        |
| AC018464.3     | 8,71    | 0,03  | 1,938187 | 0,015458 | 0,987666 | 0,9960993 |
| HIST1H2BN      | 100,55  | 0,02  | 1,051825 | 0,015442 | 0,98768  | 0,9960993 |
| MTMR11         | 727,84  | 0,01  | 0,609101 | 0,015424 | 0,987694 | 0,9960993 |
| RP11-178L8.5   | 0,11    | 0,06  | 3,747523 | 0,015365 | 0,987741 | NA        |
| RP11-383J24.2  | 0,40    | 0,06  | 3,74628  | 0,015305 | 0,987789 | NA        |
| RP11-316P21.1  | 2,56    | 0,01  | 0,676188 | 0,015298 | 0,987794 | NA        |
| MEF2B          | 15,88   | 0,02  | 1,458837 | 0,015289 | 0,987801 | 0,996154  |
| RP11-784B15.1  | 1,32    | 0,02  | 1,590686 | 0,015133 | 0,987926 | NA        |
| SPTY2D1        | 257,33  | 0,01  | 0,69944  | 0,015059 | 0,987985 | 0,9962853 |
| RP11-512C24.2  | 3,16    | 0,02  | 1,138254 | 0,014986 | 0,988044 | NA        |
| POLR2M         | 272,74  | -0,01 | 0,778895 | -0,0149  | 0,98811  | 0,996319  |
| NDUFV3         | 456,66  | 0,01  | 0,457803 | 0,014883 | 0,988126 | 0,996319  |
| AC005757.6     | 4,97    | 0,02  | 1,055228 | 0,014589 | 0,98836  | 0,9964155 |
| AC069292.6     | 3,52    | -0,01 | 0,786304 | -0,01457 | 0,988374 | NA        |
| CYP2U1         | 143,72  | -0,02 | 1,152319 | -0,01446 | 0,988464 | 0,9964155 |
| MTRNR2L6       | 8,08    | -0,01 | 0,829208 | -0,01446 | 0,988466 | 0,9964155 |
| RIDA           | 120,66  | -0,02 | 1,059207 | -0,01438 | 0,988529 | 0,9964155 |
| NETO2          | 87,84   | 0,02  | 1,270272 | 0,014234 | 0,988644 | 0,9964155 |
| THAP9          | 17,50   | -0,01 | 0,973271 | -0,01423 | 0,988644 | 0,9964155 |
| LOXL4          | 7,76    | 0,04  | 2,681793 | 0,014192 | 0,988676 | 0,9964155 |
| TMEM134        | 433,17  | -0,01 | 0,602495 | -0,01417 | 0,988696 | 0,9964155 |
| MS4A2          | 12,88   | 0,01  | 0,947639 | 0,014159 | 0,988703 | 0,9964155 |
| HEPACAM2       | 0,09    | 0,05  | 3,748196 | 0,014087 | 0,98876  | NA        |
| ATP6V1G2       | 0,02    | -0,05 | 3,748196 | -0,01401 | 0,988822 | NA        |
| SMARCA1        | 1,35    | -0,05 | 3,663767 | -0,01401 | 0,988822 | NA        |
| ARHGAP18       | 277,17  | 0,01  | 0,569141 | 0,01398  | 0,988846 | 0,9965051 |
| TSTD3          | 6,66    | 0,02  | 1,600962 | 0,013803 | 0,988988 | 0,9965939 |

|                |         |       |          |          |          |           |
|----------------|---------|-------|----------|----------|----------|-----------|
| MANBAL         | 164,06  | 0,01  | 0,685682 | 0,013687 | 0,98908  | 0,9966153 |
| RP11-430C7.5   | 16,43   | -0,02 | 1,308156 | -0,01364 | 0,989116 | 0,9966153 |
| RP11-440L14.1  | 13,11   | -0,01 | 1,020173 | -0,01338 | 0,989325 | 0,9967113 |
| RP11-380J14.1  | 0,09    | 0,05  | 3,748196 | 0,013359 | 0,989341 | NA        |
| RP11-798K23.5  | 1,61    | -0,04 | 2,638847 | -0,0133  | 0,989389 | NA        |
| MAP4K3         | 171,86  | 0,01  | 0,724384 | 0,013291 | 0,989396 | 0,9967113 |
| CD99L1         | 118,25  | -0,01 | 0,995003 | -0,01316 | 0,989498 | 0,9967113 |
| CTD-2002H8.2   | 4,12    | 0,01  | 1,020219 | 0,013156 | 0,989503 | 0,9967113 |
| BMP2K          | 598,83  | 0,01  | 0,626743 | 0,013153 | 0,989506 | 0,9967113 |
| GOT1           | 139,48  | 0,02  | 1,170707 | 0,013119 | 0,989533 | 0,9967113 |
| RP1-166H4.2    | 2,05    | -0,02 | 1,278182 | -0,01311 | 0,989536 | NA        |
| IRX4           | 0,24    | 0,05  | 3,742017 | 0,013107 | 0,989542 | NA        |
| RP1-58B11.2    | 52,66   | -0,01 | 0,868048 | -0,01304 | 0,989592 | 0,9967174 |
| TMEM253        | 0,02    | -0,05 | 3,748196 | -0,01302 | 0,989608 | NA        |
| RP11-1094H24.3 | 1,38    | -0,02 | 1,505554 | -0,01285 | 0,989745 | NA        |
| RP11-125M16.1  | 0,73    | -0,03 | 2,207339 | -0,01282 | 0,98977  | NA        |
| AC108488.3     | 21,13   | 0,02  | 1,439957 | 0,012783 | 0,989801 | 0,9967826 |
| CLIC5          | 1,10    | 0,05  | 3,676294 | 0,012765 | 0,989816 | NA        |
| ZNF226         | 169,86  | -0,01 | 0,890567 | -0,01275 | 0,989827 | 0,9967826 |
| RP11-111M22.3  | 26,00   | -0,02 | 1,640672 | -0,01272 | 0,989854 | 0,9967826 |
| WAS            | 154,26  | 0,01  | 0,49276  | 0,012689 | 0,989876 | 0,9967826 |
| FKBPL          | 1,78    | -0,05 | 3,649582 | -0,01264 | 0,989917 | NA        |
| PIGBOS1        | 139,32  | -0,01 | 0,78344  | -0,01261 | 0,98994  | 0,9967826 |
| ITSN2          | 1506,67 | 0,00  | 0,334365 | 0,012518 | 0,990012 | 0,9967826 |
| RPS16          | 4824,60 | 0,00  | 0,238655 | 0,012493 | 0,990032 | 0,9967826 |
| RP11-255N4.2   | 8,29    | 0,02  | 1,362596 | 0,012387 | 0,990117 | 0,9967926 |
| RPL5P3         | 0,58    | -0,02 | 1,416514 | -0,01236 | 0,990136 | NA        |
| RP11-88E10.5   | 44,53   | 0,02  | 1,687186 | 0,012347 | 0,990149 | 0,9967926 |
| AC133919.6     | 0,05    | 0,05  | 3,748196 | 0,0123   | 0,990186 | NA        |
| PCYOX1L        | 140,19  | 0,01  | 0,605671 | 0,012129 | 0,990323 | 0,9968892 |
| PGAP3          | 29,14   | -0,02 | 1,25952  | -0,01209 | 0,990352 | 0,9968892 |
| RP11-53B2.1    | 0,03    | -0,04 | 3,748196 | -0,01194 | 0,990473 | NA        |
| RGS17          | 132,04  | -0,01 | 0,670205 | -0,01193 | 0,990484 | 0,9969684 |
| RP11-285F7.2   | 17,74   | 0,01  | 1,100673 | 0,01184  | 0,990554 | 0,9969841 |
| C16orf97       | 0,02    | -0,04 | 3,747377 | -0,01172 | 0,99065  | NA        |
| SLC25A34       | 23,89   | -0,01 | 1,036219 | -0,01168 | 0,99068  | 0,9970048 |
| RP11-2A4.3     | 0,03    | 0,04  | 3,748196 | 0,011644 | 0,99071  | NA        |
| ATRAID         | 1235,74 | 0,00  | 0,393224 | -0,01157 | 0,99077  | 0,9970048 |
| FSTL3          | 10,53   | 0,02  | 1,876972 | 0,011539 | 0,990793 | 0,9970048 |
| PLTP           | 0,03    | -0,04 | 3,748196 | -0,01154 | 0,990794 | NA        |
| RNASEL         | 89,78   | 0,01  | 0,813685 | 0,011499 | 0,990825 | 0,9970048 |
| MAGEA6         | 0,03    | -0,04 | 3,748196 | -0,0115  | 0,990827 | NA        |
| EXD1           | 2,64    | -0,01 | 1,175808 | -0,01143 | 0,99088  | NA        |
| RP5-1074L1.1   | 4,71    | 0,01  | 1,026815 | 0,011383 | 0,990918 | 0,9970048 |
| AP2M1          | 1664,19 | 0,00  | 0,247662 | 0,011284 | 0,990997 | 0,9970048 |
| UVRAG          | 1381,91 | 0,00  | 0,303708 | -0,01126 | 0,991019 | 0,9970048 |
| KSR2           | 26,89   | 0,01  | 0,87329  | 0,01124  | 0,991032 | 0,9970048 |
| UIMC1          | 192,07  | -0,01 | 0,732314 | -0,01121 | 0,991057 | 0,9970048 |
| PIGM           | 176,88  | 0,01  | 0,661667 | 0,011047 | 0,991186 | 0,9970814 |
| RP11-348H3.8   | 1,08    | 0,03  | 2,303105 | 0,011042 | 0,99119  | NA        |



|                 |        |       |          |          |          |           |
|-----------------|--------|-------|----------|----------|----------|-----------|
| RP11-397A16.1   | 2,51   | -0,02 | 1,891768 | -0,01091 | 0,991295 | NA        |
| FAM19A2         | 95,32  | -0,01 | 0,475804 | -0,01091 | 0,991298 | 0,9971169 |
| PAX7            | 0,03   | -0,04 | 3,748196 | -0,0109  | 0,9913   | NA        |
| SLC16A2         | 0,47   | -0,02 | 1,840359 | -0,01088 | 0,991319 | NA        |
| STAMBPL1        | 66,30  | 0,01  | 0,984832 | 0,010868 | 0,991329 | 0,9971169 |
| RP11-58A12.3    | 0,03   | -0,04 | 3,748196 | -0,01086 | 0,991336 | NA        |
| PCSK1N          | 0,03   | -0,04 | 3,747907 | -0,01078 | 0,991403 | NA        |
| RP11-573D15.8   | 25,86  | -0,01 | 0,510601 | -0,01077 | 0,991406 | 0,9971411 |
| SALRNA2         | 1,21   | -0,02 | 1,941459 | -0,01057 | 0,991566 | NA        |
| AAAS            | 136,87 | -0,01 | 0,846876 | -0,01044 | 0,991671 | 0,9973126 |
| RPS10P28        | 0,25   | 0,02  | 2,144445 | 0,010411 | 0,991694 | NA        |
| TTBK2           | 415,20 | -0,01 | 0,492443 | -0,0104  | 0,991702 | 0,9973126 |
| AC002511.2      | 3,31   | -0,01 | 1,112382 | -0,01037 | 0,991724 | NA        |
| RP1-153G14.4    | 142,24 | 0,01  | 0,505834 | 0,010324 | 0,991762 | 0,9973126 |
| GRIA4           | 3,86   | -0,01 | 0,963124 | -0,01029 | 0,991791 | 0,9973126 |
| TMEM70          | 177,46 | -0,01 | 0,898992 | -0,01019 | 0,99187  | 0,9973126 |
| AC008174.3      | 0,05   | -0,04 | 3,748196 | -0,01016 | 0,991894 | NA        |
| RP5-1043L13.1   | 66,57  | -0,01 | 0,948565 | -0,01015 | 0,991899 | 0,9973126 |
| ZDHH11B         | 0,07   | 0,04  | 3,748196 | 0,010125 | 0,991921 | NA        |
| RP11-160E2.21   | 0,26   | -0,02 | 2,455355 | -0,01001 | 0,992015 | NA        |
| RP5-864K19.4    | 4,68   | 0,01  | 1,379615 | 0,009957 | 0,992056 | 0,9974167 |
| KCNB1           | 235,06 | -0,01 | 0,794748 | -0,00983 | 0,992157 | 0,9974339 |
| PARD6G          | 3,48   | -0,01 | 1,00431  | -0,00975 | 0,992224 | NA        |
| CENPV           | 30,07  | 0,01  | 1,263671 | 0,009691 | 0,992268 | 0,9974339 |
| ZSWIM7          | 430,92 | 0,00  | 0,468422 | -0,00961 | 0,992333 | 0,9974339 |
| RANBP3          | 250,83 | 0,01  | 0,68669  | 0,009565 | 0,992368 | 0,9974339 |
| RP11-382A20.3   | 279,98 | -0,01 | 0,816366 | -0,00952 | 0,992402 | 0,9974339 |
| TMEM234         | 18,20  | 0,01  | 1,431358 | 0,009495 | 0,992424 | 0,9974339 |
| RP11-300J18.1   | 0,05   | -0,04 | 3,748196 | -0,00949 | 0,992425 | NA        |
| TMEM163         | 1,75   | -0,02 | 2,242061 | -0,00942 | 0,992484 | NA        |
| SMC4            | 428,17 | -0,01 | 0,587075 | -0,0094  | 0,992501 | 0,9974339 |
| TEX40           | 6,25   | 0,02  | 2,240841 | 0,009398 | 0,992502 | 0,9974339 |
| KLK4            | 0,52   | -0,02 | 1,736009 | -0,00923 | 0,992638 | NA        |
| RP11-121L10.2   | 0,24   | -0,02 | 2,146552 | -0,00911 | 0,992732 | NA        |
| CLVS1           | 6,95   | -0,02 | 1,788773 | -0,00909 | 0,992744 | 0,9974809 |
| RP11-569O4.6    | 0,03   | -0,03 | 3,748196 | -0,00896 | 0,992848 | NA        |
| FBXO27          | 31,86  | 0,01  | 0,673329 | 0,00896  | 0,992851 | 0,9974809 |
| BPIFA3          | 0,61   | -0,03 | 3,722942 | -0,00896 | 0,992855 | NA        |
| AC079610.2      | 38,39  | 0,01  | 0,9562   | 0,008953 | 0,992856 | 0,9974809 |
| LINC00895       | 1,85   | -0,01 | 1,409642 | -0,00895 | 0,992863 | NA        |
| RP11-613E4.3    | 5,83   | 0,02  | 2,123422 | 0,008938 | 0,992869 | 0,9974809 |
| VPS45           | 249,16 | 0,01  | 0,698308 | 0,00893  | 0,992875 | 0,9974809 |
| RP11-648L3.2    | 9,41   | 0,01  | 0,766168 | 0,008904 | 0,992896 | 0,9974809 |
| RP11-122G18.7   | 0,21   | -0,02 | 2,469324 | -0,00889 | 0,992904 | NA        |
| GLYATL1P2       | 0,07   | -0,03 | 3,748196 | -0,00888 | 0,992913 | NA        |
| CTD-2540C19.1   | 0,62   | -0,02 | 2,132374 | -0,00888 | 0,992915 | NA        |
| RP11-115D19.1   | 25,58  | -0,01 | 1,232085 | -0,00887 | 0,992924 | 0,9974809 |
| LZTS3           | 1,22   | 0,02  | 1,992102 | 0,008865 | 0,992927 | NA        |
| RP11-1109M24.14 | 1,15   | 0,01  | 1,684742 | 0,008825 | 0,992959 | NA        |
| LRRC70          | 0,06   | 0,03  | 3,748196 | 0,00862  | 0,993123 | NA        |

|                   |         |       |          |          |          |           |
|-------------------|---------|-------|----------|----------|----------|-----------|
| MLYCD             | 91,33   | 0,01  | 0,99161  | 0,008566 | 0,993165 | 0,9976354 |
| ACBD3             | 175,40  | 0,00  | 0,582223 | -0,0085  | 0,993217 | 0,9976354 |
| ASTE1             | 119,34  | 0,01  | 0,792645 | 0,008475 | 0,993238 | 0,9976354 |
| HEY1              | 0,29    | 0,03  | 3,387392 | 0,00835  | 0,993338 | NA        |
| RRAD              | 42,62   | -0,03 | 3,492721 | -0,00835 | 0,993338 | 0,9976819 |
| ELMO2P1           | 0,04    | -0,03 | 3,748196 | -0,00827 | 0,993399 | NA        |
| RP11-74K11.2      | 0,03    | -0,03 | 3,748196 | -0,00825 | 0,993422 | NA        |
| RP11-647O20.1     | 0,03    | -0,03 | 3,748196 | -0,00824 | 0,993428 | NA        |
| RP11-244K5.6      | 0,07    | -0,03 | 3,748196 | -0,00822 | 0,993442 | NA        |
| ZSWIM2            | 0,07    | 0,03  | 3,748196 | 0,008192 | 0,993464 | NA        |
| RP11-152L7.2      | 21,01   | 0,01  | 0,834857 | 0,008132 | 0,993511 | 0,9978018 |
| AF131217.1        | 0,03    | -0,03 | 3,74796  | -0,00813 | 0,993513 | NA        |
| RNU6-1237P        | 1,70    | 0,02  | 2,33269  | 0,007988 | 0,993627 | NA        |
| RP11-541E12.1     | 0,04    | -0,03 | 3,748196 | -0,00786 | 0,993728 | NA        |
| CCDC42            | 0,05    | -0,03 | 3,748196 | -0,00781 | 0,993769 | NA        |
| RP11-24D15.1      | 0,05    | -0,03 | 3,748196 | -0,00766 | 0,993888 | NA        |
| ENO2              | 10,42   | 0,02  | 2,12695  | 0,007648 | 0,993898 | 0,9980897 |
| SLC35E2B          | 282,81  | 0,00  | 0,601001 | -0,00764 | 0,993905 | 0,9980897 |
| PDK4              | 184,98  | -0,01 | 1,346197 | -0,00741 | 0,994085 | 0,9981568 |
| GPALPP1           | 173,30  | 0,00  | 0,520504 | -0,00741 | 0,994085 | 0,9981568 |
| RP11-196G11.5     | 33,24   | 0,01  | 0,911917 | 0,007353 | 0,994133 | 0,9981568 |
| CTD-2184D3.7      | 0,05    | -0,03 | 3,748196 | -0,00734 | 0,994147 | NA        |
| LHX2              | 0,04    | -0,03 | 3,748196 | -0,00728 | 0,994193 | NA        |
| RP11-152C15.1     | 0,05    | -0,03 | 3,748196 | -0,00722 | 0,994243 | NA        |
| RP11-374M1.4      | 0,05    | -0,03 | 3,748196 | -0,00717 | 0,994281 | NA        |
| RP11-195E2.1      | 0,03    | -0,03 | 3,748196 | -0,00703 | 0,994392 | NA        |
| AGPAT5            | 179,52  | 0,01  | 0,848572 | 0,007025 | 0,994395 | 0,9983341 |
| VPS41             | 849,95  | 0,00  | 0,517888 | 0,006997 | 0,994417 | 0,9983341 |
| RP11-475I24.9     | 0,06    | -0,03 | 3,748196 | -0,00697 | 0,99444  | NA        |
| RP11-874G11.1     | 10,67   | -0,02 | 2,956289 | -0,00692 | 0,99448  | 0,9983435 |
| AC073842.18       | 0,05    | -0,03 | 3,748196 | -0,00685 | 0,994531 | NA        |
| LL22NC03-N14H11.1 | 0,05    | -0,03 | 3,748196 | -0,0068  | 0,994571 | NA        |
| TRIM49            | 0,05    | -0,03 | 3,748196 | -0,00679 | 0,994585 | NA        |
| AC069282.6        | 0,03    | -0,03 | 3,748196 | -0,00674 | 0,994626 | NA        |
| RP11-317N8.3      | 0,04    | -0,03 | 3,748196 | -0,00673 | 0,99463  | NA        |
| ZCCHC7            | 263,20  | 0,00  | 0,571572 | -0,0067  | 0,994654 | 0,9984639 |
| AC008984.7        | 0,06    | -0,03 | 3,748196 | -0,00668 | 0,994668 | NA        |
| RPS27AP3          | 0,06    | -0,02 | 3,748196 | -0,00663 | 0,994707 | NA        |
| RP11-1E3.1        | 0,03    | -0,02 | 3,748196 | -0,00661 | 0,994723 | NA        |
| PMPCA             | 392,94  | 0,00  | 0,593842 | -0,00657 | 0,99476  | 0,9985165 |
| RP11-334J6.6      | 0,03    | -0,02 | 3,748196 | -0,00656 | 0,994765 | NA        |
| CTC-435M10.10     | 0,04    | -0,02 | 3,748196 | -0,00654 | 0,994783 | NA        |
| RP11-72B4.2       | 0,05    | -0,02 | 3,748196 | -0,00652 | 0,994797 | NA        |
| STMN1P1           | 0,05    | -0,02 | 3,748196 | -0,0065  | 0,994814 | NA        |
| CTD-2007F2.1      | 0,06    | -0,02 | 3,748196 | -0,00648 | 0,994827 | NA        |
| RP11-805F19.2     | 0,04    | -0,02 | 3,748196 | -0,00648 | 0,994833 | NA        |
| NRSN1             | 0,03    | 0,02  | 3,748196 | 0,006466 | 0,994841 | NA        |
| HERC1             | 1261,02 | 0,00  | 0,463207 | -0,00646 | 0,994844 | 0,9985469 |
| KIF5A             | 0,26    | 0,02  | 2,456039 | 0,006432 | 0,994868 | NA        |
| CTD-2175M1.3      | 0,04    | -0,02 | 3,748196 | -0,00643 | 0,994869 | NA        |

|                |        |       |          |          |          |           |
|----------------|--------|-------|----------|----------|----------|-----------|
| H2AFZP         | 0,04   | -0,02 | 3,748196 | -0,00642 | 0,99488  | NA        |
| RP11-57C13.6   | 0,04   | -0,02 | 3,748196 | -0,00636 | 0,994924 | NA        |
| RP11-766N7.1   | 0,04   | -0,02 | 3,748196 | -0,00633 | 0,994948 | NA        |
| DUX4L32        | 0,05   | -0,02 | 3,748196 | -0,00632 | 0,994958 | NA        |
| RP11-436F9.2   | 0,04   | -0,02 | 3,748196 | -0,00631 | 0,994962 | NA        |
| RP11-451M19.2  | 0,03   | -0,02 | 3,748196 | -0,0063  | 0,994976 | NA        |
| RP1-27K12.4    | 0,04   | -0,02 | 3,748196 | -0,00627 | 0,994995 | NA        |
| THAP7          | 83,98  | 0,01  | 0,901263 | 0,006228 | 0,995031 | 0,9985577 |
| AC113167.2     | 0,04   | -0,02 | 3,748196 | -0,0062  | 0,995053 | NA        |
| CLIC3          | 31,92  | 0,01  | 1,273223 | 0,006193 | 0,995058 | 0,9985577 |
| CTC-756D1.2    | 6,99   | 0,01  | 1,058842 | 0,006152 | 0,995091 | 0,9985577 |
| LPCAT1         | 233,64 | 0,00  | 0,674164 | -0,00615 | 0,995097 | 0,9985577 |
| NSD1           | 968,33 | 0,00  | 0,539803 | -0,00611 | 0,995123 | 0,9985577 |
| DEFB103A       | 0,05   | -0,02 | 3,748196 | -0,00611 | 0,995124 | NA        |
| DEFB103B       | 0,05   | -0,02 | 3,748196 | -0,00611 | 0,995124 | NA        |
| RNU6-202P      | 0,04   | -0,02 | 3,748196 | -0,00606 | 0,995168 | NA        |
| RP11-40H20.2   | 0,65   | -0,01 | 1,484507 | -0,00605 | 0,995171 | NA        |
| C4orf50        | 25,79  | 0,01  | 2,056112 | 0,006021 | 0,995196 | 0,9985654 |
| RP11-875O11.4  | 0,04   | -0,02 | 3,748196 | -0,00602 | 0,995199 | NA        |
| RP11-298J20.4  | 1,63   | -0,02 | 3,653622 | -0,00598 | 0,99523  | NA        |
| RP11-401O9.4   | 0,04   | -0,02 | 3,748196 | -0,00597 | 0,995236 | NA        |
| RP11-266K4.16  | 0,03   | -0,02 | 3,748196 | -0,00597 | 0,99524  | NA        |
| RNY4           | 6,57   | 0,01  | 1,235105 | 0,005962 | 0,995243 | 0,9985654 |
| RP11-666O2.5   | 0,05   | -0,02 | 3,748196 | -0,00595 | 0,995256 | NA        |
| AC026954.6     | 0,05   | -0,02 | 3,748196 | -0,00593 | 0,995272 | NA        |
| POC1A          | 0,03   | -0,02 | 3,748196 | -0,00592 | 0,995274 | NA        |
| RP11-90P5.1    | 0,05   | -0,02 | 3,748196 | -0,00592 | 0,99528  | NA        |
| RP4-784A16.1   | 0,05   | -0,02 | 3,748196 | -0,0059  | 0,99529  | NA        |
| CTPS2          | 137,80 | 0,00  | 0,840077 | 0,005901 | 0,995291 | 0,9985654 |
| RP11-674I16.2  | 0,04   | -0,02 | 3,748196 | -0,00589 | 0,9953   | NA        |
| SNORA46        | 0,03   | -0,02 | 3,748196 | -0,00587 | 0,995315 | NA        |
| RP11-335G20.7  | 0,03   | -0,02 | 3,748196 | -0,00587 | 0,995317 | NA        |
| OR6K4P         | 0,06   | -0,02 | 3,748196 | -0,00586 | 0,995327 | NA        |
| RP11-134G8.10  | 0,99   | -0,01 | 1,820647 | -0,00585 | 0,995336 | NA        |
| FAM71A         | 0,35   | -0,02 | 3,36541  | -0,00584 | 0,99534  | NA        |
| RP11-527D15.1  | 0,06   | -0,02 | 3,748196 | -0,00583 | 0,995346 | NA        |
| RP11-498A13.1  | 0,03   | -0,02 | 3,748196 | -0,00583 | 0,995347 | NA        |
| RP3-481A17.1   | 0,03   | -0,02 | 3,748196 | -0,00582 | 0,995353 | NA        |
| CTD-2272D18.2  | 0,03   | -0,02 | 3,748196 | -0,0058  | 0,995371 | NA        |
| AC007349.4     | 0,06   | -0,02 | 3,748196 | -0,00579 | 0,995378 | NA        |
| RP11-553E24.2  | 0,05   | -0,02 | 3,748196 | -0,00576 | 0,995408 | NA        |
| RP11-1109M24.7 | 0,25   | -0,01 | 2,457985 | -0,00575 | 0,99541  | NA        |
| RP11-145M9.5   | 0,03   | -0,02 | 3,748196 | -0,00575 | 0,995415 | NA        |
| RP11-80G7.1    | 0,06   | -0,02 | 3,748196 | -0,00573 | 0,995431 | NA        |
| RP11-660I20.1  | 0,06   | -0,02 | 3,748196 | -0,00571 | 0,995446 | NA        |
| RP11-424M24.5  | 0,06   | -0,02 | 3,748196 | -0,00569 | 0,995457 | NA        |
| RN7SL262P      | 0,03   | -0,02 | 3,748196 | -0,00569 | 0,995463 | NA        |
| RP11-56B16.6   | 0,03   | -0,02 | 3,748196 | -0,00566 | 0,995485 | NA        |
| CTD-2325P2.2   | 0,05   | -0,02 | 3,748196 | -0,00565 | 0,995489 | NA        |
| RP5-894D12.3   | 0,04   | -0,02 | 3,748196 | -0,00565 | 0,995493 | NA        |

|               |        |       |          |          |          |           |
|---------------|--------|-------|----------|----------|----------|-----------|
| KB-68A7.2     | 0,05   | -0,02 | 3,748196 | -0,00564 | 0,995504 | NA        |
| RP11-548H18.1 | 0,06   | -0,02 | 3,748196 | -0,00563 | 0,995511 | NA        |
| AC005039.3    | 0,03   | -0,02 | 3,748196 | -0,00561 | 0,99552  | NA        |
| RP11-680F8.3  | 6,13   | -0,01 | 1,061514 | -0,00559 | 0,99554  | 0,9986429 |
| FAM197Y9      | 0,05   | -0,02 | 3,748196 | -0,00553 | 0,995592 | NA        |
| AC007041.2    | 0,03   | -0,02 | 3,748196 | -0,00552 | 0,995595 | NA        |
| OR6B1         | 14,32  | 0,00  | 0,882076 | 0,005477 | 0,99563  | 0,9986429 |
| RP1-130H16.18 | 0,03   | -0,02 | 3,748196 | -0,00546 | 0,995646 | NA        |
| RP11-434I12.2 | 0,04   | 0,02  | 3,747193 | 0,005451 | 0,995651 | NA        |
| AC078843.2    | 0,05   | -0,02 | 3,748196 | -0,00545 | 0,995653 | NA        |
| ATP5A1P1      | 0,05   | -0,02 | 3,748196 | -0,00544 | 0,995657 | NA        |
| AL590762.11   | 0,03   | -0,02 | 3,748196 | -0,00543 | 0,995665 | NA        |
| RP11-501O2.4  | 0,03   | -0,02 | 3,748196 | -0,00543 | 0,995669 | NA        |
| RP11-272J7.5  | 0,04   | -0,02 | 3,748196 | -0,00543 | 0,99567  | NA        |
| ANKRD28       | 592,94 | 0,00  | 0,496482 | 0,00541  | 0,995684 | 0,9986429 |
| VN1R85P       | 0,04   | -0,02 | 3,748196 | -0,00541 | 0,995684 | NA        |
| RP11-256I23.3 | 0,03   | -0,02 | 3,748196 | -0,00539 | 0,995701 | NA        |
| RP11-3J1.1    | 0,86   | -0,01 | 1,375119 | -0,00538 | 0,995706 | NA        |
| IGKV1OR2-6    | 0,03   | -0,02 | 3,748196 | -0,00535 | 0,995733 | NA        |
| SLC33A1       | 292,70 | 0,00  | 0,814203 | 0,005341 | 0,995739 | 0,9986429 |
| SLC4A7        | 423,18 | 0,00  | 0,525921 | 0,00532  | 0,995755 | 0,9986429 |
| NBPF5P        | 0,04   | -0,02 | 3,748196 | -0,00532 | 0,995759 | NA        |
| RP5-1114G22.2 | 0,03   | -0,02 | 3,748196 | -0,0053  | 0,995768 | NA        |
| RP11-337N19.1 | 0,04   | -0,02 | 3,748196 | -0,0053  | 0,995771 | NA        |
| AC091177.1    | 0,04   | -0,02 | 3,748196 | -0,00529 | 0,99578  | NA        |
| RP11-100M12.3 | 0,03   | -0,02 | 3,748196 | -0,00529 | 0,995781 | NA        |
| OR51A3P       | 0,04   | -0,02 | 3,748196 | -0,00527 | 0,995799 | NA        |
| CTD-2195B23.3 | 0,03   | -0,02 | 3,748196 | -0,00526 | 0,9958   | NA        |
| AC016757.3    | 0,32   | 0,01  | 2,434763 | 0,005263 | 0,9958   | NA        |
| AGGF1P1       | 0,04   | -0,02 | 3,748196 | -0,00526 | 0,995803 | NA        |
| AC011516.2    | 0,06   | -0,02 | 3,748196 | -0,00526 | 0,995804 | NA        |
| SH3PXD2B      | 29,98  | -0,01 | 1,905795 | -0,00525 | 0,995807 | 0,9986429 |
| AC005786.5    | 0,03   | -0,02 | 3,748196 | -0,00525 | 0,995809 | NA        |
| GUCA1C        | 0,04   | -0,02 | 3,748196 | -0,00523 | 0,995828 | NA        |
| TRAV19        | 0,05   | -0,02 | 3,748196 | -0,00523 | 0,995829 | NA        |
| OR1L6         | 0,06   | -0,02 | 3,748196 | -0,0052  | 0,995853 | NA        |
| RP11-128P17.2 | 0,04   | -0,02 | 3,748196 | -0,0052  | 0,995854 | NA        |
| RP3-518E13.2  | 0,04   | -0,02 | 3,748196 | -0,00519 | 0,995855 | NA        |
| RP11-45F15.1  | 0,06   | -0,02 | 3,748196 | -0,00519 | 0,995858 | NA        |
| CTD-2373N4.3  | 0,03   | -0,02 | 3,748196 | -0,00519 | 0,995859 | NA        |
| IL4R          | 395,09 | 0,00  | 0,497775 | 0,00518  | 0,995867 | 0,9986429 |
| RP11-377B2.2  | 0,06   | -0,02 | 3,748196 | -0,00517 | 0,995875 | NA        |
| KB-1440D3.16  | 0,04   | -0,02 | 3,748196 | -0,00516 | 0,995886 | NA        |
| AC010878.3    | 0,03   | -0,02 | 3,748196 | -0,00515 | 0,995887 | NA        |
| RP11-219F1.2  | 0,03   | -0,02 | 3,748196 | -0,00515 | 0,995888 | NA        |
| AC104058.1    | 0,04   | -0,02 | 3,748196 | -0,00515 | 0,995893 | NA        |
| RP11-618N24.1 | 0,04   | -0,02 | 3,748196 | -0,00514 | 0,995896 | NA        |
| CTD-2310F14.1 | 12,57  | -0,01 | 0,977147 | -0,00514 | 0,995897 | 0,9986429 |
| RP11-839G9.1  | 0,06   | -0,02 | 3,748196 | -0,00513 | 0,995911 | NA        |
| RP11-262H14.9 | 0,04   | -0,02 | 3,748196 | -0,00511 | 0,99592  | NA        |

|               |        |       |          |          |          |           |
|---------------|--------|-------|----------|----------|----------|-----------|
| RP11-241J12.3 | 0,04   | -0,02 | 3,748196 | -0,00511 | 0,995926 | NA        |
| OR6V1         | 0,04   | -0,02 | 3,748196 | -0,0051  | 0,995928 | NA        |
| DRD3          | 0,04   | -0,02 | 3,748196 | -0,00509 | 0,995942 | NA        |
| AC069213.4    | 0,04   | -0,02 | 3,748196 | -0,00508 | 0,995943 | NA        |
| CTD-2008E3.1  | 0,04   | -0,02 | 3,748196 | -0,00507 | 0,995956 | NA        |
| RP11-49O14.3  | 0,05   | -0,02 | 3,748196 | -0,00506 | 0,995959 | NA        |
| MIR103A2      | 0,04   | -0,02 | 3,748196 | -0,00506 | 0,99596  | NA        |
| PCID2         | 198,34 | 0,00  | 0,704428 | 0,005058 | 0,995964 | 0,9986429 |
| RP11-76C10.4  | 0,03   | -0,02 | 3,748196 | -0,00506 | 0,995965 | NA        |
| AF129408.16   | 0,06   | -0,02 | 3,748196 | -0,00505 | 0,995967 | NA        |
| RP11-117J13.1 | 0,03   | -0,02 | 3,748196 | -0,00505 | 0,995968 | NA        |
| CPXM1         | 0,05   | -0,02 | 3,748196 | -0,00505 | 0,995969 | NA        |
| RP11-208N14.4 | 0,03   | -0,02 | 3,748196 | -0,00504 | 0,995977 | NA        |
| CTD-2591A1.1  | 0,04   | -0,02 | 3,748196 | -0,00503 | 0,995987 | NA        |
| RP11-777B9.1  | 0,06   | -0,02 | 3,748196 | -0,00503 | 0,995989 | NA        |
| RP11-10J21.3  | 0,04   | -0,02 | 3,748196 | -0,00501 | 0,995999 | NA        |
| RP11-643G16.3 | 0,24   | -0,02 | 3,748196 | -0,00501 | 0,995999 | NA        |
| RP13-235E23.1 | 0,04   | -0,02 | 3,748196 | -0,00501 | 0,996005 | NA        |
| XX-C2158C12.1 | 0,04   | -0,02 | 3,748196 | -0,00499 | 0,996021 | NA        |
| RP5-1193P9.1  | 0,05   | -0,02 | 3,748196 | -0,00499 | 0,996022 | NA        |
| CTB-46E9.1    | 0,03   | -0,02 | 3,748196 | -0,00497 | 0,996032 | NA        |
| OR51B6        | 0,05   | -0,02 | 3,748196 | -0,00497 | 0,996033 | NA        |
| AP000577.2    | 0,06   | -0,02 | 3,748196 | -0,00497 | 0,996038 | NA        |
| RP11-22B10.3  | 0,04   | -0,02 | 3,748196 | -0,00496 | 0,996042 | NA        |
| LARGE         | 25,65  | 0,01  | 1,047346 | 0,004957 | 0,996045 | 0,9986429 |
| ADH5P3        | 0,06   | -0,02 | 3,748196 | -0,00496 | 0,996046 | NA        |
| CTC-332L22.1  | 0,03   | -0,02 | 3,748196 | -0,00495 | 0,996048 | NA        |
| RP11-344A16.2 | 0,04   | -0,02 | 3,748196 | -0,00495 | 0,99605  | NA        |
| RPS17P1       | 0,04   | -0,02 | 3,748196 | -0,00494 | 0,996056 | NA        |
| RP11-593P24.2 | 0,06   | -0,02 | 3,748196 | -0,00494 | 0,996061 | NA        |
| ANHX          | 0,08   | -0,02 | 3,748196 | -0,00492 | 0,996073 | NA        |
| RP11-125H8.1  | 0,03   | -0,02 | 3,748196 | -0,00492 | 0,996074 | NA        |
| RP11-690I21.1 | 0,05   | -0,02 | 3,748196 | -0,00492 | 0,996074 | NA        |
| RP11-276E15.4 | 0,04   | -0,02 | 3,748196 | -0,00491 | 0,996079 | NA        |
| CTD-2514A21.4 | 0,03   | -0,02 | 3,748196 | -0,00491 | 0,996081 | NA        |
| RP11-547L9.1  | 0,04   | -0,02 | 3,748196 | -0,00491 | 0,996083 | NA        |
| AC006039.5    | 0,04   | -0,02 | 3,748196 | -0,0049  | 0,996086 | NA        |
| CTD-2533G20.1 | 0,04   | -0,02 | 3,748196 | -0,0049  | 0,996088 | NA        |
| RP11-247I13.5 | 0,05   | -0,02 | 3,748196 | -0,0049  | 0,996089 | NA        |
| RP11-369E15.1 | 0,03   | -0,02 | 3,748196 | -0,0049  | 0,99609  | NA        |
| RNU6-1213P    | 0,06   | -0,02 | 3,748196 | -0,0049  | 0,996094 | NA        |
| RP11-136K14.1 | 0,03   | -0,02 | 3,748196 | -0,00489 | 0,9961   | NA        |
| RP4-555D20.2  | 0,03   | -0,02 | 3,748196 | -0,00488 | 0,996105 | NA        |
| GGA2          | 663,21 | 0,00  | 0,453926 | 0,004872 | 0,996113 | 0,9986429 |
| RP11-258O13.1 | 0,03   | -0,02 | 3,748196 | -0,00487 | 0,996113 | NA        |
| ACSM5P1       | 0,06   | -0,02 | 3,748196 | -0,00487 | 0,996117 | NA        |
| OR51G2        | 0,04   | -0,02 | 3,748196 | -0,00487 | 0,996118 | NA        |
| RP11-299H22.6 | 54,28  | -0,01 | 1,323743 | -0,00484 | 0,996135 | 0,9986429 |
| TAS2R60       | 0,03   | -0,02 | 3,748196 | -0,00482 | 0,996153 | NA        |
| AC099535.4    | 0,04   | -0,02 | 3,748196 | -0,00482 | 0,996155 | NA        |

|                |          |       |          |          |          |           |
|----------------|----------|-------|----------|----------|----------|-----------|
| PAK2           | 1570,86  | 0,00  | 0,351278 | -0,00482 | 0,996157 | 0,9986429 |
| ASPHD1         | 0,07     | 0,02  | 3,748196 | 0,004813 | 0,996159 | NA        |
| RPS3           | 21885,04 | 0,00  | 0,167141 | 0,004813 | 0,99616  | 0,9986429 |
| OR10AD1        | 0,03     | -0,02 | 3,748196 | -0,00481 | 0,99616  | NA        |
| RP11-1109F11.3 | 0,04     | -0,02 | 3,748196 | -0,0048  | 0,996169 | NA        |
| OSTF1P1        | 0,03     | -0,02 | 3,748196 | -0,00479 | 0,996177 | NA        |
| RP11-541N10.3  | 0,03     | -0,02 | 3,748196 | -0,00479 | 0,996177 | NA        |
| RNU6-1005P     | 0,03     | -0,02 | 3,748196 | -0,00479 | 0,996178 | NA        |
| LA16c-23H5.4   | 0,25     | -0,02 | 3,425085 | -0,00479 | 0,996178 | NA        |
| MIR3136        | 0,05     | -0,02 | 3,748196 | -0,00479 | 0,996179 | NA        |
| GOT2L2         | 0,04     | -0,02 | 3,748196 | -0,00478 | 0,996184 | NA        |
| RP11-62C3.6    | 0,04     | -0,02 | 3,748196 | -0,00478 | 0,996184 | NA        |
| OR10G7         | 0,06     | -0,02 | 3,748196 | -0,00478 | 0,996189 | NA        |
| RP1-77H15.1    | 0,04     | -0,02 | 3,748196 | -0,00477 | 0,996192 | NA        |
| CTA-929C8.6    | 0,04     | -0,02 | 3,748196 | -0,00477 | 0,996193 | NA        |
| RP3-485C17.1   | 0,04     | -0,02 | 3,748196 | -0,00477 | 0,996197 | NA        |
| RP11-560F18.1  | 0,03     | -0,02 | 3,748196 | -0,00476 | 0,996202 | NA        |
| PRAMEF8        | 0,05     | -0,02 | 3,748196 | -0,00475 | 0,996214 | NA        |
| RNU6-307P      | 0,03     | -0,02 | 3,748196 | -0,00474 | 0,996217 | NA        |
| RP3-388N13.5   | 0,04     | -0,02 | 3,748196 | -0,00474 | 0,996218 | NA        |
| RP11-129B22.2  | 0,06     | -0,02 | 3,748196 | -0,00474 | 0,99622  | NA        |
| FOXI1          | 0,04     | -0,02 | 3,748196 | -0,00474 | 0,99622  | NA        |
| RP11-539G18.1  | 0,04     | -0,02 | 3,748196 | -0,00474 | 0,996222 | NA        |
| RP11-298I3.3   | 0,04     | -0,02 | 3,748196 | -0,00473 | 0,996222 | NA        |
| AF129408.15    | 0,04     | -0,02 | 3,748196 | -0,00473 | 0,996224 | NA        |
| RP3-426I6.6    | 0,03     | -0,02 | 3,748196 | -0,00472 | 0,996231 | NA        |
| RP1-56K13.5    | 0,03     | -0,02 | 3,748196 | -0,00472 | 0,996237 | NA        |
| RP11-626G11.6  | 0,05     | -0,02 | 3,748196 | -0,00471 | 0,996239 | NA        |
| AC003984.1     | 0,06     | -0,02 | 3,748196 | -0,00471 | 0,996246 | NA        |
| RP11-177C12.4  | 0,05     | -0,02 | 3,748196 | -0,0047  | 0,996248 | NA        |
| RF00593        | 0,05     | -0,02 | 3,748196 | -0,00469 | 0,996255 | NA        |
| RP3-326L13.2   | 0,03     | -0,02 | 3,748196 | -0,00469 | 0,996261 | NA        |
| RNU6-1152P     | 0,04     | -0,02 | 3,748196 | -0,00468 | 0,996262 | NA        |
| CHRNA4         | 3,86     | 0,02  | 3,511661 | 0,00468  | 0,996266 | 0,9986429 |
| OR4M2          | 0,03     | 0,02  | 3,748196 | 0,004674 | 0,996271 | NA        |
| RP11-320L13.2  | 0,21     | -0,01 | 2,471043 | -0,00467 | 0,996275 | NA        |
| RP11-270F18.2  | 0,03     | -0,02 | 3,748196 | -0,00466 | 0,996278 | NA        |
| RP11-380D23.2  | 0,03     | -0,02 | 3,748196 | -0,00466 | 0,996279 | NA        |
| RP5-1154L15.1  | 0,03     | -0,02 | 3,748196 | -0,00466 | 0,996284 | NA        |
| AP000946.2     | 0,04     | -0,02 | 3,748196 | -0,00465 | 0,996293 | NA        |
| CTC-367F4.1    | 0,03     | -0,02 | 3,748196 | -0,00465 | 0,996293 | NA        |
| CTC-394G3.2    | 0,05     | -0,02 | 3,748196 | -0,00465 | 0,996293 | NA        |
| MIR211         | 0,06     | -0,02 | 3,748196 | -0,00465 | 0,996293 | NA        |
| RNU6-1001P     | 0,04     | -0,02 | 3,748196 | -0,00465 | 0,996293 | NA        |
| RNU6-31P       | 0,04     | -0,02 | 3,748196 | -0,00465 | 0,996293 | NA        |
| RP11-1006G14.5 | 0,04     | -0,02 | 3,748196 | -0,00465 | 0,996293 | NA        |
| RP11-212J19.1  | 0,06     | -0,02 | 3,748196 | -0,00465 | 0,996293 | NA        |
| RP11-213G6.2   | 0,05     | -0,02 | 3,748196 | -0,00465 | 0,996293 | NA        |
| RP11-347D21.3  | 0,04     | -0,02 | 3,748196 | -0,00465 | 0,996293 | NA        |
| RP11-510M2.7   | 0,03     | -0,02 | 3,748196 | -0,00465 | 0,996293 | NA        |

|                  |        |       |          |          |          |           |
|------------------|--------|-------|----------|----------|----------|-----------|
| RP11-517O13.2    | 0,05   | -0,02 | 3,748196 | -0,00465 | 0,996293 | NA        |
| RPS6P22          | 0,03   | -0,02 | 3,748196 | -0,00465 | 0,996293 | NA        |
| ZCCHC16          | 0,04   | -0,02 | 3,748196 | -0,00465 | 0,996293 | NA        |
| RN7SKP89         | 0,04   | -0,02 | 3,748196 | -0,00465 | 0,996293 | NA        |
| CT45A2           | 0,04   | -0,02 | 3,748196 | -0,00464 | 0,996296 | NA        |
| RP4-635E18.7     | 0,06   | -0,02 | 3,748196 | -0,00464 | 0,996297 | NA        |
| RP11-21L23.4     | 0,06   | -0,02 | 3,748196 | -0,00463 | 0,996306 | NA        |
| MIR5009          | 0,03   | -0,02 | 3,748196 | -0,00462 | 0,99631  | NA        |
| RNU6-942P        | 0,91   | -0,01 | 2,070599 | -0,00462 | 0,996313 | NA        |
| RP11-103B5.4     | 0,03   | -0,02 | 3,748196 | -0,00462 | 0,996313 | NA        |
| LY6G6F           | 0,06   | -0,02 | 3,748196 | -0,00462 | 0,996315 | NA        |
| RP11-549B18.1    | 0,04   | -0,02 | 3,748196 | -0,00461 | 0,996319 | NA        |
| RP4-614C10.4     | 0,04   | -0,02 | 3,748196 | -0,00461 | 0,996326 | NA        |
| MIR378J          | 0,04   | -0,02 | 3,748196 | -0,0046  | 0,996328 | NA        |
| RP11-330C7.4     | 0,05   | -0,02 | 3,748196 | -0,00459 | 0,996337 | NA        |
| RP11-333A23.3    | 0,03   | -0,02 | 3,748196 | -0,00459 | 0,996339 | NA        |
| RP11-402L5.2     | 0,04   | -0,02 | 3,748196 | -0,00458 | 0,996344 | NA        |
| NCRNA00208       | 0,03   | -0,02 | 3,748196 | -0,00458 | 0,996348 | NA        |
| GS1-309P15.2     | 0,04   | -0,02 | 3,748196 | -0,00457 | 0,996351 | NA        |
| IGHV3-33         | 0,44   | 0,01  | 2,602506 | 0,004573 | 0,996351 | NA        |
| RNA5SP140        | 0,04   | -0,02 | 3,748196 | -0,00457 | 0,996353 | NA        |
| ZUFSP            | 101,82 | 0,00  | 0,790034 | 0,00457  | 0,996354 | 0,9986429 |
| AC097532.4       | 0,04   | -0,02 | 3,748196 | -0,00457 | 0,996354 | NA        |
| RP11-495P10.3    | 0,04   | -0,02 | 3,748196 | -0,00457 | 0,996355 | NA        |
| RP11-96C23.5     | 0,04   | -0,02 | 3,748196 | -0,00455 | 0,99637  | NA        |
| RN7SKP206        | 0,03   | -0,02 | 3,748196 | -0,00455 | 0,996371 | NA        |
| RP11-253I19.4    | 0,05   | -0,02 | 3,748196 | -0,00454 | 0,996374 | NA        |
| NOLA2P1          | 0,04   | -0,02 | 3,748196 | -0,00454 | 0,996377 | NA        |
| PRB2             | 0,04   | 0,02  | 3,74721  | 0,004533 | 0,996383 | NA        |
| RP11-455B2.8     | 0,06   | -0,02 | 3,748196 | -0,00453 | 0,996386 | NA        |
| RP11-302L19.2    | 0,04   | -0,02 | 3,748196 | -0,00453 | 0,996388 | NA        |
| IGKV2OR22-4      | 0,06   | -0,02 | 3,748196 | -0,00451 | 0,996404 | NA        |
| EPB41            | 508,40 | 0,00  | 0,386181 | -0,00451 | 0,996404 | 0,9986429 |
| MIR4425          | 0,04   | -0,02 | 3,748196 | -0,00451 | 0,996405 | NA        |
| RP11-20I23.2     | 12,23  | -0,01 | 1,462063 | -0,0045  | 0,99641  | 0,9986429 |
| RNU6-237P        | 0,03   | -0,02 | 3,748196 | -0,00449 | 0,996414 | NA        |
| RP11-5P15.1      | 0,04   | -0,02 | 3,748196 | -0,00448 | 0,996426 | NA        |
| AC117947.1       | 0,06   | -0,02 | 3,748196 | -0,00448 | 0,996427 | NA        |
| CTD-2382E5.1     | 5,76   | 0,01  | 1,485011 | 0,004469 | 0,996434 | 0,9986429 |
| AGT              | 0,04   | -0,02 | 3,748196 | -0,00445 | 0,996447 | NA        |
| OR2A4            | 0,03   | -0,02 | 3,748196 | -0,00445 | 0,99645  | NA        |
| YES1             | 54,75  | 0,00  | 0,785899 | 0,004439 | 0,996459 | 0,9986429 |
| RP11-792A8.1     | 0,04   | -0,02 | 3,748196 | -0,00444 | 0,99646  | NA        |
| RP3-431A14.6     | 0,03   | -0,02 | 3,748196 | -0,00443 | 0,996462 | NA        |
| XXbac-BPG24O18.1 | 0,04   | -0,02 | 3,748196 | -0,00441 | 0,996477 | NA        |
| RP11-425I13.1    | 0,23   | -0,02 | 3,748196 | -0,00441 | 0,996478 | NA        |
| TOP1             | 362,67 | 0,00  | 0,389064 | -0,00439 | 0,996496 | 0,9986429 |
| CCL8             | 0,04   | -0,02 | 3,748196 | -0,00439 | 0,996497 | NA        |
| RP11-209P2.1     | 0,04   | -0,02 | 3,748196 | -0,00437 | 0,996515 | NA        |
| RXRG             | 0,07   | -0,02 | 3,748196 | -0,0043  | 0,996571 | NA        |

|               |        |       |          |          |          |           |
|---------------|--------|-------|----------|----------|----------|-----------|
| RP11-360G10.2 | 0,03   | -0,02 | 3,748196 | -0,0043  | 0,996573 | NA        |
| RP11-349A22.2 | 0,03   | -0,02 | 3,748196 | -0,00429 | 0,996574 | NA        |
| RP11-403A21.1 | 0,03   | -0,02 | 3,748196 | -0,00429 | 0,996579 | NA        |
| RNU2-10P      | 0,03   | -0,02 | 3,748196 | -0,00426 | 0,996604 | NA        |
| RP11-365O16.6 | 0,04   | -0,02 | 3,748196 | -0,00425 | 0,996609 | NA        |
| RN7SL67P      | 0,05   | -0,02 | 3,748196 | -0,00425 | 0,99661  | NA        |
| RP4-686J16.2  | 0,04   | -0,02 | 3,748196 | -0,00423 | 0,996627 | NA        |
| RP11-201M22.1 | 1,70   | -0,01 | 2,918983 | -0,0042  | 0,996651 | NA        |
| TAS2R41       | 0,04   | -0,02 | 3,748196 | -0,00419 | 0,996659 | NA        |
| PTPRO         | 153,39 | 0,00  | 0,997926 | 0,004168 | 0,996674 | 0,9987623 |
| RP11-368I23.1 | 0,03   | -0,02 | 3,748196 | -0,00415 | 0,996688 | NA        |
| AC015849.12   | 0,04   | -0,02 | 3,748196 | -0,00413 | 0,996706 | NA        |
| PFN1P3        | 1,91   | -0,01 | 2,641646 | -0,00411 | 0,996719 | NA        |
| CTD-3252C9.4  | 448,26 | 0,00  | 0,597759 | 0,004108 | 0,996722 | 0,9987623 |
| CSN3          | 0,06   | -0,02 | 3,748196 | -0,0041  | 0,996731 | NA        |
| SPIC          | 0,06   | -0,02 | 3,748196 | -0,00406 | 0,996763 | NA        |
| RP11-431K24.2 | 0,04   | -0,02 | 3,748196 | -0,00405 | 0,99677  | NA        |
| RP11-13K12.5  | 0,03   | -0,02 | 3,748196 | -0,00404 | 0,996773 | NA        |
| AF127936.5    | 0,03   | -0,02 | 3,748196 | -0,00404 | 0,996773 | NA        |
| AP000355.2    | 0,04   | -0,02 | 3,748196 | -0,00401 | 0,996801 | NA        |
| KB-1589B1.1   | 0,03   | -0,01 | 3,748196 | -0,00397 | 0,996831 | NA        |
| KCNQ4         | 0,05   | 0,01  | 3,748196 | 0,003972 | 0,996831 | NA        |
| AC005358.3    | 0,04   | -0,01 | 3,748196 | -0,00396 | 0,996841 | NA        |
| RN7SL68P      | 0,92   | 0,01  | 1,419721 | 0,003953 | 0,996846 | NA        |
| RP3-355L5.3   | 0,03   | -0,01 | 3,748196 | -0,00393 | 0,996863 | NA        |
| RP11-261P13.6 | 0,04   | -0,01 | 3,748196 | -0,00393 | 0,996863 | NA        |
| SHD           | 0,34   | 0,01  | 2,323119 | 0,003926 | 0,996867 | NA        |
| SUMO3         | 801,27 | 0,00  | 0,307329 | 0,003912 | 0,996878 | 0,9988249 |
| HERC5         | 266,59 | 0,00  | 0,820338 | -0,0039  | 0,996892 | 0,9988249 |
| RPL12P29      | 0,04   | -0,01 | 3,748196 | -0,00389 | 0,996896 | NA        |
| RN7SKP157     | 0,04   | -0,01 | 3,748196 | -0,00384 | 0,996935 | NA        |
| AC002472.14   | 0,03   | -0,01 | 3,748196 | -0,00384 | 0,996939 | NA        |
| RP4-633I8.1   | 0,03   | -0,01 | 3,748196 | -0,00383 | 0,996943 | NA        |
| RP5-1107A17.2 | 0,04   | -0,01 | 3,748196 | -0,00382 | 0,996949 | NA        |
| TRAF3IP3      | 900,20 | 0,00  | 0,431439 | 0,003808 | 0,996961 | 0,9988297 |
| Z95114.3      | 0,05   | -0,01 | 3,748196 | -0,0038  | 0,996971 | NA        |
| RP3-499B10.4  | 3,05   | 0,01  | 2,512565 | 0,003793 | 0,996974 | NA        |
| COCH          | 0,23   | 0,01  | 2,804914 | 0,00376  | 0,997    | NA        |
| RP11-430K10.1 | 0,06   | -0,01 | 3,748196 | -0,00375 | 0,997007 | NA        |
| WDR83         | 33,28  | 0,00  | 0,772616 | 0,003745 | 0,997012 | 0,9988297 |
| CETN4P        | 2,80   | 0,00  | 1,279215 | -0,00373 | 0,997022 | NA        |
| IGKV1D-42     | 0,04   | -0,01 | 3,748196 | -0,00369 | 0,997059 | NA        |
| RP11-155N3.3  | 0,06   | -0,01 | 3,748196 | -0,00368 | 0,997066 | NA        |
| IWS1          | 562,39 | 0,00  | 0,49463  | -0,00366 | 0,997076 | 0,9988297 |
| AC069277.1    | 0,05   | -0,01 | 3,748196 | -0,00365 | 0,997086 | NA        |
| RP11-138H18.2 | 0,04   | 0,01  | 3,748196 | 0,003637 | 0,997098 | NA        |
| RNU7-41P      | 5,93   | 0,00  | 1,028076 | -0,0036  | 0,997125 | 0,9988297 |
| RP11-432M8.15 | 0,06   | -0,01 | 3,748196 | -0,00359 | 0,997137 | NA        |
| RP11-276H7.3  | 0,04   | -0,01 | 3,748196 | -0,00357 | 0,997151 | NA        |
| CTB-140J7.2   | 0,03   | -0,01 | 3,748196 | -0,00355 | 0,997168 | NA        |



|                |         |       |          |          |          |           |
|----------------|---------|-------|----------|----------|----------|-----------|
| RP11-612L3.1   | 0,20    | -0,01 | 2,882262 | -0,00355 | 0,997171 | NA        |
| CDK3           | 123,10  | 0,00  | 1,215726 | -0,00349 | 0,997215 | 0,9988297 |
| PROSER1        | 337,93  | 0,00  | 0,76589  | -0,00349 | 0,997219 | 0,9988297 |
| ABCF1          | 630,24  | 0,00  | 0,530505 | -0,00335 | 0,99733  | 0,9988412 |
| HTR1D          | 5,95    | 0,00  | 0,641333 | -0,00334 | 0,997338 | 0,9988412 |
| AC096669.2     | 0,06    | -0,01 | 3,748196 | -0,0033  | 0,99737  | NA        |
| INHBE          | 2,69    | 0,00  | 1,397048 | 0,003218 | 0,997433 | NA        |
| RP11-57H14.4   | 14,47   | 0,00  | 1,303645 | 0,003112 | 0,997517 | 0,9989669 |
| RNY4P25        | 0,19    | -0,01 | 3,748196 | -0,00303 | 0,997583 | NA        |
| RNU6-626P      | 0,06    | -0,01 | 3,748196 | -0,00301 | 0,9976   | NA        |
| RP11-513I15.5  | 2,90    | 0,00  | 0,815853 | 0,002945 | 0,99765  | NA        |
| SFRP1          | 0,03    | -0,01 | 3,748196 | -0,00294 | 0,99765  | NA        |
| GRPEL2         | 47,57   | 0,00  | 1,234002 | 0,002913 | 0,997676 | 0,9990677 |
| RN7SL585P      | 0,05    | -0,01 | 3,748196 | -0,00288 | 0,997701 | NA        |
| RBM24          | 0,05    | 0,01  | 3,748196 | 0,002877 | 0,997705 | NA        |
| ITLN2          | 0,05    | -0,01 | 3,748196 | -0,00285 | 0,997727 | NA        |
| MKRN1          | 1103,05 | 0,00  | 0,372986 | -0,00276 | 0,997798 | 0,9990677 |
| MRPS21P7       | 0,06    | -0,01 | 3,748196 | -0,00273 | 0,99782  | NA        |
| ALDH9A1        | 358,92  | 0,00  | 0,810417 | 0,002724 | 0,997826 | 0,9990677 |
| RP11-400F19.18 | 16,34   | 0,00  | 1,054877 | -0,00271 | 0,997838 | 0,9990677 |
| RNU6-722P      | 0,18    | -0,01 | 3,436546 | -0,0027  | 0,997848 | NA        |
| SCG5           | 0,06    | -0,01 | 3,748196 | -0,00265 | 0,997889 | NA        |
| CES5A          | 0,10    | -0,01 | 3,748196 | -0,00261 | 0,997921 | NA        |
| RN7SL130P      | 7,35    | 0,00  | 1,159441 | -0,0026  | 0,997924 | 0,9990677 |
| F13A1          | 1332,82 | 0,00  | 0,495053 | -0,00258 | 0,99794  | 0,9990677 |
| RNU6-823P      | 0,06    | -0,01 | 3,748196 | -0,00235 | 0,998127 | NA        |
| RP13-631K18.2  | 27,46   | 0,00  | 0,549877 | 0,002125 | 0,998305 | 0,9993423 |
| USP40          | 370,52  | 0,00  | 0,708644 | 0,002103 | 0,998322 | 0,9993423 |
| REEP1          | 1,21    | -0,01 | 2,415756 | -0,00209 | 0,998332 | NA        |
| B9D2           | 175,36  | 0,00  | 0,755631 | 0,001944 | 0,998449 | 0,9993933 |
| TMEM52         | 0,03    | -0,01 | 3,748196 | -0,00194 | 0,998453 | NA        |
| JARID2         | 717,78  | 0,00  | 0,472806 | 0,001854 | 0,998521 | 0,9993933 |
| PCDHGC5        | 0,05    | 0,01  | 3,748196 | 0,001852 | 0,998522 | NA        |
| RP11-93K22.6   | 0,28    | 0,01  | 3,409308 | 0,001837 | 0,998534 | NA        |
| HAGHL          | 48,81   | 0,00  | 1,597119 | 0,001836 | 0,998535 | 0,9993933 |
| STEAP1         | 0,07    | 0,01  | 3,748196 | 0,001812 | 0,998554 | NA        |
| HRH4           | 11,00   | 0,00  | 0,97046  | 0,001766 | 0,998591 | 0,9993933 |
| KIAA1683       | 103,50  | 0,00  | 0,983831 | 0,001703 | 0,998641 | 0,9993933 |
| ITGAD          | 0,75    | 0,00  | 2,494843 | 0,001694 | 0,998648 | NA        |
| SLC6A17        | 1,22    | 0,00  | 1,290828 | -0,00163 | 0,998699 | NA        |
| RNU1-89P       | 0,03    | -0,01 | 3,748196 | -0,00162 | 0,998707 | NA        |
| AC012262.1     | 0,04    | -0,01 | 3,748196 | -0,00159 | 0,99873  | NA        |
| AC007677.1     | 6,68    | 0,00  | 1,388294 | 0,001582 | 0,998738 | 0,999436  |
| TCL6           | 44,39   | 0,00  | 0,688016 | 0,001398 | 0,998885 | 0,9994503 |
| PIGF           | 278,43  | 0,00  | 0,662981 | 0,001282 | 0,998977 | 0,9994503 |
| CMTM4          | 55,63   | 0,00  | 1,417877 | -0,00127 | 0,998985 | 0,9994503 |
| CHAF1B         | 39,12   | 0,00  | 0,548952 | -0,00125 | 0,999001 | 0,9994503 |
| ALPK1          | 404,56  | 0,00  | 0,524471 | 0,001161 | 0,999073 | 0,9994503 |
| B4GALT1        | 2844,25 | 0,00  | 0,351863 | -0,00116 | 0,999074 | 0,9994503 |
| STXBP5L        | 0,05    | 0,00  | 3,748196 | -0,00114 | 0,999087 | NA        |

|               |        |      |          |           |          |           |
|---------------|--------|------|----------|-----------|----------|-----------|
| AC010149.4    | 0,06   | 0,00 | 3,748196 | -0,00111  | 0,999117 | NA        |
| SPIRE2        | 73,71  | 0,00 | 0,745405 | -9,33E-04 | 0,999255 | 0,9995529 |
| AC010148.1    | 19,22  | 0,00 | 0,913538 | -8,47E-04 | 0,999324 | 0,9995529 |
| TMEM213       | 25,83  | 0,00 | 0,733288 | -8,30E-04 | 0,999338 | 0,9995529 |
| OPN5          | 0,02   | 0,00 | 3,748196 | 7,81E-04  | 0,999377 | NA        |
| RP11-114G11.5 | 0,04   | 0,00 | 3,748196 | 7,76E-04  | 0,999381 | NA        |
| CYP2AB1P      | 0,04   | 0,00 | 3,748196 | -7,38E-04 | 0,999411 | NA        |
| TTLL13        | 1,87   | 0,00 | 2,932053 | 7,23E-04  | 0,999423 | NA        |
| RP11-24H1.1   | 1,21   | 0,00 | 1,553741 | 7,08E-04  | 0,999435 | NA        |
| MIR205HG      | 20,82  | 0,00 | 0,522091 | -6,75E-04 | 0,999461 | 0,9996225 |
| RP4-669P10.16 | 0,64   | 0,00 | 3,624664 | -6,52E-04 | 0,99948  | NA        |
| RP11-401P9.1  | 0,19   | 0,00 | 3,748196 | -4,64E-04 | 0,99963  | NA        |
| TMPRSS11A     | 0,40   | 0,00 | 3,74626  | -3,83E-04 | 0,999694 | NA        |
| MAP3K7        | 230,46 | 0,00 | 0,693146 | -2,33E-04 | 0,999814 | 0,9998897 |
| CTC-563A5.2   | 9,37   | 0,00 | 1,996237 | 2,06E-04  | 0,999836 | 0,9998897 |
| RN7SL586P     | 0,88   | 0,00 | 1,438639 | 1,48E-04  | 0,999882 | NA        |
| ATPAF2        | 539,24 | 0,00 | 0,495367 | 1,27E-04  | 0,999898 | 0,9998984 |
| ABHD16B       | 0,00   | 0,00 | 0        | 0         | 1        | NA        |
| AC000068.10   | 0,00   | 0,00 | 0        | 0         | 1        | NA        |
| AC000370.2    | 0,00   | 0,00 | 0        | 0         | 1        | NA        |
| AC002383.2    | 0,00   | 0,00 | 0        | 0         | 1        | NA        |
| AC002480.2    | 0,00   | 0,00 | 0        | 0         | 1        | NA        |
| AC002523.1    | 0,00   | 0,00 | 0        | 0         | 1        | NA        |
| AC002550.6    | 0,00   | 0,00 | 0        | 0         | 1        | NA        |
| AC003005.4    | 0,00   | 0,00 | 0        | 0         | 1        | NA        |
| AC004022.8    | 0,00   | 0,00 | 0        | 0         | 1        | NA        |
| AC004054.1    | 0,00   | 0,00 | 0        | 0         | 1        | NA        |
| AC004076.9    | 0,00   | 0,00 | 0        | 0         | 1        | NA        |
| AC004455.1    | 0,00   | 0,00 | 0        | 0         | 1        | NA        |
| AC004463.6    | 0,00   | 0,00 | 0        | 0         | 1        | NA        |
| AC004471.9    | 0,00   | 0,00 | 0        | 0         | 1        | NA        |
| AC004540.4    | 0,00   | 0,00 | 0        | 0         | 1        | NA        |
| AC004637.1    | 0,00   | 0,00 | 0        | 0         | 1        | NA        |
| AC004837.3    | 0,00   | 0,00 | 0        | 0         | 1        | NA        |
| AC005033.6    | 0,00   | 0,00 | 0        | 0         | 1        | NA        |
| AC005154.8    | 0,00   | 0,00 | 0        | 0         | 1        | NA        |
| AC005162.5    | 0,00   | 0,00 | 0        | 0         | 1        | NA        |
| AC005229.5    | 0,00   | 0,00 | 0        | 0         | 1        | NA        |
| AC005307.4    | 0,00   | 0,00 | 0        | 0         | 1        | NA        |
| AC005522.6    | 0,00   | 0,00 | 0        | 0         | 1        | NA        |
| AC005780.1    | 0,00   | 0,00 | 0        | 0         | 1        | NA        |
| AC005794.1    | 0,00   | 0,00 | 0        | 0         | 1        | NA        |
| AC006028.11   | 0,00   | 0,00 | 0        | 0         | 1        | NA        |
| AC006116.24   | 0,00   | 0,00 | 0        | 0         | 1        | NA        |
| AC006116.27   | 0,00   | 0,00 | 0        | 0         | 1        | NA        |
| AC006159.3    | 0,00   | 0,00 | 0        | 0         | 1        | NA        |
| AC006548.19   | 0,00   | 0,00 | 0        | 0         | 1        | NA        |
| AC007009.1    | 0,00   | 0,00 | 0        | 0         | 1        | NA        |
| AC007064.23   | 0,00   | 0,00 | 0        | 0         | 1        | NA        |
| AC007091.1    | 0,00   | 0,00 | 0        | 0         | 1        | NA        |

|             |      |      |   |   |   |    |
|-------------|------|------|---|---|---|----|
| AC007285.7  | 0,00 | 0,00 | 0 | 0 | 1 | NA |
| AC007391.2  | 0,00 | 0,00 | 0 | 0 | 1 | NA |
| AC007618.3  | 0,00 | 0,00 | 0 | 0 | 1 | NA |
| AC008063.2  | 0,00 | 0,00 | 0 | 0 | 1 | NA |
| AC008067.2  | 0,00 | 0,00 | 0 | 0 | 1 | NA |
| AC008265.2  | 0,00 | 0,00 | 0 | 0 | 1 | NA |
| AC008427.2  | 0,00 | 0,00 | 0 | 0 | 1 | NA |
| AC009133.21 | 0,00 | 0,00 | 0 | 0 | 1 | NA |
| AC009232.2  | 0,00 | 0,00 | 0 | 0 | 1 | NA |
| AC009294.1  | 0,00 | 0,00 | 0 | 0 | 1 | NA |
| AC009477.7  | 0,00 | 0,00 | 0 | 0 | 1 | NA |
| AC010096.2  | 0,00 | 0,00 | 0 | 0 | 1 | NA |
| AC010880.1  | 0,00 | 0,00 | 0 | 0 | 1 | NA |
| AC011718.4  | 0,00 | 0,00 | 0 | 0 | 1 | NA |
| AC011752.1  | 0,00 | 0,00 | 0 | 0 | 1 | NA |
| AC011899.10 | 0,00 | 0,00 | 0 | 0 | 1 | NA |
| AC012497.2  | 0,00 | 0,00 | 0 | 0 | 1 | NA |
| AC013248.2  | 0,00 | 0,00 | 0 | 0 | 1 | NA |
| AC013437.9  | 0,00 | 0,00 | 0 | 0 | 1 | NA |
| AC013472.4  | 0,00 | 0,00 | 0 | 0 | 1 | NA |
| AC015923.1  | 0,00 | 0,00 | 0 | 0 | 1 | NA |
| AC016691.2  | 0,00 | 0,00 | 0 | 0 | 1 | NA |
| AC016831.5  | 0,00 | 0,00 | 0 | 0 | 1 | NA |
| AC016909.2  | 0,00 | 0,00 | 0 | 0 | 1 | NA |
| AC018693.5  | 0,00 | 0,00 | 0 | 0 | 1 | NA |
| AC018693.6  | 0,00 | 0,00 | 0 | 0 | 1 | NA |
| AC018730.1  | 0,00 | 0,00 | 0 | 0 | 1 | NA |
| AC019068.2  | 0,00 | 0,00 | 0 | 0 | 1 | NA |
| AC019349.4  | 0,00 | 0,00 | 0 | 0 | 1 | NA |
| AC020743.4  | 0,00 | 0,00 | 0 | 0 | 1 | NA |
| AC023115.4  | 0,00 | 0,00 | 0 | 0 | 1 | NA |
| AC023356.3  | 0,00 | 0,00 | 0 | 0 | 1 | NA |
| AC024619.2  | 0,00 | 0,00 | 0 | 0 | 1 | NA |
| AC025811.3  | 0,00 | 0,00 | 0 | 0 | 1 | NA |
| AC034228.2  | 0,00 | 0,00 | 0 | 0 | 1 | NA |
| AC064865.2  | 0,00 | 0,00 | 0 | 0 | 1 | NA |
| AC064875.2  | 0,00 | 0,00 | 0 | 0 | 1 | NA |
| AC067959.1  | 0,00 | 0,00 | 0 | 0 | 1 | NA |
| AC068137.13 | 0,00 | 0,00 | 0 | 0 | 1 | NA |
| AC068491.3  | 0,00 | 0,00 | 0 | 0 | 1 | NA |
| AC068535.1  | 0,00 | 0,00 | 0 | 0 | 1 | NA |
| AC073150.6  | 0,00 | 0,00 | 0 | 0 | 1 | NA |
| AC073310.3  | 0,00 | 0,00 | 0 | 0 | 1 | NA |
| AC073846.5  | 0,00 | 0,00 | 0 | 0 | 1 | NA |
| AC078842.4  | 0,00 | 0,00 | 0 | 0 | 1 | NA |
| AC078937.3  | 0,00 | 0,00 | 0 | 0 | 1 | NA |
| AC079804.8  | 0,00 | 0,00 | 0 | 0 | 1 | NA |
| AC079987.2  | 0,00 | 0,00 | 0 | 0 | 1 | NA |
| AC090952.5  | 0,00 | 0,00 | 0 | 0 | 1 | NA |
| AC092054.1  | 0,00 | 0,00 | 0 | 0 | 1 | NA |

|             |      |      |   |   |   |    |
|-------------|------|------|---|---|---|----|
| AC092570.4  | 0,00 | 0,00 | 0 | 0 | 1 | NA |
| AC092578.1  | 0,00 | 0,00 | 0 | 0 | 1 | NA |
| AC092638.1  | 0,00 | 0,00 | 0 | 0 | 1 | NA |
| AC093110.3  | 0,00 | 0,00 | 0 | 0 | 1 | NA |
| AC093326.2  | 0,00 | 0,00 | 0 | 0 | 1 | NA |
| AC093388.3  | 0,00 | 0,00 | 0 | 0 | 1 | NA |
| AC093616.4  | 0,00 | 0,00 | 0 | 0 | 1 | NA |
| AC093627.8  | 0,00 | 0,00 | 0 | 0 | 1 | NA |
| AC093639.1  | 0,00 | 0,00 | 0 | 0 | 1 | NA |
| AC093662.6  | 0,00 | 0,00 | 0 | 0 | 1 | NA |
| AC097458.2  | 0,00 | 0,00 | 0 | 0 | 1 | NA |
| AC098817.2  | 0,00 | 0,00 | 0 | 0 | 1 | NA |
| AC098828.3  | 0,00 | 0,00 | 0 | 0 | 1 | NA |
| AC103563.6  | 0,00 | 0,00 | 0 | 0 | 1 | NA |
| AC104297.2  | 0,00 | 0,00 | 0 | 0 | 1 | NA |
| AC104532.3  | 0,00 | 0,00 | 0 | 0 | 1 | NA |
| AC106705.2  | 0,00 | 0,00 | 0 | 0 | 1 | NA |
| AC109589.1  | 0,00 | 0,00 | 0 | 0 | 1 | NA |
| AC110769.3  | 0,00 | 0,00 | 0 | 0 | 1 | NA |
| AC112217.1  | 0,00 | 0,00 | 0 | 0 | 1 | NA |
| AC114273.3  | 0,00 | 0,00 | 0 | 0 | 1 | NA |
| AC114812.10 | 0,00 | 0,00 | 0 | 0 | 1 | NA |
| AC116050.1  | 0,00 | 0,00 | 0 | 0 | 1 | NA |
| AC124944.4  | 0,00 | 0,00 | 0 | 0 | 1 | NA |
| AC125238.4  | 0,00 | 0,00 | 0 | 0 | 1 | NA |
| AC130360.8  | 0,00 | 0,00 | 0 | 0 | 1 | NA |
| AC133633.2  | 0,00 | 0,00 | 0 | 0 | 1 | NA |
| AC135178.7  | 0,00 | 0,00 | 0 | 0 | 1 | NA |
| AC140725.7  | 0,00 | 0,00 | 0 | 0 | 1 | NA |
| AC144838.2  | 0,00 | 0,00 | 0 | 0 | 1 | NA |
| ACTN2       | 0,00 | 0,00 | 0 | 0 | 1 | NA |
| ADCY8       | 0,00 | 0,00 | 0 | 0 | 1 | NA |
| ADGRF4      | 0,00 | 0,00 | 0 | 0 | 1 | NA |
| AE000662.92 | 0,00 | 0,00 | 0 | 0 | 1 | NA |
| AF038458.3  | 0,00 | 0,00 | 0 | 0 | 1 | NA |
| AF038458.4  | 0,00 | 0,00 | 0 | 0 | 1 | NA |
| AF196970.3  | 0,00 | 0,00 | 0 | 0 | 1 | NA |
| AF212831.2  | 0,00 | 0,00 | 0 | 0 | 1 | NA |
| AF238378.6  | 0,00 | 0,00 | 0 | 0 | 1 | NA |
| AGXT2       | 0,00 | 0,00 | 0 | 0 | 1 | NA |
| AL022393.3  | 0,00 | 0,00 | 0 | 0 | 1 | NA |
| AL050303.10 | 0,00 | 0,00 | 0 | 0 | 1 | NA |
| AL121578.2  | 0,00 | 0,00 | 0 | 0 | 1 | NA |
| AL928742.9  | 0,00 | 0,00 | 0 | 0 | 1 | NA |
| ANKRD31     | 0,00 | 0,00 | 0 | 0 | 1 | NA |
| ANKRD34B    | 0,00 | 0,00 | 0 | 0 | 1 | NA |
| ANO4        | 0,00 | 0,00 | 0 | 0 | 1 | NA |
| ANXA8L1     | 0,00 | 0,00 | 0 | 0 | 1 | NA |
| AP000244.11 | 0,00 | 0,00 | 0 | 0 | 1 | NA |
| AP000289.6  | 0,00 | 0,00 | 0 | 0 | 1 | NA |

|              |      |      |   |   |   |    |
|--------------|------|------|---|---|---|----|
| AP000322.53  | 0,00 | 0,00 | 0 | 0 | 1 | NA |
| AP000343.1   | 0,00 | 0,00 | 0 | 0 | 1 | NA |
| AP000351.13  | 0,00 | 0,00 | 0 | 0 | 1 | NA |
| AP000351.3   | 0,00 | 0,00 | 0 | 0 | 1 | NA |
| AP000470.2   | 0,00 | 0,00 | 0 | 0 | 1 | NA |
| AP000593.7   | 0,00 | 0,00 | 0 | 0 | 1 | NA |
| AP000857.1   | 0,00 | 0,00 | 0 | 0 | 1 | NA |
| AP000857.3   | 0,00 | 0,00 | 0 | 0 | 1 | NA |
| AP000860.2   | 0,00 | 0,00 | 0 | 0 | 1 | NA |
| AP000884.4   | 0,00 | 0,00 | 0 | 0 | 1 | NA |
| AP001059.5   | 0,00 | 0,00 | 0 | 0 | 1 | NA |
| AP001429.1   | 0,00 | 0,00 | 0 | 0 | 1 | NA |
| AP001439.2   | 0,00 | 0,00 | 0 | 0 | 1 | NA |
| AP001472.1   | 0,00 | 0,00 | 0 | 0 | 1 | NA |
| AP002856.4   | 0,00 | 0,00 | 0 | 0 | 1 | NA |
| AP004289.1   | 0,00 | 0,00 | 0 | 0 | 1 | NA |
| AP005530.2   | 0,00 | 0,00 | 0 | 0 | 1 | NA |
| APOBEC1      | 0,00 | 0,00 | 0 | 0 | 1 | NA |
| APOC2        | 0,00 | 0,00 | 0 | 0 | 1 | NA |
| ARL13A       | 0,00 | 0,00 | 0 | 0 | 1 | NA |
| ASS1P5       | 0,00 | 0,00 | 0 | 0 | 1 | NA |
| ATP6V1B1     | 0,00 | 0,00 | 0 | 0 | 1 | NA |
| ATXN2-AS     | 0,00 | 0,00 | 0 | 0 | 1 | NA |
| AXIN2        | 0,00 | 0,00 | 0 | 0 | 1 | NA |
| BMS1P11      | 0,00 | 0,00 | 0 | 0 | 1 | NA |
| bP-2171C21.2 | 0,00 | 0,00 | 0 | 0 | 1 | NA |
| BPIFB2       | 0,00 | 0,00 | 0 | 0 | 1 | NA |
| BTBD16       | 0,00 | 0,00 | 0 | 0 | 1 | NA |
| BX682235.1   | 0,00 | 0,00 | 0 | 0 | 1 | NA |
| C14orf180    | 0,00 | 0,00 | 0 | 0 | 1 | NA |
| C15orf56     | 0,00 | 0,00 | 0 | 0 | 1 | NA |
| C16orf71     | 0,00 | 0,00 | 0 | 0 | 1 | NA |
| C17orf47     | 0,00 | 0,00 | 0 | 0 | 1 | NA |
| C18orf63     | 0,00 | 0,00 | 0 | 0 | 1 | NA |
| C19orf71     | 0,00 | 0,00 | 0 | 0 | 1 | NA |
| C1orf195     | 0,00 | 0,00 | 0 | 0 | 1 | NA |
| C2orf69P2    | 0,00 | 0,00 | 0 | 0 | 1 | NA |
| C2orf72      | 0,00 | 0,00 | 0 | 0 | 1 | NA |
| C5orf52      | 0,00 | 0,00 | 0 | 0 | 1 | NA |
| C6orf222     | 0,00 | 0,00 | 0 | 0 | 1 | NA |
| C8A          | 0,00 | 0,00 | 0 | 0 | 1 | NA |
| C8orf71      | 0,00 | 0,00 | 0 | 0 | 1 | NA |
| C9           | 0,00 | 0,00 | 0 | 0 | 1 | NA |
| CALM2P1      | 0,00 | 0,00 | 0 | 0 | 1 | NA |
| CAPSL        | 0,00 | 0,00 | 0 | 0 | 1 | NA |
| CCDC184      | 0,00 | 0,00 | 0 | 0 | 1 | NA |
| CCDC85A      | 0,00 | 0,00 | 0 | 0 | 1 | NA |
| CCL19        | 0,00 | 0,00 | 0 | 0 | 1 | NA |
| CDC37P1      | 0,00 | 0,00 | 0 | 0 | 1 | NA |
| CDRT15P1     | 0,00 | 0,00 | 0 | 0 | 1 | NA |

|                |      |      |   |   |   |    |
|----------------|------|------|---|---|---|----|
| CECR3          | 0,00 | 0,00 | 0 | 0 | 1 | NA |
| CERS1          | 0,00 | 0,00 | 0 | 0 | 1 | NA |
| CFAP126        | 0,00 | 0,00 | 0 | 0 | 1 | NA |
| CGB3           | 0,00 | 0,00 | 0 | 0 | 1 | NA |
| CH17-164J11.1  | 0,00 | 0,00 | 0 | 0 | 1 | NA |
| CH507-145C22.3 | 0,00 | 0,00 | 0 | 0 | 1 | NA |
| CH507-145C22.4 | 0,00 | 0,00 | 0 | 0 | 1 | NA |
| CIB4           | 0,00 | 0,00 | 0 | 0 | 1 | NA |
| CISTR          | 0,00 | 0,00 | 0 | 0 | 1 | NA |
| CLDN2          | 0,00 | 0,00 | 0 | 0 | 1 | NA |
| CLVS2          | 0,00 | 0,00 | 0 | 0 | 1 | NA |
| CMB9-14B22.1   | 0,00 | 0,00 | 0 | 0 | 1 | NA |
| CNMD           | 0,00 | 0,00 | 0 | 0 | 1 | NA |
| COLCA2         | 0,00 | 0,00 | 0 | 0 | 1 | NA |
| COX6BP3        | 0,00 | 0,00 | 0 | 0 | 1 | NA |
| CPLX3          | 0,00 | 0,00 | 0 | 0 | 1 | NA |
| CRABP1         | 0,00 | 0,00 | 0 | 0 | 1 | NA |
| CRYBB3         | 0,00 | 0,00 | 0 | 0 | 1 | NA |
| CRYGB          | 0,00 | 0,00 | 0 | 0 | 1 | NA |
| CRYGC          | 0,00 | 0,00 | 0 | 0 | 1 | NA |
| CT45A8         | 0,00 | 0,00 | 0 | 0 | 1 | NA |
| CTA-246H3.12   | 0,00 | 0,00 | 0 | 0 | 1 | NA |
| CTA-249B10.1   | 0,00 | 0,00 | 0 | 0 | 1 | NA |
| CTA-796E4.3    | 0,00 | 0,00 | 0 | 0 | 1 | NA |
| CTA-797E19.2   | 0,00 | 0,00 | 0 | 0 | 1 | NA |
| CTB-35F21.3    | 0,00 | 0,00 | 0 | 0 | 1 | NA |
| CTB-50L17.5    | 0,00 | 0,00 | 0 | 0 | 1 | NA |
| CTC-203F4.2    | 0,00 | 0,00 | 0 | 0 | 1 | NA |
| CTC-261N6.1    | 0,00 | 0,00 | 0 | 0 | 1 | NA |
| CTC-281F24.5   | 0,00 | 0,00 | 0 | 0 | 1 | NA |
| CTC-379B2.4    | 0,00 | 0,00 | 0 | 0 | 1 | NA |
| CTC-394G3.1    | 0,00 | 0,00 | 0 | 0 | 1 | NA |
| CTC-412M14.5   | 0,00 | 0,00 | 0 | 0 | 1 | NA |
| CTC-431G16.3   | 0,00 | 0,00 | 0 | 0 | 1 | NA |
| CTC-436K13.5   | 0,00 | 0,00 | 0 | 0 | 1 | NA |
| CTC-448D22.1   | 0,00 | 0,00 | 0 | 0 | 1 | NA |
| CTC-448F2.4    | 0,00 | 0,00 | 0 | 0 | 1 | NA |
| CTC-453G23.4   | 0,00 | 0,00 | 0 | 0 | 1 | NA |
| CTC-503J8.4    | 0,00 | 0,00 | 0 | 0 | 1 | NA |
| CTC-518B2.10   | 0,00 | 0,00 | 0 | 0 | 1 | NA |
| CTD-2001E22.1  | 0,00 | 0,00 | 0 | 0 | 1 | NA |
| CTD-2014E2.2   | 0,00 | 0,00 | 0 | 0 | 1 | NA |
| CTD-2015A6.1   | 0,00 | 0,00 | 0 | 0 | 1 | NA |
| CTD-2015A6.2   | 0,00 | 0,00 | 0 | 0 | 1 | NA |
| CTD-2017C7.3   | 0,00 | 0,00 | 0 | 0 | 1 | NA |
| CTD-2034I4.1   | 0,00 | 0,00 | 0 | 0 | 1 | NA |
| CTD-2034L19.1  | 0,00 | 0,00 | 0 | 0 | 1 | NA |
| CTD-2042D5.1   | 0,00 | 0,00 | 0 | 0 | 1 | NA |
| CTD-2045M21.1  | 0,00 | 0,00 | 0 | 0 | 1 | NA |
| CTD-2057J6.1   | 0,00 | 0,00 | 0 | 0 | 1 | NA |

|               |      |      |   |   |   |    |
|---------------|------|------|---|---|---|----|
| CTD-2062A1.2  | 0,00 | 0,00 | 0 | 0 | 1 | NA |
| CTD-2108O9.2  | 0,00 | 0,00 | 0 | 0 | 1 | NA |
| CTD-2122P11.1 | 0,00 | 0,00 | 0 | 0 | 1 | NA |
| CTD-2154B17.1 | 0,00 | 0,00 | 0 | 0 | 1 | NA |
| CTD-2158P22.2 | 0,00 | 0,00 | 0 | 0 | 1 | NA |
| CTD-2161F6.1  | 0,00 | 0,00 | 0 | 0 | 1 | NA |
| CTD-2199O4.6  | 0,00 | 0,00 | 0 | 0 | 1 | NA |
| CTD-2203A3.1  | 0,00 | 0,00 | 0 | 0 | 1 | NA |
| CTD-2210A23.1 | 0,00 | 0,00 | 0 | 0 | 1 | NA |
| CTD-2213F21.4 | 0,00 | 0,00 | 0 | 0 | 1 | NA |
| CTD-2218K11.3 | 0,00 | 0,00 | 0 | 0 | 1 | NA |
| CTD-2227C6.2  | 0,00 | 0,00 | 0 | 0 | 1 | NA |
| CTD-2228K2.1  | 0,00 | 0,00 | 0 | 0 | 1 | NA |
| CTD-2308G16.1 | 0,00 | 0,00 | 0 | 0 | 1 | NA |
| CTD-2308N23.3 | 0,00 | 0,00 | 0 | 0 | 1 | NA |
| CTD-2313P7.1  | 0,00 | 0,00 | 0 | 0 | 1 | NA |
| CTD-2320G14.2 | 0,00 | 0,00 | 0 | 0 | 1 | NA |
| CTD-2323K18.2 | 0,00 | 0,00 | 0 | 0 | 1 | NA |
| CTD-2325A15.5 | 0,00 | 0,00 | 0 | 0 | 1 | NA |
| CTD-2325P2.4  | 0,00 | 0,00 | 0 | 0 | 1 | NA |
| CTD-2331H12.5 | 0,00 | 0,00 | 0 | 0 | 1 | NA |
| CTD-2331H12.8 | 0,00 | 0,00 | 0 | 0 | 1 | NA |
| CTD-2335O3.1  | 0,00 | 0,00 | 0 | 0 | 1 | NA |
| CTD-2350C19.5 | 0,00 | 0,00 | 0 | 0 | 1 | NA |
| CTD-2353N24.1 | 0,00 | 0,00 | 0 | 0 | 1 | NA |
| CTD-2380F24.1 | 0,00 | 0,00 | 0 | 0 | 1 | NA |
| CTD-2382E5.2  | 0,00 | 0,00 | 0 | 0 | 1 | NA |
| CTD-2501E16.2 | 0,00 | 0,00 | 0 | 0 | 1 | NA |
| CTD-2516F10.4 | 0,00 | 0,00 | 0 | 0 | 1 | NA |
| CTD-2517O10.6 | 0,00 | 0,00 | 0 | 0 | 1 | NA |
| CTD-2526L21.1 | 0,00 | 0,00 | 0 | 0 | 1 | NA |
| CTD-2526L21.2 | 0,00 | 0,00 | 0 | 0 | 1 | NA |
| CTD-2528L19.3 | 0,00 | 0,00 | 0 | 0 | 1 | NA |
| CTD-2530H12.8 | 0,00 | 0,00 | 0 | 0 | 1 | NA |
| CTD-2552K11.2 | 0,00 | 0,00 | 0 | 0 | 1 | NA |
| CTD-2555C10.3 | 0,00 | 0,00 | 0 | 0 | 1 | NA |
| CTD-2582D11.1 | 0,00 | 0,00 | 0 | 0 | 1 | NA |
| CTD-2583P5.3  | 0,00 | 0,00 | 0 | 0 | 1 | NA |
| CTD-2587M23.1 | 0,00 | 0,00 | 0 | 0 | 1 | NA |
| CTD-2588C8.8  | 0,00 | 0,00 | 0 | 0 | 1 | NA |
| CTD-2588J6.2  | 0,00 | 0,00 | 0 | 0 | 1 | NA |
| CTD-3012A18.1 | 0,00 | 0,00 | 0 | 0 | 1 | NA |
| CTD-3028N15.3 | 0,00 | 0,00 | 0 | 0 | 1 | NA |
| CTD-3074O7.7  | 0,00 | 0,00 | 0 | 0 | 1 | NA |
| CTD-3137H5.4  | 0,00 | 0,00 | 0 | 0 | 1 | NA |
| CYLC1         | 0,00 | 0,00 | 0 | 0 | 1 | NA |
| CYP11B2       | 0,00 | 0,00 | 0 | 0 | 1 | NA |
| DBX1          | 0,00 | 0,00 | 0 | 0 | 1 | NA |
| DEFA10P       | 0,00 | 0,00 | 0 | 0 | 1 | NA |
| DEFB108P1     | 0,00 | 0,00 | 0 | 0 | 1 | NA |

|               |      |      |   |   |   |    |
|---------------|------|------|---|---|---|----|
| DEFB119       | 0,00 | 0,00 | 0 | 0 | 1 | NA |
| DISP3         | 0,00 | 0,00 | 0 | 0 | 1 | NA |
| DKK4          | 0,00 | 0,00 | 0 | 0 | 1 | NA |
| DKKL1         | 0,00 | 0,00 | 0 | 0 | 1 | NA |
| DMRTB1        | 0,00 | 0,00 | 0 | 0 | 1 | NA |
| DND1          | 0,00 | 0,00 | 0 | 0 | 1 | NA |
| DNM1P31       | 0,00 | 0,00 | 0 | 0 | 1 | NA |
| DPRXP1        | 0,00 | 0,00 | 0 | 0 | 1 | NA |
| DYX1C1-CCPG1  | 0,00 | 0,00 | 0 | 0 | 1 | NA |
| EBF3          | 0,00 | 0,00 | 0 | 0 | 1 | NA |
| ECEL1P2       | 0,00 | 0,00 | 0 | 0 | 1 | NA |
| EDDM3A        | 0,00 | 0,00 | 0 | 0 | 1 | NA |
| EDN2          | 0,00 | 0,00 | 0 | 0 | 1 | NA |
| EPYC          | 0,00 | 0,00 | 0 | 0 | 1 | NA |
| EQTN          | 0,00 | 0,00 | 0 | 0 | 1 | NA |
| FAM136B       | 0,00 | 0,00 | 0 | 0 | 1 | NA |
| FAM19A4       | 0,00 | 0,00 | 0 | 0 | 1 | NA |
| FAM228A       | 0,00 | 0,00 | 0 | 0 | 1 | NA |
| FAM60BP       | 0,00 | 0,00 | 0 | 0 | 1 | NA |
| FAM90A10      | 0,00 | 0,00 | 0 | 0 | 1 | NA |
| FCRL4         | 0,00 | 0,00 | 0 | 0 | 1 | NA |
| FDSP4         | 0,00 | 0,00 | 0 | 0 | 1 | NA |
| GAGE10        | 0,00 | 0,00 | 0 | 0 | 1 | NA |
| GAGE12F       | 0,00 | 0,00 | 0 | 0 | 1 | NA |
| GAPDHP14      | 0,00 | 0,00 | 0 | 0 | 1 | NA |
| GIMAP1-GIMAP5 | 0,00 | 0,00 | 0 | 0 | 1 | NA |
| GKN1          | 0,00 | 0,00 | 0 | 0 | 1 | NA |
| GKN3P         | 0,00 | 0,00 | 0 | 0 | 1 | NA |
| GLRB          | 0,00 | 0,00 | 0 | 0 | 1 | NA |
| GOLGA6L2      | 0,00 | 0,00 | 0 | 0 | 1 | NA |
| GPR182        | 0,00 | 0,00 | 0 | 0 | 1 | NA |
| GPR75-ASB3    | 0,00 | 0,00 | 0 | 0 | 1 | NA |
| GPX5          | 0,00 | 0,00 | 0 | 0 | 1 | NA |
| GRB14         | 0,00 | 0,00 | 0 | 0 | 1 | NA |
| GRB7          | 0,00 | 0,00 | 0 | 0 | 1 | NA |
| GS1-103B18.1  | 0,00 | 0,00 | 0 | 0 | 1 | NA |
| GS1-115G20.1  | 0,00 | 0,00 | 0 | 0 | 1 | NA |
| GS1-21A4.2    | 0,00 | 0,00 | 0 | 0 | 1 | NA |
| GS1-304P7.1   | 0,00 | 0,00 | 0 | 0 | 1 | NA |
| GS1-304P7.2   | 0,00 | 0,00 | 0 | 0 | 1 | NA |
| GS1-433O24.1  | 0,00 | 0,00 | 0 | 0 | 1 | NA |
| GS1-536K7.3   | 0,00 | 0,00 | 0 | 0 | 1 | NA |
| GSG2          | 0,00 | 0,00 | 0 | 0 | 1 | NA |
| GSTA2         | 0,00 | 0,00 | 0 | 0 | 1 | NA |
| GTSCR1        | 0,00 | 0,00 | 0 | 0 | 1 | NA |
| GUCA1A        | 0,00 | 0,00 | 0 | 0 | 1 | NA |
| HAND2         | 0,00 | 0,00 | 0 | 0 | 1 | NA |
| HCG17         | 0,00 | 0,00 | 0 | 0 | 1 | NA |
| HCG4          | 0,00 | 0,00 | 0 | 0 | 1 | NA |
| HIGD2B        | 0,00 | 0,00 | 0 | 0 | 1 | NA |



|                |      |      |   |   |   |    |
|----------------|------|------|---|---|---|----|
| HOXA4          | 0,00 | 0,00 | 0 | 0 | 1 | NA |
| HOXB1          | 0,00 | 0,00 | 0 | 0 | 1 | NA |
| HPX            | 0,00 | 0,00 | 0 | 0 | 1 | NA |
| IFNE           | 0,00 | 0,00 | 0 | 0 | 1 | NA |
| IGHV1-67       | 0,00 | 0,00 | 0 | 0 | 1 | NA |
| IGHV3-20       | 0,00 | 0,00 | 0 | 0 | 1 | NA |
| IGHV3-60       | 0,00 | 0,00 | 0 | 0 | 1 | NA |
| IGHV3-73       | 0,00 | 0,00 | 0 | 0 | 1 | NA |
| IGHV5-10-1     | 0,00 | 0,00 | 0 | 0 | 1 | NA |
| IGHV5-78       | 0,00 | 0,00 | 0 | 0 | 1 | NA |
| IGHVII-1-1     | 0,00 | 0,00 | 0 | 0 | 1 | NA |
| IGHVIII-82     | 0,00 | 0,00 | 0 | 0 | 1 | NA |
| IGKV1D-17      | 0,00 | 0,00 | 0 | 0 | 1 | NA |
| IGKV1D-43      | 0,00 | 0,00 | 0 | 0 | 1 | NA |
| IGKV1OR10-1    | 0,00 | 0,00 | 0 | 0 | 1 | NA |
| IGKV1OR2-1     | 0,00 | 0,00 | 0 | 0 | 1 | NA |
| IGKV1OR22-1    | 0,00 | 0,00 | 0 | 0 | 1 | NA |
| IGKV6-21       | 0,00 | 0,00 | 0 | 0 | 1 | NA |
| IGKV6D-21      | 0,00 | 0,00 | 0 | 0 | 1 | NA |
| IGLJ6          | 0,00 | 0,00 | 0 | 0 | 1 | NA |
| IGLJCOR18      | 0,00 | 0,00 | 0 | 0 | 1 | NA |
| IGLV3-16       | 0,00 | 0,00 | 0 | 0 | 1 | NA |
| IGLV5-52       | 0,00 | 0,00 | 0 | 0 | 1 | NA |
| IGLVI-68       | 0,00 | 0,00 | 0 | 0 | 1 | NA |
| IL17A          | 0,00 | 0,00 | 0 | 0 | 1 | NA |
| IL17B          | 0,00 | 0,00 | 0 | 0 | 1 | NA |
| IL1RAPL2       | 0,00 | 0,00 | 0 | 0 | 1 | NA |
| IQCJ           | 0,00 | 0,00 | 0 | 0 | 1 | NA |
| IQSEC3         | 0,00 | 0,00 | 0 | 0 | 1 | NA |
| KB-1073A2.1    | 0,00 | 0,00 | 0 | 0 | 1 | NA |
| KB-1299A7.2    | 0,00 | 0,00 | 0 | 0 | 1 | NA |
| KB-1458E12.1   | 0,00 | 0,00 | 0 | 0 | 1 | NA |
| KB-1592A4.16   | 0,00 | 0,00 | 0 | 0 | 1 | NA |
| KB-1958F4.2    | 0,00 | 0,00 | 0 | 0 | 1 | NA |
| KBTBD13        | 0,00 | 0,00 | 0 | 0 | 1 | NA |
| KCNG3          | 0,00 | 0,00 | 0 | 0 | 1 | NA |
| KCNQ1DN        | 0,00 | 0,00 | 0 | 0 | 1 | NA |
| KRT123P        | 0,00 | 0,00 | 0 | 0 | 1 | NA |
| KRT18P20       | 0,00 | 0,00 | 0 | 0 | 1 | NA |
| KRT20          | 0,00 | 0,00 | 0 | 0 | 1 | NA |
| KRT28          | 0,00 | 0,00 | 0 | 0 | 1 | NA |
| KRT35          | 0,00 | 0,00 | 0 | 0 | 1 | NA |
| KRTAP1-5       | 0,00 | 0,00 | 0 | 0 | 1 | NA |
| KRTAP10-3      | 0,00 | 0,00 | 0 | 0 | 1 | NA |
| LA16c-313D11.9 | 0,00 | 0,00 | 0 | 0 | 1 | NA |
| LBX1-AS1       | 0,00 | 0,00 | 0 | 0 | 1 | NA |
| LGR5           | 0,00 | 0,00 | 0 | 0 | 1 | NA |
| LINC00052      | 0,00 | 0,00 | 0 | 0 | 1 | NA |
| LINC00472      | 0,00 | 0,00 | 0 | 0 | 1 | NA |
| LINC00661      | 0,00 | 0,00 | 0 | 0 | 1 | NA |

|                  |      |      |   |   |   |    |
|------------------|------|------|---|---|---|----|
| LINC01594        | 0,00 | 0,00 | 0 | 0 | 1 | NA |
| LINC01620        | 0,00 | 0,00 | 0 | 0 | 1 | NA |
| LLOXNC01-240C2.1 | 0,00 | 0,00 | 0 | 0 | 1 | NA |
| LLOXNC01-36H8.1  | 0,00 | 0,00 | 0 | 0 | 1 | NA |
| LL22NC03-24A12.8 | 0,00 | 0,00 | 0 | 0 | 1 | NA |
| LL22NC03-84E4.8  | 0,00 | 0,00 | 0 | 0 | 1 | NA |
| LL22NC03-86D4.1  | 0,00 | 0,00 | 0 | 0 | 1 | NA |
| LLNLR-231D4.1    | 0,00 | 0,00 | 0 | 0 | 1 | NA |
| LMO1             | 0,00 | 0,00 | 0 | 0 | 1 | NA |
| LRRC14B          | 0,00 | 0,00 | 0 | 0 | 1 | NA |
| LRRC66           | 0,00 | 0,00 | 0 | 0 | 1 | NA |
| LRRC71           | 0,00 | 0,00 | 0 | 0 | 1 | NA |
| LY6G6C           | 0,00 | 0,00 | 0 | 0 | 1 | NA |
| LYPD1            | 0,00 | 0,00 | 0 | 0 | 1 | NA |
| LYVE1            | 0,00 | 0,00 | 0 | 0 | 1 | NA |
| MAGEA2B          | 0,00 | 0,00 | 0 | 0 | 1 | NA |
| MAPK15           | 0,00 | 0,00 | 0 | 0 | 1 | NA |
| MED15P1          | 0,00 | 0,00 | 0 | 0 | 1 | NA |
| MEGF10           | 0,00 | 0,00 | 0 | 0 | 1 | NA |
| MEI4             | 0,00 | 0,00 | 0 | 0 | 1 | NA |
| MEIS1-AS2        | 0,00 | 0,00 | 0 | 0 | 1 | NA |
| MIR1202          | 0,00 | 0,00 | 0 | 0 | 1 | NA |
| MIR1250          | 0,00 | 0,00 | 0 | 0 | 1 | NA |
| MIR1285-2        | 0,00 | 0,00 | 0 | 0 | 1 | NA |
| MIR153-1         | 0,00 | 0,00 | 0 | 0 | 1 | NA |
| MIR2052          | 0,00 | 0,00 | 0 | 0 | 1 | NA |
| MIR3115          | 0,00 | 0,00 | 0 | 0 | 1 | NA |
| MIR3117          | 0,00 | 0,00 | 0 | 0 | 1 | NA |
| MIR3144          | 0,00 | 0,00 | 0 | 0 | 1 | NA |
| MIR3192          | 0,00 | 0,00 | 0 | 0 | 1 | NA |
| MIR320C1         | 0,00 | 0,00 | 0 | 0 | 1 | NA |
| MIR339           | 0,00 | 0,00 | 0 | 0 | 1 | NA |
| MIR345           | 0,00 | 0,00 | 0 | 0 | 1 | NA |
| MIR3662          | 0,00 | 0,00 | 0 | 0 | 1 | NA |
| MIR424           | 0,00 | 0,00 | 0 | 0 | 1 | NA |
| MIR4263          | 0,00 | 0,00 | 0 | 0 | 1 | NA |
| MIR4316          | 0,00 | 0,00 | 0 | 0 | 1 | NA |
| MIR4328          | 0,00 | 0,00 | 0 | 0 | 1 | NA |
| MIR4428          | 0,00 | 0,00 | 0 | 0 | 1 | NA |
| MIR4451          | 0,00 | 0,00 | 0 | 0 | 1 | NA |
| MIR4506          | 0,00 | 0,00 | 0 | 0 | 1 | NA |
| MIR4529          | 0,00 | 0,00 | 0 | 0 | 1 | NA |
| MIR466           | 0,00 | 0,00 | 0 | 0 | 1 | NA |
| MIR4676          | 0,00 | 0,00 | 0 | 0 | 1 | NA |
| MIR4736          | 0,00 | 0,00 | 0 | 0 | 1 | NA |
| MIR4766          | 0,00 | 0,00 | 0 | 0 | 1 | NA |
| MIR4772          | 0,00 | 0,00 | 0 | 0 | 1 | NA |
| MIR4780          | 0,00 | 0,00 | 0 | 0 | 1 | NA |
| MIR503           | 0,00 | 0,00 | 0 | 0 | 1 | NA |
| MIR506           | 0,00 | 0,00 | 0 | 0 | 1 | NA |

|            |      |      |   |   |   |    |
|------------|------|------|---|---|---|----|
| MIR507     | 0,00 | 0,00 | 0 | 0 | 1 | NA |
| MIR518F    | 0,00 | 0,00 | 0 | 0 | 1 | NA |
| MIR548AD   | 0,00 | 0,00 | 0 | 0 | 1 | NA |
| MIR5583-1  | 0,00 | 0,00 | 0 | 0 | 1 | NA |
| MIR5583-2  | 0,00 | 0,00 | 0 | 0 | 1 | NA |
| MIR5687    | 0,00 | 0,00 | 0 | 0 | 1 | NA |
| MIR5706    | 0,00 | 0,00 | 0 | 0 | 1 | NA |
| MIR579     | 0,00 | 0,00 | 0 | 0 | 1 | NA |
| MIR580     | 0,00 | 0,00 | 0 | 0 | 1 | NA |
| MIR604     | 0,00 | 0,00 | 0 | 0 | 1 | NA |
| MIR607     | 0,00 | 0,00 | 0 | 0 | 1 | NA |
| MIR6071    | 0,00 | 0,00 | 0 | 0 | 1 | NA |
| MIR6075    | 0,00 | 0,00 | 0 | 0 | 1 | NA |
| MIR6133    | 0,00 | 0,00 | 0 | 0 | 1 | NA |
| MIR6715A   | 0,00 | 0,00 | 0 | 0 | 1 | NA |
| MIR7854    | 0,00 | 0,00 | 0 | 0 | 1 | NA |
| MIR8055    | 0,00 | 0,00 | 0 | 0 | 1 | NA |
| MIR8064    | 0,00 | 0,00 | 0 | 0 | 1 | NA |
| MIRLET7D   | 0,00 | 0,00 | 0 | 0 | 1 | NA |
| MMP23A     | 0,00 | 0,00 | 0 | 0 | 1 | NA |
| MMP26      | 0,00 | 0,00 | 0 | 0 | 1 | NA |
| MMP27      | 0,00 | 0,00 | 0 | 0 | 1 | NA |
| MRGPRX2    | 0,00 | 0,00 | 0 | 0 | 1 | NA |
| MRPL20P1   | 0,00 | 0,00 | 0 | 0 | 1 | NA |
| MRPL51P2   | 0,00 | 0,00 | 0 | 0 | 1 | NA |
| MRPS15P2   | 0,00 | 0,00 | 0 | 0 | 1 | NA |
| MT1B       | 0,00 | 0,00 | 0 | 0 | 1 | NA |
| MT1H       | 0,00 | 0,00 | 0 | 0 | 1 | NA |
| MT1L       | 0,00 | 0,00 | 0 | 0 | 1 | NA |
| MT1M       | 0,00 | 0,00 | 0 | 0 | 1 | NA |
| MYH4       | 0,00 | 0,00 | 0 | 0 | 1 | NA |
| MYOZ1      | 0,00 | 0,00 | 0 | 0 | 1 | NA |
| NBPF22P    | 0,00 | 0,00 | 0 | 0 | 1 | NA |
| NBPF4      | 0,00 | 0,00 | 0 | 0 | 1 | NA |
| NCRNA00186 | 0,00 | 0,00 | 0 | 0 | 1 | NA |
| NEK4P2     | 0,00 | 0,00 | 0 | 0 | 1 | NA |
| NKX2-5     | 0,00 | 0,00 | 0 | 0 | 1 | NA |
| NMBR       | 0,00 | 0,00 | 0 | 0 | 1 | NA |
| NMRK2      | 0,00 | 0,00 | 0 | 0 | 1 | NA |
| NODAL      | 0,00 | 0,00 | 0 | 0 | 1 | NA |
| NPM2       | 0,00 | 0,00 | 0 | 0 | 1 | NA |
| NR1H5P     | 0,00 | 0,00 | 0 | 0 | 1 | NA |
| NUDT4P2    | 0,00 | 0,00 | 0 | 0 | 1 | NA |
| NWD2       | 0,00 | 0,00 | 0 | 0 | 1 | NA |
| OCM2       | 0,00 | 0,00 | 0 | 0 | 1 | NA |
| OCSTAMP    | 0,00 | 0,00 | 0 | 0 | 1 | NA |
| OPCML      | 0,00 | 0,00 | 0 | 0 | 1 | NA |
| OPN1MW     | 0,00 | 0,00 | 0 | 0 | 1 | NA |
| OR10G6     | 0,00 | 0,00 | 0 | 0 | 1 | NA |
| OR10J5     | 0,00 | 0,00 | 0 | 0 | 1 | NA |

|            |      |      |   |   |   |    |
|------------|------|------|---|---|---|----|
| OR10S1     | 0,00 | 0,00 | 0 | 0 | 1 | NA |
| OR11H12    | 0,00 | 0,00 | 0 | 0 | 1 | NA |
| OR11H13P   | 0,00 | 0,00 | 0 | 0 | 1 | NA |
| OR1L1      | 0,00 | 0,00 | 0 | 0 | 1 | NA |
| OR2AI1P    | 0,00 | 0,00 | 0 | 0 | 1 | NA |
| OR2AJ1     | 0,00 | 0,00 | 0 | 0 | 1 | NA |
| OR2AK2     | 0,00 | 0,00 | 0 | 0 | 1 | NA |
| OR2T27     | 0,00 | 0,00 | 0 | 0 | 1 | NA |
| OR2W3      | 0,00 | 0,00 | 0 | 0 | 1 | NA |
| OR3A1      | 0,00 | 0,00 | 0 | 0 | 1 | NA |
| OR3D1P     | 0,00 | 0,00 | 0 | 0 | 1 | NA |
| OR4A6P     | 0,00 | 0,00 | 0 | 0 | 1 | NA |
| OR4C49P    | 0,00 | 0,00 | 0 | 0 | 1 | NA |
| OR4C6      | 0,00 | 0,00 | 0 | 0 | 1 | NA |
| OR4G3P     | 0,00 | 0,00 | 0 | 0 | 1 | NA |
| OR4K12P    | 0,00 | 0,00 | 0 | 0 | 1 | NA |
| OR4S1      | 0,00 | 0,00 | 0 | 0 | 1 | NA |
| OR51G1     | 0,00 | 0,00 | 0 | 0 | 1 | NA |
| OR51K1P    | 0,00 | 0,00 | 0 | 0 | 1 | NA |
| OR52P2P    | 0,00 | 0,00 | 0 | 0 | 1 | NA |
| OR5AR1     | 0,00 | 0,00 | 0 | 0 | 1 | NA |
| OR5B12     | 0,00 | 0,00 | 0 | 0 | 1 | NA |
| OR5BT1P    | 0,00 | 0,00 | 0 | 0 | 1 | NA |
| OR5M6P     | 0,00 | 0,00 | 0 | 0 | 1 | NA |
| OR5M7P     | 0,00 | 0,00 | 0 | 0 | 1 | NA |
| OR6C74     | 0,00 | 0,00 | 0 | 0 | 1 | NA |
| OR7E19P    | 0,00 | 0,00 | 0 | 0 | 1 | NA |
| OR7E33P    | 0,00 | 0,00 | 0 | 0 | 1 | NA |
| OR8K2P     | 0,00 | 0,00 | 0 | 0 | 1 | NA |
| OTOS       | 0,00 | 0,00 | 0 | 0 | 1 | NA |
| PAGE2      | 0,00 | 0,00 | 0 | 0 | 1 | NA |
| PCDHGA4    | 0,00 | 0,00 | 0 | 0 | 1 | NA |
| PCDHGB1    | 0,00 | 0,00 | 0 | 0 | 1 | NA |
| PCSK4      | 0,00 | 0,00 | 0 | 0 | 1 | NA |
| PDC        | 0,00 | 0,00 | 0 | 0 | 1 | NA |
| PDCL2      | 0,00 | 0,00 | 0 | 0 | 1 | NA |
| PDHA2      | 0,00 | 0,00 | 0 | 0 | 1 | NA |
| POM121L2   | 0,00 | 0,00 | 0 | 0 | 1 | NA |
| POM121L3P  | 0,00 | 0,00 | 0 | 0 | 1 | NA |
| POU3F2     | 0,00 | 0,00 | 0 | 0 | 1 | NA |
| PPIHP1     | 0,00 | 0,00 | 0 | 0 | 1 | NA |
| PPP1R26P3  | 0,00 | 0,00 | 0 | 0 | 1 | NA |
| PRAMEF4    | 0,00 | 0,00 | 0 | 0 | 1 | NA |
| PRB3       | 0,00 | 0,00 | 0 | 0 | 1 | NA |
| PRDM13     | 0,00 | 0,00 | 0 | 0 | 1 | NA |
| PRODH2     | 0,00 | 0,00 | 0 | 0 | 1 | NA |
| PRR32      | 0,00 | 0,00 | 0 | 0 | 1 | NA |
| PVALB      | 0,00 | 0,00 | 0 | 0 | 1 | NA |
| RARRES2P10 | 0,00 | 0,00 | 0 | 0 | 1 | NA |
| RBPMSLP    | 0,00 | 0,00 | 0 | 0 | 1 | NA |

|            |      |      |   |   |   |    |
|------------|------|------|---|---|---|----|
| REG3A      | 0,00 | 0,00 | 0 | 0 | 1 | NA |
| REP15      | 0,00 | 0,00 | 0 | 0 | 1 | NA |
| RF00264    | 0,00 | 0,00 | 0 | 0 | 1 | NA |
| RF00418    | 0,00 | 0,00 | 0 | 0 | 1 | NA |
| RF00573    | 0,00 | 0,00 | 0 | 0 | 1 | NA |
| RF00604    | 0,00 | 0,00 | 0 | 0 | 1 | NA |
| RF02102    | 0,00 | 0,00 | 0 | 0 | 1 | NA |
| RF02122    | 0,00 | 0,00 | 0 | 0 | 1 | NA |
| RF02159    | 0,00 | 0,00 | 0 | 0 | 1 | NA |
| RHBDF1     | 0,00 | 0,00 | 0 | 0 | 1 | NA |
| RHOD       | 0,00 | 0,00 | 0 | 0 | 1 | NA |
| RN7SKP115  | 0,00 | 0,00 | 0 | 0 | 1 | NA |
| RN7SKP140  | 0,00 | 0,00 | 0 | 0 | 1 | NA |
| RN7SKP223  | 0,00 | 0,00 | 0 | 0 | 1 | NA |
| RN7SKP237  | 0,00 | 0,00 | 0 | 0 | 1 | NA |
| RN7SKP251  | 0,00 | 0,00 | 0 | 0 | 1 | NA |
| RN7SKP296  | 0,00 | 0,00 | 0 | 0 | 1 | NA |
| RN7SKP299  | 0,00 | 0,00 | 0 | 0 | 1 | NA |
| RN7SL569P  | 0,00 | 0,00 | 0 | 0 | 1 | NA |
| RN7SL629P  | 0,00 | 0,00 | 0 | 0 | 1 | NA |
| RNA5SP154  | 0,00 | 0,00 | 0 | 0 | 1 | NA |
| RNA5SP182  | 0,00 | 0,00 | 0 | 0 | 1 | NA |
| RNA5SP217  | 0,00 | 0,00 | 0 | 0 | 1 | NA |
| RNA5SP218  | 0,00 | 0,00 | 0 | 0 | 1 | NA |
| RNA5SP221  | 0,00 | 0,00 | 0 | 0 | 1 | NA |
| RNA5SP239  | 0,00 | 0,00 | 0 | 0 | 1 | NA |
| RNA5SP280  | 0,00 | 0,00 | 0 | 0 | 1 | NA |
| RNA5SP328  | 0,00 | 0,00 | 0 | 0 | 1 | NA |
| RNA5SP354  | 0,00 | 0,00 | 0 | 0 | 1 | NA |
| RNA5SP461  | 0,00 | 0,00 | 0 | 0 | 1 | NA |
| RNA5SP525  | 0,00 | 0,00 | 0 | 0 | 1 | NA |
| RNA5SP94   | 0,00 | 0,00 | 0 | 0 | 1 | NA |
| RNASE11    | 0,00 | 0,00 | 0 | 0 | 1 | NA |
| RNASE13    | 0,00 | 0,00 | 0 | 0 | 1 | NA |
| RNF183     | 0,00 | 0,00 | 0 | 0 | 1 | NA |
| RNU1-136P  | 0,00 | 0,00 | 0 | 0 | 1 | NA |
| RNU2-39P   | 0,00 | 0,00 | 0 | 0 | 1 | NA |
| RNU2-50P   | 0,00 | 0,00 | 0 | 0 | 1 | NA |
| RNU4-35P   | 0,00 | 0,00 | 0 | 0 | 1 | NA |
| RNU4-71P   | 0,00 | 0,00 | 0 | 0 | 1 | NA |
| RNU5A-6P   | 0,00 | 0,00 | 0 | 0 | 1 | NA |
| RNU6-1048P | 0,00 | 0,00 | 0 | 0 | 1 | NA |
| RNU6-1079P | 0,00 | 0,00 | 0 | 0 | 1 | NA |
| RNU6-1086P | 0,00 | 0,00 | 0 | 0 | 1 | NA |
| RNU6-1109P | 0,00 | 0,00 | 0 | 0 | 1 | NA |
| RNU6-1164P | 0,00 | 0,00 | 0 | 0 | 1 | NA |
| RNU6-1193P | 0,00 | 0,00 | 0 | 0 | 1 | NA |
| RNU6-1194P | 0,00 | 0,00 | 0 | 0 | 1 | NA |
| RNU6-1264P | 0,00 | 0,00 | 0 | 0 | 1 | NA |
| RNU6-1269P | 0,00 | 0,00 | 0 | 0 | 1 | NA |

|               |      |      |   |   |   |    |
|---------------|------|------|---|---|---|----|
| RNU6-1290P    | 0,00 | 0,00 | 0 | 0 | 1 | NA |
| RNU6-1320P    | 0,00 | 0,00 | 0 | 0 | 1 | NA |
| RNU6-160P     | 0,00 | 0,00 | 0 | 0 | 1 | NA |
| RNU6-163P     | 0,00 | 0,00 | 0 | 0 | 1 | NA |
| RNU6-196P     | 0,00 | 0,00 | 0 | 0 | 1 | NA |
| RNU6-197P     | 0,00 | 0,00 | 0 | 0 | 1 | NA |
| RNU6-200P     | 0,00 | 0,00 | 0 | 0 | 1 | NA |
| RNU6-229P     | 0,00 | 0,00 | 0 | 0 | 1 | NA |
| RNU6-296P     | 0,00 | 0,00 | 0 | 0 | 1 | NA |
| RNU6-302P     | 0,00 | 0,00 | 0 | 0 | 1 | NA |
| RNU6-319P     | 0,00 | 0,00 | 0 | 0 | 1 | NA |
| RNU6-324P     | 0,00 | 0,00 | 0 | 0 | 1 | NA |
| RNU6-368P     | 0,00 | 0,00 | 0 | 0 | 1 | NA |
| RNU6-380P     | 0,00 | 0,00 | 0 | 0 | 1 | NA |
| RNU6-389P     | 0,00 | 0,00 | 0 | 0 | 1 | NA |
| RNU6-428P     | 0,00 | 0,00 | 0 | 0 | 1 | NA |
| RNU6-511P     | 0,00 | 0,00 | 0 | 0 | 1 | NA |
| RNU6-524P     | 0,00 | 0,00 | 0 | 0 | 1 | NA |
| RNU6-537P     | 0,00 | 0,00 | 0 | 0 | 1 | NA |
| RNU6-538P     | 0,00 | 0,00 | 0 | 0 | 1 | NA |
| RNU6-562P     | 0,00 | 0,00 | 0 | 0 | 1 | NA |
| RNU6-577P     | 0,00 | 0,00 | 0 | 0 | 1 | NA |
| RNU6-608P     | 0,00 | 0,00 | 0 | 0 | 1 | NA |
| RNU6-620P     | 0,00 | 0,00 | 0 | 0 | 1 | NA |
| RNU6-640P     | 0,00 | 0,00 | 0 | 0 | 1 | NA |
| RNU6-693P     | 0,00 | 0,00 | 0 | 0 | 1 | NA |
| RNU6-73P      | 0,00 | 0,00 | 0 | 0 | 1 | NA |
| RNU6-748P     | 0,00 | 0,00 | 0 | 0 | 1 | NA |
| RNU6-812P     | 0,00 | 0,00 | 0 | 0 | 1 | NA |
| RNU6-826P     | 0,00 | 0,00 | 0 | 0 | 1 | NA |
| RNU6-827P     | 0,00 | 0,00 | 0 | 0 | 1 | NA |
| RNU6-840P     | 0,00 | 0,00 | 0 | 0 | 1 | NA |
| RNU6-854P     | 0,00 | 0,00 | 0 | 0 | 1 | NA |
| RNU6-919P     | 0,00 | 0,00 | 0 | 0 | 1 | NA |
| RNU6-932P     | 0,00 | 0,00 | 0 | 0 | 1 | NA |
| RNU6-972P     | 0,00 | 0,00 | 0 | 0 | 1 | NA |
| RNU6-983P     | 0,00 | 0,00 | 0 | 0 | 1 | NA |
| RNU6-989P     | 0,00 | 0,00 | 0 | 0 | 1 | NA |
| RNU6ATAC15P   | 0,00 | 0,00 | 0 | 0 | 1 | NA |
| RNU6ATAC23P   | 0,00 | 0,00 | 0 | 0 | 1 | NA |
| RNU6ATAC6P    | 0,00 | 0,00 | 0 | 0 | 1 | NA |
| RNU7-171P     | 0,00 | 0,00 | 0 | 0 | 1 | NA |
| RNU7-18P      | 0,00 | 0,00 | 0 | 0 | 1 | NA |
| ROS1          | 0,00 | 0,00 | 0 | 0 | 1 | NA |
| RP1-128M12.3  | 0,00 | 0,00 | 0 | 0 | 1 | NA |
| RP1-138A5.2   | 0,00 | 0,00 | 0 | 0 | 1 | NA |
| RP1-13D10.5   | 0,00 | 0,00 | 0 | 0 | 1 | NA |
| RP1-144F13.3  | 0,00 | 0,00 | 0 | 0 | 1 | NA |
| RP1-149A16.16 | 0,00 | 0,00 | 0 | 0 | 1 | NA |
| RP1-149M18.3  | 0,00 | 0,00 | 0 | 0 | 1 | NA |

|                |      |      |   |   |   |    |
|----------------|------|------|---|---|---|----|
| RP1-152L7.6    | 0,00 | 0,00 | 0 | 0 | 1 | NA |
| RP1-161N10.1   | 0,00 | 0,00 | 0 | 0 | 1 | NA |
| RP1-167F1.1    | 0,00 | 0,00 | 0 | 0 | 1 | NA |
| RP1-168L15.4   | 0,00 | 0,00 | 0 | 0 | 1 | NA |
| RP1-179E13.1   | 0,00 | 0,00 | 0 | 0 | 1 | NA |
| RP1-179P9.3    | 0,00 | 0,00 | 0 | 0 | 1 | NA |
| RP1-191J18.65  | 0,00 | 0,00 | 0 | 0 | 1 | NA |
| RP1-197J16.3   | 0,00 | 0,00 | 0 | 0 | 1 | NA |
| RP1-202I21.5   | 0,00 | 0,00 | 0 | 0 | 1 | NA |
| RP1-210I18.3   | 0,00 | 0,00 | 0 | 0 | 1 | NA |
| RP1-229K20.8   | 0,00 | 0,00 | 0 | 0 | 1 | NA |
| RP1-288H2.5    | 0,00 | 0,00 | 0 | 0 | 1 | NA |
| RP1-290F12.3   | 0,00 | 0,00 | 0 | 0 | 1 | NA |
| RP1-319M7.2    | 0,00 | 0,00 | 0 | 0 | 1 | NA |
| RP1-41P2.7     | 0,00 | 0,00 | 0 | 0 | 1 | NA |
| RP1-73A14.2    | 0,00 | 0,00 | 0 | 0 | 1 | NA |
| RP1-81F6.1     | 0,00 | 0,00 | 0 | 0 | 1 | NA |
| RP1-84O15.1    | 0,00 | 0,00 | 0 | 0 | 1 | NA |
| RP1-85F18.5    | 0,00 | 0,00 | 0 | 0 | 1 | NA |
| RP1-90G24.11   | 0,00 | 0,00 | 0 | 0 | 1 | NA |
| RP1-90J4.1     | 0,00 | 0,00 | 0 | 0 | 1 | NA |
| RP1-91J24.1    | 0,00 | 0,00 | 0 | 0 | 1 | NA |
| RP1-92C8.2     | 0,00 | 0,00 | 0 | 0 | 1 | NA |
| RP1-97D16.1    | 0,00 | 0,00 | 0 | 0 | 1 | NA |
| RP11-100M12.1  | 0,00 | 0,00 | 0 | 0 | 1 | NA |
| RP11-1029J19.2 | 0,00 | 0,00 | 0 | 0 | 1 | NA |
| RP11-1038A11.3 | 0,00 | 0,00 | 0 | 0 | 1 | NA |
| RP11-103G8.1   | 0,00 | 0,00 | 0 | 0 | 1 | NA |
| RP11-1070N10.5 | 0,00 | 0,00 | 0 | 0 | 1 | NA |
| RP11-1074O12.1 | 0,00 | 0,00 | 0 | 0 | 1 | NA |
| RP11-1079K10.2 | 0,00 | 0,00 | 0 | 0 | 1 | NA |
| RP11-1079K10.4 | 0,00 | 0,00 | 0 | 0 | 1 | NA |
| RP11-107K17.1  | 0,00 | 0,00 | 0 | 0 | 1 | NA |
| RP11-108K14.8  | 0,00 | 0,00 | 0 | 0 | 1 | NA |
| RP11-108P20.2  | 0,00 | 0,00 | 0 | 0 | 1 | NA |
| RP11-109A6.3   | 0,00 | 0,00 | 0 | 0 | 1 | NA |
| RP11-109B6.2   | 0,00 | 0,00 | 0 | 0 | 1 | NA |
| RP11-109G23.1  | 0,00 | 0,00 | 0 | 0 | 1 | NA |
| RP11-109L13.5  | 0,00 | 0,00 | 0 | 0 | 1 | NA |
| RP11-10K17.3   | 0,00 | 0,00 | 0 | 0 | 1 | NA |
| RP11-110I1.14  | 0,00 | 0,00 | 0 | 0 | 1 | NA |
| RP11-111F5.2   | 0,00 | 0,00 | 0 | 0 | 1 | NA |
| RP11-111M22.5  | 0,00 | 0,00 | 0 | 0 | 1 | NA |
| RP11-112H10.4  | 0,00 | 0,00 | 0 | 0 | 1 | NA |
| RP11-112N23.1  | 0,00 | 0,00 | 0 | 0 | 1 | NA |
| RP11-113D6.9   | 0,00 | 0,00 | 0 | 0 | 1 | NA |
| RP11-114M1.3   | 0,00 | 0,00 | 0 | 0 | 1 | NA |
| RP11-114M5.1   | 0,00 | 0,00 | 0 | 0 | 1 | NA |
| RP11-115M14.1  | 0,00 | 0,00 | 0 | 0 | 1 | NA |
| RP11-115N12.1  | 0,00 | 0,00 | 0 | 0 | 1 | NA |

|                 |      |      |   |   |   |    |
|-----------------|------|------|---|---|---|----|
| RP11-115N4.2    | 0,00 | 0,00 | 0 | 0 | 1 | NA |
| RP11-116B19.2   | 0,00 | 0,00 | 0 | 0 | 1 | NA |
| RP11-116D17.5   | 0,00 | 0,00 | 0 | 0 | 1 | NA |
| RP11-116N8.1    | 0,00 | 0,00 | 0 | 0 | 1 | NA |
| RP11-117L15.1   | 0,00 | 0,00 | 0 | 0 | 1 | NA |
| RP11-117O7.2    | 0,00 | 0,00 | 0 | 0 | 1 | NA |
| RP11-118B18.3   | 0,00 | 0,00 | 0 | 0 | 1 | NA |
| RP11-118E18.4   | 0,00 | 0,00 | 0 | 0 | 1 | NA |
| RP11-118M12.1   | 0,00 | 0,00 | 0 | 0 | 1 | NA |
| RP11-118M12.2   | 0,00 | 0,00 | 0 | 0 | 1 | NA |
| RP11-119K6.4    | 0,00 | 0,00 | 0 | 0 | 1 | NA |
| RP11-120A1.1    | 0,00 | 0,00 | 0 | 0 | 1 | NA |
| RP11-120K24.3   | 0,00 | 0,00 | 0 | 0 | 1 | NA |
| RP11-1217F2.14  | 0,00 | 0,00 | 0 | 0 | 1 | NA |
| RP11-124A7.1    | 0,00 | 0,00 | 0 | 0 | 1 | NA |
| RP11-124D2.1    | 0,00 | 0,00 | 0 | 0 | 1 | NA |
| RP11-126O22.2   | 0,00 | 0,00 | 0 | 0 | 1 | NA |
| RP11-126O22.9   | 0,00 | 0,00 | 0 | 0 | 1 | NA |
| RP11-1275H24.2  | 0,00 | 0,00 | 0 | 0 | 1 | NA |
| RP11-1277H1.3   | 0,00 | 0,00 | 0 | 0 | 1 | NA |
| RP11-1281K21.3  | 0,00 | 0,00 | 0 | 0 | 1 | NA |
| RP11-130C19.1   | 0,00 | 0,00 | 0 | 0 | 1 | NA |
| RP11-131K5.1    | 0,00 | 0,00 | 0 | 0 | 1 | NA |
| RP11-131L23.2   | 0,00 | 0,00 | 0 | 0 | 1 | NA |
| RP11-133N21.6   | 0,00 | 0,00 | 0 | 0 | 1 | NA |
| RP11-134N1.1    | 0,00 | 0,00 | 0 | 0 | 1 | NA |
| RP11-1360M22.11 | 0,00 | 0,00 | 0 | 0 | 1 | NA |
| RP11-136C24.1   | 0,00 | 0,00 | 0 | 0 | 1 | NA |
| RP11-137J7.2    | 0,00 | 0,00 | 0 | 0 | 1 | NA |
| RP11-138H8.8    | 0,00 | 0,00 | 0 | 0 | 1 | NA |
| RP11-138I18.1   | 0,00 | 0,00 | 0 | 0 | 1 | NA |
| RP11-13B9.5     | 0,00 | 0,00 | 0 | 0 | 1 | NA |
| RP11-140A10.3   | 0,00 | 0,00 | 0 | 0 | 1 | NA |
| RP11-140C5.3    | 0,00 | 0,00 | 0 | 0 | 1 | NA |
| RP11-141O11.2   | 0,00 | 0,00 | 0 | 0 | 1 | NA |
| RP11-142A22.4   | 0,00 | 0,00 | 0 | 0 | 1 | NA |
| RP11-142J21.2   | 0,00 | 0,00 | 0 | 0 | 1 | NA |
| RP11-1437A8.4   | 0,00 | 0,00 | 0 | 0 | 1 | NA |
| RP11-143M1.3    | 0,00 | 0,00 | 0 | 0 | 1 | NA |
| RP11-144G6.13   | 0,00 | 0,00 | 0 | 0 | 1 | NA |
| RP11-145B3.2    | 0,00 | 0,00 | 0 | 0 | 1 | NA |
| RP11-145M9.3    | 0,00 | 0,00 | 0 | 0 | 1 | NA |
| RP11-147L13.7   | 0,00 | 0,00 | 0 | 0 | 1 | NA |
| RP11-149B7.4    | 0,00 | 0,00 | 0 | 0 | 1 | NA |
| RP11-149P24.1   | 0,00 | 0,00 | 0 | 0 | 1 | NA |
| RP11-14J7.1     | 0,00 | 0,00 | 0 | 0 | 1 | NA |
| RP11-150O12.6   | 0,00 | 0,00 | 0 | 0 | 1 | NA |
| RP11-151A10.3   | 0,00 | 0,00 | 0 | 0 | 1 | NA |
| RP11-153M7.1    | 0,00 | 0,00 | 0 | 0 | 1 | NA |
| RP11-155L15.1   | 0,00 | 0,00 | 0 | 0 | 1 | NA |



|               |      |      |   |   |   |    |
|---------------|------|------|---|---|---|----|
| RP11-157P1.4  | 0,00 | 0,00 | 0 | 0 | 1 | NA |
| RP11-15A1.8   | 0,00 | 0,00 | 0 | 0 | 1 | NA |
| RP11-15B17.3  | 0,00 | 0,00 | 0 | 0 | 1 | NA |
| RP11-160H22.4 | 0,00 | 0,00 | 0 | 0 | 1 | NA |
| RP11-161P17.2 | 0,00 | 0,00 | 0 | 0 | 1 | NA |
| RP11-164O23.7 | 0,00 | 0,00 | 0 | 0 | 1 | NA |
| RP11-167N24.2 | 0,00 | 0,00 | 0 | 0 | 1 | NA |
| RP11-168P6.2  | 0,00 | 0,00 | 0 | 0 | 1 | NA |
| RP11-168P8.5  | 0,00 | 0,00 | 0 | 0 | 1 | NA |
| RP11-16L21.7  | 0,00 | 0,00 | 0 | 0 | 1 | NA |
| RP11-172C16.2 | 0,00 | 0,00 | 0 | 0 | 1 | NA |
| RP11-173C20.2 | 0,00 | 0,00 | 0 | 0 | 1 | NA |
| RP11-173D3.2  | 0,00 | 0,00 | 0 | 0 | 1 | NA |
| RP11-173P15.5 | 0,00 | 0,00 | 0 | 0 | 1 | NA |
| RP11-177H22.2 | 0,00 | 0,00 | 0 | 0 | 1 | NA |
| RP11-177J6.1  | 0,00 | 0,00 | 0 | 0 | 1 | NA |
| RP11-181B11.1 | 0,00 | 0,00 | 0 | 0 | 1 | NA |
| RP11-182I10.4 | 0,00 | 0,00 | 0 | 0 | 1 | NA |
| RP11-18B16.2  | 0,00 | 0,00 | 0 | 0 | 1 | NA |
| RP11-190D6.2  | 0,00 | 0,00 | 0 | 0 | 1 | NA |
| RP11-190G13.4 | 0,00 | 0,00 | 0 | 0 | 1 | NA |
| RP11-193H5.9  | 0,00 | 0,00 | 0 | 0 | 1 | NA |
| RP11-193I22.2 | 0,00 | 0,00 | 0 | 0 | 1 | NA |
| RP11-196D18.5 | 0,00 | 0,00 | 0 | 0 | 1 | NA |
| RP11-196H14.3 | 0,00 | 0,00 | 0 | 0 | 1 | NA |
| RP11-196H14.4 | 0,00 | 0,00 | 0 | 0 | 1 | NA |
| RP11-19G24.1  | 0,00 | 0,00 | 0 | 0 | 1 | NA |
| RP11-19O2.1   | 0,00 | 0,00 | 0 | 0 | 1 | NA |
| RP11-19P22.3  | 0,00 | 0,00 | 0 | 0 | 1 | NA |
| RP11-1J11.1   | 0,00 | 0,00 | 0 | 0 | 1 | NA |
| RP11-202G18.1 | 0,00 | 0,00 | 0 | 0 | 1 | NA |
| RP11-203I2.1  | 0,00 | 0,00 | 0 | 0 | 1 | NA |
| RP11-203L2.4  | 0,00 | 0,00 | 0 | 0 | 1 | NA |
| RP11-205M20.7 | 0,00 | 0,00 | 0 | 0 | 1 | NA |
| RP11-209E8.1  | 0,00 | 0,00 | 0 | 0 | 1 | NA |
| RP11-20D14.1  | 0,00 | 0,00 | 0 | 0 | 1 | NA |
| RP11-213H15.4 | 0,00 | 0,00 | 0 | 0 | 1 | NA |
| RP11-214O11.2 | 0,00 | 0,00 | 0 | 0 | 1 | NA |
| RP11-215H18.5 | 0,00 | 0,00 | 0 | 0 | 1 | NA |
| RP11-215P8.2  | 0,00 | 0,00 | 0 | 0 | 1 | NA |
| RP11-21C4.5   | 0,00 | 0,00 | 0 | 0 | 1 | NA |
| RP11-21J7.1   | 0,00 | 0,00 | 0 | 0 | 1 | NA |
| RP11-220M1.1  | 0,00 | 0,00 | 0 | 0 | 1 | NA |
| RP11-220M1.2  | 0,00 | 0,00 | 0 | 0 | 1 | NA |
| RP11-223D18.1 | 0,00 | 0,00 | 0 | 0 | 1 | NA |
| RP11-226F19.1 | 0,00 | 0,00 | 0 | 0 | 1 | NA |
| RP11-232M24.1 | 0,00 | 0,00 | 0 | 0 | 1 | NA |
| RP11-233E12.4 | 0,00 | 0,00 | 0 | 0 | 1 | NA |
| RP11-236P24.1 | 0,00 | 0,00 | 0 | 0 | 1 | NA |
| RP11-238F2.1  | 0,00 | 0,00 | 0 | 0 | 1 | NA |

|               |      |      |   |   |   |    |
|---------------|------|------|---|---|---|----|
| RP11-239E10.2 | 0,00 | 0,00 | 0 | 0 | 1 | NA |
| RP11-240M16.2 | 0,00 | 0,00 | 0 | 0 | 1 | NA |
| RP11-242D8.2  | 0,00 | 0,00 | 0 | 0 | 1 | NA |
| RP11-248E9.4  | 0,00 | 0,00 | 0 | 0 | 1 | NA |
| RP11-249J13.1 | 0,00 | 0,00 | 0 | 0 | 1 | NA |
| RP11-24B13.1  | 0,00 | 0,00 | 0 | 0 | 1 | NA |
| RP11-24J20.5  | 0,00 | 0,00 | 0 | 0 | 1 | NA |
| RP11-24O5.2   | 0,00 | 0,00 | 0 | 0 | 1 | NA |
| RP11-251A15.4 | 0,00 | 0,00 | 0 | 0 | 1 | NA |
| RP11-251G23.2 | 0,00 | 0,00 | 0 | 0 | 1 | NA |
| RP11-253D19.1 | 0,00 | 0,00 | 0 | 0 | 1 | NA |
| RP11-255G12.1 | 0,00 | 0,00 | 0 | 0 | 1 | NA |
| RP11-255H23.4 | 0,00 | 0,00 | 0 | 0 | 1 | NA |
| RP11-257A22.1 | 0,00 | 0,00 | 0 | 0 | 1 | NA |
| RP11-258F22.2 | 0,00 | 0,00 | 0 | 0 | 1 | NA |
| RP11-259O18.5 | 0,00 | 0,00 | 0 | 0 | 1 | NA |
| RP11-262H14.2 | 0,00 | 0,00 | 0 | 0 | 1 | NA |
| RP11-264M12.2 | 0,00 | 0,00 | 0 | 0 | 1 | NA |
| RP11-266N13.2 | 0,00 | 0,00 | 0 | 0 | 1 | NA |
| RP11-267N12.1 | 0,00 | 0,00 | 0 | 0 | 1 | NA |
| RP11-268I9.3  | 0,00 | 0,00 | 0 | 0 | 1 | NA |
| RP11-269G24.8 | 0,00 | 0,00 | 0 | 0 | 1 | NA |
| RP11-269M20.2 | 0,00 | 0,00 | 0 | 0 | 1 | NA |
| RP11-274B18.3 | 0,00 | 0,00 | 0 | 0 | 1 | NA |
| RP11-27M24.3  | 0,00 | 0,00 | 0 | 0 | 1 | NA |
| RP11-281A20.1 | 0,00 | 0,00 | 0 | 0 | 1 | NA |
| RP11-282I1.1  | 0,00 | 0,00 | 0 | 0 | 1 | NA |
| RP11-285E9.6  | 0,00 | 0,00 | 0 | 0 | 1 | NA |
| RP11-285M22.3 | 0,00 | 0,00 | 0 | 0 | 1 | NA |
| RP11-286N3.2  | 0,00 | 0,00 | 0 | 0 | 1 | NA |
| RP11-287J9.1  | 0,00 | 0,00 | 0 | 0 | 1 | NA |
| RP11-288B23.1 | 0,00 | 0,00 | 0 | 0 | 1 | NA |
| RP11-290K4.2  | 0,00 | 0,00 | 0 | 0 | 1 | NA |
| RP11-290M5.2  | 0,00 | 0,00 | 0 | 0 | 1 | NA |
| RP11-292D4.1  | 0,00 | 0,00 | 0 | 0 | 1 | NA |
| RP11-293N1.1  | 0,00 | 0,00 | 0 | 0 | 1 | NA |
| RP11-294C11.1 | 0,00 | 0,00 | 0 | 0 | 1 | NA |
| RP11-296E23.1 | 0,00 | 0,00 | 0 | 0 | 1 | NA |
| RP11-297B17.2 | 0,00 | 0,00 | 0 | 0 | 1 | NA |
| RP11-297L21.1 | 0,00 | 0,00 | 0 | 0 | 1 | NA |
| RP11-298D21.2 | 0,00 | 0,00 | 0 | 0 | 1 | NA |
| RP11-29B2.6   | 0,00 | 0,00 | 0 | 0 | 1 | NA |
| RP11-2H3.6    | 0,00 | 0,00 | 0 | 0 | 1 | NA |
| RP11-2K15.2   | 0,00 | 0,00 | 0 | 0 | 1 | NA |
| RP11-2L8.1    | 0,00 | 0,00 | 0 | 0 | 1 | NA |
| RP11-2O17.2   | 0,00 | 0,00 | 0 | 0 | 1 | NA |
| RP11-300M6.1  | 0,00 | 0,00 | 0 | 0 | 1 | NA |
| RP11-303E16.6 | 0,00 | 0,00 | 0 | 0 | 1 | NA |
| RP11-305D15.5 | 0,00 | 0,00 | 0 | 0 | 1 | NA |
| RP11-305O4.3  | 0,00 | 0,00 | 0 | 0 | 1 | NA |

|                |      |      |   |   |   |    |
|----------------|------|------|---|---|---|----|
| RP11-307C12.11 | 0,00 | 0,00 | 0 | 0 | 1 | NA |
| RP11-307L14.2  | 0,00 | 0,00 | 0 | 0 | 1 | NA |
| RP11-308D16.3  | 0,00 | 0,00 | 0 | 0 | 1 | NA |
| RP11-30G13.1   | 0,00 | 0,00 | 0 | 0 | 1 | NA |
| RP11-30P6.2    | 0,00 | 0,00 | 0 | 0 | 1 | NA |
| RP11-310H4.2   | 0,00 | 0,00 | 0 | 0 | 1 | NA |
| RP11-312P12.3  | 0,00 | 0,00 | 0 | 0 | 1 | NA |
| RP11-312P21.2  | 0,00 | 0,00 | 0 | 0 | 1 | NA |
| RP11-313L9.1   | 0,00 | 0,00 | 0 | 0 | 1 | NA |
| RP11-315J22.3  | 0,00 | 0,00 | 0 | 0 | 1 | NA |
| RP11-317L10.1  | 0,00 | 0,00 | 0 | 0 | 1 | NA |
| RP11-319G9.5   | 0,00 | 0,00 | 0 | 0 | 1 | NA |
| RP11-31K23.1   | 0,00 | 0,00 | 0 | 0 | 1 | NA |
| RP11-325E14.5  | 0,00 | 0,00 | 0 | 0 | 1 | NA |
| RP11-325L12.5  | 0,00 | 0,00 | 0 | 0 | 1 | NA |
| RP11-325O24.6  | 0,00 | 0,00 | 0 | 0 | 1 | NA |
| RP11-326C3.15  | 0,00 | 0,00 | 0 | 0 | 1 | NA |
| RP11-326C3.7   | 0,00 | 0,00 | 0 | 0 | 1 | NA |
| RP11-326I11.1  | 0,00 | 0,00 | 0 | 0 | 1 | NA |
| RP11-327I3.1   | 0,00 | 0,00 | 0 | 0 | 1 | NA |
| RP11-327J17.8  | 0,00 | 0,00 | 0 | 0 | 1 | NA |
| RP11-327L9.1   | 0,00 | 0,00 | 0 | 0 | 1 | NA |
| RP11-331G2.4   | 0,00 | 0,00 | 0 | 0 | 1 | NA |
| RP11-332B14.2  | 0,00 | 0,00 | 0 | 0 | 1 | NA |
| RP11-332K15.1  | 0,00 | 0,00 | 0 | 0 | 1 | NA |
| RP11-334E6.4   | 0,00 | 0,00 | 0 | 0 | 1 | NA |
| RP11-335F8.1   | 0,00 | 0,00 | 0 | 0 | 1 | NA |
| RP11-338K17.6  | 0,00 | 0,00 | 0 | 0 | 1 | NA |
| RP11-338N10.3  | 0,00 | 0,00 | 0 | 0 | 1 | NA |
| RP11-338O1.3   | 0,00 | 0,00 | 0 | 0 | 1 | NA |
| RP11-33N16.2   | 0,00 | 0,00 | 0 | 0 | 1 | NA |
| RP11-342H21.2  | 0,00 | 0,00 | 0 | 0 | 1 | NA |
| RP11-343J3.7   | 0,00 | 0,00 | 0 | 0 | 1 | NA |
| RP11-346J10.3  | 0,00 | 0,00 | 0 | 0 | 1 | NA |
| RP11-347C18.3  | 0,00 | 0,00 | 0 | 0 | 1 | NA |
| RP11-347D21.1  | 0,00 | 0,00 | 0 | 0 | 1 | NA |
| RP11-347I19.8  | 0,00 | 0,00 | 0 | 0 | 1 | NA |
| RP11-347N5.2   | 0,00 | 0,00 | 0 | 0 | 1 | NA |
| RP11-349O10.1  | 0,00 | 0,00 | 0 | 0 | 1 | NA |
| RP11-34A14.3   | 0,00 | 0,00 | 0 | 0 | 1 | NA |
| RP11-350D17.3  | 0,00 | 0,00 | 0 | 0 | 1 | NA |
| RP11-350F16.1  | 0,00 | 0,00 | 0 | 0 | 1 | NA |
| RP11-353N14.1  | 0,00 | 0,00 | 0 | 0 | 1 | NA |
| RP11-353N14.7  | 0,00 | 0,00 | 0 | 0 | 1 | NA |
| RP11-354P11.2  | 0,00 | 0,00 | 0 | 0 | 1 | NA |
| RP11-354P17.12 | 0,00 | 0,00 | 0 | 0 | 1 | NA |
| RP11-356B19.11 | 0,00 | 0,00 | 0 | 0 | 1 | NA |
| RP11-356O23.1  | 0,00 | 0,00 | 0 | 0 | 1 | NA |
| RP11-357P24.2  | 0,00 | 0,00 | 0 | 0 | 1 | NA |
| RP11-359E10.1  | 0,00 | 0,00 | 0 | 0 | 1 | NA |

|                |      |      |   |   |   |    |
|----------------|------|------|---|---|---|----|
| RP11-359K18.1  | 0,00 | 0,00 | 0 | 0 | 1 | NA |
| RP11-35J10.4   | 0,00 | 0,00 | 0 | 0 | 1 | NA |
| RP11-361M4.1   | 0,00 | 0,00 | 0 | 0 | 1 | NA |
| RP11-363J17.1  | 0,00 | 0,00 | 0 | 0 | 1 | NA |
| RP11-364C11.2  | 0,00 | 0,00 | 0 | 0 | 1 | NA |
| RP11-365D9.1   | 0,00 | 0,00 | 0 | 0 | 1 | NA |
| RP11-365F18.1  | 0,00 | 0,00 | 0 | 0 | 1 | NA |
| RP11-365H23.1  | 0,00 | 0,00 | 0 | 0 | 1 | NA |
| RP11-366F6.2   | 0,00 | 0,00 | 0 | 0 | 1 | NA |
| RP11-368M16.7  | 0,00 | 0,00 | 0 | 0 | 1 | NA |
| RP11-369E15.4  | 0,00 | 0,00 | 0 | 0 | 1 | NA |
| RP11-36N20.2   | 0,00 | 0,00 | 0 | 0 | 1 | NA |
| RP11-371E8.2   | 0,00 | 0,00 | 0 | 0 | 1 | NA |
| RP11-373N22.1  | 0,00 | 0,00 | 0 | 0 | 1 | NA |
| RP11-373N24.2  | 0,00 | 0,00 | 0 | 0 | 1 | NA |
| RP11-374A22.1  | 0,00 | 0,00 | 0 | 0 | 1 | NA |
| RP11-374F3.3   | 0,00 | 0,00 | 0 | 0 | 1 | NA |
| RP11-375B1.1   | 0,00 | 0,00 | 0 | 0 | 1 | NA |
| RP11-375B1.2   | 0,00 | 0,00 | 0 | 0 | 1 | NA |
| RP11-375D13.4  | 0,00 | 0,00 | 0 | 0 | 1 | NA |
| RP11-376N17.4  | 0,00 | 0,00 | 0 | 0 | 1 | NA |
| RP11-379H8.1   | 0,00 | 0,00 | 0 | 0 | 1 | NA |
| RP11-37E23.3   | 0,00 | 0,00 | 0 | 0 | 1 | NA |
| RP11-380P16.7  | 0,00 | 0,00 | 0 | 0 | 1 | NA |
| RP11-381K7.2   | 0,00 | 0,00 | 0 | 0 | 1 | NA |
| RP11-382F24.1  | 0,00 | 0,00 | 0 | 0 | 1 | NA |
| RP11-382H24.2  | 0,00 | 0,00 | 0 | 0 | 1 | NA |
| RP11-383C12.2  | 0,00 | 0,00 | 0 | 0 | 1 | NA |
| RP11-384A12.1  | 0,00 | 0,00 | 0 | 0 | 1 | NA |
| RP11-384C4.6   | 0,00 | 0,00 | 0 | 0 | 1 | NA |
| RP11-385N23.1  | 0,00 | 0,00 | 0 | 0 | 1 | NA |
| RP11-389G6.3   | 0,00 | 0,00 | 0 | 0 | 1 | NA |
| RP11-38G5.2    | 0,00 | 0,00 | 0 | 0 | 1 | NA |
| RP11-38J22.2   | 0,00 | 0,00 | 0 | 0 | 1 | NA |
| RP11-38O23.3   | 0,00 | 0,00 | 0 | 0 | 1 | NA |
| RP11-392A14.2  | 0,00 | 0,00 | 0 | 0 | 1 | NA |
| RP11-392L5.1   | 0,00 | 0,00 | 0 | 0 | 1 | NA |
| RP11-393M18.4  | 0,00 | 0,00 | 0 | 0 | 1 | NA |
| RP11-395G17.1  | 0,00 | 0,00 | 0 | 0 | 1 | NA |
| RP11-396D18.1  | 0,00 | 0,00 | 0 | 0 | 1 | NA |
| RP11-396J6.1   | 0,00 | 0,00 | 0 | 0 | 1 | NA |
| RP11-397J18.1  | 0,00 | 0,00 | 0 | 0 | 1 | NA |
| RP11-398J10.2  | 0,00 | 0,00 | 0 | 0 | 1 | NA |
| RP11-399F2.2   | 0,00 | 0,00 | 0 | 0 | 1 | NA |
| RP11-399K21.10 | 0,00 | 0,00 | 0 | 0 | 1 | NA |
| RP11-400D2.2   | 0,00 | 0,00 | 0 | 0 | 1 | NA |
| RP11-402G3.4   | 0,00 | 0,00 | 0 | 0 | 1 | NA |
| RP11-403D15.1  | 0,00 | 0,00 | 0 | 0 | 1 | NA |
| RP11-404E6.1   | 0,00 | 0,00 | 0 | 0 | 1 | NA |
| RP11-407P10.1  | 0,00 | 0,00 | 0 | 0 | 1 | NA |

|                 |      |      |   |   |   |    |
|-----------------|------|------|---|---|---|----|
| RP11-410C4.2    | 0,00 | 0,00 | 0 | 0 | 1 | NA |
| RP11-411G7.2    | 0,00 | 0,00 | 0 | 0 | 1 | NA |
| RP11-415C15.3   | 0,00 | 0,00 | 0 | 0 | 1 | NA |
| RP11-415J8.5    | 0,00 | 0,00 | 0 | 0 | 1 | NA |
| RP11-416H1.1    | 0,00 | 0,00 | 0 | 0 | 1 | NA |
| RP11-417D4.1    | 0,00 | 0,00 | 0 | 0 | 1 | NA |
| RP11-417N10.3   | 0,00 | 0,00 | 0 | 0 | 1 | NA |
| RP11-418H16.1   | 0,00 | 0,00 | 0 | 0 | 1 | NA |
| RP11-418J17.3   | 0,00 | 0,00 | 0 | 0 | 1 | NA |
| RP11-422N16.3   | 0,00 | 0,00 | 0 | 0 | 1 | NA |
| RP11-424E7.3    | 0,00 | 0,00 | 0 | 0 | 1 | NA |
| RP11-424E7.5    | 0,00 | 0,00 | 0 | 0 | 1 | NA |
| RP11-428C19.4   | 0,00 | 0,00 | 0 | 0 | 1 | NA |
| RP11-430G17.1   | 0,00 | 0,00 | 0 | 0 | 1 | NA |
| RP11-430K22.1   | 0,00 | 0,00 | 0 | 0 | 1 | NA |
| RP11-431M7.2    | 0,00 | 0,00 | 0 | 0 | 1 | NA |
| RP11-432B6.1    | 0,00 | 0,00 | 0 | 0 | 1 | NA |
| RP11-432I13.6   | 0,00 | 0,00 | 0 | 0 | 1 | NA |
| RP11-435O5.4    | 0,00 | 0,00 | 0 | 0 | 1 | NA |
| RP11-436F9.1    | 0,00 | 0,00 | 0 | 0 | 1 | NA |
| RP11-437G21.4   | 0,00 | 0,00 | 0 | 0 | 1 | NA |
| RP11-437G21.5   | 0,00 | 0,00 | 0 | 0 | 1 | NA |
| RP11-439H8.4    | 0,00 | 0,00 | 0 | 0 | 1 | NA |
| RP11-439I14.3   | 0,00 | 0,00 | 0 | 0 | 1 | NA |
| RP11-439M15.1   | 0,00 | 0,00 | 0 | 0 | 1 | NA |
| RP11-440D17.3   | 0,00 | 0,00 | 0 | 0 | 1 | NA |
| RP11-441F2.2    | 0,00 | 0,00 | 0 | 0 | 1 | NA |
| RP11-442O18.1   | 0,00 | 0,00 | 0 | 0 | 1 | NA |
| RP11-443P15.3   | 0,00 | 0,00 | 0 | 0 | 1 | NA |
| RP11-445L13_B.3 | 0,00 | 0,00 | 0 | 0 | 1 | NA |
| RP11-445O16.2   | 0,00 | 0,00 | 0 | 0 | 1 | NA |
| RP11-448G15.1   | 0,00 | 0,00 | 0 | 0 | 1 | NA |
| RP11-44D5.2     | 0,00 | 0,00 | 0 | 0 | 1 | NA |
| RP11-44N17.2    | 0,00 | 0,00 | 0 | 0 | 1 | NA |
| RP11-452B18.2   | 0,00 | 0,00 | 0 | 0 | 1 | NA |
| RP11-453D21.1   | 0,00 | 0,00 | 0 | 0 | 1 | NA |
| RP11-455J20.3   | 0,00 | 0,00 | 0 | 0 | 1 | NA |
| RP11-456E1.2    | 0,00 | 0,00 | 0 | 0 | 1 | NA |
| RP11-458I4.2    | 0,00 | 0,00 | 0 | 0 | 1 | NA |
| RP11-458I7.1    | 0,00 | 0,00 | 0 | 0 | 1 | NA |
| RP11-45B20.3    | 0,00 | 0,00 | 0 | 0 | 1 | NA |
| RP11-460B17.2   | 0,00 | 0,00 | 0 | 0 | 1 | NA |
| RP11-460E7.5    | 0,00 | 0,00 | 0 | 0 | 1 | NA |
| RP11-460N20.4   | 0,00 | 0,00 | 0 | 0 | 1 | NA |
| RP11-460N20.5   | 0,00 | 0,00 | 0 | 0 | 1 | NA |
| RP11-462G22.2   | 0,00 | 0,00 | 0 | 0 | 1 | NA |
| RP11-467L19.8   | 0,00 | 0,00 | 0 | 0 | 1 | NA |
| RP11-468J21.2   | 0,00 | 0,00 | 0 | 0 | 1 | NA |
| RP11-468N14.10  | 0,00 | 0,00 | 0 | 0 | 1 | NA |
| RP11-469J4.2    | 0,00 | 0,00 | 0 | 0 | 1 | NA |

|                |      |      |   |   |   |    |
|----------------|------|------|---|---|---|----|
| RP11-46P12.1   | 0,00 | 0,00 | 0 | 0 | 1 | NA |
| RP11-472I20.5  | 0,00 | 0,00 | 0 | 0 | 1 | NA |
| RP11-473M14.2  | 0,00 | 0,00 | 0 | 0 | 1 | NA |
| RP11-473M14.4  | 0,00 | 0,00 | 0 | 0 | 1 | NA |
| RP11-474L23.3  | 0,00 | 0,00 | 0 | 0 | 1 | NA |
| RP11-475E11.5  | 0,00 | 0,00 | 0 | 0 | 1 | NA |
| RP11-476I15.2  | 0,00 | 0,00 | 0 | 0 | 1 | NA |
| RP11-476M19.2  | 0,00 | 0,00 | 0 | 0 | 1 | NA |
| RP11-477B16.4  | 0,00 | 0,00 | 0 | 0 | 1 | NA |
| RP11-477G18.3  | 0,00 | 0,00 | 0 | 0 | 1 | NA |
| RP11-477J21.2  | 0,00 | 0,00 | 0 | 0 | 1 | NA |
| RP11-478C6.6   | 0,00 | 0,00 | 0 | 0 | 1 | NA |
| RP11-47P18.2   | 0,00 | 0,00 | 0 | 0 | 1 | NA |
| RP11-480D4.4   | 0,00 | 0,00 | 0 | 0 | 1 | NA |
| RP11-482E14.1  | 0,00 | 0,00 | 0 | 0 | 1 | NA |
| RP11-482H16.1  | 0,00 | 0,00 | 0 | 0 | 1 | NA |
| RP11-484P15.2  | 0,00 | 0,00 | 0 | 0 | 1 | NA |
| RP11-487E1.2   | 0,00 | 0,00 | 0 | 0 | 1 | NA |
| RP11-48D4.2    | 0,00 | 0,00 | 0 | 0 | 1 | NA |
| RP11-48L13.1   | 0,00 | 0,00 | 0 | 0 | 1 | NA |
| RP11-490B18.9  | 0,00 | 0,00 | 0 | 0 | 1 | NA |
| RP11-493E12.3  | 0,00 | 0,00 | 0 | 0 | 1 | NA |
| RP11-496I2.5   | 0,00 | 0,00 | 0 | 0 | 1 | NA |
| RP11-498M14.1  | 0,00 | 0,00 | 0 | 0 | 1 | NA |
| RP11-498P14.4  | 0,00 | 0,00 | 0 | 0 | 1 | NA |
| RP11-499O7.5   | 0,00 | 0,00 | 0 | 0 | 1 | NA |
| RP11-4C20.4    | 0,00 | 0,00 | 0 | 0 | 1 | NA |
| RP11-4L24.1    | 0,00 | 0,00 | 0 | 0 | 1 | NA |
| RP11-500G22.4  | 0,00 | 0,00 | 0 | 0 | 1 | NA |
| RP11-501J20.5  | 0,00 | 0,00 | 0 | 0 | 1 | NA |
| RP11-502N13.2  | 0,00 | 0,00 | 0 | 0 | 1 | NA |
| RP11-503D12.1  | 0,00 | 0,00 | 0 | 0 | 1 | NA |
| RP11-504G3.2   | 0,00 | 0,00 | 0 | 0 | 1 | NA |
| RP11-504G3.4   | 0,00 | 0,00 | 0 | 0 | 1 | NA |
| RP11-506B15.6  | 0,00 | 0,00 | 0 | 0 | 1 | NA |
| RP11-506C15.1  | 0,00 | 0,00 | 0 | 0 | 1 | NA |
| RP11-506E9.1   | 0,00 | 0,00 | 0 | 0 | 1 | NA |
| RP11-508N22.11 | 0,00 | 0,00 | 0 | 0 | 1 | NA |
| RP11-515C16.1  | 0,00 | 0,00 | 0 | 0 | 1 | NA |
| RP11-51F16.9   | 0,00 | 0,00 | 0 | 0 | 1 | NA |
| RP11-520B13.3  | 0,00 | 0,00 | 0 | 0 | 1 | NA |
| RP11-521C10.1  | 0,00 | 0,00 | 0 | 0 | 1 | NA |
| RP11-521P1.1   | 0,00 | 0,00 | 0 | 0 | 1 | NA |
| RP11-522B15.7  | 0,00 | 0,00 | 0 | 0 | 1 | NA |
| RP11-523L1.2   | 0,00 | 0,00 | 0 | 0 | 1 | NA |
| RP11-525A16.4  | 0,00 | 0,00 | 0 | 0 | 1 | NA |
| RP11-527F15.1  | 0,00 | 0,00 | 0 | 0 | 1 | NA |
| RP11-52L11.3   | 0,00 | 0,00 | 0 | 0 | 1 | NA |
| RP11-530I17.1  | 0,00 | 0,00 | 0 | 0 | 1 | NA |
| RP11-532F12.6  | 0,00 | 0,00 | 0 | 0 | 1 | NA |

|               |      |      |   |   |   |    |
|---------------|------|------|---|---|---|----|
| RP11-533K9.3  | 0,00 | 0,00 | 0 | 0 | 1 | NA |
| RP11-534L6.3  | 0,00 | 0,00 | 0 | 0 | 1 | NA |
| RP11-536G4.5  | 0,00 | 0,00 | 0 | 0 | 1 | NA |
| RP11-536L15.1 | 0,00 | 0,00 | 0 | 0 | 1 | NA |
| RP11-537H15.5 | 0,00 | 0,00 | 0 | 0 | 1 | NA |
| RP11-538A16.1 | 0,00 | 0,00 | 0 | 0 | 1 | NA |
| RP11-538C21.1 | 0,00 | 0,00 | 0 | 0 | 1 | NA |
| RP11-539L10.6 | 0,00 | 0,00 | 0 | 0 | 1 | NA |
| RP11-53D5.1   | 0,00 | 0,00 | 0 | 0 | 1 | NA |
| RP11-53L24.2  | 0,00 | 0,00 | 0 | 0 | 1 | NA |
| RP11-540D4.3  | 0,00 | 0,00 | 0 | 0 | 1 | NA |
| RP11-543F8.1  | 0,00 | 0,00 | 0 | 0 | 1 | NA |
| RP11-545G3.1  | 0,00 | 0,00 | 0 | 0 | 1 | NA |
| RP11-545M17.2 | 0,00 | 0,00 | 0 | 0 | 1 | NA |
| RP11-54O15.3  | 0,00 | 0,00 | 0 | 0 | 1 | NA |
| RP11-54O7.16  | 0,00 | 0,00 | 0 | 0 | 1 | NA |
| RP11-54O7.18  | 0,00 | 0,00 | 0 | 0 | 1 | NA |
| RP11-552D4.1  | 0,00 | 0,00 | 0 | 0 | 1 | NA |
| RP11-553L6.3  | 0,00 | 0,00 | 0 | 0 | 1 | NA |
| RP11-555F9.2  | 0,00 | 0,00 | 0 | 0 | 1 | NA |
| RP11-557C9.2  | 0,00 | 0,00 | 0 | 0 | 1 | NA |
| RP11-56O19.1  | 0,00 | 0,00 | 0 | 0 | 1 | NA |
| RP11-563D10.1 | 0,00 | 0,00 | 0 | 0 | 1 | NA |
| RP11-565N2.2  | 0,00 | 0,00 | 0 | 0 | 1 | NA |
| RP11-566K11.4 | 0,00 | 0,00 | 0 | 0 | 1 | NA |
| RP11-568J23.6 | 0,00 | 0,00 | 0 | 0 | 1 | NA |
| RP11-571L19.7 | 0,00 | 0,00 | 0 | 0 | 1 | NA |
| RP11-573M3.4  | 0,00 | 0,00 | 0 | 0 | 1 | NA |
| RP11-58O1.1   | 0,00 | 0,00 | 0 | 0 | 1 | NA |
| RP11-587O9.1  | 0,00 | 0,00 | 0 | 0 | 1 | NA |
| RP11-588F18.1 | 0,00 | 0,00 | 0 | 0 | 1 | NA |
| RP11-589C21.6 | 0,00 | 0,00 | 0 | 0 | 1 | NA |
| RP11-58O3.1   | 0,00 | 0,00 | 0 | 0 | 1 | NA |
| RP11-592N21.2 | 0,00 | 0,00 | 0 | 0 | 1 | NA |
| RP11-592P9.3  | 0,00 | 0,00 | 0 | 0 | 1 | NA |
| RP11-59J16.2  | 0,00 | 0,00 | 0 | 0 | 1 | NA |
| RP11-59K5.1   | 0,00 | 0,00 | 0 | 0 | 1 | NA |
| RP11-5N11.4   | 0,00 | 0,00 | 0 | 0 | 1 | NA |
| RP11-602N24.3 | 0,00 | 0,00 | 0 | 0 | 1 | NA |
| RP11-60C6.5   | 0,00 | 0,00 | 0 | 0 | 1 | NA |
| RP11-612J15.1 | 0,00 | 0,00 | 0 | 0 | 1 | NA |
| RP11-61G23.2  | 0,00 | 0,00 | 0 | 0 | 1 | NA |
| RP11-622J8.1  | 0,00 | 0,00 | 0 | 0 | 1 | NA |
| RP11-625B21.1 | 0,00 | 0,00 | 0 | 0 | 1 | NA |
| RP11-625L16.3 | 0,00 | 0,00 | 0 | 0 | 1 | NA |
| RP11-631M21.1 | 0,00 | 0,00 | 0 | 0 | 1 | NA |
| RP11-639E23.1 | 0,00 | 0,00 | 0 | 0 | 1 | NA |
| RP11-642D6.1  | 0,00 | 0,00 | 0 | 0 | 1 | NA |
| RP11-642E20.4 | 0,00 | 0,00 | 0 | 0 | 1 | NA |
| RP11-643E14.2 | 0,00 | 0,00 | 0 | 0 | 1 | NA |

|                |      |      |   |   |   |    |
|----------------|------|------|---|---|---|----|
| RP11-646I6.6   | 0,00 | 0,00 | 0 | 0 | 1 | NA |
| RP11-646J21.7  | 0,00 | 0,00 | 0 | 0 | 1 | NA |
| RP11-647F2.2   | 0,00 | 0,00 | 0 | 0 | 1 | NA |
| RP11-647K16.1  | 0,00 | 0,00 | 0 | 0 | 1 | NA |
| RP11-64I24.2   | 0,00 | 0,00 | 0 | 0 | 1 | NA |
| RP11-650K20.2  | 0,00 | 0,00 | 0 | 0 | 1 | NA |
| RP11-651J20.1  | 0,00 | 0,00 | 0 | 0 | 1 | NA |
| RP11-652G5.2   | 0,00 | 0,00 | 0 | 0 | 1 | NA |
| RP11-656D10.7  | 0,00 | 0,00 | 0 | 0 | 1 | NA |
| RP11-659G9.1   | 0,00 | 0,00 | 0 | 0 | 1 | NA |
| RP11-65B23.4   | 0,00 | 0,00 | 0 | 0 | 1 | NA |
| RP11-65B7.2    | 0,00 | 0,00 | 0 | 0 | 1 | NA |
| RP11-65N13.8   | 0,00 | 0,00 | 0 | 0 | 1 | NA |
| RP11-666A20.1  | 0,00 | 0,00 | 0 | 0 | 1 | NA |
| RP11-666A8.12  | 0,00 | 0,00 | 0 | 0 | 1 | NA |
| RP11-666E17.1  | 0,00 | 0,00 | 0 | 0 | 1 | NA |
| RP11-666O2.6   | 0,00 | 0,00 | 0 | 0 | 1 | NA |
| RP11-667K14.10 | 0,00 | 0,00 | 0 | 0 | 1 | NA |
| RP11-667M19.1  | 0,00 | 0,00 | 0 | 0 | 1 | NA |
| RP11-670N15.1  | 0,00 | 0,00 | 0 | 0 | 1 | NA |
| RP11-671P2.1   | 0,00 | 0,00 | 0 | 0 | 1 | NA |
| RP11-675M1.1   | 0,00 | 0,00 | 0 | 0 | 1 | NA |
| RP11-686D16.2  | 0,00 | 0,00 | 0 | 0 | 1 | NA |
| RP11-686D22.5  | 0,00 | 0,00 | 0 | 0 | 1 | NA |
| RP11-688H10.1  | 0,00 | 0,00 | 0 | 0 | 1 | NA |
| RP11-692P14.1  | 0,00 | 0,00 | 0 | 0 | 1 | NA |
| RP11-69C17.2   | 0,00 | 0,00 | 0 | 0 | 1 | NA |
| RP11-69M1.1    | 0,00 | 0,00 | 0 | 0 | 1 | NA |
| RP11-6F6.1     | 0,00 | 0,00 | 0 | 0 | 1 | NA |
| RP11-6J21.2    | 0,00 | 0,00 | 0 | 0 | 1 | NA |
| RP11-700H6.4   | 0,00 | 0,00 | 0 | 0 | 1 | NA |
| RP11-701B16.2  | 0,00 | 0,00 | 0 | 0 | 1 | NA |
| RP11-701H24.4  | 0,00 | 0,00 | 0 | 0 | 1 | NA |
| RP11-702A23.1  | 0,00 | 0,00 | 0 | 0 | 1 | NA |
| RP11-702B10.2  | 0,00 | 0,00 | 0 | 0 | 1 | NA |
| RP11-702N8.2   | 0,00 | 0,00 | 0 | 0 | 1 | NA |
| RP11-707M1.4   | 0,00 | 0,00 | 0 | 0 | 1 | NA |
| RP11-709A23.1  | 0,00 | 0,00 | 0 | 0 | 1 | NA |
| RP11-70F11.11  | 0,00 | 0,00 | 0 | 0 | 1 | NA |
| RP11-710F7.2   | 0,00 | 0,00 | 0 | 0 | 1 | NA |
| RP11-712B9.6   | 0,00 | 0,00 | 0 | 0 | 1 | NA |
| RP11-712L6.8   | 0,00 | 0,00 | 0 | 0 | 1 | NA |
| RP11-715G15.1  | 0,00 | 0,00 | 0 | 0 | 1 | NA |
| RP11-71A24.3   | 0,00 | 0,00 | 0 | 0 | 1 | NA |
| RP11-71E19.2   | 0,00 | 0,00 | 0 | 0 | 1 | NA |
| RP11-71H17.6   | 0,00 | 0,00 | 0 | 0 | 1 | NA |
| RP11-71H9.1    | 0,00 | 0,00 | 0 | 0 | 1 | NA |
| RP11-726G23.12 | 0,00 | 0,00 | 0 | 0 | 1 | NA |
| RP11-72P19.2   | 0,00 | 0,00 | 0 | 0 | 1 | NA |
| RP11-736P16.1  | 0,00 | 0,00 | 0 | 0 | 1 | NA |



|                |      |      |   |   |   |    |
|----------------|------|------|---|---|---|----|
| RP11-737O24.4  | 0,00 | 0,00 | 0 | 0 | 1 | NA |
| RP11-742D12.2  | 0,00 | 0,00 | 0 | 0 | 1 | NA |
| RP11-745K9.1   | 0,00 | 0,00 | 0 | 0 | 1 | NA |
| RP11-745L13.1  | 0,00 | 0,00 | 0 | 0 | 1 | NA |
| RP11-747I9.1   | 0,00 | 0,00 | 0 | 0 | 1 | NA |
| RP11-74E22.6   | 0,00 | 0,00 | 0 | 0 | 1 | NA |
| RP11-752G15.10 | 0,00 | 0,00 | 0 | 0 | 1 | NA |
| RP11-753E22.3  | 0,00 | 0,00 | 0 | 0 | 1 | NA |
| RP11-754J4.1   | 0,00 | 0,00 | 0 | 0 | 1 | NA |
| RP11-755E23.3  | 0,00 | 0,00 | 0 | 0 | 1 | NA |
| RP11-758M4.3   | 0,00 | 0,00 | 0 | 0 | 1 | NA |
| RP11-761I4.5   | 0,00 | 0,00 | 0 | 0 | 1 | NA |
| RP11-76F14.1   | 0,00 | 0,00 | 0 | 0 | 1 | NA |
| RP11-770E5.2   | 0,00 | 0,00 | 0 | 0 | 1 | NA |
| RP11-781D11.1  | 0,00 | 0,00 | 0 | 0 | 1 | NA |
| RP11-788H18.1  | 0,00 | 0,00 | 0 | 0 | 1 | NA |
| RP11-790I12.1  | 0,00 | 0,00 | 0 | 0 | 1 | NA |
| RP11-793B23.1  | 0,00 | 0,00 | 0 | 0 | 1 | NA |
| RP11-793H13.12 | 0,00 | 0,00 | 0 | 0 | 1 | NA |
| RP11-795A2.3   | 0,00 | 0,00 | 0 | 0 | 1 | NA |
| RP11-795H16.3  | 0,00 | 0,00 | 0 | 0 | 1 | NA |
| RP11-798G7.7   | 0,00 | 0,00 | 0 | 0 | 1 | NA |
| RP11-79E3.2    | 0,00 | 0,00 | 0 | 0 | 1 | NA |
| RP11-804A23.2  | 0,00 | 0,00 | 0 | 0 | 1 | NA |
| RP11-809N8.6   | 0,00 | 0,00 | 0 | 0 | 1 | NA |
| RP11-80A15.1   | 0,00 | 0,00 | 0 | 0 | 1 | NA |
| RP11-80H12.2   | 0,00 | 0,00 | 0 | 0 | 1 | NA |
| RP11-810F22.1  | 0,00 | 0,00 | 0 | 0 | 1 | NA |
| RP11-813P10.2  | 0,00 | 0,00 | 0 | 0 | 1 | NA |
| RP11-815I9.4   | 0,00 | 0,00 | 0 | 0 | 1 | NA |
| RP11-815J4.1   | 0,00 | 0,00 | 0 | 0 | 1 | NA |
| RP11-815N9.3   | 0,00 | 0,00 | 0 | 0 | 1 | NA |
| RP11-81F11.2   | 0,00 | 0,00 | 0 | 0 | 1 | NA |
| RP11-829H16.3  | 0,00 | 0,00 | 0 | 0 | 1 | NA |
| RP11-83B20.2   | 0,00 | 0,00 | 0 | 0 | 1 | NA |
| RP11-841C19.3  | 0,00 | 0,00 | 0 | 0 | 1 | NA |
| RP11-843B15.1  | 0,00 | 0,00 | 0 | 0 | 1 | NA |
| RP11-848P1.7   | 0,00 | 0,00 | 0 | 0 | 1 | NA |
| RP11-84D1.2    | 0,00 | 0,00 | 0 | 0 | 1 | NA |
| RP11-852E15.1  | 0,00 | 0,00 | 0 | 0 | 1 | NA |
| RP11-854K16.2  | 0,00 | 0,00 | 0 | 0 | 1 | NA |
| RP11-863N1.1   | 0,00 | 0,00 | 0 | 0 | 1 | NA |
| RP11-872D17.8  | 0,00 | 0,00 | 0 | 0 | 1 | NA |
| RP11-876F14.2  | 0,00 | 0,00 | 0 | 0 | 1 | NA |
| RP11-878E11.1  | 0,00 | 0,00 | 0 | 0 | 1 | NA |
| RP11-882G5.1   | 0,00 | 0,00 | 0 | 0 | 1 | NA |
| RP11-88E18.1   | 0,00 | 0,00 | 0 | 0 | 1 | NA |
| RP11-88H10.2   | 0,00 | 0,00 | 0 | 0 | 1 | NA |
| RP11-899L11.1  | 0,00 | 0,00 | 0 | 0 | 1 | NA |
| RP11-89A12.1   | 0,00 | 0,00 | 0 | 0 | 1 | NA |

|                |      |      |   |   |   |    |
|----------------|------|------|---|---|---|----|
| RP11-8H2.1     | 0,00 | 0,00 | 0 | 0 | 1 | NA |
| RP11-8L8.1     | 0,00 | 0,00 | 0 | 0 | 1 | NA |
| RP11-91A15.1   | 0,00 | 0,00 | 0 | 0 | 1 | NA |
| RP11-91A18.4   | 0,00 | 0,00 | 0 | 0 | 1 | NA |
| RP11-91J19.2   | 0,00 | 0,00 | 0 | 0 | 1 | NA |
| RP11-93H10.1   | 0,00 | 0,00 | 0 | 0 | 1 | NA |
| RP11-93N20.1   | 0,00 | 0,00 | 0 | 0 | 1 | NA |
| RP11-94B19.3   | 0,00 | 0,00 | 0 | 0 | 1 | NA |
| RP11-94P11.3   | 0,00 | 0,00 | 0 | 0 | 1 | NA |
| RP11-94P11.4   | 0,00 | 0,00 | 0 | 0 | 1 | NA |
| RP11-950C14.10 | 0,00 | 0,00 | 0 | 0 | 1 | NA |
| RP11-959F10.6  | 0,00 | 0,00 | 0 | 0 | 1 | NA |
| RP11-96A15.1   | 0,00 | 0,00 | 0 | 0 | 1 | NA |
| RP11-99C10.1   | 0,00 | 0,00 | 0 | 0 | 1 | NA |
| RP13-13A3.1    | 0,00 | 0,00 | 0 | 0 | 1 | NA |
| RP13-213K19.1  | 0,00 | 0,00 | 0 | 0 | 1 | NA |
| RP13-279N23.2  | 0,00 | 0,00 | 0 | 0 | 1 | NA |
| RP13-395E19.4  | 0,00 | 0,00 | 0 | 0 | 1 | NA |
| RP13-467H17.1  | 0,00 | 0,00 | 0 | 0 | 1 | NA |
| RP13-492C18.2  | 0,00 | 0,00 | 0 | 0 | 1 | NA |
| RP13-554M15.8  | 0,00 | 0,00 | 0 | 0 | 1 | NA |
| RP13-565O16.2  | 0,00 | 0,00 | 0 | 0 | 1 | NA |
| RP13-644M16.3  | 0,00 | 0,00 | 0 | 0 | 1 | NA |
| RP13-685P2.7   | 0,00 | 0,00 | 0 | 0 | 1 | NA |
| RP13-77O11.11  | 0,00 | 0,00 | 0 | 0 | 1 | NA |
| RP13-977E11.1  | 0,00 | 0,00 | 0 | 0 | 1 | NA |
| RP3-332O11.1   | 0,00 | 0,00 | 0 | 0 | 1 | NA |
| RP3-333B15.5   | 0,00 | 0,00 | 0 | 0 | 1 | NA |
| RP3-382I10.2   | 0,00 | 0,00 | 0 | 0 | 1 | NA |
| RP3-382I10.3   | 0,00 | 0,00 | 0 | 0 | 1 | NA |
| RP3-391O22.1   | 0,00 | 0,00 | 0 | 0 | 1 | NA |
| RP3-400B16.3   | 0,00 | 0,00 | 0 | 0 | 1 | NA |
| RP3-406A7.4    | 0,00 | 0,00 | 0 | 0 | 1 | NA |
| RP3-416H24.1   | 0,00 | 0,00 | 0 | 0 | 1 | NA |
| RP3-429O6.1    | 0,00 | 0,00 | 0 | 0 | 1 | NA |
| RP3-433G13.1   | 0,00 | 0,00 | 0 | 0 | 1 | NA |
| RP3-463P15.1   | 0,00 | 0,00 | 0 | 0 | 1 | NA |
| RP3-466P17.2   | 0,00 | 0,00 | 0 | 0 | 1 | NA |
| RP3-468K18.7   | 0,00 | 0,00 | 0 | 0 | 1 | NA |
| RP3-470B24.5   | 0,00 | 0,00 | 0 | 0 | 1 | NA |
| RP3-471M13.1   | 0,00 | 0,00 | 0 | 0 | 1 | NA |
| RP3-514A23.2   | 0,00 | 0,00 | 0 | 0 | 1 | NA |
| RP4-550H1.4    | 0,00 | 0,00 | 0 | 0 | 1 | NA |
| RP4-562J12.1   | 0,00 | 0,00 | 0 | 0 | 1 | NA |
| RP4-564O4.1    | 0,00 | 0,00 | 0 | 0 | 1 | NA |
| RP4-584D14.5   | 0,00 | 0,00 | 0 | 0 | 1 | NA |
| RP4-597N16.1   | 0,00 | 0,00 | 0 | 0 | 1 | NA |
| RP4-599G15.1   | 0,00 | 0,00 | 0 | 0 | 1 | NA |
| RP4-599G15.4   | 0,00 | 0,00 | 0 | 0 | 1 | NA |
| RP4-599G15.5   | 0,00 | 0,00 | 0 | 0 | 1 | NA |

|                |      |      |   |   |   |    |
|----------------|------|------|---|---|---|----|
| RP4-604A21.1   | 0,00 | 0,00 | 0 | 0 | 1 | NA |
| RP4-612B18.4   | 0,00 | 0,00 | 0 | 0 | 1 | NA |
| RP4-613A2.1    | 0,00 | 0,00 | 0 | 0 | 1 | NA |
| RP4-635E18.6   | 0,00 | 0,00 | 0 | 0 | 1 | NA |
| RP4-639J15.1   | 0,00 | 0,00 | 0 | 0 | 1 | NA |
| RP4-655J12.5   | 0,00 | 0,00 | 0 | 0 | 1 | NA |
| RP4-668E10.3   | 0,00 | 0,00 | 0 | 0 | 1 | NA |
| RP4-676J13.2   | 0,00 | 0,00 | 0 | 0 | 1 | NA |
| RP4-683L5.1    | 0,00 | 0,00 | 0 | 0 | 1 | NA |
| RP4-717M23.2   | 0,00 | 0,00 | 0 | 0 | 1 | NA |
| RP4-744I24.4   | 0,00 | 0,00 | 0 | 0 | 1 | NA |
| RP4-769N13.2   | 0,00 | 0,00 | 0 | 0 | 1 | NA |
| RP4-777O23.3   | 0,00 | 0,00 | 0 | 0 | 1 | NA |
| RP4-782L23.2   | 0,00 | 0,00 | 0 | 0 | 1 | NA |
| RP4-811H24.9   | 0,00 | 0,00 | 0 | 0 | 1 | NA |
| RP5-1007F24.1  | 0,00 | 0,00 | 0 | 0 | 1 | NA |
| RP5-1024G6.9   | 0,00 | 0,00 | 0 | 0 | 1 | NA |
| RP5-1027O15.2  | 0,00 | 0,00 | 0 | 0 | 1 | NA |
| RP5-1028K7.1   | 0,00 | 0,00 | 0 | 0 | 1 | NA |
| RP5-1042K10.12 | 0,00 | 0,00 | 0 | 0 | 1 | NA |
| RP5-1044H5.1   | 0,00 | 0,00 | 0 | 0 | 1 | NA |
| RP5-1052I5.2   | 0,00 | 0,00 | 0 | 0 | 1 | NA |
| RP5-1057I20.4  | 0,00 | 0,00 | 0 | 0 | 1 | NA |
| RP5-1059E7.2   | 0,00 | 0,00 | 0 | 0 | 1 | NA |
| RP5-1065J22.4  | 0,00 | 0,00 | 0 | 0 | 1 | NA |
| RP5-1099E6.2   | 0,00 | 0,00 | 0 | 0 | 1 | NA |
| RP5-1121A15.3  | 0,00 | 0,00 | 0 | 0 | 1 | NA |
| RP5-1158E12.1  | 0,00 | 0,00 | 0 | 0 | 1 | NA |
| RP5-1163L11.3  | 0,00 | 0,00 | 0 | 0 | 1 | NA |
| RP5-833A20.1   | 0,00 | 0,00 | 0 | 0 | 1 | NA |
| RP5-837I24.2   | 0,00 | 0,00 | 0 | 0 | 1 | NA |
| RP5-837O21.6   | 0,00 | 0,00 | 0 | 0 | 1 | NA |
| RP5-837O21.7   | 0,00 | 0,00 | 0 | 0 | 1 | NA |
| RP5-839B4.8    | 0,00 | 0,00 | 0 | 0 | 1 | NA |
| RP5-870F10.1   | 0,00 | 0,00 | 0 | 0 | 1 | NA |
| RP5-878I13.2   | 0,00 | 0,00 | 0 | 0 | 1 | NA |
| RP5-882O7.3    | 0,00 | 0,00 | 0 | 0 | 1 | NA |
| RP5-891H21.5   | 0,00 | 0,00 | 0 | 0 | 1 | NA |
| RP5-919F19.5   | 0,00 | 0,00 | 0 | 0 | 1 | NA |
| RP5-942I16.1   | 0,00 | 0,00 | 0 | 0 | 1 | NA |
| RP5-944M2.1    | 0,00 | 0,00 | 0 | 0 | 1 | NA |
| RP5-944M2.3    | 0,00 | 0,00 | 0 | 0 | 1 | NA |
| RP5-965F6.1    | 0,00 | 0,00 | 0 | 0 | 1 | NA |
| RP5-979D14.1   | 0,00 | 0,00 | 0 | 0 | 1 | NA |
| RP5-981L23.2   | 0,00 | 0,00 | 0 | 0 | 1 | NA |
| RP5-981O7.3    | 0,00 | 0,00 | 0 | 0 | 1 | NA |
| RP5-986I17.2   | 0,00 | 0,00 | 0 | 0 | 1 | NA |
| RP5-991G20.6   | 0,00 | 0,00 | 0 | 0 | 1 | NA |
| RP5-998N21.10  | 0,00 | 0,00 | 0 | 0 | 1 | NA |
| RP6-204F4.5    | 0,00 | 0,00 | 0 | 0 | 1 | NA |

|              |      |      |   |   |   |    |
|--------------|------|------|---|---|---|----|
| RP6-218J18.3 | 0,00 | 0,00 | 0 | 0 | 1 | NA |
| RPL19P1      | 0,00 | 0,00 | 0 | 0 | 1 | NA |
| RPL19P14     | 0,00 | 0,00 | 0 | 0 | 1 | NA |
| RPL23AP68    | 0,00 | 0,00 | 0 | 0 | 1 | NA |
| RPL31P33     | 0,00 | 0,00 | 0 | 0 | 1 | NA |
| RPL34P33     | 0,00 | 0,00 | 0 | 0 | 1 | NA |
| RPL36AP26    | 0,00 | 0,00 | 0 | 0 | 1 | NA |
| RPL39P18     | 0,00 | 0,00 | 0 | 0 | 1 | NA |
| RPL7AP15     | 0,00 | 0,00 | 0 | 0 | 1 | NA |
| RPRML        | 0,00 | 0,00 | 0 | 0 | 1 | NA |
| RPS15AP16    | 0,00 | 0,00 | 0 | 0 | 1 | NA |
| RPS15AP3     | 0,00 | 0,00 | 0 | 0 | 1 | NA |
| RPS3AP32     | 0,00 | 0,00 | 0 | 0 | 1 | NA |
| RPS6P16      | 0,00 | 0,00 | 0 | 0 | 1 | NA |
| RSL24D1P11   | 0,00 | 0,00 | 0 | 0 | 1 | NA |
| S100A16      | 0,00 | 0,00 | 0 | 0 | 1 | NA |
| SAP18P3      | 0,00 | 0,00 | 0 | 0 | 1 | NA |
| SERPINA12    | 0,00 | 0,00 | 0 | 0 | 1 | NA |
| SERPINB2     | 0,00 | 0,00 | 0 | 0 | 1 | NA |
| SERPINB3     | 0,00 | 0,00 | 0 | 0 | 1 | NA |
| SHISA6       | 0,00 | 0,00 | 0 | 0 | 1 | NA |
| SLC10A5      | 0,00 | 0,00 | 0 | 0 | 1 | NA |
| SLC17A3      | 0,00 | 0,00 | 0 | 0 | 1 | NA |
| SLC22A10     | 0,00 | 0,00 | 0 | 0 | 1 | NA |
| SLC22A24     | 0,00 | 0,00 | 0 | 0 | 1 | NA |
| SLC28A1      | 0,00 | 0,00 | 0 | 0 | 1 | NA |
| SLC39A12     | 0,00 | 0,00 | 0 | 0 | 1 | NA |
| SLC45A1      | 0,00 | 0,00 | 0 | 0 | 1 | NA |
| SLC5A4P1     | 0,00 | 0,00 | 0 | 0 | 1 | NA |
| SLC6A10P     | 0,00 | 0,00 | 0 | 0 | 1 | NA |
| SLC6A6P      | 0,00 | 0,00 | 0 | 0 | 1 | NA |
| SLCO1C1      | 0,00 | 0,00 | 0 | 0 | 1 | NA |
| SLCO2A1      | 0,00 | 0,00 | 0 | 0 | 1 | NA |
| SNCG         | 0,00 | 0,00 | 0 | 0 | 1 | NA |
| SNORA22C     | 0,00 | 0,00 | 0 | 0 | 1 | NA |
| SNORA24B     | 0,00 | 0,00 | 0 | 0 | 1 | NA |
| SNORA47      | 0,00 | 0,00 | 0 | 0 | 1 | NA |
| SNORD101     | 0,00 | 0,00 | 0 | 0 | 1 | NA |
| SNORD116-21  | 0,00 | 0,00 | 0 | 0 | 1 | NA |
| SNORD3C      | 0,00 | 0,00 | 0 | 0 | 1 | NA |
| SNORD93      | 0,00 | 0,00 | 0 | 0 | 1 | NA |
| SNRPGP4      | 0,00 | 0,00 | 0 | 0 | 1 | NA |
| SNX6P1       | 0,00 | 0,00 | 0 | 0 | 1 | NA |
| SOSTDC1      | 0,00 | 0,00 | 0 | 0 | 1 | NA |
| SPDYC        | 0,00 | 0,00 | 0 | 0 | 1 | NA |
| SPERT        | 0,00 | 0,00 | 0 | 0 | 1 | NA |
| SPINT3       | 0,00 | 0,00 | 0 | 0 | 1 | NA |
| SPPL2C       | 0,00 | 0,00 | 0 | 0 | 1 | NA |
| SPRR2D       | 0,00 | 0,00 | 0 | 0 | 1 | NA |
| SUN5         | 0,00 | 0,00 | 0 | 0 | 1 | NA |

|                  |      |      |   |   |   |    |
|------------------|------|------|---|---|---|----|
| SYT9             | 0,00 | 0,00 | 0 | 0 | 1 | NA |
| SYTL5            | 0,00 | 0,00 | 0 | 0 | 1 | NA |
| TACR3            | 0,00 | 0,00 | 0 | 0 | 1 | NA |
| TCP10L2          | 0,00 | 0,00 | 0 | 0 | 1 | NA |
| TECTA            | 0,00 | 0,00 | 0 | 0 | 1 | NA |
| TEK              | 0,00 | 0,00 | 0 | 0 | 1 | NA |
| TEX19            | 0,00 | 0,00 | 0 | 0 | 1 | NA |
| TEX50            | 0,00 | 0,00 | 0 | 0 | 1 | NA |
| TM4SF19-TCTEX1D2 | 0,00 | 0,00 | 0 | 0 | 1 | NA |
| TMEFF1           | 0,00 | 0,00 | 0 | 0 | 1 | NA |
| TMEM183AP1       | 0,00 | 0,00 | 0 | 0 | 1 | NA |
| TMEM225          | 0,00 | 0,00 | 0 | 0 | 1 | NA |
| TMEM256-PLSCR3   | 0,00 | 0,00 | 0 | 0 | 1 | NA |
| TMIGD1           | 0,00 | 0,00 | 0 | 0 | 1 | NA |
| TRAJ16           | 0,00 | 0,00 | 0 | 0 | 1 | NA |
| TRAJ17           | 0,00 | 0,00 | 0 | 0 | 1 | NA |
| TRAJ19           | 0,00 | 0,00 | 0 | 0 | 1 | NA |
| TRAV37           | 0,00 | 0,00 | 0 | 0 | 1 | NA |
| TRBV16           | 0,00 | 0,00 | 0 | 0 | 1 | NA |
| TRBV24-1         | 0,00 | 0,00 | 0 | 0 | 1 | NA |
| TRBV24OR9-2      | 0,00 | 0,00 | 0 | 0 | 1 | NA |
| TRBV26OR9-2      | 0,00 | 0,00 | 0 | 0 | 1 | NA |
| TRBV27           | 0,00 | 0,00 | 0 | 0 | 1 | NA |
| TRGV10           | 0,00 | 0,00 | 0 | 0 | 1 | NA |
| TRGV5P           | 0,00 | 0,00 | 0 | 0 | 1 | NA |
| TRIM49B          | 0,00 | 0,00 | 0 | 0 | 1 | NA |
| TRPV4            | 0,00 | 0,00 | 0 | 0 | 1 | NA |
| TRPV5            | 0,00 | 0,00 | 0 | 0 | 1 | NA |
| TTC29            | 0,00 | 0,00 | 0 | 0 | 1 | NA |
| TULP3P1          | 0,00 | 0,00 | 0 | 0 | 1 | NA |
| UFSP1            | 0,00 | 0,00 | 0 | 0 | 1 | NA |
| UGT1A8           | 0,00 | 0,00 | 0 | 0 | 1 | NA |
| USP17L7          | 0,00 | 0,00 | 0 | 0 | 1 | NA |
| VENTXP6          | 0,00 | 0,00 | 0 | 0 | 1 | NA |
| VEZF1L1          | 0,00 | 0,00 | 0 | 0 | 1 | NA |
| VGLL2            | 0,00 | 0,00 | 0 | 0 | 1 | NA |
| VN1R107P         | 0,00 | 0,00 | 0 | 0 | 1 | NA |
| VN1R20P          | 0,00 | 0,00 | 0 | 0 | 1 | NA |
| VN1R3            | 0,00 | 0,00 | 0 | 0 | 1 | NA |
| VN1R46P          | 0,00 | 0,00 | 0 | 0 | 1 | NA |
| VWA8-AS1         | 0,00 | 0,00 | 0 | 0 | 1 | NA |
| WNT3A            | 0,00 | 0,00 | 0 | 0 | 1 | NA |
| WNT8A            | 0,00 | 0,00 | 0 | 0 | 1 | NA |
| XIRP1            | 0,00 | 0,00 | 0 | 0 | 1 | NA |
| XIRP2            | 0,00 | 0,00 | 0 | 0 | 1 | NA |
| XXbac-B444P24.14 | 0,00 | 0,00 | 0 | 0 | 1 | NA |
| XXbac-BPG32J3.19 | 0,00 | 0,00 | 0 | 0 | 1 | NA |
| XXbac-BPG34I8.2  | 0,00 | 0,00 | 0 | 0 | 1 | NA |
| XXyac-YM21GA2.2  | 0,00 | 0,00 | 0 | 0 | 1 | NA |
| XXyac-YM21GA2.4  | 0,00 | 0,00 | 0 | 0 | 1 | NA |

|                    |       |        |          |          |    |    |
|--------------------|-------|--------|----------|----------|----|----|
| YBX2               | 0,00  | 0,00   | 0        | 0        | 1  | NA |
| Z84721.4           | 0,00  | 0,00   | 0        | 0        | 1  | NA |
| Z95114.5           | 0,00  | 0,00   | 0        | 0        | 1  | NA |
| ZBBX               | 0,00  | 0,00   | 0        | 0        | 1  | NA |
| ZCCHC18            | 0,00  | 0,00   | 0        | 0        | 1  | NA |
| ZFP64P1            | 0,00  | 0,00   | 0        | 0        | 1  | NA |
| ZNF730             | 0,00  | 0,00   | 0        | 0        | 1  | NA |
| ZRSR1              | 0,00  | 0,00   | 0        | 0        | 1  | NA |
| ZSCAN5B            | 0,00  | 0,00   | 0        | 0        | 1  | NA |
| A1CF               | 36,27 | -4,90  | 1,054565 | -4,64413 | NA | NA |
| AATK               | 5,58  | -0,27  | 2,211563 | -0,12328 | NA | NA |
| AB015752.4         | 3,22  | -23,52 | 3,639365 | -6,46294 | NA | NA |
| AB019440.50        | 0,75  | -4,38  | 3,65229  | -1,19802 | NA | NA |
| AB020862.1         | 6,51  | -24,51 | 3,35061  | -7,31419 | NA | NA |
| ABC11-48400900C8.1 | 2,79  | -6,27  | 3,639924 | -1,72317 | NA | NA |
| ABC14-1188822O7.1  | 10,36 | -3,28  | 1,526474 | -2,14926 | NA | NA |
| ABC7-42418200C9.1  | 4,38  | -1,79  | 1,745811 | -1,02582 | NA | NA |
| ABCA12             | 2,05  | -2,63  | 3,16298  | -0,83069 | NA | NA |
| ABCA13             | 10,01 | -3,96  | 0,848728 | -4,66806 | NA | NA |
| ABCB1              | 65,06 | -8,65  | 2,90065  | -2,98157 | NA | NA |
| ABCB10P4           | 8,75  | -9,50  | 3,343684 | -2,84139 | NA | NA |
| ABCB5              | 7,73  | -3,15  | 0,943993 | -3,33942 | NA | NA |
| ABCC12             | 0,49  | -3,32  | 3,661654 | -0,90661 | NA | NA |
| ABCC13             | 10,10 | -0,92  | 0,940985 | -0,97566 | NA | NA |
| ABCG4              | 1,53  | -4,42  | 2,809202 | -1,57326 | NA | NA |
| ABHD8              | 36,99 | -0,12  | 1,118155 | -0,10747 | NA | NA |
| AC000094.3         | 0,75  | -4,38  | 3,652226 | -1,19963 | NA | NA |
| AC000123.3         | 6,65  | -3,93  | 2,168888 | -1,81372 | NA | NA |
| AC000124.1         | 2,45  | -6,09  | 3,640602 | -1,67331 | NA | NA |
| AC002117.1         | 10,63 | 0,43   | 1,830803 | 0,235683 | NA | NA |
| AC002127.4         | 17,02 | 0,55   | 2,087297 | 0,262681 | NA | NA |
| AC002128.5         | 9,34  | -25,05 | 3,636795 | -6,88903 | NA | NA |
| AC002365.4         | 2,20  | -2,01  | 2,620328 | -0,76859 | NA | NA |
| AC002386.1         | 4,23  | -6,88  | 3,460376 | -1,98775 | NA | NA |
| AC002398.5         | 2,92  | -6,18  | 3,639837 | -1,69813 | NA | NA |
| AC002398.9         | 8,80  | -2,87  | 2,177443 | -1,31974 | NA | NA |
| AC002511.3         | 1,27  | -5,14  | 3,645369 | -1,41106 | NA | NA |
| AC003029.4         | 4,53  | -2,19  | 1,108846 | -1,97218 | NA | NA |
| AC003090.1         | 1,12  | -4,94  | 3,646277 | -1,35435 | NA | NA |
| AC003958.5         | 1,77  | -5,24  | 3,643051 | -1,43749 | NA | NA |
| AC004076.5         | 11,77 | -1,14  | 0,944217 | -1,21186 | NA | NA |
| AC004160.4         | 5,73  | -2,72  | 3,329379 | -0,8175  | NA | NA |
| AC004231.2         | 2,75  | -1,23  | 2,472558 | -0,49881 | NA | NA |
| AC004381.6         | 9,46  | -5,34  | 1,813595 | -2,94394 | NA | NA |
| AC004741.3         | 1,66  | -1,80  | 3,26676  | -0,54973 | NA | NA |
| AC004754.3         | 3,72  | -7,83  | 3,077427 | -2,54529 | NA | NA |
| AC004862.6         | 3,66  | -0,65  | 1,586601 | -0,40902 | NA | NA |
| AC004895.4         | 1,75  | -1,85  | 2,939876 | -0,63059 | NA | NA |
| AC004945.2         | 26,15 | 0,74   | 1,104246 | 0,672429 | NA | NA |
| AC004987.8         | 4,74  | -24,07 | 3,638112 | -6,61563 | NA | NA |

|             |       |        |          |          |    |    |
|-------------|-------|--------|----------|----------|----|----|
| AC005013.5  | 1,41  | -5,29  | 3,644296 | -1,45258 | NA | NA |
| AC005029.1  | 3,90  | -23,80 | 3,638688 | -6,54025 | NA | NA |
| AC005037.5  | 3,94  | -3,87  | 3,564922 | -1,08553 | NA | NA |
| AC005042.4  | 5,16  | -24,18 | 3,63782  | -6,64786 | NA | NA |
| AC005076.5  | 2,56  | -1,96  | 1,804167 | -1,08859 | NA | NA |
| AC005281.1  | 6,14  | -3,38  | 1,088275 | -3,1026  | NA | NA |
| AC005307.3  | 9,24  | -24,83 | 3,636766 | -6,82796 | NA | NA |
| AC005481.5  | 2,36  | -5,53  | 2,75972  | -2,00265 | NA | NA |
| AC005514.2  | 4,36  | -0,95  | 2,814886 | -0,33855 | NA | NA |
| AC005538.3  | 2,34  | -5,85  | 3,640925 | -1,60741 | NA | NA |
| AC005540.3  | 5,60  | -1,72  | 1,926368 | -0,89538 | NA | NA |
| AC005592.1  | 4,59  | -6,88  | 3,604636 | -1,9077  | NA | NA |
| AC005614.3  | 15,56 | -1,07  | 0,976258 | -1,09859 | NA | NA |
| AC005682.6  | 1,77  | -5,43  | 3,642822 | -1,49113 | NA | NA |
| AC005776.1  | 0,89  | -3,32  | 2,220847 | -1,49531 | NA | NA |
| AC005922.3  | 6,24  | -7,33  | 2,664283 | -2,75113 | NA | NA |
| AC005932.1  | 2,72  | -3,96  | 1,791534 | -2,21254 | NA | NA |
| AC006007.1  | 6,47  | -24,47 | 3,637401 | -6,72733 | NA | NA |
| AC006014.8  | 2,69  | -3,56  | 1,705678 | -2,08954 | NA | NA |
| AC006030.1  | 0,67  | -3,06  | 3,396932 | -0,90204 | NA | NA |
| AC006032.1  | 3,56  | -3,75  | 3,560491 | -1,05338 | NA | NA |
| AC006116.12 | 1,81  | -1,71  | 1,407529 | -1,21143 | NA | NA |
| AC006116.22 | 0,84  | -4,10  | 2,776897 | -1,47619 | NA | NA |
| AC006116.25 | 45,75 | -1,58  | 1,013346 | -1,55918 | NA | NA |
| AC006150.1  | 4,38  | -23,95 | 3,638326 | -6,58169 | NA | NA |
| AC006160.4  | 4,36  | -8,40  | 3,529987 | -2,37991 | NA | NA |
| AC006230.3  | 1,70  | -5,04  | 3,226079 | -1,561   | NA | NA |
| AC006277.3  | 2,65  | -2,88  | 2,88242  | -0,99906 | NA | NA |
| AC006296.1  | 1,25  | -5,12  | 3,645569 | -1,40512 | NA | NA |
| AC006328.5  | 1,28  | -5,16  | 3,64526  | -1,41522 | NA | NA |
| AC006366.5  | 2,56  | -6,15  | 3,640377 | -1,69058 | NA | NA |
| AC006369.2  | 13,23 | -0,17  | 1,30446  | -0,12745 | NA | NA |
| AC006942.4  | 2,76  | -4,59  | 2,606487 | -1,76159 | NA | NA |
| AC006946.12 | 2,45  | -5,24  | 3,245481 | -1,61425 | NA | NA |
| AC007000.10 | 5,18  | -4,21  | 2,295501 | -1,83197 | NA | NA |
| AC007000.12 | 2,48  | -2,37  | 2,343442 | -1,01185 | NA | NA |
| AC007000.7  | 17,98 | -1,85  | 1,145874 | -1,61024 | NA | NA |
| AC007014.1  | 5,50  | -2,70  | 3,615979 | -0,74578 | NA | NA |
| AC007036.5  | 2,31  | -0,72  | 2,965999 | -0,24408 | NA | NA |
| AC007036.6  | 1,42  | -2,25  | 2,240383 | -1,00424 | NA | NA |
| AC007041.3  | 4,16  | -23,89 | 3,494436 | -6,8359  | NA | NA |
| AC007050.18 | 0,61  | -4,09  | 3,656014 | -1,1194  | NA | NA |
| AC007078.4  | 4,59  | -4,59  | 3,458778 | -1,32628 | NA | NA |
| AC007092.1  | 19,36 | -1,25  | 1,355793 | -0,92464 | NA | NA |
| AC007204.3  | 3,72  | -6,70  | 3,638869 | -1,83996 | NA | NA |
| AC007250.3  | 7,38  | -1,94  | 0,960683 | -2,0165  | NA | NA |
| AC007276.6  | 3,08  | -7,32  | 3,639033 | -2,01098 | NA | NA |
| AC007292.4  | 2,01  | -2,79  | 1,297561 | -2,15291 | NA | NA |
| AC007326.13 | 0,78  | -3,84  | 3,653494 | -1,0522  | NA | NA |
| AC007362.3  | 0,52  | -3,37  | 3,662803 | -0,91929 | NA | NA |

|             |       |        |          |          |    |    |
|-------------|-------|--------|----------|----------|----|----|
| AC007386.3  | 7,02  | -1,70  | 2,811378 | -0,60324 | NA | NA |
| AC007405.4  | 46,02 | -3,13  | 0,936087 | -3,34627 | NA | NA |
| AC007551.3  | 29,14 | 1,30   | 1,154905 | 1,123507 | NA | NA |
| AC007563.1  | 2,79  | -6,11  | 3,077776 | -1,98601 | NA | NA |
| AC007679.3  | 4,51  | -2,00  | 1,323011 | -1,51382 | NA | NA |
| AC007682.1  | 3,25  | -2,92  | 1,4825   | -1,96799 | NA | NA |
| AC007731.1  | 2,37  | -1,91  | 2,356691 | -0,81057 | NA | NA |
| AC007966.1  | 7,21  | -7,61  | 3,399552 | -2,23774 | NA | NA |
| AC008103.4  | 13,59 | -8,08  | 3,35277  | -2,41127 | NA | NA |
| AC008132.13 | 11,73 | 0,94   | 1,316998 | 0,71385  | NA | NA |
| AC008264.4  | 1,08  | -4,05  | 3,309035 | -1,22333 | NA | NA |
| AC008280.1  | 1,19  | -3,89  | 2,527524 | -1,54004 | NA | NA |
| AC008703.1  | 9,03  | -3,40  | 3,365702 | -1,00998 | NA | NA |
| AC009120.5  | 7,61  | -2,22  | 2,823957 | -0,78597 | NA | NA |
| AC009237.8  | 2,22  | -2,25  | 1,995991 | -1,1278  | NA | NA |
| AC009299.2  | 4,21  | -2,78  | 2,094088 | -1,32817 | NA | NA |
| AC009411.2  | 4,42  | -23,96 | 3,638301 | -6,58491 | NA | NA |
| AC009501.4  | 13,51 | -8,36  | 2,320883 | -3,60275 | NA | NA |
| AC009501.5  | 2,18  | -3,44  | 1,657599 | -2,07764 | NA | NA |
| AC009518.4  | 1,33  | -5,19  | 3,644241 | -1,42317 | NA | NA |
| AC009784.3  | 19,25 | -7,26  | 1,695075 | -4,28027 | NA | NA |
| AC009878.2  | 1,58  | -5,45  | 3,643307 | -1,49676 | NA | NA |
| AC010132.11 | 0,99  | -4,59  | 3,648614 | -1,25746 | NA | NA |
| AC010153.2  | 2,56  | -6,15  | 3,640377 | -1,69058 | NA | NA |
| AC010975.1  | 1,65  | -4,13  | 3,645285 | -1,13269 | NA | NA |
| AC010983.1  | 1,23  | -5,10  | 3,645645 | -1,3991  | NA | NA |
| AC011242.5  | 3,65  | -8,52  | 3,574864 | -2,38408 | NA | NA |
| AC011284.3  | 1,34  | -4,81  | 3,645744 | -1,31821 | NA | NA |
| AC011294.3  | 19,50 | -0,74  | 1,456365 | -0,50485 | NA | NA |
| AC011322.1  | 1,05  | -4,88  | 3,648442 | -1,33819 | NA | NA |
| AC011330.8  | 1,09  | -4,54  | 3,25989  | -1,39222 | NA | NA |
| AC011524.3  | 1,67  | -5,54  | 3,642966 | -1,51981 | NA | NA |
| AC011899.9  | 46,76 | -4,28  | 1,731482 | -2,47282 | NA | NA |
| AC012075.1  | 0,90  | -4,65  | 3,649385 | -1,27436 | NA | NA |
| AC012087.1  | 10,62 | -25,24 | 3,636637 | -6,94072 | NA | NA |
| AC012358.7  | 19,55 | -0,23  | 1,132849 | -0,19928 | NA | NA |
| AC012368.2  | 11,96 | -5,94  | 2,446622 | -2,42683 | NA | NA |
| AC012462.3  | 3,88  | -23,70 | 3,638696 | -6,51262 | NA | NA |
| AC012501.2  | 3,89  | -4,27  | 3,100229 | -1,37628 | NA | NA |
| AC012613.2  | 7,36  | -3,11  | 2,002861 | -1,55496 | NA | NA |
| AC013264.2  | 0,87  | -3,90  | 3,310474 | -1,17857 | NA | NA |
| AC013271.3  | 6,92  | -7,65  | 3,637728 | -2,10165 | NA | NA |
| AC013409.3  | 0,64  | -4,16  | 3,655021 | -1,13836 | NA | NA |
| AC013409.4  | 5,30  | -24,24 | 3,637827 | -6,66351 | NA | NA |
| AC013412.1  | 1,38  | -5,26  | 3,644568 | -1,44355 | NA | NA |
| AC013437.3  | 1,13  | -4,75  | 3,64724  | -1,30289 | NA | NA |
| AC013460.1  | 12,77 | -2,78  | 3,449091 | -0,80659 | NA | NA |
| AC016725.4  | 3,61  | -2,75  | 2,699581 | -1,01937 | NA | NA |
| AC016735.1  | 4,55  | -6,17  | 3,172286 | -1,94616 | NA | NA |
| AC016768.1  | 3,43  | -6,58  | 3,639172 | -1,80703 | NA | NA |



|             |       |        |          |          |    |    |
|-------------|-------|--------|----------|----------|----|----|
| AC016772.4  | 11,42 | -25,35 | 3,636554 | -6,9698  | NA | NA |
| AC016903.2  | 4,65  | -24,04 | 3,638141 | -6,60665 | NA | NA |
| AC016912.3  | 1,44  | -5,32  | 3,644255 | -1,46059 | NA | NA |
| AC017074.2  | 1,76  | -2,53  | 3,190993 | -0,79247 | NA | NA |
| AC017076.5  | 29,64 | -0,17  | 1,386253 | -0,12477 | NA | NA |
| AC018705.5  | 4,43  | -23,98 | 3,47946  | -6,89204 | NA | NA |
| AC018755.17 | 2,63  | -3,69  | 2,797329 | -1,31845 | NA | NA |
| AC018766.6  | 5,05  | -6,01  | 2,48116  | -2,42424 | NA | NA |
| AC018865.8  | 16,34 | -0,08  | 0,879912 | -0,09524 | NA | NA |
| AC019171.4  | 4,28  | -0,62  | 2,331021 | -0,26679 | NA | NA |
| AC019171.5  | 3,02  | -0,64  | 3,004125 | -0,21274 | NA | NA |
| AC019186.1  | 2,40  | -6,05  | 3,640667 | -1,66306 | NA | NA |
| AC019349.2  | 20,29 | -7,33  | 2,113401 | -3,46779 | NA | NA |
| AC020595.1  | 7,97  | -8,19  | 2,562414 | -3,19639 | NA | NA |
| AC022201.4  | 16,61 | -1,89  | 1,896647 | -0,99467 | NA | NA |
| AC023468.2  | 1,80  | -5,65  | 3,642498 | -1,55011 | NA | NA |
| AC024132.1  | 17,82 | -8,47  | 2,312999 | -3,66274 | NA | NA |
| AC025442.3  | 2,76  | -3,50  | 3,58425  | -0,97521 | NA | NA |
| AC025477.1  | 2,77  | -1,12  | 2,16337  | -0,516   | NA | NA |
| AC027124.4  | 0,92  | -3,19  | 3,490366 | -0,91468 | NA | NA |
| AC040160.13 | 12,25 | -1,20  | 1,933981 | -0,61991 | NA | NA |
| AC040963.1  | 15,37 | -25,85 | 3,164329 | -8,16948 | NA | NA |
| AC046143.3  | 7,95  | 0,37   | 1,739359 | 0,211256 | NA | NA |
| AC051649.16 | 15,34 | 0,29   | 1,608495 | 0,18178  | NA | NA |
| AC062016.2  | 1,71  | -5,57  | 3,642773 | -1,52956 | NA | NA |
| AC063976.3  | 3,24  | -23,53 | 3,639289 | -6,4646  | NA | NA |
| AC064836.3  | 1,87  | -5,70  | 3,642181 | -1,56486 | NA | NA |
| AC064852.5  | 3,42  | -3,42  | 2,374329 | -1,44066 | NA | NA |
| AC064872.1  | 0,77  | -4,42  | 3,651758 | -1,20934 | NA | NA |
| AC066692.3  | 9,03  | -3,63  | 1,994983 | -1,82191 | NA | NA |
| AC067945.3  | 3,00  | -1,06  | 2,749953 | -0,38511 | NA | NA |
| AC068137.3  | 2,29  | -5,99  | 3,640974 | -1,6453  | NA | NA |
| AC068137.4  | 13,30 | -25,59 | 3,636396 | -7,03591 | NA | NA |
| AC068196.1  | 2,32  | -5,35  | 2,773617 | -1,92932 | NA | NA |
| AC068491.2  | 2,76  | -1,63  | 3,346217 | -0,48591 | NA | NA |
| AC068535.4  | 3,44  | -6,42  | 3,598408 | -1,78378 | NA | NA |
| AC068535.5  | 3,71  | -23,57 | 3,638787 | -6,47842 | NA | NA |
| AC068831.8  | 1,89  | -4,68  | 2,848102 | -1,64179 | NA | NA |
| AC069363.1  | 10,84 | -3,87  | 1,493841 | -2,59225 | NA | NA |
| AC069542.2  | 1,20  | -3,40  | 2,57035  | -1,32255 | NA | NA |
| AC073055.2  | 4,57  | -2,39  | 0,928157 | -2,57355 | NA | NA |
| AC073094.4  | 2,65  | -6,20  | 3,640148 | -1,70321 | NA | NA |
| AC073115.5  | 1,37  | -5,06  | 3,186135 | -1,58881 | NA | NA |
| AC073115.7  | 4,29  | -7,28  | 2,695863 | -2,699   | NA | NA |
| AC073342.12 | 1,86  | -5,69  | 3,09392  | -1,83761 | NA | NA |
| AC073464.5  | 1,28  | -5,15  | 3,645323 | -1,41268 | NA | NA |
| AC073502.1  | 1,53  | -3,47  | 3,025346 | -1,14681 | NA | NA |
| AC073628.1  | 0,79  | -4,45  | 3,651222 | -1,22006 | NA | NA |
| AC073850.6  | 1,22  | -5,08  | 3,64574  | -1,39446 | NA | NA |
| AC073869.6  | 0,94  | -4,70  | 3,648726 | -1,28786 | NA | NA |

|             |       |        |          |          |    |    |
|-------------|-------|--------|----------|----------|----|----|
| AC074011.2  | 3,83  | -4,44  | 2,181851 | -2,03355 | NA | NA |
| AC074091.13 | 6,03  | -2,75  | 0,862829 | -3,19292 | NA | NA |
| AC074112.1  | 0,93  | -4,50  | 3,648954 | -1,23214 | NA | NA |
| AC074138.3  | 5,09  | -3,05  | 2,056993 | -1,48272 | NA | NA |
| AC074389.6  | 3,93  | -23,79 | 3,638559 | -6,53944 | NA | NA |
| AC074389.7  | 1,16  | -5,01  | 3,646304 | -1,37477 | NA | NA |
| AC074389.9  | 5,36  | -6,39  | 3,637908 | -1,75755 | NA | NA |
| AC078841.5  | 12,55 | -9,44  | 2,512978 | -3,75772 | NA | NA |
| AC078883.3  | 5,26  | -9,10  | 2,971151 | -3,06285 | NA | NA |
| AC078941.1  | 0,96  | -4,31  | 3,650707 | -1,18006 | NA | NA |
| AC079111.1  | 16,54 | -1,41  | 1,329207 | -1,0598  | NA | NA |
| AC079305.9  | 8,07  | 0,37   | 2,271486 | 0,16271  | NA | NA |
| AC079466.1  | 20,97 | -4,44  | 1,031207 | -4,30192 | NA | NA |
| AC079584.3  | 11,01 | -0,65  | 1,818974 | -0,35943 | NA | NA |
| AC079586.1  | 0,70  | -4,28  | 3,653382 | -1,1716  | NA | NA |
| AC079610.1  | 2,25  | -5,96  | 3,640992 | -1,63682 | NA | NA |
| AC079613.1  | 3,69  | -6,46  | 3,639027 | -1,77389 | NA | NA |
| AC079777.1  | 7,81  | -8,75  | 2,943915 | -2,97268 | NA | NA |
| AC079880.1  | 5,27  | -24,23 | 3,637838 | -6,66088 | NA | NA |
| AC079923.1  | 12,98 | 1,05   | 1,855395 | 0,564143 | NA | NA |
| AC083843.1  | 24,98 | -0,07  | 1,736316 | -0,04313 | NA | NA |
| AC083884.7  | 1,11  | -2,90  | 3,517531 | -0,82351 | NA | NA |
| AC083899.3  | 25,95 | -0,05  | 2,100296 | -0,02231 | NA | NA |
| AC083900.1  | 6,12  | 0,02   | 2,261326 | 0,008233 | NA | NA |
| AC090505.6  | 4,22  | 0,32   | 1,823065 | 0,175059 | NA | NA |
| AC090587.5  | 3,05  | -5,42  | 3,240389 | -1,67352 | NA | NA |
| AC090804.1  | 1,19  | -3,33  | 1,508559 | -2,2053  | NA | NA |
| AC090955.5  | 2,08  | -5,85  | 3,641524 | -1,60672 | NA | NA |
| AC091132.1  | 9,62  | -2,45  | 1,853131 | -1,3241  | NA | NA |
| AC091491.2  | 4,28  | -1,89  | 3,359869 | -0,56267 | NA | NA |
| AC091493.1  | 28,53 | -5,99  | 1,95756  | -3,06217 | NA | NA |
| AC091729.9  | 3,65  | -0,52  | 2,024874 | -0,25653 | NA | NA |
| AC092299.6  | 3,92  | -3,04  | 2,165221 | -1,40571 | NA | NA |
| AC092595.2  | 1,26  | -5,14  | 3,645433 | -1,4091  | NA | NA |
| AC092610.12 | 1,24  | -5,10  | 3,645547 | -1,39821 | NA | NA |
| AC092635.1  | 1,57  | -1,62  | 3,239751 | -0,49979 | NA | NA |
| AC092661.1  | 10,69 | -4,56  | 1,906408 | -2,39291 | NA | NA |
| AC092667.2  | 9,99  | -3,14  | 2,544993 | -1,23419 | NA | NA |
| AC092687.5  | 5,13  | -5,62  | 2,532258 | -2,22091 | NA | NA |
| AC093106.5  | 2,05  | -4,97  | 2,817389 | -1,76324 | NA | NA |
| AC093642.5  | 26,93 | -0,62  | 1,06948  | -0,58187 | NA | NA |
| AC093726.4  | 6,97  | -2,57  | 1,272279 | -2,02276 | NA | NA |
| AC093732.1  | 35,80 | -3,38  | 1,874021 | -1,80541 | NA | NA |
| AC093734.11 | 10,38 | -4,14  | 2,128612 | -1,94728 | NA | NA |
| AC096559.1  | 2,13  | -1,84  | 2,998112 | -0,61411 | NA | NA |
| AC096649.2  | 1,08  | -4,90  | 3,646967 | -1,34415 | NA | NA |
| AC097382.5  | 7,64  | -1,67  | 0,921062 | -1,81176 | NA | NA |
| AC097468.6  | 1,11  | -4,75  | 3,647246 | -1,30182 | NA | NA |
| AC097523.1  | 4,11  | -2,95  | 1,392886 | -2,12053 | NA | NA |
| AC097532.1  | 2,52  | -1,20  | 3,364066 | -0,35718 | NA | NA |

|             |       |        |          |          |    |    |
|-------------|-------|--------|----------|----------|----|----|
| AC098614.2  | 13,53 | -4,48  | 2,163961 | -2,06856 | NA | NA |
| AC098800.1  | 5,44  | -24,28 | 3,637766 | -6,67394 | NA | NA |
| AC100802.2  | 0,68  | -4,23  | 3,654009 | -1,15746 | NA | NA |
| AC104532.2  | 2,15  | -5,05  | 3,257886 | -1,54921 | NA | NA |
| AC104651.1  | 2,21  | -5,94  | 3,641125 | -1,63121 | NA | NA |
| AC104777.1  | 4,87  | -3,91  | 2,894967 | -1,35058 | NA | NA |
| AC104801.1  | 3,70  | -23,62 | 3,638854 | -6,49079 | NA | NA |
| AC106883.1  | 1,52  | -5,40  | 3,643791 | -1,4819  | NA | NA |
| AC107218.3  | 3,86  | -6,57  | 3,124449 | -2,1036  | NA | NA |
| AC107399.2  | 3,48  | -6,60  | 3,639112 | -1,81296 | NA | NA |
| AC108171.5  | 6,90  | -24,62 | 3,637276 | -6,76778 | NA | NA |
| AC108448.2  | 2,19  | -3,98  | 3,03748  | -1,30959 | NA | NA |
| AC108449.2  | 1,22  | -3,61  | 1,77549  | -2,03195 | NA | NA |
| AC109826.1  | 3,69  | -5,38  | 3,638778 | -1,47775 | NA | NA |
| AC112229.4  | 4,37  | -4,54  | 1,436651 | -3,16166 | NA | NA |
| AC112497.1  | 22,32 | -0,05  | 2,348016 | -0,01954 | NA | NA |
| AC113188.2  | 2,89  | -2,04  | 1,331787 | -1,53065 | NA | NA |
| AC113554.3  | 2,24  | -5,96  | 3,641072 | -1,63584 | NA | NA |
| AC113618.2  | 3,30  | -6,51  | 3,639236 | -1,79019 | NA | NA |
| AC114730.3  | 10,63 | 0,20   | 1,27919  | 0,153319 | NA | NA |
| AC114813.1  | 6,08  | -24,44 | 3,637519 | -6,71848 | NA | NA |
| AC114814.4  | 1,50  | -2,33  | 3,135789 | -0,74398 | NA | NA |
| AC129778.3  | 6,26  | -4,68  | 2,063059 | -2,27033 | NA | NA |
| AC131056.5  | 1,98  | -4,21  | 1,587953 | -2,65184 | NA | NA |
| AC138783.10 | 6,50  | -6,12  | 3,272663 | -1,86933 | NA | NA |
| AC138972.2  | 13,08 | -0,06  | 1,889177 | -0,03327 | NA | NA |
| AC139099.5  | 1,93  | -3,29  | 2,764154 | -1,18941 | NA | NA |
| AC142293.3  | 2,63  | -5,83  | 3,109968 | -1,87602 | NA | NA |
| AC142472.6  | 6,09  | -3,24  | 1,918456 | -1,68684 | NA | NA |
| AC144831.3  | 2,15  | -5,90  | 3,641305 | -1,62006 | NA | NA |
| AC145124.2  | 1,89  | -1,66  | 1,607105 | -1,03208 | NA | NA |
| ACAN        | 5,16  | -1,74  | 1,770503 | -0,98312 | NA | NA |
| ACER2       | 0,94  | -3,65  | 3,652292 | -0,99974 | NA | NA |
| ACKR3       | 22,32 | -1,30  | 2,101593 | -0,61686 | NA | NA |
| ACKR4       | 5,37  | -1,98  | 2,045227 | -0,96817 | NA | NA |
| ACMSD       | 0,93  | -3,80  | 3,279938 | -1,15756 | NA | NA |
| ACOT1       | 14,64 | -0,71  | 2,309226 | -0,30745 | NA | NA |
| ACOT4       | 28,20 | -5,27  | 1,132437 | -4,65502 | NA | NA |
| ACOX2       | 6,54  | -1,09  | 1,877022 | -0,57938 | NA | NA |
| ACSBG2      | 2,63  | -6,22  | 3,64068  | -1,70826 | NA | NA |
| ACSM5       | 3,62  | -2,56  | 1,755518 | -1,46079 | NA | NA |
| ACTGP3      | 9,89  | -7,77  | 2,638688 | -2,94284 | NA | NA |
| ACTL8       | 0,70  | -4,00  | 3,655015 | -1,09358 | NA | NA |
| ACTN3       | 5,09  | -7,19  | 3,639126 | -1,97682 | NA | NA |
| ACY3        | 18,46 | -7,05  | 1,946409 | -3,6199  | NA | NA |
| ADAD1       | 4,11  | -23,84 | 3,501491 | -6,80908 | NA | NA |
| ADAM2       | 3,14  | -3,00  | 3,249087 | -0,92237 | NA | NA |
| ADAM23      | 2,18  | -5,92  | 3,641291 | -1,62708 | NA | NA |
| ADAMTS10    | 27,04 | -1,13  | 1,920153 | -0,59046 | NA | NA |
| ADAMTS14    | 1,28  | -3,10  | 2,348554 | -1,32093 | NA | NA |

|            |        |        |          |          |    |    |
|------------|--------|--------|----------|----------|----|----|
| ADAMTSL1   | 6,89   | -7,02  | 2,108232 | -3,32891 | NA | NA |
| ADCY1      | 8,15   | -4,29  | 1,071342 | -4,00683 | NA | NA |
| ADCYAP1R1  | 5,28   | -2,09  | 2,450775 | -0,85454 | NA | NA |
| ADGRB3     | 15,84  | -8,47  | 3,637228 | -2,32816 | NA | NA |
| ADGRF2     | 15,19  | -4,53  | 1,048471 | -4,31594 | NA | NA |
| ADGRG2     | 17,27  | -0,74  | 0,641969 | -1,14646 | NA | NA |
| ADGRG3     | 3,79   | -5,86  | 3,6395   | -1,61047 | NA | NA |
| ADGRL2     | 6,78   | -1,24  | 3,128308 | -0,39687 | NA | NA |
| ADGRL4     | 4,47   | -6,93  | 3,435734 | -2,01824 | NA | NA |
| ADORA3     | 41,11  | -0,68  | 1,795313 | -0,38009 | NA | NA |
| AF127936.3 | 4,99   | -4,69  | 1,189351 | -3,94325 | NA | NA |
| AF127936.6 | 15,34  | -10,64 | 2,729014 | -3,89808 | NA | NA |
| AF131215.2 | 2,35   | -4,31  | 2,082294 | -2,07181 | NA | NA |
| AF186192.6 | 3,24   | -4,79  | 2,935573 | -1,63099 | NA | NA |
| AF196972.3 | 5,42   | 1,19   | 2,197171 | 0,543199 | NA | NA |
| AFAP1L2    | 10,10  | -8,28  | 3,247067 | -2,54902 | NA | NA |
| AGAP2      | 17,27  | -0,71  | 1,238421 | -0,57613 | NA | NA |
| AGBL2      | 7,43   | -3,75  | 1,059549 | -3,54355 | NA | NA |
| AGBL3      | 15,43  | -0,55  | 1,44431  | -0,38346 | NA | NA |
| AGGF1P4    | 1,51   | -5,38  | 3,643787 | -1,47769 | NA | NA |
| AGGF1P8    | 2,78   | -3,60  | 1,976298 | -1,82123 | NA | NA |
| AGO1       | 423,14 | -1,30  | 0,623318 | -2,08841 | NA | NA |
| AGTR1      | 0,76   | -4,18  | 3,652594 | -1,14474 | NA | NA |
| AJAP1      | 54,12  | -7,50  | 1,616729 | -4,63786 | NA | NA |
| AK1        | 19,01  | -2,42  | 1,126448 | -2,14597 | NA | NA |
| AK7        | 22,69  | -3,43  | 1,312521 | -2,6104  | NA | NA |
| AKR1C2     | 12,10  | -4,65  | 1,464736 | -3,17595 | NA | NA |
| AKR1C3     | 13,64  | -3,17  | 1,608902 | -1,9695  | NA | NA |
| AKR1E2     | 2,82   | -0,67  | 2,224764 | -0,30237 | NA | NA |
| AKR7A3     | 4,20   | -6,38  | 2,662786 | -2,39421 | NA | NA |
| AL049758.2 | 23,56  | -3,82  | 2,302491 | -1,66103 | NA | NA |
| AL078471.4 | 5,35   | -8,10  | 3,021346 | -2,68255 | NA | NA |
| AL121578.5 | 18,26  | -11,13 | 3,636139 | -3,06043 | NA | NA |
| AL162151.4 | 3,89   | -6,59  | 3,566451 | -1,84906 | NA | NA |
| AL353997.2 | 1,11   | -4,95  | 3,646806 | -1,35637 | NA | NA |
| AL353997.7 | 1,89   | -5,71  | 3,642132 | -1,56856 | NA | NA |
| AL589743.2 | 10,45  | 0,20   | 1,377856 | 0,144366 | NA | NA |
| AL592528.1 | 10,03  | -7,59  | 3,393935 | -2,2363  | NA | NA |
| ALAS2      | 6,32   | -4,65  | 1,612026 | -2,88189 | NA | NA |
| ALDH1A1    | 1,78   | -5,13  | 2,764911 | -1,85609 | NA | NA |
| ALDH1A2    | 7,91   | -6,72  | 2,719317 | -2,47141 | NA | NA |
| ALDH1L2    | 35,85  | -0,18  | 1,222887 | -0,14311 | NA | NA |
| ALG1L      | 1,47   | -4,98  | 3,230508 | -1,54149 | NA | NA |
| ALLC       | 10,40  | -7,67  | 3,391008 | -2,26142 | NA | NA |
| AMBRA1     | 92,66  | -1,88  | 1,118936 | -1,67646 | NA | NA |
| AMER1      | 20,46  | -1,78  | 1,367023 | -1,30063 | NA | NA |
| AMOT       | 9,75   | -2,31  | 2,335287 | -0,98733 | NA | NA |
| AMY1A      | 3,40   | -6,53  | 3,50482  | -1,86325 | NA | NA |
| AMY1B      | 0,57   | -3,99  | 3,656696 | -1,09101 | NA | NA |
| ANGPT1     | 16,03  | -1,52  | 1,097993 | -1,383   | NA | NA |

|             |        |        |          |          |    |    |
|-------------|--------|--------|----------|----------|----|----|
| ANGPTL1     | 13,15  | -0,81  | 2,084158 | -0,38755 | NA | NA |
| ANK1        | 1,31   | -1,57  | 2,7549   | -0,57119 | NA | NA |
| ANK2        | 43,03  | -7,71  | 1,456215 | -5,29213 | NA | NA |
| ANKFN1      | 8,71   | -3,43  | 1,55679  | -2,2019  | NA | NA |
| ANKMY2      | 36,75  | -0,21  | 1,359394 | -0,15432 | NA | NA |
| ANKRD1      | 1,84   | -3,12  | 1,443279 | -2,15877 | NA | NA |
| ANKRD18DP   | 2,68   | -1,21  | 3,374815 | -0,35843 | NA | NA |
| ANKRD20A2   | 20,58  | -4,82  | 1,78613  | -2,7008  | NA | NA |
| ANKRD30BL   | 10,31  | -2,35  | 1,114959 | -2,10742 | NA | NA |
| ANKRD35     | 4,74   | -24,06 | 3,638116 | -6,61336 | NA | NA |
| ANKRD52     | 134,76 | -3,11  | 1,052422 | -2,95555 | NA | NA |
| ANO2        | 0,67   | -3,08  | 2,83945  | -1,08609 | NA | NA |
| ANO3        | 36,15  | -5,15  | 3,457602 | -1,49032 | NA | NA |
| ANO5        | 11,94  | -1,03  | 1,205585 | -0,85605 | NA | NA |
| ANO7P1      | 5,47   | -6,13  | 2,203559 | -2,78358 | NA | NA |
| ANTXRL      | 4,08   | -6,85  | 3,638813 | -1,88311 | NA | NA |
| ANTXRLP1    | 5,02   | -6,78  | 3,080157 | -2,20206 | NA | NA |
| AOC1        | 8,16   | -4,08  | 1,07874  | -3,78209 | NA | NA |
| AP000233.2  | 1,36   | -5,24  | 3,644684 | -1,4378  | NA | NA |
| AP000235.3  | 7,24   | -0,94  | 2,419505 | -0,39016 | NA | NA |
| AP000295.9  | 5,32   | -1,58  | 2,367314 | -0,66753 | NA | NA |
| AP000336.1  | 8,55   | -24,93 | 3,636914 | -6,85393 | NA | NA |
| AP000339.4  | 6,62   | -2,08  | 2,586952 | -0,8022  | NA | NA |
| AP000350.5  | 22,70  | -0,03  | 1,696163 | -0,01896 | NA | NA |
| AP000402.3  | 1,52   | -5,40  | 3,643731 | -1,48125 | NA | NA |
| AP000439.1  | 4,52   | -0,59  | 2,604596 | -0,22776 | NA | NA |
| AP000459.4  | 14,23  | -1,14  | 1,30822  | -0,86764 | NA | NA |
| AP000462.2  | 0,96   | -4,74  | 3,181752 | -1,49035 | NA | NA |
| AP000472.2  | 1,62   | -3,27  | 1,906785 | -1,71603 | NA | NA |
| AP000525.10 | 7,82   | -4,29  | 3,186675 | -1,34628 | NA | NA |
| AP000525.9  | 30,59  | -0,79  | 1,32217  | -0,59908 | NA | NA |
| AP000593.6  | 1,45   | -2,50  | 3,128928 | -0,79776 | NA | NA |
| AP000654.5  | 8,89   | -24,94 | 3,636868 | -6,85689 | NA | NA |
| AP000705.8  | 3,60   | -1,51  | 2,485302 | -0,60611 | NA | NA |
| AP001055.8  | 27,70  | -2,06  | 1,233279 | -1,67127 | NA | NA |
| AP001056.1  | 6,14   | -4,15  | 1,191739 | -3,48216 | NA | NA |
| AP001092.4  | 0,50   | -3,81  | 3,660459 | -1,04158 | NA | NA |
| AP001172.3  | 2,49   | -5,24  | 3,641106 | -1,43887 | NA | NA |
| AP001257.1  | 10,23  | -1,77  | 3,154473 | -0,56246 | NA | NA |
| AP001432.14 | 9,18   | -2,14  | 2,648308 | -0,80659 | NA | NA |
| AP001437.1  | 6,22   | -3,10  | 2,440805 | -1,27025 | NA | NA |
| AP001601.2  | 6,07   | -8,06  | 2,990184 | -2,69604 | NA | NA |
| AP001610.5  | 17,08  | -3,23  | 1,795037 | -1,80085 | NA | NA |
| AP001610.9  | 5,21   | -24,22 | 3,637877 | -6,65746 | NA | NA |
| AP001627.1  | 6,58   | -3,24  | 2,957383 | -1,09447 | NA | NA |
| AP001629.8  | 14,95  | -1,07  | 1,168486 | -0,91971 | NA | NA |
| AP001634.6  | 10,36  | -25,21 | 3,63666  | -6,93138 | NA | NA |
| AP002856.5  | 0,49   | -3,77  | 3,661007 | -1,03102 | NA | NA |
| AP002954.4  | 26,21  | -4,29  | 1,909441 | -2,24478 | NA | NA |
| AP003774.4  | 17,73  | 0,91   | 1,370952 | 0,661275 | NA | NA |

|              |        |        |          |          |    |    |
|--------------|--------|--------|----------|----------|----|----|
| AP005135.2   | 2,29   | -2,40  | 2,914412 | -0,82208 | NA | NA |
| APOBEC3H     | 5,05   | -3,09  | 1,115921 | -2,7715  | NA | NA |
| APOM         | 26,81  | -0,08  | 1,468428 | -0,05163 | NA | NA |
| AQP8         | 9,13   | -24,82 | 3,28688  | -7,55125 | NA | NA |
| ARF4-AS1     | 5,82   | -1,08  | 1,153584 | -0,93219 | NA | NA |
| ARFGEF3      | 15,85  | -4,14  | 0,886533 | -4,66537 | NA | NA |
| ARG1         | 5,75   | -0,50  | 1,879455 | -0,26387 | NA | NA |
| ARHGAP11A    | 25,26  | -0,38  | 1,177429 | -0,3196  | NA | NA |
| ARHGAP12     | 98,07  | -1,90  | 1,042172 | -1,82546 | NA | NA |
| ARHGAP36     | 0,47   | -3,10  | 3,668332 | -0,84407 | NA | NA |
| ARHGAP6      | 13,39  | -6,04  | 1,835777 | -3,29095 | NA | NA |
| ARHGEF11     | 139,09 | -2,35  | 1,252928 | -1,8739  | NA | NA |
| ARHGEF28     | 41,46  | -3,20  | 1,016315 | -3,14834 | NA | NA |
| ARHGEF5      | 8,43   | -5,57  | 2,59966  | -2,14184 | NA | NA |
| ARID3A       | 267,64 | -0,95  | 0,856742 | -1,11069 | NA | NA |
| ARL15        | 75,87  | -0,51  | 1,127948 | -0,45467 | NA | NA |
| ARMC12       | 12,59  | -1,48  | 2,02847  | -0,72767 | NA | NA |
| ARMC3        | 21,80  | -1,70  | 1,727182 | -0,98342 | NA | NA |
| ARMC4        | 4,17   | 0,16   | 2,018642 | 0,08109  | NA | NA |
| ARMC9        | 27,60  | -4,77  | 0,943875 | -5,05858 | NA | NA |
| ARPP21       | 5,99   | -6,40  | 2,279451 | -2,80813 | NA | NA |
| ARSH         | 0,97   | -4,52  | 3,649312 | -1,23769 | NA | NA |
| ASAP1-IT2    | 45,21  | 0,01   | 0,950087 | 0,008884 | NA | NA |
| ASB14        | 32,51  | 0,45   | 1,323319 | 0,340107 | NA | NA |
| ASIC1        | 0,70   | -4,26  | 3,652668 | -1,16697 | NA | NA |
| ASIC2        | 1,39   | -4,97  | 3,643431 | -1,36278 | NA | NA |
| ASXL3        | 15,09  | -3,67  | 1,61336  | -2,27474 | NA | NA |
| ATP12A       | 7,60   | -6,90  | 3,02942  | -2,27727 | NA | NA |
| ATP1A2       | 7,63   | -5,65  | 1,39419  | -4,05187 | NA | NA |
| ATP1A3       | 2,94   | -1,76  | 1,336548 | -1,32037 | NA | NA |
| ATP1B2       | 54,90  | -5,24  | 1,200615 | -4,36475 | NA | NA |
| ATP2B2       | 10,99  | -5,40  | 2,157705 | -2,50477 | NA | NA |
| ATP2B3       | 1,66   | -5,18  | 3,161532 | -1,63725 | NA | NA |
| ATP5J2-PTCD1 | 3,06   | -1,57  | 1,861499 | -0,84517 | NA | NA |
| ATP6V1C2     | 24,02  | -2,94  | 1,792025 | -1,64158 | NA | NA |
| ATP8B5P      | 1,32   | -2,22  | 1,485979 | -1,49179 | NA | NA |
| AURKA        | 17,89  | -1,39  | 1,725426 | -0,80849 | NA | NA |
| AZIN2        | 4,95   | -1,27  | 2,330017 | -0,54529 | NA | NA |
| B3GNT6       | 5,20   | -4,32  | 1,734895 | -2,49169 | NA | NA |
| B4GAT1       | 4,06   | -1,95  | 2,288818 | -0,85089 | NA | NA |
| BAAT         | 1,98   | -1,45  | 3,632114 | -0,39843 | NA | NA |
| BAG3         | 20,91  | 0,06   | 1,695157 | 0,033605 | NA | NA |
| BAIAP3       | 1,61   | -4,64  | 3,272786 | -1,41712 | NA | NA |
| BCAN         | 0,30   | -2,76  | 3,6796   | -0,75045 | NA | NA |
| BCAR3        | 23,32  | -2,90  | 1,416813 | -2,04703 | NA | NA |
| BCAR4        | 2,12   | -5,43  | 3,642357 | -1,49133 | NA | NA |
| BCDIN3D      | 121,88 | -1,35  | 0,57926  | -2,32729 | NA | NA |
| BCO1         | 13,75  | -10,53 | 2,805769 | -3,7518  | NA | NA |
| BDNF         | 1,01   | -2,89  | 3,507851 | -0,82278 | NA | NA |
| BDNF-AS1     | 3,20   | -1,43  | 1,880006 | -0,75917 | NA | NA |

|                |       |        |          |          |    |    |
|----------------|-------|--------|----------|----------|----|----|
| BEAN1          | 69,88 | 0,45   | 1,26527  | 0,352301 | NA | NA |
| BEND6          | 94,04 | -1,07  | 0,709484 | -1,50694 | NA | NA |
| BEND7          | 75,72 | -6,44  | 1,792974 | -3,59143 | NA | NA |
| BEX2           | 25,91 | -0,67  | 2,023215 | -0,33312 | NA | NA |
| BFSP2          | 1,24  | -5,15  | 3,647015 | -1,41131 | NA | NA |
| BHMT2          | 11,59 | -4,02  | 0,965987 | -4,16389 | NA | NA |
| BICC1          | 26,74 | -1,86  | 0,934744 | -1,98763 | NA | NA |
| BLOC1S5-TXNDC5 | 15,82 | -0,56  | 2,113159 | -0,26389 | NA | NA |
| bP-21264C1.1   | 1,79  | -1,43  | 3,272118 | -0,43589 | NA | NA |
| bP-2171C21.3   | 4,39  | -23,95 | 3,638315 | -6,5821  | NA | NA |
| bP-2189O9.3    | 4,50  | 1,01   | 2,448927 | 0,414156 | NA | NA |
| BPI            | 0,86  | -4,03  | 3,651061 | -1,10339 | NA | NA |
| BRPF3          | 44,93 | -1,58  | 1,295035 | -1,22025 | NA | NA |
| BTBD19         | 41,48 | -2,05  | 0,965824 | -2,1266  | NA | NA |
| BTG3-AS1       | 7,70  | 0,96   | 1,802498 | 0,533945 | NA | NA |
| BUB1           | 25,26 | -5,54  | 1,173578 | -4,71701 | NA | NA |
| BX322563.3     | 2,73  | -6,24  | 3,640062 | -1,71495 | NA | NA |
| BYSL           | 18,12 | -0,57  | 1,497664 | -0,38305 | NA | NA |
| C10orf10       | 11,55 | -0,80  | 1,559357 | -0,51155 | NA | NA |
| C10orf62       | 1,89  | -5,71  | 3,64213  | -1,56877 | NA | NA |
| C11orf95       | 10,71 | -1,44  | 2,025526 | -0,71078 | NA | NA |
| C14orf79       | 27,35 | -2,86  | 0,89351  | -3,19861 | NA | NA |
| C16orf45       | 15,24 | -1,29  | 1,541642 | -0,83832 | NA | NA |
| C17orf78       | 5,26  | -0,08  | 3,621065 | -0,0219  | NA | NA |
| C19orf68       | 4,35  | -5,72  | 2,359316 | -2,42323 | NA | NA |
| C1orf116       | 3,05  | -7,97  | 3,624008 | -2,19938 | NA | NA |
| C1orf180       | 6,69  | -0,79  | 1,006936 | -0,78078 | NA | NA |
| C1orf185       | 3,45  | -2,69  | 3,268225 | -0,82158 | NA | NA |
| C1orf194       | 0,50  | -3,03  | 3,665754 | -0,82662 | NA | NA |
| C1orf87        | 9,30  | -8,20  | 2,578842 | -3,18009 | NA | NA |
| C1QTNF7        | 1,32  | -3,28  | 2,612522 | -1,25446 | NA | NA |
| C1QTNF9        | 3,49  | -2,34  | 2,473083 | -0,94809 | NA | NA |
| C20orf195      | 0,52  | -3,81  | 3,65723  | -1,04103 | NA | NA |
| C21orf117      | 3,22  | -6,48  | 3,639373 | -1,78166 | NA | NA |
| C21orf128      | 0,73  | -4,12  | 3,653663 | -1,12804 | NA | NA |
| C21orf67       | 4,85  | -4,24  | 2,351617 | -1,80494 | NA | NA |
| C2orf44        | 11,97 | -4,98  | 1,98342  | -2,51247 | NA | NA |
| C2orf73        | 3,05  | -6,42  | 3,639834 | -1,76462 | NA | NA |
| C2orf81        | 57,98 | -1,44  | 1,688345 | -0,8529  | NA | NA |
| C3orf20        | 2,73  | -5,09  | 2,923365 | -1,74129 | NA | NA |
| C3orf65        | 43,14 | -1,12  | 0,73954  | -1,51219 | NA | NA |
| C3P1           | 2,58  | -6,00  | 3,640459 | -1,64778 | NA | NA |
| C4A            | 8,00  | 0,47   | 2,491181 | 0,189912 | NA | NA |
| C4B            | 3,84  | -0,92  | 2,366397 | -0,38734 | NA | NA |
| C4orf46        | 28,84 | -2,12  | 1,064591 | -1,98892 | NA | NA |
| C5orf30        | 30,32 | -1,48  | 1,416566 | -1,04821 | NA | NA |
| C5orf34        | 8,81  | 0,41   | 1,817367 | 0,227025 | NA | NA |
| C5orf63        | 68,07 | 2,08   | 1,381018 | 1,507882 | NA | NA |
| C6             | 4,02  | -23,76 | 3,638342 | -6,53119 | NA | NA |
| C6orf10        | 4,31  | -23,89 | 3,501289 | -6,82281 | NA | NA |

|                |         |        |          |          |    |    |
|----------------|---------|--------|----------|----------|----|----|
| C6orf3         | 5,02    | -2,49  | 2,315232 | -1,07496 | NA | NA |
| C6orf52        | 0,75    | -1,73  | 3,071256 | -0,56327 | NA | NA |
| C7             | 33,69   | -7,24  | 1,234962 | -5,86607 | NA | NA |
| C7orf55-LUC7L2 | 19,22   | -0,62  | 2,696804 | -0,23001 | NA | NA |
| C8B            | 1,24    | -5,04  | 3,644727 | -1,38148 | NA | NA |
| C8orf22        | 1,39    | -5,25  | 3,644081 | -1,44109 | NA | NA |
| C8orf46        | 2,47    | -5,28  | 1,950039 | -2,70742 | NA | NA |
| C9orf106       | 19,92   | -2,75  | 1,382131 | -1,98721 | NA | NA |
| C9orf24        | 6,24    | -5,09  | 2,970985 | -1,71419 | NA | NA |
| C9orf73        | 11,61   | -8,68  | 2,571347 | -3,37439 | NA | NA |
| CA10           | 6,50    | -4,43  | 3,620674 | -1,22268 | NA | NA |
| CA13           | 20,33   | -1,87  | 0,971579 | -1,92569 | NA | NA |
| CA8            | 13,62   | -7,86  | 2,149704 | -3,65551 | NA | NA |
| CABP7          | 3,74    | -5,72  | 2,791577 | -2,05053 | NA | NA |
| CACHD1         | 9,38    | -4,71  | 2,39001  | -1,97074 | NA | NA |
| CACNA1I        | 3,34    | -1,99  | 1,994236 | -0,99605 | NA | NA |
| CACNA2D2       | 9,08    | -4,93  | 2,822674 | -1,74553 | NA | NA |
| CACNG2         | 6,01    | -2,73  | 1,747465 | -1,56281 | NA | NA |
| CADM1          | 68,10   | -2,78  | 1,263584 | -2,20027 | NA | NA |
| CADPS          | 27,53   | -3,03  | 1,492247 | -2,03078 | NA | NA |
| CALB2          | 4,35    | -23,95 | 3,638451 | -6,5817  | NA | NA |
| CALCR          | 2,18    | -5,93  | 3,641235 | -1,62728 | NA | NA |
| CALML6         | 2,09    | -5,68  | 3,64132  | -1,55993 | NA | NA |
| CAMK2A         | 23,85   | -5,86  | 1,44386  | -4,05583 | NA | NA |
| CAMSAP2        | 41,25   | -3,10  | 1,284283 | -2,4129  | NA | NA |
| CAND2          | 5,23    | -3,92  | 2,834798 | -1,38451 | NA | NA |
| CASC22         | 1,57    | -5,45  | 3,643496 | -1,49452 | NA | NA |
| CATSPER3       | 2,70    | -5,33  | 2,798012 | -1,90646 | NA | NA |
| CBLN2          | 10,39   | -5,54  | 1,749791 | -3,16363 | NA | NA |
| CBLN4          | 9,22    | -25,04 | 3,636815 | -6,88455 | NA | NA |
| CBR3           | 1,94    | -4,30  | 2,911304 | -1,47669 | NA | NA |
| CBX5           | 1283,93 | -1,55  | 0,59834  | -2,5889  | NA | NA |
| CCDC103        | 6,59    | -5,28  | 2,693913 | -1,95916 | NA | NA |
| CCDC113        | 48,27   | -0,08  | 1,321573 | -0,05752 | NA | NA |
| CCDC121        | 9,31    | 1,13   | 1,956897 | 0,577873 | NA | NA |
| CCDC155        | 17,04   | -3,82  | 1,493542 | -2,55633 | NA | NA |
| CCDC163P       | 20,72   | -1,15  | 0,860515 | -1,33271 | NA | NA |
| CCDC190        | 0,83    | -3,98  | 3,30734  | -1,20443 | NA | NA |
| CCDC63         | 3,24    | -6,52  | 3,639731 | -1,79071 | NA | NA |
| CCDC65         | 42,29   | -4,65  | 3,60917  | -1,28926 | NA | NA |
| CCDC83         | 0,97    | -2,81  | 2,587026 | -1,08793 | NA | NA |
| CCL11          | 3,50    | -6,61  | 3,639052 | -1,81534 | NA | NA |
| CCNB1          | 15,02   | -1,98  | 1,645509 | -1,20436 | NA | NA |
| CCNB3          | 6,55    | -3,49  | 2,67968  | -1,30319 | NA | NA |
| CCND2-AS1      | 60,54   | -9,33  | 1,931767 | -4,82917 | NA | NA |
| CCR7           | 10,14   | -2,63  | 1,569385 | -1,67798 | NA | NA |
| CCT4P2         | 3,21    | -6,32  | 3,06432  | -2,06269 | NA | NA |
| CD109          | 169,77  | 2,36   | 0,649896 | 3,624799 | NA | NA |
| CD163L1        | 12,16   | -2,74  | 2,15274  | -1,27315 | NA | NA |
| CD19           | 29,11   | -1,04  | 1,831019 | -0,56721 | NA | NA |



|                |        |       |          |          |    |    |
|----------------|--------|-------|----------|----------|----|----|
| CD276          | 23,12  | -2,34 | 1,850552 | -1,26669 | NA | NA |
| CD320          | 22,37  | -2,06 | 0,988353 | -2,08599 | NA | NA |
| CD3G           | 47,31  | -2,44 | 1,062708 | -2,29379 | NA | NA |
| CDC14B         | 14,01  | -0,41 | 1,89092  | -0,21691 | NA | NA |
| CDC45          | 13,57  | -7,72 | 2,382205 | -3,24136 | NA | NA |
| CDH10          | 1,39   | -4,91 | 3,238558 | -1,51659 | NA | NA |
| CDH16          | 1,68   | -5,06 | 3,645207 | -1,38696 | NA | NA |
| CDH5           | 20,39  | -6,17 | 1,216774 | -5,07209 | NA | NA |
| CDK1           | 3,56   | -0,08 | 1,748586 | -0,04372 | NA | NA |
| CDK15          | 2,54   | -1,63 | 1,70725  | -0,95489 | NA | NA |
| CDKL3          | 19,46  | -1,09 | 0,960512 | -1,13286 | NA | NA |
| CDKL4          | 0,60   | -3,86 | 3,276015 | -1,17803 | NA | NA |
| CDKN2B-AS1     | 30,12  | -3,19 | 0,888161 | -3,59633 | NA | NA |
| CDKN2C         | 29,93  | -2,86 | 1,619868 | -1,76825 | NA | NA |
| CDNF           | 7,01   | -5,02 | 1,633355 | -3,07613 | NA | NA |
| CDYL2          | 66,24  | -4,15 | 1,765703 | -2,35071 | NA | NA |
| CEACAM20       | 0,79   | -4,46 | 3,651673 | -1,22165 | NA | NA |
| CEBPE          | 1,49   | -3,51 | 2,370364 | -1,47934 | NA | NA |
| CECR2          | 15,40  | -1,09 | 1,026236 | -1,06016 | NA | NA |
| CELA3B         | 7,92   | -1,90 | 1,138501 | -1,6705  | NA | NA |
| CELF6          | 78,85  | -1,83 | 1,496746 | -1,22286 | NA | NA |
| CELSR3         | 9,40   | -1,05 | 1,892294 | -0,55266 | NA | NA |
| CEMIP          | 32,70  | -1,96 | 1,941271 | -1,01084 | NA | NA |
| CENPL          | 61,42  | -0,12 | 0,968414 | -0,12645 | NA | NA |
| CENPP          | 80,86  | -2,13 | 1,549623 | -1,37453 | NA | NA |
| CENPQ          | 12,21  | -1,47 | 1,687085 | -0,87398 | NA | NA |
| CES4A          | 41,04  | -0,97 | 1,036138 | -0,93602 | NA | NA |
| CFAP157        | 3,63   | -0,59 | 1,637112 | -0,36192 | NA | NA |
| CFAP43         | 21,59  | -5,37 | 2,426463 | -2,21253 | NA | NA |
| CFAP46         | 0,72   | -4,24 | 3,650654 | -1,16263 | NA | NA |
| CFAP53         | 4,00   | -8,33 | 3,549725 | -2,34762 | NA | NA |
| CFAP61         | 4,75   | -1,57 | 2,581333 | -0,60989 | NA | NA |
| CFAP77         | 0,86   | -4,37 | 3,650165 | -1,1978  | NA | NA |
| CFHR2          | 8,51   | -9,61 | 3,349421 | -2,86802 | NA | NA |
| CFHR5          | 3,53   | -3,21 | 3,234428 | -0,99382 | NA | NA |
| CFL2           | 222,99 | 2,09  | 1,075828 | 1,939385 | NA | NA |
| CH17-125A10.2  | 8,53   | -1,61 | 1,456522 | -1,10594 | NA | NA |
| CH17-264B6.3   | 2,01   | -1,16 | 2,94606  | -0,39456 | NA | NA |
| CH17-296N19.1  | 1,06   | -4,88 | 3,647384 | -1,33695 | NA | NA |
| CH17-478G19.1  | 2,55   | -5,98 | 3,640479 | -1,64252 | NA | NA |
| CH17-78J1.1    | 1,99   | -5,61 | 3,642011 | -1,53938 | NA | NA |
| CH25H          | 15,14  | -1,61 | 2,605944 | -0,61836 | NA | NA |
| CH507-154B10.2 | 2,78   | -1,26 | 2,273172 | -0,55499 | NA | NA |
| CH507-216K13.2 | 4,59   | -1,02 | 1,70528  | -0,59964 | NA | NA |
| CH507-254M2.3  | 3,16   | -4,03 | 2,411414 | -1,67115 | NA | NA |
| CHCHD6         | 36,57  | -1,70 | 1,610739 | -1,05832 | NA | NA |
| CHDH           | 33,28  | -4,16 | 0,778338 | -5,33923 | NA | NA |
| CHRD           | 12,72  | -4,00 | 1,175131 | -3,40183 | NA | NA |
| CHRND          | 2,24   | -5,95 | 3,640926 | -1,6337  | NA | NA |
| CHST7          | 8,08   | -6,56 | 2,19875  | -2,98389 | NA | NA |

|               |        |       |          |          |    |    |
|---------------|--------|-------|----------|----------|----|----|
| CIART         | 8,34   | -3,46 | 1,078149 | -3,21363 | NA | NA |
| CIB2          | 3,10   | -3,28 | 1,989679 | -1,64661 | NA | NA |
| CITF22-92A6.2 | 8,44   | -2,69 | 0,79328  | -3,39632 | NA | NA |
| CKLF-CMTM1    | 16,97  | -0,34 | 1,079867 | -0,31135 | NA | NA |
| CKM           | 10,55  | -7,89 | 2,661156 | -2,96435 | NA | NA |
| CKMT2         | 1,59   | -5,45 | 3,643286 | -1,49691 | NA | NA |
| CLEC14A       | 2,86   | -5,97 | 3,640024 | -1,63986 | NA | NA |
| CLEC18B       | 8,17   | -5,33 | 2,196942 | -2,42599 | NA | NA |
| CLEC18C       | 0,93   | -4,45 | 3,647972 | -1,22051 | NA | NA |
| CLEC6A        | 15,71  | -0,50 | 1,914865 | -0,25934 | NA | NA |
| CLIC6         | 5,03   | -0,51 | 1,457697 | -0,34702 | NA | NA |
| CLIP3         | 40,77  | -8,70 | 2,226341 | -3,90668 | NA | NA |
| CLMP          | 51,59  | 1,28  | 1,050553 | 1,217769 | NA | NA |
| CLU           | 62,40  | -4,47 | 0,891953 | -5,01697 | NA | NA |
| CLUAP1        | 106,97 | 2,23  | 0,897488 | 2,479316 | NA | NA |
| CMB9-55A18.1  | 8,72   | -0,45 | 1,429178 | -0,31193 | NA | NA |
| CMB9-55F22.1  | 0,70   | -4,27 | 3,652745 | -1,16823 | NA | NA |
| CMB9-55F22.2  | 11,69  | -1,14 | 0,914484 | -1,24892 | NA | NA |
| CMYA5         | 4,97   | -6,27 | 2,17021  | -2,88869 | NA | NA |
| CNBD1         | 2,50   | -5,45 | 2,721381 | -2,00155 | NA | NA |
| CNGB3         | 5,59   | -1,47 | 1,912061 | -0,77129 | NA | NA |
| CNIH2         | 2,43   | -4,71 | 2,898106 | -1,62598 | NA | NA |
| CNN1          | 10,91  | -4,33 | 1,050552 | -4,12125 | NA | NA |
| CNNM2         | 82,41  | -1,71 | 0,942113 | -1,81898 | NA | NA |
| CNR1          | 6,91   | -9,93 | 3,408433 | -2,91267 | NA | NA |
| CNTF          | 21,85  | -6,86 | 3,623216 | -1,89264 | NA | NA |
| CNTN6         | 4,94   | -6,41 | 3,164594 | -2,0241  | NA | NA |
| CNTNAP4       | 1,14   | -1,31 | 3,2      | -0,41092 | NA | NA |
| CNTNAP5       | 15,01  | 0,43  | 1,232991 | 0,348254 | NA | NA |
| COBL          | 4,66   | -0,18 | 2,870927 | -0,06108 | NA | NA |
| COL11A1       | 9,76   | -0,08 | 2,486559 | -0,03332 | NA | NA |
| COL11A2       | 6,03   | -6,86 | 3,175632 | -2,16056 | NA | NA |
| COL16A1       | 3,88   | -3,07 | 1,586713 | -1,93369 | NA | NA |
| COL21A1       | 4,54   | 1,31  | 3,208426 | 0,407968 | NA | NA |
| COL22A1       | 39,28  | -8,79 | 3,632514 | -2,41965 | NA | NA |
| COL25A1       | 1,14   | -4,98 | 3,646501 | -1,36553 | NA | NA |
| COL4A2        | 1,45   | -2,78 | 3,076532 | -0,90219 | NA | NA |
| COL5A1        | 2,60   | -1,95 | 2,158471 | -0,90292 | NA | NA |
| COL6A6        | 29,35  | -1,69 | 1,860495 | -0,90694 | NA | NA |
| COL8A1        | 40,94  | -1,93 | 0,661644 | -2,91292 | NA | NA |
| COL8A2        | 65,10  | -1,45 | 1,190116 | -1,22091 | NA | NA |
| COLEC11       | 5,20   | -0,23 | 1,499812 | -0,15202 | NA | NA |
| COLGALT2      | 15,91  | -3,99 | 2,387969 | -1,66923 | NA | NA |
| COPG2         | 15,90  | -2,77 | 1,330824 | -2,07951 | NA | NA |
| COPZ2         | 5,59   | -5,83 | 3,333943 | -1,74777 | NA | NA |
| COQ3          | 10,27  | 0,52  | 1,507814 | 0,345134 | NA | NA |
| COX7A2P1      | 8,62   | -8,93 | 2,933055 | -3,04618 | NA | NA |
| COX7BP2       | 1,52   | -3,61 | 3,054355 | -1,18053 | NA | NA |
| CPA3          | 1,46   | -5,37 | 3,645698 | -1,47295 | NA | NA |
| CPNE5         | 40,89  | -5,28 | 1,176611 | -4,48643 | NA | NA |

|              |        |        |          |          |    |    |
|--------------|--------|--------|----------|----------|----|----|
| CR2          | 9,67   | -0,50  | 1,284791 | -0,38608 | NA | NA |
| CRB1         | 20,93  | -2,46  | 0,640535 | -3,84507 | NA | NA |
| CRMP1        | 2,60   | -5,98  | 3,069085 | -1,94923 | NA | NA |
| CRYAB        | 1,75   | -5,33  | 3,204125 | -1,66203 | NA | NA |
| CRYGN        | 1,91   | -5,24  | 3,180964 | -1,64864 | NA | NA |
| CRYGS        | 20,43  | -2,24  | 1,59882  | -1,39995 | NA | NA |
| CSDC2        | 5,30   | -1,08  | 1,34385  | -0,80071 | NA | NA |
| CSN1S2AP     | 0,59   | -4,04  | 3,656772 | -1,10392 | NA | NA |
| CSN2         | 2,45   | -6,09  | 3,640594 | -1,67305 | NA | NA |
| CSPG4        | 20,90  | -6,86  | 2,384713 | -2,87475 | NA | NA |
| CSRNP3       | 5,29   | -4,91  | 1,247185 | -3,93735 | NA | NA |
| CST6         | 1,52   | -5,40  | 3,643758 | -1,48165 | NA | NA |
| CT45A10      | 0,46   | -3,66  | 3,661488 | -0,99996 | NA | NA |
| CTA-14H9.6   | 1,12   | -4,95  | 3,646756 | -1,35862 | NA | NA |
| CTA-217C2.2  | 10,89  | -10,04 | 3,284545 | -3,0574  | NA | NA |
| CTA-21C21.1  | 0,49   | -3,77  | 3,661007 | -1,03102 | NA | NA |
| CTA-277P6.1  | 8,61   | -24,94 | 3,636912 | -6,85726 | NA | NA |
| CTA-326K9.1  | 4,11   | -23,87 | 3,638503 | -6,561   | NA | NA |
| CTA-363E19.2 | 10,80  | -5,00  | 2,132019 | -2,34365 | NA | NA |
| CTA-363E6.6  | 2,49   | -4,42  | 2,088796 | -2,11795 | NA | NA |
| CTA-384D8.20 | 1,69   | -2,69  | 2,807404 | -0,95721 | NA | NA |
| CTA-38K21.2  | 2,27   | -2,84  | 2,287715 | -1,2404  | NA | NA |
| CTA-390C10.9 | 12,30  | -25,43 | 3,21035  | -7,92277 | NA | NA |
| CTA-392C11.1 | 0,91   | -4,63  | 3,648438 | -1,26871 | NA | NA |
| CTA-407F11.6 | 46,51  | 0,06   | 0,998139 | 0,062852 | NA | NA |
| CTA-445C9.14 | 0,79   | -3,21  | 2,964544 | -1,08124 | NA | NA |
| CTA-992D9.10 | 8,40   | -3,13  | 0,853531 | -3,67091 | NA | NA |
| CTA-992D9.6  | 5,09   | -1,84  | 2,785691 | -0,65882 | NA | NA |
| CTA-992D9.9  | 1,66   | -2,08  | 2,560495 | -0,81293 | NA | NA |
| CTB-105L4.2  | 4,42   | -23,96 | 3,638307 | -6,58557 | NA | NA |
| CTB-111H14.1 | 5,82   | -2,91  | 1,77599  | -1,63591 | NA | NA |
| CTB-113P19.4 | 2,49   | -6,11  | 3,640512 | -1,67913 | NA | NA |
| CTB-114C7.3  | 5,02   | -2,55  | 2,249447 | -1,13232 | NA | NA |
| CTB-114C7.4  | 6,42   | 0,53   | 1,965017 | 0,270592 | NA | NA |
| CTB-127C13.1 | 108,91 | -2,80  | 0,78555  | -3,56788 | NA | NA |
| CTB-129P6.11 | 4,01   | -0,75  | 2,019709 | -0,37099 | NA | NA |
| CTB-133G6.1  | 23,84  | 0,14   | 1,888645 | 0,073638 | NA | NA |
| CTB-134F13.1 | 4,52   | -5,90  | 2,782367 | -2,12036 | NA | NA |
| CTB-161K23.1 | 2,21   | -3,20  | 3,589849 | -0,89104 | NA | NA |
| CTB-171A8.1  | 5,75   | -4,58  | 2,268742 | -2,01949 | NA | NA |
| CTB-175P5.4  | 18,50  | -2,03  | 0,838476 | -2,41936 | NA | NA |
| CTB-179K24.3 | 7,63   | -0,28  | 1,619797 | -0,17057 | NA | NA |
| CTB-2317.1   | 3,20   | -6,47  | 3,639409 | -1,77897 | NA | NA |
| CTB-28J9.2   | 7,34   | -8,65  | 2,95497  | -2,92734 | NA | NA |
| CTB-30L5.1   | 2,31   | -6,00  | 3,640875 | -1,64801 | NA | NA |
| CTB-36H16.2  | 14,83  | -6,54  | 2,308809 | -2,83423 | NA | NA |
| CTB-49A3.2   | 2,16   | -3,26  | 2,503637 | -1,30332 | NA | NA |
| CTB-4E7.1    | 8,78   | -24,92 | 3,63686  | -6,8519  | NA | NA |
| CTB-55O6.4   | 5,97   | -4,49  | 3,124316 | -1,43786 | NA | NA |
| CTB-55O6.8   | 8,10   | -1,97  | 2,577335 | -0,76594 | NA | NA |

|               |       |        |          |          |    |    |
|---------------|-------|--------|----------|----------|----|----|
| CTB-57H20.1   | 8,38  | -9,94  | 3,353509 | -2,96298 | NA | NA |
| CTB-58E17.1   | 6,97  | -0,70  | 0,991832 | -0,7096  | NA | NA |
| CTB-58E17.5   | 1,26  | -4,95  | 3,645758 | -1,35648 | NA | NA |
| CTB-73N10.1   | 5,98  | -24,41 | 3,637563 | -6,71171 | NA | NA |
| CTB-77H17.1   | 1,80  | -5,64  | 3,642377 | -1,54813 | NA | NA |
| CTB-83J4.1    | 6,26  | -3,08  | 2,998596 | -1,02815 | NA | NA |
| CTB-87J17.2   | 0,91  | -4,65  | 3,64939  | -1,27456 | NA | NA |
| CTB-88F18.4   | 2,93  | -6,35  | 3,639756 | -1,74386 | NA | NA |
| CTB-95D12.1   | 18,71 | -9,44  | 2,490069 | -3,78964 | NA | NA |
| CTC-1337H24.4 | 0,78  | -4,00  | 3,653094 | -1,09395 | NA | NA |
| CTC-205M6.1   | 7,11  | 0,77   | 2,903394 | 0,266438 | NA | NA |
| CTC-232P5.3   | 40,38 | -0,93  | 1,566383 | -0,59644 | NA | NA |
| CTC-236F12.4  | 2,40  | -2,87  | 3,628551 | -0,79194 | NA | NA |
| CTC-248O19.1  | 6,39  | -2,02  | 2,203423 | -0,916   | NA | NA |
| CTC-260E6.4   | 7,28  | -2,26  | 1,72446  | -1,31137 | NA | NA |
| CTC-269P20.1  | 7,66  | -24,68 | 3,637084 | -6,78519 | NA | NA |
| CTC-281F24.1  | 0,82  | -3,61  | 3,654598 | -0,9889  | NA | NA |
| CTC-293A9.2   | 1,42  | -5,13  | 3,644522 | -1,40672 | NA | NA |
| CTC-340D7.1   | 1,47  | -1,80  | 2,053106 | -0,87701 | NA | NA |
| CTC-340I23.2  | 1,44  | -5,32  | 3,644181 | -1,46028 | NA | NA |
| CTC-360G5.6   | 6,79  | -1,28  | 0,864866 | -1,48558 | NA | NA |
| CTC-360P9.3   | 0,91  | -4,66  | 3,649236 | -1,27625 | NA | NA |
| CTC-419K13.1  | 4,52  | -23,99 | 3,638241 | -6,59441 | NA | NA |
| CTC-428G20.5  | 9,00  | -1,48  | 0,633558 | -2,34334 | NA | NA |
| CTC-428G20.6  | 9,52  | -4,55  | 2,631689 | -1,72815 | NA | NA |
| CTC-432M15.3  | 4,11  | -4,97  | 3,633394 | -1,36835 | NA | NA |
| CTC-436K13.6  | 2,31  | -3,30  | 2,004606 | -1,64631 | NA | NA |
| CTC-436P18.1  | 2,08  | -1,56  | 3,630783 | -0,4287  | NA | NA |
| CTC-448F2.5   | 0,51  | -3,83  | 3,659966 | -1,04514 | NA | NA |
| CTC-448F2.6   | 6,49  | -6,33  | 2,719058 | -2,32668 | NA | NA |
| CTC-457E21.1  | 9,92  | -5,02  | 2,780361 | -1,80556 | NA | NA |
| CTC-458G6.2   | 1,70  | -0,90  | 1,618352 | -0,55557 | NA | NA |
| CTC-458I2.2   | 7,98  | -1,65  | 2,094428 | -0,78719 | NA | NA |
| CTC-459M5.1   | 3,57  | -1,78  | 2,198088 | -0,81079 | NA | NA |
| CTC-463N11.1  | 2,87  | -4,84  | 3,63878  | -1,32978 | NA | NA |
| CTC-471J1.11  | 1,28  | -3,17  | 2,654354 | -1,19291 | NA | NA |
| CTC-479C5.6   | 22,26 | -9,67  | 3,636015 | -2,65816 | NA | NA |
| CTC-484P3.3   | 1,96  | -5,39  | 3,642274 | -1,48115 | NA | NA |
| CTC-490G23.6  | 17,10 | -5,41  | 2,198196 | -2,45986 | NA | NA |
| CTC-497E21.5  | 3,69  | -23,61 | 3,638872 | -6,48818 | NA | NA |
| CTC-498M16.2  | 24,41 | -26,48 | 3,636236 | -7,28173 | NA | NA |
| CTC-499B15.7  | 15,36 | -1,77  | 1,411321 | -1,25184 | NA | NA |
| CTC-501O10.1  | 8,46  | -0,62  | 1,331243 | -0,46606 | NA | NA |
| CTC-512J12.7  | 0,64  | -3,91  | 3,656106 | -1,06852 | NA | NA |
| CTC-523E23.10 | 7,54  | -9,84  | 3,381387 | -2,90879 | NA | NA |
| CTC-529L17.1  | 6,78  | -0,05  | 1,787109 | -0,02989 | NA | NA |
| CTC-534A2.2   | 48,86 | -0,95  | 1,526069 | -0,62505 | NA | NA |
| CTC-534B23.1  | 6,80  | -23,83 | 3,637308 | -6,55094 | NA | NA |
| CTC-542B22.2  | 11,70 | -1,08  | 1,610748 | -0,67335 | NA | NA |
| CTC-546K23.1  | 0,66  | -4,21  | 3,654342 | -1,15143 | NA | NA |

|               |       |        |          |          |    |    |
|---------------|-------|--------|----------|----------|----|----|
| CTC-552D5.1   | 4,13  | -2,25  | 2,292009 | -0,98334 | NA | NA |
| CTC-756D1.1   | 1,84  | -5,67  | 3,642343 | -1,55763 | NA | NA |
| CTC-774J1.1   | 24,48 | -6,89  | 1,43747  | -4,79523 | NA | NA |
| CTC-782O7.1   | 1,52  | -5,11  | 2,715508 | -1,88337 | NA | NA |
| CTC-820M8.1   | 1,35  | -3,27  | 2,329363 | -1,4031  | NA | NA |
| CTD-2006C1.12 | 4,00  | -2,55  | 2,447728 | -1,04045 | NA | NA |
| CTD-2013N24.2 | 24,18 | -0,86  | 1,20365  | -0,71202 | NA | NA |
| CTD-2014B16.5 | 1,90  | -5,56  | 3,642148 | -1,52561 | NA | NA |
| CTD-2017F17.1 | 2,03  | -1,51  | 3,319208 | -0,45352 | NA | NA |
| CTD-2020K17.4 | 3,39  | -0,78  | 2,347447 | -0,33385 | NA | NA |
| CTD-2021H9.2  | 0,80  | -4,22  | 3,652446 | -1,1546  | NA | NA |
| CTD-2021J15.2 | 3,68  | -6,68  | 3,638889 | -1,83485 | NA | NA |
| CTD-2023N9.1  | 0,66  | -3,93  | 3,656085 | -1,07415 | NA | NA |
| CTD-2027I19.3 | 1,71  | -3,78  | 2,667975 | -1,41785 | NA | NA |
| CTD-2033C11.1 | 1,62  | -1,25  | 3,638868 | -0,34448 | NA | NA |
| CTD-2047H16.4 | 26,43 | -1,12  | 1,383992 | -0,80589 | NA | NA |
| CTD-2053J20.1 | 4,51  | -8,56  | 3,519252 | -2,43156 | NA | NA |
| CTD-2086L14.7 | 1,11  | -4,95  | 3,646766 | -1,35609 | NA | NA |
| CTD-2091N23.1 | 0,88  | -4,62  | 3,649728 | -1,26613 | NA | NA |
| CTD-2110K23.1 | 12,97 | -9,36  | 2,852033 | -3,28267 | NA | NA |
| CTD-2116N17.1 | 14,84 | -4,35  | 1,896294 | -2,29375 | NA | NA |
| CTD-2124B8.1  | 0,90  | -4,65  | 3,649353 | -1,27548 | NA | NA |
| CTD-2126E3.1  | 2,37  | -2,20  | 2,632052 | -0,83535 | NA | NA |
| CTD-2132H18.1 | 0,69  | -4,26  | 3,653683 | -1,16681 | NA | NA |
| CTD-2132N18.2 | 3,92  | -1,22  | 0,939709 | -1,30015 | NA | NA |
| CTD-2134P3.1  | 2,05  | -1,96  | 2,917678 | -0,67134 | NA | NA |
| CTD-2139B15.1 | 10,20 | -25,18 | 3,63668  | -6,92515 | NA | NA |
| CTD-2141G3.1  | 13,60 | -4,11  | 0,828203 | -4,95704 | NA | NA |
| CTD-2146O16.1 | 1,19  | -5,05  | 3,645907 | -1,38531 | NA | NA |
| CTD-2165H16.3 | 6,56  | -0,23  | 1,621594 | -0,14008 | NA | NA |
| CTD-2168K21.1 | 3,24  | -4,88  | 3,6372   | -1,34292 | NA | NA |
| CTD-2193P3.2  | 0,94  | -4,71  | 3,648859 | -1,28969 | NA | NA |
| CTD-2194D22.4 | 9,83  | -4,18  | 1,5354   | -2,72037 | NA | NA |
| CTD-2194F4.2  | 1,05  | -4,86  | 3,647448 | -1,33377 | NA | NA |
| CTD-2200A16.1 | 1,27  | -5,14  | 3,645328 | -1,40953 | NA | NA |
| CTD-2201E9.3  | 1,32  | -5,20  | 3,644977 | -1,42693 | NA | NA |
| CTD-2207L17.1 | 4,54  | -23,99 | 3,638184 | -6,59494 | NA | NA |
| CTD-2207L17.2 | 2,22  | -5,95  | 3,64112  | -1,634   | NA | NA |
| CTD-2210P15.2 | 1,34  | -5,21  | 3,644873 | -1,43017 | NA | NA |
| CTD-2213F21.2 | 45,64 | -1,16  | 1,504045 | -0,77047 | NA | NA |
| CTD-2227C6.3  | 3,59  | -6,64  | 3,638988 | -1,82575 | NA | NA |
| CTD-2228K2.7  | 2,45  | -3,86  | 2,45015  | -1,57411 | NA | NA |
| CTD-2234N14.1 | 1,12  | -4,99  | 3,648167 | -1,36781 | NA | NA |
| CTD-2248H3.1  | 3,90  | -6,59  | 3,564934 | -1,84977 | NA | NA |
| CTD-2254N19.1 | 1,07  | -4,18  | 3,649577 | -1,14474 | NA | NA |
| CTD-2275D10.2 | 14,41 | -5,14  | 3,506957 | -1,46548 | NA | NA |
| CTD-2286N8.2  | 1,55  | -3,62  | 3,01627  | -1,19946 | NA | NA |
| CTD-2287O16.5 | 8,76  | -1,79  | 2,437843 | -0,73566 | NA | NA |
| CTD-2291D10.2 | 6,32  | -7,74  | 3,012271 | -2,56986 | NA | NA |
| CTD-2307P3.1  | 6,84  | -24,61 | 3,637292 | -6,76495 | NA | NA |

|               |       |        |          |          |    |    |
|---------------|-------|--------|----------|----------|----|----|
| CTD-2313B8.1  | 18,42 | -25,87 | 3,636134 | -7,11521 | NA | NA |
| CTD-2313N18.7 | 0,92  | -4,05  | 3,650978 | -1,11039 | NA | NA |
| CTD-2314B22.1 | 3,68  | -6,71  | 3,639301 | -1,84425 | NA | NA |
| CTD-2320B12.1 | 9,96  | -8,84  | 2,514556 | -3,516   | NA | NA |
| CTD-2323K18.1 | 5,77  | -3,74  | 1,991457 | -1,87681 | NA | NA |
| CTD-2324A24.1 | 2,97  | -3,11  | 1,057185 | -2,93774 | NA | NA |
| CTD-2325A15.3 | 3,23  | -8,33  | 3,606998 | -2,30841 | NA | NA |
| CTD-2332E11.2 | 1,99  | -5,63  | 3,641885 | -1,54476 | NA | NA |
| CTD-2349B8.1  | 3,62  | -1,77  | 1,632601 | -1,08319 | NA | NA |
| CTD-2349P21.5 | 5,04  | -1,88  | 1,929051 | -0,97536 | NA | NA |
| CTD-2357A8.3  | 7,49  | -0,29  | 1,172848 | -0,247   | NA | NA |
| CTD-2358C21.5 | 4,09  | -5,38  | 2,896047 | -1,85729 | NA | NA |
| CTD-2363C16.1 | 1,25  | -2,12  | 2,770078 | -0,76534 | NA | NA |
| CTD-2366F13.2 | 3,41  | -4,98  | 3,393051 | -1,46635 | NA | NA |
| CTD-2382E5.4  | 14,87 | -0,47  | 0,935945 | -0,50205 | NA | NA |
| CTD-2383M3.1  | 32,38 | -8,09  | 3,630304 | -2,22782 | NA | NA |
| CTD-2396E7.7  | 1,20  | -5,06  | 3,645893 | -1,3885  | NA | NA |
| CTD-2396E7.8  | 0,83  | -4,54  | 3,650554 | -1,24258 | NA | NA |
| CTD-2501E16.1 | 0,93  | -4,68  | 3,648952 | -1,2834  | NA | NA |
| CTD-2506P8.6  | 5,13  | -24,09 | 3,637903 | -6,62189 | NA | NA |
| CTD-2514K5.2  | 4,62  | 0,39   | 2,175243 | 0,180589 | NA | NA |
| CTD-2515C13.1 | 1,84  | -5,67  | 3,642276 | -1,55772 | NA | NA |
| CTD-2515O10.5 | 0,94  | -4,30  | 3,650021 | -1,17745 | NA | NA |
| CTD-2517M22.9 | 9,03  | -1,50  | 1,593275 | -0,94303 | NA | NA |
| CTD-2522B17.8 | 3,38  | -6,55  | 3,639184 | -1,80043 | NA | NA |
| CTD-2525I3.2  | 2,01  | -1,70  | 2,117412 | -0,80392 | NA | NA |
| CTD-2525I3.8  | 6,89  | -24,61 | 3,63728  | -6,76592 | NA | NA |
| CTD-2530H12.2 | 1,24  | -5,10  | 3,645679 | -1,39943 | NA | NA |
| CTD-2530N21.5 | 4,53  | -3,34  | 1,841768 | -1,81303 | NA | NA |
| CTD-2538C1.2  | 4,71  | -3,00  | 2,062214 | -1,4542  | NA | NA |
| CTD-2541M15.3 | 2,71  | -6,23  | 3,640099 | -1,71234 | NA | NA |
| CTD-2544N14.3 | 1,96  | -1,88  | 3,263085 | -0,57686 | NA | NA |
| CTD-2545M3.6  | 1,81  | -3,02  | 3,134809 | -0,962   | NA | NA |
| CTD-2547E10.6 | 46,14 | -4,45  | 0,874448 | -5,09448 | NA | NA |
| CTD-2547H18.1 | 12,82 | -0,20  | 1,72087  | -0,11704 | NA | NA |
| CTD-2555A7.3  | 1,72  | -5,40  | 3,642929 | -1,48331 | NA | NA |
| CTD-2560K21.6 | 2,00  | -5,80  | 3,641763 | -1,59267 | NA | NA |
| CTD-2566J3.1  | 2,03  | -4,38  | 3,641576 | -1,20301 | NA | NA |
| CTD-2607J13.1 | 3,85  | -7,48  | 3,071157 | -2,43487 | NA | NA |
| CTD-2611K5.6  | 2,32  | -4,05  | 2,086362 | -1,94168 | NA | NA |
| CTD-2613O8.1  | 5,94  | -24,41 | 3,63758  | -6,70952 | NA | NA |
| CTD-2616J11.3 | 1,06  | -4,88  | 3,64735  | -1,33797 | NA | NA |
| CTD-2621I17.3 | 3,87  | -5,22  | 2,604248 | -2,00362 | NA | NA |
| CTD-2623N2.3  | 15,93 | -0,43  | 1,469832 | -0,29021 | NA | NA |
| CTD-2649C14.3 | 1,75  | -5,61  | 3,642643 | -1,53899 | NA | NA |
| CTD-2650P22.1 | 6,14  | -1,26  | 1,935505 | -0,65247 | NA | NA |
| CTD-2653M23.3 | 1,17  | -5,02  | 3,646236 | -1,37703 | NA | NA |
| CTD-2655K5.1  | 1,09  | -3,45  | 3,430822 | -1,00651 | NA | NA |
| CTD-2659N19.9 | 8,51  | -0,81  | 2,653986 | -0,30679 | NA | NA |
| CTD-3025N20.2 | 7,73  | -2,05  | 0,953898 | -2,15236 | NA | NA |

|                |        |        |          |          |    |    |
|----------------|--------|--------|----------|----------|----|----|
| CTD-3035K23.6  | 6,89   | -7,00  | 2,150434 | -3,25489 | NA | NA |
| CTD-3064H18.6  | 9,14   | 0,14   | 1,496526 | 0,090252 | NA | NA |
| CTD-3064M3.4   | 5,38   | -2,91  | 1,111533 | -2,6182  | NA | NA |
| CTD-3065J16.9  | 7,57   | -1,55  | 2,643649 | -0,58455 | NA | NA |
| CTD-3107M8.4   | 6,09   | -24,41 | 3,368731 | -7,24491 | NA | NA |
| CTD-3113P16.11 | 22,66  | -2,69  | 1,247615 | -2,15629 | NA | NA |
| CTD-3138B18.4  | 29,32  | -6,35  | 3,61593  | -1,75476 | NA | NA |
| CTD-3145H4.1   | 1,58   | -4,18  | 3,379142 | -1,23818 | NA | NA |
| CTD-3187F8.11  | 2,21   | -5,07  | 1,758181 | -2,88624 | NA | NA |
| CTD-3203P2.3   | 1,81   | -3,97  | 3,015336 | -1,31737 | NA | NA |
| CTD-3214H19.16 | 15,97  | -25,84 | 3,636235 | -7,10543 | NA | NA |
| CTD-3220F14.1  | 2,23   | -1,85  | 2,094681 | -0,88499 | NA | NA |
| CTD-3234P18.6  | 1,83   | -3,73  | 1,712023 | -2,17926 | NA | NA |
| CTNNAL1        | 6,42   | -5,04  | 2,245913 | -2,24529 | NA | NA |
| CTSG           | 3,58   | -6,47  | 3,588059 | -1,80252 | NA | NA |
| CUBN           | 100,04 | 1,62   | 1,270835 | 1,27214  | NA | NA |
| CXCL10         | 10,46  | -5,94  | 1,617134 | -3,67196 | NA | NA |
| CXCL12         | 2,19   | -5,97  | 3,642787 | -1,63844 | NA | NA |
| CXCL17         | 5,44   | -3,20  | 3,617307 | -0,88449 | NA | NA |
| CXCL3          | 10,66  | -0,43  | 1,784616 | -0,24051 | NA | NA |
| CXCR6          | 8,80   | -7,77  | 2,40718  | -3,22888 | NA | NA |
| CXorf24        | 6,40   | -1,66  | 2,647008 | -0,62572 | NA | NA |
| CXorf46        | 2,94   | -6,35  | 3,6397   | -1,74448 | NA | NA |
| CXorf51B       | 1,65   | -5,52  | 3,643092 | -1,51503 | NA | NA |
| CYGB           | 1,95   | -4,00  | 3,024463 | -1,32238 | NA | NA |
| CYP19A1        | 24,36  | -11,97 | 3,63609  | -3,29279 | NA | NA |
| CYP26C1        | 4,76   | -5,43  | 3,261203 | -1,66355 | NA | NA |
| CYP2E1         | 29,34  | -0,97  | 1,175821 | -0,82422 | NA | NA |
| CYP2F1P        | 2,19   | -1,71  | 3,32704  | -0,51386 | NA | NA |
| CYP2T2P        | 14,13  | -0,59  | 1,435293 | -0,40845 | NA | NA |
| CYP4F12        | 2,69   | -1,63  | 2,051934 | -0,79571 | NA | NA |
| DAAM2          | 6,86   | 0,62   | 1,403296 | 0,440562 | NA | NA |
| DACT2          | 1,93   | -5,73  | 3,641738 | -1,574   | NA | NA |
| DAGLA          | 4,09   | -2,64  | 2,712781 | -0,97406 | NA | NA |
| DAO            | 7,12   | 0,35   | 3,618884 | 0,095471 | NA | NA |
| DBNDD1         | 5,54   | -4,76  | 2,053438 | -2,32018 | NA | NA |
| DCAF8L2        | 11,30  | -2,63  | 3,438164 | -0,76419 | NA | NA |
| DCANP1         | 56,42  | -0,65  | 1,612253 | -0,40539 | NA | NA |
| DCLK2          | 13,02  | -2,68  | 1,483565 | -1,80609 | NA | NA |
| DCLRE1B        | 25,28  | 1,39   | 1,573883 | 0,883988 | NA | NA |
| DCST1          | 7,87   | -6,90  | 1,98156  | -3,48055 | NA | NA |
| DCST2          | 6,56   | -6,87  | 3,067023 | -2,24132 | NA | NA |
| DCT            | 1,30   | -5,11  | 3,643632 | -1,40289 | NA | NA |
| DDAH1          | 0,93   | -3,30  | 3,05349  | -1,08012 | NA | NA |
| DDTL           | 8,78   | -0,60  | 1,581154 | -0,37803 | NA | NA |
| DDX11L10       | 17,80  | -8,31  | 3,526323 | -2,35692 | NA | NA |
| DDX11L9        | 5,26   | -5,38  | 1,538945 | -3,49883 | NA | NA |
| DDX25          | 35,16  | -3,89  | 0,782922 | -4,9685  | NA | NA |
| DDX3Y          | 75,82  | -7,62  | 1,505011 | -5,06121 | NA | NA |
| DEFB115        | 1,22   | -5,09  | 3,645726 | -1,39531 | NA | NA |

|         |        |        |          |          |    |    |
|---------|--------|--------|----------|----------|----|----|
| DEFB122 | 0,65   | -3,94  | 3,656083 | -1,07767 | NA | NA |
| DEFB132 | 1,18   | -4,82  | 3,646713 | -1,3211  | NA | NA |
| DFNA5   | 21,91  | -1,49  | 1,898606 | -0,78333 | NA | NA |
| DFNB31  | 85,59  | -2,74  | 1,679548 | -1,63264 | NA | NA |
| DGAT2   | 62,36  | -1,25  | 1,061036 | -1,18048 | NA | NA |
| DHFR    | 37,92  | 0,16   | 0,91643  | 0,172736 | NA | NA |
| DHRS11  | 37,32  | -1,36  | 1,381707 | -0,98396 | NA | NA |
| DIEXF   | 81,77  | -1,36  | 0,954225 | -1,42747 | NA | NA |
| DISP1   | 8,86   | -2,58  | 1,212103 | -2,12452 | NA | NA |
| DLC1    | 30,02  | -3,01  | 1,09148  | -2,759   | NA | NA |
| DLEU2L  | 21,11  | -2,63  | 2,261966 | -1,1609  | NA | NA |
| DLEU7   | 12,63  | -4,13  | 2,727708 | -1,51254 | NA | NA |
| DLG2    | 4,64   | -6,24  | 1,973762 | -3,15995 | NA | NA |
| DLG3    | 43,18  | -7,76  | 2,901356 | -2,67465 | NA | NA |
| DLG5    | 56,65  | -6,33  | 1,439003 | -4,40071 | NA | NA |
| DLGAP2  | 15,40  | -25,85 | 2,699314 | -9,57535 | NA | NA |
| DLX2    | 3,24   | -6,50  | 2,947842 | -2,20346 | NA | NA |
| DNAH10  | 15,37  | -1,76  | 1,772984 | -0,99471 | NA | NA |
| DNAJC18 | 40,73  | -2,46  | 1,035461 | -2,37853 | NA | NA |
| DNAJC22 | 14,85  | -2,45  | 0,671321 | -3,64729 | NA | NA |
| DNAJC27 | 100,14 | -0,33  | 1,246699 | -0,26621 | NA | NA |
| DNAJC5G | 1,55   | -3,78  | 2,984834 | -1,26774 | NA | NA |
| DNM3    | 14,20  | -1,64  | 1,755824 | -0,93486 | NA | NA |
| DNM3OS  | 16,61  | -2,53  | 0,93243  | -2,71641 | NA | NA |
| DNTT    | 5,39   | -24,26 | 3,637792 | -6,66972 | NA | NA |
| DOCK9   | 30,48  | -3,30  | 1,231316 | -2,68242 | NA | NA |
| DPCR1   | 3,15   | -6,35  | 3,022265 | -2,101   | NA | NA |
| DPF3    | 35,36  | -5,23  | 2,07405  | -2,52146 | NA | NA |
| DPP10   | 20,12  | -1,72  | 1,226531 | -1,39849 | NA | NA |
| DPP4    | 5,46   | -2,41  | 1,441485 | -1,66929 | NA | NA |
| DPP6    | 67,93  | -4,05  | 0,794165 | -5,09498 | NA | NA |
| DPPA2   | 3,24   | -3,00  | 3,292875 | -0,90999 | NA | NA |
| DPY19L2 | 2,76   | -1,80  | 2,235658 | -0,80299 | NA | NA |
| DPY19L4 | 272,43 | -0,86  | 1,148337 | -0,75298 | NA | NA |
| DSC2    | 14,05  | -0,66  | 1,147208 | -0,57489 | NA | NA |
| DSC3    | 6,99   | -2,23  | 1,21692  | -1,83629 | NA | NA |
| DSCAML1 | 1,75   | -5,38  | 3,641692 | -1,47808 | NA | NA |
| DSCR4   | 5,75   | -8,26  | 3,002767 | -2,75052 | NA | NA |
| DTL     | 7,98   | -6,19  | 2,044357 | -3,02956 | NA | NA |
| DTNB    | 15,14  | -0,18  | 1,51193  | -0,11652 | NA | NA |
| DUSP13  | 15,74  | -6,33  | 3,623349 | -1,74711 | NA | NA |
| DUSP27  | 2,57   | -5,25  | 3,6411   | -1,44227 | NA | NA |
| DUSP8   | 3,56   | -6,31  | 2,663831 | -2,36771 | NA | NA |
| DUX4L35 | 1,55   | -5,43  | 3,643594 | -1,49007 | NA | NA |
| DUX4L37 | 4,70   | -2,77  | 1,973659 | -1,40113 | NA | NA |
| DUXA    | 12,56  | -5,41  | 1,986515 | -2,72092 | NA | NA |
| DUXAP2  | 12,91  | -25,51 | 3,636424 | -7,01545 | NA | NA |
| DUXAP9  | 21,88  | 0,30   | 1,815781 | 0,163322 | NA | NA |
| E2F2    | 81,32  | -1,08  | 1,062091 | -1,02156 | NA | NA |
| EBI3    | 12,87  | -4,37  | 2,282431 | -1,91602 | NA | NA |



|           |        |        |          |          |    |    |
|-----------|--------|--------|----------|----------|----|----|
| ECE1      | 140,98 | -3,31  | 1,49334  | -2,21403 | NA | NA |
| ECHDC3    | 43,52  | -2,01  | 1,559922 | -1,28684 | NA | NA |
| EDA2R     | 4,17   | -2,94  | 2,221522 | -1,32457 | NA | NA |
| EDAR      | 4,01   | -8,87  | 3,550378 | -2,49874 | NA | NA |
| EDIL3     | 4,13   | -5,62  | 2,91754  | -1,92628 | NA | NA |
| EDNRA     | 12,90  | -25,52 | 3,636425 | -7,01923 | NA | NA |
| EEF1A1P38 | 3,86   | -5,60  | 1,549056 | -3,61755 | NA | NA |
| EFCAB10   | 21,68  | -2,02  | 1,265539 | -1,5965  | NA | NA |
| EFCAB4A   | 2,85   | -5,44  | 2,198194 | -2,47504 | NA | NA |
| EFHC2     | 8,09   | -2,08  | 1,313707 | -1,58596 | NA | NA |
| EFNA5     | 55,25  | -6,36  | 0,998254 | -6,36818 | NA | NA |
| EFNB2     | 9,04   | -24,99 | 3,636847 | -6,87034 | NA | NA |
| EGFEM1P   | 30,13  | -5,09  | 1,296253 | -3,92362 | NA | NA |
| EGLN3     | 20,71  | -1,66  | 1,59803  | -1,03938 | NA | NA |
| EID2      | 16,67  | -0,46  | 1,063766 | -0,42844 | NA | NA |
| EIF1AP1   | 4,16   | -1,81  | 3,001516 | -0,60342 | NA | NA |
| EIF1AY    | 14,62  | -3,19  | 0,621826 | -5,1306  | NA | NA |
| EIF5A2    | 27,25  | -4,35  | 1,040555 | -4,17944 | NA | NA |
| ELAVL3    | 3,94   | -3,09  | 1,424815 | -2,17003 | NA | NA |
| ELOVL3    | 5,43   | -8,78  | 3,47542  | -2,52697 | NA | NA |
| ELOVL7    | 8,28   | -2,61  | 1,255621 | -2,07978 | NA | NA |
| EMID1     | 0,83   | -4,54  | 3,651664 | -1,24335 | NA | NA |
| EMILIN1   | 1,03   | -3,51  | 3,394417 | -1,03434 | NA | NA |
| EML2      | 12,57  | -1,61  | 0,895953 | -1,80074 | NA | NA |
| EML5      | 3,49   | -1,66  | 2,545908 | -0,65126 | NA | NA |
| EML6      | 44,35  | 0,08   | 0,757876 | 0,11052  | NA | NA |
| ENKD1     | 6,73   | -0,01  | 1,813858 | -0,00571 | NA | NA |
| ENO4      | 7,86   | -2,88  | 2,38129  | -1,21095 | NA | NA |
| ENPEP     | 12,27  | -8,19  | 2,47337  | -3,31111 | NA | NA |
| ENPP2     | 15,45  | 1,09   | 1,455195 | 0,74881  | NA | NA |
| ENPP3     | 6,80   | -0,14  | 1,51307  | -0,09479 | NA | NA |
| ENPP7P2   | 2,13   | -5,56  | 3,168615 | -1,75442 | NA | NA |
| ENTPD3    | 6,95   | -6,65  | 1,97085  | -3,3767  | NA | NA |
| EPB41L4A  | 29,79  | -2,60  | 1,07175  | -2,42501 | NA | NA |
| EPB41L5   | 47,74  | -5,86  | 3,010099 | -1,94663 | NA | NA |
| EPCAM     | 3,19   | -4,14  | 2,197345 | -1,88221 | NA | NA |
| EPHA10    | 2,67   | -0,45  | 1,343888 | -0,3371  | NA | NA |
| EPHA5     | 9,15   | -1,20  | 1,601799 | -0,74865 | NA | NA |
| EPHA6     | 3,67   | -1,85  | 2,286489 | -0,80787 | NA | NA |
| EPHA7     | 4,53   | -6,99  | 3,484626 | -2,00568 | NA | NA |
| EPHX1     | 8,89   | -3,17  | 2,187882 | -1,44898 | NA | NA |
| EPO       | 2,13   | -5,89  | 3,641383 | -1,61822 | NA | NA |
| EPS8L1    | 6,11   | -3,83  | 3,218679 | -1,1913  | NA | NA |
| EPS8L3    | 26,92  | -30,36 | 3,635997 | -8,34923 | NA | NA |
| ERBB4     | 10,00  | -6,23  | 1,456384 | -4,27541 | NA | NA |
| ESCO2     | 115,92 | -3,08  | 0,951326 | -3,23677 | NA | NA |
| ESR2      | 28,75  | -2,78  | 0,939322 | -2,95834 | NA | NA |
| ESRP2     | 7,38   | -1,00  | 1,154248 | -0,86378 | NA | NA |
| ESRRB     | 3,47   | -5,75  | 2,727941 | -2,106   | NA | NA |
| ESRRG     | 9,46   | -1,78  | 1,490833 | -1,19531 | NA | NA |

|          |        |        |          |          |    |    |
|----------|--------|--------|----------|----------|----|----|
| ETF1P2   | 11,76  | -2,35  | 1,035324 | -2,26583 | NA | NA |
| ETS1     | 51,40  | -1,54  | 0,677636 | -2,27358 | NA | NA |
| EVA1A    | 5,69   | -7,30  | 3,404111 | -2,14312 | NA | NA |
| EXO1     | 2,11   | -1,61  | 2,026102 | -0,79501 | NA | NA |
| EXO5     | 14,27  | -0,60  | 1,151061 | -0,51896 | NA | NA |
| EXOC5    | 410,72 | -0,77  | 0,710191 | -1,08461 | NA | NA |
| EXTL1    | 2,97   | -6,42  | 3,64124  | -1,7641  | NA | NA |
| EYA2     | 8,37   | -7,21  | 2,656018 | -2,71382 | NA | NA |
| F10      | 4,73   | -24,07 | 3,63794  | -6,61746 | NA | NA |
| F2R      | 11,17  | -3,59  | 1,139539 | -3,14738 | NA | NA |
| F7       | 2,14   | -5,19  | 3,642214 | -1,42455 | NA | NA |
| FADS2P1  | 2,40   | -3,11  | 3,629818 | -0,8579  | NA | NA |
| FAIM     | 68,75  | -1,98  | 1,005057 | -1,9705  | NA | NA |
| FAM108C1 | 15,38  | 1,13   | 1,341273 | 0,8437   | NA | NA |
| FAM109B  | 24,89  | -0,41  | 1,47585  | -0,27989 | NA | NA |
| FAM131B  | 1,01   | -2,87  | 2,986868 | -0,96071 | NA | NA |
| FAM135B  | 5,51   | -2,45  | 1,606086 | -1,52235 | NA | NA |
| FAM187A  | 1,69   | -2,20  | 3,635418 | -0,60613 | NA | NA |
| FAM189A2 | 2,01   | -1,66  | 1,821943 | -0,91197 | NA | NA |
| FAM196B  | 20,07  | -3,23  | 1,847099 | -1,74928 | NA | NA |
| FAM197Y2 | 0,46   | -3,67  | 3,66293  | -1,00215 | NA | NA |
| FAM21EP  | 4,35   | -2,87  | 1,582109 | -1,81575 | NA | NA |
| FAM27E3  | 4,05   | 0,58   | 2,05827  | 0,281522 | NA | NA |
| FAM3D    | 1,12   | -4,64  | 3,64658  | -1,27217 | NA | NA |
| FAM45B   | 3,32   | -4,44  | 1,793991 | -2,47434 | NA | NA |
| FAM46D   | 1,25   | -4,93  | 3,645868 | -1,35148 | NA | NA |
| FAM47B   | 1,35   | -5,23  | 3,644844 | -1,43397 | NA | NA |
| FAM53A   | 4,89   | -6,18  | 2,709913 | -2,28053 | NA | NA |
| FAM57A   | 2,59   | -1,07  | 2,115738 | -0,50388 | NA | NA |
| FAM66C   | 47,83  | -4,76  | 1,140769 | -4,17491 | NA | NA |
| FAM72D   | 3,22   | -1,23  | 3,028946 | -0,40711 | NA | NA |
| FAM74A4  | 2,34   | -1,89  | 2,913905 | -0,64776 | NA | NA |
| FAM81B   | 20,63  | -7,56  | 2,269747 | -3,33    | NA | NA |
| FAM83B   | 2,63   | -6,19  | 3,640233 | -1,70167 | NA | NA |
| FAM83H   | 7,67   | -0,98  | 1,539371 | -0,63384 | NA | NA |
| FAM86C1  | 6,50   | -0,85  | 1,95835  | -0,43278 | NA | NA |
| FAM86EP  | 8,41   | -2,33  | 3,122747 | -0,74691 | NA | NA |
| FAM89A   | 4,25   | 0,20   | 2,642561 | 0,074915 | NA | NA |
| FAM9C    | 9,82   | -0,90  | 1,155184 | -0,78139 | NA | NA |
| FANCF    | 29,89  | -2,93  | 1,023999 | -2,86117 | NA | NA |
| FATE1    | 0,94   | -4,69  | 3,648285 | -1,28616 | NA | NA |
| FBN2     | 33,48  | -0,40  | 1,71581  | -0,23532 | NA | NA |
| FBP2     | 8,73   | -24,96 | 3,636896 | -6,86348 | NA | NA |
| FBXL13   | 6,43   | -2,60  | 2,569033 | -1,01135 | NA | NA |
| FBXL14   | 8,99   | -2,78  | 3,069656 | -0,90563 | NA | NA |
| FBXO2    | 22,03  | -1,28  | 1,361599 | -0,93885 | NA | NA |
| FBXO24   | 19,09  | -0,17  | 1,101647 | -0,15297 | NA | NA |
| FBXO32   | 84,05  | 0,31   | 1,693563 | 0,180916 | NA | NA |
| FBXO36   | 17,75  | -2,18  | 1,04123  | -2,09346 | NA | NA |
| FBXO47   | 7,08   | -7,62  | 2,342294 | -3,25454 | NA | NA |

|           |        |        |          |          |    |    |
|-----------|--------|--------|----------|----------|----|----|
| FBXW4P1   | 25,92  | 0,52   | 1,698332 | 0,309052 | NA | NA |
| FCMR      | 39,04  | -0,46  | 1,404228 | -0,32637 | NA | NA |
| FENDRR    | 18,43  | -3,25  | 1,765888 | -1,84139 | NA | NA |
| FEZF1     | 0,92   | -4,68  | 3,649202 | -1,28111 | NA | NA |
| FFAR1     | 2,35   | -0,80  | 1,364823 | -0,58495 | NA | NA |
| FGD5      | 3,51   | -1,53  | 1,248753 | -1,22476 | NA | NA |
| FGF12     | 10,33  | -0,24  | 1,249552 | -0,19407 | NA | NA |
| FGF14     | 5,51   | -8,72  | 2,558845 | -3,40919 | NA | NA |
| FGF9      | 13,11  | 0,10   | 1,403628 | 0,068053 | NA | NA |
| FGFR3     | 1,37   | -2,34  | 1,211486 | -1,92786 | NA | NA |
| FIBCD1    | 0,72   | -3,97  | 3,652804 | -1,08775 | NA | NA |
| FICD      | 25,77  | -3,45  | 1,236141 | -2,79217 | NA | NA |
| FIGF      | 1,57   | -5,47  | 3,644327 | -1,50153 | NA | NA |
| FIGN      | 8,95   | 0,39   | 2,456697 | 0,158312 | NA | NA |
| FJX1      | 0,97   | -4,75  | 3,648515 | -1,30152 | NA | NA |
| FKBP4     | 115,10 | -1,14  | 1,080286 | -1,05183 | NA | NA |
| FMO2      | 32,57  | -27,75 | 3,635925 | -7,63142 | NA | NA |
| FMO8P     | 1,91   | -5,73  | 3,642057 | -1,57385 | NA | NA |
| FMO9P     | 1,35   | -5,23  | 3,644752 | -1,43612 | NA | NA |
| FNBP1L    | 17,41  | -1,69  | 1,562205 | -1,08498 | NA | NA |
| FOXC2     | 3,72   | -23,73 | 3,638838 | -6,52202 | NA | NA |
| FOXD4L4   | 0,83   | -4,53  | 3,650681 | -1,23967 | NA | NA |
| FOXD4L5   | 13,60  | -3,99  | 2,757485 | -1,44684 | NA | NA |
| FOXG1     | 6,38   | -3,27  | 2,4738   | -1,32123 | NA | NA |
| FOXN3-AS1 | 6,38   | -2,40  | 2,221685 | -1,08189 | NA | NA |
| FOXO3B    | 4,35   | -23,93 | 3,638344 | -6,57769 | NA | NA |
| FOXP2     | 86,93  | 0,83   | 1,163458 | 0,716421 | NA | NA |
| FREM2     | 13,46  | -6,28  | 1,38208  | -4,54437 | NA | NA |
| FRMD3     | 31,47  | -3,94  | 1,401431 | -2,80887 | NA | NA |
| FRMPD2    | 7,63   | -0,28  | 1,787164 | -0,15942 | NA | NA |
| FRMPD4    | 12,76  | -3,08  | 2,824185 | -1,08991 | NA | NA |
| FRZB      | 0,78   | -3,92  | 3,654423 | -1,07171 | NA | NA |
| FSBP      | 6,54   | -24,51 | 3,637299 | -6,73907 | NA | NA |
| FSCN3     | 9,31   | -4,74  | 3,091399 | -1,5317  | NA | NA |
| FSD1L     | 92,87  | -1,98  | 1,137673 | -1,73975 | NA | NA |
| FSD2      | 6,97   | 0,31   | 1,175255 | 0,265642 | NA | NA |
| FSTL1     | 4,19   | -4,49  | 1,979132 | -2,27044 | NA | NA |
| FSTL5     | 1,79   | -5,44  | 3,146556 | -1,72901 | NA | NA |
| FTHL11    | 5,72   | -4,83  | 1,50533  | -3,21013 | NA | NA |
| FTO       | 364,95 | -0,23  | 0,537328 | -0,43379 | NA | NA |
| FUZ       | 10,72  | -1,95  | 1,389549 | -1,40443 | NA | NA |
| FXYD2     | 18,61  | -3,60  | 2,139832 | -1,68343 | NA | NA |
| FZD6      | 18,18  | -3,64  | 1,866716 | -1,94823 | NA | NA |
| GAB1      | 86,90  | -0,85  | 1,015805 | -0,84139 | NA | NA |
| GAB4      | 10,79  | -8,15  | 2,504377 | -3,25594 | NA | NA |
| GABRA6    | 7,28   | -6,38  | 2,742849 | -2,32541 | NA | NA |
| GABRB2    | 7,50   | -3,14  | 3,32756  | -0,9441  | NA | NA |
| GABRR3    | 5,30   | -1,30  | 1,872162 | -0,69616 | NA | NA |
| GAL3ST2   | 0,74   | -3,90  | 3,654494 | -1,06765 | NA | NA |
| GAL3ST4   | 7,70   | -3,32  | 1,393193 | -2,38581 | NA | NA |

|             |        |        |          |          |    |    |
|-------------|--------|--------|----------|----------|----|----|
| GALNT14     | 4,53   | -4,89  | 2,915373 | -1,67849 | NA | NA |
| GALNT16     | 71,99  | -3,79  | 0,775114 | -4,88572 | NA | NA |
| GARNL3      | 116,51 | -3,28  | 1,31382  | -2,49664 | NA | NA |
| GAS8        | 19,17  | -2,72  | 1,82736  | -1,4887  | NA | NA |
| GATA4       | 1,50   | -5,31  | 3,643463 | -1,45669 | NA | NA |
| GATA6       | 1,01   | -4,59  | 3,648942 | -1,25827 | NA | NA |
| GCG         | 2,97   | -6,04  | 3,63989  | -1,65946 | NA | NA |
| GCGR        | 1,62   | -5,53  | 3,645301 | -1,51672 | NA | NA |
| GCNA        | 20,33  | 1,32   | 1,433575 | 0,918546 | NA | NA |
| GCNT3       | 134,57 | -4,51  | 0,871079 | -5,17251 | NA | NA |
| GCOM1       | 1,93   | -1,87  | 2,914447 | -0,64063 | NA | NA |
| GCSAM       | 5,40   | -2,85  | 1,395627 | -2,03965 | NA | NA |
| GCSAML      | 66,92  | -1,87  | 1,000162 | -1,86611 | NA | NA |
| GEMIN4      | 97,00  | -0,50  | 1,200446 | -0,41759 | NA | NA |
| GFI1        | 5,76   | -5,36  | 2,917281 | -1,83851 | NA | NA |
| GFRA1       | 34,20  | -8,43  | 1,785332 | -4,72008 | NA | NA |
| GGT5        | 24,33  | -0,93  | 1,021288 | -0,91402 | NA | NA |
| GJA8        | 1,34   | -4,81  | 3,215201 | -1,49609 | NA | NA |
| GJB6        | 2,23   | -2,99  | 3,176218 | -0,94072 | NA | NA |
| GLDN        | 54,63  | 0,25   | 1,513368 | 0,162062 | NA | NA |
| GLIS3       | 3,66   | -4,90  | 2,68787  | -1,82466 | NA | NA |
| GLS2        | 13,07  | -9,85  | 3,251918 | -3,02932 | NA | NA |
| GLT8D2      | 2,86   | -3,27  | 2,605104 | -1,25663 | NA | NA |
| GLTSCR2-AS1 | 3,47   | -6,13  | 3,639258 | -1,68506 | NA | NA |
| GLYATL1     | 21,68  | -5,55  | 1,866137 | -2,97583 | NA | NA |
| GLYCTK      | 99,67  | -2,24  | 1,171022 | -1,91619 | NA | NA |
| GNAZ        | 10,69  | -3,08  | 1,775798 | -1,73673 | NA | NA |
| GNG12       | 9,61   | -10,13 | 3,317004 | -3,05356 | NA | NA |
| GNPDA2      | 63,89  | -2,09  | 1,264256 | -1,65388 | NA | NA |
| GNRHR       | 5,00   | -4,93  | 2,699674 | -1,82731 | NA | NA |
| GOLGA8G     | 4,26   | -2,79  | 2,514889 | -1,10864 | NA | NA |
| GOLGA8O     | 2,24   | -1,01  | 1,894952 | -0,5308  | NA | NA |
| GOLGA8S     | 4,96   | -5,65  | 1,910823 | -2,95439 | NA | NA |
| GP1BB       | 35,07  | -9,80  | 1,854104 | -5,2843  | NA | NA |
| GP9         | 26,35  | -10,25 | 3,322055 | -3,0849  | NA | NA |
| GPA33       | 19,87  | -3,58  | 2,295418 | -1,5578  | NA | NA |
| GPAT2       | 5,74   | -0,12  | 2,884772 | -0,04073 | NA | NA |
| GPC4        | 7,72   | -24,67 | 3,637081 | -6,78217 | NA | NA |
| GPC6        | 10,96  | -10,17 | 3,285024 | -3,09531 | NA | NA |
| GPR1-AS     | 6,74   | -1,50  | 1,043658 | -1,44172 | NA | NA |
| GPR142      | 1,19   | -5,05  | 3,646007 | -1,38479 | NA | NA |
| GPR143      | 33,69  | -5,31  | 1,902817 | -2,79194 | NA | NA |
| GPR146      | 8,73   | -5,76  | 2,726778 | -2,11248 | NA | NA |
| GPR156      | 4,85   | -24,08 | 3,428916 | -7,02158 | NA | NA |
| GPR27       | 6,68   | 0,93   | 3,508161 | 0,26562  | NA | NA |
| GPR84       | 11,07  | -4,09  | 1,743722 | -2,3443  | NA | NA |
| GPRC5B      | 1,41   | -4,00  | 3,39018  | -1,17889 | NA | NA |
| GPRC6A      | 4,89   | -24,14 | 3,638042 | -6,63515 | NA | NA |
| GPX2        | 3,99   | -2,40  | 1,164658 | -2,06338 | NA | NA |
| GPX7        | 17,98  | -3,65  | 1,451646 | -2,51645 | NA | NA |

|               |        |       |          |          |    |    |
|---------------|--------|-------|----------|----------|----|----|
| GRAP2         | 17,62  | -6,72 | 1,806927 | -3,71909 | NA | NA |
| GREB1         | 16,00  | -2,52 | 0,840017 | -3,00437 | NA | NA |
| GRIA2         | 2,64   | -5,84 | 3,640404 | -1,6052  | NA | NA |
| GRIA3         | 12,37  | -0,18 | 2,289514 | -0,07877 | NA | NA |
| GRID2         | 3,02   | -0,48 | 3,626241 | -0,13163 | NA | NA |
| GRIK5         | 3,91   | -5,81 | 2,754733 | -2,10946 | NA | NA |
| GRM2          | 4,85   | -3,22 | 3,305612 | -0,97339 | NA | NA |
| GRM7          | 9,07   | -2,12 | 1,278954 | -1,65832 | NA | NA |
| G RTP1        | 5,91   | -2,27 | 1,12431  | -2,01467 | NA | NA |
| GS1-114I9.3   | 9,67   | -0,73 | 1,976709 | -0,37074 | NA | NA |
| GS1-179L18.1  | 12,00  | -0,95 | 1,43603  | -0,66445 | NA | NA |
| GS1-358P8.4   | 112,90 | -2,16 | 1,159407 | -1,86315 | NA | NA |
| GS1-393G12.14 | 3,61   | -3,59 | 3,185881 | -1,12691 | NA | NA |
| GS1-410F4.2   | 5,83   | -1,63 | 2,23623  | -0,73089 | NA | NA |
| GS1-600G8.5   | 3,03   | -5,03 | 1,843417 | -2,72707 | NA | NA |
| GSC           | 1,29   | -5,17 | 3,645236 | -1,41732 | NA | NA |
| GSKIP         | 82,13  | -0,71 | 1,072937 | -0,65812 | NA | NA |
| GTSE1-AS1     | 11,11  | -4,81 | 2,880929 | -1,66811 | NA | NA |
| GUCY1A3       | 83,12  | -1,40 | 1,324342 | -1,05366 | NA | NA |
| H2BFM         | 1,65   | -5,48 | 3,64237  | -1,50478 | NA | NA |
| HABP2         | 2,34   | -5,51 | 2,73804  | -2,0131  | NA | NA |
| HACD1         | 47,02  | -1,53 | 0,993335 | -1,53529 | NA | NA |
| HAO2          | 1,32   | -5,20 | 3,644977 | -1,42693 | NA | NA |
| HBA1          | 4,62   | -1,52 | 1,581988 | -0,96368 | NA | NA |
| HBB           | 72,64  | -1,63 | 0,845053 | -1,92476 | NA | NA |
| HCG20         | 18,56  | -1,55 | 0,700259 | -2,21662 | NA | NA |
| HCG24         | 4,23   | -0,33 | 1,348631 | -0,24378 | NA | NA |
| HDX           | 31,88  | -0,38 | 1,416348 | -0,26931 | NA | NA |
| HEPH          | 0,45   | -3,45 | 3,664279 | -0,94091 | NA | NA |
| HEPHL1        | 19,45  | -5,00 | 2,666361 | -1,87678 | NA | NA |
| HERC2P4       | 13,30  | -2,21 | 1,021025 | -2,16691 | NA | NA |
| HES3          | 1,06   | -4,88 | 3,647288 | -1,33735 | NA | NA |
| HESX1         | 8,54   | -1,08 | 1,705234 | -0,63546 | NA | NA |
| HFM1          | 4,79   | 0,49  | 3,625066 | 0,134166 | NA | NA |
| HHAT          | 10,81  | -2,26 | 1,403098 | -1,60942 | NA | NA |
| HIF1AN        | 515,11 | -2,40 | 0,8291   | -2,89467 | NA | NA |
| HIF3A         | 81,26  | -3,44 | 0,765985 | -4,48591 | NA | NA |
| HIP1R         | 9,64   | -0,49 | 1,731101 | -0,28332 | NA | NA |
| HIST1H1PS1    | 15,43  | -1,69 | 1,951508 | -0,86799 | NA | NA |
| HIST1H2AG     | 16,28  | -0,65 | 1,085053 | -0,5975  | NA | NA |
| HIST1H2AI     | 1,93   | -5,74 | 3,641989 | -1,57711 | NA | NA |
| HIST1H2AJ     | 6,07   | -0,96 | 1,890836 | -0,50849 | NA | NA |
| HIST1H2APS3   | 0,62   | -4,11 | 3,655605 | -1,12414 | NA | NA |
| HIST1H3H      | 26,95  | -4,50 | 2,40984  | -1,86921 | NA | NA |
| HIST1H4A      | 10,32  | -3,64 | 2,475234 | -1,46874 | NA | NA |
| HIST2H2AB     | 2,80   | -0,39 | 2,03243  | -0,19193 | NA | NA |
| HIST2H2BC     | 9,18   | -2,33 | 1,8177   | -1,28403 | NA | NA |
| HLA-DPA2      | 72,59  | -1,33 | 1,239768 | -1,07138 | NA | NA |
| HMGA1P2       | 0,81   | -4,49 | 3,650902 | -1,23094 | NA | NA |
| HMGB1L12      | 5,01   | -9,17 | 3,500301 | -2,61898 | NA | NA |

|                |        |        |          |          |    |    |
|----------------|--------|--------|----------|----------|----|----|
| HMSD           | 5,10   | -0,40  | 3,619193 | -0,11114 | NA | NA |
| HNRNPUL2-BSCL2 | 15,42  | 1,28   | 2,941296 | 0,435333 | NA | NA |
| HNRPCP         | 1,63   | -1,99  | 3,636466 | -0,54845 | NA | NA |
| HOMEZ          | 45,73  | -2,63  | 1,319289 | -1,99535 | NA | NA |
| HORMAD1        | 13,75  | -1,69  | 1,455706 | -1,16    | NA | NA |
| HOXA-AS3       | 3,11   | 0,90   | 3,643292 | 0,245978 | NA | NA |
| HOXA10         | 9,70   | 0,19   | 1,599029 | 0,117859 | NA | NA |
| HOXA13         | 1,80   | -5,60  | 3,641751 | -1,53736 | NA | NA |
| HOXA2          | 3,30   | -1,40  | 2,70378  | -0,51772 | NA | NA |
| HOXA5          | 60,84  | 0,86   | 1,227185 | 0,703822 | NA | NA |
| HOXA9          | 27,22  | 1,34   | 1,196675 | 1,123546 | NA | NA |
| HOXB7          | 1,62   | -3,47  | 1,917335 | -1,81132 | NA | NA |
| HOXC11         | 18,56  | -7,71  | 3,588943 | -2,1493  | NA | NA |
| HR             | 6,17   | -7,53  | 3,361481 | -2,23911 | NA | NA |
| HRH1           | 21,03  | -5,66  | 1,278753 | -4,42707 | NA | NA |
| HSD11B2        | 4,64   | -6,60  | 2,300404 | -2,86987 | NA | NA |
| HSD3B1         | 3,76   | -0,91  | 3,382711 | -0,26808 | NA | NA |
| HSF2           | 68,98  | 0,61   | 1,255398 | 0,486259 | NA | NA |
| HSFY1          | 4,48   | -0,46  | 1,831425 | -0,253   | NA | NA |
| HSP90AB3P      | 4,26   | -3,72  | 1,252094 | -2,96775 | NA | NA |
| HSPA1L         | 24,70  | -9,36  | 2,00818  | -4,66012 | NA | NA |
| HSPB2          | 0,74   | -3,92  | 3,65434  | -1,07211 | NA | NA |
| HSPG2          | 13,18  | -0,52  | 1,006329 | -0,51706 | NA | NA |
| HTR1DP1        | 5,93   | -0,42  | 1,996132 | -0,20854 | NA | NA |
| HTR4           | 19,37  | -8,04  | 3,636063 | -2,211   | NA | NA |
| HUS1B          | 3,79   | -4,39  | 2,433529 | -1,80266 | NA | NA |
| HYLS1          | 40,92  | -2,92  | 1,061038 | -2,75255 | NA | NA |
| ICI-14BB7.1    | 13,59  | -6,06  | 2,239977 | -2,70595 | NA | NA |
| IFT172         | 86,16  | -0,13  | 1,052625 | -0,1218  | NA | NA |
| IGDCC4         | 5,49   | -6,73  | 2,418227 | -2,78118 | NA | NA |
| IGF1           | 23,01  | -6,47  | 3,619381 | -1,78665 | NA | NA |
| IGF2BP3        | 22,77  | -2,57  | 1,271    | -2,01911 | NA | NA |
| IGFBP6         | 7,78   | -4,93  | 3,127241 | -1,57704 | NA | NA |
| IGHA2          | 5,89   | -2,00  | 1,059999 | -1,88855 | NA | NA |
| IGHG2          | 23,18  | -4,24  | 0,981019 | -4,31826 | NA | NA |
| IGHM           | 263,18 | -0,39  | 1,176276 | -0,32942 | NA | NA |
| IGHV1-68       | 0,53   | -3,88  | 3,659192 | -1,06068 | NA | NA |
| IGHV3-11       | 1,93   | -5,74  | 3,641971 | -1,57613 | NA | NA |
| IGHV3-23       | 6,54   | -4,98  | 1,461605 | -3,40572 | NA | NA |
| IGHVII-43-1    | 12,08  | -25,43 | 3,636482 | -6,99208 | NA | NA |
| IGHVIII-5-1    | 6,69   | -24,58 | 3,637324 | -6,7569  | NA | NA |
| IGIP           | 2,26   | -2,79  | 2,082687 | -1,33886 | NA | NA |
| IGKV1-27       | 3,75   | -5,85  | 3,165267 | -1,84954 | NA | NA |
| IGKV1-5        | 3,81   | -1,68  | 1,846187 | -0,90802 | NA | NA |
| IGKV1D-27      | 2,56   | -6,15  | 3,640366 | -1,69065 | NA | NA |
| IGKV3-34       | 3,84   | -2,40  | 3,619562 | -0,66389 | NA | NA |
| IGKV3D-34      | 1,94   | -4,61  | 3,643318 | -1,26433 | NA | NA |
| IGKV4-1        | 5,88   | -0,23  | 1,914162 | -0,1221  | NA | NA |
| IGKV5-2        | 4,38   | -7,30  | 2,691148 | -2,71175 | NA | NA |
| IGLC3          | 54,85  | -2,59  | 1,011135 | -2,55967 | NA | NA |

|             |        |        |          |          |    |    |
|-------------|--------|--------|----------|----------|----|----|
| IGLV1-44    | 5,11   | -5,18  | 2,102403 | -2,46363 | NA | NA |
| IGLV1-47    | 17,26  | -4,60  | 1,570095 | -2,92779 | NA | NA |
| IGLV3-1     | 10,30  | -0,93  | 1,092501 | -0,85003 | NA | NA |
| IGLV9-49    | 3,43   | -8,19  | 3,591426 | -2,28025 | NA | NA |
| IGLVV-66    | 6,21   | -7,93  | 3,455363 | -2,29375 | NA | NA |
| IGSF10      | 28,41  | -3,99  | 1,767038 | -2,25785 | NA | NA |
| IKZF4       | 67,23  | 0,41   | 1,007456 | 0,404359 | NA | NA |
| IL12RB2     | 17,29  | -3,09  | 0,961018 | -3,21802 | NA | NA |
| IL17RB      | 3,66   | -3,87  | 2,469645 | -1,5654  | NA | NA |
| IL18RAP     | 6,08   | -2,72  | 1,255998 | -2,16739 | NA | NA |
| IL1RL1      | 29,91  | -6,05  | 1,676777 | -3,60935 | NA | NA |
| IL20RB      | 10,85  | -1,45  | 1,563061 | -0,92695 | NA | NA |
| IL22RA1     | 6,26   | -24,47 | 3,637464 | -6,72837 | NA | NA |
| IL23A       | 38,03  | -4,19  | 2,071484 | -2,02253 | NA | NA |
| IL36RN      | 10,17  | -5,51  | 3,079442 | -1,78769 | NA | NA |
| IL7R        | 69,88  | -2,83  | 0,932905 | -3,02997 | NA | NA |
| ILDR2       | 8,07   | -1,74  | 0,942548 | -1,84839 | NA | NA |
| IP6K3       | 11,83  | -10,36 | 3,270684 | -3,16741 | NA | NA |
| IPO4        | 91,35  | -0,98  | 1,173005 | -0,83462 | NA | NA |
| IQCH        | 7,57   | -1,81  | 2,624524 | -0,69084 | NA | NA |
| IRAK2       | 39,55  | -0,65  | 1,013496 | -0,64462 | NA | NA |
| IRS1        | 83,33  | -4,81  | 1,248186 | -3,85551 | NA | NA |
| ITGA11      | 388,93 | -6,01  | 0,910397 | -6,59686 | NA | NA |
| ITGA2       | 23,17  | -2,07  | 0,753719 | -2,74086 | NA | NA |
| ITGA2B      | 18,60  | -1,96  | 1,453581 | -1,35162 | NA | NA |
| ITGA3       | 15,53  | -2,26  | 0,693735 | -3,25282 | NA | NA |
| ITGA9       | 9,25   | -4,76  | 2,874289 | -1,6554  | NA | NA |
| ITGB1BP2    | 2,91   | -2,32  | 2,989344 | -0,77721 | NA | NA |
| ITLN1       | 1,07   | -4,88  | 3,646693 | -1,33939 | NA | NA |
| ITM2A       | 14,45  | -0,74  | 1,379694 | -0,53688 | NA | NA |
| IYD         | 26,24  | -0,39  | 0,939333 | -0,4141  | NA | NA |
| JADE3       | 7,55   | -2,71  | 2,353458 | -1,15007 | NA | NA |
| JAG2        | 16,85  | -1,93  | 2,361628 | -0,81742 | NA | NA |
| JAM3        | 19,25  | -3,36  | 2,033222 | -1,65322 | NA | NA |
| JCHAIN      | 65,62  | -0,95  | 0,655096 | -1,45727 | NA | NA |
| JPH1        | 10,74  | -25,28 | 3,256426 | -7,76188 | NA | NA |
| JPH4        | 5,77   | -2,23  | 1,994534 | -1,11921 | NA | NA |
| KANK4       | 1,74   | -3,76  | 3,470928 | -1,08215 | NA | NA |
| KANSL3      | 294,78 | -0,94  | 0,544969 | -1,71778 | NA | NA |
| KB-1299A7.1 | 3,33   | -6,53  | 3,639237 | -1,795   | NA | NA |
| KB-1568E2.1 | 3,22   | -2,91  | 2,598079 | -1,12189 | NA | NA |
| KB-1572G7.3 | 1,70   | -4,41  | 1,961233 | -2,24867 | NA | NA |
| KB-1615E4.2 | 1,00   | -4,77  | 3,647287 | -1,30814 | NA | NA |
| KB-1836B5.4 | 0,94   | -4,46  | 3,649702 | -1,22334 | NA | NA |
| KB-208E9.1  | 7,07   | -4,73  | 3,107675 | -1,52268 | NA | NA |
| KB-318B8.7  | 8,43   | -1,62  | 3,612628 | -0,44857 | NA | NA |
| KB-431C1.5  | 1,18   | -3,47  | 2,952821 | -1,17389 | NA | NA |
| KCCAT333    | 3,31   | -5,51  | 3,238741 | -1,70161 | NA | NA |
| KCNA3       | 7,25   | 1,41   | 1,924016 | 0,733107 | NA | NA |
| KCNE2       | 2,18   | -4,91  | 3,641779 | -1,34752 | NA | NA |

|                |        |        |          |          |    |    |
|----------------|--------|--------|----------|----------|----|----|
| KCNG1          | 21,96  | -4,11  | 0,926552 | -4,43557 | NA | NA |
| KCNH2          | 2,19   | -5,93  | 3,641394 | -1,62939 | NA | NA |
| KCNIP4         | 1,13   | -1,25  | 3,237236 | -0,38648 | NA | NA |
| KCNK13         | 15,46  | -1,30  | 1,831279 | -0,71128 | NA | NA |
| KCNK5          | 1,05   | -4,45  | 3,266085 | -1,36197 | NA | NA |
| KCNMB2         | 2,59   | -3,55  | 1,995929 | -1,78042 | NA | NA |
| KCNN2          | 8,47   | -8,46  | 2,586202 | -3,26975 | NA | NA |
| KCNRG          | 14,95  | -2,13  | 1,210136 | -1,75824 | NA | NA |
| KCTD14         | 1,35   | -1,26  | 2,875108 | -0,43823 | NA | NA |
| KCTD4          | 3,82   | -4,08  | 2,819976 | -1,44717 | NA | NA |
| KDM5D          | 18,42  | -3,22  | 1,319682 | -2,43802 | NA | NA |
| KIAA1211       | 11,24  | -25,30 | 3,636512 | -6,95714 | NA | NA |
| KIAA1324L      | 8,05   | 2,00   | 1,94894  | 1,028462 | NA | NA |
| KIAA1456       | 47,56  | -1,05  | 0,771815 | -1,35476 | NA | NA |
| KIAA1549L      | 4,61   | -4,61  | 3,044998 | -1,51384 | NA | NA |
| KIF18A         | 14,78  | -0,25  | 0,88518  | -0,28511 | NA | NA |
| KIF3A          | 45,59  | 0,19   | 0,839095 | 0,226618 | NA | NA |
| KIF3B          | 253,87 | 0,05   | 0,737892 | 0,06351  | NA | NA |
| KIR2DL3        | 0,66   | -3,59  | 3,65701  | -0,9816  | NA | NA |
| KLB            | 27,34  | 0,86   | 0,935963 | 0,921124 | NA | NA |
| KLF18          | 0,57   | -3,99  | 3,657493 | -1,09102 | NA | NA |
| KLF5           | 2,34   | -0,35  | 2,722104 | -0,12941 | NA | NA |
| KLHDC1         | 61,60  | 1,56   | 1,596117 | 0,975426 | NA | NA |
| KLHDC8B        | 16,92  | -6,84  | 1,934561 | -3,5347  | NA | NA |
| KLHL1          | 7,62   | -24,69 | 3,637102 | -6,7886  | NA | NA |
| KLHL25         | 5,88   | -6,04  | 2,49513  | -2,42005 | NA | NA |
| KLHL34         | 0,89   | -2,89  | 2,030956 | -1,4232  | NA | NA |
| KLHL38         | 1,11   | -4,50  | 3,648097 | -1,23335 | NA | NA |
| KLRC2          | 5,62   | -4,55  | 2,488323 | -1,82669 | NA | NA |
| KMO            | 482,06 | -2,57  | 0,988092 | -2,5993  | NA | NA |
| KRBOX1         | 7,26   | -6,53  | 2,75507  | -2,36847 | NA | NA |
| KRT4           | 6,80   | -24,59 | 3,637226 | -6,76044 | NA | NA |
| KRT6A          | 4,99   | -7,07  | 3,470246 | -2,03832 | NA | NA |
| KRT8P28        | 2,42   | -6,07  | 3,640671 | -1,66824 | NA | NA |
| KRTAP3-1       | 6,09   | -0,67  | 2,174514 | -0,30985 | NA | NA |
| KTI12          | 116,85 | 0,61   | 0,968261 | 0,627617 | NA | NA |
| L2HGDH         | 30,61  | -0,99  | 0,75446  | -1,30963 | NA | NA |
| LA16c-2F2.4    | 2,16   | -5,72  | 3,64147  | -1,57142 | NA | NA |
| LA16c-2F2.8    | 20,24  | -3,58  | 1,121594 | -3,19286 | NA | NA |
| LA16c-306A4.1  | 7,58   | -4,81  | 3,466363 | -1,38779 | NA | NA |
| LA16c-313F4.1  | 6,98   | -2,38  | 1,466503 | -1,62473 | NA | NA |
| LA16c-329F2.2  | 1,03   | -3,62  | 3,399767 | -1,06567 | NA | NA |
| LA16c-352F10.1 | 6,99   | -24,64 | 3,637262 | -6,77442 | NA | NA |
| LA16c-361A3.3  | 8,49   | -4,10  | 3,281707 | -1,25052 | NA | NA |
| LA16c-380H5.3  | 7,89   | -9,61  | 3,371806 | -2,85013 | NA | NA |
| LA16c-390E6.3  | 2,13   | -2,26  | 1,880904 | -1,199   | NA | NA |
| LA16c-444G7.1  | 6,32   | -24,50 | 3,637442 | -6,73433 | NA | NA |
| LAIR2          | 6,60   | -4,57  | 2,544153 | -1,79671 | NA | NA |
| LAMA3          | 8,91   | -2,45  | 2,137234 | -1,14424 | NA | NA |
| LAMA5          | 5,03   | -2,85  | 1,246972 | -2,28611 | NA | NA |



|                  |        |        |          |          |    |    |
|------------------|--------|--------|----------|----------|----|----|
| LAMB4            | 9,04   | 0,02   | 1,095813 | 0,021974 | NA | NA |
| LANCL3           | 53,87  | -5,64  | 0,963698 | -5,85067 | NA | NA |
| LAX1             | 14,76  | -1,38  | 0,866835 | -1,59719 | NA | NA |
| LBX2-AS1         | 9,39   | -5,53  | 2,200387 | -2,51137 | NA | NA |
| LCE6A            | 25,16  | -26,49 | 3,635943 | -7,28423 | NA | NA |
| LCN10            | 0,93   | -2,82  | 3,654867 | -0,77129 | NA | NA |
| LDHC             | 67,91  | -7,10  | 1,277784 | -5,55841 | NA | NA |
| LDLRAD3          | 20,10  | -0,24  | 1,125228 | -0,2161  | NA | NA |
| LDOC1            | 2,33   | -5,09  | 3,641815 | -1,39743 | NA | NA |
| LEF1             | 26,10  | -2,83  | 1,770481 | -1,6008  | NA | NA |
| LEFTY1           | 0,66   | -3,24  | 3,362054 | -0,96344 | NA | NA |
| LGALS12          | 23,02  | -3,17  | 2,229514 | -1,42041 | NA | NA |
| LGALS14          | 1,74   | -2,59  | 1,279722 | -2,02568 | NA | NA |
| LGI2             | 3,95   | -7,37  | 3,562447 | -2,06921 | NA | NA |
| LHFPL4           | 12,41  | -9,14  | 2,499059 | -3,6583  | NA | NA |
| LHX5             | 1,57   | -5,09  | 3,222127 | -1,5787  | NA | NA |
| LHX6             | 1,41   | -5,23  | 3,643243 | -1,43511 | NA | NA |
| LIFR             | 15,57  | -4,17  | 2,327966 | -1,79037 | NA | NA |
| LIG4             | 100,57 | -1,04  | 1,014393 | -1,0262  | NA | NA |
| LIMK2            | 97,76  | -2,20  | 1,292514 | -1,70153 | NA | NA |
| LINC00235        | 1,65   | -2,32  | 3,223114 | -0,72022 | NA | NA |
| LINC00243        | 23,96  | -3,62  | 1,0253   | -3,53012 | NA | NA |
| LINC00334        | 1,40   | -3,75  | 3,644864 | -1,02877 | NA | NA |
| LINC00344        | 2,13   | -5,39  | 2,756775 | -1,95481 | NA | NA |
| LINC00466        | 45,59  | -1,87  | 0,94147  | -1,99095 | NA | NA |
| LINC00540        | 7,09   | 0,97   | 1,704941 | 0,569711 | NA | NA |
| LINC00836        | 7,49   | -1,87  | 1,416822 | -1,32108 | NA | NA |
| LINC00908        | 33,02  | -2,70  | 0,901995 | -2,99577 | NA | NA |
| LINC01126        | 14,99  | -5,16  | 2,203655 | -2,33982 | NA | NA |
| LINC01541        | 6,23   | -0,60  | 1,428567 | -0,42135 | NA | NA |
| LINC01566        | 5,72   | -4,49  | 2,128752 | -2,1115  | NA | NA |
| LINC01596        | 3,69   | -0,39  | 3,084999 | -0,12634 | NA | NA |
| LINC01598        | 4,25   | -0,60  | 2,798701 | -0,2146  | NA | NA |
| LKAAEAR1         | 1,96   | -5,77  | 3,641892 | -1,58448 | NA | NA |
| LLOXNC01-116E7.5 | 9,27   | -6,37  | 3,63284  | -1,75254 | NA | NA |
| LLOXNC01-7P3.1   | 19,70  | -1,63  | 2,284919 | -0,71347 | NA | NA |
| LL22NC03-84E4.11 | 2,02   | -5,81  | 3,641682 | -1,59644 | NA | NA |
| LLNLF-173C4.2    | 2,95   | -3,79  | 3,116019 | -1,21579 | NA | NA |
| LMAN2L           | 43,26  | -0,67  | 1,571325 | -0,42884 | NA | NA |
| LMCD1            | 21,02  | -1,87  | 1,075349 | -1,74198 | NA | NA |
| LMNTD2           | 1,42   | -5,30  | 3,644263 | -1,45522 | NA | NA |
| LMOD1            | 0,79   | -4,46  | 3,651191 | -1,22147 | NA | NA |
| LNX1             | 9,27   | 0,09   | 1,521781 | 0,061814 | NA | NA |
| LOC100421166     | 0,76   | -4,14  | 3,252101 | -1,27323 | NA | NA |
| LOC134466        | 4,24   | -8,18  | 3,536905 | -2,31353 | NA | NA |
| LOXHD1           | 1,96   | -3,99  | 3,032708 | -1,31667 | NA | NA |
| LPAR1            | 25,13  | -2,46  | 1,908696 | -1,2892  | NA | NA |
| LRFN1            | 16,74  | -2,41  | 0,969113 | -2,49046 | NA | NA |
| LRIG1            | 41,23  | -0,83  | 1,645047 | -0,50369 | NA | NA |
| LRP5L            | 50,86  | -0,58  | 1,11782  | -0,52113 | NA | NA |

|           |        |        |          |          |    |    |
|-----------|--------|--------|----------|----------|----|----|
| LRP6      | 89,04  | -4,60  | 1,488838 | -3,09295 | NA | NA |
| LRRC24    | 4,79   | -2,97  | 3,303884 | -0,89802 | NA | NA |
| LRRC32    | 20,64  | -4,39  | 3,475855 | -1,26274 | NA | NA |
| LRRC39    | 11,18  | -0,66  | 1,546127 | -0,42963 | NA | NA |
| LRRC6     | 10,72  | -3,95  | 1,634374 | -2,41514 | NA | NA |
| LRRC61    | 8,00   | 0,38   | 1,739834 | 0,217886 | NA | NA |
| LRRC7     | 8,98   | 0,59   | 1,461706 | 0,406354 | NA | NA |
| LRRC74A   | 1,93   | -5,22  | 3,202353 | -1,62871 | NA | NA |
| LRRC75A   | 13,42  | -4,65  | 2,090167 | -2,22649 | NA | NA |
| LRRIQ3    | 3,25   | -2,19  | 2,767827 | -0,79197 | NA | NA |
| LRRN1     | 13,55  | -2,99  | 2,124454 | -1,40512 | NA | NA |
| LRRN3     | 12,48  | -0,91  | 1,482391 | -0,61155 | NA | NA |
| LRWD1     | 9,37   | -0,84  | 1,207637 | -0,69364 | NA | NA |
| LSINCT5   | 5,26   | -3,35  | 1,607162 | -2,08428 | NA | NA |
| LSMEM1    | 5,45   | -1,14  | 1,880937 | -0,60598 | NA | NA |
| LSR       | 15,19  | -0,52  | 1,355711 | -0,38157 | NA | NA |
| LUZP2     | 36,65  | -3,83  | 1,084096 | -3,53324 | NA | NA |
| LUZP4     | 1,09   | -4,92  | 3,647081 | -1,34945 | NA | NA |
| LY6G6E    | 6,27   | -1,55  | 0,736265 | -2,09883 | NA | NA |
| LYG2      | 4,71   | -4,28  | 3,11698  | -1,37352 | NA | NA |
| LYPD8     | 2,28   | -3,06  | 1,709916 | -1,78919 | NA | NA |
| M1AP      | 44,83  | -3,32  | 1,499847 | -2,21465 | NA | NA |
| MACC1     | 101,64 | -3,73  | 0,875492 | -4,26337 | NA | NA |
| MAD2L1    | 9,87   | 0,07   | 0,815809 | 0,09099  | NA | NA |
| MAL2      | 5,82   | -24,30 | 3,442561 | -7,05964 | NA | NA |
| MAML1     | 142,92 | -1,85  | 0,911802 | -2,03295 | NA | NA |
| MAP10     | 12,06  | 1,13   | 1,729254 | 0,655654 | NA | NA |
| MAP1LC3B2 | 55,43  | -1,47  | 0,998259 | -1,47703 | NA | NA |
| MAP1LC3C  | 2,12   | -1,19  | 1,82453  | -0,6496  | NA | NA |
| MAP2K4P1  | 3,15   | -2,18  | 1,836688 | -1,18796 | NA | NA |
| MAP3K19   | 3,93   | -6,83  | 3,640381 | -1,87753 | NA | NA |
| MAP6D1    | 7,00   | -0,22  | 2,421601 | -0,09063 | NA | NA |
| MAPK13    | 52,62  | -1,94  | 0,859834 | -2,26007 | NA | NA |
| MARCH3    | 29,59  | -1,75  | 1,433938 | -1,22292 | NA | NA |
| MARCH4    | 2,14   | -0,82  | 2,193835 | -0,37346 | NA | NA |
| MARS2     | 12,70  | -1,03  | 2,547947 | -0,40269 | NA | NA |
| MBTPS2    | 56,72  | -0,64  | 0,945748 | -0,67554 | NA | NA |
| MCCD1     | 0,59   | -4,03  | 3,656619 | -1,10153 | NA | NA |
| MCCD1P2   | 1,16   | -5,01  | 3,646169 | -1,37322 | NA | NA |
| MCHR2     | 7,87   | -6,05  | 1,662473 | -3,63842 | NA | NA |
| MDGA1     | 37,40  | -6,40  | 1,76136  | -3,63451 | NA | NA |
| MEIG1     | 3,04   | -2,30  | 2,444632 | -0,94188 | NA | NA |
| MEP1A     | 1,67   | -2,50  | 3,636597 | -0,68732 | NA | NA |
| MEP1B     | 4,49   | -5,60  | 2,912586 | -1,92336 | NA | NA |
| MESP1     | 7,94   | -2,45  | 2,846874 | -0,86206 | NA | NA |
| MET       | 6,61   | -0,95  | 1,030466 | -0,91907 | NA | NA |
| METTL18   | 31,80  | -3,80  | 1,792848 | -2,11996 | NA | NA |
| METTL21EP | 12,54  | -2,20  | 1,094959 | -2,00617 | NA | NA |
| METTL24   | 3,62   | -4,18  | 3,497753 | -1,19452 | NA | NA |
| MEX3A     | 3,15   | -3,20  | 2,893583 | -1,10578 | NA | NA |

|           |       |        |          |          |    |    |
|-----------|-------|--------|----------|----------|----|----|
| MFSD6L    | 4,49  | -4,62  | 2,716254 | -1,70255 | NA | NA |
| MGAM2     | 15,00 | -3,19  | 2,903766 | -1,09714 | NA | NA |
| MIA       | 2,16  | -1,15  | 2,933626 | -0,39337 | NA | NA |
| MIAT      | 42,07 | -1,11  | 1,453142 | -0,76373 | NA | NA |
| MID2      | 18,25 | -8,25  | 2,376018 | -3,4742  | NA | NA |
| MIEF2     | 25,32 | 1,58   | 1,453267 | 1,085024 | NA | NA |
| MIR10B    | 0,84  | -4,55  | 3,650391 | -1,24674 | NA | NA |
| MIR1200   | 4,50  | -1,06  | 2,563396 | -0,41179 | NA | NA |
| MIR1267   | 2,63  | 0,02   | 2,7329   | 0,008379 | NA | NA |
| MIR1273E  | 1,43  | -3,01  | 2,369839 | -1,26996 | NA | NA |
| MIR128-2  | 5,29  | -24,24 | 3,637827 | -6,66258 | NA | NA |
| MIR1288   | 2,36  | -6,04  | 3,640785 | -1,6578  | NA | NA |
| MIR1291   | 1,79  | -4,18  | 2,9306   | -1,42583 | NA | NA |
| MIR1296   | 2,29  | -5,83  | 3,109417 | -1,87499 | NA | NA |
| MIR1302-1 | 3,04  | -2,06  | 2,41012  | -0,85637 | NA | NA |
| MIR194-1  | 1,25  | -5,12  | 3,645464 | -1,4053  | NA | NA |
| MIR215    | 0,69  | -4,27  | 3,653458 | -1,16957 | NA | NA |
| MIR219A1  | 2,04  | -0,98  | 2,961317 | -0,32973 | NA | NA |
| MIR23C    | 4,10  | -23,86 | 3,638526 | -6,55868 | NA | NA |
| MIR25     | 1,42  | -5,30  | 3,644268 | -1,45541 | NA | NA |
| MIR2681   | 4,83  | -24,11 | 3,638051 | -6,62784 | NA | NA |
| MIR3125   | 1,16  | -5,01  | 3,646304 | -1,37477 | NA | NA |
| MIR3140   | 4,49  | 0,77   | 3,444555 | 0,223933 | NA | NA |
| MIR3178   | 1,79  | -4,93  | 3,250001 | -1,51779 | NA | NA |
| MIR3179-3 | 8,57  | -24,82 | 3,282733 | -7,56215 | NA | NA |
| MIR3606   | 1,07  | -4,89  | 3,647298 | -1,33969 | NA | NA |
| MIR3651   | 1,81  | -1,45  | 2,119592 | -0,68178 | NA | NA |
| MIR3679   | 2,98  | -1,70  | 2,224071 | -0,76659 | NA | NA |
| MIR3680-1 | 5,67  | 0,56   | 1,900404 | 0,295776 | NA | NA |
| MIR3680-2 | 5,60  | 0,54   | 1,899503 | 0,285007 | NA | NA |
| MIR378H   | 5,54  | -7,59  | 3,527117 | -2,15153 | NA | NA |
| MIR3945   | 5,32  | -3,06  | 2,447596 | -1,24877 | NA | NA |
| MIR4292   | 2,82  | -6,29  | 3,639926 | -1,72823 | NA | NA |
| MIR4306   | 0,68  | -4,24  | 3,653946 | -1,1617  | NA | NA |
| MIR4473   | 4,15  | -23,87 | 3,638487 | -6,55963 | NA | NA |
| MIR4661   | 0,79  | -4,45  | 3,651378 | -1,22004 | NA | NA |
| MIR4664   | 1,91  | -5,73  | 3,642047 | -1,57345 | NA | NA |
| MIR4748   | 4,33  | -4,79  | 3,444963 | -1,39091 | NA | NA |
| MIR4771-1 | 1,40  | -4,91  | 3,64497  | -1,3478  | NA | NA |
| MIR4771-2 | 1,40  | -4,91  | 3,64497  | -1,3478  | NA | NA |
| MIR4774   | 3,74  | 0,75   | 3,636466 | 0,207141 | NA | NA |
| MIR4786   | 1,24  | -5,11  | 3,64556  | -1,40186 | NA | NA |
| MIR548A1  | 2,63  | -1,76  | 3,30172  | -0,53353 | NA | NA |
| MIR548AC  | 11,47 | -0,15  | 1,973918 | -0,07441 | NA | NA |
| MIR548AG1 | 0,94  | -4,71  | 3,648847 | -1,28975 | NA | NA |
| MIR548AL  | 2,20  | -1,87  | 2,104113 | -0,89091 | NA | NA |
| MIR548AY  | 0,98  | -4,77  | 3,648314 | -1,30704 | NA | NA |
| MIR548H4  | 15,29 | -1,70  | 1,991708 | -0,85484 | NA | NA |
| MIR548I1  | 0,70  | -3,83  | 3,655621 | -1,04773 | NA | NA |
| MIR548N   | 2,45  | -5,22  | 2,466059 | -2,1171  | NA | NA |

|             |        |        |          |          |    |    |
|-------------|--------|--------|----------|----------|----|----|
| MIR5684     | 1,58   | -2,88  | 2,45422  | -1,17505 | NA | NA |
| MIR571      | 1,26   | -5,13  | 3,645485 | -1,40599 | NA | NA |
| MIR590      | 2,44   | -1,38  | 3,627721 | -0,37923 | NA | NA |
| MIR599      | 1,87   | -5,70  | 3,642196 | -1,56464 | NA | NA |
| MIR600HG    | 1,10   | -4,37  | 2,796257 | -1,56329 | NA | NA |
| MIR606      | 0,63   | -3,90  | 3,656515 | -1,06784 | NA | NA |
| MIR6134     | 6,85   | -24,59 | 3,637286 | -6,76184 | NA | NA |
| MIR621      | 5,40   | -24,27 | 3,637781 | -6,67028 | NA | NA |
| MIR623      | 4,80   | -4,01  | 3,606246 | -1,1112  | NA | NA |
| MIR635      | 0,68   | -4,24  | 3,653978 | -1,16081 | NA | NA |
| MIR6512     | 1,21   | -5,07  | 3,645881 | -1,39034 | NA | NA |
| MIR665      | 1,79   | -5,64  | 3,642471 | -1,54887 | NA | NA |
| MIR7850     | 1,74   | -5,59  | 3,64271  | -1,53515 | NA | NA |
| MIR875      | 0,81   | -4,50  | 3,650928 | -1,23191 | NA | NA |
| MIXL1       | 30,44  | -2,60  | 0,538937 | -4,83108 | NA | NA |
| MKX         | 5,64   | -5,24  | 2,360511 | -2,22168 | NA | NA |
| MLANA       | 27,84  | -0,60  | 1,449315 | -0,41376 | NA | NA |
| MMP1        | 1,61   | -5,48  | 3,643317 | -1,50396 | NA | NA |
| MMP13       | 7,30   | -6,62  | 1,619813 | -4,08879 | NA | NA |
| MMP19       | 7,00   | -1,14  | 1,89636  | -0,60082 | NA | NA |
| MMP23B      | 2,83   | -0,24  | 3,406667 | -0,07032 | NA | NA |
| MMP28       | 3,63   | -23,67 | 3,638693 | -6,50558 | NA | NA |
| MMP3        | 0,65   | -3,98  | 3,654102 | -1,0894  | NA | NA |
| MMRN1       | 8,78   | -4,17  | 2,109453 | -1,97562 | NA | NA |
| MOGAT1      | 8,33   | -7,49  | 2,561232 | -2,92446 | NA | NA |
| MORN3       | 37,84  | -2,04  | 0,706561 | -2,89412 | NA | NA |
| MOXD2       | 1,52   | -5,40  | 3,643816 | -1,48294 | NA | NA |
| MPPED1      | 0,65   | -4,17  | 3,653805 | -1,14165 | NA | NA |
| MPPED2      | 51,20  | -5,39  | 1,287403 | -4,18893 | NA | NA |
| MS4A12      | 2,88   | -5,88  | 3,640552 | -1,61483 | NA | NA |
| MS4A18      | 2,33   | -6,02  | 3,640937 | -1,65399 | NA | NA |
| MS4A6E      | 16,68  | -0,94  | 1,604837 | -0,58557 | NA | NA |
| MSH4        | 4,05   | -5,12  | 3,63539  | -1,40904 | NA | NA |
| MSH5-SAPCD1 | 2,79   | -1,71  | 3,6248   | -0,47113 | NA | NA |
| MST1P2      | 0,75   | -4,37  | 3,652346 | -1,19764 | NA | NA |
| MSX2P1      | 3,22   | -6,48  | 3,639353 | -1,78072 | NA | NA |
| MT1JP       | 3,17   | -1,23  | 3,373637 | -0,36593 | NA | NA |
| MT1P3       | 3,15   | -0,81  | 2,693951 | -0,30076 | NA | NA |
| MTCL1       | 3,45   | -1,84  | 2,738763 | -0,67142 | NA | NA |
| MTFR2       | 7,35   | -0,83  | 1,754718 | -0,47096 | NA | NA |
| MTMR7       | 6,01   | -1,48  | 1,734052 | -0,85341 | NA | NA |
| MTNR1B      | 9,94   | -25,03 | 3,63681  | -6,88358 | NA | NA |
| MTRNR2L3    | 4,14   | -1,43  | 1,642328 | -0,8696  | NA | NA |
| MTRNR2L7    | 9,99   | -5,12  | 2,756923 | -1,85662 | NA | NA |
| MTRR        | 163,53 | -0,86  | 0,964723 | -0,88728 | NA | NA |
| MUC1        | 7,12   | 1,34   | 1,837449 | 0,731874 | NA | NA |
| MUC13       | 5,69   | -7,27  | 2,865675 | -2,53588 | NA | NA |
| MUC3A       | 21,70  | -2,96  | 2,030726 | -1,45797 | NA | NA |
| MUSK        | 35,23  | -4,12  | 3,160761 | -1,30448 | NA | NA |
| MYBPC1      | 6,67   | -1,83  | 3,613517 | -0,50689 | NA | NA |

|            |        |        |          |          |    |    |
|------------|--------|--------|----------|----------|----|----|
| MYEOV      | 7,82   | -1,76  | 1,359293 | -1,29717 | NA | NA |
| MYH15      | 8,37   | -4,32  | 2,892787 | -1,4941  | NA | NA |
| MYH3       | 14,64  | 1,75   | 1,654675 | 1,057874 | NA | NA |
| MYH6       | 1,65   | -4,96  | 3,231584 | -1,53537 | NA | NA |
| MYH8       | 9,59   | -1,44  | 3,173524 | -0,45282 | NA | NA |
| MYL6B      | 46,75  | -1,71  | 0,791955 | -2,16107 | NA | NA |
| MYL8P      | 4,03   | -6,49  | 3,071703 | -2,11329 | NA | NA |
| MYO18B     | 10,30  | -0,41  | 3,612918 | -0,11371 | NA | NA |
| MYO3A      | 74,56  | -28,13 | 3,635723 | -7,73789 | NA | NA |
| MYO5B      | 30,09  | -4,01  | 2,506554 | -1,60163 | NA | NA |
| MYOM3      | 45,74  | -0,94  | 0,983555 | -0,9602  | NA | NA |
| MYOZ2      | 0,80   | -2,51  | 3,658791 | -0,68708 | NA | NA |
| MYT1L      | 5,75   | -2,94  | 0,983397 | -2,99274 | NA | NA |
| N6AMT1     | 73,21  | -0,94  | 1,237871 | -0,75655 | NA | NA |
| NACC1      | 4,81   | -1,38  | 1,21787  | -1,13648 | NA | NA |
| NAPEPLD    | 46,55  | -0,69  | 0,920233 | -0,75179 | NA | NA |
| NAT8B      | 9,73   | -6,81  | 3,117641 | -2,18364 | NA | NA |
| NATD1      | 12,91  | -0,86  | 1,02509  | -0,84277 | NA | NA |
| NBEA       | 41,26  | -0,34  | 1,381288 | -0,24262 | NA | NA |
| NBEAP1     | 2,47   | -2,80  | 2,382056 | -1,17619 | NA | NA |
| NCAM1      | 54,07  | -3,45  | 0,99105  | -3,47805 | NA | NA |
| NCAM2      | 1,70   | -0,05  | 2,056708 | -0,02215 | NA | NA |
| NCAPD3     | 129,47 | 1,47   | 1,168231 | 1,259953 | NA | NA |
| NCRNA00185 | 20,10  | -4,19  | 1,432474 | -2,92253 | NA | NA |
| NDFIP2     | 5,73   | -3,65  | 1,530326 | -2,38684 | NA | NA |
| NDP        | 7,59   | -4,31  | 1,562336 | -2,76126 | NA | NA |
| NECTIN1    | 4,26   | -0,55  | 1,53333  | -0,35958 | NA | NA |
| NECTIN3    | 5,93   | -1,96  | 2,557223 | -0,76774 | NA | NA |
| NEFH       | 8,73   | -0,01  | 1,742749 | -0,00351 | NA | NA |
| NEIL3      | 12,10  | -3,16  | 1,379971 | -2,29313 | NA | NA |
| NEK5       | 20,18  | -1,90  | 0,866432 | -2,18961 | NA | NA |
| NEPNP      | 14,34  | -10,71 | 3,216987 | -3,32809 | NA | NA |
| NEURL2     | 6,45   | -5,25  | 3,36535  | -1,56097 | NA | NA |
| NF1L2      | 1,02   | -4,37  | 3,649311 | -1,19857 | NA | NA |
| NFATC4     | 0,92   | -4,19  | 2,803851 | -1,4936  | NA | NA |
| NFE2L3P1   | 3,72   | -4,89  | 2,379995 | -2,05296 | NA | NA |
| NKPD1      | 3,37   | -3,04  | 1,455124 | -2,08774 | NA | NA |
| NLRP13     | 5,78   | -24,37 | 3,637629 | -6,69854 | NA | NA |
| NLRP14     | 2,04   | -4,81  | 2,840194 | -1,69229 | NA | NA |
| NLRP9      | 3,63   | -8,11  | 3,575697 | -2,26936 | NA | NA |
| NMB        | 26,27  | 2,24   | 1,877614 | 1,191855 | NA | NA |
| NOL3       | 7,10   | -3,00  | 1,061979 | -2,828   | NA | NA |
| NOL4       | 20,58  | -9,59  | 3,542546 | -2,70773 | NA | NA |
| NOV        | 5,24   | 1,52   | 2,453629 | 0,619039 | NA | NA |
| NPAS2      | 32,04  | -4,22  | 1,477479 | -2,85688 | NA | NA |
| NPFFR2     | 6,08   | -24,44 | 3,395488 | -7,19691 | NA | NA |
| NPHS2      | 1,34   | -5,04  | 3,645128 | -1,38199 | NA | NA |
| NPIPA7     | 7,75   | -1,15  | 2,397906 | -0,47901 | NA | NA |
| NPIPA8     | 12,76  | -0,83  | 1,348461 | -0,61743 | NA | NA |
| NPPA-AS1   | 7,24   | 1,21   | 1,741166 | 0,69475  | NA | NA |

|         |        |        |          |          |    |    |
|---------|--------|--------|----------|----------|----|----|
| NPPC    | 1,37   | -3,91  | 3,376714 | -1,15742 | NA | NA |
| NPR1    | 2,53   | -4,51  | 3,6387   | -1,23943 | NA | NA |
| NPR2    | 13,47  | -3,81  | 3,097067 | -1,22892 | NA | NA |
| NPTX1   | 5,08   | -1,56  | 1,691302 | -0,923   | NA | NA |
| NPY1R   | 19,27  | -3,60  | 1,334865 | -2,69723 | NA | NA |
| NRCAM   | 3,76   | -0,11  | 3,153119 | -0,03499 | NA | NA |
| NRF1    | 164,62 | -1,25  | 0,709527 | -1,76784 | NA | NA |
| NRIP3   | 48,60  | -2,05  | 1,087239 | -1,88402 | NA | NA |
| NRXN2   | 12,50  | -9,16  | 2,525778 | -3,62527 | NA | NA |
| NT5E    | 7,77   | -6,10  | 2,286785 | -2,66807 | NA | NA |
| NTN1    | 5,98   | -0,08  | 2,414507 | -0,03481 | NA | NA |
| NTN4    | 1,61   | -4,87  | 3,644302 | -1,33594 | NA | NA |
| NTRK2   | 8,83   | -7,35  | 1,946289 | -3,77693 | NA | NA |
| NUAK1   | 6,61   | -7,63  | 3,001681 | -2,54123 | NA | NA |
| NUDT10  | 14,14  | -9,64  | 2,844196 | -3,39093 | NA | NA |
| NUP210L | 5,43   | -1,13  | 1,687588 | -0,66804 | NA | NA |
| NUP35   | 38,03  | -1,50  | 0,900927 | -1,66598 | NA | NA |
| NUP62CL | 4,86   | -0,81  | 2,586151 | -0,31368 | NA | NA |
| NUTM2A  | 1,00   | -2,49  | 3,537134 | -0,70319 | NA | NA |
| NUTM2D  | 2,21   | -3,21  | 1,798423 | -1,78631 | NA | NA |
| NXPE1   | 10,37  | -25,11 | 3,636677 | -6,90564 | NA | NA |
| OBSCN   | 16,27  | -0,53  | 1,603234 | -0,32971 | NA | NA |
| OC90    | 22,20  | -11,15 | 3,636015 | -3,06627 | NA | NA |
| OCLN    | 52,11  | -0,24  | 1,025228 | -0,23088 | NA | NA |
| OCRL    | 114,22 | -1,21  | 1,398645 | -0,86677 | NA | NA |
| OFCC1   | 2,28   | -3,71  | 1,787166 | -2,07855 | NA | NA |
| OGN     | 7,26   | 1,82   | 1,671339 | 1,091064 | NA | NA |
| OIP5    | 13,33  | -4,39  | 1,832388 | -2,39398 | NA | NA |
| OLAH    | 12,72  | -2,79  | 1,20283  | -2,32278 | NA | NA |
| OLFM3   | 3,08   | -8,63  | 3,61408  | -2,3871  | NA | NA |
| OLIG2   | 1,44   | -4,41  | 2,472109 | -1,78392 | NA | NA |
| ONECUT2 | 19,51  | -4,58  | 2,557353 | -1,79248 | NA | NA |
| OPN1SW  | 2,87   | -3,71  | 3,159644 | -1,17316 | NA | NA |
| OR10H4  | 1,04   | -4,87  | 3,64894  | -1,33488 | NA | NA |
| OR10J3  | 29,15  | -10,67 | 3,338468 | -3,19678 | NA | NA |
| OR11L1  | 3,14   | -6,44  | 3,639448 | -1,77076 | NA | NA |
| OR11N1P | 0,81   | -4,49  | 3,651103 | -1,22925 | NA | NA |
| OR13F1  | 1,08   | -4,91  | 3,647059 | -1,34702 | NA | NA |
| OR1D4   | 5,26   | -24,21 | 3,637792 | -6,6551  | NA | NA |
| OR1X5P  | 0,98   | -2,63  | 3,535232 | -0,74254 | NA | NA |
| OR2AH1P | 2,24   | -1,26  | 2,98043  | -0,42149 | NA | NA |
| OR2J3   | 11,61  | -4,58  | 1,575156 | -2,91001 | NA | NA |
| OR2L6P  | 2,12   | -5,88  | 3,641408 | -1,61439 | NA | NA |
| OR2M7   | 3,52   | -8,24  | 3,583587 | -2,30057 | NA | NA |
| OR3A2   | 19,45  | -6,44  | 1,295093 | -4,97413 | NA | NA |
| OR4A49P | 1,10   | -4,73  | 3,647385 | -1,29661 | NA | NA |
| OR4C12  | 18,35  | -10,52 | 3,636136 | -2,89264 | NA | NA |
| OR4H12P | 10,55  | -25,23 | 3,636644 | -6,93836 | NA | NA |
| OR4M1   | 1,32   | -1,61  | 2,763042 | -0,58213 | NA | NA |
| OR4Q3   | 1,43   | -5,13  | 3,644528 | -1,40706 | NA | NA |

|           |        |        |          |          |    |    |
|-----------|--------|--------|----------|----------|----|----|
| OR51A4    | 11,99  | -6,63  | 2,53718  | -2,61426 | NA | NA |
| OR51A5P   | 26,05  | -11,61 | 3,63593  | -3,19271 | NA | NA |
| OR51A8P   | 3,37   | -23,59 | 3,639235 | -6,48294 | NA | NA |
| OR51AB1P  | 0,80   | -4,47  | 3,651249 | -1,22435 | NA | NA |
| OR51D1    | 34,75  | -6,84  | 1,221234 | -5,60287 | NA | NA |
| OR52A5    | 4,71   | -7,03  | 2,901894 | -2,42377 | NA | NA |
| OR52E3P   | 10,95  | -25,28 | 3,636598 | -6,9502  | NA | NA |
| OR52E8    | 4,29   | -23,91 | 3,638388 | -6,57269 | NA | NA |
| OR52N2    | 9,93   | -8,97  | 3,331091 | -2,6914  | NA | NA |
| OR52T1P   | 13,36  | -25,57 | 3,636393 | -7,03158 | NA | NA |
| OR5C1     | 9,04   | -24,98 | 3,636843 | -6,86903 | NA | NA |
| OR5G5P    | 1,19   | -4,84  | 3,646554 | -1,32686 | NA | NA |
| OR5M14P   | 3,28   | -23,55 | 3,639323 | -6,47077 | NA | NA |
| OR5M2P    | 25,27  | -2,31  | 0,704641 | -3,27321 | NA | NA |
| OR6C4     | 41,34  | -5,75  | 1,077442 | -5,33698 | NA | NA |
| OR6P1     | 0,51   | -3,81  | 3,658402 | -1,04227 | NA | NA |
| OR6T1     | 0,62   | -4,12  | 3,655585 | -1,12695 | NA | NA |
| OR7A2P    | 4,77   | -3,14  | 2,017118 | -1,5589  | NA | NA |
| OR7E108P  | 0,65   | -4,18  | 3,654811 | -1,14363 | NA | NA |
| OR7E12P   | 3,24   | -6,33  | 3,614014 | -1,75271 | NA | NA |
| OR7E46P   | 3,00   | -0,96  | 2,439425 | -0,39444 | NA | NA |
| OR7E93P   | 2,55   | -6,15  | 3,640387 | -1,68886 | NA | NA |
| OR8B5P    | 1,21   | -2,75  | 2,117668 | -1,29777 | NA | NA |
| OR8B7P    | 10,01  | -8,45  | 2,069492 | -4,08189 | NA | NA |
| OR8I1P    | 1,91   | -5,73  | 3,642094 | -1,57328 | NA | NA |
| OR8Q1P    | 0,68   | -4,23  | 3,654114 | -1,15705 | NA | NA |
| OSBPL5    | 90,88  | -2,30  | 1,085456 | -2,12343 | NA | NA |
| OSGIN1    | 11,73  | -1,22  | 1,634992 | -0,74494 | NA | NA |
| OTOG      | 2,42   | -2,68  | 2,908904 | -0,91971 | NA | NA |
| OTOP3     | 2,49   | -6,12  | 3,640529 | -1,67983 | NA | NA |
| OVOL3     | 3,11   | -23,47 | 3,639502 | -6,44805 | NA | NA |
| OVOS2     | 10,41  | -3,08  | 1,394996 | -2,20472 | NA | NA |
| P2RY10    | 31,63  | -3,35  | 1,3453   | -2,48999 | NA | NA |
| PA2G4P3   | 9,35   | -9,64  | 2,864473 | -3,36432 | NA | NA |
| PABPC1L2A | 1,39   | -2,83  | 2,456254 | -1,15228 | NA | NA |
| PACSIN1   | 60,50  | -7,94  | 1,7966   | -4,41718 | NA | NA |
| PALMD     | 88,29  | -6,85  | 1,1707   | -5,8485  | NA | NA |
| PAMR1     | 3,30   | 0,16   | 3,093067 | 0,052463 | NA | NA |
| PANX3     | 3,26   | -6,50  | 3,508282 | -1,85343 | NA | NA |
| PARD6B    | 60,19  | -2,27  | 0,803233 | -2,82585 | NA | NA |
| PASK      | 40,75  | -1,72  | 1,485904 | -1,15954 | NA | NA |
| PAX2      | 3,31   | -6,47  | 3,607425 | -1,79233 | NA | NA |
| PAX3      | 8,37   | 0,13   | 1,420959 | 0,088947 | NA | NA |
| PCBP3     | 9,72   | -2,78  | 1,164656 | -2,38645 | NA | NA |
| PCDH1     | 4,13   | -6,47  | 3,079065 | -2,10108 | NA | NA |
| PCDH15    | 35,52  | -1,84  | 1,286957 | -1,43218 | NA | NA |
| PCNPP     | 1,30   | -4,43  | 3,288791 | -1,34659 | NA | NA |
| PDDC1     | 197,06 | -1,56  | 0,771401 | -2,02817 | NA | NA |
| PDE9A     | 2,46   | -3,27  | 3,159186 | -1,03485 | NA | NA |
| PDX1-AS1  | 1,58   | -5,08  | 3,211155 | -1,58123 | NA | NA |

|              |        |        |          |          |    |    |
|--------------|--------|--------|----------|----------|----|----|
| PDZD2        | 9,66   | 0,40   | 1,440236 | 0,279021 | NA | NA |
| PDZD3        | 1,86   | -2,63  | 2,832668 | -0,92939 | NA | NA |
| PELI3        | 21,31  | -0,88  | 1,764135 | -0,49794 | NA | NA |
| PEX26        | 342,24 | -2,06  | 0,683626 | -3,00613 | NA | NA |
| PEX3         | 34,58  | -0,15  | 1,443449 | -0,1034  | NA | NA |
| PFKFB1       | 4,55   | -4,91  | 3,035868 | -1,61869 | NA | NA |
| PFKFB2       | 131,98 | 0,83   | 1,008486 | 0,827928 | NA | NA |
| PGA4         | 2,30   | -5,76  | 3,14308  | -1,83416 | NA | NA |
| PGA5         | 0,80   | -4,26  | 3,650358 | -1,16691 | NA | NA |
| PGBD1        | 15,92  | -2,25  | 1,719504 | -1,30647 | NA | NA |
| PGR          | 89,82  | -28,46 | 3,635842 | -7,82846 | NA | NA |
| PHEX         | 11,16  | -3,11  | 1,293369 | -2,40332 | NA | NA |
| PHF7         | 41,35  | -0,85  | 0,739407 | -1,14621 | NA | NA |
| PHKA1        | 9,04   | -6,90  | 1,953371 | -3,53281 | NA | NA |
| PHLDB2       | 20,35  | -3,02  | 1,419881 | -2,12517 | NA | NA |
| PHYHIPL      | 0,96   | -4,28  | 3,269397 | -1,31017 | NA | NA |
| PI16         | 3,49   | -8,83  | 3,584909 | -2,46218 | NA | NA |
| PIFO         | 0,51   | -2,43  | 3,307095 | -0,73437 | NA | NA |
| PITPNM2      | 9,28   | 1,03   | 1,313559 | 0,784264 | NA | NA |
| PKD2L1       | 13,21  | -25,54 | 3,636361 | -7,0229  | NA | NA |
| PKIG         | 24,42  | -1,60  | 0,982335 | -1,62808 | NA | NA |
| PKLR         | 0,80   | -3,90  | 3,652541 | -1,06818 | NA | NA |
| PKP1         | 0,90   | -3,95  | 3,299418 | -1,19604 | NA | NA |
| PLA2G4C      | 76,13  | 0,34   | 0,887275 | 0,387484 | NA | NA |
| PLA2G4C-AS1  | 2,55   | -1,31  | 2,205013 | -0,59299 | NA | NA |
| PLA2G4E      | 10,83  | -4,75  | 1,171854 | -4,05235 | NA | NA |
| PLA2G4F      | 4,10   | -3,24  | 1,835567 | -1,76539 | NA | NA |
| PLA2G5       | 2,67   | -5,45  | 2,396858 | -2,27231 | NA | NA |
| PLAC9        | 12,28  | -3,29  | 2,037244 | -1,61719 | NA | NA |
| PLCB4        | 3,60   | -3,38  | 2,850396 | -1,18696 | NA | NA |
| PLCH1        | 14,87  | -4,39  | 2,012838 | -2,17866 | NA | NA |
| PLCZ1        | 1,12   | -3,87  | 2,901105 | -1,33317 | NA | NA |
| PLD6         | 13,64  | -4,01  | 1,023763 | -3,9141  | NA | NA |
| PLEKHG1      | 32,48  | -0,36  | 0,804416 | -0,45325 | NA | NA |
| PLG          | 23,28  | -1,50  | 1,09663  | -1,37201 | NA | NA |
| PLPP3        | 5,19   | -1,19  | 1,410443 | -0,84231 | NA | NA |
| PLSCR2       | 32,46  | -6,80  | 1,749793 | -3,88398 | NA | NA |
| PLSCR5       | 2,84   | -6,31  | 3,639931 | -1,73255 | NA | NA |
| PLXNA1       | 24,28  | 1,04   | 1,67753  | 0,620494 | NA | NA |
| PLXNB1       | 7,43   | -3,69  | 2,484145 | -1,48497 | NA | NA |
| PLXNB3       | 0,74   | -3,03  | 3,323182 | -0,91149 | NA | NA |
| PMP2         | 13,36  | -3,95  | 1,022486 | -3,86618 | NA | NA |
| PMS2P10      | 0,66   | -3,04  | 2,891063 | -1,05008 | NA | NA |
| POC1B-GALNT4 | 24,60  | -1,63  | 2,125174 | -0,76838 | NA | NA |
| POTEB3       | 0,98   | -4,60  | 3,22243  | -1,42713 | NA | NA |
| POTEG        | 2,59   | -4,20  | 1,939624 | -2,1643  | NA | NA |
| POU2AF1      | 80,65  | -3,18  | 0,769425 | -4,13243 | NA | NA |
| POU4F1       | 4,55   | -8,60  | 3,518811 | -2,44367 | NA | NA |
| PPARA        | 141,55 | -1,50  | 0,636161 | -2,35192 | NA | NA |
| PPARGC1A     | 44,33  | -7,82  | 1,969684 | -3,96913 | NA | NA |



|          |        |        |          |          |    |    |
|----------|--------|--------|----------|----------|----|----|
| PPEF1    | 3,69   | -1,01  | 1,367836 | -0,7372  | NA | NA |
| PPFIA3   | 3,67   | -6,50  | 3,009248 | -2,16045 | NA | NA |
| PPFIBP1  | 149,43 | -2,00  | 1,001759 | -1,99814 | NA | NA |
| PPIAP16  | 3,36   | -23,57 | 3,639192 | -6,47763 | NA | NA |
| PPIC     | 10,22  | -3,54  | 1,63024  | -2,1738  | NA | NA |
| PPL      | 5,17   | -5,52  | 2,316802 | -2,38446 | NA | NA |
| PPP1R13L | 43,94  | -1,55  | 1,087554 | -1,42159 | NA | NA |
| PPP1R3B  | 58,11  | -0,12  | 1,028797 | -0,11466 | NA | NA |
| PPP1R3D  | 34,38  | -0,48  | 1,351344 | -0,35727 | NA | NA |
| PPP1R42  | 2,97   | -3,41  | 1,746138 | -1,95348 | NA | NA |
| PPP2R3A  | 64,88  | -2,38  | 1,056326 | -2,24962 | NA | NA |
| PPP4R4   | 4,53   | -6,51  | 3,579143 | -1,81979 | NA | NA |
| PRAMEF13 | 0,81   | -4,48  | 3,650623 | -1,22792 | NA | NA |
| PRAMEL   | 5,04   | -7,01  | 3,500308 | -2,00366 | NA | NA |
| PRAP1    | 1,46   | -2,06  | 2,841491 | -0,72528 | NA | NA |
| PRDM8    | 90,37  | -4,37  | 1,361244 | -3,20685 | NA | NA |
| PRKD1    | 8,10   | -2,49  | 2,841236 | -0,87699 | NA | NA |
| PRKXP1   | 1,18   | -3,01  | 3,023401 | -0,99396 | NA | NA |
| PRL      | 7,94   | -24,73 | 3,637031 | -6,80046 | NA | NA |
| PRMT3    | 85,79  | -0,44  | 1,011599 | -0,43522 | NA | NA |
| PROK2    | 6,53   | -5,75  | 2,626949 | -2,19051 | NA | NA |
| PROM1    | 5,46   | -2,78  | 2,079045 | -1,33493 | NA | NA |
| PROZ     | 11,27  | -10,36 | 2,846367 | -3,63845 | NA | NA |
| PRR34    | 22,52  | -3,07  | 0,951801 | -3,22227 | NA | NA |
| PRSS1    | 4,22   | -6,39  | 3,086406 | -2,07121 | NA | NA |
| PRSS30P  | 5,32   | -0,92  | 3,616781 | -0,25456 | NA | NA |
| PRSS36   | 30,23  | -0,56  | 1,544104 | -0,36432 | NA | NA |
| PRSS38   | 2,18   | -5,18  | 3,641955 | -1,42297 | NA | NA |
| PRSS42   | 1,22   | -5,09  | 3,645756 | -1,39642 | NA | NA |
| PRSS53   | 13,14  | -1,29  | 1,115968 | -1,15962 | NA | NA |
| PRUNE2   | 36,72  | -1,51  | 1,403375 | -1,07567 | NA | NA |
| PSG10P   | 1,35   | -5,23  | 3,644547 | -1,43381 | NA | NA |
| PSG6     | 8,56   | -5,68  | 2,930706 | -1,93744 | NA | NA |
| PSG7     | 14,38  | -7,33  | 2,051992 | -3,5725  | NA | NA |
| PSMD10P  | 8,41   | -4,00  | 2,92725  | -1,36722 | NA | NA |
| PSMD5    | 303,62 | 1,35   | 0,898659 | 1,503856 | NA | NA |
| PTCH1    | 18,64  | -1,27  | 0,932224 | -1,36094 | NA | NA |
| PTCHD1   | 64,32  | -3,27  | 0,670178 | -4,87745 | NA | NA |
| PTCRA    | 8,80   | -4,88  | 1,88843  | -2,58524 | NA | NA |
| PTENP1   | 3,82   | -0,46  | 1,991573 | -0,2303  | NA | NA |
| PTGDR2   | 5,47   | -3,62  | 1,758469 | -2,06084 | NA | NA |
| PTGER1   | 1,03   | -4,83  | 3,647773 | -1,32468 | NA | NA |
| PTN      | 2,58   | -6,16  | 3,640331 | -1,69309 | NA | NA |
| PTP4A3   | 25,26  | -4,14  | 2,345558 | -1,76355 | NA | NA |
| PTPDC1   | 7,71   | -1,81  | 1,332891 | -1,35465 | NA | NA |
| PTPRB    | 32,00  | -5,13  | 1,109315 | -4,62797 | NA | NA |
| PTPRG    | 14,96  | -4,51  | 1,122331 | -4,01733 | NA | NA |
| PTPRN2   | 22,16  | -0,60  | 1,572471 | -0,38132 | NA | NA |
| PTPRQ    | 2,03   | -5,69  | 3,631151 | -1,56719 | NA | NA |
| PTPRR    | 5,63   | -6,67  | 3,637718 | -1,83355 | NA | NA |

|          |        |        |          |          |    |    |
|----------|--------|--------|----------|----------|----|----|
| PTPRT    | 7,57   | -4,61  | 2,358914 | -1,95346 | NA | NA |
| PTPRVP   | 23,54  | -2,10  | 0,844484 | -2,48998 | NA | NA |
| PXDC1    | 26,88  | 1,41   | 1,472374 | 0,956636 | NA | NA |
| PXMP4    | 205,93 | -0,48  | 0,983071 | -0,48704 | NA | NA |
| PXYLP1   | 104,56 | -2,71  | 0,694597 | -3,90271 | NA | NA |
| PYROXD2  | 83,79  | -1,29  | 0,960003 | -1,33955 | NA | NA |
| PYY      | 1,64   | -5,51  | 3,643064 | -1,51262 | NA | NA |
| PZP      | 20,63  | -1,39  | 1,765747 | -0,78744 | NA | NA |
| QPCTL    | 43,98  | -1,59  | 0,848442 | -1,8682  | NA | NA |
| QPRT     | 69,33  | -1,14  | 0,768706 | -1,48575 | NA | NA |
| RAB30    | 48,95  | -2,16  | 1,255926 | -1,71587 | NA | NA |
| RAB33A   | 10,92  | -2,54  | 2,169672 | -1,17241 | NA | NA |
| RAB3C    | 2,26   | -2,21  | 1,150636 | -1,91709 | NA | NA |
| RAB6B    | 1,36   | -3,69  | 3,64547  | -1,0114  | NA | NA |
| RAB6C    | 1,51   | -5,39  | 3,643794 | -1,47991 | NA | NA |
| RAD18    | 69,92  | 1,94   | 1,134704 | 1,707773 | NA | NA |
| RAD51    | 2,51   | -4,91  | 1,94456  | -2,52718 | NA | NA |
| RAD54B   | 1,17   | -4,96  | 3,645185 | -1,36098 | NA | NA |
| RAD9B    | 74,17  | 0,77   | 1,208187 | 0,638988 | NA | NA |
| RAET1L   | 0,86   | -4,39  | 3,649785 | -1,20348 | NA | NA |
| RAPGEF3  | 6,38   | -6,84  | 2,718461 | -2,51743 | NA | NA |
| RASGRF1  | 16,43  | 0,36   | 1,044199 | 0,340961 | NA | NA |
| RASL11A  | 4,56   | -2,33  | 1,374967 | -1,69244 | NA | NA |
| RASL12   | 10,47  | -6,86  | 2,178612 | -3,14849 | NA | NA |
| RBFOX2   | 6,86   | -9,82  | 3,407471 | -2,88283 | NA | NA |
| RBM11    | 10,67  | -10,46 | 2,86166  | -3,65573 | NA | NA |
| RBP1     | 12,80  | -2,03  | 1,388779 | -1,46194 | NA | NA |
| RBPMS2   | 3,79   | -6,72  | 3,500547 | -1,91853 | NA | NA |
| RDH14    | 58,76  | 0,31   | 1,196264 | 0,258989 | NA | NA |
| RDM1     | 7,86   | -2,87  | 2,36638  | -1,21398 | NA | NA |
| REM2     | 4,89   | -2,23  | 2,323271 | -0,96119 | NA | NA |
| REXO1L1  | 44,79  | -1,86  | 1,200498 | -1,55038 | NA | NA |
| REXO1L6P | 2,14   | -1,14  | 3,02557  | -0,37542 | NA | NA |
| RF00001  | 0,73   | -3,62  | 3,31872  | -1,08928 | NA | NA |
| RF00151  | 5,71   | -2,11  | 2,336066 | -0,9017  | NA | NA |
| RF00415  | 0,91   | -4,65  | 3,649217 | -1,27431 | NA | NA |
| RF00422  | 5,91   | -9,29  | 3,44701  | -2,6958  | NA | NA |
| RF00432  | 11,74  | -1,08  | 1,425673 | -0,75503 | NA | NA |
| RF00438  | 3,62   | -4,79  | 1,798121 | -2,66548 | NA | NA |
| RF00554  | 12,06  | -1,91  | 1,175157 | -1,62726 | NA | NA |
| RF00560  | 3,08   | -4,31  | 2,407782 | -1,79038 | NA | NA |
| RF00614  | 5,50   | -6,59  | 3,637823 | -1,81195 | NA | NA |
| RF01293  | 0,72   | -3,66  | 3,329411 | -1,09948 | NA | NA |
| RF01848  | 4,82   | -24,10 | 3,638043 | -6,62337 | NA | NA |
| RF02275  | 2,53   | -6,14  | 3,64043  | -1,68586 | NA | NA |
| RFPL4A   | 21,90  | -2,30  | 2,022815 | -1,13913 | NA | NA |
| RFX4     | 10,43  | -1,89  | 2,131165 | -0,88555 | NA | NA |
| RFX7     | 404,65 | -0,02  | 0,881794 | -0,02288 | NA | NA |
| RGMA     | 28,01  | -3,40  | 0,817887 | -4,1534  | NA | NA |
| RGPD3    | 6,83   | -3,80  | 1,803467 | -2,10926 | NA | NA |

|           |        |        |          |          |    |    |
|-----------|--------|--------|----------|----------|----|----|
| RGPD8     | 49,35  | -0,86  | 1,0482   | -0,8188  | NA | NA |
| RGS4      | 5,50   | -3,52  | 1,659956 | -2,11885 | NA | NA |
| RGS5      | 15,22  | -4,11  | 3,057014 | -1,34381 | NA | NA |
| RGSL1     | 118,41 | -5,66  | 1,142386 | -4,9505  | NA | NA |
| RHBDL1    | 0,86   | -3,99  | 3,308487 | -1,20721 | NA | NA |
| RHBG      | 10,86  | -2,56  | 0,936027 | -2,73194 | NA | NA |
| RHOXF1    | 2,82   | -5,97  | 3,124428 | -1,91053 | NA | NA |
| RHOXF2B   | 12,59  | -0,69  | 0,680969 | -1,01023 | NA | NA |
| RHPN1     | 14,62  | -2,07  | 1,563833 | -1,32051 | NA | NA |
| RHPN2     | 57,69  | -1,94  | 1,331624 | -1,45646 | NA | NA |
| RIMS4     | 2,06   | -5,94  | 3,644052 | -1,63052 | NA | NA |
| RIT2      | 1,74   | -5,59  | 3,642531 | -1,5337  | NA | NA |
| RLN3      | 3,58   | -3,55  | 3,160438 | -1,12456 | NA | NA |
| RMST      | 3,37   | -1,05  | 3,462219 | -0,30426 | NA | NA |
| RN7SKP111 | 6,66   | -6,76  | 2,729716 | -2,47812 | NA | NA |
| RN7SKP150 | 0,87   | -4,39  | 3,650445 | -1,20323 | NA | NA |
| RN7SKP19  | 0,64   | -4,15  | 3,655145 | -1,1353  | NA | NA |
| RN7SKP192 | 0,57   | -3,53  | 3,659979 | -0,96531 | NA | NA |
| RN7SKP197 | 7,20   | -24,66 | 3,637191 | -6,78015 | NA | NA |
| RN7SKP213 | 3,18   | -3,73  | 1,52822  | -2,43861 | NA | NA |
| RN7SKP222 | 4,61   | -2,08  | 2,330937 | -0,89428 | NA | NA |
| RN7SKP229 | 8,73   | -24,95 | 3,636883 | -6,86083 | NA | NA |
| RN7SKP25  | 1,91   | -4,71  | 3,642634 | -1,2937  | NA | NA |
| RN7SKP284 | 10,89  | -25,28 | 3,636601 | -6,95053 | NA | NA |
| RN7SKP37  | 1,42   | -5,11  | 3,644577 | -1,4031  | NA | NA |
| RN7SKP38  | 1,08   | -4,91  | 3,647038 | -1,34616 | NA | NA |
| RN7SKP58  | 2,17   | -4,49  | 3,641305 | -1,23423 | NA | NA |
| RN7SKP79  | 2,94   | -3,70  | 2,011048 | -1,84203 | NA | NA |
| RN7SKP83  | 7,98   | -24,72 | 3,637024 | -6,79724 | NA | NA |
| RN7SKP97  | 1,72   | -5,41  | 3,642916 | -1,48408 | NA | NA |
| RN7SL153P | 5,64   | -7,53  | 2,654125 | -2,83655 | NA | NA |
| RN7SL178P | 4,36   | -3,46  | 1,537119 | -2,24971 | NA | NA |
| RN7SL187P | 7,28   | -2,96  | 1,089893 | -2,71349 | NA | NA |
| RN7SL188P | 1,40   | -4,91  | 3,229789 | -1,51897 | NA | NA |
| RN7SL205P | 3,85   | -0,49  | 1,271231 | -0,38254 | NA | NA |
| RN7SL223P | 1,23   | -4,89  | 3,646025 | -1,342   | NA | NA |
| RN7SL22P  | 12,35  | -8,13  | 1,892508 | -4,2946  | NA | NA |
| RN7SL233P | 2,59   | -4,59  | 2,063128 | -2,22371 | NA | NA |
| RN7SL239P | 13,25  | -1,17  | 1,373161 | -0,8491  | NA | NA |
| RN7SL242P | 3,16   | -0,57  | 2,78472  | -0,20347 | NA | NA |
| RN7SL268P | 1,07   | -4,44  | 2,759314 | -1,6104  | NA | NA |
| RN7SL272P | 4,00   | -23,83 | 3,638555 | -6,54906 | NA | NA |
| RN7SL273P | 2,24   | -2,10  | 2,321526 | -0,90249 | NA | NA |
| RN7SL280P | 0,54   | -3,60  | 3,661502 | -0,98312 | NA | NA |
| RN7SL293P | 2,21   | -3,60  | 1,528542 | -2,35218 | NA | NA |
| RN7SL299P | 5,94   | -24,40 | 3,637557 | -6,70739 | NA | NA |
| RN7SL3    | 1,36   | -2,75  | 3,144581 | -0,87411 | NA | NA |
| RN7SL305P | 1,43   | -5,11  | 3,644635 | -1,40073 | NA | NA |
| RN7SL318P | 6,89   | -3,89  | 1,641222 | -2,36958 | NA | NA |
| RN7SL323P | 4,89   | -2,08  | 1,286797 | -1,6147  | NA | NA |

|              |        |        |          |          |    |    |
|--------------|--------|--------|----------|----------|----|----|
| RN7SL328P    | 0,50   | -3,79  | 3,66023  | -1,03641 | NA | NA |
| RN7SL330P    | 4,88   | -4,28  | 2,464257 | -1,73747 | NA | NA |
| RN7SL342P    | 6,13   | -1,35  | 2,159101 | -0,62575 | NA | NA |
| RN7SL36P     | 1,47   | -3,85  | 2,939277 | -1,30994 | NA | NA |
| RN7SL37P     | 4,35   | -2,34  | 1,405521 | -1,66303 | NA | NA |
| RN7SL396P    | 2,60   | -4,64  | 2,574863 | -1,80305 | NA | NA |
| RN7SL430P    | 5,28   | -5,12  | 2,374456 | -2,15726 | NA | NA |
| RN7SL441P    | 2,00   | -1,30  | 2,996644 | -0,43336 | NA | NA |
| RN7SL442P    | 2,36   | -2,94  | 1,721385 | -1,70899 | NA | NA |
| RN7SL448P    | 15,90  | -0,52  | 1,025325 | -0,50403 | NA | NA |
| RN7SL452P    | 4,35   | -6,38  | 3,140616 | -2,03133 | NA | NA |
| RN7SL456P    | 2,52   | -6,13  | 3,640438 | -1,68403 | NA | NA |
| RN7SL457P    | 4,44   | -3,32  | 1,751169 | -1,89571 | NA | NA |
| RN7SL516P    | 2,70   | -1,55  | 1,853081 | -0,83886 | NA | NA |
| RN7SL571P    | 2,81   | -3,80  | 2,47119  | -1,53814 | NA | NA |
| RN7SL589P    | 13,18  | -5,94  | 1,959879 | -3,03065 | NA | NA |
| RN7SL594P    | 1,61   | -5,48  | 3,643215 | -1,50285 | NA | NA |
| RN7SL612P    | 2,71   | -0,91  | 2,530488 | -0,35886 | NA | NA |
| RN7SL627P    | 2,86   | -5,98  | 3,639968 | -1,64345 | NA | NA |
| RN7SL679P    | 1,29   | -3,90  | 2,887429 | -1,35064 | NA | NA |
| RN7SL687P    | 1,70   | -3,70  | 3,069468 | -1,20646 | NA | NA |
| RN7SL712P    | 4,26   | -4,50  | 1,829153 | -2,46134 | NA | NA |
| RN7SL738P    | 2,22   | -4,30  | 3,431545 | -1,25316 | NA | NA |
| RN7SL749P    | 9,43   | -3,60  | 2,708452 | -1,32865 | NA | NA |
| RN7SL776P    | 1,94   | -2,00  | 1,160522 | -1,72237 | NA | NA |
| RN7SL787P    | 9,67   | -5,93  | 1,491071 | -3,97608 | NA | NA |
| RN7SL792P    | 4,30   | -4,17  | 1,941192 | -2,1472  | NA | NA |
| RN7SL820P    | 2,29   | -1,88  | 2,03609  | -0,92338 | NA | NA |
| RN7SL825P    | 3,82   | -4,02  | 2,27489  | -1,76811 | NA | NA |
| RN7SL845P    | 1,61   | -4,39  | 2,230419 | -1,96821 | NA | NA |
| RN7SL856P    | 1,67   | -2,76  | 2,011205 | -1,3703  | NA | NA |
| RN7SL8P      | 1,68   | -2,36  | 2,266003 | -1,03934 | NA | NA |
| RNA5SP114    | 0,82   | -4,50  | 3,65069  | -1,23272 | NA | NA |
| RNA5SP126    | 1,53   | -5,41  | 3,6437   | -1,48511 | NA | NA |
| RNA5SP167    | 3,40   | -23,60 | 3,639157 | -6,48481 | NA | NA |
| RNA5SP194    | 1,71   | -3,33  | 2,173565 | -1,53066 | NA | NA |
| RNA5SP260    | 5,38   | -5,13  | 3,380195 | -1,51805 | NA | NA |
| RNA5SP295    | 4,26   | -1,03  | 1,966211 | -0,52398 | NA | NA |
| RNA5SP88     | 4,47   | -3,73  | 3,595357 | -1,03662 | NA | NA |
| RNA5SP89     | 1,37   | -5,25  | 3,64464  | -1,44027 | NA | NA |
| RNF103-CHMP3 | 2,50   | -5,65  | 3,168777 | -1,78313 | NA | NA |
| RNF113B      | 7,52   | 1,31   | 2,627778 | 0,498952 | NA | NA |
| RNF150       | 161,26 | -7,73  | 0,882323 | -8,76553 | NA | NA |
| RNF17        | 5,83   | -24,38 | 3,637623 | -6,70227 | NA | NA |
| RNF208       | 1,36   | -3,97  | 2,538704 | -1,56337 | NA | NA |
| RNF32        | 10,91  | -0,36  | 2,172079 | -0,16711 | NA | NA |
| RNU1-120P    | 4,84   | -2,07  | 1,988033 | -1,0399  | NA | NA |
| RNU1-44P     | 4,00   | -6,79  | 3,638606 | -1,86745 | NA | NA |
| RNU1-61P     | 3,89   | -1,47  | 1,881347 | -0,7805  | NA | NA |
| RNU1-63P     | 4,28   | -23,91 | 3,638384 | -6,57157 | NA | NA |

|            |       |        |          |          |    |    |
|------------|-------|--------|----------|----------|----|----|
| RNU2-16P   | 5,60  | -1,72  | 1,500334 | -1,14802 | NA | NA |
| RNU2-25P   | 4,77  | -6,56  | 2,719789 | -2,41339 | NA | NA |
| RNU2-47P   | 1,81  | -4,54  | 3,302283 | -1,3733  | NA | NA |
| RNU2-7P    | 1,43  | -2,47  | 3,64155  | -0,67699 | NA | NA |
| RNU4-24P   | 1,07  | -4,51  | 3,262641 | -1,38379 | NA | NA |
| RNU4-78P   | 3,47  | -4,83  | 2,623389 | -1,84297 | NA | NA |
| RNU5B-2P   | 1,22  | -2,73  | 3,572176 | -0,7633  | NA | NA |
| RNU6-1011P | 0,55  | -3,92  | 3,658485 | -1,07252 | NA | NA |
| RNU6-1014P | 3,30  | -23,55 | 3,639263 | -6,47148 | NA | NA |
| RNU6-1057P | 1,05  | -3,89  | 2,864993 | -1,35624 | NA | NA |
| RNU6-1092P | 1,39  | -3,43  | 3,645106 | -0,94037 | NA | NA |
| RNU6-1127P | 3,42  | -0,11  | 2,49511  | -0,0445  | NA | NA |
| RNU6-1135P | 0,91  | -4,65  | 3,64939  | -1,27456 | NA | NA |
| RNU6-1196P | 1,85  | -5,69  | 3,642259 | -1,56116 | NA | NA |
| RNU6-1252P | 1,21  | -5,07  | 3,645875 | -1,38944 | NA | NA |
| RNU6-1300P | 3,58  | -3,10  | 2,858036 | -1,08534 | NA | NA |
| RNU6-1332P | 1,15  | -5,00  | 3,646425 | -1,3712  | NA | NA |
| RNU6-238P  | 2,19  | -2,09  | 2,152375 | -0,97262 | NA | NA |
| RNU6-248P  | 1,56  | -5,43  | 3,643497 | -1,49161 | NA | NA |
| RNU6-254P  | 8,52  | -24,92 | 3,238405 | -7,69367 | NA | NA |
| RNU6-260P  | 1,45  | -5,16  | 3,644244 | -1,41702 | NA | NA |
| RNU6-284P  | 5,62  | -24,32 | 3,637684 | -6,68461 | NA | NA |
| RNU6-30P   | 1,61  | -5,48  | 3,643266 | -1,50346 | NA | NA |
| RNU6-406P  | 1,70  | -5,56  | 3,642886 | -1,52543 | NA | NA |
| RNU6-407P  | 1,94  | -5,75  | 3,641943 | -1,57969 | NA | NA |
| RNU6-416P  | 0,72  | -4,32  | 3,653033 | -1,18132 | NA | NA |
| RNU6-419P  | 2,26  | -5,81  | 3,64109  | -1,59554 | NA | NA |
| RNU6-433P  | 1,13  | -3,50  | 3,464871 | -1,01137 | NA | NA |
| RNU6-450P  | 1,72  | -2,93  | 3,637324 | -0,80467 | NA | NA |
| RNU6-532P  | 2,04  | -5,82  | 3,641615 | -1,59947 | NA | NA |
| RNU6-583P  | 3,43  | -23,60 | 3,639111 | -6,48628 | NA | NA |
| RNU6-598P  | 3,31  | -6,52  | 3,63925  | -1,7922  | NA | NA |
| RNU6-665P  | 1,21  | -5,07  | 3,645856 | -1,39169 | NA | NA |
| RNU6-670P  | 1,41  | -5,29  | 3,64439  | -1,45088 | NA | NA |
| RNU6-72P   | 2,04  | -5,83  | 3,641629 | -1,5999  | NA | NA |
| RNU6-733P  | 1,27  | -4,78  | 3,645875 | -1,31166 | NA | NA |
| RNU6-740P  | 1,47  | -5,36  | 3,643982 | -1,46963 | NA | NA |
| RNU6-764P  | 1,35  | -5,23  | 3,644788 | -1,43503 | NA | NA |
| RNU6-817P  | 1,00  | -4,03  | 3,649819 | -1,10483 | NA | NA |
| RNU6-845P  | 4,25  | -23,90 | 3,638413 | -6,56949 | NA | NA |
| RNU6-939P  | 0,80  | -4,48  | 3,65118  | -1,22666 | NA | NA |
| RNU6-944P  | 0,81  | -4,49  | 3,650819 | -1,23084 | NA | NA |
| RNU6-954P  | 3,89  | -23,70 | 3,638689 | -6,51268 | NA | NA |
| RNU7-3P    | 4,42  | -23,96 | 3,638304 | -6,58441 | NA | NA |
| RNVU1-7    | 1,69  | -2,67  | 2,28875  | -1,16777 | NA | NA |
| RNY1P10    | 6,77  | -6,57  | 3,536796 | -1,85777 | NA | NA |
| ROBO2      | 67,70 | -5,67  | 1,188958 | -4,77005 | NA | NA |
| ROBO4      | 8,39  | -0,67  | 1,700532 | -0,39429 | NA | NA |
| ROPN1L     | 4,80  | -7,08  | 3,638306 | -1,94561 | NA | NA |
| RP1        | 21,80 | 0,02   | 1,935174 | 0,009597 | NA | NA |

|               |       |        |          |          |    |    |
|---------------|-------|--------|----------|----------|----|----|
| RP1-101A2.1   | 1,90  | -1,95  | 2,580508 | -0,75531 | NA | NA |
| RP1-107N3.2   | 1,13  | -4,97  | 3,646504 | -1,36356 | NA | NA |
| RP1-117O3.2   | 0,83  | -3,80  | 2,826228 | -1,34365 | NA | NA |
| RP1-128M12.1  | 14,48 | -9,77  | 2,833739 | -3,44716 | NA | NA |
| RP1-131F15.2  | 8,87  | -9,85  | 3,338375 | -2,95057 | NA | NA |
| RP1-134E15.3  | 11,61 | -1,16  | 1,990731 | -0,58237 | NA | NA |
| RP1-136O14.1  | 7,21  | -4,25  | 3,567627 | -1,1924  | NA | NA |
| RP1-154K9.2   | 4,77  | -1,61  | 2,191702 | -0,73627 | NA | NA |
| RP1-15D23.2   | 1,21  | -5,07  | 3,645873 | -1,38951 | NA | NA |
| RP1-163M9.5   | 0,68  | -4,03  | 3,655623 | -1,10253 | NA | NA |
| RP1-164F3.8   | 1,31  | -5,18  | 3,645004 | -1,42003 | NA | NA |
| RP1-167G20.1  | 5,59  | -8,94  | 2,960556 | -3,02116 | NA | NA |
| RP1-178F15.5  | 13,72 | -1,62  | 1,64216  | -0,98935 | NA | NA |
| RP1-186E20.2  | 1,61  | -5,48  | 3,643226 | -1,50336 | NA | NA |
| RP1-18D14.4   | 5,25  | -5,02  | 3,629471 | -1,38236 | NA | NA |
| RP1-191J18.66 | 9,12  | -1,97  | 1,195146 | -1,6493  | NA | NA |
| RP1-199J3.6   | 2,63  | -3,02  | 2,85092  | -1,05975 | NA | NA |
| RP1-199J3.7   | 2,30  | -4,06  | 3,637338 | -1,11666 | NA | NA |
| RP1-200K18.1  | 0,73  | -4,35  | 3,652626 | -1,19027 | NA | NA |
| RP1-202O8.3   | 2,37  | -1,85  | 2,162358 | -0,85606 | NA | NA |
| RP1-20B11.2   | 21,50 | -0,91  | 1,446533 | -0,63025 | NA | NA |
| RP1-20N2.2    | 0,75  | -4,14  | 3,253545 | -1,27161 | NA | NA |
| RP1-223E5.4   | 3,46  | -5,76  | 3,639385 | -1,58142 | NA | NA |
| RP1-223H12.5  | 3,84  | -1,40  | 1,324887 | -1,05533 | NA | NA |
| RP1-230G1.4   | 1,93  | -5,23  | 2,725856 | -1,92009 | NA | NA |
| RP1-230G1.7   | 0,79  | -4,46  | 3,651078 | -1,22124 | NA | NA |
| RP1-23K20.2   | 1,49  | -3,19  | 3,642208 | -0,87496 | NA | NA |
| RP1-240K6.4   | 8,07  | -2,09  | 2,034409 | -1,02544 | NA | NA |
| RP1-244F1.1   | 1,25  | -5,12  | 3,64551  | -1,40474 | NA | NA |
| RP1-244F24.1  | 4,21  | -7,01  | 2,690405 | -2,60477 | NA | NA |
| RP1-256G22.1  | 1,33  | -5,21  | 3,139418 | -1,65856 | NA | NA |
| RP1-265C24.5  | 2,53  | -1,81  | 3,62598  | -0,49922 | NA | NA |
| RP1-266L20.2  | 5,53  | -0,26  | 1,404462 | -0,18777 | NA | NA |
| RP1-266L20.4  | 6,59  | -1,00  | 1,886204 | -0,52881 | NA | NA |
| RP1-274L14.2  | 9,31  | -0,98  | 3,508865 | -0,2798  | NA | NA |
| RP1-28O17.1   | 8,51  | -24,92 | 3,636916 | -6,85141 | NA | NA |
| RP1-300I2.2   | 4,50  | -23,99 | 3,638259 | -6,59286 | NA | NA |
| RP1-308E4.1   | 1,26  | -3,89  | 2,185781 | -1,78164 | NA | NA |
| RP1-32I10.10  | 4,31  | -0,32  | 2,810733 | -0,11288 | NA | NA |
| RP1-39G22.7   | 14,48 | 1,41   | 2,067986 | 0,682482 | NA | NA |
| RP1-45I4.3    | 4,07  | -23,84 | 3,638521 | -6,55255 | NA | NA |
| RP1-46F2.2    | 3,63  | -5,94  | 3,208747 | -1,85259 | NA | NA |
| RP1-56L9.6    | 4,34  | -5,07  | 2,157291 | -2,35052 | NA | NA |
| RP1-60O19.1   | 4,59  | -0,87  | 1,543205 | -0,56425 | NA | NA |
| RP1-65P5.6    | 9,50  | -0,23  | 3,508375 | -0,06694 | NA | NA |
| RP1-69D17.4   | 2,01  | -5,07  | 2,78308  | -1,82165 | NA | NA |
| RP1-6P5.1     | 3,93  | -8,62  | 3,56106  | -2,42147 | NA | NA |
| RP1-71L16.3   | 1,89  | -5,53  | 3,642328 | -1,51737 | NA | NA |
| RP1-78O14.1   | 69,74 | -2,85  | 0,763829 | -3,73129 | NA | NA |
| RP1-80N2.2    | 6,12  | -5,85  | 2,855916 | -2,04884 | NA | NA |

|                 |       |        |          |          |    |    |
|-----------------|-------|--------|----------|----------|----|----|
| RP1-84O15.2     | 2,89  | -2,28  | 3,623679 | -0,62993 | NA | NA |
| RP1-90J20.7     | 19,70 | -2,84  | 1,125999 | -2,52451 | NA | NA |
| RP1-95L4.3      | 6,22  | -9,58  | 3,433658 | -2,78975 | NA | NA |
| RP1-95L4.4      | 11,50 | -5,63  | 2,053059 | -2,74451 | NA | NA |
| RP1-9E21.5      | 25,81 | -1,17  | 2,356329 | -0,49623 | NA | NA |
| RP11-1000B6.8   | 11,09 | -1,27  | 2,465879 | -0,51695 | NA | NA |
| RP11-1006G14.1  | 9,81  | -1,27  | 2,138153 | -0,59476 | NA | NA |
| RP11-1007I4.1   | 2,35  | -5,86  | 3,640838 | -1,60931 | NA | NA |
| RP11-100G15.2   | 0,97  | -2,85  | 3,652922 | -0,77922 | NA | NA |
| RP11-100G15.3   | 3,08  | -6,42  | 3,639495 | -1,76266 | NA | NA |
| RP11-100L22.4   | 4,82  | -24,10 | 3,638065 | -6,6245  | NA | NA |
| RP11-1017G21.5  | 18,06 | -4,78  | 1,851929 | -2,58011 | NA | NA |
| RP11-1018J11.2  | 2,33  | -1,88  | 0,943292 | -1,99683 | NA | NA |
| RP11-1018N14.4  | 3,16  | -5,81  | 3,15186  | -1,84313 | NA | NA |
| RP11-101E14.3   | 0,68  | -4,25  | 3,653899 | -1,16226 | NA | NA |
| RP11-101E19.6   | 9,77  | -25,00 | 3,636744 | -6,87381 | NA | NA |
| RP11-101J8.2    | 1,75  | -4,25  | 3,387297 | -1,25371 | NA | NA |
| RP11-101P17.8   | 2,24  | -0,71  | 3,366148 | -0,21021 | NA | NA |
| RP11-1021N1.1   | 5,48  | -2,50  | 1,463752 | -1,71023 | NA | NA |
| RP11-1023L17.2  | 12,24 | 1,45   | 1,613062 | 0,8965   | NA | NA |
| RP11-102M11.1   | 22,16 | -2,12  | 1,323753 | -1,59892 | NA | NA |
| RP11-1030E3.1   | 3,55  | -8,57  | 3,58253  | -2,39139 | NA | NA |
| RP11-1036E20.10 | 6,43  | -8,52  | 2,978451 | -2,85977 | NA | NA |
| RP11-104G3.2    | 7,03  | -1,68  | 2,003331 | -0,8395  | NA | NA |
| RP11-104G3.7    | 1,30  | -1,86  | 2,759996 | -0,67229 | NA | NA |
| RP11-105C19.2   | 0,74  | -4,36  | 3,652425 | -1,19326 | NA | NA |
| RP11-105D1.2    | 1,12  | -2,07  | 3,167265 | -0,65331 | NA | NA |
| RP11-1060J15.4  | 10,34 | 0,13   | 1,435848 | 0,093138 | NA | NA |
| RP11-1072C15.2  | 24,55 | -1,63  | 1,054079 | -1,54484 | NA | NA |
| RP11-1079H9.1   | 2,40  | -1,77  | 2,639683 | -0,6702  | NA | NA |
| RP11-107P7.2    | 9,38  | -25,06 | 3,636789 | -6,89149 | NA | NA |
| RP11-1084A12.2  | 5,59  | -7,85  | 3,524838 | -2,22628 | NA | NA |
| RP11-1086I4.2   | 3,24  | -6,32  | 3,607771 | -1,75182 | NA | NA |
| RP11-108A14.2   | 0,67  | -4,22  | 3,654174 | -1,1551  | NA | NA |
| RP11-108E14.1   | 2,78  | -3,29  | 2,239077 | -1,47021 | NA | NA |
| RP11-108O10.8   | 0,34  | -2,24  | 3,689834 | -0,60718 | NA | NA |
| RP11-1096G20.5  | 1,85  | -1,59  | 1,804664 | -0,87907 | NA | NA |
| RP11-109D20.1   | 2,26  | -4,78  | 1,986243 | -2,40863 | NA | NA |
| RP11-109E24.2   | 5,67  | -24,33 | 3,637675 | -6,68852 | NA | NA |
| RP11-109G10.2   | 0,75  | -4,13  | 3,653659 | -1,12979 | NA | NA |
| RP11-109N23.6   | 3,41  | -3,81  | 2,504482 | -1,51964 | NA | NA |
| RP11-10A14.5    | 7,28  | -2,37  | 0,971081 | -2,43746 | NA | NA |
| RP11-10E18.7    | 44,80 | -0,40  | 1,572035 | -0,25152 | NA | NA |
| RP11-10J21.5    | 9,97  | -0,63  | 2,135438 | -0,29364 | NA | NA |
| RP11-10L12.1    | 4,30  | -4,45  | 2,67585  | -1,66191 | NA | NA |
| RP11-1105G2.4   | 0,89  | -3,13  | 2,92978  | -1,06697 | NA | NA |
| RP11-110C15.4   | 5,52  | -3,56  | 1,09908  | -3,23897 | NA | NA |
| RP11-110K18.2   | 2,32  | -3,38  | 3,586621 | -0,94306 | NA | NA |
| RP11-110K8.1    | 3,70  | -4,80  | 3,400433 | -1,41263 | NA | NA |
| RP11-1112C15.1  | 19,07 | -4,83  | 1,266555 | -3,8123  | NA | NA |

|                |       |        |          |          |    |    |
|----------------|-------|--------|----------|----------|----|----|
| RP11-1113C11.2 | 2,23  | -5,95  | 3,641113 | -1,63465 | NA | NA |
| RP11-1114A5.5  | 2,02  | -1,44  | 3,321344 | -0,43434 | NA | NA |
| RP11-111D3.2   | 0,55  | -3,93  | 3,658533 | -1,07439 | NA | NA |
| RP11-111H3.2   | 6,30  | -2,72  | 0,957512 | -2,84043 | NA | NA |
| RP11-111K18.1  | 31,99 | -2,95  | 1,898859 | -1,55187 | NA | NA |
| RP11-111K18.2  | 1,06  | -4,88  | 3,64733  | -1,33876 | NA | NA |
| RP11-111M22.4  | 1,10  | -3,32  | 2,979223 | -1,11562 | NA | NA |
| RP11-112L15.3  | 15,51 | -10,81 | 3,636261 | -2,97404 | NA | NA |
| RP11-1136L8.1  | 5,89  | -1,68  | 1,302673 | -1,28718 | NA | NA |
| RP11-113D6.6   | 4,34  | -23,93 | 3,638352 | -6,57667 | NA | NA |
| RP11-113E21.3  | 10,08 | -9,69  | 3,306203 | -2,93146 | NA | NA |
| RP11-113K21.1  | 1,51  | -5,38  | 3,64372  | -1,47786 | NA | NA |
| RP11-1144P22.1 | 3,90  | -2,64  | 2,652007 | -0,99656 | NA | NA |
| RP11-1149O23.2 | 9,32  | -0,13  | 1,222419 | -0,10975 | NA | NA |
| RP11-114F10.2  | 4,76  | -1,17  | 1,595959 | -0,73287 | NA | NA |
| RP11-114G11.3  | 4,39  | -4,92  | 1,773011 | -2,77528 | NA | NA |
| RP11-114H24.3  | 3,56  | -2,34  | 1,726777 | -1,35567 | NA | NA |
| RP11-114H24.5  | 12,79 | -8,64  | 3,639973 | -2,37372 | NA | NA |
| RP11-114N1.1   | 1,00  | -4,39  | 3,649205 | -1,20204 | NA | NA |
| RP11-114N19.2  | 7,56  | -8,19  | 3,401528 | -2,40781 | NA | NA |
| RP11-1151B14.4 | 7,49  | 0,32   | 3,219064 | 0,099664 | NA | NA |
| RP11-115C10.1  | 4,62  | -9,14  | 3,513932 | -2,60114 | NA | NA |
| RP11-115J16.2  | 6,98  | -1,49  | 1,526767 | -0,97888 | NA | NA |
| RP11-116B13.1  | 1,84  | -5,67  | 3,642233 | -1,55798 | NA | NA |
| RP11-116D17.1  | 6,42  | -6,17  | 3,237876 | -1,90566 | NA | NA |
| RP11-117P22.1  | 1,64  | -3,85  | 2,301088 | -1,6721  | NA | NA |
| RP11-118B22.6  | 14,83 | -1,47  | 2,390664 | -0,6148  | NA | NA |
| RP11-119H12.1  | 6,40  | -2,69  | 2,016354 | -1,33367 | NA | NA |
| RP11-11A18.1   | 0,98  | -4,76  | 3,648166 | -1,3043  | NA | NA |
| RP11-11N7.4    | 3,57  | -4,08  | 3,55769  | -1,14724 | NA | NA |
| RP11-120C12.3  | 0,79  | -4,46  | 3,651339 | -1,22134 | NA | NA |
| RP11-120D5.1   | 21,31 | -2,76  | 1,337033 | -2,06694 | NA | NA |
| RP11-1212A22.7 | 3,00  | -5,56  | 2,764249 | -2,01094 | NA | NA |
| RP11-1217F2.12 | 9,67  | -9,87  | 3,314645 | -2,97624 | NA | NA |
| RP11-121A13.3  | 1,83  | -5,67  | 3,642273 | -1,55583 | NA | NA |
| RP11-121C2.2   | 29,57 | -6,34  | 1,921563 | -3,30051 | NA | NA |
| RP11-121C6.5   | 12,96 | -0,63  | 1,65934  | -0,3806  | NA | NA |
| RP11-121M22.1  | 5,73  | -7,56  | 2,632801 | -2,87331 | NA | NA |
| RP11-122A21.2  | 5,35  | -5,31  | 3,631737 | -1,46105 | NA | NA |
| RP11-122G18.10 | 2,33  | -0,44  | 2,698307 | -0,16129 | NA | NA |
| RP11-122G18.11 | 14,99 | -2,15  | 1,822498 | -1,17831 | NA | NA |
| RP11-122M14.1  | 16,18 | -1,99  | 1,186979 | -1,67756 | NA | NA |
| RP11-123O22.1  | 2,52  | -6,13  | 3,628955 | -1,69016 | NA | NA |
| RP11-125D12.2  | 2,67  | -6,03  | 3,640301 | -1,65766 | NA | NA |
| RP11-1263C18.2 | 0,80  | -4,04  | 3,292651 | -1,22751 | NA | NA |
| RP11-1267H10.2 | 1,70  | -3,51  | 3,043937 | -1,15453 | NA | NA |
| RP11-126K1.2   | 7,53  | 0,79   | 2,050074 | 0,385342 | NA | NA |
| RP11-1277A3.1  | 20,75 | -3,59  | 1,465401 | -2,45071 | NA | NA |
| RP11-127L20.3  | 0,77  | -3,71  | 3,317709 | -1,11954 | NA | NA |
| RP11-127L21.2  | 3,58  | -23,67 | 3,638964 | -6,50448 | NA | NA |



|                |       |        |          |          |    |    |
|----------------|-------|--------|----------|----------|----|----|
| RP11-129K12.1  | 1,22  | -4,13  | 3,343536 | -1,2358  | NA | NA |
| RP11-129M6.1   | 8,06  | -24,73 | 3,637013 | -6,80062 | NA | NA |
| RP11-130L8.3   | 1,79  | -5,27  | 3,202567 | -1,64533 | NA | NA |
| RP11-132A1.4   | 1,86  | -5,69  | 3,642224 | -1,56309 | NA | NA |
| RP11-132A1.6   | 3,56  | -6,63  | 3,638984 | -1,82063 | NA | NA |
| RP11-132G19.3  | 0,68  | -4,23  | 3,654015 | -1,15729 | NA | NA |
| RP11-1336O20.2 | 1,50  | -4,50  | 2,812819 | -1,59925 | NA | NA |
| RP11-133F8.2   | 8,20  | -1,94  | 1,561909 | -1,24236 | NA | NA |
| RP11-133K1.5   | 1,37  | -3,12  | 2,364663 | -1,31959 | NA | NA |
| RP11-1348G14.8 | 3,74  | -2,32  | 2,303976 | -1,00747 | NA | NA |
| RP11-134E15.1  | 1,67  | -3,41  | 2,685771 | -1,27026 | NA | NA |
| RP11-134G8.7   | 2,49  | -0,99  | 1,418282 | -0,69713 | NA | NA |
| RP11-134K1.2   | 2,12  | -5,16  | 2,401265 | -2,14688 | NA | NA |
| RP11-134N1.2   | 19,46 | -6,76  | 2,31599  | -2,91748 | NA | NA |
| RP11-135A24.4  | 1,91  | -2,06  | 2,537107 | -0,81384 | NA | NA |
| RP11-136K7.2   | 7,08  | -2,44  | 1,109679 | -2,19636 | NA | NA |
| RP11-137D19.1  | 1,19  | -5,04  | 3,646019 | -1,38222 | NA | NA |
| RP11-138B9.1   | 13,20 | -1,59  | 2,139834 | -0,74413 | NA | NA |
| RP11-139G7.1   | 2,66  | -4,50  | 3,638785 | -1,23701 | NA | NA |
| RP11-139K1.2   | 5,56  | -0,26  | 2,338046 | -0,11173 | NA | NA |
| RP11-13K12.2   | 19,95 | -2,75  | 1,501034 | -1,83486 | NA | NA |
| RP11-141B14.2  | 16,59 | -0,81  | 1,149331 | -0,70818 | NA | NA |
| RP11-141E13.1  | 2,31  | -4,04  | 2,343238 | -1,72334 | NA | NA |
| RP11-141M1.1   | 0,69  | -4,27  | 3,653507 | -1,16817 | NA | NA |
| RP11-143P4.2   | 3,83  | -6,73  | 3,63873  | -1,85066 | NA | NA |
| RP11-144C15.2  | 6,98  | -3,37  | 3,615181 | -0,93087 | NA | NA |
| RP11-144L1.8   | 20,99 | -9,48  | 3,470149 | -2,73313 | NA | NA |
| RP11-145M4.1   | 3,89  | -23,70 | 3,638689 | -6,51268 | NA | NA |
| RP11-146F11.4  | 6,24  | -24,47 | 3,637462 | -6,72619 | NA | NA |
| RP11-146N18.1  | 2,57  | -4,28  | 3,010574 | -1,42097 | NA | NA |
| RP11-147G16.1  | 7,61  | -7,16  | 3,000027 | -2,38714 | NA | NA |
| RP11-147H23.3  | 21,09 | -5,32  | 2,374608 | -2,24233 | NA | NA |
| RP11-147K16.3  | 8,35  | -24,90 | 3,636956 | -6,84568 | NA | NA |
| RP11-148B18.4  | 4,67  | -4,29  | 1,219681 | -3,51569 | NA | NA |
| RP11-148B3.2   | 5,95  | -24,39 | 3,401972 | -7,1691  | NA | NA |
| RP11-148E17.1  | 5,97  | 0,01   | 1,679337 | 0,00711  | NA | NA |
| RP11-148L24.1  | 10,95 | -3,78  | 1,266838 | -2,98438 | NA | NA |
| RP11-14J7.6    | 2,08  | -5,88  | 3,060902 | -1,92072 | NA | NA |
| RP11-14O19.2   | 13,35 | -2,75  | 1,458267 | -1,88383 | NA | NA |
| RP11-14O22.1   | 0,92  | -2,61  | 3,65972  | -0,71199 | NA | NA |
| RP11-151F5.2   | 4,70  | -6,25  | 2,112674 | -2,95924 | NA | NA |
| RP11-152N13.16 | 3,20  | -0,89  | 1,986751 | -0,44922 | NA | NA |
| RP11-153N17.1  | 7,04  | -9,45  | 3,400725 | -2,77904 | NA | NA |
| RP11-156E6.1   | 38,80 | -0,59  | 1,061521 | -0,55872 | NA | NA |
| RP11-156K23.2  | 3,71  | -0,86  | 2,34074  | -0,36573 | NA | NA |
| RP11-156K23.3  | 9,11  | -1,91  | 1,905073 | -1,00436 | NA | NA |
| RP11-156P1.1   | 6,72  | 0,16   | 1,484365 | 0,110939 | NA | NA |
| RP11-157B13.6  | 1,18  | -5,04  | 3,64605  | -1,38273 | NA | NA |
| RP11-157D23.2  | 14,55 | -10,58 | 3,221257 | -3,28449 | NA | NA |
| RP11-157I4.4   | 10,01 | -4,84  | 1,602713 | -3,01974 | NA | NA |

|               |       |        |          |          |    |    |
|---------------|-------|--------|----------|----------|----|----|
| RP11-157J24.2 | 8,76  | -24,96 | 3,636879 | -6,86254 | NA | NA |
| RP11-157N3.1  | 3,60  | -1,12  | 1,50208  | -0,7472  | NA | NA |
| RP11-158A8.1  | 6,19  | -24,46 | 3,637487 | -6,72573 | NA | NA |
| RP11-159H10.3 | 3,46  | -6,36  | 3,006026 | -2,11563 | NA | NA |
| RP11-15A1.3   | 15,01 | -0,14  | 1,715313 | -0,08126 | NA | NA |
| RP11-15E1.1   | 9,92  | -5,26  | 3,06286  | -1,71631 | NA | NA |
| RP11-15E1.5   | 5,34  | 0,32   | 2,668856 | 0,119593 | NA | NA |
| RP11-15H20.7  | 2,24  | -3,57  | 1,489392 | -2,39767 | NA | NA |
| RP11-15H20.8  | 3,80  | -8,33  | 3,566509 | -2,33572 | NA | NA |
| RP11-160A9.2  | 10,58 | -7,29  | 1,997738 | -3,64948 | NA | NA |
| RP11-160E2.11 | 0,62  | -3,84  | 3,657353 | -1,05128 | NA | NA |
| RP11-160H12.2 | 1,97  | -5,78  | 3,641815 | -1,58608 | NA | NA |
| RP11-161E22.2 | 13,25 | -8,38  | 2,322213 | -3,60839 | NA | NA |
| RP11-162J8.2  | 6,70  | -7,38  | 3,50502  | -2,10595 | NA | NA |
| RP11-163E9.1  | 5,19  | -2,21  | 1,463564 | -1,51079 | NA | NA |
| RP11-163F8.3  | 64,55 | -2,40  | 0,906909 | -2,65055 | NA | NA |
| RP11-163N6.2  | 13,06 | -0,56  | 1,194843 | -0,47    | NA | NA |
| RP11-164P12.3 | 2,66  | -1,99  | 1,953373 | -1,02108 | NA | NA |
| RP11-166D18.1 | 1,84  | -2,83  | 2,760482 | -1,02541 | NA | NA |
| RP11-166E2.1  | 3,31  | -5,52  | 3,639661 | -1,51527 | NA | NA |
| RP11-166N17.1 | 2,66  | -6,04  | 3,640242 | -1,66007 | NA | NA |
| RP11-167H9.2  | 5,23  | -5,58  | 1,769016 | -3,1546  | NA | NA |
| RP11-167H9.4  | 2,13  | -5,86  | 3,640837 | -1,60822 | NA | NA |
| RP11-167H9.5  | 1,02  | -4,82  | 3,647752 | -1,32195 | NA | NA |
| RP11-167J8.1  | 2,14  | -3,88  | 1,420518 | -2,73196 | NA | NA |
| RP11-167N4.4  | 3,11  | -3,57  | 2,260598 | -1,58102 | NA | NA |
| RP11-167P11.2 | 6,83  | -1,36  | 0,834814 | -1,63467 | NA | NA |
| RP11-168G16.2 | 1,66  | -5,51  | 3,642837 | -1,51374 | NA | NA |
| RP11-168G22.1 | 3,83  | -23,77 | 3,638768 | -6,53294 | NA | NA |
| RP11-169D4.2  | 3,37  | -4,39  | 3,053827 | -1,43835 | NA | NA |
| RP11-169D4.3  | 9,67  | -9,64  | 3,317187 | -2,90604 | NA | NA |
| RP11-169K17.3 | 0,74  | -2,89  | 3,661285 | -0,79028 | NA | NA |
| RP11-169O17.6 | 2,44  | -1,58  | 1,736588 | -0,90839 | NA | NA |
| RP11-16K12.2  | 2,05  | -4,24  | 3,39827  | -1,24829 | NA | NA |
| RP11-16P6.1   | 4,38  | -2,09  | 1,325224 | -1,57661 | NA | NA |
| RP11-171G2.1  | 7,65  | 0,46   | 2,889202 | 0,158716 | NA | NA |
| RP11-172E10.1 | 4,90  | -1,51  | 2,160352 | -0,69727 | NA | NA |
| RP11-173D3.4  | 26,16 | -0,92  | 2,008404 | -0,46043 | NA | NA |
| RP11-173D9.1  | 1,90  | -2,19  | 3,63215  | -0,60325 | NA | NA |
| RP11-173P16.2 | 4,22  | -2,80  | 3,619039 | -0,77351 | NA | NA |
| RP11-174C7.1  | 1,79  | -5,63  | 3,642589 | -1,54694 | NA | NA |
| RP11-175B9.3  | 3,44  | -3,47  | 1,413254 | -2,45541 | NA | NA |
| RP11-175I6.5  | 4,80  | -6,22  | 2,733991 | -2,2737  | NA | NA |
| RP11-175K6.2  | 21,18 | -6,87  | 1,49473  | -4,59727 | NA | NA |
| RP11-175P19.3 | 1,35  | -2,75  | 1,92131  | -1,43299 | NA | NA |
| RP11-177B4.2  | 18,88 | -4,41  | 2,704831 | -1,63179 | NA | NA |
| RP11-177C12.3 | 0,91  | -4,22  | 3,286943 | -1,2837  | NA | NA |
| RP11-177G23.1 | 1,73  | -2,69  | 3,620734 | -0,74387 | NA | NA |
| RP11-177H13.2 | 56,29 | -2,99  | 0,687184 | -4,35169 | NA | NA |
| RP11-177N22.3 | 4,89  | -4,70  | 1,390456 | -3,38102 | NA | NA |

|                  |       |        |          |          |    |    |
|------------------|-------|--------|----------|----------|----|----|
| RP11-178C3.6     | 4,74  | -5,19  | 3,362397 | -1,54274 | NA | NA |
| RP11-179B15.2    | 1,82  | -3,05  | 3,583487 | -0,8523  | NA | NA |
| RP11-17A4.3      | 4,06  | -1,22  | 2,305718 | -0,5311  | NA | NA |
| RP11-17G12.3     | 1,15  | -3,37  | 2,98709  | -1,12853 | NA | NA |
| RP11-17M15.2     | 0,91  | -3,69  | 3,334278 | -1,10601 | NA | NA |
| RP11-180C1.1     | 7,19  | -4,85  | 1,956208 | -2,48033 | NA | NA |
| RP11-180P8.1     | 19,09 | -6,01  | 1,576323 | -3,81015 | NA | NA |
| RP11-180P8.4     | 12,50 | -25,47 | 3,636449 | -7,00448 | NA | NA |
| RP11-180P8.5     | 3,24  | -23,53 | 3,639342 | -6,46499 | NA | NA |
| RP11-181C3.2     | 4,63  | 0,16   | 2,667263 | 0,059134 | NA | NA |
| RP11-182J1.18    | 26,96 | -0,57  | 1,368154 | -0,41578 | NA | NA |
| RP11-185E12.2    | 1,29  | -2,40  | 3,147937 | -0,76154 | NA | NA |
| RP11-185N2.1     | 3,79  | -6,39  | 3,082197 | -2,0739  | NA | NA |
| RP11-187A9.2     | 3,29  | -1,79  | 3,621575 | -0,49467 | NA | NA |
| RP11-187C18.3    | 8,75  | -4,52  | 3,137279 | -1,44134 | NA | NA |
| RP11-187C18.5    | 7,78  | -24,79 | 3,637066 | -6,81696 | NA | NA |
| RP11-188P17.2    | 1,39  | -5,09  | 3,644697 | -1,39761 | NA | NA |
| RP11-189E14.3    | 3,67  | -4,41  | 1,443353 | -3,05597 | NA | NA |
| RP11-18J9.3      | 15,22 | -1,48  | 1,495539 | -0,98889 | NA | NA |
| RP11-190A12.4    | 3,55  | -6,47  | 3,590877 | -1,80186 | NA | NA |
| RP11-190A12.7    | 3,38  | -1,88  | 1,449944 | -1,29674 | NA | NA |
| RP11-191A15.1    | 1,34  | -4,86  | 3,217722 | -1,51073 | NA | NA |
| RP11-191J12.1    | 6,94  | -1,06  | 0,851698 | -1,24988 | NA | NA |
| RP11-191L9.4     | 14,43 | -25,72 | 3,636475 | -7,07231 | NA | NA |
| RP11-192H6.2     | 8,30  | -24,78 | 3,636975 | -6,81247 | NA | NA |
| RP11-192K2.2     | 3,10  | -0,92  | 2,094596 | -0,4398  | NA | NA |
| RP11-192P3.4     | 22,36 | -3,02  | 0,855317 | -3,5354  | NA | NA |
| RP11-196B3.2     | 2,95  | -1,56  | 2,685901 | -0,58103 | NA | NA |
| RP11-197K3.1     | 8,53  | -1,18  | 2,65303  | -0,44643 | NA | NA |
| RP11-197M22.2    | 3,28  | -0,72  | 3,624952 | -0,19895 | NA | NA |
| RP11-197P3.1     | 3,62  | -23,69 | 3,638941 | -6,50998 | NA | NA |
| RP11-1C8.6       | 1,82  | -5,47  | 3,642577 | -1,50258 | NA | NA |
| RP11-1L12.3      | 1,87  | -5,37  | 2,706287 | -1,98452 | NA | NA |
| RP11-1L9.1       | 1,34  | -5,02  | 3,645173 | -1,37799 | NA | NA |
| RP11-1M18.1      | 2,96  | -1,47  | 1,378509 | -1,06884 | NA | NA |
| RP11-202D1.3     | 4,37  | -6,95  | 3,638556 | -1,90907 | NA | NA |
| RP11-202D20.1    | 9,87  | -3,35  | 2,387703 | -1,40472 | NA | NA |
| RP11-203H19.2    | 2,10  | -3,01  | 3,632489 | -0,82882 | NA | NA |
| RP11-203I16.3    | 11,96 | -10,30 | 3,266436 | -3,15232 | NA | NA |
| RP11-203M5.8     | 1,99  | -1,30  | 2,636351 | -0,49185 | NA | NA |
| RP11-204I15.1    | 1,07  | -4,89  | 3,647262 | -1,34193 | NA | NA |
| RP11-204N11.2    | 1,58  | -3,58  | 3,057036 | -1,16992 | NA | NA |
| RP11-205A8.3     | 1,60  | -5,47  | 3,643343 | -1,50222 | NA | NA |
| RP11-206P5.2     | 2,21  | -5,94  | 3,641167 | -1,63141 | NA | NA |
| RP11-20B24.5     | 7,86  | -2,99  | 1,930779 | -1,54715 | NA | NA |
| RP11-20E23.1     | 1,81  | -5,66  | 3,642377 | -1,55285 | NA | NA |
| RP11-20G6.3      | 11,39 | -4,49  | 2,110331 | -2,12916 | NA | NA |
| RP11-20I20.1     | 9,48  | -3,52  | 3,613258 | -0,97327 | NA | NA |
| RP11-20O24.2     | 10,73 | -25,25 | 3,636617 | -6,94442 | NA | NA |
| RP11-210H10__A.1 | 2,34  | -4,76  | 3,640645 | -1,30763 | NA | NA |

|               |       |        |          |          |    |    |
|---------------|-------|--------|----------|----------|----|----|
| RP11-210K20.5 | 1,60  | -4,94  | 2,411042 | -2,04842 | NA | NA |
| RP11-210M15.1 | 4,35  | -1,49  | 2,195891 | -0,67663 | NA | NA |
| RP11-211A18.2 | 4,55  | -8,92  | 3,002365 | -2,97034 | NA | NA |
| RP11-211N8.7  | 1,26  | -3,68  | 3,491159 | -1,05503 | NA | NA |
| RP11-211P13.1 | 2,39  | -3,59  | 2,739178 | -1,31054 | NA | NA |
| RP11-212P7.3  | 2,31  | -0,97  | 2,656572 | -0,36535 | NA | NA |
| RP11-215E13.1 | 0,89  | -3,73  | 3,65183  | -1,02036 | NA | NA |
| RP11-216N14.7 | 18,28 | -1,89  | 1,926349 | -0,98096 | NA | NA |
| RP11-219F10.1 | 1,82  | -5,47  | 3,642592 | -1,50253 | NA | NA |
| RP11-219J21.2 | 3,98  | -6,79  | 3,638628 | -1,86588 | NA | NA |
| RP11-21C4.4   | 8,64  | -9,95  | 3,344772 | -2,9758  | NA | NA |
| RP11-220C2.1  | 1,32  | -5,19  | 3,645013 | -1,425   | NA | NA |
| RP11-221N13.1 | 2,04  | -5,83  | 3,641611 | -1,59979 | NA | NA |
| RP11-221N13.4 | 3,17  | -2,65  | 2,1395   | -1,23889 | NA | NA |
| RP11-222K16.2 | 13,43 | -8,39  | 2,093759 | -4,00946 | NA | NA |
| RP11-223C24.1 | 6,27  | -6,12  | 3,636463 | -1,6837  | NA | NA |
| RP11-223F20.2 | 2,38  | -6,05  | 3,640746 | -1,66133 | NA | NA |
| RP11-226F19.4 | 5,61  | 0,82   | 1,839958 | 0,445594 | NA | NA |
| RP11-227F19.2 | 3,91  | -23,80 | 3,638676 | -6,54154 | NA | NA |
| RP11-227F19.5 | 1,38  | -5,26  | 3,644584 | -1,44268 | NA | NA |
| RP11-228M15.1 | 15,81 | 0,13   | 1,601733 | 0,082455 | NA | NA |
| RP11-22B23.2  | 1,72  | -5,20  | 3,643262 | -1,42857 | NA | NA |
| RP11-230B22.1 | 1,05  | -3,04  | 2,280001 | -1,33286 | NA | NA |
| RP11-231C14.3 | 37,38 | -0,29  | 1,823851 | -0,16078 | NA | NA |
| RP11-231C14.5 | 2,94  | -23,38 | 3,639718 | -6,42384 | NA | NA |
| RP11-235E17.6 | 6,12  | -9,43  | 2,904393 | -3,24803 | NA | NA |
| RP11-235P11.1 | 1,01  | -4,62  | 3,648329 | -1,26581 | NA | NA |
| RP11-236B18.1 | 3,98  | -6,79  | 3,638624 | -1,86618 | NA | NA |
| RP11-236P24.3 | 1,22  | -5,09  | 3,645697 | -1,39531 | NA | NA |
| RP11-238I10.1 | 6,48  | -2,07  | 2,364998 | -0,87457 | NA | NA |
| RP11-238K6.1  | 2,01  | -1,14  | 2,019541 | -0,56385 | NA | NA |
| RP11-23B5.1   | 2,41  | -6,06  | 3,640648 | -1,66503 | NA | NA |
| RP11-23J18.1  | 14,76 | -1,09  | 1,636568 | -0,6651  | NA | NA |
| RP11-23N2.4   | 2,52  | -2,96  | 3,231681 | -0,91643 | NA | NA |
| RP11-242D10.2 | 2,53  | -2,68  | 3,626768 | -0,73987 | NA | NA |
| RP11-243A14.1 | 27,48 | -2,23  | 0,892672 | -2,49286 | NA | NA |
| RP11-244C20.1 | 1,13  | -4,97  | 3,646566 | -1,36258 | NA | NA |
| RP11-244H18.1 | 5,12  | -24,04 | 3,439087 | -6,98903 | NA | NA |
| RP11-244H18.3 | 4,83  | -24,09 | 3,638064 | -6,6218  | NA | NA |
| RP11-244K5.1  | 5,05  | -6,36  | 3,12111  | -2,03726 | NA | NA |
| RP11-245J9.2  | 22,15 | 1,58   | 1,303382 | 1,21355  | NA | NA |
| RP11-247A12.7 | 4,71  | -24,06 | 3,638121 | -6,61204 | NA | NA |
| RP11-248C1.2  | 6,22  | -2,17  | 1,61729  | -1,34278 | NA | NA |
| RP11-248G5.12 | 4,50  | -1,34  | 2,304778 | -0,58103 | NA | NA |
| RP11-248J23.5 | 3,41  | -2,50  | 2,469483 | -1,01126 | NA | NA |
| RP11-248J23.7 | 3,31  | -7,39  | 3,623755 | -2,04038 | NA | NA |
| RP11-24F11.5  | 2,74  | -0,52  | 2,519495 | -0,20587 | NA | NA |
| RP11-250B16.1 | 8,25  | -5,47  | 1,948184 | -2,80958 | NA | NA |
| RP11-252E2.1  | 1,00  | -3,43  | 2,957106 | -1,16141 | NA | NA |
| RP11-252K23.2 | 24,56 | -1,51  | 0,885447 | -1,7077  | NA | NA |

|                |       |        |          |          |    |    |
|----------------|-------|--------|----------|----------|----|----|
| RP11-252M21.6  | 2,39  | -5,88  | 3,640799 | -1,61531 | NA | NA |
| RP11-252P19.1  | 17,24 | -9,62  | 2,487084 | -3,86669 | NA | NA |
| RP11-254B13.1  | 6,80  | -1,63  | 0,615812 | -2,64487 | NA | NA |
| RP11-254B13.3  | 23,20 | -1,90  | 1,736629 | -1,09378 | NA | NA |
| RP11-254F19.4  | 8,94  | -5,76  | 2,357183 | -2,44507 | NA | NA |
| RP11-255H23.5  | 1,83  | -5,67  | 3,642339 | -1,55623 | NA | NA |
| RP11-255N24.4  | 2,51  | -6,12  | 3,640459 | -1,68199 | NA | NA |
| RP11-25K19.1   | 5,21  | -1,00  | 2,572575 | -0,3886  | NA | NA |
| RP11-260M19.2  | 2,11  | -3,16  | 2,750993 | -1,14793 | NA | NA |
| RP11-260M2.1   | 54,17 | -0,24  | 1,168736 | -0,20667 | NA | NA |
| RP11-262M14.2  | 6,12  | -9,28  | 3,44373  | -2,69594 | NA | NA |
| RP11-263C24.3  | 2,49  | -5,47  | 3,20576  | -1,70574 | NA | NA |
| RP11-264B17.4  | 16,02 | -1,74  | 1,244303 | -1,39477 | NA | NA |
| RP11-264C15.2  | 20,80 | -7,00  | 3,625755 | -1,93152 | NA | NA |
| RP11-264F23.1  | 3,68  | -5,28  | 1,700456 | -3,1048  | NA | NA |
| RP11-264J4.8   | 4,22  | -4,06  | 1,326401 | -3,06316 | NA | NA |
| RP11-264J4.9   | 3,75  | -3,06  | 1,866754 | -1,63957 | NA | NA |
| RP11-266K4.15  | 2,51  | -6,12  | 3,640439 | -1,68187 | NA | NA |
| RP11-268I9.1   | 4,46  | -9,09  | 3,521346 | -2,58203 | NA | NA |
| RP11-268P4.5   | 3,80  | 0,03   | 1,545787 | 0,017616 | NA | NA |
| RP11-269F20.1  | 1,30  | -1,82  | 2,808883 | -0,649   | NA | NA |
| RP11-269G24.2  | 1,56  | -5,44  | 3,08497  | -1,76311 | NA | NA |
| RP11-26M5.3    | 3,64  | -2,96  | 1,768596 | -1,67084 | NA | NA |
| RP11-270L13.1  | 8,02  | -24,84 | 3,637016 | -6,82918 | NA | NA |
| RP11-271F18.4  | 8,84  | -2,07  | 1,385884 | -1,4941  | NA | NA |
| RP11-274B21.10 | 6,59  | 0,81   | 1,807272 | 0,449663 | NA | NA |
| RP11-274B21.5  | 0,84  | -4,54  | 3,65049  | -1,24346 | NA | NA |
| RP11-274H2.2   | 10,60 | -0,22  | 1,395873 | -0,15944 | NA | NA |
| RP11-274H2.3   | 8,42  | -2,09  | 1,460036 | -1,43018 | NA | NA |
| RP11-274J16.5  | 1,22  | -5,09  | 3,645788 | -1,39514 | NA | NA |
| RP11-275I14.2  | 17,09 | -10,76 | 3,63618  | -2,95999 | NA | NA |
| RP11-275I14.4  | 10,61 | -5,58  | 2,688662 | -2,07441 | NA | NA |
| RP11-275I4.1   | 17,68 | -2,59  | 1,407752 | -1,84212 | NA | NA |
| RP11-275O4.4   | 4,19  | -23,88 | 3,638452 | -6,56265 | NA | NA |
| RP11-277J6.3   | 0,68  | -4,24  | 3,653865 | -1,16157 | NA | NA |
| RP11-278C7.2   | 6,59  | -7,19  | 2,690399 | -2,67162 | NA | NA |
| RP11-278I4.2   | 8,64  | -24,95 | 3,636903 | -6,85928 | NA | NA |
| RP11-278J6.5   | 0,66  | -4,19  | 3,654552 | -1,14529 | NA | NA |
| RP11-278L15.6  | 1,16  | -5,02  | 3,646256 | -1,37617 | NA | NA |
| RP11-279D17.1  | 1,81  | -5,32  | 3,642656 | -1,4591  | NA | NA |
| RP11-281N10.1  | 3,22  | -3,35  | 2,09946  | -1,59455 | NA | NA |
| RP11-281O15.4  | 0,98  | -4,76  | 3,648408 | -1,30587 | NA | NA |
| RP11-282K24.3  | 16,20 | -1,97  | 0,865123 | -2,27885 | NA | NA |
| RP11-284F21.8  | 6,60  | -1,52  | 0,874824 | -1,73274 | NA | NA |
| RP11-284P20.3  | 5,63  | -9,45  | 3,468517 | -2,72328 | NA | NA |
| RP11-285B24.1  | 0,71  | -4,30  | 3,652978 | -1,17766 | NA | NA |
| RP11-286B14.1  | 7,97  | -3,59  | 2,294003 | -1,56696 | NA | NA |
| RP11-287D1.5   | 5,68  | -1,80  | 2,102458 | -0,85447 | NA | NA |
| RP11-287J9.2   | 3,89  | -2,76  | 1,778862 | -1,55145 | NA | NA |
| RP11-290L1.6   | 2,60  | -6,18  | 3,64029  | -1,69691 | NA | NA |

|                |        |        |          |          |    |    |
|----------------|--------|--------|----------|----------|----|----|
| RP11-290L7.5   | 13,12  | -3,21  | 1,029017 | -3,11594 | NA | NA |
| RP11-290P14.2  | 2,00   | -5,79  | 3,641686 | -1,59066 | NA | NA |
| RP11-291B21.2  | 0,96   | -4,52  | 3,229123 | -1,40046 | NA | NA |
| RP11-294C11.11 | 3,48   | -23,63 | 3,6391   | -6,49465 | NA | NA |
| RP11-295B17.4  | 2,07   | -5,17  | 2,793365 | -1,8493  | NA | NA |
| RP11-295M18.2  | 0,76   | -4,40  | 3,652027 | -1,20539 | NA | NA |
| RP11-295M18.6  | 8,03   | -24,83 | 3,637011 | -6,82775 | NA | NA |
| RP11-295M18.7  | 10,34  | -25,20 | 3,636667 | -6,93055 | NA | NA |
| RP11-295P9.13  | 0,83   | -3,13  | 3,655741 | -0,85505 | NA | NA |
| RP11-296O14.3  | 38,42  | -1,68  | 1,740268 | -0,96552 | NA | NA |
| RP11-297I6.5   | 1,57   | -5,05  | 3,644143 | -1,38595 | NA | NA |
| RP11-298J23.8  | 2,42   | -0,79  | 2,428964 | -0,32537 | NA | NA |
| RP11-298P3.1   | 17,33  | -25,83 | 3,636174 | -7,10445 | NA | NA |
| RP11-29A1.3    | 2,83   | -5,62  | 2,760375 | -2,03577 | NA | NA |
| RP11-2H3.7     | 11,50  | -6,76  | 3,617116 | -1,86873 | NA | NA |
| RP11-2H8.2     | 0,80   | -4,47  | 3,651245 | -1,22448 | NA | NA |
| RP11-301G7.1   | 6,90   | -0,90  | 2,073327 | -0,43543 | NA | NA |
| RP11-301H24.2  | 1,57   | -5,45  | 3,643477 | -1,49656 | NA | NA |
| RP11-302I18.1  | 1,13   | -2,84  | 3,55452  | -0,79819 | NA | NA |
| RP11-302K17.3  | 1,66   | -5,53  | 3,643005 | -1,5171  | NA | NA |
| RP11-303E16.9  | 112,07 | -1,14  | 0,417502 | -2,7207  | NA | NA |
| RP11-304C16.3  | 1,58   | -5,45  | 3,643433 | -1,49639 | NA | NA |
| RP11-304L20.1  | 6,98   | -1,37  | 1,858667 | -0,73815 | NA | NA |
| RP11-305D15.8  | 0,79   | -4,46  | 3,65124  | -1,22082 | NA | NA |
| RP11-307C19.1  | 1,01   | -4,21  | 2,816215 | -1,49575 | NA | NA |
| RP11-307F22.2  | 0,80   | -4,49  | 3,65274  | -1,23009 | NA | NA |
| RP11-307L3.4   | 1,75   | -5,60  | 3,642651 | -1,53762 | NA | NA |
| RP11-307N16.6  | 1,19   | -3,06  | 3,50346  | -0,87343 | NA | NA |
| RP11-307P5.1   | 1,69   | -5,56  | 3,642925 | -1,52657 | NA | NA |
| RP11-308D13.1  | 1,64   | -5,16  | 3,206001 | -1,60827 | NA | NA |
| RP11-308N19.1  | 9,83   | -3,25  | 2,103002 | -1,5438  | NA | NA |
| RP11-309E23.2  | 3,02   | -6,37  | 3,568664 | -1,78442 | NA | NA |
| RP11-311P8.1   | 17,60  | -3,40  | 0,795176 | -4,27576 | NA | NA |
| RP11-312P12.2  | 7,96   | -0,43  | 2,12796  | -0,20129 | NA | NA |
| RP11-313I2.13  | 1,84   | -5,29  | 3,642794 | -1,45325 | NA | NA |
| RP11-314C16.1  | 1,38   | -5,26  | 3,64457  | -1,44433 | NA | NA |
| RP11-314E23.1  | 1,26   | -1,87  | 2,830015 | -0,661   | NA | NA |
| RP11-314N13.3  | 6,32   | -6,62  | 3,637508 | -1,81966 | NA | NA |
| RP11-314N13.4  | 51,59  | -1,70  | 0,996569 | -1,70493 | NA | NA |
| RP11-316C12.2  | 13,64  | 0,22   | 0,90307  | 0,240231 | NA | NA |
| RP11-316I5.1   | 1,24   | -4,89  | 3,646155 | -1,34088 | NA | NA |
| RP11-317B17.2  | 2,06   | -2,17  | 3,240918 | -0,67095 | NA | NA |
| RP11-317J10.2  | 2,59   | -2,94  | 3,194492 | -0,92177 | NA | NA |
| RP11-317J19.1  | 1,19   | -2,55  | 2,714649 | -0,93776 | NA | NA |
| RP11-318G21.2  | 0,72   | -4,33  | 3,652581 | -1,18417 | NA | NA |
| RP11-318K12.2  | 1,41   | -3,38  | 2,660732 | -1,271   | NA | NA |
| RP11-319G6.1   | 9,16   | -0,69  | 1,426917 | -0,48466 | NA | NA |
| RP11-319J24.3  | 15,27  | 0,26   | 1,33663  | 0,196507 | NA | NA |
| RP11-31H5.3    | 13,20  | -5,70  | 2,303497 | -2,47311 | NA | NA |
| RP11-31K22.3   | 4,19   | -23,88 | 3,638452 | -6,56249 | NA | NA |

|               |        |        |          |          |    |    |
|---------------|--------|--------|----------|----------|----|----|
| RP11-320E2.1  | 4,25   | -23,92 | 3,638418 | -6,57388 | NA | NA |
| RP11-320M2.1  | 28,53  | -1,25  | 1,009487 | -1,23641 | NA | NA |
| RP11-321F8.4  | 1,79   | -3,86  | 3,641989 | -1,06034 | NA | NA |
| RP11-321G12.1 | 3,00   | -1,28  | 2,505873 | -0,51256 | NA | NA |
| RP11-321M21.4 | 14,34  | -25,67 | 3,636323 | -7,06015 | NA | NA |
| RP11-321N4.5  | 5,15   | -0,62  | 1,954334 | -0,31588 | NA | NA |
| RP11-322E11.1 | 1,22   | -5,08  | 3,645816 | -1,3924  | NA | NA |
| RP11-322E11.3 | 2,33   | -1,06  | 2,660785 | -0,39661 | NA | NA |
| RP11-324B6.1  | 1,69   | -3,86  | 2,103727 | -1,83278 | NA | NA |
| RP11-324F11.1 | 4,06   | -23,86 | 3,638546 | -6,55637 | NA | NA |
| RP11-325L12.7 | 1,12   | -4,96  | 3,646658 | -1,3612  | NA | NA |
| RP11-325O24.2 | 1,89   | -5,38  | 3,642303 | -1,47816 | NA | NA |
| RP11-325P15.2 | 8,68   | -9,72  | 3,34385  | -2,90553 | NA | NA |
| RP11-326C3.11 | 97,31  | -0,83  | 0,77113  | -1,07979 | NA | NA |
| RP11-326C3.2  | 1,84   | -5,32  | 3,185095 | -1,66907 | NA | NA |
| RP11-326G21.1 | 13,42  | 1,40   | 1,618089 | 0,868109 | NA | NA |
| RP11-327F22.5 | 0,93   | -3,86  | 3,65159  | -1,05586 | NA | NA |
| RP11-327I22.5 | 4,33   | -5,22  | 3,368113 | -1,55044 | NA | NA |
| RP11-327P2.7  | 55,28  | -6,71  | 1,19714  | -5,60303 | NA | NA |
| RP11-328D5.4  | 20,45  | -4,74  | 1,928052 | -2,45687 | NA | NA |
| RP11-328K4.1  | 3,48   | -1,18  | 2,741236 | -0,43152 | NA | NA |
| RP11-330C7.2  | 7,25   | 1,07   | 2,685908 | 0,397542 | NA | NA |
| RP11-330O11.3 | 18,92  | -9,25  | 3,636117 | -2,54492 | NA | NA |
| RP11-331F9.3  | 3,73   | -1,84  | 2,52138  | -0,72915 | NA | NA |
| RP11-332L8.2  | 9,06   | -25,02 | 3,636846 | -6,87853 | NA | NA |
| RP11-332M2.1  | 136,63 | -0,70  | 1,11257  | -0,62654 | NA | NA |
| RP11-333E13.1 | 8,99   | -1,04  | 2,303264 | -0,45369 | NA | NA |
| RP11-333E13.2 | 14,15  | -0,99  | 1,735853 | -0,56752 | NA | NA |
| RP11-334E6.3  | 3,59   | -0,64  | 3,456801 | -0,18394 | NA | NA |
| RP11-334L9.2  | 0,73   | -4,33  | 3,652681 | -1,18606 | NA | NA |
| RP11-335L9.1  | 1,48   | -5,35  | 3,643839 | -1,4691  | NA | NA |
| RP11-33B1.3   | 3,46   | -0,72  | 1,572066 | -0,4559  | NA | NA |
| RP11-33I11.2  | 6,46   | -4,71  | 3,091718 | -1,52405 | NA | NA |
| RP11-340C20.2 | 6,55   | -5,07  | 1,300266 | -3,89718 | NA | NA |
| RP11-340I6.1  | 0,57   | -3,71  | 3,65956  | -1,01277 | NA | NA |
| RP11-340I6.5  | 6,56   | -24,55 | 3,637371 | -6,7488  | NA | NA |
| RP11-341G23.4 | 3,03   | -5,47  | 2,480433 | -2,20445 | NA | NA |
| RP11-342A1.1  | 11,02  | -25,29 | 3,636587 | -6,95522 | NA | NA |
| RP11-342C20.2 | 3,49   | -6,60  | 3,639086 | -1,8134  | NA | NA |
| RP11-342D11.2 | 2,58   | -6,16  | 3,640317 | -1,6919  | NA | NA |
| RP11-342K6.1  | 17,46  | -2,07  | 1,073387 | -1,93167 | NA | NA |
| RP11-343C2.9  | 1,32   | -3,02  | 2,666925 | -1,13069 | NA | NA |
| RP11-343N15.1 | 28,92  | -0,86  | 1,273743 | -0,67816 | NA | NA |
| RP11-344E13.4 | 2,95   | -6,02  | 3,124577 | -1,9262  | NA | NA |
| RP11-344F13.1 | 6,65   | -24,57 | 3,637344 | -6,75442 | NA | NA |
| RP11-345K20.2 | 4,69   | -6,09  | 1,716772 | -3,54889 | NA | NA |
| RP11-345P4.6  | 4,39   | -2,05  | 1,74866  | -1,17513 | NA | NA |
| RP11-346C16.1 | 15,23  | 0,15   | 1,922286 | 0,075528 | NA | NA |
| RP11-346E17.4 | 0,75   | -4,37  | 3,65219  | -1,19716 | NA | NA |
| RP11-347C18.1 | 1,32   | -4,99  | 3,64542  | -1,36808 | NA | NA |

|                |       |        |          |          |    |    |
|----------------|-------|--------|----------|----------|----|----|
| RP11-347C18.5  | 7,00  | -3,39  | 3,307753 | -1,02364 | NA | NA |
| RP11-348H3.5   | 0,80  | -4,48  | 3,651176 | -1,22621 | NA | NA |
| RP11-348J24.2  | 17,00 | -5,70  | 1,381267 | -4,12482 | NA | NA |
| RP11-348N5.9   | 2,03  | -0,41  | 2,995239 | -0,13791 | NA | NA |
| RP11-349G13.3  | 3,66  | -6,34  | 2,657178 | -2,38673 | NA | NA |
| RP11-34F20.7   | 17,63 | 1,69   | 1,766281 | 0,956259 | NA | NA |
| RP11-34P1.4    | 8,99  | -8,90  | 2,917762 | -3,04916 | NA | NA |
| RP11-350D17.2  | 0,83  | -4,52  | 3,650672 | -1,23883 | NA | NA |
| RP11-350J20.12 | 0,73  | -4,08  | 3,654267 | -1,11728 | NA | NA |
| RP11-351A20.1  | 0,99  | -4,54  | 3,649063 | -1,24451 | NA | NA |
| RP11-351D16.3  | 18,48 | -0,12  | 1,232693 | -0,09669 | NA | NA |
| RP11-351I21.10 | 2,40  | -6,06  | 3,640699 | -1,66495 | NA | NA |
| RP11-351I24.1  | 4,06  | -8,59  | 3,549046 | -2,42114 | NA | NA |
| RP11-351K16.4  | 13,72 | -0,32  | 2,021317 | -0,15832 | NA | NA |
| RP11-352B15.2  | 7,77  | -8,35  | 2,903008 | -2,87784 | NA | NA |
| RP11-352E6.1   | 4,50  | -23,98 | 3,638265 | -6,59184 | NA | NA |
| RP11-353K11.1  | 3,53  | -6,62  | 3,54533  | -1,86616 | NA | NA |
| RP11-353N14.5  | 3,12  | -0,37  | 1,983869 | -0,18465 | NA | NA |
| RP11-354E23.3  | 10,53 | -2,01  | 1,427034 | -1,41081 | NA | NA |
| RP11-354I13.1  | 2,65  | -1,97  | 1,768186 | -1,11626 | NA | NA |
| RP11-354I13.2  | 1,21  | -2,17  | 3,602654 | -0,60358 | NA | NA |
| RP11-354P11.3  | 2,55  | -2,19  | 1,132462 | -1,93701 | NA | NA |
| RP11-354P17.6  | 0,80  | -4,47  | 3,651249 | -1,22435 | NA | NA |
| RP11-356J5.5   | 0,72  | -4,10  | 3,258595 | -1,25906 | NA | NA |
| RP11-356K23.3  | 13,60 | -0,80  | 2,02163  | -0,39688 | NA | NA |
| RP11-357C3.2   | 3,99  | -6,63  | 3,559604 | -1,86322 | NA | NA |
| RP11-357L1.1   | 6,29  | -2,06  | 1,730058 | -1,19003 | NA | NA |
| RP11-359D24.1  | 6,70  | -24,58 | 3,637327 | -6,75732 | NA | NA |
| RP11-359E7.2   | 1,83  | -4,67  | 3,642892 | -1,28131 | NA | NA |
| RP11-359I18.5  | 4,11  | -7,63  | 3,061547 | -2,49347 | NA | NA |
| RP11-359J23.1  | 8,50  | -4,22  | 2,349051 | -1,79819 | NA | NA |
| RP11-359P18.2  | 2,50  | -6,12  | 3,640498 | -1,68051 | NA | NA |
| RP11-35G22.1   | 10,39 | -0,90  | 0,981636 | -0,9166  | NA | NA |
| RP11-35J23.1   | 2,68  | -3,89  | 2,43622  | -1,5972  | NA | NA |
| RP11-360I20.2  | 1,59  | -1,86  | 1,90436  | -0,97477 | NA | NA |
| RP11-360P21.2  | 1,62  | -1,31  | 2,090926 | -0,62532 | NA | NA |
| RP11-361M10.3  | 1,27  | -2,54  | 3,644721 | -0,69652 | NA | NA |
| RP11-362F19.3  | 6,19  | -4,48  | 3,125849 | -1,43408 | NA | NA |
| RP11-362I1.2   | 1,71  | -5,57  | 3,642843 | -1,52848 | NA | NA |
| RP11-363E6.4   | 0,97  | -4,76  | 3,648376 | -1,30468 | NA | NA |
| RP11-363N22.2  | 0,73  | -4,35  | 3,652571 | -1,18963 | NA | NA |
| RP11-364C11.3  | 3,09  | -1,75  | 2,452287 | -0,71272 | NA | NA |
| RP11-364P22.1  | 21,60 | -3,28  | 1,939839 | -1,69047 | NA | NA |
| RP11-365P13.2  | 23,26 | -11,25 | 3,635989 | -3,09394 | NA | NA |
| RP11-366M4.18  | 11,02 | -25,29 | 3,636589 | -6,95492 | NA | NA |
| RP11-366M4.8   | 20,72 | -27,25 | 3,636054 | -7,49488 | NA | NA |
| RP11-366O20.5  | 2,28  | -5,65  | 3,158068 | -1,79057 | NA | NA |
| RP11-367J11.2  | 15,28 | -1,09  | 1,622922 | -0,67015 | NA | NA |
| RP11-367N14.2  | 5,33  | 0,42   | 2,089075 | 0,198723 | NA | NA |
| RP11-368I7.2   | 1,27  | -5,13  | 3,645064 | -1,40646 | NA | NA |



|                |       |        |          |          |    |    |
|----------------|-------|--------|----------|----------|----|----|
| RP11-368I7.4   | 1,07  | -3,25  | 2,961163 | -1,09612 | NA | NA |
| RP11-368L12.1  | 4,93  | -3,64  | 2,914217 | -1,24756 | NA | NA |
| RP11-368M16.3  | 7,58  | -5,45  | 1,972155 | -2,76319 | NA | NA |
| RP11-369C8.1   | 1,43  | -0,98  | 3,645935 | -0,26984 | NA | NA |
| RP11-369E15.2  | 1,60  | -5,48  | 3,643354 | -1,50336 | NA | NA |
| RP11-371A22.1  | 49,24 | -0,34  | 0,778846 | -0,44104 | NA | NA |
| RP11-371I1.1   | 0,63  | -4,13  | 3,655415 | -1,13072 | NA | NA |
| RP11-371I1.2   | 1,24  | -4,17  | 2,178583 | -1,91525 | NA | NA |
| RP11-372B4.3   | 5,50  | -0,99  | 1,320935 | -0,75061 | NA | NA |
| RP11-373A9.3   | 9,48  | -2,67  | 1,368677 | -1,95021 | NA | NA |
| RP11-373D23.3  | 9,42  | -0,04  | 1,942501 | -0,02105 | NA | NA |
| RP11-373M8.2   | 2,48  | -1,05  | 1,934857 | -0,54071 | NA | NA |
| RP11-375A20.1  | 4,05  | -23,72 | 3,63856  | -6,5182  | NA | NA |
| RP11-375A5.1   | 6,37  | -8,07  | 2,999453 | -2,69204 | NA | NA |
| RP11-375O18.2  | 28,18 | -2,04  | 0,9347   | -2,17827 | NA | NA |
| RP11-378G13.2  | 3,50  | -6,13  | 2,381336 | -2,57386 | NA | NA |
| RP11-378J18.3  | 6,37  | -9,91  | 2,92294  | -3,39141 | NA | NA |
| RP11-379C1.1   | 0,75  | -4,38  | 3,652277 | -1,19979 | NA | NA |
| RP11-379F4.7   | 2,29  | -5,99  | 3,640851 | -1,64462 | NA | NA |
| RP11-379F4.9   | 6,02  | -2,36  | 2,532139 | -0,93214 | NA | NA |
| RP11-379J5.5   | 27,93 | -11,14 | 3,635897 | -3,06301 | NA | NA |
| RP11-379K17.4  | 10,02 | -0,33  | 1,078084 | -0,30502 | NA | NA |
| RP11-379K17.7  | 5,65  | -1,65  | 0,951584 | -1,73686 | NA | NA |
| RP11-379P15.1  | 5,21  | -4,81  | 3,627228 | -1,32554 | NA | NA |
| RP11-380F14.2  | 1,97  | -5,78  | 3,641864 | -1,5867  | NA | NA |
| RP11-380N8.6   | 10,76 | -25,26 | 3,636619 | -6,94515 | NA | NA |
| RP11-381N20.2  | 10,15 | -3,99  | 1,529543 | -2,60632 | NA | NA |
| RP11-382A18.3  | 1,55  | -5,24  | 3,643773 | -1,43897 | NA | NA |
| RP11-382E9.1   | 4,71  | -0,97  | 1,116721 | -0,86794 | NA | NA |
| RP11-383C5.4   | 14,88 | -2,36  | 2,186697 | -1,07905 | NA | NA |
| RP11-383C5.7   | 24,31 | -0,59  | 1,194416 | -0,49237 | NA | NA |
| RP11-383D22.1  | 5,45  | -24,28 | 3,63777  | -6,67402 | NA | NA |
| RP11-384F7.1   | 0,49  | -3,74  | 3,660256 | -1,02229 | NA | NA |
| RP11-384K6.6   | 22,40 | 0,39   | 1,454999 | 0,268509 | NA | NA |
| RP11-384M20.1  | 5,32  | 0,19   | 2,827154 | 0,067266 | NA | NA |
| RP11-385D13.1  | 1,67  | -1,92  | 1,899344 | -1,00945 | NA | NA |
| RP11-385F5.5   | 9,49  | -3,92  | 2,9466   | -1,33108 | NA | NA |
| RP11-387H17.4  | 6,38  | -3,17  | 2,958251 | -1,07252 | NA | NA |
| RP11-38M15.12  | 1,51  | -4,78  | 3,644838 | -1,31054 | NA | NA |
| RP11-390P24.1  | 20,03 | -0,78  | 1,785564 | -0,43526 | NA | NA |
| RP11-391L3.5   | 6,15  | -2,37  | 1,37186  | -1,72928 | NA | NA |
| RP11-392A22.2  | 54,36 | 0,53   | 1,384866 | 0,384253 | NA | NA |
| RP11-393I2.4   | 5,27  | -1,37  | 1,308457 | -1,04478 | NA | NA |
| RP11-393N21.2  | 5,00  | -1,11  | 2,181375 | -0,50919 | NA | NA |
| RP11-394B2.7   | 1,43  | -5,31  | 3,644259 | -1,45772 | NA | NA |
| RP11-394I13.1  | 3,20  | -6,47  | 3,639396 | -1,77864 | NA | NA |
| RP11-394J1.2   | 8,26  | -3,14  | 1,320786 | -2,37624 | NA | NA |
| RP11-394O2.3   | 2,72  | 0,03   | 2,713703 | 0,010812 | NA | NA |
| RP11-395L14.18 | 5,54  | -2,53  | 2,179142 | -1,15917 | NA | NA |
| RP11-395N3.1   | 0,91  | -4,66  | 3,649155 | -1,27695 | NA | NA |

|                |        |        |          |          |    |    |
|----------------|--------|--------|----------|----------|----|----|
| RP11-397P13.6  | 0,71   | -3,89  | 3,654454 | -1,06431 | NA | NA |
| RP11-398C13.2  | 8,33   | -24,89 | 3,636949 | -6,84305 | NA | NA |
| RP11-398C13.8  | 108,67 | -2,71  | 1,106047 | -2,4487  | NA | NA |
| RP11-398G24.2  | 8,19   | -0,53  | 0,765101 | -0,69547 | NA | NA |
| RP11-398H6.1   | 4,09   | -0,86  | 1,215294 | -0,70741 | NA | NA |
| RP11-399E6.1   | 2,45   | -6,09  | 3,591811 | -1,69673 | NA | NA |
| RP11-399J13.2  | 5,81   | -2,27  | 2,048365 | -1,10597 | NA | NA |
| RP11-399K21.11 | 4,23   | 0,41   | 2,21142  | 0,183207 | NA | NA |
| RP11-399K21.5  | 7,83   | -24,72 | 3,637058 | -6,79803 | NA | NA |
| RP11-399O19.5  | 2,25   | -6,01  | 3,642762 | -1,64944 | NA | NA |
| RP11-39E3.3    | 1,88   | -1,08  | 3,635417 | -0,2958  | NA | NA |
| RP11-39H3.2    | 10,28  | 0,10   | 1,184994 | 0,080391 | NA | NA |
| RP11-39K24.12  | 2,22   | -0,35  | 2,418348 | -0,14648 | NA | NA |
| RP11-39K24.15  | 1,78   | -2,52  | 1,444576 | -1,7442  | NA | NA |
| RP11-3G20.1    | 3,32   | -23,56 | 3,639194 | -6,47313 | NA | NA |
| RP11-3J10.5    | 1,50   | -2,18  | 3,197211 | -0,68254 | NA | NA |
| RP11-3K24.3    | 1,90   | -1,42  | 3,28317  | -0,43332 | NA | NA |
| RP11-3P22.1    | 1,34   | -2,80  | 2,722504 | -1,02732 | NA | NA |
| RP11-400N13.3  | 2,79   | -5,45  | 3,640302 | -1,49809 | NA | NA |
| RP11-401L13.4  | 1,74   | -5,25  | 3,199292 | -1,64141 | NA | NA |
| RP11-401P9.5   | 7,25   | -6,02  | 3,152192 | -1,90944 | NA | NA |
| RP11-401P9.6   | 2,74   | -1,39  | 1,911696 | -0,72552 | NA | NA |
| RP11-402D21.2  | 1,17   | -5,02  | 3,646102 | -1,37816 | NA | NA |
| RP11-402J7.3   | 4,43   | -23,98 | 3,486216 | -6,879   | NA | NA |
| RP11-402L6.1   | 7,22   | -9,77  | 3,393193 | -2,87824 | NA | NA |
| RP11-403B2.10  | 8,05   | -24,73 | 3,637002 | -6,79957 | NA | NA |
| RP11-403F21.1  | 0,69   | -4,26  | 3,65368  | -1,16689 | NA | NA |
| RP11-403H13.1  | 10,63  | -0,83  | 2,750566 | -0,30193 | NA | NA |
| RP11-403I13.7  | 4,79   | -6,28  | 2,682023 | -2,34324 | NA | NA |
| RP11-403N16.3  | 7,49   | -5,80  | 2,641563 | -2,19482 | NA | NA |
| RP11-404G16.1  | 5,20   | -4,68  | 2,696592 | -1,73485 | NA | NA |
| RP11-404O13.2  | 3,74   | -4,60  | 2,682918 | -1,7129  | NA | NA |
| RP11-406A20.4  | 29,48  | -3,94  | 1,834518 | -2,14895 | NA | NA |
| RP11-406H23.5  | 8,52   | -10,03 | 3,348256 | -2,9944  | NA | NA |
| RP11-407B7.1   | 8,23   | -3,26  | 2,269986 | -1,43466 | NA | NA |
| RP11-407G23.1  | 3,60   | -6,32  | 2,661142 | -2,37463 | NA | NA |
| RP11-408N14.1  | 6,27   | -9,36  | 3,431942 | -2,72784 | NA | NA |
| RP11-408O19.5  | 4,50   | -0,40  | 1,459554 | -0,2764  | NA | NA |
| RP11-409C19.2  | 1,92   | -5,56  | 3,642159 | -1,52749 | NA | NA |
| RP11-409K20.7  | 2,46   | -1,72  | 2,614883 | -0,65918 | NA | NA |
| RP11-40C11.2   | 11,31  | -25,34 | 3,636566 | -6,96698 | NA | NA |
| RP11-411B10.6  | 3,37   | -6,55  | 3,639185 | -1,79998 | NA | NA |
| RP11-415D17.4  | 4,27   | -8,49  | 3,535345 | -2,40188 | NA | NA |
| RP11-415J8.3   | 49,41  | -2,01  | 0,982546 | -2,04791 | NA | NA |
| RP11-415J8.7   | 0,80   | -4,27  | 3,651675 | -1,17024 | NA | NA |
| RP11-416O18.2  | 6,73   | -6,83  | 3,500496 | -1,95173 | NA | NA |
| RP11-417B4.2   | 1,52   | -3,93  | 2,608553 | -1,50643 | NA | NA |
| RP11-417L19.5  | 8,55   | -2,58  | 1,853435 | -1,39109 | NA | NA |
| RP11-419P8.1   | 3,41   | -0,40  | 1,572535 | -0,2573  | NA | NA |
| RP11-420A6.2   | 3,22   | -0,34  | 2,559076 | -0,13268 | NA | NA |

|                |       |        |          |          |    |    |
|----------------|-------|--------|----------|----------|----|----|
| RP11-420H19.3  | 1,67  | -5,54  | 3,642968 | -1,51967 | NA | NA |
| RP11-420J11.2  | 2,78  | -6,26  | 3,63987  | -1,72007 | NA | NA |
| RP11-420K8.1   | 5,12  | -6,08  | 1,923606 | -3,16007 | NA | NA |
| RP11-421L10.1  | 98,73 | -3,21  | 0,787191 | -4,07521 | NA | NA |
| RP11-421M1.8   | 5,73  | -24,30 | 3,637457 | -6,67968 | NA | NA |
| RP11-421P23.1  | 15,35 | -25,78 | 3,636284 | -7,0897  | NA | NA |
| RP11-422J15.1  | 4,68  | -2,88  | 1,712666 | -1,67893 | NA | NA |
| RP11-423E7.1   | 2,80  | -2,12  | 2,660316 | -0,79639 | NA | NA |
| RP11-423G4.10  | 1,71  | -3,93  | 2,083169 | -1,88862 | NA | NA |
| RP11-425D17.2  | 1,60  | -1,68  | 3,257976 | -0,51504 | NA | NA |
| RP11-425J20.2  | 2,50  | -6,12  | 3,640493 | -1,67992 | NA | NA |
| RP11-426C22.12 | 14,78 | -0,18  | 1,247014 | -0,14378 | NA | NA |
| RP11-426C22.3  | 6,47  | -2,56  | 3,028592 | -0,84401 | NA | NA |
| RP11-426C22.4  | 47,61 | -2,64  | 1,359961 | -1,94489 | NA | NA |
| RP11-426C22.6  | 10,25 | -3,09  | 2,34815  | -1,31642 | NA | NA |
| RP11-427L15.2  | 26,30 | -3,13  | 1,591135 | -1,96481 | NA | NA |
| RP11-428G5.6   | 1,63  | -5,50  | 3,6433   | -1,5095  | NA | NA |
| RP11-429J17.2  | 11,63 | -5,28  | 1,516952 | -3,48051 | NA | NA |
| RP11-429K17.1  | 0,80  | -2,81  | 2,925223 | -0,9616  | NA | NA |
| RP11-430K21.2  | 4,81  | -7,05  | 3,092227 | -2,27949 | NA | NA |
| RP11-430L17.1  | 8,22  | -3,98  | 2,879913 | -1,3837  | NA | NA |
| RP11-432B6.3   | 12,86 | -3,33  | 3,332896 | -0,99848 | NA | NA |
| RP11-432D3.1   | 8,41  | -0,79  | 0,957771 | -0,82659 | NA | NA |
| RP11-432N13.4  | 0,83  | -4,54  | 3,650522 | -1,24243 | NA | NA |
| RP11-434D2.6   | 11,45 | -10,28 | 3,277654 | -3,13586 | NA | NA |
| RP11-437F6.1   | 13,65 | -25,60 | 3,636359 | -7,04074 | NA | NA |
| RP11-437J19.1  | 0,96  | -4,74  | 3,648703 | -1,29868 | NA | NA |
| RP11-438J1.1   | 3,48  | -3,10  | 3,622573 | -0,85642 | NA | NA |
| RP11-438N5.3   | 5,64  | 0,39   | 1,981219 | 0,197771 | NA | NA |
| RP11-43A1.1    | 5,40  | -24,26 | 3,637771 | -6,66949 | NA | NA |
| RP11-440D17.4  | 9,30  | -25,05 | 3,636802 | -6,88729 | NA | NA |
| RP11-440D17.5  | 13,78 | -25,62 | 3,63636  | -7,04516 | NA | NA |
| RP11-440G9.1   | 9,70  | -0,97  | 2,139243 | -0,45501 | NA | NA |
| RP11-442A17.1  | 3,41  | -6,25  | 3,101681 | -2,01539 | NA | NA |
| RP11-442I12.1  | 5,53  | -24,30 | 3,637708 | -6,67972 | NA | NA |
| RP11-443A13.4  | 2,41  | -6,07  | 3,640661 | -1,66656 | NA | NA |
| RP11-443B7.3   | 14,97 | 1,07   | 1,810462 | 0,589324 | NA | NA |
| RP11-443N24.4  | 2,69  | -6,05  | 3,086819 | -1,96023 | NA | NA |
| RP11-444J21.1  | 1,88  | -4,56  | 3,643636 | -1,25248 | NA | NA |
| RP11-446H18.5  | 4,83  | -7,47  | 3,048724 | -2,45138 | NA | NA |
| RP11-446J8.1   | 1,67  | -2,66  | 2,256663 | -1,17706 | NA | NA |
| RP11-449D8.1   | 17,53 | -25,43 | 3,636166 | -6,99293 | NA | NA |
| RP11-449J10.1  | 8,47  | -9,76  | 3,350292 | -2,91185 | NA | NA |
| RP11-449P15.1  | 19,53 | -2,12  | 1,697984 | -1,24924 | NA | NA |
| RP11-44D15.3   | 2,08  | -1,15  | 1,448274 | -0,79384 | NA | NA |
| RP11-44F21.4   | 10,20 | -25,18 | 3,262695 | -7,7169  | NA | NA |
| RP11-450G15.2  | 32,38 | -5,92  | 3,612926 | -1,63947 | NA | NA |
| RP11-451G4.1   | 1,55  | -5,25  | 3,178071 | -1,65302 | NA | NA |
| RP11-451J24.1  | 1,84  | -5,68  | 3,642307 | -1,55833 | NA | NA |
| RP11-451O13.1  | 3,61  | -3,02  | 2,973445 | -1,01603 | NA | NA |

|                |       |        |          |          |    |    |
|----------------|-------|--------|----------|----------|----|----|
| RP11-452J13.1  | 0,69  | -3,66  | 3,655986 | -1,00196 | NA | NA |
| RP11-452J6.2   | 2,05  | -5,31  | 2,77264  | -1,91565 | NA | NA |
| RP11-452K12.4  | 4,54  | -5,42  | 2,315079 | -2,33954 | NA | NA |
| RP11-452L6.7   | 4,97  | -6,23  | 3,638111 | -1,71149 | NA | NA |
| RP11-453O5.1   | 9,62  | -25,10 | 3,636758 | -6,90086 | NA | NA |
| RP11-454C18.2  | 4,17  | -3,34  | 2,42422  | -1,37959 | NA | NA |
| RP11-454K7.1   | 0,80  | -3,96  | 3,65381  | -1,08303 | NA | NA |
| RP11-455F5.3   | 6,60  | -6,15  | 2,880406 | -2,13624 | NA | NA |
| RP11-459I19.1  | 0,62  | -3,65  | 3,658079 | -0,99891 | NA | NA |
| RP11-459K23.2  | 14,92 | -25,73 | 3,636291 | -7,07612 | NA | NA |
| RP11-459O1.2   | 1,04  | -4,67  | 3,64788  | -1,27938 | NA | NA |
| RP11-459O16.8  | 2,27  | -4,16  | 2,614302 | -1,59316 | NA | NA |
| RP11-459O16.9  | 5,25  | -5,51  | 3,303449 | -1,66702 | NA | NA |
| RP11-459P23.1  | 1,36  | -3,74  | 2,576243 | -1,45281 | NA | NA |
| RP11-45M22.3   | 1,98  | -5,62  | 3,641891 | -1,54375 | NA | NA |
| RP11-460H18.2  | 2,42  | -5,89  | 3,640772 | -1,61905 | NA | NA |
| RP11-460I13.6  | 6,59  | -0,67  | 2,198593 | -0,30643 | NA | NA |
| RP11-460N11.2  | 7,27  | -1,79  | 1,329503 | -1,34594 | NA | NA |
| RP11-462G12.2  | 6,19  | -2,63  | 1,091931 | -2,40832 | NA | NA |
| RP11-463J10.3  | 5,88  | 0,27   | 2,363397 | 0,113341 | NA | NA |
| RP11-464F9.20  | 10,16 | 0,61   | 2,014143 | 0,303023 | NA | NA |
| RP11-465B22.8  | 1,02  | -4,83  | 3,647826 | -1,3232  | NA | NA |
| RP11-466J24.1  | 0,91  | -4,65  | 3,64939  | -1,27456 | NA | NA |
| RP11-467H10.1  | 15,34 | -4,03  | 3,020392 | -1,33579 | NA | NA |
| RP11-467H10.2  | 9,96  | -5,41  | 2,246186 | -2,41039 | NA | NA |
| RP11-467P9.1   | 1,51  | -2,97  | 2,705456 | -1,09672 | NA | NA |
| RP11-469A15.2  | 2,86  | -3,54  | 1,865249 | -1,89928 | NA | NA |
| RP11-46A10.5   | 4,62  | -3,24  | 1,539184 | -2,10731 | NA | NA |
| RP11-46B11.5   | 1,24  | -3,95  | 1,723584 | -2,2919  | NA | NA |
| RP11-46D1.2    | 4,25  | -0,86  | 2,369737 | -0,36418 | NA | NA |
| RP11-46F15.2   | 3,54  | -23,66 | 3,638991 | -6,50048 | NA | NA |
| RP11-46J23.1   | 4,16  | -3,44  | 3,621236 | -0,94931 | NA | NA |
| RP11-471B22.2  | 5,53  | -2,49  | 2,534144 | -0,98189 | NA | NA |
| RP11-471M2.1   | 10,75 | -9,79  | 3,295742 | -2,97051 | NA | NA |
| RP11-474J1.1   | 4,66  | -4,53  | 3,503575 | -1,29404 | NA | NA |
| RP11-474N24.6  | 11,01 | -0,38  | 1,302538 | -0,2937  | NA | NA |
| RP11-474P2.2   | 4,07  | -3,68  | 2,772918 | -1,32855 | NA | NA |
| RP11-475D12.1  | 0,70  | -4,29  | 3,653357 | -1,17408 | NA | NA |
| RP11-475J5.11  | 2,71  | -5,56  | 2,119575 | -2,62277 | NA | NA |
| RP11-475J5.6   | 1,87  | -2,36  | 1,630858 | -1,44689 | NA | NA |
| RP11-475J5.7   | 7,21  | -8,10  | 3,414837 | -2,37265 | NA | NA |
| RP11-476C8.1   | 10,01 | -5,85  | 2,014642 | -2,90381 | NA | NA |
| RP11-477I4.3   | 4,04  | -3,06  | 1,883977 | -1,6236  | NA | NA |
| RP11-478C6.2   | 8,77  | -1,59  | 1,952556 | -0,81536 | NA | NA |
| RP11-479O17.12 | 3,38  | -1,32  | 1,483623 | -0,88994 | NA | NA |
| RP11-479O9.3   | 1,73  | -5,58  | 3,642725 | -1,53272 | NA | NA |
| RP11-479O9.4   | 20,87 | -0,01  | 1,529245 | -0,00771 | NA | NA |
| RP11-47L3.1    | 2,61  | -2,42  | 1,804237 | -1,33995 | NA | NA |
| RP11-480D4.6   | 4,07  | -3,22  | 2,892592 | -1,11458 | NA | NA |
| RP11-481E4.2   | 5,83  | -0,37  | 1,591929 | -0,23241 | NA | NA |

|               |       |        |          |          |    |    |
|---------------|-------|--------|----------|----------|----|----|
| RP11-481J2.4  | 4,21  | 0,11   | 1,503284 | 0,076048 | NA | NA |
| RP11-482G13.1 | 6,47  | -2,22  | 1,568884 | -1,4134  | NA | NA |
| RP11-483C6.2  | 9,63  | -6,01  | 2,920173 | -2,05944 | NA | NA |
| RP11-483E17.1 | 4,06  | -6,03  | 2,158581 | -2,79406 | NA | NA |
| RP11-483I13.5 | 3,57  | -2,23  | 2,949987 | -0,75474 | NA | NA |
| RP11-483M24.2 | 7,92  | -24,72 | 3,637036 | -6,79807 | NA | NA |
| RP11-484L8.1  | 0,92  | -3,05  | 3,422792 | -0,891   | NA | NA |
| RP11-485B17.3 | 3,41  | -6,56  | 3,639101 | -1,80271 | NA | NA |
| RP11-485B17.5 | 0,72  | -4,32  | 3,65297  | -1,18285 | NA | NA |
| RP11-485F13.1 | 2,86  | -1,36  | 2,744786 | -0,49645 | NA | NA |
| RP11-485G7.5  | 5,22  | -0,79  | 0,927838 | -0,8562  | NA | NA |
| RP11-486O13.2 | 7,17  | -0,89  | 0,97008  | -0,91436 | NA | NA |
| RP11-486P11.1 | 6,53  | -5,93  | 2,893033 | -2,04853 | NA | NA |
| RP11-487E1.1  | 15,09 | -3,20  | 1,873791 | -1,70633 | NA | NA |
| RP11-487I5.4  | 2,75  | -3,96  | 2,435782 | -1,6268  | NA | NA |
| RP11-488L18.6 | 2,10  | -5,86  | 3,64139  | -1,61009 | NA | NA |
| RP11-48B3.2   | 5,17  | -24,20 | 3,637871 | -6,65304 | NA | NA |
| RP11-48B3.5   | 8,32  | -0,29  | 1,355492 | -0,2135  | NA | NA |
| RP11-48G14.3  | 1,97  | -5,77  | 3,641902 | -1,58513 | NA | NA |
| RP11-491F9.1  | 0,25  | -2,77  | 3,680927 | -0,75279 | NA | NA |
| RP11-493E12.1 | 1,27  | -3,65  | 2,943371 | -1,23852 | NA | NA |
| RP11-493L12.7 | 1,96  | -5,77  | 3,64184  | -1,58344 | NA | NA |
| RP11-495L19.1 | 5,28  | -0,67  | 1,362233 | -0,49274 | NA | NA |
| RP11-496B10.3 | 4,91  | -3,25  | 1,080498 | -3,01136 | NA | NA |
| RP11-496I2.2  | 0,99  | -3,82  | 3,652088 | -1,04586 | NA | NA |
| RP11-497D6.5  | 2,46  | -5,76  | 3,640751 | -1,58154 | NA | NA |
| RP11-497J7.1  | 9,54  | -25,09 | 3,636769 | -6,89831 | NA | NA |
| RP11-499P20.2 | 25,84 | -1,08  | 1,043337 | -1,03305 | NA | NA |
| RP11-49F20.1  | 7,47  | -24,72 | 3,637133 | -6,79762 | NA | NA |
| RP11-49I11.2  | 3,12  | -23,48 | 3,639482 | -6,45138 | NA | NA |
| RP11-49K24.3  | 7,86  | -6,13  | 3,266052 | -1,87545 | NA | NA |
| RP11-4C20.3   | 7,36  | -3,12  | 2,432489 | -1,28429 | NA | NA |
| RP11-4F22.2   | 4,01  | -2,40  | 2,69096  | -0,89175 | NA | NA |
| RP11-4K16.2   | 7,46  | -24,67 | 3,637121 | -6,78211 | NA | NA |
| RP11-4K3_A.3  | 1,11  | -2,24  | 3,097653 | -0,72252 | NA | NA |
| RP11-4M23.3   | 3,26  | -1,26  | 2,468385 | -0,50861 | NA | NA |
| RP11-4N23.1   | 0,51  | -3,84  | 3,65979  | -1,04861 | NA | NA |
| RP11-500G22.2 | 4,91  | -6,64  | 3,058399 | -2,17072 | NA | NA |
| RP11-503C24.3 | 5,78  | -24,36 | 3,637613 | -6,69785 | NA | NA |
| RP11-503C24.5 | 6,60  | -24,47 | 3,637354 | -6,72737 | NA | NA |
| RP11-503L19.1 | 2,19  | -5,93  | 3,641199 | -1,62868 | NA | NA |
| RP11-504P24.9 | 11,26 | -3,35  | 1,28558  | -2,60422 | NA | NA |
| RP11-505K9.5  | 1,59  | -5,29  | 3,643546 | -1,45107 | NA | NA |
| RP11-506H20.2 | 1,53  | -3,36  | 3,550879 | -0,94569 | NA | NA |
| RP11-508M1.1  | 7,72  | -0,26  | 1,222905 | -0,21304 | NA | NA |
| RP11-508N22.4 | 0,84  | -3,83  | 2,819559 | -1,35954 | NA | NA |
| RP11-508O18.1 | 1,05  | -4,67  | 3,165707 | -1,47609 | NA | NA |
| RP11-509A17.3 | 25,61 | -7,57  | 1,637172 | -4,62133 | NA | NA |
| RP11-509I21.2 | 8,17  | -2,02  | 2,275999 | -0,88656 | NA | NA |
| RP11-50C13.1  | 16,82 | -2,49  | 1,990527 | -1,25198 | NA | NA |

|                |       |        |          |          |    |    |
|----------------|-------|--------|----------|----------|----|----|
| RP11-50F24.3   | 5,01  | -6,65  | 2,716057 | -2,44873 | NA | NA |
| RP11-510D21.2  | 7,01  | -9,65  | 3,401287 | -2,83721 | NA | NA |
| RP11-510M2.6   | 1,05  | -4,86  | 3,647444 | -1,33328 | NA | NA |
| RP11-511P7.4   | 19,44 | -26,17 | 3,636097 | -7,19599 | NA | NA |
| RP11-513I15.3  | 1,56  | -5,44  | 3,643505 | -1,49178 | NA | NA |
| RP11-513M16.8  | 19,82 | -0,32  | 2,052593 | -0,15573 | NA | NA |
| RP11-513N24.1  | 4,77  | -0,78  | 2,009851 | -0,38671 | NA | NA |
| RP11-515E23.1  | 32,65 | -3,01  | 1,069793 | -2,81295 | NA | NA |
| RP11-517I3.1   | 1,41  | -3,88  | 2,265432 | -1,71069 | NA | NA |
| RP11-517P14.7  | 2,67  | -5,56  | 3,19466  | -1,74132 | NA | NA |
| RP11-51F16.8   | 1,18  | -5,03  | 3,646132 | -1,37955 | NA | NA |
| RP11-520D19.2  | 3,64  | -2,83  | 2,044701 | -1,38588 | NA | NA |
| RP11-520F9.1   | 0,98  | -4,05  | 3,651118 | -1,11004 | NA | NA |
| RP11-521B24.4  | 50,00 | -0,76  | 0,930269 | -0,8199  | NA | NA |
| RP11-521C20.2  | 0,87  | -4,59  | 3,64995  | -1,25866 | NA | NA |
| RP11-521C22.2  | 1,73  | -3,23  | 2,17345  | -1,48422 | NA | NA |
| RP11-521J24.1  | 3,74  | -1,32  | 2,526119 | -0,52378 | NA | NA |
| RP11-522B15.1  | 7,68  | -24,76 | 3,637091 | -6,8086  | NA | NA |
| RP11-523K4.2   | 2,21  | -5,95  | 3,641203 | -1,63347 | NA | NA |
| RP11-524O1.4   | 0,86  | -4,18  | 3,295717 | -1,26943 | NA | NA |
| RP11-526F3.1   | 5,89  | -24,39 | 3,637583 | -6,70592 | NA | NA |
| RP11-526I2.5   | 14,69 | -1,39  | 1,140023 | -1,22139 | NA | NA |
| RP11-527N12.2  | 1,69  | -4,48  | 3,340681 | -1,3418  | NA | NA |
| RP11-528A10.1  | 2,58  | -5,84  | 3,144896 | -1,85552 | NA | NA |
| RP11-528G1.2   | 4,78  | -24,08 | 3,638079 | -6,61912 | NA | NA |
| RP11-528N21.3  | 10,44 | -10,04 | 3,300787 | -3,04311 | NA | NA |
| RP11-529E10.6  | 4,73  | -4,96  | 2,147973 | -2,30685 | NA | NA |
| RP11-529H2.2   | 4,82  | -5,85  | 2,494574 | -2,34683 | NA | NA |
| RP11-52E20.1   | 3,39  | -23,59 | 3,639164 | -6,48311 | NA | NA |
| RP11-52L5.6    | 10,79 | -9,80  | 3,2891   | -2,97839 | NA | NA |
| RP11-530C5.4   | 14,98 | -4,34  | 1,798022 | -2,41146 | NA | NA |
| RP11-536C10.25 | 1,25  | -5,14  | 3,646302 | -1,40894 | NA | NA |
| RP11-536C5.2   | 7,45  | -5,45  | 2,677274 | -2,0375  | NA | NA |
| RP11-536C5.7   | 3,08  | -2,11  | 1,730145 | -1,22217 | NA | NA |
| RP11-538D9.1   | 1,46  | -5,34  | 3,644135 | -1,46526 | NA | NA |
| RP11-539L10.2  | 46,47 | -8,74  | 3,631615 | -2,40727 | NA | NA |
| RP11-539L10.4  | 5,62  | -1,18  | 1,049872 | -1,12678 | NA | NA |
| RP11-53I6.3    | 3,55  | -3,83  | 1,719742 | -2,22588 | NA | NA |
| RP11-53I6.4    | 14,52 | -4,07  | 2,950696 | -1,37934 | NA | NA |
| RP11-542M13.4  | 4,28  | -7,89  | 3,056229 | -2,58185 | NA | NA |
| RP11-543B16.3  | 67,35 | 0,21   | 1,141201 | 0,181777 | NA | NA |
| RP11-543D10.2  | 4,30  | -2,88  | 2,441143 | -1,18149 | NA | NA |
| RP11-543H12.1  | 7,32  | -6,33  | 3,113664 | -2,03268 | NA | NA |
| RP11-544D21.2  | 38,87 | -3,21  | 0,818008 | -3,9302  | NA | NA |
| RP11-544N10.1  | 1,71  | -5,57  | 3,642832 | -1,52925 | NA | NA |
| RP11-545A16.1  | 10,78 | -3,80  | 1,150715 | -3,30324 | NA | NA |
| RP11-545M17.3  | 2,22  | -5,94  | 3,641039 | -1,63128 | NA | NA |
| RP11-545P7.9   | 6,46  | -2,55  | 3,095    | -0,82355 | NA | NA |
| RP11-547I7.1   | 5,05  | -24,09 | 3,637921 | -6,62319 | NA | NA |
| RP11-548M13.1  | 0,84  | -4,57  | 3,651455 | -1,2525  | NA | NA |

|                |       |        |          |          |    |    |
|----------------|-------|--------|----------|----------|----|----|
| RP11-54K16.2   | 6,37  | -5,52  | 2,911554 | -1,89693 | NA | NA |
| RP11-54O7.11   | 3,89  | -1,94  | 1,109206 | -1,74589 | NA | NA |
| RP11-551L14.7  | 7,45  | -24,68 | 3,637138 | -6,78548 | NA | NA |
| RP11-551M15.1  | 7,11  | -2,88  | 2,22774  | -1,29424 | NA | NA |
| RP11-552E4.3   | 2,08  | -5,31  | 2,736407 | -1,94222 | NA | NA |
| RP11-552M14.1  | 1,32  | -2,09  | 2,225801 | -0,9368  | NA | NA |
| RP11-554D15.1  | 2,90  | -6,33  | 3,639808 | -1,7396  | NA | NA |
| RP11-554I8.1   | 14,12 | -10,69 | 3,219911 | -3,32001 | NA | NA |
| RP11-555M1.1   | 2,47  | -4,99  | 3,640887 | -1,3692  | NA | NA |
| RP11-556G22.3  | 7,00  | -9,48  | 3,410383 | -2,77852 | NA | NA |
| RP11-556H2.3   | 1,76  | -2,34  | 2,503324 | -0,93286 | NA | NA |
| RP11-556K13.1  | 18,37 | -3,13  | 0,731497 | -4,27746 | NA | NA |
| RP11-556O5.1   | 7,73  | -7,47  | 2,667998 | -2,79871 | NA | NA |
| RP11-556O9.4   | 8,79  | -8,44  | 3,360503 | -2,51081 | NA | NA |
| RP11-557H15.2  | 17,40 | -2,28  | 1,208499 | -1,88681 | NA | NA |
| RP11-557H15.4  | 4,41  | -4,43  | 2,748664 | -1,61102 | NA | NA |
| RP11-558F24.2  | 1,60  | -5,48  | 3,643271 | -1,50328 | NA | NA |
| RP11-560J1.1   | 13,62 | -3,48  | 1,648903 | -2,10999 | NA | NA |
| RP11-561C5.5   | 3,86  | -4,07  | 1,203767 | -3,38486 | NA | NA |
| RP11-561O23.7  | 1,69  | -5,55  | 3,642906 | -1,52404 | NA | NA |
| RP11-561P12.5  | 1,01  | -4,81  | 3,647906 | -1,31966 | NA | NA |
| RP11-563E2.2   | 1,90  | -5,72  | 3,641997 | -1,5705  | NA | NA |
| RP11-563J2.2   | 15,95 | -3,70  | 1,123731 | -3,29135 | NA | NA |
| RP11-564C4.6   | 4,10  | -0,35  | 2,109183 | -0,16643 | NA | NA |
| RP11-564P9.1   | 14,01 | -25,64 | 3,636346 | -7,05037 | NA | NA |
| RP11-565F19.4  | 10,23 | -1,10  | 1,082001 | -1,0212  | NA | NA |
| RP11-566K8.2   | 5,24  | -5,99  | 2,058527 | -2,90752 | NA | NA |
| RP11-567L7.6   | 0,80  | -4,46  | 3,650824 | -1,22172 | NA | NA |
| RP11-567O18.1  | 6,86  | -1,87  | 2,406981 | -0,77559 | NA | NA |
| RP11-567P19.1  | 16,45 | -0,36  | 1,815028 | -0,19713 | NA | NA |
| RP11-568G11.5  | 3,76  | -23,62 | 3,638766 | -6,4914  | NA | NA |
| RP11-568J23.5  | 2,94  | -5,16  | 1,985993 | -2,60028 | NA | NA |
| RP11-568J23.8  | 3,55  | -1,80  | 2,749959 | -0,65598 | NA | NA |
| RP11-569D9.5   | 1,69  | -5,55  | 3,642896 | -1,52361 | NA | NA |
| RP11-569G13.3  | 6,05  | -1,99  | 1,580298 | -1,26059 | NA | NA |
| RP11-570L15.2  | 15,75 | -0,76  | 1,532405 | -0,49372 | NA | NA |
| RP11-571F15.2  | 12,66 | -2,30  | 2,053139 | -1,11818 | NA | NA |
| RP11-571G1.1   | 6,99  | -24,64 | 3,637251 | -6,77432 | NA | NA |
| RP11-571I18.4  | 7,34  | -3,68  | 2,397986 | -1,53418 | NA | NA |
| RP11-572F4.1   | 8,81  | -4,07  | 3,264666 | -1,24546 | NA | NA |
| RP11-572O17.1  | 13,28 | -1,76  | 2,171509 | -0,81137 | NA | NA |
| RP11-573D15.7  | 6,09  | -1,83  | 1,274634 | -1,43631 | NA | NA |
| RP11-573G6.4   | 1,08  | -3,41  | 2,919535 | -1,16715 | NA | NA |
| RP11-573M3.6   | 3,41  | -3,88  | 3,555291 | -1,09024 | NA | NA |
| RP11-574K11.20 | 1,67  | -4,94  | 3,230704 | -1,53035 | NA | NA |
| RP11-574K11.5  | 17,80 | -0,84  | 1,318454 | -0,63541 | NA | NA |
| RP11-575F12.1  | 9,75  | -24,98 | 3,636808 | -6,86799 | NA | NA |
| RP11-575F12.3  | 79,46 | -8,20  | 1,511679 | -5,42635 | NA | NA |
| RP11-575N15.1  | 3,06  | -23,45 | 3,639589 | -6,44272 | NA | NA |
| RP11-577H5.1   | 9,65  | -3,60  | 2,992604 | -1,20225 | NA | NA |

|               |       |        |          |           |    |    |
|---------------|-------|--------|----------|-----------|----|----|
| RP11-577N1.2  | 1,59  | -5,27  | 3,643705 | -1,44574  | NA | NA |
| RP11-578F21.2 | 4,33  | -1,64  | 3,394801 | -0,48172  | NA | NA |
| RP11-580I1.3  | 0,79  | -4,47  | 3,65128  | -1,22369  | NA | NA |
| RP11-585P4.5  | 15,63 | -2,17  | 1,235106 | -1,75572  | NA | NA |
| RP11-586K12.2 | 23,07 | -2,31  | 2,471447 | -0,93477  | NA | NA |
| RP11-587P21.2 | 3,56  | -6,63  | 3,638993 | -1,82115  | NA | NA |
| RP11-588K22.2 | 4,28  | -3,60  | 1,703999 | -2,11118  | NA | NA |
| RP11-589P10.7 | 1,10  | -2,96  | 3,003236 | -0,98572  | NA | NA |
| RP11-58H15.3  | 0,83  | -4,31  | 3,651123 | -1,18016  | NA | NA |
| RP11-58K22.4  | 3,36  | -1,06  | 1,646264 | -0,64437  | NA | NA |
| RP11-597D13.9 | 38,15 | -3,25  | 1,274742 | -2,55285  | NA | NA |
| RP11-598C10.1 | 5,31  | -24,24 | 3,637832 | -6,66394  | NA | NA |
| RP11-598F7.1  | 2,58  | -1,88  | 2,383974 | -0,78855  | NA | NA |
| RP11-598F7.3  | 11,42 | -2,41  | 1,91563  | -1,26045  | NA | NA |
| RP11-598O12.2 | 4,45  | -2,45  | 2,50467  | -0,97651  | NA | NA |
| RP11-599B13.7 | 1,27  | -5,14  | 3,645307 | -1,41059  | NA | NA |
| RP11-59E19.1  | 0,47  | -3,69  | 3,660204 | -1,00878  | NA | NA |
| RP11-5K23.5   | 7,27  | -6,76  | 2,333647 | -2,89461  | NA | NA |
| RP11-5O17.1   | 8,02  | -24,83 | 3,296875 | -7,53154  | NA | NA |
| RP11-5P4.1    | 5,88  | -24,38 | 3,63741  | -6,70257  | NA | NA |
| RP11-600F24.7 | 4,62  | -1,42  | 1,37436  | -1,03425  | NA | NA |
| RP11-600K15.1 | 8,68  | -9,05  | 2,928262 | -3,0922   | NA | NA |
| RP11-600L4.1  | 4,23  | -8,99  | 3,5361   | -2,54169  | NA | NA |
| RP11-602M11.4 | 0,74  | -4,36  | 3,652499 | -1,1935   | NA | NA |
| RP11-603B13.2 | 3,00  | -6,38  | 3,639645 | -1,75418  | NA | NA |
| RP11-603J24.4 | 3,59  | -6,64  | 3,63895  | -1,82391  | NA | NA |
| RP11-60A8.2   | 2,49  | -6,11  | 3,64051  | -1,67947  | NA | NA |
| RP11-613D13.4 | 0,97  | -4,52  | 3,648447 | -1,23787  | NA | NA |
| RP11-613M10.8 | 13,12 | -8,65  | 2,553069 | -3,38753  | NA | NA |
| RP11-616K22.2 | 5,44  | -2,36  | 1,904655 | -1,23669  | NA | NA |
| RP11-619L19.2 | 2,04  | -5,29  | 3,194453 | -1,65593  | NA | NA |
| RP11-61L19.1  | 8,41  | -3,70  | 0,829716 | -4,45976  | NA | NA |
| RP11-61L23.2  | 11,40 | -2,43  | 1,326221 | -1,83143  | NA | NA |
| RP11-61N20.3  | 2,43  | -5,09  | 2,820502 | -1,80379  | NA | NA |
| RP11-622C24.2 | 20,51 | -4,31  | 2,354549 | -1,82886  | NA | NA |
| RP11-624L4.2  | 7,38  | -6,96  | 2,358557 | -2,95067  | NA | NA |
| RP11-624M8.1  | 8,21  | -5,08  | 1,460019 | -3,47858  | NA | NA |
| RP11-625H11.1 | 2,71  | -6,24  | 3,640111 | -1,71291  | NA | NA |
| RP11-625N16.1 | 7,11  | -24,66 | 3,637223 | -6,78013  | NA | NA |
| RP11-626I20.3 | 4,12  | -3,37  | 3,621397 | -0,93173  | NA | NA |
| RP11-627C21.1 | 0,59  | -4,04  | 3,656772 | -1,10392  | NA | NA |
| RP11-629B11.4 | 0,96  | -4,73  | 3,64864  | -1,29649  | NA | NA |
| RP11-629F19.1 | 14,84 | -5,69  | 2,32206  | -2,4525   | NA | NA |
| RP11-634B22.4 | 6,01  | -2,50  | 1,791791 | -1,39274  | NA | NA |
| RP11-635N19.1 | 10,31 | 0,00   | 2,328936 | -9,18E-04 | NA | NA |
| RP11-635N19.2 | 26,39 | -6,55  | 3,617948 | -1,81086  | NA | NA |
| RP11-637I8.2  | 9,27  | -2,88  | 3,008719 | -0,95776  | NA | NA |
| RP11-639F1.2  | 3,24  | -6,49  | 3,639329 | -1,78316  | NA | NA |
| RP11-63A1.2   | 1,07  | -3,27  | 2,955923 | -1,10784  | NA | NA |
| RP11-63D14.1  | 3,71  | -6,69  | 3,524627 | -1,89775  | NA | NA |



|               |       |        |          |          |    |    |
|---------------|-------|--------|----------|----------|----|----|
| RP11-640B6.1  | 6,50  | -24,53 | 3,375444 | -7,26751 | NA | NA |
| RP11-642D21.1 | 7,40  | -24,71 | 3,63716  | -6,7948  | NA | NA |
| RP11-643M14.3 | 7,05  | -24,65 | 3,637237 | -6,77606 | NA | NA |
| RP11-644F5.16 | 5,24  | -2,54  | 0,789808 | -3,21092 | NA | NA |
| RP11-645N11.3 | 10,58 | -25,24 | 3,636628 | -6,93928 | NA | NA |
| RP11-646D13.1 | 5,98  | -3,07  | 0,852269 | -3,6016  | NA | NA |
| RP11-646E18.4 | 2,58  | -2,32  | 1,444743 | -1,60283 | NA | NA |
| RP11-646I6.5  | 13,03 | -1,97  | 2,678645 | -0,73486 | NA | NA |
| RP11-64D22.1  | 4,88  | -0,97  | 2,202867 | -0,4423  | NA | NA |
| RP11-64J21.3  | 23,05 | -11,22 | 3,635992 | -3,08651 | NA | NA |
| RP11-650J17.1 | 3,92  | -3,81  | 2,129426 | -1,78716 | NA | NA |
| RP11-650J17.2 | 1,19  | -5,05  | 3,646139 | -1,3842  | NA | NA |
| RP11-650L12.4 | 1,08  | -4,44  | 3,648621 | -1,21797 | NA | NA |
| RP11-651L5.2  | 2,06  | -5,49  | 2,716139 | -2,02279 | NA | NA |
| RP11-655C2.3  | 1,04  | -4,85  | 3,647679 | -1,32953 | NA | NA |
| RP11-659O3.1  | 1,80  | -4,48  | 3,645636 | -1,22993 | NA | NA |
| RP11-65J21.4  | 1,75  | -4,18  | 2,266482 | -1,84341 | NA | NA |
| RP11-65L3.2   | 23,44 | -4,45  | 3,610549 | -1,23135 | NA | NA |
| RP11-660L16.2 | 6,99  | -2,38  | 2,03273  | -1,16937 | NA | NA |
| RP11-661A12.8 | 13,61 | -1,40  | 1,072643 | -1,30375 | NA | NA |
| RP11-661P17.1 | 13,73 | -1,98  | 1,08119  | -1,83289 | NA | NA |
| RP11-662I13.2 | 4,71  | -1,49  | 2,39556  | -0,62221 | NA | NA |
| RP11-664D1.1  | 4,44  | -3,91  | 3,622836 | -1,07936 | NA | NA |
| RP11-667F14.1 | 15,32 | -1,65  | 1,053661 | -1,56826 | NA | NA |
| RP11-667K14.8 | 0,73  | -3,74  | 3,654875 | -1,02264 | NA | NA |
| RP11-668N23.1 | 6,19  | -24,45 | 3,637487 | -6,72097 | NA | NA |
| RP11-66N24.3  | 14,72 | -0,95  | 1,29198  | -0,73877 | NA | NA |
| RP11-671C19.1 | 1,50  | -5,39  | 3,645719 | -1,47895 | NA | NA |
| RP11-671J11.4 | 3,10  | -6,18  | 2,576529 | -2,39873 | NA | NA |
| RP11-671M22.5 | 1,00  | -4,80  | 3,648011 | -1,31551 | NA | NA |
| RP11-672A2.5  | 7,03  | 0,15   | 2,089205 | 0,073319 | NA | NA |
| RP11-672A2.6  | 1,07  | -4,32  | 2,793953 | -1,54459 | NA | NA |
| RP11-673E1.3  | 3,40  | -0,58  | 2,783815 | -0,21013 | NA | NA |
| RP11-678L1.1  | 8,70  | 0,17   | 1,472171 | 0,115917 | NA | NA |
| RP11-681L4.2  | 12,38 | -25,47 | 3,636467 | -7,0027  | NA | NA |
| RP11-685B14.1 | 9,69  | -8,04  | 2,340573 | -3,43594 | NA | NA |
| RP11-68D16.1  | 4,32  | -23,92 | 3,638378 | -6,5753  | NA | NA |
| RP11-691H4.1  | 16,02 | -0,08  | 1,533388 | -0,05351 | NA | NA |
| RP11-691N7.6  | 2,42  | -5,72  | 2,347381 | -2,43774 | NA | NA |
| RP11-692D12.1 | 3,32  | -2,91  | 3,281988 | -0,88645 | NA | NA |
| RP11-692E14.1 | 2,75  | -6,26  | 3,640069 | -1,71911 | NA | NA |
| RP11-693J15.4 | 7,78  | -1,20  | 2,172504 | -0,55327 | NA | NA |
| RP11-697E22.2 | 5,60  | -4,07  | 1,679605 | -2,42468 | NA | NA |
| RP11-697G4.3  | 2,02  | -5,81  | 3,641642 | -1,59448 | NA | NA |
| RP11-697M17.1 | 10,68 | -0,35  | 1,324959 | -0,26329 | NA | NA |
| RP11-697N18.4 | 8,80  | -4,57  | 1,686325 | -2,70896 | NA | NA |
| RP11-698F20.3 | 2,93  | -2,07  | 2,455874 | -0,84444 | NA | NA |
| RP11-69H7.2   | 0,95  | -3,53  | 3,652945 | -0,96661 | NA | NA |
| RP11-69M1.6   | 7,95  | -0,24  | 1,39301  | -0,173   | NA | NA |
| RP11-6F2.5    | 22,21 | -2,53  | 1,885412 | -1,34439 | NA | NA |

|               |       |        |          |          |    |    |
|---------------|-------|--------|----------|----------|----|----|
| RP11-6I2.3    | 3,98  | 0,35   | 1,891762 | 0,18365  | NA | NA |
| RP11-6L6.2    | 9,23  | -3,24  | 1,976057 | -1,64052 | NA | NA |
| RP11-6L6.7    | 9,13  | -24,96 | 3,636829 | -6,8633  | NA | NA |
| RP11-6N13.1   | 4,28  | -6,57  | 2,629974 | -2,49909 | NA | NA |
| RP11-700F16.3 | 1,43  | -1,42  | 2,04705  | -0,69408 | NA | NA |
| RP11-700J17.2 | 2,85  | -1,61  | 2,436289 | -0,66222 | NA | NA |
| RP11-701P16.5 | 23,93 | -2,13  | 1,305685 | -1,63185 | NA | NA |
| RP11-702F3.4  | 13,10 | -7,18  | 1,544705 | -4,64596 | NA | NA |
| RP11-702M1.1  | 2,75  | -23,22 | 3,639677 | -6,3804  | NA | NA |
| RP11-703I16.1 | 7,93  | -3,56  | 1,370885 | -2,59597 | NA | NA |
| RP11-704C2.1  | 1,29  | -5,17  | 3,645237 | -1,4176  | NA | NA |
| RP11-705C15.4 | 1,60  | -1,88  | 3,637129 | -0,51591 | NA | NA |
| RP11-706D8.3  | 3,78  | -4,36  | 1,608101 | -2,70997 | NA | NA |
| RP11-706J10.1 | 4,02  | -7,50  | 3,062737 | -2,45027 | NA | NA |
| RP11-706O15.3 | 45,02 | 0,33   | 1,036077 | 0,321385 | NA | NA |
| RP11-707G14.8 | 1,45  | -3,86  | 2,032346 | -1,89774 | NA | NA |
| RP11-707M3.3  | 14,49 | -0,10  | 1,742202 | -0,05568 | NA | NA |
| RP11-707O23.5 | 2,76  | -6,10  | 3,640045 | -1,67561 | NA | NA |
| RP11-707P17.1 | 3,78  | -7,73  | 3,074067 | -2,51309 | NA | NA |
| RP11-707P17.2 | 5,60  | -5,08  | 2,688481 | -1,88976 | NA | NA |
| RP11-709D24.6 | 1,75  | -2,83  | 3,180969 | -0,89111 | NA | NA |
| RP11-70K10.2  | 3,25  | -23,54 | 3,63933  | -6,4669  | NA | NA |
| RP11-70L8.4   | 13,68 | -1,53  | 1,171688 | -1,30688 | NA | NA |
| RP11-711C17.1 | 1,48  | -5,36  | 3,643911 | -1,47003 | NA | NA |
| RP11-711M9.2  | 0,74  | -4,37  | 3,652488 | -1,19618 | NA | NA |
| RP11-712B9.2  | 22,53 | -4,99  | 1,849704 | -2,69614 | NA | NA |
| RP11-712B9.4  | 1,55  | -5,43  | 3,643563 | -1,48975 | NA | NA |
| RP11-713C5.1  | 0,59  | -4,04  | 3,656772 | -1,10392 | NA | NA |
| RP11-719L21.1 | 9,44  | -24,96 | 3,636787 | -6,86339 | NA | NA |
| RP11-71E19.1  | 8,72  | -24,95 | 3,636872 | -6,86065 | NA | NA |
| RP11-723D22.2 | 12,99 | 0,33   | 1,453269 | 0,223762 | NA | NA |
| RP11-723O4.3  | 0,72  | -4,09  | 3,654027 | -1,11913 | NA | NA |
| RP11-726G23.3 | 11,23 | -9,15  | 3,298172 | -2,77288 | NA | NA |
| RP11-727A23.7 | 2,22  | -3,11  | 2,515213 | -1,23836 | NA | NA |
| RP11-728E14.4 | 1,05  | -4,86  | 3,64753  | -1,33375 | NA | NA |
| RP11-734C14.2 | 4,45  | -8,83  | 3,522194 | -2,50563 | NA | NA |
| RP11-736I24.3 | 9,68  | -2,39  | 1,858885 | -1,28576 | NA | NA |
| RP11-736I24.5 | 6,51  | -1,84  | 1,487034 | -1,23569 | NA | NA |
| RP11-736K12.3 | 3,75  | -6,70  | 3,520929 | -1,90416 | NA | NA |
| RP11-737O24.3 | 2,78  | -1,56  | 3,378383 | -0,46048 | NA | NA |
| RP11-738G5.2  | 1,42  | -3,17  | 1,890143 | -1,67738 | NA | NA |
| RP11-73B2.8   | 4,71  | -24,05 | 3,638117 | -6,61191 | NA | NA |
| RP11-73B2.9   | 0,85  | -4,56  | 3,650284 | -1,24942 | NA | NA |
| RP11-73M18.2  | 85,50 | 0,88   | 1,931204 | 0,457255 | NA | NA |
| RP11-73M7.6   | 8,55  | -0,68  | 1,549565 | -0,43938 | NA | NA |
| RP11-740P5.3  | 1,97  | -5,78  | 3,641854 | -1,58635 | NA | NA |
| RP11-744K17.9 | 2,75  | -4,40  | 2,632134 | -1,67308 | NA | NA |
| RP11-747H12.6 | 2,06  | -5,67  | 3,641623 | -1,55581 | NA | NA |
| RP11-749H17.1 | 5,44  | -1,23  | 1,280177 | -0,9591  | NA | NA |
| RP11-74C1.2   | 8,34  | -0,93  | 2,096951 | -0,4445  | NA | NA |

|                |       |        |          |          |    |    |
|----------------|-------|--------|----------|----------|----|----|
| RP11-74C3.1    | 1,36  | -5,24  | 3,644754 | -1,43641 | NA | NA |
| RP11-74D7.3    | 3,06  | -3,06  | 3,624534 | -0,84375 | NA | NA |
| RP11-74J13.9   | 4,07  | -4,81  | 2,394238 | -2,00974 | NA | NA |
| RP11-754B17.1  | 3,57  | -0,43  | 1,817353 | -0,23543 | NA | NA |
| RP11-755J8.1   | 2,97  | -3,11  | 2,826154 | -1,10196 | NA | NA |
| RP11-756G20.1  | 6,17  | -5,16  | 3,393714 | -1,51925 | NA | NA |
| RP11-756P10.2  | 9,52  | -2,07  | 1,234381 | -1,67603 | NA | NA |
| RP11-758E17.2  | 2,78  | -6,27  | 3,640005 | -1,7229  | NA | NA |
| RP11-761I4.3   | 71,69 | -4,64  | 1,898634 | -2,44461 | NA | NA |
| RP11-762E8.1   | 2,23  | -5,05  | 2,792743 | -1,80811 | NA | NA |
| RP11-762J3.1   | 0,76  | -4,40  | 3,652047 | -1,20457 | NA | NA |
| RP11-767N15.1  | 1,12  | -4,96  | 3,646676 | -1,36057 | NA | NA |
| RP11-76C10.5   | 0,77  | -4,42  | 3,651825 | -1,20931 | NA | NA |
| RP11-775H9.2   | 4,88  | 0,69   | 2,528168 | 0,274444 | NA | NA |
| RP11-775H9.3   | 4,70  | -7,65  | 3,571096 | -2,14309 | NA | NA |
| RP11-777B9.2   | 1,40  | -4,43  | 3,646313 | -1,21479 | NA | NA |
| RP11-778D9.9   | 8,04  | -24,84 | 3,2653   | -7,60623 | NA | NA |
| RP11-77O7.1    | 8,43  | -24,73 | 3,314795 | -7,45972 | NA | NA |
| RP11-77P19.2   | 1,84  | -4,24  | 3,019005 | -1,40306 | NA | NA |
| RP11-783N5.1   | 17,57 | -4,47  | 2,020924 | -2,21011 | NA | NA |
| RP11-786O7.1   | 9,09  | -24,82 | 3,287207 | -7,549   | NA | NA |
| RP11-789C1.2   | 3,40  | -4,26  | 2,00803  | -2,12323 | NA | NA |
| RP11-78B10.2   | 7,70  | -9,96  | 3,375336 | -2,95068 | NA | NA |
| RP11-78H24.1   | 2,56  | -1,29  | 1,897668 | -0,67963 | NA | NA |
| RP11-78J21.7   | 2,16  | -2,17  | 3,262491 | -0,66662 | NA | NA |
| RP11-793A3.2   | 2,63  | -4,00  | 3,634448 | -1,10169 | NA | NA |
| RP11-799B12.4  | 0,77  | -4,20  | 3,652403 | -1,14921 | NA | NA |
| RP11-79H23.2   | 3,61  | -6,65  | 2,993384 | -2,21999 | NA | NA |
| RP11-79I23.2   | 1,44  | -1,56  | 2,324243 | -0,67308 | NA | NA |
| RP11-79O8.1    | 7,79  | -4,09  | 3,246045 | -1,25983 | NA | NA |
| RP11-7B3.4     | 1,04  | -4,63  | 3,64817  | -1,2692  | NA | NA |
| RP11-7I15.3    | 1,76  | -3,51  | 3,086888 | -1,13715 | NA | NA |
| RP11-7I15.4    | 5,11  | -0,95  | 1,29107  | -0,73797 | NA | NA |
| RP11-7O11.3    | 2,58  | -6,16  | 3,640319 | -1,69337 | NA | NA |
| RP11-7O11.7    | 7,21  | -0,70  | 2,235091 | -0,31364 | NA | NA |
| RP11-800A3.4   | 2,48  | -0,84  | 2,041811 | -0,41117 | NA | NA |
| RP11-801F7.1   | 5,79  | -2,82  | 3,002243 | -0,93922 | NA | NA |
| RP11-802O23.4  | 12,55 | -2,28  | 1,954144 | -1,16911 | NA | NA |
| RP11-805J14.3  | 3,69  | -0,21  | 1,861359 | -0,11431 | NA | NA |
| RP11-806L2.2   | 25,03 | -1,73  | 0,828921 | -2,08274 | NA | NA |
| RP11-807E13.2  | 21,30 | -11,08 | 3,636041 | -3,0484  | NA | NA |
| RP11-807H22.10 | 4,13  | 0,23   | 2,062088 | 0,110386 | NA | NA |
| RP11-807H22.4  | 2,51  | -5,95  | 3,640571 | -1,63539 | NA | NA |
| RP11-807H22.9  | 5,85  | -24,37 | 3,637601 | -6,69986 | NA | NA |
| RP11-809N15.2  | 6,02  | -2,07  | 1,635224 | -1,26787 | NA | NA |
| RP11-80H8.4    | 9,04  | 0,00   | 1,813425 | 9,89E-05 | NA | NA |
| RP11-80I15.4   | 1,70  | -5,56  | 3,642763 | -1,5258  | NA | NA |
| RP11-815J21.3  | 12,49 | -0,32  | 1,744775 | -0,18237 | NA | NA |
| RP11-816J8.1   | 2,63  | -6,19  | 3,640251 | -1,70105 | NA | NA |
| RP11-817I4.2   | 7,23  | -0,68  | 1,535691 | -0,44134 | NA | NA |

|               |       |        |          |          |    |    |
|---------------|-------|--------|----------|----------|----|----|
| RP11-820I16.1 | 3,64  | -23,69 | 3,638864 | -6,51128 | NA | NA |
| RP11-822E23.6 | 15,06 | -4,68  | 2,103524 | -2,22396 | NA | NA |
| RP11-826N14.2 | 0,61  | -4,08  | 3,656169 | -1,11574 | NA | NA |
| RP11-82K18.2  | 3,54  | -23,66 | 3,639011 | -6,50129 | NA | NA |
| RP11-82L20.1  | 2,21  | -5,28  | 3,641476 | -1,45008 | NA | NA |
| RP11-82O19.1  | 3,59  | -0,63  | 1,611675 | -0,3894  | NA | NA |
| RP11-830F9.6  | 5,61  | -2,27  | 1,783965 | -1,27346 | NA | NA |
| RP11-832N8.1  | 1,19  | -5,04  | 3,645952 | -1,3825  | NA | NA |
| RP11-834C11.4 | 11,79 | -3,12  | 1,571207 | -1,98468 | NA | NA |
| RP11-83A24.1  | 2,29  | -1,19  | 2,395864 | -0,49874 | NA | NA |
| RP11-83C7.1   | 2,35  | -5,69  | 3,103168 | -1,83461 | NA | NA |
| RP11-83C7.2   | 2,33  | -6,02  | 3,640892 | -1,65207 | NA | NA |
| RP11-841C19.1 | 1,10  | -4,04  | 3,281262 | -1,23031 | NA | NA |
| RP11-841C19.6 | 2,66  | -1,50  | 0,919053 | -1,63088 | NA | NA |
| RP11-846F4.6  | 1,41  | -3,44  | 1,899068 | -1,8102  | NA | NA |
| RP11-849F2.9  | 6,82  | -5,08  | 1,747974 | -2,90623 | NA | NA |
| RP11-84A12.1  | 15,51 | -2,73  | 1,092869 | -2,49453 | NA | NA |
| RP11-84A19.4  | 8,67  | -3,52  | 2,264189 | -1,55271 | NA | NA |
| RP11-84C10.1  | 0,79  | -4,45  | 3,651282 | -1,21823 | NA | NA |
| RP11-854K16.3 | 13,64 | -0,58  | 2,955037 | -0,19698 | NA | NA |
| RP11-854K16.4 | 36,05 | -4,52  | 2,245083 | -2,01477 | NA | NA |
| RP11-85B7.2   | 1,68  | -4,86  | 3,215312 | -1,51164 | NA | NA |
| RP11-85G21.1  | 1,26  | -2,49  | 3,115077 | -0,79979 | NA | NA |
| RP11-862L9.2  | 12,44 | -5,31  | 2,151205 | -2,46763 | NA | NA |
| RP11-863K10.4 | 4,03  | -2,21  | 2,476132 | -0,89277 | NA | NA |
| RP11-873E20.1 | 0,97  | -3,90  | 3,65124  | -1,06694 | NA | NA |
| RP11-876N24.2 | 9,67  | -2,47  | 1,894463 | -1,30525 | NA | NA |
| RP11-876N24.3 | 16,42 | -3,62  | 3,610612 | -1,0014  | NA | NA |
| RP11-877E17.2 | 31,79 | -3,07  | 0,922636 | -3,33135 | NA | NA |
| RP11-879D6.1  | 2,82  | -5,95  | 3,640111 | -1,63409 | NA | NA |
| RP11-87E22.1  | 0,96  | -4,73  | 3,648613 | -1,29755 | NA | NA |
| RP11-87G24.5  | 4,36  | -2,19  | 2,272894 | -0,96359 | NA | NA |
| RP11-883G14.2 | 5,92  | -24,43 | 3,637817 | -6,71587 | NA | NA |
| RP11-883G14.3 | 5,45  | -9,36  | 3,468715 | -2,69909 | NA | NA |
| RP11-885N19.6 | 16,43 | -25,87 | 3,636211 | -7,11591 | NA | NA |
| RP11-886D15.1 | 8,38  | 1,62   | 1,815567 | 0,892674 | NA | NA |
| RP11-887P2.5  | 5,36  | -2,69  | 1,678586 | -1,605   | NA | NA |
| RP11-889I17.2 | 1,69  | -5,52  | 3,642303 | -1,51682 | NA | NA |
| RP11-88B8.2   | 2,62  | -2,89  | 1,93303  | -1,49294 | NA | NA |
| RP11-88H1.1   | 1,65  | -5,51  | 3,643113 | -1,51363 | NA | NA |
| RP11-894J14.2 | 7,34  | -24,69 | 3,637131 | -6,78916 | NA | NA |
| RP11-8P11.4   | 3,44  | -7,00  | 3,610366 | -1,93915 | NA | NA |
| RP11-8P13.1   | 0,72  | -4,31  | 3,653024 | -1,18023 | NA | NA |
| RP11-903H12.2 | 14,69 | -25,71 | 3,636305 | -7,07061 | NA | NA |
| RP11-903H12.5 | 17,86 | -25,61 | 3,636151 | -7,0437  | NA | NA |
| RP11-907D1.3  | 1,45  | -3,10  | 2,164952 | -1,43036 | NA | NA |
| RP11-90L20.3  | 7,35  | -1,16  | 1,557949 | -0,74698 | NA | NA |
| RP11-90M11.1  | 2,50  | -6,12  | 3,640453 | -1,68088 | NA | NA |
| RP11-90M2.4   | 3,93  | -1,09  | 1,480672 | -0,735   | NA | NA |
| RP11-923I11.4 | 3,80  | 0,34   | 2,069522 | 0,162992 | NA | NA |

|                |       |        |          |          |    |    |
|----------------|-------|--------|----------|----------|----|----|
| RP11-923I11.6  | 0,87  | -3,94  | 3,652257 | -1,07952 | NA | NA |
| RP11-930O11.3  | 1,10  | -1,74  | 1,945139 | -0,89423 | NA | NA |
| RP11-936I5.1   | 13,60 | -1,75  | 1,830817 | -0,95591 | NA | NA |
| RP11-93O14.3   | 3,42  | -0,19  | 2,129628 | -0,09118 | NA | NA |
| RP11-946L20.1  | 0,73  | -4,35  | 3,652692 | -1,19005 | NA | NA |
| RP11-94C24.6   | 1,11  | -2,51  | 2,361671 | -1,06252 | NA | NA |
| RP11-958F21.1  | 4,32  | -23,92 | 3,638372 | -6,57477 | NA | NA |
| RP11-958N24.1  | 0,35  | -3,17  | 3,66593  | -0,86598 | NA | NA |
| RP11-958N24.2  | 1,85  | -5,68  | 3,642273 | -1,56006 | NA | NA |
| RP11-95O2.1    | 2,04  | -4,22  | 2,95018  | -1,43205 | NA | NA |
| RP11-960B9.2   | 1,66  | -2,62  | 3,167152 | -0,82863 | NA | NA |
| RP11-960L18.1  | 15,05 | -1,41  | 1,276742 | -1,10683 | NA | NA |
| RP11-962G15.1  | 1,48  | -5,02  | 3,644462 | -1,3773  | NA | NA |
| RP11-96A1.4    | 3,24  | -5,45  | 3,639811 | -1,49856 | NA | NA |
| RP11-96C21.2   | 4,35  | -2,86  | 1,643414 | -1,74188 | NA | NA |
| RP11-96C23.9   | 3,90  | -1,86  | 2,473777 | -0,75277 | NA | NA |
| RP11-96L14.7   | 5,64  | -3,16  | 3,312342 | -0,95371 | NA | NA |
| RP11-96M12.1   | 6,12  | -1,42  | 0,816398 | -1,73369 | NA | NA |
| RP11-972K6.1   | 4,42  | -23,96 | 3,638288 | -6,58444 | NA | NA |
| RP11-977G19.12 | 2,01  | -1,54  | 1,41223  | -1,09209 | NA | NA |
| RP11-97C16.1   | 16,41 | -2,68  | 2,322669 | -1,15554 | NA | NA |
| RP11-97N19.2   | 3,23  | -23,53 | 3,639381 | -6,4656  | NA | NA |
| RP11-97O12.7   | 1,03  | -4,65  | 3,648088 | -1,27346 | NA | NA |
| RP11-983G14.4  | 0,70  | -4,27  | 3,653521 | -1,17001 | NA | NA |
| RP11-98F14.10  | 2,58  | -3,79  | 1,821694 | -2,07793 | NA | NA |
| RP11-98F14.4   | 11,06 | -25,30 | 3,63659  | -6,957   | NA | NA |
| RP11-996F15.5  | 8,98  | -0,76  | 2,309291 | -0,32901 | NA | NA |
| RP11-9G1.3     | 13,21 | -4,52  | 1,263031 | -3,57973 | NA | NA |
| RP13-1039J1.2  | 4,57  | -3,70  | 2,112538 | -1,75197 | NA | NA |
| RP13-122B23.8  | 1,88  | -5,36  | 3,642406 | -1,4713  | NA | NA |
| RP13-122B23.9  | 0,74  | -4,37  | 3,652262 | -1,19563 | NA | NA |
| RP13-131K19.6  | 25,44 | 0,73   | 1,51346  | 0,479269 | NA | NA |
| RP13-192B19.2  | 19,38 | -7,28  | 2,478708 | -2,93839 | NA | NA |
| RP13-204A15.5  | 9,18  | -0,69  | 1,672382 | -0,41142 | NA | NA |
| RP13-228J13.1  | 7,10  | -1,47  | 2,613774 | -0,56363 | NA | NA |
| RP13-339P19.1  | 1,81  | -2,52  | 2,021739 | -1,24518 | NA | NA |
| RP13-362E11.1  | 2,83  | -6,30  | 3,639887 | -1,73041 | NA | NA |
| RP13-470G3.1   | 6,54  | -9,35  | 2,936861 | -3,18291 | NA | NA |
| RP13-516M14.4  | 40,44 | -0,54  | 0,75988  | -0,7117  | NA | NA |
| RP13-546I2.1   | 10,10 | -25,16 | 3,636697 | -6,91953 | NA | NA |
| RP13-653N12.1  | 2,37  | -6,04  | 3,640671 | -1,65787 | NA | NA |
| RP13-653N12.2  | 10,33 | -25,20 | 3,227781 | -7,80872 | NA | NA |
| RP13-685P2.8   | 3,36  | -5,19  | 2,872934 | -1,80488 | NA | NA |
| RP13-81N3.2    | 11,76 | -25,39 | 3,63653  | -6,98145 | NA | NA |
| RP13-977J11.2  | 34,77 | -3,13  | 2,22933  | -1,402   | NA | NA |
| RP3-323B6.2    | 6,39  | -24,51 | 3,637394 | -6,73709 | NA | NA |
| RP3-324O17.4   | 2,58  | -5,16  | 2,212119 | -2,33426 | NA | NA |
| RP3-324O17.7   | 1,70  | -4,00  | 3,642939 | -1,09888 | NA | NA |
| RP3-326I13.1   | 1,04  | -4,67  | 3,64792  | -1,2791  | NA | NA |
| RP3-329E20.2   | 7,73  | -24,71 | 3,637078 | -6,79364 | NA | NA |

|               |       |        |          |          |    |    |
|---------------|-------|--------|----------|----------|----|----|
| RP3-333B15.2  | 0,78  | -4,43  | 3,65143  | -1,21365 | NA | NA |
| RP3-337H4.6   | 7,14  | -6,58  | 1,67288  | -3,93238 | NA | NA |
| RP3-368A4.6   | 61,14 | -0,43  | 1,03214  | -0,41226 | NA | NA |
| RP3-368B9.1   | 10,31 | -7,37  | 2,361933 | -3,11941 | NA | NA |
| RP3-388M5.8   | 1,85  | -5,69  | 3,642249 | -1,56173 | NA | NA |
| RP3-400B16.1  | 1,96  | -1,83  | 2,43934  | -0,74839 | NA | NA |
| RP3-416J7.4   | 6,42  | -7,48  | 2,885294 | -2,59184 | NA | NA |
| RP3-425P12.5  | 2,76  | -5,43  | 2,795087 | -1,94343 | NA | NA |
| RP3-430N8.11  | 0,81  | -3,28  | 2,871206 | -1,14158 | NA | NA |
| RP3-435K13.1  | 4,93  | -24,06 | 3,637983 | -6,61236 | NA | NA |
| RP3-437C15.1  | 4,81  | -7,31  | 3,052763 | -2,39388 | NA | NA |
| RP3-455H14.1  | 1,48  | -4,77  | 3,239662 | -1,47263 | NA | NA |
| RP3-465N24.6  | 0,87  | -3,91  | 3,30471  | -1,18297 | NA | NA |
| RP3-467L1.4   | 10,02 | -6,97  | 2,436947 | -2,86023 | NA | NA |
| RP3-467N11.1  | 9,53  | -6,02  | 2,606827 | -2,30774 | NA | NA |
| RP3-468K3.1   | 16,32 | -25,87 | 3,63622  | -7,11328 | NA | NA |
| RP3-468O1.2   | 0,53  | -3,88  | 3,659192 | -1,06068 | NA | NA |
| RP3-468O1.5   | 2,95  | -0,34  | 2,438692 | -0,13822 | NA | NA |
| RP3-468O1.6   | 10,59 | -8,19  | 2,674694 | -3,06361 | NA | NA |
| RP3-477J10.1  | 3,64  | -0,30  | 3,625627 | -0,08371 | NA | NA |
| RP3-495K2.2   | 3,13  | -1,19  | 2,081724 | -0,57056 | NA | NA |
| RP3-508I15.20 | 1,22  | -2,21  | 2,166859 | -1,02102 | NA | NA |
| RP3-509L4.3   | 17,60 | -0,58  | 2,389126 | -0,24309 | NA | NA |
| RP3-510H16.3  | 10,86 | -2,27  | 2,087183 | -1,08918 | NA | NA |
| RP3-512B11.3  | 0,73  | -4,36  | 3,652696 | -1,19249 | NA | NA |
| RP3-520B18.1  | 5,22  | -9,08  | 3,479576 | -2,60931 | NA | NA |
| RP3-521E19.3  | 1,25  | -5,11  | 3,645483 | -1,40265 | NA | NA |
| RP3-523C21.1  | 8,65  | -5,85  | 1,521151 | -3,84273 | NA | NA |
| RP3-525N10.2  | 2,95  | -6,36  | 3,639666 | -1,74623 | NA | NA |
| RP4-529N6.1   | 1,49  | -5,37  | 3,643907 | -1,47498 | NA | NA |
| RP4-534P7.2   | 14,24 | -6,46  | 2,581395 | -2,50314 | NA | NA |
| RP4-535B20.1  | 2,41  | -1,61  | 2,024206 | -0,79714 | NA | NA |
| RP4-539M6.19  | 7,04  | -6,44  | 3,158125 | -2,03981 | NA | NA |
| RP4-541C22.5  | 2,40  | -5,90  | 3,102081 | -1,90214 | NA | NA |
| RP4-548D19.5  | 4,48  | -2,28  | 2,741483 | -0,83166 | NA | NA |
| RP4-555L14.5  | 6,56  | -0,90  | 1,378533 | -0,64977 | NA | NA |
| RP4-562J12.2  | 28,79 | -4,65  | 1,126704 | -4,12416 | NA | NA |
| RP4-564F22.7  | 1,45  | -4,96  | 3,222492 | -1,54028 | NA | NA |
| RP4-576H24.4  | 3,77  | -3,10  | 2,903982 | -1,06726 | NA | NA |
| RP4-601K24.1  | 14,99 | -0,83  | 1,291889 | -0,64241 | NA | NA |
| RP4-610L12.2  | 9,25  | -4,48  | 3,214591 | -1,39324 | NA | NA |
| RP4-614C10.3  | 2,79  | -6,11  | 2,636071 | -2,31937 | NA | NA |
| RP4-614O4.13  | 8,64  | -2,13  | 1,80545  | -1,18062 | NA | NA |
| RP4-621B10.2  | 0,55  | -3,93  | 3,658406 | -1,07422 | NA | NA |
| RP4-621F18.2  | 4,66  | -7,21  | 3,065893 | -2,35155 | NA | NA |
| RP4-622L5.7   | 2,23  | -1,43  | 3,329325 | -0,43084 | NA | NA |
| RP4-625H18.2  | 1,69  | -4,07  | 2,257173 | -1,80409 | NA | NA |
| RP4-629B2.1   | 4,32  | -5,54  | 1,679766 | -3,29874 | NA | NA |
| RP4-635A23.4  | 4,33  | -1,55  | 2,560918 | -0,60336 | NA | NA |
| RP4-650F12.2  | 2,97  | -6,38  | 3,580028 | -1,78122 | NA | NA |

|               |       |        |          |          |    |    |
|---------------|-------|--------|----------|----------|----|----|
| RP4-651E10.4  | 5,17  | -4,16  | 3,144624 | -1,32347 | NA | NA |
| RP4-666F24.3  | 18,60 | -2,45  | 1,558831 | -1,57367 | NA | NA |
| RP4-687K1.2   | 8,30  | -1,46  | 2,46427  | -0,59382 | NA | NA |
| RP4-724E13.2  | 8,40  | -7,93  | 3,637469 | -2,18131 | NA | NA |
| RP4-733B9.1   | 0,90  | -4,64  | 3,649507 | -1,271   | NA | NA |
| RP4-737E23.5  | 12,82 | 0,79   | 1,547977 | 0,50788  | NA | NA |
| RP4-742C19.12 | 0,88  | -4,36  | 3,215844 | -1,35708 | NA | NA |
| RP4-742J24.2  | 17,29 | -3,25  | 1,490835 | -2,18121 | NA | NA |
| RP4-745K6.1   | 6,09  | -24,43 | 3,637511 | -6,71673 | NA | NA |
| RP4-758J18.13 | 33,68 | -1,28  | 0,633803 | -2,02349 | NA | NA |
| RP4-760C5.3   | 1,13  | -4,98  | 3,646577 | -1,36509 | NA | NA |
| RP4-765A10.2  | 3,78  | -1,71  | 2,740099 | -0,62545 | NA | NA |
| RP4-769N13.6  | 33,13 | -3,06  | 1,264047 | -2,42162 | NA | NA |
| RP4-773A18.4  | 1,42  | -5,33  | 3,645125 | -1,46087 | NA | NA |
| RP4-788L20.5  | 6,65  | -9,65  | 2,855156 | -3,37966 | NA | NA |
| RP4-791K14.2  | 2,57  | -4,00  | 2,125346 | -1,88187 | NA | NA |
| RP4-794H19.1  | 7,99  | -6,49  | 3,152237 | -2,05997 | NA | NA |
| RP4-799P18.5  | 5,44  | -8,79  | 3,468502 | -2,53427 | NA | NA |
| RP4-800G7.2   | 64,07 | -2,36  | 1,028054 | -2,29501 | NA | NA |
| RP4-800M22.1  | 2,20  | -5,59  | 3,166114 | -1,76632 | NA | NA |
| RP4-806M20.2  | 4,82  | -3,24  | 2,968692 | -1,09291 | NA | NA |
| RP4-811M8.1   | 0,82  | -4,51  | 3,650836 | -1,23482 | NA | NA |
| RP5-1007G16.1 | 4,72  | -24,07 | 3,638221 | -6,61539 | NA | NA |
| RP5-1009E24.9 | 2,14  | -5,89  | 3,64136  | -1,61834 | NA | NA |
| RP5-1043F6.1  | 17,49 | -2,74  | 2,537437 | -1,08008 | NA | NA |
| RP5-1050K3.2  | 3,11  | -6,43  | 3,63953  | -1,76758 | NA | NA |
| RP5-1059H15.1 | 5,87  | -24,38 | 3,637597 | -6,70136 | NA | NA |
| RP5-1065O2.4  | 4,35  | -1,81  | 1,22334  | -1,47731 | NA | NA |
| RP5-1068H6.3  | 14,24 | -7,21  | 2,229505 | -3,23328 | NA | NA |
| RP5-1086D14.6 | 29,14 | -0,85  | 1,038218 | -0,81885 | NA | NA |
| RP5-1086K13.3 | 18,33 | 0,48   | 1,34616  | 0,355426 | NA | NA |
| RP5-1092K5.2  | 3,99  | -1,96  | 2,481768 | -0,79069 | NA | NA |
| RP5-1112D6.5  | 12,26 | -0,72  | 1,032838 | -0,69831 | NA | NA |
| RP5-1115A15.1 | 12,79 | -1,63  | 2,021102 | -0,80841 | NA | NA |
| RP5-1116H23.3 | 1,49  | -2,63  | 1,989353 | -1,32209 | NA | NA |
| RP5-1116H23.6 | 13,54 | -0,97  | 2,396473 | -0,40346 | NA | NA |
| RP5-1119A7.11 | 7,11  | -24,55 | 3,637215 | -6,75087 | NA | NA |
| RP5-1119O21.2 | 8,35  | -24,85 | 3,636957 | -6,83126 | NA | NA |
| RP5-1120P11.3 | 6,17  | -5,65  | 3,328859 | -1,69846 | NA | NA |
| RP5-1132H15.1 | 7,80  | -3,14  | 1,788677 | -1,75632 | NA | NA |
| RP5-1136G13.2 | 19,05 | -3,66  | 1,573226 | -2,32801 | NA | NA |
| RP5-1142A6.2  | 7,41  | -24,74 | 3,315358 | -7,46328 | NA | NA |
| RP5-1142A6.3  | 30,12 | -1,42  | 1,213608 | -1,16655 | NA | NA |
| RP5-1142J19.2 | 1,05  | -4,68  | 3,647665 | -1,28391 | NA | NA |
| RP5-1159O4.1  | 8,43  | -1,19  | 1,211966 | -0,98213 | NA | NA |
| RP5-1169K15.1 | 16,78 | -3,79  | 1,172717 | -3,23562 | NA | NA |
| RP5-1189D6.2  | 11,41 | 1,70   | 1,841943 | 0,923404 | NA | NA |
| RP5-827C21.2  | 1,03  | -4,84  | 3,647601 | -1,32642 | NA | NA |
| RP5-850O15.4  | 4,05  | -5,11  | 3,322313 | -1,53685 | NA | NA |
| RP5-864K19.7  | 1,33  | -5,21  | 3,644905 | -1,42835 | NA | NA |

|              |        |        |          |          |    |    |
|--------------|--------|--------|----------|----------|----|----|
| RP5-881L22.4 | 1,56   | -1,23  | 1,933497 | -0,63674 | NA | NA |
| RP5-887A10.1 | 1,33   | -4,49  | 2,789099 | -1,61051 | NA | NA |
| RP5-890E16.5 | 9,28   | -3,49  | 3,303537 | -1,05592 | NA | NA |
| RP5-894A10.2 | 24,42  | -1,39  | 1,572138 | -0,8838  | NA | NA |
| RP5-902P8.10 | 2,31   | -4,23  | 1,358279 | -3,111   | NA | NA |
| RP5-912I13.2 | 3,58   | -4,06  | 3,551363 | -1,14338 | NA | NA |
| RP5-916L7.2  | 17,80  | -11,05 | 2,438122 | -4,53158 | NA | NA |
| RP5-943J3.2  | 1,70   | -2,71  | 1,839206 | -1,47512 | NA | NA |
| RP5-956O18.2 | 3,15   | -1,00  | 3,624395 | -0,27543 | NA | NA |
| RP5-964C11.1 | 8,85   | -6,16  | 2,121404 | -2,90531 | NA | NA |
| RP5-965G21.4 | 17,31  | -1,26  | 0,939351 | -1,34389 | NA | NA |
| RP5-983L19.1 | 2,58   | -0,97  | 1,838511 | -0,52707 | NA | NA |
| RP5-988G17.1 | 6,49   | -24,52 | 3,637396 | -6,74195 | NA | NA |
| RP5-994D16.3 | 0,96   | -4,35  | 3,275893 | -1,32732 | NA | NA |
| RP6-99M1.3   | 7,33   | -1,07  | 2,258774 | -0,47157 | NA | NA |
| RPH3A        | 29,48  | -1,43  | 0,950795 | -1,50448 | NA | NA |
| RPL10P3      | 1,75   | -2,26  | 1,234058 | -1,82894 | NA | NA |
| RPL13AP6     | 1,51   | -3,93  | 2,01115  | -1,95529 | NA | NA |
| RPL13P12     | 36,08  | -0,92  | 0,810644 | -1,1352  | NA | NA |
| RPL14P1      | 6,31   | -5,94  | 1,723305 | -3,44718 | NA | NA |
| RPL21P44     | 8,60   | -6,50  | 1,833946 | -3,54387 | NA | NA |
| RPL23AP77    | 0,51   | -3,83  | 3,659694 | -1,04723 | NA | NA |
| RPL26P30     | 0,75   | -3,66  | 3,322478 | -1,10172 | NA | NA |
| RPL31P58     | 1,60   | -5,47  | 3,64323  | -1,50207 | NA | NA |
| RPL35AP25    | 2,11   | -5,70  | 3,641448 | -1,56539 | NA | NA |
| RPL36AP40    | 1,76   | -4,83  | 3,643632 | -1,32537 | NA | NA |
| RPL39P31     | 1,21   | -5,07  | 3,645894 | -1,38997 | NA | NA |
| RPL6P8       | 4,91   | -7,36  | 3,553066 | -2,07076 | NA | NA |
| RPL7AP60     | 5,40   | 0,63   | 2,101292 | 0,298083 | NA | NA |
| RPL7AP65     | 33,09  | -6,70  | 2,267481 | -2,95369 | NA | NA |
| RPL7P23p     | 6,63   | -3,69  | 1,285268 | -2,86814 | NA | NA |
| RPL7P5       | 1,03   | -4,84  | 3,647699 | -1,32779 | NA | NA |
| RPL9P29      | 4,15   | -1,75  | 2,766003 | -0,63351 | NA | NA |
| RPL9P3       | 2,86   | -1,92  | 0,894195 | -2,14421 | NA | NA |
| RPP38        | 156,29 | -1,00  | 0,883336 | -1,12886 | NA | NA |
| RPS11P6      | 12,52  | -0,45  | 1,499388 | -0,30326 | NA | NA |
| RPS12P27     | 7,81   | -5,73  | 2,599922 | -2,20336 | NA | NA |
| RPS18P1      | 0,81   | -4,49  | 3,651229 | -1,22931 | NA | NA |
| RPS20P21     | 1,21   | -4,68  | 3,646516 | -1,28396 | NA | NA |
| RPS26P34     | 1,37   | -4,47  | 2,458816 | -1,81613 | NA | NA |
| RPS29P24     | 2,76   | -6,26  | 3,64002  | -1,72015 | NA | NA |
| RPS2P35      | 1,04   | -4,66  | 3,64797  | -1,27701 | NA | NA |
| RPS2P44      | 9,28   | 1,10   | 2,495168 | 0,441337 | NA | NA |
| RPS3P1       | 5,05   | -7,80  | 3,022197 | -2,5824  | NA | NA |
| RPS4Y1       | 118,56 | -8,92  | 1,30212  | -6,85097 | NA | NA |
| RSU1P2       | 3,28   | -6,11  | 3,100289 | -1,97002 | NA | NA |
| RUNDC3A      | 4,42   | -1,88  | 1,050314 | -1,79462 | NA | NA |
| RUNX1T1      | 20,98  | -5,10  | 1,260919 | -4,04558 | NA | NA |
| RUVBL1       | 130,56 | -0,40  | 0,786719 | -0,50264 | NA | NA |
| S100A3       | 0,60   | -4,05  | 3,655766 | -1,10731 | NA | NA |



|             |        |        |          |          |    |    |
|-------------|--------|--------|----------|----------|----|----|
| S100A7      | 3,28   | -6,35  | 3,023043 | -2,10173 | NA | NA |
| S100P       | 0,74   | -4,36  | 3,652835 | -1,19387 | NA | NA |
| S1PR5       | 10,37  | -4,14  | 1,820652 | -2,27648 | NA | NA |
| SATB2-AS1   | 1,84   | -5,56  | 3,643627 | -1,52672 | NA | NA |
| SBK2        | 1,32   | -5,01  | 3,645321 | -1,37319 | NA | NA |
| SCAND2      | 171,28 | -2,42  | 0,95217  | -2,54143 | NA | NA |
| SCARNA18B   | 3,82   | -2,99  | 3,280015 | -0,91067 | NA | NA |
| SCARNA21B   | 0,91   | -4,07  | 3,650707 | -1,11618 | NA | NA |
| SCARNA4     | 2,99   | -8,49  | 3,62793  | -2,34122 | NA | NA |
| SCb-64M4.1  | 5,84   | -1,82  | 1,292577 | -1,40618 | NA | NA |
| SCG2        | 2,34   | -6,01  | 3,640583 | -1,65039 | NA | NA |
| SCGB1D2     | 2,59   | -6,17  | 3,640315 | -1,69469 | NA | NA |
| SCGB2B2     | 11,68  | -3,60  | 1,595281 | -2,25847 | NA | NA |
| SCGN        | 3,06   | -5,84  | 2,717202 | -2,14888 | NA | NA |
| SCN11A      | 4,73   | -2,81  | 1,591212 | -1,76837 | NA | NA |
| SCNN1B      | 4,51   | -6,63  | 3,567578 | -1,85831 | NA | NA |
| SCX         | 3,86   | -0,70  | 1,994108 | -0,35107 | NA | NA |
| SDC2        | 31,01  | -1,04  | 2,013552 | -0,51858 | NA | NA |
| SEC22C      | 212,81 | -0,81  | 0,685694 | -1,18661 | NA | NA |
| SEL1L2      | 12,26  | -9,55  | 3,26216  | -2,92653 | NA | NA |
| SELP        | 4,35   | -2,70  | 3,007424 | -0,8969  | NA | NA |
| SEMA3A      | 5,95   | -9,16  | 2,929967 | -3,12469 | NA | NA |
| SEMA3D      | 12,80  | -3,08  | 1,268559 | -2,43145 | NA | NA |
| SEMA3E      | 34,94  | -5,24  | 1,463549 | -3,58022 | NA | NA |
| SEMA3G      | 2,86   | -6,40  | 3,643261 | -1,75798 | NA | NA |
| SEMA4F      | 16,98  | 0,50   | 1,506683 | 0,334411 | NA | NA |
| SEMA6C      | 9,10   | -4,58  | 3,190214 | -1,43478 | NA | NA |
| SEPP1       | 5,84   | -1,62  | 1,998802 | -0,80943 | NA | NA |
| SEPT5-GP1BB | 0,77   | -4,42  | 3,651867 | -1,20999 | NA | NA |
| SEPT7P1     | 2,10   | -5,69  | 3,641621 | -1,56154 | NA | NA |
| SERINC2     | 23,26  | -9,08  | 2,024236 | -4,48519 | NA | NA |
| SERINC4     | 3,48   | -0,77  | 3,4015   | -0,22496 | NA | NA |
| SERPINB4    | 10,14  | -25,08 | 3,636743 | -6,89565 | NA | NA |
| SERPIND1    | 1,37   | -5,04  | 3,645078 | -1,38284 | NA | NA |
| SERPINH1    | 22,38  | -2,45  | 0,990337 | -2,47847 | NA | NA |
| SERPINI2    | 5,30   | -2,32  | 1,64403  | -1,41226 | NA | NA |
| SGCA        | 9,81   | 0,00   | 1,944985 | 4,59E-04 | NA | NA |
| SGCD        | 23,66  | -9,95  | 3,636409 | -2,73576 | NA | NA |
| SGCE        | 40,97  | -0,14  | 0,616592 | -0,22692 | NA | NA |
| SGPP2       | 21,31  | -1,51  | 0,810443 | -1,86331 | NA | NA |
| SH2D7       | 2,16   | -5,91  | 3,641323 | -1,62282 | NA | NA |
| SHBG        | 9,43   | -25,05 | 3,636838 | -6,88911 | NA | NA |
| SHPK        | 10,86  | -1,53  | 1,211204 | -1,2668  | NA | NA |
| SHROOM2     | 1,65   | -1,88  | 2,859978 | -0,65578 | NA | NA |
| SHROOM3     | 56,68  | -4,18  | 1,23258  | -3,39168 | NA | NA |
| SI          | 9,51   | -7,55  | 2,97313  | -2,53943 | NA | NA |
| SIAH3       | 3,89   | -1,08  | 1,145977 | -0,94048 | NA | NA |
| SIGLEC22P   | 6,03   | -1,02  | 2,592158 | -0,39208 | NA | NA |
| SIGLEC27P   | 4,74   | -24,07 | 3,638105 | -6,61556 | NA | NA |
| SIX1        | 7,01   | -6,57  | 2,43602  | -2,69605 | NA | NA |

|           |        |        |          |          |    |    |
|-----------|--------|--------|----------|----------|----|----|
| SKOR1     | 6,68   | -4,66  | 2,526193 | -1,84374 | NA | NA |
| SLAMF1    | 9,00   | -4,83  | 1,647505 | -2,92911 | NA | NA |
| SLC10A2   | 5,48   | -0,44  | 1,967187 | -0,22222 | NA | NA |
| SLC10A7   | 118,94 | -2,63  | 1,206119 | -2,17801 | NA | NA |
| SLC12A1   | 4,60   | -1,17  | 1,509324 | -0,77213 | NA | NA |
| SLC12A3   | 6,87   | -1,31  | 1,208176 | -1,08374 | NA | NA |
| SLC15A5   | 2,61   | -5,85  | 2,702266 | -2,16558 | NA | NA |
| SLC16A10  | 71,89  | -3,15  | 0,931838 | -3,37641 | NA | NA |
| SLC17A1   | 5,13   | -24,21 | 3,43597  | -7,04591 | NA | NA |
| SLC17A4   | 8,35   | -5,65  | 2,019065 | -2,7981  | NA | NA |
| SLC22A12  | 1,99   | -5,60  | 3,641868 | -1,53794 | NA | NA |
| SLC22A17  | 1,40   | -5,09  | 3,644395 | -1,397   | NA | NA |
| SLC23A3   | 15,83  | 1,74   | 1,058832 | 1,639082 | NA | NA |
| SLC25A47  | 2,30   | -6,00  | 3,641013 | -1,64856 | NA | NA |
| SLC25A5P1 | 3,35   | -1,20  | 3,054798 | -0,39161 | NA | NA |
| SLC26A4   | 22,35  | -4,26  | 1,028313 | -4,14063 | NA | NA |
| SLC26A7   | 6,11   | -7,23  | 2,958573 | -2,44432 | NA | NA |
| SLC2A12   | 1,46   | -4,98  | 3,644565 | -1,36549 | NA | NA |
| SLC2A2    | 8,84   | -24,90 | 3,636786 | -6,84551 | NA | NA |
| SLC2A5    | 25,24  | -2,22  | 0,867169 | -2,56344 | NA | NA |
| SLC2A7    | 0,73   | -4,34  | 3,652788 | -1,1871  | NA | NA |
| SLC35F4   | 11,80  | -0,26  | 1,923945 | -0,13373 | NA | NA |
| SLC36A2   | 115,00 | -6,18  | 0,929138 | -6,64917 | NA | NA |
| SLC39A8   | 47,09  | -1,98  | 1,094016 | -1,80683 | NA | NA |
| SLC43A1   | 63,47  | 0,63   | 1,57375  | 0,40047  | NA | NA |
| SLC4A10   | 7,51   | -1,97  | 2,774239 | -0,70953 | NA | NA |
| SLC4A9    | 18,51  | -11,16 | 3,636198 | -3,06904 | NA | NA |
| SLC5A9    | 4,55   | -3,04  | 2,034237 | -1,49238 | NA | NA |
| SLC6A18   | 2,02   | -0,92  | 3,633135 | -0,25234 | NA | NA |
| SLC6A2    | 3,66   | -4,56  | 1,890686 | -2,41254 | NA | NA |
| SLC6A20   | 10,29  | -2,17  | 0,990609 | -2,19485 | NA | NA |
| SLC6A3    | 10,12  | -25,08 | 3,63678  | -6,89701 | NA | NA |
| SLC6A8    | 10,61  | 0,51   | 2,999426 | 0,169105 | NA | NA |
| SLC7A1    | 172,04 | 4,75   | 1,21042  | 3,924661 | NA | NA |
| SLC7A5P2  | 6,43   | -6,45  | 3,194683 | -2,02005 | NA | NA |
| SLC7A8    | 16,35  | -4,26  | 2,441458 | -1,74543 | NA | NA |
| SLC9A3P3  | 1,40   | -5,28  | 3,644461 | -1,44888 | NA | NA |
| SLC9A5    | 5,53   | -3,44  | 2,279372 | -1,51051 | NA | NA |
| SLC9B2    | 42,41  | -0,31  | 1,491955 | -0,20784 | NA | NA |
| SLCO1B7   | 6,45   | -5,97  | 2,537699 | -2,35389 | NA | NA |
| SLCO2B1   | 28,06  | -4,38  | 1,296847 | -3,38125 | NA | NA |
| SLCO6A1   | 11,39  | 0,14   | 3,567278 | 0,038058 | NA | NA |
| SLX4      | 30,06  | -1,88  | 0,985436 | -1,90487 | NA | NA |
| SMAD1     | 96,79  | -0,46  | 1,279154 | -0,36044 | NA | NA |
| SMCO3     | 0,86   | -4,58  | 3,650137 | -1,2547  | NA | NA |
| SMIM1     | 2,51   | -0,24  | 3,369481 | -0,07105 | NA | NA |
| SMPDL3A   | 6,81   | -5,11  | 1,500347 | -3,40608 | NA | NA |
| SNED1     | 20,83  | -3,57  | 1,728366 | -2,06315 | NA | NA |
| SNORA19   | 7,45   | -1,34  | 1,618958 | -0,82727 | NA | NA |
| SNORA22B  | 1,25   | -5,12  | 3,645538 | -1,40404 | NA | NA |

|             |        |        |          |          |    |    |
|-------------|--------|--------|----------|----------|----|----|
| SNORA2C     | 3,22   | -3,01  | 3,251347 | -0,92584 | NA | NA |
| SNORA30     | 2,04   | -5,83  | 3,641637 | -1,60002 | NA | NA |
| SNORA70D    | 5,88   | -9,24  | 3,448286 | -2,67837 | NA | NA |
| SNORA70E    | 3,96   | -6,78  | 3,638623 | -1,86306 | NA | NA |
| SNORA71C    | 4,15   | -6,85  | 3,638476 | -1,88255 | NA | NA |
| SNORA80E    | 2,83   | -0,04  | 3,039634 | -0,01249 | NA | NA |
| SNORA84     | 5,27   | -1,86  | 2,006123 | -0,92669 | NA | NA |
| SNORD100    | 4,82   | -1,16  | 1,872613 | -0,62099 | NA | NA |
| SNORD115-32 | 1,26   | -5,13  | 3,645485 | -1,40598 | NA | NA |
| SNORD14E    | 7,46   | 0,40   | 1,773083 | 0,223143 | NA | NA |
| SNORD19     | 5,13   | -3,63  | 3,619259 | -1,00419 | NA | NA |
| SNORD56B    | 6,53   | -1,06  | 2,240112 | -0,47232 | NA | NA |
| SNORD65B    | 0,77   | -4,43  | 3,651726 | -1,2124  | NA | NA |
| SNORD72     | 4,19   | -5,24  | 2,288114 | -2,29117 | NA | NA |
| SNTN        | 21,20  | 1,13   | 1,140663 | 0,987944 | NA | NA |
| SNX25       | 4,37   | -3,68  | 1,782286 | -2,06652 | NA | NA |
| SOCS6       | 126,21 | -1,08  | 1,103528 | -0,98134 | NA | NA |
| SORCS1      | 22,21  | -7,39  | 1,899916 | -3,89209 | NA | NA |
| SORCS3      | 4,53   | -6,78  | 2,963521 | -2,2868  | NA | NA |
| SOWAHB      | 1,31   | -5,18  | 3,645097 | -1,42194 | NA | NA |
| SOWAHD      | 21,20  | -5,32  | 2,199859 | -2,41992 | NA | NA |
| SOX15       | 4,15   | -1,09  | 2,78363  | -0,39332 | NA | NA |
| SOX9        | 7,29   | -6,92  | 2,185724 | -3,16478 | NA | NA |
| SPACA7      | 9,56   | -2,94  | 0,958667 | -3,06867 | NA | NA |
| SPAG11A     | 2,86   | -5,64  | 2,091416 | -2,699   | NA | NA |
| SPAG17      | 12,56  | -0,99  | 1,76792  | -0,562   | NA | NA |
| SPARC       | 25,39  | -8,95  | 1,871588 | -4,78216 | NA | NA |
| SPATA16     | 0,95   | -4,72  | 3,648667 | -1,29431 | NA | NA |
| SPATA22     | 1,54   | -5,09  | 3,212627 | -1,58571 | NA | NA |
| SPATA3      | 15,74  | -8,38  | 2,532984 | -3,30841 | NA | NA |
| SPATA31D1   | 0,58   | -3,51  | 3,659002 | -0,958   | NA | NA |
| SPATA31D2P  | 6,21   | -24,46 | 3,63748  | -6,7248  | NA | NA |
| SPATA31E1   | 2,07   | -5,67  | 3,641674 | -1,55761 | NA | NA |
| SPATA46     | 6,50   | -24,53 | 3,637384 | -6,74499 | NA | NA |
| SPATS1      | 6,53   | -24,51 | 3,637225 | -6,73735 | NA | NA |
| SPDYE4      | 1,55   | -5,41  | 3,643495 | -1,48504 | NA | NA |
| SPHAR       | 2,59   | -2,96  | 3,627344 | -0,81561 | NA | NA |
| SPIN2B      | 15,79  | -1,82  | 1,44147  | -1,26182 | NA | NA |
| SPINK5      | 15,16  | -7,12  | 2,665539 | -2,6702  | NA | NA |
| SPIRE1      | 20,84  | -3,63  | 1,690595 | -2,14767 | NA | NA |
| SPOCK3      | 1,80   | -2,11  | 3,633338 | -0,58166 | NA | NA |
| SPON1       | 3,67   | -4,46  | 3,063016 | -1,4562  | NA | NA |
| SPTBN4      | 0,91   | -4,61  | 3,647945 | -1,26378 | NA | NA |
| SPTBN5      | 10,93  | -4,45  | 1,923478 | -2,31098 | NA | NA |
| SRGAP2D     | 1,68   | -3,78  | 3,642374 | -1,03736 | NA | NA |
| SRGAP3-AS3  | 5,01   | -6,63  | 3,115351 | -2,12946 | NA | NA |
| SSPN        | 45,97  | -6,44  | 1,956928 | -3,28869 | NA | NA |
| SSPO        | 58,43  | -2,28  | 0,978514 | -2,32866 | NA | NA |
| SSX3        | 2,87   | -1,42  | 1,726284 | -0,82456 | NA | NA |
| ST6GALNAC2  | 5,99   | 0,69   | 2,456227 | 0,279472 | NA | NA |

|         |        |        |          |          |    |    |
|---------|--------|--------|----------|----------|----|----|
| ST7OT2  | 25,43  | -2,26  | 1,374227 | -1,64189 | NA | NA |
| ST8SIA1 | 89,06  | -2,00  | 0,925329 | -2,1604  | NA | NA |
| STK32A  | 14,89  | -4,48  | 1,848    | -2,42574 | NA | NA |
| STK32B  | 8,85   | -7,75  | 2,918387 | -2,65448 | NA | NA |
| STK36   | 79,39  | -2,41  | 1,348642 | -1,78374 | NA | NA |
| STMN2   | 2,40   | -5,68  | 2,715537 | -2,09087 | NA | NA |
| STRA13  | 206,91 | 1,12   | 0,857038 | 1,309489 | NA | NA |
| STRADB  | 37,10  | -0,87  | 0,925271 | -0,93952 | NA | NA |
| STXBP6  | 5,72   | -2,64  | 1,559454 | -1,6923  | NA | NA |
| SUMO4   | 10,10  | -1,24  | 1,372141 | -0,90346 | NA | NA |
| SUN3    | 1,09   | -2,35  | 2,127193 | -1,10366 | NA | NA |
| SUV39H2 | 39,92  | -1,75  | 1,001986 | -1,74771 | NA | NA |
| SVEP1   | 4,89   | 0,64   | 1,046527 | 0,608927 | NA | NA |
| SYCE1   | 6,03   | -2,39  | 2,558041 | -0,936   | NA | NA |
| SYCE3   | 3,16   | -7,35  | 3,632504 | -2,0234  | NA | NA |
| SYCP2   | 22,65  | -1,82  | 1,481144 | -1,2296  | NA | NA |
| SYNGR3  | 1,25   | -4,77  | 3,2485   | -1,46701 | NA | NA |
| SYT17   | 21,98  | 0,51   | 1,124738 | 0,454101 | NA | NA |
| TAAR7P  | 1,43   | -5,12  | 3,644549 | -1,40606 | NA | NA |
| TAF5    | 17,38  | -0,32  | 1,369536 | -0,23609 | NA | NA |
| TARM1   | 1,65   | -3,96  | 2,020984 | -1,96102 | NA | NA |
| TAS2R12 | 16,16  | -6,23  | 2,045932 | -3,04423 | NA | NA |
| TAS2R14 | 13,98  | 1,52   | 1,912812 | 0,796349 | NA | NA |
| TBC1D27 | 3,72   | -1,77  | 1,10133  | -1,60832 | NA | NA |
| TBC1D31 | 94,75  | -2,05  | 1,107624 | -1,84857 | NA | NA |
| TBX4    | 7,53   | -1,07  | 1,322248 | -0,80612 | NA | NA |
| TBX5    | 0,45   | -3,15  | 3,334508 | -0,94615 | NA | NA |
| TCEAL7  | 4,32   | -23,93 | 3,638373 | -6,57668 | NA | NA |
| TCF19   | 25,62  | -5,20  | 1,67877  | -3,09887 | NA | NA |
| TCF7L1  | 7,66   | -2,20  | 1,101002 | -1,99808 | NA | NA |
| TCL1A   | 14,71  | -2,70  | 0,93767  | -2,88178 | NA | NA |
| TCL1B   | 1,44   | -2,01  | 2,780353 | -0,72224 | NA | NA |
| TCP11X2 | 4,37   | -23,94 | 3,638338 | -6,58087 | NA | NA |
| TCTE3   | 22,02  | -1,94  | 1,954849 | -0,99266 | NA | NA |
| TDRD1   | 19,70  | -4,33  | 1,141797 | -3,79555 | NA | NA |
| TDRD15  | 1,31   | -5,19  | 3,645127 | -1,42324 | NA | NA |
| TDRKH   | 21,17  | -2,12  | 2,017477 | -1,05095 | NA | NA |
| TEAD1   | 5,21   | -5,64  | 2,814348 | -2,00261 | NA | NA |
| TECTB   | 10,27  | -10,19 | 2,851115 | -3,57475 | NA | NA |
| TEF     | 7,51   | -2,91  | 2,829301 | -1,02966 | NA | NA |
| TENM2   | 0,92   | -3,97  | 2,861714 | -1,38812 | NA | NA |
| TEX101  | 27,88  | -9,06  | 2,08589  | -4,34581 | NA | NA |
| TEX11   | 5,14   | -6,16  | 2,430162 | -2,5332  | NA | NA |
| TEX22   | 1,55   | -5,17  | 3,159235 | -1,63508 | NA | NA |
| TEX38   | 1,99   | -1,98  | 3,631381 | -0,54562 | NA | NA |
| TEX43   | 5,72   | -24,35 | 3,637642 | -6,69377 | NA | NA |
| TEX9    | 87,16  | -0,88  | 0,847785 | -1,03802 | NA | NA |
| TFAP2A  | 0,90   | -2,67  | 3,392775 | -0,78622 | NA | NA |
| TFAP2B  | 5,98   | -6,81  | 3,532772 | -1,92729 | NA | NA |
| TG      | 9,59   | -3,81  | 1,87447  | -2,03422 | NA | NA |

|             |        |        |          |          |    |    |
|-------------|--------|--------|----------|----------|----|----|
| TGFA        | 40,11  | 0,71   | 2,289201 | 0,308139 | NA | NA |
| TGM1        | 5,78   | -0,80  | 2,038423 | -0,39173 | NA | NA |
| TGM4        | 2,79   | -0,62  | 3,269915 | -0,18938 | NA | NA |
| THBS1       | 782,98 | 0,29   | 1,17986  | 0,242886 | NA | NA |
| THBS2       | 23,98  | -7,14  | 2,196785 | -3,24884 | NA | NA |
| THEM6       | 24,53  | -1,79  | 1,770634 | -1,01284 | NA | NA |
| THEMIS      | 4,28   | -4,31  | 1,587198 | -2,7162  | NA | NA |
| THNSL1      | 3,72   | -1,51  | 0,968735 | -1,55373 | NA | NA |
| THNSL2      | 16,36  | -0,12  | 1,155129 | -0,1042  | NA | NA |
| THSD7A      | 25,10  | -5,02  | 2,120049 | -2,36761 | NA | NA |
| THY1        | 8,83   | -8,91  | 3,367383 | -2,64628 | NA | NA |
| TICRR       | 3,96   | -1,27  | 2,171485 | -0,58637 | NA | NA |
| TIGD3       | 5,75   | -4,44  | 3,143585 | -1,4112  | NA | NA |
| TIGD4       | 4,08   | -6,82  | 3,470561 | -1,96649 | NA | NA |
| TIGD6       | 47,80  | -3,85  | 1,352418 | -2,84594 | NA | NA |
| TIGIT       | 8,78   | -2,38  | 1,403259 | -1,693   | NA | NA |
| TIMP4       | 4,83   | -24,11 | 3,638062 | -6,6263  | NA | NA |
| TINAG       | 10,46  | -25,09 | 3,260635 | -7,69532 | NA | NA |
| TIRAP       | 10,31  | -1,16  | 1,201308 | -0,96198 | NA | NA |
| TKTL2       | 4,37   | -4,02  | 2,572616 | -1,56079 | NA | NA |
| TLL1        | 5,23   | -8,91  | 3,490278 | -2,5535  | NA | NA |
| TM4SF5      | 5,30   | -8,32  | 3,505275 | -2,37373 | NA | NA |
| TMC3        | 24,12  | -1,70  | 1,402444 | -1,2155  | NA | NA |
| TMC5        | 3,52   | -1,09  | 1,000458 | -1,08457 | NA | NA |
| TMCO5A      | 3,07   | -0,58  | 3,091907 | -0,18766 | NA | NA |
| TMEM117     | 3,28   | -1,40  | 2,272863 | -0,61453 | NA | NA |
| TMEM129     | 29,77  | 0,29   | 1,351015 | 0,217264 | NA | NA |
| TMEM178B    | 1,02   | -2,83  | 1,893862 | -1,49409 | NA | NA |
| TMEM182     | 45,60  | -0,42  | 0,715995 | -0,58052 | NA | NA |
| TMEM184B    | 196,14 | 0,05   | 0,958105 | 0,048495 | NA | NA |
| TMEM196     | 1,10   | -4,74  | 3,647387 | -1,29945 | NA | NA |
| TMEM201     | 48,43  | 0,29   | 1,168257 | 0,250894 | NA | NA |
| TMEM207     | 2,29   | -5,99  | 3,640966 | -1,64493 | NA | NA |
| TMEM229A    | 3,32   | -23,50 | 3,63925  | -6,45845 | NA | NA |
| TMEM231     | 136,73 | -4,48  | 0,965701 | -4,64405 | NA | NA |
| TMEM246     | 0,85   | -4,54  | 3,649047 | -1,24416 | NA | NA |
| TMEM254-AS1 | 4,83   | -3,41  | 0,9829   | -3,47327 | NA | NA |
| TMEM255B    | 97,40  | -3,32  | 1,552462 | -2,13721 | NA | NA |
| TMEM27      | 1,23   | -4,92  | 3,645926 | -1,34926 | NA | NA |
| TMEM51-AS1  | 18,36  | -3,87  | 1,099802 | -3,52148 | NA | NA |
| TMEM59L     | 0,79   | -4,46  | 3,651332 | -1,22132 | NA | NA |
| TMEM63B     | 18,26  | -1,79  | 1,639818 | -1,09298 | NA | NA |
| TMEM63C     | 19,31  | -5,06  | 2,424035 | -2,08609 | NA | NA |
| TMEM72      | 2,09   | -5,07  | 3,369296 | -1,50445 | NA | NA |
| TMEM81      | 30,09  | -7,06  | 1,936339 | -3,6473  | NA | NA |
| TMEM92      | 3,70   | -1,54  | 1,660553 | -0,93031 | NA | NA |
| TMIGD3      | 7,45   | -4,08  | 2,412487 | -1,69213 | NA | NA |
| TMPPE       | 8,52   | -2,25  | 1,479853 | -1,51999 | NA | NA |
| TMPRSS11D   | 6,79   | -6,65  | 3,155614 | -2,10609 | NA | NA |
| TMPRSS13    | 3,16   | -1,23  | 1,397699 | -0,88065 | NA | NA |

|           |        |        |          |          |    |    |
|-----------|--------|--------|----------|----------|----|----|
| TMPRSS2   | 22,31  | 1,72   | 1,53931  | 1,11622  | NA | NA |
| TMPRSS9   | 1,97   | -2,61  | 2,815403 | -0,92528 | NA | NA |
| TNC       | 178,82 | -3,89  | 1,135902 | -3,42294 | NA | NA |
| TNFRSF10C | 14,16  | -0,57  | 1,954728 | -0,29234 | NA | NA |
| TNFRSF25  | 64,36  | -2,68  | 1,224858 | -2,19189 | NA | NA |
| TNFSF15   | 31,51  | -0,28  | 1,035587 | -0,26576 | NA | NA |
| TNIK      | 37,64  | -2,69  | 1,684173 | -1,59885 | NA | NA |
| TNIP3     | 19,58  | -3,07  | 0,882779 | -3,4822  | NA | NA |
| TNNT3     | 38,07  | -0,26  | 1,786213 | -0,14577 | NA | NA |
| TNRC6C    | 124,50 | -4,65  | 1,181529 | -3,93424 | NA | NA |
| TOPAZ1    | 7,93   | -7,06  | 2,672357 | -2,64262 | NA | NA |
| TOX       | 24,21  | -3,64  | 1,513711 | -2,40435 | NA | NA |
| TOX3      | 6,07   | -5,98  | 2,879127 | -2,07736 | NA | NA |
| TPRG1     | 11,05  | -2,91  | 1,500551 | -1,93907 | NA | NA |
| TPST1     | 11,33  | -3,56  | 2,718662 | -1,31035 | NA | NA |
| TPTE2P1   | 9,34   | -4,44  | 1,909061 | -2,32759 | NA | NA |
| TRAJ25    | 4,26   | -23,91 | 3,638408 | -6,57215 | NA | NA |
| TRAJ26    | 3,04   | -6,40  | 3,639604 | -1,7581  | NA | NA |
| TRAJ38    | 4,57   | -24,01 | 3,63821  | -6,59867 | NA | NA |
| TRAT1     | 17,83  | -7,07  | 1,973725 | -3,58362 | NA | NA |
| TRAV30    | 2,50   | -6,12  | 3,640419 | -1,67994 | NA | NA |
| TRAV36DV7 | 1,46   | -5,34  | 3,643974 | -1,46621 | NA | NA |
| TRAV8-3   | 4,52   | -23,99 | 3,638216 | -6,59376 | NA | NA |
| TRBJ1-1   | 2,96   | -6,36  | 3,590745 | -1,77114 | NA | NA |
| TRBV10-2  | 1,53   | -5,25  | 3,643799 | -1,43949 | NA | NA |
| TRBV10-3  | 1,92   | -5,73  | 3,641983 | -1,57458 | NA | NA |
| TRBV12-4  | 4,40   | -6,77  | 2,96426  | -2,28426 | NA | NA |
| TRBV18    | 16,97  | -10,98 | 3,636189 | -3,01991 | NA | NA |
| TRBV29-1  | 2,14   | -5,89  | 3,641286 | -1,61845 | NA | NA |
| TRBV3-1   | 2,78   | -6,10  | 3,640057 | -1,67557 | NA | NA |
| TRBV5-4   | 2,02   | -5,64  | 3,641797 | -1,54915 | NA | NA |
| TRBV6-5   | 2,06   | -5,84  | 3,641525 | -1,60347 | NA | NA |
| TRBV7-9   | 3,58   | -8,53  | 3,581826 | -2,38064 | NA | NA |
| TREM2     | 1,48   | -2,51  | 3,640244 | -0,68936 | NA | NA |
| TREML1    | 21,73  | -9,46  | 1,925119 | -4,91596 | NA | NA |
| TREML4    | 9,72   | -0,53  | 1,788885 | -0,2956  | NA | NA |
| TREX2     | 8,18   | -2,81  | 2,496767 | -1,12452 | NA | NA |
| TRGC1     | 20,25  | -6,03  | 2,451892 | -2,45848 | NA | NA |
| TRGV1     | 3,07   | -1,70  | 2,232811 | -0,76133 | NA | NA |
| TRGV4     | 4,06   | -2,03  | 2,5332   | -0,80122 | NA | NA |
| TRGV5     | 9,64   | -6,31  | 2,800185 | -2,25494 | NA | NA |
| TRGV7     | 1,52   | -3,32  | 2,683466 | -1,23821 | NA | NA |
| TRIM16    | 70,15  | 0,73   | 1,128021 | 0,647784 | NA | NA |
| TRIM49D2  | 4,40   | -23,95 | 3,638326 | -6,58349 | NA | NA |
| TRIM6     | 15,19  | -1,37  | 0,954821 | -1,43595 | NA | NA |
| TRIM65    | 107,95 | -3,45  | 0,678661 | -5,07759 | NA | NA |
| TRIM71    | 17,13  | -3,20  | 1,00544  | -3,18649 | NA | NA |
| TRIP6     | 58,25  | -1,74  | 1,250194 | -1,39308 | NA | NA |
| TRPC7     | 1,00   | -4,77  | 3,647637 | -1,30857 | NA | NA |
| TRPM8     | 21,05  | -2,09  | 1,176343 | -1,77433 | NA | NA |

|            |        |        |          |          |    |    |
|------------|--------|--------|----------|----------|----|----|
| TRPV6      | 7,15   | -6,08  | 2,532834 | -2,39893 | NA | NA |
| TRUB1      | 139,84 | -2,21  | 1,234204 | -1,79199 | NA | NA |
| TSACC      | 3,05   | -1,48  | 2,301625 | -0,64305 | NA | NA |
| TSHZ3      | 2,10   | -5,78  | 3,640476 | -1,58741 | NA | NA |
| TSPEAR     | 4,05   | -8,99  | 3,546747 | -2,53376 | NA | NA |
| TSPEAR-AS2 | 8,30   | -3,16  | 1,106291 | -2,85293 | NA | NA |
| TSSK4      | 10,47  | -1,50  | 1,346042 | -1,11145 | NA | NA |
| TTC26      | 31,33  | -2,60  | 0,846092 | -3,0777  | NA | NA |
| TTC28      | 334,91 | -5,80  | 1,121371 | -5,17551 | NA | NA |
| TTC39A     | 23,62  | 0,24   | 0,756889 | 0,311872 | NA | NA |
| TTC6       | 17,24  | -1,35  | 1,300736 | -1,03474 | NA | NA |
| TTLL7      | 23,45  | -1,86  | 0,991739 | -1,87095 | NA | NA |
| TTPAL      | 185,25 | -1,51  | 0,707867 | -2,13762 | NA | NA |
| TTY4C      | 2,56   | -6,15  | 3,640377 | -1,69058 | NA | NA |
| TTY7       | 2,11   | -5,87  | 3,641433 | -1,61272 | NA | NA |
| TTY7B      | 2,11   | -5,87  | 3,641433 | -1,61272 | NA | NA |
| TTY8       | 1,55   | -2,80  | 1,536733 | -1,82346 | NA | NA |
| TTY8B      | 1,55   | -2,80  | 1,536733 | -1,82346 | NA | NA |
| TUBA4B     | 1,35   | -3,18  | 2,361933 | -1,34816 | NA | NA |
| TUBB1      | 20,50  | -5,27  | 2,070615 | -2,54735 | NA | NA |
| TUFT1      | 43,08  | -1,84  | 1,136558 | -1,6204  | NA | NA |
| TUNAR      | 11,17  | -4,69  | 1,911797 | -2,45082 | NA | NA |
| TUSC1      | 8,58   | -2,96  | 1,753713 | -1,68768 | NA | NA |
| TUSC3      | 4,91   | -2,64  | 1,80683  | -1,4635  | NA | NA |
| TXLNG2P    | 15,50  | -4,85  | 2,044284 | -2,37185 | NA | NA |
| TXNDC8     | 8,04   | -3,25  | 3,419814 | -0,95133 | NA | NA |
| TXNRD3     | 10,32  | -8,10  | 3,01617  | -2,68496 | NA | NA |
| U51244.2   | 30,25  | 0,38   | 1,97743  | 0,193286 | NA | NA |
| U82670.9   | 0,56   | -3,97  | 3,657741 | -1,08559 | NA | NA |
| UBAP1L     | 32,66  | -2,91  | 1,267782 | -2,29372 | NA | NA |
| UBE2Q2P2   | 15,80  | -2,09  | 1,086411 | -1,92262 | NA | NA |
| UBTFL1     | 3,12   | -5,94  | 3,127786 | -1,89996 | NA | NA |
| UBTFL2     | 17,49  | -25,43 | 3,636169 | -6,99297 | NA | NA |
| UBXN10     | 11,01  | -5,29  | 3,429677 | -1,5432  | NA | NA |
| UCN        | 3,31   | -2,27  | 2,995753 | -0,7573  | NA | NA |
| UGT1A10    | 1,17   | -5,03  | 3,646188 | -1,37926 | NA | NA |
| UGT1A6     | 1,32   | -5,17  | 3,644278 | -1,41881 | NA | NA |
| UGT2B10    | 2,35   | -6,03  | 3,640832 | -1,65732 | NA | NA |
| UNC13C     | 225,77 | -5,10  | 0,885178 | -5,75635 | NA | NA |
| UNC5B      | 5,89   | -2,54  | 3,064982 | -0,82955 | NA | NA |
| UNC79      | 9,70   | -1,31  | 1,12566  | -1,16568 | NA | NA |
| UNC93B3    | 1,39   | -5,27  | 3,644558 | -1,44498 | NA | NA |
| URB2       | 22,70  | -0,86  | 1,561501 | -0,55036 | NA | NA |
| UROC1      | 0,80   | -4,46  | 3,651093 | -1,22164 | NA | NA |
| USH1G      | 1,65   | -1,88  | 2,878969 | -0,65366 | NA | NA |
| USP26      | 31,52  | -7,76  | 1,545277 | -5,02105 | NA | NA |
| USP51      | 2,29   | -0,89  | 1,892043 | -0,47256 | NA | NA |
| UST        | 56,59  | 1,28   | 1,035604 | 1,232116 | NA | NA |
| UTY        | 17,04  | -0,81  | 1,754384 | -0,45995 | NA | NA |
| VANGL1     | 58,98  | -0,34  | 1,332784 | -0,25194 | NA | NA |

|                     |        |        |          |          |    |    |
|---------------------|--------|--------|----------|----------|----|----|
| VENTXP1             | 0,58   | -4,01  | 3,657046 | -1,09759 | NA | NA |
| VIT                 | 1,48   | -4,83  | 2,743412 | -1,75957 | NA | NA |
| VMO1                | 30,45  | -1,91  | 1,915388 | -0,99472 | NA | NA |
| VN1R79P             | 10,59  | -25,24 | 3,636646 | -6,94065 | NA | NA |
| VN2R3P              | 2,03   | -5,65  | 3,641806 | -1,55025 | NA | NA |
| VSIG10L             | 12,02  | -4,33  | 2,645495 | -1,63859 | NA | NA |
| VSNL1               | 10,23  | -3,36  | 1,152672 | -2,91141 | NA | NA |
| VSTM2A              | 9,70   | -4,73  | 1,709253 | -2,76864 | NA | NA |
| VWA3B               | 7,42   | -1,67  | 1,214227 | -1,3783  | NA | NA |
| VWA5A               | 10,53  | 0,69   | 1,654434 | 0,418043 | NA | NA |
| VWA7                | 10,96  | -5,71  | 2,27929  | -2,50352 | NA | NA |
| VWF                 | 4,04   | -2,96  | 1,994958 | -1,48152 | NA | NA |
| WASF5P              | 3,21   | -23,52 | 3,639376 | -6,46228 | NA | NA |
| WDR3                | 366,49 | -1,09  | 0,930161 | -1,17716 | NA | NA |
| WDR35               | 18,49  | -0,79  | 1,573937 | -0,50302 | NA | NA |
| WDR4                | 84,18  | -0,89  | 1,310248 | -0,67583 | NA | NA |
| WDR92               | 51,27  | 0,68   | 1,0602   | 0,641145 | NA | NA |
| WDR97               | 45,42  | -1,96  | 0,826043 | -2,37367 | NA | NA |
| WEE1                | 114,43 | -0,07  | 0,907827 | -0,07654 | NA | NA |
| WFDC12              | 7,50   | -0,85  | 2,131417 | -0,39781 | NA | NA |
| WIPF3               | 25,33  | -1,32  | 0,935105 | -1,41076 | NA | NA |
| WNT3                | 4,92   | -2,09  | 0,843363 | -2,48016 | NA | NA |
| WSCD2               | 2,99   | -2,48  | 2,012837 | -1,23449 | NA | NA |
| WT1AS               | 25,75  | -4,13  | 0,869375 | -4,74762 | NA | NA |
| WWC1                | 36,34  | -6,35  | 1,405216 | -4,51944 | NA | NA |
| XAGE5               | 2,95   | -4,93  | 1,901106 | -2,59356 | NA | NA |
| XCL2                | 2,76   | -4,87  | 2,884331 | -1,68819 | NA | NA |
| XK                  | 5,05   | -9,03  | 2,985396 | -3,02584 | NA | NA |
| XKR3                | 15,50  | -25,79 | 3,636261 | -7,09233 | NA | NA |
| XKR4                | 23,46  | -0,70  | 0,617892 | -1,13449 | NA | NA |
| XKR6                | 39,02  | -3,76  | 1,596874 | -2,35178 | NA | NA |
| XPNPEP3             | 182,95 | -1,13  | 0,906331 | -1,25061 | NA | NA |
| XXbac-B476C20.17    | 2,62   | -3,88  | 1,688486 | -2,29868 | NA | NA |
| XXbac-BPG252P9.9    | 0,50   | -3,81  | 3,660091 | -1,03959 | NA | NA |
| XXbac-BPGBPG24O18.1 | 2,71   | -6,24  | 3,640117 | -1,71359 | NA | NA |
| XXbac-BPGBPG55C20.3 | 3,94   | -0,97  | 2,525066 | -0,38558 | NA | NA |
| XXyac-YM21GA2.6     | 5,81   | -24,36 | 3,637616 | -6,69772 | NA | NA |
| XXyac-YMR12DG2.1    | 9,04   | -3,51  | 2,300625 | -1,52365 | NA | NA |
| Z98941.1            | 4,12   | -8,61  | 3,54552  | -2,42925 | NA | NA |
| ZBED8               | 17,10  | -7,38  | 2,50395  | -2,94666 | NA | NA |
| ZBTB12              | 2,12   | -4,44  | 3,391749 | -1,31011 | NA | NA |
| ZBTB42              | 5,62   | -1,32  | 0,950049 | -1,38841 | NA | NA |
| ZBTB47              | 1,16   | -4,79  | 3,223914 | -1,48498 | NA | NA |
| ZBTB7C              | 3,49   | -0,22  | 1,602074 | -0,13759 | NA | NA |
| ZC2HC1C             | 50,53  | -0,59  | 1,498766 | -0,3945  | NA | NA |
| ZC4H2               | 33,40  | -3,23  | 1,656263 | -1,94844 | NA | NA |
| ZDHHHC9             | 12,39  | -1,01  | 1,939916 | -0,52142 | NA | NA |
| ZEB2P1              | 3,45   | -4,43  | 1,813972 | -2,44053 | NA | NA |
| ZFP69B              | 1,84   | -2,62  | 2,810769 | -0,93228 | NA | NA |
| ZFY                 | 3,90   | -5,00  | 2,264565 | -2,20654 | NA | NA |



|         |        |       |          |          |    |    |
|---------|--------|-------|----------|----------|----|----|
| ZG16B   | 6,77   | -6,78 | 1,987968 | -3,40954 | NA | NA |
| ZIK1    | 18,35  | 0,34  | 1,357686 | 0,252739 | NA | NA |
| ZKSCAN2 | 28,87  | 0,11  | 1,890728 | 0,060454 | NA | NA |
| ZKSCAN4 | 17,29  | -2,73 | 1,624423 | -1,68333 | NA | NA |
| ZMAT4   | 7,60   | -0,21 | 1,711528 | -0,12297 | NA | NA |
| ZMYND10 | 5,20   | 0,33  | 1,740482 | 0,189335 | NA | NA |
| ZNF177  | 3,68   | 1,13  | 2,021987 | 0,560222 | NA | NA |
| ZNF214  | 5,34   | -7,29 | 3,639164 | -2,00432 | NA | NA |
| ZNF222  | 41,80  | -3,78 | 2,819252 | -1,33909 | NA | NA |
| ZNF227  | 35,44  | -0,48 | 1,494176 | -0,32281 | NA | NA |
| ZNF229  | 3,95   | -1,68 | 2,082874 | -0,80499 | NA | NA |
| ZNF23   | 93,64  | -2,82 | 1,110868 | -2,53738 | NA | NA |
| ZNF248  | 48,77  | -0,69 | 1,250337 | -0,54898 | NA | NA |
| ZNF250  | 196,07 | -1,64 | 1,131909 | -1,45241 | NA | NA |
| ZNF256  | 9,71   | -3,27 | 2,33473  | -1,40011 | NA | NA |
| ZNF260  | 49,15  | -0,53 | 0,867347 | -0,6104  | NA | NA |
| ZNF287  | 14,51  | -2,34 | 2,18367  | -1,07009 | NA | NA |
| ZNF304  | 26,26  | 2,32  | 1,543859 | 1,504267 | NA | NA |
| ZNF311  | 1,16   | -5,01 | 3,646352 | -1,3748  | NA | NA |
| ZNF385D | 34,83  | -1,85 | 0,826387 | -2,23684 | NA | NA |
| ZNF415  | 10,64  | -0,09 | 1,62158  | -0,05728 | NA | NA |
| ZNF416  | 5,95   | -0,24 | 2,920239 | -0,08347 | NA | NA |
| ZNF418  | 6,67   | 2,94  | 1,976046 | 1,487235 | NA | NA |
| ZNF419  | 101,33 | -2,64 | 0,888775 | -2,96794 | NA | NA |
| ZNF443  | 7,92   | -7,76 | 2,438014 | -3,18216 | NA | NA |
| ZNF449  | 15,03  | -0,19 | 1,799427 | -0,10814 | NA | NA |
| ZNF470  | 79,84  | -1,70 | 0,705633 | -2,41017 | NA | NA |
| ZNF479  | 0,91   | -3,98 | 2,826766 | -1,40841 | NA | NA |
| ZNF484  | 52,56  | -1,98 | 1,384495 | -1,42949 | NA | NA |
| ZNF496  | 123,06 | -0,13 | 0,802386 | -0,1646  | NA | NA |
| ZNF510  | 40,26  | 0,40  | 1,621675 | 0,245003 | NA | NA |
| ZNF521  | 1,90   | -4,27 | 2,29136  | -1,86445 | NA | NA |
| ZNF549  | 41,69  | -0,10 | 1,053863 | -0,09764 | NA | NA |
| ZNF562  | 595,40 | -0,75 | 0,837499 | -0,90035 | NA | NA |
| ZNF571  | 132,09 | -3,72 | 0,854587 | -4,35324 | NA | NA |
| ZNF574  | 44,69  | -0,75 | 1,019948 | -0,7392  | NA | NA |
| ZNF582  | 14,98  | 0,23  | 2,326925 | 0,099045 | NA | NA |
| ZNF594  | 21,35  | -2,71 | 1,206255 | -2,24966 | NA | NA |
| ZNF599  | 17,06  | -1,40 | 0,87585  | -1,59995 | NA | NA |
| ZNF607  | 33,80  | -4,40 | 2,304442 | -1,91131 | NA | NA |
| ZNF608  | 17,42  | -6,00 | 2,274588 | -2,63851 | NA | NA |
| ZNF652P | 16,28  | -9,04 | 2,528417 | -3,57499 | NA | NA |
| ZNF660  | 33,25  | 0,80  | 1,067622 | 0,745392 | NA | NA |
| ZNF662  | 38,11  | -3,41 | 0,723537 | -4,70871 | NA | NA |
| ZNF665  | 77,73  | -2,41 | 1,003527 | -2,39804 | NA | NA |
| ZNF671  | 56,79  | -4,41 | 1,438059 | -3,06718 | NA | NA |
| ZNF683  | 19,63  | -6,40 | 1,841337 | -3,47356 | NA | NA |
| ZNF691  | 60,40  | -3,02 | 1,835148 | -1,64491 | NA | NA |
| ZNF700  | 243,62 | -0,11 | 0,824657 | -0,12923 | NA | NA |
| ZNF705E | 3,28   | -6,18 | 2,263779 | -2,7297  | NA | NA |

|                |        |       |          |          |    |    |
|----------------|--------|-------|----------|----------|----|----|
| ZNF711         | 4,70   | -6,57 | 2,098719 | -3,12868 | NA | NA |
| ZNF768         | 2,10   | -1,69 | 1,977477 | -0,85283 | NA | NA |
| ZNF775         | 5,12   | -1,12 | 2,252153 | -0,49718 | NA | NA |
| ZNF792         | 1,16   | -1,94 | 2,777022 | -0,69973 | NA | NA |
| ZNF804A        | 47,27  | -0,64 | 1,266238 | -0,50534 | NA | NA |
| ZNF816-ZNF321P | 1,89   | -1,64 | 3,632906 | -0,45226 | NA | NA |
| ZNF823         | 15,82  | 2,60  | 1,895254 | 1,371831 | NA | NA |
| ZNF849P        | 3,79   | -6,72 | 3,638782 | -1,84596 | NA | NA |
| ZNF92P3        | 2,67   | -6,21 | 3,608115 | -1,72079 | NA | NA |
| ZNF98          | 1,19   | -1,39 | 1,592144 | -0,87526 | NA | NA |
| ZSCAN23        | 0,51   | -2,50 | 3,676656 | -0,68037 | NA | NA |
| ZSCAN25        | 91,20  | -1,51 | 0,855462 | -1,76318 | NA | NA |
| ZSCAN29        | 182,22 | -1,85 | 0,849905 | -2,17122 | NA | NA |
| ZSCAN31        | 16,94  | -2,28 | 1,376007 | -1,65898 | NA | NA |
